# Supplementary material for: Uncultured Microbial Phyla Suggest Mechanisms for Multi-Thousand-Year Subsistence in Baltic Sea Sediments
Source: PubMed Central journal article supplement (PMC6469976; doi:10.1128/mbio.02376-18), 2019-04-16
Supplement: mBio.02376-18-sd001.pdf [file mBio.02376-18-sd001.pdf]

"pID" "gene\_callers\_id" "sample\_id" "mean\_transcript\_coverage" "PROKKA\_Annotation"  
"Chl\_A19\_00001" 1 "s59E13H2" 0 "Integrase core domain protein"  
"Chl\_A19\_00001" 1 "s59E25H2" 0 "Integrase core domain protein"  
"Chl\_A19\_00001" 1 "s59E5H2" 0.0206553666056678 "Integrase core domain protein"  
"Chl\_A19\_00001" 1 "s63E6H2" 0 "Integrase core domain protein"  
"Chl\_A19\_00002" 2 "s59E13H2" 0 "Transposase"  
"Chl\_A19\_00002" 2 "s59E25H2" 0 "Transposase"  
"Chl\_A19\_00002" 2 "s59E5H2" 0.270603385438915 "Transposase"  
"Chl\_A19\_00002" 2 "s63E6H2" 0.0116997647804295 "Transposase"  
"Chl\_A19\_00004" 4 "s59E13H2" 0 "hypothetical protein"  
"Chl\_A19\_00004" 4 "s59E25H2" 0 "hypothetical protein"  
"Chl\_A19\_00004" 4 "s59E5H2" 0 "hypothetical protein"  
"Chl\_A19\_00004" 4 "s63E6H2" 0 "hypothetical protein"  
"Chl\_A19\_00005" 5 "s59E13H2" 0 "Transposase IS116/IS110/IS902 family protein"  
"Chl\_A19\_00005" 5 "s59E25H2" 0 "Transposase IS116/IS110/IS902 family protein"  
"Chl\_A19\_00005" 5 "s59E5H2" 0 "Transposase IS116/IS110/IS902 family protein"  
"Chl\_A19\_00005" 5 "s63E6H2" 0 "Transposase IS116/IS110/IS902 family protein"  
"Chl\_A19\_00006" 6 "s59E13H2" 0 "pyrroloquinoline quinone biosynthesis protein PqqE"  
"Chl\_A19\_00006" 6 "s59E25H2" 0 "pyrroloquinoline quinone biosynthesis protein PqqE"  
"Chl\_A19\_00006" 6 "s59E5H2" 0 "pyrroloquinoline quinone biosynthesis protein PqqE"  
"Chl\_A19\_00006" 6 "s63E6H2" 0 "pyrroloquinoline quinone biosynthesis protein PqqE"  
"Chl\_A19\_00007" 7 "s59E13H2" 0 "hypothetical protein"  
"Chl\_A19\_00007" 7 "s59E25H2" 0 "hypothetical protein"  
"Chl\_A19\_00007" 7 "s59E5H2" 0 "hypothetical protein"  
"Chl\_A19\_00007" 7 "s63E6H2" 0 "hypothetical protein"  
"Chl\_A19\_00008" 8 "s59E13H2" 0 "hypothetical protein"  
"Chl\_A19\_00008" 8 "s59E25H2" 0 "hypothetical protein"  
"Chl\_A19\_00008" 8 "s59E5H2" 0 "hypothetical protein"  
"Chl\_A19\_00008" 8 "s63E6H2" 0 "hypothetical protein"  
"Chl\_A19\_00009" 9 "s59E13H2" 0 "Diacetylchitobiose deacetylase"  
"Chl\_A19\_00009" 9 "s59E25H2" 0 "Diacetylchitobiose deacetylase"  
"Chl\_A19\_00009" 9 "s59E5H2" 0 "Diacetylchitobiose deacetylase"  
"Chl\_A19\_00009" 9 "s63E6H2" 0 "Diacetylchitobiose deacetylase"  
"Chl\_A19\_00010" 10 "s59E13H2" 0 "UDP-N-acetylglucosamine 2-epimerase"  
"Chl\_A19\_00010" 10 "s59E25H2" 0 "UDP-N-acetylglucosamine 2-epimerase"  
"Chl\_A19\_00010" 10 "s59E5H2" 0 "UDP-N-acetylglucosamine 2-epimerase"  
"Chl\_A19\_00010" 10 "s63E6H2" 0 "UDP-N-acetylglucosamine 2-epimerase"  
"Chl\_A19\_00011" 11 "s59E13H2" 0 "carbamoyl phosphate synthase-like protein"  
"Chl\_A19\_00011" 11 "s59E25H2" 0 "carbamoyl phosphate synthase-like protein"  
"Chl\_A19\_00011" 11 "s59E5H2" 0 "carbamoyl phosphate synthase-like protein"  
"Chl\_A19\_00011" 11 "s63E6H2" 0 "carbamoyl phosphate synthase-like protein"  
"Chl\_A19\_00012" 12 "s59E13H2" 0 "N,N'-diacetyllegionaminic acid synthase"  
"Chl\_A19\_00012" 12 "s59E25H2" 0 "N,N'-diacetyllegionaminic acid synthase"  
"Chl\_A19\_00012" 12 "s59E5H2" 0 "N,N'-diacetyllegionaminic acid synthase"  
"Chl\_A19\_00012" 12 "s63E6H2" 0 "N,N'-diacetyllegionaminic acid synthase"  
"Chl\_A19\_00013" 13 "s59E13H2" 0 "3-deoxy-D-manno-octulosonate 8-phosphate phosphatase KdsC"  
"Chl\_A19\_00013" 13 "s59E25H2" 0 "3-deoxy-D-manno-octulosonate 8-phosphate phosphatase KdsC"

"Chl\_A19\_00013" 13 "s59E5H2" 0 "3-deoxy-D-manno-octulosonate 8-phosphate phosphatase KdsC"  
"Chl\_A19\_00013" 13 "s63E6H2" 0 "3-deoxy-D-manno-octulosonate 8-phosphate phosphatase KdsC"  
"Chl\_A19\_00014" 14 "s59E13H2" 0 "Ribosomal protein S12 methylthiotransferase RimO"  
"Chl\_A19\_00014" 14 "s59E25H2" 0 "Ribosomal protein S12 methylthiotransferase RimO"  
"Chl\_A19\_00014" 14 "s59E5H2" 0 "Ribosomal protein S12 methylthiotransferase RimO"  
"Chl\_A19\_00014" 14 "s63E6H2" 0 "Ribosomal protein S12 methylthiotransferase RimO"  
"Chl\_A19\_00015" 15 "s59E13H2" 0 "hypothetical protein"  
"Chl\_A19\_00015" 15 "s59E25H2" 0 "hypothetical protein"  
"Chl\_A19\_00015" 15 "s59E5H2" 0 "hypothetical protein"  
"Chl\_A19\_00015" 15 "s63E6H2" 0 "hypothetical protein"  
"Chl\_A19\_00016" 16 "s59E13H2" 0 "Macrocin-O-methyltransferase (TylF)"  
"Chl\_A19\_00016" 16 "s59E25H2" 0 "Macrocin-O-methyltransferase (TylF)"  
"Chl\_A19\_00016" 16 "s59E5H2" 0 "Macrocin-O-methyltransferase (TylF)"  
"Chl\_A19\_00016" 16 "s63E6H2" 0 "Macrocin-O-methyltransferase (TylF)"  
"Chl\_A19\_00017" 17 "s59E13H2" 0 "Radical SAM superfamily protein"  
"Chl\_A19\_00017" 17 "s59E25H2" 0 "Radical SAM superfamily protein"  
"Chl\_A19\_00017" 17 "s59E5H2" 0 "Radical SAM superfamily protein"  
"Chl\_A19\_00017" 17 "s63E6H2" 0 "Radical SAM superfamily protein"  
"Chl\_A19\_00018" 18 "s59E13H2" 0 "GDSL-like Lipase/Acylhydrolase"  
"Chl\_A19\_00018" 18 "s59E25H2" 0 "GDSL-like Lipase/Acylhydrolase"  
"Chl\_A19\_00018" 18 "s59E5H2" 0 "GDSL-like Lipase/Acylhydrolase"  
"Chl\_A19\_00018" 18 "s63E6H2" 0 "GDSL-like Lipase/Acylhydrolase"  
"Chl\_A19\_00019" 19 "s59E13H2" 0 "hypothetical protein"  
"Chl\_A19\_00019" 19 "s59E25H2" 0 "hypothetical protein"  
"Chl\_A19\_00019" 19 "s59E5H2" 0 "hypothetical protein"  
"Chl\_A19\_00019" 19 "s63E6H2" 0 "hypothetical protein"  
"Chl\_A19\_00020" 20 "s59E13H2" 0 "hypothetical protein"  
"Chl\_A19\_00020" 20 "s59E25H2" 0 "hypothetical protein"  
"Chl\_A19\_00020" 20 "s59E5H2" 0 "hypothetical protein"  
"Chl\_A19\_00020" 20 "s63E6H2" 0 "hypothetical protein"  
"Chl\_A19\_00021" 21 "s59E13H2" 0 "Decarbamoylnovobiocin carbamoyltransferase"  
"Chl\_A19\_00021" 21 "s59E25H2" 0 "Decarbamoylnovobiocin carbamoyltransferase"  
"Chl\_A19\_00021" 21 "s59E5H2" 0 "Decarbamoylnovobiocin carbamoyltransferase"  
"Chl\_A19\_00021" 21 "s63E6H2" 0 "Decarbamoylnovobiocin carbamoyltransferase"  
"Chl\_A19\_00022" 22 "s59E13H2" 0 "putative methyltransferase YcgJ"  
"Chl\_A19\_00022" 22 "s59E25H2" 0 "putative methyltransferase YcgJ"  
"Chl\_A19\_00022" 22 "s59E5H2" 0 "putative methyltransferase YcgJ"  
"Chl\_A19\_00022" 22 "s63E6H2" 0 "putative methyltransferase YcgJ"  
"Chl\_A19\_00023" 23 "s59E13H2" 0 "Cyclic pyranopterin monophosphate synthase"  
"Chl\_A19\_00023" 23 "s59E25H2" 0 "Cyclic pyranopterin monophosphate synthase"  
"Chl\_A19\_00023" 23 "s59E5H2" 0 "Cyclic pyranopterin monophosphate synthase"  
"Chl\_A19\_00023" 23 "s63E6H2" 0 "Cyclic pyranopterin monophosphate synthase"  
"Chl\_A19\_00024" 24 "s59E13H2" 0 "pyrroloquinoline quinone biosynthesis protein PqqE"  
"Chl\_A19\_00024" 24 "s59E25H2" 0 "pyrroloquinoline quinone biosynthesis protein PqqE"  
"Chl\_A19\_00024" 24 "s59E5H2" 0 "pyrroloquinoline quinone biosynthesis protein PqqE"  
"Chl\_A19\_00024" 24 "s63E6H2" 0 "pyrroloquinoline quinone biosynthesis protein PqqE"  
"Chl\_A19\_00025" 25 "s59E13H2" 0 "CMP-N,N'-diacetyllegionaminic acid synthase"

"Chl\_A19\_00025" 25 "s59E25H2" 0 "CMP-N,N'-diacetyllegionaminic acid synthase"  
"Chl\_A19\_00025" 25 "s59E5H2" 0 "CMP-N,N'-diacetyllegionaminic acid synthase"  
"Chl\_A19\_00025" 25 "s63E6H2" 0 "CMP-N,N'-diacetyllegionaminic acid synthase"  
"Chl\_A19\_00026" 26 "s59E13H2" 0 "Teichoic acids export ATP-binding protein TagH"  
"Chl\_A19\_00026" 26 "s59E25H2" 0 "Teichoic acids export ATP-binding protein TagH"  
"Chl\_A19\_00026" 26 "s59E5H2" 0 "Teichoic acids export ATP-binding protein TagH"  
"Chl\_A19\_00026" 26 "s63E6H2" 0 "Teichoic acids export ATP-binding protein TagH"  
"Chl\_A19\_00027" 27 "s59E13H2" 0 "ABC-2 type transporter"  
"Chl\_A19\_00027" 27 "s59E25H2" 0 "ABC-2 type transporter"  
"Chl\_A19\_00027" 27 "s59E5H2" 0 "ABC-2 type transporter"  
"Chl\_A19\_00027" 27 "s63E6H2" 0 "ABC-2 type transporter"  
"Chl\_A19\_00028" 28 "s59E13H2" 0 "hypothetical protein"  
"Chl\_A19\_00028" 28 "s59E25H2" 0 "hypothetical protein"  
"Chl\_A19\_00028" 28 "s59E5H2" 0 "hypothetical protein"  
"Chl\_A19\_00028" 28 "s63E6H2" 0 "hypothetical protein"  
"Chl\_A19\_00029" 29 "s59E13H2" 0 "hypothetical protein"  
"Chl\_A19\_00029" 29 "s59E25H2" 0 "hypothetical protein"  
"Chl\_A19\_00029" 29 "s59E5H2" 0 "hypothetical protein"  
"Chl\_A19\_00029" 29 "s63E6H2" 0 "hypothetical protein"  
"Chl\_A19\_00031" 31 "s59E13H2" 0 "hypothetical protein"  
"Chl\_A19\_00031" 31 "s59E25H2" 0 "hypothetical protein"  
"Chl\_A19\_00031" 31 "s59E5H2" 0 "hypothetical protein"  
"Chl\_A19\_00031" 31 "s63E6H2" 0 "hypothetical protein"  
"Chl\_A19\_00034" 34 "s59E13H2" 0 "Pesticidal crystal protein cry11Bb"  
"Chl\_A19\_00034" 34 "s59E25H2" 0 "Pesticidal crystal protein cry11Bb"  
"Chl\_A19\_00034" 34 "s59E5H2" 0 "Pesticidal crystal protein cry11Bb"  
"Chl\_A19\_00034" 34 "s63E6H2" 0 "Pesticidal crystal protein cry11Bb"  
"Chl\_A19\_00037" 37 "s59E13H2" 0 "Acetoin utilization protein AcuC"  
"Chl\_A19\_00037" 37 "s59E25H2" 0 "Acetoin utilization protein AcuC"  
"Chl\_A19\_00037" 37 "s59E5H2" 0 "Acetoin utilization protein AcuC"  
"Chl\_A19\_00037" 37 "s63E6H2" 0 "Acetoin utilization protein AcuC"  
"Chl\_A19\_00039" 39 "s59E13H2" 0 "Chaperone protein DnaJ"  
"Chl\_A19\_00039" 39 "s59E25H2" 0 "Chaperone protein DnaJ"  
"Chl\_A19\_00039" 39 "s59E5H2" 0 "Chaperone protein DnaJ"  
"Chl\_A19\_00039" 39 "s63E6H2" 0 "Chaperone protein DnaJ"  
"Chl\_A19\_00040" 40 "s59E13H2" 0 "hypothetical protein"  
"Chl\_A19\_00040" 40 "s59E25H2" 0 "hypothetical protein"  
"Chl\_A19\_00040" 40 "s59E5H2" 0 "hypothetical protein"  
"Chl\_A19\_00040" 40 "s63E6H2" 0 "hypothetical protein"  
"Chl\_A19\_00041" 41 "s59E13H2" 0 "26 kDa periplasmic immunogenic protein precursor"  
"Chl\_A19\_00041" 41 "s59E25H2" 0 "26 kDa periplasmic immunogenic protein precursor"  
"Chl\_A19\_00041" 41 "s59E5H2" 0 "26 kDa periplasmic immunogenic protein precursor"  
"Chl\_A19\_00041" 41 "s63E6H2" 0 "26 kDa periplasmic immunogenic protein precursor"  
"Chl\_A19\_00042" 42 "s59E13H2" 0 "Macrolide export ATP-binding/permease protein MacB"  
"Chl\_A19\_00042" 42 "s59E25H2" 0 "Macrolide export ATP-binding/permease protein MacB"  
"Chl\_A19\_00042" 42 "s59E5H2" 0.0192752635619859 "Macrolide export ATP-binding/permease protein MacB"  
"Chl\_A19\_00042" 42 "s63E6H2" 0 "Macrolide export ATP-binding/permease protein MacB"

"Chl\_A19\_00043" 43 "s59E13H2" 0 "putative ABC transporter ATP-binding protein"  
"Chl\_A19\_00043" 43 "s59E25H2" 0 "putative ABC transporter ATP-binding protein"  
"Chl\_A19\_00043" 43 "s59E5H2" 0 "putative ABC transporter ATP-binding protein"  
"Chl\_A19\_00043" 43 "s63E6H2" 0 "putative ABC transporter ATP-binding protein"  
"Chl\_A19\_00044" 44 "s59E13H2" 0 "macrolide transporter subunit MacA"  
"Chl\_A19\_00044" 44 "s59E25H2" 0 "macrolide transporter subunit MacA"  
"Chl\_A19\_00044" 44 "s59E5H2" 0 "macrolide transporter subunit MacA"  
"Chl\_A19\_00044" 44 "s63E6H2" 0 "macrolide transporter subunit MacA"  
"Chl\_A19\_00045" 45 "s59E13H2" 0 "Signal transduction histidine-protein kinase BaeS"  
"Chl\_A19\_00045" 45 "s59E25H2" 0 "Signal transduction histidine-protein kinase BaeS"  
"Chl\_A19\_00045" 45 "s59E5H2" 0 "Signal transduction histidine-protein kinase BaeS"  
"Chl\_A19\_00045" 45 "s63E6H2" 0 "Signal transduction histidine-protein kinase BaeS"  
"Chl\_A19\_00046" 46 "s59E13H2" 0 "Alkaline phosphatase synthesis transcriptional regulatory protein PhoP"  
"Chl\_A19\_00046" 46 "s59E25H2" 0 "Alkaline phosphatase synthesis transcriptional regulatory protein PhoP"  
"Chl\_A19\_00046" 46 "s59E5H2" 0 "Alkaline phosphatase synthesis transcriptional regulatory protein PhoP"  
"Chl\_A19\_00046" 46 "s63E6H2" 0 "Alkaline phosphatase synthesis transcriptional regulatory protein PhoP"  
"Chl\_A19\_00047" 47 "s59E13H2" 0 "hypothetical protein"  
"Chl\_A19\_00047" 47 "s59E25H2" 0 "hypothetical protein"  
"Chl\_A19\_00047" 47 "s59E5H2" 0 "hypothetical protein"  
"Chl\_A19\_00047" 47 "s63E6H2" 0 "hypothetical protein"  
"Chl\_A19\_00049" 49 "s59E13H2" 0 "Putative NAD(P)H nitroreductase"  
"Chl\_A19\_00049" 49 "s59E25H2" 0 "Putative NAD(P)H nitroreductase"  
"Chl\_A19\_00049" 49 "s59E5H2" 0 "Putative NAD(P)H nitroreductase"  
"Chl\_A19\_00049" 49 "s63E6H2" 0 "Putative NAD(P)H nitroreductase"  
"Chl\_A19\_00050" 50 "s59E13H2" 0 "hypothetical protein"  
"Chl\_A19\_00050" 50 "s59E25H2" 0 "hypothetical protein"  
"Chl\_A19\_00050" 50 "s59E5H2" 0 "hypothetical protein"  
"Chl\_A19\_00050" 50 "s63E6H2" 0 "hypothetical protein"  
"Chl\_A19\_00052" 52 "s59E13H2" 0 "hypothetical protein"  
"Chl\_A19\_00052" 52 "s59E25H2" 0 "hypothetical protein"  
"Chl\_A19\_00052" 52 "s59E5H2" 0 "hypothetical protein"  
"Chl\_A19\_00052" 52 "s63E6H2" 0 "hypothetical protein"  
"Chl\_A19\_00053" 53 "s59E13H2" 0 "hypothetical protein"  
"Chl\_A19\_00053" 53 "s59E25H2" 0 "hypothetical protein"  
"Chl\_A19\_00053" 53 "s59E5H2" 0 "hypothetical protein"  
"Chl\_A19\_00053" 53 "s63E6H2" 0 "hypothetical protein"  
"Chl\_A19\_00054" 54 "s59E13H2" 0 "CobQ/CobB/MinD/ParA nucleotide binding domain protein"  
"Chl\_A19\_00054" 54 "s59E25H2" 0 "CobQ/CobB/MinD/ParA nucleotide binding domain protein"  
"Chl\_A19\_00054" 54 "s59E5H2" 0 "CobQ/CobB/MinD/ParA nucleotide binding domain protein"  
"Chl\_A19\_00054" 54 "s63E6H2" 0 "CobQ/CobB/MinD/ParA nucleotide binding domain protein"  
"Chl\_A19\_00055" 55 "s59E13H2" 0 "Bifunctional protein FOLD protein"  
"Chl\_A19\_00055" 55 "s59E25H2" 0 "Bifunctional protein FOLD protein"  
"Chl\_A19\_00055" 55 "s59E5H2" 0 "Bifunctional protein FOLD protein"  
"Chl\_A19\_00055" 55 "s63E6H2" 0 "Bifunctional protein FOLD protein"  
"Chl\_A19\_00056" 56 "s59E13H2" 0 "putative enoyl-CoA hydratase echA8"  
"Chl\_A19\_00056" 56 "s59E25H2" 0 "putative enoyl-CoA hydratase echA8"  
"Chl\_A19\_00056" 56 "s59E5H2" 0 "putative enoyl-CoA hydratase echA8"

"Chl\_A19\_00056" 56 "s63E6H2" 0 "putative enoyl-CoA hydratase echA8"  
"Chl\_A19\_00057" 57 "s59E13H2" 0 "putative enoyl-CoA hydratase echA8"  
"Chl\_A19\_00057" 57 "s59E25H2" 0 "putative enoyl-CoA hydratase echA8"  
"Chl\_A19\_00057" 57 "s59E5H2" 0 "putative enoyl-CoA hydratase echA8"  
"Chl\_A19\_00057" 57 "s63E6H2" 0 "putative enoyl-CoA hydratase echA8"  
"Chl\_A19\_00058" 58 "s59E13H2" 0 "hypothetical protein"  
"Chl\_A19\_00058" 58 "s59E25H2" 0 "hypothetical protein"  
"Chl\_A19\_00058" 58 "s59E5H2" 0 "hypothetical protein"  
"Chl\_A19\_00058" 58 "s63E6H2" 0 "hypothetical protein"  
"Chl\_A19\_00059" 59 "s59E13H2" 0 "bifunctional enoyl-CoA hydratase/phosphate acetyltransferase"  
"Chl\_A19\_00059" 59 "s59E25H2" 0 "bifunctional enoyl-CoA hydratase/phosphate acetyltransferase"  
"Chl\_A19\_00059" 59 "s59E5H2" 0 "bifunctional enoyl-CoA hydratase/phosphate acetyltransferase"  
"Chl\_A19\_00059" 59 "s63E6H2" 0 "bifunctional enoyl-CoA hydratase/phosphate acetyltransferase"  
"Chl\_A19\_00060" 60 "s59E13H2" 0 "putative enoyl-CoA hydratase echA8"  
"Chl\_A19\_00060" 60 "s59E25H2" 0 "putative enoyl-CoA hydratase echA8"  
"Chl\_A19\_00060" 60 "s59E5H2" 0 "putative enoyl-CoA hydratase echA8"  
"Chl\_A19\_00060" 60 "s63E6H2" 0 "putative enoyl-CoA hydratase echA8"  
"Chl\_A19\_00061" 61 "s59E13H2" 0 "putative enoyl-CoA hydratase echA8"  
"Chl\_A19\_00061" 61 "s59E25H2" 0 "putative enoyl-CoA hydratase echA8"  
"Chl\_A19\_00061" 61 "s59E5H2" 0 "putative enoyl-CoA hydratase echA8"  
"Chl\_A19\_00061" 61 "s63E6H2" 0 "putative enoyl-CoA hydratase echA8"  
"Chl\_A19\_00062" 62 "s59E13H2" 0 "3-hydroxypropionyl-coenzyme A dehydratase"  
"Chl\_A19\_00062" 62 "s59E25H2" 0 "3-hydroxypropionyl-coenzyme A dehydratase"  
"Chl\_A19\_00062" 62 "s59E5H2" 0 "3-hydroxypropionyl-coenzyme A dehydratase"  
"Chl\_A19\_00062" 62 "s63E6H2" 0 "3-hydroxypropionyl-coenzyme A dehydratase"  
"Chl\_A19\_00063" 63 "s59E13H2" 0 "Glyoxalase-like domain protein"  
"Chl\_A19\_00063" 63 "s59E25H2" 0 "Glyoxalase-like domain protein"  
"Chl\_A19\_00063" 63 "s59E5H2" 0 "Glyoxalase-like domain protein"  
"Chl\_A19\_00063" 63 "s63E6H2" 0 "Glyoxalase-like domain protein"  
"Chl\_A19\_00064" 64 "s59E13H2" 0 "Acryloyl-CoA reductase electron transfer subunit gamma"  
"Chl\_A19\_00064" 64 "s59E25H2" 0 "Acryloyl-CoA reductase electron transfer subunit gamma"  
"Chl\_A19\_00064" 64 "s59E5H2" 0 "Acryloyl-CoA reductase electron transfer subunit gamma"  
"Chl\_A19\_00064" 64 "s63E6H2" 0 "Acryloyl-CoA reductase electron transfer subunit gamma"  
"Chl\_A19\_00065" 65 "s59E13H2" 0 "D-glycero-alpha-D-manno-heptose 1-phosphate guanylyltransferase"  
"Chl\_A19\_00065" 65 "s59E25H2" 0 "D-glycero-alpha-D-manno-heptose 1-phosphate guanylyltransferase"  
"Chl\_A19\_00065" 65 "s59E5H2" 0 "D-glycero-alpha-D-manno-heptose 1-phosphate guanylyltransferase"  
"Chl\_A19\_00065" 65 "s63E6H2" 0 "D-glycero-alpha-D-manno-heptose 1-phosphate guanylyltransferase"  
"Chl\_A19\_00066" 66 "s59E13H2" 0 "hypothetical protein"  
"Chl\_A19\_00066" 66 "s59E25H2" 0 "hypothetical protein"  
"Chl\_A19\_00066" 66 "s59E5H2" 0 "hypothetical protein"  
"Chl\_A19\_00066" 66 "s63E6H2" 0 "hypothetical protein"  
"Chl\_A19\_00068" 68 "s59E13H2" 0 "hypothetical protein"  
"Chl\_A19\_00068" 68 "s59E25H2" 0 "hypothetical protein"  
"Chl\_A19\_00068" 68 "s59E5H2" 0 "hypothetical protein"  
"Chl\_A19\_00068" 68 "s63E6H2" 0 "hypothetical protein"  
"Chl\_A19\_00069" 69 "s59E13H2" 0 "ATP-dependent DNA helicase RecG"  
"Chl\_A19\_00069" 69 "s59E25H2" 0 "ATP-dependent DNA helicase RecG"

"Chl\_A19\_00069" 69 "s59E5H2" 0 "ATP-dependent DNA helicase RecG"  
"Chl\_A19\_00069" 69 "s63E6H2" 0 "ATP-dependent DNA helicase RecG"  
"Chl\_A19\_00070" 70 "s59E13H2" 0 "DegV domain-containing protein"  
"Chl\_A19\_00070" 70 "s59E25H2" 0 "DegV domain-containing protein"  
"Chl\_A19\_00070" 70 "s59E5H2" 0 "DegV domain-containing protein"  
"Chl\_A19\_00070" 70 "s63E6H2" 0 "DegV domain-containing protein"  
"Chl\_A19\_00071" 71 "s59E13H2" 0 "DegV domain-containing protein"  
"Chl\_A19\_00071" 71 "s59E25H2" 0 "DegV domain-containing protein"  
"Chl\_A19\_00071" 71 "s59E5H2" 0 "DegV domain-containing protein"  
"Chl\_A19\_00071" 71 "s63E6H2" 0 "DegV domain-containing protein"  
"Chl\_A19\_00072" 72 "s59E13H2" 0 "DAK2 domain protein"  
"Chl\_A19\_00072" 72 "s59E25H2" 0 "DAK2 domain protein"  
"Chl\_A19\_00072" 72 "s59E5H2" 0 "DAK2 domain protein"  
"Chl\_A19\_00072" 72 "s63E6H2" 0 "DAK2 domain protein"  
"Chl\_A19\_00073" 73 "s59E13H2" 0 "Corrinoid/iron-sulfur protein small subunit"  
"Chl\_A19\_00073" 73 "s59E25H2" 0 "Corrinoid/iron-sulfur protein small subunit"  
"Chl\_A19\_00073" 73 "s59E5H2" 0 "Corrinoid/iron-sulfur protein small subunit"  
"Chl\_A19\_00073" 73 "s63E6H2" 0.00270648596593473 "Corrinoid/iron-sulfur protein small subunit"  
"Chl\_A19\_00074" 74 "s59E13H2" 0 "Helix-turn-helix"  
"Chl\_A19\_00074" 74 "s59E25H2" 0 "Helix-turn-helix"  
"Chl\_A19\_00074" 74 "s59E5H2" 0 "Helix-turn-helix"  
"Chl\_A19\_00074" 74 "s63E6H2" 0 "Helix-turn-helix"  
"Chl\_A19\_00075" 75 "s59E13H2" 0 "Transposase DDE domain protein"  
"Chl\_A19\_00075" 75 "s59E25H2" 0 "Transposase DDE domain protein"  
"Chl\_A19\_00075" 75 "s59E5H2" 0 "Transposase DDE domain protein"  
"Chl\_A19\_00075" 75 "s63E6H2" 0 "Transposase DDE domain protein"  
"Chl\_A19\_00076" 76 "s59E13H2" 0 "hypothetical protein"  
"Chl\_A19\_00076" 76 "s59E25H2" 0 "hypothetical protein"  
"Chl\_A19\_00076" 76 "s59E5H2" 0 "hypothetical protein"  
"Chl\_A19\_00076" 76 "s63E6H2" 0 "hypothetical protein"  
"Chl\_A19\_00078" 78 "s59E13H2" 0 "Phosphoribosylglycinamide formyltransferase"  
"Chl\_A19\_00078" 78 "s59E25H2" 0 "Phosphoribosylglycinamide formyltransferase"  
"Chl\_A19\_00078" 78 "s59E5H2" 0 "Phosphoribosylglycinamide formyltransferase"  
"Chl\_A19\_00078" 78 "s63E6H2" 0 "Phosphoribosylglycinamide formyltransferase"  
"Chl\_A19\_00079" 79 "s59E13H2" 0 "Phosphoribosylformylglycinamide synthase"  
"Chl\_A19\_00079" 79 "s59E25H2" 0 "Phosphoribosylformylglycinamide synthase"  
"Chl\_A19\_00079" 79 "s59E5H2" 0 "Phosphoribosylformylglycinamide synthase"  
"Chl\_A19\_00079" 79 "s63E6H2" 0 "Phosphoribosylformylglycinamide synthase"  
"Chl\_A19\_00080" 80 "s59E13H2" 0 "Glyoxylate reductase"  
"Chl\_A19\_00080" 80 "s59E25H2" 0 "Glyoxylate reductase"  
"Chl\_A19\_00080" 80 "s59E5H2" 0 "Glyoxylate reductase"  
"Chl\_A19\_00080" 80 "s63E6H2" 0 "Glyoxylate reductase"  
"Chl\_A19\_00081" 81 "s59E13H2" 0 "Acetophenone carboxylase gamma subunit"  
"Chl\_A19\_00081" 81 "s59E25H2" 0 "Acetophenone carboxylase gamma subunit"  
"Chl\_A19\_00081" 81 "s59E5H2" 0 "Acetophenone carboxylase gamma subunit"  
"Chl\_A19\_00081" 81 "s63E6H2" 0 "Acetophenone carboxylase gamma subunit"  
"Chl\_A19\_00082" 82 "s59E13H2" 0 "Acetophenone carboxylase delta subunit"

"Chl\_A19\_00082" 82 "s59E25H2" 0 "Acetophenone carboxylase delta subunit"  
"Chl\_A19\_00082" 82 "s59E5H2" 0 "Acetophenone carboxylase delta subunit"  
"Chl\_A19\_00082" 82 "s63E6H2" 0 "Acetophenone carboxylase delta subunit"  
"Chl\_A19\_00083" 83 "s59E13H2" 0 "Histidinol-phosphate aminotransferase 2"  
"Chl\_A19\_00083" 83 "s59E25H2" 0 "Histidinol-phosphate aminotransferase 2"  
"Chl\_A19\_00083" 83 "s59E5H2" 0 "Histidinol-phosphate aminotransferase 2"  
"Chl\_A19\_00083" 83 "s63E6H2" 0 "Histidinol-phosphate aminotransferase 2"  
"Chl\_A19\_00085" 85 "s59E13H2" 0 "hypothetical protein"  
"Chl\_A19\_00085" 85 "s59E25H2" 0 "hypothetical protein"  
"Chl\_A19\_00085" 85 "s59E5H2" 0 "hypothetical protein"  
"Chl\_A19\_00085" 85 "s63E6H2" 0 "hypothetical protein"  
"Chl\_A19\_00086" 86 "s59E13H2" 0 "hypothetical protein"  
"Chl\_A19\_00086" 86 "s59E25H2" 0 "hypothetical protein"  
"Chl\_A19\_00086" 86 "s59E5H2" 0 "hypothetical protein"  
"Chl\_A19\_00086" 86 "s63E6H2" 0 "hypothetical protein"  
"Chl\_A19\_00087" 87 "s59E13H2" 0 "Bifunctional protein GlmU"  
"Chl\_A19\_00087" 87 "s59E25H2" 0 "Bifunctional protein GlmU"  
"Chl\_A19\_00087" 87 "s59E5H2" 0 "Bifunctional protein GlmU"  
"Chl\_A19\_00087" 87 "s63E6H2" 0.000778229916531103 "Bifunctional protein GlmU"  
"Chl\_A19\_00088" 88 "s59E13H2" 0 "Bifunctional protein GlmU"  
"Chl\_A19\_00088" 88 "s59E25H2" 0 "Bifunctional protein GlmU"  
"Chl\_A19\_00088" 88 "s59E5H2" 0 "Bifunctional protein GlmU"  
"Chl\_A19\_00088" 88 "s63E6H2" 0 "Bifunctional protein GlmU"  
"Chl\_A19\_00089" 89 "s59E13H2" 0 "Glutamine--fructose-6-phosphate aminotransferase [isomerizing]"  
"Chl\_A19\_00089" 89 "s59E25H2" 0 "Glutamine--fructose-6-phosphate aminotransferase [isomerizing]"  
"Chl\_A19\_00089" 89 "s59E5H2" 0 "Glutamine--fructose-6-phosphate aminotransferase [isomerizing]"  
"Chl\_A19\_00089" 89 "s63E6H2" 0 "Glutamine--fructose-6-phosphate aminotransferase [isomerizing]"  
"Chl\_A19\_00090" 90 "s59E13H2" 0 "Light-independent protochlorophyllide reductase iron-sulfur ATP-binding protein"  
"Chl\_A19\_00090" 90 "s59E25H2" 0 "Light-independent protochlorophyllide reductase iron-sulfur ATP-binding protein"  
"Chl\_A19\_00090" 90 "s59E5H2" 0 "Light-independent protochlorophyllide reductase iron-sulfur ATP-binding protein"  
"Chl\_A19\_00090" 90 "s63E6H2" 0 "Light-independent protochlorophyllide reductase iron-sulfur ATP-binding protein"  
"Chl\_A19\_00091" 91 "s59E13H2" 0 "Formate--tetrahydrofolate ligase"  
"Chl\_A19\_00091" 91 "s59E25H2" 0 "Formate--tetrahydrofolate ligase"  
"Chl\_A19\_00091" 91 "s59E5H2" 0 "Formate--tetrahydrofolate ligase"  
"Chl\_A19\_00091" 91 "s63E6H2" 0 "Formate--tetrahydrofolate ligase"  
"Chl\_A19\_00093" 93 "s59E13H2" 0 "Tryptophan synthase beta chain 1"  
"Chl\_A19\_00093" 93 "s59E25H2" 0 "Tryptophan synthase beta chain 1"  
"Chl\_A19\_00093" 93 "s59E5H2" 0 "Tryptophan synthase beta chain 1"  
"Chl\_A19\_00093" 93 "s63E6H2" 0 "Tryptophan synthase beta chain 1"  
"Chl\_A19\_00094" 94 "s59E13H2" 0 "Putative serine protease HhoB precursor"  
"Chl\_A19\_00094" 94 "s59E25H2" 0 "Putative serine protease HhoB precursor"  
"Chl\_A19\_00094" 94 "s59E5H2" 0 "Putative serine protease HhoB precursor"  
"Chl\_A19\_00094" 94 "s63E6H2" 0 "Putative serine protease HhoB precursor"  
"Chl\_A19\_00095" 95 "s59E13H2" 0 "Isoleucine--tRNA ligase"  
"Chl\_A19\_00095" 95 "s59E25H2" 0 "Isoleucine--tRNA ligase"  
"Chl\_A19\_00095" 95 "s59E5H2" 0 "Isoleucine--tRNA ligase"  
"Chl\_A19\_00095" 95 "s63E6H2" 0 "Isoleucine--tRNA ligase"

"Chl\_A19\_00096" 96 "s59E13H2" 0 "DNA repair and recombination protein RadA"  
"Chl\_A19\_00096" 96 "s59E25H2" 0 "DNA repair and recombination protein RadA"  
"Chl\_A19\_00096" 96 "s59E5H2" 0 "DNA repair and recombination protein RadA"  
"Chl\_A19\_00096" 96 "s63E6H2" 0 "DNA repair and recombination protein RadA"  
"Chl\_A19\_00097" 97 "s59E13H2" 0 "Regulatory protein RecX"  
"Chl\_A19\_00097" 97 "s59E25H2" 0 "Regulatory protein RecX"  
"Chl\_A19\_00097" 97 "s59E5H2" 0 "Regulatory protein RecX"  
"Chl\_A19\_00097" 97 "s63E6H2" 0 "Regulatory protein RecX"  
"Chl\_A19\_00098" 98 "s59E13H2" 0 "Ribonuclease Y"  
"Chl\_A19\_00098" 98 "s59E25H2" 0 "Ribonuclease Y"  
"Chl\_A19\_00098" 98 "s59E5H2" 0 "Ribonuclease Y"  
"Chl\_A19\_00098" 98 "s63E6H2" 0.001738068485263 "Ribonuclease Y"  
"Chl\_A19\_00099" 99 "s59E13H2" 0 "hypothetical protein"  
"Chl\_A19\_00099" 99 "s59E25H2" 0 "hypothetical protein"  
"Chl\_A19\_00099" 99 "s59E5H2" 0 "hypothetical protein"  
"Chl\_A19\_00099" 99 "s63E6H2" 0 "hypothetical protein"  
"Chl\_A19\_00100" 100 "s59E13H2" 0 "hypothetical protein"  
"Chl\_A19\_00100" 100 "s59E25H2" 0 "hypothetical protein"  
"Chl\_A19\_00100" 100 "s59E5H2" 0 "hypothetical protein"  
"Chl\_A19\_00100" 100 "s63E6H2" 0 "hypothetical protein"  
"Chl\_A19\_00101" 101 "s59E13H2" 0 "putative glycerol-3-phosphate acyltransferase"  
"Chl\_A19\_00101" 101 "s59E25H2" 0 "putative glycerol-3-phosphate acyltransferase"  
"Chl\_A19\_00101" 101 "s59E5H2" 0 "putative glycerol-3-phosphate acyltransferase"  
"Chl\_A19\_00101" 101 "s63E6H2" 0 "putative glycerol-3-phosphate acyltransferase"  
"Chl\_A19\_00102" 102 "s59E13H2" 0 "hypothetical protein"  
"Chl\_A19\_00102" 102 "s59E25H2" 0 "hypothetical protein"  
"Chl\_A19\_00102" 102 "s59E5H2" 0 "hypothetical protein"  
"Chl\_A19\_00102" 102 "s63E6H2" 0 "hypothetical protein"  
"Chl\_A19\_00103" 103 "s59E13H2" 0 "putative acetyl-CoA acyltransferase"  
"Chl\_A19\_00103" 103 "s59E25H2" 0 "putative acetyl-CoA acyltransferase"  
"Chl\_A19\_00103" 103 "s59E5H2" 0 "putative acetyl-CoA acyltransferase"  
"Chl\_A19\_00103" 103 "s63E6H2" 0 "putative acetyl-CoA acyltransferase"  
"Chl\_A19\_00104" 104 "s59E13H2" 0 "hypothetical protein"  
"Chl\_A19\_00104" 104 "s59E25H2" 0 "hypothetical protein"  
"Chl\_A19\_00104" 104 "s59E5H2" 0 "hypothetical protein"  
"Chl\_A19\_00104" 104 "s63E6H2" 0 "hypothetical protein"  
"Chl\_A19\_00105" 105 "s59E13H2" 0 "R-phenyllactate dehydratase subunit alpha precursor"  
"Chl\_A19\_00105" 105 "s59E25H2" 0 "R-phenyllactate dehydratase subunit alpha precursor"  
"Chl\_A19\_00105" 105 "s59E5H2" 0 "R-phenyllactate dehydratase subunit alpha precursor"  
"Chl\_A19\_00105" 105 "s63E6H2" 0 "R-phenyllactate dehydratase subunit alpha precursor"  
"Chl\_A19\_00106" 106 "s59E13H2" 0 "Benzoyl-CoA reductase subunit C"  
"Chl\_A19\_00106" 106 "s59E25H2" 0 "Benzoyl-CoA reductase subunit C"  
"Chl\_A19\_00106" 106 "s59E5H2" 0 "Benzoyl-CoA reductase subunit C"  
"Chl\_A19\_00106" 106 "s63E6H2" 0 "Benzoyl-CoA reductase subunit C"  
"Chl\_A19\_00107" 107 "s59E13H2" 0 "R-phenyllactate dehydratase activator"  
"Chl\_A19\_00107" 107 "s59E25H2" 0 "R-phenyllactate dehydratase activator"  
"Chl\_A19\_00107" 107 "s59E5H2" 0 "R-phenyllactate dehydratase activator"



"Chl\_A19\_00107" 107 "s63E6H2" 0 "R-phenyllactate dehydratase activator"  
"Chl\_A19\_00108" 108 "s59E13H2" 0 "Activator of (R)-2-hydroxyglutaryl-CoA dehydratase"  
"Chl\_A19\_00108" 108 "s59E25H2" 0 "Activator of (R)-2-hydroxyglutaryl-CoA dehydratase"  
"Chl\_A19\_00108" 108 "s59E5H2" 0 "Activator of (R)-2-hydroxyglutaryl-CoA dehydratase"  
"Chl\_A19\_00108" 108 "s63E6H2" 0 "Activator of (R)-2-hydroxyglutaryl-CoA dehydratase"  
"Chl\_A19\_00109" 109 "s59E13H2" 0 "(R)-specific enoyl-CoA hydratase"  
"Chl\_A19\_00109" 109 "s59E25H2" 0 "(R)-specific enoyl-CoA hydratase"  
"Chl\_A19\_00109" 109 "s59E5H2" 0 "(R)-specific enoyl-CoA hydratase"  
"Chl\_A19\_00109" 109 "s63E6H2" 0 "(R)-specific enoyl-CoA hydratase"  
"Chl\_A19\_00110" 110 "s59E13H2" 0 "Methylmalonyl-CoA mutase"  
"Chl\_A19\_00110" 110 "s59E25H2" 0 "Methylmalonyl-CoA mutase"  
"Chl\_A19\_00110" 110 "s59E5H2" 0 "Methylmalonyl-CoA mutase"  
"Chl\_A19\_00110" 110 "s63E6H2" 0 "Methylmalonyl-CoA mutase"  
"Chl\_A19\_00111" 111 "s59E13H2" 0 "Methylmalonyl-CoA mutase large subunit"  
"Chl\_A19\_00111" 111 "s59E25H2" 0 "Methylmalonyl-CoA mutase large subunit"  
"Chl\_A19\_00111" 111 "s59E5H2" 0 "Methylmalonyl-CoA mutase large subunit"  
"Chl\_A19\_00111" 111 "s63E6H2" 0 "Methylmalonyl-CoA mutase large subunit"  
"Chl\_A19\_00112" 112 "s59E13H2" 0 "Formyl-coenzyme A transferase"  
"Chl\_A19\_00112" 112 "s59E25H2" 0 "Formyl-coenzyme A transferase"  
"Chl\_A19\_00112" 112 "s59E5H2" 0 "Formyl-coenzyme A transferase"  
"Chl\_A19\_00112" 112 "s63E6H2" 0 "Formyl-coenzyme A transferase"  
"Chl\_A19\_00113" 113 "s59E13H2" 0 "AsnC family protein"  
"Chl\_A19\_00113" 113 "s59E25H2" 0 "AsnC family protein"  
"Chl\_A19\_00113" 113 "s59E5H2" 0 "AsnC family protein"  
"Chl\_A19\_00113" 113 "s63E6H2" 0 "AsnC family protein"  
"Chl\_A19\_00114" 114 "s59E13H2" 0 "Glutaryl-CoA dehydrogenase"  
"Chl\_A19\_00114" 114 "s59E25H2" 0 "Glutaryl-CoA dehydrogenase"  
"Chl\_A19\_00114" 114 "s59E5H2" 0 "Glutaryl-CoA dehydrogenase"  
"Chl\_A19\_00114" 114 "s63E6H2" 0 "Glutaryl-CoA dehydrogenase"  
"Chl\_A19\_00115" 115 "s59E13H2" 0 "Acyl-CoA dehydrogenase"  
"Chl\_A19\_00115" 115 "s59E25H2" 0 "Acyl-CoA dehydrogenase"  
"Chl\_A19\_00115" 115 "s59E5H2" 0 "Acyl-CoA dehydrogenase"  
"Chl\_A19\_00115" 115 "s63E6H2" 0 "Acyl-CoA dehydrogenase"  
"Chl\_A19\_00116" 116 "s59E13H2" 0 "4-hydroxy-3-methylbut-2-enyl diphosphate reductase"  
"Chl\_A19\_00116" 116 "s59E25H2" 0 "4-hydroxy-3-methylbut-2-enyl diphosphate reductase"  
"Chl\_A19\_00116" 116 "s59E5H2" 0 "4-hydroxy-3-methylbut-2-enyl diphosphate reductase"  
"Chl\_A19\_00116" 116 "s63E6H2" 0 "4-hydroxy-3-methylbut-2-enyl diphosphate reductase"  
"Chl\_A19\_00117" 117 "s59E13H2" 0 "1-acyl-sn-glycerol-3-phosphate acyltransferase"  
"Chl\_A19\_00117" 117 "s59E25H2" 0 "1-acyl-sn-glycerol-3-phosphate acyltransferase"  
"Chl\_A19\_00117" 117 "s59E5H2" 0 "1-acyl-sn-glycerol-3-phosphate acyltransferase"  
"Chl\_A19\_00117" 117 "s63E6H2" 0 "1-acyl-sn-glycerol-3-phosphate acyltransferase"  
"Chl\_A19\_00118" 118 "s59E13H2" 0 "Protease 4"  
"Chl\_A19\_00118" 118 "s59E25H2" 0 "Protease 4"  
"Chl\_A19\_00118" 118 "s59E5H2" 0 "Protease 4"  
"Chl\_A19\_00118" 118 "s63E6H2" 0 "Protease 4"  
"Chl\_A19\_00119" 119 "s59E13H2" 0 "hypothetical protein"  
"Chl\_A19\_00119" 119 "s59E25H2" 0 "hypothetical protein"

"Chl\_A19\_00119" 119 "s59E5H2" 0 "hypothetical protein"  
"Chl\_A19\_00119" 119 "s63E6H2" 0 "hypothetical protein"  
"Chl\_A19\_00120" 120 "s59E13H2" 0 "Sialic acid TRAP transporter permease protein SiaT"  
"Chl\_A19\_00120" 120 "s59E25H2" 0 "Sialic acid TRAP transporter permease protein SiaT"  
"Chl\_A19\_00120" 120 "s59E5H2" 0 "Sialic acid TRAP transporter permease protein SiaT"  
"Chl\_A19\_00120" 120 "s63E6H2" 0 "Sialic acid TRAP transporter permease protein SiaT"  
"Chl\_A19\_00121" 121 "s59E13H2" 0 "Tripartite ATP-independent periplasmic transporters, DctQ component"  
"Chl\_A19\_00121" 121 "s59E25H2" 0 "Tripartite ATP-independent periplasmic transporters, DctQ component"  
"Chl\_A19\_00121" 121 "s59E5H2" 0 "Tripartite ATP-independent periplasmic transporters, DctQ component"  
"Chl\_A19\_00121" 121 "s63E6H2" 0 "Tripartite ATP-independent periplasmic transporters, DctQ component"  
"Chl\_A19\_00122" 122 "s59E13H2" 0 "Sialic acid-binding periplasmic protein SiaP precursor"  
"Chl\_A19\_00122" 122 "s59E25H2" 0 "Sialic acid-binding periplasmic protein SiaP precursor"  
"Chl\_A19\_00122" 122 "s59E5H2" 0 "Sialic acid-binding periplasmic protein SiaP precursor"  
"Chl\_A19\_00122" 122 "s63E6H2" 0 "Sialic acid-binding periplasmic protein SiaP precursor"  
"Chl\_A19\_00123" 123 "s59E13H2" 0 "Succinyl-CoA:(R)-benzylsuccinate CoA-transferase subunit BbsE"  
"Chl\_A19\_00123" 123 "s59E25H2" 0 "Succinyl-CoA:(R)-benzylsuccinate CoA-transferase subunit BbsE"  
"Chl\_A19\_00123" 123 "s59E5H2" 0 "Succinyl-CoA:(R)-benzylsuccinate CoA-transferase subunit BbsE"  
"Chl\_A19\_00123" 123 "s63E6H2" 0 "Succinyl-CoA:(R)-benzylsuccinate CoA-transferase subunit BbsE"  
"Chl\_A19\_00124" 124 "s59E13H2" 0 "Succinyl-CoA:(R)-benzylsuccinate CoA-transferase subunit BbsF"  
"Chl\_A19\_00124" 124 "s59E25H2" 0 "Succinyl-CoA:(R)-benzylsuccinate CoA-transferase subunit BbsF"  
"Chl\_A19\_00124" 124 "s59E5H2" 0 "Succinyl-CoA:(R)-benzylsuccinate CoA-transferase subunit BbsF"  
"Chl\_A19\_00124" 124 "s63E6H2" 0 "Succinyl-CoA:(R)-benzylsuccinate CoA-transferase subunit BbsF"  
"Chl\_A19\_00125" 125 "s59E13H2" 0 "NADH oxidase"  
"Chl\_A19\_00125" 125 "s59E25H2" 0 "NADH oxidase"  
"Chl\_A19\_00125" 125 "s59E5H2" 0 "NADH oxidase"  
"Chl\_A19\_00125" 125 "s63E6H2" 0 "NADH oxidase"  
"Chl\_A19\_00126" 126 "s59E13H2" 0 "NADH oxidase"  
"Chl\_A19\_00126" 126 "s59E25H2" 0 "NADH oxidase"  
"Chl\_A19\_00126" 126 "s59E5H2" 0 "NADH oxidase"  
"Chl\_A19\_00126" 126 "s63E6H2" 0 "NADH oxidase"  
"Chl\_A19\_00127" 127 "s59E13H2" 0 "Energy-coupling factor transporter ATP-binding protein EcfA2"  
"Chl\_A19\_00127" 127 "s59E25H2" 0 "Energy-coupling factor transporter ATP-binding protein EcfA2"  
"Chl\_A19\_00127" 127 "s59E5H2" 0 "Energy-coupling factor transporter ATP-binding protein EcfA2"  
"Chl\_A19\_00127" 127 "s63E6H2" 0 "Energy-coupling factor transporter ATP-binding protein EcfA2"  
"Chl\_A19\_00128" 128 "s59E13H2" 0 "ABC-2 family transporter protein"  
"Chl\_A19\_00128" 128 "s59E25H2" 0 "ABC-2 family transporter protein"  
"Chl\_A19\_00128" 128 "s59E5H2" 0 "ABC-2 family transporter protein"  
"Chl\_A19\_00128" 128 "s63E6H2" 0 "ABC-2 family transporter protein"  
"Chl\_A19\_00129" 129 "s59E13H2" 0 "hypothetical protein"  
"Chl\_A19\_00129" 129 "s59E25H2" 0 "hypothetical protein"  
"Chl\_A19\_00129" 129 "s59E5H2" 0 "hypothetical protein"  
"Chl\_A19\_00129" 129 "s63E6H2" 0 "hypothetical protein"  
"Chl\_A19\_00130" 130 "s59E13H2" 0 "Putative phosphatase"  
"Chl\_A19\_00130" 130 "s59E25H2" 0 "Putative phosphatase"  
"Chl\_A19\_00130" 130 "s59E5H2" 0 "Putative phosphatase"  
"Chl\_A19\_00130" 130 "s63E6H2" 0 "Putative phosphatase"  
"Chl\_A19\_00132" 132 "s59E13H2" 0 "hypothetical protein"

"Chl\_A19\_00132" 132 "s59E25H2" 0 "hypothetical protein"  
"Chl\_A19\_00132" 132 "s59E5H2" 0 "hypothetical protein"  
"Chl\_A19\_00132" 132 "s63E6H2" 0 "hypothetical protein"  
"Chl\_A19\_00133" 133 "s59E13H2" 0 "Tyrosine recombinase XerD"  
"Chl\_A19\_00133" 133 "s59E25H2" 0 "Tyrosine recombinase XerD"  
"Chl\_A19\_00133" 133 "s59E5H2" 0 "Tyrosine recombinase XerD"  
"Chl\_A19\_00133" 133 "s63E6H2" 0 "Tyrosine recombinase XerD"  
"Chl\_A19\_00134" 134 "s59E13H2" 0 "Transposase"  
"Chl\_A19\_00134" 134 "s59E25H2" 0 "Transposase"  
"Chl\_A19\_00134" 134 "s59E5H2" 0 "Transposase"  
"Chl\_A19\_00134" 134 "s63E6H2" 0 "Transposase"  
"Chl\_A19\_00135" 135 "s59E13H2" 0 "IS2 transposase TnpB"  
"Chl\_A19\_00135" 135 "s59E25H2" 0 "IS2 transposase TnpB"  
"Chl\_A19\_00135" 135 "s59E5H2" 0 "IS2 transposase TnpB"  
"Chl\_A19\_00135" 135 "s63E6H2" 0 "IS2 transposase TnpB"  
"Chl\_A19\_00136" 136 "s59E13H2" 0 "hypothetical protein"  
"Chl\_A19\_00136" 136 "s59E25H2" 0 "hypothetical protein"  
"Chl\_A19\_00136" 136 "s59E5H2" 0 "hypothetical protein"  
"Chl\_A19\_00136" 136 "s63E6H2" 0 "hypothetical protein"  
"Chl\_A19\_00137" 137 "s59E13H2" 0 "hypothetical protein"  
"Chl\_A19\_00137" 137 "s59E25H2" 0 "hypothetical protein"  
"Chl\_A19\_00137" 137 "s59E5H2" 0 "hypothetical protein"  
"Chl\_A19\_00137" 137 "s63E6H2" 0 "hypothetical protein"  
"Chl\_A19\_00138" 138 "s59E13H2" 0 "hypothetical protein"  
"Chl\_A19\_00138" 138 "s59E25H2" 0 "hypothetical protein"  
"Chl\_A19\_00138" 138 "s59E5H2" 0.00508182345981144 "hypothetical protein"  
"Chl\_A19\_00138" 138 "s63E6H2" 0 "hypothetical protein"  
"Chl\_A19\_00141" 141 "s59E13H2" 0 "hypothetical protein"  
"Chl\_A19\_00141" 141 "s59E25H2" 0 "hypothetical protein"  
"Chl\_A19\_00141" 141 "s59E5H2" 0 "hypothetical protein"  
"Chl\_A19\_00141" 141 "s63E6H2" 0 "hypothetical protein"  
"Chl\_A19\_00142" 142 "s59E13H2" 0 "hypothetical protein"  
"Chl\_A19\_00142" 142 "s59E25H2" 0 "hypothetical protein"  
"Chl\_A19\_00142" 142 "s59E5H2" 0 "hypothetical protein"  
"Chl\_A19\_00142" 142 "s63E6H2" 0 "hypothetical protein"  
"Chl\_A19\_00143" 143 "s59E13H2" 0 "DNA methylase"  
"Chl\_A19\_00143" 143 "s59E25H2" 0 "DNA methylase"  
"Chl\_A19\_00143" 143 "s59E5H2" 0 "DNA methylase"  
"Chl\_A19\_00143" 143 "s63E6H2" 0 "DNA methylase"  
"Chl\_A19\_00144" 144 "s59E13H2" 0 "hypothetical protein"  
"Chl\_A19\_00144" 144 "s59E25H2" 0 "hypothetical protein"  
"Chl\_A19\_00144" 144 "s59E5H2" 0 "hypothetical protein"  
"Chl\_A19\_00144" 144 "s63E6H2" 0 "hypothetical protein"  
"Chl\_A19\_00145" 145 "s59E13H2" 0 "N-6 DNA Methylase"  
"Chl\_A19\_00145" 145 "s59E25H2" 0 "N-6 DNA Methylase"  
"Chl\_A19\_00145" 145 "s59E5H2" 0 "N-6 DNA Methylase"  
"Chl\_A19\_00145" 145 "s63E6H2" 0 "N-6 DNA Methylase"

"Chl\_A19\_00146" 146 "s59E13H2" 0 "hypothetical protein"  
"Chl\_A19\_00146" 146 "s59E25H2" 0 "hypothetical protein"  
"Chl\_A19\_00146" 146 "s59E5H2" 0 "hypothetical protein"  
"Chl\_A19\_00146" 146 "s63E6H2" 0 "hypothetical protein"  
"Chl\_A19\_00147" 147 "s59E13H2" 0 "hypothetical protein"  
"Chl\_A19\_00147" 147 "s59E25H2" 0 "hypothetical protein"  
"Chl\_A19\_00147" 147 "s59E5H2" 0 "hypothetical protein"  
"Chl\_A19\_00147" 147 "s63E6H2" 0 "hypothetical protein"  
"Chl\_A19\_00149" 149 "s59E13H2" 0 "hypothetical protein"  
"Chl\_A19\_00149" 149 "s59E25H2" 0 "hypothetical protein"  
"Chl\_A19\_00149" 149 "s59E5H2" 0 "hypothetical protein"  
"Chl\_A19\_00149" 149 "s63E6H2" 0 "hypothetical protein"  
"Chl\_A19\_00151" 151 "s59E13H2" 0 "Putative ribosome biogenesis GTPase RsgA"  
"Chl\_A19\_00151" 151 "s59E25H2" 0 "Putative ribosome biogenesis GTPase RsgA"  
"Chl\_A19\_00151" 151 "s59E5H2" 0 "Putative ribosome biogenesis GTPase RsgA"  
"Chl\_A19\_00151" 151 "s63E6H2" 0 "Putative ribosome biogenesis GTPase RsgA"  
"Chl\_A19\_00153" 153 "s59E13H2" 0 "Lipoprotein-releasing system transmembrane protein LolE"  
"Chl\_A19\_00153" 153 "s59E25H2" 0 "Lipoprotein-releasing system transmembrane protein LolE"  
"Chl\_A19\_00153" 153 "s59E5H2" 0 "Lipoprotein-releasing system transmembrane protein LolE"  
"Chl\_A19\_00153" 153 "s63E6H2" 0 "Lipoprotein-releasing system transmembrane protein LolE"  
"Chl\_A19\_00154" 154 "s59E13H2" 0 "Lipoprotein-releasing system ATP-binding protein LolD"  
"Chl\_A19\_00154" 154 "s59E25H2" 0 "Lipoprotein-releasing system ATP-binding protein LolD"  
"Chl\_A19\_00154" 154 "s59E5H2" 0 "Lipoprotein-releasing system ATP-binding protein LolD"  
"Chl\_A19\_00154" 154 "s63E6H2" 0 "Lipoprotein-releasing system ATP-binding protein LolD"  
"Chl\_A19\_00155" 155 "s59E13H2" 0 "hypothetical protein"  
"Chl\_A19\_00155" 155 "s59E25H2" 0 "hypothetical protein"  
"Chl\_A19\_00155" 155 "s59E5H2" 0 "hypothetical protein"  
"Chl\_A19\_00155" 155 "s63E6H2" 0 "hypothetical protein"  
"Chl\_A19\_00157" 157 "s59E13H2" 0 "Tyrosine recombinase XerD"  
"Chl\_A19\_00157" 157 "s59E25H2" 0 "Tyrosine recombinase XerD"  
"Chl\_A19\_00157" 157 "s59E5H2" 0 "Tyrosine recombinase XerD"  
"Chl\_A19\_00157" 157 "s63E6H2" 0 "Tyrosine recombinase XerD"  
"Chl\_A19\_00158" 158 "s59E13H2" 0 "hypothetical protein"  
"Chl\_A19\_00158" 158 "s59E25H2" 0 "hypothetical protein"  
"Chl\_A19\_00158" 158 "s59E5H2" 0 "hypothetical protein"  
"Chl\_A19\_00158" 158 "s63E6H2" 0 "hypothetical protein"  
"Chl\_A19\_00159" 159 "s59E13H2" 0 "Alpha/beta hydrolase family protein"  
"Chl\_A19\_00159" 159 "s59E25H2" 0 "Alpha/beta hydrolase family protein"  
"Chl\_A19\_00159" 159 "s59E5H2" 0 "Alpha/beta hydrolase family protein"  
"Chl\_A19\_00159" 159 "s63E6H2" 0 "Alpha/beta hydrolase family protein"  
"Chl\_A19\_00160" 160 "s59E13H2" 0 "GYD domain protein"  
"Chl\_A19\_00160" 160 "s59E25H2" 0 "GYD domain protein"  
"Chl\_A19\_00160" 160 "s59E5H2" 0 "GYD domain protein"  
"Chl\_A19\_00160" 160 "s63E6H2" 0 "GYD domain protein"  
"Chl\_A19\_00161" 161 "s59E13H2" 0 "putative type I restriction enzymeP M protein"  
"Chl\_A19\_00161" 161 "s59E25H2" 0 "putative type I restriction enzymeP M protein"  
"Chl\_A19\_00161" 161 "s59E5H2" 0 "putative type I restriction enzymeP M protein"

"Chl\_A19\_00161" 161 "s63E6H2" 0 "putative type I restriction enzyme P M protein"  
"Chl\_A19\_00162" 162 "s59E13H2" 0 "putative MFS-type transporter YhjX"  
"Chl\_A19\_00162" 162 "s59E25H2" 0 "putative MFS-type transporter YhjX"  
"Chl\_A19\_00162" 162 "s59E5H2" 0 "putative MFS-type transporter YhjX"  
"Chl\_A19\_00162" 162 "s63E6H2" 0 "putative MFS-type transporter YhjX"  
"Chl\_A19\_00163" 163 "s59E13H2" 0 "putative MFS-type transporter YhjX"  
"Chl\_A19\_00163" 163 "s59E25H2" 0 "putative MFS-type transporter YhjX"  
"Chl\_A19\_00163" 163 "s59E5H2" 0 "putative MFS-type transporter YhjX"  
"Chl\_A19\_00163" 163 "s63E6H2" 0 "putative MFS-type transporter YhjX"  
"Chl\_A19\_00164" 164 "s59E13H2" 0 "D12 class N6 adenine-specific DNA methyltransferase"  
"Chl\_A19\_00164" 164 "s59E25H2" 0 "D12 class N6 adenine-specific DNA methyltransferase"  
"Chl\_A19\_00164" 164 "s59E5H2" 0 "D12 class N6 adenine-specific DNA methyltransferase"  
"Chl\_A19\_00164" 164 "s63E6H2" 0 "D12 class N6 adenine-specific DNA methyltransferase"  
"Chl\_A19\_00166" 166 "s59E13H2" 0 "hypothetical protein"  
"Chl\_A19\_00166" 166 "s59E25H2" 0 "hypothetical protein"  
"Chl\_A19\_00166" 166 "s59E5H2" 0 "hypothetical protein"  
"Chl\_A19\_00166" 166 "s63E6H2" 0 "hypothetical protein"  
"Chl\_A19\_00167" 167 "s59E13H2" 0 "DegV domain-containing protein"  
"Chl\_A19\_00167" 167 "s59E25H2" 0 "DegV domain-containing protein"  
"Chl\_A19\_00167" 167 "s59E5H2" 0 "DegV domain-containing protein"  
"Chl\_A19\_00167" 167 "s63E6H2" 0 "DegV domain-containing protein"  
"Chl\_A19\_00168" 168 "s59E13H2" 0 "Adenylyl-sulfate kinase"  
"Chl\_A19\_00168" 168 "s59E25H2" 0 "Adenylyl-sulfate kinase"  
"Chl\_A19\_00168" 168 "s59E5H2" 0 "Adenylyl-sulfate kinase"  
"Chl\_A19\_00168" 168 "s63E6H2" 0 "Adenylyl-sulfate kinase"  
"Chl\_A19\_00169" 169 "s59E13H2" 0 "Tungsten-containing aldehyde ferredoxin oxidoreductase"  
"Chl\_A19\_00169" 169 "s59E25H2" 0 "Tungsten-containing aldehyde ferredoxin oxidoreductase"  
"Chl\_A19\_00169" 169 "s59E5H2" 0 "Tungsten-containing aldehyde ferredoxin oxidoreductase"  
"Chl\_A19\_00169" 169 "s63E6H2" 0 "Tungsten-containing aldehyde ferredoxin oxidoreductase"  
"Chl\_A19\_00170" 170 "s59E13H2" 0 "Cytosol aminopeptidase"  
"Chl\_A19\_00170" 170 "s59E25H2" 0 "Cytosol aminopeptidase"  
"Chl\_A19\_00170" 170 "s59E5H2" 0 "Cytosol aminopeptidase"  
"Chl\_A19\_00170" 170 "s63E6H2" 0 "Cytosol aminopeptidase"  
"Chl\_A19\_00171" 171 "s59E13H2" 0 "metal-dependent hydrolase"  
"Chl\_A19\_00171" 171 "s59E25H2" 0 "metal-dependent hydrolase"  
"Chl\_A19\_00171" 171 "s59E5H2" 0 "metal-dependent hydrolase"  
"Chl\_A19\_00171" 171 "s63E6H2" 0 "metal-dependent hydrolase"  
"Chl\_A19\_00172" 172 "s59E13H2" 0 "hypothetical protein"  
"Chl\_A19\_00172" 172 "s59E25H2" 0 "hypothetical protein"  
"Chl\_A19\_00172" 172 "s59E5H2" 0 "hypothetical protein"  
"Chl\_A19\_00172" 172 "s63E6H2" 0 "hypothetical protein"  
"Chl\_A19\_00174" 174 "s59E13H2" 0 "Acylphosphatase"  
"Chl\_A19\_00174" 174 "s59E25H2" 0 "Acylphosphatase"  
"Chl\_A19\_00174" 174 "s59E5H2" 0 "Acylphosphatase"  
"Chl\_A19\_00174" 174 "s63E6H2" 0 "Acylphosphatase"  
"Chl\_A19\_00176" 176 "s59E13H2" 0 "Ribonuclease 3"  
"Chl\_A19\_00176" 176 "s59E25H2" 0 "Ribonuclease 3"

"Chl\_A19\_00176" 176 "s59E5H2" 0 "Ribonuclease 3"  
"Chl\_A19\_00176" 176 "s63E6H2" 0 "Ribonuclease 3"  
"Chl\_A19\_00177" 177 "s59E13H2" 0 "3-hydroxypropionyl-coenzyme A dehydratase"  
"Chl\_A19\_00177" 177 "s59E25H2" 0 "3-hydroxypropionyl-coenzyme A dehydratase"  
"Chl\_A19\_00177" 177 "s59E5H2" 0 "3-hydroxypropionyl-coenzyme A dehydratase"  
"Chl\_A19\_00177" 177 "s63E6H2" 0 "3-hydroxypropionyl-coenzyme A dehydratase"  
"Chl\_A19\_00178" 178 "s59E13H2" 0 "3-hydroxypropionyl-coenzyme A dehydratase"  
"Chl\_A19\_00178" 178 "s59E25H2" 0 "3-hydroxypropionyl-coenzyme A dehydratase"  
"Chl\_A19\_00178" 178 "s59E5H2" 0 "3-hydroxypropionyl-coenzyme A dehydratase"  
"Chl\_A19\_00178" 178 "s63E6H2" 0 "3-hydroxypropionyl-coenzyme A dehydratase"  
"Chl\_A19\_00179" 179 "s59E13H2" 0 "Chromosome partition protein Smc"  
"Chl\_A19\_00179" 179 "s59E25H2" 0 "Chromosome partition protein Smc"  
"Chl\_A19\_00179" 179 "s59E5H2" 0 "Chromosome partition protein Smc"  
"Chl\_A19\_00179" 179 "s63E6H2" 0 "Chromosome partition protein Smc"  
"Chl\_A19\_00180" 180 "s59E13H2" 0 "Beta-lactamase hydrolase-like protein"  
"Chl\_A19\_00180" 180 "s59E25H2" 0 "Beta-lactamase hydrolase-like protein"  
"Chl\_A19\_00180" 180 "s59E5H2" 0 "Beta-lactamase hydrolase-like protein"  
"Chl\_A19\_00180" 180 "s63E6H2" 0 "Beta-lactamase hydrolase-like protein"  
"Chl\_A19\_00181" 181 "s59E13H2" 0 "Diacetylchitobiose deacetylase"  
"Chl\_A19\_00181" 181 "s59E25H2" 0 "Diacetylchitobiose deacetylase"  
"Chl\_A19\_00181" 181 "s59E5H2" 0 "Diacetylchitobiose deacetylase"  
"Chl\_A19\_00181" 181 "s63E6H2" 0 "Diacetylchitobiose deacetylase"  
"Chl\_A19\_00182" 182 "s59E13H2" 0 "Mycothioli acetyltransferase"  
"Chl\_A19\_00182" 182 "s59E25H2" 0 "Mycothioli acetyltransferase"  
"Chl\_A19\_00182" 182 "s59E5H2" 0 "Mycothioli acetyltransferase"  
"Chl\_A19\_00182" 182 "s63E6H2" 0 "Mycothioli acetyltransferase"  
"Chl\_A19\_00183" 183 "s59E13H2" 0 "D-inositol 3-phosphate glycosyltransferase"  
"Chl\_A19\_00183" 183 "s59E25H2" 0 "D-inositol 3-phosphate glycosyltransferase"  
"Chl\_A19\_00183" 183 "s59E5H2" 0 "D-inositol 3-phosphate glycosyltransferase"  
"Chl\_A19\_00183" 183 "s63E6H2" 0 "D-inositol 3-phosphate glycosyltransferase"  
"Chl\_A19\_00184" 184 "s59E13H2" 0 "hypothetical protein"  
"Chl\_A19\_00184" 184 "s59E25H2" 0 "hypothetical protein"  
"Chl\_A19\_00184" 184 "s59E5H2" 0 "hypothetical protein"  
"Chl\_A19\_00184" 184 "s63E6H2" 0 "hypothetical protein"  
"Chl\_A19\_00186" 186 "s59E13H2" 0 "UDP-2-acetamido-2-deoxy-3-oxo-D-glucuronate aminotransferase"  
"Chl\_A19\_00186" 186 "s59E25H2" 0 "UDP-2-acetamido-2-deoxy-3-oxo-D-glucuronate aminotransferase"  
"Chl\_A19\_00186" 186 "s59E5H2" 0 "UDP-2-acetamido-2-deoxy-3-oxo-D-glucuronate aminotransferase"  
"Chl\_A19\_00186" 186 "s63E6H2" 0 "UDP-2-acetamido-2-deoxy-3-oxo-D-glucuronate aminotransferase"  
"Chl\_A19\_00187" 187 "s59E13H2" 0 "UDP-2-acetamido-3-amino-2,3-dideoxy-D-glucuronate N-acetyltransferase"  
"Chl\_A19\_00187" 187 "s59E25H2" 0 "UDP-2-acetamido-3-amino-2,3-dideoxy-D-glucuronate N-acetyltransferase"  
"Chl\_A19\_00187" 187 "s59E5H2" 0 "UDP-2-acetamido-3-amino-2,3-dideoxy-D-glucuronate N-acetyltransferase"  
"Chl\_A19\_00187" 187 "s63E6H2" 0 "UDP-2-acetamido-3-amino-2,3-dideoxy-D-glucuronate N-acetyltransferase"  
"Chl\_A19\_00188" 188 "s59E13H2" 0 "Chaperone protein TorD"  
"Chl\_A19\_00188" 188 "s59E25H2" 0 "Chaperone protein TorD"  
"Chl\_A19\_00188" 188 "s59E5H2" 0 "Chaperone protein TorD"  
"Chl\_A19\_00188" 188 "s63E6H2" 0 "Chaperone protein TorD"  
"Chl\_A19\_00191" 191 "s59E13H2" 0 "Pyrogallol hydroxytransferase large subunit"

"Chl\_A19\_00191" 191 "s59E25H2" 0 "Pyrogallol hydroxytransferase large subunit"  
"Chl\_A19\_00191" 191 "s59E5H2" 0 "Pyrogallol hydroxytransferase large subunit"  
"Chl\_A19\_00191" 191 "s63E6H2" 0 "Pyrogallol hydroxytransferase large subunit"  
"Chl\_A19\_00192" 192 "s59E13H2" 0 "Pyrogallol hydroxytransferase small subunit"  
"Chl\_A19\_00192" 192 "s59E25H2" 0 "Pyrogallol hydroxytransferase small subunit"  
"Chl\_A19\_00192" 192 "s59E5H2" 0 "Pyrogallol hydroxytransferase small subunit"  
"Chl\_A19\_00192" 192 "s63E6H2" 0 "Pyrogallol hydroxytransferase small subunit"  
"Chl\_A19\_00193" 193 "s59E13H2" 0 "Deoxyuridine 5'-triphosphate nucleotidohydrolase"  
"Chl\_A19\_00193" 193 "s59E25H2" 0 "Deoxyuridine 5'-triphosphate nucleotidohydrolase"  
"Chl\_A19\_00193" 193 "s59E5H2" 0 "Deoxyuridine 5'-triphosphate nucleotidohydrolase"  
"Chl\_A19\_00193" 193 "s63E6H2" 0 "Deoxyuridine 5'-triphosphate nucleotidohydrolase"  
"Chl\_A19\_00194" 194 "s59E13H2" 0 "putative MFS-type transporter YhjX"  
"Chl\_A19\_00194" 194 "s59E25H2" 0 "putative MFS-type transporter YhjX"  
"Chl\_A19\_00194" 194 "s59E5H2" 0 "putative MFS-type transporter YhjX"  
"Chl\_A19\_00194" 194 "s63E6H2" 0 "putative MFS-type transporter YhjX"  
"Chl\_A19\_00195" 195 "s59E13H2" 0 "tRNA-specific adenosine deaminase"  
"Chl\_A19\_00195" 195 "s59E25H2" 0 "tRNA-specific adenosine deaminase"  
"Chl\_A19\_00195" 195 "s59E5H2" 0 "tRNA-specific adenosine deaminase"  
"Chl\_A19\_00195" 195 "s63E6H2" 0 "tRNA-specific adenosine deaminase"  
"Chl\_A19\_00196" 196 "s59E13H2" 0 "hypothetical protein"  
"Chl\_A19\_00196" 196 "s59E25H2" 0 "hypothetical protein"  
"Chl\_A19\_00196" 196 "s59E5H2" 0 "hypothetical protein"  
"Chl\_A19\_00196" 196 "s63E6H2" 0 "hypothetical protein"  
"Chl\_A19\_00197" 197 "s59E13H2" 0 "putative glutamine synthetase 2"  
"Chl\_A19\_00197" 197 "s59E25H2" 0 "putative glutamine synthetase 2"  
"Chl\_A19\_00197" 197 "s59E5H2" 0 "putative glutamine synthetase 2"  
"Chl\_A19\_00197" 197 "s63E6H2" 0 "putative glutamine synthetase 2"  
"Chl\_A19\_00198" 198 "s59E13H2" 0 "hypothetical protein"  
"Chl\_A19\_00198" 198 "s59E25H2" 0 "hypothetical protein"  
"Chl\_A19\_00198" 198 "s59E5H2" 0 "hypothetical protein"  
"Chl\_A19\_00198" 198 "s63E6H2" 0 "hypothetical protein"  
"Chl\_A19\_00199" 199 "s59E13H2" 0 "Imidazole glycerol phosphate synthase subunit HisF"  
"Chl\_A19\_00199" 199 "s59E25H2" 0 "Imidazole glycerol phosphate synthase subunit HisF"  
"Chl\_A19\_00199" 199 "s59E5H2" 0 "Imidazole glycerol phosphate synthase subunit HisF"  
"Chl\_A19\_00199" 199 "s63E6H2" 0 "Imidazole glycerol phosphate synthase subunit HisF"  
"Chl\_A19\_00200" 200 "s59E13H2" 0 "Ribonuclease R winged-helix domain protein"  
"Chl\_A19\_00200" 200 "s59E25H2" 0 "Ribonuclease R winged-helix domain protein"  
"Chl\_A19\_00200" 200 "s59E5H2" 0 "Ribonuclease R winged-helix domain protein"  
"Chl\_A19\_00200" 200 "s63E6H2" 0 "Ribonuclease R winged-helix domain protein"  
"Chl\_A19\_00201" 201 "s59E13H2" 0 "AP-4-A phosphorylase"  
"Chl\_A19\_00201" 201 "s59E25H2" 0 "AP-4-A phosphorylase"  
"Chl\_A19\_00201" 201 "s59E5H2" 0 "AP-4-A phosphorylase"  
"Chl\_A19\_00201" 201 "s63E6H2" 0 "AP-4-A phosphorylase"  
"Chl\_A19\_00202" 202 "s59E13H2" 0 "Transposase"  
"Chl\_A19\_00202" 202 "s59E25H2" 0 "Transposase"  
"Chl\_A19\_00202" 202 "s59E5H2" 0.0151388973418813 "Transposase"  
"Chl\_A19\_00202" 202 "s63E6H2" 2.13366672709889 "Transposase"

"Chl\_A19\_00203" 203 "s59E13H2" 0.047428447202891 "IS2 transposase TnpB"  
"Chl\_A19\_00203" 203 "s59E25H2" 0 "IS2 transposase TnpB"  
"Chl\_A19\_00203" 203 "s59E5H2" 0.0685114573997515 "IS2 transposase TnpB"  
"Chl\_A19\_00203" 203 "s63E6H2" 0.00268501954805771 "IS2 transposase TnpB"  
"Chl\_A19\_00204" 204 "s59E13H2" 0 "O-acetylserine sulfhydrylase"  
"Chl\_A19\_00204" 204 "s59E25H2" 0 "O-acetylserine sulfhydrylase"  
"Chl\_A19\_00204" 204 "s59E5H2" 0 "O-acetylserine sulfhydrylase"  
"Chl\_A19\_00204" 204 "s63E6H2" 0 "O-acetylserine sulfhydrylase"  
"Chl\_A19\_00205" 205 "s59E13H2" 0 "Serine acetyltransferase"  
"Chl\_A19\_00205" 205 "s59E25H2" 0 "Serine acetyltransferase"  
"Chl\_A19\_00205" 205 "s59E5H2" 0 "Serine acetyltransferase"  
"Chl\_A19\_00205" 205 "s63E6H2" 0 "Serine acetyltransferase"  
"Chl\_A19\_00206" 206 "s59E13H2" 0 "hypothetical protein"  
"Chl\_A19\_00206" 206 "s59E25H2" 0 "hypothetical protein"  
"Chl\_A19\_00206" 206 "s59E5H2" 0 "hypothetical protein"  
"Chl\_A19\_00206" 206 "s63E6H2" 0 "hypothetical protein"  
"Chl\_A19\_00207" 207 "s59E13H2" 0 "Universal stress protein"  
"Chl\_A19\_00207" 207 "s59E25H2" 0 "Universal stress protein"  
"Chl\_A19\_00207" 207 "s59E5H2" 0 "Universal stress protein"  
"Chl\_A19\_00207" 207 "s63E6H2" 0 "Universal stress protein"  
"Chl\_A19\_00208" 208 "s59E13H2" 0 "putative cysteine desulfurase 2"  
"Chl\_A19\_00208" 208 "s59E25H2" 0 "putative cysteine desulfurase 2"  
"Chl\_A19\_00208" 208 "s59E5H2" 0 "putative cysteine desulfurase 2"  
"Chl\_A19\_00208" 208 "s63E6H2" 0 "putative cysteine desulfurase 2"  
"Chl\_A19\_00209" 209 "s59E13H2" 0 "NifU-like protein"  
"Chl\_A19\_00209" 209 "s59E25H2" 0 "NifU-like protein"  
"Chl\_A19\_00209" 209 "s59E5H2" 0 "NifU-like protein"  
"Chl\_A19\_00209" 209 "s63E6H2" 0 "NifU-like protein"  
"Chl\_A19\_00210" 210 "s59E13H2" 0 "Hydrogenase isoenzymes formation protein HypE"  
"Chl\_A19\_00210" 210 "s59E25H2" 0 "Hydrogenase isoenzymes formation protein HypE"  
"Chl\_A19\_00210" 210 "s59E5H2" 0 "Hydrogenase isoenzymes formation protein HypE"  
"Chl\_A19\_00210" 210 "s63E6H2" 0 "Hydrogenase isoenzymes formation protein HypE"  
"Chl\_A19\_00211" 211 "s59E13H2" 0 "hypothetical protein"  
"Chl\_A19\_00211" 211 "s59E25H2" 0 "hypothetical protein"  
"Chl\_A19\_00211" 211 "s59E5H2" 0 "hypothetical protein"  
"Chl\_A19\_00211" 211 "s63E6H2" 0 "hypothetical protein"  
"Chl\_A19\_00212" 212 "s59E13H2" 0 "formate dehydrogenase accessory protein"  
"Chl\_A19\_00212" 212 "s59E25H2" 0 "formate dehydrogenase accessory protein"  
"Chl\_A19\_00212" 212 "s59E5H2" 0 "formate dehydrogenase accessory protein"  
"Chl\_A19\_00212" 212 "s63E6H2" 0 "formate dehydrogenase accessory protein"  
"Chl\_A19\_00213" 213 "s59E13H2" 0 "Quinolate synthase A"  
"Chl\_A19\_00213" 213 "s59E25H2" 0 "Quinolate synthase A"  
"Chl\_A19\_00213" 213 "s59E5H2" 0 "Quinolate synthase A"  
"Chl\_A19\_00213" 213 "s63E6H2" 0 "Quinolate synthase A"  
"Chl\_A19\_00214" 214 "s59E13H2" 0 "DinB superfamily protein"  
"Chl\_A19\_00214" 214 "s59E25H2" 0 "DinB superfamily protein"  
"Chl\_A19\_00214" 214 "s59E5H2" 0 "DinB superfamily protein"



"Chl\_A19\_00214" 214 "s63E6H2" 0 "DinB superfamily protein"  
"Chl\_A19\_00215" 215 "s59E13H2" 0 "Demethylrebeccamycin-D-glucose O-methyltransferase"  
"Chl\_A19\_00215" 215 "s59E25H2" 0 "Demethylrebeccamycin-D-glucose O-methyltransferase"  
"Chl\_A19\_00215" 215 "s59E5H2" 0 "Demethylrebeccamycin-D-glucose O-methyltransferase"  
"Chl\_A19\_00215" 215 "s63E6H2" 0 "Demethylrebeccamycin-D-glucose O-methyltransferase"  
"Chl\_A19\_00217" 217 "s59E13H2" 0 "DNA-invertase hin"  
"Chl\_A19\_00217" 217 "s59E25H2" 0 "DNA-invertase hin"  
"Chl\_A19\_00217" 217 "s59E5H2" 0 "DNA-invertase hin"  
"Chl\_A19\_00217" 217 "s63E6H2" 0 "DNA-invertase hin"  
"Chl\_A19\_00218" 218 "s59E13H2" 0 "Zonular occludens toxin (Zot)"  
"Chl\_A19\_00218" 218 "s59E25H2" 0 "Zonular occludens toxin (Zot)"  
"Chl\_A19\_00218" 218 "s59E5H2" 0 "Zonular occludens toxin (Zot)"  
"Chl\_A19\_00218" 218 "s63E6H2" 0 "Zonular occludens toxin (Zot)"  
"Chl\_A19\_00220" 220 "s59E13H2" 0 "Oxalate:formate antiporter"  
"Chl\_A19\_00220" 220 "s59E25H2" 0 "Oxalate:formate antiporter"  
"Chl\_A19\_00220" 220 "s59E5H2" 0 "Oxalate:formate antiporter"  
"Chl\_A19\_00220" 220 "s63E6H2" 0 "Oxalate:formate antiporter"  
"Chl\_A19\_00221" 221 "s59E13H2" 0 "DSBA-like thioredoxin domain protein"  
"Chl\_A19\_00221" 221 "s59E25H2" 0 "DSBA-like thioredoxin domain protein"  
"Chl\_A19\_00221" 221 "s59E5H2" 0 "DSBA-like thioredoxin domain protein"  
"Chl\_A19\_00221" 221 "s63E6H2" 0 "DSBA-like thioredoxin domain protein"  
"Chl\_A19\_00222" 222 "s59E13H2" 0 "MmgE/PrpD family protein"  
"Chl\_A19\_00222" 222 "s59E25H2" 0 "MmgE/PrpD family protein"  
"Chl\_A19\_00222" 222 "s59E5H2" 0 "MmgE/PrpD family protein"  
"Chl\_A19\_00222" 222 "s63E6H2" 0 "MmgE/PrpD family protein"  
"Chl\_A19\_00223" 223 "s59E13H2" 0 "putative MFS-type transporter YhjX"  
"Chl\_A19\_00223" 223 "s59E25H2" 0 "putative MFS-type transporter YhjX"  
"Chl\_A19\_00223" 223 "s59E5H2" 0 "putative MFS-type transporter YhjX"  
"Chl\_A19\_00223" 223 "s63E6H2" 0 "putative MFS-type transporter YhjX"  
"Chl\_A19\_00224" 224 "s59E13H2" 0 "hypothetical protein"  
"Chl\_A19\_00224" 224 "s59E25H2" 0 "hypothetical protein"  
"Chl\_A19\_00224" 224 "s59E5H2" 0 "hypothetical protein"  
"Chl\_A19\_00224" 224 "s63E6H2" 0 "hypothetical protein"  
"Chl\_A19\_00225" 225 "s59E13H2" 0 "Rubrerythrin"  
"Chl\_A19\_00225" 225 "s59E25H2" 0 "Rubrerythrin"  
"Chl\_A19\_00225" 225 "s59E5H2" 0 "Rubrerythrin"  
"Chl\_A19\_00225" 225 "s63E6H2" 0 "Rubrerythrin"  
"Chl\_A19\_00227" 227 "s59E13H2" 0 "putative MFS-type transporter YhjX"  
"Chl\_A19\_00227" 227 "s59E25H2" 0 "putative MFS-type transporter YhjX"  
"Chl\_A19\_00227" 227 "s59E5H2" 0 "putative MFS-type transporter YhjX"  
"Chl\_A19\_00227" 227 "s63E6H2" 0 "putative MFS-type transporter YhjX"  
"Chl\_A19\_00228" 228 "s59E13H2" 0 "putative dimethyl sulfoxide reductase chain YnfF precursor"  
"Chl\_A19\_00228" 228 "s59E25H2" 0 "putative dimethyl sulfoxide reductase chain YnfF precursor"  
"Chl\_A19\_00228" 228 "s59E5H2" 0 "putative dimethyl sulfoxide reductase chain YnfF precursor"  
"Chl\_A19\_00228" 228 "s63E6H2" 0 "putative dimethyl sulfoxide reductase chain YnfF precursor"  
"Chl\_A19\_00229" 229 "s59E13H2" 0 "Assimilatory nitrate reductase catalytic subunit"  
"Chl\_A19\_00229" 229 "s59E25H2" 0 "Assimilatory nitrate reductase catalytic subunit"

"Chl\_A19\_00229" 229 "s59E5H2" 0 "Assimilatory nitrate reductase catalytic subunit"  
"Chl\_A19\_00229" 229 "s63E6H2" 0 "Assimilatory nitrate reductase catalytic subunit"  
"Chl\_A19\_00230" 230 "s59E13H2" 0 "Pyrogallol hydroxytransferase large subunit"  
"Chl\_A19\_00230" 230 "s59E25H2" 0 "Pyrogallol hydroxytransferase large subunit"  
"Chl\_A19\_00230" 230 "s59E5H2" 0 "Pyrogallol hydroxytransferase large subunit"  
"Chl\_A19\_00230" 230 "s63E6H2" 0 "Pyrogallol hydroxytransferase large subunit"  
"Chl\_A19\_00231" 231 "s59E13H2" 0 "putative MFS-type transporter YhjX"  
"Chl\_A19\_00231" 231 "s59E25H2" 0 "putative MFS-type transporter YhjX"  
"Chl\_A19\_00231" 231 "s59E5H2" 0 "putative MFS-type transporter YhjX"  
"Chl\_A19\_00231" 231 "s63E6H2" 0 "putative MFS-type transporter YhjX"  
"Chl\_A19\_00232" 232 "s59E13H2" 0 "5,6-dimethylbenzimidazole synthase"  
"Chl\_A19\_00232" 232 "s59E25H2" 0 "5,6-dimethylbenzimidazole synthase"  
"Chl\_A19\_00232" 232 "s59E5H2" 0 "5,6-dimethylbenzimidazole synthase"  
"Chl\_A19\_00232" 232 "s63E6H2" 0 "5,6-dimethylbenzimidazole synthase"  
"Chl\_A19\_00233" 233 "s59E13H2" 0 "Acetylene hydratase"  
"Chl\_A19\_00233" 233 "s59E25H2" 0 "Acetylene hydratase"  
"Chl\_A19\_00233" 233 "s59E5H2" 0 "Acetylene hydratase"  
"Chl\_A19\_00233" 233 "s63E6H2" 0 "Acetylene hydratase"  
"Chl\_A19\_00234" 234 "s59E13H2" 0 "Acetylene hydratase"  
"Chl\_A19\_00234" 234 "s59E25H2" 0 "Acetylene hydratase"  
"Chl\_A19\_00234" 234 "s59E5H2" 0 "Acetylene hydratase"  
"Chl\_A19\_00234" 234 "s63E6H2" 0 "Acetylene hydratase"  
"Chl\_A19\_00235" 235 "s59E13H2" 0 "hypothetical protein"  
"Chl\_A19\_00235" 235 "s59E25H2" 0 "hypothetical protein"  
"Chl\_A19\_00235" 235 "s59E5H2" 0 "hypothetical protein"  
"Chl\_A19\_00235" 235 "s63E6H2" 0 "hypothetical protein"  
"Chl\_A19\_00236" 236 "s59E13H2" 0 "Fumarate reductase flavoprotein subunit precursor"  
"Chl\_A19\_00236" 236 "s59E25H2" 0 "Fumarate reductase flavoprotein subunit precursor"  
"Chl\_A19\_00236" 236 "s59E5H2" 0 "Fumarate reductase flavoprotein subunit precursor"  
"Chl\_A19\_00236" 236 "s63E6H2" 0 "Fumarate reductase flavoprotein subunit precursor"  
"Chl\_A19\_00237" 237 "s59E13H2" 0 "Cysteine--tRNA ligase"  
"Chl\_A19\_00237" 237 "s59E25H2" 0 "Cysteine--tRNA ligase"  
"Chl\_A19\_00237" 237 "s59E5H2" 0 "Cysteine--tRNA ligase"  
"Chl\_A19\_00237" 237 "s63E6H2" 0 "Cysteine--tRNA ligase"  
"Chl\_A19\_00238" 238 "s59E13H2" 0 "hypothetical protein"  
"Chl\_A19\_00238" 238 "s59E25H2" 0 "hypothetical protein"  
"Chl\_A19\_00238" 238 "s59E5H2" 0 "hypothetical protein"  
"Chl\_A19\_00238" 238 "s63E6H2" 0 "hypothetical protein"  
"Chl\_A19\_00239" 239 "s59E13H2" 0 "hypothetical protein"  
"Chl\_A19\_00239" 239 "s59E25H2" 0 "hypothetical protein"  
"Chl\_A19\_00239" 239 "s59E5H2" 0 "hypothetical protein"  
"Chl\_A19\_00239" 239 "s63E6H2" 0 "hypothetical protein"  
"Chl\_A19\_00240" 240 "s59E13H2" 0 "B12 binding domain protein"  
"Chl\_A19\_00240" 240 "s59E25H2" 0 "B12 binding domain protein"  
"Chl\_A19\_00240" 240 "s59E5H2" 0 "B12 binding domain protein"  
"Chl\_A19\_00240" 240 "s63E6H2" 0 "B12 binding domain protein"  
"Chl\_A19\_00241" 241 "s59E13H2" 0 "Inner membrane transport permease YadH"

"Chl\_A19\_00241" 241 "s59E25H2" 0 "Inner membrane transport permease YadH"  
"Chl\_A19\_00241" 241 "s59E5H2" 0 "Inner membrane transport permease YadH"  
"Chl\_A19\_00241" 241 "s63E6H2" 0 "Inner membrane transport permease YadH"  
"Chl\_A19\_00242" 242 "s59E13H2" 0 "Daunorubicin/doxorubicin resistance ATP-binding protein DrrA"  
"Chl\_A19\_00242" 242 "s59E25H2" 0 "Daunorubicin/doxorubicin resistance ATP-binding protein DrrA"  
"Chl\_A19\_00242" 242 "s59E5H2" 0 "Daunorubicin/doxorubicin resistance ATP-binding protein DrrA"  
"Chl\_A19\_00242" 242 "s63E6H2" 0 "Daunorubicin/doxorubicin resistance ATP-binding protein DrrA"  
"Chl\_A19\_00243" 243 "s59E13H2" 0 "1,4-dihydroxy-2-naphthoate octaprenyltransferase"  
"Chl\_A19\_00243" 243 "s59E25H2" 0 "1,4-dihydroxy-2-naphthoate octaprenyltransferase"  
"Chl\_A19\_00243" 243 "s59E5H2" 0 "1,4-dihydroxy-2-naphthoate octaprenyltransferase"  
"Chl\_A19\_00243" 243 "s63E6H2" 0 "1,4-dihydroxy-2-naphthoate octaprenyltransferase"  
"Chl\_A19\_00244" 244 "s59E13H2" 0 "preprotein translocase subunit SecG"  
"Chl\_A19\_00244" 244 "s59E25H2" 0 "preprotein translocase subunit SecG"  
"Chl\_A19\_00244" 244 "s59E5H2" 0 "preprotein translocase subunit SecG"  
"Chl\_A19\_00244" 244 "s63E6H2" 0 "preprotein translocase subunit SecG"  
"Chl\_A19\_00246" 246 "s59E13H2" 0 "Helix-turn-helix domain protein"  
"Chl\_A19\_00246" 246 "s59E25H2" 0 "Helix-turn-helix domain protein"  
"Chl\_A19\_00246" 246 "s59E5H2" 0 "Helix-turn-helix domain protein"  
"Chl\_A19\_00246" 246 "s63E6H2" 0 "Helix-turn-helix domain protein"  
"Chl\_A19\_00247" 247 "s59E13H2" 0 "50S ribosomal protein L2"  
"Chl\_A19\_00247" 247 "s59E25H2" 0 "50S ribosomal protein L2"  
"Chl\_A19\_00247" 247 "s59E5H2" 0 "50S ribosomal protein L2"  
"Chl\_A19\_00247" 247 "s63E6H2" 0 "50S ribosomal protein L2"  
"Chl\_A19\_00248" 248 "s59E13H2" 0 "30S ribosomal protein S19"  
"Chl\_A19\_00248" 248 "s59E25H2" 0 "30S ribosomal protein S19"  
"Chl\_A19\_00248" 248 "s59E5H2" 0 "30S ribosomal protein S19"  
"Chl\_A19\_00248" 248 "s63E6H2" 0 "30S ribosomal protein S19"  
"Chl\_A19\_00249" 249 "s59E13H2" 0 "50S ribosomal protein L22"  
"Chl\_A19\_00249" 249 "s59E25H2" 0 "50S ribosomal protein L22"  
"Chl\_A19\_00249" 249 "s59E5H2" 0 "50S ribosomal protein L22"  
"Chl\_A19\_00249" 249 "s63E6H2" 0 "50S ribosomal protein L22"  
"Chl\_A19\_00250" 250 "s59E13H2" 0 "30S ribosomal protein S3"  
"Chl\_A19\_00250" 250 "s59E25H2" 0 "30S ribosomal protein S3"  
"Chl\_A19\_00250" 250 "s59E5H2" 0 "30S ribosomal protein S3"  
"Chl\_A19\_00250" 250 "s63E6H2" 0 "30S ribosomal protein S3"  
"Chl\_A19\_00251" 251 "s59E13H2" 0 "50S ribosomal protein L16"  
"Chl\_A19\_00251" 251 "s59E25H2" 0 "50S ribosomal protein L16"  
"Chl\_A19\_00251" 251 "s59E5H2" 0 "50S ribosomal protein L16"  
"Chl\_A19\_00251" 251 "s63E6H2" 0 "50S ribosomal protein L16"  
"Chl\_A19\_00252" 252 "s59E13H2" 0 "50S ribosomal protein L29"  
"Chl\_A19\_00252" 252 "s59E25H2" 0 "50S ribosomal protein L29"  
"Chl\_A19\_00252" 252 "s59E5H2" 0 "50S ribosomal protein L29"  
"Chl\_A19\_00252" 252 "s63E6H2" 0 "50S ribosomal protein L29"  
"Chl\_A19\_00253" 253 "s59E13H2" 0 "30S ribosomal protein S17"  
"Chl\_A19\_00253" 253 "s59E25H2" 0 "30S ribosomal protein S17"  
"Chl\_A19\_00253" 253 "s59E5H2" 0 "30S ribosomal protein S17"  
"Chl\_A19\_00253" 253 "s63E6H2" 0 "30S ribosomal protein S17"

"Chl\_A19\_00254" 254 "s59E13H2" 0 "50S ribosomal protein L14"  
"Chl\_A19\_00254" 254 "s59E25H2" 0 "50S ribosomal protein L14"  
"Chl\_A19\_00254" 254 "s59E5H2" 0 "50S ribosomal protein L14"  
"Chl\_A19\_00254" 254 "s63E6H2" 0 "50S ribosomal protein L14"  
"Chl\_A19\_00255" 255 "s59E13H2" 0 "50S ribosomal protein L24"  
"Chl\_A19\_00255" 255 "s59E25H2" 0 "50S ribosomal protein L24"  
"Chl\_A19\_00255" 255 "s59E5H2" 0 "50S ribosomal protein L24"  
"Chl\_A19\_00255" 255 "s63E6H2" 0 "50S ribosomal protein L24"  
"Chl\_A19\_00256" 256 "s59E13H2" 0 "50S ribosomal protein L5"  
"Chl\_A19\_00256" 256 "s59E25H2" 0 "50S ribosomal protein L5"  
"Chl\_A19\_00256" 256 "s59E5H2" 0 "50S ribosomal protein L5"  
"Chl\_A19\_00256" 256 "s63E6H2" 0 "50S ribosomal protein L5"  
"Chl\_A19\_00257" 257 "s59E13H2" 0 "30S ribosomal protein S14"  
"Chl\_A19\_00257" 257 "s59E25H2" 0 "30S ribosomal protein S14"  
"Chl\_A19\_00257" 257 "s59E5H2" 0 "30S ribosomal protein S14"  
"Chl\_A19\_00257" 257 "s63E6H2" 0 "30S ribosomal protein S14"  
"Chl\_A19\_00258" 258 "s59E13H2" 0 "30S ribosomal protein S8"  
"Chl\_A19\_00258" 258 "s59E25H2" 0 "30S ribosomal protein S8"  
"Chl\_A19\_00258" 258 "s59E5H2" 0 "30S ribosomal protein S8"  
"Chl\_A19\_00258" 258 "s63E6H2" 0 "30S ribosomal protein S8"  
"Chl\_A19\_00259" 259 "s59E13H2" 0 "50S ribosomal protein L6"  
"Chl\_A19\_00259" 259 "s59E25H2" 0 "50S ribosomal protein L6"  
"Chl\_A19\_00259" 259 "s59E5H2" 0 "50S ribosomal protein L6"  
"Chl\_A19\_00259" 259 "s63E6H2" 0 "50S ribosomal protein L6"  
"Chl\_A19\_00260" 260 "s59E13H2" 0 "50S ribosomal protein L18"  
"Chl\_A19\_00260" 260 "s59E25H2" 0 "50S ribosomal protein L18"  
"Chl\_A19\_00260" 260 "s59E5H2" 0 "50S ribosomal protein L18"  
"Chl\_A19\_00260" 260 "s63E6H2" 0 "50S ribosomal protein L18"  
"Chl\_A19\_00261" 261 "s59E13H2" 0 "30S ribosomal protein S5"  
"Chl\_A19\_00261" 261 "s59E25H2" 0 "30S ribosomal protein S5"  
"Chl\_A19\_00261" 261 "s59E5H2" 0 "30S ribosomal protein S5"  
"Chl\_A19\_00261" 261 "s63E6H2" 0 "30S ribosomal protein S5"  
"Chl\_A19\_00262" 262 "s59E13H2" 0 "50S ribosomal protein L30"  
"Chl\_A19\_00262" 262 "s59E25H2" 0 "50S ribosomal protein L30"  
"Chl\_A19\_00262" 262 "s59E5H2" 0 "50S ribosomal protein L30"  
"Chl\_A19\_00262" 262 "s63E6H2" 0 "50S ribosomal protein L30"  
"Chl\_A19\_00263" 263 "s59E13H2" 0 "50S ribosomal protein L15"  
"Chl\_A19\_00263" 263 "s59E25H2" 0 "50S ribosomal protein L15"  
"Chl\_A19\_00263" 263 "s59E5H2" 0 "50S ribosomal protein L15"  
"Chl\_A19\_00263" 263 "s63E6H2" 0 "50S ribosomal protein L15"  
"Chl\_A19\_00264" 264 "s59E13H2" 0 "preprotein translocase subunit SecY"  
"Chl\_A19\_00264" 264 "s59E25H2" 0 "preprotein translocase subunit SecY"  
"Chl\_A19\_00264" 264 "s59E5H2" 0 "preprotein translocase subunit SecY"  
"Chl\_A19\_00264" 264 "s63E6H2" 0 "preprotein translocase subunit SecY"  
"Chl\_A19\_00265" 265 "s59E13H2" 0 "Adenylate kinase"  
"Chl\_A19\_00265" 265 "s59E25H2" 0 "Adenylate kinase"  
"Chl\_A19\_00265" 265 "s59E5H2" 0 "Adenylate kinase"

"Chl\_A19\_00265" 265 "s63E6H2" 0 "Adenylate kinase"  
"Chl\_A19\_00266" 266 "s59E13H2" 0 "Methionine aminopeptidase 1"  
"Chl\_A19\_00266" 266 "s59E25H2" 0 "Methionine aminopeptidase 1"  
"Chl\_A19\_00266" 266 "s59E5H2" 0 "Methionine aminopeptidase 1"  
"Chl\_A19\_00266" 266 "s63E6H2" 0 "Methionine aminopeptidase 1"  
"Chl\_A19\_00267" 267 "s59E13H2" 0 "Translation initiation factor IF-1"  
"Chl\_A19\_00267" 267 "s59E25H2" 0 "Translation initiation factor IF-1"  
"Chl\_A19\_00267" 267 "s59E5H2" 0 "Translation initiation factor IF-1"  
"Chl\_A19\_00267" 267 "s63E6H2" 0 "Translation initiation factor IF-1"  
"Chl\_A19\_00268" 268 "s59E13H2" 0 "30S ribosomal protein S13"  
"Chl\_A19\_00268" 268 "s59E25H2" 0 "30S ribosomal protein S13"  
"Chl\_A19\_00268" 268 "s59E5H2" 0 "30S ribosomal protein S13"  
"Chl\_A19\_00268" 268 "s63E6H2" 0 "30S ribosomal protein S13"  
"Chl\_A19\_00269" 269 "s59E13H2" 0 "30S ribosomal protein S11"  
"Chl\_A19\_00269" 269 "s59E25H2" 0 "30S ribosomal protein S11"  
"Chl\_A19\_00269" 269 "s59E5H2" 0 "30S ribosomal protein S11"  
"Chl\_A19\_00269" 269 "s63E6H2" 0 "30S ribosomal protein S11"  
"Chl\_A19\_00270" 270 "s59E13H2" 0 "30S ribosomal protein S4"  
"Chl\_A19\_00270" 270 "s59E25H2" 0 "30S ribosomal protein S4"  
"Chl\_A19\_00270" 270 "s59E5H2" 0 "30S ribosomal protein S4"  
"Chl\_A19\_00270" 270 "s63E6H2" 0 "30S ribosomal protein S4"  
"Chl\_A19\_00271" 271 "s59E13H2" 0 "DNA-directed RNA polymerase subunit alpha"  
"Chl\_A19\_00271" 271 "s59E25H2" 0 "DNA-directed RNA polymerase subunit alpha"  
"Chl\_A19\_00271" 271 "s59E5H2" 0 "DNA-directed RNA polymerase subunit alpha"  
"Chl\_A19\_00271" 271 "s63E6H2" 0 "DNA-directed RNA polymerase subunit alpha"  
"Chl\_A19\_00272" 272 "s59E13H2" 0 "50S ribosomal protein L17"  
"Chl\_A19\_00272" 272 "s59E25H2" 0 "50S ribosomal protein L17"  
"Chl\_A19\_00272" 272 "s59E5H2" 0 "50S ribosomal protein L17"  
"Chl\_A19\_00272" 272 "s63E6H2" 0 "50S ribosomal protein L17"  
"Chl\_A19\_00273" 273 "s59E13H2" 0 "Acyl-CoA dehydrogenase"  
"Chl\_A19\_00273" 273 "s59E25H2" 0 "Acyl-CoA dehydrogenase"  
"Chl\_A19\_00273" 273 "s59E5H2" 0 "Acyl-CoA dehydrogenase"  
"Chl\_A19\_00273" 273 "s63E6H2" 0 "Acyl-CoA dehydrogenase"  
"Chl\_A19\_00274" 274 "s59E13H2" 0 "Amidohydrolase"  
"Chl\_A19\_00274" 274 "s59E25H2" 0 "Amidohydrolase"  
"Chl\_A19\_00274" 274 "s59E5H2" 0 "Amidohydrolase"  
"Chl\_A19\_00274" 274 "s63E6H2" 0 "Amidohydrolase"  
"Chl\_A19\_00275" 275 "s59E13H2" 0 "tRNA pseudouridine synthase A"  
"Chl\_A19\_00275" 275 "s59E25H2" 0 "tRNA pseudouridine synthase A"  
"Chl\_A19\_00275" 275 "s59E5H2" 0 "tRNA pseudouridine synthase A"  
"Chl\_A19\_00275" 275 "s63E6H2" 0 "tRNA pseudouridine synthase A"  
"Chl\_A19\_00276" 276 "s59E13H2" 0 "Amidohydrolase"  
"Chl\_A19\_00276" 276 "s59E25H2" 0 "Amidohydrolase"  
"Chl\_A19\_00276" 276 "s59E5H2" 0 "Amidohydrolase"  
"Chl\_A19\_00276" 276 "s63E6H2" 0 "Amidohydrolase"  
"Chl\_A19\_00277" 277 "s59E13H2" 0 "putative propionyl-CoA carboxylase beta chain 5"  
"Chl\_A19\_00277" 277 "s59E25H2" 0 "putative propionyl-CoA carboxylase beta chain 5"

"Chl\_A19\_00277" 277 "s59E5H2" 0 "putative propionyl-CoA carboxylase beta chain 5"  
"Chl\_A19\_00277" 277 "s63E6H2" 0 "putative propionyl-CoA carboxylase beta chain 5"  
"Chl\_A19\_00278" 278 "s59E13H2" 0 "Amidohydrolase"  
"Chl\_A19\_00278" 278 "s59E25H2" 0 "Amidohydrolase"  
"Chl\_A19\_00278" 278 "s59E5H2" 0 "Amidohydrolase"  
"Chl\_A19\_00278" 278 "s63E6H2" 0 "Amidohydrolase"  
"Chl\_A19\_00279" 279 "s59E13H2" 0 "3-oxoacyl-[acyl-carrier-protein] reductase FabG"  
"Chl\_A19\_00279" 279 "s59E25H2" 0 "3-oxoacyl-[acyl-carrier-protein] reductase FabG"  
"Chl\_A19\_00279" 279 "s59E5H2" 0 "3-oxoacyl-[acyl-carrier-protein] reductase FabG"  
"Chl\_A19\_00279" 279 "s63E6H2" 0 "3-oxoacyl-[acyl-carrier-protein] reductase FabG"  
"Chl\_A19\_00280" 280 "s59E13H2" 0 "putative NH(3)-dependent NAD(+) synthetase"  
"Chl\_A19\_00280" 280 "s59E25H2" 0 "putative NH(3)-dependent NAD(+) synthetase"  
"Chl\_A19\_00280" 280 "s59E5H2" 0 "putative NH(3)-dependent NAD(+) synthetase"  
"Chl\_A19\_00280" 280 "s63E6H2" 0 "putative NH(3)-dependent NAD(+) synthetase"  
"Chl\_A19\_00281" 281 "s59E13H2" 0 "2-methylcitrate dehydratase"  
"Chl\_A19\_00281" 281 "s59E25H2" 0 "2-methylcitrate dehydratase"  
"Chl\_A19\_00281" 281 "s59E5H2" 0 "2-methylcitrate dehydratase"  
"Chl\_A19\_00281" 281 "s63E6H2" 0 "2-methylcitrate dehydratase"  
"Chl\_A19\_00282" 282 "s59E13H2" 0 "3-hydroxypropionyl-coenzyme A dehydratase"  
"Chl\_A19\_00282" 282 "s59E25H2" 0 "3-hydroxypropionyl-coenzyme A dehydratase"  
"Chl\_A19\_00282" 282 "s59E5H2" 0 "3-hydroxypropionyl-coenzyme A dehydratase"  
"Chl\_A19\_00282" 282 "s63E6H2" 0 "3-hydroxypropionyl-coenzyme A dehydratase"  
"Chl\_A19\_00283" 283 "s59E13H2" 0 "putative acyl-CoA thioester hydrolase"  
"Chl\_A19\_00283" 283 "s59E25H2" 0 "putative acyl-CoA thioester hydrolase"  
"Chl\_A19\_00283" 283 "s59E5H2" 0 "putative acyl-CoA thioester hydrolase"  
"Chl\_A19\_00283" 283 "s63E6H2" 0 "putative acyl-CoA thioester hydrolase"  
"Chl\_A19\_00284" 284 "s59E13H2" 0 "N-substituted formamide deformylase precursor"  
"Chl\_A19\_00284" 284 "s59E25H2" 0 "N-substituted formamide deformylase precursor"  
"Chl\_A19\_00284" 284 "s59E5H2" 0 "N-substituted formamide deformylase precursor"  
"Chl\_A19\_00284" 284 "s63E6H2" 0 "N-substituted formamide deformylase precursor"  
"Chl\_A19\_00285" 285 "s59E13H2" 0 "Lactate utilization protein A"  
"Chl\_A19\_00285" 285 "s59E25H2" 0 "Lactate utilization protein A"  
"Chl\_A19\_00285" 285 "s59E5H2" 0 "Lactate utilization protein A"  
"Chl\_A19\_00285" 285 "s63E6H2" 0 "Lactate utilization protein A"  
"Chl\_A19\_00286" 286 "s59E13H2" 0 "Acetylene hydratase"  
"Chl\_A19\_00286" 286 "s59E25H2" 0 "Acetylene hydratase"  
"Chl\_A19\_00286" 286 "s59E5H2" 0 "Acetylene hydratase"  
"Chl\_A19\_00286" 286 "s63E6H2" 0 "Acetylene hydratase"  
"Chl\_A19\_00287" 287 "s59E13H2" 0 "hypothetical protein"  
"Chl\_A19\_00287" 287 "s59E25H2" 0 "hypothetical protein"  
"Chl\_A19\_00287" 287 "s59E5H2" 0.000634885702388896 "hypothetical protein"  
"Chl\_A19\_00287" 287 "s63E6H2" 0 "hypothetical protein"  
"Chl\_A19\_00288" 288 "s59E13H2" 0 "hypothetical protein"  
"Chl\_A19\_00288" 288 "s59E25H2" 0 "hypothetical protein"  
"Chl\_A19\_00288" 288 "s59E5H2" 0 "hypothetical protein"  
"Chl\_A19\_00288" 288 "s63E6H2" 0 "hypothetical protein"  
"Chl\_A19\_00289" 289 "s59E13H2" 0 "hypothetical protein"

"Chl\_A19\_00289" 289 "s59E25H2" 0 "hypothetical protein"  
"Chl\_A19\_00289" 289 "s59E5H2" 0 "hypothetical protein"  
"Chl\_A19\_00289" 289 "s63E6H2" 0 "hypothetical protein"  
"Chl\_A19\_00290" 290 "s59E13H2" 0 "DNA polymerase III subunit alpha"  
"Chl\_A19\_00290" 290 "s59E25H2" 0 "DNA polymerase III subunit alpha"  
"Chl\_A19\_00290" 290 "s59E5H2" 0 "DNA polymerase III subunit alpha"  
"Chl\_A19\_00290" 290 "s63E6H2" 0 "DNA polymerase III subunit alpha"  
"Chl\_A19\_00291" 291 "s59E13H2" 0 "Demethylmenaquinone methyltransferase"  
"Chl\_A19\_00291" 291 "s59E25H2" 0 "Demethylmenaquinone methyltransferase"  
"Chl\_A19\_00291" 291 "s59E5H2" 0 "Demethylmenaquinone methyltransferase"  
"Chl\_A19\_00291" 291 "s63E6H2" 0 "Demethylmenaquinone methyltransferase"  
"Chl\_A19\_00292" 292 "s59E13H2" 0 "hypothetical protein"  
"Chl\_A19\_00292" 292 "s59E25H2" 0 "hypothetical protein"  
"Chl\_A19\_00292" 292 "s59E5H2" 0 "hypothetical protein"  
"Chl\_A19\_00292" 292 "s63E6H2" 0.00172246537045212 "hypothetical protein"  
"Chl\_A19\_00293" 293 "s59E13H2" 0 "Chagasin family peptidase inhibitor I42"  
"Chl\_A19\_00293" 293 "s59E25H2" 0 "Chagasin family peptidase inhibitor I42"  
"Chl\_A19\_00293" 293 "s59E5H2" 0 "Chagasin family peptidase inhibitor I42"  
"Chl\_A19\_00293" 293 "s63E6H2" 0 "Chagasin family peptidase inhibitor I42"  
"Chl\_A19\_00294" 294 "s59E13H2" 0 "Methylated-DNA--protein-cysteine methyltransferase"  
"Chl\_A19\_00294" 294 "s59E25H2" 0 "Methylated-DNA--protein-cysteine methyltransferase"  
"Chl\_A19\_00294" 294 "s59E5H2" 0 "Methylated-DNA--protein-cysteine methyltransferase"  
"Chl\_A19\_00294" 294 "s63E6H2" 0 "Methylated-DNA--protein-cysteine methyltransferase"  
"Chl\_A19\_00295" 295 "s59E13H2" 0 "Putative sigma-54 modulation protein"  
"Chl\_A19\_00295" 295 "s59E25H2" 0 "Putative sigma-54 modulation protein"  
"Chl\_A19\_00295" 295 "s59E5H2" 0 "Putative sigma-54 modulation protein"  
"Chl\_A19\_00295" 295 "s63E6H2" 0 "Putative sigma-54 modulation protein"  
"Chl\_A19\_00296" 296 "s59E13H2" 0 "DNA utilization protein GntX"  
"Chl\_A19\_00296" 296 "s59E25H2" 0 "DNA utilization protein GntX"  
"Chl\_A19\_00296" 296 "s59E5H2" 0 "DNA utilization protein GntX"  
"Chl\_A19\_00296" 296 "s63E6H2" 0 "DNA utilization protein GntX"  
"Chl\_A19\_00298" 298 "s59E13H2" 0 "2'-5'-RNA ligase"  
"Chl\_A19\_00298" 298 "s59E25H2" 0 "2'-5'-RNA ligase"  
"Chl\_A19\_00298" 298 "s59E5H2" 0 "2'-5'-RNA ligase"  
"Chl\_A19\_00298" 298 "s63E6H2" 0 "2'-5'-RNA ligase"  
"Chl\_A19\_00299" 299 "s59E13H2" 0 "Amidohydrolase"  
"Chl\_A19\_00299" 299 "s59E25H2" 0 "Amidohydrolase"  
"Chl\_A19\_00299" 299 "s59E5H2" 0 "Amidohydrolase"  
"Chl\_A19\_00299" 299 "s63E6H2" 0 "Amidohydrolase"  
"Chl\_A19\_00300" 300 "s59E13H2" 0 "10 kDa chaperonin"  
"Chl\_A19\_00300" 300 "s59E25H2" 0 "10 kDa chaperonin"  
"Chl\_A19\_00300" 300 "s59E5H2" 0 "10 kDa chaperonin"  
"Chl\_A19\_00300" 300 "s63E6H2" 0 "10 kDa chaperonin"  
"Chl\_A19\_00301" 301 "s59E13H2" 0 "60 kDa chaperonin"  
"Chl\_A19\_00301" 301 "s59E25H2" 0 "60 kDa chaperonin"  
"Chl\_A19\_00301" 301 "s59E5H2" 0 "60 kDa chaperonin"  
"Chl\_A19\_00301" 301 "s63E6H2" 0 "60 kDa chaperonin"

"Chl\_A19\_00302" 302 "s59E13H2" 0 "Protease 3 precursor"  
"Chl\_A19\_00302" 302 "s59E25H2" 0 "Protease 3 precursor"  
"Chl\_A19\_00302" 302 "s59E5H2" 0 "Protease 3 precursor"  
"Chl\_A19\_00302" 302 "s63E6H2" 0 "Protease 3 precursor"  
"Chl\_A19\_00303" 303 "s59E13H2" 0 "Putative prophage phiRv2 integrase"  
"Chl\_A19\_00303" 303 "s59E25H2" 0 "Putative prophage phiRv2 integrase"  
"Chl\_A19\_00303" 303 "s59E5H2" 0 "Putative prophage phiRv2 integrase"  
"Chl\_A19\_00303" 303 "s63E6H2" 0 "Putative prophage phiRv2 integrase"  
"Chl\_A19\_00304" 304 "s59E13H2" 0 "hypothetical protein"  
"Chl\_A19\_00304" 304 "s59E25H2" 0 "hypothetical protein"  
"Chl\_A19\_00304" 304 "s59E5H2" 0 "hypothetical protein"  
"Chl\_A19\_00304" 304 "s63E6H2" 0 "hypothetical protein"  
"Chl\_A19\_00305" 305 "s59E13H2" 0 "Helix-turn-helix domain protein"  
"Chl\_A19\_00305" 305 "s59E25H2" 0 "Helix-turn-helix domain protein"  
"Chl\_A19\_00305" 305 "s59E5H2" 0 "Helix-turn-helix domain protein"  
"Chl\_A19\_00305" 305 "s63E6H2" 0 "Helix-turn-helix domain protein"  
"Chl\_A19\_00307" 307 "s59E13H2" 0 "Transcriptional regulatory protein DegU"  
"Chl\_A19\_00307" 307 "s59E25H2" 0 "Transcriptional regulatory protein DegU"  
"Chl\_A19\_00307" 307 "s59E5H2" 0 "Transcriptional regulatory protein DegU"  
"Chl\_A19\_00307" 307 "s63E6H2" 0 "Transcriptional regulatory protein DegU"  
"Chl\_A19\_00308" 308 "s59E13H2" 0 "hypothetical protein"  
"Chl\_A19\_00308" 308 "s59E25H2" 0 "hypothetical protein"  
"Chl\_A19\_00308" 308 "s59E5H2" 0 "hypothetical protein"  
"Chl\_A19\_00308" 308 "s63E6H2" 0 "hypothetical protein"  
"Chl\_A19\_00309" 309 "s59E13H2" 0 "hypothetical protein"  
"Chl\_A19\_00309" 309 "s59E25H2" 0 "hypothetical protein"  
"Chl\_A19\_00309" 309 "s59E5H2" 0 "hypothetical protein"  
"Chl\_A19\_00309" 309 "s63E6H2" 0 "hypothetical protein"  
"Chl\_A19\_00310" 310 "s59E13H2" 0 "hypothetical protein"  
"Chl\_A19\_00310" 310 "s59E25H2" 0 "hypothetical protein"  
"Chl\_A19\_00310" 310 "s59E5H2" 0 "hypothetical protein"  
"Chl\_A19\_00310" 310 "s63E6H2" 0 "hypothetical protein"  
"Chl\_A19\_00311" 311 "s59E13H2" 0 "hypothetical protein"  
"Chl\_A19\_00311" 311 "s59E25H2" 0 "hypothetical protein"  
"Chl\_A19\_00311" 311 "s59E5H2" 0 "hypothetical protein"  
"Chl\_A19\_00311" 311 "s63E6H2" 0 "hypothetical protein"  
"Chl\_A19\_00312" 312 "s59E13H2" 0 "Vegetative catalase"  
"Chl\_A19\_00312" 312 "s59E25H2" 0 "Vegetative catalase"  
"Chl\_A19\_00312" 312 "s59E5H2" 0 "Vegetative catalase"  
"Chl\_A19\_00312" 312 "s63E6H2" 0 "Vegetative catalase"  
"Chl\_A19\_00314" 314 "s59E13H2" 0 "Ribosomal RNA small subunit methyltransferase A"  
"Chl\_A19\_00314" 314 "s59E25H2" 0 "Ribosomal RNA small subunit methyltransferase A"  
"Chl\_A19\_00314" 314 "s59E5H2" 0 "Ribosomal RNA small subunit methyltransferase A"  
"Chl\_A19\_00314" 314 "s63E6H2" 0 "Ribosomal RNA small subunit methyltransferase A"  
"Chl\_A19\_00315" 315 "s59E13H2" 0 "Trigger factor"  
"Chl\_A19\_00315" 315 "s59E25H2" 0 "Trigger factor"  
"Chl\_A19\_00315" 315 "s59E5H2" 0 "Trigger factor"



"Chl\_A19\_00315" 315 "s63E6H2" 0 "Trigger factor"  
"Chl\_A19\_00316" 316 "s59E13H2" 0 "3-hydroxypropionyl-coenzyme A dehydratase"  
"Chl\_A19\_00316" 316 "s59E25H2" 0 "3-hydroxypropionyl-coenzyme A dehydratase"  
"Chl\_A19\_00316" 316 "s59E5H2" 0 "3-hydroxypropionyl-coenzyme A dehydratase"  
"Chl\_A19\_00316" 316 "s63E6H2" 0 "3-hydroxypropionyl-coenzyme A dehydratase"  
"Chl\_A19\_00317" 317 "s59E13H2" 0 "3-hydroxypropionyl-coenzyme A dehydratase"  
"Chl\_A19\_00317" 317 "s59E25H2" 0 "3-hydroxypropionyl-coenzyme A dehydratase"  
"Chl\_A19\_00317" 317 "s59E5H2" 0 "3-hydroxypropionyl-coenzyme A dehydratase"  
"Chl\_A19\_00317" 317 "s63E6H2" 0 "3-hydroxypropionyl-coenzyme A dehydratase"  
"Chl\_A19\_00318" 318 "s59E13H2" 0 "Aspartate--tRNA ligase"  
"Chl\_A19\_00318" 318 "s59E25H2" 0 "Aspartate--tRNA ligase"  
"Chl\_A19\_00318" 318 "s59E5H2" 0 "Aspartate--tRNA ligase"  
"Chl\_A19\_00318" 318 "s63E6H2" 0 "Aspartate--tRNA ligase"  
"Chl\_A19\_00319" 319 "s59E13H2" 0 "hypothetical protein"  
"Chl\_A19\_00319" 319 "s59E25H2" 0 "hypothetical protein"  
"Chl\_A19\_00319" 319 "s59E5H2" 0 "hypothetical protein"  
"Chl\_A19\_00319" 319 "s63E6H2" 0 "hypothetical protein"  
"Chl\_A19\_00320" 320 "s59E13H2" 0 "hypothetical protein"  
"Chl\_A19\_00320" 320 "s59E25H2" 0 "hypothetical protein"  
"Chl\_A19\_00320" 320 "s59E5H2" 0 "hypothetical protein"  
"Chl\_A19\_00320" 320 "s63E6H2" 0 "hypothetical protein"  
"Chl\_A19\_00321" 321 "s59E13H2" 0 "ATP-dependent Clp protease proteolytic subunit"  
"Chl\_A19\_00321" 321 "s59E25H2" 0 "ATP-dependent Clp protease proteolytic subunit"  
"Chl\_A19\_00321" 321 "s59E5H2" 0 "ATP-dependent Clp protease proteolytic subunit"  
"Chl\_A19\_00321" 321 "s63E6H2" 0 "ATP-dependent Clp protease proteolytic subunit"  
"Chl\_A19\_00322" 322 "s59E13H2" 0 "PHP domain protein"  
"Chl\_A19\_00322" 322 "s59E25H2" 0 "PHP domain protein"  
"Chl\_A19\_00322" 322 "s59E5H2" 0 "PHP domain protein"  
"Chl\_A19\_00322" 322 "s63E6H2" 0 "PHP domain protein"  
"Chl\_A19\_00323" 323 "s59E13H2" 0 "Elongation factor P"  
"Chl\_A19\_00323" 323 "s59E25H2" 0 "Elongation factor P"  
"Chl\_A19\_00323" 323 "s59E5H2" 0 "Elongation factor P"  
"Chl\_A19\_00323" 323 "s63E6H2" 0 "Elongation factor P"  
"Chl\_A19\_00324" 324 "s59E13H2" 0 "Xaa-Pro dipeptidase"  
"Chl\_A19\_00324" 324 "s59E25H2" 0 "Xaa-Pro dipeptidase"  
"Chl\_A19\_00324" 324 "s59E5H2" 0 "Xaa-Pro dipeptidase"  
"Chl\_A19\_00324" 324 "s63E6H2" 0 "Xaa-Pro dipeptidase"  
"Chl\_A19\_00325" 325 "s59E13H2" 0 "Tyrosine recombinase XerD"  
"Chl\_A19\_00325" 325 "s59E25H2" 0 "Tyrosine recombinase XerD"  
"Chl\_A19\_00325" 325 "s59E5H2" 0 "Tyrosine recombinase XerD"  
"Chl\_A19\_00325" 325 "s63E6H2" 0 "Tyrosine recombinase XerD"  
"Chl\_A19\_00326" 326 "s59E13H2" 0 "DNA topoisomerase 1"  
"Chl\_A19\_00326" 326 "s59E25H2" 0 "DNA topoisomerase 1"  
"Chl\_A19\_00326" 326 "s59E5H2" 0 "DNA topoisomerase 1"  
"Chl\_A19\_00326" 326 "s63E6H2" 0 "DNA topoisomerase 1"  
"Chl\_A19\_00327" 327 "s59E13H2" 0 "hypothetical protein"  
"Chl\_A19\_00327" 327 "s59E25H2" 0 "hypothetical protein"

"Chl\_A19\_00327" 327 "s59E5H2" 0 "hypothetical protein"  
"Chl\_A19\_00327" 327 "s63E6H2" 0 "hypothetical protein"  
"Chl\_A19\_00329" 329 "s59E13H2" 0 "4-diphosphocytidyl-2-C-methyl-D-erythritol kinase"  
"Chl\_A19\_00329" 329 "s59E25H2" 0 "4-diphosphocytidyl-2-C-methyl-D-erythritol kinase"  
"Chl\_A19\_00329" 329 "s59E5H2" 0 "4-diphosphocytidyl-2-C-methyl-D-erythritol kinase"  
"Chl\_A19\_00329" 329 "s63E6H2" 0 "4-diphosphocytidyl-2-C-methyl-D-erythritol kinase"  
"Chl\_A19\_00330" 330 "s59E13H2" 0 "hypothetical protein"  
"Chl\_A19\_00330" 330 "s59E25H2" 0 "hypothetical protein"  
"Chl\_A19\_00330" 330 "s59E5H2" 0 "hypothetical protein"  
"Chl\_A19\_00330" 330 "s63E6H2" 0 "hypothetical protein"  
"Chl\_A19\_00331" 331 "s59E13H2" 0 "Sialic acid-binding periplasmic protein SiaP precursor"  
"Chl\_A19\_00331" 331 "s59E25H2" 0 "Sialic acid-binding periplasmic protein SiaP precursor"  
"Chl\_A19\_00331" 331 "s59E5H2" 0 "Sialic acid-binding periplasmic protein SiaP precursor"  
"Chl\_A19\_00331" 331 "s63E6H2" 0 "Sialic acid-binding periplasmic protein SiaP precursor"  
"Chl\_A19\_00332" 332 "s59E13H2" 0 "2,3-diketo-L-gulonate TRAP transporter small permease protein YiaM"  
"Chl\_A19\_00332" 332 "s59E25H2" 0 "2,3-diketo-L-gulonate TRAP transporter small permease protein YiaM"  
"Chl\_A19\_00332" 332 "s59E5H2" 0 "2,3-diketo-L-gulonate TRAP transporter small permease protein YiaM"  
"Chl\_A19\_00332" 332 "s63E6H2" 0 "2,3-diketo-L-gulonate TRAP transporter small permease protein YiaM"  
"Chl\_A19\_00333" 333 "s59E13H2" 0 "Sialic acid TRAP transporter permease protein SiaT"  
"Chl\_A19\_00333" 333 "s59E25H2" 0 "Sialic acid TRAP transporter permease protein SiaT"  
"Chl\_A19\_00333" 333 "s59E5H2" 0 "Sialic acid TRAP transporter permease protein SiaT"  
"Chl\_A19\_00333" 333 "s63E6H2" 0 "Sialic acid TRAP transporter permease protein SiaT"  
"Chl\_A19\_00334" 334 "s59E13H2" 0 "2-methylcitrate dehydratase"  
"Chl\_A19\_00334" 334 "s59E25H2" 0 "2-methylcitrate dehydratase"  
"Chl\_A19\_00334" 334 "s59E5H2" 0 "2-methylcitrate dehydratase"  
"Chl\_A19\_00334" 334 "s63E6H2" 0 "2-methylcitrate dehydratase"  
"Chl\_A19\_00335" 335 "s59E13H2" 0 "hypothetical protein"  
"Chl\_A19\_00335" 335 "s59E25H2" 0 "hypothetical protein"  
"Chl\_A19\_00335" 335 "s59E5H2" 0 "hypothetical protein"  
"Chl\_A19\_00335" 335 "s63E6H2" 0 "hypothetical protein"  
"Chl\_A19\_00336" 336 "s59E13H2" 0 "Peptide deformylase 1"  
"Chl\_A19\_00336" 336 "s59E25H2" 0 "Peptide deformylase 1"  
"Chl\_A19\_00336" 336 "s59E5H2" 0 "Peptide deformylase 1"  
"Chl\_A19\_00336" 336 "s63E6H2" 0 "Peptide deformylase 1"  
"Chl\_A19\_00337" 337 "s59E13H2" 0 "Primosomal protein N"  
"Chl\_A19\_00337" 337 "s59E25H2" 0 "Primosomal protein N"  
"Chl\_A19\_00337" 337 "s59E5H2" 0 "Primosomal protein N"  
"Chl\_A19\_00337" 337 "s63E6H2" 0 "Primosomal protein N"  
"Chl\_A19\_00338" 338 "s59E13H2" 0 "50S ribosomal protein L19"  
"Chl\_A19\_00338" 338 "s59E25H2" 0 "50S ribosomal protein L19"  
"Chl\_A19\_00338" 338 "s59E5H2" 0 "50S ribosomal protein L19"  
"Chl\_A19\_00338" 338 "s63E6H2" 0 "50S ribosomal protein L19"  
"Chl\_A19\_00339" 339 "s59E13H2" 0 "tRNA (guanine-N(1)-)-methyltransferase"  
"Chl\_A19\_00339" 339 "s59E25H2" 0 "tRNA (guanine-N(1)-)-methyltransferase"  
"Chl\_A19\_00339" 339 "s59E5H2" 0 "tRNA (guanine-N(1)-)-methyltransferase"  
"Chl\_A19\_00339" 339 "s63E6H2" 0 "tRNA (guanine-N(1)-)-methyltransferase"  
"Chl\_A19\_00340" 340 "s59E13H2" 0 "cell division protein MraZ"

"Chl\_A19\_00340" 340 "s59E25H2" 0 "cell division protein MraZ"  
"Chl\_A19\_00340" 340 "s59E5H2" 0 "cell division protein MraZ"  
"Chl\_A19\_00340" 340 "s63E6H2" 0 "cell division protein MraZ"  
"Chl\_A19\_00341" 341 "s59E13H2" 0 "Ribosomal RNA small subunit methyltransferase H"  
"Chl\_A19\_00341" 341 "s59E25H2" 0 "Ribosomal RNA small subunit methyltransferase H"  
"Chl\_A19\_00341" 341 "s59E5H2" 0 "Ribosomal RNA small subunit methyltransferase H"  
"Chl\_A19\_00341" 341 "s63E6H2" 0 "Ribosomal RNA small subunit methyltransferase H"  
"Chl\_A19\_00343" 343 "s59E13H2" 0 "Cell division protein FtsA"  
"Chl\_A19\_00343" 343 "s59E25H2" 0 "Cell division protein FtsA"  
"Chl\_A19\_00343" 343 "s59E5H2" 0 "Cell division protein FtsA"  
"Chl\_A19\_00343" 343 "s63E6H2" 0 "Cell division protein FtsA"  
"Chl\_A19\_00344" 344 "s59E13H2" 0 "Cell division protein FtsZ"  
"Chl\_A19\_00344" 344 "s59E25H2" 0 "Cell division protein FtsZ"  
"Chl\_A19\_00344" 344 "s59E5H2" 0 "Cell division protein FtsZ"  
"Chl\_A19\_00344" 344 "s63E6H2" 0 "Cell division protein FtsZ"  
"Chl\_A19\_00345" 345 "s59E13H2" 0 "DNA adenine methyltransferase YhdJ"  
"Chl\_A19\_00345" 345 "s59E25H2" 0 "DNA adenine methyltransferase YhdJ"  
"Chl\_A19\_00345" 345 "s59E5H2" 0 "DNA adenine methyltransferase YhdJ"  
"Chl\_A19\_00345" 345 "s63E6H2" 0 "DNA adenine methyltransferase YhdJ"  
"Chl\_A19\_00346" 346 "s59E13H2" 0 "Transposase DDE domain protein"  
"Chl\_A19\_00346" 346 "s59E25H2" 0 "Transposase DDE domain protein"  
"Chl\_A19\_00346" 346 "s59E5H2" 0 "Transposase DDE domain protein"  
"Chl\_A19\_00346" 346 "s63E6H2" 0 "Transposase DDE domain protein"  
"Chl\_A19\_00349" 349 "s59E13H2" 0 "hypothetical protein"  
"Chl\_A19\_00349" 349 "s59E25H2" 0 "hypothetical protein"  
"Chl\_A19\_00349" 349 "s59E5H2" 0 "hypothetical protein"  
"Chl\_A19\_00349" 349 "s63E6H2" 0 "hypothetical protein"  
"Chl\_A19\_00351" 351 "s59E13H2" 0 "Transcriptional repressor NrdR"  
"Chl\_A19\_00351" 351 "s59E25H2" 0 "Transcriptional repressor NrdR"  
"Chl\_A19\_00351" 351 "s59E5H2" 0 "Transcriptional repressor NrdR"  
"Chl\_A19\_00351" 351 "s63E6H2" 0 "Transcriptional repressor NrdR"  
"Chl\_A19\_00352" 352 "s59E13H2" 0 "Ribonucleoside-diphosphate reductase NrdZ"  
"Chl\_A19\_00352" 352 "s59E25H2" 0 "Ribonucleoside-diphosphate reductase NrdZ"  
"Chl\_A19\_00352" 352 "s59E5H2" 0 "Ribonucleoside-diphosphate reductase NrdZ"  
"Chl\_A19\_00352" 352 "s63E6H2" 0 "Ribonucleoside-diphosphate reductase NrdZ"  
"Chl\_A19\_00353" 353 "s59E13H2" 0 "NYN domain protein"  
"Chl\_A19\_00353" 353 "s59E25H2" 0 "NYN domain protein"  
"Chl\_A19\_00353" 353 "s59E5H2" 0 "NYN domain protein"  
"Chl\_A19\_00353" 353 "s63E6H2" 0 "NYN domain protein"  
"Chl\_A19\_00354" 354 "s59E13H2" 0 "Radical SAM superfamily protein"  
"Chl\_A19\_00354" 354 "s59E25H2" 0 "Radical SAM superfamily protein"  
"Chl\_A19\_00354" 354 "s59E5H2" 0 "Radical SAM superfamily protein"  
"Chl\_A19\_00354" 354 "s63E6H2" 0.000580056127377272 "Radical SAM superfamily protein"  
"Chl\_A19\_00355" 355 "s59E13H2" 0 "Chloroplast import component protein (Tic20)"  
"Chl\_A19\_00355" 355 "s59E25H2" 0 "Chloroplast import component protein (Tic20)"  
"Chl\_A19\_00355" 355 "s59E5H2" 0 "Chloroplast import component protein (Tic20)"  
"Chl\_A19\_00355" 355 "s63E6H2" 0 "Chloroplast import component protein (Tic20)"

"Chl\_A19\_00356" 356 "s59E13H2" 0 "Yqey-like protein"  
"Chl\_A19\_00356" 356 "s59E25H2" 0 "Yqey-like protein"  
"Chl\_A19\_00356" 356 "s59E5H2" 0 "Yqey-like protein"  
"Chl\_A19\_00356" 356 "s63E6H2" 0 "Yqey-like protein"  
"Chl\_A19\_00357" 357 "s59E13H2" 0 "30S ribosomal protein S21"  
"Chl\_A19\_00357" 357 "s59E25H2" 0 "30S ribosomal protein S21"  
"Chl\_A19\_00357" 357 "s59E5H2" 0 "30S ribosomal protein S21"  
"Chl\_A19\_00357" 357 "s63E6H2" 0 "30S ribosomal protein S21"  
"Chl\_A19\_00358" 358 "s59E13H2" 0 "Acyl-CoA dehydrogenase"  
"Chl\_A19\_00358" 358 "s59E25H2" 0 "Acyl-CoA dehydrogenase"  
"Chl\_A19\_00358" 358 "s59E5H2" 0 "Acyl-CoA dehydrogenase"  
"Chl\_A19\_00358" 358 "s63E6H2" 0 "Acyl-CoA dehydrogenase"  
"Chl\_A19\_00359" 359 "s59E13H2" 0 "Methylmalonyl-CoA mutase large subunit"  
"Chl\_A19\_00359" 359 "s59E25H2" 0 "Methylmalonyl-CoA mutase large subunit"  
"Chl\_A19\_00359" 359 "s59E5H2" 0 "Methylmalonyl-CoA mutase large subunit"  
"Chl\_A19\_00359" 359 "s63E6H2" 0 "Methylmalonyl-CoA mutase large subunit"  
"Chl\_A19\_00360" 360 "s59E13H2" 0 "Methylmalonyl-CoA mutase"  
"Chl\_A19\_00360" 360 "s59E25H2" 0 "Methylmalonyl-CoA mutase"  
"Chl\_A19\_00360" 360 "s59E5H2" 0 "Methylmalonyl-CoA mutase"  
"Chl\_A19\_00360" 360 "s63E6H2" 0 "Methylmalonyl-CoA mutase"  
"Chl\_A19\_00361" 361 "s59E13H2" 0 "Acyl-CoA dehydrogenase"  
"Chl\_A19\_00361" 361 "s59E25H2" 0 "Acyl-CoA dehydrogenase"  
"Chl\_A19\_00361" 361 "s59E5H2" 0 "Acyl-CoA dehydrogenase"  
"Chl\_A19\_00361" 361 "s63E6H2" 0 "Acyl-CoA dehydrogenase"  
"Chl\_A19\_00362" 362 "s59E13H2" 0 "Acetylene hydratase"  
"Chl\_A19\_00362" 362 "s59E25H2" 0 "Acetylene hydratase"  
"Chl\_A19\_00362" 362 "s59E5H2" 0 "Acetylene hydratase"  
"Chl\_A19\_00362" 362 "s63E6H2" 0 "Acetylene hydratase"  
"Chl\_A19\_00363" 363 "s59E13H2" 0 "Modulator of FtsH protease HflK"  
"Chl\_A19\_00363" 363 "s59E25H2" 0 "Modulator of FtsH protease HflK"  
"Chl\_A19\_00363" 363 "s59E5H2" 0 "Modulator of FtsH protease HflK"  
"Chl\_A19\_00363" 363 "s63E6H2" 0 "Modulator of FtsH protease HflK"  
"Chl\_A19\_00364" 364 "s59E13H2" 0 "hypothetical protein"  
"Chl\_A19\_00364" 364 "s59E25H2" 0 "hypothetical protein"  
"Chl\_A19\_00364" 364 "s59E5H2" 0 "hypothetical protein"  
"Chl\_A19\_00364" 364 "s63E6H2" 0 "hypothetical protein"  
"Chl\_A19\_00365" 365 "s59E13H2" 0 "Diaminopimelate decarboxylase"  
"Chl\_A19\_00365" 365 "s59E25H2" 0 "Diaminopimelate decarboxylase"  
"Chl\_A19\_00365" 365 "s59E5H2" 0 "Diaminopimelate decarboxylase"  
"Chl\_A19\_00365" 365 "s63E6H2" 0 "Diaminopimelate decarboxylase"  
"Chl\_A19\_00366" 366 "s59E13H2" 0 "Acylamino-acid-releasing enzyme"  
"Chl\_A19\_00366" 366 "s59E25H2" 0 "Acylamino-acid-releasing enzyme"  
"Chl\_A19\_00366" 366 "s59E5H2" 0 "Acylamino-acid-releasing enzyme"  
"Chl\_A19\_00366" 366 "s63E6H2" 0 "Acylamino-acid-releasing enzyme"  
"Chl\_A19\_00367" 367 "s59E13H2" 0 "Transcriptional regulatory protein DegU"  
"Chl\_A19\_00367" 367 "s59E25H2" 0 "Transcriptional regulatory protein DegU"  
"Chl\_A19\_00367" 367 "s59E5H2" 0 "Transcriptional regulatory protein DegU"

"Chl\_A19\_00367" 367 "s63E6H2" 0 "Transcriptional regulatory protein DegU"  
"Chl\_A19\_00368" 368 "s59E13H2" 0 "Transcriptional regulatory protein DegU"  
"Chl\_A19\_00368" 368 "s59E25H2" 0 "Transcriptional regulatory protein DegU"  
"Chl\_A19\_00368" 368 "s59E5H2" 0 "Transcriptional regulatory protein DegU"  
"Chl\_A19\_00368" 368 "s63E6H2" 0 "Transcriptional regulatory protein DegU"  
"Chl\_A19\_00369" 369 "s59E13H2" 0 "Oxygen sensor histidine kinase NreB"  
"Chl\_A19\_00369" 369 "s59E25H2" 0 "Oxygen sensor histidine kinase NreB"  
"Chl\_A19\_00369" 369 "s59E5H2" 0 "Oxygen sensor histidine kinase NreB"  
"Chl\_A19\_00369" 369 "s63E6H2" 0 "Oxygen sensor histidine kinase NreB"  
"Chl\_A19\_00370" 370 "s59E13H2" 0 "GH3 auxin-responsive promoter"  
"Chl\_A19\_00370" 370 "s59E25H2" 0 "GH3 auxin-responsive promoter"  
"Chl\_A19\_00370" 370 "s59E5H2" 0 "GH3 auxin-responsive promoter"  
"Chl\_A19\_00370" 370 "s63E6H2" 0 "GH3 auxin-responsive promoter"  
"Chl\_A19\_00371" 371 "s59E13H2" 0 "hypothetical protein"  
"Chl\_A19\_00371" 371 "s59E25H2" 0 "hypothetical protein"  
"Chl\_A19\_00371" 371 "s59E5H2" 0 "hypothetical protein"  
"Chl\_A19\_00371" 371 "s63E6H2" 0 "hypothetical protein"  
"Chl\_A19\_00372" 372 "s59E13H2" 0 "hypothetical protein"  
"Chl\_A19\_00372" 372 "s59E25H2" 0 "hypothetical protein"  
"Chl\_A19\_00372" 372 "s59E5H2" 0 "hypothetical protein"  
"Chl\_A19\_00372" 372 "s63E6H2" 0 "hypothetical protein"  
"Chl\_A19\_00373" 373 "s59E13H2" 0 "Type II secretion system protein E"  
"Chl\_A19\_00373" 373 "s59E25H2" 0 "Type II secretion system protein E"  
"Chl\_A19\_00373" 373 "s59E5H2" 0 "Type II secretion system protein E"  
"Chl\_A19\_00373" 373 "s63E6H2" 0 "Type II secretion system protein E"  
"Chl\_A19\_00374" 374 "s59E13H2" 0 "Putative type II secretion system protein F"  
"Chl\_A19\_00374" 374 "s59E25H2" 0 "Putative type II secretion system protein F"  
"Chl\_A19\_00374" 374 "s59E5H2" 0 "Putative type II secretion system protein F"  
"Chl\_A19\_00374" 374 "s63E6H2" 0 "Putative type II secretion system protein F"  
"Chl\_A19\_00375" 375 "s59E13H2" 0 "hypothetical protein"  
"Chl\_A19\_00375" 375 "s59E25H2" 0 "hypothetical protein"  
"Chl\_A19\_00375" 375 "s59E5H2" 0 "hypothetical protein"  
"Chl\_A19\_00375" 375 "s63E6H2" 0 "hypothetical protein"  
"Chl\_A19\_00376" 376 "s59E13H2" 0 "hypothetical protein"  
"Chl\_A19\_00376" 376 "s59E25H2" 0 "hypothetical protein"  
"Chl\_A19\_00376" 376 "s59E5H2" 0 "hypothetical protein"  
"Chl\_A19\_00376" 376 "s63E6H2" 0 "hypothetical protein"  
"Chl\_A19\_00377" 377 "s59E13H2" 0 "hypothetical protein"  
"Chl\_A19\_00377" 377 "s59E25H2" 0 "hypothetical protein"  
"Chl\_A19\_00377" 377 "s59E5H2" 0 "hypothetical protein"  
"Chl\_A19\_00377" 377 "s63E6H2" 0 "hypothetical protein"  
"Chl\_A19\_00378" 378 "s59E13H2" 0 "hypothetical protein"  
"Chl\_A19\_00378" 378 "s59E25H2" 0 "hypothetical protein"  
"Chl\_A19\_00378" 378 "s59E5H2" 0 "hypothetical protein"  
"Chl\_A19\_00378" 378 "s63E6H2" 0 "hypothetical protein"  
"Chl\_A19\_00379" 379 "s59E13H2" 0 "hypothetical protein"  
"Chl\_A19\_00379" 379 "s59E25H2" 0 "hypothetical protein"

"Chl\_A19\_00379" 379 "s59E5H2" 0 "hypothetical protein"  
"Chl\_A19\_00379" 379 "s63E6H2" 0 "hypothetical protein"  
"Chl\_A19\_00380" 380 "s59E13H2" 0 "Competence protein A"  
"Chl\_A19\_00380" 380 "s59E25H2" 0 "Competence protein A"  
"Chl\_A19\_00380" 380 "s59E5H2" 0 "Competence protein A"  
"Chl\_A19\_00380" 380 "s63E6H2" 0 "Competence protein A"  
"Chl\_A19\_00382" 382 "s59E13H2" 0 "Fimbrial protein precursor"  
"Chl\_A19\_00382" 382 "s59E25H2" 0 "Fimbrial protein precursor"  
"Chl\_A19\_00382" 382 "s59E5H2" 0 "Fimbrial protein precursor"  
"Chl\_A19\_00382" 382 "s63E6H2" 0 "Fimbrial protein precursor"  
"Chl\_A19\_00383" 383 "s59E13H2" 0 "Fimbrial protein precursor"  
"Chl\_A19\_00383" 383 "s59E25H2" 0 "Fimbrial protein precursor"  
"Chl\_A19\_00383" 383 "s59E5H2" 0 "Fimbrial protein precursor"  
"Chl\_A19\_00383" 383 "s63E6H2" 0 "Fimbrial protein precursor"  
"Chl\_A19\_00384" 384 "s59E13H2" 0 "Transcriptional regulatory protein DegU"  
"Chl\_A19\_00384" 384 "s59E25H2" 0 "Transcriptional regulatory protein DegU"  
"Chl\_A19\_00384" 384 "s59E5H2" 0 "Transcriptional regulatory protein DegU"  
"Chl\_A19\_00384" 384 "s63E6H2" 0 "Transcriptional regulatory protein DegU"  
"Chl\_A19\_00385" 385 "s59E13H2" 0.00364932027961413 "Sensor histidine kinase LiaS"  
"Chl\_A19\_00385" 385 "s59E25H2" 0.120748299319728 "Sensor histidine kinase LiaS"  
"Chl\_A19\_00385" 385 "s59E5H2" 0 "Sensor histidine kinase LiaS"  
"Chl\_A19\_00385" 385 "s63E6H2" 0 "Sensor histidine kinase LiaS"  
"Chl\_A19\_00386" 386 "s59E13H2" 0 "Type 4 prepilin-like proteins leader peptide-processing enzyme"  
"Chl\_A19\_00386" 386 "s59E25H2" 0 "Type 4 prepilin-like proteins leader peptide-processing enzyme"  
"Chl\_A19\_00386" 386 "s59E5H2" 0.00337204037800897 "Type 4 prepilin-like proteins leader peptide-processing enzyme"  
"Chl\_A19\_00386" 386 "s63E6H2" 0 "Type 4 prepilin-like proteins leader peptide-processing enzyme"  
"Chl\_A19\_00387" 387 "s59E13H2" 0 "Signal peptidase I W"  
"Chl\_A19\_00387" 387 "s59E25H2" 0 "Signal peptidase I W"  
"Chl\_A19\_00387" 387 "s59E5H2" 0 "Signal peptidase I W"  
"Chl\_A19\_00387" 387 "s63E6H2" 0 "Signal peptidase I W"  
"Chl\_A19\_00388" 388 "s59E13H2" 0 "hypothetical protein"  
"Chl\_A19\_00388" 388 "s59E25H2" 0 "hypothetical protein"  
"Chl\_A19\_00388" 388 "s59E5H2" 0 "hypothetical protein"  
"Chl\_A19\_00388" 388 "s63E6H2" 0 "hypothetical protein"  
"Chl\_A19\_00390" 390 "s59E13H2" 0 "hypothetical protein"  
"Chl\_A19\_00390" 390 "s59E25H2" 0 "hypothetical protein"  
"Chl\_A19\_00390" 390 "s59E5H2" 0 "hypothetical protein"  
"Chl\_A19\_00390" 390 "s63E6H2" 0 "hypothetical protein"  
"Chl\_A19\_00391" 391 "s59E13H2" 0 "Transcriptional regulatory protein DegU"  
"Chl\_A19\_00391" 391 "s59E25H2" 0 "Transcriptional regulatory protein DegU"  
"Chl\_A19\_00391" 391 "s59E5H2" 0 "Transcriptional regulatory protein DegU"  
"Chl\_A19\_00391" 391 "s63E6H2" 0 "Transcriptional regulatory protein DegU"  
"Chl\_A19\_00392" 392 "s59E13H2" 0 "Nitrogenase molybdenum-iron protein alpha chain"  
"Chl\_A19\_00392" 392 "s59E25H2" 0 "Nitrogenase molybdenum-iron protein alpha chain"  
"Chl\_A19\_00392" 392 "s59E5H2" 0 "Nitrogenase molybdenum-iron protein alpha chain"  
"Chl\_A19\_00392" 392 "s63E6H2" 0 "Nitrogenase molybdenum-iron protein alpha chain"  
"Chl\_A19\_00393" 393 "s59E13H2" 0 "Nitrogenase molybdenum-iron protein alpha chain"

"Chl\_A19\_00393" 393 "s59E25H2" 0 "Nitrogenase molybdenum-iron protein alpha chain"  
"Chl\_A19\_00393" 393 "s59E5H2" 0 "Nitrogenase molybdenum-iron protein alpha chain"  
"Chl\_A19\_00393" 393 "s63E6H2" 0 "Nitrogenase molybdenum-iron protein alpha chain"  
"Chl\_A19\_00394" 394 "s59E13H2" 0 "Succinyl-CoA:(R)-benzylsuccinate CoA-transferase subunit BbsE"  
"Chl\_A19\_00394" 394 "s59E25H2" 0 "Succinyl-CoA:(R)-benzylsuccinate CoA-transferase subunit BbsE"  
"Chl\_A19\_00394" 394 "s59E5H2" 0 "Succinyl-CoA:(R)-benzylsuccinate CoA-transferase subunit BbsE"  
"Chl\_A19\_00394" 394 "s63E6H2" 0 "Succinyl-CoA:(R)-benzylsuccinate CoA-transferase subunit BbsE"  
"Chl\_A19\_00395" 395 "s59E13H2" 0 "Succinyl-CoA:(R)-benzylsuccinate CoA-transferase subunit BbsF"  
"Chl\_A19\_00395" 395 "s59E25H2" 0 "Succinyl-CoA:(R)-benzylsuccinate CoA-transferase subunit BbsF"  
"Chl\_A19\_00395" 395 "s59E5H2" 0 "Succinyl-CoA:(R)-benzylsuccinate CoA-transferase subunit BbsF"  
"Chl\_A19\_00395" 395 "s63E6H2" 0 "Succinyl-CoA:(R)-benzylsuccinate CoA-transferase subunit BbsF"  
"Chl\_A19\_00396" 396 "s59E13H2" 0 "3-dehydroquinase synthase"  
"Chl\_A19\_00396" 396 "s59E25H2" 0 "3-dehydroquinase synthase"  
"Chl\_A19\_00396" 396 "s59E5H2" 0 "3-dehydroquinase synthase"  
"Chl\_A19\_00396" 396 "s63E6H2" 0 "3-dehydroquinase synthase"  
"Chl\_A19\_00397" 397 "s59E13H2" 0 "3-dehydroquinase dehydratase"  
"Chl\_A19\_00397" 397 "s59E25H2" 0 "3-dehydroquinase dehydratase"  
"Chl\_A19\_00397" 397 "s59E5H2" 0 "3-dehydroquinase dehydratase"  
"Chl\_A19\_00397" 397 "s63E6H2" 0 "3-dehydroquinase dehydratase"  
"Chl\_A19\_00398" 398 "s59E13H2" 0 "Shikimate dehydrogenase"  
"Chl\_A19\_00398" 398 "s59E25H2" 0 "Shikimate dehydrogenase"  
"Chl\_A19\_00398" 398 "s59E5H2" 0 "Shikimate dehydrogenase"  
"Chl\_A19\_00398" 398 "s63E6H2" 0 "Shikimate dehydrogenase"  
"Chl\_A19\_00399" 399 "s59E13H2" 0 "Shikimate kinase"  
"Chl\_A19\_00399" 399 "s59E25H2" 0 "Shikimate kinase"  
"Chl\_A19\_00399" 399 "s59E5H2" 0 "Shikimate kinase"  
"Chl\_A19\_00399" 399 "s63E6H2" 0 "Shikimate kinase"  
"Chl\_A19\_00400" 400 "s59E13H2" 0 "3-phosphoshikimate 1-carboxyvinyltransferase"  
"Chl\_A19\_00400" 400 "s59E25H2" 0 "3-phosphoshikimate 1-carboxyvinyltransferase"  
"Chl\_A19\_00400" 400 "s59E5H2" 0 "3-phosphoshikimate 1-carboxyvinyltransferase"  
"Chl\_A19\_00400" 400 "s63E6H2" 0 "3-phosphoshikimate 1-carboxyvinyltransferase"  
"Chl\_A19\_00401" 401 "s59E13H2" 0 "Chorismate synthase"  
"Chl\_A19\_00401" 401 "s59E25H2" 0 "Chorismate synthase"  
"Chl\_A19\_00401" 401 "s59E5H2" 0 "Chorismate synthase"  
"Chl\_A19\_00401" 401 "s63E6H2" 0 "Chorismate synthase"  
"Chl\_A19\_00402" 402 "s59E13H2" 0 "P-protein"  
"Chl\_A19\_00402" 402 "s59E25H2" 0 "P-protein"  
"Chl\_A19\_00402" 402 "s59E5H2" 0 "P-protein"  
"Chl\_A19\_00402" 402 "s63E6H2" 0 "P-protein"  
"Chl\_A19\_00403" 403 "s59E13H2" 0 "T-protein"  
"Chl\_A19\_00403" 403 "s59E25H2" 0 "T-protein"  
"Chl\_A19\_00403" 403 "s59E5H2" 0 "T-protein"  
"Chl\_A19\_00403" 403 "s63E6H2" 0 "T-protein"  
"Chl\_A19\_00404" 404 "s59E13H2" 0 "hypothetical protein"  
"Chl\_A19\_00404" 404 "s59E25H2" 0 "hypothetical protein"  
"Chl\_A19\_00404" 404 "s59E5H2" 0 "hypothetical protein"  
"Chl\_A19\_00404" 404 "s63E6H2" 0 "hypothetical protein"

"Chl\_A19\_00405" 405 "s59E13H2" 0 "hypothetical protein"  
"Chl\_A19\_00405" 405 "s59E25H2" 0 "hypothetical protein"  
"Chl\_A19\_00405" 405 "s59E5H2" 0 "hypothetical protein"  
"Chl\_A19\_00405" 405 "s63E6H2" 0 "hypothetical protein"  
"Chl\_A19\_00406" 406 "s59E13H2" 0 "putative dimethyl sulfoxide reductase chain YnfF precursor"  
"Chl\_A19\_00406" 406 "s59E25H2" 0 "putative dimethyl sulfoxide reductase chain YnfF precursor"  
"Chl\_A19\_00406" 406 "s59E5H2" 0 "putative dimethyl sulfoxide reductase chain YnfF precursor"  
"Chl\_A19\_00406" 406 "s63E6H2" 0 "putative dimethyl sulfoxide reductase chain YnfF precursor"  
"Chl\_A19\_00407" 407 "s59E13H2" 0 "Sulfide dehydrogenase subunit alpha precursor"  
"Chl\_A19\_00407" 407 "s59E25H2" 0 "Sulfide dehydrogenase subunit alpha precursor"  
"Chl\_A19\_00407" 407 "s59E5H2" 0 "Sulfide dehydrogenase subunit alpha precursor"  
"Chl\_A19\_00407" 407 "s63E6H2" 0 "Sulfide dehydrogenase subunit alpha precursor"  
"Chl\_A19\_00408" 408 "s59E13H2" 0 "Carbamoyl-phosphate synthase large chain"  
"Chl\_A19\_00408" 408 "s59E25H2" 0 "Carbamoyl-phosphate synthase large chain"  
"Chl\_A19\_00408" 408 "s59E5H2" 0 "Carbamoyl-phosphate synthase large chain"  
"Chl\_A19\_00408" 408 "s63E6H2" 0 "Carbamoyl-phosphate synthase large chain"  
"Chl\_A19\_00409" 409 "s59E13H2" 0 "hypothetical protein"  
"Chl\_A19\_00409" 409 "s59E25H2" 0 "hypothetical protein"  
"Chl\_A19\_00409" 409 "s59E5H2" 0 "hypothetical protein"  
"Chl\_A19\_00409" 409 "s63E6H2" 0 "hypothetical protein"  
"Chl\_A19\_00410" 410 "s59E13H2" 0 "CoB--CoM heterodisulfide reductase iron-sulfur subunit D"  
"Chl\_A19\_00410" 410 "s59E25H2" 0 "CoB--CoM heterodisulfide reductase iron-sulfur subunit D"  
"Chl\_A19\_00410" 410 "s59E5H2" 0 "CoB--CoM heterodisulfide reductase iron-sulfur subunit D"  
"Chl\_A19\_00410" 410 "s63E6H2" 0 "CoB--CoM heterodisulfide reductase iron-sulfur subunit D"  
"Chl\_A19\_00411" 411 "s59E13H2" 0 "putative HTH-type transcriptional regulator/MT0088"  
"Chl\_A19\_00411" 411 "s59E25H2" 0 "putative HTH-type transcriptional regulator/MT0088"  
"Chl\_A19\_00411" 411 "s59E5H2" 0 "putative HTH-type transcriptional regulator/MT0088"  
"Chl\_A19\_00411" 411 "s63E6H2" 0 "putative HTH-type transcriptional regulator/MT0088"  
"Chl\_A19\_00412" 412 "s59E13H2" 0 "hypothetical protein"  
"Chl\_A19\_00412" 412 "s59E25H2" 0 "hypothetical protein"  
"Chl\_A19\_00412" 412 "s59E5H2" 0 "hypothetical protein"  
"Chl\_A19\_00412" 412 "s63E6H2" 0 "hypothetical protein"  
"Chl\_A19\_00413" 413 "s59E13H2" 0 "30S ribosomal protein S21"  
"Chl\_A19\_00413" 413 "s59E25H2" 0 "30S ribosomal protein S21"  
"Chl\_A19\_00413" 413 "s59E5H2" 0 "30S ribosomal protein S21"  
"Chl\_A19\_00413" 413 "s63E6H2" 0 "30S ribosomal protein S21"  
"Chl\_A19\_00414" 414 "s59E13H2" 0 "RNA recognition motif. (a.k.a. RRM, RBD, or RNP domain)"  
"Chl\_A19\_00414" 414 "s59E25H2" 0 "RNA recognition motif. (a.k.a. RRM, RBD, or RNP domain)"  
"Chl\_A19\_00414" 414 "s59E5H2" 0 "RNA recognition motif. (a.k.a. RRM, RBD, or RNP domain)"  
"Chl\_A19\_00414" 414 "s63E6H2" 0 "RNA recognition motif. (a.k.a. RRM, RBD, or RNP domain)"  
"Chl\_A19\_00415" 415 "s59E13H2" 0 "Iron-sulphur cluster biosynthesis"  
"Chl\_A19\_00415" 415 "s59E25H2" 0 "Iron-sulphur cluster biosynthesis"  
"Chl\_A19\_00415" 415 "s59E5H2" 0 "Iron-sulphur cluster biosynthesis"  
"Chl\_A19\_00415" 415 "s63E6H2" 0 "Iron-sulphur cluster biosynthesis"  
"Chl\_A19\_00417" 417 "s59E13H2" 0 "Multidrug resistance protein stp"  
"Chl\_A19\_00417" 417 "s59E25H2" 0 "Multidrug resistance protein stp"  
"Chl\_A19\_00417" 417 "s59E5H2" 0 "Multidrug resistance protein stp"



"Chl\_A19\_00417" 417 "s63E6H2" 0 "Multidrug resistance protein stp"  
"Chl\_A19\_00418" 418 "s59E13H2" 0 "Phosphoribosylamine--glycine ligase"  
"Chl\_A19\_00418" 418 "s59E25H2" 0 "Phosphoribosylamine--glycine ligase"  
"Chl\_A19\_00418" 418 "s59E5H2" 0 "Phosphoribosylamine--glycine ligase"  
"Chl\_A19\_00418" 418 "s63E6H2" 0 "Phosphoribosylamine--glycine ligase"  
"Chl\_A19\_00419" 419 "s59E13H2" 0 "hypothetical protein"  
"Chl\_A19\_00419" 419 "s59E25H2" 0 "hypothetical protein"  
"Chl\_A19\_00419" 419 "s59E5H2" 0 "hypothetical protein"  
"Chl\_A19\_00419" 419 "s63E6H2" 0 "hypothetical protein"  
"Chl\_A19\_00420" 420 "s59E13H2" 0 "NAD-dependent alcohol dehydrogenase"  
"Chl\_A19\_00420" 420 "s59E25H2" 0 "NAD-dependent alcohol dehydrogenase"  
"Chl\_A19\_00420" 420 "s59E5H2" 0.0138672666432913 "NAD-dependent alcohol dehydrogenase"  
"Chl\_A19\_00420" 420 "s63E6H2" 0.00291182381176883 "NAD-dependent alcohol dehydrogenase"  
"Chl\_A19\_00421" 421 "s59E13H2" 0 "Alcohol dehydrogenase"  
"Chl\_A19\_00421" 421 "s59E25H2" 0 "Alcohol dehydrogenase"  
"Chl\_A19\_00421" 421 "s59E5H2" 0.0041441034219278 "Alcohol dehydrogenase"  
"Chl\_A19\_00421" 421 "s63E6H2" 0.0135820528128397 "Alcohol dehydrogenase"  
"Chl\_A19\_00422" 422 "s59E13H2" 0 "GMP synthase [glutamine-hydrolyzing]"  
"Chl\_A19\_00422" 422 "s59E25H2" 0 "GMP synthase [glutamine-hydrolyzing]"  
"Chl\_A19\_00422" 422 "s59E5H2" 0 "GMP synthase [glutamine-hydrolyzing]"  
"Chl\_A19\_00422" 422 "s63E6H2" 0 "GMP synthase [glutamine-hydrolyzing]"  
"Chl\_A19\_00424" 424 "s59E13H2" 0 "hypothetical protein"  
"Chl\_A19\_00424" 424 "s59E25H2" 0 "hypothetical protein"  
"Chl\_A19\_00424" 424 "s59E5H2" 0 "hypothetical protein"  
"Chl\_A19\_00424" 424 "s63E6H2" 0 "hypothetical protein"  
"Chl\_A19\_00425" 425 "s59E13H2" 0 "Helix-turn-helix domain protein"  
"Chl\_A19\_00425" 425 "s59E25H2" 0 "Helix-turn-helix domain protein"  
"Chl\_A19\_00425" 425 "s59E5H2" 0 "Helix-turn-helix domain protein"  
"Chl\_A19\_00425" 425 "s63E6H2" 0 "Helix-turn-helix domain protein"  
"Chl\_A19\_00426" 426 "s59E13H2" 0 "Glycerol-3-phosphate acyltransferase"  
"Chl\_A19\_00426" 426 "s59E25H2" 0 "Glycerol-3-phosphate acyltransferase"  
"Chl\_A19\_00426" 426 "s59E5H2" 0 "Glycerol-3-phosphate acyltransferase"  
"Chl\_A19\_00426" 426 "s63E6H2" 0 "Glycerol-3-phosphate acyltransferase"  
"Chl\_A19\_00427" 427 "s59E13H2" 0 "hypothetical protein"  
"Chl\_A19\_00427" 427 "s59E25H2" 0 "hypothetical protein"  
"Chl\_A19\_00427" 427 "s59E5H2" 0 "hypothetical protein"  
"Chl\_A19\_00427" 427 "s63E6H2" 0 "hypothetical protein"  
"Chl\_A19\_00428" 428 "s59E13H2" 0 "1-deoxy-D-xylulose-5-phosphate synthase"  
"Chl\_A19\_00428" 428 "s59E25H2" 0 "1-deoxy-D-xylulose-5-phosphate synthase"  
"Chl\_A19\_00428" 428 "s59E5H2" 0 "1-deoxy-D-xylulose-5-phosphate synthase"  
"Chl\_A19\_00428" 428 "s63E6H2" 0 "1-deoxy-D-xylulose-5-phosphate synthase"  
"Chl\_A19\_00429" 429 "s59E13H2" 0 "Transketolase 2"  
"Chl\_A19\_00429" 429 "s59E25H2" 0 "Transketolase 2"  
"Chl\_A19\_00429" 429 "s59E5H2" 0 "Transketolase 2"  
"Chl\_A19\_00429" 429 "s63E6H2" 0 "Transketolase 2"  
"Chl\_A19\_00431" 431 "s59E13H2" 0 "Pyrogallol hydroxytransferase large subunit"  
"Chl\_A19\_00431" 431 "s59E25H2" 0 "Pyrogallol hydroxytransferase large subunit"

"Chl\_A19\_00431" 431 "s59E5H2" 0 "Pyrogallol hydroxytransferase large subunit"  
"Chl\_A19\_00431" 431 "s63E6H2" 0 "Pyrogallol hydroxytransferase large subunit"  
"Chl\_A19\_00432" 432 "s59E13H2" 0 "Pyrogallol hydroxytransferase large subunit"  
"Chl\_A19\_00432" 432 "s59E25H2" 0 "Pyrogallol hydroxytransferase large subunit"  
"Chl\_A19\_00432" 432 "s59E5H2" 0 "Pyrogallol hydroxytransferase large subunit"  
"Chl\_A19\_00432" 432 "s63E6H2" 0 "Pyrogallol hydroxytransferase large subunit"  
"Chl\_A19\_00433" 433 "s59E13H2" 0 "RDD family protein"  
"Chl\_A19\_00433" 433 "s59E25H2" 0 "RDD family protein"  
"Chl\_A19\_00433" 433 "s59E5H2" 0 "RDD family protein"  
"Chl\_A19\_00433" 433 "s63E6H2" 0 "RDD family protein"  
"Chl\_A19\_00434" 434 "s59E13H2" 0 "hypothetical protein"  
"Chl\_A19\_00434" 434 "s59E25H2" 0 "hypothetical protein"  
"Chl\_A19\_00434" 434 "s59E5H2" 0 "hypothetical protein"  
"Chl\_A19\_00434" 434 "s63E6H2" 0 "hypothetical protein"  
"Chl\_A19\_00435" 435 "s59E13H2" 0 "hypothetical protein"  
"Chl\_A19\_00435" 435 "s59E25H2" 0 "hypothetical protein"  
"Chl\_A19\_00435" 435 "s59E5H2" 0 "hypothetical protein"  
"Chl\_A19\_00435" 435 "s63E6H2" 0 "hypothetical protein"  
"Chl\_A19\_00436" 436 "s59E13H2" 0 "PD-(D/E)XK nuclease superfamily protein"  
"Chl\_A19\_00436" 436 "s59E25H2" 0 "PD-(D/E)XK nuclease superfamily protein"  
"Chl\_A19\_00436" 436 "s59E5H2" 0 "PD-(D/E)XK nuclease superfamily protein"  
"Chl\_A19\_00436" 436 "s63E6H2" 0 "PD-(D/E)XK nuclease superfamily protein"  
"Chl\_A19\_00437" 437 "s59E13H2" 0 "hypothetical protein"  
"Chl\_A19\_00437" 437 "s59E25H2" 0 "hypothetical protein"  
"Chl\_A19\_00437" 437 "s59E5H2" 0 "hypothetical protein"  
"Chl\_A19\_00437" 437 "s63E6H2" 0 "hypothetical protein"  
"Chl\_A19\_00438" 438 "s59E13H2" 0 "Tyrosine recombinase XerD"  
"Chl\_A19\_00438" 438 "s59E25H2" 0 "Tyrosine recombinase XerD"  
"Chl\_A19\_00438" 438 "s59E5H2" 0 "Tyrosine recombinase XerD"  
"Chl\_A19\_00438" 438 "s63E6H2" 0 "Tyrosine recombinase XerD"  
"Chl\_A19\_00439" 439 "s59E13H2" 0 "hypothetical protein"  
"Chl\_A19\_00439" 439 "s59E25H2" 0 "hypothetical protein"  
"Chl\_A19\_00439" 439 "s59E5H2" 0 "hypothetical protein"  
"Chl\_A19\_00439" 439 "s63E6H2" 0 "hypothetical protein"  
"Chl\_A19\_00440" 440 "s59E13H2" 0 "Protein-L-isoaspartate O-methyltransferase"  
"Chl\_A19\_00440" 440 "s59E25H2" 0 "Protein-L-isoaspartate O-methyltransferase"  
"Chl\_A19\_00440" 440 "s59E5H2" 0 "Protein-L-isoaspartate O-methyltransferase"  
"Chl\_A19\_00440" 440 "s63E6H2" 0 "Protein-L-isoaspartate O-methyltransferase"  
"Chl\_A19\_00441" 441 "s59E13H2" 0 "Glyoxalase-like domain protein"  
"Chl\_A19\_00441" 441 "s59E25H2" 0 "Glyoxalase-like domain protein"  
"Chl\_A19\_00441" 441 "s59E5H2" 0 "Glyoxalase-like domain protein"  
"Chl\_A19\_00441" 441 "s63E6H2" 0 "Glyoxalase-like domain protein"  
"Chl\_A19\_00442" 442 "s59E13H2" 0 "5,6-dimethylbenzimidazole synthase"  
"Chl\_A19\_00442" 442 "s59E25H2" 0 "5,6-dimethylbenzimidazole synthase"  
"Chl\_A19\_00442" 442 "s59E5H2" 0 "5,6-dimethylbenzimidazole synthase"  
"Chl\_A19\_00442" 442 "s63E6H2" 0 "5,6-dimethylbenzimidazole synthase"  
"Chl\_A19\_00443" 443 "s59E13H2" 0 "hypothetical protein"

"Chl\_A19\_00443" 443 "s59E25H2" 0 "hypothetical protein"  
"Chl\_A19\_00443" 443 "s59E5H2" 0 "hypothetical protein"  
"Chl\_A19\_00443" 443 "s63E6H2" 0 "hypothetical protein"  
"Chl\_A19\_00444" 444 "s59E13H2" 0 "hypothetical protein"  
"Chl\_A19\_00444" 444 "s59E25H2" 0 "hypothetical protein"  
"Chl\_A19\_00444" 444 "s59E5H2" 0 "hypothetical protein"  
"Chl\_A19\_00444" 444 "s63E6H2" 0 "hypothetical protein"  
"Chl\_A19\_00445" 445 "s59E13H2" 0 "Transglutaminase-like superfamily protein"  
"Chl\_A19\_00445" 445 "s59E25H2" 0 "Transglutaminase-like superfamily protein"  
"Chl\_A19\_00445" 445 "s59E5H2" 0 "Transglutaminase-like superfamily protein"  
"Chl\_A19\_00445" 445 "s63E6H2" 0 "Transglutaminase-like superfamily protein"  
"Chl\_A19\_00446" 446 "s59E13H2" 0 "4-hydroxybutyryl-CoA dehydratase/vinylacetyl-CoA-Delta-isomerase"  
"Chl\_A19\_00446" 446 "s59E25H2" 0 "4-hydroxybutyryl-CoA dehydratase/vinylacetyl-CoA-Delta-isomerase"  
"Chl\_A19\_00446" 446 "s59E5H2" 0 "4-hydroxybutyryl-CoA dehydratase/vinylacetyl-CoA-Delta-isomerase"  
"Chl\_A19\_00446" 446 "s63E6H2" 0 "4-hydroxybutyryl-CoA dehydratase/vinylacetyl-CoA-Delta-isomerase"  
"Chl\_A19\_00447" 447 "s59E13H2" 0 "Elongation factor G"  
"Chl\_A19\_00447" 447 "s59E25H2" 0 "Elongation factor G"  
"Chl\_A19\_00447" 447 "s59E5H2" 0 "Elongation factor G"  
"Chl\_A19\_00447" 447 "s63E6H2" 0 "Elongation factor G"  
"Chl\_A19\_00448" 448 "s59E13H2" 0 "Acryloyl-CoA reductase electron transfer subunit beta"  
"Chl\_A19\_00448" 448 "s59E25H2" 0 "Acryloyl-CoA reductase electron transfer subunit beta"  
"Chl\_A19\_00448" 448 "s59E5H2" 0 "Acryloyl-CoA reductase electron transfer subunit beta"  
"Chl\_A19\_00448" 448 "s63E6H2" 0 "Acryloyl-CoA reductase electron transfer subunit beta"  
"Chl\_A19\_00449" 449 "s59E13H2" 0 "UDP-glucose 4-epimerase"  
"Chl\_A19\_00449" 449 "s59E25H2" 0 "UDP-glucose 4-epimerase"  
"Chl\_A19\_00449" 449 "s59E5H2" 0 "UDP-glucose 4-epimerase"  
"Chl\_A19\_00449" 449 "s63E6H2" 0 "UDP-glucose 4-epimerase"  
"Chl\_A19\_00450" 450 "s59E13H2" 0 "UDP-glucose 4-epimerase"  
"Chl\_A19\_00450" 450 "s59E25H2" 0 "UDP-glucose 4-epimerase"  
"Chl\_A19\_00450" 450 "s59E5H2" 0 "UDP-glucose 4-epimerase"  
"Chl\_A19\_00450" 450 "s63E6H2" 0 "UDP-glucose 4-epimerase"  
"Chl\_A19\_00451" 451 "s59E13H2" 0 "GDP-mannose-dependent alpha-(1-6)-phosphatidylinositol monomannoside mannosyltransferase"  
"Chl\_A19\_00451" 451 "s59E25H2" 0 "GDP-mannose-dependent alpha-(1-6)-phosphatidylinositol monomannoside mannosyltransferase"  
"Chl\_A19\_00451" 451 "s59E5H2" 0 "GDP-mannose-dependent alpha-(1-6)-phosphatidylinositol monomannoside mannosyltransferase"  
"Chl\_A19\_00451" 451 "s63E6H2" 0 "GDP-mannose-dependent alpha-(1-6)-phosphatidylinositol monomannoside mannosyltransferase"  
"Chl\_A19\_00452" 452 "s59E13H2" 0 "coproporphyrinogen III oxidase"  
"Chl\_A19\_00452" 452 "s59E25H2" 0 "coproporphyrinogen III oxidase"  
"Chl\_A19\_00452" 452 "s59E5H2" 0 "coproporphyrinogen III oxidase"  
"Chl\_A19\_00452" 452 "s63E6H2" 0 "coproporphyrinogen III oxidase"  
"Chl\_A19\_00453" 453 "s59E13H2" 0 "dTDP-glucose 4,6-dehydratase"  
"Chl\_A19\_00453" 453 "s59E25H2" 0 "dTDP-glucose 4,6-dehydratase"  
"Chl\_A19\_00453" 453 "s59E5H2" 0 "dTDP-glucose 4,6-dehydratase"  
"Chl\_A19\_00453" 453 "s63E6H2" 0 "dTDP-glucose 4,6-dehydratase"  
"Chl\_A19\_00454" 454 "s59E13H2" 0 "UDP-N-acetylglucosamine 2-epimerase"  
"Chl\_A19\_00454" 454 "s59E25H2" 0 "UDP-N-acetylglucosamine 2-epimerase"  
"Chl\_A19\_00454" 454 "s59E5H2" 0 "UDP-N-acetylglucosamine 2-epimerase"  
"Chl\_A19\_00454" 454 "s63E6H2" 0 "UDP-N-acetylglucosamine 2-epimerase"

"Chl\_A19\_00455" 455 "s59E13H2" 0 "hypothetical protein"  
"Chl\_A19\_00455" 455 "s59E25H2" 0 "hypothetical protein"  
"Chl\_A19\_00455" 455 "s59E5H2" 0 "hypothetical protein"  
"Chl\_A19\_00455" 455 "s63E6H2" 0 "hypothetical protein"  
"Chl\_A19\_00456" 456 "s59E13H2" 0 "Glycosyltransferase AgIJ"  
"Chl\_A19\_00456" 456 "s59E25H2" 0 "Glycosyltransferase AgIJ"  
"Chl\_A19\_00456" 456 "s59E5H2" 0 "Glycosyltransferase AgIJ"  
"Chl\_A19\_00456" 456 "s63E6H2" 0 "Glycosyltransferase AgIJ"  
"Chl\_A19\_00457" 457 "s59E13H2" 0 "hypothetical protein"  
"Chl\_A19\_00457" 457 "s59E25H2" 0 "hypothetical protein"  
"Chl\_A19\_00457" 457 "s59E5H2" 0 "hypothetical protein"  
"Chl\_A19\_00457" 457 "s63E6H2" 0 "hypothetical protein"  
"Chl\_A19\_00458" 458 "s59E13H2" 0 "Benzylsuccinate synthase alpha subunit"  
"Chl\_A19\_00458" 458 "s59E25H2" 0 "Benzylsuccinate synthase alpha subunit"  
"Chl\_A19\_00458" 458 "s59E5H2" 0 "Benzylsuccinate synthase alpha subunit"  
"Chl\_A19\_00458" 458 "s63E6H2" 0 "Benzylsuccinate synthase alpha subunit"  
"Chl\_A19\_00459" 459 "s59E13H2" 0 "4-hydroxyphenylacetate decarboxylase activating enzyme"  
"Chl\_A19\_00459" 459 "s59E25H2" 0 "4-hydroxyphenylacetate decarboxylase activating enzyme"  
"Chl\_A19\_00459" 459 "s59E5H2" 0 "4-hydroxyphenylacetate decarboxylase activating enzyme"  
"Chl\_A19\_00459" 459 "s63E6H2" 0 "4-hydroxyphenylacetate decarboxylase activating enzyme"  
"Chl\_A19\_00460" 460 "s59E13H2" 0 "Isoprenylcysteine carboxyl methyltransferase (ICMT) family protein"  
"Chl\_A19\_00460" 460 "s59E25H2" 0 "Isoprenylcysteine carboxyl methyltransferase (ICMT) family protein"  
"Chl\_A19\_00460" 460 "s59E5H2" 0 "Isoprenylcysteine carboxyl methyltransferase (ICMT) family protein"  
"Chl\_A19\_00460" 460 "s63E6H2" 0 "Isoprenylcysteine carboxyl methyltransferase (ICMT) family protein"  
"Chl\_A19\_00461" 461 "s59E13H2" 0 "hypothetical protein"  
"Chl\_A19\_00461" 461 "s59E25H2" 0 "hypothetical protein"  
"Chl\_A19\_00461" 461 "s59E5H2" 0 "hypothetical protein"  
"Chl\_A19\_00461" 461 "s63E6H2" 0 "hypothetical protein"  
"Chl\_A19\_00462" 462 "s59E13H2" 0 "hypothetical protein"  
"Chl\_A19\_00462" 462 "s59E25H2" 0 "hypothetical protein"  
"Chl\_A19\_00462" 462 "s59E5H2" 0 "hypothetical protein"  
"Chl\_A19\_00462" 462 "s63E6H2" 0 "hypothetical protein"  
"Chl\_A19\_00465" 465 "s59E13H2" 0 "Undecaprenyl-phosphate mannosyltransferase"  
"Chl\_A19\_00465" 465 "s59E25H2" 0 "Undecaprenyl-phosphate mannosyltransferase"  
"Chl\_A19\_00465" 465 "s59E5H2" 0 "Undecaprenyl-phosphate mannosyltransferase"  
"Chl\_A19\_00465" 465 "s63E6H2" 0 "Undecaprenyl-phosphate mannosyltransferase"  
"Chl\_A19\_00466" 466 "s59E13H2" 0 "hypothetical protein"  
"Chl\_A19\_00466" 466 "s59E25H2" 0 "hypothetical protein"  
"Chl\_A19\_00466" 466 "s59E5H2" 0 "hypothetical protein"  
"Chl\_A19\_00466" 466 "s63E6H2" 0 "hypothetical protein"  
"Chl\_A19\_00467" 467 "s59E13H2" 0 "hypothetical protein"  
"Chl\_A19\_00467" 467 "s59E25H2" 0 "hypothetical protein"  
"Chl\_A19\_00467" 467 "s59E5H2" 0.208246564961486 "hypothetical protein"  
"Chl\_A19\_00467" 467 "s63E6H2" 0 "hypothetical protein"  
"Chl\_A19\_00470" 470 "s59E13H2" 0.00102728752596264 "Tryptophan--tRNA ligase"  
"Chl\_A19\_00470" 470 "s59E25H2" 0 "Tryptophan--tRNA ligase"  
"Chl\_A19\_00470" 470 "s59E5H2" 0 "Tryptophan--tRNA ligase"

"Chl\_A19\_00470" 470 "s63E6H2" 0 "Tryptophan--tRNA ligase"  
"Chl\_A19\_00471" 471 "s59E13H2" 0 "Methylmalonyl-CoA carboxyltransferase 12S subunit"  
"Chl\_A19\_00471" 471 "s59E25H2" 0 "Methylmalonyl-CoA carboxyltransferase 12S subunit"  
"Chl\_A19\_00471" 471 "s59E5H2" 0 "Methylmalonyl-CoA carboxyltransferase 12S subunit"  
"Chl\_A19\_00471" 471 "s63E6H2" 0 "Methylmalonyl-CoA carboxyltransferase 12S subunit"  
"Chl\_A19\_00472" 472 "s59E13H2" 0 "1-(5-phosphoribosyl)-5-[(5-phosphoribosylamino)methylideneamino] imidazole-4-carboxamide isomerase"  
"Chl\_A19\_00472" 472 "s59E25H2" 0 "1-(5-phosphoribosyl)-5-[(5-phosphoribosylamino)methylideneamino] imidazole-4-carboxamide isomerase"  
"Chl\_A19\_00472" 472 "s59E5H2" 0 "1-(5-phosphoribosyl)-5-[(5-phosphoribosylamino)methylideneamino] imidazole-4-carboxamide isomerase"  
"Chl\_A19\_00472" 472 "s63E6H2" 0 "1-(5-phosphoribosyl)-5-[(5-phosphoribosylamino)methylideneamino] imidazole-4-carboxamide isomerase"  
"Chl\_A19\_00473" 473 "s59E13H2" 0 "Phosphoribosyl-AMP cyclohydrolase"  
"Chl\_A19\_00473" 473 "s59E25H2" 0 "Phosphoribosyl-AMP cyclohydrolase"  
"Chl\_A19\_00473" 473 "s59E5H2" 0 "Phosphoribosyl-AMP cyclohydrolase"  
"Chl\_A19\_00473" 473 "s63E6H2" 0 "Phosphoribosyl-AMP cyclohydrolase"  
"Chl\_A19\_00474" 474 "s59E13H2" 0 "hypothetical protein"  
"Chl\_A19\_00474" 474 "s59E25H2" 0 "hypothetical protein"  
"Chl\_A19\_00474" 474 "s59E5H2" 0 "hypothetical protein"  
"Chl\_A19\_00474" 474 "s63E6H2" 0 "hypothetical protein"  
"Chl\_A19\_00475" 475 "s59E13H2" 0 "50S ribosomal protein L27"  
"Chl\_A19\_00475" 475 "s59E25H2" 0 "50S ribosomal protein L27"  
"Chl\_A19\_00475" 475 "s59E5H2" 0 "50S ribosomal protein L27"  
"Chl\_A19\_00475" 475 "s63E6H2" 0 "50S ribosomal protein L27"  
"Chl\_A19\_00476" 476 "s59E13H2" 0 "50S ribosomal protein L21"  
"Chl\_A19\_00476" 476 "s59E25H2" 0 "50S ribosomal protein L21"  
"Chl\_A19\_00476" 476 "s59E5H2" 0 "50S ribosomal protein L21"  
"Chl\_A19\_00476" 476 "s63E6H2" 0 "50S ribosomal protein L21"  
"Chl\_A19\_00477" 477 "s59E13H2" 0 "30S ribosomal protein S15"  
"Chl\_A19\_00477" 477 "s59E25H2" 0 "30S ribosomal protein S15"  
"Chl\_A19\_00477" 477 "s59E5H2" 0 "30S ribosomal protein S15"  
"Chl\_A19\_00477" 477 "s63E6H2" 0 "30S ribosomal protein S15"  
"Chl\_A19\_00478" 478 "s59E13H2" 0 "Polyribonucleotide nucleotidyltransferase"  
"Chl\_A19\_00478" 478 "s59E25H2" 0 "Polyribonucleotide nucleotidyltransferase"  
"Chl\_A19\_00478" 478 "s59E5H2" 0 "Polyribonucleotide nucleotidyltransferase"  
"Chl\_A19\_00478" 478 "s63E6H2" 0 "Polyribonucleotide nucleotidyltransferase"  
"Chl\_A19\_00479" 479 "s59E13H2" 0 "Polyribonucleotide nucleotidyltransferase"  
"Chl\_A19\_00479" 479 "s59E25H2" 0 "Polyribonucleotide nucleotidyltransferase"  
"Chl\_A19\_00479" 479 "s59E5H2" 0 "Polyribonucleotide nucleotidyltransferase"  
"Chl\_A19\_00479" 479 "s63E6H2" 0 "Polyribonucleotide nucleotidyltransferase"  
"Chl\_A19\_00480" 480 "s59E13H2" 0 "4-hydroxy-tetrahydrodipicolinate reductase"  
"Chl\_A19\_00480" 480 "s59E25H2" 0 "4-hydroxy-tetrahydrodipicolinate reductase"  
"Chl\_A19\_00480" 480 "s59E5H2" 0 "4-hydroxy-tetrahydrodipicolinate reductase"  
"Chl\_A19\_00480" 480 "s63E6H2" 0 "4-hydroxy-tetrahydrodipicolinate reductase"  
"Chl\_A19\_00481" 481 "s59E13H2" 0 "Aspartate-semialdehyde dehydrogenase"  
"Chl\_A19\_00481" 481 "s59E25H2" 0 "Aspartate-semialdehyde dehydrogenase"  
"Chl\_A19\_00481" 481 "s59E5H2" 0.0037606163310004 "Aspartate-semialdehyde dehydrogenase"  
"Chl\_A19\_00481" 481 "s63E6H2" 0 "Aspartate-semialdehyde dehydrogenase"  
"Chl\_A19\_00482" 482 "s59E13H2" 0 "4-hydroxy-tetrahydrodipicolinate synthase"  
"Chl\_A19\_00482" 482 "s59E25H2" 0 "4-hydroxy-tetrahydrodipicolinate synthase"

"Chl\_A19\_00482" 482 "s59E5H2" 0 "4-hydroxy-tetrahydrodipicolinate synthase"  
"Chl\_A19\_00482" 482 "s63E6H2" 0 "4-hydroxy-tetrahydrodipicolinate synthase"  
"Chl\_A19\_00483" 483 "s59E13H2" 0 "Adenylosuccinate synthetase"  
"Chl\_A19\_00483" 483 "s59E25H2" 0 "Adenylosuccinate synthetase"  
"Chl\_A19\_00483" 483 "s59E5H2" 0 "Adenylosuccinate synthetase"  
"Chl\_A19\_00483" 483 "s63E6H2" 0 "Adenylosuccinate synthetase"  
"Chl\_A19\_00484" 484 "s59E13H2" 0 "Archaetidylinositol phosphate synthase"  
"Chl\_A19\_00484" 484 "s59E25H2" 0 "Archaetidylinositol phosphate synthase"  
"Chl\_A19\_00484" 484 "s59E5H2" 0 "Archaetidylinositol phosphate synthase"  
"Chl\_A19\_00484" 484 "s63E6H2" 0 "Archaetidylinositol phosphate synthase"  
"Chl\_A19\_00485" 485 "s59E13H2" 0 "GDP-mannose-dependent alpha-(1-2)-phosphatidylinositol mannosyltransferase"  
"Chl\_A19\_00485" 485 "s59E25H2" 0 "GDP-mannose-dependent alpha-(1-2)-phosphatidylinositol mannosyltransferase"  
"Chl\_A19\_00485" 485 "s59E5H2" 0 "GDP-mannose-dependent alpha-(1-2)-phosphatidylinositol mannosyltransferase"  
"Chl\_A19\_00485" 485 "s63E6H2" 0 "GDP-mannose-dependent alpha-(1-2)-phosphatidylinositol mannosyltransferase"  
"Chl\_A19\_00486" 486 "s59E13H2" 0 "Inositol-3-phosphate synthase"  
"Chl\_A19\_00486" 486 "s59E25H2" 0 "Inositol-3-phosphate synthase"  
"Chl\_A19\_00486" 486 "s59E5H2" 0 "Inositol-3-phosphate synthase"  
"Chl\_A19\_00486" 486 "s63E6H2" 0 "Inositol-3-phosphate synthase"  
"Chl\_A19\_00487" 487 "s59E13H2" 0 "DNA polymerase/3'-5' exonuclease PolX"  
"Chl\_A19\_00487" 487 "s59E25H2" 0 "DNA polymerase/3'-5' exonuclease PolX"  
"Chl\_A19\_00487" 487 "s59E5H2" 0 "DNA polymerase/3'-5' exonuclease PolX"  
"Chl\_A19\_00487" 487 "s63E6H2" 0 "DNA polymerase/3'-5' exonuclease PolX"  
"Chl\_A19\_00488" 488 "s59E13H2" 0 "tRNA pseudouridine synthase B"  
"Chl\_A19\_00488" 488 "s59E25H2" 0 "tRNA pseudouridine synthase B"  
"Chl\_A19\_00488" 488 "s59E5H2" 0 "tRNA pseudouridine synthase B"  
"Chl\_A19\_00488" 488 "s63E6H2" 0 "tRNA pseudouridine synthase B"  
"Chl\_A19\_00489" 489 "s59E13H2" 0 "Ribosome-binding factor A"  
"Chl\_A19\_00489" 489 "s59E25H2" 0 "Ribosome-binding factor A"  
"Chl\_A19\_00489" 489 "s59E5H2" 0 "Ribosome-binding factor A"  
"Chl\_A19\_00489" 489 "s63E6H2" 0 "Ribosome-binding factor A"  
"Chl\_A19\_00490" 490 "s59E13H2" 0 "Translation initiation factor IF-2"  
"Chl\_A19\_00490" 490 "s59E25H2" 0 "Translation initiation factor IF-2"  
"Chl\_A19\_00490" 490 "s59E5H2" 0 "Translation initiation factor IF-2"  
"Chl\_A19\_00490" 490 "s63E6H2" 0 "Translation initiation factor IF-2"  
"Chl\_A19\_00491" 491 "s59E13H2" 0 "hypothetical protein"  
"Chl\_A19\_00491" 491 "s59E25H2" 0 "hypothetical protein"  
"Chl\_A19\_00491" 491 "s59E5H2" 0 "hypothetical protein"  
"Chl\_A19\_00491" 491 "s63E6H2" 0 "hypothetical protein"  
"Chl\_A19\_00492" 492 "s59E13H2" 0 "Integrase core domain protein"  
"Chl\_A19\_00492" 492 "s59E25H2" 0 "Integrase core domain protein"  
"Chl\_A19\_00492" 492 "s59E5H2" 0.0188321400670418 "Integrase core domain protein"  
"Chl\_A19\_00492" 492 "s63E6H2" 0 "Integrase core domain protein"  
"Chl\_A19\_00493" 493 "s59E13H2" 0 "transposase"  
"Chl\_A19\_00493" 493 "s59E25H2" 0 "transposase"  
"Chl\_A19\_00493" 493 "s59E5H2" 0.0296676859286977 "transposase"  
"Chl\_A19\_00493" 493 "s63E6H2" 0 "transposase"  
"Chl\_A19\_00494" 494 "s59E13H2" 0 "Plasmid pRiA4b ORF-3-like protein"

"Chl\_A19\_00494" 494 "s59E25H2" 0 "Plasmid pRiA4b ORF-3-like protein"  
"Chl\_A19\_00494" 494 "s59E5H2" 0 "Plasmid pRiA4b ORF-3-like protein"  
"Chl\_A19\_00494" 494 "s63E6H2" 0 "Plasmid pRiA4b ORF-3-like protein"  
"Chl\_A19\_00495" 495 "s59E13H2" 0 "lipid-transfer protein"  
"Chl\_A19\_00495" 495 "s59E25H2" 0 "lipid-transfer protein"  
"Chl\_A19\_00495" 495 "s59E5H2" 0 "lipid-transfer protein"  
"Chl\_A19\_00495" 495 "s63E6H2" 0 "lipid-transfer protein"  
"Chl\_A19\_00497" 497 "s59E13H2" 0 "ATPase family associated with various cellular activities (AAA)"  
"Chl\_A19\_00497" 497 "s59E25H2" 0 "ATPase family associated with various cellular activities (AAA)"  
"Chl\_A19\_00497" 497 "s59E5H2" 0 "ATPase family associated with various cellular activities (AAA)"  
"Chl\_A19\_00497" 497 "s63E6H2" 0 "ATPase family associated with various cellular activities (AAA)"  
"Chl\_A19\_00498" 498 "s59E13H2" 0 "VWA domain containing CoxE-like protein"  
"Chl\_A19\_00498" 498 "s59E25H2" 0 "VWA domain containing CoxE-like protein"  
"Chl\_A19\_00498" 498 "s59E5H2" 0 "VWA domain containing CoxE-like protein"  
"Chl\_A19\_00498" 498 "s63E6H2" 0 "VWA domain containing CoxE-like protein"  
"Chl\_A19\_00499" 499 "s59E13H2" 0 "cAMP receptor protein"  
"Chl\_A19\_00499" 499 "s59E25H2" 0 "cAMP receptor protein"  
"Chl\_A19\_00499" 499 "s59E5H2" 0 "cAMP receptor protein"  
"Chl\_A19\_00499" 499 "s63E6H2" 0 "cAMP receptor protein"  
"Chl\_A19\_00500" 500 "s59E13H2" 0 "2-oxoglutarate-acceptor oxidoreductase subunit OorD"  
"Chl\_A19\_00500" 500 "s59E25H2" 0 "2-oxoglutarate-acceptor oxidoreductase subunit OorD"  
"Chl\_A19\_00500" 500 "s59E5H2" 0 "2-oxoglutarate-acceptor oxidoreductase subunit OorD"  
"Chl\_A19\_00500" 500 "s63E6H2" 0 "2-oxoglutarate-acceptor oxidoreductase subunit OorD"  
"Chl\_A19\_00502" 502 "s59E13H2" 0 "Spore protein SP21"  
"Chl\_A19\_00502" 502 "s59E25H2" 0 "Spore protein SP21"  
"Chl\_A19\_00502" 502 "s59E5H2" 0 "Spore protein SP21"  
"Chl\_A19\_00502" 502 "s63E6H2" 0 "Spore protein SP21"  
"Chl\_A19\_00503" 503 "s59E13H2" 0 "2-methylcitrate dehydratase"  
"Chl\_A19\_00503" 503 "s59E25H2" 0 "2-methylcitrate dehydratase"  
"Chl\_A19\_00503" 503 "s59E5H2" 0 "2-methylcitrate dehydratase"  
"Chl\_A19\_00503" 503 "s63E6H2" 0 "2-methylcitrate dehydratase"  
"Chl\_A19\_00504" 504 "s59E13H2" 0 "DNA alkylation repair enzyme"  
"Chl\_A19\_00504" 504 "s59E25H2" 0 "DNA alkylation repair enzyme"  
"Chl\_A19\_00504" 504 "s59E5H2" 0 "DNA alkylation repair enzyme"  
"Chl\_A19\_00504" 504 "s63E6H2" 0 "DNA alkylation repair enzyme"  
"Chl\_A19\_00505" 505 "s59E13H2" 0 "Pathogenicity locus"  
"Chl\_A19\_00505" 505 "s59E25H2" 0 "Pathogenicity locus"  
"Chl\_A19\_00505" 505 "s59E5H2" 0 "Pathogenicity locus"  
"Chl\_A19\_00505" 505 "s63E6H2" 0 "Pathogenicity locus"  
"Chl\_A19\_00506" 506 "s59E13H2" 0 "Phospholipase YtpA"  
"Chl\_A19\_00506" 506 "s59E25H2" 0 "Phospholipase YtpA"  
"Chl\_A19\_00506" 506 "s59E5H2" 0 "Phospholipase YtpA"  
"Chl\_A19\_00506" 506 "s63E6H2" 0 "Phospholipase YtpA"  
"Chl\_A19\_00507" 507 "s59E13H2" 0 "hypothetical protein"  
"Chl\_A19\_00507" 507 "s59E25H2" 0 "hypothetical protein"  
"Chl\_A19\_00507" 507 "s59E5H2" 0 "hypothetical protein"  
"Chl\_A19\_00507" 507 "s63E6H2" 0.00107144566654222 "hypothetical protein"

"Chl\_A19\_00508" 508 "s59E13H2" 0 "hypothetical protein"  
"Chl\_A19\_00508" 508 "s59E25H2" 0 "hypothetical protein"  
"Chl\_A19\_00508" 508 "s59E5H2" 0.00325337490683099 "hypothetical protein"  
"Chl\_A19\_00508" 508 "s63E6H2" 0 "hypothetical protein"  
"Chl\_A19\_00509" 509 "s59E13H2" 0 "hypothetical protein"  
"Chl\_A19\_00509" 509 "s59E25H2" 0 "hypothetical protein"  
"Chl\_A19\_00509" 509 "s59E5H2" 0 "hypothetical protein"  
"Chl\_A19\_00509" 509 "s63E6H2" 0.00277007382835797 "hypothetical protein"  
"Chl\_A19\_00510" 510 "s59E13H2" 0 "hypothetical protein"  
"Chl\_A19\_00510" 510 "s59E25H2" 0 "hypothetical protein"  
"Chl\_A19\_00510" 510 "s59E5H2" 0 "hypothetical protein"  
"Chl\_A19\_00510" 510 "s63E6H2" 0 "hypothetical protein"  
"Chl\_A19\_00513" 513 "s59E13H2" 0 "putative tyrosine recombinase XerC-like protein"  
"Chl\_A19\_00513" 513 "s59E25H2" 0 "putative tyrosine recombinase XerC-like protein"  
"Chl\_A19\_00513" 513 "s59E5H2" 0 "putative tyrosine recombinase XerC-like protein"  
"Chl\_A19\_00513" 513 "s63E6H2" 0 "putative tyrosine recombinase XerC-like protein"  
"Chl\_A19\_00514" 514 "s59E13H2" 0 "Proteasome subunit alpha"  
"Chl\_A19\_00514" 514 "s59E25H2" 0 "Proteasome subunit alpha"  
"Chl\_A19\_00514" 514 "s59E5H2" 0 "Proteasome subunit alpha"  
"Chl\_A19\_00514" 514 "s63E6H2" 0 "Proteasome subunit alpha"  
"Chl\_A19\_00515" 515 "s59E13H2" 0 "hypothetical protein"  
"Chl\_A19\_00515" 515 "s59E25H2" 0 "hypothetical protein"  
"Chl\_A19\_00515" 515 "s59E5H2" 0 "hypothetical protein"  
"Chl\_A19\_00515" 515 "s63E6H2" 0 "hypothetical protein"  
"Chl\_A19\_00516" 516 "s59E13H2" 0 "Helix-turn-helix"  
"Chl\_A19\_00516" 516 "s59E25H2" 0 "Helix-turn-helix"  
"Chl\_A19\_00516" 516 "s59E5H2" 0 "Helix-turn-helix"  
"Chl\_A19\_00516" 516 "s63E6H2" 0 "Helix-turn-helix"  
"Chl\_A19\_00518" 518 "s59E13H2" 0 "putative HTH-type transcriptional regulator YusO"  
"Chl\_A19\_00518" 518 "s59E25H2" 0 "putative HTH-type transcriptional regulator YusO"  
"Chl\_A19\_00518" 518 "s59E5H2" 0 "putative HTH-type transcriptional regulator YusO"  
"Chl\_A19\_00518" 518 "s63E6H2" 0 "putative HTH-type transcriptional regulator YusO"  
"Chl\_A19\_00519" 519 "s59E13H2" 0 "Tyrosine recombinase XerC"  
"Chl\_A19\_00519" 519 "s59E25H2" 0 "Tyrosine recombinase XerC"  
"Chl\_A19\_00519" 519 "s59E5H2" 0 "Tyrosine recombinase XerC"  
"Chl\_A19\_00519" 519 "s63E6H2" 0 "Tyrosine recombinase XerC"  
"Chl\_A19\_00521" 521 "s59E13H2" 0 "Transcriptional regulatory protein AfsQ1"  
"Chl\_A19\_00521" 521 "s59E25H2" 0 "Transcriptional regulatory protein AfsQ1"  
"Chl\_A19\_00521" 521 "s59E5H2" 0 "Transcriptional regulatory protein AfsQ1"  
"Chl\_A19\_00521" 521 "s63E6H2" 0.00622507586274274 "Transcriptional regulatory protein AfsQ1"  
"Chl\_A19\_00523" 523 "s59E13H2" 0 "hypothetical protein"  
"Chl\_A19\_00523" 523 "s59E25H2" 0 "hypothetical protein"  
"Chl\_A19\_00523" 523 "s59E5H2" 0 "hypothetical protein"  
"Chl\_A19\_00523" 523 "s63E6H2" 0 "hypothetical protein"  
"Chl\_A19\_00524" 524 "s59E13H2" 0 "hypothetical protein"  
"Chl\_A19\_00524" 524 "s59E25H2" 0 "hypothetical protein"  
"Chl\_A19\_00524" 524 "s59E5H2" 0 "hypothetical protein"



"Chl\_A19\_00524" 524 "s63E6H2" 0 "hypothetical protein"  
"Chl\_A19\_00525" 525 "s59E13H2" 0 "hypothetical protein"  
"Chl\_A19\_00525" 525 "s59E25H2" 0 "hypothetical protein"  
"Chl\_A19\_00525" 525 "s59E5H2" 0 "hypothetical protein"  
"Chl\_A19\_00525" 525 "s63E6H2" 0 "hypothetical protein"  
"Chl\_A19\_00526" 526 "s59E13H2" 0.465006670658056 "Transposase DDE domain protein"  
"Chl\_A19\_00526" 526 "s59E25H2" 0 "Transposase DDE domain protein"  
"Chl\_A19\_00526" 526 "s59E5H2" 0 "Transposase DDE domain protein"  
"Chl\_A19\_00526" 526 "s63E6H2" 0.0833202120075375 "Transposase DDE domain protein"  
"Chl\_A19\_00527" 527 "s59E13H2" 0 "hypothetical protein"  
"Chl\_A19\_00527" 527 "s59E25H2" 0 "hypothetical protein"  
"Chl\_A19\_00527" 527 "s59E5H2" 0 "hypothetical protein"  
"Chl\_A19\_00527" 527 "s63E6H2" 0 "hypothetical protein"  
"Chl\_A19\_00528" 528 "s59E13H2" 0 "Restriction endonuclease"  
"Chl\_A19\_00528" 528 "s59E25H2" 0 "Restriction endonuclease"  
"Chl\_A19\_00528" 528 "s59E5H2" 0 "Restriction endonuclease"  
"Chl\_A19\_00528" 528 "s63E6H2" 0 "Restriction endonuclease"  
"Chl\_A19\_00530" 530 "s59E13H2" 0 "hypothetical protein"  
"Chl\_A19\_00530" 530 "s59E25H2" 0 "hypothetical protein"  
"Chl\_A19\_00530" 530 "s59E5H2" 0 "hypothetical protein"  
"Chl\_A19\_00530" 530 "s63E6H2" 0 "hypothetical protein"  
"Chl\_A19\_00532" 532 "s59E13H2" 0 "hypothetical protein"  
"Chl\_A19\_00532" 532 "s59E25H2" 0 "hypothetical protein"  
"Chl\_A19\_00532" 532 "s59E5H2" 0 "hypothetical protein"  
"Chl\_A19\_00532" 532 "s63E6H2" 0 "hypothetical protein"  
"Chl\_A19\_00534" 534 "s59E13H2" 0 "hypothetical protein"  
"Chl\_A19\_00534" 534 "s59E25H2" 0 "hypothetical protein"  
"Chl\_A19\_00534" 534 "s59E5H2" 0 "hypothetical protein"  
"Chl\_A19\_00534" 534 "s63E6H2" 0 "hypothetical protein"  
"Chl\_A19\_00535" 535 "s59E13H2" 0 "hypothetical protein"  
"Chl\_A19\_00535" 535 "s59E25H2" 0 "hypothetical protein"  
"Chl\_A19\_00535" 535 "s59E5H2" 0 "hypothetical protein"  
"Chl\_A19\_00535" 535 "s63E6H2" 0 "hypothetical protein"  
"Chl\_A19\_00537" 537 "s59E13H2" 0 "hypothetical protein"  
"Chl\_A19\_00537" 537 "s59E25H2" 0 "hypothetical protein"  
"Chl\_A19\_00537" 537 "s59E5H2" 0 "hypothetical protein"  
"Chl\_A19\_00537" 537 "s63E6H2" 0 "hypothetical protein"  
"Chl\_A19\_00538" 538 "s59E13H2" 0 "Methyltransferase domain protein"  
"Chl\_A19\_00538" 538 "s59E25H2" 0 "Methyltransferase domain protein"  
"Chl\_A19\_00538" 538 "s59E5H2" 0 "Methyltransferase domain protein"  
"Chl\_A19\_00538" 538 "s63E6H2" 0 "Methyltransferase domain protein"  
"Chl\_A19\_00539" 539 "s59E13H2" 0 "hypothetical protein"  
"Chl\_A19\_00539" 539 "s59E25H2" 0 "hypothetical protein"  
"Chl\_A19\_00539" 539 "s59E5H2" 0 "hypothetical protein"  
"Chl\_A19\_00539" 539 "s63E6H2" 0 "hypothetical protein"  
"Chl\_A19\_00541" 541 "s59E13H2" 0 "Beta-galactosidase"  
"Chl\_A19\_00541" 541 "s59E25H2" 0 "Beta-galactosidase"

"Chl\_A19\_00541" 541 "s59E5H2" 0.0106202673343766 "Beta-galactosidase"  
"Chl\_A19\_00541" 541 "s63E6H2" 0 "Beta-galactosidase"  
"Chl\_A19\_00545" 545 "s59E13H2" 0 "hypothetical protein"  
"Chl\_A19\_00545" 545 "s59E25H2" 0 "hypothetical protein"  
"Chl\_A19\_00545" 545 "s59E5H2" 0 "hypothetical protein"  
"Chl\_A19\_00545" 545 "s63E6H2" 0 "hypothetical protein"  
"Chl\_A19\_00546" 546 "s59E13H2" 0 "NAD-dependent protein deacylase 2"  
"Chl\_A19\_00546" 546 "s59E25H2" 0 "NAD-dependent protein deacylase 2"  
"Chl\_A19\_00546" 546 "s59E5H2" 0 "NAD-dependent protein deacylase 2"  
"Chl\_A19\_00546" 546 "s63E6H2" 0 "NAD-dependent protein deacylase 2"  
"Chl\_A19\_00547" 547 "s59E13H2" 0 "Phytoene desaturase (lycopene-forming)"  
"Chl\_A19\_00547" 547 "s59E25H2" 0 "Phytoene desaturase (lycopene-forming)"  
"Chl\_A19\_00547" 547 "s59E5H2" 0 "Phytoene desaturase (lycopene-forming)"  
"Chl\_A19\_00547" 547 "s63E6H2" 0 "Phytoene desaturase (lycopene-forming)"  
"Chl\_A19\_00548" 548 "s59E13H2" 0 "Phytoene desaturase (lycopene-forming)"  
"Chl\_A19\_00548" 548 "s59E25H2" 0 "Phytoene desaturase (lycopene-forming)"  
"Chl\_A19\_00548" 548 "s59E5H2" 0 "Phytoene desaturase (lycopene-forming)"  
"Chl\_A19\_00548" 548 "s63E6H2" 0 "Phytoene desaturase (lycopene-forming)"  
"Chl\_A19\_00549" 549 "s59E13H2" 0 "hypothetical protein"  
"Chl\_A19\_00549" 549 "s59E25H2" 0 "hypothetical protein"  
"Chl\_A19\_00549" 549 "s59E5H2" 0 "hypothetical protein"  
"Chl\_A19\_00549" 549 "s63E6H2" 0 "hypothetical protein"  
"Chl\_A19\_00550" 550 "s59E13H2" 0 "Putative thymidylate synthase"  
"Chl\_A19\_00550" 550 "s59E25H2" 0 "Putative thymidylate synthase"  
"Chl\_A19\_00550" 550 "s59E5H2" 0 "Putative thymidylate synthase"  
"Chl\_A19\_00550" 550 "s63E6H2" 0 "Putative thymidylate synthase"  
"Chl\_A19\_00552" 552 "s59E13H2" 0 "hypothetical protein"  
"Chl\_A19\_00552" 552 "s59E25H2" 0 "hypothetical protein"  
"Chl\_A19\_00552" 552 "s59E5H2" 0 "hypothetical protein"  
"Chl\_A19\_00552" 552 "s63E6H2" 0 "hypothetical protein"  
"Chl\_A19\_00553" 553 "s59E13H2" 0 "hypothetical protein"  
"Chl\_A19\_00553" 553 "s59E25H2" 0 "hypothetical protein"  
"Chl\_A19\_00553" 553 "s59E5H2" 0 "hypothetical protein"  
"Chl\_A19\_00553" 553 "s63E6H2" 0 "hypothetical protein"  
"Chl\_A19\_00554" 554 "s59E13H2" 0 "tRNA-splicing ligase RtcB"  
"Chl\_A19\_00554" 554 "s59E25H2" 0 "tRNA-splicing ligase RtcB"  
"Chl\_A19\_00554" 554 "s59E5H2" 0 "tRNA-splicing ligase RtcB"  
"Chl\_A19\_00554" 554 "s63E6H2" 0 "tRNA-splicing ligase RtcB"  
"Chl\_A19\_00555" 555 "s59E13H2" 0 "Cysteine synthase"  
"Chl\_A19\_00555" 555 "s59E25H2" 0 "Cysteine synthase"  
"Chl\_A19\_00555" 555 "s59E5H2" 0 "Cysteine synthase"  
"Chl\_A19\_00555" 555 "s63E6H2" 0 "Cysteine synthase"  
"Chl\_A19\_00556" 556 "s59E13H2" 0 "2-isopropylmalate synthase"  
"Chl\_A19\_00556" 556 "s59E25H2" 0 "2-isopropylmalate synthase"  
"Chl\_A19\_00556" 556 "s59E5H2" 0 "2-isopropylmalate synthase"  
"Chl\_A19\_00556" 556 "s63E6H2" 0 "2-isopropylmalate synthase"  
"Chl\_A19\_00557" 557 "s59E13H2" 0 "3-isopropylmalate dehydrogenase"

"Chl\_A19\_00557" 557 "s59E25H2" 0 "3-isopropylmalate dehydrogenase"  
"Chl\_A19\_00557" 557 "s59E5H2" 0 "3-isopropylmalate dehydrogenase"  
"Chl\_A19\_00557" 557 "s63E6H2" 0 "3-isopropylmalate dehydrogenase"  
"Chl\_A19\_00558" 558 "s59E13H2" 0 "2,3-dimethylmalate dehydratase small subunit"  
"Chl\_A19\_00558" 558 "s59E25H2" 0 "2,3-dimethylmalate dehydratase small subunit"  
"Chl\_A19\_00558" 558 "s59E5H2" 0 "2,3-dimethylmalate dehydratase small subunit"  
"Chl\_A19\_00558" 558 "s63E6H2" 0 "2,3-dimethylmalate dehydratase small subunit"  
"Chl\_A19\_00559" 559 "s59E13H2" 0 "hypothetical protein"  
"Chl\_A19\_00559" 559 "s59E25H2" 0 "hypothetical protein"  
"Chl\_A19\_00559" 559 "s59E5H2" 0 "hypothetical protein"  
"Chl\_A19\_00559" 559 "s63E6H2" 0 "hypothetical protein"  
"Chl\_A19\_00560" 560 "s59E13H2" 0 "hypothetical protein"  
"Chl\_A19\_00560" 560 "s59E25H2" 0 "hypothetical protein"  
"Chl\_A19\_00560" 560 "s59E5H2" 0 "hypothetical protein"  
"Chl\_A19\_00560" 560 "s63E6H2" 0 "hypothetical protein"  
"Chl\_A19\_00562" 562 "s59E13H2" 0 "Polyketide cyclase / dehydrase and lipid transport"  
"Chl\_A19\_00562" 562 "s59E25H2" 0 "Polyketide cyclase / dehydrase and lipid transport"  
"Chl\_A19\_00562" 562 "s59E5H2" 0 "Polyketide cyclase / dehydrase and lipid transport"  
"Chl\_A19\_00562" 562 "s63E6H2" 0 "Polyketide cyclase / dehydrase and lipid transport"  
"Chl\_A19\_00563" 563 "s59E13H2" 0 "2,3-dimethylmalate dehydratase large subunit"  
"Chl\_A19\_00563" 563 "s59E25H2" 0 "2,3-dimethylmalate dehydratase large subunit"  
"Chl\_A19\_00563" 563 "s59E5H2" 0 "2,3-dimethylmalate dehydratase large subunit"  
"Chl\_A19\_00563" 563 "s63E6H2" 0 "2,3-dimethylmalate dehydratase large subunit"  
"Chl\_A19\_00564" 564 "s59E13H2" 0 "2-isopropylmalate synthase"  
"Chl\_A19\_00564" 564 "s59E25H2" 0 "2-isopropylmalate synthase"  
"Chl\_A19\_00564" 564 "s59E5H2" 0 "2-isopropylmalate synthase"  
"Chl\_A19\_00564" 564 "s63E6H2" 0 "2-isopropylmalate synthase"  
"Chl\_A19\_00565" 565 "s59E13H2" 0 "Ketol-acid reductoisomerase"  
"Chl\_A19\_00565" 565 "s59E25H2" 0 "Ketol-acid reductoisomerase"  
"Chl\_A19\_00565" 565 "s59E5H2" 0 "Ketol-acid reductoisomerase"  
"Chl\_A19\_00565" 565 "s63E6H2" 0 "Ketol-acid reductoisomerase"  
"Chl\_A19\_00566" 566 "s59E13H2" 0 "Putative acetolactate synthase small subunit"  
"Chl\_A19\_00566" 566 "s59E25H2" 0 "Putative acetolactate synthase small subunit"  
"Chl\_A19\_00566" 566 "s59E5H2" 0 "Putative acetolactate synthase small subunit"  
"Chl\_A19\_00566" 566 "s63E6H2" 0 "Putative acetolactate synthase small subunit"  
"Chl\_A19\_00567" 567 "s59E13H2" 0 "Acetolactate synthase large subunit IlvB1"  
"Chl\_A19\_00567" 567 "s59E25H2" 0 "Acetolactate synthase large subunit IlvB1"  
"Chl\_A19\_00567" 567 "s59E5H2" 0 "Acetolactate synthase large subunit IlvB1"  
"Chl\_A19\_00567" 567 "s63E6H2" 0 "Acetolactate synthase large subunit IlvB1"  
"Chl\_A19\_00568" 568 "s59E13H2" 0 "Dihydroxy-acid dehydratase"  
"Chl\_A19\_00568" 568 "s59E25H2" 0 "Dihydroxy-acid dehydratase"  
"Chl\_A19\_00568" 568 "s59E5H2" 0 "Dihydroxy-acid dehydratase"  
"Chl\_A19\_00568" 568 "s63E6H2" 0 "Dihydroxy-acid dehydratase"  
"Chl\_A19\_00569" 569 "s59E13H2" 0 "Putative sugar phosphate isomerase YwIF"  
"Chl\_A19\_00569" 569 "s59E25H2" 0 "Putative sugar phosphate isomerase YwIF"  
"Chl\_A19\_00569" 569 "s59E5H2" 0 "Putative sugar phosphate isomerase YwIF"  
"Chl\_A19\_00569" 569 "s63E6H2" 0 "Putative sugar phosphate isomerase YwIF"

"Chl\_A19\_00573" 573 "s59E13H2" 0 "hypothetical protein"  
"Chl\_A19\_00573" 573 "s59E25H2" 0 "hypothetical protein"  
"Chl\_A19\_00573" 573 "s59E5H2" 0.0475544155873059 "hypothetical protein"  
"Chl\_A19\_00573" 573 "s63E6H2" 0 "hypothetical protein"  
"Chl\_A19\_00574" 574 "s59E13H2" 0 "hypothetical protein"  
"Chl\_A19\_00574" 574 "s59E25H2" 0 "hypothetical protein"  
"Chl\_A19\_00574" 574 "s59E5H2" 0 "hypothetical protein"  
"Chl\_A19\_00574" 574 "s63E6H2" 0 "hypothetical protein"  
"Chl\_A19\_00576" 576 "s59E13H2" 0 "hypothetical protein"  
"Chl\_A19\_00576" 576 "s59E25H2" 0 "hypothetical protein"  
"Chl\_A19\_00576" 576 "s59E5H2" 0 "hypothetical protein"  
"Chl\_A19\_00576" 576 "s63E6H2" 0 "hypothetical protein"  
"Chl\_A19\_00578" 578 "s59E13H2" 0 "putative deoxyribonuclease YjjV"  
"Chl\_A19\_00578" 578 "s59E25H2" 0 "putative deoxyribonuclease YjjV"  
"Chl\_A19\_00578" 578 "s59E5H2" 0 "putative deoxyribonuclease YjjV"  
"Chl\_A19\_00578" 578 "s63E6H2" 0 "putative deoxyribonuclease YjjV"  
"Chl\_A19\_00579" 579 "s59E13H2" 0 "hypothetical protein"  
"Chl\_A19\_00579" 579 "s59E25H2" 0 "hypothetical protein"  
"Chl\_A19\_00579" 579 "s59E5H2" 0 "hypothetical protein"  
"Chl\_A19\_00579" 579 "s63E6H2" 0 "hypothetical protein"  
"Chl\_A19\_00580" 580 "s59E13H2" 0 "6-hydroxynicotinate reductase"  
"Chl\_A19\_00580" 580 "s59E25H2" 0 "6-hydroxynicotinate reductase"  
"Chl\_A19\_00580" 580 "s59E5H2" 0 "6-hydroxynicotinate reductase"  
"Chl\_A19\_00580" 580 "s63E6H2" 0 "6-hydroxynicotinate reductase"  
"Chl\_A19\_00582" 582 "s59E13H2" 0 "hypothetical protein"  
"Chl\_A19\_00582" 582 "s59E25H2" 0 "hypothetical protein"  
"Chl\_A19\_00582" 582 "s59E5H2" 0 "hypothetical protein"  
"Chl\_A19\_00582" 582 "s63E6H2" 0 "hypothetical protein"  
"Chl\_A19\_00584" 584 "s59E13H2" 0 "Tyrosine recombinase XerC"  
"Chl\_A19\_00584" 584 "s59E25H2" 0 "Tyrosine recombinase XerC"  
"Chl\_A19\_00584" 584 "s59E5H2" 0 "Tyrosine recombinase XerC"  
"Chl\_A19\_00584" 584 "s63E6H2" 0 "Tyrosine recombinase XerC"  
"Chl\_A19\_00585" 585 "s59E13H2" 0 "N-6 DNA Methylase"  
"Chl\_A19\_00585" 585 "s59E25H2" 0 "N-6 DNA Methylase"  
"Chl\_A19\_00585" 585 "s59E5H2" 0 "N-6 DNA Methylase"  
"Chl\_A19\_00585" 585 "s63E6H2" 0 "N-6 DNA Methylase"  
"Chl\_A19\_00586" 586 "s59E13H2" 0 "F420-non-reducing hydrogenase iron-sulfur subunit A"  
"Chl\_A19\_00586" 586 "s59E25H2" 0 "F420-non-reducing hydrogenase iron-sulfur subunit A"  
"Chl\_A19\_00586" 586 "s59E5H2" 0 "F420-non-reducing hydrogenase iron-sulfur subunit A"  
"Chl\_A19\_00586" 586 "s63E6H2" 0 "F420-non-reducing hydrogenase iron-sulfur subunit A"  
"Chl\_A19\_00587" 587 "s59E13H2" 0 "Fe/S biogenesis protein NfuA"  
"Chl\_A19\_00587" 587 "s59E25H2" 0 "Fe/S biogenesis protein NfuA"  
"Chl\_A19\_00587" 587 "s59E5H2" 0 "Fe/S biogenesis protein NfuA"  
"Chl\_A19\_00587" 587 "s63E6H2" 0 "Fe/S biogenesis protein NfuA"  
"Chl\_A19\_00588" 588 "s59E13H2" 0 "Hydrogenase 2 maturation protease"  
"Chl\_A19\_00588" 588 "s59E25H2" 0 "Hydrogenase 2 maturation protease"  
"Chl\_A19\_00588" 588 "s59E5H2" 0 "Hydrogenase 2 maturation protease"

"Chl\_A19\_00588" 588 "s63E6H2" 0 "Hydrogenase 2 maturation protease"  
"Chl\_A19\_00589" 589 "s59E13H2" 0 "F420-non-reducing hydrogenase vhc iron-sulfur subunit D"  
"Chl\_A19\_00589" 589 "s59E25H2" 0 "F420-non-reducing hydrogenase vhc iron-sulfur subunit D"  
"Chl\_A19\_00589" 589 "s59E5H2" 0 "F420-non-reducing hydrogenase vhc iron-sulfur subunit D"  
"Chl\_A19\_00589" 589 "s63E6H2" 0 "F420-non-reducing hydrogenase vhc iron-sulfur subunit D"  
"Chl\_A19\_00590" 590 "s59E13H2" 0 "hypothetical protein"  
"Chl\_A19\_00590" 590 "s59E25H2" 0 "hypothetical protein"  
"Chl\_A19\_00590" 590 "s59E5H2" 0 "hypothetical protein"  
"Chl\_A19\_00590" 590 "s63E6H2" 0 "hypothetical protein"  
"Chl\_A19\_00591" 591 "s59E13H2" 0 "Carbamoyltransferase HypF"  
"Chl\_A19\_00591" 591 "s59E25H2" 0 "Carbamoyltransferase HypF"  
"Chl\_A19\_00591" 591 "s59E5H2" 0 "Carbamoyltransferase HypF"  
"Chl\_A19\_00591" 591 "s63E6H2" 0 "Carbamoyltransferase HypF"  
"Chl\_A19\_00592" 592 "s59E13H2" 0 "Hydrogenase isoenzymes formation protein HypC"  
"Chl\_A19\_00592" 592 "s59E25H2" 0 "Hydrogenase isoenzymes formation protein HypC"  
"Chl\_A19\_00592" 592 "s59E5H2" 0 "Hydrogenase isoenzymes formation protein HypC"  
"Chl\_A19\_00592" 592 "s63E6H2" 0 "Hydrogenase isoenzymes formation protein HypC"  
"Chl\_A19\_00593" 593 "s59E13H2" 0 "Hydrogenase expression/formation protein HypD"  
"Chl\_A19\_00593" 593 "s59E25H2" 0 "Hydrogenase expression/formation protein HypD"  
"Chl\_A19\_00593" 593 "s59E5H2" 0 "Hydrogenase expression/formation protein HypD"  
"Chl\_A19\_00593" 593 "s63E6H2" 0 "Hydrogenase expression/formation protein HypD"  
"Chl\_A19\_00594" 594 "s59E13H2" 0 "Hydrogenase expression/formation protein HypE"  
"Chl\_A19\_00594" 594 "s59E25H2" 0 "Hydrogenase expression/formation protein HypE"  
"Chl\_A19\_00594" 594 "s59E5H2" 0 "Hydrogenase expression/formation protein HypE"  
"Chl\_A19\_00594" 594 "s63E6H2" 0 "Hydrogenase expression/formation protein HypE"  
"Chl\_A19\_00595" 595 "s59E13H2" 0 "putative hydrogenase nickel incorporation protein HypA"  
"Chl\_A19\_00595" 595 "s59E25H2" 0 "putative hydrogenase nickel incorporation protein HypA"  
"Chl\_A19\_00595" 595 "s59E5H2" 0 "putative hydrogenase nickel incorporation protein HypA"  
"Chl\_A19\_00595" 595 "s63E6H2" 0 "putative hydrogenase nickel incorporation protein HypA"  
"Chl\_A19\_00596" 596 "s59E13H2" 0 "Hydrogenase isoenzymes nickel incorporation protein HypB"  
"Chl\_A19\_00596" 596 "s59E25H2" 0 "Hydrogenase isoenzymes nickel incorporation protein HypB"  
"Chl\_A19\_00596" 596 "s59E5H2" 0 "Hydrogenase isoenzymes nickel incorporation protein HypB"  
"Chl\_A19\_00596" 596 "s63E6H2" 0 "Hydrogenase isoenzymes nickel incorporation protein HypB"  
"Chl\_A19\_00597" 597 "s59E13H2" 0 "PAC2 family protein"  
"Chl\_A19\_00597" 597 "s59E25H2" 0 "PAC2 family protein"  
"Chl\_A19\_00597" 597 "s59E5H2" 0 "PAC2 family protein"  
"Chl\_A19\_00597" 597 "s63E6H2" 0 "PAC2 family protein"  
"Chl\_A19\_00598" 598 "s59E13H2" 0 "Trm112p-like protein"  
"Chl\_A19\_00598" 598 "s59E25H2" 0 "Trm112p-like protein"  
"Chl\_A19\_00598" 598 "s59E5H2" 0 "Trm112p-like protein"  
"Chl\_A19\_00598" 598 "s63E6H2" 0 "Trm112p-like protein"  
"Chl\_A19\_00599" 599 "s59E13H2" 0 "6-carboxy-5,6,7,8-tetrahydropterin synthase"  
"Chl\_A19\_00599" 599 "s59E25H2" 0 "6-carboxy-5,6,7,8-tetrahydropterin synthase"  
"Chl\_A19\_00599" 599 "s59E5H2" 0 "6-carboxy-5,6,7,8-tetrahydropterin synthase"  
"Chl\_A19\_00599" 599 "s63E6H2" 0 "6-carboxy-5,6,7,8-tetrahydropterin synthase"  
"Chl\_A19\_00600" 600 "s59E13H2" 0 "Bifunctional folate synthesis protein"  
"Chl\_A19\_00600" 600 "s59E25H2" 0 "Bifunctional folate synthesis protein"

"Chl\_A19\_00600" 600 "s59E5H2" 0 "Bifunctional folate synthesis protein"  
"Chl\_A19\_00600" 600 "s63E6H2" 0 "Bifunctional folate synthesis protein"  
"Chl\_A19\_00601" 601 "s59E13H2" 0 "Malate dehydrogenase"  
"Chl\_A19\_00601" 601 "s59E25H2" 0 "Malate dehydrogenase"  
"Chl\_A19\_00601" 601 "s59E5H2" 0 "Malate dehydrogenase"  
"Chl\_A19\_00601" 601 "s63E6H2" 0 "Malate dehydrogenase"  
"Chl\_A19\_00602" 602 "s59E13H2" 0 "L(+)-tartrate dehydratase subunit alpha"  
"Chl\_A19\_00602" 602 "s59E25H2" 0 "L(+)-tartrate dehydratase subunit alpha"  
"Chl\_A19\_00602" 602 "s59E5H2" 0 "L(+)-tartrate dehydratase subunit alpha"  
"Chl\_A19\_00602" 602 "s63E6H2" 0 "L(+)-tartrate dehydratase subunit alpha"  
"Chl\_A19\_00603" 603 "s59E13H2" 0 "Fumarate hydratase class I, aerobic"  
"Chl\_A19\_00603" 603 "s59E25H2" 0 "Fumarate hydratase class I, aerobic"  
"Chl\_A19\_00603" 603 "s59E5H2" 0 "Fumarate hydratase class I, aerobic"  
"Chl\_A19\_00603" 603 "s63E6H2" 0 "Fumarate hydratase class I, aerobic"  
"Chl\_A19\_00604" 604 "s59E13H2" 0 "HIT-like protein"  
"Chl\_A19\_00604" 604 "s59E25H2" 0 "HIT-like protein"  
"Chl\_A19\_00604" 604 "s59E5H2" 0 "HIT-like protein"  
"Chl\_A19\_00604" 604 "s63E6H2" 0 "HIT-like protein"  
"Chl\_A19\_00605" 605 "s59E13H2" 0 "hypothetical protein"  
"Chl\_A19\_00605" 605 "s59E25H2" 0 "hypothetical protein"  
"Chl\_A19\_00605" 605 "s59E5H2" 0 "hypothetical protein"  
"Chl\_A19\_00605" 605 "s63E6H2" 0 "hypothetical protein"  
"Chl\_A19\_00606" 606 "s59E13H2" 0 "ADP-ribose pyrophosphatase"  
"Chl\_A19\_00606" 606 "s59E25H2" 0 "ADP-ribose pyrophosphatase"  
"Chl\_A19\_00606" 606 "s59E5H2" 0 "ADP-ribose pyrophosphatase"  
"Chl\_A19\_00606" 606 "s63E6H2" 0 "ADP-ribose pyrophosphatase"  
"Chl\_A19\_00607" 607 "s59E13H2" 0 "Amino-acid acetyltransferase"  
"Chl\_A19\_00607" 607 "s59E25H2" 0 "Amino-acid acetyltransferase"  
"Chl\_A19\_00607" 607 "s59E5H2" 0 "Amino-acid acetyltransferase"  
"Chl\_A19\_00607" 607 "s63E6H2" 0 "Amino-acid acetyltransferase"  
"Chl\_A19\_00608" 608 "s59E13H2" 0 "putative inorganic polyphosphate/ATP-NAD kinase"  
"Chl\_A19\_00608" 608 "s59E25H2" 0 "putative inorganic polyphosphate/ATP-NAD kinase"  
"Chl\_A19\_00608" 608 "s59E5H2" 0 "putative inorganic polyphosphate/ATP-NAD kinase"  
"Chl\_A19\_00608" 608 "s63E6H2" 0.000796097440124929 "putative inorganic polyphosphate/ATP-NAD kinase"  
"Chl\_A19\_00609" 609 "s59E13H2" 0 "3-oxoacyl-[acyl-carrier-protein] synthase 3"  
"Chl\_A19\_00609" 609 "s59E25H2" 0 "3-oxoacyl-[acyl-carrier-protein] synthase 3"  
"Chl\_A19\_00609" 609 "s59E5H2" 0 "3-oxoacyl-[acyl-carrier-protein] synthase 3"  
"Chl\_A19\_00609" 609 "s63E6H2" 0 "3-oxoacyl-[acyl-carrier-protein] synthase 3"  
"Chl\_A19\_00610" 610 "s59E13H2" 0 "acetyl-CoA acetyltransferase"  
"Chl\_A19\_00610" 610 "s59E25H2" 0 "acetyl-CoA acetyltransferase"  
"Chl\_A19\_00610" 610 "s59E5H2" 0 "acetyl-CoA acetyltransferase"  
"Chl\_A19\_00610" 610 "s63E6H2" 0 "acetyl-CoA acetyltransferase"  
"Chl\_A19\_00611" 611 "s59E13H2" 0 "50S ribosomal protein L10"  
"Chl\_A19\_00611" 611 "s59E25H2" 0 "50S ribosomal protein L10"  
"Chl\_A19\_00611" 611 "s59E5H2" 0 "50S ribosomal protein L10"  
"Chl\_A19\_00611" 611 "s63E6H2" 0 "50S ribosomal protein L10"  
"Chl\_A19\_00612" 612 "s59E13H2" 0 "50S ribosomal protein L7/L12"

"Chl\_A19\_00612" 612 "s59E25H2" 0 "50S ribosomal protein L7/L12"  
"Chl\_A19\_00612" 612 "s59E5H2" 0 "50S ribosomal protein L7/L12"  
"Chl\_A19\_00612" 612 "s63E6H2" 0 "50S ribosomal protein L7/L12"  
"Chl\_A19\_00613" 613 "s59E13H2" 0 "hypothetical protein"  
"Chl\_A19\_00613" 613 "s59E25H2" 0 "hypothetical protein"  
"Chl\_A19\_00613" 613 "s59E5H2" 0 "hypothetical protein"  
"Chl\_A19\_00613" 613 "s63E6H2" 0 "hypothetical protein"  
"Chl\_A19\_00614" 614 "s59E13H2" 0 "hypothetical protein"  
"Chl\_A19\_00614" 614 "s59E25H2" 0 "hypothetical protein"  
"Chl\_A19\_00614" 614 "s59E5H2" 0 "hypothetical protein"  
"Chl\_A19\_00614" 614 "s63E6H2" 0 "hypothetical protein"  
"Chl\_A19\_00615" 615 "s59E13H2" 0 "hypothetical protein"  
"Chl\_A19\_00615" 615 "s59E25H2" 0 "hypothetical protein"  
"Chl\_A19\_00615" 615 "s59E5H2" 0 "hypothetical protein"  
"Chl\_A19\_00615" 615 "s63E6H2" 0 "hypothetical protein"  
"Chl\_A19\_00616" 616 "s59E13H2" 0 "hypothetical protein"  
"Chl\_A19\_00616" 616 "s59E25H2" 0 "hypothetical protein"  
"Chl\_A19\_00616" 616 "s59E5H2" 0 "hypothetical protein"  
"Chl\_A19\_00616" 616 "s63E6H2" 0 "hypothetical protein"  
"Chl\_A19\_00617" 617 "s59E13H2" 0 "Sodium/glucose cotransporter"  
"Chl\_A19\_00617" 617 "s59E25H2" 0 "Sodium/glucose cotransporter"  
"Chl\_A19\_00617" 617 "s59E5H2" 0 "Sodium/glucose cotransporter"  
"Chl\_A19\_00617" 617 "s63E6H2" 0 "Sodium/glucose cotransporter"  
"Chl\_A19\_00618" 618 "s59E13H2" 0 "DNA mismatch repair protein MutL"  
"Chl\_A19\_00618" 618 "s59E25H2" 0 "DNA mismatch repair protein MutL"  
"Chl\_A19\_00618" 618 "s59E5H2" 0 "DNA mismatch repair protein MutL"  
"Chl\_A19\_00618" 618 "s63E6H2" 0 "DNA mismatch repair protein MutL"  
"Chl\_A19\_00619" 619 "s59E13H2" 0 "30S ribosomal protein S6"  
"Chl\_A19\_00619" 619 "s59E25H2" 0 "30S ribosomal protein S6"  
"Chl\_A19\_00619" 619 "s59E5H2" 0 "30S ribosomal protein S6"  
"Chl\_A19\_00619" 619 "s63E6H2" 0 "30S ribosomal protein S6"  
"Chl\_A19\_00620" 620 "s59E13H2" 0 "Single-stranded DNA-binding protein"  
"Chl\_A19\_00620" 620 "s59E25H2" 0 "Single-stranded DNA-binding protein"  
"Chl\_A19\_00620" 620 "s59E5H2" 0 "Single-stranded DNA-binding protein"  
"Chl\_A19\_00620" 620 "s63E6H2" 0 "Single-stranded DNA-binding protein"  
"Chl\_A19\_00621" 621 "s59E13H2" 0 "30S ribosomal protein S18"  
"Chl\_A19\_00621" 621 "s59E25H2" 0 "30S ribosomal protein S18"  
"Chl\_A19\_00621" 621 "s59E5H2" 0 "30S ribosomal protein S18"  
"Chl\_A19\_00621" 621 "s63E6H2" 0 "30S ribosomal protein S18"  
"Chl\_A19\_00622" 622 "s59E13H2" 0 "Ribonuclease P protein component"  
"Chl\_A19\_00622" 622 "s59E25H2" 0 "Ribonuclease P protein component"  
"Chl\_A19\_00622" 622 "s59E5H2" 0 "Ribonuclease P protein component"  
"Chl\_A19\_00622" 622 "s63E6H2" 0 "Ribonuclease P protein component"  
"Chl\_A19\_00623" 623 "s59E13H2" 0 "Serine/threonine-protein kinase AfsK"  
"Chl\_A19\_00623" 623 "s59E25H2" 0 "Serine/threonine-protein kinase AfsK"  
"Chl\_A19\_00623" 623 "s59E5H2" 0 "Serine/threonine-protein kinase AfsK"  
"Chl\_A19\_00623" 623 "s63E6H2" 0 "Serine/threonine-protein kinase AfsK"

"Chl\_A19\_00624" 624 "s59E13H2" 0 "Membrane protein insertase YidC"  
"Chl\_A19\_00624" 624 "s59E25H2" 0 "Membrane protein insertase YidC"  
"Chl\_A19\_00624" 624 "s59E5H2" 0 "Membrane protein insertase YidC"  
"Chl\_A19\_00624" 624 "s63E6H2" 0 "Membrane protein insertase YidC"  
"Chl\_A19\_00625" 625 "s59E13H2" 0 "R3H domain protein"  
"Chl\_A19\_00625" 625 "s59E25H2" 0 "R3H domain protein"  
"Chl\_A19\_00625" 625 "s59E5H2" 0 "R3H domain protein"  
"Chl\_A19\_00625" 625 "s63E6H2" 0 "R3H domain protein"  
"Chl\_A19\_00626" 626 "s59E13H2" 0 "Mannosylfructose-phosphate phosphatase"  
"Chl\_A19\_00626" 626 "s59E25H2" 0 "Mannosylfructose-phosphate phosphatase"  
"Chl\_A19\_00626" 626 "s59E5H2" 0 "Mannosylfructose-phosphate phosphatase"  
"Chl\_A19\_00626" 626 "s63E6H2" 0 "Mannosylfructose-phosphate phosphatase"  
"Chl\_A19\_00627" 627 "s59E13H2" 0 "hypothetical protein"  
"Chl\_A19\_00627" 627 "s59E25H2" 0 "hypothetical protein"  
"Chl\_A19\_00627" 627 "s59E5H2" 0 "hypothetical protein"  
"Chl\_A19\_00627" 627 "s63E6H2" 0 "hypothetical protein"  
"Chl\_A19\_00628" 628 "s59E13H2" 0 "50S ribosomal protein L32"  
"Chl\_A19\_00628" 628 "s59E25H2" 0 "50S ribosomal protein L32"  
"Chl\_A19\_00628" 628 "s59E5H2" 0 "50S ribosomal protein L32"  
"Chl\_A19\_00628" 628 "s63E6H2" 0 "50S ribosomal protein L32"  
"Chl\_A19\_00629" 629 "s59E13H2" 0 "Polyketide biosynthesis malonyl CoA-acyl carrier protein transacylase PksC"  
"Chl\_A19\_00629" 629 "s59E25H2" 0 "Polyketide biosynthesis malonyl CoA-acyl carrier protein transacylase PksC"  
"Chl\_A19\_00629" 629 "s59E5H2" 0 "Polyketide biosynthesis malonyl CoA-acyl carrier protein transacylase PksC"  
"Chl\_A19\_00629" 629 "s63E6H2" 0 "Polyketide biosynthesis malonyl CoA-acyl carrier protein transacylase PksC"  
"Chl\_A19\_00630" 630 "s59E13H2" 0 "3-oxoacyl-[acyl-carrier-protein] reductase FabG"  
"Chl\_A19\_00630" 630 "s59E25H2" 0 "3-oxoacyl-[acyl-carrier-protein] reductase FabG"  
"Chl\_A19\_00630" 630 "s59E5H2" 0.00279883829516016 "3-oxoacyl-[acyl-carrier-protein] reductase FabG"  
"Chl\_A19\_00630" 630 "s63E6H2" 0 "3-oxoacyl-[acyl-carrier-protein] reductase FabG"  
"Chl\_A19\_00631" 631 "s59E13H2" 0 "hypothetical protein"  
"Chl\_A19\_00631" 631 "s59E25H2" 0 "hypothetical protein"  
"Chl\_A19\_00631" 631 "s59E5H2" 0 "hypothetical protein"  
"Chl\_A19\_00631" 631 "s63E6H2" 0 "hypothetical protein"  
"Chl\_A19\_00632" 632 "s59E13H2" 0 "Acyl carrier protein"  
"Chl\_A19\_00632" 632 "s59E25H2" 0 "Acyl carrier protein"  
"Chl\_A19\_00632" 632 "s59E5H2" 0 "Acyl carrier protein"  
"Chl\_A19\_00632" 632 "s63E6H2" 0 "Acyl carrier protein"  
"Chl\_A19\_00633" 633 "s59E13H2" 0 "putative HAD-hydrolase"  
"Chl\_A19\_00633" 633 "s59E25H2" 0 "putative HAD-hydrolase"  
"Chl\_A19\_00633" 633 "s59E5H2" 0 "putative HAD-hydrolase"  
"Chl\_A19\_00633" 633 "s63E6H2" 0 "putative HAD-hydrolase"  
"Chl\_A19\_00634" 634 "s59E13H2" 0 "Endonuclease MutS2"  
"Chl\_A19\_00634" 634 "s59E25H2" 0 "Endonuclease MutS2"  
"Chl\_A19\_00634" 634 "s59E5H2" 0 "Endonuclease MutS2"  
"Chl\_A19\_00634" 634 "s63E6H2" 0 "Endonuclease MutS2"  
"Chl\_A19\_00635" 635 "s59E13H2" 0 "putative MFS-type transporter YhjX"  
"Chl\_A19\_00635" 635 "s59E25H2" 0 "putative MFS-type transporter YhjX"  
"Chl\_A19\_00635" 635 "s59E5H2" 0 "putative MFS-type transporter YhjX"



"Chl\_A19\_00635" 635 "s63E6H2" 0 "putative MFS-type transporter YhjX"  
"Chl\_A19\_00636" 636 "s59E13H2" 0 "Alcohol dehydrogenase"  
"Chl\_A19\_00636" 636 "s59E25H2" 0 "Alcohol dehydrogenase"  
"Chl\_A19\_00636" 636 "s59E5H2" 0 "Alcohol dehydrogenase"  
"Chl\_A19\_00636" 636 "s63E6H2" 0 "Alcohol dehydrogenase"  
"Chl\_A19\_00638" 638 "s59E13H2" 0 "Putative prophage phiRv2 integrase"  
"Chl\_A19\_00638" 638 "s59E25H2" 0 "Putative prophage phiRv2 integrase"  
"Chl\_A19\_00638" 638 "s59E5H2" 0 "Putative prophage phiRv2 integrase"  
"Chl\_A19\_00638" 638 "s63E6H2" 0 "Putative prophage phiRv2 integrase"  
"Chl\_A19\_00640" 640 "s59E13H2" 0 "Helix-turn-helix domain protein"  
"Chl\_A19\_00640" 640 "s59E25H2" 0 "Helix-turn-helix domain protein"  
"Chl\_A19\_00640" 640 "s59E5H2" 0 "Helix-turn-helix domain protein"  
"Chl\_A19\_00640" 640 "s63E6H2" 0 "Helix-turn-helix domain protein"  
"Chl\_A21\_00002" 642 "s59E13H2" 0 "Elongation factor G"  
"Chl\_A21\_00002" 642 "s59E25H2" 0 "Elongation factor G"  
"Chl\_A21\_00002" 642 "s59E5H2" 0 "Elongation factor G"  
"Chl\_A21\_00002" 642 "s63E6H2" 0 "Elongation factor G"  
"Chl\_A21\_00003" 643 "s59E13H2" 0 "Elongation factor Tu"  
"Chl\_A21\_00003" 643 "s59E25H2" 0 "Elongation factor Tu"  
"Chl\_A21\_00003" 643 "s59E5H2" 0 "Elongation factor Tu"  
"Chl\_A21\_00003" 643 "s63E6H2" 0 "Elongation factor Tu"  
"Chl\_A21\_00004" 644 "s59E13H2" 0 "30S ribosomal protein S10"  
"Chl\_A21\_00004" 644 "s59E25H2" 0 "30S ribosomal protein S10"  
"Chl\_A21\_00004" 644 "s59E5H2" 0 "30S ribosomal protein S10"  
"Chl\_A21\_00004" 644 "s63E6H2" 0 "30S ribosomal protein S10"  
"Chl\_A21\_00005" 645 "s59E13H2" 0 "50S ribosomal protein L3"  
"Chl\_A21\_00005" 645 "s59E25H2" 0 "50S ribosomal protein L3"  
"Chl\_A21\_00005" 645 "s59E5H2" 0 "50S ribosomal protein L3"  
"Chl\_A21\_00005" 645 "s63E6H2" 0 "50S ribosomal protein L3"  
"Chl\_A21\_00006" 646 "s59E13H2" 0 "50S ribosomal protein L4"  
"Chl\_A21\_00006" 646 "s59E25H2" 0 "50S ribosomal protein L4"  
"Chl\_A21\_00006" 646 "s59E5H2" 0 "50S ribosomal protein L4"  
"Chl\_A21\_00006" 646 "s63E6H2" 0 "50S ribosomal protein L4"  
"Chl\_A21\_00007" 647 "s59E13H2" 0 "50S ribosomal protein L23"  
"Chl\_A21\_00007" 647 "s59E25H2" 0 "50S ribosomal protein L23"  
"Chl\_A21\_00007" 647 "s59E5H2" 0 "50S ribosomal protein L23"  
"Chl\_A21\_00007" 647 "s63E6H2" 0 "50S ribosomal protein L23"  
"Chl\_A21\_00008" 648 "s59E13H2" 0 "hypothetical protein"  
"Chl\_A21\_00008" 648 "s59E25H2" 0 "hypothetical protein"  
"Chl\_A21\_00008" 648 "s59E5H2" 0 "hypothetical protein"  
"Chl\_A21\_00008" 648 "s63E6H2" 0 "hypothetical protein"  
"Chl\_A21\_00009" 649 "s59E13H2" 0 "50S ribosomal protein L2"  
"Chl\_A21\_00009" 649 "s59E25H2" 0 "50S ribosomal protein L2"  
"Chl\_A21\_00009" 649 "s59E5H2" 0 "50S ribosomal protein L2"  
"Chl\_A21\_00009" 649 "s63E6H2" 0 "50S ribosomal protein L2"  
"Chl\_A21\_00010" 650 "s59E13H2" 0 "30S ribosomal protein S19"  
"Chl\_A21\_00010" 650 "s59E25H2" 0 "30S ribosomal protein S19"

"Chl\_A21\_00010" 650 "s59E5H2" 0 "30S ribosomal protein S19"  
"Chl\_A21\_00010" 650 "s63E6H2" 0 "30S ribosomal protein S19"  
"Chl\_A21\_00011" 651 "s59E13H2" 0 "50S ribosomal protein L22"  
"Chl\_A21\_00011" 651 "s59E25H2" 0 "50S ribosomal protein L22"  
"Chl\_A21\_00011" 651 "s59E5H2" 0 "50S ribosomal protein L22"  
"Chl\_A21\_00011" 651 "s63E6H2" 0 "50S ribosomal protein L22"  
"Chl\_A21\_00012" 652 "s59E13H2" 0 "30S ribosomal protein S3"  
"Chl\_A21\_00012" 652 "s59E25H2" 0 "30S ribosomal protein S3"  
"Chl\_A21\_00012" 652 "s59E5H2" 0 "30S ribosomal protein S3"  
"Chl\_A21\_00012" 652 "s63E6H2" 0 "30S ribosomal protein S3"  
"Chl\_A21\_00013" 653 "s59E13H2" 0 "50S ribosomal protein L16"  
"Chl\_A21\_00013" 653 "s59E25H2" 0 "50S ribosomal protein L16"  
"Chl\_A21\_00013" 653 "s59E5H2" 0 "50S ribosomal protein L16"  
"Chl\_A21\_00013" 653 "s63E6H2" 0 "50S ribosomal protein L16"  
"Chl\_A21\_00014" 654 "s59E13H2" 0 "50S ribosomal protein L29"  
"Chl\_A21\_00014" 654 "s59E25H2" 0 "50S ribosomal protein L29"  
"Chl\_A21\_00014" 654 "s59E5H2" 0 "50S ribosomal protein L29"  
"Chl\_A21\_00014" 654 "s63E6H2" 0 "50S ribosomal protein L29"  
"Chl\_A21\_00015" 655 "s59E13H2" 0 "30S ribosomal protein S17"  
"Chl\_A21\_00015" 655 "s59E25H2" 0 "30S ribosomal protein S17"  
"Chl\_A21\_00015" 655 "s59E5H2" 0 "30S ribosomal protein S17"  
"Chl\_A21\_00015" 655 "s63E6H2" 0 "30S ribosomal protein S17"  
"Chl\_A21\_00016" 656 "s59E13H2" 0 "50S ribosomal protein L14"  
"Chl\_A21\_00016" 656 "s59E25H2" 0 "50S ribosomal protein L14"  
"Chl\_A21\_00016" 656 "s59E5H2" 0 "50S ribosomal protein L14"  
"Chl\_A21\_00016" 656 "s63E6H2" 0 "50S ribosomal protein L14"  
"Chl\_A21\_00017" 657 "s59E13H2" 0 "50S ribosomal protein L24"  
"Chl\_A21\_00017" 657 "s59E25H2" 0 "50S ribosomal protein L24"  
"Chl\_A21\_00017" 657 "s59E5H2" 0 "50S ribosomal protein L24"  
"Chl\_A21\_00017" 657 "s63E6H2" 0 "50S ribosomal protein L24"  
"Chl\_A21\_00018" 658 "s59E13H2" 0 "50S ribosomal protein L5"  
"Chl\_A21\_00018" 658 "s59E25H2" 0 "50S ribosomal protein L5"  
"Chl\_A21\_00018" 658 "s59E5H2" 0 "50S ribosomal protein L5"  
"Chl\_A21\_00018" 658 "s63E6H2" 0 "50S ribosomal protein L5"  
"Chl\_A21\_00019" 659 "s59E13H2" 0 "30S ribosomal protein S8"  
"Chl\_A21\_00019" 659 "s59E25H2" 0 "30S ribosomal protein S8"  
"Chl\_A21\_00019" 659 "s59E5H2" 0 "30S ribosomal protein S8"  
"Chl\_A21\_00019" 659 "s63E6H2" 0 "30S ribosomal protein S8"  
"Chl\_A21\_00020" 660 "s59E13H2" 0 "50S ribosomal protein L6"  
"Chl\_A21\_00020" 660 "s59E25H2" 0 "50S ribosomal protein L6"  
"Chl\_A21\_00020" 660 "s59E5H2" 0 "50S ribosomal protein L6"  
"Chl\_A21\_00020" 660 "s63E6H2" 0 "50S ribosomal protein L6"  
"Chl\_A21\_00021" 661 "s59E13H2" 0 "50S ribosomal protein L18"  
"Chl\_A21\_00021" 661 "s59E25H2" 0 "50S ribosomal protein L18"  
"Chl\_A21\_00021" 661 "s59E5H2" 0 "50S ribosomal protein L18"  
"Chl\_A21\_00021" 661 "s63E6H2" 0 "50S ribosomal protein L18"  
"Chl\_A21\_00022" 662 "s59E13H2" 0 "30S ribosomal protein S5"

"Chl\_A21\_00022" 662 "s59E25H2" 0 "30S ribosomal protein S5"  
"Chl\_A21\_00022" 662 "s59E5H2" 0 "30S ribosomal protein S5"  
"Chl\_A21\_00022" 662 "s63E6H2" 0 "30S ribosomal protein S5"  
"Chl\_A21\_00023" 663 "s59E13H2" 0 "50S ribosomal protein L30"  
"Chl\_A21\_00023" 663 "s59E25H2" 0 "50S ribosomal protein L30"  
"Chl\_A21\_00023" 663 "s59E5H2" 0 "50S ribosomal protein L30"  
"Chl\_A21\_00023" 663 "s63E6H2" 0 "50S ribosomal protein L30"  
"Chl\_A21\_00024" 664 "s59E13H2" 0 "50S ribosomal protein L15"  
"Chl\_A21\_00024" 664 "s59E25H2" 0 "50S ribosomal protein L15"  
"Chl\_A21\_00024" 664 "s59E5H2" 0 "50S ribosomal protein L15"  
"Chl\_A21\_00024" 664 "s63E6H2" 0 "50S ribosomal protein L15"  
"Chl\_A21\_00025" 665 "s59E13H2" 0 "preprotein translocase subunit SecY"  
"Chl\_A21\_00025" 665 "s59E25H2" 0 "preprotein translocase subunit SecY"  
"Chl\_A21\_00025" 665 "s59E5H2" 0 "preprotein translocase subunit SecY"  
"Chl\_A21\_00025" 665 "s63E6H2" 0 "preprotein translocase subunit SecY"  
"Chl\_A21\_00026" 666 "s59E13H2" 0 "Adenylate kinase"  
"Chl\_A21\_00026" 666 "s59E25H2" 0 "Adenylate kinase"  
"Chl\_A21\_00026" 666 "s59E5H2" 0 "Adenylate kinase"  
"Chl\_A21\_00026" 666 "s63E6H2" 0 "Adenylate kinase"  
"Chl\_A21\_00027" 667 "s59E13H2" 0 "Methionine aminopeptidase 1"  
"Chl\_A21\_00027" 667 "s59E25H2" 0 "Methionine aminopeptidase 1"  
"Chl\_A21\_00027" 667 "s59E5H2" 0 "Methionine aminopeptidase 1"  
"Chl\_A21\_00027" 667 "s63E6H2" 0 "Methionine aminopeptidase 1"  
"Chl\_A21\_00028" 668 "s59E13H2" 0 "50S ribosomal protein L36"  
"Chl\_A21\_00028" 668 "s59E25H2" 0 "50S ribosomal protein L36"  
"Chl\_A21\_00028" 668 "s59E5H2" 0 "50S ribosomal protein L36"  
"Chl\_A21\_00028" 668 "s63E6H2" 0 "50S ribosomal protein L36"  
"Chl\_A21\_00029" 669 "s59E13H2" 0 "30S ribosomal protein S13"  
"Chl\_A21\_00029" 669 "s59E25H2" 0 "30S ribosomal protein S13"  
"Chl\_A21\_00029" 669 "s59E5H2" 0 "30S ribosomal protein S13"  
"Chl\_A21\_00029" 669 "s63E6H2" 0 "30S ribosomal protein S13"  
"Chl\_A21\_00030" 670 "s59E13H2" 0 "30S ribosomal protein S11"  
"Chl\_A21\_00030" 670 "s59E25H2" 0 "30S ribosomal protein S11"  
"Chl\_A21\_00030" 670 "s59E5H2" 0 "30S ribosomal protein S11"  
"Chl\_A21\_00030" 670 "s63E6H2" 0 "30S ribosomal protein S11"  
"Chl\_A21\_00031" 671 "s59E13H2" 0 "30S ribosomal protein S4"  
"Chl\_A21\_00031" 671 "s59E25H2" 0 "30S ribosomal protein S4"  
"Chl\_A21\_00031" 671 "s59E5H2" 0 "30S ribosomal protein S4"  
"Chl\_A21\_00031" 671 "s63E6H2" 0 "30S ribosomal protein S4"  
"Chl\_A21\_00032" 672 "s59E13H2" 0 "DNA-directed RNA polymerase subunit alpha"  
"Chl\_A21\_00032" 672 "s59E25H2" 0 "DNA-directed RNA polymerase subunit alpha"  
"Chl\_A21\_00032" 672 "s59E5H2" 0 "DNA-directed RNA polymerase subunit alpha"  
"Chl\_A21\_00032" 672 "s63E6H2" 0 "DNA-directed RNA polymerase subunit alpha"  
"Chl\_A21\_00033" 673 "s59E13H2" 0 "50S ribosomal protein L17"  
"Chl\_A21\_00033" 673 "s59E25H2" 0 "50S ribosomal protein L17"  
"Chl\_A21\_00033" 673 "s59E5H2" 0 "50S ribosomal protein L17"  
"Chl\_A21\_00033" 673 "s63E6H2" 0 "50S ribosomal protein L17"

"Chl\_A21\_00034" 674 "s59E13H2" 0 "tRNA pseudouridine synthase A"  
"Chl\_A21\_00034" 674 "s59E25H2" 0 "tRNA pseudouridine synthase A"  
"Chl\_A21\_00034" 674 "s59E5H2" 0 "tRNA pseudouridine synthase A"  
"Chl\_A21\_00034" 674 "s63E6H2" 0 "tRNA pseudouridine synthase A"  
"Chl\_A21\_00035" 675 "s59E13H2" 0 "50S ribosomal protein L13"  
"Chl\_A21\_00035" 675 "s59E25H2" 0 "50S ribosomal protein L13"  
"Chl\_A21\_00035" 675 "s59E5H2" 0 "50S ribosomal protein L13"  
"Chl\_A21\_00035" 675 "s63E6H2" 0 "50S ribosomal protein L13"  
"Chl\_A21\_00036" 676 "s59E13H2" 0 "30S ribosomal protein S9"  
"Chl\_A21\_00036" 676 "s59E25H2" 0 "30S ribosomal protein S9"  
"Chl\_A21\_00036" 676 "s59E5H2" 0 "30S ribosomal protein S9"  
"Chl\_A21\_00036" 676 "s63E6H2" 0 "30S ribosomal protein S9"  
"Chl\_A21\_00037" 677 "s59E13H2" 0 "hypothetical protein"  
"Chl\_A21\_00037" 677 "s59E25H2" 0 "hypothetical protein"  
"Chl\_A21\_00037" 677 "s59E5H2" 0 "hypothetical protein"  
"Chl\_A21\_00037" 677 "s63E6H2" 0 "hypothetical protein"  
"Chl\_A21\_00038" 678 "s59E13H2" 0 "Decaprenyl-phosphate phosphoribosyltransferase"  
"Chl\_A21\_00038" 678 "s59E25H2" 0 "Decaprenyl-phosphate phosphoribosyltransferase"  
"Chl\_A21\_00038" 678 "s59E5H2" 0 "Decaprenyl-phosphate phosphoribosyltransferase"  
"Chl\_A21\_00038" 678 "s63E6H2" 0 "Decaprenyl-phosphate phosphoribosyltransferase"  
"Chl\_A21\_00039" 679 "s59E13H2" 0 "16S/23S rRNA (cytidine-2'-O)-methyltransferase TlyA"  
"Chl\_A21\_00039" 679 "s59E25H2" 0 "16S/23S rRNA (cytidine-2'-O)-methyltransferase TlyA"  
"Chl\_A21\_00039" 679 "s59E5H2" 0 "16S/23S rRNA (cytidine-2'-O)-methyltransferase TlyA"  
"Chl\_A21\_00039" 679 "s63E6H2" 0 "16S/23S rRNA (cytidine-2'-O)-methyltransferase TlyA"  
"Chl\_A21\_00040" 680 "s59E13H2" 0 "hypothetical protein"  
"Chl\_A21\_00040" 680 "s59E25H2" 0 "hypothetical protein"  
"Chl\_A21\_00040" 680 "s59E5H2" 0 "hypothetical protein"  
"Chl\_A21\_00040" 680 "s63E6H2" 0 "hypothetical protein"  
"Chl\_A21\_00041" 681 "s59E13H2" 0 "Elongation factor 4"  
"Chl\_A21\_00041" 681 "s59E25H2" 0 "Elongation factor 4"  
"Chl\_A21\_00041" 681 "s59E5H2" 0 "Elongation factor 4"  
"Chl\_A21\_00041" 681 "s63E6H2" 0 "Elongation factor 4"  
"Chl\_A21\_00043" 683 "s59E13H2" 0 "Inner membrane transport protein YajR"  
"Chl\_A21\_00043" 683 "s59E25H2" 0 "Inner membrane transport protein YajR"  
"Chl\_A21\_00043" 683 "s59E5H2" 0 "Inner membrane transport protein YajR"  
"Chl\_A21\_00043" 683 "s63E6H2" 0 "Inner membrane transport protein YajR"  
"Chl\_A21\_00045" 685 "s59E13H2" 0 "Antibiotic biosynthesis monooxygenase"  
"Chl\_A21\_00045" 685 "s59E25H2" 0 "Antibiotic biosynthesis monooxygenase"  
"Chl\_A21\_00045" 685 "s59E5H2" 0 "Antibiotic biosynthesis monooxygenase"  
"Chl\_A21\_00045" 685 "s63E6H2" 0 "Antibiotic biosynthesis monooxygenase"  
"Chl\_A21\_00046" 686 "s59E13H2" 0 "hypothetical protein"  
"Chl\_A21\_00046" 686 "s59E25H2" 0 "hypothetical protein"  
"Chl\_A21\_00046" 686 "s59E5H2" 0 "hypothetical protein"  
"Chl\_A21\_00046" 686 "s63E6H2" 0 "hypothetical protein"  
"Chl\_A21\_00048" 688 "s59E13H2" 0 "hypothetical protein"  
"Chl\_A21\_00048" 688 "s59E25H2" 0 "hypothetical protein"  
"Chl\_A21\_00048" 688 "s59E5H2" 0 "hypothetical protein"

"Chl\_A21\_00048" 688 "s63E6H2" 0 "hypothetical protein"  
"Chl\_A21\_00049" 689 "s59E13H2" 0 "DNA polymerase/3'-5' exonuclease PolX"  
"Chl\_A21\_00049" 689 "s59E25H2" 0 "DNA polymerase/3'-5' exonuclease PolX"  
"Chl\_A21\_00049" 689 "s59E5H2" 0 "DNA polymerase/3'-5' exonuclease PolX"  
"Chl\_A21\_00049" 689 "s63E6H2" 0 "DNA polymerase/3'-5' exonuclease PolX"  
"Chl\_A21\_00050" 690 "s59E13H2" 0 "hypothetical protein"  
"Chl\_A21\_00050" 690 "s59E25H2" 0 "hypothetical protein"  
"Chl\_A21\_00050" 690 "s59E5H2" 0 "hypothetical protein"  
"Chl\_A21\_00050" 690 "s63E6H2" 0 "hypothetical protein"  
"Chl\_A21\_00051" 691 "s59E13H2" 0 "Transposase IS200 like protein"  
"Chl\_A21\_00051" 691 "s59E25H2" 0 "Transposase IS200 like protein"  
"Chl\_A21\_00051" 691 "s59E5H2" 0 "Transposase IS200 like protein"  
"Chl\_A21\_00051" 691 "s63E6H2" 0 "Transposase IS200 like protein"  
"Chl\_A21\_00052" 692 "s59E13H2" 0 "hypothetical protein"  
"Chl\_A21\_00052" 692 "s59E25H2" 0 "hypothetical protein"  
"Chl\_A21\_00052" 692 "s59E5H2" 0 "hypothetical protein"  
"Chl\_A21\_00052" 692 "s63E6H2" 0 "hypothetical protein"  
"Chl\_A21\_00053" 693 "s59E13H2" 0 "hypothetical protein"  
"Chl\_A21\_00053" 693 "s59E25H2" 0 "hypothetical protein"  
"Chl\_A21\_00053" 693 "s59E5H2" 0 "hypothetical protein"  
"Chl\_A21\_00053" 693 "s63E6H2" 0 "hypothetical protein"  
"Chl\_A21\_00056" 696 "s59E13H2" 0 "hypothetical protein"  
"Chl\_A21\_00056" 696 "s59E25H2" 0 "hypothetical protein"  
"Chl\_A21\_00056" 696 "s59E5H2" 0 "hypothetical protein"  
"Chl\_A21\_00056" 696 "s63E6H2" 0 "hypothetical protein"  
"Chl\_A21\_00057" 697 "s59E13H2" 0 "hypothetical protein"  
"Chl\_A21\_00057" 697 "s59E25H2" 0 "hypothetical protein"  
"Chl\_A21\_00057" 697 "s59E5H2" 0 "hypothetical protein"  
"Chl\_A21\_00057" 697 "s63E6H2" 0 "hypothetical protein"  
"Chl\_A21\_00058" 698 "s59E13H2" 0 "HTH-type transcriptional regulator MalT"  
"Chl\_A21\_00058" 698 "s59E25H2" 0 "HTH-type transcriptional regulator MalT"  
"Chl\_A21\_00058" 698 "s59E5H2" 0 "HTH-type transcriptional regulator MalT"  
"Chl\_A21\_00058" 698 "s63E6H2" 0 "HTH-type transcriptional regulator MalT"  
"Chl\_A21\_00059" 699 "s59E13H2" 0 "hypothetical protein"  
"Chl\_A21\_00059" 699 "s59E25H2" 0 "hypothetical protein"  
"Chl\_A21\_00059" 699 "s59E5H2" 0 "hypothetical protein"  
"Chl\_A21\_00059" 699 "s63E6H2" 0 "hypothetical protein"  
"Chl\_A21\_00060" 700 "s59E13H2" 0 "Error-prone DNA polymerase"  
"Chl\_A21\_00060" 700 "s59E25H2" 0 "Error-prone DNA polymerase"  
"Chl\_A21\_00060" 700 "s59E5H2" 0 "Error-prone DNA polymerase"  
"Chl\_A21\_00060" 700 "s63E6H2" 0 "Error-prone DNA polymerase"  
"Chl\_A21\_00061" 701 "s59E13H2" 0 "DNA polymerase IV"  
"Chl\_A21\_00061" 701 "s59E25H2" 0 "DNA polymerase IV"  
"Chl\_A21\_00061" 701 "s59E5H2" 0 "DNA polymerase IV"  
"Chl\_A21\_00061" 701 "s63E6H2" 0 "DNA polymerase IV"  
"Chl\_A21\_00062" 702 "s59E13H2" 0 "hypothetical protein"  
"Chl\_A21\_00062" 702 "s59E25H2" 0 "hypothetical protein"

"Chl\_A21\_00062" 702 "s59E5H2" 0 "hypothetical protein"  
"Chl\_A21\_00062" 702 "s63E6H2" 0 "hypothetical protein"  
"Chl\_A21\_00064" 704 "s59E13H2" 0 "hypothetical protein"  
"Chl\_A21\_00064" 704 "s59E25H2" 0 "hypothetical protein"  
"Chl\_A21\_00064" 704 "s59E5H2" 0 "hypothetical protein"  
"Chl\_A21\_00064" 704 "s63E6H2" 0 "hypothetical protein"  
"Chl\_A21\_00065" 705 "s59E13H2" 0 "hypothetical protein"  
"Chl\_A21\_00065" 705 "s59E25H2" 0 "hypothetical protein"  
"Chl\_A21\_00065" 705 "s59E5H2" 0 "hypothetical protein"  
"Chl\_A21\_00065" 705 "s63E6H2" 0 "hypothetical protein"  
"Chl\_A21\_00066" 706 "s59E13H2" 0 "DNA-invertase hin"  
"Chl\_A21\_00066" 706 "s59E25H2" 0 "DNA-invertase hin"  
"Chl\_A21\_00066" 706 "s59E5H2" 0 "DNA-invertase hin"  
"Chl\_A21\_00066" 706 "s63E6H2" 0 "DNA-invertase hin"  
"Chl\_A21\_00068" 708 "s59E13H2" 0 "Transposase, Mutator family"  
"Chl\_A21\_00068" 708 "s59E25H2" 0 "Transposase, Mutator family"  
"Chl\_A21\_00068" 708 "s59E5H2" 0 "Transposase, Mutator family"  
"Chl\_A21\_00068" 708 "s63E6H2" 0 "Transposase, Mutator family"  
"Chl\_A21\_00069" 709 "s59E13H2" 0 "Transposase, Mutator family"  
"Chl\_A21\_00069" 709 "s59E25H2" 0 "Transposase, Mutator family"  
"Chl\_A21\_00069" 709 "s59E5H2" 0 "Transposase, Mutator family"  
"Chl\_A21\_00069" 709 "s63E6H2" 0 "Transposase, Mutator family"  
"Chl\_A21\_00071" 711 "s59E13H2" 0 "Transposase IS116/IS110/IS902 family protein"  
"Chl\_A21\_00071" 711 "s59E25H2" 0 "Transposase IS116/IS110/IS902 family protein"  
"Chl\_A21\_00071" 711 "s59E5H2" 0 "Transposase IS116/IS110/IS902 family protein"  
"Chl\_A21\_00071" 711 "s63E6H2" 0 "Transposase IS116/IS110/IS902 family protein"  
"Chl\_A21\_00073" 713 "s59E13H2" 0 "D-inositol 3-phosphate glycosyltransferase"  
"Chl\_A21\_00073" 713 "s59E25H2" 0 "D-inositol 3-phosphate glycosyltransferase"  
"Chl\_A21\_00073" 713 "s59E5H2" 0 "D-inositol 3-phosphate glycosyltransferase"  
"Chl\_A21\_00073" 713 "s63E6H2" 0 "D-inositol 3-phosphate glycosyltransferase"  
"Chl\_A21\_00074" 714 "s59E13H2" 0 "hypothetical protein"  
"Chl\_A21\_00074" 714 "s59E25H2" 0 "hypothetical protein"  
"Chl\_A21\_00074" 714 "s59E5H2" 0 "hypothetical protein"  
"Chl\_A21\_00074" 714 "s63E6H2" 0 "hypothetical protein"  
"Chl\_A21\_00075" 715 "s59E13H2" 0 "threonine dehydratase"  
"Chl\_A21\_00075" 715 "s59E25H2" 0 "threonine dehydratase"  
"Chl\_A21\_00075" 715 "s59E5H2" 0 "threonine dehydratase"  
"Chl\_A21\_00075" 715 "s63E6H2" 0 "threonine dehydratase"  
"Chl\_A21\_00076" 716 "s59E13H2" 0 "Helix-turn-helix domain protein"  
"Chl\_A21\_00076" 716 "s59E25H2" 0 "Helix-turn-helix domain protein"  
"Chl\_A21\_00076" 716 "s59E5H2" 0 "Helix-turn-helix domain protein"  
"Chl\_A21\_00076" 716 "s63E6H2" 0 "Helix-turn-helix domain protein"  
"Chl\_A21\_00077" 717 "s59E13H2" 0 "Transcription antitermination protein RfaH"  
"Chl\_A21\_00077" 717 "s59E25H2" 0 "Transcription antitermination protein RfaH"  
"Chl\_A21\_00077" 717 "s59E5H2" 0 "Transcription antitermination protein RfaH"  
"Chl\_A21\_00077" 717 "s63E6H2" 0 "Transcription antitermination protein RfaH"  
"Chl\_A21\_00078" 718 "s59E13H2" 0 "tyrosine kinase"

"Chl\_A21\_00078" 718 "s59E25H2" 0 "tyrosine kinase"  
"Chl\_A21\_00078" 718 "s59E5H2" 0 "tyrosine kinase"  
"Chl\_A21\_00078" 718 "s63E6H2" 0 "tyrosine kinase"  
"Chl\_A21\_00079" 719 "s59E13H2" 0 "O-Antigen ligase"  
"Chl\_A21\_00079" 719 "s59E25H2" 0 "O-Antigen ligase"  
"Chl\_A21\_00079" 719 "s59E5H2" 0 "O-Antigen ligase"  
"Chl\_A21\_00079" 719 "s63E6H2" 0 "O-Antigen ligase"  
"Chl\_A21\_00082" 722 "s59E13H2" 0 "putative peptidoglycan biosynthesis protein MurJ"  
"Chl\_A21\_00082" 722 "s59E25H2" 0 "putative peptidoglycan biosynthesis protein MurJ"  
"Chl\_A21\_00082" 722 "s59E5H2" 0 "putative peptidoglycan biosynthesis protein MurJ"  
"Chl\_A21\_00082" 722 "s63E6H2" 0 "putative peptidoglycan biosynthesis protein MurJ"  
"Chl\_A21\_00083" 723 "s59E13H2" 0 "Methyltransferase domain protein"  
"Chl\_A21\_00083" 723 "s59E25H2" 0 "Methyltransferase domain protein"  
"Chl\_A21\_00083" 723 "s59E5H2" 0 "Methyltransferase domain protein"  
"Chl\_A21\_00083" 723 "s63E6H2" 0 "Methyltransferase domain protein"  
"Chl\_A21\_00084" 724 "s59E13H2" 0 "2-deoxystreptamine glucosyltransferase"  
"Chl\_A21\_00084" 724 "s59E25H2" 0 "2-deoxystreptamine glucosyltransferase"  
"Chl\_A21\_00084" 724 "s59E5H2" 0 "2-deoxystreptamine glucosyltransferase"  
"Chl\_A21\_00084" 724 "s63E6H2" 0 "2-deoxystreptamine glucosyltransferase"  
"Chl\_A21\_00085" 725 "s59E13H2" 0 "D-inositol 3-phosphate glycosyltransferase"  
"Chl\_A21\_00085" 725 "s59E25H2" 0 "D-inositol 3-phosphate glycosyltransferase"  
"Chl\_A21\_00085" 725 "s59E5H2" 0 "D-inositol 3-phosphate glycosyltransferase"  
"Chl\_A21\_00085" 725 "s63E6H2" 0 "D-inositol 3-phosphate glycosyltransferase"  
"Chl\_A21\_00086" 726 "s59E13H2" 0 "GDP-mannose-dependent alpha-(1-6)-phosphatidylinositol monomannoside mannosyltransferase"  
"Chl\_A21\_00086" 726 "s59E25H2" 0 "GDP-mannose-dependent alpha-(1-6)-phosphatidylinositol monomannoside mannosyltransferase"  
"Chl\_A21\_00086" 726 "s59E5H2" 0 "GDP-mannose-dependent alpha-(1-6)-phosphatidylinositol monomannoside mannosyltransferase"  
"Chl\_A21\_00086" 726 "s63E6H2" 0 "GDP-mannose-dependent alpha-(1-6)-phosphatidylinositol monomannoside mannosyltransferase"  
"Chl\_A21\_00087" 727 "s59E13H2" 0 "Dimethylglycine N-methyltransferase"  
"Chl\_A21\_00087" 727 "s59E25H2" 0 "Dimethylglycine N-methyltransferase"  
"Chl\_A21\_00087" 727 "s59E5H2" 0 "Dimethylglycine N-methyltransferase"  
"Chl\_A21\_00087" 727 "s63E6H2" 0 "Dimethylglycine N-methyltransferase"  
"Chl\_A21\_00088" 728 "s59E13H2" 0 "bifunctional 3-demethylubiquinone-9 3-methyltransferase/ 2-octaprenyl-6-hydroxy phenol methylase"  
"Chl\_A21\_00088" 728 "s59E25H2" 0 "bifunctional 3-demethylubiquinone-9 3-methyltransferase/ 2-octaprenyl-6-hydroxy phenol methylase"  
"Chl\_A21\_00088" 728 "s59E5H2" 0 "bifunctional 3-demethylubiquinone-9 3-methyltransferase/ 2-octaprenyl-6-hydroxy phenol methylase"  
"Chl\_A21\_00088" 728 "s63E6H2" 0 "bifunctional 3-demethylubiquinone-9 3-methyltransferase/ 2-octaprenyl-6-hydroxy phenol methylase"  
"Chl\_A21\_00089" 729 "s59E13H2" 0 "GDP-mannose-dependent alpha-(1-2)-phosphatidylinositol mannosyltransferase"  
"Chl\_A21\_00089" 729 "s59E25H2" 0 "GDP-mannose-dependent alpha-(1-2)-phosphatidylinositol mannosyltransferase"  
"Chl\_A21\_00089" 729 "s59E5H2" 0 "GDP-mannose-dependent alpha-(1-2)-phosphatidylinositol mannosyltransferase"  
"Chl\_A21\_00089" 729 "s63E6H2" 0 "GDP-mannose-dependent alpha-(1-2)-phosphatidylinositol mannosyltransferase"  
"Chl\_A21\_00090" 730 "s59E13H2" 0 "UDP-N-acetylgalactosamine-undecaprenyl-phosphate N-acetylgalactosaminephosphotransferase"  
"Chl\_A21\_00090" 730 "s59E25H2" 0 "UDP-N-acetylgalactosamine-undecaprenyl-phosphate N-acetylgalactosaminephosphotransferase"  
"Chl\_A21\_00090" 730 "s59E5H2" 0 "UDP-N-acetylgalactosamine-undecaprenyl-phosphate N-acetylgalactosaminephosphotransferase"  
"Chl\_A21\_00090" 730 "s63E6H2" 0 "UDP-N-acetylgalactosamine-undecaprenyl-phosphate N-acetylgalactosaminephosphotransferase"  
"Chl\_A21\_00091" 731 "s59E13H2" 0 "Digeranylgeranyllycerophospholipid reductase"  
"Chl\_A21\_00091" 731 "s59E25H2" 0 "Digeranylgeranyllycerophospholipid reductase"  
"Chl\_A21\_00091" 731 "s59E5H2" 0 "Digeranylgeranyllycerophospholipid reductase"  
"Chl\_A21\_00091" 731 "s63E6H2" 0 "Digeranylgeranyllycerophospholipid reductase"

"Chl\_A21\_00092" 732 "s59E13H2" 0 "UDP-glucose 4-epimerase"  
"Chl\_A21\_00092" 732 "s59E25H2" 0 "UDP-glucose 4-epimerase"  
"Chl\_A21\_00092" 732 "s59E5H2" 0 "UDP-glucose 4-epimerase"  
"Chl\_A21\_00092" 732 "s63E6H2" 0 "UDP-glucose 4-epimerase"  
"Chl\_A21\_00094" 734 "s59E13H2" 0 "Teichoic acid translocation permease protein TagG"  
"Chl\_A21\_00094" 734 "s59E25H2" 0 "Teichoic acid translocation permease protein TagG"  
"Chl\_A21\_00094" 734 "s59E5H2" 0 "Teichoic acid translocation permease protein TagG"  
"Chl\_A21\_00094" 734 "s63E6H2" 0 "Teichoic acid translocation permease protein TagG"  
"Chl\_A21\_00095" 735 "s59E13H2" 0 "Teichoic acids export ATP-binding protein TagH"  
"Chl\_A21\_00095" 735 "s59E25H2" 0 "Teichoic acids export ATP-binding protein TagH"  
"Chl\_A21\_00095" 735 "s59E5H2" 0 "Teichoic acids export ATP-binding protein TagH"  
"Chl\_A21\_00095" 735 "s63E6H2" 0 "Teichoic acids export ATP-binding protein TagH"  
"Chl\_A21\_00096" 736 "s59E13H2" 0 "putative S-adenosylmethionine-dependent methyltransferase/MSMEI\_2290"  
"Chl\_A21\_00096" 736 "s59E25H2" 0 "putative S-adenosylmethionine-dependent methyltransferase/MSMEI\_2290"  
"Chl\_A21\_00096" 736 "s59E5H2" 0 "putative S-adenosylmethionine-dependent methyltransferase/MSMEI\_2290"  
"Chl\_A21\_00096" 736 "s63E6H2" 0 "putative S-adenosylmethionine-dependent methyltransferase/MSMEI\_2290"  
"Chl\_A21\_00097" 737 "s59E13H2" 0 "hypothetical protein"  
"Chl\_A21\_00097" 737 "s59E25H2" 0 "hypothetical protein"  
"Chl\_A21\_00097" 737 "s59E5H2" 0 "hypothetical protein"  
"Chl\_A21\_00097" 737 "s63E6H2" 0 "hypothetical protein"  
"Chl\_A21\_00098" 738 "s59E13H2" 0 "Integrase core domain protein"  
"Chl\_A21\_00098" 738 "s59E25H2" 0 "Integrase core domain protein"  
"Chl\_A21\_00098" 738 "s59E5H2" 0 "Integrase core domain protein"  
"Chl\_A21\_00098" 738 "s63E6H2" 0 "Integrase core domain protein"  
"Chl\_A21\_00099" 739 "s59E13H2" 0 "hypothetical protein"  
"Chl\_A21\_00099" 739 "s59E25H2" 0 "hypothetical protein"  
"Chl\_A21\_00099" 739 "s59E5H2" 0 "hypothetical protein"  
"Chl\_A21\_00099" 739 "s63E6H2" 0 "hypothetical protein"  
"Chl\_A21\_00100" 740 "s59E13H2" 0 "hypothetical protein"  
"Chl\_A21\_00100" 740 "s59E25H2" 0 "hypothetical protein"  
"Chl\_A21\_00100" 740 "s59E5H2" 0 "hypothetical protein"  
"Chl\_A21\_00100" 740 "s63E6H2" 0 "hypothetical protein"  
"Chl\_A21\_00101" 741 "s59E13H2" 0 "hypothetical protein"  
"Chl\_A21\_00101" 741 "s59E25H2" 0 "hypothetical protein"  
"Chl\_A21\_00101" 741 "s59E5H2" 0 "hypothetical protein"  
"Chl\_A21\_00101" 741 "s63E6H2" 0 "hypothetical protein"  
"Chl\_A21\_00102" 742 "s59E13H2" 0 "hypothetical protein"  
"Chl\_A21\_00102" 742 "s59E25H2" 0 "hypothetical protein"  
"Chl\_A21\_00102" 742 "s59E5H2" 0 "hypothetical protein"  
"Chl\_A21\_00102" 742 "s63E6H2" 0 "hypothetical protein"  
"Chl\_A21\_00103" 743 "s59E13H2" 0 "Chondroitin synthase"  
"Chl\_A21\_00103" 743 "s59E25H2" 0 "Chondroitin synthase"  
"Chl\_A21\_00103" 743 "s59E5H2" 0 "Chondroitin synthase"  
"Chl\_A21\_00103" 743 "s63E6H2" 0 "Chondroitin synthase"  
"Chl\_A21\_00104" 744 "s59E13H2" 0 "D-inositol 3-phosphate glycosyltransferase"  
"Chl\_A21\_00104" 744 "s59E25H2" 0 "D-inositol 3-phosphate glycosyltransferase"  
"Chl\_A21\_00104" 744 "s59E5H2" 0 "D-inositol 3-phosphate glycosyltransferase"



"Chl\_A21\_00104" 744 "s63E6H2" 0 "D-inositol 3-phosphate glycosyltransferase"  
"Chl\_A21\_00105" 745 "s59E13H2" 0 "N-acetylglucosaminyl-diphospho-decaprenol L-rhamnosyltransferase"  
"Chl\_A21\_00105" 745 "s59E25H2" 0 "N-acetylglucosaminyl-diphospho-decaprenol L-rhamnosyltransferase"  
"Chl\_A21\_00105" 745 "s59E5H2" 0 "N-acetylglucosaminyl-diphospho-decaprenol L-rhamnosyltransferase"  
"Chl\_A21\_00105" 745 "s63E6H2" 0 "N-acetylglucosaminyl-diphospho-decaprenol L-rhamnosyltransferase"  
"Chl\_A21\_00106" 746 "s59E13H2" 0 "Endoglucanase H precursor"  
"Chl\_A21\_00106" 746 "s59E25H2" 0 "Endoglucanase H precursor"  
"Chl\_A21\_00106" 746 "s59E5H2" 0 "Endoglucanase H precursor"  
"Chl\_A21\_00106" 746 "s63E6H2" 0 "Endoglucanase H precursor"  
"Chl\_A21\_00108" 748 "s59E13H2" 0 "GDP-mannose-dependent alpha-(1-2)-phosphatidylinositol mannosyltransferase"  
"Chl\_A21\_00108" 748 "s59E25H2" 0 "GDP-mannose-dependent alpha-(1-2)-phosphatidylinositol mannosyltransferase"  
"Chl\_A21\_00108" 748 "s59E5H2" 0 "GDP-mannose-dependent alpha-(1-2)-phosphatidylinositol mannosyltransferase"  
"Chl\_A21\_00108" 748 "s63E6H2" 0 "GDP-mannose-dependent alpha-(1-2)-phosphatidylinositol mannosyltransferase"  
"Chl\_A21\_00119" 759 "s59E13H2" 0 "DNA polymerase III subunit beta"  
"Chl\_A21\_00119" 759 "s59E25H2" 0 "DNA polymerase III subunit beta"  
"Chl\_A21\_00119" 759 "s59E5H2" 0 "DNA polymerase III subunit beta"  
"Chl\_A21\_00119" 759 "s63E6H2" 0 "DNA polymerase III subunit beta"  
"Chl\_A21\_00123" 763 "s59E13H2" 0 "ATP-dependent helicase HepA"  
"Chl\_A21\_00123" 763 "s59E25H2" 0 "ATP-dependent helicase HepA"  
"Chl\_A21\_00123" 763 "s59E5H2" 0 "ATP-dependent helicase HepA"  
"Chl\_A21\_00123" 763 "s63E6H2" 0 "ATP-dependent helicase HepA"  
"Chl\_A21\_00128" 768 "s59E13H2" 0 "GvpH"  
"Chl\_A21\_00128" 768 "s59E25H2" 0 "GvpH"  
"Chl\_A21\_00128" 768 "s59E5H2" 0 "GvpH"  
"Chl\_A21\_00128" 768 "s63E6H2" 0 "GvpH"  
"Chl\_A21\_00130" 770 "s59E13H2" 0 "VCP-like ATPase"  
"Chl\_A21\_00130" 770 "s59E25H2" 0 "VCP-like ATPase"  
"Chl\_A21\_00130" 770 "s59E5H2" 0 "VCP-like ATPase"  
"Chl\_A21\_00130" 770 "s63E6H2" 0 "VCP-like ATPase"  
"Chl\_A21\_00133" 773 "s59E13H2" 0 "Gas vesicle structural protein"  
"Chl\_A21\_00133" 773 "s59E25H2" 0 "Gas vesicle structural protein"  
"Chl\_A21\_00133" 773 "s59E5H2" 0 "Gas vesicle structural protein"  
"Chl\_A21\_00133" 773 "s63E6H2" 0 "Gas vesicle structural protein"  
"Chl\_A21\_00134" 774 "s59E13H2" 0 "Gas vesicle structural protein"  
"Chl\_A21\_00134" 774 "s59E25H2" 0 "Gas vesicle structural protein"  
"Chl\_A21\_00134" 774 "s59E5H2" 0 "Gas vesicle structural protein"  
"Chl\_A21\_00134" 774 "s63E6H2" 0 "Gas vesicle structural protein"  
"Chl\_A21\_00135" 775 "s59E13H2" 0 "hypothetical protein"  
"Chl\_A21\_00135" 775 "s59E25H2" 0 "hypothetical protein"  
"Chl\_A21\_00135" 775 "s59E5H2" 0 "hypothetical protein"  
"Chl\_A21\_00135" 775 "s63E6H2" 0 "hypothetical protein"  
"Chl\_A21\_00136" 776 "s59E13H2" 0 "Denitrification regulatory protein NirQ"  
"Chl\_A21\_00136" 776 "s59E25H2" 0 "Denitrification regulatory protein NirQ"  
"Chl\_A21\_00136" 776 "s59E5H2" 0 "Denitrification regulatory protein NirQ"  
"Chl\_A21\_00136" 776 "s63E6H2" 0 "Denitrification regulatory protein NirQ"  
"Chl\_A21\_00137" 777 "s59E13H2" 0 "hypothetical protein"  
"Chl\_A21\_00137" 777 "s59E25H2" 0 "hypothetical protein"

"Chl\_A21\_00137" 777 "s59E5H2" 0 "hypothetical protein"  
"Chl\_A21\_00137" 777 "s63E6H2" 0 "hypothetical protein"  
"Chl\_A21\_00138" 778 "s59E13H2" 0 "Hsp20/alpha crystallin family protein"  
"Chl\_A21\_00138" 778 "s59E25H2" 0 "Hsp20/alpha crystallin family protein"  
"Chl\_A21\_00138" 778 "s59E5H2" 0 "Hsp20/alpha crystallin family protein"  
"Chl\_A21\_00138" 778 "s63E6H2" 0 "Hsp20/alpha crystallin family protein"  
"Chl\_A21\_00139" 779 "s59E13H2" 0 "Chaperone protein DnaK"  
"Chl\_A21\_00139" 779 "s59E25H2" 0 "Chaperone protein DnaK"  
"Chl\_A21\_00139" 779 "s59E5H2" 0 "Chaperone protein DnaK"  
"Chl\_A21\_00139" 779 "s63E6H2" 0 "Chaperone protein DnaK"  
"Chl\_A21\_00140" 780 "s59E13H2" 0 "chaperone protein DnaJ"  
"Chl\_A21\_00140" 780 "s59E25H2" 0 "chaperone protein DnaJ"  
"Chl\_A21\_00140" 780 "s59E5H2" 0 "chaperone protein DnaJ"  
"Chl\_A21\_00140" 780 "s63E6H2" 0 "chaperone protein DnaJ"  
"Chl\_A21\_00141" 781 "s59E13H2" 0 "Gas vesicle synthesis protein GvpL/GvpF"  
"Chl\_A21\_00141" 781 "s59E25H2" 0 "Gas vesicle synthesis protein GvpL/GvpF"  
"Chl\_A21\_00141" 781 "s59E5H2" 0 "Gas vesicle synthesis protein GvpL/GvpF"  
"Chl\_A21\_00141" 781 "s63E6H2" 0 "Gas vesicle synthesis protein GvpL/GvpF"  
"Chl\_A21\_00142" 782 "s59E13H2" 0 "chaperone protein DnaJ"  
"Chl\_A21\_00142" 782 "s59E25H2" 0 "chaperone protein DnaJ"  
"Chl\_A21\_00142" 782 "s59E5H2" 0 "chaperone protein DnaJ"  
"Chl\_A21\_00142" 782 "s63E6H2" 0 "chaperone protein DnaJ"  
"Chl\_A21\_00144" 784 "s59E13H2" 0 "chaperone protein DnaJ"  
"Chl\_A21\_00144" 784 "s59E25H2" 0 "chaperone protein DnaJ"  
"Chl\_A21\_00144" 784 "s59E5H2" 0 "chaperone protein DnaJ"  
"Chl\_A21\_00144" 784 "s63E6H2" 0 "chaperone protein DnaJ"  
"Chl\_A21\_00145" 785 "s59E13H2" 0 "Chaperone protein DnaJ"  
"Chl\_A21\_00145" 785 "s59E25H2" 0 "Chaperone protein DnaJ"  
"Chl\_A21\_00145" 785 "s59E5H2" 0 "Chaperone protein DnaJ"  
"Chl\_A21\_00145" 785 "s63E6H2" 0 "Chaperone protein DnaJ"  
"Chl\_A21\_00146" 786 "s59E13H2" 0 "Gas vesicle protein G"  
"Chl\_A21\_00146" 786 "s59E25H2" 0 "Gas vesicle protein G"  
"Chl\_A21\_00146" 786 "s59E5H2" 0 "Gas vesicle protein G"  
"Chl\_A21\_00146" 786 "s63E6H2" 0 "Gas vesicle protein G"  
"Chl\_A21\_00147" 787 "s59E13H2" 0 "Putative arsenical pump-driving ATPase"  
"Chl\_A21\_00147" 787 "s59E25H2" 0 "Putative arsenical pump-driving ATPase"  
"Chl\_A21\_00147" 787 "s59E5H2" 0 "Putative arsenical pump-driving ATPase"  
"Chl\_A21\_00147" 787 "s63E6H2" 0 "Putative arsenical pump-driving ATPase"  
"Chl\_A21\_00148" 788 "s59E13H2" 0 "hypothetical protein"  
"Chl\_A21\_00148" 788 "s59E25H2" 0 "hypothetical protein"  
"Chl\_A21\_00148" 788 "s59E5H2" 0 "hypothetical protein"  
"Chl\_A21\_00148" 788 "s63E6H2" 0 "hypothetical protein"  
"Chl\_A21\_00149" 789 "s59E13H2" 0 "Gas vesicle structural protein"  
"Chl\_A21\_00149" 789 "s59E25H2" 0 "Gas vesicle structural protein"  
"Chl\_A21\_00149" 789 "s59E5H2" 0 "Gas vesicle structural protein"  
"Chl\_A21\_00149" 789 "s63E6H2" 0 "Gas vesicle structural protein"  
"Chl\_A21\_00151" 791 "s59E13H2" 0 "Tyrosine phenol-lyase"

"Chl\_A21\_00151" 791 "s59E25H2" 0 "Tyrosine phenol-lyase"  
"Chl\_A21\_00151" 791 "s59E5H2" 0 "Tyrosine phenol-lyase"  
"Chl\_A21\_00151" 791 "s63E6H2" 0 "Tyrosine phenol-lyase"  
"Chl\_A21\_00152" 792 "s59E13H2" 0 "Sugar-specific transcriptional regulator TrmB"  
"Chl\_A21\_00152" 792 "s59E25H2" 0 "Sugar-specific transcriptional regulator TrmB"  
"Chl\_A21\_00152" 792 "s59E5H2" 0 "Sugar-specific transcriptional regulator TrmB"  
"Chl\_A21\_00152" 792 "s63E6H2" 0 "Sugar-specific transcriptional regulator TrmB"  
"Chl\_A21\_00153" 793 "s59E13H2" 0 "Daunorubicin/doxorubicin resistance ATP-binding protein DrrA"  
"Chl\_A21\_00153" 793 "s59E25H2" 0 "Daunorubicin/doxorubicin resistance ATP-binding protein DrrA"  
"Chl\_A21\_00153" 793 "s59E5H2" 0 "Daunorubicin/doxorubicin resistance ATP-binding protein DrrA"  
"Chl\_A21\_00153" 793 "s63E6H2" 0 "Daunorubicin/doxorubicin resistance ATP-binding protein DrrA"  
"Chl\_A21\_00154" 794 "s59E13H2" 0 "ABC-2 family transporter protein"  
"Chl\_A21\_00154" 794 "s59E25H2" 0 "ABC-2 family transporter protein"  
"Chl\_A21\_00154" 794 "s59E5H2" 0 "ABC-2 family transporter protein"  
"Chl\_A21\_00154" 794 "s63E6H2" 0 "ABC-2 family transporter protein"  
"Chl\_A21\_00155" 795 "s59E13H2" 0 "Isoprenylcysteine carboxyl methyltransferase (ICMT) family protein"  
"Chl\_A21\_00155" 795 "s59E25H2" 0 "Isoprenylcysteine carboxyl methyltransferase (ICMT) family protein"  
"Chl\_A21\_00155" 795 "s59E5H2" 0 "Isoprenylcysteine carboxyl methyltransferase (ICMT) family protein"  
"Chl\_A21\_00155" 795 "s63E6H2" 0 "Isoprenylcysteine carboxyl methyltransferase (ICMT) family protein"  
"Chl\_A21\_00156" 796 "s59E13H2" 0 "Isoprenylcysteine carboxyl methyltransferase (ICMT) family protein"  
"Chl\_A21\_00156" 796 "s59E25H2" 0 "Isoprenylcysteine carboxyl methyltransferase (ICMT) family protein"  
"Chl\_A21\_00156" 796 "s59E5H2" 0 "Isoprenylcysteine carboxyl methyltransferase (ICMT) family protein"  
"Chl\_A21\_00156" 796 "s63E6H2" 0 "Isoprenylcysteine carboxyl methyltransferase (ICMT) family protein"  
"Chl\_A21\_00157" 797 "s59E13H2" 0 "Demethylrebeccamycin-D-glucose O-methyltransferase"  
"Chl\_A21\_00157" 797 "s59E25H2" 0 "Demethylrebeccamycin-D-glucose O-methyltransferase"  
"Chl\_A21\_00157" 797 "s59E5H2" 0 "Demethylrebeccamycin-D-glucose O-methyltransferase"  
"Chl\_A21\_00157" 797 "s63E6H2" 0 "Demethylrebeccamycin-D-glucose O-methyltransferase"  
"Chl\_A21\_00158" 798 "s59E13H2" 0 "Demethylrebeccamycin-D-glucose O-methyltransferase"  
"Chl\_A21\_00158" 798 "s59E25H2" 0 "Demethylrebeccamycin-D-glucose O-methyltransferase"  
"Chl\_A21\_00158" 798 "s59E5H2" 0 "Demethylrebeccamycin-D-glucose O-methyltransferase"  
"Chl\_A21\_00158" 798 "s63E6H2" 0 "Demethylrebeccamycin-D-glucose O-methyltransferase"  
"Chl\_A21\_00159" 799 "s59E13H2" 0 "Macrolide export ATP-binding/permease protein MacB"  
"Chl\_A21\_00159" 799 "s59E25H2" 0 "Macrolide export ATP-binding/permease protein MacB"  
"Chl\_A21\_00159" 799 "s59E5H2" 0 "Macrolide export ATP-binding/permease protein MacB"  
"Chl\_A21\_00159" 799 "s63E6H2" 0 "Macrolide export ATP-binding/permease protein MacB"  
"Chl\_A21\_00160" 800 "s59E13H2" 0 "Multidrug export protein EmrA"  
"Chl\_A21\_00160" 800 "s59E25H2" 0 "Multidrug export protein EmrA"  
"Chl\_A21\_00160" 800 "s59E5H2" 0 "Multidrug export protein EmrA"  
"Chl\_A21\_00160" 800 "s63E6H2" 0 "Multidrug export protein EmrA"  
"Chl\_A21\_00161" 801 "s59E13H2" 0 "putative ABC transporter ATP-binding protein"  
"Chl\_A21\_00161" 801 "s59E25H2" 0 "putative ABC transporter ATP-binding protein"  
"Chl\_A21\_00161" 801 "s59E5H2" 0 "putative ABC transporter ATP-binding protein"  
"Chl\_A21\_00161" 801 "s63E6H2" 0 "putative ABC transporter ATP-binding protein"  
"Chl\_A21\_00163" 803 "s59E13H2" 0 "Prolipoprotein diacylglycerol transferase"  
"Chl\_A21\_00163" 803 "s59E25H2" 0 "Prolipoprotein diacylglycerol transferase"  
"Chl\_A21\_00163" 803 "s59E5H2" 0 "Prolipoprotein diacylglycerol transferase"  
"Chl\_A21\_00163" 803 "s63E6H2" 0 "Prolipoprotein diacylglycerol transferase"

"Chl\_A21\_00164" 804 "s59E13H2" 0 "Global nitrogen regulator"  
"Chl\_A21\_00164" 804 "s59E25H2" 0 "Global nitrogen regulator"  
"Chl\_A21\_00164" 804 "s59E5H2" 0 "Global nitrogen regulator"  
"Chl\_A21\_00164" 804 "s63E6H2" 0 "Global nitrogen regulator"  
"Chl\_A21\_00165" 805 "s59E13H2" 0 "Polymer-forming cytoskeletal"  
"Chl\_A21\_00165" 805 "s59E25H2" 0 "Polymer-forming cytoskeletal"  
"Chl\_A21\_00165" 805 "s59E5H2" 0 "Polymer-forming cytoskeletal"  
"Chl\_A21\_00165" 805 "s63E6H2" 0 "Polymer-forming cytoskeletal"  
"Chl\_A21\_00166" 806 "s59E13H2" 0 "hypothetical protein"  
"Chl\_A21\_00166" 806 "s59E25H2" 0 "hypothetical protein"  
"Chl\_A21\_00166" 806 "s59E5H2" 0 "hypothetical protein"  
"Chl\_A21\_00166" 806 "s63E6H2" 0 "hypothetical protein"  
"Chl\_A21\_00167" 807 "s59E13H2" 0 "dITP/XTP pyrophosphatase"  
"Chl\_A21\_00167" 807 "s59E25H2" 0 "dITP/XTP pyrophosphatase"  
"Chl\_A21\_00167" 807 "s59E5H2" 0 "dITP/XTP pyrophosphatase"  
"Chl\_A21\_00167" 807 "s63E6H2" 0 "dITP/XTP pyrophosphatase"  
"Chl\_A21\_00168" 808 "s59E13H2" 0 "2-hydroxy-6-oxo-6-phenylhexa-2,4-dienoate hydrolase"  
"Chl\_A21\_00168" 808 "s59E25H2" 0 "2-hydroxy-6-oxo-6-phenylhexa-2,4-dienoate hydrolase"  
"Chl\_A21\_00168" 808 "s59E5H2" 0 "2-hydroxy-6-oxo-6-phenylhexa-2,4-dienoate hydrolase"  
"Chl\_A21\_00168" 808 "s63E6H2" 0 "2-hydroxy-6-oxo-6-phenylhexa-2,4-dienoate hydrolase"  
"Chl\_A21\_00169" 809 "s59E13H2" 0 "Thioredoxin reductase"  
"Chl\_A21\_00169" 809 "s59E25H2" 0 "Thioredoxin reductase"  
"Chl\_A21\_00169" 809 "s59E5H2" 0 "Thioredoxin reductase"  
"Chl\_A21\_00169" 809 "s63E6H2" 0 "Thioredoxin reductase"  
"Chl\_A21\_00170" 810 "s59E13H2" 0 "putative S-adenosylmethionine-dependent methyltransferase/MSMEI\_2290"  
"Chl\_A21\_00170" 810 "s59E25H2" 0 "putative S-adenosylmethionine-dependent methyltransferase/MSMEI\_2290"  
"Chl\_A21\_00170" 810 "s59E5H2" 0 "putative S-adenosylmethionine-dependent methyltransferase/MSMEI\_2290"  
"Chl\_A21\_00170" 810 "s63E6H2" 0 "putative S-adenosylmethionine-dependent methyltransferase/MSMEI\_2290"  
"Chl\_A21\_00171" 811 "s59E13H2" 0 "hypothetical protein"  
"Chl\_A21\_00171" 811 "s59E25H2" 0 "hypothetical protein"  
"Chl\_A21\_00171" 811 "s59E5H2" 0 "hypothetical protein"  
"Chl\_A21\_00171" 811 "s63E6H2" 0 "hypothetical protein"  
"Chl\_A21\_00174" 814 "s59E13H2" 0 "Glutamate-1-semialdehyde 2,1-aminomutase 1"  
"Chl\_A21\_00174" 814 "s59E25H2" 0 "Glutamate-1-semialdehyde 2,1-aminomutase 1"  
"Chl\_A21\_00174" 814 "s59E5H2" 0 "Glutamate-1-semialdehyde 2,1-aminomutase 1"  
"Chl\_A21\_00174" 814 "s63E6H2" 0 "Glutamate-1-semialdehyde 2,1-aminomutase 1"  
"Chl\_A21\_00175" 815 "s59E13H2" 0 "hypothetical protein"  
"Chl\_A21\_00175" 815 "s59E25H2" 0 "hypothetical protein"  
"Chl\_A21\_00175" 815 "s59E5H2" 0 "hypothetical protein"  
"Chl\_A21\_00175" 815 "s63E6H2" 0 "hypothetical protein"  
"Chl\_A21\_00176" 816 "s59E13H2" 0 "CBS domain protein"  
"Chl\_A21\_00176" 816 "s59E25H2" 0 "CBS domain protein"  
"Chl\_A21\_00176" 816 "s59E5H2" 0 "CBS domain protein"  
"Chl\_A21\_00176" 816 "s63E6H2" 0 "CBS domain protein"  
"Chl\_A21\_00177" 817 "s59E13H2" 0 "Globin-coupled histidine kinase"  
"Chl\_A21\_00177" 817 "s59E25H2" 0 "Globin-coupled histidine kinase"  
"Chl\_A21\_00177" 817 "s59E5H2" 0 "Globin-coupled histidine kinase"

"Chl\_A21\_00177" 817 "s63E6H2" 0 "Globin-coupled histidine kinase"  
"Chl\_A21\_00178" 818 "s59E13H2" 0 "Response regulator receiver protein"  
"Chl\_A21\_00178" 818 "s59E25H2" 0 "Response regulator receiver protein"  
"Chl\_A21\_00178" 818 "s59E5H2" 0 "Response regulator receiver protein"  
"Chl\_A21\_00178" 818 "s63E6H2" 0 "Response regulator receiver protein"  
"Chl\_A21\_00179" 819 "s59E13H2" 0 "Cyclic di-GMP phosphodiesterase response regulator RpfG"  
"Chl\_A21\_00179" 819 "s59E25H2" 0 "Cyclic di-GMP phosphodiesterase response regulator RpfG"  
"Chl\_A21\_00179" 819 "s59E5H2" 0 "Cyclic di-GMP phosphodiesterase response regulator RpfG"  
"Chl\_A21\_00179" 819 "s63E6H2" 0.0001472956 "Cyclic di-GMP phosphodiesterase response regulator RpfG"  
"Chl\_A21\_00180" 820 "s59E13H2" 0 "hypothetical protein"  
"Chl\_A21\_00180" 820 "s59E25H2" 0 "hypothetical protein"  
"Chl\_A21\_00180" 820 "s59E5H2" 0 "hypothetical protein"  
"Chl\_A21\_00180" 820 "s63E6H2" 0 "hypothetical protein"  
"Chl\_A21\_00181" 821 "s59E13H2" 0 "Tyrosine-protein kinase YwqD"  
"Chl\_A21\_00181" 821 "s59E25H2" 0 "Tyrosine-protein kinase YwqD"  
"Chl\_A21\_00181" 821 "s59E5H2" 0 "Tyrosine-protein kinase YwqD"  
"Chl\_A21\_00181" 821 "s63E6H2" 0 "Tyrosine-protein kinase YwqD"  
"Chl\_A21\_00182" 822 "s59E13H2" 0 "photosystem I assembly protein Ycf3"  
"Chl\_A21\_00182" 822 "s59E25H2" 0 "photosystem I assembly protein Ycf3"  
"Chl\_A21\_00182" 822 "s59E5H2" 0 "photosystem I assembly protein Ycf3"  
"Chl\_A21\_00182" 822 "s63E6H2" 0 "photosystem I assembly protein Ycf3"  
"Chl\_A21\_00183" 823 "s59E13H2" 0 "UDP-N-acetyl-D-glucosamine 6-dehydrogenase"  
"Chl\_A21\_00183" 823 "s59E25H2" 0 "UDP-N-acetyl-D-glucosamine 6-dehydrogenase"  
"Chl\_A21\_00183" 823 "s59E5H2" 0 "UDP-N-acetyl-D-glucosamine 6-dehydrogenase"  
"Chl\_A21\_00183" 823 "s63E6H2" 0 "UDP-N-acetyl-D-glucosamine 6-dehydrogenase"  
"Chl\_A21\_00184" 824 "s59E13H2" 0 "Teichoic acid translocation permease protein TagG"  
"Chl\_A21\_00184" 824 "s59E25H2" 0 "Teichoic acid translocation permease protein TagG"  
"Chl\_A21\_00184" 824 "s59E5H2" 0 "Teichoic acid translocation permease protein TagG"  
"Chl\_A21\_00184" 824 "s63E6H2" 0 "Teichoic acid translocation permease protein TagG"  
"Chl\_A21\_00185" 825 "s59E13H2" 0 "hypothetical protein"  
"Chl\_A21\_00185" 825 "s59E25H2" 0 "hypothetical protein"  
"Chl\_A21\_00185" 825 "s59E5H2" 0 "hypothetical protein"  
"Chl\_A21\_00185" 825 "s63E6H2" 0 "hypothetical protein"  
"Chl\_A21\_00186" 826 "s59E13H2" 0 "Phenylacetate-coenzyme A ligase"  
"Chl\_A21\_00186" 826 "s59E25H2" 0 "Phenylacetate-coenzyme A ligase"  
"Chl\_A21\_00186" 826 "s59E5H2" 0 "Phenylacetate-coenzyme A ligase"  
"Chl\_A21\_00186" 826 "s63E6H2" 0 "Phenylacetate-coenzyme A ligase"  
"Chl\_A21\_00187" 827 "s59E13H2" 0 "Alpha-D-kanosaminyltransferase"  
"Chl\_A21\_00187" 827 "s59E25H2" 0 "Alpha-D-kanosaminyltransferase"  
"Chl\_A21\_00187" 827 "s59E5H2" 0 "Alpha-D-kanosaminyltransferase"  
"Chl\_A21\_00187" 827 "s63E6H2" 0 "Alpha-D-kanosaminyltransferase"  
"Chl\_A21\_00188" 828 "s59E13H2" 0 "Peptidoglycan deacetylase"  
"Chl\_A21\_00188" 828 "s59E25H2" 0 "Peptidoglycan deacetylase"  
"Chl\_A21\_00188" 828 "s59E5H2" 0 "Peptidoglycan deacetylase"  
"Chl\_A21\_00188" 828 "s63E6H2" 0 "Peptidoglycan deacetylase"  
"Chl\_A21\_00189" 829 "s59E13H2" 0 "FemAB family protein"  
"Chl\_A21\_00189" 829 "s59E25H2" 0 "FemAB family protein"

"Chl\_A21\_00189" 829 "s59E5H2" 0 "FemAB family protein"  
"Chl\_A21\_00189" 829 "s63E6H2" 0 "FemAB family protein"  
"Chl\_A21\_00190" 830 "s59E13H2" 0 "dTDP-4-amino-4,6-dideoxy-D-glucose transaminase"  
"Chl\_A21\_00190" 830 "s59E25H2" 0 "dTDP-4-amino-4,6-dideoxy-D-glucose transaminase"  
"Chl\_A21\_00190" 830 "s59E5H2" 0 "dTDP-4-amino-4,6-dideoxy-D-glucose transaminase"  
"Chl\_A21\_00190" 830 "s63E6H2" 0 "dTDP-4-amino-4,6-dideoxy-D-glucose transaminase"  
"Chl\_A21\_00191" 831 "s59E13H2" 0 "VanZ like family protein"  
"Chl\_A21\_00191" 831 "s59E25H2" 0 "VanZ like family protein"  
"Chl\_A21\_00191" 831 "s59E5H2" 0 "VanZ like family protein"  
"Chl\_A21\_00191" 831 "s63E6H2" 0 "VanZ like family protein"  
"Chl\_A21\_00192" 832 "s59E13H2" 0 "putative undecaprenyl-phosphate N-acetylglucosaminyl 1-phosphate transferase"  
"Chl\_A21\_00192" 832 "s59E25H2" 0 "putative undecaprenyl-phosphate N-acetylglucosaminyl 1-phosphate transferase"  
"Chl\_A21\_00192" 832 "s59E5H2" 0 "putative undecaprenyl-phosphate N-acetylglucosaminyl 1-phosphate transferase"  
"Chl\_A21\_00192" 832 "s63E6H2" 0 "putative undecaprenyl-phosphate N-acetylglucosaminyl 1-phosphate transferase"  
"Chl\_A21\_00193" 833 "s59E13H2" 0 "UDP-4-amino-4-deoxy-L-arabinose--oxoglutarate aminotransferase"  
"Chl\_A21\_00193" 833 "s59E25H2" 0 "UDP-4-amino-4-deoxy-L-arabinose--oxoglutarate aminotransferase"  
"Chl\_A21\_00193" 833 "s59E5H2" 0 "UDP-4-amino-4-deoxy-L-arabinose--oxoglutarate aminotransferase"  
"Chl\_A21\_00193" 833 "s63E6H2" 0 "UDP-4-amino-4-deoxy-L-arabinose--oxoglutarate aminotransferase"  
"Chl\_A21\_00194" 834 "s59E13H2" 0 "UDP-N-acetyl-alpha-D-glucosamine C6 dehydratase"  
"Chl\_A21\_00194" 834 "s59E25H2" 0 "UDP-N-acetyl-alpha-D-glucosamine C6 dehydratase"  
"Chl\_A21\_00194" 834 "s59E5H2" 0 "UDP-N-acetyl-alpha-D-glucosamine C6 dehydratase"  
"Chl\_A21\_00194" 834 "s63E6H2" 0 "UDP-N-acetyl-alpha-D-glucosamine C6 dehydratase"  
"Chl\_A21\_00195" 835 "s59E13H2" 0 "Macrolide export protein MacA"  
"Chl\_A21\_00195" 835 "s59E25H2" 0 "Macrolide export protein MacA"  
"Chl\_A21\_00195" 835 "s59E5H2" 0 "Macrolide export protein MacA"  
"Chl\_A21\_00195" 835 "s63E6H2" 0 "Macrolide export protein MacA"  
"Chl\_A21\_00196" 836 "s59E13H2" 0 "hypothetical protein"  
"Chl\_A21\_00196" 836 "s59E25H2" 0 "hypothetical protein"  
"Chl\_A21\_00196" 836 "s59E5H2" 0 "hypothetical protein"  
"Chl\_A21\_00196" 836 "s63E6H2" 0 "hypothetical protein"  
"Chl\_A21\_00198" 838 "s59E13H2" 0 "hypothetical protein"  
"Chl\_A21\_00198" 838 "s59E25H2" 0 "hypothetical protein"  
"Chl\_A21\_00198" 838 "s59E5H2" 0 "hypothetical protein"  
"Chl\_A21\_00198" 838 "s63E6H2" 0 "hypothetical protein"  
"Chl\_A21\_00199" 839 "s59E13H2" 0 "Digeranylgeranyl glycerophospholipid reductase"  
"Chl\_A21\_00199" 839 "s59E25H2" 0 "Digeranylgeranyl glycerophospholipid reductase"  
"Chl\_A21\_00199" 839 "s59E5H2" 0 "Digeranylgeranyl glycerophospholipid reductase"  
"Chl\_A21\_00199" 839 "s63E6H2" 0 "Digeranylgeranyl glycerophospholipid reductase"  
"Chl\_A21\_00200" 840 "s59E13H2" 0 "UDP-glucose 4-epimerase"  
"Chl\_A21\_00200" 840 "s59E25H2" 0 "UDP-glucose 4-epimerase"  
"Chl\_A21\_00200" 840 "s59E5H2" 0 "UDP-glucose 4-epimerase"  
"Chl\_A21\_00200" 840 "s63E6H2" 0 "UDP-glucose 4-epimerase"  
"Chl\_A21\_00201" 841 "s59E13H2" 0 "dTDP-4-dehydro-6-deoxyglucose reductase"  
"Chl\_A21\_00201" 841 "s59E25H2" 0 "dTDP-4-dehydro-6-deoxyglucose reductase"  
"Chl\_A21\_00201" 841 "s59E5H2" 0 "dTDP-4-dehydro-6-deoxyglucose reductase"  
"Chl\_A21\_00201" 841 "s63E6H2" 0 "dTDP-4-dehydro-6-deoxyglucose reductase"  
"Chl\_A21\_00202" 842 "s59E13H2" 0 "Phosphoheptose isomerase"

"Chl\_A21\_00202" 842 "s59E25H2" 0 "Phosphoheptose isomerase"  
"Chl\_A21\_00202" 842 "s59E5H2" 0 "Phosphoheptose isomerase"  
"Chl\_A21\_00202" 842 "s63E6H2" 0 "Phosphoheptose isomerase"  
"Chl\_A21\_00203" 843 "s59E13H2" 0 "Phosphoglucomutase"  
"Chl\_A21\_00203" 843 "s59E25H2" 0 "Phosphoglucomutase"  
"Chl\_A21\_00203" 843 "s59E5H2" 0 "Phosphoglucomutase"  
"Chl\_A21\_00203" 843 "s63E6H2" 0 "Phosphoglucomutase"  
"Chl\_A21\_00205" 845 "s59E13H2" 0 "GDP-mannose-dependent alpha-(1-2)-phosphatidylinositol mannosyltransferase"  
"Chl\_A21\_00205" 845 "s59E25H2" 0 "GDP-mannose-dependent alpha-(1-2)-phosphatidylinositol mannosyltransferase"  
"Chl\_A21\_00205" 845 "s59E5H2" 0 "GDP-mannose-dependent alpha-(1-2)-phosphatidylinositol mannosyltransferase"  
"Chl\_A21\_00205" 845 "s63E6H2" 0 "GDP-mannose-dependent alpha-(1-2)-phosphatidylinositol mannosyltransferase"  
"Chl\_A21\_00207" 847 "s59E13H2" 0 "Acyl-coenzyme A thioesterase Paal"  
"Chl\_A21\_00207" 847 "s59E25H2" 0 "Acyl-coenzyme A thioesterase Paal"  
"Chl\_A21\_00207" 847 "s59E5H2" 0 "Acyl-coenzyme A thioesterase Paal"  
"Chl\_A21\_00207" 847 "s63E6H2" 0 "Acyl-coenzyme A thioesterase Paal"  
"Chl\_A21\_00208" 848 "s59E13H2" 0 "Translation initiation factor IF-1"  
"Chl\_A21\_00208" 848 "s59E25H2" 0 "Translation initiation factor IF-1"  
"Chl\_A21\_00208" 848 "s59E5H2" 0 "Translation initiation factor IF-1"  
"Chl\_A21\_00208" 848 "s63E6H2" 0 "Translation initiation factor IF-1"  
"Chl\_A21\_00209" 849 "s59E13H2" 0 "RNA polymerase-binding transcription factor Card"  
"Chl\_A21\_00209" 849 "s59E25H2" 0 "RNA polymerase-binding transcription factor Card"  
"Chl\_A21\_00209" 849 "s59E5H2" 0 "RNA polymerase-binding transcription factor Card"  
"Chl\_A21\_00209" 849 "s63E6H2" 0 "RNA polymerase-binding transcription factor Card"  
"Chl\_A21\_00210" 850 "s59E13H2" 0 "Bifunctional IPC transferase and DIPP synthase"  
"Chl\_A21\_00210" 850 "s59E25H2" 0 "Bifunctional IPC transferase and DIPP synthase"  
"Chl\_A21\_00210" 850 "s59E5H2" 0 "Bifunctional IPC transferase and DIPP synthase"  
"Chl\_A21\_00210" 850 "s63E6H2" 0 "Bifunctional IPC transferase and DIPP synthase"  
"Chl\_A21\_00211" 851 "s59E13H2" 0 "putative hydrolase"  
"Chl\_A21\_00211" 851 "s59E25H2" 0 "putative hydrolase"  
"Chl\_A21\_00211" 851 "s59E5H2" 0 "putative hydrolase"  
"Chl\_A21\_00211" 851 "s63E6H2" 0 "putative hydrolase"  
"Chl\_A21\_00213" 853 "s59E13H2" 0 "RNA polymerase sigma factor SigA"  
"Chl\_A21\_00213" 853 "s59E25H2" 0 "RNA polymerase sigma factor SigA"  
"Chl\_A21\_00213" 853 "s59E5H2" 0 "RNA polymerase sigma factor SigA"  
"Chl\_A21\_00213" 853 "s63E6H2" 0 "RNA polymerase sigma factor SigA"  
"Chl\_A21\_00214" 854 "s59E13H2" 0 "DNA primase"  
"Chl\_A21\_00214" 854 "s59E25H2" 0 "DNA primase"  
"Chl\_A21\_00214" 854 "s59E5H2" 0 "DNA primase"  
"Chl\_A21\_00214" 854 "s63E6H2" 0 "DNA primase"  
"Chl\_A21\_00215" 855 "s59E13H2" 0 "hypothetical protein"  
"Chl\_A21\_00215" 855 "s59E25H2" 0 "hypothetical protein"  
"Chl\_A21\_00215" 855 "s59E5H2" 0 "hypothetical protein"  
"Chl\_A21\_00215" 855 "s63E6H2" 0 "hypothetical protein"  
"Chl\_A21\_00216" 856 "s59E13H2" 0 "Nucleotidyltransferase domain protein"  
"Chl\_A21\_00216" 856 "s59E25H2" 0 "Nucleotidyltransferase domain protein"  
"Chl\_A21\_00216" 856 "s59E5H2" 0 "Nucleotidyltransferase domain protein"  
"Chl\_A21\_00216" 856 "s63E6H2" 0 "Nucleotidyltransferase domain protein"

"Chl\_A21\_00217" 857 "s59E13H2" 0 "Ribonuclease Y"  
"Chl\_A21\_00217" 857 "s59E25H2" 0 "Ribonuclease Y"  
"Chl\_A21\_00217" 857 "s59E5H2" 0 "Ribonuclease Y"  
"Chl\_A21\_00217" 857 "s63E6H2" 0 "Ribonuclease Y"  
"Chl\_A21\_00218" 858 "s59E13H2" 0 "Regulatory protein RecX"  
"Chl\_A21\_00218" 858 "s59E25H2" 0 "Regulatory protein RecX"  
"Chl\_A21\_00218" 858 "s59E5H2" 0 "Regulatory protein RecX"  
"Chl\_A21\_00218" 858 "s63E6H2" 0 "Regulatory protein RecX"  
"Chl\_A21\_00219" 859 "s59E13H2" 0 "DNA repair and recombination protein RadA"  
"Chl\_A21\_00219" 859 "s59E25H2" 0 "DNA repair and recombination protein RadA"  
"Chl\_A21\_00219" 859 "s59E5H2" 0 "DNA repair and recombination protein RadA"  
"Chl\_A21\_00219" 859 "s63E6H2" 0 "DNA repair and recombination protein RadA"  
"Chl\_A21\_00222" 862 "s59E13H2" 0 "hypothetical protein"  
"Chl\_A21\_00222" 862 "s59E25H2" 0 "hypothetical protein"  
"Chl\_A21\_00222" 862 "s59E5H2" 0 "hypothetical protein"  
"Chl\_A21\_00222" 862 "s63E6H2" 0 "hypothetical protein"  
"Chl\_A21\_00223" 863 "s59E13H2" 0 "Dolichyl-phosphate-mannose-protein mannosyltransferase"  
"Chl\_A21\_00223" 863 "s59E25H2" 0 "Dolichyl-phosphate-mannose-protein mannosyltransferase"  
"Chl\_A21\_00223" 863 "s59E5H2" 0 "Dolichyl-phosphate-mannose-protein mannosyltransferase"  
"Chl\_A21\_00223" 863 "s63E6H2" 0 "Dolichyl-phosphate-mannose-protein mannosyltransferase"  
"Chl\_A21\_00224" 864 "s59E13H2" 0 "hypothetical protein"  
"Chl\_A21\_00224" 864 "s59E25H2" 0.1186791 "hypothetical protein"  
"Chl\_A21\_00224" 864 "s59E5H2" 0 "hypothetical protein"  
"Chl\_A21\_00224" 864 "s63E6H2" 0 "hypothetical protein"  
"Chl\_A21\_00225" 865 "s59E13H2" 0 "hypothetical protein"  
"Chl\_A21\_00225" 865 "s59E25H2" 0 "hypothetical protein"  
"Chl\_A21\_00225" 865 "s59E5H2" 0 "hypothetical protein"  
"Chl\_A21\_00225" 865 "s63E6H2" 0 "hypothetical protein"  
"Chl\_A21\_00226" 866 "s59E13H2" 0 "putative adenylyltransferase"  
"Chl\_A21\_00226" 866 "s59E25H2" 0 "putative adenylyltransferase"  
"Chl\_A21\_00226" 866 "s59E5H2" 0 "putative adenylyltransferase"  
"Chl\_A21\_00226" 866 "s63E6H2" 0 "putative adenylyltransferase"  
"Chl\_A21\_00227" 867 "s59E13H2" 0 "Putative peptidoglycan binding domain protein"  
"Chl\_A21\_00227" 867 "s59E25H2" 0 "Putative peptidoglycan binding domain protein"  
"Chl\_A21\_00227" 867 "s59E5H2" 0 "Putative peptidoglycan binding domain protein"  
"Chl\_A21\_00227" 867 "s63E6H2" 0 "Putative peptidoglycan binding domain protein"  
"Chl\_A21\_00228" 868 "s59E13H2" 0 "hypothetical protein"  
"Chl\_A21\_00228" 868 "s59E25H2" 0 "hypothetical protein"  
"Chl\_A21\_00228" 868 "s59E5H2" 0 "hypothetical protein"  
"Chl\_A21\_00228" 868 "s63E6H2" 0 "hypothetical protein"  
"Chl\_A21\_00229" 869 "s59E13H2" 0 "Methionine--tRNA ligase"  
"Chl\_A21\_00229" 869 "s59E25H2" 0 "Methionine--tRNA ligase"  
"Chl\_A21\_00229" 869 "s59E5H2" 0 "Methionine--tRNA ligase"  
"Chl\_A21\_00229" 869 "s63E6H2" 0 "Methionine--tRNA ligase"  
"Chl\_A21\_00230" 870 "s59E13H2" 0 "hypothetical protein"  
"Chl\_A21\_00230" 870 "s59E25H2" 0 "hypothetical protein"  
"Chl\_A21\_00230" 870 "s59E5H2" 0 "hypothetical protein"



"Chl\_A21\_00230" 870 "s63E6H2" 0 "hypothetical protein"  
"Chl\_A21\_00233" 873 "s59E13H2" 0 "hypothetical protein"  
"Chl\_A21\_00233" 873 "s59E25H2" 0 "hypothetical protein"  
"Chl\_A21\_00233" 873 "s59E5H2" 0 "hypothetical protein"  
"Chl\_A21\_00233" 873 "s63E6H2" 0 "hypothetical protein"  
"Chl\_A21\_00234" 874 "s59E13H2" 0 "hypothetical protein"  
"Chl\_A21\_00234" 874 "s59E25H2" 0 "hypothetical protein"  
"Chl\_A21\_00234" 874 "s59E5H2" 0 "hypothetical protein"  
"Chl\_A21\_00234" 874 "s63E6H2" 0 "hypothetical protein"  
"Chl\_A21\_00235" 875 "s59E13H2" 0 "Chagasin family peptidase inhibitor I42"  
"Chl\_A21\_00235" 875 "s59E25H2" 0 "Chagasin family peptidase inhibitor I42"  
"Chl\_A21\_00235" 875 "s59E5H2" 0 "Chagasin family peptidase inhibitor I42"  
"Chl\_A21\_00235" 875 "s63E6H2" 0 "Chagasin family peptidase inhibitor I42"  
"Chl\_A21\_00236" 876 "s59E13H2" 0 "hypothetical protein"  
"Chl\_A21\_00236" 876 "s59E25H2" 0 "hypothetical protein"  
"Chl\_A21\_00236" 876 "s59E5H2" 0 "hypothetical protein"  
"Chl\_A21\_00236" 876 "s63E6H2" 0 "hypothetical protein"  
"Chl\_A21\_00237" 877 "s59E13H2" 0 "methionine synthase"  
"Chl\_A21\_00237" 877 "s59E25H2" 0 "methionine synthase"  
"Chl\_A21\_00237" 877 "s59E5H2" 0 "methionine synthase"  
"Chl\_A21\_00237" 877 "s63E6H2" 0 "methionine synthase"  
"Chl\_A21\_00238" 878 "s59E13H2" 0 "Transcription antitermination protein RfaH"  
"Chl\_A21\_00238" 878 "s59E25H2" 0 "Transcription antitermination protein RfaH"  
"Chl\_A21\_00238" 878 "s59E5H2" 0 "Transcription antitermination protein RfaH"  
"Chl\_A21\_00238" 878 "s63E6H2" 0 "Transcription antitermination protein RfaH"  
"Chl\_A21\_00239" 879 "s59E13H2" 0 "Transcriptional regulatory protein YycF"  
"Chl\_A21\_00239" 879 "s59E25H2" 0 "Transcriptional regulatory protein YycF"  
"Chl\_A21\_00239" 879 "s59E5H2" 0 "Transcriptional regulatory protein YycF"  
"Chl\_A21\_00239" 879 "s63E6H2" 0 "Transcriptional regulatory protein YycF"  
"Chl\_A21\_00240" 880 "s59E13H2" 0 "hypothetical protein"  
"Chl\_A21\_00240" 880 "s59E25H2" 0 "hypothetical protein"  
"Chl\_A21\_00240" 880 "s59E5H2" 0 "hypothetical protein"  
"Chl\_A21\_00240" 880 "s63E6H2" 0 "hypothetical protein"  
"Chl\_A21\_00241" 881 "s59E13H2" 0 "N-acetylmuramoyl-L-alanine amidase XlyA precursor"  
"Chl\_A21\_00241" 881 "s59E25H2" 0 "N-acetylmuramoyl-L-alanine amidase XlyA precursor"  
"Chl\_A21\_00241" 881 "s59E5H2" 0 "N-acetylmuramoyl-L-alanine amidase XlyA precursor"  
"Chl\_A21\_00241" 881 "s63E6H2" 0 "N-acetylmuramoyl-L-alanine amidase XlyA precursor"  
"Chl\_A21\_00242" 882 "s59E13H2" 0 "CysO-cysteine peptidase"  
"Chl\_A21\_00242" 882 "s59E25H2" 0 "CysO-cysteine peptidase"  
"Chl\_A21\_00242" 882 "s59E5H2" 0 "CysO-cysteine peptidase"  
"Chl\_A21\_00242" 882 "s63E6H2" 0 "CysO-cysteine peptidase"  
"Chl\_A21\_00243" 883 "s59E13H2" 0 "hypothetical protein"  
"Chl\_A21\_00243" 883 "s59E25H2" 0 "hypothetical protein"  
"Chl\_A21\_00243" 883 "s59E5H2" 0 "hypothetical protein"  
"Chl\_A21\_00243" 883 "s63E6H2" 0 "hypothetical protein"  
"Chl\_A21\_00245" 885 "s59E13H2" 0 "hypothetical protein"  
"Chl\_A21\_00245" 885 "s59E25H2" 0 "hypothetical protein"

"Chl\_A21\_00245" 885 "s59E5H2" 0 "hypothetical protein"  
"Chl\_A21\_00245" 885 "s63E6H2" 0 "hypothetical protein"  
"Chl\_A21\_00246" 886 "s59E13H2" 0 "tRNA N6-adenosine threonylcarbamoyltransferase"  
"Chl\_A21\_00246" 886 "s59E25H2" 0 "tRNA N6-adenosine threonylcarbamoyltransferase"  
"Chl\_A21\_00246" 886 "s59E5H2" 0 "tRNA N6-adenosine threonylcarbamoyltransferase"  
"Chl\_A21\_00246" 886 "s63E6H2" 0 "tRNA N6-adenosine threonylcarbamoyltransferase"  
"Chl\_A21\_00247" 887 "s59E13H2" 0 "Glutaredoxin"  
"Chl\_A21\_00247" 887 "s59E25H2" 0 "Glutaredoxin"  
"Chl\_A21\_00247" 887 "s59E5H2" 0 "Glutaredoxin"  
"Chl\_A21\_00247" 887 "s63E6H2" 0 "Glutaredoxin"  
"Chl\_A21\_00248" 888 "s59E13H2" 0 "Bifunctional protein GlmU"  
"Chl\_A21\_00248" 888 "s59E25H2" 0 "Bifunctional protein GlmU"  
"Chl\_A21\_00248" 888 "s59E5H2" 0 "Bifunctional protein GlmU"  
"Chl\_A21\_00248" 888 "s63E6H2" 0 "Bifunctional protein GlmU"  
"Chl\_A21\_00249" 889 "s59E13H2" 0 "hypothetical protein"  
"Chl\_A21\_00249" 889 "s59E25H2" 0 "hypothetical protein"  
"Chl\_A21\_00249" 889 "s59E5H2" 0 "hypothetical protein"  
"Chl\_A21\_00249" 889 "s63E6H2" 0 "hypothetical protein"  
"Chl\_A21\_00250" 890 "s59E13H2" 0 "hypothetical protein"  
"Chl\_A21\_00250" 890 "s59E25H2" 0 "hypothetical protein"  
"Chl\_A21\_00250" 890 "s59E5H2" 0 "hypothetical protein"  
"Chl\_A21\_00250" 890 "s63E6H2" 0 "hypothetical protein"  
"Chl\_A21\_00251" 891 "s59E13H2" 0 "hypothetical protein"  
"Chl\_A21\_00251" 891 "s59E25H2" 0 "hypothetical protein"  
"Chl\_A21\_00251" 891 "s59E5H2" 0 "hypothetical protein"  
"Chl\_A21\_00251" 891 "s63E6H2" 0 "hypothetical protein"  
"Chl\_A21\_00252" 892 "s59E13H2" 0 "hypothetical protein"  
"Chl\_A21\_00252" 892 "s59E25H2" 0 "hypothetical protein"  
"Chl\_A21\_00252" 892 "s59E5H2" 0 "hypothetical protein"  
"Chl\_A21\_00252" 892 "s63E6H2" 0 "hypothetical protein"  
"Chl\_A21\_00253" 893 "s59E13H2" 0 "Phosphate-binding protein PstS 1 precursor"  
"Chl\_A21\_00253" 893 "s59E25H2" 0 "Phosphate-binding protein PstS 1 precursor"  
"Chl\_A21\_00253" 893 "s59E5H2" 0 "Phosphate-binding protein PstS 1 precursor"  
"Chl\_A21\_00253" 893 "s63E6H2" 0 "Phosphate-binding protein PstS 1 precursor"  
"Chl\_A21\_00254" 894 "s59E13H2" 0 "Undecaprenyl-diphosphatase"  
"Chl\_A21\_00254" 894 "s59E25H2" 0 "Undecaprenyl-diphosphatase"  
"Chl\_A21\_00254" 894 "s59E5H2" 0 "Undecaprenyl-diphosphatase"  
"Chl\_A21\_00254" 894 "s63E6H2" 0 "Undecaprenyl-diphosphatase"  
"Chl\_A21\_00255" 895 "s59E13H2" 0 "Queuine tRNA-ribosyltransferase"  
"Chl\_A21\_00255" 895 "s59E25H2" 0 "Queuine tRNA-ribosyltransferase"  
"Chl\_A21\_00255" 895 "s59E5H2" 0 "Queuine tRNA-ribosyltransferase"  
"Chl\_A21\_00255" 895 "s63E6H2" 0 "Queuine tRNA-ribosyltransferase"  
"Chl\_A21\_00256" 896 "s59E13H2" 0 "Zinc ribbon domain protein"  
"Chl\_A21\_00256" 896 "s59E25H2" 0 "Zinc ribbon domain protein"  
"Chl\_A21\_00256" 896 "s59E5H2" 0 "Zinc ribbon domain protein"  
"Chl\_A21\_00256" 896 "s63E6H2" 0 "Zinc ribbon domain protein"  
"Chl\_A21\_00257" 897 "s59E13H2" 0 "protease TldD"

"Chl\_A21\_00257" 897 "s59E25H2" 0 "protease TldD"  
"Chl\_A21\_00257" 897 "s59E5H2" 0 "protease TldD"  
"Chl\_A21\_00257" 897 "s63E6H2" 0 "protease TldD"  
"Chl\_A21\_00258" 898 "s59E13H2" 0 "hypothetical protein"  
"Chl\_A21\_00258" 898 "s59E25H2" 0 "hypothetical protein"  
"Chl\_A21\_00258" 898 "s59E5H2" 0 "hypothetical protein"  
"Chl\_A21\_00258" 898 "s63E6H2" 0 "hypothetical protein"  
"Chl\_A21\_00259" 899 "s59E13H2" 0 "peptidase PmbA"  
"Chl\_A21\_00259" 899 "s59E25H2" 0 "peptidase PmbA"  
"Chl\_A21\_00259" 899 "s59E5H2" 0 "peptidase PmbA"  
"Chl\_A21\_00259" 899 "s63E6H2" 0 "peptidase PmbA"  
"Chl\_A21\_00260" 900 "s59E13H2" 0 "Acyl-CoA thioester hydrolase YbgC"  
"Chl\_A21\_00260" 900 "s59E25H2" 0 "Acyl-CoA thioester hydrolase YbgC"  
"Chl\_A21\_00260" 900 "s59E5H2" 0 "Acyl-CoA thioester hydrolase YbgC"  
"Chl\_A21\_00260" 900 "s63E6H2" 0 "Acyl-CoA thioester hydrolase YbgC"  
"Chl\_A21\_00261" 901 "s59E13H2" 0 "Possibl zinc metallo-peptidase"  
"Chl\_A21\_00261" 901 "s59E25H2" 0 "Possibl zinc metallo-peptidase"  
"Chl\_A21\_00261" 901 "s59E5H2" 0 "Possibl zinc metallo-peptidase"  
"Chl\_A21\_00261" 901 "s63E6H2" 0 "Possibl zinc metallo-peptidase"  
"Chl\_A21\_00262" 902 "s59E13H2" 0 "hypothetical protein"  
"Chl\_A21\_00262" 902 "s59E25H2" 0 "hypothetical protein"  
"Chl\_A21\_00262" 902 "s59E5H2" 0 "hypothetical protein"  
"Chl\_A21\_00262" 902 "s63E6H2" 0 "hypothetical protein"  
"Chl\_A21\_00263" 903 "s59E13H2" 0 "Formamidopyrimidine-DNA glycosylase"  
"Chl\_A21\_00263" 903 "s59E25H2" 0 "Formamidopyrimidine-DNA glycosylase"  
"Chl\_A21\_00263" 903 "s59E5H2" 0 "Formamidopyrimidine-DNA glycosylase"  
"Chl\_A21\_00263" 903 "s63E6H2" 0 "Formamidopyrimidine-DNA glycosylase"  
"Chl\_A21\_00265" 905 "s59E13H2" 0 "Acyl-CoA thioester hydrolase YbgC"  
"Chl\_A21\_00265" 905 "s59E25H2" 0 "Acyl-CoA thioester hydrolase YbgC"  
"Chl\_A21\_00265" 905 "s59E5H2" 0 "Acyl-CoA thioester hydrolase YbgC"  
"Chl\_A21\_00265" 905 "s63E6H2" 0 "Acyl-CoA thioester hydrolase YbgC"  
"Chl\_A21\_00266" 906 "s59E13H2" 0 "Coenzyme A biosynthesis bifunctional protein CoaBC"  
"Chl\_A21\_00266" 906 "s59E25H2" 0 "Coenzyme A biosynthesis bifunctional protein CoaBC"  
"Chl\_A21\_00266" 906 "s59E5H2" 0 "Coenzyme A biosynthesis bifunctional protein CoaBC"  
"Chl\_A21\_00266" 906 "s63E6H2" 0 "Coenzyme A biosynthesis bifunctional protein CoaBC"  
"Chl\_A21\_00267" 907 "s59E13H2" 0 "Coenzyme A biosynthesis bifunctional protein CoaBC"  
"Chl\_A21\_00267" 907 "s59E25H2" 0 "Coenzyme A biosynthesis bifunctional protein CoaBC"  
"Chl\_A21\_00267" 907 "s59E5H2" 0 "Coenzyme A biosynthesis bifunctional protein CoaBC"  
"Chl\_A21\_00267" 907 "s63E6H2" 0 "Coenzyme A biosynthesis bifunctional protein CoaBC"  
"Chl\_A21\_00268" 908 "s59E13H2" 0 "Acyl-coenzyme A:6-aminopenicillanic acid acyl-transferase"  
"Chl\_A21\_00268" 908 "s59E25H2" 0 "Acyl-coenzyme A:6-aminopenicillanic acid acyl-transferase"  
"Chl\_A21\_00268" 908 "s59E5H2" 0 "Acyl-coenzyme A:6-aminopenicillanic acid acyl-transferase"  
"Chl\_A21\_00268" 908 "s63E6H2" 0 "Acyl-coenzyme A:6-aminopenicillanic acid acyl-transferase"  
"Chl\_A21\_00269" 909 "s59E13H2" 0 "Radical SAM superfamily protein"  
"Chl\_A21\_00269" 909 "s59E25H2" 0 "Radical SAM superfamily protein"  
"Chl\_A21\_00269" 909 "s59E5H2" 0 "Radical SAM superfamily protein"  
"Chl\_A21\_00269" 909 "s63E6H2" 0 "Radical SAM superfamily protein"

"Chl\_A21\_00270" 910 "s59E13H2" 0 "Trehalose synthase"  
"Chl\_A21\_00270" 910 "s59E25H2" 0 "Trehalose synthase"  
"Chl\_A21\_00270" 910 "s59E5H2" 0 "Trehalose synthase"  
"Chl\_A21\_00270" 910 "s63E6H2" 0 "Trehalose synthase"  
"Chl\_A21\_00271" 911 "s59E13H2" 0 "Pyruvate kinase"  
"Chl\_A21\_00271" 911 "s59E25H2" 0 "Pyruvate kinase"  
"Chl\_A21\_00271" 911 "s59E5H2" 0 "Pyruvate kinase"  
"Chl\_A21\_00271" 911 "s63E6H2" 0 "Pyruvate kinase"  
"Chl\_A21\_00272" 912 "s59E13H2" 0 "Glyceraldehyde-3-phosphate dehydrogenase"  
"Chl\_A21\_00272" 912 "s59E25H2" 0 "Glyceraldehyde-3-phosphate dehydrogenase"  
"Chl\_A21\_00272" 912 "s59E5H2" 0 "Glyceraldehyde-3-phosphate dehydrogenase"  
"Chl\_A21\_00272" 912 "s63E6H2" 0 "Glyceraldehyde-3-phosphate dehydrogenase"  
"Chl\_A21\_00273" 913 "s59E13H2" 0 "Phosphoglycerate kinase"  
"Chl\_A21\_00273" 913 "s59E25H2" 0 "Phosphoglycerate kinase"  
"Chl\_A21\_00273" 913 "s59E5H2" 0 "Phosphoglycerate kinase"  
"Chl\_A21\_00273" 913 "s63E6H2" 0 "Phosphoglycerate kinase"  
"Chl\_A21\_00274" 914 "s59E13H2" 0 "hypothetical protein"  
"Chl\_A21\_00274" 914 "s59E25H2" 0 "hypothetical protein"  
"Chl\_A21\_00274" 914 "s59E5H2" 0 "hypothetical protein"  
"Chl\_A21\_00274" 914 "s63E6H2" 0 "hypothetical protein"  
"Chl\_A21\_00275" 915 "s59E13H2" 0 "hypothetical protein"  
"Chl\_A21\_00275" 915 "s59E25H2" 0 "hypothetical protein"  
"Chl\_A21\_00275" 915 "s59E5H2" 0 "hypothetical protein"  
"Chl\_A21\_00275" 915 "s63E6H2" 0 "hypothetical protein"  
"Chl\_A21\_00277" 917 "s59E13H2" 0 "hypothetical protein"  
"Chl\_A21\_00277" 917 "s59E25H2" 0 "hypothetical protein"  
"Chl\_A21\_00277" 917 "s59E5H2" 0 "hypothetical protein"  
"Chl\_A21\_00277" 917 "s63E6H2" 0 "hypothetical protein"  
"Chl\_A21\_00278" 918 "s59E13H2" 0 "Glyoxylate reductase"  
"Chl\_A21\_00278" 918 "s59E25H2" 0 "Glyoxylate reductase"  
"Chl\_A21\_00278" 918 "s59E5H2" 0 "Glyoxylate reductase"  
"Chl\_A21\_00278" 918 "s63E6H2" 0 "Glyoxylate reductase"  
"Chl\_A21\_00280" 920 "s59E13H2" 0 "hypothetical protein"  
"Chl\_A21\_00280" 920 "s59E25H2" 0 "hypothetical protein"  
"Chl\_A21\_00280" 920 "s59E5H2" 0 "hypothetical protein"  
"Chl\_A21\_00280" 920 "s63E6H2" 0 "hypothetical protein"  
"Chl\_A21\_00285" 925 "s59E13H2" 0 "Ribosomal protein S12 methylthiotransferase RimO"  
"Chl\_A21\_00285" 925 "s59E25H2" 0 "Ribosomal protein S12 methylthiotransferase RimO"  
"Chl\_A21\_00285" 925 "s59E5H2" 0 "Ribosomal protein S12 methylthiotransferase RimO"  
"Chl\_A21\_00285" 925 "s63E6H2" 0 "Ribosomal protein S12 methylthiotransferase RimO"  
"Chl\_A21\_00286" 926 "s59E13H2" 0 "B12 binding domain protein"  
"Chl\_A21\_00286" 926 "s59E25H2" 0 "B12 binding domain protein"  
"Chl\_A21\_00286" 926 "s59E5H2" 0 "B12 binding domain protein"  
"Chl\_A21\_00286" 926 "s63E6H2" 0 "B12 binding domain protein"  
"Chl\_A21\_00287" 927 "s59E13H2" 0 "Endonuclease MutS2"  
"Chl\_A21\_00287" 927 "s59E25H2" 0 "Endonuclease MutS2"  
"Chl\_A21\_00287" 927 "s59E5H2" 0 "Endonuclease MutS2"

"Chl\_A21\_00287" 927 "s63E6H2" 0 "Endonuclease MutS2"  
"Chl\_A21\_00288" 928 "s59E13H2" 0 "Colicin V production protein"  
"Chl\_A21\_00288" 928 "s59E25H2" 0 "Colicin V production protein"  
"Chl\_A21\_00288" 928 "s59E5H2" 0 "Colicin V production protein"  
"Chl\_A21\_00288" 928 "s63E6H2" 0 "Colicin V production protein"  
"Chl\_A21\_00289" 929 "s59E13H2" 0 "Phenylalanine--tRNA ligase beta subunit"  
"Chl\_A21\_00289" 929 "s59E25H2" 0 "Phenylalanine--tRNA ligase beta subunit"  
"Chl\_A21\_00289" 929 "s59E5H2" 0 "Phenylalanine--tRNA ligase beta subunit"  
"Chl\_A21\_00289" 929 "s63E6H2" 0 "Phenylalanine--tRNA ligase beta subunit"  
"Chl\_A21\_00291" 931 "s59E13H2" 0 "Phenylalanine--tRNA ligase alpha subunit"  
"Chl\_A21\_00291" 931 "s59E25H2" 0 "Phenylalanine--tRNA ligase alpha subunit"  
"Chl\_A21\_00291" 931 "s59E5H2" 0 "Phenylalanine--tRNA ligase alpha subunit"  
"Chl\_A21\_00291" 931 "s63E6H2" 0 "Phenylalanine--tRNA ligase alpha subunit"  
"Chl\_A21\_00292" 932 "s59E13H2" 0 "Transposase IS200 like protein"  
"Chl\_A21\_00292" 932 "s59E25H2" 0 "Transposase IS200 like protein"  
"Chl\_A21\_00292" 932 "s59E5H2" 0 "Transposase IS200 like protein"  
"Chl\_A21\_00292" 932 "s63E6H2" 0 "Transposase IS200 like protein"  
"Chl\_A21\_00293" 933 "s59E13H2" 0 "Putative TrmH family tRNA/rRNA methyltransferase"  
"Chl\_A21\_00293" 933 "s59E25H2" 0 "Putative TrmH family tRNA/rRNA methyltransferase"  
"Chl\_A21\_00293" 933 "s59E5H2" 0 "Putative TrmH family tRNA/rRNA methyltransferase"  
"Chl\_A21\_00293" 933 "s63E6H2" 0 "Putative TrmH family tRNA/rRNA methyltransferase"  
"Chl\_A21\_00294" 934 "s59E13H2" 0 "50S ribosomal protein L20"  
"Chl\_A21\_00294" 934 "s59E25H2" 0 "50S ribosomal protein L20"  
"Chl\_A21\_00294" 934 "s59E5H2" 0 "50S ribosomal protein L20"  
"Chl\_A21\_00294" 934 "s63E6H2" 0 "50S ribosomal protein L20"  
"Chl\_A21\_00295" 935 "s59E13H2" 0 "50S ribosomal protein L35"  
"Chl\_A21\_00295" 935 "s59E25H2" 0 "50S ribosomal protein L35"  
"Chl\_A21\_00295" 935 "s59E5H2" 0 "50S ribosomal protein L35"  
"Chl\_A21\_00295" 935 "s63E6H2" 0 "50S ribosomal protein L35"  
"Chl\_A21\_00296" 936 "s59E13H2" 0 "Translation initiation factor IF-3"  
"Chl\_A21\_00296" 936 "s59E25H2" 0 "Translation initiation factor IF-3"  
"Chl\_A21\_00296" 936 "s59E5H2" 0 "Translation initiation factor IF-3"  
"Chl\_A21\_00296" 936 "s63E6H2" 0 "Translation initiation factor IF-3"  
"Chl\_A21\_00297" 937 "s59E13H2" 0 "3-methyladenine DNA glycosylase"  
"Chl\_A21\_00297" 937 "s59E25H2" 0 "3-methyladenine DNA glycosylase"  
"Chl\_A21\_00297" 937 "s59E5H2" 0 "3-methyladenine DNA glycosylase"  
"Chl\_A21\_00297" 937 "s63E6H2" 0 "3-methyladenine DNA glycosylase"  
"Chl\_A21\_00298" 938 "s59E13H2" 0 "ThiS family protein"  
"Chl\_A21\_00298" 938 "s59E25H2" 0 "ThiS family protein"  
"Chl\_A21\_00298" 938 "s59E5H2" 0 "ThiS family protein"  
"Chl\_A21\_00298" 938 "s63E6H2" 0 "ThiS family protein"  
"Chl\_A21\_00299" 939 "s59E13H2" 0 "3-hydroxybutyryl-CoA dehydrogenase"  
"Chl\_A21\_00299" 939 "s59E25H2" 0 "3-hydroxybutyryl-CoA dehydrogenase"  
"Chl\_A21\_00299" 939 "s59E5H2" 0 "3-hydroxybutyryl-CoA dehydrogenase"  
"Chl\_A21\_00299" 939 "s63E6H2" 0 "3-hydroxybutyryl-CoA dehydrogenase"  
"Chl\_A21\_00301" 941 "s59E13H2" 0 "Redox-sensing transcriptional repressor Rex"  
"Chl\_A21\_00301" 941 "s59E25H2" 0 "Redox-sensing transcriptional repressor Rex"

"Chl\_A21\_00301" 941 "s59E5H2" 0 "Redox-sensing transcriptional repressor Rex"  
"Chl\_A21\_00301" 941 "s63E6H2" 0 "Redox-sensing transcriptional repressor Rex"  
"Chl\_A21\_00302" 942 "s59E13H2" 0 "Rod shape-determining protein MreB"  
"Chl\_A21\_00302" 942 "s59E25H2" 0 "Rod shape-determining protein MreB"  
"Chl\_A21\_00302" 942 "s59E5H2" 0 "Rod shape-determining protein MreB"  
"Chl\_A21\_00302" 942 "s63E6H2" 0 "Rod shape-determining protein MreB"  
"Chl\_A21\_00303" 943 "s59E13H2" 0 "ATP synthase epsilon chain"  
"Chl\_A21\_00303" 943 "s59E25H2" 0 "ATP synthase epsilon chain"  
"Chl\_A21\_00303" 943 "s59E5H2" 0 "ATP synthase epsilon chain"  
"Chl\_A21\_00303" 943 "s63E6H2" 0 "ATP synthase epsilon chain"  
"Chl\_A21\_00304" 944 "s59E13H2" 0 "ATP synthase subunit beta"  
"Chl\_A21\_00304" 944 "s59E25H2" 0 "ATP synthase subunit beta"  
"Chl\_A21\_00304" 944 "s59E5H2" 0 "ATP synthase subunit beta"  
"Chl\_A21\_00304" 944 "s63E6H2" 0 "ATP synthase subunit beta"  
"Chl\_A21\_00306" 946 "s59E13H2" 0 "hypothetical protein"  
"Chl\_A21\_00306" 946 "s59E25H2" 0 "hypothetical protein"  
"Chl\_A21\_00306" 946 "s59E5H2" 0 "hypothetical protein"  
"Chl\_A21\_00306" 946 "s63E6H2" 0 "hypothetical protein"  
"Chl\_A21\_00308" 948 "s59E13H2" 0 "ATP synthase gamma chain"  
"Chl\_A21\_00308" 948 "s59E25H2" 0 "ATP synthase gamma chain"  
"Chl\_A21\_00308" 948 "s59E5H2" 0 "ATP synthase gamma chain"  
"Chl\_A21\_00308" 948 "s63E6H2" 0 "ATP synthase gamma chain"  
"Chl\_A21\_00309" 949 "s59E13H2" 0 "ATP synthase subunit alpha"  
"Chl\_A21\_00309" 949 "s59E25H2" 0 "ATP synthase subunit alpha"  
"Chl\_A21\_00309" 949 "s59E5H2" 0 "ATP synthase subunit alpha"  
"Chl\_A21\_00309" 949 "s63E6H2" 0 "ATP synthase subunit alpha"  
"Chl\_A21\_00310" 950 "s59E13H2" 0 "hypothetical protein"  
"Chl\_A21\_00310" 950 "s59E25H2" 0 "hypothetical protein"  
"Chl\_A21\_00310" 950 "s59E5H2" 0 "hypothetical protein"  
"Chl\_A21\_00310" 950 "s63E6H2" 0 "hypothetical protein"  
"Chl\_A21\_00312" 952 "s59E13H2" 0 "6-pyruvoyl-tetrahydropterin synthase related domain; membrane protein"  
"Chl\_A21\_00312" 952 "s59E25H2" 0 "6-pyruvoyl-tetrahydropterin synthase related domain; membrane protein"  
"Chl\_A21\_00312" 952 "s59E5H2" 0 "6-pyruvoyl-tetrahydropterin synthase related domain; membrane protein"  
"Chl\_A21\_00312" 952 "s63E6H2" 0 "6-pyruvoyl-tetrahydropterin synthase related domain; membrane protein"  
"Chl\_A21\_00313" 953 "s59E13H2" 0 "hypothetical protein"  
"Chl\_A21\_00313" 953 "s59E25H2" 0 "hypothetical protein"  
"Chl\_A21\_00313" 953 "s59E5H2" 0 "hypothetical protein"  
"Chl\_A21\_00313" 953 "s63E6H2" 0 "hypothetical protein"  
"Chl\_A21\_00315" 955 "s59E13H2" 0 "hypothetical protein"  
"Chl\_A21\_00315" 955 "s59E25H2" 0 "hypothetical protein"  
"Chl\_A21\_00315" 955 "s59E5H2" 0 "hypothetical protein"  
"Chl\_A21\_00315" 955 "s63E6H2" 0 "hypothetical protein"  
"Chl\_A21\_00316" 956 "s59E13H2" 0 "6-pyruvoyl-tetrahydropterin synthase related domain; membrane protein"  
"Chl\_A21\_00316" 956 "s59E25H2" 0 "6-pyruvoyl-tetrahydropterin synthase related domain; membrane protein"  
"Chl\_A21\_00316" 956 "s59E5H2" 0 "6-pyruvoyl-tetrahydropterin synthase related domain; membrane protein"  
"Chl\_A21\_00316" 956 "s63E6H2" 0 "6-pyruvoyl-tetrahydropterin synthase related domain; membrane protein"  
"Chl\_A21\_00318" 958 "s59E13H2" 0 "Radical SAM superfamily protein"

"Chl\_A21\_00318" 958 "s59E25H2" 0 "Radical SAM superfamily protein"  
"Chl\_A21\_00318" 958 "s59E5H2" 0 "Radical SAM superfamily protein"  
"Chl\_A21\_00318" 958 "s63E6H2" 0 "Radical SAM superfamily protein"  
"Chl\_A21\_00319" 959 "s59E13H2" 0 "Radical SAM superfamily protein"  
"Chl\_A21\_00319" 959 "s59E25H2" 0 "Radical SAM superfamily protein"  
"Chl\_A21\_00319" 959 "s59E5H2" 0 "Radical SAM superfamily protein"  
"Chl\_A21\_00319" 959 "s63E6H2" 0 "Radical SAM superfamily protein"  
"Chl\_A21\_00321" 961 "s59E13H2" 0 "hypothetical protein"  
"Chl\_A21\_00321" 961 "s59E25H2" 0 "hypothetical protein"  
"Chl\_A21\_00321" 961 "s59E5H2" 0 "hypothetical protein"  
"Chl\_A21\_00321" 961 "s63E6H2" 0 "hypothetical protein"  
"Chl\_A21\_00323" 963 "s59E13H2" 0 "SNARE associated Golgi protein"  
"Chl\_A21\_00323" 963 "s59E25H2" 0 "SNARE associated Golgi protein"  
"Chl\_A21\_00323" 963 "s59E5H2" 0 "SNARE associated Golgi protein"  
"Chl\_A21\_00323" 963 "s63E6H2" 0 "SNARE associated Golgi protein"  
"Chl\_A21\_00324" 964 "s59E13H2" 0 "putative peptidyl-prolyl cis-trans isomerase"  
"Chl\_A21\_00324" 964 "s59E25H2" 0 "putative peptidyl-prolyl cis-trans isomerase"  
"Chl\_A21\_00324" 964 "s59E5H2" 0 "putative peptidyl-prolyl cis-trans isomerase"  
"Chl\_A21\_00324" 964 "s63E6H2" 0 "putative peptidyl-prolyl cis-trans isomerase"  
"Chl\_A21\_00325" 965 "s59E13H2" 0 "UDP-glucose 4-epimerase"  
"Chl\_A21\_00325" 965 "s59E25H2" 0 "UDP-glucose 4-epimerase"  
"Chl\_A21\_00325" 965 "s59E5H2" 0 "UDP-glucose 4-epimerase"  
"Chl\_A21\_00325" 965 "s63E6H2" 0 "UDP-glucose 4-epimerase"  
"Chl\_A21\_00326" 966 "s59E13H2" 0 "Uridine kinase"  
"Chl\_A21\_00326" 966 "s59E25H2" 0 "Uridine kinase"  
"Chl\_A21\_00326" 966 "s59E5H2" 0 "Uridine kinase"  
"Chl\_A21\_00326" 966 "s63E6H2" 0 "Uridine kinase"  
"Chl\_A21\_00327" 967 "s59E13H2" 0 "GTP pyrophosphokinase"  
"Chl\_A21\_00327" 967 "s59E25H2" 0 "GTP pyrophosphokinase"  
"Chl\_A21\_00327" 967 "s59E5H2" 0 "GTP pyrophosphokinase"  
"Chl\_A21\_00327" 967 "s63E6H2" 0 "GTP pyrophosphokinase"  
"Chl\_A21\_00328" 968 "s59E13H2" 0 "Foldase protein PrsA precursor"  
"Chl\_A21\_00328" 968 "s59E25H2" 0 "Foldase protein PrsA precursor"  
"Chl\_A21\_00328" 968 "s59E5H2" 0 "Foldase protein PrsA precursor"  
"Chl\_A21\_00328" 968 "s63E6H2" 0 "Foldase protein PrsA precursor"  
"Chl\_A21\_00329" 969 "s59E13H2" 0 "30S ribosomal protein S18"  
"Chl\_A21\_00329" 969 "s59E25H2" 0 "30S ribosomal protein S18"  
"Chl\_A21\_00329" 969 "s59E5H2" 0 "30S ribosomal protein S18"  
"Chl\_A21\_00329" 969 "s63E6H2" 0 "30S ribosomal protein S18"  
"Chl\_A21\_00330" 970 "s59E13H2" 0 "Single-stranded DNA-binding protein"  
"Chl\_A21\_00330" 970 "s59E25H2" 0 "Single-stranded DNA-binding protein"  
"Chl\_A21\_00330" 970 "s59E5H2" 0 "Single-stranded DNA-binding protein"  
"Chl\_A21\_00330" 970 "s63E6H2" 0 "Single-stranded DNA-binding protein"  
"Chl\_A21\_00331" 971 "s59E13H2" 0 "30S ribosomal protein S6"  
"Chl\_A21\_00331" 971 "s59E25H2" 0 "30S ribosomal protein S6"  
"Chl\_A21\_00331" 971 "s59E5H2" 0 "30S ribosomal protein S6"  
"Chl\_A21\_00331" 971 "s63E6H2" 0 "30S ribosomal protein S6"

"Chl\_A21\_00332" 972 "s59E13H2" 0 "Ribosome-binding ATPase YchF"  
"Chl\_A21\_00332" 972 "s59E25H2" 0 "Ribosome-binding ATPase YchF"  
"Chl\_A21\_00332" 972 "s59E5H2" 0 "Ribosome-binding ATPase YchF"  
"Chl\_A21\_00332" 972 "s63E6H2" 0 "Ribosome-binding ATPase YchF"  
"Chl\_A21\_00333" 973 "s59E13H2" 0 "tRNA uridine 5-carboxymethylaminomethyl modification enzyme MnmG"  
"Chl\_A21\_00333" 973 "s59E25H2" 0 "tRNA uridine 5-carboxymethylaminomethyl modification enzyme MnmG"  
"Chl\_A21\_00333" 973 "s59E5H2" 0 "tRNA uridine 5-carboxymethylaminomethyl modification enzyme MnmG"  
"Chl\_A21\_00333" 973 "s63E6H2" 0 "tRNA uridine 5-carboxymethylaminomethyl modification enzyme MnmG"  
"Chl\_A21\_00334" 974 "s59E13H2" 0 "hypothetical protein"  
"Chl\_A21\_00334" 974 "s59E25H2" 0 "hypothetical protein"  
"Chl\_A21\_00334" 974 "s59E5H2" 0 "hypothetical protein"  
"Chl\_A21\_00334" 974 "s63E6H2" 0 "hypothetical protein"  
"Chl\_A21\_00335" 975 "s59E13H2" 0 "hypothetical protein"  
"Chl\_A21\_00335" 975 "s59E25H2" 0 "hypothetical protein"  
"Chl\_A21\_00335" 975 "s59E5H2" 0 "hypothetical protein"  
"Chl\_A21\_00335" 975 "s63E6H2" 0 "hypothetical protein"  
"Chl\_A21\_00336" 976 "s59E13H2" 0 "Dolichyl-phosphate-mannose-protein mannosyltransferase"  
"Chl\_A21\_00336" 976 "s59E25H2" 0 "Dolichyl-phosphate-mannose-protein mannosyltransferase"  
"Chl\_A21\_00336" 976 "s59E5H2" 0 "Dolichyl-phosphate-mannose-protein mannosyltransferase"  
"Chl\_A21\_00336" 976 "s63E6H2" 0 "Dolichyl-phosphate-mannose-protein mannosyltransferase"  
"Chl\_A21\_00337" 977 "s59E13H2" 0 "CDP-paratose 2-epimerase"  
"Chl\_A21\_00337" 977 "s59E25H2" 0 "CDP-paratose 2-epimerase"  
"Chl\_A21\_00337" 977 "s59E5H2" 0 "CDP-paratose 2-epimerase"  
"Chl\_A21\_00337" 977 "s63E6H2" 0 "CDP-paratose 2-epimerase"  
"Chl\_A21\_00338" 978 "s59E13H2" 0 "Phosphoadenosine phosphosulfate reductase"  
"Chl\_A21\_00338" 978 "s59E25H2" 0 "Phosphoadenosine phosphosulfate reductase"  
"Chl\_A21\_00338" 978 "s59E5H2" 0 "Phosphoadenosine phosphosulfate reductase"  
"Chl\_A21\_00338" 978 "s63E6H2" 0 "Phosphoadenosine phosphosulfate reductase"  
"Chl\_A21\_00339" 979 "s59E13H2" 0 "Bifunctional protein PaaZ"  
"Chl\_A21\_00339" 979 "s59E25H2" 0 "Bifunctional protein PaaZ"  
"Chl\_A21\_00339" 979 "s59E5H2" 0 "Bifunctional protein PaaZ"  
"Chl\_A21\_00339" 979 "s63E6H2" 0 "Bifunctional protein PaaZ"  
"Chl\_A21\_00340" 980 "s59E13H2" 0 "Spermidine synthase"  
"Chl\_A21\_00340" 980 "s59E25H2" 0 "Spermidine synthase"  
"Chl\_A21\_00340" 980 "s59E5H2" 0 "Spermidine synthase"  
"Chl\_A21\_00340" 980 "s63E6H2" 0 "Spermidine synthase"  
"Chl\_A21\_00341" 981 "s59E13H2" 0 "Protein-L-isoaspartate O-methyltransferase"  
"Chl\_A21\_00341" 981 "s59E25H2" 0 "Protein-L-isoaspartate O-methyltransferase"  
"Chl\_A21\_00341" 981 "s59E5H2" 0 "Protein-L-isoaspartate O-methyltransferase"  
"Chl\_A21\_00341" 981 "s63E6H2" 0 "Protein-L-isoaspartate O-methyltransferase"  
"Chl\_A21\_00342" 982 "s59E13H2" 0 "putative L-threonine 3-dehydrogenase"  
"Chl\_A21\_00342" 982 "s59E25H2" 0 "putative L-threonine 3-dehydrogenase"  
"Chl\_A21\_00342" 982 "s59E5H2" 0 "putative L-threonine 3-dehydrogenase"  
"Chl\_A21\_00342" 982 "s63E6H2" 0 "putative L-threonine 3-dehydrogenase"  
"Chl\_A21\_00343" 983 "s59E13H2" 0 "Putative pyridoxal phosphate-dependent acyltransferase"  
"Chl\_A21\_00343" 983 "s59E25H2" 0 "Putative pyridoxal phosphate-dependent acyltransferase"  
"Chl\_A21\_00343" 983 "s59E5H2" 0 "Putative pyridoxal phosphate-dependent acyltransferase"



"Chl\_A21\_00343" 983 "s63E6H2" 0 "Putative pyridoxal phosphate-dependent acyltransferase"  
"Chl\_A21\_00344" 984 "s59E13H2" 0 "hypothetical protein"  
"Chl\_A21\_00344" 984 "s59E25H2" 0 "hypothetical protein"  
"Chl\_A21\_00344" 984 "s59E5H2" 0 "hypothetical protein"  
"Chl\_A21\_00344" 984 "s63E6H2" 0 "hypothetical protein"  
"Chl\_A21\_00345" 985 "s59E13H2" 0 "Peptidoglycan endopeptidase LytF precursor"  
"Chl\_A21\_00345" 985 "s59E25H2" 0 "Peptidoglycan endopeptidase LytF precursor"  
"Chl\_A21\_00345" 985 "s59E5H2" 0 "Peptidoglycan endopeptidase LytF precursor"  
"Chl\_A21\_00345" 985 "s63E6H2" 0 "Peptidoglycan endopeptidase LytF precursor"  
"Chl\_A21\_00346" 986 "s59E13H2" 0 "Transaldolase"  
"Chl\_A21\_00346" 986 "s59E25H2" 0 "Transaldolase"  
"Chl\_A21\_00346" 986 "s59E5H2" 0 "Transaldolase"  
"Chl\_A21\_00346" 986 "s63E6H2" 0 "Transaldolase"  
"Chl\_A21\_00347" 987 "s59E13H2" 0 "hypothetical protein"  
"Chl\_A21\_00347" 987 "s59E25H2" 0 "hypothetical protein"  
"Chl\_A21\_00347" 987 "s59E5H2" 0 "hypothetical protein"  
"Chl\_A21\_00347" 987 "s63E6H2" 0 "hypothetical protein"  
"Chl\_A21\_00351" 991 "s59E13H2" 0 "Cell division protein FtsL"  
"Chl\_A21\_00351" 991 "s59E25H2" 0 "Cell division protein FtsL"  
"Chl\_A21\_00351" 991 "s59E5H2" 0 "Cell division protein FtsL"  
"Chl\_A21\_00351" 991 "s63E6H2" 0 "Cell division protein FtsL"  
"Chl\_A21\_00354" 994 "s59E13H2" 0 "RNA recognition motif. (a.k.a. RRM, RBD, or RNP domain)"  
"Chl\_A21\_00354" 994 "s59E25H2" 0 "RNA recognition motif. (a.k.a. RRM, RBD, or RNP domain)"  
"Chl\_A21\_00354" 994 "s59E5H2" 0 "RNA recognition motif. (a.k.a. RRM, RBD, or RNP domain)"  
"Chl\_A21\_00354" 994 "s63E6H2" 0 "RNA recognition motif. (a.k.a. RRM, RBD, or RNP domain)"  
"Chl\_A21\_00355" 995 "s59E13H2" 0 "hypothetical protein"  
"Chl\_A21\_00355" 995 "s59E25H2" 0 "hypothetical protein"  
"Chl\_A21\_00355" 995 "s59E5H2" 0 "hypothetical protein"  
"Chl\_A21\_00355" 995 "s63E6H2" 0 "hypothetical protein"  
"Chl\_A21\_00357" 997 "s59E13H2" 0 "hypothetical protein"  
"Chl\_A21\_00357" 997 "s59E25H2" 0 "hypothetical protein"  
"Chl\_A21\_00357" 997 "s59E5H2" 0 "hypothetical protein"  
"Chl\_A21\_00357" 997 "s63E6H2" 0 "hypothetical protein"  
"Chl\_A21\_00358" 998 "s59E13H2" 0 "GDP-mannose-dependent alpha-(1-2)-phosphatidylinositol mannosyltransferase"  
"Chl\_A21\_00358" 998 "s59E25H2" 0 "GDP-mannose-dependent alpha-(1-2)-phosphatidylinositol mannosyltransferase"  
"Chl\_A21\_00358" 998 "s59E5H2" 0 "GDP-mannose-dependent alpha-(1-2)-phosphatidylinositol mannosyltransferase"  
"Chl\_A21\_00358" 998 "s63E6H2" 0 "GDP-mannose-dependent alpha-(1-2)-phosphatidylinositol mannosyltransferase"  
"Chl\_A21\_00359" 999 "s59E13H2" 0 "Sugar-binding cellulase-like protein"  
"Chl\_A21\_00359" 999 "s59E25H2" 0 "Sugar-binding cellulase-like protein"  
"Chl\_A21\_00359" 999 "s59E5H2" 0 "Sugar-binding cellulase-like protein"  
"Chl\_A21\_00359" 999 "s63E6H2" 0 "Sugar-binding cellulase-like protein"  
"Chl\_A21\_00360" 1000 "s59E13H2" 0 "Glycogen synthase"  
"Chl\_A21\_00360" 1000 "s59E25H2" 0 "Glycogen synthase"  
"Chl\_A21\_00360" 1000 "s59E5H2" 0 "Glycogen synthase"  
"Chl\_A21\_00360" 1000 "s63E6H2" 0 "Glycogen synthase"  
"Chl\_A21\_00361" 1001 "s59E13H2" 0 "Beta-1,4-mannooligosaccharide phosphorylase"  
"Chl\_A21\_00361" 1001 "s59E25H2" 0 "Beta-1,4-mannooligosaccharide phosphorylase"

"Chl\_A21\_00361" 1001 "s59E5H2" 0 "Beta-1,4-mannooligosaccharide phosphorylase"  
"Chl\_A21\_00361" 1001 "s63E6H2" 0 "Beta-1,4-mannooligosaccharide phosphorylase"  
"Chl\_A21\_00362" 1002 "s59E13H2" 0 "Copper-sensing transcriptional repressor CsoR"  
"Chl\_A21\_00362" 1002 "s59E25H2" 0 "Copper-sensing transcriptional repressor CsoR"  
"Chl\_A21\_00362" 1002 "s59E5H2" 0 "Copper-sensing transcriptional repressor CsoR"  
"Chl\_A21\_00362" 1002 "s63E6H2" 0 "Copper-sensing transcriptional repressor CsoR"  
"Chl\_A21\_00363" 1003 "s59E13H2" 0 "Copper-exporting P-type ATPase A"  
"Chl\_A21\_00363" 1003 "s59E25H2" 0 "Copper-exporting P-type ATPase A"  
"Chl\_A21\_00363" 1003 "s59E5H2" 0 "Copper-exporting P-type ATPase A"  
"Chl\_A21\_00363" 1003 "s63E6H2" 0 "Copper-exporting P-type ATPase A"  
"Chl\_A21\_00364" 1004 "s59E13H2" 0 "hypothetical protein"  
"Chl\_A21\_00364" 1004 "s59E25H2" 0 "hypothetical protein"  
"Chl\_A21\_00364" 1004 "s59E5H2" 0 "hypothetical protein"  
"Chl\_A21\_00364" 1004 "s63E6H2" 0 "hypothetical protein"  
"Chl\_A21\_00365" 1005 "s59E13H2" 0 "hypothetical protein"  
"Chl\_A21\_00365" 1005 "s59E25H2" 0 "hypothetical protein"  
"Chl\_A21\_00365" 1005 "s59E5H2" 0 "hypothetical protein"  
"Chl\_A21\_00365" 1005 "s63E6H2" 0 "hypothetical protein"  
"Chl\_A21\_00366" 1006 "s59E13H2" 0 "CCA-adding enzyme"  
"Chl\_A21\_00366" 1006 "s59E25H2" 0 "CCA-adding enzyme"  
"Chl\_A21\_00366" 1006 "s59E5H2" 0 "CCA-adding enzyme"  
"Chl\_A21\_00366" 1006 "s63E6H2" 0 "CCA-adding enzyme"  
"Chl\_A21\_00367" 1007 "s59E13H2" 0 "2-oxoglutarate synthase subunit KorA"  
"Chl\_A21\_00367" 1007 "s59E25H2" 0 "2-oxoglutarate synthase subunit KorA"  
"Chl\_A21\_00367" 1007 "s59E5H2" 0 "2-oxoglutarate synthase subunit KorA"  
"Chl\_A21\_00367" 1007 "s63E6H2" 0 "2-oxoglutarate synthase subunit KorA"  
"Chl\_A21\_00368" 1008 "s59E13H2" 0 "lipoprotein Nlpl"  
"Chl\_A21\_00368" 1008 "s59E25H2" 0 "lipoprotein Nlpl"  
"Chl\_A21\_00368" 1008 "s59E5H2" 0 "lipoprotein Nlpl"  
"Chl\_A21\_00368" 1008 "s63E6H2" 0 "lipoprotein Nlpl"  
"Chl\_A21\_00370" 1010 "s59E13H2" 0 "hypothetical protein"  
"Chl\_A21\_00370" 1010 "s59E25H2" 0 "hypothetical protein"  
"Chl\_A21\_00370" 1010 "s59E5H2" 0 "hypothetical protein"  
"Chl\_A21\_00370" 1010 "s63E6H2" 0 "hypothetical protein"  
"Chl\_A21\_00371" 1011 "s59E13H2" 0 "Divalent-cation tolerance protein CutA"  
"Chl\_A21\_00371" 1011 "s59E25H2" 0 "Divalent-cation tolerance protein CutA"  
"Chl\_A21\_00371" 1011 "s59E5H2" 0 "Divalent-cation tolerance protein CutA"  
"Chl\_A21\_00371" 1011 "s63E6H2" 0 "Divalent-cation tolerance protein CutA"  
"Chl\_A21\_00372" 1012 "s59E13H2" 0 "Trimethylamine corrinoid protein"  
"Chl\_A21\_00372" 1012 "s59E25H2" 0 "Trimethylamine corrinoid protein"  
"Chl\_A21\_00372" 1012 "s59E5H2" 0 "Trimethylamine corrinoid protein"  
"Chl\_A21\_00372" 1012 "s63E6H2" 0 "Trimethylamine corrinoid protein"  
"Chl\_A21\_00373" 1013 "s59E13H2" 0 "Serine/threonine-protein kinase pkn1"  
"Chl\_A21\_00373" 1013 "s59E25H2" 0 "Serine/threonine-protein kinase pkn1"  
"Chl\_A21\_00373" 1013 "s59E5H2" 0 "Serine/threonine-protein kinase pkn1"  
"Chl\_A21\_00373" 1013 "s63E6H2" 0 "Serine/threonine-protein kinase pkn1"  
"Chl\_A21\_00374" 1014 "s59E13H2" 0 "Multiple sugar-binding protein precursor"

"Chl\_A21\_00374" 1014 "s59E25H2" 0 "Multiple sugar-binding protein precursor"  
"Chl\_A21\_00374" 1014 "s59E5H2" 0 "Multiple sugar-binding protein precursor"  
"Chl\_A21\_00374" 1014 "s63E6H2" 0 "Multiple sugar-binding protein precursor"  
"Chl\_A21\_00375" 1015 "s59E13H2" 0 "Lactose transport system permease protein LacF"  
"Chl\_A21\_00375" 1015 "s59E25H2" 0 "Lactose transport system permease protein LacF"  
"Chl\_A21\_00375" 1015 "s59E5H2" 0 "Lactose transport system permease protein LacF"  
"Chl\_A21\_00375" 1015 "s63E6H2" 0 "Lactose transport system permease protein LacF"  
"Chl\_A21\_00376" 1016 "s59E13H2" 0 "L-arabinose transport system permease protein AraQ"  
"Chl\_A21\_00376" 1016 "s59E25H2" 0 "L-arabinose transport system permease protein AraQ"  
"Chl\_A21\_00376" 1016 "s59E5H2" 0 "L-arabinose transport system permease protein AraQ"  
"Chl\_A21\_00376" 1016 "s63E6H2" 0 "L-arabinose transport system permease protein AraQ"  
"Chl\_A21\_00377" 1017 "s59E13H2" 0 "DNA adenine methyltransferase YhdJ"  
"Chl\_A21\_00377" 1017 "s59E25H2" 0 "DNA adenine methyltransferase YhdJ"  
"Chl\_A21\_00377" 1017 "s59E5H2" 0 "DNA adenine methyltransferase YhdJ"  
"Chl\_A21\_00377" 1017 "s63E6H2" 0 "DNA adenine methyltransferase YhdJ"  
"Chl\_A21\_00378" 1018 "s59E13H2" 0 "Type III restriction enzyme, res subunit"  
"Chl\_A21\_00378" 1018 "s59E25H2" 0 "Type III restriction enzyme, res subunit"  
"Chl\_A21\_00378" 1018 "s59E5H2" 0 "Type III restriction enzyme, res subunit"  
"Chl\_A21\_00378" 1018 "s63E6H2" 0 "Type III restriction enzyme, res subunit"  
"Chl\_A21\_00379" 1019 "s59E13H2" 0 "ThiS family protein"  
"Chl\_A21\_00379" 1019 "s59E25H2" 0 "ThiS family protein"  
"Chl\_A21\_00379" 1019 "s59E5H2" 0 "ThiS family protein"  
"Chl\_A21\_00379" 1019 "s63E6H2" 0 "ThiS family protein"  
"Chl\_A21\_00380" 1020 "s59E13H2" 0 "sn-glycerol-3-phosphate dehydrogenase subunit C"  
"Chl\_A21\_00380" 1020 "s59E25H2" 0 "sn-glycerol-3-phosphate dehydrogenase subunit C"  
"Chl\_A21\_00380" 1020 "s59E5H2" 0 "sn-glycerol-3-phosphate dehydrogenase subunit C"  
"Chl\_A21\_00380" 1020 "s63E6H2" 0 "sn-glycerol-3-phosphate dehydrogenase subunit C"  
"Chl\_A21\_00381" 1021 "s59E13H2" 0 "Sulfhydrogenase 1 subunit gamma"  
"Chl\_A21\_00381" 1021 "s59E25H2" 0 "Sulfhydrogenase 1 subunit gamma"  
"Chl\_A21\_00381" 1021 "s59E5H2" 0 "Sulfhydrogenase 1 subunit gamma"  
"Chl\_A21\_00381" 1021 "s63E6H2" 0 "Sulfhydrogenase 1 subunit gamma"  
"Chl\_A21\_00382" 1022 "s59E13H2" 0 "Sulfhydrogenase 2 subunit beta"  
"Chl\_A21\_00382" 1022 "s59E25H2" 0 "Sulfhydrogenase 2 subunit beta"  
"Chl\_A21\_00382" 1022 "s59E5H2" 0 "Sulfhydrogenase 2 subunit beta"  
"Chl\_A21\_00382" 1022 "s63E6H2" 0 "Sulfhydrogenase 2 subunit beta"  
"Chl\_A21\_00383" 1023 "s59E13H2" 0 "Formate dehydrogenase subunit beta"  
"Chl\_A21\_00383" 1023 "s59E25H2" 0 "Formate dehydrogenase subunit beta"  
"Chl\_A21\_00383" 1023 "s59E5H2" 0 "Formate dehydrogenase subunit beta"  
"Chl\_A21\_00383" 1023 "s63E6H2" 0 "Formate dehydrogenase subunit beta"  
"Chl\_A21\_00384" 1024 "s59E13H2" 0 "F420-non-reducing hydrogenase vhc iron-sulfur subunit D"  
"Chl\_A21\_00384" 1024 "s59E25H2" 0 "F420-non-reducing hydrogenase vhc iron-sulfur subunit D"  
"Chl\_A21\_00384" 1024 "s59E5H2" 0 "F420-non-reducing hydrogenase vhc iron-sulfur subunit D"  
"Chl\_A21\_00384" 1024 "s63E6H2" 0 "F420-non-reducing hydrogenase vhc iron-sulfur subunit D"  
"Chl\_A21\_00385" 1025 "s59E13H2" 0 "Heterodisulfide reductase subunit A-like protein"  
"Chl\_A21\_00385" 1025 "s59E25H2" 0 "Heterodisulfide reductase subunit A-like protein"  
"Chl\_A21\_00385" 1025 "s59E5H2" 0 "Heterodisulfide reductase subunit A-like protein"  
"Chl\_A21\_00385" 1025 "s63E6H2" 0 "Heterodisulfide reductase subunit A-like protein"

"Chl\_A21\_00386" 1026 "s59E13H2" 0 "CoB--CoM heterodisulfide reductase iron-sulfur subunit A"  
"Chl\_A21\_00386" 1026 "s59E25H2" 0 "CoB--CoM heterodisulfide reductase iron-sulfur subunit A"  
"Chl\_A21\_00386" 1026 "s59E5H2" 0 "CoB--CoM heterodisulfide reductase iron-sulfur subunit A"  
"Chl\_A21\_00386" 1026 "s63E6H2" 0 "CoB--CoM heterodisulfide reductase iron-sulfur subunit A"  
"Chl\_A21\_00387" 1027 "s59E13H2" 0 "hypothetical protein"  
"Chl\_A21\_00387" 1027 "s59E25H2" 0 "hypothetical protein"  
"Chl\_A21\_00387" 1027 "s59E5H2" 0 "hypothetical protein"  
"Chl\_A21\_00387" 1027 "s63E6H2" 0 "hypothetical protein"  
"Chl\_A21\_00388" 1028 "s59E13H2" 0 "Electron transport protein HydN"  
"Chl\_A21\_00388" 1028 "s59E25H2" 0 "Electron transport protein HydN"  
"Chl\_A21\_00388" 1028 "s59E5H2" 0 "Electron transport protein HydN"  
"Chl\_A21\_00388" 1028 "s63E6H2" 0 "Electron transport protein HydN"  
"Chl\_A21\_00389" 1029 "s59E13H2" 0 "Tungsten-containing aldehyde ferredoxin oxidoreductase"  
"Chl\_A21\_00389" 1029 "s59E25H2" 0 "Tungsten-containing aldehyde ferredoxin oxidoreductase"  
"Chl\_A21\_00389" 1029 "s59E5H2" 0 "Tungsten-containing aldehyde ferredoxin oxidoreductase"  
"Chl\_A21\_00389" 1029 "s63E6H2" 0 "Tungsten-containing aldehyde ferredoxin oxidoreductase"  
"Chl\_A21\_00391" 1031 "s59E13H2" 0 "Acetyl-CoA acetyltransferase"  
"Chl\_A21\_00391" 1031 "s59E25H2" 0 "Acetyl-CoA acetyltransferase"  
"Chl\_A21\_00391" 1031 "s59E5H2" 0 "Acetyl-CoA acetyltransferase"  
"Chl\_A21\_00391" 1031 "s63E6H2" 0 "Acetyl-CoA acetyltransferase"  
"Chl\_A21\_00392" 1032 "s59E13H2" 0 "R-phenyllactate dehydratase activator"  
"Chl\_A21\_00392" 1032 "s59E25H2" 0 "R-phenyllactate dehydratase activator"  
"Chl\_A21\_00392" 1032 "s59E5H2" 0 "R-phenyllactate dehydratase activator"  
"Chl\_A21\_00392" 1032 "s63E6H2" 0 "R-phenyllactate dehydratase activator"  
"Chl\_A21\_00393" 1033 "s59E13H2" 0 "R-phenyllactate dehydratase subunit alpha precursor"  
"Chl\_A21\_00393" 1033 "s59E25H2" 0 "R-phenyllactate dehydratase subunit alpha precursor"  
"Chl\_A21\_00393" 1033 "s59E5H2" 0 "R-phenyllactate dehydratase subunit alpha precursor"  
"Chl\_A21\_00393" 1033 "s63E6H2" 0 "R-phenyllactate dehydratase subunit alpha precursor"  
"Chl\_A21\_00394" 1034 "s59E13H2" 0 "CoB--CoM heterodisulfide reductase iron-sulfur subunit D"  
"Chl\_A21\_00394" 1034 "s59E25H2" 0 "CoB--CoM heterodisulfide reductase iron-sulfur subunit D"  
"Chl\_A21\_00394" 1034 "s59E5H2" 0 "CoB--CoM heterodisulfide reductase iron-sulfur subunit D"  
"Chl\_A21\_00394" 1034 "s63E6H2" 0 "CoB--CoM heterodisulfide reductase iron-sulfur subunit D"  
"Chl\_A21\_00395" 1035 "s59E13H2" 0 "Long-chain-fatty-acid--CoA ligase"  
"Chl\_A21\_00395" 1035 "s59E25H2" 0 "Long-chain-fatty-acid--CoA ligase"  
"Chl\_A21\_00395" 1035 "s59E5H2" 0 "Long-chain-fatty-acid--CoA ligase"  
"Chl\_A21\_00395" 1035 "s63E6H2" 0 "Long-chain-fatty-acid--CoA ligase"  
"Chl\_A21\_00396" 1036 "s59E13H2" 0 "3-hydroxypropionyl-coenzyme A dehydratase"  
"Chl\_A21\_00396" 1036 "s59E25H2" 0 "3-hydroxypropionyl-coenzyme A dehydratase"  
"Chl\_A21\_00396" 1036 "s59E5H2" 0 "3-hydroxypropionyl-coenzyme A dehydratase"  
"Chl\_A21\_00396" 1036 "s63E6H2" 0 "3-hydroxypropionyl-coenzyme A dehydratase"  
"Chl\_A21\_00397" 1037 "s59E13H2" 0 "3-hydroxybutyryl-CoA dehydrogenase"  
"Chl\_A21\_00397" 1037 "s59E25H2" 0 "3-hydroxybutyryl-CoA dehydrogenase"  
"Chl\_A21\_00397" 1037 "s59E5H2" 0 "3-hydroxybutyryl-CoA dehydrogenase"  
"Chl\_A21\_00397" 1037 "s63E6H2" 0 "3-hydroxybutyryl-CoA dehydrogenase"  
"Chl\_A21\_00398" 1038 "s59E13H2" 0 "1,4-Dihydroxy-2-naphthoyl-CoA synthase"  
"Chl\_A21\_00398" 1038 "s59E25H2" 0 "1,4-Dihydroxy-2-naphthoyl-CoA synthase"  
"Chl\_A21\_00398" 1038 "s59E5H2" 0 "1,4-Dihydroxy-2-naphthoyl-CoA synthase"

"Chl\_A21\_00398" 1038 "s63E6H2" 0 "1,4-Dihydroxy-2-naphthoyl-CoA synthase"  
"Chl\_A21\_00399" 1039 "s59E13H2" 0 "Galactitol-1-phosphate 5-dehydrogenase"  
"Chl\_A21\_00399" 1039 "s59E25H2" 0 "Galactitol-1-phosphate 5-dehydrogenase"  
"Chl\_A21\_00399" 1039 "s59E5H2" 0 "Galactitol-1-phosphate 5-dehydrogenase"  
"Chl\_A21\_00399" 1039 "s63E6H2" 0 "Galactitol-1-phosphate 5-dehydrogenase"  
"Chl\_A21\_00400" 1040 "s59E13H2" 0 "hypothetical protein"  
"Chl\_A21\_00400" 1040 "s59E25H2" 0 "hypothetical protein"  
"Chl\_A21\_00400" 1040 "s59E5H2" 0 "hypothetical protein"  
"Chl\_A21\_00400" 1040 "s63E6H2" 0 "hypothetical protein"  
"Chl\_A21\_00401" 1041 "s59E13H2" 0 "CRISPR-associated endonuclease Cas9"  
"Chl\_A21\_00401" 1041 "s59E25H2" 0 "CRISPR-associated endonuclease Cas9"  
"Chl\_A21\_00401" 1041 "s59E5H2" 0 "CRISPR-associated endonuclease Cas9"  
"Chl\_A21\_00401" 1041 "s63E6H2" 0 "CRISPR-associated endonuclease Cas9"  
"Chl\_A21\_00402" 1042 "s59E13H2" 0 "putative tyrosine recombinase XerC-like protein"  
"Chl\_A21\_00402" 1042 "s59E25H2" 0 "putative tyrosine recombinase XerC-like protein"  
"Chl\_A21\_00402" 1042 "s59E5H2" 0 "putative tyrosine recombinase XerC-like protein"  
"Chl\_A21\_00402" 1042 "s63E6H2" 0 "putative tyrosine recombinase XerC-like protein"  
"Chl\_A21\_00403" 1043 "s59E13H2" 0 "Tyrosine recombinase XerD"  
"Chl\_A21\_00403" 1043 "s59E25H2" 0 "Tyrosine recombinase XerD"  
"Chl\_A21\_00403" 1043 "s59E5H2" 0 "Tyrosine recombinase XerD"  
"Chl\_A21\_00403" 1043 "s63E6H2" 0 "Tyrosine recombinase XerD"  
"Chl\_A21\_00404" 1044 "s59E13H2" 0 "Hint module"  
"Chl\_A21\_00404" 1044 "s59E25H2" 0 "Hint module"  
"Chl\_A21\_00404" 1044 "s59E5H2" 0 "Hint module"  
"Chl\_A21\_00404" 1044 "s63E6H2" 0 "Hint module"  
"Chl\_A21\_00406" 1046 "s59E13H2" 0 "type I restriction enzyme EcoKI subunit R"  
"Chl\_A21\_00406" 1046 "s59E25H2" 0 "type I restriction enzyme EcoKI subunit R"  
"Chl\_A21\_00406" 1046 "s59E5H2" 0 "type I restriction enzyme EcoKI subunit R"  
"Chl\_A21\_00406" 1046 "s63E6H2" 0 "type I restriction enzyme EcoKI subunit R"  
"Chl\_A21\_00408" 1048 "s59E13H2" 0 "DNA double-strand break repair Rad50 ATPase"  
"Chl\_A21\_00408" 1048 "s59E25H2" 0 "DNA double-strand break repair Rad50 ATPase"  
"Chl\_A21\_00408" 1048 "s59E5H2" 0 "DNA double-strand break repair Rad50 ATPase"  
"Chl\_A21\_00408" 1048 "s63E6H2" 0 "DNA double-strand break repair Rad50 ATPase"  
"Chl\_A21\_00410" 1050 "s59E13H2" 0 "B12 binding domain protein"  
"Chl\_A21\_00410" 1050 "s59E25H2" 0 "B12 binding domain protein"  
"Chl\_A21\_00410" 1050 "s59E5H2" 0 "B12 binding domain protein"  
"Chl\_A21\_00410" 1050 "s63E6H2" 0 "B12 binding domain protein"  
"Chl\_A21\_00411" 1051 "s59E13H2" 0 "hypothetical protein"  
"Chl\_A21\_00411" 1051 "s59E25H2" 0 "hypothetical protein"  
"Chl\_A21\_00411" 1051 "s59E5H2" 0 "hypothetical protein"  
"Chl\_A21\_00411" 1051 "s63E6H2" 0 "hypothetical protein"  
"Chl\_A21\_00412" 1052 "s59E13H2" 0 "putative FAD-linked oxidoreductase"  
"Chl\_A21\_00412" 1052 "s59E25H2" 0 "putative FAD-linked oxidoreductase"  
"Chl\_A21\_00412" 1052 "s59E5H2" 0 "putative FAD-linked oxidoreductase"  
"Chl\_A21\_00412" 1052 "s63E6H2" 0 "putative FAD-linked oxidoreductase"  
"Chl\_A21\_00413" 1053 "s59E13H2" 0 "glycolate oxidase subunit GlcD"  
"Chl\_A21\_00413" 1053 "s59E25H2" 0 "glycolate oxidase subunit GlcD"

"Chl\_A21\_00413" 1053 "s59E5H2" 0 "glycolate oxidase subunit GlcD"  
"Chl\_A21\_00413" 1053 "s63E6H2" 0 "glycolate oxidase subunit GlcD"  
"Chl\_A21\_00414" 1054 "s59E13H2" 0 "putative FAD-linked oxidoreductase"  
"Chl\_A21\_00414" 1054 "s59E25H2" 0 "putative FAD-linked oxidoreductase"  
"Chl\_A21\_00414" 1054 "s59E5H2" 0 "putative FAD-linked oxidoreductase"  
"Chl\_A21\_00414" 1054 "s63E6H2" 0 "putative FAD-linked oxidoreductase"  
"Chl\_A21\_00415" 1055 "s59E13H2" 0 "hypothetical protein"  
"Chl\_A21\_00415" 1055 "s59E25H2" 0 "hypothetical protein"  
"Chl\_A21\_00415" 1055 "s59E5H2" 0 "hypothetical protein"  
"Chl\_A21\_00415" 1055 "s63E6H2" 0 "hypothetical protein"  
"Chl\_A21\_00416" 1056 "s59E13H2" 0 "hypothetical protein"  
"Chl\_A21\_00416" 1056 "s59E25H2" 0 "hypothetical protein"  
"Chl\_A21\_00416" 1056 "s59E5H2" 0 "hypothetical protein"  
"Chl\_A21\_00416" 1056 "s63E6H2" 0 "hypothetical protein"  
"Chl\_A21\_00417" 1057 "s59E13H2" 0 "5-methyltetrahydrofolate:corrinoid/iron-sulfur protein co-methyltransferase"  
"Chl\_A21\_00417" 1057 "s59E25H2" 0 "5-methyltetrahydrofolate:corrinoid/iron-sulfur protein co-methyltransferase"  
"Chl\_A21\_00417" 1057 "s59E5H2" 0 "5-methyltetrahydrofolate:corrinoid/iron-sulfur protein co-methyltransferase"  
"Chl\_A21\_00417" 1057 "s63E6H2" 0 "5-methyltetrahydrofolate:corrinoid/iron-sulfur protein co-methyltransferase"  
"Chl\_A21\_00418" 1058 "s59E13H2" 0 "Alkaline phosphatase synthesis transcriptional regulatory protein PhoP"  
"Chl\_A21\_00418" 1058 "s59E25H2" 0 "Alkaline phosphatase synthesis transcriptional regulatory protein PhoP"  
"Chl\_A21\_00418" 1058 "s59E5H2" 0 "Alkaline phosphatase synthesis transcriptional regulatory protein PhoP"  
"Chl\_A21\_00418" 1058 "s63E6H2" 0 "Alkaline phosphatase synthesis transcriptional regulatory protein PhoP"  
"Chl\_A21\_00419" 1059 "s59E13H2" 0 "hypothetical protein"  
"Chl\_A21\_00419" 1059 "s59E25H2" 0 "hypothetical protein"  
"Chl\_A21\_00419" 1059 "s59E5H2" 0 "hypothetical protein"  
"Chl\_A21\_00419" 1059 "s63E6H2" 0 "hypothetical protein"  
"Chl\_A21\_00421" 1061 "s59E13H2" 0 "hypothetical protein"  
"Chl\_A21\_00421" 1061 "s59E25H2" 0 "hypothetical protein"  
"Chl\_A21\_00421" 1061 "s59E5H2" 0 "hypothetical protein"  
"Chl\_A21\_00421" 1061 "s63E6H2" 0 "hypothetical protein"  
"Chl\_A21\_00422" 1062 "s59E13H2" 0 "hypothetical protein"  
"Chl\_A21\_00422" 1062 "s59E25H2" 0 "hypothetical protein"  
"Chl\_A21\_00422" 1062 "s59E5H2" 0 "hypothetical protein"  
"Chl\_A21\_00422" 1062 "s63E6H2" 0 "hypothetical protein"  
"Chl\_A21\_00423" 1063 "s59E13H2" 0 "translocation protein TolB"  
"Chl\_A21\_00423" 1063 "s59E25H2" 0 "translocation protein TolB"  
"Chl\_A21\_00423" 1063 "s59E5H2" 0 "translocation protein TolB"  
"Chl\_A21\_00423" 1063 "s63E6H2" 0 "translocation protein TolB"  
"Chl\_A21\_00424" 1064 "s59E13H2" 0 "O-Antigen ligase"  
"Chl\_A21\_00424" 1064 "s59E25H2" 0 "O-Antigen ligase"  
"Chl\_A21\_00424" 1064 "s59E5H2" 0 "O-Antigen ligase"  
"Chl\_A21\_00424" 1064 "s63E6H2" 0 "O-Antigen ligase"  
"Chl\_A21\_00426" 1066 "s59E13H2" 0 "UDP-glucose 4-epimerase"  
"Chl\_A21\_00426" 1066 "s59E25H2" 0 "UDP-glucose 4-epimerase"  
"Chl\_A21\_00426" 1066 "s59E5H2" 0 "UDP-glucose 4-epimerase"  
"Chl\_A21\_00426" 1066 "s63E6H2" 0 "UDP-glucose 4-epimerase"  
"Chl\_A21\_00427" 1067 "s59E13H2" 0 "GDP-L-fucose synthase"

"Chl\_A21\_00427" 1067 "s59E25H2" 0 "GDP-L-fucose synthase"  
"Chl\_A21\_00427" 1067 "s59E5H2" 0 "GDP-L-fucose synthase"  
"Chl\_A21\_00427" 1067 "s63E6H2" 0 "GDP-L-fucose synthase"  
"Chl\_A21\_00428" 1068 "s59E13H2" 0 "hypothetical protein"  
"Chl\_A21\_00428" 1068 "s59E25H2" 0 "hypothetical protein"  
"Chl\_A21\_00428" 1068 "s59E5H2" 0 "hypothetical protein"  
"Chl\_A21\_00428" 1068 "s63E6H2" 0 "hypothetical protein"  
"Chl\_A21\_00429" 1069 "s59E13H2" 0 "hypothetical protein"  
"Chl\_A21\_00429" 1069 "s59E25H2" 0 "hypothetical protein"  
"Chl\_A21\_00429" 1069 "s59E5H2" 0 "hypothetical protein"  
"Chl\_A21\_00429" 1069 "s63E6H2" 0 "hypothetical protein"  
"Chl\_A21\_00430" 1070 "s59E13H2" 0 "Pyruvate kinase, alpha/beta domain"  
"Chl\_A21\_00430" 1070 "s59E25H2" 0 "Pyruvate kinase, alpha/beta domain"  
"Chl\_A21\_00430" 1070 "s59E5H2" 0 "Pyruvate kinase, alpha/beta domain"  
"Chl\_A21\_00430" 1070 "s63E6H2" 0 "Pyruvate kinase, alpha/beta domain"  
"Chl\_A21\_00432" 1072 "s59E13H2" 0 "hypothetical protein"  
"Chl\_A21\_00432" 1072 "s59E25H2" 0 "hypothetical protein"  
"Chl\_A21\_00432" 1072 "s59E5H2" 0 "hypothetical protein"  
"Chl\_A21\_00432" 1072 "s63E6H2" 0 "hypothetical protein"  
"Chl\_A21\_00433" 1073 "s59E13H2" 0 "hypothetical protein"  
"Chl\_A21\_00433" 1073 "s59E25H2" 0 "hypothetical protein"  
"Chl\_A21\_00433" 1073 "s59E5H2" 0 "hypothetical protein"  
"Chl\_A21\_00433" 1073 "s63E6H2" 0 "hypothetical protein"  
"Chl\_A21\_00434" 1074 "s59E13H2" 0 "hypothetical protein"  
"Chl\_A21\_00434" 1074 "s59E25H2" 0 "hypothetical protein"  
"Chl\_A21\_00434" 1074 "s59E5H2" 0 "hypothetical protein"  
"Chl\_A21\_00434" 1074 "s63E6H2" 0 "hypothetical protein"  
"Chl\_A21\_00437" 1077 "s59E13H2" 0 "hypothetical protein"  
"Chl\_A21\_00437" 1077 "s59E25H2" 0 "hypothetical protein"  
"Chl\_A21\_00437" 1077 "s59E5H2" 0 "hypothetical protein"  
"Chl\_A21\_00437" 1077 "s63E6H2" 0 "hypothetical protein"  
"Chl\_A21\_00440" 1080 "s59E13H2" 0 "hypothetical protein"  
"Chl\_A21\_00440" 1080 "s59E25H2" 0 "hypothetical protein"  
"Chl\_A21\_00440" 1080 "s59E5H2" 0 "hypothetical protein"  
"Chl\_A21\_00440" 1080 "s63E6H2" 0 "hypothetical protein"  
"Chl\_A21\_00446" 1086 "s59E13H2" 0 "CoB--CoM heterodisulfide reductase iron-sulfur subunit A"  
"Chl\_A21\_00446" 1086 "s59E25H2" 0 "CoB--CoM heterodisulfide reductase iron-sulfur subunit A"  
"Chl\_A21\_00446" 1086 "s59E5H2" 0 "CoB--CoM heterodisulfide reductase iron-sulfur subunit A"  
"Chl\_A21\_00446" 1086 "s63E6H2" 0 "CoB--CoM heterodisulfide reductase iron-sulfur subunit A"  
"Chl\_A21\_00447" 1087 "s59E13H2" 0 "acetyl-CoA decarboxylase/synthase complex subunit alpha"  
"Chl\_A21\_00447" 1087 "s59E25H2" 0 "acetyl-CoA decarboxylase/synthase complex subunit alpha"  
"Chl\_A21\_00447" 1087 "s59E5H2" 0 "acetyl-CoA decarboxylase/synthase complex subunit alpha"  
"Chl\_A21\_00447" 1087 "s63E6H2" 0 "acetyl-CoA decarboxylase/synthase complex subunit alpha"  
"Chl\_A21\_00448" 1088 "s59E13H2" 0 "L-aspartate oxidase"  
"Chl\_A21\_00448" 1088 "s59E25H2" 0 "L-aspartate oxidase"  
"Chl\_A21\_00448" 1088 "s59E5H2" 0 "L-aspartate oxidase"  
"Chl\_A21\_00448" 1088 "s63E6H2" 0 "L-aspartate oxidase"

"Chl\_A21\_00449" 1089 "s59E13H2" 0 "hypothetical protein"  
"Chl\_A21\_00449" 1089 "s59E25H2" 0 "hypothetical protein"  
"Chl\_A21\_00449" 1089 "s59E5H2" 0 "hypothetical protein"  
"Chl\_A21\_00449" 1089 "s63E6H2" 0 "hypothetical protein"  
"Chl\_A21\_00450" 1090 "s59E13H2" 0 "hypothetical protein"  
"Chl\_A21\_00450" 1090 "s59E25H2" 0 "hypothetical protein"  
"Chl\_A21\_00450" 1090 "s59E5H2" 0 "hypothetical protein"  
"Chl\_A21\_00450" 1090 "s63E6H2" 0 "hypothetical protein"  
"Chl\_A21\_00451" 1091 "s59E13H2" 0 "HTH-type transcriptional regulator CymR"  
"Chl\_A21\_00451" 1091 "s59E25H2" 0 "HTH-type transcriptional regulator CymR"  
"Chl\_A21\_00451" 1091 "s59E5H2" 0 "HTH-type transcriptional regulator CymR"  
"Chl\_A21\_00451" 1091 "s63E6H2" 0 "HTH-type transcriptional regulator CymR"  
"Chl\_A21\_00454" 1094 "s59E13H2" 0 "hypothetical protein"  
"Chl\_A21\_00454" 1094 "s59E25H2" 0 "hypothetical protein"  
"Chl\_A21\_00454" 1094 "s59E5H2" 0 "hypothetical protein"  
"Chl\_A21\_00454" 1094 "s63E6H2" 0 "hypothetical protein"  
"Chl\_A21\_00455" 1095 "s59E13H2" 0 "hypothetical protein"  
"Chl\_A21\_00455" 1095 "s59E25H2" 0 "hypothetical protein"  
"Chl\_A21\_00455" 1095 "s59E5H2" 0 "hypothetical protein"  
"Chl\_A21\_00455" 1095 "s63E6H2" 0 "hypothetical protein"  
"Chl\_A21\_00457" 1097 "s59E13H2" 0 "4-amino-4-deoxy-L-arabinose-phosphoundecaprenol flippase subunit ArnE"  
"Chl\_A21\_00457" 1097 "s59E25H2" 0 "4-amino-4-deoxy-L-arabinose-phosphoundecaprenol flippase subunit ArnE"  
"Chl\_A21\_00457" 1097 "s59E5H2" 0 "4-amino-4-deoxy-L-arabinose-phosphoundecaprenol flippase subunit ArnE"  
"Chl\_A21\_00457" 1097 "s63E6H2" 0 "4-amino-4-deoxy-L-arabinose-phosphoundecaprenol flippase subunit ArnE"  
"Chl\_A21\_00460" 1100 "s59E13H2" 0 "Tungsten-containing aldehyde ferredoxin oxidoreductase"  
"Chl\_A21\_00460" 1100 "s59E25H2" 0 "Tungsten-containing aldehyde ferredoxin oxidoreductase"  
"Chl\_A21\_00460" 1100 "s59E5H2" 0 "Tungsten-containing aldehyde ferredoxin oxidoreductase"  
"Chl\_A21\_00460" 1100 "s63E6H2" 0 "Tungsten-containing aldehyde ferredoxin oxidoreductase"  
"Chl\_A21\_00461" 1101 "s59E13H2" 0 "Deoxyribose-phosphate aldolase"  
"Chl\_A21\_00461" 1101 "s59E25H2" 0 "Deoxyribose-phosphate aldolase"  
"Chl\_A21\_00461" 1101 "s59E5H2" 0 "Deoxyribose-phosphate aldolase"  
"Chl\_A21\_00461" 1101 "s63E6H2" 0 "Deoxyribose-phosphate aldolase"  
"Chl\_A21\_00462" 1102 "s59E13H2" 0 "Signal peptidase I T"  
"Chl\_A21\_00462" 1102 "s59E25H2" 0 "Signal peptidase I T"  
"Chl\_A21\_00462" 1102 "s59E5H2" 0 "Signal peptidase I T"  
"Chl\_A21\_00462" 1102 "s63E6H2" 0 "Signal peptidase I T"  
"Chl\_A21\_00463" 1103 "s59E13H2" 0 "hypothetical protein"  
"Chl\_A21\_00463" 1103 "s59E25H2" 0 "hypothetical protein"  
"Chl\_A21\_00463" 1103 "s59E5H2" 0 "hypothetical protein"  
"Chl\_A21\_00463" 1103 "s63E6H2" 0 "hypothetical protein"  
"Chl\_A21\_00464" 1104 "s59E13H2" 0 "Dihydrolipoyl dehydrogenase"  
"Chl\_A21\_00464" 1104 "s59E25H2" 0 "Dihydrolipoyl dehydrogenase"  
"Chl\_A21\_00464" 1104 "s59E5H2" 0 "Dihydrolipoyl dehydrogenase"  
"Chl\_A21\_00464" 1104 "s63E6H2" 0 "Dihydrolipoyl dehydrogenase"  
"Chl\_A21\_00465" 1105 "s59E13H2" 0 "hypothetical protein"  
"Chl\_A21\_00465" 1105 "s59E25H2" 0 "hypothetical protein"  
"Chl\_A21\_00465" 1105 "s59E5H2" 0 "hypothetical protein"



"Chl\_A21\_00465" 1105 "s63E6H2" 0 "hypothetical protein"  
"Chl\_A21\_00466" 1106 "s59E13H2" 0 "hypothetical protein"  
"Chl\_A21\_00466" 1106 "s59E25H2" 0 "hypothetical protein"  
"Chl\_A21\_00466" 1106 "s59E5H2" 0 "hypothetical protein"  
"Chl\_A21\_00466" 1106 "s63E6H2" 0 "hypothetical protein"  
"Chl\_A21\_00467" 1107 "s59E13H2" 0 "hypothetical protein"  
"Chl\_A21\_00467" 1107 "s59E25H2" 0 "hypothetical protein"  
"Chl\_A21\_00467" 1107 "s59E5H2" 0 "hypothetical protein"  
"Chl\_A21\_00467" 1107 "s63E6H2" 0 "hypothetical protein"  
"Chl\_A21\_00468" 1108 "s59E13H2" 0 "DNA-3-methyladenine glycosylase"  
"Chl\_A21\_00468" 1108 "s59E25H2" 0 "DNA-3-methyladenine glycosylase"  
"Chl\_A21\_00468" 1108 "s59E5H2" 0 "DNA-3-methyladenine glycosylase"  
"Chl\_A21\_00468" 1108 "s63E6H2" 0 "DNA-3-methyladenine glycosylase"  
"Chl\_A21\_00469" 1109 "s59E13H2" 0 "hypothetical protein"  
"Chl\_A21\_00469" 1109 "s59E25H2" 0 "hypothetical protein"  
"Chl\_A21\_00469" 1109 "s59E5H2" 0 "hypothetical protein"  
"Chl\_A21\_00469" 1109 "s63E6H2" 0 "hypothetical protein"  
"Chl\_A21\_00470" 1110 "s59E13H2" 0 "hypothetical protein"  
"Chl\_A21\_00470" 1110 "s59E25H2" 0 "hypothetical protein"  
"Chl\_A21\_00470" 1110 "s59E5H2" 0 "hypothetical protein"  
"Chl\_A21\_00470" 1110 "s63E6H2" 0 "hypothetical protein"  
"Chl\_A21\_00471" 1111 "s59E13H2" 0 "Ferredoxin--NADP reductase"  
"Chl\_A21\_00471" 1111 "s59E25H2" 0 "Ferredoxin--NADP reductase"  
"Chl\_A21\_00471" 1111 "s59E5H2" 0 "Ferredoxin--NADP reductase"  
"Chl\_A21\_00471" 1111 "s63E6H2" 0 "Ferredoxin--NADP reductase"  
"Chl\_A21\_00474" 1114 "s59E13H2" 0 "hypothetical protein"  
"Chl\_A21\_00474" 1114 "s59E25H2" 0 "hypothetical protein"  
"Chl\_A21\_00474" 1114 "s59E5H2" 0 "hypothetical protein"  
"Chl\_A21\_00474" 1114 "s63E6H2" 0 "hypothetical protein"  
"Chl\_A21\_00475" 1115 "s59E13H2" 0 "Arginine-binding extracellular protein ArtP precursor"  
"Chl\_A21\_00475" 1115 "s59E25H2" 0 "Arginine-binding extracellular protein ArtP precursor"  
"Chl\_A21\_00475" 1115 "s59E5H2" 0 "Arginine-binding extracellular protein ArtP precursor"  
"Chl\_A21\_00475" 1115 "s63E6H2" 0 "Arginine-binding extracellular protein ArtP precursor"  
"Chl\_A21\_00476" 1116 "s59E13H2" 0 "Serine dehydrogenase proteinase"  
"Chl\_A21\_00476" 1116 "s59E25H2" 0 "Serine dehydrogenase proteinase"  
"Chl\_A21\_00476" 1116 "s59E5H2" 0 "Serine dehydrogenase proteinase"  
"Chl\_A21\_00476" 1116 "s63E6H2" 0 "Serine dehydrogenase proteinase"  
"Chl\_A21\_00478" 1118 "s59E13H2" 0 "hypothetical protein"  
"Chl\_A21\_00478" 1118 "s59E25H2" 0 "hypothetical protein"  
"Chl\_A21\_00478" 1118 "s59E5H2" 0 "hypothetical protein"  
"Chl\_A21\_00478" 1118 "s63E6H2" 0 "hypothetical protein"  
"Chl\_A21\_00479" 1119 "s59E13H2" 0 "L-asparaginase precursor"  
"Chl\_A21\_00479" 1119 "s59E25H2" 0 "L-asparaginase precursor"  
"Chl\_A21\_00479" 1119 "s59E5H2" 0 "L-asparaginase precursor"  
"Chl\_A21\_00479" 1119 "s63E6H2" 0 "L-asparaginase precursor"  
"Chl\_A21\_00480" 1120 "s59E13H2" 0 "Chromosome partition protein Smc"  
"Chl\_A21\_00480" 1120 "s59E25H2" 0 "Chromosome partition protein Smc"

"Chl\_A21\_00480" 1120 "s59E5H2" 0 "Chromosome partition protein Smc"  
"Chl\_A21\_00480" 1120 "s63E6H2" 0 "Chromosome partition protein Smc"  
"Chl\_A21\_00481" 1121 "s59E13H2" 0 "Cupin domain protein"  
"Chl\_A21\_00481" 1121 "s59E25H2" 0 "Cupin domain protein"  
"Chl\_A21\_00481" 1121 "s59E5H2" 0 "Cupin domain protein"  
"Chl\_A21\_00481" 1121 "s63E6H2" 0 "Cupin domain protein"  
"Chl\_A21\_00482" 1122 "s59E13H2" 0 "Ribonuclease 3"  
"Chl\_A21\_00482" 1122 "s59E25H2" 0 "Ribonuclease 3"  
"Chl\_A21\_00482" 1122 "s59E5H2" 0 "Ribonuclease 3"  
"Chl\_A21\_00482" 1122 "s63E6H2" 0 "Ribonuclease 3"  
"Chl\_A21\_00483" 1123 "s59E13H2" 0 "3-oxoacyl-[acyl-carrier-protein] synthase 2"  
"Chl\_A21\_00483" 1123 "s59E25H2" 0 "3-oxoacyl-[acyl-carrier-protein] synthase 2"  
"Chl\_A21\_00483" 1123 "s59E5H2" 0 "3-oxoacyl-[acyl-carrier-protein] synthase 2"  
"Chl\_A21\_00483" 1123 "s63E6H2" 0 "3-oxoacyl-[acyl-carrier-protein] synthase 2"  
"Chl\_A21\_00484" 1124 "s59E13H2" 0 "Threonine synthase"  
"Chl\_A21\_00484" 1124 "s59E25H2" 0 "Threonine synthase"  
"Chl\_A21\_00484" 1124 "s59E5H2" 0 "Threonine synthase"  
"Chl\_A21\_00484" 1124 "s63E6H2" 0 "Threonine synthase"  
"Chl\_A21\_00485" 1125 "s59E13H2" 0 "Cyclic pyranopterin monophosphate synthase accessory protein"  
"Chl\_A21\_00485" 1125 "s59E25H2" 0 "Cyclic pyranopterin monophosphate synthase accessory protein"  
"Chl\_A21\_00485" 1125 "s59E5H2" 0 "Cyclic pyranopterin monophosphate synthase accessory protein"  
"Chl\_A21\_00485" 1125 "s63E6H2" 0 "Cyclic pyranopterin monophosphate synthase accessory protein"  
"Chl\_A21\_00486" 1126 "s59E13H2" 0 "hypothetical protein"  
"Chl\_A21\_00486" 1126 "s59E25H2" 0 "hypothetical protein"  
"Chl\_A21\_00486" 1126 "s59E5H2" 0 "hypothetical protein"  
"Chl\_A21\_00486" 1126 "s63E6H2" 0 "hypothetical protein"  
"Chl\_A21\_00487" 1127 "s59E13H2" 0 "hypothetical protein"  
"Chl\_A21\_00487" 1127 "s59E25H2" 0 "hypothetical protein"  
"Chl\_A21\_00487" 1127 "s59E5H2" 0 "hypothetical protein"  
"Chl\_A21\_00487" 1127 "s63E6H2" 0 "hypothetical protein"  
"Chl\_A21\_00488" 1128 "s59E13H2" 0 "Glycosyltransferase AgID"  
"Chl\_A21\_00488" 1128 "s59E25H2" 0 "Glycosyltransferase AgID"  
"Chl\_A21\_00488" 1128 "s59E5H2" 0 "Glycosyltransferase AgID"  
"Chl\_A21\_00488" 1128 "s63E6H2" 0 "Glycosyltransferase AgID"  
"Chl\_A21\_00489" 1129 "s59E13H2" 0 "Signal recognition particle receptor FtsY"  
"Chl\_A21\_00489" 1129 "s59E25H2" 0 "Signal recognition particle receptor FtsY"  
"Chl\_A21\_00489" 1129 "s59E5H2" 0 "Signal recognition particle receptor FtsY"  
"Chl\_A21\_00489" 1129 "s63E6H2" 0 "Signal recognition particle receptor FtsY"  
"Chl\_A21\_00490" 1130 "s59E13H2" 0 "Peptide chain release factor 2"  
"Chl\_A21\_00490" 1130 "s59E25H2" 0 "Peptide chain release factor 2"  
"Chl\_A21\_00490" 1130 "s59E5H2" 0 "Peptide chain release factor 2"  
"Chl\_A21\_00490" 1130 "s63E6H2" 0 "Peptide chain release factor 2"  
"Chl\_A21\_00491" 1131 "s59E13H2" 0 "8-oxoguanine deaminase"  
"Chl\_A21\_00491" 1131 "s59E25H2" 0 "8-oxoguanine deaminase"  
"Chl\_A21\_00491" 1131 "s59E5H2" 0 "8-oxoguanine deaminase"  
"Chl\_A21\_00491" 1131 "s63E6H2" 0 "8-oxoguanine deaminase"  
"Chl\_A21\_00492" 1132 "s59E13H2" 0 "Secreted effector protein pipB2"

"Chl\_A21\_00492" 1132 "s59E25H2" 0 "Secreted effector protein pipB2"  
"Chl\_A21\_00492" 1132 "s59E5H2" 0 "Secreted effector protein pipB2"  
"Chl\_A21\_00492" 1132 "s63E6H2" 0 "Secreted effector protein pipB2"  
"Chl\_A21\_00494" 1134 "s59E13H2" 0 "Major Facilitator Superfamily protein"  
"Chl\_A21\_00494" 1134 "s59E25H2" 0 "Major Facilitator Superfamily protein"  
"Chl\_A21\_00494" 1134 "s59E5H2" 0 "Major Facilitator Superfamily protein"  
"Chl\_A21\_00494" 1134 "s63E6H2" 0 "Major Facilitator Superfamily protein"  
"Chl\_A21\_00495" 1135 "s59E13H2" 0 "hypothetical protein"  
"Chl\_A21\_00495" 1135 "s59E25H2" 0 "hypothetical protein"  
"Chl\_A21\_00495" 1135 "s59E5H2" 0 "hypothetical protein"  
"Chl\_A21\_00495" 1135 "s63E6H2" 0 "hypothetical protein"  
"Chl\_A21\_00496" 1136 "s59E13H2" 0 "Oxygen-independent coproporphyrinogen-III oxidase 1"  
"Chl\_A21\_00496" 1136 "s59E25H2" 0 "Oxygen-independent coproporphyrinogen-III oxidase 1"  
"Chl\_A21\_00496" 1136 "s59E5H2" 0 "Oxygen-independent coproporphyrinogen-III oxidase 1"  
"Chl\_A21\_00496" 1136 "s63E6H2" 0 "Oxygen-independent coproporphyrinogen-III oxidase 1"  
"Chl\_A21\_00497" 1137 "s59E13H2" 0 "(2E,6E)-farnesyl diphosphate synthase"  
"Chl\_A21\_00497" 1137 "s59E25H2" 0 "(2E,6E)-farnesyl diphosphate synthase"  
"Chl\_A21\_00497" 1137 "s59E5H2" 0 "(2E,6E)-farnesyl diphosphate synthase"  
"Chl\_A21\_00497" 1137 "s63E6H2" 0 "(2E,6E)-farnesyl diphosphate synthase"  
"Chl\_A21\_00498" 1138 "s59E13H2" 0 "Isopentenyl-diphosphate delta-isomerase"  
"Chl\_A21\_00498" 1138 "s59E25H2" 0 "Isopentenyl-diphosphate delta-isomerase"  
"Chl\_A21\_00498" 1138 "s59E5H2" 0 "Isopentenyl-diphosphate delta-isomerase"  
"Chl\_A21\_00498" 1138 "s63E6H2" 0 "Isopentenyl-diphosphate delta-isomerase"  
"Chl\_A21\_00499" 1139 "s59E13H2" 0 "Acyl carrier protein"  
"Chl\_A21\_00499" 1139 "s59E25H2" 0 "Acyl carrier protein"  
"Chl\_A21\_00499" 1139 "s59E5H2" 0 "Acyl carrier protein"  
"Chl\_A21\_00499" 1139 "s63E6H2" 0 "Acyl carrier protein"  
"Chl\_A21\_00500" 1140 "s59E13H2" 0 "putative molybdenum cofactor guanylyltransferase"  
"Chl\_A21\_00500" 1140 "s59E25H2" 0 "putative molybdenum cofactor guanylyltransferase"  
"Chl\_A21\_00500" 1140 "s59E5H2" 0 "putative molybdenum cofactor guanylyltransferase"  
"Chl\_A21\_00500" 1140 "s63E6H2" 0 "putative molybdenum cofactor guanylyltransferase"  
"Chl\_A21\_00501" 1141 "s59E13H2" 0 "6-hydroxypseudooxynicotine dehydrogenase complex subunit alpha"  
"Chl\_A21\_00501" 1141 "s59E25H2" 0 "6-hydroxypseudooxynicotine dehydrogenase complex subunit alpha"  
"Chl\_A21\_00501" 1141 "s59E5H2" 0 "6-hydroxypseudooxynicotine dehydrogenase complex subunit alpha"  
"Chl\_A21\_00501" 1141 "s63E6H2" 0 "6-hydroxypseudooxynicotine dehydrogenase complex subunit alpha"  
"Chl\_A21\_00502" 1142 "s59E13H2" 0 "Nicotinate dehydrogenase small FeS subunit"  
"Chl\_A21\_00502" 1142 "s59E25H2" 0 "Nicotinate dehydrogenase small FeS subunit"  
"Chl\_A21\_00502" 1142 "s59E5H2" 0 "Nicotinate dehydrogenase small FeS subunit"  
"Chl\_A21\_00502" 1142 "s63E6H2" 0 "Nicotinate dehydrogenase small FeS subunit"  
"Chl\_A21\_00503" 1143 "s59E13H2" 0 "putative xanthine dehydrogenase subunit D"  
"Chl\_A21\_00503" 1143 "s59E25H2" 0 "putative xanthine dehydrogenase subunit D"  
"Chl\_A21\_00503" 1143 "s59E5H2" 0 "putative xanthine dehydrogenase subunit D"  
"Chl\_A21\_00503" 1143 "s63E6H2" 0 "putative xanthine dehydrogenase subunit D"  
"Chl\_A21\_00504" 1144 "s59E13H2" 0 "HEAT repeat protein"  
"Chl\_A21\_00504" 1144 "s59E25H2" 0 "HEAT repeat protein"  
"Chl\_A21\_00504" 1144 "s59E5H2" 0 "HEAT repeat protein"  
"Chl\_A21\_00504" 1144 "s63E6H2" 0 "HEAT repeat protein"

"Chl\_A21\_00505" 1145 "s59E13H2" 0 "putative xanthine dehydrogenase subunit D"  
"Chl\_A21\_00505" 1145 "s59E25H2" 0 "putative xanthine dehydrogenase subunit D"  
"Chl\_A21\_00505" 1145 "s59E5H2" 0 "putative xanthine dehydrogenase subunit D"  
"Chl\_A21\_00505" 1145 "s63E6H2" 0 "putative xanthine dehydrogenase subunit D"  
"Chl\_A21\_00506" 1146 "s59E13H2" 0 "translocation protein TolB"  
"Chl\_A21\_00506" 1146 "s59E25H2" 0 "translocation protein TolB"  
"Chl\_A21\_00506" 1146 "s59E5H2" 0 "translocation protein TolB"  
"Chl\_A21\_00506" 1146 "s63E6H2" 0 "translocation protein TolB"  
"Chl\_A21\_00508" 1148 "s59E13H2" 0 "Molybdopterin molybdenumtransferase"  
"Chl\_A21\_00508" 1148 "s59E25H2" 0 "Molybdopterin molybdenumtransferase"  
"Chl\_A21\_00508" 1148 "s59E5H2" 0 "Molybdopterin molybdenumtransferase"  
"Chl\_A21\_00508" 1148 "s63E6H2" 0 "Molybdopterin molybdenumtransferase"  
"Chl\_A21\_00509" 1149 "s59E13H2" 0 "Molybdopterin-guanine dinucleotide biosynthesis adapter protein"  
"Chl\_A21\_00509" 1149 "s59E25H2" 0 "Molybdopterin-guanine dinucleotide biosynthesis adapter protein"  
"Chl\_A21\_00509" 1149 "s59E5H2" 0 "Molybdopterin-guanine dinucleotide biosynthesis adapter protein"  
"Chl\_A21\_00509" 1149 "s63E6H2" 0 "Molybdopterin-guanine dinucleotide biosynthesis adapter protein"  
"Chl\_A21\_00510" 1150 "s59E13H2" 0 "2-oxoglutarate synthase subunit KorB"  
"Chl\_A21\_00510" 1150 "s59E25H2" 0 "2-oxoglutarate synthase subunit KorB"  
"Chl\_A21\_00510" 1150 "s59E5H2" 0 "2-oxoglutarate synthase subunit KorB"  
"Chl\_A21\_00510" 1150 "s63E6H2" 0 "2-oxoglutarate synthase subunit KorB"  
"Chl\_A21\_00511" 1151 "s59E13H2" 0 "S-methyl-5'-thioadenosine phosphorylase"  
"Chl\_A21\_00511" 1151 "s59E25H2" 0 "S-methyl-5'-thioadenosine phosphorylase"  
"Chl\_A21\_00511" 1151 "s59E5H2" 0 "S-methyl-5'-thioadenosine phosphorylase"  
"Chl\_A21\_00511" 1151 "s63E6H2" 0 "S-methyl-5'-thioadenosine phosphorylase"  
"Chl\_A21\_00512" 1152 "s59E13H2" 0 "hypothetical protein"  
"Chl\_A21\_00512" 1152 "s59E25H2" 0 "hypothetical protein"  
"Chl\_A21\_00512" 1152 "s59E5H2" 0 "hypothetical protein"  
"Chl\_A21\_00512" 1152 "s63E6H2" 0 "hypothetical protein"  
"Chl\_A21\_00513" 1153 "s59E13H2" 0 "SsrA-binding protein"  
"Chl\_A21\_00513" 1153 "s59E25H2" 0 "SsrA-binding protein"  
"Chl\_A21\_00513" 1153 "s59E5H2" 0 "SsrA-binding protein"  
"Chl\_A21\_00513" 1153 "s63E6H2" 0 "SsrA-binding protein"  
"Chl\_A21\_00514" 1154 "s59E13H2" 0 "putative CtpA-like serine protease"  
"Chl\_A21\_00514" 1154 "s59E25H2" 0 "putative CtpA-like serine protease"  
"Chl\_A21\_00514" 1154 "s59E5H2" 0 "putative CtpA-like serine protease"  
"Chl\_A21\_00514" 1154 "s63E6H2" 0 "putative CtpA-like serine protease"  
"Chl\_A21\_00515" 1155 "s59E13H2" 0 "putative CtpA-like serine protease"  
"Chl\_A21\_00515" 1155 "s59E25H2" 0 "putative CtpA-like serine protease"  
"Chl\_A21\_00515" 1155 "s59E5H2" 0 "putative CtpA-like serine protease"  
"Chl\_A21\_00515" 1155 "s63E6H2" 0 "putative CtpA-like serine protease"  
"Chl\_A21\_00516" 1156 "s59E13H2" 0 "GTPase HflX"  
"Chl\_A21\_00516" 1156 "s59E25H2" 0 "GTPase HflX"  
"Chl\_A21\_00516" 1156 "s59E5H2" 0 "GTPase HflX"  
"Chl\_A21\_00516" 1156 "s63E6H2" 0 "GTPase HflX"  
"Chl\_A21\_00517" 1157 "s59E13H2" 0 "Methylenetetrahydrofolate--tRNA-(uracil-5-)-methyltransferase TrmFO"  
"Chl\_A21\_00517" 1157 "s59E25H2" 0 "Methylenetetrahydrofolate--tRNA-(uracil-5-)-methyltransferase TrmFO"  
"Chl\_A21\_00517" 1157 "s59E5H2" 0 "Methylenetetrahydrofolate--tRNA-(uracil-5-)-methyltransferase TrmFO"

"Chl\_A21\_00517" 1157 "s63E6H2" 0 "Methylenetetrahydrofolate--tRNA-(uracil-5-)-methyltransferase TrmFO"  
"Chl\_A21\_00518" 1158 "s59E13H2" 0 "Erythromycin 3'-O-methyltransferase"  
"Chl\_A21\_00518" 1158 "s59E25H2" 0 "Erythromycin 3'-O-methyltransferase"  
"Chl\_A21\_00518" 1158 "s59E5H2" 0 "Erythromycin 3'-O-methyltransferase"  
"Chl\_A21\_00518" 1158 "s63E6H2" 0 "Erythromycin 3'-O-methyltransferase"  
"Chl\_A21\_00520" 1160 "s59E13H2" 0 "Transcriptional repressor SdpR"  
"Chl\_A21\_00520" 1160 "s59E25H2" 0 "Transcriptional repressor SdpR"  
"Chl\_A21\_00520" 1160 "s59E5H2" 0 "Transcriptional repressor SdpR"  
"Chl\_A21\_00520" 1160 "s63E6H2" 0 "Transcriptional repressor SdpR"  
"Chl\_A21\_00521" 1161 "s59E13H2" 0 "hypothetical protein"  
"Chl\_A21\_00521" 1161 "s59E25H2" 0 "hypothetical protein"  
"Chl\_A21\_00521" 1161 "s59E5H2" 0 "hypothetical protein"  
"Chl\_A21\_00521" 1161 "s63E6H2" 0 "hypothetical protein"  
"Chl\_A21\_00522" 1162 "s59E13H2" 0 "Pyrimidine-nucleoside phosphorylase"  
"Chl\_A21\_00522" 1162 "s59E25H2" 0 "Pyrimidine-nucleoside phosphorylase"  
"Chl\_A21\_00522" 1162 "s59E5H2" 0 "Pyrimidine-nucleoside phosphorylase"  
"Chl\_A21\_00522" 1162 "s63E6H2" 0 "Pyrimidine-nucleoside phosphorylase"  
"Chl\_A21\_00523" 1163 "s59E13H2" 0 "Serine/threonine-protein kinase AfsK"  
"Chl\_A21\_00523" 1163 "s59E25H2" 0 "Serine/threonine-protein kinase AfsK"  
"Chl\_A21\_00523" 1163 "s59E5H2" 0 "Serine/threonine-protein kinase AfsK"  
"Chl\_A21\_00523" 1163 "s63E6H2" 0 "Serine/threonine-protein kinase AfsK"  
"Chl\_A21\_00524" 1164 "s59E13H2" 0 "Soluble lytic murein transglycosylase precursor"  
"Chl\_A21\_00524" 1164 "s59E25H2" 0 "Soluble lytic murein transglycosylase precursor"  
"Chl\_A21\_00524" 1164 "s59E5H2" 0 "Soluble lytic murein transglycosylase precursor"  
"Chl\_A21\_00524" 1164 "s63E6H2" 0 "Soluble lytic murein transglycosylase precursor"  
"Chl\_A21\_00525" 1165 "s59E13H2" 0 "hypothetical protein"  
"Chl\_A21\_00525" 1165 "s59E25H2" 0 "hypothetical protein"  
"Chl\_A21\_00525" 1165 "s59E5H2" 0 "hypothetical protein"  
"Chl\_A21\_00525" 1165 "s63E6H2" 0 "hypothetical protein"  
"Chl\_A21\_00526" 1166 "s59E13H2" 0 "CDP-alcohol phosphatidyltransferase"  
"Chl\_A21\_00526" 1166 "s59E25H2" 0 "CDP-alcohol phosphatidyltransferase"  
"Chl\_A21\_00526" 1166 "s59E5H2" 0 "CDP-alcohol phosphatidyltransferase"  
"Chl\_A21\_00526" 1166 "s63E6H2" 0 "CDP-alcohol phosphatidyltransferase"  
"Chl\_A21\_00527" 1167 "s59E13H2" 0 "hypothetical protein"  
"Chl\_A21\_00527" 1167 "s59E25H2" 0 "hypothetical protein"  
"Chl\_A21\_00527" 1167 "s59E5H2" 0 "hypothetical protein"  
"Chl\_A21\_00527" 1167 "s63E6H2" 0 "hypothetical protein"  
"Chl\_A21\_00528" 1168 "s59E13H2" 0 "L-arabinose transport system permease protein AraQ"  
"Chl\_A21\_00528" 1168 "s59E25H2" 0 "L-arabinose transport system permease protein AraQ"  
"Chl\_A21\_00528" 1168 "s59E5H2" 0 "L-arabinose transport system permease protein AraQ"  
"Chl\_A21\_00528" 1168 "s63E6H2" 0 "L-arabinose transport system permease protein AraQ"  
"Chl\_A21\_00529" 1169 "s59E13H2" 0 "Lactose transport system permease protein LacF"  
"Chl\_A21\_00529" 1169 "s59E25H2" 0 "Lactose transport system permease protein LacF"  
"Chl\_A21\_00529" 1169 "s59E5H2" 0 "Lactose transport system permease protein LacF"  
"Chl\_A21\_00529" 1169 "s63E6H2" 0 "Lactose transport system permease protein LacF"  
"Chl\_A21\_00530" 1170 "s59E13H2" 0 "Bacterial extracellular solute-binding protein"  
"Chl\_A21\_00530" 1170 "s59E25H2" 0 "Bacterial extracellular solute-binding protein"

"Chl\_A21\_00530" 1170 "s59E5H2" 0 "Bacterial extracellular solute-binding protein"  
"Chl\_A21\_00530" 1170 "s63E6H2" 0 "Bacterial extracellular solute-binding protein"  
"Chl\_A21\_00532" 1172 "s59E13H2" 0 "Xaa-Pro dipeptidase"  
"Chl\_A21\_00532" 1172 "s59E25H2" 0 "Xaa-Pro dipeptidase"  
"Chl\_A21\_00532" 1172 "s59E5H2" 0 "Xaa-Pro dipeptidase"  
"Chl\_A21\_00532" 1172 "s63E6H2" 0 "Xaa-Pro dipeptidase"  
"Chl\_A21\_00534" 1174 "s59E13H2" 0 "hypothetical protein"  
"Chl\_A21\_00534" 1174 "s59E25H2" 0 "hypothetical protein"  
"Chl\_A21\_00534" 1174 "s59E5H2" 0 "hypothetical protein"  
"Chl\_A21\_00534" 1174 "s63E6H2" 0 "hypothetical protein"  
"Chl\_A21\_00535" 1175 "s59E13H2" 0 "Alkaline phosphatase synthesis transcriptional regulatory protein PhoP"  
"Chl\_A21\_00535" 1175 "s59E25H2" 0 "Alkaline phosphatase synthesis transcriptional regulatory protein PhoP"  
"Chl\_A21\_00535" 1175 "s59E5H2" 0 "Alkaline phosphatase synthesis transcriptional regulatory protein PhoP"  
"Chl\_A21\_00535" 1175 "s63E6H2" 0 "Alkaline phosphatase synthesis transcriptional regulatory protein PhoP"  
"Chl\_A21\_00536" 1176 "s59E13H2" 0 "Phytochrome-like protein cph2"  
"Chl\_A21\_00536" 1176 "s59E25H2" 0 "Phytochrome-like protein cph2"  
"Chl\_A21\_00536" 1176 "s59E5H2" 0 "Phytochrome-like protein cph2"  
"Chl\_A21\_00536" 1176 "s63E6H2" 0 "Phytochrome-like protein cph2"  
"Chl\_A21\_00537" 1177 "s59E13H2" 0 "hypothetical protein"  
"Chl\_A21\_00537" 1177 "s59E25H2" 0 "hypothetical protein"  
"Chl\_A21\_00537" 1177 "s59E5H2" 0 "hypothetical protein"  
"Chl\_A21\_00537" 1177 "s63E6H2" 0 "hypothetical protein"  
"Chl\_A21\_00538" 1178 "s59E13H2" 0 "Tyrosine-protein kinase YwqD"  
"Chl\_A21\_00538" 1178 "s59E25H2" 0 "Tyrosine-protein kinase YwqD"  
"Chl\_A21\_00538" 1178 "s59E5H2" 0 "Tyrosine-protein kinase YwqD"  
"Chl\_A21\_00538" 1178 "s63E6H2" 0 "Tyrosine-protein kinase YwqD"  
"Chl\_A21\_00539" 1179 "s59E13H2" 0 "UDP-N-acetylgalactosamine-undecaprenyl-phosphate N-acetylgalactosaminophosphotransferase"  
"Chl\_A21\_00539" 1179 "s59E25H2" 0 "UDP-N-acetylgalactosamine-undecaprenyl-phosphate N-acetylgalactosaminophosphotransferase"  
"Chl\_A21\_00539" 1179 "s59E5H2" 0 "UDP-N-acetylgalactosamine-undecaprenyl-phosphate N-acetylgalactosaminophosphotransferase"  
"Chl\_A21\_00539" 1179 "s63E6H2" 0 "UDP-N-acetylgalactosamine-undecaprenyl-phosphate N-acetylgalactosaminophosphotransferase"  
"Chl\_A21\_00540" 1180 "s59E13H2" 0 "putative oxidoreductase YdgJ"  
"Chl\_A21\_00540" 1180 "s59E25H2" 0 "putative oxidoreductase YdgJ"  
"Chl\_A21\_00540" 1180 "s59E5H2" 0 "putative oxidoreductase YdgJ"  
"Chl\_A21\_00540" 1180 "s63E6H2" 0 "putative oxidoreductase YdgJ"  
"Chl\_A21\_00541" 1181 "s59E13H2" 0 "dTDP-3-amino-3,6-dideoxy-alpha-D-galactopyranose 3-N-acetyltransferase"  
"Chl\_A21\_00541" 1181 "s59E25H2" 0 "dTDP-3-amino-3,6-dideoxy-alpha-D-galactopyranose 3-N-acetyltransferase"  
"Chl\_A21\_00541" 1181 "s59E5H2" 0 "dTDP-3-amino-3,6-dideoxy-alpha-D-galactopyranose 3-N-acetyltransferase"  
"Chl\_A21\_00541" 1181 "s63E6H2" 0 "dTDP-3-amino-3,6-dideoxy-alpha-D-galactopyranose 3-N-acetyltransferase"  
"Chl\_A21\_00542" 1182 "s59E13H2" 0 "dTDP-3-amino-3,6-dideoxy-alpha-D-galactopyranose transaminase"  
"Chl\_A21\_00542" 1182 "s59E25H2" 0 "dTDP-3-amino-3,6-dideoxy-alpha-D-galactopyranose transaminase"  
"Chl\_A21\_00542" 1182 "s59E5H2" 0 "dTDP-3-amino-3,6-dideoxy-alpha-D-galactopyranose transaminase"  
"Chl\_A21\_00542" 1182 "s63E6H2" 0 "dTDP-3-amino-3,6-dideoxy-alpha-D-galactopyranose transaminase"  
"Chl\_A21\_00543" 1183 "s59E13H2" 0 "hypothetical protein"  
"Chl\_A21\_00543" 1183 "s59E25H2" 0 "hypothetical protein"  
"Chl\_A21\_00543" 1183 "s59E5H2" 0 "hypothetical protein"  
"Chl\_A21\_00543" 1183 "s63E6H2" 0 "hypothetical protein"  
"Chl\_A21\_00544" 1184 "s59E13H2" 0 "hypothetical protein"

"Chl\_A21\_00544" 1184 "s59E25H2" 0 "hypothetical protein"  
"Chl\_A21\_00544" 1184 "s59E5H2" 0 "hypothetical protein"  
"Chl\_A21\_00544" 1184 "s63E6H2" 0 "hypothetical protein"  
"Chl\_A21\_00545" 1185 "s59E13H2" 0 "hypothetical protein"  
"Chl\_A21\_00545" 1185 "s59E25H2" 0 "hypothetical protein"  
"Chl\_A21\_00545" 1185 "s59E5H2" 0 "hypothetical protein"  
"Chl\_A21\_00545" 1185 "s63E6H2" 0 "hypothetical protein"  
"Chl\_A21\_00546" 1186 "s59E13H2" 0 "hypothetical protein"  
"Chl\_A21\_00546" 1186 "s59E25H2" 0 "hypothetical protein"  
"Chl\_A21\_00546" 1186 "s59E5H2" 0 "hypothetical protein"  
"Chl\_A21\_00546" 1186 "s63E6H2" 0 "hypothetical protein"  
"Chl\_A21\_00547" 1187 "s59E13H2" 0 "Ribose operon repressor"  
"Chl\_A21\_00547" 1187 "s59E25H2" 0 "Ribose operon repressor"  
"Chl\_A21\_00547" 1187 "s59E5H2" 0 "Ribose operon repressor"  
"Chl\_A21\_00547" 1187 "s63E6H2" 0 "Ribose operon repressor"  
"Chl\_A21\_00548" 1188 "s59E13H2" 0 "Bacterial extracellular solute-binding protein"  
"Chl\_A21\_00548" 1188 "s59E25H2" 0 "Bacterial extracellular solute-binding protein"  
"Chl\_A21\_00548" 1188 "s59E5H2" 0 "Bacterial extracellular solute-binding protein"  
"Chl\_A21\_00548" 1188 "s63E6H2" 0 "Bacterial extracellular solute-binding protein"  
"Chl\_A21\_00549" 1189 "s59E13H2" 0 "L-arabinose transport system permease protein AraP"  
"Chl\_A21\_00549" 1189 "s59E25H2" 0 "L-arabinose transport system permease protein AraP"  
"Chl\_A21\_00549" 1189 "s59E5H2" 0 "L-arabinose transport system permease protein AraP"  
"Chl\_A21\_00549" 1189 "s63E6H2" 0 "L-arabinose transport system permease protein AraP"  
"Chl\_A21\_00550" 1190 "s59E13H2" 0 "Trehalose/maltose transport system permease protein MalG"  
"Chl\_A21\_00550" 1190 "s59E25H2" 0 "Trehalose/maltose transport system permease protein MalG"  
"Chl\_A21\_00550" 1190 "s59E5H2" 0 "Trehalose/maltose transport system permease protein MalG"  
"Chl\_A21\_00550" 1190 "s63E6H2" 0 "Trehalose/maltose transport system permease protein MalG"  
"Chl\_A21\_00551" 1191 "s59E13H2" 0 "N,N'-diacetylchitobiose phosphorylase"  
"Chl\_A21\_00551" 1191 "s59E25H2" 0 "N,N'-diacetylchitobiose phosphorylase"  
"Chl\_A21\_00551" 1191 "s59E5H2" 0 "N,N'-diacetylchitobiose phosphorylase"  
"Chl\_A21\_00551" 1191 "s63E6H2" 0 "N,N'-diacetylchitobiose phosphorylase"  
"Chl\_A21\_00552" 1192 "s59E13H2" 0 "General stress protein 69"  
"Chl\_A21\_00552" 1192 "s59E25H2" 0 "General stress protein 69"  
"Chl\_A21\_00552" 1192 "s59E5H2" 0 "General stress protein 69"  
"Chl\_A21\_00552" 1192 "s63E6H2" 0 "General stress protein 69"  
"Chl\_A21\_00553" 1193 "s59E13H2" 0 "Beta-xylosidase"  
"Chl\_A21\_00553" 1193 "s59E25H2" 0 "Beta-xylosidase"  
"Chl\_A21\_00553" 1193 "s59E5H2" 0 "Beta-xylosidase"  
"Chl\_A21\_00553" 1193 "s63E6H2" 0 "Beta-xylosidase"  
"Chl\_A21\_00554" 1194 "s59E13H2" 0 "Periplasmic beta-glucosidase precursor"  
"Chl\_A21\_00554" 1194 "s59E25H2" 0 "Periplasmic beta-glucosidase precursor"  
"Chl\_A21\_00554" 1194 "s59E5H2" 0 "Periplasmic beta-glucosidase precursor"  
"Chl\_A21\_00554" 1194 "s63E6H2" 0 "Periplasmic beta-glucosidase precursor"  
"Chl\_A21\_00555" 1195 "s59E13H2" 0 "N,N'-diacetylchitobiose phosphorylase"  
"Chl\_A21\_00555" 1195 "s59E25H2" 0 "N,N'-diacetylchitobiose phosphorylase"  
"Chl\_A21\_00555" 1195 "s59E5H2" 0 "N,N'-diacetylchitobiose phosphorylase"  
"Chl\_A21\_00555" 1195 "s63E6H2" 0 "N,N'-diacetylchitobiose phosphorylase"

"Chl\_A21\_00556" 1196 "s59E13H2" 0 "Beta-glucosidase A"  
"Chl\_A21\_00556" 1196 "s59E25H2" 0 "Beta-glucosidase A"  
"Chl\_A21\_00556" 1196 "s59E5H2" 0 "Beta-glucosidase A"  
"Chl\_A21\_00556" 1196 "s63E6H2" 0 "Beta-glucosidase A"  
"Chl\_A21\_00557" 1197 "s59E13H2" 0 "DinB superfamily protein"  
"Chl\_A21\_00557" 1197 "s59E25H2" 0 "DinB superfamily protein"  
"Chl\_A21\_00557" 1197 "s59E5H2" 0 "DinB superfamily protein"  
"Chl\_A21\_00557" 1197 "s63E6H2" 0 "DinB superfamily protein"  
"Chl\_A21\_00558" 1198 "s59E13H2" 0 "hypothetical protein"  
"Chl\_A21\_00558" 1198 "s59E25H2" 0 "hypothetical protein"  
"Chl\_A21\_00558" 1198 "s59E5H2" 0 "hypothetical protein"  
"Chl\_A21\_00558" 1198 "s63E6H2" 0 "hypothetical protein"  
"Chl\_A21\_00559" 1199 "s59E13H2" 0 "Acyl-CoA thioester hydrolase YbgC"  
"Chl\_A21\_00559" 1199 "s59E25H2" 0 "Acyl-CoA thioester hydrolase YbgC"  
"Chl\_A21\_00559" 1199 "s59E5H2" 0 "Acyl-CoA thioester hydrolase YbgC"  
"Chl\_A21\_00559" 1199 "s63E6H2" 0 "Acyl-CoA thioester hydrolase YbgC"  
"Chl\_A21\_00560" 1200 "s59E13H2" 0 "Xaa-Pro aminopeptidase"  
"Chl\_A21\_00560" 1200 "s59E25H2" 0 "Xaa-Pro aminopeptidase"  
"Chl\_A21\_00560" 1200 "s59E5H2" 0 "Xaa-Pro aminopeptidase"  
"Chl\_A21\_00560" 1200 "s63E6H2" 0 "Xaa-Pro aminopeptidase"  
"Chl\_A21\_00564" 1204 "s59E13H2" 0 "Long-chain-fatty-acid--CoA ligase"  
"Chl\_A21\_00564" 1204 "s59E25H2" 0 "Long-chain-fatty-acid--CoA ligase"  
"Chl\_A21\_00564" 1204 "s59E5H2" 0 "Long-chain-fatty-acid--CoA ligase"  
"Chl\_A21\_00564" 1204 "s63E6H2" 0 "Long-chain-fatty-acid--CoA ligase"  
"Chl\_A21\_00565" 1205 "s59E13H2" 0 "hypothetical protein"  
"Chl\_A21\_00565" 1205 "s59E25H2" 0 "hypothetical protein"  
"Chl\_A21\_00565" 1205 "s59E5H2" 0 "hypothetical protein"  
"Chl\_A21\_00565" 1205 "s63E6H2" 0 "hypothetical protein"  
"Chl\_A21\_00566" 1206 "s59E13H2" 0 "Transposase DDE domain protein"  
"Chl\_A21\_00566" 1206 "s59E25H2" 0 "Transposase DDE domain protein"  
"Chl\_A21\_00566" 1206 "s59E5H2" 0 "Transposase DDE domain protein"  
"Chl\_A21\_00566" 1206 "s63E6H2" 0 "Transposase DDE domain protein"  
"Chl\_A21\_00567" 1207 "s59E13H2" 0 "Oligopeptide-binding protein OppA precursor"  
"Chl\_A21\_00567" 1207 "s59E25H2" 0 "Oligopeptide-binding protein OppA precursor"  
"Chl\_A21\_00567" 1207 "s59E5H2" 0 "Oligopeptide-binding protein OppA precursor"  
"Chl\_A21\_00567" 1207 "s63E6H2" 0 "Oligopeptide-binding protein OppA precursor"  
"Chl\_A21\_00568" 1208 "s59E13H2" 0 "Glutathione transport system permease protein GsiC"  
"Chl\_A21\_00568" 1208 "s59E25H2" 0 "Glutathione transport system permease protein GsiC"  
"Chl\_A21\_00568" 1208 "s59E5H2" 0 "Glutathione transport system permease protein GsiC"  
"Chl\_A21\_00568" 1208 "s63E6H2" 0 "Glutathione transport system permease protein GsiC"  
"Chl\_A21\_00569" 1209 "s59E13H2" 0 "Glutathione transport system permease protein GsiD"  
"Chl\_A21\_00569" 1209 "s59E25H2" 0 "Glutathione transport system permease protein GsiD"  
"Chl\_A21\_00569" 1209 "s59E5H2" 0 "Glutathione transport system permease protein GsiD"  
"Chl\_A21\_00569" 1209 "s63E6H2" 0 "Glutathione transport system permease protein GsiD"  
"Chl\_A21\_00570" 1210 "s59E13H2" 0 "hypothetical protein"  
"Chl\_A21\_00570" 1210 "s59E25H2" 0 "hypothetical protein"  
"Chl\_A21\_00570" 1210 "s59E5H2" 0 "hypothetical protein"



"Chl\_A21\_00570" 1210 "s63E6H2" 0 "hypothetical protein"  
"Chl\_A21\_00571" 1211 "s59E13H2" 0 "Carboxy-terminal processing protease CtpB precursor"  
"Chl\_A21\_00571" 1211 "s59E25H2" 0 "Carboxy-terminal processing protease CtpB precursor"  
"Chl\_A21\_00571" 1211 "s59E5H2" 0 "Carboxy-terminal processing protease CtpB precursor"  
"Chl\_A21\_00571" 1211 "s63E6H2" 0 "Carboxy-terminal processing protease CtpB precursor"  
"Chl\_A21\_00572" 1212 "s59E13H2" 0 "hypothetical protein"  
"Chl\_A21\_00572" 1212 "s59E25H2" 0 "hypothetical protein"  
"Chl\_A21\_00572" 1212 "s59E5H2" 0 "hypothetical protein"  
"Chl\_A21\_00572" 1212 "s63E6H2" 0 "hypothetical protein"  
"Chl\_A21\_00573" 1213 "s59E13H2" 0 "Rubrerythrin"  
"Chl\_A21\_00573" 1213 "s59E25H2" 0 "Rubrerythrin"  
"Chl\_A21\_00573" 1213 "s59E5H2" 0 "Rubrerythrin"  
"Chl\_A21\_00573" 1213 "s63E6H2" 0 "Rubrerythrin"  
"Chl\_A21\_00574" 1214 "s59E13H2" 0 "Methylmalonate semialdehyde dehydrogenase [acylating]"  
"Chl\_A21\_00574" 1214 "s59E25H2" 0 "Methylmalonate semialdehyde dehydrogenase [acylating]"  
"Chl\_A21\_00574" 1214 "s59E5H2" 0 "Methylmalonate semialdehyde dehydrogenase [acylating]"  
"Chl\_A21\_00574" 1214 "s63E6H2" 0 "Methylmalonate semialdehyde dehydrogenase [acylating]"  
"Chl\_A21\_00575" 1215 "s59E13H2" 0 "5-aminovaleate aminotransferase DavT"  
"Chl\_A21\_00575" 1215 "s59E25H2" 0 "5-aminovaleate aminotransferase DavT"  
"Chl\_A21\_00575" 1215 "s59E5H2" 0 "5-aminovaleate aminotransferase DavT"  
"Chl\_A21\_00575" 1215 "s63E6H2" 0 "5-aminovaleate aminotransferase DavT"  
"Chl\_A21\_00576" 1216 "s59E13H2" 0 "D-hydantoinase"  
"Chl\_A21\_00576" 1216 "s59E25H2" 0 "D-hydantoinase"  
"Chl\_A21\_00576" 1216 "s59E5H2" 0 "D-hydantoinase"  
"Chl\_A21\_00576" 1216 "s63E6H2" 0 "D-hydantoinase"  
"Chl\_A21\_00577" 1217 "s59E13H2" 0 "NAD-dependent dihydropyrimidine dehydrogenase subunit PreA"  
"Chl\_A21\_00577" 1217 "s59E25H2" 0 "NAD-dependent dihydropyrimidine dehydrogenase subunit PreA"  
"Chl\_A21\_00577" 1217 "s59E5H2" 0 "NAD-dependent dihydropyrimidine dehydrogenase subunit PreA"  
"Chl\_A21\_00577" 1217 "s63E6H2" 0 "NAD-dependent dihydropyrimidine dehydrogenase subunit PreA"  
"Chl\_A21\_00578" 1218 "s59E13H2" 0 "N-carbamoyl-D-amino acid hydrolase"  
"Chl\_A21\_00578" 1218 "s59E25H2" 0 "N-carbamoyl-D-amino acid hydrolase"  
"Chl\_A21\_00578" 1218 "s59E5H2" 0 "N-carbamoyl-D-amino acid hydrolase"  
"Chl\_A21\_00578" 1218 "s63E6H2" 0 "N-carbamoyl-D-amino acid hydrolase"  
"Chl\_A21\_00579" 1219 "s59E13H2" 0 "Helix-turn-helix domain protein"  
"Chl\_A21\_00579" 1219 "s59E25H2" 0 "Helix-turn-helix domain protein"  
"Chl\_A21\_00579" 1219 "s59E5H2" 0 "Helix-turn-helix domain protein"  
"Chl\_A21\_00579" 1219 "s63E6H2" 0 "Helix-turn-helix domain protein"  
"Chl\_A21\_00580" 1220 "s59E13H2" 0 "hypothetical protein"  
"Chl\_A21\_00580" 1220 "s59E25H2" 0 "hypothetical protein"  
"Chl\_A21\_00580" 1220 "s59E5H2" 0 "hypothetical protein"  
"Chl\_A21\_00580" 1220 "s63E6H2" 0 "hypothetical protein"  
"Chl\_A21\_00581" 1221 "s59E13H2" 0 "hypothetical protein"  
"Chl\_A21\_00581" 1221 "s59E25H2" 0 "hypothetical protein"  
"Chl\_A21\_00581" 1221 "s59E5H2" 0 "hypothetical protein"  
"Chl\_A21\_00581" 1221 "s63E6H2" 0 "hypothetical protein"  
"Chl\_A21\_00583" 1223 "s59E13H2" 0 "ABC transporter arginine-binding protein 1 precursor"  
"Chl\_A21\_00583" 1223 "s59E25H2" 0 "ABC transporter arginine-binding protein 1 precursor"

"Chl\_A21\_00583" 1223 "s59E5H2" 0 "ABC transporter arginine-binding protein 1 precursor"  
"Chl\_A21\_00583" 1223 "s63E6H2" 0 "ABC transporter arginine-binding protein 1 precursor"  
"Chl\_A21\_00584" 1224 "s59E13H2" 0 "Glutamine transport system permease protein GlnP"  
"Chl\_A21\_00584" 1224 "s59E25H2" 0 "Glutamine transport system permease protein GlnP"  
"Chl\_A21\_00584" 1224 "s59E5H2" 0 "Glutamine transport system permease protein GlnP"  
"Chl\_A21\_00584" 1224 "s63E6H2" 0 "Glutamine transport system permease protein GlnP"  
"Chl\_A21\_00585" 1225 "s59E13H2" 0 "Glutamine transport ATP-binding protein GlnQ"  
"Chl\_A21\_00585" 1225 "s59E25H2" 0 "Glutamine transport ATP-binding protein GlnQ"  
"Chl\_A21\_00585" 1225 "s59E5H2" 0 "Glutamine transport ATP-binding protein GlnQ"  
"Chl\_A21\_00585" 1225 "s63E6H2" 0 "Glutamine transport ATP-binding protein GlnQ"  
"Chl\_A21\_00586" 1226 "s59E13H2" 0 "Antibiotic biosynthesis monooxygenase"  
"Chl\_A21\_00586" 1226 "s59E25H2" 0 "Antibiotic biosynthesis monooxygenase"  
"Chl\_A21\_00586" 1226 "s59E5H2" 0 "Antibiotic biosynthesis monooxygenase"  
"Chl\_A21\_00586" 1226 "s63E6H2" 0 "Antibiotic biosynthesis monooxygenase"  
"Chl\_A21\_00587" 1227 "s59E13H2" 0 "NYN domain protein"  
"Chl\_A21\_00587" 1227 "s59E25H2" 0 "NYN domain protein"  
"Chl\_A21\_00587" 1227 "s59E5H2" 0 "NYN domain protein"  
"Chl\_A21\_00587" 1227 "s63E6H2" 0 "NYN domain protein"  
"Chl\_A21\_00589" 1229 "s59E13H2" 0 "Malate dehydrogenase"  
"Chl\_A21\_00589" 1229 "s59E25H2" 0 "Malate dehydrogenase"  
"Chl\_A21\_00589" 1229 "s59E5H2" 0 "Malate dehydrogenase"  
"Chl\_A21\_00589" 1229 "s63E6H2" 0 "Malate dehydrogenase"  
"Chl\_A21\_00591" 1231 "s59E13H2" 0 "Universal stress protein family protein"  
"Chl\_A21\_00591" 1231 "s59E25H2" 0 "Universal stress protein family protein"  
"Chl\_A21\_00591" 1231 "s59E5H2" 0 "Universal stress protein family protein"  
"Chl\_A21\_00591" 1231 "s63E6H2" 0 "Universal stress protein family protein"  
"Chl\_A21\_00592" 1232 "s59E13H2" 0 "hypothetical protein"  
"Chl\_A21\_00592" 1232 "s59E25H2" 0 "hypothetical protein"  
"Chl\_A21\_00592" 1232 "s59E5H2" 0 "hypothetical protein"  
"Chl\_A21\_00592" 1232 "s63E6H2" 0 "hypothetical protein"  
"Chl\_A21\_00593" 1233 "s59E13H2" 0 "Endonuclease 4"  
"Chl\_A21\_00593" 1233 "s59E25H2" 0 "Endonuclease 4"  
"Chl\_A21\_00593" 1233 "s59E5H2" 0 "Endonuclease 4"  
"Chl\_A21\_00593" 1233 "s63E6H2" 0 "Endonuclease 4"  
"Chl\_A21\_00594" 1234 "s59E13H2" 0 "Carbonic anhydrase precursor"  
"Chl\_A21\_00594" 1234 "s59E25H2" 0 "Carbonic anhydrase precursor"  
"Chl\_A21\_00594" 1234 "s59E5H2" 0 "Carbonic anhydrase precursor"  
"Chl\_A21\_00594" 1234 "s63E6H2" 0 "Carbonic anhydrase precursor"  
"Chl\_A21\_00595" 1235 "s59E13H2" 0 "S-adenosyl-L-methionine-binding protein"  
"Chl\_A21\_00595" 1235 "s59E25H2" 0 "S-adenosyl-L-methionine-binding protein"  
"Chl\_A21\_00595" 1235 "s59E5H2" 0 "S-adenosyl-L-methionine-binding protein"  
"Chl\_A21\_00595" 1235 "s63E6H2" 0 "S-adenosyl-L-methionine-binding protein"  
"Chl\_A21\_00596" 1236 "s59E13H2" 0 "putative hydrogenase nickel incorporation protein HypA"  
"Chl\_A21\_00596" 1236 "s59E25H2" 0 "putative hydrogenase nickel incorporation protein HypA"  
"Chl\_A21\_00596" 1236 "s59E5H2" 0 "putative hydrogenase nickel incorporation protein HypA"  
"Chl\_A21\_00596" 1236 "s63E6H2" 0 "putative hydrogenase nickel incorporation protein HypA"  
"Chl\_A21\_00597" 1237 "s59E13H2" 0 "Carbamoyltransferase HypF"

"Chl\_A21\_00597" 1237 "s59E25H2" 0 "Carbamoyltransferase HypF"  
"Chl\_A21\_00597" 1237 "s59E5H2" 0 "Carbamoyltransferase HypF"  
"Chl\_A21\_00597" 1237 "s63E6H2" 0 "Carbamoyltransferase HypF"  
"Chl\_A21\_00598" 1238 "s59E13H2" 0 "Hydrogenase isoenzymes formation protein HypC"  
"Chl\_A21\_00598" 1238 "s59E25H2" 0 "Hydrogenase isoenzymes formation protein HypC"  
"Chl\_A21\_00598" 1238 "s59E5H2" 0 "Hydrogenase isoenzymes formation protein HypC"  
"Chl\_A21\_00598" 1238 "s63E6H2" 0 "Hydrogenase isoenzymes formation protein HypC"  
"Chl\_A21\_00599" 1239 "s59E13H2" 0 "Hydrogenase expression/formation protein HypD"  
"Chl\_A21\_00599" 1239 "s59E25H2" 0 "Hydrogenase expression/formation protein HypD"  
"Chl\_A21\_00599" 1239 "s59E5H2" 0 "Hydrogenase expression/formation protein HypD"  
"Chl\_A21\_00599" 1239 "s63E6H2" 0 "Hydrogenase expression/formation protein HypD"  
"Chl\_A21\_00600" 1240 "s59E13H2" 0 "Hydrogenase expression/formation protein HypE"  
"Chl\_A21\_00600" 1240 "s59E25H2" 0 "Hydrogenase expression/formation protein HypE"  
"Chl\_A21\_00600" 1240 "s59E5H2" 0 "Hydrogenase expression/formation protein HypE"  
"Chl\_A21\_00600" 1240 "s63E6H2" 0 "Hydrogenase expression/formation protein HypE"  
"Chl\_A21\_00601" 1241 "s59E13H2" 0 "Formate dehydrogenase subunit alpha"  
"Chl\_A21\_00601" 1241 "s59E25H2" 0 "Formate dehydrogenase subunit alpha"  
"Chl\_A21\_00601" 1241 "s59E5H2" 0 "Formate dehydrogenase subunit alpha"  
"Chl\_A21\_00601" 1241 "s63E6H2" 0 "Formate dehydrogenase subunit alpha"  
"Chl\_A21\_00603" 1243 "s59E13H2" 0 "Formate dehydrogenase subunit alpha"  
"Chl\_A21\_00603" 1243 "s59E25H2" 0 "Formate dehydrogenase subunit alpha"  
"Chl\_A21\_00603" 1243 "s59E5H2" 0 "Formate dehydrogenase subunit alpha"  
"Chl\_A21\_00603" 1243 "s63E6H2" 0 "Formate dehydrogenase subunit alpha"  
"Chl\_A21\_00604" 1244 "s59E13H2" 0 "Formate dehydrogenase subunit beta"  
"Chl\_A21\_00604" 1244 "s59E25H2" 0 "Formate dehydrogenase subunit beta"  
"Chl\_A21\_00604" 1244 "s59E5H2" 0 "Formate dehydrogenase subunit beta"  
"Chl\_A21\_00604" 1244 "s63E6H2" 0 "Formate dehydrogenase subunit beta"  
"Chl\_A21\_00605" 1245 "s59E13H2" 0 "F420-non-reducing hydrogenase iron-sulfur subunit D"  
"Chl\_A21\_00605" 1245 "s59E25H2" 0 "F420-non-reducing hydrogenase iron-sulfur subunit D"  
"Chl\_A21\_00605" 1245 "s59E5H2" 0 "F420-non-reducing hydrogenase iron-sulfur subunit D"  
"Chl\_A21\_00605" 1245 "s63E6H2" 0 "F420-non-reducing hydrogenase iron-sulfur subunit D"  
"Chl\_A21\_00606" 1246 "s59E13H2" 0 "CoB--CoM heterodisulfide reductase iron-sulfur subunit A"  
"Chl\_A21\_00606" 1246 "s59E25H2" 0 "CoB--CoM heterodisulfide reductase iron-sulfur subunit A"  
"Chl\_A21\_00606" 1246 "s59E5H2" 0 "CoB--CoM heterodisulfide reductase iron-sulfur subunit A"  
"Chl\_A21\_00606" 1246 "s63E6H2" 0 "CoB--CoM heterodisulfide reductase iron-sulfur subunit A"  
"Chl\_A21\_00607" 1247 "s59E13H2" 0 "Heterodisulfide reductase subunit A-like protein"  
"Chl\_A21\_00607" 1247 "s59E25H2" 0 "Heterodisulfide reductase subunit A-like protein"  
"Chl\_A21\_00607" 1247 "s59E5H2" 0 "Heterodisulfide reductase subunit A-like protein"  
"Chl\_A21\_00607" 1247 "s63E6H2" 0 "Heterodisulfide reductase subunit A-like protein"  
"Chl\_A21\_00608" 1248 "s59E13H2" 0 "CoB--CoM heterodisulfide reductase subunit B"  
"Chl\_A21\_00608" 1248 "s59E25H2" 0 "CoB--CoM heterodisulfide reductase subunit B"  
"Chl\_A21\_00608" 1248 "s59E5H2" 0 "CoB--CoM heterodisulfide reductase subunit B"  
"Chl\_A21\_00608" 1248 "s63E6H2" 0 "CoB--CoM heterodisulfide reductase subunit B"  
"Chl\_A21\_00609" 1249 "s59E13H2" 0 "CoB--CoM heterodisulfide reductase iron-sulfur subunit C"  
"Chl\_A21\_00609" 1249 "s59E25H2" 0 "CoB--CoM heterodisulfide reductase iron-sulfur subunit C"  
"Chl\_A21\_00609" 1249 "s59E5H2" 0 "CoB--CoM heterodisulfide reductase iron-sulfur subunit C"  
"Chl\_A21\_00609" 1249 "s63E6H2" 0 "CoB--CoM heterodisulfide reductase iron-sulfur subunit C"

"Chl\_A21\_00610" 1250 "s59E13H2" 0 "Lipoate-protein ligase LplJ"  
"Chl\_A21\_00610" 1250 "s59E25H2" 0 "Lipoate-protein ligase LplJ"  
"Chl\_A21\_00610" 1250 "s59E5H2" 0 "Lipoate-protein ligase LplJ"  
"Chl\_A21\_00610" 1250 "s63E6H2" 0 "Lipoate-protein ligase LplJ"  
"Chl\_A21\_00611" 1251 "s59E13H2" 0 "CoB--CoM heterodisulfide reductase iron-sulfur subunit D"  
"Chl\_A21\_00611" 1251 "s59E25H2" 0 "CoB--CoM heterodisulfide reductase iron-sulfur subunit D"  
"Chl\_A21\_00611" 1251 "s59E5H2" 0 "CoB--CoM heterodisulfide reductase iron-sulfur subunit D"  
"Chl\_A21\_00611" 1251 "s63E6H2" 0 "CoB--CoM heterodisulfide reductase iron-sulfur subunit D"  
"Chl\_A21\_00612" 1252 "s59E13H2" 0 "Glycine cleavage system H protein"  
"Chl\_A21\_00612" 1252 "s59E25H2" 0 "Glycine cleavage system H protein"  
"Chl\_A21\_00612" 1252 "s59E5H2" 0 "Glycine cleavage system H protein"  
"Chl\_A21\_00612" 1252 "s63E6H2" 0 "Glycine cleavage system H protein"  
"Chl\_A21\_00613" 1253 "s59E13H2" 0 "Phosphate import ATP-binding protein PstB 3"  
"Chl\_A21\_00613" 1253 "s59E25H2" 0 "Phosphate import ATP-binding protein PstB 3"  
"Chl\_A21\_00613" 1253 "s59E5H2" 0 "Phosphate import ATP-binding protein PstB 3"  
"Chl\_A21\_00613" 1253 "s63E6H2" 0 "Phosphate import ATP-binding protein PstB 3"  
"Chl\_A21\_00614" 1254 "s59E13H2" 0 "Phosphate transport system permease protein PstA"  
"Chl\_A21\_00614" 1254 "s59E25H2" 0 "Phosphate transport system permease protein PstA"  
"Chl\_A21\_00614" 1254 "s59E5H2" 0 "Phosphate transport system permease protein PstA"  
"Chl\_A21\_00614" 1254 "s63E6H2" 0 "Phosphate transport system permease protein PstA"  
"Chl\_A21\_00615" 1255 "s59E13H2" 0 "Phosphate transport system permease protein PstC"  
"Chl\_A21\_00615" 1255 "s59E25H2" 0 "Phosphate transport system permease protein PstC"  
"Chl\_A21\_00615" 1255 "s59E5H2" 0 "Phosphate transport system permease protein PstC"  
"Chl\_A21\_00615" 1255 "s63E6H2" 0 "Phosphate transport system permease protein PstC"  
"Chl\_A21\_00616" 1256 "s59E13H2" 0 "Phosphate-binding protein PstS 1 precursor"  
"Chl\_A21\_00616" 1256 "s59E25H2" 0 "Phosphate-binding protein PstS 1 precursor"  
"Chl\_A21\_00616" 1256 "s59E5H2" 0 "Phosphate-binding protein PstS 1 precursor"  
"Chl\_A21\_00616" 1256 "s63E6H2" 0 "Phosphate-binding protein PstS 1 precursor"  
"Chl\_A21\_00618" 1258 "s59E13H2" 0 "HTH-type transcriptional regulator CymR"  
"Chl\_A21\_00618" 1258 "s59E25H2" 0 "HTH-type transcriptional regulator CymR"  
"Chl\_A21\_00618" 1258 "s59E5H2" 0 "HTH-type transcriptional regulator CymR"  
"Chl\_A21\_00618" 1258 "s63E6H2" 0 "HTH-type transcriptional regulator CymR"  
"Chl\_A21\_00619" 1259 "s59E13H2" 0 "putative formate transporter 1"  
"Chl\_A21\_00619" 1259 "s59E25H2" 0 "putative formate transporter 1"  
"Chl\_A21\_00619" 1259 "s59E5H2" 0 "putative formate transporter 1"  
"Chl\_A21\_00619" 1259 "s63E6H2" 0 "putative formate transporter 1"  
"Chl\_A21\_00620" 1260 "s59E13H2" 0 "hypothetical protein"  
"Chl\_A21\_00620" 1260 "s59E25H2" 0 "hypothetical protein"  
"Chl\_A21\_00620" 1260 "s59E5H2" 0 "hypothetical protein"  
"Chl\_A21\_00620" 1260 "s63E6H2" 0 "hypothetical protein"  
"Chl\_A21\_00621" 1261 "s59E13H2" 0 "hypothetical protein"  
"Chl\_A21\_00621" 1261 "s59E25H2" 0 "hypothetical protein"  
"Chl\_A21\_00621" 1261 "s59E5H2" 0 "hypothetical protein"  
"Chl\_A21\_00621" 1261 "s63E6H2" 0 "hypothetical protein"  
"Chl\_A21\_00622" 1262 "s59E13H2" 0 "hypothetical protein"  
"Chl\_A21\_00622" 1262 "s59E25H2" 0 "hypothetical protein"  
"Chl\_A21\_00622" 1262 "s59E5H2" 0 "hypothetical protein"

"Chl\_A21\_00622" 1262 "s63E6H2" 0 "hypothetical protein"  
"Chl\_A21\_00623" 1263 "s59E13H2" 0 "Transcriptional regulatory protein LiaR"  
"Chl\_A21\_00623" 1263 "s59E25H2" 0 "Transcriptional regulatory protein LiaR"  
"Chl\_A21\_00623" 1263 "s59E5H2" 0 "Transcriptional regulatory protein LiaR"  
"Chl\_A21\_00623" 1263 "s63E6H2" 0 "Transcriptional regulatory protein LiaR"  
"Chl\_A21\_00624" 1264 "s59E13H2" 0 "Signal transduction histidine-protein kinase/phosphatase DegS"  
"Chl\_A21\_00624" 1264 "s59E25H2" 0 "Signal transduction histidine-protein kinase/phosphatase DegS"  
"Chl\_A21\_00624" 1264 "s59E5H2" 0 "Signal transduction histidine-protein kinase/phosphatase DegS"  
"Chl\_A21\_00624" 1264 "s63E6H2" 0 "Signal transduction histidine-protein kinase/phosphatase DegS"  
"Chl\_A21\_00625" 1265 "s59E13H2" 0 "Hydrogenase 2 maturation protease"  
"Chl\_A21\_00625" 1265 "s59E25H2" 0 "Hydrogenase 2 maturation protease"  
"Chl\_A21\_00625" 1265 "s59E5H2" 0 "Hydrogenase 2 maturation protease"  
"Chl\_A21\_00625" 1265 "s63E6H2" 0 "Hydrogenase 2 maturation protease"  
"Chl\_A21\_00626" 1266 "s59E13H2" 0 "Periplasmic [NiFeSe] hydrogenase large subunit"  
"Chl\_A21\_00626" 1266 "s59E25H2" 0 "Periplasmic [NiFeSe] hydrogenase large subunit"  
"Chl\_A21\_00626" 1266 "s59E5H2" 0 "Periplasmic [NiFeSe] hydrogenase large subunit"  
"Chl\_A21\_00626" 1266 "s63E6H2" 0 "Periplasmic [NiFeSe] hydrogenase large subunit"  
"Chl\_A21\_00627" 1267 "s59E13H2" 0 "Formate dehydrogenase subunit alpha precursor"  
"Chl\_A21\_00627" 1267 "s59E25H2" 0 "Formate dehydrogenase subunit alpha precursor"  
"Chl\_A21\_00627" 1267 "s59E5H2" 0 "Formate dehydrogenase subunit alpha precursor"  
"Chl\_A21\_00627" 1267 "s63E6H2" 0 "Formate dehydrogenase subunit alpha precursor"  
"Chl\_A21\_00628" 1268 "s59E13H2" 0 "Formate dehydrogenase subunit alpha precursor"  
"Chl\_A21\_00628" 1268 "s59E25H2" 0 "Formate dehydrogenase subunit alpha precursor"  
"Chl\_A21\_00628" 1268 "s59E5H2" 0 "Formate dehydrogenase subunit alpha precursor"  
"Chl\_A21\_00628" 1268 "s63E6H2" 0 "Formate dehydrogenase subunit alpha precursor"  
"Chl\_A21\_00629" 1269 "s59E13H2" 0 "Formate dehydrogenase-O iron-sulfur subunit"  
"Chl\_A21\_00629" 1269 "s59E25H2" 0 "Formate dehydrogenase-O iron-sulfur subunit"  
"Chl\_A21\_00629" 1269 "s59E5H2" 0 "Formate dehydrogenase-O iron-sulfur subunit"  
"Chl\_A21\_00629" 1269 "s63E6H2" 0 "Formate dehydrogenase-O iron-sulfur subunit"  
"Chl\_A21\_00630" 1270 "s59E13H2" 0 "Formate dehydrogenase, cytochrome b556(fdo) subunit"  
"Chl\_A21\_00630" 1270 "s59E25H2" 0 "Formate dehydrogenase, cytochrome b556(fdo) subunit"  
"Chl\_A21\_00630" 1270 "s59E5H2" 0 "Formate dehydrogenase, cytochrome b556(fdo) subunit"  
"Chl\_A21\_00630" 1270 "s63E6H2" 0 "Formate dehydrogenase, cytochrome b556(fdo) subunit"  
"Chl\_A21\_00631" 1271 "s59E13H2" 0 "formate dehydrogenase accessory protein FdhE"  
"Chl\_A21\_00631" 1271 "s59E25H2" 0 "formate dehydrogenase accessory protein FdhE"  
"Chl\_A21\_00631" 1271 "s59E5H2" 0 "formate dehydrogenase accessory protein FdhE"  
"Chl\_A21\_00631" 1271 "s63E6H2" 0 "formate dehydrogenase accessory protein FdhE"  
"Chl\_A21\_00632" 1272 "s59E13H2" 0 "Hydrogenase isoenzymes formation protein HypC"  
"Chl\_A21\_00632" 1272 "s59E25H2" 0 "Hydrogenase isoenzymes formation protein HypC"  
"Chl\_A21\_00632" 1272 "s59E5H2" 0 "Hydrogenase isoenzymes formation protein HypC"  
"Chl\_A21\_00632" 1272 "s63E6H2" 0 "Hydrogenase isoenzymes formation protein HypC"  
"Chl\_A21\_00633" 1273 "s59E13H2" 0 "Protoheme IX farnesyltransferase 1"  
"Chl\_A21\_00633" 1273 "s59E25H2" 0 "Protoheme IX farnesyltransferase 1"  
"Chl\_A21\_00633" 1273 "s59E5H2" 0 "Protoheme IX farnesyltransferase 1"  
"Chl\_A21\_00633" 1273 "s63E6H2" 0 "Protoheme IX farnesyltransferase 1"  
"Chl\_A21\_00634" 1274 "s59E13H2" 0 "formate dehydrogenase accessory protein"  
"Chl\_A21\_00634" 1274 "s59E25H2" 0 "formate dehydrogenase accessory protein"

"Chl\_A21\_00634" 1274 "s59E5H2" 0 "formate dehydrogenase accessory protein"  
"Chl\_A21\_00634" 1274 "s63E6H2" 0 "formate dehydrogenase accessory protein"  
"Chl\_A21\_00635" 1275 "s59E13H2" 0 "hypothetical protein"  
"Chl\_A21\_00635" 1275 "s59E25H2" 0 "hypothetical protein"  
"Chl\_A21\_00635" 1275 "s59E5H2" 0 "hypothetical protein"  
"Chl\_A21\_00635" 1275 "s63E6H2" 0 "hypothetical protein"  
"Chl\_A21\_00636" 1276 "s59E13H2" 0 "Sec-independent protein translocase protein TatAd"  
"Chl\_A21\_00636" 1276 "s59E25H2" 0 "Sec-independent protein translocase protein TatAd"  
"Chl\_A21\_00636" 1276 "s59E5H2" 0 "Sec-independent protein translocase protein TatAd"  
"Chl\_A21\_00636" 1276 "s63E6H2" 0 "Sec-independent protein translocase protein TatAd"  
"Chl\_A21\_00637" 1277 "s59E13H2" 0 "Bifunctional protein FOLD protein"  
"Chl\_A21\_00637" 1277 "s59E25H2" 0 "Bifunctional protein FOLD protein"  
"Chl\_A21\_00637" 1277 "s59E5H2" 0 "Bifunctional protein FOLD protein"  
"Chl\_A21\_00637" 1277 "s63E6H2" 0 "Bifunctional protein FOLD protein"  
"Chl\_A21\_00638" 1278 "s59E13H2" 0 "CoB--CoM heterodisulfide reductase subunit B"  
"Chl\_A21\_00638" 1278 "s59E25H2" 0 "CoB--CoM heterodisulfide reductase subunit B"  
"Chl\_A21\_00638" 1278 "s59E5H2" 0 "CoB--CoM heterodisulfide reductase subunit B"  
"Chl\_A21\_00638" 1278 "s63E6H2" 0 "CoB--CoM heterodisulfide reductase subunit B"  
"Chl\_A21\_00639" 1279 "s59E13H2" 0 "Septum site-determining protein MinD"  
"Chl\_A21\_00639" 1279 "s59E25H2" 0 "Septum site-determining protein MinD"  
"Chl\_A21\_00639" 1279 "s59E5H2" 0 "Septum site-determining protein MinD"  
"Chl\_A21\_00639" 1279 "s63E6H2" 0 "Septum site-determining protein MinD"  
"Chl\_A21\_00640" 1280 "s59E13H2" 0 "phosphodiesterase"  
"Chl\_A21\_00640" 1280 "s59E25H2" 0 "phosphodiesterase"  
"Chl\_A21\_00640" 1280 "s59E5H2" 0 "phosphodiesterase"  
"Chl\_A21\_00640" 1280 "s63E6H2" 0 "phosphodiesterase"  
"Chl\_A21\_00641" 1281 "s59E13H2" 0 "Bifunctional homocysteine S-methyltransferase/5,10-methylenetetrahydrofolate reductase"  
"Chl\_A21\_00641" 1281 "s59E25H2" 0 "Bifunctional homocysteine S-methyltransferase/5,10-methylenetetrahydrofolate reductase"  
"Chl\_A21\_00641" 1281 "s59E5H2" 0 "Bifunctional homocysteine S-methyltransferase/5,10-methylenetetrahydrofolate reductase"  
"Chl\_A21\_00641" 1281 "s63E6H2" 0 "Bifunctional homocysteine S-methyltransferase/5,10-methylenetetrahydrofolate reductase"  
"Chl\_A21\_00642" 1282 "s59E13H2" 0 "hypothetical protein"  
"Chl\_A21\_00642" 1282 "s59E25H2" 0 "hypothetical protein"  
"Chl\_A21\_00642" 1282 "s59E5H2" 0 "hypothetical protein"  
"Chl\_A21\_00642" 1282 "s63E6H2" 0 "hypothetical protein"  
"Chl\_A21\_00643" 1283 "s59E13H2" 0 "Alkaline phosphatase synthesis transcriptional regulatory protein PhoP"  
"Chl\_A21\_00643" 1283 "s59E25H2" 0 "Alkaline phosphatase synthesis transcriptional regulatory protein PhoP"  
"Chl\_A21\_00643" 1283 "s59E5H2" 0 "Alkaline phosphatase synthesis transcriptional regulatory protein PhoP"  
"Chl\_A21\_00643" 1283 "s63E6H2" 0 "Alkaline phosphatase synthesis transcriptional regulatory protein PhoP"  
"Chl\_A21\_00644" 1284 "s59E13H2" 0 "Response regulator MprA"  
"Chl\_A21\_00644" 1284 "s59E25H2" 0 "Response regulator MprA"  
"Chl\_A21\_00644" 1284 "s59E5H2" 0 "Response regulator MprA"  
"Chl\_A21\_00644" 1284 "s63E6H2" 0 "Response regulator MprA"  
"Chl\_A21\_00645" 1285 "s59E13H2" 0 "Bifunctional homocysteine S-methyltransferase/5,10-methylenetetrahydrofolate reductase"  
"Chl\_A21\_00645" 1285 "s59E25H2" 0 "Bifunctional homocysteine S-methyltransferase/5,10-methylenetetrahydrofolate reductase"  
"Chl\_A21\_00645" 1285 "s59E5H2" 0 "Bifunctional homocysteine S-methyltransferase/5,10-methylenetetrahydrofolate reductase"  
"Chl\_A21\_00645" 1285 "s63E6H2" 0 "Bifunctional homocysteine S-methyltransferase/5,10-methylenetetrahydrofolate reductase"  
"Chl\_A21\_00646" 1286 "s59E13H2" 0 "Alkaline phosphatase synthesis sensor protein PhoR"

"Chl\_A21\_00646" 1286 "s59E25H2" 0 "Alkaline phosphatase synthesis sensor protein PhoR"  
"Chl\_A21\_00646" 1286 "s59E5H2" 0 "Alkaline phosphatase synthesis sensor protein PhoR"  
"Chl\_A21\_00646" 1286 "s63E6H2" 0 "Alkaline phosphatase synthesis sensor protein PhoR"  
"Chl\_A21\_00647" 1287 "s59E13H2" 0 "Periplasmic [NiFeSe] hydrogenase small subunit precursor"  
"Chl\_A21\_00647" 1287 "s59E25H2" 0 "Periplasmic [NiFeSe] hydrogenase small subunit precursor"  
"Chl\_A21\_00647" 1287 "s59E5H2" 0 "Periplasmic [NiFeSe] hydrogenase small subunit precursor"  
"Chl\_A21\_00647" 1287 "s63E6H2" 0 "Periplasmic [NiFeSe] hydrogenase small subunit precursor"  
"Chl\_A21\_00648" 1288 "s59E13H2" 0 "hypothetical protein"  
"Chl\_A21\_00648" 1288 "s59E25H2" 0 "hypothetical protein"  
"Chl\_A21\_00648" 1288 "s59E5H2" 0 "hypothetical protein"  
"Chl\_A21\_00648" 1288 "s63E6H2" 0 "hypothetical protein"  
"Chl\_A21\_00649" 1289 "s59E13H2" 0 "hypothetical protein"  
"Chl\_A21\_00649" 1289 "s59E25H2" 0 "hypothetical protein"  
"Chl\_A21\_00649" 1289 "s59E5H2" 0 "hypothetical protein"  
"Chl\_A21\_00649" 1289 "s63E6H2" 0 "hypothetical protein"  
"Chl\_A21\_00650" 1290 "s59E13H2" 0 "F420-non-reducing hydrogenase iron-sulfur subunit D"  
"Chl\_A21\_00650" 1290 "s59E25H2" 0 "F420-non-reducing hydrogenase iron-sulfur subunit D"  
"Chl\_A21\_00650" 1290 "s59E5H2" 0 "F420-non-reducing hydrogenase iron-sulfur subunit D"  
"Chl\_A21\_00650" 1290 "s63E6H2" 0 "F420-non-reducing hydrogenase iron-sulfur subunit D"  
"Chl\_A21\_00651" 1291 "s59E13H2" 0 "CoB--CoM heterodisulfide reductase iron-sulfur subunit A"  
"Chl\_A21\_00651" 1291 "s59E25H2" 0 "CoB--CoM heterodisulfide reductase iron-sulfur subunit A"  
"Chl\_A21\_00651" 1291 "s59E5H2" 0 "CoB--CoM heterodisulfide reductase iron-sulfur subunit A"  
"Chl\_A21\_00651" 1291 "s63E6H2" 0 "CoB--CoM heterodisulfide reductase iron-sulfur subunit A"  
"Chl\_A21\_00652" 1292 "s59E13H2" 0 "NAD-dependent malic enzyme"  
"Chl\_A21\_00652" 1292 "s59E25H2" 0 "NAD-dependent malic enzyme"  
"Chl\_A21\_00652" 1292 "s59E5H2" 0 "NAD-dependent malic enzyme"  
"Chl\_A21\_00652" 1292 "s63E6H2" 0 "NAD-dependent malic enzyme"  
"Chl\_A21\_00653" 1293 "s59E13H2" 0 "5-methyltetrahydrofolate:corrinoid/iron-sulfur protein co-methyltransferase"  
"Chl\_A21\_00653" 1293 "s59E25H2" 0 "5-methyltetrahydrofolate:corrinoid/iron-sulfur protein co-methyltransferase"  
"Chl\_A21\_00653" 1293 "s59E5H2" 0 "5-methyltetrahydrofolate:corrinoid/iron-sulfur protein co-methyltransferase"  
"Chl\_A21\_00653" 1293 "s63E6H2" 0 "5-methyltetrahydrofolate:corrinoid/iron-sulfur protein co-methyltransferase"  
"Chl\_A21\_00654" 1294 "s59E13H2" 0 "Corrinoid/iron-sulfur protein large subunit"  
"Chl\_A21\_00654" 1294 "s59E25H2" 0 "Corrinoid/iron-sulfur protein large subunit"  
"Chl\_A21\_00654" 1294 "s59E5H2" 0 "Corrinoid/iron-sulfur protein large subunit"  
"Chl\_A21\_00654" 1294 "s63E6H2" 0 "Corrinoid/iron-sulfur protein large subunit"  
"Chl\_A21\_00655" 1295 "s59E13H2" 0 "hypothetical protein"  
"Chl\_A21\_00655" 1295 "s59E25H2" 0 "hypothetical protein"  
"Chl\_A21\_00655" 1295 "s59E5H2" 0 "hypothetical protein"  
"Chl\_A21\_00655" 1295 "s63E6H2" 0 "hypothetical protein"  
"Chl\_A21\_00656" 1296 "s59E13H2" 0 "metal-dependent hydrolase"  
"Chl\_A21\_00656" 1296 "s59E25H2" 0 "metal-dependent hydrolase"  
"Chl\_A21\_00656" 1296 "s59E5H2" 0 "metal-dependent hydrolase"  
"Chl\_A21\_00656" 1296 "s63E6H2" 0 "metal-dependent hydrolase"  
"Chl\_A21\_00657" 1297 "s59E13H2" 0 "GTP cyclohydrolase 1"  
"Chl\_A21\_00657" 1297 "s59E25H2" 0 "GTP cyclohydrolase 1"  
"Chl\_A21\_00657" 1297 "s59E5H2" 0 "GTP cyclohydrolase 1"  
"Chl\_A21\_00657" 1297 "s63E6H2" 0 "GTP cyclohydrolase 1"

"Chl\_A21\_00658" 1298 "s59E13H2" 0 "Dihydropteroate synthase"  
"Chl\_A21\_00658" 1298 "s59E25H2" 0 "Dihydropteroate synthase"  
"Chl\_A21\_00658" 1298 "s59E5H2" 0 "Dihydropteroate synthase"  
"Chl\_A21\_00658" 1298 "s63E6H2" 0 "Dihydropteroate synthase"  
"Chl\_A21\_00659" 1299 "s59E13H2" 0 "Protease 3 precursor"  
"Chl\_A21\_00659" 1299 "s59E25H2" 0 "Protease 3 precursor"  
"Chl\_A21\_00659" 1299 "s59E5H2" 0 "Protease 3 precursor"  
"Chl\_A21\_00659" 1299 "s63E6H2" 0 "Protease 3 precursor"  
"Chl\_A21\_00660" 1300 "s59E13H2" 0 "hypothetical protein"  
"Chl\_A21\_00660" 1300 "s59E25H2" 0 "hypothetical protein"  
"Chl\_A21\_00660" 1300 "s59E5H2" 0 "hypothetical protein"  
"Chl\_A21\_00660" 1300 "s63E6H2" 0 "hypothetical protein"  
"Chl\_A21\_00661" 1301 "s59E13H2" 0 "Exodeoxyribonuclease 7 small subunit"  
"Chl\_A21\_00661" 1301 "s59E25H2" 0 "Exodeoxyribonuclease 7 small subunit"  
"Chl\_A21\_00661" 1301 "s59E5H2" 0 "Exodeoxyribonuclease 7 small subunit"  
"Chl\_A21\_00661" 1301 "s63E6H2" 0 "Exodeoxyribonuclease 7 small subunit"  
"Chl\_A21\_00662" 1302 "s59E13H2" 0 "Exodeoxyribonuclease 7 large subunit"  
"Chl\_A21\_00662" 1302 "s59E25H2" 0 "Exodeoxyribonuclease 7 large subunit"  
"Chl\_A21\_00662" 1302 "s59E5H2" 0 "Exodeoxyribonuclease 7 large subunit"  
"Chl\_A21\_00662" 1302 "s63E6H2" 0 "Exodeoxyribonuclease 7 large subunit"  
"Chl\_A21\_00663" 1303 "s59E13H2" 0 "Exodeoxyribonuclease 7 large subunit"  
"Chl\_A21\_00663" 1303 "s59E25H2" 0 "Exodeoxyribonuclease 7 large subunit"  
"Chl\_A21\_00663" 1303 "s59E5H2" 0 "Exodeoxyribonuclease 7 large subunit"  
"Chl\_A21\_00663" 1303 "s63E6H2" 0 "Exodeoxyribonuclease 7 large subunit"  
"Chl\_A21\_00664" 1304 "s59E13H2" 0 "hypothetical protein"  
"Chl\_A21\_00664" 1304 "s59E25H2" 0 "hypothetical protein"  
"Chl\_A21\_00664" 1304 "s59E5H2" 0 "hypothetical protein"  
"Chl\_A21\_00664" 1304 "s63E6H2" 0 "hypothetical protein"  
"Chl\_A21\_00665" 1305 "s59E13H2" 0 "hypothetical protein"  
"Chl\_A21\_00665" 1305 "s59E25H2" 0 "hypothetical protein"  
"Chl\_A21\_00665" 1305 "s59E5H2" 0 "hypothetical protein"  
"Chl\_A21\_00665" 1305 "s63E6H2" 0 "hypothetical protein"  
"Chl\_A21\_00667" 1307 "s59E13H2" 0 "Trigger factor"  
"Chl\_A21\_00667" 1307 "s59E25H2" 0 "Trigger factor"  
"Chl\_A21\_00667" 1307 "s59E5H2" 0 "Trigger factor"  
"Chl\_A21\_00667" 1307 "s63E6H2" 0 "Trigger factor"  
"Chl\_A21\_00668" 1308 "s59E13H2" 0 "ATP-dependent Clp protease proteolytic subunit precursor"  
"Chl\_A21\_00668" 1308 "s59E25H2" 360.2596 "ATP-dependent Clp protease proteolytic subunit precursor"  
"Chl\_A21\_00668" 1308 "s59E5H2" 0 "ATP-dependent Clp protease proteolytic subunit precursor"  
"Chl\_A21\_00668" 1308 "s63E6H2" 0 "ATP-dependent Clp protease proteolytic subunit precursor"  
"Chl\_A21\_00669" 1309 "s59E13H2" 0 "ATP-dependent Clp protease ATP-binding subunit ClpX"  
"Chl\_A21\_00669" 1309 "s59E25H2" 308.6438 "ATP-dependent Clp protease ATP-binding subunit ClpX"  
"Chl\_A21\_00669" 1309 "s59E5H2" 0 "ATP-dependent Clp protease ATP-binding subunit ClpX"  
"Chl\_A21\_00669" 1309 "s63E6H2" 0 "ATP-dependent Clp protease ATP-binding subunit ClpX"  
"Chl\_A21\_00670" 1310 "s59E13H2" 0 "translocation protein TolB"  
"Chl\_A21\_00670" 1310 "s59E25H2" 0 "translocation protein TolB"  
"Chl\_A21\_00670" 1310 "s59E5H2" 0 "translocation protein TolB"



"Chl\_A21\_00670" 1310 "s63E6H2" 0 "translocation protein TolB"  
"Chl\_A21\_00671" 1311 "s59E13H2" 0 "Cyclic pyranopterin monophosphate synthase"  
"Chl\_A21\_00671" 1311 "s59E25H2" 0 "Cyclic pyranopterin monophosphate synthase"  
"Chl\_A21\_00671" 1311 "s59E5H2" 0 "Cyclic pyranopterin monophosphate synthase"  
"Chl\_A21\_00671" 1311 "s63E6H2" 0 "Cyclic pyranopterin monophosphate synthase"  
"Chl\_A21\_00673" 1313 "s59E13H2" 0 "D-inositol 3-phosphate glycosyltransferase"  
"Chl\_A21\_00673" 1313 "s59E25H2" 0 "D-inositol 3-phosphate glycosyltransferase"  
"Chl\_A21\_00673" 1313 "s59E5H2" 0 "D-inositol 3-phosphate glycosyltransferase"  
"Chl\_A21\_00673" 1313 "s63E6H2" 0 "D-inositol 3-phosphate glycosyltransferase"  
"Chl\_A21\_00674" 1314 "s59E13H2" 0 "hypothetical protein"  
"Chl\_A21\_00674" 1314 "s59E25H2" 0 "hypothetical protein"  
"Chl\_A21\_00674" 1314 "s59E5H2" 0 "hypothetical protein"  
"Chl\_A21\_00674" 1314 "s63E6H2" 0 "hypothetical protein"  
"Chl\_A21\_00675" 1315 "s59E13H2" 0 "30S ribosomal protein S1"  
"Chl\_A21\_00675" 1315 "s59E25H2" 0 "30S ribosomal protein S1"  
"Chl\_A21\_00675" 1315 "s59E5H2" 0 "30S ribosomal protein S1"  
"Chl\_A21\_00675" 1315 "s63E6H2" 0 "30S ribosomal protein S1"  
"Chl\_A21\_00676" 1316 "s59E13H2" 0 "DNA-directed RNA polymerase subunit beta"  
"Chl\_A21\_00676" 1316 "s59E25H2" 0 "DNA-directed RNA polymerase subunit beta"  
"Chl\_A21\_00676" 1316 "s59E5H2" 0 "DNA-directed RNA polymerase subunit beta"  
"Chl\_A21\_00676" 1316 "s63E6H2" 0 "DNA-directed RNA polymerase subunit beta"  
"Chl\_A21\_00677" 1317 "s59E13H2" 0 "CoB--CoM heterodisulfide reductase iron-sulfur subunit D"  
"Chl\_A21\_00677" 1317 "s59E25H2" 0 "CoB--CoM heterodisulfide reductase iron-sulfur subunit D"  
"Chl\_A21\_00677" 1317 "s59E5H2" 0 "CoB--CoM heterodisulfide reductase iron-sulfur subunit D"  
"Chl\_A21\_00677" 1317 "s63E6H2" 0 "CoB--CoM heterodisulfide reductase iron-sulfur subunit D"  
"Chl\_A21\_00678" 1318 "s59E13H2" 0 "Demethylmenaquinone methyltransferase"  
"Chl\_A21\_00678" 1318 "s59E25H2" 0 "Demethylmenaquinone methyltransferase"  
"Chl\_A21\_00678" 1318 "s59E5H2" 0 "Demethylmenaquinone methyltransferase"  
"Chl\_A21\_00678" 1318 "s63E6H2" 0 "Demethylmenaquinone methyltransferase"  
"Chl\_A21\_00679" 1319 "s59E13H2" 0 "1,4-dihydroxy-2-naphthoate octaprenyltransferase"  
"Chl\_A21\_00679" 1319 "s59E25H2" 0 "1,4-dihydroxy-2-naphthoate octaprenyltransferase"  
"Chl\_A21\_00679" 1319 "s59E5H2" 0 "1,4-dihydroxy-2-naphthoate octaprenyltransferase"  
"Chl\_A21\_00679" 1319 "s63E6H2" 0 "1,4-dihydroxy-2-naphthoate octaprenyltransferase"  
"Chl\_A21\_00680" 1320 "s59E13H2" 0 "Branched-chain amino acid transport system / permease component"  
"Chl\_A21\_00680" 1320 "s59E25H2" 0 "Branched-chain amino acid transport system / permease component"  
"Chl\_A21\_00680" 1320 "s59E5H2" 0 "Branched-chain amino acid transport system / permease component"  
"Chl\_A21\_00680" 1320 "s63E6H2" 0 "Branched-chain amino acid transport system / permease component"  
"Chl\_A21\_00681" 1321 "s59E13H2" 0 "beta-methylgalactoside transporter inner membrane component"  
"Chl\_A21\_00681" 1321 "s59E25H2" 0 "beta-methylgalactoside transporter inner membrane component"  
"Chl\_A21\_00681" 1321 "s59E5H2" 0 "beta-methylgalactoside transporter inner membrane component"  
"Chl\_A21\_00681" 1321 "s63E6H2" 0 "beta-methylgalactoside transporter inner membrane component"  
"Chl\_A21\_00682" 1322 "s59E13H2" 0 "Ribose import ATP-binding protein RbsA"  
"Chl\_A21\_00682" 1322 "s59E25H2" 0 "Ribose import ATP-binding protein RbsA"  
"Chl\_A21\_00682" 1322 "s59E5H2" 0 "Ribose import ATP-binding protein RbsA"  
"Chl\_A21\_00682" 1322 "s63E6H2" 0 "Ribose import ATP-binding protein RbsA"  
"Chl\_A21\_00683" 1323 "s59E13H2" 0 "Membrane lipoprotein TmpC precursor"  
"Chl\_A21\_00683" 1323 "s59E25H2" 0 "Membrane lipoprotein TmpC precursor"

"Chl\_A21\_00683" 1323 "s59E5H2" 0 "Membrane lipoprotein TmpC precursor"  
"Chl\_A21\_00683" 1323 "s63E6H2" 0 "Membrane lipoprotein TmpC precursor"  
"Chl\_A21\_00684" 1324 "s59E13H2" 0 "Uracil DNA glycosylase superfamily protein"  
"Chl\_A21\_00684" 1324 "s59E25H2" 0 "Uracil DNA glycosylase superfamily protein"  
"Chl\_A21\_00684" 1324 "s59E5H2" 0 "Uracil DNA glycosylase superfamily protein"  
"Chl\_A21\_00684" 1324 "s63E6H2" 0 "Uracil DNA glycosylase superfamily protein"  
"Chl\_A21\_00686" 1326 "s59E13H2" 0 "hypothetical protein"  
"Chl\_A21\_00686" 1326 "s59E25H2" 0 "hypothetical protein"  
"Chl\_A21\_00686" 1326 "s59E5H2" 0 "hypothetical protein"  
"Chl\_A21\_00686" 1326 "s63E6H2" 0 "hypothetical protein"  
"Chl\_A21\_00688" 1328 "s59E13H2" 0 "Helix-turn-helix domain protein"  
"Chl\_A21\_00688" 1328 "s59E25H2" 0 "Helix-turn-helix domain protein"  
"Chl\_A21\_00688" 1328 "s59E5H2" 0 "Helix-turn-helix domain protein"  
"Chl\_A21\_00688" 1328 "s63E6H2" 0 "Helix-turn-helix domain protein"  
"Chl\_A21\_00689" 1329 "s59E13H2" 0 "hypothetical protein"  
"Chl\_A21\_00689" 1329 "s59E25H2" 0 "hypothetical protein"  
"Chl\_A21\_00689" 1329 "s59E5H2" 0 "hypothetical protein"  
"Chl\_A21\_00689" 1329 "s63E6H2" 0 "hypothetical protein"  
"Chl\_A21\_00690" 1330 "s59E13H2" 0 "hypothetical protein"  
"Chl\_A21\_00690" 1330 "s59E25H2" 0 "hypothetical protein"  
"Chl\_A21\_00690" 1330 "s59E5H2" 0 "hypothetical protein"  
"Chl\_A21\_00690" 1330 "s63E6H2" 0 "hypothetical protein"  
"Chl\_A21\_00691" 1331 "s59E13H2" 0 "DNA repair protein RecN"  
"Chl\_A21\_00691" 1331 "s59E25H2" 0 "DNA repair protein RecN"  
"Chl\_A21\_00691" 1331 "s59E5H2" 0 "DNA repair protein RecN"  
"Chl\_A21\_00691" 1331 "s63E6H2" 0 "DNA repair protein RecN"  
"Chl\_A21\_00692" 1332 "s59E13H2" 0 "hypothetical protein"  
"Chl\_A21\_00692" 1332 "s59E25H2" 0 "hypothetical protein"  
"Chl\_A21\_00692" 1332 "s59E5H2" 0 "hypothetical protein"  
"Chl\_A21\_00692" 1332 "s63E6H2" 0 "hypothetical protein"  
"Chl\_A21\_00693" 1333 "s59E13H2" 0 "putative inorganic polyphosphate/ATP-NAD kinase"  
"Chl\_A21\_00693" 1333 "s59E25H2" 0 "putative inorganic polyphosphate/ATP-NAD kinase"  
"Chl\_A21\_00693" 1333 "s59E5H2" 0 "putative inorganic polyphosphate/ATP-NAD kinase"  
"Chl\_A21\_00693" 1333 "s63E6H2" 0 "putative inorganic polyphosphate/ATP-NAD kinase"  
"Chl\_A21\_00694" 1334 "s59E13H2" 0 "Segregation and condensation protein B"  
"Chl\_A21\_00694" 1334 "s59E25H2" 0 "Segregation and condensation protein B"  
"Chl\_A21\_00694" 1334 "s59E5H2" 0 "Segregation and condensation protein B"  
"Chl\_A21\_00694" 1334 "s63E6H2" 0 "Segregation and condensation protein B"  
"Chl\_A21\_00695" 1335 "s59E13H2" 0 "Cytidylate kinase"  
"Chl\_A21\_00695" 1335 "s59E25H2" 0 "Cytidylate kinase"  
"Chl\_A21\_00695" 1335 "s59E5H2" 0 "Cytidylate kinase"  
"Chl\_A21\_00695" 1335 "s63E6H2" 0 "Cytidylate kinase"  
"Chl\_A21\_00696" 1336 "s59E13H2" 0 "hypothetical protein"  
"Chl\_A21\_00696" 1336 "s59E25H2" 0 "hypothetical protein"  
"Chl\_A21\_00696" 1336 "s59E5H2" 0 "hypothetical protein"  
"Chl\_A21\_00696" 1336 "s63E6H2" 0 "hypothetical protein"  
"Chl\_A21\_00697" 1337 "s59E13H2" 0 "hypothetical protein"

"Chl\_A21\_00697" 1337 "s59E25H2" 0 "hypothetical protein"  
"Chl\_A21\_00697" 1337 "s59E5H2" 0 "hypothetical protein"  
"Chl\_A21\_00697" 1337 "s63E6H2" 0 "hypothetical protein"  
"Chl\_A21\_00698" 1338 "s59E13H2" 0 "Glycosyltransferase AgIJ"  
"Chl\_A21\_00698" 1338 "s59E25H2" 0 "Glycosyltransferase AgIJ"  
"Chl\_A21\_00698" 1338 "s59E5H2" 0 "Glycosyltransferase AgIJ"  
"Chl\_A21\_00698" 1338 "s63E6H2" 0 "Glycosyltransferase AgIJ"  
"Chl\_A21\_00699" 1339 "s59E13H2" 0 "hypothetical protein"  
"Chl\_A21\_00699" 1339 "s59E25H2" 0 "hypothetical protein"  
"Chl\_A21\_00699" 1339 "s59E5H2" 0 "hypothetical protein"  
"Chl\_A21\_00699" 1339 "s63E6H2" 0 "hypothetical protein"  
"Chl\_A21\_00701" 1341 "s59E13H2" 0 "D-alanine--D-alanine ligase"  
"Chl\_A21\_00701" 1341 "s59E25H2" 0 "D-alanine--D-alanine ligase"  
"Chl\_A21\_00701" 1341 "s59E5H2" 0 "D-alanine--D-alanine ligase"  
"Chl\_A21\_00701" 1341 "s63E6H2" 0 "D-alanine--D-alanine ligase"  
"Chl\_A21\_00702" 1342 "s59E13H2" 0 "L-lysine 2,3-aminomutase"  
"Chl\_A21\_00702" 1342 "s59E25H2" 0 "L-lysine 2,3-aminomutase"  
"Chl\_A21\_00702" 1342 "s59E5H2" 0 "L-lysine 2,3-aminomutase"  
"Chl\_A21\_00702" 1342 "s63E6H2" 0 "L-lysine 2,3-aminomutase"  
"Chl\_A21\_00703" 1343 "s59E13H2" 0 "Acetyltransferase (GNAT) family protein"  
"Chl\_A21\_00703" 1343 "s59E25H2" 0 "Acetyltransferase (GNAT) family protein"  
"Chl\_A21\_00703" 1343 "s59E5H2" 0 "Acetyltransferase (GNAT) family protein"  
"Chl\_A21\_00703" 1343 "s63E6H2" 0 "Acetyltransferase (GNAT) family protein"  
"Chl\_A21\_00704" 1344 "s59E13H2" 0 "hypothetical protein"  
"Chl\_A21\_00704" 1344 "s59E25H2" 0 "hypothetical protein"  
"Chl\_A21\_00704" 1344 "s59E5H2" 0.001508068 "hypothetical protein"  
"Chl\_A21\_00704" 1344 "s63E6H2" 0 "hypothetical protein"  
"Chl\_A21\_00705" 1345 "s59E13H2" 0 "Phosphate regulon transcriptional regulatory protein PhoB"  
"Chl\_A21\_00705" 1345 "s59E25H2" 0 "Phosphate regulon transcriptional regulatory protein PhoB"  
"Chl\_A21\_00705" 1345 "s59E5H2" 0 "Phosphate regulon transcriptional regulatory protein PhoB"  
"Chl\_A21\_00705" 1345 "s63E6H2" 0 "Phosphate regulon transcriptional regulatory protein PhoB"  
"Chl\_A21\_00706" 1346 "s59E13H2" 0 "Dinitrogenase iron-molybdenum cofactor"  
"Chl\_A21\_00706" 1346 "s59E25H2" 0 "Dinitrogenase iron-molybdenum cofactor"  
"Chl\_A21\_00706" 1346 "s59E5H2" 0 "Dinitrogenase iron-molybdenum cofactor"  
"Chl\_A21\_00706" 1346 "s63E6H2" 0 "Dinitrogenase iron-molybdenum cofactor"  
"Chl\_A21\_00707" 1347 "s59E13H2" 0 "Thiol:disulfide interchange protein DsbD"  
"Chl\_A21\_00707" 1347 "s59E25H2" 0 "Thiol:disulfide interchange protein DsbD"  
"Chl\_A21\_00707" 1347 "s59E5H2" 0 "Thiol:disulfide interchange protein DsbD"  
"Chl\_A21\_00707" 1347 "s63E6H2" 0 "Thiol:disulfide interchange protein DsbD"  
"Chl\_A21\_00708" 1348 "s59E13H2" 0 "lineage-specific thermal regulator protein"  
"Chl\_A21\_00708" 1348 "s59E25H2" 0 "lineage-specific thermal regulator protein"  
"Chl\_A21\_00708" 1348 "s59E5H2" 0 "lineage-specific thermal regulator protein"  
"Chl\_A21\_00708" 1348 "s63E6H2" 0 "lineage-specific thermal regulator protein"  
"Chl\_A21\_00709" 1349 "s59E13H2" 0 "Competence protein ComM"  
"Chl\_A21\_00709" 1349 "s59E25H2" 0 "Competence protein ComM"  
"Chl\_A21\_00709" 1349 "s59E5H2" 0 "Competence protein ComM"  
"Chl\_A21\_00709" 1349 "s63E6H2" 0 "Competence protein ComM"

"Chl\_A21\_00710" 1350 "s59E13H2" 0 "L-threonine dehydratase catabolic TdcB"  
"Chl\_A21\_00710" 1350 "s59E25H2" 0 "L-threonine dehydratase catabolic TdcB"  
"Chl\_A21\_00710" 1350 "s59E5H2" 0 "L-threonine dehydratase catabolic TdcB"  
"Chl\_A21\_00710" 1350 "s63E6H2" 0 "L-threonine dehydratase catabolic TdcB"  
"Chl\_A21\_00711" 1351 "s59E13H2" 0 "D-aminopeptidase"  
"Chl\_A21\_00711" 1351 "s59E25H2" 0 "D-aminopeptidase"  
"Chl\_A21\_00711" 1351 "s59E5H2" 0 "D-aminopeptidase"  
"Chl\_A21\_00711" 1351 "s63E6H2" 0 "D-aminopeptidase"  
"Chl\_A21\_00712" 1352 "s59E13H2" 0 "Proline dehydrogenase 1"  
"Chl\_A21\_00712" 1352 "s59E25H2" 0 "Proline dehydrogenase 1"  
"Chl\_A21\_00712" 1352 "s59E5H2" 0 "Proline dehydrogenase 1"  
"Chl\_A21\_00712" 1352 "s63E6H2" 0 "Proline dehydrogenase 1"  
"Chl\_A21\_00713" 1353 "s59E13H2" 0 "Serine dehydrogenase proteinase"  
"Chl\_A21\_00713" 1353 "s59E25H2" 0 "Serine dehydrogenase proteinase"  
"Chl\_A21\_00713" 1353 "s59E5H2" 0 "Serine dehydrogenase proteinase"  
"Chl\_A21\_00713" 1353 "s63E6H2" 0 "Serine dehydrogenase proteinase"  
"Chl\_A21\_00714" 1354 "s59E13H2" 0 "Vitamin B12 dependent methionine synthase, activation domain"  
"Chl\_A21\_00714" 1354 "s59E25H2" 0 "Vitamin B12 dependent methionine synthase, activation domain"  
"Chl\_A21\_00714" 1354 "s59E5H2" 0 "Vitamin B12 dependent methionine synthase, activation domain"  
"Chl\_A21\_00714" 1354 "s63E6H2" 0 "Vitamin B12 dependent methionine synthase, activation domain"  
"Chl\_A21\_00715" 1355 "s59E13H2" 0 "NifU-like protein"  
"Chl\_A21\_00715" 1355 "s59E25H2" 0 "NifU-like protein"  
"Chl\_A21\_00715" 1355 "s59E5H2" 0 "NifU-like protein"  
"Chl\_A21\_00715" 1355 "s63E6H2" 0 "NifU-like protein"  
"Chl\_A21\_00716" 1356 "s59E13H2" 0 "Putative arsenical pump-driving ATPase"  
"Chl\_A21\_00716" 1356 "s59E25H2" 0 "Putative arsenical pump-driving ATPase"  
"Chl\_A21\_00716" 1356 "s59E5H2" 0 "Putative arsenical pump-driving ATPase"  
"Chl\_A21\_00716" 1356 "s63E6H2" 0 "Putative arsenical pump-driving ATPase"  
"Chl\_A21\_00717" 1357 "s59E13H2" 0 "putative cysteine desulfurase 2"  
"Chl\_A21\_00717" 1357 "s59E25H2" 0 "putative cysteine desulfurase 2"  
"Chl\_A21\_00717" 1357 "s59E5H2" 0 "putative cysteine desulfurase 2"  
"Chl\_A21\_00717" 1357 "s63E6H2" 0 "putative cysteine desulfurase 2"  
"Chl\_A21\_00718" 1358 "s59E13H2" 0 "O-acetylserine sulfhydrylase"  
"Chl\_A21\_00718" 1358 "s59E25H2" 0 "O-acetylserine sulfhydrylase"  
"Chl\_A21\_00718" 1358 "s59E5H2" 0 "O-acetylserine sulfhydrylase"  
"Chl\_A21\_00718" 1358 "s63E6H2" 0 "O-acetylserine sulfhydrylase"  
"Chl\_A21\_00719" 1359 "s59E13H2" 0 "Serine acetyltransferase"  
"Chl\_A21\_00719" 1359 "s59E25H2" 0 "Serine acetyltransferase"  
"Chl\_A21\_00719" 1359 "s59E5H2" 0 "Serine acetyltransferase"  
"Chl\_A21\_00719" 1359 "s63E6H2" 0 "Serine acetyltransferase"  
"Chl\_A21\_00720" 1360 "s59E13H2" 0 "HTH-type transcriptional regulator CymR"  
"Chl\_A21\_00720" 1360 "s59E25H2" 0 "HTH-type transcriptional regulator CymR"  
"Chl\_A21\_00720" 1360 "s59E5H2" 0 "HTH-type transcriptional regulator CymR"  
"Chl\_A21\_00720" 1360 "s63E6H2" 0 "HTH-type transcriptional regulator CymR"  
"Chl\_A21\_00721" 1361 "s59E13H2" 0 "DegV domain-containing protein"  
"Chl\_A21\_00721" 1361 "s59E25H2" 0 "DegV domain-containing protein"  
"Chl\_A21\_00721" 1361 "s59E5H2" 0 "DegV domain-containing protein"

"Chl\_A21\_00721" 1361 "s63E6H2" 0 "DegV domain-containing protein"  
"Chl\_A21\_00722" 1362 "s59E13H2" 0 "Phosphate acyltransferase"  
"Chl\_A21\_00722" 1362 "s59E25H2" 0 "Phosphate acyltransferase"  
"Chl\_A21\_00722" 1362 "s59E5H2" 0 "Phosphate acyltransferase"  
"Chl\_A21\_00722" 1362 "s63E6H2" 0 "Phosphate acyltransferase"  
"Chl\_A21\_00723" 1363 "s59E13H2" 0 "3-oxoacyl-[acyl-carrier-protein] synthase 2"  
"Chl\_A21\_00723" 1363 "s59E25H2" 0 "3-oxoacyl-[acyl-carrier-protein] synthase 2"  
"Chl\_A21\_00723" 1363 "s59E5H2" 0 "3-oxoacyl-[acyl-carrier-protein] synthase 2"  
"Chl\_A21\_00723" 1363 "s63E6H2" 0 "3-oxoacyl-[acyl-carrier-protein] synthase 2"  
"Chl\_A21\_00724" 1364 "s59E13H2" 0 "hypothetical protein"  
"Chl\_A21\_00724" 1364 "s59E25H2" 0 "hypothetical protein"  
"Chl\_A21\_00724" 1364 "s59E5H2" 0 "hypothetical protein"  
"Chl\_A21\_00724" 1364 "s63E6H2" 0 "hypothetical protein"  
"Chl\_A21\_00725" 1365 "s59E13H2" 0 "hypothetical protein"  
"Chl\_A21\_00725" 1365 "s59E25H2" 0 "hypothetical protein"  
"Chl\_A21\_00725" 1365 "s59E5H2" 0 "hypothetical protein"  
"Chl\_A21\_00725" 1365 "s63E6H2" 0 "hypothetical protein"  
"Chl\_A21\_00726" 1366 "s59E13H2" 0 "Peptidase family M50"  
"Chl\_A21\_00726" 1366 "s59E25H2" 0 "Peptidase family M50"  
"Chl\_A21\_00726" 1366 "s59E5H2" 0 "Peptidase family M50"  
"Chl\_A21\_00726" 1366 "s63E6H2" 0 "Peptidase family M50"  
"Chl\_A21\_00727" 1367 "s59E13H2" 0 "Galactokinase"  
"Chl\_A21\_00727" 1367 "s59E25H2" 0 "Galactokinase"  
"Chl\_A21\_00727" 1367 "s59E5H2" 0 "Galactokinase"  
"Chl\_A21\_00727" 1367 "s63E6H2" 0 "Galactokinase"  
"Chl\_A21\_00728" 1368 "s59E13H2" 0 "hypothetical protein"  
"Chl\_A21\_00728" 1368 "s59E25H2" 0 "hypothetical protein"  
"Chl\_A21\_00728" 1368 "s59E5H2" 0 "hypothetical protein"  
"Chl\_A21\_00728" 1368 "s63E6H2" 0 "hypothetical protein"  
"Chl\_A21\_00729" 1369 "s59E13H2" 0 "Pyridoxal biosynthesis lyase PdxS"  
"Chl\_A21\_00729" 1369 "s59E25H2" 0 "Pyridoxal biosynthesis lyase PdxS"  
"Chl\_A21\_00729" 1369 "s59E5H2" 0 "Pyridoxal biosynthesis lyase PdxS"  
"Chl\_A21\_00729" 1369 "s63E6H2" 0 "Pyridoxal biosynthesis lyase PdxS"  
"Chl\_A21\_00730" 1370 "s59E13H2" 0 "Glutamine amidotransferase subunit PdxT"  
"Chl\_A21\_00730" 1370 "s59E25H2" 0 "Glutamine amidotransferase subunit PdxT"  
"Chl\_A21\_00730" 1370 "s59E5H2" 0 "Glutamine amidotransferase subunit PdxT"  
"Chl\_A21\_00730" 1370 "s63E6H2" 0 "Glutamine amidotransferase subunit PdxT"  
"Chl\_A21\_00732" 1372 "s59E13H2" 0 "R3H domain protein"  
"Chl\_A21\_00732" 1372 "s59E25H2" 0 "R3H domain protein"  
"Chl\_A21\_00732" 1372 "s59E5H2" 0 "R3H domain protein"  
"Chl\_A21\_00732" 1372 "s63E6H2" 0 "R3H domain protein"  
"Chl\_A21\_00733" 1373 "s59E13H2" 0 "Thymidylate kinase"  
"Chl\_A21\_00733" 1373 "s59E25H2" 0 "Thymidylate kinase"  
"Chl\_A21\_00733" 1373 "s59E5H2" 0 "Thymidylate kinase"  
"Chl\_A21\_00733" 1373 "s63E6H2" 0 "Thymidylate kinase"  
"Chl\_A21\_00734" 1374 "s59E13H2" 0 "Zinc ribbon domain protein"  
"Chl\_A21\_00734" 1374 "s59E25H2" 0 "Zinc ribbon domain protein"

"Chl\_A21\_00734" 1374 "s59E5H2" 0 "Zinc ribbon domain protein"  
"Chl\_A21\_00734" 1374 "s63E6H2" 0 "Zinc ribbon domain protein"  
"Chl\_A21\_00735" 1375 "s59E13H2" 0 "hypothetical protein"  
"Chl\_A21\_00735" 1375 "s59E25H2" 0 "hypothetical protein"  
"Chl\_A21\_00735" 1375 "s59E5H2" 0 "hypothetical protein"  
"Chl\_A21\_00735" 1375 "s63E6H2" 0 "hypothetical protein"  
"Chl\_A21\_00736" 1376 "s59E13H2" 0 "Guanylate kinase"  
"Chl\_A21\_00736" 1376 "s59E25H2" 0 "Guanylate kinase"  
"Chl\_A21\_00736" 1376 "s59E5H2" 0 "Guanylate kinase"  
"Chl\_A21\_00736" 1376 "s63E6H2" 0 "Guanylate kinase"  
"Chl\_A21\_00737" 1377 "s59E13H2" 0 "hypothetical protein"  
"Chl\_A21\_00737" 1377 "s59E25H2" 0 "hypothetical protein"  
"Chl\_A21\_00737" 1377 "s59E5H2" 0 "hypothetical protein"  
"Chl\_A21\_00737" 1377 "s63E6H2" 0 "hypothetical protein"  
"Chl\_A21\_00738" 1378 "s59E13H2" 0 "RNA recognition motif. (a.k.a. RRM, RBD, or RNP domain)"  
"Chl\_A21\_00738" 1378 "s59E25H2" 0 "RNA recognition motif. (a.k.a. RRM, RBD, or RNP domain)"  
"Chl\_A21\_00738" 1378 "s59E5H2" 0 "RNA recognition motif. (a.k.a. RRM, RBD, or RNP domain)"  
"Chl\_A21\_00738" 1378 "s63E6H2" 0 "RNA recognition motif. (a.k.a. RRM, RBD, or RNP domain)"  
"Chl\_A21\_00739" 1379 "s59E13H2" 0 "hypothetical protein"  
"Chl\_A21\_00739" 1379 "s59E25H2" 0 "hypothetical protein"  
"Chl\_A21\_00739" 1379 "s59E5H2" 0 "hypothetical protein"  
"Chl\_A21\_00739" 1379 "s63E6H2" 0 "hypothetical protein"  
"Chl\_A21\_00741" 1381 "s59E13H2" 0 "hypothetical protein"  
"Chl\_A21\_00741" 1381 "s59E25H2" 0 "hypothetical protein"  
"Chl\_A21\_00741" 1381 "s59E5H2" 0 "hypothetical protein"  
"Chl\_A21\_00741" 1381 "s63E6H2" 0 "hypothetical protein"  
"Chl\_A21\_00742" 1382 "s59E13H2" 0 "Primosomal protein N"  
"Chl\_A21\_00742" 1382 "s59E25H2" 0 "Primosomal protein N"  
"Chl\_A21\_00742" 1382 "s59E5H2" 0 "Primosomal protein N"  
"Chl\_A21\_00742" 1382 "s63E6H2" 0 "Primosomal protein N"  
"Chl\_A21\_00747" 1387 "s59E13H2" 0 "putative ATP-dependent helicase DinG"  
"Chl\_A21\_00747" 1387 "s59E25H2" 0 "putative ATP-dependent helicase DinG"  
"Chl\_A21\_00747" 1387 "s59E5H2" 0 "putative ATP-dependent helicase DinG"  
"Chl\_A21\_00747" 1387 "s63E6H2" 0 "putative ATP-dependent helicase DinG"  
"Chl\_A21\_00748" 1388 "s59E13H2" 0 "Elongation factor P"  
"Chl\_A21\_00748" 1388 "s59E25H2" 0 "Elongation factor P"  
"Chl\_A21\_00748" 1388 "s59E5H2" 0 "Elongation factor P"  
"Chl\_A21\_00748" 1388 "s63E6H2" 0 "Elongation factor P"  
"Chl\_A21\_00749" 1389 "s59E13H2" 0 "DNA recombination protein RmuC"  
"Chl\_A21\_00749" 1389 "s59E25H2" 0 "DNA recombination protein RmuC"  
"Chl\_A21\_00749" 1389 "s59E5H2" 0 "DNA recombination protein RmuC"  
"Chl\_A21\_00749" 1389 "s63E6H2" 0 "DNA recombination protein RmuC"  
"Chl\_A21\_00750" 1390 "s59E13H2" 0 "hypothetical protein"  
"Chl\_A21\_00750" 1390 "s59E25H2" 0 "hypothetical protein"  
"Chl\_A21\_00750" 1390 "s59E5H2" 0 "hypothetical protein"  
"Chl\_A21\_00750" 1390 "s63E6H2" 0 "hypothetical protein"  
"Chl\_A21\_00751" 1391 "s59E13H2" 0 "Oxygen-independent coproporphyrinogen-III oxidase I"

"Chl\_A21\_00751" 1391 "s59E25H2" 0 "Oxygen-independent coproporphyrinogen-III oxidase 1"  
"Chl\_A21\_00751" 1391 "s59E5H2" 0 "Oxygen-independent coproporphyrinogen-III oxidase 1"  
"Chl\_A21\_00751" 1391 "s63E6H2" 0 "Oxygen-independent coproporphyrinogen-III oxidase 1"  
"Chl\_A21\_00752" 1392 "s59E13H2" 0 "hypothetical protein"  
"Chl\_A21\_00752" 1392 "s59E25H2" 0 "hypothetical protein"  
"Chl\_A21\_00752" 1392 "s59E5H2" 0 "hypothetical protein"  
"Chl\_A21\_00752" 1392 "s63E6H2" 0 "hypothetical protein"  
"Chl\_A21\_00754" 1394 "s59E13H2" 0 "Retroviral aspartyl protease"  
"Chl\_A21\_00754" 1394 "s59E25H2" 0 "Retroviral aspartyl protease"  
"Chl\_A21\_00754" 1394 "s59E5H2" 0 "Retroviral aspartyl protease"  
"Chl\_A21\_00754" 1394 "s63E6H2" 0 "Retroviral aspartyl protease"  
"Chl\_A21\_00755" 1395 "s59E13H2" 0 "hypothetical protein"  
"Chl\_A21\_00755" 1395 "s59E25H2" 0 "hypothetical protein"  
"Chl\_A21\_00755" 1395 "s59E5H2" 0 "hypothetical protein"  
"Chl\_A21\_00755" 1395 "s63E6H2" 0 "hypothetical protein"  
"Chl\_A21\_00757" 1397 "s59E13H2" 0 "Cysteine-rich secretory protein family protein"  
"Chl\_A21\_00757" 1397 "s59E25H2" 0 "Cysteine-rich secretory protein family protein"  
"Chl\_A21\_00757" 1397 "s59E5H2" 0 "Cysteine-rich secretory protein family protein"  
"Chl\_A21\_00757" 1397 "s63E6H2" 0 "Cysteine-rich secretory protein family protein"  
"Chl\_A21\_00758" 1398 "s59E13H2" 0 "Sortase family protein"  
"Chl\_A21\_00758" 1398 "s59E25H2" 0 "Sortase family protein"  
"Chl\_A21\_00758" 1398 "s59E5H2" 0 "Sortase family protein"  
"Chl\_A21\_00758" 1398 "s63E6H2" 0 "Sortase family protein"  
"Chl\_A21\_00759" 1399 "s59E13H2" 0 "Disulfide bond formation protein D precursor"  
"Chl\_A21\_00759" 1399 "s59E25H2" 0 "Disulfide bond formation protein D precursor"  
"Chl\_A21\_00759" 1399 "s59E5H2" 0 "Disulfide bond formation protein D precursor"  
"Chl\_A21\_00759" 1399 "s63E6H2" 0 "Disulfide bond formation protein D precursor"  
"Chl\_A21\_00760" 1400 "s59E13H2" 0 "hypothetical protein"  
"Chl\_A21\_00760" 1400 "s59E25H2" 0 "hypothetical protein"  
"Chl\_A21\_00760" 1400 "s59E5H2" 0 "hypothetical protein"  
"Chl\_A21\_00760" 1400 "s63E6H2" 0 "hypothetical protein"  
"Chl\_A21\_00762" 1402 "s59E13H2" 0 "Sensory transduction protein regX3"  
"Chl\_A21\_00762" 1402 "s59E25H2" 0 "Sensory transduction protein regX3"  
"Chl\_A21\_00762" 1402 "s59E5H2" 0 "Sensory transduction protein regX3"  
"Chl\_A21\_00762" 1402 "s63E6H2" 0 "Sensory transduction protein regX3"  
"Chl\_A21\_00764" 1404 "s59E13H2" 0 "hypothetical protein"  
"Chl\_A21\_00764" 1404 "s59E25H2" 0 "hypothetical protein"  
"Chl\_A21\_00764" 1404 "s59E5H2" 0 "hypothetical protein"  
"Chl\_A21\_00764" 1404 "s63E6H2" 0 "hypothetical protein"  
"Chl\_A21\_00770" 1410 "s59E13H2" 0 "putative aldolase LsrF"  
"Chl\_A21\_00770" 1410 "s59E25H2" 0 "putative aldolase LsrF"  
"Chl\_A21\_00770" 1410 "s59E5H2" 0 "putative aldolase LsrF"  
"Chl\_A21\_00770" 1410 "s63E6H2" 0 "putative aldolase LsrF"  
"Chl\_A21\_00771" 1411 "s59E13H2" 0 "putative NAD-dependent oxidoreductase"  
"Chl\_A21\_00771" 1411 "s59E25H2" 0 "putative NAD-dependent oxidoreductase"  
"Chl\_A21\_00771" 1411 "s59E5H2" 0 "putative NAD-dependent oxidoreductase"  
"Chl\_A21\_00771" 1411 "s63E6H2" 0 "putative NAD-dependent oxidoreductase"

"Chl\_A21\_00773" 1413 "s59E13H2" 0 "Xylose import ATP-binding protein XylG"  
"Chl\_A21\_00773" 1413 "s59E25H2" 0 "Xylose import ATP-binding protein XylG"  
"Chl\_A21\_00773" 1413 "s59E5H2" 0 "Xylose import ATP-binding protein XylG"  
"Chl\_A21\_00773" 1413 "s63E6H2" 0 "Xylose import ATP-binding protein XylG"  
"Chl\_A21\_00774" 1414 "s59E13H2" 0 "Periplasmic binding proteins and sugar binding domain of LacI family protein"  
"Chl\_A21\_00774" 1414 "s59E25H2" 0 "Periplasmic binding proteins and sugar binding domain of LacI family protein"  
"Chl\_A21\_00774" 1414 "s59E5H2" 0 "Periplasmic binding proteins and sugar binding domain of LacI family protein"  
"Chl\_A21\_00774" 1414 "s63E6H2" 0 "Periplasmic binding proteins and sugar binding domain of LacI family protein"  
"Chl\_A21\_00775" 1415 "s59E13H2" 0 "Catabolite control protein A"  
"Chl\_A21\_00775" 1415 "s59E25H2" 0 "Catabolite control protein A"  
"Chl\_A21\_00775" 1415 "s59E5H2" 0 "Catabolite control protein A"  
"Chl\_A21\_00775" 1415 "s63E6H2" 0 "Catabolite control protein A"  
"Chl\_A21\_00776" 1416 "s59E13H2" 0 "Competence protein ComM"  
"Chl\_A21\_00776" 1416 "s59E25H2" 0 "Competence protein ComM"  
"Chl\_A21\_00776" 1416 "s59E5H2" 0 "Competence protein ComM"  
"Chl\_A21\_00776" 1416 "s63E6H2" 0 "Competence protein ComM"  
"Chl\_A21\_00777" 1417 "s59E13H2" 0 "Copper-sensing transcriptional repressor CsoR"  
"Chl\_A21\_00777" 1417 "s59E25H2" 0 "Copper-sensing transcriptional repressor CsoR"  
"Chl\_A21\_00777" 1417 "s59E5H2" 0 "Copper-sensing transcriptional repressor CsoR"  
"Chl\_A21\_00777" 1417 "s63E6H2" 0 "Copper-sensing transcriptional repressor CsoR"  
"Chl\_A21\_00778" 1418 "s59E13H2" 0 "Sensor histidine kinase YycG"  
"Chl\_A21\_00778" 1418 "s59E25H2" 0 "Sensor histidine kinase YycG"  
"Chl\_A21\_00778" 1418 "s59E5H2" 0 "Sensor histidine kinase YycG"  
"Chl\_A21\_00778" 1418 "s63E6H2" 0 "Sensor histidine kinase YycG"  
"Chl\_A21\_00779" 1419 "s59E13H2" 0 "Transcriptional regulatory protein YycF"  
"Chl\_A21\_00779" 1419 "s59E25H2" 0 "Transcriptional regulatory protein YycF"  
"Chl\_A21\_00779" 1419 "s59E5H2" 0 "Transcriptional regulatory protein YycF"  
"Chl\_A21\_00779" 1419 "s63E6H2" 0 "Transcriptional regulatory protein YycF"  
"Chl\_A21\_00781" 1421 "s59E13H2" 0 "Glutamate synthase [NADPH] large chain precursor"  
"Chl\_A21\_00781" 1421 "s59E25H2" 0 "Glutamate synthase [NADPH] large chain precursor"  
"Chl\_A21\_00781" 1421 "s59E5H2" 0 "Glutamate synthase [NADPH] large chain precursor"  
"Chl\_A21\_00781" 1421 "s63E6H2" 0 "Glutamate synthase [NADPH] large chain precursor"  
"Chl\_A21\_00782" 1422 "s59E13H2" 0 "Molybdenum-containing formylmethanofuran dehydrogenase 1 subunit C"  
"Chl\_A21\_00782" 1422 "s59E25H2" 0 "Molybdenum-containing formylmethanofuran dehydrogenase 1 subunit C"  
"Chl\_A21\_00782" 1422 "s59E5H2" 0 "Molybdenum-containing formylmethanofuran dehydrogenase 1 subunit C"  
"Chl\_A21\_00782" 1422 "s63E6H2" 0 "Molybdenum-containing formylmethanofuran dehydrogenase 1 subunit C"  
"Chl\_A21\_00783" 1423 "s59E13H2" 0 "Coenzyme F420 hydrogenase subunit beta"  
"Chl\_A21\_00783" 1423 "s59E25H2" 0 "Coenzyme F420 hydrogenase subunit beta"  
"Chl\_A21\_00783" 1423 "s59E5H2" 0 "Coenzyme F420 hydrogenase subunit beta"  
"Chl\_A21\_00783" 1423 "s63E6H2" 0 "Coenzyme F420 hydrogenase subunit beta"  
"Chl\_A21\_00784" 1424 "s59E13H2" 0 "Heterodisulfide reductase subunit A-like protein"  
"Chl\_A21\_00784" 1424 "s59E25H2" 0 "Heterodisulfide reductase subunit A-like protein"  
"Chl\_A21\_00784" 1424 "s59E5H2" 0 "Heterodisulfide reductase subunit A-like protein"  
"Chl\_A21\_00784" 1424 "s63E6H2" 0 "Heterodisulfide reductase subunit A-like protein"  
"Chl\_A21\_00785" 1425 "s59E13H2" 0 "NADP-reducing hydrogenase subunit HndC"  
"Chl\_A21\_00785" 1425 "s59E25H2" 0 "NADP-reducing hydrogenase subunit HndC"  
"Chl\_A21\_00785" 1425 "s59E5H2" 0 "NADP-reducing hydrogenase subunit HndC"



"Chl\_A21\_00785" 1425 "s63E6H2" 0 "NADP-reducing hydrogenase subunit HndC"  
"Chl\_A21\_00786" 1426 "s59E13H2" 0 "NADP-reducing hydrogenase subunit HndC"  
"Chl\_A21\_00786" 1426 "s59E25H2" 0 "NADP-reducing hydrogenase subunit HndC"  
"Chl\_A21\_00786" 1426 "s59E5H2" 0 "NADP-reducing hydrogenase subunit HndC"  
"Chl\_A21\_00786" 1426 "s63E6H2" 0 "NADP-reducing hydrogenase subunit HndC"  
"Chl\_A21\_00787" 1427 "s59E13H2" 0 "NADP-reducing hydrogenase subunit HndA"  
"Chl\_A21\_00787" 1427 "s59E25H2" 0 "NADP-reducing hydrogenase subunit HndA"  
"Chl\_A21\_00787" 1427 "s59E5H2" 0 "NADP-reducing hydrogenase subunit HndA"  
"Chl\_A21\_00787" 1427 "s63E6H2" 0 "NADP-reducing hydrogenase subunit HndA"  
"Chl\_A21\_00788" 1428 "s59E13H2" 0 "Competence protein ComM"  
"Chl\_A21\_00788" 1428 "s59E25H2" 0 "Competence protein ComM"  
"Chl\_A21\_00788" 1428 "s59E5H2" 0 "Competence protein ComM"  
"Chl\_A21\_00788" 1428 "s63E6H2" 0 "Competence protein ComM"  
"Chl\_A21\_00789" 1429 "s59E13H2" 0 "D-alanine--D-alanine ligase B"  
"Chl\_A21\_00789" 1429 "s59E25H2" 0 "D-alanine--D-alanine ligase B"  
"Chl\_A21\_00789" 1429 "s59E5H2" 0 "D-alanine--D-alanine ligase B"  
"Chl\_A21\_00789" 1429 "s63E6H2" 0 "D-alanine--D-alanine ligase B"  
"Chl\_A21\_00790" 1430 "s59E13H2" 0 "Sporulation and spore germination"  
"Chl\_A21\_00790" 1430 "s59E25H2" 0 "Sporulation and spore germination"  
"Chl\_A21\_00790" 1430 "s59E5H2" 0 "Sporulation and spore germination"  
"Chl\_A21\_00790" 1430 "s63E6H2" 0 "Sporulation and spore germination"  
"Chl\_A21\_00791" 1431 "s59E13H2" 0 "Tungsten-containing formaldehyde ferredoxin oxidoreductase"  
"Chl\_A21\_00791" 1431 "s59E25H2" 0 "Tungsten-containing formaldehyde ferredoxin oxidoreductase"  
"Chl\_A21\_00791" 1431 "s59E5H2" 0 "Tungsten-containing formaldehyde ferredoxin oxidoreductase"  
"Chl\_A21\_00791" 1431 "s63E6H2" 0 "Tungsten-containing formaldehyde ferredoxin oxidoreductase"  
"Chl\_A21\_00792" 1432 "s59E13H2" 0 "Tungsten-containing aldehyde ferredoxin oxidoreductase"  
"Chl\_A21\_00792" 1432 "s59E25H2" 0 "Tungsten-containing aldehyde ferredoxin oxidoreductase"  
"Chl\_A21\_00792" 1432 "s59E5H2" 0 "Tungsten-containing aldehyde ferredoxin oxidoreductase"  
"Chl\_A21\_00792" 1432 "s63E6H2" 0 "Tungsten-containing aldehyde ferredoxin oxidoreductase"  
"Chl\_A21\_00793" 1433 "s59E13H2" 0 "RNA polymerase sigma factor SigA"  
"Chl\_A21\_00793" 1433 "s59E25H2" 0 "RNA polymerase sigma factor SigA"  
"Chl\_A21\_00793" 1433 "s59E5H2" 0 "RNA polymerase sigma factor SigA"  
"Chl\_A21\_00793" 1433 "s63E6H2" 0 "RNA polymerase sigma factor SigA"  
"Chl\_A21\_00794" 1434 "s59E13H2" 0 "Alpha/beta hydrolase family protein"  
"Chl\_A21\_00794" 1434 "s59E25H2" 0 "Alpha/beta hydrolase family protein"  
"Chl\_A21\_00794" 1434 "s59E5H2" 0 "Alpha/beta hydrolase family protein"  
"Chl\_A21\_00794" 1434 "s63E6H2" 0 "Alpha/beta hydrolase family protein"  
"Chl\_A21\_00795" 1435 "s59E13H2" 0 "Undecaprenyl-diphosphatase BcrC"  
"Chl\_A21\_00795" 1435 "s59E25H2" 0 "Undecaprenyl-diphosphatase BcrC"  
"Chl\_A21\_00795" 1435 "s59E5H2" 0 "Undecaprenyl-diphosphatase BcrC"  
"Chl\_A21\_00795" 1435 "s63E6H2" 0 "Undecaprenyl-diphosphatase BcrC"  
"Chl\_A21\_00796" 1436 "s59E13H2" 0 "Poly(hydroxyalcanoate) granule associated protein (phasin)"  
"Chl\_A21\_00796" 1436 "s59E25H2" 0 "Poly(hydroxyalcanoate) granule associated protein (phasin)"  
"Chl\_A21\_00796" 1436 "s59E5H2" 0 "Poly(hydroxyalcanoate) granule associated protein (phasin)"  
"Chl\_A21\_00796" 1436 "s63E6H2" 0 "Poly(hydroxyalcanoate) granule associated protein (phasin)"  
"Chl\_A21\_00797" 1437 "s59E13H2" 0 "PHB/PHA accumulation regulator DNA-binding domain protein"  
"Chl\_A21\_00797" 1437 "s59E25H2" 0 "PHB/PHA accumulation regulator DNA-binding domain protein"

"Chl\_A21\_00797" 1437 "s59E5H2" 0 "PHB/PHA accumulation regulator DNA-binding domain protein"  
"Chl\_A21\_00797" 1437 "s63E6H2" 0 "PHB/PHA accumulation regulator DNA-binding domain protein"  
"Chl\_A21\_00798" 1438 "s59E13H2" 0 "putative HTH-type transcriptional regulator YfiR"  
"Chl\_A21\_00798" 1438 "s59E25H2" 0 "putative HTH-type transcriptional regulator YfiR"  
"Chl\_A21\_00798" 1438 "s59E5H2" 0 "putative HTH-type transcriptional regulator YfiR"  
"Chl\_A21\_00798" 1438 "s63E6H2" 0 "putative HTH-type transcriptional regulator YfiR"  
"Chl\_A21\_00799" 1439 "s59E13H2" 0 "hypothetical protein"  
"Chl\_A21\_00799" 1439 "s59E25H2" 0 "hypothetical protein"  
"Chl\_A21\_00799" 1439 "s59E5H2" 0 "hypothetical protein"  
"Chl\_A21\_00799" 1439 "s63E6H2" 0 "hypothetical protein"  
"Chl\_A21\_00800" 1440 "s59E13H2" 0 "26 kDa periplasmic immunogenic protein precursor"  
"Chl\_A21\_00800" 1440 "s59E25H2" 0 "26 kDa periplasmic immunogenic protein precursor"  
"Chl\_A21\_00800" 1440 "s59E5H2" 0 "26 kDa periplasmic immunogenic protein precursor"  
"Chl\_A21\_00800" 1440 "s63E6H2" 0 "26 kDa periplasmic immunogenic protein precursor"  
"Chl\_A21\_00801" 1441 "s59E13H2" 0 "PHP domain protein"  
"Chl\_A21\_00801" 1441 "s59E25H2" 0 "PHP domain protein"  
"Chl\_A21\_00801" 1441 "s59E5H2" 0 "PHP domain protein"  
"Chl\_A21\_00801" 1441 "s63E6H2" 0 "PHP domain protein"  
"Chl\_A21\_00802" 1442 "s59E13H2" 0 "putative nucleotide-binding protein containing TIR-like domain protein"  
"Chl\_A21\_00802" 1442 "s59E25H2" 0 "putative nucleotide-binding protein containing TIR-like domain protein"  
"Chl\_A21\_00802" 1442 "s59E5H2" 0 "putative nucleotide-binding protein containing TIR-like domain protein"  
"Chl\_A21\_00802" 1442 "s63E6H2" 0 "putative nucleotide-binding protein containing TIR-like domain protein"  
"Chl\_A21\_00803" 1443 "s59E13H2" 0 "UvrABC system protein B"  
"Chl\_A21\_00803" 1443 "s59E25H2" 0 "UvrABC system protein B"  
"Chl\_A21\_00803" 1443 "s59E5H2" 0 "UvrABC system protein B"  
"Chl\_A21\_00803" 1443 "s63E6H2" 0 "UvrABC system protein B"  
"Chl\_A21\_00804" 1444 "s59E13H2" 0 "hypothetical protein"  
"Chl\_A21\_00804" 1444 "s59E25H2" 0 "hypothetical protein"  
"Chl\_A21\_00804" 1444 "s59E5H2" 0 "hypothetical protein"  
"Chl\_A21\_00804" 1444 "s63E6H2" 0 "hypothetical protein"  
"Chl\_A21\_00805" 1445 "s59E13H2" 0 "hypothetical protein"  
"Chl\_A21\_00805" 1445 "s59E25H2" 0 "hypothetical protein"  
"Chl\_A21\_00805" 1445 "s59E5H2" 0 "hypothetical protein"  
"Chl\_A21\_00805" 1445 "s63E6H2" 0 "hypothetical protein"  
"Chl\_A21\_00806" 1446 "s59E13H2" 0 "hypothetical protein"  
"Chl\_A21\_00806" 1446 "s59E25H2" 0 "hypothetical protein"  
"Chl\_A21\_00806" 1446 "s59E5H2" 0 "hypothetical protein"  
"Chl\_A21\_00806" 1446 "s63E6H2" 0 "hypothetical protein"  
"Chl\_A21\_00807" 1447 "s59E13H2" 0 "UvrABC system protein A"  
"Chl\_A21\_00807" 1447 "s59E25H2" 0 "UvrABC system protein A"  
"Chl\_A21\_00807" 1447 "s59E5H2" 0 "UvrABC system protein A"  
"Chl\_A21\_00807" 1447 "s63E6H2" 0 "UvrABC system protein A"  
"Chl\_A21\_00808" 1448 "s59E13H2" 0 "Prenyltransferase and squalene oxidase repeat protein"  
"Chl\_A21\_00808" 1448 "s59E25H2" 0 "Prenyltransferase and squalene oxidase repeat protein"  
"Chl\_A21\_00808" 1448 "s59E5H2" 0 "Prenyltransferase and squalene oxidase repeat protein"  
"Chl\_A21\_00808" 1448 "s63E6H2" 0 "Prenyltransferase and squalene oxidase repeat protein"  
"Chl\_A21\_00809" 1449 "s59E13H2" 0 "8-oxo-dGTP diphosphatase"

"Chl\_A21\_00809" 1449 "s59E25H2" 0 "8-oxo-dGTP diphosphatase"  
"Chl\_A21\_00809" 1449 "s59E5H2" 0 "8-oxo-dGTP diphosphatase"  
"Chl\_A21\_00809" 1449 "s63E6H2" 0 "8-oxo-dGTP diphosphatase"  
"Chl\_A21\_00810" 1450 "s59E13H2" 0 "SEC-C motif protein"  
"Chl\_A21\_00810" 1450 "s59E25H2" 0 "SEC-C motif protein"  
"Chl\_A21\_00810" 1450 "s59E5H2" 0 "SEC-C motif protein"  
"Chl\_A21\_00810" 1450 "s63E6H2" 0 "SEC-C motif protein"  
"Chl\_A21\_00811" 1451 "s59E13H2" 0 "(Dimethylallyl)adenosine tRNA methylthiotransferase MiaB"  
"Chl\_A21\_00811" 1451 "s59E25H2" 0 "(Dimethylallyl)adenosine tRNA methylthiotransferase MiaB"  
"Chl\_A21\_00811" 1451 "s59E5H2" 0 "(Dimethylallyl)adenosine tRNA methylthiotransferase MiaB"  
"Chl\_A21\_00811" 1451 "s63E6H2" 0 "(Dimethylallyl)adenosine tRNA methylthiotransferase MiaB"  
"Chl\_A21\_00812" 1452 "s59E13H2" 0 "Acyl-coenzyme A:6-aminopenicillanic acid acyl-transferase"  
"Chl\_A21\_00812" 1452 "s59E25H2" 0 "Acyl-coenzyme A:6-aminopenicillanic acid acyl-transferase"  
"Chl\_A21\_00812" 1452 "s59E5H2" 0 "Acyl-coenzyme A:6-aminopenicillanic acid acyl-transferase"  
"Chl\_A21\_00812" 1452 "s63E6H2" 0 "Acyl-coenzyme A:6-aminopenicillanic acid acyl-transferase"  
"Chl\_A21\_00813" 1453 "s59E13H2" 0 "hypothetical protein"  
"Chl\_A21\_00813" 1453 "s59E25H2" 0 "hypothetical protein"  
"Chl\_A21\_00813" 1453 "s59E5H2" 0 "hypothetical protein"  
"Chl\_A21\_00813" 1453 "s63E6H2" 0 "hypothetical protein"  
"Chl\_A21\_00814" 1454 "s59E13H2" 0 "L-allo-threonine aldolase"  
"Chl\_A21\_00814" 1454 "s59E25H2" 0 "L-allo-threonine aldolase"  
"Chl\_A21\_00814" 1454 "s59E5H2" 0 "L-allo-threonine aldolase"  
"Chl\_A21\_00814" 1454 "s63E6H2" 0 "L-allo-threonine aldolase"  
"Chl\_A21\_00815" 1455 "s59E13H2" 0 "Ribosomal large subunit pseudouridine synthase D"  
"Chl\_A21\_00815" 1455 "s59E25H2" 0 "Ribosomal large subunit pseudouridine synthase D"  
"Chl\_A21\_00815" 1455 "s59E5H2" 0 "Ribosomal large subunit pseudouridine synthase D"  
"Chl\_A21\_00815" 1455 "s63E6H2" 0 "Ribosomal large subunit pseudouridine synthase D"  
"Chl\_A21\_00816" 1456 "s59E13H2" 0 "Lipoprotein signal peptidase"  
"Chl\_A21\_00816" 1456 "s59E25H2" 0 "Lipoprotein signal peptidase"  
"Chl\_A21\_00816" 1456 "s59E5H2" 0 "Lipoprotein signal peptidase"  
"Chl\_A21\_00816" 1456 "s63E6H2" 0 "Lipoprotein signal peptidase"  
"Chl\_A21\_00817" 1457 "s59E13H2" 0 "General stress protein 16O"  
"Chl\_A21\_00817" 1457 "s59E25H2" 0 "General stress protein 16O"  
"Chl\_A21\_00817" 1457 "s59E5H2" 0 "General stress protein 16O"  
"Chl\_A21\_00817" 1457 "s63E6H2" 0 "General stress protein 16O"  
"Chl\_A21\_00818" 1458 "s59E13H2" 0 "Undecaprenyl-phosphate mannosyltransferase"  
"Chl\_A21\_00818" 1458 "s59E25H2" 0 "Undecaprenyl-phosphate mannosyltransferase"  
"Chl\_A21\_00818" 1458 "s59E5H2" 0 "Undecaprenyl-phosphate mannosyltransferase"  
"Chl\_A21\_00818" 1458 "s63E6H2" 0 "Undecaprenyl-phosphate mannosyltransferase"  
"Chl\_A21\_00819" 1459 "s59E13H2" 0 "Polysaccharide biosynthesis protein"  
"Chl\_A21\_00819" 1459 "s59E25H2" 0 "Polysaccharide biosynthesis protein"  
"Chl\_A21\_00819" 1459 "s59E5H2" 0 "Polysaccharide biosynthesis protein"  
"Chl\_A21\_00819" 1459 "s63E6H2" 0 "Polysaccharide biosynthesis protein"  
"Chl\_A21\_00820" 1460 "s59E13H2" 0 "Transposase IS200 like protein"  
"Chl\_A21\_00820" 1460 "s59E25H2" 0 "Transposase IS200 like protein"  
"Chl\_A21\_00820" 1460 "s59E5H2" 0 "Transposase IS200 like protein"  
"Chl\_A21\_00820" 1460 "s63E6H2" 0 "Transposase IS200 like protein"

"Chl\_A21\_00824" 1464 "s59E13H2" 0 "hypothetical protein"  
"Chl\_A21\_00824" 1464 "s59E25H2" 0 "hypothetical protein"  
"Chl\_A21\_00824" 1464 "s59E5H2" 0 "hypothetical protein"  
"Chl\_A21\_00824" 1464 "s63E6H2" 0 "hypothetical protein"  
"Chl\_A21\_00825" 1465 "s59E13H2" 0 "L-asparaginase II"  
"Chl\_A21\_00825" 1465 "s59E25H2" 0 "L-asparaginase II"  
"Chl\_A21\_00825" 1465 "s59E5H2" 0 "L-asparaginase II"  
"Chl\_A21\_00825" 1465 "s63E6H2" 0 "L-asparaginase II"  
"Chl\_A21\_00826" 1466 "s59E13H2" 0 "Fosmidomycin resistance protein"  
"Chl\_A21\_00826" 1466 "s59E25H2" 0 "Fosmidomycin resistance protein"  
"Chl\_A21\_00826" 1466 "s59E5H2" 0 "Fosmidomycin resistance protein"  
"Chl\_A21\_00826" 1466 "s63E6H2" 0 "Fosmidomycin resistance protein"  
"Chl\_A21\_00827" 1467 "s59E13H2" 0 "Sulfurtransferase TusA"  
"Chl\_A21\_00827" 1467 "s59E25H2" 0 "Sulfurtransferase TusA"  
"Chl\_A21\_00827" 1467 "s59E5H2" 0 "Sulfurtransferase TusA"  
"Chl\_A21\_00827" 1467 "s63E6H2" 0 "Sulfurtransferase TusA"  
"Chl\_A21\_00828" 1468 "s59E13H2" 0 "putative cysteine desulfurase 2"  
"Chl\_A21\_00828" 1468 "s59E25H2" 0 "putative cysteine desulfurase 2"  
"Chl\_A21\_00828" 1468 "s59E5H2" 0 "putative cysteine desulfurase 2"  
"Chl\_A21\_00828" 1468 "s63E6H2" 0 "putative cysteine desulfurase 2"  
"Chl\_A21\_00829" 1469 "s59E13H2" 0 "Nucleoside 2-deoxyribosyltransferase"  
"Chl\_A21\_00829" 1469 "s59E25H2" 0 "Nucleoside 2-deoxyribosyltransferase"  
"Chl\_A21\_00829" 1469 "s59E5H2" 0 "Nucleoside 2-deoxyribosyltransferase"  
"Chl\_A21\_00829" 1469 "s63E6H2" 0 "Nucleoside 2-deoxyribosyltransferase"  
"Chl\_A21\_00830" 1470 "s59E13H2" 0 "Acyl-coenzyme A:6-aminopenicillanic acid acyl-transferase"  
"Chl\_A21\_00830" 1470 "s59E25H2" 0 "Acyl-coenzyme A:6-aminopenicillanic acid acyl-transferase"  
"Chl\_A21\_00830" 1470 "s59E5H2" 0 "Acyl-coenzyme A:6-aminopenicillanic acid acyl-transferase"  
"Chl\_A21\_00830" 1470 "s63E6H2" 0 "Acyl-coenzyme A:6-aminopenicillanic acid acyl-transferase"  
"Chl\_A21\_00831" 1471 "s59E13H2" 0 "hypothetical protein"  
"Chl\_A21\_00831" 1471 "s59E25H2" 0 "hypothetical protein"  
"Chl\_A21\_00831" 1471 "s59E5H2" 0 "hypothetical protein"  
"Chl\_A21\_00831" 1471 "s63E6H2" 0 "hypothetical protein"  
"Chl\_A21\_00832" 1472 "s59E13H2" 0 "dihydropteridine reductase"  
"Chl\_A21\_00832" 1472 "s59E25H2" 0 "dihydropteridine reductase"  
"Chl\_A21\_00832" 1472 "s59E5H2" 0 "dihydropteridine reductase"  
"Chl\_A21\_00832" 1472 "s63E6H2" 0 "dihydropteridine reductase"  
"Chl\_A21\_00833" 1473 "s59E13H2" 0 "Demethylmenaquinone methyltransferase"  
"Chl\_A21\_00833" 1473 "s59E25H2" 0 "Demethylmenaquinone methyltransferase"  
"Chl\_A21\_00833" 1473 "s59E5H2" 0 "Demethylmenaquinone methyltransferase"  
"Chl\_A21\_00833" 1473 "s63E6H2" 0 "Demethylmenaquinone methyltransferase"  
"Chl\_A21\_00834" 1474 "s59E13H2" 0 "tRNA-specific 2-thiouridylase MnmA"  
"Chl\_A21\_00834" 1474 "s59E25H2" 0 "tRNA-specific 2-thiouridylase MnmA"  
"Chl\_A21\_00834" 1474 "s59E5H2" 0 "tRNA-specific 2-thiouridylase MnmA"  
"Chl\_A21\_00834" 1474 "s63E6H2" 0 "tRNA-specific 2-thiouridylase MnmA"  
"Chl\_A21\_00835" 1475 "s59E13H2" 0 "hypothetical protein"  
"Chl\_A21\_00835" 1475 "s59E25H2" 0 "hypothetical protein"  
"Chl\_A21\_00835" 1475 "s59E5H2" 0 "hypothetical protein"

"Chl\_A21\_00835" 1475 "s63E6H2" 0 "hypothetical protein"  
"Chl\_A21\_00836" 1476 "s59E13H2" 0 "hypothetical protein"  
"Chl\_A21\_00836" 1476 "s59E25H2" 0 "hypothetical protein"  
"Chl\_A21\_00836" 1476 "s59E5H2" 0 "hypothetical protein"  
"Chl\_A21\_00836" 1476 "s63E6H2" 0 "hypothetical protein"  
"Chl\_A21\_00837" 1477 "s59E13H2" 0 "YtxH-like protein"  
"Chl\_A21\_00837" 1477 "s59E25H2" 0 "YtxH-like protein"  
"Chl\_A21\_00837" 1477 "s59E5H2" 0 "YtxH-like protein"  
"Chl\_A21\_00837" 1477 "s63E6H2" 0 "YtxH-like protein"  
"Chl\_A21\_00838" 1478 "s59E13H2" 0 "hypothetical protein"  
"Chl\_A21\_00838" 1478 "s59E25H2" 0 "hypothetical protein"  
"Chl\_A21\_00838" 1478 "s59E5H2" 0 "hypothetical protein"  
"Chl\_A21\_00838" 1478 "s63E6H2" 0 "hypothetical protein"  
"Chl\_A21\_00839" 1479 "s59E13H2" 0 "hypothetical protein"  
"Chl\_A21\_00839" 1479 "s59E25H2" 0 "hypothetical protein"  
"Chl\_A21\_00839" 1479 "s59E5H2" 0 "hypothetical protein"  
"Chl\_A21\_00839" 1479 "s63E6H2" 0 "hypothetical protein"  
"Chl\_A21\_00840" 1480 "s59E13H2" 0 "hypothetical protein"  
"Chl\_A21\_00840" 1480 "s59E25H2" 0 "hypothetical protein"  
"Chl\_A21\_00840" 1480 "s59E5H2" 0 "hypothetical protein"  
"Chl\_A21\_00840" 1480 "s63E6H2" 0 "hypothetical protein"  
"Chl\_A21\_00841" 1481 "s59E13H2" 0 "Bifunctional NAD(P)H-hydrate repair enzyme Nnr"  
"Chl\_A21\_00841" 1481 "s59E25H2" 0 "Bifunctional NAD(P)H-hydrate repair enzyme Nnr"  
"Chl\_A21\_00841" 1481 "s59E5H2" 0 "Bifunctional NAD(P)H-hydrate repair enzyme Nnr"  
"Chl\_A21\_00841" 1481 "s63E6H2" 0 "Bifunctional NAD(P)H-hydrate repair enzyme Nnr"  
"Chl\_A21\_00845" 1485 "s59E13H2" 0 "hypothetical protein"  
"Chl\_A21\_00845" 1485 "s59E25H2" 0 "hypothetical protein"  
"Chl\_A21\_00845" 1485 "s59E5H2" 0 "hypothetical protein"  
"Chl\_A21\_00845" 1485 "s63E6H2" 0 "hypothetical protein"  
"Chl\_A21\_00846" 1486 "s59E13H2" 0 "hypothetical protein"  
"Chl\_A21\_00846" 1486 "s59E25H2" 0 "hypothetical protein"  
"Chl\_A21\_00846" 1486 "s59E5H2" 0 "hypothetical protein"  
"Chl\_A21\_00846" 1486 "s63E6H2" 0 "hypothetical protein"  
"Chl\_A21\_00847" 1487 "s59E13H2" 0 "ComEC family competence protein"  
"Chl\_A21\_00847" 1487 "s59E25H2" 0 "ComEC family competence protein"  
"Chl\_A21\_00847" 1487 "s59E5H2" 0 "ComEC family competence protein"  
"Chl\_A21\_00847" 1487 "s63E6H2" 0 "ComEC family competence protein"  
"Chl\_A21\_00848" 1488 "s59E13H2" 0 "Putative nickel-responsive regulator"  
"Chl\_A21\_00848" 1488 "s59E25H2" 0 "Putative nickel-responsive regulator"  
"Chl\_A21\_00848" 1488 "s59E5H2" 0 "Putative nickel-responsive regulator"  
"Chl\_A21\_00848" 1488 "s63E6H2" 0 "Putative nickel-responsive regulator"  
"Chl\_A21\_00849" 1489 "s59E13H2" 0 "mRNA interferase EndoA"  
"Chl\_A21\_00849" 1489 "s59E25H2" 0 "mRNA interferase EndoA"  
"Chl\_A21\_00849" 1489 "s59E5H2" 0 "mRNA interferase EndoA"  
"Chl\_A21\_00849" 1489 "s63E6H2" 0 "mRNA interferase EndoA"  
"Chl\_A21\_00850" 1490 "s59E13H2" 0 "NYN domain protein"  
"Chl\_A21\_00850" 1490 "s59E25H2" 0 "NYN domain protein"

"Chl\_A21\_00850" 1490 "s59E5H2" 0 "NYN domain protein"  
"Chl\_A21\_00850" 1490 "s63E6H2" 0 "NYN domain protein"  
"Chl\_A21\_00851" 1491 "s59E13H2" 0 "hypothetical protein"  
"Chl\_A21\_00851" 1491 "s59E25H2" 0 "hypothetical protein"  
"Chl\_A21\_00851" 1491 "s59E5H2" 0 "hypothetical protein"  
"Chl\_A21\_00851" 1491 "s63E6H2" 0 "hypothetical protein"  
"Chl\_A21\_00852" 1492 "s59E13H2" 0 "Sporulation initiation phosphotransferase F"  
"Chl\_A21\_00852" 1492 "s59E25H2" 0 "Sporulation initiation phosphotransferase F"  
"Chl\_A21\_00852" 1492 "s59E5H2" 0 "Sporulation initiation phosphotransferase F"  
"Chl\_A21\_00852" 1492 "s63E6H2" 0 "Sporulation initiation phosphotransferase F"  
"Chl\_A21\_00853" 1493 "s59E13H2" 0 "hypothetical protein"  
"Chl\_A21\_00853" 1493 "s59E25H2" 0 "hypothetical protein"  
"Chl\_A21\_00853" 1493 "s59E5H2" 0 "hypothetical protein"  
"Chl\_A21\_00853" 1493 "s63E6H2" 0 "hypothetical protein"  
"Chl\_A21\_00854" 1494 "s59E13H2" 0 "30S ribosomal protein S2"  
"Chl\_A21\_00854" 1494 "s59E25H2" 0 "30S ribosomal protein S2"  
"Chl\_A21\_00854" 1494 "s59E5H2" 0 "30S ribosomal protein S2"  
"Chl\_A21\_00854" 1494 "s63E6H2" 0 "30S ribosomal protein S2"  
"Chl\_A21\_00855" 1495 "s59E13H2" 0 "Elongation factor Ts"  
"Chl\_A21\_00855" 1495 "s59E25H2" 0 "Elongation factor Ts"  
"Chl\_A21\_00855" 1495 "s59E5H2" 0 "Elongation factor Ts"  
"Chl\_A21\_00855" 1495 "s63E6H2" 0 "Elongation factor Ts"  
"Chl\_A21\_00856" 1496 "s59E13H2" 0 "Uridylate kinase"  
"Chl\_A21\_00856" 1496 "s59E25H2" 0 "Uridylate kinase"  
"Chl\_A21\_00856" 1496 "s59E5H2" 0 "Uridylate kinase"  
"Chl\_A21\_00856" 1496 "s63E6H2" 0 "Uridylate kinase"  
"Chl\_A21\_00857" 1497 "s59E13H2" 0 "Ribosome-recycling factor"  
"Chl\_A21\_00857" 1497 "s59E25H2" 0 "Ribosome-recycling factor"  
"Chl\_A21\_00857" 1497 "s59E5H2" 0 "Ribosome-recycling factor"  
"Chl\_A21\_00857" 1497 "s63E6H2" 0 "Ribosome-recycling factor"  
"Chl\_A21\_00858" 1498 "s59E13H2" 0 "Isoprenyl transferase"  
"Chl\_A21\_00858" 1498 "s59E25H2" 0 "Isoprenyl transferase"  
"Chl\_A21\_00858" 1498 "s59E5H2" 0 "Isoprenyl transferase"  
"Chl\_A21\_00858" 1498 "s63E6H2" 0 "Isoprenyl transferase"  
"Chl\_A21\_00859" 1499 "s59E13H2" 0 "Phosphatidate cytidyltransferase"  
"Chl\_A21\_00859" 1499 "s59E25H2" 0 "Phosphatidate cytidyltransferase"  
"Chl\_A21\_00859" 1499 "s59E5H2" 0 "Phosphatidate cytidyltransferase"  
"Chl\_A21\_00859" 1499 "s63E6H2" 0 "Phosphatidate cytidyltransferase"  
"Chl\_A21\_00860" 1500 "s59E13H2" 0 "hypothetical protein"  
"Chl\_A21\_00860" 1500 "s59E25H2" 0 "hypothetical protein"  
"Chl\_A21\_00860" 1500 "s59E5H2" 0 "hypothetical protein"  
"Chl\_A21\_00860" 1500 "s63E6H2" 0 "hypothetical protein"  
"Chl\_A21\_00861" 1501 "s59E13H2" 0 "O-acetyl-ADP-ribose deacetylase"  
"Chl\_A21\_00861" 1501 "s59E25H2" 0 "O-acetyl-ADP-ribose deacetylase"  
"Chl\_A21\_00861" 1501 "s59E5H2" 0 "O-acetyl-ADP-ribose deacetylase"  
"Chl\_A21\_00861" 1501 "s63E6H2" 0 "O-acetyl-ADP-ribose deacetylase"  
"Chl\_A21\_00862" 1502 "s59E13H2" 0 "Spore germination protein YaaH"

"Chl\_A21\_00862" 1502 "s59E25H2" 0 "Spore germination protein YaaH"  
"Chl\_A21\_00862" 1502 "s59E5H2" 0 "Spore germination protein YaaH"  
"Chl\_A21\_00862" 1502 "s63E6H2" 0 "Spore germination protein YaaH"  
"Chl\_A21\_00863" 1503 "s59E13H2" 0 "Glycine cleavage system H protein"  
"Chl\_A21\_00863" 1503 "s59E25H2" 0 "Glycine cleavage system H protein"  
"Chl\_A21\_00863" 1503 "s59E5H2" 0 "Glycine cleavage system H protein"  
"Chl\_A21\_00863" 1503 "s63E6H2" 0 "Glycine cleavage system H protein"  
"Chl\_A21\_00864" 1504 "s59E13H2" 0 "Deoxyguanosinetriphosphate triphosphohydrolase"  
"Chl\_A21\_00864" 1504 "s59E25H2" 0 "Deoxyguanosinetriphosphate triphosphohydrolase"  
"Chl\_A21\_00864" 1504 "s59E5H2" 0 "Deoxyguanosinetriphosphate triphosphohydrolase"  
"Chl\_A21\_00864" 1504 "s63E6H2" 0 "Deoxyguanosinetriphosphate triphosphohydrolase"  
"Chl\_A21\_00865" 1505 "s59E13H2" 0 "hypothetical protein"  
"Chl\_A21\_00865" 1505 "s59E25H2" 0 "hypothetical protein"  
"Chl\_A21\_00865" 1505 "s59E5H2" 0 "hypothetical protein"  
"Chl\_A21\_00865" 1505 "s63E6H2" 0 "hypothetical protein"  
"Chl\_A21\_00866" 1506 "s59E13H2" 0 "putative glycine dehydrogenase (decarboxylating) subunit 1"  
"Chl\_A21\_00866" 1506 "s59E25H2" 0 "putative glycine dehydrogenase (decarboxylating) subunit 1"  
"Chl\_A21\_00866" 1506 "s59E5H2" 0 "putative glycine dehydrogenase (decarboxylating) subunit 1"  
"Chl\_A21\_00866" 1506 "s63E6H2" 0 "putative glycine dehydrogenase (decarboxylating) subunit 1"  
"Chl\_A21\_00867" 1507 "s59E13H2" 0 "Soluble hydrogenase 42 kDa subunit"  
"Chl\_A21\_00867" 1507 "s59E25H2" 0 "Soluble hydrogenase 42 kDa subunit"  
"Chl\_A21\_00867" 1507 "s59E5H2" 0 "Soluble hydrogenase 42 kDa subunit"  
"Chl\_A21\_00867" 1507 "s63E6H2" 0 "Soluble hydrogenase 42 kDa subunit"  
"Chl\_A21\_00868" 1508 "s59E13H2" 0 "putative glycine dehydrogenase (decarboxylating) subunit 2"  
"Chl\_A21\_00868" 1508 "s59E25H2" 0 "putative glycine dehydrogenase (decarboxylating) subunit 2"  
"Chl\_A21\_00868" 1508 "s59E5H2" 0 "putative glycine dehydrogenase (decarboxylating) subunit 2"  
"Chl\_A21\_00868" 1508 "s63E6H2" 0 "putative glycine dehydrogenase (decarboxylating) subunit 2"  
"Chl\_A21\_00869" 1509 "s59E13H2" 0 "ECF RNA polymerase sigma factor SigW"  
"Chl\_A21\_00869" 1509 "s59E25H2" 0 "ECF RNA polymerase sigma factor SigW"  
"Chl\_A21\_00869" 1509 "s59E5H2" 0 "ECF RNA polymerase sigma factor SigW"  
"Chl\_A21\_00869" 1509 "s63E6H2" 0 "ECF RNA polymerase sigma factor SigW"  
"Chl\_A21\_00871" 1511 "s59E13H2" 0 "Oligopeptide transport ATP-binding protein OppD"  
"Chl\_A21\_00871" 1511 "s59E25H2" 0 "Oligopeptide transport ATP-binding protein OppD"  
"Chl\_A21\_00871" 1511 "s59E5H2" 0 "Oligopeptide transport ATP-binding protein OppD"  
"Chl\_A21\_00871" 1511 "s63E6H2" 0 "Oligopeptide transport ATP-binding protein OppD"  
"Chl\_A21\_00872" 1512 "s59E13H2" 0 "Oligopeptide transport ATP-binding protein OppF"  
"Chl\_A21\_00872" 1512 "s59E25H2" 0 "Oligopeptide transport ATP-binding protein OppF"  
"Chl\_A21\_00872" 1512 "s59E5H2" 0 "Oligopeptide transport ATP-binding protein OppF"  
"Chl\_A21\_00872" 1512 "s63E6H2" 0 "Oligopeptide transport ATP-binding protein OppF"  
"Chl\_A21\_00873" 1513 "s59E13H2" 0 "Heme-binding protein A precursor"  
"Chl\_A21\_00873" 1513 "s59E25H2" 0 "Heme-binding protein A precursor"  
"Chl\_A21\_00873" 1513 "s59E5H2" 0 "Heme-binding protein A precursor"  
"Chl\_A21\_00873" 1513 "s63E6H2" 0 "Heme-binding protein A precursor"  
"Chl\_A21\_00874" 1514 "s59E13H2" 0 "Dipeptide transport system permease protein DppB"  
"Chl\_A21\_00874" 1514 "s59E25H2" 0 "Dipeptide transport system permease protein DppB"  
"Chl\_A21\_00874" 1514 "s59E5H2" 0 "Dipeptide transport system permease protein DppB"  
"Chl\_A21\_00874" 1514 "s63E6H2" 0 "Dipeptide transport system permease protein DppB"

"Chl\_A21\_00875" 1515 "s59E13H2" 0 "Glutathione transport system permease protein GsiD"  
"Chl\_A21\_00875" 1515 "s59E25H2" 0 "Glutathione transport system permease protein GsiD"  
"Chl\_A21\_00875" 1515 "s59E5H2" 0 "Glutathione transport system permease protein GsiD"  
"Chl\_A21\_00875" 1515 "s63E6H2" 0 "Glutathione transport system permease protein GsiD"  
"Chl\_A21\_00876" 1516 "s59E13H2" 0 "Oligopeptide-binding protein AppA precursor"  
"Chl\_A21\_00876" 1516 "s59E25H2" 0 "Oligopeptide-binding protein AppA precursor"  
"Chl\_A21\_00876" 1516 "s59E5H2" 0 "Oligopeptide-binding protein AppA precursor"  
"Chl\_A21\_00876" 1516 "s63E6H2" 0 "Oligopeptide-binding protein AppA precursor"  
"Chl\_A21\_00877" 1517 "s59E13H2" 0 "Dipeptide transport system permease protein DppB"  
"Chl\_A21\_00877" 1517 "s59E25H2" 0 "Dipeptide transport system permease protein DppB"  
"Chl\_A21\_00877" 1517 "s59E5H2" 0 "Dipeptide transport system permease protein DppB"  
"Chl\_A21\_00877" 1517 "s63E6H2" 0 "Dipeptide transport system permease protein DppB"  
"Chl\_A21\_00878" 1518 "s59E13H2" 0 "Glutathione transport system permease protein GsiD"  
"Chl\_A21\_00878" 1518 "s59E25H2" 0 "Glutathione transport system permease protein GsiD"  
"Chl\_A21\_00878" 1518 "s59E5H2" 0 "Glutathione transport system permease protein GsiD"  
"Chl\_A21\_00878" 1518 "s63E6H2" 0 "Glutathione transport system permease protein GsiD"  
"Chl\_A21\_00879" 1519 "s59E13H2" 0 "Alpha-galactosidase"  
"Chl\_A21\_00879" 1519 "s59E25H2" 0 "Alpha-galactosidase"  
"Chl\_A21\_00879" 1519 "s59E5H2" 0 "Alpha-galactosidase"  
"Chl\_A21\_00879" 1519 "s63E6H2" 0 "Alpha-galactosidase"  
"Chl\_A21\_00880" 1520 "s59E13H2" 0 "Ultraviolet N-glycosylase/AP lyase"  
"Chl\_A21\_00880" 1520 "s59E25H2" 0 "Ultraviolet N-glycosylase/AP lyase"  
"Chl\_A21\_00880" 1520 "s59E5H2" 0 "Ultraviolet N-glycosylase/AP lyase"  
"Chl\_A21\_00880" 1520 "s63E6H2" 0 "Ultraviolet N-glycosylase/AP lyase"  
"Chl\_A21\_00881" 1521 "s59E13H2" 0 "DNA double-strand break repair Rad50 ATPase"  
"Chl\_A21\_00881" 1521 "s59E25H2" 0 "DNA double-strand break repair Rad50 ATPase"  
"Chl\_A21\_00881" 1521 "s59E5H2" 0 "DNA double-strand break repair Rad50 ATPase"  
"Chl\_A21\_00881" 1521 "s63E6H2" 0 "DNA double-strand break repair Rad50 ATPase"  
"Chl\_A21\_00882" 1522 "s59E13H2" 0 "Ribonuclease BN"  
"Chl\_A21\_00882" 1522 "s59E25H2" 0 "Ribonuclease BN"  
"Chl\_A21\_00882" 1522 "s59E5H2" 0 "Ribonuclease BN"  
"Chl\_A21\_00882" 1522 "s63E6H2" 0 "Ribonuclease BN"  
"Chl\_A21\_00883" 1523 "s59E13H2" 0 "hypothetical protein"  
"Chl\_A21\_00883" 1523 "s59E25H2" 0 "hypothetical protein"  
"Chl\_A21\_00883" 1523 "s59E5H2" 0 "hypothetical protein"  
"Chl\_A21\_00883" 1523 "s63E6H2" 0 "hypothetical protein"  
"Chl\_A21\_00884" 1524 "s59E13H2" 0 "Sorbitol dehydrogenase"  
"Chl\_A21\_00884" 1524 "s59E25H2" 0 "Sorbitol dehydrogenase"  
"Chl\_A21\_00884" 1524 "s59E5H2" 0 "Sorbitol dehydrogenase"  
"Chl\_A21\_00884" 1524 "s63E6H2" 0 "Sorbitol dehydrogenase"  
"Chl\_A21\_00885" 1525 "s59E13H2" 0 "putative L-threonine 3-dehydrogenase"  
"Chl\_A21\_00885" 1525 "s59E25H2" 0 "putative L-threonine 3-dehydrogenase"  
"Chl\_A21\_00885" 1525 "s59E5H2" 0 "putative L-threonine 3-dehydrogenase"  
"Chl\_A21\_00885" 1525 "s63E6H2" 0 "putative L-threonine 3-dehydrogenase"  
"Chl\_A21\_00886" 1526 "s59E13H2" 0 "Putative ketoacyl reductase"  
"Chl\_A21\_00886" 1526 "s59E25H2" 0 "Putative ketoacyl reductase"  
"Chl\_A21\_00886" 1526 "s59E5H2" 0 "Putative ketoacyl reductase"



"Chl\_A21\_00886" 1526 "s63E6H2" 0 "Putative ketoacyl reductase"  
"Chl\_A21\_00888" 1528 "s59E13H2" 0 "6-pyruvoyl-tetrahydropterin synthase related domain; membrane protein"  
"Chl\_A21\_00888" 1528 "s59E25H2" 0 "6-pyruvoyl-tetrahydropterin synthase related domain; membrane protein"  
"Chl\_A21\_00888" 1528 "s59E5H2" 0 "6-pyruvoyl-tetrahydropterin synthase related domain; membrane protein"  
"Chl\_A21\_00888" 1528 "s63E6H2" 0 "6-pyruvoyl-tetrahydropterin synthase related domain; membrane protein"  
"Chl\_A21\_00889" 1529 "s59E13H2" 0 "hypothetical protein"  
"Chl\_A21\_00889" 1529 "s59E25H2" 0 "hypothetical protein"  
"Chl\_A21\_00889" 1529 "s59E5H2" 0 "hypothetical protein"  
"Chl\_A21\_00889" 1529 "s63E6H2" 0 "hypothetical protein"  
"Chl\_A21\_00890" 1530 "s59E13H2" 0 "6-pyruvoyl-tetrahydropterin synthase related domain; membrane protein"  
"Chl\_A21\_00890" 1530 "s59E25H2" 0 "6-pyruvoyl-tetrahydropterin synthase related domain; membrane protein"  
"Chl\_A21\_00890" 1530 "s59E5H2" 0 "6-pyruvoyl-tetrahydropterin synthase related domain; membrane protein"  
"Chl\_A21\_00890" 1530 "s63E6H2" 0 "6-pyruvoyl-tetrahydropterin synthase related domain; membrane protein"  
"Chl\_B06\_00001" 1532 "s59E13H2" 0.02577325 "Sensor histidine kinase CitA"  
"Chl\_B06\_00001" 1532 "s59E25H2" 0 "Sensor histidine kinase CitA"  
"Chl\_B06\_00001" 1532 "s59E5H2" 0.2120084 "Sensor histidine kinase CitA"  
"Chl\_B06\_00001" 1532 "s63E6H2" 0.02622229 "Sensor histidine kinase CitA"  
"Chl\_B06\_00002" 1533 "s59E13H2" 0.02220637 "50S ribosomal protein L34"  
"Chl\_B06\_00002" 1533 "s59E25H2" 0 "50S ribosomal protein L34"  
"Chl\_B06\_00002" 1533 "s59E5H2" 0.04743433 "50S ribosomal protein L34"  
"Chl\_B06\_00002" 1533 "s63E6H2" 0.02341652 "50S ribosomal protein L34"  
"Chl\_B06\_00003" 1534 "s59E13H2" 0.01791303 "Ribonuclease P protein component"  
"Chl\_B06\_00003" 1534 "s59E25H2" 0 "Ribonuclease P protein component"  
"Chl\_B06\_00003" 1534 "s59E5H2" 0.04019621 "Ribonuclease P protein component"  
"Chl\_B06\_00003" 1534 "s63E6H2" 0.0322008 "Ribonuclease P protein component"  
"Chl\_B06\_00004" 1535 "s59E13H2" 0.03361059 "Membrane protein insertase YidC"  
"Chl\_B06\_00004" 1535 "s59E25H2" 0 "Membrane protein insertase YidC"  
"Chl\_B06\_00004" 1535 "s59E5H2" 0.1089663 "Membrane protein insertase YidC"  
"Chl\_B06\_00004" 1535 "s63E6H2" 0.05217703 "Membrane protein insertase YidC"  
"Chl\_B06\_00005" 1536 "s59E13H2" 0.0008782314 "R3H domain protein"  
"Chl\_B06\_00005" 1536 "s59E25H2" 0 "R3H domain protein"  
"Chl\_B06\_00005" 1536 "s59E5H2" 0.01435584 "R3H domain protein"  
"Chl\_B06\_00005" 1536 "s63E6H2" 0.02067368 "R3H domain protein"  
"Chl\_B06\_00006" 1537 "s59E13H2" 0.00951429 "tRNA modification GTPase MnmE"  
"Chl\_B06\_00006" 1537 "s59E25H2" 0 "tRNA modification GTPase MnmE"  
"Chl\_B06\_00006" 1537 "s59E5H2" 0.04262846 "tRNA modification GTPase MnmE"  
"Chl\_B06\_00006" 1537 "s63E6H2" 0.0535914 "tRNA modification GTPase MnmE"  
"Chl\_B06\_00007" 1538 "s59E13H2" 0.7667416 "tRNA modification GTPase MnmE"  
"Chl\_B06\_00007" 1538 "s59E25H2" 0 "tRNA modification GTPase MnmE"  
"Chl\_B06\_00007" 1538 "s59E5H2" 0.003737033 "tRNA modification GTPase MnmE"  
"Chl\_B06\_00007" 1538 "s63E6H2" 0.03223132 "tRNA modification GTPase MnmE"  
"Chl\_B06\_00008" 1539 "s59E13H2" 1.673349 "tRNA uridine 5-carboxymethylaminomethyl modification enzyme MnmG"  
"Chl\_B06\_00008" 1539 "s59E25H2" 0 "tRNA uridine 5-carboxymethylaminomethyl modification enzyme MnmG"  
"Chl\_B06\_00008" 1539 "s59E5H2" 0.07211621 "tRNA uridine 5-carboxymethylaminomethyl modification enzyme MnmG"  
"Chl\_B06\_00008" 1539 "s63E6H2" 0.1019574 "tRNA uridine 5-carboxymethylaminomethyl modification enzyme MnmG"  
"Chl\_B06\_00009" 1540 "s59E13H2" 1.62305 "tRNA uridine 5-carboxymethylaminomethyl modification enzyme MnmG"  
"Chl\_B06\_00009" 1540 "s59E25H2" 0 "tRNA uridine 5-carboxymethylaminomethyl modification enzyme MnmG"

"Chl\_B06\_00009" 1540 "s59E5H2" 0.05601678 "tRNA uridine 5-carboxymethylaminomethyl modification enzyme MnmG"  
"Chl\_B06\_00009" 1540 "s63E6H2" 0.2790391 "tRNA uridine 5-carboxymethylaminomethyl modification enzyme MnmG"  
"Chl\_B06\_00010" 1541 "s59E13H2" 1.217666 "Ribosomal RNA small subunit methyltransferase G"  
"Chl\_B06\_00010" 1541 "s59E25H2" 0 "Ribosomal RNA small subunit methyltransferase G"  
"Chl\_B06\_00010" 1541 "s59E5H2" 0.04294337 "Ribosomal RNA small subunit methyltransferase G"  
"Chl\_B06\_00010" 1541 "s63E6H2" 0.1474892 "Ribosomal RNA small subunit methyltransferase G"  
"Chl\_B06\_00011" 1542 "s59E13H2" 1.881762 "Sporulation initiation inhibitor protein Soj"  
"Chl\_B06\_00011" 1542 "s59E25H2" 0 "Sporulation initiation inhibitor protein Soj"  
"Chl\_B06\_00011" 1542 "s59E5H2" 0.04722036 "Sporulation initiation inhibitor protein Soj"  
"Chl\_B06\_00011" 1542 "s63E6H2" 0.04412459 "Sporulation initiation inhibitor protein Soj"  
"Chl\_B06\_00012" 1543 "s59E13H2" 2.033982 "putative chromosome-partitioning protein ParB"  
"Chl\_B06\_00012" 1543 "s59E25H2" 0 "putative chromosome-partitioning protein ParB"  
"Chl\_B06\_00012" 1543 "s59E5H2" 0.05720237 "putative chromosome-partitioning protein ParB"  
"Chl\_B06\_00012" 1543 "s63E6H2" 0.02274968 "putative chromosome-partitioning protein ParB"  
"Chl\_B06\_00013" 1544 "s59E13H2" 2.306387 "Lipoyl synthase"  
"Chl\_B06\_00013" 1544 "s59E25H2" 0 "Lipoyl synthase"  
"Chl\_B06\_00013" 1544 "s59E5H2" 0.07679144 "Lipoyl synthase"  
"Chl\_B06\_00013" 1544 "s63E6H2" 0.02792979 "Lipoyl synthase"  
"Chl\_B06\_00014" 1545 "s59E13H2" 2.354923 "AsnC family protein"  
"Chl\_B06\_00014" 1545 "s59E25H2" 0 "AsnC family protein"  
"Chl\_B06\_00014" 1545 "s59E5H2" 0.0521922 "AsnC family protein"  
"Chl\_B06\_00014" 1545 "s63E6H2" 0.04699265 "AsnC family protein"  
"Chl\_B06\_00015" 1546 "s59E13H2" 2.800257 "SPFH domain / Band 7 family protein"  
"Chl\_B06\_00015" 1546 "s59E25H2" 0 "SPFH domain / Band 7 family protein"  
"Chl\_B06\_00015" 1546 "s59E5H2" 0.0907429 "SPFH domain / Band 7 family protein"  
"Chl\_B06\_00015" 1546 "s63E6H2" 0.0278818 "SPFH domain / Band 7 family protein"  
"Chl\_B06\_00016" 1547 "s59E13H2" 0.03692565 "Cyclic di-GMP phosphodiesterase response regulator RpfG"  
"Chl\_B06\_00016" 1547 "s59E25H2" 0 "Cyclic di-GMP phosphodiesterase response regulator RpfG"  
"Chl\_B06\_00016" 1547 "s59E5H2" 0 "Cyclic di-GMP phosphodiesterase response regulator RpfG"  
"Chl\_B06\_00016" 1547 "s63E6H2" 0.008404351 "Cyclic di-GMP phosphodiesterase response regulator RpfG"  
"Chl\_B06\_00017" 1548 "s59E13H2" 3.646814 "Trehalose/maltose import ATP-binding protein MalK"  
"Chl\_B06\_00017" 1548 "s59E25H2" 0 "Trehalose/maltose import ATP-binding protein MalK"  
"Chl\_B06\_00017" 1548 "s59E5H2" 0.1721849 "Trehalose/maltose import ATP-binding protein MalK"  
"Chl\_B06\_00017" 1548 "s63E6H2" 0.002781483 "Trehalose/maltose import ATP-binding protein MalK"  
"Chl\_B06\_00018" 1549 "s59E13H2" 3.426272 "VIT family protein"  
"Chl\_B06\_00018" 1549 "s59E25H2" 0 "VIT family protein"  
"Chl\_B06\_00018" 1549 "s59E5H2" 0.1250925 "VIT family protein"  
"Chl\_B06\_00018" 1549 "s63E6H2" 0 "VIT family protein"  
"Chl\_B06\_00019" 1550 "s59E13H2" 2.377674 "putative glutamine synthetase 2"  
"Chl\_B06\_00019" 1550 "s59E25H2" 0 "putative glutamine synthetase 2"  
"Chl\_B06\_00019" 1550 "s59E5H2" 0.1871256 "putative glutamine synthetase 2"  
"Chl\_B06\_00019" 1550 "s63E6H2" 0.01717467 "putative glutamine synthetase 2"  
"Chl\_B06\_00020" 1551 "s59E13H2" 0.002963329 "HTH-type transcriptional repressor PurR"  
"Chl\_B06\_00020" 1551 "s59E25H2" 0 "HTH-type transcriptional repressor PurR"  
"Chl\_B06\_00020" 1551 "s59E5H2" 0.09258594 "HTH-type transcriptional repressor PurR"  
"Chl\_B06\_00020" 1551 "s63E6H2" 0.007650072 "HTH-type transcriptional repressor PurR"  
"Chl\_B06\_00021" 1552 "s59E13H2" 1.017295 "L-arabinose isomerase"

"Chl\_B06\_00021" 1552 "s59E25H2" 0.1795977 "L-arabinose isomerase"  
"Chl\_B06\_00021" 1552 "s59E5H2" 0.02693803 "L-arabinose isomerase"  
"Chl\_B06\_00021" 1552 "s63E6H2" 0.7876654 "L-arabinose isomerase"  
"Chl\_B06\_00022" 1553 "s59E13H2" 0 "Modification methylase Mjall"  
"Chl\_B06\_00022" 1553 "s59E25H2" 0 "Modification methylase Mjall"  
"Chl\_B06\_00022" 1553 "s59E5H2" 0 "Modification methylase Mjall"  
"Chl\_B06\_00022" 1553 "s63E6H2" 0 "Modification methylase Mjall"  
"Chl\_B06\_00023" 1554 "s59E13H2" 0 "hypothetical protein"  
"Chl\_B06\_00023" 1554 "s59E25H2" 0 "hypothetical protein"  
"Chl\_B06\_00023" 1554 "s59E5H2" 0 "hypothetical protein"  
"Chl\_B06\_00023" 1554 "s63E6H2" 0 "hypothetical protein"  
"Chl\_B06\_00024" 1555 "s59E13H2" 0.01101609 "Tyrosine recombinase XerD"  
"Chl\_B06\_00024" 1555 "s59E25H2" 0 "Tyrosine recombinase XerD"  
"Chl\_B06\_00024" 1555 "s59E5H2" 0.03945713 "Tyrosine recombinase XerD"  
"Chl\_B06\_00024" 1555 "s63E6H2" 0 "Tyrosine recombinase XerD"  
"Chl\_B06\_00025" 1556 "s59E13H2" 0 "hypothetical protein"  
"Chl\_B06\_00025" 1556 "s59E25H2" 0 "hypothetical protein"  
"Chl\_B06\_00025" 1556 "s59E5H2" 0 "hypothetical protein"  
"Chl\_B06\_00025" 1556 "s63E6H2" 0 "hypothetical protein"  
"Chl\_B06\_00026" 1557 "s59E13H2" 0 "hypothetical protein"  
"Chl\_B06\_00026" 1557 "s59E25H2" 0 "hypothetical protein"  
"Chl\_B06\_00026" 1557 "s59E5H2" 0 "hypothetical protein"  
"Chl\_B06\_00026" 1557 "s63E6H2" 0 "hypothetical protein"  
"Chl\_B06\_00027" 1558 "s59E13H2" 0 "hypothetical protein"  
"Chl\_B06\_00027" 1558 "s59E25H2" 0 "hypothetical protein"  
"Chl\_B06\_00027" 1558 "s59E5H2" 0 "hypothetical protein"  
"Chl\_B06\_00027" 1558 "s63E6H2" 0 "hypothetical protein"  
"Chl\_B06\_00028" 1559 "s59E13H2" 0 "hypothetical protein"  
"Chl\_B06\_00028" 1559 "s59E25H2" 0 "hypothetical protein"  
"Chl\_B06\_00028" 1559 "s59E5H2" 0 "hypothetical protein"  
"Chl\_B06\_00028" 1559 "s63E6H2" 0.008979181 "hypothetical protein"  
"Chl\_B06\_00029" 1560 "s59E13H2" 0.001458524 "putative transposase"  
"Chl\_B06\_00029" 1560 "s59E25H2" 0 "putative transposase"  
"Chl\_B06\_00029" 1560 "s59E5H2" 0.0234034 "putative transposase"  
"Chl\_B06\_00029" 1560 "s63E6H2" 0.003900497 "putative transposase"  
"Chl\_B06\_00031" 1562 "s59E13H2" 0.892201 "Phd\_YefM"  
"Chl\_B06\_00031" 1562 "s59E25H2" 0 "Phd\_YefM"  
"Chl\_B06\_00031" 1562 "s59E5H2" 0.04383733 "Phd\_YefM"  
"Chl\_B06\_00031" 1562 "s63E6H2" 0.01259417 "Phd\_YefM"  
"Chl\_B06\_00032" 1563 "s59E13H2" 0 "hypothetical protein"  
"Chl\_B06\_00032" 1563 "s59E25H2" 0 "hypothetical protein"  
"Chl\_B06\_00032" 1563 "s59E5H2" 0 "hypothetical protein"  
"Chl\_B06\_00032" 1563 "s63E6H2" 0.02782536 "hypothetical protein"  
"Chl\_B06\_00033" 1564 "s59E13H2" 0 "hypothetical protein"  
"Chl\_B06\_00033" 1564 "s59E25H2" 0 "hypothetical protein"  
"Chl\_B06\_00033" 1564 "s59E5H2" 0 "hypothetical protein"  
"Chl\_B06\_00033" 1564 "s63E6H2" 0 "hypothetical protein"

"Chl\_B06\_00034" 1565 "s59E13H2" 0.01515495 "Glucokinase"  
"Chl\_B06\_00034" 1565 "s59E25H2" 0 "Glucokinase"  
"Chl\_B06\_00034" 1565 "s59E5H2" 0.01488833 "Glucokinase"  
"Chl\_B06\_00034" 1565 "s63E6H2" 0.1627643 "Glucokinase"  
"Chl\_C14\_00001" 1566 "s59E13H2" 0.04086411 "hypothetical protein"  
"Chl\_C14\_00001" 1566 "s59E25H2" 0 "hypothetical protein"  
"Chl\_C14\_00001" 1566 "s59E5H2" 0 "hypothetical protein"  
"Chl\_C14\_00001" 1566 "s63E6H2" 0 "hypothetical protein"  
"Chl\_C14\_00002" 1567 "s59E13H2" 0.005183707 "hypothetical protein"  
"Chl\_C14\_00002" 1567 "s59E25H2" 0 "hypothetical protein"  
"Chl\_C14\_00002" 1567 "s59E5H2" 0 "hypothetical protein"  
"Chl\_C14\_00002" 1567 "s63E6H2" 0 "hypothetical protein"  
"Chl\_C14\_00003" 1568 "s59E13H2" 0 "Tyrosine recombinase XerD"  
"Chl\_C14\_00003" 1568 "s59E25H2" 0 "Tyrosine recombinase XerD"  
"Chl\_C14\_00003" 1568 "s59E5H2" 0 "Tyrosine recombinase XerD"  
"Chl\_C14\_00003" 1568 "s63E6H2" 0 "Tyrosine recombinase XerD"  
"Chl\_C14\_00005" 1570 "s59E13H2" 0 "Tyrosine recombinase XerD"  
"Chl\_C14\_00005" 1570 "s59E25H2" 0 "Tyrosine recombinase XerD"  
"Chl\_C14\_00005" 1570 "s59E5H2" 0 "Tyrosine recombinase XerD"  
"Chl\_C14\_00005" 1570 "s63E6H2" 0 "Tyrosine recombinase XerD"  
"Chl\_C14\_00007" 1572 "s59E13H2" 0 "Tyrosine recombinase XerC"  
"Chl\_C14\_00007" 1572 "s59E25H2" 0 "Tyrosine recombinase XerC"  
"Chl\_C14\_00007" 1572 "s59E5H2" 0 "Tyrosine recombinase XerC"  
"Chl\_C14\_00007" 1572 "s63E6H2" 0 "Tyrosine recombinase XerC"  
"Chl\_C14\_00008" 1573 "s59E13H2" 0 "Adenylate cyclase 2"  
"Chl\_C14\_00008" 1573 "s59E25H2" 0 "Adenylate cyclase 2"  
"Chl\_C14\_00008" 1573 "s59E5H2" 0 "Adenylate cyclase 2"  
"Chl\_C14\_00008" 1573 "s63E6H2" 0 "Adenylate cyclase 2"  
"Chl\_C14\_00009" 1574 "s59E13H2" 0 "RNA polymerase sigma factor SigM"  
"Chl\_C14\_00009" 1574 "s59E25H2" 0 "RNA polymerase sigma factor SigM"  
"Chl\_C14\_00009" 1574 "s59E5H2" 0 "RNA polymerase sigma factor SigM"  
"Chl\_C14\_00009" 1574 "s63E6H2" 0 "RNA polymerase sigma factor SigM"  
"Chl\_C14\_00010" 1575 "s59E13H2" 0 "FecR protein"  
"Chl\_C14\_00010" 1575 "s59E25H2" 0 "FecR protein"  
"Chl\_C14\_00010" 1575 "s59E5H2" 0 "FecR protein"  
"Chl\_C14\_00010" 1575 "s63E6H2" 0 "FecR protein"  
"Chl\_C14\_00011" 1576 "s59E13H2" 0 "Cyclic di-GMP phosphodiesterase response regulator RpfG"  
"Chl\_C14\_00011" 1576 "s59E25H2" 0 "Cyclic di-GMP phosphodiesterase response regulator RpfG"  
"Chl\_C14\_00011" 1576 "s59E5H2" 0 "Cyclic di-GMP phosphodiesterase response regulator RpfG"  
"Chl\_C14\_00011" 1576 "s63E6H2" 0 "Cyclic di-GMP phosphodiesterase response regulator RpfG"  
"Chl\_C14\_00012" 1577 "s59E13H2" 0 "Phospholipase YtpA"  
"Chl\_C14\_00012" 1577 "s59E25H2" 0 "Phospholipase YtpA"  
"Chl\_C14\_00012" 1577 "s59E5H2" 0 "Phospholipase YtpA"  
"Chl\_C14\_00012" 1577 "s63E6H2" 0 "Phospholipase YtpA"  
"Chl\_C14\_00013" 1578 "s59E13H2" 0 "hypothetical protein"  
"Chl\_C14\_00013" 1578 "s59E25H2" 0 "hypothetical protein"  
"Chl\_C14\_00013" 1578 "s59E5H2" 0 "hypothetical protein"

"Chl\_C14\_00013" 1578 "s63E6H2" 0 "hypothetical protein"  
"Chl\_C14\_00015" 1580 "s59E13H2" 0 "Tungsten-containing aldehyde ferredoxin oxidoreductase"  
"Chl\_C14\_00015" 1580 "s59E25H2" 0 "Tungsten-containing aldehyde ferredoxin oxidoreductase"  
"Chl\_C14\_00015" 1580 "s59E5H2" 0 "Tungsten-containing aldehyde ferredoxin oxidoreductase"  
"Chl\_C14\_00015" 1580 "s63E6H2" 0 "Tungsten-containing aldehyde ferredoxin oxidoreductase"  
"Chl\_C14\_00016" 1581 "s59E13H2" 0 "hypothetical protein"  
"Chl\_C14\_00016" 1581 "s59E25H2" 0 "hypothetical protein"  
"Chl\_C14\_00016" 1581 "s59E5H2" 0 "hypothetical protein"  
"Chl\_C14\_00016" 1581 "s63E6H2" 0 "hypothetical protein"  
"Chl\_C14\_00017" 1582 "s59E13H2" 0 "Sialic acid TRAP transporter permease protein SiaT"  
"Chl\_C14\_00017" 1582 "s59E25H2" 0 "Sialic acid TRAP transporter permease protein SiaT"  
"Chl\_C14\_00017" 1582 "s59E5H2" 0 "Sialic acid TRAP transporter permease protein SiaT"  
"Chl\_C14\_00017" 1582 "s63E6H2" 0 "Sialic acid TRAP transporter permease protein SiaT"  
"Chl\_C14\_00018" 1583 "s59E13H2" 0 "Tripartite ATP-independent periplasmic transporters, DctQ component"  
"Chl\_C14\_00018" 1583 "s59E25H2" 0 "Tripartite ATP-independent periplasmic transporters, DctQ component"  
"Chl\_C14\_00018" 1583 "s59E5H2" 0 "Tripartite ATP-independent periplasmic transporters, DctQ component"  
"Chl\_C14\_00018" 1583 "s63E6H2" 0 "Tripartite ATP-independent periplasmic transporters, DctQ component"  
"Chl\_C14\_00019" 1584 "s59E13H2" 0 "C4-dicarboxylate-binding periplasmic protein precursor"  
"Chl\_C14\_00019" 1584 "s59E25H2" 0 "C4-dicarboxylate-binding periplasmic protein precursor"  
"Chl\_C14\_00019" 1584 "s59E5H2" 0 "C4-dicarboxylate-binding periplasmic protein precursor"  
"Chl\_C14\_00019" 1584 "s63E6H2" 0 "C4-dicarboxylate-binding periplasmic protein precursor"  
"Chl\_C14\_00020" 1585 "s59E13H2" 0 "hypothetical protein"  
"Chl\_C14\_00020" 1585 "s59E25H2" 0 "hypothetical protein"  
"Chl\_C14\_00020" 1585 "s59E5H2" 0 "hypothetical protein"  
"Chl\_C14\_00020" 1585 "s63E6H2" 0 "hypothetical protein"  
"Chl\_C14\_00022" 1587 "s59E13H2" 0 "metal-dependent hydrolase"  
"Chl\_C14\_00022" 1587 "s59E25H2" 0 "metal-dependent hydrolase"  
"Chl\_C14\_00022" 1587 "s59E5H2" 0 "metal-dependent hydrolase"  
"Chl\_C14\_00022" 1587 "s63E6H2" 0 "metal-dependent hydrolase"  
"Chl\_C14\_00023" 1588 "s59E13H2" 0 "L-hydantoinase"  
"Chl\_C14\_00023" 1588 "s59E25H2" 0 "L-hydantoinase"  
"Chl\_C14\_00023" 1588 "s59E5H2" 0 "L-hydantoinase"  
"Chl\_C14\_00023" 1588 "s63E6H2" 0 "L-hydantoinase"  
"Chl\_C14\_00024" 1589 "s59E13H2" 0 "NADH oxidase"  
"Chl\_C14\_00024" 1589 "s59E25H2" 0 "NADH oxidase"  
"Chl\_C14\_00024" 1589 "s59E5H2" 0 "NADH oxidase"  
"Chl\_C14\_00024" 1589 "s63E6H2" 0 "NADH oxidase"  
"Chl\_C14\_00025" 1590 "s59E13H2" 0 "(R)-stereoselective amidase"  
"Chl\_C14\_00025" 1590 "s59E25H2" 0 "(R)-stereoselective amidase"  
"Chl\_C14\_00025" 1590 "s59E5H2" 0 "(R)-stereoselective amidase"  
"Chl\_C14\_00025" 1590 "s63E6H2" 0 "(R)-stereoselective amidase"  
"Chl\_C14\_00026" 1591 "s59E13H2" 0 "CAAX amino terminal protease self- immunity"  
"Chl\_C14\_00026" 1591 "s59E25H2" 0 "CAAX amino terminal protease self- immunity"  
"Chl\_C14\_00026" 1591 "s59E5H2" 0 "CAAX amino terminal protease self- immunity"  
"Chl\_C14\_00026" 1591 "s63E6H2" 0 "CAAX amino terminal protease self- immunity"  
"Chl\_C14\_00027" 1592 "s59E13H2" 0 "hypothetical protein"  
"Chl\_C14\_00027" 1592 "s59E25H2" 0 "hypothetical protein"

"Chl\_C14\_00027" 1592 "s59E5H2" 0 "hypothetical protein"  
"Chl\_C14\_00027" 1592 "s63E6H2" 0 "hypothetical protein"  
"Chl\_C14\_00028" 1593 "s59E13H2" 0 "Propionyl-CoA:succinate CoA transferase"  
"Chl\_C14\_00028" 1593 "s59E25H2" 0 "Propionyl-CoA:succinate CoA transferase"  
"Chl\_C14\_00028" 1593 "s59E5H2" 0 "Propionyl-CoA:succinate CoA transferase"  
"Chl\_C14\_00028" 1593 "s63E6H2" 0 "Propionyl-CoA:succinate CoA transferase"  
"Chl\_C14\_00029" 1594 "s59E13H2" 0 "bifunctional enoyl-CoA hydratase/phosphate acetyltransferase"  
"Chl\_C14\_00029" 1594 "s59E25H2" 0 "bifunctional enoyl-CoA hydratase/phosphate acetyltransferase"  
"Chl\_C14\_00029" 1594 "s59E5H2" 0 "bifunctional enoyl-CoA hydratase/phosphate acetyltransferase"  
"Chl\_C14\_00029" 1594 "s63E6H2" 0 "bifunctional enoyl-CoA hydratase/phosphate acetyltransferase"  
"Chl\_C14\_00032" 1597 "s59E13H2" 0 "GTPase ObgE"  
"Chl\_C14\_00032" 1597 "s59E25H2" 0 "GTPase ObgE"  
"Chl\_C14\_00032" 1597 "s59E5H2" 0 "GTPase ObgE"  
"Chl\_C14\_00032" 1597 "s63E6H2" 0 "GTPase ObgE"  
"Chl\_C14\_00033" 1598 "s59E13H2" 0 "Nicotinate-nucleotide adenylyltransferase"  
"Chl\_C14\_00033" 1598 "s59E25H2" 0 "Nicotinate-nucleotide adenylyltransferase"  
"Chl\_C14\_00033" 1598 "s59E5H2" 0 "Nicotinate-nucleotide adenylyltransferase"  
"Chl\_C14\_00033" 1598 "s63E6H2" 0 "Nicotinate-nucleotide adenylyltransferase"  
"Chl\_C14\_00034" 1599 "s59E13H2" 0 "Orotate phosphoribosyltransferase"  
"Chl\_C14\_00034" 1599 "s59E25H2" 0 "Orotate phosphoribosyltransferase"  
"Chl\_C14\_00034" 1599 "s59E5H2" 0 "Orotate phosphoribosyltransferase"  
"Chl\_C14\_00034" 1599 "s63E6H2" 0 "Orotate phosphoribosyltransferase"  
"Chl\_C14\_00035" 1600 "s59E13H2" 0 "60 kDa chaperonin"  
"Chl\_C14\_00035" 1600 "s59E25H2" 0 "60 kDa chaperonin"  
"Chl\_C14\_00035" 1600 "s59E5H2" 0.004974395 "60 kDa chaperonin"  
"Chl\_C14\_00035" 1600 "s63E6H2" 0 "60 kDa chaperonin"  
"Chl\_C14\_00036" 1601 "s59E13H2" 0 "10 kDa chaperonin"  
"Chl\_C14\_00036" 1601 "s59E25H2" 0 "10 kDa chaperonin"  
"Chl\_C14\_00036" 1601 "s59E5H2" 0 "10 kDa chaperonin"  
"Chl\_C14\_00036" 1601 "s63E6H2" 0 "10 kDa chaperonin"  
"Chl\_C14\_00037" 1602 "s59E13H2" 0 "transcriptional repressor DicA"  
"Chl\_C14\_00037" 1602 "s59E25H2" 0 "transcriptional repressor DicA"  
"Chl\_C14\_00037" 1602 "s59E5H2" 0 "transcriptional repressor DicA"  
"Chl\_C14\_00037" 1602 "s63E6H2" 0 "transcriptional repressor DicA"  
"Chl\_C14\_00038" 1603 "s59E13H2" 0 "hypothetical protein"  
"Chl\_C14\_00038" 1603 "s59E25H2" 0 "hypothetical protein"  
"Chl\_C14\_00038" 1603 "s59E5H2" 0 "hypothetical protein"  
"Chl\_C14\_00038" 1603 "s63E6H2" 0 "hypothetical protein"  
"Chl\_C14\_00039" 1604 "s59E13H2" 0 "tRNA N6-adenosine threonylcarbamoyltransferase"  
"Chl\_C14\_00039" 1604 "s59E25H2" 0 "tRNA N6-adenosine threonylcarbamoyltransferase"  
"Chl\_C14\_00039" 1604 "s59E5H2" 0 "tRNA N6-adenosine threonylcarbamoyltransferase"  
"Chl\_C14\_00039" 1604 "s63E6H2" 0 "tRNA N6-adenosine threonylcarbamoyltransferase"  
"Chl\_C14\_00040" 1605 "s59E13H2" 0 "Magnesium and cobalt efflux protein CorC"  
"Chl\_C14\_00040" 1605 "s59E25H2" 0 "Magnesium and cobalt efflux protein CorC"  
"Chl\_C14\_00040" 1605 "s59E5H2" 0 "Magnesium and cobalt efflux protein CorC"  
"Chl\_C14\_00040" 1605 "s63E6H2" 0 "Magnesium and cobalt efflux protein CorC"  
"Chl\_C14\_00041" 1606 "s59E13H2" 0 "hypothetical protein"

"Chl\_C14\_00041" 1606 "s59E25H2" 0 "hypothetical protein"  
"Chl\_C14\_00041" 1606 "s59E5H2" 0 "hypothetical protein"  
"Chl\_C14\_00041" 1606 "s63E6H2" 0 "hypothetical protein"  
"Chl\_C14\_00042" 1607 "s59E13H2" 0 "hypothetical protein"  
"Chl\_C14\_00042" 1607 "s59E25H2" 0 "hypothetical protein"  
"Chl\_C14\_00042" 1607 "s59E5H2" 0 "hypothetical protein"  
"Chl\_C14\_00042" 1607 "s63E6H2" 0 "hypothetical protein"  
"Chl\_C14\_00044" 1609 "s59E13H2" 0 "Tryptophan synthase beta chain 1"  
"Chl\_C14\_00044" 1609 "s59E25H2" 0 "Tryptophan synthase beta chain 1"  
"Chl\_C14\_00044" 1609 "s59E5H2" 0 "Tryptophan synthase beta chain 1"  
"Chl\_C14\_00044" 1609 "s63E6H2" 0 "Tryptophan synthase beta chain 1"  
"Chl\_C14\_00045" 1610 "s59E13H2" 0 "Serine protease Do-like HtrB"  
"Chl\_C14\_00045" 1610 "s59E25H2" 0 "Serine protease Do-like HtrB"  
"Chl\_C14\_00045" 1610 "s59E5H2" 0 "Serine protease Do-like HtrB"  
"Chl\_C14\_00045" 1610 "s63E6H2" 0 "Serine protease Do-like HtrB"  
"Chl\_C14\_00046" 1611 "s59E13H2" 0 "Isoleucine--tRNA ligase"  
"Chl\_C14\_00046" 1611 "s59E25H2" 0 "Isoleucine--tRNA ligase"  
"Chl\_C14\_00046" 1611 "s59E5H2" 0.001314181 "Isoleucine--tRNA ligase"  
"Chl\_C14\_00046" 1611 "s63E6H2" 0 "Isoleucine--tRNA ligase"  
"Chl\_C14\_00048" 1613 "s59E13H2" 0 "R3H domain protein"  
"Chl\_C14\_00048" 1613 "s59E25H2" 0 "R3H domain protein"  
"Chl\_C14\_00048" 1613 "s59E5H2" 0 "R3H domain protein"  
"Chl\_C14\_00048" 1613 "s63E6H2" 0 "R3H domain protein"  
"Chl\_C14\_00049" 1614 "s59E13H2" 0 "Membrane protein insertase MisCA precursor"  
"Chl\_C14\_00049" 1614 "s59E25H2" 0 "Membrane protein insertase MisCA precursor"  
"Chl\_C14\_00049" 1614 "s59E5H2" 0 "Membrane protein insertase MisCA precursor"  
"Chl\_C14\_00049" 1614 "s63E6H2" 0 "Membrane protein insertase MisCA precursor"  
"Chl\_C14\_00050" 1615 "s59E13H2" 0 "outer membrane biogenesis protein BamB"  
"Chl\_C14\_00050" 1615 "s59E25H2" 0 "outer membrane biogenesis protein BamB"  
"Chl\_C14\_00050" 1615 "s59E5H2" 0 "outer membrane biogenesis protein BamB"  
"Chl\_C14\_00050" 1615 "s63E6H2" 0 "outer membrane biogenesis protein BamB"  
"Chl\_C14\_00052" 1617 "s59E13H2" 0 "hypothetical protein"  
"Chl\_C14\_00052" 1617 "s59E25H2" 0 "hypothetical protein"  
"Chl\_C14\_00052" 1617 "s59E5H2" 0 "hypothetical protein"  
"Chl\_C14\_00052" 1617 "s63E6H2" 0 "hypothetical protein"  
"Chl\_C14\_00054" 1619 "s59E13H2" 0 "hypothetical protein"  
"Chl\_C14\_00054" 1619 "s59E25H2" 0 "hypothetical protein"  
"Chl\_C14\_00054" 1619 "s59E5H2" 0 "hypothetical protein"  
"Chl\_C14\_00054" 1619 "s63E6H2" 0 "hypothetical protein"  
"Chl\_C14\_00056" 1621 "s59E13H2" 0 "hypothetical protein"  
"Chl\_C14\_00056" 1621 "s59E25H2" 0 "hypothetical protein"  
"Chl\_C14\_00056" 1621 "s59E5H2" 0 "hypothetical protein"  
"Chl\_C14\_00056" 1621 "s63E6H2" 0 "hypothetical protein"  
"Chl\_C14\_00058" 1623 "s59E13H2" 0 "putative tyrosine recombinase XerC-like protein"  
"Chl\_C14\_00058" 1623 "s59E25H2" 0 "putative tyrosine recombinase XerC-like protein"  
"Chl\_C14\_00058" 1623 "s59E5H2" 0 "putative tyrosine recombinase XerC-like protein"  
"Chl\_C14\_00058" 1623 "s63E6H2" 0 "putative tyrosine recombinase XerC-like protein"

"Chl\_C14\_00060" 1625 "s59E13H2" 0 "Tyrosine recombinase XerD"  
"Chl\_C14\_00060" 1625 "s59E25H2" 0 "Tyrosine recombinase XerD"  
"Chl\_C14\_00060" 1625 "s59E5H2" 0 "Tyrosine recombinase XerD"  
"Chl\_C14\_00060" 1625 "s63E6H2" 0 "Tyrosine recombinase XerD"  
"Chl\_C14\_00062" 1627 "s59E13H2" 0 "chromosome segregation protein"  
"Chl\_C14\_00062" 1627 "s59E25H2" 0 "chromosome segregation protein"  
"Chl\_C14\_00062" 1627 "s59E5H2" 0 "chromosome segregation protein"  
"Chl\_C14\_00062" 1627 "s63E6H2" 0 "chromosome segregation protein"  
"Chl\_C14\_00063" 1628 "s59E13H2" 0 "Modification methylase Mjall"  
"Chl\_C14\_00063" 1628 "s59E25H2" 0 "Modification methylase Mjall"  
"Chl\_C14\_00063" 1628 "s59E5H2" 0 "Modification methylase Mjall"  
"Chl\_C14\_00063" 1628 "s63E6H2" 0 "Modification methylase Mjall"  
"Chl\_C14\_00064" 1629 "s59E13H2" 0.02010024 "Oxygen sensor histidine kinase NreB"  
"Chl\_C14\_00064" 1629 "s59E25H2" 0 "Oxygen sensor histidine kinase NreB"  
"Chl\_C14\_00064" 1629 "s59E5H2" 0.2083924 "Oxygen sensor histidine kinase NreB"  
"Chl\_C14\_00064" 1629 "s63E6H2" 0 "Oxygen sensor histidine kinase NreB"  
"Chl\_C14\_00065" 1630 "s59E13H2" 0.007509116 "Transcriptional regulatory protein DegU"  
"Chl\_C14\_00065" 1630 "s59E25H2" 0 "Transcriptional regulatory protein DegU"  
"Chl\_C14\_00065" 1630 "s59E5H2" 0 "Transcriptional regulatory protein DegU"  
"Chl\_C14\_00065" 1630 "s63E6H2" 0 "Transcriptional regulatory protein DegU"  
"Chl\_C14\_00067" 1632 "s59E13H2" 0.0120396 "NADP-reducing hydrogenase subunit HndA"  
"Chl\_C14\_00067" 1632 "s59E25H2" 0 "NADP-reducing hydrogenase subunit HndA"  
"Chl\_C14\_00067" 1632 "s59E5H2" 0 "NADP-reducing hydrogenase subunit HndA"  
"Chl\_C14\_00067" 1632 "s63E6H2" 0 "NADP-reducing hydrogenase subunit HndA"  
"Chl\_C14\_00068" 1633 "s59E13H2" 0 "NADP-reducing hydrogenase subunit HndC"  
"Chl\_C14\_00068" 1633 "s59E25H2" 0 "NADP-reducing hydrogenase subunit HndC"  
"Chl\_C14\_00068" 1633 "s59E5H2" 0 "NADP-reducing hydrogenase subunit HndC"  
"Chl\_C14\_00068" 1633 "s63E6H2" 0 "NADP-reducing hydrogenase subunit HndC"  
"Chl\_C14\_00069" 1634 "s59E13H2" 0 "NADP-reducing hydrogenase subunit HndC"  
"Chl\_C14\_00069" 1634 "s59E25H2" 0 "NADP-reducing hydrogenase subunit HndC"  
"Chl\_C14\_00069" 1634 "s59E5H2" 0 "NADP-reducing hydrogenase subunit HndC"  
"Chl\_C14\_00069" 1634 "s63E6H2" 0 "NADP-reducing hydrogenase subunit HndC"  
"Chl\_C14\_00070" 1635 "s59E13H2" 0 "hypothetical protein"  
"Chl\_C14\_00070" 1635 "s59E25H2" 0 "hypothetical protein"  
"Chl\_C14\_00070" 1635 "s59E5H2" 0 "hypothetical protein"  
"Chl\_C14\_00070" 1635 "s63E6H2" 0 "hypothetical protein"  
"Chl\_C14\_00071" 1636 "s59E13H2" 0 "hypothetical protein"  
"Chl\_C14\_00071" 1636 "s59E25H2" 0 "hypothetical protein"  
"Chl\_C14\_00071" 1636 "s59E5H2" 0 "hypothetical protein"  
"Chl\_C14\_00071" 1636 "s63E6H2" 0 "hypothetical protein"  
"Chl\_C14\_00074" 1639 "s59E13H2" 0 "hypothetical protein"  
"Chl\_C14\_00074" 1639 "s59E25H2" 0 "hypothetical protein"  
"Chl\_C14\_00074" 1639 "s59E5H2" 0 "hypothetical protein"  
"Chl\_C14\_00074" 1639 "s63E6H2" 0 "hypothetical protein"  
"Chl\_C14\_00075" 1640 "s59E13H2" 0 "Recombinase"  
"Chl\_C14\_00075" 1640 "s59E25H2" 0 "Recombinase"  
"Chl\_C14\_00075" 1640 "s59E5H2" 0 "Recombinase"



"Chl\_C14\_00075" 1640 "s63E6H2" 0 "Recombinase"  
"Chl\_C14\_00076" 1641 "s59E13H2" 0 "Response regulator protein VraR"  
"Chl\_C14\_00076" 1641 "s59E25H2" 0 "Response regulator protein VraR"  
"Chl\_C14\_00076" 1641 "s59E5H2" 0 "Response regulator protein VraR"  
"Chl\_C14\_00076" 1641 "s63E6H2" 0 "Response regulator protein VraR"  
"Chl\_C14\_00077" 1642 "s59E13H2" 0 "Bifunctional homocysteine S-methyltransferase/5,10-methylenetetrahydrofolate reductase"  
"Chl\_C14\_00077" 1642 "s59E25H2" 0 "Bifunctional homocysteine S-methyltransferase/5,10-methylenetetrahydrofolate reductase"  
"Chl\_C14\_00077" 1642 "s59E5H2" 0 "Bifunctional homocysteine S-methyltransferase/5,10-methylenetetrahydrofolate reductase"  
"Chl\_C14\_00077" 1642 "s63E6H2" 0 "Bifunctional homocysteine S-methyltransferase/5,10-methylenetetrahydrofolate reductase"  
"Chl\_C14\_00078" 1643 "s59E13H2" 0 "hypothetical protein"  
"Chl\_C14\_00078" 1643 "s59E25H2" 0 "hypothetical protein"  
"Chl\_C14\_00078" 1643 "s59E5H2" 0 "hypothetical protein"  
"Chl\_C14\_00078" 1643 "s63E6H2" 0 "hypothetical protein"  
"Chl\_C14\_00079" 1644 "s59E13H2" 0 "Sulfide dehydrogenase subunit alpha precursor"  
"Chl\_C14\_00079" 1644 "s59E25H2" 0 "Sulfide dehydrogenase subunit alpha precursor"  
"Chl\_C14\_00079" 1644 "s59E5H2" 0 "Sulfide dehydrogenase subunit alpha precursor"  
"Chl\_C14\_00079" 1644 "s63E6H2" 0 "Sulfide dehydrogenase subunit alpha precursor"  
"Chl\_C14\_00080" 1645 "s59E13H2" 0 "Oxygen regulatory protein NreC"  
"Chl\_C14\_00080" 1645 "s59E25H2" 0 "Oxygen regulatory protein NreC"  
"Chl\_C14\_00080" 1645 "s59E5H2" 0 "Oxygen regulatory protein NreC"  
"Chl\_C14\_00080" 1645 "s63E6H2" 0 "Oxygen regulatory protein NreC"  
"Chl\_C14\_00081" 1646 "s59E13H2" 0 "Signal transduction histidine-protein kinase/phosphatase DegS"  
"Chl\_C14\_00081" 1646 "s59E25H2" 0 "Signal transduction histidine-protein kinase/phosphatase DegS"  
"Chl\_C14\_00081" 1646 "s59E5H2" 0 "Signal transduction histidine-protein kinase/phosphatase DegS"  
"Chl\_C14\_00081" 1646 "s63E6H2" 0 "Signal transduction histidine-protein kinase/phosphatase DegS"  
"Chl\_C14\_00082" 1647 "s59E13H2" 0 "Tripartite tricarboxylate transporter TctB family protein"  
"Chl\_C14\_00082" 1647 "s59E25H2" 0 "Tripartite tricarboxylate transporter TctB family protein"  
"Chl\_C14\_00082" 1647 "s59E5H2" 0 "Tripartite tricarboxylate transporter TctB family protein"  
"Chl\_C14\_00082" 1647 "s63E6H2" 0 "Tripartite tricarboxylate transporter TctB family protein"  
"Chl\_C14\_00083" 1648 "s59E13H2" 0 "Tripartite tricarboxylate transporter TctA family protein"  
"Chl\_C14\_00083" 1648 "s59E25H2" 0 "Tripartite tricarboxylate transporter TctA family protein"  
"Chl\_C14\_00083" 1648 "s59E5H2" 0 "Tripartite tricarboxylate transporter TctA family protein"  
"Chl\_C14\_00083" 1648 "s63E6H2" 0 "Tripartite tricarboxylate transporter TctA family protein"  
"Chl\_C14\_00084" 1649 "s59E13H2" 0 "Succinyl-CoA:coenzyme A transferase"  
"Chl\_C14\_00084" 1649 "s59E25H2" 0 "Succinyl-CoA:coenzyme A transferase"  
"Chl\_C14\_00084" 1649 "s59E5H2" 0 "Succinyl-CoA:coenzyme A transferase"  
"Chl\_C14\_00084" 1649 "s63E6H2" 0 "Succinyl-CoA:coenzyme A transferase"  
"Chl\_C14\_00085" 1650 "s59E13H2" 0 "bifunctional enoyl-CoA hydratase/phosphate acetyltransferase"  
"Chl\_C14\_00085" 1650 "s59E25H2" 0 "bifunctional enoyl-CoA hydratase/phosphate acetyltransferase"  
"Chl\_C14\_00085" 1650 "s59E5H2" 0 "bifunctional enoyl-CoA hydratase/phosphate acetyltransferase"  
"Chl\_C14\_00085" 1650 "s63E6H2" 0 "bifunctional enoyl-CoA hydratase/phosphate acetyltransferase"  
"Chl\_C14\_00086" 1651 "s59E13H2" 0 "Succinyl-CoA:(R)-benzylsuccinate CoA-transferase subunit BbsE"  
"Chl\_C14\_00086" 1651 "s59E25H2" 0 "Succinyl-CoA:(R)-benzylsuccinate CoA-transferase subunit BbsE"  
"Chl\_C14\_00086" 1651 "s59E5H2" 0 "Succinyl-CoA:(R)-benzylsuccinate CoA-transferase subunit BbsE"  
"Chl\_C14\_00086" 1651 "s63E6H2" 0 "Succinyl-CoA:(R)-benzylsuccinate CoA-transferase subunit BbsE"  
"Chl\_C14\_00087" 1652 "s59E13H2" 0 "Succinyl-CoA:(R)-benzylsuccinate CoA-transferase subunit BbsF"  
"Chl\_C14\_00087" 1652 "s59E25H2" 0 "Succinyl-CoA:(R)-benzylsuccinate CoA-transferase subunit BbsF"

"Chl\_C14\_00087" 1652 "s59E5H2" 0 "Succinyl-CoA:(R)-benzylsuccinate CoA-transferase subunit BbsF"  
"Chl\_C14\_00087" 1652 "s63E6H2" 0 "Succinyl-CoA:(R)-benzylsuccinate CoA-transferase subunit BbsF"  
"Chl\_C14\_00088" 1653 "s59E13H2" 0 "metal-dependent hydrolase"  
"Chl\_C14\_00088" 1653 "s59E25H2" 0 "metal-dependent hydrolase"  
"Chl\_C14\_00088" 1653 "s59E5H2" 0 "metal-dependent hydrolase"  
"Chl\_C14\_00088" 1653 "s63E6H2" 0 "metal-dependent hydrolase"  
"Chl\_C14\_00090" 1655 "s59E13H2" 0 "Glycine cleavage system H protein"  
"Chl\_C14\_00090" 1655 "s59E25H2" 0 "Glycine cleavage system H protein"  
"Chl\_C14\_00090" 1655 "s59E5H2" 0 "Glycine cleavage system H protein"  
"Chl\_C14\_00090" 1655 "s63E6H2" 0 "Glycine cleavage system H protein"  
"Chl\_C14\_00094" 1659 "s59E13H2" 0 "Antibiotic biosynthesis monooxygenase"  
"Chl\_C14\_00094" 1659 "s59E25H2" 0 "Antibiotic biosynthesis monooxygenase"  
"Chl\_C14\_00094" 1659 "s59E5H2" 0 "Antibiotic biosynthesis monooxygenase"  
"Chl\_C14\_00094" 1659 "s63E6H2" 0 "Antibiotic biosynthesis monooxygenase"  
"Chl\_C14\_00095" 1660 "s59E13H2" 0 "Oxygen sensor histidine kinase NreB"  
"Chl\_C14\_00095" 1660 "s59E25H2" 0 "Oxygen sensor histidine kinase NreB"  
"Chl\_C14\_00095" 1660 "s59E5H2" 0 "Oxygen sensor histidine kinase NreB"  
"Chl\_C14\_00095" 1660 "s63E6H2" 0 "Oxygen sensor histidine kinase NreB"  
"Chl\_C14\_00096" 1661 "s59E13H2" 0 "Transcriptional regulatory protein DegU"  
"Chl\_C14\_00096" 1661 "s59E25H2" 0 "Transcriptional regulatory protein DegU"  
"Chl\_C14\_00096" 1661 "s59E5H2" 0 "Transcriptional regulatory protein DegU"  
"Chl\_C14\_00096" 1661 "s63E6H2" 0 "Transcriptional regulatory protein DegU"  
"Chl\_C14\_00097" 1662 "s59E13H2" 0 "hypothetical protein"  
"Chl\_C14\_00097" 1662 "s59E25H2" 0 "hypothetical protein"  
"Chl\_C14\_00097" 1662 "s59E5H2" 0 "hypothetical protein"  
"Chl\_C14\_00097" 1662 "s63E6H2" 0 "hypothetical protein"  
"Chl\_C14\_00098" 1663 "s59E13H2" 0 "NADH-quinone oxidoreductase subunit E"  
"Chl\_C14\_00098" 1663 "s59E25H2" 0 "NADH-quinone oxidoreductase subunit E"  
"Chl\_C14\_00098" 1663 "s59E5H2" 0 "NADH-quinone oxidoreductase subunit E"  
"Chl\_C14\_00098" 1663 "s63E6H2" 0 "NADH-quinone oxidoreductase subunit E"  
"Chl\_C14\_00099" 1664 "s59E13H2" 0 "NADP-reducing hydrogenase subunit HndC"  
"Chl\_C14\_00099" 1664 "s59E25H2" 0 "NADP-reducing hydrogenase subunit HndC"  
"Chl\_C14\_00099" 1664 "s59E5H2" 0 "NADP-reducing hydrogenase subunit HndC"  
"Chl\_C14\_00099" 1664 "s63E6H2" 0 "NADP-reducing hydrogenase subunit HndC"  
"Chl\_C14\_00100" 1665 "s59E13H2" 0 "Putative formate dehydrogenase"  
"Chl\_C14\_00100" 1665 "s59E25H2" 0 "Putative formate dehydrogenase"  
"Chl\_C14\_00100" 1665 "s59E5H2" 0.002194927 "Putative formate dehydrogenase"  
"Chl\_C14\_00100" 1665 "s63E6H2" 0 "Putative formate dehydrogenase"  
"Chl\_C14\_00101" 1666 "s59E13H2" 0 "putative MFS-type transporter YhjX"  
"Chl\_C14\_00101" 1666 "s59E25H2" 0 "putative MFS-type transporter YhjX"  
"Chl\_C14\_00101" 1666 "s59E5H2" 0 "putative MFS-type transporter YhjX"  
"Chl\_C14\_00101" 1666 "s63E6H2" 0 "putative MFS-type transporter YhjX"  
"Chl\_C14\_00104" 1669 "s59E13H2" 0.001001076 "Anthranilate synthase component 1"  
"Chl\_C14\_00104" 1669 "s59E25H2" 0 "Anthranilate synthase component 1"  
"Chl\_C14\_00104" 1669 "s59E5H2" 0.009718235 "Anthranilate synthase component 1"  
"Chl\_C14\_00104" 1669 "s63E6H2" 0 "Anthranilate synthase component 1"  
"Chl\_C14\_00105" 1670 "s59E13H2" 0 "Aminodeoxychorismate synthase component 2"

"Chl\_C14\_00105" 1670 "s59E25H2" 0 "Aminodeoxychorismate synthase component 2"  
"Chl\_C14\_00105" 1670 "s59E5H2" 0.0003981829 "Aminodeoxychorismate synthase component 2"  
"Chl\_C14\_00105" 1670 "s63E6H2" 0 "Aminodeoxychorismate synthase component 2"  
"Chl\_C14\_00106" 1671 "s59E13H2" 0 "Anthranilate phosphoribosyltransferase"  
"Chl\_C14\_00106" 1671 "s59E25H2" 0 "Anthranilate phosphoribosyltransferase"  
"Chl\_C14\_00106" 1671 "s59E5H2" 0 "Anthranilate phosphoribosyltransferase"  
"Chl\_C14\_00106" 1671 "s63E6H2" 0 "Anthranilate phosphoribosyltransferase"  
"Chl\_C14\_00107" 1672 "s59E13H2" 0 "Indole-3-glycerol phosphate synthase"  
"Chl\_C14\_00107" 1672 "s59E25H2" 0 "Indole-3-glycerol phosphate synthase"  
"Chl\_C14\_00107" 1672 "s59E5H2" 0 "Indole-3-glycerol phosphate synthase"  
"Chl\_C14\_00107" 1672 "s63E6H2" 0 "Indole-3-glycerol phosphate synthase"  
"Chl\_C14\_00108" 1673 "s59E13H2" 0 "N-(5'-phosphoribosyl)anthranilate isomerase"  
"Chl\_C14\_00108" 1673 "s59E25H2" 0 "N-(5'-phosphoribosyl)anthranilate isomerase"  
"Chl\_C14\_00108" 1673 "s59E5H2" 0 "N-(5'-phosphoribosyl)anthranilate isomerase"  
"Chl\_C14\_00108" 1673 "s63E6H2" 0 "N-(5'-phosphoribosyl)anthranilate isomerase"  
"Chl\_C14\_00109" 1674 "s59E13H2" 0 "Tryptophan synthase beta chain"  
"Chl\_C14\_00109" 1674 "s59E25H2" 0 "Tryptophan synthase beta chain"  
"Chl\_C14\_00109" 1674 "s59E5H2" 0 "Tryptophan synthase beta chain"  
"Chl\_C14\_00109" 1674 "s63E6H2" 0 "Tryptophan synthase beta chain"  
"Chl\_C14\_00110" 1675 "s59E13H2" 0 "Tryptophan synthase alpha chain"  
"Chl\_C14\_00110" 1675 "s59E25H2" 0 "Tryptophan synthase alpha chain"  
"Chl\_C14\_00110" 1675 "s59E5H2" 0 "Tryptophan synthase alpha chain"  
"Chl\_C14\_00110" 1675 "s63E6H2" 0 "Tryptophan synthase alpha chain"  
"Chl\_C14\_00113" 1678 "s59E13H2" 0 "hypothetical protein"  
"Chl\_C14\_00113" 1678 "s59E25H2" 0 "hypothetical protein"  
"Chl\_C14\_00113" 1678 "s59E5H2" 0 "hypothetical protein"  
"Chl\_C14\_00113" 1678 "s63E6H2" 0 "hypothetical protein"  
"Chl\_C14\_00115" 1680 "s59E13H2" 0 "putative cold shock protein A"  
"Chl\_C14\_00115" 1680 "s59E25H2" 0 "putative cold shock protein A"  
"Chl\_C14\_00115" 1680 "s59E5H2" 0 "putative cold shock protein A"  
"Chl\_C14\_00115" 1680 "s63E6H2" 0.6933953 "putative cold shock protein A"  
"Chl\_C14\_00116" 1681 "s59E13H2" 0 "hypothetical protein"  
"Chl\_C14\_00116" 1681 "s59E25H2" 0 "hypothetical protein"  
"Chl\_C14\_00116" 1681 "s59E5H2" 0 "hypothetical protein"  
"Chl\_C14\_00116" 1681 "s63E6H2" 0 "hypothetical protein"  
"Chl\_C14\_00117" 1682 "s59E13H2" 0 "putative solute-binding protein precursor"  
"Chl\_C14\_00117" 1682 "s59E25H2" 0 "putative solute-binding protein precursor"  
"Chl\_C14\_00117" 1682 "s59E5H2" 0 "putative solute-binding protein precursor"  
"Chl\_C14\_00117" 1682 "s63E6H2" 0 "putative solute-binding protein precursor"  
"Chl\_C14\_00118" 1683 "s59E13H2" 0 "Sulfate/thiosulfate import ATP-binding protein CysA"  
"Chl\_C14\_00118" 1683 "s59E25H2" 0 "Sulfate/thiosulfate import ATP-binding protein CysA"  
"Chl\_C14\_00118" 1683 "s59E5H2" 0 "Sulfate/thiosulfate import ATP-binding protein CysA"  
"Chl\_C14\_00118" 1683 "s63E6H2" 0 "Sulfate/thiosulfate import ATP-binding protein CysA"  
"Chl\_C14\_00119" 1684 "s59E13H2" 0 "Molybdate/tungstate transport system permease protein WtpB"  
"Chl\_C14\_00119" 1684 "s59E25H2" 0 "Molybdate/tungstate transport system permease protein WtpB"  
"Chl\_C14\_00119" 1684 "s59E5H2" 0 "Molybdate/tungstate transport system permease protein WtpB"  
"Chl\_C14\_00119" 1684 "s63E6H2" 0 "Molybdate/tungstate transport system permease protein WtpB"

"Chl\_C14\_00121" 1686 "s59E13H2" 0 "hydroxyacylglutathione hydrolase"  
"Chl\_C14\_00121" 1686 "s59E25H2" 0 "hydroxyacylglutathione hydrolase"  
"Chl\_C14\_00121" 1686 "s59E5H2" 0 "hydroxyacylglutathione hydrolase"  
"Chl\_C14\_00121" 1686 "s63E6H2" 0 "hydroxyacylglutathione hydrolase"  
"Chl\_C14\_00123" 1688 "s59E13H2" 0.0006970267 "Magnesium transport protein CorA"  
"Chl\_C14\_00123" 1688 "s59E25H2" 0 "Magnesium transport protein CorA"  
"Chl\_C14\_00123" 1688 "s59E5H2" 0 "Magnesium transport protein CorA"  
"Chl\_C14\_00123" 1688 "s63E6H2" 0 "Magnesium transport protein CorA"  
"Chl\_C14\_00124" 1689 "s59E13H2" 0 "hypothetical protein"  
"Chl\_C14\_00124" 1689 "s59E25H2" 0 "hypothetical protein"  
"Chl\_C14\_00124" 1689 "s59E5H2" 0 "hypothetical protein"  
"Chl\_C14\_00124" 1689 "s63E6H2" 0 "hypothetical protein"  
"Chl\_C14\_00125" 1690 "s59E13H2" 0 "ribonuclease Z"  
"Chl\_C14\_00125" 1690 "s59E25H2" 0 "ribonuclease Z"  
"Chl\_C14\_00125" 1690 "s59E5H2" 0 "ribonuclease Z"  
"Chl\_C14\_00125" 1690 "s63E6H2" 0 "ribonuclease Z"  
"Chl\_C14\_00126" 1691 "s59E13H2" 0 "hypothetical protein"  
"Chl\_C14\_00126" 1691 "s59E25H2" 0 "hypothetical protein"  
"Chl\_C14\_00126" 1691 "s59E5H2" 0 "hypothetical protein"  
"Chl\_C14\_00126" 1691 "s63E6H2" 0 "hypothetical protein"  
"Chl\_C14\_00127" 1692 "s59E13H2" 0 "Bifunctional NAD(P)H-hydrate repair enzyme Nnr"  
"Chl\_C14\_00127" 1692 "s59E25H2" 0 "Bifunctional NAD(P)H-hydrate repair enzyme Nnr"  
"Chl\_C14\_00127" 1692 "s59E5H2" 0 "Bifunctional NAD(P)H-hydrate repair enzyme Nnr"  
"Chl\_C14\_00127" 1692 "s63E6H2" 0 "Bifunctional NAD(P)H-hydrate repair enzyme Nnr"  
"Chl\_C14\_00128" 1693 "s59E13H2" 0 "Type III pantothenate kinase"  
"Chl\_C14\_00128" 1693 "s59E25H2" 0 "Type III pantothenate kinase"  
"Chl\_C14\_00128" 1693 "s59E5H2" 0 "Type III pantothenate kinase"  
"Chl\_C14\_00128" 1693 "s63E6H2" 0 "Type III pantothenate kinase"  
"Chl\_C14\_00129" 1694 "s59E13H2" 0 "Coenzyme A biosynthesis bifunctional protein CoaBC"  
"Chl\_C14\_00129" 1694 "s59E25H2" 0 "Coenzyme A biosynthesis bifunctional protein CoaBC"  
"Chl\_C14\_00129" 1694 "s59E5H2" 0 "Coenzyme A biosynthesis bifunctional protein CoaBC"  
"Chl\_C14\_00129" 1694 "s63E6H2" 0 "Coenzyme A biosynthesis bifunctional protein CoaBC"  
"Chl\_C14\_00132" 1697 "s59E13H2" 0 "Valine--tRNA ligase"  
"Chl\_C14\_00132" 1697 "s59E25H2" 0 "Valine--tRNA ligase"  
"Chl\_C14\_00132" 1697 "s59E5H2" 0 "Valine--tRNA ligase"  
"Chl\_C14\_00132" 1697 "s63E6H2" 0 "Valine--tRNA ligase"  
"Chl\_C14\_00133" 1698 "s59E13H2" 0 "Universal stress protein"  
"Chl\_C14\_00133" 1698 "s59E25H2" 0 "Universal stress protein"  
"Chl\_C14\_00133" 1698 "s59E5H2" 0 "Universal stress protein"  
"Chl\_C14\_00133" 1698 "s63E6H2" 0 "Universal stress protein"  
"Chl\_C14\_00135" 1700 "s59E13H2" 0 "NAD-dependent methanol dehydrogenase"  
"Chl\_C14\_00135" 1700 "s59E25H2" 0 "NAD-dependent methanol dehydrogenase"  
"Chl\_C14\_00135" 1700 "s59E5H2" 0 "NAD-dependent methanol dehydrogenase"  
"Chl\_C14\_00135" 1700 "s63E6H2" 0 "NAD-dependent methanol dehydrogenase"  
"Chl\_C14\_00136" 1701 "s59E13H2" 0 "hypothetical protein"  
"Chl\_C14\_00136" 1701 "s59E25H2" 0 "hypothetical protein"  
"Chl\_C14\_00136" 1701 "s59E5H2" 0 "hypothetical protein"

"Chl\_C14\_00136" 1701 "s63E6H2" 0 "hypothetical protein"  
"Chl\_C14\_00137" 1702 "s59E13H2" 0 "Isopropylmalate/citramalate isomerase small subunit"  
"Chl\_C14\_00137" 1702 "s59E25H2" 0 "Isopropylmalate/citramalate isomerase small subunit"  
"Chl\_C14\_00137" 1702 "s59E5H2" 0 "Isopropylmalate/citramalate isomerase small subunit"  
"Chl\_C14\_00137" 1702 "s63E6H2" 0 "Isopropylmalate/citramalate isomerase small subunit"  
"Chl\_C14\_00138" 1703 "s59E13H2" 0 "Isopropylmalate/citramalate isomerase large subunit"  
"Chl\_C14\_00138" 1703 "s59E25H2" 0 "Isopropylmalate/citramalate isomerase large subunit"  
"Chl\_C14\_00138" 1703 "s59E5H2" 0 "Isopropylmalate/citramalate isomerase large subunit"  
"Chl\_C14\_00138" 1703 "s63E6H2" 0 "Isopropylmalate/citramalate isomerase large subunit"  
"Chl\_C14\_00139" 1704 "s59E13H2" 0 "D-gluconate dehydratase"  
"Chl\_C14\_00139" 1704 "s59E25H2" 0 "D-gluconate dehydratase"  
"Chl\_C14\_00139" 1704 "s59E5H2" 0 "D-gluconate dehydratase"  
"Chl\_C14\_00139" 1704 "s63E6H2" 0 "D-gluconate dehydratase"  
"Chl\_C14\_00140" 1705 "s59E13H2" 0 "D-gluconate dehydratase"  
"Chl\_C14\_00140" 1705 "s59E25H2" 0 "D-gluconate dehydratase"  
"Chl\_C14\_00140" 1705 "s59E5H2" 0 "D-gluconate dehydratase"  
"Chl\_C14\_00140" 1705 "s63E6H2" 0 "D-gluconate dehydratase"  
"Chl\_C14\_00141" 1706 "s59E13H2" 0 "Thioredoxin reductase"  
"Chl\_C14\_00141" 1706 "s59E25H2" 0 "Thioredoxin reductase"  
"Chl\_C14\_00141" 1706 "s59E5H2" 0 "Thioredoxin reductase"  
"Chl\_C14\_00141" 1706 "s63E6H2" 0 "Thioredoxin reductase"  
"Chl\_C14\_00142" 1707 "s59E13H2" 0 "hypothetical protein"  
"Chl\_C14\_00142" 1707 "s59E25H2" 0 "hypothetical protein"  
"Chl\_C14\_00142" 1707 "s59E5H2" 0 "hypothetical protein"  
"Chl\_C14\_00142" 1707 "s63E6H2" 0 "hypothetical protein"  
"Chl\_C14\_00144" 1709 "s59E13H2" 0 "Tetrathionate reductase subunit B precursor"  
"Chl\_C14\_00144" 1709 "s59E25H2" 0 "Tetrathionate reductase subunit B precursor"  
"Chl\_C14\_00144" 1709 "s59E5H2" 0.03879236 "Tetrathionate reductase subunit B precursor"  
"Chl\_C14\_00144" 1709 "s63E6H2" 0 "Tetrathionate reductase subunit B precursor"  
"Chl\_C14\_00145" 1710 "s59E13H2" 0 "Acetylene hydratase"  
"Chl\_C14\_00145" 1710 "s59E25H2" 0 "Acetylene hydratase"  
"Chl\_C14\_00145" 1710 "s59E5H2" 0 "Acetylene hydratase"  
"Chl\_C14\_00145" 1710 "s63E6H2" 0 "Acetylene hydratase"  
"Chl\_C14\_00146" 1711 "s59E13H2" 0 "Xaa-Pro dipeptidase"  
"Chl\_C14\_00146" 1711 "s59E25H2" 0 "Xaa-Pro dipeptidase"  
"Chl\_C14\_00146" 1711 "s59E5H2" 0 "Xaa-Pro dipeptidase"  
"Chl\_C14\_00146" 1711 "s63E6H2" 0 "Xaa-Pro dipeptidase"  
"Chl\_C14\_00147" 1712 "s59E13H2" 0 "Xaa-Pro dipeptidase"  
"Chl\_C14\_00147" 1712 "s59E25H2" 0 "Xaa-Pro dipeptidase"  
"Chl\_C14\_00147" 1712 "s59E5H2" 0 "Xaa-Pro dipeptidase"  
"Chl\_C14\_00147" 1712 "s63E6H2" 0 "Xaa-Pro dipeptidase"  
"Chl\_C14\_00148" 1713 "s59E13H2" 0 "NMT1/THI5 like protein"  
"Chl\_C14\_00148" 1713 "s59E25H2" 0 "NMT1/THI5 like protein"  
"Chl\_C14\_00148" 1713 "s59E5H2" 0 "NMT1/THI5 like protein"  
"Chl\_C14\_00148" 1713 "s63E6H2" 0 "NMT1/THI5 like protein"  
"Chl\_C14\_00149" 1714 "s59E13H2" 0 "Sialic acid TRAP transporter permease protein SiaT"  
"Chl\_C14\_00149" 1714 "s59E25H2" 0 "Sialic acid TRAP transporter permease protein SiaT"

"Chl\_C14\_00149" 1714 "s59E5H2" 0 "Sialic acid TRAP transporter permease protein SiaT"  
"Chl\_C14\_00149" 1714 "s63E6H2" 0 "Sialic acid TRAP transporter permease protein SiaT"  
"Chl\_C14\_00150" 1715 "s59E13H2" 0 "hypothetical protein"  
"Chl\_C14\_00150" 1715 "s59E25H2" 0 "hypothetical protein"  
"Chl\_C14\_00150" 1715 "s59E5H2" 0 "hypothetical protein"  
"Chl\_C14\_00150" 1715 "s63E6H2" 0 "hypothetical protein"  
"Chl\_C14\_00151" 1716 "s59E13H2" 0 "EthD protein"  
"Chl\_C14\_00151" 1716 "s59E25H2" 0 "EthD protein"  
"Chl\_C14\_00151" 1716 "s59E5H2" 0 "EthD protein"  
"Chl\_C14\_00151" 1716 "s63E6H2" 0 "EthD protein"  
"Chl\_C14\_00152" 1717 "s59E13H2" 0 "2-hydroxymuconate tautomerase"  
"Chl\_C14\_00152" 1717 "s59E25H2" 0 "2-hydroxymuconate tautomerase"  
"Chl\_C14\_00152" 1717 "s59E5H2" 0 "2-hydroxymuconate tautomerase"  
"Chl\_C14\_00152" 1717 "s63E6H2" 0 "2-hydroxymuconate tautomerase"  
"Chl\_C14\_00153" 1718 "s59E13H2" 0 "metal-dependent hydrolase"  
"Chl\_C14\_00153" 1718 "s59E25H2" 0 "metal-dependent hydrolase"  
"Chl\_C14\_00153" 1718 "s59E5H2" 0 "metal-dependent hydrolase"  
"Chl\_C14\_00153" 1718 "s63E6H2" 0 "metal-dependent hydrolase"  
"Chl\_C14\_00154" 1719 "s59E13H2" 0 "Digeranylgeranylglycerophospholipid reductase"  
"Chl\_C14\_00154" 1719 "s59E25H2" 0 "Digeranylgeranylglycerophospholipid reductase"  
"Chl\_C14\_00154" 1719 "s59E5H2" 0 "Digeranylgeranylglycerophospholipid reductase"  
"Chl\_C14\_00154" 1719 "s63E6H2" 0 "Digeranylgeranylglycerophospholipid reductase"  
"Chl\_C14\_00155" 1720 "s59E13H2" 0 "2-methylcitrate dehydratase"  
"Chl\_C14\_00155" 1720 "s59E25H2" 0 "2-methylcitrate dehydratase"  
"Chl\_C14\_00155" 1720 "s59E5H2" 0 "2-methylcitrate dehydratase"  
"Chl\_C14\_00155" 1720 "s63E6H2" 0 "2-methylcitrate dehydratase"  
"Chl\_C14\_00156" 1721 "s59E13H2" 0 "Tungsten-containing aldehyde ferredoxin oxidoreductase"  
"Chl\_C14\_00156" 1721 "s59E25H2" 0 "Tungsten-containing aldehyde ferredoxin oxidoreductase"  
"Chl\_C14\_00156" 1721 "s59E5H2" 0 "Tungsten-containing aldehyde ferredoxin oxidoreductase"  
"Chl\_C14\_00156" 1721 "s63E6H2" 0 "Tungsten-containing aldehyde ferredoxin oxidoreductase"  
"Chl\_C14\_00157" 1722 "s59E13H2" 0 "Putative redox-active protein (C\_GCAxxG\_C\_C)"  
"Chl\_C14\_00157" 1722 "s59E25H2" 0 "Putative redox-active protein (C\_GCAxxG\_C\_C)"  
"Chl\_C14\_00157" 1722 "s59E5H2" 0 "Putative redox-active protein (C\_GCAxxG\_C\_C)"  
"Chl\_C14\_00157" 1722 "s63E6H2" 0 "Putative redox-active protein (C\_GCAxxG\_C\_C)"  
"Chl\_C14\_00158" 1723 "s59E13H2" 0 "2-methylcitrate dehydratase"  
"Chl\_C14\_00158" 1723 "s59E25H2" 0 "2-methylcitrate dehydratase"  
"Chl\_C14\_00158" 1723 "s59E5H2" 0 "2-methylcitrate dehydratase"  
"Chl\_C14\_00158" 1723 "s63E6H2" 0 "2-methylcitrate dehydratase"  
"Chl\_C14\_00159" 1724 "s59E13H2" 0 "hypothetical protein"  
"Chl\_C14\_00159" 1724 "s59E25H2" 0 "hypothetical protein"  
"Chl\_C14\_00159" 1724 "s59E5H2" 0 "hypothetical protein"  
"Chl\_C14\_00159" 1724 "s63E6H2" 0 "hypothetical protein"  
"Chl\_C14\_00160" 1725 "s59E13H2" 0 "hypothetical protein"  
"Chl\_C14\_00160" 1725 "s59E25H2" 0 "hypothetical protein"  
"Chl\_C14\_00160" 1725 "s59E5H2" 0 "hypothetical protein"  
"Chl\_C14\_00160" 1725 "s63E6H2" 0 "hypothetical protein"  
"Chl\_C14\_00161" 1726 "s59E13H2" 0 "CoB--CoM heterodisulfide reductase iron-sulfur subunit A"

"Chl\_C14\_00161" 1726 "s59E25H2" 0 "CoB--CoM heterodisulfide reductase iron-sulfur subunit A"  
"Chl\_C14\_00161" 1726 "s59E5H2" 0 "CoB--CoM heterodisulfide reductase iron-sulfur subunit A"  
"Chl\_C14\_00161" 1726 "s63E6H2" 0 "CoB--CoM heterodisulfide reductase iron-sulfur subunit A"  
"Chl\_C14\_00162" 1727 "s59E13H2" 0 "Light-independent protochlorophyllide reductase iron-sulfur ATP-binding protein"  
"Chl\_C14\_00162" 1727 "s59E25H2" 0 "Light-independent protochlorophyllide reductase iron-sulfur ATP-binding protein"  
"Chl\_C14\_00162" 1727 "s59E5H2" 0 "Light-independent protochlorophyllide reductase iron-sulfur ATP-binding protein"  
"Chl\_C14\_00162" 1727 "s63E6H2" 0.0007165703 "Light-independent protochlorophyllide reductase iron-sulfur ATP-binding protein"  
"Chl\_C14\_00163" 1728 "s59E13H2" 0 "Formate--tetrahydrofolate ligase"  
"Chl\_C14\_00163" 1728 "s59E25H2" 0 "Formate--tetrahydrofolate ligase"  
"Chl\_C14\_00163" 1728 "s59E5H2" 0 "Formate--tetrahydrofolate ligase"  
"Chl\_C14\_00163" 1728 "s63E6H2" 0.002191853 "Formate--tetrahydrofolate ligase"  
"Chl\_C14\_00164" 1729 "s59E13H2" 0 "CobQ/CobB/MinD/ParA nucleotide binding domain protein"  
"Chl\_C14\_00164" 1729 "s59E25H2" 0 "CobQ/CobB/MinD/ParA nucleotide binding domain protein"  
"Chl\_C14\_00164" 1729 "s59E5H2" 0 "CobQ/CobB/MinD/ParA nucleotide binding domain protein"  
"Chl\_C14\_00164" 1729 "s63E6H2" 0 "CobQ/CobB/MinD/ParA nucleotide binding domain protein"  
"Chl\_C14\_00165" 1730 "s59E13H2" 0 "Bifunctional protein FoLD protein"  
"Chl\_C14\_00165" 1730 "s59E25H2" 0 "Bifunctional protein FoLD protein"  
"Chl\_C14\_00165" 1730 "s59E5H2" 0 "Bifunctional protein FoLD protein"  
"Chl\_C14\_00165" 1730 "s63E6H2" 0 "Bifunctional protein FoLD protein"  
"Chl\_C14\_00167" 1732 "s59E13H2" 0 "Corrinoid/iron-sulfur protein small subunit"  
"Chl\_C14\_00167" 1732 "s59E25H2" 0 "Corrinoid/iron-sulfur protein small subunit"  
"Chl\_C14\_00167" 1732 "s59E5H2" 0 "Corrinoid/iron-sulfur protein small subunit"  
"Chl\_C14\_00167" 1732 "s63E6H2" 0 "Corrinoid/iron-sulfur protein small subunit"  
"Chl\_C14\_00168" 1733 "s59E13H2" 0 "Carbon monoxide dehydrogenase 1"  
"Chl\_C14\_00168" 1733 "s59E25H2" 0 "Carbon monoxide dehydrogenase 1"  
"Chl\_C14\_00168" 1733 "s59E5H2" 0 "Carbon monoxide dehydrogenase 1"  
"Chl\_C14\_00168" 1733 "s63E6H2" 0 "Carbon monoxide dehydrogenase 1"  
"Chl\_C14\_00169" 1734 "s59E13H2" 0.001036409 "Carbon monoxide dehydrogenase/acetyl-CoA synthase subunit alpha"  
"Chl\_C14\_00169" 1734 "s59E25H2" 0 "Carbon monoxide dehydrogenase/acetyl-CoA synthase subunit alpha"  
"Chl\_C14\_00169" 1734 "s59E5H2" 0 "Carbon monoxide dehydrogenase/acetyl-CoA synthase subunit alpha"  
"Chl\_C14\_00169" 1734 "s63E6H2" 0 "Carbon monoxide dehydrogenase/acetyl-CoA synthase subunit alpha"  
"Chl\_C14\_00170" 1735 "s59E13H2" 0 "Corrinoid/iron-sulfur protein large subunit"  
"Chl\_C14\_00170" 1735 "s59E25H2" 0 "Corrinoid/iron-sulfur protein large subunit"  
"Chl\_C14\_00170" 1735 "s59E5H2" 0 "Corrinoid/iron-sulfur protein large subunit"  
"Chl\_C14\_00170" 1735 "s63E6H2" 0.02285037 "Corrinoid/iron-sulfur protein large subunit"  
"Chl\_C14\_00171" 1736 "s59E13H2" 0 "5-methyltetrahydrofolate:corrinoid/iron-sulfur protein co-methyltransferase"  
"Chl\_C14\_00171" 1736 "s59E25H2" 0 "5-methyltetrahydrofolate:corrinoid/iron-sulfur protein co-methyltransferase"  
"Chl\_C14\_00171" 1736 "s59E5H2" 0 "5-methyltetrahydrofolate:corrinoid/iron-sulfur protein co-methyltransferase"  
"Chl\_C14\_00171" 1736 "s63E6H2" 0.008565322 "5-methyltetrahydrofolate:corrinoid/iron-sulfur protein co-methyltransferase"  
"Chl\_C14\_00172" 1737 "s59E13H2" 0 "hypothetical protein"  
"Chl\_C14\_00172" 1737 "s59E25H2" 0 "hypothetical protein"  
"Chl\_C14\_00172" 1737 "s59E5H2" 0 "hypothetical protein"  
"Chl\_C14\_00172" 1737 "s63E6H2" 0 "hypothetical protein"  
"Chl\_C14\_00173" 1738 "s59E13H2" 0 "D-tyrosyl-tRNA(Tyr) deacylase"  
"Chl\_C14\_00173" 1738 "s59E25H2" 0 "D-tyrosyl-tRNA(Tyr) deacylase"  
"Chl\_C14\_00173" 1738 "s59E5H2" 0 "D-tyrosyl-tRNA(Tyr) deacylase"  
"Chl\_C14\_00173" 1738 "s63E6H2" 0 "D-tyrosyl-tRNA(Tyr) deacylase"

"Chl\_C14\_00174" 1739 "s59E13H2" 0 "hydroxyacylglutathione hydrolase"  
"Chl\_C14\_00174" 1739 "s59E25H2" 0 "hydroxyacylglutathione hydrolase"  
"Chl\_C14\_00174" 1739 "s59E5H2" 0 "hydroxyacylglutathione hydrolase"  
"Chl\_C14\_00174" 1739 "s63E6H2" 0 "hydroxyacylglutathione hydrolase"  
"Chl\_C14\_00175" 1740 "s59E13H2" 0 "Ferric uptake regulation protein"  
"Chl\_C14\_00175" 1740 "s59E25H2" 0 "Ferric uptake regulation protein"  
"Chl\_C14\_00175" 1740 "s59E5H2" 0 "Ferric uptake regulation protein"  
"Chl\_C14\_00175" 1740 "s63E6H2" 0 "Ferric uptake regulation protein"  
"Chl\_C14\_00176" 1741 "s59E13H2" 0 "putative periplasmic iron-binding protein precursor"  
"Chl\_C14\_00176" 1741 "s59E25H2" 0 "putative periplasmic iron-binding protein precursor"  
"Chl\_C14\_00176" 1741 "s59E5H2" 0.006132097 "putative periplasmic iron-binding protein precursor"  
"Chl\_C14\_00176" 1741 "s63E6H2" 0.0004024116 "putative periplasmic iron-binding protein precursor"  
"Chl\_C14\_00177" 1742 "s59E13H2" 0 "Iron(3+)-hydroxamate import ATP-binding protein FhuC"  
"Chl\_C14\_00177" 1742 "s59E25H2" 0 "Iron(3+)-hydroxamate import ATP-binding protein FhuC"  
"Chl\_C14\_00177" 1742 "s59E5H2" 0 "Iron(3+)-hydroxamate import ATP-binding protein FhuC"  
"Chl\_C14\_00177" 1742 "s63E6H2" 0.009568817 "Iron(3+)-hydroxamate import ATP-binding protein FhuC"  
"Chl\_C14\_00178" 1743 "s59E13H2" 0 "High-affinity zinc uptake system membrane protein ZnuB"  
"Chl\_C14\_00178" 1743 "s59E25H2" 0.1170213 "High-affinity zinc uptake system membrane protein ZnuB"  
"Chl\_C14\_00178" 1743 "s59E5H2" 0 "High-affinity zinc uptake system membrane protein ZnuB"  
"Chl\_C14\_00178" 1743 "s63E6H2" 0.04024835 "High-affinity zinc uptake system membrane protein ZnuB"  
"Chl\_C14\_00179" 1744 "s59E13H2" 0 "Ubiquinone/menaquinone biosynthesis C-methyltransferase UbiE"  
"Chl\_C14\_00179" 1744 "s59E25H2" 0 "Ubiquinone/menaquinone biosynthesis C-methyltransferase UbiE"  
"Chl\_C14\_00179" 1744 "s59E5H2" 0 "Ubiquinone/menaquinone biosynthesis C-methyltransferase UbiE"  
"Chl\_C14\_00179" 1744 "s63E6H2" 0.01367591 "Ubiquinone/menaquinone biosynthesis C-methyltransferase UbiE"  
"Chl\_C14\_00180" 1745 "s59E13H2" 0 "putative nicotinate-nucleotide pyrophosphorylase [carboxylating]"  
"Chl\_C14\_00180" 1745 "s59E25H2" 0 "putative nicotinate-nucleotide pyrophosphorylase [carboxylating]"  
"Chl\_C14\_00180" 1745 "s59E5H2" 0 "putative nicotinate-nucleotide pyrophosphorylase [carboxylating]"  
"Chl\_C14\_00180" 1745 "s63E6H2" 0.008588203 "putative nicotinate-nucleotide pyrophosphorylase [carboxylating]"  
"Chl\_C14\_00181" 1746 "s59E13H2" 0 "L-aspartate oxidase"  
"Chl\_C14\_00181" 1746 "s59E25H2" 0 "L-aspartate oxidase"  
"Chl\_C14\_00181" 1746 "s59E5H2" 0.005152078 "L-aspartate oxidase"  
"Chl\_C14\_00181" 1746 "s63E6H2" 0 "L-aspartate oxidase"  
"Chl\_C14\_00182" 1747 "s59E13H2" 0 "Quinolinate synthase A"  
"Chl\_C14\_00182" 1747 "s59E25H2" 0 "Quinolinate synthase A"  
"Chl\_C14\_00182" 1747 "s59E5H2" 0 "Quinolinate synthase A"  
"Chl\_C14\_00182" 1747 "s63E6H2" 0.01229856 "Quinolinate synthase A"  
"Chl\_C14\_00183" 1748 "s59E13H2" 0 "preprotein translocase subunit YajC"  
"Chl\_C14\_00183" 1748 "s59E25H2" 0 "preprotein translocase subunit YajC"  
"Chl\_C14\_00183" 1748 "s59E5H2" 0 "preprotein translocase subunit YajC"  
"Chl\_C14\_00183" 1748 "s63E6H2" 0 "preprotein translocase subunit YajC"  
"Chl\_C14\_00184" 1749 "s59E13H2" 0 "(Dimethylallyl)adenosine tRNA methylthiotransferase MiaB"  
"Chl\_C14\_00184" 1749 "s59E25H2" 0 "(Dimethylallyl)adenosine tRNA methylthiotransferase MiaB"  
"Chl\_C14\_00184" 1749 "s59E5H2" 0 "(Dimethylallyl)adenosine tRNA methylthiotransferase MiaB"  
"Chl\_C14\_00184" 1749 "s63E6H2" 0 "(Dimethylallyl)adenosine tRNA methylthiotransferase MiaB"  
"Chl\_C14\_00186" 1751 "s59E13H2" 0 "NTE family protein RssA"  
"Chl\_C14\_00186" 1751 "s59E25H2" 0 "NTE family protein RssA"  
"Chl\_C14\_00186" 1751 "s59E5H2" 0 "NTE family protein RssA"



"Chl\_C14\_00186" 1751 "s63E6H2" 0 "NTE family protein RssA"  
"Chl\_C14\_00187" 1752 "s59E13H2" 0 "Endoribonuclease YbeY"  
"Chl\_C14\_00187" 1752 "s59E25H2" 0 "Endoribonuclease YbeY"  
"Chl\_C14\_00187" 1752 "s59E5H2" 0 "Endoribonuclease YbeY"  
"Chl\_C14\_00187" 1752 "s63E6H2" 0 "Endoribonuclease YbeY"  
"Chl\_C14\_00188" 1753 "s59E13H2" 0 "Iron-sulfur flavoprotein"  
"Chl\_C14\_00188" 1753 "s59E25H2" 0 "Iron-sulfur flavoprotein"  
"Chl\_C14\_00188" 1753 "s59E5H2" 0 "Iron-sulfur flavoprotein"  
"Chl\_C14\_00188" 1753 "s63E6H2" 0 "Iron-sulfur flavoprotein"  
"Chl\_C14\_00189" 1754 "s59E13H2" 0 "Ferredoxin-2"  
"Chl\_C14\_00189" 1754 "s59E25H2" 0 "Ferredoxin-2"  
"Chl\_C14\_00189" 1754 "s59E5H2" 0 "Ferredoxin-2"  
"Chl\_C14\_00189" 1754 "s63E6H2" 0 "Ferredoxin-2"  
"Chl\_C14\_00190" 1755 "s59E13H2" 0 "hypothetical protein"  
"Chl\_C14\_00190" 1755 "s59E25H2" 0 "hypothetical protein"  
"Chl\_C14\_00190" 1755 "s59E5H2" 0 "hypothetical protein"  
"Chl\_C14\_00190" 1755 "s63E6H2" 0 "hypothetical protein"  
"Chl\_C14\_00191" 1756 "s59E13H2" 0 "cAMP receptor protein"  
"Chl\_C14\_00191" 1756 "s59E25H2" 0 "cAMP receptor protein"  
"Chl\_C14\_00191" 1756 "s59E5H2" 0.01185528 "cAMP receptor protein"  
"Chl\_C14\_00191" 1756 "s63E6H2" 0 "cAMP receptor protein"  
"Chl\_C14\_00192" 1757 "s59E13H2" 0 "TspO/MBR family protein"  
"Chl\_C14\_00192" 1757 "s59E25H2" 0 "TspO/MBR family protein"  
"Chl\_C14\_00192" 1757 "s59E5H2" 0 "TspO/MBR family protein"  
"Chl\_C14\_00192" 1757 "s63E6H2" 0 "TspO/MBR family protein"  
"Chl\_C14\_00193" 1758 "s59E13H2" 0 "Hydroxyacylglutathione hydrolase"  
"Chl\_C14\_00193" 1758 "s59E25H2" 0 "Hydroxyacylglutathione hydrolase"  
"Chl\_C14\_00193" 1758 "s59E5H2" 0 "Hydroxyacylglutathione hydrolase"  
"Chl\_C14\_00193" 1758 "s63E6H2" 0 "Hydroxyacylglutathione hydrolase"  
"Chl\_C14\_00195" 1760 "s59E13H2" 0 "Glucokinase"  
"Chl\_C14\_00195" 1760 "s59E25H2" 0 "Glucokinase"  
"Chl\_C14\_00195" 1760 "s59E5H2" 0 "Glucokinase"  
"Chl\_C14\_00195" 1760 "s63E6H2" 0 "Glucokinase"  
"Chl\_C14\_00196" 1761 "s59E13H2" 0 "UTP--glucose-1-phosphate uridylyltransferase"  
"Chl\_C14\_00196" 1761 "s59E25H2" 0 "UTP--glucose-1-phosphate uridylyltransferase"  
"Chl\_C14\_00196" 1761 "s59E5H2" 0 "UTP--glucose-1-phosphate uridylyltransferase"  
"Chl\_C14\_00196" 1761 "s63E6H2" 0 "UTP--glucose-1-phosphate uridylyltransferase"  
"Chl\_C14\_00197" 1762 "s59E13H2" 0 "Alanine--tRNA ligase"  
"Chl\_C14\_00197" 1762 "s59E25H2" 0 "Alanine--tRNA ligase"  
"Chl\_C14\_00197" 1762 "s59E5H2" 0 "Alanine--tRNA ligase"  
"Chl\_C14\_00197" 1762 "s63E6H2" 0 "Alanine--tRNA ligase"  
"Chl\_C14\_00198" 1763 "s59E13H2" 0 "Putative Holliday junction resolvase"  
"Chl\_C14\_00198" 1763 "s59E25H2" 0 "Putative Holliday junction resolvase"  
"Chl\_C14\_00198" 1763 "s59E5H2" 0 "Putative Holliday junction resolvase"  
"Chl\_C14\_00198" 1763 "s63E6H2" 0 "Putative Holliday junction resolvase"  
"Chl\_C14\_00199" 1764 "s59E13H2" 0 "HPP family protein"  
"Chl\_C14\_00199" 1764 "s59E25H2" 0 "HPP family protein"

"Chl\_C14\_00199" 1764 "s59E5H2" 0 "HPP family protein"  
"Chl\_C14\_00199" 1764 "s63E6H2" 0 "HPP family protein"  
"Chl\_C14\_00200" 1765 "s59E13H2" 0 "Protoheme IX farnesyltransferase 1"  
"Chl\_C14\_00200" 1765 "s59E25H2" 0 "Protoheme IX farnesyltransferase 1"  
"Chl\_C14\_00200" 1765 "s59E5H2" 0 "Protoheme IX farnesyltransferase 1"  
"Chl\_C14\_00200" 1765 "s63E6H2" 0 "Protoheme IX farnesyltransferase 1"  
"Chl\_C14\_00201" 1766 "s59E13H2" 0.000611998 "Queuine tRNA-ribosyltransferase"  
"Chl\_C14\_00201" 1766 "s59E25H2" 0 "Queuine tRNA-ribosyltransferase"  
"Chl\_C14\_00201" 1766 "s59E5H2" 0 "Queuine tRNA-ribosyltransferase"  
"Chl\_C14\_00201" 1766 "s63E6H2" 0.001280663 "Queuine tRNA-ribosyltransferase"  
"Chl\_C14\_00202" 1767 "s59E13H2" 0 "NIL domain protein"  
"Chl\_C14\_00202" 1767 "s59E25H2" 0 "NIL domain protein"  
"Chl\_C14\_00202" 1767 "s59E5H2" 0 "NIL domain protein"  
"Chl\_C14\_00202" 1767 "s63E6H2" 0 "NIL domain protein"  
"Chl\_C14\_00203" 1768 "s59E13H2" 0 "Nitronate monooxygenase"  
"Chl\_C14\_00203" 1768 "s59E25H2" 0 "Nitronate monooxygenase"  
"Chl\_C14\_00203" 1768 "s59E5H2" 0 "Nitronate monooxygenase"  
"Chl\_C14\_00203" 1768 "s63E6H2" 0 "Nitronate monooxygenase"  
"Chl\_C14\_00204" 1769 "s59E13H2" 0 "Sulfur carrier protein CysO"  
"Chl\_C14\_00204" 1769 "s59E25H2" 0 "Sulfur carrier protein CysO"  
"Chl\_C14\_00204" 1769 "s59E5H2" 0 "Sulfur carrier protein CysO"  
"Chl\_C14\_00204" 1769 "s63E6H2" 0 "Sulfur carrier protein CysO"  
"Chl\_C14\_00205" 1770 "s59E13H2" 0 "putative adenylyltransferase"  
"Chl\_C14\_00205" 1770 "s59E25H2" 0 "putative adenylyltransferase"  
"Chl\_C14\_00205" 1770 "s59E5H2" 0 "putative adenylyltransferase"  
"Chl\_C14\_00205" 1770 "s63E6H2" 0 "putative adenylyltransferase"  
"Chl\_C14\_00206" 1771 "s59E13H2" 0 "Divalent-cation tolerance protein CutA"  
"Chl\_C14\_00206" 1771 "s59E25H2" 0 "Divalent-cation tolerance protein CutA"  
"Chl\_C14\_00206" 1771 "s59E5H2" 0 "Divalent-cation tolerance protein CutA"  
"Chl\_C14\_00206" 1771 "s63E6H2" 0 "Divalent-cation tolerance protein CutA"  
"Chl\_C14\_00207" 1772 "s59E13H2" 0 "formate dehydrogenase accessory protein"  
"Chl\_C14\_00207" 1772 "s59E25H2" 0 "formate dehydrogenase accessory protein"  
"Chl\_C14\_00207" 1772 "s59E5H2" 0 "formate dehydrogenase accessory protein"  
"Chl\_C14\_00207" 1772 "s63E6H2" 0 "formate dehydrogenase accessory protein"  
"Chl\_C14\_00208" 1773 "s59E13H2" 0 "MOSC domain protein"  
"Chl\_C14\_00208" 1773 "s59E25H2" 0 "MOSC domain protein"  
"Chl\_C14\_00208" 1773 "s59E5H2" 0 "MOSC domain protein"  
"Chl\_C14\_00208" 1773 "s63E6H2" 0 "MOSC domain protein"  
"Chl\_C14\_00209" 1774 "s59E13H2" 0 "putative permease"  
"Chl\_C14\_00209" 1774 "s59E25H2" 0 "putative permease"  
"Chl\_C14\_00209" 1774 "s59E5H2" 0 "putative permease"  
"Chl\_C14\_00209" 1774 "s63E6H2" 0 "putative permease"  
"Chl\_C14\_00210" 1775 "s59E13H2" 0 "putative methyltransferase YcgJ"  
"Chl\_C14\_00210" 1775 "s59E25H2" 0 "putative methyltransferase YcgJ"  
"Chl\_C14\_00210" 1775 "s59E5H2" 0 "putative methyltransferase YcgJ"  
"Chl\_C14\_00210" 1775 "s63E6H2" 0 "putative methyltransferase YcgJ"  
"Chl\_C14\_00211" 1776 "s59E13H2" 0 "hypothetical protein"

"Chl\_C14\_00211" 1776 "s59E25H2" 0 "hypothetical protein"  
"Chl\_C14\_00211" 1776 "s59E5H2" 0 "hypothetical protein"  
"Chl\_C14\_00211" 1776 "s63E6H2" 0 "hypothetical protein"  
"Chl\_C14\_00212" 1777 "s59E13H2" 0 "PKD domain protein"  
"Chl\_C14\_00212" 1777 "s59E25H2" 0 "PKD domain protein"  
"Chl\_C14\_00212" 1777 "s59E5H2" 0 "PKD domain protein"  
"Chl\_C14\_00212" 1777 "s63E6H2" 0 "PKD domain protein"  
"Chl\_C14\_00213" 1778 "s59E13H2" 0 "DoxX"  
"Chl\_C14\_00213" 1778 "s59E25H2" 0 "DoxX"  
"Chl\_C14\_00213" 1778 "s59E5H2" 0 "DoxX"  
"Chl\_C14\_00213" 1778 "s63E6H2" 0 "DoxX"  
"Chl\_C14\_00214" 1779 "s59E13H2" 0 "hypothetical protein"  
"Chl\_C14\_00214" 1779 "s59E25H2" 0 "hypothetical protein"  
"Chl\_C14\_00214" 1779 "s59E5H2" 0 "hypothetical protein"  
"Chl\_C14\_00214" 1779 "s63E6H2" 0 "hypothetical protein"  
"Chl\_C14\_00215" 1780 "s59E13H2" 0 "Ferredoxin"  
"Chl\_C14\_00215" 1780 "s59E25H2" 0 "Ferredoxin"  
"Chl\_C14\_00215" 1780 "s59E5H2" 0 "Ferredoxin"  
"Chl\_C14\_00215" 1780 "s63E6H2" 0 "Ferredoxin"  
"Chl\_C14\_00216" 1781 "s59E13H2" 0 "hypothetical protein"  
"Chl\_C14\_00216" 1781 "s59E25H2" 0 "hypothetical protein"  
"Chl\_C14\_00216" 1781 "s59E5H2" 0 "hypothetical protein"  
"Chl\_C14\_00216" 1781 "s63E6H2" 0 "hypothetical protein"  
"Chl\_C14\_00217" 1782 "s59E13H2" 0 "Aspartate--tRNA ligase"  
"Chl\_C14\_00217" 1782 "s59E25H2" 0 "Aspartate--tRNA ligase"  
"Chl\_C14\_00217" 1782 "s59E5H2" 0 "Aspartate--tRNA ligase"  
"Chl\_C14\_00217" 1782 "s63E6H2" 0 "Aspartate--tRNA ligase"  
"Chl\_C14\_00218" 1783 "s59E13H2" 0 "Trigger factor"  
"Chl\_C14\_00218" 1783 "s59E25H2" 0 "Trigger factor"  
"Chl\_C14\_00218" 1783 "s59E5H2" 0 "Trigger factor"  
"Chl\_C14\_00218" 1783 "s63E6H2" 0 "Trigger factor"  
"Chl\_C14\_00219" 1784 "s59E13H2" 0 "ATP-dependent Clp protease proteolytic subunit"  
"Chl\_C14\_00219" 1784 "s59E25H2" 0 "ATP-dependent Clp protease proteolytic subunit"  
"Chl\_C14\_00219" 1784 "s59E5H2" 0 "ATP-dependent Clp protease proteolytic subunit"  
"Chl\_C14\_00219" 1784 "s63E6H2" 0.001570726 "ATP-dependent Clp protease proteolytic subunit"  
"Chl\_C14\_00220" 1785 "s59E13H2" 0 "putative sugar kinase"  
"Chl\_C14\_00220" 1785 "s59E25H2" 0 "putative sugar kinase"  
"Chl\_C14\_00220" 1785 "s59E5H2" 0 "putative sugar kinase"  
"Chl\_C14\_00220" 1785 "s63E6H2" 0 "putative sugar kinase"  
"Chl\_C14\_00221" 1786 "s59E13H2" 0 "phosphoserine phosphatase"  
"Chl\_C14\_00221" 1786 "s59E25H2" 0 "phosphoserine phosphatase"  
"Chl\_C14\_00221" 1786 "s59E5H2" 0 "phosphoserine phosphatase"  
"Chl\_C14\_00221" 1786 "s63E6H2" 0 "phosphoserine phosphatase"  
"Chl\_C14\_00222" 1787 "s59E13H2" 0 "hypothetical protein"  
"Chl\_C14\_00222" 1787 "s59E25H2" 0 "hypothetical protein"  
"Chl\_C14\_00222" 1787 "s59E5H2" 0 "hypothetical protein"  
"Chl\_C14\_00222" 1787 "s63E6H2" 0 "hypothetical protein"

"Chl\_C14\_00223" 1788 "s59E13H2" 0 "Phosphoribosylglycinamide formyltransferase"  
"Chl\_C14\_00223" 1788 "s59E25H2" 0 "Phosphoribosylglycinamide formyltransferase"  
"Chl\_C14\_00223" 1788 "s59E5H2" 0 "Phosphoribosylglycinamide formyltransferase"  
"Chl\_C14\_00223" 1788 "s63E6H2" 0 "Phosphoribosylglycinamide formyltransferase"  
"Chl\_C14\_00224" 1789 "s59E13H2" 0 "PHP domain protein"  
"Chl\_C14\_00224" 1789 "s59E25H2" 0 "PHP domain protein"  
"Chl\_C14\_00224" 1789 "s59E5H2" 0 "PHP domain protein"  
"Chl\_C14\_00224" 1789 "s63E6H2" 0 "PHP domain protein"  
"Chl\_C14\_00225" 1790 "s59E13H2" 0 "Elongation factor P"  
"Chl\_C14\_00225" 1790 "s59E25H2" 0 "Elongation factor P"  
"Chl\_C14\_00225" 1790 "s59E5H2" 0 "Elongation factor P"  
"Chl\_C14\_00225" 1790 "s63E6H2" 0 "Elongation factor P"  
"Chl\_C14\_00226" 1791 "s59E13H2" 0 "Xaa-Pro dipeptidase"  
"Chl\_C14\_00226" 1791 "s59E25H2" 0 "Xaa-Pro dipeptidase"  
"Chl\_C14\_00226" 1791 "s59E5H2" 0 "Xaa-Pro dipeptidase"  
"Chl\_C14\_00226" 1791 "s63E6H2" 0 "Xaa-Pro dipeptidase"  
"Chl\_C14\_00227" 1792 "s59E13H2" 0 "Tyrosine recombinase XerC"  
"Chl\_C14\_00227" 1792 "s59E25H2" 0 "Tyrosine recombinase XerC"  
"Chl\_C14\_00227" 1792 "s59E5H2" 0 "Tyrosine recombinase XerC"  
"Chl\_C14\_00227" 1792 "s63E6H2" 0 "Tyrosine recombinase XerC"  
"Chl\_C14\_00228" 1793 "s59E13H2" 0 "DNA topoisomerase 1"  
"Chl\_C14\_00228" 1793 "s59E25H2" 0 "DNA topoisomerase 1"  
"Chl\_C14\_00228" 1793 "s59E5H2" 0.008299677 "DNA topoisomerase 1"  
"Chl\_C14\_00228" 1793 "s63E6H2" 0 "DNA topoisomerase 1"  
"Chl\_C14\_00229" 1794 "s59E13H2" 0 "hypothetical protein"  
"Chl\_C14\_00229" 1794 "s59E25H2" 0 "hypothetical protein"  
"Chl\_C14\_00229" 1794 "s59E5H2" 0 "hypothetical protein"  
"Chl\_C14\_00229" 1794 "s63E6H2" 0 "hypothetical protein"  
"Chl\_C14\_00230" 1795 "s59E13H2" 0 "hypothetical protein"  
"Chl\_C14\_00230" 1795 "s59E25H2" 0 "hypothetical protein"  
"Chl\_C14\_00230" 1795 "s59E5H2" 0 "hypothetical protein"  
"Chl\_C14\_00230" 1795 "s63E6H2" 0 "hypothetical protein"  
"Chl\_C14\_00231" 1796 "s59E13H2" 0 "hypothetical protein"  
"Chl\_C14\_00231" 1796 "s59E25H2" 0 "hypothetical protein"  
"Chl\_C14\_00231" 1796 "s59E5H2" 0 "hypothetical protein"  
"Chl\_C14\_00231" 1796 "s63E6H2" 0 "hypothetical protein"  
"Chl\_C14\_00232" 1797 "s59E13H2" 0 "hypothetical protein"  
"Chl\_C14\_00232" 1797 "s59E25H2" 0 "hypothetical protein"  
"Chl\_C14\_00232" 1797 "s59E5H2" 0 "hypothetical protein"  
"Chl\_C14\_00232" 1797 "s63E6H2" 0 "hypothetical protein"  
"Chl\_C14\_00235" 1800 "s59E13H2" 0 "Putative prophage phiRv2 integrase"  
"Chl\_C14\_00235" 1800 "s59E25H2" 0 "Putative prophage phiRv2 integrase"  
"Chl\_C14\_00235" 1800 "s59E5H2" 0 "Putative prophage phiRv2 integrase"  
"Chl\_C14\_00235" 1800 "s63E6H2" 0.005951097 "Putative prophage phiRv2 integrase"  
"Chl\_C14\_00237" 1802 "s59E13H2" 0 "Helix-turn-helix domain protein"  
"Chl\_C14\_00237" 1802 "s59E25H2" 0 "Helix-turn-helix domain protein"  
"Chl\_C14\_00237" 1802 "s59E5H2" 0 "Helix-turn-helix domain protein"

"Chl\_C14\_00237" 1802 "s63E6H2" 0 "Helix-turn-helix domain protein"  
"Chl\_C14\_00238" 1803 "s59E13H2" 0 "putative tyrosine recombinase XerC-like protein"  
"Chl\_C14\_00238" 1803 "s59E25H2" 0 "putative tyrosine recombinase XerC-like protein"  
"Chl\_C14\_00238" 1803 "s59E5H2" 0.006287728 "putative tyrosine recombinase XerC-like protein"  
"Chl\_C14\_00238" 1803 "s63E6H2" 0 "putative tyrosine recombinase XerC-like protein"  
"Chl\_C14\_00240" 1805 "s59E13H2" 0 "Chromosome partition protein Smc"  
"Chl\_C14\_00240" 1805 "s59E25H2" 0 "Chromosome partition protein Smc"  
"Chl\_C14\_00240" 1805 "s59E5H2" 0 "Chromosome partition protein Smc"  
"Chl\_C14\_00240" 1805 "s63E6H2" 0 "Chromosome partition protein Smc"  
"Chl\_C14\_00242" 1807 "s59E13H2" 0 "hypothetical protein"  
"Chl\_C14\_00242" 1807 "s59E25H2" 0 "hypothetical protein"  
"Chl\_C14\_00242" 1807 "s59E5H2" 0 "hypothetical protein"  
"Chl\_C14\_00242" 1807 "s63E6H2" 0 "hypothetical protein"  
"Chl\_C14\_00243" 1808 "s59E13H2" 0 "hypothetical protein"  
"Chl\_C14\_00243" 1808 "s59E25H2" 0 "hypothetical protein"  
"Chl\_C14\_00243" 1808 "s59E5H2" 0 "hypothetical protein"  
"Chl\_C14\_00243" 1808 "s63E6H2" 0 "hypothetical protein"  
"Chl\_C14\_00244" 1809 "s59E13H2" 0 "Cell division protein FtsZ 1"  
"Chl\_C14\_00244" 1809 "s59E25H2" 0 "Cell division protein FtsZ 1"  
"Chl\_C14\_00244" 1809 "s59E5H2" 0 "Cell division protein FtsZ 1"  
"Chl\_C14\_00244" 1809 "s63E6H2" 0 "Cell division protein FtsZ 1"  
"Chl\_C14\_00245" 1810 "s59E13H2" 0 "cell division protein FtsZ"  
"Chl\_C14\_00245" 1810 "s59E25H2" 0 "cell division protein FtsZ"  
"Chl\_C14\_00245" 1810 "s59E5H2" 0.0018658 "cell division protein FtsZ"  
"Chl\_C14\_00245" 1810 "s63E6H2" 0 "cell division protein FtsZ"  
"Chl\_C14\_00246" 1811 "s59E13H2" 0 "Glycosyltransferase AgIJ"  
"Chl\_C14\_00246" 1811 "s59E25H2" 0 "Glycosyltransferase AgIJ"  
"Chl\_C14\_00246" 1811 "s59E5H2" 0 "Glycosyltransferase AgIJ"  
"Chl\_C14\_00246" 1811 "s63E6H2" 0 "Glycosyltransferase AgIJ"  
"Chl\_C14\_00247" 1812 "s59E13H2" 0 "hypothetical protein"  
"Chl\_C14\_00247" 1812 "s59E25H2" 0 "hypothetical protein"  
"Chl\_C14\_00247" 1812 "s59E5H2" 0 "hypothetical protein"  
"Chl\_C14\_00247" 1812 "s63E6H2" 0 "hypothetical protein"  
"Chl\_C14\_00248" 1813 "s59E13H2" 0 "UDP-glucose 4-epimerase"  
"Chl\_C14\_00248" 1813 "s59E25H2" 0 "UDP-glucose 4-epimerase"  
"Chl\_C14\_00248" 1813 "s59E5H2" 0 "UDP-glucose 4-epimerase"  
"Chl\_C14\_00248" 1813 "s63E6H2" 0 "UDP-glucose 4-epimerase"  
"Chl\_C14\_00249" 1814 "s59E13H2" 0 "ATP synthase epsilon chain"  
"Chl\_C14\_00249" 1814 "s59E25H2" 0 "ATP synthase epsilon chain"  
"Chl\_C14\_00249" 1814 "s59E5H2" 0 "ATP synthase epsilon chain"  
"Chl\_C14\_00249" 1814 "s63E6H2" 0 "ATP synthase epsilon chain"  
"Chl\_C14\_00250" 1815 "s59E13H2" 0 "ATP synthase subunit beta"  
"Chl\_C14\_00250" 1815 "s59E25H2" 0 "ATP synthase subunit beta"  
"Chl\_C14\_00250" 1815 "s59E5H2" 0.04181043 "ATP synthase subunit beta"  
"Chl\_C14\_00250" 1815 "s63E6H2" 0 "ATP synthase subunit beta"  
"Chl\_C14\_00251" 1816 "s59E13H2" 0 "ATP synthase gamma chain"  
"Chl\_C14\_00251" 1816 "s59E25H2" 0 "ATP synthase gamma chain"

"Chl\_C14\_00251" 1816 "s59E5H2" 0 "ATP synthase gamma chain"  
"Chl\_C14\_00251" 1816 "s63E6H2" 0 "ATP synthase gamma chain"  
"Chl\_C14\_00252" 1817 "s59E13H2" 0 "ATP synthase subunit alpha"  
"Chl\_C14\_00252" 1817 "s59E25H2" 0 "ATP synthase subunit alpha"  
"Chl\_C14\_00252" 1817 "s59E5H2" 0 "ATP synthase subunit alpha"  
"Chl\_C14\_00252" 1817 "s63E6H2" 0 "ATP synthase subunit alpha"  
"Chl\_C14\_00253" 1818 "s59E13H2" 0.0004948084 "Acetyl-coenzyme A synthetase"  
"Chl\_C14\_00253" 1818 "s59E25H2" 0 "Acetyl-coenzyme A synthetase"  
"Chl\_C14\_00253" 1818 "s59E5H2" 0 "Acetyl-coenzyme A synthetase"  
"Chl\_C14\_00253" 1818 "s63E6H2" 0 "Acetyl-coenzyme A synthetase"  
"Chl\_C14\_00254" 1819 "s59E13H2" 0 "Cyclic nucleotide-binding domain protein"  
"Chl\_C14\_00254" 1819 "s59E25H2" 0 "Cyclic nucleotide-binding domain protein"  
"Chl\_C14\_00254" 1819 "s59E5H2" 0 "Cyclic nucleotide-binding domain protein"  
"Chl\_C14\_00254" 1819 "s63E6H2" 0 "Cyclic nucleotide-binding domain protein"  
"Chl\_C14\_00255" 1820 "s59E13H2" 0 "ATP synthase subunit delta"  
"Chl\_C14\_00255" 1820 "s59E25H2" 0 "ATP synthase subunit delta"  
"Chl\_C14\_00255" 1820 "s59E5H2" 0 "ATP synthase subunit delta"  
"Chl\_C14\_00255" 1820 "s63E6H2" 0 "ATP synthase subunit delta"  
"Chl\_C14\_00256" 1821 "s59E13H2" 0 "DNA recombination-mediator protein A"  
"Chl\_C14\_00256" 1821 "s59E25H2" 0 "DNA recombination-mediator protein A"  
"Chl\_C14\_00256" 1821 "s59E5H2" 0 "DNA recombination-mediator protein A"  
"Chl\_C14\_00256" 1821 "s63E6H2" 0 "DNA recombination-mediator protein A"  
"Chl\_C14\_00257" 1822 "s59E13H2" 0 "Enolase"  
"Chl\_C14\_00257" 1822 "s59E25H2" 0 "Enolase"  
"Chl\_C14\_00257" 1822 "s59E5H2" 0 "Enolase"  
"Chl\_C14\_00257" 1822 "s63E6H2" 0 "Enolase"  
"Chl\_C14\_00258" 1823 "s59E13H2" 0 "hypothetical protein"  
"Chl\_C14\_00258" 1823 "s59E25H2" 0 "hypothetical protein"  
"Chl\_C14\_00258" 1823 "s59E5H2" 0 "hypothetical protein"  
"Chl\_C14\_00258" 1823 "s63E6H2" 0 "hypothetical protein"  
"Chl\_C14\_00259" 1824 "s59E13H2" 0 "2-hydroxyglutaryl-CoA dehydratase, D-component"  
"Chl\_C14\_00259" 1824 "s59E25H2" 0 "2-hydroxyglutaryl-CoA dehydratase, D-component"  
"Chl\_C14\_00259" 1824 "s59E5H2" 0 "2-hydroxyglutaryl-CoA dehydratase, D-component"  
"Chl\_C14\_00259" 1824 "s63E6H2" 0 "2-hydroxyglutaryl-CoA dehydratase, D-component"  
"Chl\_C14\_00260" 1825 "s59E13H2" 0 "Glyceraldehyde-3-phosphate dehydrogenase"  
"Chl\_C14\_00260" 1825 "s59E25H2" 0 "Glyceraldehyde-3-phosphate dehydrogenase"  
"Chl\_C14\_00260" 1825 "s59E5H2" 0 "Glyceraldehyde-3-phosphate dehydrogenase"  
"Chl\_C14\_00260" 1825 "s63E6H2" 0 "Glyceraldehyde-3-phosphate dehydrogenase"  
"Chl\_C14\_00261" 1826 "s59E13H2" 0 "5,6-dimethylbenzimidazole synthase"  
"Chl\_C14\_00261" 1826 "s59E25H2" 0 "5,6-dimethylbenzimidazole synthase"  
"Chl\_C14\_00261" 1826 "s59E5H2" 0 "5,6-dimethylbenzimidazole synthase"  
"Chl\_C14\_00261" 1826 "s63E6H2" 0 "5,6-dimethylbenzimidazole synthase"  
"Chl\_C14\_00262" 1827 "s59E13H2" 0 "Ribonuclease 3"  
"Chl\_C14\_00262" 1827 "s59E25H2" 0 "Ribonuclease 3"  
"Chl\_C14\_00262" 1827 "s59E5H2" 0 "Ribonuclease 3"  
"Chl\_C14\_00262" 1827 "s63E6H2" 0 "Ribonuclease 3"  
"Chl\_C14\_00264" 1829 "s59E13H2" 0.001000462 "Radical SAM superfamily protein"

"Chl\_C14\_00264" 1829 "s59E25H2" 0 "Radical SAM superfamily protein"  
"Chl\_C14\_00264" 1829 "s59E5H2" 0 "Radical SAM superfamily protein"  
"Chl\_C14\_00264" 1829 "s63E6H2" 0 "Radical SAM superfamily protein"  
"Chl\_C14\_00265" 1830 "s59E13H2" 0 "Acylphosphatase"  
"Chl\_C14\_00265" 1830 "s59E25H2" 0 "Acylphosphatase"  
"Chl\_C14\_00265" 1830 "s59E5H2" 0 "Acylphosphatase"  
"Chl\_C14\_00265" 1830 "s63E6H2" 0 "Acylphosphatase"  
"Chl\_C14\_00267" 1832 "s59E13H2" 0 "hypothetical protein"  
"Chl\_C14\_00267" 1832 "s59E25H2" 0 "hypothetical protein"  
"Chl\_C14\_00267" 1832 "s59E5H2" 0 "hypothetical protein"  
"Chl\_C14\_00267" 1832 "s63E6H2" 0 "hypothetical protein"  
"Chl\_C14\_00268" 1833 "s59E13H2" 0 "Molybdopterin-guanine dinucleotide biosynthesis adapter protein"  
"Chl\_C14\_00268" 1833 "s59E25H2" 0 "Molybdopterin-guanine dinucleotide biosynthesis adapter protein"  
"Chl\_C14\_00268" 1833 "s59E5H2" 0 "Molybdopterin-guanine dinucleotide biosynthesis adapter protein"  
"Chl\_C14\_00268" 1833 "s63E6H2" 0 "Molybdopterin-guanine dinucleotide biosynthesis adapter protein"  
"Chl\_C14\_00269" 1834 "s59E13H2" 0 "Molybdopterin molybdenumtransferase"  
"Chl\_C14\_00269" 1834 "s59E25H2" 0 "Molybdopterin molybdenumtransferase"  
"Chl\_C14\_00269" 1834 "s59E5H2" 0 "Molybdopterin molybdenumtransferase"  
"Chl\_C14\_00269" 1834 "s63E6H2" 0 "Molybdopterin molybdenumtransferase"  
"Chl\_C14\_00270" 1835 "s59E13H2" 0 "putative molybdenum cofactor guanylyltransferase"  
"Chl\_C14\_00270" 1835 "s59E25H2" 0 "putative molybdenum cofactor guanylyltransferase"  
"Chl\_C14\_00270" 1835 "s59E5H2" 0 "putative molybdenum cofactor guanylyltransferase"  
"Chl\_C14\_00270" 1835 "s63E6H2" 0 "putative molybdenum cofactor guanylyltransferase"  
"Chl\_C14\_00271" 1836 "s59E13H2" 0 "Enhancing lycopene biosynthesis protein 2"  
"Chl\_C14\_00271" 1836 "s59E25H2" 0 "Enhancing lycopene biosynthesis protein 2"  
"Chl\_C14\_00271" 1836 "s59E5H2" 0 "Enhancing lycopene biosynthesis protein 2"  
"Chl\_C14\_00271" 1836 "s63E6H2" 0 "Enhancing lycopene biosynthesis protein 2"  
"Chl\_C14\_00272" 1837 "s59E13H2" 0 "Cytosol aminopeptidase"  
"Chl\_C14\_00272" 1837 "s59E25H2" 0 "Cytosol aminopeptidase"  
"Chl\_C14\_00272" 1837 "s59E5H2" 0 "Cytosol aminopeptidase"  
"Chl\_C14\_00272" 1837 "s63E6H2" 0 "Cytosol aminopeptidase"  
"Chl\_C14\_00274" 1839 "s59E13H2" 0 "Double zinc ribbon"  
"Chl\_C14\_00274" 1839 "s59E25H2" 0 "Double zinc ribbon"  
"Chl\_C14\_00274" 1839 "s59E5H2" 0 "Double zinc ribbon"  
"Chl\_C14\_00274" 1839 "s63E6H2" 0 "Double zinc ribbon"  
"Chl\_C14\_00277" 1842 "s59E13H2" 0 "Elongation factor Tu-B"  
"Chl\_C14\_00277" 1842 "s59E25H2" 0 "Elongation factor Tu-B"  
"Chl\_C14\_00277" 1842 "s59E5H2" 0 "Elongation factor Tu-B"  
"Chl\_C14\_00277" 1842 "s63E6H2" 0.0005760923 "Elongation factor Tu-B"  
"Chl\_C14\_00278" 1843 "s59E13H2" 0 "preprotein translocase subunit SecE"  
"Chl\_C14\_00278" 1843 "s59E25H2" 0 "preprotein translocase subunit SecE"  
"Chl\_C14\_00278" 1843 "s59E5H2" 0 "preprotein translocase subunit SecE"  
"Chl\_C14\_00278" 1843 "s63E6H2" 0 "preprotein translocase subunit SecE"  
"Chl\_C14\_00279" 1844 "s59E13H2" 0 "hypothetical protein"  
"Chl\_C14\_00279" 1844 "s59E25H2" 0 "hypothetical protein"  
"Chl\_C14\_00279" 1844 "s59E5H2" 0 "hypothetical protein"  
"Chl\_C14\_00279" 1844 "s63E6H2" 0 "hypothetical protein"

"Chl\_C14\_00280" 1845 "s59E13H2" 0 "50S ribosomal protein L11"  
"Chl\_C14\_00280" 1845 "s59E25H2" 0 "50S ribosomal protein L11"  
"Chl\_C14\_00280" 1845 "s59E5H2" 0 "50S ribosomal protein L11"  
"Chl\_C14\_00280" 1845 "s63E6H2" 0 "50S ribosomal protein L11"  
"Chl\_C14\_00281" 1846 "s59E13H2" 0 "50S ribosomal protein L1"  
"Chl\_C14\_00281" 1846 "s59E25H2" 0 "50S ribosomal protein L1"  
"Chl\_C14\_00281" 1846 "s59E5H2" 0 "50S ribosomal protein L1"  
"Chl\_C14\_00281" 1846 "s63E6H2" 0 "50S ribosomal protein L1"  
"Chl\_C14\_00282" 1847 "s59E13H2" 0 "putative acetyl-CoA acyltransferase"  
"Chl\_C14\_00282" 1847 "s59E25H2" 0 "putative acetyl-CoA acyltransferase"  
"Chl\_C14\_00282" 1847 "s59E5H2" 0 "putative acetyl-CoA acyltransferase"  
"Chl\_C14\_00282" 1847 "s63E6H2" 0 "putative acetyl-CoA acyltransferase"  
"Chl\_C14\_00283" 1848 "s59E13H2" 0 "hypothetical protein"  
"Chl\_C14\_00283" 1848 "s59E25H2" 0 "hypothetical protein"  
"Chl\_C14\_00283" 1848 "s59E5H2" 0 "hypothetical protein"  
"Chl\_C14\_00283" 1848 "s63E6H2" 0 "hypothetical protein"  
"Chl\_C14\_00284" 1849 "s59E13H2" 0 "50S ribosomal protein L10"  
"Chl\_C14\_00284" 1849 "s59E25H2" 0 "50S ribosomal protein L10"  
"Chl\_C14\_00284" 1849 "s59E5H2" 0 "50S ribosomal protein L10"  
"Chl\_C14\_00284" 1849 "s63E6H2" 0 "50S ribosomal protein L10"  
"Chl\_C14\_00285" 1850 "s59E13H2" 0 "50S ribosomal protein L7/L12"  
"Chl\_C14\_00285" 1850 "s59E25H2" 0 "50S ribosomal protein L7/L12"  
"Chl\_C14\_00285" 1850 "s59E5H2" 0 "50S ribosomal protein L7/L12"  
"Chl\_C14\_00285" 1850 "s63E6H2" 0 "50S ribosomal protein L7/L12"  
"Chl\_C14\_00286" 1851 "s59E13H2" 0 "hypothetical protein"  
"Chl\_C14\_00286" 1851 "s59E25H2" 0 "hypothetical protein"  
"Chl\_C14\_00286" 1851 "s59E5H2" 0 "hypothetical protein"  
"Chl\_C14\_00286" 1851 "s63E6H2" 0 "hypothetical protein"  
"Chl\_C14\_00287" 1852 "s59E13H2" 0 "hypothetical protein"  
"Chl\_C14\_00287" 1852 "s59E25H2" 0 "hypothetical protein"  
"Chl\_C14\_00287" 1852 "s59E5H2" 0 "hypothetical protein"  
"Chl\_C14\_00287" 1852 "s63E6H2" 0 "hypothetical protein"  
"Chl\_C14\_00288" 1853 "s59E13H2" 0 "Competence protein ComM"  
"Chl\_C14\_00288" 1853 "s59E25H2" 0 "Competence protein ComM"  
"Chl\_C14\_00288" 1853 "s59E5H2" 0.0104363 "Competence protein ComM"  
"Chl\_C14\_00288" 1853 "s63E6H2" 0 "Competence protein ComM"  
"Chl\_C14\_00289" 1854 "s59E13H2" 0 "Transposon gamma-delta resolvase"  
"Chl\_C14\_00289" 1854 "s59E25H2" 0 "Transposon gamma-delta resolvase"  
"Chl\_C14\_00289" 1854 "s59E5H2" 0.005312319 "Transposon gamma-delta resolvase"  
"Chl\_C14\_00289" 1854 "s63E6H2" 0 "Transposon gamma-delta resolvase"  
"Chl\_C14\_00291" 1856 "s59E13H2" 0 "hypothetical protein"  
"Chl\_C14\_00291" 1856 "s59E25H2" 0 "hypothetical protein"  
"Chl\_C14\_00291" 1856 "s59E5H2" 0 "hypothetical protein"  
"Chl\_C14\_00291" 1856 "s63E6H2" 0 "hypothetical protein"  
"Chl\_C14\_00295" 1860 "s59E13H2" 0.0002637192 "Transposase"  
"Chl\_C14\_00295" 1860 "s59E25H2" 0 "Transposase"  
"Chl\_C14\_00295" 1860 "s59E5H2" 0.003214174 "Transposase"



"Chl\_C14\_00295" 1860 "s63E6H2" 0.002900388 "Transposase"  
"Chl\_C14\_00296" 1861 "s59E13H2" 0 "hypothetical protein"  
"Chl\_C14\_00296" 1861 "s59E25H2" 0 "hypothetical protein"  
"Chl\_C14\_00296" 1861 "s59E5H2" 0 "hypothetical protein"  
"Chl\_C14\_00296" 1861 "s63E6H2" 0 "hypothetical protein"  
"Chl\_C14\_00297" 1862 "s59E13H2" 0 "hypothetical protein"  
"Chl\_C14\_00297" 1862 "s59E25H2" 0 "hypothetical protein"  
"Chl\_C14\_00297" 1862 "s59E5H2" 0 "hypothetical protein"  
"Chl\_C14\_00297" 1862 "s63E6H2" 0 "hypothetical protein"  
"Chl\_C14\_00298" 1863 "s59E13H2" 0 "Beta-galactosidase"  
"Chl\_C14\_00298" 1863 "s59E25H2" 0 "Beta-galactosidase"  
"Chl\_C14\_00298" 1863 "s59E5H2" 0 "Beta-galactosidase"  
"Chl\_C14\_00298" 1863 "s63E6H2" 0 "Beta-galactosidase"  
"Chl\_C14\_00299" 1864 "s59E13H2" 0 "LexA repressor"  
"Chl\_C14\_00299" 1864 "s59E25H2" 0 "LexA repressor"  
"Chl\_C14\_00299" 1864 "s59E5H2" 0 "LexA repressor"  
"Chl\_C14\_00299" 1864 "s63E6H2" 0 "LexA repressor"  
"Chl\_C14\_00300" 1865 "s59E13H2" 0 "hypothetical protein"  
"Chl\_C14\_00300" 1865 "s59E25H2" 0 "hypothetical protein"  
"Chl\_C14\_00300" 1865 "s59E5H2" 0 "hypothetical protein"  
"Chl\_C14\_00300" 1865 "s63E6H2" 0 "hypothetical protein"  
"Chl\_C14\_00301" 1866 "s59E13H2" 0 "Thermonuclease precursor"  
"Chl\_C14\_00301" 1866 "s59E25H2" 0 "Thermonuclease precursor"  
"Chl\_C14\_00301" 1866 "s59E5H2" 0 "Thermonuclease precursor"  
"Chl\_C14\_00301" 1866 "s63E6H2" 0 "Thermonuclease precursor"  
"Chl\_C14\_00302" 1867 "s59E13H2" 0 "Peptidoglycan deacetylase"  
"Chl\_C14\_00302" 1867 "s59E25H2" 0 "Peptidoglycan deacetylase"  
"Chl\_C14\_00302" 1867 "s59E5H2" 0 "Peptidoglycan deacetylase"  
"Chl\_C14\_00302" 1867 "s63E6H2" 0 "Peptidoglycan deacetylase"  
"Chl\_C14\_00303" 1868 "s59E13H2" 0 "Putative acetyltransferase"  
"Chl\_C14\_00303" 1868 "s59E25H2" 0 "Putative acetyltransferase"  
"Chl\_C14\_00303" 1868 "s59E5H2" 0 "Putative acetyltransferase"  
"Chl\_C14\_00303" 1868 "s63E6H2" 0 "Putative acetyltransferase"  
"Chl\_C14\_00304" 1869 "s59E13H2" 0 "D-glycero-alpha-D-manno-heptose 7-phosphate kinase"  
"Chl\_C14\_00304" 1869 "s59E25H2" 0 "D-glycero-alpha-D-manno-heptose 7-phosphate kinase"  
"Chl\_C14\_00304" 1869 "s59E5H2" 0 "D-glycero-alpha-D-manno-heptose 7-phosphate kinase"  
"Chl\_C14\_00304" 1869 "s63E6H2" 0 "D-glycero-alpha-D-manno-heptose 7-phosphate kinase"  
"Chl\_C14\_00305" 1870 "s59E13H2" 0 "Phosphoheptose isomerase"  
"Chl\_C14\_00305" 1870 "s59E25H2" 0 "Phosphoheptose isomerase"  
"Chl\_C14\_00305" 1870 "s59E5H2" 0 "Phosphoheptose isomerase"  
"Chl\_C14\_00305" 1870 "s63E6H2" 0 "Phosphoheptose isomerase"  
"Chl\_C14\_00306" 1871 "s59E13H2" 0 "D-glycero-beta-D-manno-heptose-1,7-bisphosphate 7-phosphatase"  
"Chl\_C14\_00306" 1871 "s59E25H2" 0 "D-glycero-beta-D-manno-heptose-1,7-bisphosphate 7-phosphatase"  
"Chl\_C14\_00306" 1871 "s59E5H2" 0 "D-glycero-beta-D-manno-heptose-1,7-bisphosphate 7-phosphatase"  
"Chl\_C14\_00306" 1871 "s63E6H2" 0 "D-glycero-beta-D-manno-heptose-1,7-bisphosphate 7-phosphatase"  
"Chl\_C14\_00307" 1872 "s59E13H2" 0 "D-inositol 3-phosphate glycosyltransferase"  
"Chl\_C14\_00307" 1872 "s59E25H2" 0 "D-inositol 3-phosphate glycosyltransferase"

"Chl\_C14\_00307" 1872 "s59E5H2" 0 "D-inositol 3-phosphate glycosyltransferase"  
"Chl\_C14\_00307" 1872 "s63E6H2" 0 "D-inositol 3-phosphate glycosyltransferase"  
"Chl\_C14\_00308" 1873 "s59E13H2" 0 "putative S-adenosylmethionine-dependent methyltransferase/MSMEI\_2290"  
"Chl\_C14\_00308" 1873 "s59E25H2" 0 "putative S-adenosylmethionine-dependent methyltransferase/MSMEI\_2290"  
"Chl\_C14\_00308" 1873 "s59E5H2" 0 "putative S-adenosylmethionine-dependent methyltransferase/MSMEI\_2290"  
"Chl\_C14\_00308" 1873 "s63E6H2" 0 "putative S-adenosylmethionine-dependent methyltransferase/MSMEI\_2290"  
"Chl\_C14\_00309" 1874 "s59E13H2" 0 "putative oxidoreductase YcjS"  
"Chl\_C14\_00309" 1874 "s59E25H2" 0 "putative oxidoreductase YcjS"  
"Chl\_C14\_00309" 1874 "s59E5H2" 0 "putative oxidoreductase YcjS"  
"Chl\_C14\_00309" 1874 "s63E6H2" 0 "putative oxidoreductase YcjS"  
"Chl\_C14\_00310" 1875 "s59E13H2" 0 "UDP-2-acetamido-2-deoxy-3-oxo-D-glucuronate aminotransferase"  
"Chl\_C14\_00310" 1875 "s59E25H2" 0 "UDP-2-acetamido-2-deoxy-3-oxo-D-glucuronate aminotransferase"  
"Chl\_C14\_00310" 1875 "s59E5H2" 0 "UDP-2-acetamido-2-deoxy-3-oxo-D-glucuronate aminotransferase"  
"Chl\_C14\_00310" 1875 "s63E6H2" 0 "UDP-2-acetamido-2-deoxy-3-oxo-D-glucuronate aminotransferase"  
"Chl\_C14\_00311" 1876 "s59E13H2" 0 "UDP-glucose 4-epimerase"  
"Chl\_C14\_00311" 1876 "s59E25H2" 0 "UDP-glucose 4-epimerase"  
"Chl\_C14\_00311" 1876 "s59E5H2" 0 "UDP-glucose 4-epimerase"  
"Chl\_C14\_00311" 1876 "s63E6H2" 0 "UDP-glucose 4-epimerase"  
"Chl\_C14\_00314" 1879 "s59E13H2" 0 "putative cold shock protein A"  
"Chl\_C14\_00314" 1879 "s59E25H2" 0 "putative cold shock protein A"  
"Chl\_C14\_00314" 1879 "s59E5H2" 0 "putative cold shock protein A"  
"Chl\_C14\_00314" 1879 "s63E6H2" 0 "putative cold shock protein A"  
"Chl\_C14\_00315" 1880 "s59E13H2" 0 "hypothetical protein"  
"Chl\_C14\_00315" 1880 "s59E25H2" 0 "hypothetical protein"  
"Chl\_C14\_00315" 1880 "s59E5H2" 0 "hypothetical protein"  
"Chl\_C14\_00315" 1880 "s63E6H2" 0 "hypothetical protein"  
"Chl\_C14\_00316" 1881 "s59E13H2" 0 "Modification methylase VspI"  
"Chl\_C14\_00316" 1881 "s59E25H2" 0 "Modification methylase VspI"  
"Chl\_C14\_00316" 1881 "s59E5H2" 0 "Modification methylase VspI"  
"Chl\_C14\_00316" 1881 "s63E6H2" 0 "Modification methylase VspI"  
"Chl\_C14\_00319" 1884 "s59E13H2" 0 "hypothetical protein"  
"Chl\_C14\_00319" 1884 "s59E25H2" 0 "hypothetical protein"  
"Chl\_C14\_00319" 1884 "s59E5H2" 0 "hypothetical protein"  
"Chl\_C14\_00319" 1884 "s63E6H2" 0 "hypothetical protein"  
"Chl\_C14\_00321" 1886 "s59E13H2" 0 "hypothetical protein"  
"Chl\_C14\_00321" 1886 "s59E25H2" 0 "hypothetical protein"  
"Chl\_C14\_00321" 1886 "s59E5H2" 0 "hypothetical protein"  
"Chl\_C14\_00321" 1886 "s63E6H2" 0 "hypothetical protein"  
"Chl\_C14\_00323" 1888 "s59E13H2" 0 "Glutathione transport system permease protein GsiC"  
"Chl\_C14\_00323" 1888 "s59E25H2" 0 "Glutathione transport system permease protein GsiC"  
"Chl\_C14\_00323" 1888 "s59E5H2" 0 "Glutathione transport system permease protein GsiC"  
"Chl\_C14\_00323" 1888 "s63E6H2" 0 "Glutathione transport system permease protein GsiC"  
"Chl\_C14\_00324" 1889 "s59E13H2" 0 "Dipeptide transport system permease protein DppC"  
"Chl\_C14\_00324" 1889 "s59E25H2" 0 "Dipeptide transport system permease protein DppC"  
"Chl\_C14\_00324" 1889 "s59E5H2" 0 "Dipeptide transport system permease protein DppC"  
"Chl\_C14\_00324" 1889 "s63E6H2" 0 "Dipeptide transport system permease protein DppC"  
"Chl\_C14\_00325" 1890 "s59E13H2" 0 "Oligopeptide transport ATP-binding protein OppD"

"Chl\_C14\_00325" 1890 "s59E25H2" 0 "Oligopeptide transport ATP-binding protein OppD"  
"Chl\_C14\_00325" 1890 "s59E5H2" 0 "Oligopeptide transport ATP-binding protein OppD"  
"Chl\_C14\_00325" 1890 "s63E6H2" 0 "Oligopeptide transport ATP-binding protein OppD"  
"Chl\_C14\_00326" 1891 "s59E13H2" 0 "Oligopeptide transport ATP-binding protein OppF"  
"Chl\_C14\_00326" 1891 "s59E25H2" 0 "Oligopeptide transport ATP-binding protein OppF"  
"Chl\_C14\_00326" 1891 "s59E5H2" 0 "Oligopeptide transport ATP-binding protein OppF"  
"Chl\_C14\_00326" 1891 "s63E6H2" 0 "Oligopeptide transport ATP-binding protein OppF"  
"Chl\_C14\_00328" 1893 "s59E13H2" 0 "hypothetical protein"  
"Chl\_C14\_00328" 1893 "s59E25H2" 0 "hypothetical protein"  
"Chl\_C14\_00328" 1893 "s59E5H2" 0 "hypothetical protein"  
"Chl\_C14\_00328" 1893 "s63E6H2" 0 "hypothetical protein"  
"Chl\_C14\_00329" 1894 "s59E13H2" 0 "Tungsten-containing aldehyde ferredoxin oxidoreductase"  
"Chl\_C14\_00329" 1894 "s59E25H2" 0 "Tungsten-containing aldehyde ferredoxin oxidoreductase"  
"Chl\_C14\_00329" 1894 "s59E5H2" 0 "Tungsten-containing aldehyde ferredoxin oxidoreductase"  
"Chl\_C14\_00329" 1894 "s63E6H2" 0 "Tungsten-containing aldehyde ferredoxin oxidoreductase"  
"Chl\_C14\_00330" 1895 "s59E13H2" 0 "Putative redox-active protein (C\_GCAxxG\_C\_C)"  
"Chl\_C14\_00330" 1895 "s59E25H2" 0 "Putative redox-active protein (C\_GCAxxG\_C\_C)"  
"Chl\_C14\_00330" 1895 "s59E5H2" 0 "Putative redox-active protein (C\_GCAxxG\_C\_C)"  
"Chl\_C14\_00330" 1895 "s63E6H2" 0 "Putative redox-active protein (C\_GCAxxG\_C\_C)"  
"Chl\_C14\_00334" 1899 "s59E13H2" 0 "Glutaredoxin-3"  
"Chl\_C14\_00334" 1899 "s59E25H2" 0 "Glutaredoxin-3"  
"Chl\_C14\_00334" 1899 "s59E5H2" 0 "Glutaredoxin-3"  
"Chl\_C14\_00334" 1899 "s63E6H2" 0 "Glutaredoxin-3"  
"Chl\_C14\_00335" 1900 "s59E13H2" 0 "Alkyl hydroperoxide reductase subunit F"  
"Chl\_C14\_00335" 1900 "s59E25H2" 0 "Alkyl hydroperoxide reductase subunit F"  
"Chl\_C14\_00335" 1900 "s59E5H2" 0 "Alkyl hydroperoxide reductase subunit F"  
"Chl\_C14\_00335" 1900 "s63E6H2" 0 "Alkyl hydroperoxide reductase subunit F"  
"Chl\_C14\_00336" 1901 "s59E13H2" 0 "Rubrerythrin"  
"Chl\_C14\_00336" 1901 "s59E25H2" 0 "Rubrerythrin"  
"Chl\_C14\_00336" 1901 "s59E5H2" 0 "Rubrerythrin"  
"Chl\_C14\_00336" 1901 "s63E6H2" 0 "Rubrerythrin"  
"Chl\_C14\_00337" 1902 "s59E13H2" 0 "putative trifunctional 2-polyprenylphenol hydroxylase/glutamate synthase subunit beta/ferritin domain-containing protein"  
"Chl\_C14\_00337" 1902 "s59E25H2" 0 "putative trifunctional 2-polyprenylphenol hydroxylase/glutamate synthase subunit beta/ferritin domain-containing protein"  
"Chl\_C14\_00337" 1902 "s59E5H2" 0 "putative trifunctional 2-polyprenylphenol hydroxylase/glutamate synthase subunit beta/ferritin domain-containing protein"  
"Chl\_C14\_00337" 1902 "s63E6H2" 0 "putative trifunctional 2-polyprenylphenol hydroxylase/glutamate synthase subunit beta/ferritin domain-containing protein"  
"Chl\_C14\_00338" 1903 "s59E13H2" 0 "putative cysteine desulfurase 2"  
"Chl\_C14\_00338" 1903 "s59E25H2" 0 "putative cysteine desulfurase 2"  
"Chl\_C14\_00338" 1903 "s59E5H2" 0 "putative cysteine desulfurase 2"  
"Chl\_C14\_00338" 1903 "s63E6H2" 0 "putative cysteine desulfurase 2"  
"Chl\_C14\_00339" 1904 "s59E13H2" 0 "NifU-like protein"  
"Chl\_C14\_00339" 1904 "s59E25H2" 0 "NifU-like protein"  
"Chl\_C14\_00339" 1904 "s59E5H2" 0 "NifU-like protein"  
"Chl\_C14\_00339" 1904 "s63E6H2" 0 "NifU-like protein"  
"Chl\_C14\_00341" 1906 "s59E13H2" 0 "hypothetical protein"  
"Chl\_C14\_00341" 1906 "s59E25H2" 0 "hypothetical protein"  
"Chl\_C14\_00341" 1906 "s59E5H2" 0 "hypothetical protein"  
"Chl\_C14\_00341" 1906 "s63E6H2" 0 "hypothetical protein"

"Chl\_C14\_00342" 1907 "s59E13H2" 0 "Sulfurtransferase TusA"  
"Chl\_C14\_00342" 1907 "s59E25H2" 0 "Sulfurtransferase TusA"  
"Chl\_C14\_00342" 1907 "s59E5H2" 0 "Sulfurtransferase TusA"  
"Chl\_C14\_00342" 1907 "s63E6H2" 0 "Sulfurtransferase TusA"  
"Chl\_C14\_00343" 1908 "s59E13H2" 0 "High molecular weight rubredoxin"  
"Chl\_C14\_00343" 1908 "s59E25H2" 0 "High molecular weight rubredoxin"  
"Chl\_C14\_00343" 1908 "s59E5H2" 0.005710683 "High molecular weight rubredoxin"  
"Chl\_C14\_00343" 1908 "s63E6H2" 0 "High molecular weight rubredoxin"  
"Chl\_C14\_00344" 1909 "s59E13H2" 0 "3-oxoacyl-[acyl-carrier-protein] reductase FabG"  
"Chl\_C14\_00344" 1909 "s59E25H2" 0 "3-oxoacyl-[acyl-carrier-protein] reductase FabG"  
"Chl\_C14\_00344" 1909 "s59E5H2" 0 "3-oxoacyl-[acyl-carrier-protein] reductase FabG"  
"Chl\_C14\_00344" 1909 "s63E6H2" 0 "3-oxoacyl-[acyl-carrier-protein] reductase FabG"  
"Chl\_C14\_00345" 1910 "s59E13H2" 0 "Desulfoferrodoxin"  
"Chl\_C14\_00345" 1910 "s59E25H2" 0 "Desulfoferrodoxin"  
"Chl\_C14\_00345" 1910 "s59E5H2" 0 "Desulfoferrodoxin"  
"Chl\_C14\_00345" 1910 "s63E6H2" 0 "Desulfoferrodoxin"  
"Chl\_C14\_00346" 1911 "s59E13H2" 0 "hypothetical protein"  
"Chl\_C14\_00346" 1911 "s59E25H2" 0 "hypothetical protein"  
"Chl\_C14\_00346" 1911 "s59E5H2" 0 "hypothetical protein"  
"Chl\_C14\_00346" 1911 "s63E6H2" 0 "hypothetical protein"  
"Chl\_C14\_00347" 1912 "s59E13H2" 0 "Copper-exporting P-type ATPase A"  
"Chl\_C14\_00347" 1912 "s59E25H2" 0 "Copper-exporting P-type ATPase A"  
"Chl\_C14\_00347" 1912 "s59E5H2" 0 "Copper-exporting P-type ATPase A"  
"Chl\_C14\_00347" 1912 "s63E6H2" 0.0002591092 "Copper-exporting P-type ATPase A"  
"Chl\_C14\_00348" 1913 "s59E13H2" 0 "Copper-transporting P-type ATPase"  
"Chl\_C14\_00348" 1913 "s59E25H2" 0 "Copper-transporting P-type ATPase"  
"Chl\_C14\_00348" 1913 "s59E5H2" 0 "Copper-transporting P-type ATPase"  
"Chl\_C14\_00348" 1913 "s63E6H2" 0 "Copper-transporting P-type ATPase"  
"Chl\_C14\_00349" 1914 "s59E13H2" 0 "Bacterioferritin"  
"Chl\_C14\_00349" 1914 "s59E25H2" 0 "Bacterioferritin"  
"Chl\_C14\_00349" 1914 "s59E5H2" 0.005017917 "Bacterioferritin"  
"Chl\_C14\_00349" 1914 "s63E6H2" 0 "Bacterioferritin"  
"Chl\_C14\_00350" 1915 "s59E13H2" 0 "tRNA-binding protein YgjH"  
"Chl\_C14\_00350" 1915 "s59E25H2" 0 "tRNA-binding protein YgjH"  
"Chl\_C14\_00350" 1915 "s59E5H2" 0 "tRNA-binding protein YgjH"  
"Chl\_C14\_00350" 1915 "s63E6H2" 0 "tRNA-binding protein YgjH"  
"Chl\_C14\_00351" 1916 "s59E13H2" 0 "3-oxoadipate CoA-transferase subunit A"  
"Chl\_C14\_00351" 1916 "s59E25H2" 0 "3-oxoadipate CoA-transferase subunit A"  
"Chl\_C14\_00351" 1916 "s59E5H2" 0 "3-oxoadipate CoA-transferase subunit A"  
"Chl\_C14\_00351" 1916 "s63E6H2" 0 "3-oxoadipate CoA-transferase subunit A"  
"Chl\_C14\_00352" 1917 "s59E13H2" 0 "3-oxoadipate CoA-transferase subunit B"  
"Chl\_C14\_00352" 1917 "s59E25H2" 0 "3-oxoadipate CoA-transferase subunit B"  
"Chl\_C14\_00352" 1917 "s59E5H2" 0 "3-oxoadipate CoA-transferase subunit B"  
"Chl\_C14\_00352" 1917 "s63E6H2" 0 "3-oxoadipate CoA-transferase subunit B"  
"Chl\_C14\_00353" 1918 "s59E13H2" 0 "Transposase"  
"Chl\_C14\_00353" 1918 "s59E25H2" 0 "Transposase"  
"Chl\_C14\_00353" 1918 "s59E5H2" 0 "Transposase"

"Chl\_C14\_00353" 1918 "s63E6H2" 0 "Transposase"  
"Chl\_C14\_00354" 1919 "s59E13H2" 0 "IS2 transposase TnpB"  
"Chl\_C14\_00354" 1919 "s59E25H2" 0 "IS2 transposase TnpB"  
"Chl\_C14\_00354" 1919 "s59E5H2" 0 "IS2 transposase TnpB"  
"Chl\_C14\_00354" 1919 "s63E6H2" 0 "IS2 transposase TnpB"  
"Chl\_C14\_00355" 1920 "s59E13H2" 0 "Butyrate--acetoacetate CoA-transferase subunit B"  
"Chl\_C14\_00355" 1920 "s59E25H2" 0 "Butyrate--acetoacetate CoA-transferase subunit B"  
"Chl\_C14\_00355" 1920 "s59E5H2" 0 "Butyrate--acetoacetate CoA-transferase subunit B"  
"Chl\_C14\_00355" 1920 "s63E6H2" 0 "Butyrate--acetoacetate CoA-transferase subunit B"  
"Chl\_C14\_00356" 1921 "s59E13H2" 0 "hypothetical protein"  
"Chl\_C14\_00356" 1921 "s59E25H2" 0 "hypothetical protein"  
"Chl\_C14\_00356" 1921 "s59E5H2" 0 "hypothetical protein"  
"Chl\_C14\_00356" 1921 "s63E6H2" 0 "hypothetical protein"  
"Chl\_C14\_00357" 1922 "s59E13H2" 0 "5,6-dimethylbenzimidazole synthase"  
"Chl\_C14\_00357" 1922 "s59E25H2" 0 "5,6-dimethylbenzimidazole synthase"  
"Chl\_C14\_00357" 1922 "s59E5H2" 0 "5,6-dimethylbenzimidazole synthase"  
"Chl\_C14\_00357" 1922 "s63E6H2" 0 "5,6-dimethylbenzimidazole synthase"  
"Chl\_C14\_00358" 1923 "s59E13H2" 0 "Tungsten-containing aldehyde ferredoxin oxidoreductase"  
"Chl\_C14\_00358" 1923 "s59E25H2" 0 "Tungsten-containing aldehyde ferredoxin oxidoreductase"  
"Chl\_C14\_00358" 1923 "s59E5H2" 0 "Tungsten-containing aldehyde ferredoxin oxidoreductase"  
"Chl\_C14\_00358" 1923 "s63E6H2" 0 "Tungsten-containing aldehyde ferredoxin oxidoreductase"  
"Chl\_C14\_00359" 1924 "s59E13H2" 0 "Quinolate synthase A"  
"Chl\_C14\_00359" 1924 "s59E25H2" 0 "Quinolate synthase A"  
"Chl\_C14\_00359" 1924 "s59E5H2" 0 "Quinolate synthase A"  
"Chl\_C14\_00359" 1924 "s63E6H2" 0 "Quinolate synthase A"  
"Chl\_C14\_00360" 1925 "s59E13H2" 0 "formate dehydrogenase accessory protein"  
"Chl\_C14\_00360" 1925 "s59E25H2" 0 "formate dehydrogenase accessory protein"  
"Chl\_C14\_00360" 1925 "s59E5H2" 0 "formate dehydrogenase accessory protein"  
"Chl\_C14\_00360" 1925 "s63E6H2" 0 "formate dehydrogenase accessory protein"  
"Chl\_C14\_00361" 1926 "s59E13H2" 0 "Hydrogenase isoenzymes formation protein HypE"  
"Chl\_C14\_00361" 1926 "s59E25H2" 0 "Hydrogenase isoenzymes formation protein HypE"  
"Chl\_C14\_00361" 1926 "s59E5H2" 0 "Hydrogenase isoenzymes formation protein HypE"  
"Chl\_C14\_00361" 1926 "s63E6H2" 0 "Hydrogenase isoenzymes formation protein HypE"  
"Chl\_C14\_00362" 1927 "s59E13H2" 0 "NifU-like protein"  
"Chl\_C14\_00362" 1927 "s59E25H2" 0 "NifU-like protein"  
"Chl\_C14\_00362" 1927 "s59E5H2" 0 "NifU-like protein"  
"Chl\_C14\_00362" 1927 "s63E6H2" 0 "NifU-like protein"  
"Chl\_C14\_00363" 1928 "s59E13H2" 0 "hypothetical protein"  
"Chl\_C14\_00363" 1928 "s59E25H2" 0 "hypothetical protein"  
"Chl\_C14\_00363" 1928 "s59E5H2" 0 "hypothetical protein"  
"Chl\_C14\_00363" 1928 "s63E6H2" 0 "hypothetical protein"  
"Chl\_C14\_00364" 1929 "s59E13H2" 0 "putative cysteine desulfurase 2"  
"Chl\_C14\_00364" 1929 "s59E25H2" 0 "putative cysteine desulfurase 2"  
"Chl\_C14\_00364" 1929 "s59E5H2" 0 "putative cysteine desulfurase 2"  
"Chl\_C14\_00364" 1929 "s63E6H2" 0 "putative cysteine desulfurase 2"  
"Chl\_C14\_00365" 1930 "s59E13H2" 0 "NIL domain protein"  
"Chl\_C14\_00365" 1930 "s59E25H2" 0 "NIL domain protein"

"Chl\_C14\_00365" 1930 "s59E5H2" 0 "NIL domain protein"  
"Chl\_C14\_00365" 1930 "s63E6H2" 0 "NIL domain protein"  
"Chl\_C14\_00366" 1931 "s59E13H2" 0 "Threonine synthase"  
"Chl\_C14\_00366" 1931 "s59E25H2" 0 "Threonine synthase"  
"Chl\_C14\_00366" 1931 "s59E5H2" 0 "Threonine synthase"  
"Chl\_C14\_00366" 1931 "s63E6H2" 0 "Threonine synthase"  
"Chl\_C14\_00367" 1932 "s59E13H2" 0 "Cystathionine beta-lyase"  
"Chl\_C14\_00367" 1932 "s59E25H2" 0 "Cystathionine beta-lyase"  
"Chl\_C14\_00367" 1932 "s59E5H2" 0 "Cystathionine beta-lyase"  
"Chl\_C14\_00367" 1932 "s63E6H2" 0 "Cystathionine beta-lyase"  
"Chl\_C14\_00368" 1933 "s59E13H2" 0 "Serine acetyltransferase"  
"Chl\_C14\_00368" 1933 "s59E25H2" 0 "Serine acetyltransferase"  
"Chl\_C14\_00368" 1933 "s59E5H2" 0 "Serine acetyltransferase"  
"Chl\_C14\_00368" 1933 "s63E6H2" 0 "Serine acetyltransferase"  
"Chl\_C14\_00369" 1934 "s59E13H2" 0 "O-acetylserine sulfhydrylase"  
"Chl\_C14\_00369" 1934 "s59E25H2" 0 "O-acetylserine sulfhydrylase"  
"Chl\_C14\_00369" 1934 "s59E5H2" 0 "O-acetylserine sulfhydrylase"  
"Chl\_C14\_00369" 1934 "s63E6H2" 0 "O-acetylserine sulfhydrylase"  
"Chl\_C14\_00370" 1935 "s59E13H2" 0 "HTH-type transcriptional regulator CymR"  
"Chl\_C14\_00370" 1935 "s59E25H2" 0 "HTH-type transcriptional regulator CymR"  
"Chl\_C14\_00370" 1935 "s59E5H2" 0 "HTH-type transcriptional regulator CymR"  
"Chl\_C14\_00370" 1935 "s63E6H2" 0 "HTH-type transcriptional regulator CymR"  
"Chl\_C14\_00371" 1936 "s59E13H2" 0 "hypothetical protein"  
"Chl\_C14\_00371" 1936 "s59E25H2" 0 "hypothetical protein"  
"Chl\_C14\_00371" 1936 "s59E5H2" 0 "hypothetical protein"  
"Chl\_C14\_00371" 1936 "s63E6H2" 0 "hypothetical protein"  
"Chl\_C14\_00372" 1937 "s59E13H2" 0 "V4R domain protein"  
"Chl\_C14\_00372" 1937 "s59E25H2" 0 "V4R domain protein"  
"Chl\_C14\_00372" 1937 "s59E5H2" 0 "V4R domain protein"  
"Chl\_C14\_00372" 1937 "s63E6H2" 0 "V4R domain protein"  
"Chl\_C14\_00373" 1938 "s59E13H2" 0 "Cyclic di-GMP phosphodiesterase response regulator RpfG"  
"Chl\_C14\_00373" 1938 "s59E25H2" 0 "Cyclic di-GMP phosphodiesterase response regulator RpfG"  
"Chl\_C14\_00373" 1938 "s59E5H2" 0 "Cyclic di-GMP phosphodiesterase response regulator RpfG"  
"Chl\_C14\_00373" 1938 "s63E6H2" 0 "Cyclic di-GMP phosphodiesterase response regulator RpfG"  
"Chl\_C14\_00374" 1939 "s59E13H2" 0 "Type II secretion system protein E"  
"Chl\_C14\_00374" 1939 "s59E25H2" 0 "Type II secretion system protein E"  
"Chl\_C14\_00374" 1939 "s59E5H2" 0 "Type II secretion system protein E"  
"Chl\_C14\_00374" 1939 "s63E6H2" 0 "Type II secretion system protein E"  
"Chl\_C14\_00375" 1940 "s59E13H2" 0 "Type II secretion system protein F"  
"Chl\_C14\_00375" 1940 "s59E25H2" 0 "Type II secretion system protein F"  
"Chl\_C14\_00375" 1940 "s59E5H2" 0 "Type II secretion system protein F"  
"Chl\_C14\_00375" 1940 "s63E6H2" 0 "Type II secretion system protein F"  
"Chl\_C14\_00376" 1941 "s59E13H2" 0 "hypothetical protein"  
"Chl\_C14\_00376" 1941 "s59E25H2" 0 "hypothetical protein"  
"Chl\_C14\_00376" 1941 "s59E5H2" 0 "hypothetical protein"  
"Chl\_C14\_00376" 1941 "s63E6H2" 0 "hypothetical protein"  
"Chl\_C14\_00377" 1942 "s59E13H2" 0 "hypothetical protein"

"Chl\_C14\_00377" 1942 "s59E25H2" 0 "hypothetical protein"  
"Chl\_C14\_00377" 1942 "s59E5H2" 0 "hypothetical protein"  
"Chl\_C14\_00377" 1942 "s63E6H2" 0 "hypothetical protein"  
"Chl\_C14\_00378" 1943 "s59E13H2" 0 "hypothetical protein"  
"Chl\_C14\_00378" 1943 "s59E25H2" 0 "hypothetical protein"  
"Chl\_C14\_00378" 1943 "s59E5H2" 0 "hypothetical protein"  
"Chl\_C14\_00378" 1943 "s63E6H2" 0 "hypothetical protein"  
"Chl\_C14\_00379" 1944 "s59E13H2" 0 "hypothetical protein"  
"Chl\_C14\_00379" 1944 "s59E25H2" 0 "hypothetical protein"  
"Chl\_C14\_00379" 1944 "s59E5H2" 0 "hypothetical protein"  
"Chl\_C14\_00379" 1944 "s63E6H2" 0 "hypothetical protein"  
"Chl\_C14\_00380" 1945 "s59E13H2" 0 "Competence protein A"  
"Chl\_C14\_00380" 1945 "s59E25H2" 0 "Competence protein A"  
"Chl\_C14\_00380" 1945 "s59E5H2" 0 "Competence protein A"  
"Chl\_C14\_00380" 1945 "s63E6H2" 0 "Competence protein A"  
"Chl\_C14\_00381" 1946 "s59E13H2" 0 "Twitching mobility protein"  
"Chl\_C14\_00381" 1946 "s59E25H2" 0 "Twitching mobility protein"  
"Chl\_C14\_00381" 1946 "s59E5H2" 0 "Twitching mobility protein"  
"Chl\_C14\_00381" 1946 "s63E6H2" 0 "Twitching mobility protein"  
"Chl\_C14\_00382" 1947 "s59E13H2" 0 "Phytochrome-like protein cph2"  
"Chl\_C14\_00382" 1947 "s59E25H2" 0 "Phytochrome-like protein cph2"  
"Chl\_C14\_00382" 1947 "s59E5H2" 0 "Phytochrome-like protein cph2"  
"Chl\_C14\_00382" 1947 "s63E6H2" 0 "Phytochrome-like protein cph2"  
"Chl\_C14\_00383" 1948 "s59E13H2" 0 "Cysteine-rich secretory protein family protein"  
"Chl\_C14\_00383" 1948 "s59E25H2" 0 "Cysteine-rich secretory protein family protein"  
"Chl\_C14\_00383" 1948 "s59E5H2" 0 "Cysteine-rich secretory protein family protein"  
"Chl\_C14\_00383" 1948 "s63E6H2" 0 "Cysteine-rich secretory protein family protein"  
"Chl\_C14\_00384" 1949 "s59E13H2" 0 "hypothetical protein"  
"Chl\_C14\_00384" 1949 "s59E25H2" 0 "hypothetical protein"  
"Chl\_C14\_00384" 1949 "s59E5H2" 0 "hypothetical protein"  
"Chl\_C14\_00384" 1949 "s63E6H2" 0 "hypothetical protein"  
"Chl\_C14\_00385" 1950 "s59E13H2" 0 "hypothetical protein"  
"Chl\_C14\_00385" 1950 "s59E25H2" 0 "hypothetical protein"  
"Chl\_C14\_00385" 1950 "s59E5H2" 0 "hypothetical protein"  
"Chl\_C14\_00385" 1950 "s63E6H2" 0 "hypothetical protein"  
"Chl\_C14\_00386" 1951 "s59E13H2" 0 "hypothetical protein"  
"Chl\_C14\_00386" 1951 "s59E25H2" 0 "hypothetical protein"  
"Chl\_C14\_00386" 1951 "s59E5H2" 0 "hypothetical protein"  
"Chl\_C14\_00386" 1951 "s63E6H2" 0 "hypothetical protein"  
"Chl\_C14\_00387" 1952 "s59E13H2" 0 "Chagasin family peptidase inhibitor I42"  
"Chl\_C14\_00387" 1952 "s59E25H2" 0 "Chagasin family peptidase inhibitor I42"  
"Chl\_C14\_00387" 1952 "s59E5H2" 0 "Chagasin family peptidase inhibitor I42"  
"Chl\_C14\_00387" 1952 "s63E6H2" 0 "Chagasin family peptidase inhibitor I42"  
"Chl\_C14\_00388" 1953 "s59E13H2" 0 "Multidrug resistance protein stp"  
"Chl\_C14\_00388" 1953 "s59E25H2" 0 "Multidrug resistance protein stp"  
"Chl\_C14\_00388" 1953 "s59E5H2" 0 "Multidrug resistance protein stp"  
"Chl\_C14\_00388" 1953 "s63E6H2" 0 "Multidrug resistance protein stp"

"Chl\_C14\_00390" 1955 "s59E13H2" 0 "hypothetical protein"  
"Chl\_C14\_00390" 1955 "s59E25H2" 0 "hypothetical protein"  
"Chl\_C14\_00390" 1955 "s59E5H2" 0 "hypothetical protein"  
"Chl\_C14\_00390" 1955 "s63E6H2" 0 "hypothetical protein"  
"Chl\_C14\_00391" 1956 "s59E13H2" 0 "hypothetical protein"  
"Chl\_C14\_00391" 1956 "s59E25H2" 0 "hypothetical protein"  
"Chl\_C14\_00391" 1956 "s59E5H2" 0 "hypothetical protein"  
"Chl\_C14\_00391" 1956 "s63E6H2" 0 "hypothetical protein"  
"Chl\_C14\_00392" 1957 "s59E13H2" 0 "1-deoxy-D-xylulose-5-phosphate synthase"  
"Chl\_C14\_00392" 1957 "s59E25H2" 0 "1-deoxy-D-xylulose-5-phosphate synthase"  
"Chl\_C14\_00392" 1957 "s59E5H2" 0 "1-deoxy-D-xylulose-5-phosphate synthase"  
"Chl\_C14\_00392" 1957 "s63E6H2" 0 "1-deoxy-D-xylulose-5-phosphate synthase"  
"Chl\_C14\_00393" 1958 "s59E13H2" 0.006228054 "Transketolase 2"  
"Chl\_C14\_00393" 1958 "s59E25H2" 0 "Transketolase 2"  
"Chl\_C14\_00393" 1958 "s59E5H2" 0.01505641 "Transketolase 2"  
"Chl\_C14\_00393" 1958 "s63E6H2" 0 "Transketolase 2"  
"Chl\_C14\_00394" 1959 "s59E13H2" 0 "hypothetical protein"  
"Chl\_C14\_00394" 1959 "s59E25H2" 0 "hypothetical protein"  
"Chl\_C14\_00394" 1959 "s59E5H2" 0 "hypothetical protein"  
"Chl\_C14\_00394" 1959 "s63E6H2" 0 "hypothetical protein"  
"Chl\_C14\_00395" 1960 "s59E13H2" 0 "Sodium:neurotransmitter symporter family protein"  
"Chl\_C14\_00395" 1960 "s59E25H2" 0 "Sodium:neurotransmitter symporter family protein"  
"Chl\_C14\_00395" 1960 "s59E5H2" 0.001142724 "Sodium:neurotransmitter symporter family protein"  
"Chl\_C14\_00395" 1960 "s63E6H2" 0.0004405282 "Sodium:neurotransmitter symporter family protein"  
"Chl\_C14\_00396" 1961 "s59E13H2" 0 "Amidohydrolase"  
"Chl\_C14\_00396" 1961 "s59E25H2" 0 "Amidohydrolase"  
"Chl\_C14\_00396" 1961 "s59E5H2" 0 "Amidohydrolase"  
"Chl\_C14\_00396" 1961 "s63E6H2" 0 "Amidohydrolase"  
"Chl\_C14\_00397" 1962 "s59E13H2" 0 "hypothetical protein"  
"Chl\_C14\_00397" 1962 "s59E25H2" 0 "hypothetical protein"  
"Chl\_C14\_00397" 1962 "s59E5H2" 0 "hypothetical protein"  
"Chl\_C14\_00397" 1962 "s63E6H2" 0 "hypothetical protein"  
"Chl\_C14\_00398" 1963 "s59E13H2" 0 "D-2-hydroxyacid dehydrogenase"  
"Chl\_C14\_00398" 1963 "s59E25H2" 0 "D-2-hydroxyacid dehydrogenase"  
"Chl\_C14\_00398" 1963 "s59E5H2" 0 "D-2-hydroxyacid dehydrogenase"  
"Chl\_C14\_00398" 1963 "s63E6H2" 0 "D-2-hydroxyacid dehydrogenase"  
"Chl\_C14\_00399" 1964 "s59E13H2" 0 "Glutamate-1-semialdehyde 2,1-aminomutase"  
"Chl\_C14\_00399" 1964 "s59E25H2" 0 "Glutamate-1-semialdehyde 2,1-aminomutase"  
"Chl\_C14\_00399" 1964 "s59E5H2" 0 "Glutamate-1-semialdehyde 2,1-aminomutase"  
"Chl\_C14\_00399" 1964 "s63E6H2" 0 "Glutamate-1-semialdehyde 2,1-aminomutase"  
"Chl\_C14\_00400" 1965 "s59E13H2" 0 "putative amino-acid racemase"  
"Chl\_C14\_00400" 1965 "s59E25H2" 0 "putative amino-acid racemase"  
"Chl\_C14\_00400" 1965 "s59E5H2" 0 "putative amino-acid racemase"  
"Chl\_C14\_00400" 1965 "s63E6H2" 0 "putative amino-acid racemase"  
"Chl\_C14\_00401" 1966 "s59E13H2" 0 "3-keto-5-aminohexanoate cleavage enzyme"  
"Chl\_C14\_00401" 1966 "s59E25H2" 0 "3-keto-5-aminohexanoate cleavage enzyme"  
"Chl\_C14\_00401" 1966 "s59E5H2" 0 "3-keto-5-aminohexanoate cleavage enzyme"



"Chl\_C14\_00401" 1966 "s63E6H2" 0 "3-keto-5-aminohexanoate cleavage enzyme"  
"Chl\_C14\_00402" 1967 "s59E13H2" 0 "3-chloro-4-hydroxyphenylacetate reductive dehalogenase precursor"  
"Chl\_C14\_00402" 1967 "s59E25H2" 0 "3-chloro-4-hydroxyphenylacetate reductive dehalogenase precursor"  
"Chl\_C14\_00402" 1967 "s59E5H2" 0 "3-chloro-4-hydroxyphenylacetate reductive dehalogenase precursor"  
"Chl\_C14\_00402" 1967 "s63E6H2" 0 "3-chloro-4-hydroxyphenylacetate reductive dehalogenase precursor"  
"Chl\_C14\_00403" 1968 "s59E13H2" 0 "Methylthioribose-1-phosphate isomerase"  
"Chl\_C14\_00403" 1968 "s59E25H2" 0 "Methylthioribose-1-phosphate isomerase"  
"Chl\_C14\_00403" 1968 "s59E5H2" 0.003895127 "Methylthioribose-1-phosphate isomerase"  
"Chl\_C14\_00403" 1968 "s63E6H2" 0.0005369173 "Methylthioribose-1-phosphate isomerase"  
"Chl\_C14\_00404" 1969 "s59E13H2" 0 "Lactoylglutathione lyase"  
"Chl\_C14\_00404" 1969 "s59E25H2" 0 "Lactoylglutathione lyase"  
"Chl\_C14\_00404" 1969 "s59E5H2" 0 "Lactoylglutathione lyase"  
"Chl\_C14\_00404" 1969 "s63E6H2" 0 "Lactoylglutathione lyase"  
"Chl\_C14\_00405" 1970 "s59E13H2" 0 "Molybdopterin adenyltransferase"  
"Chl\_C14\_00405" 1970 "s59E25H2" 0 "Molybdopterin adenyltransferase"  
"Chl\_C14\_00405" 1970 "s59E5H2" 0 "Molybdopterin adenyltransferase"  
"Chl\_C14\_00405" 1970 "s63E6H2" 0 "Molybdopterin adenyltransferase"  
"Chl\_C14\_00406" 1971 "s59E13H2" 0 "tRNA (guanine-N(1)-)-methyltransferase"  
"Chl\_C14\_00406" 1971 "s59E25H2" 0 "tRNA (guanine-N(1)-)-methyltransferase"  
"Chl\_C14\_00406" 1971 "s59E5H2" 0 "tRNA (guanine-N(1)-)-methyltransferase"  
"Chl\_C14\_00406" 1971 "s63E6H2" 0 "tRNA (guanine-N(1)-)-methyltransferase"  
"Chl\_C14\_00407" 1972 "s59E13H2" 0 "50S ribosomal protein L19"  
"Chl\_C14\_00407" 1972 "s59E25H2" 0 "50S ribosomal protein L19"  
"Chl\_C14\_00407" 1972 "s59E5H2" 0 "50S ribosomal protein L19"  
"Chl\_C14\_00407" 1972 "s63E6H2" 0 "50S ribosomal protein L19"  
"Chl\_C14\_00408" 1973 "s59E13H2" 0.0006750514 "Primosomal protein N"  
"Chl\_C14\_00408" 1973 "s59E25H2" 0 "Primosomal protein N"  
"Chl\_C14\_00408" 1973 "s59E5H2" 0 "Primosomal protein N"  
"Chl\_C14\_00408" 1973 "s63E6H2" 0 "Primosomal protein N"  
"Chl\_C14\_00409" 1974 "s59E13H2" 0 "Alpha-keto acid-binding periplasmic protein TakP precursor"  
"Chl\_C14\_00409" 1974 "s59E25H2" 0 "Alpha-keto acid-binding periplasmic protein TakP precursor"  
"Chl\_C14\_00409" 1974 "s59E5H2" 0 "Alpha-keto acid-binding periplasmic protein TakP precursor"  
"Chl\_C14\_00409" 1974 "s63E6H2" 0 "Alpha-keto acid-binding periplasmic protein TakP precursor"  
"Chl\_C14\_00410" 1975 "s59E13H2" 0 "Tripartite ATP-independent periplasmic transporters, DctQ component"  
"Chl\_C14\_00410" 1975 "s59E25H2" 0 "Tripartite ATP-independent periplasmic transporters, DctQ component"  
"Chl\_C14\_00410" 1975 "s59E5H2" 0 "Tripartite ATP-independent periplasmic transporters, DctQ component"  
"Chl\_C14\_00410" 1975 "s63E6H2" 0 "Tripartite ATP-independent periplasmic transporters, DctQ component"  
"Chl\_C14\_00411" 1976 "s59E13H2" 0 "Sialic acid TRAP transporter permease protein SiaT"  
"Chl\_C14\_00411" 1976 "s59E25H2" 0 "Sialic acid TRAP transporter permease protein SiaT"  
"Chl\_C14\_00411" 1976 "s59E5H2" 0 "Sialic acid TRAP transporter permease protein SiaT"  
"Chl\_C14\_00411" 1976 "s63E6H2" 0 "Sialic acid TRAP transporter permease protein SiaT"  
"Chl\_C14\_00413" 1978 "s59E13H2" 0 "SsrA-binding protein"  
"Chl\_C14\_00413" 1978 "s59E25H2" 0 "SsrA-binding protein"  
"Chl\_C14\_00413" 1978 "s59E5H2" 0.008750849 "SsrA-binding protein"  
"Chl\_C14\_00413" 1978 "s63E6H2" 0 "SsrA-binding protein"  
"Chl\_C14\_00414" 1979 "s59E13H2" 0 "Tetracycline resistance protein, class B"  
"Chl\_C14\_00414" 1979 "s59E25H2" 0 "Tetracycline resistance protein, class B"

"Chl\_C14\_00414" 1979 "s59E5H2" 0 "Tetracycline resistance protein, class B"  
"Chl\_C14\_00414" 1979 "s63E6H2" 0 "Tetracycline resistance protein, class B"  
"Chl\_C14\_00415" 1980 "s59E13H2" 0 "Threonine--tRNA ligase 1"  
"Chl\_C14\_00415" 1980 "s59E25H2" 0 "Threonine--tRNA ligase 1"  
"Chl\_C14\_00415" 1980 "s59E5H2" 0 "Threonine--tRNA ligase 1"  
"Chl\_C14\_00415" 1980 "s63E6H2" 0 "Threonine--tRNA ligase 1"  
"Chl\_C14\_00416" 1981 "s59E13H2" 0 "Translation initiation factor IF-3"  
"Chl\_C14\_00416" 1981 "s59E25H2" 0 "Translation initiation factor IF-3"  
"Chl\_C14\_00416" 1981 "s59E5H2" 0 "Translation initiation factor IF-3"  
"Chl\_C14\_00416" 1981 "s63E6H2" 0 "Translation initiation factor IF-3"  
"Chl\_C14\_00417" 1982 "s59E13H2" 0 "50S ribosomal protein L35"  
"Chl\_C14\_00417" 1982 "s59E25H2" 0 "50S ribosomal protein L35"  
"Chl\_C14\_00417" 1982 "s59E5H2" 0 "50S ribosomal protein L35"  
"Chl\_C14\_00417" 1982 "s63E6H2" 0 "50S ribosomal protein L35"  
"Chl\_C14\_00418" 1983 "s59E13H2" 0 "50S ribosomal protein L20"  
"Chl\_C14\_00418" 1983 "s59E25H2" 0 "50S ribosomal protein L20"  
"Chl\_C14\_00418" 1983 "s59E5H2" 0 "50S ribosomal protein L20"  
"Chl\_C14\_00418" 1983 "s63E6H2" 0 "50S ribosomal protein L20"  
"Chl\_C14\_00419" 1984 "s59E13H2" 0 "Major Facilitator Superfamily protein"  
"Chl\_C14\_00419" 1984 "s59E25H2" 0 "Major Facilitator Superfamily protein"  
"Chl\_C14\_00419" 1984 "s59E5H2" 0 "Major Facilitator Superfamily protein"  
"Chl\_C14\_00419" 1984 "s63E6H2" 0 "Major Facilitator Superfamily protein"  
"Chl\_C14\_00420" 1985 "s59E13H2" 0 "Phenylalanine--tRNA ligase alpha subunit"  
"Chl\_C14\_00420" 1985 "s59E25H2" 0 "Phenylalanine--tRNA ligase alpha subunit"  
"Chl\_C14\_00420" 1985 "s59E5H2" 0 "Phenylalanine--tRNA ligase alpha subunit"  
"Chl\_C14\_00420" 1985 "s63E6H2" 0 "Phenylalanine--tRNA ligase alpha subunit"  
"Chl\_C14\_00421" 1986 "s59E13H2" 0 "Phenylalanine--tRNA ligase beta subunit"  
"Chl\_C14\_00421" 1986 "s59E25H2" 0 "Phenylalanine--tRNA ligase beta subunit"  
"Chl\_C14\_00421" 1986 "s59E5H2" 0 "Phenylalanine--tRNA ligase beta subunit"  
"Chl\_C14\_00421" 1986 "s63E6H2" 0 "Phenylalanine--tRNA ligase beta subunit"  
"Chl\_C14\_00422" 1987 "s59E13H2" 0 "Proline--tRNA ligase"  
"Chl\_C14\_00422" 1987 "s59E25H2" 0 "Proline--tRNA ligase"  
"Chl\_C14\_00422" 1987 "s59E5H2" 0 "Proline--tRNA ligase"  
"Chl\_C14\_00422" 1987 "s63E6H2" 0 "Proline--tRNA ligase"  
"Chl\_C14\_00423" 1988 "s59E13H2" 0 "50S ribosomal protein L15"  
"Chl\_C14\_00423" 1988 "s59E25H2" 0 "50S ribosomal protein L15"  
"Chl\_C14\_00423" 1988 "s59E5H2" 0 "50S ribosomal protein L15"  
"Chl\_C14\_00423" 1988 "s63E6H2" 0 "50S ribosomal protein L15"  
"Chl\_C14\_00424" 1989 "s59E13H2" 0 "preprotein translocase subunit SecY"  
"Chl\_C14\_00424" 1989 "s59E25H2" 0 "preprotein translocase subunit SecY"  
"Chl\_C14\_00424" 1989 "s59E5H2" 0 "preprotein translocase subunit SecY"  
"Chl\_C14\_00424" 1989 "s63E6H2" 0 "preprotein translocase subunit SecY"  
"Chl\_C14\_00425" 1990 "s59E13H2" 0 "Adenylate kinase"  
"Chl\_C14\_00425" 1990 "s59E25H2" 0 "Adenylate kinase"  
"Chl\_C14\_00425" 1990 "s59E5H2" 0 "Adenylate kinase"  
"Chl\_C14\_00425" 1990 "s63E6H2" 0.0007542317 "Adenylate kinase"  
"Chl\_C14\_00426" 1991 "s59E13H2" 0 "Methionine aminopeptidase 1"

"Chl\_C14\_00426" 1991 "s59E25H2" 0 "Methionine aminopeptidase 1"  
"Chl\_C14\_00426" 1991 "s59E5H2" 0.001923792 "Methionine aminopeptidase 1"  
"Chl\_C14\_00426" 1991 "s63E6H2" 0.00231013 "Methionine aminopeptidase 1"  
"Chl\_C14\_00427" 1992 "s59E13H2" 0 "Translation initiation factor IF-1"  
"Chl\_C14\_00427" 1992 "s59E25H2" 0 "Translation initiation factor IF-1"  
"Chl\_C14\_00427" 1992 "s59E5H2" 0 "Translation initiation factor IF-1"  
"Chl\_C14\_00427" 1992 "s63E6H2" 0 "Translation initiation factor IF-1"  
"Chl\_C14\_00428" 1993 "s59E13H2" 0 "30S ribosomal protein S13"  
"Chl\_C14\_00428" 1993 "s59E25H2" 0 "30S ribosomal protein S13"  
"Chl\_C14\_00428" 1993 "s59E5H2" 0 "30S ribosomal protein S13"  
"Chl\_C14\_00428" 1993 "s63E6H2" 0 "30S ribosomal protein S13"  
"Chl\_C14\_00429" 1994 "s59E13H2" 0 "30S ribosomal protein S11"  
"Chl\_C14\_00429" 1994 "s59E25H2" 0 "30S ribosomal protein S11"  
"Chl\_C14\_00429" 1994 "s59E5H2" 0 "30S ribosomal protein S11"  
"Chl\_C14\_00429" 1994 "s63E6H2" 0.009358703 "30S ribosomal protein S11"  
"Chl\_C14\_00430" 1995 "s59E13H2" 0 "30S ribosomal protein S4"  
"Chl\_C14\_00430" 1995 "s59E25H2" 0 "30S ribosomal protein S4"  
"Chl\_C14\_00430" 1995 "s59E5H2" 0 "30S ribosomal protein S4"  
"Chl\_C14\_00430" 1995 "s63E6H2" 0 "30S ribosomal protein S4"  
"Chl\_C14\_00431" 1996 "s59E13H2" 0 "DNA-directed RNA polymerase subunit alpha"  
"Chl\_C14\_00431" 1996 "s59E25H2" 0 "DNA-directed RNA polymerase subunit alpha"  
"Chl\_C14\_00431" 1996 "s59E5H2" 0 "DNA-directed RNA polymerase subunit alpha"  
"Chl\_C14\_00431" 1996 "s63E6H2" 0 "DNA-directed RNA polymerase subunit alpha"  
"Chl\_C14\_00432" 1997 "s59E13H2" 0 "50S ribosomal protein L17"  
"Chl\_C14\_00432" 1997 "s59E25H2" 0 "50S ribosomal protein L17"  
"Chl\_C14\_00432" 1997 "s59E5H2" 0 "50S ribosomal protein L17"  
"Chl\_C14\_00432" 1997 "s63E6H2" 0 "50S ribosomal protein L17"  
"Chl\_C14\_00433" 1998 "s59E13H2" 0 "tRNA pseudouridine synthase A"  
"Chl\_C14\_00433" 1998 "s59E25H2" 0 "tRNA pseudouridine synthase A"  
"Chl\_C14\_00433" 1998 "s59E5H2" 0 "tRNA pseudouridine synthase A"  
"Chl\_C14\_00433" 1998 "s63E6H2" 0 "tRNA pseudouridine synthase A"  
"Chl\_C14\_00434" 1999 "s59E13H2" 0 "50S ribosomal protein L13"  
"Chl\_C14\_00434" 1999 "s59E25H2" 0 "50S ribosomal protein L13"  
"Chl\_C14\_00434" 1999 "s59E5H2" 0 "50S ribosomal protein L13"  
"Chl\_C14\_00434" 1999 "s63E6H2" 0 "50S ribosomal protein L13"  
"Chl\_C14\_00435" 2000 "s59E13H2" 0 "30S ribosomal protein S9"  
"Chl\_C14\_00435" 2000 "s59E25H2" 0 "30S ribosomal protein S9"  
"Chl\_C14\_00435" 2000 "s59E5H2" 0 "30S ribosomal protein S9"  
"Chl\_C14\_00435" 2000 "s63E6H2" 0 "30S ribosomal protein S9"  
"Chl\_C14\_00437" 2002 "s59E13H2" 0 "AIG2-like family protein"  
"Chl\_C14\_00437" 2002 "s59E25H2" 0 "AIG2-like family protein"  
"Chl\_C14\_00437" 2002 "s59E5H2" 0 "AIG2-like family protein"  
"Chl\_C14\_00437" 2002 "s63E6H2" 0 "AIG2-like family protein"  
"Chl\_C14\_00438" 2003 "s59E13H2" 0 "Bifunctional phosphoglucose/phosphomannose isomerase"  
"Chl\_C14\_00438" 2003 "s59E25H2" 0 "Bifunctional phosphoglucose/phosphomannose isomerase"  
"Chl\_C14\_00438" 2003 "s59E5H2" 0 "Bifunctional phosphoglucose/phosphomannose isomerase"  
"Chl\_C14\_00438" 2003 "s63E6H2" 0 "Bifunctional phosphoglucose/phosphomannose isomerase"

"Chl\_C14\_00439" 2004 "s59E13H2" 0.0004369737 "Phosphoglucosamine mutase"  
"Chl\_C14\_00439" 2004 "s59E25H2" 0 "Phosphoglucosamine mutase"  
"Chl\_C14\_00439" 2004 "s59E5H2" 0 "Phosphoglucosamine mutase"  
"Chl\_C14\_00439" 2004 "s63E6H2" 0 "Phosphoglucosamine mutase"  
"Chl\_C14\_00440" 2005 "s59E13H2" 0 "S-adenosylmethionine synthase"  
"Chl\_C14\_00440" 2005 "s59E25H2" 0 "S-adenosylmethionine synthase"  
"Chl\_C14\_00440" 2005 "s59E5H2" 0.008859745 "S-adenosylmethionine synthase"  
"Chl\_C14\_00440" 2005 "s63E6H2" 0 "S-adenosylmethionine synthase"  
"Chl\_C14\_00441" 2006 "s59E13H2" 0 "Adenosylhomocysteinase"  
"Chl\_C14\_00441" 2006 "s59E25H2" 0 "Adenosylhomocysteinase"  
"Chl\_C14\_00441" 2006 "s59E5H2" 0 "Adenosylhomocysteinase"  
"Chl\_C14\_00441" 2006 "s63E6H2" 0 "Adenosylhomocysteinase"  
"Chl\_C14\_00442" 2007 "s59E13H2" 0 "Chromatin associated protein KTI12"  
"Chl\_C14\_00442" 2007 "s59E25H2" 0 "Chromatin associated protein KTI12"  
"Chl\_C14\_00442" 2007 "s59E5H2" 0 "Chromatin associated protein KTI12"  
"Chl\_C14\_00442" 2007 "s63E6H2" 0 "Chromatin associated protein KTI12"  
"Chl\_C14\_00443" 2008 "s59E13H2" 0.007142141 "GIY-YIG nuclease superfamily protein"  
"Chl\_C14\_00443" 2008 "s59E25H2" 0 "GIY-YIG nuclease superfamily protein"  
"Chl\_C14\_00443" 2008 "s59E5H2" 0.01043514 "GIY-YIG nuclease superfamily protein"  
"Chl\_C14\_00443" 2008 "s63E6H2" 0 "GIY-YIG nuclease superfamily protein"  
"Chl\_C14\_00445" 2010 "s59E13H2" 0 "Acetylene hydratase"  
"Chl\_C14\_00445" 2010 "s59E25H2" 0 "Acetylene hydratase"  
"Chl\_C14\_00445" 2010 "s59E5H2" 0 "Acetylene hydratase"  
"Chl\_C14\_00445" 2010 "s63E6H2" 0 "Acetylene hydratase"  
"Chl\_C14\_00446" 2011 "s59E13H2" 0 "Coenzyme F420 hydrogenase subunit beta"  
"Chl\_C14\_00446" 2011 "s59E25H2" 0 "Coenzyme F420 hydrogenase subunit beta"  
"Chl\_C14\_00446" 2011 "s59E5H2" 0 "Coenzyme F420 hydrogenase subunit beta"  
"Chl\_C14\_00446" 2011 "s63E6H2" 0 "Coenzyme F420 hydrogenase subunit beta"  
"Chl\_C14\_00448" 2013 "s59E13H2" 0 "hypothetical protein"  
"Chl\_C14\_00448" 2013 "s59E25H2" 0 "hypothetical protein"  
"Chl\_C14\_00448" 2013 "s59E5H2" 0 "hypothetical protein"  
"Chl\_C14\_00448" 2013 "s63E6H2" 0 "hypothetical protein"  
"Chl\_C14\_00449" 2014 "s59E13H2" 0 "hypothetical protein"  
"Chl\_C14\_00449" 2014 "s59E25H2" 0 "hypothetical protein"  
"Chl\_C14\_00449" 2014 "s59E5H2" 0 "hypothetical protein"  
"Chl\_C14\_00449" 2014 "s63E6H2" 0 "hypothetical protein"  
"Chl\_C14\_00451" 2016 "s59E13H2" 0 "Ribonuclease Y"  
"Chl\_C14\_00451" 2016 "s59E25H2" 0 "Ribonuclease Y"  
"Chl\_C14\_00451" 2016 "s59E5H2" 0 "Ribonuclease Y"  
"Chl\_C14\_00451" 2016 "s63E6H2" 0 "Ribonuclease Y"  
"Chl\_C14\_00452" 2017 "s59E13H2" 0 "Regulatory protein RecX"  
"Chl\_C14\_00452" 2017 "s59E25H2" 0 "Regulatory protein RecX"  
"Chl\_C14\_00452" 2017 "s59E5H2" 0 "Regulatory protein RecX"  
"Chl\_C14\_00452" 2017 "s63E6H2" 0 "Regulatory protein RecX"  
"Chl\_C14\_00453" 2018 "s59E13H2" 0 "DNA repair and recombination protein RadA"  
"Chl\_C14\_00453" 2018 "s59E25H2" 0 "DNA repair and recombination protein RadA"  
"Chl\_C14\_00453" 2018 "s59E5H2" 0 "DNA repair and recombination protein RadA"

"Chl\_C14\_00453" 2018 "s63E6H2" 0.001077413 "DNA repair and recombination protein RadA"  
"Chl\_C14\_00454" 2019 "s59E13H2" 0 "Methylmalonyl-CoA carboxyltransferase 12S subunit"  
"Chl\_C14\_00454" 2019 "s59E25H2" 0 "Methylmalonyl-CoA carboxyltransferase 12S subunit"  
"Chl\_C14\_00454" 2019 "s59E5H2" 0 "Methylmalonyl-CoA carboxyltransferase 12S subunit"  
"Chl\_C14\_00454" 2019 "s63E6H2" 0 "Methylmalonyl-CoA carboxyltransferase 12S subunit"  
"Chl\_C14\_00455" 2020 "s59E13H2" 0 "Glyoxalase/Bleomycin resistance protein/Dioxygenase superfamily protein"  
"Chl\_C14\_00455" 2020 "s59E25H2" 0 "Glyoxalase/Bleomycin resistance protein/Dioxygenase superfamily protein"  
"Chl\_C14\_00455" 2020 "s59E5H2" 0 "Glyoxalase/Bleomycin resistance protein/Dioxygenase superfamily protein"  
"Chl\_C14\_00455" 2020 "s63E6H2" 0 "Glyoxalase/Bleomycin resistance protein/Dioxygenase superfamily protein"  
"Chl\_C14\_00456" 2021 "s59E13H2" 0 "Methylmalonyl-CoA mutase"  
"Chl\_C14\_00456" 2021 "s59E25H2" 0 "Methylmalonyl-CoA mutase"  
"Chl\_C14\_00456" 2021 "s59E5H2" 0 "Methylmalonyl-CoA mutase"  
"Chl\_C14\_00456" 2021 "s63E6H2" 0 "Methylmalonyl-CoA mutase"  
"Chl\_C14\_00457" 2022 "s59E13H2" 0 "Methylmalonyl-CoA mutase"  
"Chl\_C14\_00457" 2022 "s59E25H2" 0 "Methylmalonyl-CoA mutase"  
"Chl\_C14\_00457" 2022 "s59E5H2" 0 "Methylmalonyl-CoA mutase"  
"Chl\_C14\_00457" 2022 "s63E6H2" 0 "Methylmalonyl-CoA mutase"  
"Chl\_C14\_00458" 2023 "s59E13H2" 0 "Methylmalonyl-CoA mutase"  
"Chl\_C14\_00458" 2023 "s59E25H2" 0 "Methylmalonyl-CoA mutase"  
"Chl\_C14\_00458" 2023 "s59E5H2" 0 "Methylmalonyl-CoA mutase"  
"Chl\_C14\_00458" 2023 "s63E6H2" 0 "Methylmalonyl-CoA mutase"  
"Chl\_C14\_00459" 2024 "s59E13H2" 0 "3-hydroxybutyryl-CoA dehydrogenase"  
"Chl\_C14\_00459" 2024 "s59E25H2" 0 "3-hydroxybutyryl-CoA dehydrogenase"  
"Chl\_C14\_00459" 2024 "s59E5H2" 0 "3-hydroxybutyryl-CoA dehydrogenase"  
"Chl\_C14\_00459" 2024 "s63E6H2" 0 "3-hydroxybutyryl-CoA dehydrogenase"  
"Chl\_C14\_00460" 2025 "s59E13H2" 0 "3-hydroxypropionyl-coenzyme A dehydratase"  
"Chl\_C14\_00460" 2025 "s59E25H2" 0 "3-hydroxypropionyl-coenzyme A dehydratase"  
"Chl\_C14\_00460" 2025 "s59E5H2" 0 "3-hydroxypropionyl-coenzyme A dehydratase"  
"Chl\_C14\_00460" 2025 "s63E6H2" 0 "3-hydroxypropionyl-coenzyme A dehydratase"  
"Chl\_C14\_00461" 2026 "s59E13H2" 0 "Carnitiny-CoA dehydratase"  
"Chl\_C14\_00461" 2026 "s59E25H2" 0 "Carnitiny-CoA dehydratase"  
"Chl\_C14\_00461" 2026 "s59E5H2" 0 "Carnitiny-CoA dehydratase"  
"Chl\_C14\_00461" 2026 "s63E6H2" 0 "Carnitiny-CoA dehydratase"  
"Chl\_C14\_00462" 2027 "s59E13H2" 0 "hypothetical protein"  
"Chl\_C14\_00462" 2027 "s59E25H2" 0 "hypothetical protein"  
"Chl\_C14\_00462" 2027 "s59E5H2" 0 "hypothetical protein"  
"Chl\_C14\_00462" 2027 "s63E6H2" 0 "hypothetical protein"  
"Chl\_C14\_00463" 2028 "s59E13H2" 0 "3-oxoacyl-[acyl-carrier-protein] synthase 3"  
"Chl\_C14\_00463" 2028 "s59E25H2" 0 "3-oxoacyl-[acyl-carrier-protein] synthase 3"  
"Chl\_C14\_00463" 2028 "s59E5H2" 0 "3-oxoacyl-[acyl-carrier-protein] synthase 3"  
"Chl\_C14\_00463" 2028 "s63E6H2" 0 "3-oxoacyl-[acyl-carrier-protein] synthase 3"  
"Chl\_C14\_00464" 2029 "s59E13H2" 0 "putative acetyl-CoA acyltransferase"  
"Chl\_C14\_00464" 2029 "s59E25H2" 0 "putative acetyl-CoA acyltransferase"  
"Chl\_C14\_00464" 2029 "s59E5H2" 0 "putative acetyl-CoA acyltransferase"  
"Chl\_C14\_00464" 2029 "s63E6H2" 0 "putative acetyl-CoA acyltransferase"  
"Chl\_C14\_00465" 2030 "s59E13H2" 0 "Tetratricopeptide repeat protein"  
"Chl\_C14\_00465" 2030 "s59E25H2" 0 "Tetratricopeptide repeat protein"

"Chl\_C14\_00465" 2030 "s59E5H2" 0 "Tetratricopeptide repeat protein"  
"Chl\_C14\_00465" 2030 "s63E6H2" 0 "Tetratricopeptide repeat protein"  
"Chl\_C14\_00466" 2031 "s59E13H2" 0 "Thiol:disulfide interchange protein DsbD precursor"  
"Chl\_C14\_00466" 2031 "s59E25H2" 0 "Thiol:disulfide interchange protein DsbD precursor"  
"Chl\_C14\_00466" 2031 "s59E5H2" 0 "Thiol:disulfide interchange protein DsbD precursor"  
"Chl\_C14\_00466" 2031 "s63E6H2" 0 "Thiol:disulfide interchange protein DsbD precursor"  
"Chl\_C14\_00467" 2032 "s59E13H2" 0 "Thiol-disulfide oxidoreductase ResA"  
"Chl\_C14\_00467" 2032 "s59E25H2" 0 "Thiol-disulfide oxidoreductase ResA"  
"Chl\_C14\_00467" 2032 "s59E5H2" 0 "Thiol-disulfide oxidoreductase ResA"  
"Chl\_C14\_00467" 2032 "s63E6H2" 0 "Thiol-disulfide oxidoreductase ResA"  
"Chl\_C14\_00471" 2036 "s59E13H2" 0 "Zinc ribbon domain protein"  
"Chl\_C14\_00471" 2036 "s59E25H2" 0 "Zinc ribbon domain protein"  
"Chl\_C14\_00471" 2036 "s59E5H2" 0 "Zinc ribbon domain protein"  
"Chl\_C14\_00471" 2036 "s63E6H2" 0.002786341 "Zinc ribbon domain protein"  
"Chl\_C14\_00472" 2037 "s59E13H2" 0 "DNA gyrase subunit B"  
"Chl\_C14\_00472" 2037 "s59E25H2" 0 "DNA gyrase subunit B"  
"Chl\_C14\_00472" 2037 "s59E5H2" 0 "DNA gyrase subunit B"  
"Chl\_C14\_00472" 2037 "s63E6H2" 0 "DNA gyrase subunit B"  
"Chl\_C14\_00473" 2038 "s59E13H2" 0 "Radical SAM superfamily protein"  
"Chl\_C14\_00473" 2038 "s59E25H2" 0 "Radical SAM superfamily protein"  
"Chl\_C14\_00473" 2038 "s59E5H2" 0.002849901 "Radical SAM superfamily protein"  
"Chl\_C14\_00473" 2038 "s63E6H2" 0 "Radical SAM superfamily protein"  
"Chl\_C14\_00474" 2039 "s59E13H2" 0 "hypothetical protein"  
"Chl\_C14\_00474" 2039 "s59E25H2" 0 "hypothetical protein"  
"Chl\_C14\_00474" 2039 "s59E5H2" 0 "hypothetical protein"  
"Chl\_C14\_00474" 2039 "s63E6H2" 0.000474073 "hypothetical protein"  
"Chl\_C14\_00475" 2040 "s59E13H2" 0 "Nitroreductase family protein"  
"Chl\_C14\_00475" 2040 "s59E25H2" 0 "Nitroreductase family protein"  
"Chl\_C14\_00475" 2040 "s59E5H2" 0 "Nitroreductase family protein"  
"Chl\_C14\_00475" 2040 "s63E6H2" 0 "Nitroreductase family protein"  
"Chl\_C14\_00477" 2042 "s59E13H2" 0 "Replication-associated recombination protein A"  
"Chl\_C14\_00477" 2042 "s59E25H2" 0 "Replication-associated recombination protein A"  
"Chl\_C14\_00477" 2042 "s59E5H2" 0 "Replication-associated recombination protein A"  
"Chl\_C14\_00477" 2042 "s63E6H2" 0 "Replication-associated recombination protein A"  
"Chl\_C14\_00478" 2043 "s59E13H2" 0 "Folypolyglutamate synthase"  
"Chl\_C14\_00478" 2043 "s59E25H2" 0 "Folypolyglutamate synthase"  
"Chl\_C14\_00478" 2043 "s59E5H2" 0 "Folypolyglutamate synthase"  
"Chl\_C14\_00478" 2043 "s63E6H2" 0 "Folypolyglutamate synthase"  
"Chl\_C14\_00479" 2044 "s59E13H2" 0 "hypothetical protein"  
"Chl\_C14\_00479" 2044 "s59E25H2" 0 "hypothetical protein"  
"Chl\_C14\_00479" 2044 "s59E5H2" 0 "hypothetical protein"  
"Chl\_C14\_00479" 2044 "s63E6H2" 0.0006055997 "hypothetical protein"  
"Chl\_C14\_00480" 2045 "s59E13H2" 0 "Thiosulfate sulfurtransferase PspE precursor"  
"Chl\_C14\_00480" 2045 "s59E25H2" 0 "Thiosulfate sulfurtransferase PspE precursor"  
"Chl\_C14\_00480" 2045 "s59E5H2" 0 "Thiosulfate sulfurtransferase PspE precursor"  
"Chl\_C14\_00480" 2045 "s63E6H2" 0 "Thiosulfate sulfurtransferase PspE precursor"  
"Chl\_C14\_00481" 2046 "s59E13H2" 0 "DNA polymerase I"

"Chl\_C14\_00481" 2046 "s59E25H2" 0 "DNA polymerase I"  
"Chl\_C14\_00481" 2046 "s59E5H2" 0 "DNA polymerase I"  
"Chl\_C14\_00481" 2046 "s63E6H2" 0 "DNA polymerase I"  
"Chl\_C14\_00482" 2047 "s59E13H2" 0 "Formamidopyrimidine-DNA glycosylase"  
"Chl\_C14\_00482" 2047 "s59E25H2" 0 "Formamidopyrimidine-DNA glycosylase"  
"Chl\_C14\_00482" 2047 "s59E5H2" 0 "Formamidopyrimidine-DNA glycosylase"  
"Chl\_C14\_00482" 2047 "s63E6H2" 0 "Formamidopyrimidine-DNA glycosylase"  
"Chl\_C14\_00483" 2048 "s59E13H2" 0 "hypothetical protein"  
"Chl\_C14\_00483" 2048 "s59E25H2" 0 "hypothetical protein"  
"Chl\_C14\_00483" 2048 "s59E5H2" 0 "hypothetical protein"  
"Chl\_C14\_00483" 2048 "s63E6H2" 0 "hypothetical protein"  
"Chl\_C14\_00484" 2049 "s59E13H2" 0 "Succinyl-CoA:(R)-benzylsuccinate CoA-transferase subunit BbsF"  
"Chl\_C14\_00484" 2049 "s59E25H2" 0 "Succinyl-CoA:(R)-benzylsuccinate CoA-transferase subunit BbsF"  
"Chl\_C14\_00484" 2049 "s59E5H2" 0 "Succinyl-CoA:(R)-benzylsuccinate CoA-transferase subunit BbsF"  
"Chl\_C14\_00484" 2049 "s63E6H2" 0 "Succinyl-CoA:(R)-benzylsuccinate CoA-transferase subunit BbsF"  
"Chl\_C14\_00486" 2051 "s59E13H2" 0 "hypothetical protein"  
"Chl\_C14\_00486" 2051 "s59E25H2" 0 "hypothetical protein"  
"Chl\_C14\_00486" 2051 "s59E5H2" 0 "hypothetical protein"  
"Chl\_C14\_00486" 2051 "s63E6H2" 0 "hypothetical protein"  
"Chl\_C14\_00487" 2052 "s59E13H2" 0 "Succinyl-CoA:(R)-benzylsuccinate CoA-transferase subunit BbsE"  
"Chl\_C14\_00487" 2052 "s59E25H2" 0 "Succinyl-CoA:(R)-benzylsuccinate CoA-transferase subunit BbsE"  
"Chl\_C14\_00487" 2052 "s59E5H2" 0 "Succinyl-CoA:(R)-benzylsuccinate CoA-transferase subunit BbsE"  
"Chl\_C14\_00487" 2052 "s63E6H2" 0 "Succinyl-CoA:(R)-benzylsuccinate CoA-transferase subunit BbsE"  
"Chl\_C14\_00488" 2053 "s59E13H2" 0 "Glutamate--tRNA ligase"  
"Chl\_C14\_00488" 2053 "s59E25H2" 0 "Glutamate--tRNA ligase"  
"Chl\_C14\_00488" 2053 "s59E5H2" 0 "Glutamate--tRNA ligase"  
"Chl\_C14\_00488" 2053 "s63E6H2" 0 "Glutamate--tRNA ligase"  
"Chl\_C14\_00489" 2054 "s59E13H2" 0 "Ribosomal large subunit pseudouridine synthase D"  
"Chl\_C14\_00489" 2054 "s59E25H2" 0 "Ribosomal large subunit pseudouridine synthase D"  
"Chl\_C14\_00489" 2054 "s59E5H2" 0 "Ribosomal large subunit pseudouridine synthase D"  
"Chl\_C14\_00489" 2054 "s63E6H2" 0 "Ribosomal large subunit pseudouridine synthase D"  
"Chl\_C14\_00490" 2055 "s59E13H2" 0 "Lipoprotein signal peptidase"  
"Chl\_C14\_00490" 2055 "s59E25H2" 0 "Lipoprotein signal peptidase"  
"Chl\_C14\_00490" 2055 "s59E5H2" 0 "Lipoprotein signal peptidase"  
"Chl\_C14\_00490" 2055 "s63E6H2" 0 "Lipoprotein signal peptidase"  
"Chl\_C14\_00491" 2056 "s59E13H2" 0 "RNA polymerase-binding transcription factor DksA"  
"Chl\_C14\_00491" 2056 "s59E25H2" 0 "RNA polymerase-binding transcription factor DksA"  
"Chl\_C14\_00491" 2056 "s59E5H2" 0 "RNA polymerase-binding transcription factor DksA"  
"Chl\_C14\_00491" 2056 "s63E6H2" 0 "RNA polymerase-binding transcription factor DksA"  
"Chl\_C14\_00492" 2057 "s59E13H2" 0 "hypothetical protein"  
"Chl\_C14\_00492" 2057 "s59E25H2" 0 "hypothetical protein"  
"Chl\_C14\_00492" 2057 "s59E5H2" 0 "hypothetical protein"  
"Chl\_C14\_00492" 2057 "s63E6H2" 0 "hypothetical protein"  
"Chl\_C14\_00493" 2058 "s59E13H2" 0 "hypothetical protein"  
"Chl\_C14\_00493" 2058 "s59E25H2" 0 "hypothetical protein"  
"Chl\_C14\_00493" 2058 "s59E5H2" 0 "hypothetical protein"  
"Chl\_C14\_00493" 2058 "s63E6H2" 0 "hypothetical protein"

"Chl\_C14\_00494" 2059 "s59E13H2" 0 "Dihydroorotate dehydrogenase B (NAD(+)), catalytic subunit"  
"Chl\_C14\_00494" 2059 "s59E25H2" 0 "Dihydroorotate dehydrogenase B (NAD(+)), catalytic subunit"  
"Chl\_C14\_00494" 2059 "s59E5H2" 0.001701881 "Dihydroorotate dehydrogenase B (NAD(+)), catalytic subunit"  
"Chl\_C14\_00494" 2059 "s63E6H2" 0 "Dihydroorotate dehydrogenase B (NAD(+)), catalytic subunit"  
"Chl\_C14\_00495" 2060 "s59E13H2" 0 "Xaa-Pro dipeptidase"  
"Chl\_C14\_00495" 2060 "s59E25H2" 0 "Xaa-Pro dipeptidase"  
"Chl\_C14\_00495" 2060 "s59E5H2" 0 "Xaa-Pro dipeptidase"  
"Chl\_C14\_00495" 2060 "s63E6H2" 0 "Xaa-Pro dipeptidase"  
"Chl\_C14\_00496" 2061 "s59E13H2" 0 "Asp/Glu/Hydantoin racemase"  
"Chl\_C14\_00496" 2061 "s59E25H2" 0 "Asp/Glu/Hydantoin racemase"  
"Chl\_C14\_00496" 2061 "s59E5H2" 0 "Asp/Glu/Hydantoin racemase"  
"Chl\_C14\_00496" 2061 "s63E6H2" 0 "Asp/Glu/Hydantoin racemase"  
"Chl\_C14\_00497" 2062 "s59E13H2" 0 "DctM-like transporters"  
"Chl\_C14\_00497" 2062 "s59E25H2" 0 "DctM-like transporters"  
"Chl\_C14\_00497" 2062 "s59E5H2" 0 "DctM-like transporters"  
"Chl\_C14\_00497" 2062 "s63E6H2" 0 "DctM-like transporters"  
"Chl\_C14\_00498" 2063 "s59E13H2" 0 "NMT1/THI5 like protein"  
"Chl\_C14\_00498" 2063 "s59E25H2" 0 "NMT1/THI5 like protein"  
"Chl\_C14\_00498" 2063 "s59E5H2" 0 "NMT1/THI5 like protein"  
"Chl\_C14\_00498" 2063 "s63E6H2" 0 "NMT1/THI5 like protein"  
"Chl\_C14\_00499" 2064 "s59E13H2" 0 "hypothetical protein"  
"Chl\_C14\_00499" 2064 "s59E25H2" 0 "hypothetical protein"  
"Chl\_C14\_00499" 2064 "s59E5H2" 0 "hypothetical protein"  
"Chl\_C14\_00499" 2064 "s63E6H2" 0 "hypothetical protein"  
"Chl\_C14\_00500" 2065 "s59E13H2" 0 "hypothetical protein"  
"Chl\_C14\_00500" 2065 "s59E25H2" 0 "hypothetical protein"  
"Chl\_C14\_00500" 2065 "s59E5H2" 0 "hypothetical protein"  
"Chl\_C14\_00500" 2065 "s63E6H2" 0 "hypothetical protein"  
"Chl\_C14\_00501" 2066 "s59E13H2" 0 "hypothetical protein"  
"Chl\_C14\_00501" 2066 "s59E25H2" 0 "hypothetical protein"  
"Chl\_C14\_00501" 2066 "s59E5H2" 0 "hypothetical protein"  
"Chl\_C14\_00501" 2066 "s63E6H2" 0 "hypothetical protein"  
"Chl\_C14\_00505" 2070 "s59E13H2" 0 "hypothetical protein"  
"Chl\_C14\_00505" 2070 "s59E25H2" 0 "hypothetical protein"  
"Chl\_C14\_00505" 2070 "s59E5H2" 0 "hypothetical protein"  
"Chl\_C14\_00505" 2070 "s63E6H2" 0 "hypothetical protein"  
"Chl\_C14\_00507" 2072 "s59E13H2" 0 "hypothetical protein"  
"Chl\_C14\_00507" 2072 "s59E25H2" 0 "hypothetical protein"  
"Chl\_C14\_00507" 2072 "s59E5H2" 0 "hypothetical protein"  
"Chl\_C14\_00507" 2072 "s63E6H2" 0 "hypothetical protein"  
"Chl\_C14\_00509" 2074 "s59E13H2" 0.00522025 "hypothetical protein"  
"Chl\_C14\_00509" 2074 "s59E25H2" 0 "hypothetical protein"  
"Chl\_C14\_00509" 2074 "s59E5H2" 0 "hypothetical protein"  
"Chl\_C14\_00509" 2074 "s63E6H2" 0.1853873 "hypothetical protein"  
"Chl\_C14\_00512" 2077 "s59E13H2" 0.1628755 "DNA polymerase III subunit beta"  
"Chl\_C14\_00512" 2077 "s59E25H2" 0 "DNA polymerase III subunit beta"  
"Chl\_C14\_00512" 2077 "s59E5H2" 0.1486137 "DNA polymerase III subunit beta"



"Chl\_C14\_00512" 2077 "s63E6H2" 0.004641776 "DNA polymerase III subunit beta"  
"Chl\_C14\_00514" 2079 "s59E13H2" 0.1419012 "thiamine biosynthesis protein ThiF"  
"Chl\_C14\_00514" 2079 "s59E25H2" 0 "thiamine biosynthesis protein ThiF"  
"Chl\_C14\_00514" 2079 "s59E5H2" 0.3600951 "thiamine biosynthesis protein ThiF"  
"Chl\_C14\_00514" 2079 "s63E6H2" 0.008113483 "thiamine biosynthesis protein ThiF"  
"Chl\_C14\_00516" 2081 "s59E13H2" 0.1014508 "hypothetical protein"  
"Chl\_C14\_00516" 2081 "s59E25H2" 0 "hypothetical protein"  
"Chl\_C14\_00516" 2081 "s59E5H2" 0.401722 "hypothetical protein"  
"Chl\_C14\_00516" 2081 "s63E6H2" 0 "hypothetical protein"  
"Chl\_C14\_00519" 2084 "s59E13H2" 0 "hypothetical protein"  
"Chl\_C14\_00519" 2084 "s59E25H2" 0 "hypothetical protein"  
"Chl\_C14\_00519" 2084 "s59E5H2" 0.01568877 "hypothetical protein"  
"Chl\_C14\_00519" 2084 "s63E6H2" 0 "hypothetical protein"  
"Chl\_C14\_00524" 2089 "s59E13H2" 0 "Kynurenine formamidase"  
"Chl\_C14\_00524" 2089 "s59E25H2" 0 "Kynurenine formamidase"  
"Chl\_C14\_00524" 2089 "s59E5H2" 0 "Kynurenine formamidase"  
"Chl\_C14\_00524" 2089 "s63E6H2" 0 "Kynurenine formamidase"  
"Chl\_C14\_00525" 2090 "s59E13H2" 0 "Methylmalonate semialdehyde dehydrogenase [acylating]"  
"Chl\_C14\_00525" 2090 "s59E25H2" 0 "Methylmalonate semialdehyde dehydrogenase [acylating]"  
"Chl\_C14\_00525" 2090 "s59E5H2" 0 "Methylmalonate semialdehyde dehydrogenase [acylating]"  
"Chl\_C14\_00525" 2090 "s63E6H2" 0 "Methylmalonate semialdehyde dehydrogenase [acylating]"  
"Chl\_C14\_00526" 2091 "s59E13H2" 0 "hypothetical protein"  
"Chl\_C14\_00526" 2091 "s59E25H2" 0 "hypothetical protein"  
"Chl\_C14\_00526" 2091 "s59E5H2" 0 "hypothetical protein"  
"Chl\_C14\_00526" 2091 "s63E6H2" 0 "hypothetical protein"  
"Chl\_C14\_00527" 2092 "s59E13H2" 0 "putative membrane protein"  
"Chl\_C14\_00527" 2092 "s59E25H2" 0 "putative membrane protein"  
"Chl\_C14\_00527" 2092 "s59E5H2" 0 "putative membrane protein"  
"Chl\_C14\_00527" 2092 "s63E6H2" 0 "putative membrane protein"  
"Chl\_C14\_00528" 2093 "s59E13H2" 0 "Calcium-transporting ATPase 1"  
"Chl\_C14\_00528" 2093 "s59E25H2" 0 "Calcium-transporting ATPase 1"  
"Chl\_C14\_00528" 2093 "s59E5H2" 0 "Calcium-transporting ATPase 1"  
"Chl\_C14\_00528" 2093 "s63E6H2" 0 "Calcium-transporting ATPase 1"  
"Chl\_C14\_00529" 2094 "s59E13H2" 0 "Arsenical pump membrane protein"  
"Chl\_C14\_00529" 2094 "s59E25H2" 0 "Arsenical pump membrane protein"  
"Chl\_C14\_00529" 2094 "s59E5H2" 0 "Arsenical pump membrane protein"  
"Chl\_C14\_00529" 2094 "s63E6H2" 0 "Arsenical pump membrane protein"  
"Chl\_C14\_00530" 2095 "s59E13H2" 0 "Inosine-5'-monophosphate dehydrogenase"  
"Chl\_C14\_00530" 2095 "s59E25H2" 0 "Inosine-5'-monophosphate dehydrogenase"  
"Chl\_C14\_00530" 2095 "s59E5H2" 0 "Inosine-5'-monophosphate dehydrogenase"  
"Chl\_C14\_00530" 2095 "s63E6H2" 0 "Inosine-5'-monophosphate dehydrogenase"  
"Chl\_C14\_00532" 2097 "s59E13H2" 0 "Pyruvate/ketoisovalerate oxidoreductases common subunit gamma"  
"Chl\_C14\_00532" 2097 "s59E25H2" 0 "Pyruvate/ketoisovalerate oxidoreductases common subunit gamma"  
"Chl\_C14\_00532" 2097 "s59E5H2" 0 "Pyruvate/ketoisovalerate oxidoreductases common subunit gamma"  
"Chl\_C14\_00532" 2097 "s63E6H2" 0 "Pyruvate/ketoisovalerate oxidoreductases common subunit gamma"  
"Chl\_C14\_00533" 2098 "s59E13H2" 0 "Pyruvate synthase subunit PorD"  
"Chl\_C14\_00533" 2098 "s59E25H2" 0 "Pyruvate synthase subunit PorD"

"Chl\_C14\_00533" 2098 "s59E5H2" 0 "Pyruvate synthase subunit PorD"  
"Chl\_C14\_00533" 2098 "s63E6H2" 0 "Pyruvate synthase subunit PorD"  
"Chl\_C14\_00534" 2099 "s59E13H2" 0 "Pyruvate synthase subunit PorA"  
"Chl\_C14\_00534" 2099 "s59E25H2" 0 "Pyruvate synthase subunit PorA"  
"Chl\_C14\_00534" 2099 "s59E5H2" 0 "Pyruvate synthase subunit PorA"  
"Chl\_C14\_00534" 2099 "s63E6H2" 0 "Pyruvate synthase subunit PorA"  
"Chl\_C14\_00535" 2100 "s59E13H2" 0 "Pyruvate synthase subunit PorB"  
"Chl\_C14\_00535" 2100 "s59E25H2" 0 "Pyruvate synthase subunit PorB"  
"Chl\_C14\_00535" 2100 "s59E5H2" 0 "Pyruvate synthase subunit PorB"  
"Chl\_C14\_00535" 2100 "s63E6H2" 0 "Pyruvate synthase subunit PorB"  
"Chl\_C14\_00536" 2101 "s59E13H2" 0 "NADP-reducing hydrogenase subunit HndA"  
"Chl\_C14\_00536" 2101 "s59E25H2" 0 "NADP-reducing hydrogenase subunit HndA"  
"Chl\_C14\_00536" 2101 "s59E5H2" 0 "NADP-reducing hydrogenase subunit HndA"  
"Chl\_C14\_00536" 2101 "s63E6H2" 0 "NADP-reducing hydrogenase subunit HndA"  
"Chl\_C14\_00537" 2102 "s59E13H2" 0 "NADP-reducing hydrogenase subunit HndC"  
"Chl\_C14\_00537" 2102 "s59E25H2" 0 "NADP-reducing hydrogenase subunit HndC"  
"Chl\_C14\_00537" 2102 "s59E5H2" 0 "NADP-reducing hydrogenase subunit HndC"  
"Chl\_C14\_00537" 2102 "s63E6H2" 0 "NADP-reducing hydrogenase subunit HndC"  
"Chl\_C14\_00538" 2103 "s59E13H2" 0 "NADP-reducing hydrogenase subunit HndC"  
"Chl\_C14\_00538" 2103 "s59E25H2" 0 "NADP-reducing hydrogenase subunit HndC"  
"Chl\_C14\_00538" 2103 "s59E5H2" 0 "NADP-reducing hydrogenase subunit HndC"  
"Chl\_C14\_00538" 2103 "s63E6H2" 0.0007599112 "NADP-reducing hydrogenase subunit HndC"  
"Chl\_C14\_00540" 2105 "s59E13H2" 0 "hypothetical protein"  
"Chl\_C14\_00540" 2105 "s59E25H2" 0 "hypothetical protein"  
"Chl\_C14\_00540" 2105 "s59E5H2" 0 "hypothetical protein"  
"Chl\_C14\_00540" 2105 "s63E6H2" 0 "hypothetical protein"  
"Chl\_C14\_00541" 2106 "s59E13H2" 0 "lipid-transfer protein"  
"Chl\_C14\_00541" 2106 "s59E25H2" 0 "lipid-transfer protein"  
"Chl\_C14\_00541" 2106 "s59E5H2" 0 "lipid-transfer protein"  
"Chl\_C14\_00541" 2106 "s63E6H2" 0 "lipid-transfer protein"  
"Chl\_C14\_00544" 2109 "s59E13H2" 0 "hypothetical protein"  
"Chl\_C14\_00544" 2109 "s59E25H2" 0 "hypothetical protein"  
"Chl\_C14\_00544" 2109 "s59E5H2" 0 "hypothetical protein"  
"Chl\_C14\_00544" 2109 "s63E6H2" 0 "hypothetical protein"  
"Chl\_C14\_00546" 2111 "s59E13H2" 0 "hypothetical protein"  
"Chl\_C14\_00546" 2111 "s59E25H2" 0 "hypothetical protein"  
"Chl\_C14\_00546" 2111 "s59E5H2" 0 "hypothetical protein"  
"Chl\_C14\_00546" 2111 "s63E6H2" 0 "hypothetical protein"  
"Chl\_C14\_00547" 2112 "s59E13H2" 0 "Flavodoxin"  
"Chl\_C14\_00547" 2112 "s59E25H2" 0 "Flavodoxin"  
"Chl\_C14\_00547" 2112 "s59E5H2" 0 "Flavodoxin"  
"Chl\_C14\_00547" 2112 "s63E6H2" 0 "Flavodoxin"  
"Chl\_C14\_00548" 2113 "s59E13H2" 0 "hypothetical protein"  
"Chl\_C14\_00548" 2113 "s59E25H2" 0 "hypothetical protein"  
"Chl\_C14\_00548" 2113 "s59E5H2" 0 "hypothetical protein"  
"Chl\_C14\_00548" 2113 "s63E6H2" 0 "hypothetical protein"  
"Chl\_C14\_00549" 2114 "s59E13H2" 0 "hypothetical protein"

"Chl\_C14\_00549" 2114 "s59E25H2" 0 "hypothetical protein"  
"Chl\_C14\_00549" 2114 "s59E5H2" 0 "hypothetical protein"  
"Chl\_C14\_00549" 2114 "s63E6H2" 0 "hypothetical protein"  
"Chl\_C14\_00550" 2115 "s59E13H2" 0 "hypothetical protein"  
"Chl\_C14\_00550" 2115 "s59E25H2" 0 "hypothetical protein"  
"Chl\_C14\_00550" 2115 "s59E5H2" 0 "hypothetical protein"  
"Chl\_C14\_00550" 2115 "s63E6H2" 0 "hypothetical protein"  
"Chl\_C14\_00551" 2116 "s59E13H2" 0 "GTPase HflX"  
"Chl\_C14\_00551" 2116 "s59E25H2" 0 "GTPase HflX"  
"Chl\_C14\_00551" 2116 "s59E5H2" 0 "GTPase HflX"  
"Chl\_C14\_00551" 2116 "s63E6H2" 0.003039645 "GTPase HflX"  
"Chl\_C14\_00552" 2117 "s59E13H2" 0 "LL-diaminopimelate aminotransferase"  
"Chl\_C14\_00552" 2117 "s59E25H2" 0 "LL-diaminopimelate aminotransferase"  
"Chl\_C14\_00552" 2117 "s59E5H2" 0 "LL-diaminopimelate aminotransferase"  
"Chl\_C14\_00552" 2117 "s63E6H2" 0 "LL-diaminopimelate aminotransferase"  
"Chl\_C14\_00553" 2118 "s59E13H2" 0 "Diaminopimelate epimerase"  
"Chl\_C14\_00553" 2118 "s59E25H2" 0 "Diaminopimelate epimerase"  
"Chl\_C14\_00553" 2118 "s59E5H2" 0 "Diaminopimelate epimerase"  
"Chl\_C14\_00553" 2118 "s63E6H2" 0 "Diaminopimelate epimerase"  
"Chl\_C14\_00554" 2119 "s59E13H2" 0 "tRNA dimethylallyltransferase"  
"Chl\_C14\_00554" 2119 "s59E25H2" 0 "tRNA dimethylallyltransferase"  
"Chl\_C14\_00554" 2119 "s59E5H2" 0 "tRNA dimethylallyltransferase"  
"Chl\_C14\_00554" 2119 "s63E6H2" 0 "tRNA dimethylallyltransferase"  
"Chl\_C14\_00555" 2120 "s59E13H2" 0 "Triosephosphate isomerase"  
"Chl\_C14\_00555" 2120 "s59E25H2" 0 "Triosephosphate isomerase"  
"Chl\_C14\_00555" 2120 "s59E5H2" 0 "Triosephosphate isomerase"  
"Chl\_C14\_00555" 2120 "s63E6H2" 0.009679183 "Triosephosphate isomerase"  
"Chl\_C14\_00556" 2121 "s59E13H2" 0 "2,3-bisphosphoglycerate-independent phosphoglycerate mutase 1"  
"Chl\_C14\_00556" 2121 "s59E25H2" 0 "2,3-bisphosphoglycerate-independent phosphoglycerate mutase 1"  
"Chl\_C14\_00556" 2121 "s59E5H2" 0 "2,3-bisphosphoglycerate-independent phosphoglycerate mutase 1"  
"Chl\_C14\_00556" 2121 "s63E6H2" 0.03589032 "2,3-bisphosphoglycerate-independent phosphoglycerate mutase 1"  
"Chl\_C14\_00557" 2122 "s59E13H2" 0 "Phosphoglycerate kinase"  
"Chl\_C14\_00557" 2122 "s59E25H2" 0 "Phosphoglycerate kinase"  
"Chl\_C14\_00557" 2122 "s59E5H2" 0 "Phosphoglycerate kinase"  
"Chl\_C14\_00557" 2122 "s63E6H2" 0 "Phosphoglycerate kinase"  
"Chl\_C14\_00558" 2123 "s59E13H2" 0 "1-deoxy-D-xylulose-5-phosphate synthase"  
"Chl\_C14\_00558" 2123 "s59E25H2" 0 "1-deoxy-D-xylulose-5-phosphate synthase"  
"Chl\_C14\_00558" 2123 "s59E5H2" 0 "1-deoxy-D-xylulose-5-phosphate synthase"  
"Chl\_C14\_00558" 2123 "s63E6H2" 0 "1-deoxy-D-xylulose-5-phosphate synthase"  
"Chl\_C14\_00559" 2124 "s59E13H2" 0 "Putative small multi-drug export protein"  
"Chl\_C14\_00559" 2124 "s59E25H2" 0 "Putative small multi-drug export protein"  
"Chl\_C14\_00559" 2124 "s59E5H2" 0 "Putative small multi-drug export protein"  
"Chl\_C14\_00559" 2124 "s63E6H2" 0 "Putative small multi-drug export protein"  
"Chl\_C14\_00561" 2126 "s59E13H2" 0 "Tyrosine recombinase XerC"  
"Chl\_C14\_00561" 2126 "s59E25H2" 0 "Tyrosine recombinase XerC"  
"Chl\_C14\_00561" 2126 "s59E5H2" 0 "Tyrosine recombinase XerC"  
"Chl\_C14\_00561" 2126 "s63E6H2" 0 "Tyrosine recombinase XerC"

"Chl\_C14\_00564" 2129 "s59E13H2" 0 "Tyrosine recombinase XerD"  
"Chl\_C14\_00564" 2129 "s59E25H2" 0 "Tyrosine recombinase XerD"  
"Chl\_C14\_00564" 2129 "s59E5H2" 0 "Tyrosine recombinase XerD"  
"Chl\_C14\_00564" 2129 "s63E6H2" 0 "Tyrosine recombinase XerD"  
"Chl\_C14\_00565" 2130 "s59E13H2" 0 "site-specific tyrosine recombinase XerC"  
"Chl\_C14\_00565" 2130 "s59E25H2" 0 "site-specific tyrosine recombinase XerC"  
"Chl\_C14\_00565" 2130 "s59E5H2" 0 "site-specific tyrosine recombinase XerC"  
"Chl\_C14\_00565" 2130 "s63E6H2" 0 "site-specific tyrosine recombinase XerC"  
"Chl\_C14\_00566" 2131 "s59E13H2" 0 "Integrase core domain protein"  
"Chl\_C14\_00566" 2131 "s59E25H2" 0 "Integrase core domain protein"  
"Chl\_C14\_00566" 2131 "s59E5H2" 0 "Integrase core domain protein"  
"Chl\_C14\_00566" 2131 "s63E6H2" 0 "Integrase core domain protein"  
"Chl\_C14\_00567" 2132 "s59E13H2" 0 "Tripartite tricarboxylate transporter family receptor"  
"Chl\_C14\_00567" 2132 "s59E25H2" 0 "Tripartite tricarboxylate transporter family receptor"  
"Chl\_C14\_00567" 2132 "s59E5H2" 0 "Tripartite tricarboxylate transporter family receptor"  
"Chl\_C14\_00567" 2132 "s63E6H2" 0 "Tripartite tricarboxylate transporter family receptor"  
"Chl\_C14\_00568" 2133 "s59E13H2" 0 "Tripartite tricarboxylate transporter TctB family protein"  
"Chl\_C14\_00568" 2133 "s59E25H2" 0 "Tripartite tricarboxylate transporter TctB family protein"  
"Chl\_C14\_00568" 2133 "s59E5H2" 0 "Tripartite tricarboxylate transporter TctB family protein"  
"Chl\_C14\_00568" 2133 "s63E6H2" 0 "Tripartite tricarboxylate transporter TctB family protein"  
"Chl\_C14\_00569" 2134 "s59E13H2" 0 "Tripartite tricarboxylate transporter TctA family protein"  
"Chl\_C14\_00569" 2134 "s59E25H2" 0 "Tripartite tricarboxylate transporter TctA family protein"  
"Chl\_C14\_00569" 2134 "s59E5H2" 0 "Tripartite tricarboxylate transporter TctA family protein"  
"Chl\_C14\_00569" 2134 "s63E6H2" 0 "Tripartite tricarboxylate transporter TctA family protein"  
"Chl\_C14\_00570" 2135 "s59E13H2" 0 "Thermophilic metalloprotease (M29)"  
"Chl\_C14\_00570" 2135 "s59E25H2" 0 "Thermophilic metalloprotease (M29)"  
"Chl\_C14\_00570" 2135 "s59E5H2" 0 "Thermophilic metalloprotease (M29)"  
"Chl\_C14\_00570" 2135 "s63E6H2" 0 "Thermophilic metalloprotease (M29)"  
"Chl\_C14\_00572" 2137 "s59E13H2" 0 "putative adenylyltransferase/sulfurtransferase MoeZ"  
"Chl\_C14\_00572" 2137 "s59E25H2" 0 "putative adenylyltransferase/sulfurtransferase MoeZ"  
"Chl\_C14\_00572" 2137 "s59E5H2" 0 "putative adenylyltransferase/sulfurtransferase MoeZ"  
"Chl\_C14\_00572" 2137 "s63E6H2" 0 "putative adenylyltransferase/sulfurtransferase MoeZ"  
"Chl\_C14\_00573" 2138 "s59E13H2" 0.001232931 "Acetyltransferase Pat"  
"Chl\_C14\_00573" 2138 "s59E25H2" 0 "Acetyltransferase Pat"  
"Chl\_C14\_00573" 2138 "s59E5H2" 0.07401008 "Acetyltransferase Pat"  
"Chl\_C14\_00573" 2138 "s63E6H2" 0 "Acetyltransferase Pat"  
"Chl\_C14\_00576" 2141 "s59E13H2" 0 "hypothetical protein"  
"Chl\_C14\_00576" 2141 "s59E25H2" 0 "hypothetical protein"  
"Chl\_C14\_00576" 2141 "s59E5H2" 0 "hypothetical protein"  
"Chl\_C14\_00576" 2141 "s63E6H2" 0 "hypothetical protein"  
"Chl\_C14\_00577" 2142 "s59E13H2" 0 "Pyridoxal biosynthesis lyase PdxS"  
"Chl\_C14\_00577" 2142 "s59E25H2" 0 "Pyridoxal biosynthesis lyase PdxS"  
"Chl\_C14\_00577" 2142 "s59E5H2" 0 "Pyridoxal biosynthesis lyase PdxS"  
"Chl\_C14\_00577" 2142 "s63E6H2" 0 "Pyridoxal biosynthesis lyase PdxS"  
"Chl\_C14\_00578" 2143 "s59E13H2" 0.006280416 "hypothetical protein"  
"Chl\_C14\_00578" 2143 "s59E25H2" 0 "hypothetical protein"  
"Chl\_C14\_00578" 2143 "s59E5H2" 0 "hypothetical protein"

"Chl\_C14\_00578" 2143 "s63E6H2" 0 "hypothetical protein"  
"Chl\_C14\_00579" 2144 "s59E13H2" 0.03509776 "Trehalase"  
"Chl\_C14\_00579" 2144 "s59E25H2" 0 "Trehalase"  
"Chl\_C14\_00579" 2144 "s59E5H2" 1.841543 "Trehalase"  
"Chl\_C14\_00579" 2144 "s63E6H2" 0.04249123 "Trehalase"  
"Chl\_C14\_00580" 2145 "s59E13H2" 0.001250387 "Lipopolysaccharide core biosynthesis protein RfaG"  
"Chl\_C14\_00580" 2145 "s59E25H2" 0 "Lipopolysaccharide core biosynthesis protein RfaG"  
"Chl\_C14\_00580" 2145 "s59E5H2" 0.9773763 "Lipopolysaccharide core biosynthesis protein RfaG"  
"Chl\_C14\_00580" 2145 "s63E6H2" 0.001092856 "Lipopolysaccharide core biosynthesis protein RfaG"  
"Chl\_C14\_00584" 2149 "s59E13H2" 0 "hypothetical protein"  
"Chl\_C14\_00584" 2149 "s59E25H2" 0 "hypothetical protein"  
"Chl\_C14\_00584" 2149 "s59E5H2" 0.005010899 "hypothetical protein"  
"Chl\_C14\_00584" 2149 "s63E6H2" 0 "hypothetical protein"  
"Chl\_C14\_00585" 2150 "s59E13H2" 0 "Acetyltransferase (GNAT) family protein"  
"Chl\_C14\_00585" 2150 "s59E25H2" 0 "Acetyltransferase (GNAT) family protein"  
"Chl\_C14\_00585" 2150 "s59E5H2" 0.00356862 "Acetyltransferase (GNAT) family protein"  
"Chl\_C14\_00585" 2150 "s63E6H2" 0 "Acetyltransferase (GNAT) family protein"  
"Chl\_C14\_00586" 2151 "s59E13H2" 0 "Epoxyqueuosine reductase"  
"Chl\_C14\_00586" 2151 "s59E25H2" 0 "Epoxyqueuosine reductase"  
"Chl\_C14\_00586" 2151 "s59E5H2" 0 "Epoxyqueuosine reductase"  
"Chl\_C14\_00586" 2151 "s63E6H2" 0 "Epoxyqueuosine reductase"  
"Chl\_C14\_00587" 2152 "s59E13H2" 0 "hypothetical protein"  
"Chl\_C14\_00587" 2152 "s59E25H2" 0 "hypothetical protein"  
"Chl\_C14\_00587" 2152 "s59E5H2" 0 "hypothetical protein"  
"Chl\_C14\_00587" 2152 "s63E6H2" 0 "hypothetical protein"  
"Chl\_C14\_00588" 2153 "s59E13H2" 0 "hypothetical protein"  
"Chl\_C14\_00588" 2153 "s59E25H2" 0 "hypothetical protein"  
"Chl\_C14\_00588" 2153 "s59E5H2" 0 "hypothetical protein"  
"Chl\_C14\_00588" 2153 "s63E6H2" 0 "hypothetical protein"  
"Chl\_C14\_00589" 2154 "s59E13H2" 0 "Threonylcarbamoyladenosine tRNA methylthiotransferase MtaB"  
"Chl\_C14\_00589" 2154 "s59E25H2" 0 "Threonylcarbamoyladenosine tRNA methylthiotransferase MtaB"  
"Chl\_C14\_00589" 2154 "s59E5H2" 0 "Threonylcarbamoyladenosine tRNA methylthiotransferase MtaB"  
"Chl\_C14\_00589" 2154 "s63E6H2" 0 "Threonylcarbamoyladenosine tRNA methylthiotransferase MtaB"  
"Chl\_C14\_00590" 2155 "s59E13H2" 0 "3-oxoacyl-[acyl-carrier-protein] synthase 2"  
"Chl\_C14\_00590" 2155 "s59E25H2" 0 "3-oxoacyl-[acyl-carrier-protein] synthase 2"  
"Chl\_C14\_00590" 2155 "s59E5H2" 0 "3-oxoacyl-[acyl-carrier-protein] synthase 2"  
"Chl\_C14\_00590" 2155 "s63E6H2" 0.0008047544 "3-oxoacyl-[acyl-carrier-protein] synthase 2"  
"Chl\_C14\_00591" 2156 "s59E13H2" 0 "Single-stranded-DNA-specific exonuclease RecJ"  
"Chl\_C14\_00591" 2156 "s59E25H2" 0 "Single-stranded-DNA-specific exonuclease RecJ"  
"Chl\_C14\_00591" 2156 "s59E5H2" 0 "Single-stranded-DNA-specific exonuclease RecJ"  
"Chl\_C14\_00591" 2156 "s63E6H2" 0.005456886 "Single-stranded-DNA-specific exonuclease RecJ"  
"Chl\_C14\_00592" 2157 "s59E13H2" 0 "Oxygen sensor histidine kinase NreB"  
"Chl\_C14\_00592" 2157 "s59E25H2" 0 "Oxygen sensor histidine kinase NreB"  
"Chl\_C14\_00592" 2157 "s59E5H2" 0 "Oxygen sensor histidine kinase NreB"  
"Chl\_C14\_00592" 2157 "s63E6H2" 0 "Oxygen sensor histidine kinase NreB"  
"Chl\_C14\_00593" 2158 "s59E13H2" 0 "Transcriptional regulatory protein LiaR"  
"Chl\_C14\_00593" 2158 "s59E25H2" 0 "Transcriptional regulatory protein LiaR"

"Chl\_C14\_00593" 2158 "s59E5H2" 0 "Transcriptional regulatory protein LiaR"  
"Chl\_C14\_00593" 2158 "s63E6H2" 0 "Transcriptional regulatory protein LiaR"  
"Chl\_C14\_00595" 2160 "s59E13H2" 0 "putative formate transporter 1"  
"Chl\_C14\_00595" 2160 "s59E25H2" 0 "putative formate transporter 1"  
"Chl\_C14\_00595" 2160 "s59E5H2" 0 "putative formate transporter 1"  
"Chl\_C14\_00595" 2160 "s63E6H2" 0 "putative formate transporter 1"  
"Chl\_C14\_00596" 2161 "s59E13H2" 0 "Prolipoprotein diacylglyceryl transferase"  
"Chl\_C14\_00596" 2161 "s59E25H2" 0 "Prolipoprotein diacylglyceryl transferase"  
"Chl\_C14\_00596" 2161 "s59E5H2" 0 "Prolipoprotein diacylglyceryl transferase"  
"Chl\_C14\_00596" 2161 "s63E6H2" 0 "Prolipoprotein diacylglyceryl transferase"  
"Chl\_C14\_00597" 2162 "s59E13H2" 0 "Signal recognition particle receptor FtsY"  
"Chl\_C14\_00597" 2162 "s59E25H2" 0 "Signal recognition particle receptor FtsY"  
"Chl\_C14\_00597" 2162 "s59E5H2" 0 "Signal recognition particle receptor FtsY"  
"Chl\_C14\_00597" 2162 "s63E6H2" 0 "Signal recognition particle receptor FtsY"  
"Chl\_C14\_00598" 2163 "s59E13H2" 0 "hypothetical protein"  
"Chl\_C14\_00598" 2163 "s59E25H2" 0 "hypothetical protein"  
"Chl\_C14\_00598" 2163 "s59E5H2" 0 "hypothetical protein"  
"Chl\_C14\_00598" 2163 "s63E6H2" 0 "hypothetical protein"  
"Chl\_C14\_00599" 2164 "s59E13H2" 0 "Putative ski2-type helicase"  
"Chl\_C14\_00599" 2164 "s59E25H2" 0 "Putative ski2-type helicase"  
"Chl\_C14\_00599" 2164 "s59E5H2" 0 "Putative ski2-type helicase"  
"Chl\_C14\_00599" 2164 "s63E6H2" 0 "Putative ski2-type helicase"  
"Chl\_C14\_00600" 2165 "s59E13H2" 0 "hypothetical protein"  
"Chl\_C14\_00600" 2165 "s59E25H2" 0 "hypothetical protein"  
"Chl\_C14\_00600" 2165 "s59E5H2" 0 "hypothetical protein"  
"Chl\_C14\_00600" 2165 "s63E6H2" 0 "hypothetical protein"  
"Chl\_C14\_00601" 2166 "s59E13H2" 0 "hypothetical protein"  
"Chl\_C14\_00601" 2166 "s59E25H2" 0 "hypothetical protein"  
"Chl\_C14\_00601" 2166 "s59E5H2" 0 "hypothetical protein"  
"Chl\_C14\_00601" 2166 "s63E6H2" 0 "hypothetical protein"  
"Chl\_C14\_00602" 2167 "s59E13H2" 0 "30S ribosomal protein S15"  
"Chl\_C14\_00602" 2167 "s59E25H2" 0 "30S ribosomal protein S15"  
"Chl\_C14\_00602" 2167 "s59E5H2" 0 "30S ribosomal protein S15"  
"Chl\_C14\_00602" 2167 "s63E6H2" 0 "30S ribosomal protein S15"  
"Chl\_C14\_00603" 2168 "s59E13H2" 0 "Polyribonucleotide nucleotidyltransferase"  
"Chl\_C14\_00603" 2168 "s59E25H2" 0 "Polyribonucleotide nucleotidyltransferase"  
"Chl\_C14\_00603" 2168 "s59E5H2" 0 "Polyribonucleotide nucleotidyltransferase"  
"Chl\_C14\_00603" 2168 "s63E6H2" 0 "Polyribonucleotide nucleotidyltransferase"  
"Chl\_C14\_00604" 2169 "s59E13H2" 0 "4-hydroxy-tetrahydrodipicolinate reductase"  
"Chl\_C14\_00604" 2169 "s59E25H2" 0 "4-hydroxy-tetrahydrodipicolinate reductase"  
"Chl\_C14\_00604" 2169 "s59E5H2" 0 "4-hydroxy-tetrahydrodipicolinate reductase"  
"Chl\_C14\_00604" 2169 "s63E6H2" 0 "4-hydroxy-tetrahydrodipicolinate reductase"  
"Chl\_C14\_00605" 2170 "s59E13H2" 0 "Aspartate-semialdehyde dehydrogenase"  
"Chl\_C14\_00605" 2170 "s59E25H2" 0 "Aspartate-semialdehyde dehydrogenase"  
"Chl\_C14\_00605" 2170 "s59E5H2" 0.001327276 "Aspartate-semialdehyde dehydrogenase"  
"Chl\_C14\_00605" 2170 "s63E6H2" 0.001481308 "Aspartate-semialdehyde dehydrogenase"  
"Chl\_C14\_00606" 2171 "s59E13H2" 0 "4-hydroxy-tetrahydrodipicolinate synthase"

"Chl\_C14\_00606" 2171 "s59E25H2" 0 "4-hydroxy-tetrahydrodipicolinate synthase"  
"Chl\_C14\_00606" 2171 "s59E5H2" 0 "4-hydroxy-tetrahydrodipicolinate synthase"  
"Chl\_C14\_00606" 2171 "s63E6H2" 0 "4-hydroxy-tetrahydrodipicolinate synthase"  
"Chl\_C14\_00607" 2172 "s59E13H2" 0.00371615 "Adenylosuccinate synthetase"  
"Chl\_C14\_00607" 2172 "s59E25H2" 0 "Adenylosuccinate synthetase"  
"Chl\_C14\_00607" 2172 "s59E5H2" 0 "Adenylosuccinate synthetase"  
"Chl\_C14\_00607" 2172 "s63E6H2" 0 "Adenylosuccinate synthetase"  
"Chl\_C14\_00608" 2173 "s59E13H2" 0 "Archaetidylinositol phosphate synthase"  
"Chl\_C14\_00608" 2173 "s59E25H2" 0 "Archaetidylinositol phosphate synthase"  
"Chl\_C14\_00608" 2173 "s59E5H2" 0 "Archaetidylinositol phosphate synthase"  
"Chl\_C14\_00608" 2173 "s63E6H2" 0 "Archaetidylinositol phosphate synthase"  
"Chl\_C14\_00609" 2174 "s59E13H2" 0 "GDP-mannose-dependent alpha-(1-2)-phosphatidylinositol mannosyltransferase"  
"Chl\_C14\_00609" 2174 "s59E25H2" 0 "GDP-mannose-dependent alpha-(1-2)-phosphatidylinositol mannosyltransferase"  
"Chl\_C14\_00609" 2174 "s59E5H2" 0 "GDP-mannose-dependent alpha-(1-2)-phosphatidylinositol mannosyltransferase"  
"Chl\_C14\_00609" 2174 "s63E6H2" 0 "GDP-mannose-dependent alpha-(1-2)-phosphatidylinositol mannosyltransferase"  
"Chl\_C14\_00610" 2175 "s59E13H2" 0 "Inositol-3-phosphate synthase"  
"Chl\_C14\_00610" 2175 "s59E25H2" 0 "Inositol-3-phosphate synthase"  
"Chl\_C14\_00610" 2175 "s59E5H2" 0.007347552 "Inositol-3-phosphate synthase"  
"Chl\_C14\_00610" 2175 "s63E6H2" 0.07365272 "Inositol-3-phosphate synthase"  
"Chl\_C14\_00611" 2176 "s59E13H2" 0 "tRNA pseudouridine synthase B"  
"Chl\_C14\_00611" 2176 "s59E25H2" 0 "tRNA pseudouridine synthase B"  
"Chl\_C14\_00611" 2176 "s59E5H2" 0 "tRNA pseudouridine synthase B"  
"Chl\_C14\_00611" 2176 "s63E6H2" 0 "tRNA pseudouridine synthase B"  
"Chl\_C14\_00612" 2177 "s59E13H2" 0 "Ribosome-binding factor A"  
"Chl\_C14\_00612" 2177 "s59E25H2" 0 "Ribosome-binding factor A"  
"Chl\_C14\_00612" 2177 "s59E5H2" 0 "Ribosome-binding factor A"  
"Chl\_C14\_00612" 2177 "s63E6H2" 0 "Ribosome-binding factor A"  
"Chl\_C14\_00613" 2178 "s59E13H2" 0.003632241 "Translation initiation factor IF-2"  
"Chl\_C14\_00613" 2178 "s59E25H2" 0 "Translation initiation factor IF-2"  
"Chl\_C14\_00613" 2178 "s59E5H2" 0 "Translation initiation factor IF-2"  
"Chl\_C14\_00613" 2178 "s63E6H2" 0 "Translation initiation factor IF-2"  
"Chl\_C14\_00614" 2179 "s59E13H2" 0 "hypothetical protein"  
"Chl\_C14\_00614" 2179 "s59E25H2" 0 "hypothetical protein"  
"Chl\_C14\_00614" 2179 "s59E5H2" 0 "hypothetical protein"  
"Chl\_C14\_00614" 2179 "s63E6H2" 0 "hypothetical protein"  
"Chl\_C14\_00615" 2180 "s59E13H2" 0.001440449 "hypothetical protein"  
"Chl\_C14\_00615" 2180 "s59E25H2" 0 "hypothetical protein"  
"Chl\_C14\_00615" 2180 "s59E5H2" 0 "hypothetical protein"  
"Chl\_C14\_00615" 2180 "s63E6H2" 0 "hypothetical protein"  
"Chl\_C14\_00616" 2181 "s59E13H2" 0 "5'/3'-nucleotidase SurE"  
"Chl\_C14\_00616" 2181 "s59E25H2" 0 "5'/3'-nucleotidase SurE"  
"Chl\_C14\_00616" 2181 "s59E5H2" 0 "5'/3'-nucleotidase SurE"  
"Chl\_C14\_00616" 2181 "s63E6H2" 0 "5'/3'-nucleotidase SurE"  
"Chl\_C14\_00617" 2182 "s59E13H2" 0 "CoB--CoM heterodisulfide reductase iron-sulfur subunit C"  
"Chl\_C14\_00617" 2182 "s59E25H2" 0 "CoB--CoM heterodisulfide reductase iron-sulfur subunit C"  
"Chl\_C14\_00617" 2182 "s59E5H2" 0 "CoB--CoM heterodisulfide reductase iron-sulfur subunit C"  
"Chl\_C14\_00617" 2182 "s63E6H2" 0 "CoB--CoM heterodisulfide reductase iron-sulfur subunit C"

"Chl\_C14\_00618" 2183 "s59E13H2" 0 "CoB--CoM heterodisulfide reductase subunit B"  
"Chl\_C14\_00618" 2183 "s59E25H2" 0 "CoB--CoM heterodisulfide reductase subunit B"  
"Chl\_C14\_00618" 2183 "s59E5H2" 0 "CoB--CoM heterodisulfide reductase subunit B"  
"Chl\_C14\_00618" 2183 "s63E6H2" 0 "CoB--CoM heterodisulfide reductase subunit B"  
"Chl\_C14\_00619" 2184 "s59E13H2" 0 "CoB--CoM heterodisulfide reductase iron-sulfur subunit A"  
"Chl\_C14\_00619" 2184 "s59E25H2" 0 "CoB--CoM heterodisulfide reductase iron-sulfur subunit A"  
"Chl\_C14\_00619" 2184 "s59E5H2" 0 "CoB--CoM heterodisulfide reductase iron-sulfur subunit A"  
"Chl\_C14\_00619" 2184 "s63E6H2" 0 "CoB--CoM heterodisulfide reductase iron-sulfur subunit A"  
"Chl\_C14\_00620" 2185 "s59E13H2" 0 "NADP-reducing hydrogenase subunit HndC"  
"Chl\_C14\_00620" 2185 "s59E25H2" 0 "NADP-reducing hydrogenase subunit HndC"  
"Chl\_C14\_00620" 2185 "s59E5H2" 0 "NADP-reducing hydrogenase subunit HndC"  
"Chl\_C14\_00620" 2185 "s63E6H2" 0 "NADP-reducing hydrogenase subunit HndC"  
"Chl\_C14\_00621" 2186 "s59E13H2" 0 "NADP-reducing hydrogenase subunit HndA"  
"Chl\_C14\_00621" 2186 "s59E25H2" 0 "NADP-reducing hydrogenase subunit HndA"  
"Chl\_C14\_00621" 2186 "s59E5H2" 0 "NADP-reducing hydrogenase subunit HndA"  
"Chl\_C14\_00621" 2186 "s63E6H2" 0 "NADP-reducing hydrogenase subunit HndA"  
"Chl\_C14\_00622" 2187 "s59E13H2" 0 "NADP-reducing hydrogenase subunit HndC"  
"Chl\_C14\_00622" 2187 "s59E25H2" 0 "NADP-reducing hydrogenase subunit HndC"  
"Chl\_C14\_00622" 2187 "s59E5H2" 0 "NADP-reducing hydrogenase subunit HndC"  
"Chl\_C14\_00622" 2187 "s63E6H2" 0 "NADP-reducing hydrogenase subunit HndC"  
"Chl\_C14\_00623" 2188 "s59E13H2" 0 "hypothetical protein"  
"Chl\_C14\_00623" 2188 "s59E25H2" 0 "hypothetical protein"  
"Chl\_C14\_00623" 2188 "s59E5H2" 0 "hypothetical protein"  
"Chl\_C14\_00623" 2188 "s63E6H2" 0 "hypothetical protein"  
"Chl\_C14\_00624" 2189 "s59E13H2" 0 "Alkaline phosphatase synthesis sensor protein PhoR"  
"Chl\_C14\_00624" 2189 "s59E25H2" 0 "Alkaline phosphatase synthesis sensor protein PhoR"  
"Chl\_C14\_00624" 2189 "s59E5H2" 0 "Alkaline phosphatase synthesis sensor protein PhoR"  
"Chl\_C14\_00624" 2189 "s63E6H2" 0 "Alkaline phosphatase synthesis sensor protein PhoR"  
"Chl\_C14\_00625" 2190 "s59E13H2" 0 "Bifunctional homocysteine S-methyltransferase/5,10-methylenetetrahydrofolate reductase"  
"Chl\_C14\_00625" 2190 "s59E25H2" 0 "Bifunctional homocysteine S-methyltransferase/5,10-methylenetetrahydrofolate reductase"  
"Chl\_C14\_00625" 2190 "s59E5H2" 0 "Bifunctional homocysteine S-methyltransferase/5,10-methylenetetrahydrofolate reductase"  
"Chl\_C14\_00625" 2190 "s63E6H2" 0 "Bifunctional homocysteine S-methyltransferase/5,10-methylenetetrahydrofolate reductase"  
"Chl\_C14\_00626" 2191 "s59E13H2" 0 "Alkaline phosphatase synthesis transcriptional regulatory protein PhoP"  
"Chl\_C14\_00626" 2191 "s59E25H2" 0 "Alkaline phosphatase synthesis transcriptional regulatory protein PhoP"  
"Chl\_C14\_00626" 2191 "s59E5H2" 0 "Alkaline phosphatase synthesis transcriptional regulatory protein PhoP"  
"Chl\_C14\_00626" 2191 "s63E6H2" 0 "Alkaline phosphatase synthesis transcriptional regulatory protein PhoP"  
"Chl\_C14\_00627" 2192 "s59E13H2" 0 "Alkaline phosphatase synthesis transcriptional regulatory protein PhoP"  
"Chl\_C14\_00627" 2192 "s59E25H2" 0 "Alkaline phosphatase synthesis transcriptional regulatory protein PhoP"  
"Chl\_C14\_00627" 2192 "s59E5H2" 0 "Alkaline phosphatase synthesis transcriptional regulatory protein PhoP"  
"Chl\_C14\_00627" 2192 "s63E6H2" 0 "Alkaline phosphatase synthesis transcriptional regulatory protein PhoP"  
"Chl\_C14\_00628" 2193 "s59E13H2" 0 "Bifunctional homocysteine S-methyltransferase/5,10-methylenetetrahydrofolate reductase"  
"Chl\_C14\_00628" 2193 "s59E25H2" 0 "Bifunctional homocysteine S-methyltransferase/5,10-methylenetetrahydrofolate reductase"  
"Chl\_C14\_00628" 2193 "s59E5H2" 0 "Bifunctional homocysteine S-methyltransferase/5,10-methylenetetrahydrofolate reductase"  
"Chl\_C14\_00628" 2193 "s63E6H2" 0 "Bifunctional homocysteine S-methyltransferase/5,10-methylenetetrahydrofolate reductase"  
"Chl\_C14\_00629" 2194 "s59E13H2" 0 "Sulfhydrogenase 1 subunit gamma"  
"Chl\_C14\_00629" 2194 "s59E25H2" 0 "Sulfhydrogenase 1 subunit gamma"  
"Chl\_C14\_00629" 2194 "s59E5H2" 0 "Sulfhydrogenase 1 subunit gamma"



"Chl\_C14\_00629" 2194 "s63E6H2" 0 "Sulfhydrogenase 1 subunit gamma"  
"Chl\_C14\_00630" 2195 "s59E13H2" 0 "Sulfhydrogenase 2 subunit beta"  
"Chl\_C14\_00630" 2195 "s59E25H2" 0 "Sulfhydrogenase 2 subunit beta"  
"Chl\_C14\_00630" 2195 "s59E5H2" 0 "Sulfhydrogenase 2 subunit beta"  
"Chl\_C14\_00630" 2195 "s63E6H2" 0 "Sulfhydrogenase 2 subunit beta"  
"Chl\_C14\_00631" 2196 "s59E13H2" 0 "Formate dehydrogenase subunit beta"  
"Chl\_C14\_00631" 2196 "s59E25H2" 0 "Formate dehydrogenase subunit beta"  
"Chl\_C14\_00631" 2196 "s59E5H2" 0 "Formate dehydrogenase subunit beta"  
"Chl\_C14\_00631" 2196 "s63E6H2" 0 "Formate dehydrogenase subunit beta"  
"Chl\_C14\_00632" 2197 "s59E13H2" 0 "F420-non-reducing hydrogenase vhc iron-sulfur subunit D"  
"Chl\_C14\_00632" 2197 "s59E25H2" 0 "F420-non-reducing hydrogenase vhc iron-sulfur subunit D"  
"Chl\_C14\_00632" 2197 "s59E5H2" 0 "F420-non-reducing hydrogenase vhc iron-sulfur subunit D"  
"Chl\_C14\_00632" 2197 "s63E6H2" 0 "F420-non-reducing hydrogenase vhc iron-sulfur subunit D"  
"Chl\_C14\_00633" 2198 "s59E13H2" 0 "S-adenosylmethionine:tRNA ribosyltransferase-isomerase"  
"Chl\_C14\_00633" 2198 "s59E25H2" 0 "S-adenosylmethionine:tRNA ribosyltransferase-isomerase"  
"Chl\_C14\_00633" 2198 "s59E5H2" 0 "S-adenosylmethionine:tRNA ribosyltransferase-isomerase"  
"Chl\_C14\_00633" 2198 "s63E6H2" 0 "S-adenosylmethionine:tRNA ribosyltransferase-isomerase"  
"Chl\_C14\_00634" 2199 "s59E13H2" 0 "Recombinase"  
"Chl\_C14\_00634" 2199 "s59E25H2" 0 "Recombinase"  
"Chl\_C14\_00634" 2199 "s59E5H2" 0 "Recombinase"  
"Chl\_C14\_00634" 2199 "s63E6H2" 0 "Recombinase"  
"Chl\_C14\_00636" 2201 "s59E13H2" 0 "hypothetical protein"  
"Chl\_C14\_00636" 2201 "s59E25H2" 0 "hypothetical protein"  
"Chl\_C14\_00636" 2201 "s59E5H2" 0 "hypothetical protein"  
"Chl\_C14\_00636" 2201 "s63E6H2" 0 "hypothetical protein"  
"Chl\_C14\_00637" 2202 "s59E13H2" 0 "hypothetical protein"  
"Chl\_C14\_00637" 2202 "s59E25H2" 0 "hypothetical protein"  
"Chl\_C14\_00637" 2202 "s59E5H2" 0 "hypothetical protein"  
"Chl\_C14\_00637" 2202 "s63E6H2" 0 "hypothetical protein"  
"Chl\_C14\_00639" 2204 "s59E13H2" 0 "AIPR protein"  
"Chl\_C14\_00639" 2204 "s59E25H2" 0 "AIPR protein"  
"Chl\_C14\_00639" 2204 "s59E5H2" 0 "AIPR protein"  
"Chl\_C14\_00639" 2204 "s63E6H2" 0 "AIPR protein"  
"Chl\_C14\_00640" 2205 "s59E13H2" 0 "Transposase IS116/IS110/IS902 family protein"  
"Chl\_C14\_00640" 2205 "s59E25H2" 0 "Transposase IS116/IS110/IS902 family protein"  
"Chl\_C14\_00640" 2205 "s59E5H2" 0.02473819 "Transposase IS116/IS110/IS902 family protein"  
"Chl\_C14\_00640" 2205 "s63E6H2" 0.4434823 "Transposase IS116/IS110/IS902 family protein"  
"Chl\_C14\_00641" 2206 "s59E13H2" 0 "Oxalate:formate antiporter"  
"Chl\_C14\_00641" 2206 "s59E25H2" 0 "Oxalate:formate antiporter"  
"Chl\_C14\_00641" 2206 "s59E5H2" 0 "Oxalate:formate antiporter"  
"Chl\_C14\_00641" 2206 "s63E6H2" 0 "Oxalate:formate antiporter"  
"Chl\_C14\_00642" 2207 "s59E13H2" 0 "Pyruvate kinase"  
"Chl\_C14\_00642" 2207 "s59E25H2" 0 "Pyruvate kinase"  
"Chl\_C14\_00642" 2207 "s59E5H2" 0 "Pyruvate kinase"  
"Chl\_C14\_00642" 2207 "s63E6H2" 0 "Pyruvate kinase"  
"Chl\_C14\_00643" 2208 "s59E13H2" 0 "3-keto-5-aminohexanoate cleavage enzyme"  
"Chl\_C14\_00643" 2208 "s59E25H2" 0 "3-keto-5-aminohexanoate cleavage enzyme"

"Chl\_C14\_00643" 2208 "s59E5H2" 0 "3-keto-5-aminohexanoate cleavage enzyme"  
"Chl\_C14\_00643" 2208 "s63E6H2" 0 "3-keto-5-aminohexanoate cleavage enzyme"  
"Chl\_C14\_00644" 2209 "s59E13H2" 0 "3-keto-5-aminohexanoate cleavage enzyme"  
"Chl\_C14\_00644" 2209 "s59E25H2" 0 "3-keto-5-aminohexanoate cleavage enzyme"  
"Chl\_C14\_00644" 2209 "s59E5H2" 0 "3-keto-5-aminohexanoate cleavage enzyme"  
"Chl\_C14\_00644" 2209 "s63E6H2" 0 "3-keto-5-aminohexanoate cleavage enzyme"  
"Chl\_C14\_00646" 2211 "s59E13H2" 0 "hypothetical protein"  
"Chl\_C14\_00646" 2211 "s59E25H2" 0 "hypothetical protein"  
"Chl\_C14\_00646" 2211 "s59E5H2" 0 "hypothetical protein"  
"Chl\_C14\_00646" 2211 "s63E6H2" 0 "hypothetical protein"  
"Chl\_C14\_00647" 2212 "s59E13H2" 0 "hypothetical protein"  
"Chl\_C14\_00647" 2212 "s59E25H2" 0 "hypothetical protein"  
"Chl\_C14\_00647" 2212 "s59E5H2" 0 "hypothetical protein"  
"Chl\_C14\_00647" 2212 "s63E6H2" 0 "hypothetical protein"  
"Chl\_C14\_00648" 2213 "s59E13H2" 0 "metal-dependent hydrolase"  
"Chl\_C14\_00648" 2213 "s59E25H2" 0 "metal-dependent hydrolase"  
"Chl\_C14\_00648" 2213 "s59E5H2" 0.005531966 "metal-dependent hydrolase"  
"Chl\_C14\_00648" 2213 "s63E6H2" 0.002400983 "metal-dependent hydrolase"  
"Chl\_C14\_00649" 2214 "s59E13H2" 0 "Heat-inducible transcription repressor HrcA"  
"Chl\_C14\_00649" 2214 "s59E25H2" 0 "Heat-inducible transcription repressor HrcA"  
"Chl\_C14\_00649" 2214 "s59E5H2" 0 "Heat-inducible transcription repressor HrcA"  
"Chl\_C14\_00649" 2214 "s63E6H2" 0 "Heat-inducible transcription repressor HrcA"  
"Chl\_C14\_00650" 2215 "s59E13H2" 0 "heat shock protein GrpE"  
"Chl\_C14\_00650" 2215 "s59E25H2" 0 "heat shock protein GrpE"  
"Chl\_C14\_00650" 2215 "s59E5H2" 0 "heat shock protein GrpE"  
"Chl\_C14\_00650" 2215 "s63E6H2" 0 "heat shock protein GrpE"  
"Chl\_C14\_00651" 2216 "s59E13H2" 0 "Chaperone protein DnaK"  
"Chl\_C14\_00651" 2216 "s59E25H2" 0 "Chaperone protein DnaK"  
"Chl\_C14\_00651" 2216 "s59E5H2" 0.00133177 "Chaperone protein DnaK"  
"Chl\_C14\_00651" 2216 "s63E6H2" 0 "Chaperone protein DnaK"  
"Chl\_C14\_00652" 2217 "s59E13H2" 0 "Chaperone protein DnaJ"  
"Chl\_C14\_00652" 2217 "s59E25H2" 0 "Chaperone protein DnaJ"  
"Chl\_C14\_00652" 2217 "s59E5H2" 0 "Chaperone protein DnaJ"  
"Chl\_C14\_00652" 2217 "s63E6H2" 0 "Chaperone protein DnaJ"  
"Chl\_C14\_00653" 2218 "s59E13H2" 0 "Glycerol-3-phosphate dehydrogenase [NAD(P)+]"  
"Chl\_C14\_00653" 2218 "s59E25H2" 0 "Glycerol-3-phosphate dehydrogenase [NAD(P)+]"  
"Chl\_C14\_00653" 2218 "s59E5H2" 0 "Glycerol-3-phosphate dehydrogenase [NAD(P)+]"  
"Chl\_C14\_00653" 2218 "s63E6H2" 0 "Glycerol-3-phosphate dehydrogenase [NAD(P)+]"  
"Chl\_C14\_00654" 2219 "s59E13H2" 0 "Glycerol-3-phosphate acyltransferase"  
"Chl\_C14\_00654" 2219 "s59E25H2" 0 "Glycerol-3-phosphate acyltransferase"  
"Chl\_C14\_00654" 2219 "s59E5H2" 0 "Glycerol-3-phosphate acyltransferase"  
"Chl\_C14\_00654" 2219 "s63E6H2" 0 "Glycerol-3-phosphate acyltransferase"  
"Chl\_C14\_00655" 2220 "s59E13H2" 0 "GTPase Der"  
"Chl\_C14\_00655" 2220 "s59E25H2" 0 "GTPase Der"  
"Chl\_C14\_00655" 2220 "s59E5H2" 0 "GTPase Der"  
"Chl\_C14\_00655" 2220 "s63E6H2" 0 "GTPase Der"  
"Chl\_C14\_00656" 2221 "s59E13H2" 0 "hypothetical protein"

"Chl\_C14\_00656" 2221 "s59E25H2" 0 "hypothetical protein"  
"Chl\_C14\_00656" 2221 "s59E5H2" 0 "hypothetical protein"  
"Chl\_C14\_00656" 2221 "s63E6H2" 0 "hypothetical protein"  
"Chl\_C14\_00657" 2222 "s59E13H2" 0 "Ornithine carbamoyltransferase"  
"Chl\_C14\_00657" 2222 "s59E25H2" 0 "Ornithine carbamoyltransferase"  
"Chl\_C14\_00657" 2222 "s59E5H2" 0.001691959 "Ornithine carbamoyltransferase"  
"Chl\_C14\_00657" 2222 "s63E6H2" 0 "Ornithine carbamoyltransferase"  
"Chl\_C14\_00658" 2223 "s59E13H2" 0 "NADH dehydrogenase"  
"Chl\_C14\_00658" 2223 "s59E25H2" 0 "NADH dehydrogenase"  
"Chl\_C14\_00658" 2223 "s59E5H2" 0 "NADH dehydrogenase"  
"Chl\_C14\_00658" 2223 "s63E6H2" 0 "NADH dehydrogenase"  
"Chl\_C14\_00659" 2224 "s59E13H2" 0 "Phosphoserine phosphatase 1"  
"Chl\_C14\_00659" 2224 "s59E25H2" 0 "Phosphoserine phosphatase 1"  
"Chl\_C14\_00659" 2224 "s59E5H2" 0 "Phosphoserine phosphatase 1"  
"Chl\_C14\_00659" 2224 "s63E6H2" 0 "Phosphoserine phosphatase 1"  
"Chl\_C14\_00660" 2225 "s59E13H2" 0 "Transposase IS116/IS110/IS902 family protein"  
"Chl\_C14\_00660" 2225 "s59E25H2" 0 "Transposase IS116/IS110/IS902 family protein"  
"Chl\_C14\_00660" 2225 "s59E5H2" 0.07186864 "Transposase IS116/IS110/IS902 family protein"  
"Chl\_C14\_00660" 2225 "s63E6H2" 0 "Transposase IS116/IS110/IS902 family protein"  
"Chl\_C14\_00661" 2226 "s59E13H2" 0.003935401 "hypothetical protein"  
"Chl\_C14\_00661" 2226 "s59E25H2" 0 "hypothetical protein"  
"Chl\_C14\_00661" 2226 "s59E5H2" 0 "hypothetical protein"  
"Chl\_C14\_00661" 2226 "s63E6H2" 0.0100255 "hypothetical protein"  
"Chl\_C14\_00663" 2228 "s59E13H2" 0.001786127 "Transposase"  
"Chl\_C14\_00663" 2228 "s59E25H2" 0 "Transposase"  
"Chl\_C14\_00663" 2228 "s59E5H2" 0 "Transposase"  
"Chl\_C14\_00663" 2228 "s63E6H2" 1.093296 "Transposase"  
"Chl\_C14\_00664" 2229 "s59E13H2" 0 "hypothetical protein"  
"Chl\_C14\_00664" 2229 "s59E25H2" 0 "hypothetical protein"  
"Chl\_C14\_00664" 2229 "s59E5H2" 0 "hypothetical protein"  
"Chl\_C14\_00664" 2229 "s63E6H2" 0 "hypothetical protein"  
"Chl\_C14\_00666" 2231 "s59E13H2" 0 "hypothetical protein"  
"Chl\_C14\_00666" 2231 "s59E25H2" 0 "hypothetical protein"  
"Chl\_C14\_00666" 2231 "s59E5H2" 0 "hypothetical protein"  
"Chl\_C14\_00666" 2231 "s63E6H2" 0 "hypothetical protein"  
"Chl\_C14\_00667" 2232 "s59E13H2" 0 "hypothetical protein"  
"Chl\_C14\_00667" 2232 "s59E25H2" 0 "hypothetical protein"  
"Chl\_C14\_00667" 2232 "s59E5H2" 0 "hypothetical protein"  
"Chl\_C14\_00667" 2232 "s63E6H2" 0 "hypothetical protein"  
"Chl\_C14\_00668" 2233 "s59E13H2" 0 "GIY-YIG nuclease superfamily protein"  
"Chl\_C14\_00668" 2233 "s59E25H2" 0 "GIY-YIG nuclease superfamily protein"  
"Chl\_C14\_00668" 2233 "s59E5H2" 0 "GIY-YIG nuclease superfamily protein"  
"Chl\_C14\_00668" 2233 "s63E6H2" 0 "GIY-YIG nuclease superfamily protein"  
"Chl\_C14\_00671" 2236 "s59E13H2" 0 "hypothetical protein"  
"Chl\_C14\_00671" 2236 "s59E25H2" 0 "hypothetical protein"  
"Chl\_C14\_00671" 2236 "s59E5H2" 0 "hypothetical protein"  
"Chl\_C14\_00671" 2236 "s63E6H2" 0 "hypothetical protein"

"Chl\_C14\_00672" 2237 "s59E13H2" 0 "Glycine reductase complex component B subunit gamma"  
"Chl\_C14\_00672" 2237 "s59E25H2" 0 "Glycine reductase complex component B subunit gamma"  
"Chl\_C14\_00672" 2237 "s59E5H2" 0 "Glycine reductase complex component B subunit gamma"  
"Chl\_C14\_00672" 2237 "s63E6H2" 0.05707273 "Glycine reductase complex component B subunit gamma"  
"Chl\_C14\_00673" 2238 "s59E13H2" 0 "Glycine reductase complex component B subunit gamma"  
"Chl\_C14\_00673" 2238 "s59E25H2" 0 "Glycine reductase complex component B subunit gamma"  
"Chl\_C14\_00673" 2238 "s59E5H2" 0 "Glycine reductase complex component B subunit gamma"  
"Chl\_C14\_00673" 2238 "s63E6H2" 0.09445351 "Glycine reductase complex component B subunit gamma"  
"Chl\_C14\_00674" 2239 "s59E13H2" 0 "Glycine reductase complex component B subunits alpha and beta"  
"Chl\_C14\_00674" 2239 "s59E25H2" 0 "Glycine reductase complex component B subunits alpha and beta"  
"Chl\_C14\_00674" 2239 "s59E5H2" 0 "Glycine reductase complex component B subunits alpha and beta"  
"Chl\_C14\_00674" 2239 "s63E6H2" 0.05064163 "Glycine reductase complex component B subunits alpha and beta"  
"Chl\_C14\_00675" 2240 "s59E13H2" 0 "Glycine/sarcosine/betaine reductase complex component A"  
"Chl\_C14\_00675" 2240 "s59E25H2" 0 "Glycine/sarcosine/betaine reductase complex component A"  
"Chl\_C14\_00675" 2240 "s59E5H2" 0 "Glycine/sarcosine/betaine reductase complex component A"  
"Chl\_C14\_00675" 2240 "s63E6H2" 0 "Glycine/sarcosine/betaine reductase complex component A"  
"Chl\_C14\_00676" 2241 "s59E13H2" 0 "Glycine/sarcosine/betaine reductase complex component A"  
"Chl\_C14\_00676" 2241 "s59E25H2" 0 "Glycine/sarcosine/betaine reductase complex component A"  
"Chl\_C14\_00676" 2241 "s59E5H2" 0 "Glycine/sarcosine/betaine reductase complex component A"  
"Chl\_C14\_00676" 2241 "s63E6H2" 0 "Glycine/sarcosine/betaine reductase complex component A"  
"Chl\_C14\_00677" 2242 "s59E13H2" 0 "Thioredoxin"  
"Chl\_C14\_00677" 2242 "s59E25H2" 0 "Thioredoxin"  
"Chl\_C14\_00677" 2242 "s59E5H2" 0 "Thioredoxin"  
"Chl\_C14\_00677" 2242 "s63E6H2" 0 "Thioredoxin"  
"Chl\_C14\_00678" 2243 "s59E13H2" 0 "Glycine/sarcosine/betaine reductase complex component C subunit beta"  
"Chl\_C14\_00678" 2243 "s59E25H2" 0 "Glycine/sarcosine/betaine reductase complex component C subunit beta"  
"Chl\_C14\_00678" 2243 "s59E5H2" 0 "Glycine/sarcosine/betaine reductase complex component C subunit beta"  
"Chl\_C14\_00678" 2243 "s63E6H2" 0 "Glycine/sarcosine/betaine reductase complex component C subunit beta"  
"Chl\_C14\_00680" 2245 "s59E13H2" 0 "D-3-phosphoglycerate dehydrogenase"  
"Chl\_C14\_00680" 2245 "s59E25H2" 0 "D-3-phosphoglycerate dehydrogenase"  
"Chl\_C14\_00680" 2245 "s59E5H2" 0 "D-3-phosphoglycerate dehydrogenase"  
"Chl\_C14\_00680" 2245 "s63E6H2" 0 "D-3-phosphoglycerate dehydrogenase"  
"Chl\_C14\_00683" 2248 "s59E13H2" 0 "hypothetical protein"  
"Chl\_C14\_00683" 2248 "s59E25H2" 0 "hypothetical protein"  
"Chl\_C14\_00683" 2248 "s59E5H2" 0 "hypothetical protein"  
"Chl\_C14\_00683" 2248 "s63E6H2" 0 "hypothetical protein"  
"Chl\_C14\_00684" 2249 "s59E13H2" 0 "hypothetical protein"  
"Chl\_C14\_00684" 2249 "s59E25H2" 0 "hypothetical protein"  
"Chl\_C14\_00684" 2249 "s59E5H2" 0 "hypothetical protein"  
"Chl\_C14\_00684" 2249 "s63E6H2" 0 "hypothetical protein"  
"Chl\_C14\_00685" 2250 "s59E13H2" 0 "DctM-like transporters"  
"Chl\_C14\_00685" 2250 "s59E25H2" 0 "DctM-like transporters"  
"Chl\_C14\_00685" 2250 "s59E5H2" 0 "DctM-like transporters"  
"Chl\_C14\_00685" 2250 "s63E6H2" 0 "DctM-like transporters"  
"Chl\_C14\_00686" 2251 "s59E13H2" 0 "Thermophilic metalloprotease (M29)"  
"Chl\_C14\_00686" 2251 "s59E25H2" 0 "Thermophilic metalloprotease (M29)"  
"Chl\_C14\_00686" 2251 "s59E5H2" 0 "Thermophilic metalloprotease (M29)"

"Chl\_C14\_00686" 2251 "s63E6H2" 0 "Thermophilic metalloprotease (M29)"  
"Chl\_C14\_00687" 2252 "s59E13H2" 0 "hypothetical protein"  
"Chl\_C14\_00687" 2252 "s59E25H2" 0 "hypothetical protein"  
"Chl\_C14\_00687" 2252 "s59E5H2" 0 "hypothetical protein"  
"Chl\_C14\_00687" 2252 "s63E6H2" 0 "hypothetical protein"  
"Chl\_C14\_00688" 2253 "s59E13H2" 0 "Enamine/imine deaminase"  
"Chl\_C14\_00688" 2253 "s59E25H2" 0 "Enamine/imine deaminase"  
"Chl\_C14\_00688" 2253 "s59E5H2" 0 "Enamine/imine deaminase"  
"Chl\_C14\_00688" 2253 "s63E6H2" 0 "Enamine/imine deaminase"  
"Chl\_C14\_00689" 2254 "s59E13H2" 0 "Acetylene hydratase"  
"Chl\_C14\_00689" 2254 "s59E25H2" 0 "Acetylene hydratase"  
"Chl\_C14\_00689" 2254 "s59E5H2" 0.005658055 "Acetylene hydratase"  
"Chl\_C14\_00689" 2254 "s63E6H2" 0.404669 "Acetylene hydratase"  
"Chl\_C14\_00690" 2255 "s59E13H2" 0 "L-hydantoinase"  
"Chl\_C14\_00690" 2255 "s59E25H2" 0 "L-hydantoinase"  
"Chl\_C14\_00690" 2255 "s59E5H2" 0 "L-hydantoinase"  
"Chl\_C14\_00690" 2255 "s63E6H2" 0.0004387939 "L-hydantoinase"  
"Chl\_C14\_00691" 2256 "s59E13H2" 0 "hypothetical protein"  
"Chl\_C14\_00691" 2256 "s59E25H2" 0 "hypothetical protein"  
"Chl\_C14\_00691" 2256 "s59E5H2" 0 "hypothetical protein"  
"Chl\_C14\_00691" 2256 "s63E6H2" 0 "hypothetical protein"  
"Chl\_C14\_00692" 2257 "s59E13H2" 0 "Putative serine protease HhoA precursor"  
"Chl\_C14\_00692" 2257 "s59E25H2" 0 "Putative serine protease HhoA precursor"  
"Chl\_C14\_00692" 2257 "s59E5H2" 0 "Putative serine protease HhoA precursor"  
"Chl\_C14\_00692" 2257 "s63E6H2" 0 "Putative serine protease HhoA precursor"  
"Chl\_C14\_00693" 2258 "s59E13H2" 0 "hypothetical protein"  
"Chl\_C14\_00693" 2258 "s59E25H2" 0 "hypothetical protein"  
"Chl\_C14\_00693" 2258 "s59E5H2" 0 "hypothetical protein"  
"Chl\_C14\_00693" 2258 "s63E6H2" 0 "hypothetical protein"  
"Chl\_C14\_00696" 2261 "s59E13H2" 0 "Antilisterial bacteriocin subtilisin biosynthesis protein AlbA"  
"Chl\_C14\_00696" 2261 "s59E25H2" 0 "Antilisterial bacteriocin subtilisin biosynthesis protein AlbA"  
"Chl\_C14\_00696" 2261 "s59E5H2" 0 "Antilisterial bacteriocin subtilisin biosynthesis protein AlbA"  
"Chl\_C14\_00696" 2261 "s63E6H2" 0 "Antilisterial bacteriocin subtilisin biosynthesis protein AlbA"  
"Chl\_C14\_00697" 2262 "s59E13H2" 0 "hypothetical protein"  
"Chl\_C14\_00697" 2262 "s59E25H2" 0 "hypothetical protein"  
"Chl\_C14\_00697" 2262 "s59E5H2" 0 "hypothetical protein"  
"Chl\_C14\_00697" 2262 "s63E6H2" 0 "hypothetical protein"  
"Chl\_C14\_00699" 2264 "s59E13H2" 0 "hypothetical protein"  
"Chl\_C14\_00699" 2264 "s59E25H2" 0 "hypothetical protein"  
"Chl\_C14\_00699" 2264 "s59E5H2" 0 "hypothetical protein"  
"Chl\_C14\_00699" 2264 "s63E6H2" 0 "hypothetical protein"  
"Chl\_C14\_00702" 2267 "s59E13H2" 0 "hypothetical protein"  
"Chl\_C14\_00702" 2267 "s59E25H2" 0 "hypothetical protein"  
"Chl\_C14\_00702" 2267 "s59E5H2" 0 "hypothetical protein"  
"Chl\_C14\_00702" 2267 "s63E6H2" 0 "hypothetical protein"  
"Chl\_C14\_00704" 2269 "s59E13H2" 0 "Recombinase"  
"Chl\_C14\_00704" 2269 "s59E25H2" 0 "Recombinase"

"Chl\_C14\_00704" 2269 "s59E5H2" 0 "Recombinase"  
"Chl\_C14\_00704" 2269 "s63E6H2" 0 "Recombinase"  
"Chl\_C14\_00706" 2271 "s59E13H2" 0 "DNA polymerase III subunit alpha"  
"Chl\_C14\_00706" 2271 "s59E25H2" 0 "DNA polymerase III subunit alpha"  
"Chl\_C14\_00706" 2271 "s59E5H2" 0 "DNA polymerase III subunit alpha"  
"Chl\_C14\_00706" 2271 "s63E6H2" 0.0008603257 "DNA polymerase III subunit alpha"  
"Chl\_C14\_00707" 2272 "s59E13H2" 0 "hypothetical protein"  
"Chl\_C14\_00707" 2272 "s59E25H2" 0 "hypothetical protein"  
"Chl\_C14\_00707" 2272 "s59E5H2" 0 "hypothetical protein"  
"Chl\_C14\_00707" 2272 "s63E6H2" 0 "hypothetical protein"  
"Chl\_C14\_00709" 2274 "s59E13H2" 0 "hypothetical protein"  
"Chl\_C14\_00709" 2274 "s59E25H2" 0 "hypothetical protein"  
"Chl\_C14\_00709" 2274 "s59E5H2" 0 "hypothetical protein"  
"Chl\_C14\_00709" 2274 "s63E6H2" 0 "hypothetical protein"  
"Chl\_C14\_00710" 2275 "s59E13H2" 0 "Zinc ribbon domain protein"  
"Chl\_C14\_00710" 2275 "s59E25H2" 0 "Zinc ribbon domain protein"  
"Chl\_C14\_00710" 2275 "s59E5H2" 0 "Zinc ribbon domain protein"  
"Chl\_C14\_00710" 2275 "s63E6H2" 0 "Zinc ribbon domain protein"  
"Chl\_C14\_00711" 2276 "s59E13H2" 0 "N-substituted formamide deformylase precursor"  
"Chl\_C14\_00711" 2276 "s59E25H2" 0 "N-substituted formamide deformylase precursor"  
"Chl\_C14\_00711" 2276 "s59E5H2" 0.009016991 "N-substituted formamide deformylase precursor"  
"Chl\_C14\_00711" 2276 "s63E6H2" 0 "N-substituted formamide deformylase precursor"  
"Chl\_C14\_00712" 2277 "s59E13H2" 0 "putative MFS-type transporter YhjX"  
"Chl\_C14\_00712" 2277 "s59E25H2" 0 "putative MFS-type transporter YhjX"  
"Chl\_C14\_00712" 2277 "s59E5H2" 0 "putative MFS-type transporter YhjX"  
"Chl\_C14\_00712" 2277 "s63E6H2" 0 "putative MFS-type transporter YhjX"  
"Chl\_C14\_00713" 2278 "s59E13H2" 0 "putative NH(3)-dependent NAD(+) synthetase"  
"Chl\_C14\_00713" 2278 "s59E25H2" 0 "putative NH(3)-dependent NAD(+) synthetase"  
"Chl\_C14\_00713" 2278 "s59E5H2" 0 "putative NH(3)-dependent NAD(+) synthetase"  
"Chl\_C14\_00713" 2278 "s63E6H2" 0 "putative NH(3)-dependent NAD(+) synthetase"  
"Chl\_C14\_00714" 2279 "s59E13H2" 0 "Nitrilase, bromoxynil-specific"  
"Chl\_C14\_00714" 2279 "s59E25H2" 0 "Nitrilase, bromoxynil-specific"  
"Chl\_C14\_00714" 2279 "s59E5H2" 0 "Nitrilase, bromoxynil-specific"  
"Chl\_C14\_00714" 2279 "s63E6H2" 0 "Nitrilase, bromoxynil-specific"  
"Chl\_C14\_00716" 2281 "s59E13H2" 0 "Amidohydrolase"  
"Chl\_C14\_00716" 2281 "s59E25H2" 0 "Amidohydrolase"  
"Chl\_C14\_00716" 2281 "s59E5H2" 0 "Amidohydrolase"  
"Chl\_C14\_00716" 2281 "s63E6H2" 0 "Amidohydrolase"  
"Chl\_C14\_00717" 2282 "s59E13H2" 0 "Phosphate acetyltransferase"  
"Chl\_C14\_00717" 2282 "s59E25H2" 0 "Phosphate acetyltransferase"  
"Chl\_C14\_00717" 2282 "s59E5H2" 0 "Phosphate acetyltransferase"  
"Chl\_C14\_00717" 2282 "s63E6H2" 0 "Phosphate acetyltransferase"  
"Chl\_C14\_00718" 2283 "s59E13H2" 0 "Radical SAM superfamily protein"  
"Chl\_C14\_00718" 2283 "s59E25H2" 0 "Radical SAM superfamily protein"  
"Chl\_C14\_00718" 2283 "s59E5H2" 0 "Radical SAM superfamily protein"  
"Chl\_C14\_00718" 2283 "s63E6H2" 0 "Radical SAM superfamily protein"  
"Chl\_C14\_00720" 2285 "s59E13H2" 0 "hypothetical protein"

"Chl\_C14\_00720" 2285 "s59E25H2" 0 "hypothetical protein"  
"Chl\_C14\_00720" 2285 "s59E5H2" 0 "hypothetical protein"  
"Chl\_C14\_00720" 2285 "s63E6H2" 0 "hypothetical protein"  
"Chl\_C14\_00721" 2286 "s59E13H2" 0 "Divergent AAA domain protein"  
"Chl\_C14\_00721" 2286 "s59E25H2" 0 "Divergent AAA domain protein"  
"Chl\_C14\_00721" 2286 "s59E5H2" 0 "Divergent AAA domain protein"  
"Chl\_C14\_00721" 2286 "s63E6H2" 0 "Divergent AAA domain protein"  
"Chl\_C14\_00722" 2287 "s59E13H2" 0 "hypothetical protein"  
"Chl\_C14\_00722" 2287 "s59E25H2" 0 "hypothetical protein"  
"Chl\_C14\_00722" 2287 "s59E5H2" 0 "hypothetical protein"  
"Chl\_C14\_00722" 2287 "s63E6H2" 0 "hypothetical protein"  
"Chl\_C14\_00723" 2288 "s59E13H2" 0 "Transcription-repair-coupling factor"  
"Chl\_C14\_00723" 2288 "s59E25H2" 0 "Transcription-repair-coupling factor"  
"Chl\_C14\_00723" 2288 "s59E5H2" 0 "Transcription-repair-coupling factor"  
"Chl\_C14\_00723" 2288 "s63E6H2" 0.0002506743 "Transcription-repair-coupling factor"  
"Chl\_C14\_00724" 2289 "s59E13H2" 0 "Inner membrane transport protein YajR"  
"Chl\_C14\_00724" 2289 "s59E25H2" 0 "Inner membrane transport protein YajR"  
"Chl\_C14\_00724" 2289 "s59E5H2" 0 "Inner membrane transport protein YajR"  
"Chl\_C14\_00724" 2289 "s63E6H2" 0 "Inner membrane transport protein YajR"  
"Chl\_C14\_00725" 2290 "s59E13H2" 0 "Glutamate 5-kinase"  
"Chl\_C14\_00725" 2290 "s59E25H2" 0 "Glutamate 5-kinase"  
"Chl\_C14\_00725" 2290 "s59E5H2" 0 "Glutamate 5-kinase"  
"Chl\_C14\_00725" 2290 "s63E6H2" 0.002627444 "Glutamate 5-kinase"  
"Chl\_C14\_00726" 2291 "s59E13H2" 0 "Gamma-glutamyl phosphate reductase"  
"Chl\_C14\_00726" 2291 "s59E25H2" 0 "Gamma-glutamyl phosphate reductase"  
"Chl\_C14\_00726" 2291 "s59E5H2" 0 "Gamma-glutamyl phosphate reductase"  
"Chl\_C14\_00726" 2291 "s63E6H2" 0 "Gamma-glutamyl phosphate reductase"  
"Chl\_C14\_00727" 2292 "s59E13H2" 0 "Ribonuclease PH"  
"Chl\_C14\_00727" 2292 "s59E25H2" 0 "Ribonuclease PH"  
"Chl\_C14\_00727" 2292 "s59E5H2" 0 "Ribonuclease PH"  
"Chl\_C14\_00727" 2292 "s63E6H2" 0 "Ribonuclease PH"  
"Chl\_C14\_00729" 2294 "s59E13H2" 0 "Nicotinamide-nucleotide amidohydrolase PncC"  
"Chl\_C14\_00729" 2294 "s59E25H2" 0 "Nicotinamide-nucleotide amidohydrolase PncC"  
"Chl\_C14\_00729" 2294 "s59E5H2" 0 "Nicotinamide-nucleotide amidohydrolase PncC"  
"Chl\_C14\_00729" 2294 "s63E6H2" 0 "Nicotinamide-nucleotide amidohydrolase PncC"  
"Chl\_C14\_00730" 2295 "s59E13H2" 0 "Radical SAM superfamily protein"  
"Chl\_C14\_00730" 2295 "s59E25H2" 0 "Radical SAM superfamily protein"  
"Chl\_C14\_00730" 2295 "s59E5H2" 0 "Radical SAM superfamily protein"  
"Chl\_C14\_00730" 2295 "s63E6H2" 0 "Radical SAM superfamily protein"  
"Chl\_C14\_00731" 2296 "s59E13H2" 0 "hypothetical protein"  
"Chl\_C14\_00731" 2296 "s59E25H2" 0 "hypothetical protein"  
"Chl\_C14\_00731" 2296 "s59E5H2" 0 "hypothetical protein"  
"Chl\_C14\_00731" 2296 "s63E6H2" 0 "hypothetical protein"  
"Chl\_C14\_00732" 2297 "s59E13H2" 0 "hypothetical protein"  
"Chl\_C14\_00732" 2297 "s59E25H2" 0 "hypothetical protein"  
"Chl\_C14\_00732" 2297 "s59E5H2" 0 "hypothetical protein"  
"Chl\_C14\_00732" 2297 "s63E6H2" 0 "hypothetical protein"

"Chl\_C14\_00733" 2298 "s59E13H2" 0 "hypothetical protein"  
"Chl\_C14\_00733" 2298 "s59E25H2" 0 "hypothetical protein"  
"Chl\_C14\_00733" 2298 "s59E5H2" 0 "hypothetical protein"  
"Chl\_C14\_00733" 2298 "s63E6H2" 0 "hypothetical protein"  
"Chl\_C14\_00734" 2299 "s59E13H2" 0 "Protease 1 precursor"  
"Chl\_C14\_00734" 2299 "s59E25H2" 0 "Protease 1 precursor"  
"Chl\_C14\_00734" 2299 "s59E5H2" 0.00702227 "Protease 1 precursor"  
"Chl\_C14\_00734" 2299 "s63E6H2" 0 "Protease 1 precursor"  
"Chl\_C14\_00735" 2300 "s59E13H2" 0 "YcfA-like protein"  
"Chl\_C14\_00735" 2300 "s59E25H2" 0 "YcfA-like protein"  
"Chl\_C14\_00735" 2300 "s59E5H2" 0 "YcfA-like protein"  
"Chl\_C14\_00735" 2300 "s63E6H2" 0 "YcfA-like protein"  
"Chl\_C14\_00736" 2301 "s59E13H2" 0 "hypothetical protein"  
"Chl\_C14\_00736" 2301 "s59E25H2" 0 "hypothetical protein"  
"Chl\_C14\_00736" 2301 "s59E5H2" 0 "hypothetical protein"  
"Chl\_C14\_00736" 2301 "s63E6H2" 0 "hypothetical protein"  
"Chl\_C14\_00737" 2302 "s59E13H2" 0 "Chaperone protein DnaJ"  
"Chl\_C14\_00737" 2302 "s59E25H2" 0 "Chaperone protein DnaJ"  
"Chl\_C14\_00737" 2302 "s59E5H2" 0 "Chaperone protein DnaJ"  
"Chl\_C14\_00737" 2302 "s63E6H2" 0 "Chaperone protein DnaJ"  
"Chl\_C14\_00738" 2303 "s59E13H2" 0 "hypothetical protein"  
"Chl\_C14\_00738" 2303 "s59E25H2" 0 "hypothetical protein"  
"Chl\_C14\_00738" 2303 "s59E5H2" 0 "hypothetical protein"  
"Chl\_C14\_00738" 2303 "s63E6H2" 0 "hypothetical protein"  
"Chl\_C14\_00739" 2304 "s59E13H2" 0 "ComEC family competence protein"  
"Chl\_C14\_00739" 2304 "s59E25H2" 0 "ComEC family competence protein"  
"Chl\_C14\_00739" 2304 "s59E5H2" 0 "ComEC family competence protein"  
"Chl\_C14\_00739" 2304 "s63E6H2" 0 "ComEC family competence protein"  
"Chl\_C14\_00740" 2305 "s59E13H2" 0 "putative tyrosine recombinase XerC-like protein"  
"Chl\_C14\_00740" 2305 "s59E25H2" 0 "putative tyrosine recombinase XerC-like protein"  
"Chl\_C14\_00740" 2305 "s59E5H2" 0 "putative tyrosine recombinase XerC-like protein"  
"Chl\_C14\_00740" 2305 "s63E6H2" 0 "putative tyrosine recombinase XerC-like protein"  
"Chl\_C14\_00742" 2307 "s59E13H2" 0 "hypothetical protein"  
"Chl\_C14\_00742" 2307 "s59E25H2" 0 "hypothetical protein"  
"Chl\_C14\_00742" 2307 "s59E5H2" 0 "hypothetical protein"  
"Chl\_C14\_00742" 2307 "s63E6H2" 0 "hypothetical protein"  
"Chl\_C14\_00744" 2309 "s59E13H2" 0.01402055 "Transposase"  
"Chl\_C14\_00744" 2309 "s59E25H2" 0 "Transposase"  
"Chl\_C14\_00744" 2309 "s59E5H2" 1.390487 "Transposase"  
"Chl\_C14\_00744" 2309 "s63E6H2" 0.0006117524 "Transposase"  
"Chl\_C14\_00745" 2310 "s59E13H2" 0.003732269 "Integrase core domain protein"  
"Chl\_C14\_00745" 2310 "s59E25H2" 0 "Integrase core domain protein"  
"Chl\_C14\_00745" 2310 "s59E5H2" 1.232468 "Integrase core domain protein"  
"Chl\_C14\_00745" 2310 "s63E6H2" 0.8650314 "Integrase core domain protein"  
"Chl\_C14\_00746" 2311 "s59E13H2" 0 "hypothetical protein"  
"Chl\_C14\_00746" 2311 "s59E25H2" 0 "hypothetical protein"  
"Chl\_C14\_00746" 2311 "s59E5H2" 0 "hypothetical protein"



"Chl\_C14\_00746" 2311 "s63E6H2" 0.008319444 "hypothetical protein"  
"Chl\_C14\_00747" 2312 "s59E13H2" 0 "hypothetical protein"  
"Chl\_C14\_00747" 2312 "s59E25H2" 0 "hypothetical protein"  
"Chl\_C14\_00747" 2312 "s59E5H2" 0 "hypothetical protein"  
"Chl\_C14\_00747" 2312 "s63E6H2" 0 "hypothetical protein"  
"Chl\_C14\_00748" 2313 "s59E13H2" 0 "Glycerol-3-phosphate acyltransferase"  
"Chl\_C14\_00748" 2313 "s59E25H2" 0 "Glycerol-3-phosphate acyltransferase"  
"Chl\_C14\_00748" 2313 "s59E5H2" 0 "Glycerol-3-phosphate acyltransferase"  
"Chl\_C14\_00748" 2313 "s63E6H2" 0 "Glycerol-3-phosphate acyltransferase"  
"Chl\_C14\_00749" 2314 "s59E13H2" 0 "hypothetical protein"  
"Chl\_C14\_00749" 2314 "s59E25H2" 0 "hypothetical protein"  
"Chl\_C14\_00749" 2314 "s59E5H2" 0 "hypothetical protein"  
"Chl\_C14\_00749" 2314 "s63E6H2" 0 "hypothetical protein"  
"Chl\_C14\_00750" 2315 "s59E13H2" 0 "CoB--CoM heterodisulfide reductase iron-sulfur subunit D"  
"Chl\_C14\_00750" 2315 "s59E25H2" 0 "CoB--CoM heterodisulfide reductase iron-sulfur subunit D"  
"Chl\_C14\_00750" 2315 "s59E5H2" 0 "CoB--CoM heterodisulfide reductase iron-sulfur subunit D"  
"Chl\_C14\_00750" 2315 "s63E6H2" 0 "CoB--CoM heterodisulfide reductase iron-sulfur subunit D"  
"Chl\_C14\_00751" 2316 "s59E13H2" 0 "Acyl-CoA dehydrogenase"  
"Chl\_C14\_00751" 2316 "s59E25H2" 0 "Acyl-CoA dehydrogenase"  
"Chl\_C14\_00751" 2316 "s59E5H2" 0 "Acyl-CoA dehydrogenase"  
"Chl\_C14\_00751" 2316 "s63E6H2" 0 "Acyl-CoA dehydrogenase"  
"Chl\_C14\_00752" 2317 "s59E13H2" 0 "Long-chain-fatty-acid--CoA ligase"  
"Chl\_C14\_00752" 2317 "s59E25H2" 0 "Long-chain-fatty-acid--CoA ligase"  
"Chl\_C14\_00752" 2317 "s59E5H2" 0 "Long-chain-fatty-acid--CoA ligase"  
"Chl\_C14\_00752" 2317 "s63E6H2" 0 "Long-chain-fatty-acid--CoA ligase"  
"Chl\_C14\_00753" 2318 "s59E13H2" 0 "NAD-dependent protein deacylase 2"  
"Chl\_C14\_00753" 2318 "s59E25H2" 0 "NAD-dependent protein deacylase 2"  
"Chl\_C14\_00753" 2318 "s59E5H2" 0 "NAD-dependent protein deacylase 2"  
"Chl\_C14\_00753" 2318 "s63E6H2" 0 "NAD-dependent protein deacylase 2"  
"Chl\_C14\_00754" 2319 "s59E13H2" 0 "3-hydroxypropionyl-coenzyme A dehydratase"  
"Chl\_C14\_00754" 2319 "s59E25H2" 0 "3-hydroxypropionyl-coenzyme A dehydratase"  
"Chl\_C14\_00754" 2319 "s59E5H2" 0 "3-hydroxypropionyl-coenzyme A dehydratase"  
"Chl\_C14\_00754" 2319 "s63E6H2" 0 "3-hydroxypropionyl-coenzyme A dehydratase"  
"Chl\_C14\_00755" 2320 "s59E13H2" 0 "3-hydroxypropionyl-coenzyme A dehydratase"  
"Chl\_C14\_00755" 2320 "s59E25H2" 0 "3-hydroxypropionyl-coenzyme A dehydratase"  
"Chl\_C14\_00755" 2320 "s59E5H2" 0 "3-hydroxypropionyl-coenzyme A dehydratase"  
"Chl\_C14\_00755" 2320 "s63E6H2" 0 "3-hydroxypropionyl-coenzyme A dehydratase"  
"Chl\_C14\_00756" 2321 "s59E13H2" 0.002432387 "Endonuclease III"  
"Chl\_C14\_00756" 2321 "s59E25H2" 0 "Endonuclease III"  
"Chl\_C14\_00756" 2321 "s59E5H2" 0 "Endonuclease III"  
"Chl\_C14\_00756" 2321 "s63E6H2" 0 "Endonuclease III"  
"Chl\_C14\_00757" 2322 "s59E13H2" 0 "S-adenosyl-L-methionine-binding protein"  
"Chl\_C14\_00757" 2322 "s59E25H2" 0 "S-adenosyl-L-methionine-binding protein"  
"Chl\_C14\_00757" 2322 "s59E5H2" 0 "S-adenosyl-L-methionine-binding protein"  
"Chl\_C14\_00757" 2322 "s63E6H2" 0 "S-adenosyl-L-methionine-binding protein"  
"Chl\_C14\_00758" 2323 "s59E13H2" 0 "2-oxoglutarate synthase subunit KorC"  
"Chl\_C14\_00758" 2323 "s59E25H2" 0 "2-oxoglutarate synthase subunit KorC"

"Chl\_C14\_00758" 2323 "s59E5H2" 0 "2-oxoglutarate synthase subunit KorC"  
"Chl\_C14\_00758" 2323 "s63E6H2" 0 "2-oxoglutarate synthase subunit KorC"  
"Chl\_C14\_00759" 2324 "s59E13H2" 0 "2-oxoglutarate synthase subunit KorB"  
"Chl\_C14\_00759" 2324 "s59E25H2" 0 "2-oxoglutarate synthase subunit KorB"  
"Chl\_C14\_00759" 2324 "s59E5H2" 0 "2-oxoglutarate synthase subunit KorB"  
"Chl\_C14\_00759" 2324 "s63E6H2" 0 "2-oxoglutarate synthase subunit KorB"  
"Chl\_C14\_00760" 2325 "s59E13H2" 0 "2-oxoglutarate synthase subunit KorA"  
"Chl\_C14\_00760" 2325 "s59E25H2" 0 "2-oxoglutarate synthase subunit KorA"  
"Chl\_C14\_00760" 2325 "s59E5H2" 0 "2-oxoglutarate synthase subunit KorA"  
"Chl\_C14\_00760" 2325 "s63E6H2" 0 "2-oxoglutarate synthase subunit KorA"  
"Chl\_C14\_00761" 2326 "s59E13H2" 0 "Methionyl-tRNA formyltransferase"  
"Chl\_C14\_00761" 2326 "s59E25H2" 0 "Methionyl-tRNA formyltransferase"  
"Chl\_C14\_00761" 2326 "s59E5H2" 0 "Methionyl-tRNA formyltransferase"  
"Chl\_C14\_00761" 2326 "s63E6H2" 0 "Methionyl-tRNA formyltransferase"  
"Chl\_C14\_00762" 2327 "s59E13H2" 0 "Nucleoside triphosphate pyrophosphohydrolase/pyrophosphatase MazG"  
"Chl\_C14\_00762" 2327 "s59E25H2" 0 "Nucleoside triphosphate pyrophosphohydrolase/pyrophosphatase MazG"  
"Chl\_C14\_00762" 2327 "s59E5H2" 0 "Nucleoside triphosphate pyrophosphohydrolase/pyrophosphatase MazG"  
"Chl\_C14\_00762" 2327 "s63E6H2" 0 "Nucleoside triphosphate pyrophosphohydrolase/pyrophosphatase MazG"  
"Chl\_C14\_00764" 2329 "s59E13H2" 0 "2,3-bisphosphoglycerate-independent phosphoglycerate mutase"  
"Chl\_C14\_00764" 2329 "s59E25H2" 0 "2,3-bisphosphoglycerate-independent phosphoglycerate mutase"  
"Chl\_C14\_00764" 2329 "s59E5H2" 0 "2,3-bisphosphoglycerate-independent phosphoglycerate mutase"  
"Chl\_C14\_00764" 2329 "s63E6H2" 0 "2,3-bisphosphoglycerate-independent phosphoglycerate mutase"  
"Chl\_C14\_00765" 2330 "s59E13H2" 0 "hypothetical protein"  
"Chl\_C14\_00765" 2330 "s59E25H2" 0 "hypothetical protein"  
"Chl\_C14\_00765" 2330 "s59E5H2" 0 "hypothetical protein"  
"Chl\_C14\_00765" 2330 "s63E6H2" 0 "hypothetical protein"  
"Chl\_C14\_00766" 2331 "s59E13H2" 0 "Aspartokinase"  
"Chl\_C14\_00766" 2331 "s59E25H2" 0 "Aspartokinase"  
"Chl\_C14\_00766" 2331 "s59E5H2" 0 "Aspartokinase"  
"Chl\_C14\_00766" 2331 "s63E6H2" 0 "Aspartokinase"  
"Chl\_C14\_00767" 2332 "s59E13H2" 0 "Aspartokinase"  
"Chl\_C14\_00767" 2332 "s59E25H2" 0 "Aspartokinase"  
"Chl\_C14\_00767" 2332 "s59E5H2" 0 "Aspartokinase"  
"Chl\_C14\_00767" 2332 "s63E6H2" 0 "Aspartokinase"  
"Chl\_C14\_00768" 2333 "s59E13H2" 0 "Tetratricopeptide repeat protein"  
"Chl\_C14\_00768" 2333 "s59E25H2" 0 "Tetratricopeptide repeat protein"  
"Chl\_C14\_00768" 2333 "s59E5H2" 0 "Tetratricopeptide repeat protein"  
"Chl\_C14\_00768" 2333 "s63E6H2" 0 "Tetratricopeptide repeat protein"  
"Chl\_C14\_00769" 2334 "s59E13H2" 0 "DNA gyrase subunit A"  
"Chl\_C14\_00769" 2334 "s59E25H2" 0 "DNA gyrase subunit A"  
"Chl\_C14\_00769" 2334 "s59E5H2" 0 "DNA gyrase subunit A"  
"Chl\_C14\_00769" 2334 "s63E6H2" 0 "DNA gyrase subunit A"  
"Chl\_C14\_00771" 2336 "s59E13H2" 0 "tRNA(Ile)-lysidine synthase"  
"Chl\_C14\_00771" 2336 "s59E25H2" 0 "tRNA(Ile)-lysidine synthase"  
"Chl\_C14\_00771" 2336 "s59E5H2" 0 "tRNA(Ile)-lysidine synthase"  
"Chl\_C14\_00771" 2336 "s63E6H2" 0 "tRNA(Ile)-lysidine synthase"  
"Chl\_C14\_00772" 2337 "s59E13H2" 0 "hypothetical protein"

"Chl\_C14\_00772" 2337 "s59E25H2" 0 "hypothetical protein"  
"Chl\_C14\_00772" 2337 "s59E5H2" 0 "hypothetical protein"  
"Chl\_C14\_00772" 2337 "s63E6H2" 0 "hypothetical protein"  
"Chl\_C14\_00773" 2338 "s59E13H2" 0 "Putative nicotinate phosphoribosyltransferase"  
"Chl\_C14\_00773" 2338 "s59E25H2" 0 "Putative nicotinate phosphoribosyltransferase"  
"Chl\_C14\_00773" 2338 "s59E5H2" 0.002288715 "Putative nicotinate phosphoribosyltransferase"  
"Chl\_C14\_00773" 2338 "s63E6H2" 0 "Putative nicotinate phosphoribosyltransferase"  
"Chl\_C14\_00774" 2339 "s59E13H2" 0 "hypothetical protein"  
"Chl\_C14\_00774" 2339 "s59E25H2" 0 "hypothetical protein"  
"Chl\_C14\_00774" 2339 "s59E5H2" 0 "hypothetical protein"  
"Chl\_C14\_00774" 2339 "s63E6H2" 0 "hypothetical protein"  
"Chl\_C14\_00775" 2340 "s59E13H2" 0 "Bifunctional purine biosynthesis protein PurH"  
"Chl\_C14\_00775" 2340 "s59E25H2" 0 "Bifunctional purine biosynthesis protein PurH"  
"Chl\_C14\_00775" 2340 "s59E5H2" 0 "Bifunctional purine biosynthesis protein PurH"  
"Chl\_C14\_00775" 2340 "s63E6H2" 0 "Bifunctional purine biosynthesis protein PurH"  
"Chl\_C14\_00776" 2341 "s59E13H2" 0.001633052 "Phosphoribosylformylglycinamide cyclo-ligase"  
"Chl\_C14\_00776" 2341 "s59E25H2" 0 "Phosphoribosylformylglycinamide cyclo-ligase"  
"Chl\_C14\_00776" 2341 "s59E5H2" 0 "Phosphoribosylformylglycinamide cyclo-ligase"  
"Chl\_C14\_00776" 2341 "s63E6H2" 0.007301021 "Phosphoribosylformylglycinamide cyclo-ligase"  
"Chl\_C14\_00777" 2342 "s59E13H2" 0 "hypothetical protein"  
"Chl\_C14\_00777" 2342 "s59E25H2" 0 "hypothetical protein"  
"Chl\_C14\_00777" 2342 "s59E5H2" 0 "hypothetical protein"  
"Chl\_C14\_00777" 2342 "s63E6H2" 0 "hypothetical protein"  
"Chl\_C14\_00778" 2343 "s59E13H2" 0.01120134 "Amidophosphoribosyltransferase precursor"  
"Chl\_C14\_00778" 2343 "s59E25H2" 0 "Amidophosphoribosyltransferase precursor"  
"Chl\_C14\_00778" 2343 "s59E5H2" 0 "Amidophosphoribosyltransferase precursor"  
"Chl\_C14\_00778" 2343 "s63E6H2" 0 "Amidophosphoribosyltransferase precursor"  
"Chl\_C14\_00779" 2344 "s59E13H2" 0 "Amidohydrolase"  
"Chl\_C14\_00779" 2344 "s59E25H2" 0 "Amidohydrolase"  
"Chl\_C14\_00779" 2344 "s59E5H2" 0.01013949 "Amidohydrolase"  
"Chl\_C14\_00779" 2344 "s63E6H2" 0 "Amidohydrolase"  
"Chl\_C14\_00780" 2345 "s59E13H2" 0 "2'-5'-RNA ligase"  
"Chl\_C14\_00780" 2345 "s59E25H2" 0 "2'-5'-RNA ligase"  
"Chl\_C14\_00780" 2345 "s59E5H2" 0 "2'-5'-RNA ligase"  
"Chl\_C14\_00780" 2345 "s63E6H2" 0 "2'-5'-RNA ligase"  
"Chl\_C14\_00781" 2346 "s59E13H2" 0 "HTH-type transcriptional activator RhaS"  
"Chl\_C14\_00781" 2346 "s59E25H2" 0 "HTH-type transcriptional activator RhaS"  
"Chl\_C14\_00781" 2346 "s59E5H2" 0 "HTH-type transcriptional activator RhaS"  
"Chl\_C14\_00781" 2346 "s63E6H2" 0 "HTH-type transcriptional activator RhaS"  
"Chl\_C14\_00783" 2348 "s59E13H2" 0 "DNA utilization protein GntX"  
"Chl\_C14\_00783" 2348 "s59E25H2" 0 "DNA utilization protein GntX"  
"Chl\_C14\_00783" 2348 "s59E5H2" 0.00404158 "DNA utilization protein GntX"  
"Chl\_C14\_00783" 2348 "s63E6H2" 0 "DNA utilization protein GntX"  
"Chl\_C14\_00784" 2349 "s59E13H2" 0 "hypothetical protein"  
"Chl\_C14\_00784" 2349 "s59E25H2" 0 "hypothetical protein"  
"Chl\_C14\_00784" 2349 "s59E5H2" 0 "hypothetical protein"  
"Chl\_C14\_00784" 2349 "s63E6H2" 0 "hypothetical protein"

"Chl\_C14\_00785" 2350 "s59E13H2" 0 "hypothetical protein"  
"Chl\_C14\_00785" 2350 "s59E25H2" 0 "hypothetical protein"  
"Chl\_C14\_00785" 2350 "s59E5H2" 0 "hypothetical protein"  
"Chl\_C14\_00785" 2350 "s63E6H2" 0 "hypothetical protein"  
"Chl\_C14\_00786" 2351 "s59E13H2" 0 "hypothetical protein"  
"Chl\_C14\_00786" 2351 "s59E25H2" 0 "hypothetical protein"  
"Chl\_C14\_00786" 2351 "s59E5H2" 0 "hypothetical protein"  
"Chl\_C14\_00786" 2351 "s63E6H2" 0 "hypothetical protein"  
"Chl\_C14\_00787" 2352 "s59E13H2" 0 "Methylated-DNA--protein-cysteine methyltransferase"  
"Chl\_C14\_00787" 2352 "s59E25H2" 0 "Methylated-DNA--protein-cysteine methyltransferase"  
"Chl\_C14\_00787" 2352 "s59E5H2" 0 "Methylated-DNA--protein-cysteine methyltransferase"  
"Chl\_C14\_00787" 2352 "s63E6H2" 0 "Methylated-DNA--protein-cysteine methyltransferase"  
"Chl\_C14\_00788" 2353 "s59E13H2" 0 "Chagasin family peptidase inhibitor I42"  
"Chl\_C14\_00788" 2353 "s59E25H2" 0 "Chagasin family peptidase inhibitor I42"  
"Chl\_C14\_00788" 2353 "s59E5H2" 0 "Chagasin family peptidase inhibitor I42"  
"Chl\_C14\_00788" 2353 "s63E6H2" 0 "Chagasin family peptidase inhibitor I42"  
"Chl\_C14\_00789" 2354 "s59E13H2" 0 "hypothetical protein"  
"Chl\_C14\_00789" 2354 "s59E25H2" 0 "hypothetical protein"  
"Chl\_C14\_00789" 2354 "s59E5H2" 0 "hypothetical protein"  
"Chl\_C14\_00789" 2354 "s63E6H2" 0 "hypothetical protein"  
"Chl\_C14\_00790" 2355 "s59E13H2" 0 "hypothetical protein"  
"Chl\_C14\_00790" 2355 "s59E25H2" 0 "hypothetical protein"  
"Chl\_C14\_00790" 2355 "s59E5H2" 0.005095703 "hypothetical protein"  
"Chl\_C14\_00790" 2355 "s63E6H2" 0 "hypothetical protein"  
"Chl\_C14\_00791" 2356 "s59E13H2" 0 "hypothetical protein"  
"Chl\_C14\_00791" 2356 "s59E25H2" 0 "hypothetical protein"  
"Chl\_C14\_00791" 2356 "s59E5H2" 0 "hypothetical protein"  
"Chl\_C14\_00791" 2356 "s63E6H2" 0 "hypothetical protein"  
"Chl\_C14\_00792" 2357 "s59E13H2" 0 "NAD-dependent protein deacylase 2"  
"Chl\_C14\_00792" 2357 "s59E25H2" 0 "NAD-dependent protein deacylase 2"  
"Chl\_C14\_00792" 2357 "s59E5H2" 0 "NAD-dependent protein deacylase 2"  
"Chl\_C14\_00792" 2357 "s63E6H2" 0 "NAD-dependent protein deacylase 2"  
"Chl\_C14\_00793" 2358 "s59E13H2" 0 "hypothetical protein"  
"Chl\_C14\_00793" 2358 "s59E25H2" 0 "hypothetical protein"  
"Chl\_C14\_00793" 2358 "s59E5H2" 0 "hypothetical protein"  
"Chl\_C14\_00793" 2358 "s63E6H2" 0 "hypothetical protein"  
"Chl\_C14\_00794" 2359 "s59E13H2" 0 "Acetoin utilization protein AcuC"  
"Chl\_C14\_00794" 2359 "s59E25H2" 0 "Acetoin utilization protein AcuC"  
"Chl\_C14\_00794" 2359 "s59E5H2" 0 "Acetoin utilization protein AcuC"  
"Chl\_C14\_00794" 2359 "s63E6H2" 0 "Acetoin utilization protein AcuC"  
"Chl\_C14\_00795" 2360 "s59E13H2" 0 "hypothetical protein"  
"Chl\_C14\_00795" 2360 "s59E25H2" 0 "hypothetical protein"  
"Chl\_C14\_00795" 2360 "s59E5H2" 0 "hypothetical protein"  
"Chl\_C14\_00795" 2360 "s63E6H2" 0 "hypothetical protein"  
"Chl\_C14\_00796" 2361 "s59E13H2" 0 "hypothetical protein"  
"Chl\_C14\_00796" 2361 "s59E25H2" 0 "hypothetical protein"  
"Chl\_C14\_00796" 2361 "s59E5H2" 0 "hypothetical protein"

"Chl\_C14\_00796" 2361 "s63E6H2" 0 "hypothetical protein"  
"Chl\_C14\_00797" 2362 "s59E13H2" 0 "Ribonuclease HI"  
"Chl\_C14\_00797" 2362 "s59E25H2" 0 "Ribonuclease HI"  
"Chl\_C14\_00797" 2362 "s59E5H2" 0 "Ribonuclease HI"  
"Chl\_C14\_00797" 2362 "s63E6H2" 0 "Ribonuclease HI"  
"Chl\_C14\_00798" 2363 "s59E13H2" 0 "IPT/TIG domain protein"  
"Chl\_C14\_00798" 2363 "s59E25H2" 0 "IPT/TIG domain protein"  
"Chl\_C14\_00798" 2363 "s59E5H2" 0 "IPT/TIG domain protein"  
"Chl\_C14\_00798" 2363 "s63E6H2" 0 "IPT/TIG domain protein"  
"Chl\_C14\_00799" 2364 "s59E13H2" 0 "Alpha-monoglucosyldiacylglycerol synthase"  
"Chl\_C14\_00799" 2364 "s59E25H2" 0 "Alpha-monoglucosyldiacylglycerol synthase"  
"Chl\_C14\_00799" 2364 "s59E5H2" 0.05201264 "Alpha-monoglucosyldiacylglycerol synthase"  
"Chl\_C14\_00799" 2364 "s63E6H2" 0 "Alpha-monoglucosyldiacylglycerol synthase"  
"Chl\_C14\_00800" 2365 "s59E13H2" 0.5002689 "Transposase"  
"Chl\_C14\_00800" 2365 "s59E25H2" 0 "Transposase"  
"Chl\_C14\_00800" 2365 "s59E5H2" 0 "Transposase"  
"Chl\_C14\_00800" 2365 "s63E6H2" 0 "Transposase"  
"Chl\_C14\_00802" 2367 "s59E13H2" 0 "hypothetical protein"  
"Chl\_C14\_00802" 2367 "s59E25H2" 0 "hypothetical protein"  
"Chl\_C14\_00802" 2367 "s59E5H2" 0 "hypothetical protein"  
"Chl\_C14\_00802" 2367 "s63E6H2" 0 "hypothetical protein"  
"Chl\_C14\_00803" 2368 "s59E13H2" 0 "Polyketide cyclase / dehydrase and lipid transport"  
"Chl\_C14\_00803" 2368 "s59E25H2" 0 "Polyketide cyclase / dehydrase and lipid transport"  
"Chl\_C14\_00803" 2368 "s59E5H2" 0 "Polyketide cyclase / dehydrase and lipid transport"  
"Chl\_C14\_00803" 2368 "s63E6H2" 0 "Polyketide cyclase / dehydrase and lipid transport"  
"Chl\_C14\_00804" 2369 "s59E13H2" 0 "hypothetical protein"  
"Chl\_C14\_00804" 2369 "s59E25H2" 0 "hypothetical protein"  
"Chl\_C14\_00804" 2369 "s59E5H2" 0 "hypothetical protein"  
"Chl\_C14\_00804" 2369 "s63E6H2" 0 "hypothetical protein"  
"Chl\_C14\_00805" 2370 "s59E13H2" 0 "hypothetical protein"  
"Chl\_C14\_00805" 2370 "s59E25H2" 0 "hypothetical protein"  
"Chl\_C14\_00805" 2370 "s59E5H2" 0 "hypothetical protein"  
"Chl\_C14\_00805" 2370 "s63E6H2" 0 "hypothetical protein"  
"Chl\_C14\_00806" 2371 "s59E13H2" 0 "Peptide chain release factor 2"  
"Chl\_C14\_00806" 2371 "s59E25H2" 0 "Peptide chain release factor 2"  
"Chl\_C14\_00806" 2371 "s59E5H2" 0.00400163 "Peptide chain release factor 2"  
"Chl\_C14\_00806" 2371 "s63E6H2" 0 "Peptide chain release factor 2"  
"Chl\_C14\_00807" 2372 "s59E13H2" 0 "Endonuclease V"  
"Chl\_C14\_00807" 2372 "s59E25H2" 0 "Endonuclease V"  
"Chl\_C14\_00807" 2372 "s59E5H2" 0 "Endonuclease V"  
"Chl\_C14\_00807" 2372 "s63E6H2" 0 "Endonuclease V"  
"Chl\_C14\_00808" 2373 "s59E13H2" 0 "30S ribosomal protein S16"  
"Chl\_C14\_00808" 2373 "s59E25H2" 0 "30S ribosomal protein S16"  
"Chl\_C14\_00808" 2373 "s59E5H2" 0 "30S ribosomal protein S16"  
"Chl\_C14\_00808" 2373 "s63E6H2" 0 "30S ribosomal protein S16"  
"Chl\_C14\_00809" 2374 "s59E13H2" 0 "hypothetical protein"  
"Chl\_C14\_00809" 2374 "s59E25H2" 0 "hypothetical protein"

"Chl\_C14\_00809" 2374 "s59E5H2" 0 "hypothetical protein"  
"Chl\_C14\_00809" 2374 "s63E6H2" 0 "hypothetical protein"  
"Chl\_C14\_00810" 2375 "s59E13H2" 0 "hypothetical protein"  
"Chl\_C14\_00810" 2375 "s59E25H2" 0 "hypothetical protein"  
"Chl\_C14\_00810" 2375 "s59E5H2" 0 "hypothetical protein"  
"Chl\_C14\_00810" 2375 "s63E6H2" 0 "hypothetical protein"  
"Chl\_C14\_00811" 2376 "s59E13H2" 0 "RNA 3'-terminal phosphate cyclase"  
"Chl\_C14\_00811" 2376 "s59E25H2" 0 "RNA 3'-terminal phosphate cyclase"  
"Chl\_C14\_00811" 2376 "s59E5H2" 0 "RNA 3'-terminal phosphate cyclase"  
"Chl\_C14\_00811" 2376 "s63E6H2" 0 "RNA 3'-terminal phosphate cyclase"  
"Chl\_C14\_00812" 2377 "s59E13H2" 0 "3-oxoadipate CoA-transferase subunit B"  
"Chl\_C14\_00812" 2377 "s59E25H2" 0 "3-oxoadipate CoA-transferase subunit B"  
"Chl\_C14\_00812" 2377 "s59E5H2" 0 "3-oxoadipate CoA-transferase subunit B"  
"Chl\_C14\_00812" 2377 "s63E6H2" 0 "3-oxoadipate CoA-transferase subunit B"  
"Chl\_C14\_00813" 2378 "s59E13H2" 0 "3-oxoadipate CoA-transferase subunit A"  
"Chl\_C14\_00813" 2378 "s59E25H2" 0 "3-oxoadipate CoA-transferase subunit A"  
"Chl\_C14\_00813" 2378 "s59E5H2" 0 "3-oxoadipate CoA-transferase subunit A"  
"Chl\_C14\_00813" 2378 "s63E6H2" 0 "3-oxoadipate CoA-transferase subunit A"  
"Chl\_C14\_00814" 2379 "s59E13H2" 0 "4-hydroxybutyryl-CoA dehydratase/vinylacetyl-CoA-Delta-isomerase"  
"Chl\_C14\_00814" 2379 "s59E25H2" 0 "4-hydroxybutyryl-CoA dehydratase/vinylacetyl-CoA-Delta-isomerase"  
"Chl\_C14\_00814" 2379 "s59E5H2" 0 "4-hydroxybutyryl-CoA dehydratase/vinylacetyl-CoA-Delta-isomerase"  
"Chl\_C14\_00814" 2379 "s63E6H2" 0 "4-hydroxybutyryl-CoA dehydratase/vinylacetyl-CoA-Delta-isomerase"  
"Chl\_C14\_00816" 2381 "s59E13H2" 0 "p-aminobenzoyl-glutamate hydrolase subunit B"  
"Chl\_C14\_00816" 2381 "s59E25H2" 0 "p-aminobenzoyl-glutamate hydrolase subunit B"  
"Chl\_C14\_00816" 2381 "s59E5H2" 0 "p-aminobenzoyl-glutamate hydrolase subunit B"  
"Chl\_C14\_00816" 2381 "s63E6H2" 0 "p-aminobenzoyl-glutamate hydrolase subunit B"  
"Chl\_C14\_00817" 2382 "s59E13H2" 0 "hypothetical protein"  
"Chl\_C14\_00817" 2382 "s59E25H2" 0 "hypothetical protein"  
"Chl\_C14\_00817" 2382 "s59E5H2" 0 "hypothetical protein"  
"Chl\_C14\_00817" 2382 "s63E6H2" 0 "hypothetical protein"  
"Chl\_C14\_00818" 2383 "s59E13H2" 0 "hypothetical protein"  
"Chl\_C14\_00818" 2383 "s59E25H2" 0 "hypothetical protein"  
"Chl\_C14\_00818" 2383 "s59E5H2" 0 "hypothetical protein"  
"Chl\_C14\_00818" 2383 "s63E6H2" 0 "hypothetical protein"  
"Chl\_C14\_00819" 2384 "s59E13H2" 0 "R-phenyllactate dehydratase activator"  
"Chl\_C14\_00819" 2384 "s59E25H2" 0 "R-phenyllactate dehydratase activator"  
"Chl\_C14\_00819" 2384 "s59E5H2" 0 "R-phenyllactate dehydratase activator"  
"Chl\_C14\_00819" 2384 "s63E6H2" 0 "R-phenyllactate dehydratase activator"  
"Chl\_C14\_00820" 2385 "s59E13H2" 0 "Phosphate acyltransferase"  
"Chl\_C14\_00820" 2385 "s59E25H2" 0 "Phosphate acyltransferase"  
"Chl\_C14\_00820" 2385 "s59E5H2" 0 "Phosphate acyltransferase"  
"Chl\_C14\_00820" 2385 "s63E6H2" 0 "Phosphate acyltransferase"  
"Chl\_C14\_00821" 2386 "s59E13H2" 0 "Thioredoxin-1"  
"Chl\_C14\_00821" 2386 "s59E25H2" 0 "Thioredoxin-1"  
"Chl\_C14\_00821" 2386 "s59E5H2" 0 "Thioredoxin-1"  
"Chl\_C14\_00821" 2386 "s63E6H2" 0 "Thioredoxin-1"  
"Chl\_C14\_00822" 2387 "s59E13H2" 0 "hypothetical protein"

"Chl\_C14\_00822" 2387 "s59E25H2" 0 "hypothetical protein"  
"Chl\_C14\_00822" 2387 "s59E5H2" 0 "hypothetical protein"  
"Chl\_C14\_00822" 2387 "s63E6H2" 0 "hypothetical protein"  
"Chl\_C14\_00823" 2388 "s59E13H2" 0 "Thioredoxin reductase"  
"Chl\_C14\_00823" 2388 "s59E25H2" 0 "Thioredoxin reductase"  
"Chl\_C14\_00823" 2388 "s59E5H2" 0 "Thioredoxin reductase"  
"Chl\_C14\_00823" 2388 "s63E6H2" 0 "Thioredoxin reductase"  
"Chl\_C14\_00824" 2389 "s59E13H2" 0 "50S ribosomal protein L9"  
"Chl\_C14\_00824" 2389 "s59E25H2" 0 "50S ribosomal protein L9"  
"Chl\_C14\_00824" 2389 "s59E5H2" 0 "50S ribosomal protein L9"  
"Chl\_C14\_00824" 2389 "s63E6H2" 0 "50S ribosomal protein L9"  
"Chl\_C14\_00825" 2390 "s59E13H2" 0 "Replicative DNA helicase"  
"Chl\_C14\_00825" 2390 "s59E25H2" 0 "Replicative DNA helicase"  
"Chl\_C14\_00825" 2390 "s59E5H2" 0 "Replicative DNA helicase"  
"Chl\_C14\_00825" 2390 "s63E6H2" 0 "Replicative DNA helicase"  
"Chl\_C14\_00826" 2391 "s59E13H2" 0 "Replication initiation and membrane attachment"  
"Chl\_C14\_00826" 2391 "s59E25H2" 0 "Replication initiation and membrane attachment"  
"Chl\_C14\_00826" 2391 "s59E5H2" 0.007137666 "Replication initiation and membrane attachment"  
"Chl\_C14\_00826" 2391 "s63E6H2" 0 "Replication initiation and membrane attachment"  
"Chl\_C14\_00827" 2392 "s59E13H2" 0 "Succinyl-CoA:(R)-benzylsuccinate CoA-transferase subunit BbsE"  
"Chl\_C14\_00827" 2392 "s59E25H2" 0 "Succinyl-CoA:(R)-benzylsuccinate CoA-transferase subunit BbsE"  
"Chl\_C14\_00827" 2392 "s59E5H2" 0 "Succinyl-CoA:(R)-benzylsuccinate CoA-transferase subunit BbsE"  
"Chl\_C14\_00827" 2392 "s63E6H2" 0 "Succinyl-CoA:(R)-benzylsuccinate CoA-transferase subunit BbsE"  
"Chl\_C14\_00828" 2393 "s59E13H2" 0 "Succinyl-CoA:(R)-benzylsuccinate CoA-transferase subunit BbsF"  
"Chl\_C14\_00828" 2393 "s59E25H2" 0 "Succinyl-CoA:(R)-benzylsuccinate CoA-transferase subunit BbsF"  
"Chl\_C14\_00828" 2393 "s59E5H2" 0 "Succinyl-CoA:(R)-benzylsuccinate CoA-transferase subunit BbsF"  
"Chl\_C14\_00828" 2393 "s63E6H2" 0 "Succinyl-CoA:(R)-benzylsuccinate CoA-transferase subunit BbsF"  
"Chl\_C14\_00831" 2396 "s59E13H2" 0 "putative transcriptional regulatory protein"  
"Chl\_C14\_00831" 2396 "s59E25H2" 0 "putative transcriptional regulatory protein"  
"Chl\_C14\_00831" 2396 "s59E5H2" 0 "putative transcriptional regulatory protein"  
"Chl\_C14\_00831" 2396 "s63E6H2" 0 "putative transcriptional regulatory protein"  
"Chl\_C14\_00832" 2397 "s59E13H2" 0 "Crossover junction endodeoxyribonuclease RuvC"  
"Chl\_C14\_00832" 2397 "s59E25H2" 0 "Crossover junction endodeoxyribonuclease RuvC"  
"Chl\_C14\_00832" 2397 "s59E5H2" 0 "Crossover junction endodeoxyribonuclease RuvC"  
"Chl\_C14\_00832" 2397 "s63E6H2" 0 "Crossover junction endodeoxyribonuclease RuvC"  
"Chl\_C14\_00833" 2398 "s59E13H2" 0 "Holliday junction ATP-dependent DNA helicase RuvA"  
"Chl\_C14\_00833" 2398 "s59E25H2" 0 "Holliday junction ATP-dependent DNA helicase RuvA"  
"Chl\_C14\_00833" 2398 "s59E5H2" 0 "Holliday junction ATP-dependent DNA helicase RuvA"  
"Chl\_C14\_00833" 2398 "s63E6H2" 0 "Holliday junction ATP-dependent DNA helicase RuvA"  
"Chl\_C14\_00834" 2399 "s59E13H2" 0 "hypothetical protein"  
"Chl\_C14\_00834" 2399 "s59E25H2" 0 "hypothetical protein"  
"Chl\_C14\_00834" 2399 "s59E5H2" 0 "hypothetical protein"  
"Chl\_C14\_00834" 2399 "s63E6H2" 0 "hypothetical protein"  
"Chl\_C14\_00836" 2401 "s59E13H2" 0 "UvrABC system protein B"  
"Chl\_C14\_00836" 2401 "s59E25H2" 0 "UvrABC system protein B"  
"Chl\_C14\_00836" 2401 "s59E5H2" 0.002065715 "UvrABC system protein B"  
"Chl\_C14\_00836" 2401 "s63E6H2" 0 "UvrABC system protein B"

"Chl\_C14\_00837" 2402 "s59E13H2" 0 "hypothetical protein"  
"Chl\_C14\_00837" 2402 "s59E25H2" 0 "hypothetical protein"  
"Chl\_C14\_00837" 2402 "s59E5H2" 0 "hypothetical protein"  
"Chl\_C14\_00837" 2402 "s63E6H2" 0 "hypothetical protein"  
"Chl\_C14\_00838" 2403 "s59E13H2" 0 "hypothetical protein"  
"Chl\_C14\_00838" 2403 "s59E25H2" 0 "hypothetical protein"  
"Chl\_C14\_00838" 2403 "s59E5H2" 0 "hypothetical protein"  
"Chl\_C14\_00838" 2403 "s63E6H2" 0 "hypothetical protein"  
"Chl\_C14\_00839" 2404 "s59E13H2" 0 "DNA translocase SpoIIIE"  
"Chl\_C14\_00839" 2404 "s59E25H2" 0 "DNA translocase SpoIIIE"  
"Chl\_C14\_00839" 2404 "s59E5H2" 0.004315623 "DNA translocase SpoIIIE"  
"Chl\_C14\_00839" 2404 "s63E6H2" 0 "DNA translocase SpoIIIE"  
"Chl\_C14\_00840" 2405 "s59E13H2" 0 "Ribonuclease J 1"  
"Chl\_C14\_00840" 2405 "s59E25H2" 0 "Ribonuclease J 1"  
"Chl\_C14\_00840" 2405 "s59E5H2" 0 "Ribonuclease J 1"  
"Chl\_C14\_00840" 2405 "s63E6H2" 0 "Ribonuclease J 1"  
"Chl\_C14\_00841" 2406 "s59E13H2" 0 "Uracil DNA glycosylase superfamily protein"  
"Chl\_C14\_00841" 2406 "s59E25H2" 0 "Uracil DNA glycosylase superfamily protein"  
"Chl\_C14\_00841" 2406 "s59E5H2" 0 "Uracil DNA glycosylase superfamily protein"  
"Chl\_C14\_00841" 2406 "s63E6H2" 0 "Uracil DNA glycosylase superfamily protein"  
"Chl\_C14\_00842" 2407 "s59E13H2" 0 "hypothetical protein"  
"Chl\_C14\_00842" 2407 "s59E25H2" 0 "hypothetical protein"  
"Chl\_C14\_00842" 2407 "s59E5H2" 0 "hypothetical protein"  
"Chl\_C14\_00842" 2407 "s63E6H2" 0 "hypothetical protein"  
"Chl\_C14\_00843" 2408 "s59E13H2" 0 "hypothetical protein"  
"Chl\_C14\_00843" 2408 "s59E25H2" 0 "hypothetical protein"  
"Chl\_C14\_00843" 2408 "s59E5H2" 0 "hypothetical protein"  
"Chl\_C14\_00843" 2408 "s63E6H2" 0 "hypothetical protein"  
"Chl\_C14\_00844" 2409 "s59E13H2" 0 "Phosphoribosylamine--glycine ligase"  
"Chl\_C14\_00844" 2409 "s59E25H2" 0 "Phosphoribosylamine--glycine ligase"  
"Chl\_C14\_00844" 2409 "s59E5H2" 0 "Phosphoribosylamine--glycine ligase"  
"Chl\_C14\_00844" 2409 "s63E6H2" 0 "Phosphoribosylamine--glycine ligase"  
"Chl\_C14\_00845" 2410 "s59E13H2" 0 "N5-carboxyaminoimidazole ribonucleotide mutase"  
"Chl\_C14\_00845" 2410 "s59E25H2" 0 "N5-carboxyaminoimidazole ribonucleotide mutase"  
"Chl\_C14\_00845" 2410 "s59E5H2" 0 "N5-carboxyaminoimidazole ribonucleotide mutase"  
"Chl\_C14\_00845" 2410 "s63E6H2" 0 "N5-carboxyaminoimidazole ribonucleotide mutase"  
"Chl\_C14\_00846" 2411 "s59E13H2" 0 "Adenylosuccinate lyase"  
"Chl\_C14\_00846" 2411 "s59E25H2" 0 "Adenylosuccinate lyase"  
"Chl\_C14\_00846" 2411 "s59E5H2" 0 "Adenylosuccinate lyase"  
"Chl\_C14\_00846" 2411 "s63E6H2" 0.001121291 "Adenylosuccinate lyase"  
"Chl\_C14\_00847" 2412 "s59E13H2" 0 "DNA polymerase IV"  
"Chl\_C14\_00847" 2412 "s59E25H2" 0 "DNA polymerase IV"  
"Chl\_C14\_00847" 2412 "s59E5H2" 0 "DNA polymerase IV"  
"Chl\_C14\_00847" 2412 "s63E6H2" 0 "DNA polymerase IV"  
"Chl\_C14\_00848" 2413 "s59E13H2" 0 "hypothetical protein"  
"Chl\_C14\_00848" 2413 "s59E25H2" 0 "hypothetical protein"  
"Chl\_C14\_00848" 2413 "s59E5H2" 0 "hypothetical protein"



"Chl\_C14\_00848" 2413 "s63E6H2" 0.003767893 "hypothetical protein"  
"Chl\_C14\_00849" 2414 "s59E13H2" 0 "putative MFS-type transporter YhjX"  
"Chl\_C14\_00849" 2414 "s59E25H2" 0 "putative MFS-type transporter YhjX"  
"Chl\_C14\_00849" 2414 "s59E5H2" 0 "putative MFS-type transporter YhjX"  
"Chl\_C14\_00849" 2414 "s63E6H2" 0 "putative MFS-type transporter YhjX"  
"Chl\_C14\_00851" 2416 "s59E13H2" 0 "Orotidine 5'-phosphate decarboxylase"  
"Chl\_C14\_00851" 2416 "s59E25H2" 0 "Orotidine 5'-phosphate decarboxylase"  
"Chl\_C14\_00851" 2416 "s59E5H2" 0 "Orotidine 5'-phosphate decarboxylase"  
"Chl\_C14\_00851" 2416 "s63E6H2" 0 "Orotidine 5'-phosphate decarboxylase"  
"Chl\_C14\_00853" 2418 "s59E13H2" 0 "hypothetical protein"  
"Chl\_C14\_00853" 2418 "s59E25H2" 0 "hypothetical protein"  
"Chl\_C14\_00853" 2418 "s59E5H2" 0 "hypothetical protein"  
"Chl\_C14\_00853" 2418 "s63E6H2" 0 "hypothetical protein"  
"Chl\_C14\_00854" 2419 "s59E13H2" 0.0007232115 "hypothetical protein"  
"Chl\_C14\_00854" 2419 "s59E25H2" 0 "hypothetical protein"  
"Chl\_C14\_00854" 2419 "s59E5H2" 0 "hypothetical protein"  
"Chl\_C14\_00854" 2419 "s63E6H2" 0 "hypothetical protein"  
"Chl\_C14\_00855" 2420 "s59E13H2" 0 "hypothetical protein"  
"Chl\_C14\_00855" 2420 "s59E25H2" 0 "hypothetical protein"  
"Chl\_C14\_00855" 2420 "s59E5H2" 0 "hypothetical protein"  
"Chl\_C14\_00855" 2420 "s63E6H2" 0 "hypothetical protein"  
"Chl\_C14\_00856" 2421 "s59E13H2" 0.0639987 "IS2 transposase TnpB"  
"Chl\_C14\_00856" 2421 "s59E25H2" 0 "IS2 transposase TnpB"  
"Chl\_C14\_00856" 2421 "s59E5H2" 0.07573919 "IS2 transposase TnpB"  
"Chl\_C14\_00856" 2421 "s63E6H2" 0.004914092 "IS2 transposase TnpB"  
"Chl\_C14\_00857" 2422 "s59E13H2" 0.001501207 "Transposase"  
"Chl\_C14\_00857" 2422 "s59E25H2" 0 "Transposase"  
"Chl\_C14\_00857" 2422 "s59E5H2" 0 "Transposase"  
"Chl\_C14\_00857" 2422 "s63E6H2" 0.882882 "Transposase"  
"Chl\_C14\_00858" 2423 "s59E13H2" 0.0003622704 "hypothetical protein"  
"Chl\_C14\_00858" 2423 "s59E25H2" 0 "hypothetical protein"  
"Chl\_C14\_00858" 2423 "s59E5H2" 0 "hypothetical protein"  
"Chl\_C14\_00858" 2423 "s63E6H2" 0.0268502 "hypothetical protein"  
"Chl\_C14\_00859" 2424 "s59E13H2" 0.03018265 "30S ribosomal protein S1"  
"Chl\_C14\_00859" 2424 "s59E25H2" 0.1158818 "30S ribosomal protein S1"  
"Chl\_C14\_00859" 2424 "s59E5H2" 0.848429 "30S ribosomal protein S1"  
"Chl\_C14\_00859" 2424 "s63E6H2" 0.4226453 "30S ribosomal protein S1"  
"Chl\_C14\_00860" 2425 "s59E13H2" 0 "GIY-YIG nuclease superfamily protein"  
"Chl\_C14\_00860" 2425 "s59E25H2" 0 "GIY-YIG nuclease superfamily protein"  
"Chl\_C14\_00860" 2425 "s59E5H2" 0.6539846 "GIY-YIG nuclease superfamily protein"  
"Chl\_C14\_00860" 2425 "s63E6H2" 0.3491309 "GIY-YIG nuclease superfamily protein"  
"Chl\_C14\_00861" 2426 "s59E13H2" 0 "hypothetical protein"  
"Chl\_C14\_00861" 2426 "s59E25H2" 0 "hypothetical protein"  
"Chl\_C14\_00861" 2426 "s59E5H2" 0.003756377 "hypothetical protein"  
"Chl\_C14\_00861" 2426 "s63E6H2" 0.02540451 "hypothetical protein"  
"Chl\_C14\_00862" 2427 "s59E13H2" 0 "hypothetical protein"  
"Chl\_C14\_00862" 2427 "s59E25H2" 0 "hypothetical protein"

"Chl\_C14\_00862" 2427 "s59E5H2" 0.04584284 "hypothetical protein"  
"Chl\_C14\_00862" 2427 "s63E6H2" 0 "hypothetical protein"  
"Chl\_C14\_00863" 2428 "s59E13H2" 0.08962062 "hypothetical protein"  
"Chl\_C14\_00863" 2428 "s59E25H2" 0 "hypothetical protein"  
"Chl\_C14\_00863" 2428 "s59E5H2" 0 "hypothetical protein"  
"Chl\_C14\_00863" 2428 "s63E6H2" 0.03999187 "hypothetical protein"  
"Chl\_C14\_00864" 2429 "s59E13H2" 0 "hypothetical protein"  
"Chl\_C14\_00864" 2429 "s59E25H2" 0 "hypothetical protein"  
"Chl\_C14\_00864" 2429 "s59E5H2" 0.2088071 "hypothetical protein"  
"Chl\_C14\_00864" 2429 "s63E6H2" 0.08421842 "hypothetical protein"  
"Chl\_C14\_00865" 2430 "s59E13H2" 0 "30S ribosomal protein S21"  
"Chl\_C14\_00865" 2430 "s59E25H2" 0 "30S ribosomal protein S21"  
"Chl\_C14\_00865" 2430 "s59E5H2" 0.08473632 "30S ribosomal protein S21"  
"Chl\_C14\_00865" 2430 "s63E6H2" 0.005094219 "30S ribosomal protein S21"  
"Chl\_C14\_00866" 2431 "s59E13H2" 0.1793452 "RNA recognition motif. (a.k.a. RRM, RBD, or RNP domain)"  
"Chl\_C14\_00866" 2431 "s59E25H2" 0 "RNA recognition motif. (a.k.a. RRM, RBD, or RNP domain)"  
"Chl\_C14\_00866" 2431 "s59E5H2" 0.02410568 "RNA recognition motif. (a.k.a. RRM, RBD, or RNP domain)"  
"Chl\_C14\_00866" 2431 "s63E6H2" 0.1740346 "RNA recognition motif. (a.k.a. RRM, RBD, or RNP domain)"  
"Chl\_C14\_00867" 2432 "s59E13H2" 0 "RNA recognition motif. (a.k.a. RRM, RBD, or RNP domain)"  
"Chl\_C14\_00867" 2432 "s59E25H2" 0 "RNA recognition motif. (a.k.a. RRM, RBD, or RNP domain)"  
"Chl\_C14\_00867" 2432 "s59E5H2" 0.00961797 "RNA recognition motif. (a.k.a. RRM, RBD, or RNP domain)"  
"Chl\_C14\_00867" 2432 "s63E6H2" 0.4619145 "RNA recognition motif. (a.k.a. RRM, RBD, or RNP domain)"  
"Chl\_C14\_00870" 2435 "s59E13H2" 0 "Negative regulator of genetic competence ClpC/MecB"  
"Chl\_C14\_00870" 2435 "s59E25H2" 0 "Negative regulator of genetic competence ClpC/MecB"  
"Chl\_C14\_00870" 2435 "s59E5H2" 0.004144747 "Negative regulator of genetic competence ClpC/MecB"  
"Chl\_C14\_00870" 2435 "s63E6H2" 0 "Negative regulator of genetic competence ClpC/MecB"  
"Chl\_C14\_00871" 2436 "s59E13H2" 0 "Biotinylated protein TB7.3"  
"Chl\_C14\_00871" 2436 "s59E25H2" 0 "Biotinylated protein TB7.3"  
"Chl\_C14\_00871" 2436 "s59E5H2" 0 "Biotinylated protein TB7.3"  
"Chl\_C14\_00871" 2436 "s63E6H2" 0 "Biotinylated protein TB7.3"  
"Chl\_C14\_00872" 2437 "s59E13H2" 0 "hypothetical protein"  
"Chl\_C14\_00872" 2437 "s59E25H2" 0 "hypothetical protein"  
"Chl\_C14\_00872" 2437 "s59E5H2" 0 "hypothetical protein"  
"Chl\_C14\_00872" 2437 "s63E6H2" 0 "hypothetical protein"  
"Chl\_C14\_00873" 2438 "s59E13H2" 0 "Glutaconyl-CoA decarboxylase subunit beta"  
"Chl\_C14\_00873" 2438 "s59E25H2" 0 "Glutaconyl-CoA decarboxylase subunit beta"  
"Chl\_C14\_00873" 2438 "s59E5H2" 0 "Glutaconyl-CoA decarboxylase subunit beta"  
"Chl\_C14\_00873" 2438 "s63E6H2" 0 "Glutaconyl-CoA decarboxylase subunit beta"  
"Chl\_C14\_00874" 2439 "s59E13H2" 0 "hypothetical protein"  
"Chl\_C14\_00874" 2439 "s59E25H2" 0 "hypothetical protein"  
"Chl\_C14\_00874" 2439 "s59E5H2" 0 "hypothetical protein"  
"Chl\_C14\_00874" 2439 "s63E6H2" 0 "hypothetical protein"  
"Chl\_C14\_00875" 2440 "s59E13H2" 0 "2-C-methyl-D-erythritol 4-phosphate cytidyltransferase"  
"Chl\_C14\_00875" 2440 "s59E25H2" 0 "2-C-methyl-D-erythritol 4-phosphate cytidyltransferase"  
"Chl\_C14\_00875" 2440 "s59E5H2" 0 "2-C-methyl-D-erythritol 4-phosphate cytidyltransferase"  
"Chl\_C14\_00875" 2440 "s63E6H2" 0 "2-C-methyl-D-erythritol 4-phosphate cytidyltransferase"  
"Chl\_C14\_00876" 2441 "s59E13H2" 0 "2-C-methyl-D-erythritol 2,4-cyclodiphosphate synthase"

"Chl\_C14\_00876" 2441 "s59E25H2" 0 "2-C-methyl-D-erythritol 2,4-cyclodiphosphate synthase"  
"Chl\_C14\_00876" 2441 "s59E5H2" 0 "2-C-methyl-D-erythritol 2,4-cyclodiphosphate synthase"  
"Chl\_C14\_00876" 2441 "s63E6H2" 0 "2-C-methyl-D-erythritol 2,4-cyclodiphosphate synthase"  
"Chl\_C14\_00877" 2442 "s59E13H2" 0 "Serine acetyltransferase"  
"Chl\_C14\_00877" 2442 "s59E25H2" 0 "Serine acetyltransferase"  
"Chl\_C14\_00877" 2442 "s59E5H2" 0 "Serine acetyltransferase"  
"Chl\_C14\_00877" 2442 "s63E6H2" 0 "Serine acetyltransferase"  
"Chl\_C14\_00878" 2443 "s59E13H2" 0 "hypothetical protein"  
"Chl\_C14\_00878" 2443 "s59E25H2" 0 "hypothetical protein"  
"Chl\_C14\_00878" 2443 "s59E5H2" 0 "hypothetical protein"  
"Chl\_C14\_00878" 2443 "s63E6H2" 0 "hypothetical protein"  
"Chl\_C14\_00879" 2444 "s59E13H2" 0 "Cysteine--tRNA ligase"  
"Chl\_C14\_00879" 2444 "s59E25H2" 0 "Cysteine--tRNA ligase"  
"Chl\_C14\_00879" 2444 "s59E5H2" 0 "Cysteine--tRNA ligase"  
"Chl\_C14\_00879" 2444 "s63E6H2" 0 "Cysteine--tRNA ligase"  
"Chl\_C14\_00880" 2445 "s59E13H2" 0 "hypothetical protein"  
"Chl\_C14\_00880" 2445 "s59E25H2" 0 "hypothetical protein"  
"Chl\_C14\_00880" 2445 "s59E5H2" 0 "hypothetical protein"  
"Chl\_C14\_00880" 2445 "s63E6H2" 0 "hypothetical protein"  
"Chl\_C14\_00881" 2446 "s59E13H2" 0 "hypothetical protein"  
"Chl\_C14\_00881" 2446 "s59E25H2" 0 "hypothetical protein"  
"Chl\_C14\_00881" 2446 "s59E5H2" 0 "hypothetical protein"  
"Chl\_C14\_00881" 2446 "s63E6H2" 0 "hypothetical protein"  
"Chl\_C14\_00882" 2447 "s59E13H2" 0 "Chlorinase"  
"Chl\_C14\_00882" 2447 "s59E25H2" 0 "Chlorinase"  
"Chl\_C14\_00882" 2447 "s59E5H2" 0 "Chlorinase"  
"Chl\_C14\_00882" 2447 "s63E6H2" 0 "Chlorinase"  
"Chl\_C14\_00883" 2448 "s59E13H2" 0 "preprotein translocase subunit SecG"  
"Chl\_C14\_00883" 2448 "s59E25H2" 0 "preprotein translocase subunit SecG"  
"Chl\_C14\_00883" 2448 "s59E5H2" 0 "preprotein translocase subunit SecG"  
"Chl\_C14\_00883" 2448 "s63E6H2" 0 "preprotein translocase subunit SecG"  
"Chl\_C14\_00884" 2449 "s59E13H2" 0 "Aspartyl/glutamyl-tRNA(Asn/Gln) amidotransferase subunit B"  
"Chl\_C14\_00884" 2449 "s59E25H2" 0 "Aspartyl/glutamyl-tRNA(Asn/Gln) amidotransferase subunit B"  
"Chl\_C14\_00884" 2449 "s59E5H2" 0.001032326 "Aspartyl/glutamyl-tRNA(Asn/Gln) amidotransferase subunit B"  
"Chl\_C14\_00884" 2449 "s63E6H2" 0 "Aspartyl/glutamyl-tRNA(Asn/Gln) amidotransferase subunit B"  
"Chl\_C14\_00886" 2451 "s59E13H2" 0 "Glycine betaine transport system permease protein OpuAB"  
"Chl\_C14\_00886" 2451 "s59E25H2" 0 "Glycine betaine transport system permease protein OpuAB"  
"Chl\_C14\_00886" 2451 "s59E5H2" 0 "Glycine betaine transport system permease protein OpuAB"  
"Chl\_C14\_00886" 2451 "s63E6H2" 0 "Glycine betaine transport system permease protein OpuAB"  
"Chl\_C14\_00887" 2452 "s59E13H2" 0 "hypothetical protein"  
"Chl\_C14\_00887" 2452 "s59E25H2" 0 "hypothetical protein"  
"Chl\_C14\_00887" 2452 "s59E5H2" 0 "hypothetical protein"  
"Chl\_C14\_00887" 2452 "s63E6H2" 0 "hypothetical protein"  
"Chl\_C14\_00888" 2453 "s59E13H2" 0 "Macrolide export ATP-binding/permease protein MacB"  
"Chl\_C14\_00888" 2453 "s59E25H2" 0 "Macrolide export ATP-binding/permease protein MacB"  
"Chl\_C14\_00888" 2453 "s59E5H2" 0 "Macrolide export ATP-binding/permease protein MacB"  
"Chl\_C14\_00888" 2453 "s63E6H2" 0 "Macrolide export ATP-binding/permease protein MacB"

"Chl\_C14\_00889" 2454 "s59E13H2" 0 "putative ABC transporter ATP-binding protein"  
"Chl\_C14\_00889" 2454 "s59E25H2" 0 "putative ABC transporter ATP-binding protein"  
"Chl\_C14\_00889" 2454 "s59E5H2" 0.002205183 "putative ABC transporter ATP-binding protein"  
"Chl\_C14\_00889" 2454 "s63E6H2" 0 "putative ABC transporter ATP-binding protein"  
"Chl\_C14\_00890" 2455 "s59E13H2" 0 "Macrolide export protein MacA"  
"Chl\_C14\_00890" 2455 "s59E25H2" 0 "Macrolide export protein MacA"  
"Chl\_C14\_00890" 2455 "s59E5H2" 0 "Macrolide export protein MacA"  
"Chl\_C14\_00890" 2455 "s63E6H2" 0 "Macrolide export protein MacA"  
"Chl\_C14\_00891" 2456 "s59E13H2" 0 "Signal transduction histidine-protein kinase BaeS"  
"Chl\_C14\_00891" 2456 "s59E25H2" 0 "Signal transduction histidine-protein kinase BaeS"  
"Chl\_C14\_00891" 2456 "s59E5H2" 0 "Signal transduction histidine-protein kinase BaeS"  
"Chl\_C14\_00891" 2456 "s63E6H2" 0 "Signal transduction histidine-protein kinase BaeS"  
"Chl\_C14\_00892" 2457 "s59E13H2" 0 "Transcriptional regulatory protein YycF"  
"Chl\_C14\_00892" 2457 "s59E25H2" 0 "Transcriptional regulatory protein YycF"  
"Chl\_C14\_00892" 2457 "s59E5H2" 0 "Transcriptional regulatory protein YycF"  
"Chl\_C14\_00892" 2457 "s63E6H2" 0 "Transcriptional regulatory protein YycF"  
"Chl\_C14\_00893" 2458 "s59E13H2" 0 "hypothetical protein"  
"Chl\_C14\_00893" 2458 "s59E25H2" 0 "hypothetical protein"  
"Chl\_C14\_00893" 2458 "s59E5H2" 0 "hypothetical protein"  
"Chl\_C14\_00893" 2458 "s63E6H2" 0 "hypothetical protein"  
"Chl\_C14\_00894" 2459 "s59E13H2" 0 "hypothetical protein"  
"Chl\_C14\_00894" 2459 "s59E25H2" 0 "hypothetical protein"  
"Chl\_C14\_00894" 2459 "s59E5H2" 0 "hypothetical protein"  
"Chl\_C14\_00894" 2459 "s63E6H2" 0 "hypothetical protein"  
"Chl\_C14\_00896" 2461 "s59E13H2" 0 "Putative serine protease HtrA"  
"Chl\_C14\_00896" 2461 "s59E25H2" 0 "Putative serine protease HtrA"  
"Chl\_C14\_00896" 2461 "s59E5H2" 0 "Putative serine protease HtrA"  
"Chl\_C14\_00896" 2461 "s63E6H2" 0 "Putative serine protease HtrA"  
"Chl\_C14\_00898" 2463 "s59E13H2" 0.2867935 "Holliday junction ATP-dependent DNA helicase RuvB"  
"Chl\_C14\_00898" 2463 "s59E25H2" 0 "Holliday junction ATP-dependent DNA helicase RuvB"  
"Chl\_C14\_00898" 2463 "s59E5H2" 0.03196174 "Holliday junction ATP-dependent DNA helicase RuvB"  
"Chl\_C14\_00898" 2463 "s63E6H2" 0 "Holliday junction ATP-dependent DNA helicase RuvB"  
"Chl\_C14\_00899" 2464 "s59E13H2" 0 "hypothetical protein"  
"Chl\_C14\_00899" 2464 "s59E25H2" 0 "hypothetical protein"  
"Chl\_C14\_00899" 2464 "s59E5H2" 0.01610577 "hypothetical protein"  
"Chl\_C14\_00899" 2464 "s63E6H2" 0 "hypothetical protein"  
"Chl\_C14\_00900" 2465 "s59E13H2" 0 "hypothetical protein"  
"Chl\_C14\_00900" 2465 "s59E25H2" 0 "hypothetical protein"  
"Chl\_C14\_00900" 2465 "s59E5H2" 0.05607323 "hypothetical protein"  
"Chl\_C14\_00900" 2465 "s63E6H2" 0 "hypothetical protein"  
"Chl\_C14\_00905" 2470 "s59E13H2" 0 "hypothetical protein"  
"Chl\_C14\_00905" 2470 "s59E25H2" 0 "hypothetical protein"  
"Chl\_C14\_00905" 2470 "s59E5H2" 0.02820209 "hypothetical protein"  
"Chl\_C14\_00905" 2470 "s63E6H2" 0 "hypothetical protein"  
"Chl\_C14\_00906" 2471 "s59E13H2" 0 "hypothetical protein"  
"Chl\_C14\_00906" 2471 "s59E25H2" 0 "hypothetical protein"  
"Chl\_C14\_00906" 2471 "s59E5H2" 0.05689469 "hypothetical protein"

"Chl\_C14\_00906" 2471 "s63E6H2" 0 "hypothetical protein"  
"Chl\_C14\_00907" 2472 "s59E13H2" 0 "hypothetical protein"  
"Chl\_C14\_00907" 2472 "s59E25H2" 0 "hypothetical protein"  
"Chl\_C14\_00907" 2472 "s59E5H2" 0.08417331 "hypothetical protein"  
"Chl\_C14\_00907" 2472 "s63E6H2" 0 "hypothetical protein"  
"Chl\_C14\_00908" 2473 "s59E13H2" 0.00545048 "Beta-1,4-mannooligosaccharide phosphorylase"  
"Chl\_C14\_00908" 2473 "s59E25H2" 0 "Beta-1,4-mannooligosaccharide phosphorylase"  
"Chl\_C14\_00908" 2473 "s59E5H2" 0 "Beta-1,4-mannooligosaccharide phosphorylase"  
"Chl\_C14\_00908" 2473 "s63E6H2" 0.1532386 "Beta-1,4-mannooligosaccharide phosphorylase"  
"Chl\_C14\_00909" 2474 "s59E13H2" 0 "Zinc ribbon domain protein"  
"Chl\_C14\_00909" 2474 "s59E25H2" 0 "Zinc ribbon domain protein"  
"Chl\_C14\_00909" 2474 "s59E5H2" 0 "Zinc ribbon domain protein"  
"Chl\_C14\_00909" 2474 "s63E6H2" 0 "Zinc ribbon domain protein"  
"Chl\_C14\_00911" 2476 "s59E13H2" 0 "hypothetical protein"  
"Chl\_C14\_00911" 2476 "s59E25H2" 0 "hypothetical protein"  
"Chl\_C14\_00911" 2476 "s59E5H2" 0 "hypothetical protein"  
"Chl\_C14\_00911" 2476 "s63E6H2" 0.002093978 "hypothetical protein"  
"Chl\_C14\_00912" 2477 "s59E13H2" 0 "hypothetical protein"  
"Chl\_C14\_00912" 2477 "s59E25H2" 0 "hypothetical protein"  
"Chl\_C14\_00912" 2477 "s59E5H2" 0 "hypothetical protein"  
"Chl\_C14\_00912" 2477 "s63E6H2" 0.002747513 "hypothetical protein"  
"Chl\_C14\_00915" 2480 "s59E13H2" 0 "hypothetical protein"  
"Chl\_C14\_00915" 2480 "s59E25H2" 0 "hypothetical protein"  
"Chl\_C14\_00915" 2480 "s59E5H2" 0.06768398 "hypothetical protein"  
"Chl\_C14\_00915" 2480 "s63E6H2" 0 "hypothetical protein"  
"Chl\_C14\_00916" 2481 "s59E13H2" 0.3306347 "Helix-turn-helix domain protein"  
"Chl\_C14\_00916" 2481 "s59E25H2" 0.2105263 "Helix-turn-helix domain protein"  
"Chl\_C14\_00916" 2481 "s59E5H2" 0 "Helix-turn-helix domain protein"  
"Chl\_C14\_00916" 2481 "s63E6H2" 0.1722732 "Helix-turn-helix domain protein"  
"Chl\_C14\_00917" 2482 "s59E13H2" 0 "Sensory transduction protein regX3"  
"Chl\_C14\_00917" 2482 "s59E25H2" 0 "Sensory transduction protein regX3"  
"Chl\_C14\_00917" 2482 "s59E5H2" 0 "Sensory transduction protein regX3"  
"Chl\_C14\_00917" 2482 "s63E6H2" 0 "Sensory transduction protein regX3"  
"Chl\_C14\_00919" 2484 "s59E13H2" 0 "Response regulator ArlR"  
"Chl\_C14\_00919" 2484 "s59E25H2" 0 "Response regulator ArlR"  
"Chl\_C14\_00919" 2484 "s59E5H2" 0 "Response regulator ArlR"  
"Chl\_C14\_00919" 2484 "s63E6H2" 0 "Response regulator ArlR"  
"Chl\_C14\_00920" 2485 "s59E13H2" 0 "cell division protein FtsZ"  
"Chl\_C14\_00920" 2485 "s59E25H2" 0 "cell division protein FtsZ"  
"Chl\_C14\_00920" 2485 "s59E5H2" 0 "cell division protein FtsZ"  
"Chl\_C14\_00920" 2485 "s63E6H2" 0.07701953 "cell division protein FtsZ"  
"Chl\_C14\_00921" 2486 "s59E13H2" 0 "General stress protein CTC"  
"Chl\_C14\_00921" 2486 "s59E25H2" 0 "General stress protein CTC"  
"Chl\_C14\_00921" 2486 "s59E5H2" 0 "General stress protein CTC"  
"Chl\_C14\_00921" 2486 "s63E6H2" 0 "General stress protein CTC"  
"Chl\_C14\_00922" 2487 "s59E13H2" 0 "Cold shock-like protein CspC"  
"Chl\_C14\_00922" 2487 "s59E25H2" 0 "Cold shock-like protein CspC"

"Chl\_C14\_00922" 2487 "s59E5H2" 0 "Cold shock-like protein CspC"  
"Chl\_C14\_00922" 2487 "s63E6H2" 0 "Cold shock-like protein CspC"  
"Chl\_C14\_00924" 2489 "s59E13H2" 0 "hypothetical protein"  
"Chl\_C14\_00924" 2489 "s59E25H2" 0 "hypothetical protein"  
"Chl\_C14\_00924" 2489 "s59E5H2" 0 "hypothetical protein"  
"Chl\_C14\_00924" 2489 "s63E6H2" 0 "hypothetical protein"  
"Chl\_C14\_00926" 2491 "s59E13H2" 0 "AsnC family protein"  
"Chl\_C14\_00926" 2491 "s59E25H2" 0 "AsnC family protein"  
"Chl\_C14\_00926" 2491 "s59E5H2" 0 "AsnC family protein"  
"Chl\_C14\_00926" 2491 "s63E6H2" 0 "AsnC family protein"  
"Chl\_C14\_00928" 2493 "s59E13H2" 0 "Methyltransferase domain protein"  
"Chl\_C14\_00928" 2493 "s59E25H2" 0 "Methyltransferase domain protein"  
"Chl\_C14\_00928" 2493 "s59E5H2" 0 "Methyltransferase domain protein"  
"Chl\_C14\_00928" 2493 "s63E6H2" 0 "Methyltransferase domain protein"  
"Chl\_C14\_00929" 2494 "s59E13H2" 0 "Trimethylamine corrinoid protein"  
"Chl\_C14\_00929" 2494 "s59E25H2" 0 "Trimethylamine corrinoid protein"  
"Chl\_C14\_00929" 2494 "s59E5H2" 0 "Trimethylamine corrinoid protein"  
"Chl\_C14\_00929" 2494 "s63E6H2" 0 "Trimethylamine corrinoid protein"  
"Chl\_C14\_00930" 2495 "s59E13H2" 0 "Trimethylamine methyltransferase MttB"  
"Chl\_C14\_00930" 2495 "s59E25H2" 0 "Trimethylamine methyltransferase MttB"  
"Chl\_C14\_00930" 2495 "s59E5H2" 0 "Trimethylamine methyltransferase MttB"  
"Chl\_C14\_00930" 2495 "s63E6H2" 0 "Trimethylamine methyltransferase MttB"  
"Chl\_C14\_00931" 2496 "s59E13H2" 0 "5-methyltetrahydrofolate:corrinoid/iron-sulfur protein co-methyltransferase"  
"Chl\_C14\_00931" 2496 "s59E25H2" 0 "5-methyltetrahydrofolate:corrinoid/iron-sulfur protein co-methyltransferase"  
"Chl\_C14\_00931" 2496 "s59E5H2" 0 "5-methyltetrahydrofolate:corrinoid/iron-sulfur protein co-methyltransferase"  
"Chl\_C14\_00931" 2496 "s63E6H2" 0 "5-methyltetrahydrofolate:corrinoid/iron-sulfur protein co-methyltransferase"  
"Chl\_C14\_00932" 2497 "s59E13H2" 0 "Trimethylamine methyltransferase MttB"  
"Chl\_C14\_00932" 2497 "s59E25H2" 0 "Trimethylamine methyltransferase MttB"  
"Chl\_C14\_00932" 2497 "s59E5H2" 0 "Trimethylamine methyltransferase MttB"  
"Chl\_C14\_00932" 2497 "s63E6H2" 0 "Trimethylamine methyltransferase MttB"  
"Chl\_C14\_00933" 2498 "s59E13H2" 0 "Vitamin B12 dependent methionine synthase, activation domain"  
"Chl\_C14\_00933" 2498 "s59E25H2" 0 "Vitamin B12 dependent methionine synthase, activation domain"  
"Chl\_C14\_00933" 2498 "s59E5H2" 0 "Vitamin B12 dependent methionine synthase, activation domain"  
"Chl\_C14\_00933" 2498 "s63E6H2" 0 "Vitamin B12 dependent methionine synthase, activation domain"  
"Chl\_C14\_00934" 2499 "s59E13H2" 0 "Response regulator protein VraR"  
"Chl\_C14\_00934" 2499 "s59E25H2" 0 "Response regulator protein VraR"  
"Chl\_C14\_00934" 2499 "s59E5H2" 0 "Response regulator protein VraR"  
"Chl\_C14\_00934" 2499 "s63E6H2" 0 "Response regulator protein VraR"  
"Chl\_C14\_00936" 2501 "s59E13H2" 0 "Polyketide cyclase / dehydrase and lipid transport"  
"Chl\_C14\_00936" 2501 "s59E25H2" 0 "Polyketide cyclase / dehydrase and lipid transport"  
"Chl\_C14\_00936" 2501 "s59E5H2" 0 "Polyketide cyclase / dehydrase and lipid transport"  
"Chl\_C14\_00936" 2501 "s63E6H2" 0 "Polyketide cyclase / dehydrase and lipid transport"  
"Chl\_C14\_00939" 2504 "s59E13H2" 0 "RNA polymerase sigma factor SigA"  
"Chl\_C14\_00939" 2504 "s59E25H2" 0 "RNA polymerase sigma factor SigA"  
"Chl\_C14\_00939" 2504 "s59E5H2" 0 "RNA polymerase sigma factor SigA"  
"Chl\_C14\_00939" 2504 "s63E6H2" 0 "RNA polymerase sigma factor SigA"  
"Chl\_C14\_00942" 2507 "s59E13H2" 0 "Iron-sulfur cluster insertion protein ErpA"

"Chl\_C14\_00942" 2507 "s59E25H2" 0 "Iron-sulfur cluster insertion protein ErpA"  
"Chl\_C14\_00942" 2507 "s59E5H2" 0 "Iron-sulfur cluster insertion protein ErpA"  
"Chl\_C14\_00942" 2507 "s63E6H2" 0 "Iron-sulfur cluster insertion protein ErpA"  
"Chl\_C14\_00946" 2511 "s59E13H2" 0 "hypothetical protein"  
"Chl\_C14\_00946" 2511 "s59E25H2" 0 "hypothetical protein"  
"Chl\_C14\_00946" 2511 "s59E5H2" 0 "hypothetical protein"  
"Chl\_C14\_00946" 2511 "s63E6H2" 0 "hypothetical protein"  
"Chl\_C14\_00947" 2512 "s59E13H2" 0 "IPT/TIG domain protein"  
"Chl\_C14\_00947" 2512 "s59E25H2" 0 "IPT/TIG domain protein"  
"Chl\_C14\_00947" 2512 "s59E5H2" 0 "IPT/TIG domain protein"  
"Chl\_C14\_00947" 2512 "s63E6H2" 0 "IPT/TIG domain protein"  
"Chl\_C14\_00948" 2513 "s59E13H2" 0 "hypothetical protein"  
"Chl\_C14\_00948" 2513 "s59E25H2" 0 "hypothetical protein"  
"Chl\_C14\_00948" 2513 "s59E5H2" 0 "hypothetical protein"  
"Chl\_C14\_00948" 2513 "s63E6H2" 0 "hypothetical protein"  
"Chl\_C14\_00949" 2514 "s59E13H2" 0 "hypothetical protein"  
"Chl\_C14\_00949" 2514 "s59E25H2" 0 "hypothetical protein"  
"Chl\_C14\_00949" 2514 "s59E5H2" 0 "hypothetical protein"  
"Chl\_C14\_00949" 2514 "s63E6H2" 0 "hypothetical protein"  
"Chl\_C14\_00951" 2516 "s59E13H2" 0 "hypothetical protein"  
"Chl\_C14\_00951" 2516 "s59E25H2" 0 "hypothetical protein"  
"Chl\_C14\_00951" 2516 "s59E5H2" 0 "hypothetical protein"  
"Chl\_C14\_00951" 2516 "s63E6H2" 0 "hypothetical protein"  
"Chl\_C14\_00956" 2521 "s59E13H2" 0 "Spore photopproduct lyase"  
"Chl\_C14\_00956" 2521 "s59E25H2" 0 "Spore photopproduct lyase"  
"Chl\_C14\_00956" 2521 "s59E5H2" 0 "Spore photopproduct lyase"  
"Chl\_C14\_00956" 2521 "s63E6H2" 0 "Spore photopproduct lyase"  
"Chl\_C14\_00957" 2522 "s59E13H2" 0 "hypothetical protein"  
"Chl\_C14\_00957" 2522 "s59E25H2" 0 "hypothetical protein"  
"Chl\_C14\_00957" 2522 "s59E5H2" 0.008387889 "hypothetical protein"  
"Chl\_C14\_00957" 2522 "s63E6H2" 0 "hypothetical protein"  
"Chl\_C14\_00958" 2523 "s59E13H2" 0 "putative glycosyl hydrolase/MT2062"  
"Chl\_C14\_00958" 2523 "s59E25H2" 0 "putative glycosyl hydrolase/MT2062"  
"Chl\_C14\_00958" 2523 "s59E5H2" 0 "putative glycosyl hydrolase/MT2062"  
"Chl\_C14\_00958" 2523 "s63E6H2" 0 "putative glycosyl hydrolase/MT2062"  
"Chl\_C14\_00959" 2524 "s59E13H2" 0 "Putative prophage phiRv2 integrase"  
"Chl\_C14\_00959" 2524 "s59E25H2" 0 "Putative prophage phiRv2 integrase"  
"Chl\_C14\_00959" 2524 "s59E5H2" 0 "Putative prophage phiRv2 integrase"  
"Chl\_C14\_00959" 2524 "s63E6H2" 0 "Putative prophage phiRv2 integrase"  
"Chl\_C14\_00962" 2527 "s59E13H2" 0 "Tyrosine recombinase XerD"  
"Chl\_C14\_00962" 2527 "s59E25H2" 0 "Tyrosine recombinase XerD"  
"Chl\_C14\_00962" 2527 "s59E5H2" 0 "Tyrosine recombinase XerD"  
"Chl\_C14\_00962" 2527 "s63E6H2" 0 "Tyrosine recombinase XerD"  
"Chl\_C14\_00964" 2529 "s59E13H2" 0 "Ribosome-binding ATPase YchF"  
"Chl\_C14\_00964" 2529 "s59E25H2" 0 "Ribosome-binding ATPase YchF"  
"Chl\_C14\_00964" 2529 "s59E5H2" 0 "Ribosome-binding ATPase YchF"  
"Chl\_C14\_00964" 2529 "s63E6H2" 0 "Ribosome-binding ATPase YchF"

"Chl\_C14\_00966" 2531 "s59E13H2" 0 "DNA polymerase III subunit delta"  
"Chl\_C14\_00966" 2531 "s59E25H2" 0 "DNA polymerase III subunit delta"  
"Chl\_C14\_00966" 2531 "s59E5H2" 0 "DNA polymerase III subunit delta"  
"Chl\_C14\_00966" 2531 "s63E6H2" 0 "DNA polymerase III subunit delta"  
"Chl\_C14\_00967" 2532 "s59E13H2" 0 "Bifunctional trehalose-6-phosphate synthase/phosphatase"  
"Chl\_C14\_00967" 2532 "s59E25H2" 0 "Bifunctional trehalose-6-phosphate synthase/phosphatase"  
"Chl\_C14\_00967" 2532 "s59E5H2" 0 "Bifunctional trehalose-6-phosphate synthase/phosphatase"  
"Chl\_C14\_00967" 2532 "s63E6H2" 0 "Bifunctional trehalose-6-phosphate synthase/phosphatase"  
"Chl\_C14\_00968" 2533 "s59E13H2" 0 "Trehalose-phosphate phosphatase"  
"Chl\_C14\_00968" 2533 "s59E25H2" 0 "Trehalose-phosphate phosphatase"  
"Chl\_C14\_00968" 2533 "s59E5H2" 0 "Trehalose-phosphate phosphatase"  
"Chl\_C14\_00968" 2533 "s63E6H2" 0 "Trehalose-phosphate phosphatase"  
"Chl\_C14\_00969" 2534 "s59E13H2" 0 "Glycosyl hydrolase family 57"  
"Chl\_C14\_00969" 2534 "s59E25H2" 0 "Glycosyl hydrolase family 57"  
"Chl\_C14\_00969" 2534 "s59E5H2" 0 "Glycosyl hydrolase family 57"  
"Chl\_C14\_00969" 2534 "s63E6H2" 0 "Glycosyl hydrolase family 57"  
"Chl\_C14\_00970" 2535 "s59E13H2" 0 "hypothetical protein"  
"Chl\_C14\_00970" 2535 "s59E25H2" 0 "hypothetical protein"  
"Chl\_C14\_00970" 2535 "s59E5H2" 0 "hypothetical protein"  
"Chl\_C14\_00970" 2535 "s63E6H2" 0 "hypothetical protein"  
"Chl\_C14\_00971" 2536 "s59E13H2" 0 "putative MscS family protein YkuT"  
"Chl\_C14\_00971" 2536 "s59E25H2" 0 "putative MscS family protein YkuT"  
"Chl\_C14\_00971" 2536 "s59E5H2" 0 "putative MscS family protein YkuT"  
"Chl\_C14\_00971" 2536 "s63E6H2" 0 "putative MscS family protein YkuT"  
"Chl\_C14\_00972" 2537 "s59E13H2" 0 "Carbonic anhydrase 2"  
"Chl\_C14\_00972" 2537 "s59E25H2" 0 "Carbonic anhydrase 2"  
"Chl\_C14\_00972" 2537 "s59E5H2" 0.009965276 "Carbonic anhydrase 2"  
"Chl\_C14\_00972" 2537 "s63E6H2" 0 "Carbonic anhydrase 2"  
"Chl\_C14\_00973" 2538 "s59E13H2" 0 "Magnesium transport protein CorA"  
"Chl\_C14\_00973" 2538 "s59E25H2" 0 "Magnesium transport protein CorA"  
"Chl\_C14\_00973" 2538 "s59E5H2" 0.04732976 "Magnesium transport protein CorA"  
"Chl\_C14\_00973" 2538 "s63E6H2" 0 "Magnesium transport protein CorA"  
"Chl\_C14\_00974" 2539 "s59E13H2" 0 "NAD(P)H dehydrogenase (quinone)"  
"Chl\_C14\_00974" 2539 "s59E25H2" 0 "NAD(P)H dehydrogenase (quinone)"  
"Chl\_C14\_00974" 2539 "s59E5H2" 0 "NAD(P)H dehydrogenase (quinone)"  
"Chl\_C14\_00974" 2539 "s63E6H2" 0 "NAD(P)H dehydrogenase (quinone)"  
"Chl\_C14\_00975" 2540 "s59E13H2" 0 "hypothetical protein"  
"Chl\_C14\_00975" 2540 "s59E25H2" 0 "hypothetical protein"  
"Chl\_C14\_00975" 2540 "s59E5H2" 0 "hypothetical protein"  
"Chl\_C14\_00975" 2540 "s63E6H2" 0 "hypothetical protein"  
"Chl\_C14\_00977" 2542 "s59E13H2" 0 "Desulfiredoxin"  
"Chl\_C14\_00977" 2542 "s59E25H2" 0 "Desulfiredoxin"  
"Chl\_C14\_00977" 2542 "s59E5H2" 0 "Desulfiredoxin"  
"Chl\_C14\_00977" 2542 "s63E6H2" 0 "Desulfiredoxin"  
"Chl\_C14\_00978" 2543 "s59E13H2" 0 "hypothetical protein"  
"Chl\_C14\_00978" 2543 "s59E25H2" 0 "hypothetical protein"  
"Chl\_C14\_00978" 2543 "s59E5H2" 0 "hypothetical protein"



"Chl\_C14\_00978" 2543 "s63E6H2" 0 "hypothetical protein"  
"Chl\_C14\_00979" 2544 "s59E13H2" 0 "Succinyl-CoA ligase [ADP-forming] subunit alpha"  
"Chl\_C14\_00979" 2544 "s59E25H2" 0 "Succinyl-CoA ligase [ADP-forming] subunit alpha"  
"Chl\_C14\_00979" 2544 "s59E5H2" 0 "Succinyl-CoA ligase [ADP-forming] subunit alpha"  
"Chl\_C14\_00979" 2544 "s63E6H2" 0 "Succinyl-CoA ligase [ADP-forming] subunit alpha"  
"Chl\_C14\_00980" 2545 "s59E13H2" 0.0008760458 "Alpha-1,4-glucan:maltose-1-phosphate maltosyltransferase 1"  
"Chl\_C14\_00980" 2545 "s59E25H2" 0 "Alpha-1,4-glucan:maltose-1-phosphate maltosyltransferase 1"  
"Chl\_C14\_00980" 2545 "s59E5H2" 0 "Alpha-1,4-glucan:maltose-1-phosphate maltosyltransferase 1"  
"Chl\_C14\_00980" 2545 "s63E6H2" 0 "Alpha-1,4-glucan:maltose-1-phosphate maltosyltransferase 1"  
"Chl\_C14\_00981" 2546 "s59E13H2" 0 "Trehalose synthase/amylase TreS"  
"Chl\_C14\_00981" 2546 "s59E25H2" 0 "Trehalose synthase/amylase TreS"  
"Chl\_C14\_00981" 2546 "s59E5H2" 0 "Trehalose synthase/amylase TreS"  
"Chl\_C14\_00981" 2546 "s63E6H2" 0 "Trehalose synthase/amylase TreS"  
"Chl\_C14\_00982" 2547 "s59E13H2" 0 "4-alpha-glucanotransferase"  
"Chl\_C14\_00982" 2547 "s59E25H2" 0 "4-alpha-glucanotransferase"  
"Chl\_C14\_00982" 2547 "s59E5H2" 0 "4-alpha-glucanotransferase"  
"Chl\_C14\_00982" 2547 "s63E6H2" 0 "4-alpha-glucanotransferase"  
"Chl\_C14\_00983" 2548 "s59E13H2" 0 "1,4-alpha-glucan branching enzyme GlgB"  
"Chl\_C14\_00983" 2548 "s59E25H2" 0 "1,4-alpha-glucan branching enzyme GlgB"  
"Chl\_C14\_00983" 2548 "s59E5H2" 0 "1,4-alpha-glucan branching enzyme GlgB"  
"Chl\_C14\_00983" 2548 "s63E6H2" 0.000357243 "1,4-alpha-glucan branching enzyme GlgB"  
"Chl\_C14\_00984" 2549 "s59E13H2" 0 "Malto-oligosyltrehalose trehalohydrolase"  
"Chl\_C14\_00984" 2549 "s59E25H2" 0 "Malto-oligosyltrehalose trehalohydrolase"  
"Chl\_C14\_00984" 2549 "s59E5H2" 0 "Malto-oligosyltrehalose trehalohydrolase"  
"Chl\_C14\_00984" 2549 "s63E6H2" 0 "Malto-oligosyltrehalose trehalohydrolase"  
"Chl\_C14\_00985" 2550 "s59E13H2" 0 "Glycosyl hydrolase family 57"  
"Chl\_C14\_00985" 2550 "s59E25H2" 0 "Glycosyl hydrolase family 57"  
"Chl\_C14\_00985" 2550 "s59E5H2" 0 "Glycosyl hydrolase family 57"  
"Chl\_C14\_00985" 2550 "s63E6H2" 0 "Glycosyl hydrolase family 57"  
"Chl\_C14\_00986" 2551 "s59E13H2" 0 "Maltooligosyl trehalose synthase"  
"Chl\_C14\_00986" 2551 "s59E25H2" 0 "Maltooligosyl trehalose synthase"  
"Chl\_C14\_00986" 2551 "s59E5H2" 0 "Maltooligosyl trehalose synthase"  
"Chl\_C14\_00986" 2551 "s63E6H2" 0 "Maltooligosyl trehalose synthase"  
"Chl\_C14\_00987" 2552 "s59E13H2" 0 "pH-gated potassium channel KcsA"  
"Chl\_C14\_00987" 2552 "s59E25H2" 0 "pH-gated potassium channel KcsA"  
"Chl\_C14\_00987" 2552 "s59E5H2" 0 "pH-gated potassium channel KcsA"  
"Chl\_C14\_00987" 2552 "s63E6H2" 0 "pH-gated potassium channel KcsA"  
"Chl\_C14\_00988" 2553 "s59E13H2" 0 "Maltodextrin phosphorylase"  
"Chl\_C14\_00988" 2553 "s59E25H2" 0 "Maltodextrin phosphorylase"  
"Chl\_C14\_00988" 2553 "s59E5H2" 0 "Maltodextrin phosphorylase"  
"Chl\_C14\_00988" 2553 "s63E6H2" 0 "Maltodextrin phosphorylase"  
"Chl\_C14\_00990" 2555 "s59E13H2" 0 "Lactate-binding periplasmic protein precursor"  
"Chl\_C14\_00990" 2555 "s59E25H2" 0 "Lactate-binding periplasmic protein precursor"  
"Chl\_C14\_00990" 2555 "s59E5H2" 0 "Lactate-binding periplasmic protein precursor"  
"Chl\_C14\_00990" 2555 "s63E6H2" 0 "Lactate-binding periplasmic protein precursor"  
"Chl\_C14\_00991" 2556 "s59E13H2" 0 "Tripartite ATP-independent periplasmic transporters, DctQ component"  
"Chl\_C14\_00991" 2556 "s59E25H2" 0 "Tripartite ATP-independent periplasmic transporters, DctQ component"

"Chl\_C14\_00991" 2556 "s59E5H2" 0 "Tripartite ATP-independent periplasmic transporters, DctQ component"  
"Chl\_C14\_00991" 2556 "s63E6H2" 0 "Tripartite ATP-independent periplasmic transporters, DctQ component"  
"Chl\_C14\_00992" 2557 "s59E13H2" 0 "Sialic acid TRAP transporter permease protein SiaT"  
"Chl\_C14\_00992" 2557 "s59E25H2" 0 "Sialic acid TRAP transporter permease protein SiaT"  
"Chl\_C14\_00992" 2557 "s59E5H2" 0 "Sialic acid TRAP transporter permease protein SiaT"  
"Chl\_C14\_00992" 2557 "s63E6H2" 0 "Sialic acid TRAP transporter permease protein SiaT"  
"Chl\_C14\_00993" 2558 "s59E13H2" 0 "Aldehyde-alcohol dehydrogenase"  
"Chl\_C14\_00993" 2558 "s59E25H2" 0 "Aldehyde-alcohol dehydrogenase"  
"Chl\_C14\_00993" 2558 "s59E5H2" 0 "Aldehyde-alcohol dehydrogenase"  
"Chl\_C14\_00993" 2558 "s63E6H2" 0 "Aldehyde-alcohol dehydrogenase"  
"Chl\_C14\_00994" 2559 "s59E13H2" 0 "Tungsten-containing aldehyde ferredoxin oxidoreductase"  
"Chl\_C14\_00994" 2559 "s59E25H2" 0 "Tungsten-containing aldehyde ferredoxin oxidoreductase"  
"Chl\_C14\_00994" 2559 "s59E5H2" 0 "Tungsten-containing aldehyde ferredoxin oxidoreductase"  
"Chl\_C14\_00994" 2559 "s63E6H2" 0 "Tungsten-containing aldehyde ferredoxin oxidoreductase"  
"Chl\_C14\_00995" 2560 "s59E13H2" 0 "2-dehydro-3-deoxy-D-gluconate 5-dehydrogenase"  
"Chl\_C14\_00995" 2560 "s59E25H2" 0 "2-dehydro-3-deoxy-D-gluconate 5-dehydrogenase"  
"Chl\_C14\_00995" 2560 "s59E5H2" 0 "2-dehydro-3-deoxy-D-gluconate 5-dehydrogenase"  
"Chl\_C14\_00995" 2560 "s63E6H2" 0 "2-dehydro-3-deoxy-D-gluconate 5-dehydrogenase"  
"Chl\_C14\_00996" 2561 "s59E13H2" 0 "NADH oxidase"  
"Chl\_C14\_00996" 2561 "s59E25H2" 0 "NADH oxidase"  
"Chl\_C14\_00996" 2561 "s59E5H2" 0 "NADH oxidase"  
"Chl\_C14\_00996" 2561 "s63E6H2" 0 "NADH oxidase"  
"Chl\_C14\_00997" 2562 "s59E13H2" 0 "2-isopropylmalate synthase"  
"Chl\_C14\_00997" 2562 "s59E25H2" 0 "2-isopropylmalate synthase"  
"Chl\_C14\_00997" 2562 "s59E5H2" 0 "2-isopropylmalate synthase"  
"Chl\_C14\_00997" 2562 "s63E6H2" 0 "2-isopropylmalate synthase"  
"Chl\_C14\_00998" 2563 "s59E13H2" 0 "Tungsten-containing aldehyde ferredoxin oxidoreductase"  
"Chl\_C14\_00998" 2563 "s59E25H2" 0 "Tungsten-containing aldehyde ferredoxin oxidoreductase"  
"Chl\_C14\_00998" 2563 "s59E5H2" 0 "Tungsten-containing aldehyde ferredoxin oxidoreductase"  
"Chl\_C14\_00998" 2563 "s63E6H2" 0 "Tungsten-containing aldehyde ferredoxin oxidoreductase"  
"Chl\_C14\_00999" 2564 "s59E13H2" 0 "2,6-dihydropseudooxynicotine hydrolase"  
"Chl\_C14\_00999" 2564 "s59E25H2" 0 "2,6-dihydropseudooxynicotine hydrolase"  
"Chl\_C14\_00999" 2564 "s59E5H2" 0 "2,6-dihydropseudooxynicotine hydrolase"  
"Chl\_C14\_00999" 2564 "s63E6H2" 0 "2,6-dihydropseudooxynicotine hydrolase"  
"Chl\_C14\_01000" 2565 "s59E13H2" 0 "Sialic acid TRAP transporter permease protein SiaT"  
"Chl\_C14\_01000" 2565 "s59E25H2" 0 "Sialic acid TRAP transporter permease protein SiaT"  
"Chl\_C14\_01000" 2565 "s59E5H2" 0 "Sialic acid TRAP transporter permease protein SiaT"  
"Chl\_C14\_01000" 2565 "s63E6H2" 0 "Sialic acid TRAP transporter permease protein SiaT"  
"Chl\_C14\_01001" 2566 "s59E13H2" 0 "Tripartite ATP-independent periplasmic transporters, DctQ component"  
"Chl\_C14\_01001" 2566 "s59E25H2" 0 "Tripartite ATP-independent periplasmic transporters, DctQ component"  
"Chl\_C14\_01001" 2566 "s59E5H2" 0 "Tripartite ATP-independent periplasmic transporters, DctQ component"  
"Chl\_C14\_01001" 2566 "s63E6H2" 0 "Tripartite ATP-independent periplasmic transporters, DctQ component"  
"Chl\_C14\_01002" 2567 "s59E13H2" 0 "Lactate-binding periplasmic protein precursor"  
"Chl\_C14\_01002" 2567 "s59E25H2" 0 "Lactate-binding periplasmic protein precursor"  
"Chl\_C14\_01002" 2567 "s59E5H2" 0 "Lactate-binding periplasmic protein precursor"  
"Chl\_C14\_01002" 2567 "s63E6H2" 0 "Lactate-binding periplasmic protein precursor"  
"Chl\_C14\_01004" 2569 "s59E13H2" 0 "hypothetical protein"

"Chl\_C14\_01004" 2569 "s59E25H2" 0 "hypothetical protein"  
"Chl\_C14\_01004" 2569 "s59E5H2" 0 "hypothetical protein"  
"Chl\_C14\_01004" 2569 "s63E6H2" 0 "hypothetical protein"  
"Chl\_C14\_01005" 2570 "s59E13H2" 0 "D-inositol 3-phosphate glycosyltransferase"  
"Chl\_C14\_01005" 2570 "s59E25H2" 0 "D-inositol 3-phosphate glycosyltransferase"  
"Chl\_C14\_01005" 2570 "s59E5H2" 0 "D-inositol 3-phosphate glycosyltransferase"  
"Chl\_C14\_01005" 2570 "s63E6H2" 0 "D-inositol 3-phosphate glycosyltransferase"  
"Chl\_C14\_01006" 2571 "s59E13H2" 0 "putative acetyltransferase YhhY"  
"Chl\_C14\_01006" 2571 "s59E25H2" 0 "putative acetyltransferase YhhY"  
"Chl\_C14\_01006" 2571 "s59E5H2" 0 "putative acetyltransferase YhhY"  
"Chl\_C14\_01006" 2571 "s63E6H2" 0 "putative acetyltransferase YhhY"  
"Chl\_C14\_01007" 2572 "s59E13H2" 0 "hypothetical protein"  
"Chl\_C14\_01007" 2572 "s59E25H2" 0 "hypothetical protein"  
"Chl\_C14\_01007" 2572 "s59E5H2" 0 "hypothetical protein"  
"Chl\_C14\_01007" 2572 "s63E6H2" 0 "hypothetical protein"  
"Chl\_C14\_01008" 2573 "s59E13H2" 0 "Alpha-D-kanosaminyltransferase"  
"Chl\_C14\_01008" 2573 "s59E25H2" 0 "Alpha-D-kanosaminyltransferase"  
"Chl\_C14\_01008" 2573 "s59E5H2" 0 "Alpha-D-kanosaminyltransferase"  
"Chl\_C14\_01008" 2573 "s63E6H2" 0 "Alpha-D-kanosaminyltransferase"  
"Chl\_C14\_01010" 2575 "s59E13H2" 0 "Dimethyl sulfoxide reductase DmsA precursor"  
"Chl\_C14\_01010" 2575 "s59E25H2" 0 "Dimethyl sulfoxide reductase DmsA precursor"  
"Chl\_C14\_01010" 2575 "s59E5H2" 0 "Dimethyl sulfoxide reductase DmsA precursor"  
"Chl\_C14\_01010" 2575 "s63E6H2" 0 "Dimethyl sulfoxide reductase DmsA precursor"  
"Chl\_C14\_01011" 2576 "s59E13H2" 0 "Sulfide dehydrogenase subunit alpha precursor"  
"Chl\_C14\_01011" 2576 "s59E25H2" 0 "Sulfide dehydrogenase subunit alpha precursor"  
"Chl\_C14\_01011" 2576 "s59E5H2" 0.01101283 "Sulfide dehydrogenase subunit alpha precursor"  
"Chl\_C14\_01011" 2576 "s63E6H2" 0 "Sulfide dehydrogenase subunit alpha precursor"  
"Chl\_C14\_01012" 2577 "s59E13H2" 0 "Branched-chain-amino-acid aminotransferase"  
"Chl\_C14\_01012" 2577 "s59E25H2" 0 "Branched-chain-amino-acid aminotransferase"  
"Chl\_C14\_01012" 2577 "s59E5H2" 0 "Branched-chain-amino-acid aminotransferase"  
"Chl\_C14\_01012" 2577 "s63E6H2" 0 "Branched-chain-amino-acid aminotransferase"  
"Chl\_C14\_01013" 2578 "s59E13H2" 0 "Glycerol-3-phosphate acyltransferase"  
"Chl\_C14\_01013" 2578 "s59E25H2" 0 "Glycerol-3-phosphate acyltransferase"  
"Chl\_C14\_01013" 2578 "s59E5H2" 0 "Glycerol-3-phosphate acyltransferase"  
"Chl\_C14\_01013" 2578 "s63E6H2" 0 "Glycerol-3-phosphate acyltransferase"  
"Chl\_C14\_01014" 2579 "s59E13H2" 0 "L-fucose phosphate aldolase"  
"Chl\_C14\_01014" 2579 "s59E25H2" 0 "L-fucose phosphate aldolase"  
"Chl\_C14\_01014" 2579 "s59E5H2" 0 "L-fucose phosphate aldolase"  
"Chl\_C14\_01014" 2579 "s63E6H2" 0 "L-fucose phosphate aldolase"  
"Chl\_C14\_01015" 2580 "s59E13H2" 0 "LexA repressor"  
"Chl\_C14\_01015" 2580 "s59E25H2" 0 "LexA repressor"  
"Chl\_C14\_01015" 2580 "s59E5H2" 0 "LexA repressor"  
"Chl\_C14\_01015" 2580 "s63E6H2" 0 "LexA repressor"  
"Chl\_C14\_01016" 2581 "s59E13H2" 0 "30S ribosomal protein S20"  
"Chl\_C14\_01016" 2581 "s59E25H2" 0 "30S ribosomal protein S20"  
"Chl\_C14\_01016" 2581 "s59E5H2" 0 "30S ribosomal protein S20"  
"Chl\_C14\_01016" 2581 "s63E6H2" 0 "30S ribosomal protein S20"

"Chl\_C14\_01017" 2582 "s59E13H2" 0 "GTP pyrophosphokinase"  
"Chl\_C14\_01017" 2582 "s59E25H2" 0 "GTP pyrophosphokinase"  
"Chl\_C14\_01017" 2582 "s59E5H2" 0 "GTP pyrophosphokinase"  
"Chl\_C14\_01017" 2582 "s63E6H2" 0 "GTP pyrophosphokinase"  
"Chl\_C14\_01018" 2583 "s59E13H2" 0 "Histidine--tRNA ligase"  
"Chl\_C14\_01018" 2583 "s59E25H2" 0 "Histidine--tRNA ligase"  
"Chl\_C14\_01018" 2583 "s59E5H2" 0 "Histidine--tRNA ligase"  
"Chl\_C14\_01018" 2583 "s63E6H2" 0 "Histidine--tRNA ligase"  
"Chl\_C14\_01019" 2584 "s59E13H2" 0 "30S ribosomal protein S21"  
"Chl\_C14\_01019" 2584 "s59E25H2" 0 "30S ribosomal protein S21"  
"Chl\_C14\_01019" 2584 "s59E5H2" 0 "30S ribosomal protein S21"  
"Chl\_C14\_01019" 2584 "s63E6H2" 0 "30S ribosomal protein S21"  
"Chl\_C14\_01020" 2585 "s59E13H2" 0 "Yqey-like protein"  
"Chl\_C14\_01020" 2585 "s59E25H2" 0 "Yqey-like protein"  
"Chl\_C14\_01020" 2585 "s59E5H2" 0 "Yqey-like protein"  
"Chl\_C14\_01020" 2585 "s63E6H2" 0 "Yqey-like protein"  
"Chl\_C14\_01021" 2586 "s59E13H2" 0 "Phosphoribosylformylglycinamide synthase 2"  
"Chl\_C14\_01021" 2586 "s59E25H2" 0 "Phosphoribosylformylglycinamide synthase 2"  
"Chl\_C14\_01021" 2586 "s59E5H2" 0 "Phosphoribosylformylglycinamide synthase 2"  
"Chl\_C14\_01021" 2586 "s63E6H2" 0 "Phosphoribosylformylglycinamide synthase 2"  
"Chl\_C14\_01022" 2587 "s59E13H2" 0 "Radical SAM superfamily protein"  
"Chl\_C14\_01022" 2587 "s59E25H2" 0 "Radical SAM superfamily protein"  
"Chl\_C14\_01022" 2587 "s59E5H2" 0 "Radical SAM superfamily protein"  
"Chl\_C14\_01022" 2587 "s63E6H2" 0 "Radical SAM superfamily protein"  
"Chl\_C14\_01023" 2588 "s59E13H2" 0 "NYN domain protein"  
"Chl\_C14\_01023" 2588 "s59E25H2" 0 "NYN domain protein"  
"Chl\_C14\_01023" 2588 "s59E5H2" 0 "NYN domain protein"  
"Chl\_C14\_01023" 2588 "s63E6H2" 0 "NYN domain protein"  
"Chl\_C14\_01024" 2589 "s59E13H2" 0 "Ribonucleoside-diphosphate reductase NrdZ"  
"Chl\_C14\_01024" 2589 "s59E25H2" 0 "Ribonucleoside-diphosphate reductase NrdZ"  
"Chl\_C14\_01024" 2589 "s59E5H2" 0 "Ribonucleoside-diphosphate reductase NrdZ"  
"Chl\_C14\_01024" 2589 "s63E6H2" 0 "Ribonucleoside-diphosphate reductase NrdZ"  
"Chl\_C14\_01025" 2590 "s59E13H2" 0 "Transcriptional repressor NrdR"  
"Chl\_C14\_01025" 2590 "s59E25H2" 0 "Transcriptional repressor NrdR"  
"Chl\_C14\_01025" 2590 "s59E5H2" 0 "Transcriptional repressor NrdR"  
"Chl\_C14\_01025" 2590 "s63E6H2" 0.001681016 "Transcriptional repressor NrdR"  
"Chl\_C14\_01026" 2591 "s59E13H2" 0 "Transaldolase"  
"Chl\_C14\_01026" 2591 "s59E25H2" 0 "Transaldolase"  
"Chl\_C14\_01026" 2591 "s59E5H2" 0 "Transaldolase"  
"Chl\_C14\_01026" 2591 "s63E6H2" 0 "Transaldolase"  
"Chl\_C14\_01027" 2592 "s59E13H2" 0 "CTP synthase"  
"Chl\_C14\_01027" 2592 "s59E25H2" 0 "CTP synthase"  
"Chl\_C14\_01027" 2592 "s59E5H2" 0.004977547 "CTP synthase"  
"Chl\_C14\_01027" 2592 "s63E6H2" 0.1992259 "CTP synthase"  
"Chl\_C14\_01028" 2593 "s59E13H2" 0 "putative NUDIX hydrolase"  
"Chl\_C14\_01028" 2593 "s59E25H2" 0 "putative NUDIX hydrolase"  
"Chl\_C14\_01028" 2593 "s59E5H2" 0 "putative NUDIX hydrolase"

"Chl\_C14\_01028" 2593 "s63E6H2" 0 "putative NUDIX hydrolase"  
"Chl\_C14\_01029" 2594 "s59E13H2" 0.0003916246 "ATP-dependent Clp protease ATP-binding subunit ClpC"  
"Chl\_C14\_01029" 2594 "s59E25H2" 0 "ATP-dependent Clp protease ATP-binding subunit ClpC"  
"Chl\_C14\_01029" 2594 "s59E5H2" 0 "ATP-dependent Clp protease ATP-binding subunit ClpC"  
"Chl\_C14\_01029" 2594 "s63E6H2" 0.000307561 "ATP-dependent Clp protease ATP-binding subunit ClpC"  
"Chl\_C14\_01030" 2595 "s59E13H2" 0 "hypothetical protein"  
"Chl\_C14\_01030" 2595 "s59E25H2" 0 "hypothetical protein"  
"Chl\_C14\_01030" 2595 "s59E5H2" 0 "hypothetical protein"  
"Chl\_C14\_01030" 2595 "s63E6H2" 0 "hypothetical protein"  
"Chl\_C14\_01031" 2596 "s59E13H2" 0.0008963393 "putative peptidyl-prolyl cis-trans isomerase"  
"Chl\_C14\_01031" 2596 "s59E25H2" 0 "putative peptidyl-prolyl cis-trans isomerase"  
"Chl\_C14\_01031" 2596 "s59E5H2" 0 "putative peptidyl-prolyl cis-trans isomerase"  
"Chl\_C14\_01031" 2596 "s63E6H2" 0 "putative peptidyl-prolyl cis-trans isomerase"  
"Chl\_C14\_01033" 2598 "s59E13H2" 0 "NADH dehydrogenase"  
"Chl\_C14\_01033" 2598 "s59E25H2" 0 "NADH dehydrogenase"  
"Chl\_C14\_01033" 2598 "s59E5H2" 0 "NADH dehydrogenase"  
"Chl\_C14\_01033" 2598 "s63E6H2" 0 "NADH dehydrogenase"  
"Chl\_C14\_01034" 2599 "s59E13H2" 0 "Succinyl-diaminopimelate desuccinylase"  
"Chl\_C14\_01034" 2599 "s59E25H2" 0 "Succinyl-diaminopimelate desuccinylase"  
"Chl\_C14\_01034" 2599 "s59E5H2" 0 "Succinyl-diaminopimelate desuccinylase"  
"Chl\_C14\_01034" 2599 "s63E6H2" 0 "Succinyl-diaminopimelate desuccinylase"  
"Chl\_C14\_01036" 2601 "s59E13H2" 0 "Leucine--tRNA ligase"  
"Chl\_C14\_01036" 2601 "s59E25H2" 0 "Leucine--tRNA ligase"  
"Chl\_C14\_01036" 2601 "s59E5H2" 0.00165561 "Leucine--tRNA ligase"  
"Chl\_C14\_01036" 2601 "s63E6H2" 0 "Leucine--tRNA ligase"  
"Chl\_C14\_01037" 2602 "s59E13H2" 0 "Pyrroline-5-carboxylate reductase"  
"Chl\_C14\_01037" 2602 "s59E25H2" 0 "Pyrroline-5-carboxylate reductase"  
"Chl\_C14\_01037" 2602 "s59E5H2" 0 "Pyrroline-5-carboxylate reductase"  
"Chl\_C14\_01037" 2602 "s63E6H2" 0 "Pyrroline-5-carboxylate reductase"  
"Chl\_C14\_01038" 2603 "s59E13H2" 0 "MMPL family protein"  
"Chl\_C14\_01038" 2603 "s59E25H2" 0 "MMPL family protein"  
"Chl\_C14\_01038" 2603 "s59E5H2" 0 "MMPL family protein"  
"Chl\_C14\_01038" 2603 "s63E6H2" 0 "MMPL family protein"  
"Chl\_C14\_01039" 2604 "s59E13H2" 0 "Macrolide export protein MacA"  
"Chl\_C14\_01039" 2604 "s59E25H2" 0 "Macrolide export protein MacA"  
"Chl\_C14\_01039" 2604 "s59E5H2" 0 "Macrolide export protein MacA"  
"Chl\_C14\_01039" 2604 "s63E6H2" 0 "Macrolide export protein MacA"  
"Chl\_C14\_01040" 2605 "s59E13H2" 0 "putative ABC transporter ATP-binding protein"  
"Chl\_C14\_01040" 2605 "s59E25H2" 0 "putative ABC transporter ATP-binding protein"  
"Chl\_C14\_01040" 2605 "s59E5H2" 0 "putative ABC transporter ATP-binding protein"  
"Chl\_C14\_01040" 2605 "s63E6H2" 0 "putative ABC transporter ATP-binding protein"  
"Chl\_C14\_01041" 2606 "s59E13H2" 0.001289926 "Macrolide export ATP-binding/permease protein MacB"  
"Chl\_C14\_01041" 2606 "s59E25H2" 0 "Macrolide export ATP-binding/permease protein MacB"  
"Chl\_C14\_01041" 2606 "s59E5H2" 0.006453591 "Macrolide export ATP-binding/permease protein MacB"  
"Chl\_C14\_01041" 2606 "s63E6H2" 0.003289911 "Macrolide export ATP-binding/permease protein MacB"  
"Chl\_C14\_01042" 2607 "s59E13H2" 0 "colicin V production protein"  
"Chl\_C14\_01042" 2607 "s59E25H2" 0 "colicin V production protein"

"Chl\_C14\_01042" 2607 "s59E5H2" 0 "colicin V production protein"  
"Chl\_C14\_01042" 2607 "s63E6H2" 0 "colicin V production protein"  
"Chl\_C14\_01043" 2608 "s59E13H2" 0 "putative ferredoxin-like protein YfhL"  
"Chl\_C14\_01043" 2608 "s59E25H2" 0 "putative ferredoxin-like protein YfhL"  
"Chl\_C14\_01043" 2608 "s59E5H2" 0 "putative ferredoxin-like protein YfhL"  
"Chl\_C14\_01043" 2608 "s63E6H2" 0 "putative ferredoxin-like protein YfhL"  
"Chl\_C14\_01044" 2609 "s59E13H2" 0 "Phosphopantetheine adenyltransferase"  
"Chl\_C14\_01044" 2609 "s59E25H2" 0 "Phosphopantetheine adenyltransferase"  
"Chl\_C14\_01044" 2609 "s59E5H2" 0 "Phosphopantetheine adenyltransferase"  
"Chl\_C14\_01044" 2609 "s63E6H2" 0 "Phosphopantetheine adenyltransferase"  
"Chl\_C14\_01045" 2610 "s59E13H2" 0 "Ribosomal RNA small subunit methyltransferase D"  
"Chl\_C14\_01045" 2610 "s59E25H2" 0 "Ribosomal RNA small subunit methyltransferase D"  
"Chl\_C14\_01045" 2610 "s59E5H2" 0 "Ribosomal RNA small subunit methyltransferase D"  
"Chl\_C14\_01045" 2610 "s63E6H2" 0 "Ribosomal RNA small subunit methyltransferase D"  
"Chl\_C14\_01046" 2611 "s59E13H2" 0 "NAD(P)H-quinone oxidoreductase subunit 3"  
"Chl\_C14\_01046" 2611 "s59E25H2" 0 "NAD(P)H-quinone oxidoreductase subunit 3"  
"Chl\_C14\_01046" 2611 "s59E5H2" 0 "NAD(P)H-quinone oxidoreductase subunit 3"  
"Chl\_C14\_01046" 2611 "s63E6H2" 0 "NAD(P)H-quinone oxidoreductase subunit 3"  
"Chl\_C14\_01047" 2612 "s59E13H2" 0 "NADH-quinone oxidoreductase subunit B"  
"Chl\_C14\_01047" 2612 "s59E25H2" 0 "NADH-quinone oxidoreductase subunit B"  
"Chl\_C14\_01047" 2612 "s59E5H2" 0 "NADH-quinone oxidoreductase subunit B"  
"Chl\_C14\_01047" 2612 "s63E6H2" 0 "NADH-quinone oxidoreductase subunit B"  
"Chl\_C14\_01048" 2613 "s59E13H2" 0 "NADH-quinone oxidoreductase subunit 5"  
"Chl\_C14\_01048" 2613 "s59E25H2" 0 "NADH-quinone oxidoreductase subunit 5"  
"Chl\_C14\_01048" 2613 "s59E5H2" 0 "NADH-quinone oxidoreductase subunit 5"  
"Chl\_C14\_01048" 2613 "s63E6H2" 0 "NADH-quinone oxidoreductase subunit 5"  
"Chl\_C14\_01049" 2614 "s59E13H2" 0 "NADH-quinone oxidoreductase subunit 4"  
"Chl\_C14\_01049" 2614 "s59E25H2" 0 "NADH-quinone oxidoreductase subunit 4"  
"Chl\_C14\_01049" 2614 "s59E5H2" 0 "NADH-quinone oxidoreductase subunit 4"  
"Chl\_C14\_01049" 2614 "s63E6H2" 0 "NADH-quinone oxidoreductase subunit 4"  
"Chl\_C14\_01050" 2615 "s59E13H2" 0 "NADH-quinone oxidoreductase subunit H"  
"Chl\_C14\_01050" 2615 "s59E25H2" 0 "NADH-quinone oxidoreductase subunit H"  
"Chl\_C14\_01050" 2615 "s59E5H2" 0 "NADH-quinone oxidoreductase subunit H"  
"Chl\_C14\_01050" 2615 "s63E6H2" 0 "NADH-quinone oxidoreductase subunit H"  
"Chl\_C14\_01051" 2616 "s59E13H2" 0 "NADH-quinone oxidoreductase subunit I"  
"Chl\_C14\_01051" 2616 "s59E25H2" 0 "NADH-quinone oxidoreductase subunit I"  
"Chl\_C14\_01051" 2616 "s59E5H2" 0 "NADH-quinone oxidoreductase subunit I"  
"Chl\_C14\_01051" 2616 "s63E6H2" 0 "NADH-quinone oxidoreductase subunit I"  
"Chl\_C14\_01052" 2617 "s59E13H2" 0 "F(420)H(2) dehydrogenase subunit J"  
"Chl\_C14\_01052" 2617 "s59E25H2" 0 "F(420)H(2) dehydrogenase subunit J"  
"Chl\_C14\_01052" 2617 "s59E5H2" 0 "F(420)H(2) dehydrogenase subunit J"  
"Chl\_C14\_01052" 2617 "s63E6H2" 0 "F(420)H(2) dehydrogenase subunit J"  
"Chl\_C14\_01053" 2618 "s59E13H2" 0 "F(420)H(2) dehydrogenase subunit K"  
"Chl\_C14\_01053" 2618 "s59E25H2" 0 "F(420)H(2) dehydrogenase subunit K"  
"Chl\_C14\_01053" 2618 "s59E5H2" 0 "F(420)H(2) dehydrogenase subunit K"  
"Chl\_C14\_01053" 2618 "s63E6H2" 0 "F(420)H(2) dehydrogenase subunit K"  
"Chl\_C14\_01054" 2619 "s59E13H2" 0 "hypothetical protein"

"Chl\_C14\_01054" 2619 "s59E25H2" 0 "hypothetical protein"  
"Chl\_C14\_01054" 2619 "s59E5H2" 0 "hypothetical protein"  
"Chl\_C14\_01054" 2619 "s63E6H2" 0 "hypothetical protein"  
"Chl\_C14\_01056" 2621 "s59E13H2" 0 "F(420)H(2) dehydrogenase subunit L"  
"Chl\_C14\_01056" 2621 "s59E25H2" 0 "F(420)H(2) dehydrogenase subunit L"  
"Chl\_C14\_01056" 2621 "s59E5H2" 0.04654888 "F(420)H(2) dehydrogenase subunit L"  
"Chl\_C14\_01056" 2621 "s63E6H2" 0 "F(420)H(2) dehydrogenase subunit L"  
"Chl\_C14\_01057" 2622 "s59E13H2" 0.00066043 "F(420)H(2) dehydrogenase subunit M"  
"Chl\_C14\_01057" 2622 "s59E25H2" 0 "F(420)H(2) dehydrogenase subunit M"  
"Chl\_C14\_01057" 2622 "s59E5H2" 0.02424664 "F(420)H(2) dehydrogenase subunit M"  
"Chl\_C14\_01057" 2622 "s63E6H2" 0 "F(420)H(2) dehydrogenase subunit M"  
"Chl\_C14\_01058" 2623 "s59E13H2" 0 "ADP-ribose pyrophosphatase"  
"Chl\_C14\_01058" 2623 "s59E25H2" 0 "ADP-ribose pyrophosphatase"  
"Chl\_C14\_01058" 2623 "s59E5H2" 0 "ADP-ribose pyrophosphatase"  
"Chl\_C14\_01058" 2623 "s63E6H2" 0 "ADP-ribose pyrophosphatase"  
"Chl\_C14\_01059" 2624 "s59E13H2" 0 "F(420)H(2) dehydrogenase subunit N"  
"Chl\_C14\_01059" 2624 "s59E25H2" 0 "F(420)H(2) dehydrogenase subunit N"  
"Chl\_C14\_01059" 2624 "s59E5H2" 0 "F(420)H(2) dehydrogenase subunit N"  
"Chl\_C14\_01059" 2624 "s63E6H2" 0 "F(420)H(2) dehydrogenase subunit N"  
"Chl\_C14\_01060" 2625 "s59E13H2" 0 "DNA recombination protein RmuC"  
"Chl\_C14\_01060" 2625 "s59E25H2" 0 "DNA recombination protein RmuC"  
"Chl\_C14\_01060" 2625 "s59E5H2" 0 "DNA recombination protein RmuC"  
"Chl\_C14\_01060" 2625 "s63E6H2" 0 "DNA recombination protein RmuC"  
"Chl\_C14\_01061" 2626 "s59E13H2" 0 "hypothetical protein"  
"Chl\_C14\_01061" 2626 "s59E25H2" 0 "hypothetical protein"  
"Chl\_C14\_01061" 2626 "s59E5H2" 0 "hypothetical protein"  
"Chl\_C14\_01061" 2626 "s63E6H2" 0 "hypothetical protein"  
"Chl\_C14\_01062" 2627 "s59E13H2" 0 "hypothetical protein"  
"Chl\_C14\_01062" 2627 "s59E25H2" 0 "hypothetical protein"  
"Chl\_C14\_01062" 2627 "s59E5H2" 0 "hypothetical protein"  
"Chl\_C14\_01062" 2627 "s63E6H2" 0 "hypothetical protein"  
"Chl\_C14\_01063" 2628 "s59E13H2" 0 "hypothetical protein"  
"Chl\_C14\_01063" 2628 "s59E25H2" 0 "hypothetical protein"  
"Chl\_C14\_01063" 2628 "s59E5H2" 0 "hypothetical protein"  
"Chl\_C14\_01063" 2628 "s63E6H2" 0 "hypothetical protein"  
"Chl\_C14\_01064" 2629 "s59E13H2" 0 "hypothetical protein"  
"Chl\_C14\_01064" 2629 "s59E25H2" 0 "hypothetical protein"  
"Chl\_C14\_01064" 2629 "s59E5H2" 0 "hypothetical protein"  
"Chl\_C14\_01064" 2629 "s63E6H2" 0 "hypothetical protein"  
"Chl\_C14\_01065" 2630 "s59E13H2" 0 "hypothetical protein"  
"Chl\_C14\_01065" 2630 "s59E25H2" 0 "hypothetical protein"  
"Chl\_C14\_01065" 2630 "s59E5H2" 0 "hypothetical protein"  
"Chl\_C14\_01065" 2630 "s63E6H2" 0 "hypothetical protein"  
"Chl\_C14\_01068" 2633 "s59E13H2" 0 "hypothetical protein"  
"Chl\_C14\_01068" 2633 "s59E25H2" 0 "hypothetical protein"  
"Chl\_C14\_01068" 2633 "s59E5H2" 0 "hypothetical protein"  
"Chl\_C14\_01068" 2633 "s63E6H2" 0 "hypothetical protein"

"Chl\_C14\_01069" 2634 "s59E13H2" 0 "putative inorganic polyphosphate/ATP-NAD kinase"  
"Chl\_C14\_01069" 2634 "s59E25H2" 0 "putative inorganic polyphosphate/ATP-NAD kinase"  
"Chl\_C14\_01069" 2634 "s59E5H2" 0 "putative inorganic polyphosphate/ATP-NAD kinase"  
"Chl\_C14\_01069" 2634 "s63E6H2" 0.03285141 "putative inorganic polyphosphate/ATP-NAD kinase"  
"Chl\_C14\_01070" 2635 "s59E13H2" 0 "Amino-acid acetyltransferase"  
"Chl\_C14\_01070" 2635 "s59E25H2" 0 "Amino-acid acetyltransferase"  
"Chl\_C14\_01070" 2635 "s59E5H2" 0.006519557 "Amino-acid acetyltransferase"  
"Chl\_C14\_01070" 2635 "s63E6H2" 0.0007190558 "Amino-acid acetyltransferase"  
"Chl\_C14\_01071" 2636 "s59E13H2" 0 "ADP-ribose pyrophosphatase"  
"Chl\_C14\_01071" 2636 "s59E25H2" 0 "ADP-ribose pyrophosphatase"  
"Chl\_C14\_01071" 2636 "s59E5H2" 0 "ADP-ribose pyrophosphatase"  
"Chl\_C14\_01071" 2636 "s63E6H2" 0 "ADP-ribose pyrophosphatase"  
"Chl\_C14\_01072" 2637 "s59E13H2" 0 "hypothetical protein"  
"Chl\_C14\_01072" 2637 "s59E25H2" 0 "hypothetical protein"  
"Chl\_C14\_01072" 2637 "s59E5H2" 0 "hypothetical protein"  
"Chl\_C14\_01072" 2637 "s63E6H2" 0 "hypothetical protein"  
"Chl\_C14\_01073" 2638 "s59E13H2" 0 "HIT-like protein"  
"Chl\_C14\_01073" 2638 "s59E25H2" 0 "HIT-like protein"  
"Chl\_C14\_01073" 2638 "s59E5H2" 0 "HIT-like protein"  
"Chl\_C14\_01073" 2638 "s63E6H2" 0 "HIT-like protein"  
"Chl\_C14\_01074" 2639 "s59E13H2" 0 "Fumarate hydratase class I, aerobic"  
"Chl\_C14\_01074" 2639 "s59E25H2" 0 "Fumarate hydratase class I, aerobic"  
"Chl\_C14\_01074" 2639 "s59E5H2" 0.00543328 "Fumarate hydratase class I, aerobic"  
"Chl\_C14\_01074" 2639 "s63E6H2" 0 "Fumarate hydratase class I, aerobic"  
"Chl\_C14\_01075" 2640 "s59E13H2" 0 "L(+)-tartrate dehydratase subunit alpha"  
"Chl\_C14\_01075" 2640 "s59E25H2" 0 "L(+)-tartrate dehydratase subunit alpha"  
"Chl\_C14\_01075" 2640 "s59E5H2" 0 "L(+)-tartrate dehydratase subunit alpha"  
"Chl\_C14\_01075" 2640 "s63E6H2" 0 "L(+)-tartrate dehydratase subunit alpha"  
"Chl\_C14\_01077" 2642 "s59E13H2" 0 "Malate dehydrogenase"  
"Chl\_C14\_01077" 2642 "s59E25H2" 0 "Malate dehydrogenase"  
"Chl\_C14\_01077" 2642 "s59E5H2" 0 "Malate dehydrogenase"  
"Chl\_C14\_01077" 2642 "s63E6H2" 0 "Malate dehydrogenase"  
"Chl\_C14\_01078" 2643 "s59E13H2" 0 "Bifunctional folate synthesis protein"  
"Chl\_C14\_01078" 2643 "s59E25H2" 0 "Bifunctional folate synthesis protein"  
"Chl\_C14\_01078" 2643 "s59E5H2" 0 "Bifunctional folate synthesis protein"  
"Chl\_C14\_01078" 2643 "s63E6H2" 0 "Bifunctional folate synthesis protein"  
"Chl\_C14\_01079" 2644 "s59E13H2" 0 "6-carboxy-5,6,7,8-tetrahydropterin synthase"  
"Chl\_C14\_01079" 2644 "s59E25H2" 0 "6-carboxy-5,6,7,8-tetrahydropterin synthase"  
"Chl\_C14\_01079" 2644 "s59E5H2" 0 "6-carboxy-5,6,7,8-tetrahydropterin synthase"  
"Chl\_C14\_01079" 2644 "s63E6H2" 0 "6-carboxy-5,6,7,8-tetrahydropterin synthase"  
"Chl\_C14\_01080" 2645 "s59E13H2" 0 "hypothetical protein"  
"Chl\_C14\_01080" 2645 "s59E25H2" 0 "hypothetical protein"  
"Chl\_C14\_01080" 2645 "s59E5H2" 0 "hypothetical protein"  
"Chl\_C14\_01080" 2645 "s63E6H2" 0 "hypothetical protein"  
"Chl\_C14\_01081" 2646 "s59E13H2" 0 "fermentation/respiration switch protein"  
"Chl\_C14\_01081" 2646 "s59E25H2" 0 "fermentation/respiration switch protein"  
"Chl\_C14\_01081" 2646 "s59E5H2" 7.133876e-05 "fermentation/respiration switch protein"



"Chl\_C14\_01081" 2646 "s63E6H2" 0 "fermentation/respiration switch protein"  
"Chl\_C14\_01082" 2647 "s59E13H2" 0 "hypothetical protein"  
"Chl\_C14\_01082" 2647 "s59E25H2" 0 "hypothetical protein"  
"Chl\_C14\_01082" 2647 "s59E5H2" 0.07633975 "hypothetical protein"  
"Chl\_C14\_01082" 2647 "s63E6H2" 0 "hypothetical protein"  
"Chl\_C14\_01083" 2648 "s59E13H2" 0 "Vegetative catalase"  
"Chl\_C14\_01083" 2648 "s59E25H2" 0 "Vegetative catalase"  
"Chl\_C14\_01083" 2648 "s59E5H2" 0.0158051 "Vegetative catalase"  
"Chl\_C14\_01083" 2648 "s63E6H2" 0 "Vegetative catalase"  
"Chl\_C14\_01084" 2649 "s59E13H2" 0 "DNA polymerase III subunit beta"  
"Chl\_C14\_01084" 2649 "s59E25H2" 0 "DNA polymerase III subunit beta"  
"Chl\_C14\_01084" 2649 "s59E5H2" 0 "DNA polymerase III subunit beta"  
"Chl\_C14\_01084" 2649 "s63E6H2" 0 "DNA polymerase III subunit beta"  
"Chl\_C14\_01085" 2650 "s59E13H2" 0 "Cyclic pyranopterin monophosphate synthase accessory protein"  
"Chl\_C14\_01085" 2650 "s59E25H2" 0 "Cyclic pyranopterin monophosphate synthase accessory protein"  
"Chl\_C14\_01085" 2650 "s59E5H2" 0 "Cyclic pyranopterin monophosphate synthase accessory protein"  
"Chl\_C14\_01085" 2650 "s63E6H2" 0.03496585 "Cyclic pyranopterin monophosphate synthase accessory protein"  
"Chl\_C14\_01086" 2651 "s59E13H2" 0 "putative tyrosine recombinase XerC-like protein"  
"Chl\_C14\_01086" 2651 "s59E25H2" 0 "putative tyrosine recombinase XerC-like protein"  
"Chl\_C14\_01086" 2651 "s59E5H2" 0 "putative tyrosine recombinase XerC-like protein"  
"Chl\_C14\_01086" 2651 "s63E6H2" 0 "putative tyrosine recombinase XerC-like protein"  
"Chl\_C14\_01087" 2652 "s59E13H2" 0 "hypothetical protein"  
"Chl\_C14\_01087" 2652 "s59E25H2" 0 "hypothetical protein"  
"Chl\_C14\_01087" 2652 "s59E5H2" 0 "hypothetical protein"  
"Chl\_C14\_01087" 2652 "s63E6H2" 0 "hypothetical protein"  
"Chl\_C14\_01088" 2653 "s59E13H2" 0 "Succinyl-CoA ligase [ADP-forming] subunit alpha"  
"Chl\_C14\_01088" 2653 "s59E25H2" 0 "Succinyl-CoA ligase [ADP-forming] subunit alpha"  
"Chl\_C14\_01088" 2653 "s59E5H2" 0 "Succinyl-CoA ligase [ADP-forming] subunit alpha"  
"Chl\_C14\_01088" 2653 "s63E6H2" 0 "Succinyl-CoA ligase [ADP-forming] subunit alpha"  
"Chl\_C14\_01089" 2654 "s59E13H2" 0 "Argininosuccinate lyase 1"  
"Chl\_C14\_01089" 2654 "s59E25H2" 0 "Argininosuccinate lyase 1"  
"Chl\_C14\_01089" 2654 "s59E5H2" 0 "Argininosuccinate lyase 1"  
"Chl\_C14\_01089" 2654 "s63E6H2" 0 "Argininosuccinate lyase 1"  
"Chl\_C14\_01090" 2655 "s59E13H2" 0 "2-methylcitrate dehydratase"  
"Chl\_C14\_01090" 2655 "s59E25H2" 0 "2-methylcitrate dehydratase"  
"Chl\_C14\_01090" 2655 "s59E5H2" 0 "2-methylcitrate dehydratase"  
"Chl\_C14\_01090" 2655 "s63E6H2" 0 "2-methylcitrate dehydratase"  
"Chl\_C14\_01091" 2656 "s59E13H2" 0 "Aldehyde ferredoxin oxidoreductase, domains 2 & 3"  
"Chl\_C14\_01091" 2656 "s59E25H2" 0 "Aldehyde ferredoxin oxidoreductase, domains 2 & 3"  
"Chl\_C14\_01091" 2656 "s59E5H2" 0 "Aldehyde ferredoxin oxidoreductase, domains 2 & 3"  
"Chl\_C14\_01091" 2656 "s63E6H2" 0 "Aldehyde ferredoxin oxidoreductase, domains 2 & 3"  
"Chl\_C14\_01092" 2657 "s59E13H2" 0 "Alpha/beta hydrolase family protein"  
"Chl\_C14\_01092" 2657 "s59E25H2" 0 "Alpha/beta hydrolase family protein"  
"Chl\_C14\_01092" 2657 "s59E5H2" 0 "Alpha/beta hydrolase family protein"  
"Chl\_C14\_01092" 2657 "s63E6H2" 0 "Alpha/beta hydrolase family protein"  
"Chl\_C14\_01093" 2658 "s59E13H2" 0 "2-methylcitrate dehydratase"  
"Chl\_C14\_01093" 2658 "s59E25H2" 0 "2-methylcitrate dehydratase"

"Chl\_C14\_01093" 2658 "s59E5H2" 0 "2-methylcitrate dehydratase"  
"Chl\_C14\_01093" 2658 "s63E6H2" 0 "2-methylcitrate dehydratase"  
"Chl\_C14\_01094" 2659 "s59E13H2" 0 "Acryloyl-CoA reductase electron transfer subunit beta"  
"Chl\_C14\_01094" 2659 "s59E25H2" 0 "Acryloyl-CoA reductase electron transfer subunit beta"  
"Chl\_C14\_01094" 2659 "s59E5H2" 0 "Acryloyl-CoA reductase electron transfer subunit beta"  
"Chl\_C14\_01094" 2659 "s63E6H2" 0 "Acryloyl-CoA reductase electron transfer subunit beta"  
"Chl\_C14\_01095" 2660 "s59E13H2" 0 "Electron transfer flavoprotein subunit beta"  
"Chl\_C14\_01095" 2660 "s59E25H2" 0 "Electron transfer flavoprotein subunit beta"  
"Chl\_C14\_01095" 2660 "s59E5H2" 0 "Electron transfer flavoprotein subunit beta"  
"Chl\_C14\_01095" 2660 "s63E6H2" 0 "Electron transfer flavoprotein subunit beta"  
"Chl\_C14\_01096" 2661 "s59E13H2" 0 "Fumarate reductase flavoprotein subunit precursor"  
"Chl\_C14\_01096" 2661 "s59E25H2" 0 "Fumarate reductase flavoprotein subunit precursor"  
"Chl\_C14\_01096" 2661 "s59E5H2" 0 "Fumarate reductase flavoprotein subunit precursor"  
"Chl\_C14\_01096" 2661 "s63E6H2" 0 "Fumarate reductase flavoprotein subunit precursor"  
"Chl\_C14\_01097" 2662 "s59E13H2" 0 "Capsule biosynthesis protein CapA"  
"Chl\_C14\_01097" 2662 "s59E25H2" 0 "Capsule biosynthesis protein CapA"  
"Chl\_C14\_01097" 2662 "s59E5H2" 0 "Capsule biosynthesis protein CapA"  
"Chl\_C14\_01097" 2662 "s63E6H2" 0 "Capsule biosynthesis protein CapA"  
"Chl\_C14\_01098" 2663 "s59E13H2" 0 "2,3-dimethylmalate lyase"  
"Chl\_C14\_01098" 2663 "s59E25H2" 0 "2,3-dimethylmalate lyase"  
"Chl\_C14\_01098" 2663 "s59E5H2" 0 "2,3-dimethylmalate lyase"  
"Chl\_C14\_01098" 2663 "s63E6H2" 0 "2,3-dimethylmalate lyase"  
"Chl\_C14\_01099" 2664 "s59E13H2" 0 "Isopropylmalate/citramalate isomerase small subunit"  
"Chl\_C14\_01099" 2664 "s59E25H2" 0 "Isopropylmalate/citramalate isomerase small subunit"  
"Chl\_C14\_01099" 2664 "s59E5H2" 0 "Isopropylmalate/citramalate isomerase small subunit"  
"Chl\_C14\_01099" 2664 "s63E6H2" 0 "Isopropylmalate/citramalate isomerase small subunit"  
"Chl\_C14\_01100" 2665 "s59E13H2" 0 "Isopropylmalate/citramalate isomerase large subunit"  
"Chl\_C14\_01100" 2665 "s59E25H2" 0 "Isopropylmalate/citramalate isomerase large subunit"  
"Chl\_C14\_01100" 2665 "s59E5H2" 0 "Isopropylmalate/citramalate isomerase large subunit"  
"Chl\_C14\_01100" 2665 "s63E6H2" 0 "Isopropylmalate/citramalate isomerase large subunit"  
"Chl\_C14\_01101" 2666 "s59E13H2" 0 "3-oxosteroid 1-dehydrogenase"  
"Chl\_C14\_01101" 2666 "s59E25H2" 0 "3-oxosteroid 1-dehydrogenase"  
"Chl\_C14\_01101" 2666 "s59E5H2" 0 "3-oxosteroid 1-dehydrogenase"  
"Chl\_C14\_01101" 2666 "s63E6H2" 0 "3-oxosteroid 1-dehydrogenase"  
"Chl\_C14\_01102" 2667 "s59E13H2" 0 "3-isopropylmalate/3-methylmalate dehydrogenase"  
"Chl\_C14\_01102" 2667 "s59E25H2" 0 "3-isopropylmalate/3-methylmalate dehydrogenase"  
"Chl\_C14\_01102" 2667 "s59E5H2" 0 "3-isopropylmalate/3-methylmalate dehydrogenase"  
"Chl\_C14\_01102" 2667 "s63E6H2" 0 "3-isopropylmalate/3-methylmalate dehydrogenase"  
"Chl\_C14\_01103" 2668 "s59E13H2" 0 "Indolepyruvate oxidoreductase subunit lorB"  
"Chl\_C14\_01103" 2668 "s59E25H2" 0 "Indolepyruvate oxidoreductase subunit lorB"  
"Chl\_C14\_01103" 2668 "s59E5H2" 0 "Indolepyruvate oxidoreductase subunit lorB"  
"Chl\_C14\_01103" 2668 "s63E6H2" 0 "Indolepyruvate oxidoreductase subunit lorB"  
"Chl\_G11\_00001" 2670 "s59E13H2" 0 "hypothetical protein"  
"Chl\_G11\_00001" 2670 "s59E25H2" 0 "hypothetical protein"  
"Chl\_G11\_00001" 2670 "s59E5H2" 0 "hypothetical protein"  
"Chl\_G11\_00001" 2670 "s63E6H2" 0 "hypothetical protein"  
"Chl\_G11\_00003" 2672 "s59E13H2" 0 "L-2-keto-3-deoxyarabonate dehydratase"

"Chl\_G11\_00003" 2672 "s59E25H2" 0 "L-2-keto-3-deoxyarabonate dehydratase"  
"Chl\_G11\_00003" 2672 "s59E5H2" 0 "L-2-keto-3-deoxyarabonate dehydratase"  
"Chl\_G11\_00003" 2672 "s63E6H2" 0 "L-2-keto-3-deoxyarabonate dehydratase"  
"Chl\_G11\_00004" 2673 "s59E13H2" 0 "Trehalose synthase"  
"Chl\_G11\_00004" 2673 "s59E25H2" 0 "Trehalose synthase"  
"Chl\_G11\_00004" 2673 "s59E5H2" 0.003068027 "Trehalose synthase"  
"Chl\_G11\_00004" 2673 "s63E6H2" 0 "Trehalose synthase"  
"Chl\_G11\_00005" 2674 "s59E13H2" 0 "Bifunctional trehalose-6-phosphate synthase/phosphatase"  
"Chl\_G11\_00005" 2674 "s59E25H2" 0 "Bifunctional trehalose-6-phosphate synthase/phosphatase"  
"Chl\_G11\_00005" 2674 "s59E5H2" 0.001821125 "Bifunctional trehalose-6-phosphate synthase/phosphatase"  
"Chl\_G11\_00005" 2674 "s63E6H2" 0 "Bifunctional trehalose-6-phosphate synthase/phosphatase"  
"Chl\_G11\_00006" 2675 "s59E13H2" 0 "Glucose-1-phosphate thymidyltransferase"  
"Chl\_G11\_00006" 2675 "s59E25H2" 0 "Glucose-1-phosphate thymidyltransferase"  
"Chl\_G11\_00006" 2675 "s59E5H2" 0 "Glucose-1-phosphate thymidyltransferase"  
"Chl\_G11\_00006" 2675 "s63E6H2" 0 "Glucose-1-phosphate thymidyltransferase"  
"Chl\_G11\_00007" 2676 "s59E13H2" 0 "NADP-reducing hydrogenase subunit HndC"  
"Chl\_G11\_00007" 2676 "s59E25H2" 0 "NADP-reducing hydrogenase subunit HndC"  
"Chl\_G11\_00007" 2676 "s59E5H2" 0 "NADP-reducing hydrogenase subunit HndC"  
"Chl\_G11\_00007" 2676 "s63E6H2" 0 "NADP-reducing hydrogenase subunit HndC"  
"Chl\_G11\_00008" 2677 "s59E13H2" 0 "NADP-reducing hydrogenase subunit HndC"  
"Chl\_G11\_00008" 2677 "s59E25H2" 0 "NADP-reducing hydrogenase subunit HndC"  
"Chl\_G11\_00008" 2677 "s59E5H2" 0.00210905 "NADP-reducing hydrogenase subunit HndC"  
"Chl\_G11\_00008" 2677 "s63E6H2" 0 "NADP-reducing hydrogenase subunit HndC"  
"Chl\_G11\_00009" 2678 "s59E13H2" 0 "NADP-reducing hydrogenase subunit HndA"  
"Chl\_G11\_00009" 2678 "s59E25H2" 0 "NADP-reducing hydrogenase subunit HndA"  
"Chl\_G11\_00009" 2678 "s59E5H2" 0 "NADP-reducing hydrogenase subunit HndA"  
"Chl\_G11\_00009" 2678 "s63E6H2" 0 "NADP-reducing hydrogenase subunit HndA"  
"Chl\_G11\_00010" 2679 "s59E13H2" 0 "hypothetical protein"  
"Chl\_G11\_00010" 2679 "s59E25H2" 0 "hypothetical protein"  
"Chl\_G11\_00010" 2679 "s59E5H2" 0 "hypothetical protein"  
"Chl\_G11\_00010" 2679 "s63E6H2" 0 "hypothetical protein"  
"Chl\_G11\_00011" 2680 "s59E13H2" 0 "hypothetical protein"  
"Chl\_G11\_00011" 2680 "s59E25H2" 0 "hypothetical protein"  
"Chl\_G11\_00011" 2680 "s59E5H2" 0 "hypothetical protein"  
"Chl\_G11\_00011" 2680 "s63E6H2" 0 "hypothetical protein"  
"Chl\_G11\_00012" 2681 "s59E13H2" 0 "acetyl-CoA acetyltransferase"  
"Chl\_G11\_00012" 2681 "s59E25H2" 0 "acetyl-CoA acetyltransferase"  
"Chl\_G11\_00012" 2681 "s59E5H2" 0 "acetyl-CoA acetyltransferase"  
"Chl\_G11\_00012" 2681 "s63E6H2" 0 "acetyl-CoA acetyltransferase"  
"Chl\_G11\_00013" 2682 "s59E13H2" 0 "Acyl-CoA dehydrogenase"  
"Chl\_G11\_00013" 2682 "s59E25H2" 0 "Acyl-CoA dehydrogenase"  
"Chl\_G11\_00013" 2682 "s59E5H2" 0 "Acyl-CoA dehydrogenase"  
"Chl\_G11\_00013" 2682 "s63E6H2" 0 "Acyl-CoA dehydrogenase"  
"Chl\_G11\_00014" 2683 "s59E13H2" 0 "Acyl-CoA dehydrogenase"  
"Chl\_G11\_00014" 2683 "s59E25H2" 0 "Acyl-CoA dehydrogenase"  
"Chl\_G11\_00014" 2683 "s59E5H2" 0 "Acyl-CoA dehydrogenase"  
"Chl\_G11\_00014" 2683 "s63E6H2" 0 "Acyl-CoA dehydrogenase"

"Chl\_G11\_00015" 2684 "s59E13H2" 0 "2-dehydro-3-deoxy-D-gluconate 5-dehydrogenase"  
"Chl\_G11\_00015" 2684 "s59E25H2" 0 "2-dehydro-3-deoxy-D-gluconate 5-dehydrogenase"  
"Chl\_G11\_00015" 2684 "s59E5H2" 0 "2-dehydro-3-deoxy-D-gluconate 5-dehydrogenase"  
"Chl\_G11\_00015" 2684 "s63E6H2" 0 "2-dehydro-3-deoxy-D-gluconate 5-dehydrogenase"  
"Chl\_G11\_00016" 2685 "s59E13H2" 0 "3-hydroxypropionyl-coenzyme A dehydratase"  
"Chl\_G11\_00016" 2685 "s59E25H2" 0 "3-hydroxypropionyl-coenzyme A dehydratase"  
"Chl\_G11\_00016" 2685 "s59E5H2" 0 "3-hydroxypropionyl-coenzyme A dehydratase"  
"Chl\_G11\_00016" 2685 "s63E6H2" 0 "3-hydroxypropionyl-coenzyme A dehydratase"  
"Chl\_G11\_00017" 2686 "s59E13H2" 0 "4-hydroxybutyryl-CoA dehydratase/vinylacetyl-CoA-Delta-isomerase"  
"Chl\_G11\_00017" 2686 "s59E25H2" 0 "4-hydroxybutyryl-CoA dehydratase/vinylacetyl-CoA-Delta-isomerase"  
"Chl\_G11\_00017" 2686 "s59E5H2" 0 "4-hydroxybutyryl-CoA dehydratase/vinylacetyl-CoA-Delta-isomerase"  
"Chl\_G11\_00017" 2686 "s63E6H2" 0 "4-hydroxybutyryl-CoA dehydratase/vinylacetyl-CoA-Delta-isomerase"  
"Chl\_G11\_00018" 2687 "s59E13H2" 0 "Enamine/imine deaminase"  
"Chl\_G11\_00018" 2687 "s59E25H2" 0 "Enamine/imine deaminase"  
"Chl\_G11\_00018" 2687 "s59E5H2" 0 "Enamine/imine deaminase"  
"Chl\_G11\_00018" 2687 "s63E6H2" 0 "Enamine/imine deaminase"  
"Chl\_G11\_00019" 2688 "s59E13H2" 0.6584998 "putative peptidyl-prolyl cis-trans isomerase"  
"Chl\_G11\_00019" 2688 "s59E25H2" 0 "putative peptidyl-prolyl cis-trans isomerase"  
"Chl\_G11\_00019" 2688 "s59E5H2" 0 "putative peptidyl-prolyl cis-trans isomerase"  
"Chl\_G11\_00019" 2688 "s63E6H2" 0 "putative peptidyl-prolyl cis-trans isomerase"  
"Chl\_G11\_00020" 2689 "s59E13H2" 0 "Alkaline phosphatase synthesis sensor protein PhoR"  
"Chl\_G11\_00020" 2689 "s59E25H2" 0 "Alkaline phosphatase synthesis sensor protein PhoR"  
"Chl\_G11\_00020" 2689 "s59E5H2" 0 "Alkaline phosphatase synthesis sensor protein PhoR"  
"Chl\_G11\_00020" 2689 "s63E6H2" 0 "Alkaline phosphatase synthesis sensor protein PhoR"  
"Chl\_G11\_00022" 2691 "s59E13H2" 0 "Alkaline phosphatase synthesis transcriptional regulatory protein PhoP"  
"Chl\_G11\_00022" 2691 "s59E25H2" 0 "Alkaline phosphatase synthesis transcriptional regulatory protein PhoP"  
"Chl\_G11\_00022" 2691 "s59E5H2" 0 "Alkaline phosphatase synthesis transcriptional regulatory protein PhoP"  
"Chl\_G11\_00022" 2691 "s63E6H2" 0 "Alkaline phosphatase synthesis transcriptional regulatory protein PhoP"  
"Chl\_G11\_00023" 2692 "s59E13H2" 0 "Alkaline phosphatase synthesis transcriptional regulatory protein PhoP"  
"Chl\_G11\_00023" 2692 "s59E25H2" 0 "Alkaline phosphatase synthesis transcriptional regulatory protein PhoP"  
"Chl\_G11\_00023" 2692 "s59E5H2" 0 "Alkaline phosphatase synthesis transcriptional regulatory protein PhoP"  
"Chl\_G11\_00023" 2692 "s63E6H2" 0 "Alkaline phosphatase synthesis transcriptional regulatory protein PhoP"  
"Chl\_G11\_00024" 2693 "s59E13H2" 0 "Putative formate dehydrogenase"  
"Chl\_G11\_00024" 2693 "s59E25H2" 0 "Putative formate dehydrogenase"  
"Chl\_G11\_00024" 2693 "s59E5H2" 0 "Putative formate dehydrogenase"  
"Chl\_G11\_00024" 2693 "s63E6H2" 0 "Putative formate dehydrogenase"  
"Chl\_G11\_00025" 2694 "s59E13H2" 0 "NADP-reducing hydrogenase subunit HndA"  
"Chl\_G11\_00025" 2694 "s59E25H2" 0 "NADP-reducing hydrogenase subunit HndA"  
"Chl\_G11\_00025" 2694 "s59E5H2" 0 "NADP-reducing hydrogenase subunit HndA"  
"Chl\_G11\_00025" 2694 "s63E6H2" 0 "NADP-reducing hydrogenase subunit HndA"  
"Chl\_G11\_00026" 2695 "s59E13H2" 0 "NADP-reducing hydrogenase subunit HndC"  
"Chl\_G11\_00026" 2695 "s59E25H2" 0 "NADP-reducing hydrogenase subunit HndC"  
"Chl\_G11\_00026" 2695 "s59E5H2" 0 "NADP-reducing hydrogenase subunit HndC"  
"Chl\_G11\_00026" 2695 "s63E6H2" 0 "NADP-reducing hydrogenase subunit HndC"  
"Chl\_G11\_00027" 2696 "s59E13H2" 0 "hypothetical protein"  
"Chl\_G11\_00027" 2696 "s59E25H2" 0 "hypothetical protein"  
"Chl\_G11\_00027" 2696 "s59E5H2" 0 "hypothetical protein"

"Chl\_G11\_00027" 2696 "s63E6H2" 0 "hypothetical protein"  
"Chl\_G11\_00028" 2697 "s59E13H2" 0 "Bifunctional homocysteine S-methyltransferase/5,10-methylenetetrahydrofolate reductase"  
"Chl\_G11\_00028" 2697 "s59E25H2" 0 "Bifunctional homocysteine S-methyltransferase/5,10-methylenetetrahydrofolate reductase"  
"Chl\_G11\_00028" 2697 "s59E5H2" 0.009018567 "Bifunctional homocysteine S-methyltransferase/5,10-methylenetetrahydrofolate reductase"  
"Chl\_G11\_00028" 2697 "s63E6H2" 0 "Bifunctional homocysteine S-methyltransferase/5,10-methylenetetrahydrofolate reductase"  
"Chl\_G11\_00029" 2698 "s59E13H2" 0 "Demethylmenaquinone methyltransferase"  
"Chl\_G11\_00029" 2698 "s59E25H2" 0 "Demethylmenaquinone methyltransferase"  
"Chl\_G11\_00029" 2698 "s59E5H2" 0 "Demethylmenaquinone methyltransferase"  
"Chl\_G11\_00029" 2698 "s63E6H2" 0 "Demethylmenaquinone methyltransferase"  
"Chl\_G11\_00030" 2699 "s59E13H2" 0 "putative polyketide biosynthesis zinc-dependent hydrolase BaeB"  
"Chl\_G11\_00030" 2699 "s59E25H2" 0 "putative polyketide biosynthesis zinc-dependent hydrolase BaeB"  
"Chl\_G11\_00030" 2699 "s59E5H2" 0 "putative polyketide biosynthesis zinc-dependent hydrolase BaeB"  
"Chl\_G11\_00030" 2699 "s63E6H2" 0 "putative polyketide biosynthesis zinc-dependent hydrolase BaeB"  
"Chl\_G11\_00031" 2700 "s59E13H2" 0 "Diacetylchitobiose deacetylase"  
"Chl\_G11\_00031" 2700 "s59E25H2" 0 "Diacetylchitobiose deacetylase"  
"Chl\_G11\_00031" 2700 "s59E5H2" 0.004916863 "Diacetylchitobiose deacetylase"  
"Chl\_G11\_00031" 2700 "s63E6H2" 0 "Diacetylchitobiose deacetylase"  
"Chl\_G11\_00032" 2701 "s59E13H2" 0 "Mycothioli acetyltransferase"  
"Chl\_G11\_00032" 2701 "s59E25H2" 0 "Mycothioli acetyltransferase"  
"Chl\_G11\_00032" 2701 "s59E5H2" 0 "Mycothioli acetyltransferase"  
"Chl\_G11\_00032" 2701 "s63E6H2" 0 "Mycothioli acetyltransferase"  
"Chl\_G11\_00033" 2702 "s59E13H2" 0 "D-inositol 3-phosphate glycosyltransferase"  
"Chl\_G11\_00033" 2702 "s59E25H2" 0 "D-inositol 3-phosphate glycosyltransferase"  
"Chl\_G11\_00033" 2702 "s59E5H2" 0 "D-inositol 3-phosphate glycosyltransferase"  
"Chl\_G11\_00033" 2702 "s63E6H2" 0 "D-inositol 3-phosphate glycosyltransferase"  
"Chl\_G11\_00034" 2703 "s59E13H2" 0 "hypothetical protein"  
"Chl\_G11\_00034" 2703 "s59E25H2" 0 "hypothetical protein"  
"Chl\_G11\_00034" 2703 "s59E5H2" 0.002380062 "hypothetical protein"  
"Chl\_G11\_00034" 2703 "s63E6H2" 0 "hypothetical protein"  
"Chl\_G11\_00036" 2705 "s59E13H2" 0 "hypothetical protein"  
"Chl\_G11\_00036" 2705 "s59E25H2" 0 "hypothetical protein"  
"Chl\_G11\_00036" 2705 "s59E5H2" 0 "hypothetical protein"  
"Chl\_G11\_00036" 2705 "s63E6H2" 0 "hypothetical protein"  
"Chl\_G11\_00037" 2706 "s59E13H2" 0 "hypothetical protein"  
"Chl\_G11\_00037" 2706 "s59E25H2" 0 "hypothetical protein"  
"Chl\_G11\_00037" 2706 "s59E5H2" 0 "hypothetical protein"  
"Chl\_G11\_00037" 2706 "s63E6H2" 0 "hypothetical protein"  
"Chl\_G11\_00039" 2708 "s59E13H2" 0 "hypothetical protein"  
"Chl\_G11\_00039" 2708 "s59E25H2" 0 "hypothetical protein"  
"Chl\_G11\_00039" 2708 "s59E5H2" 0 "hypothetical protein"  
"Chl\_G11\_00039" 2708 "s63E6H2" 0 "hypothetical protein"  
"Chl\_G11\_00047" 2716 "s59E13H2" 0.001163305 "putative tyrosine recombinase XerC-like protein"  
"Chl\_G11\_00047" 2716 "s59E25H2" 0 "putative tyrosine recombinase XerC-like protein"  
"Chl\_G11\_00047" 2716 "s59E5H2" 0 "putative tyrosine recombinase XerC-like protein"  
"Chl\_G11\_00047" 2716 "s63E6H2" 0 "putative tyrosine recombinase XerC-like protein"  
"Chl\_G11\_00049" 2718 "s59E13H2" 0.001436917 "Transposase"  
"Chl\_G11\_00049" 2718 "s59E25H2" 0 "Transposase"

"Chl\_G11\_00049" 2718 "s59E5H2" 0 "Transposase"  
"Chl\_G11\_00049" 2718 "s63E6H2" 1.024933 "Transposase"  
"Chl\_G11\_00050" 2719 "s59E13H2" 0 "hypothetical protein"  
"Chl\_G11\_00050" 2719 "s59E25H2" 0 "hypothetical protein"  
"Chl\_G11\_00050" 2719 "s59E5H2" 0 "hypothetical protein"  
"Chl\_G11\_00050" 2719 "s63E6H2" 0.00120411 "hypothetical protein"  
"Chl\_G11\_00052" 2721 "s59E13H2" 0 "hypothetical protein"  
"Chl\_G11\_00052" 2721 "s59E25H2" 0 "hypothetical protein"  
"Chl\_G11\_00052" 2721 "s59E5H2" 0 "hypothetical protein"  
"Chl\_G11\_00052" 2721 "s63E6H2" 0 "hypothetical protein"  
"Chl\_G11\_00053" 2722 "s59E13H2" 0 "NTE family protein RssA"  
"Chl\_G11\_00053" 2722 "s59E25H2" 0 "NTE family protein RssA"  
"Chl\_G11\_00053" 2722 "s59E5H2" 0 "NTE family protein RssA"  
"Chl\_G11\_00053" 2722 "s63E6H2" 0 "NTE family protein RssA"  
"Chl\_G11\_00055" 2724 "s59E13H2" 0 "DegV domain-containing protein/M5005\_Spy1226"  
"Chl\_G11\_00055" 2724 "s59E25H2" 0 "DegV domain-containing protein/M5005\_Spy1226"  
"Chl\_G11\_00055" 2724 "s59E5H2" 0 "DegV domain-containing protein/M5005\_Spy1226"  
"Chl\_G11\_00055" 2724 "s63E6H2" 0 "DegV domain-containing protein/M5005\_Spy1226"  
"Chl\_G11\_00057" 2726 "s59E13H2" 0 "hypothetical protein"  
"Chl\_G11\_00057" 2726 "s59E25H2" 0 "hypothetical protein"  
"Chl\_G11\_00057" 2726 "s59E5H2" 0.469881 "hypothetical protein"  
"Chl\_G11\_00057" 2726 "s63E6H2" 0 "hypothetical protein"  
"Chl\_G11\_00058" 2727 "s59E13H2" 0 "hypothetical protein"  
"Chl\_G11\_00058" 2727 "s59E25H2" 0 "hypothetical protein"  
"Chl\_G11\_00058" 2727 "s59E5H2" 1.415418 "hypothetical protein"  
"Chl\_G11\_00058" 2727 "s63E6H2" 0 "hypothetical protein"  
"Chl\_G11\_00059" 2728 "s59E13H2" 0 "hypothetical protein"  
"Chl\_G11\_00059" 2728 "s59E25H2" 0 "hypothetical protein"  
"Chl\_G11\_00059" 2728 "s59E5H2" 1.064193 "hypothetical protein"  
"Chl\_G11\_00059" 2728 "s63E6H2" 0 "hypothetical protein"  
"Chl\_G11\_00060" 2729 "s59E13H2" 0.00613947 "Protease 1 precursor"  
"Chl\_G11\_00060" 2729 "s59E25H2" 0 "Protease 1 precursor"  
"Chl\_G11\_00060" 2729 "s59E5H2" 0.1880561 "Protease 1 precursor"  
"Chl\_G11\_00060" 2729 "s63E6H2" 0.01409314 "Protease 1 precursor"  
"Chl\_G11\_00061" 2730 "s59E13H2" 0 "hypothetical protein"  
"Chl\_G11\_00061" 2730 "s59E25H2" 0 "hypothetical protein"  
"Chl\_G11\_00061" 2730 "s59E5H2" 0 "hypothetical protein"  
"Chl\_G11\_00061" 2730 "s63E6H2" 0 "hypothetical protein"  
"Chl\_G11\_00062" 2731 "s59E13H2" 0 "hypothetical protein"  
"Chl\_G11\_00062" 2731 "s59E25H2" 0 "hypothetical protein"  
"Chl\_G11\_00062" 2731 "s59E5H2" 0 "hypothetical protein"  
"Chl\_G11\_00062" 2731 "s63E6H2" 0 "hypothetical protein"  
"Chl\_G11\_00063" 2732 "s59E13H2" 0 "Nitronate monooxygenase"  
"Chl\_G11\_00063" 2732 "s59E25H2" 0 "Nitronate monooxygenase"  
"Chl\_G11\_00063" 2732 "s59E5H2" 0 "Nitronate monooxygenase"  
"Chl\_G11\_00063" 2732 "s63E6H2" 0 "Nitronate monooxygenase"  
"Chl\_G11\_00064" 2733 "s59E13H2" 0 "Phytoene desaturase (neurosporene-forming)"

"Chl\_G11\_00064" 2733 "s59E25H2" 0 "Phytoene desaturase (neurosporene-forming)"  
"Chl\_G11\_00064" 2733 "s59E5H2" 0 "Phytoene desaturase (neurosporene-forming)"  
"Chl\_G11\_00064" 2733 "s63E6H2" 0 "Phytoene desaturase (neurosporene-forming)"  
"Chl\_G11\_00065" 2734 "s59E13H2" 0 "2-methylcitrate dehydratase"  
"Chl\_G11\_00065" 2734 "s59E25H2" 0 "2-methylcitrate dehydratase"  
"Chl\_G11\_00065" 2734 "s59E5H2" 0 "2-methylcitrate dehydratase"  
"Chl\_G11\_00065" 2734 "s63E6H2" 0 "2-methylcitrate dehydratase"  
"Chl\_G11\_00066" 2735 "s59E13H2" 0 "2-methylcitrate dehydratase"  
"Chl\_G11\_00066" 2735 "s59E25H2" 0 "2-methylcitrate dehydratase"  
"Chl\_G11\_00066" 2735 "s59E5H2" 0 "2-methylcitrate dehydratase"  
"Chl\_G11\_00066" 2735 "s63E6H2" 0 "2-methylcitrate dehydratase"  
"Chl\_G11\_00067" 2736 "s59E13H2" 0 "NADH oxidase"  
"Chl\_G11\_00067" 2736 "s59E25H2" 0 "NADH oxidase"  
"Chl\_G11\_00067" 2736 "s59E5H2" 0 "NADH oxidase"  
"Chl\_G11\_00067" 2736 "s63E6H2" 0 "NADH oxidase"  
"Chl\_G11\_00068" 2737 "s59E13H2" 0 "hypothetical protein"  
"Chl\_G11\_00068" 2737 "s59E25H2" 0 "hypothetical protein"  
"Chl\_G11\_00068" 2737 "s59E5H2" 0 "hypothetical protein"  
"Chl\_G11\_00068" 2737 "s63E6H2" 0 "hypothetical protein"  
"Chl\_G11\_00069" 2738 "s59E13H2" 0 "MmgE/PrpD family protein"  
"Chl\_G11\_00069" 2738 "s59E25H2" 0 "MmgE/PrpD family protein"  
"Chl\_G11\_00069" 2738 "s59E5H2" 0 "MmgE/PrpD family protein"  
"Chl\_G11\_00069" 2738 "s63E6H2" 0 "MmgE/PrpD family protein"  
"Chl\_G11\_00070" 2739 "s59E13H2" 0 "R-phenyllactate dehydratase subunit alpha precursor"  
"Chl\_G11\_00070" 2739 "s59E25H2" 0 "R-phenyllactate dehydratase subunit alpha precursor"  
"Chl\_G11\_00070" 2739 "s59E5H2" 0 "R-phenyllactate dehydratase subunit alpha precursor"  
"Chl\_G11\_00070" 2739 "s63E6H2" 0 "R-phenyllactate dehydratase subunit alpha precursor"  
"Chl\_G11\_00071" 2740 "s59E13H2" 0 "Benzoyl-CoA reductase subunit C"  
"Chl\_G11\_00071" 2740 "s59E25H2" 0 "Benzoyl-CoA reductase subunit C"  
"Chl\_G11\_00071" 2740 "s59E5H2" 0 "Benzoyl-CoA reductase subunit C"  
"Chl\_G11\_00071" 2740 "s63E6H2" 0 "Benzoyl-CoA reductase subunit C"  
"Chl\_G11\_00072" 2741 "s59E13H2" 0 "Succinyl-CoA:(R)-benzylsuccinate CoA-transferase subunit BbsF"  
"Chl\_G11\_00072" 2741 "s59E25H2" 0 "Succinyl-CoA:(R)-benzylsuccinate CoA-transferase subunit BbsF"  
"Chl\_G11\_00072" 2741 "s59E5H2" 0 "Succinyl-CoA:(R)-benzylsuccinate CoA-transferase subunit BbsF"  
"Chl\_G11\_00072" 2741 "s63E6H2" 0 "Succinyl-CoA:(R)-benzylsuccinate CoA-transferase subunit BbsF"  
"Chl\_G11\_00073" 2742 "s59E13H2" 0 "Formyl-coenzyme A transferase"  
"Chl\_G11\_00073" 2742 "s59E25H2" 0 "Formyl-coenzyme A transferase"  
"Chl\_G11\_00073" 2742 "s59E5H2" 0 "Formyl-coenzyme A transferase"  
"Chl\_G11\_00073" 2742 "s63E6H2" 0 "Formyl-coenzyme A transferase"  
"Chl\_G11\_00074" 2743 "s59E13H2" 0 "R-phenyllactate dehydratase activator"  
"Chl\_G11\_00074" 2743 "s59E25H2" 0 "R-phenyllactate dehydratase activator"  
"Chl\_G11\_00074" 2743 "s59E5H2" 0 "R-phenyllactate dehydratase activator"  
"Chl\_G11\_00074" 2743 "s63E6H2" 0 "R-phenyllactate dehydratase activator"  
"Chl\_G11\_00075" 2744 "s59E13H2" 0 "Sialic acid TRAP transporter permease protein SiaT"  
"Chl\_G11\_00075" 2744 "s59E25H2" 0 "Sialic acid TRAP transporter permease protein SiaT"  
"Chl\_G11\_00075" 2744 "s59E5H2" 0 "Sialic acid TRAP transporter permease protein SiaT"  
"Chl\_G11\_00075" 2744 "s63E6H2" 0 "Sialic acid TRAP transporter permease protein SiaT"

"Chl\_G11\_00076" 2745 "s59E13H2" 0 "2,3-diketo-L-gulonate TRAP transporter small permease protein YiaM"  
"Chl\_G11\_00076" 2745 "s59E25H2" 0 "2,3-diketo-L-gulonate TRAP transporter small permease protein YiaM"  
"Chl\_G11\_00076" 2745 "s59E5H2" 0 "2,3-diketo-L-gulonate TRAP transporter small permease protein YiaM"  
"Chl\_G11\_00076" 2745 "s63E6H2" 0 "2,3-diketo-L-gulonate TRAP transporter small permease protein YiaM"  
"Chl\_G11\_00077" 2746 "s59E13H2" 0 "Lactate-binding periplasmic protein precursor"  
"Chl\_G11\_00077" 2746 "s59E25H2" 0 "Lactate-binding periplasmic protein precursor"  
"Chl\_G11\_00077" 2746 "s59E5H2" 0 "Lactate-binding periplasmic protein precursor"  
"Chl\_G11\_00077" 2746 "s63E6H2" 0 "Lactate-binding periplasmic protein precursor"  
"Chl\_G11\_00080" 2749 "s59E13H2" 0 "hypothetical protein"  
"Chl\_G11\_00080" 2749 "s59E25H2" 0 "hypothetical protein"  
"Chl\_G11\_00080" 2749 "s59E5H2" 0 "hypothetical protein"  
"Chl\_G11\_00080" 2749 "s63E6H2" 0 "hypothetical protein"  
"Chl\_G11\_00081" 2750 "s59E13H2" 0 "DNA-invertase hin"  
"Chl\_G11\_00081" 2750 "s59E25H2" 0 "DNA-invertase hin"  
"Chl\_G11\_00081" 2750 "s59E5H2" 0.00481573 "DNA-invertase hin"  
"Chl\_G11\_00081" 2750 "s63E6H2" 0 "DNA-invertase hin"  
"Chl\_G11\_00082" 2751 "s59E13H2" 0 "hypothetical protein"  
"Chl\_G11\_00082" 2751 "s59E25H2" 0 "hypothetical protein"  
"Chl\_G11\_00082" 2751 "s59E5H2" 0 "hypothetical protein"  
"Chl\_G11\_00082" 2751 "s63E6H2" 0 "hypothetical protein"  
"Chl\_G11\_00084" 2753 "s59E13H2" 0 "Helix-turn-helix"  
"Chl\_G11\_00084" 2753 "s59E25H2" 0 "Helix-turn-helix"  
"Chl\_G11\_00084" 2753 "s59E5H2" 0 "Helix-turn-helix"  
"Chl\_G11\_00084" 2753 "s63E6H2" 0 "Helix-turn-helix"  
"Chl\_G11\_00087" 2756 "s59E13H2" 0 "Signal transduction histidine-protein kinase/phosphatase DegS"  
"Chl\_G11\_00087" 2756 "s59E25H2" 0 "Signal transduction histidine-protein kinase/phosphatase DegS"  
"Chl\_G11\_00087" 2756 "s59E5H2" 0 "Signal transduction histidine-protein kinase/phosphatase DegS"  
"Chl\_G11\_00087" 2756 "s63E6H2" 0 "Signal transduction histidine-protein kinase/phosphatase DegS"  
"Chl\_G11\_00088" 2757 "s59E13H2" 0 "Oxygen regulatory protein NreC"  
"Chl\_G11\_00088" 2757 "s59E25H2" 0 "Oxygen regulatory protein NreC"  
"Chl\_G11\_00088" 2757 "s59E5H2" 0 "Oxygen regulatory protein NreC"  
"Chl\_G11\_00088" 2757 "s63E6H2" 0 "Oxygen regulatory protein NreC"  
"Chl\_G11\_00089" 2758 "s59E13H2" 0 "Sulfide dehydrogenase subunit alpha precursor"  
"Chl\_G11\_00089" 2758 "s59E25H2" 0 "Sulfide dehydrogenase subunit alpha precursor"  
"Chl\_G11\_00089" 2758 "s59E5H2" 0 "Sulfide dehydrogenase subunit alpha precursor"  
"Chl\_G11\_00089" 2758 "s63E6H2" 0 "Sulfide dehydrogenase subunit alpha precursor"  
"Chl\_G11\_00090" 2759 "s59E13H2" 0 "hypothetical protein"  
"Chl\_G11\_00090" 2759 "s59E25H2" 0 "hypothetical protein"  
"Chl\_G11\_00090" 2759 "s59E5H2" 0 "hypothetical protein"  
"Chl\_G11\_00090" 2759 "s63E6H2" 0 "hypothetical protein"  
"Chl\_G11\_00091" 2760 "s59E13H2" 0 "Bifunctional homocysteine S-methyltransferase/5,10-methylenetetrahydrofolate reductase"  
"Chl\_G11\_00091" 2760 "s59E25H2" 0 "Bifunctional homocysteine S-methyltransferase/5,10-methylenetetrahydrofolate reductase"  
"Chl\_G11\_00091" 2760 "s59E5H2" 0 "Bifunctional homocysteine S-methyltransferase/5,10-methylenetetrahydrofolate reductase"  
"Chl\_G11\_00091" 2760 "s63E6H2" 0 "Bifunctional homocysteine S-methyltransferase/5,10-methylenetetrahydrofolate reductase"  
"Chl\_G11\_00092" 2761 "s59E13H2" 0 "Response regulator protein VraR"  
"Chl\_G11\_00092" 2761 "s59E25H2" 0 "Response regulator protein VraR"  
"Chl\_G11\_00092" 2761 "s59E5H2" 0 "Response regulator protein VraR"



"Chl\_G11\_00092" 2761 "s63E6H2" 0 "Response regulator protein VraR"  
"Chl\_G11\_00093" 2762 "s59E13H2" 0 "YcfA-like protein"  
"Chl\_G11\_00093" 2762 "s59E25H2" 0 "YcfA-like protein"  
"Chl\_G11\_00093" 2762 "s59E5H2" 0 "YcfA-like protein"  
"Chl\_G11\_00093" 2762 "s63E6H2" 0 "YcfA-like protein"  
"Chl\_G11\_00094" 2763 "s59E13H2" 0 "hypothetical protein"  
"Chl\_G11\_00094" 2763 "s59E25H2" 0 "hypothetical protein"  
"Chl\_G11\_00094" 2763 "s59E5H2" 0 "hypothetical protein"  
"Chl\_G11\_00094" 2763 "s63E6H2" 0 "hypothetical protein"  
"Chl\_G11\_00095" 2764 "s59E13H2" 0 "YcfA-like protein"  
"Chl\_G11\_00095" 2764 "s59E25H2" 0 "YcfA-like protein"  
"Chl\_G11\_00095" 2764 "s59E5H2" 0 "YcfA-like protein"  
"Chl\_G11\_00095" 2764 "s63E6H2" 0 "YcfA-like protein"  
"Chl\_G11\_00096" 2765 "s59E13H2" 0 "putative aldolase LsrF"  
"Chl\_G11\_00096" 2765 "s59E25H2" 0 "putative aldolase LsrF"  
"Chl\_G11\_00096" 2765 "s59E5H2" 0 "putative aldolase LsrF"  
"Chl\_G11\_00096" 2765 "s63E6H2" 0 "putative aldolase LsrF"  
"Chl\_G11\_00097" 2766 "s59E13H2" 0 "Sorbitol dehydrogenase"  
"Chl\_G11\_00097" 2766 "s59E25H2" 0 "Sorbitol dehydrogenase"  
"Chl\_G11\_00097" 2766 "s59E5H2" 0.009665059 "Sorbitol dehydrogenase"  
"Chl\_G11\_00097" 2766 "s63E6H2" 0.002142641 "Sorbitol dehydrogenase"  
"Chl\_G11\_00098" 2767 "s59E13H2" 0 "hypothetical protein"  
"Chl\_G11\_00098" 2767 "s59E25H2" 0 "hypothetical protein"  
"Chl\_G11\_00098" 2767 "s59E5H2" 0.002041477 "hypothetical protein"  
"Chl\_G11\_00098" 2767 "s63E6H2" 0 "hypothetical protein"  
"Chl\_G11\_00099" 2768 "s59E13H2" 0 "Holliday junction ATP-dependent DNA helicase RuvB"  
"Chl\_G11\_00099" 2768 "s59E25H2" 0 "Holliday junction ATP-dependent DNA helicase RuvB"  
"Chl\_G11\_00099" 2768 "s59E5H2" 0.1918566 "Holliday junction ATP-dependent DNA helicase RuvB"  
"Chl\_G11\_00099" 2768 "s63E6H2" 0.001586481 "Holliday junction ATP-dependent DNA helicase RuvB"  
"Chl\_G11\_00102" 2771 "s59E13H2" 0 "Alginate biosynthesis sensor protein KinB"  
"Chl\_G11\_00102" 2771 "s59E25H2" 0 "Alginate biosynthesis sensor protein KinB"  
"Chl\_G11\_00102" 2771 "s59E5H2" 0 "Alginate biosynthesis sensor protein KinB"  
"Chl\_G11\_00102" 2771 "s63E6H2" 0 "Alginate biosynthesis sensor protein KinB"  
"Chl\_G11\_00103" 2772 "s59E13H2" 0 "ATP-dependent helicase/deoxyribonuclease subunit B"  
"Chl\_G11\_00103" 2772 "s59E25H2" 0 "ATP-dependent helicase/deoxyribonuclease subunit B"  
"Chl\_G11\_00103" 2772 "s59E5H2" 0 "ATP-dependent helicase/deoxyribonuclease subunit B"  
"Chl\_G11\_00103" 2772 "s63E6H2" 0 "ATP-dependent helicase/deoxyribonuclease subunit B"  
"Chl\_G11\_00104" 2773 "s59E13H2" 0 "Tetratricopeptide repeat protein"  
"Chl\_G11\_00104" 2773 "s59E25H2" 0 "Tetratricopeptide repeat protein"  
"Chl\_G11\_00104" 2773 "s59E5H2" 0 "Tetratricopeptide repeat protein"  
"Chl\_G11\_00104" 2773 "s63E6H2" 0 "Tetratricopeptide repeat protein"  
"Chl\_G11\_00105" 2774 "s59E13H2" 0 "Ribosomal RNA small subunit methyltransferase G"  
"Chl\_G11\_00105" 2774 "s59E25H2" 0 "Ribosomal RNA small subunit methyltransferase G"  
"Chl\_G11\_00105" 2774 "s59E5H2" 0 "Ribosomal RNA small subunit methyltransferase G"  
"Chl\_G11\_00105" 2774 "s63E6H2" 0 "Ribosomal RNA small subunit methyltransferase G"  
"Chl\_G11\_00106" 2775 "s59E13H2" 0 "4-hydroxybutyryl-CoA dehydratase/vinylacetyl-CoA-Delta-isomerase"  
"Chl\_G11\_00106" 2775 "s59E25H2" 0 "4-hydroxybutyryl-CoA dehydratase/vinylacetyl-CoA-Delta-isomerase"

"Chl\_G11\_00106" 2775 "s59E5H2" 0 "4-hydroxybutyryl-CoA dehydratase/vinylacetyl-CoA-Delta-isomerase"  
"Chl\_G11\_00106" 2775 "s63E6H2" 0 "4-hydroxybutyryl-CoA dehydratase/vinylacetyl-CoA-Delta-isomerase"  
"Chl\_G11\_00107" 2776 "s59E13H2" 0 "Pyridoxal biosynthesis lyase PdxS"  
"Chl\_G11\_00107" 2776 "s59E25H2" 0 "Pyridoxal biosynthesis lyase PdxS"  
"Chl\_G11\_00107" 2776 "s59E5H2" 0.01670801 "Pyridoxal biosynthesis lyase PdxS"  
"Chl\_G11\_00107" 2776 "s63E6H2" 0 "Pyridoxal biosynthesis lyase PdxS"  
"Chl\_G11\_00108" 2777 "s59E13H2" 0 "hypothetical protein"  
"Chl\_G11\_00108" 2777 "s59E25H2" 0 "hypothetical protein"  
"Chl\_G11\_00108" 2777 "s59E5H2" 0 "hypothetical protein"  
"Chl\_G11\_00108" 2777 "s63E6H2" 0 "hypothetical protein"  
"Chl\_G11\_00109" 2778 "s59E13H2" 0 "Glutamine amidotransferase subunit PdxT"  
"Chl\_G11\_00109" 2778 "s59E25H2" 0 "Glutamine amidotransferase subunit PdxT"  
"Chl\_G11\_00109" 2778 "s59E5H2" 0 "Glutamine amidotransferase subunit PdxT"  
"Chl\_G11\_00109" 2778 "s63E6H2" 0 "Glutamine amidotransferase subunit PdxT"  
"Chl\_G11\_00110" 2779 "s59E13H2" 0.001147788 "R3H domain protein"  
"Chl\_G11\_00110" 2779 "s59E25H2" 0 "R3H domain protein"  
"Chl\_G11\_00110" 2779 "s59E5H2" 0.009438118 "R3H domain protein"  
"Chl\_G11\_00110" 2779 "s63E6H2" 0 "R3H domain protein"  
"Chl\_G11\_00112" 2781 "s59E13H2" 0 "Thymidylate kinase"  
"Chl\_G11\_00112" 2781 "s59E25H2" 0 "Thymidylate kinase"  
"Chl\_G11\_00112" 2781 "s59E5H2" 0 "Thymidylate kinase"  
"Chl\_G11\_00112" 2781 "s63E6H2" 0 "Thymidylate kinase"  
"Chl\_G11\_00113" 2782 "s59E13H2" 0 "tRNA-specific 2-thiouridylase MnmA"  
"Chl\_G11\_00113" 2782 "s59E25H2" 0 "tRNA-specific 2-thiouridylase MnmA"  
"Chl\_G11\_00113" 2782 "s59E5H2" 0 "tRNA-specific 2-thiouridylase MnmA"  
"Chl\_G11\_00113" 2782 "s63E6H2" 0 "tRNA-specific 2-thiouridylase MnmA"  
"Chl\_G11\_00114" 2783 "s59E13H2" 0 "Non-heme chloroperoxidase"  
"Chl\_G11\_00114" 2783 "s59E25H2" 0 "Non-heme chloroperoxidase"  
"Chl\_G11\_00114" 2783 "s59E5H2" 0 "Non-heme chloroperoxidase"  
"Chl\_G11\_00114" 2783 "s63E6H2" 0 "Non-heme chloroperoxidase"  
"Chl\_G11\_00115" 2784 "s59E13H2" 0 "Ribonuclease HII"  
"Chl\_G11\_00115" 2784 "s59E25H2" 0 "Ribonuclease HII"  
"Chl\_G11\_00115" 2784 "s59E5H2" 0 "Ribonuclease HII"  
"Chl\_G11\_00115" 2784 "s63E6H2" 0 "Ribonuclease HII"  
"Chl\_N02\_00001" 2785 "s59E13H2" 0 "CoB--CoM heterodisulfide reductase iron-sulfur subunit D"  
"Chl\_N02\_00001" 2785 "s59E25H2" 0 "CoB--CoM heterodisulfide reductase iron-sulfur subunit D"  
"Chl\_N02\_00001" 2785 "s59E5H2" 0 "CoB--CoM heterodisulfide reductase iron-sulfur subunit D"  
"Chl\_N02\_00001" 2785 "s63E6H2" 0 "CoB--CoM heterodisulfide reductase iron-sulfur subunit D"  
"Chl\_N02\_00002" 2786 "s59E13H2" 0 "CoB--CoM heterodisulfide reductase iron-sulfur subunit A"  
"Chl\_N02\_00002" 2786 "s59E25H2" 0 "CoB--CoM heterodisulfide reductase iron-sulfur subunit A"  
"Chl\_N02\_00002" 2786 "s59E5H2" 0 "CoB--CoM heterodisulfide reductase iron-sulfur subunit A"  
"Chl\_N02\_00002" 2786 "s63E6H2" 0 "CoB--CoM heterodisulfide reductase iron-sulfur subunit A"  
"Chl\_N02\_00003" 2787 "s59E13H2" 0 "Sulfhydrogenase 1 subunit gamma"  
"Chl\_N02\_00003" 2787 "s59E25H2" 0 "Sulfhydrogenase 1 subunit gamma"  
"Chl\_N02\_00003" 2787 "s59E5H2" 0 "Sulfhydrogenase 1 subunit gamma"  
"Chl\_N02\_00003" 2787 "s63E6H2" 0 "Sulfhydrogenase 1 subunit gamma"  
"Chl\_N02\_00004" 2788 "s59E13H2" 0 "Sulfhydrogenase 2 subunit beta"

"Chl\_N02\_00004" 2788 "s59E25H2" 0 "Sulphydrogenase 2 subunit beta"  
"Chl\_N02\_00004" 2788 "s59E5H2" 0 "Sulphydrogenase 2 subunit beta"  
"Chl\_N02\_00004" 2788 "s63E6H2" 0 "Sulphydrogenase 2 subunit beta"  
"Chl\_N02\_00005" 2789 "s59E13H2" 0 "Formate dehydrogenase subunit beta"  
"Chl\_N02\_00005" 2789 "s59E25H2" 0 "Formate dehydrogenase subunit beta"  
"Chl\_N02\_00005" 2789 "s59E5H2" 0 "Formate dehydrogenase subunit beta"  
"Chl\_N02\_00005" 2789 "s63E6H2" 0 "Formate dehydrogenase subunit beta"  
"Chl\_N02\_00006" 2790 "s59E13H2" 0 "F420-non-reducing hydrogenase iron-sulfur subunit D"  
"Chl\_N02\_00006" 2790 "s59E25H2" 0 "F420-non-reducing hydrogenase iron-sulfur subunit D"  
"Chl\_N02\_00006" 2790 "s59E5H2" 0 "F420-non-reducing hydrogenase iron-sulfur subunit D"  
"Chl\_N02\_00006" 2790 "s63E6H2" 0 "F420-non-reducing hydrogenase iron-sulfur subunit D"  
"Chl\_N02\_00007" 2791 "s59E13H2" 0 "fused phosphoenolpyruvate-protein phosphotransferase PtsP/GAF domain protein"  
"Chl\_N02\_00007" 2791 "s59E25H2" 0 "fused phosphoenolpyruvate-protein phosphotransferase PtsP/GAF domain protein"  
"Chl\_N02\_00007" 2791 "s59E5H2" 0 "fused phosphoenolpyruvate-protein phosphotransferase PtsP/GAF domain protein"  
"Chl\_N02\_00007" 2791 "s63E6H2" 0 "fused phosphoenolpyruvate-protein phosphotransferase PtsP/GAF domain protein"  
"Chl\_N02\_00008" 2792 "s59E13H2" 0 "CoB--CoM heterodisulfide reductase iron-sulfur subunit D"  
"Chl\_N02\_00008" 2792 "s59E25H2" 0 "CoB--CoM heterodisulfide reductase iron-sulfur subunit D"  
"Chl\_N02\_00008" 2792 "s59E5H2" 0 "CoB--CoM heterodisulfide reductase iron-sulfur subunit D"  
"Chl\_N02\_00008" 2792 "s63E6H2" 0 "CoB--CoM heterodisulfide reductase iron-sulfur subunit D"  
"Chl\_N02\_00009" 2793 "s59E13H2" 0 "CoB--CoM heterodisulfide reductase iron-sulfur subunit A"  
"Chl\_N02\_00009" 2793 "s59E25H2" 0 "CoB--CoM heterodisulfide reductase iron-sulfur subunit A"  
"Chl\_N02\_00009" 2793 "s59E5H2" 0 "CoB--CoM heterodisulfide reductase iron-sulfur subunit A"  
"Chl\_N02\_00009" 2793 "s63E6H2" 0 "CoB--CoM heterodisulfide reductase iron-sulfur subunit A"  
"Chl\_N02\_00010" 2794 "s59E13H2" 0 "NADP-reducing hydrogenase subunit HndA"  
"Chl\_N02\_00010" 2794 "s59E25H2" 0 "NADP-reducing hydrogenase subunit HndA"  
"Chl\_N02\_00010" 2794 "s59E5H2" 0 "NADP-reducing hydrogenase subunit HndA"  
"Chl\_N02\_00010" 2794 "s63E6H2" 0 "NADP-reducing hydrogenase subunit HndA"  
"Chl\_N02\_00011" 2795 "s59E13H2" 0 "NADP-reducing hydrogenase subunit HndC"  
"Chl\_N02\_00011" 2795 "s59E25H2" 0 "NADP-reducing hydrogenase subunit HndC"  
"Chl\_N02\_00011" 2795 "s59E5H2" 0 "NADP-reducing hydrogenase subunit HndC"  
"Chl\_N02\_00011" 2795 "s63E6H2" 0 "NADP-reducing hydrogenase subunit HndC"  
"Chl\_N02\_00012" 2796 "s59E13H2" 0 "CoB--CoM heterodisulfide reductase iron-sulfur subunit A"  
"Chl\_N02\_00012" 2796 "s59E25H2" 0 "CoB--CoM heterodisulfide reductase iron-sulfur subunit A"  
"Chl\_N02\_00012" 2796 "s59E5H2" 0 "CoB--CoM heterodisulfide reductase iron-sulfur subunit A"  
"Chl\_N02\_00012" 2796 "s63E6H2" 0 "CoB--CoM heterodisulfide reductase iron-sulfur subunit A"  
"Chl\_N02\_00013" 2797 "s59E13H2" 0 "F420-non-reducing hydrogenase vhc iron-sulfur subunit D"  
"Chl\_N02\_00013" 2797 "s59E25H2" 0 "F420-non-reducing hydrogenase vhc iron-sulfur subunit D"  
"Chl\_N02\_00013" 2797 "s59E5H2" 0 "F420-non-reducing hydrogenase vhc iron-sulfur subunit D"  
"Chl\_N02\_00013" 2797 "s63E6H2" 0 "F420-non-reducing hydrogenase vhc iron-sulfur subunit D"  
"Chl\_N02\_00015" 2799 "s59E13H2" 0 "F420-non-reducing hydrogenase subunit G"  
"Chl\_N02\_00015" 2799 "s59E25H2" 0 "F420-non-reducing hydrogenase subunit G"  
"Chl\_N02\_00015" 2799 "s59E5H2" 0 "F420-non-reducing hydrogenase subunit G"  
"Chl\_N02\_00015" 2799 "s63E6H2" 0 "F420-non-reducing hydrogenase subunit G"  
"Chl\_N02\_00016" 2800 "s59E13H2" 0 "F420-non-reducing hydrogenase subunit A"  
"Chl\_N02\_00016" 2800 "s59E25H2" 0 "F420-non-reducing hydrogenase subunit A"  
"Chl\_N02\_00016" 2800 "s59E5H2" 0 "F420-non-reducing hydrogenase subunit A"  
"Chl\_N02\_00016" 2800 "s63E6H2" 0 "F420-non-reducing hydrogenase subunit A"

"ChI\_N02\_00017" 2801 "s59E13H2" 0 "Hydrogenase 2 maturation protease"  
"ChI\_N02\_00017" 2801 "s59E25H2" 0 "Hydrogenase 2 maturation protease"  
"ChI\_N02\_00017" 2801 "s59E5H2" 0 "Hydrogenase 2 maturation protease"  
"ChI\_N02\_00017" 2801 "s63E6H2" 0 "Hydrogenase 2 maturation protease"  
"ChI\_N02\_00018" 2802 "s59E13H2" 0 "Electron transfer flavoprotein subunit beta"  
"ChI\_N02\_00018" 2802 "s59E25H2" 0 "Electron transfer flavoprotein subunit beta"  
"ChI\_N02\_00018" 2802 "s59E5H2" 0 "Electron transfer flavoprotein subunit beta"  
"ChI\_N02\_00018" 2802 "s63E6H2" 0 "Electron transfer flavoprotein subunit beta"  
"ChI\_N02\_00019" 2803 "s59E13H2" 0 "Acryloyl-CoA reductase electron transfer subunit beta"  
"ChI\_N02\_00019" 2803 "s59E25H2" 0 "Acryloyl-CoA reductase electron transfer subunit beta"  
"ChI\_N02\_00019" 2803 "s59E5H2" 0 "Acryloyl-CoA reductase electron transfer subunit beta"  
"ChI\_N02\_00019" 2803 "s63E6H2" 0 "Acryloyl-CoA reductase electron transfer subunit beta"  
"ChI\_N02\_00020" 2804 "s59E13H2" 0 "putative sensor histidine kinase TcrY"  
"ChI\_N02\_00020" 2804 "s59E25H2" 0 "putative sensor histidine kinase TcrY"  
"ChI\_N02\_00020" 2804 "s59E5H2" 0 "putative sensor histidine kinase TcrY"  
"ChI\_N02\_00020" 2804 "s63E6H2" 0 "putative sensor histidine kinase TcrY"  
"ChI\_N02\_00021" 2805 "s59E13H2" 0 "Response regulator MprA"  
"ChI\_N02\_00021" 2805 "s59E25H2" 0 "Response regulator MprA"  
"ChI\_N02\_00021" 2805 "s59E5H2" 0 "Response regulator MprA"  
"ChI\_N02\_00021" 2805 "s63E6H2" 0 "Response regulator MprA"  
"ChI\_N02\_00022" 2806 "s59E13H2" 0 "Collagen triple helix repeat (20 copies)"  
"ChI\_N02\_00022" 2806 "s59E25H2" 0 "Collagen triple helix repeat (20 copies)"  
"ChI\_N02\_00022" 2806 "s59E5H2" 0 "Collagen triple helix repeat (20 copies)"  
"ChI\_N02\_00022" 2806 "s63E6H2" 0 "Collagen triple helix repeat (20 copies)"  
"ChI\_N02\_00023" 2807 "s59E13H2" 0 "hypothetical protein"  
"ChI\_N02\_00023" 2807 "s59E25H2" 0 "hypothetical protein"  
"ChI\_N02\_00023" 2807 "s59E5H2" 0 "hypothetical protein"  
"ChI\_N02\_00023" 2807 "s63E6H2" 0 "hypothetical protein"  
"ChI\_N02\_00026" 2810 "s59E13H2" 0 "Recombinase"  
"ChI\_N02\_00026" 2810 "s59E25H2" 0 "Recombinase"  
"ChI\_N02\_00026" 2810 "s59E5H2" 0 "Recombinase"  
"ChI\_N02\_00026" 2810 "s63E6H2" 0 "Recombinase"  
"ChI\_N02\_00028" 2812 "s59E13H2" 0 "30S ribosomal protein S6"  
"ChI\_N02\_00028" 2812 "s59E25H2" 0 "30S ribosomal protein S6"  
"ChI\_N02\_00028" 2812 "s59E5H2" 0 "30S ribosomal protein S6"  
"ChI\_N02\_00028" 2812 "s63E6H2" 0 "30S ribosomal protein S6"  
"ChI\_N02\_00029" 2813 "s59E13H2" 0 "Single-stranded DNA-binding protein"  
"ChI\_N02\_00029" 2813 "s59E25H2" 0 "Single-stranded DNA-binding protein"  
"ChI\_N02\_00029" 2813 "s59E5H2" 0 "Single-stranded DNA-binding protein"  
"ChI\_N02\_00029" 2813 "s63E6H2" 0 "Single-stranded DNA-binding protein"  
"ChI\_N02\_00030" 2814 "s59E13H2" 0 "30S ribosomal protein S18"  
"ChI\_N02\_00030" 2814 "s59E25H2" 0 "30S ribosomal protein S18"  
"ChI\_N02\_00030" 2814 "s59E5H2" 0 "30S ribosomal protein S18"  
"ChI\_N02\_00030" 2814 "s63E6H2" 0 "30S ribosomal protein S18"  
"ChI\_N02\_00031" 2815 "s59E13H2" 0 "Ribonuclease P protein component"  
"ChI\_N02\_00031" 2815 "s59E25H2" 0 "Ribonuclease P protein component"  
"ChI\_N02\_00031" 2815 "s59E5H2" 0 "Ribonuclease P protein component"

"ChI\_N02\_00031" 2815 "s63E6H2" 0 "Ribonuclease P protein component"  
"ChI\_N02\_00032" 2816 "s59E13H2" 0 "Putative membrane protein insertion efficiency factor"  
"ChI\_N02\_00032" 2816 "s59E25H2" 0 "Putative membrane protein insertion efficiency factor"  
"ChI\_N02\_00032" 2816 "s59E5H2" 0 "Putative membrane protein insertion efficiency factor"  
"ChI\_N02\_00032" 2816 "s63E6H2" 0 "Putative membrane protein insertion efficiency factor"  
"ChI\_N02\_00033" 2817 "s59E13H2" 0 "Serine/threonine-protein kinase AfsK"  
"ChI\_N02\_00033" 2817 "s59E25H2" 0 "Serine/threonine-protein kinase AfsK"  
"ChI\_N02\_00033" 2817 "s59E5H2" 0 "Serine/threonine-protein kinase AfsK"  
"ChI\_N02\_00033" 2817 "s63E6H2" 0 "Serine/threonine-protein kinase AfsK"  
"ChI\_N02\_00034" 2818 "s59E13H2" 0 "Membrane protein insertase YidC"  
"ChI\_N02\_00034" 2818 "s59E25H2" 0 "Membrane protein insertase YidC"  
"ChI\_N02\_00034" 2818 "s59E5H2" 0 "Membrane protein insertase YidC"  
"ChI\_N02\_00034" 2818 "s63E6H2" 0 "Membrane protein insertase YidC"  
"ChI\_N02\_00035" 2819 "s59E13H2" 0 "R3H domain protein"  
"ChI\_N02\_00035" 2819 "s59E25H2" 0 "R3H domain protein"  
"ChI\_N02\_00035" 2819 "s59E5H2" 0 "R3H domain protein"  
"ChI\_N02\_00035" 2819 "s63E6H2" 0 "R3H domain protein"  
"ChI\_N02\_00036" 2820 "s59E13H2" 0 "Isoleucine--tRNA ligase"  
"ChI\_N02\_00036" 2820 "s59E25H2" 0 "Isoleucine--tRNA ligase"  
"ChI\_N02\_00036" 2820 "s59E5H2" 0 "Isoleucine--tRNA ligase"  
"ChI\_N02\_00036" 2820 "s63E6H2" 0 "Isoleucine--tRNA ligase"  
"ChI\_N02\_00037" 2821 "s59E13H2" 0 "Putative serine protease HtrA"  
"ChI\_N02\_00037" 2821 "s59E25H2" 0 "Putative serine protease HtrA"  
"ChI\_N02\_00037" 2821 "s59E5H2" 0 "Putative serine protease HtrA"  
"ChI\_N02\_00037" 2821 "s63E6H2" 0 "Putative serine protease HtrA"  
"ChI\_N02\_00038" 2822 "s59E13H2" 0 "Tryptophan synthase beta chain 1"  
"ChI\_N02\_00038" 2822 "s59E25H2" 0 "Tryptophan synthase beta chain 1"  
"ChI\_N02\_00038" 2822 "s59E5H2" 0 "Tryptophan synthase beta chain 1"  
"ChI\_N02\_00038" 2822 "s63E6H2" 0 "Tryptophan synthase beta chain 1"  
"ChI\_N02\_00039" 2823 "s59E13H2" 0 "Tryptophan synthase alpha chain"  
"ChI\_N02\_00039" 2823 "s59E25H2" 0 "Tryptophan synthase alpha chain"  
"ChI\_N02\_00039" 2823 "s59E5H2" 0 "Tryptophan synthase alpha chain"  
"ChI\_N02\_00039" 2823 "s63E6H2" 0 "Tryptophan synthase alpha chain"  
"ChI\_N02\_00040" 2824 "s59E13H2" 0 "Tryptophan synthase beta chain"  
"ChI\_N02\_00040" 2824 "s59E25H2" 0 "Tryptophan synthase beta chain"  
"ChI\_N02\_00040" 2824 "s59E5H2" 0.01008192 "Tryptophan synthase beta chain"  
"ChI\_N02\_00040" 2824 "s63E6H2" 0 "Tryptophan synthase beta chain"  
"ChI\_N02\_00041" 2825 "s59E13H2" 0 "N-(5'-phosphoribosyl)anthranilate isomerase"  
"ChI\_N02\_00041" 2825 "s59E25H2" 0 "N-(5'-phosphoribosyl)anthranilate isomerase"  
"ChI\_N02\_00041" 2825 "s59E5H2" 0 "N-(5'-phosphoribosyl)anthranilate isomerase"  
"ChI\_N02\_00041" 2825 "s63E6H2" 0 "N-(5'-phosphoribosyl)anthranilate isomerase"  
"ChI\_N02\_00042" 2826 "s59E13H2" 0 "NADP-reducing hydrogenase subunit HndA"  
"ChI\_N02\_00042" 2826 "s59E25H2" 0 "NADP-reducing hydrogenase subunit HndA"  
"ChI\_N02\_00042" 2826 "s59E5H2" 0 "NADP-reducing hydrogenase subunit HndA"  
"ChI\_N02\_00042" 2826 "s63E6H2" 0 "NADP-reducing hydrogenase subunit HndA"  
"ChI\_N02\_00043" 2827 "s59E13H2" 0 "L-2-hydroxyglutarate oxidase LhgO"  
"ChI\_N02\_00043" 2827 "s59E25H2" 0 "L-2-hydroxyglutarate oxidase LhgO"

"ChI\_N02\_00043" 2827 "s59E5H2" 0 "L-2-hydroxyglutarate oxidase LhgO"  
"ChI\_N02\_00043" 2827 "s63E6H2" 0 "L-2-hydroxyglutarate oxidase LhgO"  
"ChI\_N02\_00046" 2830 "s59E13H2" 0 "hypothetical protein"  
"ChI\_N02\_00046" 2830 "s59E25H2" 0 "hypothetical protein"  
"ChI\_N02\_00046" 2830 "s59E5H2" 0 "hypothetical protein"  
"ChI\_N02\_00046" 2830 "s63E6H2" 0 "hypothetical protein"  
"ChI\_N02\_00047" 2831 "s59E13H2" 0 "hypothetical protein"  
"ChI\_N02\_00047" 2831 "s59E25H2" 0 "hypothetical protein"  
"ChI\_N02\_00047" 2831 "s59E5H2" 0.007318103 "hypothetical protein"  
"ChI\_N02\_00047" 2831 "s63E6H2" 0 "hypothetical protein"  
"ChI\_N02\_00048" 2832 "s59E13H2" 0.001323362 "Ribosomal protein S12 methylthiotransferase RimO"  
"ChI\_N02\_00048" 2832 "s59E25H2" 0 "Ribosomal protein S12 methylthiotransferase RimO"  
"ChI\_N02\_00048" 2832 "s59E5H2" 0.01807472 "Ribosomal protein S12 methylthiotransferase RimO"  
"ChI\_N02\_00048" 2832 "s63E6H2" 0.5403443 "Ribosomal protein S12 methylthiotransferase RimO"  
"ChI\_N02\_00049" 2833 "s59E13H2" 0 "GTPase ObgE"  
"ChI\_N02\_00049" 2833 "s59E25H2" 0 "GTPase ObgE"  
"ChI\_N02\_00049" 2833 "s59E5H2" 0.01948839 "GTPase ObgE"  
"ChI\_N02\_00049" 2833 "s63E6H2" 0 "GTPase ObgE"  
"ChI\_N02\_00050" 2834 "s59E13H2" 0 "UvrABC system protein C"  
"ChI\_N02\_00050" 2834 "s59E25H2" 0 "UvrABC system protein C"  
"ChI\_N02\_00050" 2834 "s59E5H2" 0 "UvrABC system protein C"  
"ChI\_N02\_00050" 2834 "s63E6H2" 0 "UvrABC system protein C"  
"ChI\_N02\_00051" 2835 "s59E13H2" 0 "hypothetical protein"  
"ChI\_N02\_00051" 2835 "s59E25H2" 0 "hypothetical protein"  
"ChI\_N02\_00051" 2835 "s59E5H2" 0 "hypothetical protein"  
"ChI\_N02\_00051" 2835 "s63E6H2" 0 "hypothetical protein"  
"ChI\_N02\_00052" 2836 "s59E13H2" 0 "hypothetical protein"  
"ChI\_N02\_00052" 2836 "s59E25H2" 0 "hypothetical protein"  
"ChI\_N02\_00052" 2836 "s59E5H2" 0 "hypothetical protein"  
"ChI\_N02\_00052" 2836 "s63E6H2" 0 "hypothetical protein"  
"ChI\_N02\_00053" 2837 "s59E13H2" 0 "Cysteine--tRNA ligase"  
"ChI\_N02\_00053" 2837 "s59E25H2" 0 "Cysteine--tRNA ligase"  
"ChI\_N02\_00053" 2837 "s59E5H2" 0 "Cysteine--tRNA ligase"  
"ChI\_N02\_00053" 2837 "s63E6H2" 0.0005863882 "Cysteine--tRNA ligase"  
"ChI\_N02\_00054" 2838 "s59E13H2" 0 "2-C-methyl-D-erythritol 2,4-cyclodiphosphate synthase"  
"ChI\_N02\_00054" 2838 "s59E25H2" 0 "2-C-methyl-D-erythritol 2,4-cyclodiphosphate synthase"  
"ChI\_N02\_00054" 2838 "s59E5H2" 0 "2-C-methyl-D-erythritol 2,4-cyclodiphosphate synthase"  
"ChI\_N02\_00054" 2838 "s63E6H2" 0 "2-C-methyl-D-erythritol 2,4-cyclodiphosphate synthase"  
"ChI\_N02\_00055" 2839 "s59E13H2" 0 "2-C-methyl-D-erythritol 4-phosphate cytidyltransferase"  
"ChI\_N02\_00055" 2839 "s59E25H2" 0 "2-C-methyl-D-erythritol 4-phosphate cytidyltransferase"  
"ChI\_N02\_00055" 2839 "s59E5H2" 0 "2-C-methyl-D-erythritol 4-phosphate cytidyltransferase"  
"ChI\_N02\_00055" 2839 "s63E6H2" 0 "2-C-methyl-D-erythritol 4-phosphate cytidyltransferase"  
"ChI\_N02\_00056" 2840 "s59E13H2" 0 "Cupin domain protein"  
"ChI\_N02\_00056" 2840 "s59E25H2" 0 "Cupin domain protein"  
"ChI\_N02\_00056" 2840 "s59E5H2" 0 "Cupin domain protein"  
"ChI\_N02\_00056" 2840 "s63E6H2" 0 "Cupin domain protein"  
"ChI\_N02\_00057" 2841 "s59E13H2" 0 "hypothetical protein"

"ChI\_N02\_00057" 2841 "s59E25H2" 0 "hypothetical protein"  
"ChI\_N02\_00057" 2841 "s59E5H2" 0 "hypothetical protein"  
"ChI\_N02\_00057" 2841 "s63E6H2" 0 "hypothetical protein"  
"ChI\_N02\_00058" 2842 "s59E13H2" 0 "Glutaconyl-CoA decarboxylase subunit beta"  
"ChI\_N02\_00058" 2842 "s59E25H2" 0 "Glutaconyl-CoA decarboxylase subunit beta"  
"ChI\_N02\_00058" 2842 "s59E5H2" 0 "Glutaconyl-CoA decarboxylase subunit beta"  
"ChI\_N02\_00058" 2842 "s63E6H2" 0 "Glutaconyl-CoA decarboxylase subunit beta"  
"ChI\_N02\_00059" 2843 "s59E13H2" 0 "Glutaconyl-CoA decarboxylase subunit gamma"  
"ChI\_N02\_00059" 2843 "s59E25H2" 0 "Glutaconyl-CoA decarboxylase subunit gamma"  
"ChI\_N02\_00059" 2843 "s59E5H2" 0 "Glutaconyl-CoA decarboxylase subunit gamma"  
"ChI\_N02\_00059" 2843 "s63E6H2" 0 "Glutaconyl-CoA decarboxylase subunit gamma"  
"ChI\_N02\_00060" 2844 "s59E13H2" 0 "hypothetical protein"  
"ChI\_N02\_00060" 2844 "s59E25H2" 0 "hypothetical protein"  
"ChI\_N02\_00060" 2844 "s59E5H2" 0 "hypothetical protein"  
"ChI\_N02\_00060" 2844 "s63E6H2" 0 "hypothetical protein"  
"ChI\_N02\_00061" 2845 "s59E13H2" 0 "Negative regulator of genetic competence ClpC/MecB"  
"ChI\_N02\_00061" 2845 "s59E25H2" 0 "Negative regulator of genetic competence ClpC/MecB"  
"ChI\_N02\_00061" 2845 "s59E5H2" 0.01808964 "Negative regulator of genetic competence ClpC/MecB"  
"ChI\_N02\_00061" 2845 "s63E6H2" 0.0006032507 "Negative regulator of genetic competence ClpC/MecB"  
"ChI\_N02\_00063" 2847 "s59E13H2" 0 "hypothetical protein"  
"ChI\_N02\_00063" 2847 "s59E25H2" 0 "hypothetical protein"  
"ChI\_N02\_00063" 2847 "s59E5H2" 0 "hypothetical protein"  
"ChI\_N02\_00063" 2847 "s63E6H2" 0 "hypothetical protein"  
"ChI\_N02\_00067" 2851 "s59E13H2" 0 "Heat-inducible transcription repressor HrcA"  
"ChI\_N02\_00067" 2851 "s59E25H2" 0 "Heat-inducible transcription repressor HrcA"  
"ChI\_N02\_00067" 2851 "s59E5H2" 0 "Heat-inducible transcription repressor HrcA"  
"ChI\_N02\_00067" 2851 "s63E6H2" 0 "Heat-inducible transcription repressor HrcA"  
"ChI\_N02\_00068" 2852 "s59E13H2" 0 "heat shock protein GrpE"  
"ChI\_N02\_00068" 2852 "s59E25H2" 0 "heat shock protein GrpE"  
"ChI\_N02\_00068" 2852 "s59E5H2" 0 "heat shock protein GrpE"  
"ChI\_N02\_00068" 2852 "s63E6H2" 0 "heat shock protein GrpE"  
"ChI\_N02\_00069" 2853 "s59E13H2" 0 "Chaperone protein DnaK"  
"ChI\_N02\_00069" 2853 "s59E25H2" 0 "Chaperone protein DnaK"  
"ChI\_N02\_00069" 2853 "s59E5H2" 0 "Chaperone protein DnaK"  
"ChI\_N02\_00069" 2853 "s63E6H2" 0.004263031 "Chaperone protein DnaK"  
"ChI\_N02\_00070" 2854 "s59E13H2" 0 "Chaperone protein DnaJ"  
"ChI\_N02\_00070" 2854 "s59E25H2" 0 "Chaperone protein DnaJ"  
"ChI\_N02\_00070" 2854 "s59E5H2" 0 "Chaperone protein DnaJ"  
"ChI\_N02\_00070" 2854 "s63E6H2" 0 "Chaperone protein DnaJ"  
"ChI\_N02\_00071" 2855 "s59E13H2" 0 "Glycerol-3-phosphate dehydrogenase [NAD(P)+]"  
"ChI\_N02\_00071" 2855 "s59E25H2" 0 "Glycerol-3-phosphate dehydrogenase [NAD(P)+]"  
"ChI\_N02\_00071" 2855 "s59E5H2" 0 "Glycerol-3-phosphate dehydrogenase [NAD(P)+]"  
"ChI\_N02\_00071" 2855 "s63E6H2" 0 "Glycerol-3-phosphate dehydrogenase [NAD(P)+]"  
"ChI\_N02\_00072" 2856 "s59E13H2" 0 "Glycerol-3-phosphate acyltransferase"  
"ChI\_N02\_00072" 2856 "s59E25H2" 0 "Glycerol-3-phosphate acyltransferase"  
"ChI\_N02\_00072" 2856 "s59E5H2" 0 "Glycerol-3-phosphate acyltransferase"  
"ChI\_N02\_00072" 2856 "s63E6H2" 0 "Glycerol-3-phosphate acyltransferase"

"ChI\_N02\_00073" 2857 "s59E13H2" 0 "GTPase Der"  
"ChI\_N02\_00073" 2857 "s59E25H2" 0 "GTPase Der"  
"ChI\_N02\_00073" 2857 "s59E5H2" 0 "GTPase Der"  
"ChI\_N02\_00073" 2857 "s63E6H2" 0 "GTPase Der"  
"ChI\_N02\_00074" 2858 "s59E13H2" 0 "hypothetical protein"  
"ChI\_N02\_00074" 2858 "s59E25H2" 0 "hypothetical protein"  
"ChI\_N02\_00074" 2858 "s59E5H2" 0 "hypothetical protein"  
"ChI\_N02\_00074" 2858 "s63E6H2" 0 "hypothetical protein"  
"ChI\_N02\_00075" 2859 "s59E13H2" 0 "Xaa-Pro dipeptidase"  
"ChI\_N02\_00075" 2859 "s59E25H2" 0 "Xaa-Pro dipeptidase"  
"ChI\_N02\_00075" 2859 "s59E5H2" 0.03387952 "Xaa-Pro dipeptidase"  
"ChI\_N02\_00075" 2859 "s63E6H2" 0 "Xaa-Pro dipeptidase"  
"ChI\_N02\_00076" 2860 "s59E13H2" 0 "Elongation factor P"  
"ChI\_N02\_00076" 2860 "s59E25H2" 0 "Elongation factor P"  
"ChI\_N02\_00076" 2860 "s59E5H2" 0.07754322 "Elongation factor P"  
"ChI\_N02\_00076" 2860 "s63E6H2" 0 "Elongation factor P"  
"ChI\_N02\_00077" 2861 "s59E13H2" 0 "putative hydrolase"  
"ChI\_N02\_00077" 2861 "s59E25H2" 0 "putative hydrolase"  
"ChI\_N02\_00077" 2861 "s59E5H2" 0.01118309 "putative hydrolase"  
"ChI\_N02\_00077" 2861 "s63E6H2" 0 "putative hydrolase"  
"ChI\_N02\_00078" 2862 "s59E13H2" 0 "Phosphoribosylglycinamide formyltransferase"  
"ChI\_N02\_00078" 2862 "s59E25H2" 0 "Phosphoribosylglycinamide formyltransferase"  
"ChI\_N02\_00078" 2862 "s59E5H2" 0.1793705 "Phosphoribosylglycinamide formyltransferase"  
"ChI\_N02\_00078" 2862 "s63E6H2" 0 "Phosphoribosylglycinamide formyltransferase"  
"ChI\_N02\_00080" 2864 "s59E13H2" 0 "hypothetical protein"  
"ChI\_N02\_00080" 2864 "s59E25H2" 0 "hypothetical protein"  
"ChI\_N02\_00080" 2864 "s59E5H2" 0 "hypothetical protein"  
"ChI\_N02\_00080" 2864 "s63E6H2" 0 "hypothetical protein"  
"ChI\_N02\_00081" 2865 "s59E13H2" 0 "Glyoxylate reductase"  
"ChI\_N02\_00081" 2865 "s59E25H2" 0 "Glyoxylate reductase"  
"ChI\_N02\_00081" 2865 "s59E5H2" 0 "Glyoxylate reductase"  
"ChI\_N02\_00081" 2865 "s63E6H2" 0 "Glyoxylate reductase"  
"ChI\_N02\_00082" 2866 "s59E13H2" 0 "4-hydroxy-tetrahydrodipicolinate synthase"  
"ChI\_N02\_00082" 2866 "s59E25H2" 0 "4-hydroxy-tetrahydrodipicolinate synthase"  
"ChI\_N02\_00082" 2866 "s59E5H2" 0 "4-hydroxy-tetrahydrodipicolinate synthase"  
"ChI\_N02\_00082" 2866 "s63E6H2" 0 "4-hydroxy-tetrahydrodipicolinate synthase"  
"ChI\_N02\_00083" 2867 "s59E13H2" 0 "putative sugar kinase YdjH"  
"ChI\_N02\_00083" 2867 "s59E25H2" 0 "putative sugar kinase YdjH"  
"ChI\_N02\_00083" 2867 "s59E5H2" 0.4130324 "putative sugar kinase YdjH"  
"ChI\_N02\_00083" 2867 "s63E6H2" 0 "putative sugar kinase YdjH"  
"ChI\_N02\_00084" 2868 "s59E13H2" 0 "hypothetical protein"  
"ChI\_N02\_00084" 2868 "s59E25H2" 0 "hypothetical protein"  
"ChI\_N02\_00084" 2868 "s59E5H2" 1.066682 "hypothetical protein"  
"ChI\_N02\_00084" 2868 "s63E6H2" 0 "hypothetical protein"  
"ChI\_N02\_00085" 2869 "s59E13H2" 0 "hypothetical protein"  
"ChI\_N02\_00085" 2869 "s59E25H2" 0 "hypothetical protein"  
"ChI\_N02\_00085" 2869 "s59E5H2" 0.6219727 "hypothetical protein"



"ChI\_N02\_00085" 2869 "s63E6H2" 0 "hypothetical protein"  
"ChI\_N02\_00086" 2870 "s59E13H2" 0 "ATP-dependent Clp protease proteolytic subunit"  
"ChI\_N02\_00086" 2870 "s59E25H2" 0 "ATP-dependent Clp protease proteolytic subunit"  
"ChI\_N02\_00086" 2870 "s59E5H2" 0 "ATP-dependent Clp protease proteolytic subunit"  
"ChI\_N02\_00086" 2870 "s63E6H2" 0 "ATP-dependent Clp protease proteolytic subunit"  
"ChI\_N02\_00087" 2871 "s59E13H2" 0 "Trigger factor"  
"ChI\_N02\_00087" 2871 "s59E25H2" 0 "Trigger factor"  
"ChI\_N02\_00087" 2871 "s59E5H2" 0 "Trigger factor"  
"ChI\_N02\_00087" 2871 "s63E6H2" 0 "Trigger factor"  
"ChI\_N02\_00088" 2872 "s59E13H2" 0 "Aspartate--tRNA ligase"  
"ChI\_N02\_00088" 2872 "s59E25H2" 0 "Aspartate--tRNA ligase"  
"ChI\_N02\_00088" 2872 "s59E5H2" 0.04839162 "Aspartate--tRNA ligase"  
"ChI\_N02\_00088" 2872 "s63E6H2" 0 "Aspartate--tRNA ligase"  
"ChI\_N02\_00089" 2873 "s59E13H2" 0 "hypothetical protein"  
"ChI\_N02\_00089" 2873 "s59E25H2" 0 "hypothetical protein"  
"ChI\_N02\_00089" 2873 "s59E5H2" 0.02002105 "hypothetical protein"  
"ChI\_N02\_00089" 2873 "s63E6H2" 0 "hypothetical protein"  
"ChI\_N02\_00090" 2874 "s59E13H2" 0 "(R)-citramalate synthase CimA"  
"ChI\_N02\_00090" 2874 "s59E25H2" 0 "(R)-citramalate synthase CimA"  
"ChI\_N02\_00090" 2874 "s59E5H2" 0.01486839 "(R)-citramalate synthase CimA"  
"ChI\_N02\_00090" 2874 "s63E6H2" 0.001007491 "(R)-citramalate synthase CimA"  
"ChI\_N02\_00091" 2875 "s59E13H2" 0 "Glyoxylate reductase"  
"ChI\_N02\_00091" 2875 "s59E25H2" 0 "Glyoxylate reductase"  
"ChI\_N02\_00091" 2875 "s59E5H2" 0.01171377 "Glyoxylate reductase"  
"ChI\_N02\_00091" 2875 "s63E6H2" 0 "Glyoxylate reductase"  
"ChI\_N02\_00092" 2876 "s59E13H2" 0 "3-isopropylmalate dehydrogenase"  
"ChI\_N02\_00092" 2876 "s59E25H2" 0 "3-isopropylmalate dehydrogenase"  
"ChI\_N02\_00092" 2876 "s59E5H2" 0 "3-isopropylmalate dehydrogenase"  
"ChI\_N02\_00092" 2876 "s63E6H2" 0 "3-isopropylmalate dehydrogenase"  
"ChI\_N02\_00093" 2877 "s59E13H2" 0 "2,3-dimethylmalate dehydratase small subunit"  
"ChI\_N02\_00093" 2877 "s59E25H2" 0 "2,3-dimethylmalate dehydratase small subunit"  
"ChI\_N02\_00093" 2877 "s59E5H2" 0 "2,3-dimethylmalate dehydratase small subunit"  
"ChI\_N02\_00093" 2877 "s63E6H2" 0 "2,3-dimethylmalate dehydratase small subunit"  
"ChI\_N02\_00094" 2878 "s59E13H2" 0 "hypothetical protein"  
"ChI\_N02\_00094" 2878 "s59E25H2" 0 "hypothetical protein"  
"ChI\_N02\_00094" 2878 "s59E5H2" 0 "hypothetical protein"  
"ChI\_N02\_00094" 2878 "s63E6H2" 0 "hypothetical protein"  
"ChI\_N02\_00096" 2880 "s59E13H2" 0 "Acetyltransferase (GNAT) family protein"  
"ChI\_N02\_00096" 2880 "s59E25H2" 0 "Acetyltransferase (GNAT) family protein"  
"ChI\_N02\_00096" 2880 "s59E5H2" 0 "Acetyltransferase (GNAT) family protein"  
"ChI\_N02\_00096" 2880 "s63E6H2" 0 "Acetyltransferase (GNAT) family protein"  
"ChI\_N02\_00097" 2881 "s59E13H2" 0 "2,3-dimethylmalate dehydratase large subunit"  
"ChI\_N02\_00097" 2881 "s59E25H2" 0 "2,3-dimethylmalate dehydratase large subunit"  
"ChI\_N02\_00097" 2881 "s59E5H2" 0 "2,3-dimethylmalate dehydratase large subunit"  
"ChI\_N02\_00097" 2881 "s63E6H2" 0 "2,3-dimethylmalate dehydratase large subunit"  
"ChI\_N02\_00098" 2882 "s59E13H2" 0 "2-isopropylmalate synthase"  
"ChI\_N02\_00098" 2882 "s59E25H2" 0 "2-isopropylmalate synthase"

"ChI\_N02\_00098" 2882 "s59E5H2" 0 "2-isopropylmalate synthase"  
"ChI\_N02\_00098" 2882 "s63E6H2" 0 "2-isopropylmalate synthase"  
"ChI\_N02\_00099" 2883 "s59E13H2" 0 "Ketol-acid reductoisomerase"  
"ChI\_N02\_00099" 2883 "s59E25H2" 0 "Ketol-acid reductoisomerase"  
"ChI\_N02\_00099" 2883 "s59E5H2" 0 "Ketol-acid reductoisomerase"  
"ChI\_N02\_00099" 2883 "s63E6H2" 0 "Ketol-acid reductoisomerase"  
"ChI\_N02\_00100" 2884 "s59E13H2" 0 "Putative acetolactate synthase small subunit"  
"ChI\_N02\_00100" 2884 "s59E25H2" 0 "Putative acetolactate synthase small subunit"  
"ChI\_N02\_00100" 2884 "s59E5H2" 0 "Putative acetolactate synthase small subunit"  
"ChI\_N02\_00100" 2884 "s63E6H2" 0 "Putative acetolactate synthase small subunit"  
"ChI\_N02\_00101" 2885 "s59E13H2" 0 "Acetolactate synthase large subunit IlvB1"  
"ChI\_N02\_00101" 2885 "s59E25H2" 0 "Acetolactate synthase large subunit IlvB1"  
"ChI\_N02\_00101" 2885 "s59E5H2" 0 "Acetolactate synthase large subunit IlvB1"  
"ChI\_N02\_00101" 2885 "s63E6H2" 0 "Acetolactate synthase large subunit IlvB1"  
"ChI\_N02\_00102" 2886 "s59E13H2" 0.003128972 "Dihydroxy-acid dehydratase"  
"ChI\_N02\_00102" 2886 "s59E25H2" 0 "Dihydroxy-acid dehydratase"  
"ChI\_N02\_00102" 2886 "s59E5H2" 0 "Dihydroxy-acid dehydratase"  
"ChI\_N02\_00102" 2886 "s63E6H2" 0 "Dihydroxy-acid dehydratase"  
"ChI\_N02\_00103" 2887 "s59E13H2" 0 "Putative sugar phosphate isomerase YwF"  
"ChI\_N02\_00103" 2887 "s59E25H2" 0 "Putative sugar phosphate isomerase YwF"  
"ChI\_N02\_00103" 2887 "s59E5H2" 0 "Putative sugar phosphate isomerase YwF"  
"ChI\_N02\_00103" 2887 "s63E6H2" 0 "Putative sugar phosphate isomerase YwF"  
"ChI\_N02\_00104" 2888 "s59E13H2" 0 "Threonylcarbamoyl-AMP synthase"  
"ChI\_N02\_00104" 2888 "s59E25H2" 0 "Threonylcarbamoyl-AMP synthase"  
"ChI\_N02\_00104" 2888 "s59E5H2" 0 "Threonylcarbamoyl-AMP synthase"  
"ChI\_N02\_00104" 2888 "s63E6H2" 0 "Threonylcarbamoyl-AMP synthase"  
"ChI\_N02\_00105" 2889 "s59E13H2" 0 "GMP synthase [glutamine-hydrolyzing]"  
"ChI\_N02\_00105" 2889 "s59E25H2" 0 "GMP synthase [glutamine-hydrolyzing]"  
"ChI\_N02\_00105" 2889 "s59E5H2" 0 "GMP synthase [glutamine-hydrolyzing]"  
"ChI\_N02\_00105" 2889 "s63E6H2" 0 "GMP synthase [glutamine-hydrolyzing]"  
"ChI\_N02\_00106" 2890 "s59E13H2" 0 "hypothetical protein"  
"ChI\_N02\_00106" 2890 "s59E25H2" 0 "hypothetical protein"  
"ChI\_N02\_00106" 2890 "s59E5H2" 0 "hypothetical protein"  
"ChI\_N02\_00106" 2890 "s63E6H2" 0 "hypothetical protein"  
"ChI\_N02\_00108" 2892 "s59E13H2" 0 "PAC2 family protein"  
"ChI\_N02\_00108" 2892 "s59E25H2" 0 "PAC2 family protein"  
"ChI\_N02\_00108" 2892 "s59E5H2" 0.01390237 "PAC2 family protein"  
"ChI\_N02\_00108" 2892 "s63E6H2" 0 "PAC2 family protein"  
"ChI\_N02\_00109" 2893 "s59E13H2" 0 "HEAT repeat protein"  
"ChI\_N02\_00109" 2893 "s59E25H2" 0 "HEAT repeat protein"  
"ChI\_N02\_00109" 2893 "s59E5H2" 0.002257555 "HEAT repeat protein"  
"ChI\_N02\_00109" 2893 "s63E6H2" 0 "HEAT repeat protein"  
"ChI\_N02\_00110" 2894 "s59E13H2" 0 "Acetyltransferase (GNAT) family protein"  
"ChI\_N02\_00110" 2894 "s59E25H2" 0 "Acetyltransferase (GNAT) family protein"  
"ChI\_N02\_00110" 2894 "s59E5H2" 0.003162516 "Acetyltransferase (GNAT) family protein"  
"ChI\_N02\_00110" 2894 "s63E6H2" 0 "Acetyltransferase (GNAT) family protein"  
"ChI\_N02\_00111" 2895 "s59E13H2" 0 "Methylthioribose-1-phosphate isomerase"

"Chl\_N02\_00111" 2895 "s59E25H2" 0 "Methylthioribose-1-phosphate isomerase"  
"Chl\_N02\_00111" 2895 "s59E5H2" 0.001197368 "Methylthioribose-1-phosphate isomerase"  
"Chl\_N02\_00111" 2895 "s63E6H2" 0 "Methylthioribose-1-phosphate isomerase"  
"Chl\_N02\_00113" 2897 "s59E13H2" 0 "S-methyl-5'-thioadenosine phosphorylase"  
"Chl\_N02\_00113" 2897 "s59E25H2" 0 "S-methyl-5'-thioadenosine phosphorylase"  
"Chl\_N02\_00113" 2897 "s59E5H2" 0 "S-methyl-5'-thioadenosine phosphorylase"  
"Chl\_N02\_00113" 2897 "s63E6H2" 0 "S-methyl-5'-thioadenosine phosphorylase"  
"Chl\_N02\_00114" 2898 "s59E13H2" 0 "methionine synthase"  
"Chl\_N02\_00114" 2898 "s59E25H2" 0 "methionine synthase"  
"Chl\_N02\_00114" 2898 "s59E5H2" 0 "methionine synthase"  
"Chl\_N02\_00114" 2898 "s63E6H2" 0 "methionine synthase"  
"Chl\_N02\_00116" 2900 "s59E13H2" 0 "Nucleoside-triphosphatase THEP1"  
"Chl\_N02\_00116" 2900 "s59E25H2" 0 "Nucleoside-triphosphatase THEP1"  
"Chl\_N02\_00116" 2900 "s59E5H2" 0 "Nucleoside-triphosphatase THEP1"  
"Chl\_N02\_00116" 2900 "s63E6H2" 0 "Nucleoside-triphosphatase THEP1"  
"Chl\_N02\_00117" 2901 "s59E13H2" 0 "Glycerol-3-phosphate acyltransferase"  
"Chl\_N02\_00117" 2901 "s59E25H2" 0 "Glycerol-3-phosphate acyltransferase"  
"Chl\_N02\_00117" 2901 "s59E5H2" 0 "Glycerol-3-phosphate acyltransferase"  
"Chl\_N02\_00117" 2901 "s63E6H2" 0 "Glycerol-3-phosphate acyltransferase"  
"Chl\_N02\_00118" 2902 "s59E13H2" 0.001742369 "hypothetical protein"  
"Chl\_N02\_00118" 2902 "s59E25H2" 0 "hypothetical protein"  
"Chl\_N02\_00118" 2902 "s59E5H2" 0 "hypothetical protein"  
"Chl\_N02\_00118" 2902 "s63E6H2" 0 "hypothetical protein"  
"Chl\_N02\_00119" 2903 "s59E13H2" 0 "hypothetical protein"  
"Chl\_N02\_00119" 2903 "s59E25H2" 0 "hypothetical protein"  
"Chl\_N02\_00119" 2903 "s59E5H2" 0 "hypothetical protein"  
"Chl\_N02\_00119" 2903 "s63E6H2" 0 "hypothetical protein"  
"Chl\_N02\_00120" 2904 "s59E13H2" 0 "Chromatin associated protein KTI12"  
"Chl\_N02\_00120" 2904 "s59E25H2" 0 "Chromatin associated protein KTI12"  
"Chl\_N02\_00120" 2904 "s59E5H2" 0 "Chromatin associated protein KTI12"  
"Chl\_N02\_00120" 2904 "s63E6H2" 0 "Chromatin associated protein KTI12"  
"Chl\_N02\_00121" 2905 "s59E13H2" 0 "DNA polymerase III PolC-type"  
"Chl\_N02\_00121" 2905 "s59E25H2" 0 "DNA polymerase III PolC-type"  
"Chl\_N02\_00121" 2905 "s59E5H2" 0 "DNA polymerase III PolC-type"  
"Chl\_N02\_00121" 2905 "s63E6H2" 0 "DNA polymerase III PolC-type"  
"Chl\_N02\_00122" 2906 "s59E13H2" 0 "Adenosylhomocysteinase"  
"Chl\_N02\_00122" 2906 "s59E25H2" 0 "Adenosylhomocysteinase"  
"Chl\_N02\_00122" 2906 "s59E5H2" 0.003374015 "Adenosylhomocysteinase"  
"Chl\_N02\_00122" 2906 "s63E6H2" 0 "Adenosylhomocysteinase"  
"Chl\_N02\_00123" 2907 "s59E13H2" 0 "S-adenosylmethionine synthase"  
"Chl\_N02\_00123" 2907 "s59E25H2" 0 "S-adenosylmethionine synthase"  
"Chl\_N02\_00123" 2907 "s59E5H2" 0.1077572 "S-adenosylmethionine synthase"  
"Chl\_N02\_00123" 2907 "s63E6H2" 0 "S-adenosylmethionine synthase"  
"Chl\_N02\_00125" 2909 "s59E13H2" 0 "ATP-binding region"  
"Chl\_N02\_00125" 2909 "s59E25H2" 0 "ATP-binding region"  
"Chl\_N02\_00125" 2909 "s59E5H2" 0.04481342 "ATP-binding region"  
"Chl\_N02\_00125" 2909 "s63E6H2" 0 "ATP-binding region"

"ChI\_N02\_00126" 2910 "s59E13H2" 0 "Phosphoglucomutase"  
"ChI\_N02\_00126" 2910 "s59E25H2" 0 "Phosphoglucomutase"  
"ChI\_N02\_00126" 2910 "s59E5H2" 0.007250247 "Phosphoglucomutase"  
"ChI\_N02\_00126" 2910 "s63E6H2" 0 "Phosphoglucomutase"  
"ChI\_N02\_00127" 2911 "s59E13H2" 0 "Mannose-6-phosphate isomerase"  
"ChI\_N02\_00127" 2911 "s59E25H2" 0 "Mannose-6-phosphate isomerase"  
"ChI\_N02\_00127" 2911 "s59E5H2" 0.07083143 "Mannose-6-phosphate isomerase"  
"ChI\_N02\_00127" 2911 "s63E6H2" 0 "Mannose-6-phosphate isomerase"  
"ChI\_N02\_00128" 2912 "s59E13H2" 0 "30S ribosomal protein S9"  
"ChI\_N02\_00128" 2912 "s59E25H2" 0 "30S ribosomal protein S9"  
"ChI\_N02\_00128" 2912 "s59E5H2" 0.4738758 "30S ribosomal protein S9"  
"ChI\_N02\_00128" 2912 "s63E6H2" 0 "30S ribosomal protein S9"  
"ChI\_N02\_00129" 2913 "s59E13H2" 0 "50S ribosomal protein L13"  
"ChI\_N02\_00129" 2913 "s59E25H2" 1.009592 "50S ribosomal protein L13"  
"ChI\_N02\_00129" 2913 "s59E5H2" 0.7544093 "50S ribosomal protein L13"  
"ChI\_N02\_00129" 2913 "s63E6H2" 0 "50S ribosomal protein L13"  
"ChI\_N02\_00130" 2914 "s59E13H2" 0 "tRNA pseudouridine synthase A"  
"ChI\_N02\_00130" 2914 "s59E25H2" 0.1024643 "tRNA pseudouridine synthase A"  
"ChI\_N02\_00130" 2914 "s59E5H2" 0.3117447 "tRNA pseudouridine synthase A"  
"ChI\_N02\_00130" 2914 "s63E6H2" 0.0009935026 "tRNA pseudouridine synthase A"  
"ChI\_N02\_00131" 2915 "s59E13H2" 0 "50S ribosomal protein L17"  
"ChI\_N02\_00131" 2915 "s59E25H2" 0 "50S ribosomal protein L17"  
"ChI\_N02\_00131" 2915 "s59E5H2" 0.05710743 "50S ribosomal protein L17"  
"ChI\_N02\_00131" 2915 "s63E6H2" 0.003091164 "50S ribosomal protein L17"  
"ChI\_N02\_00132" 2916 "s59E13H2" 0 "DNA-directed RNA polymerase subunit alpha"  
"ChI\_N02\_00132" 2916 "s59E25H2" 0 "DNA-directed RNA polymerase subunit alpha"  
"ChI\_N02\_00132" 2916 "s59E5H2" 0.1029057 "DNA-directed RNA polymerase subunit alpha"  
"ChI\_N02\_00132" 2916 "s63E6H2" 0 "DNA-directed RNA polymerase subunit alpha"  
"ChI\_N02\_00133" 2917 "s59E13H2" 0 "30S ribosomal protein S4"  
"ChI\_N02\_00133" 2917 "s59E25H2" 0 "30S ribosomal protein S4"  
"ChI\_N02\_00133" 2917 "s59E5H2" 0.01080782 "30S ribosomal protein S4"  
"ChI\_N02\_00133" 2917 "s63E6H2" 0 "30S ribosomal protein S4"  
"ChI\_N02\_00134" 2918 "s59E13H2" 0 "30S ribosomal protein S11"  
"ChI\_N02\_00134" 2918 "s59E25H2" 0 "30S ribosomal protein S11"  
"ChI\_N02\_00134" 2918 "s59E5H2" 0 "30S ribosomal protein S11"  
"ChI\_N02\_00134" 2918 "s63E6H2" 0 "30S ribosomal protein S11"  
"ChI\_N02\_00135" 2919 "s59E13H2" 0 "30S ribosomal protein S13"  
"ChI\_N02\_00135" 2919 "s59E25H2" 0 "30S ribosomal protein S13"  
"ChI\_N02\_00135" 2919 "s59E5H2" 0 "30S ribosomal protein S13"  
"ChI\_N02\_00135" 2919 "s63E6H2" 0 "30S ribosomal protein S13"  
"ChI\_N02\_00136" 2920 "s59E13H2" 0 "50S ribosomal protein L36"  
"ChI\_N02\_00136" 2920 "s59E25H2" 0 "50S ribosomal protein L36"  
"ChI\_N02\_00136" 2920 "s59E5H2" 0 "50S ribosomal protein L36"  
"ChI\_N02\_00136" 2920 "s63E6H2" 0 "50S ribosomal protein L36"  
"ChI\_N02\_00137" 2921 "s59E13H2" 0 "Translation initiation factor IF-1"  
"ChI\_N02\_00137" 2921 "s59E25H2" 0 "Translation initiation factor IF-1"  
"ChI\_N02\_00137" 2921 "s59E5H2" 0 "Translation initiation factor IF-1"

"ChI\_N02\_00137" 2921 "s63E6H2" 0.009021777 "Translation initiation factor IF-1"  
"ChI\_N02\_00138" 2922 "s59E13H2" 0 "Methionine aminopeptidase 1"  
"ChI\_N02\_00138" 2922 "s59E25H2" 0 "Methionine aminopeptidase 1"  
"ChI\_N02\_00138" 2922 "s59E5H2" 0 "Methionine aminopeptidase 1"  
"ChI\_N02\_00138" 2922 "s63E6H2" 0.001248281 "Methionine aminopeptidase 1"  
"ChI\_N02\_00139" 2923 "s59E13H2" 0 "Adenylate kinase"  
"ChI\_N02\_00139" 2923 "s59E25H2" 0 "Adenylate kinase"  
"ChI\_N02\_00139" 2923 "s59E5H2" 0 "Adenylate kinase"  
"ChI\_N02\_00139" 2923 "s63E6H2" 0 "Adenylate kinase"  
"ChI\_N02\_00140" 2924 "s59E13H2" 0 "preprotein translocase subunit SecY"  
"ChI\_N02\_00140" 2924 "s59E25H2" 0 "preprotein translocase subunit SecY"  
"ChI\_N02\_00140" 2924 "s59E5H2" 0 "preprotein translocase subunit SecY"  
"ChI\_N02\_00140" 2924 "s63E6H2" 0.0002067786 "preprotein translocase subunit SecY"  
"ChI\_N02\_00141" 2925 "s59E13H2" 0 "50S ribosomal protein L15"  
"ChI\_N02\_00141" 2925 "s59E25H2" 0 "50S ribosomal protein L15"  
"ChI\_N02\_00141" 2925 "s59E5H2" 0 "50S ribosomal protein L15"  
"ChI\_N02\_00141" 2925 "s63E6H2" 0.00866789 "50S ribosomal protein L15"  
"ChI\_N02\_00142" 2926 "s59E13H2" 0 "50S ribosomal protein L30"  
"ChI\_N02\_00142" 2926 "s59E25H2" 0 "50S ribosomal protein L30"  
"ChI\_N02\_00142" 2926 "s59E5H2" 0 "50S ribosomal protein L30"  
"ChI\_N02\_00142" 2926 "s63E6H2" 0 "50S ribosomal protein L30"  
"ChI\_N02\_00143" 2927 "s59E13H2" 0 "30S ribosomal protein S5"  
"ChI\_N02\_00143" 2927 "s59E25H2" 0 "30S ribosomal protein S5"  
"ChI\_N02\_00143" 2927 "s59E5H2" 0 "30S ribosomal protein S5"  
"ChI\_N02\_00143" 2927 "s63E6H2" 0 "30S ribosomal protein S5"  
"ChI\_N02\_00144" 2928 "s59E13H2" 0 "50S ribosomal protein L18"  
"ChI\_N02\_00144" 2928 "s59E25H2" 0 "50S ribosomal protein L18"  
"ChI\_N02\_00144" 2928 "s59E5H2" 0 "50S ribosomal protein L18"  
"ChI\_N02\_00144" 2928 "s63E6H2" 0 "50S ribosomal protein L18"  
"ChI\_N02\_00145" 2929 "s59E13H2" 0 "50S ribosomal protein L6"  
"ChI\_N02\_00145" 2929 "s59E25H2" 0 "50S ribosomal protein L6"  
"ChI\_N02\_00145" 2929 "s59E5H2" 0 "50S ribosomal protein L6"  
"ChI\_N02\_00145" 2929 "s63E6H2" 0 "50S ribosomal protein L6"  
"ChI\_N02\_00146" 2930 "s59E13H2" 0 "30S ribosomal protein S8"  
"ChI\_N02\_00146" 2930 "s59E25H2" 0 "30S ribosomal protein S8"  
"ChI\_N02\_00146" 2930 "s59E5H2" 0 "30S ribosomal protein S8"  
"ChI\_N02\_00146" 2930 "s63E6H2" 0 "30S ribosomal protein S8"  
"ChI\_N02\_00147" 2931 "s59E13H2" 0 "30S ribosomal protein S14"  
"ChI\_N02\_00147" 2931 "s59E25H2" 0 "30S ribosomal protein S14"  
"ChI\_N02\_00147" 2931 "s59E5H2" 0 "30S ribosomal protein S14"  
"ChI\_N02\_00147" 2931 "s63E6H2" 0 "30S ribosomal protein S14"  
"ChI\_N02\_00148" 2932 "s59E13H2" 0 "50S ribosomal protein L5"  
"ChI\_N02\_00148" 2932 "s59E25H2" 0 "50S ribosomal protein L5"  
"ChI\_N02\_00148" 2932 "s59E5H2" 0 "50S ribosomal protein L5"  
"ChI\_N02\_00148" 2932 "s63E6H2" 0 "50S ribosomal protein L5"  
"ChI\_N02\_00149" 2933 "s59E13H2" 0 "50S ribosomal protein L24"  
"ChI\_N02\_00149" 2933 "s59E25H2" 0 "50S ribosomal protein L24"

"Chl\_N02\_00149" 2933 "s59E5H2" 0 "50S ribosomal protein L24"  
"Chl\_N02\_00149" 2933 "s63E6H2" 0 "50S ribosomal protein L24"  
"Chl\_N02\_00150" 2934 "s59E13H2" 0 "50S ribosomal protein L14"  
"Chl\_N02\_00150" 2934 "s59E25H2" 0 "50S ribosomal protein L14"  
"Chl\_N02\_00150" 2934 "s59E5H2" 0 "50S ribosomal protein L14"  
"Chl\_N02\_00150" 2934 "s63E6H2" 0 "50S ribosomal protein L14"  
"Chl\_N02\_00151" 2935 "s59E13H2" 0 "30S ribosomal protein S17"  
"Chl\_N02\_00151" 2935 "s59E25H2" 0 "30S ribosomal protein S17"  
"Chl\_N02\_00151" 2935 "s59E5H2" 0 "30S ribosomal protein S17"  
"Chl\_N02\_00151" 2935 "s63E6H2" 0 "30S ribosomal protein S17"  
"Chl\_N02\_00152" 2936 "s59E13H2" 0 "50S ribosomal protein L29"  
"Chl\_N02\_00152" 2936 "s59E25H2" 0 "50S ribosomal protein L29"  
"Chl\_N02\_00152" 2936 "s59E5H2" 0 "50S ribosomal protein L29"  
"Chl\_N02\_00152" 2936 "s63E6H2" 0 "50S ribosomal protein L29"  
"Chl\_N02\_00153" 2937 "s59E13H2" 0 "50S ribosomal protein L16"  
"Chl\_N02\_00153" 2937 "s59E25H2" 0 "50S ribosomal protein L16"  
"Chl\_N02\_00153" 2937 "s59E5H2" 0 "50S ribosomal protein L16"  
"Chl\_N02\_00153" 2937 "s63E6H2" 0 "50S ribosomal protein L16"  
"Chl\_N02\_00154" 2938 "s59E13H2" 0 "30S ribosomal protein S3"  
"Chl\_N02\_00154" 2938 "s59E25H2" 0 "30S ribosomal protein S3"  
"Chl\_N02\_00154" 2938 "s59E5H2" 0 "30S ribosomal protein S3"  
"Chl\_N02\_00154" 2938 "s63E6H2" 0 "30S ribosomal protein S3"  
"Chl\_N02\_00155" 2939 "s59E13H2" 0 "50S ribosomal protein L22"  
"Chl\_N02\_00155" 2939 "s59E25H2" 0 "50S ribosomal protein L22"  
"Chl\_N02\_00155" 2939 "s59E5H2" 0 "50S ribosomal protein L22"  
"Chl\_N02\_00155" 2939 "s63E6H2" 0 "50S ribosomal protein L22"  
"Chl\_N02\_00156" 2940 "s59E13H2" 0 "30S ribosomal protein S19"  
"Chl\_N02\_00156" 2940 "s59E25H2" 0 "30S ribosomal protein S19"  
"Chl\_N02\_00156" 2940 "s59E5H2" 0 "30S ribosomal protein S19"  
"Chl\_N02\_00156" 2940 "s63E6H2" 0 "30S ribosomal protein S19"  
"Chl\_N02\_00157" 2941 "s59E13H2" 0 "50S ribosomal protein L2"  
"Chl\_N02\_00157" 2941 "s59E25H2" 0 "50S ribosomal protein L2"  
"Chl\_N02\_00157" 2941 "s59E5H2" 0 "50S ribosomal protein L2"  
"Chl\_N02\_00157" 2941 "s63E6H2" 0 "50S ribosomal protein L2"  
"Chl\_N02\_00158" 2942 "s59E13H2" 0 "50S ribosomal protein L23"  
"Chl\_N02\_00158" 2942 "s59E25H2" 0 "50S ribosomal protein L23"  
"Chl\_N02\_00158" 2942 "s59E5H2" 0 "50S ribosomal protein L23"  
"Chl\_N02\_00158" 2942 "s63E6H2" 0 "50S ribosomal protein L23"  
"Chl\_N02\_00159" 2943 "s59E13H2" 0 "50S ribosomal protein L4"  
"Chl\_N02\_00159" 2943 "s59E25H2" 0 "50S ribosomal protein L4"  
"Chl\_N02\_00159" 2943 "s59E5H2" 0 "50S ribosomal protein L4"  
"Chl\_N02\_00159" 2943 "s63E6H2" 0 "50S ribosomal protein L4"  
"Chl\_N02\_00160" 2944 "s59E13H2" 0 "50S ribosomal protein L3"  
"Chl\_N02\_00160" 2944 "s59E25H2" 0 "50S ribosomal protein L3"  
"Chl\_N02\_00160" 2944 "s59E5H2" 0 "50S ribosomal protein L3"  
"Chl\_N02\_00160" 2944 "s63E6H2" 0 "50S ribosomal protein L3"  
"Chl\_N02\_00161" 2945 "s59E13H2" 0 "30S ribosomal protein S10"

"Chl\_N02\_00161" 2945 "s59E25H2" 0 "30S ribosomal protein S10"  
"Chl\_N02\_00161" 2945 "s59E5H2" 0 "30S ribosomal protein S10"  
"Chl\_N02\_00161" 2945 "s63E6H2" 0 "30S ribosomal protein S10"  
"Chl\_N02\_00162" 2946 "s59E13H2" 0 "Elongation factor G"  
"Chl\_N02\_00162" 2946 "s59E25H2" 0 "Elongation factor G"  
"Chl\_N02\_00162" 2946 "s59E5H2" 0 "Elongation factor G"  
"Chl\_N02\_00162" 2946 "s63E6H2" 0 "Elongation factor G"  
"Chl\_N02\_00163" 2947 "s59E13H2" 0 "30S ribosomal protein S7"  
"Chl\_N02\_00163" 2947 "s59E25H2" 0 "30S ribosomal protein S7"  
"Chl\_N02\_00163" 2947 "s59E5H2" 0 "30S ribosomal protein S7"  
"Chl\_N02\_00163" 2947 "s63E6H2" 0 "30S ribosomal protein S7"  
"Chl\_N02\_00164" 2948 "s59E13H2" 0.0008659573 "30S ribosomal protein S12"  
"Chl\_N02\_00164" 2948 "s59E25H2" 0 "30S ribosomal protein S12"  
"Chl\_N02\_00164" 2948 "s59E5H2" 0 "30S ribosomal protein S12"  
"Chl\_N02\_00164" 2948 "s63E6H2" 0 "30S ribosomal protein S12"  
"Chl\_N02\_00165" 2949 "s59E13H2" 0 "Deoxyuridine 5'-triphosphate nucleotidohydrolase"  
"Chl\_N02\_00165" 2949 "s59E25H2" 0 "Deoxyuridine 5'-triphosphate nucleotidohydrolase"  
"Chl\_N02\_00165" 2949 "s59E5H2" 0 "Deoxyuridine 5'-triphosphate nucleotidohydrolase"  
"Chl\_N02\_00165" 2949 "s63E6H2" 0 "Deoxyuridine 5'-triphosphate nucleotidohydrolase"  
"Chl\_N02\_00166" 2950 "s59E13H2" 0 "Type II secretion system protein G precursor"  
"Chl\_N02\_00166" 2950 "s59E25H2" 0 "Type II secretion system protein G precursor"  
"Chl\_N02\_00166" 2950 "s59E5H2" 0 "Type II secretion system protein G precursor"  
"Chl\_N02\_00166" 2950 "s63E6H2" 0 "Type II secretion system protein G precursor"  
"Chl\_N02\_00167" 2951 "s59E13H2" 0 "hypothetical protein"  
"Chl\_N02\_00167" 2951 "s59E25H2" 0 "hypothetical protein"  
"Chl\_N02\_00167" 2951 "s59E5H2" 0 "hypothetical protein"  
"Chl\_N02\_00167" 2951 "s63E6H2" 0 "hypothetical protein"  
"Chl\_N02\_00168" 2952 "s59E13H2" 0 "Tungsten-containing aldehyde ferredoxin oxidoreductase"  
"Chl\_N02\_00168" 2952 "s59E25H2" 0 "Tungsten-containing aldehyde ferredoxin oxidoreductase"  
"Chl\_N02\_00168" 2952 "s59E5H2" 0 "Tungsten-containing aldehyde ferredoxin oxidoreductase"  
"Chl\_N02\_00168" 2952 "s63E6H2" 0 "Tungsten-containing aldehyde ferredoxin oxidoreductase"  
"Chl\_N02\_00169" 2953 "s59E13H2" 0 "NADH-dependent phenylglyoxylate dehydrogenase subunit beta"  
"Chl\_N02\_00169" 2953 "s59E25H2" 0 "NADH-dependent phenylglyoxylate dehydrogenase subunit beta"  
"Chl\_N02\_00169" 2953 "s59E5H2" 0 "NADH-dependent phenylglyoxylate dehydrogenase subunit beta"  
"Chl\_N02\_00169" 2953 "s63E6H2" 0 "NADH-dependent phenylglyoxylate dehydrogenase subunit beta"  
"Chl\_N02\_00170" 2954 "s59E13H2" 0 "(R)-citramalate synthase CimA"  
"Chl\_N02\_00170" 2954 "s59E25H2" 0 "(R)-citramalate synthase CimA"  
"Chl\_N02\_00170" 2954 "s59E5H2" 0 "(R)-citramalate synthase CimA"  
"Chl\_N02\_00170" 2954 "s63E6H2" 0 "(R)-citramalate synthase CimA"  
"Chl\_N02\_00171" 2955 "s59E13H2" 0 "putative phosphoenolpyruvate synthase"  
"Chl\_N02\_00171" 2955 "s59E25H2" 0 "putative phosphoenolpyruvate synthase"  
"Chl\_N02\_00171" 2955 "s59E5H2" 0.003767727 "putative phosphoenolpyruvate synthase"  
"Chl\_N02\_00171" 2955 "s63E6H2" 0 "putative phosphoenolpyruvate synthase"  
"Chl\_N02\_00173" 2957 "s59E13H2" 0 "hypothetical protein"  
"Chl\_N02\_00173" 2957 "s59E25H2" 0 "hypothetical protein"  
"Chl\_N02\_00173" 2957 "s59E5H2" 0 "hypothetical protein"  
"Chl\_N02\_00173" 2957 "s63E6H2" 0 "hypothetical protein"

"ChI\_N02\_00174" 2958 "s59E13H2" 0 "High-affinity branched-chain amino acid transport system permease protein LivH"  
"ChI\_N02\_00174" 2958 "s59E25H2" 0 "High-affinity branched-chain amino acid transport system permease protein LivH"  
"ChI\_N02\_00174" 2958 "s59E5H2" 0 "High-affinity branched-chain amino acid transport system permease protein LivH"  
"ChI\_N02\_00174" 2958 "s63E6H2" 0 "High-affinity branched-chain amino acid transport system permease protein LivH"  
"ChI\_N02\_00175" 2959 "s59E13H2" 0 "leucine/isoleucine/valine transporter permease subunit"  
"ChI\_N02\_00175" 2959 "s59E25H2" 0 "leucine/isoleucine/valine transporter permease subunit"  
"ChI\_N02\_00175" 2959 "s59E5H2" 0 "leucine/isoleucine/valine transporter permease subunit"  
"ChI\_N02\_00175" 2959 "s63E6H2" 0 "leucine/isoleucine/valine transporter permease subunit"  
"ChI\_N02\_00176" 2960 "s59E13H2" 0.004329132 "Lipopolysaccharide export system ATP-binding protein LptB"  
"ChI\_N02\_00176" 2960 "s59E25H2" 0 "Lipopolysaccharide export system ATP-binding protein LptB"  
"ChI\_N02\_00176" 2960 "s59E5H2" 0 "Lipopolysaccharide export system ATP-binding protein LptB"  
"ChI\_N02\_00176" 2960 "s63E6H2" 0 "Lipopolysaccharide export system ATP-binding protein LptB"  
"ChI\_N02\_00177" 2961 "s59E13H2" 0 "High-affinity branched-chain amino acid transport ATP-binding protein LivF"  
"ChI\_N02\_00177" 2961 "s59E25H2" 0 "High-affinity branched-chain amino acid transport ATP-binding protein LivF"  
"ChI\_N02\_00177" 2961 "s59E5H2" 0 "High-affinity branched-chain amino acid transport ATP-binding protein LivF"  
"ChI\_N02\_00177" 2961 "s63E6H2" 0 "High-affinity branched-chain amino acid transport ATP-binding protein LivF"  
"ChI\_N02\_00179" 2963 "s59E13H2" 0 "Chondramide synthase cmdD"  
"ChI\_N02\_00179" 2963 "s59E25H2" 0 "Chondramide synthase cmdD"  
"ChI\_N02\_00179" 2963 "s59E5H2" 0 "Chondramide synthase cmdD"  
"ChI\_N02\_00179" 2963 "s63E6H2" 0 "Chondramide synthase cmdD"  
"ChI\_N02\_00181" 2965 "s59E13H2" 0 "HTH-type transcriptional activator RhaS"  
"ChI\_N02\_00181" 2965 "s59E25H2" 0 "HTH-type transcriptional activator RhaS"  
"ChI\_N02\_00181" 2965 "s59E5H2" 0 "HTH-type transcriptional activator RhaS"  
"ChI\_N02\_00181" 2965 "s63E6H2" 0 "HTH-type transcriptional activator RhaS"  
"ChI\_N02\_00183" 2967 "s59E13H2" 0 "hypothetical protein"  
"ChI\_N02\_00183" 2967 "s59E25H2" 0 "hypothetical protein"  
"ChI\_N02\_00183" 2967 "s59E5H2" 0 "hypothetical protein"  
"ChI\_N02\_00183" 2967 "s63E6H2" 0 "hypothetical protein"  
"ChI\_N02\_00184" 2968 "s59E13H2" 0 "Tungsten-containing aldehyde ferredoxin oxidoreductase"  
"ChI\_N02\_00184" 2968 "s59E25H2" 0 "Tungsten-containing aldehyde ferredoxin oxidoreductase"  
"ChI\_N02\_00184" 2968 "s59E5H2" 0 "Tungsten-containing aldehyde ferredoxin oxidoreductase"  
"ChI\_N02\_00184" 2968 "s63E6H2" 0 "Tungsten-containing aldehyde ferredoxin oxidoreductase"  
"ChI\_N02\_00186" 2970 "s59E13H2" 0 "Kynurenine formamidase"  
"ChI\_N02\_00186" 2970 "s59E25H2" 0 "Kynurenine formamidase"  
"ChI\_N02\_00186" 2970 "s59E5H2" 0 "Kynurenine formamidase"  
"ChI\_N02\_00186" 2970 "s63E6H2" 0 "Kynurenine formamidase"  
"ChI\_N02\_00187" 2971 "s59E13H2" 0 "hypothetical protein"  
"ChI\_N02\_00187" 2971 "s59E25H2" 0 "hypothetical protein"  
"ChI\_N02\_00187" 2971 "s59E5H2" 0 "hypothetical protein"  
"ChI\_N02\_00187" 2971 "s63E6H2" 0 "hypothetical protein"  
"ChI\_N02\_00188" 2972 "s59E13H2" 0 "putative adenylyltransferase"  
"ChI\_N02\_00188" 2972 "s59E25H2" 0 "putative adenylyltransferase"  
"ChI\_N02\_00188" 2972 "s59E5H2" 0 "putative adenylyltransferase"  
"ChI\_N02\_00188" 2972 "s63E6H2" 0 "putative adenylyltransferase"  
"ChI\_N02\_00189" 2973 "s59E13H2" 0 "Sulfur carrier protein CysO"  
"ChI\_N02\_00189" 2973 "s59E25H2" 0 "Sulfur carrier protein CysO"  
"ChI\_N02\_00189" 2973 "s59E5H2" 0 "Sulfur carrier protein CysO"



"ChI\_N02\_00189" 2973 "s63E6H2" 0 "Sulfur carrier protein CysO"  
"ChI\_N02\_00191" 2975 "s59E13H2" 0.02379871 "chromosome segregation protein"  
"ChI\_N02\_00191" 2975 "s59E25H2" 0 "chromosome segregation protein"  
"ChI\_N02\_00191" 2975 "s59E5H2" 0 "chromosome segregation protein"  
"ChI\_N02\_00191" 2975 "s63E6H2" 0 "chromosome segregation protein"  
"ChI\_N02\_00192" 2976 "s59E13H2" 0.0003389665 "hypothetical protein"  
"ChI\_N02\_00192" 2976 "s59E25H2" 0 "hypothetical protein"  
"ChI\_N02\_00192" 2976 "s59E5H2" 0 "hypothetical protein"  
"ChI\_N02\_00192" 2976 "s63E6H2" 0 "hypothetical protein"  
"ChI\_N02\_00193" 2977 "s59E13H2" 0 "Tyrosine recombinase XerD"  
"ChI\_N02\_00193" 2977 "s59E25H2" 0 "Tyrosine recombinase XerD"  
"ChI\_N02\_00193" 2977 "s59E5H2" 0 "Tyrosine recombinase XerD"  
"ChI\_N02\_00193" 2977 "s63E6H2" 0 "Tyrosine recombinase XerD"  
"ChI\_N02\_00194" 2978 "s59E13H2" 0.03444915 "hypothetical protein"  
"ChI\_N02\_00194" 2978 "s59E25H2" 0 "hypothetical protein"  
"ChI\_N02\_00194" 2978 "s59E5H2" 0 "hypothetical protein"  
"ChI\_N02\_00194" 2978 "s63E6H2" 0 "hypothetical protein"  
"ChI\_N02\_00195" 2979 "s59E13H2" 0 "hypothetical protein"  
"ChI\_N02\_00195" 2979 "s59E25H2" 0 "hypothetical protein"  
"ChI\_N02\_00195" 2979 "s59E5H2" 0 "hypothetical protein"  
"ChI\_N02\_00195" 2979 "s63E6H2" 0 "hypothetical protein"  
"ChI\_N02\_00196" 2980 "s59E13H2" 0 "hypothetical protein"  
"ChI\_N02\_00196" 2980 "s59E25H2" 0 "hypothetical protein"  
"ChI\_N02\_00196" 2980 "s59E5H2" 0 "hypothetical protein"  
"ChI\_N02\_00196" 2980 "s63E6H2" 0 "hypothetical protein"  
"ChI\_N02\_00197" 2981 "s59E13H2" 0 "Ribonuclease PH"  
"ChI\_N02\_00197" 2981 "s59E25H2" 0 "Ribonuclease PH"  
"ChI\_N02\_00197" 2981 "s59E5H2" 0 "Ribonuclease PH"  
"ChI\_N02\_00197" 2981 "s63E6H2" 0 "Ribonuclease PH"  
"ChI\_N02\_00198" 2982 "s59E13H2" 0 "hypothetical protein"  
"ChI\_N02\_00198" 2982 "s59E25H2" 0 "hypothetical protein"  
"ChI\_N02\_00198" 2982 "s59E5H2" 0 "hypothetical protein"  
"ChI\_N02\_00198" 2982 "s63E6H2" 0 "hypothetical protein"  
"ChI\_N02\_00199" 2983 "s59E13H2" 0 "Galactose/methyl galactoside import ATP-binding protein MglA"  
"ChI\_N02\_00199" 2983 "s59E25H2" 0 "Galactose/methyl galactoside import ATP-binding protein MglA"  
"ChI\_N02\_00199" 2983 "s59E5H2" 0.04022328 "Galactose/methyl galactoside import ATP-binding protein MglA"  
"ChI\_N02\_00199" 2983 "s63E6H2" 0.009325512 "Galactose/methyl galactoside import ATP-binding protein MglA"  
"ChI\_N02\_00200" 2984 "s59E13H2" 0 "Ribose transport system permease protein RbsC"  
"ChI\_N02\_00200" 2984 "s59E25H2" 0 "Ribose transport system permease protein RbsC"  
"ChI\_N02\_00200" 2984 "s59E5H2" 0 "Ribose transport system permease protein RbsC"  
"ChI\_N02\_00200" 2984 "s63E6H2" 0.003289821 "Ribose transport system permease protein RbsC"  
"ChI\_N02\_00201" 2985 "s59E13H2" 0 "Inner membrane ABC transporter permease protein Yjff"  
"ChI\_N02\_00201" 2985 "s59E25H2" 0 "Inner membrane ABC transporter permease protein Yjff"  
"ChI\_N02\_00201" 2985 "s59E5H2" 0 "Inner membrane ABC transporter permease protein Yjff"  
"ChI\_N02\_00201" 2985 "s63E6H2" 0.004543927 "Inner membrane ABC transporter permease protein Yjff"  
"ChI\_N02\_00203" 2987 "s59E13H2" 0 "hypothetical protein"  
"ChI\_N02\_00203" 2987 "s59E25H2" 0 "hypothetical protein"

"ChI\_N02\_00203" 2987 "s59E5H2" 0 "hypothetical protein"  
"ChI\_N02\_00203" 2987 "s63E6H2" 0 "hypothetical protein"  
"ChI\_N02\_00204" 2988 "s59E13H2" 0 "hypothetical protein"  
"ChI\_N02\_00204" 2988 "s59E25H2" 0 "hypothetical protein"  
"ChI\_N02\_00204" 2988 "s59E5H2" 0 "hypothetical protein"  
"ChI\_N02\_00204" 2988 "s63E6H2" 0 "hypothetical protein"  
"ChI\_N02\_00205" 2989 "s59E13H2" 0 "hypothetical protein"  
"ChI\_N02\_00205" 2989 "s59E25H2" 0 "hypothetical protein"  
"ChI\_N02\_00205" 2989 "s59E5H2" 0 "hypothetical protein"  
"ChI\_N02\_00205" 2989 "s63E6H2" 0 "hypothetical protein"  
"ChI\_N02\_00206" 2990 "s59E13H2" 0 "putative ABC transporter ATP-binding protein YxIF"  
"ChI\_N02\_00206" 2990 "s59E25H2" 0 "putative ABC transporter ATP-binding protein YxIF"  
"ChI\_N02\_00206" 2990 "s59E5H2" 0 "putative ABC transporter ATP-binding protein YxIF"  
"ChI\_N02\_00206" 2990 "s63E6H2" 0 "putative ABC transporter ATP-binding protein YxIF"  
"ChI\_N02\_00207" 2991 "s59E13H2" 0 "ABC-2 type transporter"  
"ChI\_N02\_00207" 2991 "s59E25H2" 0 "ABC-2 type transporter"  
"ChI\_N02\_00207" 2991 "s59E5H2" 0 "ABC-2 type transporter"  
"ChI\_N02\_00207" 2991 "s63E6H2" 0 "ABC-2 type transporter"  
"ChI\_N02\_00208" 2992 "s59E13H2" 0 "Non-motile and phage-resistance protein"  
"ChI\_N02\_00208" 2992 "s59E25H2" 0 "Non-motile and phage-resistance protein"  
"ChI\_N02\_00208" 2992 "s59E5H2" 0 "Non-motile and phage-resistance protein"  
"ChI\_N02\_00208" 2992 "s63E6H2" 0 "Non-motile and phage-resistance protein"  
"ChI\_N02\_00209" 2993 "s59E13H2" 0 "Polar-differentiation response regulator DivK"  
"ChI\_N02\_00209" 2993 "s59E25H2" 0 "Polar-differentiation response regulator DivK"  
"ChI\_N02\_00209" 2993 "s59E5H2" 0 "Polar-differentiation response regulator DivK"  
"ChI\_N02\_00209" 2993 "s63E6H2" 0 "Polar-differentiation response regulator DivK"  
"ChI\_N02\_00210" 2994 "s59E13H2" 0 "hypothetical protein"  
"ChI\_N02\_00210" 2994 "s59E25H2" 0 "hypothetical protein"  
"ChI\_N02\_00210" 2994 "s59E5H2" 0.002488774 "hypothetical protein"  
"ChI\_N02\_00210" 2994 "s63E6H2" 0 "hypothetical protein"  
"ChI\_N02\_00211" 2995 "s59E13H2" 0 "Threonine--tRNA ligase 1"  
"ChI\_N02\_00211" 2995 "s59E25H2" 0 "Threonine--tRNA ligase 1"  
"ChI\_N02\_00211" 2995 "s59E5H2" 0 "Threonine--tRNA ligase 1"  
"ChI\_N02\_00211" 2995 "s63E6H2" 0 "Threonine--tRNA ligase 1"  
"ChI\_N02\_00213" 2997 "s59E13H2" 0 "Translation initiation factor IF-3"  
"ChI\_N02\_00213" 2997 "s59E25H2" 0 "Translation initiation factor IF-3"  
"ChI\_N02\_00213" 2997 "s59E5H2" 0 "Translation initiation factor IF-3"  
"ChI\_N02\_00213" 2997 "s63E6H2" 0 "Translation initiation factor IF-3"  
"ChI\_N02\_00214" 2998 "s59E13H2" 0 "50S ribosomal protein L35"  
"ChI\_N02\_00214" 2998 "s59E25H2" 0 "50S ribosomal protein L35"  
"ChI\_N02\_00214" 2998 "s59E5H2" 0 "50S ribosomal protein L35"  
"ChI\_N02\_00214" 2998 "s63E6H2" 0 "50S ribosomal protein L35"  
"ChI\_N02\_00215" 2999 "s59E13H2" 0 "50S ribosomal protein L20"  
"ChI\_N02\_00215" 2999 "s59E25H2" 0 "50S ribosomal protein L20"  
"ChI\_N02\_00215" 2999 "s59E5H2" 0 "50S ribosomal protein L20"  
"ChI\_N02\_00215" 2999 "s63E6H2" 0 "50S ribosomal protein L20"  
"ChI\_N02\_00216" 3000 "s59E13H2" 0 "hypothetical protein"

"ChI\_N02\_00216" 3000 "s59E25H2" 0 "hypothetical protein"  
"ChI\_N02\_00216" 3000 "s59E5H2" 0 "hypothetical protein"  
"ChI\_N02\_00216" 3000 "s63E6H2" 0 "hypothetical protein"  
"ChI\_N02\_00217" 3001 "s59E13H2" 0 "Phenylalanine--tRNA ligase alpha subunit"  
"ChI\_N02\_00217" 3001 "s59E25H2" 0 "Phenylalanine--tRNA ligase alpha subunit"  
"ChI\_N02\_00217" 3001 "s59E5H2" 0 "Phenylalanine--tRNA ligase alpha subunit"  
"ChI\_N02\_00217" 3001 "s63E6H2" 0 "Phenylalanine--tRNA ligase alpha subunit"  
"ChI\_N02\_00218" 3002 "s59E13H2" 0 "Phenylalanine--tRNA ligase beta subunit"  
"ChI\_N02\_00218" 3002 "s59E25H2" 0 "Phenylalanine--tRNA ligase beta subunit"  
"ChI\_N02\_00218" 3002 "s59E5H2" 0 "Phenylalanine--tRNA ligase beta subunit"  
"ChI\_N02\_00218" 3002 "s63E6H2" 0 "Phenylalanine--tRNA ligase beta subunit"  
"ChI\_N02\_00219" 3003 "s59E13H2" 0 "Ubiquinone/menaquinone biosynthesis C-methyltransferase UbiE"  
"ChI\_N02\_00219" 3003 "s59E25H2" 0 "Ubiquinone/menaquinone biosynthesis C-methyltransferase UbiE"  
"ChI\_N02\_00219" 3003 "s59E5H2" 0 "Ubiquinone/menaquinone biosynthesis C-methyltransferase UbiE"  
"ChI\_N02\_00219" 3003 "s63E6H2" 0.004682004 "Ubiquinone/menaquinone biosynthesis C-methyltransferase UbiE"  
"ChI\_N02\_00220" 3004 "s59E13H2" 0 "Proline--tRNA ligase"  
"ChI\_N02\_00220" 3004 "s59E25H2" 0 "Proline--tRNA ligase"  
"ChI\_N02\_00220" 3004 "s59E5H2" 0 "Proline--tRNA ligase"  
"ChI\_N02\_00220" 3004 "s63E6H2" 0 "Proline--tRNA ligase"  
"ChI\_N02\_00221" 3005 "s59E13H2" 0 "hypothetical protein"  
"ChI\_N02\_00221" 3005 "s59E25H2" 0 "hypothetical protein"  
"ChI\_N02\_00221" 3005 "s59E5H2" 0 "hypothetical protein"  
"ChI\_N02\_00221" 3005 "s63E6H2" 0 "hypothetical protein"  
"ChI\_N02\_00222" 3006 "s59E13H2" 0 "hypothetical protein"  
"ChI\_N02\_00222" 3006 "s59E25H2" 0 "hypothetical protein"  
"ChI\_N02\_00222" 3006 "s59E5H2" 0 "hypothetical protein"  
"ChI\_N02\_00222" 3006 "s63E6H2" 0 "hypothetical protein"  
"ChI\_N02\_00223" 3007 "s59E13H2" 0 "hypothetical protein"  
"ChI\_N02\_00223" 3007 "s59E25H2" 0 "hypothetical protein"  
"ChI\_N02\_00223" 3007 "s59E5H2" 0 "hypothetical protein"  
"ChI\_N02\_00223" 3007 "s63E6H2" 0 "hypothetical protein"  
"ChI\_N02\_00224" 3008 "s59E13H2" 0 "hypothetical protein"  
"ChI\_N02\_00224" 3008 "s59E25H2" 0 "hypothetical protein"  
"ChI\_N02\_00224" 3008 "s59E5H2" 0.0122746 "hypothetical protein"  
"ChI\_N02\_00224" 3008 "s63E6H2" 0 "hypothetical protein"  
"ChI\_N02\_00226" 3010 "s59E13H2" 0 "Phosphoglycerate kinase"  
"ChI\_N02\_00226" 3010 "s59E25H2" 0 "Phosphoglycerate kinase"  
"ChI\_N02\_00226" 3010 "s59E5H2" 0 "Phosphoglycerate kinase"  
"ChI\_N02\_00226" 3010 "s63E6H2" 0 "Phosphoglycerate kinase"  
"ChI\_N02\_00227" 3011 "s59E13H2" 0 "2,3-bisphosphoglycerate-independent phosphoglycerate mutase 1"  
"ChI\_N02\_00227" 3011 "s59E25H2" 0 "2,3-bisphosphoglycerate-independent phosphoglycerate mutase 1"  
"ChI\_N02\_00227" 3011 "s59E5H2" 0 "2,3-bisphosphoglycerate-independent phosphoglycerate mutase 1"  
"ChI\_N02\_00227" 3011 "s63E6H2" 0 "2,3-bisphosphoglycerate-independent phosphoglycerate mutase 1"  
"ChI\_N02\_00228" 3012 "s59E13H2" 0 "Doxorubicin resistance ATP-binding protein DrrA"  
"ChI\_N02\_00228" 3012 "s59E25H2" 0 "Doxorubicin resistance ATP-binding protein DrrA"  
"ChI\_N02\_00228" 3012 "s59E5H2" 0 "Doxorubicin resistance ATP-binding protein DrrA"  
"ChI\_N02\_00228" 3012 "s63E6H2" 0 "Doxorubicin resistance ATP-binding protein DrrA"

"ChI\_N02\_00229" 3013 "s59E13H2" 0 "Daunorubicin/doxorubicin resistance ATP-binding protein DrrA"  
"ChI\_N02\_00229" 3013 "s59E25H2" 0 "Daunorubicin/doxorubicin resistance ATP-binding protein DrrA"  
"ChI\_N02\_00229" 3013 "s59E5H2" 0 "Daunorubicin/doxorubicin resistance ATP-binding protein DrrA"  
"ChI\_N02\_00229" 3013 "s63E6H2" 0 "Daunorubicin/doxorubicin resistance ATP-binding protein DrrA"  
"ChI\_N02\_00230" 3014 "s59E13H2" 0 "Inner membrane transport permease YbhR"  
"ChI\_N02\_00230" 3014 "s59E25H2" 0 "Inner membrane transport permease YbhR"  
"ChI\_N02\_00230" 3014 "s59E5H2" 0 "Inner membrane transport permease YbhR"  
"ChI\_N02\_00230" 3014 "s63E6H2" 0 "Inner membrane transport permease YbhR"  
"ChI\_N02\_00231" 3015 "s59E13H2" 0 "Triosephosphate isomerase"  
"ChI\_N02\_00231" 3015 "s59E25H2" 0 "Triosephosphate isomerase"  
"ChI\_N02\_00231" 3015 "s59E5H2" 0 "Triosephosphate isomerase"  
"ChI\_N02\_00231" 3015 "s63E6H2" 0 "Triosephosphate isomerase"  
"ChI\_N02\_00232" 3016 "s59E13H2" 0 "tRNA dimethylallyltransferase"  
"ChI\_N02\_00232" 3016 "s59E25H2" 0 "tRNA dimethylallyltransferase"  
"ChI\_N02\_00232" 3016 "s59E5H2" 0 "tRNA dimethylallyltransferase"  
"ChI\_N02\_00232" 3016 "s63E6H2" 0 "tRNA dimethylallyltransferase"  
"ChI\_N02\_00233" 3017 "s59E13H2" 0.00174412 "Demethylmenaquinone methyltransferase"  
"ChI\_N02\_00233" 3017 "s59E25H2" 0 "Demethylmenaquinone methyltransferase"  
"ChI\_N02\_00233" 3017 "s59E5H2" 0 "Demethylmenaquinone methyltransferase"  
"ChI\_N02\_00233" 3017 "s63E6H2" 0 "Demethylmenaquinone methyltransferase"  
"ChI\_N02\_00234" 3018 "s59E13H2" 0 "Diaminopimelate epimerase"  
"ChI\_N02\_00234" 3018 "s59E25H2" 0 "Diaminopimelate epimerase"  
"ChI\_N02\_00234" 3018 "s59E5H2" 0 "Diaminopimelate epimerase"  
"ChI\_N02\_00234" 3018 "s63E6H2" 0 "Diaminopimelate epimerase"  
"ChI\_N02\_00235" 3019 "s59E13H2" 0 "LL-diaminopimelate aminotransferase"  
"ChI\_N02\_00235" 3019 "s59E25H2" 0 "LL-diaminopimelate aminotransferase"  
"ChI\_N02\_00235" 3019 "s59E5H2" 0 "LL-diaminopimelate aminotransferase"  
"ChI\_N02\_00235" 3019 "s63E6H2" 0 "LL-diaminopimelate aminotransferase"  
"ChI\_N02\_00236" 3020 "s59E13H2" 0 "GTPase HflX"  
"ChI\_N02\_00236" 3020 "s59E25H2" 0.04014939 "GTPase HflX"  
"ChI\_N02\_00236" 3020 "s59E5H2" 0.01250317 "GTPase HflX"  
"ChI\_N02\_00236" 3020 "s63E6H2" 0.0005846562 "GTPase HflX"  
"ChI\_N02\_00237" 3021 "s59E13H2" 0 "Carboxymuconolactone decarboxylase family protein"  
"ChI\_N02\_00237" 3021 "s59E25H2" 0 "Carboxymuconolactone decarboxylase family protein"  
"ChI\_N02\_00237" 3021 "s59E5H2" 0 "Carboxymuconolactone decarboxylase family protein"  
"ChI\_N02\_00237" 3021 "s63E6H2" 0 "Carboxymuconolactone decarboxylase family protein"  
"ChI\_N02\_00239" 3023 "s59E13H2" 0 "ADP-ribosyl-[dinitrogen reductase] glycohydrolase"  
"ChI\_N02\_00239" 3023 "s59E25H2" 0 "ADP-ribosyl-[dinitrogen reductase] glycohydrolase"  
"ChI\_N02\_00239" 3023 "s59E5H2" 0 "ADP-ribosyl-[dinitrogen reductase] glycohydrolase"  
"ChI\_N02\_00239" 3023 "s63E6H2" 0.0006190059 "ADP-ribosyl-[dinitrogen reductase] glycohydrolase"  
"ChI\_N02\_00240" 3024 "s59E13H2" 0 "Radical SAM superfamily protein"  
"ChI\_N02\_00240" 3024 "s59E25H2" 0 "Radical SAM superfamily protein"  
"ChI\_N02\_00240" 3024 "s59E5H2" 0 "Radical SAM superfamily protein"  
"ChI\_N02\_00240" 3024 "s63E6H2" 0 "Radical SAM superfamily protein"  
"ChI\_N02\_00241" 3025 "s59E13H2" 0 "pyruvate formate lyase-activating enzyme 1"  
"ChI\_N02\_00241" 3025 "s59E25H2" 0 "pyruvate formate lyase-activating enzyme 1"  
"ChI\_N02\_00241" 3025 "s59E5H2" 0 "pyruvate formate lyase-activating enzyme 1"

"ChI\_N02\_00241" 3025 "s63E6H2" 0 "pyruvate formate lyase-activating enzyme 1"  
"ChI\_N02\_00243" 3027 "s59E13H2" 0 "30S ribosomal protein S2"  
"ChI\_N02\_00243" 3027 "s59E25H2" 0 "30S ribosomal protein S2"  
"ChI\_N02\_00243" 3027 "s59E5H2" 0 "30S ribosomal protein S2"  
"ChI\_N02\_00243" 3027 "s63E6H2" 0 "30S ribosomal protein S2"  
"ChI\_N02\_00244" 3028 "s59E13H2" 0 "Elongation factor Ts"  
"ChI\_N02\_00244" 3028 "s59E25H2" 0 "Elongation factor Ts"  
"ChI\_N02\_00244" 3028 "s59E5H2" 0 "Elongation factor Ts"  
"ChI\_N02\_00244" 3028 "s63E6H2" 0 "Elongation factor Ts"  
"ChI\_N02\_00245" 3029 "s59E13H2" 0 "Uridylate kinase"  
"ChI\_N02\_00245" 3029 "s59E25H2" 0 "Uridylate kinase"  
"ChI\_N02\_00245" 3029 "s59E5H2" 0 "Uridylate kinase"  
"ChI\_N02\_00245" 3029 "s63E6H2" 0 "Uridylate kinase"  
"ChI\_N02\_00246" 3030 "s59E13H2" 0 "Ribosome-recycling factor"  
"ChI\_N02\_00246" 3030 "s59E25H2" 0 "Ribosome-recycling factor"  
"ChI\_N02\_00246" 3030 "s59E5H2" 0 "Ribosome-recycling factor"  
"ChI\_N02\_00246" 3030 "s63E6H2" 0 "Ribosome-recycling factor"  
"ChI\_N02\_00247" 3031 "s59E13H2" 0 "Isoprenyl transferase"  
"ChI\_N02\_00247" 3031 "s59E25H2" 0 "Isoprenyl transferase"  
"ChI\_N02\_00247" 3031 "s59E5H2" 0 "Isoprenyl transferase"  
"ChI\_N02\_00247" 3031 "s63E6H2" 0 "Isoprenyl transferase"  
"ChI\_N02\_00248" 3032 "s59E13H2" 0 "Phosphatidate cytidyltransferase"  
"ChI\_N02\_00248" 3032 "s59E25H2" 0 "Phosphatidate cytidyltransferase"  
"ChI\_N02\_00248" 3032 "s59E5H2" 0.004779632 "Phosphatidate cytidyltransferase"  
"ChI\_N02\_00248" 3032 "s63E6H2" 0 "Phosphatidate cytidyltransferase"  
"ChI\_N02\_00249" 3033 "s59E13H2" 0.001046686 "1-deoxy-D-xylulose 5-phosphate reductoisomerase"  
"ChI\_N02\_00249" 3033 "s59E25H2" 0 "1-deoxy-D-xylulose 5-phosphate reductoisomerase"  
"ChI\_N02\_00249" 3033 "s59E5H2" 0.004113213 "1-deoxy-D-xylulose 5-phosphate reductoisomerase"  
"ChI\_N02\_00249" 3033 "s63E6H2" 0 "1-deoxy-D-xylulose 5-phosphate reductoisomerase"  
"ChI\_N02\_00250" 3034 "s59E13H2" 0 "Regulator of sigma-W protease RasP"  
"ChI\_N02\_00250" 3034 "s59E25H2" 0 "Regulator of sigma-W protease RasP"  
"ChI\_N02\_00250" 3034 "s59E5H2" 0 "Regulator of sigma-W protease RasP"  
"ChI\_N02\_00250" 3034 "s63E6H2" 0 "Regulator of sigma-W protease RasP"  
"ChI\_N02\_00251" 3035 "s59E13H2" 0 "4-hydroxy-3-methylbut-2-en-1-yl diphosphate synthase"  
"ChI\_N02\_00251" 3035 "s59E25H2" 0 "4-hydroxy-3-methylbut-2-en-1-yl diphosphate synthase"  
"ChI\_N02\_00251" 3035 "s59E5H2" 0 "4-hydroxy-3-methylbut-2-en-1-yl diphosphate synthase"  
"ChI\_N02\_00251" 3035 "s63E6H2" 0 "4-hydroxy-3-methylbut-2-en-1-yl diphosphate synthase"  
"ChI\_N02\_00252" 3036 "s59E13H2" 0 "hypothetical protein"  
"ChI\_N02\_00252" 3036 "s59E25H2" 0 "hypothetical protein"  
"ChI\_N02\_00252" 3036 "s59E5H2" 0 "hypothetical protein"  
"ChI\_N02\_00252" 3036 "s63E6H2" 0 "hypothetical protein"  
"ChI\_N02\_00253" 3037 "s59E13H2" 0 "hypothetical protein"  
"ChI\_N02\_00253" 3037 "s59E25H2" 0 "hypothetical protein"  
"ChI\_N02\_00253" 3037 "s59E5H2" 0 "hypothetical protein"  
"ChI\_N02\_00253" 3037 "s63E6H2" 0 "hypothetical protein"  
"ChI\_N02\_00254" 3038 "s59E13H2" 0 "putative ABC transporter ATP-binding protein"  
"ChI\_N02\_00254" 3038 "s59E25H2" 0 "putative ABC transporter ATP-binding protein"

"ChI\_N02\_00254" 3038 "s59E5H2" 0 "putative ABC transporter ATP-binding protein"  
"ChI\_N02\_00254" 3038 "s63E6H2" 0 "putative ABC transporter ATP-binding protein"  
"ChI\_N02\_00255" 3039 "s59E13H2" 0 "ABC transporter permease YtrF precursor"  
"ChI\_N02\_00255" 3039 "s59E25H2" 0 "ABC transporter permease YtrF precursor"  
"ChI\_N02\_00255" 3039 "s59E5H2" 0 "ABC transporter permease YtrF precursor"  
"ChI\_N02\_00255" 3039 "s63E6H2" 0 "ABC transporter permease YtrF precursor"  
"ChI\_N02\_00256" 3040 "s59E13H2" 0 "Macrolide export ATP-binding/permease protein MacB"  
"ChI\_N02\_00256" 3040 "s59E25H2" 0 "Macrolide export ATP-binding/permease protein MacB"  
"ChI\_N02\_00256" 3040 "s59E5H2" 0 "Macrolide export ATP-binding/permease protein MacB"  
"ChI\_N02\_00256" 3040 "s63E6H2" 0 "Macrolide export ATP-binding/permease protein MacB"  
"ChI\_N02\_00257" 3041 "s59E13H2" 0 "hypothetical protein"  
"ChI\_N02\_00257" 3041 "s59E25H2" 0 "hypothetical protein"  
"ChI\_N02\_00257" 3041 "s59E5H2" 0 "hypothetical protein"  
"ChI\_N02\_00257" 3041 "s63E6H2" 0 "hypothetical protein"  
"ChI\_N02\_00258" 3042 "s59E13H2" 0 "hypothetical protein"  
"ChI\_N02\_00258" 3042 "s59E25H2" 0 "hypothetical protein"  
"ChI\_N02\_00258" 3042 "s59E5H2" 0 "hypothetical protein"  
"ChI\_N02\_00258" 3042 "s63E6H2" 0 "hypothetical protein"  
"ChI\_N02\_00259" 3043 "s59E13H2" 0 "Ferredoxin"  
"ChI\_N02\_00259" 3043 "s59E25H2" 0 "Ferredoxin"  
"ChI\_N02\_00259" 3043 "s59E5H2" 0 "Ferredoxin"  
"ChI\_N02\_00259" 3043 "s63E6H2" 0 "Ferredoxin"  
"ChI\_N02\_00260" 3044 "s59E13H2" 0 "hypothetical protein"  
"ChI\_N02\_00260" 3044 "s59E25H2" 0 "hypothetical protein"  
"ChI\_N02\_00260" 3044 "s59E5H2" 0 "hypothetical protein"  
"ChI\_N02\_00260" 3044 "s63E6H2" 0 "hypothetical protein"  
"ChI\_N02\_00264" 3048 "s59E13H2" 0 "hypothetical protein"  
"ChI\_N02\_00264" 3048 "s59E25H2" 0 "hypothetical protein"  
"ChI\_N02\_00264" 3048 "s59E5H2" 0.01208577 "hypothetical protein"  
"ChI\_N02\_00264" 3048 "s63E6H2" 0 "hypothetical protein"  
"ChI\_N02\_00265" 3049 "s59E13H2" 0 "Methylmalonate semialdehyde dehydrogenase [acylating]"  
"ChI\_N02\_00265" 3049 "s59E25H2" 0 "Methylmalonate semialdehyde dehydrogenase [acylating]"  
"ChI\_N02\_00265" 3049 "s59E5H2" 0.01088409 "Methylmalonate semialdehyde dehydrogenase [acylating]"  
"ChI\_N02\_00265" 3049 "s63E6H2" 0 "Methylmalonate semialdehyde dehydrogenase [acylating]"  
"ChI\_N02\_00266" 3050 "s59E13H2" 0 "1,3-propanediol dehydrogenase"  
"ChI\_N02\_00266" 3050 "s59E25H2" 0 "1,3-propanediol dehydrogenase"  
"ChI\_N02\_00266" 3050 "s59E5H2" 0 "1,3-propanediol dehydrogenase"  
"ChI\_N02\_00266" 3050 "s63E6H2" 0 "1,3-propanediol dehydrogenase"  
"ChI\_N02\_00268" 3052 "s59E13H2" 0 "High-affinity branched-chain amino acid transport ATP-binding protein LivF"  
"ChI\_N02\_00268" 3052 "s59E25H2" 0 "High-affinity branched-chain amino acid transport ATP-binding protein LivF"  
"ChI\_N02\_00268" 3052 "s59E5H2" 0 "High-affinity branched-chain amino acid transport ATP-binding protein LivF"  
"ChI\_N02\_00268" 3052 "s63E6H2" 0 "High-affinity branched-chain amino acid transport ATP-binding protein LivF"  
"ChI\_N02\_00269" 3053 "s59E13H2" 0 "Long-chain-fatty-acid--CoA ligase FadD15"  
"ChI\_N02\_00269" 3053 "s59E25H2" 0 "Long-chain-fatty-acid--CoA ligase FadD15"  
"ChI\_N02\_00269" 3053 "s59E5H2" 0 "Long-chain-fatty-acid--CoA ligase FadD15"  
"ChI\_N02\_00269" 3053 "s63E6H2" 0 "Long-chain-fatty-acid--CoA ligase FadD15"  
"ChI\_N02\_00270" 3054 "s59E13H2" 0 "putative branched-chain amino acid transport ATP-binding protein LivG"

"ChI\_N02\_00270" 3054 "s59E25H2" 0 "putative branched-chain amino acid transport ATP-binding protein LivG"  
"ChI\_N02\_00270" 3054 "s59E5H2" 0 "putative branched-chain amino acid transport ATP-binding protein LivG"  
"ChI\_N02\_00270" 3054 "s63E6H2" 0 "putative branched-chain amino acid transport ATP-binding protein LivG"  
"ChI\_N02\_00271" 3055 "s59E13H2" 0 "hypothetical protein"  
"ChI\_N02\_00271" 3055 "s59E25H2" 0 "hypothetical protein"  
"ChI\_N02\_00271" 3055 "s59E5H2" 0 "hypothetical protein"  
"ChI\_N02\_00271" 3055 "s63E6H2" 0 "hypothetical protein"  
"ChI\_N02\_00272" 3056 "s59E13H2" 0 "leucine/isoleucine/valine transporter permease subunit"  
"ChI\_N02\_00272" 3056 "s59E25H2" 0 "leucine/isoleucine/valine transporter permease subunit"  
"ChI\_N02\_00272" 3056 "s59E5H2" 0 "leucine/isoleucine/valine transporter permease subunit"  
"ChI\_N02\_00272" 3056 "s63E6H2" 0 "leucine/isoleucine/valine transporter permease subunit"  
"ChI\_N02\_00273" 3057 "s59E13H2" 0 "High-affinity branched-chain amino acid transport system permease protein LivH"  
"ChI\_N02\_00273" 3057 "s59E25H2" 0 "High-affinity branched-chain amino acid transport system permease protein LivH"  
"ChI\_N02\_00273" 3057 "s59E5H2" 0 "High-affinity branched-chain amino acid transport system permease protein LivH"  
"ChI\_N02\_00273" 3057 "s63E6H2" 0 "High-affinity branched-chain amino acid transport system permease protein LivH"  
"ChI\_N02\_00274" 3058 "s59E13H2" 0 "hypothetical protein"  
"ChI\_N02\_00274" 3058 "s59E25H2" 0 "hypothetical protein"  
"ChI\_N02\_00274" 3058 "s59E5H2" 0 "hypothetical protein"  
"ChI\_N02\_00274" 3058 "s63E6H2" 0 "hypothetical protein"  
"ChI\_N02\_00275" 3059 "s59E13H2" 0 "hypothetical protein"  
"ChI\_N02\_00275" 3059 "s59E25H2" 0 "hypothetical protein"  
"ChI\_N02\_00275" 3059 "s59E5H2" 0 "hypothetical protein"  
"ChI\_N02\_00275" 3059 "s63E6H2" 0 "hypothetical protein"  
"ChI\_N02\_00276" 3060 "s59E13H2" 0 "hypothetical protein"  
"ChI\_N02\_00276" 3060 "s59E25H2" 0 "hypothetical protein"  
"ChI\_N02\_00276" 3060 "s59E5H2" 0 "hypothetical protein"  
"ChI\_N02\_00276" 3060 "s63E6H2" 0 "hypothetical protein"  
"ChI\_N02\_00277" 3061 "s59E13H2" 0 "putative HTH-type transcriptional regulator"  
"ChI\_N02\_00277" 3061 "s59E25H2" 0 "putative HTH-type transcriptional regulator"  
"ChI\_N02\_00277" 3061 "s59E5H2" 0 "putative HTH-type transcriptional regulator"  
"ChI\_N02\_00277" 3061 "s63E6H2" 0 "putative HTH-type transcriptional regulator"  
"ChI\_N02\_00278" 3062 "s59E13H2" 0 "Macrolide export ATP-binding/permease protein MacB"  
"ChI\_N02\_00278" 3062 "s59E25H2" 0 "Macrolide export ATP-binding/permease protein MacB"  
"ChI\_N02\_00278" 3062 "s59E5H2" 0 "Macrolide export ATP-binding/permease protein MacB"  
"ChI\_N02\_00278" 3062 "s63E6H2" 0 "Macrolide export ATP-binding/permease protein MacB"  
"ChI\_N02\_00279" 3063 "s59E13H2" 0 "hypothetical protein"  
"ChI\_N02\_00279" 3063 "s59E25H2" 0 "hypothetical protein"  
"ChI\_N02\_00279" 3063 "s59E5H2" 0 "hypothetical protein"  
"ChI\_N02\_00279" 3063 "s63E6H2" 0 "hypothetical protein"  
"ChI\_N02\_00280" 3064 "s59E13H2" 0 "Helix-turn-helix domain protein"  
"ChI\_N02\_00280" 3064 "s59E25H2" 0 "Helix-turn-helix domain protein"  
"ChI\_N02\_00280" 3064 "s59E5H2" 0 "Helix-turn-helix domain protein"  
"ChI\_N02\_00280" 3064 "s63E6H2" 0 "Helix-turn-helix domain protein"  
"ChI\_N02\_00282" 3066 "s59E13H2" 0 "Cyclic di-GMP phosphodiesterase response regulator RpfG"  
"ChI\_N02\_00282" 3066 "s59E25H2" 0 "Cyclic di-GMP phosphodiesterase response regulator RpfG"  
"ChI\_N02\_00282" 3066 "s59E5H2" 0 "Cyclic di-GMP phosphodiesterase response regulator RpfG"  
"ChI\_N02\_00282" 3066 "s63E6H2" 0 "Cyclic di-GMP phosphodiesterase response regulator RpfG"

"ChI\_N02\_00283" 3067 "s59E13H2" 0 "Bifunctional homocysteine S-methyltransferase/5,10-methylenetetrahydrofolate reductase"  
"ChI\_N02\_00283" 3067 "s59E25H2" 0 "Bifunctional homocysteine S-methyltransferase/5,10-methylenetetrahydrofolate reductase"  
"ChI\_N02\_00283" 3067 "s59E5H2" 0 "Bifunctional homocysteine S-methyltransferase/5,10-methylenetetrahydrofolate reductase"  
"ChI\_N02\_00283" 3067 "s63E6H2" 0 "Bifunctional homocysteine S-methyltransferase/5,10-methylenetetrahydrofolate reductase"  
"ChI\_N02\_00284" 3068 "s59E13H2" 0 "hypothetical protein"  
"ChI\_N02\_00284" 3068 "s59E25H2" 0 "hypothetical protein"  
"ChI\_N02\_00284" 3068 "s59E5H2" 0 "hypothetical protein"  
"ChI\_N02\_00284" 3068 "s63E6H2" 0 "hypothetical protein"  
"ChI\_N02\_00285" 3069 "s59E13H2" 0 "NADP-reducing hydrogenase subunit HndC"  
"ChI\_N02\_00285" 3069 "s59E25H2" 0 "NADP-reducing hydrogenase subunit HndC"  
"ChI\_N02\_00285" 3069 "s59E5H2" 0 "NADP-reducing hydrogenase subunit HndC"  
"ChI\_N02\_00285" 3069 "s63E6H2" 0 "NADP-reducing hydrogenase subunit HndC"  
"ChI\_N02\_00286" 3070 "s59E13H2" 0 "NADP-reducing hydrogenase subunit HndA"  
"ChI\_N02\_00286" 3070 "s59E25H2" 0 "NADP-reducing hydrogenase subunit HndA"  
"ChI\_N02\_00286" 3070 "s59E5H2" 0 "NADP-reducing hydrogenase subunit HndA"  
"ChI\_N02\_00286" 3070 "s63E6H2" 0 "NADP-reducing hydrogenase subunit HndA"  
"ChI\_N02\_00287" 3071 "s59E13H2" 0 "Putative formate dehydrogenase"  
"ChI\_N02\_00287" 3071 "s59E25H2" 0 "Putative formate dehydrogenase"  
"ChI\_N02\_00287" 3071 "s59E5H2" 0 "Putative formate dehydrogenase"  
"ChI\_N02\_00287" 3071 "s63E6H2" 0 "Putative formate dehydrogenase"  
"ChI\_N02\_00288" 3072 "s59E13H2" 0 "Response regulator protein VraR"  
"ChI\_N02\_00288" 3072 "s59E25H2" 0 "Response regulator protein VraR"  
"ChI\_N02\_00288" 3072 "s59E5H2" 0 "Response regulator protein VraR"  
"ChI\_N02\_00288" 3072 "s63E6H2" 0 "Response regulator protein VraR"  
"ChI\_N02\_00289" 3073 "s59E13H2" 0 "Oxygen regulatory protein NreC"  
"ChI\_N02\_00289" 3073 "s59E25H2" 0 "Oxygen regulatory protein NreC"  
"ChI\_N02\_00289" 3073 "s59E5H2" 0 "Oxygen regulatory protein NreC"  
"ChI\_N02\_00289" 3073 "s63E6H2" 0 "Oxygen regulatory protein NreC"  
"ChI\_N02\_00290" 3074 "s59E13H2" 0 "Signal transduction histidine-protein kinase/phosphatase DegS"  
"ChI\_N02\_00290" 3074 "s59E25H2" 0 "Signal transduction histidine-protein kinase/phosphatase DegS"  
"ChI\_N02\_00290" 3074 "s59E5H2" 0 "Signal transduction histidine-protein kinase/phosphatase DegS"  
"ChI\_N02\_00290" 3074 "s63E6H2" 0 "Signal transduction histidine-protein kinase/phosphatase DegS"  
"ChI\_N02\_00293" 3077 "s59E13H2" 0 "acyl-CoA esterase"  
"ChI\_N02\_00293" 3077 "s59E25H2" 0 "acyl-CoA esterase"  
"ChI\_N02\_00293" 3077 "s59E5H2" 0 "acyl-CoA esterase"  
"ChI\_N02\_00293" 3077 "s63E6H2" 0 "acyl-CoA esterase"  
"ChI\_N02\_00295" 3079 "s59E13H2" 0 "Modification methylase Mjall"  
"ChI\_N02\_00295" 3079 "s59E25H2" 0 "Modification methylase Mjall"  
"ChI\_N02\_00295" 3079 "s59E5H2" 0 "Modification methylase Mjall"  
"ChI\_N02\_00295" 3079 "s63E6H2" 0 "Modification methylase Mjall"  
"ChI\_N02\_00296" 3080 "s59E13H2" 0 "hypothetical protein"  
"ChI\_N02\_00296" 3080 "s59E25H2" 0 "hypothetical protein"  
"ChI\_N02\_00296" 3080 "s59E5H2" 0 "hypothetical protein"  
"ChI\_N02\_00296" 3080 "s63E6H2" 0 "hypothetical protein"  
"ChI\_N02\_00298" 3082 "s59E13H2" 0 "hypothetical protein"  
"ChI\_N02\_00298" 3082 "s59E25H2" 0 "hypothetical protein"  
"ChI\_N02\_00298" 3082 "s59E5H2" 0 "hypothetical protein"



"ChI\_N02\_00298" 3082 "s63E6H2" 0 "hypothetical protein"  
"ChI\_N02\_00299" 3083 "s59E13H2" 0 "hypothetical protein"  
"ChI\_N02\_00299" 3083 "s59E25H2" 0 "hypothetical protein"  
"ChI\_N02\_00299" 3083 "s59E5H2" 0 "hypothetical protein"  
"ChI\_N02\_00299" 3083 "s63E6H2" 0 "hypothetical protein"  
"ChI\_N02\_00301" 3085 "s59E13H2" 0 "hypothetical protein"  
"ChI\_N02\_00301" 3085 "s59E25H2" 0 "hypothetical protein"  
"ChI\_N02\_00301" 3085 "s59E5H2" 0 "hypothetical protein"  
"ChI\_N02\_00301" 3085 "s63E6H2" 0 "hypothetical protein"  
"ChI\_N02\_00302" 3086 "s59E13H2" 0 "Type-1 restriction enzyme R protein"  
"ChI\_N02\_00302" 3086 "s59E25H2" 0 "Type-1 restriction enzyme R protein"  
"ChI\_N02\_00302" 3086 "s59E5H2" 0 "Type-1 restriction enzyme R protein"  
"ChI\_N02\_00302" 3086 "s63E6H2" 0 "Type-1 restriction enzyme R protein"  
"ChI\_N02\_00303" 3087 "s59E13H2" 0 "hypothetical protein"  
"ChI\_N02\_00303" 3087 "s59E25H2" 0 "hypothetical protein"  
"ChI\_N02\_00303" 3087 "s59E5H2" 0 "hypothetical protein"  
"ChI\_N02\_00303" 3087 "s63E6H2" 0 "hypothetical protein"  
"ChI\_N02\_00304" 3088 "s59E13H2" 0 "Type-1 restriction enzyme MjaXIP specificity protein"  
"ChI\_N02\_00304" 3088 "s59E25H2" 0 "Type-1 restriction enzyme MjaXIP specificity protein"  
"ChI\_N02\_00304" 3088 "s59E5H2" 0 "Type-1 restriction enzyme MjaXIP specificity protein"  
"ChI\_N02\_00304" 3088 "s63E6H2" 0 "Type-1 restriction enzyme MjaXIP specificity protein"  
"ChI\_N02\_00305" 3089 "s59E13H2" 0 "Type I restriction enzyme EcoKI M protein"  
"ChI\_N02\_00305" 3089 "s59E25H2" 0 "Type I restriction enzyme EcoKI M protein"  
"ChI\_N02\_00305" 3089 "s59E5H2" 0 "Type I restriction enzyme EcoKI M protein"  
"ChI\_N02\_00305" 3089 "s63E6H2" 0 "Type I restriction enzyme EcoKI M protein"  
"ChI\_N02\_00306" 3090 "s59E13H2" 0 "Helix-turn-helix domain protein"  
"ChI\_N02\_00306" 3090 "s59E25H2" 0 "Helix-turn-helix domain protein"  
"ChI\_N02\_00306" 3090 "s59E5H2" 0 "Helix-turn-helix domain protein"  
"ChI\_N02\_00306" 3090 "s63E6H2" 0 "Helix-turn-helix domain protein"  
"ChI\_N02\_00309" 3093 "s59E13H2" 0 "RES domain protein"  
"ChI\_N02\_00309" 3093 "s59E25H2" 0 "RES domain protein"  
"ChI\_N02\_00309" 3093 "s59E5H2" 0 "RES domain protein"  
"ChI\_N02\_00309" 3093 "s63E6H2" 0 "RES domain protein"  
"ChI\_N02\_00311" 3095 "s59E13H2" 0 "hypothetical protein"  
"ChI\_N02\_00311" 3095 "s59E25H2" 0 "hypothetical protein"  
"ChI\_N02\_00311" 3095 "s59E5H2" 0 "hypothetical protein"  
"ChI\_N02\_00311" 3095 "s63E6H2" 0 "hypothetical protein"  
"ChI\_N02\_00312" 3096 "s59E13H2" 0 "6-aminohexanoate-dimer hydrolase"  
"ChI\_N02\_00312" 3096 "s59E25H2" 0 "6-aminohexanoate-dimer hydrolase"  
"ChI\_N02\_00312" 3096 "s59E5H2" 0 "6-aminohexanoate-dimer hydrolase"  
"ChI\_N02\_00312" 3096 "s63E6H2" 0 "6-aminohexanoate-dimer hydrolase"  
"ChI\_N02\_00313" 3097 "s59E13H2" 0 "Tyrosine recombinase XerD"  
"ChI\_N02\_00313" 3097 "s59E25H2" 0 "Tyrosine recombinase XerD"  
"ChI\_N02\_00313" 3097 "s59E5H2" 0 "Tyrosine recombinase XerD"  
"ChI\_N02\_00313" 3097 "s63E6H2" 0 "Tyrosine recombinase XerD"  
"ChI\_N02\_00314" 3098 "s59E13H2" 0 "hypothetical protein"  
"ChI\_N02\_00314" 3098 "s59E25H2" 0 "hypothetical protein"

"ChI\_N02\_00314" 3098 "s59E5H2" 0 "hypothetical protein"  
"ChI\_N02\_00314" 3098 "s63E6H2" 0 "hypothetical protein"  
"ChI\_N02\_00319" 3103 "s59E13H2" 0 "DNA repair protein RadA"  
"ChI\_N02\_00319" 3103 "s59E25H2" 0 "DNA repair protein RadA"  
"ChI\_N02\_00319" 3103 "s59E5H2" 0 "DNA repair protein RadA"  
"ChI\_N02\_00319" 3103 "s63E6H2" 0 "DNA repair protein RadA"  
"ChI\_N02\_00320" 3104 "s59E13H2" 0 "Tyrosine recombinase XerD"  
"ChI\_N02\_00320" 3104 "s59E25H2" 0 "Tyrosine recombinase XerD"  
"ChI\_N02\_00320" 3104 "s59E5H2" 0 "Tyrosine recombinase XerD"  
"ChI\_N02\_00320" 3104 "s63E6H2" 0 "Tyrosine recombinase XerD"  
"ChI\_N02\_00321" 3105 "s59E13H2" 0 "MerR family regulatory protein"  
"ChI\_N02\_00321" 3105 "s59E25H2" 0 "MerR family regulatory protein"  
"ChI\_N02\_00321" 3105 "s59E5H2" 0 "MerR family regulatory protein"  
"ChI\_N02\_00321" 3105 "s63E6H2" 0 "MerR family regulatory protein"  
"ChI\_N02\_00323" 3107 "s59E13H2" 0 "Tyrosine recombinase XerD"  
"ChI\_N02\_00323" 3107 "s59E25H2" 0 "Tyrosine recombinase XerD"  
"ChI\_N02\_00323" 3107 "s59E5H2" 0 "Tyrosine recombinase XerD"  
"ChI\_N02\_00323" 3107 "s63E6H2" 0 "Tyrosine recombinase XerD"  
"ChI\_N02\_00325" 3109 "s59E13H2" 0 "Methionyl-tRNA formyltransferase"  
"ChI\_N02\_00325" 3109 "s59E25H2" 0 "Methionyl-tRNA formyltransferase"  
"ChI\_N02\_00325" 3109 "s59E5H2" 0 "Methionyl-tRNA formyltransferase"  
"ChI\_N02\_00325" 3109 "s63E6H2" 0 "Methionyl-tRNA formyltransferase"  
"ChI\_N02\_00326" 3110 "s59E13H2" 0 "Lipoyl synthase"  
"ChI\_N02\_00326" 3110 "s59E25H2" 0 "Lipoyl synthase"  
"ChI\_N02\_00326" 3110 "s59E5H2" 0 "Lipoyl synthase"  
"ChI\_N02\_00326" 3110 "s63E6H2" 0 "Lipoyl synthase"  
"ChI\_N02\_00327" 3111 "s59E13H2" 0 "Octanoyltransferase"  
"ChI\_N02\_00327" 3111 "s59E25H2" 0 "Octanoyltransferase"  
"ChI\_N02\_00327" 3111 "s59E5H2" 0 "Octanoyltransferase"  
"ChI\_N02\_00327" 3111 "s63E6H2" 0 "Octanoyltransferase"  
"ChI\_N02\_00328" 3112 "s59E13H2" 0 "Dihydrolipoyl dehydrogenase"  
"ChI\_N02\_00328" 3112 "s59E25H2" 0 "Dihydrolipoyl dehydrogenase"  
"ChI\_N02\_00328" 3112 "s59E5H2" 0 "Dihydrolipoyl dehydrogenase"  
"ChI\_N02\_00328" 3112 "s63E6H2" 0 "Dihydrolipoyl dehydrogenase"  
"ChI\_N02\_00329" 3113 "s59E13H2" 0 "Dihydrolipoyllysine-residue acetyltransferase component of pyruvate dehydrogenase complex"  
"ChI\_N02\_00329" 3113 "s59E25H2" 0 "Dihydrolipoyllysine-residue acetyltransferase component of pyruvate dehydrogenase complex"  
"ChI\_N02\_00329" 3113 "s59E5H2" 0 "Dihydrolipoyllysine-residue acetyltransferase component of pyruvate dehydrogenase complex"  
"ChI\_N02\_00329" 3113 "s63E6H2" 0 "Dihydrolipoyllysine-residue acetyltransferase component of pyruvate dehydrogenase complex"  
"ChI\_N02\_00330" 3114 "s59E13H2" 0 "Acetoin:2,6-dichlorophenolindophenol oxidoreductase subunit beta"  
"ChI\_N02\_00330" 3114 "s59E25H2" 0 "Acetoin:2,6-dichlorophenolindophenol oxidoreductase subunit beta"  
"ChI\_N02\_00330" 3114 "s59E5H2" 0 "Acetoin:2,6-dichlorophenolindophenol oxidoreductase subunit beta"  
"ChI\_N02\_00330" 3114 "s63E6H2" 0 "Acetoin:2,6-dichlorophenolindophenol oxidoreductase subunit beta"  
"ChI\_N02\_00331" 3115 "s59E13H2" 0 "Acetoin:2,6-dichlorophenolindophenol oxidoreductase subunit alpha"  
"ChI\_N02\_00331" 3115 "s59E25H2" 0 "Acetoin:2,6-dichlorophenolindophenol oxidoreductase subunit alpha"  
"ChI\_N02\_00331" 3115 "s59E5H2" 0 "Acetoin:2,6-dichlorophenolindophenol oxidoreductase subunit alpha"  
"ChI\_N02\_00331" 3115 "s63E6H2" 0 "Acetoin:2,6-dichlorophenolindophenol oxidoreductase subunit alpha"  
"ChI\_N02\_00332" 3116 "s59E13H2" 0 "Queuine tRNA-ribosyltransferase"

"ChI\_N02\_00332" 3116 "s59E25H2" 0 "Queuine tRNA-ribosyltransferase"  
"ChI\_N02\_00332" 3116 "s59E5H2" 0 "Queuine tRNA-ribosyltransferase"  
"ChI\_N02\_00332" 3116 "s63E6H2" 0 "Queuine tRNA-ribosyltransferase"  
"ChI\_N02\_00333" 3117 "s59E13H2" 0 "Inner membrane protein YhhQ"  
"ChI\_N02\_00333" 3117 "s59E25H2" 0 "Inner membrane protein YhhQ"  
"ChI\_N02\_00333" 3117 "s59E5H2" 0 "Inner membrane protein YhhQ"  
"ChI\_N02\_00333" 3117 "s63E6H2" 0 "Inner membrane protein YhhQ"  
"ChI\_N02\_00334" 3118 "s59E13H2" 0 "hypothetical protein"  
"ChI\_N02\_00334" 3118 "s59E25H2" 0 "hypothetical protein"  
"ChI\_N02\_00334" 3118 "s59E5H2" 0 "hypothetical protein"  
"ChI\_N02\_00334" 3118 "s63E6H2" 0 "hypothetical protein"  
"ChI\_N02\_00335" 3119 "s59E13H2" 0 "Sulfofpyruvate decarboxylase subunit beta"  
"ChI\_N02\_00335" 3119 "s59E25H2" 0 "Sulfofpyruvate decarboxylase subunit beta"  
"ChI\_N02\_00335" 3119 "s59E5H2" 0 "Sulfofpyruvate decarboxylase subunit beta"  
"ChI\_N02\_00335" 3119 "s63E6H2" 0 "Sulfofpyruvate decarboxylase subunit beta"  
"ChI\_N02\_00336" 3120 "s59E13H2" 0 "Sulfofpyruvate decarboxylase subunit alpha"  
"ChI\_N02\_00336" 3120 "s59E25H2" 0 "Sulfofpyruvate decarboxylase subunit alpha"  
"ChI\_N02\_00336" 3120 "s59E5H2" 0 "Sulfofpyruvate decarboxylase subunit alpha"  
"ChI\_N02\_00336" 3120 "s63E6H2" 0 "Sulfofpyruvate decarboxylase subunit alpha"  
"ChI\_N02\_00337" 3121 "s59E13H2" 0 "S-adenosylmethionine:tRNA ribosyltransferase-isomerase"  
"ChI\_N02\_00337" 3121 "s59E25H2" 0 "S-adenosylmethionine:tRNA ribosyltransferase-isomerase"  
"ChI\_N02\_00337" 3121 "s59E5H2" 0 "S-adenosylmethionine:tRNA ribosyltransferase-isomerase"  
"ChI\_N02\_00337" 3121 "s63E6H2" 0 "S-adenosylmethionine:tRNA ribosyltransferase-isomerase"  
"ChI\_N02\_00338" 3122 "s59E13H2" 0 "Bacterioferritin"  
"ChI\_N02\_00338" 3122 "s59E25H2" 0 "Bacterioferritin"  
"ChI\_N02\_00338" 3122 "s59E5H2" 0.0115935 "Bacterioferritin"  
"ChI\_N02\_00338" 3122 "s63E6H2" 0 "Bacterioferritin"  
"ChI\_N02\_00339" 3123 "s59E13H2" 0 "Desulfoferrodoxin"  
"ChI\_N02\_00339" 3123 "s59E25H2" 0 "Desulfoferrodoxin"  
"ChI\_N02\_00339" 3123 "s59E5H2" 0 "Desulfoferrodoxin"  
"ChI\_N02\_00339" 3123 "s63E6H2" 0 "Desulfoferrodoxin"  
"ChI\_N02\_00340" 3124 "s59E13H2" 0 "hypothetical protein"  
"ChI\_N02\_00340" 3124 "s59E25H2" 0 "hypothetical protein"  
"ChI\_N02\_00340" 3124 "s59E5H2" 0 "hypothetical protein"  
"ChI\_N02\_00340" 3124 "s63E6H2" 0 "hypothetical protein"  
"ChI\_N02\_00341" 3125 "s59E13H2" 0 "Rubredoxin"  
"ChI\_N02\_00341" 3125 "s59E25H2" 0 "Rubredoxin"  
"ChI\_N02\_00341" 3125 "s59E5H2" 0 "Rubredoxin"  
"ChI\_N02\_00341" 3125 "s63E6H2" 0 "Rubredoxin"  
"ChI\_N02\_00342" 3126 "s59E13H2" 0 "High molecular weight rubredoxin"  
"ChI\_N02\_00342" 3126 "s59E25H2" 0 "High molecular weight rubredoxin"  
"ChI\_N02\_00342" 3126 "s59E5H2" 0 "High molecular weight rubredoxin"  
"ChI\_N02\_00342" 3126 "s63E6H2" 0 "High molecular weight rubredoxin"  
"ChI\_N02\_00343" 3127 "s59E13H2" 0 "FeS cluster assembly protein SufB"  
"ChI\_N02\_00343" 3127 "s59E25H2" 0 "FeS cluster assembly protein SufB"  
"ChI\_N02\_00343" 3127 "s59E5H2" 0 "FeS cluster assembly protein SufB"  
"ChI\_N02\_00343" 3127 "s63E6H2" 0 "FeS cluster assembly protein SufB"

"ChI\_N02\_00344" 3128 "s59E13H2" 0 "putative ABC transporter ATP-binding protein"  
"ChI\_N02\_00344" 3128 "s59E25H2" 0 "putative ABC transporter ATP-binding protein"  
"ChI\_N02\_00344" 3128 "s59E5H2" 0 "putative ABC transporter ATP-binding protein"  
"ChI\_N02\_00344" 3128 "s63E6H2" 0 "putative ABC transporter ATP-binding protein"  
"ChI\_N02\_00345" 3129 "s59E13H2" 0 "putative trifunctional 2-polyprenylphenol hydroxylase/glutamate synthase subunit beta/ferritin domain-containing protein"  
"ChI\_N02\_00345" 3129 "s59E25H2" 0 "putative trifunctional 2-polyprenylphenol hydroxylase/glutamate synthase subunit beta/ferritin domain-containing protein"  
"ChI\_N02\_00345" 3129 "s59E5H2" 0 "putative trifunctional 2-polyprenylphenol hydroxylase/glutamate synthase subunit beta/ferritin domain-containing protein"  
"ChI\_N02\_00345" 3129 "s63E6H2" 0 "putative trifunctional 2-polyprenylphenol hydroxylase/glutamate synthase subunit beta/ferritin domain-containing protein"  
"ChI\_N02\_00347" 3131 "s59E13H2" 0 "Protease 1 precursor"  
"ChI\_N02\_00347" 3131 "s59E25H2" 0 "Protease 1 precursor"  
"ChI\_N02\_00347" 3131 "s59E5H2" 0.00271285 "Protease 1 precursor"  
"ChI\_N02\_00347" 3131 "s63E6H2" 0 "Protease 1 precursor"  
"ChI\_N02\_00348" 3132 "s59E13H2" 0 "putative peptidyl-prolyl cis-trans isomerase"  
"ChI\_N02\_00348" 3132 "s59E25H2" 0 "putative peptidyl-prolyl cis-trans isomerase"  
"ChI\_N02\_00348" 3132 "s59E5H2" 0 "putative peptidyl-prolyl cis-trans isomerase"  
"ChI\_N02\_00348" 3132 "s63E6H2" 0 "putative peptidyl-prolyl cis-trans isomerase"  
"ChI\_N02\_00349" 3133 "s59E13H2" 0 "cell division protein FtsZ"  
"ChI\_N02\_00349" 3133 "s59E25H2" 0 "cell division protein FtsZ"  
"ChI\_N02\_00349" 3133 "s59E5H2" 0 "cell division protein FtsZ"  
"ChI\_N02\_00349" 3133 "s63E6H2" 0 "cell division protein FtsZ"  
"ChI\_N02\_00350" 3134 "s59E13H2" 0 "hypothetical protein"  
"ChI\_N02\_00350" 3134 "s59E25H2" 0 "hypothetical protein"  
"ChI\_N02\_00350" 3134 "s59E5H2" 0 "hypothetical protein"  
"ChI\_N02\_00350" 3134 "s63E6H2" 0 "hypothetical protein"  
"ChI\_N02\_00353" 3137 "s59E13H2" 0 "Cell division protein FtsA"  
"ChI\_N02\_00353" 3137 "s59E25H2" 0 "Cell division protein FtsA"  
"ChI\_N02\_00353" 3137 "s59E5H2" 0 "Cell division protein FtsA"  
"ChI\_N02\_00353" 3137 "s63E6H2" 0 "Cell division protein FtsA"  
"ChI\_N02\_00354" 3138 "s59E13H2" 0 "Cell division protein FtsZ"  
"ChI\_N02\_00354" 3138 "s59E25H2" 0 "Cell division protein FtsZ"  
"ChI\_N02\_00354" 3138 "s59E5H2" 0 "Cell division protein FtsZ"  
"ChI\_N02\_00354" 3138 "s63E6H2" 0 "Cell division protein FtsZ"  
"ChI\_N02\_00355" 3139 "s59E13H2" 0 "hypothetical protein"  
"ChI\_N02\_00355" 3139 "s59E25H2" 0 "hypothetical protein"  
"ChI\_N02\_00355" 3139 "s59E5H2" 0 "hypothetical protein"  
"ChI\_N02\_00355" 3139 "s63E6H2" 0 "hypothetical protein"  
"ChI\_N02\_00359" 3143 "s59E13H2" 0 "Major Facilitator Superfamily protein"  
"ChI\_N02\_00359" 3143 "s59E25H2" 0 "Major Facilitator Superfamily protein"  
"ChI\_N02\_00359" 3143 "s59E5H2" 0 "Major Facilitator Superfamily protein"  
"ChI\_N02\_00359" 3143 "s63E6H2" 0 "Major Facilitator Superfamily protein"  
"ChI\_N02\_00361" 3145 "s59E13H2" 0 "L-lysine 2,3-aminomutase"  
"ChI\_N02\_00361" 3145 "s59E25H2" 0 "L-lysine 2,3-aminomutase"  
"ChI\_N02\_00361" 3145 "s59E5H2" 0 "L-lysine 2,3-aminomutase"  
"ChI\_N02\_00361" 3145 "s63E6H2" 0 "L-lysine 2,3-aminomutase"  
"ChI\_N02\_00362" 3146 "s59E13H2" 0 "D-alanine--D-alanine ligase"  
"ChI\_N02\_00362" 3146 "s59E25H2" 0 "D-alanine--D-alanine ligase"  
"ChI\_N02\_00362" 3146 "s59E5H2" 0 "D-alanine--D-alanine ligase"

"ChI\_N02\_00362" 3146 "s63E6H2" 0 "D-alanine--D-alanine ligase"  
"ChI\_N02\_00363" 3147 "s59E13H2" 0 "Vancomycin B-type resistance protein VanB"  
"ChI\_N02\_00363" 3147 "s59E25H2" 0 "Vancomycin B-type resistance protein VanB"  
"ChI\_N02\_00363" 3147 "s59E5H2" 0 "Vancomycin B-type resistance protein VanB"  
"ChI\_N02\_00363" 3147 "s63E6H2" 0 "Vancomycin B-type resistance protein VanB"  
"ChI\_N02\_00364" 3148 "s59E13H2" 0 "aminoalkylphosphonic acid N-acetyltransferase"  
"ChI\_N02\_00364" 3148 "s59E25H2" 0 "aminoalkylphosphonic acid N-acetyltransferase"  
"ChI\_N02\_00364" 3148 "s59E5H2" 0 "aminoalkylphosphonic acid N-acetyltransferase"  
"ChI\_N02\_00364" 3148 "s63E6H2" 0 "aminoalkylphosphonic acid N-acetyltransferase"  
"ChI\_N02\_00365" 3149 "s59E13H2" 0 "Glycerol-3-phosphate acyltransferase"  
"ChI\_N02\_00365" 3149 "s59E25H2" 0 "Glycerol-3-phosphate acyltransferase"  
"ChI\_N02\_00365" 3149 "s59E5H2" 0 "Glycerol-3-phosphate acyltransferase"  
"ChI\_N02\_00365" 3149 "s63E6H2" 0 "Glycerol-3-phosphate acyltransferase"  
"ChI\_N02\_00366" 3150 "s59E13H2" 0 "SnoaL-like polyketide cyclase"  
"ChI\_N02\_00366" 3150 "s59E25H2" 0 "SnoaL-like polyketide cyclase"  
"ChI\_N02\_00366" 3150 "s59E5H2" 0 "SnoaL-like polyketide cyclase"  
"ChI\_N02\_00366" 3150 "s63E6H2" 0 "SnoaL-like polyketide cyclase"  
"ChI\_N02\_00367" 3151 "s59E13H2" 0 "hypothetical protein"  
"ChI\_N02\_00367" 3151 "s59E25H2" 0 "hypothetical protein"  
"ChI\_N02\_00367" 3151 "s59E5H2" 0 "hypothetical protein"  
"ChI\_N02\_00367" 3151 "s63E6H2" 0 "hypothetical protein"  
"ChI\_N02\_00369" 3153 "s59E13H2" 0 "hypothetical protein"  
"ChI\_N02\_00369" 3153 "s59E25H2" 0 "hypothetical protein"  
"ChI\_N02\_00369" 3153 "s59E5H2" 0 "hypothetical protein"  
"ChI\_N02\_00369" 3153 "s63E6H2" 0 "hypothetical protein"  
"ChI\_N02\_00372" 3156 "s59E13H2" 0 "Tyrosine recombinase XerC"  
"ChI\_N02\_00372" 3156 "s59E25H2" 0 "Tyrosine recombinase XerC"  
"ChI\_N02\_00372" 3156 "s59E5H2" 0 "Tyrosine recombinase XerC"  
"ChI\_N02\_00372" 3156 "s63E6H2" 0 "Tyrosine recombinase XerC"  
"ChI\_N02\_00374" 3158 "s59E13H2" 0 "hypothetical protein"  
"ChI\_N02\_00374" 3158 "s59E25H2" 0 "hypothetical protein"  
"ChI\_N02\_00374" 3158 "s59E5H2" 0 "hypothetical protein"  
"ChI\_N02\_00374" 3158 "s63E6H2" 0 "hypothetical protein"  
"ChI\_N02\_00375" 3159 "s59E13H2" 0 "Putative thymidylate synthase"  
"ChI\_N02\_00375" 3159 "s59E25H2" 0 "Putative thymidylate synthase"  
"ChI\_N02\_00375" 3159 "s59E5H2" 0 "Putative thymidylate synthase"  
"ChI\_N02\_00375" 3159 "s63E6H2" 0 "Putative thymidylate synthase"  
"ChI\_N02\_00376" 3160 "s59E13H2" 0 "hypothetical protein"  
"ChI\_N02\_00376" 3160 "s59E25H2" 0 "hypothetical protein"  
"ChI\_N02\_00376" 3160 "s59E5H2" 0 "hypothetical protein"  
"ChI\_N02\_00376" 3160 "s63E6H2" 0 "hypothetical protein"  
"ChI\_N02\_00379" 3163 "s59E13H2" 0 "hypothetical protein"  
"ChI\_N02\_00379" 3163 "s59E25H2" 0 "hypothetical protein"  
"ChI\_N02\_00379" 3163 "s59E5H2" 0 "hypothetical protein"  
"ChI\_N02\_00379" 3163 "s63E6H2" 0 "hypothetical protein"  
"ChI\_N02\_00380" 3164 "s59E13H2" 0 "hypothetical protein"  
"ChI\_N02\_00380" 3164 "s59E25H2" 0 "hypothetical protein"

"ChI\_N02\_00380" 3164 "s59E5H2" 0 "hypothetical protein"  
"ChI\_N02\_00380" 3164 "s63E6H2" 0 "hypothetical protein"  
"ChI\_N02\_00381" 3165 "s59E13H2" 0 "tRNA-splicing ligase RtcB"  
"ChI\_N02\_00381" 3165 "s59E25H2" 0 "tRNA-splicing ligase RtcB"  
"ChI\_N02\_00381" 3165 "s59E5H2" 0 "tRNA-splicing ligase RtcB"  
"ChI\_N02\_00381" 3165 "s63E6H2" 0 "tRNA-splicing ligase RtcB"  
"ChI\_N02\_00382" 3166 "s59E13H2" 0 "Cysteine synthase"  
"ChI\_N02\_00382" 3166 "s59E25H2" 0 "Cysteine synthase"  
"ChI\_N02\_00382" 3166 "s59E5H2" 0 "Cysteine synthase"  
"ChI\_N02\_00382" 3166 "s63E6H2" 0 "Cysteine synthase"  
"ChI\_N02\_00383" 3167 "s59E13H2" 0 "Nitroreductase family protein"  
"ChI\_N02\_00383" 3167 "s59E25H2" 0 "Nitroreductase family protein"  
"ChI\_N02\_00383" 3167 "s59E5H2" 0 "Nitroreductase family protein"  
"ChI\_N02\_00383" 3167 "s63E6H2" 0 "Nitroreductase family protein"  
"ChI\_N02\_00384" 3168 "s59E13H2" 0 "hypothetical protein"  
"ChI\_N02\_00384" 3168 "s59E25H2" 0 "hypothetical protein"  
"ChI\_N02\_00384" 3168 "s59E5H2" 0 "hypothetical protein"  
"ChI\_N02\_00384" 3168 "s63E6H2" 0 "hypothetical protein"  
"ChI\_N02\_00385" 3169 "s59E13H2" 0 "Heterodisulfide reductase subunit A-like protein"  
"ChI\_N02\_00385" 3169 "s59E25H2" 0 "Heterodisulfide reductase subunit A-like protein"  
"ChI\_N02\_00385" 3169 "s59E5H2" 0 "Heterodisulfide reductase subunit A-like protein"  
"ChI\_N02\_00385" 3169 "s63E6H2" 0 "Heterodisulfide reductase subunit A-like protein"  
"ChI\_N02\_00386" 3170 "s59E13H2" 0 "hypothetical protein"  
"ChI\_N02\_00386" 3170 "s59E25H2" 0 "hypothetical protein"  
"ChI\_N02\_00386" 3170 "s59E5H2" 0 "hypothetical protein"  
"ChI\_N02\_00386" 3170 "s63E6H2" 0 "hypothetical protein"  
"ChI\_N02\_00388" 3172 "s59E13H2" 0 "Divalent-cation tolerance protein CutA"  
"ChI\_N02\_00388" 3172 "s59E25H2" 0 "Divalent-cation tolerance protein CutA"  
"ChI\_N02\_00388" 3172 "s59E5H2" 0 "Divalent-cation tolerance protein CutA"  
"ChI\_N02\_00388" 3172 "s63E6H2" 0 "Divalent-cation tolerance protein CutA"  
"ChI\_N02\_00389" 3173 "s59E13H2" 0 "NIL domain protein"  
"ChI\_N02\_00389" 3173 "s59E25H2" 0 "NIL domain protein"  
"ChI\_N02\_00389" 3173 "s59E5H2" 0 "NIL domain protein"  
"ChI\_N02\_00389" 3173 "s63E6H2" 0 "NIL domain protein"  
"ChI\_N02\_00390" 3174 "s59E13H2" 0 "Hydrogenase isoenzymes nickel incorporation protein HypB"  
"ChI\_N02\_00390" 3174 "s59E25H2" 0 "Hydrogenase isoenzymes nickel incorporation protein HypB"  
"ChI\_N02\_00390" 3174 "s59E5H2" 0 "Hydrogenase isoenzymes nickel incorporation protein HypB"  
"ChI\_N02\_00390" 3174 "s63E6H2" 0 "Hydrogenase isoenzymes nickel incorporation protein HypB"  
"ChI\_N02\_00391" 3175 "s59E13H2" 0 "putative hydrogenase nickel incorporation protein HypA"  
"ChI\_N02\_00391" 3175 "s59E25H2" 0 "putative hydrogenase nickel incorporation protein HypA"  
"ChI\_N02\_00391" 3175 "s59E5H2" 0 "putative hydrogenase nickel incorporation protein HypA"  
"ChI\_N02\_00391" 3175 "s63E6H2" 0 "putative hydrogenase nickel incorporation protein HypA"  
"ChI\_N02\_00392" 3176 "s59E13H2" 0 "Hydrogenase expression/formation protein HypE"  
"ChI\_N02\_00392" 3176 "s59E25H2" 0 "Hydrogenase expression/formation protein HypE"  
"ChI\_N02\_00392" 3176 "s59E5H2" 0 "Hydrogenase expression/formation protein HypE"  
"ChI\_N02\_00392" 3176 "s63E6H2" 0 "Hydrogenase expression/formation protein HypE"  
"ChI\_N02\_00393" 3177 "s59E13H2" 0 "Hydrogenase expression/formation protein HypD"

"ChI\_N02\_00393" 3177 "s59E25H2" 0 "Hydrogenase expression/formation protein HypD"  
"ChI\_N02\_00393" 3177 "s59E5H2" 0 "Hydrogenase expression/formation protein HypD"  
"ChI\_N02\_00393" 3177 "s63E6H2" 0 "Hydrogenase expression/formation protein HypD"  
"ChI\_N02\_00394" 3178 "s59E13H2" 0 "Hydrogenase isoenzymes formation protein HypC"  
"ChI\_N02\_00394" 3178 "s59E25H2" 0 "Hydrogenase isoenzymes formation protein HypC"  
"ChI\_N02\_00394" 3178 "s59E5H2" 0 "Hydrogenase isoenzymes formation protein HypC"  
"ChI\_N02\_00394" 3178 "s63E6H2" 0 "Hydrogenase isoenzymes formation protein HypC"  
"ChI\_N02\_00395" 3179 "s59E13H2" 0 "Carbamoyltransferase HypF"  
"ChI\_N02\_00395" 3179 "s59E25H2" 0 "Carbamoyltransferase HypF"  
"ChI\_N02\_00395" 3179 "s59E5H2" 0 "Carbamoyltransferase HypF"  
"ChI\_N02\_00395" 3179 "s63E6H2" 0 "Carbamoyltransferase HypF"  
"ChI\_N02\_00396" 3180 "s59E13H2" 0 "hypothetical protein"  
"ChI\_N02\_00396" 3180 "s59E25H2" 0 "hypothetical protein"  
"ChI\_N02\_00396" 3180 "s59E5H2" 0 "hypothetical protein"  
"ChI\_N02\_00396" 3180 "s63E6H2" 0 "hypothetical protein"  
"ChI\_N02\_00397" 3181 "s59E13H2" 0 "Sulfide dehydrogenase subunit alpha precursor"  
"ChI\_N02\_00397" 3181 "s59E25H2" 0 "Sulfide dehydrogenase subunit alpha precursor"  
"ChI\_N02\_00397" 3181 "s59E5H2" 0 "Sulfide dehydrogenase subunit alpha precursor"  
"ChI\_N02\_00397" 3181 "s63E6H2" 0 "Sulfide dehydrogenase subunit alpha precursor"  
"ChI\_N02\_00398" 3182 "s59E13H2" 0 "F420-non-reducing hydrogenase vhc iron-sulfur subunit D"  
"ChI\_N02\_00398" 3182 "s59E25H2" 0 "F420-non-reducing hydrogenase vhc iron-sulfur subunit D"  
"ChI\_N02\_00398" 3182 "s59E5H2" 0 "F420-non-reducing hydrogenase vhc iron-sulfur subunit D"  
"ChI\_N02\_00398" 3182 "s63E6H2" 0 "F420-non-reducing hydrogenase vhc iron-sulfur subunit D"  
"ChI\_N02\_00399" 3183 "s59E13H2" 0 "Hydrogenase 2 maturation protease"  
"ChI\_N02\_00399" 3183 "s59E25H2" 0 "Hydrogenase 2 maturation protease"  
"ChI\_N02\_00399" 3183 "s59E5H2" 0 "Hydrogenase 2 maturation protease"  
"ChI\_N02\_00399" 3183 "s63E6H2" 0 "Hydrogenase 2 maturation protease"  
"ChI\_N02\_00400" 3184 "s59E13H2" 0 "Cysteine synthase"  
"ChI\_N02\_00400" 3184 "s59E25H2" 0 "Cysteine synthase"  
"ChI\_N02\_00400" 3184 "s59E5H2" 0 "Cysteine synthase"  
"ChI\_N02\_00400" 3184 "s63E6H2" 0 "Cysteine synthase"  
"ChI\_N02\_00401" 3185 "s59E13H2" 0 "FeS cluster assembly protein SufB"  
"ChI\_N02\_00401" 3185 "s59E25H2" 0 "FeS cluster assembly protein SufB"  
"ChI\_N02\_00401" 3185 "s59E5H2" 0 "FeS cluster assembly protein SufB"  
"ChI\_N02\_00401" 3185 "s63E6H2" 0 "FeS cluster assembly protein SufB"  
"ChI\_N02\_00402" 3186 "s59E13H2" 0 "Vegetative protein 296"  
"ChI\_N02\_00402" 3186 "s59E25H2" 0 "Vegetative protein 296"  
"ChI\_N02\_00402" 3186 "s59E5H2" 0 "Vegetative protein 296"  
"ChI\_N02\_00402" 3186 "s63E6H2" 0 "Vegetative protein 296"  
"ChI\_N02\_00403" 3187 "s59E13H2" 0 "Fe/S biogenesis protein NfuA"  
"ChI\_N02\_00403" 3187 "s59E25H2" 0 "Fe/S biogenesis protein NfuA"  
"ChI\_N02\_00403" 3187 "s59E5H2" 0 "Fe/S biogenesis protein NfuA"  
"ChI\_N02\_00403" 3187 "s63E6H2" 0 "Fe/S biogenesis protein NfuA"  
"ChI\_N02\_00404" 3188 "s59E13H2" 0 "Sulfide dehydrogenase subunit alpha precursor"  
"ChI\_N02\_00404" 3188 "s59E25H2" 0 "Sulfide dehydrogenase subunit alpha precursor"  
"ChI\_N02\_00404" 3188 "s59E5H2" 0 "Sulfide dehydrogenase subunit alpha precursor"  
"ChI\_N02\_00404" 3188 "s63E6H2" 0 "Sulfide dehydrogenase subunit alpha precursor"

"ChI\_N02\_00405" 3189 "s59E13H2" 0 "F420-non-reducing hydrogenase iron-sulfur subunit A"  
"ChI\_N02\_00405" 3189 "s59E25H2" 0 "F420-non-reducing hydrogenase iron-sulfur subunit A"  
"ChI\_N02\_00405" 3189 "s59E5H2" 0 "F420-non-reducing hydrogenase iron-sulfur subunit A"  
"ChI\_N02\_00405" 3189 "s63E6H2" 0 "F420-non-reducing hydrogenase iron-sulfur subunit A"  
"ChI\_N02\_00406" 3190 "s59E13H2" 0 "F420-non-reducing hydrogenase iron-sulfur subunit G"  
"ChI\_N02\_00406" 3190 "s59E25H2" 0 "F420-non-reducing hydrogenase iron-sulfur subunit G"  
"ChI\_N02\_00406" 3190 "s59E5H2" 0 "F420-non-reducing hydrogenase iron-sulfur subunit G"  
"ChI\_N02\_00406" 3190 "s63E6H2" 0 "F420-non-reducing hydrogenase iron-sulfur subunit G"  
"ChI\_N02\_00407" 3191 "s59E13H2" 0 "Glucose 1-dehydrogenase"  
"ChI\_N02\_00407" 3191 "s59E25H2" 0 "Glucose 1-dehydrogenase"  
"ChI\_N02\_00407" 3191 "s59E5H2" 0.0138899 "Glucose 1-dehydrogenase"  
"ChI\_N02\_00407" 3191 "s63E6H2" 0 "Glucose 1-dehydrogenase"  
"ChI\_N02\_00408" 3192 "s59E13H2" 0 "Phosphoenolpyruvate carboxykinase [ATP]"  
"ChI\_N02\_00408" 3192 "s59E25H2" 0 "Phosphoenolpyruvate carboxykinase [ATP]"  
"ChI\_N02\_00408" 3192 "s59E5H2" 0 "Phosphoenolpyruvate carboxykinase [ATP]"  
"ChI\_N02\_00408" 3192 "s63E6H2" 0 "Phosphoenolpyruvate carboxykinase [ATP]"  
"ChI\_N02\_00409" 3193 "s59E13H2" 0 "Acetyltransferase (GNAT) family protein"  
"ChI\_N02\_00409" 3193 "s59E25H2" 0 "Acetyltransferase (GNAT) family protein"  
"ChI\_N02\_00409" 3193 "s59E5H2" 0 "Acetyltransferase (GNAT) family protein"  
"ChI\_N02\_00409" 3193 "s63E6H2" 0 "Acetyltransferase (GNAT) family protein"  
"ChI\_N02\_00410" 3194 "s59E13H2" 0 "hypothetical protein"  
"ChI\_N02\_00410" 3194 "s59E25H2" 0 "hypothetical protein"  
"ChI\_N02\_00410" 3194 "s59E5H2" 0 "hypothetical protein"  
"ChI\_N02\_00410" 3194 "s63E6H2" 0 "hypothetical protein"  
"ChI\_N02\_00411" 3195 "s59E13H2" 0 "Threonylcarbamoyladenosine tRNA methylthiotransferase MtaB"  
"ChI\_N02\_00411" 3195 "s59E25H2" 0 "Threonylcarbamoyladenosine tRNA methylthiotransferase MtaB"  
"ChI\_N02\_00411" 3195 "s59E5H2" 0 "Threonylcarbamoyladenosine tRNA methylthiotransferase MtaB"  
"ChI\_N02\_00411" 3195 "s63E6H2" 0 "Threonylcarbamoyladenosine tRNA methylthiotransferase MtaB"  
"ChI\_N02\_00412" 3196 "s59E13H2" 0 "CoB--CoM heterodisulfide reductase iron-sulfur subunit A"  
"ChI\_N02\_00412" 3196 "s59E25H2" 0 "CoB--CoM heterodisulfide reductase iron-sulfur subunit A"  
"ChI\_N02\_00412" 3196 "s59E5H2" 0 "CoB--CoM heterodisulfide reductase iron-sulfur subunit A"  
"ChI\_N02\_00412" 3196 "s63E6H2" 0 "CoB--CoM heterodisulfide reductase iron-sulfur subunit A"  
"ChI\_N02\_00413" 3197 "s59E13H2" 0 "F420-non-reducing hydrogenase iron-sulfur subunit D"  
"ChI\_N02\_00413" 3197 "s59E25H2" 0 "F420-non-reducing hydrogenase iron-sulfur subunit D"  
"ChI\_N02\_00413" 3197 "s59E5H2" 0 "F420-non-reducing hydrogenase iron-sulfur subunit D"  
"ChI\_N02\_00413" 3197 "s63E6H2" 0 "F420-non-reducing hydrogenase iron-sulfur subunit D"  
"ChI\_N02\_00414" 3198 "s59E13H2" 0 "CoB--CoM heterodisulfide reductase iron-sulfur subunit A"  
"ChI\_N02\_00414" 3198 "s59E25H2" 0 "CoB--CoM heterodisulfide reductase iron-sulfur subunit A"  
"ChI\_N02\_00414" 3198 "s59E5H2" 0 "CoB--CoM heterodisulfide reductase iron-sulfur subunit A"  
"ChI\_N02\_00414" 3198 "s63E6H2" 0 "CoB--CoM heterodisulfide reductase iron-sulfur subunit A"  
"ChI\_N02\_00415" 3199 "s59E13H2" 0 "F420-non-reducing hydrogenase vhc iron-sulfur subunit D"  
"ChI\_N02\_00415" 3199 "s59E25H2" 0 "F420-non-reducing hydrogenase vhc iron-sulfur subunit D"  
"ChI\_N02\_00415" 3199 "s59E5H2" 0 "F420-non-reducing hydrogenase vhc iron-sulfur subunit D"  
"ChI\_N02\_00415" 3199 "s63E6H2" 0 "F420-non-reducing hydrogenase vhc iron-sulfur subunit D"  
"ChI\_N02\_00416" 3200 "s59E13H2" 0 "Formate dehydrogenase subunit beta"  
"ChI\_N02\_00416" 3200 "s59E25H2" 0 "Formate dehydrogenase subunit beta"  
"ChI\_N02\_00416" 3200 "s59E5H2" 0 "Formate dehydrogenase subunit beta"



"ChI\_N02\_00416" 3200 "s63E6H2" 0 "Formate dehydrogenase subunit beta"  
"ChI\_N02\_00417" 3201 "s59E13H2" 0 "Sulfhydrogenase 1 subunit beta"  
"ChI\_N02\_00417" 3201 "s59E25H2" 0 "Sulfhydrogenase 1 subunit beta"  
"ChI\_N02\_00417" 3201 "s59E5H2" 0 "Sulfhydrogenase 1 subunit beta"  
"ChI\_N02\_00417" 3201 "s63E6H2" 0 "Sulfhydrogenase 1 subunit beta"  
"ChI\_N02\_00418" 3202 "s59E13H2" 0 "Sulfhydrogenase 1 subunit gamma"  
"ChI\_N02\_00418" 3202 "s59E25H2" 0 "Sulfhydrogenase 1 subunit gamma"  
"ChI\_N02\_00418" 3202 "s59E5H2" 0 "Sulfhydrogenase 1 subunit gamma"  
"ChI\_N02\_00418" 3202 "s63E6H2" 0 "Sulfhydrogenase 1 subunit gamma"  
"ChI\_N02\_00419" 3203 "s59E13H2" 0 "CoB--CoM heterodisulfide reductase iron-sulfur subunit D"  
"ChI\_N02\_00419" 3203 "s59E25H2" 0 "CoB--CoM heterodisulfide reductase iron-sulfur subunit D"  
"ChI\_N02\_00419" 3203 "s59E5H2" 0 "CoB--CoM heterodisulfide reductase iron-sulfur subunit D"  
"ChI\_N02\_00419" 3203 "s63E6H2" 0 "CoB--CoM heterodisulfide reductase iron-sulfur subunit D"  
"ChI\_N02\_00422" 3206 "s59E13H2" 0 "Demethylrebeccamycin-D-glucose O-methyltransferase"  
"ChI\_N02\_00422" 3206 "s59E25H2" 0 "Demethylrebeccamycin-D-glucose O-methyltransferase"  
"ChI\_N02\_00422" 3206 "s59E5H2" 0 "Demethylrebeccamycin-D-glucose O-methyltransferase"  
"ChI\_N02\_00422" 3206 "s63E6H2" 0 "Demethylrebeccamycin-D-glucose O-methyltransferase"  
"ChI\_N02\_00423" 3207 "s59E13H2" 0 "Cyclic pyranopterin monophosphate synthase 1"  
"ChI\_N02\_00423" 3207 "s59E25H2" 0 "Cyclic pyranopterin monophosphate synthase 1"  
"ChI\_N02\_00423" 3207 "s59E5H2" 0 "Cyclic pyranopterin monophosphate synthase 1"  
"ChI\_N02\_00423" 3207 "s63E6H2" 0 "Cyclic pyranopterin monophosphate synthase 1"  
"ChI\_N02\_00424" 3208 "s59E13H2" 0 "hypothetical protein"  
"ChI\_N02\_00424" 3208 "s59E25H2" 0 "hypothetical protein"  
"ChI\_N02\_00424" 3208 "s59E5H2" 0 "hypothetical protein"  
"ChI\_N02\_00424" 3208 "s63E6H2" 0 "hypothetical protein"  
"ChI\_N02\_00425" 3209 "s59E13H2" 0 "Phenylacetate-coenzyme A ligase"  
"ChI\_N02\_00425" 3209 "s59E25H2" 0 "Phenylacetate-coenzyme A ligase"  
"ChI\_N02\_00425" 3209 "s59E5H2" 0 "Phenylacetate-coenzyme A ligase"  
"ChI\_N02\_00425" 3209 "s63E6H2" 0 "Phenylacetate-coenzyme A ligase"  
"ChI\_N02\_00426" 3210 "s59E13H2" 0 "Putative redox-active protein (C\_GCAxxG\_C\_C)"  
"ChI\_N02\_00426" 3210 "s59E25H2" 0 "Putative redox-active protein (C\_GCAxxG\_C\_C)"  
"ChI\_N02\_00426" 3210 "s59E5H2" 0.002384722 "Putative redox-active protein (C\_GCAxxG\_C\_C)"  
"ChI\_N02\_00426" 3210 "s63E6H2" 0 "Putative redox-active protein (C\_GCAxxG\_C\_C)"  
"ChI\_N02\_00428" 3212 "s59E13H2" 0 "3-oxoacyl-[acyl-carrier-protein] synthase 2"  
"ChI\_N02\_00428" 3212 "s59E25H2" 0 "3-oxoacyl-[acyl-carrier-protein] synthase 2"  
"ChI\_N02\_00428" 3212 "s59E5H2" 2.259287 "3-oxoacyl-[acyl-carrier-protein] synthase 2"  
"ChI\_N02\_00428" 3212 "s63E6H2" 0 "3-oxoacyl-[acyl-carrier-protein] synthase 2"  
"ChI\_N02\_00429" 3213 "s59E13H2" 0 "Single-stranded-DNA-specific exonuclease RecJ"  
"ChI\_N02\_00429" 3213 "s59E25H2" 0 "Single-stranded-DNA-specific exonuclease RecJ"  
"ChI\_N02\_00429" 3213 "s59E5H2" 1.788051 "Single-stranded-DNA-specific exonuclease RecJ"  
"ChI\_N02\_00429" 3213 "s63E6H2" 0 "Single-stranded-DNA-specific exonuclease RecJ"  
"ChI\_N02\_00430" 3214 "s59E13H2" 0 "Cohesin domain protein"  
"ChI\_N02\_00430" 3214 "s59E25H2" 0 "Cohesin domain protein"  
"ChI\_N02\_00430" 3214 "s59E5H2" 0 "Cohesin domain protein"  
"ChI\_N02\_00430" 3214 "s63E6H2" 0 "Cohesin domain protein"  
"ChI\_N02\_00431" 3215 "s59E13H2" 0 "hypothetical protein"  
"ChI\_N02\_00431" 3215 "s59E25H2" 0 "hypothetical protein"

"ChI\_N02\_00431" 3215 "s59E5H2" 0 "hypothetical protein"  
"ChI\_N02\_00431" 3215 "s63E6H2" 0 "hypothetical protein"  
"ChI\_N02\_00432" 3216 "s59E13H2" 0 "Cohesin domain protein"  
"ChI\_N02\_00432" 3216 "s59E25H2" 0 "Cohesin domain protein"  
"ChI\_N02\_00432" 3216 "s59E5H2" 0 "Cohesin domain protein"  
"ChI\_N02\_00432" 3216 "s63E6H2" 0 "Cohesin domain protein"  
"DsuD02\_00001" 3217 "s59E13H2" 0 "Alkaline phosphatase synthesis transcriptional regulatory protein PhoP"  
"DsuD02\_00001" 3217 "s59E25H2" 0 "Alkaline phosphatase synthesis transcriptional regulatory protein PhoP"  
"DsuD02\_00001" 3217 "s59E5H2" 0 "Alkaline phosphatase synthesis transcriptional regulatory protein PhoP"  
"DsuD02\_00001" 3217 "s63E6H2" 0 "Alkaline phosphatase synthesis transcriptional regulatory protein PhoP"  
"DsuD02\_00002" 3218 "s59E13H2" 0 "Type II secretion system protein E"  
"DsuD02\_00002" 3218 "s59E25H2" 0 "Type II secretion system protein E"  
"DsuD02\_00002" 3218 "s59E5H2" 0 "Type II secretion system protein E"  
"DsuD02\_00002" 3218 "s63E6H2" 0 "Type II secretion system protein E"  
"DsuD02\_00003" 3219 "s59E13H2" 0 "hypothetical protein"  
"DsuD02\_00003" 3219 "s59E25H2" 0 "hypothetical protein"  
"DsuD02\_00003" 3219 "s59E5H2" 0 "hypothetical protein"  
"DsuD02\_00003" 3219 "s63E6H2" 0 "hypothetical protein"  
"DsuD02\_00005" 3221 "s59E13H2" 0 "Sensor protein ZraS"  
"DsuD02\_00005" 3221 "s59E25H2" 0 "Sensor protein ZraS"  
"DsuD02\_00005" 3221 "s59E5H2" 0 "Sensor protein ZraS"  
"DsuD02\_00005" 3221 "s63E6H2" 0 "Sensor protein ZraS"  
"DsuD02\_00006" 3222 "s59E13H2" 0 "hypothetical protein"  
"DsuD02\_00006" 3222 "s59E25H2" 0 "hypothetical protein"  
"DsuD02\_00006" 3222 "s59E5H2" 0 "hypothetical protein"  
"DsuD02\_00006" 3222 "s63E6H2" 0 "hypothetical protein"  
"DsuD02\_00007" 3223 "s59E13H2" 0 "Sensor protein ZraS"  
"DsuD02\_00007" 3223 "s59E25H2" 0 "Sensor protein ZraS"  
"DsuD02\_00007" 3223 "s59E5H2" 0 "Sensor protein ZraS"  
"DsuD02\_00007" 3223 "s63E6H2" 0 "Sensor protein ZraS"  
"DsuD02\_00008" 3224 "s59E13H2" 0 "Response regulator PleD"  
"DsuD02\_00008" 3224 "s59E25H2" 0 "Response regulator PleD"  
"DsuD02\_00008" 3224 "s59E5H2" 0 "Response regulator PleD"  
"DsuD02\_00008" 3224 "s63E6H2" 0 "Response regulator PleD"  
"DsuD02\_00009" 3225 "s59E13H2" 0 "Methylated-DNA--protein-cysteine methyltransferase"  
"DsuD02\_00009" 3225 "s59E25H2" 0 "Methylated-DNA--protein-cysteine methyltransferase"  
"DsuD02\_00009" 3225 "s59E5H2" 0 "Methylated-DNA--protein-cysteine methyltransferase"  
"DsuD02\_00009" 3225 "s63E6H2" 0 "Methylated-DNA--protein-cysteine methyltransferase"  
"DsuD02\_00010" 3226 "s59E13H2" 0 "DNA-3-methyladenine glycosylase"  
"DsuD02\_00010" 3226 "s59E25H2" 0 "DNA-3-methyladenine glycosylase"  
"DsuD02\_00010" 3226 "s59E5H2" 0 "DNA-3-methyladenine glycosylase"  
"DsuD02\_00010" 3226 "s63E6H2" 0 "DNA-3-methyladenine glycosylase"  
"DsuD02\_00011" 3227 "s59E13H2" 0 "putative MFS-type transporter YhjX"  
"DsuD02\_00011" 3227 "s59E25H2" 0 "putative MFS-type transporter YhjX"  
"DsuD02\_00011" 3227 "s59E5H2" 0 "putative MFS-type transporter YhjX"  
"DsuD02\_00011" 3227 "s63E6H2" 0.00628892 "putative MFS-type transporter YhjX"  
"DsuD02\_00013" 3229 "s59E13H2" 0 "Transglutaminase-like superfamily protein"

"DsuD02\_00013" 3229 "s59E25H2" 0 "Transglutaminase-like superfamily protein"  
"DsuD02\_00013" 3229 "s59E5H2" 0 "Transglutaminase-like superfamily protein"  
"DsuD02\_00013" 3229 "s63E6H2" 0 "Transglutaminase-like superfamily protein"  
"DsuD02\_00015" 3231 "s59E13H2" 0 "Group II intron-encoded protein LtrA"  
"DsuD02\_00015" 3231 "s59E25H2" 0 "Group II intron-encoded protein LtrA"  
"DsuD02\_00015" 3231 "s59E5H2" 0 "Group II intron-encoded protein LtrA"  
"DsuD02\_00015" 3231 "s63E6H2" 0 "Group II intron-encoded protein LtrA"  
"DsuD02\_00016" 3232 "s59E13H2" 0 "hypothetical protein"  
"DsuD02\_00016" 3232 "s59E25H2" 0 "hypothetical protein"  
"DsuD02\_00016" 3232 "s59E5H2" 0 "hypothetical protein"  
"DsuD02\_00016" 3232 "s63E6H2" 0 "hypothetical protein"  
"DsuD02\_00017" 3233 "s59E13H2" 0 "thiamine biosynthesis protein ThiF"  
"DsuD02\_00017" 3233 "s59E25H2" 0 "thiamine biosynthesis protein ThiF"  
"DsuD02\_00017" 3233 "s59E5H2" 0 "thiamine biosynthesis protein ThiF"  
"DsuD02\_00017" 3233 "s63E6H2" 0 "thiamine biosynthesis protein ThiF"  
"DsuD02\_00018" 3234 "s59E13H2" 0 "hypothetical protein"  
"DsuD02\_00018" 3234 "s59E25H2" 0 "hypothetical protein"  
"DsuD02\_00018" 3234 "s59E5H2" 0 "hypothetical protein"  
"DsuD02\_00018" 3234 "s63E6H2" 0 "hypothetical protein"  
"DsuD02\_00019" 3235 "s59E13H2" 0 "hypothetical protein"  
"DsuD02\_00019" 3235 "s59E25H2" 0 "hypothetical protein"  
"DsuD02\_00019" 3235 "s59E5H2" 0 "hypothetical protein"  
"DsuD02\_00019" 3235 "s63E6H2" 0 "hypothetical protein"  
"DsuD02\_00020" 3236 "s59E13H2" 0 "hypothetical protein"  
"DsuD02\_00020" 3236 "s59E25H2" 0 "hypothetical protein"  
"DsuD02\_00020" 3236 "s59E5H2" 0 "hypothetical protein"  
"DsuD02\_00020" 3236 "s63E6H2" 0 "hypothetical protein"  
"DsuD02\_00021" 3237 "s59E13H2" 0 "RNA polymerase sigma factor RpoE"  
"DsuD02\_00021" 3237 "s59E25H2" 0 "RNA polymerase sigma factor RpoE"  
"DsuD02\_00021" 3237 "s59E5H2" 0 "RNA polymerase sigma factor RpoE"  
"DsuD02\_00021" 3237 "s63E6H2" 0 "RNA polymerase sigma factor RpoE"  
"DsuD02\_00022" 3238 "s59E13H2" 0 "hypothetical protein"  
"DsuD02\_00022" 3238 "s59E25H2" 0 "hypothetical protein"  
"DsuD02\_00022" 3238 "s59E5H2" 0 "hypothetical protein"  
"DsuD02\_00022" 3238 "s63E6H2" 0 "hypothetical protein"  
"DsuD02\_00023" 3239 "s59E13H2" 0 "Methyl-accepting chemotaxis protein McpB"  
"DsuD02\_00023" 3239 "s59E25H2" 0 "Methyl-accepting chemotaxis protein McpB"  
"DsuD02\_00023" 3239 "s59E5H2" 0 "Methyl-accepting chemotaxis protein McpB"  
"DsuD02\_00023" 3239 "s63E6H2" 0 "Methyl-accepting chemotaxis protein McpB"  
"DsuD02\_00024" 3240 "s59E13H2" 0 "Alkaline phosphatase synthesis transcriptional regulatory protein PhoP"  
"DsuD02\_00024" 3240 "s59E25H2" 0 "Alkaline phosphatase synthesis transcriptional regulatory protein PhoP"  
"DsuD02\_00024" 3240 "s59E5H2" 0 "Alkaline phosphatase synthesis transcriptional regulatory protein PhoP"  
"DsuD02\_00024" 3240 "s63E6H2" 0 "Alkaline phosphatase synthesis transcriptional regulatory protein PhoP"  
"DsuD02\_00025" 3241 "s59E13H2" 0 "Putative type II secretion system protein E"  
"DsuD02\_00025" 3241 "s59E25H2" 0 "Putative type II secretion system protein E"  
"DsuD02\_00025" 3241 "s59E5H2" 0 "Putative type II secretion system protein E"  
"DsuD02\_00025" 3241 "s63E6H2" 0 "Putative type II secretion system protein E"

"DsuD02\_00026" 3242 "s59E13H2" 0 "Mutual gliding-motility protein MglA"  
"DsuD02\_00026" 3242 "s59E25H2" 0 "Mutual gliding-motility protein MglA"  
"DsuD02\_00026" 3242 "s59E5H2" 0 "Mutual gliding-motility protein MglA"  
"DsuD02\_00026" 3242 "s63E6H2" 0 "Mutual gliding-motility protein MglA"  
"DsuD02\_00027" 3243 "s59E13H2" 0 "Cyclic di-GMP phosphodiesterase response regulator RpfG"  
"DsuD02\_00027" 3243 "s59E25H2" 0 "Cyclic di-GMP phosphodiesterase response regulator RpfG"  
"DsuD02\_00027" 3243 "s59E5H2" 0 "Cyclic di-GMP phosphodiesterase response regulator RpfG"  
"DsuD02\_00027" 3243 "s63E6H2" 0 "Cyclic di-GMP phosphodiesterase response regulator RpfG"  
"DsuD02\_00028" 3244 "s59E13H2" 0 "Cyclic di-GMP phosphodiesterase response regulator RpfG"  
"DsuD02\_00028" 3244 "s59E25H2" 0 "Cyclic di-GMP phosphodiesterase response regulator RpfG"  
"DsuD02\_00028" 3244 "s59E5H2" 0 "Cyclic di-GMP phosphodiesterase response regulator RpfG"  
"DsuD02\_00028" 3244 "s63E6H2" 0 "Cyclic di-GMP phosphodiesterase response regulator RpfG"  
"DsuD02\_00029" 3245 "s59E13H2" 0 "hypothetical protein"  
"DsuD02\_00029" 3245 "s59E25H2" 0 "hypothetical protein"  
"DsuD02\_00029" 3245 "s59E5H2" 0 "hypothetical protein"  
"DsuD02\_00029" 3245 "s63E6H2" 0 "hypothetical protein"  
"DsuD02\_00030" 3246 "s59E13H2" 0 "Phosphate regulon transcriptional regulatory protein PhoB"  
"DsuD02\_00030" 3246 "s59E25H2" 0 "Phosphate regulon transcriptional regulatory protein PhoB"  
"DsuD02\_00030" 3246 "s59E5H2" 0 "Phosphate regulon transcriptional regulatory protein PhoB"  
"DsuD02\_00030" 3246 "s63E6H2" 0 "Phosphate regulon transcriptional regulatory protein PhoB"  
"DsuD02\_00031" 3247 "s59E13H2" 0 "hypothetical protein"  
"DsuD02\_00031" 3247 "s59E25H2" 0 "hypothetical protein"  
"DsuD02\_00031" 3247 "s59E5H2" 0 "hypothetical protein"  
"DsuD02\_00031" 3247 "s63E6H2" 0 "hypothetical protein"  
"DsuD02\_00032" 3248 "s59E13H2" 0 "Integrase core domain protein"  
"DsuD02\_00032" 3248 "s59E25H2" 0 "Integrase core domain protein"  
"DsuD02\_00032" 3248 "s59E5H2" 0 "Integrase core domain protein"  
"DsuD02\_00032" 3248 "s63E6H2" 0 "Integrase core domain protein"  
"DsuD02\_00034" 3250 "s59E13H2" 0 "30S ribosomal protein S1"  
"DsuD02\_00034" 3250 "s59E25H2" 0 "30S ribosomal protein S1"  
"DsuD02\_00034" 3250 "s59E5H2" 0 "30S ribosomal protein S1"  
"DsuD02\_00034" 3250 "s63E6H2" 0 "30S ribosomal protein S1"  
"DsuD02\_00035" 3251 "s59E13H2" 0 "Putative signal peptide peptidase SppA"  
"DsuD02\_00035" 3251 "s59E25H2" 0 "Putative signal peptide peptidase SppA"  
"DsuD02\_00035" 3251 "s59E5H2" 0 "Putative signal peptide peptidase SppA"  
"DsuD02\_00035" 3251 "s63E6H2" 0 "Putative signal peptide peptidase SppA"  
"DsuD02\_00036" 3252 "s59E13H2" 0 "Threonylcarbamoyl-AMP synthase"  
"DsuD02\_00036" 3252 "s59E25H2" 0 "Threonylcarbamoyl-AMP synthase"  
"DsuD02\_00036" 3252 "s59E5H2" 0 "Threonylcarbamoyl-AMP synthase"  
"DsuD02\_00036" 3252 "s63E6H2" 0 "Threonylcarbamoyl-AMP synthase"  
"DsuD02\_00037" 3253 "s59E13H2" 0 "Type 4 prepilin-like proteins leader peptide-processing enzyme"  
"DsuD02\_00037" 3253 "s59E25H2" 0 "Type 4 prepilin-like proteins leader peptide-processing enzyme"  
"DsuD02\_00037" 3253 "s59E5H2" 0 "Type 4 prepilin-like proteins leader peptide-processing enzyme"  
"DsuD02\_00037" 3253 "s63E6H2" 0 "Type 4 prepilin-like proteins leader peptide-processing enzyme"  
"DsuD02\_00038" 3254 "s59E13H2" 0 "Sensor protein ZraS"  
"DsuD02\_00038" 3254 "s59E25H2" 0 "Sensor protein ZraS"  
"DsuD02\_00038" 3254 "s59E5H2" 0 "Sensor protein ZraS"

"DsuD02\_00038" 3254 "s63E6H2" 0 "Sensor protein ZraS"  
"DsuD02\_00039" 3255 "s59E13H2" 0 "Transcriptional regulatory protein ZraR"  
"DsuD02\_00039" 3255 "s59E25H2" 0 "Transcriptional regulatory protein ZraR"  
"DsuD02\_00039" 3255 "s59E5H2" 0 "Transcriptional regulatory protein ZraR"  
"DsuD02\_00039" 3255 "s63E6H2" 0 "Transcriptional regulatory protein ZraR"  
"DsuD02\_00040" 3256 "s59E13H2" 0 "hypothetical protein"  
"DsuD02\_00040" 3256 "s59E25H2" 0 "hypothetical protein"  
"DsuD02\_00040" 3256 "s59E5H2" 0 "hypothetical protein"  
"DsuD02\_00040" 3256 "s63E6H2" 0 "hypothetical protein"  
"DsuD02\_00041" 3257 "s59E13H2" 0 "hypothetical protein"  
"DsuD02\_00041" 3257 "s59E25H2" 0 "hypothetical protein"  
"DsuD02\_00041" 3257 "s59E5H2" 0 "hypothetical protein"  
"DsuD02\_00041" 3257 "s63E6H2" 0 "hypothetical protein"  
"DsuD02\_00042" 3258 "s59E13H2" 0 "hypothetical protein"  
"DsuD02\_00042" 3258 "s59E25H2" 0 "hypothetical protein"  
"DsuD02\_00042" 3258 "s59E5H2" 0 "hypothetical protein"  
"DsuD02\_00042" 3258 "s63E6H2" 0 "hypothetical protein"  
"DsuD02\_00043" 3259 "s59E13H2" 0 "hypothetical protein"  
"DsuD02\_00043" 3259 "s59E25H2" 0 "hypothetical protein"  
"DsuD02\_00043" 3259 "s59E5H2" 0 "hypothetical protein"  
"DsuD02\_00043" 3259 "s63E6H2" 0 "hypothetical protein"  
"DsuD02\_00044" 3260 "s59E13H2" 0 "Neisseria PilC protein"  
"DsuD02\_00044" 3260 "s59E25H2" 0 "Neisseria PilC protein"  
"DsuD02\_00044" 3260 "s59E5H2" 0 "Neisseria PilC protein"  
"DsuD02\_00044" 3260 "s63E6H2" 0 "Neisseria PilC protein"  
"DsuD02\_00045" 3261 "s59E13H2" 0 "Fimbrial protein precursor"  
"DsuD02\_00045" 3261 "s59E25H2" 0 "Fimbrial protein precursor"  
"DsuD02\_00045" 3261 "s59E5H2" 0 "Fimbrial protein precursor"  
"DsuD02\_00045" 3261 "s63E6H2" 0 "Fimbrial protein precursor"  
"DsuD02\_00046" 3262 "s59E13H2" 0 "hypothetical protein"  
"DsuD02\_00046" 3262 "s59E25H2" 0 "hypothetical protein"  
"DsuD02\_00046" 3262 "s59E5H2" 0 "hypothetical protein"  
"DsuD02\_00046" 3262 "s63E6H2" 0 "hypothetical protein"  
"DsuD02\_00047" 3263 "s59E13H2" 0 "Type II secretion system protein G precursor"  
"DsuD02\_00047" 3263 "s59E25H2" 0 "Type II secretion system protein G precursor"  
"DsuD02\_00047" 3263 "s59E5H2" 0 "Type II secretion system protein G precursor"  
"DsuD02\_00047" 3263 "s63E6H2" 0 "Type II secretion system protein G precursor"  
"DsuD02\_00049" 3265 "s59E13H2" 0 "MORN repeat protein"  
"DsuD02\_00049" 3265 "s59E25H2" 0 "MORN repeat protein"  
"DsuD02\_00049" 3265 "s59E5H2" 0 "MORN repeat protein"  
"DsuD02\_00049" 3265 "s63E6H2" 0 "MORN repeat protein"  
"DsuD02\_00050" 3266 "s59E13H2" 0 "Serine/threonine-protein phosphatase 1"  
"DsuD02\_00050" 3266 "s59E25H2" 0 "Serine/threonine-protein phosphatase 1"  
"DsuD02\_00050" 3266 "s59E5H2" 0 "Serine/threonine-protein phosphatase 1"  
"DsuD02\_00050" 3266 "s63E6H2" 0 "Serine/threonine-protein phosphatase 1"  
"DsuD02\_00051" 3267 "s59E13H2" 0 "hypothetical protein"  
"DsuD02\_00051" 3267 "s59E25H2" 0 "hypothetical protein"

"DsuD02\_00051" 3267 "s59E5H2" 0 "hypothetical protein"  
"DsuD02\_00051" 3267 "s63E6H2" 0 "hypothetical protein"  
"DsuD02\_00052" 3268 "s59E13H2" 0 "hypothetical protein"  
"DsuD02\_00052" 3268 "s59E25H2" 0 "hypothetical protein"  
"DsuD02\_00052" 3268 "s59E5H2" 0 "hypothetical protein"  
"DsuD02\_00052" 3268 "s63E6H2" 0 "hypothetical protein"  
"DsuD02\_00053" 3269 "s59E13H2" 0 "Fimbrial protein precursor"  
"DsuD02\_00053" 3269 "s59E25H2" 0 "Fimbrial protein precursor"  
"DsuD02\_00053" 3269 "s59E5H2" 0 "Fimbrial protein precursor"  
"DsuD02\_00053" 3269 "s63E6H2" 0 "Fimbrial protein precursor"  
"DsuD02\_00054" 3270 "s59E13H2" 0 "PilZ domain protein"  
"DsuD02\_00054" 3270 "s59E25H2" 0 "PilZ domain protein"  
"DsuD02\_00054" 3270 "s59E5H2" 0 "PilZ domain protein"  
"DsuD02\_00054" 3270 "s63E6H2" 0 "PilZ domain protein"  
"DsuD02\_00055" 3271 "s59E13H2" 0 "hypothetical protein"  
"DsuD02\_00055" 3271 "s59E25H2" 0 "hypothetical protein"  
"DsuD02\_00055" 3271 "s59E5H2" 0 "hypothetical protein"  
"DsuD02\_00055" 3271 "s63E6H2" 0 "hypothetical protein"  
"DsuD02\_00056" 3272 "s59E13H2" 0 "hypothetical protein"  
"DsuD02\_00056" 3272 "s59E25H2" 0 "hypothetical protein"  
"DsuD02\_00056" 3272 "s59E5H2" 0 "hypothetical protein"  
"DsuD02\_00056" 3272 "s63E6H2" 0 "hypothetical protein"  
"DsuD02\_00057" 3273 "s59E13H2" 0 "hypothetical protein"  
"DsuD02\_00057" 3273 "s59E25H2" 0 "hypothetical protein"  
"DsuD02\_00057" 3273 "s59E5H2" 0 "hypothetical protein"  
"DsuD02\_00057" 3273 "s63E6H2" 0 "hypothetical protein"  
"DsuD02\_00058" 3274 "s59E13H2" 0 "Methionine--tRNA ligase"  
"DsuD02\_00058" 3274 "s59E25H2" 0 "Methionine--tRNA ligase"  
"DsuD02\_00058" 3274 "s59E5H2" 0 "Methionine--tRNA ligase"  
"DsuD02\_00058" 3274 "s63E6H2" 0 "Methionine--tRNA ligase"  
"DsuD02\_00059" 3275 "s59E13H2" 0 "hypothetical protein"  
"DsuD02\_00059" 3275 "s59E25H2" 0 "hypothetical protein"  
"DsuD02\_00059" 3275 "s59E5H2" 0 "hypothetical protein"  
"DsuD02\_00059" 3275 "s63E6H2" 0 "hypothetical protein"  
"DsuD02\_00060" 3276 "s59E13H2" 0 "DNA polymerase III subunit tau"  
"DsuD02\_00060" 3276 "s59E25H2" 0 "DNA polymerase III subunit tau"  
"DsuD02\_00060" 3276 "s59E5H2" 0 "DNA polymerase III subunit tau"  
"DsuD02\_00060" 3276 "s63E6H2" 0 "DNA polymerase III subunit tau"  
"DsuD02\_00061" 3277 "s59E13H2" 0 "Thymidylate kinase"  
"DsuD02\_00061" 3277 "s59E25H2" 0 "Thymidylate kinase"  
"DsuD02\_00061" 3277 "s59E5H2" 0 "Thymidylate kinase"  
"DsuD02\_00061" 3277 "s63E6H2" 0 "Thymidylate kinase"  
"DsuD02\_00062" 3278 "s59E13H2" 0 "Thiamine-monophosphate kinase"  
"DsuD02\_00062" 3278 "s59E25H2" 0 "Thiamine-monophosphate kinase"  
"DsuD02\_00062" 3278 "s59E5H2" 0 "Thiamine-monophosphate kinase"  
"DsuD02\_00062" 3278 "s63E6H2" 0 "Thiamine-monophosphate kinase"  
"DsuD02\_00063" 3279 "s59E13H2" 0 "Methylated-DNA--protein-cysteine methyltransferase"

"DsuD02\_00063" 3279 "s59E25H2" 0 "Methylated-DNA--protein-cysteine methyltransferase"  
"DsuD02\_00063" 3279 "s59E5H2" 0 "Methylated-DNA--protein-cysteine methyltransferase"  
"DsuD02\_00063" 3279 "s63E6H2" 0 "Methylated-DNA--protein-cysteine methyltransferase"  
"DsuD02\_00064" 3280 "s59E13H2" 0 "hypothetical protein"  
"DsuD02\_00064" 3280 "s59E25H2" 0 "hypothetical protein"  
"DsuD02\_00064" 3280 "s59E5H2" 0 "hypothetical protein"  
"DsuD02\_00064" 3280 "s63E6H2" 0 "hypothetical protein"  
"DsuD02\_00065" 3281 "s59E13H2" 0 "Acetyl-CoA decarboxylase/synthase complex subunit gamma"  
"DsuD02\_00065" 3281 "s59E25H2" 0 "Acetyl-CoA decarboxylase/synthase complex subunit gamma"  
"DsuD02\_00065" 3281 "s59E5H2" 0 "Acetyl-CoA decarboxylase/synthase complex subunit gamma"  
"DsuD02\_00065" 3281 "s63E6H2" 0 "Acetyl-CoA decarboxylase/synthase complex subunit gamma"  
"DsuD02\_00066" 3282 "s59E13H2" 0 "hypothetical protein"  
"DsuD02\_00066" 3282 "s59E25H2" 0 "hypothetical protein"  
"DsuD02\_00066" 3282 "s59E5H2" 0 "hypothetical protein"  
"DsuD02\_00066" 3282 "s63E6H2" 0 "hypothetical protein"  
"DsuD02\_00067" 3283 "s59E13H2" 0 "Transposase IS116/IS110/IS902 family protein"  
"DsuD02\_00067" 3283 "s59E25H2" 0 "Transposase IS116/IS110/IS902 family protein"  
"DsuD02\_00067" 3283 "s59E5H2" 0 "Transposase IS116/IS110/IS902 family protein"  
"DsuD02\_00067" 3283 "s63E6H2" 0 "Transposase IS116/IS110/IS902 family protein"  
"DsuD02\_00069" 3285 "s59E13H2" 0 "hypothetical protein"  
"DsuD02\_00069" 3285 "s59E25H2" 0 "hypothetical protein"  
"DsuD02\_00069" 3285 "s59E5H2" 0 "hypothetical protein"  
"DsuD02\_00069" 3285 "s63E6H2" 0.07548018 "hypothetical protein"  
"DsuD02\_00070" 3286 "s59E13H2" 0 "hypothetical protein"  
"DsuD02\_00070" 3286 "s59E25H2" 0 "hypothetical protein"  
"DsuD02\_00070" 3286 "s59E5H2" 0 "hypothetical protein"  
"DsuD02\_00070" 3286 "s63E6H2" 0 "hypothetical protein"  
"DsuD02\_00071" 3287 "s59E13H2" 0 "ATP-dependent DNA helicase RecQ"  
"DsuD02\_00071" 3287 "s59E25H2" 0 "ATP-dependent DNA helicase RecQ"  
"DsuD02\_00071" 3287 "s59E5H2" 0 "ATP-dependent DNA helicase RecQ"  
"DsuD02\_00071" 3287 "s63E6H2" 0 "ATP-dependent DNA helicase RecQ"  
"DsuD02\_00073" 3289 "s59E13H2" 0 "2-aminoadipate transaminase"  
"DsuD02\_00073" 3289 "s59E25H2" 0 "2-aminoadipate transaminase"  
"DsuD02\_00073" 3289 "s59E5H2" 0 "2-aminoadipate transaminase"  
"DsuD02\_00073" 3289 "s63E6H2" 0.006268423 "2-aminoadipate transaminase"  
"DsuD02\_00074" 3290 "s59E13H2" 0 "ATP-dependent DNA helicase RecQ"  
"DsuD02\_00074" 3290 "s59E25H2" 0 "ATP-dependent DNA helicase RecQ"  
"DsuD02\_00074" 3290 "s59E5H2" 0 "ATP-dependent DNA helicase RecQ"  
"DsuD02\_00074" 3290 "s63E6H2" 0 "ATP-dependent DNA helicase RecQ"  
"DsuD02\_00075" 3291 "s59E13H2" 0 "hypothetical protein"  
"DsuD02\_00075" 3291 "s59E25H2" 0 "hypothetical protein"  
"DsuD02\_00075" 3291 "s59E5H2" 0 "hypothetical protein"  
"DsuD02\_00075" 3291 "s63E6H2" 0 "hypothetical protein"  
"DsuD02\_00078" 3294 "s59E13H2" 0 "10 kDa chaperonin 1"  
"DsuD02\_00078" 3294 "s59E25H2" 0 "10 kDa chaperonin 1"  
"DsuD02\_00078" 3294 "s59E5H2" 0 "10 kDa chaperonin 1"  
"DsuD02\_00078" 3294 "s63E6H2" 0 "10 kDa chaperonin 1"

"DsuD02\_00079" 3295 "s59E13H2" 0 "Transcriptional regulatory protein ZraR"  
"DsuD02\_00079" 3295 "s59E25H2" 0 "Transcriptional regulatory protein ZraR"  
"DsuD02\_00079" 3295 "s59E5H2" 0 "Transcriptional regulatory protein ZraR"  
"DsuD02\_00079" 3295 "s63E6H2" 0 "Transcriptional regulatory protein ZraR"  
"DsuD02\_00082" 3298 "s59E13H2" 0 "L-lysine 2,3-aminomutase"  
"DsuD02\_00082" 3298 "s59E25H2" 0 "L-lysine 2,3-aminomutase"  
"DsuD02\_00082" 3298 "s59E5H2" 0 "L-lysine 2,3-aminomutase"  
"DsuD02\_00082" 3298 "s63E6H2" 0 "L-lysine 2,3-aminomutase"  
"DsuD02\_00083" 3299 "s59E13H2" 0 "D-alanine--D-alanine ligase"  
"DsuD02\_00083" 3299 "s59E25H2" 0 "D-alanine--D-alanine ligase"  
"DsuD02\_00083" 3299 "s59E5H2" 0 "D-alanine--D-alanine ligase"  
"DsuD02\_00083" 3299 "s63E6H2" 0 "D-alanine--D-alanine ligase"  
"DsuD02\_00084" 3300 "s59E13H2" 0 "D-alanine--D-alanine ligase"  
"DsuD02\_00084" 3300 "s59E25H2" 0 "D-alanine--D-alanine ligase"  
"DsuD02\_00084" 3300 "s59E5H2" 0 "D-alanine--D-alanine ligase"  
"DsuD02\_00084" 3300 "s63E6H2" 0 "D-alanine--D-alanine ligase"  
"DsuD02\_00085" 3301 "s59E13H2" 0 "Acetyltransferase (GNAT) family protein"  
"DsuD02\_00085" 3301 "s59E25H2" 0 "Acetyltransferase (GNAT) family protein"  
"DsuD02\_00085" 3301 "s59E5H2" 0 "Acetyltransferase (GNAT) family protein"  
"DsuD02\_00085" 3301 "s63E6H2" 0 "Acetyltransferase (GNAT) family protein"  
"DsuD02\_00086" 3302 "s59E13H2" 0 "hypothetical protein"  
"DsuD02\_00086" 3302 "s59E25H2" 0 "hypothetical protein"  
"DsuD02\_00086" 3302 "s59E5H2" 0 "hypothetical protein"  
"DsuD02\_00086" 3302 "s63E6H2" 0 "hypothetical protein"  
"DsuD02\_00087" 3303 "s59E13H2" 0 "Diacylglycerol kinase"  
"DsuD02\_00087" 3303 "s59E25H2" 0 "Diacylglycerol kinase"  
"DsuD02\_00087" 3303 "s59E5H2" 0 "Diacylglycerol kinase"  
"DsuD02\_00087" 3303 "s63E6H2" 0 "Diacylglycerol kinase"  
"DsuD02\_00088" 3304 "s59E13H2" 0 "hypothetical protein"  
"DsuD02\_00088" 3304 "s59E25H2" 0 "hypothetical protein"  
"DsuD02\_00088" 3304 "s59E5H2" 0 "hypothetical protein"  
"DsuD02\_00088" 3304 "s63E6H2" 0 "hypothetical protein"  
"DsuD02\_00089" 3305 "s59E13H2" 0 "Inner membrane ABC transporter permease protein YcjP"  
"DsuD02\_00089" 3305 "s59E25H2" 0 "Inner membrane ABC transporter permease protein YcjP"  
"DsuD02\_00089" 3305 "s59E5H2" 0 "Inner membrane ABC transporter permease protein YcjP"  
"DsuD02\_00089" 3305 "s63E6H2" 0 "Inner membrane ABC transporter permease protein YcjP"  
"DsuD02\_00090" 3306 "s59E13H2" 0 "Inner membrane ABC transporter permease protein YcjO"  
"DsuD02\_00090" 3306 "s59E25H2" 0 "Inner membrane ABC transporter permease protein YcjO"  
"DsuD02\_00090" 3306 "s59E5H2" 0 "Inner membrane ABC transporter permease protein YcjO"  
"DsuD02\_00090" 3306 "s63E6H2" 0 "Inner membrane ABC transporter permease protein YcjO"  
"DsuD02\_00091" 3307 "s59E13H2" 0 "Bacterial extracellular solute-binding protein"  
"DsuD02\_00091" 3307 "s59E25H2" 0 "Bacterial extracellular solute-binding protein"  
"DsuD02\_00091" 3307 "s59E5H2" 0 "Bacterial extracellular solute-binding protein"  
"DsuD02\_00091" 3307 "s63E6H2" 0 "Bacterial extracellular solute-binding protein"  
"DsuD02\_00092" 3308 "s59E13H2" 0 "NAD-dependent protein deacylase 2"  
"DsuD02\_00092" 3308 "s59E25H2" 0 "NAD-dependent protein deacylase 2"  
"DsuD02\_00092" 3308 "s59E5H2" 0 "NAD-dependent protein deacylase 2"



"DsuD02\_00092" 3308 "s63E6H2" 0 "NAD-dependent protein deacylase 2"  
"DsuD02\_00093" 3309 "s59E13H2" 0 "putative nicotinate-nucleotide pyrophosphorylase [carboxylating]"  
"DsuD02\_00093" 3309 "s59E25H2" 0 "putative nicotinate-nucleotide pyrophosphorylase [carboxylating]"  
"DsuD02\_00093" 3309 "s59E5H2" 0 "putative nicotinate-nucleotide pyrophosphorylase [carboxylating]"  
"DsuD02\_00093" 3309 "s63E6H2" 0 "putative nicotinate-nucleotide pyrophosphorylase [carboxylating]"  
"DsuD02\_00094" 3310 "s59E13H2" 0 "Valine--tRNA ligase"  
"DsuD02\_00094" 3310 "s59E25H2" 0 "Valine--tRNA ligase"  
"DsuD02\_00094" 3310 "s59E5H2" 0 "Valine--tRNA ligase"  
"DsuD02\_00094" 3310 "s63E6H2" 0 "Valine--tRNA ligase"  
"DsuD02\_00095" 3311 "s59E13H2" 0 "hypothetical protein"  
"DsuD02\_00095" 3311 "s59E25H2" 0 "hypothetical protein"  
"DsuD02\_00095" 3311 "s59E5H2" 0 "hypothetical protein"  
"DsuD02\_00095" 3311 "s63E6H2" 0 "hypothetical protein"  
"DsuD02\_00096" 3312 "s59E13H2" 0 "putative acyl-CoA dehydrogenase"  
"DsuD02\_00096" 3312 "s59E25H2" 0 "putative acyl-CoA dehydrogenase"  
"DsuD02\_00096" 3312 "s59E5H2" 0 "putative acyl-CoA dehydrogenase"  
"DsuD02\_00096" 3312 "s63E6H2" 0 "putative acyl-CoA dehydrogenase"  
"DsuD02\_00097" 3313 "s59E13H2" 0 "Archaeal Lon protease"  
"DsuD02\_00097" 3313 "s59E25H2" 0 "Archaeal Lon protease"  
"DsuD02\_00097" 3313 "s59E5H2" 0 "Archaeal Lon protease"  
"DsuD02\_00097" 3313 "s63E6H2" 0 "Archaeal Lon protease"  
"DsuD02\_00099" 3315 "s59E13H2" 0 "hypothetical protein"  
"DsuD02\_00099" 3315 "s59E25H2" 0 "hypothetical protein"  
"DsuD02\_00099" 3315 "s59E5H2" 0 "hypothetical protein"  
"DsuD02\_00099" 3315 "s63E6H2" 0 "hypothetical protein"  
"DsuD02\_00100" 3316 "s59E13H2" 0 "Ribosomal RNA small subunit methyltransferase E"  
"DsuD02\_00100" 3316 "s59E25H2" 0 "Ribosomal RNA small subunit methyltransferase E"  
"DsuD02\_00100" 3316 "s59E5H2" 0 "Ribosomal RNA small subunit methyltransferase E"  
"DsuD02\_00100" 3316 "s63E6H2" 0.002190103 "Ribosomal RNA small subunit methyltransferase E"  
"DsuD02\_00107" 3323 "s59E13H2" 0 "Corrinoid/iron-sulfur protein small subunit"  
"DsuD02\_00107" 3323 "s59E25H2" 0 "Corrinoid/iron-sulfur protein small subunit"  
"DsuD02\_00107" 3323 "s59E5H2" 0 "Corrinoid/iron-sulfur protein small subunit"  
"DsuD02\_00107" 3323 "s63E6H2" 0 "Corrinoid/iron-sulfur protein small subunit"  
"DsuD02\_00108" 3324 "s59E13H2" 0 "Carbon monoxide dehydrogenase 1"  
"DsuD02\_00108" 3324 "s59E25H2" 0 "Carbon monoxide dehydrogenase 1"  
"DsuD02\_00108" 3324 "s59E5H2" 0 "Carbon monoxide dehydrogenase 1"  
"DsuD02\_00108" 3324 "s63E6H2" 0 "Carbon monoxide dehydrogenase 1"  
"DsuD02\_00109" 3325 "s59E13H2" 0 "Carbon monoxide dehydrogenase/acetyl-CoA synthase subunit alpha"  
"DsuD02\_00109" 3325 "s59E25H2" 0 "Carbon monoxide dehydrogenase/acetyl-CoA synthase subunit alpha"  
"DsuD02\_00109" 3325 "s59E5H2" 0 "Carbon monoxide dehydrogenase/acetyl-CoA synthase subunit alpha"  
"DsuD02\_00109" 3325 "s63E6H2" 0 "Carbon monoxide dehydrogenase/acetyl-CoA synthase subunit alpha"  
"DsuD02\_00110" 3326 "s59E13H2" 0 "Corrinoid/iron-sulfur protein large subunit"  
"DsuD02\_00110" 3326 "s59E25H2" 0 "Corrinoid/iron-sulfur protein large subunit"  
"DsuD02\_00110" 3326 "s59E5H2" 0 "Corrinoid/iron-sulfur protein large subunit"  
"DsuD02\_00110" 3326 "s63E6H2" 0 "Corrinoid/iron-sulfur protein large subunit"  
"DsuD02\_00111" 3327 "s59E13H2" 0 "5-methyltetrahydrofolate:corrinoid/iron-sulfur protein co-methyltransferase"  
"DsuD02\_00111" 3327 "s59E25H2" 0 "5-methyltetrahydrofolate:corrinoid/iron-sulfur protein co-methyltransferase"

"DsuD02\_00111" 3327 "s59E5H2" 0 "5-methyltetrahydrofolate:corrinoid/iron-sulfur protein co-methyltransferase"  
"DsuD02\_00111" 3327 "s63E6H2" 0 "5-methyltetrahydrofolate:corrinoid/iron-sulfur protein co-methyltransferase"  
"DsuD02\_00112" 3328 "s59E13H2" 0 "ComEC family competence protein"  
"DsuD02\_00112" 3328 "s59E25H2" 0 "ComEC family competence protein"  
"DsuD02\_00112" 3328 "s59E5H2" 0 "ComEC family competence protein"  
"DsuD02\_00112" 3328 "s63E6H2" 0 "ComEC family competence protein"  
"DsuD02\_00113" 3329 "s59E13H2" 0 "UDP-N-acetylglucosamine 1-carboxyvinyltransferase"  
"DsuD02\_00113" 3329 "s59E25H2" 0 "UDP-N-acetylglucosamine 1-carboxyvinyltransferase"  
"DsuD02\_00113" 3329 "s59E5H2" 0 "UDP-N-acetylglucosamine 1-carboxyvinyltransferase"  
"DsuD02\_00113" 3329 "s63E6H2" 0 "UDP-N-acetylglucosamine 1-carboxyvinyltransferase"  
"DsuD02\_00114" 3330 "s59E13H2" 0 "Release factor glutamine methyltransferase"  
"DsuD02\_00114" 3330 "s59E25H2" 0 "Release factor glutamine methyltransferase"  
"DsuD02\_00114" 3330 "s59E5H2" 0 "Release factor glutamine methyltransferase"  
"DsuD02\_00114" 3330 "s63E6H2" 0 "Release factor glutamine methyltransferase"  
"DsuD02\_00115" 3331 "s59E13H2" 0 "Putative redox-active protein (C\_GCAxxG\_C\_C)"  
"DsuD02\_00115" 3331 "s59E25H2" 0 "Putative redox-active protein (C\_GCAxxG\_C\_C)"  
"DsuD02\_00115" 3331 "s59E5H2" 0 "Putative redox-active protein (C\_GCAxxG\_C\_C)"  
"DsuD02\_00115" 3331 "s63E6H2" 0 "Putative redox-active protein (C\_GCAxxG\_C\_C)"  
"DsuD02\_00116" 3332 "s59E13H2" 0 "GMP synthase [glutamine-hydrolyzing] subunit B"  
"DsuD02\_00116" 3332 "s59E25H2" 0 "GMP synthase [glutamine-hydrolyzing] subunit B"  
"DsuD02\_00116" 3332 "s59E5H2" 0 "GMP synthase [glutamine-hydrolyzing] subunit B"  
"DsuD02\_00116" 3332 "s63E6H2" 0 "GMP synthase [glutamine-hydrolyzing] subunit B"  
"DsuD02\_00117" 3333 "s59E13H2" 0 "Zinc ribbon domain protein"  
"DsuD02\_00117" 3333 "s59E25H2" 0 "Zinc ribbon domain protein"  
"DsuD02\_00117" 3333 "s59E5H2" 0 "Zinc ribbon domain protein"  
"DsuD02\_00117" 3333 "s63E6H2" 0 "Zinc ribbon domain protein"  
"DsuD02\_00119" 3335 "s59E13H2" 0 "4-chlorobenzoyl coenzyme A dehalogenase-2"  
"DsuD02\_00119" 3335 "s59E25H2" 0 "4-chlorobenzoyl coenzyme A dehalogenase-2"  
"DsuD02\_00119" 3335 "s59E5H2" 0 "4-chlorobenzoyl coenzyme A dehalogenase-2"  
"DsuD02\_00119" 3335 "s63E6H2" 0 "4-chlorobenzoyl coenzyme A dehalogenase-2"  
"DsuD02\_00120" 3336 "s59E13H2" 0 "Queuine tRNA-ribosyltransferase"  
"DsuD02\_00120" 3336 "s59E25H2" 0 "Queuine tRNA-ribosyltransferase"  
"DsuD02\_00120" 3336 "s59E5H2" 0 "Queuine tRNA-ribosyltransferase"  
"DsuD02\_00120" 3336 "s63E6H2" 0 "Queuine tRNA-ribosyltransferase"  
"DsuD02\_00121" 3337 "s59E13H2" 0 "hypothetical protein"  
"DsuD02\_00121" 3337 "s59E25H2" 0 "hypothetical protein"  
"DsuD02\_00121" 3337 "s59E5H2" 0 "hypothetical protein"  
"DsuD02\_00121" 3337 "s63E6H2" 0 "hypothetical protein"  
"DsuD02\_00122" 3338 "s59E13H2" 0 "Methylmalonyl-CoA mutase"  
"DsuD02\_00122" 3338 "s59E25H2" 0 "Methylmalonyl-CoA mutase"  
"DsuD02\_00122" 3338 "s59E5H2" 0 "Methylmalonyl-CoA mutase"  
"DsuD02\_00122" 3338 "s63E6H2" 0 "Methylmalonyl-CoA mutase"  
"DsuD02\_00123" 3339 "s59E13H2" 0 "Methylmalonyl-CoA mutase large subunit"  
"DsuD02\_00123" 3339 "s59E25H2" 0 "Methylmalonyl-CoA mutase large subunit"  
"DsuD02\_00123" 3339 "s59E5H2" 0 "Methylmalonyl-CoA mutase large subunit"  
"DsuD02\_00123" 3339 "s63E6H2" 0 "Methylmalonyl-CoA mutase large subunit"  
"DsuD02\_00124" 3340 "s59E13H2" 0 "Acyl-CoA dehydrogenase"

"DsuD02\_00124" 3340 "s59E25H2" 0 "Acyl-CoA dehydrogenase"  
"DsuD02\_00124" 3340 "s59E5H2" 0 "Acyl-CoA dehydrogenase"  
"DsuD02\_00124" 3340 "s63E6H2" 0 "Acyl-CoA dehydrogenase"  
"DsuD02\_00125" 3341 "s59E13H2" 0 "Long-chain-fatty-acid--CoA ligase"  
"DsuD02\_00125" 3341 "s59E25H2" 0 "Long-chain-fatty-acid--CoA ligase"  
"DsuD02\_00125" 3341 "s59E5H2" 0 "Long-chain-fatty-acid--CoA ligase"  
"DsuD02\_00125" 3341 "s63E6H2" 0 "Long-chain-fatty-acid--CoA ligase"  
"DsuD02\_00126" 3342 "s59E13H2" 0 "Long-chain-fatty-acid--CoA ligase FadD13"  
"DsuD02\_00126" 3342 "s59E25H2" 0 "Long-chain-fatty-acid--CoA ligase FadD13"  
"DsuD02\_00126" 3342 "s59E5H2" 0 "Long-chain-fatty-acid--CoA ligase FadD13"  
"DsuD02\_00126" 3342 "s63E6H2" 0 "Long-chain-fatty-acid--CoA ligase FadD13"  
"DsuD02\_00127" 3343 "s59E13H2" 0 "2-enoate reductase FldZ"  
"DsuD02\_00127" 3343 "s59E25H2" 0 "2-enoate reductase FldZ"  
"DsuD02\_00127" 3343 "s59E5H2" 0 "2-enoate reductase FldZ"  
"DsuD02\_00127" 3343 "s63E6H2" 0 "2-enoate reductase FldZ"  
"DsuD02\_00128" 3344 "s59E13H2" 0 "hypothetical protein"  
"DsuD02\_00128" 3344 "s59E25H2" 0 "hypothetical protein"  
"DsuD02\_00128" 3344 "s59E5H2" 0 "hypothetical protein"  
"DsuD02\_00128" 3344 "s63E6H2" 0 "hypothetical protein"  
"DsuD02\_00129" 3345 "s59E13H2" 0 "hypothetical protein"  
"DsuD02\_00129" 3345 "s59E25H2" 0 "hypothetical protein"  
"DsuD02\_00129" 3345 "s59E5H2" 0 "hypothetical protein"  
"DsuD02\_00129" 3345 "s63E6H2" 0 "hypothetical protein"  
"DsuD02\_00132" 3348 "s59E13H2" 0 "hypothetical protein"  
"DsuD02\_00132" 3348 "s59E25H2" 0 "hypothetical protein"  
"DsuD02\_00132" 3348 "s59E5H2" 0 "hypothetical protein"  
"DsuD02\_00132" 3348 "s63E6H2" 0 "hypothetical protein"  
"DsuD02\_00135" 3351 "s59E13H2" 0 "PHP domain protein"  
"DsuD02\_00135" 3351 "s59E25H2" 0 "PHP domain protein"  
"DsuD02\_00135" 3351 "s59E5H2" 0 "PHP domain protein"  
"DsuD02\_00135" 3351 "s63E6H2" 0 "PHP domain protein"  
"DsuD02\_00138" 3354 "s59E13H2" 0.002955553 "putative BsuMI modification methylase subunit YdiO"  
"DsuD02\_00138" 3354 "s59E25H2" 0 "putative BsuMI modification methylase subunit YdiO"  
"DsuD02\_00138" 3354 "s59E5H2" 0 "putative BsuMI modification methylase subunit YdiO"  
"DsuD02\_00138" 3354 "s63E6H2" 0 "putative BsuMI modification methylase subunit YdiO"  
"DsuD02\_00139" 3355 "s59E13H2" 0.01438161 "Very short patch repair protein"  
"DsuD02\_00139" 3355 "s59E25H2" 0 "Very short patch repair protein"  
"DsuD02\_00139" 3355 "s59E5H2" 0 "Very short patch repair protein"  
"DsuD02\_00139" 3355 "s63E6H2" 0 "Very short patch repair protein"  
"DsuD02\_00140" 3356 "s59E13H2" 0.001011588 "HNH endonuclease"  
"DsuD02\_00140" 3356 "s59E25H2" 0 "HNH endonuclease"  
"DsuD02\_00140" 3356 "s59E5H2" 0 "HNH endonuclease"  
"DsuD02\_00140" 3356 "s63E6H2" 0 "HNH endonuclease"  
"DsuD02\_00142" 3358 "s59E13H2" 0 "Amidohydrolase"  
"DsuD02\_00142" 3358 "s59E25H2" 0 "Amidohydrolase"  
"DsuD02\_00142" 3358 "s59E5H2" 0 "Amidohydrolase"  
"DsuD02\_00142" 3358 "s63E6H2" 0 "Amidohydrolase"

"DsuD02\_00147" 3363 "s59E13H2" 0 "hypothetical protein"  
"DsuD02\_00147" 3363 "s59E25H2" 0 "hypothetical protein"  
"DsuD02\_00147" 3363 "s59E5H2" 0 "hypothetical protein"  
"DsuD02\_00147" 3363 "s63E6H2" 0 "hypothetical protein"  
"DsuD02\_00148" 3364 "s59E13H2" 0 "putative BsuMI modification methylase subunit YdiO"  
"DsuD02\_00148" 3364 "s59E25H2" 0 "putative BsuMI modification methylase subunit YdiO"  
"DsuD02\_00148" 3364 "s59E5H2" 0 "putative BsuMI modification methylase subunit YdiO"  
"DsuD02\_00148" 3364 "s63E6H2" 0 "putative BsuMI modification methylase subunit YdiO"  
"DsuD02\_00149" 3365 "s59E13H2" 0 "Very short patch repair protein"  
"DsuD02\_00149" 3365 "s59E25H2" 0 "Very short patch repair protein"  
"DsuD02\_00149" 3365 "s59E5H2" 0 "Very short patch repair protein"  
"DsuD02\_00149" 3365 "s63E6H2" 0 "Very short patch repair protein"  
"DsuD02\_00150" 3366 "s59E13H2" 0 "HNH endonuclease"  
"DsuD02\_00150" 3366 "s59E25H2" 0 "HNH endonuclease"  
"DsuD02\_00150" 3366 "s59E5H2" 0 "HNH endonuclease"  
"DsuD02\_00150" 3366 "s63E6H2" 0 "HNH endonuclease"  
"DsuD02\_00152" 3368 "s59E13H2" 0 "Transposase IS200 like protein"  
"DsuD02\_00152" 3368 "s59E25H2" 0 "Transposase IS200 like protein"  
"DsuD02\_00152" 3368 "s59E5H2" 0 "Transposase IS200 like protein"  
"DsuD02\_00152" 3368 "s63E6H2" 0 "Transposase IS200 like protein"  
"DsuD02\_00153" 3369 "s59E13H2" 0 "hypothetical protein"  
"DsuD02\_00153" 3369 "s59E25H2" 0 "hypothetical protein"  
"DsuD02\_00153" 3369 "s59E5H2" 0 "hypothetical protein"  
"DsuD02\_00153" 3369 "s63E6H2" 0 "hypothetical protein"  
"DsuD02\_00154" 3370 "s59E13H2" 0 "hypothetical protein"  
"DsuD02\_00154" 3370 "s59E25H2" 0 "hypothetical protein"  
"DsuD02\_00154" 3370 "s59E5H2" 0 "hypothetical protein"  
"DsuD02\_00154" 3370 "s63E6H2" 0 "hypothetical protein"  
"DsuD02\_00157" 3373 "s59E13H2" 0 "Toxin RelE3"  
"DsuD02\_00157" 3373 "s59E25H2" 0 "Toxin RelE3"  
"DsuD02\_00157" 3373 "s59E5H2" 0 "Toxin RelE3"  
"DsuD02\_00157" 3373 "s63E6H2" 0 "Toxin RelE3"  
"DsuD02\_00158" 3374 "s59E13H2" 0 "Phd\_YefM"  
"DsuD02\_00158" 3374 "s59E25H2" 0 "Phd\_YefM"  
"DsuD02\_00158" 3374 "s59E5H2" 0 "Phd\_YefM"  
"DsuD02\_00158" 3374 "s63E6H2" 0 "Phd\_YefM"  
"DsuD02\_00159" 3375 "s59E13H2" 0 "hypothetical protein"  
"DsuD02\_00159" 3375 "s59E25H2" 0 "hypothetical protein"  
"DsuD02\_00159" 3375 "s59E5H2" 0 "hypothetical protein"  
"DsuD02\_00159" 3375 "s63E6H2" 0 "hypothetical protein"  
"DsuD02\_00160" 3376 "s59E13H2" 0 "Plasmid stabilisation system protein"  
"DsuD02\_00160" 3376 "s59E25H2" 0 "Plasmid stabilisation system protein"  
"DsuD02\_00160" 3376 "s59E5H2" 0 "Plasmid stabilisation system protein"  
"DsuD02\_00160" 3376 "s63E6H2" 0 "Plasmid stabilisation system protein"  
"DsuD02\_00162" 3378 "s59E13H2" 0 "Acyl-CoA dehydrogenase"  
"DsuD02\_00162" 3378 "s59E25H2" 0 "Acyl-CoA dehydrogenase"  
"DsuD02\_00162" 3378 "s59E5H2" 0 "Acyl-CoA dehydrogenase"

"DsuD02\_00162" 3378 "s63E6H2" 0 "Acyl-CoA dehydrogenase"  
"DsuD02\_00163" 3379 "s59E13H2" 0 "4-aminobutyrate aminotransferase GabT"  
"DsuD02\_00163" 3379 "s59E25H2" 0 "4-aminobutyrate aminotransferase GabT"  
"DsuD02\_00163" 3379 "s59E5H2" 0 "4-aminobutyrate aminotransferase GabT"  
"DsuD02\_00163" 3379 "s63E6H2" 0 "4-aminobutyrate aminotransferase GabT"  
"DsuD02\_00164" 3380 "s59E13H2" 0 "putative hydrolase"  
"DsuD02\_00164" 3380 "s59E25H2" 0 "putative hydrolase"  
"DsuD02\_00164" 3380 "s59E5H2" 0 "putative hydrolase"  
"DsuD02\_00164" 3380 "s63E6H2" 0 "putative hydrolase"  
"DsuD02\_00165" 3381 "s59E13H2" 0 "hypothetical protein"  
"DsuD02\_00165" 3381 "s59E25H2" 0 "hypothetical protein"  
"DsuD02\_00165" 3381 "s59E5H2" 0 "hypothetical protein"  
"DsuD02\_00165" 3381 "s63E6H2" 0 "hypothetical protein"  
"DsuD02\_00166" 3382 "s59E13H2" 0 "p-aminobenzoyl-glutamate hydrolase subunit B"  
"DsuD02\_00166" 3382 "s59E25H2" 0 "p-aminobenzoyl-glutamate hydrolase subunit B"  
"DsuD02\_00166" 3382 "s59E5H2" 0 "p-aminobenzoyl-glutamate hydrolase subunit B"  
"DsuD02\_00166" 3382 "s63E6H2" 0 "p-aminobenzoyl-glutamate hydrolase subunit B"  
"DsuD02\_00168" 3384 "s59E13H2" 0 "2-oxoglutaramate amidase"  
"DsuD02\_00168" 3384 "s59E25H2" 0 "2-oxoglutaramate amidase"  
"DsuD02\_00168" 3384 "s59E5H2" 0 "2-oxoglutaramate amidase"  
"DsuD02\_00168" 3384 "s63E6H2" 0 "2-oxoglutaramate amidase"  
"DsuD02\_00169" 3385 "s59E13H2" 0 "leucine/isoleucine/valine transporter permease subunit"  
"DsuD02\_00169" 3385 "s59E25H2" 0 "leucine/isoleucine/valine transporter permease subunit"  
"DsuD02\_00169" 3385 "s59E5H2" 0 "leucine/isoleucine/valine transporter permease subunit"  
"DsuD02\_00169" 3385 "s63E6H2" 0 "leucine/isoleucine/valine transporter permease subunit"  
"DsuD02\_00170" 3386 "s59E13H2" 0 "High-affinity branched-chain amino acid transport system permease protein LivH"  
"DsuD02\_00170" 3386 "s59E25H2" 0 "High-affinity branched-chain amino acid transport system permease protein LivH"  
"DsuD02\_00170" 3386 "s59E5H2" 0 "High-affinity branched-chain amino acid transport system permease protein LivH"  
"DsuD02\_00170" 3386 "s63E6H2" 0 "High-affinity branched-chain amino acid transport system permease protein LivH"  
"DsuD02\_00171" 3387 "s59E13H2" 0 "High-affinity branched-chain amino acid transport ATP-binding protein LivF"  
"DsuD02\_00171" 3387 "s59E25H2" 0 "High-affinity branched-chain amino acid transport ATP-binding protein LivF"  
"DsuD02\_00171" 3387 "s59E5H2" 0 "High-affinity branched-chain amino acid transport ATP-binding protein LivF"  
"DsuD02\_00171" 3387 "s63E6H2" 0 "High-affinity branched-chain amino acid transport ATP-binding protein LivF"  
"DsuD02\_00172" 3388 "s59E13H2" 0 "putative branched-chain amino acid transport ATP-binding protein LivG"  
"DsuD02\_00172" 3388 "s59E25H2" 0 "putative branched-chain amino acid transport ATP-binding protein LivG"  
"DsuD02\_00172" 3388 "s59E5H2" 0 "putative branched-chain amino acid transport ATP-binding protein LivG"  
"DsuD02\_00172" 3388 "s63E6H2" 0 "putative branched-chain amino acid transport ATP-binding protein LivG"  
"DsuD02\_00173" 3389 "s59E13H2" 0 "Receptor family ligand binding region"  
"DsuD02\_00173" 3389 "s59E25H2" 0 "Receptor family ligand binding region"  
"DsuD02\_00173" 3389 "s59E5H2" 0 "Receptor family ligand binding region"  
"DsuD02\_00173" 3389 "s63E6H2" 0 "Receptor family ligand binding region"  
"DsuD02\_00175" 3391 "s59E13H2" 0 "Tungsten-containing aldehyde ferredoxin oxidoreductase"  
"DsuD02\_00175" 3391 "s59E25H2" 0 "Tungsten-containing aldehyde ferredoxin oxidoreductase"  
"DsuD02\_00175" 3391 "s59E5H2" 0 "Tungsten-containing aldehyde ferredoxin oxidoreductase"  
"DsuD02\_00175" 3391 "s63E6H2" 0 "Tungsten-containing aldehyde ferredoxin oxidoreductase"  
"DsuD02\_00176" 3392 "s59E13H2" 0 "Histone deacetylase-like amidohydrolase"  
"DsuD02\_00176" 3392 "s59E25H2" 0 "Histone deacetylase-like amidohydrolase"

"DsuD02\_00176" 3392 "s59E5H2" 0 "Histone deacetylase-like amidohydrolase"  
"DsuD02\_00176" 3392 "s63E6H2" 0 "Histone deacetylase-like amidohydrolase"  
"DsuD02\_00177" 3393 "s59E13H2" 0 "Phosphoribosylformylglycinamide synthase 1"  
"DsuD02\_00177" 3393 "s59E25H2" 0 "Phosphoribosylformylglycinamide synthase 1"  
"DsuD02\_00177" 3393 "s59E5H2" 0 "Phosphoribosylformylglycinamide synthase 1"  
"DsuD02\_00177" 3393 "s63E6H2" 0 "Phosphoribosylformylglycinamide synthase 1"  
"DsuD02\_00178" 3394 "s59E13H2" 0 "Phosphoribosylformylglycinamide synthase 2"  
"DsuD02\_00178" 3394 "s59E25H2" 0 "Phosphoribosylformylglycinamide synthase 2"  
"DsuD02\_00178" 3394 "s59E5H2" 0 "Phosphoribosylformylglycinamide synthase 2"  
"DsuD02\_00178" 3394 "s63E6H2" 0 "Phosphoribosylformylglycinamide synthase 2"  
"DsuD02\_00179" 3395 "s59E13H2" 0 "phosphohistidine phosphatase"  
"DsuD02\_00179" 3395 "s59E25H2" 0 "phosphohistidine phosphatase"  
"DsuD02\_00179" 3395 "s59E5H2" 0 "phosphohistidine phosphatase"  
"DsuD02\_00179" 3395 "s63E6H2" 0 "phosphohistidine phosphatase"  
"DsuD02\_00180" 3396 "s59E13H2" 0 "Tetracycline resistance protein, class B"  
"DsuD02\_00180" 3396 "s59E25H2" 0 "Tetracycline resistance protein, class B"  
"DsuD02\_00180" 3396 "s59E5H2" 0 "Tetracycline resistance protein, class B"  
"DsuD02\_00180" 3396 "s63E6H2" 0 "Tetracycline resistance protein, class B"  
"DsuD02\_00181" 3397 "s59E13H2" 0 "hypothetical protein"  
"DsuD02\_00181" 3397 "s59E25H2" 0 "hypothetical protein"  
"DsuD02\_00181" 3397 "s59E5H2" 0 "hypothetical protein"  
"DsuD02\_00181" 3397 "s63E6H2" 0 "hypothetical protein"  
"DsuD02\_00182" 3398 "s59E13H2" 0 "Glycosyltransferase AgIJ"  
"DsuD02\_00182" 3398 "s59E25H2" 0 "Glycosyltransferase AgIJ"  
"DsuD02\_00182" 3398 "s59E5H2" 0 "Glycosyltransferase AgIJ"  
"DsuD02\_00182" 3398 "s63E6H2" 0 "Glycosyltransferase AgIJ"  
"DsuD02\_00183" 3399 "s59E13H2" 0 "Undecaprenyl-phosphate 4-deoxy-4-formamido-L-arabinose transferase"  
"DsuD02\_00183" 3399 "s59E25H2" 0 "Undecaprenyl-phosphate 4-deoxy-4-formamido-L-arabinose transferase"  
"DsuD02\_00183" 3399 "s59E5H2" 0 "Undecaprenyl-phosphate 4-deoxy-4-formamido-L-arabinose transferase"  
"DsuD02\_00183" 3399 "s63E6H2" 0 "Undecaprenyl-phosphate 4-deoxy-4-formamido-L-arabinose transferase"  
"DsuD02\_00184" 3400 "s59E13H2" 0 "Glycosyltransferase AgID"  
"DsuD02\_00184" 3400 "s59E25H2" 0 "Glycosyltransferase AgID"  
"DsuD02\_00184" 3400 "s59E5H2" 0 "Glycosyltransferase AgID"  
"DsuD02\_00184" 3400 "s63E6H2" 0 "Glycosyltransferase AgID"  
"DsuD02\_00185" 3401 "s59E13H2" 0 "hypothetical protein"  
"DsuD02\_00185" 3401 "s59E25H2" 0 "hypothetical protein"  
"DsuD02\_00185" 3401 "s59E5H2" 0 "hypothetical protein"  
"DsuD02\_00185" 3401 "s63E6H2" 0 "hypothetical protein"  
"DsuD02\_00186" 3402 "s59E13H2" 0 "FecR protein"  
"DsuD02\_00186" 3402 "s59E25H2" 0 "FecR protein"  
"DsuD02\_00186" 3402 "s59E5H2" 0 "FecR protein"  
"DsuD02\_00186" 3402 "s63E6H2" 0 "FecR protein"  
"DsuD02\_00187" 3403 "s59E13H2" 0 "photosystem I assembly protein Ycf3"  
"DsuD02\_00187" 3403 "s59E25H2" 0 "photosystem I assembly protein Ycf3"  
"DsuD02\_00187" 3403 "s59E5H2" 0 "photosystem I assembly protein Ycf3"  
"DsuD02\_00187" 3403 "s63E6H2" 0 "photosystem I assembly protein Ycf3"  
"DsuD02\_00188" 3404 "s59E13H2" 0 "Ribosomal protein S12 methylthiotransferase RimO"

"DsuD02\_00188" 3404 "s59E25H2" 0 "Ribosomal protein S12 methylthiotransferase RimO"  
"DsuD02\_00188" 3404 "s59E5H2" 0 "Ribosomal protein S12 methylthiotransferase RimO"  
"DsuD02\_00188" 3404 "s63E6H2" 0 "Ribosomal protein S12 methylthiotransferase RimO"  
"DsuD02\_00189" 3405 "s59E13H2" 0 "Outer membrane protein assembly factor BamD"  
"DsuD02\_00189" 3405 "s59E25H2" 0 "Outer membrane protein assembly factor BamD"  
"DsuD02\_00189" 3405 "s59E5H2" 0 "Outer membrane protein assembly factor BamD"  
"DsuD02\_00189" 3405 "s63E6H2" 0 "Outer membrane protein assembly factor BamD"  
"DsuD02\_00190" 3406 "s59E13H2" 0 "hypothetical protein"  
"DsuD02\_00190" 3406 "s59E25H2" 0 "hypothetical protein"  
"DsuD02\_00190" 3406 "s59E5H2" 0 "hypothetical protein"  
"DsuD02\_00190" 3406 "s63E6H2" 0 "hypothetical protein"  
"DsuD02\_00191" 3407 "s59E13H2" 0 "DNA polymerase IV"  
"DsuD02\_00191" 3407 "s59E25H2" 0 "DNA polymerase IV"  
"DsuD02\_00191" 3407 "s59E5H2" 0 "DNA polymerase IV"  
"DsuD02\_00191" 3407 "s63E6H2" 0 "DNA polymerase IV"  
"DsuD02\_00192" 3408 "s59E13H2" 0 "Elongation factor G"  
"DsuD02\_00192" 3408 "s59E25H2" 0 "Elongation factor G"  
"DsuD02\_00192" 3408 "s59E5H2" 0 "Elongation factor G"  
"DsuD02\_00192" 3408 "s63E6H2" 0 "Elongation factor G"  
"DsuD02\_00193" 3409 "s59E13H2" 0 "hypothetical protein"  
"DsuD02\_00193" 3409 "s59E25H2" 0 "hypothetical protein"  
"DsuD02\_00193" 3409 "s59E5H2" 0 "hypothetical protein"  
"DsuD02\_00193" 3409 "s63E6H2" 0 "hypothetical protein"  
"DsuD02\_00194" 3410 "s59E13H2" 0 "hypothetical protein"  
"DsuD02\_00194" 3410 "s59E25H2" 0 "hypothetical protein"  
"DsuD02\_00194" 3410 "s59E5H2" 0 "hypothetical protein"  
"DsuD02\_00194" 3410 "s63E6H2" 0 "hypothetical protein"  
"DsuD02\_00195" 3411 "s59E13H2" 0 "Integration host factor subunit alpha"  
"DsuD02\_00195" 3411 "s59E25H2" 0 "Integration host factor subunit alpha"  
"DsuD02\_00195" 3411 "s59E5H2" 0 "Integration host factor subunit alpha"  
"DsuD02\_00195" 3411 "s63E6H2" 0 "Integration host factor subunit alpha"  
"DsuD02\_00196" 3412 "s59E13H2" 0 "DNA-binding protein HU"  
"DsuD02\_00196" 3412 "s59E25H2" 0 "DNA-binding protein HU"  
"DsuD02\_00196" 3412 "s59E5H2" 0 "DNA-binding protein HU"  
"DsuD02\_00196" 3412 "s63E6H2" 0 "DNA-binding protein HU"  
"DsuD02\_00197" 3413 "s59E13H2" 0 "Diaminopimelate epimerase"  
"DsuD02\_00197" 3413 "s59E25H2" 0 "Diaminopimelate epimerase"  
"DsuD02\_00197" 3413 "s59E5H2" 0 "Diaminopimelate epimerase"  
"DsuD02\_00197" 3413 "s63E6H2" 0 "Diaminopimelate epimerase"  
"DsuD02\_00198" 3414 "s59E13H2" 0 "hypothetical protein"  
"DsuD02\_00198" 3414 "s59E25H2" 0 "hypothetical protein"  
"DsuD02\_00198" 3414 "s59E5H2" 0 "hypothetical protein"  
"DsuD02\_00198" 3414 "s63E6H2" 0 "hypothetical protein"  
"DsuD02\_00199" 3415 "s59E13H2" 0 "Lipopolysaccharide export system permease protein LptF"  
"DsuD02\_00199" 3415 "s59E25H2" 0 "Lipopolysaccharide export system permease protein LptF"  
"DsuD02\_00199" 3415 "s59E5H2" 0 "Lipopolysaccharide export system permease protein LptF"  
"DsuD02\_00199" 3415 "s63E6H2" 0 "Lipopolysaccharide export system permease protein LptF"

"DsuD02\_00200" 3416 "s59E13H2" 0 "PAP2 superfamily protein"  
"DsuD02\_00200" 3416 "s59E25H2" 0 "PAP2 superfamily protein"  
"DsuD02\_00200" 3416 "s59E5H2" 0 "PAP2 superfamily protein"  
"DsuD02\_00200" 3416 "s63E6H2" 0 "PAP2 superfamily protein"  
"DsuD02\_00201" 3417 "s59E13H2" 0 "hypothetical protein"  
"DsuD02\_00201" 3417 "s59E25H2" 0 "hypothetical protein"  
"DsuD02\_00201" 3417 "s59E5H2" 0 "hypothetical protein"  
"DsuD02\_00201" 3417 "s63E6H2" 0 "hypothetical protein"  
"DsuD02\_00202" 3418 "s59E13H2" 0 "Undecaprenyl-phosphate 4-deoxy-4-formamido-L-arabinose transferase"  
"DsuD02\_00202" 3418 "s59E25H2" 0 "Undecaprenyl-phosphate 4-deoxy-4-formamido-L-arabinose transferase"  
"DsuD02\_00202" 3418 "s59E5H2" 0 "Undecaprenyl-phosphate 4-deoxy-4-formamido-L-arabinose transferase"  
"DsuD02\_00202" 3418 "s63E6H2" 0 "Undecaprenyl-phosphate 4-deoxy-4-formamido-L-arabinose transferase"  
"DsuD02\_00203" 3419 "s59E13H2" 0 "hypothetical protein"  
"DsuD02\_00203" 3419 "s59E25H2" 0 "hypothetical protein"  
"DsuD02\_00203" 3419 "s59E5H2" 0 "hypothetical protein"  
"DsuD02\_00203" 3419 "s63E6H2" 0 "hypothetical protein"  
"DsuD02\_00204" 3420 "s59E13H2" 0 "hypothetical protein"  
"DsuD02\_00204" 3420 "s59E25H2" 0 "hypothetical protein"  
"DsuD02\_00204" 3420 "s59E5H2" 0 "hypothetical protein"  
"DsuD02\_00204" 3420 "s63E6H2" 0 "hypothetical protein"  
"DsuD02\_00205" 3421 "s59E13H2" 0 "Undecaprenyl phosphate-alpha-4-amino-4-deoxy-L-arabinose arabinosyl transferase"  
"DsuD02\_00205" 3421 "s59E25H2" 0 "Undecaprenyl phosphate-alpha-4-amino-4-deoxy-L-arabinose arabinosyl transferase"  
"DsuD02\_00205" 3421 "s59E5H2" 0 "Undecaprenyl phosphate-alpha-4-amino-4-deoxy-L-arabinose arabinosyl transferase"  
"DsuD02\_00205" 3421 "s63E6H2" 0 "Undecaprenyl phosphate-alpha-4-amino-4-deoxy-L-arabinose arabinosyl transferase"  
"DsuD02\_00206" 3422 "s59E13H2" 0 "serine/threonine protein kinase"  
"DsuD02\_00206" 3422 "s59E25H2" 0 "serine/threonine protein kinase"  
"DsuD02\_00206" 3422 "s59E5H2" 0 "serine/threonine protein kinase"  
"DsuD02\_00206" 3422 "s63E6H2" 0 "serine/threonine protein kinase"  
"DsuD02\_00207" 3423 "s59E13H2" 0 "hypothetical protein"  
"DsuD02\_00207" 3423 "s59E25H2" 0 "hypothetical protein"  
"DsuD02\_00207" 3423 "s59E5H2" 0 "hypothetical protein"  
"DsuD02\_00207" 3423 "s63E6H2" 0 "hypothetical protein"  
"DsuD02\_00208" 3424 "s59E13H2" 0 "GMP synthase [glutamine-hydrolyzing]"  
"DsuD02\_00208" 3424 "s59E25H2" 0 "GMP synthase [glutamine-hydrolyzing]"  
"DsuD02\_00208" 3424 "s59E5H2" 0 "GMP synthase [glutamine-hydrolyzing]"  
"DsuD02\_00208" 3424 "s63E6H2" 0 "GMP synthase [glutamine-hydrolyzing]"  
"DsuD02\_00209" 3425 "s59E13H2" 0 "GMP synthase [glutamine-hydrolyzing]"  
"DsuD02\_00209" 3425 "s59E25H2" 0 "GMP synthase [glutamine-hydrolyzing]"  
"DsuD02\_00209" 3425 "s59E5H2" 0 "GMP synthase [glutamine-hydrolyzing]"  
"DsuD02\_00209" 3425 "s63E6H2" 0 "GMP synthase [glutamine-hydrolyzing]"  
"DsuD02\_00211" 3427 "s59E13H2" 0 "3-deoxy-D-manno-octulosonic acid transferase"  
"DsuD02\_00211" 3427 "s59E25H2" 0 "3-deoxy-D-manno-octulosonic acid transferase"  
"DsuD02\_00211" 3427 "s59E5H2" 0 "3-deoxy-D-manno-octulosonic acid transferase"  
"DsuD02\_00211" 3427 "s63E6H2" 0 "3-deoxy-D-manno-octulosonic acid transferase"  
"DsuD02\_00212" 3428 "s59E13H2" 0 "hypothetical protein"  
"DsuD02\_00212" 3428 "s59E25H2" 0 "hypothetical protein"  
"DsuD02\_00212" 3428 "s59E5H2" 0 "hypothetical protein"



"DsuD02\_00212" 3428 "s63E6H2" 0 "hypothetical protein"  
"DsuD02\_00214" 3430 "s59E13H2" 0 "Phosphoglucosamine mutase"  
"DsuD02\_00214" 3430 "s59E25H2" 0 "Phosphoglucosamine mutase"  
"DsuD02\_00214" 3430 "s59E5H2" 0 "Phosphoglucosamine mutase"  
"DsuD02\_00214" 3430 "s63E6H2" 0 "Phosphoglucosamine mutase"  
"DsuD02\_00215" 3431 "s59E13H2" 0 "Glucosamine-6-phosphate deaminase 1"  
"DsuD02\_00215" 3431 "s59E25H2" 0 "Glucosamine-6-phosphate deaminase 1"  
"DsuD02\_00215" 3431 "s59E5H2" 0 "Glucosamine-6-phosphate deaminase 1"  
"DsuD02\_00215" 3431 "s63E6H2" 0 "Glucosamine-6-phosphate deaminase 1"  
"DsuD02\_00216" 3432 "s59E13H2" 0 "Glutamine--fructose-6-phosphate aminotransferase [isomerizing]"  
"DsuD02\_00216" 3432 "s59E25H2" 0 "Glutamine--fructose-6-phosphate aminotransferase [isomerizing]"  
"DsuD02\_00216" 3432 "s59E5H2" 0 "Glutamine--fructose-6-phosphate aminotransferase [isomerizing]"  
"DsuD02\_00216" 3432 "s63E6H2" 0 "Glutamine--fructose-6-phosphate aminotransferase [isomerizing]"  
"DsuD02\_00217" 3433 "s59E13H2" 0 "putative transcriptional regulatory protein pdtaR"  
"DsuD02\_00217" 3433 "s59E25H2" 0 "putative transcriptional regulatory protein pdtaR"  
"DsuD02\_00217" 3433 "s59E5H2" 0 "putative transcriptional regulatory protein pdtaR"  
"DsuD02\_00217" 3433 "s63E6H2" 0 "putative transcriptional regulatory protein pdtaR"  
"DsuD02\_00218" 3434 "s59E13H2" 0 "Glutamate dehydrogenase"  
"DsuD02\_00218" 3434 "s59E25H2" 0 "Glutamate dehydrogenase"  
"DsuD02\_00218" 3434 "s59E5H2" 0 "Glutamate dehydrogenase"  
"DsuD02\_00218" 3434 "s63E6H2" 0 "Glutamate dehydrogenase"  
"DsuD02\_00219" 3435 "s59E13H2" 0 "phosphoenolpyruvate synthase"  
"DsuD02\_00219" 3435 "s59E25H2" 0 "phosphoenolpyruvate synthase"  
"DsuD02\_00219" 3435 "s59E5H2" 0 "phosphoenolpyruvate synthase"  
"DsuD02\_00219" 3435 "s63E6H2" 0 "phosphoenolpyruvate synthase"  
"DsuD02\_00220" 3436 "s59E13H2" 0 "hypothetical protein"  
"DsuD02\_00220" 3436 "s59E25H2" 0 "hypothetical protein"  
"DsuD02\_00220" 3436 "s59E5H2" 0 "hypothetical protein"  
"DsuD02\_00220" 3436 "s63E6H2" 0 "hypothetical protein"  
"DsuD02\_00221" 3437 "s59E13H2" 0 "hypothetical protein"  
"DsuD02\_00221" 3437 "s59E25H2" 0 "hypothetical protein"  
"DsuD02\_00221" 3437 "s59E5H2" 0 "hypothetical protein"  
"DsuD02\_00221" 3437 "s63E6H2" 0 "hypothetical protein"  
"DsuD02\_00223" 3439 "s59E13H2" 0 "Carbamoyl-phosphate synthase large chain"  
"DsuD02\_00223" 3439 "s59E25H2" 0 "Carbamoyl-phosphate synthase large chain"  
"DsuD02\_00223" 3439 "s59E5H2" 0 "Carbamoyl-phosphate synthase large chain"  
"DsuD02\_00223" 3439 "s63E6H2" 0 "Carbamoyl-phosphate synthase large chain"  
"DsuD02\_00224" 3440 "s59E13H2" 0 "Amidophosphoribosyltransferase precursor"  
"DsuD02\_00224" 3440 "s59E25H2" 0 "Amidophosphoribosyltransferase precursor"  
"DsuD02\_00224" 3440 "s59E5H2" 0.005473789 "Amidophosphoribosyltransferase precursor"  
"DsuD02\_00224" 3440 "s63E6H2" 0 "Amidophosphoribosyltransferase precursor"  
"DsuD02\_00225" 3441 "s59E13H2" 0 "Glutamine-dependent NAD(+) synthetase"  
"DsuD02\_00225" 3441 "s59E25H2" 0 "Glutamine-dependent NAD(+) synthetase"  
"DsuD02\_00225" 3441 "s59E5H2" 0 "Glutamine-dependent NAD(+) synthetase"  
"DsuD02\_00225" 3441 "s63E6H2" 0 "Glutamine-dependent NAD(+) synthetase"  
"DsuD02\_00226" 3442 "s59E13H2" 0 "putative glutamine synthetase 2"  
"DsuD02\_00226" 3442 "s59E25H2" 0 "putative glutamine synthetase 2"

"DsuD02\_00226" 3442 "s59E5H2" 0 "putative glutamine synthetase 2"  
"DsuD02\_00226" 3442 "s63E6H2" 0 "putative glutamine synthetase 2"  
"DsuD02\_00227" 3443 "s59E13H2" 0 "asparagine synthetase A"  
"DsuD02\_00227" 3443 "s59E25H2" 0 "asparagine synthetase A"  
"DsuD02\_00227" 3443 "s59E5H2" 0 "asparagine synthetase A"  
"DsuD02\_00227" 3443 "s63E6H2" 0 "asparagine synthetase A"  
"DsuD02\_00228" 3444 "s59E13H2" 0 "Bifunctional ligase/repressor BirA"  
"DsuD02\_00228" 3444 "s59E25H2" 0 "Bifunctional ligase/repressor BirA"  
"DsuD02\_00228" 3444 "s59E5H2" 0 "Bifunctional ligase/repressor BirA"  
"DsuD02\_00228" 3444 "s63E6H2" 0 "Bifunctional ligase/repressor BirA"  
"DsuD02\_00230" 3446 "s59E13H2" 0 "DNA gyrase subunit A"  
"DsuD02\_00230" 3446 "s59E25H2" 0 "DNA gyrase subunit A"  
"DsuD02\_00230" 3446 "s59E5H2" 0.001669935 "DNA gyrase subunit A"  
"DsuD02\_00230" 3446 "s63E6H2" 0 "DNA gyrase subunit A"  
"DsuD02\_00231" 3447 "s59E13H2" 0 "DNA gyrase subunit B"  
"DsuD02\_00231" 3447 "s59E25H2" 0 "DNA gyrase subunit B"  
"DsuD02\_00231" 3447 "s59E5H2" 0 "DNA gyrase subunit B"  
"DsuD02\_00231" 3447 "s63E6H2" 0 "DNA gyrase subunit B"  
"DsuD02\_00232" 3448 "s59E13H2" 0 "DNA polymerase III subunit beta"  
"DsuD02\_00232" 3448 "s59E25H2" 0 "DNA polymerase III subunit beta"  
"DsuD02\_00232" 3448 "s59E5H2" 0 "DNA polymerase III subunit beta"  
"DsuD02\_00232" 3448 "s63E6H2" 0 "DNA polymerase III subunit beta"  
"DsuD02\_00233" 3449 "s59E13H2" 0 "Glutaryl-CoA dehydrogenase"  
"DsuD02\_00233" 3449 "s59E25H2" 0 "Glutaryl-CoA dehydrogenase"  
"DsuD02\_00233" 3449 "s59E5H2" 0 "Glutaryl-CoA dehydrogenase"  
"DsuD02\_00233" 3449 "s63E6H2" 0 "Glutaryl-CoA dehydrogenase"  
"DsuD02\_00234" 3450 "s59E13H2" 0 "tRNA modification GTPase MnmE"  
"DsuD02\_00234" 3450 "s59E25H2" 0 "tRNA modification GTPase MnmE"  
"DsuD02\_00234" 3450 "s59E5H2" 0 "tRNA modification GTPase MnmE"  
"DsuD02\_00234" 3450 "s63E6H2" 0 "tRNA modification GTPase MnmE"  
"DsuD02\_00235" 3451 "s59E13H2" 0 "ATP-dependent zinc metalloprotease FtsH"  
"DsuD02\_00235" 3451 "s59E25H2" 0 "ATP-dependent zinc metalloprotease FtsH"  
"DsuD02\_00235" 3451 "s59E5H2" 0 "ATP-dependent zinc metalloprotease FtsH"  
"DsuD02\_00235" 3451 "s63E6H2" 0 "ATP-dependent zinc metalloprotease FtsH"  
"DsuD02\_00236" 3452 "s59E13H2" 0 "Dihydropteroate synthase"  
"DsuD02\_00236" 3452 "s59E25H2" 0 "Dihydropteroate synthase"  
"DsuD02\_00236" 3452 "s59E5H2" 0 "Dihydropteroate synthase"  
"DsuD02\_00236" 3452 "s63E6H2" 0 "Dihydropteroate synthase"  
"DsuD02\_00237" 3453 "s59E13H2" 0 "Type III pantothenate kinase"  
"DsuD02\_00237" 3453 "s59E25H2" 0 "Type III pantothenate kinase"  
"DsuD02\_00237" 3453 "s59E5H2" 0 "Type III pantothenate kinase"  
"DsuD02\_00237" 3453 "s63E6H2" 0 "Type III pantothenate kinase"  
"DsuD02\_00238" 3454 "s59E13H2" 0 "hypothetical protein"  
"DsuD02\_00238" 3454 "s59E25H2" 0 "hypothetical protein"  
"DsuD02\_00238" 3454 "s59E5H2" 0 "hypothetical protein"  
"DsuD02\_00238" 3454 "s63E6H2" 0 "hypothetical protein"  
"DsuD02\_00239" 3455 "s59E13H2" 0 "Gas vesicle protein K"

"DsuD02\_00239" 3455 "s59E25H2" 0 "Gas vesicle protein K"  
"DsuD02\_00239" 3455 "s59E5H2" 0 "Gas vesicle protein K"  
"DsuD02\_00239" 3455 "s63E6H2" 0 "Gas vesicle protein K"  
"DsuD02\_00240" 3456 "s59E13H2" 0 "gas vesicle synthesis protein GvpA"  
"DsuD02\_00240" 3456 "s59E25H2" 0 "gas vesicle synthesis protein GvpA"  
"DsuD02\_00240" 3456 "s59E5H2" 0 "gas vesicle synthesis protein GvpA"  
"DsuD02\_00240" 3456 "s63E6H2" 0 "gas vesicle synthesis protein GvpA"  
"DsuD02\_00241" 3457 "s59E13H2" 0 "Putative arsenical pump-driving ATPase"  
"DsuD02\_00241" 3457 "s59E25H2" 0 "Putative arsenical pump-driving ATPase"  
"DsuD02\_00241" 3457 "s59E5H2" 0 "Putative arsenical pump-driving ATPase"  
"DsuD02\_00241" 3457 "s63E6H2" 0 "Putative arsenical pump-driving ATPase"  
"DsuD02\_00243" 3459 "s59E13H2" 0 "Gas vesicle protein G"  
"DsuD02\_00243" 3459 "s59E25H2" 0 "Gas vesicle protein G"  
"DsuD02\_00243" 3459 "s59E5H2" 0 "Gas vesicle protein G"  
"DsuD02\_00243" 3459 "s63E6H2" 0 "Gas vesicle protein G"  
"DsuD02\_00244" 3460 "s59E13H2" 0 "Gas vesicle synthesis protein GvpL/GvpF"  
"DsuD02\_00244" 3460 "s59E25H2" 0 "Gas vesicle synthesis protein GvpL/GvpF"  
"DsuD02\_00244" 3460 "s59E5H2" 0 "Gas vesicle synthesis protein GvpL/GvpF"  
"DsuD02\_00244" 3460 "s63E6H2" 0 "Gas vesicle synthesis protein GvpL/GvpF"  
"DsuD02\_00246" 3462 "s59E13H2" 0 "chaperone protein DnaJ"  
"DsuD02\_00246" 3462 "s59E25H2" 0 "chaperone protein DnaJ"  
"DsuD02\_00246" 3462 "s59E5H2" 0 "chaperone protein DnaJ"  
"DsuD02\_00246" 3462 "s63E6H2" 0 "chaperone protein DnaJ"  
"DsuD02\_00248" 3464 "s59E13H2" 0 "Denitrification regulatory protein NirQ"  
"DsuD02\_00248" 3464 "s59E25H2" 0 "Denitrification regulatory protein NirQ"  
"DsuD02\_00248" 3464 "s59E5H2" 0 "Denitrification regulatory protein NirQ"  
"DsuD02\_00248" 3464 "s63E6H2" 0 "Denitrification regulatory protein NirQ"  
"DsuD02\_00249" 3465 "s59E13H2" 0 "chaperone protein DnaJ"  
"DsuD02\_00249" 3465 "s59E25H2" 0 "chaperone protein DnaJ"  
"DsuD02\_00249" 3465 "s59E5H2" 0 "chaperone protein DnaJ"  
"DsuD02\_00249" 3465 "s63E6H2" 0 "chaperone protein DnaJ"  
"DsuD02\_00250" 3466 "s59E13H2" 0 "50S ribosomal protein L21/unknown domain fusion protein"  
"DsuD02\_00250" 3466 "s59E25H2" 0 "50S ribosomal protein L21/unknown domain fusion protein"  
"DsuD02\_00250" 3466 "s59E5H2" 0 "50S ribosomal protein L21/unknown domain fusion protein"  
"DsuD02\_00250" 3466 "s63E6H2" 0 "50S ribosomal protein L21/unknown domain fusion protein"  
"DsuD02\_00251" 3467 "s59E13H2" 0 "Gas vesicle structural protein"  
"DsuD02\_00251" 3467 "s59E25H2" 0 "Gas vesicle structural protein"  
"DsuD02\_00251" 3467 "s59E5H2" 0 "Gas vesicle structural protein"  
"DsuD02\_00251" 3467 "s63E6H2" 0 "Gas vesicle structural protein"  
"DsuD02\_00252" 3468 "s59E13H2" 0 "hypothetical protein"  
"DsuD02\_00252" 3468 "s59E25H2" 0 "hypothetical protein"  
"DsuD02\_00252" 3468 "s59E5H2" 0 "hypothetical protein"  
"DsuD02\_00252" 3468 "s63E6H2" 0 "hypothetical protein"  
"DsuD02\_00253" 3469 "s59E13H2" 0 "hypothetical protein"  
"DsuD02\_00253" 3469 "s59E25H2" 0 "hypothetical protein"  
"DsuD02\_00253" 3469 "s59E5H2" 0 "hypothetical protein"  
"DsuD02\_00253" 3469 "s63E6H2" 0 "hypothetical protein"

"DsuD02\_00254" 3470 "s59E13H2" 0 "Sporulation initiation phosphotransferase F"  
"DsuD02\_00254" 3470 "s59E25H2" 0 "Sporulation initiation phosphotransferase F"  
"DsuD02\_00254" 3470 "s59E5H2" 0 "Sporulation initiation phosphotransferase F"  
"DsuD02\_00254" 3470 "s63E6H2" 0 "Sporulation initiation phosphotransferase F"  
"DsuD02\_00255" 3471 "s59E13H2" 0 "hypothetical protein"  
"DsuD02\_00255" 3471 "s59E25H2" 0 "hypothetical protein"  
"DsuD02\_00255" 3471 "s59E5H2" 0 "hypothetical protein"  
"DsuD02\_00255" 3471 "s63E6H2" 0 "hypothetical protein"  
"DsuD02\_00256" 3472 "s59E13H2" 0 "Sporulation kinase A"  
"DsuD02\_00256" 3472 "s59E25H2" 0 "Sporulation kinase A"  
"DsuD02\_00256" 3472 "s59E5H2" 0 "Sporulation kinase A"  
"DsuD02\_00256" 3472 "s63E6H2" 0 "Sporulation kinase A"  
"DsuD02\_00259" 3475 "s59E13H2" 0 "Gas vesicle synthesis protein GvpL/GvpF"  
"DsuD02\_00259" 3475 "s59E25H2" 0 "Gas vesicle synthesis protein GvpL/GvpF"  
"DsuD02\_00259" 3475 "s59E5H2" 0 "Gas vesicle synthesis protein GvpL/GvpF"  
"DsuD02\_00259" 3475 "s63E6H2" 0 "Gas vesicle synthesis protein GvpL/GvpF"  
"DsuD02\_00260" 3476 "s59E13H2" 0 "Gas vesicle synthesis protein GvpL/GvpF"  
"DsuD02\_00260" 3476 "s59E25H2" 0 "Gas vesicle synthesis protein GvpL/GvpF"  
"DsuD02\_00260" 3476 "s59E5H2" 0 "Gas vesicle synthesis protein GvpL/GvpF"  
"DsuD02\_00260" 3476 "s63E6H2" 0 "Gas vesicle synthesis protein GvpL/GvpF"  
"DsuD02\_00261" 3477 "s59E13H2" 0 "Sporulation initiation phosphotransferase F"  
"DsuD02\_00261" 3477 "s59E25H2" 0 "Sporulation initiation phosphotransferase F"  
"DsuD02\_00261" 3477 "s59E5H2" 0 "Sporulation initiation phosphotransferase F"  
"DsuD02\_00261" 3477 "s63E6H2" 0 "Sporulation initiation phosphotransferase F"  
"DsuD02\_00262" 3478 "s59E13H2" 0 "hypothetical protein"  
"DsuD02\_00262" 3478 "s59E25H2" 0 "hypothetical protein"  
"DsuD02\_00262" 3478 "s59E5H2" 0 "hypothetical protein"  
"DsuD02\_00262" 3478 "s63E6H2" 0 "hypothetical protein"  
"DsuD02\_00263" 3479 "s59E13H2" 0 "VCP-like ATPase"  
"DsuD02\_00263" 3479 "s59E25H2" 0 "VCP-like ATPase"  
"DsuD02\_00263" 3479 "s59E5H2" 0 "VCP-like ATPase"  
"DsuD02\_00263" 3479 "s63E6H2" 0 "VCP-like ATPase"  
"DsuD02\_00264" 3480 "s59E13H2" 0 "GIY-YIG nuclease superfamily protein"  
"DsuD02\_00264" 3480 "s59E25H2" 0 "GIY-YIG nuclease superfamily protein"  
"DsuD02\_00264" 3480 "s59E5H2" 0 "GIY-YIG nuclease superfamily protein"  
"DsuD02\_00264" 3480 "s63E6H2" 0.001072816 "GIY-YIG nuclease superfamily protein"  
"DsuD02\_00265" 3481 "s59E13H2" 0 "Hsp20/alpha crystallin family protein"  
"DsuD02\_00265" 3481 "s59E25H2" 0 "Hsp20/alpha crystallin family protein"  
"DsuD02\_00265" 3481 "s59E5H2" 0 "Hsp20/alpha crystallin family protein"  
"DsuD02\_00265" 3481 "s63E6H2" 0 "Hsp20/alpha crystallin family protein"  
"DsuD02\_00266" 3482 "s59E13H2" 0 "Nitrogen regulation protein NR(I)"  
"DsuD02\_00266" 3482 "s59E25H2" 0 "Nitrogen regulation protein NR(I)"  
"DsuD02\_00266" 3482 "s59E5H2" 0 "Nitrogen regulation protein NR(I)"  
"DsuD02\_00266" 3482 "s63E6H2" 0 "Nitrogen regulation protein NR(I)"  
"DsuD02\_00268" 3484 "s59E13H2" 0 "Transcriptional regulatory protein ZraR"  
"DsuD02\_00268" 3484 "s59E25H2" 0 "Transcriptional regulatory protein ZraR"  
"DsuD02\_00268" 3484 "s59E5H2" 0 "Transcriptional regulatory protein ZraR"

"DsuD02\_00268" 3484 "s63E6H2" 0 "Transcriptional regulatory protein ZraR"  
"DsuD02\_00269" 3485 "s59E13H2" 0 "Fe/S biogenesis protein NfuA"  
"DsuD02\_00269" 3485 "s59E25H2" 0 "Fe/S biogenesis protein NfuA"  
"DsuD02\_00269" 3485 "s59E5H2" 0 "Fe/S biogenesis protein NfuA"  
"DsuD02\_00269" 3485 "s63E6H2" 0 "Fe/S biogenesis protein NfuA"  
"DsuD02\_00270" 3486 "s59E13H2" 0 "Sulfurtransferase TusA"  
"DsuD02\_00270" 3486 "s59E25H2" 0 "Sulfurtransferase TusA"  
"DsuD02\_00270" 3486 "s59E5H2" 0 "Sulfurtransferase TusA"  
"DsuD02\_00270" 3486 "s63E6H2" 0 "Sulfurtransferase TusA"  
"DsuD02\_00271" 3487 "s59E13H2" 0 "DsrE/DsrF-like family protein"  
"DsuD02\_00271" 3487 "s59E25H2" 0 "DsrE/DsrF-like family protein"  
"DsuD02\_00271" 3487 "s59E5H2" 0 "DsrE/DsrF-like family protein"  
"DsuD02\_00271" 3487 "s63E6H2" 0 "DsrE/DsrF-like family protein"  
"DsuD02\_00272" 3488 "s59E13H2" 0 "putative cysteine desulfurase 2"  
"DsuD02\_00272" 3488 "s59E25H2" 0 "putative cysteine desulfurase 2"  
"DsuD02\_00272" 3488 "s59E5H2" 0 "putative cysteine desulfurase 2"  
"DsuD02\_00272" 3488 "s63E6H2" 0 "putative cysteine desulfurase 2"  
"DsuD02\_00273" 3489 "s59E13H2" 0 "NifU-like protein"  
"DsuD02\_00273" 3489 "s59E25H2" 0 "NifU-like protein"  
"DsuD02\_00273" 3489 "s59E5H2" 0 "NifU-like protein"  
"DsuD02\_00273" 3489 "s63E6H2" 0 "NifU-like protein"  
"DsuD02\_00274" 3490 "s59E13H2" 0 "Copper chaperone CopZ"  
"DsuD02\_00274" 3490 "s59E25H2" 0 "Copper chaperone CopZ"  
"DsuD02\_00274" 3490 "s59E5H2" 0 "Copper chaperone CopZ"  
"DsuD02\_00274" 3490 "s63E6H2" 0 "Copper chaperone CopZ"  
"DsuD02\_00275" 3491 "s59E13H2" 0 "Copper-exporting P-type ATPase A"  
"DsuD02\_00275" 3491 "s59E25H2" 0 "Copper-exporting P-type ATPase A"  
"DsuD02\_00275" 3491 "s59E5H2" 0 "Copper-exporting P-type ATPase A"  
"DsuD02\_00275" 3491 "s63E6H2" 0 "Copper-exporting P-type ATPase A"  
"DsuD02\_00276" 3492 "s59E13H2" 0 "hypothetical protein"  
"DsuD02\_00276" 3492 "s59E25H2" 0 "hypothetical protein"  
"DsuD02\_00276" 3492 "s59E5H2" 0 "hypothetical protein"  
"DsuD02\_00276" 3492 "s63E6H2" 0 "hypothetical protein"  
"DsuD02\_00277" 3493 "s59E13H2" 0 "3-oxoadipate CoA-transferase subunit B"  
"DsuD02\_00277" 3493 "s59E25H2" 0 "3-oxoadipate CoA-transferase subunit B"  
"DsuD02\_00277" 3493 "s59E5H2" 0 "3-oxoadipate CoA-transferase subunit B"  
"DsuD02\_00277" 3493 "s63E6H2" 0 "3-oxoadipate CoA-transferase subunit B"  
"DsuD02\_00278" 3494 "s59E13H2" 0 "Glutaconate CoA-transferase subunit A"  
"DsuD02\_00278" 3494 "s59E25H2" 0 "Glutaconate CoA-transferase subunit A"  
"DsuD02\_00278" 3494 "s59E5H2" 0 "Glutaconate CoA-transferase subunit A"  
"DsuD02\_00278" 3494 "s63E6H2" 0 "Glutaconate CoA-transferase subunit A"  
"DsuD02\_00279" 3495 "s59E13H2" 0 "Sulfur carrier protein CysO"  
"DsuD02\_00279" 3495 "s59E25H2" 0 "Sulfur carrier protein CysO"  
"DsuD02\_00279" 3495 "s59E5H2" 0 "Sulfur carrier protein CysO"  
"DsuD02\_00279" 3495 "s63E6H2" 0 "Sulfur carrier protein CysO"  
"DsuD02\_00280" 3496 "s59E13H2" 0 "hypothetical protein"  
"DsuD02\_00280" 3496 "s59E25H2" 0 "hypothetical protein"

"DsuD02\_00280" 3496 "s59E5H2" 0 "hypothetical protein"  
"DsuD02\_00280" 3496 "s63E6H2" 0 "hypothetical protein"  
"DsuD02\_00281" 3497 "s59E13H2" 0 "Double zinc ribbon"  
"DsuD02\_00281" 3497 "s59E25H2" 0 "Double zinc ribbon"  
"DsuD02\_00281" 3497 "s59E5H2" 0 "Double zinc ribbon"  
"DsuD02\_00281" 3497 "s63E6H2" 0 "Double zinc ribbon"  
"DsuD02\_00283" 3499 "s59E13H2" 0 "hypothetical protein"  
"DsuD02\_00283" 3499 "s59E25H2" 0 "hypothetical protein"  
"DsuD02\_00283" 3499 "s59E5H2" 0 "hypothetical protein"  
"DsuD02\_00283" 3499 "s63E6H2" 0 "hypothetical protein"  
"DsuD02\_00284" 3500 "s59E13H2" 0 "Ubiquinone/menaquinone biosynthesis C-methyltransferase UbiE"  
"DsuD02\_00284" 3500 "s59E25H2" 0 "Ubiquinone/menaquinone biosynthesis C-methyltransferase UbiE"  
"DsuD02\_00284" 3500 "s59E5H2" 0 "Ubiquinone/menaquinone biosynthesis C-methyltransferase UbiE"  
"DsuD02\_00284" 3500 "s63E6H2" 0 "Ubiquinone/menaquinone biosynthesis C-methyltransferase UbiE"  
"DsuD02\_00285" 3501 "s59E13H2" 0 "Helix-turn-helix domain protein"  
"DsuD02\_00285" 3501 "s59E25H2" 0 "Helix-turn-helix domain protein"  
"DsuD02\_00285" 3501 "s59E5H2" 0 "Helix-turn-helix domain protein"  
"DsuD02\_00285" 3501 "s63E6H2" 0 "Helix-turn-helix domain protein"  
"DsuD02\_00286" 3502 "s59E13H2" 0 "hypothetical protein"  
"DsuD02\_00286" 3502 "s59E25H2" 0 "hypothetical protein"  
"DsuD02\_00286" 3502 "s59E5H2" 0 "hypothetical protein"  
"DsuD02\_00286" 3502 "s63E6H2" 0 "hypothetical protein"  
"DsuD02\_00287" 3503 "s59E13H2" 0 "Methylamine utilisation protein MauE"  
"DsuD02\_00287" 3503 "s59E25H2" 0 "Methylamine utilisation protein MauE"  
"DsuD02\_00287" 3503 "s59E5H2" 0 "Methylamine utilisation protein MauE"  
"DsuD02\_00287" 3503 "s63E6H2" 0 "Methylamine utilisation protein MauE"  
"DsuD02\_00288" 3504 "s59E13H2" 0 "Rhodanese-like domain protein"  
"DsuD02\_00288" 3504 "s59E25H2" 0 "Rhodanese-like domain protein"  
"DsuD02\_00288" 3504 "s59E5H2" 0 "Rhodanese-like domain protein"  
"DsuD02\_00288" 3504 "s63E6H2" 0 "Rhodanese-like domain protein"  
"DsuD02\_00289" 3505 "s59E13H2" 0 "thiol-disulfide oxidoreductase"  
"DsuD02\_00289" 3505 "s59E25H2" 0 "thiol-disulfide oxidoreductase"  
"DsuD02\_00289" 3505 "s59E5H2" 0 "thiol-disulfide oxidoreductase"  
"DsuD02\_00289" 3505 "s63E6H2" 0 "thiol-disulfide oxidoreductase"  
"DsuD02\_00290" 3506 "s59E13H2" 0 "Nitrogen regulation protein NR(I)"  
"DsuD02\_00290" 3506 "s59E25H2" 0 "Nitrogen regulation protein NR(I)"  
"DsuD02\_00290" 3506 "s59E5H2" 0 "Nitrogen regulation protein NR(I)"  
"DsuD02\_00290" 3506 "s63E6H2" 0 "Nitrogen regulation protein NR(I)"  
"DsuD02\_00291" 3507 "s59E13H2" 0 "Sporulation kinase E"  
"DsuD02\_00291" 3507 "s59E25H2" 0 "Sporulation kinase E"  
"DsuD02\_00291" 3507 "s59E5H2" 0 "Sporulation kinase E"  
"DsuD02\_00291" 3507 "s63E6H2" 0 "Sporulation kinase E"  
"DsuD02\_00292" 3508 "s59E13H2" 0 "hypothetical protein"  
"DsuD02\_00292" 3508 "s59E25H2" 0 "hypothetical protein"  
"DsuD02\_00292" 3508 "s59E5H2" 0 "hypothetical protein"  
"DsuD02\_00292" 3508 "s63E6H2" 0 "hypothetical protein"  
"DsuD02\_00293" 3509 "s59E13H2" 0 "Quinolinate synthase A"

"DsuD02\_00293" 3509 "s59E25H2" 0 "Quinolate synthase A"  
"DsuD02\_00293" 3509 "s59E5H2" 0 "Quinolate synthase A"  
"DsuD02\_00293" 3509 "s63E6H2" 0 "Quinolate synthase A"  
"DsuD02\_00294" 3510 "s59E13H2" 0 "formate dehydrogenase accessory protein"  
"DsuD02\_00294" 3510 "s59E25H2" 0 "formate dehydrogenase accessory protein"  
"DsuD02\_00294" 3510 "s59E5H2" 0 "formate dehydrogenase accessory protein"  
"DsuD02\_00294" 3510 "s63E6H2" 0 "formate dehydrogenase accessory protein"  
"DsuD02\_00295" 3511 "s59E13H2" 0 "MOSC domain protein"  
"DsuD02\_00295" 3511 "s59E25H2" 0 "MOSC domain protein"  
"DsuD02\_00295" 3511 "s59E5H2" 0 "MOSC domain protein"  
"DsuD02\_00295" 3511 "s63E6H2" 0 "MOSC domain protein"  
"DsuD02\_00296" 3512 "s59E13H2" 0 "tRNA-specific 2-thiouridylase MnmA"  
"DsuD02\_00296" 3512 "s59E25H2" 0 "tRNA-specific 2-thiouridylase MnmA"  
"DsuD02\_00296" 3512 "s59E5H2" 0 "tRNA-specific 2-thiouridylase MnmA"  
"DsuD02\_00296" 3512 "s63E6H2" 0 "tRNA-specific 2-thiouridylase MnmA"  
"DsuD02\_00297" 3513 "s59E13H2" 0 "hypothetical protein"  
"DsuD02\_00297" 3513 "s59E25H2" 0 "hypothetical protein"  
"DsuD02\_00297" 3513 "s59E5H2" 0 "hypothetical protein"  
"DsuD02\_00297" 3513 "s63E6H2" 0 "hypothetical protein"  
"DsuD02\_00299" 3515 "s59E13H2" 0 "Gas vesicle structural protein"  
"DsuD02\_00299" 3515 "s59E25H2" 0 "Gas vesicle structural protein"  
"DsuD02\_00299" 3515 "s59E5H2" 0 "Gas vesicle structural protein"  
"DsuD02\_00299" 3515 "s63E6H2" 0 "Gas vesicle structural protein"  
"DsuD02\_00300" 3516 "s59E13H2" 0 "hypothetical protein"  
"DsuD02\_00300" 3516 "s59E25H2" 0 "hypothetical protein"  
"DsuD02\_00300" 3516 "s59E5H2" 0 "hypothetical protein"  
"DsuD02\_00300" 3516 "s63E6H2" 0 "hypothetical protein"  
"DsuD02\_00301" 3517 "s59E13H2" 0 "ISXO2-like transposase domain protein"  
"DsuD02\_00301" 3517 "s59E25H2" 0 "ISXO2-like transposase domain protein"  
"DsuD02\_00301" 3517 "s59E5H2" 0 "ISXO2-like transposase domain protein"  
"DsuD02\_00301" 3517 "s63E6H2" 0 "ISXO2-like transposase domain protein"  
"DsuD02\_00303" 3519 "s59E13H2" 0 "hypothetical protein"  
"DsuD02\_00303" 3519 "s59E25H2" 0 "hypothetical protein"  
"DsuD02\_00303" 3519 "s59E5H2" 0 "hypothetical protein"  
"DsuD02\_00303" 3519 "s63E6H2" 0 "hypothetical protein"  
"DsuD02\_00304" 3520 "s59E13H2" 0 "hypothetical protein"  
"DsuD02\_00304" 3520 "s59E25H2" 0 "hypothetical protein"  
"DsuD02\_00304" 3520 "s59E5H2" 0 "hypothetical protein"  
"DsuD02\_00304" 3520 "s63E6H2" 0 "hypothetical protein"  
"DsuD02\_00307" 3523 "s59E13H2" 0 "Helix-turn-helix domain protein"  
"DsuD02\_00307" 3523 "s59E25H2" 0 "Helix-turn-helix domain protein"  
"DsuD02\_00307" 3523 "s59E5H2" 0 "Helix-turn-helix domain protein"  
"DsuD02\_00307" 3523 "s63E6H2" 0 "Helix-turn-helix domain protein"  
"DsuD02\_00308" 3524 "s59E13H2" 0 "Chemotaxis protein methyltransferase"  
"DsuD02\_00308" 3524 "s59E25H2" 0 "Chemotaxis protein methyltransferase"  
"DsuD02\_00308" 3524 "s59E5H2" 0 "Chemotaxis protein methyltransferase"  
"DsuD02\_00308" 3524 "s63E6H2" 0 "Chemotaxis protein methyltransferase"

"DsuD02\_00309" 3525 "s59E13H2" 0 "Chemotaxis response regulator protein-glutamate methylesterase"  
"DsuD02\_00309" 3525 "s59E25H2" 0 "Chemotaxis response regulator protein-glutamate methylesterase"  
"DsuD02\_00309" 3525 "s59E5H2" 0 "Chemotaxis response regulator protein-glutamate methylesterase"  
"DsuD02\_00309" 3525 "s63E6H2" 0 "Chemotaxis response regulator protein-glutamate methylesterase"  
"DsuD02\_00311" 3527 "s59E13H2" 0 "Phytochrome-like protein cph1"  
"DsuD02\_00311" 3527 "s59E25H2" 0 "Phytochrome-like protein cph1"  
"DsuD02\_00311" 3527 "s59E5H2" 0 "Phytochrome-like protein cph1"  
"DsuD02\_00311" 3527 "s63E6H2" 0 "Phytochrome-like protein cph1"  
"DsuD02\_00312" 3528 "s59E13H2" 0 "Response regulator rcp1"  
"DsuD02\_00312" 3528 "s59E25H2" 0 "Response regulator rcp1"  
"DsuD02\_00312" 3528 "s59E5H2" 0 "Response regulator rcp1"  
"DsuD02\_00312" 3528 "s63E6H2" 0 "Response regulator rcp1"  
"DsuD02\_00313" 3529 "s59E13H2" 0 "hypothetical protein"  
"DsuD02\_00313" 3529 "s59E25H2" 0 "hypothetical protein"  
"DsuD02\_00313" 3529 "s59E5H2" 0 "hypothetical protein"  
"DsuD02\_00313" 3529 "s63E6H2" 0 "hypothetical protein"  
"DsuD02\_00314" 3530 "s59E13H2" 0 "SpoVT / AbrB like domain protein"  
"DsuD02\_00314" 3530 "s59E25H2" 0 "SpoVT / AbrB like domain protein"  
"DsuD02\_00314" 3530 "s59E5H2" 0 "SpoVT / AbrB like domain protein"  
"DsuD02\_00314" 3530 "s63E6H2" 0 "SpoVT / AbrB like domain protein"  
"DsuD02\_00315" 3531 "s59E13H2" 0 "Luminescence regulatory protein LuxO"  
"DsuD02\_00315" 3531 "s59E25H2" 0 "Luminescence regulatory protein LuxO"  
"DsuD02\_00315" 3531 "s59E5H2" 0.223765 "Luminescence regulatory protein LuxO"  
"DsuD02\_00315" 3531 "s63E6H2" 0.001554011 "Luminescence regulatory protein LuxO"  
"DsuD02\_00316" 3532 "s59E13H2" 0 "Circadian clock protein KaiB"  
"DsuD02\_00316" 3532 "s59E25H2" 0 "Circadian clock protein KaiB"  
"DsuD02\_00316" 3532 "s59E5H2" 0.4890807 "Circadian clock protein KaiB"  
"DsuD02\_00316" 3532 "s63E6H2" 0 "Circadian clock protein KaiB"  
"DsuD02\_00317" 3533 "s59E13H2" 0 "Circadian clock protein kinase KaiC"  
"DsuD02\_00317" 3533 "s59E25H2" 0 "Circadian clock protein kinase KaiC"  
"DsuD02\_00317" 3533 "s59E5H2" 0.3309976 "Circadian clock protein kinase KaiC"  
"DsuD02\_00317" 3533 "s63E6H2" 0.0056098 "Circadian clock protein kinase KaiC"  
"DsuD02\_00319" 3535 "s59E13H2" 0 "hypothetical protein"  
"DsuD02\_00319" 3535 "s59E25H2" 0 "hypothetical protein"  
"DsuD02\_00319" 3535 "s59E5H2" 0.0170594 "hypothetical protein"  
"DsuD02\_00319" 3535 "s63E6H2" 0 "hypothetical protein"  
"DsuD02\_00321" 3537 "s59E13H2" 0 "Non-motile and phage-resistance protein"  
"DsuD02\_00321" 3537 "s59E25H2" 0 "Non-motile and phage-resistance protein"  
"DsuD02\_00321" 3537 "s59E5H2" 0.0342117 "Non-motile and phage-resistance protein"  
"DsuD02\_00321" 3537 "s63E6H2" 0 "Non-motile and phage-resistance protein"  
"DsuD02\_00322" 3538 "s59E13H2" 0 "PemK-like protein"  
"DsuD02\_00322" 3538 "s59E25H2" 0 "PemK-like protein"  
"DsuD02\_00322" 3538 "s59E5H2" 0 "PemK-like protein"  
"DsuD02\_00322" 3538 "s63E6H2" 0 "PemK-like protein"  
"DsuD02\_00323" 3539 "s59E13H2" 0 "hypothetical protein"  
"DsuD02\_00323" 3539 "s59E25H2" 0 "hypothetical protein"  
"DsuD02\_00323" 3539 "s59E5H2" 0 "hypothetical protein"



"DsuD02\_00323" 3539 "s63E6H2" 0 "hypothetical protein"  
"DsuD02\_00324" 3540 "s59E13H2" 0 "RNA polymerase sigma factor RpoD"  
"DsuD02\_00324" 3540 "s59E25H2" 0 "RNA polymerase sigma factor RpoD"  
"DsuD02\_00324" 3540 "s59E5H2" 0 "RNA polymerase sigma factor RpoD"  
"DsuD02\_00324" 3540 "s63E6H2" 0 "RNA polymerase sigma factor RpoD"  
"DsuD02\_00325" 3541 "s59E13H2" 0 "Putative zinc ribbon domain protein"  
"DsuD02\_00325" 3541 "s59E25H2" 0 "Putative zinc ribbon domain protein"  
"DsuD02\_00325" 3541 "s59E5H2" 0 "Putative zinc ribbon domain protein"  
"DsuD02\_00325" 3541 "s63E6H2" 0 "Putative zinc ribbon domain protein"  
"DsuD02\_00329" 3545 "s59E13H2" 0 "YGGT family protein"  
"DsuD02\_00329" 3545 "s59E25H2" 0 "YGGT family protein"  
"DsuD02\_00329" 3545 "s59E5H2" 0 "YGGT family protein"  
"DsuD02\_00329" 3545 "s63E6H2" 0 "YGGT family protein"  
"DsuD02\_00330" 3546 "s59E13H2" 0 "hypothetical protein"  
"DsuD02\_00330" 3546 "s59E25H2" 0 "hypothetical protein"  
"DsuD02\_00330" 3546 "s59E5H2" 0 "hypothetical protein"  
"DsuD02\_00330" 3546 "s63E6H2" 0 "hypothetical protein"  
"DsuD02\_00331" 3547 "s59E13H2" 0 "Coenzyme A biosynthesis bifunctional protein CoaBC"  
"DsuD02\_00331" 3547 "s59E25H2" 0 "Coenzyme A biosynthesis bifunctional protein CoaBC"  
"DsuD02\_00331" 3547 "s59E5H2" 0 "Coenzyme A biosynthesis bifunctional protein CoaBC"  
"DsuD02\_00331" 3547 "s63E6H2" 0 "Coenzyme A biosynthesis bifunctional protein CoaBC"  
"DsuD02\_00332" 3548 "s59E13H2" 0 "Uracil DNA glycosylase superfamily protein"  
"DsuD02\_00332" 3548 "s59E25H2" 0 "Uracil DNA glycosylase superfamily protein"  
"DsuD02\_00332" 3548 "s59E5H2" 0 "Uracil DNA glycosylase superfamily protein"  
"DsuD02\_00332" 3548 "s63E6H2" 0 "Uracil DNA glycosylase superfamily protein"  
"DsuD02\_00333" 3549 "s59E13H2" 0 "hypothetical protein"  
"DsuD02\_00333" 3549 "s59E25H2" 0 "hypothetical protein"  
"DsuD02\_00333" 3549 "s59E5H2" 0 "hypothetical protein"  
"DsuD02\_00333" 3549 "s63E6H2" 0 "hypothetical protein"  
"DsuD02\_00334" 3550 "s59E13H2" 0 "Modulator of FtsH protease HflC"  
"DsuD02\_00334" 3550 "s59E25H2" 0 "Modulator of FtsH protease HflC"  
"DsuD02\_00334" 3550 "s59E5H2" 0.005513746 "Modulator of FtsH protease HflC"  
"DsuD02\_00334" 3550 "s63E6H2" 0 "Modulator of FtsH protease HflC"  
"DsuD02\_00335" 3551 "s59E13H2" 0 "hypothetical protein"  
"DsuD02\_00335" 3551 "s59E25H2" 0 "hypothetical protein"  
"DsuD02\_00335" 3551 "s59E5H2" 0 "hypothetical protein"  
"DsuD02\_00335" 3551 "s63E6H2" 0 "hypothetical protein"  
"DsuD02\_00336" 3552 "s59E13H2" 0 "2-C-methyl-D-erythritol 4-phosphate cytidyltransferase"  
"DsuD02\_00336" 3552 "s59E25H2" 0 "2-C-methyl-D-erythritol 4-phosphate cytidyltransferase"  
"DsuD02\_00336" 3552 "s59E5H2" 0 "2-C-methyl-D-erythritol 4-phosphate cytidyltransferase"  
"DsuD02\_00336" 3552 "s63E6H2" 0 "2-C-methyl-D-erythritol 4-phosphate cytidyltransferase"  
"DsuD02\_00337" 3553 "s59E13H2" 0 "Porphobilinogen deaminase"  
"DsuD02\_00337" 3553 "s59E25H2" 0 "Porphobilinogen deaminase"  
"DsuD02\_00337" 3553 "s59E5H2" 0 "Porphobilinogen deaminase"  
"DsuD02\_00337" 3553 "s63E6H2" 0 "Porphobilinogen deaminase"  
"DsuD02\_00338" 3554 "s59E13H2" 0 "Uroporphyrinogen-III C-methyltransferase"  
"DsuD02\_00338" 3554 "s59E25H2" 0 "Uroporphyrinogen-III C-methyltransferase"

"DsuD02\_00338" 3554 "s59E5H2" 0 "Uroporphyrinogen-III C-methyltransferase"  
"DsuD02\_00338" 3554 "s63E6H2" 0 "Uroporphyrinogen-III C-methyltransferase"  
"DsuD02\_00339" 3555 "s59E13H2" 0 "3'(2'),5'-bisphosphate nucleotidase CysQ"  
"DsuD02\_00339" 3555 "s59E25H2" 0 "3'(2'),5'-bisphosphate nucleotidase CysQ"  
"DsuD02\_00339" 3555 "s59E5H2" 0 "3'(2'),5'-bisphosphate nucleotidase CysQ"  
"DsuD02\_00339" 3555 "s63E6H2" 0 "3'(2'),5'-bisphosphate nucleotidase CysQ"  
"DsuD02\_00341" 3557 "s59E13H2" 0 "Xaa-Pro dipeptidase"  
"DsuD02\_00341" 3557 "s59E25H2" 0 "Xaa-Pro dipeptidase"  
"DsuD02\_00341" 3557 "s59E5H2" 0 "Xaa-Pro dipeptidase"  
"DsuD02\_00341" 3557 "s63E6H2" 0 "Xaa-Pro dipeptidase"  
"DsuD02\_00342" 3558 "s59E13H2" 0 "Tyrosine recombinase XerD"  
"DsuD02\_00342" 3558 "s59E25H2" 0 "Tyrosine recombinase XerD"  
"DsuD02\_00342" 3558 "s59E5H2" 0 "Tyrosine recombinase XerD"  
"DsuD02\_00342" 3558 "s63E6H2" 0 "Tyrosine recombinase XerD"  
"DsuD02\_00346" 3562 "s59E13H2" 0 "outer membrane protease"  
"DsuD02\_00346" 3562 "s59E25H2" 0 "outer membrane protease"  
"DsuD02\_00346" 3562 "s59E5H2" 0 "outer membrane protease"  
"DsuD02\_00346" 3562 "s63E6H2" 0 "outer membrane protease"  
"DsuD02\_00347" 3563 "s59E13H2" 0 "Inositol-1-monophosphatase"  
"DsuD02\_00347" 3563 "s59E25H2" 0 "Inositol-1-monophosphatase"  
"DsuD02\_00347" 3563 "s59E5H2" 0 "Inositol-1-monophosphatase"  
"DsuD02\_00347" 3563 "s63E6H2" 0 "Inositol-1-monophosphatase"  
"DsuD02\_00348" 3564 "s59E13H2" 0 "Sec-independent protein translocase protein TatAy"  
"DsuD02\_00348" 3564 "s59E25H2" 0 "Sec-independent protein translocase protein TatAy"  
"DsuD02\_00348" 3564 "s59E5H2" 0 "Sec-independent protein translocase protein TatAy"  
"DsuD02\_00348" 3564 "s63E6H2" 0 "Sec-independent protein translocase protein TatAy"  
"DsuD02\_00349" 3565 "s59E13H2" 0 "Putative ski2-type helicase"  
"DsuD02\_00349" 3565 "s59E25H2" 0 "Putative ski2-type helicase"  
"DsuD02\_00349" 3565 "s59E5H2" 0 "Putative ski2-type helicase"  
"DsuD02\_00349" 3565 "s63E6H2" 0 "Putative ski2-type helicase"  
"DsuD02\_00350" 3566 "s59E13H2" 0 "D-inositol 3-phosphate glycosyltransferase"  
"DsuD02\_00350" 3566 "s59E25H2" 0 "D-inositol 3-phosphate glycosyltransferase"  
"DsuD02\_00350" 3566 "s59E5H2" 0 "D-inositol 3-phosphate glycosyltransferase"  
"DsuD02\_00350" 3566 "s63E6H2" 0 "D-inositol 3-phosphate glycosyltransferase"  
"DsuD02\_00351" 3567 "s59E13H2" 0 "GDP-mannose-dependent alpha-(1-6)-phosphatidylinositol monomannoside mannosyltransferase"  
"DsuD02\_00351" 3567 "s59E25H2" 0 "GDP-mannose-dependent alpha-(1-6)-phosphatidylinositol monomannoside mannosyltransferase"  
"DsuD02\_00351" 3567 "s59E5H2" 0 "GDP-mannose-dependent alpha-(1-6)-phosphatidylinositol monomannoside mannosyltransferase"  
"DsuD02\_00351" 3567 "s63E6H2" 0 "GDP-mannose-dependent alpha-(1-6)-phosphatidylinositol monomannoside mannosyltransferase"  
"DsuD02\_00352" 3568 "s59E13H2" 0 "Asparagine synthetase [glutamine-hydrolyzing] 1"  
"DsuD02\_00352" 3568 "s59E25H2" 0 "Asparagine synthetase [glutamine-hydrolyzing] 1"  
"DsuD02\_00352" 3568 "s59E5H2" 0 "Asparagine synthetase [glutamine-hydrolyzing] 1"  
"DsuD02\_00352" 3568 "s63E6H2" 0 "Asparagine synthetase [glutamine-hydrolyzing] 1"  
"DsuD02\_00353" 3569 "s59E13H2" 0 "hypothetical protein"  
"DsuD02\_00353" 3569 "s59E25H2" 0 "hypothetical protein"  
"DsuD02\_00353" 3569 "s59E5H2" 0 "hypothetical protein"  
"DsuD02\_00353" 3569 "s63E6H2" 0 "hypothetical protein"  
"DsuD02\_00354" 3570 "s59E13H2" 0 "Alpha-D-kanosaminyltransferase"

"DsuD02\_00354" 3570 "s59E25H2" 0 "Alpha-D-kanosaminyltransferase"  
"DsuD02\_00354" 3570 "s59E5H2" 0 "Alpha-D-kanosaminyltransferase"  
"DsuD02\_00354" 3570 "s63E6H2" 0 "Alpha-D-kanosaminyltransferase"  
"DsuD02\_00355" 3571 "s59E13H2" 0 "Asparagine synthetase [glutamine-hydrolyzing] 1"  
"DsuD02\_00355" 3571 "s59E25H2" 0 "Asparagine synthetase [glutamine-hydrolyzing] 1"  
"DsuD02\_00355" 3571 "s59E5H2" 0 "Asparagine synthetase [glutamine-hydrolyzing] 1"  
"DsuD02\_00355" 3571 "s63E6H2" 0 "Asparagine synthetase [glutamine-hydrolyzing] 1"  
"DsuD02\_00356" 3572 "s59E13H2" 0 "Glycosyl transferase family 2"  
"DsuD02\_00356" 3572 "s59E25H2" 0 "Glycosyl transferase family 2"  
"DsuD02\_00356" 3572 "s59E5H2" 0 "Glycosyl transferase family 2"  
"DsuD02\_00356" 3572 "s63E6H2" 0 "Glycosyl transferase family 2"  
"DsuD02\_00357" 3573 "s59E13H2" 0 "GDP-mannose-dependent alpha-(1-6)-phosphatidylinositol monomannoside mannosyltransferase"  
"DsuD02\_00357" 3573 "s59E25H2" 0 "GDP-mannose-dependent alpha-(1-6)-phosphatidylinositol monomannoside mannosyltransferase"  
"DsuD02\_00357" 3573 "s59E5H2" 0 "GDP-mannose-dependent alpha-(1-6)-phosphatidylinositol monomannoside mannosyltransferase"  
"DsuD02\_00357" 3573 "s63E6H2" 0 "GDP-mannose-dependent alpha-(1-6)-phosphatidylinositol monomannoside mannosyltransferase"  
"DsuD02\_00358" 3574 "s59E13H2" 0 "Phd\_YefM"  
"DsuD02\_00358" 3574 "s59E25H2" 0 "Phd\_YefM"  
"DsuD02\_00358" 3574 "s59E5H2" 0 "Phd\_YefM"  
"DsuD02\_00358" 3574 "s63E6H2" 0 "Phd\_YefM"  
"DsuD02\_00359" 3575 "s59E13H2" 0 "Ribonuclease VapC22"  
"DsuD02\_00359" 3575 "s59E25H2" 0 "Ribonuclease VapC22"  
"DsuD02\_00359" 3575 "s59E5H2" 0 "Ribonuclease VapC22"  
"DsuD02\_00359" 3575 "s63E6H2" 0 "Ribonuclease VapC22"  
"DsuD02\_00360" 3576 "s59E13H2" 0 "Putative glycosyltransferase EpsD"  
"DsuD02\_00360" 3576 "s59E25H2" 0 "Putative glycosyltransferase EpsD"  
"DsuD02\_00360" 3576 "s59E5H2" 0 "Putative glycosyltransferase EpsD"  
"DsuD02\_00360" 3576 "s63E6H2" 0 "Putative glycosyltransferase EpsD"  
"DsuD02\_00361" 3577 "s59E13H2" 0 "hypothetical protein"  
"DsuD02\_00361" 3577 "s59E25H2" 0 "hypothetical protein"  
"DsuD02\_00361" 3577 "s59E5H2" 0 "hypothetical protein"  
"DsuD02\_00361" 3577 "s63E6H2" 0 "hypothetical protein"  
"DsuD02\_00362" 3578 "s59E13H2" 0 "hypothetical protein"  
"DsuD02\_00362" 3578 "s59E25H2" 0 "hypothetical protein"  
"DsuD02\_00362" 3578 "s59E5H2" 0 "hypothetical protein"  
"DsuD02\_00362" 3578 "s63E6H2" 0 "hypothetical protein"  
"DsuD02\_00363" 3579 "s59E13H2" 0 "WbqC-like protein family protein"  
"DsuD02\_00363" 3579 "s59E25H2" 0 "WbqC-like protein family protein"  
"DsuD02\_00363" 3579 "s59E5H2" 0 "WbqC-like protein family protein"  
"DsuD02\_00363" 3579 "s63E6H2" 0 "WbqC-like protein family protein"  
"DsuD02\_00364" 3580 "s59E13H2" 0 "Diacetylchitobiose deacetylase"  
"DsuD02\_00364" 3580 "s59E25H2" 0 "Diacetylchitobiose deacetylase"  
"DsuD02\_00364" 3580 "s59E5H2" 0 "Diacetylchitobiose deacetylase"  
"DsuD02\_00364" 3580 "s63E6H2" 0 "Diacetylchitobiose deacetylase"  
"DsuD02\_00366" 3582 "s59E13H2" 0 "UDP-4-amino-4-deoxy-L-arabinose--oxoglutarate aminotransferase"  
"DsuD02\_00366" 3582 "s59E25H2" 0 "UDP-4-amino-4-deoxy-L-arabinose--oxoglutarate aminotransferase"  
"DsuD02\_00366" 3582 "s59E5H2" 0 "UDP-4-amino-4-deoxy-L-arabinose--oxoglutarate aminotransferase"  
"DsuD02\_00366" 3582 "s63E6H2" 0 "UDP-4-amino-4-deoxy-L-arabinose--oxoglutarate aminotransferase"

"DsuD02\_00367" 3583 "s59E13H2" 0 "putative undecaprenyl-phosphate N-acetylglucosaminyl 1-phosphate transferase"  
"DsuD02\_00367" 3583 "s59E25H2" 0 "putative undecaprenyl-phosphate N-acetylglucosaminyl 1-phosphate transferase"  
"DsuD02\_00367" 3583 "s59E5H2" 0 "putative undecaprenyl-phosphate N-acetylglucosaminyl 1-phosphate transferase"  
"DsuD02\_00367" 3583 "s63E6H2" 0 "putative undecaprenyl-phosphate N-acetylglucosaminyl 1-phosphate transferase"  
"DsuD02\_00368" 3584 "s59E13H2" 0 "hypothetical protein"  
"DsuD02\_00368" 3584 "s59E25H2" 0 "hypothetical protein"  
"DsuD02\_00368" 3584 "s59E5H2" 0 "hypothetical protein"  
"DsuD02\_00368" 3584 "s63E6H2" 0 "hypothetical protein"  
"DsuD02\_00369" 3585 "s59E13H2" 0 "Antilisterial bacteriocin subtilisin biosynthesis protein AlbA"  
"DsuD02\_00369" 3585 "s59E25H2" 0 "Antilisterial bacteriocin subtilisin biosynthesis protein AlbA"  
"DsuD02\_00369" 3585 "s59E5H2" 0 "Antilisterial bacteriocin subtilisin biosynthesis protein AlbA"  
"DsuD02\_00369" 3585 "s63E6H2" 0 "Antilisterial bacteriocin subtilisin biosynthesis protein AlbA"  
"DsuD02\_00370" 3586 "s59E13H2" 0 "Coenzyme PQQ synthesis protein D"  
"DsuD02\_00370" 3586 "s59E25H2" 0 "Coenzyme PQQ synthesis protein D"  
"DsuD02\_00370" 3586 "s59E5H2" 0 "Coenzyme PQQ synthesis protein D"  
"DsuD02\_00370" 3586 "s63E6H2" 0 "Coenzyme PQQ synthesis protein D"  
"DsuD02\_00371" 3587 "s59E13H2" 0 "Peptidase S24-like protein"  
"DsuD02\_00371" 3587 "s59E25H2" 0 "Peptidase S24-like protein"  
"DsuD02\_00371" 3587 "s59E5H2" 0 "Peptidase S24-like protein"  
"DsuD02\_00371" 3587 "s63E6H2" 0 "Peptidase S24-like protein"  
"DsuD02\_00372" 3588 "s59E13H2" 0 "Antilisterial bacteriocin subtilisin biosynthesis protein AlbA"  
"DsuD02\_00372" 3588 "s59E25H2" 0 "Antilisterial bacteriocin subtilisin biosynthesis protein AlbA"  
"DsuD02\_00372" 3588 "s59E5H2" 0 "Antilisterial bacteriocin subtilisin biosynthesis protein AlbA"  
"DsuD02\_00372" 3588 "s63E6H2" 0 "Antilisterial bacteriocin subtilisin biosynthesis protein AlbA"  
"DsuD02\_00375" 3591 "s59E13H2" 0 "Digeranylgeranyllycerophospholipid reductase"  
"DsuD02\_00375" 3591 "s59E25H2" 0 "Digeranylgeranyllycerophospholipid reductase"  
"DsuD02\_00375" 3591 "s59E5H2" 0 "Digeranylgeranyllycerophospholipid reductase"  
"DsuD02\_00375" 3591 "s63E6H2" 0 "Digeranylgeranyllycerophospholipid reductase"  
"DsuD02\_00376" 3592 "s59E13H2" 0 "hypothetical protein"  
"DsuD02\_00376" 3592 "s59E25H2" 0 "hypothetical protein"  
"DsuD02\_00376" 3592 "s59E5H2" 0 "hypothetical protein"  
"DsuD02\_00376" 3592 "s63E6H2" 0 "hypothetical protein"  
"DsuD02\_00377" 3593 "s59E13H2" 0 "hypothetical protein"  
"DsuD02\_00377" 3593 "s59E25H2" 0 "hypothetical protein"  
"DsuD02\_00377" 3593 "s59E5H2" 0 "hypothetical protein"  
"DsuD02\_00377" 3593 "s63E6H2" 0 "hypothetical protein"  
"DsuD02\_00378" 3594 "s59E13H2" 0 "Bacillopeptidase F precursor"  
"DsuD02\_00378" 3594 "s59E25H2" 0 "Bacillopeptidase F precursor"  
"DsuD02\_00378" 3594 "s59E5H2" 0 "Bacillopeptidase F precursor"  
"DsuD02\_00378" 3594 "s63E6H2" 0 "Bacillopeptidase F precursor"  
"DsuD02\_00379" 3595 "s59E13H2" 0 "hypothetical protein"  
"DsuD02\_00379" 3595 "s59E25H2" 0 "hypothetical protein"  
"DsuD02\_00379" 3595 "s59E5H2" 0 "hypothetical protein"  
"DsuD02\_00379" 3595 "s63E6H2" 0 "hypothetical protein"  
"DsuD02\_00380" 3596 "s59E13H2" 0 "hypothetical protein"  
"DsuD02\_00380" 3596 "s59E25H2" 0 "hypothetical protein"  
"DsuD02\_00380" 3596 "s59E5H2" 0 "hypothetical protein"

"DsuD02\_00380" 3596 "s63E6H2" 0 "hypothetical protein"  
"DsuD02\_00381" 3597 "s59E13H2" 0 "PilZ domain protein"  
"DsuD02\_00381" 3597 "s59E25H2" 0 "PilZ domain protein"  
"DsuD02\_00381" 3597 "s59E5H2" 0 "PilZ domain protein"  
"DsuD02\_00381" 3597 "s63E6H2" 0 "PilZ domain protein"  
"DsuD02\_00382" 3598 "s59E13H2" 0 "Type II secretion system protein G precursor"  
"DsuD02\_00382" 3598 "s59E25H2" 0 "Type II secretion system protein G precursor"  
"DsuD02\_00382" 3598 "s59E5H2" 0 "Type II secretion system protein G precursor"  
"DsuD02\_00382" 3598 "s63E6H2" 0 "Type II secretion system protein G precursor"  
"DsuD02\_00383" 3599 "s59E13H2" 0 "Nitrogen fixation protein VnfA"  
"DsuD02\_00383" 3599 "s59E25H2" 0 "Nitrogen fixation protein VnfA"  
"DsuD02\_00383" 3599 "s59E5H2" 0 "Nitrogen fixation protein VnfA"  
"DsuD02\_00383" 3599 "s63E6H2" 0 "Nitrogen fixation protein VnfA"  
"DsuD02\_00384" 3600 "s59E13H2" 0 "Type II secretion system protein F"  
"DsuD02\_00384" 3600 "s59E25H2" 0 "Type II secretion system protein F"  
"DsuD02\_00384" 3600 "s59E5H2" 0 "Type II secretion system protein F"  
"DsuD02\_00384" 3600 "s63E6H2" 0 "Type II secretion system protein F"  
"DsuD02\_00385" 3601 "s59E13H2" 0 "Type II secretion system protein E"  
"DsuD02\_00385" 3601 "s59E25H2" 0 "Type II secretion system protein E"  
"DsuD02\_00385" 3601 "s59E5H2" 0 "Type II secretion system protein E"  
"DsuD02\_00385" 3601 "s63E6H2" 0 "Type II secretion system protein E"  
"DsuD02\_00386" 3602 "s59E13H2" 0 "hypothetical protein"  
"DsuD02\_00386" 3602 "s59E25H2" 0 "hypothetical protein"  
"DsuD02\_00386" 3602 "s59E5H2" 0 "hypothetical protein"  
"DsuD02\_00386" 3602 "s63E6H2" 0 "hypothetical protein"  
"DsuD02\_00387" 3603 "s59E13H2" 0 "Type IV pilus biogenesis and competence protein PilQ precursor"  
"DsuD02\_00387" 3603 "s59E25H2" 0 "Type IV pilus biogenesis and competence protein PilQ precursor"  
"DsuD02\_00387" 3603 "s59E5H2" 0 "Type IV pilus biogenesis and competence protein PilQ precursor"  
"DsuD02\_00387" 3603 "s63E6H2" 0 "Type IV pilus biogenesis and competence protein PilQ precursor"  
"DsuD02\_00388" 3604 "s59E13H2" 0 "hypothetical protein"  
"DsuD02\_00388" 3604 "s59E25H2" 0 "hypothetical protein"  
"DsuD02\_00388" 3604 "s59E5H2" 0 "hypothetical protein"  
"DsuD02\_00388" 3604 "s63E6H2" 0 "hypothetical protein"  
"DsuD02\_00389" 3605 "s59E13H2" 0 "hypothetical protein"  
"DsuD02\_00389" 3605 "s59E25H2" 0 "hypothetical protein"  
"DsuD02\_00389" 3605 "s59E5H2" 0 "hypothetical protein"  
"DsuD02\_00389" 3605 "s63E6H2" 0 "hypothetical protein"  
"DsuD02\_00390" 3606 "s59E13H2" 0 "Competence protein A"  
"DsuD02\_00390" 3606 "s59E25H2" 0 "Competence protein A"  
"DsuD02\_00390" 3606 "s59E5H2" 0 "Competence protein A"  
"DsuD02\_00390" 3606 "s63E6H2" 0 "Competence protein A"  
"DsuD02\_00392" 3608 "s59E13H2" 0 "CAAX amino terminal protease self- immunity"  
"DsuD02\_00392" 3608 "s59E25H2" 0 "CAAX amino terminal protease self- immunity"  
"DsuD02\_00392" 3608 "s59E5H2" 0 "CAAX amino terminal protease self- immunity"  
"DsuD02\_00392" 3608 "s63E6H2" 0 "CAAX amino terminal protease self- immunity"  
"DsuD02\_00393" 3609 "s59E13H2" 0 "hypothetical protein"  
"DsuD02\_00393" 3609 "s59E25H2" 0 "hypothetical protein"

"DsuD02\_00393" 3609 "s59E5H2" 0 "hypothetical protein"  
"DsuD02\_00393" 3609 "s63E6H2" 0 "hypothetical protein"  
"DsuD02\_00394" 3610 "s59E13H2" 0 "Bifunctional purine biosynthesis protein PurH"  
"DsuD02\_00394" 3610 "s59E25H2" 0 "Bifunctional purine biosynthesis protein PurH"  
"DsuD02\_00394" 3610 "s59E5H2" 0 "Bifunctional purine biosynthesis protein PurH"  
"DsuD02\_00394" 3610 "s63E6H2" 0 "Bifunctional purine biosynthesis protein PurH"  
"DsuD02\_00395" 3611 "s59E13H2" 0 "GTP cyclohydrolase FolE2"  
"DsuD02\_00395" 3611 "s59E25H2" 0 "GTP cyclohydrolase FolE2"  
"DsuD02\_00395" 3611 "s59E5H2" 0 "GTP cyclohydrolase FolE2"  
"DsuD02\_00395" 3611 "s63E6H2" 0 "GTP cyclohydrolase FolE2"  
"DsuD02\_00397" 3613 "s59E13H2" 0 "CRISPR-associated endonuclease Cas9"  
"DsuD02\_00397" 3613 "s59E25H2" 0 "CRISPR-associated endonuclease Cas9"  
"DsuD02\_00397" 3613 "s59E5H2" 0 "CRISPR-associated endonuclease Cas9"  
"DsuD02\_00397" 3613 "s63E6H2" 0 "CRISPR-associated endonuclease Cas9"  
"DsuD02\_00398" 3614 "s59E13H2" 0 "Alpha/beta hydrolase family protein"  
"DsuD02\_00398" 3614 "s59E25H2" 0 "Alpha/beta hydrolase family protein"  
"DsuD02\_00398" 3614 "s59E5H2" 0 "Alpha/beta hydrolase family protein"  
"DsuD02\_00398" 3614 "s63E6H2" 0 "Alpha/beta hydrolase family protein"  
"DsuD02\_00399" 3615 "s59E13H2" 0 "hypothetical protein"  
"DsuD02\_00399" 3615 "s59E25H2" 0 "hypothetical protein"  
"DsuD02\_00399" 3615 "s59E5H2" 0 "hypothetical protein"  
"DsuD02\_00399" 3615 "s63E6H2" 0 "hypothetical protein"  
"DsuD02\_00400" 3616 "s59E13H2" 0 "hypothetical protein"  
"DsuD02\_00400" 3616 "s59E25H2" 0 "hypothetical protein"  
"DsuD02\_00400" 3616 "s59E5H2" 0 "hypothetical protein"  
"DsuD02\_00400" 3616 "s63E6H2" 0 "hypothetical protein"  
"DsuD02\_00402" 3618 "s59E13H2" 0 "Glucose 1-dehydrogenase 1"  
"DsuD02\_00402" 3618 "s59E25H2" 0 "Glucose 1-dehydrogenase 1"  
"DsuD02\_00402" 3618 "s59E5H2" 0 "Glucose 1-dehydrogenase 1"  
"DsuD02\_00402" 3618 "s63E6H2" 0 "Glucose 1-dehydrogenase 1"  
"DsuD02\_00403" 3619 "s59E13H2" 0 "hybrid sensory kinase in two-component regulatory system with RcsB and YojN"  
"DsuD02\_00403" 3619 "s59E25H2" 0 "hybrid sensory kinase in two-component regulatory system with RcsB and YojN"  
"DsuD02\_00403" 3619 "s59E5H2" 0 "hybrid sensory kinase in two-component regulatory system with RcsB and YojN"  
"DsuD02\_00403" 3619 "s63E6H2" 0 "hybrid sensory kinase in two-component regulatory system with RcsB and YojN"  
"DsuD02\_00404" 3620 "s59E13H2" 0 "Sorbitol dehydrogenase"  
"DsuD02\_00404" 3620 "s59E25H2" 0 "Sorbitol dehydrogenase"  
"DsuD02\_00404" 3620 "s59E5H2" 0 "Sorbitol dehydrogenase"  
"DsuD02\_00404" 3620 "s63E6H2" 0 "Sorbitol dehydrogenase"  
"DsuD02\_00405" 3621 "s59E13H2" 0 "putative aldolase LsrF"  
"DsuD02\_00405" 3621 "s59E25H2" 0 "putative aldolase LsrF"  
"DsuD02\_00405" 3621 "s59E5H2" 0 "putative aldolase LsrF"  
"DsuD02\_00405" 3621 "s63E6H2" 0 "putative aldolase LsrF"  
"DsuD02\_00406" 3622 "s59E13H2" 0 "Inositol-3-phosphate synthase"  
"DsuD02\_00406" 3622 "s59E25H2" 0 "Inositol-3-phosphate synthase"  
"DsuD02\_00406" 3622 "s59E5H2" 0 "Inositol-3-phosphate synthase"  
"DsuD02\_00406" 3622 "s63E6H2" 0 "Inositol-3-phosphate synthase"  
"DsuD02\_00407" 3623 "s59E13H2" 0 "hypothetical protein"

"DsuD02\_00407" 3623 "s59E25H2" 0 "hypothetical protein"  
"DsuD02\_00407" 3623 "s59E5H2" 0 "hypothetical protein"  
"DsuD02\_00407" 3623 "s63E6H2" 0 "hypothetical protein"  
"DsuD02\_00408" 3624 "s59E13H2" 0 "3'-5' exoribonuclease YhaM"  
"DsuD02\_00408" 3624 "s59E25H2" 0 "3'-5' exoribonuclease YhaM"  
"DsuD02\_00408" 3624 "s59E5H2" 0 "3'-5' exoribonuclease YhaM"  
"DsuD02\_00408" 3624 "s63E6H2" 0 "3'-5' exoribonuclease YhaM"  
"DsuD02\_00409" 3625 "s59E13H2" 0 "L-threonine dehydratase catabolic TdcB"  
"DsuD02\_00409" 3625 "s59E25H2" 0 "L-threonine dehydratase catabolic TdcB"  
"DsuD02\_00409" 3625 "s59E5H2" 0 "L-threonine dehydratase catabolic TdcB"  
"DsuD02\_00409" 3625 "s63E6H2" 0 "L-threonine dehydratase catabolic TdcB"  
"DsuD02\_00410" 3626 "s59E13H2" 0 "Streptothricin hydrolase"  
"DsuD02\_00410" 3626 "s59E25H2" 0 "Streptothricin hydrolase"  
"DsuD02\_00410" 3626 "s59E5H2" 0 "Streptothricin hydrolase"  
"DsuD02\_00410" 3626 "s63E6H2" 0 "Streptothricin hydrolase"  
"DsuD02\_00411" 3627 "s59E13H2" 0 "hypothetical protein"  
"DsuD02\_00411" 3627 "s59E25H2" 0 "hypothetical protein"  
"DsuD02\_00411" 3627 "s59E5H2" 0 "hypothetical protein"  
"DsuD02\_00411" 3627 "s63E6H2" 0 "hypothetical protein"  
"DsuD02\_00412" 3628 "s59E13H2" 0 "hypothetical protein"  
"DsuD02\_00412" 3628 "s59E25H2" 0 "hypothetical protein"  
"DsuD02\_00412" 3628 "s59E5H2" 0 "hypothetical protein"  
"DsuD02\_00412" 3628 "s63E6H2" 0 "hypothetical protein"  
"DsuD02\_00413" 3629 "s59E13H2" 0 "hypothetical protein"  
"DsuD02\_00413" 3629 "s59E25H2" 0 "hypothetical protein"  
"DsuD02\_00413" 3629 "s59E5H2" 0 "hypothetical protein"  
"DsuD02\_00413" 3629 "s63E6H2" 0 "hypothetical protein"  
"DsuD02\_00414" 3630 "s59E13H2" 0 "31-O-demethyl-FK506 methyltransferase FkbM"  
"DsuD02\_00414" 3630 "s59E25H2" 0 "31-O-demethyl-FK506 methyltransferase FkbM"  
"DsuD02\_00414" 3630 "s59E5H2" 0 "31-O-demethyl-FK506 methyltransferase FkbM"  
"DsuD02\_00414" 3630 "s63E6H2" 0 "31-O-demethyl-FK506 methyltransferase FkbM"  
"DsuD02\_00415" 3631 "s59E13H2" 0 "putative hydrolase YxeP"  
"DsuD02\_00415" 3631 "s59E25H2" 0 "putative hydrolase YxeP"  
"DsuD02\_00415" 3631 "s59E5H2" 0 "putative hydrolase YxeP"  
"DsuD02\_00415" 3631 "s63E6H2" 0 "putative hydrolase YxeP"  
"DsuD02\_00416" 3632 "s59E13H2" 0 "hypothetical protein"  
"DsuD02\_00416" 3632 "s59E25H2" 0 "hypothetical protein"  
"DsuD02\_00416" 3632 "s59E5H2" 0 "hypothetical protein"  
"DsuD02\_00416" 3632 "s63E6H2" 0 "hypothetical protein"  
"DsuD02\_00417" 3633 "s59E13H2" 0 "General stress protein 69"  
"DsuD02\_00417" 3633 "s59E25H2" 0 "General stress protein 69"  
"DsuD02\_00417" 3633 "s59E5H2" 0 "General stress protein 69"  
"DsuD02\_00417" 3633 "s63E6H2" 0 "General stress protein 69"  
"DsuD02\_00418" 3634 "s59E13H2" 0 "Rhomboid protease GluP"  
"DsuD02\_00418" 3634 "s59E25H2" 0 "Rhomboid protease GluP"  
"DsuD02\_00418" 3634 "s59E5H2" 0 "Rhomboid protease GluP"  
"DsuD02\_00418" 3634 "s63E6H2" 0 "Rhomboid protease GluP"

"DsuD02\_00419" 3635 "s59E13H2" 0 "Prolipoprotein diacylglyceryl transferase"  
"DsuD02\_00419" 3635 "s59E25H2" 0 "Prolipoprotein diacylglyceryl transferase"  
"DsuD02\_00419" 3635 "s59E5H2" 0 "Prolipoprotein diacylglyceryl transferase"  
"DsuD02\_00419" 3635 "s63E6H2" 0 "Prolipoprotein diacylglyceryl transferase"  
"DsuD02\_00420" 3636 "s59E13H2" 0 "L-carnitine dehydrogenase"  
"DsuD02\_00420" 3636 "s59E25H2" 0 "L-carnitine dehydrogenase"  
"DsuD02\_00420" 3636 "s59E5H2" 0 "L-carnitine dehydrogenase"  
"DsuD02\_00420" 3636 "s63E6H2" 0 "L-carnitine dehydrogenase"  
"DsuD02\_00425" 3641 "s59E13H2" 0 "Diaminopropionate ammonia-lyase"  
"DsuD02\_00425" 3641 "s59E25H2" 0 "Diaminopropionate ammonia-lyase"  
"DsuD02\_00425" 3641 "s59E5H2" 0 "Diaminopropionate ammonia-lyase"  
"DsuD02\_00425" 3641 "s63E6H2" 0 "Diaminopropionate ammonia-lyase"  
"DsuD02\_00426" 3642 "s59E13H2" 0 "shikimate kinase"  
"DsuD02\_00426" 3642 "s59E25H2" 0 "shikimate kinase"  
"DsuD02\_00426" 3642 "s59E5H2" 0 "shikimate kinase"  
"DsuD02\_00426" 3642 "s63E6H2" 0 "shikimate kinase"  
"DsuD02\_00427" 3643 "s59E13H2" 0 "hypothetical protein"  
"DsuD02\_00427" 3643 "s59E25H2" 0 "hypothetical protein"  
"DsuD02\_00427" 3643 "s59E5H2" 0 "hypothetical protein"  
"DsuD02\_00427" 3643 "s63E6H2" 0 "hypothetical protein"  
"DsuD02\_00428" 3644 "s59E13H2" 0 "Prolyl-tRNA editing protein ProX"  
"DsuD02\_00428" 3644 "s59E25H2" 0 "Prolyl-tRNA editing protein ProX"  
"DsuD02\_00428" 3644 "s59E5H2" 0 "Prolyl-tRNA editing protein ProX"  
"DsuD02\_00428" 3644 "s63E6H2" 0 "Prolyl-tRNA editing protein ProX"  
"DsuD02\_00429" 3645 "s59E13H2" 0 "Glutamyl-tRNA(Gln) amidotransferase subunit A"  
"DsuD02\_00429" 3645 "s59E25H2" 0 "Glutamyl-tRNA(Gln) amidotransferase subunit A"  
"DsuD02\_00429" 3645 "s59E5H2" 0 "Glutamyl-tRNA(Gln) amidotransferase subunit A"  
"DsuD02\_00429" 3645 "s63E6H2" 0 "Glutamyl-tRNA(Gln) amidotransferase subunit A"  
"DsuD02\_00430" 3646 "s59E13H2" 0 "hypothetical protein"  
"DsuD02\_00430" 3646 "s59E25H2" 0 "hypothetical protein"  
"DsuD02\_00430" 3646 "s59E5H2" 0 "hypothetical protein"  
"DsuD02\_00430" 3646 "s63E6H2" 0 "hypothetical protein"  
"DsuD02\_00431" 3647 "s59E13H2" 0 "putative periplasmic serine endoprotease DegP-like precursor"  
"DsuD02\_00431" 3647 "s59E25H2" 0 "putative periplasmic serine endoprotease DegP-like precursor"  
"DsuD02\_00431" 3647 "s59E5H2" 0 "putative periplasmic serine endoprotease DegP-like precursor"  
"DsuD02\_00431" 3647 "s63E6H2" 0 "putative periplasmic serine endoprotease DegP-like precursor"  
"DsuD02\_00432" 3648 "s59E13H2" 0 "DNA-3-methyladenine glycosylase 1"  
"DsuD02\_00432" 3648 "s59E25H2" 0 "DNA-3-methyladenine glycosylase 1"  
"DsuD02\_00432" 3648 "s59E5H2" 0 "DNA-3-methyladenine glycosylase 1"  
"DsuD02\_00432" 3648 "s63E6H2" 0 "DNA-3-methyladenine glycosylase 1"  
"DsuD02\_00433" 3649 "s59E13H2" 0 "Glutamate dehydrogenase"  
"DsuD02\_00433" 3649 "s59E25H2" 0 "Glutamate dehydrogenase"  
"DsuD02\_00433" 3649 "s59E5H2" 0 "Glutamate dehydrogenase"  
"DsuD02\_00433" 3649 "s63E6H2" 0 "Glutamate dehydrogenase"  
"DsuD02\_00436" 3652 "s59E13H2" 0 "Phosphoglycolate phosphatase"  
"DsuD02\_00436" 3652 "s59E25H2" 0 "Phosphoglycolate phosphatase"  
"DsuD02\_00436" 3652 "s59E5H2" 0 "Phosphoglycolate phosphatase"



"DsuD02\_00436" 3652 "s63E6H2" 0 "Phosphoglycolate phosphatase"  
"DsuD02\_00438" 3654 "s59E13H2" 0 "FecR protein"  
"DsuD02\_00438" 3654 "s59E25H2" 0 "FecR protein"  
"DsuD02\_00438" 3654 "s59E5H2" 0 "FecR protein"  
"DsuD02\_00438" 3654 "s63E6H2" 0 "FecR protein"  
"DsuD02\_00439" 3655 "s59E13H2" 0 "Adenylate cyclase 2"  
"DsuD02\_00439" 3655 "s59E25H2" 0 "Adenylate cyclase 2"  
"DsuD02\_00439" 3655 "s59E5H2" 0 "Adenylate cyclase 2"  
"DsuD02\_00439" 3655 "s63E6H2" 0 "Adenylate cyclase 2"  
"DsuD02\_00440" 3656 "s59E13H2" 0 "Sulfide dehydrogenase subunit alpha precursor"  
"DsuD02\_00440" 3656 "s59E25H2" 0 "Sulfide dehydrogenase subunit alpha precursor"  
"DsuD02\_00440" 3656 "s59E5H2" 0 "Sulfide dehydrogenase subunit alpha precursor"  
"DsuD02\_00440" 3656 "s63E6H2" 0 "Sulfide dehydrogenase subunit alpha precursor"  
"DsuD02\_00442" 3658 "s59E13H2" 0 "Altronate dehydratase"  
"DsuD02\_00442" 3658 "s59E25H2" 0 "Altronate dehydratase"  
"DsuD02\_00442" 3658 "s59E5H2" 0 "Altronate dehydratase"  
"DsuD02\_00442" 3658 "s63E6H2" 0 "Altronate dehydratase"  
"DsuD02\_00443" 3659 "s59E13H2" 0 "4-hydroxybutyryl-CoA dehydratase/vinylacetyl-CoA-Delta-isomerase"  
"DsuD02\_00443" 3659 "s59E25H2" 0 "4-hydroxybutyryl-CoA dehydratase/vinylacetyl-CoA-Delta-isomerase"  
"DsuD02\_00443" 3659 "s59E5H2" 0 "4-hydroxybutyryl-CoA dehydratase/vinylacetyl-CoA-Delta-isomerase"  
"DsuD02\_00443" 3659 "s63E6H2" 0 "4-hydroxybutyryl-CoA dehydratase/vinylacetyl-CoA-Delta-isomerase"  
"DsuD02\_00444" 3660 "s59E13H2" 0 "hypothetical protein"  
"DsuD02\_00444" 3660 "s59E25H2" 0 "hypothetical protein"  
"DsuD02\_00444" 3660 "s59E5H2" 0 "hypothetical protein"  
"DsuD02\_00444" 3660 "s63E6H2" 0 "hypothetical protein"  
"DsuD02\_00445" 3661 "s59E13H2" 0 "Phosphate acyltransferase"  
"DsuD02\_00445" 3661 "s59E25H2" 0 "Phosphate acyltransferase"  
"DsuD02\_00445" 3661 "s59E5H2" 0 "Phosphate acyltransferase"  
"DsuD02\_00445" 3661 "s63E6H2" 0 "Phosphate acyltransferase"  
"DsuD02\_00446" 3662 "s59E13H2" 0 "3-oxoacyl-[acyl-carrier-protein] reductase FabG"  
"DsuD02\_00446" 3662 "s59E25H2" 0 "3-oxoacyl-[acyl-carrier-protein] reductase FabG"  
"DsuD02\_00446" 3662 "s59E5H2" 0 "3-oxoacyl-[acyl-carrier-protein] reductase FabG"  
"DsuD02\_00446" 3662 "s63E6H2" 0 "3-oxoacyl-[acyl-carrier-protein] reductase FabG"  
"DsuD02\_00447" 3663 "s59E13H2" 0 "Acyl carrier protein"  
"DsuD02\_00447" 3663 "s59E25H2" 0 "Acyl carrier protein"  
"DsuD02\_00447" 3663 "s59E5H2" 0 "Acyl carrier protein"  
"DsuD02\_00447" 3663 "s63E6H2" 0 "Acyl carrier protein"  
"DsuD02\_00448" 3664 "s59E13H2" 0 "3-oxoacyl-[acyl-carrier-protein] synthase 2"  
"DsuD02\_00448" 3664 "s59E25H2" 0 "3-oxoacyl-[acyl-carrier-protein] synthase 2"  
"DsuD02\_00448" 3664 "s59E5H2" 0 "3-oxoacyl-[acyl-carrier-protein] synthase 2"  
"DsuD02\_00448" 3664 "s63E6H2" 0 "3-oxoacyl-[acyl-carrier-protein] synthase 2"  
"DsuD02\_00449" 3665 "s59E13H2" 0 "Ribose-5-phosphate isomerase B"  
"DsuD02\_00449" 3665 "s59E25H2" 0 "Ribose-5-phosphate isomerase B"  
"DsuD02\_00449" 3665 "s59E5H2" 0 "Ribose-5-phosphate isomerase B"  
"DsuD02\_00449" 3665 "s63E6H2" 0 "Ribose-5-phosphate isomerase B"  
"DsuD02\_00450" 3666 "s59E13H2" 0 "tRNA-specific adenosine deaminase"  
"DsuD02\_00450" 3666 "s59E25H2" 0 "tRNA-specific adenosine deaminase"

"DsuD02\_00450" 3666 "s59E5H2" 0 "tRNA-specific adenosine deaminase"  
"DsuD02\_00450" 3666 "s63E6H2" 0 "tRNA-specific adenosine deaminase"  
"DsuD02\_00451" 3667 "s59E13H2" 0 "Transcriptional repressor NrdR"  
"DsuD02\_00451" 3667 "s59E25H2" 0 "Transcriptional repressor NrdR"  
"DsuD02\_00451" 3667 "s59E5H2" 0 "Transcriptional repressor NrdR"  
"DsuD02\_00451" 3667 "s63E6H2" 0 "Transcriptional repressor NrdR"  
"DsuD02\_00452" 3668 "s59E13H2" 0 "Riboflavin biosynthesis protein RibD"  
"DsuD02\_00452" 3668 "s59E25H2" 0 "Riboflavin biosynthesis protein RibD"  
"DsuD02\_00452" 3668 "s59E5H2" 0 "Riboflavin biosynthesis protein RibD"  
"DsuD02\_00452" 3668 "s63E6H2" 0 "Riboflavin biosynthesis protein RibD"  
"DsuD02\_00454" 3670 "s59E13H2" 0 "Riboflavin synthase"  
"DsuD02\_00454" 3670 "s59E25H2" 0 "Riboflavin synthase"  
"DsuD02\_00454" 3670 "s59E5H2" 0 "Riboflavin synthase"  
"DsuD02\_00454" 3670 "s63E6H2" 0 "Riboflavin synthase"  
"DsuD02\_00455" 3671 "s59E13H2" 0 "Riboflavin biosynthesis protein RibBA"  
"DsuD02\_00455" 3671 "s59E25H2" 0 "Riboflavin biosynthesis protein RibBA"  
"DsuD02\_00455" 3671 "s59E5H2" 0 "Riboflavin biosynthesis protein RibBA"  
"DsuD02\_00455" 3671 "s63E6H2" 0 "Riboflavin biosynthesis protein RibBA"  
"DsuD02\_00456" 3672 "s59E13H2" 0 "6,7-dimethyl-8-ribityllumazine synthase"  
"DsuD02\_00456" 3672 "s59E25H2" 0 "6,7-dimethyl-8-ribityllumazine synthase"  
"DsuD02\_00456" 3672 "s59E5H2" 0 "6,7-dimethyl-8-ribityllumazine synthase"  
"DsuD02\_00456" 3672 "s63E6H2" 0 "6,7-dimethyl-8-ribityllumazine synthase"  
"DsuD02\_00457" 3673 "s59E13H2" 0 "hypothetical protein"  
"DsuD02\_00457" 3673 "s59E25H2" 0 "hypothetical protein"  
"DsuD02\_00457" 3673 "s59E5H2" 0 "hypothetical protein"  
"DsuD02\_00457" 3673 "s63E6H2" 0 "hypothetical protein"  
"DsuD02\_00458" 3674 "s59E13H2" 0 "hypothetical protein"  
"DsuD02\_00458" 3674 "s59E25H2" 0 "hypothetical protein"  
"DsuD02\_00458" 3674 "s59E5H2" 0 "hypothetical protein"  
"DsuD02\_00458" 3674 "s63E6H2" 0 "hypothetical protein"  
"DsuD02\_00459" 3675 "s59E13H2" 0 "Leucine--tRNA ligase"  
"DsuD02\_00459" 3675 "s59E25H2" 0 "Leucine--tRNA ligase"  
"DsuD02\_00459" 3675 "s59E5H2" 0 "Leucine--tRNA ligase"  
"DsuD02\_00459" 3675 "s63E6H2" 0 "Leucine--tRNA ligase"  
"DsuD02\_00460" 3676 "s59E13H2" 0 "hypothetical protein"  
"DsuD02\_00460" 3676 "s59E25H2" 0 "hypothetical protein"  
"DsuD02\_00460" 3676 "s59E5H2" 0 "hypothetical protein"  
"DsuD02\_00460" 3676 "s63E6H2" 0 "hypothetical protein"  
"DsuD02\_00461" 3677 "s59E13H2" 0 "DNA polymerase III subunit delta"  
"DsuD02\_00461" 3677 "s59E25H2" 0 "DNA polymerase III subunit delta"  
"DsuD02\_00461" 3677 "s59E5H2" 0 "DNA polymerase III subunit delta"  
"DsuD02\_00461" 3677 "s63E6H2" 0 "DNA polymerase III subunit delta"  
"DsuD02\_00462" 3678 "s59E13H2" 0 "30S ribosomal protein S20"  
"DsuD02\_00462" 3678 "s59E25H2" 0 "30S ribosomal protein S20"  
"DsuD02\_00462" 3678 "s59E5H2" 0 "30S ribosomal protein S20"  
"DsuD02\_00462" 3678 "s63E6H2" 0 "30S ribosomal protein S20"  
"DsuD02\_00463" 3679 "s59E13H2" 0 "putative peptidoglycan biosynthesis protein MurJ"

"DsuD02\_00463" 3679 "s59E25H2" 0 "putative peptidoglycan biosynthesis protein MurJ"  
"DsuD02\_00463" 3679 "s59E5H2" 0 "putative peptidoglycan biosynthesis protein MurJ"  
"DsuD02\_00463" 3679 "s63E6H2" 0 "putative peptidoglycan biosynthesis protein MurJ"  
"DsuD02\_00465" 3681 "s59E13H2" 0 "Transketolase"  
"DsuD02\_00465" 3681 "s59E25H2" 0 "Transketolase"  
"DsuD02\_00465" 3681 "s59E5H2" 0 "Transketolase"  
"DsuD02\_00465" 3681 "s63E6H2" 0 "Transketolase"  
"DsuD02\_00466" 3682 "s59E13H2" 0 "putative ATPase of the ABC class"  
"DsuD02\_00466" 3682 "s59E25H2" 0 "putative ATPase of the ABC class"  
"DsuD02\_00466" 3682 "s59E5H2" 0 "putative ATPase of the ABC class"  
"DsuD02\_00466" 3682 "s63E6H2" 0 "putative ATPase of the ABC class"  
"DsuD02\_00467" 3683 "s59E13H2" 0 "hypothetical protein"  
"DsuD02\_00467" 3683 "s59E25H2" 0 "hypothetical protein"  
"DsuD02\_00467" 3683 "s59E5H2" 0 "hypothetical protein"  
"DsuD02\_00467" 3683 "s63E6H2" 0 "hypothetical protein"  
"DsuD02\_00468" 3684 "s59E13H2" 0 "tRNA(fMet)-specific endonuclease VapC"  
"DsuD02\_00468" 3684 "s59E25H2" 0 "tRNA(fMet)-specific endonuclease VapC"  
"DsuD02\_00468" 3684 "s59E5H2" 0 "tRNA(fMet)-specific endonuclease VapC"  
"DsuD02\_00468" 3684 "s63E6H2" 0 "tRNA(fMet)-specific endonuclease VapC"  
"DsuD02\_00470" 3686 "s59E13H2" 0 "hypothetical protein"  
"DsuD02\_00470" 3686 "s59E25H2" 0 "hypothetical protein"  
"DsuD02\_00470" 3686 "s59E5H2" 0 "hypothetical protein"  
"DsuD02\_00470" 3686 "s63E6H2" 0 "hypothetical protein"  
"DsuD02\_00471" 3687 "s59E13H2" 0 "Oxygen sensor histidine kinase NreB"  
"DsuD02\_00471" 3687 "s59E25H2" 0 "Oxygen sensor histidine kinase NreB"  
"DsuD02\_00471" 3687 "s59E5H2" 0 "Oxygen sensor histidine kinase NreB"  
"DsuD02\_00471" 3687 "s63E6H2" 0 "Oxygen sensor histidine kinase NreB"  
"DsuD02\_00473" 3689 "s59E13H2" 0 "Response regulator UvrY"  
"DsuD02\_00473" 3689 "s59E25H2" 0 "Response regulator UvrY"  
"DsuD02\_00473" 3689 "s59E5H2" 0 "Response regulator UvrY"  
"DsuD02\_00473" 3689 "s63E6H2" 0 "Response regulator UvrY"  
"DsuD02\_00474" 3690 "s59E13H2" 0 "hypothetical protein"  
"DsuD02\_00474" 3690 "s59E25H2" 0 "hypothetical protein"  
"DsuD02\_00474" 3690 "s59E5H2" 0 "hypothetical protein"  
"DsuD02\_00474" 3690 "s63E6H2" 0 "hypothetical protein"  
"DsuD02\_00475" 3691 "s59E13H2" 0 "Transcriptional regulatory protein DevR (DosR)"  
"DsuD02\_00475" 3691 "s59E25H2" 0 "Transcriptional regulatory protein DevR (DosR)"  
"DsuD02\_00475" 3691 "s59E5H2" 0 "Transcriptional regulatory protein DevR (DosR)"  
"DsuD02\_00475" 3691 "s63E6H2" 0 "Transcriptional regulatory protein DevR (DosR)"  
"DsuD02\_00476" 3692 "s59E13H2" 0 "Cyclic di-GMP phosphodiesterase response regulator RpfG"  
"DsuD02\_00476" 3692 "s59E25H2" 0 "Cyclic di-GMP phosphodiesterase response regulator RpfG"  
"DsuD02\_00476" 3692 "s59E5H2" 0 "Cyclic di-GMP phosphodiesterase response regulator RpfG"  
"DsuD02\_00476" 3692 "s63E6H2" 0 "Cyclic di-GMP phosphodiesterase response regulator RpfG"  
"DsuD02\_00477" 3693 "s59E13H2" 0 "HEPN domain protein"  
"DsuD02\_00477" 3693 "s59E25H2" 0 "HEPN domain protein"  
"DsuD02\_00477" 3693 "s59E5H2" 0 "HEPN domain protein"  
"DsuD02\_00477" 3693 "s63E6H2" 0 "HEPN domain protein"

"DsuD02\_00478" 3694 "s59E13H2" 0 "Nucleotidyltransferase domain protein"  
"DsuD02\_00478" 3694 "s59E25H2" 0 "Nucleotidyltransferase domain protein"  
"DsuD02\_00478" 3694 "s59E5H2" 0 "Nucleotidyltransferase domain protein"  
"DsuD02\_00478" 3694 "s63E6H2" 0 "Nucleotidyltransferase domain protein"  
"DsuD02\_00479" 3695 "s59E13H2" 0 "hypothetical protein"  
"DsuD02\_00479" 3695 "s59E25H2" 0 "hypothetical protein"  
"DsuD02\_00479" 3695 "s59E5H2" 0 "hypothetical protein"  
"DsuD02\_00479" 3695 "s63E6H2" 0 "hypothetical protein"  
"DsuD02\_00480" 3696 "s59E13H2" 0 "Nucleotidyltransferase domain protein"  
"DsuD02\_00480" 3696 "s59E25H2" 0 "Nucleotidyltransferase domain protein"  
"DsuD02\_00480" 3696 "s59E5H2" 0 "Nucleotidyltransferase domain protein"  
"DsuD02\_00480" 3696 "s63E6H2" 0 "Nucleotidyltransferase domain protein"  
"DsuD02\_00481" 3697 "s59E13H2" 0 "hypothetical protein"  
"DsuD02\_00481" 3697 "s59E25H2" 0 "hypothetical protein"  
"DsuD02\_00481" 3697 "s59E5H2" 0 "hypothetical protein"  
"DsuD02\_00481" 3697 "s63E6H2" 0 "hypothetical protein"  
"DsuD02\_00484" 3700 "s59E13H2" 0 "hypothetical protein"  
"DsuD02\_00484" 3700 "s59E25H2" 0 "hypothetical protein"  
"DsuD02\_00484" 3700 "s59E5H2" 0 "hypothetical protein"  
"DsuD02\_00484" 3700 "s63E6H2" 0 "hypothetical protein"  
"DsuD02\_00485" 3701 "s59E13H2" 0 "hypothetical protein"  
"DsuD02\_00485" 3701 "s59E25H2" 0 "hypothetical protein"  
"DsuD02\_00485" 3701 "s59E5H2" 0 "hypothetical protein"  
"DsuD02\_00485" 3701 "s63E6H2" 0 "hypothetical protein"  
"DsuD02\_00486" 3702 "s59E13H2" 0 "Archaeal ATPase"  
"DsuD02\_00486" 3702 "s59E25H2" 0 "Archaeal ATPase"  
"DsuD02\_00486" 3702 "s59E5H2" 0 "Archaeal ATPase"  
"DsuD02\_00486" 3702 "s63E6H2" 0 "Archaeal ATPase"  
"DsuD02\_00487" 3703 "s59E13H2" 0 "Nucleotidyltransferase domain protein"  
"DsuD02\_00487" 3703 "s59E25H2" 0 "Nucleotidyltransferase domain protein"  
"DsuD02\_00487" 3703 "s59E5H2" 0 "Nucleotidyltransferase domain protein"  
"DsuD02\_00487" 3703 "s63E6H2" 0 "Nucleotidyltransferase domain protein"  
"DsuD02\_00488" 3704 "s59E13H2" 0 "HEPN domain protein"  
"DsuD02\_00488" 3704 "s59E25H2" 0 "HEPN domain protein"  
"DsuD02\_00488" 3704 "s59E5H2" 0 "HEPN domain protein"  
"DsuD02\_00488" 3704 "s63E6H2" 0 "HEPN domain protein"  
"DsuD02\_00489" 3705 "s59E13H2" 0 "hypothetical protein"  
"DsuD02\_00489" 3705 "s59E25H2" 0 "hypothetical protein"  
"DsuD02\_00489" 3705 "s59E5H2" 0 "hypothetical protein"  
"DsuD02\_00489" 3705 "s63E6H2" 0 "hypothetical protein"  
"DsuD02\_00493" 3709 "s59E13H2" 0 "Serine/threonine-protein kinase pkn1"  
"DsuD02\_00493" 3709 "s59E25H2" 0 "Serine/threonine-protein kinase pkn1"  
"DsuD02\_00493" 3709 "s59E5H2" 0 "Serine/threonine-protein kinase pkn1"  
"DsuD02\_00493" 3709 "s63E6H2" 0 "Serine/threonine-protein kinase pkn1"  
"DsuD02\_00494" 3710 "s59E13H2" 0 "Phosphatidylinositol mannoside acyltransferase"  
"DsuD02\_00494" 3710 "s59E25H2" 0 "Phosphatidylinositol mannoside acyltransferase"  
"DsuD02\_00494" 3710 "s59E5H2" 0 "Phosphatidylinositol mannoside acyltransferase"

"DsuD02\_00494" 3710 "s63E6H2" 0 "Phosphatidylinositol mannoside acyltransferase"  
"DsuD02\_00495" 3711 "s59E13H2" 0 "GYD domain protein"  
"DsuD02\_00495" 3711 "s59E25H2" 0 "GYD domain protein"  
"DsuD02\_00495" 3711 "s59E5H2" 0 "GYD domain protein"  
"DsuD02\_00495" 3711 "s63E6H2" 0 "GYD domain protein"  
"DsuD02\_00497" 3713 "s59E13H2" 0 "hypothetical protein"  
"DsuD02\_00497" 3713 "s59E25H2" 0 "hypothetical protein"  
"DsuD02\_00497" 3713 "s59E5H2" 0.1856084 "hypothetical protein"  
"DsuD02\_00497" 3713 "s63E6H2" 0 "hypothetical protein"  
"DsuD02\_00498" 3714 "s59E13H2" 0 "Ribonucleoside-diphosphate reductase NrdZ"  
"DsuD02\_00498" 3714 "s59E25H2" 0 "Ribonucleoside-diphosphate reductase NrdZ"  
"DsuD02\_00498" 3714 "s59E5H2" 0.002820255 "Ribonucleoside-diphosphate reductase NrdZ"  
"DsuD02\_00498" 3714 "s63E6H2" 0 "Ribonucleoside-diphosphate reductase NrdZ"  
"DsuD02\_00499" 3715 "s59E13H2" 0 "Flagellar brake protein YcgR"  
"DsuD02\_00499" 3715 "s59E25H2" 0 "Flagellar brake protein YcgR"  
"DsuD02\_00499" 3715 "s59E5H2" 0 "Flagellar brake protein YcgR"  
"DsuD02\_00499" 3715 "s63E6H2" 0 "Flagellar brake protein YcgR"  
"DsuD02\_00500" 3716 "s59E13H2" 0 "putative glutamate synthase (NADPH) small subunit"  
"DsuD02\_00500" 3716 "s59E25H2" 0 "putative glutamate synthase (NADPH) small subunit"  
"DsuD02\_00500" 3716 "s59E5H2" 0 "putative glutamate synthase (NADPH) small subunit"  
"DsuD02\_00500" 3716 "s63E6H2" 0 "putative glutamate synthase (NADPH) small subunit"  
"DsuD02\_00501" 3717 "s59E13H2" 0 "N5-carboxyaminoimidazole ribonucleotide mutase"  
"DsuD02\_00501" 3717 "s59E25H2" 0 "N5-carboxyaminoimidazole ribonucleotide mutase"  
"DsuD02\_00501" 3717 "s59E5H2" 0 "N5-carboxyaminoimidazole ribonucleotide mutase"  
"DsuD02\_00501" 3717 "s63E6H2" 0 "N5-carboxyaminoimidazole ribonucleotide mutase"  
"DsuD02\_00502" 3718 "s59E13H2" 0 "coproporphyrinogen III oxidase"  
"DsuD02\_00502" 3718 "s59E25H2" 0 "coproporphyrinogen III oxidase"  
"DsuD02\_00502" 3718 "s59E5H2" 0 "coproporphyrinogen III oxidase"  
"DsuD02\_00502" 3718 "s63E6H2" 0 "coproporphyrinogen III oxidase"  
"DsuD02\_00503" 3719 "s59E13H2" 0 "D-tyrosyl-tRNA(Tyr) deacylase"  
"DsuD02\_00503" 3719 "s59E25H2" 0 "D-tyrosyl-tRNA(Tyr) deacylase"  
"DsuD02\_00503" 3719 "s59E5H2" 0 "D-tyrosyl-tRNA(Tyr) deacylase"  
"DsuD02\_00503" 3719 "s63E6H2" 0 "D-tyrosyl-tRNA(Tyr) deacylase"  
"DsuD02\_00504" 3720 "s59E13H2" 0 "hypothetical protein"  
"DsuD02\_00504" 3720 "s59E25H2" 0 "hypothetical protein"  
"DsuD02\_00504" 3720 "s59E5H2" 0 "hypothetical protein"  
"DsuD02\_00504" 3720 "s63E6H2" 0 "hypothetical protein"  
"DsuD02\_00505" 3721 "s59E13H2" 0 "putative phospholipid ABC transporter-binding protein MlaD"  
"DsuD02\_00505" 3721 "s59E25H2" 0 "putative phospholipid ABC transporter-binding protein MlaD"  
"DsuD02\_00505" 3721 "s59E5H2" 0 "putative phospholipid ABC transporter-binding protein MlaD"  
"DsuD02\_00505" 3721 "s63E6H2" 0 "putative phospholipid ABC transporter-binding protein MlaD"  
"DsuD02\_00506" 3722 "s59E13H2" 0 "putative ABC transporter ATP-binding protein"  
"DsuD02\_00506" 3722 "s59E25H2" 0 "putative ABC transporter ATP-binding protein"  
"DsuD02\_00506" 3722 "s59E5H2" 0 "putative ABC transporter ATP-binding protein"  
"DsuD02\_00506" 3722 "s63E6H2" 0 "putative ABC transporter ATP-binding protein"  
"DsuD02\_00507" 3723 "s59E13H2" 0 "putative phospholipid ABC transporter permease protein MlaE"  
"DsuD02\_00507" 3723 "s59E25H2" 0 "putative phospholipid ABC transporter permease protein MlaE"

"DsuD02\_00507" 3723 "s59E5H2" 0 "putative phospholipid ABC transporter permease protein MlaE"  
"DsuD02\_00507" 3723 "s63E6H2" 0 "putative phospholipid ABC transporter permease protein MlaE"  
"DsuD02\_00508" 3724 "s59E13H2" 0 "Adenylate cyclase 1"  
"DsuD02\_00508" 3724 "s59E25H2" 0 "Adenylate cyclase 1"  
"DsuD02\_00508" 3724 "s59E5H2" 0 "Adenylate cyclase 1"  
"DsuD02\_00508" 3724 "s63E6H2" 0 "Adenylate cyclase 1"  
"DsuD02\_00509" 3725 "s59E13H2" 0 "Hydroxymethylpyrimidine/phosphomethylpyrimidine kinase"  
"DsuD02\_00509" 3725 "s59E25H2" 0 "Hydroxymethylpyrimidine/phosphomethylpyrimidine kinase"  
"DsuD02\_00509" 3725 "s59E5H2" 0 "Hydroxymethylpyrimidine/phosphomethylpyrimidine kinase"  
"DsuD02\_00509" 3725 "s63E6H2" 0 "Hydroxymethylpyrimidine/phosphomethylpyrimidine kinase"  
"DsuD02\_00511" 3727 "s59E13H2" 0 "Phosphomethylpyrimidine synthase"  
"DsuD02\_00511" 3727 "s59E25H2" 0 "Phosphomethylpyrimidine synthase"  
"DsuD02\_00511" 3727 "s59E5H2" 0 "Phosphomethylpyrimidine synthase"  
"DsuD02\_00511" 3727 "s63E6H2" 0 "Phosphomethylpyrimidine synthase"  
"DsuD02\_00512" 3728 "s59E13H2" 0 "Glucosyl-3-phosphoglycerate/mannosyl-3-phosphoglycerate phosphatase"  
"DsuD02\_00512" 3728 "s59E25H2" 0 "Glucosyl-3-phosphoglycerate/mannosyl-3-phosphoglycerate phosphatase"  
"DsuD02\_00512" 3728 "s59E5H2" 0 "Glucosyl-3-phosphoglycerate/mannosyl-3-phosphoglycerate phosphatase"  
"DsuD02\_00512" 3728 "s63E6H2" 0 "Glucosyl-3-phosphoglycerate/mannosyl-3-phosphoglycerate phosphatase"  
"DsuD02\_00513" 3729 "s59E13H2" 0 "Methylthioribose-1-phosphate isomerase"  
"DsuD02\_00513" 3729 "s59E25H2" 0 "Methylthioribose-1-phosphate isomerase"  
"DsuD02\_00513" 3729 "s59E5H2" 0 "Methylthioribose-1-phosphate isomerase"  
"DsuD02\_00513" 3729 "s63E6H2" 0 "Methylthioribose-1-phosphate isomerase"  
"DsuD02\_00514" 3730 "s59E13H2" 0 "Ribonuclease VapC11"  
"DsuD02\_00514" 3730 "s59E25H2" 0 "Ribonuclease VapC11"  
"DsuD02\_00514" 3730 "s59E5H2" 0 "Ribonuclease VapC11"  
"DsuD02\_00514" 3730 "s63E6H2" 0 "Ribonuclease VapC11"  
"DsuD02\_00515" 3731 "s59E13H2" 0 "hypothetical protein"  
"DsuD02\_00515" 3731 "s59E25H2" 0 "hypothetical protein"  
"DsuD02\_00515" 3731 "s59E5H2" 0 "hypothetical protein"  
"DsuD02\_00515" 3731 "s63E6H2" 0 "hypothetical protein"  
"DsuD02\_00516" 3732 "s59E13H2" 0 "Glutamate-1-semialdehyde 2,1-aminomutase"  
"DsuD02\_00516" 3732 "s59E25H2" 0 "Glutamate-1-semialdehyde 2,1-aminomutase"  
"DsuD02\_00516" 3732 "s59E5H2" 0 "Glutamate-1-semialdehyde 2,1-aminomutase"  
"DsuD02\_00516" 3732 "s63E6H2" 0 "Glutamate-1-semialdehyde 2,1-aminomutase"  
"DsuD02\_00518" 3734 "s59E13H2" 0 "Pyruvate synthase subunit PorD"  
"DsuD02\_00518" 3734 "s59E25H2" 0 "Pyruvate synthase subunit PorD"  
"DsuD02\_00518" 3734 "s59E5H2" 0 "Pyruvate synthase subunit PorD"  
"DsuD02\_00518" 3734 "s63E6H2" 0 "Pyruvate synthase subunit PorD"  
"DsuD02\_00519" 3735 "s59E13H2" 0 "Adenylate cyclase 2"  
"DsuD02\_00519" 3735 "s59E25H2" 0 "Adenylate cyclase 2"  
"DsuD02\_00519" 3735 "s59E5H2" 0 "Adenylate cyclase 2"  
"DsuD02\_00519" 3735 "s63E6H2" 0 "Adenylate cyclase 2"  
"DsuD02\_00521" 3737 "s59E13H2" 0 "Phytochrome-like protein cph1"  
"DsuD02\_00521" 3737 "s59E25H2" 0 "Phytochrome-like protein cph1"  
"DsuD02\_00521" 3737 "s59E5H2" 0 "Phytochrome-like protein cph1"  
"DsuD02\_00521" 3737 "s63E6H2" 0 "Phytochrome-like protein cph1"  
"DsuD02\_00522" 3738 "s59E13H2" 0 "HicB family protein"

"DsuD02\_00522" 3738 "s59E25H2" 0 "HicB family protein"  
"DsuD02\_00522" 3738 "s59E5H2" 0 "HicB family protein"  
"DsuD02\_00522" 3738 "s63E6H2" 0 "HicB family protein"  
"DsuD02\_00523" 3739 "s59E13H2" 0 "hypothetical protein"  
"DsuD02\_00523" 3739 "s59E25H2" 0 "hypothetical protein"  
"DsuD02\_00523" 3739 "s59E5H2" 0 "hypothetical protein"  
"DsuD02\_00523" 3739 "s63E6H2" 0 "hypothetical protein"  
"DsuD02\_00525" 3741 "s59E13H2" 0 "Opine dehydrogenase"  
"DsuD02\_00525" 3741 "s59E25H2" 0 "Opine dehydrogenase"  
"DsuD02\_00525" 3741 "s59E5H2" 0 "Opine dehydrogenase"  
"DsuD02\_00525" 3741 "s63E6H2" 0 "Opine dehydrogenase"  
"DsuD02\_00526" 3742 "s59E13H2" 0 "Glyoxylate reductase"  
"DsuD02\_00526" 3742 "s59E25H2" 0 "Glyoxylate reductase"  
"DsuD02\_00526" 3742 "s59E5H2" 0 "Glyoxylate reductase"  
"DsuD02\_00526" 3742 "s63E6H2" 0 "Glyoxylate reductase"  
"DsuD02\_00527" 3743 "s59E13H2" 0 "Coenzyme F420 hydrogenase subunit beta"  
"DsuD02\_00527" 3743 "s59E25H2" 0 "Coenzyme F420 hydrogenase subunit beta"  
"DsuD02\_00527" 3743 "s59E5H2" 0 "Coenzyme F420 hydrogenase subunit beta"  
"DsuD02\_00527" 3743 "s63E6H2" 0 "Coenzyme F420 hydrogenase subunit beta"  
"DsuD02\_00528" 3744 "s59E13H2" 0 "Indolepyruvate oxidoreductase subunit lorA"  
"DsuD02\_00528" 3744 "s59E25H2" 0 "Indolepyruvate oxidoreductase subunit lorA"  
"DsuD02\_00528" 3744 "s59E5H2" 0 "Indolepyruvate oxidoreductase subunit lorA"  
"DsuD02\_00528" 3744 "s63E6H2" 0 "Indolepyruvate oxidoreductase subunit lorA"  
"DsuD02\_00529" 3745 "s59E13H2" 0 "Indolepyruvate oxidoreductase subunit lorB"  
"DsuD02\_00529" 3745 "s59E25H2" 0 "Indolepyruvate oxidoreductase subunit lorB"  
"DsuD02\_00529" 3745 "s59E5H2" 0 "Indolepyruvate oxidoreductase subunit lorB"  
"DsuD02\_00529" 3745 "s63E6H2" 0 "Indolepyruvate oxidoreductase subunit lorB"  
"DsuD02\_00530" 3746 "s59E13H2" 0 "Aspartate aminotransferase"  
"DsuD02\_00530" 3746 "s59E25H2" 0 "Aspartate aminotransferase"  
"DsuD02\_00530" 3746 "s59E5H2" 0 "Aspartate aminotransferase"  
"DsuD02\_00530" 3746 "s63E6H2" 0 "Aspartate aminotransferase"  
"DsuD02\_00531" 3747 "s59E13H2" 0 "Threonylcarbamoyladenine tRNA methylthiotransferase MtaB"  
"DsuD02\_00531" 3747 "s59E25H2" 0 "Threonylcarbamoyladenine tRNA methylthiotransferase MtaB"  
"DsuD02\_00531" 3747 "s59E5H2" 0 "Threonylcarbamoyladenine tRNA methylthiotransferase MtaB"  
"DsuD02\_00531" 3747 "s63E6H2" 0 "Threonylcarbamoyladenine tRNA methylthiotransferase MtaB"  
"DsuD02\_00532" 3748 "s59E13H2" 0 "Transcription elongation factor GreA"  
"DsuD02\_00532" 3748 "s59E25H2" 0 "Transcription elongation factor GreA"  
"DsuD02\_00532" 3748 "s59E5H2" 0 "Transcription elongation factor GreA"  
"DsuD02\_00532" 3748 "s63E6H2" 0 "Transcription elongation factor GreA"  
"DsuD02\_00533" 3749 "s59E13H2" 0 "hypothetical protein"  
"DsuD02\_00533" 3749 "s59E25H2" 0 "hypothetical protein"  
"DsuD02\_00533" 3749 "s59E5H2" 0 "hypothetical protein"  
"DsuD02\_00533" 3749 "s63E6H2" 0 "hypothetical protein"  
"DsuD02\_00534" 3750 "s59E13H2" 0 "2-hydroxy-3-oxopropionate reductase"  
"DsuD02\_00534" 3750 "s59E25H2" 0 "2-hydroxy-3-oxopropionate reductase"  
"DsuD02\_00534" 3750 "s59E5H2" 0 "2-hydroxy-3-oxopropionate reductase"  
"DsuD02\_00534" 3750 "s63E6H2" 0 "2-hydroxy-3-oxopropionate reductase"

"DsuD02\_00535" 3751 "s59E13H2" 0 "Sialic acid TRAP transporter permease protein SiaT"  
"DsuD02\_00535" 3751 "s59E25H2" 0 "Sialic acid TRAP transporter permease protein SiaT"  
"DsuD02\_00535" 3751 "s59E5H2" 0 "Sialic acid TRAP transporter permease protein SiaT"  
"DsuD02\_00535" 3751 "s63E6H2" 0 "Sialic acid TRAP transporter permease protein SiaT"  
"DsuD02\_00536" 3752 "s59E13H2" 0 "Sialic acid TRAP transporter permease protein SiaT"  
"DsuD02\_00536" 3752 "s59E25H2" 0 "Sialic acid TRAP transporter permease protein SiaT"  
"DsuD02\_00536" 3752 "s59E5H2" 0 "Sialic acid TRAP transporter permease protein SiaT"  
"DsuD02\_00536" 3752 "s63E6H2" 0 "Sialic acid TRAP transporter permease protein SiaT"  
"DsuD02\_00537" 3753 "s59E13H2" 0 "2,3-diketo-L-gulonate-binding periplasmic protein YiaO precursor"  
"DsuD02\_00537" 3753 "s59E25H2" 0 "2,3-diketo-L-gulonate-binding periplasmic protein YiaO precursor"  
"DsuD02\_00537" 3753 "s59E5H2" 0 "2,3-diketo-L-gulonate-binding periplasmic protein YiaO precursor"  
"DsuD02\_00537" 3753 "s63E6H2" 0 "2,3-diketo-L-gulonate-binding periplasmic protein YiaO precursor"  
"DsuD02\_00539" 3755 "s59E13H2" 0 "Ferredoxin"  
"DsuD02\_00539" 3755 "s59E25H2" 0 "Ferredoxin"  
"DsuD02\_00539" 3755 "s59E5H2" 0 "Ferredoxin"  
"DsuD02\_00539" 3755 "s63E6H2" 0 "Ferredoxin"  
"DsuD02\_00540" 3756 "s59E13H2" 0 "putative HTH-type transcriptional regulator YdfH"  
"DsuD02\_00540" 3756 "s59E25H2" 0 "putative HTH-type transcriptional regulator YdfH"  
"DsuD02\_00540" 3756 "s59E5H2" 0 "putative HTH-type transcriptional regulator YdfH"  
"DsuD02\_00540" 3756 "s63E6H2" 0 "putative HTH-type transcriptional regulator YdfH"  
"DsuD02\_00542" 3758 "s59E13H2" 0 "Hypoxanthine phosphoribosyltransferase"  
"DsuD02\_00542" 3758 "s59E25H2" 0 "Hypoxanthine phosphoribosyltransferase"  
"DsuD02\_00542" 3758 "s59E5H2" 0 "Hypoxanthine phosphoribosyltransferase"  
"DsuD02\_00542" 3758 "s63E6H2" 0 "Hypoxanthine phosphoribosyltransferase"  
"DsuD02\_00543" 3759 "s59E13H2" 0 "hypothetical protein"  
"DsuD02\_00543" 3759 "s59E25H2" 0 "hypothetical protein"  
"DsuD02\_00543" 3759 "s59E5H2" 0 "hypothetical protein"  
"DsuD02\_00543" 3759 "s63E6H2" 0 "hypothetical protein"  
"DsuD02\_00544" 3760 "s59E13H2" 0 "hypothetical protein"  
"DsuD02\_00544" 3760 "s59E25H2" 0 "hypothetical protein"  
"DsuD02\_00544" 3760 "s59E5H2" 0 "hypothetical protein"  
"DsuD02\_00544" 3760 "s63E6H2" 0 "hypothetical protein"  
"DsuD02\_00545" 3761 "s59E13H2" 0 "hypothetical protein"  
"DsuD02\_00545" 3761 "s59E25H2" 0 "hypothetical protein"  
"DsuD02\_00545" 3761 "s59E5H2" 0 "hypothetical protein"  
"DsuD02\_00545" 3761 "s63E6H2" 0 "hypothetical protein"  
"DsuD02\_00546" 3762 "s59E13H2" 0 "Long-chain-fatty-acid--CoA ligase FadD15"  
"DsuD02\_00546" 3762 "s59E25H2" 0 "Long-chain-fatty-acid--CoA ligase FadD15"  
"DsuD02\_00546" 3762 "s59E5H2" 0 "Long-chain-fatty-acid--CoA ligase FadD15"  
"DsuD02\_00546" 3762 "s63E6H2" 0 "Long-chain-fatty-acid--CoA ligase FadD15"  
"DsuD02\_00547" 3763 "s59E13H2" 0 "hypothetical protein"  
"DsuD02\_00547" 3763 "s59E25H2" 0 "hypothetical protein"  
"DsuD02\_00547" 3763 "s59E5H2" 0 "hypothetical protein"  
"DsuD02\_00547" 3763 "s63E6H2" 0 "hypothetical protein"  
"DsuD02\_00548" 3764 "s59E13H2" 0 "Phosphopantetheine adenyltransferase"  
"DsuD02\_00548" 3764 "s59E25H2" 0 "Phosphopantetheine adenyltransferase"  
"DsuD02\_00548" 3764 "s59E5H2" 0 "Phosphopantetheine adenyltransferase"



"DsuD02\_00548" 3764 "s63E6H2" 0 "Phosphopantetheine adenylyltransferase"  
"DsuD02\_00549" 3765 "s59E13H2" 0 "Aspartate--tRNA ligase"  
"DsuD02\_00549" 3765 "s59E25H2" 0 "Aspartate--tRNA ligase"  
"DsuD02\_00549" 3765 "s59E5H2" 0 "Aspartate--tRNA ligase"  
"DsuD02\_00549" 3765 "s63E6H2" 0 "Aspartate--tRNA ligase"  
"DsuD02\_00550" 3766 "s59E13H2" 0 "Histidine--tRNA ligase"  
"DsuD02\_00550" 3766 "s59E25H2" 0 "Histidine--tRNA ligase"  
"DsuD02\_00550" 3766 "s59E5H2" 0 "Histidine--tRNA ligase"  
"DsuD02\_00550" 3766 "s63E6H2" 0 "Histidine--tRNA ligase"  
"DsuD02\_00552" 3768 "s59E13H2" 0 "hypothetical protein"  
"DsuD02\_00552" 3768 "s59E25H2" 0 "hypothetical protein"  
"DsuD02\_00552" 3768 "s59E5H2" 0 "hypothetical protein"  
"DsuD02\_00552" 3768 "s63E6H2" 0 "hypothetical protein"  
"DsuD02\_00552" 3768 "s59E5H2" 0 "hypothetical protein"  
"DsuD02\_00552" 3768 "s63E6H2" 0 "hypothetical protein"  
"DsuD02\_00553" 3769 "s59E13H2" 0 "Glutamate 5-kinase 1"  
"DsuD02\_00553" 3769 "s59E25H2" 0 "Glutamate 5-kinase 1"  
"DsuD02\_00553" 3769 "s59E5H2" 0.04415457 "Glutamate 5-kinase 1"  
"DsuD02\_00553" 3769 "s63E6H2" 0.1602611 "Glutamate 5-kinase 1"  
"DsuD02\_00554" 3770 "s59E13H2" 0.08931047 "Gamma-glutamyl phosphate reductase"  
"DsuD02\_00554" 3770 "s59E25H2" 0 "Gamma-glutamyl phosphate reductase"  
"DsuD02\_00554" 3770 "s59E5H2" 0.07092149 "Gamma-glutamyl phosphate reductase"  
"DsuD02\_00554" 3770 "s63E6H2" 0.205037 "Gamma-glutamyl phosphate reductase"  
"DsuD02\_00555" 3771 "s59E13H2" 1.580888 "Nicotinate-nucleotide adenylyltransferase"  
"DsuD02\_00555" 3771 "s59E25H2" 0 "Nicotinate-nucleotide adenylyltransferase"  
"DsuD02\_00555" 3771 "s59E5H2" 0.1115194 "Nicotinate-nucleotide adenylyltransferase"  
"DsuD02\_00555" 3771 "s63E6H2" 0.183889 "Nicotinate-nucleotide adenylyltransferase"  
"DsuD02\_00556" 3772 "s59E13H2" 1.263952 "putative nicotinate-nucleotide adenylyltransferase"  
"DsuD02\_00556" 3772 "s59E25H2" 0 "putative nicotinate-nucleotide adenylyltransferase"  
"DsuD02\_00556" 3772 "s59E5H2" 0.04278096 "putative nicotinate-nucleotide adenylyltransferase"  
"DsuD02\_00556" 3772 "s63E6H2" 0.1530253 "putative nicotinate-nucleotide adenylyltransferase"  
"DsuD02\_00557" 3773 "s59E13H2" 0.6695776 "Cell envelope-related transcriptional attenuator domain protein"  
"DsuD02\_00557" 3773 "s59E25H2" 0 "Cell envelope-related transcriptional attenuator domain protein"  
"DsuD02\_00557" 3773 "s59E5H2" 0.04572329 "Cell envelope-related transcriptional attenuator domain protein"  
"DsuD02\_00557" 3773 "s63E6H2" 0.06873089 "Cell envelope-related transcriptional attenuator domain protein"  
"DsuD02\_00558" 3774 "s59E13H2" 2.318071 "Ribosomal silencing factor RsfS"  
"DsuD02\_00558" 3774 "s59E25H2" 0 "Ribosomal silencing factor RsfS"  
"DsuD02\_00558" 3774 "s59E5H2" 0.1841455 "Ribosomal silencing factor RsfS"  
"DsuD02\_00558" 3774 "s63E6H2" 0.1374414 "Ribosomal silencing factor RsfS"  
"DsuD02\_00559" 3775 "s59E13H2" 2.731775 "Leucine--tRNA ligase"  
"DsuD02\_00559" 3775 "s59E25H2" 0 "Leucine--tRNA ligase"  
"DsuD02\_00559" 3775 "s59E5H2" 0.2173008 "Leucine--tRNA ligase"  
"DsuD02\_00559" 3775 "s63E6H2" 0.3190769 "Leucine--tRNA ligase"  
"DsuD02\_00560" 3776 "s59E13H2" 2.021891 "Intracellular protease 1"  
"DsuD02\_00560" 3776 "s59E25H2" 0 "Intracellular protease 1"  
"DsuD02\_00560" 3776 "s59E5H2" 0.2322446 "Intracellular protease 1"  
"DsuD02\_00560" 3776 "s63E6H2" 0.2079117 "Intracellular protease 1"  
"DsuD02\_00562" 3778 "s59E13H2" 1.187861 "ComE operon protein 1"  
"DsuD02\_00562" 3778 "s59E25H2" 0 "ComE operon protein 1"

"DsuD02\_00562" 3778 "s59E5H2" 0.05954422 "ComE operon protein 1"  
"DsuD02\_00562" 3778 "s63E6H2" 0.1450605 "ComE operon protein 1"  
"DsuD02\_00563" 3779 "s59E13H2" 0.9601061 "ComEC family competence protein"  
"DsuD02\_00563" 3779 "s59E25H2" 0.2259001 "ComEC family competence protein"  
"DsuD02\_00563" 3779 "s59E5H2" 0.07798013 "ComEC family competence protein"  
"DsuD02\_00563" 3779 "s63E6H2" 0.1362403 "ComEC family competence protein"  
"DsuD02\_00564" 3780 "s59E13H2" 0.00755353 "hypothetical protein"  
"DsuD02\_00564" 3780 "s59E25H2" 0.3122807 "hypothetical protein"  
"DsuD02\_00564" 3780 "s59E5H2" 0.0243176 "hypothetical protein"  
"DsuD02\_00564" 3780 "s63E6H2" 0.04117919 "hypothetical protein"  
"DsuD02\_00565" 3781 "s59E13H2" 0 "DNA ligase"  
"DsuD02\_00565" 3781 "s59E25H2" 0 "DNA ligase"  
"DsuD02\_00565" 3781 "s59E5H2" 0.05351477 "DNA ligase"  
"DsuD02\_00565" 3781 "s63E6H2" 0.1852358 "DNA ligase"  
"DsuD02\_00566" 3782 "s59E13H2" 0 "putative adenylyltransferase/sulfurtransferase MoeZ"  
"DsuD02\_00566" 3782 "s59E25H2" 0 "putative adenylyltransferase/sulfurtransferase MoeZ"  
"DsuD02\_00566" 3782 "s59E5H2" 0.1047723 "putative adenylyltransferase/sulfurtransferase MoeZ"  
"DsuD02\_00566" 3782 "s63E6H2" 0.001025135 "putative adenylyltransferase/sulfurtransferase MoeZ"  
"DsuD02\_00567" 3783 "s59E13H2" 0 "hypothetical protein"  
"DsuD02\_00567" 3783 "s59E25H2" 0 "hypothetical protein"  
"DsuD02\_00567" 3783 "s59E5H2" 0.01320098 "hypothetical protein"  
"DsuD02\_00567" 3783 "s63E6H2" 0 "hypothetical protein"  
"DsuD02\_00568" 3784 "s59E13H2" 0 "5-methyltetrahydrofolate:corrinoid/iron-sulfur protein co-methyltransferase"  
"DsuD02\_00568" 3784 "s59E25H2" 0 "5-methyltetrahydrofolate:corrinoid/iron-sulfur protein co-methyltransferase"  
"DsuD02\_00568" 3784 "s59E5H2" 0.04026523 "5-methyltetrahydrofolate:corrinoid/iron-sulfur protein co-methyltransferase"  
"DsuD02\_00568" 3784 "s63E6H2" 0.1117812 "5-methyltetrahydrofolate:corrinoid/iron-sulfur protein co-methyltransferase"  
"DsuD02\_00569" 3785 "s59E13H2" 0 "Arginine-binding extracellular protein ArtP precursor"  
"DsuD02\_00569" 3785 "s59E25H2" 0 "Arginine-binding extracellular protein ArtP precursor"  
"DsuD02\_00569" 3785 "s59E5H2" 0.0118886 "Arginine-binding extracellular protein ArtP precursor"  
"DsuD02\_00569" 3785 "s63E6H2" 0.01845552 "Arginine-binding extracellular protein ArtP precursor"  
"DsuD02\_00570" 3786 "s59E13H2" 0.9256005 "Na(+)-translocating NADH-quinone reductase subunit F"  
"DsuD02\_00570" 3786 "s59E25H2" 0 "Na(+)-translocating NADH-quinone reductase subunit F"  
"DsuD02\_00570" 3786 "s59E5H2" 0.00814835 "Na(+)-translocating NADH-quinone reductase subunit F"  
"DsuD02\_00570" 3786 "s63E6H2" 0.02215054 "Na(+)-translocating NADH-quinone reductase subunit F"  
"DsuD02\_00571" 3787 "s59E13H2" 0 "hypothetical protein"  
"DsuD02\_00571" 3787 "s59E25H2" 0 "hypothetical protein"  
"DsuD02\_00571" 3787 "s59E5H2" 0.003216614 "hypothetical protein"  
"DsuD02\_00571" 3787 "s63E6H2" 0 "hypothetical protein"  
"DsuD02\_00572" 3788 "s59E13H2" 0 "Riboflavin synthase"  
"DsuD02\_00572" 3788 "s59E25H2" 0 "Riboflavin synthase"  
"DsuD02\_00572" 3788 "s59E5H2" 0 "Riboflavin synthase"  
"DsuD02\_00572" 3788 "s63E6H2" 0 "Riboflavin synthase"  
"DsuD02\_00573" 3789 "s59E13H2" 0 "Riboflavin biosynthesis protein RibBA"  
"DsuD02\_00573" 3789 "s59E25H2" 0 "Riboflavin biosynthesis protein RibBA"  
"DsuD02\_00573" 3789 "s59E5H2" 0 "Riboflavin biosynthesis protein RibBA"  
"DsuD02\_00573" 3789 "s63E6H2" 0 "Riboflavin biosynthesis protein RibBA"  
"DsuD02\_00574" 3790 "s59E13H2" 0 "6,7-dimethyl-8-ribityllumazine synthase"

"DsuD02\_00574" 3790 "s59E25H2" 0 "6,7-dimethyl-8-ribityllumazine synthase"  
"DsuD02\_00574" 3790 "s59E5H2" 0 "6,7-dimethyl-8-ribityllumazine synthase"  
"DsuD02\_00574" 3790 "s63E6H2" 0 "6,7-dimethyl-8-ribityllumazine synthase"  
"DsuD02\_00575" 3791 "s59E13H2" 0 "Phosphodiesterase YfcE"  
"DsuD02\_00575" 3791 "s59E25H2" 0 "Phosphodiesterase YfcE"  
"DsuD02\_00575" 3791 "s59E5H2" 0 "Phosphodiesterase YfcE"  
"DsuD02\_00575" 3791 "s63E6H2" 0 "Phosphodiesterase YfcE"  
"DsuD02\_00576" 3792 "s59E13H2" 0 "hypothetical protein"  
"DsuD02\_00576" 3792 "s59E25H2" 0 "hypothetical protein"  
"DsuD02\_00576" 3792 "s59E5H2" 0 "hypothetical protein"  
"DsuD02\_00576" 3792 "s63E6H2" 0 "hypothetical protein"  
"DsuD02\_00577" 3793 "s59E13H2" 0 "DAK2 domain protein"  
"DsuD02\_00577" 3793 "s59E25H2" 0 "DAK2 domain protein"  
"DsuD02\_00577" 3793 "s59E5H2" 0 "DAK2 domain protein"  
"DsuD02\_00577" 3793 "s63E6H2" 0 "DAK2 domain protein"  
"DsuD02\_00578" 3794 "s59E13H2" 0 "ATP-dependent DNA helicase RecG"  
"DsuD02\_00578" 3794 "s59E25H2" 0 "ATP-dependent DNA helicase RecG"  
"DsuD02\_00578" 3794 "s59E5H2" 0 "ATP-dependent DNA helicase RecG"  
"DsuD02\_00578" 3794 "s63E6H2" 0 "ATP-dependent DNA helicase RecG"  
"DsuD02\_00579" 3795 "s59E13H2" 0 "Ribosomal RNA small subunit methyltransferase D"  
"DsuD02\_00579" 3795 "s59E25H2" 0 "Ribosomal RNA small subunit methyltransferase D"  
"DsuD02\_00579" 3795 "s59E5H2" 0 "Ribosomal RNA small subunit methyltransferase D"  
"DsuD02\_00579" 3795 "s63E6H2" 0 "Ribosomal RNA small subunit methyltransferase D"  
"DsuD02\_00580" 3796 "s59E13H2" 0 "malonic semialdehyde reductase"  
"DsuD02\_00580" 3796 "s59E25H2" 0 "malonic semialdehyde reductase"  
"DsuD02\_00580" 3796 "s59E5H2" 0 "malonic semialdehyde reductase"  
"DsuD02\_00580" 3796 "s63E6H2" 0 "malonic semialdehyde reductase"  
"DsuD02\_00581" 3797 "s59E13H2" 0 "B3/4 domain protein"  
"DsuD02\_00581" 3797 "s59E25H2" 0 "B3/4 domain protein"  
"DsuD02\_00581" 3797 "s59E5H2" 0 "B3/4 domain protein"  
"DsuD02\_00581" 3797 "s63E6H2" 0 "B3/4 domain protein"  
"DsuD02\_00582" 3798 "s59E13H2" 0 "hypothetical protein"  
"DsuD02\_00582" 3798 "s59E25H2" 0 "hypothetical protein"  
"DsuD02\_00582" 3798 "s59E5H2" 0 "hypothetical protein"  
"DsuD02\_00582" 3798 "s63E6H2" 0 "hypothetical protein"  
"DsuD02\_00583" 3799 "s59E13H2" 0 "Hydroxyacylglutathione hydrolase"  
"DsuD02\_00583" 3799 "s59E25H2" 0 "Hydroxyacylglutathione hydrolase"  
"DsuD02\_00583" 3799 "s59E5H2" 0 "Hydroxyacylglutathione hydrolase"  
"DsuD02\_00583" 3799 "s63E6H2" 0 "Hydroxyacylglutathione hydrolase"  
"DsuD02\_00584" 3800 "s59E13H2" 0 "High-affinity branched-chain amino acid transport ATP-binding protein LivF"  
"DsuD02\_00584" 3800 "s59E25H2" 0 "High-affinity branched-chain amino acid transport ATP-binding protein LivF"  
"DsuD02\_00584" 3800 "s59E5H2" 0 "High-affinity branched-chain amino acid transport ATP-binding protein LivF"  
"DsuD02\_00584" 3800 "s63E6H2" 0 "High-affinity branched-chain amino acid transport ATP-binding protein LivF"  
"DsuD02\_00585" 3801 "s59E13H2" 0 "putative branched-chain amino acid transport ATP-binding protein LivG"  
"DsuD02\_00585" 3801 "s59E25H2" 0 "putative branched-chain amino acid transport ATP-binding protein LivG"  
"DsuD02\_00585" 3801 "s59E5H2" 0 "putative branched-chain amino acid transport ATP-binding protein LivG"  
"DsuD02\_00585" 3801 "s63E6H2" 0 "putative branched-chain amino acid transport ATP-binding protein LivG"

"DsuD02\_00586" 3802 "s59E13H2" 0 "leucine/isoleucine/valine transporter permease subunit"  
"DsuD02\_00586" 3802 "s59E25H2" 0 "leucine/isoleucine/valine transporter permease subunit"  
"DsuD02\_00586" 3802 "s59E5H2" 0 "leucine/isoleucine/valine transporter permease subunit"  
"DsuD02\_00586" 3802 "s63E6H2" 0 "leucine/isoleucine/valine transporter permease subunit"  
"DsuD02\_00587" 3803 "s59E13H2" 0 "High-affinity branched-chain amino acid transport system permease protein LivH"  
"DsuD02\_00587" 3803 "s59E25H2" 0 "High-affinity branched-chain amino acid transport system permease protein LivH"  
"DsuD02\_00587" 3803 "s59E5H2" 0 "High-affinity branched-chain amino acid transport system permease protein LivH"  
"DsuD02\_00587" 3803 "s63E6H2" 0 "High-affinity branched-chain amino acid transport system permease protein LivH"  
"DsuD02\_00588" 3804 "s59E13H2" 0 "hypothetical protein"  
"DsuD02\_00588" 3804 "s59E25H2" 0 "hypothetical protein"  
"DsuD02\_00588" 3804 "s59E5H2" 0 "hypothetical protein"  
"DsuD02\_00588" 3804 "s63E6H2" 0 "hypothetical protein"  
"DsuD02\_00589" 3805 "s59E13H2" 0 "hypothetical protein"  
"DsuD02\_00589" 3805 "s59E25H2" 0 "hypothetical protein"  
"DsuD02\_00589" 3805 "s59E5H2" 0 "hypothetical protein"  
"DsuD02\_00589" 3805 "s63E6H2" 0 "hypothetical protein"  
"DsuD02\_00590" 3806 "s59E13H2" 0 "metal-dependent hydrolase"  
"DsuD02\_00590" 3806 "s59E25H2" 0 "metal-dependent hydrolase"  
"DsuD02\_00590" 3806 "s59E5H2" 0 "metal-dependent hydrolase"  
"DsuD02\_00590" 3806 "s63E6H2" 0 "metal-dependent hydrolase"  
"DsuD02\_00591" 3807 "s59E13H2" 0 "hypothetical protein"  
"DsuD02\_00591" 3807 "s59E25H2" 0 "hypothetical protein"  
"DsuD02\_00591" 3807 "s59E5H2" 0 "hypothetical protein"  
"DsuD02\_00591" 3807 "s63E6H2" 0 "hypothetical protein"  
"DsuD02\_00592" 3808 "s59E13H2" 0 "hypothetical protein"  
"DsuD02\_00592" 3808 "s59E25H2" 0 "hypothetical protein"  
"DsuD02\_00592" 3808 "s59E5H2" 0 "hypothetical protein"  
"DsuD02\_00592" 3808 "s63E6H2" 0 "hypothetical protein"  
"DsuD02\_00593" 3809 "s59E13H2" 0 "Transposase DDE domain protein"  
"DsuD02\_00593" 3809 "s59E25H2" 0 "Transposase DDE domain protein"  
"DsuD02\_00593" 3809 "s59E5H2" 0 "Transposase DDE domain protein"  
"DsuD02\_00593" 3809 "s63E6H2" 0 "Transposase DDE domain protein"  
"DsuD02\_00594" 3810 "s59E13H2" 0 "Psp operon transcriptional activator"  
"DsuD02\_00594" 3810 "s59E25H2" 0 "Psp operon transcriptional activator"  
"DsuD02\_00594" 3810 "s59E5H2" 0 "Psp operon transcriptional activator"  
"DsuD02\_00594" 3810 "s63E6H2" 0 "Psp operon transcriptional activator"  
"DsuD02\_00595" 3811 "s59E13H2" 0 "Phage shock protein A"  
"DsuD02\_00595" 3811 "s59E25H2" 0 "Phage shock protein A"  
"DsuD02\_00595" 3811 "s59E5H2" 0 "Phage shock protein A"  
"DsuD02\_00595" 3811 "s63E6H2" 0 "Phage shock protein A"  
"DsuD02\_00596" 3812 "s59E13H2" 0 "hypothetical protein"  
"DsuD02\_00596" 3812 "s59E25H2" 0 "hypothetical protein"  
"DsuD02\_00596" 3812 "s59E5H2" 0 "hypothetical protein"  
"DsuD02\_00596" 3812 "s63E6H2" 0 "hypothetical protein"  
"DsuD02\_00597" 3813 "s59E13H2" 0 "Phage shock protein C"  
"DsuD02\_00597" 3813 "s59E25H2" 0 "Phage shock protein C"  
"DsuD02\_00597" 3813 "s59E5H2" 0 "Phage shock protein C"

"DsuD02\_00597" 3813 "s63E6H2" 0 "Phage shock protein C"  
"DsuD02\_00598" 3814 "s59E13H2" 0 "DSBA-like thioredoxin domain protein"  
"DsuD02\_00598" 3814 "s59E25H2" 0 "DSBA-like thioredoxin domain protein"  
"DsuD02\_00598" 3814 "s59E5H2" 0 "DSBA-like thioredoxin domain protein"  
"DsuD02\_00598" 3814 "s63E6H2" 0 "DSBA-like thioredoxin domain protein"  
"DsuD02\_00599" 3815 "s59E13H2" 0 "Dimethylamine corrinoid protein"  
"DsuD02\_00599" 3815 "s59E25H2" 0 "Dimethylamine corrinoid protein"  
"DsuD02\_00599" 3815 "s59E5H2" 0 "Dimethylamine corrinoid protein"  
"DsuD02\_00599" 3815 "s63E6H2" 0 "Dimethylamine corrinoid protein"  
"DsuD02\_00600" 3816 "s59E13H2" 0 "methylcobalamin:coenzyme M methyltransferase"  
"DsuD02\_00600" 3816 "s59E25H2" 0 "methylcobalamin:coenzyme M methyltransferase"  
"DsuD02\_00600" 3816 "s59E5H2" 0 "methylcobalamin:coenzyme M methyltransferase"  
"DsuD02\_00600" 3816 "s63E6H2" 0 "methylcobalamin:coenzyme M methyltransferase"  
"DsuD02\_00601" 3817 "s59E13H2" 0 "Sensor protein FixL"  
"DsuD02\_00601" 3817 "s59E25H2" 0 "Sensor protein FixL"  
"DsuD02\_00601" 3817 "s59E5H2" 0 "Sensor protein FixL"  
"DsuD02\_00601" 3817 "s63E6H2" 0 "Sensor protein FixL"  
"DsuD02\_00602" 3818 "s59E13H2" 0 "Putative phosphoribosyl transferase/MT0597"  
"DsuD02\_00602" 3818 "s59E25H2" 0 "Putative phosphoribosyl transferase/MT0597"  
"DsuD02\_00602" 3818 "s59E5H2" 0 "Putative phosphoribosyl transferase/MT0597"  
"DsuD02\_00602" 3818 "s63E6H2" 0 "Putative phosphoribosyl transferase/MT0597"  
"DsuD02\_00603" 3819 "s59E13H2" 0 "Leucine dehydrogenase"  
"DsuD02\_00603" 3819 "s59E25H2" 0 "Leucine dehydrogenase"  
"DsuD02\_00603" 3819 "s59E5H2" 0 "Leucine dehydrogenase"  
"DsuD02\_00603" 3819 "s63E6H2" 0 "Leucine dehydrogenase"  
"DsuD02\_00604" 3820 "s59E13H2" 0 "SdiA-regulated"  
"DsuD02\_00604" 3820 "s59E25H2" 0 "SdiA-regulated"  
"DsuD02\_00604" 3820 "s59E5H2" 0 "SdiA-regulated"  
"DsuD02\_00604" 3820 "s63E6H2" 0 "SdiA-regulated"  
"DsuD02\_00605" 3821 "s59E13H2" 0 "putative 3-hydroxybutyryl-CoA dehydrogenase"  
"DsuD02\_00605" 3821 "s59E25H2" 0 "putative 3-hydroxybutyryl-CoA dehydrogenase"  
"DsuD02\_00605" 3821 "s59E5H2" 0 "putative 3-hydroxybutyryl-CoA dehydrogenase"  
"DsuD02\_00605" 3821 "s63E6H2" 0 "putative 3-hydroxybutyryl-CoA dehydrogenase"  
"DsuD02\_00606" 3822 "s59E13H2" 0 "Glycosyl transferase family 2"  
"DsuD02\_00606" 3822 "s59E25H2" 0 "Glycosyl transferase family 2"  
"DsuD02\_00606" 3822 "s59E5H2" 0 "Glycosyl transferase family 2"  
"DsuD02\_00606" 3822 "s63E6H2" 0 "Glycosyl transferase family 2"  
"DsuD02\_00607" 3823 "s59E13H2" 0 "Alkaline phosphatase synthesis transcriptional regulatory protein PhoP"  
"DsuD02\_00607" 3823 "s59E25H2" 0 "Alkaline phosphatase synthesis transcriptional regulatory protein PhoP"  
"DsuD02\_00607" 3823 "s59E5H2" 0 "Alkaline phosphatase synthesis transcriptional regulatory protein PhoP"  
"DsuD02\_00607" 3823 "s63E6H2" 0 "Alkaline phosphatase synthesis transcriptional regulatory protein PhoP"  
"DsuD02\_00608" 3824 "s59E13H2" 0 "Lipopolysaccharide export system permease protein LptG"  
"DsuD02\_00608" 3824 "s59E25H2" 0 "Lipopolysaccharide export system permease protein LptG"  
"DsuD02\_00608" 3824 "s59E5H2" 0 "Lipopolysaccharide export system permease protein LptG"  
"DsuD02\_00608" 3824 "s63E6H2" 0 "Lipopolysaccharide export system permease protein LptG"  
"DsuD02\_00609" 3825 "s59E13H2" 0 "Threonine synthase"  
"DsuD02\_00609" 3825 "s59E25H2" 0 "Threonine synthase"

"DsuD02\_00609" 3825 "s59E5H2" 0 "Threonine synthase"  
"DsuD02\_00609" 3825 "s63E6H2" 0 "Threonine synthase"  
"DsuD02\_00610" 3826 "s59E13H2" 0 "Protein-L-isoaspartate O-methyltransferase"  
"DsuD02\_00610" 3826 "s59E25H2" 0 "Protein-L-isoaspartate O-methyltransferase"  
"DsuD02\_00610" 3826 "s59E5H2" 0 "Protein-L-isoaspartate O-methyltransferase"  
"DsuD02\_00610" 3826 "s63E6H2" 0 "Protein-L-isoaspartate O-methyltransferase"  
"DsuD02\_00611" 3827 "s59E13H2" 0 "Phosphoribosylglycinamide formyltransferase"  
"DsuD02\_00611" 3827 "s59E25H2" 0 "Phosphoribosylglycinamide formyltransferase"  
"DsuD02\_00611" 3827 "s59E5H2" 0 "Phosphoribosylglycinamide formyltransferase"  
"DsuD02\_00611" 3827 "s63E6H2" 0 "Phosphoribosylglycinamide formyltransferase"  
"DsuD02\_00612" 3828 "s59E13H2" 0 "hypothetical protein"  
"DsuD02\_00612" 3828 "s59E25H2" 0 "hypothetical protein"  
"DsuD02\_00612" 3828 "s59E5H2" 0 "hypothetical protein"  
"DsuD02\_00612" 3828 "s63E6H2" 0 "hypothetical protein"  
"DsuD02\_00613" 3829 "s59E13H2" 0 "Aspartate racemase"  
"DsuD02\_00613" 3829 "s59E25H2" 0 "Aspartate racemase"  
"DsuD02\_00613" 3829 "s59E5H2" 0 "Aspartate racemase"  
"DsuD02\_00613" 3829 "s63E6H2" 0 "Aspartate racemase"  
"DsuD02\_00615" 3831 "s59E13H2" 0 "4-hydroxy-tetrahydrodipicolinate synthase"  
"DsuD02\_00615" 3831 "s59E25H2" 0 "4-hydroxy-tetrahydrodipicolinate synthase"  
"DsuD02\_00615" 3831 "s59E5H2" 0 "4-hydroxy-tetrahydrodipicolinate synthase"  
"DsuD02\_00615" 3831 "s63E6H2" 0 "4-hydroxy-tetrahydrodipicolinate synthase"  
"DsuD02\_00616" 3832 "s59E13H2" 0 "lipoprotein Nlpl"  
"DsuD02\_00616" 3832 "s59E25H2" 0 "lipoprotein Nlpl"  
"DsuD02\_00616" 3832 "s59E5H2" 0 "lipoprotein Nlpl"  
"DsuD02\_00616" 3832 "s63E6H2" 0 "lipoprotein Nlpl"  
"DsuD02\_00617" 3833 "s59E13H2" 0 "Epoxyqueuosine reductase"  
"DsuD02\_00617" 3833 "s59E25H2" 0 "Epoxyqueuosine reductase"  
"DsuD02\_00617" 3833 "s59E5H2" 0 "Epoxyqueuosine reductase"  
"DsuD02\_00617" 3833 "s63E6H2" 0 "Epoxyqueuosine reductase"  
"DsuD02\_00619" 3835 "s59E13H2" 0 "D-alanine--D-alanine ligase A"  
"DsuD02\_00619" 3835 "s59E25H2" 0 "D-alanine--D-alanine ligase A"  
"DsuD02\_00619" 3835 "s59E5H2" 0 "D-alanine--D-alanine ligase A"  
"DsuD02\_00619" 3835 "s63E6H2" 0 "D-alanine--D-alanine ligase A"  
"DsuD02\_00620" 3836 "s59E13H2" 0 "Purine efflux pump PbuE"  
"DsuD02\_00620" 3836 "s59E25H2" 0 "Purine efflux pump PbuE"  
"DsuD02\_00620" 3836 "s59E5H2" 0 "Purine efflux pump PbuE"  
"DsuD02\_00620" 3836 "s63E6H2" 0 "Purine efflux pump PbuE"  
"DsuD02\_00621" 3837 "s59E13H2" 0 "3-hydroxypropionyl-coenzyme A dehydratase"  
"DsuD02\_00621" 3837 "s59E25H2" 0 "3-hydroxypropionyl-coenzyme A dehydratase"  
"DsuD02\_00621" 3837 "s59E5H2" 0 "3-hydroxypropionyl-coenzyme A dehydratase"  
"DsuD02\_00621" 3837 "s63E6H2" 0 "3-hydroxypropionyl-coenzyme A dehydratase"  
"DsuD02\_00622" 3838 "s59E13H2" 0 "hypothetical protein"  
"DsuD02\_00622" 3838 "s59E25H2" 0 "hypothetical protein"  
"DsuD02\_00622" 3838 "s59E5H2" 0 "hypothetical protein"  
"DsuD02\_00622" 3838 "s63E6H2" 0 "hypothetical protein"  
"DsuD02\_00623" 3839 "s59E13H2" 0 "2-hydroxymuconate tautomerase"

"DsuD02\_00623" 3839 "s59E25H2" 0 "2-hydroxymuconate tautomerase"  
"DsuD02\_00623" 3839 "s59E5H2" 0 "2-hydroxymuconate tautomerase"  
"DsuD02\_00623" 3839 "s63E6H2" 0 "2-hydroxymuconate tautomerase"  
"DsuD02\_00624" 3840 "s59E13H2" 0 "Acryloyl-CoA reductase electron transfer subunit beta"  
"DsuD02\_00624" 3840 "s59E25H2" 0 "Acryloyl-CoA reductase electron transfer subunit beta"  
"DsuD02\_00624" 3840 "s59E5H2" 0 "Acryloyl-CoA reductase electron transfer subunit beta"  
"DsuD02\_00624" 3840 "s63E6H2" 0 "Acryloyl-CoA reductase electron transfer subunit beta"  
"DsuD02\_00625" 3841 "s59E13H2" 0 "Acryloyl-CoA reductase electron transfer subunit gamma"  
"DsuD02\_00625" 3841 "s59E25H2" 0 "Acryloyl-CoA reductase electron transfer subunit gamma"  
"DsuD02\_00625" 3841 "s59E5H2" 0 "Acryloyl-CoA reductase electron transfer subunit gamma"  
"DsuD02\_00625" 3841 "s63E6H2" 0 "Acryloyl-CoA reductase electron transfer subunit gamma"  
"DsuD02\_00626" 3842 "s59E13H2" 0 "Acyl-CoA dehydrogenase"  
"DsuD02\_00626" 3842 "s59E25H2" 0 "Acyl-CoA dehydrogenase"  
"DsuD02\_00626" 3842 "s59E5H2" 0 "Acyl-CoA dehydrogenase"  
"DsuD02\_00626" 3842 "s63E6H2" 0 "Acyl-CoA dehydrogenase"  
"DsuD02\_00627" 3843 "s59E13H2" 0 "Lon protease 2"  
"DsuD02\_00627" 3843 "s59E25H2" 0 "Lon protease 2"  
"DsuD02\_00627" 3843 "s59E5H2" 0 "Lon protease 2"  
"DsuD02\_00627" 3843 "s63E6H2" 0 "Lon protease 2"  
"DsuD02\_00628" 3844 "s59E13H2" 0 "hypothetical protein"  
"DsuD02\_00628" 3844 "s59E25H2" 0 "hypothetical protein"  
"DsuD02\_00628" 3844 "s59E5H2" 0 "hypothetical protein"  
"DsuD02\_00628" 3844 "s63E6H2" 0 "hypothetical protein"  
"DsuD02\_00629" 3845 "s59E13H2" 0 "Arylsulfotransferase (ASST)"  
"DsuD02\_00629" 3845 "s59E25H2" 0 "Arylsulfotransferase (ASST)"  
"DsuD02\_00629" 3845 "s59E5H2" 0 "Arylsulfotransferase (ASST)"  
"DsuD02\_00629" 3845 "s63E6H2" 0 "Arylsulfotransferase (ASST)"  
"DsuD02\_00630" 3846 "s59E13H2" 0 "mRNA interferase EndoA"  
"DsuD02\_00630" 3846 "s59E25H2" 0 "mRNA interferase EndoA"  
"DsuD02\_00630" 3846 "s59E5H2" 0 "mRNA interferase EndoA"  
"DsuD02\_00630" 3846 "s63E6H2" 0 "mRNA interferase EndoA"  
"DsuD02\_00631" 3847 "s59E13H2" 0 "SpoVT / AbrB like domain protein"  
"DsuD02\_00631" 3847 "s59E25H2" 0 "SpoVT / AbrB like domain protein"  
"DsuD02\_00631" 3847 "s59E5H2" 0 "SpoVT / AbrB like domain protein"  
"DsuD02\_00631" 3847 "s63E6H2" 0 "SpoVT / AbrB like domain protein"  
"DsuD02\_00632" 3848 "s59E13H2" 0 "hypothetical protein"  
"DsuD02\_00632" 3848 "s59E25H2" 0 "hypothetical protein"  
"DsuD02\_00632" 3848 "s59E5H2" 0.02583939 "hypothetical protein"  
"DsuD02\_00632" 3848 "s63E6H2" 0 "hypothetical protein"  
"DsuD02\_00634" 3850 "s59E13H2" 0 "HicB family protein"  
"DsuD02\_00634" 3850 "s59E25H2" 0 "HicB family protein"  
"DsuD02\_00634" 3850 "s59E5H2" 0 "HicB family protein"  
"DsuD02\_00634" 3850 "s63E6H2" 0 "HicB family protein"  
"DsuD02\_00635" 3851 "s59E13H2" 0 "hypothetical protein"  
"DsuD02\_00635" 3851 "s59E25H2" 0 "hypothetical protein"  
"DsuD02\_00635" 3851 "s59E5H2" 0 "hypothetical protein"  
"DsuD02\_00635" 3851 "s63E6H2" 0 "hypothetical protein"

"DsuD02\_00636" 3852 "s59E13H2" 0 "Helix-turn-helix"  
"DsuD02\_00636" 3852 "s59E25H2" 0 "Helix-turn-helix"  
"DsuD02\_00636" 3852 "s59E5H2" 0 "Helix-turn-helix"  
"DsuD02\_00636" 3852 "s63E6H2" 0 "Helix-turn-helix"  
"DsuD02\_00637" 3853 "s59E13H2" 0 "hypothetical protein"  
"DsuD02\_00637" 3853 "s59E25H2" 0 "hypothetical protein"  
"DsuD02\_00637" 3853 "s59E5H2" 0 "hypothetical protein"  
"DsuD02\_00637" 3853 "s63E6H2" 0 "hypothetical protein"  
"DsuD02\_00638" 3854 "s59E13H2" 0 "hypothetical protein"  
"DsuD02\_00638" 3854 "s59E25H2" 0 "hypothetical protein"  
"DsuD02\_00638" 3854 "s59E5H2" 0 "hypothetical protein"  
"DsuD02\_00638" 3854 "s63E6H2" 0 "hypothetical protein"  
"DsuD02\_00640" 3856 "s59E13H2" 0 "hypothetical protein"  
"DsuD02\_00640" 3856 "s59E25H2" 0 "hypothetical protein"  
"DsuD02\_00640" 3856 "s59E5H2" 0 "hypothetical protein"  
"DsuD02\_00640" 3856 "s63E6H2" 0 "hypothetical protein"  
"DsuD02\_00641" 3857 "s59E13H2" 0 "DNA utilization protein GntX"  
"DsuD02\_00641" 3857 "s59E25H2" 0 "DNA utilization protein GntX"  
"DsuD02\_00641" 3857 "s59E5H2" 0 "DNA utilization protein GntX"  
"DsuD02\_00641" 3857 "s63E6H2" 0 "DNA utilization protein GntX"  
"DsuD02\_00642" 3858 "s59E13H2" 0 "Metal binding domain of Ada"  
"DsuD02\_00642" 3858 "s59E25H2" 0 "Metal binding domain of Ada"  
"DsuD02\_00642" 3858 "s59E5H2" 0 "Metal binding domain of Ada"  
"DsuD02\_00642" 3858 "s63E6H2" 0 "Metal binding domain of Ada"  
"DsuD02\_00643" 3859 "s59E13H2" 0 "Cyclic nucleotide-gated potassium channel"  
"DsuD02\_00643" 3859 "s59E25H2" 0 "Cyclic nucleotide-gated potassium channel"  
"DsuD02\_00643" 3859 "s59E5H2" 0 "Cyclic nucleotide-gated potassium channel"  
"DsuD02\_00643" 3859 "s63E6H2" 0 "Cyclic nucleotide-gated potassium channel"  
"DsuD02\_00646" 3862 "s59E13H2" 0 "hypothetical protein"  
"DsuD02\_00646" 3862 "s59E25H2" 0 "hypothetical protein"  
"DsuD02\_00646" 3862 "s59E5H2" 0 "hypothetical protein"  
"DsuD02\_00646" 3862 "s63E6H2" 0 "hypothetical protein"  
"DsuD02\_00648" 3864 "s59E13H2" 0 "hypothetical protein"  
"DsuD02\_00648" 3864 "s59E25H2" 0 "hypothetical protein"  
"DsuD02\_00648" 3864 "s59E5H2" 0 "hypothetical protein"  
"DsuD02\_00648" 3864 "s63E6H2" 0 "hypothetical protein"  
"DsuD02\_00649" 3865 "s59E13H2" 0 "hypothetical protein"  
"DsuD02\_00649" 3865 "s59E25H2" 0 "hypothetical protein"  
"DsuD02\_00649" 3865 "s59E5H2" 0 "hypothetical protein"  
"DsuD02\_00649" 3865 "s63E6H2" 0 "hypothetical protein"  
"DsuD02\_00650" 3866 "s59E13H2" 0 "Helix-turn-helix domain protein"  
"DsuD02\_00650" 3866 "s59E25H2" 0 "Helix-turn-helix domain protein"  
"DsuD02\_00650" 3866 "s59E5H2" 0 "Helix-turn-helix domain protein"  
"DsuD02\_00650" 3866 "s63E6H2" 0 "Helix-turn-helix domain protein"  
"DsuD02\_00651" 3867 "s59E13H2" 0 "hypothetical protein"  
"DsuD02\_00651" 3867 "s59E25H2" 0 "hypothetical protein"  
"DsuD02\_00651" 3867 "s59E5H2" 0 "hypothetical protein"



"DsuD02\_00651" 3867 "s63E6H2" 0 "hypothetical protein"  
"DsuD02\_00656" 3872 "s59E13H2" 0 "hypothetical protein"  
"DsuD02\_00656" 3872 "s59E25H2" 0 "hypothetical protein"  
"DsuD02\_00656" 3872 "s59E5H2" 0 "hypothetical protein"  
"DsuD02\_00656" 3872 "s63E6H2" 0 "hypothetical protein"  
"DsuD02\_00657" 3873 "s59E13H2" 0 "hypothetical protein"  
"DsuD02\_00657" 3873 "s59E25H2" 0 "hypothetical protein"  
"DsuD02\_00657" 3873 "s59E5H2" 0 "hypothetical protein"  
"DsuD02\_00657" 3873 "s63E6H2" 0 "hypothetical protein"  
"DsuD02\_00660" 3876 "s59E13H2" 0 "hypothetical protein"  
"DsuD02\_00660" 3876 "s59E25H2" 0 "hypothetical protein"  
"DsuD02\_00660" 3876 "s59E5H2" 0 "hypothetical protein"  
"DsuD02\_00660" 3876 "s63E6H2" 0 "hypothetical protein"  
"DsuD02\_00662" 3878 "s59E13H2" 0 "hypothetical protein"  
"DsuD02\_00662" 3878 "s59E25H2" 0 "hypothetical protein"  
"DsuD02\_00662" 3878 "s59E5H2" 0 "hypothetical protein"  
"DsuD02\_00662" 3878 "s63E6H2" 0 "hypothetical protein"  
"DsuD02\_00667" 3883 "s59E13H2" 0 "hypothetical protein"  
"DsuD02\_00667" 3883 "s59E25H2" 0 "hypothetical protein"  
"DsuD02\_00667" 3883 "s59E5H2" 0 "hypothetical protein"  
"DsuD02\_00667" 3883 "s63E6H2" 0 "hypothetical protein"  
"DsuD02\_00668" 3884 "s59E13H2" 0 "hypothetical protein"  
"DsuD02\_00668" 3884 "s59E25H2" 0 "hypothetical protein"  
"DsuD02\_00668" 3884 "s59E5H2" 0 "hypothetical protein"  
"DsuD02\_00668" 3884 "s63E6H2" 0 "hypothetical protein"  
"DsuD02\_00672" 3888 "s59E13H2" 0 "hypothetical protein"  
"DsuD02\_00672" 3888 "s59E25H2" 0 "hypothetical protein"  
"DsuD02\_00672" 3888 "s59E5H2" 0 "hypothetical protein"  
"DsuD02\_00672" 3888 "s63E6H2" 0 "hypothetical protein"  
"DsuD02\_00673" 3889 "s59E13H2" 0 "hypothetical protein"  
"DsuD02\_00673" 3889 "s59E25H2" 0 "hypothetical protein"  
"DsuD02\_00673" 3889 "s59E5H2" 0 "hypothetical protein"  
"DsuD02\_00673" 3889 "s63E6H2" 0 "hypothetical protein"  
"DsuD02\_00675" 3891 "s59E13H2" 0 "hypothetical protein"  
"DsuD02\_00675" 3891 "s59E25H2" 0 "hypothetical protein"  
"DsuD02\_00675" 3891 "s59E5H2" 0 "hypothetical protein"  
"DsuD02\_00675" 3891 "s63E6H2" 0 "hypothetical protein"  
"DsuD02\_00676" 3892 "s59E13H2" 0 "hypothetical protein"  
"DsuD02\_00676" 3892 "s59E25H2" 0 "hypothetical protein"  
"DsuD02\_00676" 3892 "s59E5H2" 0 "hypothetical protein"  
"DsuD02\_00676" 3892 "s63E6H2" 0 "hypothetical protein"  
"DsuD02\_00677" 3893 "s59E13H2" 0 "Tyrosine recombinase XerD"  
"DsuD02\_00677" 3893 "s59E25H2" 0 "Tyrosine recombinase XerD"  
"DsuD02\_00677" 3893 "s59E5H2" 0 "Tyrosine recombinase XerD"  
"DsuD02\_00677" 3893 "s63E6H2" 0 "Tyrosine recombinase XerD"  
"DsuD02\_00678" 3894 "s59E13H2" 0 "hypothetical protein"  
"DsuD02\_00678" 3894 "s59E25H2" 0 "hypothetical protein"

"DsuD02\_00678" 3894 "s59E5H2" 0 "hypothetical protein"  
"DsuD02\_00678" 3894 "s63E6H2" 0 "hypothetical protein"  
"DsuD02\_00679" 3895 "s59E13H2" 0 "UDP-3-O-[3-hydroxymyristoyl] N-acetylglucosamine deacetylase"  
"DsuD02\_00679" 3895 "s59E25H2" 0 "UDP-3-O-[3-hydroxymyristoyl] N-acetylglucosamine deacetylase"  
"DsuD02\_00679" 3895 "s59E5H2" 0 "UDP-3-O-[3-hydroxymyristoyl] N-acetylglucosamine deacetylase"  
"DsuD02\_00679" 3895 "s63E6H2" 0 "UDP-3-O-[3-hydroxymyristoyl] N-acetylglucosamine deacetylase"  
"DsuD02\_00680" 3896 "s59E13H2" 0 "Membrane-bound lytic murein transglycosylase A precursor"  
"DsuD02\_00680" 3896 "s59E25H2" 0 "Membrane-bound lytic murein transglycosylase A precursor"  
"DsuD02\_00680" 3896 "s59E5H2" 0 "Membrane-bound lytic murein transglycosylase A precursor"  
"DsuD02\_00680" 3896 "s63E6H2" 0 "Membrane-bound lytic murein transglycosylase A precursor"  
"DsuD02\_00681" 3897 "s59E13H2" 0 "Glycine--tRNA ligase beta subunit"  
"DsuD02\_00681" 3897 "s59E25H2" 0 "Glycine--tRNA ligase beta subunit"  
"DsuD02\_00681" 3897 "s59E5H2" 0 "Glycine--tRNA ligase beta subunit"  
"DsuD02\_00681" 3897 "s63E6H2" 0 "Glycine--tRNA ligase beta subunit"  
"DsuD02\_00682" 3898 "s59E13H2" 0 "hypothetical protein"  
"DsuD02\_00682" 3898 "s59E25H2" 0 "hypothetical protein"  
"DsuD02\_00682" 3898 "s59E5H2" 0 "hypothetical protein"  
"DsuD02\_00682" 3898 "s63E6H2" 0 "hypothetical protein"  
"DsuD02\_00683" 3899 "s59E13H2" 0 "Glycine--tRNA ligase alpha subunit"  
"DsuD02\_00683" 3899 "s59E25H2" 0 "Glycine--tRNA ligase alpha subunit"  
"DsuD02\_00683" 3899 "s59E5H2" 0 "Glycine--tRNA ligase alpha subunit"  
"DsuD02\_00683" 3899 "s63E6H2" 0 "Glycine--tRNA ligase alpha subunit"  
"DsuD02\_00684" 3900 "s59E13H2" 0 "DNA repair protein RecO"  
"DsuD02\_00684" 3900 "s59E25H2" 0 "DNA repair protein RecO"  
"DsuD02\_00684" 3900 "s59E5H2" 0 "DNA repair protein RecO"  
"DsuD02\_00684" 3900 "s63E6H2" 0 "DNA repair protein RecO"  
"DsuD02\_00685" 3901 "s59E13H2" 0 "hypothetical protein"  
"DsuD02\_00685" 3901 "s59E25H2" 0 "hypothetical protein"  
"DsuD02\_00685" 3901 "s59E5H2" 0 "hypothetical protein"  
"DsuD02\_00685" 3901 "s63E6H2" 0 "hypothetical protein"  
"DsuD02\_00686" 3902 "s59E13H2" 0 "High-affinity branched-chain amino acid transport ATP-binding protein LivF"  
"DsuD02\_00686" 3902 "s59E25H2" 0 "High-affinity branched-chain amino acid transport ATP-binding protein LivF"  
"DsuD02\_00686" 3902 "s59E5H2" 0 "High-affinity branched-chain amino acid transport ATP-binding protein LivF"  
"DsuD02\_00686" 3902 "s63E6H2" 0 "High-affinity branched-chain amino acid transport ATP-binding protein LivF"  
"DsuD02\_00687" 3903 "s59E13H2" 0 "hypothetical protein"  
"DsuD02\_00687" 3903 "s59E25H2" 0 "hypothetical protein"  
"DsuD02\_00687" 3903 "s59E5H2" 0 "hypothetical protein"  
"DsuD02\_00687" 3903 "s63E6H2" 0 "hypothetical protein"  
"DsuD02\_00688" 3904 "s59E13H2" 0 "leucine/isoleucine/valine transporter permease subunit"  
"DsuD02\_00688" 3904 "s59E25H2" 0 "leucine/isoleucine/valine transporter permease subunit"  
"DsuD02\_00688" 3904 "s59E5H2" 0 "leucine/isoleucine/valine transporter permease subunit"  
"DsuD02\_00688" 3904 "s63E6H2" 0.005010708 "leucine/isoleucine/valine transporter permease subunit"  
"DsuD02\_00689" 3905 "s59E13H2" 0 "High-affinity branched-chain amino acid transport system permease protein LivH"  
"DsuD02\_00689" 3905 "s59E25H2" 0 "High-affinity branched-chain amino acid transport system permease protein LivH"  
"DsuD02\_00689" 3905 "s59E5H2" 0 "High-affinity branched-chain amino acid transport system permease protein LivH"  
"DsuD02\_00689" 3905 "s63E6H2" 0 "High-affinity branched-chain amino acid transport system permease protein LivH"  
"DsuD02\_00690" 3906 "s59E13H2" 0 "Long-chain-fatty-acid--CoA ligase FadD15"

"DsuD02\_00690" 3906 "s59E25H2" 0 "Long-chain-fatty-acid--CoA ligase FadD15"  
"DsuD02\_00690" 3906 "s59E5H2" 0 "Long-chain-fatty-acid--CoA ligase FadD15"  
"DsuD02\_00690" 3906 "s63E6H2" 0 "Long-chain-fatty-acid--CoA ligase FadD15"  
"DsuD02\_00691" 3907 "s59E13H2" 0 "putative branched-chain amino acid transport ATP-binding protein LivG"  
"DsuD02\_00691" 3907 "s59E25H2" 0 "putative branched-chain amino acid transport ATP-binding protein LivG"  
"DsuD02\_00691" 3907 "s59E5H2" 0 "putative branched-chain amino acid transport ATP-binding protein LivG"  
"DsuD02\_00691" 3907 "s63E6H2" 0 "putative branched-chain amino acid transport ATP-binding protein LivG"  
"DsuD02\_00692" 3908 "s59E13H2" 0 "Deoxyguanosinetriphosphate triphosphohydrolase"  
"DsuD02\_00692" 3908 "s59E25H2" 0 "Deoxyguanosinetriphosphate triphosphohydrolase"  
"DsuD02\_00692" 3908 "s59E5H2" 0 "Deoxyguanosinetriphosphate triphosphohydrolase"  
"DsuD02\_00692" 3908 "s63E6H2" 0 "Deoxyguanosinetriphosphate triphosphohydrolase"  
"DsuD02\_00693" 3909 "s59E13H2" 0 "tRNA(Ile)-lysidine synthase"  
"DsuD02\_00693" 3909 "s59E25H2" 0 "tRNA(Ile)-lysidine synthase"  
"DsuD02\_00693" 3909 "s59E5H2" 0 "tRNA(Ile)-lysidine synthase"  
"DsuD02\_00693" 3909 "s63E6H2" 0 "tRNA(Ile)-lysidine synthase"  
"DsuD02\_00694" 3910 "s59E13H2" 0 "Acyl-coenzyme A:6-aminopenicillanic acid acyl-transferase"  
"DsuD02\_00694" 3910 "s59E25H2" 0 "Acyl-coenzyme A:6-aminopenicillanic acid acyl-transferase"  
"DsuD02\_00694" 3910 "s59E5H2" 0 "Acyl-coenzyme A:6-aminopenicillanic acid acyl-transferase"  
"DsuD02\_00694" 3910 "s63E6H2" 0 "Acyl-coenzyme A:6-aminopenicillanic acid acyl-transferase"  
"DsuD02\_00695" 3911 "s59E13H2" 0 "pyrroline-5-carboxylate reductase"  
"DsuD02\_00695" 3911 "s59E25H2" 0 "pyrroline-5-carboxylate reductase"  
"DsuD02\_00695" 3911 "s59E5H2" 0 "pyrroline-5-carboxylate reductase"  
"DsuD02\_00695" 3911 "s63E6H2" 0 "pyrroline-5-carboxylate reductase"  
"DsuD02\_00696" 3912 "s59E13H2" 0 "3-methyl-2-oxobutanoate hydroxymethyltransferase"  
"DsuD02\_00696" 3912 "s59E25H2" 0 "3-methyl-2-oxobutanoate hydroxymethyltransferase"  
"DsuD02\_00696" 3912 "s59E5H2" 0.05520542 "3-methyl-2-oxobutanoate hydroxymethyltransferase"  
"DsuD02\_00696" 3912 "s63E6H2" 0 "3-methyl-2-oxobutanoate hydroxymethyltransferase"  
"DsuD02\_00697" 3913 "s59E13H2" 0 "Acetylene hydratase"  
"DsuD02\_00697" 3913 "s59E25H2" 0 "Acetylene hydratase"  
"DsuD02\_00697" 3913 "s59E5H2" 0 "Acetylene hydratase"  
"DsuD02\_00697" 3913 "s63E6H2" 0 "Acetylene hydratase"  
"DsuD02\_00698" 3914 "s59E13H2" 0 "3-oxoacyl-[acyl-carrier-protein] reductase FabG"  
"DsuD02\_00698" 3914 "s59E25H2" 0 "3-oxoacyl-[acyl-carrier-protein] reductase FabG"  
"DsuD02\_00698" 3914 "s59E5H2" 0 "3-oxoacyl-[acyl-carrier-protein] reductase FabG"  
"DsuD02\_00698" 3914 "s63E6H2" 0 "3-oxoacyl-[acyl-carrier-protein] reductase FabG"  
"DsuD02\_00699" 3915 "s59E13H2" 0 "Signal recognition particle receptor FtsY"  
"DsuD02\_00699" 3915 "s59E25H2" 0 "Signal recognition particle receptor FtsY"  
"DsuD02\_00699" 3915 "s59E5H2" 0 "Signal recognition particle receptor FtsY"  
"DsuD02\_00699" 3915 "s63E6H2" 0 "Signal recognition particle receptor FtsY"  
"DsuD02\_00700" 3916 "s59E13H2" 0 "Chromosome partition protein Smc"  
"DsuD02\_00700" 3916 "s59E25H2" 0 "Chromosome partition protein Smc"  
"DsuD02\_00700" 3916 "s59E5H2" 0 "Chromosome partition protein Smc"  
"DsuD02\_00700" 3916 "s63E6H2" 0 "Chromosome partition protein Smc"  
"DsuD02\_00701" 3917 "s59E13H2" 0 "LysM domain/BON superfamily protein"  
"DsuD02\_00701" 3917 "s59E25H2" 0 "LysM domain/BON superfamily protein"  
"DsuD02\_00701" 3917 "s59E5H2" 0 "LysM domain/BON superfamily protein"  
"DsuD02\_00701" 3917 "s63E6H2" 0 "LysM domain/BON superfamily protein"

"DsuE09\_00001" 3918 "s59E13H2" 0 "hypothetical protein"  
"DsuE09\_00001" 3918 "s59E25H2" 0 "hypothetical protein"  
"DsuE09\_00001" 3918 "s59E5H2" 0 "hypothetical protein"  
"DsuE09\_00001" 3918 "s63E6H2" 0 "hypothetical protein"  
"DsuE09\_00002" 3919 "s59E13H2" 0 "hypothetical protein"  
"DsuE09\_00002" 3919 "s59E25H2" 0 "hypothetical protein"  
"DsuE09\_00002" 3919 "s59E5H2" 0 "hypothetical protein"  
"DsuE09\_00002" 3919 "s63E6H2" 0 "hypothetical protein"  
"DsuE09\_00003" 3920 "s59E13H2" 0 "dTDP-glucose 4,6-dehydratase"  
"DsuE09\_00003" 3920 "s59E25H2" 0 "dTDP-glucose 4,6-dehydratase"  
"DsuE09\_00003" 3920 "s59E5H2" 0 "dTDP-glucose 4,6-dehydratase"  
"DsuE09\_00003" 3920 "s63E6H2" 0 "dTDP-glucose 4,6-dehydratase"  
"DsuE09\_00005" 3922 "s59E13H2" 0 "YcfA-like protein"  
"DsuE09\_00005" 3922 "s59E25H2" 0 "YcfA-like protein"  
"DsuE09\_00005" 3922 "s59E5H2" 0 "YcfA-like protein"  
"DsuE09\_00005" 3922 "s63E6H2" 0 "YcfA-like protein"  
"DsuE09\_00006" 3923 "s59E13H2" 0 "hypothetical protein"  
"DsuE09\_00006" 3923 "s59E25H2" 0 "hypothetical protein"  
"DsuE09\_00006" 3923 "s59E5H2" 0 "hypothetical protein"  
"DsuE09\_00006" 3923 "s63E6H2" 0 "hypothetical protein"  
"DsuE09\_00007" 3924 "s59E13H2" 0 "hypothetical protein"  
"DsuE09\_00007" 3924 "s59E25H2" 0 "hypothetical protein"  
"DsuE09\_00007" 3924 "s59E5H2" 0 "hypothetical protein"  
"DsuE09\_00007" 3924 "s63E6H2" 0 "hypothetical protein"  
"DsuE09\_00009" 3926 "s59E13H2" 0 "hypothetical protein"  
"DsuE09\_00009" 3926 "s59E25H2" 0 "hypothetical protein"  
"DsuE09\_00009" 3926 "s59E5H2" 0 "hypothetical protein"  
"DsuE09\_00009" 3926 "s63E6H2" 0 "hypothetical protein"  
"DsuE09\_00010" 3927 "s59E13H2" 0 "Nucleotidyltransferase domain protein"  
"DsuE09\_00010" 3927 "s59E25H2" 0 "Nucleotidyltransferase domain protein"  
"DsuE09\_00010" 3927 "s59E5H2" 0 "Nucleotidyltransferase domain protein"  
"DsuE09\_00010" 3927 "s63E6H2" 0 "Nucleotidyltransferase domain protein"  
"DsuE09\_00011" 3928 "s59E13H2" 0 "hypothetical protein"  
"DsuE09\_00011" 3928 "s59E25H2" 0 "hypothetical protein"  
"DsuE09\_00011" 3928 "s59E5H2" 0 "hypothetical protein"  
"DsuE09\_00011" 3928 "s63E6H2" 0 "hypothetical protein"  
"DsuE09\_00012" 3929 "s59E13H2" 0 "DAK2 domain protein"  
"DsuE09\_00012" 3929 "s59E25H2" 0 "DAK2 domain protein"  
"DsuE09\_00012" 3929 "s59E5H2" 0 "DAK2 domain protein"  
"DsuE09\_00012" 3929 "s63E6H2" 0 "DAK2 domain protein"  
"DsuE09\_00013" 3930 "s59E13H2" 0 "ATP-dependent DNA helicase RecG"  
"DsuE09\_00013" 3930 "s59E25H2" 0 "ATP-dependent DNA helicase RecG"  
"DsuE09\_00013" 3930 "s59E5H2" 0 "ATP-dependent DNA helicase RecG"  
"DsuE09\_00013" 3930 "s63E6H2" 0 "ATP-dependent DNA helicase RecG"  
"DsuE09\_00014" 3931 "s59E13H2" 0 "Ribosomal RNA small subunit methyltransferase D"  
"DsuE09\_00014" 3931 "s59E25H2" 0 "Ribosomal RNA small subunit methyltransferase D"  
"DsuE09\_00014" 3931 "s59E5H2" 0 "Ribosomal RNA small subunit methyltransferase D"

"DsuE09\_00014" 3931 "s63E6H2" 0 "Ribosomal RNA small subunit methyltransferase D"  
"DsuE09\_00015" 3932 "s59E13H2" 0 "Succinyl-CoA ligase [ADP-forming] subunit alpha"  
"DsuE09\_00015" 3932 "s59E25H2" 0 "Succinyl-CoA ligase [ADP-forming] subunit alpha"  
"DsuE09\_00015" 3932 "s59E5H2" 0 "Succinyl-CoA ligase [ADP-forming] subunit alpha"  
"DsuE09\_00015" 3932 "s63E6H2" 0 "Succinyl-CoA ligase [ADP-forming] subunit alpha"  
"DsuE09\_00016" 3933 "s59E13H2" 0 "hypothetical protein"  
"DsuE09\_00016" 3933 "s59E25H2" 0 "hypothetical protein"  
"DsuE09\_00016" 3933 "s59E5H2" 0 "hypothetical protein"  
"DsuE09\_00016" 3933 "s63E6H2" 0 "hypothetical protein"  
"DsuE09\_00017" 3934 "s59E13H2" 0 "Phosphopantetheine adenyltransferase"  
"DsuE09\_00017" 3934 "s59E25H2" 0 "Phosphopantetheine adenyltransferase"  
"DsuE09\_00017" 3934 "s59E5H2" 0 "Phosphopantetheine adenyltransferase"  
"DsuE09\_00017" 3934 "s63E6H2" 0 "Phosphopantetheine adenyltransferase"  
"DsuE09\_00018" 3935 "s59E13H2" 0 "Leucine-specific-binding protein precursor"  
"DsuE09\_00018" 3935 "s59E25H2" 0 "Leucine-specific-binding protein precursor"  
"DsuE09\_00018" 3935 "s59E5H2" 0 "Leucine-specific-binding protein precursor"  
"DsuE09\_00018" 3935 "s63E6H2" 0 "Leucine-specific-binding protein precursor"  
"DsuE09\_00019" 3936 "s59E13H2" 0 "putative branched-chain amino acid transport ATP-binding protein LivG"  
"DsuE09\_00019" 3936 "s59E25H2" 0 "putative branched-chain amino acid transport ATP-binding protein LivG"  
"DsuE09\_00019" 3936 "s59E5H2" 0 "putative branched-chain amino acid transport ATP-binding protein LivG"  
"DsuE09\_00019" 3936 "s63E6H2" 0 "putative branched-chain amino acid transport ATP-binding protein LivG"  
"DsuE09\_00020" 3937 "s59E13H2" 0 "High-affinity branched-chain amino acid transport ATP-binding protein LivF"  
"DsuE09\_00020" 3937 "s59E25H2" 0 "High-affinity branched-chain amino acid transport ATP-binding protein LivF"  
"DsuE09\_00020" 3937 "s59E5H2" 0 "High-affinity branched-chain amino acid transport ATP-binding protein LivF"  
"DsuE09\_00020" 3937 "s63E6H2" 0 "High-affinity branched-chain amino acid transport ATP-binding protein LivF"  
"DsuE09\_00021" 3938 "s59E13H2" 0 "High-affinity branched-chain amino acid transport system permease protein LivH"  
"DsuE09\_00021" 3938 "s59E25H2" 0 "High-affinity branched-chain amino acid transport system permease protein LivH"  
"DsuE09\_00021" 3938 "s59E5H2" 0 "High-affinity branched-chain amino acid transport system permease protein LivH"  
"DsuE09\_00021" 3938 "s63E6H2" 0 "High-affinity branched-chain amino acid transport system permease protein LivH"  
"DsuE09\_00022" 3939 "s59E13H2" 0 "leucine/isoleucine/valine transporter permease subunit"  
"DsuE09\_00022" 3939 "s59E25H2" 0 "leucine/isoleucine/valine transporter permease subunit"  
"DsuE09\_00022" 3939 "s59E5H2" 0 "leucine/isoleucine/valine transporter permease subunit"  
"DsuE09\_00022" 3939 "s63E6H2" 0 "leucine/isoleucine/valine transporter permease subunit"  
"DsuE09\_00023" 3940 "s59E13H2" 0 "hypothetical protein"  
"DsuE09\_00023" 3940 "s59E25H2" 0 "hypothetical protein"  
"DsuE09\_00023" 3940 "s59E5H2" 0 "hypothetical protein"  
"DsuE09\_00023" 3940 "s63E6H2" 0 "hypothetical protein"  
"DsuE09\_00024" 3941 "s59E13H2" 0 "Long-chain-fatty-acid--CoA ligase"  
"DsuE09\_00024" 3941 "s59E25H2" 0 "Long-chain-fatty-acid--CoA ligase"  
"DsuE09\_00024" 3941 "s59E5H2" 0 "Long-chain-fatty-acid--CoA ligase"  
"DsuE09\_00024" 3941 "s63E6H2" 0 "Long-chain-fatty-acid--CoA ligase"  
"DsuE09\_00026" 3943 "s59E13H2" 0 "Leucine-, isoleucine-, valine-, threonine-, and alanine-binding protein precursor"  
"DsuE09\_00026" 3943 "s59E25H2" 0 "Leucine-, isoleucine-, valine-, threonine-, and alanine-binding protein precursor"  
"DsuE09\_00026" 3943 "s59E5H2" 0 "Leucine-, isoleucine-, valine-, threonine-, and alanine-binding protein precursor"  
"DsuE09\_00026" 3943 "s63E6H2" 0 "Leucine-, isoleucine-, valine-, threonine-, and alanine-binding protein precursor"  
"DsuE09\_00027" 3944 "s59E13H2" 0 "4-hydroxybutyryl-CoA dehydratase/vinylacetyl-CoA-Delta-isomerase"  
"DsuE09\_00027" 3944 "s59E25H2" 0 "4-hydroxybutyryl-CoA dehydratase/vinylacetyl-CoA-Delta-isomerase"

"DsuE09\_00027" 3944 "s59E5H2" 0 "4-hydroxybutyryl-CoA dehydratase/vinylacetyl-CoA-Delta-isomerase"  
"DsuE09\_00027" 3944 "s63E6H2" 0 "4-hydroxybutyryl-CoA dehydratase/vinylacetyl-CoA-Delta-isomerase"  
"DsuE09\_00028" 3945 "s59E13H2" 0 "hypothetical protein"  
"DsuE09\_00028" 3945 "s59E25H2" 0 "hypothetical protein"  
"DsuE09\_00028" 3945 "s59E5H2" 0 "hypothetical protein"  
"DsuE09\_00028" 3945 "s63E6H2" 0 "hypothetical protein"  
"DsuE09\_00029" 3946 "s59E13H2" 0 "Long-chain-fatty-acid--CoA ligase"  
"DsuE09\_00029" 3946 "s59E25H2" 0 "Long-chain-fatty-acid--CoA ligase"  
"DsuE09\_00029" 3946 "s59E5H2" 0 "Long-chain-fatty-acid--CoA ligase"  
"DsuE09\_00029" 3946 "s63E6H2" 0 "Long-chain-fatty-acid--CoA ligase"  
"DsuE09\_00030" 3947 "s59E13H2" 0 "1,3-propanediol dehydrogenase"  
"DsuE09\_00030" 3947 "s59E25H2" 0 "1,3-propanediol dehydrogenase"  
"DsuE09\_00030" 3947 "s59E5H2" 0 "1,3-propanediol dehydrogenase"  
"DsuE09\_00030" 3947 "s63E6H2" 0 "1,3-propanediol dehydrogenase"  
"DsuE09\_00031" 3948 "s59E13H2" 0 "NDMA-dependent alcohol dehydrogenase"  
"DsuE09\_00031" 3948 "s59E25H2" 0 "NDMA-dependent alcohol dehydrogenase"  
"DsuE09\_00031" 3948 "s59E5H2" 0 "NDMA-dependent alcohol dehydrogenase"  
"DsuE09\_00031" 3948 "s63E6H2" 0 "NDMA-dependent alcohol dehydrogenase"  
"DsuE09\_00032" 3949 "s59E13H2" 0 "NDMA-dependent alcohol dehydrogenase"  
"DsuE09\_00032" 3949 "s59E25H2" 0 "NDMA-dependent alcohol dehydrogenase"  
"DsuE09\_00032" 3949 "s59E5H2" 0 "NDMA-dependent alcohol dehydrogenase"  
"DsuE09\_00032" 3949 "s63E6H2" 0 "NDMA-dependent alcohol dehydrogenase"  
"DsuE09\_00033" 3950 "s59E13H2" 0 "Lipoate-protein ligase A subunit 2"  
"DsuE09\_00033" 3950 "s59E25H2" 0 "Lipoate-protein ligase A subunit 2"  
"DsuE09\_00033" 3950 "s59E5H2" 0 "Lipoate-protein ligase A subunit 2"  
"DsuE09\_00033" 3950 "s63E6H2" 0 "Lipoate-protein ligase A subunit 2"  
"DsuE09\_00034" 3951 "s59E13H2" 0 "Glyoxalase/Bleomycin resistance protein/Dioxygenase superfamily protein"  
"DsuE09\_00034" 3951 "s59E25H2" 0 "Glyoxalase/Bleomycin resistance protein/Dioxygenase superfamily protein"  
"DsuE09\_00034" 3951 "s59E5H2" 0 "Glyoxalase/Bleomycin resistance protein/Dioxygenase superfamily protein"  
"DsuE09\_00034" 3951 "s63E6H2" 0 "Glyoxalase/Bleomycin resistance protein/Dioxygenase superfamily protein"  
"DsuE09\_00035" 3952 "s59E13H2" 0 "Octanoyltransferase LipM"  
"DsuE09\_00035" 3952 "s59E25H2" 0 "Octanoyltransferase LipM"  
"DsuE09\_00035" 3952 "s59E5H2" 0 "Octanoyltransferase LipM"  
"DsuE09\_00035" 3952 "s63E6H2" 0 "Octanoyltransferase LipM"  
"DsuE09\_00036" 3953 "s59E13H2" 0 "Acyl-CoA dehydrogenase"  
"DsuE09\_00036" 3953 "s59E25H2" 0 "Acyl-CoA dehydrogenase"  
"DsuE09\_00036" 3953 "s59E5H2" 0 "Acyl-CoA dehydrogenase"  
"DsuE09\_00036" 3953 "s63E6H2" 0 "Acyl-CoA dehydrogenase"  
"DsuE09\_00037" 3954 "s59E13H2" 0 "Lipoate-protein ligase A subunit 1"  
"DsuE09\_00037" 3954 "s59E25H2" 0 "Lipoate-protein ligase A subunit 1"  
"DsuE09\_00037" 3954 "s59E5H2" 0 "Lipoate-protein ligase A subunit 1"  
"DsuE09\_00037" 3954 "s63E6H2" 0 "Lipoate-protein ligase A subunit 1"  
"DsuE09\_00038" 3955 "s59E13H2" 0 "Methylmalonyl-CoA mutase"  
"DsuE09\_00038" 3955 "s59E25H2" 0 "Methylmalonyl-CoA mutase"  
"DsuE09\_00038" 3955 "s59E5H2" 0 "Methylmalonyl-CoA mutase"  
"DsuE09\_00038" 3955 "s63E6H2" 0 "Methylmalonyl-CoA mutase"  
"DsuE09\_00039" 3956 "s59E13H2" 0 "Methylmalonyl-CoA mutase"

"DsuE09\_00039" 3956 "s59E25H2" 0 "Methylmalonyl-CoA mutase"  
"DsuE09\_00039" 3956 "s59E5H2" 0 "Methylmalonyl-CoA mutase"  
"DsuE09\_00039" 3956 "s63E6H2" 0 "Methylmalonyl-CoA mutase"  
"DsuE09\_00042" 3959 "s59E13H2" 0 "Acyl-CoA dehydrogenase"  
"DsuE09\_00042" 3959 "s59E25H2" 0 "Acyl-CoA dehydrogenase"  
"DsuE09\_00042" 3959 "s59E5H2" 0 "Acyl-CoA dehydrogenase"  
"DsuE09\_00042" 3959 "s63E6H2" 0 "Acyl-CoA dehydrogenase"  
"DsuE09\_00043" 3960 "s59E13H2" 0 "Glutaconate CoA-transferase subunit B"  
"DsuE09\_00043" 3960 "s59E25H2" 0 "Glutaconate CoA-transferase subunit B"  
"DsuE09\_00043" 3960 "s59E5H2" 0 "Glutaconate CoA-transferase subunit B"  
"DsuE09\_00043" 3960 "s63E6H2" 0 "Glutaconate CoA-transferase subunit B"  
"DsuE09\_00044" 3961 "s59E13H2" 0 "Purine nucleoside phosphorylase"  
"DsuE09\_00044" 3961 "s59E25H2" 0 "Purine nucleoside phosphorylase"  
"DsuE09\_00044" 3961 "s59E5H2" 0 "Purine nucleoside phosphorylase"  
"DsuE09\_00044" 3961 "s63E6H2" 0 "Purine nucleoside phosphorylase"  
"DsuE09\_00045" 3962 "s59E13H2" 0 "hypothetical protein"  
"DsuE09\_00045" 3962 "s59E25H2" 0 "hypothetical protein"  
"DsuE09\_00045" 3962 "s59E5H2" 0 "hypothetical protein"  
"DsuE09\_00045" 3962 "s63E6H2" 0 "hypothetical protein"  
"DsuE09\_00046" 3963 "s59E13H2" 0 "Acylphosphatase"  
"DsuE09\_00046" 3963 "s59E25H2" 0 "Acylphosphatase"  
"DsuE09\_00046" 3963 "s59E5H2" 0 "Acylphosphatase"  
"DsuE09\_00046" 3963 "s63E6H2" 0 "Acylphosphatase"  
"DsuE09\_00047" 3964 "s59E13H2" 0 "hypothetical protein"  
"DsuE09\_00047" 3964 "s59E25H2" 0 "hypothetical protein"  
"DsuE09\_00047" 3964 "s59E5H2" 0 "hypothetical protein"  
"DsuE09\_00047" 3964 "s63E6H2" 0 "hypothetical protein"  
"DsuE09\_00048" 3965 "s59E13H2" 0 "DNA repair protein RecN"  
"DsuE09\_00048" 3965 "s59E25H2" 0 "DNA repair protein RecN"  
"DsuE09\_00048" 3965 "s59E5H2" 0 "DNA repair protein RecN"  
"DsuE09\_00048" 3965 "s63E6H2" 0 "DNA repair protein RecN"  
"DsuE09\_00049" 3966 "s59E13H2" 0 "Type II secretion system protein E"  
"DsuE09\_00049" 3966 "s59E25H2" 0 "Type II secretion system protein E"  
"DsuE09\_00049" 3966 "s59E5H2" 0 "Type II secretion system protein E"  
"DsuE09\_00049" 3966 "s63E6H2" 0 "Type II secretion system protein E"  
"DsuE09\_00050" 3967 "s59E13H2" 0 "Bifunctional protein GlmU"  
"DsuE09\_00050" 3967 "s59E25H2" 0 "Bifunctional protein GlmU"  
"DsuE09\_00050" 3967 "s59E5H2" 0 "Bifunctional protein GlmU"  
"DsuE09\_00050" 3967 "s63E6H2" 0 "Bifunctional protein GlmU"  
"DsuE09\_00051" 3968 "s59E13H2" 0 "hypothetical protein"  
"DsuE09\_00051" 3968 "s59E25H2" 0 "hypothetical protein"  
"DsuE09\_00051" 3968 "s59E5H2" 0 "hypothetical protein"  
"DsuE09\_00051" 3968 "s63E6H2" 0 "hypothetical protein"  
"DsuE09\_00052" 3969 "s59E13H2" 0 "Nitronate monooxygenase"  
"DsuE09\_00052" 3969 "s59E25H2" 0 "Nitronate monooxygenase"  
"DsuE09\_00052" 3969 "s59E5H2" 0 "Nitronate monooxygenase"  
"DsuE09\_00052" 3969 "s63E6H2" 0 "Nitronate monooxygenase"

"DsuE09\_00053" 3970 "s59E13H2" 0 "tRNA 2'-O-methylase"  
"DsuE09\_00053" 3970 "s59E25H2" 0 "tRNA 2'-O-methylase"  
"DsuE09\_00053" 3970 "s59E5H2" 0 "tRNA 2'-O-methylase"  
"DsuE09\_00053" 3970 "s63E6H2" 0 "tRNA 2'-O-methylase"  
"DsuE09\_00054" 3971 "s59E13H2" 0 "Primosomal protein N"  
"DsuE09\_00054" 3971 "s59E25H2" 0 "Primosomal protein N"  
"DsuE09\_00054" 3971 "s59E5H2" 0 "Primosomal protein N"  
"DsuE09\_00054" 3971 "s63E6H2" 0 "Primosomal protein N"  
"DsuE09\_00055" 3972 "s59E13H2" 0 "hypothetical protein"  
"DsuE09\_00055" 3972 "s59E25H2" 0 "hypothetical protein"  
"DsuE09\_00055" 3972 "s59E5H2" 0 "hypothetical protein"  
"DsuE09\_00055" 3972 "s63E6H2" 0 "hypothetical protein"  
"DsuE09\_00056" 3973 "s59E13H2" 0 "hypothetical protein"  
"DsuE09\_00056" 3973 "s59E25H2" 0 "hypothetical protein"  
"DsuE09\_00056" 3973 "s59E5H2" 0 "hypothetical protein"  
"DsuE09\_00056" 3973 "s63E6H2" 0 "hypothetical protein"  
"DsuE09\_00057" 3974 "s59E13H2" 0 "Murein DD-endopeptidase MepM"  
"DsuE09\_00057" 3974 "s59E25H2" 0 "Murein DD-endopeptidase MepM"  
"DsuE09\_00057" 3974 "s59E5H2" 0 "Murein DD-endopeptidase MepM"  
"DsuE09\_00057" 3974 "s63E6H2" 0 "Murein DD-endopeptidase MepM"  
"DsuE09\_00058" 3975 "s59E13H2" 0 "Ferredoxin"  
"DsuE09\_00058" 3975 "s59E25H2" 0 "Ferredoxin"  
"DsuE09\_00058" 3975 "s59E5H2" 0 "Ferredoxin"  
"DsuE09\_00058" 3975 "s63E6H2" 0 "Ferredoxin"  
"DsuE09\_00059" 3976 "s59E13H2" 0 "thiosulfate sulfurtransferase"  
"DsuE09\_00059" 3976 "s59E25H2" 0 "thiosulfate sulfurtransferase"  
"DsuE09\_00059" 3976 "s59E5H2" 0 "thiosulfate sulfurtransferase"  
"DsuE09\_00059" 3976 "s63E6H2" 0 "thiosulfate sulfurtransferase"  
"DsuE09\_00060" 3977 "s59E13H2" 0 "ADP-ribose pyrophosphatase"  
"DsuE09\_00060" 3977 "s59E25H2" 0 "ADP-ribose pyrophosphatase"  
"DsuE09\_00060" 3977 "s59E5H2" 0 "ADP-ribose pyrophosphatase"  
"DsuE09\_00060" 3977 "s63E6H2" 0 "ADP-ribose pyrophosphatase"  
"DsuE09\_00061" 3978 "s59E13H2" 0 "hypothetical protein"  
"DsuE09\_00061" 3978 "s59E25H2" 0 "hypothetical protein"  
"DsuE09\_00061" 3978 "s59E5H2" 0 "hypothetical protein"  
"DsuE09\_00061" 3978 "s63E6H2" 0 "hypothetical protein"  
"DsuE09\_00062" 3979 "s59E13H2" 0 "DNA polymerase III subunit alpha"  
"DsuE09\_00062" 3979 "s59E25H2" 0 "DNA polymerase III subunit alpha"  
"DsuE09\_00062" 3979 "s59E5H2" 0 "DNA polymerase III subunit alpha"  
"DsuE09\_00062" 3979 "s63E6H2" 0 "DNA polymerase III subunit alpha"  
"DsuE09\_00064" 3981 "s59E13H2" 0 "Transcriptional regulatory protein AfsQ1"  
"DsuE09\_00064" 3981 "s59E25H2" 0 "Transcriptional regulatory protein AfsQ1"  
"DsuE09\_00064" 3981 "s59E5H2" 0 "Transcriptional regulatory protein AfsQ1"  
"DsuE09\_00064" 3981 "s63E6H2" 0 "Transcriptional regulatory protein AfsQ1"  
"DsuE09\_00065" 3982 "s59E13H2" 0 "Replication-associated recombination protein A"  
"DsuE09\_00065" 3982 "s59E25H2" 0 "Replication-associated recombination protein A"  
"DsuE09\_00065" 3982 "s59E5H2" 0 "Replication-associated recombination protein A"



"DsuE09\_00065" 3982 "s63E6H2" 0 "Replication-associated recombination protein A"  
"DsuE09\_00066" 3983 "s59E13H2" 0 "Radical SAM superfamily protein"  
"DsuE09\_00066" 3983 "s59E25H2" 0 "Radical SAM superfamily protein"  
"DsuE09\_00066" 3983 "s59E5H2" 0 "Radical SAM superfamily protein"  
"DsuE09\_00066" 3983 "s63E6H2" 0 "Radical SAM superfamily protein"  
"DsuE09\_00067" 3984 "s59E13H2" 0 "Endonuclease MutS2"  
"DsuE09\_00067" 3984 "s59E25H2" 0 "Endonuclease MutS2"  
"DsuE09\_00067" 3984 "s59E5H2" 0 "Endonuclease MutS2"  
"DsuE09\_00067" 3984 "s63E6H2" 0 "Endonuclease MutS2"  
"DsuE09\_00069" 3986 "s59E13H2" 0 "Putative arsenical pump-driving ATPase"  
"DsuE09\_00069" 3986 "s59E25H2" 0 "Putative arsenical pump-driving ATPase"  
"DsuE09\_00069" 3986 "s59E5H2" 0 "Putative arsenical pump-driving ATPase"  
"DsuE09\_00069" 3986 "s63E6H2" 0 "Putative arsenical pump-driving ATPase"  
"DsuE09\_00070" 3987 "s59E13H2" 0 "hypothetical protein"  
"DsuE09\_00070" 3987 "s59E25H2" 0 "hypothetical protein"  
"DsuE09\_00070" 3987 "s59E5H2" 0 "hypothetical protein"  
"DsuE09\_00070" 3987 "s63E6H2" 0 "hypothetical protein"  
"DsuE09\_00071" 3988 "s59E13H2" 0 "hypothetical protein"  
"DsuE09\_00071" 3988 "s59E25H2" 0 "hypothetical protein"  
"DsuE09\_00071" 3988 "s59E5H2" 0 "hypothetical protein"  
"DsuE09\_00071" 3988 "s63E6H2" 0 "hypothetical protein"  
"DsuE09\_00072" 3989 "s59E13H2" 0 "3-oxoadipyl-CoA/3-oxo-5,6-dehydrosuberyl-CoA thiolase"  
"DsuE09\_00072" 3989 "s59E25H2" 0 "3-oxoadipyl-CoA/3-oxo-5,6-dehydrosuberyl-CoA thiolase"  
"DsuE09\_00072" 3989 "s59E5H2" 0 "3-oxoadipyl-CoA/3-oxo-5,6-dehydrosuberyl-CoA thiolase"  
"DsuE09\_00072" 3989 "s63E6H2" 0 "3-oxoadipyl-CoA/3-oxo-5,6-dehydrosuberyl-CoA thiolase"  
"DsuE09\_00073" 3990 "s59E13H2" 0 "hypothetical protein"  
"DsuE09\_00073" 3990 "s59E25H2" 0 "hypothetical protein"  
"DsuE09\_00073" 3990 "s59E5H2" 0 "hypothetical protein"  
"DsuE09\_00073" 3990 "s63E6H2" 0 "hypothetical protein"  
"DsuE09\_00074" 3991 "s59E13H2" 0 "Caspase domain protein"  
"DsuE09\_00074" 3991 "s59E25H2" 0 "Caspase domain protein"  
"DsuE09\_00074" 3991 "s59E5H2" 0 "Caspase domain protein"  
"DsuE09\_00074" 3991 "s63E6H2" 0 "Caspase domain protein"  
"DsuE09\_00075" 3992 "s59E13H2" 0 "Serine/threonine-protein kinase pkn1"  
"DsuE09\_00075" 3992 "s59E25H2" 0 "Serine/threonine-protein kinase pkn1"  
"DsuE09\_00075" 3992 "s59E5H2" 0 "Serine/threonine-protein kinase pkn1"  
"DsuE09\_00075" 3992 "s63E6H2" 0 "Serine/threonine-protein kinase pkn1"  
"DsuE09\_00076" 3993 "s59E13H2" 0 "hypothetical protein"  
"DsuE09\_00076" 3993 "s59E25H2" 0 "hypothetical protein"  
"DsuE09\_00076" 3993 "s59E5H2" 0 "hypothetical protein"  
"DsuE09\_00076" 3993 "s63E6H2" 0 "hypothetical protein"  
"DsuE09\_00077" 3994 "s59E13H2" 0 "Transcriptional regulatory protein DevR (DosR)"  
"DsuE09\_00077" 3994 "s59E25H2" 0 "Transcriptional regulatory protein DevR (DosR)"  
"DsuE09\_00077" 3994 "s59E5H2" 0 "Transcriptional regulatory protein DevR (DosR)"  
"DsuE09\_00077" 3994 "s63E6H2" 0 "Transcriptional regulatory protein DevR (DosR)"  
"DsuE09\_00078" 3995 "s59E13H2" 0 "hypothetical protein"  
"DsuE09\_00078" 3995 "s59E25H2" 0 "hypothetical protein"

"DsuE09\_00078" 3995 "s59E5H2" 0 "hypothetical protein"  
"DsuE09\_00078" 3995 "s63E6H2" 0 "hypothetical protein"  
"DsuE09\_00079" 3996 "s59E13H2" 0 "Response regulator UvrY"  
"DsuE09\_00079" 3996 "s59E25H2" 0 "Response regulator UvrY"  
"DsuE09\_00079" 3996 "s59E5H2" 0 "Response regulator UvrY"  
"DsuE09\_00079" 3996 "s63E6H2" 0 "Response regulator UvrY"  
"DsuE09\_00080" 3997 "s59E13H2" 0 "Helix-turn-helix domain protein"  
"DsuE09\_00080" 3997 "s59E25H2" 0 "Helix-turn-helix domain protein"  
"DsuE09\_00080" 3997 "s59E5H2" 0 "Helix-turn-helix domain protein"  
"DsuE09\_00080" 3997 "s63E6H2" 0 "Helix-turn-helix domain protein"  
"DsuE09\_00081" 3998 "s59E13H2" 0 "Chemotaxis protein methyltransferase"  
"DsuE09\_00081" 3998 "s59E25H2" 0 "Chemotaxis protein methyltransferase"  
"DsuE09\_00081" 3998 "s59E5H2" 0 "Chemotaxis protein methyltransferase"  
"DsuE09\_00081" 3998 "s63E6H2" 0 "Chemotaxis protein methyltransferase"  
"DsuE09\_00082" 3999 "s59E13H2" 0 "Chemotaxis response regulator protein-glutamate methylesterase"  
"DsuE09\_00082" 3999 "s59E25H2" 0 "Chemotaxis response regulator protein-glutamate methylesterase"  
"DsuE09\_00082" 3999 "s59E5H2" 0 "Chemotaxis response regulator protein-glutamate methylesterase"  
"DsuE09\_00082" 3999 "s63E6H2" 0 "Chemotaxis response regulator protein-glutamate methylesterase"  
"DsuE09\_00084" 4001 "s59E13H2" 0 "Phytochrome-like protein cph1"  
"DsuE09\_00084" 4001 "s59E25H2" 0 "Phytochrome-like protein cph1"  
"DsuE09\_00084" 4001 "s59E5H2" 0 "Phytochrome-like protein cph1"  
"DsuE09\_00084" 4001 "s63E6H2" 0 "Phytochrome-like protein cph1"  
"DsuE09\_00085" 4002 "s59E13H2" 0 "Response regulator rcp1"  
"DsuE09\_00085" 4002 "s59E25H2" 0 "Response regulator rcp1"  
"DsuE09\_00085" 4002 "s59E5H2" 0 "Response regulator rcp1"  
"DsuE09\_00085" 4002 "s63E6H2" 0 "Response regulator rcp1"  
"DsuE09\_00086" 4003 "s59E13H2" 0 "hypothetical protein"  
"DsuE09\_00086" 4003 "s59E25H2" 0 "hypothetical protein"  
"DsuE09\_00086" 4003 "s59E5H2" 0 "hypothetical protein"  
"DsuE09\_00086" 4003 "s63E6H2" 0 "hypothetical protein"  
"DsuE09\_00087" 4004 "s59E13H2" 0 "SpoVT / AbrB like domain protein"  
"DsuE09\_00087" 4004 "s59E25H2" 0 "SpoVT / AbrB like domain protein"  
"DsuE09\_00087" 4004 "s59E5H2" 0 "SpoVT / AbrB like domain protein"  
"DsuE09\_00087" 4004 "s63E6H2" 0 "SpoVT / AbrB like domain protein"  
"DsuE09\_00088" 4005 "s59E13H2" 0 "Luminescence regulatory protein LuxO"  
"DsuE09\_00088" 4005 "s59E25H2" 0 "Luminescence regulatory protein LuxO"  
"DsuE09\_00088" 4005 "s59E5H2" 0.223765 "Luminescence regulatory protein LuxO"  
"DsuE09\_00088" 4005 "s63E6H2" 0.001554011 "Luminescence regulatory protein LuxO"  
"DsuE09\_00089" 4006 "s59E13H2" 0 "Circadian clock protein KaiB"  
"DsuE09\_00089" 4006 "s59E25H2" 0 "Circadian clock protein KaiB"  
"DsuE09\_00089" 4006 "s59E5H2" 0.4890807 "Circadian clock protein KaiB"  
"DsuE09\_00089" 4006 "s63E6H2" 0 "Circadian clock protein KaiB"  
"DsuE09\_00090" 4007 "s59E13H2" 0 "Circadian clock protein kinase KaiC"  
"DsuE09\_00090" 4007 "s59E25H2" 0 "Circadian clock protein kinase KaiC"  
"DsuE09\_00090" 4007 "s59E5H2" 0.3309976 "Circadian clock protein kinase KaiC"  
"DsuE09\_00090" 4007 "s63E6H2" 0.0056098 "Circadian clock protein kinase KaiC"  
"DsuE09\_00092" 4009 "s59E13H2" 0 "hypothetical protein"

"DsuE09\_00092" 4009 "s59E25H2" 0 "hypothetical protein"  
"DsuE09\_00092" 4009 "s59E5H2" 0.0170594 "hypothetical protein"  
"DsuE09\_00092" 4009 "s63E6H2" 0 "hypothetical protein"  
"DsuE09\_00094" 4011 "s59E13H2" 0 "Non-motile and phage-resistance protein"  
"DsuE09\_00094" 4011 "s59E25H2" 0 "Non-motile and phage-resistance protein"  
"DsuE09\_00094" 4011 "s59E5H2" 0.0342117 "Non-motile and phage-resistance protein"  
"DsuE09\_00094" 4011 "s63E6H2" 0 "Non-motile and phage-resistance protein"  
"DsuE09\_00095" 4012 "s59E13H2" 0 "PemK-like protein"  
"DsuE09\_00095" 4012 "s59E25H2" 0 "PemK-like protein"  
"DsuE09\_00095" 4012 "s59E5H2" 0 "PemK-like protein"  
"DsuE09\_00095" 4012 "s63E6H2" 0 "PemK-like protein"  
"DsuE09\_00096" 4013 "s59E13H2" 0 "hypothetical protein"  
"DsuE09\_00096" 4013 "s59E25H2" 0 "hypothetical protein"  
"DsuE09\_00096" 4013 "s59E5H2" 0 "hypothetical protein"  
"DsuE09\_00096" 4013 "s63E6H2" 0 "hypothetical protein"  
"DsuE09\_00097" 4014 "s59E13H2" 0.002334091 "putative homocitrate synthase AksA"  
"DsuE09\_00097" 4014 "s59E25H2" 0.5973154 "putative homocitrate synthase AksA"  
"DsuE09\_00097" 4014 "s59E5H2" 0 "putative homocitrate synthase AksA"  
"DsuE09\_00097" 4014 "s63E6H2" 0 "putative homocitrate synthase AksA"  
"DsuE09\_00098" 4015 "s59E13H2" 0 "metal-dependent hydrolase"  
"DsuE09\_00098" 4015 "s59E25H2" 0 "metal-dependent hydrolase"  
"DsuE09\_00098" 4015 "s59E5H2" 0 "metal-dependent hydrolase"  
"DsuE09\_00098" 4015 "s63E6H2" 0 "metal-dependent hydrolase"  
"DsuE09\_00099" 4016 "s59E13H2" 0 "Transposase DDE domain protein"  
"DsuE09\_00099" 4016 "s59E25H2" 0 "Transposase DDE domain protein"  
"DsuE09\_00099" 4016 "s59E5H2" 0 "Transposase DDE domain protein"  
"DsuE09\_00099" 4016 "s63E6H2" 0 "Transposase DDE domain protein"  
"DsuE09\_00100" 4017 "s59E13H2" 0 "Tripartite tricarboxylate transporter family receptor"  
"DsuE09\_00100" 4017 "s59E25H2" 0 "Tripartite tricarboxylate transporter family receptor"  
"DsuE09\_00100" 4017 "s59E5H2" 0 "Tripartite tricarboxylate transporter family receptor"  
"DsuE09\_00100" 4017 "s63E6H2" 0 "Tripartite tricarboxylate transporter family receptor"  
"DsuE09\_00101" 4018 "s59E13H2" 0 "Tripartite tricarboxylate transporter TctB family protein"  
"DsuE09\_00101" 4018 "s59E25H2" 0 "Tripartite tricarboxylate transporter TctB family protein"  
"DsuE09\_00101" 4018 "s59E5H2" 0 "Tripartite tricarboxylate transporter TctB family protein"  
"DsuE09\_00101" 4018 "s63E6H2" 0 "Tripartite tricarboxylate transporter TctB family protein"  
"DsuE09\_00103" 4020 "s59E13H2" 0 "ISXO2-like transposase domain protein"  
"DsuE09\_00103" 4020 "s59E25H2" 0 "ISXO2-like transposase domain protein"  
"DsuE09\_00103" 4020 "s59E5H2" 0 "ISXO2-like transposase domain protein"  
"DsuE09\_00103" 4020 "s63E6H2" 0 "ISXO2-like transposase domain protein"  
"DsuE09\_00104" 4021 "s59E13H2" 0 "Transposase zinc-ribbon domain protein"  
"DsuE09\_00104" 4021 "s59E25H2" 0 "Transposase zinc-ribbon domain protein"  
"DsuE09\_00104" 4021 "s59E5H2" 0 "Transposase zinc-ribbon domain protein"  
"DsuE09\_00104" 4021 "s63E6H2" 0 "Transposase zinc-ribbon domain protein"  
"DsuE09\_00105" 4022 "s59E13H2" 0 "Tripartite tricarboxylate transporter TctA family protein"  
"DsuE09\_00105" 4022 "s59E25H2" 0 "Tripartite tricarboxylate transporter TctA family protein"  
"DsuE09\_00105" 4022 "s59E5H2" 0 "Tripartite tricarboxylate transporter TctA family protein"  
"DsuE09\_00105" 4022 "s63E6H2" 0 "Tripartite tricarboxylate transporter TctA family protein"

"DsuE09\_00106" 4023 "s59E13H2" 0 "hypothetical protein"  
"DsuE09\_00106" 4023 "s59E25H2" 0 "hypothetical protein"  
"DsuE09\_00106" 4023 "s59E5H2" 0.003216614 "hypothetical protein"  
"DsuE09\_00106" 4023 "s63E6H2" 0 "hypothetical protein"  
"DsuE09\_00107" 4024 "s59E13H2" 0 "hypothetical protein"  
"DsuE09\_00107" 4024 "s59E25H2" 0 "hypothetical protein"  
"DsuE09\_00107" 4024 "s59E5H2" 0 "hypothetical protein"  
"DsuE09\_00107" 4024 "s63E6H2" 0 "hypothetical protein"  
"DsuE09\_00109" 4026 "s59E13H2" 0 "hypothetical protein"  
"DsuE09\_00109" 4026 "s59E25H2" 0 "hypothetical protein"  
"DsuE09\_00109" 4026 "s59E5H2" 0 "hypothetical protein"  
"DsuE09\_00109" 4026 "s63E6H2" 0 "hypothetical protein"  
"DsuE09\_00110" 4027 "s59E13H2" 0 "Nucleotidyltransferase domain protein"  
"DsuE09\_00110" 4027 "s59E25H2" 0 "Nucleotidyltransferase domain protein"  
"DsuE09\_00110" 4027 "s59E5H2" 0 "Nucleotidyltransferase domain protein"  
"DsuE09\_00110" 4027 "s63E6H2" 0 "Nucleotidyltransferase domain protein"  
"DsuE09\_00111" 4028 "s59E13H2" 0 "hypothetical protein"  
"DsuE09\_00111" 4028 "s59E25H2" 0 "hypothetical protein"  
"DsuE09\_00111" 4028 "s59E5H2" 0 "hypothetical protein"  
"DsuE09\_00111" 4028 "s63E6H2" 0 "hypothetical protein"  
"DsuE09\_00113" 4030 "s59E13H2" 0 "hypothetical protein"  
"DsuE09\_00113" 4030 "s59E25H2" 0 "hypothetical protein"  
"DsuE09\_00113" 4030 "s59E5H2" 0 "hypothetical protein"  
"DsuE09\_00113" 4030 "s63E6H2" 0 "hypothetical protein"  
"DsuE09\_00114" 4031 "s59E13H2" 0 "hypothetical protein"  
"DsuE09\_00114" 4031 "s59E25H2" 0 "hypothetical protein"  
"DsuE09\_00114" 4031 "s59E5H2" 0 "hypothetical protein"  
"DsuE09\_00114" 4031 "s63E6H2" 0 "hypothetical protein"  
"DsuE09\_00115" 4032 "s59E13H2" 0 "UDP-N-acetyl-alpha-D-glucosamine C6 dehydratase"  
"DsuE09\_00115" 4032 "s59E25H2" 0 "UDP-N-acetyl-alpha-D-glucosamine C6 dehydratase"  
"DsuE09\_00115" 4032 "s59E5H2" 0 "UDP-N-acetyl-alpha-D-glucosamine C6 dehydratase"  
"DsuE09\_00115" 4032 "s63E6H2" 0 "UDP-N-acetyl-alpha-D-glucosamine C6 dehydratase"  
"DsuE09\_00116" 4033 "s59E13H2" 0 "hypothetical protein"  
"DsuE09\_00116" 4033 "s59E25H2" 0 "hypothetical protein"  
"DsuE09\_00116" 4033 "s59E5H2" 0 "hypothetical protein"  
"DsuE09\_00116" 4033 "s63E6H2" 0 "hypothetical protein"  
"DsuE09\_00117" 4034 "s59E13H2" 0 "hypothetical protein"  
"DsuE09\_00117" 4034 "s59E25H2" 0 "hypothetical protein"  
"DsuE09\_00117" 4034 "s59E5H2" 0 "hypothetical protein"  
"DsuE09\_00117" 4034 "s63E6H2" 0 "hypothetical protein"  
"DsuE09\_00118" 4035 "s59E13H2" 0 "hypothetical protein"  
"DsuE09\_00118" 4035 "s59E25H2" 0 "hypothetical protein"  
"DsuE09\_00118" 4035 "s59E5H2" 0 "hypothetical protein"  
"DsuE09\_00118" 4035 "s63E6H2" 0 "hypothetical protein"  
"DsuE09\_00119" 4036 "s59E13H2" 0 "HEPN domain protein"  
"DsuE09\_00119" 4036 "s59E25H2" 0 "HEPN domain protein"  
"DsuE09\_00119" 4036 "s59E5H2" 0 "HEPN domain protein"

"DsuE09\_00119" 4036 "s63E6H2" 0 "HEPN domain protein"  
"DsuE09\_00120" 4037 "s59E13H2" 0 "Nucleotidyltransferase domain protein"  
"DsuE09\_00120" 4037 "s59E25H2" 0 "Nucleotidyltransferase domain protein"  
"DsuE09\_00120" 4037 "s59E5H2" 0 "Nucleotidyltransferase domain protein"  
"DsuE09\_00120" 4037 "s63E6H2" 0 "Nucleotidyltransferase domain protein"  
"DsuE09\_00121" 4038 "s59E13H2" 0 "putative HTH-type transcriptional regulator YbaQ"  
"DsuE09\_00121" 4038 "s59E25H2" 0 "putative HTH-type transcriptional regulator YbaQ"  
"DsuE09\_00121" 4038 "s59E5H2" 0 "putative HTH-type transcriptional regulator YbaQ"  
"DsuE09\_00121" 4038 "s63E6H2" 0 "putative HTH-type transcriptional regulator YbaQ"  
"DsuE09\_00122" 4039 "s59E13H2" 0 "Toxin HigB-1"  
"DsuE09\_00122" 4039 "s59E25H2" 0 "Toxin HigB-1"  
"DsuE09\_00122" 4039 "s59E5H2" 0 "Toxin HigB-1"  
"DsuE09\_00122" 4039 "s63E6H2" 0 "Toxin HigB-1"  
"DsuE09\_00124" 4041 "s59E13H2" 0 "hypothetical protein"  
"DsuE09\_00124" 4041 "s59E25H2" 0 "hypothetical protein"  
"DsuE09\_00124" 4041 "s59E5H2" 0 "hypothetical protein"  
"DsuE09\_00124" 4041 "s63E6H2" 0 "hypothetical protein"  
"DsuE09\_00126" 4043 "s59E13H2" 0 "hypothetical protein"  
"DsuE09\_00126" 4043 "s59E25H2" 0 "hypothetical protein"  
"DsuE09\_00126" 4043 "s59E5H2" 0 "hypothetical protein"  
"DsuE09\_00126" 4043 "s63E6H2" 0 "hypothetical protein"  
"DsuE09\_00127" 4044 "s59E13H2" 0 "hypothetical protein"  
"DsuE09\_00127" 4044 "s59E25H2" 0 "hypothetical protein"  
"DsuE09\_00127" 4044 "s59E5H2" 0 "hypothetical protein"  
"DsuE09\_00127" 4044 "s63E6H2" 0 "hypothetical protein"  
"DsuE09\_00128" 4045 "s59E13H2" 0 "hypothetical protein"  
"DsuE09\_00128" 4045 "s59E25H2" 0 "hypothetical protein"  
"DsuE09\_00128" 4045 "s59E5H2" 0 "hypothetical protein"  
"DsuE09\_00128" 4045 "s63E6H2" 0 "hypothetical protein"  
"DsuE09\_00129" 4046 "s59E13H2" 0 "hypothetical protein"  
"DsuE09\_00129" 4046 "s59E25H2" 0 "hypothetical protein"  
"DsuE09\_00129" 4046 "s59E5H2" 0 "hypothetical protein"  
"DsuE09\_00129" 4046 "s63E6H2" 0 "hypothetical protein"  
"DsuE09\_00130" 4047 "s59E13H2" 0 "hypothetical protein"  
"DsuE09\_00130" 4047 "s59E25H2" 0 "hypothetical protein"  
"DsuE09\_00130" 4047 "s59E5H2" 0 "hypothetical protein"  
"DsuE09\_00130" 4047 "s63E6H2" 0 "hypothetical protein"  
"DsuE09\_00131" 4048 "s59E13H2" 0 "YcfA-like protein"  
"DsuE09\_00131" 4048 "s59E25H2" 0 "YcfA-like protein"  
"DsuE09\_00131" 4048 "s59E5H2" 0 "YcfA-like protein"  
"DsuE09\_00131" 4048 "s63E6H2" 0.005821019 "YcfA-like protein"  
"DsuE09\_00133" 4050 "s59E13H2" 0 "UDP-N-acetyl-alpha-D-glucosamine C6 dehydratase"  
"DsuE09\_00133" 4050 "s59E25H2" 0 "UDP-N-acetyl-alpha-D-glucosamine C6 dehydratase"  
"DsuE09\_00133" 4050 "s59E5H2" 0 "UDP-N-acetyl-alpha-D-glucosamine C6 dehydratase"  
"DsuE09\_00133" 4050 "s63E6H2" 0 "UDP-N-acetyl-alpha-D-glucosamine C6 dehydratase"  
"DsuE09\_00134" 4051 "s59E13H2" 0 "hypothetical protein"  
"DsuE09\_00134" 4051 "s59E25H2" 0 "hypothetical protein"

"DsuE09\_00134" 4051 "s59E5H2" 0 "hypothetical protein"  
"DsuE09\_00134" 4051 "s63E6H2" 0 "hypothetical protein"  
"DsuE09\_00135" 4052 "s59E13H2" 0 "Nucleotidyltransferase domain protein"  
"DsuE09\_00135" 4052 "s59E25H2" 0 "Nucleotidyltransferase domain protein"  
"DsuE09\_00135" 4052 "s59E5H2" 0 "Nucleotidyltransferase domain protein"  
"DsuE09\_00135" 4052 "s63E6H2" 0 "Nucleotidyltransferase domain protein"  
"DsuE09\_00136" 4053 "s59E13H2" 0 "hypothetical protein"  
"DsuE09\_00136" 4053 "s59E25H2" 0 "hypothetical protein"  
"DsuE09\_00136" 4053 "s59E5H2" 0 "hypothetical protein"  
"DsuE09\_00136" 4053 "s63E6H2" 0 "hypothetical protein"  
"DsuE09\_00137" 4054 "s59E13H2" 0 "hypothetical protein"  
"DsuE09\_00137" 4054 "s59E25H2" 0 "hypothetical protein"  
"DsuE09\_00137" 4054 "s59E5H2" 0 "hypothetical protein"  
"DsuE09\_00137" 4054 "s63E6H2" 0 "hypothetical protein"  
"DsuE09\_00138" 4055 "s59E13H2" 0 "hypothetical protein"  
"DsuE09\_00138" 4055 "s59E25H2" 0 "hypothetical protein"  
"DsuE09\_00138" 4055 "s59E5H2" 0 "hypothetical protein"  
"DsuE09\_00138" 4055 "s63E6H2" 0 "hypothetical protein"  
"DsuE09\_00139" 4056 "s59E13H2" 0 "hypothetical protein"  
"DsuE09\_00139" 4056 "s59E25H2" 0 "hypothetical protein"  
"DsuE09\_00139" 4056 "s59E5H2" 0 "hypothetical protein"  
"DsuE09\_00139" 4056 "s63E6H2" 0 "hypothetical protein"  
"DsuE09\_00141" 4058 "s59E13H2" 0 "hypothetical protein"  
"DsuE09\_00141" 4058 "s59E25H2" 0 "hypothetical protein"  
"DsuE09\_00141" 4058 "s59E5H2" 0 "hypothetical protein"  
"DsuE09\_00141" 4058 "s63E6H2" 0 "hypothetical protein"  
"DsuE09\_00142" 4059 "s59E13H2" 0 "hypothetical protein"  
"DsuE09\_00142" 4059 "s59E25H2" 0 "hypothetical protein"  
"DsuE09\_00142" 4059 "s59E5H2" 0 "hypothetical protein"  
"DsuE09\_00142" 4059 "s63E6H2" 0 "hypothetical protein"  
"DsuE09\_00144" 4061 "s59E13H2" 0 "hypothetical protein"  
"DsuE09\_00144" 4061 "s59E25H2" 0 "hypothetical protein"  
"DsuE09\_00144" 4061 "s59E5H2" 0 "hypothetical protein"  
"DsuE09\_00144" 4061 "s63E6H2" 0 "hypothetical protein"  
"DsuE09\_00146" 4063 "s59E13H2" 0 "10 kDa chaperonin 1"  
"DsuE09\_00146" 4063 "s59E25H2" 0 "10 kDa chaperonin 1"  
"DsuE09\_00146" 4063 "s59E5H2" 0 "10 kDa chaperonin 1"  
"DsuE09\_00146" 4063 "s63E6H2" 0 "10 kDa chaperonin 1"  
"DsuE09\_00148" 4065 "s59E13H2" 0 "Transcriptional regulatory protein ZraR"  
"DsuE09\_00148" 4065 "s59E25H2" 0 "Transcriptional regulatory protein ZraR"  
"DsuE09\_00148" 4065 "s59E5H2" 0 "Transcriptional regulatory protein ZraR"  
"DsuE09\_00148" 4065 "s63E6H2" 0 "Transcriptional regulatory protein ZraR"  
"DsuE09\_00151" 4068 "s59E13H2" 0 "L-lysine 2,3-aminomutase"  
"DsuE09\_00151" 4068 "s59E25H2" 0 "L-lysine 2,3-aminomutase"  
"DsuE09\_00151" 4068 "s59E5H2" 0 "L-lysine 2,3-aminomutase"  
"DsuE09\_00151" 4068 "s63E6H2" 0 "L-lysine 2,3-aminomutase"  
"DsuE09\_00152" 4069 "s59E13H2" 0 "D-alanine--D-alanine ligase"

"DsuE09\_00152" 4069 "s59E25H2" 0 "D-alanine--D-alanine ligase"  
"DsuE09\_00152" 4069 "s59E5H2" 0 "D-alanine--D-alanine ligase"  
"DsuE09\_00152" 4069 "s63E6H2" 0 "D-alanine--D-alanine ligase"  
"DsuE09\_00153" 4070 "s59E13H2" 0 "D-alanine--D-alanine ligase"  
"DsuE09\_00153" 4070 "s59E25H2" 0 "D-alanine--D-alanine ligase"  
"DsuE09\_00153" 4070 "s59E5H2" 0 "D-alanine--D-alanine ligase"  
"DsuE09\_00153" 4070 "s63E6H2" 0 "D-alanine--D-alanine ligase"  
"DsuE09\_00154" 4071 "s59E13H2" 0 "Acetyltransferase (GNAT) family protein"  
"DsuE09\_00154" 4071 "s59E25H2" 0 "Acetyltransferase (GNAT) family protein"  
"DsuE09\_00154" 4071 "s59E5H2" 0 "Acetyltransferase (GNAT) family protein"  
"DsuE09\_00154" 4071 "s63E6H2" 0 "Acetyltransferase (GNAT) family protein"  
"DsuE09\_00155" 4072 "s59E13H2" 0 "hypothetical protein"  
"DsuE09\_00155" 4072 "s59E25H2" 0 "hypothetical protein"  
"DsuE09\_00155" 4072 "s59E5H2" 0 "hypothetical protein"  
"DsuE09\_00155" 4072 "s63E6H2" 0 "hypothetical protein"  
"DsuE09\_00156" 4073 "s59E13H2" 0 "Diacylglycerol kinase"  
"DsuE09\_00156" 4073 "s59E25H2" 0 "Diacylglycerol kinase"  
"DsuE09\_00156" 4073 "s59E5H2" 0 "Diacylglycerol kinase"  
"DsuE09\_00156" 4073 "s63E6H2" 0 "Diacylglycerol kinase"  
"DsuE09\_00157" 4074 "s59E13H2" 0 "hypothetical protein"  
"DsuE09\_00157" 4074 "s59E25H2" 0 "hypothetical protein"  
"DsuE09\_00157" 4074 "s59E5H2" 0 "hypothetical protein"  
"DsuE09\_00157" 4074 "s63E6H2" 0 "hypothetical protein"  
"DsuE09\_00158" 4075 "s59E13H2" 0 "Inner membrane ABC transporter permease protein YcjP"  
"DsuE09\_00158" 4075 "s59E25H2" 0 "Inner membrane ABC transporter permease protein YcjP"  
"DsuE09\_00158" 4075 "s59E5H2" 0 "Inner membrane ABC transporter permease protein YcjP"  
"DsuE09\_00158" 4075 "s63E6H2" 0 "Inner membrane ABC transporter permease protein YcjP"  
"DsuE09\_00159" 4076 "s59E13H2" 0 "Inner membrane ABC transporter permease protein YcjO"  
"DsuE09\_00159" 4076 "s59E25H2" 0 "Inner membrane ABC transporter permease protein YcjO"  
"DsuE09\_00159" 4076 "s59E5H2" 0 "Inner membrane ABC transporter permease protein YcjO"  
"DsuE09\_00159" 4076 "s63E6H2" 0 "Inner membrane ABC transporter permease protein YcjO"  
"DsuE09\_00160" 4077 "s59E13H2" 0 "Bacterial extracellular solute-binding protein"  
"DsuE09\_00160" 4077 "s59E25H2" 0 "Bacterial extracellular solute-binding protein"  
"DsuE09\_00160" 4077 "s59E5H2" 0 "Bacterial extracellular solute-binding protein"  
"DsuE09\_00160" 4077 "s63E6H2" 0 "Bacterial extracellular solute-binding protein"  
"DsuE09\_00161" 4078 "s59E13H2" 0 "NAD-dependent protein deacylase 2"  
"DsuE09\_00161" 4078 "s59E25H2" 0 "NAD-dependent protein deacylase 2"  
"DsuE09\_00161" 4078 "s59E5H2" 0 "NAD-dependent protein deacylase 2"  
"DsuE09\_00161" 4078 "s63E6H2" 0 "NAD-dependent protein deacylase 2"  
"DsuE09\_00162" 4079 "s59E13H2" 0 "putative nicotinate-nucleotide pyrophosphorylase [carboxylating]"  
"DsuE09\_00162" 4079 "s59E25H2" 0 "putative nicotinate-nucleotide pyrophosphorylase [carboxylating]"  
"DsuE09\_00162" 4079 "s59E5H2" 0 "putative nicotinate-nucleotide pyrophosphorylase [carboxylating]"  
"DsuE09\_00162" 4079 "s63E6H2" 0 "putative nicotinate-nucleotide pyrophosphorylase [carboxylating]"  
"DsuE09\_00163" 4080 "s59E13H2" 0 "Valine--tRNA ligase"  
"DsuE09\_00163" 4080 "s59E25H2" 0 "Valine--tRNA ligase"  
"DsuE09\_00163" 4080 "s59E5H2" 0 "Valine--tRNA ligase"  
"DsuE09\_00163" 4080 "s63E6H2" 0 "Valine--tRNA ligase"

"DsuE09\_00164" 4081 "s59E13H2" 0 "hypothetical protein"  
"DsuE09\_00164" 4081 "s59E25H2" 0 "hypothetical protein"  
"DsuE09\_00164" 4081 "s59E5H2" 0 "hypothetical protein"  
"DsuE09\_00164" 4081 "s63E6H2" 0 "hypothetical protein"  
"DsuE09\_00165" 4082 "s59E13H2" 0 "putative acyl-CoA dehydrogenase"  
"DsuE09\_00165" 4082 "s59E25H2" 0 "putative acyl-CoA dehydrogenase"  
"DsuE09\_00165" 4082 "s59E5H2" 0 "putative acyl-CoA dehydrogenase"  
"DsuE09\_00165" 4082 "s63E6H2" 0 "putative acyl-CoA dehydrogenase"  
"DsuE09\_00166" 4083 "s59E13H2" 0 "Archaeal Lon protease"  
"DsuE09\_00166" 4083 "s59E25H2" 0 "Archaeal Lon protease"  
"DsuE09\_00166" 4083 "s59E5H2" 0 "Archaeal Lon protease"  
"DsuE09\_00166" 4083 "s63E6H2" 0 "Archaeal Lon protease"  
"DsuE09\_00168" 4085 "s59E13H2" 0 "hypothetical protein"  
"DsuE09\_00168" 4085 "s59E25H2" 0 "hypothetical protein"  
"DsuE09\_00168" 4085 "s59E5H2" 0 "hypothetical protein"  
"DsuE09\_00168" 4085 "s63E6H2" 0 "hypothetical protein"  
"DsuE09\_00169" 4086 "s59E13H2" 0 "hypothetical protein"  
"DsuE09\_00169" 4086 "s59E25H2" 0 "hypothetical protein"  
"DsuE09\_00169" 4086 "s59E5H2" 0 "hypothetical protein"  
"DsuE09\_00169" 4086 "s63E6H2" 0 "hypothetical protein"  
"DsuE09\_00170" 4087 "s59E13H2" 0 "Ribosomal RNA small subunit methyltransferase E"  
"DsuE09\_00170" 4087 "s59E25H2" 0 "Ribosomal RNA small subunit methyltransferase E"  
"DsuE09\_00170" 4087 "s59E5H2" 0 "Ribosomal RNA small subunit methyltransferase E"  
"DsuE09\_00170" 4087 "s63E6H2" 0.002190103 "Ribosomal RNA small subunit methyltransferase E"  
"DsuE09\_00177" 4094 "s59E13H2" 0 "Corrinoid/iron-sulfur protein small subunit"  
"DsuE09\_00177" 4094 "s59E25H2" 0 "Corrinoid/iron-sulfur protein small subunit"  
"DsuE09\_00177" 4094 "s59E5H2" 0 "Corrinoid/iron-sulfur protein small subunit"  
"DsuE09\_00177" 4094 "s63E6H2" 0 "Corrinoid/iron-sulfur protein small subunit"  
"DsuE09\_00178" 4095 "s59E13H2" 0 "Carbon monoxide dehydrogenase 1"  
"DsuE09\_00178" 4095 "s59E25H2" 0 "Carbon monoxide dehydrogenase 1"  
"DsuE09\_00178" 4095 "s59E5H2" 0 "Carbon monoxide dehydrogenase 1"  
"DsuE09\_00178" 4095 "s63E6H2" 0 "Carbon monoxide dehydrogenase 1"  
"DsuE09\_00179" 4096 "s59E13H2" 0 "Carbon monoxide dehydrogenase/acetyl-CoA synthase subunit alpha"  
"DsuE09\_00179" 4096 "s59E25H2" 0 "Carbon monoxide dehydrogenase/acetyl-CoA synthase subunit alpha"  
"DsuE09\_00179" 4096 "s59E5H2" 0 "Carbon monoxide dehydrogenase/acetyl-CoA synthase subunit alpha"  
"DsuE09\_00179" 4096 "s63E6H2" 0 "Carbon monoxide dehydrogenase/acetyl-CoA synthase subunit alpha"  
"DsuE09\_00180" 4097 "s59E13H2" 0 "Carbon monoxide dehydrogenase/acetyl-CoA synthase subunit alpha"  
"DsuE09\_00180" 4097 "s59E25H2" 0 "Carbon monoxide dehydrogenase/acetyl-CoA synthase subunit alpha"  
"DsuE09\_00180" 4097 "s59E5H2" 0 "Carbon monoxide dehydrogenase/acetyl-CoA synthase subunit alpha"  
"DsuE09\_00180" 4097 "s63E6H2" 0 "Carbon monoxide dehydrogenase/acetyl-CoA synthase subunit alpha"  
"DsuE09\_00181" 4098 "s59E13H2" 0 "Corrinoid/iron-sulfur protein large subunit"  
"DsuE09\_00181" 4098 "s59E25H2" 0 "Corrinoid/iron-sulfur protein large subunit"  
"DsuE09\_00181" 4098 "s59E5H2" 0 "Corrinoid/iron-sulfur protein large subunit"  
"DsuE09\_00181" 4098 "s63E6H2" 0 "Corrinoid/iron-sulfur protein large subunit"  
"DsuE09\_00182" 4099 "s59E13H2" 0 "5-methyltetrahydrofolate:corrinoid/iron-sulfur protein co-methyltransferase"  
"DsuE09\_00182" 4099 "s59E25H2" 0 "5-methyltetrahydrofolate:corrinoid/iron-sulfur protein co-methyltransferase"  
"DsuE09\_00182" 4099 "s59E5H2" 0 "5-methyltetrahydrofolate:corrinoid/iron-sulfur protein co-methyltransferase"



"DsuE09\_00182" 4099 "s63E6H2" 0 "5-methyltetrahydrofolate:corrinoide/iron-sulfur protein co-methyltransferase"  
"DsuE09\_00183" 4100 "s59E13H2" 0 "ComEC family competence protein"  
"DsuE09\_00183" 4100 "s59E25H2" 0 "ComEC family competence protein"  
"DsuE09\_00183" 4100 "s59E5H2" 0 "ComEC family competence protein"  
"DsuE09\_00183" 4100 "s63E6H2" 0 "ComEC family competence protein"  
"DsuE09\_00184" 4101 "s59E13H2" 0 "UDP-N-acetylglucosamine 1-carboxyvinyltransferase"  
"DsuE09\_00184" 4101 "s59E25H2" 0 "UDP-N-acetylglucosamine 1-carboxyvinyltransferase"  
"DsuE09\_00184" 4101 "s59E5H2" 0 "UDP-N-acetylglucosamine 1-carboxyvinyltransferase"  
"DsuE09\_00184" 4101 "s63E6H2" 0 "UDP-N-acetylglucosamine 1-carboxyvinyltransferase"  
"DsuE09\_00185" 4102 "s59E13H2" 0 "Release factor glutamine methyltransferase"  
"DsuE09\_00185" 4102 "s59E25H2" 0 "Release factor glutamine methyltransferase"  
"DsuE09\_00185" 4102 "s59E5H2" 0 "Release factor glutamine methyltransferase"  
"DsuE09\_00185" 4102 "s63E6H2" 0 "Release factor glutamine methyltransferase"  
"DsuE09\_00186" 4103 "s59E13H2" 0 "Peptide chain release factor 1"  
"DsuE09\_00186" 4103 "s59E25H2" 0 "Peptide chain release factor 1"  
"DsuE09\_00186" 4103 "s59E5H2" 0 "Peptide chain release factor 1"  
"DsuE09\_00186" 4103 "s63E6H2" 0 "Peptide chain release factor 1"  
"DsuE09\_00187" 4104 "s59E13H2" 0 "50S ribosomal protein L31"  
"DsuE09\_00187" 4104 "s59E25H2" 0 "50S ribosomal protein L31"  
"DsuE09\_00187" 4104 "s59E5H2" 0 "50S ribosomal protein L31"  
"DsuE09\_00187" 4104 "s63E6H2" 0 "50S ribosomal protein L31"  
"DsuE09\_00188" 4105 "s59E13H2" 0 "hypothetical protein"  
"DsuE09\_00188" 4105 "s59E25H2" 0 "hypothetical protein"  
"DsuE09\_00188" 4105 "s59E5H2" 0 "hypothetical protein"  
"DsuE09\_00188" 4105 "s63E6H2" 0 "hypothetical protein"  
"DsuE09\_00189" 4106 "s59E13H2" 0 "hypothetical protein"  
"DsuE09\_00189" 4106 "s59E25H2" 0 "hypothetical protein"  
"DsuE09\_00189" 4106 "s59E5H2" 0 "hypothetical protein"  
"DsuE09\_00189" 4106 "s63E6H2" 0 "hypothetical protein"  
"DsuE09\_00190" 4107 "s59E13H2" 0 "Helix-turn-helix domain protein"  
"DsuE09\_00190" 4107 "s59E25H2" 0 "Helix-turn-helix domain protein"  
"DsuE09\_00190" 4107 "s59E5H2" 0 "Helix-turn-helix domain protein"  
"DsuE09\_00190" 4107 "s63E6H2" 0 "Helix-turn-helix domain protein"  
"DsuE09\_00191" 4108 "s59E13H2" 0 "hypothetical protein"  
"DsuE09\_00191" 4108 "s59E25H2" 0 "hypothetical protein"  
"DsuE09\_00191" 4108 "s59E5H2" 0 "hypothetical protein"  
"DsuE09\_00191" 4108 "s63E6H2" 0 "hypothetical protein"  
"DsuE09\_00196" 4113 "s59E13H2" 0 "hypothetical protein"  
"DsuE09\_00196" 4113 "s59E25H2" 0 "hypothetical protein"  
"DsuE09\_00196" 4113 "s59E5H2" 0 "hypothetical protein"  
"DsuE09\_00196" 4113 "s63E6H2" 0 "hypothetical protein"  
"DsuE09\_00197" 4114 "s59E13H2" 0 "hypothetical protein"  
"DsuE09\_00197" 4114 "s59E25H2" 0 "hypothetical protein"  
"DsuE09\_00197" 4114 "s59E5H2" 0 "hypothetical protein"  
"DsuE09\_00197" 4114 "s63E6H2" 0 "hypothetical protein"  
"DsuE09\_00199" 4116 "s59E13H2" 0 "30S ribosomal protein S21"  
"DsuE09\_00199" 4116 "s59E25H2" 0 "30S ribosomal protein S21"

"DsuE09\_00199" 4116 "s59E5H2" 0 "30S ribosomal protein S21"  
"DsuE09\_00199" 4116 "s63E6H2" 0 "30S ribosomal protein S21"  
"DsuE09\_00201" 4118 "s59E13H2" 0 "hypothetical protein"  
"DsuE09\_00201" 4118 "s59E25H2" 0 "hypothetical protein"  
"DsuE09\_00201" 4118 "s59E5H2" 0 "hypothetical protein"  
"DsuE09\_00201" 4118 "s63E6H2" 0 "hypothetical protein"  
"DsuE09\_00203" 4120 "s59E13H2" 0 "hypothetical protein"  
"DsuE09\_00203" 4120 "s59E25H2" 0 "hypothetical protein"  
"DsuE09\_00203" 4120 "s59E5H2" 0 "hypothetical protein"  
"DsuE09\_00203" 4120 "s63E6H2" 0 "hypothetical protein"  
"DsuE09\_00208" 4125 "s59E13H2" 0 "hypothetical protein"  
"DsuE09\_00208" 4125 "s59E25H2" 0 "hypothetical protein"  
"DsuE09\_00208" 4125 "s59E5H2" 0 "hypothetical protein"  
"DsuE09\_00208" 4125 "s63E6H2" 0 "hypothetical protein"  
"DsuE09\_00209" 4126 "s59E13H2" 0 "hypothetical protein"  
"DsuE09\_00209" 4126 "s59E25H2" 0 "hypothetical protein"  
"DsuE09\_00209" 4126 "s59E5H2" 0 "hypothetical protein"  
"DsuE09\_00209" 4126 "s63E6H2" 0 "hypothetical protein"  
"DsuE09\_00213" 4130 "s59E13H2" 0 "hypothetical protein"  
"DsuE09\_00213" 4130 "s59E25H2" 0 "hypothetical protein"  
"DsuE09\_00213" 4130 "s59E5H2" 0 "hypothetical protein"  
"DsuE09\_00213" 4130 "s63E6H2" 0 "hypothetical protein"  
"DsuE09\_00214" 4131 "s59E13H2" 0 "hypothetical protein"  
"DsuE09\_00214" 4131 "s59E25H2" 0 "hypothetical protein"  
"DsuE09\_00214" 4131 "s59E5H2" 0 "hypothetical protein"  
"DsuE09\_00214" 4131 "s63E6H2" 0 "hypothetical protein"  
"DsuE09\_00216" 4133 "s59E13H2" 0 "hypothetical protein"  
"DsuE09\_00216" 4133 "s59E25H2" 0 "hypothetical protein"  
"DsuE09\_00216" 4133 "s59E5H2" 0 "hypothetical protein"  
"DsuE09\_00216" 4133 "s63E6H2" 0 "hypothetical protein"  
"DsuE09\_00217" 4134 "s59E13H2" 0 "hypothetical protein"  
"DsuE09\_00217" 4134 "s59E25H2" 0 "hypothetical protein"  
"DsuE09\_00217" 4134 "s59E5H2" 0 "hypothetical protein"  
"DsuE09\_00217" 4134 "s63E6H2" 0 "hypothetical protein"  
"DsuE09\_00218" 4135 "s59E13H2" 0 "Tyrosine recombinase XerD"  
"DsuE09\_00218" 4135 "s59E25H2" 0 "Tyrosine recombinase XerD"  
"DsuE09\_00218" 4135 "s59E5H2" 0 "Tyrosine recombinase XerD"  
"DsuE09\_00218" 4135 "s63E6H2" 0 "Tyrosine recombinase XerD"  
"DsuE09\_00219" 4136 "s59E13H2" 0 "hypothetical protein"  
"DsuE09\_00219" 4136 "s59E25H2" 0 "hypothetical protein"  
"DsuE09\_00219" 4136 "s59E5H2" 0 "hypothetical protein"  
"DsuE09\_00219" 4136 "s63E6H2" 0 "hypothetical protein"  
"DsuE09\_00220" 4137 "s59E13H2" 0 "UDP-3-O-[3-hydroxymyristoyl] N-acetylglucosamine deacetylase"  
"DsuE09\_00220" 4137 "s59E25H2" 0 "UDP-3-O-[3-hydroxymyristoyl] N-acetylglucosamine deacetylase"  
"DsuE09\_00220" 4137 "s59E5H2" 0 "UDP-3-O-[3-hydroxymyristoyl] N-acetylglucosamine deacetylase"  
"DsuE09\_00220" 4137 "s63E6H2" 0 "UDP-3-O-[3-hydroxymyristoyl] N-acetylglucosamine deacetylase"  
"DsuE09\_00221" 4138 "s59E13H2" 0 "Membrane-bound lytic murein transglycosylase A precursor"

"DsuE09\_00221" 4138 "s59E25H2" 0 "Membrane-bound lytic murein transglycosylase A precursor"  
"DsuE09\_00221" 4138 "s59E5H2" 0 "Membrane-bound lytic murein transglycosylase A precursor"  
"DsuE09\_00221" 4138 "s63E6H2" 0 "Membrane-bound lytic murein transglycosylase A precursor"  
"DsuE09\_00222" 4139 "s59E13H2" 0 "Glycine--tRNA ligase beta subunit"  
"DsuE09\_00222" 4139 "s59E25H2" 0 "Glycine--tRNA ligase beta subunit"  
"DsuE09\_00222" 4139 "s59E5H2" 0 "Glycine--tRNA ligase beta subunit"  
"DsuE09\_00222" 4139 "s63E6H2" 0 "Glycine--tRNA ligase beta subunit"  
"DsuE09\_00223" 4140 "s59E13H2" 0 "hypothetical protein"  
"DsuE09\_00223" 4140 "s59E25H2" 0 "hypothetical protein"  
"DsuE09\_00223" 4140 "s59E5H2" 0 "hypothetical protein"  
"DsuE09\_00223" 4140 "s63E6H2" 0 "hypothetical protein"  
"DsuE09\_00224" 4141 "s59E13H2" 0 "Glycine--tRNA ligase alpha subunit"  
"DsuE09\_00224" 4141 "s59E25H2" 0 "Glycine--tRNA ligase alpha subunit"  
"DsuE09\_00224" 4141 "s59E5H2" 0 "Glycine--tRNA ligase alpha subunit"  
"DsuE09\_00224" 4141 "s63E6H2" 0 "Glycine--tRNA ligase alpha subunit"  
"DsuE09\_00225" 4142 "s59E13H2" 0 "DNA repair protein RecO"  
"DsuE09\_00225" 4142 "s59E25H2" 0 "DNA repair protein RecO"  
"DsuE09\_00225" 4142 "s59E5H2" 0 "DNA repair protein RecO"  
"DsuE09\_00225" 4142 "s63E6H2" 0 "DNA repair protein RecO"  
"DsuE09\_00226" 4143 "s59E13H2" 0 "hypothetical protein"  
"DsuE09\_00226" 4143 "s59E25H2" 0 "hypothetical protein"  
"DsuE09\_00226" 4143 "s59E5H2" 0 "hypothetical protein"  
"DsuE09\_00226" 4143 "s63E6H2" 0 "hypothetical protein"  
"DsuE09\_00227" 4144 "s59E13H2" 0 "High-affinity branched-chain amino acid transport ATP-binding protein LivF"  
"DsuE09\_00227" 4144 "s59E25H2" 0 "High-affinity branched-chain amino acid transport ATP-binding protein LivF"  
"DsuE09\_00227" 4144 "s59E5H2" 0 "High-affinity branched-chain amino acid transport ATP-binding protein LivF"  
"DsuE09\_00227" 4144 "s63E6H2" 0 "High-affinity branched-chain amino acid transport ATP-binding protein LivF"  
"DsuE09\_00228" 4145 "s59E13H2" 0 "hypothetical protein"  
"DsuE09\_00228" 4145 "s59E25H2" 0 "hypothetical protein"  
"DsuE09\_00228" 4145 "s59E5H2" 0 "hypothetical protein"  
"DsuE09\_00228" 4145 "s63E6H2" 0 "hypothetical protein"  
"DsuE09\_00229" 4146 "s59E13H2" 0 "leucine/isoleucine/valine transporter permease subunit"  
"DsuE09\_00229" 4146 "s59E25H2" 0 "leucine/isoleucine/valine transporter permease subunit"  
"DsuE09\_00229" 4146 "s59E5H2" 0 "leucine/isoleucine/valine transporter permease subunit"  
"DsuE09\_00229" 4146 "s63E6H2" 0.005010708 "leucine/isoleucine/valine transporter permease subunit"  
"DsuE09\_00230" 4147 "s59E13H2" 0 "High-affinity branched-chain amino acid transport system permease protein LivH"  
"DsuE09\_00230" 4147 "s59E25H2" 0 "High-affinity branched-chain amino acid transport system permease protein LivH"  
"DsuE09\_00230" 4147 "s59E5H2" 0 "High-affinity branched-chain amino acid transport system permease protein LivH"  
"DsuE09\_00230" 4147 "s63E6H2" 0 "High-affinity branched-chain amino acid transport system permease protein LivH"  
"DsuE09\_00231" 4148 "s59E13H2" 0 "Long-chain-fatty-acid--CoA ligase FadD15"  
"DsuE09\_00231" 4148 "s59E25H2" 0 "Long-chain-fatty-acid--CoA ligase FadD15"  
"DsuE09\_00231" 4148 "s59E5H2" 0 "Long-chain-fatty-acid--CoA ligase FadD15"  
"DsuE09\_00231" 4148 "s63E6H2" 0 "Long-chain-fatty-acid--CoA ligase FadD15"  
"DsuE09\_00232" 4149 "s59E13H2" 0 "putative branched-chain amino acid transport ATP-binding protein LivG"  
"DsuE09\_00232" 4149 "s59E25H2" 0 "putative branched-chain amino acid transport ATP-binding protein LivG"  
"DsuE09\_00232" 4149 "s59E5H2" 0 "putative branched-chain amino acid transport ATP-binding protein LivG"  
"DsuE09\_00232" 4149 "s63E6H2" 0 "putative branched-chain amino acid transport ATP-binding protein LivG"

"DsuE09\_00233" 4150 "s59E13H2" 0 "deoxyguanosinetriphosphate triphosphohydrolase-like protein"  
"DsuE09\_00233" 4150 "s59E25H2" 0 "deoxyguanosinetriphosphate triphosphohydrolase-like protein"  
"DsuE09\_00233" 4150 "s59E5H2" 0 "deoxyguanosinetriphosphate triphosphohydrolase-like protein"  
"DsuE09\_00233" 4150 "s63E6H2" 0 "deoxyguanosinetriphosphate triphosphohydrolase-like protein"  
"DsuE09\_00234" 4151 "s59E13H2" 0 "Alkaline phosphatase synthesis transcriptional regulatory protein PhoP"  
"DsuE09\_00234" 4151 "s59E25H2" 0 "Alkaline phosphatase synthesis transcriptional regulatory protein PhoP"  
"DsuE09\_00234" 4151 "s59E5H2" 0 "Alkaline phosphatase synthesis transcriptional regulatory protein PhoP"  
"DsuE09\_00234" 4151 "s63E6H2" 0 "Alkaline phosphatase synthesis transcriptional regulatory protein PhoP"  
"DsuE09\_00235" 4152 "s59E13H2" 0 "Type II secretion system protein E"  
"DsuE09\_00235" 4152 "s59E25H2" 0 "Type II secretion system protein E"  
"DsuE09\_00235" 4152 "s59E5H2" 0 "Type II secretion system protein E"  
"DsuE09\_00235" 4152 "s63E6H2" 0 "Type II secretion system protein E"  
"DsuE09\_00236" 4153 "s59E13H2" 0 "hypothetical protein"  
"DsuE09\_00236" 4153 "s59E25H2" 0 "hypothetical protein"  
"DsuE09\_00236" 4153 "s59E5H2" 0 "hypothetical protein"  
"DsuE09\_00236" 4153 "s63E6H2" 0 "hypothetical protein"  
"DsuE09\_00238" 4155 "s59E13H2" 0 "Sensor protein ZraS"  
"DsuE09\_00238" 4155 "s59E25H2" 0 "Sensor protein ZraS"  
"DsuE09\_00238" 4155 "s59E5H2" 0 "Sensor protein ZraS"  
"DsuE09\_00238" 4155 "s63E6H2" 0 "Sensor protein ZraS"  
"DsuE09\_00239" 4156 "s59E13H2" 0 "hypothetical protein"  
"DsuE09\_00239" 4156 "s59E25H2" 0 "hypothetical protein"  
"DsuE09\_00239" 4156 "s59E5H2" 0 "hypothetical protein"  
"DsuE09\_00239" 4156 "s63E6H2" 0 "hypothetical protein"  
"DsuE09\_00240" 4157 "s59E13H2" 0 "hypothetical protein"  
"DsuE09\_00240" 4157 "s59E25H2" 0 "hypothetical protein"  
"DsuE09\_00240" 4157 "s59E5H2" 0 "hypothetical protein"  
"DsuE09\_00240" 4157 "s63E6H2" 0 "hypothetical protein"  
"DsuE09\_00241" 4158 "s59E13H2" 0 "Sensor protein ZraS"  
"DsuE09\_00241" 4158 "s59E25H2" 0 "Sensor protein ZraS"  
"DsuE09\_00241" 4158 "s59E5H2" 0 "Sensor protein ZraS"  
"DsuE09\_00241" 4158 "s63E6H2" 0 "Sensor protein ZraS"  
"DsuE09\_00242" 4159 "s59E13H2" 0 "Response regulator PleD"  
"DsuE09\_00242" 4159 "s59E25H2" 0 "Response regulator PleD"  
"DsuE09\_00242" 4159 "s59E5H2" 0 "Response regulator PleD"  
"DsuE09\_00242" 4159 "s63E6H2" 0 "Response regulator PleD"  
"DsuE09\_00243" 4160 "s59E13H2" 0 "Phosphate regulon transcriptional regulatory protein PhoB"  
"DsuE09\_00243" 4160 "s59E25H2" 0 "Phosphate regulon transcriptional regulatory protein PhoB"  
"DsuE09\_00243" 4160 "s59E5H2" 0 "Phosphate regulon transcriptional regulatory protein PhoB"  
"DsuE09\_00243" 4160 "s63E6H2" 0 "Phosphate regulon transcriptional regulatory protein PhoB"  
"DsuE09\_00244" 4161 "s59E13H2" 0 "hypothetical protein"  
"DsuE09\_00244" 4161 "s59E25H2" 0 "hypothetical protein"  
"DsuE09\_00244" 4161 "s59E5H2" 0 "hypothetical protein"  
"DsuE09\_00244" 4161 "s63E6H2" 0 "hypothetical protein"  
"DsuE09\_00245" 4162 "s59E13H2" 0 "Cyclic di-GMP phosphodiesterase response regulator RpfG"  
"DsuE09\_00245" 4162 "s59E25H2" 0 "Cyclic di-GMP phosphodiesterase response regulator RpfG"  
"DsuE09\_00245" 4162 "s59E5H2" 0 "Cyclic di-GMP phosphodiesterase response regulator RpfG"

"DsuE09\_00245" 4162 "s63E6H2" 0 "Cyclic di-GMP phosphodiesterase response regulator RpfG"  
"DsuE09\_00246" 4163 "s59E13H2" 0 "Mutual gliding-motility protein MglA"  
"DsuE09\_00246" 4163 "s59E25H2" 0 "Mutual gliding-motility protein MglA"  
"DsuE09\_00246" 4163 "s59E5H2" 0 "Mutual gliding-motility protein MglA"  
"DsuE09\_00246" 4163 "s63E6H2" 0 "Mutual gliding-motility protein MglA"  
"DsuE09\_00247" 4164 "s59E13H2" 0 "Putative type II secretion system protein E"  
"DsuE09\_00247" 4164 "s59E25H2" 0 "Putative type II secretion system protein E"  
"DsuE09\_00247" 4164 "s59E5H2" 0 "Putative type II secretion system protein E"  
"DsuE09\_00247" 4164 "s63E6H2" 0 "Putative type II secretion system protein E"  
"DsuE09\_00248" 4165 "s59E13H2" 0 "Alkaline phosphatase synthesis transcriptional regulatory protein PhoP"  
"DsuE09\_00248" 4165 "s59E25H2" 0 "Alkaline phosphatase synthesis transcriptional regulatory protein PhoP"  
"DsuE09\_00248" 4165 "s59E5H2" 0 "Alkaline phosphatase synthesis transcriptional regulatory protein PhoP"  
"DsuE09\_00248" 4165 "s63E6H2" 0 "Alkaline phosphatase synthesis transcriptional regulatory protein PhoP"  
"DsuE09\_00249" 4166 "s59E13H2" 0 "Methyl-accepting chemotaxis protein McpB"  
"DsuE09\_00249" 4166 "s59E25H2" 0 "Methyl-accepting chemotaxis protein McpB"  
"DsuE09\_00249" 4166 "s59E5H2" 0 "Methyl-accepting chemotaxis protein McpB"  
"DsuE09\_00249" 4166 "s63E6H2" 0 "Methyl-accepting chemotaxis protein McpB"  
"DsuE09\_00250" 4167 "s59E13H2" 0 "CheW-like domain protein"  
"DsuE09\_00250" 4167 "s59E25H2" 0 "CheW-like domain protein"  
"DsuE09\_00250" 4167 "s59E5H2" 0 "CheW-like domain protein"  
"DsuE09\_00250" 4167 "s63E6H2" 0 "CheW-like domain protein"  
"DsuE09\_00251" 4168 "s59E13H2" 0 "Chemotaxis protein CheA"  
"DsuE09\_00251" 4168 "s59E25H2" 0 "Chemotaxis protein CheA"  
"DsuE09\_00251" 4168 "s59E5H2" 0 "Chemotaxis protein CheA"  
"DsuE09\_00251" 4168 "s63E6H2" 0 "Chemotaxis protein CheA"  
"DsuE09\_00252" 4169 "s59E13H2" 0 "3-oxoacyl-[acyl-carrier-protein] reductase FabG"  
"DsuE09\_00252" 4169 "s59E25H2" 0 "3-oxoacyl-[acyl-carrier-protein] reductase FabG"  
"DsuE09\_00252" 4169 "s59E5H2" 0 "3-oxoacyl-[acyl-carrier-protein] reductase FabG"  
"DsuE09\_00252" 4169 "s63E6H2" 0 "3-oxoacyl-[acyl-carrier-protein] reductase FabG"  
"DsuE09\_00253" 4170 "s59E13H2" 0 "Alcohol dehydrogenase"  
"DsuE09\_00253" 4170 "s59E25H2" 0 "Alcohol dehydrogenase"  
"DsuE09\_00253" 4170 "s59E5H2" 0 "Alcohol dehydrogenase"  
"DsuE09\_00253" 4170 "s63E6H2" 0 "Alcohol dehydrogenase"  
"DsuE09\_00254" 4171 "s59E13H2" 0 "1,4-Dihydroxy-2-naphthoyl-CoA synthase"  
"DsuE09\_00254" 4171 "s59E25H2" 0 "1,4-Dihydroxy-2-naphthoyl-CoA synthase"  
"DsuE09\_00254" 4171 "s59E5H2" 0 "1,4-Dihydroxy-2-naphthoyl-CoA synthase"  
"DsuE09\_00254" 4171 "s63E6H2" 0 "1,4-Dihydroxy-2-naphthoyl-CoA synthase"  
"DsuE09\_00255" 4172 "s59E13H2" 0 "putative enoyl-CoA hydratase echA8"  
"DsuE09\_00255" 4172 "s59E25H2" 0 "putative enoyl-CoA hydratase echA8"  
"DsuE09\_00255" 4172 "s59E5H2" 0 "putative enoyl-CoA hydratase echA8"  
"DsuE09\_00255" 4172 "s63E6H2" 0 "putative enoyl-CoA hydratase echA8"  
"DsuE09\_00256" 4173 "s59E13H2" 0 "Calcium-gated potassium channel MthK"  
"DsuE09\_00256" 4173 "s59E25H2" 0 "Calcium-gated potassium channel MthK"  
"DsuE09\_00256" 4173 "s59E5H2" 0 "Calcium-gated potassium channel MthK"  
"DsuE09\_00256" 4173 "s63E6H2" 0 "Calcium-gated potassium channel MthK"  
"DsuE09\_00257" 4174 "s59E13H2" 0 "cAMP receptor protein"  
"DsuE09\_00257" 4174 "s59E25H2" 0 "cAMP receptor protein"

"DsuE09\_00257" 4174 "s59E5H2" 0 "cAMP receptor protein"  
"DsuE09\_00257" 4174 "s63E6H2" 0 "cAMP receptor protein"  
"DsuE09\_00258" 4175 "s59E13H2" 0 "RlpA-like protein precursor"  
"DsuE09\_00258" 4175 "s59E25H2" 0 "RlpA-like protein precursor"  
"DsuE09\_00258" 4175 "s59E5H2" 0 "RlpA-like protein precursor"  
"DsuE09\_00258" 4175 "s63E6H2" 0 "RlpA-like protein precursor"  
"DsuE09\_00259" 4176 "s59E13H2" 0 "Integration host factor subunit alpha"  
"DsuE09\_00259" 4176 "s59E25H2" 0 "Integration host factor subunit alpha"  
"DsuE09\_00259" 4176 "s59E5H2" 0 "Integration host factor subunit alpha"  
"DsuE09\_00259" 4176 "s63E6H2" 0 "Integration host factor subunit alpha"  
"DsuE09\_00260" 4177 "s59E13H2" 0 "Phosphopantetheine adenyltransferase"  
"DsuE09\_00260" 4177 "s59E25H2" 0 "Phosphopantetheine adenyltransferase"  
"DsuE09\_00260" 4177 "s59E5H2" 0 "Phosphopantetheine adenyltransferase"  
"DsuE09\_00260" 4177 "s63E6H2" 0 "Phosphopantetheine adenyltransferase"  
"DsuE09\_00261" 4178 "s59E13H2" 0 "Ribosomal RNA small subunit methyltransferase D"  
"DsuE09\_00261" 4178 "s59E25H2" 0 "Ribosomal RNA small subunit methyltransferase D"  
"DsuE09\_00261" 4178 "s59E5H2" 0 "Ribosomal RNA small subunit methyltransferase D"  
"DsuE09\_00261" 4178 "s63E6H2" 0 "Ribosomal RNA small subunit methyltransferase D"  
"DsuE09\_00262" 4179 "s59E13H2" 0 "Archaetidylserine synthase"  
"DsuE09\_00262" 4179 "s59E25H2" 0 "Archaetidylserine synthase"  
"DsuE09\_00262" 4179 "s59E5H2" 0 "Archaetidylserine synthase"  
"DsuE09\_00262" 4179 "s63E6H2" 0 "Archaetidylserine synthase"  
"DsuE09\_00263" 4180 "s59E13H2" 0 "phosphatidylserine decarboxylase"  
"DsuE09\_00263" 4180 "s59E25H2" 0 "phosphatidylserine decarboxylase"  
"DsuE09\_00263" 4180 "s59E5H2" 0 "phosphatidylserine decarboxylase"  
"DsuE09\_00263" 4180 "s63E6H2" 0 "phosphatidylserine decarboxylase"  
"DsuE09\_00265" 4182 "s59E13H2" 0 "tRNA threonylcarbamoyladenosine biosynthesis protein Tsab"  
"DsuE09\_00265" 4182 "s59E25H2" 0 "tRNA threonylcarbamoyladenosine biosynthesis protein Tsab"  
"DsuE09\_00265" 4182 "s59E5H2" 0 "tRNA threonylcarbamoyladenosine biosynthesis protein Tsab"  
"DsuE09\_00265" 4182 "s63E6H2" 0 "tRNA threonylcarbamoyladenosine biosynthesis protein Tsab"  
"DsuE09\_00266" 4183 "s59E13H2" 0 "Metalloprotease MmpA"  
"DsuE09\_00266" 4183 "s59E25H2" 0 "Metalloprotease MmpA"  
"DsuE09\_00266" 4183 "s59E5H2" 0 "Metalloprotease MmpA"  
"DsuE09\_00266" 4183 "s63E6H2" 0 "Metalloprotease MmpA"  
"DsuE09\_00267" 4184 "s59E13H2" 0 "1-deoxy-D-xylulose 5-phosphate reductoisomerase"  
"DsuE09\_00267" 4184 "s59E25H2" 0 "1-deoxy-D-xylulose 5-phosphate reductoisomerase"  
"DsuE09\_00267" 4184 "s59E5H2" 0 "1-deoxy-D-xylulose 5-phosphate reductoisomerase"  
"DsuE09\_00267" 4184 "s63E6H2" 0 "1-deoxy-D-xylulose 5-phosphate reductoisomerase"  
"DsuE09\_00268" 4185 "s59E13H2" 0 "Phosphatidate cytidyltransferase"  
"DsuE09\_00268" 4185 "s59E25H2" 0 "Phosphatidate cytidyltransferase"  
"DsuE09\_00268" 4185 "s59E5H2" 0 "Phosphatidate cytidyltransferase"  
"DsuE09\_00268" 4185 "s63E6H2" 0 "Phosphatidate cytidyltransferase"  
"DsuE09\_00269" 4186 "s59E13H2" 0 "Isoprenyl transferase"  
"DsuE09\_00269" 4186 "s59E25H2" 0 "Isoprenyl transferase"  
"DsuE09\_00269" 4186 "s59E5H2" 0 "Isoprenyl transferase"  
"DsuE09\_00269" 4186 "s63E6H2" 0 "Isoprenyl transferase"  
"DsuE09\_00270" 4187 "s59E13H2" 0 "Ribosome-recycling factor"

"DsuE09\_00270" 4187 "s59E25H2" 0 "Ribosome-recycling factor"  
"DsuE09\_00270" 4187 "s59E5H2" 0 "Ribosome-recycling factor"  
"DsuE09\_00270" 4187 "s63E6H2" 0 "Ribosome-recycling factor"  
"DsuE09\_00271" 4188 "s59E13H2" 0 "Uridylate kinase"  
"DsuE09\_00271" 4188 "s59E25H2" 0 "Uridylate kinase"  
"DsuE09\_00271" 4188 "s59E5H2" 0 "Uridylate kinase"  
"DsuE09\_00271" 4188 "s63E6H2" 0 "Uridylate kinase"  
"DsuE09\_00272" 4189 "s59E13H2" 0 "Elongation factor Ts"  
"DsuE09\_00272" 4189 "s59E25H2" 0 "Elongation factor Ts"  
"DsuE09\_00272" 4189 "s59E5H2" 0 "Elongation factor Ts"  
"DsuE09\_00272" 4189 "s63E6H2" 0 "Elongation factor Ts"  
"DsuE09\_00273" 4190 "s59E13H2" 0 "30S ribosomal protein S2"  
"DsuE09\_00273" 4190 "s59E25H2" 0 "30S ribosomal protein S2"  
"DsuE09\_00273" 4190 "s59E5H2" 0 "30S ribosomal protein S2"  
"DsuE09\_00273" 4190 "s63E6H2" 0 "30S ribosomal protein S2"  
"DsuE09\_00274" 4191 "s59E13H2" 0 "High-affinity branched-chain amino acid transport ATP-binding protein LivF"  
"DsuE09\_00274" 4191 "s59E25H2" 0 "High-affinity branched-chain amino acid transport ATP-binding protein LivF"  
"DsuE09\_00274" 4191 "s59E5H2" 0 "High-affinity branched-chain amino acid transport ATP-binding protein LivF"  
"DsuE09\_00274" 4191 "s63E6H2" 0 "High-affinity branched-chain amino acid transport ATP-binding protein LivF"  
"DsuE09\_00275" 4192 "s59E13H2" 0 "leucine/isoleucine/valine transporter permease subunit"  
"DsuE09\_00275" 4192 "s59E25H2" 0 "leucine/isoleucine/valine transporter permease subunit"  
"DsuE09\_00275" 4192 "s59E5H2" 0 "leucine/isoleucine/valine transporter permease subunit"  
"DsuE09\_00275" 4192 "s63E6H2" 0 "leucine/isoleucine/valine transporter permease subunit"  
"DsuE09\_00276" 4193 "s59E13H2" 0 "High-affinity branched-chain amino acid transport system permease protein LivH"  
"DsuE09\_00276" 4193 "s59E25H2" 0 "High-affinity branched-chain amino acid transport system permease protein LivH"  
"DsuE09\_00276" 4193 "s59E5H2" 0 "High-affinity branched-chain amino acid transport system permease protein LivH"  
"DsuE09\_00276" 4193 "s63E6H2" 0 "High-affinity branched-chain amino acid transport system permease protein LivH"  
"DsuE09\_00277" 4194 "s59E13H2" 0 "hypothetical protein"  
"DsuE09\_00277" 4194 "s59E25H2" 0 "hypothetical protein"  
"DsuE09\_00277" 4194 "s59E5H2" 0 "hypothetical protein"  
"DsuE09\_00277" 4194 "s63E6H2" 0 "hypothetical protein"  
"DsuE09\_00278" 4195 "s59E13H2" 0 "Long-chain-fatty-acid--CoA ligase FadD15"  
"DsuE09\_00278" 4195 "s59E25H2" 0 "Long-chain-fatty-acid--CoA ligase FadD15"  
"DsuE09\_00278" 4195 "s59E5H2" 0 "Long-chain-fatty-acid--CoA ligase FadD15"  
"DsuE09\_00278" 4195 "s63E6H2" 0 "Long-chain-fatty-acid--CoA ligase FadD15"  
"DsuE09\_00279" 4196 "s59E13H2" 0 "putative branched-chain amino acid transport ATP-binding protein LivG"  
"DsuE09\_00279" 4196 "s59E25H2" 0 "putative branched-chain amino acid transport ATP-binding protein LivG"  
"DsuE09\_00279" 4196 "s59E5H2" 0 "putative branched-chain amino acid transport ATP-binding protein LivG"  
"DsuE09\_00279" 4196 "s63E6H2" 0 "putative branched-chain amino acid transport ATP-binding protein LivG"  
"DsuE09\_00280" 4197 "s59E13H2" 0 "hypothetical protein"  
"DsuE09\_00280" 4197 "s59E25H2" 0 "hypothetical protein"  
"DsuE09\_00280" 4197 "s59E5H2" 0 "hypothetical protein"  
"DsuE09\_00280" 4197 "s63E6H2" 0 "hypothetical protein"  
"DsuE09\_00281" 4198 "s59E13H2" 0 "Long-chain-fatty-acid--CoA ligase"  
"DsuE09\_00281" 4198 "s59E25H2" 0 "Long-chain-fatty-acid--CoA ligase"  
"DsuE09\_00281" 4198 "s59E5H2" 0 "Long-chain-fatty-acid--CoA ligase"  
"DsuE09\_00281" 4198 "s63E6H2" 0 "Long-chain-fatty-acid--CoA ligase"

"DsuE09\_00282" 4199 "s59E13H2" 0 "Indolepyruvate oxidoreductase subunit IorA"  
"DsuE09\_00282" 4199 "s59E25H2" 0 "Indolepyruvate oxidoreductase subunit IorA"  
"DsuE09\_00282" 4199 "s59E5H2" 0 "Indolepyruvate oxidoreductase subunit IorA"  
"DsuE09\_00282" 4199 "s63E6H2" 0 "Indolepyruvate oxidoreductase subunit IorA"  
"DsuE09\_00283" 4200 "s59E13H2" 0 "Indolepyruvate oxidoreductase subunit IorB"  
"DsuE09\_00283" 4200 "s59E25H2" 0 "Indolepyruvate oxidoreductase subunit IorB"  
"DsuE09\_00283" 4200 "s59E5H2" 0 "Indolepyruvate oxidoreductase subunit IorB"  
"DsuE09\_00283" 4200 "s63E6H2" 0 "Indolepyruvate oxidoreductase subunit IorB"  
"DsuE09\_00284" 4201 "s59E13H2" 0 "MoaE protein"  
"DsuE09\_00284" 4201 "s59E25H2" 0 "MoaE protein"  
"DsuE09\_00284" 4201 "s59E5H2" 0 "MoaE protein"  
"DsuE09\_00284" 4201 "s63E6H2" 0 "MoaE protein"  
"DsuE09\_00285" 4202 "s59E13H2" 0 "Glutamyl-tRNA reductase"  
"DsuE09\_00285" 4202 "s59E25H2" 0 "Glutamyl-tRNA reductase"  
"DsuE09\_00285" 4202 "s59E5H2" 0 "Glutamyl-tRNA reductase"  
"DsuE09\_00285" 4202 "s63E6H2" 0 "Glutamyl-tRNA reductase"  
"DsuE09\_00286" 4203 "s59E13H2" 0 "Cytochrome c biogenesis protein CcsA"  
"DsuE09\_00286" 4203 "s59E25H2" 0 "Cytochrome c biogenesis protein CcsA"  
"DsuE09\_00286" 4203 "s59E5H2" 0 "Cytochrome c biogenesis protein CcsA"  
"DsuE09\_00286" 4203 "s63E6H2" 0 "Cytochrome c biogenesis protein CcsA"  
"DsuE09\_00287" 4204 "s59E13H2" 0 "Siroheme synthase"  
"DsuE09\_00287" 4204 "s59E25H2" 0 "Siroheme synthase"  
"DsuE09\_00287" 4204 "s59E5H2" 0 "Siroheme synthase"  
"DsuE09\_00287" 4204 "s63E6H2" 0 "Siroheme synthase"  
"DsuE09\_00288" 4205 "s59E13H2" 0 "hypothetical protein"  
"DsuE09\_00288" 4205 "s59E25H2" 0 "hypothetical protein"  
"DsuE09\_00288" 4205 "s59E5H2" 0 "hypothetical protein"  
"DsuE09\_00288" 4205 "s63E6H2" 0 "hypothetical protein"  
"DsuE09\_00289" 4206 "s59E13H2" 0 "putative transcriptional regulatory protein"  
"DsuE09\_00289" 4206 "s59E25H2" 0 "putative transcriptional regulatory protein"  
"DsuE09\_00289" 4206 "s59E5H2" 0 "putative transcriptional regulatory protein"  
"DsuE09\_00289" 4206 "s63E6H2" 0 "putative transcriptional regulatory protein"  
"DsuE09\_00290" 4207 "s59E13H2" 0 "Crossover junction endodeoxyribonuclease RuvC"  
"DsuE09\_00290" 4207 "s59E25H2" 0 "Crossover junction endodeoxyribonuclease RuvC"  
"DsuE09\_00290" 4207 "s59E5H2" 0.00292287 "Crossover junction endodeoxyribonuclease RuvC"  
"DsuE09\_00290" 4207 "s63E6H2" 0 "Crossover junction endodeoxyribonuclease RuvC"  
"DsuE09\_00291" 4208 "s59E13H2" 0 "Holliday junction ATP-dependent DNA helicase RuvA"  
"DsuE09\_00291" 4208 "s59E25H2" 0 "Holliday junction ATP-dependent DNA helicase RuvA"  
"DsuE09\_00291" 4208 "s59E5H2" 0.005809838 "Holliday junction ATP-dependent DNA helicase RuvA"  
"DsuE09\_00291" 4208 "s63E6H2" 0 "Holliday junction ATP-dependent DNA helicase RuvA"  
"DsuE09\_00292" 4209 "s59E13H2" 0 "hypothetical protein"  
"DsuE09\_00292" 4209 "s59E25H2" 0 "hypothetical protein"  
"DsuE09\_00292" 4209 "s59E5H2" 0 "hypothetical protein"  
"DsuE09\_00292" 4209 "s63E6H2" 0 "hypothetical protein"  
"DsuE09\_00293" 4210 "s59E13H2" 0 "Transposase"  
"DsuE09\_00293" 4210 "s59E25H2" 0 "Transposase"  
"DsuE09\_00293" 4210 "s59E5H2" 0 "Transposase"



"DsuE09\_00293" 4210 "s63E6H2" 0 "Transposase"  
"DsuE09\_00294" 4211 "s59E13H2" 0 "Benzoylformate decarboxylase"  
"DsuE09\_00294" 4211 "s59E25H2" 0 "Benzoylformate decarboxylase"  
"DsuE09\_00294" 4211 "s59E5H2" 0 "Benzoylformate decarboxylase"  
"DsuE09\_00294" 4211 "s63E6H2" 0 "Benzoylformate decarboxylase"  
"DsuE09\_00295" 4212 "s59E13H2" 0 "Sulfoacetaldehyde acetyltransferase"  
"DsuE09\_00295" 4212 "s59E25H2" 0 "Sulfoacetaldehyde acetyltransferase"  
"DsuE09\_00295" 4212 "s59E5H2" 0 "Sulfoacetaldehyde acetyltransferase"  
"DsuE09\_00295" 4212 "s63E6H2" 0 "Sulfoacetaldehyde acetyltransferase"  
"DsuE09\_00296" 4213 "s59E13H2" 0 "NTE family protein RssA"  
"DsuE09\_00296" 4213 "s59E25H2" 0 "NTE family protein RssA"  
"DsuE09\_00296" 4213 "s59E5H2" 0 "NTE family protein RssA"  
"DsuE09\_00296" 4213 "s63E6H2" 0 "NTE family protein RssA"  
"DsuE09\_00297" 4214 "s59E13H2" 0 "Magnesium transporter MgtE"  
"DsuE09\_00297" 4214 "s59E25H2" 0 "Magnesium transporter MgtE"  
"DsuE09\_00297" 4214 "s59E5H2" 0 "Magnesium transporter MgtE"  
"DsuE09\_00297" 4214 "s63E6H2" 0 "Magnesium transporter MgtE"  
"DsuE09\_00298" 4215 "s59E13H2" 0 "Thiamine-phosphate synthase"  
"DsuE09\_00298" 4215 "s59E25H2" 0 "Thiamine-phosphate synthase"  
"DsuE09\_00298" 4215 "s59E5H2" 0 "Thiamine-phosphate synthase"  
"DsuE09\_00298" 4215 "s63E6H2" 0 "Thiamine-phosphate synthase"  
"DsuE09\_00299" 4216 "s59E13H2" 0 "Putative ribose 1,5-bisphosphate isomerase"  
"DsuE09\_00299" 4216 "s59E25H2" 0 "Putative ribose 1,5-bisphosphate isomerase"  
"DsuE09\_00299" 4216 "s59E5H2" 0 "Putative ribose 1,5-bisphosphate isomerase"  
"DsuE09\_00299" 4216 "s63E6H2" 0 "Putative ribose 1,5-bisphosphate isomerase"  
"DsuE09\_00300" 4217 "s59E13H2" 0 "Isoleucine--tRNA ligase"  
"DsuE09\_00300" 4217 "s59E25H2" 0 "Isoleucine--tRNA ligase"  
"DsuE09\_00300" 4217 "s59E5H2" 0 "Isoleucine--tRNA ligase"  
"DsuE09\_00300" 4217 "s63E6H2" 0 "Isoleucine--tRNA ligase"  
"DsuE09\_00301" 4218 "s59E13H2" 0 "Lipoprotein signal peptidase"  
"DsuE09\_00301" 4218 "s59E25H2" 0 "Lipoprotein signal peptidase"  
"DsuE09\_00301" 4218 "s59E5H2" 0 "Lipoprotein signal peptidase"  
"DsuE09\_00301" 4218 "s63E6H2" 0 "Lipoprotein signal peptidase"  
"DsuE09\_00302" 4219 "s59E13H2" 0 "Pyruvate formate-lyase 1-activating enzyme"  
"DsuE09\_00302" 4219 "s59E25H2" 0 "Pyruvate formate-lyase 1-activating enzyme"  
"DsuE09\_00302" 4219 "s59E5H2" 0 "Pyruvate formate-lyase 1-activating enzyme"  
"DsuE09\_00302" 4219 "s63E6H2" 0 "Pyruvate formate-lyase 1-activating enzyme"  
"DsuE09\_00303" 4220 "s59E13H2" 0 "hypothetical protein"  
"DsuE09\_00303" 4220 "s59E25H2" 0 "hypothetical protein"  
"DsuE09\_00303" 4220 "s59E5H2" 0 "hypothetical protein"  
"DsuE09\_00303" 4220 "s63E6H2" 0 "hypothetical protein"  
"DsuE09\_00304" 4221 "s59E13H2" 0 "putative methyltransferase YcgJ"  
"DsuE09\_00304" 4221 "s59E25H2" 0 "putative methyltransferase YcgJ"  
"DsuE09\_00304" 4221 "s59E5H2" 0 "putative methyltransferase YcgJ"  
"DsuE09\_00304" 4221 "s63E6H2" 0 "putative methyltransferase YcgJ"  
"DsuE09\_00305" 4222 "s59E13H2" 0 "CCA-adding enzyme"  
"DsuE09\_00305" 4222 "s59E25H2" 0 "CCA-adding enzyme"

"DsuE09\_00305" 4222 "s59E5H2" 0 "CCA-adding enzyme"  
"DsuE09\_00305" 4222 "s63E6H2" 0 "CCA-adding enzyme"  
"DsuE09\_00306" 4223 "s59E13H2" 0 "hypothetical protein"  
"DsuE09\_00306" 4223 "s59E25H2" 0 "hypothetical protein"  
"DsuE09\_00306" 4223 "s59E5H2" 0 "hypothetical protein"  
"DsuE09\_00306" 4223 "s63E6H2" 0 "hypothetical protein"  
"DsuE09\_00307" 4224 "s59E13H2" 0 "putative inner membrane transporter yjE"  
"DsuE09\_00307" 4224 "s59E25H2" 0 "putative inner membrane transporter yjE"  
"DsuE09\_00307" 4224 "s59E5H2" 0 "putative inner membrane transporter yjE"  
"DsuE09\_00307" 4224 "s63E6H2" 0 "putative inner membrane transporter yjE"  
"DsuE09\_00308" 4225 "s59E13H2" 0 "methylcobalamin:coenzyme M methyltransferase"  
"DsuE09\_00308" 4225 "s59E25H2" 0 "methylcobalamin:coenzyme M methyltransferase"  
"DsuE09\_00308" 4225 "s59E5H2" 0 "methylcobalamin:coenzyme M methyltransferase"  
"DsuE09\_00308" 4225 "s63E6H2" 0 "methylcobalamin:coenzyme M methyltransferase"  
"DsuE09\_00309" 4226 "s59E13H2" 0 "Aspartate aminotransferase"  
"DsuE09\_00309" 4226 "s59E25H2" 0 "Aspartate aminotransferase"  
"DsuE09\_00309" 4226 "s59E5H2" 0 "Aspartate aminotransferase"  
"DsuE09\_00309" 4226 "s63E6H2" 0 "Aspartate aminotransferase"  
"DsuE09\_00310" 4227 "s59E13H2" 0 "hypothetical protein"  
"DsuE09\_00310" 4227 "s59E25H2" 0 "hypothetical protein"  
"DsuE09\_00310" 4227 "s59E5H2" 0 "hypothetical protein"  
"DsuE09\_00310" 4227 "s63E6H2" 0 "hypothetical protein"  
"DsuE09\_00311" 4228 "s59E13H2" 0 "Mannosylfructose-phosphate synthase"  
"DsuE09\_00311" 4228 "s59E25H2" 0 "Mannosylfructose-phosphate synthase"  
"DsuE09\_00311" 4228 "s59E5H2" 0 "Mannosylfructose-phosphate synthase"  
"DsuE09\_00311" 4228 "s63E6H2" 0 "Mannosylfructose-phosphate synthase"  
"DsuE09\_00312" 4229 "s59E13H2" 0 "N(1)-aminopropylagmatine ureohydrolase"  
"DsuE09\_00312" 4229 "s59E25H2" 0 "N(1)-aminopropylagmatine ureohydrolase"  
"DsuE09\_00312" 4229 "s59E5H2" 0 "N(1)-aminopropylagmatine ureohydrolase"  
"DsuE09\_00312" 4229 "s63E6H2" 0 "N(1)-aminopropylagmatine ureohydrolase"  
"DsuE09\_00313" 4230 "s59E13H2" 0 "S-adenosylmethionine decarboxylase proenzyme precursor"  
"DsuE09\_00313" 4230 "s59E25H2" 0 "S-adenosylmethionine decarboxylase proenzyme precursor"  
"DsuE09\_00313" 4230 "s59E5H2" 0 "S-adenosylmethionine decarboxylase proenzyme precursor"  
"DsuE09\_00313" 4230 "s63E6H2" 0 "S-adenosylmethionine decarboxylase proenzyme precursor"  
"DsuE09\_00314" 4231 "s59E13H2" 0 "putative isochorismatase"  
"DsuE09\_00314" 4231 "s59E25H2" 0 "putative isochorismatase"  
"DsuE09\_00314" 4231 "s59E5H2" 0 "putative isochorismatase"  
"DsuE09\_00314" 4231 "s63E6H2" 0 "putative isochorismatase"  
"DsuE09\_00315" 4232 "s59E13H2" 0 "LysM domain protein"  
"DsuE09\_00315" 4232 "s59E25H2" 0 "LysM domain protein"  
"DsuE09\_00315" 4232 "s59E5H2" 0 "LysM domain protein"  
"DsuE09\_00315" 4232 "s63E6H2" 0 "LysM domain protein"  
"DsuE09\_00316" 4233 "s59E13H2" 0 "3-oxoacyl-[acyl-carrier-protein] reductase FabG"  
"DsuE09\_00316" 4233 "s59E25H2" 0 "3-oxoacyl-[acyl-carrier-protein] reductase FabG"  
"DsuE09\_00316" 4233 "s59E5H2" 0 "3-oxoacyl-[acyl-carrier-protein] reductase FabG"  
"DsuE09\_00316" 4233 "s63E6H2" 0 "3-oxoacyl-[acyl-carrier-protein] reductase FabG"  
"DsuE09\_00317" 4234 "s59E13H2" 0 "hypothetical protein"

"DsuE09\_00317" 4234 "s59E25H2" 0 "hypothetical protein"  
"DsuE09\_00317" 4234 "s59E5H2" 0 "hypothetical protein"  
"DsuE09\_00317" 4234 "s63E6H2" 0 "hypothetical protein"  
"DsuE09\_00318" 4235 "s59E13H2" 0 "hypothetical protein"  
"DsuE09\_00318" 4235 "s59E25H2" 0 "hypothetical protein"  
"DsuE09\_00318" 4235 "s59E5H2" 0 "hypothetical protein"  
"DsuE09\_00318" 4235 "s63E6H2" 0 "hypothetical protein"  
"DsuE09\_00319" 4236 "s59E13H2" 0 "DNA topoisomerase 1"  
"DsuE09\_00319" 4236 "s59E25H2" 0 "DNA topoisomerase 1"  
"DsuE09\_00319" 4236 "s59E5H2" 0 "DNA topoisomerase 1"  
"DsuE09\_00319" 4236 "s63E6H2" 0 "DNA topoisomerase 1"  
"DsuE09\_00320" 4237 "s59E13H2" 0 "Deoxyuridine 5'-triphosphate nucleotidohydrolase"  
"DsuE09\_00320" 4237 "s59E25H2" 0 "Deoxyuridine 5'-triphosphate nucleotidohydrolase"  
"DsuE09\_00320" 4237 "s59E5H2" 0 "Deoxyuridine 5'-triphosphate nucleotidohydrolase"  
"DsuE09\_00320" 4237 "s63E6H2" 0 "Deoxyuridine 5'-triphosphate nucleotidohydrolase"  
"DsuE09\_00321" 4238 "s59E13H2" 0 "Protease 3 precursor"  
"DsuE09\_00321" 4238 "s59E25H2" 0 "Protease 3 precursor"  
"DsuE09\_00321" 4238 "s59E5H2" 0 "Protease 3 precursor"  
"DsuE09\_00321" 4238 "s63E6H2" 0 "Protease 3 precursor"  
"DsuE09\_00322" 4239 "s59E13H2" 0 "Polyribonucleotide nucleotidyltransferase"  
"DsuE09\_00322" 4239 "s59E25H2" 0 "Polyribonucleotide nucleotidyltransferase"  
"DsuE09\_00322" 4239 "s59E5H2" 0 "Polyribonucleotide nucleotidyltransferase"  
"DsuE09\_00322" 4239 "s63E6H2" 0 "Polyribonucleotide nucleotidyltransferase"  
"DsuE09\_00323" 4240 "s59E13H2" 0 "30S ribosomal protein S15"  
"DsuE09\_00323" 4240 "s59E25H2" 0 "30S ribosomal protein S15"  
"DsuE09\_00323" 4240 "s59E5H2" 0 "30S ribosomal protein S15"  
"DsuE09\_00323" 4240 "s63E6H2" 0 "30S ribosomal protein S15"  
"DsuE09\_00324" 4241 "s59E13H2" 0 "tRNA pseudouridine synthase B"  
"DsuE09\_00324" 4241 "s59E25H2" 0 "tRNA pseudouridine synthase B"  
"DsuE09\_00324" 4241 "s59E5H2" 0 "tRNA pseudouridine synthase B"  
"DsuE09\_00324" 4241 "s63E6H2" 0 "tRNA pseudouridine synthase B"  
"DsuE09\_00325" 4242 "s59E13H2" 0 "Bifunctional oligoribonuclease and PAP phosphatase NrnA"  
"DsuE09\_00325" 4242 "s59E25H2" 0 "Bifunctional oligoribonuclease and PAP phosphatase NrnA"  
"DsuE09\_00325" 4242 "s59E5H2" 0 "Bifunctional oligoribonuclease and PAP phosphatase NrnA"  
"DsuE09\_00325" 4242 "s63E6H2" 0 "Bifunctional oligoribonuclease and PAP phosphatase NrnA"  
"DsuE09\_00326" 4243 "s59E13H2" 0 "Acyl-CoA dehydrogenase"  
"DsuE09\_00326" 4243 "s59E25H2" 0 "Acyl-CoA dehydrogenase"  
"DsuE09\_00326" 4243 "s59E5H2" 0 "Acyl-CoA dehydrogenase"  
"DsuE09\_00326" 4243 "s63E6H2" 0 "Acyl-CoA dehydrogenase"  
"DsuE09\_00327" 4244 "s59E13H2" 0 "Methylmalonyl-CoA mutase"  
"DsuE09\_00327" 4244 "s59E25H2" 0 "Methylmalonyl-CoA mutase"  
"DsuE09\_00327" 4244 "s59E5H2" 0 "Methylmalonyl-CoA mutase"  
"DsuE09\_00327" 4244 "s63E6H2" 0 "Methylmalonyl-CoA mutase"  
"DsuE09\_00328" 4245 "s59E13H2" 0 "Methylmalonyl-CoA mutase"  
"DsuE09\_00328" 4245 "s59E25H2" 0 "Methylmalonyl-CoA mutase"  
"DsuE09\_00328" 4245 "s59E5H2" 0 "Methylmalonyl-CoA mutase"  
"DsuE09\_00328" 4245 "s63E6H2" 0 "Methylmalonyl-CoA mutase"

"DsuE09\_00329" 4246 "s59E13H2" 0 "Glutaconyl-CoA decarboxylase subunit beta"  
"DsuE09\_00329" 4246 "s59E25H2" 0 "Glutaconyl-CoA decarboxylase subunit beta"  
"DsuE09\_00329" 4246 "s59E5H2" 0 "Glutaconyl-CoA decarboxylase subunit beta"  
"DsuE09\_00329" 4246 "s63E6H2" 0 "Glutaconyl-CoA decarboxylase subunit beta"  
"DsuE09\_00330" 4247 "s59E13H2" 0 "hypothetical protein"  
"DsuE09\_00330" 4247 "s59E25H2" 0 "hypothetical protein"  
"DsuE09\_00330" 4247 "s59E5H2" 0 "hypothetical protein"  
"DsuE09\_00330" 4247 "s63E6H2" 0 "hypothetical protein"  
"DsuE09\_00331" 4248 "s59E13H2" 0 "Glutaconyl-CoA decarboxylase subunit gamma"  
"DsuE09\_00331" 4248 "s59E25H2" 0 "Glutaconyl-CoA decarboxylase subunit gamma"  
"DsuE09\_00331" 4248 "s59E5H2" 0 "Glutaconyl-CoA decarboxylase subunit gamma"  
"DsuE09\_00331" 4248 "s63E6H2" 0 "Glutaconyl-CoA decarboxylase subunit gamma"  
"DsuE09\_00332" 4249 "s59E13H2" 0 "Aspartate--tRNA ligase"  
"DsuE09\_00332" 4249 "s59E25H2" 0 "Aspartate--tRNA ligase"  
"DsuE09\_00332" 4249 "s59E5H2" 0 "Aspartate--tRNA ligase"  
"DsuE09\_00332" 4249 "s63E6H2" 0 "Aspartate--tRNA ligase"  
"DsuE09\_00335" 4252 "s59E13H2" 0 "hypothetical protein"  
"DsuE09\_00335" 4252 "s59E25H2" 0 "hypothetical protein"  
"DsuE09\_00335" 4252 "s59E5H2" 0 "hypothetical protein"  
"DsuE09\_00335" 4252 "s63E6H2" 0 "hypothetical protein"  
"DsuE09\_00336" 4253 "s59E13H2" 0 "hypothetical protein"  
"DsuE09\_00336" 4253 "s59E25H2" 0 "hypothetical protein"  
"DsuE09\_00336" 4253 "s59E5H2" 0 "hypothetical protein"  
"DsuE09\_00336" 4253 "s63E6H2" 0 "hypothetical protein"  
"DsuE09\_00337" 4254 "s59E13H2" 0 "hypothetical protein"  
"DsuE09\_00337" 4254 "s59E25H2" 0 "hypothetical protein"  
"DsuE09\_00337" 4254 "s59E5H2" 0 "hypothetical protein"  
"DsuE09\_00337" 4254 "s63E6H2" 0 "hypothetical protein"  
"DsuE09\_00338" 4255 "s59E13H2" 0 "hypothetical protein"  
"DsuE09\_00338" 4255 "s59E25H2" 0 "hypothetical protein"  
"DsuE09\_00338" 4255 "s59E5H2" 0 "hypothetical protein"  
"DsuE09\_00338" 4255 "s63E6H2" 0 "hypothetical protein"  
"DsuE09\_00339" 4256 "s59E13H2" 0 "photosystem I assembly protein Ycf3"  
"DsuE09\_00339" 4256 "s59E25H2" 0 "photosystem I assembly protein Ycf3"  
"DsuE09\_00339" 4256 "s59E5H2" 0 "photosystem I assembly protein Ycf3"  
"DsuE09\_00339" 4256 "s63E6H2" 0 "photosystem I assembly protein Ycf3"  
"DsuE09\_00340" 4257 "s59E13H2" 0 "Phosphoglycerate kinase"  
"DsuE09\_00340" 4257 "s59E25H2" 0 "Phosphoglycerate kinase"  
"DsuE09\_00340" 4257 "s59E5H2" 0 "Phosphoglycerate kinase"  
"DsuE09\_00340" 4257 "s63E6H2" 0 "Phosphoglycerate kinase"  
"DsuE09\_00341" 4258 "s59E13H2" 0 "hypothetical protein"  
"DsuE09\_00341" 4258 "s59E25H2" 0 "hypothetical protein"  
"DsuE09\_00341" 4258 "s59E5H2" 0 "hypothetical protein"  
"DsuE09\_00341" 4258 "s63E6H2" 0 "hypothetical protein"  
"DsuE09\_00342" 4259 "s59E13H2" 0 "putative inner membrane transporter YicL"  
"DsuE09\_00342" 4259 "s59E25H2" 0 "putative inner membrane transporter YicL"  
"DsuE09\_00342" 4259 "s59E5H2" 0 "putative inner membrane transporter YicL"

"DsuE09\_00342" 4259 "s63E6H2" 0 "putative inner membrane transporter YicL"  
"DsuE09\_00343" 4260 "s59E13H2" 0 "Inosine-5'-monophosphate dehydrogenase"  
"DsuE09\_00343" 4260 "s59E25H2" 0 "Inosine-5'-monophosphate dehydrogenase"  
"DsuE09\_00343" 4260 "s59E5H2" 0 "Inosine-5'-monophosphate dehydrogenase"  
"DsuE09\_00343" 4260 "s63E6H2" 0 "Inosine-5'-monophosphate dehydrogenase"  
"DsuE09\_00344" 4261 "s59E13H2" 0 "dTDP-4-dehydrorhamnose reductase"  
"DsuE09\_00344" 4261 "s59E25H2" 0 "dTDP-4-dehydrorhamnose reductase"  
"DsuE09\_00344" 4261 "s59E5H2" 0 "dTDP-4-dehydrorhamnose reductase"  
"DsuE09\_00344" 4261 "s63E6H2" 0 "dTDP-4-dehydrorhamnose reductase"  
"DsuE09\_00345" 4262 "s59E13H2" 0 "D-tagatose 3-epimerase"  
"DsuE09\_00345" 4262 "s59E25H2" 0 "D-tagatose 3-epimerase"  
"DsuE09\_00345" 4262 "s59E5H2" 0 "D-tagatose 3-epimerase"  
"DsuE09\_00345" 4262 "s63E6H2" 0 "D-tagatose 3-epimerase"  
"DsuE09\_00346" 4263 "s59E13H2" 0 "hypothetical protein"  
"DsuE09\_00346" 4263 "s59E25H2" 0 "hypothetical protein"  
"DsuE09\_00346" 4263 "s59E5H2" 0 "hypothetical protein"  
"DsuE09\_00346" 4263 "s63E6H2" 0 "hypothetical protein"  
"DsuE09\_00347" 4264 "s59E13H2" 0 "Murein DD-endopeptidase MepM"  
"DsuE09\_00347" 4264 "s59E25H2" 0 "Murein DD-endopeptidase MepM"  
"DsuE09\_00347" 4264 "s59E5H2" 0 "Murein DD-endopeptidase MepM"  
"DsuE09\_00347" 4264 "s63E6H2" 0 "Murein DD-endopeptidase MepM"  
"DsuE09\_00349" 4266 "s59E13H2" 0 "UvrABC system protein B"  
"DsuE09\_00349" 4266 "s59E25H2" 0 "UvrABC system protein B"  
"DsuE09\_00349" 4266 "s59E5H2" 0 "UvrABC system protein B"  
"DsuE09\_00349" 4266 "s63E6H2" 0 "UvrABC system protein B"  
"DsuE09\_00350" 4267 "s59E13H2" 0 "Cysteine--tRNA ligase"  
"DsuE09\_00350" 4267 "s59E25H2" 0 "Cysteine--tRNA ligase"  
"DsuE09\_00350" 4267 "s59E5H2" 0 "Cysteine--tRNA ligase"  
"DsuE09\_00350" 4267 "s63E6H2" 0 "Cysteine--tRNA ligase"  
"DsuE09\_00351" 4268 "s59E13H2" 0 "2-C-methyl-D-erythritol 2,4-cyclodiphosphate synthase"  
"DsuE09\_00351" 4268 "s59E25H2" 0 "2-C-methyl-D-erythritol 2,4-cyclodiphosphate synthase"  
"DsuE09\_00351" 4268 "s59E5H2" 0 "2-C-methyl-D-erythritol 2,4-cyclodiphosphate synthase"  
"DsuE09\_00351" 4268 "s63E6H2" 0 "2-C-methyl-D-erythritol 2,4-cyclodiphosphate synthase"  
"DsuE09\_00353" 4270 "s59E13H2" 0 "Phosphoheptose isomerase"  
"DsuE09\_00353" 4270 "s59E25H2" 0 "Phosphoheptose isomerase"  
"DsuE09\_00353" 4270 "s59E5H2" 0 "Phosphoheptose isomerase"  
"DsuE09\_00353" 4270 "s63E6H2" 0 "Phosphoheptose isomerase"  
"DsuE09\_00354" 4271 "s59E13H2" 0 "DNA-binding protein HU-beta"  
"DsuE09\_00354" 4271 "s59E25H2" 0 "DNA-binding protein HU-beta"  
"DsuE09\_00354" 4271 "s59E5H2" 0 "DNA-binding protein HU-beta"  
"DsuE09\_00354" 4271 "s63E6H2" 0 "DNA-binding protein HU-beta"  
"DsuE09\_00355" 4272 "s59E13H2" 0 "L-seryl-tRNA(Sec) selenium transferase"  
"DsuE09\_00355" 4272 "s59E25H2" 0 "L-seryl-tRNA(Sec) selenium transferase"  
"DsuE09\_00355" 4272 "s59E5H2" 0 "L-seryl-tRNA(Sec) selenium transferase"  
"DsuE09\_00355" 4272 "s63E6H2" 0 "L-seryl-tRNA(Sec) selenium transferase"  
"DsuE09\_00357" 4274 "s59E13H2" 0 "Peptidase family M50"  
"DsuE09\_00357" 4274 "s59E25H2" 0 "Peptidase family M50"

"DsuE09\_00357" 4274 "s59E5H2" 0 "Peptidase family M50"  
"DsuE09\_00357" 4274 "s63E6H2" 0 "Peptidase family M50"  
"DsuE09\_00358" 4275 "s59E13H2" 0 "hypothetical protein"  
"DsuE09\_00358" 4275 "s59E25H2" 0 "hypothetical protein"  
"DsuE09\_00358" 4275 "s59E5H2" 0 "hypothetical protein"  
"DsuE09\_00358" 4275 "s63E6H2" 0 "hypothetical protein"  
"DsuE09\_00359" 4276 "s59E13H2" 0 "F420-non-reducing hydrogenase iron-sulfur subunit D"  
"DsuE09\_00359" 4276 "s59E25H2" 0 "F420-non-reducing hydrogenase iron-sulfur subunit D"  
"DsuE09\_00359" 4276 "s59E5H2" 0 "F420-non-reducing hydrogenase iron-sulfur subunit D"  
"DsuE09\_00359" 4276 "s63E6H2" 0.004966414 "F420-non-reducing hydrogenase iron-sulfur subunit D"  
"DsuE09\_00360" 4277 "s59E13H2" 0 "CoB--CoM heterodisulfide reductase iron-sulfur subunit A"  
"DsuE09\_00360" 4277 "s59E25H2" 0 "CoB--CoM heterodisulfide reductase iron-sulfur subunit A"  
"DsuE09\_00360" 4277 "s59E5H2" 0 "CoB--CoM heterodisulfide reductase iron-sulfur subunit A"  
"DsuE09\_00360" 4277 "s63E6H2" 0.002912435 "CoB--CoM heterodisulfide reductase iron-sulfur subunit A"  
"DsuE09\_00361" 4278 "s59E13H2" 0 "Heterodisulfide reductase subunit A-like protein"  
"DsuE09\_00361" 4278 "s59E25H2" 0 "Heterodisulfide reductase subunit A-like protein"  
"DsuE09\_00361" 4278 "s59E5H2" 0 "Heterodisulfide reductase subunit A-like protein"  
"DsuE09\_00361" 4278 "s63E6H2" 0.002165226 "Heterodisulfide reductase subunit A-like protein"  
"DsuE09\_00362" 4279 "s59E13H2" 0 "formate dehydrogenase accessory protein"  
"DsuE09\_00362" 4279 "s59E25H2" 0 "formate dehydrogenase accessory protein"  
"DsuE09\_00362" 4279 "s59E5H2" 0 "formate dehydrogenase accessory protein"  
"DsuE09\_00362" 4279 "s63E6H2" 0 "formate dehydrogenase accessory protein"  
"DsuE09\_00363" 4280 "s59E13H2" 0 "CoB--CoM heterodisulfide reductase iron-sulfur subunit D"  
"DsuE09\_00363" 4280 "s59E25H2" 0 "CoB--CoM heterodisulfide reductase iron-sulfur subunit D"  
"DsuE09\_00363" 4280 "s59E5H2" 0 "CoB--CoM heterodisulfide reductase iron-sulfur subunit D"  
"DsuE09\_00363" 4280 "s63E6H2" 0.001324567 "CoB--CoM heterodisulfide reductase iron-sulfur subunit D"  
"DsuE09\_00364" 4281 "s59E13H2" 0 "hydrogenase 2 protein HybA"  
"DsuE09\_00364" 4281 "s59E25H2" 0 "hydrogenase 2 protein HybA"  
"DsuE09\_00364" 4281 "s59E5H2" 0 "hydrogenase 2 protein HybA"  
"DsuE09\_00364" 4281 "s63E6H2" 0 "hydrogenase 2 protein HybA"  
"DsuE09\_00365" 4282 "s59E13H2" 0 "hypothetical protein"  
"DsuE09\_00365" 4282 "s59E25H2" 0 "hypothetical protein"  
"DsuE09\_00365" 4282 "s59E5H2" 0 "hypothetical protein"  
"DsuE09\_00365" 4282 "s63E6H2" 0 "hypothetical protein"  
"DsuE09\_00366" 4283 "s59E13H2" 0 "hypothetical protein"  
"DsuE09\_00366" 4283 "s59E25H2" 0 "hypothetical protein"  
"DsuE09\_00366" 4283 "s59E5H2" 0 "hypothetical protein"  
"DsuE09\_00366" 4283 "s63E6H2" 0 "hypothetical protein"  
"DsuE09\_00367" 4284 "s59E13H2" 0 "hypothetical protein"  
"DsuE09\_00367" 4284 "s59E25H2" 0 "hypothetical protein"  
"DsuE09\_00367" 4284 "s59E5H2" 0 "hypothetical protein"  
"DsuE09\_00367" 4284 "s63E6H2" 0 "hypothetical protein"  
"DsuE09\_00368" 4285 "s59E13H2" 0 "Modulator of FtsH protease HflK"  
"DsuE09\_00368" 4285 "s59E25H2" 0 "Modulator of FtsH protease HflK"  
"DsuE09\_00368" 4285 "s59E5H2" 0 "Modulator of FtsH protease HflK"  
"DsuE09\_00368" 4285 "s63E6H2" 0 "Modulator of FtsH protease HflK"  
"DsuE09\_00369" 4286 "s59E13H2" 0 "Modulator of FtsH protease HflC"

"DsuE09\_00369" 4286 "s59E25H2" 0 "Modulator of FtsH protease HflC"  
"DsuE09\_00369" 4286 "s59E5H2" 0 "Modulator of FtsH protease HflC"  
"DsuE09\_00369" 4286 "s63E6H2" 0 "Modulator of FtsH protease HflC"  
"DsuE09\_00370" 4287 "s59E13H2" 0 "hypothetical protein"  
"DsuE09\_00370" 4287 "s59E25H2" 0 "hypothetical protein"  
"DsuE09\_00370" 4287 "s59E5H2" 0 "hypothetical protein"  
"DsuE09\_00370" 4287 "s63E6H2" 0 "hypothetical protein"  
"DsuE09\_00371" 4288 "s59E13H2" 0 "Single-stranded-DNA-specific exonuclease RecJ"  
"DsuE09\_00371" 4288 "s59E25H2" 0 "Single-stranded-DNA-specific exonuclease RecJ"  
"DsuE09\_00371" 4288 "s59E5H2" 0 "Single-stranded-DNA-specific exonuclease RecJ"  
"DsuE09\_00371" 4288 "s63E6H2" 0 "Single-stranded-DNA-specific exonuclease RecJ"  
"DsuE09\_00372" 4289 "s59E13H2" 0 "Benzoyl-CoA reductase subunit C"  
"DsuE09\_00372" 4289 "s59E25H2" 0 "Benzoyl-CoA reductase subunit C"  
"DsuE09\_00372" 4289 "s59E5H2" 0 "Benzoyl-CoA reductase subunit C"  
"DsuE09\_00372" 4289 "s63E6H2" 0 "Benzoyl-CoA reductase subunit C"  
"DsuE09\_00373" 4290 "s59E13H2" 0 "Benzoyl-CoA reductase subunit B"  
"DsuE09\_00373" 4290 "s59E25H2" 0 "Benzoyl-CoA reductase subunit B"  
"DsuE09\_00373" 4290 "s59E5H2" 0 "Benzoyl-CoA reductase subunit B"  
"DsuE09\_00373" 4290 "s63E6H2" 0 "Benzoyl-CoA reductase subunit B"  
"DsuE09\_00374" 4291 "s59E13H2" 0 "R-phenyllactate dehydratase activator"  
"DsuE09\_00374" 4291 "s59E25H2" 0 "R-phenyllactate dehydratase activator"  
"DsuE09\_00374" 4291 "s59E5H2" 0 "R-phenyllactate dehydratase activator"  
"DsuE09\_00374" 4291 "s63E6H2" 0 "R-phenyllactate dehydratase activator"  
"DsuE09\_00375" 4292 "s59E13H2" 0 "Membrane-bound lytic murein transglycosylase B precursor"  
"DsuE09\_00375" 4292 "s59E25H2" 0 "Membrane-bound lytic murein transglycosylase B precursor"  
"DsuE09\_00375" 4292 "s59E5H2" 0 "Membrane-bound lytic murein transglycosylase B precursor"  
"DsuE09\_00375" 4292 "s63E6H2" 0 "Membrane-bound lytic murein transglycosylase B precursor"  
"DsuE09\_00376" 4293 "s59E13H2" 0 "hypothetical protein"  
"DsuE09\_00376" 4293 "s59E25H2" 0 "hypothetical protein"  
"DsuE09\_00376" 4293 "s59E5H2" 0 "hypothetical protein"  
"DsuE09\_00376" 4293 "s63E6H2" 0 "hypothetical protein"  
"DsuE09\_00377" 4294 "s59E13H2" 0 "tRNA-splicing ligase RtcB"  
"DsuE09\_00377" 4294 "s59E25H2" 0 "tRNA-splicing ligase RtcB"  
"DsuE09\_00377" 4294 "s59E5H2" 0 "tRNA-splicing ligase RtcB"  
"DsuE09\_00377" 4294 "s63E6H2" 0 "tRNA-splicing ligase RtcB"  
"DsuE09\_00378" 4295 "s59E13H2" 0 "hypothetical protein"  
"DsuE09\_00378" 4295 "s59E25H2" 0 "hypothetical protein"  
"DsuE09\_00378" 4295 "s59E5H2" 0 "hypothetical protein"  
"DsuE09\_00378" 4295 "s63E6H2" 0 "hypothetical protein"  
"DsuE09\_00379" 4296 "s59E13H2" 0 "Undecaprenyl-phosphate mannosyltransferase"  
"DsuE09\_00379" 4296 "s59E25H2" 0 "Undecaprenyl-phosphate mannosyltransferase"  
"DsuE09\_00379" 4296 "s59E5H2" 0 "Undecaprenyl-phosphate mannosyltransferase"  
"DsuE09\_00379" 4296 "s63E6H2" 0 "Undecaprenyl-phosphate mannosyltransferase"  
"DsuE09\_00380" 4297 "s59E13H2" 0 "putative glycosyl transferase"  
"DsuE09\_00380" 4297 "s59E25H2" 0 "putative glycosyl transferase"  
"DsuE09\_00380" 4297 "s59E5H2" 0 "putative glycosyl transferase"  
"DsuE09\_00380" 4297 "s63E6H2" 0 "putative glycosyl transferase"

"DsuE09\_00381" 4298 "s59E13H2" 0 "putative S-adenosylmethionine-dependent methyltransferase/MSMEI\_2290"  
"DsuE09\_00381" 4298 "s59E25H2" 0 "putative S-adenosylmethionine-dependent methyltransferase/MSMEI\_2290"  
"DsuE09\_00381" 4298 "s59E5H2" 0 "putative S-adenosylmethionine-dependent methyltransferase/MSMEI\_2290"  
"DsuE09\_00381" 4298 "s63E6H2" 0 "putative S-adenosylmethionine-dependent methyltransferase/MSMEI\_2290"  
"DsuE09\_00382" 4299 "s59E13H2" 0 "bifunctional 3-demethylubiquinone-9 3-methyltransferase/ 2-octaprenyl-6-hydroxy phenol methylase"  
"DsuE09\_00382" 4299 "s59E25H2" 0 "bifunctional 3-demethylubiquinone-9 3-methyltransferase/ 2-octaprenyl-6-hydroxy phenol methylase"  
"DsuE09\_00382" 4299 "s59E5H2" 0 "bifunctional 3-demethylubiquinone-9 3-methyltransferase/ 2-octaprenyl-6-hydroxy phenol methylase"  
"DsuE09\_00382" 4299 "s63E6H2" 0 "bifunctional 3-demethylubiquinone-9 3-methyltransferase/ 2-octaprenyl-6-hydroxy phenol methylase"  
"DsuE09\_00383" 4300 "s59E13H2" 0 "hypothetical protein"  
"DsuE09\_00383" 4300 "s59E25H2" 0 "hypothetical protein"  
"DsuE09\_00383" 4300 "s59E5H2" 0 "hypothetical protein"  
"DsuE09\_00383" 4300 "s63E6H2" 0 "hypothetical protein"  
"DsuE09\_00384" 4301 "s59E13H2" 0 "coproporphyrinogen III oxidase"  
"DsuE09\_00384" 4301 "s59E25H2" 0 "coproporphyrinogen III oxidase"  
"DsuE09\_00384" 4301 "s59E5H2" 0 "coproporphyrinogen III oxidase"  
"DsuE09\_00384" 4301 "s63E6H2" 0 "coproporphyrinogen III oxidase"  
"DsuE09\_00385" 4302 "s59E13H2" 0 "Demethylmenaquinone methyltransferase"  
"DsuE09\_00385" 4302 "s59E25H2" 0 "Demethylmenaquinone methyltransferase"  
"DsuE09\_00385" 4302 "s59E5H2" 0 "Demethylmenaquinone methyltransferase"  
"DsuE09\_00385" 4302 "s63E6H2" 0 "Demethylmenaquinone methyltransferase"  
"DsuE09\_00386" 4303 "s59E13H2" 0 "putative methyltransferase YcgJ"  
"DsuE09\_00386" 4303 "s59E25H2" 0 "putative methyltransferase YcgJ"  
"DsuE09\_00386" 4303 "s59E5H2" 0 "putative methyltransferase YcgJ"  
"DsuE09\_00386" 4303 "s63E6H2" 0 "putative methyltransferase YcgJ"  
"DsuE09\_00387" 4304 "s59E13H2" 0 "hypothetical protein"  
"DsuE09\_00387" 4304 "s59E25H2" 0 "hypothetical protein"  
"DsuE09\_00387" 4304 "s59E5H2" 0 "hypothetical protein"  
"DsuE09\_00387" 4304 "s63E6H2" 0 "hypothetical protein"  
"DsuE09\_00388" 4305 "s59E13H2" 0 "Undecaprenyl-phosphate mannosyltransferase"  
"DsuE09\_00388" 4305 "s59E25H2" 0 "Undecaprenyl-phosphate mannosyltransferase"  
"DsuE09\_00388" 4305 "s59E5H2" 0 "Undecaprenyl-phosphate mannosyltransferase"  
"DsuE09\_00388" 4305 "s63E6H2" 0 "Undecaprenyl-phosphate mannosyltransferase"  
"DsuE09\_00389" 4306 "s59E13H2" 0 "Phd\_YefM"  
"DsuE09\_00389" 4306 "s59E25H2" 0 "Phd\_YefM"  
"DsuE09\_00389" 4306 "s59E5H2" 0 "Phd\_YefM"  
"DsuE09\_00389" 4306 "s63E6H2" 0 "Phd\_YefM"  
"DsuE09\_00390" 4307 "s59E13H2" 0 "GDP-mannose-dependent alpha-(1-6)-phosphatidylinositol monomannoside mannosyltransferase"  
"DsuE09\_00390" 4307 "s59E25H2" 0 "GDP-mannose-dependent alpha-(1-6)-phosphatidylinositol monomannoside mannosyltransferase"  
"DsuE09\_00390" 4307 "s59E5H2" 0 "GDP-mannose-dependent alpha-(1-6)-phosphatidylinositol monomannoside mannosyltransferase"  
"DsuE09\_00390" 4307 "s63E6H2" 0 "GDP-mannose-dependent alpha-(1-6)-phosphatidylinositol monomannoside mannosyltransferase"  
"DsuE09\_00391" 4308 "s59E13H2" 0 "Chondroitin synthase"  
"DsuE09\_00391" 4308 "s59E25H2" 0 "Chondroitin synthase"  
"DsuE09\_00391" 4308 "s59E5H2" 0 "Chondroitin synthase"  
"DsuE09\_00391" 4308 "s63E6H2" 0 "Chondroitin synthase"  
"DsuE09\_00392" 4309 "s59E13H2" 0 "Polysaccharide biosynthesis protein"  
"DsuE09\_00392" 4309 "s59E25H2" 0 "Polysaccharide biosynthesis protein"  
"DsuE09\_00392" 4309 "s59E5H2" 0 "Polysaccharide biosynthesis protein"



"DsuE09\_00392" 4309 "s63E6H2" 0 "Polysaccharide biosynthesis protein"  
"DsuE09\_00393" 4310 "s59E13H2" 0 "Methyltransferase domain protein"  
"DsuE09\_00393" 4310 "s59E25H2" 0 "Methyltransferase domain protein"  
"DsuE09\_00393" 4310 "s59E5H2" 0 "Methyltransferase domain protein"  
"DsuE09\_00393" 4310 "s63E6H2" 0 "Methyltransferase domain protein"  
"DsuE09\_00394" 4311 "s59E13H2" 0 "dTDP-4-amino-4,6-dideoxy-D-glucose acyltransferase"  
"DsuE09\_00394" 4311 "s59E25H2" 0 "dTDP-4-amino-4,6-dideoxy-D-glucose acyltransferase"  
"DsuE09\_00394" 4311 "s59E5H2" 0 "dTDP-4-amino-4,6-dideoxy-D-glucose acyltransferase"  
"DsuE09\_00394" 4311 "s63E6H2" 0 "dTDP-4-amino-4,6-dideoxy-D-glucose acyltransferase"  
"DsuE09\_00395" 4312 "s59E13H2" 0 "dTDP-4-amino-4,6-dideoxy-D-glucose transaminase"  
"DsuE09\_00395" 4312 "s59E25H2" 0 "dTDP-4-amino-4,6-dideoxy-D-glucose transaminase"  
"DsuE09\_00395" 4312 "s59E5H2" 0 "dTDP-4-amino-4,6-dideoxy-D-glucose transaminase"  
"DsuE09\_00395" 4312 "s63E6H2" 0 "dTDP-4-amino-4,6-dideoxy-D-glucose transaminase"  
"DsuE09\_00396" 4313 "s59E13H2" 0 "GalNAc(5)-diNAcBac-PP-undecaprenol beta-1,3-glucosyltransferase"  
"DsuE09\_00396" 4313 "s59E25H2" 0 "GalNAc(5)-diNAcBac-PP-undecaprenol beta-1,3-glucosyltransferase"  
"DsuE09\_00396" 4313 "s59E5H2" 0 "GalNAc(5)-diNAcBac-PP-undecaprenol beta-1,3-glucosyltransferase"  
"DsuE09\_00396" 4313 "s63E6H2" 0 "GalNAc(5)-diNAcBac-PP-undecaprenol beta-1,3-glucosyltransferase"  
"DsuE09\_00397" 4314 "s59E13H2" 0 "Glycosyltransferase AglJ"  
"DsuE09\_00397" 4314 "s59E25H2" 0 "Glycosyltransferase AglJ"  
"DsuE09\_00397" 4314 "s59E5H2" 0 "Glycosyltransferase AglJ"  
"DsuE09\_00397" 4314 "s63E6H2" 0 "Glycosyltransferase AglJ"  
"DsuE09\_00398" 4315 "s59E13H2" 0 "Phd\_YefM"  
"DsuE09\_00398" 4315 "s59E25H2" 0 "Phd\_YefM"  
"DsuE09\_00398" 4315 "s59E5H2" 0 "Phd\_YefM"  
"DsuE09\_00398" 4315 "s63E6H2" 0 "Phd\_YefM"  
"DsuE09\_00399" 4316 "s59E13H2" 0 "hypothetical protein"  
"DsuE09\_00399" 4316 "s59E25H2" 0 "hypothetical protein"  
"DsuE09\_00399" 4316 "s59E5H2" 0 "hypothetical protein"  
"DsuE09\_00399" 4316 "s63E6H2" 0 "hypothetical protein"  
"DsuE09\_00400" 4317 "s59E13H2" 0 "hypothetical protein"  
"DsuE09\_00400" 4317 "s59E25H2" 0 "hypothetical protein"  
"DsuE09\_00400" 4317 "s59E5H2" 0 "hypothetical protein"  
"DsuE09\_00400" 4317 "s63E6H2" 0 "hypothetical protein"  
"DsuE09\_00401" 4318 "s59E13H2" 0 "tRNA(fMet)-specific endonuclease VapC"  
"DsuE09\_00401" 4318 "s59E25H2" 0 "tRNA(fMet)-specific endonuclease VapC"  
"DsuE09\_00401" 4318 "s59E5H2" 0 "tRNA(fMet)-specific endonuclease VapC"  
"DsuE09\_00401" 4318 "s63E6H2" 0 "tRNA(fMet)-specific endonuclease VapC"  
"DsuE09\_00402" 4319 "s59E13H2" 0 "Phd\_YefM"  
"DsuE09\_00402" 4319 "s59E25H2" 0 "Phd\_YefM"  
"DsuE09\_00402" 4319 "s59E5H2" 0 "Phd\_YefM"  
"DsuE09\_00402" 4319 "s63E6H2" 0 "Phd\_YefM"  
"DsuE09\_00403" 4320 "s59E13H2" 0 "hypothetical protein"  
"DsuE09\_00403" 4320 "s59E25H2" 0 "hypothetical protein"  
"DsuE09\_00403" 4320 "s59E5H2" 0 "hypothetical protein"  
"DsuE09\_00403" 4320 "s63E6H2" 0 "hypothetical protein"  
"DsuE09\_00404" 4321 "s59E13H2" 0 "bifunctional 3-demethylubiquinone-9 3-methyltransferase/ 2-octaprenyl-6-hydroxy phenol methylase"  
"DsuE09\_00404" 4321 "s59E25H2" 0 "bifunctional 3-demethylubiquinone-9 3-methyltransferase/ 2-octaprenyl-6-hydroxy phenol methylase"

"DsuE09\_00404" 4321 "s59E5H2" 0 "bifunctional 3-demethylubiquinone-9 3-methyltransferase/ 2-octaprenyl-6-hydroxy phenol methylase"  
"DsuE09\_00404" 4321 "s63E6H2" 0 "bifunctional 3-demethylubiquinone-9 3-methyltransferase/ 2-octaprenyl-6-hydroxy phenol methylase"  
"DsuE09\_00405" 4322 "s59E13H2" 0 "Glycosyltransferase AgID"  
"DsuE09\_00405" 4322 "s59E25H2" 0 "Glycosyltransferase AgID"  
"DsuE09\_00405" 4322 "s59E5H2" 0 "Glycosyltransferase AgID"  
"DsuE09\_00405" 4322 "s63E6H2" 0 "Glycosyltransferase AgID"  
"DsuE09\_00406" 4323 "s59E13H2" 0 "photosystem I assembly protein Ycf3"  
"DsuE09\_00406" 4323 "s59E25H2" 0 "photosystem I assembly protein Ycf3"  
"DsuE09\_00406" 4323 "s59E5H2" 0 "photosystem I assembly protein Ycf3"  
"DsuE09\_00406" 4323 "s63E6H2" 0 "photosystem I assembly protein Ycf3"  
"DsuE09\_00408" 4325 "s59E13H2" 0 "photosystem I assembly protein Ycf3"  
"DsuE09\_00408" 4325 "s59E25H2" 0 "photosystem I assembly protein Ycf3"  
"DsuE09\_00408" 4325 "s59E5H2" 0 "photosystem I assembly protein Ycf3"  
"DsuE09\_00408" 4325 "s63E6H2" 0 "photosystem I assembly protein Ycf3"  
"DsuE09\_00409" 4326 "s59E13H2" 0 "photosystem I assembly protein Ycf3"  
"DsuE09\_00409" 4326 "s59E25H2" 0 "photosystem I assembly protein Ycf3"  
"DsuE09\_00409" 4326 "s59E5H2" 0 "photosystem I assembly protein Ycf3"  
"DsuE09\_00409" 4326 "s63E6H2" 0 "photosystem I assembly protein Ycf3"  
"DsuE09\_00410" 4327 "s59E13H2" 0 "Type II secretion system protein G precursor"  
"DsuE09\_00410" 4327 "s59E25H2" 0 "Type II secretion system protein G precursor"  
"DsuE09\_00410" 4327 "s59E5H2" 0 "Type II secretion system protein G precursor"  
"DsuE09\_00410" 4327 "s63E6H2" 0 "Type II secretion system protein G precursor"  
"DsuE09\_00412" 4329 "s59E13H2" 0 "Transcriptional regulatory protein ZraR"  
"DsuE09\_00412" 4329 "s59E25H2" 0 "Transcriptional regulatory protein ZraR"  
"DsuE09\_00412" 4329 "s59E5H2" 0 "Transcriptional regulatory protein ZraR"  
"DsuE09\_00412" 4329 "s63E6H2" 0 "Transcriptional regulatory protein ZraR"  
"DsuE09\_00413" 4330 "s59E13H2" 0 "Dihydroorotase"  
"DsuE09\_00413" 4330 "s59E25H2" 0 "Dihydroorotase"  
"DsuE09\_00413" 4330 "s59E5H2" 0 "Dihydroorotase"  
"DsuE09\_00413" 4330 "s63E6H2" 0 "Dihydroorotase"  
"DsuE09\_00414" 4331 "s59E13H2" 0 "Aspartate carbamoyltransferase"  
"DsuE09\_00414" 4331 "s59E25H2" 0 "Aspartate carbamoyltransferase"  
"DsuE09\_00414" 4331 "s59E5H2" 0 "Aspartate carbamoyltransferase"  
"DsuE09\_00414" 4331 "s63E6H2" 0 "Aspartate carbamoyltransferase"  
"DsuE09\_00415" 4332 "s59E13H2" 0 "50S ribosomal protein L17"  
"DsuE09\_00415" 4332 "s59E25H2" 0 "50S ribosomal protein L17"  
"DsuE09\_00415" 4332 "s59E5H2" 0 "50S ribosomal protein L17"  
"DsuE09\_00415" 4332 "s63E6H2" 0 "50S ribosomal protein L17"  
"DsuE09\_00416" 4333 "s59E13H2" 0 "DNA-directed RNA polymerase subunit alpha"  
"DsuE09\_00416" 4333 "s59E25H2" 0 "DNA-directed RNA polymerase subunit alpha"  
"DsuE09\_00416" 4333 "s59E5H2" 0 "DNA-directed RNA polymerase subunit alpha"  
"DsuE09\_00416" 4333 "s63E6H2" 0 "DNA-directed RNA polymerase subunit alpha"  
"DsuE09\_00417" 4334 "s59E13H2" 0 "30S ribosomal protein S4"  
"DsuE09\_00417" 4334 "s59E25H2" 0 "30S ribosomal protein S4"  
"DsuE09\_00417" 4334 "s59E5H2" 0 "30S ribosomal protein S4"  
"DsuE09\_00417" 4334 "s63E6H2" 0 "30S ribosomal protein S4"  
"DsuE09\_00418" 4335 "s59E13H2" 0 "30S ribosomal protein S11"

"DsuE09\_00418" 4335 "s59E25H2" 0 "30S ribosomal protein S11"  
"DsuE09\_00418" 4335 "s59E5H2" 0 "30S ribosomal protein S11"  
"DsuE09\_00418" 4335 "s63E6H2" 0 "30S ribosomal protein S11"  
"DsuE09\_00419" 4336 "s59E13H2" 0 "30S ribosomal protein S13"  
"DsuE09\_00419" 4336 "s59E25H2" 0 "30S ribosomal protein S13"  
"DsuE09\_00419" 4336 "s59E5H2" 0 "30S ribosomal protein S13"  
"DsuE09\_00419" 4336 "s63E6H2" 0 "30S ribosomal protein S13"  
"DsuE09\_00420" 4337 "s59E13H2" 0 "preprotein translocase subunit SecY"  
"DsuE09\_00420" 4337 "s59E25H2" 0 "preprotein translocase subunit SecY"  
"DsuE09\_00420" 4337 "s59E5H2" 0 "preprotein translocase subunit SecY"  
"DsuE09\_00420" 4337 "s63E6H2" 0 "preprotein translocase subunit SecY"  
"DsuE09\_00421" 4338 "s59E13H2" 0 "50S ribosomal protein L15"  
"DsuE09\_00421" 4338 "s59E25H2" 0 "50S ribosomal protein L15"  
"DsuE09\_00421" 4338 "s59E5H2" 0 "50S ribosomal protein L15"  
"DsuE09\_00421" 4338 "s63E6H2" 0 "50S ribosomal protein L15"  
"DsuE09\_00422" 4339 "s59E13H2" 0 "30S ribosomal protein S5"  
"DsuE09\_00422" 4339 "s59E25H2" 0 "30S ribosomal protein S5"  
"DsuE09\_00422" 4339 "s59E5H2" 0 "30S ribosomal protein S5"  
"DsuE09\_00422" 4339 "s63E6H2" 0 "30S ribosomal protein S5"  
"DsuE09\_00423" 4340 "s59E13H2" 0 "50S ribosomal protein L18"  
"DsuE09\_00423" 4340 "s59E25H2" 0 "50S ribosomal protein L18"  
"DsuE09\_00423" 4340 "s59E5H2" 0 "50S ribosomal protein L18"  
"DsuE09\_00423" 4340 "s63E6H2" 0 "50S ribosomal protein L18"  
"DsuE09\_00424" 4341 "s59E13H2" 0 "50S ribosomal protein L6"  
"DsuE09\_00424" 4341 "s59E25H2" 0 "50S ribosomal protein L6"  
"DsuE09\_00424" 4341 "s59E5H2" 0 "50S ribosomal protein L6"  
"DsuE09\_00424" 4341 "s63E6H2" 0 "50S ribosomal protein L6"  
"DsuE09\_00425" 4342 "s59E13H2" 0 "30S ribosomal protein S8"  
"DsuE09\_00425" 4342 "s59E25H2" 0 "30S ribosomal protein S8"  
"DsuE09\_00425" 4342 "s59E5H2" 0 "30S ribosomal protein S8"  
"DsuE09\_00425" 4342 "s63E6H2" 0 "30S ribosomal protein S8"  
"DsuE09\_00426" 4343 "s59E13H2" 0 "50S ribosomal protein L5"  
"DsuE09\_00426" 4343 "s59E25H2" 0 "50S ribosomal protein L5"  
"DsuE09\_00426" 4343 "s59E5H2" 0 "50S ribosomal protein L5"  
"DsuE09\_00426" 4343 "s63E6H2" 0 "50S ribosomal protein L5"  
"DsuE09\_00427" 4344 "s59E13H2" 0 "50S ribosomal protein L24"  
"DsuE09\_00427" 4344 "s59E25H2" 0 "50S ribosomal protein L24"  
"DsuE09\_00427" 4344 "s59E5H2" 0 "50S ribosomal protein L24"  
"DsuE09\_00427" 4344 "s63E6H2" 0 "50S ribosomal protein L24"  
"DsuE09\_00428" 4345 "s59E13H2" 0 "50S ribosomal protein L14"  
"DsuE09\_00428" 4345 "s59E25H2" 0 "50S ribosomal protein L14"  
"DsuE09\_00428" 4345 "s59E5H2" 0 "50S ribosomal protein L14"  
"DsuE09\_00428" 4345 "s63E6H2" 0 "50S ribosomal protein L14"  
"DsuE09\_00429" 4346 "s59E13H2" 0 "30S ribosomal protein S17"  
"DsuE09\_00429" 4346 "s59E25H2" 0 "30S ribosomal protein S17"  
"DsuE09\_00429" 4346 "s59E5H2" 0 "30S ribosomal protein S17"  
"DsuE09\_00429" 4346 "s63E6H2" 0 "30S ribosomal protein S17"

"DsuE09\_00430" 4347 "s59E13H2" 0 "50S ribosomal protein L29"  
"DsuE09\_00430" 4347 "s59E25H2" 0 "50S ribosomal protein L29"  
"DsuE09\_00430" 4347 "s59E5H2" 0 "50S ribosomal protein L29"  
"DsuE09\_00430" 4347 "s63E6H2" 0 "50S ribosomal protein L29"  
"DsuE09\_00431" 4348 "s59E13H2" 0 "50S ribosomal protein L16"  
"DsuE09\_00431" 4348 "s59E25H2" 0 "50S ribosomal protein L16"  
"DsuE09\_00431" 4348 "s59E5H2" 0 "50S ribosomal protein L16"  
"DsuE09\_00431" 4348 "s63E6H2" 0 "50S ribosomal protein L16"  
"DsuE09\_00432" 4349 "s59E13H2" 0.001251789 "30S ribosomal protein S3"  
"DsuE09\_00432" 4349 "s59E25H2" 0 "30S ribosomal protein S3"  
"DsuE09\_00432" 4349 "s59E5H2" 0 "30S ribosomal protein S3"  
"DsuE09\_00432" 4349 "s63E6H2" 0 "30S ribosomal protein S3"  
"DsuE09\_00433" 4350 "s59E13H2" 0 "50S ribosomal protein L22"  
"DsuE09\_00433" 4350 "s59E25H2" 0 "50S ribosomal protein L22"  
"DsuE09\_00433" 4350 "s59E5H2" 0 "50S ribosomal protein L22"  
"DsuE09\_00433" 4350 "s63E6H2" 0 "50S ribosomal protein L22"  
"DsuE09\_00434" 4351 "s59E13H2" 0 "30S ribosomal protein S19"  
"DsuE09\_00434" 4351 "s59E25H2" 0 "30S ribosomal protein S19"  
"DsuE09\_00434" 4351 "s59E5H2" 0 "30S ribosomal protein S19"  
"DsuE09\_00434" 4351 "s63E6H2" 0 "30S ribosomal protein S19"  
"DsuE09\_00435" 4352 "s59E13H2" 0 "50S ribosomal protein L2"  
"DsuE09\_00435" 4352 "s59E25H2" 0 "50S ribosomal protein L2"  
"DsuE09\_00435" 4352 "s59E5H2" 0 "50S ribosomal protein L2"  
"DsuE09\_00435" 4352 "s63E6H2" 0 "50S ribosomal protein L2"  
"DsuE09\_00436" 4353 "s59E13H2" 0 "50S ribosomal protein L23"  
"DsuE09\_00436" 4353 "s59E25H2" 0 "50S ribosomal protein L23"  
"DsuE09\_00436" 4353 "s59E5H2" 0 "50S ribosomal protein L23"  
"DsuE09\_00436" 4353 "s63E6H2" 0 "50S ribosomal protein L23"  
"DsuE09\_00437" 4354 "s59E13H2" 0 "50S ribosomal protein L4"  
"DsuE09\_00437" 4354 "s59E25H2" 0 "50S ribosomal protein L4"  
"DsuE09\_00437" 4354 "s59E5H2" 0 "50S ribosomal protein L4"  
"DsuE09\_00437" 4354 "s63E6H2" 0 "50S ribosomal protein L4"  
"DsuE09\_00438" 4355 "s59E13H2" 0 "50S ribosomal protein L3"  
"DsuE09\_00438" 4355 "s59E25H2" 0 "50S ribosomal protein L3"  
"DsuE09\_00438" 4355 "s59E5H2" 0 "50S ribosomal protein L3"  
"DsuE09\_00438" 4355 "s63E6H2" 0 "50S ribosomal protein L3"  
"DsuE09\_00439" 4356 "s59E13H2" 0 "30S ribosomal protein S10"  
"DsuE09\_00439" 4356 "s59E25H2" 0 "30S ribosomal protein S10"  
"DsuE09\_00439" 4356 "s59E5H2" 0 "30S ribosomal protein S10"  
"DsuE09\_00439" 4356 "s63E6H2" 0 "30S ribosomal protein S10"  
"DsuE09\_00440" 4357 "s59E13H2" 0 "Elongation factor Tu"  
"DsuE09\_00440" 4357 "s59E25H2" 0 "Elongation factor Tu"  
"DsuE09\_00440" 4357 "s59E5H2" 0 "Elongation factor Tu"  
"DsuE09\_00440" 4357 "s63E6H2" 0 "Elongation factor Tu"  
"DsuE09\_00441" 4358 "s59E13H2" 0 "30S ribosomal protein S7"  
"DsuE09\_00441" 4358 "s59E25H2" 0 "30S ribosomal protein S7"  
"DsuE09\_00441" 4358 "s59E5H2" 0 "30S ribosomal protein S7"

"DsuE09\_00441" 4358 "s63E6H2" 0 "30S ribosomal protein S7"  
"DsuE09\_00442" 4359 "s59E13H2" 0 "30S ribosomal protein S12"  
"DsuE09\_00442" 4359 "s59E25H2" 0 "30S ribosomal protein S12"  
"DsuE09\_00442" 4359 "s59E5H2" 0 "30S ribosomal protein S12"  
"DsuE09\_00442" 4359 "s63E6H2" 0 "30S ribosomal protein S12"  
"DsuE09\_00443" 4360 "s59E13H2" 0 "DNA-directed RNA polymerase subunit beta"  
"DsuE09\_00443" 4360 "s59E25H2" 0 "DNA-directed RNA polymerase subunit beta"  
"DsuE09\_00443" 4360 "s59E5H2" 0 "DNA-directed RNA polymerase subunit beta"  
"DsuE09\_00443" 4360 "s63E6H2" 0 "DNA-directed RNA polymerase subunit beta"  
"DsuE09\_00444" 4361 "s59E13H2" 0 "DNA-directed RNA polymerase subunit beta"  
"DsuE09\_00444" 4361 "s59E25H2" 0 "DNA-directed RNA polymerase subunit beta"  
"DsuE09\_00444" 4361 "s59E5H2" 0 "DNA-directed RNA polymerase subunit beta"  
"DsuE09\_00444" 4361 "s63E6H2" 0 "DNA-directed RNA polymerase subunit beta"  
"DsuE09\_00445" 4362 "s59E13H2" 0 "50S ribosomal protein L7/L12"  
"DsuE09\_00445" 4362 "s59E25H2" 0 "50S ribosomal protein L7/L12"  
"DsuE09\_00445" 4362 "s59E5H2" 0 "50S ribosomal protein L7/L12"  
"DsuE09\_00445" 4362 "s63E6H2" 0 "50S ribosomal protein L7/L12"  
"DsuE09\_00446" 4363 "s59E13H2" 0 "50S ribosomal protein L10"  
"DsuE09\_00446" 4363 "s59E25H2" 0 "50S ribosomal protein L10"  
"DsuE09\_00446" 4363 "s59E5H2" 0 "50S ribosomal protein L10"  
"DsuE09\_00446" 4363 "s63E6H2" 0 "50S ribosomal protein L10"  
"DsuE09\_00447" 4364 "s59E13H2" 0 "50S ribosomal protein L11"  
"DsuE09\_00447" 4364 "s59E25H2" 0 "50S ribosomal protein L11"  
"DsuE09\_00447" 4364 "s59E5H2" 0 "50S ribosomal protein L11"  
"DsuE09\_00447" 4364 "s63E6H2" 0 "50S ribosomal protein L11"  
"DsuE09\_00448" 4365 "s59E13H2" 0 "50S ribosomal protein L11"  
"DsuE09\_00448" 4365 "s59E25H2" 0 "50S ribosomal protein L11"  
"DsuE09\_00448" 4365 "s59E5H2" 0 "50S ribosomal protein L11"  
"DsuE09\_00448" 4365 "s63E6H2" 0 "50S ribosomal protein L11"  
"DsuE09\_00449" 4366 "s59E13H2" 0 "hypothetical protein"  
"DsuE09\_00449" 4366 "s59E25H2" 0 "hypothetical protein"  
"DsuE09\_00449" 4366 "s59E5H2" 0 "hypothetical protein"  
"DsuE09\_00449" 4366 "s63E6H2" 0 "hypothetical protein"  
"DsuE09\_00450" 4367 "s59E13H2" 0 "preprotein translocase subunit SecE"  
"DsuE09\_00450" 4367 "s59E25H2" 0 "preprotein translocase subunit SecE"  
"DsuE09\_00450" 4367 "s59E5H2" 0 "preprotein translocase subunit SecE"  
"DsuE09\_00450" 4367 "s63E6H2" 0 "preprotein translocase subunit SecE"  
"DsuE09\_00458" 4375 "s59E13H2" 0 "putative HTH-type transcriptional regulator"  
"DsuE09\_00458" 4375 "s59E25H2" 0 "putative HTH-type transcriptional regulator"  
"DsuE09\_00458" 4375 "s59E5H2" 0 "putative HTH-type transcriptional regulator"  
"DsuE09\_00458" 4375 "s63E6H2" 0 "putative HTH-type transcriptional regulator"  
"DsuE09\_00459" 4376 "s59E13H2" 0 "Antilisterial bacteriocin subtilisin biosynthesis protein Alba"  
"DsuE09\_00459" 4376 "s59E25H2" 0 "Antilisterial bacteriocin subtilisin biosynthesis protein Alba"  
"DsuE09\_00459" 4376 "s59E5H2" 0 "Antilisterial bacteriocin subtilisin biosynthesis protein Alba"  
"DsuE09\_00459" 4376 "s63E6H2" 0 "Antilisterial bacteriocin subtilisin biosynthesis protein Alba"  
"DsuE09\_00460" 4377 "s59E13H2" 0 "Delta-aminolevulinic acid dehydratase"  
"DsuE09\_00460" 4377 "s59E25H2" 0 "Delta-aminolevulinic acid dehydratase"

"DsuE09\_00460" 4377 "s59E5H2" 0 "Delta-aminolevulinic acid dehydratase"  
"DsuE09\_00460" 4377 "s63E6H2" 0 "Delta-aminolevulinic acid dehydratase"  
"DsuE09\_00461" 4378 "s59E13H2" 0 "ATP-dependent Clp protease ATP-binding subunit ClpX"  
"DsuE09\_00461" 4378 "s59E25H2" 0 "ATP-dependent Clp protease ATP-binding subunit ClpX"  
"DsuE09\_00461" 4378 "s59E5H2" 0 "ATP-dependent Clp protease ATP-binding subunit ClpX"  
"DsuE09\_00461" 4378 "s63E6H2" 0 "ATP-dependent Clp protease ATP-binding subunit ClpX"  
"DsuE09\_00464" 4381 "s59E13H2" 0 "Rhomboid family protein"  
"DsuE09\_00464" 4381 "s59E25H2" 0 "Rhomboid family protein"  
"DsuE09\_00464" 4381 "s59E5H2" 0 "Rhomboid family protein"  
"DsuE09\_00464" 4381 "s63E6H2" 0 "Rhomboid family protein"  
"DsuE09\_00465" 4382 "s59E13H2" 0 "hypothetical protein"  
"DsuE09\_00465" 4382 "s59E25H2" 0 "hypothetical protein"  
"DsuE09\_00465" 4382 "s59E5H2" 0 "hypothetical protein"  
"DsuE09\_00465" 4382 "s63E6H2" 0 "hypothetical protein"  
"DsuE09\_00466" 4383 "s59E13H2" 0 "D-inositol 3-phosphate glycosyltransferase"  
"DsuE09\_00466" 4383 "s59E25H2" 0 "D-inositol 3-phosphate glycosyltransferase"  
"DsuE09\_00466" 4383 "s59E5H2" 0 "D-inositol 3-phosphate glycosyltransferase"  
"DsuE09\_00466" 4383 "s63E6H2" 0 "D-inositol 3-phosphate glycosyltransferase"  
"DsuE09\_00467" 4384 "s59E13H2" 0 "Mycothiol acetyltransferase"  
"DsuE09\_00467" 4384 "s59E25H2" 0 "Mycothiol acetyltransferase"  
"DsuE09\_00467" 4384 "s59E5H2" 0 "Mycothiol acetyltransferase"  
"DsuE09\_00467" 4384 "s63E6H2" 0 "Mycothiol acetyltransferase"  
"DsuE09\_00468" 4385 "s59E13H2" 0 "Diacetylchitobiose deacetylase"  
"DsuE09\_00468" 4385 "s59E25H2" 0 "Diacetylchitobiose deacetylase"  
"DsuE09\_00468" 4385 "s59E5H2" 0 "Diacetylchitobiose deacetylase"  
"DsuE09\_00468" 4385 "s63E6H2" 0 "Diacetylchitobiose deacetylase"  
"DsuE09\_00469" 4386 "s59E13H2" 0 "Hydroxyacylglutathione hydrolase"  
"DsuE09\_00469" 4386 "s59E25H2" 0 "Hydroxyacylglutathione hydrolase"  
"DsuE09\_00469" 4386 "s59E5H2" 0 "Hydroxyacylglutathione hydrolase"  
"DsuE09\_00469" 4386 "s63E6H2" 0 "Hydroxyacylglutathione hydrolase"  
"DsuE09\_00470" 4387 "s59E13H2" 0 "FecR protein"  
"DsuE09\_00470" 4387 "s59E25H2" 0 "FecR protein"  
"DsuE09\_00470" 4387 "s59E5H2" 0 "FecR protein"  
"DsuE09\_00470" 4387 "s63E6H2" 0 "FecR protein"  
"DsuE09\_00472" 4389 "s59E13H2" 0 "putative phosphatase"  
"DsuE09\_00472" 4389 "s59E25H2" 0 "putative phosphatase"  
"DsuE09\_00472" 4389 "s59E5H2" 0 "putative phosphatase"  
"DsuE09\_00472" 4389 "s63E6H2" 0 "putative phosphatase"  
"DsuE09\_00473" 4390 "s59E13H2" 0 "Integration host factor subunit alpha"  
"DsuE09\_00473" 4390 "s59E25H2" 0 "Integration host factor subunit alpha"  
"DsuE09\_00473" 4390 "s59E5H2" 0 "Integration host factor subunit alpha"  
"DsuE09\_00473" 4390 "s63E6H2" 0 "Integration host factor subunit alpha"  
"DsuE09\_00475" 4392 "s59E13H2" 0 "SsrA-binding protein"  
"DsuE09\_00475" 4392 "s59E25H2" 0 "SsrA-binding protein"  
"DsuE09\_00475" 4392 "s59E5H2" 0 "SsrA-binding protein"  
"DsuE09\_00475" 4392 "s63E6H2" 0 "SsrA-binding protein"  
"DsuE09\_00476" 4393 "s59E13H2" 0 "Phosphoenolpyruvate-protein phosphotransferase"

"DsuE09\_00476" 4393 "s59E25H2" 0 "Phosphoenolpyruvate-protein phosphotransferase"  
"DsuE09\_00476" 4393 "s59E5H2" 0.009233639 "Phosphoenolpyruvate-protein phosphotransferase"  
"DsuE09\_00476" 4393 "s63E6H2" 0 "Phosphoenolpyruvate-protein phosphotransferase"  
"DsuE09\_00477" 4394 "s59E13H2" 0 "Ribosomal RNA small subunit methyltransferase I"  
"DsuE09\_00477" 4394 "s59E25H2" 0 "Ribosomal RNA small subunit methyltransferase I"  
"DsuE09\_00477" 4394 "s59E5H2" 0 "Ribosomal RNA small subunit methyltransferase I"  
"DsuE09\_00477" 4394 "s63E6H2" 0 "Ribosomal RNA small subunit methyltransferase I"  
"DsuE09\_00478" 4395 "s59E13H2" 0 "hypothetical protein"  
"DsuE09\_00478" 4395 "s59E25H2" 0 "hypothetical protein"  
"DsuE09\_00478" 4395 "s59E5H2" 0 "hypothetical protein"  
"DsuE09\_00478" 4395 "s63E6H2" 0 "hypothetical protein"  
"DsuE09\_00479" 4396 "s59E13H2" 0 "Ribonuclease HII"  
"DsuE09\_00479" 4396 "s59E25H2" 0 "Ribonuclease HII"  
"DsuE09\_00479" 4396 "s59E5H2" 0 "Ribonuclease HII"  
"DsuE09\_00479" 4396 "s63E6H2" 0 "Ribonuclease HII"  
"DsuE09\_00480" 4397 "s59E13H2" 0 "50S ribosomal protein L19"  
"DsuE09\_00480" 4397 "s59E25H2" 0 "50S ribosomal protein L19"  
"DsuE09\_00480" 4397 "s59E5H2" 0 "50S ribosomal protein L19"  
"DsuE09\_00480" 4397 "s63E6H2" 0 "50S ribosomal protein L19"  
"DsuE09\_00481" 4398 "s59E13H2" 0 "hypothetical protein"  
"DsuE09\_00481" 4398 "s59E25H2" 0 "hypothetical protein"  
"DsuE09\_00481" 4398 "s59E5H2" 0 "hypothetical protein"  
"DsuE09\_00481" 4398 "s63E6H2" 0 "hypothetical protein"  
"DsuE09\_00482" 4399 "s59E13H2" 0 "tRNA (guanine-N(1)-)-methyltransferase"  
"DsuE09\_00482" 4399 "s59E25H2" 0 "tRNA (guanine-N(1)-)-methyltransferase"  
"DsuE09\_00482" 4399 "s59E5H2" 0 "tRNA (guanine-N(1)-)-methyltransferase"  
"DsuE09\_00482" 4399 "s63E6H2" 0 "tRNA (guanine-N(1)-)-methyltransferase"  
"DsuE09\_00483" 4400 "s59E13H2" 0 "Ribosome maturation factor RimM"  
"DsuE09\_00483" 4400 "s59E25H2" 0 "Ribosome maturation factor RimM"  
"DsuE09\_00483" 4400 "s59E5H2" 0 "Ribosome maturation factor RimM"  
"DsuE09\_00483" 4400 "s63E6H2" 0 "Ribosome maturation factor RimM"  
"DsuE09\_00484" 4401 "s59E13H2" 0 "hypothetical protein"  
"DsuE09\_00484" 4401 "s59E25H2" 0 "hypothetical protein"  
"DsuE09\_00484" 4401 "s59E5H2" 0.01812704 "hypothetical protein"  
"DsuE09\_00484" 4401 "s63E6H2" 0 "hypothetical protein"  
"DsuE09\_00485" 4402 "s59E13H2" 0 "30S ribosomal protein S16"  
"DsuE09\_00485" 4402 "s59E25H2" 0 "30S ribosomal protein S16"  
"DsuE09\_00485" 4402 "s59E5H2" 0 "30S ribosomal protein S16"  
"DsuE09\_00485" 4402 "s63E6H2" 0 "30S ribosomal protein S16"  
"DsuE09\_00486" 4403 "s59E13H2" 0 "Signal recognition particle protein"  
"DsuE09\_00486" 4403 "s59E25H2" 0 "Signal recognition particle protein"  
"DsuE09\_00486" 4403 "s59E5H2" 0 "Signal recognition particle protein"  
"DsuE09\_00486" 4403 "s63E6H2" 0 "Signal recognition particle protein"  
"DsuE09\_00488" 4405 "s59E13H2" 0 "hypothetical protein"  
"DsuE09\_00488" 4405 "s59E25H2" 0 "hypothetical protein"  
"DsuE09\_00488" 4405 "s59E5H2" 0 "hypothetical protein"  
"DsuE09\_00488" 4405 "s63E6H2" 0 "hypothetical protein"

"DsuE09\_00489" 4406 "s59E13H2" 0 "hypothetical protein"  
"DsuE09\_00489" 4406 "s59E25H2" 0 "hypothetical protein"  
"DsuE09\_00489" 4406 "s59E5H2" 0 "hypothetical protein"  
"DsuE09\_00489" 4406 "s63E6H2" 0 "hypothetical protein"  
"DsuE09\_00490" 4407 "s59E13H2" 0 "YcfA-like protein"  
"DsuE09\_00490" 4407 "s59E25H2" 0 "YcfA-like protein"  
"DsuE09\_00490" 4407 "s59E5H2" 0 "YcfA-like protein"  
"DsuE09\_00490" 4407 "s63E6H2" 0 "YcfA-like protein"  
"DsuE09\_00491" 4408 "s59E13H2" 0 "Phd\_YefM"  
"DsuE09\_00491" 4408 "s59E25H2" 0 "Phd\_YefM"  
"DsuE09\_00491" 4408 "s59E5H2" 0 "Phd\_YefM"  
"DsuE09\_00491" 4408 "s63E6H2" 0 "Phd\_YefM"  
"DsuE09\_00492" 4409 "s59E13H2" 0 "hypothetical protein"  
"DsuE09\_00492" 4409 "s59E25H2" 0 "hypothetical protein"  
"DsuE09\_00492" 4409 "s59E5H2" 0 "hypothetical protein"  
"DsuE09\_00492" 4409 "s63E6H2" 0 "hypothetical protein"  
"DsuE09\_00493" 4410 "s59E13H2" 0 "Nucleotidyltransferase domain protein"  
"DsuE09\_00493" 4410 "s59E25H2" 0 "Nucleotidyltransferase domain protein"  
"DsuE09\_00493" 4410 "s59E5H2" 0 "Nucleotidyltransferase domain protein"  
"DsuE09\_00493" 4410 "s63E6H2" 0 "Nucleotidyltransferase domain protein"  
"DsuE09\_00494" 4411 "s59E13H2" 0 "HEPN domain protein"  
"DsuE09\_00494" 4411 "s59E25H2" 0 "HEPN domain protein"  
"DsuE09\_00494" 4411 "s59E5H2" 0 "HEPN domain protein"  
"DsuE09\_00494" 4411 "s63E6H2" 0 "HEPN domain protein"  
"DsuE09\_00495" 4412 "s59E13H2" 0 "hypothetical protein"  
"DsuE09\_00495" 4412 "s59E25H2" 0 "hypothetical protein"  
"DsuE09\_00495" 4412 "s59E5H2" 0 "hypothetical protein"  
"DsuE09\_00495" 4412 "s63E6H2" 0 "hypothetical protein"  
"DsuE09\_00496" 4413 "s59E13H2" 0 "hypothetical protein"  
"DsuE09\_00496" 4413 "s59E25H2" 0 "hypothetical protein"  
"DsuE09\_00496" 4413 "s59E5H2" 0 "hypothetical protein"  
"DsuE09\_00496" 4413 "s63E6H2" 0 "hypothetical protein"  
"DsuE09\_00498" 4415 "s59E13H2" 0 "YcfA-like protein"  
"DsuE09\_00498" 4415 "s59E25H2" 0 "YcfA-like protein"  
"DsuE09\_00498" 4415 "s59E5H2" 0 "YcfA-like protein"  
"DsuE09\_00498" 4415 "s63E6H2" 0 "YcfA-like protein"  
"DsuE09\_00499" 4416 "s59E13H2" 0 "hypothetical protein"  
"DsuE09\_00499" 4416 "s59E25H2" 0 "hypothetical protein"  
"DsuE09\_00499" 4416 "s59E5H2" 0 "hypothetical protein"  
"DsuE09\_00499" 4416 "s63E6H2" 0 "hypothetical protein"  
"DsuE09\_00500" 4417 "s59E13H2" 0 "hypothetical protein"  
"DsuE09\_00500" 4417 "s59E25H2" 0 "hypothetical protein"  
"DsuE09\_00500" 4417 "s59E5H2" 0 "hypothetical protein"  
"DsuE09\_00500" 4417 "s63E6H2" 0 "hypothetical protein"  
"DsuE09\_00501" 4418 "s59E13H2" 0 "YcfA-like protein"  
"DsuE09\_00501" 4418 "s59E25H2" 0 "YcfA-like protein"  
"DsuE09\_00501" 4418 "s59E5H2" 0 "YcfA-like protein"



"DsuE09\_00501" 4418 "s63E6H2" 0 "YcfA-like protein"  
"DsuE09\_00503" 4420 "s59E13H2" 0 "hypothetical protein"  
"DsuE09\_00503" 4420 "s59E25H2" 0 "hypothetical protein"  
"DsuE09\_00503" 4420 "s59E5H2" 0 "hypothetical protein"  
"DsuE09\_00503" 4420 "s63E6H2" 0 "hypothetical protein"  
"DsuE09\_00508" 4425 "s59E13H2" 0 "hypothetical protein"  
"DsuE09\_00508" 4425 "s59E25H2" 0 "hypothetical protein"  
"DsuE09\_00508" 4425 "s59E5H2" 0 "hypothetical protein"  
"DsuE09\_00508" 4425 "s63E6H2" 0 "hypothetical protein"  
"DsuE09\_00510" 4427 "s59E13H2" 0 "hypothetical protein"  
"DsuE09\_00510" 4427 "s59E25H2" 0 "hypothetical protein"  
"DsuE09\_00510" 4427 "s59E5H2" 0 "hypothetical protein"  
"DsuE09\_00510" 4427 "s63E6H2" 0 "hypothetical protein"  
"DsuE09\_00511" 4428 "s59E13H2" 0 "hypothetical protein"  
"DsuE09\_00511" 4428 "s59E25H2" 0 "hypothetical protein"  
"DsuE09\_00511" 4428 "s59E5H2" 0 "hypothetical protein"  
"DsuE09\_00511" 4428 "s63E6H2" 0 "hypothetical protein"  
"DsuE09\_00512" 4429 "s59E13H2" 0 "Helix-turn-helix domain protein"  
"DsuE09\_00512" 4429 "s59E25H2" 0 "Helix-turn-helix domain protein"  
"DsuE09\_00512" 4429 "s59E5H2" 0 "Helix-turn-helix domain protein"  
"DsuE09\_00512" 4429 "s63E6H2" 0 "Helix-turn-helix domain protein"  
"DsuE09\_00514" 4431 "s59E13H2" 0 "hypothetical protein"  
"DsuE09\_00514" 4431 "s59E25H2" 0 "hypothetical protein"  
"DsuE09\_00514" 4431 "s59E5H2" 0 "hypothetical protein"  
"DsuE09\_00514" 4431 "s63E6H2" 0 "hypothetical protein"  
"DsuE09\_00515" 4432 "s59E13H2" 0 "hypothetical protein"  
"DsuE09\_00515" 4432 "s59E25H2" 0 "hypothetical protein"  
"DsuE09\_00515" 4432 "s59E5H2" 0 "hypothetical protein"  
"DsuE09\_00515" 4432 "s63E6H2" 0 "hypothetical protein"  
"DsuE09\_00517" 4434 "s59E13H2" 0 "hypothetical protein"  
"DsuE09\_00517" 4434 "s59E25H2" 0 "hypothetical protein"  
"DsuE09\_00517" 4434 "s59E5H2" 0 "hypothetical protein"  
"DsuE09\_00517" 4434 "s63E6H2" 0 "hypothetical protein"  
"DsuE09\_00518" 4435 "s59E13H2" 0 "putative HTH-type transcriptional regulator YbaQ"  
"DsuE09\_00518" 4435 "s59E25H2" 0 "putative HTH-type transcriptional regulator YbaQ"  
"DsuE09\_00518" 4435 "s59E5H2" 0 "putative HTH-type transcriptional regulator YbaQ"  
"DsuE09\_00518" 4435 "s63E6H2" 0 "putative HTH-type transcriptional regulator YbaQ"  
"DsuE09\_00519" 4436 "s59E13H2" 0 "Toxin HigB-1"  
"DsuE09\_00519" 4436 "s59E25H2" 0 "Toxin HigB-1"  
"DsuE09\_00519" 4436 "s59E5H2" 0 "Toxin HigB-1"  
"DsuE09\_00519" 4436 "s63E6H2" 0 "Toxin HigB-1"  
"DsuE09\_00520" 4437 "s59E13H2" 0 "hypothetical protein"  
"DsuE09\_00520" 4437 "s59E25H2" 0 "hypothetical protein"  
"DsuE09\_00520" 4437 "s59E5H2" 0 "hypothetical protein"  
"DsuE09\_00520" 4437 "s63E6H2" 0 "hypothetical protein"  
"DsuE09\_00522" 4439 "s59E13H2" 0 "UDP-glucose:undecaprenyl-phosphate glucose-1-phosphate transferase"  
"DsuE09\_00522" 4439 "s59E25H2" 0 "UDP-glucose:undecaprenyl-phosphate glucose-1-phosphate transferase"

"DsuE09\_00522" 4439 "s59E5H2" 0 "UDP-glucose:undecaprenyl-phosphate glucose-1-phosphate transferase"  
"DsuE09\_00522" 4439 "s63E6H2" 0 "UDP-glucose:undecaprenyl-phosphate glucose-1-phosphate transferase"  
"DsuE09\_00525" 4442 "s59E13H2" 0 "hypothetical protein"  
"DsuE09\_00525" 4442 "s59E25H2" 0 "hypothetical protein"  
"DsuE09\_00525" 4442 "s59E5H2" 0 "hypothetical protein"  
"DsuE09\_00525" 4442 "s63E6H2" 0 "hypothetical protein"  
"DsuE09\_00526" 4443 "s59E13H2" 0 "hypothetical protein"  
"DsuE09\_00526" 4443 "s59E25H2" 0 "hypothetical protein"  
"DsuE09\_00526" 4443 "s59E5H2" 0 "hypothetical protein"  
"DsuE09\_00526" 4443 "s63E6H2" 0 "hypothetical protein"  
"DsuE09\_00527" 4444 "s59E13H2" 0 "tRNA(fMet)-specific endonuclease VapC"  
"DsuE09\_00527" 4444 "s59E25H2" 0 "tRNA(fMet)-specific endonuclease VapC"  
"DsuE09\_00527" 4444 "s59E5H2" 0 "tRNA(fMet)-specific endonuclease VapC"  
"DsuE09\_00527" 4444 "s63E6H2" 0 "tRNA(fMet)-specific endonuclease VapC"  
"DsuE09\_00528" 4445 "s59E13H2" 0 "Putative antitoxin VapB21"  
"DsuE09\_00528" 4445 "s59E25H2" 0 "Putative antitoxin VapB21"  
"DsuE09\_00528" 4445 "s59E5H2" 0 "Putative antitoxin VapB21"  
"DsuE09\_00528" 4445 "s63E6H2" 0 "Putative antitoxin VapB21"  
"DsuE09\_00531" 4448 "s59E13H2" 0 "B3/4 domain protein"  
"DsuE09\_00531" 4448 "s59E25H2" 0 "B3/4 domain protein"  
"DsuE09\_00531" 4448 "s59E5H2" 0 "B3/4 domain protein"  
"DsuE09\_00531" 4448 "s63E6H2" 0 "B3/4 domain protein"  
"DsuE09\_00532" 4449 "s59E13H2" 0 "pyruvate formate lyase-activating enzyme 1"  
"DsuE09\_00532" 4449 "s59E25H2" 0 "pyruvate formate lyase-activating enzyme 1"  
"DsuE09\_00532" 4449 "s59E5H2" 0 "pyruvate formate lyase-activating enzyme 1"  
"DsuE09\_00532" 4449 "s63E6H2" 0 "pyruvate formate lyase-activating enzyme 1"  
"DsuE09\_00534" 4451 "s59E13H2" 0 "DNA mismatch repair protein"  
"DsuE09\_00534" 4451 "s59E25H2" 0 "DNA mismatch repair protein"  
"DsuE09\_00534" 4451 "s59E5H2" 0 "DNA mismatch repair protein"  
"DsuE09\_00534" 4451 "s63E6H2" 0 "DNA mismatch repair protein"  
"DsuE09\_00535" 4452 "s59E13H2" 0 "hypothetical protein"  
"DsuE09\_00535" 4452 "s59E25H2" 0 "hypothetical protein"  
"DsuE09\_00535" 4452 "s59E5H2" 0 "hypothetical protein"  
"DsuE09\_00535" 4452 "s63E6H2" 0 "hypothetical protein"  
"DsuE09\_00536" 4453 "s59E13H2" 0 "hypothetical protein"  
"DsuE09\_00536" 4453 "s59E25H2" 0 "hypothetical protein"  
"DsuE09\_00536" 4453 "s59E5H2" 0 "hypothetical protein"  
"DsuE09\_00536" 4453 "s63E6H2" 0 "hypothetical protein"  
"DsuE09\_00537" 4454 "s59E13H2" 0 "site-specific tyrosine recombinase XerC"  
"DsuE09\_00537" 4454 "s59E25H2" 0 "site-specific tyrosine recombinase XerC"  
"DsuE09\_00537" 4454 "s59E5H2" 0 "site-specific tyrosine recombinase XerC"  
"DsuE09\_00537" 4454 "s63E6H2" 0 "site-specific tyrosine recombinase XerC"  
"DsuE09\_00539" 4456 "s59E13H2" 0 "PilZ domain protein"  
"DsuE09\_00539" 4456 "s59E25H2" 0 "PilZ domain protein"  
"DsuE09\_00539" 4456 "s59E5H2" 0 "PilZ domain protein"  
"DsuE09\_00539" 4456 "s63E6H2" 0 "PilZ domain protein"  
"DsuE09\_00540" 4457 "s59E13H2" 0 "hypothetical protein"

"DsuE09\_00540" 4457 "s59E25H2" 0 "hypothetical protein"  
"DsuE09\_00540" 4457 "s59E5H2" 0 "hypothetical protein"  
"DsuE09\_00540" 4457 "s63E6H2" 0 "hypothetical protein"  
"DsuE09\_00541" 4458 "s59E13H2" 0 "Mutual gliding-motility protein MglA"  
"DsuE09\_00541" 4458 "s59E25H2" 0 "Mutual gliding-motility protein MglA"  
"DsuE09\_00541" 4458 "s59E5H2" 0 "Mutual gliding-motility protein MglA"  
"DsuE09\_00541" 4458 "s63E6H2" 0 "Mutual gliding-motility protein MglA"  
"DsuE09\_00542" 4459 "s59E13H2" 0 "DNA-binding transcriptional dual regulator Crp"  
"DsuE09\_00542" 4459 "s59E25H2" 0 "DNA-binding transcriptional dual regulator Crp"  
"DsuE09\_00542" 4459 "s59E5H2" 0 "DNA-binding transcriptional dual regulator Crp"  
"DsuE09\_00542" 4459 "s63E6H2" 0 "DNA-binding transcriptional dual regulator Crp"  
"DsuE09\_00543" 4460 "s59E13H2" 0 "hypothetical protein"  
"DsuE09\_00543" 4460 "s59E25H2" 0 "hypothetical protein"  
"DsuE09\_00543" 4460 "s59E5H2" 0 "hypothetical protein"  
"DsuE09\_00543" 4460 "s63E6H2" 0 "hypothetical protein"  
"DsuE09\_00544" 4461 "s59E13H2" 0 "hypothetical protein"  
"DsuE09\_00544" 4461 "s59E25H2" 0 "hypothetical protein"  
"DsuE09\_00544" 4461 "s59E5H2" 0 "hypothetical protein"  
"DsuE09\_00544" 4461 "s63E6H2" 0 "hypothetical protein"  
"DsuE09\_00545" 4462 "s59E13H2" 0 "Vacuole effluxer Atg22 like protein"  
"DsuE09\_00545" 4462 "s59E25H2" 0 "Vacuole effluxer Atg22 like protein"  
"DsuE09\_00545" 4462 "s59E5H2" 0 "Vacuole effluxer Atg22 like protein"  
"DsuE09\_00545" 4462 "s63E6H2" 0 "Vacuole effluxer Atg22 like protein"  
"DsuE09\_00547" 4464 "s59E13H2" 0 "Hemolysin C"  
"DsuE09\_00547" 4464 "s59E25H2" 0 "Hemolysin C"  
"DsuE09\_00547" 4464 "s59E5H2" 0 "Hemolysin C"  
"DsuE09\_00547" 4464 "s63E6H2" 0 "Hemolysin C"  
"DsuE09\_00548" 4465 "s59E13H2" 0 "Magnesium and cobalt efflux protein CorC"  
"DsuE09\_00548" 4465 "s59E25H2" 0 "Magnesium and cobalt efflux protein CorC"  
"DsuE09\_00548" 4465 "s59E5H2" 0 "Magnesium and cobalt efflux protein CorC"  
"DsuE09\_00548" 4465 "s63E6H2" 0 "Magnesium and cobalt efflux protein CorC"  
"DsuE09\_00549" 4466 "s59E13H2" 0 "hypothetical protein"  
"DsuE09\_00549" 4466 "s59E25H2" 0 "hypothetical protein"  
"DsuE09\_00549" 4466 "s59E5H2" 0 "hypothetical protein"  
"DsuE09\_00549" 4466 "s63E6H2" 0 "hypothetical protein"  
"DsuE09\_00550" 4467 "s59E13H2" 0 "Adenylate cyclase 1"  
"DsuE09\_00550" 4467 "s59E25H2" 0 "Adenylate cyclase 1"  
"DsuE09\_00550" 4467 "s59E5H2" 0 "Adenylate cyclase 1"  
"DsuE09\_00550" 4467 "s63E6H2" 0 "Adenylate cyclase 1"  
"DsuE09\_00551" 4468 "s59E13H2" 0 "hypothetical protein"  
"DsuE09\_00551" 4468 "s59E25H2" 0 "hypothetical protein"  
"DsuE09\_00551" 4468 "s59E5H2" 0 "hypothetical protein"  
"DsuE09\_00551" 4468 "s63E6H2" 0 "hypothetical protein"  
"DsuE09\_00552" 4469 "s59E13H2" 0 "putative hydrogenase nickel incorporation protein HypA"  
"DsuE09\_00552" 4469 "s59E25H2" 0 "putative hydrogenase nickel incorporation protein HypA"  
"DsuE09\_00552" 4469 "s59E5H2" 0 "putative hydrogenase nickel incorporation protein HypA"  
"DsuE09\_00552" 4469 "s63E6H2" 0 "putative hydrogenase nickel incorporation protein HypA"

"DsuE09\_00553" 4470 "s59E13H2" 0 "hypothetical protein"  
"DsuE09\_00553" 4470 "s59E25H2" 0 "hypothetical protein"  
"DsuE09\_00553" 4470 "s59E5H2" 0 "hypothetical protein"  
"DsuE09\_00553" 4470 "s63E6H2" 0 "hypothetical protein"  
"DsuE09\_00554" 4471 "s59E13H2" 0 "hypothetical protein"  
"DsuE09\_00554" 4471 "s59E25H2" 0 "hypothetical protein"  
"DsuE09\_00554" 4471 "s59E5H2" 0 "hypothetical protein"  
"DsuE09\_00554" 4471 "s63E6H2" 0 "hypothetical protein"  
"DsuE09\_00555" 4472 "s59E13H2" 0 "hypothetical protein"  
"DsuE09\_00555" 4472 "s59E25H2" 0 "hypothetical protein"  
"DsuE09\_00555" 4472 "s59E5H2" 0 "hypothetical protein"  
"DsuE09\_00555" 4472 "s63E6H2" 0 "hypothetical protein"  
"DsuE09\_00556" 4473 "s59E13H2" 0 "Acyl-CoA dehydrogenase"  
"DsuE09\_00556" 4473 "s59E25H2" 0 "Acyl-CoA dehydrogenase"  
"DsuE09\_00556" 4473 "s59E5H2" 0 "Acyl-CoA dehydrogenase"  
"DsuE09\_00556" 4473 "s63E6H2" 0 "Acyl-CoA dehydrogenase"  
"DsuE09\_00557" 4474 "s59E13H2" 0 "hypothetical protein"  
"DsuE09\_00557" 4474 "s59E25H2" 0 "hypothetical protein"  
"DsuE09\_00557" 4474 "s59E5H2" 0 "hypothetical protein"  
"DsuE09\_00557" 4474 "s63E6H2" 0 "hypothetical protein"  
"DsuE09\_00559" 4476 "s59E13H2" 0 "Fructose-1,6-bisphosphatase"  
"DsuE09\_00559" 4476 "s59E25H2" 0 "Fructose-1,6-bisphosphatase"  
"DsuE09\_00559" 4476 "s59E5H2" 0 "Fructose-1,6-bisphosphatase"  
"DsuE09\_00559" 4476 "s63E6H2" 0 "Fructose-1,6-bisphosphatase"  
"DsuE09\_00561" 4478 "s59E13H2" 0 "Methylmalonyl-CoA mutase large subunit"  
"DsuE09\_00561" 4478 "s59E25H2" 0 "Methylmalonyl-CoA mutase large subunit"  
"DsuE09\_00561" 4478 "s59E5H2" 0 "Methylmalonyl-CoA mutase large subunit"  
"DsuE09\_00561" 4478 "s63E6H2" 0 "Methylmalonyl-CoA mutase large subunit"  
"DsuE09\_00564" 4481 "s59E13H2" 0 "putative lipoprotein YiaD precursor"  
"DsuE09\_00564" 4481 "s59E25H2" 0 "putative lipoprotein YiaD precursor"  
"DsuE09\_00564" 4481 "s59E5H2" 0 "putative lipoprotein YiaD precursor"  
"DsuE09\_00564" 4481 "s63E6H2" 0 "putative lipoprotein YiaD precursor"  
"DsuE09\_00565" 4482 "s59E13H2" 0 "Leucine-, isoleucine-, valine-, threonine-, and alanine-binding protein precursor"  
"DsuE09\_00565" 4482 "s59E25H2" 0 "Leucine-, isoleucine-, valine-, threonine-, and alanine-binding protein precursor"  
"DsuE09\_00565" 4482 "s59E5H2" 0 "Leucine-, isoleucine-, valine-, threonine-, and alanine-binding protein precursor"  
"DsuE09\_00565" 4482 "s63E6H2" 0 "Leucine-, isoleucine-, valine-, threonine-, and alanine-binding protein precursor"  
"DsuE09\_00566" 4483 "s59E13H2" 0 "leucine/isoleucine/valine transporter permease subunit"  
"DsuE09\_00566" 4483 "s59E25H2" 0 "leucine/isoleucine/valine transporter permease subunit"  
"DsuE09\_00566" 4483 "s59E5H2" 0 "leucine/isoleucine/valine transporter permease subunit"  
"DsuE09\_00566" 4483 "s63E6H2" 0 "leucine/isoleucine/valine transporter permease subunit"  
"DsuE09\_00567" 4484 "s59E13H2" 0 "High-affinity branched-chain amino acid transport system permease protein LivH"  
"DsuE09\_00567" 4484 "s59E25H2" 0 "High-affinity branched-chain amino acid transport system permease protein LivH"  
"DsuE09\_00567" 4484 "s59E5H2" 0 "High-affinity branched-chain amino acid transport system permease protein LivH"  
"DsuE09\_00567" 4484 "s63E6H2" 0 "High-affinity branched-chain amino acid transport system permease protein LivH"  
"DsuE09\_00568" 4485 "s59E13H2" 0 "High-affinity branched-chain amino acid transport ATP-binding protein LivF"  
"DsuE09\_00568" 4485 "s59E25H2" 0 "High-affinity branched-chain amino acid transport ATP-binding protein LivF"  
"DsuE09\_00568" 4485 "s59E5H2" 0 "High-affinity branched-chain amino acid transport ATP-binding protein LivF"

"DsuE09\_00568" 4485 "s63E6H2" 0 "High-affinity branched-chain amino acid transport ATP-binding protein LivF"  
"DsuE09\_00569" 4486 "s59E13H2" 0 "putative branched-chain amino acid transport ATP-binding protein LivG"  
"DsuE09\_00569" 4486 "s59E25H2" 0 "putative branched-chain amino acid transport ATP-binding protein LivG"  
"DsuE09\_00569" 4486 "s59E5H2" 0 "putative branched-chain amino acid transport ATP-binding protein LivG"  
"DsuE09\_00569" 4486 "s63E6H2" 0 "putative branched-chain amino acid transport ATP-binding protein LivG"  
"DsuE09\_00570" 4487 "s59E13H2" 0 "DNA integrity scanning protein DisA"  
"DsuE09\_00570" 4487 "s59E25H2" 0 "DNA integrity scanning protein DisA"  
"DsuE09\_00570" 4487 "s59E5H2" 0 "DNA integrity scanning protein DisA"  
"DsuE09\_00570" 4487 "s63E6H2" 0 "DNA integrity scanning protein DisA"  
"DsuE09\_00571" 4488 "s59E13H2" 0 "Phosphoglycerate transporter protein"  
"DsuE09\_00571" 4488 "s59E25H2" 0 "Phosphoglycerate transporter protein"  
"DsuE09\_00571" 4488 "s59E5H2" 0 "Phosphoglycerate transporter protein"  
"DsuE09\_00571" 4488 "s63E6H2" 0 "Phosphoglycerate transporter protein"  
"DsuE09\_00572" 4489 "s59E13H2" 0 "Altronate dehydratase"  
"DsuE09\_00572" 4489 "s59E25H2" 0 "Altronate dehydratase"  
"DsuE09\_00572" 4489 "s59E5H2" 0 "Altronate dehydratase"  
"DsuE09\_00572" 4489 "s63E6H2" 0 "Altronate dehydratase"  
"DsuE09\_00573" 4490 "s59E13H2" 0 "Butyrate--acetoacetate CoA-transferase subunit B"  
"DsuE09\_00573" 4490 "s59E25H2" 0 "Butyrate--acetoacetate CoA-transferase subunit B"  
"DsuE09\_00573" 4490 "s59E5H2" 0 "Butyrate--acetoacetate CoA-transferase subunit B"  
"DsuE09\_00573" 4490 "s63E6H2" 0 "Butyrate--acetoacetate CoA-transferase subunit B"  
"DsuE09\_00574" 4491 "s59E13H2" 0 "3-oxoadipate CoA-transferase subunit A"  
"DsuE09\_00574" 4491 "s59E25H2" 0 "3-oxoadipate CoA-transferase subunit A"  
"DsuE09\_00574" 4491 "s59E5H2" 0 "3-oxoadipate CoA-transferase subunit A"  
"DsuE09\_00574" 4491 "s63E6H2" 0 "3-oxoadipate CoA-transferase subunit A"  
"DsuE09\_00575" 4492 "s59E13H2" 0 "Glucose 1-dehydrogenase 1"  
"DsuE09\_00575" 4492 "s59E25H2" 0 "Glucose 1-dehydrogenase 1"  
"DsuE09\_00575" 4492 "s59E5H2" 0 "Glucose 1-dehydrogenase 1"  
"DsuE09\_00575" 4492 "s63E6H2" 0 "Glucose 1-dehydrogenase 1"  
"DsuE09\_00576" 4493 "s59E13H2" 0 "hypothetical protein"  
"DsuE09\_00576" 4493 "s59E25H2" 0 "hypothetical protein"  
"DsuE09\_00576" 4493 "s59E5H2" 0 "hypothetical protein"  
"DsuE09\_00576" 4493 "s63E6H2" 0 "hypothetical protein"  
"DsuE09\_00577" 4494 "s59E13H2" 0 "Glycosyl transferases group 1"  
"DsuE09\_00577" 4494 "s59E25H2" 0 "Glycosyl transferases group 1"  
"DsuE09\_00577" 4494 "s59E5H2" 0 "Glycosyl transferases group 1"  
"DsuE09\_00577" 4494 "s63E6H2" 0 "Glycosyl transferases group 1"  
"DsuE09\_00578" 4495 "s59E13H2" 0 "hypothetical protein"  
"DsuE09\_00578" 4495 "s59E25H2" 0 "hypothetical protein"  
"DsuE09\_00578" 4495 "s59E5H2" 0 "hypothetical protein"  
"DsuE09\_00578" 4495 "s63E6H2" 0 "hypothetical protein"  
"DsuE09\_00579" 4496 "s59E13H2" 0 "hypothetical protein"  
"DsuE09\_00579" 4496 "s59E25H2" 0 "hypothetical protein"  
"DsuE09\_00579" 4496 "s59E5H2" 0 "hypothetical protein"  
"DsuE09\_00579" 4496 "s63E6H2" 0 "hypothetical protein"  
"DsuE09\_00580" 4497 "s59E13H2" 0 "hypothetical protein"  
"DsuE09\_00580" 4497 "s59E25H2" 0 "hypothetical protein"

"DsuE09\_00580" 4497 "s59E5H2" 0 "hypothetical protein"  
"DsuE09\_00580" 4497 "s63E6H2" 0 "hypothetical protein"  
"DsuE09\_00581" 4498 "s59E13H2" 0 "hypothetical protein"  
"DsuE09\_00581" 4498 "s59E25H2" 0 "hypothetical protein"  
"DsuE09\_00581" 4498 "s59E5H2" 0 "hypothetical protein"  
"DsuE09\_00581" 4498 "s63E6H2" 0 "hypothetical protein"  
"DsuE09\_00583" 4500 "s59E13H2" 0 "PemK-like protein"  
"DsuE09\_00583" 4500 "s59E25H2" 0 "PemK-like protein"  
"DsuE09\_00583" 4500 "s59E5H2" 0 "PemK-like protein"  
"DsuE09\_00583" 4500 "s63E6H2" 0 "PemK-like protein"  
"DsuE09\_00584" 4501 "s59E13H2" 0 "hypothetical protein"  
"DsuE09\_00584" 4501 "s59E25H2" 0 "hypothetical protein"  
"DsuE09\_00584" 4501 "s59E5H2" 0 "hypothetical protein"  
"DsuE09\_00584" 4501 "s63E6H2" 0 "hypothetical protein"  
"DsuE09\_00586" 4503 "s59E13H2" 0 "hypothetical protein"  
"DsuE09\_00586" 4503 "s59E25H2" 0 "hypothetical protein"  
"DsuE09\_00586" 4503 "s59E5H2" 0 "hypothetical protein"  
"DsuE09\_00586" 4503 "s63E6H2" 0 "hypothetical protein"  
"DsuE09\_00588" 4505 "s59E13H2" 0 "PemK-like protein"  
"DsuE09\_00588" 4505 "s59E25H2" 0 "PemK-like protein"  
"DsuE09\_00588" 4505 "s59E5H2" 0 "PemK-like protein"  
"DsuE09\_00588" 4505 "s63E6H2" 0 "PemK-like protein"  
"DsuE09\_00591" 4508 "s59E13H2" 0 "Ribonuclease VapC20"  
"DsuE09\_00591" 4508 "s59E25H2" 0 "Ribonuclease VapC20"  
"DsuE09\_00591" 4508 "s59E5H2" 0 "Ribonuclease VapC20"  
"DsuE09\_00591" 4508 "s63E6H2" 0 "Ribonuclease VapC20"  
"DsuE09\_00592" 4509 "s59E13H2" 0 "hypothetical protein"  
"DsuE09\_00592" 4509 "s59E25H2" 0 "hypothetical protein"  
"DsuE09\_00592" 4509 "s59E5H2" 0 "hypothetical protein"  
"DsuE09\_00592" 4509 "s63E6H2" 0 "hypothetical protein"  
"DsuE09\_00593" 4510 "s59E13H2" 0 "hypothetical protein"  
"DsuE09\_00593" 4510 "s59E25H2" 0 "hypothetical protein"  
"DsuE09\_00593" 4510 "s59E5H2" 0 "hypothetical protein"  
"DsuE09\_00593" 4510 "s63E6H2" 0 "hypothetical protein"  
"DsuE09\_00594" 4511 "s59E13H2" 0 "hypothetical protein"  
"DsuE09\_00594" 4511 "s59E25H2" 0 "hypothetical protein"  
"DsuE09\_00594" 4511 "s59E5H2" 0 "hypothetical protein"  
"DsuE09\_00594" 4511 "s63E6H2" 0 "hypothetical protein"  
"DsuE09\_00595" 4512 "s59E13H2" 0 "hypothetical protein"  
"DsuE09\_00595" 4512 "s59E25H2" 0 "hypothetical protein"  
"DsuE09\_00595" 4512 "s59E5H2" 0 "hypothetical protein"  
"DsuE09\_00595" 4512 "s63E6H2" 0 "hypothetical protein"  
"DsuE09\_00596" 4513 "s59E13H2" 0 "ATP-dependent RecD-like DNA helicase"  
"DsuE09\_00596" 4513 "s59E25H2" 0 "ATP-dependent RecD-like DNA helicase"  
"DsuE09\_00596" 4513 "s59E5H2" 0 "ATP-dependent RecD-like DNA helicase"  
"DsuE09\_00596" 4513 "s63E6H2" 0 "ATP-dependent RecD-like DNA helicase"  
"DsuE09\_00597" 4514 "s59E13H2" 0 "Arginine--tRNA ligase"

"DsuE09\_00597" 4514 "s59E25H2" 0 "Arginine--tRNA ligase"  
"DsuE09\_00597" 4514 "s59E5H2" 0 "Arginine--tRNA ligase"  
"DsuE09\_00597" 4514 "s63E6H2" 0 "Arginine--tRNA ligase"  
"DsuE09\_00598" 4515 "s59E13H2" 0 "Sporulation related domain protein"  
"DsuE09\_00598" 4515 "s59E25H2" 0 "Sporulation related domain protein"  
"DsuE09\_00598" 4515 "s59E5H2" 0 "Sporulation related domain protein"  
"DsuE09\_00598" 4515 "s63E6H2" 0 "Sporulation related domain protein"  
"DsuE09\_00599" 4516 "s59E13H2" 0 "Amino-acid acetyltransferase"  
"DsuE09\_00599" 4516 "s59E25H2" 0 "Amino-acid acetyltransferase"  
"DsuE09\_00599" 4516 "s59E5H2" 0 "Amino-acid acetyltransferase"  
"DsuE09\_00599" 4516 "s63E6H2" 0 "Amino-acid acetyltransferase"  
"DsuE09\_00600" 4517 "s59E13H2" 0 "hypothetical protein"  
"DsuE09\_00600" 4517 "s59E25H2" 0 "hypothetical protein"  
"DsuE09\_00600" 4517 "s59E5H2" 0 "hypothetical protein"  
"DsuE09\_00600" 4517 "s63E6H2" 0 "hypothetical protein"  
"DsuE09\_00601" 4518 "s59E13H2" 0 "Sec-independent protein translocase protein TatAd"  
"DsuE09\_00601" 4518 "s59E25H2" 0 "Sec-independent protein translocase protein TatAd"  
"DsuE09\_00601" 4518 "s59E5H2" 0 "Sec-independent protein translocase protein TatAd"  
"DsuE09\_00601" 4518 "s63E6H2" 0 "Sec-independent protein translocase protein TatAd"  
"DsuE09\_00602" 4519 "s59E13H2" 0 "Sec-independent protein translocase protein TatC"  
"DsuE09\_00602" 4519 "s59E25H2" 0 "Sec-independent protein translocase protein TatC"  
"DsuE09\_00602" 4519 "s59E5H2" 0 "Sec-independent protein translocase protein TatC"  
"DsuE09\_00602" 4519 "s63E6H2" 0 "Sec-independent protein translocase protein TatC"  
"DsuE09\_00603" 4520 "s59E13H2" 0 "Penicillin-binding protein activator LpoA"  
"DsuE09\_00603" 4520 "s59E25H2" 0 "Penicillin-binding protein activator LpoA"  
"DsuE09\_00603" 4520 "s59E5H2" 0 "Penicillin-binding protein activator LpoA"  
"DsuE09\_00603" 4520 "s63E6H2" 0 "Penicillin-binding protein activator LpoA"  
"DsuE09\_00604" 4521 "s59E13H2" 0 "Chaperone protein DnaK"  
"DsuE09\_00604" 4521 "s59E25H2" 0 "Chaperone protein DnaK"  
"DsuE09\_00604" 4521 "s59E5H2" 0 "Chaperone protein DnaK"  
"DsuE09\_00604" 4521 "s63E6H2" 0 "Chaperone protein DnaK"  
"DsuE09\_00605" 4522 "s59E13H2" 0 "heat shock protein GrpE"  
"DsuE09\_00605" 4522 "s59E25H2" 0 "heat shock protein GrpE"  
"DsuE09\_00605" 4522 "s59E5H2" 0 "heat shock protein GrpE"  
"DsuE09\_00605" 4522 "s63E6H2" 0 "heat shock protein GrpE"  
"DsuE09\_00606" 4523 "s59E13H2" 0 "Phosphoribosylaminoimidazole-succinocarboxamide synthase"  
"DsuE09\_00606" 4523 "s59E25H2" 0 "Phosphoribosylaminoimidazole-succinocarboxamide synthase"  
"DsuE09\_00606" 4523 "s59E5H2" 0 "Phosphoribosylaminoimidazole-succinocarboxamide synthase"  
"DsuE09\_00606" 4523 "s63E6H2" 0 "Phosphoribosylaminoimidazole-succinocarboxamide synthase"  
"DsuE09\_00607" 4524 "s59E13H2" 0 "Phosphoribosyl-AMP cyclohydrolase"  
"DsuE09\_00607" 4524 "s59E25H2" 0 "Phosphoribosyl-AMP cyclohydrolase"  
"DsuE09\_00607" 4524 "s59E5H2" 0 "Phosphoribosyl-AMP cyclohydrolase"  
"DsuE09\_00607" 4524 "s63E6H2" 0 "Phosphoribosyl-AMP cyclohydrolase"  
"DsuE09\_00608" 4525 "s59E13H2" 0 "ATP phosphoribosyltransferase"  
"DsuE09\_00608" 4525 "s59E25H2" 0 "ATP phosphoribosyltransferase"  
"DsuE09\_00608" 4525 "s59E5H2" 0 "ATP phosphoribosyltransferase"  
"DsuE09\_00608" 4525 "s63E6H2" 0 "ATP phosphoribosyltransferase"

"DsuE09\_00609" 4526 "s59E13H2" 0.007986051 "putative aspartate aminotransferase 2"  
"DsuE09\_00609" 4526 "s59E25H2" 0 "putative aspartate aminotransferase 2"  
"DsuE09\_00609" 4526 "s59E5H2" 0 "putative aspartate aminotransferase 2"  
"DsuE09\_00609" 4526 "s63E6H2" 0 "putative aspartate aminotransferase 2"  
"DsuE09\_00610" 4527 "s59E13H2" 0.1788302 "Transcriptional regulatory protein ZraR"  
"DsuE09\_00610" 4527 "s59E25H2" 0 "Transcriptional regulatory protein ZraR"  
"DsuE09\_00610" 4527 "s59E5H2" 0 "Transcriptional regulatory protein ZraR"  
"DsuE09\_00610" 4527 "s63E6H2" 0 "Transcriptional regulatory protein ZraR"  
"DsuE09\_00611" 4528 "s59E13H2" 0 "Lipid-A-disaccharide synthase"  
"DsuE09\_00611" 4528 "s59E25H2" 0 "Lipid-A-disaccharide synthase"  
"DsuE09\_00611" 4528 "s59E5H2" 0 "Lipid-A-disaccharide synthase"  
"DsuE09\_00611" 4528 "s63E6H2" 0 "Lipid-A-disaccharide synthase"  
"DsuE09\_00612" 4529 "s59E13H2" 0 "Putative oxidoreductase YceM"  
"DsuE09\_00612" 4529 "s59E25H2" 0 "Putative oxidoreductase YceM"  
"DsuE09\_00612" 4529 "s59E5H2" 0 "Putative oxidoreductase YceM"  
"DsuE09\_00612" 4529 "s63E6H2" 0 "Putative oxidoreductase YceM"  
"DsuE09\_00613" 4530 "s59E13H2" 0 "hypothetical protein"  
"DsuE09\_00613" 4530 "s59E25H2" 0 "hypothetical protein"  
"DsuE09\_00613" 4530 "s59E5H2" 0 "hypothetical protein"  
"DsuE09\_00613" 4530 "s63E6H2" 0 "hypothetical protein"  
"DsuE09\_00614" 4531 "s59E13H2" 0 "Acyl-[acyl-carrier-protein]--UDP-N-acetylglucosamine O-acyltransferase"  
"DsuE09\_00614" 4531 "s59E25H2" 0 "Acyl-[acyl-carrier-protein]--UDP-N-acetylglucosamine O-acyltransferase"  
"DsuE09\_00614" 4531 "s59E5H2" 0 "Acyl-[acyl-carrier-protein]--UDP-N-acetylglucosamine O-acyltransferase"  
"DsuE09\_00614" 4531 "s63E6H2" 0 "Acyl-[acyl-carrier-protein]--UDP-N-acetylglucosamine O-acyltransferase"  
"DsuE09\_00615" 4532 "s59E13H2" 0 "3-hydroxyacyl-[acyl-carrier-protein] dehydratase FabZ"  
"DsuE09\_00615" 4532 "s59E25H2" 0 "3-hydroxyacyl-[acyl-carrier-protein] dehydratase FabZ"  
"DsuE09\_00615" 4532 "s59E5H2" 0 "3-hydroxyacyl-[acyl-carrier-protein] dehydratase FabZ"  
"DsuE09\_00615" 4532 "s63E6H2" 0 "3-hydroxyacyl-[acyl-carrier-protein] dehydratase FabZ"  
"DsuE09\_00616" 4533 "s59E13H2" 0 "UDP-3-O-(3-hydroxymyristoyl)glucosamine N-acyltransferase"  
"DsuE09\_00616" 4533 "s59E25H2" 0 "UDP-3-O-(3-hydroxymyristoyl)glucosamine N-acyltransferase"  
"DsuE09\_00616" 4533 "s59E5H2" 0 "UDP-3-O-(3-hydroxymyristoyl)glucosamine N-acyltransferase"  
"DsuE09\_00616" 4533 "s63E6H2" 0 "UDP-3-O-(3-hydroxymyristoyl)glucosamine N-acyltransferase"  
"DsuE09\_00617" 4534 "s59E13H2" 0 "Outer membrane protein (OmpH-like)"  
"DsuE09\_00617" 4534 "s59E25H2" 0 "Outer membrane protein (OmpH-like)"  
"DsuE09\_00617" 4534 "s59E5H2" 0 "Outer membrane protein (OmpH-like)"  
"DsuE09\_00617" 4534 "s63E6H2" 0 "Outer membrane protein (OmpH-like)"  
"DsuE09\_00618" 4535 "s59E13H2" 0 "Outer membrane protein assembly factor BamA precursor"  
"DsuE09\_00618" 4535 "s59E25H2" 0 "Outer membrane protein assembly factor BamA precursor"  
"DsuE09\_00618" 4535 "s59E5H2" 0 "Outer membrane protein assembly factor BamA precursor"  
"DsuE09\_00618" 4535 "s63E6H2" 0 "Outer membrane protein assembly factor BamA precursor"  
"DsuE09\_00619" 4536 "s59E13H2" 0 "Lipoprotein-releasing system ATP-binding protein LolD"  
"DsuE09\_00619" 4536 "s59E25H2" 0 "Lipoprotein-releasing system ATP-binding protein LolD"  
"DsuE09\_00619" 4536 "s59E5H2" 0 "Lipoprotein-releasing system ATP-binding protein LolD"  
"DsuE09\_00619" 4536 "s63E6H2" 0 "Lipoprotein-releasing system ATP-binding protein LolD"  
"DsuE09\_00620" 4537 "s59E13H2" 0 "Lipoprotein-releasing system transmembrane protein LolC"  
"DsuE09\_00620" 4537 "s59E25H2" 0 "Lipoprotein-releasing system transmembrane protein LolC"  
"DsuE09\_00620" 4537 "s59E5H2" 0 "Lipoprotein-releasing system transmembrane protein LolC"



"DsuE09\_00620" 4537 "s63E6H2" 0 "Lipoprotein-releasing system transmembrane protein LolC"  
"DsuE09\_00621" 4538 "s59E13H2" 0 "Lysine--tRNA ligase"  
"DsuE09\_00621" 4538 "s59E25H2" 0 "Lysine--tRNA ligase"  
"DsuE09\_00621" 4538 "s59E5H2" 0 "Lysine--tRNA ligase"  
"DsuE09\_00621" 4538 "s63E6H2" 0 "Lysine--tRNA ligase"  
"DsuE09\_00622" 4539 "s59E13H2" 0 "Acetyl-coenzyme A synthetase"  
"DsuE09\_00622" 4539 "s59E25H2" 0 "Acetyl-coenzyme A synthetase"  
"DsuE09\_00622" 4539 "s59E5H2" 0 "Acetyl-coenzyme A synthetase"  
"DsuE09\_00622" 4539 "s63E6H2" 0 "Acetyl-coenzyme A synthetase"  
"DsuE09\_00623" 4540 "s59E13H2" 0 "F(420)H(2) dehydrogenase subunit M"  
"DsuE09\_00623" 4540 "s59E25H2" 0 "F(420)H(2) dehydrogenase subunit M"  
"DsuE09\_00623" 4540 "s59E5H2" 0 "F(420)H(2) dehydrogenase subunit M"  
"DsuE09\_00623" 4540 "s63E6H2" 0 "F(420)H(2) dehydrogenase subunit M"  
"DsuE09\_00624" 4541 "s59E13H2" 0 "NADH-quinone oxidoreductase subunit L"  
"DsuE09\_00624" 4541 "s59E25H2" 0 "NADH-quinone oxidoreductase subunit L"  
"DsuE09\_00624" 4541 "s59E5H2" 0 "NADH-quinone oxidoreductase subunit L"  
"DsuE09\_00624" 4541 "s63E6H2" 0 "NADH-quinone oxidoreductase subunit L"  
"DsuE09\_00625" 4542 "s59E13H2" 0 "hypothetical protein"  
"DsuE09\_00625" 4542 "s59E25H2" 0 "hypothetical protein"  
"DsuE09\_00625" 4542 "s59E5H2" 0 "hypothetical protein"  
"DsuE09\_00625" 4542 "s63E6H2" 0 "hypothetical protein"  
"DsuE09\_00626" 4543 "s59E13H2" 0 "Na(+)/H(+) antiporter subunit D"  
"DsuE09\_00626" 4543 "s59E25H2" 0 "Na(+)/H(+) antiporter subunit D"  
"DsuE09\_00626" 4543 "s59E5H2" 0 "Na(+)/H(+) antiporter subunit D"  
"DsuE09\_00626" 4543 "s63E6H2" 0 "Na(+)/H(+) antiporter subunit D"  
"DsuE09\_00627" 4544 "s59E13H2" 0 "Na(+)/H(+) antiporter subunit C1"  
"DsuE09\_00627" 4544 "s59E25H2" 0 "Na(+)/H(+) antiporter subunit C1"  
"DsuE09\_00627" 4544 "s59E5H2" 0 "Na(+)/H(+) antiporter subunit C1"  
"DsuE09\_00627" 4544 "s63E6H2" 0 "Na(+)/H(+) antiporter subunit C1"  
"DsuE09\_00628" 4545 "s59E13H2" 0 "putative monovalent cation/H+ antiporter subunit B"  
"DsuE09\_00628" 4545 "s59E25H2" 0 "putative monovalent cation/H+ antiporter subunit B"  
"DsuE09\_00628" 4545 "s59E5H2" 0 "putative monovalent cation/H+ antiporter subunit B"  
"DsuE09\_00628" 4545 "s63E6H2" 0 "putative monovalent cation/H+ antiporter subunit B"  
"DsuE09\_00629" 4546 "s59E13H2" 0 "putative monovalent cation/H+ antiporter subunit B"  
"DsuE09\_00629" 4546 "s59E25H2" 0 "putative monovalent cation/H+ antiporter subunit B"  
"DsuE09\_00629" 4546 "s59E5H2" 0 "putative monovalent cation/H+ antiporter subunit B"  
"DsuE09\_00629" 4546 "s63E6H2" 0 "putative monovalent cation/H+ antiporter subunit B"  
"DsuE09\_00630" 4547 "s59E13H2" 0 "Na(+)/H(+) antiporter subunit G"  
"DsuE09\_00630" 4547 "s59E25H2" 0 "Na(+)/H(+) antiporter subunit G"  
"DsuE09\_00630" 4547 "s59E5H2" 0 "Na(+)/H(+) antiporter subunit G"  
"DsuE09\_00630" 4547 "s63E6H2" 0 "Na(+)/H(+) antiporter subunit G"  
"DsuE09\_00631" 4548 "s59E13H2" 0 "putative monovalent cation/H+ antiporter subunit F"  
"DsuE09\_00631" 4548 "s59E25H2" 0 "putative monovalent cation/H+ antiporter subunit F"  
"DsuE09\_00631" 4548 "s59E5H2" 0 "putative monovalent cation/H+ antiporter subunit F"  
"DsuE09\_00631" 4548 "s63E6H2" 0 "putative monovalent cation/H+ antiporter subunit F"  
"DsuE09\_00632" 4549 "s59E13H2" 0 "Na(+)/H(+) antiporter subunit B"  
"DsuE09\_00632" 4549 "s59E25H2" 0 "Na(+)/H(+) antiporter subunit B"

"DsuE09\_00632" 4549 "s59E5H2" 0 "Na(+)/H(+) antiporter subunit B"  
"DsuE09\_00632" 4549 "s63E6H2" 0 "Na(+)/H(+) antiporter subunit B"  
"DsuE09\_00633" 4550 "s59E13H2" 0 "Na(+)/H(+) antiporter subunit E1"  
"DsuE09\_00633" 4550 "s59E25H2" 0 "Na(+)/H(+) antiporter subunit E1"  
"DsuE09\_00633" 4550 "s59E5H2" 0 "Na(+)/H(+) antiporter subunit E1"  
"DsuE09\_00633" 4550 "s63E6H2" 0 "Na(+)/H(+) antiporter subunit E1"  
"DsuE09\_00634" 4551 "s59E13H2" 0 "Universal stress protein family protein"  
"DsuE09\_00634" 4551 "s59E25H2" 0 "Universal stress protein family protein"  
"DsuE09\_00634" 4551 "s59E5H2" 0 "Universal stress protein family protein"  
"DsuE09\_00634" 4551 "s63E6H2" 0 "Universal stress protein family protein"  
"DsuE09\_00636" 4553 "s59E13H2" 0 "Phosphate regulon transcriptional regulatory protein PhoB"  
"DsuE09\_00636" 4553 "s59E25H2" 0 "Phosphate regulon transcriptional regulatory protein PhoB"  
"DsuE09\_00636" 4553 "s59E5H2" 0 "Phosphate regulon transcriptional regulatory protein PhoB"  
"DsuE09\_00636" 4553 "s63E6H2" 0 "Phosphate regulon transcriptional regulatory protein PhoB"  
"DsuE09\_00637" 4554 "s59E13H2" 0 "Sporulation kinase E"  
"DsuE09\_00637" 4554 "s59E25H2" 0 "Sporulation kinase E"  
"DsuE09\_00637" 4554 "s59E5H2" 0 "Sporulation kinase E"  
"DsuE09\_00637" 4554 "s63E6H2" 0 "Sporulation kinase E"  
"DsuE09\_00638" 4555 "s59E13H2" 0 "Acetyl-CoA acetyltransferase"  
"DsuE09\_00638" 4555 "s59E25H2" 0 "Acetyl-CoA acetyltransferase"  
"DsuE09\_00638" 4555 "s59E5H2" 0 "Acetyl-CoA acetyltransferase"  
"DsuE09\_00638" 4555 "s63E6H2" 0 "Acetyl-CoA acetyltransferase"  
"DsuE09\_00639" 4556 "s59E13H2" 0 "3-hydroxypropionyl-coenzyme A dehydratase"  
"DsuE09\_00639" 4556 "s59E25H2" 0 "3-hydroxypropionyl-coenzyme A dehydratase"  
"DsuE09\_00639" 4556 "s59E5H2" 0 "3-hydroxypropionyl-coenzyme A dehydratase"  
"DsuE09\_00639" 4556 "s63E6H2" 0 "3-hydroxypropionyl-coenzyme A dehydratase"  
"DsuE09\_00640" 4557 "s59E13H2" 0 "Acryloyl-CoA reductase (NADH)"  
"DsuE09\_00640" 4557 "s59E25H2" 0 "Acryloyl-CoA reductase (NADH)"  
"DsuE09\_00640" 4557 "s59E5H2" 0 "Acryloyl-CoA reductase (NADH)"  
"DsuE09\_00640" 4557 "s63E6H2" 0 "Acryloyl-CoA reductase (NADH)"  
"DsuE09\_00641" 4558 "s59E13H2" 0 "Methylmalonyl-CoA mutase"  
"DsuE09\_00641" 4558 "s59E25H2" 0 "Methylmalonyl-CoA mutase"  
"DsuE09\_00641" 4558 "s59E5H2" 0 "Methylmalonyl-CoA mutase"  
"DsuE09\_00641" 4558 "s63E6H2" 0 "Methylmalonyl-CoA mutase"  
"DsuE09\_00642" 4559 "s59E13H2" 0 "Methylmalonyl-CoA mutase"  
"DsuE09\_00642" 4559 "s59E25H2" 0 "Methylmalonyl-CoA mutase"  
"DsuE09\_00642" 4559 "s59E5H2" 0 "Methylmalonyl-CoA mutase"  
"DsuE09\_00642" 4559 "s63E6H2" 0 "Methylmalonyl-CoA mutase"  
"DsuE09\_00643" 4560 "s59E13H2" 0 "putative GTPase/MT1543"  
"DsuE09\_00643" 4560 "s59E25H2" 0 "putative GTPase/MT1543"  
"DsuE09\_00643" 4560 "s59E5H2" 0 "putative GTPase/MT1543"  
"DsuE09\_00643" 4560 "s63E6H2" 0 "putative GTPase/MT1543"  
"DsuE09\_00644" 4561 "s59E13H2" 0 "hypothetical protein"  
"DsuE09\_00644" 4561 "s59E25H2" 0 "hypothetical protein"  
"DsuE09\_00644" 4561 "s59E5H2" 0 "hypothetical protein"  
"DsuE09\_00644" 4561 "s63E6H2" 0 "hypothetical protein"  
"DsuE09\_00645" 4562 "s59E13H2" 0 "DNA-binding transcriptional repressor PuuR"

"DsuE09\_00645" 4562 "s59E25H2" 0 "DNA-binding transcriptional repressor PuuR"  
"DsuE09\_00645" 4562 "s59E5H2" 0 "DNA-binding transcriptional repressor PuuR"  
"DsuE09\_00645" 4562 "s63E6H2" 0 "DNA-binding transcriptional repressor PuuR"  
"DsuE09\_00646" 4563 "s59E13H2" 0 "Acyl-CoA dehydrogenase"  
"DsuE09\_00646" 4563 "s59E25H2" 0 "Acyl-CoA dehydrogenase"  
"DsuE09\_00646" 4563 "s59E5H2" 0 "Acyl-CoA dehydrogenase"  
"DsuE09\_00646" 4563 "s63E6H2" 0 "Acyl-CoA dehydrogenase"  
"DsuE09\_00647" 4564 "s59E13H2" 0 "Hydroxymethylglutaryl-CoA lyase YngG"  
"DsuE09\_00647" 4564 "s59E25H2" 0 "Hydroxymethylglutaryl-CoA lyase YngG"  
"DsuE09\_00647" 4564 "s59E5H2" 0 "Hydroxymethylglutaryl-CoA lyase YngG"  
"DsuE09\_00647" 4564 "s63E6H2" 0 "Hydroxymethylglutaryl-CoA lyase YngG"  
"DsuE09\_00648" 4565 "s59E13H2" 0 "hypothetical protein"  
"DsuE09\_00648" 4565 "s59E25H2" 0 "hypothetical protein"  
"DsuE09\_00648" 4565 "s59E5H2" 0 "hypothetical protein"  
"DsuE09\_00648" 4565 "s63E6H2" 0 "hypothetical protein"  
"DsuE09\_00649" 4566 "s59E13H2" 0 "Putative N-acetyl-LL-diaminopimelate aminotransferase"  
"DsuE09\_00649" 4566 "s59E25H2" 0 "Putative N-acetyl-LL-diaminopimelate aminotransferase"  
"DsuE09\_00649" 4566 "s59E5H2" 0 "Putative N-acetyl-LL-diaminopimelate aminotransferase"  
"DsuE09\_00649" 4566 "s63E6H2" 0 "Putative N-acetyl-LL-diaminopimelate aminotransferase"  
"DsuE09\_00650" 4567 "s59E13H2" 0 "hypothetical protein"  
"DsuE09\_00650" 4567 "s59E25H2" 0 "hypothetical protein"  
"DsuE09\_00650" 4567 "s59E5H2" 0 "hypothetical protein"  
"DsuE09\_00650" 4567 "s63E6H2" 0 "hypothetical protein"  
"DsuE09\_00651" 4568 "s59E13H2" 0 "putative acetyl-CoA acyltransferase"  
"DsuE09\_00651" 4568 "s59E25H2" 0 "putative acetyl-CoA acyltransferase"  
"DsuE09\_00651" 4568 "s59E5H2" 0 "putative acetyl-CoA acyltransferase"  
"DsuE09\_00651" 4568 "s63E6H2" 0 "putative acetyl-CoA acyltransferase"  
"DsuE09\_00652" 4569 "s59E13H2" 0 "Putative ski2-type helicase"  
"DsuE09\_00652" 4569 "s59E25H2" 0 "Putative ski2-type helicase"  
"DsuE09\_00652" 4569 "s59E5H2" 0 "Putative ski2-type helicase"  
"DsuE09\_00652" 4569 "s63E6H2" 0 "Putative ski2-type helicase"  
"DsuE09\_00653" 4570 "s59E13H2" 0 "Sec-independent protein translocase protein TatAy"  
"DsuE09\_00653" 4570 "s59E25H2" 0 "Sec-independent protein translocase protein TatAy"  
"DsuE09\_00653" 4570 "s59E5H2" 0 "Sec-independent protein translocase protein TatAy"  
"DsuE09\_00653" 4570 "s63E6H2" 0 "Sec-independent protein translocase protein TatAy"  
"DsuE09\_00654" 4571 "s59E13H2" 0 "Inositol-1-monophosphatase"  
"DsuE09\_00654" 4571 "s59E25H2" 0 "Inositol-1-monophosphatase"  
"DsuE09\_00654" 4571 "s59E5H2" 0 "Inositol-1-monophosphatase"  
"DsuE09\_00654" 4571 "s63E6H2" 0 "Inositol-1-monophosphatase"  
"DsuE09\_00655" 4572 "s59E13H2" 0 "outer membrane protease"  
"DsuE09\_00655" 4572 "s59E25H2" 0 "outer membrane protease"  
"DsuE09\_00655" 4572 "s59E5H2" 0 "outer membrane protease"  
"DsuE09\_00655" 4572 "s63E6H2" 0 "outer membrane protease"  
"DsuE09\_00658" 4575 "s59E13H2" 0 "Tyrosine recombinase XerD"  
"DsuE09\_00658" 4575 "s59E25H2" 0 "Tyrosine recombinase XerD"  
"DsuE09\_00658" 4575 "s59E5H2" 0 "Tyrosine recombinase XerD"  
"DsuE09\_00658" 4575 "s63E6H2" 0 "Tyrosine recombinase XerD"

"DsuE09\_00659" 4576 "s59E13H2" 0 "Xaa-Pro dipeptidase"  
"DsuE09\_00659" 4576 "s59E25H2" 0 "Xaa-Pro dipeptidase"  
"DsuE09\_00659" 4576 "s59E5H2" 0 "Xaa-Pro dipeptidase"  
"DsuE09\_00659" 4576 "s63E6H2" 0 "Xaa-Pro dipeptidase"  
"DsuE09\_00661" 4578 "s59E13H2" 0 "3'(2'),5'-bisphosphate nucleotidase CysQ"  
"DsuE09\_00661" 4578 "s59E25H2" 0 "3'(2'),5'-bisphosphate nucleotidase CysQ"  
"DsuE09\_00661" 4578 "s59E5H2" 0 "3'(2'),5'-bisphosphate nucleotidase CysQ"  
"DsuE09\_00661" 4578 "s63E6H2" 0 "3'(2'),5'-bisphosphate nucleotidase CysQ"  
"DsuE09\_00662" 4579 "s59E13H2" 0 "Uroporphyrinogen-III C-methyltransferase"  
"DsuE09\_00662" 4579 "s59E25H2" 0 "Uroporphyrinogen-III C-methyltransferase"  
"DsuE09\_00662" 4579 "s59E5H2" 0 "Uroporphyrinogen-III C-methyltransferase"  
"DsuE09\_00662" 4579 "s63E6H2" 0 "Uroporphyrinogen-III C-methyltransferase"  
"DsuE09\_00663" 4580 "s59E13H2" 0 "Porphobilinogen deaminase"  
"DsuE09\_00663" 4580 "s59E25H2" 0 "Porphobilinogen deaminase"  
"DsuE09\_00663" 4580 "s59E5H2" 0 "Porphobilinogen deaminase"  
"DsuE09\_00663" 4580 "s63E6H2" 0 "Porphobilinogen deaminase"  
"DsuE09\_00664" 4581 "s59E13H2" 0 "2-C-methyl-D-erythritol 4-phosphate cytidylyltransferase"  
"DsuE09\_00664" 4581 "s59E25H2" 0 "2-C-methyl-D-erythritol 4-phosphate cytidylyltransferase"  
"DsuE09\_00664" 4581 "s59E5H2" 0 "2-C-methyl-D-erythritol 4-phosphate cytidylyltransferase"  
"DsuE09\_00664" 4581 "s63E6H2" 0 "2-C-methyl-D-erythritol 4-phosphate cytidylyltransferase"  
"DsuE09\_00665" 4582 "s59E13H2" 0 "hypothetical protein"  
"DsuE09\_00665" 4582 "s59E25H2" 0 "hypothetical protein"  
"DsuE09\_00665" 4582 "s59E5H2" 0 "hypothetical protein"  
"DsuE09\_00665" 4582 "s63E6H2" 0 "hypothetical protein"  
"DsuE09\_00666" 4583 "s59E13H2" 0 "Modulator of FtsH protease HflC"  
"DsuE09\_00666" 4583 "s59E25H2" 0 "Modulator of FtsH protease HflC"  
"DsuE09\_00666" 4583 "s59E5H2" 0.005513746 "Modulator of FtsH protease HflC"  
"DsuE09\_00666" 4583 "s63E6H2" 0 "Modulator of FtsH protease HflC"  
"DsuE09\_00667" 4584 "s59E13H2" 0 "hypothetical protein"  
"DsuE09\_00667" 4584 "s59E25H2" 0 "hypothetical protein"  
"DsuE09\_00667" 4584 "s59E5H2" 0 "hypothetical protein"  
"DsuE09\_00667" 4584 "s63E6H2" 0 "hypothetical protein"  
"DsuE09\_00668" 4585 "s59E13H2" 0 "Uracil DNA glycosylase superfamily protein"  
"DsuE09\_00668" 4585 "s59E25H2" 0 "Uracil DNA glycosylase superfamily protein"  
"DsuE09\_00668" 4585 "s59E5H2" 0 "Uracil DNA glycosylase superfamily protein"  
"DsuE09\_00668" 4585 "s63E6H2" 0 "Uracil DNA glycosylase superfamily protein"  
"DsuE09\_00669" 4586 "s59E13H2" 0 "Coenzyme A biosynthesis bifunctional protein CoaBC"  
"DsuE09\_00669" 4586 "s59E25H2" 0 "Coenzyme A biosynthesis bifunctional protein CoaBC"  
"DsuE09\_00669" 4586 "s59E5H2" 0 "Coenzyme A biosynthesis bifunctional protein CoaBC"  
"DsuE09\_00669" 4586 "s63E6H2" 0 "Coenzyme A biosynthesis bifunctional protein CoaBC"  
"DsuE09\_00670" 4587 "s59E13H2" 0 "hypothetical protein"  
"DsuE09\_00670" 4587 "s59E25H2" 0 "hypothetical protein"  
"DsuE09\_00670" 4587 "s59E5H2" 0 "hypothetical protein"  
"DsuE09\_00670" 4587 "s63E6H2" 0 "hypothetical protein"  
"DsuE09\_00671" 4588 "s59E13H2" 0 "YGGT family protein"  
"DsuE09\_00671" 4588 "s59E25H2" 0 "YGGT family protein"  
"DsuE09\_00671" 4588 "s59E5H2" 0 "YGGT family protein"

"DsuE09\_00671" 4588 "s63E6H2" 0 "YGGT family protein"  
"DsuE09\_00675" 4592 "s59E13H2" 0 "Putative zinc ribbon domain protein"  
"DsuE09\_00675" 4592 "s59E25H2" 0 "Putative zinc ribbon domain protein"  
"DsuE09\_00675" 4592 "s59E5H2" 0 "Putative zinc ribbon domain protein"  
"DsuE09\_00675" 4592 "s63E6H2" 0 "Putative zinc ribbon domain protein"  
"DsuE09\_00677" 4594 "s59E13H2" 0 "RNA polymerase sigma factor RpoD"  
"DsuE09\_00677" 4594 "s59E25H2" 0 "RNA polymerase sigma factor RpoD"  
"DsuE09\_00677" 4594 "s59E5H2" 0 "RNA polymerase sigma factor RpoD"  
"DsuE09\_00677" 4594 "s63E6H2" 0 "RNA polymerase sigma factor RpoD"  
"DsuE09\_00678" 4595 "s59E13H2" 0 "DNA primase"  
"DsuE09\_00678" 4595 "s59E25H2" 0 "DNA primase"  
"DsuE09\_00678" 4595 "s59E5H2" 0 "DNA primase"  
"DsuE09\_00678" 4595 "s63E6H2" 0 "DNA primase"  
"DsuE09\_00679" 4596 "s59E13H2" 0 "Tyrosine-protein kinase etk"  
"DsuE09\_00679" 4596 "s59E25H2" 0 "Tyrosine-protein kinase etk"  
"DsuE09\_00679" 4596 "s59E5H2" 0 "Tyrosine-protein kinase etk"  
"DsuE09\_00679" 4596 "s63E6H2" 0 "Tyrosine-protein kinase etk"  
"DsuE09\_00680" 4597 "s59E13H2" 0 "Polysialic acid transport protein KpsD precursor"  
"DsuE09\_00680" 4597 "s59E25H2" 0 "Polysialic acid transport protein KpsD precursor"  
"DsuE09\_00680" 4597 "s59E5H2" 0 "Polysialic acid transport protein KpsD precursor"  
"DsuE09\_00680" 4597 "s63E6H2" 0 "Polysialic acid transport protein KpsD precursor"  
"DsuE09\_00681" 4598 "s59E13H2" 0 "GIY-YIG nuclease superfamily protein"  
"DsuE09\_00681" 4598 "s59E25H2" 0 "GIY-YIG nuclease superfamily protein"  
"DsuE09\_00681" 4598 "s59E5H2" 0 "GIY-YIG nuclease superfamily protein"  
"DsuE09\_00681" 4598 "s63E6H2" 0 "GIY-YIG nuclease superfamily protein"  
"DsuE09\_00682" 4599 "s59E13H2" 0 "hypothetical protein"  
"DsuE09\_00682" 4599 "s59E25H2" 0 "hypothetical protein"  
"DsuE09\_00682" 4599 "s59E5H2" 0 "hypothetical protein"  
"DsuE09\_00682" 4599 "s63E6H2" 0 "hypothetical protein"  
"DsuE09\_00683" 4600 "s59E13H2" 0 "hypothetical protein"  
"DsuE09\_00683" 4600 "s59E25H2" 0 "hypothetical protein"  
"DsuE09\_00683" 4600 "s59E5H2" 0 "hypothetical protein"  
"DsuE09\_00683" 4600 "s63E6H2" 0 "hypothetical protein"  
"DsuE09\_00684" 4601 "s59E13H2" 0 "UDP-N-acetylgalactosamine-undecaprenyl-phosphate N-acetylgalactosaminophosphotransferase"  
"DsuE09\_00684" 4601 "s59E25H2" 0 "UDP-N-acetylgalactosamine-undecaprenyl-phosphate N-acetylgalactosaminophosphotransferase"  
"DsuE09\_00684" 4601 "s59E5H2" 0 "UDP-N-acetylgalactosamine-undecaprenyl-phosphate N-acetylgalactosaminophosphotransferase"  
"DsuE09\_00684" 4601 "s63E6H2" 0 "UDP-N-acetylgalactosamine-undecaprenyl-phosphate N-acetylgalactosaminophosphotransferase"  
"DsuE09\_00685" 4602 "s59E13H2" 0 "hypothetical protein"  
"DsuE09\_00685" 4602 "s59E25H2" 0 "hypothetical protein"  
"DsuE09\_00685" 4602 "s59E5H2" 0 "hypothetical protein"  
"DsuE09\_00685" 4602 "s63E6H2" 0 "hypothetical protein"  
"DsuE09\_00687" 4604 "s59E13H2" 0 "hypothetical protein"  
"DsuE09\_00687" 4604 "s59E25H2" 0 "hypothetical protein"  
"DsuE09\_00687" 4604 "s59E5H2" 0 "hypothetical protein"  
"DsuE09\_00687" 4604 "s63E6H2" 0 "hypothetical protein"  
"DsuE09\_00689" 4606 "s59E13H2" 0 "hypothetical protein"  
"DsuE09\_00689" 4606 "s59E25H2" 0 "hypothetical protein"

"DsuE09\_00689" 4606 "s59E5H2" 0 "hypothetical protein"  
"DsuE09\_00689" 4606 "s63E6H2" 0 "hypothetical protein"  
"DsuE09\_00690" 4607 "s59E13H2" 0 "hypothetical protein"  
"DsuE09\_00690" 4607 "s59E25H2" 0 "hypothetical protein"  
"DsuE09\_00690" 4607 "s59E5H2" 0 "hypothetical protein"  
"DsuE09\_00690" 4607 "s63E6H2" 0 "hypothetical protein"  
"DsuE09\_00691" 4608 "s59E13H2" 0 "Dissimilatory sulfite reductase D (DsrD)"  
"DsuE09\_00691" 4608 "s59E25H2" 0 "Dissimilatory sulfite reductase D (DsrD)"  
"DsuE09\_00691" 4608 "s59E5H2" 0 "Dissimilatory sulfite reductase D (DsrD)"  
"DsuE09\_00691" 4608 "s63E6H2" 0 "Dissimilatory sulfite reductase D (DsrD)"  
"DsuE09\_00692" 4609 "s59E13H2" 0 "Sulfite reductase, dissimilatory-type subunit gamma"  
"DsuE09\_00692" 4609 "s59E25H2" 0 "Sulfite reductase, dissimilatory-type subunit gamma"  
"DsuE09\_00692" 4609 "s59E5H2" 0 "Sulfite reductase, dissimilatory-type subunit gamma"  
"DsuE09\_00692" 4609 "s63E6H2" 0 "Sulfite reductase, dissimilatory-type subunit gamma"  
"DsuE09\_00693" 4610 "s59E13H2" 0 "Cobyrinic acid A,C-diamide synthase"  
"DsuE09\_00693" 4610 "s59E25H2" 0 "Cobyrinic acid A,C-diamide synthase"  
"DsuE09\_00693" 4610 "s59E5H2" 0 "Cobyrinic acid A,C-diamide synthase"  
"DsuE09\_00693" 4610 "s63E6H2" 0 "Cobyrinic acid A,C-diamide synthase"  
"DsuE09\_00694" 4611 "s59E13H2" 0 "Sulfite reductase, dissimilatory-type subunit beta"  
"DsuE09\_00694" 4611 "s59E25H2" 0 "Sulfite reductase, dissimilatory-type subunit beta"  
"DsuE09\_00694" 4611 "s59E5H2" 0 "Sulfite reductase, dissimilatory-type subunit beta"  
"DsuE09\_00694" 4611 "s63E6H2" 0 "Sulfite reductase, dissimilatory-type subunit beta"  
"DsuE09\_00695" 4612 "s59E13H2" 0 "Sulfite reductase, dissimilatory-type subunit alpha"  
"DsuE09\_00695" 4612 "s59E25H2" 0 "Sulfite reductase, dissimilatory-type subunit alpha"  
"DsuE09\_00695" 4612 "s59E5H2" 0 "Sulfite reductase, dissimilatory-type subunit alpha"  
"DsuE09\_00695" 4612 "s63E6H2" 0 "Sulfite reductase, dissimilatory-type subunit alpha"  
"DsuE09\_00696" 4613 "s59E13H2" 0 "Yip1 domain protein"  
"DsuE09\_00696" 4613 "s59E25H2" 0 "Yip1 domain protein"  
"DsuE09\_00696" 4613 "s59E5H2" 0 "Yip1 domain protein"  
"DsuE09\_00696" 4613 "s63E6H2" 0 "Yip1 domain protein"  
"DsuE09\_00697" 4614 "s59E13H2" 0 "ATP-dependent DNA helicase PcrA"  
"DsuE09\_00697" 4614 "s59E25H2" 0 "ATP-dependent DNA helicase PcrA"  
"DsuE09\_00697" 4614 "s59E5H2" 0 "ATP-dependent DNA helicase PcrA"  
"DsuE09\_00697" 4614 "s63E6H2" 0 "ATP-dependent DNA helicase PcrA"  
"DsuE09\_00698" 4615 "s59E13H2" 0 "Endonuclease V"  
"DsuE09\_00698" 4615 "s59E25H2" 0 "Endonuclease V"  
"DsuE09\_00698" 4615 "s59E5H2" 0 "Endonuclease V"  
"DsuE09\_00698" 4615 "s63E6H2" 0 "Endonuclease V"  
"DsuE09\_00699" 4616 "s59E13H2" 0 "GTPase Era"  
"DsuE09\_00699" 4616 "s59E25H2" 0 "GTPase Era"  
"DsuE09\_00699" 4616 "s59E5H2" 0 "GTPase Era"  
"DsuE09\_00699" 4616 "s63E6H2" 0 "GTPase Era"  
"DsuE09\_00700" 4617 "s59E13H2" 0 "Transcriptional regulatory protein ZraR"  
"DsuE09\_00700" 4617 "s59E25H2" 0 "Transcriptional regulatory protein ZraR"  
"DsuE09\_00700" 4617 "s59E5H2" 0 "Transcriptional regulatory protein ZraR"  
"DsuE09\_00700" 4617 "s63E6H2" 0 "Transcriptional regulatory protein ZraR"  
"DsuE09\_00701" 4618 "s59E13H2" 0 "Sensor protein ZraS"

"DsuE09\_00701" 4618 "s59E25H2" 0 "Sensor protein ZraS"  
"DsuE09\_00701" 4618 "s59E5H2" 0 "Sensor protein ZraS"  
"DsuE09\_00701" 4618 "s63E6H2" 0 "Sensor protein ZraS"  
"DsuE09\_00702" 4619 "s59E13H2" 0 "Bifunctional purine biosynthesis protein PurH"  
"DsuE09\_00702" 4619 "s59E25H2" 0 "Bifunctional purine biosynthesis protein PurH"  
"DsuE09\_00702" 4619 "s59E5H2" 0 "Bifunctional purine biosynthesis protein PurH"  
"DsuE09\_00702" 4619 "s63E6H2" 0 "Bifunctional purine biosynthesis protein PurH"  
"DsuE09\_00703" 4620 "s59E13H2" 0 "Phosphoserine phosphatase 1"  
"DsuE09\_00703" 4620 "s59E25H2" 0 "Phosphoserine phosphatase 1"  
"DsuE09\_00703" 4620 "s59E5H2" 0 "Phosphoserine phosphatase 1"  
"DsuE09\_00703" 4620 "s63E6H2" 0 "Phosphoserine phosphatase 1"  
"DsuE09\_00704" 4621 "s59E13H2" 0 "YfaZ precursor"  
"DsuE09\_00704" 4621 "s59E25H2" 0 "YfaZ precursor"  
"DsuE09\_00704" 4621 "s59E5H2" 0 "YfaZ precursor"  
"DsuE09\_00704" 4621 "s63E6H2" 0 "YfaZ precursor"  
"DsuE09\_00706" 4623 "s59E13H2" 0 "hypothetical protein"  
"DsuE09\_00706" 4623 "s59E25H2" 0 "hypothetical protein"  
"DsuE09\_00706" 4623 "s59E5H2" 0 "hypothetical protein"  
"DsuE09\_00706" 4623 "s63E6H2" 0 "hypothetical protein"  
"DsuE09\_00707" 4624 "s59E13H2" 0 "3-chloro-4-hydroxyphenylacetate reductive dehalogenase precursor"  
"DsuE09\_00707" 4624 "s59E25H2" 0 "3-chloro-4-hydroxyphenylacetate reductive dehalogenase precursor"  
"DsuE09\_00707" 4624 "s59E5H2" 0 "3-chloro-4-hydroxyphenylacetate reductive dehalogenase precursor"  
"DsuE09\_00707" 4624 "s63E6H2" 0 "3-chloro-4-hydroxyphenylacetate reductive dehalogenase precursor"  
"DsuE09\_00708" 4625 "s59E13H2" 0 "putative sulfoacetate transporter SauU"  
"DsuE09\_00708" 4625 "s59E25H2" 0 "putative sulfoacetate transporter SauU"  
"DsuE09\_00708" 4625 "s59E5H2" 0 "putative sulfoacetate transporter SauU"  
"DsuE09\_00708" 4625 "s63E6H2" 0 "putative sulfoacetate transporter SauU"  
"DsuE09\_00709" 4626 "s59E13H2" 0 "Imidazoleglycerol-phosphate dehydratase"  
"DsuE09\_00709" 4626 "s59E25H2" 0 "Imidazoleglycerol-phosphate dehydratase"  
"DsuE09\_00709" 4626 "s59E5H2" 0 "Imidazoleglycerol-phosphate dehydratase"  
"DsuE09\_00709" 4626 "s63E6H2" 0 "Imidazoleglycerol-phosphate dehydratase"  
"DsuE09\_00710" 4627 "s59E13H2" 0 "putative peptidoglycan biosynthesis protein MurJ"  
"DsuE09\_00710" 4627 "s59E25H2" 0 "putative peptidoglycan biosynthesis protein MurJ"  
"DsuE09\_00710" 4627 "s59E5H2" 0 "putative peptidoglycan biosynthesis protein MurJ"  
"DsuE09\_00710" 4627 "s63E6H2" 0 "putative peptidoglycan biosynthesis protein MurJ"  
"DsuE09\_00711" 4628 "s59E13H2" 0 "30S ribosomal protein S20"  
"DsuE09\_00711" 4628 "s59E25H2" 0 "30S ribosomal protein S20"  
"DsuE09\_00711" 4628 "s59E5H2" 0 "30S ribosomal protein S20"  
"DsuE09\_00711" 4628 "s63E6H2" 0 "30S ribosomal protein S20"  
"DsuE09\_00712" 4629 "s59E13H2" 0 "DNA polymerase III subunit delta"  
"DsuE09\_00712" 4629 "s59E25H2" 0 "DNA polymerase III subunit delta"  
"DsuE09\_00712" 4629 "s59E5H2" 0 "DNA polymerase III subunit delta"  
"DsuE09\_00712" 4629 "s63E6H2" 0 "DNA polymerase III subunit delta"  
"DsuE09\_00713" 4630 "s59E13H2" 0 "hypothetical protein"  
"DsuE09\_00713" 4630 "s59E25H2" 0 "hypothetical protein"  
"DsuE09\_00713" 4630 "s59E5H2" 0 "hypothetical protein"  
"DsuE09\_00713" 4630 "s63E6H2" 0 "hypothetical protein"

"DsuE09\_00714" 4631 "s59E13H2" 0 "Leucine--tRNA ligase"  
"DsuE09\_00714" 4631 "s59E25H2" 0 "Leucine--tRNA ligase"  
"DsuE09\_00714" 4631 "s59E5H2" 0 "Leucine--tRNA ligase"  
"DsuE09\_00714" 4631 "s63E6H2" 0 "Leucine--tRNA ligase"  
"DsuE09\_00715" 4632 "s59E13H2" 0 "hypothetical protein"  
"DsuE09\_00715" 4632 "s59E25H2" 0 "hypothetical protein"  
"DsuE09\_00715" 4632 "s59E5H2" 0 "hypothetical protein"  
"DsuE09\_00715" 4632 "s63E6H2" 0 "hypothetical protein"  
"DsuE09\_00716" 4633 "s59E13H2" 0 "hypothetical protein"  
"DsuE09\_00716" 4633 "s59E25H2" 0 "hypothetical protein"  
"DsuE09\_00716" 4633 "s59E5H2" 0 "hypothetical protein"  
"DsuE09\_00716" 4633 "s63E6H2" 0 "hypothetical protein"  
"DsuE09\_00717" 4634 "s59E13H2" 0 "6,7-dimethyl-8-ribityllumazine synthase"  
"DsuE09\_00717" 4634 "s59E25H2" 0 "6,7-dimethyl-8-ribityllumazine synthase"  
"DsuE09\_00717" 4634 "s59E5H2" 0 "6,7-dimethyl-8-ribityllumazine synthase"  
"DsuE09\_00717" 4634 "s63E6H2" 0 "6,7-dimethyl-8-ribityllumazine synthase"  
"DsuE09\_00718" 4635 "s59E13H2" 0 "Riboflavin biosynthesis protein RibBA"  
"DsuE09\_00718" 4635 "s59E25H2" 0 "Riboflavin biosynthesis protein RibBA"  
"DsuE09\_00718" 4635 "s59E5H2" 0 "Riboflavin biosynthesis protein RibBA"  
"DsuE09\_00718" 4635 "s63E6H2" 0 "Riboflavin biosynthesis protein RibBA"  
"DsuE09\_00719" 4636 "s59E13H2" 0 "Riboflavin synthase"  
"DsuE09\_00719" 4636 "s59E25H2" 0 "Riboflavin synthase"  
"DsuE09\_00719" 4636 "s59E5H2" 0 "Riboflavin synthase"  
"DsuE09\_00719" 4636 "s63E6H2" 0 "Riboflavin synthase"  
"DsuE09\_00721" 4638 "s59E13H2" 0 "Riboflavin biosynthesis protein RibD"  
"DsuE09\_00721" 4638 "s59E25H2" 0 "Riboflavin biosynthesis protein RibD"  
"DsuE09\_00721" 4638 "s59E5H2" 0 "Riboflavin biosynthesis protein RibD"  
"DsuE09\_00721" 4638 "s63E6H2" 0 "Riboflavin biosynthesis protein RibD"  
"DsuE09\_00722" 4639 "s59E13H2" 0 "Transcriptional repressor NrdR"  
"DsuE09\_00722" 4639 "s59E25H2" 0 "Transcriptional repressor NrdR"  
"DsuE09\_00722" 4639 "s59E5H2" 0 "Transcriptional repressor NrdR"  
"DsuE09\_00722" 4639 "s63E6H2" 0 "Transcriptional repressor NrdR"  
"DsuE09\_00723" 4640 "s59E13H2" 0 "tRNA-specific adenosine deaminase"  
"DsuE09\_00723" 4640 "s59E25H2" 0 "tRNA-specific adenosine deaminase"  
"DsuE09\_00723" 4640 "s59E5H2" 0 "tRNA-specific adenosine deaminase"  
"DsuE09\_00723" 4640 "s63E6H2" 0 "tRNA-specific adenosine deaminase"  
"DsuE09\_00724" 4641 "s59E13H2" 0 "Ribose-5-phosphate isomerase B"  
"DsuE09\_00724" 4641 "s59E25H2" 0 "Ribose-5-phosphate isomerase B"  
"DsuE09\_00724" 4641 "s59E5H2" 0 "Ribose-5-phosphate isomerase B"  
"DsuE09\_00724" 4641 "s63E6H2" 0 "Ribose-5-phosphate isomerase B"  
"DsuE09\_00725" 4642 "s59E13H2" 0 "3-oxoacyl-[acyl-carrier-protein] synthase 2"  
"DsuE09\_00725" 4642 "s59E25H2" 0 "3-oxoacyl-[acyl-carrier-protein] synthase 2"  
"DsuE09\_00725" 4642 "s59E5H2" 0 "3-oxoacyl-[acyl-carrier-protein] synthase 2"  
"DsuE09\_00725" 4642 "s63E6H2" 0 "3-oxoacyl-[acyl-carrier-protein] synthase 2"  
"DsuE09\_00726" 4643 "s59E13H2" 0 "Acyl carrier protein"  
"DsuE09\_00726" 4643 "s59E25H2" 0 "Acyl carrier protein"  
"DsuE09\_00726" 4643 "s59E5H2" 0 "Acyl carrier protein"



"DsuE09\_00726" 4643 "s63E6H2" 0 "Acyl carrier protein"  
"DsuE09\_00727" 4644 "s59E13H2" 0 "3-oxoacyl-[acyl-carrier-protein] reductase FabG"  
"DsuE09\_00727" 4644 "s59E25H2" 0 "3-oxoacyl-[acyl-carrier-protein] reductase FabG"  
"DsuE09\_00727" 4644 "s59E5H2" 0 "3-oxoacyl-[acyl-carrier-protein] reductase FabG"  
"DsuE09\_00727" 4644 "s63E6H2" 0 "3-oxoacyl-[acyl-carrier-protein] reductase FabG"  
"DsuE09\_00728" 4645 "s59E13H2" 0 "Phosphate acyltransferase"  
"DsuE09\_00728" 4645 "s59E25H2" 0 "Phosphate acyltransferase"  
"DsuE09\_00728" 4645 "s59E5H2" 0 "Phosphate acyltransferase"  
"DsuE09\_00728" 4645 "s63E6H2" 0 "Phosphate acyltransferase"  
"DsuE09\_00729" 4646 "s59E13H2" 0 "hypothetical protein"  
"DsuE09\_00729" 4646 "s59E25H2" 0 "hypothetical protein"  
"DsuE09\_00729" 4646 "s59E5H2" 0 "hypothetical protein"  
"DsuE09\_00729" 4646 "s63E6H2" 0 "hypothetical protein"  
"DsuE09\_00730" 4647 "s59E13H2" 0 "4-hydroxybutyryl-CoA dehydratase/vinylacetyl-CoA-Delta-isomerase"  
"DsuE09\_00730" 4647 "s59E25H2" 0 "4-hydroxybutyryl-CoA dehydratase/vinylacetyl-CoA-Delta-isomerase"  
"DsuE09\_00730" 4647 "s59E5H2" 0 "4-hydroxybutyryl-CoA dehydratase/vinylacetyl-CoA-Delta-isomerase"  
"DsuE09\_00730" 4647 "s63E6H2" 0 "4-hydroxybutyryl-CoA dehydratase/vinylacetyl-CoA-Delta-isomerase"  
"DsuE09\_00732" 4649 "s59E13H2" 0 "Phosphosulfolactate synthase"  
"DsuE09\_00732" 4649 "s59E25H2" 0 "Phosphosulfolactate synthase"  
"DsuE09\_00732" 4649 "s59E5H2" 0 "Phosphosulfolactate synthase"  
"DsuE09\_00732" 4649 "s63E6H2" 0 "Phosphosulfolactate synthase"  
"DsuE09\_00733" 4650 "s59E13H2" 0 "L(+)-tartrate dehydratase subunit alpha"  
"DsuE09\_00733" 4650 "s59E25H2" 0 "L(+)-tartrate dehydratase subunit alpha"  
"DsuE09\_00733" 4650 "s59E5H2" 0 "L(+)-tartrate dehydratase subunit alpha"  
"DsuE09\_00733" 4650 "s63E6H2" 0 "L(+)-tartrate dehydratase subunit alpha"  
"DsuE09\_00734" 4651 "s59E13H2" 0 "L(+)-tartrate dehydratase subunit beta"  
"DsuE09\_00734" 4651 "s59E25H2" 0 "L(+)-tartrate dehydratase subunit beta"  
"DsuE09\_00734" 4651 "s59E5H2" 0 "L(+)-tartrate dehydratase subunit beta"  
"DsuE09\_00734" 4651 "s63E6H2" 0 "L(+)-tartrate dehydratase subunit beta"  
"DsuE09\_00735" 4652 "s59E13H2" 0 "hypothetical protein"  
"DsuE09\_00735" 4652 "s59E25H2" 0 "hypothetical protein"  
"DsuE09\_00735" 4652 "s59E5H2" 0 "hypothetical protein"  
"DsuE09\_00735" 4652 "s63E6H2" 0 "hypothetical protein"  
"DsuE09\_00736" 4653 "s59E13H2" 0 "hypothetical protein"  
"DsuE09\_00736" 4653 "s59E25H2" 0 "hypothetical protein"  
"DsuE09\_00736" 4653 "s59E5H2" 0 "hypothetical protein"  
"DsuE09\_00736" 4653 "s63E6H2" 0 "hypothetical protein"  
"DsuE09\_00737" 4654 "s59E13H2" 0 "HTH-type transcriptional regulator KipR"  
"DsuE09\_00737" 4654 "s59E25H2" 0 "HTH-type transcriptional regulator KipR"  
"DsuE09\_00737" 4654 "s59E5H2" 0 "HTH-type transcriptional regulator KipR"  
"DsuE09\_00737" 4654 "s63E6H2" 0 "HTH-type transcriptional regulator KipR"  
"DsuE09\_00738" 4655 "s59E13H2" 0 "3-keto-5-aminohexanoate cleavage enzyme"  
"DsuE09\_00738" 4655 "s59E25H2" 0 "3-keto-5-aminohexanoate cleavage enzyme"  
"DsuE09\_00738" 4655 "s59E5H2" 0 "3-keto-5-aminohexanoate cleavage enzyme"  
"DsuE09\_00738" 4655 "s63E6H2" 0 "3-keto-5-aminohexanoate cleavage enzyme"  
"DsuE09\_00739" 4656 "s59E13H2" 0 "Pyruvate carboxylase subunit B"  
"DsuE09\_00739" 4656 "s59E25H2" 0 "Pyruvate carboxylase subunit B"

"DsuE09\_00739" 4656 "s59E5H2" 0 "Pyruvate carboxylase subunit B"  
"DsuE09\_00739" 4656 "s63E6H2" 0 "Pyruvate carboxylase subunit B"  
"DsuE09\_00740" 4657 "s59E13H2" 0 "hypothetical protein"  
"DsuE09\_00740" 4657 "s59E25H2" 0 "hypothetical protein"  
"DsuE09\_00740" 4657 "s59E5H2" 0 "hypothetical protein"  
"DsuE09\_00740" 4657 "s63E6H2" 0 "hypothetical protein"  
"DsuE09\_00741" 4658 "s59E13H2" 0 "Putative aliphatic sulfonates-binding protein precursor"  
"DsuE09\_00741" 4658 "s59E25H2" 0 "Putative aliphatic sulfonates-binding protein precursor"  
"DsuE09\_00741" 4658 "s59E5H2" 0 "Putative aliphatic sulfonates-binding protein precursor"  
"DsuE09\_00741" 4658 "s63E6H2" 0 "Putative aliphatic sulfonates-binding protein precursor"  
"DsuE09\_00742" 4659 "s59E13H2" 0 "imidazolonepropionase"  
"DsuE09\_00742" 4659 "s59E25H2" 0 "imidazolonepropionase"  
"DsuE09\_00742" 4659 "s59E5H2" 0 "imidazolonepropionase"  
"DsuE09\_00742" 4659 "s63E6H2" 0 "imidazolonepropionase"  
"DsuE09\_00743" 4660 "s59E13H2" 0 "Bicarbonate transport ATP-binding protein CmpD"  
"DsuE09\_00743" 4660 "s59E25H2" 0 "Bicarbonate transport ATP-binding protein CmpD"  
"DsuE09\_00743" 4660 "s59E5H2" 0 "Bicarbonate transport ATP-binding protein CmpD"  
"DsuE09\_00743" 4660 "s63E6H2" 0 "Bicarbonate transport ATP-binding protein CmpD"  
"DsuE09\_00744" 4661 "s59E13H2" 0 "Bicarbonate transport system permease protein CmpB"  
"DsuE09\_00744" 4661 "s59E25H2" 0 "Bicarbonate transport system permease protein CmpB"  
"DsuE09\_00744" 4661 "s59E5H2" 0 "Bicarbonate transport system permease protein CmpB"  
"DsuE09\_00744" 4661 "s63E6H2" 0 "Bicarbonate transport system permease protein CmpB"  
"DsuE09\_00745" 4662 "s59E13H2" 0 "Putative transposase"  
"DsuE09\_00745" 4662 "s59E25H2" 0 "Putative transposase"  
"DsuE09\_00745" 4662 "s59E5H2" 0 "Putative transposase"  
"DsuE09\_00745" 4662 "s63E6H2" 0 "Putative transposase"  
"DsuE09\_00746" 4663 "s59E13H2" 0 "hypothetical protein"  
"DsuE09\_00746" 4663 "s59E25H2" 0 "hypothetical protein"  
"DsuE09\_00746" 4663 "s59E5H2" 0 "hypothetical protein"  
"DsuE09\_00746" 4663 "s63E6H2" 0 "hypothetical protein"  
"DsuE09\_00748" 4665 "s59E13H2" 0 "hypothetical protein"  
"DsuE09\_00748" 4665 "s59E25H2" 0 "hypothetical protein"  
"DsuE09\_00748" 4665 "s59E5H2" 0.4558379 "hypothetical protein"  
"DsuE09\_00748" 4665 "s63E6H2" 0 "hypothetical protein"  
"DsuE09\_00749" 4666 "s59E13H2" 0 "hypothetical protein"  
"DsuE09\_00749" 4666 "s59E25H2" 0 "hypothetical protein"  
"DsuE09\_00749" 4666 "s59E5H2" 0.5614995 "hypothetical protein"  
"DsuE09\_00749" 4666 "s63E6H2" 0 "hypothetical protein"  
"DsuE09\_00750" 4667 "s59E13H2" 0 "Guanidinobutyrase"  
"DsuE09\_00750" 4667 "s59E25H2" 0 "Guanidinobutyrase"  
"DsuE09\_00750" 4667 "s59E5H2" 0 "Guanidinobutyrase"  
"DsuE09\_00750" 4667 "s63E6H2" 0 "Guanidinobutyrase"  
"DsuE09\_00751" 4668 "s59E13H2" 0 "hypothetical protein"  
"DsuE09\_00751" 4668 "s59E25H2" 0 "hypothetical protein"  
"DsuE09\_00751" 4668 "s59E5H2" 0 "hypothetical protein"  
"DsuE09\_00751" 4668 "s63E6H2" 0 "hypothetical protein"  
"DsuE09\_00752" 4669 "s59E13H2" 0 "putative HTH-type transcriptional regulator YdfH"

"DsuE09\_00752" 4669 "s59E25H2" 0 "putative HTH-type transcriptional regulator YdfH"  
"DsuE09\_00752" 4669 "s59E5H2" 0 "putative HTH-type transcriptional regulator YdfH"  
"DsuE09\_00752" 4669 "s63E6H2" 0 "putative HTH-type transcriptional regulator YdfH"  
"DsuE09\_00753" 4670 "s59E13H2" 0 "Succinate dehydrogenase flavoprotein subunit"  
"DsuE09\_00753" 4670 "s59E25H2" 0 "Succinate dehydrogenase flavoprotein subunit"  
"DsuE09\_00753" 4670 "s59E5H2" 0 "Succinate dehydrogenase flavoprotein subunit"  
"DsuE09\_00753" 4670 "s63E6H2" 0 "Succinate dehydrogenase flavoprotein subunit"  
"DsuE09\_00754" 4671 "s59E13H2" 0 "Succinate dehydrogenase/Fumarate reductase transmembrane subunit"  
"DsuE09\_00754" 4671 "s59E25H2" 0 "Succinate dehydrogenase/Fumarate reductase transmembrane subunit"  
"DsuE09\_00754" 4671 "s59E5H2" 0 "Succinate dehydrogenase/Fumarate reductase transmembrane subunit"  
"DsuE09\_00754" 4671 "s63E6H2" 0 "Succinate dehydrogenase/Fumarate reductase transmembrane subunit"  
"DsuE09\_00755" 4672 "s59E13H2" 0 "Succinate dehydrogenase iron-sulfur subunit"  
"DsuE09\_00755" 4672 "s59E25H2" 0 "Succinate dehydrogenase iron-sulfur subunit"  
"DsuE09\_00755" 4672 "s59E5H2" 0 "Succinate dehydrogenase iron-sulfur subunit"  
"DsuE09\_00755" 4672 "s63E6H2" 0 "Succinate dehydrogenase iron-sulfur subunit"  
"DsuE09\_00756" 4673 "s59E13H2" 0 "Cytochrome b6"  
"DsuE09\_00756" 4673 "s59E25H2" 0 "Cytochrome b6"  
"DsuE09\_00756" 4673 "s59E5H2" 0 "Cytochrome b6"  
"DsuE09\_00756" 4673 "s63E6H2" 0 "Cytochrome b6"  
"DsuE09\_00757" 4674 "s59E13H2" 0 "L-aspartate oxidase"  
"DsuE09\_00757" 4674 "s59E25H2" 0 "L-aspartate oxidase"  
"DsuE09\_00757" 4674 "s59E5H2" 0 "L-aspartate oxidase"  
"DsuE09\_00757" 4674 "s63E6H2" 0 "L-aspartate oxidase"  
"DsuE09\_00758" 4675 "s59E13H2" 0 "Sulfide dehydrogenase subunit alpha precursor"  
"DsuE09\_00758" 4675 "s59E25H2" 0 "Sulfide dehydrogenase subunit alpha precursor"  
"DsuE09\_00758" 4675 "s59E5H2" 0 "Sulfide dehydrogenase subunit alpha precursor"  
"DsuE09\_00758" 4675 "s63E6H2" 0 "Sulfide dehydrogenase subunit alpha precursor"  
"DsuE09\_00759" 4676 "s59E13H2" 0 "hypothetical protein"  
"DsuE09\_00759" 4676 "s59E25H2" 0 "hypothetical protein"  
"DsuE09\_00759" 4676 "s59E5H2" 0 "hypothetical protein"  
"DsuE09\_00759" 4676 "s63E6H2" 0 "hypothetical protein"  
"DsuE09\_00760" 4677 "s59E13H2" 0 "Methylaspartate mutase S chain"  
"DsuE09\_00760" 4677 "s59E25H2" 0 "Methylaspartate mutase S chain"  
"DsuE09\_00760" 4677 "s59E5H2" 0 "Methylaspartate mutase S chain"  
"DsuE09\_00760" 4677 "s63E6H2" 0 "Methylaspartate mutase S chain"  
"DsuE09\_00761" 4678 "s59E13H2" 0 "hypothetical protein"  
"DsuE09\_00761" 4678 "s59E25H2" 0 "hypothetical protein"  
"DsuE09\_00761" 4678 "s59E5H2" 0 "hypothetical protein"  
"DsuE09\_00761" 4678 "s63E6H2" 0 "hypothetical protein"  
"DsuE09\_00762" 4679 "s59E13H2" 0 "Methylaspartate mutase E chain"  
"DsuE09\_00762" 4679 "s59E25H2" 0 "Methylaspartate mutase E chain"  
"DsuE09\_00762" 4679 "s59E5H2" 0 "Methylaspartate mutase E chain"  
"DsuE09\_00762" 4679 "s63E6H2" 0 "Methylaspartate mutase E chain"  
"DsuE09\_00763" 4680 "s59E13H2" 0 "L-Ala-D/L-Glu epimerase"  
"DsuE09\_00763" 4680 "s59E25H2" 0 "L-Ala-D/L-Glu epimerase"  
"DsuE09\_00763" 4680 "s59E5H2" 0 "L-Ala-D/L-Glu epimerase"  
"DsuE09\_00763" 4680 "s63E6H2" 0 "L-Ala-D/L-Glu epimerase"

"DsuE09\_00764" 4681 "s59E13H2" 0 "Tripartite tricarboxylate transporter TctA family protein"  
"DsuE09\_00764" 4681 "s59E25H2" 0 "Tripartite tricarboxylate transporter TctA family protein"  
"DsuE09\_00764" 4681 "s59E5H2" 0 "Tripartite tricarboxylate transporter TctA family protein"  
"DsuE09\_00764" 4681 "s63E6H2" 0 "Tripartite tricarboxylate transporter TctA family protein"  
"DsuE09\_00766" 4683 "s59E13H2" 0 "GIY-YIG nuclease superfamily protein"  
"DsuE09\_00766" 4683 "s59E25H2" 0 "GIY-YIG nuclease superfamily protein"  
"DsuE09\_00766" 4683 "s59E5H2" 0 "GIY-YIG nuclease superfamily protein"  
"DsuE09\_00766" 4683 "s63E6H2" 0 "GIY-YIG nuclease superfamily protein"  
"DsuE09\_00767" 4684 "s59E13H2" 0 "NADH dehydrogenase"  
"DsuE09\_00767" 4684 "s59E25H2" 0 "NADH dehydrogenase"  
"DsuE09\_00767" 4684 "s59E5H2" 0 "NADH dehydrogenase"  
"DsuE09\_00767" 4684 "s63E6H2" 0 "NADH dehydrogenase"  
"DsuE09\_00768" 4685 "s59E13H2" 0 "Long-chain-fatty-acid--CoA ligase"  
"DsuE09\_00768" 4685 "s59E25H2" 0 "Long-chain-fatty-acid--CoA ligase"  
"DsuE09\_00768" 4685 "s59E5H2" 0 "Long-chain-fatty-acid--CoA ligase"  
"DsuE09\_00768" 4685 "s63E6H2" 0 "Long-chain-fatty-acid--CoA ligase"  
"DsuE09\_00769" 4686 "s59E13H2" 0 "hypothetical protein"  
"DsuE09\_00769" 4686 "s59E25H2" 0 "hypothetical protein"  
"DsuE09\_00769" 4686 "s59E5H2" 0 "hypothetical protein"  
"DsuE09\_00769" 4686 "s63E6H2" 0 "hypothetical protein"  
"DsuE09\_00771" 4688 "s59E13H2" 0 "hypothetical protein"  
"DsuE09\_00771" 4688 "s59E25H2" 0 "hypothetical protein"  
"DsuE09\_00771" 4688 "s59E5H2" 0 "hypothetical protein"  
"DsuE09\_00771" 4688 "s63E6H2" 0 "hypothetical protein"  
"DsuE09\_00772" 4689 "s59E13H2" 0 "Thioredoxin-1"  
"DsuE09\_00772" 4689 "s59E25H2" 0 "Thioredoxin-1"  
"DsuE09\_00772" 4689 "s59E5H2" 0 "Thioredoxin-1"  
"DsuE09\_00772" 4689 "s63E6H2" 0 "Thioredoxin-1"  
"DsuE09\_00773" 4690 "s59E13H2" 0 "Outer membrane protein assembly factor BamD precursor"  
"DsuE09\_00773" 4690 "s59E25H2" 0 "Outer membrane protein assembly factor BamD precursor"  
"DsuE09\_00773" 4690 "s59E5H2" 0 "Outer membrane protein assembly factor BamD precursor"  
"DsuE09\_00773" 4690 "s63E6H2" 0 "Outer membrane protein assembly factor BamD precursor"  
"DsuE09\_00774" 4691 "s59E13H2" 0 "Molybdopterin molybdenumtransferase"  
"DsuE09\_00774" 4691 "s59E25H2" 0 "Molybdopterin molybdenumtransferase"  
"DsuE09\_00774" 4691 "s59E5H2" 0 "Molybdopterin molybdenumtransferase"  
"DsuE09\_00774" 4691 "s63E6H2" 0 "Molybdopterin molybdenumtransferase"  
"DsuE09\_00775" 4692 "s59E13H2" 0 "Molybdopterin molybdenumtransferase"  
"DsuE09\_00775" 4692 "s59E25H2" 0 "Molybdopterin molybdenumtransferase"  
"DsuE09\_00775" 4692 "s59E5H2" 0 "Molybdopterin molybdenumtransferase"  
"DsuE09\_00775" 4692 "s63E6H2" 0 "Molybdopterin molybdenumtransferase"  
"DsuE09\_00776" 4693 "s59E13H2" 0 "DNA-binding transcriptional regulator ModE"  
"DsuE09\_00776" 4693 "s59E25H2" 0 "DNA-binding transcriptional regulator ModE"  
"DsuE09\_00776" 4693 "s59E5H2" 0 "DNA-binding transcriptional regulator ModE"  
"DsuE09\_00776" 4693 "s63E6H2" 0 "DNA-binding transcriptional regulator ModE"  
"DsuE09\_00777" 4694 "s59E13H2" 0 "ferredoxin"  
"DsuE09\_00777" 4694 "s59E25H2" 0 "ferredoxin"  
"DsuE09\_00777" 4694 "s59E5H2" 0 "ferredoxin"

"DsuE09\_00777" 4694 "s63E6H2" 0 "ferredoxin"  
"DsuE09\_00778" 4695 "s59E13H2" 0 "Cyclic pyranopterin monophosphate synthase"  
"DsuE09\_00778" 4695 "s59E25H2" 0 "Cyclic pyranopterin monophosphate synthase"  
"DsuE09\_00778" 4695 "s59E5H2" 0 "Cyclic pyranopterin monophosphate synthase"  
"DsuE09\_00778" 4695 "s63E6H2" 0 "Cyclic pyranopterin monophosphate synthase"  
"DsuE09\_00779" 4696 "s59E13H2" 0 "Electron transport protein HydN"  
"DsuE09\_00779" 4696 "s59E25H2" 0 "Electron transport protein HydN"  
"DsuE09\_00779" 4696 "s59E5H2" 0 "Electron transport protein HydN"  
"DsuE09\_00779" 4696 "s63E6H2" 0 "Electron transport protein HydN"  
"DsuE09\_00780" 4697 "s59E13H2" 0 "Tungsten-containing aldehyde ferredoxin oxidoreductase"  
"DsuE09\_00780" 4697 "s59E25H2" 0 "Tungsten-containing aldehyde ferredoxin oxidoreductase"  
"DsuE09\_00780" 4697 "s59E5H2" 0 "Tungsten-containing aldehyde ferredoxin oxidoreductase"  
"DsuE09\_00780" 4697 "s63E6H2" 0 "Tungsten-containing aldehyde ferredoxin oxidoreductase"  
"DsuE09\_00781" 4698 "s59E13H2" 0 "hypothetical protein"  
"DsuE09\_00781" 4698 "s59E25H2" 0 "hypothetical protein"  
"DsuE09\_00781" 4698 "s59E5H2" 0 "hypothetical protein"  
"DsuE09\_00781" 4698 "s63E6H2" 0 "hypothetical protein"  
"DsuE09\_00782" 4699 "s59E13H2" 0 "formate hydrogenlyase complex iron-sulfur subunit"  
"DsuE09\_00782" 4699 "s59E25H2" 0 "formate hydrogenlyase complex iron-sulfur subunit"  
"DsuE09\_00782" 4699 "s59E5H2" 0 "formate hydrogenlyase complex iron-sulfur subunit"  
"DsuE09\_00782" 4699 "s63E6H2" 0 "formate hydrogenlyase complex iron-sulfur subunit"  
"DsuE09\_00783" 4700 "s59E13H2" 0 "Selenocysteine-specific elongation factor"  
"DsuE09\_00783" 4700 "s59E25H2" 0 "Selenocysteine-specific elongation factor"  
"DsuE09\_00783" 4700 "s59E5H2" 0 "Selenocysteine-specific elongation factor"  
"DsuE09\_00783" 4700 "s63E6H2" 0 "Selenocysteine-specific elongation factor"  
"DsuE09\_00785" 4702 "s59E13H2" 0 "GIY-YIG nuclease superfamily protein"  
"DsuE09\_00785" 4702 "s59E25H2" 0 "GIY-YIG nuclease superfamily protein"  
"DsuE09\_00785" 4702 "s59E5H2" 0 "GIY-YIG nuclease superfamily protein"  
"DsuE09\_00785" 4702 "s63E6H2" 0 "GIY-YIG nuclease superfamily protein"  
"DsuE09\_00786" 4703 "s59E13H2" 0 "hypothetical protein"  
"DsuE09\_00786" 4703 "s59E25H2" 0 "hypothetical protein"  
"DsuE09\_00786" 4703 "s59E5H2" 0 "hypothetical protein"  
"DsuE09\_00786" 4703 "s63E6H2" 0 "hypothetical protein"  
"DsuE09\_00787" 4704 "s59E13H2" 0 "Oxygen sensor histidine kinase NreB"  
"DsuE09\_00787" 4704 "s59E25H2" 0 "Oxygen sensor histidine kinase NreB"  
"DsuE09\_00787" 4704 "s59E5H2" 0 "Oxygen sensor histidine kinase NreB"  
"DsuE09\_00787" 4704 "s63E6H2" 0 "Oxygen sensor histidine kinase NreB"  
"DsuE09\_00788" 4705 "s59E13H2" 0 "hypothetical protein"  
"DsuE09\_00788" 4705 "s59E25H2" 0 "hypothetical protein"  
"DsuE09\_00788" 4705 "s59E5H2" 0 "hypothetical protein"  
"DsuE09\_00788" 4705 "s63E6H2" 0 "hypothetical protein"  
"DsuE09\_00790" 4707 "s59E13H2" 0 "tRNA(fMet)-specific endonuclease VapC"  
"DsuE09\_00790" 4707 "s59E25H2" 0 "tRNA(fMet)-specific endonuclease VapC"  
"DsuE09\_00790" 4707 "s59E5H2" 0 "tRNA(fMet)-specific endonuclease VapC"  
"DsuE09\_00790" 4707 "s63E6H2" 0 "tRNA(fMet)-specific endonuclease VapC"  
"DsuE09\_00791" 4708 "s59E13H2" 0 "hypothetical protein"  
"DsuE09\_00791" 4708 "s59E25H2" 0 "hypothetical protein"

"DsuE09\_00791" 4708 "s59E5H2" 0 "hypothetical protein"  
"DsuE09\_00791" 4708 "s63E6H2" 0 "hypothetical protein"  
"DsuE09\_00792" 4709 "s59E13H2" 0 "Beta-1,4-mannooligosaccharide phosphorylase"  
"DsuE09\_00792" 4709 "s59E25H2" 0 "Beta-1,4-mannooligosaccharide phosphorylase"  
"DsuE09\_00792" 4709 "s59E5H2" 0 "Beta-1,4-mannooligosaccharide phosphorylase"  
"DsuE09\_00792" 4709 "s63E6H2" 0 "Beta-1,4-mannooligosaccharide phosphorylase"  
"DsuE09\_00793" 4710 "s59E13H2" 0 "hypothetical protein"  
"DsuE09\_00793" 4710 "s59E25H2" 0 "hypothetical protein"  
"DsuE09\_00793" 4710 "s59E5H2" 0 "hypothetical protein"  
"DsuE09\_00793" 4710 "s63E6H2" 0 "hypothetical protein"  
"DsuE09\_00797" 4714 "s59E13H2" 0 "Chromosomal replication initiator protein DnaA"  
"DsuE09\_00797" 4714 "s59E25H2" 0 "Chromosomal replication initiator protein DnaA"  
"DsuE09\_00797" 4714 "s59E5H2" 0 "Chromosomal replication initiator protein DnaA"  
"DsuE09\_00797" 4714 "s63E6H2" 0 "Chromosomal replication initiator protein DnaA"  
"DsuE09\_00798" 4715 "s59E13H2" 0 "DNA polymerase V subunit UmuD"  
"DsuE09\_00798" 4715 "s59E25H2" 0 "DNA polymerase V subunit UmuD"  
"DsuE09\_00798" 4715 "s59E5H2" 0 "DNA polymerase V subunit UmuD"  
"DsuE09\_00798" 4715 "s63E6H2" 0 "DNA polymerase V subunit UmuD"  
"DsuE09\_00799" 4716 "s59E13H2" 0 "Succinyl-CoA:(R)-benzylsuccinate CoA-transferase subunit BbsF"  
"DsuE09\_00799" 4716 "s59E25H2" 0 "Succinyl-CoA:(R)-benzylsuccinate CoA-transferase subunit BbsF"  
"DsuE09\_00799" 4716 "s59E5H2" 0 "Succinyl-CoA:(R)-benzylsuccinate CoA-transferase subunit BbsF"  
"DsuE09\_00799" 4716 "s63E6H2" 0 "Succinyl-CoA:(R)-benzylsuccinate CoA-transferase subunit BbsF"  
"DsuE09\_00800" 4717 "s59E13H2" 0 "Dihydroorotase"  
"DsuE09\_00800" 4717 "s59E25H2" 0 "Dihydroorotase"  
"DsuE09\_00800" 4717 "s59E5H2" 0 "Dihydroorotase"  
"DsuE09\_00800" 4717 "s63E6H2" 0 "Dihydroorotase"  
"DsuE09\_00801" 4718 "s59E13H2" 0 "Iron-sulfur flavoprotein"  
"DsuE09\_00801" 4718 "s59E25H2" 0 "Iron-sulfur flavoprotein"  
"DsuE09\_00801" 4718 "s59E5H2" 0 "Iron-sulfur flavoprotein"  
"DsuE09\_00801" 4718 "s63E6H2" 0 "Iron-sulfur flavoprotein"  
"DsuE09\_00802" 4719 "s59E13H2" 0 "3-oxoacyl-[acyl-carrier-protein] reductase FabG"  
"DsuE09\_00802" 4719 "s59E25H2" 0 "3-oxoacyl-[acyl-carrier-protein] reductase FabG"  
"DsuE09\_00802" 4719 "s59E5H2" 0 "3-oxoacyl-[acyl-carrier-protein] reductase FabG"  
"DsuE09\_00802" 4719 "s63E6H2" 0 "3-oxoacyl-[acyl-carrier-protein] reductase FabG"  
"DsuE09\_00803" 4720 "s59E13H2" 0 "putative 3-hydroxybutyryl-CoA dehydrogenase"  
"DsuE09\_00803" 4720 "s59E25H2" 0 "putative 3-hydroxybutyryl-CoA dehydrogenase"  
"DsuE09\_00803" 4720 "s59E5H2" 0 "putative 3-hydroxybutyryl-CoA dehydrogenase"  
"DsuE09\_00803" 4720 "s63E6H2" 0 "putative 3-hydroxybutyryl-CoA dehydrogenase"  
"DsuE09\_00804" 4721 "s59E13H2" 0 "Acyl-CoA dehydrogenase"  
"DsuE09\_00804" 4721 "s59E25H2" 0 "Acyl-CoA dehydrogenase"  
"DsuE09\_00804" 4721 "s59E5H2" 0 "Acyl-CoA dehydrogenase"  
"DsuE09\_00804" 4721 "s63E6H2" 0 "Acyl-CoA dehydrogenase"  
"DsuE09\_00805" 4722 "s59E13H2" 0 "Acyl-CoA dehydrogenase"  
"DsuE09\_00805" 4722 "s59E25H2" 0 "Acyl-CoA dehydrogenase"  
"DsuE09\_00805" 4722 "s59E5H2" 0 "Acyl-CoA dehydrogenase"  
"DsuE09\_00805" 4722 "s63E6H2" 0 "Acyl-CoA dehydrogenase"  
"DsuE09\_00806" 4723 "s59E13H2" 0 "NMT1/THI5 like protein"

"DsuE09\_00806" 4723 "s59E25H2" 0 "NMT1/THI5 like protein"  
"DsuE09\_00806" 4723 "s59E5H2" 0 "NMT1/THI5 like protein"  
"DsuE09\_00806" 4723 "s63E6H2" 0 "NMT1/THI5 like protein"  
"DsuE09\_00807" 4724 "s59E13H2" 0 "Sialic acid TRAP transporter permease protein SiaT"  
"DsuE09\_00807" 4724 "s59E25H2" 0 "Sialic acid TRAP transporter permease protein SiaT"  
"DsuE09\_00807" 4724 "s59E5H2" 0 "Sialic acid TRAP transporter permease protein SiaT"  
"DsuE09\_00807" 4724 "s63E6H2" 0 "Sialic acid TRAP transporter permease protein SiaT"  
"DsuE09\_00808" 4725 "s59E13H2" 0 "2-dehydro-3-deoxy-D-gluconate 5-dehydrogenase"  
"DsuE09\_00808" 4725 "s59E25H2" 0 "2-dehydro-3-deoxy-D-gluconate 5-dehydrogenase"  
"DsuE09\_00808" 4725 "s59E5H2" 0 "2-dehydro-3-deoxy-D-gluconate 5-dehydrogenase"  
"DsuE09\_00808" 4725 "s63E6H2" 0 "2-dehydro-3-deoxy-D-gluconate 5-dehydrogenase"  
"DsuE09\_00809" 4726 "s59E13H2" 0 "Acryloyl-CoA reductase (NADH)"  
"DsuE09\_00809" 4726 "s59E25H2" 0 "Acryloyl-CoA reductase (NADH)"  
"DsuE09\_00809" 4726 "s59E5H2" 0 "Acryloyl-CoA reductase (NADH)"  
"DsuE09\_00809" 4726 "s63E6H2" 0 "Acryloyl-CoA reductase (NADH)"  
"DsuE09\_00810" 4727 "s59E13H2" 0 "4-hydroxybutyryl-CoA dehydratase/vinylacetyl-CoA-Delta-isomerase"  
"DsuE09\_00810" 4727 "s59E25H2" 0 "4-hydroxybutyryl-CoA dehydratase/vinylacetyl-CoA-Delta-isomerase"  
"DsuE09\_00810" 4727 "s59E5H2" 0 "4-hydroxybutyryl-CoA dehydratase/vinylacetyl-CoA-Delta-isomerase"  
"DsuE09\_00810" 4727 "s63E6H2" 0 "4-hydroxybutyryl-CoA dehydratase/vinylacetyl-CoA-Delta-isomerase"  
"DsuE09\_00811" 4728 "s59E13H2" 0 "Carbon starvation protein A"  
"DsuE09\_00811" 4728 "s59E25H2" 0 "Carbon starvation protein A"  
"DsuE09\_00811" 4728 "s59E5H2" 0 "Carbon starvation protein A"  
"DsuE09\_00811" 4728 "s63E6H2" 0 "Carbon starvation protein A"  
"DsuE09\_00812" 4729 "s59E13H2" 0 "hypothetical protein"  
"DsuE09\_00812" 4729 "s59E25H2" 0 "hypothetical protein"  
"DsuE09\_00812" 4729 "s59E5H2" 0 "hypothetical protein"  
"DsuE09\_00812" 4729 "s63E6H2" 0 "hypothetical protein"  
"DsuE09\_00814" 4731 "s59E13H2" 0 "hypothetical protein"  
"DsuE09\_00814" 4731 "s59E25H2" 0 "hypothetical protein"  
"DsuE09\_00814" 4731 "s59E5H2" 0 "hypothetical protein"  
"DsuE09\_00814" 4731 "s63E6H2" 0 "hypothetical protein"  
"DsuE09\_00816" 4733 "s59E13H2" 0 "Putative arsenical pump-driving ATPase"  
"DsuE09\_00816" 4733 "s59E25H2" 0 "Putative arsenical pump-driving ATPase"  
"DsuE09\_00816" 4733 "s59E5H2" 0 "Putative arsenical pump-driving ATPase"  
"DsuE09\_00816" 4733 "s63E6H2" 0 "Putative arsenical pump-driving ATPase"  
"DsuE09\_00817" 4734 "s59E13H2" 0 "Putative arsenical pump-driving ATPase"  
"DsuE09\_00817" 4734 "s59E25H2" 0 "Putative arsenical pump-driving ATPase"  
"DsuE09\_00817" 4734 "s59E5H2" 0 "Putative arsenical pump-driving ATPase"  
"DsuE09\_00817" 4734 "s63E6H2" 0 "Putative arsenical pump-driving ATPase"  
"DsuE09\_00818" 4735 "s59E13H2" 0 "hypothetical protein"  
"DsuE09\_00818" 4735 "s59E25H2" 0 "hypothetical protein"  
"DsuE09\_00818" 4735 "s59E5H2" 0 "hypothetical protein"  
"DsuE09\_00818" 4735 "s63E6H2" 0 "hypothetical protein"  
"DsuE09\_00819" 4736 "s59E13H2" 0 "Adenylosuccinate synthetase"  
"DsuE09\_00819" 4736 "s59E25H2" 0 "Adenylosuccinate synthetase"  
"DsuE09\_00819" 4736 "s59E5H2" 0 "Adenylosuccinate synthetase"  
"DsuE09\_00819" 4736 "s63E6H2" 0 "Adenylosuccinate synthetase"

"DsuE09\_00820" 4737 "s59E13H2" 0 "PAC2 family protein"  
"DsuE09\_00820" 4737 "s59E25H2" 0 "PAC2 family protein"  
"DsuE09\_00820" 4737 "s59E5H2" 0 "PAC2 family protein"  
"DsuE09\_00820" 4737 "s63E6H2" 0 "PAC2 family protein"  
"DsuE09\_00821" 4738 "s59E13H2" 0 "dTDP-3-amino-3,6-dideoxy-alpha-D-galactopyranose transaminase"  
"DsuE09\_00821" 4738 "s59E25H2" 0 "dTDP-3-amino-3,6-dideoxy-alpha-D-galactopyranose transaminase"  
"DsuE09\_00821" 4738 "s59E5H2" 0 "dTDP-3-amino-3,6-dideoxy-alpha-D-galactopyranose transaminase"  
"DsuE09\_00821" 4738 "s63E6H2" 0 "dTDP-3-amino-3,6-dideoxy-alpha-D-galactopyranose transaminase"  
"DsuE09\_00822" 4739 "s59E13H2" 0 "Divergent polysaccharide deacetylase"  
"DsuE09\_00822" 4739 "s59E25H2" 0 "Divergent polysaccharide deacetylase"  
"DsuE09\_00822" 4739 "s59E5H2" 0 "Divergent polysaccharide deacetylase"  
"DsuE09\_00822" 4739 "s63E6H2" 0 "Divergent polysaccharide deacetylase"  
"DsuE09\_00823" 4740 "s59E13H2" 0 "Carboxy-terminal processing protease CtpA precursor"  
"DsuE09\_00823" 4740 "s59E25H2" 0 "Carboxy-terminal processing protease CtpA precursor"  
"DsuE09\_00823" 4740 "s59E5H2" 0 "Carboxy-terminal processing protease CtpA precursor"  
"DsuE09\_00823" 4740 "s63E6H2" 0 "Carboxy-terminal processing protease CtpA precursor"  
"DsuE09\_00824" 4741 "s59E13H2" 0 "Murein hydrolase activator EnvC precursor"  
"DsuE09\_00824" 4741 "s59E25H2" 0 "Murein hydrolase activator EnvC precursor"  
"DsuE09\_00824" 4741 "s59E5H2" 0 "Murein hydrolase activator EnvC precursor"  
"DsuE09\_00824" 4741 "s63E6H2" 0 "Murein hydrolase activator EnvC precursor"  
"DsuE09\_00825" 4742 "s59E13H2" 0 "Cell division protein FtsX"  
"DsuE09\_00825" 4742 "s59E25H2" 0 "Cell division protein FtsX"  
"DsuE09\_00825" 4742 "s59E5H2" 0 "Cell division protein FtsX"  
"DsuE09\_00825" 4742 "s63E6H2" 0 "Cell division protein FtsX"  
"DsuE09\_00826" 4743 "s59E13H2" 0 "Cell division ATP-binding protein FtsE"  
"DsuE09\_00826" 4743 "s59E25H2" 0 "Cell division ATP-binding protein FtsE"  
"DsuE09\_00826" 4743 "s59E5H2" 0 "Cell division ATP-binding protein FtsE"  
"DsuE09\_00826" 4743 "s63E6H2" 0 "Cell division ATP-binding protein FtsE"  
"DsuE09\_00827" 4744 "s59E13H2" 0 "Ribonuclease Y"  
"DsuE09\_00827" 4744 "s59E25H2" 0 "Ribonuclease Y"  
"DsuE09\_00827" 4744 "s59E5H2" 0 "Ribonuclease Y"  
"DsuE09\_00827" 4744 "s63E6H2" 0 "Ribonuclease Y"  
"DsuE09\_00829" 4746 "s59E13H2" 0 "Cell division protein ZapA"  
"DsuE09\_00829" 4746 "s59E25H2" 0 "Cell division protein ZapA"  
"DsuE09\_00829" 4746 "s59E5H2" 0 "Cell division protein ZapA"  
"DsuE09\_00829" 4746 "s63E6H2" 0 "Cell division protein ZapA"  
"DsuE09\_00830" 4747 "s59E13H2" 0 "hypothetical protein"  
"DsuE09\_00830" 4747 "s59E25H2" 0 "hypothetical protein"  
"DsuE09\_00830" 4747 "s59E5H2" 0 "hypothetical protein"  
"DsuE09\_00830" 4747 "s63E6H2" 0 "hypothetical protein"  
"DsuE09\_00831" 4748 "s59E13H2" 0 "V-type sodium ATPase subunit D"  
"DsuE09\_00831" 4748 "s59E25H2" 0 "V-type sodium ATPase subunit D"  
"DsuE09\_00831" 4748 "s59E5H2" 0 "V-type sodium ATPase subunit D"  
"DsuE09\_00831" 4748 "s63E6H2" 0 "V-type sodium ATPase subunit D"  
"DsuE09\_00832" 4749 "s59E13H2" 0 "V-type ATP synthase beta chain"  
"DsuE09\_00832" 4749 "s59E25H2" 0 "V-type ATP synthase beta chain"  
"DsuE09\_00832" 4749 "s59E5H2" 0 "V-type ATP synthase beta chain"



"DsuE09\_00832" 4749 "s63E6H2" 0 "V-type ATP synthase beta chain"  
"DsuE09\_00833" 4750 "s59E13H2" 0 "V-type ATP synthase alpha chain"  
"DsuE09\_00833" 4750 "s59E25H2" 0 "V-type ATP synthase alpha chain"  
"DsuE09\_00833" 4750 "s59E5H2" 0 "V-type ATP synthase alpha chain"  
"DsuE09\_00833" 4750 "s63E6H2" 0 "V-type ATP synthase alpha chain"  
"DsuE09\_00834" 4751 "s59E13H2" 0 "V-type ATP synthase subunit F"  
"DsuE09\_00834" 4751 "s59E25H2" 0 "V-type ATP synthase subunit F"  
"DsuE09\_00834" 4751 "s59E5H2" 0 "V-type ATP synthase subunit F"  
"DsuE09\_00834" 4751 "s63E6H2" 0 "V-type ATP synthase subunit F"  
"DsuE09\_00835" 4752 "s59E13H2" 0 "V-type ATP synthase subunit C"  
"DsuE09\_00835" 4752 "s59E25H2" 0 "V-type ATP synthase subunit C"  
"DsuE09\_00835" 4752 "s59E5H2" 0 "V-type ATP synthase subunit C"  
"DsuE09\_00835" 4752 "s63E6H2" 0 "V-type ATP synthase subunit C"  
"DsuE09\_00836" 4753 "s59E13H2" 0 "V-type ATP synthase subunit E"  
"DsuE09\_00836" 4753 "s59E25H2" 0 "V-type ATP synthase subunit E"  
"DsuE09\_00836" 4753 "s59E5H2" 0 "V-type ATP synthase subunit E"  
"DsuE09\_00836" 4753 "s63E6H2" 0 "V-type ATP synthase subunit E"  
"DsuE09\_00837" 4754 "s59E13H2" 0 "V-type sodium ATPase subunit K"  
"DsuE09\_00837" 4754 "s59E25H2" 0 "V-type sodium ATPase subunit K"  
"DsuE09\_00837" 4754 "s59E5H2" 0 "V-type sodium ATPase subunit K"  
"DsuE09\_00837" 4754 "s63E6H2" 0 "V-type sodium ATPase subunit K"  
"DsuE09\_00838" 4755 "s59E13H2" 0 "V-type ATP synthase subunit I"  
"DsuE09\_00838" 4755 "s59E25H2" 0 "V-type ATP synthase subunit I"  
"DsuE09\_00838" 4755 "s59E5H2" 0 "V-type ATP synthase subunit I"  
"DsuE09\_00838" 4755 "s63E6H2" 0 "V-type ATP synthase subunit I"  
"DsuE09\_00839" 4756 "s59E13H2" 0 "V-type ATP synthase subunit H"  
"DsuE09\_00839" 4756 "s59E25H2" 0 "V-type ATP synthase subunit H"  
"DsuE09\_00839" 4756 "s59E5H2" 0 "V-type ATP synthase subunit H"  
"DsuE09\_00839" 4756 "s63E6H2" 0 "V-type ATP synthase subunit H"  
"DsuE09\_00840" 4757 "s59E13H2" 0 "Polymer-forming cytoskeletal"  
"DsuE09\_00840" 4757 "s59E25H2" 0 "Polymer-forming cytoskeletal"  
"DsuE09\_00840" 4757 "s59E5H2" 0 "Polymer-forming cytoskeletal"  
"DsuE09\_00840" 4757 "s63E6H2" 0 "Polymer-forming cytoskeletal"  
"DsuE09\_00841" 4758 "s59E13H2" 0 "Rod shape-determining protein RodA"  
"DsuE09\_00841" 4758 "s59E25H2" 0 "Rod shape-determining protein RodA"  
"DsuE09\_00841" 4758 "s59E5H2" 0 "Rod shape-determining protein RodA"  
"DsuE09\_00841" 4758 "s63E6H2" 0 "Rod shape-determining protein RodA"  
"DsuE09\_00842" 4759 "s59E13H2" 0 "Stage V sporulation protein D"  
"DsuE09\_00842" 4759 "s59E25H2" 0 "Stage V sporulation protein D"  
"DsuE09\_00842" 4759 "s59E5H2" 0 "Stage V sporulation protein D"  
"DsuE09\_00842" 4759 "s63E6H2" 0 "Stage V sporulation protein D"  
"DsuE09\_00843" 4760 "s59E13H2" 0 "hypothetical protein"  
"DsuE09\_00843" 4760 "s59E25H2" 0 "hypothetical protein"  
"DsuE09\_00843" 4760 "s59E5H2" 0 "hypothetical protein"  
"DsuE09\_00843" 4760 "s63E6H2" 0 "hypothetical protein"  
"DsuE09\_00844" 4761 "s59E13H2" 0 "Cell shape-determining protein MreC"  
"DsuE09\_00844" 4761 "s59E25H2" 0 "Cell shape-determining protein MreC"

"DsuE09\_00844" 4761 "s59E5H2" 0 "Cell shape-determining protein MreC"  
"DsuE09\_00844" 4761 "s63E6H2" 0 "Cell shape-determining protein MreC"  
"DsuE09\_00845" 4762 "s59E13H2" 0 "Rod shape-determining protein MreB"  
"DsuE09\_00845" 4762 "s59E25H2" 0 "Rod shape-determining protein MreB"  
"DsuE09\_00845" 4762 "s59E5H2" 0 "Rod shape-determining protein MreB"  
"DsuE09\_00845" 4762 "s63E6H2" 0 "Rod shape-determining protein MreB"  
"DsuE09\_00846" 4763 "s59E13H2" 0 "Ribonuclease P protein component"  
"DsuE09\_00846" 4763 "s59E25H2" 0 "Ribonuclease P protein component"  
"DsuE09\_00846" 4763 "s59E5H2" 0 "Ribonuclease P protein component"  
"DsuE09\_00846" 4763 "s63E6H2" 0 "Ribonuclease P protein component"  
"DsuE09\_00847" 4764 "s59E13H2" 0 "Putative membrane protein insertion efficiency factor"  
"DsuE09\_00847" 4764 "s59E25H2" 0 "Putative membrane protein insertion efficiency factor"  
"DsuE09\_00847" 4764 "s59E5H2" 0 "Putative membrane protein insertion efficiency factor"  
"DsuE09\_00847" 4764 "s63E6H2" 0 "Putative membrane protein insertion efficiency factor"  
"DsuE09\_00848" 4765 "s59E13H2" 0 "Membrane protein insertase YidC"  
"DsuE09\_00848" 4765 "s59E25H2" 0 "Membrane protein insertase YidC"  
"DsuE09\_00848" 4765 "s59E5H2" 0 "Membrane protein insertase YidC"  
"DsuE09\_00848" 4765 "s63E6H2" 0 "Membrane protein insertase YidC"  
"DsuE09\_00849" 4766 "s59E13H2" 0 "hypothetical protein"  
"DsuE09\_00849" 4766 "s59E25H2" 0 "hypothetical protein"  
"DsuE09\_00849" 4766 "s59E5H2" 0 "hypothetical protein"  
"DsuE09\_00849" 4766 "s63E6H2" 0 "hypothetical protein"  
"DsuE09\_00850" 4767 "s59E13H2" 0 "tRNA modification GTPase MnmE"  
"DsuE09\_00850" 4767 "s59E25H2" 0 "tRNA modification GTPase MnmE"  
"DsuE09\_00850" 4767 "s59E5H2" 0 "tRNA modification GTPase MnmE"  
"DsuE09\_00850" 4767 "s63E6H2" 0 "tRNA modification GTPase MnmE"  
"DsuE09\_00851" 4768 "s59E13H2" 0 "Glutaryl-CoA dehydrogenase"  
"DsuE09\_00851" 4768 "s59E25H2" 0 "Glutaryl-CoA dehydrogenase"  
"DsuE09\_00851" 4768 "s59E5H2" 0 "Glutaryl-CoA dehydrogenase"  
"DsuE09\_00851" 4768 "s63E6H2" 0 "Glutaryl-CoA dehydrogenase"  
"DsuE09\_00852" 4769 "s59E13H2" 0 "DNA polymerase III subunit beta"  
"DsuE09\_00852" 4769 "s59E25H2" 0 "DNA polymerase III subunit beta"  
"DsuE09\_00852" 4769 "s59E5H2" 0 "DNA polymerase III subunit beta"  
"DsuE09\_00852" 4769 "s63E6H2" 0 "DNA polymerase III subunit beta"  
"DsuE09\_00853" 4770 "s59E13H2" 0 "DNA gyrase subunit B"  
"DsuE09\_00853" 4770 "s59E25H2" 0 "DNA gyrase subunit B"  
"DsuE09\_00853" 4770 "s59E5H2" 0 "DNA gyrase subunit B"  
"DsuE09\_00853" 4770 "s63E6H2" 0 "DNA gyrase subunit B"  
"DsuE09\_00854" 4771 "s59E13H2" 0 "DNA gyrase subunit A"  
"DsuE09\_00854" 4771 "s59E25H2" 0 "DNA gyrase subunit A"  
"DsuE09\_00854" 4771 "s59E5H2" 0.001669935 "DNA gyrase subunit A"  
"DsuE09\_00854" 4771 "s63E6H2" 0 "DNA gyrase subunit A"  
"DsuE09\_00856" 4773 "s59E13H2" 0 "Bifunctional ligase/repressor BirA"  
"DsuE09\_00856" 4773 "s59E25H2" 0 "Bifunctional ligase/repressor BirA"  
"DsuE09\_00856" 4773 "s59E5H2" 0 "Bifunctional ligase/repressor BirA"  
"DsuE09\_00856" 4773 "s63E6H2" 0 "Bifunctional ligase/repressor BirA"  
"DsuE09\_00857" 4774 "s59E13H2" 0 "asparagine synthetase A"

"DsuE09\_00857" 4774 "s59E25H2" 0 "asparagine synthetase A"  
"DsuE09\_00857" 4774 "s59E5H2" 0 "asparagine synthetase A"  
"DsuE09\_00857" 4774 "s63E6H2" 0 "asparagine synthetase A"  
"DsuE09\_00858" 4775 "s59E13H2" 0 "putative glutamine synthetase 2"  
"DsuE09\_00858" 4775 "s59E25H2" 0 "putative glutamine synthetase 2"  
"DsuE09\_00858" 4775 "s59E5H2" 0 "putative glutamine synthetase 2"  
"DsuE09\_00858" 4775 "s63E6H2" 0 "putative glutamine synthetase 2"  
"DsuE09\_00859" 4776 "s59E13H2" 0 "Glutamine-dependent NAD(+) synthetase"  
"DsuE09\_00859" 4776 "s59E25H2" 0 "Glutamine-dependent NAD(+) synthetase"  
"DsuE09\_00859" 4776 "s59E5H2" 0 "Glutamine-dependent NAD(+) synthetase"  
"DsuE09\_00859" 4776 "s63E6H2" 0 "Glutamine-dependent NAD(+) synthetase"  
"DsuE09\_00860" 4777 "s59E13H2" 0 "Amidophosphoribosyltransferase precursor"  
"DsuE09\_00860" 4777 "s59E25H2" 0 "Amidophosphoribosyltransferase precursor"  
"DsuE09\_00860" 4777 "s59E5H2" 0.005473789 "Amidophosphoribosyltransferase precursor"  
"DsuE09\_00860" 4777 "s63E6H2" 0 "Amidophosphoribosyltransferase precursor"  
"DsuE09\_00861" 4778 "s59E13H2" 0 "Carbamoyl-phosphate synthase large chain"  
"DsuE09\_00861" 4778 "s59E25H2" 0 "Carbamoyl-phosphate synthase large chain"  
"DsuE09\_00861" 4778 "s59E5H2" 0 "Carbamoyl-phosphate synthase large chain"  
"DsuE09\_00861" 4778 "s63E6H2" 0 "Carbamoyl-phosphate synthase large chain"  
"DsuE09\_00863" 4780 "s59E13H2" 0 "hypothetical protein"  
"DsuE09\_00863" 4780 "s59E25H2" 0 "hypothetical protein"  
"DsuE09\_00863" 4780 "s59E5H2" 0 "hypothetical protein"  
"DsuE09\_00863" 4780 "s63E6H2" 0 "hypothetical protein"  
"DsuE09\_00864" 4781 "s59E13H2" 0 "hypothetical protein"  
"DsuE09\_00864" 4781 "s59E25H2" 0 "hypothetical protein"  
"DsuE09\_00864" 4781 "s59E5H2" 0 "hypothetical protein"  
"DsuE09\_00864" 4781 "s63E6H2" 0 "hypothetical protein"  
"DsuE09\_00865" 4782 "s59E13H2" 0 "phosphoenolpyruvate synthase"  
"DsuE09\_00865" 4782 "s59E25H2" 0 "phosphoenolpyruvate synthase"  
"DsuE09\_00865" 4782 "s59E5H2" 0 "phosphoenolpyruvate synthase"  
"DsuE09\_00865" 4782 "s63E6H2" 0 "phosphoenolpyruvate synthase"  
"DsuE09\_00866" 4783 "s59E13H2" 0 "Glutamate dehydrogenase"  
"DsuE09\_00866" 4783 "s59E25H2" 0 "Glutamate dehydrogenase"  
"DsuE09\_00866" 4783 "s59E5H2" 0 "Glutamate dehydrogenase"  
"DsuE09\_00866" 4783 "s63E6H2" 0 "Glutamate dehydrogenase"  
"DsuE09\_00867" 4784 "s59E13H2" 0 "putative transcriptional regulatory protein pdtaR"  
"DsuE09\_00867" 4784 "s59E25H2" 0 "putative transcriptional regulatory protein pdtaR"  
"DsuE09\_00867" 4784 "s59E5H2" 0 "putative transcriptional regulatory protein pdtaR"  
"DsuE09\_00867" 4784 "s63E6H2" 0 "putative transcriptional regulatory protein pdtaR"  
"DsuE09\_00868" 4785 "s59E13H2" 0 "Glutamine--fructose-6-phosphate aminotransferase [isomerizing]"  
"DsuE09\_00868" 4785 "s59E25H2" 0 "Glutamine--fructose-6-phosphate aminotransferase [isomerizing]"  
"DsuE09\_00868" 4785 "s59E5H2" 0 "Glutamine--fructose-6-phosphate aminotransferase [isomerizing]"  
"DsuE09\_00868" 4785 "s63E6H2" 0 "Glutamine--fructose-6-phosphate aminotransferase [isomerizing]"  
"DsuE09\_00869" 4786 "s59E13H2" 0 "Glucosamine-6-phosphate deaminase 1"  
"DsuE09\_00869" 4786 "s59E25H2" 0 "Glucosamine-6-phosphate deaminase 1"  
"DsuE09\_00869" 4786 "s59E5H2" 0 "Glucosamine-6-phosphate deaminase 1"  
"DsuE09\_00869" 4786 "s63E6H2" 0 "Glucosamine-6-phosphate deaminase 1"

"DsuE09\_00870" 4787 "s59E13H2" 0 "Phosphoglucosamine mutase"  
"DsuE09\_00870" 4787 "s59E25H2" 0 "Phosphoglucosamine mutase"  
"DsuE09\_00870" 4787 "s59E5H2" 0 "Phosphoglucosamine mutase"  
"DsuE09\_00870" 4787 "s63E6H2" 0 "Phosphoglucosamine mutase"  
"DsuE09\_00872" 4789 "s59E13H2" 0 "hypothetical protein"  
"DsuE09\_00872" 4789 "s59E25H2" 0 "hypothetical protein"  
"DsuE09\_00872" 4789 "s59E5H2" 0 "hypothetical protein"  
"DsuE09\_00872" 4789 "s63E6H2" 0 "hypothetical protein"  
"DsuE09\_00873" 4790 "s59E13H2" 0 "3-deoxy-D-manno-octulosonic acid transferase"  
"DsuE09\_00873" 4790 "s59E25H2" 0 "3-deoxy-D-manno-octulosonic acid transferase"  
"DsuE09\_00873" 4790 "s59E5H2" 0 "3-deoxy-D-manno-octulosonic acid transferase"  
"DsuE09\_00873" 4790 "s63E6H2" 0 "3-deoxy-D-manno-octulosonic acid transferase"  
"DsuE09\_00875" 4792 "s59E13H2" 0 "GMP synthase [glutamine-hydrolyzing]"  
"DsuE09\_00875" 4792 "s59E25H2" 0 "GMP synthase [glutamine-hydrolyzing]"  
"DsuE09\_00875" 4792 "s59E5H2" 0 "GMP synthase [glutamine-hydrolyzing]"  
"DsuE09\_00875" 4792 "s63E6H2" 0 "GMP synthase [glutamine-hydrolyzing]"  
"DsuE09\_00876" 4793 "s59E13H2" 0 "GMP synthase [glutamine-hydrolyzing]"  
"DsuE09\_00876" 4793 "s59E25H2" 0 "GMP synthase [glutamine-hydrolyzing]"  
"DsuE09\_00876" 4793 "s59E5H2" 0 "GMP synthase [glutamine-hydrolyzing]"  
"DsuE09\_00876" 4793 "s63E6H2" 0 "GMP synthase [glutamine-hydrolyzing]"  
"DsuE09\_00877" 4794 "s59E13H2" 0 "hypothetical protein"  
"DsuE09\_00877" 4794 "s59E25H2" 0 "hypothetical protein"  
"DsuE09\_00877" 4794 "s59E5H2" 0 "hypothetical protein"  
"DsuE09\_00877" 4794 "s63E6H2" 0 "hypothetical protein"  
"DsuE09\_00878" 4795 "s59E13H2" 0 "Long-chain-fatty-acid--CoA ligase"  
"DsuE09\_00878" 4795 "s59E25H2" 0 "Long-chain-fatty-acid--CoA ligase"  
"DsuE09\_00878" 4795 "s59E5H2" 0 "Long-chain-fatty-acid--CoA ligase"  
"DsuE09\_00878" 4795 "s63E6H2" 0 "Long-chain-fatty-acid--CoA ligase"  
"DsuE09\_00879" 4796 "s59E13H2" 0 "3-keto-5-aminohexanoate cleavage enzyme"  
"DsuE09\_00879" 4796 "s59E25H2" 0 "3-keto-5-aminohexanoate cleavage enzyme"  
"DsuE09\_00879" 4796 "s59E5H2" 0 "3-keto-5-aminohexanoate cleavage enzyme"  
"DsuE09\_00879" 4796 "s63E6H2" 0 "3-keto-5-aminohexanoate cleavage enzyme"  
"DsuE09\_00880" 4797 "s59E13H2" 0 "hypothetical protein"  
"DsuE09\_00880" 4797 "s59E25H2" 0 "hypothetical protein"  
"DsuE09\_00880" 4797 "s59E5H2" 0 "hypothetical protein"  
"DsuE09\_00880" 4797 "s63E6H2" 0 "hypothetical protein"  
"DsuE09\_00881" 4798 "s59E13H2" 0 "4-hydroxybutyryl-CoA dehydratase/vinylacetyl-CoA-Delta-isomerase"  
"DsuE09\_00881" 4798 "s59E25H2" 0 "4-hydroxybutyryl-CoA dehydratase/vinylacetyl-CoA-Delta-isomerase"  
"DsuE09\_00881" 4798 "s59E5H2" 0 "4-hydroxybutyryl-CoA dehydratase/vinylacetyl-CoA-Delta-isomerase"  
"DsuE09\_00881" 4798 "s63E6H2" 0 "4-hydroxybutyryl-CoA dehydratase/vinylacetyl-CoA-Delta-isomerase"  
"DsuE09\_00883" 4800 "s59E13H2" 0 "NMT1/THIS like protein"  
"DsuE09\_00883" 4800 "s59E25H2" 0 "NMT1/THIS like protein"  
"DsuE09\_00883" 4800 "s59E5H2" 0 "NMT1/THIS like protein"  
"DsuE09\_00883" 4800 "s63E6H2" 0 "NMT1/THIS like protein"  
"DsuE09\_00885" 4802 "s59E13H2" 0 "Sialic acid TRAP transporter permease protein SiaT"  
"DsuE09\_00885" 4802 "s59E25H2" 0 "Sialic acid TRAP transporter permease protein SiaT"  
"DsuE09\_00885" 4802 "s59E5H2" 0 "Sialic acid TRAP transporter permease protein SiaT"

"DsuE09\_00885" 4802 "s63E6H2" 0 "Sialic acid TRAP transporter permease protein SiaT"  
"DsuE09\_00886" 4803 "s59E13H2" 0 "Indolepyruvate oxidoreductase subunit lorA"  
"DsuE09\_00886" 4803 "s59E25H2" 0 "Indolepyruvate oxidoreductase subunit lorA"  
"DsuE09\_00886" 4803 "s59E5H2" 0 "Indolepyruvate oxidoreductase subunit lorA"  
"DsuE09\_00886" 4803 "s63E6H2" 0 "Indolepyruvate oxidoreductase subunit lorA"  
"DsuE09\_00887" 4804 "s59E13H2" 0 "Indolepyruvate oxidoreductase subunit lorB"  
"DsuE09\_00887" 4804 "s59E25H2" 0 "Indolepyruvate oxidoreductase subunit lorB"  
"DsuE09\_00887" 4804 "s59E5H2" 0 "Indolepyruvate oxidoreductase subunit lorB"  
"DsuE09\_00887" 4804 "s63E6H2" 0 "Indolepyruvate oxidoreductase subunit lorB"  
"DsuE09\_00888" 4805 "s59E13H2" 0 "Lactate-binding periplasmic protein precursor"  
"DsuE09\_00888" 4805 "s59E25H2" 0 "Lactate-binding periplasmic protein precursor"  
"DsuE09\_00888" 4805 "s59E5H2" 0 "Lactate-binding periplasmic protein precursor"  
"DsuE09\_00888" 4805 "s63E6H2" 0 "Lactate-binding periplasmic protein precursor"  
"DsuE09\_00889" 4806 "s59E13H2" 0 "Tripartite ATP-independent periplasmic transporters, DctQ component"  
"DsuE09\_00889" 4806 "s59E25H2" 0 "Tripartite ATP-independent periplasmic transporters, DctQ component"  
"DsuE09\_00889" 4806 "s59E5H2" 0 "Tripartite ATP-independent periplasmic transporters, DctQ component"  
"DsuE09\_00889" 4806 "s63E6H2" 0 "Tripartite ATP-independent periplasmic transporters, DctQ component"  
"DsuE09\_00890" 4807 "s59E13H2" 0 "Sialic acid TRAP transporter permease protein SiaT"  
"DsuE09\_00890" 4807 "s59E25H2" 0 "Sialic acid TRAP transporter permease protein SiaT"  
"DsuE09\_00890" 4807 "s59E5H2" 0 "Sialic acid TRAP transporter permease protein SiaT"  
"DsuE09\_00890" 4807 "s63E6H2" 0 "Sialic acid TRAP transporter permease protein SiaT"  
"DsuE09\_00891" 4808 "s59E13H2" 0 "putative 3-hydroxybutyryl-CoA dehydrogenase"  
"DsuE09\_00891" 4808 "s59E25H2" 0 "putative 3-hydroxybutyryl-CoA dehydrogenase"  
"DsuE09\_00891" 4808 "s59E5H2" 0 "putative 3-hydroxybutyryl-CoA dehydrogenase"  
"DsuE09\_00891" 4808 "s63E6H2" 0 "putative 3-hydroxybutyryl-CoA dehydrogenase"  
"DsuE09\_00893" 4810 "s59E13H2" 0 "hypothetical protein"  
"DsuE09\_00893" 4810 "s59E25H2" 0 "hypothetical protein"  
"DsuE09\_00893" 4810 "s59E5H2" 0 "hypothetical protein"  
"DsuE09\_00893" 4810 "s63E6H2" 0 "hypothetical protein"  
"DsuE09\_00894" 4811 "s59E13H2" 0 "Putative ketoacyl reductase"  
"DsuE09\_00894" 4811 "s59E25H2" 0 "Putative ketoacyl reductase"  
"DsuE09\_00894" 4811 "s59E5H2" 0 "Putative ketoacyl reductase"  
"DsuE09\_00894" 4811 "s63E6H2" 0 "Putative ketoacyl reductase"  
"DsuE09\_00896" 4813 "s59E13H2" 0 "putative periplasmic serine endoprotease DegP-like precursor"  
"DsuE09\_00896" 4813 "s59E25H2" 0 "putative periplasmic serine endoprotease DegP-like precursor"  
"DsuE09\_00896" 4813 "s59E5H2" 0 "putative periplasmic serine endoprotease DegP-like precursor"  
"DsuE09\_00896" 4813 "s63E6H2" 0 "putative periplasmic serine endoprotease DegP-like precursor"  
"DsuE09\_00897" 4814 "s59E13H2" 0 "Chaperone protein ClpB 1"  
"DsuE09\_00897" 4814 "s59E25H2" 0 "Chaperone protein ClpB 1"  
"DsuE09\_00897" 4814 "s59E5H2" 0 "Chaperone protein ClpB 1"  
"DsuE09\_00897" 4814 "s63E6H2" 0 "Chaperone protein ClpB 1"  
"DsuE09\_00898" 4815 "s59E13H2" 0 "hypothetical protein"  
"DsuE09\_00898" 4815 "s59E25H2" 0 "hypothetical protein"  
"DsuE09\_00898" 4815 "s59E5H2" 0.1865091 "hypothetical protein"  
"DsuE09\_00898" 4815 "s63E6H2" 0 "hypothetical protein"  
"DsuE09\_00900" 4817 "s59E13H2" 0 "hypothetical protein"  
"DsuE09\_00900" 4817 "s59E25H2" 0 "hypothetical protein"

"DsuE09\_00900" 4817 "s59E5H2" 0 "hypothetical protein"  
"DsuE09\_00900" 4817 "s63E6H2" 0 "hypothetical protein"  
"DsuE09\_00902" 4819 "s59E13H2" 0 "hypothetical protein"  
"DsuE09\_00902" 4819 "s59E25H2" 0 "hypothetical protein"  
"DsuE09\_00902" 4819 "s59E5H2" 0 "hypothetical protein"  
"DsuE09\_00902" 4819 "s63E6H2" 0 "hypothetical protein"  
"DsuE09\_00903" 4820 "s59E13H2" 0 "Foldase protein PrsA precursor"  
"DsuE09\_00903" 4820 "s59E25H2" 0 "Foldase protein PrsA precursor"  
"DsuE09\_00903" 4820 "s59E5H2" 0 "Foldase protein PrsA precursor"  
"DsuE09\_00903" 4820 "s63E6H2" 0 "Foldase protein PrsA precursor"  
"DsuE09\_00904" 4821 "s59E13H2" 0 "Purine catabolism protein PucG"  
"DsuE09\_00904" 4821 "s59E25H2" 0 "Purine catabolism protein PucG"  
"DsuE09\_00904" 4821 "s59E5H2" 0 "Purine catabolism protein PucG"  
"DsuE09\_00904" 4821 "s63E6H2" 0 "Purine catabolism protein PucG"  
"DsuE09\_00905" 4822 "s59E13H2" 0 "Glycogen synthase"  
"DsuE09\_00905" 4822 "s59E25H2" 0 "Glycogen synthase"  
"DsuE09\_00905" 4822 "s59E5H2" 0 "Glycogen synthase"  
"DsuE09\_00905" 4822 "s63E6H2" 0 "Glycogen synthase"  
"DsuE09\_00906" 4823 "s59E13H2" 0 "Demethylrebeccamycin-D-glucose O-methyltransferase"  
"DsuE09\_00906" 4823 "s59E25H2" 0 "Demethylrebeccamycin-D-glucose O-methyltransferase"  
"DsuE09\_00906" 4823 "s59E5H2" 0 "Demethylrebeccamycin-D-glucose O-methyltransferase"  
"DsuE09\_00906" 4823 "s63E6H2" 0 "Demethylrebeccamycin-D-glucose O-methyltransferase"  
"DsuE09\_00907" 4824 "s59E13H2" 0 "hypothetical protein"  
"DsuE09\_00907" 4824 "s59E25H2" 0 "hypothetical protein"  
"DsuE09\_00907" 4824 "s59E5H2" 0 "hypothetical protein"  
"DsuE09\_00907" 4824 "s63E6H2" 0 "hypothetical protein"  
"DsuE09\_00908" 4825 "s59E13H2" 0 "Bifunctional purine biosynthesis protein PurH"  
"DsuE09\_00908" 4825 "s59E25H2" 0 "Bifunctional purine biosynthesis protein PurH"  
"DsuE09\_00908" 4825 "s59E5H2" 0 "Bifunctional purine biosynthesis protein PurH"  
"DsuE09\_00908" 4825 "s63E6H2" 0 "Bifunctional purine biosynthesis protein PurH"  
"DsuE09\_00909" 4826 "s59E13H2" 0 "Hydrogenase transcriptional regulatory protein hupR1"  
"DsuE09\_00909" 4826 "s59E25H2" 0 "Hydrogenase transcriptional regulatory protein hupR1"  
"DsuE09\_00909" 4826 "s59E5H2" 0 "Hydrogenase transcriptional regulatory protein hupR1"  
"DsuE09\_00909" 4826 "s63E6H2" 0 "Hydrogenase transcriptional regulatory protein hupR1"  
"DsuE09\_00910" 4827 "s59E13H2" 0 "Transcriptional regulatory protein ZraR"  
"DsuE09\_00910" 4827 "s59E25H2" 0 "Transcriptional regulatory protein ZraR"  
"DsuE09\_00910" 4827 "s59E5H2" 0 "Transcriptional regulatory protein ZraR"  
"DsuE09\_00910" 4827 "s63E6H2" 0 "Transcriptional regulatory protein ZraR"  
"DsuE09\_00911" 4828 "s59E13H2" 0 "Sensor protein ZraS"  
"DsuE09\_00911" 4828 "s59E25H2" 0 "Sensor protein ZraS"  
"DsuE09\_00911" 4828 "s59E5H2" 0 "Sensor protein ZraS"  
"DsuE09\_00911" 4828 "s63E6H2" 0 "Sensor protein ZraS"  
"DsuE09\_00913" 4830 "s59E13H2" 0 "GIY-YIG nuclease superfamily protein"  
"DsuE09\_00913" 4830 "s59E25H2" 0 "GIY-YIG nuclease superfamily protein"  
"DsuE09\_00913" 4830 "s59E5H2" 0 "GIY-YIG nuclease superfamily protein"  
"DsuE09\_00913" 4830 "s63E6H2" 0 "GIY-YIG nuclease superfamily protein"  
"DsuE09\_00914" 4831 "s59E13H2" 0 "Sensor protein FixL"

"DsuE09\_00914" 4831 "s59E25H2" 0 "Sensor protein FixL"  
"DsuE09\_00914" 4831 "s59E5H2" 0 "Sensor protein FixL"  
"DsuE09\_00914" 4831 "s63E6H2" 0 "Sensor protein FixL"  
"DsuE09\_00915" 4832 "s59E13H2" 0 "metal-dependent hydrolase"  
"DsuE09\_00915" 4832 "s59E25H2" 0 "metal-dependent hydrolase"  
"DsuE09\_00915" 4832 "s59E5H2" 0 "metal-dependent hydrolase"  
"DsuE09\_00915" 4832 "s63E6H2" 0 "metal-dependent hydrolase"  
"DsuE09\_00916" 4833 "s59E13H2" 0 "Sensor protein kinase Walk"  
"DsuE09\_00916" 4833 "s59E25H2" 0 "Sensor protein kinase Walk"  
"DsuE09\_00916" 4833 "s59E5H2" 0 "Sensor protein kinase Walk"  
"DsuE09\_00916" 4833 "s63E6H2" 5.366949e-05 "Sensor protein kinase Walk"  
"DsuE09\_00917" 4834 "s59E13H2" 0 "GIY-YIG catalytic domain protein"  
"DsuE09\_00917" 4834 "s59E25H2" 0 "GIY-YIG catalytic domain protein"  
"DsuE09\_00917" 4834 "s59E5H2" 0 "GIY-YIG catalytic domain protein"  
"DsuE09\_00917" 4834 "s63E6H2" 0 "GIY-YIG catalytic domain protein"  
"DsuE09\_00918" 4835 "s59E13H2" 0 "hypothetical protein"  
"DsuE09\_00918" 4835 "s59E25H2" 0 "hypothetical protein"  
"DsuE09\_00918" 4835 "s59E5H2" 0 "hypothetical protein"  
"DsuE09\_00918" 4835 "s63E6H2" 0 "hypothetical protein"  
"DsuE09\_00919" 4836 "s59E13H2" 0 "Chemotaxis protein CheA"  
"DsuE09\_00919" 4836 "s59E25H2" 0 "Chemotaxis protein CheA"  
"DsuE09\_00919" 4836 "s59E5H2" 0 "Chemotaxis protein CheA"  
"DsuE09\_00919" 4836 "s63E6H2" 0 "Chemotaxis protein CheA"  
"DsuE09\_00920" 4837 "s59E13H2" 0 "CheW-like domain protein"  
"DsuE09\_00920" 4837 "s59E25H2" 0 "CheW-like domain protein"  
"DsuE09\_00920" 4837 "s59E5H2" 0 "CheW-like domain protein"  
"DsuE09\_00920" 4837 "s63E6H2" 0 "CheW-like domain protein"  
"DsuE09\_00921" 4838 "s59E13H2" 0 "Methyl-accepting chemotaxis protein McpB"  
"DsuE09\_00921" 4838 "s59E25H2" 0 "Methyl-accepting chemotaxis protein McpB"  
"DsuE09\_00921" 4838 "s59E5H2" 0 "Methyl-accepting chemotaxis protein McpB"  
"DsuE09\_00921" 4838 "s63E6H2" 0 "Methyl-accepting chemotaxis protein McpB"  
"DsuE09\_00922" 4839 "s59E13H2" 0 "Sensor histidine kinase TmoS"  
"DsuE09\_00922" 4839 "s59E25H2" 0 "Sensor histidine kinase TmoS"  
"DsuE09\_00922" 4839 "s59E5H2" 0 "Sensor histidine kinase TmoS"  
"DsuE09\_00922" 4839 "s63E6H2" 0 "Sensor histidine kinase TmoS"  
"DsuE09\_00923" 4840 "s59E13H2" 0 "hypothetical protein"  
"DsuE09\_00923" 4840 "s59E25H2" 0 "hypothetical protein"  
"DsuE09\_00923" 4840 "s59E5H2" 0 "hypothetical protein"  
"DsuE09\_00923" 4840 "s63E6H2" 0 "hypothetical protein"  
"DsuE09\_00924" 4841 "s59E13H2" 0 "Type II secretion system protein E"  
"DsuE09\_00924" 4841 "s59E25H2" 0 "Type II secretion system protein E"  
"DsuE09\_00924" 4841 "s59E5H2" 0 "Type II secretion system protein E"  
"DsuE09\_00924" 4841 "s63E6H2" 0 "Type II secretion system protein E"  
"DsuE09\_00926" 4843 "s59E13H2" 0 "Transcriptional regulatory protein ZraR"  
"DsuE09\_00926" 4843 "s59E25H2" 0 "Transcriptional regulatory protein ZraR"  
"DsuE09\_00926" 4843 "s59E5H2" 0 "Transcriptional regulatory protein ZraR"  
"DsuE09\_00926" 4843 "s63E6H2" 0 "Transcriptional regulatory protein ZraR"

"DsuE09\_00929" 4846 "s59E13H2" 0 "Gas vesicle structural protein 1"  
"DsuE09\_00929" 4846 "s59E25H2" 0 "Gas vesicle structural protein 1"  
"DsuE09\_00929" 4846 "s59E5H2" 0 "Gas vesicle structural protein 1"  
"DsuE09\_00929" 4846 "s63E6H2" 0 "Gas vesicle structural protein 1"  
"DsuE09\_00931" 4848 "s59E13H2" 0 "Gas vesicle protein K"  
"DsuE09\_00931" 4848 "s59E25H2" 0 "Gas vesicle protein K"  
"DsuE09\_00931" 4848 "s59E5H2" 0 "Gas vesicle protein K"  
"DsuE09\_00931" 4848 "s63E6H2" 0 "Gas vesicle protein K"  
"DsuE09\_00932" 4849 "s59E13H2" 0 "Gas vesicle synthesis protein Gvpl/GvpF"  
"DsuE09\_00932" 4849 "s59E25H2" 0 "Gas vesicle synthesis protein Gvpl/GvpF"  
"DsuE09\_00932" 4849 "s59E5H2" 0 "Gas vesicle synthesis protein Gvpl/GvpF"  
"DsuE09\_00932" 4849 "s63E6H2" 0 "Gas vesicle synthesis protein Gvpl/GvpF"  
"DsuE09\_00933" 4850 "s59E13H2" 0 "Gas vesicle synthesis protein GvpO"  
"DsuE09\_00933" 4850 "s59E25H2" 0 "Gas vesicle synthesis protein GvpO"  
"DsuE09\_00933" 4850 "s59E5H2" 0 "Gas vesicle synthesis protein GvpO"  
"DsuE09\_00933" 4850 "s63E6H2" 0 "Gas vesicle synthesis protein GvpO"  
"DsuE09\_00934" 4851 "s59E13H2" 0 "Putative arsenical pump-driving ATPase"  
"DsuE09\_00934" 4851 "s59E25H2" 0 "Putative arsenical pump-driving ATPase"  
"DsuE09\_00934" 4851 "s59E5H2" 0.02885376 "Putative arsenical pump-driving ATPase"  
"DsuE09\_00934" 4851 "s63E6H2" 0.005265016 "Putative arsenical pump-driving ATPase"  
"DsuE09\_00935" 4852 "s59E13H2" 0 "Gas vesicle protein G"  
"DsuE09\_00935" 4852 "s59E25H2" 0 "Gas vesicle protein G"  
"DsuE09\_00935" 4852 "s59E5H2" 0 "Gas vesicle protein G"  
"DsuE09\_00935" 4852 "s63E6H2" 0 "Gas vesicle protein G"  
"DsuE09\_00936" 4853 "s59E13H2" 0 "Gas vesicle synthesis protein Gvpl/GvpF"  
"DsuE09\_00936" 4853 "s59E25H2" 0 "Gas vesicle synthesis protein Gvpl/GvpF"  
"DsuE09\_00936" 4853 "s59E5H2" 0 "Gas vesicle synthesis protein Gvpl/GvpF"  
"DsuE09\_00936" 4853 "s63E6H2" 0 "Gas vesicle synthesis protein Gvpl/GvpF"  
"DsuE09\_00937" 4854 "s59E13H2" 0 "Gas vesicle synthesis protein Gvpl/GvpF"  
"DsuE09\_00937" 4854 "s59E25H2" 0 "Gas vesicle synthesis protein Gvpl/GvpF"  
"DsuE09\_00937" 4854 "s59E5H2" 0 "Gas vesicle synthesis protein Gvpl/GvpF"  
"DsuE09\_00937" 4854 "s63E6H2" 0 "Gas vesicle synthesis protein Gvpl/GvpF"  
"DsuE09\_00938" 4855 "s59E13H2" 0 "chaperone protein DnaJ"  
"DsuE09\_00938" 4855 "s59E25H2" 0 "chaperone protein DnaJ"  
"DsuE09\_00938" 4855 "s59E5H2" 0 "chaperone protein DnaJ"  
"DsuE09\_00938" 4855 "s63E6H2" 0 "chaperone protein DnaJ"  
"DsuE09\_00940" 4857 "s59E13H2" 0 "VCP-like ATPase"  
"DsuE09\_00940" 4857 "s59E25H2" 0 "VCP-like ATPase"  
"DsuE09\_00940" 4857 "s59E5H2" 0 "VCP-like ATPase"  
"DsuE09\_00940" 4857 "s63E6H2" 0 "VCP-like ATPase"  
"DsuE09\_00941" 4858 "s59E13H2" 0 "Hsp20/alpha crystallin family protein"  
"DsuE09\_00941" 4858 "s59E25H2" 0 "Hsp20/alpha crystallin family protein"  
"DsuE09\_00941" 4858 "s59E5H2" 0 "Hsp20/alpha crystallin family protein"  
"DsuE09\_00941" 4858 "s63E6H2" 0 "Hsp20/alpha crystallin family protein"  
"DsuE09\_00942" 4859 "s59E13H2" 0 "hypothetical protein"  
"DsuE09\_00942" 4859 "s59E25H2" 0 "hypothetical protein"  
"DsuE09\_00942" 4859 "s59E5H2" 0 "hypothetical protein"



"DsuE09\_00942" 4859 "s63E6H2" 0 "hypothetical protein"  
"DsuE09\_00944" 4861 "s59E13H2" 0 "chaperone protein DnaJ"  
"DsuE09\_00944" 4861 "s59E25H2" 0 "chaperone protein DnaJ"  
"DsuE09\_00944" 4861 "s59E5H2" 0 "chaperone protein DnaJ"  
"DsuE09\_00944" 4861 "s63E6H2" 0 "chaperone protein DnaJ"  
"DsuE09\_00945" 4862 "s59E13H2" 0 "hypothetical protein"  
"DsuE09\_00945" 4862 "s59E25H2" 0 "hypothetical protein"  
"DsuE09\_00945" 4862 "s59E5H2" 0 "hypothetical protein"  
"DsuE09\_00945" 4862 "s63E6H2" 0 "hypothetical protein"  
"DsuE09\_00946" 4863 "s59E13H2" 0 "hypothetical protein"  
"DsuE09\_00946" 4863 "s59E25H2" 0 "hypothetical protein"  
"DsuE09\_00946" 4863 "s59E5H2" 0 "hypothetical protein"  
"DsuE09\_00946" 4863 "s63E6H2" 0 "hypothetical protein"  
"DsuE09\_00947" 4864 "s59E13H2" 0 "Denitrification regulatory protein NirQ"  
"DsuE09\_00947" 4864 "s59E25H2" 0 "Denitrification regulatory protein NirQ"  
"DsuE09\_00947" 4864 "s59E5H2" 0 "Denitrification regulatory protein NirQ"  
"DsuE09\_00947" 4864 "s63E6H2" 0 "Denitrification regulatory protein NirQ"  
"DsuE09\_00948" 4865 "s59E13H2" 0 "hypothetical protein"  
"DsuE09\_00948" 4865 "s59E25H2" 0 "hypothetical protein"  
"DsuE09\_00948" 4865 "s59E5H2" 0 "hypothetical protein"  
"DsuE09\_00948" 4865 "s63E6H2" 0 "hypothetical protein"  
"DsuE09\_00949" 4866 "s59E13H2" 0 "chaperone protein DnaJ"  
"DsuE09\_00949" 4866 "s59E25H2" 0 "chaperone protein DnaJ"  
"DsuE09\_00949" 4866 "s59E5H2" 0 "chaperone protein DnaJ"  
"DsuE09\_00949" 4866 "s63E6H2" 0 "chaperone protein DnaJ"  
"DsuE09\_00950" 4867 "s59E13H2" 0 "hypothetical protein"  
"DsuE09\_00950" 4867 "s59E25H2" 0 "hypothetical protein"  
"DsuE09\_00950" 4867 "s59E5H2" 0 "hypothetical protein"  
"DsuE09\_00950" 4867 "s63E6H2" 0 "hypothetical protein"  
"DsuE09\_00951" 4868 "s59E13H2" 0 "hypothetical protein"  
"DsuE09\_00951" 4868 "s59E25H2" 0 "hypothetical protein"  
"DsuE09\_00951" 4868 "s59E5H2" 0 "hypothetical protein"  
"DsuE09\_00951" 4868 "s63E6H2" 0 "hypothetical protein"  
"DsuE09\_00952" 4869 "s59E13H2" 0 "hypothetical protein"  
"DsuE09\_00952" 4869 "s59E25H2" 0 "hypothetical protein"  
"DsuE09\_00952" 4869 "s59E5H2" 0 "hypothetical protein"  
"DsuE09\_00952" 4869 "s63E6H2" 0 "hypothetical protein"  
"DsuE09\_00953" 4870 "s59E13H2" 0 "Gas vesicle structural protein"  
"DsuE09\_00953" 4870 "s59E25H2" 0 "Gas vesicle structural protein"  
"DsuE09\_00953" 4870 "s59E5H2" 0 "Gas vesicle structural protein"  
"DsuE09\_00953" 4870 "s63E6H2" 0 "Gas vesicle structural protein"  
"DsuE09\_00954" 4871 "s59E13H2" 0 "Response regulator ArlR"  
"DsuE09\_00954" 4871 "s59E25H2" 0 "Response regulator ArlR"  
"DsuE09\_00954" 4871 "s59E5H2" 0 "Response regulator ArlR"  
"DsuE09\_00954" 4871 "s63E6H2" 0 "Response regulator ArlR"  
"DsuE09\_00955" 4872 "s59E13H2" 0 "Transcriptional regulatory protein ZraR"  
"DsuE09\_00955" 4872 "s59E25H2" 0 "Transcriptional regulatory protein ZraR"

"DsuE09\_00955" 4872 "s59E5H2" 0 "Transcriptional regulatory protein ZraR"  
"DsuE09\_00955" 4872 "s63E6H2" 0 "Transcriptional regulatory protein ZraR"  
"DsuE09\_00956" 4873 "s59E13H2" 0 "Sporulation initiation phosphotransferase F"  
"DsuE09\_00956" 4873 "s59E25H2" 0 "Sporulation initiation phosphotransferase F"  
"DsuE09\_00956" 4873 "s59E5H2" 0 "Sporulation initiation phosphotransferase F"  
"DsuE09\_00956" 4873 "s63E6H2" 0 "Sporulation initiation phosphotransferase F"  
"DsuE09\_00957" 4874 "s59E13H2" 0 "DNA polymerase III subunits gamma and tau"  
"DsuE09\_00957" 4874 "s59E25H2" 0 "DNA polymerase III subunits gamma and tau"  
"DsuE09\_00957" 4874 "s59E5H2" 0 "DNA polymerase III subunits gamma and tau"  
"DsuE09\_00957" 4874 "s63E6H2" 0.00200045 "DNA polymerase III subunits gamma and tau"  
"DsuE09\_00958" 4875 "s59E13H2" 0 "Nucleoid-associated protein"  
"DsuE09\_00958" 4875 "s59E25H2" 0 "Nucleoid-associated protein"  
"DsuE09\_00958" 4875 "s59E5H2" 0 "Nucleoid-associated protein"  
"DsuE09\_00958" 4875 "s63E6H2" 0.00560463 "Nucleoid-associated protein"  
"DsuE09\_00959" 4876 "s59E13H2" 0 "hypothetical protein"  
"DsuE09\_00959" 4876 "s59E25H2" 0 "hypothetical protein"  
"DsuE09\_00959" 4876 "s59E5H2" 0 "hypothetical protein"  
"DsuE09\_00959" 4876 "s63E6H2" 0 "hypothetical protein"  
"DsuE09\_00960" 4877 "s59E13H2" 0 "Antilisterial bacteriocin subtilisin biosynthesis protein Alba"  
"DsuE09\_00960" 4877 "s59E25H2" 0 "Antilisterial bacteriocin subtilisin biosynthesis protein Alba"  
"DsuE09\_00960" 4877 "s59E5H2" 0 "Antilisterial bacteriocin subtilisin biosynthesis protein Alba"  
"DsuE09\_00960" 4877 "s63E6H2" 0 "Antilisterial bacteriocin subtilisin biosynthesis protein Alba"  
"DsuE09\_00961" 4878 "s59E13H2" 0 "hypothetical protein"  
"DsuE09\_00961" 4878 "s59E25H2" 0 "hypothetical protein"  
"DsuE09\_00961" 4878 "s59E5H2" 0 "hypothetical protein"  
"DsuE09\_00961" 4878 "s63E6H2" 0 "hypothetical protein"  
"DsuE09\_00963" 4880 "s59E13H2" 0 "putative methyltransferase"  
"DsuE09\_00963" 4880 "s59E25H2" 0 "putative methyltransferase"  
"DsuE09\_00963" 4880 "s59E5H2" 0 "putative methyltransferase"  
"DsuE09\_00963" 4880 "s63E6H2" 0 "putative methyltransferase"  
"DsuE09\_00964" 4881 "s59E13H2" 0 "Beta-lactamase superfamily domain protein"  
"DsuE09\_00964" 4881 "s59E25H2" 0 "Beta-lactamase superfamily domain protein"  
"DsuE09\_00964" 4881 "s59E5H2" 0 "Beta-lactamase superfamily domain protein"  
"DsuE09\_00964" 4881 "s63E6H2" 0 "Beta-lactamase superfamily domain protein"  
"DsuE09\_00965" 4882 "s59E13H2" 0 "hypothetical protein"  
"DsuE09\_00965" 4882 "s59E25H2" 0 "hypothetical protein"  
"DsuE09\_00965" 4882 "s59E5H2" 0 "hypothetical protein"  
"DsuE09\_00965" 4882 "s63E6H2" 0 "hypothetical protein"  
"DsuE09\_00966" 4883 "s59E13H2" 0 "Asparagine synthetase [glutamine-hydrolyzing] 1"  
"DsuE09\_00966" 4883 "s59E25H2" 0 "Asparagine synthetase [glutamine-hydrolyzing] 1"  
"DsuE09\_00966" 4883 "s59E5H2" 0 "Asparagine synthetase [glutamine-hydrolyzing] 1"  
"DsuE09\_00966" 4883 "s63E6H2" 0 "Asparagine synthetase [glutamine-hydrolyzing] 1"  
"DsuE09\_00967" 4884 "s59E13H2" 0 "hypothetical protein"  
"DsuE09\_00967" 4884 "s59E25H2" 0 "hypothetical protein"  
"DsuE09\_00967" 4884 "s59E5H2" 0 "hypothetical protein"  
"DsuE09\_00967" 4884 "s63E6H2" 0 "hypothetical protein"  
"DsuE09\_00968" 4885 "s59E13H2" 0 "hypothetical protein"

"DsuE09\_00968" 4885 "s59E25H2" 0 "hypothetical protein"  
"DsuE09\_00968" 4885 "s59E5H2" 0 "hypothetical protein"  
"DsuE09\_00968" 4885 "s63E6H2" 0 "hypothetical protein"  
"DsuE09\_00971" 4888 "s59E13H2" 0 "membrane-bound lytic murein transglycosylase D"  
"DsuE09\_00971" 4888 "s59E25H2" 0 "membrane-bound lytic murein transglycosylase D"  
"DsuE09\_00971" 4888 "s59E5H2" 0 "membrane-bound lytic murein transglycosylase D"  
"DsuE09\_00971" 4888 "s63E6H2" 0 "membrane-bound lytic murein transglycosylase D"  
"DsuE09\_00972" 4889 "s59E13H2" 0 "3-keto-5-aminohexanoate cleavage enzyme"  
"DsuE09\_00972" 4889 "s59E25H2" 0 "3-keto-5-aminohexanoate cleavage enzyme"  
"DsuE09\_00972" 4889 "s59E5H2" 0 "3-keto-5-aminohexanoate cleavage enzyme"  
"DsuE09\_00972" 4889 "s63E6H2" 0 "3-keto-5-aminohexanoate cleavage enzyme"  
"DsuE09\_00974" 4891 "s59E13H2" 0 "Phosphoenolpyruvate synthase"  
"DsuE09\_00974" 4891 "s59E25H2" 0 "Phosphoenolpyruvate synthase"  
"DsuE09\_00974" 4891 "s59E5H2" 0 "Phosphoenolpyruvate synthase"  
"DsuE09\_00974" 4891 "s63E6H2" 0 "Phosphoenolpyruvate synthase"  
"DsuE09\_00975" 4892 "s59E13H2" 0 "Phosphoenolpyruvate synthase"  
"DsuE09\_00975" 4892 "s59E25H2" 0 "Phosphoenolpyruvate synthase"  
"DsuE09\_00975" 4892 "s59E5H2" 0 "Phosphoenolpyruvate synthase"  
"DsuE09\_00975" 4892 "s63E6H2" 0 "Phosphoenolpyruvate synthase"  
"DsuE09\_00976" 4893 "s59E13H2" 0 "hypothetical protein"  
"DsuE09\_00976" 4893 "s59E25H2" 0 "hypothetical protein"  
"DsuE09\_00976" 4893 "s59E5H2" 0 "hypothetical protein"  
"DsuE09\_00976" 4893 "s63E6H2" 0 "hypothetical protein"  
"DsuE09\_00977" 4894 "s59E13H2" 0 "Spore protein SP21"  
"DsuE09\_00977" 4894 "s59E25H2" 0 "Spore protein SP21"  
"DsuE09\_00977" 4894 "s59E5H2" 0 "Spore protein SP21"  
"DsuE09\_00977" 4894 "s63E6H2" 0 "Spore protein SP21"  
"DsuE09\_00978" 4895 "s59E13H2" 0 "Archaeal Lon protease"  
"DsuE09\_00978" 4895 "s59E25H2" 0 "Archaeal Lon protease"  
"DsuE09\_00978" 4895 "s59E5H2" 0 "Archaeal Lon protease"  
"DsuE09\_00978" 4895 "s63E6H2" 0 "Archaeal Lon protease"  
"DsuE09\_00979" 4896 "s59E13H2" 0 "hypothetical protein"  
"DsuE09\_00979" 4896 "s59E25H2" 0 "hypothetical protein"  
"DsuE09\_00979" 4896 "s59E5H2" 0 "hypothetical protein"  
"DsuE09\_00979" 4896 "s63E6H2" 0 "hypothetical protein"  
"DsuE09\_00980" 4897 "s59E13H2" 0 "Integration host factor subunit beta"  
"DsuE09\_00980" 4897 "s59E25H2" 0 "Integration host factor subunit beta"  
"DsuE09\_00980" 4897 "s59E5H2" 0 "Integration host factor subunit beta"  
"DsuE09\_00980" 4897 "s63E6H2" 0 "Integration host factor subunit beta"  
"DsuE09\_00984" 4901 "s59E13H2" 0 "Dihydroorotate dehydrogenase B (NAD(+) , electron transfer subunit"  
"DsuE09\_00984" 4901 "s59E25H2" 0 "Dihydroorotate dehydrogenase B (NAD(+) , electron transfer subunit"  
"DsuE09\_00984" 4901 "s59E5H2" 0 "Dihydroorotate dehydrogenase B (NAD(+) , electron transfer subunit"  
"DsuE09\_00984" 4901 "s63E6H2" 0 "Dihydroorotate dehydrogenase B (NAD(+) , electron transfer subunit"  
"DsuE09\_00985" 4902 "s59E13H2" 0 "Dihydroorotate dehydrogenase B (NAD(+) , catalytic subunit"  
"DsuE09\_00985" 4902 "s59E25H2" 0 "Dihydroorotate dehydrogenase B (NAD(+) , catalytic subunit"  
"DsuE09\_00985" 4902 "s59E5H2" 0.001234227 "Dihydroorotate dehydrogenase B (NAD(+) , catalytic subunit"  
"DsuE09\_00985" 4902 "s63E6H2" 0 "Dihydroorotate dehydrogenase B (NAD(+) , catalytic subunit"

"DsuE09\_00986" 4903 "s59E13H2" 0 "putative M18 family aminopeptidase 1"  
"DsuE09\_00986" 4903 "s59E25H2" 0 "putative M18 family aminopeptidase 1"  
"DsuE09\_00986" 4903 "s59E5H2" 0 "putative M18 family aminopeptidase 1"  
"DsuE09\_00986" 4903 "s63E6H2" 0 "putative M18 family aminopeptidase 1"  
"DsuE09\_00987" 4904 "s59E13H2" 0 "Glyoxylate reductase"  
"DsuE09\_00987" 4904 "s59E25H2" 0 "Glyoxylate reductase"  
"DsuE09\_00987" 4904 "s59E5H2" 0 "Glyoxylate reductase"  
"DsuE09\_00987" 4904 "s63E6H2" 0 "Glyoxylate reductase"  
"DsuE09\_00988" 4905 "s59E13H2" 0 "Archaemetzincin"  
"DsuE09\_00988" 4905 "s59E25H2" 0 "Archaemetzincin"  
"DsuE09\_00988" 4905 "s59E5H2" 0 "Archaemetzincin"  
"DsuE09\_00988" 4905 "s63E6H2" 0 "Archaemetzincin"  
"DsuE09\_00989" 4906 "s59E13H2" 0 "GYD domain protein"  
"DsuE09\_00989" 4906 "s59E25H2" 0 "GYD domain protein"  
"DsuE09\_00989" 4906 "s59E5H2" 0 "GYD domain protein"  
"DsuE09\_00989" 4906 "s63E6H2" 0 "GYD domain protein"  
"DsuE09\_00990" 4907 "s59E13H2" 0 "Radical SAM superfamily protein"  
"DsuE09\_00990" 4907 "s59E25H2" 0 "Radical SAM superfamily protein"  
"DsuE09\_00990" 4907 "s59E5H2" 0 "Radical SAM superfamily protein"  
"DsuE09\_00990" 4907 "s63E6H2" 0 "Radical SAM superfamily protein"  
"DsuE09\_00991" 4908 "s59E13H2" 0 "Cell division protein FtsZ"  
"DsuE09\_00991" 4908 "s59E25H2" 0 "Cell division protein FtsZ"  
"DsuE09\_00991" 4908 "s59E5H2" 0 "Cell division protein FtsZ"  
"DsuE09\_00991" 4908 "s63E6H2" 0 "Cell division protein FtsZ"  
"DsuE09\_00993" 4910 "s59E13H2" 0 "Cell division protein FtsA"  
"DsuE09\_00993" 4910 "s59E25H2" 0 "Cell division protein FtsA"  
"DsuE09\_00993" 4910 "s59E5H2" 0 "Cell division protein FtsA"  
"DsuE09\_00993" 4910 "s63E6H2" 0 "Cell division protein FtsA"  
"DsuE09\_00994" 4911 "s59E13H2" 0 "Cell division protein DivIB"  
"DsuE09\_00994" 4911 "s59E25H2" 0 "Cell division protein DivIB"  
"DsuE09\_00994" 4911 "s59E5H2" 0 "Cell division protein DivIB"  
"DsuE09\_00994" 4911 "s63E6H2" 0 "Cell division protein DivIB"  
"DsuE09\_00995" 4912 "s59E13H2" 0 "UDP-N-acetylenolpyruvoylglucosamine reductase"  
"DsuE09\_00995" 4912 "s59E25H2" 0 "UDP-N-acetylenolpyruvoylglucosamine reductase"  
"DsuE09\_00995" 4912 "s59E5H2" 0 "UDP-N-acetylenolpyruvoylglucosamine reductase"  
"DsuE09\_00995" 4912 "s63E6H2" 0 "UDP-N-acetylenolpyruvoylglucosamine reductase"  
"DsuE09\_00996" 4913 "s59E13H2" 0 "UDP-N-acetylenolpyruvoylglucosamine reductase"  
"DsuE09\_00996" 4913 "s59E25H2" 0 "UDP-N-acetylenolpyruvoylglucosamine reductase"  
"DsuE09\_00996" 4913 "s59E5H2" 0 "UDP-N-acetylenolpyruvoylglucosamine reductase"  
"DsuE09\_00996" 4913 "s63E6H2" 0 "UDP-N-acetylenolpyruvoylglucosamine reductase"  
"DsuE09\_00997" 4914 "s59E13H2" 0 "UDP-N-acetylmuramate--L-alanine ligase"  
"DsuE09\_00997" 4914 "s59E25H2" 0 "UDP-N-acetylmuramate--L-alanine ligase"  
"DsuE09\_00997" 4914 "s59E5H2" 0 "UDP-N-acetylmuramate--L-alanine ligase"  
"DsuE09\_00997" 4914 "s63E6H2" 0 "UDP-N-acetylmuramate--L-alanine ligase"  
"DsuE09\_00998" 4915 "s59E13H2" 0 "UDP-N-acetylglucosamine--N-acetylmuramyl-(pentapeptide) pyrophosphoryl-undecaprenol N-acetylglucosamine transferase"  
"DsuE09\_00998" 4915 "s59E25H2" 0 "UDP-N-acetylglucosamine--N-acetylmuramyl-(pentapeptide) pyrophosphoryl-undecaprenol N-acetylglucosamine transferase"  
"DsuE09\_00998" 4915 "s59E5H2" 0 "UDP-N-acetylglucosamine--N-acetylmuramyl-(pentapeptide) pyrophosphoryl-undecaprenol N-acetylglucosamine transferase"

"DsuE09\_00998" 4915 "s63E6H2" 0 "UDP-N-acetylglucosamine--N-acetylmuramyl-(pentapeptide) pyrophosphoryl-undecaprenol N-acetylglucosamine transferase"  
"DsuE09\_00999" 4916 "s59E13H2" 0 "Lipid II flippase FtsW"  
"DsuE09\_00999" 4916 "s59E25H2" 0 "Lipid II flippase FtsW"  
"DsuE09\_00999" 4916 "s59E5H2" 0 "Lipid II flippase FtsW"  
"DsuE09\_00999" 4916 "s63E6H2" 0 "Lipid II flippase FtsW"  
"DsuE09\_01000" 4917 "s59E13H2" 0 "UDP-N-acetylmuramoylalanine--D-glutamate ligase"  
"DsuE09\_01000" 4917 "s59E25H2" 0 "UDP-N-acetylmuramoylalanine--D-glutamate ligase"  
"DsuE09\_01000" 4917 "s59E5H2" 0 "UDP-N-acetylmuramoylalanine--D-glutamate ligase"  
"DsuE09\_01000" 4917 "s63E6H2" 0 "UDP-N-acetylmuramoylalanine--D-glutamate ligase"  
"DsuE09\_01001" 4918 "s59E13H2" 0 "Phospho-N-acetylmuramoyl-pentapeptide-transferase"  
"DsuE09\_01001" 4918 "s59E25H2" 0 "Phospho-N-acetylmuramoyl-pentapeptide-transferase"  
"DsuE09\_01001" 4918 "s59E5H2" 0 "Phospho-N-acetylmuramoyl-pentapeptide-transferase"  
"DsuE09\_01001" 4918 "s63E6H2" 0 "Phospho-N-acetylmuramoyl-pentapeptide-transferase"  
"DsuE09\_01002" 4919 "s59E13H2" 0 "NADP-reducing hydrogenase subunit HndC"  
"DsuE09\_01002" 4919 "s59E25H2" 0 "NADP-reducing hydrogenase subunit HndC"  
"DsuE09\_01002" 4919 "s59E5H2" 0 "NADP-reducing hydrogenase subunit HndC"  
"DsuE09\_01002" 4919 "s63E6H2" 0 "NADP-reducing hydrogenase subunit HndC"  
"DsuE09\_01003" 4920 "s59E13H2" 0 "NADP-reducing hydrogenase subunit HndA"  
"DsuE09\_01003" 4920 "s59E25H2" 0 "NADP-reducing hydrogenase subunit HndA"  
"DsuE09\_01003" 4920 "s59E5H2" 0 "NADP-reducing hydrogenase subunit HndA"  
"DsuE09\_01003" 4920 "s63E6H2" 0 "NADP-reducing hydrogenase subunit HndA"  
"DsuE09\_01004" 4921 "s59E13H2" 0 "NADP-reducing hydrogenase subunit HndC"  
"DsuE09\_01004" 4921 "s59E25H2" 0 "NADP-reducing hydrogenase subunit HndC"  
"DsuE09\_01004" 4921 "s59E5H2" 0 "NADP-reducing hydrogenase subunit HndC"  
"DsuE09\_01004" 4921 "s63E6H2" 0 "NADP-reducing hydrogenase subunit HndC"  
"DsuE09\_01005" 4922 "s59E13H2" 0 "NADP-reducing hydrogenase subunit HndC"  
"DsuE09\_01005" 4922 "s59E25H2" 0 "NADP-reducing hydrogenase subunit HndC"  
"DsuE09\_01005" 4922 "s59E5H2" 0 "NADP-reducing hydrogenase subunit HndC"  
"DsuE09\_01005" 4922 "s63E6H2" 0 "NADP-reducing hydrogenase subunit HndC"  
"DsuE09\_01006" 4923 "s59E13H2" 0 "Putative formate dehydrogenase"  
"DsuE09\_01006" 4923 "s59E25H2" 0 "Putative formate dehydrogenase"  
"DsuE09\_01006" 4923 "s59E5H2" 0 "Putative formate dehydrogenase"  
"DsuE09\_01006" 4923 "s63E6H2" 0 "Putative formate dehydrogenase"  
"DsuE09\_01007" 4924 "s59E13H2" 0 "Formate dehydrogenase subunit alpha"  
"DsuE09\_01007" 4924 "s59E25H2" 0 "Formate dehydrogenase subunit alpha"  
"DsuE09\_01007" 4924 "s59E5H2" 0 "Formate dehydrogenase subunit alpha"  
"DsuE09\_01007" 4924 "s63E6H2" 0 "Formate dehydrogenase subunit alpha"  
"DsuE09\_01008" 4925 "s59E13H2" 0 "hypothetical protein"  
"DsuE09\_01008" 4925 "s59E25H2" 0 "hypothetical protein"  
"DsuE09\_01008" 4925 "s59E5H2" 0 "hypothetical protein"  
"DsuE09\_01008" 4925 "s63E6H2" 0 "hypothetical protein"  
"DsuE09\_01009" 4926 "s59E13H2" 0 "Hdr-like menaquinol oxidoreductase cytochrome b-like subunit"  
"DsuE09\_01009" 4926 "s59E25H2" 0 "Hdr-like menaquinol oxidoreductase cytochrome b-like subunit"  
"DsuE09\_01009" 4926 "s59E5H2" 0 "Hdr-like menaquinol oxidoreductase cytochrome b-like subunit"  
"DsuE09\_01009" 4926 "s63E6H2" 0 "Hdr-like menaquinol oxidoreductase cytochrome b-like subunit"  
"DsuE09\_01010" 4927 "s59E13H2" 0 "Hdr-like menaquinol oxidoreductase iron-sulfur subunit 2"  
"DsuE09\_01010" 4927 "s59E25H2" 0 "Hdr-like menaquinol oxidoreductase iron-sulfur subunit 2"

"DsuE09\_01010" 4927 "s59E5H2" 0 "Hdr-like menaquinol oxidoreductase iron-sulfur subunit 2"  
"DsuE09\_01010" 4927 "s63E6H2" 0 "Hdr-like menaquinol oxidoreductase iron-sulfur subunit 2"  
"DsuE09\_01011" 4928 "s59E13H2" 0 "Hdr-like menaquinol oxidoreductase cytochrome c subunit"  
"DsuE09\_01011" 4928 "s59E25H2" 0 "Hdr-like menaquinol oxidoreductase cytochrome c subunit"  
"DsuE09\_01011" 4928 "s59E5H2" 0 "Hdr-like menaquinol oxidoreductase cytochrome c subunit"  
"DsuE09\_01011" 4928 "s63E6H2" 0 "Hdr-like menaquinol oxidoreductase cytochrome c subunit"  
"DsuE09\_01012" 4929 "s59E13H2" 0 "Hdr-like menaquinol oxidoreductase iron-sulfur subunit 1 precursor"  
"DsuE09\_01012" 4929 "s59E25H2" 0 "Hdr-like menaquinol oxidoreductase iron-sulfur subunit 1 precursor"  
"DsuE09\_01012" 4929 "s59E5H2" 0 "Hdr-like menaquinol oxidoreductase iron-sulfur subunit 1 precursor"  
"DsuE09\_01012" 4929 "s63E6H2" 0 "Hdr-like menaquinol oxidoreductase iron-sulfur subunit 1 precursor"  
"DsuE09\_01013" 4930 "s59E13H2" 0 "Polysulphide reductase, NrfD"  
"DsuE09\_01013" 4930 "s59E25H2" 0 "Polysulphide reductase, NrfD"  
"DsuE09\_01013" 4930 "s59E5H2" 0 "Polysulphide reductase, NrfD"  
"DsuE09\_01013" 4930 "s63E6H2" 0 "Polysulphide reductase, NrfD"  
"DsuE09\_01015" 4932 "s59E13H2" 0 "Sulfurtransferase TusD"  
"DsuE09\_01015" 4932 "s59E25H2" 0 "Sulfurtransferase TusD"  
"DsuE09\_01015" 4932 "s59E5H2" 0 "Sulfurtransferase TusD"  
"DsuE09\_01015" 4932 "s63E6H2" 0 "Sulfurtransferase TusD"  
"DsuE09\_01016" 4933 "s59E13H2" 0 "Acidic cytochrome c3 precursor"  
"DsuE09\_01016" 4933 "s59E25H2" 0 "Acidic cytochrome c3 precursor"  
"DsuE09\_01016" 4933 "s59E5H2" 0 "Acidic cytochrome c3 precursor"  
"DsuE09\_01016" 4933 "s63E6H2" 0 "Acidic cytochrome c3 precursor"  
"DsuE09\_01017" 4934 "s59E13H2" 0 "Universal stress protein"  
"DsuE09\_01017" 4934 "s59E25H2" 0 "Universal stress protein"  
"DsuE09\_01017" 4934 "s59E5H2" 0 "Universal stress protein"  
"DsuE09\_01017" 4934 "s63E6H2" 0 "Universal stress protein"  
"DsuE09\_01018" 4935 "s59E13H2" 0 "Hdr-like menaquinol oxidoreductase iron-sulfur subunit"  
"DsuE09\_01018" 4935 "s59E25H2" 0 "Hdr-like menaquinol oxidoreductase iron-sulfur subunit"  
"DsuE09\_01018" 4935 "s59E5H2" 0 "Hdr-like menaquinol oxidoreductase iron-sulfur subunit"  
"DsuE09\_01018" 4935 "s63E6H2" 0 "Hdr-like menaquinol oxidoreductase iron-sulfur subunit"  
"DsuE09\_01019" 4936 "s59E13H2" 0 "hypothetical protein"  
"DsuE09\_01019" 4936 "s59E25H2" 0 "hypothetical protein"  
"DsuE09\_01019" 4936 "s59E5H2" 0 "hypothetical protein"  
"DsuE09\_01019" 4936 "s63E6H2" 0 "hypothetical protein"  
"DsuE09\_01021" 4938 "s59E13H2" 0 "Transcriptional regulatory protein ZraR"  
"DsuE09\_01021" 4938 "s59E25H2" 0 "Transcriptional regulatory protein ZraR"  
"DsuE09\_01021" 4938 "s59E5H2" 0 "Transcriptional regulatory protein ZraR"  
"DsuE09\_01021" 4938 "s63E6H2" 0 "Transcriptional regulatory protein ZraR"  
"DsuE09\_01022" 4939 "s59E13H2" 0 "Dinitrogenase iron-molybdenum cofactor"  
"DsuE09\_01022" 4939 "s59E25H2" 0 "Dinitrogenase iron-molybdenum cofactor"  
"DsuE09\_01022" 4939 "s59E5H2" 0 "Dinitrogenase iron-molybdenum cofactor"  
"DsuE09\_01022" 4939 "s63E6H2" 0 "Dinitrogenase iron-molybdenum cofactor"  
"DsuE09\_01024" 4941 "s59E13H2" 0 "hypothetical protein"  
"DsuE09\_01024" 4941 "s59E25H2" 0 "hypothetical protein"  
"DsuE09\_01024" 4941 "s59E5H2" 0 "hypothetical protein"  
"DsuE09\_01024" 4941 "s63E6H2" 0 "hypothetical protein"  
"DsuE09\_01025" 4942 "s59E13H2" 0 "7,8-dihydropterin-6-methyl-4-(beta-D-ribofuranosyl)-aminobenzene-5'-phosphate synthase"

"DsuE09\_01025" 4942 "s59E25H2" 0 "7,8-dihydropterin-6-methyl-4-(beta-D-ribofuranosyl)-aminobenzene-5'-phosphate synthase"  
"DsuE09\_01025" 4942 "s59E5H2" 0 "7,8-dihydropterin-6-methyl-4-(beta-D-ribofuranosyl)-aminobenzene-5'-phosphate synthase"  
"DsuE09\_01025" 4942 "s63E6H2" 0 "7,8-dihydropterin-6-methyl-4-(beta-D-ribofuranosyl)-aminobenzene-5'-phosphate synthase"  
"DsuE09\_01026" 4943 "s59E13H2" 0 "4-hydroxybutyryl-CoA dehydratase/vinylacetyl-CoA-Delta-isomerase"  
"DsuE09\_01026" 4943 "s59E25H2" 0 "4-hydroxybutyryl-CoA dehydratase/vinylacetyl-CoA-Delta-isomerase"  
"DsuE09\_01026" 4943 "s59E5H2" 0 "4-hydroxybutyryl-CoA dehydratase/vinylacetyl-CoA-Delta-isomerase"  
"DsuE09\_01026" 4943 "s63E6H2" 0 "4-hydroxybutyryl-CoA dehydratase/vinylacetyl-CoA-Delta-isomerase"  
"DsuE09\_01027" 4944 "s59E13H2" 0 "Dinitrogenase iron-molybdenum cofactor"  
"DsuE09\_01027" 4944 "s59E25H2" 0 "Dinitrogenase iron-molybdenum cofactor"  
"DsuE09\_01027" 4944 "s59E5H2" 0 "Dinitrogenase iron-molybdenum cofactor"  
"DsuE09\_01027" 4944 "s63E6H2" 0 "Dinitrogenase iron-molybdenum cofactor"  
"DsuE09\_01029" 4946 "s59E13H2" 0 "antiporter inner membrane protein"  
"DsuE09\_01029" 4946 "s59E25H2" 0 "antiporter inner membrane protein"  
"DsuE09\_01029" 4946 "s59E5H2" 0 "antiporter inner membrane protein"  
"DsuE09\_01029" 4946 "s63E6H2" 0 "antiporter inner membrane protein"  
"DsuE09\_01030" 4947 "s59E13H2" 0 "Dinitrogenase iron-molybdenum cofactor"  
"DsuE09\_01030" 4947 "s59E25H2" 0 "Dinitrogenase iron-molybdenum cofactor"  
"DsuE09\_01030" 4947 "s59E5H2" 0 "Dinitrogenase iron-molybdenum cofactor"  
"DsuE09\_01030" 4947 "s63E6H2" 0 "Dinitrogenase iron-molybdenum cofactor"  
"DsuE09\_01031" 4948 "s59E13H2" 0 "Dinitrogenase iron-molybdenum cofactor"  
"DsuE09\_01031" 4948 "s59E25H2" 0 "Dinitrogenase iron-molybdenum cofactor"  
"DsuE09\_01031" 4948 "s59E5H2" 0 "Dinitrogenase iron-molybdenum cofactor"  
"DsuE09\_01031" 4948 "s63E6H2" 0 "Dinitrogenase iron-molybdenum cofactor"  
"DsuE09\_01032" 4949 "s59E13H2" 0 "Electron transport complex subunit RxB"  
"DsuE09\_01032" 4949 "s59E25H2" 0 "Electron transport complex subunit RxB"  
"DsuE09\_01032" 4949 "s59E5H2" 0 "Electron transport complex subunit RxB"  
"DsuE09\_01032" 4949 "s63E6H2" 0 "Electron transport complex subunit RxB"  
"DsuE09\_01033" 4950 "s59E13H2" 0 "CoB--CoM heterodisulfide reductase iron-sulfur subunit A"  
"DsuE09\_01033" 4950 "s59E25H2" 0 "CoB--CoM heterodisulfide reductase iron-sulfur subunit A"  
"DsuE09\_01033" 4950 "s59E5H2" 0 "CoB--CoM heterodisulfide reductase iron-sulfur subunit A"  
"DsuE09\_01033" 4950 "s63E6H2" 0 "CoB--CoM heterodisulfide reductase iron-sulfur subunit A"  
"DsuE09\_01034" 4951 "s59E13H2" 0 "hypothetical protein"  
"DsuE09\_01034" 4951 "s59E25H2" 0 "hypothetical protein"  
"DsuE09\_01034" 4951 "s59E5H2" 0 "hypothetical protein"  
"DsuE09\_01034" 4951 "s63E6H2" 0 "hypothetical protein"  
"DsuE09\_01036" 4953 "s59E13H2" 0 "NifU-like protein"  
"DsuE09\_01036" 4953 "s59E25H2" 0 "NifU-like protein"  
"DsuE09\_01036" 4953 "s59E5H2" 0 "NifU-like protein"  
"DsuE09\_01036" 4953 "s63E6H2" 0 "NifU-like protein"  
"DsuE09\_01038" 4955 "s59E13H2" 0 "Chaperone protein DnaJ"  
"DsuE09\_01038" 4955 "s59E25H2" 0 "Chaperone protein DnaJ"  
"DsuE09\_01038" 4955 "s59E5H2" 0 "Chaperone protein DnaJ"  
"DsuE09\_01038" 4955 "s63E6H2" 0 "Chaperone protein DnaJ"  
"DsuE09\_01039" 4956 "s59E13H2" 0 "putative RNA-binding protein"  
"DsuE09\_01039" 4956 "s59E25H2" 0 "putative RNA-binding protein"  
"DsuE09\_01039" 4956 "s59E5H2" 0 "putative RNA-binding protein"  
"DsuE09\_01039" 4956 "s63E6H2" 0 "putative RNA-binding protein"

"DsuE09\_01040" 4957 "s59E13H2" 0 "Thioredoxin-1"  
"DsuE09\_01040" 4957 "s59E25H2" 0 "Thioredoxin-1"  
"DsuE09\_01040" 4957 "s59E5H2" 0 "Thioredoxin-1"  
"DsuE09\_01040" 4957 "s63E6H2" 0 "Thioredoxin-1"  
"DsuE09\_01041" 4958 "s59E13H2" 0 "Acetyl-CoA decarboxylase/synthase complex subunit gamma"  
"DsuE09\_01041" 4958 "s59E25H2" 0 "Acetyl-CoA decarboxylase/synthase complex subunit gamma"  
"DsuE09\_01041" 4958 "s59E5H2" 0 "Acetyl-CoA decarboxylase/synthase complex subunit gamma"  
"DsuE09\_01041" 4958 "s63E6H2" 0 "Acetyl-CoA decarboxylase/synthase complex subunit gamma"  
"DsuE09\_01042" 4959 "s59E13H2" 0 "hypothetical protein"  
"DsuE09\_01042" 4959 "s59E25H2" 0 "hypothetical protein"  
"DsuE09\_01042" 4959 "s59E5H2" 0 "hypothetical protein"  
"DsuE09\_01042" 4959 "s63E6H2" 0 "hypothetical protein"  
"DsuE09\_01043" 4960 "s59E13H2" 0 "hypothetical protein"  
"DsuE09\_01043" 4960 "s59E25H2" 0 "hypothetical protein"  
"DsuE09\_01043" 4960 "s59E5H2" 0 "hypothetical protein"  
"DsuE09\_01043" 4960 "s63E6H2" 0 "hypothetical protein"  
"DsuE09\_01044" 4961 "s59E13H2" 0 "Dinitrogenase iron-molybdenum cofactor"  
"DsuE09\_01044" 4961 "s59E25H2" 0 "Dinitrogenase iron-molybdenum cofactor"  
"DsuE09\_01044" 4961 "s59E5H2" 0 "Dinitrogenase iron-molybdenum cofactor"  
"DsuE09\_01044" 4961 "s63E6H2" 0 "Dinitrogenase iron-molybdenum cofactor"  
"DsuE09\_01045" 4962 "s59E13H2" 0 "Dinitrogenase iron-molybdenum cofactor"  
"DsuE09\_01045" 4962 "s59E25H2" 0 "Dinitrogenase iron-molybdenum cofactor"  
"DsuE09\_01045" 4962 "s59E5H2" 0 "Dinitrogenase iron-molybdenum cofactor"  
"DsuE09\_01045" 4962 "s63E6H2" 0 "Dinitrogenase iron-molybdenum cofactor"  
"DsuE09\_01046" 4963 "s59E13H2" 0 "Response regulator receiver domain protein"  
"DsuE09\_01046" 4963 "s59E25H2" 0 "Response regulator receiver domain protein"  
"DsuE09\_01046" 4963 "s59E5H2" 0 "Response regulator receiver domain protein"  
"DsuE09\_01046" 4963 "s63E6H2" 0 "Response regulator receiver domain protein"  
"DsuE09\_01047" 4964 "s59E13H2" 0 "NifU-like protein"  
"DsuE09\_01047" 4964 "s59E25H2" 0 "NifU-like protein"  
"DsuE09\_01047" 4964 "s59E5H2" 0 "NifU-like protein"  
"DsuE09\_01047" 4964 "s63E6H2" 0 "NifU-like protein"  
"DsuE09\_01048" 4965 "s59E13H2" 0 "Zinc ribbon domain protein"  
"DsuE09\_01048" 4965 "s59E25H2" 0 "Zinc ribbon domain protein"  
"DsuE09\_01048" 4965 "s59E5H2" 0 "Zinc ribbon domain protein"  
"DsuE09\_01048" 4965 "s63E6H2" 0 "Zinc ribbon domain protein"  
"DsuE09\_01049" 4966 "s59E13H2" 0 "hypothetical protein"  
"DsuE09\_01049" 4966 "s59E25H2" 0 "hypothetical protein"  
"DsuE09\_01049" 4966 "s59E5H2" 0 "hypothetical protein"  
"DsuE09\_01049" 4966 "s63E6H2" 0 "hypothetical protein"  
"DsuE09\_01050" 4967 "s59E13H2" 0 "Sulfite exporter TauE/SafE"  
"DsuE09\_01050" 4967 "s59E25H2" 0 "Sulfite exporter TauE/SafE"  
"DsuE09\_01050" 4967 "s59E5H2" 0 "Sulfite exporter TauE/SafE"  
"DsuE09\_01050" 4967 "s63E6H2" 0 "Sulfite exporter TauE/SafE"  
"DsuE09\_01051" 4968 "s59E13H2" 0 "hypothetical protein"  
"DsuE09\_01051" 4968 "s59E25H2" 0 "hypothetical protein"  
"DsuE09\_01051" 4968 "s59E5H2" 0 "hypothetical protein"



"DsuE09\_01051" 4968 "s63E6H2" 0 "hypothetical protein"  
"DsuE09\_01052" 4969 "s59E13H2" 0 "Coenzyme A disulfide reductase"  
"DsuE09\_01052" 4969 "s59E25H2" 0 "Coenzyme A disulfide reductase"  
"DsuE09\_01052" 4969 "s59E5H2" 0 "Coenzyme A disulfide reductase"  
"DsuE09\_01052" 4969 "s63E6H2" 0 "Coenzyme A disulfide reductase"  
"DsuE09\_01055" 4972 "s59E13H2" 0 "(R)-stereoselective amidase"  
"DsuE09\_01055" 4972 "s59E25H2" 0 "(R)-stereoselective amidase"  
"DsuE09\_01055" 4972 "s59E5H2" 0 "(R)-stereoselective amidase"  
"DsuE09\_01055" 4972 "s63E6H2" 0 "(R)-stereoselective amidase"  
"JS1\_A09\_00001" 10487 "s59E13H2" 0.02123696 "ATP-dependent protease subunit HslV"  
"JS1\_A09\_00001" 10487 "s59E25H2" 0 "ATP-dependent protease subunit HslV"  
"JS1\_A09\_00001" 10487 "s59E5H2" 0.1647966 "ATP-dependent protease subunit HslV"  
"JS1\_A09\_00001" 10487 "s63E6H2" 0.0444282 "ATP-dependent protease subunit HslV"  
"JS1\_A09\_00002" 10488 "s59E13H2" 0 "Formate dehydrogenase subunit beta"  
"JS1\_A09\_00002" 10488 "s59E25H2" 0 "Formate dehydrogenase subunit beta"  
"JS1\_A09\_00002" 10488 "s59E5H2" 0.003573786 "Formate dehydrogenase subunit beta"  
"JS1\_A09\_00002" 10488 "s63E6H2" 0 "Formate dehydrogenase subunit beta"  
"JS1\_A09\_00003" 10489 "s59E13H2" 0 "F420-non-reducing hydrogenase vhc iron-sulfur subunit D"  
"JS1\_A09\_00003" 10489 "s59E25H2" 0 "F420-non-reducing hydrogenase vhc iron-sulfur subunit D"  
"JS1\_A09\_00003" 10489 "s59E5H2" 0 "F420-non-reducing hydrogenase vhc iron-sulfur subunit D"  
"JS1\_A09\_00003" 10489 "s63E6H2" 0 "F420-non-reducing hydrogenase vhc iron-sulfur subunit D"  
"JS1\_A09\_00004" 10490 "s59E13H2" 0 "CoB--CoM heterodisulfide reductase iron-sulfur subunit A"  
"JS1\_A09\_00004" 10490 "s59E25H2" 0 "CoB--CoM heterodisulfide reductase iron-sulfur subunit A"  
"JS1\_A09\_00004" 10490 "s59E5H2" 0.00562814 "CoB--CoM heterodisulfide reductase iron-sulfur subunit A"  
"JS1\_A09\_00004" 10490 "s63E6H2" 0 "CoB--CoM heterodisulfide reductase iron-sulfur subunit A"  
"JS1\_A09\_00005" 10491 "s59E13H2" 0 "hypothetical protein"  
"JS1\_A09\_00005" 10491 "s59E25H2" 0 "hypothetical protein"  
"JS1\_A09\_00005" 10491 "s59E5H2" 0 "hypothetical protein"  
"JS1\_A09\_00005" 10491 "s63E6H2" 0 "hypothetical protein"  
"JS1\_A09\_00006" 10492 "s59E13H2" 0.02996592 "hypothetical protein"  
"JS1\_A09\_00006" 10492 "s59E25H2" 0 "hypothetical protein"  
"JS1\_A09\_00006" 10492 "s59E5H2" 0.990751 "hypothetical protein"  
"JS1\_A09\_00006" 10492 "s63E6H2" 1.467307 "hypothetical protein"  
"JS1\_A09\_00009" 10495 "s59E13H2" 0.17658 "Transposase IS200 like protein"  
"JS1\_A09\_00009" 10495 "s59E25H2" 0 "Transposase IS200 like protein"  
"JS1\_A09\_00009" 10495 "s59E5H2" 0.02169815 "Transposase IS200 like protein"  
"JS1\_A09\_00009" 10495 "s63E6H2" 0.2101454 "Transposase IS200 like protein"  
"JS1\_A09\_00010" 10496 "s59E13H2" 0 "Enamine/imine deaminase"  
"JS1\_A09\_00010" 10496 "s59E25H2" 0 "Enamine/imine deaminase"  
"JS1\_A09\_00010" 10496 "s59E5H2" 0 "Enamine/imine deaminase"  
"JS1\_A09\_00010" 10496 "s63E6H2" 0 "Enamine/imine deaminase"  
"JS1\_A09\_00011" 10497 "s59E13H2" 0 "hypothetical protein"  
"JS1\_A09\_00011" 10497 "s59E25H2" 0 "hypothetical protein"  
"JS1\_A09\_00011" 10497 "s59E5H2" 0 "hypothetical protein"  
"JS1\_A09\_00011" 10497 "s63E6H2" 0 "hypothetical protein"  
"JS1\_A09\_00012" 10498 "s59E13H2" 0 "2-oxoglutarate synthase subunit KorC"  
"JS1\_A09\_00012" 10498 "s59E25H2" 0 "2-oxoglutarate synthase subunit KorC"

"JS1\_A09\_00012" 10498 "s59E5H2" 0 "2-oxoglutarate synthase subunit KorC"  
"JS1\_A09\_00012" 10498 "s63E6H2" 0 "2-oxoglutarate synthase subunit KorC"  
"JS1\_A09\_00013" 10499 "s59E13H2" 0.1810703 "Integrase core domain protein"  
"JS1\_A09\_00013" 10499 "s59E25H2" 0 "Integrase core domain protein"  
"JS1\_A09\_00013" 10499 "s59E5H2" 16.86801 "Integrase core domain protein"  
"JS1\_A09\_00013" 10499 "s63E6H2" 0.09171818 "Integrase core domain protein"  
"JS1\_A09\_00014" 10500 "s59E13H2" 0 "CoB--CoM heterodisulfide reductase subunit B"  
"JS1\_A09\_00014" 10500 "s59E25H2" 0 "CoB--CoM heterodisulfide reductase subunit B"  
"JS1\_A09\_00014" 10500 "s59E5H2" 0 "CoB--CoM heterodisulfide reductase subunit B"  
"JS1\_A09\_00014" 10500 "s63E6H2" 0 "CoB--CoM heterodisulfide reductase subunit B"  
"JS1\_A09\_00015" 10501 "s59E13H2" 0 "CoB--CoM heterodisulfide reductase iron-sulfur subunit A"  
"JS1\_A09\_00015" 10501 "s59E25H2" 0 "CoB--CoM heterodisulfide reductase iron-sulfur subunit A"  
"JS1\_A09\_00015" 10501 "s59E5H2" 0.002085327 "CoB--CoM heterodisulfide reductase iron-sulfur subunit A"  
"JS1\_A09\_00015" 10501 "s63E6H2" 0 "CoB--CoM heterodisulfide reductase iron-sulfur subunit A"  
"JS1\_A09\_00016" 10502 "s59E13H2" 0 "CoB--CoM heterodisulfide reductase subunit B"  
"JS1\_A09\_00016" 10502 "s59E25H2" 0 "CoB--CoM heterodisulfide reductase subunit B"  
"JS1\_A09\_00016" 10502 "s59E5H2" 0.0176093 "CoB--CoM heterodisulfide reductase subunit B"  
"JS1\_A09\_00016" 10502 "s63E6H2" 0 "CoB--CoM heterodisulfide reductase subunit B"  
"JS1\_A09\_00017" 10503 "s59E13H2" 0 "L-Ala-D/L-Glu epimerase"  
"JS1\_A09\_00017" 10503 "s59E25H2" 0 "L-Ala-D/L-Glu epimerase"  
"JS1\_A09\_00017" 10503 "s59E5H2" 0 "L-Ala-D/L-Glu epimerase"  
"JS1\_A09\_00017" 10503 "s63E6H2" 0 "L-Ala-D/L-Glu epimerase"  
"JS1\_A09\_00018" 10504 "s59E13H2" 0 "hypothetical protein"  
"JS1\_A09\_00018" 10504 "s59E25H2" 0 "hypothetical protein"  
"JS1\_A09\_00018" 10504 "s59E5H2" 0 "hypothetical protein"  
"JS1\_A09\_00018" 10504 "s63E6H2" 0 "hypothetical protein"  
"JS1\_A09\_00019" 10505 "s59E13H2" 0.03527236 "CoB--CoM heterodisulfide reductase iron-sulfur subunit D"  
"JS1\_A09\_00019" 10505 "s59E25H2" 0 "CoB--CoM heterodisulfide reductase iron-sulfur subunit D"  
"JS1\_A09\_00019" 10505 "s59E5H2" 0.04617165 "CoB--CoM heterodisulfide reductase iron-sulfur subunit D"  
"JS1\_A09\_00019" 10505 "s63E6H2" 0.03926208 "CoB--CoM heterodisulfide reductase iron-sulfur subunit D"  
"JS1\_A09\_00020" 10506 "s59E13H2" 0 "CoB--CoM heterodisulfide reductase subunit B"  
"JS1\_A09\_00020" 10506 "s59E25H2" 0 "CoB--CoM heterodisulfide reductase subunit B"  
"JS1\_A09\_00020" 10506 "s59E5H2" 0.0146942 "CoB--CoM heterodisulfide reductase subunit B"  
"JS1\_A09\_00020" 10506 "s63E6H2" 0.2602158 "CoB--CoM heterodisulfide reductase subunit B"  
"JS1\_A09\_00021" 10507 "s59E13H2" 0 "CoB--CoM heterodisulfide reductase iron-sulfur subunit C"  
"JS1\_A09\_00021" 10507 "s59E25H2" 0 "CoB--CoM heterodisulfide reductase iron-sulfur subunit C"  
"JS1\_A09\_00021" 10507 "s59E5H2" 0.002802028 "CoB--CoM heterodisulfide reductase iron-sulfur subunit C"  
"JS1\_A09\_00021" 10507 "s63E6H2" 0.1503911 "CoB--CoM heterodisulfide reductase iron-sulfur subunit C"  
"JS1\_A09\_00022" 10508 "s59E13H2" 8.085155 "hypothetical protein"  
"JS1\_A09\_00022" 10508 "s59E25H2" 0 "hypothetical protein"  
"JS1\_A09\_00022" 10508 "s59E5H2" 1.483425 "hypothetical protein"  
"JS1\_A09\_00022" 10508 "s63E6H2" 1.921744 "hypothetical protein"  
"JS1\_A09\_00023" 10509 "s59E13H2" 0 "Formate dehydrogenase subunit beta"  
"JS1\_A09\_00023" 10509 "s59E25H2" 0 "Formate dehydrogenase subunit beta"  
"JS1\_A09\_00023" 10509 "s59E5H2" 0.004049331 "Formate dehydrogenase subunit beta"  
"JS1\_A09\_00023" 10509 "s63E6H2" 0.004004225 "Formate dehydrogenase subunit beta"  
"JS1\_A09\_00026" 10512 "s59E13H2" 0 "Succinyl-CoA ligase [ADP-forming] subunit beta"

"JS1\_A09\_00026" 10512 "s59E25H2" 0 "Succinyl-CoA ligase [ADP-forming] subunit beta"  
"JS1\_A09\_00026" 10512 "s59E5H2" 0.01646906 "Succinyl-CoA ligase [ADP-forming] subunit beta"  
"JS1\_A09\_00026" 10512 "s63E6H2" 0 "Succinyl-CoA ligase [ADP-forming] subunit beta"  
"JS1\_A09\_00027" 10513 "s59E13H2" 0 "hypothetical protein"  
"JS1\_A09\_00027" 10513 "s59E25H2" 0 "hypothetical protein"  
"JS1\_A09\_00027" 10513 "s59E5H2" 0 "hypothetical protein"  
"JS1\_A09\_00027" 10513 "s63E6H2" 0 "hypothetical protein"  
"JS1\_A09\_00030" 10516 "s59E13H2" 0 "Formate dehydrogenase subunit beta"  
"JS1\_A09\_00030" 10516 "s59E25H2" 0 "Formate dehydrogenase subunit beta"  
"JS1\_A09\_00030" 10516 "s59E5H2" 0.03609948 "Formate dehydrogenase subunit beta"  
"JS1\_A09\_00030" 10516 "s63E6H2" 0.0002032782 "Formate dehydrogenase subunit beta"  
"JS1\_A09\_00031" 10517 "s59E13H2" 0 "putative aspartate aminotransferase 2"  
"JS1\_A09\_00031" 10517 "s59E25H2" 0 "putative aspartate aminotransferase 2"  
"JS1\_A09\_00031" 10517 "s59E5H2" 0 "putative aspartate aminotransferase 2"  
"JS1\_A09\_00031" 10517 "s63E6H2" 0 "putative aspartate aminotransferase 2"  
"JS1\_A09\_00032" 10518 "s59E13H2" 0 "Aspartate aminotransferase"  
"JS1\_A09\_00032" 10518 "s59E25H2" 0 "Aspartate aminotransferase"  
"JS1\_A09\_00032" 10518 "s59E5H2" 0 "Aspartate aminotransferase"  
"JS1\_A09\_00032" 10518 "s63E6H2" 0 "Aspartate aminotransferase"  
"JS1\_A09\_00033" 10519 "s59E13H2" 1.381994 "Endonuclease MutS2"  
"JS1\_A09\_00033" 10519 "s59E25H2" 0 "Endonuclease MutS2"  
"JS1\_A09\_00033" 10519 "s59E5H2" 0.3454048 "Endonuclease MutS2"  
"JS1\_A09\_00033" 10519 "s63E6H2" 1.802055 "Endonuclease MutS2"  
"JS1\_A09\_00034" 10520 "s59E13H2" 0.6951119 "Penicillin-binding protein 2D"  
"JS1\_A09\_00034" 10520 "s59E25H2" 0 "Penicillin-binding protein 2D"  
"JS1\_A09\_00034" 10520 "s59E5H2" 0.4310114 "Penicillin-binding protein 2D"  
"JS1\_A09\_00034" 10520 "s63E6H2" 0.8260356 "Penicillin-binding protein 2D"  
"JS1\_A09\_00035" 10521 "s59E13H2" 0.9439096 "Queuosine precursor transporter QueT"  
"JS1\_A09\_00035" 10521 "s59E25H2" 0 "Queuosine precursor transporter QueT"  
"JS1\_A09\_00035" 10521 "s59E5H2" 0.4185952 "Queuosine precursor transporter QueT"  
"JS1\_A09\_00035" 10521 "s63E6H2" 0.7338794 "Queuosine precursor transporter QueT"  
"JS1\_A09\_00036" 10522 "s59E13H2" 1.171473 "Tyrosine--tRNA ligase"  
"JS1\_A09\_00036" 10522 "s59E25H2" 0 "Tyrosine--tRNA ligase"  
"JS1\_A09\_00036" 10522 "s59E5H2" 0.834486 "Tyrosine--tRNA ligase"  
"JS1\_A09\_00036" 10522 "s63E6H2" 1.218522 "Tyrosine--tRNA ligase"  
"JS1\_A09\_00039" 10525 "s59E13H2" 0.6089416 "DNA replication protein DnaC"  
"JS1\_A09\_00039" 10525 "s59E25H2" 0 "DNA replication protein DnaC"  
"JS1\_A09\_00039" 10525 "s59E5H2" 0.9310851 "DNA replication protein DnaC"  
"JS1\_A09\_00039" 10525 "s63E6H2" 0.2132491 "DNA replication protein DnaC"  
"JS1\_A09\_00040" 10526 "s59E13H2" 0 "hypothetical protein"  
"JS1\_A09\_00040" 10526 "s59E25H2" 0 "hypothetical protein"  
"JS1\_A09\_00040" 10526 "s59E5H2" 0 "hypothetical protein"  
"JS1\_A09\_00040" 10526 "s63E6H2" 0 "hypothetical protein"  
"JS1\_A09\_00041" 10527 "s59E13H2" 0.776488 "putative epimerase/dehydratase"  
"JS1\_A09\_00041" 10527 "s59E25H2" 0 "putative epimerase/dehydratase"  
"JS1\_A09\_00041" 10527 "s59E5H2" 1.457321 "putative epimerase/dehydratase"  
"JS1\_A09\_00041" 10527 "s63E6H2" 2.063023 "putative epimerase/dehydratase"

"JS1\_A09\_00042" 10528 "s59E13H2" 0.441636 "putative HTH-type transcriptional regulator YdfH"  
"JS1\_A09\_00042" 10528 "s59E25H2" 0 "putative HTH-type transcriptional regulator YdfH"  
"JS1\_A09\_00042" 10528 "s59E5H2" 0.3893132 "putative HTH-type transcriptional regulator YdfH"  
"JS1\_A09\_00042" 10528 "s63E6H2" 1.567222 "putative HTH-type transcriptional regulator YdfH"  
"JS1\_A09\_00043" 10529 "s59E13H2" 0.8831805 "Malate dehydrogenase"  
"JS1\_A09\_00043" 10529 "s59E25H2" 0 "Malate dehydrogenase"  
"JS1\_A09\_00043" 10529 "s59E5H2" 1.819832 "Malate dehydrogenase"  
"JS1\_A09\_00043" 10529 "s63E6H2" 0.9259267 "Malate dehydrogenase"  
"JS1\_A09\_00044" 10530 "s59E13H2" 0.4903079 "hypothetical protein"  
"JS1\_A09\_00044" 10530 "s59E25H2" 0 "hypothetical protein"  
"JS1\_A09\_00044" 10530 "s59E5H2" 0.6361127 "hypothetical protein"  
"JS1\_A09\_00044" 10530 "s63E6H2" 0.793805 "hypothetical protein"  
"JS1\_A09\_00046" 10532 "s59E13H2" 0.004767683 "hypothetical protein"  
"JS1\_A09\_00046" 10532 "s59E25H2" 0 "hypothetical protein"  
"JS1\_A09\_00046" 10532 "s59E5H2" 0.2256704 "hypothetical protein"  
"JS1\_A09\_00046" 10532 "s63E6H2" 0.9291609 "hypothetical protein"  
"JS1\_A09\_00047" 10533 "s59E13H2" 0.004252926 "Flavoredoxin"  
"JS1\_A09\_00047" 10533 "s59E25H2" 0 "Flavoredoxin"  
"JS1\_A09\_00047" 10533 "s59E5H2" 0.1032818 "Flavoredoxin"  
"JS1\_A09\_00047" 10533 "s63E6H2" 0.7417093 "Flavoredoxin"  
"JS1\_A09\_00048" 10534 "s59E13H2" 0.005972602 "Endonuclease YhcR precursor"  
"JS1\_A09\_00048" 10534 "s59E25H2" 0.293381 "Endonuclease YhcR precursor"  
"JS1\_A09\_00048" 10534 "s59E5H2" 0.1174263 "Endonuclease YhcR precursor"  
"JS1\_A09\_00048" 10534 "s63E6H2" 0.7602411 "Endonuclease YhcR precursor"  
"JS1\_A09\_00049" 10535 "s59E13H2" 0.0896187 "DNA replication protein DnaC"  
"JS1\_A09\_00049" 10535 "s59E25H2" 0 "DNA replication protein DnaC"  
"JS1\_A09\_00049" 10535 "s59E5H2" 0.1253141 "DNA replication protein DnaC"  
"JS1\_A09\_00049" 10535 "s63E6H2" 0.04721255 "DNA replication protein DnaC"  
"JS1\_A09\_00051" 10537 "s59E13H2" 0 "hypothetical protein"  
"JS1\_A09\_00051" 10537 "s59E25H2" 0 "hypothetical protein"  
"JS1\_A09\_00051" 10537 "s59E5H2" 0 "hypothetical protein"  
"JS1\_A09\_00051" 10537 "s63E6H2" 0 "hypothetical protein"  
"JS1\_A09\_00052" 10538 "s59E13H2" 0 "hypothetical protein"  
"JS1\_A09\_00052" 10538 "s59E25H2" 0 "hypothetical protein"  
"JS1\_A09\_00052" 10538 "s59E5H2" 0 "hypothetical protein"  
"JS1\_A09\_00052" 10538 "s63E6H2" 0 "hypothetical protein"  
"JS1\_A09\_00054" 10540 "s59E13H2" 0.4995429 "RDD family protein"  
"JS1\_A09\_00054" 10540 "s59E25H2" 0 "RDD family protein"  
"JS1\_A09\_00054" 10540 "s59E5H2" 1.760363 "RDD family protein"  
"JS1\_A09\_00054" 10540 "s63E6H2" 1.149724 "RDD family protein"  
"JS1\_A09\_00058" 10544 "s59E13H2" 0.05183462 "Bifunctional homocysteine S-methyltransferase/5,10-methylenetetrahydrofolate reductase"  
"JS1\_A09\_00058" 10544 "s59E25H2" 0 "Bifunctional homocysteine S-methyltransferase/5,10-methylenetetrahydrofolate reductase"  
"JS1\_A09\_00058" 10544 "s59E5H2" 0.363359 "Bifunctional homocysteine S-methyltransferase/5,10-methylenetetrahydrofolate reductase"  
"JS1\_A09\_00058" 10544 "s63E6H2" 0.04374387 "Bifunctional homocysteine S-methyltransferase/5,10-methylenetetrahydrofolate reductase"  
"JS1\_A09\_00059" 10545 "s59E13H2" 0.02624689 "hypothetical protein"  
"JS1\_A09\_00059" 10545 "s59E25H2" 0 "hypothetical protein"  
"JS1\_A09\_00059" 10545 "s59E5H2" 0.09948405 "hypothetical protein"

"JS1\_A09\_00059" 10545 "s63E6H2" 0.3350787 "hypothetical protein"  
"JS1\_A09\_00060" 10546 "s59E13H2" 0.00502731 "D-3-phosphoglycerate dehydrogenase"  
"JS1\_A09\_00060" 10546 "s59E25H2" 0 "D-3-phosphoglycerate dehydrogenase"  
"JS1\_A09\_00060" 10546 "s59E5H2" 0.4615439 "D-3-phosphoglycerate dehydrogenase"  
"JS1\_A09\_00060" 10546 "s63E6H2" 0.1138613 "D-3-phosphoglycerate dehydrogenase"  
"JS1\_A09\_00061" 10547 "s59E13H2" 0.7881576 "Soluble hydrogenase 42 kDa subunit"  
"JS1\_A09\_00061" 10547 "s59E25H2" 0 "Soluble hydrogenase 42 kDa subunit"  
"JS1\_A09\_00061" 10547 "s59E5H2" 0.3000457 "Soluble hydrogenase 42 kDa subunit"  
"JS1\_A09\_00061" 10547 "s63E6H2" 0.04757285 "Soluble hydrogenase 42 kDa subunit"  
"JS1\_A09\_00062" 10548 "s59E13H2" 0.237995 "Phosphorylated carbohydrates phosphatase"  
"JS1\_A09\_00062" 10548 "s59E25H2" 0 "Phosphorylated carbohydrates phosphatase"  
"JS1\_A09\_00062" 10548 "s59E5H2" 0.03795728 "Phosphorylated carbohydrates phosphatase"  
"JS1\_A09\_00062" 10548 "s63E6H2" 0.03716745 "Phosphorylated carbohydrates phosphatase"  
"JS1\_A09\_00063" 10549 "s59E13H2" 0 "hypothetical protein"  
"JS1\_A09\_00063" 10549 "s59E25H2" 0 "hypothetical protein"  
"JS1\_A09\_00063" 10549 "s59E5H2" 0.2174084 "hypothetical protein"  
"JS1\_A09\_00063" 10549 "s63E6H2" 0.001806062 "hypothetical protein"  
"JS1\_A09\_00064" 10550 "s59E13H2" 0 "hypothetical protein"  
"JS1\_A09\_00064" 10550 "s59E25H2" 0 "hypothetical protein"  
"JS1\_A09\_00064" 10550 "s59E5H2" 0.2483945 "hypothetical protein"  
"JS1\_A09\_00064" 10550 "s63E6H2" 0.007857382 "hypothetical protein"  
"JS1\_A09\_00065" 10551 "s59E13H2" 0.003463996 "Low molecular weight protein-tyrosine-phosphatase YwIE"  
"JS1\_A09\_00065" 10551 "s59E25H2" 0 "Low molecular weight protein-tyrosine-phosphatase YwIE"  
"JS1\_A09\_00065" 10551 "s59E5H2" 0.02750205 "Low molecular weight protein-tyrosine-phosphatase YwIE"  
"JS1\_A09\_00065" 10551 "s63E6H2" 0.009143058 "Low molecular weight protein-tyrosine-phosphatase YwIE"  
"JS1\_A09\_00066" 10552 "s59E13H2" 0 "Putative sugar phosphate isomerase YwIF"  
"JS1\_A09\_00066" 10552 "s59E25H2" 0 "Putative sugar phosphate isomerase YwIF"  
"JS1\_A09\_00066" 10552 "s59E5H2" 0.007572359 "Putative sugar phosphate isomerase YwIF"  
"JS1\_A09\_00066" 10552 "s63E6H2" 0.03075785 "Putative sugar phosphate isomerase YwIF"  
"JS1\_A09\_00071" 10557 "s59E13H2" 0 "2-oxoglutarate synthase subunit KorA"  
"JS1\_A09\_00071" 10557 "s59E25H2" 0 "2-oxoglutarate synthase subunit KorA"  
"JS1\_A09\_00071" 10557 "s59E5H2" 0 "2-oxoglutarate synthase subunit KorA"  
"JS1\_A09\_00071" 10557 "s63E6H2" 0.01364507 "2-oxoglutarate synthase subunit KorA"  
"JS1\_A09\_00072" 10558 "s59E13H2" 0 "L-Ala-D/L-Glu epimerase"  
"JS1\_A09\_00072" 10558 "s59E25H2" 0 "L-Ala-D/L-Glu epimerase"  
"JS1\_A09\_00072" 10558 "s59E5H2" 0 "L-Ala-D/L-Glu epimerase"  
"JS1\_A09\_00072" 10558 "s63E6H2" 0 "L-Ala-D/L-Glu epimerase"  
"JS1\_A09\_00073" 10559 "s59E13H2" 0 "Muconate cycloisomerase 1"  
"JS1\_A09\_00073" 10559 "s59E25H2" 0 "Muconate cycloisomerase 1"  
"JS1\_A09\_00073" 10559 "s59E5H2" 0 "Muconate cycloisomerase 1"  
"JS1\_A09\_00073" 10559 "s63E6H2" 0 "Muconate cycloisomerase 1"  
"JS1\_A09\_00074" 10560 "s59E13H2" 0 "L-allo-threonine aldolase"  
"JS1\_A09\_00074" 10560 "s59E25H2" 0 "L-allo-threonine aldolase"  
"JS1\_A09\_00074" 10560 "s59E5H2" 0 "L-allo-threonine aldolase"  
"JS1\_A09\_00074" 10560 "s63E6H2" 0.009716321 "L-allo-threonine aldolase"  
"JS1\_A09\_00075" 10561 "s59E13H2" 0 "Cysteine desulfurase"  
"JS1\_A09\_00075" 10561 "s59E25H2" 0 "Cysteine desulfurase"

"JS1\_A09\_00075" 10561 "s59E5H2" 0 "Cysteine desulfurase"  
"JS1\_A09\_00075" 10561 "s63E6H2" 0 "Cysteine desulfurase"  
"JS1\_A09\_00076" 10562 "s59E13H2" 0.2810059 "hypothetical protein"  
"JS1\_A09\_00076" 10562 "s59E25H2" 0 "hypothetical protein"  
"JS1\_A09\_00076" 10562 "s59E5H2" 0.06426672 "hypothetical protein"  
"JS1\_A09\_00076" 10562 "s63E6H2" 3.241264 "hypothetical protein"  
"JS1\_A09\_00077" 10563 "s59E13H2" 0 "hypothetical protein"  
"JS1\_A09\_00077" 10563 "s59E25H2" 0 "hypothetical protein"  
"JS1\_A09\_00077" 10563 "s59E5H2" 0 "hypothetical protein"  
"JS1\_A09\_00077" 10563 "s63E6H2" 0 "hypothetical protein"  
"JS1\_A09\_00083" 10569 "s59E13H2" 0 "hypothetical protein"  
"JS1\_A09\_00083" 10569 "s59E25H2" 0 "hypothetical protein"  
"JS1\_A09\_00083" 10569 "s59E5H2" 0 "hypothetical protein"  
"JS1\_A09\_00083" 10569 "s63E6H2" 0 "hypothetical protein"  
"JS1\_A09\_00084" 10570 "s59E13H2" 0 "Cysteine desulfurase"  
"JS1\_A09\_00084" 10570 "s59E25H2" 0 "Cysteine desulfurase"  
"JS1\_A09\_00084" 10570 "s59E5H2" 0 "Cysteine desulfurase"  
"JS1\_A09\_00084" 10570 "s63E6H2" 0 "Cysteine desulfurase"  
"JS1\_A09\_00085" 10571 "s59E13H2" 0 "Sialic acid TRAP transporter permease protein SiaT"  
"JS1\_A09\_00085" 10571 "s59E25H2" 0 "Sialic acid TRAP transporter permease protein SiaT"  
"JS1\_A09\_00085" 10571 "s59E5H2" 0 "Sialic acid TRAP transporter permease protein SiaT"  
"JS1\_A09\_00085" 10571 "s63E6H2" 0 "Sialic acid TRAP transporter permease protein SiaT"  
"JS1\_A09\_00086" 10572 "s59E13H2" 0.001598987 "Sulfide dehydrogenase subunit alpha precursor"  
"JS1\_A09\_00086" 10572 "s59E25H2" 0 "Sulfide dehydrogenase subunit alpha precursor"  
"JS1\_A09\_00086" 10572 "s59E5H2" 0.01317809 "Sulfide dehydrogenase subunit alpha precursor"  
"JS1\_A09\_00086" 10572 "s63E6H2" 0.001400333 "Sulfide dehydrogenase subunit alpha precursor"  
"JS1\_A09\_00088" 10574 "s59E13H2" 0 "Cysteine desulfurase"  
"JS1\_A09\_00088" 10574 "s59E25H2" 0 "Cysteine desulfurase"  
"JS1\_A09\_00088" 10574 "s59E5H2" 0 "Cysteine desulfurase"  
"JS1\_A09\_00088" 10574 "s63E6H2" 0 "Cysteine desulfurase"  
"JS1\_A09\_00089" 10575 "s59E13H2" 0 "hypothetical protein"  
"JS1\_A09\_00089" 10575 "s59E25H2" 0 "hypothetical protein"  
"JS1\_A09\_00089" 10575 "s59E5H2" 0 "hypothetical protein"  
"JS1\_A09\_00089" 10575 "s63E6H2" 0 "hypothetical protein"  
"JS1\_A09\_00090" 10576 "s59E13H2" 0 "Formate dehydrogenase subunit beta"  
"JS1\_A09\_00090" 10576 "s59E25H2" 0 "Formate dehydrogenase subunit beta"  
"JS1\_A09\_00090" 10576 "s59E5H2" 0.001413331 "Formate dehydrogenase subunit beta"  
"JS1\_A09\_00090" 10576 "s63E6H2" 0 "Formate dehydrogenase subunit beta"  
"JS1\_A09\_00091" 10577 "s59E13H2" 0.7599733 "Poly-beta-1,6-N-acetyl-D-glucosamine N-deacetylase precursor"  
"JS1\_A09\_00091" 10577 "s59E25H2" 0 "Poly-beta-1,6-N-acetyl-D-glucosamine N-deacetylase precursor"  
"JS1\_A09\_00091" 10577 "s59E5H2" 0.4631965 "Poly-beta-1,6-N-acetyl-D-glucosamine N-deacetylase precursor"  
"JS1\_A09\_00091" 10577 "s63E6H2" 0.7137718 "Poly-beta-1,6-N-acetyl-D-glucosamine N-deacetylase precursor"  
"JS1\_A09\_00092" 10578 "s59E13H2" 0.726006 "High-affinity branched-chain amino acid transport ATP-binding protein LivF"  
"JS1\_A09\_00092" 10578 "s59E25H2" 0 "High-affinity branched-chain amino acid transport ATP-binding protein LivF"  
"JS1\_A09\_00092" 10578 "s59E5H2" 0.3689146 "High-affinity branched-chain amino acid transport ATP-binding protein LivF"  
"JS1\_A09\_00092" 10578 "s63E6H2" 0.6478884 "High-affinity branched-chain amino acid transport ATP-binding protein LivF"  
"JS1\_A09\_00093" 10579 "s59E13H2" 0.02867541 "YibE/F-like protein"

"JS1\_A09\_00093" 10579 "s59E25H2" 0 "YibE/F-like protein"  
"JS1\_A09\_00093" 10579 "s59E5H2" 0.6382902 "YibE/F-like protein"  
"JS1\_A09\_00093" 10579 "s63E6H2" 2.833796 "YibE/F-like protein"  
"JS1\_A09\_00094" 10580 "s59E13H2" 2.905628 "Sorbitol dehydrogenase"  
"JS1\_A09\_00094" 10580 "s59E25H2" 0.7261209 "Sorbitol dehydrogenase"  
"JS1\_A09\_00094" 10580 "s59E5H2" 0.611274 "Sorbitol dehydrogenase"  
"JS1\_A09\_00094" 10580 "s63E6H2" 1.473647 "Sorbitol dehydrogenase"  
"JS1\_A09\_00095" 10581 "s59E13H2" 1.981086 "Folate transporter FolT"  
"JS1\_A09\_00095" 10581 "s59E25H2" 0 "Folate transporter FolT"  
"JS1\_A09\_00095" 10581 "s59E5H2" 0.4961218 "Folate transporter FolT"  
"JS1\_A09\_00095" 10581 "s63E6H2" 1.368264 "Folate transporter FolT"  
"JS1\_A09\_00096" 10582 "s59E13H2" 0.5226631 "hypothetical protein"  
"JS1\_A09\_00096" 10582 "s59E25H2" 0 "hypothetical protein"  
"JS1\_A09\_00096" 10582 "s59E5H2" 0.2954781 "hypothetical protein"  
"JS1\_A09\_00096" 10582 "s63E6H2" 0.508851 "hypothetical protein"  
"JS1\_A09\_00097" 10583 "s59E13H2" 0.476754 "Membrane dipeptidase (Peptidase family M19)"  
"JS1\_A09\_00097" 10583 "s59E25H2" 0 "Membrane dipeptidase (Peptidase family M19)"  
"JS1\_A09\_00097" 10583 "s59E5H2" 0.5306705 "Membrane dipeptidase (Peptidase family M19)"  
"JS1\_A09\_00097" 10583 "s63E6H2" 1.563047 "Membrane dipeptidase (Peptidase family M19)"  
"JS1\_A09\_00098" 10584 "s59E13H2" 0.9677836 "lipoprotein Nlpl"  
"JS1\_A09\_00098" 10584 "s59E25H2" 0 "lipoprotein Nlpl"  
"JS1\_A09\_00098" 10584 "s59E5H2" 0.4103309 "lipoprotein Nlpl"  
"JS1\_A09\_00098" 10584 "s63E6H2" 0.7849267 "lipoprotein Nlpl"  
"JS1\_A09\_00099" 10585 "s59E13H2" 1.118745 "Inosine-5'-monophosphate dehydrogenase"  
"JS1\_A09\_00099" 10585 "s59E25H2" 0 "Inosine-5'-monophosphate dehydrogenase"  
"JS1\_A09\_00099" 10585 "s59E5H2" 1.194385 "Inosine-5'-monophosphate dehydrogenase"  
"JS1\_A09\_00099" 10585 "s63E6H2" 1.066926 "Inosine-5'-monophosphate dehydrogenase"  
"JS1\_A09\_00100" 10586 "s59E13H2" 0.611775 "Quinolate synthase A"  
"JS1\_A09\_00100" 10586 "s59E25H2" 0 "Quinolate synthase A"  
"JS1\_A09\_00100" 10586 "s59E5H2" 0.4621312 "Quinolate synthase A"  
"JS1\_A09\_00100" 10586 "s63E6H2" 0.693303 "Quinolate synthase A"  
"JS1\_A09\_00101" 10587 "s59E13H2" 5.748585 "Ribosomal RNA small subunit methyltransferase D"  
"JS1\_A09\_00101" 10587 "s59E25H2" 0 "Ribosomal RNA small subunit methyltransferase D"  
"JS1\_A09\_00101" 10587 "s59E5H2" 0.07539327 "Ribosomal RNA small subunit methyltransferase D"  
"JS1\_A09\_00101" 10587 "s63E6H2" 0.1617875 "Ribosomal RNA small subunit methyltransferase D"  
"JS1\_A09\_00102" 10588 "s59E13H2" 6.435317 "Phosphopantetheine adenylyltransferase"  
"JS1\_A09\_00102" 10588 "s59E25H2" 0 "Phosphopantetheine adenylyltransferase"  
"JS1\_A09\_00102" 10588 "s59E5H2" 0.106089 "Phosphopantetheine adenylyltransferase"  
"JS1\_A09\_00102" 10588 "s63E6H2" 0.3477254 "Phosphopantetheine adenylyltransferase"  
"JS1\_A09\_00103" 10589 "s59E13H2" 5.803717 "Lon protease"  
"JS1\_A09\_00103" 10589 "s59E25H2" 0 "Lon protease"  
"JS1\_A09\_00103" 10589 "s59E5H2" 0.2630611 "Lon protease"  
"JS1\_A09\_00103" 10589 "s63E6H2" 0.5231005 "Lon protease"  
"JS1\_A09\_00107" 10593 "s59E13H2" 0 "2-oxoglutarate synthase subunit KorA"  
"JS1\_A09\_00107" 10593 "s59E25H2" 0 "2-oxoglutarate synthase subunit KorA"  
"JS1\_A09\_00107" 10593 "s59E5H2" 0 "2-oxoglutarate synthase subunit KorA"  
"JS1\_A09\_00107" 10593 "s63E6H2" 0.01198082 "2-oxoglutarate synthase subunit KorA"

"JS1\_A09\_00108" 10594 "s59E13H2" 0 "2-oxoglutarate synthase subunit KorA"  
"JS1\_A09\_00108" 10594 "s59E25H2" 0 "2-oxoglutarate synthase subunit KorA"  
"JS1\_A09\_00108" 10594 "s59E5H2" 0.009920612 "2-oxoglutarate synthase subunit KorA"  
"JS1\_A09\_00108" 10594 "s63E6H2" 0.01075218 "2-oxoglutarate synthase subunit KorA"  
"JS1\_A09\_00110" 10596 "s59E13H2" 0.6790865 "DNA replication protein DnaC"  
"JS1\_A09\_00110" 10596 "s59E25H2" 0 "DNA replication protein DnaC"  
"JS1\_A09\_00110" 10596 "s59E5H2" 0.6645285 "DNA replication protein DnaC"  
"JS1\_A09\_00110" 10596 "s63E6H2" 0.1967189 "DNA replication protein DnaC"  
"JS1\_A09\_00112" 10598 "s59E13H2" 0.7227023 "ISXO2-like transposase domain protein"  
"JS1\_A09\_00112" 10598 "s59E25H2" 0 "ISXO2-like transposase domain protein"  
"JS1\_A09\_00112" 10598 "s59E5H2" 0 "ISXO2-like transposase domain protein"  
"JS1\_A09\_00112" 10598 "s63E6H2" 0 "ISXO2-like transposase domain protein"  
"JS1\_A09\_00113" 10599 "s59E13H2" 0.03180842 "hypothetical protein"  
"JS1\_A09\_00113" 10599 "s59E25H2" 0 "hypothetical protein"  
"JS1\_A09\_00113" 10599 "s59E5H2" 0.158457 "hypothetical protein"  
"JS1\_A09\_00113" 10599 "s63E6H2" 0.5001688 "hypothetical protein"  
"JS1\_A09\_00114" 10600 "s59E13H2" 0 "Pectin degradation repressor protein KdgR"  
"JS1\_A09\_00114" 10600 "s59E25H2" 0 "Pectin degradation repressor protein KdgR"  
"JS1\_A09\_00114" 10600 "s59E5H2" 0 "Pectin degradation repressor protein KdgR"  
"JS1\_A09\_00114" 10600 "s63E6H2" 0 "Pectin degradation repressor protein KdgR"  
"JS1\_A09\_00115" 10601 "s59E13H2" 0 "Malate dehydrogenase"  
"JS1\_A09\_00115" 10601 "s59E25H2" 0 "Malate dehydrogenase"  
"JS1\_A09\_00115" 10601 "s59E5H2" 0 "Malate dehydrogenase"  
"JS1\_A09\_00115" 10601 "s63E6H2" 0.001365638 "Malate dehydrogenase"  
"JS1\_A09\_00116" 10602 "s59E13H2" 0.04075733 "hypothetical protein"  
"JS1\_A09\_00116" 10602 "s59E25H2" 0 "hypothetical protein"  
"JS1\_A09\_00116" 10602 "s59E5H2" 0.3184752 "hypothetical protein"  
"JS1\_A09\_00116" 10602 "s63E6H2" 0.2013631 "hypothetical protein"  
"JS1\_A09\_00117" 10603 "s59E13H2" 0.06811248 "5'-nucleotidase SurE"  
"JS1\_A09\_00117" 10603 "s59E25H2" 0 "5'-nucleotidase SurE"  
"JS1\_A09\_00117" 10603 "s59E5H2" 0.5687984 "5'-nucleotidase SurE"  
"JS1\_A09\_00117" 10603 "s63E6H2" 0.281863 "5'-nucleotidase SurE"  
"JS1\_A09\_00118" 10604 "s59E13H2" 0.04920438 "hypothetical protein"  
"JS1\_A09\_00118" 10604 "s59E25H2" 0 "hypothetical protein"  
"JS1\_A09\_00118" 10604 "s59E5H2" 0.4925815 "hypothetical protein"  
"JS1\_A09\_00118" 10604 "s63E6H2" 0.2419614 "hypothetical protein"  
"JS1\_A09\_00119" 10605 "s59E13H2" 0.05587441 "Protein-L-isoaspartate O-methyltransferase"  
"JS1\_A09\_00119" 10605 "s59E25H2" 0 "Protein-L-isoaspartate O-methyltransferase"  
"JS1\_A09\_00119" 10605 "s59E5H2" 0.3907639 "Protein-L-isoaspartate O-methyltransferase"  
"JS1\_A09\_00119" 10605 "s63E6H2" 0.5271681 "Protein-L-isoaspartate O-methyltransferase"  
"JS1\_A09\_00121" 10607 "s59E13H2" 0.08439862 "Vancomycin B-type resistance protein VanW"  
"JS1\_A09\_00121" 10607 "s59E25H2" 0.3377483 "Vancomycin B-type resistance protein VanW"  
"JS1\_A09\_00121" 10607 "s59E5H2" 0.3743849 "Vancomycin B-type resistance protein VanW"  
"JS1\_A09\_00121" 10607 "s63E6H2" 0.5710596 "Vancomycin B-type resistance protein VanW"  
"JS1\_A09\_00122" 10608 "s59E13H2" 0.1992583 "aspartoacylase"  
"JS1\_A09\_00122" 10608 "s59E25H2" 0 "aspartoacylase"  
"JS1\_A09\_00122" 10608 "s59E5H2" 0.5273334 "aspartoacylase"



"JS1\_A09\_00122" 10608 "s63E6H2" 0.2534851 "aspartoacylase"  
"JS1\_A09\_00123" 10609 "s59E13H2" 6.074481 "Putative peptidyl-prolyl cis-trans isomerase Cbf2 precursor"  
"JS1\_A09\_00123" 10609 "s59E25H2" 0 "Putative peptidyl-prolyl cis-trans isomerase Cbf2 precursor"  
"JS1\_A09\_00123" 10609 "s59E5H2" 0.3041226 "Putative peptidyl-prolyl cis-trans isomerase Cbf2 precursor"  
"JS1\_A09\_00123" 10609 "s63E6H2" 0.2799655 "Putative peptidyl-prolyl cis-trans isomerase Cbf2 precursor"  
"JS1\_A09\_00124" 10610 "s59E13H2" 0.03248941 "hypothetical protein"  
"JS1\_A09\_00124" 10610 "s59E25H2" 0 "hypothetical protein"  
"JS1\_A09\_00124" 10610 "s59E5H2" 0.03398408 "hypothetical protein"  
"JS1\_A09\_00124" 10610 "s63E6H2" 0.3134328 "hypothetical protein"  
"JS1\_A09\_00126" 10612 "s59E13H2" 0.0270191 "Peptidase M15"  
"JS1\_A09\_00126" 10612 "s59E25H2" 0 "Peptidase M15"  
"JS1\_A09\_00126" 10612 "s59E5H2" 0.05365615 "Peptidase M15"  
"JS1\_A09\_00126" 10612 "s63E6H2" 1.125466 "Peptidase M15"  
"JS1\_A09\_00127" 10613 "s59E13H2" 1.003125 "hypothetical protein"  
"JS1\_A09\_00127" 10613 "s59E25H2" 0 "hypothetical protein"  
"JS1\_A09\_00127" 10613 "s59E5H2" 1.110444 "hypothetical protein"  
"JS1\_A09\_00127" 10613 "s63E6H2" 4.724103 "hypothetical protein"  
"JS1\_A09\_00128" 10614 "s59E13H2" 0.3768969 "Inner membrane symporter YicJ"  
"JS1\_A09\_00128" 10614 "s59E25H2" 0 "Inner membrane symporter YicJ"  
"JS1\_A09\_00128" 10614 "s59E5H2" 3.819074 "Inner membrane symporter YicJ"  
"JS1\_A09\_00128" 10614 "s63E6H2" 1.79467 "Inner membrane symporter YicJ"  
"JS1\_A09\_00129" 10615 "s59E13H2" 0.2602169 "Carbon-nitrogen hydrolase"  
"JS1\_A09\_00129" 10615 "s59E25H2" 0 "Carbon-nitrogen hydrolase"  
"JS1\_A09\_00129" 10615 "s59E5H2" 2.478628 "Carbon-nitrogen hydrolase"  
"JS1\_A09\_00129" 10615 "s63E6H2" 0.9498612 "Carbon-nitrogen hydrolase"  
"JS1\_A09\_00130" 10616 "s59E13H2" 0.109356 "Formamidase"  
"JS1\_A09\_00130" 10616 "s59E25H2" 0 "Formamidase"  
"JS1\_A09\_00130" 10616 "s59E5H2" 0.8043234 "Formamidase"  
"JS1\_A09\_00130" 10616 "s63E6H2" 0.6170013 "Formamidase"  
"JS1\_A09\_00131" 10617 "s59E13H2" 0.1402885 "hypothetical protein"  
"JS1\_A09\_00131" 10617 "s59E25H2" 0 "hypothetical protein"  
"JS1\_A09\_00131" 10617 "s59E5H2" 0.9200855 "hypothetical protein"  
"JS1\_A09\_00131" 10617 "s63E6H2" 1.404515 "hypothetical protein"  
"JS1\_A09\_00132" 10618 "s59E13H2" 1.017925 "protease TldD"  
"JS1\_A09\_00132" 10618 "s59E25H2" 0 "protease TldD"  
"JS1\_A09\_00132" 10618 "s59E5H2" 0.1553686 "protease TldD"  
"JS1\_A09\_00132" 10618 "s63E6H2" 1.1436 "protease TldD"  
"JS1\_A09\_00133" 10619 "s59E13H2" 0.8544167 "protease TldD"  
"JS1\_A09\_00133" 10619 "s59E25H2" 0.1298322 "protease TldD"  
"JS1\_A09\_00133" 10619 "s59E5H2" 11.54644 "protease TldD"  
"JS1\_A09\_00133" 10619 "s63E6H2" 0.7863701 "protease TldD"  
"JS1\_A09\_00134" 10620 "s59E13H2" 0.06238657 "3'-5' exoribonuclease YhaM"  
"JS1\_A09\_00134" 10620 "s59E25H2" 0 "3'-5' exoribonuclease YhaM"  
"JS1\_A09\_00134" 10620 "s59E5H2" 0.03859389 "3'-5' exoribonuclease YhaM"  
"JS1\_A09\_00134" 10620 "s63E6H2" 0.3867607 "3'-5' exoribonuclease YhaM"  
"JS1\_A09\_00135" 10621 "s59E13H2" 0.6712499 "Valine--tRNA ligase"  
"JS1\_A09\_00135" 10621 "s59E25H2" 0 "Valine--tRNA ligase"

"JS1\_A09\_00135" 10621 "s59E5H2" 0.4159561 "Valine--tRNA ligase"  
"JS1\_A09\_00135" 10621 "s63E6H2" 0.1971546 "Valine--tRNA ligase"  
"JS1\_A09\_00136" 10622 "s59E13H2" 0 "L-threonine dehydratase catabolic TdcB"  
"JS1\_A09\_00136" 10622 "s59E25H2" 0 "L-threonine dehydratase catabolic TdcB"  
"JS1\_A09\_00136" 10622 "s59E5H2" 0 "L-threonine dehydratase catabolic TdcB"  
"JS1\_A09\_00136" 10622 "s63E6H2" 0.008322837 "L-threonine dehydratase catabolic TdcB"  
"JS1\_A09\_00137" 10623 "s59E13H2" 0 "hypothetical protein"  
"JS1\_A09\_00137" 10623 "s59E25H2" 0 "hypothetical protein"  
"JS1\_A09\_00137" 10623 "s59E5H2" 0 "hypothetical protein"  
"JS1\_A09\_00137" 10623 "s63E6H2" 0.02269488 "hypothetical protein"  
"JS1\_A09\_00138" 10624 "s59E13H2" 0 "L-ribulose-5-phosphate 3-epimerase UlaE"  
"JS1\_A09\_00138" 10624 "s59E25H2" 0 "L-ribulose-5-phosphate 3-epimerase UlaE"  
"JS1\_A09\_00138" 10624 "s59E5H2" 0 "L-ribulose-5-phosphate 3-epimerase UlaE"  
"JS1\_A09\_00138" 10624 "s63E6H2" 0.01151012 "L-ribulose-5-phosphate 3-epimerase UlaE"  
"JS1\_A09\_00139" 10625 "s59E13H2" 0 "hypothetical protein"  
"JS1\_A09\_00139" 10625 "s59E25H2" 0 "hypothetical protein"  
"JS1\_A09\_00139" 10625 "s59E5H2" 0 "hypothetical protein"  
"JS1\_A09\_00139" 10625 "s63E6H2" 0.00354271 "hypothetical protein"  
"JS1\_A09\_00140" 10626 "s59E13H2" 0 "Aspartate aminotransferase"  
"JS1\_A09\_00140" 10626 "s59E25H2" 0 "Aspartate aminotransferase"  
"JS1\_A09\_00140" 10626 "s59E5H2" 0 "Aspartate aminotransferase"  
"JS1\_A09\_00140" 10626 "s63E6H2" 0 "Aspartate aminotransferase"  
"JS1\_A09\_00141" 10627 "s59E13H2" 0 "hypothetical protein"  
"JS1\_A09\_00141" 10627 "s59E25H2" 0 "hypothetical protein"  
"JS1\_A09\_00141" 10627 "s59E5H2" 0 "hypothetical protein"  
"JS1\_A09\_00141" 10627 "s63E6H2" 0.0288734 "hypothetical protein"  
"JS1\_A09\_00142" 10628 "s59E13H2" 0 "Sialic acid TRAP transporter permease protein SiaT"  
"JS1\_A09\_00142" 10628 "s59E25H2" 0 "Sialic acid TRAP transporter permease protein SiaT"  
"JS1\_A09\_00142" 10628 "s59E5H2" 0 "Sialic acid TRAP transporter permease protein SiaT"  
"JS1\_A09\_00142" 10628 "s63E6H2" 0.0007118606 "Sialic acid TRAP transporter permease protein SiaT"  
"JS1\_A09\_00143" 10629 "s59E13H2" 0 "2,3-diketo-L-gulonate TRAP transporter small permease protein YiaM"  
"JS1\_A09\_00143" 10629 "s59E25H2" 0 "2,3-diketo-L-gulonate TRAP transporter small permease protein YiaM"  
"JS1\_A09\_00143" 10629 "s59E5H2" 0 "2,3-diketo-L-gulonate TRAP transporter small permease protein YiaM"  
"JS1\_A09\_00143" 10629 "s63E6H2" 0.0010562 "2,3-diketo-L-gulonate TRAP transporter small permease protein YiaM"  
"JS1\_A09\_00144" 10630 "s59E13H2" 0 "2,3-diketo-L-gulonate-binding periplasmic protein YiaO precursor"  
"JS1\_A09\_00144" 10630 "s59E25H2" 0 "2,3-diketo-L-gulonate-binding periplasmic protein YiaO precursor"  
"JS1\_A09\_00144" 10630 "s59E5H2" 0 "2,3-diketo-L-gulonate-binding periplasmic protein YiaO precursor"  
"JS1\_A09\_00144" 10630 "s63E6H2" 0.00295521 "2,3-diketo-L-gulonate-binding periplasmic protein YiaO precursor"  
"JS1\_A09\_00145" 10631 "s59E13H2" 0 "Succinyl-CoA ligase [ADP-forming] subunit beta"  
"JS1\_A09\_00145" 10631 "s59E25H2" 0 "Succinyl-CoA ligase [ADP-forming] subunit beta"  
"JS1\_A09\_00145" 10631 "s59E5H2" 0 "Succinyl-CoA ligase [ADP-forming] subunit beta"  
"JS1\_A09\_00145" 10631 "s63E6H2" 0 "Succinyl-CoA ligase [ADP-forming] subunit beta"  
"JS1\_A09\_00146" 10632 "s59E13H2" 0.01299327 "Succinyl-CoA ligase [ADP-forming] subunit alpha"  
"JS1\_A09\_00146" 10632 "s59E25H2" 0 "Succinyl-CoA ligase [ADP-forming] subunit alpha"  
"JS1\_A09\_00146" 10632 "s59E5H2" 0.7501846 "Succinyl-CoA ligase [ADP-forming] subunit alpha"  
"JS1\_A09\_00146" 10632 "s63E6H2" 0.06980463 "Succinyl-CoA ligase [ADP-forming] subunit alpha"  
"JS1\_A09\_00147" 10633 "s59E13H2" 0.007867015 "Succinyl-CoA ligase [ADP-forming] subunit beta"

"JS1\_A09\_00147" 10633 "s59E25H2" 0 "Succinyl-CoA ligase [ADP-forming] subunit beta"  
"JS1\_A09\_00147" 10633 "s59E5H2" 0.9772507 "Succinyl-CoA ligase [ADP-forming] subunit beta"  
"JS1\_A09\_00147" 10633 "s63E6H2" 0.0581795 "Succinyl-CoA ligase [ADP-forming] subunit beta"  
"JS1\_A09\_00148" 10634 "s59E13H2" 0.02045947 "hypothetical protein"  
"JS1\_A09\_00148" 10634 "s59E25H2" 0 "hypothetical protein"  
"JS1\_A09\_00148" 10634 "s59E5H2" 0.04567765 "hypothetical protein"  
"JS1\_A09\_00148" 10634 "s63E6H2" 0.3780935 "hypothetical protein"  
"JS1\_A09\_00149" 10635 "s59E13H2" 0.0298502 "SigmaW regulon antibacterial"  
"JS1\_A09\_00149" 10635 "s59E25H2" 0 "SigmaW regulon antibacterial"  
"JS1\_A09\_00149" 10635 "s59E5H2" 0.2127356 "SigmaW regulon antibacterial"  
"JS1\_A09\_00149" 10635 "s63E6H2" 0.9733246 "SigmaW regulon antibacterial"  
"JS1\_A09\_00150" 10636 "s59E13H2" 0.07763707 "hypothetical protein"  
"JS1\_A09\_00150" 10636 "s59E25H2" 0 "hypothetical protein"  
"JS1\_A09\_00150" 10636 "s59E5H2" 0.2911584 "hypothetical protein"  
"JS1\_A09\_00150" 10636 "s63E6H2" 0.9088606 "hypothetical protein"  
"JS1\_A09\_00151" 10637 "s59E13H2" 0.0501308 "glutamyl-tRNA(Gln) amidotransferase subunit E"  
"JS1\_A09\_00151" 10637 "s59E25H2" 0 "glutamyl-tRNA(Gln) amidotransferase subunit E"  
"JS1\_A09\_00151" 10637 "s59E5H2" 0.2763269 "glutamyl-tRNA(Gln) amidotransferase subunit E"  
"JS1\_A09\_00151" 10637 "s63E6H2" 0.07283457 "glutamyl-tRNA(Gln) amidotransferase subunit E"  
"JS1\_A09\_00152" 10638 "s59E13H2" 0.04902037 "30S ribosomal protein S21"  
"JS1\_A09\_00152" 10638 "s59E25H2" 0 "30S ribosomal protein S21"  
"JS1\_A09\_00152" 10638 "s59E5H2" 0.3167721 "30S ribosomal protein S21"  
"JS1\_A09\_00152" 10638 "s63E6H2" 0.1865924 "30S ribosomal protein S21"  
"JS1\_A09\_00153" 10639 "s59E13H2" 0.04361554 "N-6 DNA Methylase"  
"JS1\_A09\_00153" 10639 "s59E25H2" 0 "N-6 DNA Methylase"  
"JS1\_A09\_00153" 10639 "s59E5H2" 0.3602758 "N-6 DNA Methylase"  
"JS1\_A09\_00153" 10639 "s63E6H2" 0.4035224 "N-6 DNA Methylase"  
"JS1\_A09\_00155" 10641 "s59E13H2" 0.002596134 "Sulfide dehydrogenase subunit alpha precursor"  
"JS1\_A09\_00155" 10641 "s59E25H2" 0 "Sulfide dehydrogenase subunit alpha precursor"  
"JS1\_A09\_00155" 10641 "s59E5H2" 0.0009072787 "Sulfide dehydrogenase subunit alpha precursor"  
"JS1\_A09\_00155" 10641 "s63E6H2" 0.002447981 "Sulfide dehydrogenase subunit alpha precursor"  
"JS1\_A09\_00156" 10642 "s59E13H2" 0.04624859 "F420-non-reducing hydrogenase iron-sulfur subunit D"  
"JS1\_A09\_00156" 10642 "s59E25H2" 0 "F420-non-reducing hydrogenase iron-sulfur subunit D"  
"JS1\_A09\_00156" 10642 "s59E5H2" 0 "F420-non-reducing hydrogenase iron-sulfur subunit D"  
"JS1\_A09\_00156" 10642 "s63E6H2" 0.004026196 "F420-non-reducing hydrogenase iron-sulfur subunit D"  
"JS1\_A09\_00157" 10643 "s59E13H2" 0.0435319 "Formate dehydrogenase subunit beta"  
"JS1\_A09\_00157" 10643 "s59E25H2" 0 "Formate dehydrogenase subunit beta"  
"JS1\_A09\_00157" 10643 "s59E5H2" 0 "Formate dehydrogenase subunit beta"  
"JS1\_A09\_00157" 10643 "s63E6H2" 0.002123854 "Formate dehydrogenase subunit beta"  
"JS1\_A09\_00158" 10644 "s59E13H2" 0.04350613 "Sulfhydrogenase 2 subunit beta"  
"JS1\_A09\_00158" 10644 "s59E25H2" 0 "Sulfhydrogenase 2 subunit beta"  
"JS1\_A09\_00158" 10644 "s59E5H2" 0 "Sulfhydrogenase 2 subunit beta"  
"JS1\_A09\_00158" 10644 "s63E6H2" 0 "Sulfhydrogenase 2 subunit beta"  
"JS1\_A09\_00159" 10645 "s59E13H2" 0.01152659 "Sulfide dehydrogenase subunit alpha precursor"  
"JS1\_A09\_00159" 10645 "s59E25H2" 0 "Sulfide dehydrogenase subunit alpha precursor"  
"JS1\_A09\_00159" 10645 "s59E5H2" 0.01736843 "Sulfide dehydrogenase subunit alpha precursor"  
"JS1\_A09\_00159" 10645 "s63E6H2" 0.01400238 "Sulfide dehydrogenase subunit alpha precursor"

"JS1\_A09\_00160" 10646 "s59E13H2" 0 "CoB--CoM heterodisulfide reductase subunit B"  
"JS1\_A09\_00160" 10646 "s59E25H2" 0 "CoB--CoM heterodisulfide reductase subunit B"  
"JS1\_A09\_00160" 10646 "s59E5H2" 0.01115423 "CoB--CoM heterodisulfide reductase subunit B"  
"JS1\_A09\_00160" 10646 "s63E6H2" 0 "CoB--CoM heterodisulfide reductase subunit B"  
"JS1\_A09\_00161" 10647 "s59E13H2" 0 "hypothetical protein"  
"JS1\_A09\_00161" 10647 "s59E25H2" 0 "hypothetical protein"  
"JS1\_A09\_00161" 10647 "s59E5H2" 0 "hypothetical protein"  
"JS1\_A09\_00161" 10647 "s63E6H2" 0 "hypothetical protein"  
"JS1\_A09\_00163" 10649 "s59E13H2" 0 "DctM-like transporters"  
"JS1\_A09\_00163" 10649 "s59E25H2" 0 "DctM-like transporters"  
"JS1\_A09\_00163" 10649 "s59E5H2" 0 "DctM-like transporters"  
"JS1\_A09\_00163" 10649 "s63E6H2" 0 "DctM-like transporters"  
"JS1\_A09\_00164" 10650 "s59E13H2" 0.04266845 "DNA replication protein DnaC"  
"JS1\_A09\_00164" 10650 "s59E25H2" 0 "DNA replication protein DnaC"  
"JS1\_A09\_00164" 10650 "s59E5H2" 0.06595822 "DNA replication protein DnaC"  
"JS1\_A09\_00164" 10650 "s63E6H2" 0.02332029 "DNA replication protein DnaC"  
"JS1\_A09\_00166" 10652 "s59E13H2" 0.001882372 "Ferrous-iron efflux pump FieF"  
"JS1\_A09\_00166" 10652 "s59E25H2" 0 "Ferrous-iron efflux pump FieF"  
"JS1\_A09\_00166" 10652 "s59E5H2" 0.08391221 "Ferrous-iron efflux pump FieF"  
"JS1\_A09\_00166" 10652 "s63E6H2" 0.02756747 "Ferrous-iron efflux pump FieF"  
"JS1\_A09\_00168" 10654 "s59E13H2" 4.376177 "HTH-type transcriptional repressor YtrA"  
"JS1\_A09\_00168" 10654 "s59E25H2" 0 "HTH-type transcriptional repressor YtrA"  
"JS1\_A09\_00168" 10654 "s59E5H2" 1.853588 "HTH-type transcriptional repressor YtrA"  
"JS1\_A09\_00168" 10654 "s63E6H2" 3.227826 "HTH-type transcriptional repressor YtrA"  
"JS1\_A09\_00169" 10655 "s59E13H2" 5.748571 "ABC transporter ATP-binding protein YtrB"  
"JS1\_A09\_00169" 10655 "s59E25H2" 0 "ABC transporter ATP-binding protein YtrB"  
"JS1\_A09\_00169" 10655 "s59E5H2" 4.893721 "ABC transporter ATP-binding protein YtrB"  
"JS1\_A09\_00169" 10655 "s63E6H2" 3.460686 "ABC transporter ATP-binding protein YtrB"  
"JS1\_A09\_00170" 10656 "s59E13H2" 7.565338 "hypothetical protein"  
"JS1\_A09\_00170" 10656 "s59E25H2" 0 "hypothetical protein"  
"JS1\_A09\_00170" 10656 "s59E5H2" 5.043265 "hypothetical protein"  
"JS1\_A09\_00170" 10656 "s63E6H2" 1.590437 "hypothetical protein"  
"JS1\_A09\_00171" 10657 "s59E13H2" 7.612231 "hypothetical protein"  
"JS1\_A09\_00171" 10657 "s59E25H2" 0.07407407 "hypothetical protein"  
"JS1\_A09\_00171" 10657 "s59E5H2" 5.845981 "hypothetical protein"  
"JS1\_A09\_00171" 10657 "s63E6H2" 2.521442 "hypothetical protein"  
"JS1\_A09\_00172" 10658 "s59E13H2" 7.299792 "hypothetical protein"  
"JS1\_A09\_00172" 10658 "s59E25H2" 1.294118 "hypothetical protein"  
"JS1\_A09\_00172" 10658 "s59E5H2" 4.157197 "hypothetical protein"  
"JS1\_A09\_00172" 10658 "s63E6H2" 2.263403 "hypothetical protein"  
"JS1\_A09\_00173" 10659 "s59E13H2" 1.674165 "CGGC domain protein"  
"JS1\_A09\_00173" 10659 "s59E25H2" 0.1044444 "CGGC domain protein"  
"JS1\_A09\_00173" 10659 "s59E5H2" 2.46739 "CGGC domain protein"  
"JS1\_A09\_00173" 10659 "s63E6H2" 0.2623416 "CGGC domain protein"  
"JS1\_A09\_00174" 10660 "s59E13H2" 4.57348 "Pyruvate kinase"  
"JS1\_A09\_00174" 10660 "s59E25H2" 0 "Pyruvate kinase"  
"JS1\_A09\_00174" 10660 "s59E5H2" 2.978021 "Pyruvate kinase"

"JS1\_A09\_00174" 10660 "s63E6H2" 2.703454 "Pyruvate kinase"  
"JS1\_A09\_00175" 10661 "s59E13H2" 0.02995808 "Trifunctional nucleotide phosphoesterase protein YfkN precursor"  
"JS1\_A09\_00175" 10661 "s59E25H2" 0 "Trifunctional nucleotide phosphoesterase protein YfkN precursor"  
"JS1\_A09\_00175" 10661 "s59E5H2" 0.1588634 "Trifunctional nucleotide phosphoesterase protein YfkN precursor"  
"JS1\_A09\_00175" 10661 "s63E6H2" 0 "Trifunctional nucleotide phosphoesterase protein YfkN precursor"  
"JS1\_A09\_00176" 10662 "s59E13H2" 0.02270796 "hypothetical protein"  
"JS1\_A09\_00176" 10662 "s59E25H2" 0 "hypothetical protein"  
"JS1\_A09\_00176" 10662 "s59E5H2" 0.575437 "hypothetical protein"  
"JS1\_A09\_00176" 10662 "s63E6H2" 0.007509711 "hypothetical protein"  
"JS1\_A09\_00177" 10663 "s59E13H2" 0.154713 "hypothetical protein"  
"JS1\_A09\_00177" 10663 "s59E25H2" 0 "hypothetical protein"  
"JS1\_A09\_00177" 10663 "s59E5H2" 0.006924193 "hypothetical protein"  
"JS1\_A09\_00177" 10663 "s63E6H2" 0.3450839 "hypothetical protein"  
"JS1\_A09\_00178" 10664 "s59E13H2" 0.0180132 "hypothetical protein"  
"JS1\_A09\_00178" 10664 "s59E25H2" 0 "hypothetical protein"  
"JS1\_A09\_00178" 10664 "s59E5H2" 0 "hypothetical protein"  
"JS1\_A09\_00178" 10664 "s63E6H2" 0.00602733 "hypothetical protein"  
"JS1\_A09\_00179" 10665 "s59E13H2" 0.003679658 "hypothetical protein"  
"JS1\_A09\_00179" 10665 "s59E25H2" 0 "hypothetical protein"  
"JS1\_A09\_00179" 10665 "s59E5H2" 0 "hypothetical protein"  
"JS1\_A09\_00179" 10665 "s63E6H2" 0.08008179 "hypothetical protein"  
"JS1\_A09\_00180" 10666 "s59E13H2" 0.1532037 "hypothetical protein"  
"JS1\_A09\_00180" 10666 "s59E25H2" 0 "hypothetical protein"  
"JS1\_A09\_00180" 10666 "s59E5H2" 0.7303 "hypothetical protein"  
"JS1\_A09\_00180" 10666 "s63E6H2" 0.7969659 "hypothetical protein"  
"JS1\_A09\_00181" 10667 "s59E13H2" 0.1343038 "Galactose-1-phosphate uridylyltransferase"  
"JS1\_A09\_00181" 10667 "s59E25H2" 0 "Galactose-1-phosphate uridylyltransferase"  
"JS1\_A09\_00181" 10667 "s59E5H2" 0.1645563 "Galactose-1-phosphate uridylyltransferase"  
"JS1\_A09\_00181" 10667 "s63E6H2" 0.2342051 "Galactose-1-phosphate uridylyltransferase"  
"JS1\_A09\_00182" 10668 "s59E13H2" 0.1011513 "6-phosphofructokinase"  
"JS1\_A09\_00182" 10668 "s59E25H2" 0 "6-phosphofructokinase"  
"JS1\_A09\_00182" 10668 "s59E5H2" 0.1822561 "6-phosphofructokinase"  
"JS1\_A09\_00182" 10668 "s63E6H2" 0.3603017 "6-phosphofructokinase"  
"JS1\_A09\_00183" 10669 "s59E13H2" 0.03646798 "Transposase IS200 like protein"  
"JS1\_A09\_00183" 10669 "s59E25H2" 0 "Transposase IS200 like protein"  
"JS1\_A09\_00183" 10669 "s59E5H2" 0 "Transposase IS200 like protein"  
"JS1\_A09\_00183" 10669 "s63E6H2" 0.01617482 "Transposase IS200 like protein"  
"JS1\_A09\_00184" 10670 "s59E13H2" 0.2863071 "Transcription-repair-coupling factor"  
"JS1\_A09\_00184" 10670 "s59E25H2" 0 "Transcription-repair-coupling factor"  
"JS1\_A09\_00184" 10670 "s59E5H2" 0.4249814 "Transcription-repair-coupling factor"  
"JS1\_A09\_00184" 10670 "s63E6H2" 0.4059342 "Transcription-repair-coupling factor"  
"JS1\_A09\_00185" 10671 "s59E13H2" 0 "NTE family protein RssA"  
"JS1\_A09\_00185" 10671 "s59E25H2" 0 "NTE family protein RssA"  
"JS1\_A09\_00185" 10671 "s59E5H2" 0.2749819 "NTE family protein RssA"  
"JS1\_A09\_00185" 10671 "s63E6H2" 0.001576112 "NTE family protein RssA"  
"JS1\_A09\_00186" 10672 "s59E13H2" 0.01841432 "Type I phosphodiesterase / nucleotide pyrophosphatase"  
"JS1\_A09\_00186" 10672 "s59E25H2" 0 "Type I phosphodiesterase / nucleotide pyrophosphatase"

"JS1\_A09\_00186" 10672 "s59E5H2" 0.007345027 "Type I phosphodiesterase / nucleotide pyrophosphatase"  
"JS1\_A09\_00186" 10672 "s63E6H2" 0.05036446 "Type I phosphodiesterase / nucleotide pyrophosphatase"  
"JS1\_A09\_00187" 10673 "s59E13H2" 0.1454503 "Nucleoside triphosphate pyrophosphohydrolase/pyrophosphatase MazG"  
"JS1\_A09\_00187" 10673 "s59E25H2" 0 "Nucleoside triphosphate pyrophosphohydrolase/pyrophosphatase MazG"  
"JS1\_A09\_00187" 10673 "s59E5H2" 0.3649389 "Nucleoside triphosphate pyrophosphohydrolase/pyrophosphatase MazG"  
"JS1\_A09\_00187" 10673 "s63E6H2" 0.1102582 "Nucleoside triphosphate pyrophosphohydrolase/pyrophosphatase MazG"  
"JS1\_A09\_00188" 10674 "s59E13H2" 0.111271 "AsmA family protein"  
"JS1\_A09\_00188" 10674 "s59E25H2" 0 "AsmA family protein"  
"JS1\_A09\_00188" 10674 "s59E5H2" 0.3223758 "AsmA family protein"  
"JS1\_A09\_00188" 10674 "s63E6H2" 0.3218818 "AsmA family protein"  
"JS1\_A09\_00189" 10675 "s59E13H2" 0.2969744 "Outer membrane protein assembly factor BamA precursor"  
"JS1\_A09\_00189" 10675 "s59E25H2" 0 "Outer membrane protein assembly factor BamA precursor"  
"JS1\_A09\_00189" 10675 "s59E5H2" 0.8057379 "Outer membrane protein assembly factor BamA precursor"  
"JS1\_A09\_00189" 10675 "s63E6H2" 0.543274 "Outer membrane protein assembly factor BamA precursor"  
"JS1\_A09\_00190" 10676 "s59E13H2" 0.350048 "Outer membrane protein (OmpH-like)"  
"JS1\_A09\_00190" 10676 "s59E25H2" 0 "Outer membrane protein (OmpH-like)"  
"JS1\_A09\_00190" 10676 "s59E5H2" 0.8472456 "Outer membrane protein (OmpH-like)"  
"JS1\_A09\_00190" 10676 "s63E6H2" 1.365299 "Outer membrane protein (OmpH-like)"  
"JS1\_A09\_00191" 10677 "s59E13H2" 0.6057689 "3-hydroxyacyl-[acyl-carrier-protein] dehydratase FabZ"  
"JS1\_A09\_00191" 10677 "s59E25H2" 0 "3-hydroxyacyl-[acyl-carrier-protein] dehydratase FabZ"  
"JS1\_A09\_00191" 10677 "s59E5H2" 1.009133 "3-hydroxyacyl-[acyl-carrier-protein] dehydratase FabZ"  
"JS1\_A09\_00191" 10677 "s63E6H2" 1.419521 "3-hydroxyacyl-[acyl-carrier-protein] dehydratase FabZ"  
"JS1\_A09\_00192" 10678 "s59E13H2" 0.5726194 "Lipopolysaccharide export system ATP-binding protein LptB"  
"JS1\_A09\_00192" 10678 "s59E25H2" 0 "Lipopolysaccharide export system ATP-binding protein LptB"  
"JS1\_A09\_00192" 10678 "s59E5H2" 0.8644015 "Lipopolysaccharide export system ATP-binding protein LptB"  
"JS1\_A09\_00192" 10678 "s63E6H2" 1.718244 "Lipopolysaccharide export system ATP-binding protein LptB"  
"JS1\_A09\_00193" 10679 "s59E13H2" 0.2231464 "hypothetical protein"  
"JS1\_A09\_00193" 10679 "s59E25H2" 0 "hypothetical protein"  
"JS1\_A09\_00193" 10679 "s59E5H2" 0.3625029 "hypothetical protein"  
"JS1\_A09\_00193" 10679 "s63E6H2" 0.7676543 "hypothetical protein"  
"JS1\_A09\_00194" 10680 "s59E13H2" 0.1357512 "Outer membrane protein alpha precursor"  
"JS1\_A09\_00194" 10680 "s59E25H2" 0.008865248 "Outer membrane protein alpha precursor"  
"JS1\_A09\_00194" 10680 "s59E5H2" 0.3841376 "Outer membrane protein alpha precursor"  
"JS1\_A09\_00194" 10680 "s63E6H2" 0.4971113 "Outer membrane protein alpha precursor"  
"JS1\_A09\_00203" 10689 "s59E13H2" 0 "hypothetical protein"  
"JS1\_A09\_00203" 10689 "s59E25H2" 0 "hypothetical protein"  
"JS1\_A09\_00203" 10689 "s59E5H2" 0 "hypothetical protein"  
"JS1\_A09\_00203" 10689 "s63E6H2" 0.00260818 "hypothetical protein"  
"JS1\_A09\_00204" 10690 "s59E13H2" 5.09867 "50S ribosomal protein L28"  
"JS1\_A09\_00204" 10690 "s59E25H2" 0 "50S ribosomal protein L28"  
"JS1\_A09\_00204" 10690 "s59E5H2" 0.1063627 "50S ribosomal protein L28"  
"JS1\_A09\_00204" 10690 "s63E6H2" 0.3459084 "50S ribosomal protein L28"  
"JS1\_A09\_00205" 10691 "s59E13H2" 6.133039 "4-hydroxy-3-methylbut-2-enyl diphosphate reductase"  
"JS1\_A09\_00205" 10691 "s59E25H2" 0 "4-hydroxy-3-methylbut-2-enyl diphosphate reductase"  
"JS1\_A09\_00205" 10691 "s59E5H2" 0.1426858 "4-hydroxy-3-methylbut-2-enyl diphosphate reductase"  
"JS1\_A09\_00205" 10691 "s63E6H2" 0.4145285 "4-hydroxy-3-methylbut-2-enyl diphosphate reductase"  
"JS1\_A09\_00206" 10692 "s59E13H2" 5.036201 "Cytidylate kinase"

"JS1\_A09\_00206" 10692 "s59E25H2" 0.1082982 "Cytidylate kinase"  
"JS1\_A09\_00206" 10692 "s59E5H2" 0.04510099 "Cytidylate kinase"  
"JS1\_A09\_00206" 10692 "s63E6H2" 0.1426025 "Cytidylate kinase"  
"JS1\_A09\_00207" 10693 "s59E13H2" 4.053673 "Ribosomal large subunit pseudouridine synthase B"  
"JS1\_A09\_00207" 10693 "s59E25H2" 0 "Ribosomal large subunit pseudouridine synthase B"  
"JS1\_A09\_00207" 10693 "s59E5H2" 0.03635358 "Ribosomal large subunit pseudouridine synthase B"  
"JS1\_A09\_00207" 10693 "s63E6H2" 0.08467462 "Ribosomal large subunit pseudouridine synthase B"  
"JS1\_A09\_00208" 10694 "s59E13H2" 5.110618 "Segregation and condensation protein B"  
"JS1\_A09\_00208" 10694 "s59E25H2" 0 "Segregation and condensation protein B"  
"JS1\_A09\_00208" 10694 "s59E5H2" 0.2101484 "Segregation and condensation protein B"  
"JS1\_A09\_00208" 10694 "s63E6H2" 0.2173692 "Segregation and condensation protein B"  
"JS1\_A09\_00209" 10695 "s59E13H2" 1.343156 "Segregation and condensation protein A"  
"JS1\_A09\_00209" 10695 "s59E25H2" 0 "Segregation and condensation protein A"  
"JS1\_A09\_00209" 10695 "s59E5H2" 0.4332509 "Segregation and condensation protein A"  
"JS1\_A09\_00209" 10695 "s63E6H2" 0.0861118 "Segregation and condensation protein A"  
"JS1\_A09\_00210" 10696 "s59E13H2" 0.08382652 "Tryptophan--tRNA ligase"  
"JS1\_A09\_00210" 10696 "s59E25H2" 0 "Tryptophan--tRNA ligase"  
"JS1\_A09\_00210" 10696 "s59E5H2" 0.2406301 "Tryptophan--tRNA ligase"  
"JS1\_A09\_00210" 10696 "s63E6H2" 0.06681059 "Tryptophan--tRNA ligase"  
"JS1\_A09\_00211" 10697 "s59E13H2" 0.04903263 "Peptidase family M50"  
"JS1\_A09\_00211" 10697 "s59E25H2" 0 "Peptidase family M50"  
"JS1\_A09\_00211" 10697 "s59E5H2" 0.2475041 "Peptidase family M50"  
"JS1\_A09\_00211" 10697 "s63E6H2" 0.06687218 "Peptidase family M50"  
"JS1\_A09\_00212" 10698 "s59E13H2" 0.03764547 "Multifunctional CCA protein"  
"JS1\_A09\_00212" 10698 "s59E25H2" 0 "Multifunctional CCA protein"  
"JS1\_A09\_00212" 10698 "s59E5H2" 0.232831 "Multifunctional CCA protein"  
"JS1\_A09\_00212" 10698 "s63E6H2" 0.06649957 "Multifunctional CCA protein"  
"JS1\_A09\_00214" 10700 "s59E13H2" 3.317645 "Integrase core domain protein"  
"JS1\_A09\_00214" 10700 "s59E25H2" 0 "Integrase core domain protein"  
"JS1\_A09\_00214" 10700 "s59E5H2" 1.653472 "Integrase core domain protein"  
"JS1\_A09\_00214" 10700 "s63E6H2" 0.4986216 "Integrase core domain protein"  
"JS1\_A09\_00216" 10702 "s59E13H2" 0.007893234 "TPR repeat-containing protein YrrB"  
"JS1\_A09\_00216" 10702 "s59E25H2" 0 "TPR repeat-containing protein YrrB"  
"JS1\_A09\_00216" 10702 "s59E5H2" 0.04095847 "TPR repeat-containing protein YrrB"  
"JS1\_A09\_00216" 10702 "s63E6H2" 0.3043906 "TPR repeat-containing protein YrrB"  
"JS1\_A09\_00217" 10703 "s59E13H2" 0 "putative major pilin subunit"  
"JS1\_A09\_00217" 10703 "s59E25H2" 0 "putative major pilin subunit"  
"JS1\_A09\_00217" 10703 "s59E5H2" 0 "putative major pilin subunit"  
"JS1\_A09\_00217" 10703 "s63E6H2" 0.07466003 "putative major pilin subunit"  
"JS1\_A09\_00219" 10705 "s59E13H2" 0.127188 "hypothetical protein"  
"JS1\_A09\_00219" 10705 "s59E25H2" 0 "hypothetical protein"  
"JS1\_A09\_00219" 10705 "s59E5H2" 0.01493795 "hypothetical protein"  
"JS1\_A09\_00219" 10705 "s63E6H2" 0.4408353 "hypothetical protein"  
"JS1\_A09\_00220" 10706 "s59E13H2" 0.0439467 "Toxin RelE"  
"JS1\_A09\_00220" 10706 "s59E25H2" 0 "Toxin RelE"  
"JS1\_A09\_00220" 10706 "s59E5H2" 0.0190365 "Toxin RelE"  
"JS1\_A09\_00220" 10706 "s63E6H2" 0.2527971 "Toxin RelE"

"JS1\_A09\_00222" 10708 "s59E13H2" 0.06342838 "hypothetical protein"  
"JS1\_A09\_00222" 10708 "s59E25H2" 0 "hypothetical protein"  
"JS1\_A09\_00222" 10708 "s59E5H2" 0.1657457 "hypothetical protein"  
"JS1\_A09\_00222" 10708 "s63E6H2" 0.01267966 "hypothetical protein"  
"JS1\_A09\_00225" 10711 "s59E13H2" 0.03360699 "hypothetical protein"  
"JS1\_A09\_00225" 10711 "s59E25H2" 0 "hypothetical protein"  
"JS1\_A09\_00225" 10711 "s59E5H2" 0.7561108 "hypothetical protein"  
"JS1\_A09\_00225" 10711 "s63E6H2" 0.4719842 "hypothetical protein"  
"JS1\_A09\_00226" 10712 "s59E13H2" 0.1555777 "hypothetical protein"  
"JS1\_A09\_00226" 10712 "s59E25H2" 0 "hypothetical protein"  
"JS1\_A09\_00226" 10712 "s59E5H2" 0.1361485 "hypothetical protein"  
"JS1\_A09\_00226" 10712 "s63E6H2" 0.009456673 "hypothetical protein"  
"JS1\_A09\_00227" 10713 "s59E13H2" 0.1662763 "AIR carboxylase"  
"JS1\_A09\_00227" 10713 "s59E25H2" 0 "AIR carboxylase"  
"JS1\_A09\_00227" 10713 "s59E5H2" 0.129986 "AIR carboxylase"  
"JS1\_A09\_00227" 10713 "s63E6H2" 0.0223455 "AIR carboxylase"  
"JS1\_A09\_00229" 10715 "s59E13H2" 0 "CoB--CoM heterodisulfide reductase iron-sulfur subunit A"  
"JS1\_A09\_00229" 10715 "s59E25H2" 0 "CoB--CoM heterodisulfide reductase iron-sulfur subunit A"  
"JS1\_A09\_00229" 10715 "s59E5H2" 0 "CoB--CoM heterodisulfide reductase iron-sulfur subunit A"  
"JS1\_A09\_00229" 10715 "s63E6H2" 0 "CoB--CoM heterodisulfide reductase iron-sulfur subunit A"  
"JS1\_A09\_00230" 10716 "s59E13H2" 2.234266 "putative zinc-type alcohol dehydrogenase-like protein YjmD"  
"JS1\_A09\_00230" 10716 "s59E25H2" 0.1360544 "putative zinc-type alcohol dehydrogenase-like protein YjmD"  
"JS1\_A09\_00230" 10716 "s59E5H2" 0 "putative zinc-type alcohol dehydrogenase-like protein YjmD"  
"JS1\_A09\_00230" 10716 "s63E6H2" 0.002014614 "putative zinc-type alcohol dehydrogenase-like protein YjmD"  
"JS1\_A09\_00231" 10717 "s59E13H2" 0.005262697 "Glucose-6-phosphate isomerase"  
"JS1\_A09\_00231" 10717 "s59E25H2" 0 "Glucose-6-phosphate isomerase"  
"JS1\_A09\_00231" 10717 "s59E5H2" 0 "Glucose-6-phosphate isomerase"  
"JS1\_A09\_00231" 10717 "s63E6H2" 0.003581098 "Glucose-6-phosphate isomerase"  
"JS1\_A09\_00232" 10718 "s59E13H2" 0 "putative L-threonine 3-dehydrogenase"  
"JS1\_A09\_00232" 10718 "s59E25H2" 0 "putative L-threonine 3-dehydrogenase"  
"JS1\_A09\_00232" 10718 "s59E5H2" 0.0008885625 "putative L-threonine 3-dehydrogenase"  
"JS1\_A09\_00232" 10718 "s63E6H2" 0.07948637 "putative L-threonine 3-dehydrogenase"  
"JS1\_A09\_00233" 10719 "s59E13H2" 0 "ureidoglycolate hydrolase"  
"JS1\_A09\_00233" 10719 "s59E25H2" 0 "ureidoglycolate hydrolase"  
"JS1\_A09\_00233" 10719 "s59E5H2" 0 "ureidoglycolate hydrolase"  
"JS1\_A09\_00233" 10719 "s63E6H2" 0.01095027 "ureidoglycolate hydrolase"  
"JS1\_A09\_00234" 10720 "s59E13H2" 0 "General stress protein 69"  
"JS1\_A09\_00234" 10720 "s59E25H2" 0 "General stress protein 69"  
"JS1\_A09\_00234" 10720 "s59E5H2" 0 "General stress protein 69"  
"JS1\_A09\_00234" 10720 "s63E6H2" 0.003148093 "General stress protein 69"  
"JS1\_A09\_00235" 10721 "s59E13H2" 0 "D-tagatose 3-epimerase"  
"JS1\_A09\_00235" 10721 "s59E25H2" 0 "D-tagatose 3-epimerase"  
"JS1\_A09\_00235" 10721 "s59E5H2" 0.004459171 "D-tagatose 3-epimerase"  
"JS1\_A09\_00235" 10721 "s63E6H2" 0.00261452 "D-tagatose 3-epimerase"  
"JS1\_A09\_00236" 10722 "s59E13H2" 0 "3-oxoacyl-[acyl-carrier-protein] reductase FabG"  
"JS1\_A09\_00236" 10722 "s59E25H2" 0 "3-oxoacyl-[acyl-carrier-protein] reductase FabG"  
"JS1\_A09\_00236" 10722 "s59E5H2" 0.03056075 "3-oxoacyl-[acyl-carrier-protein] reductase FabG"



"JS1\_A09\_00236" 10722 "s63E6H2" 0.0009671597 "3-oxoacyl-[acyl-carrier-protein] reductase FabG"  
"JS1\_A09\_00237" 10723 "s59E13H2" 8.429853 "ferredoxin"  
"JS1\_A09\_00237" 10723 "s59E25H2" 0 "ferredoxin"  
"JS1\_A09\_00237" 10723 "s59E5H2" 0.3127859 "ferredoxin"  
"JS1\_A09\_00237" 10723 "s63E6H2" 0.4536199 "ferredoxin"  
"JS1\_A09\_00238" 10724 "s59E13H2" 0 "Ribose transport system permease protein RbsC"  
"JS1\_A09\_00238" 10724 "s59E25H2" 0 "Ribose transport system permease protein RbsC"  
"JS1\_A09\_00238" 10724 "s59E5H2" 0 "Ribose transport system permease protein RbsC"  
"JS1\_A09\_00238" 10724 "s63E6H2" 0.005957946 "Ribose transport system permease protein RbsC"  
"JS1\_A09\_00239" 10725 "s59E13H2" 0 "Ribose import ATP-binding protein RbsA"  
"JS1\_A09\_00239" 10725 "s59E25H2" 0 "Ribose import ATP-binding protein RbsA"  
"JS1\_A09\_00239" 10725 "s59E5H2" 0 "Ribose import ATP-binding protein RbsA"  
"JS1\_A09\_00239" 10725 "s63E6H2" 0 "Ribose import ATP-binding protein RbsA"  
"JS1\_A09\_00240" 10726 "s59E13H2" 0 "D-allose transport system permease protein AlsC"  
"JS1\_A09\_00240" 10726 "s59E25H2" 0 "D-allose transport system permease protein AlsC"  
"JS1\_A09\_00240" 10726 "s59E5H2" 0 "D-allose transport system permease protein AlsC"  
"JS1\_A09\_00240" 10726 "s63E6H2" 0.001284191 "D-allose transport system permease protein AlsC"  
"JS1\_A09\_00241" 10727 "s59E13H2" 0 "D-allose-binding periplasmic protein precursor"  
"JS1\_A09\_00241" 10727 "s59E25H2" 0 "D-allose-binding periplasmic protein precursor"  
"JS1\_A09\_00241" 10727 "s59E5H2" 0 "D-allose-binding periplasmic protein precursor"  
"JS1\_A09\_00241" 10727 "s63E6H2" 0.001459964 "D-allose-binding periplasmic protein precursor"  
"JS1\_A09\_00242" 10728 "s59E13H2" 0 "hypothetical protein"  
"JS1\_A09\_00242" 10728 "s59E25H2" 0 "hypothetical protein"  
"JS1\_A09\_00242" 10728 "s59E5H2" 0 "hypothetical protein"  
"JS1\_A09\_00242" 10728 "s63E6H2" 0 "hypothetical protein"  
"JS1\_A09\_00243" 10729 "s59E13H2" 0 "Putative alcohol dehydrogenase D"  
"JS1\_A09\_00243" 10729 "s59E25H2" 0 "Putative alcohol dehydrogenase D"  
"JS1\_A09\_00243" 10729 "s59E5H2" 0 "Putative alcohol dehydrogenase D"  
"JS1\_A09\_00243" 10729 "s63E6H2" 0 "Putative alcohol dehydrogenase D"  
"JS1\_A09\_00244" 10730 "s59E13H2" 0.002346691 "HTH-type transcriptional repressor YvoA"  
"JS1\_A09\_00244" 10730 "s59E25H2" 0 "HTH-type transcriptional repressor YvoA"  
"JS1\_A09\_00244" 10730 "s59E5H2" 0 "HTH-type transcriptional repressor YvoA"  
"JS1\_A09\_00244" 10730 "s63E6H2" 0.01347945 "HTH-type transcriptional repressor YvoA"  
"JS1\_A09\_00245" 10731 "s59E13H2" 0.006646455 "hypothetical protein"  
"JS1\_A09\_00245" 10731 "s59E25H2" 0 "hypothetical protein"  
"JS1\_A09\_00245" 10731 "s59E5H2" 0.1145029 "hypothetical protein"  
"JS1\_A09\_00245" 10731 "s63E6H2" 0.03598039 "hypothetical protein"  
"JS1\_A09\_00246" 10732 "s59E13H2" 0.07600474 "Lipoate-protein ligase A subunit 2"  
"JS1\_A09\_00246" 10732 "s59E25H2" 0 "Lipoate-protein ligase A subunit 2"  
"JS1\_A09\_00246" 10732 "s59E5H2" 0 "Lipoate-protein ligase A subunit 2"  
"JS1\_A09\_00246" 10732 "s63E6H2" 0.1413075 "Lipoate-protein ligase A subunit 2"  
"JS1\_A09\_00247" 10733 "s59E13H2" 0.002727683 "CoB--CoM heterodisulfide reductase iron-sulfur subunit C"  
"JS1\_A09\_00247" 10733 "s59E25H2" 0 "CoB--CoM heterodisulfide reductase iron-sulfur subunit C"  
"JS1\_A09\_00247" 10733 "s59E5H2" 0 "CoB--CoM heterodisulfide reductase iron-sulfur subunit C"  
"JS1\_A09\_00247" 10733 "s63E6H2" 0.1171604 "CoB--CoM heterodisulfide reductase iron-sulfur subunit C"  
"JS1\_A09\_00249" 10735 "s59E13H2" 1.027587 "colicin V production protein"  
"JS1\_A09\_00249" 10735 "s59E25H2" 0 "colicin V production protein"

"JS1\_A09\_00249" 10735 "s59E5H2" 0.4143741 "colicin V production protein"  
"JS1\_A09\_00249" 10735 "s63E6H2" 0.5837685 "colicin V production protein"  
"JS1\_A09\_00250" 10736 "s59E13H2" 0.4212542 "Phenylalanine--tRNA ligase beta subunit"  
"JS1\_A09\_00250" 10736 "s59E25H2" 0 "Phenylalanine--tRNA ligase beta subunit"  
"JS1\_A09\_00250" 10736 "s59E5H2" 0.3111852 "Phenylalanine--tRNA ligase beta subunit"  
"JS1\_A09\_00250" 10736 "s63E6H2" 0.3317641 "Phenylalanine--tRNA ligase beta subunit"  
"JS1\_A09\_00251" 10737 "s59E13H2" 0.03582812 "Phenylalanine--tRNA ligase alpha subunit"  
"JS1\_A09\_00251" 10737 "s59E25H2" 0 "Phenylalanine--tRNA ligase alpha subunit"  
"JS1\_A09\_00251" 10737 "s59E5H2" 0.09110358 "Phenylalanine--tRNA ligase alpha subunit"  
"JS1\_A09\_00251" 10737 "s63E6H2" 0.4271357 "Phenylalanine--tRNA ligase alpha subunit"  
"JS1\_A09\_00253" 10739 "s59E13H2" 0.2847896 "50S ribosomal protein L20"  
"JS1\_A09\_00253" 10739 "s59E25H2" 0 "50S ribosomal protein L20"  
"JS1\_A09\_00253" 10739 "s59E5H2" 0.2940363 "50S ribosomal protein L20"  
"JS1\_A09\_00253" 10739 "s63E6H2" 0.384613 "50S ribosomal protein L20"  
"JS1\_A09\_00254" 10740 "s59E13H2" 0.02950857 "50S ribosomal protein L35"  
"JS1\_A09\_00254" 10740 "s59E25H2" 0 "50S ribosomal protein L35"  
"JS1\_A09\_00254" 10740 "s59E5H2" 0.3054028 "50S ribosomal protein L35"  
"JS1\_A09\_00254" 10740 "s63E6H2" 0.3160616 "50S ribosomal protein L35"  
"JS1\_A09\_00255" 10741 "s59E13H2" 0.09884821 "Translation initiation factor IF-3"  
"JS1\_A09\_00255" 10741 "s59E25H2" 0 "Translation initiation factor IF-3"  
"JS1\_A09\_00255" 10741 "s59E5H2" 0.2822749 "Translation initiation factor IF-3"  
"JS1\_A09\_00255" 10741 "s63E6H2" 0.2949184 "Translation initiation factor IF-3"  
"JS1\_A09\_00256" 10742 "s59E13H2" 0.09744371 "Threonine--tRNA ligase 2"  
"JS1\_A09\_00256" 10742 "s59E25H2" 0 "Threonine--tRNA ligase 2"  
"JS1\_A09\_00256" 10742 "s59E5H2" 0.1784815 "Threonine--tRNA ligase 2"  
"JS1\_A09\_00256" 10742 "s63E6H2" 0.2621082 "Threonine--tRNA ligase 2"  
"JS1\_A09\_00264" 10750 "s59E13H2" 0.05117885 "Single-stranded DNA-binding protein ssb"  
"JS1\_A09\_00264" 10750 "s59E25H2" 0 "Single-stranded DNA-binding protein ssb"  
"JS1\_A09\_00264" 10750 "s59E5H2" 0.3112508 "Single-stranded DNA-binding protein ssb"  
"JS1\_A09\_00264" 10750 "s63E6H2" 0.2786681 "Single-stranded DNA-binding protein ssb"  
"JS1\_A09\_00265" 10751 "s59E13H2" 0.06584739 "Leucine--tRNA ligase"  
"JS1\_A09\_00265" 10751 "s59E25H2" 0.1830536 "Leucine--tRNA ligase"  
"JS1\_A09\_00265" 10751 "s59E5H2" 0.9754513 "Leucine--tRNA ligase"  
"JS1\_A09\_00265" 10751 "s63E6H2" 0.6577879 "Leucine--tRNA ligase"  
"JS1\_A09\_00268" 10754 "s59E13H2" 0.1194043 "hypothetical protein"  
"JS1\_A09\_00268" 10754 "s59E25H2" 0 "hypothetical protein"  
"JS1\_A09\_00268" 10754 "s59E5H2" 0.6700138 "hypothetical protein"  
"JS1\_A09\_00268" 10754 "s63E6H2" 1.157965 "hypothetical protein"  
"JS1\_A09\_00269" 10755 "s59E13H2" 0.1404202 "Elongation factor G"  
"JS1\_A09\_00269" 10755 "s59E25H2" 0.2366667 "Elongation factor G"  
"JS1\_A09\_00269" 10755 "s59E5H2" 1.200324 "Elongation factor G"  
"JS1\_A09\_00269" 10755 "s63E6H2" 1.220003 "Elongation factor G"  
"JS1\_A09\_00270" 10756 "s59E13H2" 0.1607112 "Lipoyl synthase"  
"JS1\_A09\_00270" 10756 "s59E25H2" 0 "Lipoyl synthase"  
"JS1\_A09\_00270" 10756 "s59E5H2" 1.028807 "Lipoyl synthase"  
"JS1\_A09\_00270" 10756 "s63E6H2" 0.8991157 "Lipoyl synthase"  
"JS1\_A09\_00271" 10757 "s59E13H2" 0.482666 "Inosose isomerase"

"JS1\_A09\_00271" 10757 "s59E25H2" 0 "Inosose isomerase"  
"JS1\_A09\_00271" 10757 "s59E5H2" 1.484842 "Inosose isomerase"  
"JS1\_A09\_00271" 10757 "s63E6H2" 1.114507 "Inosose isomerase"  
"JS1\_A09\_00272" 10758 "s59E13H2" 0.622352 "Thioredoxin reductase"  
"JS1\_A09\_00272" 10758 "s59E25H2" 0 "Thioredoxin reductase"  
"JS1\_A09\_00272" 10758 "s59E5H2" 0.6876396 "Thioredoxin reductase"  
"JS1\_A09\_00272" 10758 "s63E6H2" 0.6358136 "Thioredoxin reductase"  
"JS1\_A09\_00274" 10760 "s59E13H2" 2.569066 "L-aspartate oxidase"  
"JS1\_A09\_00274" 10760 "s59E25H2" 0 "L-aspartate oxidase"  
"JS1\_A09\_00274" 10760 "s59E5H2" 2.357025 "L-aspartate oxidase"  
"JS1\_A09\_00274" 10760 "s63E6H2" 1.989326 "L-aspartate oxidase"  
"JS1\_A09\_00275" 10761 "s59E13H2" 6.236725 "putative nicotinate-nucleotide pyrophosphorylase [carboxylating]"  
"JS1\_A09\_00275" 10761 "s59E25H2" 0.7588652 "putative nicotinate-nucleotide pyrophosphorylase [carboxylating]"  
"JS1\_A09\_00275" 10761 "s59E5H2" 3.573786 "putative nicotinate-nucleotide pyrophosphorylase [carboxylating]"  
"JS1\_A09\_00275" 10761 "s63E6H2" 3.413385 "putative nicotinate-nucleotide pyrophosphorylase [carboxylating]"  
"JS1\_A09\_00276" 10762 "s59E13H2" 8.04139 "Type III pantothenate kinase"  
"JS1\_A09\_00276" 10762 "s59E25H2" 0 "Type III pantothenate kinase"  
"JS1\_A09\_00276" 10762 "s59E5H2" 1.448787 "Type III pantothenate kinase"  
"JS1\_A09\_00276" 10762 "s63E6H2" 3.675491 "Type III pantothenate kinase"  
"JS1\_A09\_00277" 10763 "s59E13H2" 6.40838 "Pantothenic acid transporter PanT"  
"JS1\_A09\_00277" 10763 "s59E25H2" 0 "Pantothenic acid transporter PanT"  
"JS1\_A09\_00277" 10763 "s59E5H2" 4.056618 "Pantothenic acid transporter PanT"  
"JS1\_A09\_00277" 10763 "s63E6H2" 4.396627 "Pantothenic acid transporter PanT"  
"JS1\_A09\_00278" 10764 "s59E13H2" 7.968768 "V-type ATP synthase subunit D"  
"JS1\_A09\_00278" 10764 "s59E25H2" 0 "V-type ATP synthase subunit D"  
"JS1\_A09\_00278" 10764 "s59E5H2" 5.515085 "V-type ATP synthase subunit D"  
"JS1\_A09\_00278" 10764 "s63E6H2" 4.400609 "V-type ATP synthase subunit D"  
"JS1\_A09\_00279" 10765 "s59E13H2" 7.333316 "V-type sodium ATPase subunit B"  
"JS1\_A09\_00279" 10765 "s59E25H2" 0.1259098 "V-type sodium ATPase subunit B"  
"JS1\_A09\_00279" 10765 "s59E5H2" 5.394767 "V-type sodium ATPase subunit B"  
"JS1\_A09\_00279" 10765 "s63E6H2" 3.471863 "V-type sodium ATPase subunit B"  
"JS1\_A09\_00280" 10766 "s59E13H2" 5.296401 "V-type ATP synthase alpha chain"  
"JS1\_A09\_00280" 10766 "s59E25H2" 0 "V-type ATP synthase alpha chain"  
"JS1\_A09\_00280" 10766 "s59E5H2" 3.924266 "V-type ATP synthase alpha chain"  
"JS1\_A09\_00280" 10766 "s63E6H2" 2.983511 "V-type ATP synthase alpha chain"  
"JS1\_A09\_00281" 10767 "s59E13H2" 3.503963 "V-type ATP synthase subunit E"  
"JS1\_A09\_00281" 10767 "s59E25H2" 0 "V-type ATP synthase subunit E"  
"JS1\_A09\_00281" 10767 "s59E5H2" 3.154597 "V-type ATP synthase subunit E"  
"JS1\_A09\_00281" 10767 "s63E6H2" 1.497184 "V-type ATP synthase subunit E"  
"JS1\_A09\_00282" 10768 "s59E13H2" 1.627091 "V-type ATP synthase subunit F"  
"JS1\_A09\_00282" 10768 "s59E25H2" 0 "V-type ATP synthase subunit F"  
"JS1\_A09\_00282" 10768 "s59E5H2" 2.94403 "V-type ATP synthase subunit F"  
"JS1\_A09\_00282" 10768 "s63E6H2" 1.42942 "V-type ATP synthase subunit F"  
"JS1\_A09\_00283" 10769 "s59E13H2" 1.106636 "V-type ATP synthase subunit K"  
"JS1\_A09\_00283" 10769 "s59E25H2" 0 "V-type ATP synthase subunit K"  
"JS1\_A09\_00283" 10769 "s59E5H2" 1.91374 "V-type ATP synthase subunit K"  
"JS1\_A09\_00283" 10769 "s63E6H2" 0.9348927 "V-type ATP synthase subunit K"

"JS1\_A09\_00284" 10770 "s59E13H2" 1.336591 "V-type ATP synthase subunit I"  
"JS1\_A09\_00284" 10770 "s59E25H2" 0.1161103 "V-type ATP synthase subunit I"  
"JS1\_A09\_00284" 10770 "s59E5H2" 1.992961 "V-type ATP synthase subunit I"  
"JS1\_A09\_00284" 10770 "s63E6H2" 0.1888639 "V-type ATP synthase subunit I"  
"JS1\_A09\_00285" 10771 "s59E13H2" 1.190117 "V-type ATP synthase subunit C"  
"JS1\_A09\_00285" 10771 "s59E25H2" 0.4737345 "V-type ATP synthase subunit C"  
"JS1\_A09\_00285" 10771 "s59E5H2" 1.159023 "V-type ATP synthase subunit C"  
"JS1\_A09\_00285" 10771 "s63E6H2" 0.2923459 "V-type ATP synthase subunit C"  
"JS1\_A09\_00286" 10772 "s59E13H2" 1.07261 "hypothetical protein"  
"JS1\_A09\_00286" 10772 "s59E25H2" 0 "hypothetical protein"  
"JS1\_A09\_00286" 10772 "s59E5H2" 0.1984007 "hypothetical protein"  
"JS1\_A09\_00286" 10772 "s63E6H2" 0.1488521 "hypothetical protein"  
"JS1\_A09\_00287" 10773 "s59E13H2" 0.9661208 "Transcriptional regulatory protein ZraR"  
"JS1\_A09\_00287" 10773 "s59E25H2" 0 "Transcriptional regulatory protein ZraR"  
"JS1\_A09\_00287" 10773 "s59E5H2" 0.9850976 "Transcriptional regulatory protein ZraR"  
"JS1\_A09\_00287" 10773 "s63E6H2" 0.3232819 "Transcriptional regulatory protein ZraR"  
"JS1\_A09\_00288" 10774 "s59E13H2" 0.8508968 "Sensor protein ZraS"  
"JS1\_A09\_00288" 10774 "s59E25H2" 0 "Sensor protein ZraS"  
"JS1\_A09\_00288" 10774 "s59E5H2" 0.6350823 "Sensor protein ZraS"  
"JS1\_A09\_00288" 10774 "s63E6H2" 0.1696887 "Sensor protein ZraS"  
"JS1\_A09\_00289" 10775 "s59E13H2" 0.5481007 "Putative serine protease HtrA"  
"JS1\_A09\_00289" 10775 "s59E25H2" 0 "Putative serine protease HtrA"  
"JS1\_A09\_00289" 10775 "s59E5H2" 0.1640226 "Putative serine protease HtrA"  
"JS1\_A09\_00289" 10775 "s63E6H2" 0.06770783 "Putative serine protease HtrA"  
"JS1\_A09\_00290" 10776 "s59E13H2" 0.1254056 "hypothetical protein"  
"JS1\_A09\_00290" 10776 "s59E25H2" 0 "hypothetical protein"  
"JS1\_A09\_00290" 10776 "s59E5H2" 0.04224604 "hypothetical protein"  
"JS1\_A09\_00290" 10776 "s63E6H2" 0.1262768 "hypothetical protein"  
"JS1\_A09\_00291" 10777 "s59E13H2" 0.1724503 "hypothetical protein"  
"JS1\_A09\_00291" 10777 "s59E25H2" 0 "hypothetical protein"  
"JS1\_A09\_00291" 10777 "s59E5H2" 0.07544691 "hypothetical protein"  
"JS1\_A09\_00291" 10777 "s63E6H2" 0.09081078 "hypothetical protein"  
"JS1\_A09\_00292" 10778 "s59E13H2" 0.333567 "hypothetical protein"  
"JS1\_A09\_00292" 10778 "s59E25H2" 0 "hypothetical protein"  
"JS1\_A09\_00292" 10778 "s59E5H2" 0.05522697 "hypothetical protein"  
"JS1\_A09\_00292" 10778 "s63E6H2" 0.09018554 "hypothetical protein"  
"JS1\_A09\_00293" 10779 "s59E13H2" 0.3613002 "Disulfide bond reductase DsbH precursor"  
"JS1\_A09\_00293" 10779 "s59E25H2" 0 "Disulfide bond reductase DsbH precursor"  
"JS1\_A09\_00293" 10779 "s59E5H2" 0.02367148 "Disulfide bond reductase DsbH precursor"  
"JS1\_A09\_00293" 10779 "s63E6H2" 0.05873343 "Disulfide bond reductase DsbH precursor"  
"JS1\_A09\_00294" 10780 "s59E13H2" 0.5225389 "Thiol:disulfide interchange protein DsbD precursor"  
"JS1\_A09\_00294" 10780 "s59E25H2" 0 "Thiol:disulfide interchange protein DsbD precursor"  
"JS1\_A09\_00294" 10780 "s59E5H2" 0.1066597 "Thiol:disulfide interchange protein DsbD precursor"  
"JS1\_A09\_00294" 10780 "s63E6H2" 0.08828479 "Thiol:disulfide interchange protein DsbD precursor"  
"JS1\_A09\_00295" 10781 "s59E13H2" 0.6438814 "NifU-like protein"  
"JS1\_A09\_00295" 10781 "s59E25H2" 0 "NifU-like protein"  
"JS1\_A09\_00295" 10781 "s59E5H2" 0.1381375 "NifU-like protein"

"JS1\_A09\_00295" 10781 "s63E6H2" 0.1000233 "NifU-like protein"  
"JS1\_A09\_00296" 10782 "s59E13H2" 0.4158194 "putative cysteine desulfurase 2"  
"JS1\_A09\_00296" 10782 "s59E25H2" 0 "putative cysteine desulfurase 2"  
"JS1\_A09\_00296" 10782 "s59E5H2" 0.08651758 "putative cysteine desulfurase 2"  
"JS1\_A09\_00296" 10782 "s63E6H2" 0.1300112 "putative cysteine desulfurase 2"  
"JS1\_A09\_00297" 10783 "s59E13H2" 0.1993436 "hypothetical protein"  
"JS1\_A09\_00297" 10783 "s59E25H2" 0 "hypothetical protein"  
"JS1\_A09\_00297" 10783 "s59E5H2" 0.06519682 "hypothetical protein"  
"JS1\_A09\_00297" 10783 "s63E6H2" 0.03372038 "hypothetical protein"  
"JS1\_A09\_00298" 10784 "s59E13H2" 0.1557832 "Acylphosphatase"  
"JS1\_A09\_00298" 10784 "s59E25H2" 0 "Acylphosphatase"  
"JS1\_A09\_00298" 10784 "s59E5H2" 0.02444626 "Acylphosphatase"  
"JS1\_A09\_00298" 10784 "s63E6H2" 0.01053744 "Acylphosphatase"  
"JS1\_A09\_00299" 10785 "s59E13H2" 0.5882655 "Peptidase family M50"  
"JS1\_A09\_00299" 10785 "s59E25H2" 0 "Peptidase family M50"  
"JS1\_A09\_00299" 10785 "s59E5H2" 0.48365 "Peptidase family M50"  
"JS1\_A09\_00299" 10785 "s63E6H2" 0.2980684 "Peptidase family M50"  
"JS1\_A09\_00300" 10786 "s59E13H2" 17.74046 "Sodium:neurotransmitter symporter family protein"  
"JS1\_A09\_00300" 10786 "s59E25H2" 0 "Sodium:neurotransmitter symporter family protein"  
"JS1\_A09\_00300" 10786 "s59E5H2" 0.6184423 "Sodium:neurotransmitter symporter family protein"  
"JS1\_A09\_00300" 10786 "s63E6H2" 1.515091 "Sodium:neurotransmitter symporter family protein"  
"JS1\_A09\_00301" 10787 "s59E13H2" 8.139702 "TPR repeat-containing protein YfgC precursor"  
"JS1\_A09\_00301" 10787 "s59E25H2" 0 "TPR repeat-containing protein YfgC precursor"  
"JS1\_A09\_00301" 10787 "s59E5H2" 0.17562 "TPR repeat-containing protein YfgC precursor"  
"JS1\_A09\_00301" 10787 "s63E6H2" 1.173843 "TPR repeat-containing protein YfgC precursor"  
"JS1\_A09\_00302" 10788 "s59E13H2" 3.145291 "Alanine--tRNA ligase"  
"JS1\_A09\_00302" 10788 "s59E25H2" 0.08699187 "Alanine--tRNA ligase"  
"JS1\_A09\_00302" 10788 "s59E5H2" 0.2377062 "Alanine--tRNA ligase"  
"JS1\_A09\_00302" 10788 "s63E6H2" 1.105442 "Alanine--tRNA ligase"  
"JS1\_A09\_00303" 10789 "s59E13H2" 11.96015 "Bicarbonate transport ATP-binding protein CmpD"  
"JS1\_A09\_00303" 10789 "s59E25H2" 0 "Bicarbonate transport ATP-binding protein CmpD"  
"JS1\_A09\_00303" 10789 "s59E5H2" 0.2632189 "Bicarbonate transport ATP-binding protein CmpD"  
"JS1\_A09\_00303" 10789 "s63E6H2" 0.7379078 "Bicarbonate transport ATP-binding protein CmpD"  
"JS1\_A09\_00304" 10790 "s59E13H2" 16.54602 "beta-methylgalactoside transporter inner membrane component"  
"JS1\_A09\_00304" 10790 "s59E25H2" 0 "beta-methylgalactoside transporter inner membrane component"  
"JS1\_A09\_00304" 10790 "s59E5H2" 0.6283805 "beta-methylgalactoside transporter inner membrane component"  
"JS1\_A09\_00304" 10790 "s63E6H2" 1.163801 "beta-methylgalactoside transporter inner membrane component"  
"JS1\_A09\_00305" 10791 "s59E13H2" 7.687768 "ABC transporter substrate binding protein"  
"JS1\_A09\_00305" 10791 "s59E25H2" 0 "ABC transporter substrate binding protein"  
"JS1\_A09\_00305" 10791 "s59E5H2" 0.2942616 "ABC transporter substrate binding protein"  
"JS1\_A09\_00305" 10791 "s63E6H2" 2.037876 "ABC transporter substrate binding protein"  
"JS1\_A09\_00306" 10792 "s59E13H2" 1.822967 "putative deoxyribonuclease YcfH"  
"JS1\_A09\_00306" 10792 "s59E25H2" 0 "putative deoxyribonuclease YcfH"  
"JS1\_A09\_00306" 10792 "s59E5H2" 0.07605271 "putative deoxyribonuclease YcfH"  
"JS1\_A09\_00306" 10792 "s63E6H2" 1.791733 "putative deoxyribonuclease YcfH"  
"JS1\_A09\_00307" 10793 "s59E13H2" 4.62283 "hypothetical protein"  
"JS1\_A09\_00307" 10793 "s59E25H2" 0 "hypothetical protein"

"JS1\_A09\_00307" 10793 "s59E5H2" 0.3638729 "hypothetical protein"  
"JS1\_A09\_00307" 10793 "s63E6H2" 1.719835 "hypothetical protein"  
"JS1\_A09\_00308" 10794 "s59E13H2" 1.202227 "hypothetical protein"  
"JS1\_A09\_00308" 10794 "s59E25H2" 0 "hypothetical protein"  
"JS1\_A09\_00308" 10794 "s59E5H2" 0.02360994 "hypothetical protein"  
"JS1\_A09\_00308" 10794 "s63E6H2" 0.7206371 "hypothetical protein"  
"JS1\_A09\_00310" 10796 "s59E13H2" 9.698486 "hypothetical protein"  
"JS1\_A09\_00310" 10796 "s59E25H2" 0 "hypothetical protein"  
"JS1\_A09\_00310" 10796 "s59E5H2" 0.4174313 "hypothetical protein"  
"JS1\_A09\_00310" 10796 "s63E6H2" 2.320574 "hypothetical protein"  
"JS1\_A09\_00311" 10797 "s59E13H2" 11.00566 "Major Facilitator Superfamily protein"  
"JS1\_A09\_00311" 10797 "s59E25H2" 0 "Major Facilitator Superfamily protein"  
"JS1\_A09\_00311" 10797 "s59E5H2" 0.5182066 "Major Facilitator Superfamily protein"  
"JS1\_A09\_00311" 10797 "s63E6H2" 1.608665 "Major Facilitator Superfamily protein"  
"JS1\_A09\_00312" 10798 "s59E13H2" 9.251134 "Fosmidomycin resistance protein"  
"JS1\_A09\_00312" 10798 "s59E25H2" 0 "Fosmidomycin resistance protein"  
"JS1\_A09\_00312" 10798 "s59E5H2" 0.6241651 "Fosmidomycin resistance protein"  
"JS1\_A09\_00312" 10798 "s63E6H2" 1.745361 "Fosmidomycin resistance protein"  
"JS1\_A09\_00313" 10799 "s59E13H2" 0.009223353 "hypothetical protein"  
"JS1\_A09\_00313" 10799 "s59E25H2" 0 "hypothetical protein"  
"JS1\_A09\_00313" 10799 "s59E5H2" 0.03108235 "hypothetical protein"  
"JS1\_A09\_00313" 10799 "s63E6H2" 0.0464156 "hypothetical protein"  
"JS1\_A09\_00314" 10800 "s59E13H2" 0.1767002 "hypothetical protein"  
"JS1\_A09\_00314" 10800 "s59E25H2" 0 "hypothetical protein"  
"JS1\_A09\_00314" 10800 "s59E5H2" 0.009233256 "hypothetical protein"  
"JS1\_A09\_00314" 10800 "s63E6H2" 0.7726035 "hypothetical protein"  
"JS1\_A09\_00315" 10801 "s59E13H2" 0.4009586 "hypothetical protein"  
"JS1\_A09\_00315" 10801 "s59E25H2" 0 "hypothetical protein"  
"JS1\_A09\_00315" 10801 "s59E5H2" 0 "hypothetical protein"  
"JS1\_A09\_00315" 10801 "s63E6H2" 0.8089315 "hypothetical protein"  
"JS1\_A09\_00316" 10802 "s59E13H2" 0.02724697 "hypothetical protein"  
"JS1\_A09\_00316" 10802 "s59E25H2" 0 "hypothetical protein"  
"JS1\_A09\_00316" 10802 "s59E5H2" 0.06748972 "hypothetical protein"  
"JS1\_A09\_00316" 10802 "s63E6H2" 0.425358 "hypothetical protein"  
"JS1\_A09\_00317" 10803 "s59E13H2" 1.607828 "ABC-2 type transporter"  
"JS1\_A09\_00317" 10803 "s59E25H2" 0 "ABC-2 type transporter"  
"JS1\_A09\_00317" 10803 "s59E5H2" 1.386113 "ABC-2 type transporter"  
"JS1\_A09\_00317" 10803 "s63E6H2" 1.448022 "ABC-2 type transporter"  
"JS1\_A09\_00318" 10804 "s59E13H2" 0.8406493 "putative ABC transporter ATP-binding protein YbhF"  
"JS1\_A09\_00318" 10804 "s59E25H2" 0 "putative ABC transporter ATP-binding protein YbhF"  
"JS1\_A09\_00318" 10804 "s59E5H2" 1.242935 "putative ABC transporter ATP-binding protein YbhF"  
"JS1\_A09\_00318" 10804 "s63E6H2" 1.869719 "putative ABC transporter ATP-binding protein YbhF"  
"JS1\_A09\_00319" 10805 "s59E13H2" 0 "hypothetical protein"  
"JS1\_A09\_00319" 10805 "s59E25H2" 0 "hypothetical protein"  
"JS1\_A09\_00319" 10805 "s59E5H2" 0 "hypothetical protein"  
"JS1\_A09\_00319" 10805 "s63E6H2" 0 "hypothetical protein"  
"JS1\_A09\_00320" 10806 "s59E13H2" 0 "hypothetical protein"

"JS1\_A09\_00320" 10806 "s59E25H2" 0 "hypothetical protein"  
"JS1\_A09\_00320" 10806 "s59E5H2" 0 "hypothetical protein"  
"JS1\_A09\_00320" 10806 "s63E6H2" 0.06991856 "hypothetical protein"  
"JS1\_A09\_00321" 10807 "s59E13H2" 0.3718301 "haloacid dehalogenase-like hydrolase"  
"JS1\_A09\_00321" 10807 "s59E25H2" 0.6218905 "haloacid dehalogenase-like hydrolase"  
"JS1\_A09\_00321" 10807 "s59E5H2" 0.7890718 "haloacid dehalogenase-like hydrolase"  
"JS1\_A09\_00321" 10807 "s63E6H2" 1.577016 "haloacid dehalogenase-like hydrolase"  
"JS1\_A09\_00323" 10809 "s59E13H2" 0.1172948 "ATP synthase subunit beta"  
"JS1\_A09\_00323" 10809 "s59E25H2" 0 "ATP synthase subunit beta"  
"JS1\_A09\_00323" 10809 "s59E5H2" 1.554297 "ATP synthase subunit beta"  
"JS1\_A09\_00323" 10809 "s63E6H2" 0.4600735 "ATP synthase subunit beta"  
"JS1\_A09\_00324" 10810 "s59E13H2" 0.1553593 "FOF1 ATP synthase subunit epsilon"  
"JS1\_A09\_00324" 10810 "s59E25H2" 0 "FOF1 ATP synthase subunit epsilon"  
"JS1\_A09\_00324" 10810 "s59E5H2" 1.528729 "FOF1 ATP synthase subunit epsilon"  
"JS1\_A09\_00324" 10810 "s63E6H2" 0.5299501 "FOF1 ATP synthase subunit epsilon"  
"JS1\_A09\_00325" 10811 "s59E13H2" 0.1846023 "Putative FOF1-ATPase subunit (ATPase\_gene1)"  
"JS1\_A09\_00325" 10811 "s59E25H2" 0 "Putative FOF1-ATPase subunit (ATPase\_gene1)"  
"JS1\_A09\_00325" 10811 "s59E5H2" 1.651845 "Putative FOF1-ATPase subunit (ATPase\_gene1)"  
"JS1\_A09\_00325" 10811 "s63E6H2" 0.6725308 "Putative FOF1-ATPase subunit (ATPase\_gene1)"  
"JS1\_A09\_00326" 10812 "s59E13H2" 0.2532029 "N-ATPase, AtpR subunit"  
"JS1\_A09\_00326" 10812 "s59E25H2" 0 "N-ATPase, AtpR subunit"  
"JS1\_A09\_00326" 10812 "s59E5H2" 2.089512 "N-ATPase, AtpR subunit"  
"JS1\_A09\_00326" 10812 "s63E6H2" 0.8706471 "N-ATPase, AtpR subunit"  
"JS1\_A09\_00327" 10813 "s59E13H2" 0.1932165 "ATP synthase subunit a"  
"JS1\_A09\_00327" 10813 "s59E25H2" 0 "ATP synthase subunit a"  
"JS1\_A09\_00327" 10813 "s59E5H2" 2.393144 "ATP synthase subunit a"  
"JS1\_A09\_00327" 10813 "s63E6H2" 0.9023677 "ATP synthase subunit a"  
"JS1\_A09\_00328" 10814 "s59E13H2" 0.2633901 "ATP synthase subunit a"  
"JS1\_A09\_00328" 10814 "s59E25H2" 0 "ATP synthase subunit a"  
"JS1\_A09\_00328" 10814 "s59E5H2" 2.692426 "ATP synthase subunit a"  
"JS1\_A09\_00328" 10814 "s63E6H2" 0.94497 "ATP synthase subunit a"  
"JS1\_A09\_00329" 10815 "s59E13H2" 0.2810832 "ATP synthase subunit c, sodium ion specific"  
"JS1\_A09\_00329" 10815 "s59E25H2" 0 "ATP synthase subunit c, sodium ion specific"  
"JS1\_A09\_00329" 10815 "s59E5H2" 2.326384 "ATP synthase subunit c, sodium ion specific"  
"JS1\_A09\_00329" 10815 "s63E6H2" 1.044444 "ATP synthase subunit c, sodium ion specific"  
"JS1\_A09\_00330" 10816 "s59E13H2" 0.4094176 "ATP synthase subunit b, sodium ion specific"  
"JS1\_A09\_00330" 10816 "s59E25H2" 0 "ATP synthase subunit b, sodium ion specific"  
"JS1\_A09\_00330" 10816 "s59E5H2" 0.5614969 "ATP synthase subunit b, sodium ion specific"  
"JS1\_A09\_00330" 10816 "s63E6H2" 1.04576 "ATP synthase subunit b, sodium ion specific"  
"JS1\_A09\_00331" 10817 "s59E13H2" 0.4978442 "ATP synthase subunit alpha"  
"JS1\_A09\_00331" 10817 "s59E25H2" 0 "ATP synthase subunit alpha"  
"JS1\_A09\_00331" 10817 "s59E5H2" 1.153168 "ATP synthase subunit alpha"  
"JS1\_A09\_00331" 10817 "s63E6H2" 2.070724 "ATP synthase subunit alpha"  
"JS1\_A09\_00332" 10818 "s59E13H2" 0.3468632 "ATP synthase gamma chain"  
"JS1\_A09\_00332" 10818 "s59E25H2" 0 "ATP synthase gamma chain"  
"JS1\_A09\_00332" 10818 "s59E5H2" 1.500717 "ATP synthase gamma chain"  
"JS1\_A09\_00332" 10818 "s63E6H2" 1.661207 "ATP synthase gamma chain"

"JS1\_A09\_00333" 10819 "s59E13H2" 0 "hypothetical protein"  
"JS1\_A09\_00333" 10819 "s59E25H2" 0 "hypothetical protein"  
"JS1\_A09\_00333" 10819 "s59E5H2" 0.1342888 "hypothetical protein"  
"JS1\_A09\_00333" 10819 "s63E6H2" 0.004890127 "hypothetical protein"  
"JS1\_A09\_00334" 10820 "s59E13H2" 0.3311062 "Demethylmenaquinone methyltransferase"  
"JS1\_A09\_00334" 10820 "s59E25H2" 0 "Demethylmenaquinone methyltransferase"  
"JS1\_A09\_00334" 10820 "s59E5H2" 2.521816 "Demethylmenaquinone methyltransferase"  
"JS1\_A09\_00334" 10820 "s63E6H2" 2.27443 "Demethylmenaquinone methyltransferase"  
"JS1\_A09\_00335" 10821 "s59E13H2" 0.47234 "Glutathione amide reductase"  
"JS1\_A09\_00335" 10821 "s59E25H2" 0 "Glutathione amide reductase"  
"JS1\_A09\_00335" 10821 "s59E5H2" 1.998436 "Glutathione amide reductase"  
"JS1\_A09\_00335" 10821 "s63E6H2" 2.933052 "Glutathione amide reductase"  
"JS1\_A09\_00336" 10822 "s59E13H2" 0 "Mercuric reductase"  
"JS1\_A09\_00336" 10822 "s59E25H2" 0 "Mercuric reductase"  
"JS1\_A09\_00336" 10822 "s59E5H2" 1.404135 "Mercuric reductase"  
"JS1\_A09\_00336" 10822 "s63E6H2" 0.1391835 "Mercuric reductase"  
"JS1\_A09\_00337" 10823 "s59E13H2" 0 "Antilisterial bacteriocin subtilisin biosynthesis protein Alba"  
"JS1\_A09\_00337" 10823 "s59E25H2" 0 "Antilisterial bacteriocin subtilisin biosynthesis protein Alba"  
"JS1\_A09\_00337" 10823 "s59E5H2" 1.047543 "Antilisterial bacteriocin subtilisin biosynthesis protein Alba"  
"JS1\_A09\_00337" 10823 "s63E6H2" 0.002965651 "Antilisterial bacteriocin subtilisin biosynthesis protein Alba"  
"JS1\_A09\_00338" 10824 "s59E13H2" 0 "6-phosphogluconolactonase"  
"JS1\_A09\_00338" 10824 "s59E25H2" 0 "6-phosphogluconolactonase"  
"JS1\_A09\_00338" 10824 "s59E5H2" 1.679389 "6-phosphogluconolactonase"  
"JS1\_A09\_00338" 10824 "s63E6H2" 0.2479833 "6-phosphogluconolactonase"  
"JS1\_A09\_00339" 10825 "s59E13H2" 0.001106371 "Glucose-6-phosphate 1-dehydrogenase"  
"JS1\_A09\_00339" 10825 "s59E25H2" 0 "Glucose-6-phosphate 1-dehydrogenase"  
"JS1\_A09\_00339" 10825 "s59E5H2" 2.817092 "Glucose-6-phosphate 1-dehydrogenase"  
"JS1\_A09\_00339" 10825 "s63E6H2" 0.2510346 "Glucose-6-phosphate 1-dehydrogenase"  
"JS1\_A09\_00340" 10826 "s59E13H2" 0.1153801 "Ribose-5-phosphate isomerase B"  
"JS1\_A09\_00340" 10826 "s59E25H2" 0 "Ribose-5-phosphate isomerase B"  
"JS1\_A09\_00340" 10826 "s59E5H2" 1.973254 "Ribose-5-phosphate isomerase B"  
"JS1\_A09\_00340" 10826 "s63E6H2" 0.6030242 "Ribose-5-phosphate isomerase B"  
"JS1\_A09\_00341" 10827 "s59E13H2" 0 "Transaldolase"  
"JS1\_A09\_00341" 10827 "s59E25H2" 0 "Transaldolase"  
"JS1\_A09\_00341" 10827 "s59E5H2" 0 "Transaldolase"  
"JS1\_A09\_00341" 10827 "s63E6H2" 0 "Transaldolase"  
"JS1\_A09\_00342" 10828 "s59E13H2" 0 "hypothetical protein"  
"JS1\_A09\_00342" 10828 "s59E25H2" 0 "hypothetical protein"  
"JS1\_A09\_00342" 10828 "s59E5H2" 0 "hypothetical protein"  
"JS1\_A09\_00342" 10828 "s63E6H2" 0 "hypothetical protein"  
"JS1\_A09\_00343" 10829 "s59E13H2" 0.9786881 "Ribosome maturation factor RimM"  
"JS1\_A09\_00343" 10829 "s59E25H2" 0 "Ribosome maturation factor RimM"  
"JS1\_A09\_00343" 10829 "s59E5H2" 0.03095535 "Ribosome maturation factor RimM"  
"JS1\_A09\_00343" 10829 "s63E6H2" 0.007379484 "Ribosome maturation factor RimM"  
"JS1\_A09\_00344" 10830 "s59E13H2" 0.01608367 "tRNA (guanine-N(1)-)-methyltransferase"  
"JS1\_A09\_00344" 10830 "s59E25H2" 0 "tRNA (guanine-N(1)-)-methyltransferase"  
"JS1\_A09\_00344" 10830 "s59E5H2" 0.0732081 "tRNA (guanine-N(1)-)-methyltransferase"



"JS1\_A09\_00344" 10830 "s63E6H2" 0.01362654 "tRNA (guanine-N(1)-)-methyltransferase"  
"JS1\_A09\_00345" 10831 "s59E13H2" 0.01749987 "50S ribosomal protein L19"  
"JS1\_A09\_00345" 10831 "s59E25H2" 0 "50S ribosomal protein L19"  
"JS1\_A09\_00345" 10831 "s59E5H2" 0.06968695 "50S ribosomal protein L19"  
"JS1\_A09\_00345" 10831 "s63E6H2" 0.04343608 "50S ribosomal protein L19"  
"JS1\_A09\_00346" 10832 "s59E13H2" 0.0308642 "Ribonuclease HII"  
"JS1\_A09\_00346" 10832 "s59E25H2" 0 "Ribonuclease HII"  
"JS1\_A09\_00346" 10832 "s59E5H2" 0.1192093 "Ribonuclease HII"  
"JS1\_A09\_00346" 10832 "s63E6H2" 0.04112613 "Ribonuclease HII"  
"JS1\_A09\_00347" 10833 "s59E13H2" 0.03381039 "hypothetical protein"  
"JS1\_A09\_00347" 10833 "s59E25H2" 0 "hypothetical protein"  
"JS1\_A09\_00347" 10833 "s59E5H2" 0.09565348 "hypothetical protein"  
"JS1\_A09\_00347" 10833 "s63E6H2" 0.02283324 "hypothetical protein"  
"JS1\_A09\_00348" 10834 "s59E13H2" 0.2348328 "Competence protein ComM"  
"JS1\_A09\_00348" 10834 "s59E25H2" 0 "Competence protein ComM"  
"JS1\_A09\_00348" 10834 "s59E5H2" 0.2053381 "Competence protein ComM"  
"JS1\_A09\_00348" 10834 "s63E6H2" 0.04882825 "Competence protein ComM"  
"JS1\_A09\_00349" 10835 "s59E13H2" 0.0167273 "Ribulose-phosphate 3-epimerase"  
"JS1\_A09\_00349" 10835 "s59E25H2" 0 "Ribulose-phosphate 3-epimerase"  
"JS1\_A09\_00349" 10835 "s59E5H2" 0.1448939 "Ribulose-phosphate 3-epimerase"  
"JS1\_A09\_00349" 10835 "s63E6H2" 0.0345881 "Ribulose-phosphate 3-epimerase"  
"JS1\_A09\_00350" 10836 "s59E13H2" 0.03317807 "GTPase Der"  
"JS1\_A09\_00350" 10836 "s59E25H2" 0 "GTPase Der"  
"JS1\_A09\_00350" 10836 "s59E5H2" 0.1716536 "GTPase Der"  
"JS1\_A09\_00350" 10836 "s63E6H2" 0.08520633 "GTPase Der"  
"JS1\_A09\_00351" 10837 "s59E13H2" 0.007970671 "Glycerol-3-phosphate acyltransferase"  
"JS1\_A09\_00351" 10837 "s59E25H2" 0 "Glycerol-3-phosphate acyltransferase"  
"JS1\_A09\_00351" 10837 "s59E5H2" 0.09135567 "Glycerol-3-phosphate acyltransferase"  
"JS1\_A09\_00351" 10837 "s63E6H2" 0.05160843 "Glycerol-3-phosphate acyltransferase"  
"JS1\_A09\_00352" 10838 "s59E13H2" 0.03349617 "ferredoxin"  
"JS1\_A09\_00352" 10838 "s59E25H2" 0 "ferredoxin"  
"JS1\_A09\_00352" 10838 "s59E5H2" 0.2468811 "ferredoxin"  
"JS1\_A09\_00352" 10838 "s63E6H2" 0.05348347 "ferredoxin"  
"JS1\_A09\_00355" 10841 "s59E13H2" 0.004705991 "Formate dehydrogenase subunit beta"  
"JS1\_A09\_00355" 10841 "s59E25H2" 0 "Formate dehydrogenase subunit beta"  
"JS1\_A09\_00355" 10841 "s59E5H2" 0.04165393 "Formate dehydrogenase subunit beta"  
"JS1\_A09\_00355" 10841 "s63E6H2" 0.002738419 "Formate dehydrogenase subunit beta"  
"JS1\_A09\_00359" 10845 "s59E13H2" 2.315676 "Benzylsuccinate synthase alpha subunit"  
"JS1\_A09\_00359" 10845 "s59E25H2" 0 "Benzylsuccinate synthase alpha subunit"  
"JS1\_A09\_00359" 10845 "s59E5H2" 6.556908 "Benzylsuccinate synthase alpha subunit"  
"JS1\_A09\_00359" 10845 "s63E6H2" 1.514513 "Benzylsuccinate synthase alpha subunit"  
"JS1\_A09\_00360" 10846 "s59E13H2" 0.1545811 "Pyruvate formate-lyase-activating enzyme"  
"JS1\_A09\_00360" 10846 "s59E25H2" 0 "Pyruvate formate-lyase-activating enzyme"  
"JS1\_A09\_00360" 10846 "s59E5H2" 0.2522113 "Pyruvate formate-lyase-activating enzyme"  
"JS1\_A09\_00360" 10846 "s63E6H2" 0.08699058 "Pyruvate formate-lyase-activating enzyme"  
"JS1\_A09\_00361" 10847 "s59E13H2" 1.030916 "Benzylsuccinate synthase activating enzyme"  
"JS1\_A09\_00361" 10847 "s59E25H2" 0 "Benzylsuccinate synthase activating enzyme"

"JS1\_A09\_00361" 10847 "s59E5H2" 0.6726027 "Benzy succinate synthase activating enzyme"  
"JS1\_A09\_00361" 10847 "s63E6H2" 0.4553941 "Benzy succinate synthase activating enzyme"  
"JS1\_A09\_00362" 10848 "s59E13H2" 1.132486 "Transketolase 2"  
"JS1\_A09\_00362" 10848 "s59E25H2" 0.2537994 "Transketolase 2"  
"JS1\_A09\_00362" 10848 "s59E5H2" 1.681339 "Transketolase 2"  
"JS1\_A09\_00362" 10848 "s63E6H2" 0.826999 "Transketolase 2"  
"JS1\_A09\_00363" 10849 "s59E13H2" 1.309183 "Thiamine pyrophosphokinase"  
"JS1\_A09\_00363" 10849 "s59E25H2" 0 "Thiamine pyrophosphokinase"  
"JS1\_A09\_00363" 10849 "s59E5H2" 1.272671 "Thiamine pyrophosphokinase"  
"JS1\_A09\_00363" 10849 "s63E6H2" 0.6965992 "Thiamine pyrophosphokinase"  
"JS1\_A09\_00364" 10850 "s59E13H2" 1.34154 "Thiamine transporter ThiT"  
"JS1\_A09\_00364" 10850 "s59E25H2" 0 "Thiamine transporter ThiT"  
"JS1\_A09\_00364" 10850 "s59E5H2" 1.553172 "Thiamine transporter ThiT"  
"JS1\_A09\_00364" 10850 "s63E6H2" 1.068334 "Thiamine transporter ThiT"  
"JS1\_A09\_00366" 10852 "s59E13H2" 1.048281 "RNA recognition motif. (a.k.a. RRM, RBD, or RNP domain)"  
"JS1\_A09\_00366" 10852 "s59E25H2" 0 "RNA recognition motif. (a.k.a. RRM, RBD, or RNP domain)"  
"JS1\_A09\_00366" 10852 "s59E5H2" 2.292473 "RNA recognition motif. (a.k.a. RRM, RBD, or RNP domain)"  
"JS1\_A09\_00366" 10852 "s63E6H2" 1.118684 "RNA recognition motif. (a.k.a. RRM, RBD, or RNP domain)"  
"JS1\_A09\_00367" 10853 "s59E13H2" 0.2493375 "NAD-dependent protein deacetylase"  
"JS1\_A09\_00367" 10853 "s59E25H2" 0 "NAD-dependent protein deacetylase"  
"JS1\_A09\_00367" 10853 "s59E5H2" 0.5890475 "NAD-dependent protein deacetylase"  
"JS1\_A09\_00367" 10853 "s63E6H2" 0.158888 "NAD-dependent protein deacetylase"  
"JS1\_A09\_00368" 10854 "s59E13H2" 0.5307749 "Methionine--tRNA ligase"  
"JS1\_A09\_00368" 10854 "s59E25H2" 0 "Methionine--tRNA ligase"  
"JS1\_A09\_00368" 10854 "s59E5H2" 1.189155 "Methionine--tRNA ligase"  
"JS1\_A09\_00368" 10854 "s63E6H2" 0.1610643 "Methionine--tRNA ligase"  
"JS1\_A09\_00369" 10855 "s59E13H2" 0 "Serine acetyltransferase"  
"JS1\_A09\_00369" 10855 "s59E25H2" 0 "Serine acetyltransferase"  
"JS1\_A09\_00369" 10855 "s59E5H2" 0 "Serine acetyltransferase"  
"JS1\_A09\_00369" 10855 "s63E6H2" 0.1637258 "Serine acetyltransferase"  
"JS1\_A09\_00370" 10856 "s59E13H2" 0 "Ferredoxin"  
"JS1\_A09\_00370" 10856 "s59E25H2" 0 "Ferredoxin"  
"JS1\_A09\_00370" 10856 "s59E5H2" 0 "Ferredoxin"  
"JS1\_A09\_00370" 10856 "s63E6H2" 0.5481493 "Ferredoxin"  
"JS1\_A09\_00371" 10857 "s59E13H2" 0.001441872 "hypothetical protein"  
"JS1\_A09\_00371" 10857 "s59E25H2" 0 "hypothetical protein"  
"JS1\_A09\_00371" 10857 "s59E5H2" 0.003374084 "hypothetical protein"  
"JS1\_A09\_00371" 10857 "s63E6H2" 0.8204067 "hypothetical protein"  
"JS1\_A09\_00372" 10858 "s59E13H2" 0 "O-acetylserine sulfhydrylase"  
"JS1\_A09\_00372" 10858 "s59E25H2" 0 "O-acetylserine sulfhydrylase"  
"JS1\_A09\_00372" 10858 "s59E5H2" 0 "O-acetylserine sulfhydrylase"  
"JS1\_A09\_00372" 10858 "s63E6H2" 0.06654322 "O-acetylserine sulfhydrylase"  
"JS1\_A09\_00373" 10859 "s59E13H2" 0 "HTH-type transcriptional regulator CymR"  
"JS1\_A09\_00373" 10859 "s59E25H2" 0 "HTH-type transcriptional regulator CymR"  
"JS1\_A09\_00373" 10859 "s59E5H2" 0 "HTH-type transcriptional regulator CymR"  
"JS1\_A09\_00373" 10859 "s63E6H2" 0.08258042 "HTH-type transcriptional regulator CymR"  
"JS1\_A09\_00374" 10860 "s59E13H2" 0 "putative adenyltransferase"

"JS1\_A09\_00374" 10860 "s59E25H2" 0 "putative adenylyltransferase"  
"JS1\_A09\_00374" 10860 "s59E5H2" 0 "putative adenylyltransferase"  
"JS1\_A09\_00374" 10860 "s63E6H2" 0.09258812 "putative adenylyltransferase"  
"JS1\_A09\_00375" 10861 "s59E13H2" 0 "formate dehydrogenase accessory protein"  
"JS1\_A09\_00375" 10861 "s59E25H2" 0 "formate dehydrogenase accessory protein"  
"JS1\_A09\_00375" 10861 "s59E5H2" 0 "formate dehydrogenase accessory protein"  
"JS1\_A09\_00375" 10861 "s63E6H2" 0.04678469 "formate dehydrogenase accessory protein"  
"JS1\_A09\_00376" 10862 "s59E13H2" 0.0001979234 "hypothetical protein"  
"JS1\_A09\_00376" 10862 "s59E25H2" 0 "hypothetical protein"  
"JS1\_A09\_00376" 10862 "s59E5H2" 0.002499182 "hypothetical protein"  
"JS1\_A09\_00376" 10862 "s63E6H2" 0.0004600338 "hypothetical protein"  
"JS1\_A09\_00378" 10864 "s59E13H2" 0 "hypothetical protein"  
"JS1\_A09\_00378" 10864 "s59E25H2" 0 "hypothetical protein"  
"JS1\_A09\_00378" 10864 "s59E5H2" 0 "hypothetical protein"  
"JS1\_A09\_00378" 10864 "s63E6H2" 0.007822019 "hypothetical protein"  
"JS1\_A09\_00379" 10865 "s59E13H2" 0 "hypothetical protein"  
"JS1\_A09\_00379" 10865 "s59E25H2" 0 "hypothetical protein"  
"JS1\_A09\_00379" 10865 "s59E5H2" 0 "hypothetical protein"  
"JS1\_A09\_00379" 10865 "s63E6H2" 0.1141856 "hypothetical protein"  
"JS1\_A09\_00380" 10866 "s59E13H2" 0 "hypothetical protein"  
"JS1\_A09\_00380" 10866 "s59E25H2" 0 "hypothetical protein"  
"JS1\_A09\_00380" 10866 "s59E5H2" 0.0125691 "hypothetical protein"  
"JS1\_A09\_00380" 10866 "s63E6H2" 0.2959788 "hypothetical protein"  
"JS1\_A09\_00381" 10867 "s59E13H2" 0.003086356 "hypothetical protein"  
"JS1\_A09\_00381" 10867 "s59E25H2" 0 "hypothetical protein"  
"JS1\_A09\_00381" 10867 "s59E5H2" 0.002947588 "hypothetical protein"  
"JS1\_A09\_00381" 10867 "s63E6H2" 0.09478165 "hypothetical protein"  
"JS1\_A09\_00382" 10868 "s59E13H2" 0 "hypothetical protein"  
"JS1\_A09\_00382" 10868 "s59E25H2" 0 "hypothetical protein"  
"JS1\_A09\_00382" 10868 "s59E5H2" 0 "hypothetical protein"  
"JS1\_A09\_00382" 10868 "s63E6H2" 0.04833362 "hypothetical protein"  
"JS1\_A09\_00383" 10869 "s59E13H2" 0 "hypothetical protein"  
"JS1\_A09\_00383" 10869 "s59E25H2" 0 "hypothetical protein"  
"JS1\_A09\_00383" 10869 "s59E5H2" 0 "hypothetical protein"  
"JS1\_A09\_00383" 10869 "s63E6H2" 0 "hypothetical protein"  
"JS1\_A09\_00385" 10871 "s59E13H2" 0 "hypothetical protein"  
"JS1\_A09\_00385" 10871 "s59E25H2" 0 "hypothetical protein"  
"JS1\_A09\_00385" 10871 "s59E5H2" 0 "hypothetical protein"  
"JS1\_A09\_00385" 10871 "s63E6H2" 0 "hypothetical protein"  
"JS1\_A09\_00386" 10872 "s59E13H2" 0 "Peptidase M15"  
"JS1\_A09\_00386" 10872 "s59E25H2" 0 "Peptidase M15"  
"JS1\_A09\_00386" 10872 "s59E5H2" 0 "Peptidase M15"  
"JS1\_A09\_00386" 10872 "s63E6H2" 0.03226799 "Peptidase M15"  
"JS1\_A09\_00387" 10873 "s59E13H2" 0.0007728436 "hypothetical protein"  
"JS1\_A09\_00387" 10873 "s59E25H2" 0 "hypothetical protein"  
"JS1\_A09\_00387" 10873 "s59E5H2" 0.0008313709 "hypothetical protein"  
"JS1\_A09\_00387" 10873 "s63E6H2" 0.002883766 "hypothetical protein"

"JS1\_A09\_00388" 10874 "s59E13H2" 0.08620946 "hypothetical protein"  
"JS1\_A09\_00388" 10874 "s59E25H2" 0 "hypothetical protein"  
"JS1\_A09\_00388" 10874 "s59E5H2" 0.03788548 "hypothetical protein"  
"JS1\_A09\_00388" 10874 "s63E6H2" 0.008258246 "hypothetical protein"  
"JS1\_A09\_00389" 10875 "s59E13H2" 0 "Modification methylase Pvull"  
"JS1\_A09\_00389" 10875 "s59E25H2" 0 "Modification methylase Pvull"  
"JS1\_A09\_00389" 10875 "s59E5H2" 0 "Modification methylase Pvull"  
"JS1\_A09\_00389" 10875 "s63E6H2" 0 "Modification methylase Pvull"  
"JS1\_A09\_00392" 10878 "s59E13H2" 0 "hypothetical protein"  
"JS1\_A09\_00392" 10878 "s59E25H2" 0 "hypothetical protein"  
"JS1\_A09\_00392" 10878 "s59E5H2" 0 "hypothetical protein"  
"JS1\_A09\_00392" 10878 "s63E6H2" 0 "hypothetical protein"  
"JS1\_A09\_00395" 10881 "s59E13H2" 0.002565841 "hypothetical protein"  
"JS1\_A09\_00395" 10881 "s59E25H2" 0 "hypothetical protein"  
"JS1\_A09\_00395" 10881 "s59E5H2" 0.007997788 "hypothetical protein"  
"JS1\_A09\_00395" 10881 "s63E6H2" 0.01188839 "hypothetical protein"  
"JS1\_A09\_00398" 10884 "s59E13H2" 0 "hypothetical protein"  
"JS1\_A09\_00398" 10884 "s59E25H2" 0 "hypothetical protein"  
"JS1\_A09\_00398" 10884 "s59E5H2" 0 "hypothetical protein"  
"JS1\_A09\_00398" 10884 "s63E6H2" 0 "hypothetical protein"  
"JS1\_A09\_00404" 10890 "s59E13H2" 0 "hypothetical protein"  
"JS1\_A09\_00404" 10890 "s59E25H2" 0 "hypothetical protein"  
"JS1\_A09\_00404" 10890 "s59E5H2" 0 "hypothetical protein"  
"JS1\_A09\_00404" 10890 "s63E6H2" 0 "hypothetical protein"  
"JS1\_A09\_00406" 10892 "s59E13H2" 0 "hypothetical protein"  
"JS1\_A09\_00406" 10892 "s59E25H2" 0 "hypothetical protein"  
"JS1\_A09\_00406" 10892 "s59E5H2" 0 "hypothetical protein"  
"JS1\_A09\_00406" 10892 "s63E6H2" 0 "hypothetical protein"  
"JS1\_A09\_00407" 10893 "s59E13H2" 0 "hypothetical protein"  
"JS1\_A09\_00407" 10893 "s59E25H2" 0 "hypothetical protein"  
"JS1\_A09\_00407" 10893 "s59E5H2" 0 "hypothetical protein"  
"JS1\_A09\_00407" 10893 "s63E6H2" 0 "hypothetical protein"  
"JS1\_A09\_00408" 10894 "s59E13H2" 0 "hypothetical protein"  
"JS1\_A09\_00408" 10894 "s59E25H2" 0 "hypothetical protein"  
"JS1\_A09\_00408" 10894 "s59E5H2" 0 "hypothetical protein"  
"JS1\_A09\_00408" 10894 "s63E6H2" 0 "hypothetical protein"  
"JS1\_A09\_00411" 10897 "s59E13H2" 0.04976495 "Lipoate-protein ligase A subunit 2"  
"JS1\_A09\_00411" 10897 "s59E25H2" 0 "Lipoate-protein ligase A subunit 2"  
"JS1\_A09\_00411" 10897 "s59E5H2" 0 "Lipoate-protein ligase A subunit 2"  
"JS1\_A09\_00411" 10897 "s63E6H2" 0.09971656 "Lipoate-protein ligase A subunit 2"  
"JS1\_A09\_00418" 10904 "s59E13H2" 0.01811786 "Sulfhydrogenase 1 subunit gamma"  
"JS1\_A09\_00418" 10904 "s59E25H2" 0 "Sulfhydrogenase 1 subunit gamma"  
"JS1\_A09\_00418" 10904 "s59E5H2" 0 "Sulfhydrogenase 1 subunit gamma"  
"JS1\_A09\_00418" 10904 "s63E6H2" 0.003033578 "Sulfhydrogenase 1 subunit gamma"  
"JS1\_A09\_00419" 10905 "s59E13H2" 0 "2-oxoglutarate synthase subunit KorC"  
"JS1\_A09\_00419" 10905 "s59E25H2" 0 "2-oxoglutarate synthase subunit KorC"  
"JS1\_A09\_00419" 10905 "s59E5H2" 0 "2-oxoglutarate synthase subunit KorC"

"JS1\_A09\_00419" 10905 "s63E6H2" 0.006914747 "2-oxoglutarate synthase subunit KorC"  
"JS1\_A09\_00422" 10908 "s59E13H2" 0 "putative transcriptional regulatory protein pdtaR"  
"JS1\_A09\_00422" 10908 "s59E25H2" 0 "putative transcriptional regulatory protein pdtaR"  
"JS1\_A09\_00422" 10908 "s59E5H2" 0 "putative transcriptional regulatory protein pdtaR"  
"JS1\_A09\_00422" 10908 "s63E6H2" 0 "putative transcriptional regulatory protein pdtaR"  
"JS1\_A09\_00423" 10909 "s59E13H2" 0.0119407 "Glutamate dehydrogenase"  
"JS1\_A09\_00423" 10909 "s59E25H2" 0 "Glutamate dehydrogenase"  
"JS1\_A09\_00423" 10909 "s59E5H2" 0 "Glutamate dehydrogenase"  
"JS1\_A09\_00423" 10909 "s63E6H2" 0.07789353 "Glutamate dehydrogenase"  
"JS1\_A09\_00424" 10910 "s59E13H2" 0.007520489 "(R)-citramalate synthase CimA"  
"JS1\_A09\_00424" 10910 "s59E25H2" 0 "(R)-citramalate synthase CimA"  
"JS1\_A09\_00424" 10910 "s59E5H2" 0 "(R)-citramalate synthase CimA"  
"JS1\_A09\_00424" 10910 "s63E6H2" 0.1773727 "(R)-citramalate synthase CimA"  
"JS1\_A09\_00425" 10911 "s59E13H2" 0 "Methanogen homoaconitase large subunit"  
"JS1\_A09\_00425" 10911 "s59E25H2" 0 "Methanogen homoaconitase large subunit"  
"JS1\_A09\_00425" 10911 "s59E5H2" 0 "Methanogen homoaconitase large subunit"  
"JS1\_A09\_00425" 10911 "s63E6H2" 0.1056822 "Methanogen homoaconitase large subunit"  
"JS1\_A09\_00426" 10912 "s59E13H2" 0 "Isocitrate dehydrogenase [NADP]"  
"JS1\_A09\_00426" 10912 "s59E25H2" 0 "Isocitrate dehydrogenase [NADP]"  
"JS1\_A09\_00426" 10912 "s59E5H2" 0 "Isocitrate dehydrogenase [NADP]"  
"JS1\_A09\_00426" 10912 "s63E6H2" 0.09212264 "Isocitrate dehydrogenase [NADP]"  
"JS1\_A09\_00427" 10913 "s59E13H2" 0.02685143 "Dihydroxy-acid dehydratase"  
"JS1\_A09\_00427" 10913 "s59E25H2" 0 "Dihydroxy-acid dehydratase"  
"JS1\_A09\_00427" 10913 "s59E5H2" 0.465585 "Dihydroxy-acid dehydratase"  
"JS1\_A09\_00427" 10913 "s63E6H2" 0.08652929 "Dihydroxy-acid dehydratase"  
"JS1\_A09\_00430" 10916 "s59E13H2" 0.03363327 "Acetolactate synthase large subunit"  
"JS1\_A09\_00430" 10916 "s59E25H2" 0 "Acetolactate synthase large subunit"  
"JS1\_A09\_00430" 10916 "s59E5H2" 0.7171193 "Acetolactate synthase large subunit"  
"JS1\_A09\_00430" 10916 "s63E6H2" 0.5103693 "Acetolactate synthase large subunit"  
"JS1\_A09\_00431" 10917 "s59E13H2" 0.006684419 "Putative acetolactate synthase small subunit"  
"JS1\_A09\_00431" 10917 "s59E25H2" 0 "Putative acetolactate synthase small subunit"  
"JS1\_A09\_00431" 10917 "s59E5H2" 0.7736441 "Putative acetolactate synthase small subunit"  
"JS1\_A09\_00431" 10917 "s63E6H2" 0.4879193 "Putative acetolactate synthase small subunit"  
"JS1\_A09\_00432" 10918 "s59E13H2" 0.001742369 "Ketol-acid reductoisomerase"  
"JS1\_A09\_00432" 10918 "s59E25H2" 0 "Ketol-acid reductoisomerase"  
"JS1\_A09\_00432" 10918 "s59E5H2" 0.9689827 "Ketol-acid reductoisomerase"  
"JS1\_A09\_00432" 10918 "s63E6H2" 0.2861331 "Ketol-acid reductoisomerase"  
"JS1\_A09\_00433" 10919 "s59E13H2" 0.02035907 "P-protein"  
"JS1\_A09\_00433" 10919 "s59E25H2" 0 "P-protein"  
"JS1\_A09\_00433" 10919 "s59E5H2" 2.152058 "P-protein"  
"JS1\_A09\_00433" 10919 "s63E6H2" 0.5986473 "P-protein"  
"JS1\_A09\_00434" 10920 "s59E13H2" 0.09637103 "2-isopropylmalate synthase"  
"JS1\_A09\_00434" 10920 "s59E25H2" 0 "2-isopropylmalate synthase"  
"JS1\_A09\_00434" 10920 "s59E5H2" 1.925653 "2-isopropylmalate synthase"  
"JS1\_A09\_00434" 10920 "s63E6H2" 0.8303723 "2-isopropylmalate synthase"  
"JS1\_A09\_00435" 10921 "s59E13H2" 0.1255975 "(R)-citramalate synthase CimA"  
"JS1\_A09\_00435" 10921 "s59E25H2" 0 "(R)-citramalate synthase CimA"

"JS1\_A09\_00435" 10921 "s59E5H2" 1.881538 "(R)-citramalate synthase CimA"  
"JS1\_A09\_00435" 10921 "s63E6H2" 0.6596497 "(R)-citramalate synthase CimA"  
"JS1\_A09\_00436" 10922 "s59E13H2" 0.1571209 "hypothetical protein"  
"JS1\_A09\_00436" 10922 "s59E25H2" 0 "hypothetical protein"  
"JS1\_A09\_00436" 10922 "s59E5H2" 1.218589 "hypothetical protein"  
"JS1\_A09\_00436" 10922 "s63E6H2" 0.5249501 "hypothetical protein"  
"JS1\_A09\_00437" 10923 "s59E13H2" 0.1533129 "Ferredoxin"  
"JS1\_A09\_00437" 10923 "s59E25H2" 0 "Ferredoxin"  
"JS1\_A09\_00437" 10923 "s59E5H2" 2.569321 "Ferredoxin"  
"JS1\_A09\_00437" 10923 "s63E6H2" 0.8310299 "Ferredoxin"  
"JS1\_A09\_00438" 10924 "s59E13H2" 0.2433349 "hypothetical protein"  
"JS1\_A09\_00438" 10924 "s59E25H2" 0 "hypothetical protein"  
"JS1\_A09\_00438" 10924 "s59E5H2" 1.955182 "hypothetical protein"  
"JS1\_A09\_00438" 10924 "s63E6H2" 1.041117 "hypothetical protein"  
"JS1\_A09\_00439" 10925 "s59E13H2" 0.02588462 "Pyrroline-5-carboxylate reductase"  
"JS1\_A09\_00439" 10925 "s59E25H2" 0 "Pyrroline-5-carboxylate reductase"  
"JS1\_A09\_00439" 10925 "s59E5H2" 1.535973 "Pyrroline-5-carboxylate reductase"  
"JS1\_A09\_00439" 10925 "s63E6H2" 0.4269407 "Pyrroline-5-carboxylate reductase"  
"JS1\_A09\_00440" 10926 "s59E13H2" 0.002396074 "Bifunctional homocysteine S-methyltransferase/5,10-methylenetetrahydrofolate reductase"  
"JS1\_A09\_00440" 10926 "s59E25H2" 0 "Bifunctional homocysteine S-methyltransferase/5,10-methylenetetrahydrofolate reductase"  
"JS1\_A09\_00440" 10926 "s59E5H2" 0.01050058 "Bifunctional homocysteine S-methyltransferase/5,10-methylenetetrahydrofolate reductase"  
"JS1\_A09\_00440" 10926 "s63E6H2" 0.007834625 "Bifunctional homocysteine S-methyltransferase/5,10-methylenetetrahydrofolate reductase"  
"JS1\_A09\_00441" 10927 "s59E13H2" 0.08649128 "Vitamin B12 dependent methionine synthase, activation domain"  
"JS1\_A09\_00441" 10927 "s59E25H2" 0 "Vitamin B12 dependent methionine synthase, activation domain"  
"JS1\_A09\_00441" 10927 "s59E5H2" 0.05622417 "Vitamin B12 dependent methionine synthase, activation domain"  
"JS1\_A09\_00441" 10927 "s63E6H2" 0.2254712 "Vitamin B12 dependent methionine synthase, activation domain"  
"JS1\_A09\_00442" 10928 "s59E13H2" 0.2749965 "2,3-dimethylmalate dehydratase large subunit"  
"JS1\_A09\_00442" 10928 "s59E25H2" 0.6642914 "2,3-dimethylmalate dehydratase large subunit"  
"JS1\_A09\_00442" 10928 "s59E5H2" 0.7403486 "2,3-dimethylmalate dehydratase large subunit"  
"JS1\_A09\_00442" 10928 "s63E6H2" 1.117121 "2,3-dimethylmalate dehydratase large subunit"  
"JS1\_A09\_00443" 10929 "s59E13H2" 0.02499922 "2,3-dimethylmalate dehydratase small subunit"  
"JS1\_A09\_00443" 10929 "s59E25H2" 0.1019608 "2,3-dimethylmalate dehydratase small subunit"  
"JS1\_A09\_00443" 10929 "s59E5H2" 0.4609218 "2,3-dimethylmalate dehydratase small subunit"  
"JS1\_A09\_00443" 10929 "s63E6H2" 0.7125404 "2,3-dimethylmalate dehydratase small subunit"  
"JS1\_A09\_00444" 10930 "s59E13H2" 0.1591236 "Glyoxylate reductase"  
"JS1\_A09\_00444" 10930 "s59E25H2" 0 "Glyoxylate reductase"  
"JS1\_A09\_00444" 10930 "s59E5H2" 0.1936401 "Glyoxylate reductase"  
"JS1\_A09\_00444" 10930 "s63E6H2" 0.02249912 "Glyoxylate reductase"  
"JS1\_A09\_00445" 10931 "s59E13H2" 0 "Cyclopentanol dehydrogenase"  
"JS1\_A09\_00445" 10931 "s59E25H2" 0 "Cyclopentanol dehydrogenase"  
"JS1\_A09\_00445" 10931 "s59E5H2" 0.08851606 "Cyclopentanol dehydrogenase"  
"JS1\_A09\_00445" 10931 "s63E6H2" 0.06760981 "Cyclopentanol dehydrogenase"  
"JS1\_A09\_00446" 10932 "s59E13H2" 0 "hypothetical protein"  
"JS1\_A09\_00446" 10932 "s59E25H2" 0.1763441 "hypothetical protein"  
"JS1\_A09\_00446" 10932 "s59E5H2" 0.0859861 "hypothetical protein"  
"JS1\_A09\_00446" 10932 "s63E6H2" 0.3458963 "hypothetical protein"  
"JS1\_A09\_00447" 10933 "s59E13H2" 0 "Ribose import ATP-binding protein RbsA"

"JS1\_A09\_00447" 10933 "s59E25H2" 0 "Ribose import ATP-binding protein RbsA"  
"JS1\_A09\_00447" 10933 "s59E5H2" 0.1249865 "Ribose import ATP-binding protein RbsA"  
"JS1\_A09\_00447" 10933 "s63E6H2" 0.228381 "Ribose import ATP-binding protein RbsA"  
"JS1\_A09\_00448" 10934 "s59E13H2" 0 "Ribose transport system permease protein RbsC"  
"JS1\_A09\_00448" 10934 "s59E25H2" 0 "Ribose transport system permease protein RbsC"  
"JS1\_A09\_00448" 10934 "s59E5H2" 0.02983026 "Ribose transport system permease protein RbsC"  
"JS1\_A09\_00448" 10934 "s63E6H2" 0.1346603 "Ribose transport system permease protein RbsC"  
"JS1\_A09\_00449" 10935 "s59E13H2" 0 "Ribose transport system permease protein RbsC"  
"JS1\_A09\_00449" 10935 "s59E25H2" 0 "Ribose transport system permease protein RbsC"  
"JS1\_A09\_00449" 10935 "s59E5H2" 0.1021661 "Ribose transport system permease protein RbsC"  
"JS1\_A09\_00449" 10935 "s63E6H2" 0.09261229 "Ribose transport system permease protein RbsC"  
"JS1\_A09\_00450" 10936 "s59E13H2" 0.03793473 "Deoxyribose operon repressor"  
"JS1\_A09\_00450" 10936 "s59E25H2" 0 "Deoxyribose operon repressor"  
"JS1\_A09\_00450" 10936 "s59E5H2" 0.6876477 "Deoxyribose operon repressor"  
"JS1\_A09\_00450" 10936 "s63E6H2" 0.5121724 "Deoxyribose operon repressor"  
"JS1\_A09\_00451" 10937 "s59E13H2" 0.02422809 "hypothetical protein"  
"JS1\_A09\_00451" 10937 "s59E25H2" 0 "hypothetical protein"  
"JS1\_A09\_00451" 10937 "s59E5H2" 0.5663247 "hypothetical protein"  
"JS1\_A09\_00451" 10937 "s63E6H2" 0.5476984 "hypothetical protein"  
"JS1\_A09\_00452" 10938 "s59E13H2" 0.04527525 "Sporulation protein YtfJ (Spore\_Ytfj)"  
"JS1\_A09\_00452" 10938 "s59E25H2" 0 "Sporulation protein YtfJ (Spore\_Ytfj)"  
"JS1\_A09\_00452" 10938 "s59E5H2" 0.7402081 "Sporulation protein YtfJ (Spore\_Ytfj)"  
"JS1\_A09\_00452" 10938 "s63E6H2" 0.6740193 "Sporulation protein YtfJ (Spore\_Ytfj)"  
"JS1\_A09\_00453" 10939 "s59E13H2" 4.448193 "General stress protein 69"  
"JS1\_A09\_00453" 10939 "s59E25H2" 0 "General stress protein 69"  
"JS1\_A09\_00453" 10939 "s59E5H2" 0.5082647 "General stress protein 69"  
"JS1\_A09\_00453" 10939 "s63E6H2" 1.150949 "General stress protein 69"  
"JS1\_A09\_00454" 10940 "s59E13H2" 0.0008927676 "Intracellular protease 1"  
"JS1\_A09\_00454" 10940 "s59E25H2" 0 "Intracellular protease 1"  
"JS1\_A09\_00454" 10940 "s59E5H2" 0.01142896 "Intracellular protease 1"  
"JS1\_A09\_00454" 10940 "s63E6H2" 0.1006111 "Intracellular protease 1"  
"JS1\_A09\_00455" 10941 "s59E13H2" 0.04352214 "hypothetical protein"  
"JS1\_A09\_00455" 10941 "s59E25H2" 0 "hypothetical protein"  
"JS1\_A09\_00455" 10941 "s59E5H2" 0.3257477 "hypothetical protein"  
"JS1\_A09\_00455" 10941 "s63E6H2" 0.4127548 "hypothetical protein"  
"JS1\_A09\_00456" 10942 "s59E13H2" 0.003518119 "DNA-binding transcriptional repressor AcrR"  
"JS1\_A09\_00456" 10942 "s59E25H2" 0 "DNA-binding transcriptional repressor AcrR"  
"JS1\_A09\_00456" 10942 "s59E5H2" 0.01506046 "DNA-binding transcriptional repressor AcrR"  
"JS1\_A09\_00456" 10942 "s63E6H2" 0.1208633 "DNA-binding transcriptional repressor AcrR"  
"JS1\_A09\_00457" 10943 "s59E13H2" 0 "hypothetical protein"  
"JS1\_A09\_00457" 10943 "s59E25H2" 0 "hypothetical protein"  
"JS1\_A09\_00457" 10943 "s59E5H2" 0.1350978 "hypothetical protein"  
"JS1\_A09\_00457" 10943 "s63E6H2" 0.1679685 "hypothetical protein"  
"JS1\_A09\_00459" 10945 "s59E13H2" 0.1278881 "ThiS family protein"  
"JS1\_A09\_00459" 10945 "s59E25H2" 0 "ThiS family protein"  
"JS1\_A09\_00459" 10945 "s59E5H2" 0.1909177 "ThiS family protein"  
"JS1\_A09\_00459" 10945 "s63E6H2" 0.1074238 "ThiS family protein"

"JS1\_A09\_00460" 10946 "s59E13H2" 0.3447671 "Tungsten-containing aldehyde ferredoxin oxidoreductase"  
"JS1\_A09\_00460" 10946 "s59E25H2" 0 "Tungsten-containing aldehyde ferredoxin oxidoreductase"  
"JS1\_A09\_00460" 10946 "s59E5H2" 0.7713549 "Tungsten-containing aldehyde ferredoxin oxidoreductase"  
"JS1\_A09\_00460" 10946 "s63E6H2" 0.08801638 "Tungsten-containing aldehyde ferredoxin oxidoreductase"  
"JS1\_A09\_00461" 10947 "s59E13H2" 0.02969897 "Ribose transport system permease protein RbsC"  
"JS1\_A09\_00461" 10947 "s59E25H2" 0 "Ribose transport system permease protein RbsC"  
"JS1\_A09\_00461" 10947 "s59E5H2" 1.379415 "Ribose transport system permease protein RbsC"  
"JS1\_A09\_00461" 10947 "s63E6H2" 0.1241328 "Ribose transport system permease protein RbsC"  
"JS1\_A09\_00462" 10948 "s59E13H2" 0.09522403 "Ribose import ATP-binding protein RbsA"  
"JS1\_A09\_00462" 10948 "s59E25H2" 0 "Ribose import ATP-binding protein RbsA"  
"JS1\_A09\_00462" 10948 "s59E5H2" 0.9694222 "Ribose import ATP-binding protein RbsA"  
"JS1\_A09\_00462" 10948 "s63E6H2" 0.6081218 "Ribose import ATP-binding protein RbsA"  
"JS1\_A09\_00463" 10949 "s59E13H2" 0.03139831 "D-allose-binding periplasmic protein precursor"  
"JS1\_A09\_00463" 10949 "s59E25H2" 0 "D-allose-binding periplasmic protein precursor"  
"JS1\_A09\_00463" 10949 "s59E5H2" 0.6047662 "D-allose-binding periplasmic protein precursor"  
"JS1\_A09\_00463" 10949 "s63E6H2" 0.4779855 "D-allose-binding periplasmic protein precursor"  
"JS1\_A09\_00464" 10950 "s59E13H2" 0.1917809 "Glucose-6-phosphate isomerase"  
"JS1\_A09\_00464" 10950 "s59E25H2" 0 "Glucose-6-phosphate isomerase"  
"JS1\_A09\_00464" 10950 "s59E5H2" 0.5138917 "Glucose-6-phosphate isomerase"  
"JS1\_A09\_00464" 10950 "s63E6H2" 0.08534846 "Glucose-6-phosphate isomerase"  
"JS1\_A09\_00465" 10951 "s59E13H2" 0.378367 "Xylulose kinase"  
"JS1\_A09\_00465" 10951 "s59E25H2" 0 "Xylulose kinase"  
"JS1\_A09\_00465" 10951 "s59E5H2" 0.4852996 "Xylulose kinase"  
"JS1\_A09\_00465" 10951 "s63E6H2" 0.06736882 "Xylulose kinase"  
"JS1\_A09\_00466" 10952 "s59E13H2" 0.004942429 "preprotein translocase subunit SecF"  
"JS1\_A09\_00466" 10952 "s59E25H2" 0 "preprotein translocase subunit SecF"  
"JS1\_A09\_00466" 10952 "s59E5H2" 0.454113 "preprotein translocase subunit SecF"  
"JS1\_A09\_00466" 10952 "s63E6H2" 0.1427002 "preprotein translocase subunit SecF"  
"JS1\_A09\_00467" 10953 "s59E13H2" 0.01615112 "Single-stranded-DNA-specific exonuclease RecJ"  
"JS1\_A09\_00467" 10953 "s59E25H2" 0 "Single-stranded-DNA-specific exonuclease RecJ"  
"JS1\_A09\_00467" 10953 "s59E5H2" 0.438825 "Single-stranded-DNA-specific exonuclease RecJ"  
"JS1\_A09\_00467" 10953 "s63E6H2" 0.3574141 "Single-stranded-DNA-specific exonuclease RecJ"  
"JS1\_A09\_00468" 10954 "s59E13H2" 0.02053173 "Adenine phosphoribosyltransferase"  
"JS1\_A09\_00468" 10954 "s59E25H2" 0 "Adenine phosphoribosyltransferase"  
"JS1\_A09\_00468" 10954 "s59E5H2" 0.1078283 "Adenine phosphoribosyltransferase"  
"JS1\_A09\_00468" 10954 "s63E6H2" 0.2233641 "Adenine phosphoribosyltransferase"  
"JS1\_A09\_00469" 10955 "s59E13H2" 0.06197226 "GTP pyrophosphokinase"  
"JS1\_A09\_00469" 10955 "s59E25H2" 0 "GTP pyrophosphokinase"  
"JS1\_A09\_00469" 10955 "s59E5H2" 0.1320688 "GTP pyrophosphokinase"  
"JS1\_A09\_00469" 10955 "s63E6H2" 0.3348982 "GTP pyrophosphokinase"  
"JS1\_A09\_00470" 10956 "s59E13H2" 0.01775995 "D-tyrosyl-tRNA(Tyr) deacylase"  
"JS1\_A09\_00470" 10956 "s59E25H2" 0 "D-tyrosyl-tRNA(Tyr) deacylase"  
"JS1\_A09\_00470" 10956 "s59E5H2" 0.06808928 "D-tyrosyl-tRNA(Tyr) deacylase"  
"JS1\_A09\_00470" 10956 "s63E6H2" 0.2636791 "D-tyrosyl-tRNA(Tyr) deacylase"  
"JS1\_A09\_00471" 10957 "s59E13H2" 0.03150434 "putative glycerophosphoryl diester phosphodiesterase 1"  
"JS1\_A09\_00471" 10957 "s59E25H2" 0 "putative glycerophosphoryl diester phosphodiesterase 1"  
"JS1\_A09\_00471" 10957 "s59E5H2" 0.05950754 "putative glycerophosphoryl diester phosphodiesterase 1"



"JS1\_A09\_00471" 10957 "s63E6H2" 0.2822545 "putative glycerophosphoryl diester phosphodiesterase 1"  
"JS1\_A09\_00472" 10958 "s59E13H2" 0.01723441 "Beta-lactamase hydrolase-like protein"  
"JS1\_A09\_00472" 10958 "s59E25H2" 0 "Beta-lactamase hydrolase-like protein"  
"JS1\_A09\_00472" 10958 "s59E5H2" 0.1808766 "Beta-lactamase hydrolase-like protein"  
"JS1\_A09\_00472" 10958 "s63E6H2" 0.4622769 "Beta-lactamase hydrolase-like protein"  
"JS1\_A09\_00473" 10959 "s59E13H2" 0.01046382 "Adenosylhomocysteinase"  
"JS1\_A09\_00473" 10959 "s59E25H2" 0 "Adenosylhomocysteinase"  
"JS1\_A09\_00473" 10959 "s59E5H2" 0.2126484 "Adenosylhomocysteinase"  
"JS1\_A09\_00473" 10959 "s63E6H2" 0.4060356 "Adenosylhomocysteinase"  
"JS1\_A09\_00474" 10960 "s59E13H2" 0.116313 "DNA utilization protein GntX"  
"JS1\_A09\_00474" 10960 "s59E25H2" 0 "DNA utilization protein GntX"  
"JS1\_A09\_00474" 10960 "s59E5H2" 0.1768923 "DNA utilization protein GntX"  
"JS1\_A09\_00474" 10960 "s63E6H2" 0.2424961 "DNA utilization protein GntX"  
"JS1\_A09\_00475" 10961 "s59E13H2" 0.003967264 "Putative sigma-54 modulation protein"  
"JS1\_A09\_00475" 10961 "s59E25H2" 0 "Putative sigma-54 modulation protein"  
"JS1\_A09\_00475" 10961 "s59E5H2" 0.1387004 "Putative sigma-54 modulation protein"  
"JS1\_A09\_00475" 10961 "s63E6H2" 0.1923757 "Putative sigma-54 modulation protein"  
"JS1\_A09\_00477" 10963 "s59E13H2" 0.01517992 "Cyclic di-GMP phosphodiesterase response regulator RpfG"  
"JS1\_A09\_00477" 10963 "s59E25H2" 0 "Cyclic di-GMP phosphodiesterase response regulator RpfG"  
"JS1\_A09\_00477" 10963 "s59E5H2" 0.1800955 "Cyclic di-GMP phosphodiesterase response regulator RpfG"  
"JS1\_A09\_00477" 10963 "s63E6H2" 0.09038957 "Cyclic di-GMP phosphodiesterase response regulator RpfG"  
"JS1\_A09\_00478" 10964 "s59E13H2" 0.01973047 "hypothetical protein"  
"JS1\_A09\_00478" 10964 "s59E25H2" 0 "hypothetical protein"  
"JS1\_A09\_00478" 10964 "s59E5H2" 0.256552 "hypothetical protein"  
"JS1\_A09\_00478" 10964 "s63E6H2" 0.09312549 "hypothetical protein"  
"JS1\_A09\_00479" 10965 "s59E13H2" 0.03521166 "preprotein translocase subunit SecA"  
"JS1\_A09\_00479" 10965 "s59E25H2" 0 "preprotein translocase subunit SecA"  
"JS1\_A09\_00479" 10965 "s59E5H2" 0.2299777 "preprotein translocase subunit SecA"  
"JS1\_A09\_00479" 10965 "s63E6H2" 0.1163052 "preprotein translocase subunit SecA"  
"JS1\_A09\_00480" 10966 "s59E13H2" 0.02849422 "Peptide chain release factor 2"  
"JS1\_A09\_00480" 10966 "s59E25H2" 0 "Peptide chain release factor 2"  
"JS1\_A09\_00480" 10966 "s59E5H2" 0.187571 "Peptide chain release factor 2"  
"JS1\_A09\_00480" 10966 "s63E6H2" 0.1933686 "Peptide chain release factor 2"  
"JS1\_A09\_00481" 10967 "s59E13H2" 0.01848153 "hypothetical protein"  
"JS1\_A09\_00481" 10967 "s59E25H2" 0 "hypothetical protein"  
"JS1\_A09\_00481" 10967 "s59E5H2" 0.1133266 "hypothetical protein"  
"JS1\_A09\_00481" 10967 "s63E6H2" 0.07392824 "hypothetical protein"  
"JS1\_A09\_00482" 10968 "s59E13H2" 0 "Methenyltetrahydrofolate cyclohydrolase"  
"JS1\_A09\_00482" 10968 "s59E25H2" 0 "Methenyltetrahydrofolate cyclohydrolase"  
"JS1\_A09\_00482" 10968 "s59E5H2" 0.01244458 "Methenyltetrahydrofolate cyclohydrolase"  
"JS1\_A09\_00482" 10968 "s63E6H2" 0.05211237 "Methenyltetrahydrofolate cyclohydrolase"  
"JS1\_A09\_00483" 10969 "s59E13H2" 0.03141419 "Glutamate 2,3-aminomutase"  
"JS1\_A09\_00483" 10969 "s59E25H2" 0 "Glutamate 2,3-aminomutase"  
"JS1\_A09\_00483" 10969 "s59E5H2" 0.07269589 "Glutamate 2,3-aminomutase"  
"JS1\_A09\_00483" 10969 "s63E6H2" 0.1766648 "Glutamate 2,3-aminomutase"  
"JS1\_A09\_00484" 10970 "s59E13H2" 0.05552638 "HTH-type transcriptional repressor YtrA"  
"JS1\_A09\_00484" 10970 "s59E25H2" 0 "HTH-type transcriptional repressor YtrA"

"JS1\_A09\_00484" 10970 "s59E5H2" 0.3109926 "HTH-type transcriptional repressor YtrA"  
"JS1\_A09\_00484" 10970 "s63E6H2" 0.2610078 "HTH-type transcriptional repressor YtrA"  
"JS1\_A09\_00485" 10971 "s59E13H2" 0.02767925 "Ferredoxin"  
"JS1\_A09\_00485" 10971 "s59E25H2" 0 "Ferredoxin"  
"JS1\_A09\_00485" 10971 "s59E5H2" 0.2507148 "Ferredoxin"  
"JS1\_A09\_00485" 10971 "s63E6H2" 0.2597583 "Ferredoxin"  
"JS1\_A09\_00486" 10972 "s59E13H2" 0.1309699 "2-oxoglutarate synthase subunit KorA"  
"JS1\_A09\_00486" 10972 "s59E25H2" 0 "2-oxoglutarate synthase subunit KorA"  
"JS1\_A09\_00486" 10972 "s59E5H2" 0.3142409 "2-oxoglutarate synthase subunit KorA"  
"JS1\_A09\_00486" 10972 "s63E6H2" 0.3311502 "2-oxoglutarate synthase subunit KorA"  
"JS1\_A09\_00487" 10973 "s59E13H2" 0.1069128 "2-oxoglutarate synthase subunit KorB"  
"JS1\_A09\_00487" 10973 "s59E25H2" 0 "2-oxoglutarate synthase subunit KorB"  
"JS1\_A09\_00487" 10973 "s59E5H2" 0.3446755 "2-oxoglutarate synthase subunit KorB"  
"JS1\_A09\_00487" 10973 "s63E6H2" 0.1960571 "2-oxoglutarate synthase subunit KorB"  
"JS1\_A09\_00492" 10978 "s59E13H2" 0 "hypothetical protein"  
"JS1\_A09\_00492" 10978 "s59E25H2" 0 "hypothetical protein"  
"JS1\_A09\_00492" 10978 "s59E5H2" 0 "hypothetical protein"  
"JS1\_A09\_00492" 10978 "s63E6H2" 1.041078 "hypothetical protein"  
"JS1\_A09\_00493" 10979 "s59E13H2" 0.004637062 "hypothetical protein"  
"JS1\_A09\_00493" 10979 "s59E25H2" 0 "hypothetical protein"  
"JS1\_A09\_00493" 10979 "s59E5H2" 0.01048359 "hypothetical protein"  
"JS1\_A09\_00493" 10979 "s63E6H2" 0.6926743 "hypothetical protein"  
"JS1\_A09\_00494" 10980 "s59E13H2" 0 "Integrase core domain protein"  
"JS1\_A09\_00494" 10980 "s59E25H2" 0 "Integrase core domain protein"  
"JS1\_A09\_00494" 10980 "s59E5H2" 4.07384 "Integrase core domain protein"  
"JS1\_A09\_00494" 10980 "s63E6H2" 3.609196 "Integrase core domain protein"  
"JS1\_A09\_00495" 10981 "s59E13H2" 0 "Transposase"  
"JS1\_A09\_00495" 10981 "s59E25H2" 0 "Transposase"  
"JS1\_A09\_00495" 10981 "s59E5H2" 2.920382 "Transposase"  
"JS1\_A09\_00495" 10981 "s63E6H2" 0.01292862 "Transposase"  
"JS1\_A09\_00496" 10982 "s59E13H2" 0.06295881 "Transposase IS116/IS110/IS902 family protein"  
"JS1\_A09\_00496" 10982 "s59E25H2" 0 "Transposase IS116/IS110/IS902 family protein"  
"JS1\_A09\_00496" 10982 "s59E5H2" 0.01396123 "Transposase IS116/IS110/IS902 family protein"  
"JS1\_A09\_00496" 10982 "s63E6H2" 0.2201532 "Transposase IS116/IS110/IS902 family protein"  
"JS1\_A09\_00499" 10985 "s59E13H2" 0 "putative methyltransferase"  
"JS1\_A09\_00499" 10985 "s59E25H2" 0 "putative methyltransferase"  
"JS1\_A09\_00499" 10985 "s59E5H2" 0.02491041 "putative methyltransferase"  
"JS1\_A09\_00499" 10985 "s63E6H2" 0 "putative methyltransferase"  
"JS1\_A09\_00502" 10988 "s59E13H2" 0 "hypothetical protein"  
"JS1\_A09\_00502" 10988 "s59E25H2" 0 "hypothetical protein"  
"JS1\_A09\_00502" 10988 "s59E5H2" 0 "hypothetical protein"  
"JS1\_A09\_00502" 10988 "s63E6H2" 0 "hypothetical protein"  
"JS1\_A09\_00503" 10989 "s59E13H2" 0 "transcriptional repressor MprA"  
"JS1\_A09\_00503" 10989 "s59E25H2" 0 "transcriptional repressor MprA"  
"JS1\_A09\_00503" 10989 "s59E5H2" 0 "transcriptional repressor MprA"  
"JS1\_A09\_00503" 10989 "s63E6H2" 0.02030565 "transcriptional repressor MprA"  
"JS1\_A09\_00504" 10990 "s59E13H2" 0 "hypothetical protein"

"JS1\_A09\_00504" 10990 "s59E25H2" 0 "hypothetical protein"  
"JS1\_A09\_00504" 10990 "s59E5H2" 0.3857224 "hypothetical protein"  
"JS1\_A09\_00504" 10990 "s63E6H2" 0.09593594 "hypothetical protein"  
"JS1\_A09\_00505" 10991 "s59E13H2" 0.02176673 "Heterodisulfide reductase subunit A-like protein"  
"JS1\_A09\_00505" 10991 "s59E25H2" 0 "Heterodisulfide reductase subunit A-like protein"  
"JS1\_A09\_00505" 10991 "s59E5H2" 0 "Heterodisulfide reductase subunit A-like protein"  
"JS1\_A09\_00505" 10991 "s63E6H2" 0 "Heterodisulfide reductase subunit A-like protein"  
"JS1\_A09\_00506" 10992 "s59E13H2" 0.0008300707 "Sulfide dehydrogenase subunit alpha precursor"  
"JS1\_A09\_00506" 10992 "s59E25H2" 0 "Sulfide dehydrogenase subunit alpha precursor"  
"JS1\_A09\_00506" 10992 "s59E5H2" 0.02137866 "Sulfide dehydrogenase subunit alpha precursor"  
"JS1\_A09\_00506" 10992 "s63E6H2" 0.01320603 "Sulfide dehydrogenase subunit alpha precursor"  
"JS1\_A09\_00508" 10994 "s59E13H2" 0 "methylcobalamin:coenzyme M methyltransferase"  
"JS1\_A09\_00508" 10994 "s59E25H2" 0 "methylcobalamin:coenzyme M methyltransferase"  
"JS1\_A09\_00508" 10994 "s59E5H2" 0 "methylcobalamin:coenzyme M methyltransferase"  
"JS1\_A09\_00508" 10994 "s63E6H2" 0.001367428 "methylcobalamin:coenzyme M methyltransferase"  
"JS1\_A09\_00509" 10995 "s59E13H2" 0.05769808 "4-hydroxy-tetrahydrodipicolinate synthase"  
"JS1\_A09\_00509" 10995 "s59E25H2" 0 "4-hydroxy-tetrahydrodipicolinate synthase"  
"JS1\_A09\_00509" 10995 "s59E5H2" 0.1298705 "4-hydroxy-tetrahydrodipicolinate synthase"  
"JS1\_A09\_00509" 10995 "s63E6H2" 0.4044847 "4-hydroxy-tetrahydrodipicolinate synthase"  
"JS1\_A09\_00510" 10996 "s59E13H2" 0 "4-hydroxy-tetrahydrodipicolinate synthase"  
"JS1\_A09\_00510" 10996 "s59E25H2" 0 "4-hydroxy-tetrahydrodipicolinate synthase"  
"JS1\_A09\_00510" 10996 "s59E5H2" 0 "4-hydroxy-tetrahydrodipicolinate synthase"  
"JS1\_A09\_00510" 10996 "s63E6H2" 0 "4-hydroxy-tetrahydrodipicolinate synthase"  
"JS1\_A09\_00511" 10997 "s59E13H2" 0.02098479 "putative oxidoreductase YvaA"  
"JS1\_A09\_00511" 10997 "s59E25H2" 0 "putative oxidoreductase YvaA"  
"JS1\_A09\_00511" 10997 "s59E5H2" 0.1196626 "putative oxidoreductase YvaA"  
"JS1\_A09\_00511" 10997 "s63E6H2" 0.006067155 "putative oxidoreductase YvaA"  
"JS1\_A09\_00512" 10998 "s59E13H2" 0 "Tripartite tricarboxylate transporter family receptor"  
"JS1\_A09\_00512" 10998 "s59E25H2" 0 "Tripartite tricarboxylate transporter family receptor"  
"JS1\_A09\_00512" 10998 "s59E5H2" 0.009622011 "Tripartite tricarboxylate transporter family receptor"  
"JS1\_A09\_00512" 10998 "s63E6H2" 0 "Tripartite tricarboxylate transporter family receptor"  
"JS1\_A09\_00513" 10999 "s59E13H2" 0 "Tripartite tricarboxylate transporter TctB family protein"  
"JS1\_A09\_00513" 10999 "s59E25H2" 0 "Tripartite tricarboxylate transporter TctB family protein"  
"JS1\_A09\_00513" 10999 "s59E5H2" 0.009686255 "Tripartite tricarboxylate transporter TctB family protein"  
"JS1\_A09\_00513" 10999 "s63E6H2" 0 "Tripartite tricarboxylate transporter TctB family protein"  
"JS1\_A09\_00514" 11000 "s59E13H2" 0 "Tripartite tricarboxylate transporter TctA family protein"  
"JS1\_A09\_00514" 11000 "s59E25H2" 0 "Tripartite tricarboxylate transporter TctA family protein"  
"JS1\_A09\_00514" 11000 "s59E5H2" 0.04423916 "Tripartite tricarboxylate transporter TctA family protein"  
"JS1\_A09\_00514" 11000 "s63E6H2" 0 "Tripartite tricarboxylate transporter TctA family protein"  
"JS1\_A09\_00515" 11001 "s59E13H2" 0.4298031 "Serine--tRNA ligase"  
"JS1\_A09\_00515" 11001 "s59E25H2" 0.1878931 "Serine--tRNA ligase"  
"JS1\_A09\_00515" 11001 "s59E5H2" 1.532034 "Serine--tRNA ligase"  
"JS1\_A09\_00515" 11001 "s63E6H2" 1.087691 "Serine--tRNA ligase"  
"JS1\_A09\_00516" 11002 "s59E13H2" 0.1026021 "tRNA-splicing ligase RtcB"  
"JS1\_A09\_00516" 11002 "s59E25H2" 0 "tRNA-splicing ligase RtcB"  
"JS1\_A09\_00516" 11002 "s59E5H2" 0.9590941 "tRNA-splicing ligase RtcB"  
"JS1\_A09\_00516" 11002 "s63E6H2" 0.08313366 "tRNA-splicing ligase RtcB"

"JS1\_A09\_00517" 11003 "s59E13H2" 0.07995666 "hypothetical protein"  
"JS1\_A09\_00517" 11003 "s59E25H2" 0 "hypothetical protein"  
"JS1\_A09\_00517" 11003 "s59E5H2" 0.3926588 "hypothetical protein"  
"JS1\_A09\_00517" 11003 "s63E6H2" 0.0261438 "hypothetical protein"  
"JS1\_A09\_00519" 11005 "s59E13H2" 0.02320732 "Glyoxylate reductase"  
"JS1\_A09\_00519" 11005 "s59E25H2" 0 "Glyoxylate reductase"  
"JS1\_A09\_00519" 11005 "s59E5H2" 0.004309448 "Glyoxylate reductase"  
"JS1\_A09\_00519" 11005 "s63E6H2" 0.01241509 "Glyoxylate reductase"  
"JS1\_A09\_00520" 11006 "s59E13H2" 0.01807933 "ThiS family protein"  
"JS1\_A09\_00520" 11006 "s59E25H2" 0 "ThiS family protein"  
"JS1\_A09\_00520" 11006 "s59E5H2" 0 "ThiS family protein"  
"JS1\_A09\_00520" 11006 "s63E6H2" 0.001434439 "ThiS family protein"  
"JS1\_A09\_00521" 11007 "s59E13H2" 0.06345212 "Tungsten-containing aldehyde ferredoxin oxidoreductase"  
"JS1\_A09\_00521" 11007 "s59E25H2" 0 "Tungsten-containing aldehyde ferredoxin oxidoreductase"  
"JS1\_A09\_00521" 11007 "s59E5H2" 0 "Tungsten-containing aldehyde ferredoxin oxidoreductase"  
"JS1\_A09\_00521" 11007 "s63E6H2" 0.01559383 "Tungsten-containing aldehyde ferredoxin oxidoreductase"  
"JS1\_A09\_00522" 11008 "s59E13H2" 0 "Inositol 2-dehydrogenase/D-chiro-inositol 3-dehydrogenase"  
"JS1\_A09\_00522" 11008 "s59E25H2" 0 "Inositol 2-dehydrogenase/D-chiro-inositol 3-dehydrogenase"  
"JS1\_A09\_00522" 11008 "s59E5H2" 0 "Inositol 2-dehydrogenase/D-chiro-inositol 3-dehydrogenase"  
"JS1\_A09\_00522" 11008 "s63E6H2" 0.002386151 "Inositol 2-dehydrogenase/D-chiro-inositol 3-dehydrogenase"  
"JS1\_A09\_00523" 11009 "s59E13H2" 2.928092 "KHG/KDPG aldolase"  
"JS1\_A09\_00523" 11009 "s59E25H2" 0 "KHG/KDPG aldolase"  
"JS1\_A09\_00523" 11009 "s59E5H2" 0 "KHG/KDPG aldolase"  
"JS1\_A09\_00523" 11009 "s63E6H2" 0.003030349 "KHG/KDPG aldolase"  
"JS1\_A09\_00524" 11010 "s59E13H2" 11.05719 "Xylulose kinase"  
"JS1\_A09\_00524" 11010 "s59E25H2" 0.1584284 "Xylulose kinase"  
"JS1\_A09\_00524" 11010 "s59E5H2" 0 "Xylulose kinase"  
"JS1\_A09\_00524" 11010 "s63E6H2" 0.0009669846 "Xylulose kinase"  
"JS1\_A09\_00525" 11011 "s59E13H2" 6.438912 "Xylulose kinase"  
"JS1\_A09\_00525" 11011 "s59E25H2" 0 "Xylulose kinase"  
"JS1\_A09\_00525" 11011 "s59E5H2" 0.02265916 "Xylulose kinase"  
"JS1\_A09\_00525" 11011 "s63E6H2" 0.05830528 "Xylulose kinase"  
"JS1\_A09\_00528" 11014 "s59E13H2" 0.05671001 "Ribosomal RNA small subunit methyltransferase I"  
"JS1\_A09\_00528" 11014 "s59E25H2" 0 "Ribosomal RNA small subunit methyltransferase I"  
"JS1\_A09\_00528" 11014 "s59E5H2" 0.0694719 "Ribosomal RNA small subunit methyltransferase I"  
"JS1\_A09\_00528" 11014 "s63E6H2" 0.01752588 "Ribosomal RNA small subunit methyltransferase I"  
"JS1\_A09\_00529" 11015 "s59E13H2" 0.1235922 "Methionine--tRNA ligase"  
"JS1\_A09\_00529" 11015 "s59E25H2" 0 "Methionine--tRNA ligase"  
"JS1\_A09\_00529" 11015 "s59E5H2" 0.1368203 "Methionine--tRNA ligase"  
"JS1\_A09\_00529" 11015 "s63E6H2" 0.1262402 "Methionine--tRNA ligase"  
"JS1\_A09\_00530" 11016 "s59E13H2" 0.2078341 "Membrane-bound lytic murein transglycosylase C precursor"  
"JS1\_A09\_00530" 11016 "s59E25H2" 0 "Membrane-bound lytic murein transglycosylase C precursor"  
"JS1\_A09\_00530" 11016 "s59E5H2" 0.1826411 "Membrane-bound lytic murein transglycosylase C precursor"  
"JS1\_A09\_00530" 11016 "s63E6H2" 0.08456181 "Membrane-bound lytic murein transglycosylase C precursor"  
"JS1\_A09\_00532" 11018 "s59E13H2" 0.196931 "Riboflavin transporter RibU"  
"JS1\_A09\_00532" 11018 "s59E25H2" 0 "Riboflavin transporter RibU"  
"JS1\_A09\_00532" 11018 "s59E5H2" 0.1334797 "Riboflavin transporter RibU"

"JS1\_A09\_00532" 11018 "s63E6H2" 0.1598819 "Riboflavin transporter RibU"  
"JS1\_A09\_00533" 11019 "s59E13H2" 0.2544492 "Mannose-1-phosphate guanylyltransferase RfbM"  
"JS1\_A09\_00533" 11019 "s59E25H2" 0 "Mannose-1-phosphate guanylyltransferase RfbM"  
"JS1\_A09\_00533" 11019 "s59E5H2" 0.2210229 "Mannose-1-phosphate guanylyltransferase RfbM"  
"JS1\_A09\_00533" 11019 "s63E6H2" 0.2169791 "Mannose-1-phosphate guanylyltransferase RfbM"  
"JS1\_A09\_00534" 11020 "s59E13H2" 0.2739876 "S-adenosylmethionine synthase"  
"JS1\_A09\_00534" 11020 "s59E25H2" 0 "S-adenosylmethionine synthase"  
"JS1\_A09\_00534" 11020 "s59E5H2" 0.17023 "S-adenosylmethionine synthase"  
"JS1\_A09\_00534" 11020 "s63E6H2" 0.3096629 "S-adenosylmethionine synthase"  
"JS1\_A09\_00536" 11022 "s59E13H2" 0.2381419 "Twitching mobility protein"  
"JS1\_A09\_00536" 11022 "s59E25H2" 0 "Twitching mobility protein"  
"JS1\_A09\_00536" 11022 "s59E5H2" 0.1732607 "Twitching mobility protein"  
"JS1\_A09\_00536" 11022 "s63E6H2" 0.5730426 "Twitching mobility protein"  
"JS1\_A09\_00538" 11024 "s59E13H2" 0.1396503 "bacteriophage N4 adsorption protein B"  
"JS1\_A09\_00538" 11024 "s59E25H2" 0 "bacteriophage N4 adsorption protein B"  
"JS1\_A09\_00538" 11024 "s59E5H2" 0.2318103 "bacteriophage N4 adsorption protein B"  
"JS1\_A09\_00538" 11024 "s63E6H2" 0.3720394 "bacteriophage N4 adsorption protein B"  
"JS1\_A09\_00539" 11025 "s59E13H2" 0.09815333 "Twitching mobility protein"  
"JS1\_A09\_00539" 11025 "s59E25H2" 0 "Twitching mobility protein"  
"JS1\_A09\_00539" 11025 "s59E5H2" 0.1266475 "Twitching mobility protein"  
"JS1\_A09\_00539" 11025 "s63E6H2" 0.401302 "Twitching mobility protein"  
"JS1\_A09\_00540" 11026 "s59E13H2" 0.09581967 "Histidine--tRNA ligase"  
"JS1\_A09\_00540" 11026 "s59E25H2" 0 "Histidine--tRNA ligase"  
"JS1\_A09\_00540" 11026 "s59E5H2" 0.04990214 "Histidine--tRNA ligase"  
"JS1\_A09\_00540" 11026 "s63E6H2" 0.4920152 "Histidine--tRNA ligase"  
"JS1\_A09\_00541" 11027 "s59E13H2" 0.1195331 "Asparagine--tRNA ligase"  
"JS1\_A09\_00541" 11027 "s59E25H2" 0 "Asparagine--tRNA ligase"  
"JS1\_A09\_00541" 11027 "s59E5H2" 0.1095293 "Asparagine--tRNA ligase"  
"JS1\_A09\_00541" 11027 "s63E6H2" 0.6099038 "Asparagine--tRNA ligase"  
"JS1\_A09\_00542" 11028 "s59E13H2" 0.1233918 "Aspartate--tRNA ligase"  
"JS1\_A09\_00542" 11028 "s59E25H2" 0 "Aspartate--tRNA ligase"  
"JS1\_A09\_00542" 11028 "s59E5H2" 0.09208085 "Aspartate--tRNA ligase"  
"JS1\_A09\_00542" 11028 "s63E6H2" 0.5263425 "Aspartate--tRNA ligase"  
"JS1\_A09\_00544" 11030 "s59E13H2" 0.09354892 "putative 5-formyltetrahydrofolate cyclo-ligase"  
"JS1\_A09\_00544" 11030 "s59E25H2" 0.3415301 "putative 5-formyltetrahydrofolate cyclo-ligase"  
"JS1\_A09\_00544" 11030 "s59E5H2" 0.09465703 "putative 5-formyltetrahydrofolate cyclo-ligase"  
"JS1\_A09\_00544" 11030 "s63E6H2" 0.3418022 "putative 5-formyltetrahydrofolate cyclo-ligase"  
"JS1\_A09\_00545" 11031 "s59E13H2" 0.08897843 "30S ribosomal protein S1"  
"JS1\_A09\_00545" 11031 "s59E25H2" 0 "30S ribosomal protein S1"  
"JS1\_A09\_00545" 11031 "s59E5H2" 0.09779204 "30S ribosomal protein S1"  
"JS1\_A09\_00545" 11031 "s63E6H2" 0.59077 "30S ribosomal protein S1"  
"JS1\_A09\_00546" 11032 "s59E13H2" 0.01521232 "Type II secretion system protein E"  
"JS1\_A09\_00546" 11032 "s59E25H2" 0 "Type II secretion system protein E"  
"JS1\_A09\_00546" 11032 "s59E5H2" 0.2003793 "Type II secretion system protein E"  
"JS1\_A09\_00546" 11032 "s63E6H2" 0.8346128 "Type II secretion system protein E"  
"JS1\_A09\_00547" 11033 "s59E13H2" 0.06247501 "Alanine--tRNA ligase"  
"JS1\_A09\_00547" 11033 "s59E25H2" 0 "Alanine--tRNA ligase"

"JS1\_A09\_00547" 11033 "s59E5H2" 0.06872338 "Alanine--tRNA ligase"  
"JS1\_A09\_00547" 11033 "s63E6H2" 0.2355999 "Alanine--tRNA ligase"  
"JS1\_A09\_00548" 11034 "s59E13H2" 0.05004162 "Putative Holliday junction resolvase"  
"JS1\_A09\_00548" 11034 "s59E25H2" 0 "Putative Holliday junction resolvase"  
"JS1\_A09\_00548" 11034 "s59E5H2" 0.0643966 "Putative Holliday junction resolvase"  
"JS1\_A09\_00548" 11034 "s63E6H2" 0.1045159 "Putative Holliday junction resolvase"  
"JS1\_A09\_00549" 11035 "s59E13H2" 0.003798599 "putative aminodeoxychorismate lyase"  
"JS1\_A09\_00549" 11035 "s59E25H2" 0 "putative aminodeoxychorismate lyase"  
"JS1\_A09\_00549" 11035 "s59E5H2" 0.07273188 "putative aminodeoxychorismate lyase"  
"JS1\_A09\_00549" 11035 "s63E6H2" 0.08521201 "putative aminodeoxychorismate lyase"  
"JS1\_A09\_00550" 11036 "s59E13H2" 0.01738364 "Uridine kinase"  
"JS1\_A09\_00550" 11036 "s59E25H2" 0 "Uridine kinase"  
"JS1\_A09\_00550" 11036 "s59E5H2" 0.1277265 "Uridine kinase"  
"JS1\_A09\_00550" 11036 "s63E6H2" 0.07079431 "Uridine kinase"  
"JS1\_A09\_00551" 11037 "s59E13H2" 0.007807031 "Mitochondrial PGP phosphatase"  
"JS1\_A09\_00551" 11037 "s59E25H2" 0 "Mitochondrial PGP phosphatase"  
"JS1\_A09\_00551" 11037 "s59E5H2" 0.1328996 "Mitochondrial PGP phosphatase"  
"JS1\_A09\_00551" 11037 "s63E6H2" 0.2341614 "Mitochondrial PGP phosphatase"  
"JS1\_A09\_00552" 11038 "s59E13H2" 0.3596996 "hypothetical protein"  
"JS1\_A09\_00552" 11038 "s59E25H2" 0 "hypothetical protein"  
"JS1\_A09\_00552" 11038 "s59E5H2" 0.2573745 "hypothetical protein"  
"JS1\_A09\_00552" 11038 "s63E6H2" 0.2959223 "hypothetical protein"  
"JS1\_A09\_00553" 11039 "s59E13H2" 0.8049866 "Putative type II secretion system protein E"  
"JS1\_A09\_00553" 11039 "s59E25H2" 0 "Putative type II secretion system protein E"  
"JS1\_A09\_00553" 11039 "s59E5H2" 0.9875412 "Putative type II secretion system protein E"  
"JS1\_A09\_00553" 11039 "s63E6H2" 0.7612916 "Putative type II secretion system protein E"  
"JS1\_A09\_00554" 11040 "s59E13H2" 0.983044 "Cyclic di-GMP phosphodiesterase response regulator RpfG"  
"JS1\_A09\_00554" 11040 "s59E25H2" 0 "Cyclic di-GMP phosphodiesterase response regulator RpfG"  
"JS1\_A09\_00554" 11040 "s59E5H2" 0.586248 "Cyclic di-GMP phosphodiesterase response regulator RpfG"  
"JS1\_A09\_00554" 11040 "s63E6H2" 0.7253703 "Cyclic di-GMP phosphodiesterase response regulator RpfG"  
"JS1\_A09\_00555" 11041 "s59E13H2" 0.4799015 "Type II secretion system protein F"  
"JS1\_A09\_00555" 11041 "s59E25H2" 0.140264 "Type II secretion system protein F"  
"JS1\_A09\_00555" 11041 "s59E5H2" 1.018035 "Type II secretion system protein F"  
"JS1\_A09\_00555" 11041 "s63E6H2" 1.28896 "Type II secretion system protein F"  
"JS1\_A09\_00556" 11042 "s59E13H2" 0.6747022 "RNA polymerase sigma factor SigF"  
"JS1\_A09\_00556" 11042 "s59E25H2" 0 "RNA polymerase sigma factor SigF"  
"JS1\_A09\_00556" 11042 "s59E5H2" 0.1881378 "RNA polymerase sigma factor SigF"  
"JS1\_A09\_00556" 11042 "s63E6H2" 1.172681 "RNA polymerase sigma factor SigF"  
"JS1\_A09\_00557" 11043 "s59E13H2" 0.4317609 "RNA polymerase sigma-B factor"  
"JS1\_A09\_00557" 11043 "s59E25H2" 0 "RNA polymerase sigma-B factor"  
"JS1\_A09\_00557" 11043 "s59E5H2" 0.1306209 "RNA polymerase sigma-B factor"  
"JS1\_A09\_00557" 11043 "s63E6H2" 0.7921051 "RNA polymerase sigma-B factor"  
"JS1\_A09\_00558" 11044 "s59E13H2" 0.08441108 "Transposase DDE domain protein"  
"JS1\_A09\_00558" 11044 "s59E25H2" 0 "Transposase DDE domain protein"  
"JS1\_A09\_00558" 11044 "s59E5H2" 1.774046 "Transposase DDE domain protein"  
"JS1\_A09\_00558" 11044 "s63E6H2" 1.353576 "Transposase DDE domain protein"  
"JS1\_A09\_00559" 11045 "s59E13H2" 0 "hypothetical protein"

"JS1\_A09\_00559" 11045 "s59E25H2" 0 "hypothetical protein"  
"JS1\_A09\_00559" 11045 "s59E5H2" 0 "hypothetical protein"  
"JS1\_A09\_00559" 11045 "s63E6H2" 0.3485275 "hypothetical protein"  
"JS1\_A09\_00560" 11046 "s59E13H2" 0.09058371 "Caspase domain protein"  
"JS1\_A09\_00560" 11046 "s59E25H2" 0 "Caspase domain protein"  
"JS1\_A09\_00560" 11046 "s59E5H2" 0.1275709 "Caspase domain protein"  
"JS1\_A09\_00560" 11046 "s63E6H2" 0.04415526 "Caspase domain protein"  
"JS1\_A09\_00561" 11047 "s59E13H2" 0.1524043 "hypothetical protein"  
"JS1\_A09\_00561" 11047 "s59E25H2" 0 "hypothetical protein"  
"JS1\_A09\_00561" 11047 "s59E5H2" 0.5411383 "hypothetical protein"  
"JS1\_A09\_00561" 11047 "s63E6H2" 1.484487 "hypothetical protein"  
"JS1\_A09\_00562" 11048 "s59E13H2" 0.05545058 "hypothetical protein"  
"JS1\_A09\_00562" 11048 "s59E25H2" 0 "hypothetical protein"  
"JS1\_A09\_00562" 11048 "s59E5H2" 0.4385154 "hypothetical protein"  
"JS1\_A09\_00562" 11048 "s63E6H2" 0.5232581 "hypothetical protein"  
"JS1\_A09\_00563" 11049 "s59E13H2" 0.03916724 "Integrase core domain protein"  
"JS1\_A09\_00563" 11049 "s59E25H2" 0 "Integrase core domain protein"  
"JS1\_A09\_00563" 11049 "s59E5H2" 0.1134409 "Integrase core domain protein"  
"JS1\_A09\_00563" 11049 "s63E6H2" 7.400676 "Integrase core domain protein"  
"JS1\_A09\_00564" 11050 "s59E13H2" 0.6881698 "Integrase core domain protein"  
"JS1\_A09\_00564" 11050 "s59E25H2" 0 "Integrase core domain protein"  
"JS1\_A09\_00564" 11050 "s59E5H2" 0.7225327 "Integrase core domain protein"  
"JS1\_A09\_00564" 11050 "s63E6H2" 1.649763 "Integrase core domain protein"  
"JS1\_A09\_00566" 11052 "s59E13H2" 0.3516724 "Lon protease 1"  
"JS1\_A09\_00566" 11052 "s59E25H2" 0 "Lon protease 1"  
"JS1\_A09\_00566" 11052 "s59E5H2" 0.2455731 "Lon protease 1"  
"JS1\_A09\_00566" 11052 "s63E6H2" 0.1318086 "Lon protease 1"  
"JS1\_A09\_00567" 11053 "s59E13H2" 0.1895504 "Lon protease"  
"JS1\_A09\_00567" 11053 "s59E25H2" 0 "Lon protease"  
"JS1\_A09\_00567" 11053 "s59E5H2" 0.08471858 "Lon protease"  
"JS1\_A09\_00567" 11053 "s63E6H2" 0.07908603 "Lon protease"  
"JS1\_A09\_00568" 11054 "s59E13H2" 0.105885 "ATP-dependent Clp protease ATP-binding subunit ClpX"  
"JS1\_A09\_00568" 11054 "s59E25H2" 0 "ATP-dependent Clp protease ATP-binding subunit ClpX"  
"JS1\_A09\_00568" 11054 "s59E5H2" 0.132992 "ATP-dependent Clp protease ATP-binding subunit ClpX"  
"JS1\_A09\_00568" 11054 "s63E6H2" 0.08149483 "ATP-dependent Clp protease ATP-binding subunit ClpX"  
"JS1\_A09\_00569" 11055 "s59E13H2" 0.2605217 "ATP-dependent Clp protease proteolytic subunit"  
"JS1\_A09\_00569" 11055 "s59E25H2" 0 "ATP-dependent Clp protease proteolytic subunit"  
"JS1\_A09\_00569" 11055 "s59E5H2" 0.09219072 "ATP-dependent Clp protease proteolytic subunit"  
"JS1\_A09\_00569" 11055 "s63E6H2" 0.1178065 "ATP-dependent Clp protease proteolytic subunit"  
"JS1\_A09\_00570" 11056 "s59E13H2" 0.2304588 "Trigger factor"  
"JS1\_A09\_00570" 11056 "s59E25H2" 0 "Trigger factor"  
"JS1\_A09\_00570" 11056 "s59E5H2" 0.04118789 "Trigger factor"  
"JS1\_A09\_00570" 11056 "s63E6H2" 0.09586536 "Trigger factor"  
"JS1\_A09\_00578" 11064 "s59E13H2" 0.02204388 "Non-canonical purine NTP pyrophosphatase"  
"JS1\_A09\_00578" 11064 "s59E25H2" 0 "Non-canonical purine NTP pyrophosphatase"  
"JS1\_A09\_00578" 11064 "s59E5H2" 0.03730084 "Non-canonical purine NTP pyrophosphatase"  
"JS1\_A09\_00578" 11064 "s63E6H2" 0.09882742 "Non-canonical purine NTP pyrophosphatase"

"JS1\_A09\_00579" 11065 "s59E13H2" 0.02208353 "Ribonuclease PH"  
"JS1\_A09\_00579" 11065 "s59E25H2" 0 "Ribonuclease PH"  
"JS1\_A09\_00579" 11065 "s59E5H2" 0.145191 "Ribonuclease PH"  
"JS1\_A09\_00579" 11065 "s63E6H2" 0.2639132 "Ribonuclease PH"  
"JS1\_A09\_00580" 11066 "s59E13H2" 0.0291634 "Farnesyl diphosphate synthase"  
"JS1\_A09\_00580" 11066 "s59E25H2" 0 "Farnesyl diphosphate synthase"  
"JS1\_A09\_00580" 11066 "s59E5H2" 0.06680514 "Farnesyl diphosphate synthase"  
"JS1\_A09\_00580" 11066 "s63E6H2" 0.1697894 "Farnesyl diphosphate synthase"  
"JS1\_A09\_00581" 11067 "s59E13H2" 0.01702832 "Exodeoxyribonuclease 7 small subunit"  
"JS1\_A09\_00581" 11067 "s59E25H2" 0 "Exodeoxyribonuclease 7 small subunit"  
"JS1\_A09\_00581" 11067 "s59E5H2" 0.04839502 "Exodeoxyribonuclease 7 small subunit"  
"JS1\_A09\_00581" 11067 "s63E6H2" 0.2065833 "Exodeoxyribonuclease 7 small subunit"  
"JS1\_A09\_00582" 11068 "s59E13H2" 0.03509464 "Exodeoxyribonuclease 7 large subunit"  
"JS1\_A09\_00582" 11068 "s59E25H2" 0 "Exodeoxyribonuclease 7 large subunit"  
"JS1\_A09\_00582" 11068 "s59E5H2" 0.06785203 "Exodeoxyribonuclease 7 large subunit"  
"JS1\_A09\_00582" 11068 "s63E6H2" 0.197656 "Exodeoxyribonuclease 7 large subunit"  
"JS1\_A09\_00583" 11069 "s59E13H2" 0.03142349 "hypothetical protein"  
"JS1\_A09\_00583" 11069 "s59E25H2" 0 "hypothetical protein"  
"JS1\_A09\_00583" 11069 "s59E5H2" 0.06852619 "hypothetical protein"  
"JS1\_A09\_00583" 11069 "s63E6H2" 0.219803 "hypothetical protein"  
"JS1\_A09\_00584" 11070 "s59E13H2" 0.03345542 "hypothetical protein"  
"JS1\_A09\_00584" 11070 "s59E25H2" 0 "hypothetical protein"  
"JS1\_A09\_00584" 11070 "s59E5H2" 0.09376927 "hypothetical protein"  
"JS1\_A09\_00584" 11070 "s63E6H2" 0.1459315 "hypothetical protein"  
"JS1\_A09\_00585" 11071 "s59E13H2" 0.03280846 "Elongation factor P"  
"JS1\_A09\_00585" 11071 "s59E25H2" 0 "Elongation factor P"  
"JS1\_A09\_00585" 11071 "s59E5H2" 0.1506122 "Elongation factor P"  
"JS1\_A09\_00585" 11071 "s63E6H2" 0.1339514 "Elongation factor P"  
"JS1\_A09\_00586" 11072 "s59E13H2" 0.05022539 "Serine hydroxymethyltransferase"  
"JS1\_A09\_00586" 11072 "s59E25H2" 0 "Serine hydroxymethyltransferase"  
"JS1\_A09\_00586" 11072 "s59E5H2" 0.1757658 "Serine hydroxymethyltransferase"  
"JS1\_A09\_00586" 11072 "s63E6H2" 0.09954775 "Serine hydroxymethyltransferase"  
"JS1\_A09\_00587" 11073 "s59E13H2" 0.07394961 "Xaa-Pro dipeptidase"  
"JS1\_A09\_00587" 11073 "s59E25H2" 0 "Xaa-Pro dipeptidase"  
"JS1\_A09\_00587" 11073 "s59E5H2" 0.1558028 "Xaa-Pro dipeptidase"  
"JS1\_A09\_00587" 11073 "s63E6H2" 0.01857374 "Xaa-Pro dipeptidase"  
"JS1\_A09\_00588" 11074 "s59E13H2" 0.0480108 "Ribosomal protein S12 methylthiotransferase RimO"  
"JS1\_A09\_00588" 11074 "s59E25H2" 0 "Ribosomal protein S12 methylthiotransferase RimO"  
"JS1\_A09\_00588" 11074 "s59E5H2" 0.01262486 "Ribosomal protein S12 methylthiotransferase RimO"  
"JS1\_A09\_00588" 11074 "s63E6H2" 0.05703205 "Ribosomal protein S12 methylthiotransferase RimO"  
"JS1\_A09\_00589" 11075 "s59E13H2" 0 "Helix-turn-helix domain protein"  
"JS1\_A09\_00589" 11075 "s59E25H2" 0 "Helix-turn-helix domain protein"  
"JS1\_A09\_00589" 11075 "s59E5H2" 0 "Helix-turn-helix domain protein"  
"JS1\_A09\_00589" 11075 "s63E6H2" 0 "Helix-turn-helix domain protein"  
"JS1\_A09\_00590" 11076 "s59E13H2" 0 "hypothetical protein"  
"JS1\_A09\_00590" 11076 "s59E25H2" 0 "hypothetical protein"  
"JS1\_A09\_00590" 11076 "s59E5H2" 0 "hypothetical protein"



"JS1\_A09\_00590" 11076 "s63E6H2" 0 "hypothetical protein"  
"JS1\_A09\_00591" 11077 "s59E13H2" 0 "hypothetical protein"  
"JS1\_A09\_00591" 11077 "s59E25H2" 0 "hypothetical protein"  
"JS1\_A09\_00591" 11077 "s59E5H2" 0 "hypothetical protein"  
"JS1\_A09\_00591" 11077 "s63E6H2" 0 "hypothetical protein"  
"JS1\_A09\_00592" 11078 "s59E13H2" 0.1943078 "Transposase IS200 like protein"  
"JS1\_A09\_00592" 11078 "s59E25H2" 0 "Transposase IS200 like protein"  
"JS1\_A09\_00592" 11078 "s59E5H2" 0 "Transposase IS200 like protein"  
"JS1\_A09\_00592" 11078 "s63E6H2" 0.03874185 "Transposase IS200 like protein"  
"JS1\_A09\_00593" 11079 "s59E13H2" 0.080565 "Formamidase"  
"JS1\_A09\_00593" 11079 "s59E25H2" 0 "Formamidase"  
"JS1\_A09\_00593" 11079 "s59E5H2" 0.09607565 "Formamidase"  
"JS1\_A09\_00593" 11079 "s63E6H2" 0.02428959 "Formamidase"  
"JS1\_A09\_00594" 11080 "s59E13H2" 0 "leucine/isoleucine/valine transporter permease subunit"  
"JS1\_A09\_00594" 11080 "s59E25H2" 0 "leucine/isoleucine/valine transporter permease subunit"  
"JS1\_A09\_00594" 11080 "s59E5H2" 0.04505818 "leucine/isoleucine/valine transporter permease subunit"  
"JS1\_A09\_00594" 11080 "s63E6H2" 0.03682691 "leucine/isoleucine/valine transporter permease subunit"  
"JS1\_A09\_00595" 11081 "s59E13H2" 0 "High-affinity branched-chain amino acid transport system permease protein LivH"  
"JS1\_A09\_00595" 11081 "s59E25H2" 0 "High-affinity branched-chain amino acid transport system permease protein LivH"  
"JS1\_A09\_00595" 11081 "s59E5H2" 0.01839818 "High-affinity branched-chain amino acid transport system permease protein LivH"  
"JS1\_A09\_00595" 11081 "s63E6H2" 0.02078424 "High-affinity branched-chain amino acid transport system permease protein LivH"  
"JS1\_A09\_00596" 11082 "s59E13H2" 0 "High-affinity branched-chain amino acid transport ATP-binding protein LivF"  
"JS1\_A09\_00596" 11082 "s59E25H2" 0 "High-affinity branched-chain amino acid transport ATP-binding protein LivF"  
"JS1\_A09\_00596" 11082 "s59E5H2" 0.001322476 "High-affinity branched-chain amino acid transport ATP-binding protein LivF"  
"JS1\_A09\_00596" 11082 "s63E6H2" 0.04097321 "High-affinity branched-chain amino acid transport ATP-binding protein LivF"  
"JS1\_A09\_00597" 11083 "s59E13H2" 0 "Lipopolysaccharide export system ATP-binding protein LptB"  
"JS1\_A09\_00597" 11083 "s59E25H2" 0 "Lipopolysaccharide export system ATP-binding protein LptB"  
"JS1\_A09\_00597" 11083 "s59E5H2" 0.03024514 "Lipopolysaccharide export system ATP-binding protein LptB"  
"JS1\_A09\_00597" 11083 "s63E6H2" 0.02364168 "Lipopolysaccharide export system ATP-binding protein LptB"  
"JS1\_A09\_00598" 11084 "s59E13H2" 0 "Leucine-, isoleucine-, valine-, threonine-, and alanine-binding protein precursor"  
"JS1\_A09\_00598" 11084 "s59E25H2" 0 "Leucine-, isoleucine-, valine-, threonine-, and alanine-binding protein precursor"  
"JS1\_A09\_00598" 11084 "s59E5H2" 0.06146472 "Leucine-, isoleucine-, valine-, threonine-, and alanine-binding protein precursor"  
"JS1\_A09\_00598" 11084 "s63E6H2" 0.01580615 "Leucine-, isoleucine-, valine-, threonine-, and alanine-binding protein precursor"  
"JS1\_A09\_00601" 11087 "s59E13H2" 0.6393929 "SsrA-binding protein"  
"JS1\_A09\_00601" 11087 "s59E25H2" 0 "SsrA-binding protein"  
"JS1\_A09\_00601" 11087 "s59E5H2" 0.361319 "SsrA-binding protein"  
"JS1\_A09\_00601" 11087 "s63E6H2" 0.2675141 "SsrA-binding protein"  
"JS1\_A09\_00602" 11088 "s59E13H2" 0.08256056 "prephenate dehydrogenase"  
"JS1\_A09\_00602" 11088 "s59E25H2" 0 "prephenate dehydrogenase"  
"JS1\_A09\_00602" 11088 "s59E5H2" 0.2754873 "prephenate dehydrogenase"  
"JS1\_A09\_00602" 11088 "s63E6H2" 0.08607769 "prephenate dehydrogenase"  
"JS1\_A09\_00603" 11089 "s59E13H2" 0.04385115 "3-dehydroquininate dehydratase"  
"JS1\_A09\_00603" 11089 "s59E25H2" 0 "3-dehydroquininate dehydratase"  
"JS1\_A09\_00603" 11089 "s59E5H2" 0.3936929 "3-dehydroquininate dehydratase"  
"JS1\_A09\_00603" 11089 "s63E6H2" 0.1860263 "3-dehydroquininate dehydratase"  
"JS1\_A09\_00604" 11090 "s59E13H2" 0.07042688 "3-dehydroquininate synthase"  
"JS1\_A09\_00604" 11090 "s59E25H2" 0 "3-dehydroquininate synthase"

"JS1\_A09\_00604" 11090 "s59E5H2" 0.5747745 "3-dehydroquinase synthase"  
"JS1\_A09\_00604" 11090 "s63E6H2" 0.2963837 "3-dehydroquinase synthase"  
"JS1\_A09\_00605" 11091 "s59E13H2" 0.06906494 "Shikimate kinase 1"  
"JS1\_A09\_00605" 11091 "s59E25H2" 0 "Shikimate kinase 1"  
"JS1\_A09\_00605" 11091 "s59E5H2" 0.1896137 "Shikimate kinase 1"  
"JS1\_A09\_00605" 11091 "s63E6H2" 0.09552829 "Shikimate kinase 1"  
"JS1\_A09\_00606" 11092 "s59E13H2" 0.05276928 "Chorismate synthase"  
"JS1\_A09\_00606" 11092 "s59E25H2" 0 "Chorismate synthase"  
"JS1\_A09\_00606" 11092 "s59E5H2" 0.1131012 "Chorismate synthase"  
"JS1\_A09\_00606" 11092 "s63E6H2" 0.07333242 "Chorismate synthase"  
"JS1\_A09\_00607" 11093 "s59E13H2" 0 "Quinate/shikimate dehydrogenase"  
"JS1\_A09\_00607" 11093 "s59E25H2" 0 "Quinate/shikimate dehydrogenase"  
"JS1\_A09\_00607" 11093 "s59E5H2" 0.1402607 "Quinate/shikimate dehydrogenase"  
"JS1\_A09\_00607" 11093 "s63E6H2" 0.03234543 "Quinate/shikimate dehydrogenase"  
"JS1\_A09\_00608" 11094 "s59E13H2" 0 "hypothetical protein"  
"JS1\_A09\_00608" 11094 "s59E25H2" 0 "hypothetical protein"  
"JS1\_A09\_00608" 11094 "s59E5H2" 0.1168328 "hypothetical protein"  
"JS1\_A09\_00608" 11094 "s63E6H2" 0.00236653 "hypothetical protein"  
"JS1\_A09\_00609" 11095 "s59E13H2" 0 "Malate dehydrogenase"  
"JS1\_A09\_00609" 11095 "s59E25H2" 0 "Malate dehydrogenase"  
"JS1\_A09\_00609" 11095 "s59E5H2" 0.055114 "Malate dehydrogenase"  
"JS1\_A09\_00609" 11095 "s63E6H2" 0.02441655 "Malate dehydrogenase"  
"JS1\_A09\_00610" 11096 "s59E13H2" 0 "Sialic acid TRAP transporter permease protein SiaT"  
"JS1\_A09\_00610" 11096 "s59E25H2" 0 "Sialic acid TRAP transporter permease protein SiaT"  
"JS1\_A09\_00610" 11096 "s59E5H2" 0.05539009 "Sialic acid TRAP transporter permease protein SiaT"  
"JS1\_A09\_00610" 11096 "s63E6H2" 0.06776813 "Sialic acid TRAP transporter permease protein SiaT"  
"JS1\_A09\_00611" 11097 "s59E13H2" 0 "Sialic acid TRAP transporter permease protein SiaT"  
"JS1\_A09\_00611" 11097 "s59E25H2" 0 "Sialic acid TRAP transporter permease protein SiaT"  
"JS1\_A09\_00611" 11097 "s59E5H2" 0.04849925 "Sialic acid TRAP transporter permease protein SiaT"  
"JS1\_A09\_00611" 11097 "s63E6H2" 0.03306012 "Sialic acid TRAP transporter permease protein SiaT"  
"JS1\_A09\_00612" 11098 "s59E13H2" 0 "Sialic acid-binding periplasmic protein SiaP precursor"  
"JS1\_A09\_00612" 11098 "s59E25H2" 0 "Sialic acid-binding periplasmic protein SiaP precursor"  
"JS1\_A09\_00612" 11098 "s59E5H2" 0.0902744 "Sialic acid-binding periplasmic protein SiaP precursor"  
"JS1\_A09\_00612" 11098 "s63E6H2" 0.04473071 "Sialic acid-binding periplasmic protein SiaP precursor"  
"JS1\_A09\_00613" 11099 "s59E13H2" 0.3203187 "Transcriptional regulator KdGR"  
"JS1\_A09\_00613" 11099 "s59E25H2" 0 "Transcriptional regulator KdGR"  
"JS1\_A09\_00613" 11099 "s59E5H2" 0.06661399 "Transcriptional regulator KdGR"  
"JS1\_A09\_00613" 11099 "s63E6H2" 0.5305779 "Transcriptional regulator KdGR"  
"JS1\_A09\_00614" 11100 "s59E13H2" 0 "2-oxoglutarate synthase subunit KorB"  
"JS1\_A09\_00614" 11100 "s59E25H2" 0 "2-oxoglutarate synthase subunit KorB"  
"JS1\_A09\_00614" 11100 "s59E5H2" 0 "2-oxoglutarate synthase subunit KorB"  
"JS1\_A09\_00614" 11100 "s63E6H2" 0.01976803 "2-oxoglutarate synthase subunit KorB"  
"JS1\_A09\_00616" 11102 "s59E13H2" 0.1960797 "hypothetical protein"  
"JS1\_A09\_00616" 11102 "s59E25H2" 0 "hypothetical protein"  
"JS1\_A09\_00616" 11102 "s59E5H2" 0.446645 "hypothetical protein"  
"JS1\_A09\_00616" 11102 "s63E6H2" 0.9830498 "hypothetical protein"  
"JS1\_A09\_00617" 11103 "s59E13H2" 0.02964276 "Integrase core domain protein"

"JS1\_A09\_00617" 11103 "s59E25H2" 0 "Integrase core domain protein"  
"JS1\_A09\_00617" 11103 "s59E5H2" 1.325177 "Integrase core domain protein"  
"JS1\_A09\_00617" 11103 "s63E6H2" 0.7057244 "Integrase core domain protein"  
"JS1\_A09\_00618" 11104 "s59E13H2" 0.002943158 "IS2 transposase TnpB"  
"JS1\_A09\_00618" 11104 "s59E25H2" 0 "IS2 transposase TnpB"  
"JS1\_A09\_00618" 11104 "s59E5H2" 0.08009632 "IS2 transposase TnpB"  
"JS1\_A09\_00618" 11104 "s63E6H2" 0.03916839 "IS2 transposase TnpB"  
"JS1\_A09\_00619" 11105 "s59E13H2" 0.01506071 "Transposase"  
"JS1\_A09\_00619" 11105 "s59E25H2" 0 "Transposase"  
"JS1\_A09\_00619" 11105 "s59E5H2" 0.369464 "Transposase"  
"JS1\_A09\_00619" 11105 "s63E6H2" 0.2526226 "Transposase"  
"JS1\_A09\_00620" 11106 "s59E13H2" 0 "hypothetical protein"  
"JS1\_A09\_00620" 11106 "s59E25H2" 0 "hypothetical protein"  
"JS1\_A09\_00620" 11106 "s59E5H2" 0.008916453 "hypothetical protein"  
"JS1\_A09\_00620" 11106 "s63E6H2" 0.003730473 "hypothetical protein"  
"JS1\_A09\_00622" 11108 "s59E13H2" 0 "hypothetical protein"  
"JS1\_A09\_00622" 11108 "s59E25H2" 0 "hypothetical protein"  
"JS1\_A09\_00622" 11108 "s59E5H2" 0 "hypothetical protein"  
"JS1\_A09\_00622" 11108 "s63E6H2" 0.002318373 "hypothetical protein"  
"JS1\_A09\_00631" 11117 "s59E13H2" 0.06194075 "hypothetical protein"  
"JS1\_A09\_00631" 11117 "s59E25H2" 0 "hypothetical protein"  
"JS1\_A09\_00631" 11117 "s59E5H2" 0.03302908 "hypothetical protein"  
"JS1\_A09\_00631" 11117 "s63E6H2" 0.02835255 "hypothetical protein"  
"JS1\_A09\_00632" 11118 "s59E13H2" 0.03795716 "hypothetical protein"  
"JS1\_A09\_00632" 11118 "s59E25H2" 0 "hypothetical protein"  
"JS1\_A09\_00632" 11118 "s59E5H2" 0 "hypothetical protein"  
"JS1\_A09\_00632" 11118 "s63E6H2" 0.005219592 "hypothetical protein"  
"JS1\_A09\_00634" 11120 "s59E13H2" 0 "Adenylate cyclase 2"  
"JS1\_A09\_00634" 11120 "s59E25H2" 0 "Adenylate cyclase 2"  
"JS1\_A09\_00634" 11120 "s59E5H2" 0.005092553 "Adenylate cyclase 2"  
"JS1\_A09\_00634" 11120 "s63E6H2" 0.01608281 "Adenylate cyclase 2"  
"JS1\_A09\_00636" 11122 "s59E13H2" 0.01866817 "Nucleotidyltransferase domain protein"  
"JS1\_A09\_00636" 11122 "s59E25H2" 0 "Nucleotidyltransferase domain protein"  
"JS1\_A09\_00636" 11122 "s59E5H2" 0 "Nucleotidyltransferase domain protein"  
"JS1\_A09\_00636" 11122 "s63E6H2" 0.08210535 "Nucleotidyltransferase domain protein"  
"JS1\_A09\_00637" 11123 "s59E13H2" 0.5996855 "hypothetical protein"  
"JS1\_A09\_00637" 11123 "s59E25H2" 0 "hypothetical protein"  
"JS1\_A09\_00637" 11123 "s59E5H2" 0.07249289 "hypothetical protein"  
"JS1\_A09\_00637" 11123 "s63E6H2" 0.03748895 "hypothetical protein"  
"JS1\_A09\_00638" 11124 "s59E13H2" 0.1448911 "Microbial collagenase precursor"  
"JS1\_A09\_00638" 11124 "s59E25H2" 0 "Microbial collagenase precursor"  
"JS1\_A09\_00638" 11124 "s59E5H2" 0 "Microbial collagenase precursor"  
"JS1\_A09\_00638" 11124 "s63E6H2" 0.0009309613 "Microbial collagenase precursor"  
"JS1\_A09\_00639" 11125 "s59E13H2" 0.01366167 "Type IV pilus biogenesis and competence protein PilQ precursor"  
"JS1\_A09\_00639" 11125 "s59E25H2" 0 "Type IV pilus biogenesis and competence protein PilQ precursor"  
"JS1\_A09\_00639" 11125 "s59E5H2" 0.08823405 "Type IV pilus biogenesis and competence protein PilQ precursor"  
"JS1\_A09\_00639" 11125 "s63E6H2" 0.02583363 "Type IV pilus biogenesis and competence protein PilQ precursor"

"JS1\_A09\_00640" 11126 "s59E13H2" 0.02199958 "hypothetical protein"  
"JS1\_A09\_00640" 11126 "s59E25H2" 0 "hypothetical protein"  
"JS1\_A09\_00640" 11126 "s59E5H2" 0.04846247 "hypothetical protein"  
"JS1\_A09\_00640" 11126 "s63E6H2" 0.06150538 "hypothetical protein"  
"JS1\_A09\_00641" 11127 "s59E13H2" 0.07698776 "Pilus assembly protein, PilO"  
"JS1\_A09\_00641" 11127 "s59E25H2" 0 "Pilus assembly protein, PilO"  
"JS1\_A09\_00641" 11127 "s59E5H2" 0.04834309 "Pilus assembly protein, PilO"  
"JS1\_A09\_00641" 11127 "s63E6H2" 0.06623687 "Pilus assembly protein, PilO"  
"JS1\_A09\_00642" 11128 "s59E13H2" 0.1122268 "hypothetical protein"  
"JS1\_A09\_00642" 11128 "s59E25H2" 0 "hypothetical protein"  
"JS1\_A09\_00642" 11128 "s59E5H2" 0.1407029 "hypothetical protein"  
"JS1\_A09\_00642" 11128 "s63E6H2" 0.05561903 "hypothetical protein"  
"JS1\_A09\_00643" 11129 "s59E13H2" 0.08120025 "Competence protein A"  
"JS1\_A09\_00643" 11129 "s59E25H2" 0 "Competence protein A"  
"JS1\_A09\_00643" 11129 "s59E5H2" 0.3163169 "Competence protein A"  
"JS1\_A09\_00643" 11129 "s63E6H2" 0.03909486 "Competence protein A"  
"JS1\_A09\_00644" 11130 "s59E13H2" 0.001439818 "Helix-hairpin-helix motif protein"  
"JS1\_A09\_00644" 11130 "s59E25H2" 0 "Helix-hairpin-helix motif protein"  
"JS1\_A09\_00644" 11130 "s59E5H2" 0.06075082 "Helix-hairpin-helix motif protein"  
"JS1\_A09\_00644" 11130 "s63E6H2" 0.05435273 "Helix-hairpin-helix motif protein"  
"JS1\_A09\_00645" 11131 "s59E13H2" 0.02519877 "hypothetical protein"  
"JS1\_A09\_00645" 11131 "s59E25H2" 0 "hypothetical protein"  
"JS1\_A09\_00645" 11131 "s59E5H2" 0.6621782 "hypothetical protein"  
"JS1\_A09\_00645" 11131 "s63E6H2" 0.09762059 "hypothetical protein"  
"JS1\_A09\_00646" 11132 "s59E13H2" 0.2514054 "Peptidase M15"  
"JS1\_A09\_00646" 11132 "s59E25H2" 0 "Peptidase M15"  
"JS1\_A09\_00646" 11132 "s59E5H2" 0.01157373 "Peptidase M15"  
"JS1\_A09\_00646" 11132 "s63E6H2" 1.282938 "Peptidase M15"  
"JS1\_A09\_00647" 11133 "s59E13H2" 0.003168659 "YvrJ protein family protein"  
"JS1\_A09\_00647" 11133 "s59E25H2" 0 "YvrJ protein family protein"  
"JS1\_A09\_00647" 11133 "s59E5H2" 0.02924116 "YvrJ protein family protein"  
"JS1\_A09\_00647" 11133 "s63E6H2" 0.8502674 "YvrJ protein family protein"  
"JS1\_A09\_00648" 11134 "s59E13H2" 0.02626862 "putative xanthine dehydrogenase subunit D"  
"JS1\_A09\_00648" 11134 "s59E25H2" 0 "putative xanthine dehydrogenase subunit D"  
"JS1\_A09\_00648" 11134 "s59E5H2" 0.02356725 "putative xanthine dehydrogenase subunit D"  
"JS1\_A09\_00648" 11134 "s63E6H2" 0.3734549 "putative xanthine dehydrogenase subunit D"  
"JS1\_A09\_00649" 11135 "s59E13H2" 0.00361917 "Nicotinate dehydrogenase small FeS subunit"  
"JS1\_A09\_00649" 11135 "s59E25H2" 0 "Nicotinate dehydrogenase small FeS subunit"  
"JS1\_A09\_00649" 11135 "s59E5H2" 0.07710458 "Nicotinate dehydrogenase small FeS subunit"  
"JS1\_A09\_00649" 11135 "s63E6H2" 0.1099956 "Nicotinate dehydrogenase small FeS subunit"  
"JS1\_A09\_00650" 11136 "s59E13H2" 0.2737254 "Glyceraldehyde dehydrogenase medium chain"  
"JS1\_A09\_00650" 11136 "s59E25H2" 0 "Glyceraldehyde dehydrogenase medium chain"  
"JS1\_A09\_00650" 11136 "s59E5H2" 0.02258606 "Glyceraldehyde dehydrogenase medium chain"  
"JS1\_A09\_00650" 11136 "s63E6H2" 0.03005395 "Glyceraldehyde dehydrogenase medium chain"  
"JS1\_A09\_00651" 11137 "s59E13H2" 2.157026 "Glyceraldehyde dehydrogenase small chain"  
"JS1\_A09\_00651" 11137 "s59E25H2" 0 "Glyceraldehyde dehydrogenase small chain"  
"JS1\_A09\_00651" 11137 "s59E5H2" 0.1603388 "Glyceraldehyde dehydrogenase small chain"

"JS1\_A09\_00651" 11137 "s63E6H2" 0.06750063 "Glyceraldehyde dehydrogenase small chain"  
"JS1\_A09\_00652" 11138 "s59E13H2" 1.860844 "Glyceraldehyde dehydrogenase medium chain"  
"JS1\_A09\_00652" 11138 "s59E25H2" 0 "Glyceraldehyde dehydrogenase medium chain"  
"JS1\_A09\_00652" 11138 "s59E5H2" 0.2328048 "Glyceraldehyde dehydrogenase medium chain"  
"JS1\_A09\_00652" 11138 "s63E6H2" 0.04967823 "Glyceraldehyde dehydrogenase medium chain"  
"JS1\_A09\_00653" 11139 "s59E13H2" 1.798943 "Xanthine dehydrogenase molybdenum-binding subunit"  
"JS1\_A09\_00653" 11139 "s59E25H2" 0 "Xanthine dehydrogenase molybdenum-binding subunit"  
"JS1\_A09\_00653" 11139 "s59E5H2" 0.1217622 "Xanthine dehydrogenase molybdenum-binding subunit"  
"JS1\_A09\_00653" 11139 "s63E6H2" 0.0793305 "Xanthine dehydrogenase molybdenum-binding subunit"  
"JS1\_A09\_00654" 11140 "s59E13H2" 0.01002994 "succinyl-CoA synthetase subunit beta"  
"JS1\_A09\_00654" 11140 "s59E25H2" 0 "succinyl-CoA synthetase subunit beta"  
"JS1\_A09\_00654" 11140 "s59E5H2" 0.07534528 "succinyl-CoA synthetase subunit beta"  
"JS1\_A09\_00654" 11140 "s63E6H2" 0.07327285 "succinyl-CoA synthetase subunit beta"  
"JS1\_A09\_00655" 11141 "s59E13H2" 0 "High-affinity branched-chain amino acid transport ATP-binding protein LivF"  
"JS1\_A09\_00655" 11141 "s59E25H2" 0 "High-affinity branched-chain amino acid transport ATP-binding protein LivF"  
"JS1\_A09\_00655" 11141 "s59E5H2" 0 "High-affinity branched-chain amino acid transport ATP-binding protein LivF"  
"JS1\_A09\_00655" 11141 "s63E6H2" 0.05033583 "High-affinity branched-chain amino acid transport ATP-binding protein LivF"  
"JS1\_A09\_00656" 11142 "s59E13H2" 0 "putative branched-chain amino acid transport ATP-binding protein LivG"  
"JS1\_A09\_00656" 11142 "s59E25H2" 0 "putative branched-chain amino acid transport ATP-binding protein LivG"  
"JS1\_A09\_00656" 11142 "s59E5H2" 0 "putative branched-chain amino acid transport ATP-binding protein LivG"  
"JS1\_A09\_00656" 11142 "s63E6H2" 0.03111786 "putative branched-chain amino acid transport ATP-binding protein LivG"  
"JS1\_A09\_00657" 11143 "s59E13H2" 0 "leucine/isoleucine/valine transporter permease subunit"  
"JS1\_A09\_00657" 11143 "s59E25H2" 0 "leucine/isoleucine/valine transporter permease subunit"  
"JS1\_A09\_00657" 11143 "s59E5H2" 0.001596977 "leucine/isoleucine/valine transporter permease subunit"  
"JS1\_A09\_00657" 11143 "s63E6H2" 0.02085106 "leucine/isoleucine/valine transporter permease subunit"  
"JS1\_A09\_00658" 11144 "s59E13H2" 0 "High-affinity branched-chain amino acid transport system permease protein LivH"  
"JS1\_A09\_00658" 11144 "s59E25H2" 0 "High-affinity branched-chain amino acid transport system permease protein LivH"  
"JS1\_A09\_00658" 11144 "s59E5H2" 0.01221509 "High-affinity branched-chain amino acid transport system permease protein LivH"  
"JS1\_A09\_00658" 11144 "s63E6H2" 0.0207498 "High-affinity branched-chain amino acid transport system permease protein LivH"  
"JS1\_A09\_00659" 11145 "s59E13H2" 0.004112632 "hypothetical protein"  
"JS1\_A09\_00659" 11145 "s59E25H2" 0 "hypothetical protein"  
"JS1\_A09\_00659" 11145 "s59E5H2" 0 "hypothetical protein"  
"JS1\_A09\_00659" 11145 "s63E6H2" 0.01402096 "hypothetical protein"  
"JS1\_A09\_00660" 11146 "s59E13H2" 0.0196997 "Succinyl-CoA ligase [ADP-forming] subunit alpha"  
"JS1\_A09\_00660" 11146 "s59E25H2" 0 "Succinyl-CoA ligase [ADP-forming] subunit alpha"  
"JS1\_A09\_00660" 11146 "s59E5H2" 0.2829585 "Succinyl-CoA ligase [ADP-forming] subunit alpha"  
"JS1\_A09\_00660" 11146 "s63E6H2" 0.4858104 "Succinyl-CoA ligase [ADP-forming] subunit alpha"  
"JS1\_A09\_00661" 11147 "s59E13H2" 0.0546156 "Indolepyruvate oxidoreductase subunit lorB"  
"JS1\_A09\_00661" 11147 "s59E25H2" 0 "Indolepyruvate oxidoreductase subunit lorB"  
"JS1\_A09\_00661" 11147 "s59E5H2" 0.3166526 "Indolepyruvate oxidoreductase subunit lorB"  
"JS1\_A09\_00661" 11147 "s63E6H2" 0.4829417 "Indolepyruvate oxidoreductase subunit lorB"  
"JS1\_A09\_00662" 11148 "s59E13H2" 0.03812122 "Indolepyruvate oxidoreductase subunit lorA"  
"JS1\_A09\_00662" 11148 "s59E25H2" 0 "Indolepyruvate oxidoreductase subunit lorA"  
"JS1\_A09\_00662" 11148 "s59E5H2" 0.2587691 "Indolepyruvate oxidoreductase subunit lorA"  
"JS1\_A09\_00662" 11148 "s63E6H2" 0.274222 "Indolepyruvate oxidoreductase subunit lorA"  
"JS1\_A09\_00663" 11149 "s59E13H2" 0 "hypothetical protein"  
"JS1\_A09\_00663" 11149 "s59E25H2" 0 "hypothetical protein"

"JS1\_A09\_00663" 11149 "s59E5H2" 0 "hypothetical protein"  
"JS1\_A09\_00663" 11149 "s63E6H2" 0.02184308 "hypothetical protein"  
"JS1\_A09\_00664" 11150 "s59E13H2" 0 "Lysine-arginine-ornithine-binding periplasmic protein precursor"  
"JS1\_A09\_00664" 11150 "s59E25H2" 0 "Lysine-arginine-ornithine-binding periplasmic protein precursor"  
"JS1\_A09\_00664" 11150 "s59E5H2" 0 "Lysine-arginine-ornithine-binding periplasmic protein precursor"  
"JS1\_A09\_00664" 11150 "s63E6H2" 0.06992366 "Lysine-arginine-ornithine-binding periplasmic protein precursor"  
"JS1\_A09\_00665" 11151 "s59E13H2" 0 "Inner membrane amino-acid ABC transporter permease protein YecS"  
"JS1\_A09\_00665" 11151 "s59E25H2" 0 "Inner membrane amino-acid ABC transporter permease protein YecS"  
"JS1\_A09\_00665" 11151 "s59E5H2" 0 "Inner membrane amino-acid ABC transporter permease protein YecS"  
"JS1\_A09\_00665" 11151 "s63E6H2" 0.03044229 "Inner membrane amino-acid ABC transporter permease protein YecS"  
"JS1\_A09\_00666" 11152 "s59E13H2" 0 "Glutamine transport ATP-binding protein GlnQ"  
"JS1\_A09\_00666" 11152 "s59E25H2" 0 "Glutamine transport ATP-binding protein GlnQ"  
"JS1\_A09\_00666" 11152 "s59E5H2" 0 "Glutamine transport ATP-binding protein GlnQ"  
"JS1\_A09\_00666" 11152 "s63E6H2" 0.01526106 "Glutamine transport ATP-binding protein GlnQ"  
"JS1\_A09\_00667" 11153 "s59E13H2" 0 "Inner membrane amino-acid ABC transporter permease protein YecS"  
"JS1\_A09\_00667" 11153 "s59E25H2" 0 "Inner membrane amino-acid ABC transporter permease protein YecS"  
"JS1\_A09\_00667" 11153 "s59E5H2" 0 "Inner membrane amino-acid ABC transporter permease protein YecS"  
"JS1\_A09\_00667" 11153 "s63E6H2" 0.02030854 "Inner membrane amino-acid ABC transporter permease protein YecS"  
"JS1\_A09\_00668" 11154 "s59E13H2" 0.09379195 "D-aminopeptidase"  
"JS1\_A09\_00668" 11154 "s59E25H2" 0 "D-aminopeptidase"  
"JS1\_A09\_00668" 11154 "s59E5H2" 0.3265419 "D-aminopeptidase"  
"JS1\_A09\_00668" 11154 "s63E6H2" 0.3738953 "D-aminopeptidase"  
"JS1\_A09\_00669" 11155 "s59E13H2" 0.09934905 "hypothetical protein"  
"JS1\_A09\_00669" 11155 "s59E25H2" 0 "hypothetical protein"  
"JS1\_A09\_00669" 11155 "s59E5H2" 0.1486075 "hypothetical protein"  
"JS1\_A09\_00669" 11155 "s63E6H2" 0.2988477 "hypothetical protein"  
"JS1\_A09\_00670" 11156 "s59E13H2" 0.165841 "putative NH(3)-dependent NAD(+) synthetase"  
"JS1\_A09\_00670" 11156 "s59E25H2" 0 "putative NH(3)-dependent NAD(+) synthetase"  
"JS1\_A09\_00670" 11156 "s59E5H2" 0.2016377 "putative NH(3)-dependent NAD(+) synthetase"  
"JS1\_A09\_00670" 11156 "s63E6H2" 0.4888634 "putative NH(3)-dependent NAD(+) synthetase"  
"JS1\_A09\_00671" 11157 "s59E13H2" 0.08875336 "Acyl carrier protein"  
"JS1\_A09\_00671" 11157 "s59E25H2" 0 "Acyl carrier protein"  
"JS1\_A09\_00671" 11157 "s59E5H2" 0.2142831 "Acyl carrier protein"  
"JS1\_A09\_00671" 11157 "s63E6H2" 0.09978141 "Acyl carrier protein"  
"JS1\_A09\_00672" 11158 "s59E13H2" 0.1664929 "3-oxoacyl-[acyl-carrier-protein] synthase 2"  
"JS1\_A09\_00672" 11158 "s59E25H2" 0 "3-oxoacyl-[acyl-carrier-protein] synthase 2"  
"JS1\_A09\_00672" 11158 "s59E5H2" 0.1258004 "3-oxoacyl-[acyl-carrier-protein] synthase 2"  
"JS1\_A09\_00672" 11158 "s63E6H2" 0.1190857 "3-oxoacyl-[acyl-carrier-protein] synthase 2"  
"JS1\_A09\_00673" 11159 "s59E13H2" 0.04144253 "Ribonuclease 3"  
"JS1\_A09\_00673" 11159 "s59E25H2" 0 "Ribonuclease 3"  
"JS1\_A09\_00673" 11159 "s59E5H2" 0.1072416 "Ribonuclease 3"  
"JS1\_A09\_00673" 11159 "s63E6H2" 0.1196526 "Ribonuclease 3"  
"JS1\_A09\_00674" 11160 "s59E13H2" 0.01751368 "Chromosome partition protein Smc"  
"JS1\_A09\_00674" 11160 "s59E25H2" 0 "Chromosome partition protein Smc"  
"JS1\_A09\_00674" 11160 "s59E5H2" 0.05535603 "Chromosome partition protein Smc"  
"JS1\_A09\_00674" 11160 "s63E6H2" 0.04601699 "Chromosome partition protein Smc"  
"JS1\_A09\_00675" 11161 "s59E13H2" 0.01896362 "Signal recognition particle receptor FtsY"

"JS1\_A09\_00675" 11161 "s59E25H2" 0 "Signal recognition particle receptor FtsY"  
"JS1\_A09\_00675" 11161 "s59E5H2" 0.03971082 "Signal recognition particle receptor FtsY"  
"JS1\_A09\_00675" 11161 "s63E6H2" 0.05971037 "Signal recognition particle receptor FtsY"  
"JS1\_A09\_00676" 11162 "s59E13H2" 0.0829992 "Signal recognition particle protein"  
"JS1\_A09\_00676" 11162 "s59E25H2" 0 "Signal recognition particle protein"  
"JS1\_A09\_00676" 11162 "s59E5H2" 0.08973433 "Signal recognition particle protein"  
"JS1\_A09\_00676" 11162 "s63E6H2" 0.0222218 "Signal recognition particle protein"  
"JS1\_A09\_00677" 11163 "s59E13H2" 0.01019595 "30S ribosomal protein S16"  
"JS1\_A09\_00677" 11163 "s59E25H2" 0 "30S ribosomal protein S16"  
"JS1\_A09\_00677" 11163 "s59E5H2" 0.02024839 "30S ribosomal protein S16"  
"JS1\_A09\_00677" 11163 "s63E6H2" 0.01440474 "30S ribosomal protein S16"  
"JS1\_A09\_00678" 11164 "s59E13H2" 0.02553395 "hypothetical protein"  
"JS1\_A09\_00678" 11164 "s59E25H2" 0 "hypothetical protein"  
"JS1\_A09\_00678" 11164 "s59E5H2" 0.03740629 "hypothetical protein"  
"JS1\_A09\_00678" 11164 "s63E6H2" 0.02631727 "hypothetical protein"  
"JS1\_A09\_00680" 11166 "s59E13H2" 0.4388373 "Ribonuclease"  
"JS1\_A09\_00680" 11166 "s59E25H2" 0 "Ribonuclease"  
"JS1\_A09\_00680" 11166 "s59E5H2" 0.5303456 "Ribonuclease"  
"JS1\_A09\_00680" 11166 "s63E6H2" 0.8908387 "Ribonuclease"  
"JS1\_A09\_00681" 11167 "s59E13H2" 0.01701636 "Thioredoxin-1"  
"JS1\_A09\_00681" 11167 "s59E25H2" 0 "Thioredoxin-1"  
"JS1\_A09\_00681" 11167 "s59E5H2" 0.2633924 "Thioredoxin-1"  
"JS1\_A09\_00681" 11167 "s63E6H2" 0.4536489 "Thioredoxin-1"  
"JS1\_A09\_00682" 11168 "s59E13H2" 0.01890746 "Multiple antibiotic resistance protein MarR"  
"JS1\_A09\_00682" 11168 "s59E25H2" 0 "Multiple antibiotic resistance protein MarR"  
"JS1\_A09\_00682" 11168 "s59E5H2" 0.2668086 "Multiple antibiotic resistance protein MarR"  
"JS1\_A09\_00682" 11168 "s63E6H2" 0.6534665 "Multiple antibiotic resistance protein MarR"  
"JS1\_A09\_00683" 11169 "s59E13H2" 0.001268822 "23S rRNA (uracil-C(5))-methyltransferase RlmCD"  
"JS1\_A09\_00683" 11169 "s59E25H2" 0 "23S rRNA (uracil-C(5))-methyltransferase RlmCD"  
"JS1\_A09\_00683" 11169 "s59E5H2" 0.0404165 "23S rRNA (uracil-C(5))-methyltransferase RlmCD"  
"JS1\_A09\_00683" 11169 "s63E6H2" 0.03589676 "23S rRNA (uracil-C(5))-methyltransferase RlmCD"  
"JS1\_A09\_00684" 11170 "s59E13H2" 0.01628026 "putative oxidoreductase"  
"JS1\_A09\_00684" 11170 "s59E25H2" 0 "putative oxidoreductase"  
"JS1\_A09\_00684" 11170 "s59E5H2" 0.2273913 "putative oxidoreductase"  
"JS1\_A09\_00684" 11170 "s63E6H2" 0.4231042 "putative oxidoreductase"  
"JS1\_A09\_00685" 11171 "s59E13H2" 0.004493483 "Poly(A) polymerase I precursor"  
"JS1\_A09\_00685" 11171 "s59E25H2" 0 "Poly(A) polymerase I precursor"  
"JS1\_A09\_00685" 11171 "s59E5H2" 0.01699257 "Poly(A) polymerase I precursor"  
"JS1\_A09\_00685" 11171 "s63E6H2" 0.4755185 "Poly(A) polymerase I precursor"  
"JS1\_A09\_00686" 11172 "s59E13H2" 0.06527556 "Transposase IS200 like protein"  
"JS1\_A09\_00686" 11172 "s59E25H2" 0 "Transposase IS200 like protein"  
"JS1\_A09\_00686" 11172 "s59E5H2" 0.4421382 "Transposase IS200 like protein"  
"JS1\_A09\_00686" 11172 "s63E6H2" 0.07707519 "Transposase IS200 like protein"  
"JS1\_A09\_00689" 11175 "s59E13H2" 0.004744622 "Group II intron-encoded protein LtrA"  
"JS1\_A09\_00689" 11175 "s59E25H2" 0 "Group II intron-encoded protein LtrA"  
"JS1\_A09\_00689" 11175 "s59E5H2" 0.1898333 "Group II intron-encoded protein LtrA"  
"JS1\_A09\_00689" 11175 "s63E6H2" 0.001953311 "Group II intron-encoded protein LtrA"

"JS1\_A09\_00691" 11177 "s59E13H2" 0.06402712 "hypothetical protein"  
"JS1\_A09\_00691" 11177 "s59E25H2" 0 "hypothetical protein"  
"JS1\_A09\_00691" 11177 "s59E5H2" 0.6034367 "hypothetical protein"  
"JS1\_A09\_00691" 11177 "s63E6H2" 0.2940228 "hypothetical protein"  
"JS1\_A09\_00692" 11178 "s59E13H2" 0.005952049 "hypothetical protein"  
"JS1\_A09\_00692" 11178 "s59E25H2" 0 "hypothetical protein"  
"JS1\_A09\_00692" 11178 "s59E5H2" 0.04589291 "hypothetical protein"  
"JS1\_A09\_00692" 11178 "s63E6H2" 0.01100926 "hypothetical protein"  
"JS1\_A09\_00693" 11179 "s59E13H2" 0.04822403 "ADP-ribosyl-[dinitrogen reductase] glycohydrolase"  
"JS1\_A09\_00693" 11179 "s59E25H2" 0 "ADP-ribosyl-[dinitrogen reductase] glycohydrolase"  
"JS1\_A09\_00693" 11179 "s59E5H2" 0 "ADP-ribosyl-[dinitrogen reductase] glycohydrolase"  
"JS1\_A09\_00693" 11179 "s63E6H2" 0.00153984 "ADP-ribosyl-[dinitrogen reductase] glycohydrolase"  
"JS1\_A09\_00695" 11181 "s59E13H2" 0.006631497 "hypothetical protein"  
"JS1\_A09\_00695" 11181 "s59E25H2" 0 "hypothetical protein"  
"JS1\_A09\_00695" 11181 "s59E5H2" 0 "hypothetical protein"  
"JS1\_A09\_00695" 11181 "s63E6H2" 0 "hypothetical protein"  
"JS1\_A09\_00696" 11182 "s59E13H2" 0.01637357 "hypothetical protein"  
"JS1\_A09\_00696" 11182 "s59E25H2" 0 "hypothetical protein"  
"JS1\_A09\_00696" 11182 "s59E5H2" 0 "hypothetical protein"  
"JS1\_A09\_00696" 11182 "s63E6H2" 0.00907456 "hypothetical protein"  
"JS1\_A09\_00697" 11183 "s59E13H2" 0 "DNA helicase II"  
"JS1\_A09\_00697" 11183 "s59E25H2" 0 "DNA helicase II"  
"JS1\_A09\_00697" 11183 "s59E5H2" 0 "DNA helicase II"  
"JS1\_A09\_00697" 11183 "s63E6H2" 0 "DNA helicase II"  
"JS1\_A09\_00698" 11184 "s59E13H2" 0 "hypothetical protein"  
"JS1\_A09\_00698" 11184 "s59E25H2" 0 "hypothetical protein"  
"JS1\_A09\_00698" 11184 "s59E5H2" 0 "hypothetical protein"  
"JS1\_A09\_00698" 11184 "s63E6H2" 0 "hypothetical protein"  
"JS1\_A09\_00699" 11185 "s59E13H2" 0.188986 "DNA integrity scanning protein DisA"  
"JS1\_A09\_00699" 11185 "s59E25H2" 0.5950617 "DNA integrity scanning protein DisA"  
"JS1\_A09\_00699" 11185 "s59E5H2" 0.1168245 "DNA integrity scanning protein DisA"  
"JS1\_A09\_00699" 11185 "s63E6H2" 2.893382 "DNA integrity scanning protein DisA"  
"JS1\_A09\_00700" 11186 "s59E13H2" 0.178085 "YbbR-like protein"  
"JS1\_A09\_00700" 11186 "s59E25H2" 0 "YbbR-like protein"  
"JS1\_A09\_00700" 11186 "s59E5H2" 0.1235008 "YbbR-like protein"  
"JS1\_A09\_00700" 11186 "s63E6H2" 1.034773 "YbbR-like protein"  
"JS1\_A09\_00701" 11187 "s59E13H2" 0.1964555 "Phosphoglucosamine mutase"  
"JS1\_A09\_00701" 11187 "s59E25H2" 0.6867112 "Phosphoglucosamine mutase"  
"JS1\_A09\_00701" 11187 "s59E5H2" 0.1219551 "Phosphoglucosamine mutase"  
"JS1\_A09\_00701" 11187 "s63E6H2" 0.1924612 "Phosphoglucosamine mutase"  
"JS1\_A09\_00703" 11189 "s59E13H2" 0.2100893 "Glutamine--fructose-6-phosphate aminotransferase [isomerizing]"  
"JS1\_A09\_00703" 11189 "s59E25H2" 0.2540984 "Glutamine--fructose-6-phosphate aminotransferase [isomerizing]"  
"JS1\_A09\_00703" 11189 "s59E5H2" 0.2032756 "Glutamine--fructose-6-phosphate aminotransferase [isomerizing]"  
"JS1\_A09\_00703" 11189 "s63E6H2" 0.2128017 "Glutamine--fructose-6-phosphate aminotransferase [isomerizing]"  
"JS1\_A09\_00704" 11190 "s59E13H2" 0.0691948 "Glutamine synthetase"  
"JS1\_A09\_00704" 11190 "s59E25H2" 0.5018811 "Glutamine synthetase"  
"JS1\_A09\_00704" 11190 "s59E5H2" 0.1699243 "Glutamine synthetase"



"JS1\_A09\_00704" 11190 "s63E6H2" 0.1837647 "Glutamine synthetase"  
"JS1\_A09\_00705" 11191 "s59E13H2" 0.9392277 "L-allo-threonine aldolase"  
"JS1\_A09\_00705" 11191 "s59E25H2" 0 "L-allo-threonine aldolase"  
"JS1\_A09\_00705" 11191 "s59E5H2" 0.3384619 "L-allo-threonine aldolase"  
"JS1\_A09\_00705" 11191 "s63E6H2" 0.200193 "L-allo-threonine aldolase"  
"JS1\_A09\_00706" 11192 "s59E13H2" 2.508586 "Thioesterase superfamily protein"  
"JS1\_A09\_00706" 11192 "s59E25H2" 1.368056 "Thioesterase superfamily protein"  
"JS1\_A09\_00706" 11192 "s59E5H2" 0.4416947 "Thioesterase superfamily protein"  
"JS1\_A09\_00706" 11192 "s63E6H2" 0.09408826 "Thioesterase superfamily protein"  
"JS1\_A09\_00707" 11193 "s59E13H2" 3.668794 "phage T7 F exclusion suppressor FxsA"  
"JS1\_A09\_00707" 11193 "s59E25H2" 0 "phage T7 F exclusion suppressor FxsA"  
"JS1\_A09\_00707" 11193 "s59E5H2" 0.2027285 "phage T7 F exclusion suppressor FxsA"  
"JS1\_A09\_00707" 11193 "s63E6H2" 0.1440607 "phage T7 F exclusion suppressor FxsA"  
"JS1\_A09\_00708" 11194 "s59E13H2" 5.706992 "Holo-[acyl-carrier-protein] synthase"  
"JS1\_A09\_00708" 11194 "s59E25H2" 0 "Holo-[acyl-carrier-protein] synthase"  
"JS1\_A09\_00708" 11194 "s59E5H2" 0.4599975 "Holo-[acyl-carrier-protein] synthase"  
"JS1\_A09\_00708" 11194 "s63E6H2" 0.3258655 "Holo-[acyl-carrier-protein] synthase"  
"JS1\_A09\_00712" 11198 "s59E13H2" 0 "CoB--CoM heterodisulfide reductase subunit B"  
"JS1\_A09\_00712" 11198 "s59E25H2" 0 "CoB--CoM heterodisulfide reductase subunit B"  
"JS1\_A09\_00712" 11198 "s59E5H2" 0 "CoB--CoM heterodisulfide reductase subunit B"  
"JS1\_A09\_00712" 11198 "s63E6H2" 0 "CoB--CoM heterodisulfide reductase subunit B"  
"JS1\_A09\_00713" 11199 "s59E13H2" 0.4971022 "Xylulose kinase"  
"JS1\_A09\_00713" 11199 "s59E25H2" 0 "Xylulose kinase"  
"JS1\_A09\_00713" 11199 "s59E5H2" 0.1877244 "Xylulose kinase"  
"JS1\_A09\_00713" 11199 "s63E6H2" 0.1124287 "Xylulose kinase"  
"JS1\_A09\_00714" 11200 "s59E13H2" 0.4876484 "Sorbitol dehydrogenase"  
"JS1\_A09\_00714" 11200 "s59E25H2" 0 "Sorbitol dehydrogenase"  
"JS1\_A09\_00714" 11200 "s59E5H2" 0.1041206 "Sorbitol dehydrogenase"  
"JS1\_A09\_00714" 11200 "s63E6H2" 0.1350794 "Sorbitol dehydrogenase"  
"JS1\_A09\_00715" 11201 "s59E13H2" 0.8457873 "Glyoxylate reductase"  
"JS1\_A09\_00715" 11201 "s59E25H2" 0 "Glyoxylate reductase"  
"JS1\_A09\_00715" 11201 "s59E5H2" 0.1659796 "Glyoxylate reductase"  
"JS1\_A09\_00715" 11201 "s63E6H2" 0.3195916 "Glyoxylate reductase"  
"JS1\_A09\_00716" 11202 "s59E13H2" 0.09898343 "Vitamin B12 dependent methionine synthase, activation domain"  
"JS1\_A09\_00716" 11202 "s59E25H2" 0 "Vitamin B12 dependent methionine synthase, activation domain"  
"JS1\_A09\_00716" 11202 "s59E5H2" 0.02270104 "Vitamin B12 dependent methionine synthase, activation domain"  
"JS1\_A09\_00716" 11202 "s63E6H2" 0.0712368 "Vitamin B12 dependent methionine synthase, activation domain"  
"JS1\_A09\_00717" 11203 "s59E13H2" 0.5522252 "Chlorosome protein I"  
"JS1\_A09\_00717" 11203 "s59E25H2" 0 "Chlorosome protein I"  
"JS1\_A09\_00717" 11203 "s59E5H2" 0.1131714 "Chlorosome protein I"  
"JS1\_A09\_00717" 11203 "s63E6H2" 0.08105072 "Chlorosome protein I"  
"JS1\_A09\_00718" 11204 "s59E13H2" 0.3681426 "Formate--tetrahydrofolate ligase"  
"JS1\_A09\_00718" 11204 "s59E25H2" 0 "Formate--tetrahydrofolate ligase"  
"JS1\_A09\_00718" 11204 "s59E5H2" 0.1132816 "Formate--tetrahydrofolate ligase"  
"JS1\_A09\_00718" 11204 "s63E6H2" 0.8796352 "Formate--tetrahydrofolate ligase"  
"JS1\_A09\_00719" 11205 "s59E13H2" 2.340467 "5-methyltetrahydrofolate:corrinoic/iron-sulfur protein co-methyltransferase"  
"JS1\_A09\_00719" 11205 "s59E25H2" 0 "5-methyltetrahydrofolate:corrinoic/iron-sulfur protein co-methyltransferase"

"JS1\_A09\_00719" 11205 "s59E5H2" 0.1594253 "5-methyltetrahydrofolate:corrinoid/iron-sulfur protein co-methyltransferase"  
"JS1\_A09\_00719" 11205 "s63E6H2" 0.3414946 "5-methyltetrahydrofolate:corrinoid/iron-sulfur protein co-methyltransferase"  
"JS1\_A09\_00720" 11206 "s59E13H2" 2.932287 "Acryloyl-CoA reductase electron transfer subunit beta"  
"JS1\_A09\_00720" 11206 "s59E25H2" 0 "Acryloyl-CoA reductase electron transfer subunit beta"  
"JS1\_A09\_00720" 11206 "s59E5H2" 0.1412328 "Acryloyl-CoA reductase electron transfer subunit beta"  
"JS1\_A09\_00720" 11206 "s63E6H2" 0.9140212 "Acryloyl-CoA reductase electron transfer subunit beta"  
"JS1\_A09\_00721" 11207 "s59E13H2" 2.873048 "Acryloyl-CoA reductase electron transfer subunit gamma"  
"JS1\_A09\_00721" 11207 "s59E25H2" 0 "Acryloyl-CoA reductase electron transfer subunit gamma"  
"JS1\_A09\_00721" 11207 "s59E5H2" 0.2288546 "Acryloyl-CoA reductase electron transfer subunit gamma"  
"JS1\_A09\_00721" 11207 "s63E6H2" 1.082923 "Acryloyl-CoA reductase electron transfer subunit gamma"  
"JS1\_A09\_00722" 11208 "s59E13H2" 3.189226 "bifunctional homocysteine S-methyltransferase/5,10-methylenetetrahydrofolate reductase protein"  
"JS1\_A09\_00722" 11208 "s59E25H2" 0 "bifunctional homocysteine S-methyltransferase/5,10-methylenetetrahydrofolate reductase protein"  
"JS1\_A09\_00722" 11208 "s59E5H2" 0.2719833 "bifunctional homocysteine S-methyltransferase/5,10-methylenetetrahydrofolate reductase protein"  
"JS1\_A09\_00722" 11208 "s63E6H2" 0.834493 "bifunctional homocysteine S-methyltransferase/5,10-methylenetetrahydrofolate reductase protein"  
"JS1\_A09\_00723" 11209 "s59E13H2" 2.582701 "Trimethylamine corrinoid protein"  
"JS1\_A09\_00723" 11209 "s59E25H2" 0 "Trimethylamine corrinoid protein"  
"JS1\_A09\_00723" 11209 "s59E5H2" 0.3557873 "Trimethylamine corrinoid protein"  
"JS1\_A09\_00723" 11209 "s63E6H2" 0.42871 "Trimethylamine corrinoid protein"  
"JS1\_A09\_00724" 11210 "s59E13H2" 1.13166 "HTH-type transcriptional activator Btr"  
"JS1\_A09\_00724" 11210 "s59E25H2" 0.2209821 "HTH-type transcriptional activator Btr"  
"JS1\_A09\_00724" 11210 "s59E5H2" 0.03271296 "HTH-type transcriptional activator Btr"  
"JS1\_A09\_00724" 11210 "s63E6H2" 0.1292844 "HTH-type transcriptional activator Btr"  
"JS1\_A09\_00725" 11211 "s59E13H2" 2.501804 "DNA polymerase/3'-5' exonuclease PolX"  
"JS1\_A09\_00725" 11211 "s59E25H2" 0.09656777 "DNA polymerase/3'-5' exonuclease PolX"  
"JS1\_A09\_00725" 11211 "s59E5H2" 0.3569222 "DNA polymerase/3'-5' exonuclease PolX"  
"JS1\_A09\_00725" 11211 "s63E6H2" 0.1067324 "DNA polymerase/3'-5' exonuclease PolX"  
"JS1\_A09\_00727" 11213 "s59E13H2" 2.288024e-05 "NADH dehydrogenase"  
"JS1\_A09\_00727" 11213 "s59E25H2" 0 "NADH dehydrogenase"  
"JS1\_A09\_00727" 11213 "s59E5H2" 1.777602e-05 "NADH dehydrogenase"  
"JS1\_A09\_00727" 11213 "s63E6H2" 0.154402 "NADH dehydrogenase"  
"JS1\_A09\_00728" 11214 "s59E13H2" 0 "Glutaredoxin-3"  
"JS1\_A09\_00728" 11214 "s59E25H2" 0 "Glutaredoxin-3"  
"JS1\_A09\_00728" 11214 "s59E5H2" 0 "Glutaredoxin-3"  
"JS1\_A09\_00728" 11214 "s63E6H2" 0.1471288 "Glutaredoxin-3"  
"JS1\_A09\_00729" 11215 "s59E13H2" 0.1564484 "Carnitine transport permease protein OpuCB"  
"JS1\_A09\_00729" 11215 "s59E25H2" 0 "Carnitine transport permease protein OpuCB"  
"JS1\_A09\_00729" 11215 "s59E5H2" 0.3352326 "Carnitine transport permease protein OpuCB"  
"JS1\_A09\_00729" 11215 "s63E6H2" 0.1982439 "Carnitine transport permease protein OpuCB"  
"JS1\_A09\_00730" 11216 "s59E13H2" 0.4575197 "Glycine betaine/carnitine/choline transport system permease protein OpuCB"  
"JS1\_A09\_00730" 11216 "s59E25H2" 0 "Glycine betaine/carnitine/choline transport system permease protein OpuCB"  
"JS1\_A09\_00730" 11216 "s59E5H2" 0.7312167 "Glycine betaine/carnitine/choline transport system permease protein OpuCB"  
"JS1\_A09\_00730" 11216 "s63E6H2" 0.4626593 "Glycine betaine/carnitine/choline transport system permease protein OpuCB"  
"JS1\_A09\_00731" 11217 "s59E13H2" 0.4029222 "Choline transport ATP-binding protein OpuBA"  
"JS1\_A09\_00731" 11217 "s59E25H2" 0 "Choline transport ATP-binding protein OpuBA"  
"JS1\_A09\_00731" 11217 "s59E5H2" 2.496101 "Choline transport ATP-binding protein OpuBA"  
"JS1\_A09\_00731" 11217 "s63E6H2" 0.5311305 "Choline transport ATP-binding protein OpuBA"  
"JS1\_A09\_00732" 11218 "s59E13H2" 0.3128328 "Glycine betaine/carnitine/choline-binding protein OpuCC precursor"

"JS1\_A09\_00732" 11218 "s59E25H2" 0 "Glycine betaine/carnitine/choline-binding protein OpuCC precursor"  
"JS1\_A09\_00732" 11218 "s59E5H2" 4.170406 "Glycine betaine/carnitine/choline-binding protein OpuCC precursor"  
"JS1\_A09\_00732" 11218 "s63E6H2" 0.4551214 "Glycine betaine/carnitine/choline-binding protein OpuCC precursor"  
"JS1\_A09\_00733" 11219 "s59E13H2" 0.2067396 "Uracil DNA glycosylase superfamily protein"  
"JS1\_A09\_00733" 11219 "s59E25H2" 0.2142857 "Uracil DNA glycosylase superfamily protein"  
"JS1\_A09\_00733" 11219 "s59E5H2" 0.3556931 "Uracil DNA glycosylase superfamily protein"  
"JS1\_A09\_00733" 11219 "s63E6H2" 0.2090014 "Uracil DNA glycosylase superfamily protein"  
"JS1\_A09\_00734" 11220 "s59E13H2" 0.1225146 "putative HTH-type transcriptional regulator YdfH"  
"JS1\_A09\_00734" 11220 "s59E25H2" 0.1463415 "putative HTH-type transcriptional regulator YdfH"  
"JS1\_A09\_00734" 11220 "s59E5H2" 0.01548682 "putative HTH-type transcriptional regulator YdfH"  
"JS1\_A09\_00734" 11220 "s63E6H2" 0.2495804 "putative HTH-type transcriptional regulator YdfH"  
"JS1\_A09\_00735" 11221 "s59E13H2" 0.005548117 "hypothetical protein"  
"JS1\_A09\_00735" 11221 "s59E25H2" 0 "hypothetical protein"  
"JS1\_A09\_00735" 11221 "s59E5H2" 0.03505671 "hypothetical protein"  
"JS1\_A09\_00735" 11221 "s63E6H2" 0.1760101 "hypothetical protein"  
"JS1\_A09\_00736" 11222 "s59E13H2" 0.005509438 "Opine dehydrogenase"  
"JS1\_A09\_00736" 11222 "s59E25H2" 0 "Opine dehydrogenase"  
"JS1\_A09\_00736" 11222 "s59E5H2" 0 "Opine dehydrogenase"  
"JS1\_A09\_00736" 11222 "s63E6H2" 0.1060498 "Opine dehydrogenase"  
"JS1\_A09\_00737" 11223 "s59E13H2" 0 "Gamma-glutamyl-gamma-aminobutyrate hydrolase PuuD"  
"JS1\_A09\_00737" 11223 "s59E25H2" 0 "Gamma-glutamyl-gamma-aminobutyrate hydrolase PuuD"  
"JS1\_A09\_00737" 11223 "s59E5H2" 0 "Gamma-glutamyl-gamma-aminobutyrate hydrolase PuuD"  
"JS1\_A09\_00737" 11223 "s63E6H2" 0.04072159 "Gamma-glutamyl-gamma-aminobutyrate hydrolase PuuD"  
"JS1\_A09\_00738" 11224 "s59E13H2" 0 "Oligopeptide transport ATP-binding protein OppF"  
"JS1\_A09\_00738" 11224 "s59E25H2" 0 "Oligopeptide transport ATP-binding protein OppF"  
"JS1\_A09\_00738" 11224 "s59E5H2" 0.01195556 "Oligopeptide transport ATP-binding protein OppF"  
"JS1\_A09\_00738" 11224 "s63E6H2" 0.1226438 "Oligopeptide transport ATP-binding protein OppF"  
"JS1\_A09\_00739" 11225 "s59E13H2" 0 "Oligopeptide transport ATP-binding protein OppD"  
"JS1\_A09\_00739" 11225 "s59E25H2" 0 "Oligopeptide transport ATP-binding protein OppD"  
"JS1\_A09\_00739" 11225 "s59E5H2" 0 "Oligopeptide transport ATP-binding protein OppD"  
"JS1\_A09\_00739" 11225 "s63E6H2" 0.02107613 "Oligopeptide transport ATP-binding protein OppD"  
"JS1\_A09\_00740" 11226 "s59E13H2" 0 "Glutathione transport system permease protein GsiD"  
"JS1\_A09\_00740" 11226 "s59E25H2" 0 "Glutathione transport system permease protein GsiD"  
"JS1\_A09\_00740" 11226 "s59E5H2" 0 "Glutathione transport system permease protein GsiD"  
"JS1\_A09\_00740" 11226 "s63E6H2" 0.03003692 "Glutathione transport system permease protein GsiD"  
"JS1\_A09\_00741" 11227 "s59E13H2" 0 "Dipeptide transport system permease protein DppB"  
"JS1\_A09\_00741" 11227 "s59E25H2" 0 "Dipeptide transport system permease protein DppB"  
"JS1\_A09\_00741" 11227 "s59E5H2" 0 "Dipeptide transport system permease protein DppB"  
"JS1\_A09\_00741" 11227 "s63E6H2" 0.0272636 "Dipeptide transport system permease protein DppB"  
"JS1\_A09\_00742" 11228 "s59E13H2" 0 "Periplasmic dipeptide transport protein precursor"  
"JS1\_A09\_00742" 11228 "s59E25H2" 0 "Periplasmic dipeptide transport protein precursor"  
"JS1\_A09\_00742" 11228 "s59E5H2" 0.002760347 "Periplasmic dipeptide transport protein precursor"  
"JS1\_A09\_00742" 11228 "s63E6H2" 0.02220314 "Periplasmic dipeptide transport protein precursor"  
"JS1\_A09\_00743" 11229 "s59E13H2" 0.05728363 "N-acyl-D-glutamate deacylase"  
"JS1\_A09\_00743" 11229 "s59E25H2" 0 "N-acyl-D-glutamate deacylase"  
"JS1\_A09\_00743" 11229 "s59E5H2" 0.2173796 "N-acyl-D-glutamate deacylase"  
"JS1\_A09\_00743" 11229 "s63E6H2" 0.1159915 "N-acyl-D-glutamate deacylase"

"JS1\_A09\_00744" 11230 "s59E13H2" 0.02045099 "Oligopeptide transport ATP-binding protein OppF"  
"JS1\_A09\_00744" 11230 "s59E25H2" 0 "Oligopeptide transport ATP-binding protein OppF"  
"JS1\_A09\_00744" 11230 "s59E5H2" 0.4260056 "Oligopeptide transport ATP-binding protein OppF"  
"JS1\_A09\_00744" 11230 "s63E6H2" 0.1239756 "Oligopeptide transport ATP-binding protein OppF"  
"JS1\_A09\_00745" 11231 "s59E13H2" 0.01538405 "Oligopeptide transport ATP-binding protein OppD"  
"JS1\_A09\_00745" 11231 "s59E25H2" 0 "Oligopeptide transport ATP-binding protein OppD"  
"JS1\_A09\_00745" 11231 "s59E5H2" 1.636925 "Oligopeptide transport ATP-binding protein OppD"  
"JS1\_A09\_00745" 11231 "s63E6H2" 0.2476926 "Oligopeptide transport ATP-binding protein OppD"  
"JS1\_A09\_00746" 11232 "s59E13H2" 0.007569087 "Glutathione transport system permease protein GsiD"  
"JS1\_A09\_00746" 11232 "s59E25H2" 0 "Glutathione transport system permease protein GsiD"  
"JS1\_A09\_00746" 11232 "s59E5H2" 1.784126 "Glutathione transport system permease protein GsiD"  
"JS1\_A09\_00746" 11232 "s63E6H2" 2.652464 "Glutathione transport system permease protein GsiD"  
"JS1\_A09\_00747" 11233 "s59E13H2" 0.01753625 "Glutathione transport system permease protein GsiC"  
"JS1\_A09\_00747" 11233 "s59E25H2" 0 "Glutathione transport system permease protein GsiC"  
"JS1\_A09\_00747" 11233 "s59E5H2" 0.9548552 "Glutathione transport system permease protein GsiC"  
"JS1\_A09\_00747" 11233 "s63E6H2" 2.813351 "Glutathione transport system permease protein GsiC"  
"JS1\_A09\_00748" 11234 "s59E13H2" 0.002656095 "Glutathione-binding protein GsiB precursor"  
"JS1\_A09\_00748" 11234 "s59E25H2" 0 "Glutathione-binding protein GsiB precursor"  
"JS1\_A09\_00748" 11234 "s59E5H2" 1.221035 "Glutathione-binding protein GsiB precursor"  
"JS1\_A09\_00748" 11234 "s63E6H2" 2.784874 "Glutathione-binding protein GsiB precursor"  
"JS1\_A09\_00749" 11235 "s59E13H2" 0.4589686 "putative protease YhbU precursor"  
"JS1\_A09\_00749" 11235 "s59E25H2" 0 "putative protease YhbU precursor"  
"JS1\_A09\_00749" 11235 "s59E5H2" 0.6744602 "putative protease YhbU precursor"  
"JS1\_A09\_00749" 11235 "s63E6H2" 1.405991 "putative protease YhbU precursor"  
"JS1\_A09\_00750" 11236 "s59E13H2" 0.4107367 "Putative GTP cyclohydrolase 1 type 2"  
"JS1\_A09\_00750" 11236 "s59E25H2" 0.1776557 "Putative GTP cyclohydrolase 1 type 2"  
"JS1\_A09\_00750" 11236 "s59E5H2" 0.3410848 "Putative GTP cyclohydrolase 1 type 2"  
"JS1\_A09\_00750" 11236 "s63E6H2" 0.1663844 "Putative GTP cyclohydrolase 1 type 2"  
"JS1\_A09\_00751" 11237 "s59E13H2" 0.3899548 "hypothetical protein"  
"JS1\_A09\_00751" 11237 "s59E25H2" 0 "hypothetical protein"  
"JS1\_A09\_00751" 11237 "s59E5H2" 0.3371869 "hypothetical protein"  
"JS1\_A09\_00751" 11237 "s63E6H2" 0.7504224 "hypothetical protein"  
"JS1\_A09\_00752" 11238 "s59E13H2" 0 "4-hydroxy-tetrahydrodipicolinate synthase"  
"JS1\_A09\_00752" 11238 "s59E25H2" 0 "4-hydroxy-tetrahydrodipicolinate synthase"  
"JS1\_A09\_00752" 11238 "s59E5H2" 0.04660873 "4-hydroxy-tetrahydrodipicolinate synthase"  
"JS1\_A09\_00752" 11238 "s63E6H2" 3.128233 "4-hydroxy-tetrahydrodipicolinate synthase"  
"JS1\_A09\_00753" 11239 "s59E13H2" 0.002085847 "Aldo/keto reductase family protein"  
"JS1\_A09\_00753" 11239 "s59E25H2" 0 "Aldo/keto reductase family protein"  
"JS1\_A09\_00753" 11239 "s59E5H2" 0.05004912 "Aldo/keto reductase family protein"  
"JS1\_A09\_00753" 11239 "s63E6H2" 0.03710763 "Aldo/keto reductase family protein"  
"JS1\_A09\_00754" 11240 "s59E13H2" 0 "D-allulose-6-phosphate 3-epimerase"  
"JS1\_A09\_00754" 11240 "s59E25H2" 0 "D-allulose-6-phosphate 3-epimerase"  
"JS1\_A09\_00754" 11240 "s59E5H2" 0.005258514 "D-allulose-6-phosphate 3-epimerase"  
"JS1\_A09\_00754" 11240 "s63E6H2" 0.008587337 "D-allulose-6-phosphate 3-epimerase"  
"JS1\_A09\_00755" 11241 "s59E13H2" 0 "4-oxalmesaconate hydratase"  
"JS1\_A09\_00755" 11241 "s59E25H2" 0 "4-oxalmesaconate hydratase"  
"JS1\_A09\_00755" 11241 "s59E5H2" 0 "4-oxalmesaconate hydratase"

"JS1\_A09\_00755" 11241 "s63E6H2" 0.005691085 "4-oxalomesaconate hydratase"  
"JS1\_A09\_00757" 11243 "s59E13H2" 0 "EamA-like transporter family protein"  
"JS1\_A09\_00757" 11243 "s59E25H2" 0 "EamA-like transporter family protein"  
"JS1\_A09\_00757" 11243 "s59E5H2" 0 "EamA-like transporter family protein"  
"JS1\_A09\_00757" 11243 "s63E6H2" 0 "EamA-like transporter family protein"  
"JS1\_A09\_00758" 11244 "s59E13H2" 0.006326479 "L-threonine dehydratase catabolic TdcB"  
"JS1\_A09\_00758" 11244 "s59E25H2" 0 "L-threonine dehydratase catabolic TdcB"  
"JS1\_A09\_00758" 11244 "s59E5H2" 0 "L-threonine dehydratase catabolic TdcB"  
"JS1\_A09\_00758" 11244 "s63E6H2" 0.001686632 "L-threonine dehydratase catabolic TdcB"  
"JS1\_A09\_00760" 11246 "s59E13H2" 0.003901918 "Integrase core domain protein"  
"JS1\_A09\_00760" 11246 "s59E25H2" 0 "Integrase core domain protein"  
"JS1\_A09\_00760" 11246 "s59E5H2" 0.9697252 "Integrase core domain protein"  
"JS1\_A09\_00760" 11246 "s63E6H2" 0.8781064 "Integrase core domain protein"  
"JS1\_A09\_00761" 11247 "s59E13H2" 0.03129457 "Transposase"  
"JS1\_A09\_00761" 11247 "s59E25H2" 0 "Transposase"  
"JS1\_A09\_00761" 11247 "s59E5H2" 0.1110543 "Transposase"  
"JS1\_A09\_00761" 11247 "s63E6H2" 0.364777 "Transposase"  
"JS1\_A09\_00762" 11248 "s59E13H2" 0 "putative glycolipid permease LtaA"  
"JS1\_A09\_00762" 11248 "s59E25H2" 0 "putative glycolipid permease LtaA"  
"JS1\_A09\_00762" 11248 "s59E5H2" 0.002213816 "putative glycolipid permease LtaA"  
"JS1\_A09\_00762" 11248 "s63E6H2" 0.002939097 "putative glycolipid permease LtaA"  
"JS1\_A09\_00763" 11249 "s59E13H2" 0.04714346 "Transposase"  
"JS1\_A09\_00763" 11249 "s59E25H2" 0 "Transposase"  
"JS1\_A09\_00763" 11249 "s59E5H2" 0 "Transposase"  
"JS1\_A09\_00763" 11249 "s63E6H2" 0.006698476 "Transposase"  
"JS1\_A09\_00764" 11250 "s59E13H2" 0.6440786 "branched-chain amino acid transporter permease subunit LivH"  
"JS1\_A09\_00764" 11250 "s59E25H2" 0 "branched-chain amino acid transporter permease subunit LivH"  
"JS1\_A09\_00764" 11250 "s59E5H2" 0.03293428 "branched-chain amino acid transporter permease subunit LivH"  
"JS1\_A09\_00764" 11250 "s63E6H2" 0.1660866 "branched-chain amino acid transporter permease subunit LivH"  
"JS1\_A09\_00765" 11251 "s59E13H2" 0.03857945 "Aspartate carbamoyltransferase"  
"JS1\_A09\_00765" 11251 "s59E25H2" 0 "Aspartate carbamoyltransferase"  
"JS1\_A09\_00765" 11251 "s59E5H2" 0.0306514 "Aspartate carbamoyltransferase"  
"JS1\_A09\_00765" 11251 "s63E6H2" 0.0237645 "Aspartate carbamoyltransferase"  
"JS1\_A09\_00767" 11253 "s59E13H2" 0.1436556 "Carbamate kinase"  
"JS1\_A09\_00767" 11253 "s59E25H2" 0 "Carbamate kinase"  
"JS1\_A09\_00767" 11253 "s59E5H2" 0.6628742 "Carbamate kinase"  
"JS1\_A09\_00767" 11253 "s63E6H2" 0.04227271 "Carbamate kinase"  
"JS1\_A09\_00768" 11254 "s59E13H2" 0 "HTH-type transcriptional regulator KipR"  
"JS1\_A09\_00768" 11254 "s59E25H2" 0 "HTH-type transcriptional regulator KipR"  
"JS1\_A09\_00768" 11254 "s59E5H2" 0 "HTH-type transcriptional regulator KipR"  
"JS1\_A09\_00768" 11254 "s63E6H2" 0.005145232 "HTH-type transcriptional regulator KipR"  
"JS1\_A09\_00769" 11255 "s59E13H2" 0.09376139 "Trehalose/maltose import ATP-binding protein Malk"  
"JS1\_A09\_00769" 11255 "s59E25H2" 0 "Trehalose/maltose import ATP-binding protein Malk"  
"JS1\_A09\_00769" 11255 "s59E5H2" 0.2567938 "Trehalose/maltose import ATP-binding protein Malk"  
"JS1\_A09\_00769" 11255 "s63E6H2" 0.1157728 "Trehalose/maltose import ATP-binding protein Malk"  
"JS1\_A09\_00770" 11256 "s59E13H2" 0 "methylcobalamin:coenzyme M methyltransferase"  
"JS1\_A09\_00770" 11256 "s59E25H2" 0 "methylcobalamin:coenzyme M methyltransferase"

"JS1\_A09\_00770" 11256 "s59E5H2" 0.2448366 "methylcobalamin:coenzyme M methyltransferase"  
"JS1\_A09\_00770" 11256 "s63E6H2" 0.1693652 "methylcobalamin:coenzyme M methyltransferase"  
"JS1\_A09\_00772" 11258 "s59E13H2" 0 "Sulfide dehydrogenase subunit alpha precursor"  
"JS1\_A09\_00772" 11258 "s59E25H2" 0 "Sulfide dehydrogenase subunit alpha precursor"  
"JS1\_A09\_00772" 11258 "s59E5H2" 0.005290294 "Sulfide dehydrogenase subunit alpha precursor"  
"JS1\_A09\_00772" 11258 "s63E6H2" 0 "Sulfide dehydrogenase subunit alpha precursor"  
"JS1\_A09\_00773" 11259 "s59E13H2" 0 "hypothetical protein"  
"JS1\_A09\_00773" 11259 "s59E25H2" 0 "hypothetical protein"  
"JS1\_A09\_00773" 11259 "s59E5H2" 0.0574298 "hypothetical protein"  
"JS1\_A09\_00773" 11259 "s63E6H2" 0.1017453 "hypothetical protein"  
"JS1\_A09\_00775" 11261 "s59E13H2" 0 "Helix-turn-helix"  
"JS1\_A09\_00775" 11261 "s59E25H2" 0 "Helix-turn-helix"  
"JS1\_A09\_00775" 11261 "s59E5H2" 0 "Helix-turn-helix"  
"JS1\_A09\_00775" 11261 "s63E6H2" 0.3185998 "Helix-turn-helix"  
"JS1\_A09\_00776" 11262 "s59E13H2" 0.008148192 "Quinone oxidoreductase 1"  
"JS1\_A09\_00776" 11262 "s59E25H2" 0 "Quinone oxidoreductase 1"  
"JS1\_A09\_00776" 11262 "s59E5H2" 0 "Quinone oxidoreductase 1"  
"JS1\_A09\_00776" 11262 "s63E6H2" 0.3056737 "Quinone oxidoreductase 1"  
"JS1\_A09\_00777" 11263 "s59E13H2" 0 "hypothetical protein"  
"JS1\_A09\_00777" 11263 "s59E25H2" 0 "hypothetical protein"  
"JS1\_A09\_00777" 11263 "s59E5H2" 0 "hypothetical protein"  
"JS1\_A09\_00777" 11263 "s63E6H2" 0.3887589 "hypothetical protein"  
"JS1\_A09\_00778" 11264 "s59E13H2" 0.002435432 "hypothetical protein"  
"JS1\_A09\_00778" 11264 "s59E25H2" 0 "hypothetical protein"  
"JS1\_A09\_00778" 11264 "s59E5H2" 0 "hypothetical protein"  
"JS1\_A09\_00778" 11264 "s63E6H2" 0.4723284 "hypothetical protein"  
"JS1\_A09\_00779" 11265 "s59E13H2" 0 "Acryloyl-coenzyme A reductase"  
"JS1\_A09\_00779" 11265 "s59E25H2" 0 "Acryloyl-coenzyme A reductase"  
"JS1\_A09\_00779" 11265 "s59E5H2" 0 "Acryloyl-coenzyme A reductase"  
"JS1\_A09\_00779" 11265 "s63E6H2" 0.5561228 "Acryloyl-coenzyme A reductase"  
"JS1\_A09\_00780" 11266 "s59E13H2" 0.006674559 "Alcohol dehydrogenase"  
"JS1\_A09\_00780" 11266 "s59E25H2" 0 "Alcohol dehydrogenase"  
"JS1\_A09\_00780" 11266 "s59E5H2" 0.001113533 "Alcohol dehydrogenase"  
"JS1\_A09\_00780" 11266 "s63E6H2" 0.7504729 "Alcohol dehydrogenase"  
"JS1\_A09\_00781" 11267 "s59E13H2" 0.06508687 "hypothetical protein"  
"JS1\_A09\_00781" 11267 "s59E25H2" 0 "hypothetical protein"  
"JS1\_A09\_00781" 11267 "s59E5H2" 0.3698155 "hypothetical protein"  
"JS1\_A09\_00781" 11267 "s63E6H2" 0.4906897 "hypothetical protein"  
"JS1\_A09\_00782" 11268 "s59E13H2" 0.05868119 "Cystathionine beta-lyase PatB"  
"JS1\_A09\_00782" 11268 "s59E25H2" 0.4204738 "Cystathionine beta-lyase PatB"  
"JS1\_A09\_00782" 11268 "s59E5H2" 0.8884359 "Cystathionine beta-lyase PatB"  
"JS1\_A09\_00782" 11268 "s63E6H2" 1.050601 "Cystathionine beta-lyase PatB"  
"JS1\_A09\_00783" 11269 "s59E13H2" 0.06995567 "Pyridoxamine 5'-phosphate oxidase"  
"JS1\_A09\_00783" 11269 "s59E25H2" 0 "Pyridoxamine 5'-phosphate oxidase"  
"JS1\_A09\_00783" 11269 "s59E5H2" 0.3068117 "Pyridoxamine 5'-phosphate oxidase"  
"JS1\_A09\_00783" 11269 "s63E6H2" 0.3258359 "Pyridoxamine 5'-phosphate oxidase"  
"JS1\_A09\_00784" 11270 "s59E13H2" 0.07842431 "hypothetical protein"

"JS1\_A09\_00784" 11270 "s59E25H2" 0 "hypothetical protein"  
"JS1\_A09\_00784" 11270 "s59E5H2" 0.2256133 "hypothetical protein"  
"JS1\_A09\_00784" 11270 "s63E6H2" 0.1041078 "hypothetical protein"  
"JS1\_A09\_00785" 11271 "s59E13H2" 0.2184545 "L-galactonate transporter"  
"JS1\_A09\_00785" 11271 "s59E25H2" 0 "L-galactonate transporter"  
"JS1\_A09\_00785" 11271 "s59E5H2" 0.1718389 "L-galactonate transporter"  
"JS1\_A09\_00785" 11271 "s63E6H2" 0.0651767 "L-galactonate transporter"  
"JS1\_A09\_00786" 11272 "s59E13H2" 0.005925134 "Demethylmenaquinone methyltransferase"  
"JS1\_A09\_00786" 11272 "s59E25H2" 0 "Demethylmenaquinone methyltransferase"  
"JS1\_A09\_00786" 11272 "s59E5H2" 0.2376365 "Demethylmenaquinone methyltransferase"  
"JS1\_A09\_00786" 11272 "s63E6H2" 0.7883103 "Demethylmenaquinone methyltransferase"  
"JS1\_A09\_00787" 11273 "s59E13H2" 0.01798956 "hypothetical protein"  
"JS1\_A09\_00787" 11273 "s59E25H2" 0 "hypothetical protein"  
"JS1\_A09\_00787" 11273 "s59E5H2" 0.432378 "hypothetical protein"  
"JS1\_A09\_00787" 11273 "s63E6H2" 0.4393446 "hypothetical protein"  
"JS1\_A09\_00789" 11275 "s59E13H2" 0.04052055 "Ribokinase"  
"JS1\_A09\_00789" 11275 "s59E25H2" 0 "Ribokinase"  
"JS1\_A09\_00789" 11275 "s59E5H2" 0.8931663 "Ribokinase"  
"JS1\_A09\_00789" 11275 "s63E6H2" 0.4838135 "Ribokinase"  
"JS1\_A09\_00790" 11276 "s59E13H2" 0.08769741 "HTH-type transcriptional regulator DegA"  
"JS1\_A09\_00790" 11276 "s59E25H2" 0 "HTH-type transcriptional regulator DegA"  
"JS1\_A09\_00790" 11276 "s59E5H2" 0.8802686 "HTH-type transcriptional regulator DegA"  
"JS1\_A09\_00790" 11276 "s63E6H2" 1.540916 "HTH-type transcriptional regulator DegA"  
"JS1\_A09\_00791" 11277 "s59E13H2" 0.1725165 "D-ribose pyranase"  
"JS1\_A09\_00791" 11277 "s59E25H2" 0 "D-ribose pyranase"  
"JS1\_A09\_00791" 11277 "s59E5H2" 0.227089 "D-ribose pyranase"  
"JS1\_A09\_00791" 11277 "s63E6H2" 0.2827961 "D-ribose pyranase"  
"JS1\_A09\_00792" 11278 "s59E13H2" 0.0035514 "Galactose/methyl galactoside import ATP-binding protein MglA"  
"JS1\_A09\_00792" 11278 "s59E25H2" 0 "Galactose/methyl galactoside import ATP-binding protein MglA"  
"JS1\_A09\_00792" 11278 "s59E5H2" 0.221614 "Galactose/methyl galactoside import ATP-binding protein MglA"  
"JS1\_A09\_00792" 11278 "s63E6H2" 2.215037 "Galactose/methyl galactoside import ATP-binding protein MglA"  
"JS1\_A09\_00793" 11279 "s59E13H2" 0.001543202 "Ribose transport system permease protein RbsC"  
"JS1\_A09\_00793" 11279 "s59E25H2" 0 "Ribose transport system permease protein RbsC"  
"JS1\_A09\_00793" 11279 "s59E5H2" 0.2281632 "Ribose transport system permease protein RbsC"  
"JS1\_A09\_00793" 11279 "s63E6H2" 2.338741 "Ribose transport system permease protein RbsC"  
"JS1\_A09\_00794" 11280 "s59E13H2" 0.1716342 "D-ribose-binding periplasmic protein precursor"  
"JS1\_A09\_00794" 11280 "s59E25H2" 0 "D-ribose-binding periplasmic protein precursor"  
"JS1\_A09\_00794" 11280 "s59E5H2" 0.3241247 "D-ribose-binding periplasmic protein precursor"  
"JS1\_A09\_00794" 11280 "s63E6H2" 3.055513 "D-ribose-binding periplasmic protein precursor"  
"JS1\_A09\_00795" 11281 "s59E13H2" 0.3876305 "Cyclic di-GMP phosphodiesterase Gmr"  
"JS1\_A09\_00795" 11281 "s59E25H2" 0 "Cyclic di-GMP phosphodiesterase Gmr"  
"JS1\_A09\_00795" 11281 "s59E5H2" 1.225266 "Cyclic di-GMP phosphodiesterase Gmr"  
"JS1\_A09\_00795" 11281 "s63E6H2" 2.188712 "Cyclic di-GMP phosphodiesterase Gmr"  
"JS1\_A09\_00796" 11282 "s59E13H2" 1.100097 "L-asparaginase 1"  
"JS1\_A09\_00796" 11282 "s59E25H2" 0 "L-asparaginase 1"  
"JS1\_A09\_00796" 11282 "s59E5H2" 1.936863 "L-asparaginase 1"  
"JS1\_A09\_00796" 11282 "s63E6H2" 3.553268 "L-asparaginase 1"

"JS1\_A09\_00797" 11283 "s59E13H2" 0.86474 "Multidrug export protein MepA"  
"JS1\_A09\_00797" 11283 "s59E25H2" 0.3399852 "Multidrug export protein MepA"  
"JS1\_A09\_00797" 11283 "s59E5H2" 0.259855 "Multidrug export protein MepA"  
"JS1\_A09\_00797" 11283 "s63E6H2" 4.082384 "Multidrug export protein MepA"  
"JS1\_A09\_00798" 11284 "s59E13H2" 0.1990754 "putative HTH-type transcriptional regulator YusO"  
"JS1\_A09\_00798" 11284 "s59E25H2" 0 "putative HTH-type transcriptional regulator YusO"  
"JS1\_A09\_00798" 11284 "s59E5H2" 0.1343914 "putative HTH-type transcriptional regulator YusO"  
"JS1\_A09\_00798" 11284 "s63E6H2" 0.188895 "putative HTH-type transcriptional regulator YusO"  
"JS1\_A09\_00799" 11285 "s59E13H2" 0.01198104 "Flavoredoxin"  
"JS1\_A09\_00799" 11285 "s59E25H2" 0 "Flavoredoxin"  
"JS1\_A09\_00799" 11285 "s59E5H2" 0.008147013 "Flavoredoxin"  
"JS1\_A09\_00799" 11285 "s63E6H2" 0.007190226 "Flavoredoxin"  
"JS1\_A09\_00800" 11286 "s59E13H2" 0.05631355 "hypothetical protein"  
"JS1\_A09\_00800" 11286 "s59E25H2" 0 "hypothetical protein"  
"JS1\_A09\_00800" 11286 "s59E5H2" 0 "hypothetical protein"  
"JS1\_A09\_00800" 11286 "s63E6H2" 0.07817343 "hypothetical protein"  
"JS1\_A09\_00801" 11287 "s59E13H2" 0.1634144 "PEGA domain protein"  
"JS1\_A09\_00801" 11287 "s59E25H2" 0 "PEGA domain protein"  
"JS1\_A09\_00801" 11287 "s59E5H2" 0.9276362 "PEGA domain protein"  
"JS1\_A09\_00801" 11287 "s63E6H2" 1.421651 "PEGA domain protein"  
"JS1\_A09\_00802" 11288 "s59E13H2" 0 "hypothetical protein"  
"JS1\_A09\_00802" 11288 "s59E25H2" 0 "hypothetical protein"  
"JS1\_A09\_00802" 11288 "s59E5H2" 0 "hypothetical protein"  
"JS1\_A09\_00802" 11288 "s63E6H2" 0 "hypothetical protein"  
"JS1\_A09\_00803" 11289 "s59E13H2" 0.1244455 "PEGA domain protein"  
"JS1\_A09\_00803" 11289 "s59E25H2" 0 "PEGA domain protein"  
"JS1\_A09\_00803" 11289 "s59E5H2" 0.06365708 "PEGA domain protein"  
"JS1\_A09\_00803" 11289 "s63E6H2" 0.4289013 "PEGA domain protein"  
"JS1\_A09\_00804" 11290 "s59E13H2" 0.07107111 "hypothetical protein"  
"JS1\_A09\_00804" 11290 "s59E25H2" 0 "hypothetical protein"  
"JS1\_A09\_00804" 11290 "s59E5H2" 0.0451511 "hypothetical protein"  
"JS1\_A09\_00804" 11290 "s63E6H2" 0.2013454 "hypothetical protein"  
"JS1\_A09\_00805" 11291 "s59E13H2" 0.009480215 "hypothetical protein"  
"JS1\_A09\_00805" 11291 "s59E25H2" 0 "hypothetical protein"  
"JS1\_A09\_00805" 11291 "s59E5H2" 0 "hypothetical protein"  
"JS1\_A09\_00805" 11291 "s63E6H2" 0.041812 "hypothetical protein"  
"JS1\_A09\_00806" 11292 "s59E13H2" 0 "tetratricopeptide repeat protein"  
"JS1\_A09\_00806" 11292 "s59E25H2" 0 "tetratricopeptide repeat protein"  
"JS1\_A09\_00806" 11292 "s59E5H2" 0 "tetratricopeptide repeat protein"  
"JS1\_A09\_00806" 11292 "s63E6H2" 0.005188751 "tetratricopeptide repeat protein"  
"JS1\_A09\_00807" 11293 "s59E13H2" 0 "hypothetical protein"  
"JS1\_A09\_00807" 11293 "s59E25H2" 0 "hypothetical protein"  
"JS1\_A09\_00807" 11293 "s59E5H2" 0 "hypothetical protein"  
"JS1\_A09\_00807" 11293 "s63E6H2" 0.02450714 "hypothetical protein"  
"JS1\_A09\_00808" 11294 "s59E13H2" 0 "hypothetical protein"  
"JS1\_A09\_00808" 11294 "s59E25H2" 0 "hypothetical protein"  
"JS1\_A09\_00808" 11294 "s59E5H2" 0 "hypothetical protein"



"JS1\_A09\_00808" 11294 "s63E6H2" 0.00202643 "hypothetical protein"  
"JS1\_A09\_00809" 11295 "s59E13H2" 0 "hypothetical protein"  
"JS1\_A09\_00809" 11295 "s59E25H2" 0 "hypothetical protein"  
"JS1\_A09\_00809" 11295 "s59E5H2" 0 "hypothetical protein"  
"JS1\_A09\_00809" 11295 "s63E6H2" 0 "hypothetical protein"  
"JS1\_A09\_00810" 11296 "s59E13H2" 0 "hypothetical protein"  
"JS1\_A09\_00810" 11296 "s59E25H2" 0 "hypothetical protein"  
"JS1\_A09\_00810" 11296 "s59E5H2" 0.004510702 "hypothetical protein"  
"JS1\_A09\_00810" 11296 "s63E6H2" 0 "hypothetical protein"  
"JS1\_A09\_00811" 11297 "s59E13H2" 0 "hypothetical protein"  
"JS1\_A09\_00811" 11297 "s59E25H2" 0 "hypothetical protein"  
"JS1\_A09\_00811" 11297 "s59E5H2" 0.002575958 "hypothetical protein"  
"JS1\_A09\_00811" 11297 "s63E6H2" 0 "hypothetical protein"  
"JS1\_A09\_00812" 11298 "s59E13H2" 0.1805789 "hypothetical protein"  
"JS1\_A09\_00812" 11298 "s59E25H2" 0 "hypothetical protein"  
"JS1\_A09\_00812" 11298 "s59E5H2" 0.04000136 "hypothetical protein"  
"JS1\_A09\_00812" 11298 "s63E6H2" 0.3576066 "hypothetical protein"  
"JS1\_A09\_00813" 11299 "s59E13H2" 1.215749 "Cyclic di-GMP phosphodiesterase response regulator RpfG"  
"JS1\_A09\_00813" 11299 "s59E25H2" 0 "Cyclic di-GMP phosphodiesterase response regulator RpfG"  
"JS1\_A09\_00813" 11299 "s59E5H2" 0.1543331 "Cyclic di-GMP phosphodiesterase response regulator RpfG"  
"JS1\_A09\_00813" 11299 "s63E6H2" 0.5668606 "Cyclic di-GMP phosphodiesterase response regulator RpfG"  
"JS1\_A09\_00814" 11300 "s59E13H2" 0 "hypothetical protein"  
"JS1\_A09\_00814" 11300 "s59E25H2" 0 "hypothetical protein"  
"JS1\_A09\_00814" 11300 "s59E5H2" 0 "hypothetical protein"  
"JS1\_A09\_00814" 11300 "s63E6H2" 0.003743605 "hypothetical protein"  
"JS1\_A09\_00816" 11302 "s59E13H2" 1.180052 "hypothetical protein"  
"JS1\_A09\_00816" 11302 "s59E25H2" 0 "hypothetical protein"  
"JS1\_A09\_00816" 11302 "s59E5H2" 0.02403809 "hypothetical protein"  
"JS1\_A09\_00816" 11302 "s63E6H2" 0.001746922 "hypothetical protein"  
"JS1\_A09\_00817" 11303 "s59E13H2" 0.1578509 "Anti-sigma-V factor RsiV"  
"JS1\_A09\_00817" 11303 "s59E25H2" 0 "Anti-sigma-V factor RsiV"  
"JS1\_A09\_00817" 11303 "s59E5H2" 1.017959 "Anti-sigma-V factor RsiV"  
"JS1\_A09\_00817" 11303 "s63E6H2" 0.02340818 "Anti-sigma-V factor RsiV"  
"JS1\_A09\_00818" 11304 "s59E13H2" 0.08168661 "Response regulator PleD"  
"JS1\_A09\_00818" 11304 "s59E25H2" 0 "Response regulator PleD"  
"JS1\_A09\_00818" 11304 "s59E5H2" 0.07116873 "Response regulator PleD"  
"JS1\_A09\_00818" 11304 "s63E6H2" 0.04191995 "Response regulator PleD"  
"JS1\_A09\_00819" 11305 "s59E13H2" 7.587254 "D-alanine--D-alanine ligase"  
"JS1\_A09\_00819" 11305 "s59E25H2" 0.2899061 "D-alanine--D-alanine ligase"  
"JS1\_A09\_00819" 11305 "s59E5H2" 5.301275 "D-alanine--D-alanine ligase"  
"JS1\_A09\_00819" 11305 "s63E6H2" 7.760434 "D-alanine--D-alanine ligase"  
"JS1\_A09\_00820" 11306 "s59E13H2" 5.241311 "Methylated-DNA--protein-cysteine methyltransferase"  
"JS1\_A09\_00820" 11306 "s59E25H2" 0 "Methylated-DNA--protein-cysteine methyltransferase"  
"JS1\_A09\_00820" 11306 "s59E5H2" 4.987563 "Methylated-DNA--protein-cysteine methyltransferase"  
"JS1\_A09\_00820" 11306 "s63E6H2" 4.090586 "Methylated-DNA--protein-cysteine methyltransferase"  
"JS1\_A09\_00821" 11307 "s59E13H2" 4.053091 "molybdopterin-guanine dinucleotide biosynthesis protein MobA"  
"JS1\_A09\_00821" 11307 "s59E25H2" 0 "molybdopterin-guanine dinucleotide biosynthesis protein MobA"

"JS1\_A09\_00821" 11307 "s59E5H2" 8.733395 "molybdopterin-guanine dinucleotide biosynthesis protein MobA"  
"JS1\_A09\_00821" 11307 "s63E6H2" 13.34444 "molybdopterin-guanine dinucleotide biosynthesis protein MobA"  
"JS1\_A09\_00822" 11308 "s59E13H2" 0.3887856 "hypothetical protein"  
"JS1\_A09\_00822" 11308 "s59E25H2" 0 "hypothetical protein"  
"JS1\_A09\_00822" 11308 "s59E5H2" 6.780643 "hypothetical protein"  
"JS1\_A09\_00822" 11308 "s63E6H2" 10.23639 "hypothetical protein"  
"JS1\_A09\_00823" 11309 "s59E13H2" 0.008056701 "Tetratricopeptide repeat protein"  
"JS1\_A09\_00823" 11309 "s59E25H2" 0 "Tetratricopeptide repeat protein"  
"JS1\_A09\_00823" 11309 "s59E5H2" 1.062203 "Tetratricopeptide repeat protein"  
"JS1\_A09\_00823" 11309 "s63E6H2" 0.02010842 "Tetratricopeptide repeat protein"  
"JS1\_A09\_00824" 11310 "s59E13H2" 0.07429379 "Putative competence-damage inducible protein"  
"JS1\_A09\_00824" 11310 "s59E25H2" 0.1457327 "Putative competence-damage inducible protein"  
"JS1\_A09\_00824" 11310 "s59E5H2" 4.414173 "Putative competence-damage inducible protein"  
"JS1\_A09\_00824" 11310 "s63E6H2" 1.515632 "Putative competence-damage inducible protein"  
"JS1\_A09\_00825" 11311 "s59E13H2" 0.2085147 "NADH-dependent butanol dehydrogenase A"  
"JS1\_A09\_00825" 11311 "s59E25H2" 0 "NADH-dependent butanol dehydrogenase A"  
"JS1\_A09\_00825" 11311 "s59E5H2" 4.407603 "NADH-dependent butanol dehydrogenase A"  
"JS1\_A09\_00825" 11311 "s63E6H2" 4.462791 "NADH-dependent butanol dehydrogenase A"  
"JS1\_A09\_00826" 11312 "s59E13H2" 0.2608801 "1,3-propanediol dehydrogenase"  
"JS1\_A09\_00826" 11312 "s59E25H2" 0 "1,3-propanediol dehydrogenase"  
"JS1\_A09\_00826" 11312 "s59E5H2" 9.404651 "1,3-propanediol dehydrogenase"  
"JS1\_A09\_00826" 11312 "s63E6H2" 6.590152 "1,3-propanediol dehydrogenase"  
"JS1\_A09\_00827" 11313 "s59E13H2" 0.1782034 "hypothetical protein"  
"JS1\_A09\_00827" 11313 "s59E25H2" 0 "hypothetical protein"  
"JS1\_A09\_00827" 11313 "s59E5H2" 5.485975 "hypothetical protein"  
"JS1\_A09\_00827" 11313 "s63E6H2" 1.663039 "hypothetical protein"  
"JS1\_A09\_00828" 11314 "s59E13H2" 0.05894111 "methylcobalamin:coenzyme M methyltransferase"  
"JS1\_A09\_00828" 11314 "s59E25H2" 0 "methylcobalamin:coenzyme M methyltransferase"  
"JS1\_A09\_00828" 11314 "s59E5H2" 0.01201188 "methylcobalamin:coenzyme M methyltransferase"  
"JS1\_A09\_00828" 11314 "s63E6H2" 0.3532868 "methylcobalamin:coenzyme M methyltransferase"  
"JS1\_A09\_00829" 11315 "s59E13H2" 2.773328 "Sialic acid-binding periplasmic protein SiaP precursor"  
"JS1\_A09\_00829" 11315 "s59E25H2" 0 "Sialic acid-binding periplasmic protein SiaP precursor"  
"JS1\_A09\_00829" 11315 "s59E5H2" 0.3864037 "Sialic acid-binding periplasmic protein SiaP precursor"  
"JS1\_A09\_00829" 11315 "s63E6H2" 0.09451461 "Sialic acid-binding periplasmic protein SiaP precursor"  
"JS1\_A09\_00830" 11316 "s59E13H2" 2.28275 "Tripartite ATP-independent periplasmic transporters, DctQ component"  
"JS1\_A09\_00830" 11316 "s59E25H2" 0 "Tripartite ATP-independent periplasmic transporters, DctQ component"  
"JS1\_A09\_00830" 11316 "s59E5H2" 0.502885 "Tripartite ATP-independent periplasmic transporters, DctQ component"  
"JS1\_A09\_00830" 11316 "s63E6H2" 0.05178897 "Tripartite ATP-independent periplasmic transporters, DctQ component"  
"JS1\_A09\_00831" 11317 "s59E13H2" 1.373463 "Sialic acid TRAP transporter permease protein SiaT"  
"JS1\_A09\_00831" 11317 "s59E25H2" 0 "Sialic acid TRAP transporter permease protein SiaT"  
"JS1\_A09\_00831" 11317 "s59E5H2" 0.3506022 "Sialic acid TRAP transporter permease protein SiaT"  
"JS1\_A09\_00831" 11317 "s63E6H2" 0.02844524 "Sialic acid TRAP transporter permease protein SiaT"  
"JS1\_A09\_00832" 11318 "s59E13H2" 0.05265866 "Methylated-thiol--coenzyme M methyltransferase"  
"JS1\_A09\_00832" 11318 "s59E25H2" 0 "Methylated-thiol--coenzyme M methyltransferase"  
"JS1\_A09\_00832" 11318 "s59E5H2" 0.01079393 "Methylated-thiol--coenzyme M methyltransferase"  
"JS1\_A09\_00832" 11318 "s63E6H2" 0.05240066 "Methylated-thiol--coenzyme M methyltransferase"  
"JS1\_A09\_00833" 11319 "s59E13H2" 0.05011447 "methylcobalamin:coenzyme M methyltransferase"

"JS1\_A09\_00833" 11319 "s59E25H2" 0 "methylcobalamin:coenzyme M methyltransferase"  
"JS1\_A09\_00833" 11319 "s59E5H2" 0.001565067 "methylcobalamin:coenzyme M methyltransferase"  
"JS1\_A09\_00833" 11319 "s63E6H2" 0.01177101 "methylcobalamin:coenzyme M methyltransferase"  
"JS1\_A09\_00835" 11321 "s59E13H2" 0.008599108 "N5-carboxyaminoimidazole ribonucleotide mutase"  
"JS1\_A09\_00835" 11321 "s59E25H2" 0 "N5-carboxyaminoimidazole ribonucleotide mutase"  
"JS1\_A09\_00835" 11321 "s59E5H2" 0.01922151 "N5-carboxyaminoimidazole ribonucleotide mutase"  
"JS1\_A09\_00835" 11321 "s63E6H2" 0.08622587 "N5-carboxyaminoimidazole ribonucleotide mutase"  
"JS1\_A09\_00836" 11322 "s59E13H2" 0.01838507 "Phosphoribosylaminoimidazole-succinocarboxamide synthase"  
"JS1\_A09\_00836" 11322 "s59E25H2" 0 "Phosphoribosylaminoimidazole-succinocarboxamide synthase"  
"JS1\_A09\_00836" 11322 "s59E5H2" 0.01308983 "Phosphoribosylaminoimidazole-succinocarboxamide synthase"  
"JS1\_A09\_00836" 11322 "s63E6H2" 0.06912443 "Phosphoribosylaminoimidazole-succinocarboxamide synthase"  
"JS1\_A09\_00837" 11323 "s59E13H2" 0.822984 "Phosphoribosylformylglycinamide synthase 2"  
"JS1\_A09\_00837" 11323 "s59E25H2" 0 "Phosphoribosylformylglycinamide synthase 2"  
"JS1\_A09\_00837" 11323 "s59E5H2" 2.142012 "Phosphoribosylformylglycinamide synthase 2"  
"JS1\_A09\_00837" 11323 "s63E6H2" 0.1559938 "Phosphoribosylformylglycinamide synthase 2"  
"JS1\_A09\_00838" 11324 "s59E13H2" 0.02559104 "Amidophosphoribosyltransferase precursor"  
"JS1\_A09\_00838" 11324 "s59E25H2" 0 "Amidophosphoribosyltransferase precursor"  
"JS1\_A09\_00838" 11324 "s59E5H2" 0.3122432 "Amidophosphoribosyltransferase precursor"  
"JS1\_A09\_00838" 11324 "s63E6H2" 0.1087099 "Amidophosphoribosyltransferase precursor"  
"JS1\_A09\_00839" 11325 "s59E13H2" 1.173135 "Phosphoribosylformylglycinamide cyclo-ligase"  
"JS1\_A09\_00839" 11325 "s59E25H2" 0 "Phosphoribosylformylglycinamide cyclo-ligase"  
"JS1\_A09\_00839" 11325 "s59E5H2" 0.05695754 "Phosphoribosylformylglycinamide cyclo-ligase"  
"JS1\_A09\_00839" 11325 "s63E6H2" 0.2650234 "Phosphoribosylformylglycinamide cyclo-ligase"  
"JS1\_A09\_00840" 11326 "s59E13H2" 1.264262 "Phosphoribosylglycinamide formyltransferase"  
"JS1\_A09\_00840" 11326 "s59E25H2" 0 "Phosphoribosylglycinamide formyltransferase"  
"JS1\_A09\_00840" 11326 "s59E5H2" 0.02856353 "Phosphoribosylglycinamide formyltransferase"  
"JS1\_A09\_00840" 11326 "s63E6H2" 0.3001638 "Phosphoribosylglycinamide formyltransferase"  
"JS1\_A09\_00841" 11327 "s59E13H2" 1.616418 "Phosphoribosylamine--glycine ligase"  
"JS1\_A09\_00841" 11327 "s59E25H2" 0 "Phosphoribosylamine--glycine ligase"  
"JS1\_A09\_00841" 11327 "s59E5H2" 0.1523599 "Phosphoribosylamine--glycine ligase"  
"JS1\_A09\_00841" 11327 "s63E6H2" 0.484032 "Phosphoribosylamine--glycine ligase"  
"JS1\_A09\_00842" 11328 "s59E13H2" 0.8281971 "Bifunctional purine biosynthesis protein PurH"  
"JS1\_A09\_00842" 11328 "s59E25H2" 0 "Bifunctional purine biosynthesis protein PurH"  
"JS1\_A09\_00842" 11328 "s59E5H2" 0.2927984 "Bifunctional purine biosynthesis protein PurH"  
"JS1\_A09\_00842" 11328 "s63E6H2" 0.3939925 "Bifunctional purine biosynthesis protein PurH"  
"JS1\_A09\_00844" 11330 "s59E13H2" 0 "hypothetical protein"  
"JS1\_A09\_00844" 11330 "s59E25H2" 0 "hypothetical protein"  
"JS1\_A09\_00844" 11330 "s59E5H2" 0.02023053 "hypothetical protein"  
"JS1\_A09\_00844" 11330 "s63E6H2" 0.001368023 "hypothetical protein"  
"JS1\_A09\_00845" 11331 "s59E13H2" 0 "hypothetical protein"  
"JS1\_A09\_00845" 11331 "s59E25H2" 0 "hypothetical protein"  
"JS1\_A09\_00845" 11331 "s59E5H2" 0.007997245 "hypothetical protein"  
"JS1\_A09\_00845" 11331 "s63E6H2" 0.005101715 "hypothetical protein"  
"JS1\_A09\_00846" 11332 "s59E13H2" 0 "DctM-like transporters"  
"JS1\_A09\_00846" 11332 "s59E25H2" 0 "DctM-like transporters"  
"JS1\_A09\_00846" 11332 "s59E5H2" 0 "DctM-like transporters"  
"JS1\_A09\_00846" 11332 "s63E6H2" 0 "DctM-like transporters"

"JS1\_A09\_00850" 11336 "s59E13H2" 0 "Nucleotidyltransferase domain protein"  
"JS1\_A09\_00850" 11336 "s59E25H2" 0 "Nucleotidyltransferase domain protein"  
"JS1\_A09\_00850" 11336 "s59E5H2" 0.02156214 "Nucleotidyltransferase domain protein"  
"JS1\_A09\_00850" 11336 "s63E6H2" 0.02347448 "Nucleotidyltransferase domain protein"  
"JS1\_A09\_00851" 11337 "s59E13H2" 0 "HEPN domain protein"  
"JS1\_A09\_00851" 11337 "s59E25H2" 0 "HEPN domain protein"  
"JS1\_A09\_00851" 11337 "s59E5H2" 0.006847704 "HEPN domain protein"  
"JS1\_A09\_00851" 11337 "s63E6H2" 0.02734907 "HEPN domain protein"  
"JS1\_A09\_00852" 11338 "s59E13H2" 2.508503 "hypothetical protein"  
"JS1\_A09\_00852" 11338 "s59E25H2" 0 "hypothetical protein"  
"JS1\_A09\_00852" 11338 "s59E5H2" 0.00471614 "hypothetical protein"  
"JS1\_A09\_00852" 11338 "s63E6H2" 0.06129029 "hypothetical protein"  
"JS1\_A09\_00854" 11340 "s59E13H2" 0 "Adenylate cyclase 1"  
"JS1\_A09\_00854" 11340 "s59E25H2" 0 "Adenylate cyclase 1"  
"JS1\_A09\_00854" 11340 "s59E5H2" 0 "Adenylate cyclase 1"  
"JS1\_A09\_00854" 11340 "s63E6H2" 0 "Adenylate cyclase 1"  
"JS1\_A09\_00855" 11341 "s59E13H2" 0.01469302 "Adenylate cyclase 2"  
"JS1\_A09\_00855" 11341 "s59E25H2" 0 "Adenylate cyclase 2"  
"JS1\_A09\_00855" 11341 "s59E5H2" 0 "Adenylate cyclase 2"  
"JS1\_A09\_00855" 11341 "s63E6H2" 0 "Adenylate cyclase 2"  
"JS1\_A09\_00856" 11342 "s59E13H2" 0 "methylcobalamin:coenzyme M methyltransferase"  
"JS1\_A09\_00856" 11342 "s59E25H2" 0 "methylcobalamin:coenzyme M methyltransferase"  
"JS1\_A09\_00856" 11342 "s59E5H2" 0.0003899729 "methylcobalamin:coenzyme M methyltransferase"  
"JS1\_A09\_00856" 11342 "s63E6H2" 0 "methylcobalamin:coenzyme M methyltransferase"  
"JS1\_A09\_00857" 11343 "s59E13H2" 0 "4-hydroxy-tetrahydrodipicolinate synthase"  
"JS1\_A09\_00857" 11343 "s59E25H2" 0 "4-hydroxy-tetrahydrodipicolinate synthase"  
"JS1\_A09\_00857" 11343 "s59E5H2" 0.002094676 "4-hydroxy-tetrahydrodipicolinate synthase"  
"JS1\_A09\_00857" 11343 "s63E6H2" 0.006165099 "4-hydroxy-tetrahydrodipicolinate synthase"  
"JS1\_A09\_00858" 11344 "s59E13H2" 0 "4-hydroxy-tetrahydrodipicolinate synthase"  
"JS1\_A09\_00858" 11344 "s59E25H2" 0 "4-hydroxy-tetrahydrodipicolinate synthase"  
"JS1\_A09\_00858" 11344 "s59E5H2" 0.03427412 "4-hydroxy-tetrahydrodipicolinate synthase"  
"JS1\_A09\_00858" 11344 "s63E6H2" 0.004261055 "4-hydroxy-tetrahydrodipicolinate synthase"  
"JS1\_A09\_00859" 11345 "s59E13H2" 0 "Methylcobamide:CoM methyltransferase MtbA"  
"JS1\_A09\_00859" 11345 "s59E25H2" 0 "Methylcobamide:CoM methyltransferase MtbA"  
"JS1\_A09\_00859" 11345 "s59E5H2" 0 "Methylcobamide:CoM methyltransferase MtbA"  
"JS1\_A09\_00859" 11345 "s63E6H2" 0 "Methylcobamide:CoM methyltransferase MtbA"  
"JS1\_A09\_00860" 11346 "s59E13H2" 0 "Dimethylamine corrinoid protein"  
"JS1\_A09\_00860" 11346 "s59E25H2" 0 "Dimethylamine corrinoid protein"  
"JS1\_A09\_00860" 11346 "s59E5H2" 0 "Dimethylamine corrinoid protein"  
"JS1\_A09\_00860" 11346 "s63E6H2" 0 "Dimethylamine corrinoid protein"  
"JS1\_A09\_00861" 11347 "s59E13H2" 0 "Methylated-thiol--coenzyme M methyltransferase"  
"JS1\_A09\_00861" 11347 "s59E25H2" 0 "Methylated-thiol--coenzyme M methyltransferase"  
"JS1\_A09\_00861" 11347 "s59E5H2" 0 "Methylated-thiol--coenzyme M methyltransferase"  
"JS1\_A09\_00861" 11347 "s63E6H2" 0 "Methylated-thiol--coenzyme M methyltransferase"  
"JS1\_A09\_00862" 11348 "s59E13H2" 0.0004830273 "2Fe-2S ferredoxin"  
"JS1\_A09\_00862" 11348 "s59E25H2" 0 "2Fe-2S ferredoxin"  
"JS1\_A09\_00862" 11348 "s59E5H2" 0.02733998 "2Fe-2S ferredoxin"

"JS1\_A09\_00862" 11348 "s63E6H2" 0.009430693 "2Fe-2S ferredoxin"  
"JS1\_A09\_00863" 11349 "s59E13H2" 0 "Vitamin B12 dependent methionine synthase, activation domain"  
"JS1\_A09\_00863" 11349 "s59E25H2" 0 "Vitamin B12 dependent methionine synthase, activation domain"  
"JS1\_A09\_00863" 11349 "s59E5H2" 0 "Vitamin B12 dependent methionine synthase, activation domain"  
"JS1\_A09\_00863" 11349 "s63E6H2" 0 "Vitamin B12 dependent methionine synthase, activation domain"  
"JS1\_A09\_00864" 11350 "s59E13H2" 0 "Ribulokinase"  
"JS1\_A09\_00864" 11350 "s59E25H2" 0 "Ribulokinase"  
"JS1\_A09\_00864" 11350 "s59E5H2" 0 "Ribulokinase"  
"JS1\_A09\_00864" 11350 "s63E6H2" 0.003908671 "Ribulokinase"  
"JS1\_A09\_00868" 11354 "s59E13H2" 0.23883 "50S ribosomal protein L17"  
"JS1\_A09\_00868" 11354 "s59E25H2" 0 "50S ribosomal protein L17"  
"JS1\_A09\_00868" 11354 "s59E5H2" 0.1174979 "50S ribosomal protein L17"  
"JS1\_A09\_00868" 11354 "s63E6H2" 1.829011 "50S ribosomal protein L17"  
"JS1\_A09\_00869" 11355 "s59E13H2" 0.2579945 "Energy-coupling factor transporter ATP-binding protein EcfA1"  
"JS1\_A09\_00869" 11355 "s59E25H2" 0 "Energy-coupling factor transporter ATP-binding protein EcfA1"  
"JS1\_A09\_00869" 11355 "s59E5H2" 0.2316155 "Energy-coupling factor transporter ATP-binding protein EcfA1"  
"JS1\_A09\_00869" 11355 "s63E6H2" 2.911502 "Energy-coupling factor transporter ATP-binding protein EcfA1"  
"JS1\_A09\_00870" 11356 "s59E13H2" 0.2842312 "Energy-coupling factor transporter ATP-binding protein EcfA2"  
"JS1\_A09\_00870" 11356 "s59E25H2" 0 "Energy-coupling factor transporter ATP-binding protein EcfA2"  
"JS1\_A09\_00870" 11356 "s59E5H2" 0.6114404 "Energy-coupling factor transporter ATP-binding protein EcfA2"  
"JS1\_A09\_00870" 11356 "s63E6H2" 1.785542 "Energy-coupling factor transporter ATP-binding protein EcfA2"  
"JS1\_A09\_00871" 11357 "s59E13H2" 0.2747372 "Energy-coupling factor transporter transmembrane protein EcfT"  
"JS1\_A09\_00871" 11357 "s59E25H2" 0 "Energy-coupling factor transporter transmembrane protein EcfT"  
"JS1\_A09\_00871" 11357 "s59E5H2" 0.5575983 "Energy-coupling factor transporter transmembrane protein EcfT"  
"JS1\_A09\_00871" 11357 "s63E6H2" 1.002138 "Energy-coupling factor transporter transmembrane protein EcfT"  
"JS1\_A09\_00872" 11358 "s59E13H2" 0.2547591 "tRNA pseudouridine synthase A"  
"JS1\_A09\_00872" 11358 "s59E25H2" 0 "tRNA pseudouridine synthase A"  
"JS1\_A09\_00872" 11358 "s59E5H2" 0.356593 "tRNA pseudouridine synthase A"  
"JS1\_A09\_00872" 11358 "s63E6H2" 0.9839334 "tRNA pseudouridine synthase A"  
"JS1\_A09\_00873" 11359 "s59E13H2" 0.1725183 "50S ribosomal protein L13"  
"JS1\_A09\_00873" 11359 "s59E25H2" 0 "50S ribosomal protein L13"  
"JS1\_A09\_00873" 11359 "s59E5H2" 0.4538524 "50S ribosomal protein L13"  
"JS1\_A09\_00873" 11359 "s63E6H2" 1.627723 "50S ribosomal protein L13"  
"JS1\_A09\_00874" 11360 "s59E13H2" 0.1344217 "30S ribosomal protein S9"  
"JS1\_A09\_00874" 11360 "s59E25H2" 0 "30S ribosomal protein S9"  
"JS1\_A09\_00874" 11360 "s59E5H2" 0.4510822 "30S ribosomal protein S9"  
"JS1\_A09\_00874" 11360 "s63E6H2" 1.417898 "30S ribosomal protein S9"  
"JS1\_A09\_00875" 11361 "s59E13H2" 0.2132474 "alanine racemase"  
"JS1\_A09\_00875" 11361 "s59E25H2" 0 "alanine racemase"  
"JS1\_A09\_00875" 11361 "s59E5H2" 0.4328637 "alanine racemase"  
"JS1\_A09\_00875" 11361 "s63E6H2" 1.91592 "alanine racemase"  
"JS1\_A09\_00876" 11362 "s59E13H2" 0.161 "Ornithine carbamoyltransferase"  
"JS1\_A09\_00876" 11362 "s59E25H2" 0 "Ornithine carbamoyltransferase"  
"JS1\_A09\_00876" 11362 "s59E5H2" 0.3576138 "Ornithine carbamoyltransferase"  
"JS1\_A09\_00876" 11362 "s63E6H2" 1.975789 "Ornithine carbamoyltransferase"  
"JS1\_A09\_00880" 11366 "s59E13H2" 0.1021317 "putative inner membrane transporter YicL"  
"JS1\_A09\_00880" 11366 "s59E25H2" 0 "putative inner membrane transporter YicL"

"JS1\_A09\_00880" 11366 "s59E5H2" 0.5110401 "putative inner membrane transporter YicL"  
"JS1\_A09\_00880" 11366 "s63E6H2" 0.1683292 "putative inner membrane transporter YicL"  
"JS1\_A09\_00881" 11367 "s59E13H2" 0.02689218 "Acetyltransferase (GNAT) family protein"  
"JS1\_A09\_00881" 11367 "s59E25H2" 0 "Acetyltransferase (GNAT) family protein"  
"JS1\_A09\_00881" 11367 "s59E5H2" 0.4584911 "Acetyltransferase (GNAT) family protein"  
"JS1\_A09\_00881" 11367 "s63E6H2" 0.6245894 "Acetyltransferase (GNAT) family protein"  
"JS1\_A09\_00882" 11368 "s59E13H2" 0.07005103 "tRNA 2'-O-methylase"  
"JS1\_A09\_00882" 11368 "s59E25H2" 0 "tRNA 2'-O-methylase"  
"JS1\_A09\_00882" 11368 "s59E5H2" 1.783009 "tRNA 2'-O-methylase"  
"JS1\_A09\_00882" 11368 "s63E6H2" 1.070082 "tRNA 2'-O-methylase"  
"JS1\_A09\_00883" 11369 "s59E13H2" 8.1322 "Bifunctional NAD(P)H-hydrate repair enzyme Nnr"  
"JS1\_A09\_00883" 11369 "s59E25H2" 0.2168285 "Bifunctional NAD(P)H-hydrate repair enzyme Nnr"  
"JS1\_A09\_00883" 11369 "s59E5H2" 0.7929374 "Bifunctional NAD(P)H-hydrate repair enzyme Nnr"  
"JS1\_A09\_00883" 11369 "s63E6H2" 0.1721954 "Bifunctional NAD(P)H-hydrate repair enzyme Nnr"  
"JS1\_A09\_00891" 11377 "s59E13H2" 0 "hypothetical protein"  
"JS1\_A09\_00891" 11377 "s59E25H2" 0 "hypothetical protein"  
"JS1\_A09\_00891" 11377 "s59E5H2" 0 "hypothetical protein"  
"JS1\_A09\_00891" 11377 "s63E6H2" 0 "hypothetical protein"  
"JS1\_A09\_00892" 11378 "s59E13H2" 0 "Aspartate aminotransferase"  
"JS1\_A09\_00892" 11378 "s59E25H2" 0 "Aspartate aminotransferase"  
"JS1\_A09\_00892" 11378 "s59E5H2" 0 "Aspartate aminotransferase"  
"JS1\_A09\_00892" 11378 "s63E6H2" 0 "Aspartate aminotransferase"  
"JS1\_A09\_00894" 11380 "s59E13H2" 0 "Sulfide dehydrogenase subunit alpha precursor"  
"JS1\_A09\_00894" 11380 "s59E25H2" 0 "Sulfide dehydrogenase subunit alpha precursor"  
"JS1\_A09\_00894" 11380 "s59E5H2" 0.01953518 "Sulfide dehydrogenase subunit alpha precursor"  
"JS1\_A09\_00894" 11380 "s63E6H2" 0.001652879 "Sulfide dehydrogenase subunit alpha precursor"  
"JS1\_A09\_00895" 11381 "s59E13H2" 0.001694311 "CoB--CoM heterodisulfide reductase subunit B"  
"JS1\_A09\_00895" 11381 "s59E25H2" 0 "CoB--CoM heterodisulfide reductase subunit B"  
"JS1\_A09\_00895" 11381 "s59E5H2" 0.05594433 "CoB--CoM heterodisulfide reductase subunit B"  
"JS1\_A09\_00895" 11381 "s63E6H2" 0.7406601 "CoB--CoM heterodisulfide reductase subunit B"  
"JS1\_A09\_00901" 11387 "s59E13H2" 0 "hypothetical protein"  
"JS1\_A09\_00901" 11387 "s59E25H2" 0 "hypothetical protein"  
"JS1\_A09\_00901" 11387 "s59E5H2" 0 "hypothetical protein"  
"JS1\_A09\_00901" 11387 "s63E6H2" 0 "hypothetical protein"  
"JS1\_A09\_00903" 11389 "s59E13H2" 0 "hypothetical protein"  
"JS1\_A09\_00903" 11389 "s59E25H2" 0 "hypothetical protein"  
"JS1\_A09\_00903" 11389 "s59E5H2" 0 "hypothetical protein"  
"JS1\_A09\_00903" 11389 "s63E6H2" 0 "hypothetical protein"  
"JS1\_A09\_00904" 11390 "s59E13H2" 0 "hypothetical protein"  
"JS1\_A09\_00904" 11390 "s59E25H2" 0 "hypothetical protein"  
"JS1\_A09\_00904" 11390 "s59E5H2" 0 "hypothetical protein"  
"JS1\_A09\_00904" 11390 "s63E6H2" 0 "hypothetical protein"  
"JS1\_A09\_00906" 11392 "s59E13H2" 0.63162 "Integrase core domain protein"  
"JS1\_A09\_00906" 11392 "s59E25H2" 0 "Integrase core domain protein"  
"JS1\_A09\_00906" 11392 "s59E5H2" 5.881475 "Integrase core domain protein"  
"JS1\_A09\_00906" 11392 "s63E6H2" 3.420201 "Integrase core domain protein"  
"JS1\_A09\_00908" 11394 "s59E13H2" 0 "CoB--CoM heterodisulfide reductase iron-sulfur subunit A"

"JS1\_A09\_00908" 11394 "s59E25H2" 0 "CoB--CoM heterodisulfide reductase iron-sulfur subunit A"  
"JS1\_A09\_00908" 11394 "s59E5H2" 0 "CoB--CoM heterodisulfide reductase iron-sulfur subunit A"  
"JS1\_A09\_00908" 11394 "s63E6H2" 0 "CoB--CoM heterodisulfide reductase iron-sulfur subunit A"  
"JS1\_A09\_00910" 11396 "s59E13H2" 0.5127004 "hypothetical protein"  
"JS1\_A09\_00910" 11396 "s59E25H2" 0 "hypothetical protein"  
"JS1\_A09\_00910" 11396 "s59E5H2" 1.452088 "hypothetical protein"  
"JS1\_A09\_00910" 11396 "s63E6H2" 5.13468 "hypothetical protein"  
"JS1\_A09\_00911" 11397 "s59E13H2" 0.3347837 "hypothetical protein"  
"JS1\_A09\_00911" 11397 "s59E25H2" 0 "hypothetical protein"  
"JS1\_A09\_00911" 11397 "s59E5H2" 0.7005886 "hypothetical protein"  
"JS1\_A09\_00911" 11397 "s63E6H2" 3.723938 "hypothetical protein"  
"JS1\_A09\_00912" 11398 "s59E13H2" 0.003158578 "sporulation sigma factor SigG"  
"JS1\_A09\_00912" 11398 "s59E25H2" 0 "sporulation sigma factor SigG"  
"JS1\_A09\_00912" 11398 "s59E5H2" 0 "sporulation sigma factor SigG"  
"JS1\_A09\_00912" 11398 "s63E6H2" 0.8018201 "sporulation sigma factor SigG"  
"JS1\_A09\_00913" 11399 "s59E13H2" 0.05895079 "RNA polymerase factor sigma-70"  
"JS1\_A09\_00913" 11399 "s59E25H2" 0 "RNA polymerase factor sigma-70"  
"JS1\_A09\_00913" 11399 "s59E5H2" 0 "RNA polymerase factor sigma-70"  
"JS1\_A09\_00913" 11399 "s63E6H2" 0.8576114 "RNA polymerase factor sigma-70"  
"JS1\_A09\_00914" 11400 "s59E13H2" 0.01277478 "hypothetical protein"  
"JS1\_A09\_00914" 11400 "s59E25H2" 0 "hypothetical protein"  
"JS1\_A09\_00914" 11400 "s59E5H2" 0.0674195 "hypothetical protein"  
"JS1\_A09\_00914" 11400 "s63E6H2" 0.5787712 "hypothetical protein"  
"JS1\_A09\_00915" 11401 "s59E13H2" 0.01607125 "Putative ski2-type helicase"  
"JS1\_A09\_00915" 11401 "s59E25H2" 0 "Putative ski2-type helicase"  
"JS1\_A09\_00915" 11401 "s59E5H2" 0.3143019 "Putative ski2-type helicase"  
"JS1\_A09\_00915" 11401 "s63E6H2" 0.196764 "Putative ski2-type helicase"  
"JS1\_A09\_00917" 11403 "s59E13H2" 0.2641392 "Cypemycin methyltransferase"  
"JS1\_A09\_00917" 11403 "s59E25H2" 0 "Cypemycin methyltransferase"  
"JS1\_A09\_00917" 11403 "s59E5H2" 0.008807798 "Cypemycin methyltransferase"  
"JS1\_A09\_00917" 11403 "s63E6H2" 0.09910756 "Cypemycin methyltransferase"  
"JS1\_A09\_00923" 11409 "s59E13H2" 0.07978987 "Ribosome-recycling factor"  
"JS1\_A09\_00923" 11409 "s59E25H2" 0 "Ribosome-recycling factor"  
"JS1\_A09\_00923" 11409 "s59E5H2" 0.09744472 "Ribosome-recycling factor"  
"JS1\_A09\_00923" 11409 "s63E6H2" 0.159358 "Ribosome-recycling factor"  
"JS1\_A09\_00924" 11410 "s59E13H2" 0.06508309 "Uridylate kinase"  
"JS1\_A09\_00924" 11410 "s59E25H2" 0 "Uridylate kinase"  
"JS1\_A09\_00924" 11410 "s59E5H2" 0.1807608 "Uridylate kinase"  
"JS1\_A09\_00924" 11410 "s63E6H2" 0.08265301 "Uridylate kinase"  
"JS1\_A09\_00925" 11411 "s59E13H2" 0.06370164 "Elongation factor Ts"  
"JS1\_A09\_00925" 11411 "s59E25H2" 0 "Elongation factor Ts"  
"JS1\_A09\_00925" 11411 "s59E5H2" 0.05066166 "Elongation factor Ts"  
"JS1\_A09\_00925" 11411 "s63E6H2" 0.01744756 "Elongation factor Ts"  
"JS1\_A09\_00926" 11412 "s59E13H2" 0.04586405 "30S ribosomal protein S2"  
"JS1\_A09\_00926" 11412 "s59E25H2" 0 "30S ribosomal protein S2"  
"JS1\_A09\_00926" 11412 "s59E5H2" 0.08139925 "30S ribosomal protein S2"  
"JS1\_A09\_00926" 11412 "s63E6H2" 0.02603707 "30S ribosomal protein S2"

"JS1\_A09\_00927" 11413 "s59E13H2" 0.04255814 "ATP-dependent protease ATPase subunit HslU"  
"JS1\_A09\_00927" 11413 "s59E25H2" 0 "ATP-dependent protease ATPase subunit HslU"  
"JS1\_A09\_00927" 11413 "s59E5H2" 1.702548 "ATP-dependent protease ATPase subunit HslU"  
"JS1\_A09\_00927" 11413 "s63E6H2" 0.0856527 "ATP-dependent protease ATPase subunit HslU"  
"JS1\_A09\_00928" 11414 "s59E13H2" 0 "CoB--CoM heterodisulfide reductase subunit B"  
"JS1\_A09\_00928" 11414 "s59E25H2" 0 "CoB--CoM heterodisulfide reductase subunit B"  
"JS1\_A09\_00928" 11414 "s59E5H2" 0.001602855 "CoB--CoM heterodisulfide reductase subunit B"  
"JS1\_A09\_00928" 11414 "s63E6H2" 0 "CoB--CoM heterodisulfide reductase subunit B"  
"JS1\_A09\_00929" 11415 "s59E13H2" 0 "hypothetical protein"  
"JS1\_A09\_00929" 11415 "s59E25H2" 0 "hypothetical protein"  
"JS1\_A09\_00929" 11415 "s59E5H2" 0 "hypothetical protein"  
"JS1\_A09\_00929" 11415 "s63E6H2" 0.006900122 "hypothetical protein"  
"JS1\_A09\_00930" 11416 "s59E13H2" 0 "Uroporphyrinogen decarboxylase (URO-D)"  
"JS1\_A09\_00930" 11416 "s59E25H2" 0 "Uroporphyrinogen decarboxylase (URO-D)"  
"JS1\_A09\_00930" 11416 "s59E5H2" 0 "Uroporphyrinogen decarboxylase (URO-D)"  
"JS1\_A09\_00930" 11416 "s63E6H2" 0 "Uroporphyrinogen decarboxylase (URO-D)"  
"JS1\_A09\_00931" 11417 "s59E13H2" 0.1691406 "DNA replication protein DnaC"  
"JS1\_A09\_00931" 11417 "s59E25H2" 0 "DNA replication protein DnaC"  
"JS1\_A09\_00931" 11417 "s59E5H2" 0.1713999 "DNA replication protein DnaC"  
"JS1\_A09\_00931" 11417 "s63E6H2" 0.1576121 "DNA replication protein DnaC"  
"JS1\_A09\_00933" 11419 "s59E13H2" 2.483099 "Phosphate acetyltransferase"  
"JS1\_A09\_00933" 11419 "s59E25H2" 0 "Phosphate acetyltransferase"  
"JS1\_A09\_00933" 11419 "s59E5H2" 1.514411 "Phosphate acetyltransferase"  
"JS1\_A09\_00933" 11419 "s63E6H2" 0.1926823 "Phosphate acetyltransferase"  
"JS1\_A09\_00934" 11420 "s59E13H2" 0 "Branched-chain-amino-acid aminotransferase"  
"JS1\_A09\_00934" 11420 "s59E25H2" 0 "Branched-chain-amino-acid aminotransferase"  
"JS1\_A09\_00934" 11420 "s59E5H2" 0 "Branched-chain-amino-acid aminotransferase"  
"JS1\_A09\_00934" 11420 "s63E6H2" 0 "Branched-chain-amino-acid aminotransferase"  
"JS1\_A09\_00935" 11421 "s59E13H2" 0 "succinyl-CoA synthetase subunit alpha"  
"JS1\_A09\_00935" 11421 "s59E25H2" 0 "succinyl-CoA synthetase subunit alpha"  
"JS1\_A09\_00935" 11421 "s59E5H2" 0.0007245467 "succinyl-CoA synthetase subunit alpha"  
"JS1\_A09\_00935" 11421 "s63E6H2" 0.1813258 "succinyl-CoA synthetase subunit alpha"  
"JS1\_A09\_00941" 11427 "s59E13H2" 0.04135203 "hypothetical protein"  
"JS1\_A09\_00941" 11427 "s59E25H2" 0 "hypothetical protein"  
"JS1\_A09\_00941" 11427 "s59E5H2" 0 "hypothetical protein"  
"JS1\_A09\_00941" 11427 "s63E6H2" 0.003873303 "hypothetical protein"  
"JS1\_A09\_00942" 11428 "s59E13H2" 0.003453717 "L-glyceraldehyde 3-phosphate reductase"  
"JS1\_A09\_00942" 11428 "s59E25H2" 0 "L-glyceraldehyde 3-phosphate reductase"  
"JS1\_A09\_00942" 11428 "s59E5H2" 0.05977976 "L-glyceraldehyde 3-phosphate reductase"  
"JS1\_A09\_00942" 11428 "s63E6H2" 0.2663042 "L-glyceraldehyde 3-phosphate reductase"  
"JS1\_A09\_00943" 11429 "s59E13H2" 0 "Bacterial extracellular solute-binding protein"  
"JS1\_A09\_00943" 11429 "s59E25H2" 0 "Bacterial extracellular solute-binding protein"  
"JS1\_A09\_00943" 11429 "s59E5H2" 0.1596893 "Bacterial extracellular solute-binding protein"  
"JS1\_A09\_00943" 11429 "s63E6H2" 0.1655589 "Bacterial extracellular solute-binding protein"  
"JS1\_A09\_00944" 11430 "s59E13H2" 0 "Trehalose/maltose transport system permease protein MalG"  
"JS1\_A09\_00944" 11430 "s59E25H2" 0 "Trehalose/maltose transport system permease protein MalG"  
"JS1\_A09\_00944" 11430 "s59E5H2" 0.04783462 "Trehalose/maltose transport system permease protein MalG"



"JS1\_A09\_00944" 11430 "s63E6H2" 0.177009 "Trehalose/maltose transport system permease protein MalG"  
"JS1\_A09\_00946" 11432 "s59E13H2" 0.01167497 "Oligopeptide transport ATP-binding protein OppF"  
"JS1\_A09\_00946" 11432 "s59E25H2" 0 "Oligopeptide transport ATP-binding protein OppF"  
"JS1\_A09\_00946" 11432 "s59E5H2" 0.2816109 "Oligopeptide transport ATP-binding protein OppF"  
"JS1\_A09\_00946" 11432 "s63E6H2" 0.09719669 "Oligopeptide transport ATP-binding protein OppF"  
"JS1\_A09\_00947" 11433 "s59E13H2" 0 "Oligopeptide transport ATP-binding protein OppD"  
"JS1\_A09\_00947" 11433 "s59E25H2" 0 "Oligopeptide transport ATP-binding protein OppD"  
"JS1\_A09\_00947" 11433 "s59E5H2" 0.09565246 "Oligopeptide transport ATP-binding protein OppD"  
"JS1\_A09\_00947" 11433 "s63E6H2" 0.002105303 "Oligopeptide transport ATP-binding protein OppD"  
"JS1\_A09\_00948" 11434 "s59E13H2" 0 "putative D,D-dipeptide transport system permease protein DdpC"  
"JS1\_A09\_00948" 11434 "s59E25H2" 0 "putative D,D-dipeptide transport system permease protein DdpC"  
"JS1\_A09\_00948" 11434 "s59E5H2" 0.09938334 "putative D,D-dipeptide transport system permease protein DdpC"  
"JS1\_A09\_00948" 11434 "s63E6H2" 0.0009676378 "putative D,D-dipeptide transport system permease protein DdpC"  
"JS1\_A09\_00949" 11435 "s59E13H2" 0 "putative D,D-dipeptide transport system permease protein DdpB"  
"JS1\_A09\_00949" 11435 "s59E25H2" 0 "putative D,D-dipeptide transport system permease protein DdpB"  
"JS1\_A09\_00949" 11435 "s59E5H2" 0.02626552 "putative D,D-dipeptide transport system permease protein DdpB"  
"JS1\_A09\_00949" 11435 "s63E6H2" 0.007870088 "putative D,D-dipeptide transport system permease protein DdpB"  
"JS1\_A09\_00950" 11436 "s59E13H2" 0 "putative D,D-dipeptide-binding periplasmic protein DdpA precursor"  
"JS1\_A09\_00950" 11436 "s59E25H2" 0 "putative D,D-dipeptide-binding periplasmic protein DdpA precursor"  
"JS1\_A09\_00950" 11436 "s59E5H2" 0 "putative D,D-dipeptide-binding periplasmic protein DdpA precursor"  
"JS1\_A09\_00950" 11436 "s63E6H2" 0.0001460827 "putative D,D-dipeptide-binding periplasmic protein DdpA precursor"  
"JS1\_A09\_00951" 11437 "s59E13H2" 0 "2,5-dihydroxypyridine 5,6-dioxygenase"  
"JS1\_A09\_00951" 11437 "s59E25H2" 0 "2,5-dihydroxypyridine 5,6-dioxygenase"  
"JS1\_A09\_00951" 11437 "s59E5H2" 0.08624071 "2,5-dihydroxypyridine 5,6-dioxygenase"  
"JS1\_A09\_00951" 11437 "s63E6H2" 0.00287028 "2,5-dihydroxypyridine 5,6-dioxygenase"  
"JS1\_A09\_00952" 11438 "s59E13H2" 0 "Creatinine amidohydrolase"  
"JS1\_A09\_00952" 11438 "s59E25H2" 0 "Creatinine amidohydrolase"  
"JS1\_A09\_00952" 11438 "s59E5H2" 0.01925143 "Creatinine amidohydrolase"  
"JS1\_A09\_00952" 11438 "s63E6H2" 0.007584212 "Creatinine amidohydrolase"  
"JS1\_A09\_00953" 11439 "s59E13H2" 0 "2,5-dihydroxypyridine 5,6-dioxygenase"  
"JS1\_A09\_00953" 11439 "s59E25H2" 0 "2,5-dihydroxypyridine 5,6-dioxygenase"  
"JS1\_A09\_00953" 11439 "s59E5H2" 0.02378686 "2,5-dihydroxypyridine 5,6-dioxygenase"  
"JS1\_A09\_00953" 11439 "s63E6H2" 0.306407 "2,5-dihydroxypyridine 5,6-dioxygenase"  
"JS1\_A09\_00955" 11441 "s59E13H2" 0.00221092 "Asp/Glu/Hydantoin racemase"  
"JS1\_A09\_00955" 11441 "s59E25H2" 0 "Asp/Glu/Hydantoin racemase"  
"JS1\_A09\_00955" 11441 "s59E5H2" 0.004879481 "Asp/Glu/Hydantoin racemase"  
"JS1\_A09\_00955" 11441 "s63E6H2" 0.156702 "Asp/Glu/Hydantoin racemase"  
"JS1\_A09\_00956" 11442 "s59E13H2" 0.008139178 "Indolepyruvate oxidoreductase subunit IorB"  
"JS1\_A09\_00956" 11442 "s59E25H2" 0 "Indolepyruvate oxidoreductase subunit IorB"  
"JS1\_A09\_00956" 11442 "s59E5H2" 0 "Indolepyruvate oxidoreductase subunit IorB"  
"JS1\_A09\_00956" 11442 "s63E6H2" 0 "Indolepyruvate oxidoreductase subunit IorB"  
"JS1\_A09\_00959" 11445 "s59E13H2" 0.06447278 "hypothetical protein"  
"JS1\_A09\_00959" 11445 "s59E25H2" 0 "hypothetical protein"  
"JS1\_A09\_00959" 11445 "s59E5H2" 0.5153098 "hypothetical protein"  
"JS1\_A09\_00959" 11445 "s63E6H2" 0.9360325 "hypothetical protein"  
"JS1\_A09\_00960" 11446 "s59E13H2" 0 "CoB--CoM heterodisulfide reductase subunit B"  
"JS1\_A09\_00960" 11446 "s59E25H2" 0 "CoB--CoM heterodisulfide reductase subunit B"

"JS1\_A09\_00960" 11446 "s59E5H2" 0 "CoB--CoM heterodisulfide reductase subunit B"  
"JS1\_A09\_00960" 11446 "s63E6H2" 0 "CoB--CoM heterodisulfide reductase subunit B"  
"JS1\_A09\_00961" 11447 "s59E13H2" 0 "CoB--CoM heterodisulfide reductase subunit B"  
"JS1\_A09\_00961" 11447 "s59E25H2" 0 "CoB--CoM heterodisulfide reductase subunit B"  
"JS1\_A09\_00961" 11447 "s59E5H2" 0 "CoB--CoM heterodisulfide reductase subunit B"  
"JS1\_A09\_00961" 11447 "s63E6H2" 0 "CoB--CoM heterodisulfide reductase subunit B"  
"JS1\_A09\_00962" 11448 "s59E13H2" 0.02649094 "Tyrosine recombinase XerD"  
"JS1\_A09\_00962" 11448 "s59E25H2" 0 "Tyrosine recombinase XerD"  
"JS1\_A09\_00962" 11448 "s59E5H2" 0.1157471 "Tyrosine recombinase XerD"  
"JS1\_A09\_00962" 11448 "s63E6H2" 0.06809607 "Tyrosine recombinase XerD"  
"JS1\_A09\_00963" 11449 "s59E13H2" 0.1197803 "50S ribosomal protein L31"  
"JS1\_A09\_00963" 11449 "s59E25H2" 0 "50S ribosomal protein L31"  
"JS1\_A09\_00963" 11449 "s59E5H2" 0.04578719 "50S ribosomal protein L31"  
"JS1\_A09\_00963" 11449 "s63E6H2" 0.05312532 "50S ribosomal protein L31"  
"JS1\_A09\_00964" 11450 "s59E13H2" 0.1761509 "hypothetical protein"  
"JS1\_A09\_00964" 11450 "s59E25H2" 0 "hypothetical protein"  
"JS1\_A09\_00964" 11450 "s59E5H2" 0.08909754 "hypothetical protein"  
"JS1\_A09\_00964" 11450 "s63E6H2" 0.1508434 "hypothetical protein"  
"JS1\_A09\_00965" 11451 "s59E13H2" 0.0004589745 "hypothetical protein"  
"JS1\_A09\_00965" 11451 "s59E25H2" 0 "hypothetical protein"  
"JS1\_A09\_00965" 11451 "s59E5H2" 0.0026027 "hypothetical protein"  
"JS1\_A09\_00965" 11451 "s63E6H2" 0.005665732 "hypothetical protein"  
"JS1\_A09\_00967" 11453 "s59E13H2" 0.007298332 "Lipoate-protein ligase A subunit 2"  
"JS1\_A09\_00967" 11453 "s59E25H2" 0 "Lipoate-protein ligase A subunit 2"  
"JS1\_A09\_00967" 11453 "s59E5H2" 0 "Lipoate-protein ligase A subunit 2"  
"JS1\_A09\_00967" 11453 "s63E6H2" 0.02507487 "Lipoate-protein ligase A subunit 2"  
"JS1\_A09\_00968" 11454 "s59E13H2" 0.1183529 "Lipoate-protein ligase LplJ"  
"JS1\_A09\_00968" 11454 "s59E25H2" 0 "Lipoate-protein ligase LplJ"  
"JS1\_A09\_00968" 11454 "s59E5H2" 0.0110843 "Lipoate-protein ligase LplJ"  
"JS1\_A09\_00968" 11454 "s63E6H2" 0.1819734 "Lipoate-protein ligase LplJ"  
"JS1\_A09\_00969" 11455 "s59E13H2" 0 "hypothetical protein"  
"JS1\_A09\_00969" 11455 "s59E25H2" 0 "hypothetical protein"  
"JS1\_A09\_00969" 11455 "s59E5H2" 0 "hypothetical protein"  
"JS1\_A09\_00969" 11455 "s63E6H2" 0 "hypothetical protein"  
"JS1\_A09\_00970" 11456 "s59E13H2" 0 "hypothetical protein"  
"JS1\_A09\_00970" 11456 "s59E25H2" 0 "hypothetical protein"  
"JS1\_A09\_00970" 11456 "s59E5H2" 0 "hypothetical protein"  
"JS1\_A09\_00970" 11456 "s63E6H2" 0 "hypothetical protein"  
"JS1\_A09\_00971" 11457 "s59E13H2" 0 "hypothetical protein"  
"JS1\_A09\_00971" 11457 "s59E25H2" 0 "hypothetical protein"  
"JS1\_A09\_00971" 11457 "s59E5H2" 0 "hypothetical protein"  
"JS1\_A09\_00971" 11457 "s63E6H2" 0 "hypothetical protein"  
"JS1\_A09\_00978" 11464 "s59E13H2" 0.01075151 "3-phosphoshikimate 1-carboxyvinyltransferase 1"  
"JS1\_A09\_00978" 11464 "s59E25H2" 0 "3-phosphoshikimate 1-carboxyvinyltransferase 1"  
"JS1\_A09\_00978" 11464 "s59E5H2" 0.7668904 "3-phosphoshikimate 1-carboxyvinyltransferase 1"  
"JS1\_A09\_00978" 11464 "s63E6H2" 0.1465062 "3-phosphoshikimate 1-carboxyvinyltransferase 1"  
"JS1\_A09\_00979" 11465 "s59E13H2" 0 "CoB--CoM heterodisulfide reductase subunit B"

"JS1\_A09\_00979" 11465 "s59E25H2" 0 "CoB--CoM heterodisulfide reductase subunit B"  
"JS1\_A09\_00979" 11465 "s59E5H2" 0 "CoB--CoM heterodisulfide reductase subunit B"  
"JS1\_A09\_00979" 11465 "s63E6H2" 0.002543519 "CoB--CoM heterodisulfide reductase subunit B"  
"JS1\_A09\_00980" 11466 "s59E13H2" 0 "CoB--CoM heterodisulfide reductase iron-sulfur subunit A"  
"JS1\_A09\_00980" 11466 "s59E25H2" 0 "CoB--CoM heterodisulfide reductase iron-sulfur subunit A"  
"JS1\_A09\_00980" 11466 "s59E5H2" 0.003490898 "CoB--CoM heterodisulfide reductase iron-sulfur subunit A"  
"JS1\_A09\_00980" 11466 "s63E6H2" 0 "CoB--CoM heterodisulfide reductase iron-sulfur subunit A"  
"JS1\_A09\_00983" 11469 "s59E13H2" 0 "CoB--CoM heterodisulfide reductase iron-sulfur subunit A"  
"JS1\_A09\_00983" 11469 "s59E25H2" 0 "CoB--CoM heterodisulfide reductase iron-sulfur subunit A"  
"JS1\_A09\_00983" 11469 "s59E5H2" 0 "CoB--CoM heterodisulfide reductase iron-sulfur subunit A"  
"JS1\_A09\_00983" 11469 "s63E6H2" 0 "CoB--CoM heterodisulfide reductase iron-sulfur subunit A"  
"JS1\_A09\_00984" 11470 "s59E13H2" 0.01936194 "putative FAD-linked oxidoreductase"  
"JS1\_A09\_00984" 11470 "s59E25H2" 0 "putative FAD-linked oxidoreductase"  
"JS1\_A09\_00984" 11470 "s59E5H2" 0 "putative FAD-linked oxidoreductase"  
"JS1\_A09\_00984" 11470 "s63E6H2" 0.003705839 "putative FAD-linked oxidoreductase"  
"JS1\_A09\_00986" 11472 "s59E13H2" 0 "Succinyl-CoA ligase [ADP-forming] subunit alpha"  
"JS1\_A09\_00986" 11472 "s59E25H2" 0 "Succinyl-CoA ligase [ADP-forming] subunit alpha"  
"JS1\_A09\_00986" 11472 "s59E5H2" 0.01770057 "Succinyl-CoA ligase [ADP-forming] subunit alpha"  
"JS1\_A09\_00986" 11472 "s63E6H2" 0.009222324 "Succinyl-CoA ligase [ADP-forming] subunit alpha"  
"JS1\_A09\_00988" 11474 "s59E13H2" 0.01130284 "Putative sugar phosphate isomerase YwIF"  
"JS1\_A09\_00988" 11474 "s59E25H2" 0 "Putative sugar phosphate isomerase YwIF"  
"JS1\_A09\_00988" 11474 "s59E5H2" 0.02889591 "Putative sugar phosphate isomerase YwIF"  
"JS1\_A09\_00988" 11474 "s63E6H2" 0.01422723 "Putative sugar phosphate isomerase YwIF"  
"JS1\_A09\_00992" 11478 "s59E13H2" 0 "succinyl-CoA synthetase subunit beta"  
"JS1\_A09\_00992" 11478 "s59E25H2" 0 "succinyl-CoA synthetase subunit beta"  
"JS1\_A09\_00992" 11478 "s59E5H2" 0 "succinyl-CoA synthetase subunit beta"  
"JS1\_A09\_00992" 11478 "s63E6H2" 0 "succinyl-CoA synthetase subunit beta"  
"JS1\_A09\_00993" 11479 "s59E13H2" 0 "Succinyl-CoA ligase [ADP-forming] subunit beta"  
"JS1\_A09\_00993" 11479 "s59E25H2" 0 "Succinyl-CoA ligase [ADP-forming] subunit beta"  
"JS1\_A09\_00993" 11479 "s59E5H2" 0 "Succinyl-CoA ligase [ADP-forming] subunit beta"  
"JS1\_A09\_00993" 11479 "s63E6H2" 0 "Succinyl-CoA ligase [ADP-forming] subunit beta"  
"JS1\_A09\_00996" 11482 "s59E13H2" 0 "CoB--CoM heterodisulfide reductase iron-sulfur subunit A"  
"JS1\_A09\_00996" 11482 "s59E25H2" 0 "CoB--CoM heterodisulfide reductase iron-sulfur subunit A"  
"JS1\_A09\_00996" 11482 "s59E5H2" 0.009358947 "CoB--CoM heterodisulfide reductase iron-sulfur subunit A"  
"JS1\_A09\_00996" 11482 "s63E6H2" 0 "CoB--CoM heterodisulfide reductase iron-sulfur subunit A"  
"JS1\_A09\_00997" 11483 "s59E13H2" 0.0004425485 "Sulfide dehydrogenase subunit alpha precursor"  
"JS1\_A09\_00997" 11483 "s59E25H2" 0 "Sulfide dehydrogenase subunit alpha precursor"  
"JS1\_A09\_00997" 11483 "s59E5H2" 0.01464604 "Sulfide dehydrogenase subunit alpha precursor"  
"JS1\_A09\_00997" 11483 "s63E6H2" 0.3613055 "Sulfide dehydrogenase subunit alpha precursor"  
"JS1\_A09\_00998" 11484 "s59E13H2" 0 "L-aspartate oxidase"  
"JS1\_A09\_00998" 11484 "s59E25H2" 0 "L-aspartate oxidase"  
"JS1\_A09\_00998" 11484 "s59E5H2" 0.003255953 "L-aspartate oxidase"  
"JS1\_A09\_00998" 11484 "s63E6H2" 0.4508296 "L-aspartate oxidase"  
"JS1\_A09\_00999" 11485 "s59E13H2" 0 "acetyl-CoA decarboxylase/synthase complex subunit alpha"  
"JS1\_A09\_00999" 11485 "s59E25H2" 0 "acetyl-CoA decarboxylase/synthase complex subunit alpha"  
"JS1\_A09\_00999" 11485 "s59E5H2" 0.0110139 "acetyl-CoA decarboxylase/synthase complex subunit alpha"  
"JS1\_A09\_00999" 11485 "s63E6H2" 0.520346 "acetyl-CoA decarboxylase/synthase complex subunit alpha"

"JS1\_A09\_01000" 11486 "s59E13H2" 0.002455491 "CoB--CoM heterodisulfide reductase iron-sulfur subunit A"  
"JS1\_A09\_01000" 11486 "s59E25H2" 0 "CoB--CoM heterodisulfide reductase iron-sulfur subunit A"  
"JS1\_A09\_01000" 11486 "s59E5H2" 0.005586321 "CoB--CoM heterodisulfide reductase iron-sulfur subunit A"  
"JS1\_A09\_01000" 11486 "s63E6H2" 0.4100314 "CoB--CoM heterodisulfide reductase iron-sulfur subunit A"  
"JS1\_A09\_01001" 11487 "s59E13H2" 0 "Asp/Glu/Hydantoin racemase"  
"JS1\_A09\_01001" 11487 "s59E25H2" 0 "Asp/Glu/Hydantoin racemase"  
"JS1\_A09\_01001" 11487 "s59E5H2" 0 "Asp/Glu/Hydantoin racemase"  
"JS1\_A09\_01001" 11487 "s63E6H2" 0.00407884 "Asp/Glu/Hydantoin racemase"  
"JS1\_A09\_01002" 11488 "s59E13H2" 0 "Enamine/imine deaminase"  
"JS1\_A09\_01002" 11488 "s59E25H2" 0 "Enamine/imine deaminase"  
"JS1\_A09\_01002" 11488 "s59E5H2" 0 "Enamine/imine deaminase"  
"JS1\_A09\_01002" 11488 "s63E6H2" 0.04349755 "Enamine/imine deaminase"  
"JS1\_A09\_01003" 11489 "s59E13H2" 0.003753812 "L-hydantoinase"  
"JS1\_A09\_01003" 11489 "s59E25H2" 0 "L-hydantoinase"  
"JS1\_A09\_01003" 11489 "s59E5H2" 0.01152133 "L-hydantoinase"  
"JS1\_A09\_01003" 11489 "s63E6H2" 0.07134173 "L-hydantoinase"  
"JS1\_A09\_01004" 11490 "s59E13H2" 0.01907776 "Phosphoenolpyruvate carboxykinase [GTP]"  
"JS1\_A09\_01004" 11490 "s59E25H2" 0 "Phosphoenolpyruvate carboxykinase [GTP]"  
"JS1\_A09\_01004" 11490 "s59E5H2" 0.001736657 "Phosphoenolpyruvate carboxykinase [GTP]"  
"JS1\_A09\_01004" 11490 "s63E6H2" 0.03476666 "Phosphoenolpyruvate carboxykinase [GTP]"  
"JS1\_A09\_01005" 11491 "s59E13H2" 1.372698 "N(G),N(G)-dimethylarginine dimethylaminohydrolase"  
"JS1\_A09\_01005" 11491 "s59E25H2" 0 "N(G),N(G)-dimethylarginine dimethylaminohydrolase"  
"JS1\_A09\_01005" 11491 "s59E5H2" 0.07849445 "N(G),N(G)-dimethylarginine dimethylaminohydrolase"  
"JS1\_A09\_01005" 11491 "s63E6H2" 0.09149132 "N(G),N(G)-dimethylarginine dimethylaminohydrolase"  
"JS1\_A09\_01006" 11492 "s59E13H2" 0.4131903 "HTH-type transcriptional regulator LutR"  
"JS1\_A09\_01006" 11492 "s59E25H2" 0 "HTH-type transcriptional regulator LutR"  
"JS1\_A09\_01006" 11492 "s59E5H2" 0.05366481 "HTH-type transcriptional regulator LutR"  
"JS1\_A09\_01006" 11492 "s63E6H2" 0.08647855 "HTH-type transcriptional regulator LutR"  
"JS1\_A09\_01007" 11493 "s59E13H2" 3.747964 "hypothetical protein"  
"JS1\_A09\_01007" 11493 "s59E25H2" 0.3679176 "hypothetical protein"  
"JS1\_A09\_01007" 11493 "s59E5H2" 0.2052055 "hypothetical protein"  
"JS1\_A09\_01007" 11493 "s63E6H2" 0.2639727 "hypothetical protein"  
"JS1\_A09\_01008" 11494 "s59E13H2" 1.919322 "hypothetical protein"  
"JS1\_A09\_01008" 11494 "s59E25H2" 0 "hypothetical protein"  
"JS1\_A09\_01008" 11494 "s59E5H2" 0.1917897 "hypothetical protein"  
"JS1\_A09\_01008" 11494 "s63E6H2" 0.1995112 "hypothetical protein"  
"JS1\_A09\_01009" 11495 "s59E13H2" 1.602223 "Dihydroneopterin 2',3'-cyclic phosphate phosphodiesterase"  
"JS1\_A09\_01009" 11495 "s59E25H2" 0 "Dihydroneopterin 2',3'-cyclic phosphate phosphodiesterase"  
"JS1\_A09\_01009" 11495 "s59E5H2" 0.2796906 "Dihydroneopterin 2',3'-cyclic phosphate phosphodiesterase"  
"JS1\_A09\_01009" 11495 "s63E6H2" 0.1987275 "Dihydroneopterin 2',3'-cyclic phosphate phosphodiesterase"  
"JS1\_A09\_01010" 11496 "s59E13H2" 0.9657287 "Isopropylmalate/citramalate isomerase large subunit"  
"JS1\_A09\_01010" 11496 "s59E25H2" 0 "Isopropylmalate/citramalate isomerase large subunit"  
"JS1\_A09\_01010" 11496 "s59E5H2" 0.1072136 "Isopropylmalate/citramalate isomerase large subunit"  
"JS1\_A09\_01010" 11496 "s63E6H2" 0.06545057 "Isopropylmalate/citramalate isomerase large subunit"  
"JS1\_A09\_01011" 11497 "s59E13H2" 0.1010378 "Beta-galactosidase"  
"JS1\_A09\_01011" 11497 "s59E25H2" 0 "Beta-galactosidase"  
"JS1\_A09\_01011" 11497 "s59E5H2" 0.4792442 "Beta-galactosidase"

"JS1\_A09\_01011" 11497 "s63E6H2" 0.2184915 "Beta-galactosidase"  
"JS1\_A09\_01012" 11498 "s59E13H2" 0.153101 "Alpha-galactosidase"  
"JS1\_A09\_01012" 11498 "s59E25H2" 0 "Alpha-galactosidase"  
"JS1\_A09\_01012" 11498 "s59E5H2" 0.5862259 "Alpha-galactosidase"  
"JS1\_A09\_01012" 11498 "s63E6H2" 0.1128897 "Alpha-galactosidase"  
"JS1\_A09\_01013" 11499 "s59E13H2" 0.2745 "Galactose-1-phosphate uridylyltransferase"  
"JS1\_A09\_01013" 11499 "s59E25H2" 0 "Galactose-1-phosphate uridylyltransferase"  
"JS1\_A09\_01013" 11499 "s59E5H2" 0.4468707 "Galactose-1-phosphate uridylyltransferase"  
"JS1\_A09\_01013" 11499 "s63E6H2" 0.636606 "Galactose-1-phosphate uridylyltransferase"  
"JS1\_A09\_01014" 11500 "s59E13H2" 0.04743254 "Galactokinase"  
"JS1\_A09\_01014" 11500 "s59E25H2" 0 "Galactokinase"  
"JS1\_A09\_01014" 11500 "s59E5H2" 0.101203 "Galactokinase"  
"JS1\_A09\_01014" 11500 "s63E6H2" 0.05681738 "Galactokinase"  
"JS1\_A09\_01015" 11501 "s59E13H2" 1.923945 "Glycerol kinase"  
"JS1\_A09\_01015" 11501 "s59E25H2" 0.2573333 "Glycerol kinase"  
"JS1\_A09\_01015" 11501 "s59E5H2" 1.543216 "Glycerol kinase"  
"JS1\_A09\_01015" 11501 "s63E6H2" 2.865339 "Glycerol kinase"  
"JS1\_A09\_01016" 11502 "s59E13H2" 0.1716304 "HTH-type transcriptional regulator EthR"  
"JS1\_A09\_01016" 11502 "s59E25H2" 0 "HTH-type transcriptional regulator EthR"  
"JS1\_A09\_01016" 11502 "s59E5H2" 1.04607 "HTH-type transcriptional regulator EthR"  
"JS1\_A09\_01016" 11502 "s63E6H2" 1.160627 "HTH-type transcriptional regulator EthR"  
"JS1\_A09\_01017" 11503 "s59E13H2" 0.1935494 "hypothetical protein"  
"JS1\_A09\_01017" 11503 "s59E25H2" 0 "hypothetical protein"  
"JS1\_A09\_01017" 11503 "s59E5H2" 0.8447982 "hypothetical protein"  
"JS1\_A09\_01017" 11503 "s63E6H2" 0.59509 "hypothetical protein"  
"JS1\_A09\_01018" 11504 "s59E13H2" 0.07894509 "hypothetical protein"  
"JS1\_A09\_01018" 11504 "s59E25H2" 0 "hypothetical protein"  
"JS1\_A09\_01018" 11504 "s59E5H2" 0.4374693 "hypothetical protein"  
"JS1\_A09\_01018" 11504 "s63E6H2" 1.4169 "hypothetical protein"  
"JS1\_A09\_01019" 11505 "s59E13H2" 0 "Membrane transport protein mmpL8"  
"JS1\_A09\_01019" 11505 "s59E25H2" 0 "Membrane transport protein mmpL8"  
"JS1\_A09\_01019" 11505 "s59E5H2" 0.1332344 "Membrane transport protein mmpL8"  
"JS1\_A09\_01019" 11505 "s63E6H2" 0.0227589 "Membrane transport protein mmpL8"  
"JS1\_A09\_01021" 11507 "s59E13H2" 0.04288093 "UDP-N-acetylglucosamine 2-epimerase"  
"JS1\_A09\_01021" 11507 "s59E25H2" 0 "UDP-N-acetylglucosamine 2-epimerase"  
"JS1\_A09\_01021" 11507 "s59E5H2" 1.659832 "UDP-N-acetylglucosamine 2-epimerase"  
"JS1\_A09\_01021" 11507 "s63E6H2" 0.08667404 "UDP-N-acetylglucosamine 2-epimerase"  
"JS1\_A09\_01022" 11508 "s59E13H2" 0.01634307 "Rhomboid protease GluP"  
"JS1\_A09\_01022" 11508 "s59E25H2" 0 "Rhomboid protease GluP"  
"JS1\_A09\_01022" 11508 "s59E5H2" 0.6620872 "Rhomboid protease GluP"  
"JS1\_A09\_01022" 11508 "s63E6H2" 0.1461011 "Rhomboid protease GluP"  
"JS1\_A09\_01023" 11509 "s59E13H2" 0.03058075 "Tagatose-6-phosphate kinase"  
"JS1\_A09\_01023" 11509 "s59E25H2" 0 "Tagatose-6-phosphate kinase"  
"JS1\_A09\_01023" 11509 "s59E5H2" 0.8589959 "Tagatose-6-phosphate kinase"  
"JS1\_A09\_01023" 11509 "s63E6H2" 0.08753395 "Tagatose-6-phosphate kinase"  
"JS1\_A09\_01024" 11510 "s59E13H2" 0.0228168 "inosine 5'-monophosphate dehydrogenase"  
"JS1\_A09\_01024" 11510 "s59E25H2" 0 "inosine 5'-monophosphate dehydrogenase"

"JS1\_A09\_01024" 11510 "s59E5H2" 0.7421967 "inosine 5'-monophosphate dehydrogenase"  
"JS1\_A09\_01024" 11510 "s63E6H2" 0.1081926 "inosine 5'-monophosphate dehydrogenase"  
"JS1\_A09\_01025" 11511 "s59E13H2" 0.03867016 "Thymidylate kinase"  
"JS1\_A09\_01025" 11511 "s59E25H2" 0 "Thymidylate kinase"  
"JS1\_A09\_01025" 11511 "s59E5H2" 0.7478915 "Thymidylate kinase"  
"JS1\_A09\_01025" 11511 "s63E6H2" 0.09351836 "Thymidylate kinase"  
"JS1\_A09\_01026" 11512 "s59E13H2" 0.04661903 "DNA polymerase III subunit tau"  
"JS1\_A09\_01026" 11512 "s59E25H2" 0 "DNA polymerase III subunit tau"  
"JS1\_A09\_01026" 11512 "s59E5H2" 0.4226309 "DNA polymerase III subunit tau"  
"JS1\_A09\_01026" 11512 "s63E6H2" 0.07144371 "DNA polymerase III subunit tau"  
"JS1\_A09\_01027" 11513 "s59E13H2" 0.05105581 "hypothetical protein"  
"JS1\_A09\_01027" 11513 "s59E25H2" 0 "hypothetical protein"  
"JS1\_A09\_01027" 11513 "s59E5H2" 0.2634266 "hypothetical protein"  
"JS1\_A09\_01027" 11513 "s63E6H2" 0.1028851 "hypothetical protein"  
"JS1\_A09\_01028" 11514 "s59E13H2" 0.05322603 "Tetracycline resistance protein, class B"  
"JS1\_A09\_01028" 11514 "s59E25H2" 0 "Tetracycline resistance protein, class B"  
"JS1\_A09\_01028" 11514 "s59E5H2" 0.5113034 "Tetracycline resistance protein, class B"  
"JS1\_A09\_01028" 11514 "s63E6H2" 0.2169156 "Tetracycline resistance protein, class B"  
"JS1\_A09\_01029" 11515 "s59E13H2" 0.006118345 "hypothetical protein"  
"JS1\_A09\_01029" 11515 "s59E25H2" 0 "hypothetical protein"  
"JS1\_A09\_01029" 11515 "s59E5H2" 0.02621897 "hypothetical protein"  
"JS1\_A09\_01029" 11515 "s63E6H2" 0.006979925 "hypothetical protein"  
"JS1\_A09\_01030" 11516 "s59E13H2" 0 "hypothetical protein"  
"JS1\_A09\_01030" 11516 "s59E25H2" 0 "hypothetical protein"  
"JS1\_A09\_01030" 11516 "s59E5H2" 0.02496807 "hypothetical protein"  
"JS1\_A09\_01030" 11516 "s63E6H2" 0.05710592 "hypothetical protein"  
"JS1\_A09\_01031" 11517 "s59E13H2" 0 "Putative N-acetyl-LL-diaminopimelate aminotransferase"  
"JS1\_A09\_01031" 11517 "s59E25H2" 0 "Putative N-acetyl-LL-diaminopimelate aminotransferase"  
"JS1\_A09\_01031" 11517 "s59E5H2" 0 "Putative N-acetyl-LL-diaminopimelate aminotransferase"  
"JS1\_A09\_01031" 11517 "s63E6H2" 0.002683501 "Putative N-acetyl-LL-diaminopimelate aminotransferase"  
"JS1\_A09\_01032" 11518 "s59E13H2" 0 "hypothetical protein"  
"JS1\_A09\_01032" 11518 "s59E25H2" 0 "hypothetical protein"  
"JS1\_A09\_01032" 11518 "s59E5H2" 0 "hypothetical protein"  
"JS1\_A09\_01032" 11518 "s63E6H2" 0.04953603 "hypothetical protein"  
"JS1\_A09\_01035" 11521 "s59E13H2" 0 "2-oxoglutarate synthase subunit KorA"  
"JS1\_A09\_01035" 11521 "s59E25H2" 0 "2-oxoglutarate synthase subunit KorA"  
"JS1\_A09\_01035" 11521 "s59E5H2" 0.0002526504 "2-oxoglutarate synthase subunit KorA"  
"JS1\_A09\_01035" 11521 "s63E6H2" 0.02506457 "2-oxoglutarate synthase subunit KorA"  
"JS1\_A09\_01036" 11522 "s59E13H2" 0 "Succinyl-CoA ligase [ADP-forming] subunit beta"  
"JS1\_A09\_01036" 11522 "s59E25H2" 0 "Succinyl-CoA ligase [ADP-forming] subunit beta"  
"JS1\_A09\_01036" 11522 "s59E5H2" 0 "Succinyl-CoA ligase [ADP-forming] subunit beta"  
"JS1\_A09\_01036" 11522 "s63E6H2" 0 "Succinyl-CoA ligase [ADP-forming] subunit beta"  
"JS1\_A09\_01039" 11525 "s59E13H2" 0 "hypothetical protein"  
"JS1\_A09\_01039" 11525 "s59E25H2" 0 "hypothetical protein"  
"JS1\_A09\_01039" 11525 "s59E5H2" 0 "hypothetical protein"  
"JS1\_A09\_01039" 11525 "s63E6H2" 0 "hypothetical protein"  
"JS1\_A09\_01040" 11526 "s59E13H2" 0 "hypothetical protein"

"JS1\_A09\_01040" 11526 "s59E25H2" 0 "hypothetical protein"  
"JS1\_A09\_01040" 11526 "s59E5H2" 0 "hypothetical protein"  
"JS1\_A09\_01040" 11526 "s63E6H2" 0 "hypothetical protein"  
"JS1\_A09\_01041" 11527 "s59E13H2" 1.595446 "Group II intron-encoded protein LtrA"  
"JS1\_A09\_01041" 11527 "s59E25H2" 0 "Group II intron-encoded protein LtrA"  
"JS1\_A09\_01041" 11527 "s59E5H2" 1.907204 "Group II intron-encoded protein LtrA"  
"JS1\_A09\_01041" 11527 "s63E6H2" 12.62315 "Group II intron-encoded protein LtrA"  
"JS1\_A09\_01045" 11531 "s59E13H2" 1.204358 "hypothetical protein"  
"JS1\_A09\_01045" 11531 "s59E25H2" 0 "hypothetical protein"  
"JS1\_A09\_01045" 11531 "s59E5H2" 1.064709 "hypothetical protein"  
"JS1\_A09\_01045" 11531 "s63E6H2" 0.06535669 "hypothetical protein"  
"JS1\_A09\_01046" 11532 "s59E13H2" 0.709776 "hypothetical protein"  
"JS1\_A09\_01046" 11532 "s59E25H2" 0 "hypothetical protein"  
"JS1\_A09\_01046" 11532 "s59E5H2" 1.189656 "hypothetical protein"  
"JS1\_A09\_01046" 11532 "s63E6H2" 0.1050916 "hypothetical protein"  
"JS1\_A09\_01047" 11533 "s59E13H2" 0.6193994 "hypothetical protein"  
"JS1\_A09\_01047" 11533 "s59E25H2" 0 "hypothetical protein"  
"JS1\_A09\_01047" 11533 "s59E5H2" 2.446704 "hypothetical protein"  
"JS1\_A09\_01047" 11533 "s63E6H2" 0.1372004 "hypothetical protein"  
"JS1\_A09\_01048" 11534 "s59E13H2" 0.01530855 "putative DMT superfamily transporter inner membrane protein"  
"JS1\_A09\_01048" 11534 "s59E25H2" 0 "putative DMT superfamily transporter inner membrane protein"  
"JS1\_A09\_01048" 11534 "s59E5H2" 1.684819 "putative DMT superfamily transporter inner membrane protein"  
"JS1\_A09\_01048" 11534 "s63E6H2" 0.08398426 "putative DMT superfamily transporter inner membrane protein"  
"JS1\_A09\_01049" 11535 "s59E13H2" 0.1065035 "Outer membrane efflux protein"  
"JS1\_A09\_01049" 11535 "s59E25H2" 0 "Outer membrane efflux protein"  
"JS1\_A09\_01049" 11535 "s59E5H2" 1.529609 "Outer membrane efflux protein"  
"JS1\_A09\_01049" 11535 "s63E6H2" 0.08347985 "Outer membrane efflux protein"  
"JS1\_A09\_01050" 11536 "s59E13H2" 0.2963791 "Outer membrane efflux protein"  
"JS1\_A09\_01050" 11536 "s59E25H2" 0 "Outer membrane efflux protein"  
"JS1\_A09\_01050" 11536 "s59E5H2" 0.3091841 "Outer membrane efflux protein"  
"JS1\_A09\_01050" 11536 "s63E6H2" 0.08865212 "Outer membrane efflux protein"  
"JS1\_A09\_01051" 11537 "s59E13H2" 0.1774476 "Putative efflux system component YknX"  
"JS1\_A09\_01051" 11537 "s59E25H2" 0 "Putative efflux system component YknX"  
"JS1\_A09\_01051" 11537 "s59E5H2" 0.5739481 "Putative efflux system component YknX"  
"JS1\_A09\_01051" 11537 "s63E6H2" 0.5928006 "Putative efflux system component YknX"  
"JS1\_A09\_01052" 11538 "s59E13H2" 0.1313663 "putative ABC transporter ATP-binding protein"  
"JS1\_A09\_01052" 11538 "s59E25H2" 0 "putative ABC transporter ATP-binding protein"  
"JS1\_A09\_01052" 11538 "s59E5H2" 0.5149736 "putative ABC transporter ATP-binding protein"  
"JS1\_A09\_01052" 11538 "s63E6H2" 1.347397 "putative ABC transporter ATP-binding protein"  
"JS1\_A09\_01053" 11539 "s59E13H2" 0.2172109 "Macrolide export ATP-binding/permease protein MacB"  
"JS1\_A09\_01053" 11539 "s59E25H2" 0.1978654 "Macrolide export ATP-binding/permease protein MacB"  
"JS1\_A09\_01053" 11539 "s59E5H2" 0.9026395 "Macrolide export ATP-binding/permease protein MacB"  
"JS1\_A09\_01053" 11539 "s63E6H2" 0.8805337 "Macrolide export ATP-binding/permease protein MacB"  
"JS1\_A09\_01054" 11540 "s59E13H2" 0.004236945 "Trifunctional nucleotide phosphoesterase protein YfkN precursor"  
"JS1\_A09\_01054" 11540 "s59E25H2" 0 "Trifunctional nucleotide phosphoesterase protein YfkN precursor"  
"JS1\_A09\_01054" 11540 "s59E5H2" 0.1415342 "Trifunctional nucleotide phosphoesterase protein YfkN precursor"  
"JS1\_A09\_01054" 11540 "s63E6H2" 0.2287555 "Trifunctional nucleotide phosphoesterase protein YfkN precursor"

"JS1\_A09\_01055" 11541 "s59E13H2" 0.0644627 "hypothetical protein"  
"JS1\_A09\_01055" 11541 "s59E25H2" 0 "hypothetical protein"  
"JS1\_A09\_01055" 11541 "s59E5H2" 0.4183945 "hypothetical protein"  
"JS1\_A09\_01055" 11541 "s63E6H2" 1.566928 "hypothetical protein"  
"JS1\_A09\_01056" 11542 "s59E13H2" 0.07397523 "LemA family protein"  
"JS1\_A09\_01056" 11542 "s59E25H2" 0 "LemA family protein"  
"JS1\_A09\_01056" 11542 "s59E5H2" 1.055763 "LemA family protein"  
"JS1\_A09\_01056" 11542 "s63E6H2" 1.867797 "LemA family protein"  
"JS1\_A09\_01057" 11543 "s59E13H2" 0.03536993 "galactoside permease"  
"JS1\_A09\_01057" 11543 "s59E25H2" 0 "galactoside permease"  
"JS1\_A09\_01057" 11543 "s59E5H2" 0.6437425 "galactoside permease"  
"JS1\_A09\_01057" 11543 "s63E6H2" 1.098703 "galactoside permease"  
"JS1\_A09\_01064" 11550 "s59E13H2" 0 "hypothetical protein"  
"JS1\_A09\_01064" 11550 "s59E25H2" 0 "hypothetical protein"  
"JS1\_A09\_01064" 11550 "s59E5H2" 0 "hypothetical protein"  
"JS1\_A09\_01064" 11550 "s63E6H2" 0 "hypothetical protein"  
"JS1\_A09\_01066" 11552 "s59E13H2" 0 "hypothetical protein"  
"JS1\_A09\_01066" 11552 "s59E25H2" 0 "hypothetical protein"  
"JS1\_A09\_01066" 11552 "s59E5H2" 0 "hypothetical protein"  
"JS1\_A09\_01066" 11552 "s63E6H2" 0 "hypothetical protein"  
"JS1\_A09\_01069" 11555 "s59E13H2" 0 "hypothetical protein"  
"JS1\_A09\_01069" 11555 "s59E25H2" 0 "hypothetical protein"  
"JS1\_A09\_01069" 11555 "s59E5H2" 0 "hypothetical protein"  
"JS1\_A09\_01069" 11555 "s63E6H2" 0 "hypothetical protein"  
"JS1\_A09\_01073" 11559 "s59E13H2" 0 "hypothetical protein"  
"JS1\_A09\_01073" 11559 "s59E25H2" 0 "hypothetical protein"  
"JS1\_A09\_01073" 11559 "s59E5H2" 0 "hypothetical protein"  
"JS1\_A09\_01073" 11559 "s63E6H2" 0 "hypothetical protein"  
"JS1\_A09\_01074" 11560 "s59E13H2" 0 "hypothetical protein"  
"JS1\_A09\_01074" 11560 "s59E25H2" 0 "hypothetical protein"  
"JS1\_A09\_01074" 11560 "s59E5H2" 0 "hypothetical protein"  
"JS1\_A09\_01074" 11560 "s63E6H2" 0 "hypothetical protein"  
"JS1\_A09\_01075" 11561 "s59E13H2" 0 "Alanine dehydrogenase"  
"JS1\_A09\_01075" 11561 "s59E25H2" 0 "Alanine dehydrogenase"  
"JS1\_A09\_01075" 11561 "s59E5H2" 0 "Alanine dehydrogenase"  
"JS1\_A09\_01075" 11561 "s63E6H2" 0 "Alanine dehydrogenase"  
"JS1\_A09\_01076" 11562 "s59E13H2" 0 "L-Ala-D/L-Glu epimerase"  
"JS1\_A09\_01076" 11562 "s59E25H2" 0 "L-Ala-D/L-Glu epimerase"  
"JS1\_A09\_01076" 11562 "s59E5H2" 0 "L-Ala-D/L-Glu epimerase"  
"JS1\_A09\_01076" 11562 "s63E6H2" 0 "L-Ala-D/L-Glu epimerase"  
"JS1\_A09\_01078" 11564 "s59E13H2" 0 "hypothetical protein"  
"JS1\_A09\_01078" 11564 "s59E25H2" 0 "hypothetical protein"  
"JS1\_A09\_01078" 11564 "s59E5H2" 0 "hypothetical protein"  
"JS1\_A09\_01078" 11564 "s63E6H2" 0.007822615 "hypothetical protein"  
"JS1\_A09\_01079" 11565 "s59E13H2" 0.09515843 "putative tyrosine recombinase XerC-like protein"  
"JS1\_A09\_01079" 11565 "s59E25H2" 0 "putative tyrosine recombinase XerC-like protein"  
"JS1\_A09\_01079" 11565 "s59E5H2" 0 "putative tyrosine recombinase XerC-like protein"



"JS1\_A09\_01079" 11565 "s63E6H2" 0.009974059 "putative tyrosine recombinase XerC-like protein"  
"JS1\_A09\_01080" 11566 "s59E13H2" 0 "hypothetical protein"  
"JS1\_A09\_01080" 11566 "s59E25H2" 0 "hypothetical protein"  
"JS1\_A09\_01080" 11566 "s59E5H2" 0 "hypothetical protein"  
"JS1\_A09\_01080" 11566 "s63E6H2" 0 "hypothetical protein"  
"JS1\_A09\_01081" 11567 "s59E13H2" 0 "hypothetical protein"  
"JS1\_A09\_01081" 11567 "s59E25H2" 0 "hypothetical protein"  
"JS1\_A09\_01081" 11567 "s59E5H2" 0 "hypothetical protein"  
"JS1\_A09\_01081" 11567 "s63E6H2" 0 "hypothetical protein"  
"JS1\_A09\_01082" 11568 "s59E13H2" 0 "hypothetical protein"  
"JS1\_A09\_01082" 11568 "s59E25H2" 0 "hypothetical protein"  
"JS1\_A09\_01082" 11568 "s59E5H2" 0 "hypothetical protein"  
"JS1\_A09\_01082" 11568 "s63E6H2" 0 "hypothetical protein"  
"JS1\_A09\_01083" 11569 "s59E13H2" 0.0363145 "Restriction endonuclease BgIII"  
"JS1\_A09\_01083" 11569 "s59E25H2" 0 "Restriction endonuclease BgIII"  
"JS1\_A09\_01083" 11569 "s59E5H2" 0 "Restriction endonuclease BgIII"  
"JS1\_A09\_01083" 11569 "s63E6H2" 0 "Restriction endonuclease BgIII"  
"JS1\_A09\_01084" 11570 "s59E13H2" 0 "Tetratricopeptide repeat protein"  
"JS1\_A09\_01084" 11570 "s59E25H2" 0 "Tetratricopeptide repeat protein"  
"JS1\_A09\_01084" 11570 "s59E5H2" 0 "Tetratricopeptide repeat protein"  
"JS1\_A09\_01084" 11570 "s63E6H2" 0 "Tetratricopeptide repeat protein"  
"JS1\_A09\_01085" 11571 "s59E13H2" 0 "hypothetical protein"  
"JS1\_A09\_01085" 11571 "s59E25H2" 0 "hypothetical protein"  
"JS1\_A09\_01085" 11571 "s59E5H2" 0 "hypothetical protein"  
"JS1\_A09\_01085" 11571 "s63E6H2" 0 "hypothetical protein"  
"JS1\_A09\_01086" 11572 "s59E13H2" 0 "hypothetical protein"  
"JS1\_A09\_01086" 11572 "s59E25H2" 0 "hypothetical protein"  
"JS1\_A09\_01086" 11572 "s59E5H2" 0 "hypothetical protein"  
"JS1\_A09\_01086" 11572 "s63E6H2" 0 "hypothetical protein"  
"JS1\_A09\_01087" 11573 "s59E13H2" 0 "hypothetical protein"  
"JS1\_A09\_01087" 11573 "s59E25H2" 0 "hypothetical protein"  
"JS1\_A09\_01087" 11573 "s59E5H2" 0 "hypothetical protein"  
"JS1\_A09\_01087" 11573 "s63E6H2" 0 "hypothetical protein"  
"JS1\_A09\_01089" 11575 "s59E13H2" 0.02574012 "Transcription elongation factor GreA"  
"JS1\_A09\_01089" 11575 "s59E25H2" 0 "Transcription elongation factor GreA"  
"JS1\_A09\_01089" 11575 "s59E5H2" 0.1491755 "Transcription elongation factor GreA"  
"JS1\_A09\_01089" 11575 "s63E6H2" 0.06426493 "Transcription elongation factor GreA"  
"JS1\_A09\_01090" 11576 "s59E13H2" 0.03121518 "Threonylcarbamoyl-AMP synthase"  
"JS1\_A09\_01090" 11576 "s59E25H2" 0 "Threonylcarbamoyl-AMP synthase"  
"JS1\_A09\_01090" 11576 "s59E5H2" 0.1535281 "Threonylcarbamoyl-AMP synthase"  
"JS1\_A09\_01090" 11576 "s63E6H2" 0.08013609 "Threonylcarbamoyl-AMP synthase"  
"JS1\_A09\_01091" 11577 "s59E13H2" 0 "Chorismate mutase AroH"  
"JS1\_A09\_01091" 11577 "s59E25H2" 0 "Chorismate mutase AroH"  
"JS1\_A09\_01091" 11577 "s59E5H2" 0 "Chorismate mutase AroH"  
"JS1\_A09\_01091" 11577 "s63E6H2" 0 "Chorismate mutase AroH"  
"JS1\_A09\_01092" 11578 "s59E13H2" 0.01604867 "Putative pyridoxal phosphate-dependent acyltransferase"  
"JS1\_A09\_01092" 11578 "s59E25H2" 0 "Putative pyridoxal phosphate-dependent acyltransferase"

"JS1\_A09\_01092" 11578 "s59E5H2" 0.1476207 "Putative pyridoxal phosphate-dependent acyltransferase"  
"JS1\_A09\_01092" 11578 "s63E6H2" 0.1958134 "Putative pyridoxal phosphate-dependent acyltransferase"  
"JS1\_A09\_01094" 11580 "s59E13H2" 0.01767383 "hypothetical protein"  
"JS1\_A09\_01094" 11580 "s59E25H2" 0 "hypothetical protein"  
"JS1\_A09\_01094" 11580 "s59E5H2" 0.3005192 "hypothetical protein"  
"JS1\_A09\_01094" 11580 "s63E6H2" 0.08996191 "hypothetical protein"  
"JS1\_A09\_01095" 11581 "s59E13H2" 0.07545824 "tRNA-specific 2-thiouridylase MnmA"  
"JS1\_A09\_01095" 11581 "s59E25H2" 0 "tRNA-specific 2-thiouridylase MnmA"  
"JS1\_A09\_01095" 11581 "s59E5H2" 0.3791847 "tRNA-specific 2-thiouridylase MnmA"  
"JS1\_A09\_01095" 11581 "s63E6H2" 0.1152112 "tRNA-specific 2-thiouridylase MnmA"  
"JS1\_A09\_01096" 11582 "s59E13H2" 0.03544238 "hypothetical protein"  
"JS1\_A09\_01096" 11582 "s59E25H2" 0 "hypothetical protein"  
"JS1\_A09\_01096" 11582 "s59E5H2" 0.1638756 "hypothetical protein"  
"JS1\_A09\_01096" 11582 "s63E6H2" 0.08205529 "hypothetical protein"  
"JS1\_A09\_01097" 11583 "s59E13H2" 0.03635338 "HTH-type transcriptional regulator CymR"  
"JS1\_A09\_01097" 11583 "s59E25H2" 0 "HTH-type transcriptional regulator CymR"  
"JS1\_A09\_01097" 11583 "s59E5H2" 0.1473259 "HTH-type transcriptional regulator CymR"  
"JS1\_A09\_01097" 11583 "s63E6H2" 0.09817793 "HTH-type transcriptional regulator CymR"  
"JS1\_A09\_01098" 11584 "s59E13H2" 0.3687576 "Oligo-1,6-glucosidase"  
"JS1\_A09\_01098" 11584 "s59E25H2" 0 "Oligo-1,6-glucosidase"  
"JS1\_A09\_01098" 11584 "s59E5H2" 0.7604925 "Oligo-1,6-glucosidase"  
"JS1\_A09\_01098" 11584 "s63E6H2" 1.181628 "Oligo-1,6-glucosidase"  
"JS1\_A09\_01099" 11585 "s59E13H2" 0.06226377 "Ferredoxin"  
"JS1\_A09\_01099" 11585 "s59E25H2" 0 "Ferredoxin"  
"JS1\_A09\_01099" 11585 "s59E5H2" 0.5502401 "Ferredoxin"  
"JS1\_A09\_01099" 11585 "s63E6H2" 0.1209648 "Ferredoxin"  
"JS1\_A09\_01100" 11586 "s59E13H2" 0.2107662 "Ribonuclease Z"  
"JS1\_A09\_01100" 11586 "s59E25H2" 0 "Ribonuclease Z"  
"JS1\_A09\_01100" 11586 "s59E5H2" 0.4007445 "Ribonuclease Z"  
"JS1\_A09\_01100" 11586 "s63E6H2" 0.2308014 "Ribonuclease Z"  
"JS1\_A09\_01101" 11587 "s59E13H2" 0.2334582 "Molybdopterin adenyllyltransferase"  
"JS1\_A09\_01101" 11587 "s59E25H2" 0 "Molybdopterin adenyllyltransferase"  
"JS1\_A09\_01101" 11587 "s59E5H2" 0.4012004 "Molybdopterin adenyllyltransferase"  
"JS1\_A09\_01101" 11587 "s63E6H2" 0.1903645 "Molybdopterin adenyllyltransferase"  
"JS1\_A09\_01102" 11588 "s59E13H2" 0.01391119 "MOSC domain protein"  
"JS1\_A09\_01102" 11588 "s59E25H2" 0 "MOSC domain protein"  
"JS1\_A09\_01102" 11588 "s59E5H2" 0.5802995 "MOSC domain protein"  
"JS1\_A09\_01102" 11588 "s63E6H2" 0.1091377 "MOSC domain protein"  
"JS1\_A09\_01103" 11589 "s59E13H2" 0 "Cyclic pyranopterin monophosphate synthase accessory protein"  
"JS1\_A09\_01103" 11589 "s59E25H2" 0 "Cyclic pyranopterin monophosphate synthase accessory protein"  
"JS1\_A09\_01103" 11589 "s59E5H2" 0.4410047 "Cyclic pyranopterin monophosphate synthase accessory protein"  
"JS1\_A09\_01103" 11589 "s63E6H2" 0.2154363 "Cyclic pyranopterin monophosphate synthase accessory protein"  
"JS1\_A09\_01104" 11590 "s59E13H2" 0.1554723 "Cyclic pyranopterin monophosphate synthase"  
"JS1\_A09\_01104" 11590 "s59E25H2" 0 "Cyclic pyranopterin monophosphate synthase"  
"JS1\_A09\_01104" 11590 "s59E5H2" 0.3671292 "Cyclic pyranopterin monophosphate synthase"  
"JS1\_A09\_01104" 11590 "s63E6H2" 0.2919262 "Cyclic pyranopterin monophosphate synthase"  
"JS1\_A09\_01105" 11591 "s59E13H2" 0.184754 "Molybdopterin molybdenumtransferase"

"JS1\_A09\_01105" 11591 "s59E25H2" 0 "Molybdopterin molybdenumtransferase"  
"JS1\_A09\_01105" 11591 "s59E5H2" 0.3909264 "Molybdopterin molybdenumtransferase"  
"JS1\_A09\_01105" 11591 "s63E6H2" 0.4381496 "Molybdopterin molybdenumtransferase"  
"JS1\_A09\_01106" 11592 "s59E13H2" 0.437322 "Lipopolysaccharide export system permease protein LptF"  
"JS1\_A09\_01106" 11592 "s59E25H2" 0 "Lipopolysaccharide export system permease protein LptF"  
"JS1\_A09\_01106" 11592 "s59E5H2" 0.7848241 "Lipopolysaccharide export system permease protein LptF"  
"JS1\_A09\_01106" 11592 "s63E6H2" 0.7104533 "Lipopolysaccharide export system permease protein LptF"  
"JS1\_A09\_01107" 11593 "s59E13H2" 0.03396522 "LPS-assembly protein LptD"  
"JS1\_A09\_01107" 11593 "s59E25H2" 0 "LPS-assembly protein LptD"  
"JS1\_A09\_01107" 11593 "s59E5H2" 0.07088962 "LPS-assembly protein LptD"  
"JS1\_A09\_01107" 11593 "s63E6H2" 0.7811722 "LPS-assembly protein LptD"  
"JS1\_A09\_01108" 11594 "s59E13H2" 0.01114084 "hypothetical protein"  
"JS1\_A09\_01108" 11594 "s59E25H2" 0 "hypothetical protein"  
"JS1\_A09\_01108" 11594 "s59E5H2" 0 "hypothetical protein"  
"JS1\_A09\_01108" 11594 "s63E6H2" 0.9654431 "hypothetical protein"  
"JS1\_A09\_01109" 11595 "s59E13H2" 0.2631126 "LPS-assembly protein LptD"  
"JS1\_A09\_01109" 11595 "s59E25H2" 0 "LPS-assembly protein LptD"  
"JS1\_A09\_01109" 11595 "s59E5H2" 0.8034051 "LPS-assembly protein LptD"  
"JS1\_A09\_01109" 11595 "s63E6H2" 3.018874 "LPS-assembly protein LptD"  
"JS1\_A09\_01110" 11596 "s59E13H2" 0.150003 "Lipopolysaccharide-assembly, LptC-related"  
"JS1\_A09\_01110" 11596 "s59E25H2" 0 "Lipopolysaccharide-assembly, LptC-related"  
"JS1\_A09\_01110" 11596 "s59E5H2" 0.3962868 "Lipopolysaccharide-assembly, LptC-related"  
"JS1\_A09\_01110" 11596 "s63E6H2" 1.505191 "Lipopolysaccharide-assembly, LptC-related"  
"JS1\_A09\_01111" 11597 "s59E13H2" 0.1076842 "Clostripain family protein"  
"JS1\_A09\_01111" 11597 "s59E25H2" 0 "Clostripain family protein"  
"JS1\_A09\_01111" 11597 "s59E5H2" 0.05919984 "Clostripain family protein"  
"JS1\_A09\_01111" 11597 "s63E6H2" 0.256931 "Clostripain family protein"  
"JS1\_A09\_01112" 11598 "s59E13H2" 0 "Succinyl-CoA ligase [ADP-forming] subunit beta"  
"JS1\_A09\_01112" 11598 "s59E25H2" 0 "Succinyl-CoA ligase [ADP-forming] subunit beta"  
"JS1\_A09\_01112" 11598 "s59E5H2" 0 "Succinyl-CoA ligase [ADP-forming] subunit beta"  
"JS1\_A09\_01112" 11598 "s63E6H2" 0 "Succinyl-CoA ligase [ADP-forming] subunit beta"  
"JS1\_A09\_01113" 11599 "s59E13H2" 8.166361 "Alanine racemase"  
"JS1\_A09\_01113" 11599 "s59E25H2" 0.6335878 "Alanine racemase"  
"JS1\_A09\_01113" 11599 "s59E5H2" 0.4919209 "Alanine racemase"  
"JS1\_A09\_01113" 11599 "s63E6H2" 0.2626985 "Alanine racemase"  
"JS1\_A09\_01115" 11601 "s59E13H2" 0 "hypothetical protein"  
"JS1\_A09\_01115" 11601 "s59E25H2" 0 "hypothetical protein"  
"JS1\_A09\_01115" 11601 "s59E5H2" 0.1088213 "hypothetical protein"  
"JS1\_A09\_01115" 11601 "s63E6H2" 0.02702751 "hypothetical protein"  
"JS1\_A09\_01116" 11602 "s59E13H2" 0 "Putative sugar phosphate isomerase Ywlf"  
"JS1\_A09\_01116" 11602 "s59E25H2" 0 "Putative sugar phosphate isomerase Ywlf"  
"JS1\_A09\_01116" 11602 "s59E5H2" 0 "Putative sugar phosphate isomerase Ywlf"  
"JS1\_A09\_01116" 11602 "s63E6H2" 0.00120382 "Putative sugar phosphate isomerase Ywlf"  
"JS1\_A09\_01117" 11603 "s59E13H2" 0 "hypothetical protein"  
"JS1\_A09\_01117" 11603 "s59E25H2" 0 "hypothetical protein"  
"JS1\_A09\_01117" 11603 "s59E5H2" 0 "hypothetical protein"  
"JS1\_A09\_01117" 11603 "s63E6H2" 0 "hypothetical protein"

"JS1\_A09\_01118" 11604 "s59E13H2" 0 "hypothetical protein"  
"JS1\_A09\_01118" 11604 "s59E25H2" 0 "hypothetical protein"  
"JS1\_A09\_01118" 11604 "s59E5H2" 0 "hypothetical protein"  
"JS1\_A09\_01118" 11604 "s63E6H2" 0 "hypothetical protein"  
"JS1\_A09\_01119" 11605 "s59E13H2" 0 "hypothetical protein"  
"JS1\_A09\_01119" 11605 "s59E25H2" 0 "hypothetical protein"  
"JS1\_A09\_01119" 11605 "s59E5H2" 0 "hypothetical protein"  
"JS1\_A09\_01119" 11605 "s63E6H2" 0 "hypothetical protein"  
"JS1\_A09\_01120" 11606 "s59E13H2" 0 "hypothetical protein"  
"JS1\_A09\_01120" 11606 "s59E25H2" 0 "hypothetical protein"  
"JS1\_A09\_01120" 11606 "s59E5H2" 0 "hypothetical protein"  
"JS1\_A09\_01120" 11606 "s63E6H2" 0 "hypothetical protein"  
"JS1\_A09\_01122" 11608 "s59E13H2" 0 "methylcobalamin:coenzyme M methyltransferase"  
"JS1\_A09\_01122" 11608 "s59E25H2" 0 "methylcobalamin:coenzyme M methyltransferase"  
"JS1\_A09\_01122" 11608 "s59E5H2" 0 "methylcobalamin:coenzyme M methyltransferase"  
"JS1\_A09\_01122" 11608 "s63E6H2" 0.001481308 "methylcobalamin:coenzyme M methyltransferase"  
"JS1\_A09\_01124" 11610 "s59E13H2" 1.06539 "Putative nickel-responsive regulator"  
"JS1\_A09\_01124" 11610 "s59E25H2" 0 "Putative nickel-responsive regulator"  
"JS1\_A09\_01124" 11610 "s59E5H2" 1.253552 "Putative nickel-responsive regulator"  
"JS1\_A09\_01124" 11610 "s63E6H2" 0.1986339 "Putative nickel-responsive regulator"  
"JS1\_A09\_01125" 11611 "s59E13H2" 0.938702 "putative peptidyl-prolyl cis-trans isomerase"  
"JS1\_A09\_01125" 11611 "s59E25H2" 0 "putative peptidyl-prolyl cis-trans isomerase"  
"JS1\_A09\_01125" 11611 "s59E5H2" 0.7192728 "putative peptidyl-prolyl cis-trans isomerase"  
"JS1\_A09\_01125" 11611 "s63E6H2" 0.1908759 "putative peptidyl-prolyl cis-trans isomerase"  
"JS1\_A09\_01126" 11612 "s59E13H2" 0.5672112 "Nitroreductase family protein"  
"JS1\_A09\_01126" 11612 "s59E25H2" 0 "Nitroreductase family protein"  
"JS1\_A09\_01126" 11612 "s59E5H2" 0.4396207 "Nitroreductase family protein"  
"JS1\_A09\_01126" 11612 "s63E6H2" 0.07716183 "Nitroreductase family protein"  
"JS1\_A09\_01127" 11613 "s59E13H2" 18.14928 "Adenosylcobalamin-dependent ribonucleoside-triphosphate reductase"  
"JS1\_A09\_01127" 11613 "s59E25H2" 0.1239243 "Adenosylcobalamin-dependent ribonucleoside-triphosphate reductase"  
"JS1\_A09\_01127" 11613 "s59E5H2" 4.52844 "Adenosylcobalamin-dependent ribonucleoside-triphosphate reductase"  
"JS1\_A09\_01127" 11613 "s63E6H2" 4.684192 "Adenosylcobalamin-dependent ribonucleoside-triphosphate reductase"  
"JS1\_A09\_01128" 11614 "s59E13H2" 29.18942 "Adenosylcobalamin-dependent ribonucleoside-triphosphate reductase"  
"JS1\_A09\_01128" 11614 "s59E25H2" 0.3350254 "Adenosylcobalamin-dependent ribonucleoside-triphosphate reductase"  
"JS1\_A09\_01128" 11614 "s59E5H2" 10.32273 "Adenosylcobalamin-dependent ribonucleoside-triphosphate reductase"  
"JS1\_A09\_01128" 11614 "s63E6H2" 11.89276 "Adenosylcobalamin-dependent ribonucleoside-triphosphate reductase"  
"JS1\_A09\_01129" 11615 "s59E13H2" 25.08448 "Methionine aminopeptidase"  
"JS1\_A09\_01129" 11615 "s59E25H2" 0.3359788 "Methionine aminopeptidase"  
"JS1\_A09\_01129" 11615 "s59E5H2" 9.620076 "Methionine aminopeptidase"  
"JS1\_A09\_01129" 11615 "s63E6H2" 11.33426 "Methionine aminopeptidase"  
"JS1\_A09\_01130" 11616 "s59E13H2" 0.9049795 "D-alanine--D-alanine ligase"  
"JS1\_A09\_01130" 11616 "s59E25H2" 0 "D-alanine--D-alanine ligase"  
"JS1\_A09\_01130" 11616 "s59E5H2" 5.341146 "D-alanine--D-alanine ligase"  
"JS1\_A09\_01130" 11616 "s63E6H2" 8.584871 "D-alanine--D-alanine ligase"  
"JS1\_A09\_01131" 11617 "s59E13H2" 0.2774054 "putative adenylyltransferase"  
"JS1\_A09\_01131" 11617 "s59E25H2" 0 "putative adenylyltransferase"  
"JS1\_A09\_01131" 11617 "s59E5H2" 2.594307 "putative adenylyltransferase"

"JS1\_A09\_01131" 11617 "s63E6H2" 5.577541 "putative adenylyltransferase"  
"JS1\_A09\_01132" 11618 "s59E13H2" 0.5320141 "Replication-associated recombination protein A"  
"JS1\_A09\_01132" 11618 "s59E25H2" 0.1614114 "Replication-associated recombination protein A"  
"JS1\_A09\_01132" 11618 "s59E5H2" 2.718374 "Replication-associated recombination protein A"  
"JS1\_A09\_01132" 11618 "s63E6H2" 5.108009 "Replication-associated recombination protein A"  
"JS1\_A09\_01133" 11619 "s59E13H2" 0.504274 "Spermidine N(1)-acetyltransferase"  
"JS1\_A09\_01133" 11619 "s59E25H2" 0 "Spermidine N(1)-acetyltransferase"  
"JS1\_A09\_01133" 11619 "s59E5H2" 2.279303 "Spermidine N(1)-acetyltransferase"  
"JS1\_A09\_01133" 11619 "s63E6H2" 3.613566 "Spermidine N(1)-acetyltransferase"  
"JS1\_A09\_01134" 11620 "s59E13H2" 0.4856697 "(R)-stereoselective amidase"  
"JS1\_A09\_01134" 11620 "s59E25H2" 0 "(R)-stereoselective amidase"  
"JS1\_A09\_01134" 11620 "s59E5H2" 2.273598 "(R)-stereoselective amidase"  
"JS1\_A09\_01134" 11620 "s63E6H2" 3.663577 "(R)-stereoselective amidase"  
"JS1\_A09\_01135" 11621 "s59E13H2" 0.9576303 "Diacylglycerol kinase"  
"JS1\_A09\_01135" 11621 "s59E25H2" 0 "Diacylglycerol kinase"  
"JS1\_A09\_01135" 11621 "s59E5H2" 2.569658 "Diacylglycerol kinase"  
"JS1\_A09\_01135" 11621 "s63E6H2" 4.094661 "Diacylglycerol kinase"  
"JS1\_A09\_01136" 11622 "s59E13H2" 0.3865871 "putative diguanylate cyclase YeaP"  
"JS1\_A09\_01136" 11622 "s59E25H2" 0 "putative diguanylate cyclase YeaP"  
"JS1\_A09\_01136" 11622 "s59E5H2" 1.349976 "putative diguanylate cyclase YeaP"  
"JS1\_A09\_01136" 11622 "s63E6H2" 0.8883806 "putative diguanylate cyclase YeaP"  
"JS1\_A09\_01137" 11623 "s59E13H2" 0.5919635 "L-fucose phosphate aldolase"  
"JS1\_A09\_01137" 11623 "s59E25H2" 0 "L-fucose phosphate aldolase"  
"JS1\_A09\_01137" 11623 "s59E5H2" 0.9760786 "L-fucose phosphate aldolase"  
"JS1\_A09\_01137" 11623 "s63E6H2" 1.002347 "L-fucose phosphate aldolase"  
"JS1\_A09\_01138" 11624 "s59E13H2" 0.1107578 "Aromatic amino acid exporter YddG"  
"JS1\_A09\_01138" 11624 "s59E25H2" 0 "Aromatic amino acid exporter YddG"  
"JS1\_A09\_01138" 11624 "s59E5H2" 0.8069381 "Aromatic amino acid exporter YddG"  
"JS1\_A09\_01138" 11624 "s63E6H2" 0.5690589 "Aromatic amino acid exporter YddG"  
"JS1\_A09\_01140" 11626 "s59E13H2" 0.0462946 "hypothetical protein"  
"JS1\_A09\_01140" 11626 "s59E25H2" 0 "hypothetical protein"  
"JS1\_A09\_01140" 11626 "s59E5H2" 0.8656888 "hypothetical protein"  
"JS1\_A09\_01140" 11626 "s63E6H2" 7.351971 "hypothetical protein"  
"JS1\_A09\_01142" 11628 "s59E13H2" 0.6933659 "Heterodisulfide reductase subunit A-like protein"  
"JS1\_A09\_01142" 11628 "s59E25H2" 0 "Heterodisulfide reductase subunit A-like protein"  
"JS1\_A09\_01142" 11628 "s59E5H2" 1.221753 "Heterodisulfide reductase subunit A-like protein"  
"JS1\_A09\_01142" 11628 "s63E6H2" 16.40452 "Heterodisulfide reductase subunit A-like protein"  
"JS1\_A09\_01144" 11630 "s59E13H2" 0.4778004 "Ribosomal protein S6 modification protein"  
"JS1\_A09\_01144" 11630 "s59E25H2" 0 "Ribosomal protein S6 modification protein"  
"JS1\_A09\_01144" 11630 "s59E5H2" 0.9708908 "Ribosomal protein S6 modification protein"  
"JS1\_A09\_01144" 11630 "s63E6H2" 8.479082 "Ribosomal protein S6 modification protein"  
"JS1\_A09\_01145" 11631 "s59E13H2" 8.605055 "putative transporter"  
"JS1\_A09\_01145" 11631 "s59E25H2" 0.1370641 "putative transporter"  
"JS1\_A09\_01145" 11631 "s59E5H2" 0.8817053 "putative transporter"  
"JS1\_A09\_01145" 11631 "s63E6H2" 7.461487 "putative transporter"  
"JS1\_A09\_01146" 11632 "s59E13H2" 16.57486 "Cyclic nucleotide-binding domain protein"  
"JS1\_A09\_01146" 11632 "s59E25H2" 0 "Cyclic nucleotide-binding domain protein"

"JS1\_A09\_01146" 11632 "s59E5H2" 2.280951 "Cyclic nucleotide-binding domain protein"  
"JS1\_A09\_01146" 11632 "s63E6H2" 2.270202 "Cyclic nucleotide-binding domain protein"  
"JS1\_A09\_01148" 11634 "s59E13H2" 3.381022 "hypothetical protein"  
"JS1\_A09\_01148" 11634 "s59E25H2" 0.7438017 "hypothetical protein"  
"JS1\_A09\_01148" 11634 "s59E5H2" 1.207752 "hypothetical protein"  
"JS1\_A09\_01148" 11634 "s63E6H2" 1.874992 "hypothetical protein"  
"JS1\_A09\_01149" 11635 "s59E13H2" 9.403549 "Glycogen synthase"  
"JS1\_A09\_01149" 11635 "s59E25H2" 0 "Glycogen synthase"  
"JS1\_A09\_01149" 11635 "s59E5H2" 1.063121 "Glycogen synthase"  
"JS1\_A09\_01149" 11635 "s63E6H2" 1.574683 "Glycogen synthase"  
"JS1\_A09\_01150" 11636 "s59E13H2" 11.83729 "hypothetical protein"  
"JS1\_A09\_01150" 11636 "s59E25H2" 0 "hypothetical protein"  
"JS1\_A09\_01150" 11636 "s59E5H2" 0.7111685 "hypothetical protein"  
"JS1\_A09\_01150" 11636 "s63E6H2" 0.368592 "hypothetical protein"  
"JS1\_A09\_01151" 11637 "s59E13H2" 10.26257 "hypothetical protein"  
"JS1\_A09\_01151" 11637 "s59E25H2" 0 "hypothetical protein"  
"JS1\_A09\_01151" 11637 "s59E5H2" 0.4903884 "hypothetical protein"  
"JS1\_A09\_01151" 11637 "s63E6H2" 0.2953294 "hypothetical protein"  
"JS1\_A09\_01152" 11638 "s59E13H2" 11.39761 "Aspartate racemase"  
"JS1\_A09\_01152" 11638 "s59E25H2" 0.6869565 "Aspartate racemase"  
"JS1\_A09\_01152" 11638 "s59E5H2" 1.311788 "Aspartate racemase"  
"JS1\_A09\_01152" 11638 "s63E6H2" 0.3196473 "Aspartate racemase"  
"JS1\_A09\_01153" 11639 "s59E13H2" 6.877567 "1-acyl-sn-glycerol-3-phosphate acyltransferase"  
"JS1\_A09\_01153" 11639 "s59E25H2" 0 "1-acyl-sn-glycerol-3-phosphate acyltransferase"  
"JS1\_A09\_01153" 11639 "s59E5H2" 0.7629716 "1-acyl-sn-glycerol-3-phosphate acyltransferase"  
"JS1\_A09\_01153" 11639 "s63E6H2" 0.1506278 "1-acyl-sn-glycerol-3-phosphate acyltransferase"  
"JS1\_A09\_01154" 11640 "s59E13H2" 3.277012 "Alpha/beta hydrolase family protein"  
"JS1\_A09\_01154" 11640 "s59E25H2" 0 "Alpha/beta hydrolase family protein"  
"JS1\_A09\_01154" 11640 "s59E5H2" 0.2153575 "Alpha/beta hydrolase family protein"  
"JS1\_A09\_01154" 11640 "s63E6H2" 0.08906305 "Alpha/beta hydrolase family protein"  
"JS1\_A09\_01155" 11641 "s59E13H2" 0.00771423 "Zinc transporter ZupT"  
"JS1\_A09\_01155" 11641 "s59E25H2" 0 "Zinc transporter ZupT"  
"JS1\_A09\_01155" 11641 "s59E5H2" 1.077901 "Zinc transporter ZupT"  
"JS1\_A09\_01155" 11641 "s63E6H2" 0.0268949 "Zinc transporter ZupT"  
"JS1\_A09\_01156" 11642 "s59E13H2" 0.08105746 "DNA alkylation repair enzyme"  
"JS1\_A09\_01156" 11642 "s59E25H2" 0.3144105 "DNA alkylation repair enzyme"  
"JS1\_A09\_01156" 11642 "s59E5H2" 1.616029 "DNA alkylation repair enzyme"  
"JS1\_A09\_01156" 11642 "s63E6H2" 3.117056 "DNA alkylation repair enzyme"  
"JS1\_A09\_01157" 11643 "s59E13H2" 0.07180143 "Demethylrebeccamycin-D-glucose O-methyltransferase"  
"JS1\_A09\_01157" 11643 "s59E25H2" 0 "Demethylrebeccamycin-D-glucose O-methyltransferase"  
"JS1\_A09\_01157" 11643 "s59E5H2" 2.615386 "Demethylrebeccamycin-D-glucose O-methyltransferase"  
"JS1\_A09\_01157" 11643 "s63E6H2" 2.447137 "Demethylrebeccamycin-D-glucose O-methyltransferase"  
"JS1\_A09\_01158" 11644 "s59E13H2" 0 "hypothetical protein"  
"JS1\_A09\_01158" 11644 "s59E25H2" 0 "hypothetical protein"  
"JS1\_A09\_01158" 11644 "s59E5H2" 0 "hypothetical protein"  
"JS1\_A09\_01158" 11644 "s63E6H2" 2.08525 "hypothetical protein"  
"JS1\_A09\_01159" 11645 "s59E13H2" 0 "hypothetical protein"

"JS1\_A09\_01159" 11645 "s59E25H2" 0 "hypothetical protein"  
"JS1\_A09\_01159" 11645 "s59E5H2" 0 "hypothetical protein"  
"JS1\_A09\_01159" 11645 "s63E6H2" 1.975609 "hypothetical protein"  
"JS1\_A09\_01161" 11647 "s59E13H2" 0.03525437 "hypothetical protein"  
"JS1\_A09\_01161" 11647 "s59E25H2" 0 "hypothetical protein"  
"JS1\_A09\_01161" 11647 "s59E5H2" 1.068679 "hypothetical protein"  
"JS1\_A09\_01161" 11647 "s63E6H2" 1.249808 "hypothetical protein"  
"JS1\_A09\_01162" 11648 "s59E13H2" 0 "HTH-type transcriptional repressor AseR"  
"JS1\_A09\_01162" 11648 "s59E25H2" 0 "HTH-type transcriptional repressor AseR"  
"JS1\_A09\_01162" 11648 "s59E5H2" 0 "HTH-type transcriptional repressor AseR"  
"JS1\_A09\_01162" 11648 "s63E6H2" 0.007882626 "HTH-type transcriptional repressor AseR"  
"JS1\_A09\_01164" 11650 "s59E13H2" 0 "hypothetical protein"  
"JS1\_A09\_01164" 11650 "s59E25H2" 0 "hypothetical protein"  
"JS1\_A09\_01164" 11650 "s59E5H2" 0 "hypothetical protein"  
"JS1\_A09\_01164" 11650 "s63E6H2" 0.004470811 "hypothetical protein"  
"JS1\_A09\_01165" 11651 "s59E13H2" 0 "putative permease"  
"JS1\_A09\_01165" 11651 "s59E25H2" 0 "putative permease"  
"JS1\_A09\_01165" 11651 "s59E5H2" 0 "putative permease"  
"JS1\_A09\_01165" 11651 "s63E6H2" 0.01127059 "putative permease"  
"JS1\_A09\_01166" 11652 "s59E13H2" 0 "hypothetical protein"  
"JS1\_A09\_01166" 11652 "s59E25H2" 0 "hypothetical protein"  
"JS1\_A09\_01166" 11652 "s59E5H2" 0 "hypothetical protein"  
"JS1\_A09\_01166" 11652 "s63E6H2" 0.009118934 "hypothetical protein"  
"JS1\_A09\_01167" 11653 "s59E13H2" 0 "Sulfate transporter family protein"  
"JS1\_A09\_01167" 11653 "s59E25H2" 0 "Sulfate transporter family protein"  
"JS1\_A09\_01167" 11653 "s59E5H2" 0 "Sulfate transporter family protein"  
"JS1\_A09\_01167" 11653 "s63E6H2" 0.004458146 "Sulfate transporter family protein"  
"JS1\_A09\_01168" 11654 "s59E13H2" 0 "hypothetical protein"  
"JS1\_A09\_01168" 11654 "s59E25H2" 0 "hypothetical protein"  
"JS1\_A09\_01168" 11654 "s59E5H2" 0 "hypothetical protein"  
"JS1\_A09\_01168" 11654 "s63E6H2" 0.1709353 "hypothetical protein"  
"JS1\_A09\_01169" 11655 "s59E13H2" 0 "HTH-type transcriptional repressor AseR"  
"JS1\_A09\_01169" 11655 "s59E25H2" 0 "HTH-type transcriptional repressor AseR"  
"JS1\_A09\_01169" 11655 "s59E5H2" 0 "HTH-type transcriptional repressor AseR"  
"JS1\_A09\_01169" 11655 "s63E6H2" 0.006255501 "HTH-type transcriptional repressor AseR"  
"JS1\_A09\_01170" 11656 "s59E13H2" 0.2057548 "putative permease"  
"JS1\_A09\_01170" 11656 "s59E25H2" 0 "putative permease"  
"JS1\_A09\_01170" 11656 "s59E5H2" 0.1021339 "putative permease"  
"JS1\_A09\_01170" 11656 "s63E6H2" 0.3049829 "putative permease"  
"JS1\_A09\_01171" 11657 "s59E13H2" 0.004150457 "Thioredoxin"  
"JS1\_A09\_01171" 11657 "s59E25H2" 0 "Thioredoxin"  
"JS1\_A09\_01171" 11657 "s59E5H2" 0.3067553 "Thioredoxin"  
"JS1\_A09\_01171" 11657 "s63E6H2" 0.1891585 "Thioredoxin"  
"JS1\_A09\_01172" 11658 "s59E13H2" 0.0205095 "Cadmium, cobalt and zinc/H(+)-K(+) antiporter"  
"JS1\_A09\_01172" 11658 "s59E25H2" 0 "Cadmium, cobalt and zinc/H(+)-K(+) antiporter"  
"JS1\_A09\_01172" 11658 "s59E5H2" 0.4159417 "Cadmium, cobalt and zinc/H(+)-K(+) antiporter"  
"JS1\_A09\_01172" 11658 "s63E6H2" 2.227624 "Cadmium, cobalt and zinc/H(+)-K(+) antiporter"

"JS1\_A09\_01173" 11659 "s59E13H2" 0.0512352 "Sporulation thiol-disulfide oxidoreductase A precursor"  
"JS1\_A09\_01173" 11659 "s59E25H2" 0 "Sporulation thiol-disulfide oxidoreductase A precursor"  
"JS1\_A09\_01173" 11659 "s59E5H2" 1.140781 "Sporulation thiol-disulfide oxidoreductase A precursor"  
"JS1\_A09\_01173" 11659 "s63E6H2" 14.29874 "Sporulation thiol-disulfide oxidoreductase A precursor"  
"JS1\_A09\_01174" 11660 "s59E13H2" 0.141515 "Thioredoxin C-1"  
"JS1\_A09\_01174" 11660 "s59E25H2" 0.5742092 "Thioredoxin C-1"  
"JS1\_A09\_01174" 11660 "s59E5H2" 3.948168 "Thioredoxin C-1"  
"JS1\_A09\_01174" 11660 "s63E6H2" 17.31862 "Thioredoxin C-1"  
"JS1\_A09\_01175" 11661 "s59E13H2" 0.1496245 "thiol:disulfide interchange protein precursor"  
"JS1\_A09\_01175" 11661 "s59E25H2" 0 "thiol:disulfide interchange protein precursor"  
"JS1\_A09\_01175" 11661 "s59E5H2" 4.33202 "thiol:disulfide interchange protein precursor"  
"JS1\_A09\_01175" 11661 "s63E6H2" 23.87592 "thiol:disulfide interchange protein precursor"  
"JS1\_A09\_01176" 11662 "s59E13H2" 0.2431111 "Sodium Bile acid symporter family protein"  
"JS1\_A09\_01176" 11662 "s59E25H2" 0 "Sodium Bile acid symporter family protein"  
"JS1\_A09\_01176" 11662 "s59E5H2" 5.671293 "Sodium Bile acid symporter family protein"  
"JS1\_A09\_01176" 11662 "s63E6H2" 29.79249 "Sodium Bile acid symporter family protein"  
"JS1\_A09\_01178" 11664 "s59E13H2" 0.3815677 "Biotin transporter BioY"  
"JS1\_A09\_01178" 11664 "s59E25H2" 0 "Biotin transporter BioY"  
"JS1\_A09\_01178" 11664 "s59E5H2" 2.310779 "Biotin transporter BioY"  
"JS1\_A09\_01178" 11664 "s63E6H2" 1.978558 "Biotin transporter BioY"  
"JS1\_A09\_01179" 11665 "s59E13H2" 0.1786352 "Bifunctional ligase/repressor BirA"  
"JS1\_A09\_01179" 11665 "s59E25H2" 0 "Bifunctional ligase/repressor BirA"  
"JS1\_A09\_01179" 11665 "s59E5H2" 0.7494433 "Bifunctional ligase/repressor BirA"  
"JS1\_A09\_01179" 11665 "s63E6H2" 2.598066 "Bifunctional ligase/repressor BirA"  
"JS1\_A09\_01180" 11666 "s59E13H2" 0.1607969 "hypothetical protein"  
"JS1\_A09\_01180" 11666 "s59E25H2" 0 "hypothetical protein"  
"JS1\_A09\_01180" 11666 "s59E5H2" 2.305523 "hypothetical protein"  
"JS1\_A09\_01180" 11666 "s63E6H2" 0.1578976 "hypothetical protein"  
"JS1\_A09\_01181" 11667 "s59E13H2" 0.1264037 "Deoxyadenosine/deoxycytidine kinase"  
"JS1\_A09\_01181" 11667 "s59E25H2" 0 "Deoxyadenosine/deoxycytidine kinase"  
"JS1\_A09\_01181" 11667 "s59E5H2" 1.731597 "Deoxyadenosine/deoxycytidine kinase"  
"JS1\_A09\_01181" 11667 "s63E6H2" 12.40563 "Deoxyadenosine/deoxycytidine kinase"  
"JS1\_A09\_01182" 11668 "s59E13H2" 0.1991397 "Deoxyguanosine kinase"  
"JS1\_A09\_01182" 11668 "s59E25H2" 0 "Deoxyguanosine kinase"  
"JS1\_A09\_01182" 11668 "s59E5H2" 1.441789 "Deoxyguanosine kinase"  
"JS1\_A09\_01182" 11668 "s63E6H2" 10.46612 "Deoxyguanosine kinase"  
"JS1\_A09\_01183" 11669 "s59E13H2" 0.1161092 "Octanoyltransferase LipM"  
"JS1\_A09\_01183" 11669 "s59E25H2" 0 "Octanoyltransferase LipM"  
"JS1\_A09\_01183" 11669 "s59E5H2" 0.6730645 "Octanoyltransferase LipM"  
"JS1\_A09\_01183" 11669 "s63E6H2" 4.993179 "Octanoyltransferase LipM"  
"JS1\_A09\_01185" 11671 "s59E13H2" 0.2025618 "hypothetical protein"  
"JS1\_A09\_01185" 11671 "s59E25H2" 0 "hypothetical protein"  
"JS1\_A09\_01185" 11671 "s59E5H2" 0.7792365 "hypothetical protein"  
"JS1\_A09\_01185" 11671 "s63E6H2" 0.03149988 "hypothetical protein"  
"JS1\_A09\_01187" 11673 "s59E13H2" 0.561418 "Septum site-determining protein MinD"  
"JS1\_A09\_01187" 11673 "s59E25H2" 0 "Septum site-determining protein MinD"  
"JS1\_A09\_01187" 11673 "s59E5H2" 0.5296591 "Septum site-determining protein MinD"



"JS1\_A09\_01187" 11673 "s63E6H2" 0.1067324 "Septum site-determining protein MinD"  
"JS1\_A09\_01188" 11674 "s59E13H2" 1.200825 "Radical SAM superfamily protein"  
"JS1\_A09\_01188" 11674 "s59E25H2" 0 "Radical SAM superfamily protein"  
"JS1\_A09\_01188" 11674 "s59E5H2" 0.4771874 "Radical SAM superfamily protein"  
"JS1\_A09\_01188" 11674 "s63E6H2" 0.1198706 "Radical SAM superfamily protein"  
"JS1\_A09\_01189" 11675 "s59E13H2" 0.5876996 "Heterodisulfide reductase subunit A-like protein"  
"JS1\_A09\_01189" 11675 "s59E25H2" 0 "Heterodisulfide reductase subunit A-like protein"  
"JS1\_A09\_01189" 11675 "s59E5H2" 0.8600231 "Heterodisulfide reductase subunit A-like protein"  
"JS1\_A09\_01189" 11675 "s63E6H2" 0.2609063 "Heterodisulfide reductase subunit A-like protein"  
"JS1\_A09\_01190" 11676 "s59E13H2" 0.4357103 "antiporter inner membrane protein"  
"JS1\_A09\_01190" 11676 "s59E25H2" 0 "antiporter inner membrane protein"  
"JS1\_A09\_01190" 11676 "s59E5H2" 0.5091991 "antiporter inner membrane protein"  
"JS1\_A09\_01190" 11676 "s63E6H2" 0.3522404 "antiporter inner membrane protein"  
"JS1\_A09\_01191" 11677 "s59E13H2" 0.1022071 "Dinitrogenase iron-molybdenum cofactor"  
"JS1\_A09\_01191" 11677 "s59E25H2" 0 "Dinitrogenase iron-molybdenum cofactor"  
"JS1\_A09\_01191" 11677 "s59E5H2" 0.1292876 "Dinitrogenase iron-molybdenum cofactor"  
"JS1\_A09\_01191" 11677 "s63E6H2" 0.01974626 "Dinitrogenase iron-molybdenum cofactor"  
"JS1\_A09\_01192" 11678 "s59E13H2" 0.1682882 "Dinitrogenase iron-molybdenum cofactor"  
"JS1\_A09\_01192" 11678 "s59E25H2" 0 "Dinitrogenase iron-molybdenum cofactor"  
"JS1\_A09\_01192" 11678 "s59E5H2" 0.3507787 "Dinitrogenase iron-molybdenum cofactor"  
"JS1\_A09\_01192" 11678 "s63E6H2" 0.08609895 "Dinitrogenase iron-molybdenum cofactor"  
"JS1\_A09\_01193" 11679 "s59E13H2" 0.1436729 "hypothetical protein"  
"JS1\_A09\_01193" 11679 "s59E25H2" 0 "hypothetical protein"  
"JS1\_A09\_01193" 11679 "s59E5H2" 0.02197 "hypothetical protein"  
"JS1\_A09\_01193" 11679 "s63E6H2" 0.02705782 "hypothetical protein"  
"JS1\_A09\_01194" 11680 "s59E13H2" 0.5776765 "Ferric uptake regulation protein"  
"JS1\_A09\_01194" 11680 "s59E25H2" 0 "Ferric uptake regulation protein"  
"JS1\_A09\_01194" 11680 "s59E5H2" 0.2749577 "Ferric uptake regulation protein"  
"JS1\_A09\_01194" 11680 "s63E6H2" 0.1635456 "Ferric uptake regulation protein"  
"JS1\_A09\_01195" 11681 "s59E13H2" 0.769967 "hypothetical protein"  
"JS1\_A09\_01195" 11681 "s59E25H2" 0 "hypothetical protein"  
"JS1\_A09\_01195" 11681 "s59E5H2" 0.6155453 "hypothetical protein"  
"JS1\_A09\_01195" 11681 "s63E6H2" 0.926791 "hypothetical protein"  
"JS1\_A09\_01196" 11682 "s59E13H2" 0.6213061 "FeoA domain protein"  
"JS1\_A09\_01196" 11682 "s59E25H2" 0 "FeoA domain protein"  
"JS1\_A09\_01196" 11682 "s59E5H2" 0.5151962 "FeoA domain protein"  
"JS1\_A09\_01196" 11682 "s63E6H2" 3.020144 "FeoA domain protein"  
"JS1\_A09\_01197" 11683 "s59E13H2" 0.4932147 "Transcriptional regulator MntR"  
"JS1\_A09\_01197" 11683 "s59E25H2" 0 "Transcriptional regulator MntR"  
"JS1\_A09\_01197" 11683 "s59E5H2" 0.3528684 "Transcriptional regulator MntR"  
"JS1\_A09\_01197" 11683 "s63E6H2" 2.945837 "Transcriptional regulator MntR"  
"JS1\_A09\_01198" 11684 "s59E13H2" 0.5256039 "Sulfur carrier protein ThiS"  
"JS1\_A09\_01198" 11684 "s59E25H2" 0 "Sulfur carrier protein ThiS"  
"JS1\_A09\_01198" 11684 "s59E5H2" 0.1570409 "Sulfur carrier protein ThiS"  
"JS1\_A09\_01198" 11684 "s63E6H2" 2.821773 "Sulfur carrier protein ThiS"  
"JS1\_A09\_01199" 11685 "s59E13H2" 0.5811292 "Tungsten-containing aldehyde ferredoxin oxidoreductase"  
"JS1\_A09\_01199" 11685 "s59E25H2" 0 "Tungsten-containing aldehyde ferredoxin oxidoreductase"

"JS1\_A09\_01199" 11685 "s59E5H2" 0.1973101 "Tungsten-containing aldehyde ferredoxin oxidoreductase"  
"JS1\_A09\_01199" 11685 "s63E6H2" 1.094951 "Tungsten-containing aldehyde ferredoxin oxidoreductase"  
"JS1\_A09\_01200" 11686 "s59E13H2" 0.952734 "Malate-2H(+)/Na(+)-lactate antiporter"  
"JS1\_A09\_01200" 11686 "s59E25H2" 0 "Malate-2H(+)/Na(+)-lactate antiporter"  
"JS1\_A09\_01200" 11686 "s59E5H2" 0.563763 "Malate-2H(+)/Na(+)-lactate antiporter"  
"JS1\_A09\_01200" 11686 "s63E6H2" 0.8407151 "Malate-2H(+)/Na(+)-lactate antiporter"  
"JS1\_A09\_01201" 11687 "s59E13H2" 0.7289472 "Cyclic 2,3-diphosphoglycerate synthetase"  
"JS1\_A09\_01201" 11687 "s59E25H2" 0 "Cyclic 2,3-diphosphoglycerate synthetase"  
"JS1\_A09\_01201" 11687 "s59E5H2" 0.2908942 "Cyclic 2,3-diphosphoglycerate synthetase"  
"JS1\_A09\_01201" 11687 "s63E6H2" 1.098412 "Cyclic 2,3-diphosphoglycerate synthetase"  
"JS1\_A09\_01202" 11688 "s59E13H2" 0.2673986 "5-aminovalerate aminotransferase DavT"  
"JS1\_A09\_01202" 11688 "s59E25H2" 0 "5-aminovalerate aminotransferase DavT"  
"JS1\_A09\_01202" 11688 "s59E5H2" 0.209063 "5-aminovalerate aminotransferase DavT"  
"JS1\_A09\_01202" 11688 "s63E6H2" 1.234459 "5-aminovalerate aminotransferase DavT"  
"JS1\_A09\_01203" 11689 "s59E13H2" 0.6189192 "Lysine 6-dehydrogenase"  
"JS1\_A09\_01203" 11689 "s59E25H2" 0 "Lysine 6-dehydrogenase"  
"JS1\_A09\_01203" 11689 "s59E5H2" 0.4453734 "Lysine 6-dehydrogenase"  
"JS1\_A09\_01203" 11689 "s63E6H2" 1.26752 "Lysine 6-dehydrogenase"  
"JS1\_A09\_01205" 11691 "s59E13H2" 0.3433506 "Lysine 6-dehydrogenase"  
"JS1\_A09\_01205" 11691 "s59E25H2" 0 "Lysine 6-dehydrogenase"  
"JS1\_A09\_01205" 11691 "s59E5H2" 0.3845902 "Lysine 6-dehydrogenase"  
"JS1\_A09\_01205" 11691 "s63E6H2" 0.8332797 "Lysine 6-dehydrogenase"  
"JS1\_A09\_01206" 11692 "s59E13H2" 0.3348404 "2-methylcitrate dehydratase"  
"JS1\_A09\_01206" 11692 "s59E25H2" 0.1804949 "2-methylcitrate dehydratase"  
"JS1\_A09\_01206" 11692 "s59E5H2" 0.1674386 "2-methylcitrate dehydratase"  
"JS1\_A09\_01206" 11692 "s63E6H2" 0.4774278 "2-methylcitrate dehydratase"  
"JS1\_A09\_01207" 11693 "s59E13H2" 0.208178 "3-isopropylmalate/3-methylmalate dehydrogenase"  
"JS1\_A09\_01207" 11693 "s59E25H2" 0 "3-isopropylmalate/3-methylmalate dehydrogenase"  
"JS1\_A09\_01207" 11693 "s59E5H2" 0.3248415 "3-isopropylmalate/3-methylmalate dehydrogenase"  
"JS1\_A09\_01207" 11693 "s63E6H2" 0.2370977 "3-isopropylmalate/3-methylmalate dehydrogenase"  
"JS1\_A09\_01208" 11694 "s59E13H2" 1.068705 "Isopropylmalate/citramalate isomerase small subunit"  
"JS1\_A09\_01208" 11694 "s59E25H2" 0 "Isopropylmalate/citramalate isomerase small subunit"  
"JS1\_A09\_01208" 11694 "s59E5H2" 0.1857273 "Isopropylmalate/citramalate isomerase small subunit"  
"JS1\_A09\_01208" 11694 "s63E6H2" 0.2919024 "Isopropylmalate/citramalate isomerase small subunit"  
"JS1\_A09\_01209" 11695 "s59E13H2" 1.313881 "Methanogen homoacnitase large subunit"  
"JS1\_A09\_01209" 11695 "s59E25H2" 0 "Methanogen homoacnitase large subunit"  
"JS1\_A09\_01209" 11695 "s59E5H2" 0.1509189 "Methanogen homoacnitase large subunit"  
"JS1\_A09\_01209" 11695 "s63E6H2" 0.1299357 "Methanogen homoacnitase large subunit"  
"JS1\_A09\_01210" 11696 "s59E13H2" 0 "Uroporphyrinogen decarboxylase (URO-D)"  
"JS1\_A09\_01210" 11696 "s59E25H2" 0 "Uroporphyrinogen decarboxylase (URO-D)"  
"JS1\_A09\_01210" 11696 "s59E5H2" 0 "Uroporphyrinogen decarboxylase (URO-D)"  
"JS1\_A09\_01210" 11696 "s63E6H2" 0 "Uroporphyrinogen decarboxylase (URO-D)"  
"JS1\_A09\_01211" 11697 "s59E13H2" 0 "Sialic acid TRAP transporter permease protein SiaT"  
"JS1\_A09\_01211" 11697 "s59E25H2" 0 "Sialic acid TRAP transporter permease protein SiaT"  
"JS1\_A09\_01211" 11697 "s59E5H2" 0 "Sialic acid TRAP transporter permease protein SiaT"  
"JS1\_A09\_01211" 11697 "s63E6H2" 0 "Sialic acid TRAP transporter permease protein SiaT"  
"JS1\_A09\_01212" 11698 "s59E13H2" 0 "2,3-diketo-L-gulonate TRAP transporter small permease protein YiaM"

"JS1\_A09\_01212" 11698 "s59E25H2" 0 "2,3-diketo-L-gulonate TRAP transporter small permease protein YiaM"  
"JS1\_A09\_01212" 11698 "s59E5H2" 0 "2,3-diketo-L-gulonate TRAP transporter small permease protein YiaM"  
"JS1\_A09\_01212" 11698 "s63E6H2" 0 "2,3-diketo-L-gulonate TRAP transporter small permease protein YiaM"  
"JS1\_A09\_01214" 11700 "s59E13H2" 0.03029809 "hypothetical protein"  
"JS1\_A09\_01214" 11700 "s59E25H2" 0 "hypothetical protein"  
"JS1\_A09\_01214" 11700 "s59E5H2" 0.4458684 "hypothetical protein"  
"JS1\_A09\_01214" 11700 "s63E6H2" 0.2061463 "hypothetical protein"  
"JS1\_A09\_01217" 11703 "s59E13H2" 0.03151372 "Release factor glutamine methyltransferase"  
"JS1\_A09\_01217" 11703 "s59E25H2" 0 "Release factor glutamine methyltransferase"  
"JS1\_A09\_01217" 11703 "s59E5H2" 0.1269919 "Release factor glutamine methyltransferase"  
"JS1\_A09\_01217" 11703 "s63E6H2" 0.0801773 "Release factor glutamine methyltransferase"  
"JS1\_A09\_01218" 11704 "s59E13H2" 0.3303085 "Peptide chain release factor 1"  
"JS1\_A09\_01218" 11704 "s59E25H2" 0 "Peptide chain release factor 1"  
"JS1\_A09\_01218" 11704 "s59E5H2" 0.06723506 "Peptide chain release factor 1"  
"JS1\_A09\_01218" 11704 "s63E6H2" 0.1157246 "Peptide chain release factor 1"  
"JS1\_A09\_01219" 11705 "s59E13H2" 0.03782055 "hypothetical protein"  
"JS1\_A09\_01219" 11705 "s59E25H2" 0 "hypothetical protein"  
"JS1\_A09\_01219" 11705 "s59E5H2" 0.1167496 "hypothetical protein"  
"JS1\_A09\_01219" 11705 "s63E6H2" 0.2577605 "hypothetical protein"  
"JS1\_A09\_01220" 11706 "s59E13H2" 0.08150835 "Thymidylate synthase ThyX"  
"JS1\_A09\_01220" 11706 "s59E25H2" 0 "Thymidylate synthase ThyX"  
"JS1\_A09\_01220" 11706 "s59E5H2" 0.1773508 "Thymidylate synthase ThyX"  
"JS1\_A09\_01220" 11706 "s63E6H2" 0.2684233 "Thymidylate synthase ThyX"  
"JS1\_A09\_01221" 11707 "s59E13H2" 0.07591086 "Thymidine kinase"  
"JS1\_A09\_01221" 11707 "s59E25H2" 0 "Thymidine kinase"  
"JS1\_A09\_01221" 11707 "s59E5H2" 0.1719172 "Thymidine kinase"  
"JS1\_A09\_01221" 11707 "s63E6H2" 0.2043544 "Thymidine kinase"  
"JS1\_A09\_01222" 11708 "s59E13H2" 0.04136747 "hypothetical protein"  
"JS1\_A09\_01222" 11708 "s59E25H2" 0 "hypothetical protein"  
"JS1\_A09\_01222" 11708 "s59E5H2" 0 "hypothetical protein"  
"JS1\_A09\_01222" 11708 "s63E6H2" 0.07849749 "hypothetical protein"  
"JS1\_A09\_01223" 11709 "s59E13H2" 0.09085685 "2-C-methyl-D-erythritol 4-phosphate cytidyltransferase"  
"JS1\_A09\_01223" 11709 "s59E25H2" 0 "2-C-methyl-D-erythritol 4-phosphate cytidyltransferase"  
"JS1\_A09\_01223" 11709 "s59E5H2" 0.1107694 "2-C-methyl-D-erythritol 4-phosphate cytidyltransferase"  
"JS1\_A09\_01223" 11709 "s63E6H2" 0.1279557 "2-C-methyl-D-erythritol 4-phosphate cytidyltransferase"  
"JS1\_A09\_01224" 11710 "s59E13H2" 0.06623818 "CTP synthase"  
"JS1\_A09\_01224" 11710 "s59E25H2" 0 "CTP synthase"  
"JS1\_A09\_01224" 11710 "s59E5H2" 0.489437 "CTP synthase"  
"JS1\_A09\_01224" 11710 "s63E6H2" 0.4265786 "CTP synthase"  
"JS1\_A09\_01225" 11711 "s59E13H2" 0.04125461 "metal-dependent hydrolase"  
"JS1\_A09\_01225" 11711 "s59E25H2" 0 "metal-dependent hydrolase"  
"JS1\_A09\_01225" 11711 "s59E5H2" 0.6308368 "metal-dependent hydrolase"  
"JS1\_A09\_01225" 11711 "s63E6H2" 0.5087861 "metal-dependent hydrolase"  
"JS1\_A09\_01226" 11712 "s59E13H2" 0.05658143 "DNA-directed RNA polymerase subunit delta"  
"JS1\_A09\_01226" 11712 "s59E25H2" 0 "DNA-directed RNA polymerase subunit delta"  
"JS1\_A09\_01226" 11712 "s59E5H2" 0.1730332 "DNA-directed RNA polymerase subunit delta"  
"JS1\_A09\_01226" 11712 "s63E6H2" 0.154495 "DNA-directed RNA polymerase subunit delta"

"JS1\_A09\_01227" 11713 "s59E13H2" 0.0433718 "Carbonic anhydrase precursor"  
"JS1\_A09\_01227" 11713 "s59E25H2" 0 "Carbonic anhydrase precursor"  
"JS1\_A09\_01227" 11713 "s59E5H2" 0.1611142 "Carbonic anhydrase precursor"  
"JS1\_A09\_01227" 11713 "s63E6H2" 0.2263049 "Carbonic anhydrase precursor"  
"JS1\_A09\_01228" 11714 "s59E13H2" 0.04865669 "UvrABC system protein C"  
"JS1\_A09\_01228" 11714 "s59E25H2" 0 "UvrABC system protein C"  
"JS1\_A09\_01228" 11714 "s59E5H2" 0.2312225 "UvrABC system protein C"  
"JS1\_A09\_01228" 11714 "s63E6H2" 0.1617172 "UvrABC system protein C"  
"JS1\_A09\_01229" 11715 "s59E13H2" 0.04540723 "UvrABC system protein A"  
"JS1\_A09\_01229" 11715 "s59E25H2" 0 "UvrABC system protein A"  
"JS1\_A09\_01229" 11715 "s59E5H2" 0.9444038 "UvrABC system protein A"  
"JS1\_A09\_01229" 11715 "s63E6H2" 0.2085694 "UvrABC system protein A"  
"JS1\_A09\_01230" 11716 "s59E13H2" 0.06066532 "UvrABC system protein B"  
"JS1\_A09\_01230" 11716 "s59E25H2" 0 "UvrABC system protein B"  
"JS1\_A09\_01230" 11716 "s59E5H2" 0.776928 "UvrABC system protein B"  
"JS1\_A09\_01230" 11716 "s63E6H2" 0.8196619 "UvrABC system protein B"  
"JS1\_A09\_01231" 11717 "s59E13H2" 0.07082685 "Adenine deaminase"  
"JS1\_A09\_01231" 11717 "s59E25H2" 0 "Adenine deaminase"  
"JS1\_A09\_01231" 11717 "s59E5H2" 1.058211 "Adenine deaminase"  
"JS1\_A09\_01231" 11717 "s63E6H2" 2.198155 "Adenine deaminase"  
"JS1\_A09\_01232" 11718 "s59E13H2" 0.03859672 "Dephospho-CoA kinase"  
"JS1\_A09\_01232" 11718 "s59E25H2" 0 "Dephospho-CoA kinase"  
"JS1\_A09\_01232" 11718 "s59E5H2" 0.2030705 "Dephospho-CoA kinase"  
"JS1\_A09\_01232" 11718 "s63E6H2" 0.6580434 "Dephospho-CoA kinase"  
"JS1\_A09\_01233" 11719 "s59E13H2" 0.02492225 "DNA polymerase I"  
"JS1\_A09\_01233" 11719 "s59E25H2" 0 "DNA polymerase I"  
"JS1\_A09\_01233" 11719 "s59E5H2" 0.1653086 "DNA polymerase I"  
"JS1\_A09\_01233" 11719 "s63E6H2" 1.329188 "DNA polymerase I"  
"JS1\_A09\_01236" 11722 "s59E13H2" 0.1079562 "DNA polymerase III subunit alpha"  
"JS1\_A09\_01236" 11722 "s59E25H2" 0 "DNA polymerase III subunit alpha"  
"JS1\_A09\_01236" 11722 "s59E5H2" 0.5875208 "DNA polymerase III subunit alpha"  
"JS1\_A09\_01236" 11722 "s63E6H2" 0.6263916 "DNA polymerase III subunit alpha"  
"JS1\_A09\_01237" 11723 "s59E13H2" 0.7148209 "hypothetical protein"  
"JS1\_A09\_01237" 11723 "s59E25H2" 0 "hypothetical protein"  
"JS1\_A09\_01237" 11723 "s59E5H2" 0.02916726 "hypothetical protein"  
"JS1\_A09\_01237" 11723 "s63E6H2" 0.4619221 "hypothetical protein"  
"JS1\_A09\_01238" 11724 "s59E13H2" 0.005273653 "6-phosphofructokinase 1"  
"JS1\_A09\_01238" 11724 "s59E25H2" 0 "6-phosphofructokinase 1"  
"JS1\_A09\_01238" 11724 "s59E5H2" 0.5559 "6-phosphofructokinase 1"  
"JS1\_A09\_01238" 11724 "s63E6H2" 1.229188 "6-phosphofructokinase 1"  
"JS1\_A09\_01239" 11725 "s59E13H2" 0.0718183 "Fructose-bisphosphate aldolase"  
"JS1\_A09\_01239" 11725 "s59E25H2" 0 "Fructose-bisphosphate aldolase"  
"JS1\_A09\_01239" 11725 "s59E5H2" 0.8934591 "Fructose-bisphosphate aldolase"  
"JS1\_A09\_01239" 11725 "s63E6H2" 0.2766392 "Fructose-bisphosphate aldolase"  
"JS1\_A09\_01240" 11726 "s59E13H2" 0.04450215 "Modulator of FtsH protease HflK"  
"JS1\_A09\_01240" 11726 "s59E25H2" 0 "Modulator of FtsH protease HflK"  
"JS1\_A09\_01240" 11726 "s59E5H2" 0.7294167 "Modulator of FtsH protease HflK"

"JS1\_A09\_01240" 11726 "s63E6H2" 0.4588076 "Modulator of FtsH protease HflK"  
"JS1\_A09\_01241" 11727 "s59E13H2" 0.1276906 "Modulator of FtsH protease HflC"  
"JS1\_A09\_01241" 11727 "s59E25H2" 0 "Modulator of FtsH protease HflC"  
"JS1\_A09\_01241" 11727 "s59E5H2" 1.289137 "Modulator of FtsH protease HflC"  
"JS1\_A09\_01241" 11727 "s63E6H2" 0.5368255 "Modulator of FtsH protease HflC"  
"JS1\_A09\_01242" 11728 "s59E13H2" 0.1152141 "Glyoxylate reductase"  
"JS1\_A09\_01242" 11728 "s59E25H2" 0 "Glyoxylate reductase"  
"JS1\_A09\_01242" 11728 "s59E5H2" 0.9316048 "Glyoxylate reductase"  
"JS1\_A09\_01242" 11728 "s63E6H2" 0.9241294 "Glyoxylate reductase"  
"JS1\_A09\_01243" 11729 "s59E13H2" 0.09876942 "hypothetical protein"  
"JS1\_A09\_01243" 11729 "s59E25H2" 0 "hypothetical protein"  
"JS1\_A09\_01243" 11729 "s59E5H2" 0.5963298 "hypothetical protein"  
"JS1\_A09\_01243" 11729 "s63E6H2" 0.541634 "hypothetical protein"  
"JS1\_A09\_01245" 11731 "s59E13H2" 0.0628592 "putative transporter"  
"JS1\_A09\_01245" 11731 "s59E25H2" 0 "putative transporter"  
"JS1\_A09\_01245" 11731 "s59E5H2" 0.3937379 "putative transporter"  
"JS1\_A09\_01245" 11731 "s63E6H2" 0.6237912 "putative transporter"  
"JS1\_A09\_01246" 11732 "s59E13H2" 0.03641289 "Aspartyl/glutamyl-tRNA(Asn/Gln) amidotransferase subunit B"  
"JS1\_A09\_01246" 11732 "s59E25H2" 0 "Aspartyl/glutamyl-tRNA(Asn/Gln) amidotransferase subunit B"  
"JS1\_A09\_01246" 11732 "s59E5H2" 0.4802684 "Aspartyl/glutamyl-tRNA(Asn/Gln) amidotransferase subunit B"  
"JS1\_A09\_01246" 11732 "s63E6H2" 0.4059378 "Aspartyl/glutamyl-tRNA(Asn/Gln) amidotransferase subunit B"  
"JS1\_A09\_01247" 11733 "s59E13H2" 0.1342415 "Glutamyl-tRNA(Gln) amidotransferase subunit A"  
"JS1\_A09\_01247" 11733 "s59E25H2" 0 "Glutamyl-tRNA(Gln) amidotransferase subunit A"  
"JS1\_A09\_01247" 11733 "s59E5H2" 0.6561348 "Glutamyl-tRNA(Gln) amidotransferase subunit A"  
"JS1\_A09\_01247" 11733 "s63E6H2" 0.7392229 "Glutamyl-tRNA(Gln) amidotransferase subunit A"  
"JS1\_A09\_01248" 11734 "s59E13H2" 0.0260953 "Aspartyl/glutamyl-tRNA(Asn/Gln) amidotransferase subunit C"  
"JS1\_A09\_01248" 11734 "s59E25H2" 0 "Aspartyl/glutamyl-tRNA(Asn/Gln) amidotransferase subunit C"  
"JS1\_A09\_01248" 11734 "s59E5H2" 0.1375792 "Aspartyl/glutamyl-tRNA(Asn/Gln) amidotransferase subunit C"  
"JS1\_A09\_01248" 11734 "s63E6H2" 0.06530067 "Aspartyl/glutamyl-tRNA(Asn/Gln) amidotransferase subunit C"  
"JS1\_A09\_01249" 11735 "s59E13H2" 0 "DctM-like transporters"  
"JS1\_A09\_01249" 11735 "s59E25H2" 0 "DctM-like transporters"  
"JS1\_A09\_01249" 11735 "s59E5H2" 0 "DctM-like transporters"  
"JS1\_A09\_01249" 11735 "s63E6H2" 0 "DctM-like transporters"  
"JS1\_A09\_01255" 11741 "s59E13H2" 0.06456427 "hypothetical protein"  
"JS1\_A09\_01255" 11741 "s59E25H2" 0 "hypothetical protein"  
"JS1\_A09\_01255" 11741 "s59E5H2" 0.5061875 "hypothetical protein"  
"JS1\_A09\_01255" 11741 "s63E6H2" 1.276794 "hypothetical protein"  
"JS1\_A09\_01256" 11742 "s59E13H2" 0.04633339 "R-phenyllactate dehydratase activator"  
"JS1\_A09\_01256" 11742 "s59E25H2" 0 "R-phenyllactate dehydratase activator"  
"JS1\_A09\_01256" 11742 "s59E5H2" 0.4172845 "R-phenyllactate dehydratase activator"  
"JS1\_A09\_01256" 11742 "s63E6H2" 0.784323 "R-phenyllactate dehydratase activator"  
"JS1\_A09\_01257" 11743 "s59E13H2" 0.08170675 "hypothetical protein"  
"JS1\_A09\_01257" 11743 "s59E25H2" 0 "hypothetical protein"  
"JS1\_A09\_01257" 11743 "s59E5H2" 0.8562197 "hypothetical protein"  
"JS1\_A09\_01257" 11743 "s63E6H2" 0.09653687 "hypothetical protein"  
"JS1\_A09\_01259" 11745 "s59E13H2" 0.251356 "EamA-like transporter family protein"  
"JS1\_A09\_01259" 11745 "s59E25H2" 0 "EamA-like transporter family protein"

"JS1\_A09\_01259" 11745 "s59E5H2" 1.109391 "EamA-like transporter family protein"  
"JS1\_A09\_01259" 11745 "s63E6H2" 0.6038364 "EamA-like transporter family protein"  
"JS1\_A09\_01261" 11747 "s59E13H2" 0.09622973 "tRNA dimethylallyltransferase"  
"JS1\_A09\_01261" 11747 "s59E25H2" 0 "tRNA dimethylallyltransferase"  
"JS1\_A09\_01261" 11747 "s59E5H2" 0.3547792 "tRNA dimethylallyltransferase"  
"JS1\_A09\_01261" 11747 "s63E6H2" 0.02020195 "tRNA dimethylallyltransferase"  
"JS1\_A09\_01262" 11748 "s59E13H2" 0.1175438 "(Dimethylallyl)adenosine tRNA methylthiotransferase MiaB"  
"JS1\_A09\_01262" 11748 "s59E25H2" 0 "(Dimethylallyl)adenosine tRNA methylthiotransferase MiaB"  
"JS1\_A09\_01262" 11748 "s59E5H2" 0.7963388 "(Dimethylallyl)adenosine tRNA methylthiotransferase MiaB"  
"JS1\_A09\_01262" 11748 "s63E6H2" 0.08333979 "(Dimethylallyl)adenosine tRNA methylthiotransferase MiaB"  
"JS1\_A09\_01263" 11749 "s59E13H2" 0.09171185 "Ribonuclease Y"  
"JS1\_A09\_01263" 11749 "s59E25H2" 0 "Ribonuclease Y"  
"JS1\_A09\_01263" 11749 "s59E5H2" 0.668975 "Ribonuclease Y"  
"JS1\_A09\_01263" 11749 "s63E6H2" 0.1280939 "Ribonuclease Y"  
"JS1\_A09\_01264" 11750 "s59E13H2" 0.0795374 "Regulatory protein RecX"  
"JS1\_A09\_01264" 11750 "s59E25H2" 0 "Regulatory protein RecX"  
"JS1\_A09\_01264" 11750 "s59E5H2" 0.2389322 "Regulatory protein RecX"  
"JS1\_A09\_01264" 11750 "s63E6H2" 0.2456216 "Regulatory protein RecX"  
"JS1\_A09\_01265" 11751 "s59E13H2" 0.07308036 "DNA repair and recombination protein RadA"  
"JS1\_A09\_01265" 11751 "s59E25H2" 0 "DNA repair and recombination protein RadA"  
"JS1\_A09\_01265" 11751 "s59E5H2" 0.3169984 "DNA repair and recombination protein RadA"  
"JS1\_A09\_01265" 11751 "s63E6H2" 0.4004121 "DNA repair and recombination protein RadA"  
"JS1\_A09\_01266" 11752 "s59E13H2" 0.06939812 "2'-5'-RNA ligase"  
"JS1\_A09\_01266" 11752 "s59E25H2" 0 "2'-5'-RNA ligase"  
"JS1\_A09\_01266" 11752 "s59E5H2" 0.07596597 "2'-5'-RNA ligase"  
"JS1\_A09\_01266" 11752 "s63E6H2" 0.1810949 "2'-5'-RNA ligase"  
"JS1\_A09\_01267" 11753 "s59E13H2" 0.06270006 "hypothetical protein"  
"JS1\_A09\_01267" 11753 "s59E25H2" 0 "hypothetical protein"  
"JS1\_A09\_01267" 11753 "s59E5H2" 0.130333 "hypothetical protein"  
"JS1\_A09\_01267" 11753 "s63E6H2" 0.1832176 "hypothetical protein"  
"JS1\_A09\_01268" 11754 "s59E13H2" 0.4870007 "Helix-turn-helix domain protein"  
"JS1\_A09\_01268" 11754 "s59E25H2" 0 "Helix-turn-helix domain protein"  
"JS1\_A09\_01268" 11754 "s59E5H2" 0.07545896 "Helix-turn-helix domain protein"  
"JS1\_A09\_01268" 11754 "s63E6H2" 0.2098163 "Helix-turn-helix domain protein"  
"JS1\_A09\_01269" 11755 "s59E13H2" 0.9326824 "L-arabinose transporter permease protein"  
"JS1\_A09\_01269" 11755 "s59E25H2" 0 "L-arabinose transporter permease protein"  
"JS1\_A09\_01269" 11755 "s59E5H2" 0.08814379 "L-arabinose transporter permease protein"  
"JS1\_A09\_01269" 11755 "s63E6H2" 0.4489218 "L-arabinose transporter permease protein"  
"JS1\_A09\_01270" 11756 "s59E13H2" 2.167344 "D-allose transporter subunit"  
"JS1\_A09\_01270" 11756 "s59E25H2" 0 "D-allose transporter subunit"  
"JS1\_A09\_01270" 11756 "s59E5H2" 0.2472974 "D-allose transporter subunit"  
"JS1\_A09\_01270" 11756 "s63E6H2" 0.3039375 "D-allose transporter subunit"  
"JS1\_A09\_01271" 11757 "s59E13H2" 1.827246 "Galactose/methyl galactoside import ATP-binding protein MglA"  
"JS1\_A09\_01271" 11757 "s59E25H2" 0 "Galactose/methyl galactoside import ATP-binding protein MglA"  
"JS1\_A09\_01271" 11757 "s59E5H2" 0.2724709 "Galactose/methyl galactoside import ATP-binding protein MglA"  
"JS1\_A09\_01271" 11757 "s63E6H2" 0.1990444 "Galactose/methyl galactoside import ATP-binding protein MglA"  
"JS1\_A09\_01272" 11758 "s59E13H2" 0.8836517 "Membrane lipoprotein TmpC precursor"

"JS1\_A09\_01272" 11758 "s59E25H2" 0 "Membrane lipoprotein TmpC precursor"  
"JS1\_A09\_01272" 11758 "s59E5H2" 0.2828561 "Membrane lipoprotein TmpC precursor"  
"JS1\_A09\_01272" 11758 "s63E6H2" 0.06168452 "Membrane lipoprotein TmpC precursor"  
"JS1\_A09\_01273" 11759 "s59E13H2" 3.780002 "DNA translocase SpoIIIE"  
"JS1\_A09\_01273" 11759 "s59E25H2" 0 "DNA translocase SpoIIIE"  
"JS1\_A09\_01273" 11759 "s59E5H2" 0.192271 "DNA translocase SpoIIIE"  
"JS1\_A09\_01273" 11759 "s63E6H2" 0.1019359 "DNA translocase SpoIIIE"  
"JS1\_A09\_01274" 11760 "s59E13H2" 4.440818 "Undecaprenyl-diphosphatase"  
"JS1\_A09\_01274" 11760 "s59E25H2" 0 "Undecaprenyl-diphosphatase"  
"JS1\_A09\_01274" 11760 "s59E5H2" 0.2117902 "Undecaprenyl-diphosphatase"  
"JS1\_A09\_01274" 11760 "s63E6H2" 0.142041 "Undecaprenyl-diphosphatase"  
"JS1\_A09\_01275" 11761 "s59E13H2" 4.795472 "hypothetical protein"  
"JS1\_A09\_01275" 11761 "s59E25H2" 0 "hypothetical protein"  
"JS1\_A09\_01275" 11761 "s59E5H2" 0.04884613 "hypothetical protein"  
"JS1\_A09\_01275" 11761 "s63E6H2" 0.1105384 "hypothetical protein"  
"JS1\_A09\_01276" 11762 "s59E13H2" 3.732775 "Deoxyuridine 5'-triphosphate nucleotidohydrolase"  
"JS1\_A09\_01276" 11762 "s59E25H2" 0 "Deoxyuridine 5'-triphosphate nucleotidohydrolase"  
"JS1\_A09\_01276" 11762 "s59E5H2" 0.1454899 "Deoxyuridine 5'-triphosphate nucleotidohydrolase"  
"JS1\_A09\_01276" 11762 "s63E6H2" 0.08361621 "Deoxyuridine 5'-triphosphate nucleotidohydrolase"  
"JS1\_A09\_01277" 11763 "s59E13H2" 1.938737 "Polyribonucleotide nucleotidyltransferase"  
"JS1\_A09\_01277" 11763 "s59E25H2" 0 "Polyribonucleotide nucleotidyltransferase"  
"JS1\_A09\_01277" 11763 "s59E5H2" 0.1067235 "Polyribonucleotide nucleotidyltransferase"  
"JS1\_A09\_01277" 11763 "s63E6H2" 0.02732275 "Polyribonucleotide nucleotidyltransferase"  
"JS1\_A09\_01278" 11764 "s59E13H2" 0.03717378 "30S ribosomal protein S15"  
"JS1\_A09\_01278" 11764 "s59E25H2" 0 "30S ribosomal protein S15"  
"JS1\_A09\_01278" 11764 "s59E5H2" 0 "30S ribosomal protein S15"  
"JS1\_A09\_01278" 11764 "s63E6H2" 0.02861769 "30S ribosomal protein S15"  
"JS1\_A09\_01279" 11765 "s59E13H2" 0.08321282 "Riboflavin biosynthesis protein RibF"  
"JS1\_A09\_01279" 11765 "s59E25H2" 0 "Riboflavin biosynthesis protein RibF"  
"JS1\_A09\_01279" 11765 "s59E5H2" 0.02633971 "Riboflavin biosynthesis protein RibF"  
"JS1\_A09\_01279" 11765 "s63E6H2" 0.02702342 "Riboflavin biosynthesis protein RibF"  
"JS1\_A09\_01280" 11766 "s59E13H2" 0.04846405 "tRNA pseudouridine synthase B"  
"JS1\_A09\_01280" 11766 "s59E25H2" 0 "tRNA pseudouridine synthase B"  
"JS1\_A09\_01280" 11766 "s59E5H2" 0.08081383 "tRNA pseudouridine synthase B"  
"JS1\_A09\_01280" 11766 "s63E6H2" 0.05101488 "tRNA pseudouridine synthase B"  
"JS1\_A09\_01281" 11767 "s59E13H2" 0.03945705 "Bifunctional oligoribonuclease and PAP phosphatase NrnA"  
"JS1\_A09\_01281" 11767 "s59E25H2" 0 "Bifunctional oligoribonuclease and PAP phosphatase NrnA"  
"JS1\_A09\_01281" 11767 "s59E5H2" 0.04765564 "Bifunctional oligoribonuclease and PAP phosphatase NrnA"  
"JS1\_A09\_01281" 11767 "s63E6H2" 0.05552785 "Bifunctional oligoribonuclease and PAP phosphatase NrnA"  
"JS1\_A09\_01282" 11768 "s59E13H2" 0.02081201 "Ribosome-binding factor A"  
"JS1\_A09\_01282" 11768 "s59E25H2" 0 "Ribosome-binding factor A"  
"JS1\_A09\_01282" 11768 "s59E5H2" 0.06974024 "Ribosome-binding factor A"  
"JS1\_A09\_01282" 11768 "s63E6H2" 0.04301775 "Ribosome-binding factor A"  
"JS1\_A09\_01283" 11769 "s59E13H2" 0.03721796 "Translation initiation factor IF-2"  
"JS1\_A09\_01283" 11769 "s59E25H2" 0 "Translation initiation factor IF-2"  
"JS1\_A09\_01283" 11769 "s59E5H2" 0.128653 "Translation initiation factor IF-2"  
"JS1\_A09\_01283" 11769 "s63E6H2" 0.07625808 "Translation initiation factor IF-2"

"JS1\_A09\_01284" 11770 "s59E13H2" 0.01458742 "hypothetical protein"  
"JS1\_A09\_01284" 11770 "s59E25H2" 0 "hypothetical protein"  
"JS1\_A09\_01284" 11770 "s59E5H2" 0 "hypothetical protein"  
"JS1\_A09\_01284" 11770 "s63E6H2" 0.1006038 "hypothetical protein"  
"JS1\_A09\_01285" 11771 "s59E13H2" 0.2368241 "hypothetical protein"  
"JS1\_A09\_01285" 11771 "s59E25H2" 0 "hypothetical protein"  
"JS1\_A09\_01285" 11771 "s59E5H2" 0.02029835 "hypothetical protein"  
"JS1\_A09\_01285" 11771 "s63E6H2" 0.1820756 "hypothetical protein"  
"JS1\_A09\_01286" 11772 "s59E13H2" 0.7439259 "Threonylcarbamoyladenosine tRNA methylthiotransferase MtaB"  
"JS1\_A09\_01286" 11772 "s59E25H2" 0 "Threonylcarbamoyladenosine tRNA methylthiotransferase MtaB"  
"JS1\_A09\_01286" 11772 "s59E5H2" 0.1806693 "Threonylcarbamoyladenosine tRNA methylthiotransferase MtaB"  
"JS1\_A09\_01286" 11772 "s63E6H2" 0.414599 "Threonylcarbamoyladenosine tRNA methylthiotransferase MtaB"  
"JS1\_A09\_01287" 11773 "s59E13H2" 0.04456732 "Chaperone protein DnaJ"  
"JS1\_A09\_01287" 11773 "s59E25H2" 0 "Chaperone protein DnaJ"  
"JS1\_A09\_01287" 11773 "s59E5H2" 0.03725553 "Chaperone protein DnaJ"  
"JS1\_A09\_01287" 11773 "s63E6H2" 0.4185703 "Chaperone protein DnaJ"  
"JS1\_A09\_01288" 11774 "s59E13H2" 0.2048774 "Chaperone protein DnaK"  
"JS1\_A09\_01288" 11774 "s59E25H2" 0 "Chaperone protein DnaK"  
"JS1\_A09\_01288" 11774 "s59E5H2" 0.08844429 "Chaperone protein DnaK"  
"JS1\_A09\_01288" 11774 "s63E6H2" 0.2931017 "Chaperone protein DnaK"  
"JS1\_A09\_01289" 11775 "s59E13H2" 0.1277672 "heat shock protein GrpE"  
"JS1\_A09\_01289" 11775 "s59E25H2" 0 "heat shock protein GrpE"  
"JS1\_A09\_01289" 11775 "s59E5H2" 0.03187051 "heat shock protein GrpE"  
"JS1\_A09\_01289" 11775 "s63E6H2" 0.1147148 "heat shock protein GrpE"  
"JS1\_A09\_01290" 11776 "s59E13H2" 0.08470726 "Heat-inducible transcription repressor HrcA"  
"JS1\_A09\_01290" 11776 "s59E25H2" 0 "Heat-inducible transcription repressor HrcA"  
"JS1\_A09\_01290" 11776 "s59E5H2" 0.1510425 "Heat-inducible transcription repressor HrcA"  
"JS1\_A09\_01290" 11776 "s63E6H2" 0.1329903 "Heat-inducible transcription repressor HrcA"  
"JS1\_A09\_01291" 11777 "s59E13H2" 0.09092024 "Oxygen-independent coproporphyrinogen-III oxidase 1"  
"JS1\_A09\_01291" 11777 "s59E25H2" 0 "Oxygen-independent coproporphyrinogen-III oxidase 1"  
"JS1\_A09\_01291" 11777 "s59E5H2" 0.07428638 "Oxygen-independent coproporphyrinogen-III oxidase 1"  
"JS1\_A09\_01291" 11777 "s63E6H2" 0.09549442 "Oxygen-independent coproporphyrinogen-III oxidase 1"  
"JS1\_A09\_01292" 11778 "s59E13H2" 0.2135683 "Oxygen-independent coproporphyrinogen-III oxidase 1"  
"JS1\_A09\_01292" 11778 "s59E25H2" 0 "Oxygen-independent coproporphyrinogen-III oxidase 1"  
"JS1\_A09\_01292" 11778 "s59E5H2" 0.2069862 "Oxygen-independent coproporphyrinogen-III oxidase 1"  
"JS1\_A09\_01292" 11778 "s63E6H2" 0.1066178 "Oxygen-independent coproporphyrinogen-III oxidase 1"  
"JS1\_A09\_01293" 11779 "s59E13H2" 1.298419 "Elongation factor 4"  
"JS1\_A09\_01293" 11779 "s59E25H2" 0 "Elongation factor 4"  
"JS1\_A09\_01293" 11779 "s59E5H2" 0.2593699 "Elongation factor 4"  
"JS1\_A09\_01293" 11779 "s63E6H2" 0.1166353 "Elongation factor 4"  
"JS1\_A09\_01294" 11780 "s59E13H2" 0.3713019 "putative peptidoglycan biosynthesis protein MurJ"  
"JS1\_A09\_01294" 11780 "s59E25H2" 0.126195 "putative peptidoglycan biosynthesis protein MurJ"  
"JS1\_A09\_01294" 11780 "s59E5H2" 0.4391943 "putative peptidoglycan biosynthesis protein MurJ"  
"JS1\_A09\_01294" 11780 "s63E6H2" 0.129583 "putative peptidoglycan biosynthesis protein MurJ"  
"JS1\_A09\_01295" 11781 "s59E13H2" 0.1266786 "30S ribosomal protein S20"  
"JS1\_A09\_01295" 11781 "s59E25H2" 0 "30S ribosomal protein S20"  
"JS1\_A09\_01295" 11781 "s59E5H2" 0.3417737 "30S ribosomal protein S20"



"JS1\_A09\_01295" 11781 "s63E6H2" 0.04292239 "30S ribosomal protein S20"  
"JS1\_A09\_01296" 11782 "s59E13H2" 0.7494482 "DNA polymerase III subunit delta"  
"JS1\_A09\_01296" 11782 "s59E25H2" 0 "DNA polymerase III subunit delta"  
"JS1\_A09\_01296" 11782 "s59E5H2" 0.6418329 "DNA polymerase III subunit delta"  
"JS1\_A09\_01296" 11782 "s63E6H2" 0.05487359 "DNA polymerase III subunit delta"  
"JS1\_A09\_01297" 11783 "s59E13H2" 0.6834318 "ComEC family competence protein"  
"JS1\_A09\_01297" 11783 "s59E25H2" 0 "ComEC family competence protein"  
"JS1\_A09\_01297" 11783 "s59E5H2" 0.9002296 "ComEC family competence protein"  
"JS1\_A09\_01297" 11783 "s63E6H2" 0.07476313 "ComEC family competence protein"  
"JS1\_A09\_01298" 11784 "s59E13H2" 0.467585 "ComE operon protein 1"  
"JS1\_A09\_01298" 11784 "s59E25H2" 0 "ComE operon protein 1"  
"JS1\_A09\_01298" 11784 "s59E5H2" 1.000287 "ComE operon protein 1"  
"JS1\_A09\_01298" 11784 "s63E6H2" 0.08894202 "ComE operon protein 1"  
"JS1\_A09\_01299" 11785 "s59E13H2" 0.6724534 "Folypolyglutamate synthase"  
"JS1\_A09\_01299" 11785 "s59E25H2" 0.3805175 "Folypolyglutamate synthase"  
"JS1\_A09\_01299" 11785 "s59E5H2" 0.2616949 "Folypolyglutamate synthase"  
"JS1\_A09\_01299" 11785 "s63E6H2" 0.07976639 "Folypolyglutamate synthase"  
"JS1\_A09\_01301" 11787 "s59E13H2" 0 "CoB--CoM heterodisulfide reductase iron-sulfur subunit A"  
"JS1\_A09\_01301" 11787 "s59E25H2" 0 "CoB--CoM heterodisulfide reductase iron-sulfur subunit A"  
"JS1\_A09\_01301" 11787 "s59E5H2" 0.006168848 "CoB--CoM heterodisulfide reductase iron-sulfur subunit A"  
"JS1\_A09\_01301" 11787 "s63E6H2" 0 "CoB--CoM heterodisulfide reductase iron-sulfur subunit A"  
"JS1\_A09\_01302" 11788 "s59E13H2" 2.484695 "putative inner membrane transporter yjE"  
"JS1\_A09\_01302" 11788 "s59E25H2" 0 "putative inner membrane transporter yjE"  
"JS1\_A09\_01302" 11788 "s59E5H2" 0.8857259 "putative inner membrane transporter yjE"  
"JS1\_A09\_01302" 11788 "s63E6H2" 1.163451 "putative inner membrane transporter yjE"  
"JS1\_A09\_01303" 11789 "s59E13H2" 3.461504 "hypothetical protein"  
"JS1\_A09\_01303" 11789 "s59E25H2" 0 "hypothetical protein"  
"JS1\_A09\_01303" 11789 "s59E5H2" 0.8614234 "hypothetical protein"  
"JS1\_A09\_01303" 11789 "s63E6H2" 0.6814126 "hypothetical protein"  
"JS1\_A09\_01304" 11790 "s59E13H2" 3.717277 "Ribose operon repressor"  
"JS1\_A09\_01304" 11790 "s59E25H2" 0 "Ribose operon repressor"  
"JS1\_A09\_01304" 11790 "s59E5H2" 0.5878345 "Ribose operon repressor"  
"JS1\_A09\_01304" 11790 "s63E6H2" 0.3155904 "Ribose operon repressor"  
"JS1\_A09\_01305" 11791 "s59E13H2" 0.02847192 "Galactose/methyl galactoside import ATP-binding protein MglA"  
"JS1\_A09\_01305" 11791 "s59E25H2" 0 "Galactose/methyl galactoside import ATP-binding protein MglA"  
"JS1\_A09\_01305" 11791 "s59E5H2" 0.4628439 "Galactose/methyl galactoside import ATP-binding protein MglA"  
"JS1\_A09\_01305" 11791 "s63E6H2" 0.1519428 "Galactose/methyl galactoside import ATP-binding protein MglA"  
"JS1\_A09\_01306" 11792 "s59E13H2" 0.01125304 "Inner membrane ABC transporter permease protein Yjff"  
"JS1\_A09\_01306" 11792 "s59E25H2" 0 "Inner membrane ABC transporter permease protein Yjff"  
"JS1\_A09\_01306" 11792 "s59E5H2" 0.4113975 "Inner membrane ABC transporter permease protein Yjff"  
"JS1\_A09\_01306" 11792 "s63E6H2" 0.1605218 "Inner membrane ABC transporter permease protein Yjff"  
"JS1\_A09\_01307" 11793 "s59E13H2" 0.01993244 "Periplasmic binding proteins and sugar binding domain of LacI family protein"  
"JS1\_A09\_01307" 11793 "s59E25H2" 0 "Periplasmic binding proteins and sugar binding domain of LacI family protein"  
"JS1\_A09\_01307" 11793 "s59E5H2" 0.3857908 "Periplasmic binding proteins and sugar binding domain of LacI family protein"  
"JS1\_A09\_01307" 11793 "s63E6H2" 0.2172877 "Periplasmic binding proteins and sugar binding domain of LacI family protein"  
"JS1\_A09\_01308" 11794 "s59E13H2" 5.096001 "Lactose-binding protein precursor"  
"JS1\_A09\_01308" 11794 "s59E25H2" 0 "Lactose-binding protein precursor"

"JS1\_A09\_01308" 11794 "s59E5H2" 0.6232975 "Lactose-binding protein precursor"  
"JS1\_A09\_01308" 11794 "s63E6H2" 0.4553915 "Lactose-binding protein precursor"  
"JS1\_A09\_01309" 11795 "s59E13H2" 6.18074 "Lactose transport system permease protein LacF"  
"JS1\_A09\_01309" 11795 "s59E25H2" 0 "Lactose transport system permease protein LacF"  
"JS1\_A09\_01309" 11795 "s59E5H2" 0.7220511 "Lactose transport system permease protein LacF"  
"JS1\_A09\_01309" 11795 "s63E6H2" 0.5537137 "Lactose transport system permease protein LacF"  
"JS1\_A09\_01310" 11796 "s59E13H2" 0.9747815 "Lactose transport system permease protein LacG"  
"JS1\_A09\_01310" 11796 "s59E25H2" 0 "Lactose transport system permease protein LacG"  
"JS1\_A09\_01310" 11796 "s59E5H2" 0.617032 "Lactose transport system permease protein LacG"  
"JS1\_A09\_01310" 11796 "s63E6H2" 0.4177921 "Lactose transport system permease protein LacG"  
"JS1\_A09\_01311" 11797 "s59E13H2" 0.1487305 "Beta-galactosidase"  
"JS1\_A09\_01311" 11797 "s59E25H2" 0 "Beta-galactosidase"  
"JS1\_A09\_01311" 11797 "s59E5H2" 0.2618618 "Beta-galactosidase"  
"JS1\_A09\_01311" 11797 "s63E6H2" 0.2421136 "Beta-galactosidase"  
"JS1\_A09\_01312" 11798 "s59E13H2" 4.852442 "Elongation factor Tu domain 2"  
"JS1\_A09\_01312" 11798 "s59E25H2" 0 "Elongation factor Tu domain 2"  
"JS1\_A09\_01312" 11798 "s59E5H2" 2.967627 "Elongation factor Tu domain 2"  
"JS1\_A09\_01312" 11798 "s63E6H2" 1.784625 "Elongation factor Tu domain 2"  
"JS1\_A09\_01313" 11799 "s59E13H2" 5.413827 "Proline--tRNA ligase"  
"JS1\_A09\_01313" 11799 "s59E25H2" 0 "Proline--tRNA ligase"  
"JS1\_A09\_01313" 11799 "s59E5H2" 3.588118 "Proline--tRNA ligase"  
"JS1\_A09\_01313" 11799 "s63E6H2" 2.980769 "Proline--tRNA ligase"  
"JS1\_A09\_01314" 11800 "s59E13H2" 1.081035 "Aspartate racemase"  
"JS1\_A09\_01314" 11800 "s59E25H2" 0 "Aspartate racemase"  
"JS1\_A09\_01314" 11800 "s59E5H2" 0.814989 "Aspartate racemase"  
"JS1\_A09\_01314" 11800 "s63E6H2" 0.8698275 "Aspartate racemase"  
"JS1\_A09\_01315" 11801 "s59E13H2" 0.5494779 "Phosphodiesterase"  
"JS1\_A09\_01315" 11801 "s59E25H2" 0 "Phosphodiesterase"  
"JS1\_A09\_01315" 11801 "s59E5H2" 0.7485719 "Phosphodiesterase"  
"JS1\_A09\_01315" 11801 "s63E6H2" 0.9564993 "Phosphodiesterase"  
"JS1\_A09\_01316" 11802 "s59E13H2" 1.078523 "hypothetical protein"  
"JS1\_A09\_01316" 11802 "s59E25H2" 0 "hypothetical protein"  
"JS1\_A09\_01316" 11802 "s59E5H2" 3.849769 "hypothetical protein"  
"JS1\_A09\_01316" 11802 "s63E6H2" 1.789989 "hypothetical protein"  
"JS1\_A09\_01317" 11803 "s59E13H2" 0.4753623 "Peptidase family S58"  
"JS1\_A09\_01317" 11803 "s59E25H2" 0 "Peptidase family S58"  
"JS1\_A09\_01317" 11803 "s59E5H2" 1.60299 "Peptidase family S58"  
"JS1\_A09\_01317" 11803 "s63E6H2" 2.18831 "Peptidase family S58"  
"JS1\_A09\_01318" 11804 "s59E13H2" 0.007002432 "1,3-propanediol dehydrogenase"  
"JS1\_A09\_01318" 11804 "s59E25H2" 0 "1,3-propanediol dehydrogenase"  
"JS1\_A09\_01318" 11804 "s59E5H2" 1.165389 "1,3-propanediol dehydrogenase"  
"JS1\_A09\_01318" 11804 "s63E6H2" 0.2115368 "1,3-propanediol dehydrogenase"  
"JS1\_A09\_01319" 11805 "s59E13H2" 0.5950986 "Xylulose kinase"  
"JS1\_A09\_01319" 11805 "s59E25H2" 0 "Xylulose kinase"  
"JS1\_A09\_01319" 11805 "s59E5H2" 0.651475 "Xylulose kinase"  
"JS1\_A09\_01319" 11805 "s63E6H2" 1.10131 "Xylulose kinase"  
"JS1\_A09\_01320" 11806 "s59E13H2" 0.002367445 "Glycerol-1-phosphate dehydrogenase [NAD(P)+]"

"JS1\_A09\_01320" 11806 "s59E25H2" 0 "Glycerol-1-phosphate dehydrogenase [NAD(P)+]"  
"JS1\_A09\_01320" 11806 "s59E5H2" 0.002200327 "Glycerol-1-phosphate dehydrogenase [NAD(P)+]"  
"JS1\_A09\_01320" 11806 "s63E6H2" 0.0882523 "Glycerol-1-phosphate dehydrogenase [NAD(P)+]"  
"JS1\_A09\_01321" 11807 "s59E13H2" 0.004504444 "Xylulose kinase"  
"JS1\_A09\_01321" 11807 "s59E25H2" 0 "Xylulose kinase"  
"JS1\_A09\_01321" 11807 "s59E5H2" 0 "Xylulose kinase"  
"JS1\_A09\_01321" 11807 "s63E6H2" 0.1057061 "Xylulose kinase"  
"JS1\_A09\_01322" 11808 "s59E13H2" 0.003357179 "Putative 2-hydroxyacid dehydrogenase YoaD"  
"JS1\_A09\_01322" 11808 "s59E25H2" 0 "Putative 2-hydroxyacid dehydrogenase YoaD"  
"JS1\_A09\_01322" 11808 "s59E5H2" 0 "Putative 2-hydroxyacid dehydrogenase YoaD"  
"JS1\_A09\_01322" 11808 "s63E6H2" 0.2388552 "Putative 2-hydroxyacid dehydrogenase YoaD"  
"JS1\_A09\_01323" 11809 "s59E13H2" 0.0054135 "L-fuculose phosphate aldolase"  
"JS1\_A09\_01323" 11809 "s59E25H2" 0 "L-fuculose phosphate aldolase"  
"JS1\_A09\_01323" 11809 "s59E5H2" 0 "L-fuculose phosphate aldolase"  
"JS1\_A09\_01323" 11809 "s63E6H2" 0.2352355 "L-fuculose phosphate aldolase"  
"JS1\_A09\_01324" 11810 "s59E13H2" 0.001938367 "L-xylulose/3-keto-L-gulonate kinase"  
"JS1\_A09\_01324" 11810 "s59E25H2" 0 "L-xylulose/3-keto-L-gulonate kinase"  
"JS1\_A09\_01324" 11810 "s59E5H2" 0 "L-xylulose/3-keto-L-gulonate kinase"  
"JS1\_A09\_01324" 11810 "s63E6H2" 0.306397 "L-xylulose/3-keto-L-gulonate kinase"  
"JS1\_A09\_01325" 11811 "s59E13H2" 0 "putative L-threonine 3-dehydrogenase"  
"JS1\_A09\_01325" 11811 "s59E25H2" 0 "putative L-threonine 3-dehydrogenase"  
"JS1\_A09\_01325" 11811 "s59E5H2" 0 "putative L-threonine 3-dehydrogenase"  
"JS1\_A09\_01325" 11811 "s63E6H2" 0.1205246 "putative L-threonine 3-dehydrogenase"  
"JS1\_A09\_01326" 11812 "s59E13H2" 0 "Trehalose/maltose import ATP-binding protein Malk"  
"JS1\_A09\_01326" 11812 "s59E25H2" 0 "Trehalose/maltose import ATP-binding protein Malk"  
"JS1\_A09\_01326" 11812 "s59E5H2" 0 "Trehalose/maltose import ATP-binding protein Malk"  
"JS1\_A09\_01326" 11812 "s63E6H2" 0.03683077 "Trehalose/maltose import ATP-binding protein Malk"  
"JS1\_A09\_01327" 11813 "s59E13H2" 0 "Trehalose/maltose import ATP-binding protein Malk"  
"JS1\_A09\_01327" 11813 "s59E25H2" 0 "Trehalose/maltose import ATP-binding protein Malk"  
"JS1\_A09\_01327" 11813 "s59E5H2" 0 "Trehalose/maltose import ATP-binding protein Malk"  
"JS1\_A09\_01327" 11813 "s63E6H2" 0.02662141 "Trehalose/maltose import ATP-binding protein Malk"  
"JS1\_A09\_01328" 11814 "s59E13H2" 0 "Inner membrane ABC transporter permease protein YcjP"  
"JS1\_A09\_01328" 11814 "s59E25H2" 0 "Inner membrane ABC transporter permease protein YcjP"  
"JS1\_A09\_01328" 11814 "s59E5H2" 0 "Inner membrane ABC transporter permease protein YcjP"  
"JS1\_A09\_01328" 11814 "s63E6H2" 0.06418631 "Inner membrane ABC transporter permease protein YcjP"  
"JS1\_A09\_01329" 11815 "s59E13H2" 0 "Trehalose/maltose transport system permease protein MalF"  
"JS1\_A09\_01329" 11815 "s59E25H2" 0 "Trehalose/maltose transport system permease protein MalF"  
"JS1\_A09\_01329" 11815 "s59E5H2" 0 "Trehalose/maltose transport system permease protein MalF"  
"JS1\_A09\_01329" 11815 "s63E6H2" 0.01083936 "Trehalose/maltose transport system permease protein MalF"  
"JS1\_A09\_01330" 11816 "s59E13H2" 0 "Bacterial extracellular solute-binding protein"  
"JS1\_A09\_01330" 11816 "s59E25H2" 0 "Bacterial extracellular solute-binding protein"  
"JS1\_A09\_01330" 11816 "s59E5H2" 0 "Bacterial extracellular solute-binding protein"  
"JS1\_A09\_01330" 11816 "s63E6H2" 0.008627193 "Bacterial extracellular solute-binding protein"  
"JS1\_A09\_01331" 11817 "s59E13H2" 0.007838336 "PTS-dependent dihydroxyacetone kinase, ADP-binding subunit DhaL"  
"JS1\_A09\_01331" 11817 "s59E25H2" 0 "PTS-dependent dihydroxyacetone kinase, ADP-binding subunit DhaL"  
"JS1\_A09\_01331" 11817 "s59E5H2" 0.01187373 "PTS-dependent dihydroxyacetone kinase, ADP-binding subunit DhaL"  
"JS1\_A09\_01331" 11817 "s63E6H2" 0.01120114 "PTS-dependent dihydroxyacetone kinase, ADP-binding subunit DhaL"

"JS1\_A09\_01332" 11818 "s59E13H2" 0.01010267 "PTS-dependent dihydroxyacetone kinase, dihydroxyacetone-binding subunit DhaK"  
"JS1\_A09\_01332" 11818 "s59E25H2" 0 "PTS-dependent dihydroxyacetone kinase, dihydroxyacetone-binding subunit DhaK"  
"JS1\_A09\_01332" 11818 "s59E5H2" 0.004073218 "PTS-dependent dihydroxyacetone kinase, dihydroxyacetone-binding subunit DhaK"  
"JS1\_A09\_01332" 11818 "s63E6H2" 0.005154313 "PTS-dependent dihydroxyacetone kinase, dihydroxyacetone-binding subunit DhaK"  
"JS1\_A09\_01333" 11819 "s59E13H2" 0.01897817 "Ribose-5-phosphate isomerase B"  
"JS1\_A09\_01333" 11819 "s59E25H2" 0 "Ribose-5-phosphate isomerase B"  
"JS1\_A09\_01333" 11819 "s59E5H2" 0 "Ribose-5-phosphate isomerase B"  
"JS1\_A09\_01333" 11819 "s63E6H2" 0 "Ribose-5-phosphate isomerase B"  
"JS1\_A09\_01334" 11820 "s59E13H2" 0.03243247 "Glucitol operon repressor"  
"JS1\_A09\_01334" 11820 "s59E25H2" 0 "Glucitol operon repressor"  
"JS1\_A09\_01334" 11820 "s59E5H2" 0 "Glucitol operon repressor"  
"JS1\_A09\_01334" 11820 "s63E6H2" 0.07505645 "Glucitol operon repressor"  
"JS1\_A09\_01335" 11821 "s59E13H2" 0.05055421 "Ferredoxin"  
"JS1\_A09\_01335" 11821 "s59E25H2" 0 "Ferredoxin"  
"JS1\_A09\_01335" 11821 "s59E5H2" 0.3550557 "Ferredoxin"  
"JS1\_A09\_01335" 11821 "s63E6H2" 0.3890809 "Ferredoxin"  
"JS1\_A09\_01336" 11822 "s59E13H2" 0.08774659 "Lipoate-protein ligase A subunit 2"  
"JS1\_A09\_01336" 11822 "s59E25H2" 0 "Lipoate-protein ligase A subunit 2"  
"JS1\_A09\_01336" 11822 "s59E5H2" 0 "Lipoate-protein ligase A subunit 2"  
"JS1\_A09\_01336" 11822 "s63E6H2" 0.2043367 "Lipoate-protein ligase A subunit 2"  
"JS1\_A09\_01338" 11824 "s59E13H2" 0 "hypothetical protein"  
"JS1\_A09\_01338" 11824 "s59E25H2" 0 "hypothetical protein"  
"JS1\_A09\_01338" 11824 "s59E5H2" 0 "hypothetical protein"  
"JS1\_A09\_01338" 11824 "s63E6H2" 0 "hypothetical protein"  
"JS1\_A09\_01346" 11832 "s59E13H2" 0 "hypothetical protein"  
"JS1\_A09\_01346" 11832 "s59E25H2" 0 "hypothetical protein"  
"JS1\_A09\_01346" 11832 "s59E5H2" 0 "hypothetical protein"  
"JS1\_A09\_01346" 11832 "s63E6H2" 0 "hypothetical protein"  
"JS1\_A09\_01347" 11833 "s59E13H2" 0 "Modification methylase DpnIIB"  
"JS1\_A09\_01347" 11833 "s59E25H2" 0 "Modification methylase DpnIIB"  
"JS1\_A09\_01347" 11833 "s59E5H2" 0 "Modification methylase DpnIIB"  
"JS1\_A09\_01347" 11833 "s63E6H2" 0 "Modification methylase DpnIIB"  
"JS1\_A09\_01348" 11834 "s59E13H2" 0 "hypothetical protein"  
"JS1\_A09\_01348" 11834 "s59E25H2" 0 "hypothetical protein"  
"JS1\_A09\_01348" 11834 "s59E5H2" 0 "hypothetical protein"  
"JS1\_A09\_01348" 11834 "s63E6H2" 0 "hypothetical protein"  
"JS1\_A09\_01350" 11836 "s59E13H2" 0 "hypothetical protein"  
"JS1\_A09\_01350" 11836 "s59E25H2" 0 "hypothetical protein"  
"JS1\_A09\_01350" 11836 "s59E5H2" 0 "hypothetical protein"  
"JS1\_A09\_01350" 11836 "s63E6H2" 0 "hypothetical protein"  
"JS1\_A09\_01351" 11837 "s59E13H2" 0 "hypothetical protein"  
"JS1\_A09\_01351" 11837 "s59E25H2" 0 "hypothetical protein"  
"JS1\_A09\_01351" 11837 "s59E5H2" 0 "hypothetical protein"  
"JS1\_A09\_01351" 11837 "s63E6H2" 0 "hypothetical protein"  
"JS1\_A09\_01357" 11843 "s59E13H2" 0.0311109 "Tyrosine recombinase XerC"  
"JS1\_A09\_01357" 11843 "s59E25H2" 0 "Tyrosine recombinase XerC"  
"JS1\_A09\_01357" 11843 "s59E5H2" 0.1381857 "Tyrosine recombinase XerC"

"JS1\_A09\_01357" 11843 "s63E6H2" 0.047435 "Tyrosine recombinase XerC"  
"JS1\_A09\_01358" 11844 "s59E13H2" 0.02437508 "ATP-dependent protease subunit HslV"  
"JS1\_A09\_01358" 11844 "s59E25H2" 0 "ATP-dependent protease subunit HslV"  
"JS1\_A09\_01358" 11844 "s59E5H2" 0.1103535 "ATP-dependent protease subunit HslV"  
"JS1\_A09\_01358" 11844 "s63E6H2" 0.03106304 "ATP-dependent protease subunit HslV"  
"JS1\_A09\_01359" 11845 "s59E13H2" 0.01717543 "ATP-dependent protease subunit HslV"  
"JS1\_A09\_01359" 11845 "s59E25H2" 0 "ATP-dependent protease subunit HslV"  
"JS1\_A09\_01359" 11845 "s59E5H2" 0.0121588 "ATP-dependent protease subunit HslV"  
"JS1\_A09\_01359" 11845 "s63E6H2" 0.01154532 "ATP-dependent protease subunit HslV"  
"JS1\_A09\_01361" 11847 "s59E13H2" 0.6730491 "NTE family protein RssA"  
"JS1\_A09\_01361" 11847 "s59E25H2" 0 "NTE family protein RssA"  
"JS1\_A09\_01361" 11847 "s59E5H2" 0.1508009 "NTE family protein RssA"  
"JS1\_A09\_01361" 11847 "s63E6H2" 0.4357182 "NTE family protein RssA"  
"JS1\_A09\_01362" 11848 "s59E13H2" 0.8244513 "NTE family protein RssA"  
"JS1\_A09\_01362" 11848 "s59E25H2" 0 "NTE family protein RssA"  
"JS1\_A09\_01362" 11848 "s59E5H2" 0.1609489 "NTE family protein RssA"  
"JS1\_A09\_01362" 11848 "s63E6H2" 0.7290666 "NTE family protein RssA"  
"JS1\_A09\_01363" 11849 "s59E13H2" 0.8486869 "spermidine synthase"  
"JS1\_A09\_01363" 11849 "s59E25H2" 0 "spermidine synthase"  
"JS1\_A09\_01363" 11849 "s59E5H2" 0.6537192 "spermidine synthase"  
"JS1\_A09\_01363" 11849 "s63E6H2" 0.7921054 "spermidine synthase"  
"JS1\_A09\_01364" 11850 "s59E13H2" 0.5080088 "Capsule biosynthesis protein CapA"  
"JS1\_A09\_01364" 11850 "s59E25H2" 0 "Capsule biosynthesis protein CapA"  
"JS1\_A09\_01364" 11850 "s59E5H2" 0.2733471 "Capsule biosynthesis protein CapA"  
"JS1\_A09\_01364" 11850 "s63E6H2" 0.5259958 "Capsule biosynthesis protein CapA"  
"JS1\_A09\_01365" 11851 "s59E13H2" 0.5237825 "hypothetical protein"  
"JS1\_A09\_01365" 11851 "s59E25H2" 0 "hypothetical protein"  
"JS1\_A09\_01365" 11851 "s59E5H2" 1.181534 "hypothetical protein"  
"JS1\_A09\_01365" 11851 "s63E6H2" 1.573953 "hypothetical protein"  
"JS1\_A09\_01366" 11852 "s59E13H2" 1.391214 "Protein-L-isoaspartate O-methyltransferase"  
"JS1\_A09\_01366" 11852 "s59E25H2" 0 "Protein-L-isoaspartate O-methyltransferase"  
"JS1\_A09\_01366" 11852 "s59E5H2" 2.395518 "Protein-L-isoaspartate O-methyltransferase"  
"JS1\_A09\_01366" 11852 "s63E6H2" 1.21147 "Protein-L-isoaspartate O-methyltransferase"  
"JS1\_A09\_01367" 11853 "s59E13H2" 0 "PEGA domain protein"  
"JS1\_A09\_01367" 11853 "s59E25H2" 0 "PEGA domain protein"  
"JS1\_A09\_01367" 11853 "s59E5H2" 1.186691 "PEGA domain protein"  
"JS1\_A09\_01367" 11853 "s63E6H2" 0.392895 "PEGA domain protein"  
"JS1\_A09\_01368" 11854 "s59E13H2" 1.789131 "Inner membrane transport permease YbhS"  
"JS1\_A09\_01368" 11854 "s59E25H2" 0 "Inner membrane transport permease YbhS"  
"JS1\_A09\_01368" 11854 "s59E5H2" 2.237029 "Inner membrane transport permease YbhS"  
"JS1\_A09\_01368" 11854 "s63E6H2" 1.678128 "Inner membrane transport permease YbhS"  
"JS1\_A09\_01369" 11855 "s59E13H2" 2.105887 "putative ABC transporter ATP-binding protein YbhF"  
"JS1\_A09\_01369" 11855 "s59E25H2" 0 "putative ABC transporter ATP-binding protein YbhF"  
"JS1\_A09\_01369" 11855 "s59E5H2" 3.315788 "putative ABC transporter ATP-binding protein YbhF"  
"JS1\_A09\_01369" 11855 "s63E6H2" 1.724866 "putative ABC transporter ATP-binding protein YbhF"  
"JS1\_A09\_01370" 11856 "s59E13H2" 1.147378 "Epoxyqueuosine reductase"  
"JS1\_A09\_01370" 11856 "s59E25H2" 0 "Epoxyqueuosine reductase"

"JS1\_A09\_01370" 11856 "s59E5H2" 0.6024241 "Epoxyqueuosine reductase"  
"JS1\_A09\_01370" 11856 "s63E6H2" 0.8685089 "Epoxyqueuosine reductase"  
"JS1\_A09\_01371" 11857 "s59E13H2" 1.110606 "Phage shock protein C"  
"JS1\_A09\_01371" 11857 "s59E25H2" 0 "Phage shock protein C"  
"JS1\_A09\_01371" 11857 "s59E5H2" 1.217453 "Phage shock protein C"  
"JS1\_A09\_01371" 11857 "s63E6H2" 0.7692353 "Phage shock protein C"  
"JS1\_A09\_01372" 11858 "s59E13H2" 0.5488438 "Adenosine specific kinase"  
"JS1\_A09\_01372" 11858 "s59E25H2" 0 "Adenosine specific kinase"  
"JS1\_A09\_01372" 11858 "s59E5H2" 1.106493 "Adenosine specific kinase"  
"JS1\_A09\_01372" 11858 "s63E6H2" 0.5570417 "Adenosine specific kinase"  
"JS1\_A09\_01373" 11859 "s59E13H2" 0.5341493 "putative sulfoacetate transporter SauU"  
"JS1\_A09\_01373" 11859 "s59E25H2" 0 "putative sulfoacetate transporter SauU"  
"JS1\_A09\_01373" 11859 "s59E5H2" 0.4839257 "putative sulfoacetate transporter SauU"  
"JS1\_A09\_01373" 11859 "s63E6H2" 0.6806478 "putative sulfoacetate transporter SauU"  
"JS1\_A09\_01374" 11860 "s59E13H2" 0.4973431 "Pyrimidine 5'-nucleotidase YjjG"  
"JS1\_A09\_01374" 11860 "s59E25H2" 0 "Pyrimidine 5'-nucleotidase YjjG"  
"JS1\_A09\_01374" 11860 "s59E5H2" 0.9631726 "Pyrimidine 5'-nucleotidase YjjG"  
"JS1\_A09\_01374" 11860 "s63E6H2" 0.9365297 "Pyrimidine 5'-nucleotidase YjjG"  
"JS1\_A09\_01376" 11862 "s59E13H2" 0 "hypothetical protein"  
"JS1\_A09\_01376" 11862 "s59E25H2" 0 "hypothetical protein"  
"JS1\_A09\_01376" 11862 "s59E5H2" 0.3642815 "hypothetical protein"  
"JS1\_A09\_01376" 11862 "s63E6H2" 0.07823467 "hypothetical protein"  
"JS1\_A09\_01377" 11863 "s59E13H2" 3.724548e-05 "transposase/IS protein"  
"JS1\_A09\_01377" 11863 "s59E25H2" 0 "transposase/IS protein"  
"JS1\_A09\_01377" 11863 "s59E5H2" 1.92338 "transposase/IS protein"  
"JS1\_A09\_01377" 11863 "s63E6H2" 0.4515846 "transposase/IS protein"  
"JS1\_A09\_01378" 11864 "s59E13H2" 0.006809255 "Integrase core domain protein"  
"JS1\_A09\_01378" 11864 "s59E25H2" 0 "Integrase core domain protein"  
"JS1\_A09\_01378" 11864 "s59E5H2" 0.8747088 "Integrase core domain protein"  
"JS1\_A09\_01378" 11864 "s63E6H2" 0.3442732 "Integrase core domain protein"  
"JS1\_A09\_01384" 11870 "s59E13H2" 0.01856505 "Sulphydrogenase 1 subunit gamma"  
"JS1\_A09\_01384" 11870 "s59E25H2" 0 "Sulphydrogenase 1 subunit gamma"  
"JS1\_A09\_01384" 11870 "s59E5H2" 0 "Sulphydrogenase 1 subunit gamma"  
"JS1\_A09\_01384" 11870 "s63E6H2" 0.008582958 "Sulphydrogenase 1 subunit gamma"  
"JS1\_A09\_01385" 11871 "s59E13H2" 0.2290236 "hypothetical protein"  
"JS1\_A09\_01385" 11871 "s59E25H2" 0 "hypothetical protein"  
"JS1\_A09\_01385" 11871 "s59E5H2" 0 "hypothetical protein"  
"JS1\_A09\_01385" 11871 "s63E6H2" 0.01278764 "hypothetical protein"  
"JS1\_A09\_01386" 11872 "s59E13H2" 0.009631769 "NADP-dependent malic enzyme"  
"JS1\_A09\_01386" 11872 "s59E25H2" 0 "NADP-dependent malic enzyme"  
"JS1\_A09\_01386" 11872 "s59E5H2" 0.01210131 "NADP-dependent malic enzyme"  
"JS1\_A09\_01386" 11872 "s63E6H2" 0.2977019 "NADP-dependent malic enzyme"  
"JS1\_A09\_01387" 11873 "s59E13H2" 0.008315333 "NAD-dependent malic enzyme"  
"JS1\_A09\_01387" 11873 "s59E25H2" 0 "NAD-dependent malic enzyme"  
"JS1\_A09\_01387" 11873 "s59E5H2" 0.1170983 "NAD-dependent malic enzyme"  
"JS1\_A09\_01387" 11873 "s63E6H2" 0.3906286 "NAD-dependent malic enzyme"  
"JS1\_A09\_01388" 11874 "s59E13H2" 0.009948306 "L(+)-tartrate dehydratase subunit alpha"

"JS1\_A09\_01388" 11874 "s59E25H2" 0 "L(+)-tartrate dehydratase subunit alpha"  
"JS1\_A09\_01388" 11874 "s59E5H2" 0.02014011 "L(+)-tartrate dehydratase subunit alpha"  
"JS1\_A09\_01388" 11874 "s63E6H2" 0.5102004 "L(+)-tartrate dehydratase subunit alpha"  
"JS1\_A09\_01389" 11875 "s59E13H2" 0.003145682 "Fumarate hydratase class I, anaerobic"  
"JS1\_A09\_01389" 11875 "s59E25H2" 0 "Fumarate hydratase class I, anaerobic"  
"JS1\_A09\_01389" 11875 "s59E5H2" 0 "Fumarate hydratase class I, anaerobic"  
"JS1\_A09\_01389" 11875 "s63E6H2" 0.5230927 "Fumarate hydratase class I, anaerobic"  
"JS1\_A09\_01390" 11876 "s59E13H2" 0.7953474 "hypothetical protein"  
"JS1\_A09\_01390" 11876 "s59E25H2" 0 "hypothetical protein"  
"JS1\_A09\_01390" 11876 "s59E5H2" 1.230517 "hypothetical protein"  
"JS1\_A09\_01390" 11876 "s63E6H2" 2.687445 "hypothetical protein"  
"JS1\_A09\_01391" 11877 "s59E13H2" 0.08083823 "Peptidase M15"  
"JS1\_A09\_01391" 11877 "s59E25H2" 0 "Peptidase M15"  
"JS1\_A09\_01391" 11877 "s59E5H2" 0.4852882 "Peptidase M15"  
"JS1\_A09\_01391" 11877 "s63E6H2" 1.757617 "Peptidase M15"  
"JS1\_A09\_01392" 11878 "s59E13H2" 1.326457 "hypothetical protein"  
"JS1\_A09\_01392" 11878 "s59E25H2" 0.7518519 "hypothetical protein"  
"JS1\_A09\_01392" 11878 "s59E5H2" 1.500126 "hypothetical protein"  
"JS1\_A09\_01392" 11878 "s63E6H2" 1.824102 "hypothetical protein"  
"JS1\_A09\_01393" 11879 "s59E13H2" 0.002218746 "hypothetical protein"  
"JS1\_A09\_01393" 11879 "s59E25H2" 0 "hypothetical protein"  
"JS1\_A09\_01393" 11879 "s59E5H2" 2.539961 "hypothetical protein"  
"JS1\_A09\_01393" 11879 "s63E6H2" 0.3777573 "hypothetical protein"  
"JS1\_A09\_01394" 11880 "s59E13H2" 0 "hypothetical protein"  
"JS1\_A09\_01394" 11880 "s59E25H2" 0 "hypothetical protein"  
"JS1\_A09\_01394" 11880 "s59E5H2" 2.520494 "hypothetical protein"  
"JS1\_A09\_01394" 11880 "s63E6H2" 0.5111826 "hypothetical protein"  
"JS1\_A09\_01401" 11887 "s59E13H2" 4.223376 "hypothetical protein"  
"JS1\_A09\_01401" 11887 "s59E25H2" 0 "hypothetical protein"  
"JS1\_A09\_01401" 11887 "s59E5H2" 0.1942531 "hypothetical protein"  
"JS1\_A09\_01401" 11887 "s63E6H2" 0.5449324 "hypothetical protein"  
"JS1\_A09\_01402" 11888 "s59E13H2" 4.255669 "hypothetical protein"  
"JS1\_A09\_01402" 11888 "s59E25H2" 0 "hypothetical protein"  
"JS1\_A09\_01402" 11888 "s59E5H2" 0.2325824 "hypothetical protein"  
"JS1\_A09\_01402" 11888 "s63E6H2" 0.4386194 "hypothetical protein"  
"JS1\_A09\_01403" 11889 "s59E13H2" 0.454551 "hypothetical protein"  
"JS1\_A09\_01403" 11889 "s59E25H2" 0 "hypothetical protein"  
"JS1\_A09\_01403" 11889 "s59E5H2" 2.068451 "hypothetical protein"  
"JS1\_A09\_01403" 11889 "s63E6H2" 0.1163249 "hypothetical protein"  
"JS1\_A09\_01404" 11890 "s59E13H2" 0.00778724 "Phage shock protein C"  
"JS1\_A09\_01404" 11890 "s59E25H2" 0 "Phage shock protein C"  
"JS1\_A09\_01404" 11890 "s59E5H2" 1.923264 "Phage shock protein C"  
"JS1\_A09\_01404" 11890 "s63E6H2" 0.1146915 "Phage shock protein C"  
"JS1\_A09\_01405" 11891 "s59E13H2" 0.1195822 "hypothetical protein"  
"JS1\_A09\_01405" 11891 "s59E25H2" 0 "hypothetical protein"  
"JS1\_A09\_01405" 11891 "s59E5H2" 0.8386355 "hypothetical protein"  
"JS1\_A09\_01405" 11891 "s63E6H2" 0.1418394 "hypothetical protein"

"JS1\_A09\_01406" 11892 "s59E13H2" 0.05283329 "hypothetical protein"  
"JS1\_A09\_01406" 11892 "s59E25H2" 0 "hypothetical protein"  
"JS1\_A09\_01406" 11892 "s59E5H2" 0.3415101 "hypothetical protein"  
"JS1\_A09\_01406" 11892 "s63E6H2" 0.01294043 "hypothetical protein"  
"JS1\_A09\_01408" 11894 "s59E13H2" 0.1290313 "UvrABC system protein C"  
"JS1\_A09\_01408" 11894 "s59E25H2" 0 "UvrABC system protein C"  
"JS1\_A09\_01408" 11894 "s59E5H2" 0.1178288 "UvrABC system protein C"  
"JS1\_A09\_01408" 11894 "s63E6H2" 2.000769 "UvrABC system protein C"  
"JS1\_A09\_01410" 11896 "s59E13H2" 0.3588799 "B3/4 domain protein"  
"JS1\_A09\_01410" 11896 "s59E25H2" 0 "B3/4 domain protein"  
"JS1\_A09\_01410" 11896 "s59E5H2" 1.226305 "B3/4 domain protein"  
"JS1\_A09\_01410" 11896 "s63E6H2" 2.716635 "B3/4 domain protein"  
"JS1\_A09\_01411" 11897 "s59E13H2" 0 "hypothetical protein"  
"JS1\_A09\_01411" 11897 "s59E25H2" 0 "hypothetical protein"  
"JS1\_A09\_01411" 11897 "s59E5H2" 0.2180224 "hypothetical protein"  
"JS1\_A09\_01411" 11897 "s63E6H2" 0.003680287 "hypothetical protein"  
"JS1\_A09\_01412" 11898 "s59E13H2" 0 "Acryloyl-coenzyme A reductase"  
"JS1\_A09\_01412" 11898 "s59E25H2" 0 "Acryloyl-coenzyme A reductase"  
"JS1\_A09\_01412" 11898 "s59E5H2" 0.4546786 "Acryloyl-coenzyme A reductase"  
"JS1\_A09\_01412" 11898 "s63E6H2" 0.2095213 "Acryloyl-coenzyme A reductase"  
"JS1\_A09\_01413" 11899 "s59E13H2" 0.3972896 "Acetyltransferase (GNAT) family protein"  
"JS1\_A09\_01413" 11899 "s59E25H2" 0 "Acetyltransferase (GNAT) family protein"  
"JS1\_A09\_01413" 11899 "s59E5H2" 0.04078107 "Acetyltransferase (GNAT) family protein"  
"JS1\_A09\_01413" 11899 "s63E6H2" 0.1174952 "Acetyltransferase (GNAT) family protein"  
"JS1\_A09\_01414" 11900 "s59E13H2" 0 "hypothetical protein"  
"JS1\_A09\_01414" 11900 "s59E25H2" 0 "hypothetical protein"  
"JS1\_A09\_01414" 11900 "s59E5H2" 0 "hypothetical protein"  
"JS1\_A09\_01414" 11900 "s63E6H2" 0 "hypothetical protein"  
"JS1\_A09\_01415" 11901 "s59E13H2" 0.02541151 "NADH dehydrogenase"  
"JS1\_A09\_01415" 11901 "s59E25H2" 0 "NADH dehydrogenase"  
"JS1\_A09\_01415" 11901 "s59E5H2" 1.424122 "NADH dehydrogenase"  
"JS1\_A09\_01415" 11901 "s63E6H2" 0.02841485 "NADH dehydrogenase"  
"JS1\_A09\_01416" 11902 "s59E13H2" 0.02321181 "protoporphyrinogen oxidase"  
"JS1\_A09\_01416" 11902 "s59E25H2" 0 "protoporphyrinogen oxidase"  
"JS1\_A09\_01416" 11902 "s59E5H2" 0.1396371 "protoporphyrinogen oxidase"  
"JS1\_A09\_01416" 11902 "s63E6H2" 0.2654739 "protoporphyrinogen oxidase"  
"JS1\_A09\_01418" 11904 "s59E13H2" 0.02281379 "Response regulator PleD"  
"JS1\_A09\_01418" 11904 "s59E25H2" 0 "Response regulator PleD"  
"JS1\_A09\_01418" 11904 "s59E5H2" 0.3394762 "Response regulator PleD"  
"JS1\_A09\_01418" 11904 "s63E6H2" 0.0085086 "Response regulator PleD"  
"JS1\_A09\_01419" 11905 "s59E13H2" 5.680024 "Group II intron-encoded protein LtrA"  
"JS1\_A09\_01419" 11905 "s59E25H2" 0 "Group II intron-encoded protein LtrA"  
"JS1\_A09\_01419" 11905 "s59E5H2" 0.4990997 "Group II intron-encoded protein LtrA"  
"JS1\_A09\_01419" 11905 "s63E6H2" 2.022602 "Group II intron-encoded protein LtrA"  
"JS1\_A09\_01420" 11906 "s59E13H2" 0 "Sulfide dehydrogenase subunit alpha precursor"  
"JS1\_A09\_01420" 11906 "s59E25H2" 0 "Sulfide dehydrogenase subunit alpha precursor"  
"JS1\_A09\_01420" 11906 "s59E5H2" 0.01015782 "Sulfide dehydrogenase subunit alpha precursor"



"JS1\_A09\_01420" 11906 "s63E6H2" 0 "Sulfide dehydrogenase subunit alpha precursor"  
"JS1\_C14\_00001" 4975 "s59E13H2" 3.908067 "Tripartite ATP-independent periplasmic transporters, DctQ component"  
"JS1\_C14\_00001" 4975 "s59E25H2" 0 "Tripartite ATP-independent periplasmic transporters, DctQ component"  
"JS1\_C14\_00001" 4975 "s59E5H2" 0.9807624 "Tripartite ATP-independent periplasmic transporters, DctQ component"  
"JS1\_C14\_00001" 4975 "s63E6H2" 0.1639394 "Tripartite ATP-independent periplasmic transporters, DctQ component"  
"JS1\_C14\_00002" 4976 "s59E13H2" 9.007492 "Lactate-binding periplasmic protein precursor"  
"JS1\_C14\_00002" 4976 "s59E25H2" 0 "Lactate-binding periplasmic protein precursor"  
"JS1\_C14\_00002" 4976 "s59E5H2" 0.5533013 "Lactate-binding periplasmic protein precursor"  
"JS1\_C14\_00002" 4976 "s63E6H2" 0.1207273 "Lactate-binding periplasmic protein precursor"  
"JS1\_C14\_00003" 4977 "s59E13H2" 7.222968 "hypothetical protein"  
"JS1\_C14\_00003" 4977 "s59E25H2" 0 "hypothetical protein"  
"JS1\_C14\_00003" 4977 "s59E5H2" 0.4965034 "hypothetical protein"  
"JS1\_C14\_00003" 4977 "s63E6H2" 3.467613 "hypothetical protein"  
"JS1\_C14\_00004" 4978 "s59E13H2" 5.133837 "FMN reductase [NAD(P)H]"  
"JS1\_C14\_00004" 4978 "s59E25H2" 0 "FMN reductase [NAD(P)H]"  
"JS1\_C14\_00004" 4978 "s59E5H2" 0.1641398 "FMN reductase [NAD(P)H]"  
"JS1\_C14\_00004" 4978 "s63E6H2" 0.08847559 "FMN reductase [NAD(P)H]"  
"JS1\_C14\_00005" 4979 "s59E13H2" 3.435185 "hypothetical protein"  
"JS1\_C14\_00005" 4979 "s59E25H2" 0 "hypothetical protein"  
"JS1\_C14\_00005" 4979 "s59E5H2" 0.09712434 "hypothetical protein"  
"JS1\_C14\_00005" 4979 "s63E6H2" 0.09266809 "hypothetical protein"  
"JS1\_C14\_00006" 4980 "s59E13H2" 5.231774 "Winged helix-turn-helix transcription repressor, HrcA DNA-binding"  
"JS1\_C14\_00006" 4980 "s59E25H2" 0 "Winged helix-turn-helix transcription repressor, HrcA DNA-binding"  
"JS1\_C14\_00006" 4980 "s59E5H2" 0.479833 "Winged helix-turn-helix transcription repressor, HrcA DNA-binding"  
"JS1\_C14\_00006" 4980 "s63E6H2" 0.2139974 "Winged helix-turn-helix transcription repressor, HrcA DNA-binding"  
"JS1\_C14\_00007" 4981 "s59E13H2" 8.599794 "pyrroloquinoline quinone biosynthesis protein PqqE"  
"JS1\_C14\_00007" 4981 "s59E25H2" 0.3128964 "pyrroloquinoline quinone biosynthesis protein PqqE"  
"JS1\_C14\_00007" 4981 "s59E5H2" 0.6063691 "pyrroloquinoline quinone biosynthesis protein PqqE"  
"JS1\_C14\_00007" 4981 "s63E6H2" 0.5771127 "pyrroloquinoline quinone biosynthesis protein PqqE"  
"JS1\_C14\_00008" 4982 "s59E13H2" 12.11495 "putative inner membrane transporter yjE"  
"JS1\_C14\_00008" 4982 "s59E25H2" 0 "putative inner membrane transporter yjE"  
"JS1\_C14\_00008" 4982 "s59E5H2" 0.4090345 "putative inner membrane transporter yjE"  
"JS1\_C14\_00008" 4982 "s63E6H2" 0.6952709 "putative inner membrane transporter yjE"  
"JS1\_C14\_00009" 4983 "s59E13H2" 11.29507 "Radical SAM superfamily protein"  
"JS1\_C14\_00009" 4983 "s59E25H2" 0 "Radical SAM superfamily protein"  
"JS1\_C14\_00009" 4983 "s59E5H2" 0.2980371 "Radical SAM superfamily protein"  
"JS1\_C14\_00009" 4983 "s63E6H2" 0.510116 "Radical SAM superfamily protein"  
"JS1\_C14\_00010" 4984 "s59E13H2" 10.16486 "Putative HAD-hydrolase YfnB"  
"JS1\_C14\_00010" 4984 "s59E25H2" 0 "Putative HAD-hydrolase YfnB"  
"JS1\_C14\_00010" 4984 "s59E5H2" 0.3221793 "Putative HAD-hydrolase YfnB"  
"JS1\_C14\_00010" 4984 "s63E6H2" 0.3185825 "Putative HAD-hydrolase YfnB"  
"JS1\_C14\_00011" 4985 "s59E13H2" 13.2849 "Signal peptidase I S"  
"JS1\_C14\_00011" 4985 "s59E25H2" 0 "Signal peptidase I S"  
"JS1\_C14\_00011" 4985 "s59E5H2" 1.21742 "Signal peptidase I S"  
"JS1\_C14\_00011" 4985 "s63E6H2" 0.6068988 "Signal peptidase I S"  
"JS1\_C14\_00013" 4987 "s59E13H2" 0.00538272 "hypothetical protein"  
"JS1\_C14\_00013" 4987 "s59E25H2" 0 "hypothetical protein"

"JS1\_C14\_00013" 4987 "s59E5H2" 0 "hypothetical protein"  
"JS1\_C14\_00013" 4987 "s63E6H2" 0.07519175 "hypothetical protein"  
"JS1\_C14\_00014" 4988 "s59E13H2" 0.003846305 "Xylose isomerase-like TIM barrel"  
"JS1\_C14\_00014" 4988 "s59E25H2" 0 "Xylose isomerase-like TIM barrel"  
"JS1\_C14\_00014" 4988 "s59E5H2" 0.008803722 "Xylose isomerase-like TIM barrel"  
"JS1\_C14\_00014" 4988 "s63E6H2" 0.07625952 "Xylose isomerase-like TIM barrel"  
"JS1\_C14\_00015" 4989 "s59E13H2" 0.005630718 "putative L-threonine 3-dehydrogenase"  
"JS1\_C14\_00015" 4989 "s59E25H2" 0 "putative L-threonine 3-dehydrogenase"  
"JS1\_C14\_00015" 4989 "s59E5H2" 0.02288391 "putative L-threonine 3-dehydrogenase"  
"JS1\_C14\_00015" 4989 "s63E6H2" 0.06008985 "putative L-threonine 3-dehydrogenase"  
"JS1\_C14\_00016" 4990 "s59E13H2" 0.03800145 "Transaldolase"  
"JS1\_C14\_00016" 4990 "s59E25H2" 0 "Transaldolase"  
"JS1\_C14\_00016" 4990 "s59E5H2" 0.01942945 "Transaldolase"  
"JS1\_C14\_00016" 4990 "s63E6H2" 0.2029432 "Transaldolase"  
"JS1\_C14\_00017" 4991 "s59E13H2" 0.006795694 "4-hydroxy-2-oxo-heptane-1,7-dioate aldolase"  
"JS1\_C14\_00017" 4991 "s59E25H2" 0 "4-hydroxy-2-oxo-heptane-1,7-dioate aldolase"  
"JS1\_C14\_00017" 4991 "s59E5H2" 0 "4-hydroxy-2-oxo-heptane-1,7-dioate aldolase"  
"JS1\_C14\_00017" 4991 "s63E6H2" 0.06732638 "4-hydroxy-2-oxo-heptane-1,7-dioate aldolase"  
"JS1\_C14\_00018" 4992 "s59E13H2" 3.960352 "hypothetical protein"  
"JS1\_C14\_00018" 4992 "s59E25H2" 0 "hypothetical protein"  
"JS1\_C14\_00018" 4992 "s59E5H2" 0.09214721 "hypothetical protein"  
"JS1\_C14\_00018" 4992 "s63E6H2" 0.1474557 "hypothetical protein"  
"JS1\_C14\_00019" 4993 "s59E13H2" 7.916705 "hypothetical protein"  
"JS1\_C14\_00019" 4993 "s59E25H2" 0 "hypothetical protein"  
"JS1\_C14\_00019" 4993 "s59E5H2" 0.3929686 "hypothetical protein"  
"JS1\_C14\_00019" 4993 "s63E6H2" 0.5782613 "hypothetical protein"  
"JS1\_C14\_00020" 4994 "s59E13H2" 3.356369 "hypothetical protein"  
"JS1\_C14\_00020" 4994 "s59E25H2" 0 "hypothetical protein"  
"JS1\_C14\_00020" 4994 "s59E5H2" 0.8859622 "hypothetical protein"  
"JS1\_C14\_00020" 4994 "s63E6H2" 0.6314909 "hypothetical protein"  
"JS1\_C14\_00021" 4995 "s59E13H2" 0.2366558 "Cupin domain protein"  
"JS1\_C14\_00021" 4995 "s59E25H2" 0 "Cupin domain protein"  
"JS1\_C14\_00021" 4995 "s59E5H2" 0.4054381 "Cupin domain protein"  
"JS1\_C14\_00021" 4995 "s63E6H2" 0.0439482 "Cupin domain protein"  
"JS1\_C14\_00022" 4996 "s59E13H2" 0.2265924 "ADP-ribose pyrophosphatase"  
"JS1\_C14\_00022" 4996 "s59E25H2" 0 "ADP-ribose pyrophosphatase"  
"JS1\_C14\_00022" 4996 "s59E5H2" 0.5514971 "ADP-ribose pyrophosphatase"  
"JS1\_C14\_00022" 4996 "s63E6H2" 0.4047829 "ADP-ribose pyrophosphatase"  
"JS1\_C14\_00023" 4997 "s59E13H2" 0.2241466 "hypothetical protein"  
"JS1\_C14\_00023" 4997 "s59E25H2" 0 "hypothetical protein"  
"JS1\_C14\_00023" 4997 "s59E5H2" 0.5972087 "hypothetical protein"  
"JS1\_C14\_00023" 4997 "s63E6H2" 0.5840138 "hypothetical protein"  
"JS1\_C14\_00024" 4998 "s59E13H2" 0.5219359 "hypothetical protein"  
"JS1\_C14\_00024" 4998 "s59E25H2" 0 "hypothetical protein"  
"JS1\_C14\_00024" 4998 "s59E5H2" 0.4645117 "hypothetical protein"  
"JS1\_C14\_00024" 4998 "s63E6H2" 0.6353328 "hypothetical protein"  
"JS1\_C14\_00025" 4999 "s59E13H2" 1.816592 "Putative ski2-type helicase"

"JS1\_C14\_00025" 4999 "s59E25H2" 0 "Putative ski2-type helicase"  
"JS1\_C14\_00025" 4999 "s59E5H2" 0.6616915 "Putative ski2-type helicase"  
"JS1\_C14\_00025" 4999 "s63E6H2" 0.5978527 "Putative ski2-type helicase"  
"JS1\_C14\_00026" 5000 "s59E13H2" 9.385925 "putative endonuclease 4"  
"JS1\_C14\_00026" 5000 "s59E25H2" 0.2862069 "putative endonuclease 4"  
"JS1\_C14\_00026" 5000 "s59E5H2" 0.2404181 "putative endonuclease 4"  
"JS1\_C14\_00026" 5000 "s63E6H2" 0.2606757 "putative endonuclease 4"  
"JS1\_C14\_00027" 5001 "s59E13H2" 7.613501 "hypothetical protein"  
"JS1\_C14\_00027" 5001 "s59E25H2" 0 "hypothetical protein"  
"JS1\_C14\_00027" 5001 "s59E5H2" 0.2276233 "hypothetical protein"  
"JS1\_C14\_00027" 5001 "s63E6H2" 0.1571323 "hypothetical protein"  
"JS1\_C14\_00029" 5003 "s59E13H2" 4.334707 "hypothetical protein"  
"JS1\_C14\_00029" 5003 "s59E25H2" 0 "hypothetical protein"  
"JS1\_C14\_00029" 5003 "s59E5H2" 0.5573298 "hypothetical protein"  
"JS1\_C14\_00029" 5003 "s63E6H2" 3.66613 "hypothetical protein"  
"JS1\_C14\_00031" 5005 "s59E13H2" 5.580577 "Plasmid pRiA4b ORF-3-like protein"  
"JS1\_C14\_00031" 5005 "s59E25H2" 0 "Plasmid pRiA4b ORF-3-like protein"  
"JS1\_C14\_00031" 5005 "s59E5H2" 0.2099729 "Plasmid pRiA4b ORF-3-like protein"  
"JS1\_C14\_00031" 5005 "s63E6H2" 4.995563 "Plasmid pRiA4b ORF-3-like protein"  
"JS1\_C14\_00032" 5006 "s59E13H2" 0.3890926 "Demethylmenaquinone methyltransferase"  
"JS1\_C14\_00032" 5006 "s59E25H2" 0 "Demethylmenaquinone methyltransferase"  
"JS1\_C14\_00032" 5006 "s59E5H2" 0.05585635 "Demethylmenaquinone methyltransferase"  
"JS1\_C14\_00032" 5006 "s63E6H2" 0.3111556 "Demethylmenaquinone methyltransferase"  
"JS1\_C14\_00033" 5007 "s59E13H2" 5.501252 "Acetyl-CoA decarboxylase/synthase complex subunit gamma"  
"JS1\_C14\_00033" 5007 "s59E25H2" 0 "Acetyl-CoA decarboxylase/synthase complex subunit gamma"  
"JS1\_C14\_00033" 5007 "s59E5H2" 0.1710171 "Acetyl-CoA decarboxylase/synthase complex subunit gamma"  
"JS1\_C14\_00033" 5007 "s63E6H2" 0.2472714 "Acetyl-CoA decarboxylase/synthase complex subunit gamma"  
"JS1\_C14\_00034" 5008 "s59E13H2" 3.028246 "hypothetical protein"  
"JS1\_C14\_00034" 5008 "s59E25H2" 0 "hypothetical protein"  
"JS1\_C14\_00034" 5008 "s59E5H2" 0.1819589 "hypothetical protein"  
"JS1\_C14\_00034" 5008 "s63E6H2" 0.4677994 "hypothetical protein"  
"JS1\_C14\_00035" 5009 "s59E13H2" 1.216309 "Putative membrane protein YdgH"  
"JS1\_C14\_00035" 5009 "s59E25H2" 0 "Putative membrane protein YdgH"  
"JS1\_C14\_00035" 5009 "s59E5H2" 0.2452114 "Putative membrane protein YdgH"  
"JS1\_C14\_00035" 5009 "s63E6H2" 0.1928188 "Putative membrane protein YdgH"  
"JS1\_C14\_00036" 5010 "s59E13H2" 1.679241 "hypothetical protein"  
"JS1\_C14\_00036" 5010 "s59E25H2" 0 "hypothetical protein"  
"JS1\_C14\_00036" 5010 "s59E5H2" 0.2680027 "hypothetical protein"  
"JS1\_C14\_00036" 5010 "s63E6H2" 0.01518941 "hypothetical protein"  
"JS1\_C14\_00039" 5013 "s59E13H2" 0.9865637 "Cysteine/O-acetylserine efflux protein"  
"JS1\_C14\_00039" 5013 "s59E25H2" 0 "Cysteine/O-acetylserine efflux protein"  
"JS1\_C14\_00039" 5013 "s59E5H2" 2.830789 "Cysteine/O-acetylserine efflux protein"  
"JS1\_C14\_00039" 5013 "s63E6H2" 0.2587378 "Cysteine/O-acetylserine efflux protein"  
"JS1\_C14\_00040" 5014 "s59E13H2" 0.599248 "Biotin transporter BioY"  
"JS1\_C14\_00040" 5014 "s59E25H2" 0 "Biotin transporter BioY"  
"JS1\_C14\_00040" 5014 "s59E5H2" 2.004329 "Biotin transporter BioY"  
"JS1\_C14\_00040" 5014 "s63E6H2" 1.153637 "Biotin transporter BioY"

"JS1\_C14\_00041" 5015 "s59E13H2" 0.6301646 "Pyruvate, phosphate dikinase"  
"JS1\_C14\_00041" 5015 "s59E25H2" 0 "Pyruvate, phosphate dikinase"  
"JS1\_C14\_00041" 5015 "s59E5H2" 3.412649 "Pyruvate, phosphate dikinase"  
"JS1\_C14\_00041" 5015 "s63E6H2" 0.1488139 "Pyruvate, phosphate dikinase"  
"JS1\_C14\_00042" 5016 "s59E13H2" 0.1716357 "hypothetical protein"  
"JS1\_C14\_00042" 5016 "s59E25H2" 0 "hypothetical protein"  
"JS1\_C14\_00042" 5016 "s59E5H2" 0.06304563 "hypothetical protein"  
"JS1\_C14\_00042" 5016 "s63E6H2" 0.06535236 "hypothetical protein"  
"JS1\_C14\_00045" 5019 "s59E13H2" 0.02421017 "Cell division protein DivIB"  
"JS1\_C14\_00045" 5019 "s59E25H2" 0 "Cell division protein DivIB"  
"JS1\_C14\_00045" 5019 "s59E5H2" 0.1982805 "Cell division protein DivIB"  
"JS1\_C14\_00045" 5019 "s63E6H2" 1.15809 "Cell division protein DivIB"  
"JS1\_C14\_00046" 5020 "s59E13H2" 0.1245578 "Cell division protein FtsA"  
"JS1\_C14\_00046" 5020 "s59E25H2" 0 "Cell division protein FtsA"  
"JS1\_C14\_00046" 5020 "s59E5H2" 0.2845422 "Cell division protein FtsA"  
"JS1\_C14\_00046" 5020 "s63E6H2" 1.13379 "Cell division protein FtsA"  
"JS1\_C14\_00047" 5021 "s59E13H2" 0.1214421 "Ribonucleoside-diphosphate reductase NrdZ"  
"JS1\_C14\_00047" 5021 "s59E25H2" 0 "Ribonucleoside-diphosphate reductase NrdZ"  
"JS1\_C14\_00047" 5021 "s59E5H2" 0.1893047 "Ribonucleoside-diphosphate reductase NrdZ"  
"JS1\_C14\_00047" 5021 "s63E6H2" 1.110786 "Ribonucleoside-diphosphate reductase NrdZ"  
"JS1\_C14\_00048" 5022 "s59E13H2" 0.1017062 "Transcriptional repressor NrdR"  
"JS1\_C14\_00048" 5022 "s59E25H2" 0 "Transcriptional repressor NrdR"  
"JS1\_C14\_00048" 5022 "s59E5H2" 0.3950979 "Transcriptional repressor NrdR"  
"JS1\_C14\_00048" 5022 "s63E6H2" 1.638274 "Transcriptional repressor NrdR"  
"JS1\_C14\_00049" 5023 "s59E13H2" 0.2724307 "Cell division protein FtsZ"  
"JS1\_C14\_00049" 5023 "s59E25H2" 0 "Cell division protein FtsZ"  
"JS1\_C14\_00049" 5023 "s59E5H2" 0.5717736 "Cell division protein FtsZ"  
"JS1\_C14\_00049" 5023 "s63E6H2" 1.611827 "Cell division protein FtsZ"  
"JS1\_C14\_00051" 5025 "s59E13H2" 0.8666847 "L-arabinose transport system permease protein AraQ"  
"JS1\_C14\_00051" 5025 "s59E25H2" 0 "L-arabinose transport system permease protein AraQ"  
"JS1\_C14\_00051" 5025 "s59E5H2" 0.5481644 "L-arabinose transport system permease protein AraQ"  
"JS1\_C14\_00051" 5025 "s63E6H2" 0.3690441 "L-arabinose transport system permease protein AraQ"  
"JS1\_C14\_00052" 5026 "s59E13H2" 0.1624717 "hypothetical protein"  
"JS1\_C14\_00052" 5026 "s59E25H2" 0 "hypothetical protein"  
"JS1\_C14\_00052" 5026 "s59E5H2" 0.02231292 "hypothetical protein"  
"JS1\_C14\_00052" 5026 "s63E6H2" 0 "hypothetical protein"  
"JS1\_C14\_00053" 5027 "s59E13H2" 0.2996057 "hypothetical protein"  
"JS1\_C14\_00053" 5027 "s59E25H2" 0 "hypothetical protein"  
"JS1\_C14\_00053" 5027 "s59E5H2" 0.05450611 "hypothetical protein"  
"JS1\_C14\_00053" 5027 "s63E6H2" 0.05128619 "hypothetical protein"  
"JS1\_C14\_00054" 5028 "s59E13H2" 0.4334088 "hypothetical protein"  
"JS1\_C14\_00054" 5028 "s59E25H2" 0 "hypothetical protein"  
"JS1\_C14\_00054" 5028 "s59E5H2" 0.4040998 "hypothetical protein"  
"JS1\_C14\_00054" 5028 "s63E6H2" 1.160585 "hypothetical protein"  
"JS1\_C14\_00055" 5029 "s59E13H2" 0.7522843 "Phospholipase YtpA"  
"JS1\_C14\_00055" 5029 "s59E25H2" 0 "Phospholipase YtpA"  
"JS1\_C14\_00055" 5029 "s59E5H2" 0.2316709 "Phospholipase YtpA"

"JS1\_C14\_00055" 5029 "s63E6H2" 1.257716 "Phospholipase YtpA"  
"JS1\_C14\_00056" 5030 "s59E13H2" 0.06226911 "Low molecular weight protein-tyrosine-phosphatase YwIE"  
"JS1\_C14\_00056" 5030 "s59E25H2" 0 "Low molecular weight protein-tyrosine-phosphatase YwIE"  
"JS1\_C14\_00056" 5030 "s59E5H2" 0.3827127 "Low molecular weight protein-tyrosine-phosphatase YwIE"  
"JS1\_C14\_00056" 5030 "s63E6H2" 0.0874501 "Low molecular weight protein-tyrosine-phosphatase YwIE"  
"JS1\_C14\_00057" 5031 "s59E13H2" 0.02806643 "Release factor glutamine methyltransferase"  
"JS1\_C14\_00057" 5031 "s59E25H2" 0 "Release factor glutamine methyltransferase"  
"JS1\_C14\_00057" 5031 "s59E5H2" 0.1642149 "Release factor glutamine methyltransferase"  
"JS1\_C14\_00057" 5031 "s63E6H2" 0.07941739 "Release factor glutamine methyltransferase"  
"JS1\_C14\_00058" 5032 "s59E13H2" 0.319931 "Peptide chain release factor 1"  
"JS1\_C14\_00058" 5032 "s59E25H2" 0 "Peptide chain release factor 1"  
"JS1\_C14\_00058" 5032 "s59E5H2" 0.06723506 "Peptide chain release factor 1"  
"JS1\_C14\_00058" 5032 "s63E6H2" 0.11627 "Peptide chain release factor 1"  
"JS1\_C14\_00059" 5033 "s59E13H2" 0.02376494 "hypothetical protein"  
"JS1\_C14\_00059" 5033 "s59E25H2" 0 "hypothetical protein"  
"JS1\_C14\_00059" 5033 "s59E5H2" 0.08327813 "hypothetical protein"  
"JS1\_C14\_00059" 5033 "s63E6H2" 0.0773662 "hypothetical protein"  
"JS1\_C14\_00060" 5034 "s59E13H2" 0.03212287 "hypothetical protein"  
"JS1\_C14\_00060" 5034 "s59E25H2" 0 "hypothetical protein"  
"JS1\_C14\_00060" 5034 "s59E5H2" 0.111935 "hypothetical protein"  
"JS1\_C14\_00060" 5034 "s63E6H2" 0.294388 "hypothetical protein"  
"JS1\_C14\_00061" 5035 "s59E13H2" 0.08139842 "Thymidylate synthase ThyX"  
"JS1\_C14\_00061" 5035 "s59E25H2" 0 "Thymidylate synthase ThyX"  
"JS1\_C14\_00061" 5035 "s59E5H2" 0.1860855 "Thymidylate synthase ThyX"  
"JS1\_C14\_00061" 5035 "s63E6H2" 0.2650081 "Thymidylate synthase ThyX"  
"JS1\_C14\_00062" 5036 "s59E13H2" 0.07591086 "Thymidine kinase"  
"JS1\_C14\_00062" 5036 "s59E25H2" 0 "Thymidine kinase"  
"JS1\_C14\_00062" 5036 "s59E5H2" 0.1913208 "Thymidine kinase"  
"JS1\_C14\_00062" 5036 "s63E6H2" 0.202496 "Thymidine kinase"  
"JS1\_C14\_00063" 5037 "s59E13H2" 0.141963 "50S ribosomal protein L31"  
"JS1\_C14\_00063" 5037 "s59E25H2" 0 "50S ribosomal protein L31"  
"JS1\_C14\_00063" 5037 "s59E5H2" 0.06360549 "50S ribosomal protein L31"  
"JS1\_C14\_00063" 5037 "s63E6H2" 0.04981184 "50S ribosomal protein L31"  
"JS1\_C14\_00064" 5038 "s59E13H2" 0.1697532 "hypothetical protein"  
"JS1\_C14\_00064" 5038 "s59E25H2" 0 "hypothetical protein"  
"JS1\_C14\_00064" 5038 "s59E5H2" 0.1560395 "hypothetical protein"  
"JS1\_C14\_00064" 5038 "s63E6H2" 0.252983 "hypothetical protein"  
"JS1\_C14\_00065" 5039 "s59E13H2" 0.1034379 "2-C-methyl-D-erythritol 4-phosphate cytidyltransferase"  
"JS1\_C14\_00065" 5039 "s59E25H2" 0 "2-C-methyl-D-erythritol 4-phosphate cytidyltransferase"  
"JS1\_C14\_00065" 5039 "s59E5H2" 0.1263353 "2-C-methyl-D-erythritol 4-phosphate cytidyltransferase"  
"JS1\_C14\_00065" 5039 "s63E6H2" 0.1282302 "2-C-methyl-D-erythritol 4-phosphate cytidyltransferase"  
"JS1\_C14\_00066" 5040 "s59E13H2" 0.06554175 "CTP synthase"  
"JS1\_C14\_00066" 5040 "s59E25H2" 0 "CTP synthase"  
"JS1\_C14\_00066" 5040 "s59E5H2" 0.480575 "CTP synthase"  
"JS1\_C14\_00066" 5040 "s63E6H2" 0.410042 "CTP synthase"  
"JS1\_C14\_00067" 5041 "s59E13H2" 0.04383438 "metal-dependent hydrolase"  
"JS1\_C14\_00067" 5041 "s59E25H2" 0 "metal-dependent hydrolase"

"JS1\_C14\_00067" 5041 "s59E5H2" 0.6232003 "metal-dependent hydrolase"  
"JS1\_C14\_00067" 5041 "s63E6H2" 0.5160261 "metal-dependent hydrolase"  
"JS1\_C14\_00070" 5044 "s59E13H2" 0.04465267 "Carbonic anhydrase precursor"  
"JS1\_C14\_00070" 5044 "s59E25H2" 0 "Carbonic anhydrase precursor"  
"JS1\_C14\_00070" 5044 "s59E5H2" 0.1520257 "Carbonic anhydrase precursor"  
"JS1\_C14\_00070" 5044 "s63E6H2" 0.2166937 "Carbonic anhydrase precursor"  
"JS1\_C14\_00071" 5045 "s59E13H2" 0.05098449 "UvrABC system protein C"  
"JS1\_C14\_00071" 5045 "s59E25H2" 0 "UvrABC system protein C"  
"JS1\_C14\_00071" 5045 "s59E5H2" 0.2501146 "UvrABC system protein C"  
"JS1\_C14\_00071" 5045 "s63E6H2" 0.1709699 "UvrABC system protein C"  
"JS1\_C14\_00072" 5046 "s59E13H2" 0.04618336 "UvrABC system protein A"  
"JS1\_C14\_00072" 5046 "s59E25H2" 0 "UvrABC system protein A"  
"JS1\_C14\_00072" 5046 "s59E5H2" 0.9584275 "UvrABC system protein A"  
"JS1\_C14\_00072" 5046 "s63E6H2" 0.2130809 "UvrABC system protein A"  
"JS1\_C14\_00073" 5047 "s59E13H2" 0.05872682 "UvrABC system protein B"  
"JS1\_C14\_00073" 5047 "s59E25H2" 0 "UvrABC system protein B"  
"JS1\_C14\_00073" 5047 "s59E5H2" 0.7619514 "UvrABC system protein B"  
"JS1\_C14\_00073" 5047 "s63E6H2" 0.9455657 "UvrABC system protein B"  
"JS1\_C14\_00074" 5048 "s59E13H2" 0.07763221 "Adenine deaminase"  
"JS1\_C14\_00074" 5048 "s59E25H2" 0 "Adenine deaminase"  
"JS1\_C14\_00074" 5048 "s59E5H2" 1.111663 "Adenine deaminase"  
"JS1\_C14\_00074" 5048 "s63E6H2" 2.592687 "Adenine deaminase"  
"JS1\_C14\_00075" 5049 "s59E13H2" 0.03951583 "Dephospho-CoA kinase"  
"JS1\_C14\_00075" 5049 "s59E25H2" 0 "Dephospho-CoA kinase"  
"JS1\_C14\_00075" 5049 "s59E5H2" 0.4646319 "Dephospho-CoA kinase"  
"JS1\_C14\_00075" 5049 "s63E6H2" 0.4982962 "Dephospho-CoA kinase"  
"JS1\_C14\_00076" 5050 "s59E13H2" 0.02547776 "DNA polymerase I"  
"JS1\_C14\_00076" 5050 "s59E25H2" 0 "DNA polymerase I"  
"JS1\_C14\_00076" 5050 "s59E5H2" 0.1700743 "DNA polymerase I"  
"JS1\_C14\_00076" 5050 "s63E6H2" 1.493294 "DNA polymerase I"  
"JS1\_C14\_00078" 5052 "s59E13H2" 0.03486601 "hypothetical protein"  
"JS1\_C14\_00078" 5052 "s59E25H2" 0 "hypothetical protein"  
"JS1\_C14\_00078" 5052 "s59E5H2" 0.2071271 "hypothetical protein"  
"JS1\_C14\_00078" 5052 "s63E6H2" 0.1824813 "hypothetical protein"  
"JS1\_C14\_00081" 5055 "s59E13H2" 0.09516948 "alkanesulfonate transporter substrate-binding subunit"  
"JS1\_C14\_00081" 5055 "s59E25H2" 0 "alkanesulfonate transporter substrate-binding subunit"  
"JS1\_C14\_00081" 5055 "s59E5H2" 0.2763325 "alkanesulfonate transporter substrate-binding subunit"  
"JS1\_C14\_00081" 5055 "s63E6H2" 0.03769032 "alkanesulfonate transporter substrate-binding subunit"  
"JS1\_C14\_00082" 5056 "s59E13H2" 0.07616564 "Glutamate 2,3-aminomutase"  
"JS1\_C14\_00082" 5056 "s59E25H2" 0 "Glutamate 2,3-aminomutase"  
"JS1\_C14\_00082" 5056 "s59E5H2" 0.1361343 "Glutamate 2,3-aminomutase"  
"JS1\_C14\_00082" 5056 "s63E6H2" 0.1421624 "Glutamate 2,3-aminomutase"  
"JS1\_C14\_00083" 5057 "s59E13H2" 0.02055605 "putative HTH-type transcriptional regulator YbbH"  
"JS1\_C14\_00083" 5057 "s59E25H2" 0 "putative HTH-type transcriptional regulator YbbH"  
"JS1\_C14\_00083" 5057 "s59E5H2" 0.1170847 "putative HTH-type transcriptional regulator YbbH"  
"JS1\_C14\_00083" 5057 "s63E6H2" 0.01536187 "putative HTH-type transcriptional regulator YbbH"  
"JS1\_C14\_00084" 5058 "s59E13H2" 0.003450063 "Methenyltetrahydrofolate cyclohydrolase"

"JS1\_C14\_00084" 5058 "s59E25H2" 0 "Methenyltetrahydrofolate cyclohydrolase"  
"JS1\_C14\_00084" 5058 "s59E5H2" 0.0214088 "Methenyltetrahydrofolate cyclohydrolase"  
"JS1\_C14\_00084" 5058 "s63E6H2" 0.04436815 "Methenyltetrahydrofolate cyclohydrolase"  
"JS1\_C14\_00085" 5059 "s59E13H2" 0.01931528 "hypothetical protein"  
"JS1\_C14\_00085" 5059 "s59E25H2" 0 "hypothetical protein"  
"JS1\_C14\_00085" 5059 "s59E5H2" 0.1322536 "hypothetical protein"  
"JS1\_C14\_00085" 5059 "s63E6H2" 0.1326626 "hypothetical protein"  
"JS1\_C14\_00086" 5060 "s59E13H2" 0.02849422 "Peptide chain release factor 2"  
"JS1\_C14\_00086" 5060 "s59E25H2" 0 "Peptide chain release factor 2"  
"JS1\_C14\_00086" 5060 "s59E5H2" 0.190887 "Peptide chain release factor 2"  
"JS1\_C14\_00086" 5060 "s63E6H2" 0.192413 "Peptide chain release factor 2"  
"JS1\_C14\_00087" 5061 "s59E13H2" 0.03521166 "preprotein translocase subunit SecA"  
"JS1\_C14\_00087" 5061 "s59E25H2" 0 "preprotein translocase subunit SecA"  
"JS1\_C14\_00087" 5061 "s59E5H2" 0.2208356 "preprotein translocase subunit SecA"  
"JS1\_C14\_00087" 5061 "s63E6H2" 0.1128602 "preprotein translocase subunit SecA"  
"JS1\_C14\_00088" 5062 "s59E13H2" 0.02231299 "hypothetical protein"  
"JS1\_C14\_00088" 5062 "s59E25H2" 0 "hypothetical protein"  
"JS1\_C14\_00088" 5062 "s59E5H2" 0.2907679 "hypothetical protein"  
"JS1\_C14\_00088" 5062 "s63E6H2" 0.07533905 "hypothetical protein"  
"JS1\_C14\_00089" 5063 "s59E13H2" 0.01872789 "Cyclic di-GMP phosphodiesterase response regulator RpfG"  
"JS1\_C14\_00089" 5063 "s59E25H2" 0 "Cyclic di-GMP phosphodiesterase response regulator RpfG"  
"JS1\_C14\_00089" 5063 "s59E5H2" 0.1777926 "Cyclic di-GMP phosphodiesterase response regulator RpfG"  
"JS1\_C14\_00089" 5063 "s63E6H2" 0.05136239 "Cyclic di-GMP phosphodiesterase response regulator RpfG"  
"JS1\_C14\_00090" 5064 "s59E13H2" 0.01290649 "hypothetical protein"  
"JS1\_C14\_00090" 5064 "s59E25H2" 0 "hypothetical protein"  
"JS1\_C14\_00090" 5064 "s59E5H2" 0.2687545 "hypothetical protein"  
"JS1\_C14\_00090" 5064 "s63E6H2" 0.1755564 "hypothetical protein"  
"JS1\_C14\_00092" 5066 "s59E13H2" 0.003967264 "Putative sigma-54 modulation protein"  
"JS1\_C14\_00092" 5066 "s59E25H2" 0 "Putative sigma-54 modulation protein"  
"JS1\_C14\_00092" 5066 "s59E5H2" 0.09979222 "Putative sigma-54 modulation protein"  
"JS1\_C14\_00092" 5066 "s63E6H2" 0.1787086 "Putative sigma-54 modulation protein"  
"JS1\_C14\_00093" 5067 "s59E13H2" 0.1180059 "DNA utilization protein GntX"  
"JS1\_C14\_00093" 5067 "s59E25H2" 0 "DNA utilization protein GntX"  
"JS1\_C14\_00093" 5067 "s59E5H2" 0.1975859 "DNA utilization protein GntX"  
"JS1\_C14\_00093" 5067 "s63E6H2" 0.2685663 "DNA utilization protein GntX"  
"JS1\_C14\_00094" 5068 "s59E13H2" 0.0107903 "Adenosylhomocysteinase"  
"JS1\_C14\_00094" 5068 "s59E25H2" 0 "Adenosylhomocysteinase"  
"JS1\_C14\_00094" 5068 "s59E5H2" 0.2158985 "Adenosylhomocysteinase"  
"JS1\_C14\_00094" 5068 "s63E6H2" 0.4022246 "Adenosylhomocysteinase"  
"JS1\_C14\_00095" 5069 "s59E13H2" 0.01723441 "Beta-lactamase hydrolase-like protein"  
"JS1\_C14\_00095" 5069 "s59E25H2" 0 "Beta-lactamase hydrolase-like protein"  
"JS1\_C14\_00095" 5069 "s59E5H2" 0.1692968 "Beta-lactamase hydrolase-like protein"  
"JS1\_C14\_00095" 5069 "s63E6H2" 0.4128706 "Beta-lactamase hydrolase-like protein"  
"JS1\_C14\_00096" 5070 "s59E13H2" 0.03150434 "putative glycerophosphoryl diester phosphodiesterase 1"  
"JS1\_C14\_00096" 5070 "s59E25H2" 0 "putative glycerophosphoryl diester phosphodiesterase 1"  
"JS1\_C14\_00096" 5070 "s59E5H2" 0.05800735 "putative glycerophosphoryl diester phosphodiesterase 1"  
"JS1\_C14\_00096" 5070 "s63E6H2" 0.2855754 "putative glycerophosphoryl diester phosphodiesterase 1"

"JS1\_C14\_00097" 5071 "s59E13H2" 0.01775995 "D-tyrosyl-tRNA(Tyr) deacylase"  
"JS1\_C14\_00097" 5071 "s59E25H2" 0 "D-tyrosyl-tRNA(Tyr) deacylase"  
"JS1\_C14\_00097" 5071 "s59E5H2" 0.06808928 "D-tyrosyl-tRNA(Tyr) deacylase"  
"JS1\_C14\_00097" 5071 "s63E6H2" 0.2569918 "D-tyrosyl-tRNA(Tyr) deacylase"  
"JS1\_C14\_00098" 5072 "s59E13H2" 0.06656953 "GTP pyrophosphokinase"  
"JS1\_C14\_00098" 5072 "s59E25H2" 0 "GTP pyrophosphokinase"  
"JS1\_C14\_00098" 5072 "s59E5H2" 0.1535622 "GTP pyrophosphokinase"  
"JS1\_C14\_00098" 5072 "s63E6H2" 0.3498273 "GTP pyrophosphokinase"  
"JS1\_C14\_00099" 5073 "s59E13H2" 0.9656209 "Transketolase 2"  
"JS1\_C14\_00099" 5073 "s59E25H2" 0.2518854 "Transketolase 2"  
"JS1\_C14\_00099" 5073 "s59E5H2" 1.623635 "Transketolase 2"  
"JS1\_C14\_00099" 5073 "s63E6H2" 0.8758517 "Transketolase 2"  
"JS1\_C14\_00100" 5074 "s59E13H2" 0.05713098 "protease TldD"  
"JS1\_C14\_00100" 5074 "s59E25H2" 0.1892552 "protease TldD"  
"JS1\_C14\_00100" 5074 "s59E5H2" 1.437361 "protease TldD"  
"JS1\_C14\_00100" 5074 "s63E6H2" 1.229442 "protease TldD"  
"JS1\_C14\_00101" 5075 "s59E13H2" 0.07505401 "protease TldD"  
"JS1\_C14\_00101" 5075 "s59E25H2" 0 "protease TldD"  
"JS1\_C14\_00101" 5075 "s59E5H2" 1.583152 "protease TldD"  
"JS1\_C14\_00101" 5075 "s63E6H2" 0.6863658 "protease TldD"  
"JS1\_C14\_00102" 5076 "s59E13H2" 10.77915 "Lactose transport system permease protein LacF"  
"JS1\_C14\_00102" 5076 "s59E25H2" 0 "Lactose transport system permease protein LacF"  
"JS1\_C14\_00102" 5076 "s59E5H2" 0.7752447 "Lactose transport system permease protein LacF"  
"JS1\_C14\_00102" 5076 "s63E6H2" 2.573389 "Lactose transport system permease protein LacF"  
"JS1\_C14\_00103" 5077 "s59E13H2" 10.59919 "Multiple sugar-binding protein precursor"  
"JS1\_C14\_00103" 5077 "s59E25H2" 0 "Multiple sugar-binding protein precursor"  
"JS1\_C14\_00103" 5077 "s59E5H2" 0.9573655 "Multiple sugar-binding protein precursor"  
"JS1\_C14\_00103" 5077 "s63E6H2" 2.543872 "Multiple sugar-binding protein precursor"  
"JS1\_C14\_00104" 5078 "s59E13H2" 0.04083132 "Inner membrane amino-acid ABC transporter permease protein YecS"  
"JS1\_C14\_00104" 5078 "s59E25H2" 0 "Inner membrane amino-acid ABC transporter permease protein YecS"  
"JS1\_C14\_00104" 5078 "s59E5H2" 0.3446521 "Inner membrane amino-acid ABC transporter permease protein YecS"  
"JS1\_C14\_00104" 5078 "s63E6H2" 0.1507444 "Inner membrane amino-acid ABC transporter permease protein YecS"  
"JS1\_C14\_00105" 5079 "s59E13H2" 0.06141886 "Glutamine transport ATP-binding protein GlnQ"  
"JS1\_C14\_00105" 5079 "s59E25H2" 0 "Glutamine transport ATP-binding protein GlnQ"  
"JS1\_C14\_00105" 5079 "s59E5H2" 0.5542425 "Glutamine transport ATP-binding protein GlnQ"  
"JS1\_C14\_00105" 5079 "s63E6H2" 0.1738537 "Glutamine transport ATP-binding protein GlnQ"  
"JS1\_C14\_00106" 5080 "s59E13H2" 0.1260522 "Inner membrane amino-acid ABC transporter permease protein YecS"  
"JS1\_C14\_00106" 5080 "s59E25H2" 0 "Inner membrane amino-acid ABC transporter permease protein YecS"  
"JS1\_C14\_00106" 5080 "s59E5H2" 0.5660238 "Inner membrane amino-acid ABC transporter permease protein YecS"  
"JS1\_C14\_00106" 5080 "s63E6H2" 0.568037 "Inner membrane amino-acid ABC transporter permease protein YecS"  
"JS1\_C14\_00107" 5081 "s59E13H2" 0.1869909 "Putative ABC transporter arginine-binding protein 2 precursor"  
"JS1\_C14\_00107" 5081 "s59E25H2" 0 "Putative ABC transporter arginine-binding protein 2 precursor"  
"JS1\_C14\_00107" 5081 "s59E5H2" 0.3211312 "Putative ABC transporter arginine-binding protein 2 precursor"  
"JS1\_C14\_00107" 5081 "s63E6H2" 0.3248554 "Putative ABC transporter arginine-binding protein 2 precursor"  
"JS1\_C14\_00108" 5082 "s59E13H2" 0.5009167 "hypothetical protein"  
"JS1\_C14\_00108" 5082 "s59E25H2" 0 "hypothetical protein"  
"JS1\_C14\_00108" 5082 "s59E5H2" 0.2577931 "hypothetical protein"



"JS1\_C14\_00108" 5082 "s63E6H2" 8.246307 "hypothetical protein"  
"JS1\_C14\_00109" 5083 "s59E13H2" 0.5999607 "Heterodisulfide reductase subunit A-like protein"  
"JS1\_C14\_00109" 5083 "s59E25H2" 0 "Heterodisulfide reductase subunit A-like protein"  
"JS1\_C14\_00109" 5083 "s59E5H2" 1.37508 "Heterodisulfide reductase subunit A-like protein"  
"JS1\_C14\_00109" 5083 "s63E6H2" 16.38721 "Heterodisulfide reductase subunit A-like protein"  
"JS1\_C14\_00111" 5085 "s59E13H2" 0.05461851 "hypothetical protein"  
"JS1\_C14\_00111" 5085 "s59E25H2" 0 "hypothetical protein"  
"JS1\_C14\_00111" 5085 "s59E5H2" 1.225802 "hypothetical protein"  
"JS1\_C14\_00111" 5085 "s63E6H2" 2.268788 "hypothetical protein"  
"JS1\_C14\_00112" 5086 "s59E13H2" 0.0141527 "Pseudouridine kinase"  
"JS1\_C14\_00112" 5086 "s59E25H2" 0 "Pseudouridine kinase"  
"JS1\_C14\_00112" 5086 "s59E5H2" 0.01393196 "Pseudouridine kinase"  
"JS1\_C14\_00112" 5086 "s63E6H2" 0.333638 "Pseudouridine kinase"  
"JS1\_C14\_00113" 5087 "s59E13H2" 0.06493397 "Pseudouridine-5'-phosphate glycosidase"  
"JS1\_C14\_00113" 5087 "s59E25H2" 0 "Pseudouridine-5'-phosphate glycosidase"  
"JS1\_C14\_00113" 5087 "s59E5H2" 0.04615327 "Pseudouridine-5'-phosphate glycosidase"  
"JS1\_C14\_00113" 5087 "s63E6H2" 0.3063605 "Pseudouridine-5'-phosphate glycosidase"  
"JS1\_C14\_00114" 5088 "s59E13H2" 0.04747798 "Nucleotidyltransferase domain protein"  
"JS1\_C14\_00114" 5088 "s59E25H2" 0 "Nucleotidyltransferase domain protein"  
"JS1\_C14\_00114" 5088 "s59E5H2" 0.1075943 "Nucleotidyltransferase domain protein"  
"JS1\_C14\_00114" 5088 "s63E6H2" 0.05468336 "Nucleotidyltransferase domain protein"  
"JS1\_C14\_00115" 5089 "s59E13H2" 0.05904525 "hypothetical protein"  
"JS1\_C14\_00115" 5089 "s59E25H2" 0 "hypothetical protein"  
"JS1\_C14\_00115" 5089 "s59E5H2" 0.03298387 "hypothetical protein"  
"JS1\_C14\_00115" 5089 "s63E6H2" 0.0286252 "hypothetical protein"  
"JS1\_C14\_00116" 5090 "s59E13H2" 0.05010394 "Digeranylgeranyl glycerophospholipid reductase"  
"JS1\_C14\_00116" 5090 "s59E25H2" 0 "Digeranylgeranyl glycerophospholipid reductase"  
"JS1\_C14\_00116" 5090 "s59E5H2" 0.007710917 "Digeranylgeranyl glycerophospholipid reductase"  
"JS1\_C14\_00116" 5090 "s63E6H2" 0.3976692 "Digeranylgeranyl glycerophospholipid reductase"  
"JS1\_C14\_00117" 5091 "s59E13H2" 0.0488194 "Glucose-1-phosphate thymidyltransferase"  
"JS1\_C14\_00117" 5091 "s59E25H2" 0 "Glucose-1-phosphate thymidyltransferase"  
"JS1\_C14\_00117" 5091 "s59E5H2" 0.1376024 "Glucose-1-phosphate thymidyltransferase"  
"JS1\_C14\_00117" 5091 "s63E6H2" 0.780221 "Glucose-1-phosphate thymidyltransferase"  
"JS1\_C14\_00118" 5092 "s59E13H2" 0.1092454 "translocation protein TolB"  
"JS1\_C14\_00118" 5092 "s59E25H2" 0.1255048 "translocation protein TolB"  
"JS1\_C14\_00118" 5092 "s59E5H2" 0.08646761 "translocation protein TolB"  
"JS1\_C14\_00118" 5092 "s63E6H2" 1.920683 "translocation protein TolB"  
"JS1\_C14\_00119" 5093 "s59E13H2" 0.1146367 "Transposase IS200 like protein"  
"JS1\_C14\_00119" 5093 "s59E25H2" 0 "Transposase IS200 like protein"  
"JS1\_C14\_00119" 5093 "s59E5H2" 0.03613058 "Transposase IS200 like protein"  
"JS1\_C14\_00119" 5093 "s63E6H2" 8.556209 "Transposase IS200 like protein"  
"JS1\_C14\_00120" 5094 "s59E13H2" 0.009170126 "Amidohydrolase"  
"JS1\_C14\_00120" 5094 "s59E25H2" 0 "Amidohydrolase"  
"JS1\_C14\_00120" 5094 "s59E5H2" 0.1747645 "Amidohydrolase"  
"JS1\_C14\_00120" 5094 "s63E6H2" 12.65868 "Amidohydrolase"  
"JS1\_C14\_00121" 5095 "s59E13H2" 0.4828264 "Ribosomal protein S6 modification protein"  
"JS1\_C14\_00121" 5095 "s59E25H2" 0 "Ribosomal protein S6 modification protein"

"JS1\_C14\_00121" 5095 "s59E5H2" 0.9726506 "Ribosomal protein S6 modification protein"  
"JS1\_C14\_00121" 5095 "s63E6H2" 8.47023 "Ribosomal protein S6 modification protein"  
"JS1\_C14\_00122" 5096 "s59E13H2" 12.25848 "putative transporter"  
"JS1\_C14\_00122" 5096 "s59E25H2" 0.1370641 "putative transporter"  
"JS1\_C14\_00122" 5096 "s59E5H2" 0.672399 "putative transporter"  
"JS1\_C14\_00122" 5096 "s63E6H2" 5.594539 "putative transporter"  
"JS1\_C14\_00123" 5097 "s59E13H2" 18.92976 "DNA-binding transcriptional dual regulator Crp"  
"JS1\_C14\_00123" 5097 "s59E25H2" 0.7066895 "DNA-binding transcriptional dual regulator Crp"  
"JS1\_C14\_00123" 5097 "s59E5H2" 1.305865 "DNA-binding transcriptional dual regulator Crp"  
"JS1\_C14\_00123" 5097 "s63E6H2" 0.7928833 "DNA-binding transcriptional dual regulator Crp"  
"JS1\_C14\_00124" 5098 "s59E13H2" 15.31049 "D-inositol 3-phosphate glycosyltransferase"  
"JS1\_C14\_00124" 5098 "s59E25H2" 0 "D-inositol 3-phosphate glycosyltransferase"  
"JS1\_C14\_00124" 5098 "s59E5H2" 1.217265 "D-inositol 3-phosphate glycosyltransferase"  
"JS1\_C14\_00124" 5098 "s63E6H2" 1.334287 "D-inositol 3-phosphate glycosyltransferase"  
"JS1\_C14\_00125" 5099 "s59E13H2" 11.86599 "hypothetical protein"  
"JS1\_C14\_00125" 5099 "s59E25H2" 0 "hypothetical protein"  
"JS1\_C14\_00125" 5099 "s59E5H2" 0.7589835 "hypothetical protein"  
"JS1\_C14\_00125" 5099 "s63E6H2" 0.3616967 "hypothetical protein"  
"JS1\_C14\_00126" 5100 "s59E13H2" 10.44761 "hypothetical protein"  
"JS1\_C14\_00126" 5100 "s59E25H2" 0 "hypothetical protein"  
"JS1\_C14\_00126" 5100 "s59E5H2" 0.5278264 "hypothetical protein"  
"JS1\_C14\_00126" 5100 "s63E6H2" 0.3041896 "hypothetical protein"  
"JS1\_C14\_00127" 5101 "s59E13H2" 10.05631 "Aspartate racemase"  
"JS1\_C14\_00127" 5101 "s59E25H2" 0.6869565 "Aspartate racemase"  
"JS1\_C14\_00127" 5101 "s59E5H2" 1.26569 "Aspartate racemase"  
"JS1\_C14\_00127" 5101 "s63E6H2" 0.299524 "Aspartate racemase"  
"JS1\_C14\_00128" 5102 "s59E13H2" 1.280414 "Thiamine pyrophosphokinase"  
"JS1\_C14\_00128" 5102 "s59E25H2" 0 "Thiamine pyrophosphokinase"  
"JS1\_C14\_00128" 5102 "s59E5H2" 1.3513 "Thiamine pyrophosphokinase"  
"JS1\_C14\_00128" 5102 "s63E6H2" 0.5826544 "Thiamine pyrophosphokinase"  
"JS1\_C14\_00129" 5103 "s59E13H2" 1.332142 "Thiamine transporter ThiT"  
"JS1\_C14\_00129" 5103 "s59E25H2" 0 "Thiamine transporter ThiT"  
"JS1\_C14\_00129" 5103 "s59E5H2" 1.418896 "Thiamine transporter ThiT"  
"JS1\_C14\_00129" 5103 "s63E6H2" 0.8960031 "Thiamine transporter ThiT"  
"JS1\_C14\_00131" 5105 "s59E13H2" 1.055201 "RNA recognition motif. (a.k.a. RRM, RBD, or RNP domain)"  
"JS1\_C14\_00131" 5105 "s59E25H2" 0 "RNA recognition motif. (a.k.a. RRM, RBD, or RNP domain)"  
"JS1\_C14\_00131" 5105 "s59E5H2" 2.541472 "RNA recognition motif. (a.k.a. RRM, RBD, or RNP domain)"  
"JS1\_C14\_00131" 5105 "s63E6H2" 1.143032 "RNA recognition motif. (a.k.a. RRM, RBD, or RNP domain)"  
"JS1\_C14\_00132" 5106 "s59E13H2" 1.101911 "NAD-dependent protein deacetylase"  
"JS1\_C14\_00132" 5106 "s59E25H2" 0 "NAD-dependent protein deacetylase"  
"JS1\_C14\_00132" 5106 "s59E5H2" 1.141306 "NAD-dependent protein deacetylase"  
"JS1\_C14\_00132" 5106 "s63E6H2" 0.1350238 "NAD-dependent protein deacetylase"  
"JS1\_C14\_00133" 5107 "s59E13H2" 0.8132142 "Methionine--tRNA ligase"  
"JS1\_C14\_00133" 5107 "s59E25H2" 0 "Methionine--tRNA ligase"  
"JS1\_C14\_00133" 5107 "s59E5H2" 1.428548 "Methionine--tRNA ligase"  
"JS1\_C14\_00133" 5107 "s63E6H2" 0.1490715 "Methionine--tRNA ligase"  
"JS1\_C14\_00134" 5108 "s59E13H2" 0.001859493 "Quinolate synthase A"

"JS1\_C14\_00134" 5108 "s59E25H2" 0 "Quinolate synthase A"  
"JS1\_C14\_00134" 5108 "s59E5H2" 0.05726695 "Quinolate synthase A"  
"JS1\_C14\_00134" 5108 "s63E6H2" 0.07873156 "Quinolate synthase A"  
"JS1\_C14\_00135" 5109 "s59E13H2" 0.1190937 "Thiosulfate sulfurtransferase PspE precursor"  
"JS1\_C14\_00135" 5109 "s59E25H2" 0 "Thiosulfate sulfurtransferase PspE precursor"  
"JS1\_C14\_00135" 5109 "s59E5H2" 0.08187102 "Thiosulfate sulfurtransferase PspE precursor"  
"JS1\_C14\_00135" 5109 "s63E6H2" 0.07789173 "Thiosulfate sulfurtransferase PspE precursor"  
"JS1\_C14\_00136" 5110 "s59E13H2" 0.01353963 "hypothetical protein"  
"JS1\_C14\_00136" 5110 "s59E25H2" 0 "hypothetical protein"  
"JS1\_C14\_00136" 5110 "s59E5H2" 0.1502357 "hypothetical protein"  
"JS1\_C14\_00136" 5110 "s63E6H2" 0.01378232 "hypothetical protein"  
"JS1\_C14\_00137" 5111 "s59E13H2" 0.2700189 "putative ABC transporter ATP-binding protein"  
"JS1\_C14\_00137" 5111 "s59E25H2" 0 "putative ABC transporter ATP-binding protein"  
"JS1\_C14\_00137" 5111 "s59E5H2" 0.1255245 "putative ABC transporter ATP-binding protein"  
"JS1\_C14\_00137" 5111 "s63E6H2" 0.03817899 "putative ABC transporter ATP-binding protein"  
"JS1\_C14\_00138" 5112 "s59E13H2" 0.2384024 "putative ABC transporter ATP-binding protein"  
"JS1\_C14\_00138" 5112 "s59E25H2" 0 "putative ABC transporter ATP-binding protein"  
"JS1\_C14\_00138" 5112 "s59E5H2" 0.1847953 "putative ABC transporter ATP-binding protein"  
"JS1\_C14\_00138" 5112 "s63E6H2" 0.1332508 "putative ABC transporter ATP-binding protein"  
"JS1\_C14\_00139" 5113 "s59E13H2" 1.263141 "Macrolide export ATP-binding/permease protein MacB"  
"JS1\_C14\_00139" 5113 "s59E25H2" 0 "Macrolide export ATP-binding/permease protein MacB"  
"JS1\_C14\_00139" 5113 "s59E5H2" 0.1192691 "Macrolide export ATP-binding/permease protein MacB"  
"JS1\_C14\_00139" 5113 "s63E6H2" 0.4603536 "Macrolide export ATP-binding/permease protein MacB"  
"JS1\_C14\_00140" 5114 "s59E13H2" 0.882316 "hypothetical protein"  
"JS1\_C14\_00140" 5114 "s59E25H2" 0 "hypothetical protein"  
"JS1\_C14\_00140" 5114 "s59E5H2" 0.05651418 "hypothetical protein"  
"JS1\_C14\_00140" 5114 "s63E6H2" 0.1065345 "hypothetical protein"  
"JS1\_C14\_00141" 5115 "s59E13H2" 0.2142931 "YHS domain protein"  
"JS1\_C14\_00141" 5115 "s59E25H2" 0 "YHS domain protein"  
"JS1\_C14\_00141" 5115 "s59E5H2" 0.1694702 "YHS domain protein"  
"JS1\_C14\_00141" 5115 "s63E6H2" 0.1004578 "YHS domain protein"  
"JS1\_C14\_00142" 5116 "s59E13H2" 0.2472369 "putative copper-exporting P-type ATPase A"  
"JS1\_C14\_00142" 5116 "s59E25H2" 0 "putative copper-exporting P-type ATPase A"  
"JS1\_C14\_00142" 5116 "s59E5H2" 0.04262557 "putative copper-exporting P-type ATPase A"  
"JS1\_C14\_00142" 5116 "s63E6H2" 0.1897651 "putative copper-exporting P-type ATPase A"  
"JS1\_C14\_00143" 5117 "s59E13H2" 0.3024573 "Cysteine synthase B"  
"JS1\_C14\_00143" 5117 "s59E25H2" 0 "Cysteine synthase B"  
"JS1\_C14\_00143" 5117 "s59E5H2" 0.3090217 "Cysteine synthase B"  
"JS1\_C14\_00143" 5117 "s63E6H2" 0.381972 "Cysteine synthase B"  
"JS1\_C14\_00144" 5118 "s59E13H2" 0 "putative diguanylate cyclase YedQ"  
"JS1\_C14\_00144" 5118 "s59E25H2" 0 "putative diguanylate cyclase YedQ"  
"JS1\_C14\_00144" 5118 "s59E5H2" 0 "putative diguanylate cyclase YedQ"  
"JS1\_C14\_00144" 5118 "s63E6H2" 0.009867435 "putative diguanylate cyclase YedQ"  
"JS1\_C14\_00145" 5119 "s59E13H2" 0 "putative trifunctional 2-polyprenylphenol hydroxylase/glutamate synthase subunit beta/ferritin domain-containing protein"  
"JS1\_C14\_00145" 5119 "s59E25H2" 0 "putative trifunctional 2-polyprenylphenol hydroxylase/glutamate synthase subunit beta/ferritin domain-containing protein"  
"JS1\_C14\_00145" 5119 "s59E5H2" 0 "putative trifunctional 2-polyprenylphenol hydroxylase/glutamate synthase subunit beta/ferritin domain-containing protein"  
"JS1\_C14\_00145" 5119 "s63E6H2" 0 "putative trifunctional 2-polyprenylphenol hydroxylase/glutamate synthase subunit beta/ferritin domain-containing protein"

"JS1\_C14\_00146" 5120 "s59E13H2" 0.001751684 "Aerobic respiration control sensor protein ArcB"  
"JS1\_C14\_00146" 5120 "s59E25H2" 0 "Aerobic respiration control sensor protein ArcB"  
"JS1\_C14\_00146" 5120 "s59E5H2" 0.02267855 "Aerobic respiration control sensor protein ArcB"  
"JS1\_C14\_00146" 5120 "s63E6H2" 0.0008791129 "Aerobic respiration control sensor protein ArcB"  
"JS1\_C14\_00147" 5121 "s59E13H2" 0.006288529 "Cyclic di-GMP phosphodiesterase response regulator RpfG"  
"JS1\_C14\_00147" 5121 "s59E25H2" 0 "Cyclic di-GMP phosphodiesterase response regulator RpfG"  
"JS1\_C14\_00147" 5121 "s59E5H2" 0.003501976 "Cyclic di-GMP phosphodiesterase response regulator RpfG"  
"JS1\_C14\_00147" 5121 "s63E6H2" 0.02874361 "Cyclic di-GMP phosphodiesterase response regulator RpfG"  
"JS1\_C14\_00148" 5122 "s59E13H2" 0.007147414 "hypothetical protein"  
"JS1\_C14\_00148" 5122 "s59E25H2" 0 "hypothetical protein"  
"JS1\_C14\_00148" 5122 "s59E5H2" 0.6703571 "hypothetical protein"  
"JS1\_C14\_00148" 5122 "s63E6H2" 0.04719832 "hypothetical protein"  
"JS1\_C14\_00150" 5124 "s59E13H2" 0 "Nucleotidyltransferase domain protein"  
"JS1\_C14\_00150" 5124 "s59E25H2" 0 "Nucleotidyltransferase domain protein"  
"JS1\_C14\_00150" 5124 "s59E5H2" 0.1480434 "Nucleotidyltransferase domain protein"  
"JS1\_C14\_00150" 5124 "s63E6H2" 0 "Nucleotidyltransferase domain protein"  
"JS1\_C14\_00151" 5125 "s59E13H2" 0 "HEPN domain protein"  
"JS1\_C14\_00151" 5125 "s59E25H2" 0 "HEPN domain protein"  
"JS1\_C14\_00151" 5125 "s59E5H2" 0.08548687 "HEPN domain protein"  
"JS1\_C14\_00151" 5125 "s63E6H2" 0 "HEPN domain protein"  
"JS1\_C14\_00152" 5126 "s59E13H2" 0.008251242 "hypothetical protein"  
"JS1\_C14\_00152" 5126 "s59E25H2" 0 "hypothetical protein"  
"JS1\_C14\_00152" 5126 "s59E5H2" 0.002304609 "hypothetical protein"  
"JS1\_C14\_00152" 5126 "s63E6H2" 0 "hypothetical protein"  
"JS1\_C14\_00153" 5127 "s59E13H2" 0.00460026 "Peptidase M15"  
"JS1\_C14\_00153" 5127 "s59E25H2" 0 "Peptidase M15"  
"JS1\_C14\_00153" 5127 "s59E5H2" 0.1121526 "Peptidase M15"  
"JS1\_C14\_00153" 5127 "s63E6H2" 0.01217466 "Peptidase M15"  
"JS1\_C14\_00154" 5128 "s59E13H2" 0.00976121 "hypothetical protein"  
"JS1\_C14\_00154" 5128 "s59E25H2" 0 "hypothetical protein"  
"JS1\_C14\_00154" 5128 "s59E5H2" 0.6495138 "hypothetical protein"  
"JS1\_C14\_00154" 5128 "s63E6H2" 0.03795724 "hypothetical protein"  
"JS1\_C14\_00155" 5129 "s59E13H2" 0.007643508 "hypothetical protein"  
"JS1\_C14\_00155" 5129 "s59E25H2" 0 "hypothetical protein"  
"JS1\_C14\_00155" 5129 "s59E5H2" 0.01187673 "hypothetical protein"  
"JS1\_C14\_00155" 5129 "s63E6H2" 0.02001935 "hypothetical protein"  
"JS1\_C14\_00156" 5130 "s59E13H2" 0 "hypothetical protein"  
"JS1\_C14\_00156" 5130 "s59E25H2" 0 "hypothetical protein"  
"JS1\_C14\_00156" 5130 "s59E5H2" 0 "hypothetical protein"  
"JS1\_C14\_00156" 5130 "s63E6H2" 0.0005066075 "hypothetical protein"  
"JS1\_C14\_00157" 5131 "s59E13H2" 1.363734 "hypothetical protein"  
"JS1\_C14\_00157" 5131 "s59E25H2" 0 "hypothetical protein"  
"JS1\_C14\_00157" 5131 "s59E5H2" 0.201848 "hypothetical protein"  
"JS1\_C14\_00157" 5131 "s63E6H2" 0.05708415 "hypothetical protein"  
"JS1\_C14\_00158" 5132 "s59E13H2" 6.644728 "Bifunctional phosphoglucose/phosphomannose isomerase"  
"JS1\_C14\_00158" 5132 "s59E25H2" 0 "Bifunctional phosphoglucose/phosphomannose isomerase"  
"JS1\_C14\_00158" 5132 "s59E5H2" 0.8040757 "Bifunctional phosphoglucose/phosphomannose isomerase"

"JS1\_C14\_00158" 5132 "s63E6H2" 0.6102012 "Bifunctional phosphoglucose/phosphomannose isomerase"  
"JS1\_C14\_00159" 5133 "s59E13H2" 6.167849 "putative undecaprenyl-phosphate N-acetylglucosaminyl 1-phosphate transferase"  
"JS1\_C14\_00159" 5133 "s59E25H2" 0 "putative undecaprenyl-phosphate N-acetylglucosaminyl 1-phosphate transferase"  
"JS1\_C14\_00159" 5133 "s59E5H2" 0.6858581 "putative undecaprenyl-phosphate N-acetylglucosaminyl 1-phosphate transferase"  
"JS1\_C14\_00159" 5133 "s63E6H2" 0.303721 "putative undecaprenyl-phosphate N-acetylglucosaminyl 1-phosphate transferase"  
"JS1\_C14\_00160" 5134 "s59E13H2" 4.725153 "UDP-glucose 4-epimerase"  
"JS1\_C14\_00160" 5134 "s59E25H2" 0 "UDP-glucose 4-epimerase"  
"JS1\_C14\_00160" 5134 "s59E5H2" 0.6483792 "UDP-glucose 4-epimerase"  
"JS1\_C14\_00160" 5134 "s63E6H2" 0.6264201 "UDP-glucose 4-epimerase"  
"JS1\_C14\_00161" 5135 "s59E13H2" 0.05294528 "L-2-hydroxyglutarate oxidase LhgO"  
"JS1\_C14\_00161" 5135 "s59E25H2" 0 "L-2-hydroxyglutarate oxidase LhgO"  
"JS1\_C14\_00161" 5135 "s59E5H2" 0.4276543 "L-2-hydroxyglutarate oxidase LhgO"  
"JS1\_C14\_00161" 5135 "s63E6H2" 0.05627556 "L-2-hydroxyglutarate oxidase LhgO"  
"JS1\_C14\_00162" 5136 "s59E13H2" 0.03048501 "Benzene 1,2-dioxygenase system ferredoxin--NAD(+) reductase subunit"  
"JS1\_C14\_00162" 5136 "s59E25H2" 0 "Benzene 1,2-dioxygenase system ferredoxin--NAD(+) reductase subunit"  
"JS1\_C14\_00162" 5136 "s59E5H2" 0.03759071 "Benzene 1,2-dioxygenase system ferredoxin--NAD(+) reductase subunit"  
"JS1\_C14\_00162" 5136 "s63E6H2" 0.01569867 "Benzene 1,2-dioxygenase system ferredoxin--NAD(+) reductase subunit"  
"JS1\_C14\_00163" 5137 "s59E13H2" 0.05738813 "hypothetical protein"  
"JS1\_C14\_00163" 5137 "s59E25H2" 0 "hypothetical protein"  
"JS1\_C14\_00163" 5137 "s59E5H2" 0 "hypothetical protein"  
"JS1\_C14\_00163" 5137 "s63E6H2" 0.02255778 "hypothetical protein"  
"JS1\_C14\_00164" 5138 "s59E13H2" 0.1521235 "Bifunctional protein PyrR"  
"JS1\_C14\_00164" 5138 "s59E25H2" 0 "Bifunctional protein PyrR"  
"JS1\_C14\_00164" 5138 "s59E5H2" 0.09862876 "Bifunctional protein PyrR"  
"JS1\_C14\_00164" 5138 "s63E6H2" 0.1353279 "Bifunctional protein PyrR"  
"JS1\_C14\_00165" 5139 "s59E13H2" 0.008390874 "Dihydroorotate dehydrogenase B (NAD(+)), electron transfer subunit"  
"JS1\_C14\_00165" 5139 "s59E25H2" 0 "Dihydroorotate dehydrogenase B (NAD(+)), electron transfer subunit"  
"JS1\_C14\_00165" 5139 "s59E5H2" 0.02593085 "Dihydroorotate dehydrogenase B (NAD(+)), electron transfer subunit"  
"JS1\_C14\_00165" 5139 "s63E6H2" 0.05224923 "Dihydroorotate dehydrogenase B (NAD(+)), electron transfer subunit"  
"JS1\_C14\_00166" 5140 "s59E13H2" 0.04026204 "Dihydroorotate dehydrogenase B (NAD(+)), catalytic subunit"  
"JS1\_C14\_00166" 5140 "s59E25H2" 0 "Dihydroorotate dehydrogenase B (NAD(+)), catalytic subunit"  
"JS1\_C14\_00166" 5140 "s59E5H2" 0.007880006 "Dihydroorotate dehydrogenase B (NAD(+)), catalytic subunit"  
"JS1\_C14\_00166" 5140 "s63E6H2" 0.02712154 "Dihydroorotate dehydrogenase B (NAD(+)), catalytic subunit"  
"JS1\_C14\_00167" 5141 "s59E13H2" 1.632946 "orotidine 5'-phosphate decarboxylase"  
"JS1\_C14\_00167" 5141 "s59E25H2" 0 "orotidine 5'-phosphate decarboxylase"  
"JS1\_C14\_00167" 5141 "s59E5H2" 0 "orotidine 5'-phosphate decarboxylase"  
"JS1\_C14\_00167" 5141 "s63E6H2" 0.004432815 "orotidine 5'-phosphate decarboxylase"  
"JS1\_C14\_00168" 5142 "s59E13H2" 3.322888 "Argininosuccinate lyase 1"  
"JS1\_C14\_00168" 5142 "s59E25H2" 0 "Argininosuccinate lyase 1"  
"JS1\_C14\_00168" 5142 "s59E5H2" 0.02123972 "Argininosuccinate lyase 1"  
"JS1\_C14\_00168" 5142 "s63E6H2" 0.06325104 "Argininosuccinate lyase 1"  
"JS1\_C14\_00169" 5143 "s59E13H2" 2.948205 "Argininosuccinate synthase"  
"JS1\_C14\_00169" 5143 "s59E25H2" 0 "Argininosuccinate synthase"  
"JS1\_C14\_00169" 5143 "s59E5H2" 0.1392949 "Argininosuccinate synthase"  
"JS1\_C14\_00169" 5143 "s63E6H2" 0.1147724 "Argininosuccinate synthase"  
"JS1\_C14\_00170" 5144 "s59E13H2" 1.667082 "Acetylornithine aminotransferase"  
"JS1\_C14\_00170" 5144 "s59E25H2" 0 "Acetylornithine aminotransferase"

"JS1\_C14\_00170" 5144 "s59E5H2" 0.07011472 "Acetylornithine aminotransferase"  
"JS1\_C14\_00170" 5144 "s63E6H2" 0.07022064 "Acetylornithine aminotransferase"  
"JS1\_C14\_00171" 5145 "s59E13H2" 0.2159625 "Acetylglutamate kinase"  
"JS1\_C14\_00171" 5145 "s59E25H2" 0 "Acetylglutamate kinase"  
"JS1\_C14\_00171" 5145 "s59E5H2" 0.03233156 "Acetylglutamate kinase"  
"JS1\_C14\_00171" 5145 "s63E6H2" 0.1230057 "Acetylglutamate kinase"  
"JS1\_C14\_00172" 5146 "s59E13H2" 0.1089007 "Arginine biosynthesis bifunctional protein ArgJ"  
"JS1\_C14\_00172" 5146 "s59E25H2" 0 "Arginine biosynthesis bifunctional protein ArgJ"  
"JS1\_C14\_00172" 5146 "s59E5H2" 0.05628255 "Arginine biosynthesis bifunctional protein ArgJ"  
"JS1\_C14\_00172" 5146 "s63E6H2" 0.192517 "Arginine biosynthesis bifunctional protein ArgJ"  
"JS1\_C14\_00173" 5147 "s59E13H2" 0.739578 "preprotein translocase subunit SecY"  
"JS1\_C14\_00173" 5147 "s59E25H2" 0 "preprotein translocase subunit SecY"  
"JS1\_C14\_00173" 5147 "s59E5H2" 0.1182649 "preprotein translocase subunit SecY"  
"JS1\_C14\_00173" 5147 "s63E6H2" 0.8928753 "preprotein translocase subunit SecY"  
"JS1\_C14\_00174" 5148 "s59E13H2" 0.1468154 "Adenylate kinase"  
"JS1\_C14\_00174" 5148 "s59E25H2" 0 "Adenylate kinase"  
"JS1\_C14\_00174" 5148 "s59E5H2" 0.02779154 "Adenylate kinase"  
"JS1\_C14\_00174" 5148 "s63E6H2" 0.96473 "Adenylate kinase"  
"JS1\_C14\_00175" 5149 "s59E13H2" 0.1640683 "Translation initiation factor IF-1"  
"JS1\_C14\_00175" 5149 "s59E25H2" 0 "Translation initiation factor IF-1"  
"JS1\_C14\_00175" 5149 "s59E5H2" 0.07805649 "Translation initiation factor IF-1"  
"JS1\_C14\_00175" 5149 "s63E6H2" 0.7242517 "Translation initiation factor IF-1"  
"JS1\_C14\_00176" 5150 "s59E13H2" 0.3360086 "50S ribosomal protein L36"  
"JS1\_C14\_00176" 5150 "s59E25H2" 0 "50S ribosomal protein L36"  
"JS1\_C14\_00176" 5150 "s59E5H2" 0.0714979 "50S ribosomal protein L36"  
"JS1\_C14\_00176" 5150 "s63E6H2" 0.8852381 "50S ribosomal protein L36"  
"JS1\_C14\_00177" 5151 "s59E13H2" 0.2417344 "30S ribosomal protein S13"  
"JS1\_C14\_00177" 5151 "s59E25H2" 0 "30S ribosomal protein S13"  
"JS1\_C14\_00177" 5151 "s59E5H2" 0.1293079 "30S ribosomal protein S13"  
"JS1\_C14\_00177" 5151 "s63E6H2" 1.263302 "30S ribosomal protein S13"  
"JS1\_C14\_00178" 5152 "s59E13H2" 0.2085448 "30S ribosomal protein S11"  
"JS1\_C14\_00178" 5152 "s59E25H2" 0 "30S ribosomal protein S11"  
"JS1\_C14\_00178" 5152 "s59E5H2" 0.1413205 "30S ribosomal protein S11"  
"JS1\_C14\_00178" 5152 "s63E6H2" 0.9587316 "30S ribosomal protein S11"  
"JS1\_C14\_00179" 5153 "s59E13H2" 0.2795203 "30S ribosomal protein S4"  
"JS1\_C14\_00179" 5153 "s59E25H2" 0 "30S ribosomal protein S4"  
"JS1\_C14\_00179" 5153 "s59E5H2" 0.1449836 "30S ribosomal protein S4"  
"JS1\_C14\_00179" 5153 "s63E6H2" 1.151598 "30S ribosomal protein S4"  
"JS1\_C14\_00180" 5154 "s59E13H2" 0.2015461 "DNA-directed RNA polymerase subunit alpha"  
"JS1\_C14\_00180" 5154 "s59E25H2" 0 "DNA-directed RNA polymerase subunit alpha"  
"JS1\_C14\_00180" 5154 "s59E5H2" 0.142707 "DNA-directed RNA polymerase subunit alpha"  
"JS1\_C14\_00180" 5154 "s63E6H2" 1.313625 "DNA-directed RNA polymerase subunit alpha"  
"JS1\_C14\_00181" 5155 "s59E13H2" 0.284747 "50S ribosomal protein L17"  
"JS1\_C14\_00181" 5155 "s59E25H2" 0 "50S ribosomal protein L17"  
"JS1\_C14\_00181" 5155 "s59E5H2" 0.198525 "50S ribosomal protein L17"  
"JS1\_C14\_00181" 5155 "s63E6H2" 2.565254 "50S ribosomal protein L17"  
"JS1\_C14\_00182" 5156 "s59E13H2" 0.286736 "Energy-coupling factor transporter ATP-binding protein EcfA1"

"JS1\_C14\_00182" 5156 "s59E25H2" 0 "Energy-coupling factor transporter ATP-binding protein EcfA1"  
"JS1\_C14\_00182" 5156 "s59E5H2" 0.220441 "Energy-coupling factor transporter ATP-binding protein EcfA1"  
"JS1\_C14\_00182" 5156 "s63E6H2" 3.153356 "Energy-coupling factor transporter ATP-binding protein EcfA1"  
"JS1\_C14\_00183" 5157 "s59E13H2" 0.2829484 "Energy-coupling factor transporter ATP-binding protein EcfA2"  
"JS1\_C14\_00183" 5157 "s59E25H2" 0 "Energy-coupling factor transporter ATP-binding protein EcfA2"  
"JS1\_C14\_00183" 5157 "s59E5H2" 0.5764172 "Energy-coupling factor transporter ATP-binding protein EcfA2"  
"JS1\_C14\_00183" 5157 "s63E6H2" 1.786517 "Energy-coupling factor transporter ATP-binding protein EcfA2"  
"JS1\_C14\_00184" 5158 "s59E13H2" 0.2768378 "Energy-coupling factor transporter transmembrane protein EcfT"  
"JS1\_C14\_00184" 5158 "s59E25H2" 0 "Energy-coupling factor transporter transmembrane protein EcfT"  
"JS1\_C14\_00184" 5158 "s59E5H2" 0.5534336 "Energy-coupling factor transporter transmembrane protein EcfT"  
"JS1\_C14\_00184" 5158 "s63E6H2" 0.9904214 "Energy-coupling factor transporter transmembrane protein EcfT"  
"JS1\_C14\_00185" 5159 "s59E13H2" 0.2517142 "tRNA pseudouridine synthase A"  
"JS1\_C14\_00185" 5159 "s59E25H2" 0 "tRNA pseudouridine synthase A"  
"JS1\_C14\_00185" 5159 "s59E5H2" 0.3544228 "tRNA pseudouridine synthase A"  
"JS1\_C14\_00185" 5159 "s63E6H2" 0.9383184 "tRNA pseudouridine synthase A"  
"JS1\_C14\_00186" 5160 "s59E13H2" 0.1725183 "50S ribosomal protein L13"  
"JS1\_C14\_00186" 5160 "s59E25H2" 0 "50S ribosomal protein L13"  
"JS1\_C14\_00186" 5160 "s59E5H2" 0.4568588 "50S ribosomal protein L13"  
"JS1\_C14\_00186" 5160 "s63E6H2" 1.607044 "50S ribosomal protein L13"  
"JS1\_C14\_00187" 5161 "s59E13H2" 0.1249529 "30S ribosomal protein S9"  
"JS1\_C14\_00187" 5161 "s59E25H2" 0 "30S ribosomal protein S9"  
"JS1\_C14\_00187" 5161 "s59E5H2" 0.4501334 "30S ribosomal protein S9"  
"JS1\_C14\_00187" 5161 "s63E6H2" 1.291532 "30S ribosomal protein S9"  
"JS1\_C14\_00188" 5162 "s59E13H2" 0.2094343 "alanine racemase"  
"JS1\_C14\_00188" 5162 "s59E25H2" 0 "alanine racemase"  
"JS1\_C14\_00188" 5162 "s59E5H2" 0.4023994 "alanine racemase"  
"JS1\_C14\_00188" 5162 "s63E6H2" 1.835624 "alanine racemase"  
"JS1\_C14\_00189" 5163 "s59E13H2" 0.1780423 "Ornithine carbamoyltransferase"  
"JS1\_C14\_00189" 5163 "s59E25H2" 0 "Ornithine carbamoyltransferase"  
"JS1\_C14\_00189" 5163 "s59E5H2" 0.3555982 "Ornithine carbamoyltransferase"  
"JS1\_C14\_00189" 5163 "s63E6H2" 2.30437 "Ornithine carbamoyltransferase"  
"JS1\_C14\_00190" 5164 "s59E13H2" 0.1850531 "DNA integrity scanning protein DisA"  
"JS1\_C14\_00190" 5164 "s59E25H2" 0.5950617 "DNA integrity scanning protein DisA"  
"JS1\_C14\_00190" 5164 "s59E5H2" 0.1268318 "DNA integrity scanning protein DisA"  
"JS1\_C14\_00190" 5164 "s63E6H2" 2.902418 "DNA integrity scanning protein DisA"  
"JS1\_C14\_00191" 5165 "s59E13H2" 0.03242106 "MmgE/PrpD family protein"  
"JS1\_C14\_00191" 5165 "s59E25H2" 0 "MmgE/PrpD family protein"  
"JS1\_C14\_00191" 5165 "s59E5H2" 0.5078015 "MmgE/PrpD family protein"  
"JS1\_C14\_00191" 5165 "s63E6H2" 0 "MmgE/PrpD family protein"  
"JS1\_C14\_00192" 5166 "s59E13H2" 0.009947947 "alkanesulfonate transporter substrate-binding subunit"  
"JS1\_C14\_00192" 5166 "s59E25H2" 0 "alkanesulfonate transporter substrate-binding subunit"  
"JS1\_C14\_00192" 5166 "s59E5H2" 1.533968 "alkanesulfonate transporter substrate-binding subunit"  
"JS1\_C14\_00192" 5166 "s63E6H2" 0 "alkanesulfonate transporter substrate-binding subunit"  
"JS1\_C14\_00193" 5167 "s59E13H2" 0.001956826 "Sialic acid TRAP transporter permease protein SiaT"  
"JS1\_C14\_00193" 5167 "s59E25H2" 0 "Sialic acid TRAP transporter permease protein SiaT"  
"JS1\_C14\_00193" 5167 "s59E5H2" 1.254019 "Sialic acid TRAP transporter permease protein SiaT"  
"JS1\_C14\_00193" 5167 "s63E6H2" 0.001577517 "Sialic acid TRAP transporter permease protein SiaT"

"JS1\_C14\_00194" 5168 "s59E13H2" 0.03704474 "HTH-type transcriptional activator Btr"  
"JS1\_C14\_00194" 5168 "s59E25H2" 0 "HTH-type transcriptional activator Btr"  
"JS1\_C14\_00194" 5168 "s59E5H2" 1.561742 "HTH-type transcriptional activator Btr"  
"JS1\_C14\_00194" 5168 "s63E6H2" 0.1348571 "HTH-type transcriptional activator Btr"  
"JS1\_C14\_00195" 5169 "s59E13H2" 0.05461761 "Cation/acetate symporter ActP"  
"JS1\_C14\_00195" 5169 "s59E25H2" 0 "Cation/acetate symporter ActP"  
"JS1\_C14\_00195" 5169 "s59E5H2" 1.684254 "Cation/acetate symporter ActP"  
"JS1\_C14\_00195" 5169 "s63E6H2" 0.108085 "Cation/acetate symporter ActP"  
"JS1\_C14\_00196" 5170 "s59E13H2" 0.415502 "Uracil DNA glycosylase superfamily protein"  
"JS1\_C14\_00196" 5170 "s59E25H2" 0.2142857 "Uracil DNA glycosylase superfamily protein"  
"JS1\_C14\_00196" 5170 "s59E5H2" 0.2966361 "Uracil DNA glycosylase superfamily protein"  
"JS1\_C14\_00196" 5170 "s63E6H2" 0.1930691 "Uracil DNA glycosylase superfamily protein"  
"JS1\_C14\_00197" 5171 "s59E13H2" 0.5962085 "hypothetical protein"  
"JS1\_C14\_00197" 5171 "s59E25H2" 0.5373134 "hypothetical protein"  
"JS1\_C14\_00197" 5171 "s59E5H2" 0.1108205 "hypothetical protein"  
"JS1\_C14\_00197" 5171 "s63E6H2" 0.1530408 "hypothetical protein"  
"JS1\_C14\_00198" 5172 "s59E13H2" 0.5294959 "putative protease YhbU precursor"  
"JS1\_C14\_00198" 5172 "s59E25H2" 0 "putative protease YhbU precursor"  
"JS1\_C14\_00198" 5172 "s59E5H2" 0.6717588 "putative protease YhbU precursor"  
"JS1\_C14\_00198" 5172 "s63E6H2" 1.261715 "putative protease YhbU precursor"  
"JS1\_C14\_00199" 5173 "s59E13H2" 0.3815767 "Putative GTP cyclohydrolase 1 type 2"  
"JS1\_C14\_00199" 5173 "s59E25H2" 0 "Putative GTP cyclohydrolase 1 type 2"  
"JS1\_C14\_00199" 5173 "s59E5H2" 0.338754 "Putative GTP cyclohydrolase 1 type 2"  
"JS1\_C14\_00199" 5173 "s63E6H2" 0.1343679 "Putative GTP cyclohydrolase 1 type 2"  
"JS1\_C14\_00200" 5174 "s59E13H2" 0.4970121 "hypothetical protein"  
"JS1\_C14\_00200" 5174 "s59E25H2" 0 "hypothetical protein"  
"JS1\_C14\_00200" 5174 "s59E5H2" 0.3722265 "hypothetical protein"  
"JS1\_C14\_00200" 5174 "s63E6H2" 1.161466 "hypothetical protein"  
"JS1\_C14\_00201" 5175 "s59E13H2" 0.4438905 "Transketolase 2"  
"JS1\_C14\_00201" 5175 "s59E25H2" 0 "Transketolase 2"  
"JS1\_C14\_00201" 5175 "s59E5H2" 0.8077686 "Transketolase 2"  
"JS1\_C14\_00201" 5175 "s63E6H2" 2.18988 "Transketolase 2"  
"JS1\_C14\_00202" 5176 "s59E13H2" 0.249994 "2-hydroxy-3-oxopropionate reductase"  
"JS1\_C14\_00202" 5176 "s59E25H2" 0 "2-hydroxy-3-oxopropionate reductase"  
"JS1\_C14\_00202" 5176 "s59E5H2" 0.8192037 "2-hydroxy-3-oxopropionate reductase"  
"JS1\_C14\_00202" 5176 "s63E6H2" 0.1698915 "2-hydroxy-3-oxopropionate reductase"  
"JS1\_C14\_00203" 5177 "s59E13H2" 0.1676054 "hypothetical protein"  
"JS1\_C14\_00203" 5177 "s59E25H2" 0 "hypothetical protein"  
"JS1\_C14\_00203" 5177 "s59E5H2" 0.4991033 "hypothetical protein"  
"JS1\_C14\_00203" 5177 "s63E6H2" 0.6101865 "hypothetical protein"  
"JS1\_C14\_00204" 5178 "s59E13H2" 0.1138708 "2-dehydro-3-deoxygluconokinase"  
"JS1\_C14\_00204" 5178 "s59E25H2" 0 "2-dehydro-3-deoxygluconokinase"  
"JS1\_C14\_00204" 5178 "s59E5H2" 0.7221967 "2-dehydro-3-deoxygluconokinase"  
"JS1\_C14\_00204" 5178 "s63E6H2" 0.2270885 "2-dehydro-3-deoxygluconokinase"  
"JS1\_C14\_00205" 5179 "s59E13H2" 1.054551 "Trehalose/maltose import ATP-binding protein Malk"  
"JS1\_C14\_00205" 5179 "s59E25H2" 0 "Trehalose/maltose import ATP-binding protein Malk"  
"JS1\_C14\_00205" 5179 "s59E5H2" 1.641947 "Trehalose/maltose import ATP-binding protein Malk"



"JS1\_C14\_00205" 5179 "s63E6H2" 0.6065946 "Trehalose/maltose import ATP-binding protein MalK"  
"JS1\_C14\_00206" 5180 "s59E13H2" 0.1762974 "Putative 2-aminoethylphosphonate transport system permease protein PhnV"  
"JS1\_C14\_00206" 5180 "s59E25H2" 0 "Putative 2-aminoethylphosphonate transport system permease protein PhnV"  
"JS1\_C14\_00206" 5180 "s59E5H2" 0.8468082 "Putative 2-aminoethylphosphonate transport system permease protein PhnV"  
"JS1\_C14\_00206" 5180 "s63E6H2" 0.53152 "Putative 2-aminoethylphosphonate transport system permease protein PhnV"  
"JS1\_C14\_00207" 5181 "s59E13H2" 0.07206824 "putative binding protein component of ABC iron transporter precursor"  
"JS1\_C14\_00207" 5181 "s59E25H2" 0 "putative binding protein component of ABC iron transporter precursor"  
"JS1\_C14\_00207" 5181 "s59E5H2" 0.03350425 "putative binding protein component of ABC iron transporter precursor"  
"JS1\_C14\_00207" 5181 "s63E6H2" 0.7840106 "putative binding protein component of ABC iron transporter precursor"  
"JS1\_C14\_00208" 5182 "s59E13H2" 0.05125419 "hypothetical protein"  
"JS1\_C14\_00208" 5182 "s59E25H2" 0 "hypothetical protein"  
"JS1\_C14\_00208" 5182 "s59E5H2" 0.330446 "hypothetical protein"  
"JS1\_C14\_00208" 5182 "s63E6H2" 0.1361959 "hypothetical protein"  
"JS1\_C14\_00209" 5183 "s59E13H2" 1.002897 "6-phosphofructokinase 1"  
"JS1\_C14\_00209" 5183 "s59E25H2" 0 "6-phosphofructokinase 1"  
"JS1\_C14\_00209" 5183 "s59E5H2" 0.4582097 "6-phosphofructokinase 1"  
"JS1\_C14\_00209" 5183 "s63E6H2" 0.7173793 "6-phosphofructokinase 1"  
"JS1\_C14\_00210" 5184 "s59E13H2" 0.0711114 "Transcription elongation factor GreA"  
"JS1\_C14\_00210" 5184 "s59E25H2" 0 "Transcription elongation factor GreA"  
"JS1\_C14\_00210" 5184 "s59E5H2" 0.2280245 "Transcription elongation factor GreA"  
"JS1\_C14\_00210" 5184 "s63E6H2" 0.182725 "Transcription elongation factor GreA"  
"JS1\_C14\_00211" 5185 "s59E13H2" 0.01681373 "Putative pyridoxal phosphate-dependent acyltransferase"  
"JS1\_C14\_00211" 5185 "s59E25H2" 0 "Putative pyridoxal phosphate-dependent acyltransferase"  
"JS1\_C14\_00211" 5185 "s59E5H2" 0.1664459 "Putative pyridoxal phosphate-dependent acyltransferase"  
"JS1\_C14\_00211" 5185 "s63E6H2" 0.198243 "Putative pyridoxal phosphate-dependent acyltransferase"  
"JS1\_C14\_00212" 5186 "s59E13H2" 0.04146574 "hypothetical protein"  
"JS1\_C14\_00212" 5186 "s59E25H2" 0 "hypothetical protein"  
"JS1\_C14\_00212" 5186 "s59E5H2" 0.1570523 "hypothetical protein"  
"JS1\_C14\_00212" 5186 "s63E6H2" 0.1623886 "hypothetical protein"  
"JS1\_C14\_00213" 5187 "s59E13H2" 0.01569977 "hypothetical protein"  
"JS1\_C14\_00213" 5187 "s59E25H2" 0 "hypothetical protein"  
"JS1\_C14\_00213" 5187 "s59E5H2" 0.2942507 "hypothetical protein"  
"JS1\_C14\_00213" 5187 "s63E6H2" 0.09304208 "hypothetical protein"  
"JS1\_C14\_00214" 5188 "s59E13H2" 0.002668726 "Molybdate/tungstate import ATP-binding protein WtpC"  
"JS1\_C14\_00214" 5188 "s59E25H2" 0 "Molybdate/tungstate import ATP-binding protein WtpC"  
"JS1\_C14\_00214" 5188 "s59E5H2" 0.1936683 "Molybdate/tungstate import ATP-binding protein WtpC"  
"JS1\_C14\_00214" 5188 "s63E6H2" 0.2389287 "Molybdate/tungstate import ATP-binding protein WtpC"  
"JS1\_C14\_00215" 5189 "s59E13H2" 0.1571178 "Molybdopterin molybdenumtransferase"  
"JS1\_C14\_00215" 5189 "s59E25H2" 0 "Molybdopterin molybdenumtransferase"  
"JS1\_C14\_00215" 5189 "s59E5H2" 0.278411 "Molybdopterin molybdenumtransferase"  
"JS1\_C14\_00215" 5189 "s63E6H2" 0.6234198 "Molybdopterin molybdenumtransferase"  
"JS1\_C14\_00216" 5190 "s59E13H2" 0.2372081 "Molybdopterin molybdenumtransferase"  
"JS1\_C14\_00216" 5190 "s59E25H2" 0 "Molybdopterin molybdenumtransferase"  
"JS1\_C14\_00216" 5190 "s59E5H2" 0.4270396 "Molybdopterin molybdenumtransferase"  
"JS1\_C14\_00216" 5190 "s63E6H2" 0.5670851 "Molybdopterin molybdenumtransferase"  
"JS1\_C14\_00217" 5191 "s59E13H2" 0.1585407 "Cyclic pyranopterin monophosphate synthase"  
"JS1\_C14\_00217" 5191 "s59E25H2" 0 "Cyclic pyranopterin monophosphate synthase"

"JS1\_C14\_00217" 5191 "s59E5H2" 0.4018297 "Cyclic pyranopterin monophosphate synthase"  
"JS1\_C14\_00217" 5191 "s63E6H2" 0.3230502 "Cyclic pyranopterin monophosphate synthase"  
"JS1\_C14\_00218" 5192 "s59E13H2" 0 "Cyclic pyranopterin monophosphate synthase accessory protein"  
"JS1\_C14\_00218" 5192 "s59E25H2" 0 "Cyclic pyranopterin monophosphate synthase accessory protein"  
"JS1\_C14\_00218" 5192 "s59E5H2" 0.4210818 "Cyclic pyranopterin monophosphate synthase accessory protein"  
"JS1\_C14\_00218" 5192 "s63E6H2" 0.2065616 "Cyclic pyranopterin monophosphate synthase accessory protein"  
"JS1\_C14\_00219" 5193 "s59E13H2" 0.1142845 "Molybdopterin adenyltransferase"  
"JS1\_C14\_00219" 5193 "s59E25H2" 0 "Molybdopterin adenyltransferase"  
"JS1\_C14\_00219" 5193 "s59E5H2" 0.4844795 "Molybdopterin adenyltransferase"  
"JS1\_C14\_00219" 5193 "s63E6H2" 0.1411787 "Molybdopterin adenyltransferase"  
"JS1\_C14\_00220" 5194 "s59E13H2" 0.2215664 "Ribonuclease Z"  
"JS1\_C14\_00220" 5194 "s59E25H2" 0 "Ribonuclease Z"  
"JS1\_C14\_00220" 5194 "s59E5H2" 0.5367315 "Ribonuclease Z"  
"JS1\_C14\_00220" 5194 "s63E6H2" 0.2512003 "Ribonuclease Z"  
"JS1\_C14\_00221" 5195 "s59E13H2" 0.06592855 "Ferredoxin"  
"JS1\_C14\_00221" 5195 "s59E25H2" 0 "Ferredoxin"  
"JS1\_C14\_00221" 5195 "s59E5H2" 0.7962924 "Ferredoxin"  
"JS1\_C14\_00221" 5195 "s63E6H2" 0.1297569 "Ferredoxin"  
"JS1\_C14\_00222" 5196 "s59E13H2" 0.08982087 "Oligo-1,6-glucosidase"  
"JS1\_C14\_00222" 5196 "s59E25H2" 0 "Oligo-1,6-glucosidase"  
"JS1\_C14\_00222" 5196 "s59E5H2" 1.187182 "Oligo-1,6-glucosidase"  
"JS1\_C14\_00222" 5196 "s63E6H2" 2.931425 "Oligo-1,6-glucosidase"  
"JS1\_C14\_00223" 5197 "s59E13H2" 0.6710239 "Oligo-1,6-glucosidase"  
"JS1\_C14\_00223" 5197 "s59E25H2" 0 "Oligo-1,6-glucosidase"  
"JS1\_C14\_00223" 5197 "s59E5H2" 0.6798154 "Oligo-1,6-glucosidase"  
"JS1\_C14\_00223" 5197 "s63E6H2" 0.8809776 "Oligo-1,6-glucosidase"  
"JS1\_C14\_00224" 5198 "s59E13H2" 0.03708163 "HTH-type transcriptional regulator CymR"  
"JS1\_C14\_00224" 5198 "s59E25H2" 0 "HTH-type transcriptional regulator CymR"  
"JS1\_C14\_00224" 5198 "s59E5H2" 0.1809964 "HTH-type transcriptional regulator CymR"  
"JS1\_C14\_00224" 5198 "s63E6H2" 0.09711275 "HTH-type transcriptional regulator CymR"  
"JS1\_C14\_00225" 5199 "s59E13H2" 0.03537317 "hypothetical protein"  
"JS1\_C14\_00225" 5199 "s59E25H2" 0 "hypothetical protein"  
"JS1\_C14\_00225" 5199 "s59E5H2" 0.166634 "hypothetical protein"  
"JS1\_C14\_00225" 5199 "s63E6H2" 0.07998651 "hypothetical protein"  
"JS1\_C14\_00226" 5200 "s59E13H2" 0.03179012 "V-type ATP synthase subunit I"  
"JS1\_C14\_00226" 5200 "s59E25H2" 0 "V-type ATP synthase subunit I"  
"JS1\_C14\_00226" 5200 "s59E5H2" 0.2115376 "V-type ATP synthase subunit I"  
"JS1\_C14\_00226" 5200 "s63E6H2" 0.04813344 "V-type ATP synthase subunit I"  
"JS1\_C14\_00227" 5201 "s59E13H2" 0.06405853 "V-type sodium ATPase subunit K"  
"JS1\_C14\_00227" 5201 "s59E25H2" 0 "V-type sodium ATPase subunit K"  
"JS1\_C14\_00227" 5201 "s59E5H2" 1.017125 "V-type sodium ATPase subunit K"  
"JS1\_C14\_00227" 5201 "s63E6H2" 0.1069037 "V-type sodium ATPase subunit K"  
"JS1\_C14\_00228" 5202 "s59E13H2" 0.9232064 "V-type ATP synthase subunit E"  
"JS1\_C14\_00228" 5202 "s59E25H2" 0 "V-type ATP synthase subunit E"  
"JS1\_C14\_00228" 5202 "s59E5H2" 0.2500734 "V-type ATP synthase subunit E"  
"JS1\_C14\_00228" 5202 "s63E6H2" 0.08215696 "V-type ATP synthase subunit E"  
"JS1\_C14\_00229" 5203 "s59E13H2" 0.02442362 "V-type sodium ATPase subunit C"

"JS1\_C14\_00229" 5203 "s59E25H2" 0 "V-type sodium ATPase subunit C"  
"JS1\_C14\_00229" 5203 "s59E5H2" 0.3518529 "V-type sodium ATPase subunit C"  
"JS1\_C14\_00229" 5203 "s63E6H2" 0.04436845 "V-type sodium ATPase subunit C"  
"JS1\_C14\_00230" 5204 "s59E13H2" 0.105759 "V-type sodium ATPase subunit G"  
"JS1\_C14\_00230" 5204 "s59E25H2" 0 "V-type sodium ATPase subunit G"  
"JS1\_C14\_00230" 5204 "s59E5H2" 0.5159991 "V-type sodium ATPase subunit G"  
"JS1\_C14\_00230" 5204 "s63E6H2" 0.06610995 "V-type sodium ATPase subunit G"  
"JS1\_C14\_00231" 5205 "s59E13H2" 0.1125498 "V-type sodium ATPase catalytic subunit A"  
"JS1\_C14\_00231" 5205 "s59E25H2" 0 "V-type sodium ATPase catalytic subunit A"  
"JS1\_C14\_00231" 5205 "s59E5H2" 0.5621176 "V-type sodium ATPase catalytic subunit A"  
"JS1\_C14\_00231" 5205 "s63E6H2" 0.4415989 "V-type sodium ATPase catalytic subunit A"  
"JS1\_C14\_00232" 5206 "s59E13H2" 0.2243068 "V-type sodium ATPase subunit B"  
"JS1\_C14\_00232" 5206 "s59E25H2" 0 "V-type sodium ATPase subunit B"  
"JS1\_C14\_00232" 5206 "s59E5H2" 0.7773256 "V-type sodium ATPase subunit B"  
"JS1\_C14\_00232" 5206 "s63E6H2" 0.6961496 "V-type sodium ATPase subunit B"  
"JS1\_C14\_00233" 5207 "s59E13H2" 0.1056507 "V-type sodium ATPase subunit D"  
"JS1\_C14\_00233" 5207 "s59E25H2" 0 "V-type sodium ATPase subunit D"  
"JS1\_C14\_00233" 5207 "s59E5H2" 0.3737093 "V-type sodium ATPase subunit D"  
"JS1\_C14\_00233" 5207 "s63E6H2" 0.5445981 "V-type sodium ATPase subunit D"  
"JS1\_C14\_00234" 5208 "s59E13H2" 0.8327424 "Transposase IS116/IS110/IS902 family protein"  
"JS1\_C14\_00234" 5208 "s59E25H2" 0 "Transposase IS116/IS110/IS902 family protein"  
"JS1\_C14\_00234" 5208 "s59E5H2" 0.517632 "Transposase IS116/IS110/IS902 family protein"  
"JS1\_C14\_00234" 5208 "s63E6H2" 1.372486 "Transposase IS116/IS110/IS902 family protein"  
"JS1\_C14\_00235" 5209 "s59E13H2" 0.2559185 "phosphodiesterase"  
"JS1\_C14\_00235" 5209 "s59E25H2" 0 "phosphodiesterase"  
"JS1\_C14\_00235" 5209 "s59E5H2" 0.5579483 "phosphodiesterase"  
"JS1\_C14\_00235" 5209 "s63E6H2" 0.4771953 "phosphodiesterase"  
"JS1\_C14\_00237" 5211 "s59E13H2" 0.1616638 "1-acyl-sn-glycerol-3-phosphate acyltransferase"  
"JS1\_C14\_00237" 5211 "s59E25H2" 0 "1-acyl-sn-glycerol-3-phosphate acyltransferase"  
"JS1\_C14\_00237" 5211 "s59E5H2" 0.2576743 "1-acyl-sn-glycerol-3-phosphate acyltransferase"  
"JS1\_C14\_00237" 5211 "s63E6H2" 0.5450602 "1-acyl-sn-glycerol-3-phosphate acyltransferase"  
"JS1\_C14\_00238" 5212 "s59E13H2" 0.1112063 "Serine/threonine-protein kinase PknD"  
"JS1\_C14\_00238" 5212 "s59E25H2" 0 "Serine/threonine-protein kinase PknD"  
"JS1\_C14\_00238" 5212 "s59E5H2" 0.691655 "Serine/threonine-protein kinase PknD"  
"JS1\_C14\_00238" 5212 "s63E6H2" 0.7169757 "Serine/threonine-protein kinase PknD"  
"JS1\_C14\_00239" 5213 "s59E13H2" 0.08968499 "hypothetical protein"  
"JS1\_C14\_00239" 5213 "s59E25H2" 0 "hypothetical protein"  
"JS1\_C14\_00239" 5213 "s59E5H2" 0.2131144 "hypothetical protein"  
"JS1\_C14\_00239" 5213 "s63E6H2" 1.126922 "hypothetical protein"  
"JS1\_C14\_00240" 5214 "s59E13H2" 0.0123655 "Acetyltransferase (GNAT) family protein"  
"JS1\_C14\_00240" 5214 "s59E25H2" 0.8367003 "Acetyltransferase (GNAT) family protein"  
"JS1\_C14\_00240" 5214 "s59E5H2" 0.06962311 "Acetyltransferase (GNAT) family protein"  
"JS1\_C14\_00240" 5214 "s63E6H2" 0.510732 "Acetyltransferase (GNAT) family protein"  
"JS1\_C14\_00241" 5215 "s59E13H2" 0.06325303 "hypothetical protein"  
"JS1\_C14\_00241" 5215 "s59E25H2" 0 "hypothetical protein"  
"JS1\_C14\_00241" 5215 "s59E5H2" 0.5788996 "hypothetical protein"  
"JS1\_C14\_00241" 5215 "s63E6H2" 0.787004 "hypothetical protein"

"JS1\_C14\_00242" 5216 "s59E13H2" 0.05340828 "hypothetical protein"  
"JS1\_C14\_00242" 5216 "s59E25H2" 0 "hypothetical protein"  
"JS1\_C14\_00242" 5216 "s59E5H2" 0.4805177 "hypothetical protein"  
"JS1\_C14\_00242" 5216 "s63E6H2" 1.051825 "hypothetical protein"  
"JS1\_C14\_00244" 5218 "s59E13H2" 0.008000477 "hypothetical protein"  
"JS1\_C14\_00244" 5218 "s59E25H2" 0 "hypothetical protein"  
"JS1\_C14\_00244" 5218 "s59E5H2" 0 "hypothetical protein"  
"JS1\_C14\_00244" 5218 "s63E6H2" 0 "hypothetical protein"  
"JS1\_C14\_00245" 5219 "s59E13H2" 0.006161281 "hypothetical protein"  
"JS1\_C14\_00245" 5219 "s59E25H2" 0 "hypothetical protein"  
"JS1\_C14\_00245" 5219 "s59E5H2" 0 "hypothetical protein"  
"JS1\_C14\_00245" 5219 "s63E6H2" 0 "hypothetical protein"  
"JS1\_C14\_00246" 5220 "s59E13H2" 0.001917632 "Secreted effector protein pipB2"  
"JS1\_C14\_00246" 5220 "s59E25H2" 0 "Secreted effector protein pipB2"  
"JS1\_C14\_00246" 5220 "s59E5H2" 0.01484129 "Secreted effector protein pipB2"  
"JS1\_C14\_00246" 5220 "s63E6H2" 0 "Secreted effector protein pipB2"  
"JS1\_C14\_00247" 5221 "s59E13H2" 0 "NYN domain protein"  
"JS1\_C14\_00247" 5221 "s59E25H2" 0 "NYN domain protein"  
"JS1\_C14\_00247" 5221 "s59E5H2" 0.01357261 "NYN domain protein"  
"JS1\_C14\_00247" 5221 "s63E6H2" 0 "NYN domain protein"  
"JS1\_C14\_00248" 5222 "s59E13H2" 0.004717941 "hypothetical protein"  
"JS1\_C14\_00248" 5222 "s59E25H2" 0 "hypothetical protein"  
"JS1\_C14\_00248" 5222 "s59E5H2" 0 "hypothetical protein"  
"JS1\_C14\_00248" 5222 "s63E6H2" 0 "hypothetical protein"  
"JS1\_C14\_00249" 5223 "s59E13H2" 0.008020224 "hypothetical protein"  
"JS1\_C14\_00249" 5223 "s59E25H2" 0 "hypothetical protein"  
"JS1\_C14\_00249" 5223 "s59E5H2" 0 "hypothetical protein"  
"JS1\_C14\_00249" 5223 "s63E6H2" 0 "hypothetical protein"  
"JS1\_C14\_00250" 5224 "s59E13H2" 0.1577679 "hypothetical protein"  
"JS1\_C14\_00250" 5224 "s59E25H2" 0 "hypothetical protein"  
"JS1\_C14\_00250" 5224 "s59E5H2" 0 "hypothetical protein"  
"JS1\_C14\_00250" 5224 "s63E6H2" 0 "hypothetical protein"  
"JS1\_C14\_00251" 5225 "s59E13H2" 0.008782314 "hypothetical protein"  
"JS1\_C14\_00251" 5225 "s59E25H2" 0 "hypothetical protein"  
"JS1\_C14\_00251" 5225 "s59E5H2" 0 "hypothetical protein"  
"JS1\_C14\_00251" 5225 "s63E6H2" 0 "hypothetical protein"  
"JS1\_C14\_00252" 5226 "s59E13H2" 0 "hypothetical protein"  
"JS1\_C14\_00252" 5226 "s59E25H2" 0 "hypothetical protein"  
"JS1\_C14\_00252" 5226 "s59E5H2" 0.006221608 "hypothetical protein"  
"JS1\_C14\_00252" 5226 "s63E6H2" 0.004172846 "hypothetical protein"  
"JS1\_C14\_00255" 5229 "s59E13H2" 0.003251273 "Dipeptide transport system permease protein DppB"  
"JS1\_C14\_00255" 5229 "s59E25H2" 0 "Dipeptide transport system permease protein DppB"  
"JS1\_C14\_00255" 5229 "s59E5H2" 0.9405911 "Dipeptide transport system permease protein DppB"  
"JS1\_C14\_00255" 5229 "s63E6H2" 0.03961437 "Dipeptide transport system permease protein DppB"  
"JS1\_C14\_00256" 5230 "s59E13H2" 0.002452579 "Dipeptide transport system permease protein DppC"  
"JS1\_C14\_00256" 5230 "s59E25H2" 0.1548894 "Dipeptide transport system permease protein DppC"  
"JS1\_C14\_00256" 5230 "s59E5H2" 0.2893233 "Dipeptide transport system permease protein DppC"

"JS1\_C14\_00256" 5230 "s63E6H2" 0.05444023 "Dipeptide transport system permease protein DppC"  
"JS1\_C14\_00257" 5231 "s59E13H2" 0.003594786 "Oligopeptide transport ATP-binding protein OppD"  
"JS1\_C14\_00257" 5231 "s59E25H2" 0 "Oligopeptide transport ATP-binding protein OppD"  
"JS1\_C14\_00257" 5231 "s59E5H2" 0.4616791 "Oligopeptide transport ATP-binding protein OppD"  
"JS1\_C14\_00257" 5231 "s63E6H2" 0.0263188 "Oligopeptide transport ATP-binding protein OppD"  
"JS1\_C14\_00258" 5232 "s59E13H2" 0.05959043 "Oligopeptide transport ATP-binding protein OppF"  
"JS1\_C14\_00258" 5232 "s59E25H2" 0 "Oligopeptide transport ATP-binding protein OppF"  
"JS1\_C14\_00258" 5232 "s59E5H2" 0.8323162 "Oligopeptide transport ATP-binding protein OppF"  
"JS1\_C14\_00258" 5232 "s63E6H2" 0.02098454 "Oligopeptide transport ATP-binding protein OppF"  
"JS1\_C14\_00259" 5233 "s59E13H2" 0.05750677 "ECF RNA polymerase sigma factor SigW"  
"JS1\_C14\_00259" 5233 "s59E25H2" 0 "ECF RNA polymerase sigma factor SigW"  
"JS1\_C14\_00259" 5233 "s59E5H2" 0.05006317 "ECF RNA polymerase sigma factor SigW"  
"JS1\_C14\_00259" 5233 "s63E6H2" 0.01112961 "ECF RNA polymerase sigma factor SigW"  
"JS1\_C14\_00260" 5234 "s59E13H2" 0.07346033 "Anti-sigma-W factor RsiW"  
"JS1\_C14\_00260" 5234 "s59E25H2" 0 "Anti-sigma-W factor RsiW"  
"JS1\_C14\_00260" 5234 "s59E5H2" 0.07798924 "Anti-sigma-W factor RsiW"  
"JS1\_C14\_00260" 5234 "s63E6H2" 0.04394921 "Anti-sigma-W factor RsiW"  
"JS1\_C14\_00261" 5235 "s59E13H2" 0.5021507 "Lipopolysaccharide export system permease protein LptF"  
"JS1\_C14\_00261" 5235 "s59E25H2" 0 "Lipopolysaccharide export system permease protein LptF"  
"JS1\_C14\_00261" 5235 "s59E5H2" 0.7697274 "Lipopolysaccharide export system permease protein LptF"  
"JS1\_C14\_00261" 5235 "s63E6H2" 0.8556541 "Lipopolysaccharide export system permease protein LptF"  
"JS1\_C14\_00262" 5236 "s59E13H2" 0.5878652 "LPS-assembly protein LptD"  
"JS1\_C14\_00262" 5236 "s59E25H2" 0 "LPS-assembly protein LptD"  
"JS1\_C14\_00262" 5236 "s59E5H2" 0.2467225 "LPS-assembly protein LptD"  
"JS1\_C14\_00262" 5236 "s63E6H2" 2.797721 "LPS-assembly protein LptD"  
"JS1\_C14\_00263" 5237 "s59E13H2" 0.3357643 "hypothetical protein"  
"JS1\_C14\_00263" 5237 "s59E25H2" 0 "hypothetical protein"  
"JS1\_C14\_00263" 5237 "s59E5H2" 0.02732915 "hypothetical protein"  
"JS1\_C14\_00263" 5237 "s63E6H2" 2.123171 "hypothetical protein"  
"JS1\_C14\_00264" 5238 "s59E13H2" 0.274207 "LPS-assembly protein LptD"  
"JS1\_C14\_00264" 5238 "s59E25H2" 0 "LPS-assembly protein LptD"  
"JS1\_C14\_00264" 5238 "s59E5H2" 0.7167529 "LPS-assembly protein LptD"  
"JS1\_C14\_00264" 5238 "s63E6H2" 2.844939 "LPS-assembly protein LptD"  
"JS1\_C14\_00265" 5239 "s59E13H2" 0.1716545 "Lipopolysaccharide-assembly, LptC-related"  
"JS1\_C14\_00265" 5239 "s59E25H2" 0 "Lipopolysaccharide-assembly, LptC-related"  
"JS1\_C14\_00265" 5239 "s59E5H2" 0.4705005 "Lipopolysaccharide-assembly, LptC-related"  
"JS1\_C14\_00265" 5239 "s63E6H2" 1.236372 "Lipopolysaccharide-assembly, LptC-related"  
"JS1\_C14\_00266" 5240 "s59E13H2" 0.1831125 "Clostripain precursor"  
"JS1\_C14\_00266" 5240 "s59E25H2" 0 "Clostripain precursor"  
"JS1\_C14\_00266" 5240 "s59E5H2" 0.04934063 "Clostripain precursor"  
"JS1\_C14\_00266" 5240 "s63E6H2" 0.3175156 "Clostripain precursor"  
"JS1\_C14\_00267" 5241 "s59E13H2" 0.07133941 "hypothetical protein"  
"JS1\_C14\_00267" 5241 "s59E25H2" 0 "hypothetical protein"  
"JS1\_C14\_00267" 5241 "s59E5H2" 0 "hypothetical protein"  
"JS1\_C14\_00267" 5241 "s63E6H2" 0 "hypothetical protein"  
"JS1\_C14\_00268" 5242 "s59E13H2" 0.741499 "hypothetical protein"  
"JS1\_C14\_00268" 5242 "s59E25H2" 0 "hypothetical protein"

"JS1\_C14\_00268" 5242 "s59E5H2" 0.1670908 "hypothetical protein"  
"JS1\_C14\_00268" 5242 "s63E6H2" 0.006473816 "hypothetical protein"  
"JS1\_C14\_00269" 5243 "s59E13H2" 0.3189733 "PEGA domain protein"  
"JS1\_C14\_00269" 5243 "s59E25H2" 0 "PEGA domain protein"  
"JS1\_C14\_00269" 5243 "s59E5H2" 0.1047041 "PEGA domain protein"  
"JS1\_C14\_00269" 5243 "s63E6H2" 1.977005e-05 "PEGA domain protein"  
"JS1\_C14\_00270" 5244 "s59E13H2" 0.2020035 "Bacterial Ig-like domain (group 2)"  
"JS1\_C14\_00270" 5244 "s59E25H2" 0 "Bacterial Ig-like domain (group 2)"  
"JS1\_C14\_00270" 5244 "s59E5H2" 0.1141038 "Bacterial Ig-like domain (group 2)"  
"JS1\_C14\_00270" 5244 "s63E6H2" 0.02817275 "Bacterial Ig-like domain (group 2)"  
"JS1\_C14\_00271" 5245 "s59E13H2" 0.1966129 "hypothetical protein"  
"JS1\_C14\_00271" 5245 "s59E25H2" 0 "hypothetical protein"  
"JS1\_C14\_00271" 5245 "s59E5H2" 0.5914937 "hypothetical protein"  
"JS1\_C14\_00271" 5245 "s63E6H2" 1.499226 "hypothetical protein"  
"JS1\_C14\_00272" 5246 "s59E13H2" 0.1617186 "Outer membrane protein alpha precursor"  
"JS1\_C14\_00272" 5246 "s59E25H2" 0 "Outer membrane protein alpha precursor"  
"JS1\_C14\_00272" 5246 "s59E5H2" 0.6177017 "Outer membrane protein alpha precursor"  
"JS1\_C14\_00272" 5246 "s63E6H2" 0.738907 "Outer membrane protein alpha precursor"  
"JS1\_C14\_00273" 5247 "s59E13H2" 0.03560601 "hypothetical protein"  
"JS1\_C14\_00273" 5247 "s59E25H2" 0 "hypothetical protein"  
"JS1\_C14\_00273" 5247 "s59E5H2" 0.014163 "hypothetical protein"  
"JS1\_C14\_00273" 5247 "s63E6H2" 0.01306045 "hypothetical protein"  
"JS1\_C14\_00274" 5248 "s59E13H2" 0.1905376 "hypothetical protein"  
"JS1\_C14\_00274" 5248 "s59E25H2" 0 "hypothetical protein"  
"JS1\_C14\_00274" 5248 "s59E5H2" 0.02210288 "hypothetical protein"  
"JS1\_C14\_00274" 5248 "s63E6H2" 0.08967783 "hypothetical protein"  
"JS1\_C14\_00275" 5249 "s59E13H2" 0.0604099 "hypothetical protein"  
"JS1\_C14\_00275" 5249 "s59E25H2" 0 "hypothetical protein"  
"JS1\_C14\_00275" 5249 "s59E5H2" 0.03161736 "hypothetical protein"  
"JS1\_C14\_00275" 5249 "s63E6H2" 0.0478954 "hypothetical protein"  
"JS1\_C14\_00276" 5250 "s59E13H2" 0.08634381 "Putative serine protease HtrA"  
"JS1\_C14\_00276" 5250 "s59E25H2" 0 "Putative serine protease HtrA"  
"JS1\_C14\_00276" 5250 "s59E5H2" 0.02363933 "Putative serine protease HtrA"  
"JS1\_C14\_00276" 5250 "s63E6H2" 0.03029638 "Putative serine protease HtrA"  
"JS1\_C14\_00278" 5252 "s59E13H2" 1.186616 "V-type ATP synthase subunit C"  
"JS1\_C14\_00278" 5252 "s59E25H2" 0.4737345 "V-type ATP synthase subunit C"  
"JS1\_C14\_00278" 5252 "s59E5H2" 1.162367 "V-type ATP synthase subunit C"  
"JS1\_C14\_00278" 5252 "s63E6H2" 0.2461503 "V-type ATP synthase subunit C"  
"JS1\_C14\_00279" 5253 "s59E13H2" 1.074639 "hypothetical protein"  
"JS1\_C14\_00279" 5253 "s59E25H2" 0 "hypothetical protein"  
"JS1\_C14\_00279" 5253 "s59E5H2" 0.2238281 "hypothetical protein"  
"JS1\_C14\_00279" 5253 "s63E6H2" 0.1488883 "hypothetical protein"  
"JS1\_C14\_00280" 5254 "s59E13H2" 0.9587308 "Transcriptional regulatory protein ZraR"  
"JS1\_C14\_00280" 5254 "s59E25H2" 0 "Transcriptional regulatory protein ZraR"  
"JS1\_C14\_00280" 5254 "s59E5H2" 0.9910504 "Transcriptional regulatory protein ZraR"  
"JS1\_C14\_00280" 5254 "s63E6H2" 0.3004285 "Transcriptional regulatory protein ZraR"  
"JS1\_C14\_00281" 5255 "s59E13H2" 0.8327172 "Sensor protein ZraS"

"JS1\_C14\_00281" 5255 "s59E25H2" 0 "Sensor protein ZraS"  
"JS1\_C14\_00281" 5255 "s59E5H2" 0.698212 "Sensor protein ZraS"  
"JS1\_C14\_00281" 5255 "s63E6H2" 0.1642769 "Sensor protein ZraS"  
"JS1\_C14\_00286" 5260 "s59E13H2" 0.3247132 "putative outer membrane protein PmpB precursor"  
"JS1\_C14\_00286" 5260 "s59E25H2" 0 "putative outer membrane protein PmpB precursor"  
"JS1\_C14\_00286" 5260 "s59E5H2" 0.01729503 "putative outer membrane protein PmpB precursor"  
"JS1\_C14\_00286" 5260 "s63E6H2" 0 "putative outer membrane protein PmpB precursor"  
"JS1\_C14\_00287" 5261 "s59E13H2" 0.3317893 "hypothetical protein"  
"JS1\_C14\_00287" 5261 "s59E25H2" 0 "hypothetical protein"  
"JS1\_C14\_00287" 5261 "s59E5H2" 0.01263465 "hypothetical protein"  
"JS1\_C14\_00287" 5261 "s63E6H2" 0 "hypothetical protein"  
"JS1\_C14\_00288" 5262 "s59E13H2" 0.1829514 "hypothetical protein"  
"JS1\_C14\_00288" 5262 "s59E25H2" 0 "hypothetical protein"  
"JS1\_C14\_00288" 5262 "s59E5H2" 0.007970769 "hypothetical protein"  
"JS1\_C14\_00288" 5262 "s63E6H2" 0 "hypothetical protein"  
"JS1\_C14\_00289" 5263 "s59E13H2" 0.08995348 "hypothetical protein"  
"JS1\_C14\_00289" 5263 "s59E25H2" 0 "hypothetical protein"  
"JS1\_C14\_00289" 5263 "s59E5H2" 0.02457493 "hypothetical protein"  
"JS1\_C14\_00289" 5263 "s63E6H2" 0 "hypothetical protein"  
"JS1\_C14\_00290" 5264 "s59E13H2" 0.1318724 "hypothetical protein"  
"JS1\_C14\_00290" 5264 "s59E25H2" 0 "hypothetical protein"  
"JS1\_C14\_00290" 5264 "s59E5H2" 0.03804794 "hypothetical protein"  
"JS1\_C14\_00290" 5264 "s63E6H2" 0 "hypothetical protein"  
"JS1\_C14\_00291" 5265 "s59E13H2" 0.09190242 "hypothetical protein"  
"JS1\_C14\_00291" 5265 "s59E25H2" 0 "hypothetical protein"  
"JS1\_C14\_00291" 5265 "s59E5H2" 0.0009665532 "hypothetical protein"  
"JS1\_C14\_00291" 5265 "s63E6H2" 0 "hypothetical protein"  
"JS1\_C14\_00292" 5266 "s59E13H2" 0.4088567 "hypothetical protein"  
"JS1\_C14\_00292" 5266 "s59E25H2" 0 "hypothetical protein"  
"JS1\_C14\_00292" 5266 "s59E5H2" 0.7670987 "hypothetical protein"  
"JS1\_C14\_00292" 5266 "s63E6H2" 1.111371 "hypothetical protein"  
"JS1\_C14\_00293" 5267 "s59E13H2" 0.670979 "Lipopolysaccharide export system ATP-binding protein LptB"  
"JS1\_C14\_00293" 5267 "s59E25H2" 0 "Lipopolysaccharide export system ATP-binding protein LptB"  
"JS1\_C14\_00293" 5267 "s59E5H2" 0.9711119 "Lipopolysaccharide export system ATP-binding protein LptB"  
"JS1\_C14\_00293" 5267 "s63E6H2" 1.495345 "Lipopolysaccharide export system ATP-binding protein LptB"  
"JS1\_C14\_00294" 5268 "s59E13H2" 0.6218851 "3-hydroxyacyl-[acyl-carrier-protein] dehydratase FabZ"  
"JS1\_C14\_00294" 5268 "s59E25H2" 0 "3-hydroxyacyl-[acyl-carrier-protein] dehydratase FabZ"  
"JS1\_C14\_00294" 5268 "s59E5H2" 0.9304174 "3-hydroxyacyl-[acyl-carrier-protein] dehydratase FabZ"  
"JS1\_C14\_00294" 5268 "s63E6H2" 1.133171 "3-hydroxyacyl-[acyl-carrier-protein] dehydratase FabZ"  
"JS1\_C14\_00295" 5269 "s59E13H2" 0.3700751 "Outer membrane protein (OmpH-like)"  
"JS1\_C14\_00295" 5269 "s59E25H2" 0 "Outer membrane protein (OmpH-like)"  
"JS1\_C14\_00295" 5269 "s59E5H2" 0.8461648 "Outer membrane protein (OmpH-like)"  
"JS1\_C14\_00295" 5269 "s63E6H2" 1.267384 "Outer membrane protein (OmpH-like)"  
"JS1\_C14\_00296" 5270 "s59E13H2" 0.3489158 "Outer membrane protein assembly factor BamA precursor"  
"JS1\_C14\_00296" 5270 "s59E25H2" 0 "Outer membrane protein assembly factor BamA precursor"  
"JS1\_C14\_00296" 5270 "s59E5H2" 0.7804879 "Outer membrane protein assembly factor BamA precursor"  
"JS1\_C14\_00296" 5270 "s63E6H2" 0.4840454 "Outer membrane protein assembly factor BamA precursor"

"JS1\_C14\_00297" 5271 "s59E13H2" 0.03631497 "N-acetyl-gamma-glutamyl-phosphate reductase"  
"JS1\_C14\_00297" 5271 "s59E25H2" 0 "N-acetyl-gamma-glutamyl-phosphate reductase"  
"JS1\_C14\_00297" 5271 "s59E5H2" 0.04405098 "N-acetyl-gamma-glutamyl-phosphate reductase"  
"JS1\_C14\_00297" 5271 "s63E6H2" 0.05663758 "N-acetyl-gamma-glutamyl-phosphate reductase"  
"JS1\_C14\_00299" 5273 "s59E13H2" 0.01563522 "Orotate phosphoribosyltransferase"  
"JS1\_C14\_00299" 5273 "s59E25H2" 0 "Orotate phosphoribosyltransferase"  
"JS1\_C14\_00299" 5273 "s59E5H2" 0.05608982 "Orotate phosphoribosyltransferase"  
"JS1\_C14\_00299" 5273 "s63E6H2" 0.1105703 "Orotate phosphoribosyltransferase"  
"JS1\_C14\_00300" 5274 "s59E13H2" 0.02456194 "Orotidine 5'-phosphate decarboxylase"  
"JS1\_C14\_00300" 5274 "s59E25H2" 0 "Orotidine 5'-phosphate decarboxylase"  
"JS1\_C14\_00300" 5274 "s59E5H2" 0.009220423 "Orotidine 5'-phosphate decarboxylase"  
"JS1\_C14\_00300" 5274 "s63E6H2" 0.08960619 "Orotidine 5'-phosphate decarboxylase"  
"JS1\_C14\_00301" 5275 "s59E13H2" 0.08678276 "Trimethylamine methyltransferase MttB"  
"JS1\_C14\_00301" 5275 "s59E25H2" 0 "Trimethylamine methyltransferase MttB"  
"JS1\_C14\_00301" 5275 "s59E5H2" 1.862781 "Trimethylamine methyltransferase MttB"  
"JS1\_C14\_00301" 5275 "s63E6H2" 0.2994378 "Trimethylamine methyltransferase MttB"  
"JS1\_C14\_00302" 5276 "s59E13H2" 0.0228677 "UDP-D-galactose:(glucosyl)lipopolysaccharide-1,6-D-galactosyltransferase"  
"JS1\_C14\_00302" 5276 "s59E25H2" 0 "UDP-D-galactose:(glucosyl)lipopolysaccharide-1,6-D-galactosyltransferase"  
"JS1\_C14\_00302" 5276 "s59E5H2" 0 "UDP-D-galactose:(glucosyl)lipopolysaccharide-1,6-D-galactosyltransferase"  
"JS1\_C14\_00302" 5276 "s63E6H2" 0 "UDP-D-galactose:(glucosyl)lipopolysaccharide-1,6-D-galactosyltransferase"  
"JS1\_C14\_00303" 5277 "s59E13H2" 0.02994722 "N,N'-diacetylbacillosaminyldiphospho-undecaprenol alpha-1,3-N-acetylgalactosaminyltransferase"  
"JS1\_C14\_00303" 5277 "s59E25H2" 0 "N,N'-diacetylbacillosaminyldiphospho-undecaprenol alpha-1,3-N-acetylgalactosaminyltransferase"  
"JS1\_C14\_00303" 5277 "s59E5H2" 0 "N,N'-diacetylbacillosaminyldiphospho-undecaprenol alpha-1,3-N-acetylgalactosaminyltransferase"  
"JS1\_C14\_00303" 5277 "s63E6H2" 0 "N,N'-diacetylbacillosaminyldiphospho-undecaprenol alpha-1,3-N-acetylgalactosaminyltransferase"  
"JS1\_C14\_00304" 5278 "s59E13H2" 0.00290642 "GDP-mannose 4,6-dehydratase"  
"JS1\_C14\_00304" 5278 "s59E25H2" 0 "GDP-mannose 4,6-dehydratase"  
"JS1\_C14\_00304" 5278 "s59E5H2" 0 "GDP-mannose 4,6-dehydratase"  
"JS1\_C14\_00304" 5278 "s63E6H2" 0 "GDP-mannose 4,6-dehydratase"  
"JS1\_C14\_00305" 5279 "s59E13H2" 0.01563522 "GDP-L-fucose synthase"  
"JS1\_C14\_00305" 5279 "s59E25H2" 0 "GDP-L-fucose synthase"  
"JS1\_C14\_00305" 5279 "s59E5H2" 0 "GDP-L-fucose synthase"  
"JS1\_C14\_00305" 5279 "s63E6H2" 0.003104594 "GDP-L-fucose synthase"  
"JS1\_C14\_00306" 5280 "s59E13H2" 0.03671669 "putative glycosyl transferase"  
"JS1\_C14\_00306" 5280 "s59E25H2" 0 "putative glycosyl transferase"  
"JS1\_C14\_00306" 5280 "s59E5H2" 0 "putative glycosyl transferase"  
"JS1\_C14\_00306" 5280 "s63E6H2" 0 "putative glycosyl transferase"  
"JS1\_C14\_00307" 5281 "s59E13H2" 0.02027119 "hypothetical protein"  
"JS1\_C14\_00307" 5281 "s59E25H2" 0 "hypothetical protein"  
"JS1\_C14\_00307" 5281 "s59E5H2" 0 "hypothetical protein"  
"JS1\_C14\_00307" 5281 "s63E6H2" 0.004647775 "hypothetical protein"  
"JS1\_C14\_00308" 5282 "s59E13H2" 0.01745523 "Phosphoglycerate kinase"  
"JS1\_C14\_00308" 5282 "s59E25H2" 0 "Phosphoglycerate kinase"  
"JS1\_C14\_00308" 5282 "s59E5H2" 0.005944302 "Phosphoglycerate kinase"  
"JS1\_C14\_00308" 5282 "s63E6H2" 0.002393117 "Phosphoglycerate kinase"  
"JS1\_C14\_00309" 5283 "s59E13H2" 0.03447792 "Glyceraldehyde-3-phosphate dehydrogenase"  
"JS1\_C14\_00309" 5283 "s59E25H2" 0 "Glyceraldehyde-3-phosphate dehydrogenase"  
"JS1\_C14\_00309" 5283 "s59E5H2" 0 "Glyceraldehyde-3-phosphate dehydrogenase"



"JS1\_C14\_00309" 5283 "s63E6H2" 0.01628296 "Glyceraldehyde-3-phosphate dehydrogenase"  
"JS1\_C14\_00310" 5284 "s59E13H2" 0.1245191 "Dihydrolipoyllysine-residue acetyltransferase component of pyruvate dehydrogenase complex"  
"JS1\_C14\_00310" 5284 "s59E25H2" 0 "Dihydrolipoyllysine-residue acetyltransferase component of pyruvate dehydrogenase complex"  
"JS1\_C14\_00310" 5284 "s59E5H2" 0.01293032 "Dihydrolipoyllysine-residue acetyltransferase component of pyruvate dehydrogenase complex"  
"JS1\_C14\_00310" 5284 "s63E6H2" 0 "Dihydrolipoyllysine-residue acetyltransferase component of pyruvate dehydrogenase complex"  
"JS1\_C14\_00311" 5285 "s59E13H2" 0.08477789 "Acetoin:2,6-dichlorophenolindophenol oxidoreductase subunit beta"  
"JS1\_C14\_00311" 5285 "s59E25H2" 0 "Acetoin:2,6-dichlorophenolindophenol oxidoreductase subunit beta"  
"JS1\_C14\_00311" 5285 "s59E5H2" 0.004122741 "Acetoin:2,6-dichlorophenolindophenol oxidoreductase subunit beta"  
"JS1\_C14\_00311" 5285 "s63E6H2" 0 "Acetoin:2,6-dichlorophenolindophenol oxidoreductase subunit beta"  
"JS1\_C14\_00312" 5286 "s59E13H2" 0 "Acetoin:2,6-dichlorophenolindophenol oxidoreductase subunit alpha"  
"JS1\_C14\_00312" 5286 "s59E25H2" 0 "Acetoin:2,6-dichlorophenolindophenol oxidoreductase subunit alpha"  
"JS1\_C14\_00312" 5286 "s59E5H2" 0 "Acetoin:2,6-dichlorophenolindophenol oxidoreductase subunit alpha"  
"JS1\_C14\_00312" 5286 "s63E6H2" 0 "Acetoin:2,6-dichlorophenolindophenol oxidoreductase subunit alpha"  
"JS1\_C14\_00313" 5287 "s59E13H2" 8.936768 "Tripartite tricarboxylate transporter TctA family protein"  
"JS1\_C14\_00313" 5287 "s59E25H2" 0.5142672 "Tripartite tricarboxylate transporter TctA family protein"  
"JS1\_C14\_00313" 5287 "s59E5H2" 1.068019 "Tripartite tricarboxylate transporter TctA family protein"  
"JS1\_C14\_00313" 5287 "s63E6H2" 12.4574 "Tripartite tricarboxylate transporter TctA family protein"  
"JS1\_C14\_00314" 5288 "s59E13H2" 8.76366 "3-keto-5-aminohexanoate cleavage enzyme"  
"JS1\_C14\_00314" 5288 "s59E25H2" 1.560847 "3-keto-5-aminohexanoate cleavage enzyme"  
"JS1\_C14\_00314" 5288 "s59E5H2" 0.8995367 "3-keto-5-aminohexanoate cleavage enzyme"  
"JS1\_C14\_00314" 5288 "s63E6H2" 13.49588 "3-keto-5-aminohexanoate cleavage enzyme"  
"JS1\_C14\_00315" 5289 "s59E13H2" 6.747736 "3-keto-5-aminohexanoate cleavage enzyme"  
"JS1\_C14\_00315" 5289 "s59E25H2" 0 "3-keto-5-aminohexanoate cleavage enzyme"  
"JS1\_C14\_00315" 5289 "s59E5H2" 0.423628 "3-keto-5-aminohexanoate cleavage enzyme"  
"JS1\_C14\_00315" 5289 "s63E6H2" 11.05581 "3-keto-5-aminohexanoate cleavage enzyme"  
"JS1\_C14\_00317" 5291 "s59E13H2" 0.06913007 "Formamidase"  
"JS1\_C14\_00317" 5291 "s59E25H2" 0 "Formamidase"  
"JS1\_C14\_00317" 5291 "s59E5H2" 0.0854884 "Formamidase"  
"JS1\_C14\_00317" 5291 "s63E6H2" 0.01548082 "Formamidase"  
"JS1\_C14\_00318" 5292 "s59E13H2" 0.05643792 "hypothetical protein"  
"JS1\_C14\_00318" 5292 "s59E25H2" 0 "hypothetical protein"  
"JS1\_C14\_00318" 5292 "s59E5H2" 0.003232004 "hypothetical protein"  
"JS1\_C14\_00318" 5292 "s63E6H2" 0.02749739 "hypothetical protein"  
"JS1\_C14\_00320" 5294 "s59E13H2" 5.204848 "Diacetylchitobiose deacetylase"  
"JS1\_C14\_00320" 5294 "s59E25H2" 0 "Diacetylchitobiose deacetylase"  
"JS1\_C14\_00320" 5294 "s59E5H2" 5.109161 "Diacetylchitobiose deacetylase"  
"JS1\_C14\_00320" 5294 "s63E6H2" 2.660614 "Diacetylchitobiose deacetylase"  
"JS1\_C14\_00321" 5295 "s59E13H2" 6.794953 "Undecaprenyl-phosphate mannosyltransferase"  
"JS1\_C14\_00321" 5295 "s59E25H2" 0 "Undecaprenyl-phosphate mannosyltransferase"  
"JS1\_C14\_00321" 5295 "s59E5H2" 7.432895 "Undecaprenyl-phosphate mannosyltransferase"  
"JS1\_C14\_00321" 5295 "s63E6H2" 1.867717 "Undecaprenyl-phosphate mannosyltransferase"  
"JS1\_C14\_00322" 5296 "s59E13H2" 7.84966 "Na+/Pi-cotransporter"  
"JS1\_C14\_00322" 5296 "s59E25H2" 0.3103662 "Na+/Pi-cotransporter"  
"JS1\_C14\_00322" 5296 "s59E5H2" 2.974224 "Na+/Pi-cotransporter"  
"JS1\_C14\_00322" 5296 "s63E6H2" 1.418173 "Na+/Pi-cotransporter"  
"JS1\_C14\_00323" 5297 "s59E13H2" 7.876921 "L-2-hydroxyglutarate oxidase LhgO"  
"JS1\_C14\_00323" 5297 "s59E25H2" 0.3306826 "L-2-hydroxyglutarate oxidase LhgO"

"JS1\_C14\_00323" 5297 "s59E5H2" 0.9053216 "L-2-hydroxyglutarate oxidase LhgO"  
"JS1\_C14\_00323" 5297 "s63E6H2" 2.537844 "L-2-hydroxyglutarate oxidase LhgO"  
"JS1\_C14\_00324" 5298 "s59E13H2" 2.759793 "Thioredoxin reductase"  
"JS1\_C14\_00324" 5298 "s59E25H2" 0 "Thioredoxin reductase"  
"JS1\_C14\_00324" 5298 "s59E5H2" 1.687685 "Thioredoxin reductase"  
"JS1\_C14\_00324" 5298 "s63E6H2" 4.450371 "Thioredoxin reductase"  
"JS1\_C14\_00325" 5299 "s59E13H2" 0.3743159 "hypothetical protein"  
"JS1\_C14\_00325" 5299 "s59E25H2" 0 "hypothetical protein"  
"JS1\_C14\_00325" 5299 "s59E5H2" 3.377655 "hypothetical protein"  
"JS1\_C14\_00325" 5299 "s63E6H2" 4.980331 "hypothetical protein"  
"JS1\_C14\_00326" 5300 "s59E13H2" 0.3201556 "Glycerol-3-phosphate responsive antiterminator"  
"JS1\_C14\_00326" 5300 "s59E25H2" 0 "Glycerol-3-phosphate responsive antiterminator"  
"JS1\_C14\_00326" 5300 "s59E5H2" 2.022392 "Glycerol-3-phosphate responsive antiterminator"  
"JS1\_C14\_00326" 5300 "s63E6H2" 2.305698 "Glycerol-3-phosphate responsive antiterminator"  
"JS1\_C14\_00327" 5301 "s59E13H2" 2.877265 "sn-glycerol-3-phosphate-binding periplasmic protein UgpB precursor"  
"JS1\_C14\_00327" 5301 "s59E25H2" 0.3795455 "sn-glycerol-3-phosphate-binding periplasmic protein UgpB precursor"  
"JS1\_C14\_00327" 5301 "s59E5H2" 1.822592 "sn-glycerol-3-phosphate-binding periplasmic protein UgpB precursor"  
"JS1\_C14\_00327" 5301 "s63E6H2" 4.993155 "sn-glycerol-3-phosphate-binding periplasmic protein UgpB precursor"  
"JS1\_C14\_00328" 5302 "s59E13H2" 2.797175 "sn-glycerol-3-phosphate transport system permease protein UgpA"  
"JS1\_C14\_00328" 5302 "s59E25H2" 0 "sn-glycerol-3-phosphate transport system permease protein UgpA"  
"JS1\_C14\_00328" 5302 "s59E5H2" 1.357053 "sn-glycerol-3-phosphate transport system permease protein UgpA"  
"JS1\_C14\_00328" 5302 "s63E6H2" 0.950688 "sn-glycerol-3-phosphate transport system permease protein UgpA"  
"JS1\_C14\_00329" 5303 "s59E13H2" 0.8666433 "Lactose transport system permease protein LacG"  
"JS1\_C14\_00329" 5303 "s59E25H2" 0 "Lactose transport system permease protein LacG"  
"JS1\_C14\_00329" 5303 "s59E5H2" 1.186256 "Lactose transport system permease protein LacG"  
"JS1\_C14\_00329" 5303 "s63E6H2" 1.099331 "Lactose transport system permease protein LacG"  
"JS1\_C14\_00330" 5304 "s59E13H2" 0.354017 "hypothetical protein"  
"JS1\_C14\_00330" 5304 "s59E25H2" 0 "hypothetical protein"  
"JS1\_C14\_00330" 5304 "s59E5H2" 0.04901729 "hypothetical protein"  
"JS1\_C14\_00330" 5304 "s63E6H2" 2.082999 "hypothetical protein"  
"JS1\_C14\_00331" 5305 "s59E13H2" 0.1464165 "hypothetical protein"  
"JS1\_C14\_00331" 5305 "s59E25H2" 0 "hypothetical protein"  
"JS1\_C14\_00331" 5305 "s59E5H2" 0.7759164 "hypothetical protein"  
"JS1\_C14\_00331" 5305 "s63E6H2" 0.09402925 "hypothetical protein"  
"JS1\_C14\_00332" 5306 "s59E13H2" 0.06648317 "hypothetical protein"  
"JS1\_C14\_00332" 5306 "s59E25H2" 0 "hypothetical protein"  
"JS1\_C14\_00332" 5306 "s59E5H2" 0.4076372 "hypothetical protein"  
"JS1\_C14\_00332" 5306 "s63E6H2" 0.03215431 "hypothetical protein"  
"JS1\_C14\_00333" 5307 "s59E13H2" 0.0256433 "hypothetical protein"  
"JS1\_C14\_00333" 5307 "s59E25H2" 0 "hypothetical protein"  
"JS1\_C14\_00333" 5307 "s59E5H2" 0.4143134 "hypothetical protein"  
"JS1\_C14\_00333" 5307 "s63E6H2" 0.04040671 "hypothetical protein"  
"JS1\_C14\_00334" 5308 "s59E13H2" 0.6070063 "ATP-dependent RecD-like DNA helicase"  
"JS1\_C14\_00334" 5308 "s59E25H2" 0 "ATP-dependent RecD-like DNA helicase"  
"JS1\_C14\_00334" 5308 "s59E5H2" 0.7238436 "ATP-dependent RecD-like DNA helicase"  
"JS1\_C14\_00334" 5308 "s63E6H2" 0.1363335 "ATP-dependent RecD-like DNA helicase"  
"JS1\_C14\_00335" 5309 "s59E13H2" 0.2675285 "2,3-bisphosphoglycerate-independent phosphoglycerate mutase"

"JS1\_C14\_00335" 5309 "s59E25H2" 0 "2,3-bisphosphoglycerate-independent phosphoglycerate mutase"  
"JS1\_C14\_00335" 5309 "s59E5H2" 0.4405729 "2,3-bisphosphoglycerate-independent phosphoglycerate mutase"  
"JS1\_C14\_00335" 5309 "s63E6H2" 0.07456055 "2,3-bisphosphoglycerate-independent phosphoglycerate mutase"  
"JS1\_C14\_00336" 5310 "s59E13H2" 0.05490397 "putative 2-phosphosulfolactate phosphatase"  
"JS1\_C14\_00336" 5310 "s59E25H2" 0 "putative 2-phosphosulfolactate phosphatase"  
"JS1\_C14\_00336" 5310 "s59E5H2" 0.3239207 "putative 2-phosphosulfolactate phosphatase"  
"JS1\_C14\_00336" 5310 "s63E6H2" 0.08372266 "putative 2-phosphosulfolactate phosphatase"  
"JS1\_C14\_00337" 5311 "s59E13H2" 0.3030435 "Soluble hydrogenase 42 kDa subunit"  
"JS1\_C14\_00337" 5311 "s59E25H2" 0 "Soluble hydrogenase 42 kDa subunit"  
"JS1\_C14\_00337" 5311 "s59E5H2" 0.2092569 "Soluble hydrogenase 42 kDa subunit"  
"JS1\_C14\_00337" 5311 "s63E6H2" 0.07493558 "Soluble hydrogenase 42 kDa subunit"  
"JS1\_C14\_00338" 5312 "s59E13H2" 0.02881336 "VanZ like family protein"  
"JS1\_C14\_00338" 5312 "s59E25H2" 0 "VanZ like family protein"  
"JS1\_C14\_00338" 5312 "s59E5H2" 0.1333982 "VanZ like family protein"  
"JS1\_C14\_00338" 5312 "s63E6H2" 0.0564949 "VanZ like family protein"  
"JS1\_C14\_00339" 5313 "s59E13H2" 0.4807221 "Tetrahedral aminopeptidase"  
"JS1\_C14\_00339" 5313 "s59E25H2" 0 "Tetrahedral aminopeptidase"  
"JS1\_C14\_00339" 5313 "s59E5H2" 0.3695312 "Tetrahedral aminopeptidase"  
"JS1\_C14\_00339" 5313 "s63E6H2" 0.1343325 "Tetrahedral aminopeptidase"  
"JS1\_C14\_00340" 5314 "s59E13H2" 0.145985 "putative A/G-specific adenine glycosylase YfhQ"  
"JS1\_C14\_00340" 5314 "s59E25H2" 0 "putative A/G-specific adenine glycosylase YfhQ"  
"JS1\_C14\_00340" 5314 "s59E5H2" 0.2276367 "putative A/G-specific adenine glycosylase YfhQ"  
"JS1\_C14\_00340" 5314 "s63E6H2" 0.1182264 "putative A/G-specific adenine glycosylase YfhQ"  
"JS1\_C14\_00341" 5315 "s59E13H2" 0.06349728 "Trehalose synthase"  
"JS1\_C14\_00341" 5315 "s59E25H2" 0 "Trehalose synthase"  
"JS1\_C14\_00341" 5315 "s59E5H2" 0.2878799 "Trehalose synthase"  
"JS1\_C14\_00341" 5315 "s63E6H2" 0.1573614 "Trehalose synthase"  
"JS1\_C14\_00342" 5316 "s59E13H2" 0.05151986 "4-alpha-glucanotransferase"  
"JS1\_C14\_00342" 5316 "s59E25H2" 0 "4-alpha-glucanotransferase"  
"JS1\_C14\_00342" 5316 "s59E5H2" 0.1824753 "4-alpha-glucanotransferase"  
"JS1\_C14\_00342" 5316 "s63E6H2" 0.1347836 "4-alpha-glucanotransferase"  
"JS1\_C14\_00343" 5317 "s59E13H2" 0.06787464 "Glycosyl hydrolase family 57"  
"JS1\_C14\_00343" 5317 "s59E25H2" 0 "Glycosyl hydrolase family 57"  
"JS1\_C14\_00343" 5317 "s59E5H2" 0.1006122 "Glycosyl hydrolase family 57"  
"JS1\_C14\_00343" 5317 "s63E6H2" 0.3543318 "Glycosyl hydrolase family 57"  
"JS1\_C14\_00344" 5318 "s59E13H2" 11.14693 "Transposase IS116/IS110/IS902 family protein"  
"JS1\_C14\_00344" 5318 "s59E25H2" 0 "Transposase IS116/IS110/IS902 family protein"  
"JS1\_C14\_00344" 5318 "s59E5H2" 0.5080886 "Transposase IS116/IS110/IS902 family protein"  
"JS1\_C14\_00344" 5318 "s63E6H2" 2.747274 "Transposase IS116/IS110/IS902 family protein"  
"JS1\_C14\_00345" 5319 "s59E13H2" 0.1303971 "Transposase IS116/IS110/IS902 family protein"  
"JS1\_C14\_00345" 5319 "s59E25H2" 0 "Transposase IS116/IS110/IS902 family protein"  
"JS1\_C14\_00345" 5319 "s59E5H2" 0.5107639 "Transposase IS116/IS110/IS902 family protein"  
"JS1\_C14\_00345" 5319 "s63E6H2" 2.385256 "Transposase IS116/IS110/IS902 family protein"  
"JS1\_C14\_00346" 5320 "s59E13H2" 0.006660507 "hypothetical protein"  
"JS1\_C14\_00346" 5320 "s59E25H2" 0 "hypothetical protein"  
"JS1\_C14\_00346" 5320 "s59E5H2" 0 "hypothetical protein"  
"JS1\_C14\_00346" 5320 "s63E6H2" 0 "hypothetical protein"

"JS1\_C14\_00347" 5321 "s59E13H2" 0.08537185 "6-phosphofructokinase 1"  
"JS1\_C14\_00347" 5321 "s59E25H2" 0 "6-phosphofructokinase 1"  
"JS1\_C14\_00347" 5321 "s59E5H2" 0.07954312 "6-phosphofructokinase 1"  
"JS1\_C14\_00347" 5321 "s63E6H2" 0.3873696 "6-phosphofructokinase 1"  
"JS1\_C14\_00348" 5322 "s59E13H2" 0.07262858 "Fructose-bisphosphate aldolase"  
"JS1\_C14\_00348" 5322 "s59E25H2" 0 "Fructose-bisphosphate aldolase"  
"JS1\_C14\_00348" 5322 "s59E5H2" 0.7139894 "Fructose-bisphosphate aldolase"  
"JS1\_C14\_00348" 5322 "s63E6H2" 0.215054 "Fructose-bisphosphate aldolase"  
"JS1\_C14\_00350" 5324 "s59E13H2" 0.007016028 "hypothetical protein"  
"JS1\_C14\_00350" 5324 "s59E25H2" 0 "hypothetical protein"  
"JS1\_C14\_00350" 5324 "s59E5H2" 0 "hypothetical protein"  
"JS1\_C14\_00350" 5324 "s63E6H2" 0 "hypothetical protein"  
"JS1\_C14\_00351" 5325 "s59E13H2" 0.01476005 "Retroviral aspartyl protease"  
"JS1\_C14\_00351" 5325 "s59E25H2" 0 "Retroviral aspartyl protease"  
"JS1\_C14\_00351" 5325 "s59E5H2" 0 "Retroviral aspartyl protease"  
"JS1\_C14\_00351" 5325 "s63E6H2" 0.001384173 "Retroviral aspartyl protease"  
"JS1\_C14\_00353" 5327 "s59E13H2" 0.07422005 "Exodeoxyribonuclease"  
"JS1\_C14\_00353" 5327 "s59E25H2" 0 "Exodeoxyribonuclease"  
"JS1\_C14\_00353" 5327 "s59E5H2" 0.7568209 "Exodeoxyribonuclease"  
"JS1\_C14\_00353" 5327 "s63E6H2" 0.03679113 "Exodeoxyribonuclease"  
"JS1\_C14\_00354" 5328 "s59E13H2" 0.8869989 "Trifunctional nucleotide phosphoesterase protein YfkN precursor"  
"JS1\_C14\_00354" 5328 "s59E25H2" 0 "Trifunctional nucleotide phosphoesterase protein YfkN precursor"  
"JS1\_C14\_00354" 5328 "s59E5H2" 0.1436232 "Trifunctional nucleotide phosphoesterase protein YfkN precursor"  
"JS1\_C14\_00354" 5328 "s63E6H2" 0.006645683 "Trifunctional nucleotide phosphoesterase protein YfkN precursor"  
"JS1\_C14\_00355" 5329 "s59E13H2" 1.125399 "Ribosome maturation factor RimM"  
"JS1\_C14\_00355" 5329 "s59E25H2" 0 "Ribosome maturation factor RimM"  
"JS1\_C14\_00355" 5329 "s59E5H2" 0.03512542 "Ribosome maturation factor RimM"  
"JS1\_C14\_00355" 5329 "s63E6H2" 0.006092799 "Ribosome maturation factor RimM"  
"JS1\_C14\_00356" 5330 "s59E13H2" 0.01426401 "tRNA (guanine-N(1)-)-methyltransferase"  
"JS1\_C14\_00356" 5330 "s59E25H2" 0 "tRNA (guanine-N(1)-)-methyltransferase"  
"JS1\_C14\_00356" 5330 "s59E5H2" 0.05262939 "tRNA (guanine-N(1)-)-methyltransferase"  
"JS1\_C14\_00356" 5330 "s63E6H2" 0.004449335 "tRNA (guanine-N(1)-)-methyltransferase"  
"JS1\_C14\_00357" 5331 "s59E13H2" 0.09048912 "Signal recognition particle protein"  
"JS1\_C14\_00357" 5331 "s59E25H2" 0 "Signal recognition particle protein"  
"JS1\_C14\_00357" 5331 "s59E5H2" 0.08941784 "Signal recognition particle protein"  
"JS1\_C14\_00357" 5331 "s63E6H2" 0.02195827 "Signal recognition particle protein"  
"JS1\_C14\_00358" 5332 "s59E13H2" 0.01896362 "Signal recognition particle receptor FtsY"  
"JS1\_C14\_00358" 5332 "s59E25H2" 0 "Signal recognition particle receptor FtsY"  
"JS1\_C14\_00358" 5332 "s59E5H2" 0.03971082 "Signal recognition particle receptor FtsY"  
"JS1\_C14\_00358" 5332 "s63E6H2" 0.05850244 "Signal recognition particle receptor FtsY"  
"JS1\_C14\_00359" 5333 "s59E13H2" 0.007785383 "Chromosome partition protein Smc"  
"JS1\_C14\_00359" 5333 "s59E25H2" 0 "Chromosome partition protein Smc"  
"JS1\_C14\_00359" 5333 "s59E5H2" 0.0122299 "Chromosome partition protein Smc"  
"JS1\_C14\_00359" 5333 "s63E6H2" 0.03867281 "Chromosome partition protein Smc"  
"JS1\_C14\_00360" 5334 "s59E13H2" 0.6328403 "4-diphosphocytidyl-2-C-methyl-D-erythritol kinase"  
"JS1\_C14\_00360" 5334 "s59E25H2" 0 "4-diphosphocytidyl-2-C-methyl-D-erythritol kinase"  
"JS1\_C14\_00360" 5334 "s59E5H2" 0.3366168 "4-diphosphocytidyl-2-C-methyl-D-erythritol kinase"

"JS1\_C14\_00360" 5334 "s63E6H2" 0.3416289 "4-diphosphocytidyl-2-C-methyl-D-erythritol kinase"  
"JS1\_C14\_00361" 5335 "s59E13H2" 0.9330711 "Putative 2-C-methyl-D-erythritol 4-phosphate cytidyltransferase 2"  
"JS1\_C14\_00361" 5335 "s59E25H2" 0 "Putative 2-C-methyl-D-erythritol 4-phosphate cytidyltransferase 2"  
"JS1\_C14\_00361" 5335 "s59E5H2" 0.1851984 "Putative 2-C-methyl-D-erythritol 4-phosphate cytidyltransferase 2"  
"JS1\_C14\_00361" 5335 "s63E6H2" 0.2643117 "Putative 2-C-methyl-D-erythritol 4-phosphate cytidyltransferase 2"  
"JS1\_C14\_00362" 5336 "s59E13H2" 0.9544517 "hypothetical protein"  
"JS1\_C14\_00362" 5336 "s59E25H2" 0 "hypothetical protein"  
"JS1\_C14\_00362" 5336 "s59E5H2" 0.1671295 "hypothetical protein"  
"JS1\_C14\_00362" 5336 "s63E6H2" 0.1130194 "hypothetical protein"  
"JS1\_C14\_00363" 5337 "s59E13H2" 1.658953 "Rod shape-determining protein MreB"  
"JS1\_C14\_00363" 5337 "s59E25H2" 0 "Rod shape-determining protein MreB"  
"JS1\_C14\_00363" 5337 "s59E5H2" 0.2187707 "Rod shape-determining protein MreB"  
"JS1\_C14\_00363" 5337 "s63E6H2" 0.3994637 "Rod shape-determining protein MreB"  
"JS1\_C14\_00364" 5338 "s59E13H2" 0.6844733 "UDP-N-acetylglucosamine 1-carboxyvinyltransferase 1"  
"JS1\_C14\_00364" 5338 "s59E25H2" 0 "UDP-N-acetylglucosamine 1-carboxyvinyltransferase 1"  
"JS1\_C14\_00364" 5338 "s59E5H2" 0.302465 "UDP-N-acetylglucosamine 1-carboxyvinyltransferase 1"  
"JS1\_C14\_00364" 5338 "s63E6H2" 0.1566175 "UDP-N-acetylglucosamine 1-carboxyvinyltransferase 1"  
"JS1\_C14\_00365" 5339 "s59E13H2" 0.4347077 "Methylthioribose-1-phosphate isomerase"  
"JS1\_C14\_00365" 5339 "s59E25H2" 0 "Methylthioribose-1-phosphate isomerase"  
"JS1\_C14\_00365" 5339 "s59E5H2" 0.2855145 "Methylthioribose-1-phosphate isomerase"  
"JS1\_C14\_00365" 5339 "s63E6H2" 0.1456151 "Methylthioribose-1-phosphate isomerase"  
"JS1\_C14\_00366" 5340 "s59E13H2" 0.3739805 "Putative small multi-drug export protein"  
"JS1\_C14\_00366" 5340 "s59E25H2" 0 "Putative small multi-drug export protein"  
"JS1\_C14\_00366" 5340 "s59E5H2" 0.2575158 "Putative small multi-drug export protein"  
"JS1\_C14\_00366" 5340 "s63E6H2" 0.2331851 "Putative small multi-drug export protein"  
"JS1\_C14\_00367" 5341 "s59E13H2" 0.3729041 "Purine nucleoside phosphorylase 1"  
"JS1\_C14\_00367" 5341 "s59E25H2" 0 "Purine nucleoside phosphorylase 1"  
"JS1\_C14\_00367" 5341 "s59E5H2" 0.2699204 "Purine nucleoside phosphorylase 1"  
"JS1\_C14\_00367" 5341 "s63E6H2" 0.1809712 "Purine nucleoside phosphorylase 1"  
"JS1\_C14\_00368" 5342 "s59E13H2" 0.2733147 "Tyrosine recombinase XerD"  
"JS1\_C14\_00368" 5342 "s59E25H2" 0 "Tyrosine recombinase XerD"  
"JS1\_C14\_00368" 5342 "s59E5H2" 0.224329 "Tyrosine recombinase XerD"  
"JS1\_C14\_00368" 5342 "s63E6H2" 0.1075259 "Tyrosine recombinase XerD"  
"JS1\_C14\_00369" 5343 "s59E13H2" 0.7537009 "Putative lipoprotein YerB precursor"  
"JS1\_C14\_00369" 5343 "s59E25H2" 0 "Putative lipoprotein YerB precursor"  
"JS1\_C14\_00369" 5343 "s59E5H2" 0.3117938 "Putative lipoprotein YerB precursor"  
"JS1\_C14\_00369" 5343 "s63E6H2" 0.1066158 "Putative lipoprotein YerB precursor"  
"JS1\_C14\_00370" 5344 "s59E13H2" 0.05630517 "Restriction endonuclease BgIII"  
"JS1\_C14\_00370" 5344 "s59E25H2" 0 "Restriction endonuclease BgIII"  
"JS1\_C14\_00370" 5344 "s59E5H2" 0.01388641 "Restriction endonuclease BgIII"  
"JS1\_C14\_00370" 5344 "s63E6H2" 0 "Restriction endonuclease BgIII"  
"JS1\_C14\_00371" 5345 "s59E13H2" 0.04733127 "DNA replication and repair protein RecF"  
"JS1\_C14\_00371" 5345 "s59E25H2" 0 "DNA replication and repair protein RecF"  
"JS1\_C14\_00371" 5345 "s59E5H2" 0.003514432 "DNA replication and repair protein RecF"  
"JS1\_C14\_00371" 5345 "s63E6H2" 0 "DNA replication and repair protein RecF"  
"JS1\_C14\_00372" 5346 "s59E13H2" 0.1122092 "hypothetical protein"  
"JS1\_C14\_00372" 5346 "s59E25H2" 0 "hypothetical protein"

"JS1\_C14\_00372" 5346 "s59E5H2" 0.009087812 "hypothetical protein"  
"JS1\_C14\_00372" 5346 "s63E6H2" 0.001164836 "hypothetical protein"  
"JS1\_C14\_00373" 5347 "s59E13H2" 0.1307552 "Inner membrane protein Yhal"  
"JS1\_C14\_00373" 5347 "s59E25H2" 0 "Inner membrane protein Yhal"  
"JS1\_C14\_00373" 5347 "s59E5H2" 0 "Inner membrane protein Yhal"  
"JS1\_C14\_00373" 5347 "s63E6H2" 0.006675298 "Inner membrane protein Yhal"  
"JS1\_C14\_00374" 5348 "s59E13H2" 0.05065486 "hypothetical protein"  
"JS1\_C14\_00374" 5348 "s59E25H2" 0 "hypothetical protein"  
"JS1\_C14\_00374" 5348 "s59E5H2" 0.006960472 "hypothetical protein"  
"JS1\_C14\_00374" 5348 "s63E6H2" 0.1728413 "hypothetical protein"  
"JS1\_C14\_00375" 5349 "s59E13H2" 2.581823 "hypothetical protein"  
"JS1\_C14\_00375" 5349 "s59E25H2" 0.1657559 "hypothetical protein"  
"JS1\_C14\_00375" 5349 "s59E5H2" 1.189805 "hypothetical protein"  
"JS1\_C14\_00375" 5349 "s63E6H2" 0.3019823 "hypothetical protein"  
"JS1\_C14\_00376" 5350 "s59E13H2" 2.277772 "hypothetical protein"  
"JS1\_C14\_00376" 5350 "s59E25H2" 0 "hypothetical protein"  
"JS1\_C14\_00376" 5350 "s59E5H2" 0.7889433 "hypothetical protein"  
"JS1\_C14\_00376" 5350 "s63E6H2" 0.06445086 "hypothetical protein"  
"JS1\_C14\_00377" 5351 "s59E13H2" 2.410201 "putative ATP-dependent RNA helicase"  
"JS1\_C14\_00377" 5351 "s59E25H2" 0 "putative ATP-dependent RNA helicase"  
"JS1\_C14\_00377" 5351 "s59E5H2" 1.394722 "putative ATP-dependent RNA helicase"  
"JS1\_C14\_00377" 5351 "s63E6H2" 0.4386485 "putative ATP-dependent RNA helicase"  
"JS1\_C14\_00378" 5352 "s59E13H2" 1.801467 "Aminopeptidase 2"  
"JS1\_C14\_00378" 5352 "s59E25H2" 0 "Aminopeptidase 2"  
"JS1\_C14\_00378" 5352 "s59E5H2" 1.30838 "Aminopeptidase 2"  
"JS1\_C14\_00378" 5352 "s63E6H2" 0.7849903 "Aminopeptidase 2"  
"JS1\_C14\_00379" 5353 "s59E13H2" 0.02725441 "HTH-type transcriptional regulator MurR"  
"JS1\_C14\_00379" 5353 "s59E25H2" 0 "HTH-type transcriptional regulator MurR"  
"JS1\_C14\_00379" 5353 "s59E5H2" 0 "HTH-type transcriptional regulator MurR"  
"JS1\_C14\_00379" 5353 "s63E6H2" 0.001618424 "HTH-type transcriptional regulator MurR"  
"JS1\_C14\_00380" 5354 "s59E13H2" 0.000920692 "Alanine dehydrogenase"  
"JS1\_C14\_00380" 5354 "s59E25H2" 0 "Alanine dehydrogenase"  
"JS1\_C14\_00380" 5354 "s59E5H2" 0.06032018 "Alanine dehydrogenase"  
"JS1\_C14\_00380" 5354 "s63E6H2" 0 "Alanine dehydrogenase"  
"JS1\_C14\_00381" 5355 "s59E13H2" 0.03143379 "alkanesulfonate transporter substrate-binding subunit"  
"JS1\_C14\_00381" 5355 "s59E25H2" 0 "alkanesulfonate transporter substrate-binding subunit"  
"JS1\_C14\_00381" 5355 "s59E5H2" 0.02016787 "alkanesulfonate transporter substrate-binding subunit"  
"JS1\_C14\_00381" 5355 "s63E6H2" 0.00354783 "alkanesulfonate transporter substrate-binding subunit"  
"JS1\_C14\_00382" 5356 "s59E13H2" 0 "hypothetical protein"  
"JS1\_C14\_00382" 5356 "s59E25H2" 0 "hypothetical protein"  
"JS1\_C14\_00382" 5356 "s59E5H2" 0.2143862 "hypothetical protein"  
"JS1\_C14\_00382" 5356 "s63E6H2" 0.0008851073 "hypothetical protein"  
"JS1\_C14\_00383" 5357 "s59E13H2" 0.3169126 "Sialic acid TRAP transporter permease protein SiaT"  
"JS1\_C14\_00383" 5357 "s59E25H2" 0 "Sialic acid TRAP transporter permease protein SiaT"  
"JS1\_C14\_00383" 5357 "s59E5H2" 0.7115568 "Sialic acid TRAP transporter permease protein SiaT"  
"JS1\_C14\_00383" 5357 "s63E6H2" 0.01366662 "Sialic acid TRAP transporter permease protein SiaT"  
"JS1\_C14\_00384" 5358 "s59E13H2" 0.7637513 "Opine dehydrogenase"

"JS1\_C14\_00384" 5358 "s59E25H2" 0 "Opine dehydrogenase"  
"JS1\_C14\_00384" 5358 "s59E5H2" 0.1818408 "Opine dehydrogenase"  
"JS1\_C14\_00384" 5358 "s63E6H2" 0.01157392 "Opine dehydrogenase"  
"JS1\_C14\_00385" 5359 "s59E13H2" 10.99218 "Integrase core domain protein"  
"JS1\_C14\_00385" 5359 "s59E25H2" 0 "Integrase core domain protein"  
"JS1\_C14\_00385" 5359 "s59E5H2" 2.697251 "Integrase core domain protein"  
"JS1\_C14\_00385" 5359 "s63E6H2" 2.363429 "Integrase core domain protein"  
"JS1\_C14\_00386" 5360 "s59E13H2" 0.9760388 "hypothetical protein"  
"JS1\_C14\_00386" 5360 "s59E25H2" 0 "hypothetical protein"  
"JS1\_C14\_00386" 5360 "s59E5H2" 1.438588 "hypothetical protein"  
"JS1\_C14\_00386" 5360 "s63E6H2" 0.1032149 "hypothetical protein"  
"JS1\_C14\_00387" 5361 "s59E13H2" 1.535766 "Iron-sulfur flavoprotein"  
"JS1\_C14\_00387" 5361 "s59E25H2" 0 "Iron-sulfur flavoprotein"  
"JS1\_C14\_00387" 5361 "s59E5H2" 0.2552004 "Iron-sulfur flavoprotein"  
"JS1\_C14\_00387" 5361 "s63E6H2" 0.002302279 "Iron-sulfur flavoprotein"  
"JS1\_C14\_00388" 5362 "s59E13H2" 1.115423 "hypothetical protein"  
"JS1\_C14\_00388" 5362 "s59E25H2" 0 "hypothetical protein"  
"JS1\_C14\_00388" 5362 "s59E5H2" 0.169967 "hypothetical protein"  
"JS1\_C14\_00388" 5362 "s63E6H2" 0.005301909 "hypothetical protein"  
"JS1\_C14\_00389" 5363 "s59E13H2" 0.005548887 "PLAT/LH2 domain protein"  
"JS1\_C14\_00389" 5363 "s59E25H2" 0 "PLAT/LH2 domain protein"  
"JS1\_C14\_00389" 5363 "s59E5H2" 0.1715901 "PLAT/LH2 domain protein"  
"JS1\_C14\_00389" 5363 "s63E6H2" 0.0008565498 "PLAT/LH2 domain protein"  
"JS1\_C14\_00390" 5364 "s59E13H2" 0 "hypothetical protein"  
"JS1\_C14\_00390" 5364 "s59E25H2" 0 "hypothetical protein"  
"JS1\_C14\_00390" 5364 "s59E5H2" 0.5755462 "hypothetical protein"  
"JS1\_C14\_00390" 5364 "s63E6H2" 0 "hypothetical protein"  
"JS1\_C14\_00391" 5365 "s59E13H2" 2.118783 "23S rRNA (uridine(2479)-2'-O)-methyltransferase"  
"JS1\_C14\_00391" 5365 "s59E25H2" 0 "23S rRNA (uridine(2479)-2'-O)-methyltransferase"  
"JS1\_C14\_00391" 5365 "s59E5H2" 0.5089783 "23S rRNA (uridine(2479)-2'-O)-methyltransferase"  
"JS1\_C14\_00391" 5365 "s63E6H2" 0.3212897 "23S rRNA (uridine(2479)-2'-O)-methyltransferase"  
"JS1\_C14\_00392" 5366 "s59E13H2" 0.03031043 "dihydrolipoamide dehydrogenase"  
"JS1\_C14\_00392" 5366 "s59E25H2" 0 "dihydrolipoamide dehydrogenase"  
"JS1\_C14\_00392" 5366 "s59E5H2" 0.3881751 "dihydrolipoamide dehydrogenase"  
"JS1\_C14\_00392" 5366 "s63E6H2" 0.2160741 "dihydrolipoamide dehydrogenase"  
"JS1\_C14\_00393" 5367 "s59E13H2" 0.06419714 "5'-nucleotidase SurE"  
"JS1\_C14\_00393" 5367 "s59E25H2" 0 "5'-nucleotidase SurE"  
"JS1\_C14\_00393" 5367 "s59E5H2" 0.5912551 "5'-nucleotidase SurE"  
"JS1\_C14\_00393" 5367 "s63E6H2" 0.2722355 "5'-nucleotidase SurE"  
"JS1\_C14\_00394" 5368 "s59E13H2" 0.04798071 "hypothetical protein"  
"JS1\_C14\_00394" 5368 "s59E25H2" 0 "hypothetical protein"  
"JS1\_C14\_00394" 5368 "s59E5H2" 0.7023583 "hypothetical protein"  
"JS1\_C14\_00394" 5368 "s63E6H2" 0.234503 "hypothetical protein"  
"JS1\_C14\_00395" 5369 "s59E13H2" 0.05357775 "Protein-L-isoaspartate O-methyltransferase"  
"JS1\_C14\_00395" 5369 "s59E25H2" 0 "Protein-L-isoaspartate O-methyltransferase"  
"JS1\_C14\_00395" 5369 "s59E5H2" 0.4088874 "Protein-L-isoaspartate O-methyltransferase"  
"JS1\_C14\_00395" 5369 "s63E6H2" 0.4668436 "Protein-L-isoaspartate O-methyltransferase"

"JS1\_C14\_00397" 5371 "s59E13H2" 0.08838567 "Vancomycin B-type resistance protein VanW"  
"JS1\_C14\_00397" 5371 "s59E25H2" 0.3377483 "Vancomycin B-type resistance protein VanW"  
"JS1\_C14\_00397" 5371 "s59E5H2" 0.3904176 "Vancomycin B-type resistance protein VanW"  
"JS1\_C14\_00397" 5371 "s63E6H2" 0.5987183 "Vancomycin B-type resistance protein VanW"  
"JS1\_C14\_00398" 5372 "s59E13H2" 0.2313091 "aspartoacylase"  
"JS1\_C14\_00398" 5372 "s59E25H2" 0 "aspartoacylase"  
"JS1\_C14\_00398" 5372 "s59E5H2" 0.5110437 "aspartoacylase"  
"JS1\_C14\_00398" 5372 "s63E6H2" 0.2559771 "aspartoacylase"  
"JS1\_C14\_00399" 5373 "s59E13H2" 6.404402 "Putative peptidyl-prolyl cis-trans isomerase Cbf2 precursor"  
"JS1\_C14\_00399" 5373 "s59E25H2" 0 "Putative peptidyl-prolyl cis-trans isomerase Cbf2 precursor"  
"JS1\_C14\_00399" 5373 "s59E5H2" 0.35115 "Putative peptidyl-prolyl cis-trans isomerase Cbf2 precursor"  
"JS1\_C14\_00399" 5373 "s63E6H2" 0.3325801 "Putative peptidyl-prolyl cis-trans isomerase Cbf2 precursor"  
"JS1\_C14\_00400" 5374 "s59E13H2" 0.150865 "Integrase core domain protein"  
"JS1\_C14\_00400" 5374 "s59E25H2" 0 "Integrase core domain protein"  
"JS1\_C14\_00400" 5374 "s59E5H2" 1.036351 "Integrase core domain protein"  
"JS1\_C14\_00400" 5374 "s63E6H2" 1.571068 "Integrase core domain protein"  
"JS1\_C14\_00401" 5375 "s59E13H2" 0.04902037 "30S ribosomal protein S21"  
"JS1\_C14\_00401" 5375 "s59E25H2" 0 "30S ribosomal protein S21"  
"JS1\_C14\_00401" 5375 "s59E5H2" 0.3331554 "30S ribosomal protein S21"  
"JS1\_C14\_00401" 5375 "s63E6H2" 0.1957274 "30S ribosomal protein S21"  
"JS1\_C14\_00402" 5376 "s59E13H2" 0.04967007 "glutamyl-tRNA(Gln) amidotransferase subunit E"  
"JS1\_C14\_00402" 5376 "s59E25H2" 0 "glutamyl-tRNA(Gln) amidotransferase subunit E"  
"JS1\_C14\_00402" 5376 "s59E5H2" 0.2865458 "glutamyl-tRNA(Gln) amidotransferase subunit E"  
"JS1\_C14\_00402" 5376 "s63E6H2" 0.1344718 "glutamyl-tRNA(Gln) amidotransferase subunit E"  
"JS1\_C14\_00403" 5377 "s59E13H2" 0.08685932 "hypothetical protein"  
"JS1\_C14\_00403" 5377 "s59E25H2" 0 "hypothetical protein"  
"JS1\_C14\_00403" 5377 "s59E5H2" 0.295438 "hypothetical protein"  
"JS1\_C14\_00403" 5377 "s63E6H2" 0.9146633 "hypothetical protein"  
"JS1\_C14\_00404" 5378 "s59E13H2" 0.0318213 "SigmaW regulon antibacterial"  
"JS1\_C14\_00404" 5378 "s59E25H2" 0 "SigmaW regulon antibacterial"  
"JS1\_C14\_00404" 5378 "s59E5H2" 0.2231799 "SigmaW regulon antibacterial"  
"JS1\_C14\_00404" 5378 "s63E6H2" 0.911156 "SigmaW regulon antibacterial"  
"JS1\_C14\_00405" 5379 "s59E13H2" 0.02072767 "hypothetical protein"  
"JS1\_C14\_00405" 5379 "s59E25H2" 0 "hypothetical protein"  
"JS1\_C14\_00405" 5379 "s59E5H2" 0.1421229 "hypothetical protein"  
"JS1\_C14\_00405" 5379 "s63E6H2" 0.2566676 "hypothetical protein"  
"JS1\_C14\_00406" 5380 "s59E13H2" 0.058398 "PhoH-like protein"  
"JS1\_C14\_00406" 5380 "s59E25H2" 0 "PhoH-like protein"  
"JS1\_C14\_00406" 5380 "s59E5H2" 0.3158554 "PhoH-like protein"  
"JS1\_C14\_00406" 5380 "s63E6H2" 0.5633113 "PhoH-like protein"  
"JS1\_C14\_00407" 5381 "s59E13H2" 0.05827848 "7TM-HD extracellular"  
"JS1\_C14\_00407" 5381 "s59E25H2" 0 "7TM-HD extracellular"  
"JS1\_C14\_00407" 5381 "s59E5H2" 0.2460494 "7TM-HD extracellular"  
"JS1\_C14\_00407" 5381 "s63E6H2" 0.4612118 "7TM-HD extracellular"  
"JS1\_C14\_00408" 5382 "s59E13H2" 0.0997106 "Glycine--tRNA ligase beta subunit"  
"JS1\_C14\_00408" 5382 "s59E25H2" 0 "Glycine--tRNA ligase beta subunit"  
"JS1\_C14\_00408" 5382 "s59E5H2" 0.1039263 "Glycine--tRNA ligase beta subunit"



"JS1\_C14\_00408" 5382 "s63E6H2" 0.05299214 "Glycine--tRNA ligase beta subunit"  
"JS1\_C14\_00409" 5383 "s59E13H2" 0.07289781 "Glycine--tRNA ligase alpha subunit"  
"JS1\_C14\_00409" 5383 "s59E25H2" 0 "Glycine--tRNA ligase alpha subunit"  
"JS1\_C14\_00409" 5383 "s59E5H2" 0.2404927 "Glycine--tRNA ligase alpha subunit"  
"JS1\_C14\_00409" 5383 "s63E6H2" 0.3647504 "Glycine--tRNA ligase alpha subunit"  
"JS1\_C14\_00410" 5384 "s59E13H2" 0.09155392 "DNA repair protein RecO"  
"JS1\_C14\_00410" 5384 "s59E25H2" 0 "DNA repair protein RecO"  
"JS1\_C14\_00410" 5384 "s59E5H2" 0.3671827 "DNA repair protein RecO"  
"JS1\_C14\_00410" 5384 "s63E6H2" 0.7849474 "DNA repair protein RecO"  
"JS1\_C14\_00411" 5385 "s59E13H2" 0.1002765 "Cytidine deaminase"  
"JS1\_C14\_00411" 5385 "s59E25H2" 0 "Cytidine deaminase"  
"JS1\_C14\_00411" 5385 "s59E5H2" 0.475319 "Cytidine deaminase"  
"JS1\_C14\_00411" 5385 "s63E6H2" 0.6967401 "Cytidine deaminase"  
"JS1\_C14\_00412" 5386 "s59E13H2" 0.1895696 "Putative lipoprotein YerB precursor"  
"JS1\_C14\_00412" 5386 "s59E25H2" 0 "Putative lipoprotein YerB precursor"  
"JS1\_C14\_00412" 5386 "s59E5H2" 0.3113311 "Putative lipoprotein YerB precursor"  
"JS1\_C14\_00412" 5386 "s63E6H2" 0.5239685 "Putative lipoprotein YerB precursor"  
"JS1\_C14\_00413" 5387 "s59E13H2" 0.2123015 "Magnesium and cobalt efflux protein CorC"  
"JS1\_C14\_00413" 5387 "s59E25H2" 0 "Magnesium and cobalt efflux protein CorC"  
"JS1\_C14\_00413" 5387 "s59E5H2" 0.3245823 "Magnesium and cobalt efflux protein CorC"  
"JS1\_C14\_00413" 5387 "s63E6H2" 0.3468395 "Magnesium and cobalt efflux protein CorC"  
"JS1\_C14\_00414" 5388 "s59E13H2" 0.2955235 "Magnesium and cobalt efflux protein CorC"  
"JS1\_C14\_00414" 5388 "s59E25H2" 0 "Magnesium and cobalt efflux protein CorC"  
"JS1\_C14\_00414" 5388 "s59E5H2" 0.2735455 "Magnesium and cobalt efflux protein CorC"  
"JS1\_C14\_00414" 5388 "s63E6H2" 0.263578 "Magnesium and cobalt efflux protein CorC"  
"JS1\_C14\_00415" 5389 "s59E13H2" 0.6606531 "Sialic acid TRAP transporter permease protein SiaT"  
"JS1\_C14\_00415" 5389 "s59E25H2" 0 "Sialic acid TRAP transporter permease protein SiaT"  
"JS1\_C14\_00415" 5389 "s59E5H2" 0.04079911 "Sialic acid TRAP transporter permease protein SiaT"  
"JS1\_C14\_00415" 5389 "s63E6H2" 0.304503 "Sialic acid TRAP transporter permease protein SiaT"  
"JS1\_C14\_00416" 5390 "s59E13H2" 0.1519592 "hypothetical protein"  
"JS1\_C14\_00416" 5390 "s59E25H2" 0 "hypothetical protein"  
"JS1\_C14\_00416" 5390 "s59E5H2" 0.0380181 "hypothetical protein"  
"JS1\_C14\_00416" 5390 "s63E6H2" 0.6140321 "hypothetical protein"  
"JS1\_C14\_00417" 5391 "s59E13H2" 0.1492617 "NMT1/THI5 like protein"  
"JS1\_C14\_00417" 5391 "s59E25H2" 0 "NMT1/THI5 like protein"  
"JS1\_C14\_00417" 5391 "s59E5H2" 0.1005328 "NMT1/THI5 like protein"  
"JS1\_C14\_00417" 5391 "s63E6H2" 0.5530146 "NMT1/THI5 like protein"  
"JS1\_C14\_00418" 5392 "s59E13H2" 0.1837946 "Endoribonuclease YbeY"  
"JS1\_C14\_00418" 5392 "s59E25H2" 0 "Endoribonuclease YbeY"  
"JS1\_C14\_00418" 5392 "s59E5H2" 0.3085849 "Endoribonuclease YbeY"  
"JS1\_C14\_00418" 5392 "s63E6H2" 0.4343855 "Endoribonuclease YbeY"  
"JS1\_C14\_00419" 5393 "s59E13H2" 0.1453369 "hypothetical protein"  
"JS1\_C14\_00419" 5393 "s59E25H2" 0 "hypothetical protein"  
"JS1\_C14\_00419" 5393 "s59E5H2" 0.4008709 "hypothetical protein"  
"JS1\_C14\_00419" 5393 "s63E6H2" 0.6075343 "hypothetical protein"  
"JS1\_C14\_00420" 5394 "s59E13H2" 0.4369918 "hypothetical protein"  
"JS1\_C14\_00420" 5394 "s59E25H2" 0.7374631 "hypothetical protein"

"JS1\_C14\_00420" 5394 "s59E5H2" 0.7180506 "hypothetical protein"  
"JS1\_C14\_00420" 5394 "s63E6H2" 1.717462 "hypothetical protein"  
"JS1\_C14\_00421" 5395 "s59E13H2" 0.1211607 "ATP synthase subunit beta"  
"JS1\_C14\_00421" 5395 "s59E25H2" 0 "ATP synthase subunit beta"  
"JS1\_C14\_00421" 5395 "s59E5H2" 1.568375 "ATP synthase subunit beta"  
"JS1\_C14\_00421" 5395 "s63E6H2" 0.487626 "ATP synthase subunit beta"  
"JS1\_C14\_00422" 5396 "s59E13H2" 0.1610936 "FOF1 ATP synthase subunit epsilon"  
"JS1\_C14\_00422" 5396 "s59E25H2" 0 "FOF1 ATP synthase subunit epsilon"  
"JS1\_C14\_00422" 5396 "s59E5H2" 1.20961 "FOF1 ATP synthase subunit epsilon"  
"JS1\_C14\_00422" 5396 "s63E6H2" 0.5424799 "FOF1 ATP synthase subunit epsilon"  
"JS1\_C14\_00423" 5397 "s59E13H2" 0.1893467 "Putative FOF1-ATPase subunit (ATPase\_gene1)"  
"JS1\_C14\_00423" 5397 "s59E25H2" 0 "Putative FOF1-ATPase subunit (ATPase\_gene1)"  
"JS1\_C14\_00423" 5397 "s59E5H2" 1.535211 "Putative FOF1-ATPase subunit (ATPase\_gene1)"  
"JS1\_C14\_00423" 5397 "s63E6H2" 0.6888736 "Putative FOF1-ATPase subunit (ATPase\_gene1)"  
"JS1\_C14\_00424" 5398 "s59E13H2" 0.2603034 "N-ATPase, AtpR subunit"  
"JS1\_C14\_00424" 5398 "s59E25H2" 0 "N-ATPase, AtpR subunit"  
"JS1\_C14\_00424" 5398 "s59E5H2" 2.055006 "N-ATPase, AtpR subunit"  
"JS1\_C14\_00424" 5398 "s63E6H2" 0.8592696 "N-ATPase, AtpR subunit"  
"JS1\_C14\_00425" 5399 "s59E13H2" 0.2143569 "ATP synthase subunit a"  
"JS1\_C14\_00425" 5399 "s59E25H2" 0 "ATP synthase subunit a"  
"JS1\_C14\_00425" 5399 "s59E5H2" 2.361645 "ATP synthase subunit a"  
"JS1\_C14\_00425" 5399 "s63E6H2" 0.9177003 "ATP synthase subunit a"  
"JS1\_C14\_00426" 5400 "s59E13H2" 0.2869311 "ATP synthase subunit c, sodium ion specific"  
"JS1\_C14\_00426" 5400 "s59E25H2" 0 "ATP synthase subunit c, sodium ion specific"  
"JS1\_C14\_00426" 5400 "s59E5H2" 2.263998 "ATP synthase subunit c, sodium ion specific"  
"JS1\_C14\_00426" 5400 "s63E6H2" 1.008442 "ATP synthase subunit c, sodium ion specific"  
"JS1\_C14\_00427" 5401 "s59E13H2" 0.4326466 "ATP synthase subunit b, sodium ion specific"  
"JS1\_C14\_00427" 5401 "s59E25H2" 0 "ATP synthase subunit b, sodium ion specific"  
"JS1\_C14\_00427" 5401 "s59E5H2" 0.5358844 "ATP synthase subunit b, sodium ion specific"  
"JS1\_C14\_00427" 5401 "s63E6H2" 1.073847 "ATP synthase subunit b, sodium ion specific"  
"JS1\_C14\_00428" 5402 "s59E13H2" 0.5138811 "ATP synthase subunit alpha"  
"JS1\_C14\_00428" 5402 "s59E25H2" 0 "ATP synthase subunit alpha"  
"JS1\_C14\_00428" 5402 "s59E5H2" 0.9173777 "ATP synthase subunit alpha"  
"JS1\_C14\_00428" 5402 "s63E6H2" 1.986418 "ATP synthase subunit alpha"  
"JS1\_C14\_00429" 5403 "s59E13H2" 0.315046 "ATP synthase gamma chain, sodium ion specific"  
"JS1\_C14\_00429" 5403 "s59E25H2" 0 "ATP synthase gamma chain, sodium ion specific"  
"JS1\_C14\_00429" 5403 "s59E5H2" 1.154611 "ATP synthase gamma chain, sodium ion specific"  
"JS1\_C14\_00429" 5403 "s63E6H2" 2.053766 "ATP synthase gamma chain, sodium ion specific"  
"JS1\_C14\_00430" 5404 "s59E13H2" 0.285856 "ubiquinone/menaquinone biosynthesis methyltransferase"  
"JS1\_C14\_00430" 5404 "s59E25H2" 0 "ubiquinone/menaquinone biosynthesis methyltransferase"  
"JS1\_C14\_00430" 5404 "s59E5H2" 2.437241 "ubiquinone/menaquinone biosynthesis methyltransferase"  
"JS1\_C14\_00430" 5404 "s63E6H2" 2.117784 "ubiquinone/menaquinone biosynthesis methyltransferase"  
"JS1\_C14\_00431" 5405 "s59E13H2" 2.073416 "hypothetical protein"  
"JS1\_C14\_00431" 5405 "s59E25H2" 0 "hypothetical protein"  
"JS1\_C14\_00431" 5405 "s59E5H2" 1.110569 "hypothetical protein"  
"JS1\_C14\_00431" 5405 "s63E6H2" 4.506245 "hypothetical protein"  
"JS1\_C14\_00432" 5406 "s59E13H2" 0.1636914 "ferredoxin"

"JS1\_C14\_00432" 5406 "s59E25H2" 0 "ferredoxin"  
"JS1\_C14\_00432" 5406 "s59E5H2" 0.07194869 "ferredoxin"  
"JS1\_C14\_00432" 5406 "s63E6H2" 0.104457 "ferredoxin"  
"JS1\_C14\_00433" 5407 "s59E13H2" 0.7569706 "tetratricopeptide repeat protein"  
"JS1\_C14\_00433" 5407 "s59E25H2" 0 "tetratricopeptide repeat protein"  
"JS1\_C14\_00433" 5407 "s59E5H2" 0.09318282 "tetratricopeptide repeat protein"  
"JS1\_C14\_00433" 5407 "s63E6H2" 2.733849 "tetratricopeptide repeat protein"  
"JS1\_C14\_00434" 5408 "s59E13H2" 0.20425 "hypothetical protein"  
"JS1\_C14\_00434" 5408 "s59E25H2" 0 "hypothetical protein"  
"JS1\_C14\_00434" 5408 "s59E5H2" 0.08470995 "hypothetical protein"  
"JS1\_C14\_00434" 5408 "s63E6H2" 2.056169 "hypothetical protein"  
"JS1\_C14\_00435" 5409 "s59E13H2" 0.2017224 "hypothetical protein"  
"JS1\_C14\_00435" 5409 "s59E25H2" 0 "hypothetical protein"  
"JS1\_C14\_00435" 5409 "s59E5H2" 0.06686155 "hypothetical protein"  
"JS1\_C14\_00435" 5409 "s63E6H2" 0.9309312 "hypothetical protein"  
"JS1\_C14\_00436" 5410 "s59E13H2" 0.1808666 "PEGA domain protein"  
"JS1\_C14\_00436" 5410 "s59E25H2" 0 "PEGA domain protein"  
"JS1\_C14\_00436" 5410 "s59E5H2" 0.08684592 "PEGA domain protein"  
"JS1\_C14\_00436" 5410 "s63E6H2" 0.7851187 "PEGA domain protein"  
"JS1\_C14\_00437" 5411 "s59E13H2" 0.2272096 "PEGA domain protein"  
"JS1\_C14\_00437" 5411 "s59E25H2" 0 "PEGA domain protein"  
"JS1\_C14\_00437" 5411 "s59E5H2" 1.030725 "PEGA domain protein"  
"JS1\_C14\_00437" 5411 "s63E6H2" 1.533558 "PEGA domain protein"  
"JS1\_C14\_00438" 5412 "s59E13H2" 0.7459873 "hypothetical protein"  
"JS1\_C14\_00438" 5412 "s59E25H2" 0 "hypothetical protein"  
"JS1\_C14\_00438" 5412 "s59E5H2" 0.08700296 "hypothetical protein"  
"JS1\_C14\_00438" 5412 "s63E6H2" 0.1501247 "hypothetical protein"  
"JS1\_C14\_00439" 5413 "s59E13H2" 0.7575446 "lipoprotein Nlpl"  
"JS1\_C14\_00439" 5413 "s59E25H2" 0 "lipoprotein Nlpl"  
"JS1\_C14\_00439" 5413 "s59E5H2" 0.3376456 "lipoprotein Nlpl"  
"JS1\_C14\_00439" 5413 "s63E6H2" 0.2622559 "lipoprotein Nlpl"  
"JS1\_C14\_00440" 5414 "s59E13H2" 0.1902045 "putative nicotinate-nucleotide adenyllyltransferase"  
"JS1\_C14\_00440" 5414 "s59E25H2" 0 "putative nicotinate-nucleotide adenyllyltransferase"  
"JS1\_C14\_00440" 5414 "s59E5H2" 0.3337976 "putative nicotinate-nucleotide adenyllyltransferase"  
"JS1\_C14\_00440" 5414 "s63E6H2" 0.2278195 "putative nicotinate-nucleotide adenyllyltransferase"  
"JS1\_C14\_00441" 5415 "s59E13H2" 0.03662308 "putative nicotinate-nucleotide adenyllyltransferase"  
"JS1\_C14\_00441" 5415 "s59E25H2" 0 "putative nicotinate-nucleotide adenyllyltransferase"  
"JS1\_C14\_00441" 5415 "s59E5H2" 0.3419459 "putative nicotinate-nucleotide adenyllyltransferase"  
"JS1\_C14\_00441" 5415 "s63E6H2" 0.3103302 "putative nicotinate-nucleotide adenyllyltransferase"  
"JS1\_C14\_00442" 5416 "s59E13H2" 0.02999433 "hypothetical protein"  
"JS1\_C14\_00442" 5416 "s59E25H2" 0 "hypothetical protein"  
"JS1\_C14\_00442" 5416 "s59E5H2" 0.1203768 "hypothetical protein"  
"JS1\_C14\_00442" 5416 "s63E6H2" 0.2250735 "hypothetical protein"  
"JS1\_C14\_00443" 5417 "s59E13H2" 0.03921578 "Ribosomal silencing factor Rsfs"  
"JS1\_C14\_00443" 5417 "s59E25H2" 0 "Ribosomal silencing factor Rsfs"  
"JS1\_C14\_00443" 5417 "s59E5H2" 0.2159031 "Ribosomal silencing factor Rsfs"  
"JS1\_C14\_00443" 5417 "s63E6H2" 0.3726889 "Ribosomal silencing factor Rsfs"

"JS1\_C14\_00444" 5418 "s59E13H2" 0.08943172 "hypothetical protein"  
"JS1\_C14\_00444" 5418 "s59E25H2" 0 "hypothetical protein"  
"JS1\_C14\_00444" 5418 "s59E5H2" 0.4041602 "hypothetical protein"  
"JS1\_C14\_00444" 5418 "s63E6H2" 0.5026036 "hypothetical protein"  
"JS1\_C14\_00445" 5419 "s59E13H2" 0.04855962 "hypothetical protein"  
"JS1\_C14\_00445" 5419 "s59E25H2" 0 "hypothetical protein"  
"JS1\_C14\_00445" 5419 "s59E5H2" 0.4877105 "hypothetical protein"  
"JS1\_C14\_00445" 5419 "s63E6H2" 0.375982 "hypothetical protein"  
"JS1\_C14\_00447" 5421 "s59E13H2" 0 "hypothetical protein"  
"JS1\_C14\_00447" 5421 "s59E25H2" 0 "hypothetical protein"  
"JS1\_C14\_00447" 5421 "s59E5H2" 0.0005721788 "hypothetical protein"  
"JS1\_C14\_00447" 5421 "s63E6H2" 0.007509711 "hypothetical protein"  
"JS1\_C14\_00448" 5422 "s59E13H2" 0.005166553 "Disaggregatase related repeat protein"  
"JS1\_C14\_00448" 5422 "s59E25H2" 0 "Disaggregatase related repeat protein"  
"JS1\_C14\_00448" 5422 "s59E5H2" 0.3655026 "Disaggregatase related repeat protein"  
"JS1\_C14\_00448" 5422 "s63E6H2" 0.001752967 "Disaggregatase related repeat protein"  
"JS1\_C14\_00449" 5423 "s59E13H2" 0.01075352 "Glutamine synthetase"  
"JS1\_C14\_00449" 5423 "s59E25H2" 0 "Glutamine synthetase"  
"JS1\_C14\_00449" 5423 "s59E5H2" 0.8999094 "Glutamine synthetase"  
"JS1\_C14\_00449" 5423 "s63E6H2" 0 "Glutamine synthetase"  
"JS1\_C14\_00450" 5424 "s59E13H2" 0 "Phosphate acetyltransferase"  
"JS1\_C14\_00450" 5424 "s59E25H2" 0 "Phosphate acetyltransferase"  
"JS1\_C14\_00450" 5424 "s59E5H2" 0.04508636 "Phosphate acetyltransferase"  
"JS1\_C14\_00450" 5424 "s63E6H2" 0 "Phosphate acetyltransferase"  
"JS1\_C14\_00451" 5425 "s59E13H2" 0.29068 "Transcription-repair-coupling factor"  
"JS1\_C14\_00451" 5425 "s59E25H2" 0 "Transcription-repair-coupling factor"  
"JS1\_C14\_00451" 5425 "s59E5H2" 0.4441342 "Transcription-repair-coupling factor"  
"JS1\_C14\_00451" 5425 "s63E6H2" 0.3886714 "Transcription-repair-coupling factor"  
"JS1\_C14\_00452" 5426 "s59E13H2" 0.0240792 "Transposase IS200 like protein"  
"JS1\_C14\_00452" 5426 "s59E25H2" 0 "Transposase IS200 like protein"  
"JS1\_C14\_00452" 5426 "s59E5H2" 0 "Transposase IS200 like protein"  
"JS1\_C14\_00452" 5426 "s63E6H2" 0.02172919 "Transposase IS200 like protein"  
"JS1\_C14\_00453" 5427 "s59E13H2" 0.1009137 "6-phosphofructokinase"  
"JS1\_C14\_00453" 5427 "s59E25H2" 0 "6-phosphofructokinase"  
"JS1\_C14\_00453" 5427 "s59E5H2" 0.182189 "6-phosphofructokinase"  
"JS1\_C14\_00453" 5427 "s63E6H2" 0.3930267 "6-phosphofructokinase"  
"JS1\_C14\_00454" 5428 "s59E13H2" 0.1463615 "Galactose-1-phosphate uridylyltransferase"  
"JS1\_C14\_00454" 5428 "s59E25H2" 0 "Galactose-1-phosphate uridylyltransferase"  
"JS1\_C14\_00454" 5428 "s59E5H2" 0.1736903 "Galactose-1-phosphate uridylyltransferase"  
"JS1\_C14\_00454" 5428 "s63E6H2" 0.3005751 "Galactose-1-phosphate uridylyltransferase"  
"JS1\_C14\_00455" 5429 "s59E13H2" 0.2902563 "Peptidyl-tRNA hydrolase"  
"JS1\_C14\_00455" 5429 "s59E25H2" 0 "Peptidyl-tRNA hydrolase"  
"JS1\_C14\_00455" 5429 "s59E5H2" 0.1088265 "Peptidyl-tRNA hydrolase"  
"JS1\_C14\_00455" 5429 "s63E6H2" 0.510359 "Peptidyl-tRNA hydrolase"  
"JS1\_C14\_00456" 5430 "s59E13H2" 0.07405186 "50S ribosomal protein L25"  
"JS1\_C14\_00456" 5430 "s59E25H2" 0 "50S ribosomal protein L25"  
"JS1\_C14\_00456" 5430 "s59E5H2" 0.5280561 "50S ribosomal protein L25"

"JS1\_C14\_00456" 5430 "s63E6H2" 0.5457264 "50S ribosomal protein L25"  
"JS1\_C14\_00457" 5431 "s59E13H2" 0.1383985 "Ribose-phosphate pyrophosphokinase"  
"JS1\_C14\_00457" 5431 "s59E25H2" 0 "Ribose-phosphate pyrophosphokinase"  
"JS1\_C14\_00457" 5431 "s59E5H2" 0.3377361 "Ribose-phosphate pyrophosphokinase"  
"JS1\_C14\_00457" 5431 "s63E6H2" 0.7228743 "Ribose-phosphate pyrophosphokinase"  
"JS1\_C14\_00458" 5432 "s59E13H2" 0.08613418 "Bifunctional protein GlmU"  
"JS1\_C14\_00458" 5432 "s59E25H2" 0 "Bifunctional protein GlmU"  
"JS1\_C14\_00458" 5432 "s59E5H2" 0.214932 "Bifunctional protein GlmU"  
"JS1\_C14\_00458" 5432 "s63E6H2" 0.6567928 "Bifunctional protein GlmU"  
"JS1\_C14\_00460" 5434 "s59E13H2" 0.159441 "Putative septation protein SpoVG"  
"JS1\_C14\_00460" 5434 "s59E25H2" 0 "Putative septation protein SpoVG"  
"JS1\_C14\_00460" 5434 "s59E5H2" 0.1300463 "Putative septation protein SpoVG"  
"JS1\_C14\_00460" 5434 "s63E6H2" 0.2162847 "Putative septation protein SpoVG"  
"JS1\_C14\_00461" 5435 "s59E13H2" 0.1845913 "Ribosomal RNA small subunit methyltransferase A"  
"JS1\_C14\_00461" 5435 "s59E25H2" 0 "Ribosomal RNA small subunit methyltransferase A"  
"JS1\_C14\_00461" 5435 "s59E5H2" 0.2046318 "Ribosomal RNA small subunit methyltransferase A"  
"JS1\_C14\_00461" 5435 "s63E6H2" 0.5443721 "Ribosomal RNA small subunit methyltransferase A"  
"JS1\_C14\_00466" 5440 "s59E13H2" 0.1543686 "Replicative DNA helicase"  
"JS1\_C14\_00466" 5440 "s59E25H2" 0 "Replicative DNA helicase"  
"JS1\_C14\_00466" 5440 "s59E5H2" 0.4638799 "Replicative DNA helicase"  
"JS1\_C14\_00466" 5440 "s63E6H2" 1.357396 "Replicative DNA helicase"  
"JS1\_C14\_00467" 5441 "s59E13H2" 0.06887733 "50S ribosomal protein L9"  
"JS1\_C14\_00467" 5441 "s59E25H2" 0 "50S ribosomal protein L9"  
"JS1\_C14\_00467" 5441 "s59E5H2" 0.533735 "50S ribosomal protein L9"  
"JS1\_C14\_00467" 5441 "s63E6H2" 0.6080896 "50S ribosomal protein L9"  
"JS1\_C14\_00468" 5442 "s59E13H2" 0.005391721 "2-keto-3-deoxy-L-rhamnonate aldolase"  
"JS1\_C14\_00468" 5442 "s59E25H2" 0 "2-keto-3-deoxy-L-rhamnonate aldolase"  
"JS1\_C14\_00468" 5442 "s59E5H2" 0 "2-keto-3-deoxy-L-rhamnonate aldolase"  
"JS1\_C14\_00468" 5442 "s63E6H2" 0 "2-keto-3-deoxy-L-rhamnonate aldolase"  
"JS1\_C14\_00469" 5443 "s59E13H2" 1.01253 "hypothetical protein"  
"JS1\_C14\_00469" 5443 "s59E25H2" 0 "hypothetical protein"  
"JS1\_C14\_00469" 5443 "s59E5H2" 0.3564852 "hypothetical protein"  
"JS1\_C14\_00469" 5443 "s63E6H2" 1.819053 "hypothetical protein"  
"JS1\_C14\_00470" 5444 "s59E13H2" 1.294703 "hypothetical protein"  
"JS1\_C14\_00470" 5444 "s59E25H2" 0 "hypothetical protein"  
"JS1\_C14\_00470" 5444 "s59E5H2" 0.1477455 "hypothetical protein"  
"JS1\_C14\_00470" 5444 "s63E6H2" 1.974654 "hypothetical protein"  
"JS1\_C14\_00471" 5445 "s59E13H2" 1.542081 "N-acetylglucosamine-6-phosphate deacetylase"  
"JS1\_C14\_00471" 5445 "s59E25H2" 0 "N-acetylglucosamine-6-phosphate deacetylase"  
"JS1\_C14\_00471" 5445 "s59E5H2" 0.2682939 "N-acetylglucosamine-6-phosphate deacetylase"  
"JS1\_C14\_00471" 5445 "s63E6H2" 1.187837 "N-acetylglucosamine-6-phosphate deacetylase"  
"JS1\_C14\_00472" 5446 "s59E13H2" 1.226515 "hypothetical protein"  
"JS1\_C14\_00472" 5446 "s59E25H2" 0 "hypothetical protein"  
"JS1\_C14\_00472" 5446 "s59E5H2" 0.4390535 "hypothetical protein"  
"JS1\_C14\_00472" 5446 "s63E6H2" 0.02953255 "hypothetical protein"  
"JS1\_C14\_00473" 5447 "s59E13H2" 1.359383 "hypothetical protein"  
"JS1\_C14\_00473" 5447 "s59E25H2" 0 "hypothetical protein"

"JS1\_C14\_00473" 5447 "s59E5H2" 0.4693484 "hypothetical protein"  
"JS1\_C14\_00473" 5447 "s63E6H2" 0 "hypothetical protein"  
"JS1\_C14\_00474" 5448 "s59E13H2" 1.234474 "Ankyrin repeats (3 copies)"  
"JS1\_C14\_00474" 5448 "s59E25H2" 0 "Ankyrin repeats (3 copies)"  
"JS1\_C14\_00474" 5448 "s59E5H2" 0.1638469 "Ankyrin repeats (3 copies)"  
"JS1\_C14\_00474" 5448 "s63E6H2" 0.2835001 "Ankyrin repeats (3 copies)"  
"JS1\_C14\_00475" 5449 "s59E13H2" 1.171562 "protease TldD"  
"JS1\_C14\_00475" 5449 "s59E25H2" 0 "protease TldD"  
"JS1\_C14\_00475" 5449 "s59E5H2" 0.1453257 "protease TldD"  
"JS1\_C14\_00475" 5449 "s63E6H2" 0.8777587 "protease TldD"  
"JS1\_C14\_00476" 5450 "s59E13H2" 0.8591045 "protease TldD"  
"JS1\_C14\_00476" 5450 "s59E25H2" 0.1298322 "protease TldD"  
"JS1\_C14\_00476" 5450 "s59E5H2" 11.25826 "protease TldD"  
"JS1\_C14\_00476" 5450 "s63E6H2" 0.8216441 "protease TldD"  
"JS1\_C14\_00477" 5451 "s59E13H2" 0.1903033 "3'-5' exoribonuclease YhaM"  
"JS1\_C14\_00477" 5451 "s59E25H2" 0 "3'-5' exoribonuclease YhaM"  
"JS1\_C14\_00477" 5451 "s59E5H2" 0.09058141 "3'-5' exoribonuclease YhaM"  
"JS1\_C14\_00477" 5451 "s63E6H2" 0.5768282 "3'-5' exoribonuclease YhaM"  
"JS1\_C14\_00480" 5454 "s59E13H2" 0.06101397 "hypothetical protein"  
"JS1\_C14\_00480" 5454 "s59E25H2" 0 "hypothetical protein"  
"JS1\_C14\_00480" 5454 "s59E5H2" 0.7250129 "hypothetical protein"  
"JS1\_C14\_00480" 5454 "s63E6H2" 1.51481 "hypothetical protein"  
"JS1\_C14\_00481" 5455 "s59E13H2" 0.5580749 "Multidrug export protein MepA"  
"JS1\_C14\_00481" 5455 "s59E25H2" 0 "Multidrug export protein MepA"  
"JS1\_C14\_00481" 5455 "s59E5H2" 3.950994 "Multidrug export protein MepA"  
"JS1\_C14\_00481" 5455 "s63E6H2" 0.4201975 "Multidrug export protein MepA"  
"JS1\_C14\_00482" 5456 "s59E13H2" 0.08080853 "putative HTH-type transcriptional regulator YusO"  
"JS1\_C14\_00482" 5456 "s59E25H2" 0.6755556 "putative HTH-type transcriptional regulator YusO"  
"JS1\_C14\_00482" 5456 "s59E5H2" 2.82113 "putative HTH-type transcriptional regulator YusO"  
"JS1\_C14\_00482" 5456 "s63E6H2" 0.3117189 "putative HTH-type transcriptional regulator YusO"  
"JS1\_C14\_00484" 5458 "s59E13H2" 0.2657091 "2,3-diketo-L-gulonate-binding periplasmic protein YiaO precursor"  
"JS1\_C14\_00484" 5458 "s59E25H2" 0 "2,3-diketo-L-gulonate-binding periplasmic protein YiaO precursor"  
"JS1\_C14\_00484" 5458 "s59E5H2" 1.710073 "2,3-diketo-L-gulonate-binding periplasmic protein YiaO precursor"  
"JS1\_C14\_00484" 5458 "s63E6H2" 0 "2,3-diketo-L-gulonate-binding periplasmic protein YiaO precursor"  
"JS1\_C14\_00485" 5459 "s59E13H2" 0.217249 "2,3-diketo-L-gulonate TRAP transporter small permease protein YiaM"  
"JS1\_C14\_00485" 5459 "s59E25H2" 0 "2,3-diketo-L-gulonate TRAP transporter small permease protein YiaM"  
"JS1\_C14\_00485" 5459 "s59E5H2" 3.491982 "2,3-diketo-L-gulonate TRAP transporter small permease protein YiaM"  
"JS1\_C14\_00485" 5459 "s63E6H2" 0 "2,3-diketo-L-gulonate TRAP transporter small permease protein YiaM"  
"JS1\_C14\_00486" 5460 "s59E13H2" 0.2277385 "Sialic acid TRAP transporter permease protein SiaT"  
"JS1\_C14\_00486" 5460 "s59E25H2" 0 "Sialic acid TRAP transporter permease protein SiaT"  
"JS1\_C14\_00486" 5460 "s59E5H2" 4.610259 "Sialic acid TRAP transporter permease protein SiaT"  
"JS1\_C14\_00486" 5460 "s63E6H2" 0 "Sialic acid TRAP transporter permease protein SiaT"  
"JS1\_C14\_00487" 5461 "s59E13H2" 1.82955 "hypothetical protein"  
"JS1\_C14\_00487" 5461 "s59E25H2" 0 "hypothetical protein"  
"JS1\_C14\_00487" 5461 "s59E5H2" 2.763268 "hypothetical protein"  
"JS1\_C14\_00487" 5461 "s63E6H2" 0.2159881 "hypothetical protein"  
"JS1\_C14\_00489" 5463 "s59E13H2" 4.473843 "Isoprenylcysteine carboxyl methyltransferase (ICMT) family protein"

"JS1\_C14\_00489" 5463 "s59E25H2" 0 "Isoprenylcysteine carboxyl methyltransferase (ICMT) family protein"  
"JS1\_C14\_00489" 5463 "s59E5H2" 0.7395638 "Isoprenylcysteine carboxyl methyltransferase (ICMT) family protein"  
"JS1\_C14\_00489" 5463 "s63E6H2" 4.234623 "Isoprenylcysteine carboxyl methyltransferase (ICMT) family protein"  
"JS1\_C14\_00490" 5464 "s59E13H2" 0.2653951 "Exodeoxyribonuclease"  
"JS1\_C14\_00490" 5464 "s59E25H2" 0 "Exodeoxyribonuclease"  
"JS1\_C14\_00490" 5464 "s59E5H2" 1.04245 "Exodeoxyribonuclease"  
"JS1\_C14\_00490" 5464 "s63E6H2" 0.1981091 "Exodeoxyribonuclease"  
"JS1\_C14\_00491" 5465 "s59E13H2" 0.114197 "hypothetical protein"  
"JS1\_C14\_00491" 5465 "s59E25H2" 0 "hypothetical protein"  
"JS1\_C14\_00491" 5465 "s59E5H2" 0.4702056 "hypothetical protein"  
"JS1\_C14\_00491" 5465 "s63E6H2" 3.588889 "hypothetical protein"  
"JS1\_C14\_00492" 5466 "s59E13H2" 0.2062322 "Rubrerythrin"  
"JS1\_C14\_00492" 5466 "s59E25H2" 0 "Rubrerythrin"  
"JS1\_C14\_00492" 5466 "s59E5H2" 0.5816573 "Rubrerythrin"  
"JS1\_C14\_00492" 5466 "s63E6H2" 1.059393 "Rubrerythrin"  
"JS1\_C14\_00493" 5467 "s59E13H2" 0.4467274 "Glyoxalase-like domain protein"  
"JS1\_C14\_00493" 5467 "s59E25H2" 0 "Glyoxalase-like domain protein"  
"JS1\_C14\_00493" 5467 "s59E5H2" 0.1153943 "Glyoxalase-like domain protein"  
"JS1\_C14\_00493" 5467 "s63E6H2" 10.90692 "Glyoxalase-like domain protein"  
"JS1\_C14\_00494" 5468 "s59E13H2" 0.2545409 "FMN reductase [NAD(P)H]"  
"JS1\_C14\_00494" 5468 "s59E25H2" 0 "FMN reductase [NAD(P)H]"  
"JS1\_C14\_00494" 5468 "s59E5H2" 0.06348042 "FMN reductase [NAD(P)H]"  
"JS1\_C14\_00494" 5468 "s63E6H2" 9.317788 "FMN reductase [NAD(P)H]"  
"JS1\_C14\_00497" 5471 "s59E13H2" 0.3292117 "DNA alkylation repair enzyme"  
"JS1\_C14\_00497" 5471 "s59E25H2" 0 "DNA alkylation repair enzyme"  
"JS1\_C14\_00497" 5471 "s59E5H2" 0.505632 "DNA alkylation repair enzyme"  
"JS1\_C14\_00497" 5471 "s63E6H2" 0.2892729 "DNA alkylation repair enzyme"  
"JS1\_C14\_00498" 5472 "s59E13H2" 0.3006952 "Dihydrolipoyl dehydrogenase"  
"JS1\_C14\_00498" 5472 "s59E25H2" 0 "Dihydrolipoyl dehydrogenase"  
"JS1\_C14\_00498" 5472 "s59E5H2" 0.5948432 "Dihydrolipoyl dehydrogenase"  
"JS1\_C14\_00498" 5472 "s63E6H2" 0.06873943 "Dihydrolipoyl dehydrogenase"  
"JS1\_C14\_00499" 5473 "s59E13H2" 0.1969945 "hypothetical protein"  
"JS1\_C14\_00499" 5473 "s59E25H2" 0 "hypothetical protein"  
"JS1\_C14\_00499" 5473 "s59E5H2" 0.3113592 "hypothetical protein"  
"JS1\_C14\_00499" 5473 "s63E6H2" 0.03471362 "hypothetical protein"  
"JS1\_C14\_00500" 5474 "s59E13H2" 2.808052 "putative tRNA-dihydrouridine synthase"  
"JS1\_C14\_00500" 5474 "s59E25H2" 0 "putative tRNA-dihydrouridine synthase"  
"JS1\_C14\_00500" 5474 "s59E5H2" 0.2820565 "putative tRNA-dihydrouridine synthase"  
"JS1\_C14\_00500" 5474 "s63E6H2" 0.3339207 "putative tRNA-dihydrouridine synthase"  
"JS1\_C14\_00501" 5475 "s59E13H2" 0.1742823 "1-acyl-sn-glycerol-3-phosphate acyltransferase"  
"JS1\_C14\_00501" 5475 "s59E25H2" 0 "1-acyl-sn-glycerol-3-phosphate acyltransferase"  
"JS1\_C14\_00501" 5475 "s59E5H2" 0.1408634 "1-acyl-sn-glycerol-3-phosphate acyltransferase"  
"JS1\_C14\_00501" 5475 "s63E6H2" 8.080947 "1-acyl-sn-glycerol-3-phosphate acyltransferase"  
"JS1\_C14\_00502" 5476 "s59E13H2" 0.2099607 "Diacylglycerol kinase"  
"JS1\_C14\_00502" 5476 "s59E25H2" 0 "Diacylglycerol kinase"  
"JS1\_C14\_00502" 5476 "s59E5H2" 0.1789086 "Diacylglycerol kinase"  
"JS1\_C14\_00502" 5476 "s63E6H2" 8.27821 "Diacylglycerol kinase"

"JS1\_C14\_00503" 5477 "s59E13H2" 1.196551 "Indolepyruvate oxidoreductase subunit IorA"  
"JS1\_C14\_00503" 5477 "s59E25H2" 0 "Indolepyruvate oxidoreductase subunit IorA"  
"JS1\_C14\_00503" 5477 "s59E5H2" 0.9743147 "Indolepyruvate oxidoreductase subunit IorA"  
"JS1\_C14\_00503" 5477 "s63E6H2" 1.081318 "Indolepyruvate oxidoreductase subunit IorA"  
"JS1\_C14\_00504" 5478 "s59E13H2" 0.7464997 "Indolepyruvate oxidoreductase subunit IorB"  
"JS1\_C14\_00504" 5478 "s59E25H2" 0 "Indolepyruvate oxidoreductase subunit IorB"  
"JS1\_C14\_00504" 5478 "s59E5H2" 1.063239 "Indolepyruvate oxidoreductase subunit IorB"  
"JS1\_C14\_00504" 5478 "s63E6H2" 0.6638173 "Indolepyruvate oxidoreductase subunit IorB"  
"JS1\_C14\_00505" 5479 "s59E13H2" 0.7247031 "Aspartate aminotransferase"  
"JS1\_C14\_00505" 5479 "s59E25H2" 0 "Aspartate aminotransferase"  
"JS1\_C14\_00505" 5479 "s59E5H2" 1.168631 "Aspartate aminotransferase"  
"JS1\_C14\_00505" 5479 "s63E6H2" 0.3932954 "Aspartate aminotransferase"  
"JS1\_C14\_00506" 5480 "s59E13H2" 0.7615267 "Butyrate kinase 2"  
"JS1\_C14\_00506" 5480 "s59E25H2" 0 "Butyrate kinase 2"  
"JS1\_C14\_00506" 5480 "s59E5H2" 1.854346 "Butyrate kinase 2"  
"JS1\_C14\_00506" 5480 "s63E6H2" 1.033263 "Butyrate kinase 2"  
"JS1\_C14\_00507" 5481 "s59E13H2" 1.733836 "Phosphate acetyltransferase"  
"JS1\_C14\_00507" 5481 "s59E25H2" 0.2766667 "Phosphate acetyltransferase"  
"JS1\_C14\_00507" 5481 "s59E5H2" 1.93732 "Phosphate acetyltransferase"  
"JS1\_C14\_00507" 5481 "s63E6H2" 1.312107 "Phosphate acetyltransferase"  
"JS1\_C14\_00508" 5482 "s59E13H2" 2.785189 "GTP-binding protein TypA/BipA"  
"JS1\_C14\_00508" 5482 "s59E25H2" 0.1376096 "GTP-binding protein TypA/BipA"  
"JS1\_C14\_00508" 5482 "s59E5H2" 1.202281 "GTP-binding protein TypA/BipA"  
"JS1\_C14\_00508" 5482 "s63E6H2" 8.497524 "GTP-binding protein TypA/BipA"  
"JS1\_C14\_00509" 5483 "s59E13H2" 2.97926 "Transcriptional repressor PagR"  
"JS1\_C14\_00509" 5483 "s59E25H2" 0 "Transcriptional repressor PagR"  
"JS1\_C14\_00509" 5483 "s59E5H2" 0.3280599 "Transcriptional repressor PagR"  
"JS1\_C14\_00509" 5483 "s63E6H2" 0.3454038 "Transcriptional repressor PagR"  
"JS1\_C14\_00510" 5484 "s59E13H2" 1.521951 "Coenzyme A disulfide reductase"  
"JS1\_C14\_00510" 5484 "s59E25H2" 0 "Coenzyme A disulfide reductase"  
"JS1\_C14\_00510" 5484 "s59E5H2" 0.5252786 "Coenzyme A disulfide reductase"  
"JS1\_C14\_00510" 5484 "s63E6H2" 0.1377557 "Coenzyme A disulfide reductase"  
"JS1\_C14\_00511" 5485 "s59E13H2" 1.25756 "sn-glycerol-3-phosphate-binding periplasmic protein UgpB precursor"  
"JS1\_C14\_00511" 5485 "s59E25H2" 0.5641892 "sn-glycerol-3-phosphate-binding periplasmic protein UgpB precursor"  
"JS1\_C14\_00511" 5485 "s59E5H2" 0.09073458 "sn-glycerol-3-phosphate-binding periplasmic protein UgpB precursor"  
"JS1\_C14\_00511" 5485 "s63E6H2" 2.89483 "sn-glycerol-3-phosphate-binding periplasmic protein UgpB precursor"  
"JS1\_C14\_00512" 5486 "s59E13H2" 5.122769 "sn-glycerol-3-phosphate transport system permease protein UgpA"  
"JS1\_C14\_00512" 5486 "s59E25H2" 0 "sn-glycerol-3-phosphate transport system permease protein UgpA"  
"JS1\_C14\_00512" 5486 "s59E5H2" 0.148941 "sn-glycerol-3-phosphate transport system permease protein UgpA"  
"JS1\_C14\_00512" 5486 "s63E6H2" 5.21666 "sn-glycerol-3-phosphate transport system permease protein UgpA"  
"JS1\_D03\_00001" 11910 "s59E13H2" 0.02900085 "30S ribosomal protein S5"  
"JS1\_D03\_00001" 11910 "s59E25H2" 0 "30S ribosomal protein S5"  
"JS1\_D03\_00001" 11910 "s59E5H2" 0.01492793 "30S ribosomal protein S5"  
"JS1\_D03\_00001" 11910 "s63E6H2" 0.03059797 "30S ribosomal protein S5"  
"JS1\_D03\_00002" 11911 "s59E13H2" 0.03566121 "50S ribosomal protein L15"  
"JS1\_D03\_00002" 11911 "s59E25H2" 0 "50S ribosomal protein L15"  
"JS1\_D03\_00002" 11911 "s59E5H2" 0.005146582 "50S ribosomal protein L15"



"JS1\_D03\_00002" 11911 "s63E6H2" 0.04106622 "50S ribosomal protein L15"  
"JS1\_D03\_00003" 11912 "s59E13H2" 0.02079199 "LL-diaminopimelate aminotransferase"  
"JS1\_D03\_00003" 11912 "s59E25H2" 0 "LL-diaminopimelate aminotransferase"  
"JS1\_D03\_00003" 11912 "s59E5H2" 0 "LL-diaminopimelate aminotransferase"  
"JS1\_D03\_00003" 11912 "s63E6H2" 0.002614748 "LL-diaminopimelate aminotransferase"  
"JS1\_D03\_00004" 11913 "s59E13H2" 0.03643014 "hypothetical protein"  
"JS1\_D03\_00004" 11913 "s59E25H2" 0 "hypothetical protein"  
"JS1\_D03\_00004" 11913 "s59E5H2" 0.09256857 "hypothetical protein"  
"JS1\_D03\_00004" 11913 "s63E6H2" 0.06419953 "hypothetical protein"  
"JS1\_D03\_00005" 11914 "s59E13H2" 0.04615518 "hypothetical protein"  
"JS1\_D03\_00005" 11914 "s59E25H2" 0 "hypothetical protein"  
"JS1\_D03\_00005" 11914 "s59E5H2" 0.1247921 "hypothetical protein"  
"JS1\_D03\_00005" 11914 "s63E6H2" 0.04552294 "hypothetical protein"  
"JS1\_D03\_00007" 11916 "s59E13H2" 0.05873834 "L-seryl-tRNA(Sec) selenium transferase"  
"JS1\_D03\_00007" 11916 "s59E25H2" 0 "L-seryl-tRNA(Sec) selenium transferase"  
"JS1\_D03\_00007" 11916 "s59E5H2" 1.075861 "L-seryl-tRNA(Sec) selenium transferase"  
"JS1\_D03\_00007" 11916 "s63E6H2" 2.591792 "L-seryl-tRNA(Sec) selenium transferase"  
"JS1\_D03\_00008" 11917 "s59E13H2" 0.03584862 "Selenocysteine-specific elongation factor"  
"JS1\_D03\_00008" 11917 "s59E25H2" 0 "Selenocysteine-specific elongation factor"  
"JS1\_D03\_00008" 11917 "s59E5H2" 1.122034 "Selenocysteine-specific elongation factor"  
"JS1\_D03\_00008" 11917 "s63E6H2" 1.50022 "Selenocysteine-specific elongation factor"  
"JS1\_D03\_00009" 11918 "s59E13H2" 0.117692 "Selenide, water dikinase"  
"JS1\_D03\_00009" 11918 "s59E25H2" 0 "Selenide, water dikinase"  
"JS1\_D03\_00009" 11918 "s59E5H2" 0.9204331 "Selenide, water dikinase"  
"JS1\_D03\_00009" 11918 "s63E6H2" 3.729908 "Selenide, water dikinase"  
"JS1\_D03\_00010" 11919 "s59E13H2" 0.004505824 "Putative Ig domain protein"  
"JS1\_D03\_00010" 11919 "s59E25H2" 0 "Putative Ig domain protein"  
"JS1\_D03\_00010" 11919 "s59E5H2" 0.006882339 "Putative Ig domain protein"  
"JS1\_D03\_00010" 11919 "s63E6H2" 0.2429422 "Putative Ig domain protein"  
"JS1\_D03\_00011" 11920 "s59E13H2" 0.02737155 "hypothetical protein"  
"JS1\_D03\_00011" 11920 "s59E25H2" 0 "hypothetical protein"  
"JS1\_D03\_00011" 11920 "s59E5H2" 0.2413747 "hypothetical protein"  
"JS1\_D03\_00011" 11920 "s63E6H2" 0.4967568 "hypothetical protein"  
"JS1\_D03\_00013" 11922 "s59E13H2" 0.01935789 "Uridine phosphorylase"  
"JS1\_D03\_00013" 11922 "s59E25H2" 0 "Uridine phosphorylase"  
"JS1\_D03\_00013" 11922 "s59E5H2" 0.3373799 "Uridine phosphorylase"  
"JS1\_D03\_00013" 11922 "s63E6H2" 1.024425 "Uridine phosphorylase"  
"JS1\_D03\_00014" 11923 "s59E13H2" 0.1696298 "Uridine phosphorylase"  
"JS1\_D03\_00014" 11923 "s59E25H2" 0 "Uridine phosphorylase"  
"JS1\_D03\_00014" 11923 "s59E5H2" 1.063582 "Uridine phosphorylase"  
"JS1\_D03\_00014" 11923 "s63E6H2" 2.369358 "Uridine phosphorylase"  
"JS1\_D03\_00015" 11924 "s59E13H2" 0.01553357 "Purine-binding protein precursor"  
"JS1\_D03\_00015" 11924 "s59E25H2" 0.01950806 "Purine-binding protein precursor"  
"JS1\_D03\_00015" 11924 "s59E5H2" 0.429109 "Purine-binding protein precursor"  
"JS1\_D03\_00015" 11924 "s63E6H2" 2.265858 "Purine-binding protein precursor"  
"JS1\_D03\_00016" 11925 "s59E13H2" 0.005070851 "L-arabinose transporter permease protein"  
"JS1\_D03\_00016" 11925 "s59E25H2" 0.02688172 "L-arabinose transporter permease protein"

"JS1\_D03\_00016" 11925 "s59E5H2" 0.439704 "L-arabinose transporter permease protein"  
"JS1\_D03\_00016" 11925 "s63E6H2" 1.742579 "L-arabinose transporter permease protein"  
"JS1\_D03\_00017" 11926 "s59E13H2" 0.01234618 "D-allose transporter subunit"  
"JS1\_D03\_00017" 11926 "s59E25H2" 0 "D-allose transporter subunit"  
"JS1\_D03\_00017" 11926 "s59E5H2" 0.3043302 "D-allose transporter subunit"  
"JS1\_D03\_00017" 11926 "s63E6H2" 3.323784 "D-allose transporter subunit"  
"JS1\_D03\_00018" 11927 "s59E13H2" 0.01605311 "Galactose/methyl galactoside import ATP-binding protein MglA"  
"JS1\_D03\_00018" 11927 "s59E25H2" 0 "Galactose/methyl galactoside import ATP-binding protein MglA"  
"JS1\_D03\_00018" 11927 "s59E5H2" 0.08243075 "Galactose/methyl galactoside import ATP-binding protein MglA"  
"JS1\_D03\_00018" 11927 "s63E6H2" 2.335417 "Galactose/methyl galactoside import ATP-binding protein MglA"  
"JS1\_D03\_00019" 11928 "s59E13H2" 0.006883589 "hypothetical protein"  
"JS1\_D03\_00019" 11928 "s59E25H2" 0 "hypothetical protein"  
"JS1\_D03\_00019" 11928 "s59E5H2" 0.2723772 "hypothetical protein"  
"JS1\_D03\_00019" 11928 "s63E6H2" 0.5228567 "hypothetical protein"  
"JS1\_D03\_00020" 11929 "s59E13H2" 0.01953265 "Cell wall-binding protein YocH precursor"  
"JS1\_D03\_00020" 11929 "s59E25H2" 0 "Cell wall-binding protein YocH precursor"  
"JS1\_D03\_00020" 11929 "s59E5H2" 0.08341344 "Cell wall-binding protein YocH precursor"  
"JS1\_D03\_00020" 11929 "s63E6H2" 0.1742277 "Cell wall-binding protein YocH precursor"  
"JS1\_D03\_00021" 11930 "s59E13H2" 0 "Cupin domain protein"  
"JS1\_D03\_00021" 11930 "s59E25H2" 0 "Cupin domain protein"  
"JS1\_D03\_00021" 11930 "s59E5H2" 0 "Cupin domain protein"  
"JS1\_D03\_00021" 11930 "s63E6H2" 0.004007828 "Cupin domain protein"  
"JS1\_D03\_00022" 11931 "s59E13H2" 0.0263759 "5-methylthioadenosine/S-adenosylhomocysteine deaminase"  
"JS1\_D03\_00022" 11931 "s59E25H2" 0.3033033 "5-methylthioadenosine/S-adenosylhomocysteine deaminase"  
"JS1\_D03\_00022" 11931 "s59E5H2" 0.27678 "5-methylthioadenosine/S-adenosylhomocysteine deaminase"  
"JS1\_D03\_00022" 11931 "s63E6H2" 0.6737605 "5-methylthioadenosine/S-adenosylhomocysteine deaminase"  
"JS1\_D03\_00023" 11932 "s59E13H2" 0.9849662 "8-oxoguanine deaminase"  
"JS1\_D03\_00023" 11932 "s59E25H2" 0 "8-oxoguanine deaminase"  
"JS1\_D03\_00023" 11932 "s59E5H2" 0.355501 "8-oxoguanine deaminase"  
"JS1\_D03\_00023" 11932 "s63E6H2" 0.2091159 "8-oxoguanine deaminase"  
"JS1\_D03\_00024" 11933 "s59E13H2" 1.106313 "Nicotinate dehydrogenase small FeS subunit"  
"JS1\_D03\_00024" 11933 "s59E25H2" 0 "Nicotinate dehydrogenase small FeS subunit"  
"JS1\_D03\_00024" 11933 "s59E5H2" 0.1061956 "Nicotinate dehydrogenase small FeS subunit"  
"JS1\_D03\_00024" 11933 "s63E6H2" 0.5793367 "Nicotinate dehydrogenase small FeS subunit"  
"JS1\_D03\_00025" 11934 "s59E13H2" 1.574512 "Glyceraldehyde dehydrogenase medium chain"  
"JS1\_D03\_00025" 11934 "s59E25H2" 0 "Glyceraldehyde dehydrogenase medium chain"  
"JS1\_D03\_00025" 11934 "s59E5H2" 0.2232018 "Glyceraldehyde dehydrogenase medium chain"  
"JS1\_D03\_00025" 11934 "s63E6H2" 0.693779 "Glyceraldehyde dehydrogenase medium chain"  
"JS1\_D03\_00026" 11935 "s59E13H2" 1.976304 "putative xanthine dehydrogenase subunit D"  
"JS1\_D03\_00026" 11935 "s59E25H2" 0 "putative xanthine dehydrogenase subunit D"  
"JS1\_D03\_00026" 11935 "s59E5H2" 0.6687181 "putative xanthine dehydrogenase subunit D"  
"JS1\_D03\_00026" 11935 "s63E6H2" 1.46145 "putative xanthine dehydrogenase subunit D"  
"JS1\_D03\_00027" 11936 "s59E13H2" 0.1258933 "Aspartate carbamoyltransferase"  
"JS1\_D03\_00027" 11936 "s59E25H2" 0 "Aspartate carbamoyltransferase"  
"JS1\_D03\_00027" 11936 "s59E5H2" 0.8135095 "Aspartate carbamoyltransferase"  
"JS1\_D03\_00027" 11936 "s63E6H2" 1.57906 "Aspartate carbamoyltransferase"  
"JS1\_D03\_00028" 11937 "s59E13H2" 0.05310944 "Cysteine synthase"

"JS1\_D03\_00028" 11937 "s59E25H2" 0 "Cysteine synthase"  
"JS1\_D03\_00028" 11937 "s59E5H2" 0.4827933 "Cysteine synthase"  
"JS1\_D03\_00028" 11937 "s63E6H2" 1.347325 "Cysteine synthase"  
"JS1\_D03\_00029" 11938 "s59E13H2" 0.05763029 "putative succinyl-diaminopimelate desuccinylase"  
"JS1\_D03\_00029" 11938 "s59E25H2" 0 "putative succinyl-diaminopimelate desuccinylase"  
"JS1\_D03\_00029" 11938 "s59E5H2" 0.2225951 "putative succinyl-diaminopimelate desuccinylase"  
"JS1\_D03\_00029" 11938 "s63E6H2" 1.025918 "putative succinyl-diaminopimelate desuccinylase"  
"JS1\_D03\_00030" 11939 "s59E13H2" 0.02063605 "Threonine synthase"  
"JS1\_D03\_00030" 11939 "s59E25H2" 0 "Threonine synthase"  
"JS1\_D03\_00030" 11939 "s59E5H2" 0.1963771 "Threonine synthase"  
"JS1\_D03\_00030" 11939 "s63E6H2" 0.6820756 "Threonine synthase"  
"JS1\_D03\_00031" 11940 "s59E13H2" 0.01552992 "Ornithine carbamoyltransferase"  
"JS1\_D03\_00031" 11940 "s59E25H2" 0 "Ornithine carbamoyltransferase"  
"JS1\_D03\_00031" 11940 "s59E5H2" 0.2143936 "Ornithine carbamoyltransferase"  
"JS1\_D03\_00031" 11940 "s63E6H2" 0.8637039 "Ornithine carbamoyltransferase"  
"JS1\_D03\_00032" 11941 "s59E13H2" 0.01479618 "Carbamate kinase"  
"JS1\_D03\_00032" 11941 "s59E25H2" 0 "Carbamate kinase"  
"JS1\_D03\_00032" 11941 "s59E5H2" 0.07846751 "Carbamate kinase"  
"JS1\_D03\_00032" 11941 "s63E6H2" 0.6580144 "Carbamate kinase"  
"JS1\_D03\_00033" 11942 "s59E13H2" 0.01257765 "Allantoinase"  
"JS1\_D03\_00033" 11942 "s59E25H2" 0 "Allantoinase"  
"JS1\_D03\_00033" 11942 "s59E5H2" 0.1282693 "Allantoinase"  
"JS1\_D03\_00033" 11942 "s63E6H2" 0.1746836 "Allantoinase"  
"JS1\_D03\_00034" 11943 "s59E13H2" 0 "Sialic acid TRAP transporter permease protein SiaT"  
"JS1\_D03\_00034" 11943 "s59E25H2" 0 "Sialic acid TRAP transporter permease protein SiaT"  
"JS1\_D03\_00034" 11943 "s59E5H2" 0.09728302 "Sialic acid TRAP transporter permease protein SiaT"  
"JS1\_D03\_00034" 11943 "s63E6H2" 0.2800829 "Sialic acid TRAP transporter permease protein SiaT"  
"JS1\_D03\_00036" 11945 "s59E13H2" 0.009683276 "hypothetical protein"  
"JS1\_D03\_00036" 11945 "s59E25H2" 0 "hypothetical protein"  
"JS1\_D03\_00036" 11945 "s59E5H2" 0.1443616 "hypothetical protein"  
"JS1\_D03\_00036" 11945 "s63E6H2" 1.450396 "hypothetical protein"  
"JS1\_D03\_00038" 11947 "s59E13H2" 0 "GDP-mannose 4,6-dehydratase"  
"JS1\_D03\_00038" 11947 "s59E25H2" 0 "GDP-mannose 4,6-dehydratase"  
"JS1\_D03\_00038" 11947 "s59E5H2" 0 "GDP-mannose 4,6-dehydratase"  
"JS1\_D03\_00038" 11947 "s63E6H2" 0.006506549 "GDP-mannose 4,6-dehydratase"  
"JS1\_D03\_00039" 11948 "s59E13H2" 0 "GDP-6-deoxy-D-mannose reductase"  
"JS1\_D03\_00039" 11948 "s59E25H2" 0 "GDP-6-deoxy-D-mannose reductase"  
"JS1\_D03\_00039" 11948 "s59E5H2" 0 "GDP-6-deoxy-D-mannose reductase"  
"JS1\_D03\_00039" 11948 "s63E6H2" 0.0006584299 "GDP-6-deoxy-D-mannose reductase"  
"JS1\_D03\_00041" 11950 "s59E13H2" 0 "hypothetical protein"  
"JS1\_D03\_00041" 11950 "s59E25H2" 0 "hypothetical protein"  
"JS1\_D03\_00041" 11950 "s59E5H2" 0 "hypothetical protein"  
"JS1\_D03\_00041" 11950 "s63E6H2" 0.007388675 "hypothetical protein"  
"JS1\_D03\_00042" 11951 "s59E13H2" 0 "50S ribosomal protein L3"  
"JS1\_D03\_00042" 11951 "s59E25H2" 0 "50S ribosomal protein L3"  
"JS1\_D03\_00042" 11951 "s59E5H2" 0 "50S ribosomal protein L3"  
"JS1\_D03\_00042" 11951 "s63E6H2" 0.004107628 "50S ribosomal protein L3"

"JS1\_D03\_00043" 11952 "s59E13H2" 0.2788765 "30S ribosomal protein S10"  
"JS1\_D03\_00043" 11952 "s59E25H2" 0 "30S ribosomal protein S10"  
"JS1\_D03\_00043" 11952 "s59E5H2" 0 "30S ribosomal protein S10"  
"JS1\_D03\_00043" 11952 "s63E6H2" 0.08546419 "30S ribosomal protein S10"  
"JS1\_D03\_00044" 11953 "s59E13H2" 0.03444225 "Elongation factor Tu"  
"JS1\_D03\_00044" 11953 "s59E25H2" 0 "Elongation factor Tu"  
"JS1\_D03\_00044" 11953 "s59E5H2" 0.04623889 "Elongation factor Tu"  
"JS1\_D03\_00044" 11953 "s63E6H2" 0.1745939 "Elongation factor Tu"  
"JS1\_D03\_00045" 11954 "s59E13H2" 0 "hypothetical protein"  
"JS1\_D03\_00045" 11954 "s59E25H2" 0 "hypothetical protein"  
"JS1\_D03\_00045" 11954 "s59E5H2" 0.07512754 "hypothetical protein"  
"JS1\_D03\_00045" 11954 "s63E6H2" 0.01341892 "hypothetical protein"  
"JS1\_D03\_00047" 11956 "s59E13H2" 0 "hypothetical protein"  
"JS1\_D03\_00047" 11956 "s59E25H2" 0 "hypothetical protein"  
"JS1\_D03\_00047" 11956 "s59E5H2" 0 "hypothetical protein"  
"JS1\_D03\_00047" 11956 "s63E6H2" 0 "hypothetical protein"  
"JS1\_D03\_00048" 11957 "s59E13H2" 0.001402809 "hypothetical protein"  
"JS1\_D03\_00048" 11957 "s59E25H2" 0 "hypothetical protein"  
"JS1\_D03\_00048" 11957 "s59E5H2" 0.2749864 "hypothetical protein"  
"JS1\_D03\_00048" 11957 "s63E6H2" 1.75522 "hypothetical protein"  
"JS1\_D03\_00049" 11958 "s59E13H2" 0 "HNH endonuclease"  
"JS1\_D03\_00049" 11958 "s59E25H2" 0 "HNH endonuclease"  
"JS1\_D03\_00049" 11958 "s59E5H2" 0.1209051 "HNH endonuclease"  
"JS1\_D03\_00049" 11958 "s63E6H2" 0 "HNH endonuclease"  
"JS1\_D03\_00050" 11959 "s59E13H2" 0.001336375 "DNA-directed RNA polymerase subunit beta"  
"JS1\_D03\_00050" 11959 "s59E25H2" 0 "DNA-directed RNA polymerase subunit beta"  
"JS1\_D03\_00050" 11959 "s59E5H2" 0.004647113 "DNA-directed RNA polymerase subunit beta"  
"JS1\_D03\_00050" 11959 "s63E6H2" 0.00492535 "DNA-directed RNA polymerase subunit beta"  
"JS1\_D03\_00051" 11960 "s59E13H2" 0.002673521 "hypothetical protein"  
"JS1\_D03\_00051" 11960 "s59E25H2" 0.400319 "hypothetical protein"  
"JS1\_D03\_00051" 11960 "s59E5H2" 0.8617557 "hypothetical protein"  
"JS1\_D03\_00051" 11960 "s63E6H2" 1.943424 "hypothetical protein"  
"JS1\_D03\_00052" 11961 "s59E13H2" 0.00274397 "Putative ski2-type helicase"  
"JS1\_D03\_00052" 11961 "s59E25H2" 0 "Putative ski2-type helicase"  
"JS1\_D03\_00052" 11961 "s59E5H2" 0.0904814 "Putative ski2-type helicase"  
"JS1\_D03\_00052" 11961 "s63E6H2" 0.0904496 "Putative ski2-type helicase"  
"JS1\_D03\_00053" 11962 "s59E13H2" 0.9747835 "Cyclic di-GMP phosphodiesterase response regulator RpfG"  
"JS1\_D03\_00053" 11962 "s59E25H2" 0 "Cyclic di-GMP phosphodiesterase response regulator RpfG"  
"JS1\_D03\_00053" 11962 "s59E5H2" 0.2073188 "Cyclic di-GMP phosphodiesterase response regulator RpfG"  
"JS1\_D03\_00053" 11962 "s63E6H2" 0.4309058 "Cyclic di-GMP phosphodiesterase response regulator RpfG"  
"JS1\_D03\_00054" 11963 "s59E13H2" 0 "Helix-hairpin-helix motif protein"  
"JS1\_D03\_00054" 11963 "s59E25H2" 0 "Helix-hairpin-helix motif protein"  
"JS1\_D03\_00054" 11963 "s59E5H2" 0 "Helix-hairpin-helix motif protein"  
"JS1\_D03\_00054" 11963 "s63E6H2" 0.007463193 "Helix-hairpin-helix motif protein"  
"JS1\_D03\_00055" 11964 "s59E13H2" 0 "ATP-dependent helicase HepA"  
"JS1\_D03\_00055" 11964 "s59E25H2" 0 "ATP-dependent helicase HepA"  
"JS1\_D03\_00055" 11964 "s59E5H2" 0.001005944 "ATP-dependent helicase HepA"

"JS1\_D03\_00055" 11964 "s63E6H2" 0.09276384 "ATP-dependent helicase HepA"  
"JS1\_D03\_00056" 11965 "s59E13H2" 0 "hypothetical protein"  
"JS1\_D03\_00056" 11965 "s59E25H2" 0 "hypothetical protein"  
"JS1\_D03\_00056" 11965 "s59E5H2" 0 "hypothetical protein"  
"JS1\_D03\_00056" 11965 "s63E6H2" 0.01166175 "hypothetical protein"  
"JS1\_D03\_00057" 11966 "s59E13H2" 0 "hypothetical protein"  
"JS1\_D03\_00057" 11966 "s59E25H2" 0 "hypothetical protein"  
"JS1\_D03\_00057" 11966 "s59E5H2" 0 "hypothetical protein"  
"JS1\_D03\_00057" 11966 "s63E6H2" 0.005437067 "hypothetical protein"  
"JS1\_D03\_00059" 11968 "s59E13H2" 0 "Divergent AAA domain protein"  
"JS1\_D03\_00059" 11968 "s59E25H2" 0 "Divergent AAA domain protein"  
"JS1\_D03\_00059" 11968 "s59E5H2" 0.04450414 "Divergent AAA domain protein"  
"JS1\_D03\_00059" 11968 "s63E6H2" 0 "Divergent AAA domain protein"  
"JS1\_D03\_00060" 11969 "s59E13H2" 0 "hypothetical protein"  
"JS1\_D03\_00060" 11969 "s59E25H2" 0 "hypothetical protein"  
"JS1\_D03\_00060" 11969 "s59E5H2" 0 "hypothetical protein"  
"JS1\_D03\_00060" 11969 "s63E6H2" 0 "hypothetical protein"  
"JS1\_D03\_00061" 11970 "s59E13H2" 0 "hypothetical protein"  
"JS1\_D03\_00061" 11970 "s59E25H2" 0 "hypothetical protein"  
"JS1\_D03\_00061" 11970 "s59E5H2" 0 "hypothetical protein"  
"JS1\_D03\_00061" 11970 "s63E6H2" 0.02096307 "hypothetical protein"  
"JS1\_D03\_00062" 11971 "s59E13H2" 0.001238422 "PHP domain protein"  
"JS1\_D03\_00062" 11971 "s59E25H2" 0 "PHP domain protein"  
"JS1\_D03\_00062" 11971 "s59E5H2" 0 "PHP domain protein"  
"JS1\_D03\_00062" 11971 "s63E6H2" 0.004325133 "PHP domain protein"  
"JS1\_D03\_00063" 11972 "s59E13H2" 0 "hypothetical protein"  
"JS1\_D03\_00063" 11972 "s59E25H2" 0 "hypothetical protein"  
"JS1\_D03\_00063" 11972 "s59E5H2" 0.006265118 "hypothetical protein"  
"JS1\_D03\_00063" 11972 "s63E6H2" 0 "hypothetical protein"  
"JS1\_D03\_00064" 11973 "s59E13H2" 0 "hypothetical protein"  
"JS1\_D03\_00064" 11973 "s59E25H2" 0 "hypothetical protein"  
"JS1\_D03\_00064" 11973 "s59E5H2" 0 "hypothetical protein"  
"JS1\_D03\_00064" 11973 "s63E6H2" 0 "hypothetical protein"  
"JS1\_D03\_00066" 11975 "s59E13H2" 0 "Divergent AAA domain protein"  
"JS1\_D03\_00066" 11975 "s59E25H2" 0 "Divergent AAA domain protein"  
"JS1\_D03\_00066" 11975 "s59E5H2" 0 "Divergent AAA domain protein"  
"JS1\_D03\_00066" 11975 "s63E6H2" 0 "Divergent AAA domain protein"  
"JS1\_D03\_00070" 11979 "s59E13H2" 0 "exonuclease III"  
"JS1\_D03\_00070" 11979 "s59E25H2" 0 "exonuclease III"  
"JS1\_D03\_00070" 11979 "s59E5H2" 0 "exonuclease III"  
"JS1\_D03\_00070" 11979 "s63E6H2" 0.1434522 "exonuclease III"  
"JS1\_D03\_00071" 11980 "s59E13H2" 0.03045817 "hypothetical protein"  
"JS1\_D03\_00071" 11980 "s59E25H2" 0 "hypothetical protein"  
"JS1\_D03\_00071" 11980 "s59E5H2" 0 "hypothetical protein"  
"JS1\_D03\_00071" 11980 "s63E6H2" 0.01348109 "hypothetical protein"  
"JS1\_D03\_00072" 11981 "s59E13H2" 0.02257076 "hypothetical protein"  
"JS1\_D03\_00072" 11981 "s59E25H2" 0 "hypothetical protein"

"JS1\_D03\_00072" 11981 "s59E5H2" 0 "hypothetical protein"  
"JS1\_D03\_00072" 11981 "s63E6H2" 0.03430282 "hypothetical protein"  
"JS1\_D03\_00073" 11982 "s59E13H2" 0.06014542 "Beta-lactamase superfamily domain protein"  
"JS1\_D03\_00073" 11982 "s59E25H2" 0 "Beta-lactamase superfamily domain protein"  
"JS1\_D03\_00073" 11982 "s59E5H2" 0.08947018 "Beta-lactamase superfamily domain protein"  
"JS1\_D03\_00073" 11982 "s63E6H2" 0.1751028 "Beta-lactamase superfamily domain protein"  
"JS1\_D03\_00074" 11983 "s59E13H2" 0 "hypothetical protein"  
"JS1\_D03\_00074" 11983 "s59E25H2" 0 "hypothetical protein"  
"JS1\_D03\_00074" 11983 "s59E5H2" 0.1044981 "hypothetical protein"  
"JS1\_D03\_00074" 11983 "s63E6H2" 0.1549966 "hypothetical protein"  
"JS1\_D03\_00075" 11984 "s59E13H2" 0 "Glucosamine-6-phosphate deaminase 1"  
"JS1\_D03\_00075" 11984 "s59E25H2" 0 "Glucosamine-6-phosphate deaminase 1"  
"JS1\_D03\_00075" 11984 "s59E5H2" 0.03299 "Glucosamine-6-phosphate deaminase 1"  
"JS1\_D03\_00075" 11984 "s63E6H2" 0 "Glucosamine-6-phosphate deaminase 1"  
"JS1\_D03\_00076" 11985 "s59E13H2" 0 "Enoyl-[acyl-carrier-protein] reductase [NADPH] FabL"  
"JS1\_D03\_00076" 11985 "s59E25H2" 0 "Enoyl-[acyl-carrier-protein] reductase [NADPH] FabL"  
"JS1\_D03\_00076" 11985 "s59E5H2" 0.002273074 "Enoyl-[acyl-carrier-protein] reductase [NADPH] FabL"  
"JS1\_D03\_00076" 11985 "s63E6H2" 0 "Enoyl-[acyl-carrier-protein] reductase [NADPH] FabL"  
"JS1\_D03\_00077" 11986 "s59E13H2" 0 "Cupin domain protein"  
"JS1\_D03\_00077" 11986 "s59E25H2" 0 "Cupin domain protein"  
"JS1\_D03\_00077" 11986 "s59E5H2" 0 "Cupin domain protein"  
"JS1\_D03\_00077" 11986 "s63E6H2" 0 "Cupin domain protein"  
"JS1\_D03\_00078" 11987 "s59E13H2" 0 "N-acetylglucosamine-6-phosphate deacetylase"  
"JS1\_D03\_00078" 11987 "s59E25H2" 0 "N-acetylglucosamine-6-phosphate deacetylase"  
"JS1\_D03\_00078" 11987 "s59E5H2" 0 "N-acetylglucosamine-6-phosphate deacetylase"  
"JS1\_D03\_00078" 11987 "s63E6H2" 0 "N-acetylglucosamine-6-phosphate deacetylase"  
"JS1\_D03\_00079" 11988 "s59E13H2" 0 "Trehalose/maltose transport system permease protein MalG"  
"JS1\_D03\_00079" 11988 "s59E25H2" 0 "Trehalose/maltose transport system permease protein MalG"  
"JS1\_D03\_00079" 11988 "s59E5H2" 0 "Trehalose/maltose transport system permease protein MalG"  
"JS1\_D03\_00079" 11988 "s63E6H2" 0 "Trehalose/maltose transport system permease protein MalG"  
"JS1\_D03\_00080" 11989 "s59E13H2" 0 "hypothetical protein"  
"JS1\_D03\_00080" 11989 "s59E25H2" 0 "hypothetical protein"  
"JS1\_D03\_00080" 11989 "s59E5H2" 0 "hypothetical protein"  
"JS1\_D03\_00080" 11989 "s63E6H2" 0 "hypothetical protein"  
"JS1\_D03\_00081" 11990 "s59E13H2" 0 "Trehalose/maltose transport system permease protein MalF"  
"JS1\_D03\_00081" 11990 "s59E25H2" 0 "Trehalose/maltose transport system permease protein MalF"  
"JS1\_D03\_00081" 11990 "s59E5H2" 0 "Trehalose/maltose transport system permease protein MalF"  
"JS1\_D03\_00081" 11990 "s63E6H2" 0 "Trehalose/maltose transport system permease protein MalF"  
"JS1\_D03\_00082" 11991 "s59E13H2" 0 "Trehalose/maltose-binding protein MalE precursor"  
"JS1\_D03\_00082" 11991 "s59E25H2" 0 "Trehalose/maltose-binding protein MalE precursor"  
"JS1\_D03\_00082" 11991 "s59E5H2" 0.04776122 "Trehalose/maltose-binding protein MalE precursor"  
"JS1\_D03\_00082" 11991 "s63E6H2" 0 "Trehalose/maltose-binding protein MalE precursor"  
"JS1\_D03\_00083" 11992 "s59E13H2" 0 "hypothetical protein"  
"JS1\_D03\_00083" 11992 "s59E25H2" 0 "hypothetical protein"  
"JS1\_D03\_00083" 11992 "s59E5H2" 0.05406081 "hypothetical protein"  
"JS1\_D03\_00083" 11992 "s63E6H2" 0 "hypothetical protein"  
"JS1\_D03\_00084" 11993 "s59E13H2" 0 "hypothetical protein"

"JS1\_D03\_00084" 11993 "s59E25H2" 0 "hypothetical protein"  
"JS1\_D03\_00084" 11993 "s59E5H2" 0 "hypothetical protein"  
"JS1\_D03\_00084" 11993 "s63E6H2" 0 "hypothetical protein"  
"JS1\_D03\_00085" 11994 "s59E13H2" 0.01885198 "Demethylmenaquinone methyltransferase"  
"JS1\_D03\_00085" 11994 "s59E25H2" 0 "Demethylmenaquinone methyltransferase"  
"JS1\_D03\_00085" 11994 "s59E5H2" 0.07220946 "Demethylmenaquinone methyltransferase"  
"JS1\_D03\_00085" 11994 "s63E6H2" 0.2644093 "Demethylmenaquinone methyltransferase"  
"JS1\_D03\_00087" 11996 "s59E13H2" 0 "Trehalose/maltose-binding protein MalE precursor"  
"JS1\_D03\_00087" 11996 "s59E25H2" 0 "Trehalose/maltose-binding protein MalE precursor"  
"JS1\_D03\_00087" 11996 "s59E5H2" 0.05260126 "Trehalose/maltose-binding protein MalE precursor"  
"JS1\_D03\_00087" 11996 "s63E6H2" 0 "Trehalose/maltose-binding protein MalE precursor"  
"JS1\_D03\_00088" 11997 "s59E13H2" 0 "Inner membrane ABC transporter permease protein YcjO"  
"JS1\_D03\_00088" 11997 "s59E25H2" 0 "Inner membrane ABC transporter permease protein YcjO"  
"JS1\_D03\_00088" 11997 "s59E5H2" 0.03915498 "Inner membrane ABC transporter permease protein YcjO"  
"JS1\_D03\_00088" 11997 "s63E6H2" 0 "Inner membrane ABC transporter permease protein YcjO"  
"JS1\_D03\_00089" 11998 "s59E13H2" 0 "Inner membrane ABC transporter permease protein YcjP"  
"JS1\_D03\_00089" 11998 "s59E25H2" 0 "Inner membrane ABC transporter permease protein YcjP"  
"JS1\_D03\_00089" 11998 "s59E5H2" 0.02820041 "Inner membrane ABC transporter permease protein YcjP"  
"JS1\_D03\_00089" 11998 "s63E6H2" 0 "Inner membrane ABC transporter permease protein YcjP"  
"JS1\_D03\_00090" 11999 "s59E13H2" 0 "Mannosylglycerate hydrolase"  
"JS1\_D03\_00090" 11999 "s59E25H2" 0 "Mannosylglycerate hydrolase"  
"JS1\_D03\_00090" 11999 "s59E5H2" 0.03356429 "Mannosylglycerate hydrolase"  
"JS1\_D03\_00090" 11999 "s63E6H2" 6.754766e-05 "Mannosylglycerate hydrolase"  
"JS1\_D03\_00091" 12000 "s59E13H2" 0 "Mannosylglycerate hydrolase"  
"JS1\_D03\_00091" 12000 "s59E25H2" 0 "Mannosylglycerate hydrolase"  
"JS1\_D03\_00091" 12000 "s59E5H2" 0.02513061 "Mannosylglycerate hydrolase"  
"JS1\_D03\_00091" 12000 "s63E6H2" 0.01884761 "Mannosylglycerate hydrolase"  
"JS1\_D03\_00092" 12001 "s59E13H2" 0 "Uroporphyrinogen decarboxylase (URO-D)"  
"JS1\_D03\_00092" 12001 "s59E25H2" 0 "Uroporphyrinogen decarboxylase (URO-D)"  
"JS1\_D03\_00092" 12001 "s59E5H2" 0.004077885 "Uroporphyrinogen decarboxylase (URO-D)"  
"JS1\_D03\_00092" 12001 "s63E6H2" 0 "Uroporphyrinogen decarboxylase (URO-D)"  
"JS1\_D03\_00093" 12002 "s59E13H2" 0.02978491 "Transposase IS200 like protein"  
"JS1\_D03\_00093" 12002 "s59E25H2" 0 "Transposase IS200 like protein"  
"JS1\_D03\_00093" 12002 "s59E5H2" 0.3628705 "Transposase IS200 like protein"  
"JS1\_D03\_00093" 12002 "s63E6H2" 1.06078 "Transposase IS200 like protein"  
"JS1\_D03\_00094" 12003 "s59E13H2" 0 "50S ribosomal protein L3"  
"JS1\_D03\_00094" 12003 "s59E25H2" 0 "50S ribosomal protein L3"  
"JS1\_D03\_00094" 12003 "s59E5H2" 0 "50S ribosomal protein L3"  
"JS1\_D03\_00094" 12003 "s63E6H2" 0.05420389 "50S ribosomal protein L3"  
"JS1\_D03\_00098" 12007 "s59E13H2" 0.002683952 "Arginine biosynthesis bifunctional protein ArgJ"  
"JS1\_D03\_00098" 12007 "s59E25H2" 0 "Arginine biosynthesis bifunctional protein ArgJ"  
"JS1\_D03\_00098" 12007 "s59E5H2" 0 "Arginine biosynthesis bifunctional protein ArgJ"  
"JS1\_D03\_00098" 12007 "s63E6H2" 0.08202636 "Arginine biosynthesis bifunctional protein ArgJ"  
"JS1\_D03\_00100" 12009 "s59E13H2" 0.07757896 "Elongation factor Tu-A"  
"JS1\_D03\_00100" 12009 "s59E25H2" 0 "Elongation factor Tu-A"  
"JS1\_D03\_00100" 12009 "s59E5H2" 0.08916453 "Elongation factor Tu-A"  
"JS1\_D03\_00100" 12009 "s63E6H2" 0.2338019 "Elongation factor Tu-A"

"JS1\_D03\_00101" 12010 "s59E13H2" 0 "Protein of unknown function (Hypoth\_ymh)"  
"JS1\_D03\_00101" 12010 "s59E25H2" 0 "Protein of unknown function (Hypoth\_ymh)"  
"JS1\_D03\_00101" 12010 "s59E5H2" 0.001375904 "Protein of unknown function (Hypoth\_ymh)"  
"JS1\_D03\_00101" 12010 "s63E6H2" 0 "Protein of unknown function (Hypoth\_ymh)"  
"JS1\_D03\_00102" 12011 "s59E13H2" 0.01588966 "F0F1 ATP synthase subunit beta"  
"JS1\_D03\_00102" 12011 "s59E25H2" 0 "F0F1 ATP synthase subunit beta"  
"JS1\_D03\_00102" 12011 "s59E5H2" 0.5617906 "F0F1 ATP synthase subunit beta"  
"JS1\_D03\_00102" 12011 "s63E6H2" 0.1191541 "F0F1 ATP synthase subunit beta"  
"JS1\_D03\_00104" 12013 "s59E13H2" 0 "Copper-sensing transcriptional repressor CsoR"  
"JS1\_D03\_00104" 12013 "s59E25H2" 0 "Copper-sensing transcriptional repressor CsoR"  
"JS1\_D03\_00104" 12013 "s59E5H2" 0 "Copper-sensing transcriptional repressor CsoR"  
"JS1\_D03\_00104" 12013 "s63E6H2" 0.03835285 "Copper-sensing transcriptional repressor CsoR"  
"JS1\_D03\_00105" 12014 "s59E13H2" 0 "30S ribosomal protein S12"  
"JS1\_D03\_00105" 12014 "s59E25H2" 0 "30S ribosomal protein S12"  
"JS1\_D03\_00105" 12014 "s59E5H2" 0.03933544 "30S ribosomal protein S12"  
"JS1\_D03\_00105" 12014 "s63E6H2" 0.06737487 "30S ribosomal protein S12"  
"JS1\_D03\_00106" 12015 "s59E13H2" 0.01573743 "preprotein translocase subunit SecY"  
"JS1\_D03\_00106" 12015 "s59E25H2" 0 "preprotein translocase subunit SecY"  
"JS1\_D03\_00106" 12015 "s59E5H2" 0.01961694 "preprotein translocase subunit SecY"  
"JS1\_D03\_00106" 12015 "s63E6H2" 0.09198742 "preprotein translocase subunit SecY"  
"JS1\_D03\_00109" 12018 "s59E13H2" 0.004577612 "DNA-directed RNA polymerase subunit beta"  
"JS1\_D03\_00109" 12018 "s59E25H2" 0 "DNA-directed RNA polymerase subunit beta"  
"JS1\_D03\_00109" 12018 "s59E5H2" 0 "DNA-directed RNA polymerase subunit beta"  
"JS1\_D03\_00109" 12018 "s63E6H2" 0.004278019 "DNA-directed RNA polymerase subunit beta"  
"JS1\_D03\_00110" 12019 "s59E13H2" 0 "Tyrosine-protein kinase ptk"  
"JS1\_D03\_00110" 12019 "s59E25H2" 0 "Tyrosine-protein kinase ptk"  
"JS1\_D03\_00110" 12019 "s59E5H2" 0.2058206 "Tyrosine-protein kinase ptk"  
"JS1\_D03\_00110" 12019 "s63E6H2" 0.1165507 "Tyrosine-protein kinase ptk"  
"JS1\_D03\_00111" 12020 "s59E13H2" 0 "hypothetical protein"  
"JS1\_D03\_00111" 12020 "s59E25H2" 0 "hypothetical protein"  
"JS1\_D03\_00111" 12020 "s59E5H2" 0 "hypothetical protein"  
"JS1\_D03\_00111" 12020 "s63E6H2" 0.05367852 "hypothetical protein"  
"JS1\_D03\_00112" 12021 "s59E13H2" 0 "Phosphoglucomutase"  
"JS1\_D03\_00112" 12021 "s59E25H2" 0.07273877 "Phosphoglucomutase"  
"JS1\_D03\_00112" 12021 "s59E5H2" 0.1333751 "Phosphoglucomutase"  
"JS1\_D03\_00112" 12021 "s63E6H2" 2.977571 "Phosphoglucomutase"  
"JS1\_D03\_00113" 12022 "s59E13H2" 0 "Tetratricopeptide repeat protein"  
"JS1\_D03\_00113" 12022 "s59E25H2" 0 "Tetratricopeptide repeat protein"  
"JS1\_D03\_00113" 12022 "s59E5H2" 0 "Tetratricopeptide repeat protein"  
"JS1\_D03\_00113" 12022 "s63E6H2" 0.009059333 "Tetratricopeptide repeat protein"  
"JS1\_D03\_00114" 12023 "s59E13H2" 1.905552 "Radical SAM superfamily protein"  
"JS1\_D03\_00114" 12023 "s59E25H2" 0 "Radical SAM superfamily protein"  
"JS1\_D03\_00114" 12023 "s59E5H2" 0.02723716 "Radical SAM superfamily protein"  
"JS1\_D03\_00114" 12023 "s63E6H2" 0.06624658 "Radical SAM superfamily protein"  
"JS1\_D03\_00115" 12024 "s59E13H2" 4.58309 "Ktr system potassium uptake protein A"  
"JS1\_D03\_00115" 12024 "s59E25H2" 0 "Ktr system potassium uptake protein A"  
"JS1\_D03\_00115" 12024 "s59E5H2" 3.971825 "Ktr system potassium uptake protein A"



"JS1\_D03\_00115" 12024 "s63E6H2" 9.780365 "Ktr system potassium uptake protein A"  
"JS1\_D03\_00116" 12025 "s59E13H2" 1.079357 "D-alanine--D-alanine ligase"  
"JS1\_D03\_00116" 12025 "s59E25H2" 0.2950089 "D-alanine--D-alanine ligase"  
"JS1\_D03\_00116" 12025 "s59E5H2" 4.816951 "D-alanine--D-alanine ligase"  
"JS1\_D03\_00116" 12025 "s63E6H2" 8.153324 "D-alanine--D-alanine ligase"  
"JS1\_D03\_00117" 12026 "s59E13H2" 1.770602 "Methylated-DNA--protein-cysteine methyltransferase"  
"JS1\_D03\_00117" 12026 "s59E25H2" 0.1561905 "Methylated-DNA--protein-cysteine methyltransferase"  
"JS1\_D03\_00117" 12026 "s59E5H2" 4.928398 "Methylated-DNA--protein-cysteine methyltransferase"  
"JS1\_D03\_00117" 12026 "s63E6H2" 11.22152 "Methylated-DNA--protein-cysteine methyltransferase"  
"JS1\_D03\_00118" 12027 "s59E13H2" 2.370308 "MobA-like NTP transferase domain protein"  
"JS1\_D03\_00118" 12027 "s59E25H2" 0 "MobA-like NTP transferase domain protein"  
"JS1\_D03\_00118" 12027 "s59E5H2" 3.988487 "MobA-like NTP transferase domain protein"  
"JS1\_D03\_00118" 12027 "s63E6H2" 13.5678 "MobA-like NTP transferase domain protein"  
"JS1\_D03\_00119" 12028 "s59E13H2" 0.1058508 "hypothetical protein"  
"JS1\_D03\_00119" 12028 "s59E25H2" 0 "hypothetical protein"  
"JS1\_D03\_00119" 12028 "s59E5H2" 2.092894 "hypothetical protein"  
"JS1\_D03\_00119" 12028 "s63E6H2" 11.01973 "hypothetical protein"  
"JS1\_D03\_00120" 12029 "s59E13H2" 0.01237847 "Tetratricopeptide repeat protein"  
"JS1\_D03\_00120" 12029 "s59E25H2" 0 "Tetratricopeptide repeat protein"  
"JS1\_D03\_00120" 12029 "s59E5H2" 2.160803 "Tetratricopeptide repeat protein"  
"JS1\_D03\_00120" 12029 "s63E6H2" 0.05763765 "Tetratricopeptide repeat protein"  
"JS1\_D03\_00121" 12030 "s59E13H2" 0.03456719 "Putative competence-damage inducible protein"  
"JS1\_D03\_00121" 12030 "s59E25H2" 0.1443381 "Putative competence-damage inducible protein"  
"JS1\_D03\_00121" 12030 "s59E5H2" 2.325854 "Putative competence-damage inducible protein"  
"JS1\_D03\_00121" 12030 "s63E6H2" 0.8926278 "Putative competence-damage inducible protein"  
"JS1\_D03\_00122" 12031 "s59E13H2" 0.06187097 "1,3-propanediol dehydrogenase"  
"JS1\_D03\_00122" 12031 "s59E25H2" 0 "1,3-propanediol dehydrogenase"  
"JS1\_D03\_00122" 12031 "s59E5H2" 4.110925 "1,3-propanediol dehydrogenase"  
"JS1\_D03\_00122" 12031 "s63E6H2" 1.985445 "1,3-propanediol dehydrogenase"  
"JS1\_D03\_00123" 12032 "s59E13H2" 0.07145291 "RNA recognition motif. (a.k.a. RRM, RBD, or RNP domain)"  
"JS1\_D03\_00123" 12032 "s59E25H2" 0 "RNA recognition motif. (a.k.a. RRM, RBD, or RNP domain)"  
"JS1\_D03\_00123" 12032 "s59E5H2" 1.092695 "RNA recognition motif. (a.k.a. RRM, RBD, or RNP domain)"  
"JS1\_D03\_00123" 12032 "s63E6H2" 0.3496282 "RNA recognition motif. (a.k.a. RRM, RBD, or RNP domain)"  
"JS1\_D03\_00124" 12033 "s59E13H2" 0.6472619 "Benzylsuccinate synthase alpha subunit"  
"JS1\_D03\_00124" 12033 "s59E25H2" 0 "Benzylsuccinate synthase alpha subunit"  
"JS1\_D03\_00124" 12033 "s59E5H2" 3.85029 "Benzylsuccinate synthase alpha subunit"  
"JS1\_D03\_00124" 12033 "s63E6H2" 0.6082766 "Benzylsuccinate synthase alpha subunit"  
"JS1\_D03\_00125" 12034 "s59E13H2" 0.3970785 "Benzylsuccinate synthase activating enzyme"  
"JS1\_D03\_00125" 12034 "s59E25H2" 0 "Benzylsuccinate synthase activating enzyme"  
"JS1\_D03\_00125" 12034 "s59E5H2" 0.8255877 "Benzylsuccinate synthase activating enzyme"  
"JS1\_D03\_00125" 12034 "s63E6H2" 0.438176 "Benzylsuccinate synthase activating enzyme"  
"JS1\_D03\_00126" 12035 "s59E13H2" 0.3187368 "Transketolase 2"  
"JS1\_D03\_00126" 12035 "s59E25H2" 0 "Transketolase 2"  
"JS1\_D03\_00126" 12035 "s59E5H2" 1.58474 "Transketolase 2"  
"JS1\_D03\_00126" 12035 "s63E6H2" 0.361649 "Transketolase 2"  
"JS1\_D03\_00127" 12036 "s59E13H2" 0.5111407 "Thiamine pyrophosphokinase"  
"JS1\_D03\_00127" 12036 "s59E25H2" 0 "Thiamine pyrophosphokinase"

"JS1\_D03\_00127" 12036 "s59E5H2" 1.503714 "Thiamine pyrophosphokinase"  
"JS1\_D03\_00127" 12036 "s63E6H2" 0.9598961 "Thiamine pyrophosphokinase"  
"JS1\_D03\_00128" 12037 "s59E13H2" 0.6171804 "Thiamine transporter ThiT"  
"JS1\_D03\_00128" 12037 "s59E25H2" 0 "Thiamine transporter ThiT"  
"JS1\_D03\_00128" 12037 "s59E5H2" 0.8190284 "Thiamine transporter ThiT"  
"JS1\_D03\_00128" 12037 "s63E6H2" 1.31466 "Thiamine transporter ThiT"  
"JS1\_D03\_00130" 12039 "s59E13H2" 0.6585427 "RNA recognition motif. (a.k.a. RRM, RBD, or RNP domain)"  
"JS1\_D03\_00130" 12039 "s59E25H2" 0 "RNA recognition motif. (a.k.a. RRM, RBD, or RNP domain)"  
"JS1\_D03\_00130" 12039 "s59E5H2" 1.617509 "RNA recognition motif. (a.k.a. RRM, RBD, or RNP domain)"  
"JS1\_D03\_00130" 12039 "s63E6H2" 1.451553 "RNA recognition motif. (a.k.a. RRM, RBD, or RNP domain)"  
"JS1\_D03\_00131" 12040 "s59E13H2" 0.1292831 "NAD-dependent protein deacetylase"  
"JS1\_D03\_00131" 12040 "s59E25H2" 0 "NAD-dependent protein deacetylase"  
"JS1\_D03\_00131" 12040 "s59E5H2" 1.125158 "NAD-dependent protein deacetylase"  
"JS1\_D03\_00131" 12040 "s63E6H2" 0.2969236 "NAD-dependent protein deacetylase"  
"JS1\_D03\_00132" 12041 "s59E13H2" 0.0129202 "hypothetical protein"  
"JS1\_D03\_00132" 12041 "s59E25H2" 0 "hypothetical protein"  
"JS1\_D03\_00132" 12041 "s59E5H2" 0.06497767 "hypothetical protein"  
"JS1\_D03\_00132" 12041 "s63E6H2" 0.4131302 "hypothetical protein"  
"JS1\_D03\_00133" 12042 "s59E13H2" 0.01352781 "Ribosomal silencing factor RsfS"  
"JS1\_D03\_00133" 12042 "s59E25H2" 0 "Ribosomal silencing factor RsfS"  
"JS1\_D03\_00133" 12042 "s59E5H2" 0.07773973 "Ribosomal silencing factor RsfS"  
"JS1\_D03\_00133" 12042 "s63E6H2" 0.4509684 "Ribosomal silencing factor RsfS"  
"JS1\_D03\_00134" 12043 "s59E13H2" 0 "hypothetical protein"  
"JS1\_D03\_00134" 12043 "s59E25H2" 0 "hypothetical protein"  
"JS1\_D03\_00134" 12043 "s59E5H2" 0 "hypothetical protein"  
"JS1\_D03\_00134" 12043 "s63E6H2" 0.0001282551 "hypothetical protein"  
"JS1\_D03\_00135" 12044 "s59E13H2" 0 "DNA-directed RNA polymerase subunit beta"  
"JS1\_D03\_00135" 12044 "s59E25H2" 0 "DNA-directed RNA polymerase subunit beta"  
"JS1\_D03\_00135" 12044 "s59E5H2" 0 "DNA-directed RNA polymerase subunit beta"  
"JS1\_D03\_00135" 12044 "s63E6H2" 0.03944301 "DNA-directed RNA polymerase subunit beta"  
"JS1\_D03\_00137" 12046 "s59E13H2" 0.03433154 "hypothetical protein"  
"JS1\_D03\_00137" 12046 "s59E25H2" 0 "hypothetical protein"  
"JS1\_D03\_00137" 12046 "s59E5H2" 0.1089006 "hypothetical protein"  
"JS1\_D03\_00137" 12046 "s63E6H2" 0.09758959 "hypothetical protein"  
"JS1\_D03\_00140" 12049 "s59E13H2" 0.003941502 "hypothetical protein"  
"JS1\_D03\_00140" 12049 "s59E25H2" 0 "hypothetical protein"  
"JS1\_D03\_00140" 12049 "s59E5H2" 0.0385479 "hypothetical protein"  
"JS1\_D03\_00140" 12049 "s63E6H2" 0.1574536 "hypothetical protein"  
"JS1\_D03\_00141" 12050 "s59E13H2" 0.004721757 "Methionine aminopeptidase 1"  
"JS1\_D03\_00141" 12050 "s59E25H2" 0 "Methionine aminopeptidase 1"  
"JS1\_D03\_00141" 12050 "s59E5H2" 0.01095587 "Methionine aminopeptidase 1"  
"JS1\_D03\_00141" 12050 "s63E6H2" 0.04992975 "Methionine aminopeptidase 1"  
"JS1\_D03\_00142" 12051 "s59E13H2" 0 "Adenylate kinase"  
"JS1\_D03\_00142" 12051 "s59E25H2" 0 "Adenylate kinase"  
"JS1\_D03\_00142" 12051 "s59E5H2" 0.00834288 "Adenylate kinase"  
"JS1\_D03\_00142" 12051 "s63E6H2" 0.03136819 "Adenylate kinase"  
"JS1\_D03\_00144" 12053 "s59E13H2" 0 "putative membrane protein Ydfk"

"JS1\_D03\_00144" 12053 "s59E25H2" 0 "putative membrane protein Ydfk"  
"JS1\_D03\_00144" 12053 "s59E5H2" 0.004479558 "putative membrane protein Ydfk"  
"JS1\_D03\_00144" 12053 "s63E6H2" 0.06422361 "putative membrane protein Ydfk"  
"JS1\_D03\_00145" 12054 "s59E13H2" 0.04957641 "Putative ATP:guanido phosphotransferase"  
"JS1\_D03\_00145" 12054 "s59E25H2" 0 "Putative ATP:guanido phosphotransferase"  
"JS1\_D03\_00145" 12054 "s59E5H2" 0.3627564 "Putative ATP:guanido phosphotransferase"  
"JS1\_D03\_00145" 12054 "s63E6H2" 0.6008704 "Putative ATP:guanido phosphotransferase"  
"JS1\_D03\_00146" 12055 "s59E13H2" 0.3922225 "UvrABC system protein B"  
"JS1\_D03\_00146" 12055 "s59E25H2" 0 "UvrABC system protein B"  
"JS1\_D03\_00146" 12055 "s59E5H2" 0.06994725 "UvrABC system protein B"  
"JS1\_D03\_00146" 12055 "s63E6H2" 0.4375381 "UvrABC system protein B"  
"JS1\_D03\_00148" 12057 "s59E13H2" 0 "hypothetical protein"  
"JS1\_D03\_00148" 12057 "s59E25H2" 0 "hypothetical protein"  
"JS1\_D03\_00148" 12057 "s59E5H2" 0.00417144 "hypothetical protein"  
"JS1\_D03\_00148" 12057 "s63E6H2" 0.3827108 "hypothetical protein"  
"JS1\_D03\_00149" 12058 "s59E13H2" 0.0014201 "Phosphoglycerate kinase"  
"JS1\_D03\_00149" 12058 "s59E25H2" 0 "Phosphoglycerate kinase"  
"JS1\_D03\_00149" 12058 "s59E5H2" 0.09232582 "Phosphoglycerate kinase"  
"JS1\_D03\_00149" 12058 "s63E6H2" 0.6888544 "Phosphoglycerate kinase"  
"JS1\_D03\_00150" 12059 "s59E13H2" 0 "putative membrane protein Ydfk"  
"JS1\_D03\_00150" 12059 "s59E25H2" 0 "putative membrane protein Ydfk"  
"JS1\_D03\_00150" 12059 "s59E5H2" 0 "putative membrane protein Ydfk"  
"JS1\_D03\_00150" 12059 "s63E6H2" 0.04267057 "putative membrane protein Ydfk"  
"JS1\_D03\_00151" 12060 "s59E13H2" 0 "hypothetical protein"  
"JS1\_D03\_00151" 12060 "s59E25H2" 0 "hypothetical protein"  
"JS1\_D03\_00151" 12060 "s59E5H2" 0.01551977 "hypothetical protein"  
"JS1\_D03\_00151" 12060 "s63E6H2" 0.0527366 "hypothetical protein"  
"JS1\_D03\_00152" 12061 "s59E13H2" 0 "Ribonuclease 3"  
"JS1\_D03\_00152" 12061 "s59E25H2" 0 "Ribonuclease 3"  
"JS1\_D03\_00152" 12061 "s59E5H2" 0 "Ribonuclease 3"  
"JS1\_D03\_00152" 12061 "s63E6H2" 0.1476581 "Ribonuclease 3"  
"JS1\_D03\_00153" 12062 "s59E13H2" 0 "3-oxoacyl-[acyl-carrier-protein] synthase 2"  
"JS1\_D03\_00153" 12062 "s59E25H2" 0 "3-oxoacyl-[acyl-carrier-protein] synthase 2"  
"JS1\_D03\_00153" 12062 "s59E5H2" 0.002493109 "3-oxoacyl-[acyl-carrier-protein] synthase 2"  
"JS1\_D03\_00153" 12062 "s63E6H2" 0.2295935 "3-oxoacyl-[acyl-carrier-protein] synthase 2"  
"JS1\_D03\_00154" 12063 "s59E13H2" 0 "Acyl carrier protein"  
"JS1\_D03\_00154" 12063 "s59E25H2" 0 "Acyl carrier protein"  
"JS1\_D03\_00154" 12063 "s59E5H2" 0 "Acyl carrier protein"  
"JS1\_D03\_00154" 12063 "s63E6H2" 0.1509285 "Acyl carrier protein"  
"JS1\_D03\_00155" 12064 "s59E13H2" 0 "3-oxoacyl-[acyl-carrier-protein] reductase FabG"  
"JS1\_D03\_00155" 12064 "s59E25H2" 0 "3-oxoacyl-[acyl-carrier-protein] reductase FabG"  
"JS1\_D03\_00155" 12064 "s59E5H2" 0 "3-oxoacyl-[acyl-carrier-protein] reductase FabG"  
"JS1\_D03\_00155" 12064 "s63E6H2" 0.1425093 "3-oxoacyl-[acyl-carrier-protein] reductase FabG"  
"JS1\_D03\_00156" 12065 "s59E13H2" 0 "Malonyl CoA-acyl carrier protein transacylase"  
"JS1\_D03\_00156" 12065 "s59E25H2" 0 "Malonyl CoA-acyl carrier protein transacylase"  
"JS1\_D03\_00156" 12065 "s59E5H2" 0 "Malonyl CoA-acyl carrier protein transacylase"  
"JS1\_D03\_00156" 12065 "s63E6H2" 0.128739 "Malonyl CoA-acyl carrier protein transacylase"

"JS1\_D03\_00157" 12066 "s59E13H2" 0 "3-oxoacyl-[acyl-carrier-protein] synthase 3"  
"JS1\_D03\_00157" 12066 "s59E25H2" 0 "3-oxoacyl-[acyl-carrier-protein] synthase 3"  
"JS1\_D03\_00157" 12066 "s59E5H2" 0.003087949 "3-oxoacyl-[acyl-carrier-protein] synthase 3"  
"JS1\_D03\_00157" 12066 "s63E6H2" 0.09650487 "3-oxoacyl-[acyl-carrier-protein] synthase 3"  
"JS1\_D03\_00158" 12067 "s59E13H2" 0 "Phosphate acyltransferase"  
"JS1\_D03\_00158" 12067 "s59E25H2" 0 "Phosphate acyltransferase"  
"JS1\_D03\_00158" 12067 "s59E5H2" 0 "Phosphate acyltransferase"  
"JS1\_D03\_00158" 12067 "s63E6H2" 0.08999586 "Phosphate acyltransferase"  
"JS1\_D03\_00159" 12068 "s59E13H2" 0.02151739 "Transcription factor FapR"  
"JS1\_D03\_00159" 12068 "s59E25H2" 0 "Transcription factor FapR"  
"JS1\_D03\_00159" 12068 "s59E5H2" 0.03319545 "Transcription factor FapR"  
"JS1\_D03\_00159" 12068 "s63E6H2" 0.1084967 "Transcription factor FapR"  
"JS1\_D03\_00160" 12069 "s59E13H2" 0.003407538 "50S ribosomal protein L32"  
"JS1\_D03\_00160" 12069 "s59E25H2" 0 "50S ribosomal protein L32"  
"JS1\_D03\_00160" 12069 "s59E5H2" 0 "50S ribosomal protein L32"  
"JS1\_D03\_00160" 12069 "s63E6H2" 0.124779 "50S ribosomal protein L32"  
"JS1\_D03\_00161" 12070 "s59E13H2" 0.002406708 "Acetate kinase"  
"JS1\_D03\_00161" 12070 "s59E25H2" 0 "Acetate kinase"  
"JS1\_D03\_00161" 12070 "s59E5H2" 0 "Acetate kinase"  
"JS1\_D03\_00161" 12070 "s63E6H2" 0.09323844 "Acetate kinase"  
"JS1\_D03\_00162" 12071 "s59E13H2" 0.07713627 "Phosphate acetyltransferase"  
"JS1\_D03\_00162" 12071 "s59E25H2" 0 "Phosphate acetyltransferase"  
"JS1\_D03\_00162" 12071 "s59E5H2" 0.05028549 "Phosphate acetyltransferase"  
"JS1\_D03\_00162" 12071 "s63E6H2" 0.1024257 "Phosphate acetyltransferase"  
"JS1\_D03\_00163" 12072 "s59E13H2" 0.003370019 "hypothetical protein"  
"JS1\_D03\_00163" 12072 "s59E25H2" 0 "hypothetical protein"  
"JS1\_D03\_00163" 12072 "s59E5H2" 0 "hypothetical protein"  
"JS1\_D03\_00163" 12072 "s63E6H2" 0.05944194 "hypothetical protein"  
"JS1\_D03\_00164" 12073 "s59E13H2" 0 "Lon protease"  
"JS1\_D03\_00164" 12073 "s59E25H2" 0 "Lon protease"  
"JS1\_D03\_00164" 12073 "s59E5H2" 0 "Lon protease"  
"JS1\_D03\_00164" 12073 "s63E6H2" 0.09411573 "Lon protease"  
"JS1\_D03\_00165" 12074 "s59E13H2" 0.5967443 "Phosphopantetheine adenylyltransferase"  
"JS1\_D03\_00165" 12074 "s59E25H2" 0 "Phosphopantetheine adenylyltransferase"  
"JS1\_D03\_00165" 12074 "s59E5H2" 0.0709802 "Phosphopantetheine adenylyltransferase"  
"JS1\_D03\_00165" 12074 "s63E6H2" 0.1647376 "Phosphopantetheine adenylyltransferase"  
"JS1\_D03\_00166" 12075 "s59E13H2" 0.007786296 "Ribosomal RNA small subunit methyltransferase D"  
"JS1\_D03\_00166" 12075 "s59E25H2" 0 "Ribosomal RNA small subunit methyltransferase D"  
"JS1\_D03\_00166" 12075 "s59E5H2" 0.04034149 "Ribosomal RNA small subunit methyltransferase D"  
"JS1\_D03\_00166" 12075 "s63E6H2" 0.05734688 "Ribosomal RNA small subunit methyltransferase D"  
"JS1\_D03\_00167" 12076 "s59E13H2" 0.4253216 "50S ribosomal protein L28"  
"JS1\_D03\_00167" 12076 "s59E25H2" 0 "50S ribosomal protein L28"  
"JS1\_D03\_00167" 12076 "s59E5H2" 0.09744195 "50S ribosomal protein L28"  
"JS1\_D03\_00167" 12076 "s63E6H2" 0.1621787 "50S ribosomal protein L28"  
"JS1\_D03\_00168" 12077 "s59E13H2" 1.275508 "4-hydroxy-3-methylbut-2-enyl diphosphate reductase"  
"JS1\_D03\_00168" 12077 "s59E25H2" 0.2998805 "4-hydroxy-3-methylbut-2-enyl diphosphate reductase"  
"JS1\_D03\_00168" 12077 "s59E5H2" 0.03620039 "4-hydroxy-3-methylbut-2-enyl diphosphate reductase"

"JS1\_D03\_00168" 12077 "s63E6H2" 0.1367876 "4-hydroxy-3-methylbut-2-enyl diphosphate reductase"  
"JS1\_D03\_00169" 12078 "s59E13H2" 2.185387 "Cytidylate kinase"  
"JS1\_D03\_00169" 12078 "s59E25H2" 0.1082982 "Cytidylate kinase"  
"JS1\_D03\_00169" 12078 "s59E5H2" 0.01420522 "Cytidylate kinase"  
"JS1\_D03\_00169" 12078 "s63E6H2" 0.0926429 "Cytidylate kinase"  
"JS1\_D03\_00170" 12079 "s59E13H2" 1.005093 "Ribosomal large subunit pseudouridine synthase B"  
"JS1\_D03\_00170" 12079 "s59E25H2" 0 "Ribosomal large subunit pseudouridine synthase B"  
"JS1\_D03\_00170" 12079 "s59E5H2" 0.006475761 "Ribosomal large subunit pseudouridine synthase B"  
"JS1\_D03\_00170" 12079 "s63E6H2" 0.05385112 "Ribosomal large subunit pseudouridine synthase B"  
"JS1\_D03\_00171" 12080 "s59E13H2" 0.001215815 "Segregation and condensation protein B"  
"JS1\_D03\_00171" 12080 "s59E25H2" 0 "Segregation and condensation protein B"  
"JS1\_D03\_00171" 12080 "s59E5H2" 0.04501062 "Segregation and condensation protein B"  
"JS1\_D03\_00171" 12080 "s63E6H2" 0.04198664 "Segregation and condensation protein B"  
"JS1\_D03\_00172" 12081 "s59E13H2" 0 "Segregation and condensation protein A"  
"JS1\_D03\_00172" 12081 "s59E25H2" 0 "Segregation and condensation protein A"  
"JS1\_D03\_00172" 12081 "s59E5H2" 0.007891425 "Segregation and condensation protein A"  
"JS1\_D03\_00172" 12081 "s63E6H2" 0.02102019 "Segregation and condensation protein A"  
"JS1\_D03\_00173" 12082 "s59E13H2" 0 "Tryptophan--tRNA ligase"  
"JS1\_D03\_00173" 12082 "s59E25H2" 0 "Tryptophan--tRNA ligase"  
"JS1\_D03\_00173" 12082 "s59E5H2" 0.04860235 "Tryptophan--tRNA ligase"  
"JS1\_D03\_00173" 12082 "s63E6H2" 0.02667619 "Tryptophan--tRNA ligase"  
"JS1\_D03\_00174" 12083 "s59E13H2" 0 "Peptidase family M50"  
"JS1\_D03\_00174" 12083 "s59E25H2" 0 "Peptidase family M50"  
"JS1\_D03\_00174" 12083 "s59E5H2" 0.02154059 "Peptidase family M50"  
"JS1\_D03\_00174" 12083 "s63E6H2" 0.006792293 "Peptidase family M50"  
"JS1\_D03\_00175" 12084 "s59E13H2" 0.001954943 "Multifunctional CCA protein"  
"JS1\_D03\_00175" 12084 "s59E25H2" 0 "Multifunctional CCA protein"  
"JS1\_D03\_00175" 12084 "s59E5H2" 0.01506954 "Multifunctional CCA protein"  
"JS1\_D03\_00175" 12084 "s63E6H2" 0.02528202 "Multifunctional CCA protein"  
"JS1\_D03\_00176" 12085 "s59E13H2" 0 "Pyrimidine-nucleoside phosphorylase"  
"JS1\_D03\_00176" 12085 "s59E25H2" 0 "Pyrimidine-nucleoside phosphorylase"  
"JS1\_D03\_00176" 12085 "s59E5H2" 0.0117471 "Pyrimidine-nucleoside phosphorylase"  
"JS1\_D03\_00176" 12085 "s63E6H2" 0.01041576 "Pyrimidine-nucleoside phosphorylase"  
"JS1\_D03\_00177" 12086 "s59E13H2" 0.01645626 "Putative K(+)-stimulated pyrophosphate-energized sodium pump"  
"JS1\_D03\_00177" 12086 "s59E25H2" 0 "Putative K(+)-stimulated pyrophosphate-energized sodium pump"  
"JS1\_D03\_00177" 12086 "s59E5H2" 0.1654587 "Putative K(+)-stimulated pyrophosphate-energized sodium pump"  
"JS1\_D03\_00177" 12086 "s63E6H2" 0.07870282 "Putative K(+)-stimulated pyrophosphate-energized sodium pump"  
"JS1\_D03\_00178" 12087 "s59E13H2" 0.02827464 "Pyruvate, phosphate dikinase"  
"JS1\_D03\_00178" 12087 "s59E25H2" 0 "Pyruvate, phosphate dikinase"  
"JS1\_D03\_00178" 12087 "s59E5H2" 0.07497623 "Pyruvate, phosphate dikinase"  
"JS1\_D03\_00178" 12087 "s63E6H2" 0.0831745 "Pyruvate, phosphate dikinase"  
"JS1\_D03\_00179" 12088 "s59E13H2" 0.2549322 "hypothetical protein"  
"JS1\_D03\_00179" 12088 "s59E25H2" 0 "hypothetical protein"  
"JS1\_D03\_00179" 12088 "s59E5H2" 0.006765201 "hypothetical protein"  
"JS1\_D03\_00179" 12088 "s63E6H2" 0.08701273 "hypothetical protein"  
"JS1\_D03\_00180" 12089 "s59E13H2" 0.6552344 "Macrolide export ATP-binding/permease protein MacB"  
"JS1\_D03\_00180" 12089 "s59E25H2" 0 "Macrolide export ATP-binding/permease protein MacB"

"JS1\_D03\_00180" 12089 "s59E5H2" 0.053615 "Macrolide export ATP-binding/permease protein MacB"  
"JS1\_D03\_00180" 12089 "s63E6H2" 0.3147328 "Macrolide export ATP-binding/permease protein MacB"  
"JS1\_D03\_00181" 12090 "s59E13H2" 0.02718729 "putative ABC transporter ATP-binding protein"  
"JS1\_D03\_00181" 12090 "s59E25H2" 0 "putative ABC transporter ATP-binding protein"  
"JS1\_D03\_00181" 12090 "s59E5H2" 0.005850321 "putative ABC transporter ATP-binding protein"  
"JS1\_D03\_00181" 12090 "s63E6H2" 0.04133917 "putative ABC transporter ATP-binding protein"  
"JS1\_D03\_00182" 12091 "s59E13H2" 0.05211359 "putative ABC transporter ATP-binding protein"  
"JS1\_D03\_00182" 12091 "s59E25H2" 0 "putative ABC transporter ATP-binding protein"  
"JS1\_D03\_00182" 12091 "s59E5H2" 0.05971435 "putative ABC transporter ATP-binding protein"  
"JS1\_D03\_00182" 12091 "s63E6H2" 0.03100692 "putative ABC transporter ATP-binding protein"  
"JS1\_D03\_00183" 12092 "s59E13H2" 0.02309413 "hypothetical protein"  
"JS1\_D03\_00183" 12092 "s59E25H2" 0 "hypothetical protein"  
"JS1\_D03\_00183" 12092 "s59E5H2" 0.0657577 "hypothetical protein"  
"JS1\_D03\_00183" 12092 "s63E6H2" 0.04150766 "hypothetical protein"  
"JS1\_D03\_00184" 12093 "s59E13H2" 0.1304089 "Dihydrolipoyllysine-residue acetyltransferase component of pyruvate dehydrogenase complex"  
"JS1\_D03\_00184" 12093 "s59E25H2" 0 "Dihydrolipoyllysine-residue acetyltransferase component of pyruvate dehydrogenase complex"  
"JS1\_D03\_00184" 12093 "s59E5H2" 0.2238669 "Dihydrolipoyllysine-residue acetyltransferase component of pyruvate dehydrogenase complex"  
"JS1\_D03\_00184" 12093 "s63E6H2" 0.2177918 "Dihydrolipoyllysine-residue acetyltransferase component of pyruvate dehydrogenase complex"  
"JS1\_D03\_00185" 12094 "s59E13H2" 0.2031734 "Rhamnulokinase"  
"JS1\_D03\_00185" 12094 "s59E25H2" 0 "Rhamnulokinase"  
"JS1\_D03\_00185" 12094 "s59E5H2" 0.4924598 "Rhamnulokinase"  
"JS1\_D03\_00185" 12094 "s63E6H2" 0.6852824 "Rhamnulokinase"  
"JS1\_D03\_00186" 12095 "s59E13H2" 0.04019377 "short chain dehydrogenase"  
"JS1\_D03\_00186" 12095 "s59E25H2" 0 "short chain dehydrogenase"  
"JS1\_D03\_00186" 12095 "s59E5H2" 0.09178398 "short chain dehydrogenase"  
"JS1\_D03\_00186" 12095 "s63E6H2" 1.200103 "short chain dehydrogenase"  
"JS1\_D03\_00187" 12096 "s59E13H2" 0.075789 "hypothetical protein"  
"JS1\_D03\_00187" 12096 "s59E25H2" 0 "hypothetical protein"  
"JS1\_D03\_00187" 12096 "s59E5H2" 0.1910471 "hypothetical protein"  
"JS1\_D03\_00187" 12096 "s63E6H2" 1.229656 "hypothetical protein"  
"JS1\_D03\_00188" 12097 "s59E13H2" 0.1960891 "Cell division protein FtsZ"  
"JS1\_D03\_00188" 12097 "s59E25H2" 0 "Cell division protein FtsZ"  
"JS1\_D03\_00188" 12097 "s59E5H2" 0.5308255 "Cell division protein FtsZ"  
"JS1\_D03\_00188" 12097 "s63E6H2" 1.647618 "Cell division protein FtsZ"  
"JS1\_D03\_00189" 12098 "s59E13H2" 0.08504164 "Sporulation initiation inhibitor protein Soj"  
"JS1\_D03\_00189" 12098 "s59E25H2" 0.5646766 "Sporulation initiation inhibitor protein Soj"  
"JS1\_D03\_00189" 12098 "s59E5H2" 0.5184125 "Sporulation initiation inhibitor protein Soj"  
"JS1\_D03\_00189" 12098 "s63E6H2" 1.777776 "Sporulation initiation inhibitor protein Soj"  
"JS1\_D03\_00190" 12099 "s59E13H2" 0.01583716 "Glutamine amidotransferase subunit PdxT"  
"JS1\_D03\_00190" 12099 "s59E25H2" 0 "Glutamine amidotransferase subunit PdxT"  
"JS1\_D03\_00190" 12099 "s59E5H2" 0.08085852 "Glutamine amidotransferase subunit PdxT"  
"JS1\_D03\_00190" 12099 "s63E6H2" 0.08275125 "Glutamine amidotransferase subunit PdxT"  
"JS1\_D03\_00191" 12100 "s59E13H2" 0.02900128 "Pyridoxal biosynthesis lyase PdxS"  
"JS1\_D03\_00191" 12100 "s59E25H2" 0 "Pyridoxal biosynthesis lyase PdxS"  
"JS1\_D03\_00191" 12100 "s59E5H2" 0.5134814 "Pyridoxal biosynthesis lyase PdxS"  
"JS1\_D03\_00191" 12100 "s63E6H2" 0.4547034 "Pyridoxal biosynthesis lyase PdxS"  
"JS1\_D03\_00192" 12101 "s59E13H2" 0.08420299 "Pyruvate-flavodoxin oxidoreductase"

"JS1\_D03\_00192" 12101 "s59E25H2" 0 "Pyruvate-flavodoxin oxidoreductase"  
"JS1\_D03\_00192" 12101 "s59E5H2" 0.2939728 "Pyruvate-flavodoxin oxidoreductase"  
"JS1\_D03\_00192" 12101 "s63E6H2" 0.4699026 "Pyruvate-flavodoxin oxidoreductase"  
"JS1\_D03\_00193" 12102 "s59E13H2" 0 "hypothetical protein"  
"JS1\_D03\_00193" 12102 "s59E25H2" 0 "hypothetical protein"  
"JS1\_D03\_00193" 12102 "s59E5H2" 0 "hypothetical protein"  
"JS1\_D03\_00193" 12102 "s63E6H2" 0 "hypothetical protein"  
"JS1\_D03\_00194" 12103 "s59E13H2" 0.1055229 "Inositol 2-dehydrogenase/D-chiro-inositol 3-dehydrogenase"  
"JS1\_D03\_00194" 12103 "s59E25H2" 0 "Inositol 2-dehydrogenase/D-chiro-inositol 3-dehydrogenase"  
"JS1\_D03\_00194" 12103 "s59E5H2" 0.09195886 "Inositol 2-dehydrogenase/D-chiro-inositol 3-dehydrogenase"  
"JS1\_D03\_00194" 12103 "s63E6H2" 0.05484062 "Inositol 2-dehydrogenase/D-chiro-inositol 3-dehydrogenase"  
"JS1\_D03\_00195" 12104 "s59E13H2" 0.001412109 "Uronate isomerase"  
"JS1\_D03\_00195" 12104 "s59E25H2" 0 "Uronate isomerase"  
"JS1\_D03\_00195" 12104 "s59E5H2" 0.004592212 "Uronate isomerase"  
"JS1\_D03\_00195" 12104 "s63E6H2" 0.3011041 "Uronate isomerase"  
"JS1\_D03\_00196" 12105 "s59E13H2" 0.02459498 "hypothetical protein"  
"JS1\_D03\_00196" 12105 "s59E25H2" 0 "hypothetical protein"  
"JS1\_D03\_00196" 12105 "s59E5H2" 0.04164254 "hypothetical protein"  
"JS1\_D03\_00196" 12105 "s63E6H2" 0.2545642 "hypothetical protein"  
"JS1\_D03\_00197" 12106 "s59E13H2" 0.002700969 "hypothetical protein"  
"JS1\_D03\_00197" 12106 "s59E25H2" 0 "hypothetical protein"  
"JS1\_D03\_00197" 12106 "s59E5H2" 0 "hypothetical protein"  
"JS1\_D03\_00197" 12106 "s63E6H2" 0.01957489 "hypothetical protein"  
"JS1\_D03\_00198" 12107 "s59E13H2" 0 "Threonylcarbamoyladenine tRNA methylthiotransferase MtaB"  
"JS1\_D03\_00198" 12107 "s59E25H2" 0 "Threonylcarbamoyladenine tRNA methylthiotransferase MtaB"  
"JS1\_D03\_00198" 12107 "s59E5H2" 0 "Threonylcarbamoyladenine tRNA methylthiotransferase MtaB"  
"JS1\_D03\_00198" 12107 "s63E6H2" 0.1363278 "Threonylcarbamoyladenine tRNA methylthiotransferase MtaB"  
"JS1\_D03\_00199" 12108 "s59E13H2" 0.01586783 "Chaperone protein DnaJ"  
"JS1\_D03\_00199" 12108 "s59E25H2" 0 "Chaperone protein DnaJ"  
"JS1\_D03\_00199" 12108 "s59E5H2" 0.003574015 "Chaperone protein DnaJ"  
"JS1\_D03\_00199" 12108 "s63E6H2" 0.1448897 "Chaperone protein DnaJ"  
"JS1\_D03\_00200" 12109 "s59E13H2" 0.09664297 "Chaperone protein DnaK"  
"JS1\_D03\_00200" 12109 "s59E25H2" 0 "Chaperone protein DnaK"  
"JS1\_D03\_00200" 12109 "s59E5H2" 0.01420057 "Chaperone protein DnaK"  
"JS1\_D03\_00200" 12109 "s63E6H2" 0.08852678 "Chaperone protein DnaK"  
"JS1\_D03\_00201" 12110 "s59E13H2" 0.1818544 "Valine--tRNA ligase"  
"JS1\_D03\_00201" 12110 "s59E25H2" 0 "Valine--tRNA ligase"  
"JS1\_D03\_00201" 12110 "s59E5H2" 0.1195075 "Valine--tRNA ligase"  
"JS1\_D03\_00201" 12110 "s63E6H2" 0.09591159 "Valine--tRNA ligase"  
"JS1\_D03\_00203" 12112 "s59E13H2" 0.05401567 "Lon protease 1"  
"JS1\_D03\_00203" 12112 "s59E25H2" 0 "Lon protease 1"  
"JS1\_D03\_00203" 12112 "s59E5H2" 0.03478412 "Lon protease 1"  
"JS1\_D03\_00203" 12112 "s63E6H2" 0.0413765 "Lon protease 1"  
"JS1\_D03\_00204" 12113 "s59E13H2" 0 "Chromosome partition protein Smc"  
"JS1\_D03\_00204" 12113 "s59E25H2" 0 "Chromosome partition protein Smc"  
"JS1\_D03\_00204" 12113 "s59E5H2" 0 "Chromosome partition protein Smc"  
"JS1\_D03\_00204" 12113 "s63E6H2" 0.05720459 "Chromosome partition protein Smc"

"JS1\_D03\_00205" 12114 "s59E13H2" 0 "Signal recognition particle receptor FtsY"  
"JS1\_D03\_00205" 12114 "s59E25H2" 0 "Signal recognition particle receptor FtsY"  
"JS1\_D03\_00205" 12114 "s59E5H2" 0 "Signal recognition particle receptor FtsY"  
"JS1\_D03\_00205" 12114 "s63E6H2" 0.08770415 "Signal recognition particle receptor FtsY"  
"JS1\_D03\_00206" 12115 "s59E13H2" 0.0007150118 "Signal recognition particle protein"  
"JS1\_D03\_00206" 12115 "s59E25H2" 0 "Signal recognition particle protein"  
"JS1\_D03\_00206" 12115 "s59E5H2" 0.007536066 "Signal recognition particle protein"  
"JS1\_D03\_00206" 12115 "s63E6H2" 0.01961639 "Signal recognition particle protein"  
"JS1\_D03\_00207" 12116 "s59E13H2" 0 "30S ribosomal protein S16"  
"JS1\_D03\_00207" 12116 "s59E25H2" 0 "30S ribosomal protein S16"  
"JS1\_D03\_00207" 12116 "s59E5H2" 0 "30S ribosomal protein S16"  
"JS1\_D03\_00207" 12116 "s63E6H2" 0.01665091 "30S ribosomal protein S16"  
"JS1\_D03\_00208" 12117 "s59E13H2" 0 "hypothetical protein"  
"JS1\_D03\_00208" 12117 "s59E25H2" 0 "hypothetical protein"  
"JS1\_D03\_00208" 12117 "s59E5H2" 0 "hypothetical protein"  
"JS1\_D03\_00208" 12117 "s63E6H2" 0.02168762 "hypothetical protein"  
"JS1\_D03\_00209" 12118 "s59E13H2" 0.1011698 "Ribosome maturation factor RimM"  
"JS1\_D03\_00209" 12118 "s59E25H2" 0 "Ribosome maturation factor RimM"  
"JS1\_D03\_00209" 12118 "s59E5H2" 0.001398659 "Ribosome maturation factor RimM"  
"JS1\_D03\_00209" 12118 "s63E6H2" 0.03782272 "Ribosome maturation factor RimM"  
"JS1\_D03\_00210" 12119 "s59E13H2" 0 "tRNA (guanine-N(1)-)-methyltransferase"  
"JS1\_D03\_00210" 12119 "s59E25H2" 0 "tRNA (guanine-N(1)-)-methyltransferase"  
"JS1\_D03\_00210" 12119 "s59E5H2" 0.003971246 "tRNA (guanine-N(1)-)-methyltransferase"  
"JS1\_D03\_00210" 12119 "s63E6H2" 0.03863412 "tRNA (guanine-N(1)-)-methyltransferase"  
"JS1\_D03\_00211" 12120 "s59E13H2" 0 "50S ribosomal protein L19"  
"JS1\_D03\_00211" 12120 "s59E25H2" 0 "50S ribosomal protein L19"  
"JS1\_D03\_00211" 12120 "s59E5H2" 0 "50S ribosomal protein L19"  
"JS1\_D03\_00211" 12120 "s63E6H2" 0.01807928 "50S ribosomal protein L19"  
"JS1\_D03\_00212" 12121 "s59E13H2" 0 "tRNA (guanine-N(1)-)-methyltransferase"  
"JS1\_D03\_00212" 12121 "s59E25H2" 0 "tRNA (guanine-N(1)-)-methyltransferase"  
"JS1\_D03\_00212" 12121 "s59E5H2" 0 "tRNA (guanine-N(1)-)-methyltransferase"  
"JS1\_D03\_00212" 12121 "s63E6H2" 0 "tRNA (guanine-N(1)-)-methyltransferase"  
"JS1\_D03\_00213" 12122 "s59E13H2" 0 "Putative ski2-type helicase"  
"JS1\_D03\_00213" 12122 "s59E25H2" 0 "Putative ski2-type helicase"  
"JS1\_D03\_00213" 12122 "s59E5H2" 0.1280842 "Putative ski2-type helicase"  
"JS1\_D03\_00213" 12122 "s63E6H2" 0.04474608 "Putative ski2-type helicase"  
"JS1\_D03\_00214" 12123 "s59E13H2" 0.0116302 "hypothetical protein"  
"JS1\_D03\_00214" 12123 "s59E25H2" 0 "hypothetical protein"  
"JS1\_D03\_00214" 12123 "s59E5H2" 0.7801103 "hypothetical protein"  
"JS1\_D03\_00214" 12123 "s63E6H2" 0.2127177 "hypothetical protein"  
"JS1\_D03\_00215" 12124 "s59E13H2" 0.002441239 "hypothetical protein"  
"JS1\_D03\_00215" 12124 "s59E25H2" 0 "hypothetical protein"  
"JS1\_D03\_00215" 12124 "s59E5H2" 0.2376667 "hypothetical protein"  
"JS1\_D03\_00215" 12124 "s63E6H2" 1.052699 "hypothetical protein"  
"JS1\_D03\_00216" 12125 "s59E13H2" 0.04229752 "RNA polymerase factor sigma-70"  
"JS1\_D03\_00216" 12125 "s59E25H2" 0 "RNA polymerase factor sigma-70"  
"JS1\_D03\_00216" 12125 "s59E5H2" 0.02575377 "RNA polymerase factor sigma-70"



"JS1\_D03\_00216" 12125 "s63E6H2" 5.886541 "RNA polymerase factor sigma-70"  
"JS1\_D03\_00217" 12126 "s59E13H2" 0.1521233 "putative DNA-binding protein"  
"JS1\_D03\_00217" 12126 "s59E25H2" 0 "putative DNA-binding protein"  
"JS1\_D03\_00217" 12126 "s59E5H2" 0.08509143 "putative DNA-binding protein"  
"JS1\_D03\_00217" 12126 "s63E6H2" 7.939552 "putative DNA-binding protein"  
"JS1\_D03\_00218" 12127 "s59E13H2" 0.02278872 "hypothetical protein"  
"JS1\_D03\_00218" 12127 "s59E25H2" 0 "hypothetical protein"  
"JS1\_D03\_00218" 12127 "s59E5H2" 0.118886 "hypothetical protein"  
"JS1\_D03\_00218" 12127 "s63E6H2" 1.266572 "hypothetical protein"  
"JS1\_D03\_00219" 12128 "s59E13H2" 0.5213637 "hypothetical protein"  
"JS1\_D03\_00219" 12128 "s59E25H2" 0.2197802 "hypothetical protein"  
"JS1\_D03\_00219" 12128 "s59E5H2" 1.560127 "hypothetical protein"  
"JS1\_D03\_00219" 12128 "s63E6H2" 11.87183 "hypothetical protein"  
"JS1\_D03\_00220" 12129 "s59E13H2" 0.1816424 "hypothetical protein"  
"JS1\_D03\_00220" 12129 "s59E25H2" 0 "hypothetical protein"  
"JS1\_D03\_00220" 12129 "s59E5H2" 0.3700835 "hypothetical protein"  
"JS1\_D03\_00220" 12129 "s63E6H2" 1.707473 "hypothetical protein"  
"JS1\_D03\_00221" 12130 "s59E13H2" 0.2803414 "Peptidase M15"  
"JS1\_D03\_00221" 12130 "s59E25H2" 0 "Peptidase M15"  
"JS1\_D03\_00221" 12130 "s59E5H2" 0.03204051 "Peptidase M15"  
"JS1\_D03\_00221" 12130 "s63E6H2" 0.6720248 "Peptidase M15"  
"JS1\_D03\_00222" 12131 "s59E13H2" 0.07182236 "hypothetical protein"  
"JS1\_D03\_00222" 12131 "s59E25H2" 0 "hypothetical protein"  
"JS1\_D03\_00222" 12131 "s59E5H2" 0.05598209 "hypothetical protein"  
"JS1\_D03\_00222" 12131 "s63E6H2" 0.04116613 "hypothetical protein"  
"JS1\_D03\_00223" 12132 "s59E13H2" 6.44823 "D-alanyl-D-alanine carboxypeptidase precursor"  
"JS1\_D03\_00223" 12132 "s59E25H2" 0 "D-alanyl-D-alanine carboxypeptidase precursor"  
"JS1\_D03\_00223" 12132 "s59E5H2" 0.258998 "D-alanyl-D-alanine carboxypeptidase precursor"  
"JS1\_D03\_00223" 12132 "s63E6H2" 0.3751867 "D-alanyl-D-alanine carboxypeptidase precursor"  
"JS1\_D03\_00224" 12133 "s59E13H2" 5.789195 "3-chloro-4-hydroxyphenylacetate reductive dehalogenase precursor"  
"JS1\_D03\_00224" 12133 "s59E25H2" 0 "3-chloro-4-hydroxyphenylacetate reductive dehalogenase precursor"  
"JS1\_D03\_00224" 12133 "s59E5H2" 0.5939112 "3-chloro-4-hydroxyphenylacetate reductive dehalogenase precursor"  
"JS1\_D03\_00224" 12133 "s63E6H2" 0.1938503 "3-chloro-4-hydroxyphenylacetate reductive dehalogenase precursor"  
"JS1\_D03\_00225" 12134 "s59E13H2" 0.04396622 "Phosphoserine phosphatase 1"  
"JS1\_D03\_00225" 12134 "s59E25H2" 0 "Phosphoserine phosphatase 1"  
"JS1\_D03\_00225" 12134 "s59E5H2" 0 "Phosphoserine phosphatase 1"  
"JS1\_D03\_00225" 12134 "s63E6H2" 0.03315464 "Phosphoserine phosphatase 1"  
"JS1\_D03\_00226" 12135 "s59E13H2" 0.7585587 "putative hydrolase"  
"JS1\_D03\_00226" 12135 "s59E25H2" 0 "putative hydrolase"  
"JS1\_D03\_00226" 12135 "s59E5H2" 0.05964234 "putative hydrolase"  
"JS1\_D03\_00226" 12135 "s63E6H2" 0.2098601 "putative hydrolase"  
"JS1\_D03\_00227" 12136 "s59E13H2" 3.503718 "Ferredoxin-2"  
"JS1\_D03\_00227" 12136 "s59E25H2" 0 "Ferredoxin-2"  
"JS1\_D03\_00227" 12136 "s59E5H2" 0.120789 "Ferredoxin-2"  
"JS1\_D03\_00227" 12136 "s63E6H2" 0.2460805 "Ferredoxin-2"  
"JS1\_D03\_00228" 12137 "s59E13H2" 6.506014 "Glucose-6-phosphate 3-dehydrogenase"  
"JS1\_D03\_00228" 12137 "s59E25H2" 0 "Glucose-6-phosphate 3-dehydrogenase"

"JS1\_D03\_00228" 12137 "s59E5H2" 0.2876144 "Glucose-6-phosphate 3-dehydrogenase"  
"JS1\_D03\_00228" 12137 "s63E6H2" 0.5771904 "Glucose-6-phosphate 3-dehydrogenase"  
"JS1\_D03\_00229" 12138 "s59E13H2" 4.977542 "Pyruvate formate-lyase 1-activating enzyme"  
"JS1\_D03\_00229" 12138 "s59E25H2" 0 "Pyruvate formate-lyase 1-activating enzyme"  
"JS1\_D03\_00229" 12138 "s59E5H2" 0.06238127 "Pyruvate formate-lyase 1-activating enzyme"  
"JS1\_D03\_00229" 12138 "s63E6H2" 1.131649 "Pyruvate formate-lyase 1-activating enzyme"  
"JS1\_D03\_00230" 12139 "s59E13H2" 0 "Helix-turn-helix domain protein"  
"JS1\_D03\_00230" 12139 "s59E25H2" 0 "Helix-turn-helix domain protein"  
"JS1\_D03\_00230" 12139 "s59E5H2" 0 "Helix-turn-helix domain protein"  
"JS1\_D03\_00230" 12139 "s63E6H2" 0 "Helix-turn-helix domain protein"  
"JS1\_D03\_00231" 12140 "s59E13H2" 0.03972676 "Cyclic di-GMP phosphodiesterase response regulator RpfG"  
"JS1\_D03\_00231" 12140 "s59E25H2" 0 "Cyclic di-GMP phosphodiesterase response regulator RpfG"  
"JS1\_D03\_00231" 12140 "s59E5H2" 0.7212405 "Cyclic di-GMP phosphodiesterase response regulator RpfG"  
"JS1\_D03\_00231" 12140 "s63E6H2" 0.16959 "Cyclic di-GMP phosphodiesterase response regulator RpfG"  
"JS1\_D03\_00232" 12141 "s59E13H2" 0.006036985 "Cyclic di-GMP phosphodiesterase response regulator RpfG"  
"JS1\_D03\_00232" 12141 "s59E25H2" 0 "Cyclic di-GMP phosphodiesterase response regulator RpfG"  
"JS1\_D03\_00232" 12141 "s59E5H2" 0.04048145 "Cyclic di-GMP phosphodiesterase response regulator RpfG"  
"JS1\_D03\_00232" 12141 "s63E6H2" 0.1680269 "Cyclic di-GMP phosphodiesterase response regulator RpfG"  
"JS1\_D03\_00233" 12142 "s59E13H2" 0.08627624 "putative diguanylate cyclase YegE"  
"JS1\_D03\_00233" 12142 "s59E25H2" 0 "putative diguanylate cyclase YegE"  
"JS1\_D03\_00233" 12142 "s59E5H2" 0.04992265 "putative diguanylate cyclase YegE"  
"JS1\_D03\_00233" 12142 "s63E6H2" 0.03755565 "putative diguanylate cyclase YegE"  
"JS1\_D03\_00234" 12143 "s59E13H2" 11.19907 "Benzylsuccinate synthase alpha subunit"  
"JS1\_D03\_00234" 12143 "s59E25H2" 0 "Benzylsuccinate synthase alpha subunit"  
"JS1\_D03\_00234" 12143 "s59E5H2" 0.1273318 "Benzylsuccinate synthase alpha subunit"  
"JS1\_D03\_00234" 12143 "s63E6H2" 2.073346 "Benzylsuccinate synthase alpha subunit"  
"JS1\_D03\_00235" 12144 "s59E13H2" 9.253275 "Xylulose kinase"  
"JS1\_D03\_00235" 12144 "s59E25H2" 0 "Xylulose kinase"  
"JS1\_D03\_00235" 12144 "s59E5H2" 0.08837489 "Xylulose kinase"  
"JS1\_D03\_00235" 12144 "s63E6H2" 0.9930312 "Xylulose kinase"  
"JS1\_D03\_00236" 12145 "s59E13H2" 0 "aminoimidazole riboside kinase"  
"JS1\_D03\_00236" 12145 "s59E25H2" 0 "aminoimidazole riboside kinase"  
"JS1\_D03\_00236" 12145 "s59E5H2" 0.03976724 "aminoimidazole riboside kinase"  
"JS1\_D03\_00236" 12145 "s63E6H2" 0 "aminoimidazole riboside kinase"  
"JS1\_D03\_00237" 12146 "s59E13H2" 0 "Trehalose/maltose transport system permease protein MalG"  
"JS1\_D03\_00237" 12146 "s59E25H2" 0 "Trehalose/maltose transport system permease protein MalG"  
"JS1\_D03\_00237" 12146 "s59E5H2" 0.01523603 "Trehalose/maltose transport system permease protein MalG"  
"JS1\_D03\_00237" 12146 "s63E6H2" 0.0008091647 "Trehalose/maltose transport system permease protein MalG"  
"JS1\_D03\_00238" 12147 "s59E13H2" 0 "Lactose transport system permease protein LacF"  
"JS1\_D03\_00238" 12147 "s59E25H2" 0 "Lactose transport system permease protein LacF"  
"JS1\_D03\_00238" 12147 "s59E5H2" 0.03248075 "Lactose transport system permease protein LacF"  
"JS1\_D03\_00238" 12147 "s63E6H2" 0.4013334 "Lactose transport system permease protein LacF"  
"JS1\_D03\_00239" 12148 "s59E13H2" 0 "Trehalose/maltose-binding protein MalE precursor"  
"JS1\_D03\_00239" 12148 "s59E25H2" 0 "Trehalose/maltose-binding protein MalE precursor"  
"JS1\_D03\_00239" 12148 "s59E5H2" 0.002149943 "Trehalose/maltose-binding protein MalE precursor"  
"JS1\_D03\_00239" 12148 "s63E6H2" 0.7490818 "Trehalose/maltose-binding protein MalE precursor"  
"JS1\_D03\_00240" 12149 "s59E13H2" 0 "hypothetical protein"

"JS1\_D03\_00240" 12149 "s59E25H2" 0 "hypothetical protein"  
"JS1\_D03\_00240" 12149 "s59E5H2" 0 "hypothetical protein"  
"JS1\_D03\_00240" 12149 "s63E6H2" 0.03585222 "hypothetical protein"  
"JS1\_D03\_00241" 12150 "s59E13H2" 0.05312126 "ATP-dependent zinc metalloprotease FtsH"  
"JS1\_D03\_00241" 12150 "s59E25H2" 0 "ATP-dependent zinc metalloprotease FtsH"  
"JS1\_D03\_00241" 12150 "s59E5H2" 0.09874826 "ATP-dependent zinc metalloprotease FtsH"  
"JS1\_D03\_00241" 12150 "s63E6H2" 0.1171355 "ATP-dependent zinc metalloprotease FtsH"  
"JS1\_D03\_00242" 12151 "s59E13H2" 0 "hypothetical protein"  
"JS1\_D03\_00242" 12151 "s59E25H2" 0 "hypothetical protein"  
"JS1\_D03\_00242" 12151 "s59E5H2" 0 "hypothetical protein"  
"JS1\_D03\_00242" 12151 "s63E6H2" 0.007852416 "hypothetical protein"  
"JS1\_D03\_00243" 12152 "s59E13H2" 0.00203684 "Oligopeptide-binding protein OppA precursor"  
"JS1\_D03\_00243" 12152 "s59E25H2" 0 "Oligopeptide-binding protein OppA precursor"  
"JS1\_D03\_00243" 12152 "s59E5H2" 0.04709988 "Oligopeptide-binding protein OppA precursor"  
"JS1\_D03\_00243" 12152 "s63E6H2" 0.03025251 "Oligopeptide-binding protein OppA precursor"  
"JS1\_D03\_00244" 12153 "s59E13H2" 0.02073039 "Dipeptide transport system permease protein DppB"  
"JS1\_D03\_00244" 12153 "s59E25H2" 0 "Dipeptide transport system permease protein DppB"  
"JS1\_D03\_00244" 12153 "s59E5H2" 0.09787083 "Dipeptide transport system permease protein DppB"  
"JS1\_D03\_00244" 12153 "s63E6H2" 0.01824449 "Dipeptide transport system permease protein DppB"  
"JS1\_D03\_00245" 12154 "s59E13H2" 0.00809339 "Oligopeptide transport system permease protein OppC"  
"JS1\_D03\_00245" 12154 "s59E25H2" 0 "Oligopeptide transport system permease protein OppC"  
"JS1\_D03\_00245" 12154 "s59E5H2" 0.08232625 "Oligopeptide transport system permease protein OppC"  
"JS1\_D03\_00245" 12154 "s63E6H2" 0.06200625 "Oligopeptide transport system permease protein OppC"  
"JS1\_D03\_00247" 12156 "s59E13H2" 0 "Protein of unknown function (Hypoth\_ymh)"  
"JS1\_D03\_00247" 12156 "s59E25H2" 0 "Protein of unknown function (Hypoth\_ymh)"  
"JS1\_D03\_00247" 12156 "s59E5H2" 0 "Protein of unknown function (Hypoth\_ymh)"  
"JS1\_D03\_00247" 12156 "s63E6H2" 0 "Protein of unknown function (Hypoth\_ymh)"  
"JS1\_D03\_00248" 12157 "s59E13H2" 0.2478061 "Capsule biosynthesis protein CapA"  
"JS1\_D03\_00248" 12157 "s59E25H2" 0 "Capsule biosynthesis protein CapA"  
"JS1\_D03\_00248" 12157 "s59E5H2" 0.1639973 "Capsule biosynthesis protein CapA"  
"JS1\_D03\_00248" 12157 "s63E6H2" 0.5963562 "Capsule biosynthesis protein CapA"  
"JS1\_D03\_00249" 12158 "s59E13H2" 0.7226115 "hypothetical protein"  
"JS1\_D03\_00249" 12158 "s59E25H2" 0 "hypothetical protein"  
"JS1\_D03\_00249" 12158 "s59E5H2" 1.110895 "hypothetical protein"  
"JS1\_D03\_00249" 12158 "s63E6H2" 0.8082949 "hypothetical protein"  
"JS1\_D03\_00250" 12159 "s59E13H2" 4.364117 "Ktr system potassium uptake protein B"  
"JS1\_D03\_00250" 12159 "s59E25H2" 0.05367232 "Ktr system potassium uptake protein B"  
"JS1\_D03\_00250" 12159 "s59E5H2" 1.852351 "Ktr system potassium uptake protein B"  
"JS1\_D03\_00250" 12159 "s63E6H2" 9.771319 "Ktr system potassium uptake protein B"  
"JS1\_D03\_00251" 12160 "s59E13H2" 6.268941 "Trk system potassium uptake protein TrkH"  
"JS1\_D03\_00251" 12160 "s59E25H2" 0.2383922 "Trk system potassium uptake protein TrkH"  
"JS1\_D03\_00251" 12160 "s59E5H2" 0.7665577 "Trk system potassium uptake protein TrkH"  
"JS1\_D03\_00251" 12160 "s63E6H2" 10.40643 "Trk system potassium uptake protein TrkH"  
"JS1\_D03\_00252" 12161 "s59E13H2" 3.975499 "Trk system potassium uptake protein TrkA"  
"JS1\_D03\_00252" 12161 "s59E25H2" 0 "Trk system potassium uptake protein TrkA"  
"JS1\_D03\_00252" 12161 "s59E5H2" 0.4971246 "Trk system potassium uptake protein TrkA"  
"JS1\_D03\_00252" 12161 "s63E6H2" 7.740698 "Trk system potassium uptake protein TrkA"

"JS1\_D03\_00254" 12163 "s59E13H2" 3.271658 "Zinc ribbon domain protein"  
"JS1\_D03\_00254" 12163 "s59E25H2" 0 "Zinc ribbon domain protein"  
"JS1\_D03\_00254" 12163 "s59E5H2" 0.06540838 "Zinc ribbon domain protein"  
"JS1\_D03\_00254" 12163 "s63E6H2" 1.715018 "Zinc ribbon domain protein"  
"JS1\_D03\_00255" 12164 "s59E13H2" 1.514554 "hypothetical protein"  
"JS1\_D03\_00255" 12164 "s59E25H2" 0 "hypothetical protein"  
"JS1\_D03\_00255" 12164 "s59E5H2" 0.09577125 "hypothetical protein"  
"JS1\_D03\_00255" 12164 "s63E6H2" 4.028974 "hypothetical protein"  
"JS1\_D03\_00256" 12165 "s59E13H2" 0.01844566 "hypothetical protein"  
"JS1\_D03\_00256" 12165 "s59E25H2" 0 "hypothetical protein"  
"JS1\_D03\_00256" 12165 "s59E5H2" 0.4978293 "hypothetical protein"  
"JS1\_D03\_00256" 12165 "s63E6H2" 0.8128674 "hypothetical protein"  
"JS1\_D03\_00257" 12166 "s59E13H2" 0 "L-lactate permease"  
"JS1\_D03\_00257" 12166 "s59E25H2" 0 "L-lactate permease"  
"JS1\_D03\_00257" 12166 "s59E5H2" 0.008816907 "L-lactate permease"  
"JS1\_D03\_00257" 12166 "s63E6H2" 0.6639264 "L-lactate permease"  
"JS1\_D03\_00258" 12167 "s59E13H2" 0 "hypothetical protein"  
"JS1\_D03\_00258" 12167 "s59E25H2" 0 "hypothetical protein"  
"JS1\_D03\_00258" 12167 "s59E5H2" 0 "hypothetical protein"  
"JS1\_D03\_00258" 12167 "s63E6H2" 0 "hypothetical protein"  
"JS1\_D03\_00259" 12168 "s59E13H2" 0 "hypothetical protein"  
"JS1\_D03\_00259" 12168 "s59E25H2" 0 "hypothetical protein"  
"JS1\_D03\_00259" 12168 "s59E5H2" 0 "hypothetical protein"  
"JS1\_D03\_00259" 12168 "s63E6H2" 0 "hypothetical protein"  
"JS1\_D03\_00260" 12169 "s59E13H2" 0 "Ion channel"  
"JS1\_D03\_00260" 12169 "s59E25H2" 0 "Ion channel"  
"JS1\_D03\_00260" 12169 "s59E5H2" 0 "Ion channel"  
"JS1\_D03\_00260" 12169 "s63E6H2" 0.001044423 "Ion channel"  
"JS1\_D03\_00261" 12170 "s59E13H2" 0 "Protein of unknown function (Hypoth\_ymh)"  
"JS1\_D03\_00261" 12170 "s59E25H2" 0 "Protein of unknown function (Hypoth\_ymh)"  
"JS1\_D03\_00261" 12170 "s59E5H2" 0 "Protein of unknown function (Hypoth\_ymh)"  
"JS1\_D03\_00261" 12170 "s63E6H2" 0 "Protein of unknown function (Hypoth\_ymh)"  
"JS1\_D03\_00262" 12171 "s59E13H2" 0.2815764 "Thioredoxin reductase"  
"JS1\_D03\_00262" 12171 "s59E25H2" 0 "Thioredoxin reductase"  
"JS1\_D03\_00262" 12171 "s59E5H2" 0.62802 "Thioredoxin reductase"  
"JS1\_D03\_00262" 12171 "s63E6H2" 0.2601776 "Thioredoxin reductase"  
"JS1\_D03\_00263" 12172 "s59E13H2" 0.2196701 "Inosose isomerase"  
"JS1\_D03\_00263" 12172 "s59E25H2" 0 "Inosose isomerase"  
"JS1\_D03\_00263" 12172 "s59E5H2" 0.4843978 "Inosose isomerase"  
"JS1\_D03\_00263" 12172 "s63E6H2" 0.2878951 "Inosose isomerase"  
"JS1\_D03\_00264" 12173 "s59E13H2" 0.04545775 "Lipoyl synthase"  
"JS1\_D03\_00264" 12173 "s59E25H2" 0 "Lipoyl synthase"  
"JS1\_D03\_00264" 12173 "s59E5H2" 0.2751287 "Lipoyl synthase"  
"JS1\_D03\_00264" 12173 "s63E6H2" 0.3879166 "Lipoyl synthase"  
"JS1\_D03\_00265" 12174 "s59E13H2" 0.07394789 "Elongation factor G"  
"JS1\_D03\_00265" 12174 "s59E25H2" 0.2366667 "Elongation factor G"  
"JS1\_D03\_00265" 12174 "s59E5H2" 0.7751138 "Elongation factor G"

"JS1\_D03\_00265" 12174 "s63E6H2" 0.7119572 "Elongation factor G"  
"JS1\_D03\_00267" 12176 "s59E13H2" 0.05039439 "hypothetical protein"  
"JS1\_D03\_00267" 12176 "s59E25H2" 0 "hypothetical protein"  
"JS1\_D03\_00267" 12176 "s59E5H2" 0.4243988 "hypothetical protein"  
"JS1\_D03\_00267" 12176 "s63E6H2" 1.089938 "hypothetical protein"  
"JS1\_D03\_00270" 12179 "s59E13H2" 0.02704953 "Leucine--tRNA ligase"  
"JS1\_D03\_00270" 12179 "s59E25H2" 0 "Leucine--tRNA ligase"  
"JS1\_D03\_00270" 12179 "s59E5H2" 0.6976293 "Leucine--tRNA ligase"  
"JS1\_D03\_00270" 12179 "s63E6H2" 0.6654101 "Leucine--tRNA ligase"  
"JS1\_D03\_00271" 12180 "s59E13H2" 0.0687779 "Single-stranded DNA-binding protein ssb"  
"JS1\_D03\_00271" 12180 "s59E25H2" 0 "Single-stranded DNA-binding protein ssb"  
"JS1\_D03\_00271" 12180 "s59E5H2" 0.4328206 "Single-stranded DNA-binding protein ssb"  
"JS1\_D03\_00271" 12180 "s63E6H2" 0.1780674 "Single-stranded DNA-binding protein ssb"  
"JS1\_D03\_00279" 12188 "s59E13H2" 0.02692112 "Threonine--tRNA ligase 2"  
"JS1\_D03\_00279" 12188 "s59E25H2" 0 "Threonine--tRNA ligase 2"  
"JS1\_D03\_00279" 12188 "s59E5H2" 0.1130502 "Threonine--tRNA ligase 2"  
"JS1\_D03\_00279" 12188 "s63E6H2" 0.1340048 "Threonine--tRNA ligase 2"  
"JS1\_D03\_00280" 12189 "s59E13H2" 0.08687999 "Translation initiation factor IF-3"  
"JS1\_D03\_00280" 12189 "s59E25H2" 0 "Translation initiation factor IF-3"  
"JS1\_D03\_00280" 12189 "s59E5H2" 0.2932811 "Translation initiation factor IF-3"  
"JS1\_D03\_00280" 12189 "s63E6H2" 0.2552977 "Translation initiation factor IF-3"  
"JS1\_D03\_00281" 12190 "s59E13H2" 0.01443812 "50S ribosomal protein L35"  
"JS1\_D03\_00281" 12190 "s59E25H2" 0 "50S ribosomal protein L35"  
"JS1\_D03\_00281" 12190 "s59E5H2" 0.1505726 "50S ribosomal protein L35"  
"JS1\_D03\_00281" 12190 "s63E6H2" 0.1546227 "50S ribosomal protein L35"  
"JS1\_D03\_00282" 12191 "s59E13H2" 0.1058146 "50S ribosomal protein L20"  
"JS1\_D03\_00282" 12191 "s59E25H2" 0 "50S ribosomal protein L20"  
"JS1\_D03\_00282" 12191 "s59E5H2" 0.1603009 "50S ribosomal protein L20"  
"JS1\_D03\_00282" 12191 "s63E6H2" 0.2176283 "50S ribosomal protein L20"  
"JS1\_D03\_00284" 12193 "s59E13H2" 0.01007197 "Phenylalanine--tRNA ligase alpha subunit"  
"JS1\_D03\_00284" 12193 "s59E25H2" 0 "Phenylalanine--tRNA ligase alpha subunit"  
"JS1\_D03\_00284" 12193 "s59E5H2" 0.2273298 "Phenylalanine--tRNA ligase alpha subunit"  
"JS1\_D03\_00284" 12193 "s63E6H2" 0.116621 "Phenylalanine--tRNA ligase alpha subunit"  
"JS1\_D03\_00285" 12194 "s59E13H2" 0.2259909 "Phenylalanine--tRNA ligase beta subunit"  
"JS1\_D03\_00285" 12194 "s59E25H2" 0 "Phenylalanine--tRNA ligase beta subunit"  
"JS1\_D03\_00285" 12194 "s59E5H2" 0.1898641 "Phenylalanine--tRNA ligase beta subunit"  
"JS1\_D03\_00285" 12194 "s63E6H2" 0.199108 "Phenylalanine--tRNA ligase beta subunit"  
"JS1\_D03\_00286" 12195 "s59E13H2" 0.07756998 "colicin V production protein"  
"JS1\_D03\_00286" 12195 "s59E25H2" 0 "colicin V production protein"  
"JS1\_D03\_00286" 12195 "s59E5H2" 0 "colicin V production protein"  
"JS1\_D03\_00286" 12195 "s63E6H2" 0.0376982 "colicin V production protein"  
"JS1\_D03\_00287" 12196 "s59E13H2" 0.05964842 "Endonuclease MutS2"  
"JS1\_D03\_00287" 12196 "s59E25H2" 0 "Endonuclease MutS2"  
"JS1\_D03\_00287" 12196 "s59E5H2" 0.01046923 "Endonuclease MutS2"  
"JS1\_D03\_00287" 12196 "s63E6H2" 0.05182125 "Endonuclease MutS2"  
"JS1\_D03\_00288" 12197 "s59E13H2" 0.2610802 "Penicillin-binding protein 2D"  
"JS1\_D03\_00288" 12197 "s59E25H2" 0 "Penicillin-binding protein 2D"

"JS1\_D03\_00288" 12197 "s59E5H2" 0.08647015 "Penicillin-binding protein 2D"  
"JS1\_D03\_00288" 12197 "s63E6H2" 0.341219 "Penicillin-binding protein 2D"  
"JS1\_D03\_00289" 12198 "s59E13H2" 0.08013794 "Queuosine precursor transporter QueT"  
"JS1\_D03\_00289" 12198 "s59E25H2" 0 "Queuosine precursor transporter QueT"  
"JS1\_D03\_00289" 12198 "s59E5H2" 0.07267567 "Queuosine precursor transporter QueT"  
"JS1\_D03\_00289" 12198 "s63E6H2" 0.0780825 "Queuosine precursor transporter QueT"  
"JS1\_D03\_00290" 12199 "s59E13H2" 0.3237284 "Tyrosine--tRNA ligase"  
"JS1\_D03\_00290" 12199 "s59E25H2" 0 "Tyrosine--tRNA ligase"  
"JS1\_D03\_00290" 12199 "s59E5H2" 0.2645128 "Tyrosine--tRNA ligase"  
"JS1\_D03\_00290" 12199 "s63E6H2" 0.2829434 "Tyrosine--tRNA ligase"  
"JS1\_D03\_00295" 12204 "s59E13H2" 0.2853717 "putative NH(3)-dependent NAD(+) synthetase"  
"JS1\_D03\_00295" 12204 "s59E25H2" 0 "putative NH(3)-dependent NAD(+) synthetase"  
"JS1\_D03\_00295" 12204 "s59E5H2" 0.1311738 "putative NH(3)-dependent NAD(+) synthetase"  
"JS1\_D03\_00295" 12204 "s63E6H2" 1.11346 "putative NH(3)-dependent NAD(+) synthetase"  
"JS1\_D03\_00296" 12205 "s59E13H2" 0.1016517 "putative transcriptional regulatory protein"  
"JS1\_D03\_00296" 12205 "s59E25H2" 0 "putative transcriptional regulatory protein"  
"JS1\_D03\_00296" 12205 "s59E5H2" 0.04467233 "putative transcriptional regulatory protein"  
"JS1\_D03\_00296" 12205 "s63E6H2" 0.2401598 "putative transcriptional regulatory protein"  
"JS1\_D03\_00297" 12206 "s59E13H2" 0.1849951 "Crossover junction endodeoxyribonuclease RuvC"  
"JS1\_D03\_00297" 12206 "s59E25H2" 0 "Crossover junction endodeoxyribonuclease RuvC"  
"JS1\_D03\_00297" 12206 "s59E5H2" 2.487382 "Crossover junction endodeoxyribonuclease RuvC"  
"JS1\_D03\_00297" 12206 "s63E6H2" 0.08241245 "Crossover junction endodeoxyribonuclease RuvC"  
"JS1\_D03\_00298" 12207 "s59E13H2" 0.3220993 "Holliday junction ATP-dependent DNA helicase RuvA"  
"JS1\_D03\_00298" 12207 "s59E25H2" 0 "Holliday junction ATP-dependent DNA helicase RuvA"  
"JS1\_D03\_00298" 12207 "s59E5H2" 0.08539276 "Holliday junction ATP-dependent DNA helicase RuvA"  
"JS1\_D03\_00298" 12207 "s63E6H2" 0.06755109 "Holliday junction ATP-dependent DNA helicase RuvA"  
"JS1\_D03\_00299" 12208 "s59E13H2" 0.2685677 "Holliday junction ATP-dependent DNA helicase RuvB"  
"JS1\_D03\_00299" 12208 "s59E25H2" 0 "Holliday junction ATP-dependent DNA helicase RuvB"  
"JS1\_D03\_00299" 12208 "s59E5H2" 0.1038187 "Holliday junction ATP-dependent DNA helicase RuvB"  
"JS1\_D03\_00299" 12208 "s63E6H2" 0.07318988 "Holliday junction ATP-dependent DNA helicase RuvB"  
"JS1\_D03\_00300" 12209 "s59E13H2" 0.1824093 "Amidase enhancer precursor"  
"JS1\_D03\_00300" 12209 "s59E25H2" 0 "Amidase enhancer precursor"  
"JS1\_D03\_00300" 12209 "s59E5H2" 0.1135863 "Amidase enhancer precursor"  
"JS1\_D03\_00300" 12209 "s63E6H2" 0.01431953 "Amidase enhancer precursor"  
"JS1\_D03\_00301" 12210 "s59E13H2" 0.6924972 "S-adenosylmethionine:tRNA ribosyltransferase-isomerase"  
"JS1\_D03\_00301" 12210 "s59E25H2" 0 "S-adenosylmethionine:tRNA ribosyltransferase-isomerase"  
"JS1\_D03\_00301" 12210 "s59E5H2" 0.151404 "S-adenosylmethionine:tRNA ribosyltransferase-isomerase"  
"JS1\_D03\_00301" 12210 "s63E6H2" 0.05643282 "S-adenosylmethionine:tRNA ribosyltransferase-isomerase"  
"JS1\_D03\_00302" 12211 "s59E13H2" 0.01658786 "Queuine tRNA-ribosyltransferase"  
"JS1\_D03\_00302" 12211 "s59E25H2" 0 "Queuine tRNA-ribosyltransferase"  
"JS1\_D03\_00302" 12211 "s59E5H2" 0.07629912 "Queuine tRNA-ribosyltransferase"  
"JS1\_D03\_00302" 12211 "s63E6H2" 0.08241913 "Queuine tRNA-ribosyltransferase"  
"JS1\_D03\_00303" 12212 "s59E13H2" 0.004530463 "preprotein translocase subunit YajC"  
"JS1\_D03\_00303" 12212 "s59E25H2" 0 "preprotein translocase subunit YajC"  
"JS1\_D03\_00303" 12212 "s59E5H2" 0.04441145 "preprotein translocase subunit YajC"  
"JS1\_D03\_00303" 12212 "s63E6H2" 0.04539669 "preprotein translocase subunit YajC"  
"JS1\_D03\_00304" 12213 "s59E13H2" 0.06220797 "preprotein translocase subunit SecD"

"JS1\_D03\_00304" 12213 "s59E25H2" 0 "preprotein translocase subunit SecD"  
"JS1\_D03\_00304" 12213 "s59E5H2" 0.3431761 "preprotein translocase subunit SecD"  
"JS1\_D03\_00304" 12213 "s63E6H2" 0.13628 "preprotein translocase subunit SecD"  
"JS1\_D03\_00305" 12214 "s59E13H2" 0.003121099 "preprotein translocase subunit SecF"  
"JS1\_D03\_00305" 12214 "s59E25H2" 0 "preprotein translocase subunit SecF"  
"JS1\_D03\_00305" 12214 "s59E5H2" 0.02043787 "preprotein translocase subunit SecF"  
"JS1\_D03\_00305" 12214 "s63E6H2" 0.01460069 "preprotein translocase subunit SecF"  
"JS1\_D03\_00306" 12215 "s59E13H2" 0 "Cytochrome C biogenesis protein transmembrane region"  
"JS1\_D03\_00306" 12215 "s59E25H2" 0 "Cytochrome C biogenesis protein transmembrane region"  
"JS1\_D03\_00306" 12215 "s59E5H2" 0 "Cytochrome C biogenesis protein transmembrane region"  
"JS1\_D03\_00306" 12215 "s63E6H2" 0.009376019 "Cytochrome C biogenesis protein transmembrane region"  
"JS1\_D03\_00307" 12216 "s59E13H2" 0.1852814 "Thiol:disulfide interchange protein DsbD precursor"  
"JS1\_D03\_00307" 12216 "s59E25H2" 0 "Thiol:disulfide interchange protein DsbD precursor"  
"JS1\_D03\_00307" 12216 "s59E5H2" 0.004328643 "Thiol:disulfide interchange protein DsbD precursor"  
"JS1\_D03\_00307" 12216 "s63E6H2" 0.04761076 "Thiol:disulfide interchange protein DsbD precursor"  
"JS1\_D03\_00308" 12217 "s59E13H2" 0.1268732 "NAD synthetase"  
"JS1\_D03\_00308" 12217 "s59E25H2" 0 "NAD synthetase"  
"JS1\_D03\_00308" 12217 "s59E5H2" 0.03692394 "NAD synthetase"  
"JS1\_D03\_00308" 12217 "s63E6H2" 0.07201668 "NAD synthetase"  
"JS1\_D03\_00309" 12218 "s59E13H2" 0.01580932 "hypothetical protein"  
"JS1\_D03\_00309" 12218 "s59E25H2" 0 "hypothetical protein"  
"JS1\_D03\_00309" 12218 "s59E5H2" 0.04323129 "hypothetical protein"  
"JS1\_D03\_00309" 12218 "s63E6H2" 0.0724059 "hypothetical protein"  
"JS1\_D03\_00310" 12219 "s59E13H2" 0.0124495 "hypothetical protein"  
"JS1\_D03\_00310" 12219 "s59E25H2" 0 "hypothetical protein"  
"JS1\_D03\_00310" 12219 "s59E5H2" 0.02787126 "hypothetical protein"  
"JS1\_D03\_00310" 12219 "s63E6H2" 0.1128964 "hypothetical protein"  
"JS1\_D03\_00311" 12220 "s59E13H2" 0.01744874 "Putative serine protease HtrA"  
"JS1\_D03\_00311" 12220 "s59E25H2" 0 "Putative serine protease HtrA"  
"JS1\_D03\_00311" 12220 "s59E5H2" 0.002339838 "Putative serine protease HtrA"  
"JS1\_D03\_00311" 12220 "s63E6H2" 0.1167934 "Putative serine protease HtrA"  
"JS1\_D03\_00312" 12221 "s59E13H2" 0.4173645 "Sensor protein ZraS"  
"JS1\_D03\_00312" 12221 "s59E25H2" 0 "Sensor protein ZraS"  
"JS1\_D03\_00312" 12221 "s59E5H2" 0.4752064 "Sensor protein ZraS"  
"JS1\_D03\_00312" 12221 "s63E6H2" 0.1830735 "Sensor protein ZraS"  
"JS1\_D03\_00313" 12222 "s59E13H2" 0.6077639 "Transcriptional regulatory protein ZraR"  
"JS1\_D03\_00313" 12222 "s59E25H2" 0 "Transcriptional regulatory protein ZraR"  
"JS1\_D03\_00313" 12222 "s59E5H2" 0.7477036 "Transcriptional regulatory protein ZraR"  
"JS1\_D03\_00313" 12222 "s63E6H2" 0.3820438 "Transcriptional regulatory protein ZraR"  
"JS1\_D03\_00314" 12223 "s59E13H2" 2.424235 "Pantothenic acid transporter PanT"  
"JS1\_D03\_00314" 12223 "s59E25H2" 0 "Pantothenic acid transporter PanT"  
"JS1\_D03\_00314" 12223 "s59E5H2" 4.199361 "Pantothenic acid transporter PanT"  
"JS1\_D03\_00314" 12223 "s63E6H2" 1.853608 "Pantothenic acid transporter PanT"  
"JS1\_D03\_00315" 12224 "s59E13H2" 0.709325 "Type III pantothenate kinase"  
"JS1\_D03\_00315" 12224 "s59E25H2" 0 "Type III pantothenate kinase"  
"JS1\_D03\_00315" 12224 "s59E5H2" 4.555327 "Type III pantothenate kinase"  
"JS1\_D03\_00315" 12224 "s63E6H2" 1.283978 "Type III pantothenate kinase"

"JS1\_D03\_00316" 12225 "s59E13H2" 0.5464729 "putative nicotinate-nucleotide pyrophosphorylase [carboxylating]"  
"JS1\_D03\_00316" 12225 "s59E25H2" 0.4826389 "putative nicotinate-nucleotide pyrophosphorylase [carboxylating]"  
"JS1\_D03\_00316" 12225 "s59E5H2" 0.2091576 "putative nicotinate-nucleotide pyrophosphorylase [carboxylating]"  
"JS1\_D03\_00316" 12225 "s63E6H2" 0.1349757 "putative nicotinate-nucleotide pyrophosphorylase [carboxylating]"  
"JS1\_D03\_00317" 12226 "s59E13H2" 0.9699013 "L-aspartate oxidase"  
"JS1\_D03\_00317" 12226 "s59E25H2" 0 "L-aspartate oxidase"  
"JS1\_D03\_00317" 12226 "s59E5H2" 0.5841516 "L-aspartate oxidase"  
"JS1\_D03\_00317" 12226 "s63E6H2" 1.005189 "L-aspartate oxidase"  
"JS1\_D03\_00318" 12227 "s59E13H2" 0.0004025745 "Quinolate synthase A"  
"JS1\_D03\_00318" 12227 "s59E25H2" 0 "Quinolate synthase A"  
"JS1\_D03\_00318" 12227 "s59E5H2" 0 "Quinolate synthase A"  
"JS1\_D03\_00318" 12227 "s63E6H2" 0.0418448 "Quinolate synthase A"  
"JS1\_D03\_00319" 12228 "s59E13H2" 4.292755 "hypothetical protein"  
"JS1\_D03\_00319" 12228 "s59E25H2" 0 "hypothetical protein"  
"JS1\_D03\_00319" 12228 "s59E5H2" 1.769633 "hypothetical protein"  
"JS1\_D03\_00319" 12228 "s63E6H2" 1.179169 "hypothetical protein"  
"JS1\_D03\_00320" 12229 "s59E13H2" 0.007339948 "hypothetical protein"  
"JS1\_D03\_00320" 12229 "s59E25H2" 0 "hypothetical protein"  
"JS1\_D03\_00320" 12229 "s59E5H2" 0.01430447 "hypothetical protein"  
"JS1\_D03\_00320" 12229 "s63E6H2" 0.003348486 "hypothetical protein"  
"JS1\_D03\_00321" 12230 "s59E13H2" 0.7370234 "Diaminopimelate epimerase"  
"JS1\_D03\_00321" 12230 "s59E25H2" 0 "Diaminopimelate epimerase"  
"JS1\_D03\_00321" 12230 "s59E5H2" 0.4335116 "Diaminopimelate epimerase"  
"JS1\_D03\_00321" 12230 "s63E6H2" 0.2183906 "Diaminopimelate epimerase"  
"JS1\_D03\_00322" 12231 "s59E13H2" 0.02787447 "4-hydroxy-tetrahydrodipicolinate reductase"  
"JS1\_D03\_00322" 12231 "s59E25H2" 0 "4-hydroxy-tetrahydrodipicolinate reductase"  
"JS1\_D03\_00322" 12231 "s59E5H2" 2.41741 "4-hydroxy-tetrahydrodipicolinate reductase"  
"JS1\_D03\_00322" 12231 "s63E6H2" 0.6197232 "4-hydroxy-tetrahydrodipicolinate reductase"  
"JS1\_D03\_00323" 12232 "s59E13H2" 0.9615458 "4-hydroxy-tetrahydrodipicolinate synthase"  
"JS1\_D03\_00323" 12232 "s59E25H2" 0 "4-hydroxy-tetrahydrodipicolinate synthase"  
"JS1\_D03\_00323" 12232 "s59E5H2" 2.075047 "4-hydroxy-tetrahydrodipicolinate synthase"  
"JS1\_D03\_00323" 12232 "s63E6H2" 1.26895 "4-hydroxy-tetrahydrodipicolinate synthase"  
"JS1\_D03\_00324" 12233 "s59E13H2" 0.9164637 "aspartate kinase"  
"JS1\_D03\_00324" 12233 "s59E25H2" 0 "aspartate kinase"  
"JS1\_D03\_00324" 12233 "s59E5H2" 0.3691672 "aspartate kinase"  
"JS1\_D03\_00324" 12233 "s63E6H2" 0.6326839 "aspartate kinase"  
"JS1\_D03\_00325" 12234 "s59E13H2" 2.200863 "Diaminopimelate decarboxylase"  
"JS1\_D03\_00325" 12234 "s59E25H2" 0 "Diaminopimelate decarboxylase"  
"JS1\_D03\_00325" 12234 "s59E5H2" 1.314701 "Diaminopimelate decarboxylase"  
"JS1\_D03\_00325" 12234 "s63E6H2" 1.377295 "Diaminopimelate decarboxylase"  
"JS1\_D03\_00326" 12235 "s59E13H2" 0.002724956 "preprotein translocase subunit SecA"  
"JS1\_D03\_00326" 12235 "s59E25H2" 0 "preprotein translocase subunit SecA"  
"JS1\_D03\_00326" 12235 "s59E5H2" 0.03697547 "preprotein translocase subunit SecA"  
"JS1\_D03\_00326" 12235 "s63E6H2" 0.3672177 "preprotein translocase subunit SecA"  
"JS1\_D03\_00327" 12236 "s59E13H2" 0 "Peptide chain release factor 2"  
"JS1\_D03\_00327" 12236 "s59E25H2" 0 "Peptide chain release factor 2"  
"JS1\_D03\_00327" 12236 "s59E5H2" 0.01557502 "Peptide chain release factor 2"



"JS1\_D03\_00327" 12236 "s63E6H2" 0.587983 "Peptide chain release factor 2"  
"JS1\_D03\_00328" 12237 "s59E13H2" 0 "Acryloyl-CoA reductase electron transfer subunit gamma"  
"JS1\_D03\_00328" 12237 "s59E25H2" 0 "Acryloyl-CoA reductase electron transfer subunit gamma"  
"JS1\_D03\_00328" 12237 "s59E5H2" 0 "Acryloyl-CoA reductase electron transfer subunit gamma"  
"JS1\_D03\_00328" 12237 "s63E6H2" 0.05636878 "Acryloyl-CoA reductase electron transfer subunit gamma"  
"JS1\_D03\_00329" 12238 "s59E13H2" 0 "Acryloyl-CoA reductase electron transfer subunit beta"  
"JS1\_D03\_00329" 12238 "s59E25H2" 0 "Acryloyl-CoA reductase electron transfer subunit beta"  
"JS1\_D03\_00329" 12238 "s59E5H2" 0 "Acryloyl-CoA reductase electron transfer subunit beta"  
"JS1\_D03\_00329" 12238 "s63E6H2" 0.02324822 "Acryloyl-CoA reductase electron transfer subunit beta"  
"JS1\_D03\_00330" 12239 "s59E13H2" 0 "hypothetical protein"  
"JS1\_D03\_00330" 12239 "s59E25H2" 0 "hypothetical protein"  
"JS1\_D03\_00330" 12239 "s59E5H2" 0 "hypothetical protein"  
"JS1\_D03\_00330" 12239 "s63E6H2" 0.01754177 "hypothetical protein"  
"JS1\_D03\_00331" 12240 "s59E13H2" 0 "Methenyltetrahydrofolate cyclohydrolase"  
"JS1\_D03\_00331" 12240 "s59E25H2" 0 "Methenyltetrahydrofolate cyclohydrolase"  
"JS1\_D03\_00331" 12240 "s59E5H2" 0.006464008 "Methenyltetrahydrofolate cyclohydrolase"  
"JS1\_D03\_00331" 12240 "s63E6H2" 0.0738338 "Methenyltetrahydrofolate cyclohydrolase"  
"JS1\_D03\_00332" 12241 "s59E13H2" 0.007373688 "Glutamate 2,3-aminomutase"  
"JS1\_D03\_00332" 12241 "s59E25H2" 0 "Glutamate 2,3-aminomutase"  
"JS1\_D03\_00332" 12241 "s59E5H2" 0.01355407 "Glutamate 2,3-aminomutase"  
"JS1\_D03\_00332" 12241 "s63E6H2" 0.04655141 "Glutamate 2,3-aminomutase"  
"JS1\_D03\_00333" 12242 "s59E13H2" 0.005201477 "Adenosylhomocysteinase"  
"JS1\_D03\_00333" 12242 "s59E25H2" 0 "Adenosylhomocysteinase"  
"JS1\_D03\_00333" 12242 "s59E5H2" 0.09313041 "Adenosylhomocysteinase"  
"JS1\_D03\_00333" 12242 "s63E6H2" 0.5192255 "Adenosylhomocysteinase"  
"JS1\_D03\_00334" 12243 "s59E13H2" 0 "putative metallo-hydrolase"  
"JS1\_D03\_00334" 12243 "s59E25H2" 0.6682692 "putative metallo-hydrolase"  
"JS1\_D03\_00334" 12243 "s59E5H2" 0 "putative metallo-hydrolase"  
"JS1\_D03\_00334" 12243 "s63E6H2" 0.2314027 "putative metallo-hydrolase"  
"JS1\_D03\_00335" 12244 "s59E13H2" 0 "putative glycerophosphoryl diester phosphodiesterase 1"  
"JS1\_D03\_00335" 12244 "s59E25H2" 0 "putative glycerophosphoryl diester phosphodiesterase 1"  
"JS1\_D03\_00335" 12244 "s59E5H2" 0 "putative glycerophosphoryl diester phosphodiesterase 1"  
"JS1\_D03\_00335" 12244 "s63E6H2" 0.1937448 "putative glycerophosphoryl diester phosphodiesterase 1"  
"JS1\_D03\_00336" 12245 "s59E13H2" 0 "D-tyrosyl-tRNA(Tyr) deacylase"  
"JS1\_D03\_00336" 12245 "s59E25H2" 0 "D-tyrosyl-tRNA(Tyr) deacylase"  
"JS1\_D03\_00336" 12245 "s59E5H2" 0.03162018 "D-tyrosyl-tRNA(Tyr) deacylase"  
"JS1\_D03\_00336" 12245 "s63E6H2" 0.4339161 "D-tyrosyl-tRNA(Tyr) deacylase"  
"JS1\_D03\_00337" 12246 "s59E13H2" 0.028103 "GTP pyrophosphokinase"  
"JS1\_D03\_00337" 12246 "s59E25H2" 0 "GTP pyrophosphokinase"  
"JS1\_D03\_00337" 12246 "s59E5H2" 0.1240408 "GTP pyrophosphokinase"  
"JS1\_D03\_00337" 12246 "s63E6H2" 0.4960344 "GTP pyrophosphokinase"  
"JS1\_D03\_00338" 12247 "s59E13H2" 0.002251521 "Adenine phosphoribosyltransferase"  
"JS1\_D03\_00338" 12247 "s59E25H2" 0 "Adenine phosphoribosyltransferase"  
"JS1\_D03\_00338" 12247 "s59E5H2" 0.04585515 "Adenine phosphoribosyltransferase"  
"JS1\_D03\_00338" 12247 "s63E6H2" 0.4802287 "Adenine phosphoribosyltransferase"  
"JS1\_D03\_00339" 12248 "s59E13H2" 0.009971934 "Single-stranded-DNA-specific exonuclease RecJ"  
"JS1\_D03\_00339" 12248 "s59E25H2" 0 "Single-stranded-DNA-specific exonuclease RecJ"

"JS1\_D03\_00339" 12248 "s59E5H2" 0.2599963 "Single-stranded-DNA-specific exonuclease RecJ"  
"JS1\_D03\_00339" 12248 "s63E6H2" 0.5197773 "Single-stranded-DNA-specific exonuclease RecJ"  
"JS1\_D03\_00340" 12249 "s59E13H2" 0 "Photosystem I assembly protein Ycf3"  
"JS1\_D03\_00340" 12249 "s59E25H2" 0 "Photosystem I assembly protein Ycf3"  
"JS1\_D03\_00340" 12249 "s59E5H2" 0.04291503 "Photosystem I assembly protein Ycf3"  
"JS1\_D03\_00340" 12249 "s63E6H2" 0.02319824 "Photosystem I assembly protein Ycf3"  
"JS1\_D03\_00341" 12250 "s59E13H2" 0 "hypothetical protein"  
"JS1\_D03\_00341" 12250 "s59E25H2" 0 "hypothetical protein"  
"JS1\_D03\_00341" 12250 "s59E5H2" 0.009633058 "hypothetical protein"  
"JS1\_D03\_00341" 12250 "s63E6H2" 0.01656386 "hypothetical protein"  
"JS1\_D03\_00342" 12251 "s59E13H2" 0 "hypothetical protein"  
"JS1\_D03\_00342" 12251 "s59E25H2" 0 "hypothetical protein"  
"JS1\_D03\_00342" 12251 "s59E5H2" 0 "hypothetical protein"  
"JS1\_D03\_00342" 12251 "s63E6H2" 0.004004611 "hypothetical protein"  
"JS1\_D03\_00343" 12252 "s59E13H2" 0.01010699 "Sialic acid TRAP transporter permease protein SiaT"  
"JS1\_D03\_00343" 12252 "s59E25H2" 0 "Sialic acid TRAP transporter permease protein SiaT"  
"JS1\_D03\_00343" 12252 "s59E5H2" 0.04297945 "Sialic acid TRAP transporter permease protein SiaT"  
"JS1\_D03\_00343" 12252 "s63E6H2" 0.007775195 "Sialic acid TRAP transporter permease protein SiaT"  
"JS1\_D03\_00344" 12253 "s59E13H2" 0.01415658 "Putative pyruvate, phosphate dikinase regulatory protein"  
"JS1\_D03\_00344" 12253 "s59E25H2" 0 "Putative pyruvate, phosphate dikinase regulatory protein"  
"JS1\_D03\_00344" 12253 "s59E5H2" 0.03879377 "Putative pyruvate, phosphate dikinase regulatory protein"  
"JS1\_D03\_00344" 12253 "s63E6H2" 0.02334092 "Putative pyruvate, phosphate dikinase regulatory protein"  
"JS1\_D03\_00345" 12254 "s59E13H2" 0.003684513 "Glycine--tRNA ligase beta subunit"  
"JS1\_D03\_00345" 12254 "s59E25H2" 0 "Glycine--tRNA ligase beta subunit"  
"JS1\_D03\_00345" 12254 "s59E5H2" 0.03805093 "Glycine--tRNA ligase beta subunit"  
"JS1\_D03\_00345" 12254 "s63E6H2" 0.02236589 "Glycine--tRNA ligase beta subunit"  
"JS1\_D03\_00346" 12255 "s59E13H2" 0.009901491 "Glycine--tRNA ligase alpha subunit"  
"JS1\_D03\_00346" 12255 "s59E25H2" 0 "Glycine--tRNA ligase alpha subunit"  
"JS1\_D03\_00346" 12255 "s59E5H2" 0.1809039 "Glycine--tRNA ligase alpha subunit"  
"JS1\_D03\_00346" 12255 "s63E6H2" 0.1071266 "Glycine--tRNA ligase alpha subunit"  
"JS1\_D03\_00347" 12256 "s59E13H2" 0 "Hypoxanthine-guanine phosphoribosyltransferase"  
"JS1\_D03\_00347" 12256 "s59E25H2" 0 "Hypoxanthine-guanine phosphoribosyltransferase"  
"JS1\_D03\_00347" 12256 "s59E5H2" 0 "Hypoxanthine-guanine phosphoribosyltransferase"  
"JS1\_D03\_00347" 12256 "s63E6H2" 0.020571 "Hypoxanthine-guanine phosphoribosyltransferase"  
"JS1\_D03\_00348" 12257 "s59E13H2" 0.005756514 "tRNA(Ile)-lysidine synthase"  
"JS1\_D03\_00348" 12257 "s59E25H2" 0 "tRNA(Ile)-lysidine synthase"  
"JS1\_D03\_00348" 12257 "s59E5H2" 0.06493427 "tRNA(Ile)-lysidine synthase"  
"JS1\_D03\_00348" 12257 "s63E6H2" 0.1306085 "tRNA(Ile)-lysidine synthase"  
"JS1\_D03\_00352" 12261 "s59E13H2" 0.01825843 "cell division protein FtsB"  
"JS1\_D03\_00352" 12261 "s59E25H2" 0 "cell division protein FtsB"  
"JS1\_D03\_00352" 12261 "s59E5H2" 0.2488614 "cell division protein FtsB"  
"JS1\_D03\_00352" 12261 "s63E6H2" 0.320197 "cell division protein FtsB"  
"JS1\_D03\_00353" 12262 "s59E13H2" 0.007232513 "Enolase"  
"JS1\_D03\_00353" 12262 "s59E25H2" 0 "Enolase"  
"JS1\_D03\_00353" 12262 "s59E5H2" 0.3100858 "Enolase"  
"JS1\_D03\_00353" 12262 "s63E6H2" 0.4401719 "Enolase"  
"JS1\_D03\_00354" 12263 "s59E13H2" 0.030207 "Magnesium transporter MgtE"

"JS1\_D03\_00354" 12263 "s59E25H2" 0 "Magnesium transporter MgtE"  
"JS1\_D03\_00354" 12263 "s59E5H2" 0.3166384 "Magnesium transporter MgtE"  
"JS1\_D03\_00354" 12263 "s63E6H2" 0.2531526 "Magnesium transporter MgtE"  
"JS1\_D03\_00355" 12264 "s59E13H2" 0 "S4 domain protein"  
"JS1\_D03\_00355" 12264 "s59E25H2" 0 "S4 domain protein"  
"JS1\_D03\_00355" 12264 "s59E5H2" 0.01493665 "S4 domain protein"  
"JS1\_D03\_00355" 12264 "s63E6H2" 0.0185794 "S4 domain protein"  
"JS1\_D03\_00356" 12265 "s59E13H2" 0.03910526 "Lysine--tRNA ligase"  
"JS1\_D03\_00356" 12265 "s59E25H2" 0 "Lysine--tRNA ligase"  
"JS1\_D03\_00356" 12265 "s59E5H2" 0.1914888 "Lysine--tRNA ligase"  
"JS1\_D03\_00356" 12265 "s63E6H2" 0.1734361 "Lysine--tRNA ligase"  
"JS1\_D03\_00357" 12266 "s59E13H2" 0.03976721 "Transcription elongation factor GreA"  
"JS1\_D03\_00357" 12266 "s59E25H2" 0 "Transcription elongation factor GreA"  
"JS1\_D03\_00357" 12266 "s59E5H2" 0.1328062 "Transcription elongation factor GreA"  
"JS1\_D03\_00357" 12266 "s63E6H2" 0.1325388 "Transcription elongation factor GreA"  
"JS1\_D03\_00358" 12267 "s59E13H2" 0.004274974 "Putative pyridoxal phosphate-dependent acyltransferase"  
"JS1\_D03\_00358" 12267 "s59E25H2" 0 "Putative pyridoxal phosphate-dependent acyltransferase"  
"JS1\_D03\_00358" 12267 "s59E5H2" 0.04841741 "Putative pyridoxal phosphate-dependent acyltransferase"  
"JS1\_D03\_00358" 12267 "s63E6H2" 0.1671779 "Putative pyridoxal phosphate-dependent acyltransferase"  
"JS1\_D03\_00359" 12268 "s59E13H2" 0.02633025 "hypothetical protein"  
"JS1\_D03\_00359" 12268 "s59E25H2" 0 "hypothetical protein"  
"JS1\_D03\_00359" 12268 "s59E5H2" 0.1018896 "hypothetical protein"  
"JS1\_D03\_00359" 12268 "s63E6H2" 0.101997 "hypothetical protein"  
"JS1\_D03\_00360" 12269 "s59E13H2" 0 "hypothetical protein"  
"JS1\_D03\_00360" 12269 "s59E25H2" 0 "hypothetical protein"  
"JS1\_D03\_00360" 12269 "s59E5H2" 0.1168789 "hypothetical protein"  
"JS1\_D03\_00360" 12269 "s63E6H2" 0.05997074 "hypothetical protein"  
"JS1\_D03\_00361" 12270 "s59E13H2" 0.01945063 "tRNA-specific 2-thiouridylase MnmA"  
"JS1\_D03\_00361" 12270 "s59E25H2" 0 "tRNA-specific 2-thiouridylase MnmA"  
"JS1\_D03\_00361" 12270 "s59E5H2" 0.07837206 "tRNA-specific 2-thiouridylase MnmA"  
"JS1\_D03\_00361" 12270 "s63E6H2" 0.08327936 "tRNA-specific 2-thiouridylase MnmA"  
"JS1\_D03\_00362" 12271 "s59E13H2" 0.0194229 "hypothetical protein"  
"JS1\_D03\_00362" 12271 "s59E25H2" 0 "hypothetical protein"  
"JS1\_D03\_00362" 12271 "s59E5H2" 0.06373055 "hypothetical protein"  
"JS1\_D03\_00362" 12271 "s63E6H2" 0.04911969 "hypothetical protein"  
"JS1\_D03\_00363" 12272 "s59E13H2" 0 "HTH-type transcriptional regulator CymR"  
"JS1\_D03\_00363" 12272 "s59E25H2" 0 "HTH-type transcriptional regulator CymR"  
"JS1\_D03\_00363" 12272 "s59E5H2" 0 "HTH-type transcriptional regulator CymR"  
"JS1\_D03\_00363" 12272 "s63E6H2" 0.05360946 "HTH-type transcriptional regulator CymR"  
"JS1\_D03\_00364" 12273 "s59E13H2" 0 "Ferredoxin"  
"JS1\_D03\_00364" 12273 "s59E25H2" 0 "Ferredoxin"  
"JS1\_D03\_00364" 12273 "s59E5H2" 0.01621173 "Ferredoxin"  
"JS1\_D03\_00364" 12273 "s63E6H2" 0.01013215 "Ferredoxin"  
"JS1\_D03\_00365" 12274 "s59E13H2" 0.001394053 "Ribonuclease Z"  
"JS1\_D03\_00365" 12274 "s59E25H2" 0 "Ribonuclease Z"  
"JS1\_D03\_00365" 12274 "s59E5H2" 0.09022479 "Ribonuclease Z"  
"JS1\_D03\_00365" 12274 "s63E6H2" 0.03098001 "Ribonuclease Z"

"JS1\_D03\_00366" 12275 "s59E13H2" 0 "Molybdopterin adenyltransferase"  
"JS1\_D03\_00366" 12275 "s59E25H2" 0 "Molybdopterin adenyltransferase"  
"JS1\_D03\_00366" 12275 "s59E5H2" 0 "Molybdopterin adenyltransferase"  
"JS1\_D03\_00366" 12275 "s63E6H2" 0.01030002 "Molybdopterin adenyltransferase"  
"JS1\_D03\_00367" 12276 "s59E13H2" 0 "MOSC domain protein"  
"JS1\_D03\_00367" 12276 "s59E25H2" 0 "MOSC domain protein"  
"JS1\_D03\_00367" 12276 "s59E5H2" 0 "MOSC domain protein"  
"JS1\_D03\_00367" 12276 "s63E6H2" 0.01651731 "MOSC domain protein"  
"JS1\_D03\_00368" 12277 "s59E13H2" 0 "Cyclic pyranopterin monophosphate synthase accessory protein"  
"JS1\_D03\_00368" 12277 "s59E25H2" 0 "Cyclic pyranopterin monophosphate synthase accessory protein"  
"JS1\_D03\_00368" 12277 "s59E5H2" 0.007617561 "Cyclic pyranopterin monophosphate synthase accessory protein"  
"JS1\_D03\_00368" 12277 "s63E6H2" 0.01198768 "Cyclic pyranopterin monophosphate synthase accessory protein"  
"JS1\_D03\_00369" 12278 "s59E13H2" 0 "Cyclic pyranopterin monophosphate synthase"  
"JS1\_D03\_00369" 12278 "s59E25H2" 0 "Cyclic pyranopterin monophosphate synthase"  
"JS1\_D03\_00369" 12278 "s59E5H2" 0 "Cyclic pyranopterin monophosphate synthase"  
"JS1\_D03\_00369" 12278 "s63E6H2" 0.04102924 "Cyclic pyranopterin monophosphate synthase"  
"JS1\_D03\_00370" 12279 "s59E13H2" 0.02355655 "Molybdopterin molybdenumtransferase"  
"JS1\_D03\_00370" 12279 "s59E25H2" 0 "Molybdopterin molybdenumtransferase"  
"JS1\_D03\_00370" 12279 "s59E5H2" 0.02630121 "Molybdopterin molybdenumtransferase"  
"JS1\_D03\_00370" 12279 "s63E6H2" 0.04874758 "Molybdopterin molybdenumtransferase"  
"JS1\_D03\_00371" 12280 "s59E13H2" 0.0009968031 "Molybdopterin molybdenumtransferase"  
"JS1\_D03\_00371" 12280 "s59E25H2" 0 "Molybdopterin molybdenumtransferase"  
"JS1\_D03\_00371" 12280 "s59E5H2" 0.008689899 "Molybdopterin molybdenumtransferase"  
"JS1\_D03\_00371" 12280 "s63E6H2" 0.01781429 "Molybdopterin molybdenumtransferase"  
"JS1\_D03\_00372" 12281 "s59E13H2" 0.001697983 "Sulfate/thiosulfate import ATP-binding protein CysA"  
"JS1\_D03\_00372" 12281 "s59E25H2" 0 "Sulfate/thiosulfate import ATP-binding protein CysA"  
"JS1\_D03\_00372" 12281 "s59E5H2" 0.07249187 "Sulfate/thiosulfate import ATP-binding protein CysA"  
"JS1\_D03\_00372" 12281 "s63E6H2" 0.08004398 "Sulfate/thiosulfate import ATP-binding protein CysA"  
"JS1\_D03\_00373" 12282 "s59E13H2" 0.004627788 "Molybdenum transport system permease protein ModB"  
"JS1\_D03\_00373" 12282 "s59E25H2" 0 "Molybdenum transport system permease protein ModB"  
"JS1\_D03\_00373" 12282 "s59E5H2" 0.09569245 "Molybdenum transport system permease protein ModB"  
"JS1\_D03\_00373" 12282 "s63E6H2" 0.08769578 "Molybdenum transport system permease protein ModB"  
"JS1\_D03\_00374" 12283 "s59E13H2" 0.4981274 "PBP superfamily domain protein"  
"JS1\_D03\_00374" 12283 "s59E25H2" 0 "PBP superfamily domain protein"  
"JS1\_D03\_00374" 12283 "s59E5H2" 0.0145094 "PBP superfamily domain protein"  
"JS1\_D03\_00374" 12283 "s63E6H2" 0.07473295 "PBP superfamily domain protein"  
"JS1\_D03\_00376" 12285 "s59E13H2" 0.02159029 "Formamidopyrimidine-DNA glycosylase"  
"JS1\_D03\_00376" 12285 "s59E25H2" 0 "Formamidopyrimidine-DNA glycosylase"  
"JS1\_D03\_00376" 12285 "s59E5H2" 0.2392093 "Formamidopyrimidine-DNA glycosylase"  
"JS1\_D03\_00376" 12285 "s63E6H2" 0.114443 "Formamidopyrimidine-DNA glycosylase"  
"JS1\_D03\_00377" 12286 "s59E13H2" 0.9697993 "GMP/IMP nucleotidase YrfG"  
"JS1\_D03\_00377" 12286 "s59E25H2" 0 "GMP/IMP nucleotidase YrfG"  
"JS1\_D03\_00377" 12286 "s59E5H2" 0.3790352 "GMP/IMP nucleotidase YrfG"  
"JS1\_D03\_00377" 12286 "s63E6H2" 0.3800938 "GMP/IMP nucleotidase YrfG"  
"JS1\_D03\_00378" 12287 "s59E13H2" 0 "Serine acetyltransferase"  
"JS1\_D03\_00378" 12287 "s59E25H2" 0 "Serine acetyltransferase"  
"JS1\_D03\_00378" 12287 "s59E5H2" 0 "Serine acetyltransferase"

"JS1\_D03\_00378" 12287 "s63E6H2" 0.6361118 "Serine acetyltransferase"  
"JS1\_D03\_00379" 12288 "s59E13H2" 0 "Ferredoxin"  
"JS1\_D03\_00379" 12288 "s59E25H2" 0 "Ferredoxin"  
"JS1\_D03\_00379" 12288 "s59E5H2" 0 "Ferredoxin"  
"JS1\_D03\_00379" 12288 "s63E6H2" 1.049393 "Ferredoxin"  
"JS1\_D03\_00380" 12289 "s59E13H2" 0.001441872 "hypothetical protein"  
"JS1\_D03\_00380" 12289 "s59E25H2" 0 "hypothetical protein"  
"JS1\_D03\_00380" 12289 "s59E5H2" 0.006748167 "hypothetical protein"  
"JS1\_D03\_00380" 12289 "s63E6H2" 1.223888 "hypothetical protein"  
"JS1\_D03\_00382" 12291 "s59E13H2" 0 "O-acetylserine sulfhydrylase"  
"JS1\_D03\_00382" 12291 "s59E25H2" 0 "O-acetylserine sulfhydrylase"  
"JS1\_D03\_00382" 12291 "s59E5H2" 0 "O-acetylserine sulfhydrylase"  
"JS1\_D03\_00382" 12291 "s63E6H2" 0.244869 "O-acetylserine sulfhydrylase"  
"JS1\_D03\_00383" 12292 "s59E13H2" 0 "HTH-type transcriptional regulator CymR"  
"JS1\_D03\_00383" 12292 "s59E25H2" 0 "HTH-type transcriptional regulator CymR"  
"JS1\_D03\_00383" 12292 "s59E5H2" 0 "HTH-type transcriptional regulator CymR"  
"JS1\_D03\_00383" 12292 "s63E6H2" 0.07682753 "HTH-type transcriptional regulator CymR"  
"JS1\_D03\_00384" 12293 "s59E13H2" 0 "hypothetical protein"  
"JS1\_D03\_00384" 12293 "s59E25H2" 0 "hypothetical protein"  
"JS1\_D03\_00384" 12293 "s59E5H2" 0 "hypothetical protein"  
"JS1\_D03\_00384" 12293 "s63E6H2" 0.02463712 "hypothetical protein"  
"JS1\_D03\_00385" 12294 "s59E13H2" 0 "formate dehydrogenase accessory protein"  
"JS1\_D03\_00385" 12294 "s59E25H2" 0 "formate dehydrogenase accessory protein"  
"JS1\_D03\_00385" 12294 "s59E5H2" 0 "formate dehydrogenase accessory protein"  
"JS1\_D03\_00385" 12294 "s63E6H2" 0.04818312 "formate dehydrogenase accessory protein"  
"JS1\_D03\_00386" 12295 "s59E13H2" 0 "putative cysteine desulfurase"  
"JS1\_D03\_00386" 12295 "s59E25H2" 0 "putative cysteine desulfurase"  
"JS1\_D03\_00386" 12295 "s59E5H2" 0 "putative cysteine desulfurase"  
"JS1\_D03\_00386" 12295 "s63E6H2" 0.04507219 "putative cysteine desulfurase"  
"JS1\_D03\_00390" 12299 "s59E13H2" 0.1552221 "UDP-N-acetylmuramate--L-alanine ligase"  
"JS1\_D03\_00390" 12299 "s59E25H2" 0 "UDP-N-acetylmuramate--L-alanine ligase"  
"JS1\_D03\_00390" 12299 "s59E5H2" 0.3678671 "UDP-N-acetylmuramate--L-alanine ligase"  
"JS1\_D03\_00390" 12299 "s63E6H2" 0.2498985 "UDP-N-acetylmuramate--L-alanine ligase"  
"JS1\_D03\_00391" 12300 "s59E13H2" 0.04487297 "UDP-N-acetylglucosamine--N-acetylmuramyl-(pentapeptide) pyrophosphoryl-undecaprenol N-acetylglucosamine transferase"  
"JS1\_D03\_00391" 12300 "s59E25H2" 0 "UDP-N-acetylglucosamine--N-acetylmuramyl-(pentapeptide) pyrophosphoryl-undecaprenol N-acetylglucosamine transferase"  
"JS1\_D03\_00391" 12300 "s59E5H2" 0.2729267 "UDP-N-acetylglucosamine--N-acetylmuramyl-(pentapeptide) pyrophosphoryl-undecaprenol N-acetylglucosamine transferase"  
"JS1\_D03\_00391" 12300 "s63E6H2" 0.3022886 "UDP-N-acetylglucosamine--N-acetylmuramyl-(pentapeptide) pyrophosphoryl-undecaprenol N-acetylglucosamine transferase"  
"JS1\_D03\_00392" 12301 "s59E13H2" 0.3879907 "Lipid II flippase FtsW"  
"JS1\_D03\_00392" 12301 "s59E25H2" 0 "Lipid II flippase FtsW"  
"JS1\_D03\_00392" 12301 "s59E5H2" 0.6149562 "Lipid II flippase FtsW"  
"JS1\_D03\_00392" 12301 "s63E6H2" 0.8732753 "Lipid II flippase FtsW"  
"JS1\_D03\_00393" 12302 "s59E13H2" 0.006151055 "Phospho-N-acetylmuramoyl-pentapeptide-transferase"  
"JS1\_D03\_00393" 12302 "s59E25H2" 0 "Phospho-N-acetylmuramoyl-pentapeptide-transferase"  
"JS1\_D03\_00393" 12302 "s59E5H2" 0.06380706 "Phospho-N-acetylmuramoyl-pentapeptide-transferase"  
"JS1\_D03\_00393" 12302 "s63E6H2" 0.06742833 "Phospho-N-acetylmuramoyl-pentapeptide-transferase"  
"JS1\_D03\_00394" 12303 "s59E13H2" 0.09302741 "UDP-N-acetylmuramoyl-tripeptide--D-alanyl-D-alanine ligase"  
"JS1\_D03\_00394" 12303 "s59E25H2" 0 "UDP-N-acetylmuramoyl-tripeptide--D-alanyl-D-alanine ligase"

"JS1\_D03\_00394" 12303 "s59E5H2" 0.4231556 "UDP-N-acetylmuramoyl-tripeptide--D-alanyl-D-alanine ligase"  
"JS1\_D03\_00394" 12303 "s63E6H2" 0.2782398 "UDP-N-acetylmuramoyl-tripeptide--D-alanyl-D-alanine ligase"  
"JS1\_D03\_00395" 12304 "s59E13H2" 0.012929 "UDP-N-acetylmuramoyl-L-alanyl-D-glutamate--L-lysine ligase"  
"JS1\_D03\_00395" 12304 "s59E25H2" 0 "UDP-N-acetylmuramoyl-L-alanyl-D-glutamate--L-lysine ligase"  
"JS1\_D03\_00395" 12304 "s59E5H2" 0.2206028 "UDP-N-acetylmuramoyl-L-alanyl-D-glutamate--L-lysine ligase"  
"JS1\_D03\_00395" 12304 "s63E6H2" 0.2721937 "UDP-N-acetylmuramoyl-L-alanyl-D-glutamate--L-lysine ligase"  
"JS1\_D03\_00396" 12305 "s59E13H2" 0 "photosystem I assembly protein Ycf3"  
"JS1\_D03\_00396" 12305 "s59E25H2" 0 "photosystem I assembly protein Ycf3"  
"JS1\_D03\_00396" 12305 "s59E5H2" 0.003191486 "photosystem I assembly protein Ycf3"  
"JS1\_D03\_00396" 12305 "s63E6H2" 0.01633064 "photosystem I assembly protein Ycf3"  
"JS1\_D03\_00397" 12306 "s59E13H2" 0.01913842 "hypothetical protein"  
"JS1\_D03\_00397" 12306 "s59E25H2" 0 "hypothetical protein"  
"JS1\_D03\_00397" 12306 "s59E5H2" 0.01225705 "hypothetical protein"  
"JS1\_D03\_00397" 12306 "s63E6H2" 0.1993178 "hypothetical protein"  
"JS1\_D03\_00398" 12307 "s59E13H2" 0 "Cystathionine beta-lyase PatB"  
"JS1\_D03\_00398" 12307 "s59E25H2" 0 "Cystathionine beta-lyase PatB"  
"JS1\_D03\_00398" 12307 "s59E5H2" 0 "Cystathionine beta-lyase PatB"  
"JS1\_D03\_00398" 12307 "s63E6H2" 0.1300421 "Cystathionine beta-lyase PatB"  
"JS1\_D03\_00399" 12308 "s59E13H2" 1.478817 "Radical SAM superfamily protein"  
"JS1\_D03\_00399" 12308 "s59E25H2" 0 "Radical SAM superfamily protein"  
"JS1\_D03\_00399" 12308 "s59E5H2" 0.0871923 "Radical SAM superfamily protein"  
"JS1\_D03\_00399" 12308 "s63E6H2" 0.581504 "Radical SAM superfamily protein"  
"JS1\_D03\_00400" 12309 "s59E13H2" 0.4342592 "Cyclic di-GMP phosphodiesterase response regulator RpfG"  
"JS1\_D03\_00400" 12309 "s59E25H2" 0 "Cyclic di-GMP phosphodiesterase response regulator RpfG"  
"JS1\_D03\_00400" 12309 "s59E5H2" 0.9590705 "Cyclic di-GMP phosphodiesterase response regulator RpfG"  
"JS1\_D03\_00400" 12309 "s63E6H2" 0.03752106 "Cyclic di-GMP phosphodiesterase response regulator RpfG"  
"JS1\_D03\_00402" 12311 "s59E13H2" 0.02308559 "dihydrolipoamide dehydrogenase"  
"JS1\_D03\_00402" 12311 "s59E25H2" 0 "dihydrolipoamide dehydrogenase"  
"JS1\_D03\_00402" 12311 "s59E5H2" 0.2661513 "dihydrolipoamide dehydrogenase"  
"JS1\_D03\_00402" 12311 "s63E6H2" 0.2897446 "dihydrolipoamide dehydrogenase"  
"JS1\_D03\_00403" 12312 "s59E13H2" 0.02636088 "5'-nucleotidase SurE"  
"JS1\_D03\_00403" 12312 "s59E25H2" 0 "5'-nucleotidase SurE"  
"JS1\_D03\_00403" 12312 "s59E5H2" 0.4087207 "5'-nucleotidase SurE"  
"JS1\_D03\_00403" 12312 "s63E6H2" 0.3260108 "5'-nucleotidase SurE"  
"JS1\_D03\_00404" 12313 "s59E13H2" 0.03609824 "hypothetical protein"  
"JS1\_D03\_00404" 12313 "s59E25H2" 0 "hypothetical protein"  
"JS1\_D03\_00404" 12313 "s59E5H2" 0.4743433 "hypothetical protein"  
"JS1\_D03\_00404" 12313 "s63E6H2" 0.249082 "hypothetical protein"  
"JS1\_D03\_00405" 12314 "s59E13H2" 0.02114979 "Protein-L-isoaspartate O-methyltransferase"  
"JS1\_D03\_00405" 12314 "s59E25H2" 0 "Protein-L-isoaspartate O-methyltransferase"  
"JS1\_D03\_00405" 12314 "s59E5H2" 0.211336 "Protein-L-isoaspartate O-methyltransferase"  
"JS1\_D03\_00405" 12314 "s63E6H2" 0.292253 "Protein-L-isoaspartate O-methyltransferase"  
"JS1\_D03\_00407" 12316 "s59E13H2" 0 "hypothetical protein"  
"JS1\_D03\_00407" 12316 "s59E25H2" 0 "hypothetical protein"  
"JS1\_D03\_00407" 12316 "s59E5H2" 0 "hypothetical protein"  
"JS1\_D03\_00407" 12316 "s63E6H2" 0.1880739 "hypothetical protein"  
"JS1\_D03\_00408" 12317 "s59E13H2" 0.03433102 "Vancomycin B-type resistance protein VanW"

"JS1\_D03\_00408" 12317 "s59E25H2" 0.6144578 "Vancomycin B-type resistance protein VanW"  
"JS1\_D03\_00408" 12317 "s59E5H2" 0.1381144 "Vancomycin B-type resistance protein VanW"  
"JS1\_D03\_00408" 12317 "s63E6H2" 1.431571 "Vancomycin B-type resistance protein VanW"  
"JS1\_D03\_00409" 12318 "s59E13H2" 0 "Succinylglutamate desuccinylase / Aspartoacylase family protein"  
"JS1\_D03\_00409" 12318 "s59E25H2" 0 "Succinylglutamate desuccinylase / Aspartoacylase family protein"  
"JS1\_D03\_00409" 12318 "s59E5H2" 0 "Succinylglutamate desuccinylase / Aspartoacylase family protein"  
"JS1\_D03\_00409" 12318 "s63E6H2" 1.04628 "Succinylglutamate desuccinylase / Aspartoacylase family protein"  
"JS1\_D03\_00410" 12319 "s59E13H2" 0.1155141 "Putative peptidyl-prolyl cis-trans isomerase Cbf2 precursor"  
"JS1\_D03\_00410" 12319 "s59E25H2" 0 "Putative peptidyl-prolyl cis-trans isomerase Cbf2 precursor"  
"JS1\_D03\_00410" 12319 "s59E5H2" 0.01102631 "Putative peptidyl-prolyl cis-trans isomerase Cbf2 precursor"  
"JS1\_D03\_00410" 12319 "s63E6H2" 0.8227797 "Putative peptidyl-prolyl cis-trans isomerase Cbf2 precursor"  
"JS1\_D03\_00411" 12320 "s59E13H2" 0.006955593 "30S ribosomal protein S21"  
"JS1\_D03\_00411" 12320 "s59E25H2" 0 "30S ribosomal protein S21"  
"JS1\_D03\_00411" 12320 "s59E5H2" 0.2849491 "30S ribosomal protein S21"  
"JS1\_D03\_00411" 12320 "s63E6H2" 0.5078298 "30S ribosomal protein S21"  
"JS1\_D03\_00412" 12321 "s59E13H2" 0.000787706 "glutamyl-tRNA(Gln) amidotransferase subunit E"  
"JS1\_D03\_00412" 12321 "s59E25H2" 0 "glutamyl-tRNA(Gln) amidotransferase subunit E"  
"JS1\_D03\_00412" 12321 "s59E5H2" 0.08843708 "glutamyl-tRNA(Gln) amidotransferase subunit E"  
"JS1\_D03\_00412" 12321 "s63E6H2" 0.7185383 "glutamyl-tRNA(Gln) amidotransferase subunit E"  
"JS1\_D03\_00413" 12322 "s59E13H2" 0.04552276 "hypothetical protein"  
"JS1\_D03\_00413" 12322 "s59E25H2" 0 "hypothetical protein"  
"JS1\_D03\_00413" 12322 "s59E5H2" 0.2198892 "hypothetical protein"  
"JS1\_D03\_00413" 12322 "s63E6H2" 0.9620556 "hypothetical protein"  
"JS1\_D03\_00414" 12323 "s59E13H2" 0.02605688 "SigmaW regulon antibacterial"  
"JS1\_D03\_00414" 12323 "s59E25H2" 0 "SigmaW regulon antibacterial"  
"JS1\_D03\_00414" 12323 "s59E5H2" 0.1525324 "SigmaW regulon antibacterial"  
"JS1\_D03\_00414" 12323 "s63E6H2" 0.8577252 "SigmaW regulon antibacterial"  
"JS1\_D03\_00415" 12324 "s59E13H2" 0.005145233 "hypothetical protein"  
"JS1\_D03\_00415" 12324 "s59E25H2" 0 "hypothetical protein"  
"JS1\_D03\_00415" 12324 "s59E5H2" 0.03642088 "hypothetical protein"  
"JS1\_D03\_00415" 12324 "s63E6H2" 0.2710142 "hypothetical protein"  
"JS1\_D03\_00416" 12325 "s59E13H2" 0.007016076 "PhoH-like protein"  
"JS1\_D03\_00416" 12325 "s59E25H2" 0 "PhoH-like protein"  
"JS1\_D03\_00416" 12325 "s59E5H2" 0.06191002 "PhoH-like protein"  
"JS1\_D03\_00416" 12325 "s63E6H2" 0.2436474 "PhoH-like protein"  
"JS1\_D03\_00417" 12326 "s59E13H2" 0.05317124 "Ribonuclease Y"  
"JS1\_D03\_00417" 12326 "s59E25H2" 0 "Ribonuclease Y"  
"JS1\_D03\_00417" 12326 "s59E5H2" 0.1441633 "Ribonuclease Y"  
"JS1\_D03\_00417" 12326 "s63E6H2" 0.2310767 "Ribonuclease Y"  
"JS1\_D03\_00418" 12327 "s59E13H2" 0.1057193 "NMT1/THI5 like protein"  
"JS1\_D03\_00418" 12327 "s59E25H2" 0 "NMT1/THI5 like protein"  
"JS1\_D03\_00418" 12327 "s59E5H2" 0.07818104 "NMT1/THI5 like protein"  
"JS1\_D03\_00418" 12327 "s63E6H2" 0.2452984 "NMT1/THI5 like protein"  
"JS1\_D03\_00419" 12328 "s59E13H2" 0.04177376 "hypothetical protein"  
"JS1\_D03\_00419" 12328 "s59E25H2" 0 "hypothetical protein"  
"JS1\_D03\_00419" 12328 "s59E5H2" 0.04526166 "hypothetical protein"  
"JS1\_D03\_00419" 12328 "s63E6H2" 0.1828121 "hypothetical protein"

"JS1\_D03\_00420" 12329 "s59E13H2" 0.157653 "Sialic acid TRAP transporter permease protein SiaT"  
"JS1\_D03\_00420" 12329 "s59E25H2" 0 "Sialic acid TRAP transporter permease protein SiaT"  
"JS1\_D03\_00420" 12329 "s59E5H2" 0.06399193 "Sialic acid TRAP transporter permease protein SiaT"  
"JS1\_D03\_00420" 12329 "s63E6H2" 0.2472649 "Sialic acid TRAP transporter permease protein SiaT"  
"JS1\_D03\_00421" 12330 "s59E13H2" 0.00494585 "Magnesium and cobalt efflux protein CorC"  
"JS1\_D03\_00421" 12330 "s59E25H2" 0 "Magnesium and cobalt efflux protein CorC"  
"JS1\_D03\_00421" 12330 "s59E5H2" 0.01274737 "Magnesium and cobalt efflux protein CorC"  
"JS1\_D03\_00421" 12330 "s63E6H2" 0.04374893 "Magnesium and cobalt efflux protein CorC"  
"JS1\_D03\_00422" 12331 "s59E13H2" 0.03799814 "Magnesium and cobalt efflux protein CorC"  
"JS1\_D03\_00422" 12331 "s59E25H2" 0 "Magnesium and cobalt efflux protein CorC"  
"JS1\_D03\_00422" 12331 "s59E5H2" 0.04105076 "Magnesium and cobalt efflux protein CorC"  
"JS1\_D03\_00422" 12331 "s63E6H2" 0.0988566 "Magnesium and cobalt efflux protein CorC"  
"JS1\_D03\_00423" 12332 "s59E13H2" 0.0005901715 "Putative lipoprotein YerB precursor"  
"JS1\_D03\_00423" 12332 "s59E25H2" 0 "Putative lipoprotein YerB precursor"  
"JS1\_D03\_00423" 12332 "s59E5H2" 0.06135895 "Putative lipoprotein YerB precursor"  
"JS1\_D03\_00423" 12332 "s63E6H2" 0.07070398 "Putative lipoprotein YerB precursor"  
"JS1\_D03\_00424" 12333 "s59E13H2" 0.2048844 "Trehalose/maltose-binding protein MalE precursor"  
"JS1\_D03\_00424" 12333 "s59E25H2" 0 "Trehalose/maltose-binding protein MalE precursor"  
"JS1\_D03\_00424" 12333 "s59E5H2" 0.3416108 "Trehalose/maltose-binding protein MalE precursor"  
"JS1\_D03\_00424" 12333 "s63E6H2" 0.5172356 "Trehalose/maltose-binding protein MalE precursor"  
"JS1\_D03\_00425" 12334 "s59E13H2" 0.05724748 "Inner membrane ABC transporter permease protein YcjO"  
"JS1\_D03\_00425" 12334 "s59E25H2" 0 "Inner membrane ABC transporter permease protein YcjO"  
"JS1\_D03\_00425" 12334 "s59E5H2" 0.1898441 "Inner membrane ABC transporter permease protein YcjO"  
"JS1\_D03\_00425" 12334 "s63E6H2" 0.2799601 "Inner membrane ABC transporter permease protein YcjO"  
"JS1\_D03\_00426" 12335 "s59E13H2" 0.09233871 "Trehalose/maltose transport system permease protein MalG"  
"JS1\_D03\_00426" 12335 "s59E25H2" 0 "Trehalose/maltose transport system permease protein MalG"  
"JS1\_D03\_00426" 12335 "s59E5H2" 0.2670433 "Trehalose/maltose transport system permease protein MalG"  
"JS1\_D03\_00426" 12335 "s63E6H2" 0.2296972 "Trehalose/maltose transport system permease protein MalG"  
"JS1\_D03\_00427" 12336 "s59E13H2" 0.1748232 "Ribokinase"  
"JS1\_D03\_00427" 12336 "s59E25H2" 0 "Ribokinase"  
"JS1\_D03\_00427" 12336 "s59E5H2" 0.1460955 "Ribokinase"  
"JS1\_D03\_00427" 12336 "s63E6H2" 0.2775432 "Ribokinase"  
"JS1\_D03\_00428" 12337 "s59E13H2" 0.1201109 "hypothetical protein"  
"JS1\_D03\_00428" 12337 "s59E25H2" 0 "hypothetical protein"  
"JS1\_D03\_00428" 12337 "s59E5H2" 0.13481 "hypothetical protein"  
"JS1\_D03\_00428" 12337 "s63E6H2" 0.8026701 "hypothetical protein"  
"JS1\_D03\_00429" 12338 "s59E13H2" 0.08895837 "hypothetical protein"  
"JS1\_D03\_00429" 12338 "s59E25H2" 0 "hypothetical protein"  
"JS1\_D03\_00429" 12338 "s59E5H2" 0.3079992 "hypothetical protein"  
"JS1\_D03\_00429" 12338 "s63E6H2" 1.524462 "hypothetical protein"  
"JS1\_D03\_00430" 12339 "s59E13H2" 0.05416346 "hypothetical protein"  
"JS1\_D03\_00430" 12339 "s59E25H2" 0 "hypothetical protein"  
"JS1\_D03\_00430" 12339 "s59E5H2" 0.292962 "hypothetical protein"  
"JS1\_D03\_00430" 12339 "s63E6H2" 1.627017 "hypothetical protein"  
"JS1\_D03\_00431" 12340 "s59E13H2" 0.06243302 "Carbon dioxide concentrating mechanism protein CcmL"  
"JS1\_D03\_00431" 12340 "s59E25H2" 0 "Carbon dioxide concentrating mechanism protein CcmL"  
"JS1\_D03\_00431" 12340 "s59E5H2" 0.4005579 "Carbon dioxide concentrating mechanism protein CcmL"



"JS1\_D03\_00431" 12340 "s63E6H2" 1.627537 "Carbon dioxide concentrating mechanism protein CcmL"  
"JS1\_D03\_00432" 12341 "s59E13H2" 0.0991655 "Carbon dioxide concentrating mechanism protein CcmL"  
"JS1\_D03\_00432" 12341 "s59E25H2" 0 "Carbon dioxide concentrating mechanism protein CcmL"  
"JS1\_D03\_00432" 12341 "s59E5H2" 0.486352 "Carbon dioxide concentrating mechanism protein CcmL"  
"JS1\_D03\_00432" 12341 "s63E6H2" 1.71075 "Carbon dioxide concentrating mechanism protein CcmL"  
"JS1\_D03\_00433" 12342 "s59E13H2" 0.1073096 "Electron transport complex protein RnfC"  
"JS1\_D03\_00433" 12342 "s59E25H2" 0 "Electron transport complex protein RnfC"  
"JS1\_D03\_00433" 12342 "s59E5H2" 0.7046896 "Electron transport complex protein RnfC"  
"JS1\_D03\_00433" 12342 "s63E6H2" 2.580923 "Electron transport complex protein RnfC"  
"JS1\_D03\_00434" 12343 "s59E13H2" 0.125539 "BMC domain protein"  
"JS1\_D03\_00434" 12343 "s59E25H2" 0 "BMC domain protein"  
"JS1\_D03\_00434" 12343 "s59E5H2" 0.7607246 "BMC domain protein"  
"JS1\_D03\_00434" 12343 "s63E6H2" 3.053184 "BMC domain protein"  
"JS1\_D03\_00435" 12344 "s59E13H2" 0.08504815 "Aldehyde-alcohol dehydrogenase"  
"JS1\_D03\_00435" 12344 "s59E25H2" 0 "Aldehyde-alcohol dehydrogenase"  
"JS1\_D03\_00435" 12344 "s59E5H2" 0.5648941 "Aldehyde-alcohol dehydrogenase"  
"JS1\_D03\_00435" 12344 "s63E6H2" 2.590582 "Aldehyde-alcohol dehydrogenase"  
"JS1\_D03\_00436" 12345 "s59E13H2" 0.07352319 "Carbon dioxide concentrating mechanism protein CcmL"  
"JS1\_D03\_00436" 12345 "s59E25H2" 0 "Carbon dioxide concentrating mechanism protein CcmL"  
"JS1\_D03\_00436" 12345 "s59E5H2" 0.5684914 "Carbon dioxide concentrating mechanism protein CcmL"  
"JS1\_D03\_00436" 12345 "s63E6H2" 2.012875 "Carbon dioxide concentrating mechanism protein CcmL"  
"JS1\_D03\_00437" 12346 "s59E13H2" 0.09856332 "Carbon dioxide concentrating mechanism protein CcmL"  
"JS1\_D03\_00437" 12346 "s59E25H2" 0 "Carbon dioxide concentrating mechanism protein CcmL"  
"JS1\_D03\_00437" 12346 "s59E5H2" 0.5923287 "Carbon dioxide concentrating mechanism protein CcmL"  
"JS1\_D03\_00437" 12346 "s63E6H2" 4.348201 "Carbon dioxide concentrating mechanism protein CcmL"  
"JS1\_D03\_00438" 12347 "s59E13H2" 0.1308599 "Putative sugar phosphate isomerase YwIF"  
"JS1\_D03\_00438" 12347 "s59E25H2" 0 "Putative sugar phosphate isomerase YwIF"  
"JS1\_D03\_00438" 12347 "s59E5H2" 0.4290008 "Putative sugar phosphate isomerase YwIF"  
"JS1\_D03\_00438" 12347 "s63E6H2" 5.939411 "Putative sugar phosphate isomerase YwIF"  
"JS1\_D03\_00439" 12348 "s59E13H2" 0.0783868 "Deoxyribose-phosphate aldolase 1"  
"JS1\_D03\_00439" 12348 "s59E25H2" 0 "Deoxyribose-phosphate aldolase 1"  
"JS1\_D03\_00439" 12348 "s59E5H2" 0.1213099 "Deoxyribose-phosphate aldolase 1"  
"JS1\_D03\_00439" 12348 "s63E6H2" 2.551737 "Deoxyribose-phosphate aldolase 1"  
"JS1\_D03\_00440" 12349 "s59E13H2" 0.1194202 "Phosphate propanoyltransferase"  
"JS1\_D03\_00440" 12349 "s59E25H2" 0 "Phosphate propanoyltransferase"  
"JS1\_D03\_00440" 12349 "s59E5H2" 0.4455636 "Phosphate propanoyltransferase"  
"JS1\_D03\_00440" 12349 "s63E6H2" 3.081635 "Phosphate propanoyltransferase"  
"JS1\_D03\_00441" 12350 "s59E13H2" 0.02463885 "Deoxyribose operon repressor"  
"JS1\_D03\_00441" 12350 "s59E25H2" 0 "Deoxyribose operon repressor"  
"JS1\_D03\_00441" 12350 "s59E5H2" 0.3361233 "Deoxyribose operon repressor"  
"JS1\_D03\_00441" 12350 "s63E6H2" 0.2852044 "Deoxyribose operon repressor"  
"JS1\_D03\_00442" 12351 "s59E13H2" 0.006599909 "hypothetical protein"  
"JS1\_D03\_00442" 12351 "s59E25H2" 0 "hypothetical protein"  
"JS1\_D03\_00442" 12351 "s59E5H2" 0.3617857 "hypothetical protein"  
"JS1\_D03\_00442" 12351 "s63E6H2" 0.1629549 "hypothetical protein"  
"JS1\_D03\_00443" 12352 "s59E13H2" 0.0156707 "HTH-type transcriptional regulator MtrR"  
"JS1\_D03\_00443" 12352 "s59E25H2" 0 "HTH-type transcriptional regulator MtrR"

"JS1\_D03\_00443" 12352 "s59E5H2" 0.06587218 "HTH-type transcriptional regulator MtrR"  
"JS1\_D03\_00443" 12352 "s63E6H2" 0.06343606 "HTH-type transcriptional regulator MtrR"  
"JS1\_D03\_00444" 12353 "s59E13H2" 0.0009520537 "Lipoprotein-releasing system transmembrane protein LolE"  
"JS1\_D03\_00444" 12353 "s59E25H2" 0 "Lipoprotein-releasing system transmembrane protein LolE"  
"JS1\_D03\_00444" 12353 "s59E5H2" 0.3136487 "Lipoprotein-releasing system transmembrane protein LolE"  
"JS1\_D03\_00444" 12353 "s63E6H2" 0.05963284 "Lipoprotein-releasing system transmembrane protein LolE"  
"JS1\_D03\_00445" 12354 "s59E13H2" 0.04688473 "putative ABC transporter ATP-binding protein"  
"JS1\_D03\_00445" 12354 "s59E25H2" 0 "putative ABC transporter ATP-binding protein"  
"JS1\_D03\_00445" 12354 "s59E5H2" 0.1219169 "putative ABC transporter ATP-binding protein"  
"JS1\_D03\_00445" 12354 "s63E6H2" 0.03304843 "putative ABC transporter ATP-binding protein"  
"JS1\_D03\_00446" 12355 "s59E13H2" 0.01204738 "Lipoprotein-releasing system transmembrane protein LolE"  
"JS1\_D03\_00446" 12355 "s59E25H2" 0 "Lipoprotein-releasing system transmembrane protein LolE"  
"JS1\_D03\_00446" 12355 "s59E5H2" 0.1224189 "Lipoprotein-releasing system transmembrane protein LolE"  
"JS1\_D03\_00446" 12355 "s63E6H2" 0.01641261 "Lipoprotein-releasing system transmembrane protein LolE"  
"JS1\_D03\_00447" 12356 "s59E13H2" 0.002742585 "Lipoprotein-releasing system transmembrane protein LolE"  
"JS1\_D03\_00447" 12356 "s59E25H2" 0 "Lipoprotein-releasing system transmembrane protein LolE"  
"JS1\_D03\_00447" 12356 "s59E5H2" 0.02170549 "Lipoprotein-releasing system transmembrane protein LolE"  
"JS1\_D03\_00447" 12356 "s63E6H2" 0.09296548 "Lipoprotein-releasing system transmembrane protein LolE"  
"JS1\_D03\_00448" 12357 "s59E13H2" 0 "hypothetical protein"  
"JS1\_D03\_00448" 12357 "s59E25H2" 0 "hypothetical protein"  
"JS1\_D03\_00448" 12357 "s59E5H2" 0 "hypothetical protein"  
"JS1\_D03\_00448" 12357 "s63E6H2" 0.02662504 "hypothetical protein"  
"JS1\_D03\_00449" 12358 "s59E13H2" 0.02623502 "hypothetical protein"  
"JS1\_D03\_00449" 12358 "s59E25H2" 0 "hypothetical protein"  
"JS1\_D03\_00449" 12358 "s59E5H2" 0.9482188 "hypothetical protein"  
"JS1\_D03\_00449" 12358 "s63E6H2" 0.2551991 "hypothetical protein"  
"JS1\_D03\_00450" 12359 "s59E13H2" 1.57688 "Anaerobic regulatory protein"  
"JS1\_D03\_00450" 12359 "s59E25H2" 0 "Anaerobic regulatory protein"  
"JS1\_D03\_00450" 12359 "s59E5H2" 0.2442375 "Anaerobic regulatory protein"  
"JS1\_D03\_00450" 12359 "s63E6H2" 0.1718575 "Anaerobic regulatory protein"  
"JS1\_D03\_00451" 12360 "s59E13H2" 2.882567 "ferredoxin"  
"JS1\_D03\_00451" 12360 "s59E25H2" 0 "ferredoxin"  
"JS1\_D03\_00451" 12360 "s59E5H2" 0.3494963 "ferredoxin"  
"JS1\_D03\_00451" 12360 "s63E6H2" 0.3811153 "ferredoxin"  
"JS1\_D03\_00452" 12361 "s59E13H2" 2.299697 "Hydroxylamine reductase"  
"JS1\_D03\_00452" 12361 "s59E25H2" 0 "Hydroxylamine reductase"  
"JS1\_D03\_00452" 12361 "s59E5H2" 0.3670548 "Hydroxylamine reductase"  
"JS1\_D03\_00452" 12361 "s63E6H2" 0.3523859 "Hydroxylamine reductase"  
"JS1\_D03\_00453" 12362 "s59E13H2" 0.0374782 "3-oxoacyl-[acyl-carrier-protein] synthase 3"  
"JS1\_D03\_00453" 12362 "s59E25H2" 0 "3-oxoacyl-[acyl-carrier-protein] synthase 3"  
"JS1\_D03\_00453" 12362 "s59E5H2" 0.3082041 "3-oxoacyl-[acyl-carrier-protein] synthase 3"  
"JS1\_D03\_00453" 12362 "s63E6H2" 0.1718573 "3-oxoacyl-[acyl-carrier-protein] synthase 3"  
"JS1\_D03\_00454" 12363 "s59E13H2" 0.02567185 "3-oxoacyl-[acyl-carrier-protein] synthase 2"  
"JS1\_D03\_00454" 12363 "s59E25H2" 0 "3-oxoacyl-[acyl-carrier-protein] synthase 2"  
"JS1\_D03\_00454" 12363 "s59E5H2" 0.2704566 "3-oxoacyl-[acyl-carrier-protein] synthase 2"  
"JS1\_D03\_00454" 12363 "s63E6H2" 0.05316197 "3-oxoacyl-[acyl-carrier-protein] synthase 2"  
"JS1\_D03\_00455" 12364 "s59E13H2" 0.3636772 "isopentenyl pyrophosphate isomerase"

"JS1\_D03\_00455" 12364 "s59E25H2" 0 "isopentenyl pyrophosphate isomerase"  
"JS1\_D03\_00455" 12364 "s59E5H2" 0.5013369 "isopentenyl pyrophosphate isomerase"  
"JS1\_D03\_00455" 12364 "s63E6H2" 0.06531676 "isopentenyl pyrophosphate isomerase"  
"JS1\_D03\_00456" 12365 "s59E13H2" 0.2617992 "hypothetical protein"  
"JS1\_D03\_00456" 12365 "s59E25H2" 0 "hypothetical protein"  
"JS1\_D03\_00456" 12365 "s59E5H2" 0.2910619 "hypothetical protein"  
"JS1\_D03\_00456" 12365 "s63E6H2" 0.02642873 "hypothetical protein"  
"JS1\_D03\_00457" 12366 "s59E13H2" 0.06278269 "hypothetical protein"  
"JS1\_D03\_00457" 12366 "s59E25H2" 0 "hypothetical protein"  
"JS1\_D03\_00457" 12366 "s59E5H2" 0.15896 "hypothetical protein"  
"JS1\_D03\_00457" 12366 "s63E6H2" 0.06498237 "hypothetical protein"  
"JS1\_D03\_00458" 12367 "s59E13H2" 0.2808857 "hypothetical protein"  
"JS1\_D03\_00458" 12367 "s59E25H2" 0 "hypothetical protein"  
"JS1\_D03\_00458" 12367 "s59E5H2" 0.9037779 "hypothetical protein"  
"JS1\_D03\_00458" 12367 "s63E6H2" 0.09606064 "hypothetical protein"  
"JS1\_D03\_00459" 12368 "s59E13H2" 0.03406757 "putative inner membrane transporter YedA"  
"JS1\_D03\_00459" 12368 "s59E25H2" 0 "putative inner membrane transporter YedA"  
"JS1\_D03\_00459" 12368 "s59E5H2" 1.825139 "putative inner membrane transporter YedA"  
"JS1\_D03\_00459" 12368 "s63E6H2" 0.07795273 "putative inner membrane transporter YedA"  
"JS1\_D03\_00460" 12369 "s59E13H2" 0.09828498 "Outer membrane efflux protein"  
"JS1\_D03\_00460" 12369 "s59E25H2" 0 "Outer membrane efflux protein"  
"JS1\_D03\_00460" 12369 "s59E5H2" 1.449863 "Outer membrane efflux protein"  
"JS1\_D03\_00460" 12369 "s63E6H2" 0.07372129 "Outer membrane efflux protein"  
"JS1\_D03\_00461" 12370 "s59E13H2" 0.1893175 "Outer membrane efflux protein"  
"JS1\_D03\_00461" 12370 "s59E25H2" 0 "Outer membrane efflux protein"  
"JS1\_D03\_00461" 12370 "s59E5H2" 0.2954251 "Outer membrane efflux protein"  
"JS1\_D03\_00461" 12370 "s63E6H2" 0.0631167 "Outer membrane efflux protein"  
"JS1\_D03\_00462" 12371 "s59E13H2" 0.1389325 "Putative efflux system component YknX"  
"JS1\_D03\_00462" 12371 "s59E25H2" 0 "Putative efflux system component YknX"  
"JS1\_D03\_00462" 12371 "s59E5H2" 0.4230999 "Putative efflux system component YknX"  
"JS1\_D03\_00462" 12371 "s63E6H2" 0.5262505 "Putative efflux system component YknX"  
"JS1\_D03\_00463" 12372 "s59E13H2" 0.1206559 "putative ABC transporter ATP-binding protein"  
"JS1\_D03\_00463" 12372 "s59E25H2" 0 "putative ABC transporter ATP-binding protein"  
"JS1\_D03\_00463" 12372 "s59E5H2" 0.5049309 "putative ABC transporter ATP-binding protein"  
"JS1\_D03\_00463" 12372 "s63E6H2" 1.414242 "putative ABC transporter ATP-binding protein"  
"JS1\_D03\_00464" 12373 "s59E13H2" 0.1763054 "Macrolide export ATP-binding/permease protein MacB"  
"JS1\_D03\_00464" 12373 "s59E25H2" 0.1978654 "Macrolide export ATP-binding/permease protein MacB"  
"JS1\_D03\_00464" 12373 "s59E5H2" 0.6917139 "Macrolide export ATP-binding/permease protein MacB"  
"JS1\_D03\_00464" 12373 "s63E6H2" 1.093638 "Macrolide export ATP-binding/permease protein MacB"  
"JS1\_D03\_00465" 12374 "s59E13H2" 0.01062094 "Trifunctional nucleotide phosphoesterase protein YfkN precursor"  
"JS1\_D03\_00465" 12374 "s59E25H2" 0 "Trifunctional nucleotide phosphoesterase protein YfkN precursor"  
"JS1\_D03\_00465" 12374 "s59E5H2" 0.3059496 "Trifunctional nucleotide phosphoesterase protein YfkN precursor"  
"JS1\_D03\_00465" 12374 "s63E6H2" 1.008541 "Trifunctional nucleotide phosphoesterase protein YfkN precursor"  
"JS1\_D03\_00466" 12375 "s59E13H2" 0.05353555 "hypothetical protein"  
"JS1\_D03\_00466" 12375 "s59E25H2" 0 "hypothetical protein"  
"JS1\_D03\_00466" 12375 "s59E5H2" 0.5659929 "hypothetical protein"  
"JS1\_D03\_00466" 12375 "s63E6H2" 1.553564 "hypothetical protein"

"JS1\_D03\_00467" 12376 "s59E13H2" 0.02112297 "LemA family protein"  
"JS1\_D03\_00467" 12376 "s59E25H2" 0 "LemA family protein"  
"JS1\_D03\_00467" 12376 "s59E5H2" 0.5336138 "LemA family protein"  
"JS1\_D03\_00467" 12376 "s63E6H2" 0.8492197 "LemA family protein"  
"JS1\_D03\_00468" 12377 "s59E13H2" 0.01837833 "galactoside permease"  
"JS1\_D03\_00468" 12377 "s59E25H2" 0 "galactoside permease"  
"JS1\_D03\_00468" 12377 "s59E5H2" 0.3493252 "galactoside permease"  
"JS1\_D03\_00468" 12377 "s63E6H2" 0.8134128 "galactoside permease"  
"JS1\_D03\_00469" 12378 "s59E13H2" 0.02806643 "hypothetical protein"  
"JS1\_D03\_00469" 12378 "s59E25H2" 0 "hypothetical protein"  
"JS1\_D03\_00469" 12378 "s59E5H2" 0.4561185 "hypothetical protein"  
"JS1\_D03\_00469" 12378 "s63E6H2" 0.270795 "hypothetical protein"  
"JS1\_D03\_00470" 12379 "s59E13H2" 0.02952635 "Acetyltransferase (GNAT) family protein"  
"JS1\_D03\_00470" 12379 "s59E25H2" 0 "Acetyltransferase (GNAT) family protein"  
"JS1\_D03\_00470" 12379 "s59E5H2" 1.109429 "Acetyltransferase (GNAT) family protein"  
"JS1\_D03\_00470" 12379 "s63E6H2" 0.884854 "Acetyltransferase (GNAT) family protein"  
"JS1\_D03\_00471" 12380 "s59E13H2" 0.06778795 "putative inner membrane transporter YicL"  
"JS1\_D03\_00471" 12380 "s59E25H2" 0 "putative inner membrane transporter YicL"  
"JS1\_D03\_00471" 12380 "s59E5H2" 0.2698883 "putative inner membrane transporter YicL"  
"JS1\_D03\_00471" 12380 "s63E6H2" 0.1858961 "putative inner membrane transporter YicL"  
"JS1\_D03\_00472" 12381 "s59E13H2" 0.05353061 "Response regulator aspartate phosphatase G"  
"JS1\_D03\_00472" 12381 "s59E25H2" 0 "Response regulator aspartate phosphatase G"  
"JS1\_D03\_00472" 12381 "s59E5H2" 0.6022434 "Response regulator aspartate phosphatase G"  
"JS1\_D03\_00472" 12381 "s63E6H2" 0.1632935 "Response regulator aspartate phosphatase G"  
"JS1\_D03\_00473" 12382 "s59E13H2" 0.02880562 "hypothetical protein"  
"JS1\_D03\_00473" 12382 "s59E25H2" 0 "hypothetical protein"  
"JS1\_D03\_00473" 12382 "s59E5H2" 0.8428686 "hypothetical protein"  
"JS1\_D03\_00473" 12382 "s63E6H2" 0.193402 "hypothetical protein"  
"JS1\_D03\_00474" 12383 "s59E13H2" 0.0004091525 "EamA-like transporter family protein"  
"JS1\_D03\_00474" 12383 "s59E25H2" 0 "EamA-like transporter family protein"  
"JS1\_D03\_00474" 12383 "s59E5H2" 0.07351631 "EamA-like transporter family protein"  
"JS1\_D03\_00474" 12383 "s63E6H2" 0.01951658 "EamA-like transporter family protein"  
"JS1\_D03\_00475" 12384 "s59E13H2" 0 "L-lysine 2,3-aminomutase"  
"JS1\_D03\_00475" 12384 "s59E25H2" 0 "L-lysine 2,3-aminomutase"  
"JS1\_D03\_00475" 12384 "s59E5H2" 0.003070404 "L-lysine 2,3-aminomutase"  
"JS1\_D03\_00475" 12384 "s63E6H2" 0.01571404 "L-lysine 2,3-aminomutase"  
"JS1\_D03\_00478" 12387 "s59E13H2" 0.01092093 "recombination protein F"  
"JS1\_D03\_00478" 12387 "s59E25H2" 0 "recombination protein F"  
"JS1\_D03\_00478" 12387 "s59E5H2" 0.004764196 "recombination protein F"  
"JS1\_D03\_00478" 12387 "s63E6H2" 0 "recombination protein F"  
"JS1\_D03\_00479" 12388 "s59E13H2" 0.009318555 "ATP-dependent DNA helicase PcrA"  
"JS1\_D03\_00479" 12388 "s59E25H2" 0 "ATP-dependent DNA helicase PcrA"  
"JS1\_D03\_00479" 12388 "s59E5H2" 0.017558 "ATP-dependent DNA helicase PcrA"  
"JS1\_D03\_00479" 12388 "s63E6H2" 0.03908468 "ATP-dependent DNA helicase PcrA"  
"JS1\_D03\_00481" 12390 "s59E13H2" 0 "Type-1 restriction enzyme R protein"  
"JS1\_D03\_00481" 12390 "s59E25H2" 0 "Type-1 restriction enzyme R protein"  
"JS1\_D03\_00481" 12390 "s59E5H2" 0 "Type-1 restriction enzyme R protein"

"JS1\_D03\_00481" 12390 "s63E6H2" 0 "Type-1 restriction enzyme R protein"  
"JS1\_D03\_00482" 12391 "s59E13H2" 0 "Type-1 restriction enzyme MjaXIP specificity protein"  
"JS1\_D03\_00482" 12391 "s59E25H2" 0 "Type-1 restriction enzyme MjaXIP specificity protein"  
"JS1\_D03\_00482" 12391 "s59E5H2" 0 "Type-1 restriction enzyme MjaXIP specificity protein"  
"JS1\_D03\_00482" 12391 "s63E6H2" 0 "Type-1 restriction enzyme MjaXIP specificity protein"  
"JS1\_D03\_00484" 12393 "s59E13H2" 0 "Type I restriction enzyme EcoKI M protein"  
"JS1\_D03\_00484" 12393 "s59E25H2" 0 "Type I restriction enzyme EcoKI M protein"  
"JS1\_D03\_00484" 12393 "s59E5H2" 0 "Type I restriction enzyme EcoKI M protein"  
"JS1\_D03\_00484" 12393 "s63E6H2" 0 "Type I restriction enzyme EcoKI M protein"  
"JS1\_D03\_00485" 12394 "s59E13H2" 0 "hypothetical protein"  
"JS1\_D03\_00485" 12394 "s59E25H2" 0 "hypothetical protein"  
"JS1\_D03\_00485" 12394 "s59E5H2" 0 "hypothetical protein"  
"JS1\_D03\_00485" 12394 "s63E6H2" 0 "hypothetical protein"  
"JS1\_D03\_00486" 12395 "s59E13H2" 4.196836 "Adenosine monophosphate-protein transferase SoFic"  
"JS1\_D03\_00486" 12395 "s59E25H2" 0 "Adenosine monophosphate-protein transferase SoFic"  
"JS1\_D03\_00486" 12395 "s59E5H2" 0.6984321 "Adenosine monophosphate-protein transferase SoFic"  
"JS1\_D03\_00486" 12395 "s63E6H2" 0.5445532 "Adenosine monophosphate-protein transferase SoFic"  
"JS1\_D03\_00487" 12396 "s59E13H2" 17.59294 "DNA-binding transcriptional dual regulator Crp"  
"JS1\_D03\_00487" 12396 "s59E25H2" 0.7066895 "DNA-binding transcriptional dual regulator Crp"  
"JS1\_D03\_00487" 12396 "s59E5H2" 1.127054 "DNA-binding transcriptional dual regulator Crp"  
"JS1\_D03\_00487" 12396 "s63E6H2" 0.3894708 "DNA-binding transcriptional dual regulator Crp"  
"JS1\_D03\_00488" 12397 "s59E13H2" 12.4021 "D-inositol 3-phosphate glycosyltransferase"  
"JS1\_D03\_00488" 12397 "s59E25H2" 0 "D-inositol 3-phosphate glycosyltransferase"  
"JS1\_D03\_00488" 12397 "s59E5H2" 0.8845484 "D-inositol 3-phosphate glycosyltransferase"  
"JS1\_D03\_00488" 12397 "s63E6H2" 1.033215 "D-inositol 3-phosphate glycosyltransferase"  
"JS1\_D03\_00489" 12398 "s59E13H2" 5.914174 "hypothetical protein"  
"JS1\_D03\_00489" 12398 "s59E25H2" 0 "hypothetical protein"  
"JS1\_D03\_00489" 12398 "s59E5H2" 0.1949703 "hypothetical protein"  
"JS1\_D03\_00489" 12398 "s63E6H2" 0.2649011 "hypothetical protein"  
"JS1\_D03\_00490" 12399 "s59E13H2" 0.4221554 "hypothetical protein"  
"JS1\_D03\_00490" 12399 "s59E25H2" 0 "hypothetical protein"  
"JS1\_D03\_00490" 12399 "s59E5H2" 0.1079213 "hypothetical protein"  
"JS1\_D03\_00490" 12399 "s63E6H2" 0.09187883 "hypothetical protein"  
"JS1\_D03\_00491" 12400 "s59E13H2" 5.922022 "Aspartate racemase"  
"JS1\_D03\_00491" 12400 "s59E25H2" 0 "Aspartate racemase"  
"JS1\_D03\_00491" 12400 "s59E5H2" 0.8311685 "Aspartate racemase"  
"JS1\_D03\_00491" 12400 "s63E6H2" 0.2591539 "Aspartate racemase"  
"JS1\_D03\_00492" 12401 "s59E13H2" 0.4549171 "1-acyl-sn-glycerol-3-phosphate acyltransferase"  
"JS1\_D03\_00492" 12401 "s59E25H2" 0 "1-acyl-sn-glycerol-3-phosphate acyltransferase"  
"JS1\_D03\_00492" 12401 "s59E5H2" 0.1698096 "1-acyl-sn-glycerol-3-phosphate acyltransferase"  
"JS1\_D03\_00492" 12401 "s63E6H2" 0.1634584 "1-acyl-sn-glycerol-3-phosphate acyltransferase"  
"JS1\_D03\_00493" 12402 "s59E13H2" 0 "hypothetical protein"  
"JS1\_D03\_00493" 12402 "s59E25H2" 0 "hypothetical protein"  
"JS1\_D03\_00493" 12402 "s59E5H2" 0.02341695 "hypothetical protein"  
"JS1\_D03\_00493" 12402 "s63E6H2" 0.05962616 "hypothetical protein"  
"JS1\_D03\_00494" 12403 "s59E13H2" 0.03005033 "Alpha/beta hydrolase family protein"  
"JS1\_D03\_00494" 12403 "s59E25H2" 0 "Alpha/beta hydrolase family protein"

"JS1\_D03\_00494" 12403 "s59E5H2" 0.2281253 "Alpha/beta hydrolase family protein"  
"JS1\_D03\_00494" 12403 "s63E6H2" 0.03399811 "Alpha/beta hydrolase family protein"  
"JS1\_D03\_00495" 12404 "s59E13H2" 0.03554472 "Ubiquinone biosynthesis O-methyltransferase"  
"JS1\_D03\_00495" 12404 "s59E25H2" 0 "Ubiquinone biosynthesis O-methyltransferase"  
"JS1\_D03\_00495" 12404 "s59E5H2" 1.393209 "Ubiquinone biosynthesis O-methyltransferase"  
"JS1\_D03\_00495" 12404 "s63E6H2" 0.9568977 "Ubiquinone biosynthesis O-methyltransferase"  
"JS1\_D03\_00496" 12405 "s59E13H2" 0.003970087 "hypothetical protein"  
"JS1\_D03\_00496" 12405 "s59E25H2" 0 "hypothetical protein"  
"JS1\_D03\_00496" 12405 "s59E5H2" 0.3727588 "hypothetical protein"  
"JS1\_D03\_00496" 12405 "s63E6H2" 0.1357986 "hypothetical protein"  
"JS1\_D03\_00497" 12406 "s59E13H2" 0.1679177 "putative permease"  
"JS1\_D03\_00497" 12406 "s59E25H2" 0 "putative permease"  
"JS1\_D03\_00497" 12406 "s59E5H2" 0.4405229 "putative permease"  
"JS1\_D03\_00497" 12406 "s63E6H2" 2.550572 "putative permease"  
"JS1\_D03\_00498" 12407 "s59E13H2" 0 "Thioredoxin"  
"JS1\_D03\_00498" 12407 "s59E25H2" 0 "Thioredoxin"  
"JS1\_D03\_00498" 12407 "s59E5H2" 0.06984042 "Thioredoxin"  
"JS1\_D03\_00498" 12407 "s63E6H2" 0.02778004 "Thioredoxin"  
"JS1\_D03\_00499" 12408 "s59E13H2" 0.05261019 "Thioredoxin-1"  
"JS1\_D03\_00499" 12408 "s59E25H2" 0.2058824 "Thioredoxin-1"  
"JS1\_D03\_00499" 12408 "s59E5H2" 3.944179 "Thioredoxin-1"  
"JS1\_D03\_00499" 12408 "s63E6H2" 16.8801 "Thioredoxin-1"  
"JS1\_D03\_00500" 12409 "s59E13H2" 0.1418564 "thiol:disulfide interchange protein precursor"  
"JS1\_D03\_00500" 12409 "s59E25H2" 0.8547009 "thiol:disulfide interchange protein precursor"  
"JS1\_D03\_00500" 12409 "s59E5H2" 6.479774 "thiol:disulfide interchange protein precursor"  
"JS1\_D03\_00500" 12409 "s63E6H2" 29.64071 "thiol:disulfide interchange protein precursor"  
"JS1\_D03\_00501" 12410 "s59E13H2" 0.1974038 "Sodium Bile acid symporter family protein"  
"JS1\_D03\_00501" 12410 "s59E25H2" 0 "Sodium Bile acid symporter family protein"  
"JS1\_D03\_00501" 12410 "s59E5H2" 4.772962 "Sodium Bile acid symporter family protein"  
"JS1\_D03\_00501" 12410 "s63E6H2" 32.20641 "Sodium Bile acid symporter family protein"  
"JS1\_D03\_00502" 12411 "s59E13H2" 0.09773405 "hypothetical protein"  
"JS1\_D03\_00502" 12411 "s59E25H2" 0 "hypothetical protein"  
"JS1\_D03\_00502" 12411 "s59E5H2" 0.9454557 "hypothetical protein"  
"JS1\_D03\_00502" 12411 "s63E6H2" 0.07478491 "hypothetical protein"  
"JS1\_D03\_00503" 12412 "s59E13H2" 0.0001575701 "Na(+)/H(+) antiporter subunit D1"  
"JS1\_D03\_00503" 12412 "s59E25H2" 0 "Na(+)/H(+) antiporter subunit D1"  
"JS1\_D03\_00503" 12412 "s59E5H2" 1.924317 "Na(+)/H(+) antiporter subunit D1"  
"JS1\_D03\_00503" 12412 "s63E6H2" 0.5307967 "Na(+)/H(+) antiporter subunit D1"  
"JS1\_D03\_00504" 12413 "s59E13H2" 0.08651302 "Na(+)/H(+) antiporter subunit D"  
"JS1\_D03\_00504" 12413 "s59E25H2" 0 "Na(+)/H(+) antiporter subunit D"  
"JS1\_D03\_00504" 12413 "s59E5H2" 4.704705 "Na(+)/H(+) antiporter subunit D"  
"JS1\_D03\_00504" 12413 "s63E6H2" 0.7746591 "Na(+)/H(+) antiporter subunit D"  
"JS1\_D03\_00505" 12414 "s59E13H2" 0.1302375 "Na(+)/H(+) antiporter subunit C"  
"JS1\_D03\_00505" 12414 "s59E25H2" 0 "Na(+)/H(+) antiporter subunit C"  
"JS1\_D03\_00505" 12414 "s59E5H2" 6.173176 "Na(+)/H(+) antiporter subunit C"  
"JS1\_D03\_00505" 12414 "s63E6H2" 1.087162 "Na(+)/H(+) antiporter subunit C"  
"JS1\_D03\_00506" 12415 "s59E13H2" 0.2691455 "Na(+)/H(+) antiporter subunit B"

"JS1\_D03\_00506" 12415 "s59E25H2" 0 "Na(+)/H(+) antiporter subunit B"  
"JS1\_D03\_00506" 12415 "s59E5H2" 3.084568 "Na(+)/H(+) antiporter subunit B"  
"JS1\_D03\_00506" 12415 "s63E6H2" 1.149485 "Na(+)/H(+) antiporter subunit B"  
"JS1\_D03\_00507" 12416 "s59E13H2" 0.3067416 "putative monovalent cation/H+ antiporter subunit B"  
"JS1\_D03\_00507" 12416 "s59E25H2" 0 "putative monovalent cation/H+ antiporter subunit B"  
"JS1\_D03\_00507" 12416 "s59E5H2" 2.700274 "putative monovalent cation/H+ antiporter subunit B"  
"JS1\_D03\_00507" 12416 "s63E6H2" 1.263592 "putative monovalent cation/H+ antiporter subunit B"  
"JS1\_D03\_00508" 12417 "s59E13H2" 0.8892243 "Glutamine-binding periplasmic protein precursor"  
"JS1\_D03\_00508" 12417 "s59E25H2" 0 "Glutamine-binding periplasmic protein precursor"  
"JS1\_D03\_00508" 12417 "s59E5H2" 2.463979 "Glutamine-binding periplasmic protein precursor"  
"JS1\_D03\_00508" 12417 "s63E6H2" 1.80745 "Glutamine-binding periplasmic protein precursor"  
"JS1\_D03\_00509" 12418 "s59E13H2" 1.673534 "Na(+)/H(+) antiporter subunit G1"  
"JS1\_D03\_00509" 12418 "s59E25H2" 0 "Na(+)/H(+) antiporter subunit G1"  
"JS1\_D03\_00509" 12418 "s59E5H2" 2.448681 "Na(+)/H(+) antiporter subunit G1"  
"JS1\_D03\_00509" 12418 "s63E6H2" 1.829436 "Na(+)/H(+) antiporter subunit G1"  
"JS1\_D03\_00510" 12419 "s59E13H2" 1.717224 "putative monovalent cation/H+ antiporter subunit F"  
"JS1\_D03\_00510" 12419 "s59E25H2" 0 "putative monovalent cation/H+ antiporter subunit F"  
"JS1\_D03\_00510" 12419 "s59E5H2" 2.774756 "putative monovalent cation/H+ antiporter subunit F"  
"JS1\_D03\_00510" 12419 "s63E6H2" 1.464517 "putative monovalent cation/H+ antiporter subunit F"  
"JS1\_D03\_00511" 12420 "s59E13H2" 0.7034034 "Na(+)/H(+) antiporter subunit E1"  
"JS1\_D03\_00511" 12420 "s59E25H2" 0 "Na(+)/H(+) antiporter subunit E1"  
"JS1\_D03\_00511" 12420 "s59E5H2" 1.716243 "Na(+)/H(+) antiporter subunit E1"  
"JS1\_D03\_00511" 12420 "s63E6H2" 1.273872 "Na(+)/H(+) antiporter subunit E1"  
"JS1\_D03\_00512" 12421 "s59E13H2" 1.263014 "Pyruvate formate-lyase 1-activating enzyme"  
"JS1\_D03\_00512" 12421 "s59E25H2" 0 "Pyruvate formate-lyase 1-activating enzyme"  
"JS1\_D03\_00512" 12421 "s59E5H2" 0.4545614 "Pyruvate formate-lyase 1-activating enzyme"  
"JS1\_D03\_00512" 12421 "s63E6H2" 1.297006 "Pyruvate formate-lyase 1-activating enzyme"  
"JS1\_D03\_00513" 12422 "s59E13H2" 0.8530736 "hypothetical protein"  
"JS1\_D03\_00513" 12422 "s59E25H2" 0 "hypothetical protein"  
"JS1\_D03\_00513" 12422 "s59E5H2" 4.824982 "hypothetical protein"  
"JS1\_D03\_00513" 12422 "s63E6H2" 1.03004 "hypothetical protein"  
"JS1\_D03\_00514" 12423 "s59E13H2" 0.3872635 "Hydrogenase expression/formation protein HypE"  
"JS1\_D03\_00514" 12423 "s59E25H2" 0 "Hydrogenase expression/formation protein HypE"  
"JS1\_D03\_00514" 12423 "s59E5H2" 0.05638027 "Hydrogenase expression/formation protein HypE"  
"JS1\_D03\_00514" 12423 "s63E6H2" 0.9489344 "Hydrogenase expression/formation protein HypE"  
"JS1\_D03\_00515" 12424 "s59E13H2" 0 "Transposase IS200 like protein"  
"JS1\_D03\_00515" 12424 "s59E25H2" 0 "Transposase IS200 like protein"  
"JS1\_D03\_00515" 12424 "s59E5H2" 0 "Transposase IS200 like protein"  
"JS1\_D03\_00515" 12424 "s63E6H2" 0.4396059 "Transposase IS200 like protein"  
"JS1\_D03\_00516" 12425 "s59E13H2" 0.3856059 "Hydrogenase expression/formation protein HypD"  
"JS1\_D03\_00516" 12425 "s59E25H2" 0 "Hydrogenase expression/formation protein HypD"  
"JS1\_D03\_00516" 12425 "s59E5H2" 0.4200449 "Hydrogenase expression/formation protein HypD"  
"JS1\_D03\_00516" 12425 "s63E6H2" 0.9391119 "Hydrogenase expression/formation protein HypD"  
"JS1\_D03\_00517" 12426 "s59E13H2" 0.4903693 "Hydrogenase isoenzymes formation protein HypC"  
"JS1\_D03\_00517" 12426 "s59E25H2" 0 "Hydrogenase isoenzymes formation protein HypC"  
"JS1\_D03\_00517" 12426 "s59E5H2" 0.3017184 "Hydrogenase isoenzymes formation protein HypC"  
"JS1\_D03\_00517" 12426 "s63E6H2" 0.8158632 "Hydrogenase isoenzymes formation protein HypC"

"JS1\_D03\_00518" 12427 "s59E13H2" 0.2950905 "Carbamoyltransferase HypF"  
"JS1\_D03\_00518" 12427 "s59E25H2" 0 "Carbamoyltransferase HypF"  
"JS1\_D03\_00518" 12427 "s59E5H2" 0.1332846 "Carbamoyltransferase HypF"  
"JS1\_D03\_00518" 12427 "s63E6H2" 0.7262917 "Carbamoyltransferase HypF"  
"JS1\_D03\_00519" 12428 "s59E13H2" 0.236605 "Hydrogenase isoenzymes nickel incorporation protein HypB"  
"JS1\_D03\_00519" 12428 "s59E25H2" 0 "Hydrogenase isoenzymes nickel incorporation protein HypB"  
"JS1\_D03\_00519" 12428 "s59E5H2" 0.1846823 "Hydrogenase isoenzymes nickel incorporation protein HypB"  
"JS1\_D03\_00519" 12428 "s63E6H2" 0.7646395 "Hydrogenase isoenzymes nickel incorporation protein HypB"  
"JS1\_D03\_00520" 12429 "s59E13H2" 0 "Holliday junction resolvase-like protein"  
"JS1\_D03\_00520" 12429 "s59E25H2" 0 "Holliday junction resolvase-like protein"  
"JS1\_D03\_00520" 12429 "s59E5H2" 0.03956294 "Holliday junction resolvase-like protein"  
"JS1\_D03\_00520" 12429 "s63E6H2" 0.1786217 "Holliday junction resolvase-like protein"  
"JS1\_D03\_00521" 12430 "s59E13H2" 0 "formate dehydrogenase accessory protein"  
"JS1\_D03\_00521" 12430 "s59E25H2" 0 "formate dehydrogenase accessory protein"  
"JS1\_D03\_00521" 12430 "s59E5H2" 0.000610119 "formate dehydrogenase accessory protein"  
"JS1\_D03\_00521" 12430 "s63E6H2" 0.4905513 "formate dehydrogenase accessory protein"  
"JS1\_D03\_00522" 12431 "s59E13H2" 0 "putative molybdenum cofactor guanylyltransferase"  
"JS1\_D03\_00522" 12431 "s59E25H2" 0 "putative molybdenum cofactor guanylyltransferase"  
"JS1\_D03\_00522" 12431 "s59E5H2" 0 "putative molybdenum cofactor guanylyltransferase"  
"JS1\_D03\_00522" 12431 "s63E6H2" 0.5518549 "putative molybdenum cofactor guanylyltransferase"  
"JS1\_D03\_00523" 12432 "s59E13H2" 0 "Formate dehydrogenase subunit alpha"  
"JS1\_D03\_00523" 12432 "s59E25H2" 0 "Formate dehydrogenase subunit alpha"  
"JS1\_D03\_00523" 12432 "s59E5H2" 0.01760474 "Formate dehydrogenase subunit alpha"  
"JS1\_D03\_00523" 12432 "s63E6H2" 0.09832913 "Formate dehydrogenase subunit alpha"  
"JS1\_D03\_00524" 12433 "s59E13H2" 0 "NADP-reducing hydrogenase subunit HndC"  
"JS1\_D03\_00524" 12433 "s59E25H2" 0 "NADP-reducing hydrogenase subunit HndC"  
"JS1\_D03\_00524" 12433 "s59E5H2" 0 "NADP-reducing hydrogenase subunit HndC"  
"JS1\_D03\_00524" 12433 "s63E6H2" 0.0604227 "NADP-reducing hydrogenase subunit HndC"  
"JS1\_D03\_00525" 12434 "s59E13H2" 0 "NADP-reducing hydrogenase subunit HndA"  
"JS1\_D03\_00525" 12434 "s59E25H2" 0 "NADP-reducing hydrogenase subunit HndA"  
"JS1\_D03\_00525" 12434 "s59E5H2" 0 "NADP-reducing hydrogenase subunit HndA"  
"JS1\_D03\_00525" 12434 "s63E6H2" 0.1192523 "NADP-reducing hydrogenase subunit HndA"  
"JS1\_D03\_00526" 12435 "s59E13H2" 0 "NADH-quinone oxidoreductase subunit I"  
"JS1\_D03\_00526" 12435 "s59E25H2" 0 "NADH-quinone oxidoreductase subunit I"  
"JS1\_D03\_00526" 12435 "s59E5H2" 0.1910876 "NADH-quinone oxidoreductase subunit I"  
"JS1\_D03\_00526" 12435 "s63E6H2" 0.3879279 "NADH-quinone oxidoreductase subunit I"  
"JS1\_D03\_00527" 12436 "s59E13H2" 0 "Na(+)/H(+) antiporter subunit G"  
"JS1\_D03\_00527" 12436 "s59E25H2" 0 "Na(+)/H(+) antiporter subunit G"  
"JS1\_D03\_00527" 12436 "s59E5H2" 0.2759854 "Na(+)/H(+) antiporter subunit G"  
"JS1\_D03\_00527" 12436 "s63E6H2" 0.3463567 "Na(+)/H(+) antiporter subunit G"  
"JS1\_D03\_00528" 12437 "s59E13H2" 0 "Na(+)/H(+) antiporter subunit F"  
"JS1\_D03\_00528" 12437 "s59E25H2" 0 "Na(+)/H(+) antiporter subunit F"  
"JS1\_D03\_00528" 12437 "s59E5H2" 0.3099121 "Na(+)/H(+) antiporter subunit F"  
"JS1\_D03\_00528" 12437 "s63E6H2" 0.2851829 "Na(+)/H(+) antiporter subunit F"  
"JS1\_D03\_00529" 12438 "s59E13H2" 0 "Na(+)/H(+) antiporter subunit E"  
"JS1\_D03\_00529" 12438 "s59E25H2" 0 "Na(+)/H(+) antiporter subunit E"  
"JS1\_D03\_00529" 12438 "s59E5H2" 0.1071016 "Na(+)/H(+) antiporter subunit E"



"JS1\_D03\_00529" 12438 "s63E6H2" 0.807752 "Na(+)/H(+)" antiporter subunit E"  
"JS1\_D03\_00530" 12439 "s59E13H2" 0.001159265 "Na(+)/H(+)" antiporter subunit D"  
"JS1\_D03\_00530" 12439 "s59E25H2" 0.5285525 "Na(+)/H(+)" antiporter subunit D"  
"JS1\_D03\_00530" 12439 "s59E5H2" 0.3237825 "Na(+)/H(+)" antiporter subunit D"  
"JS1\_D03\_00530" 12439 "s63E6H2" 5.321667 "Na(+)/H(+)" antiporter subunit D"  
"JS1\_D03\_00531" 12440 "s59E13H2" 0.003405983 "Na(+)/H(+)" antiporter subunit C"  
"JS1\_D03\_00531" 12440 "s59E25H2" 0.5870206 "Na(+)/H(+)" antiporter subunit C"  
"JS1\_D03\_00531" 12440 "s59E5H2" 0.3998416 "Na(+)/H(+)" antiporter subunit C"  
"JS1\_D03\_00531" 12440 "s63E6H2" 5.888572 "Na(+)/H(+)" antiporter subunit C"  
"JS1\_D03\_00532" 12441 "s59E13H2" 0.001305133 "Na(+)/H(+)" antiporter subunit B"  
"JS1\_D03\_00532" 12441 "s59E25H2" 0 "Na(+)/H(+)" antiporter subunit B"  
"JS1\_D03\_00532" 12441 "s59E5H2" 0.4118782 "Na(+)/H(+)" antiporter subunit B"  
"JS1\_D03\_00532" 12441 "s63E6H2" 5.791349 "Na(+)/H(+)" antiporter subunit B"  
"JS1\_D03\_00533" 12442 "s59E13H2" 0 "Na(+)/H(+)" antiporter subunit A"  
"JS1\_D03\_00533" 12442 "s59E25H2" 0 "Na(+)/H(+)" antiporter subunit A"  
"JS1\_D03\_00533" 12442 "s59E5H2" 0.3289594 "Na(+)/H(+)" antiporter subunit A"  
"JS1\_D03\_00533" 12442 "s63E6H2" 5.371578 "Na(+)/H(+)" antiporter subunit A"  
"JS1\_D03\_00534" 12443 "s59E13H2" 0 "Na(+)/H(+)" antiporter subunit A"  
"JS1\_D03\_00534" 12443 "s59E25H2" 0 "Na(+)/H(+)" antiporter subunit A"  
"JS1\_D03\_00534" 12443 "s59E5H2" 0.3848892 "Na(+)/H(+)" antiporter subunit A"  
"JS1\_D03\_00534" 12443 "s63E6H2" 6.001546 "Na(+)/H(+)" antiporter subunit A"  
"JS1\_D03\_00535" 12444 "s59E13H2" 0 "Membrane-bound hydrogenase subunit alpha"  
"JS1\_D03\_00535" 12444 "s59E25H2" 0 "Membrane-bound hydrogenase subunit alpha"  
"JS1\_D03\_00535" 12444 "s59E5H2" 0.8517795 "Membrane-bound hydrogenase subunit alpha"  
"JS1\_D03\_00535" 12444 "s63E6H2" 8.110249 "Membrane-bound hydrogenase subunit alpha"  
"JS1\_D03\_00536" 12445 "s59E13H2" 0 "F(420)H(2) dehydrogenase subunit C"  
"JS1\_D03\_00536" 12445 "s59E25H2" 0 "F(420)H(2) dehydrogenase subunit C"  
"JS1\_D03\_00536" 12445 "s59E5H2" 0.8750231 "F(420)H(2) dehydrogenase subunit C"  
"JS1\_D03\_00536" 12445 "s63E6H2" 6.382331 "F(420)H(2) dehydrogenase subunit C"  
"JS1\_D03\_00537" 12446 "s59E13H2" 0.00732336 "putative membrane-bound hydrogenase subunit mbhJ"  
"JS1\_D03\_00537" 12446 "s59E25H2" 0 "putative membrane-bound hydrogenase subunit mbhJ"  
"JS1\_D03\_00537" 12446 "s59E5H2" 0.5173965 "putative membrane-bound hydrogenase subunit mbhJ"  
"JS1\_D03\_00537" 12446 "s63E6H2" 6.188186 "putative membrane-bound hydrogenase subunit mbhJ"  
"JS1\_D03\_00538" 12447 "s59E13H2" 0.0002860525 "F(420)H(2) dehydrogenase subunit H"  
"JS1\_D03\_00538" 12447 "s59E25H2" 0 "F(420)H(2) dehydrogenase subunit H"  
"JS1\_D03\_00538" 12447 "s59E5H2" 0.3943802 "F(420)H(2) dehydrogenase subunit H"  
"JS1\_D03\_00538" 12447 "s63E6H2" 5.886108 "F(420)H(2) dehydrogenase subunit H"  
"JS1\_D03\_00539" 12448 "s59E13H2" 0.001310474 "Anaerobic dimethyl sulfoxide reductase chain B"  
"JS1\_D03\_00539" 12448 "s59E25H2" 0 "Anaerobic dimethyl sulfoxide reductase chain B"  
"JS1\_D03\_00539" 12448 "s59E5H2" 1.03852 "Anaerobic dimethyl sulfoxide reductase chain B"  
"JS1\_D03\_00539" 12448 "s63E6H2" 6.972053 "Anaerobic dimethyl sulfoxide reductase chain B"  
"JS1\_D03\_00540" 12449 "s59E13H2" 0.001656093 "Anaerobic sulfite reductase subunit B"  
"JS1\_D03\_00540" 12449 "s59E25H2" 0 "Anaerobic sulfite reductase subunit B"  
"JS1\_D03\_00540" 12449 "s59E5H2" 0.9129415 "Anaerobic sulfite reductase subunit B"  
"JS1\_D03\_00540" 12449 "s63E6H2" 4.24006 "Anaerobic sulfite reductase subunit B"  
"JS1\_D03\_00541" 12450 "s59E13H2" 0 "Sulphydrogenase 1 subunit gamma"  
"JS1\_D03\_00541" 12450 "s59E25H2" 0 "Sulphydrogenase 1 subunit gamma"

"JS1\_D03\_00541" 12450 "s59E5H2" 0.1653597 "Sulfhydrogenase 1 subunit gamma"  
"JS1\_D03\_00541" 12450 "s63E6H2" 0.442024 "Sulfhydrogenase 1 subunit gamma"  
"JS1\_D03\_00542" 12451 "s59E13H2" 0 "Sulfhydrogenase 2 subunit beta"  
"JS1\_D03\_00542" 12451 "s59E25H2" 0 "Sulfhydrogenase 2 subunit beta"  
"JS1\_D03\_00542" 12451 "s59E5H2" 0.1872092 "Sulfhydrogenase 2 subunit beta"  
"JS1\_D03\_00542" 12451 "s63E6H2" 0.8689059 "Sulfhydrogenase 2 subunit beta"  
"JS1\_D03\_00543" 12452 "s59E13H2" 0.1356666 "Redox-sensing transcriptional repressor Rex"  
"JS1\_D03\_00543" 12452 "s59E25H2" 0 "Redox-sensing transcriptional repressor Rex"  
"JS1\_D03\_00543" 12452 "s59E5H2" 0.5535978 "Redox-sensing transcriptional repressor Rex"  
"JS1\_D03\_00543" 12452 "s63E6H2" 1.063734 "Redox-sensing transcriptional repressor Rex"  
"JS1\_D03\_00544" 12453 "s59E13H2" 0.1280488 "Sporulation-specific N-acetylmuramoyl-L-alanine amidase"  
"JS1\_D03\_00544" 12453 "s59E25H2" 0 "Sporulation-specific N-acetylmuramoyl-L-alanine amidase"  
"JS1\_D03\_00544" 12453 "s59E5H2" 0.3377307 "Sporulation-specific N-acetylmuramoyl-L-alanine amidase"  
"JS1\_D03\_00544" 12453 "s63E6H2" 0.3795904 "Sporulation-specific N-acetylmuramoyl-L-alanine amidase"  
"JS1\_D03\_00545" 12454 "s59E13H2" 0.0696023 "Hydrogenase 3 maturation protease"  
"JS1\_D03\_00545" 12454 "s59E25H2" 0 "Hydrogenase 3 maturation protease"  
"JS1\_D03\_00545" 12454 "s59E5H2" 1.474151 "Hydrogenase 3 maturation protease"  
"JS1\_D03\_00545" 12454 "s63E6H2" 0.6028088 "Hydrogenase 3 maturation protease"  
"JS1\_D03\_00546" 12455 "s59E13H2" 0.2849717 "NAD(P)H-quinone oxidoreductase subunit I"  
"JS1\_D03\_00546" 12455 "s59E25H2" 0 "NAD(P)H-quinone oxidoreductase subunit I"  
"JS1\_D03\_00546" 12455 "s59E5H2" 1.140628 "NAD(P)H-quinone oxidoreductase subunit I"  
"JS1\_D03\_00546" 12455 "s63E6H2" 5.120486 "NAD(P)H-quinone oxidoreductase subunit I"  
"JS1\_D03\_00547" 12456 "s59E13H2" 0.6812834 "Hydrogenase-4 component C"  
"JS1\_D03\_00547" 12456 "s59E25H2" 0 "Hydrogenase-4 component C"  
"JS1\_D03\_00547" 12456 "s59E5H2" 1.09903 "Hydrogenase-4 component C"  
"JS1\_D03\_00547" 12456 "s63E6H2" 4.34386 "Hydrogenase-4 component C"  
"JS1\_D03\_00548" 12457 "s59E13H2" 0.3126778 "Membrane-bound hydrogenase subunit alpha"  
"JS1\_D03\_00548" 12457 "s59E25H2" 0 "Membrane-bound hydrogenase subunit alpha"  
"JS1\_D03\_00548" 12457 "s59E5H2" 0.5054246 "Membrane-bound hydrogenase subunit alpha"  
"JS1\_D03\_00548" 12457 "s63E6H2" 2.66849 "Membrane-bound hydrogenase subunit alpha"  
"JS1\_D03\_00549" 12458 "s59E13H2" 0.006918595 "Membrane-bound hydrogenase subunit beta"  
"JS1\_D03\_00549" 12458 "s59E25H2" 0 "Membrane-bound hydrogenase subunit beta"  
"JS1\_D03\_00549" 12458 "s59E5H2" 0.02092578 "Membrane-bound hydrogenase subunit beta"  
"JS1\_D03\_00549" 12458 "s63E6H2" 0.2033759 "Membrane-bound hydrogenase subunit beta"  
"JS1\_D03\_00550" 12459 "s59E13H2" 0.2323905 "putative membrane-bound hydrogenase subunit mbhJ"  
"JS1\_D03\_00550" 12459 "s59E25H2" 0 "putative membrane-bound hydrogenase subunit mbhJ"  
"JS1\_D03\_00550" 12459 "s59E5H2" 0.5783974 "putative membrane-bound hydrogenase subunit mbhJ"  
"JS1\_D03\_00550" 12459 "s63E6H2" 1.408221 "putative membrane-bound hydrogenase subunit mbhJ"  
"JS1\_D03\_00551" 12460 "s59E13H2" 0.467245 "hypothetical protein"  
"JS1\_D03\_00551" 12460 "s59E25H2" 0 "hypothetical protein"  
"JS1\_D03\_00551" 12460 "s59E5H2" 1.269018 "hypothetical protein"  
"JS1\_D03\_00551" 12460 "s63E6H2" 4.374902 "hypothetical protein"  
"JS1\_D03\_00552" 12461 "s59E13H2" 0.1989806 "Na(+)/H(+) antiporter subunit A"  
"JS1\_D03\_00552" 12461 "s59E25H2" 0 "Na(+)/H(+) antiporter subunit A"  
"JS1\_D03\_00552" 12461 "s59E5H2" 1.185278 "Na(+)/H(+) antiporter subunit A"  
"JS1\_D03\_00552" 12461 "s63E6H2" 4.459237 "Na(+)/H(+) antiporter subunit A"  
"JS1\_D03\_00553" 12462 "s59E13H2" 0.5394582 "Na(+)/H(+) antiporter subunit C1"

"JS1\_D03\_00553" 12462 "s59E25H2" 0 "Na(+)/H(+) antiporter subunit C1"  
"JS1\_D03\_00553" 12462 "s59E5H2" 1.664777 "Na(+)/H(+) antiporter subunit C1"  
"JS1\_D03\_00553" 12462 "s63E6H2" 3.836032 "Na(+)/H(+) antiporter subunit C1"  
"JS1\_D03\_00554" 12463 "s59E13H2" 0.7544558 "Na(+)/H(+) antiporter subunit B"  
"JS1\_D03\_00554" 12463 "s59E25H2" 0 "Na(+)/H(+) antiporter subunit B"  
"JS1\_D03\_00554" 12463 "s59E5H2" 0.7419332 "Na(+)/H(+) antiporter subunit B"  
"JS1\_D03\_00554" 12463 "s63E6H2" 2.561535 "Na(+)/H(+) antiporter subunit B"  
"JS1\_D03\_00555" 12464 "s59E13H2" 1.399299 "Na(+)/H(+) antiporter subunit A"  
"JS1\_D03\_00555" 12464 "s59E25H2" 0 "Na(+)/H(+) antiporter subunit A"  
"JS1\_D03\_00555" 12464 "s59E5H2" 0.8508427 "Na(+)/H(+) antiporter subunit A"  
"JS1\_D03\_00555" 12464 "s63E6H2" 4.550109 "Na(+)/H(+) antiporter subunit A"  
"JS1\_D03\_00556" 12465 "s59E13H2" 0.5631422 "hypothetical protein"  
"JS1\_D03\_00556" 12465 "s59E25H2" 0 "hypothetical protein"  
"JS1\_D03\_00556" 12465 "s59E5H2" 0.8541557 "hypothetical protein"  
"JS1\_D03\_00556" 12465 "s63E6H2" 1.97772 "hypothetical protein"  
"JS1\_D03\_00557" 12466 "s59E13H2" 0.1911926 "Na(+)/H(+) antiporter subunit G"  
"JS1\_D03\_00557" 12466 "s59E25H2" 0 "Na(+)/H(+) antiporter subunit G"  
"JS1\_D03\_00557" 12466 "s59E5H2" 1.139153 "Na(+)/H(+) antiporter subunit G"  
"JS1\_D03\_00557" 12466 "s63E6H2" 0.6736958 "Na(+)/H(+) antiporter subunit G"  
"JS1\_D03\_00558" 12467 "s59E13H2" 1.049632 "Na(+)/H(+) antiporter subunit F"  
"JS1\_D03\_00558" 12467 "s59E25H2" 0 "Na(+)/H(+) antiporter subunit F"  
"JS1\_D03\_00558" 12467 "s59E5H2" 1.237139 "Na(+)/H(+) antiporter subunit F"  
"JS1\_D03\_00558" 12467 "s63E6H2" 2.574835 "Na(+)/H(+) antiporter subunit F"  
"JS1\_D03\_00559" 12468 "s59E13H2" 1.257626 "Na(+)/H(+) antiporter subunit E"  
"JS1\_D03\_00559" 12468 "s59E25H2" 0 "Na(+)/H(+) antiporter subunit E"  
"JS1\_D03\_00559" 12468 "s59E5H2" 1.190195 "Na(+)/H(+) antiporter subunit E"  
"JS1\_D03\_00559" 12468 "s63E6H2" 3.242645 "Na(+)/H(+) antiporter subunit E"  
"JS1\_D03\_00560" 12469 "s59E13H2" 0.09926973 "putative hydrogenase nickel incorporation protein HypA"  
"JS1\_D03\_00560" 12469 "s59E25H2" 0 "putative hydrogenase nickel incorporation protein HypA"  
"JS1\_D03\_00560" 12469 "s59E5H2" 0.2328422 "putative hydrogenase nickel incorporation protein HypA"  
"JS1\_D03\_00560" 12469 "s63E6H2" 0.4354691 "putative hydrogenase nickel incorporation protein HypA"  
"JS1\_D03\_00562" 12471 "s59E13H2" 2.050181 "Oligopeptide transport ATP-binding protein OppF"  
"JS1\_D03\_00562" 12471 "s59E25H2" 0.2317949 "Oligopeptide transport ATP-binding protein OppF"  
"JS1\_D03\_00562" 12471 "s59E5H2" 1.542526 "Oligopeptide transport ATP-binding protein OppF"  
"JS1\_D03\_00562" 12471 "s63E6H2" 4.846509 "Oligopeptide transport ATP-binding protein OppF"  
"JS1\_D03\_00563" 12472 "s59E13H2" 1.837081 "Oligopeptide transport ATP-binding protein OppD"  
"JS1\_D03\_00563" 12472 "s59E25H2" 0.3867833 "Oligopeptide transport ATP-binding protein OppD"  
"JS1\_D03\_00563" 12472 "s59E5H2" 1.195493 "Oligopeptide transport ATP-binding protein OppD"  
"JS1\_D03\_00563" 12472 "s63E6H2" 2.647374 "Oligopeptide transport ATP-binding protein OppD"  
"JS1\_D03\_00564" 12473 "s59E13H2" 0.2636156 "Putative nicotinate phosphoribosyltransferase"  
"JS1\_D03\_00564" 12473 "s59E25H2" 0.2909441 "Putative nicotinate phosphoribosyltransferase"  
"JS1\_D03\_00564" 12473 "s59E5H2" 0.2349296 "Putative nicotinate phosphoribosyltransferase"  
"JS1\_D03\_00564" 12473 "s63E6H2" 0.26237 "Putative nicotinate phosphoribosyltransferase"  
"JS1\_D03\_00565" 12474 "s59E13H2" 0.7892897 "Protein-export membrane protein SecG"  
"JS1\_D03\_00565" 12474 "s59E25H2" 0 "Protein-export membrane protein SecG"  
"JS1\_D03\_00565" 12474 "s59E5H2" 0.2014578 "Protein-export membrane protein SecG"  
"JS1\_D03\_00565" 12474 "s63E6H2" 0.5561874 "Protein-export membrane protein SecG"

"JS1\_D03\_00566" 12475 "s59E13H2" 0.9225836 "Triosephosphate isomerase"  
"JS1\_D03\_00566" 12475 "s59E25H2" 0 "Triosephosphate isomerase"  
"JS1\_D03\_00566" 12475 "s59E5H2" 0.3140651 "Triosephosphate isomerase"  
"JS1\_D03\_00566" 12475 "s63E6H2" 0.8235842 "Triosephosphate isomerase"  
"JS1\_D03\_00567" 12476 "s59E13H2" 0.05018744 "hypothetical protein"  
"JS1\_D03\_00567" 12476 "s59E25H2" 0 "hypothetical protein"  
"JS1\_D03\_00567" 12476 "s59E5H2" 0.008080376 "hypothetical protein"  
"JS1\_D03\_00567" 12476 "s63E6H2" 0 "hypothetical protein"  
"JS1\_D03\_00568" 12477 "s59E13H2" 0.04245356 "4-hydroxythreonine-4-phosphate dehydrogenase 2"  
"JS1\_D03\_00568" 12477 "s59E25H2" 0 "4-hydroxythreonine-4-phosphate dehydrogenase 2"  
"JS1\_D03\_00568" 12477 "s59E5H2" 0.003848939 "4-hydroxythreonine-4-phosphate dehydrogenase 2"  
"JS1\_D03\_00568" 12477 "s63E6H2" 0 "4-hydroxythreonine-4-phosphate dehydrogenase 2"  
"JS1\_D03\_00569" 12478 "s59E13H2" 0.03872325 "hypothetical protein"  
"JS1\_D03\_00569" 12478 "s59E25H2" 0 "hypothetical protein"  
"JS1\_D03\_00569" 12478 "s59E5H2" 0.003161729 "hypothetical protein"  
"JS1\_D03\_00569" 12478 "s63E6H2" 0 "hypothetical protein"  
"JS1\_D03\_00570" 12479 "s59E13H2" 0.08330632 "Sialic acid TRAP transporter permease protein SiaT"  
"JS1\_D03\_00570" 12479 "s59E25H2" 0 "Sialic acid TRAP transporter permease protein SiaT"  
"JS1\_D03\_00570" 12479 "s59E5H2" 0.3085548 "Sialic acid TRAP transporter permease protein SiaT"  
"JS1\_D03\_00570" 12479 "s63E6H2" 0.03896911 "Sialic acid TRAP transporter permease protein SiaT"  
"JS1\_D03\_00571" 12480 "s59E13H2" 0.1485045 "Tripartite ATP-independent periplasmic transporters, DctQ component"  
"JS1\_D03\_00571" 12480 "s59E25H2" 0 "Tripartite ATP-independent periplasmic transporters, DctQ component"  
"JS1\_D03\_00571" 12480 "s59E5H2" 0.593724 "Tripartite ATP-independent periplasmic transporters, DctQ component"  
"JS1\_D03\_00571" 12480 "s63E6H2" 0.05627948 "Tripartite ATP-independent periplasmic transporters, DctQ component"  
"JS1\_D03\_00572" 12481 "s59E13H2" 0.1236238 "Monocarboxylate 2-oxoacid-binding periplasmic protein precursor"  
"JS1\_D03\_00572" 12481 "s59E25H2" 0 "Monocarboxylate 2-oxoacid-binding periplasmic protein precursor"  
"JS1\_D03\_00572" 12481 "s59E5H2" 0.3284083 "Monocarboxylate 2-oxoacid-binding periplasmic protein precursor"  
"JS1\_D03\_00572" 12481 "s63E6H2" 0.01602456 "Monocarboxylate 2-oxoacid-binding periplasmic protein precursor"  
"JS1\_D03\_00573" 12482 "s59E13H2" 0 "Glycerol kinase"  
"JS1\_D03\_00573" 12482 "s59E25H2" 0 "Glycerol kinase"  
"JS1\_D03\_00573" 12482 "s59E5H2" 0 "Glycerol kinase"  
"JS1\_D03\_00573" 12482 "s63E6H2" 0 "Glycerol kinase"  
"JS1\_D03\_00574" 12483 "s59E13H2" 0 "Fructose-bisphosphate aldolase"  
"JS1\_D03\_00574" 12483 "s59E25H2" 0 "Fructose-bisphosphate aldolase"  
"JS1\_D03\_00574" 12483 "s59E5H2" 0 "Fructose-bisphosphate aldolase"  
"JS1\_D03\_00574" 12483 "s63E6H2" 0 "Fructose-bisphosphate aldolase"  
"JS1\_D03\_00575" 12484 "s59E13H2" 0 "Putative 2-hydroxyacid dehydrogenase YoaD"  
"JS1\_D03\_00575" 12484 "s59E25H2" 0 "Putative 2-hydroxyacid dehydrogenase YoaD"  
"JS1\_D03\_00575" 12484 "s59E5H2" 0 "Putative 2-hydroxyacid dehydrogenase YoaD"  
"JS1\_D03\_00575" 12484 "s63E6H2" 0 "Putative 2-hydroxyacid dehydrogenase YoaD"  
"JS1\_D03\_00576" 12485 "s59E13H2" 0 "HTH-type transcriptional regulator Mce2R"  
"JS1\_D03\_00576" 12485 "s59E25H2" 0 "HTH-type transcriptional regulator Mce2R"  
"JS1\_D03\_00576" 12485 "s59E5H2" 0 "HTH-type transcriptional regulator Mce2R"  
"JS1\_D03\_00576" 12485 "s63E6H2" 0 "HTH-type transcriptional regulator Mce2R"  
"JS1\_D03\_00577" 12486 "s59E13H2" 0.09988275 "NifU-like protein"  
"JS1\_D03\_00577" 12486 "s59E25H2" 0 "NifU-like protein"  
"JS1\_D03\_00577" 12486 "s59E5H2" 0.2104976 "NifU-like protein"

"JS1\_D03\_00577" 12486 "s63E6H2" 0.6058261 "NifU-like protein"  
"JS1\_D03\_00578" 12487 "s59E13H2" 0.1221806 "putative cysteine desulfurase 2"  
"JS1\_D03\_00578" 12487 "s59E25H2" 0 "putative cysteine desulfurase 2"  
"JS1\_D03\_00578" 12487 "s59E5H2" 0.5494115 "putative cysteine desulfurase 2"  
"JS1\_D03\_00578" 12487 "s63E6H2" 0.8173423 "putative cysteine desulfurase 2"  
"JS1\_D03\_00579" 12488 "s59E13H2" 0.04471452 "hypothetical protein"  
"JS1\_D03\_00579" 12488 "s59E25H2" 0 "hypothetical protein"  
"JS1\_D03\_00579" 12488 "s59E5H2" 0.2799226 "hypothetical protein"  
"JS1\_D03\_00579" 12488 "s63E6H2" 0.4245371 "hypothetical protein"  
"JS1\_D03\_00580" 12489 "s59E13H2" 0.01272059 "hypothetical protein"  
"JS1\_D03\_00580" 12489 "s59E25H2" 0 "hypothetical protein"  
"JS1\_D03\_00580" 12489 "s59E5H2" 0.1587581 "hypothetical protein"  
"JS1\_D03\_00580" 12489 "s63E6H2" 0.3565969 "hypothetical protein"  
"JS1\_D03\_00582" 12491 "s59E13H2" 0.01673909 "hypothetical protein"  
"JS1\_D03\_00582" 12491 "s59E25H2" 0 "hypothetical protein"  
"JS1\_D03\_00582" 12491 "s59E5H2" 2.420277 "hypothetical protein"  
"JS1\_D03\_00582" 12491 "s63E6H2" 4.477312 "hypothetical protein"  
"JS1\_D03\_00583" 12492 "s59E13H2" 9.120864 "Transposase IS116/IS110/IS902 family protein"  
"JS1\_D03\_00583" 12492 "s59E25H2" 0 "Transposase IS116/IS110/IS902 family protein"  
"JS1\_D03\_00583" 12492 "s59E5H2" 0.4363725 "Transposase IS116/IS110/IS902 family protein"  
"JS1\_D03\_00583" 12492 "s63E6H2" 2.54576 "Transposase IS116/IS110/IS902 family protein"  
"JS1\_D03\_00585" 12494 "s59E13H2" 0.4804024 "Fic/DOC family protein"  
"JS1\_D03\_00585" 12494 "s59E25H2" 0 "Fic/DOC family protein"  
"JS1\_D03\_00585" 12494 "s59E5H2" 0.2536543 "Fic/DOC family protein"  
"JS1\_D03\_00585" 12494 "s63E6H2" 0.21128 "Fic/DOC family protein"  
"JS1\_D03\_00586" 12495 "s59E13H2" 0 "Vitamin B12 dependent methionine synthase, activation domain"  
"JS1\_D03\_00586" 12495 "s59E25H2" 0 "Vitamin B12 dependent methionine synthase, activation domain"  
"JS1\_D03\_00586" 12495 "s59E5H2" 0 "Vitamin B12 dependent methionine synthase, activation domain"  
"JS1\_D03\_00586" 12495 "s63E6H2" 0.1640696 "Vitamin B12 dependent methionine synthase, activation domain"  
"JS1\_D03\_00587" 12496 "s59E13H2" 0 "2Fe-2S ferredoxin"  
"JS1\_D03\_00587" 12496 "s59E25H2" 0 "2Fe-2S ferredoxin"  
"JS1\_D03\_00587" 12496 "s59E5H2" 0 "2Fe-2S ferredoxin"  
"JS1\_D03\_00587" 12496 "s63E6H2" 0.2753403 "2Fe-2S ferredoxin"  
"JS1\_D03\_00588" 12497 "s59E13H2" 1.081906 "Bifunctional protein FolD protein"  
"JS1\_D03\_00588" 12497 "s59E25H2" 0 "Bifunctional protein FolD protein"  
"JS1\_D03\_00588" 12497 "s59E5H2" 1.278524 "Bifunctional protein FolD protein"  
"JS1\_D03\_00588" 12497 "s63E6H2" 0.3484047 "Bifunctional protein FolD protein"  
"JS1\_D03\_00589" 12498 "s59E13H2" 2.292659 "5-methyltetrahydrofolate:corrinoid/iron-sulfur protein co-methyltransferase"  
"JS1\_D03\_00589" 12498 "s59E25H2" 0 "5-methyltetrahydrofolate:corrinoid/iron-sulfur protein co-methyltransferase"  
"JS1\_D03\_00589" 12498 "s59E5H2" 0.1312492 "5-methyltetrahydrofolate:corrinoid/iron-sulfur protein co-methyltransferase"  
"JS1\_D03\_00589" 12498 "s63E6H2" 0.3322672 "5-methyltetrahydrofolate:corrinoid/iron-sulfur protein co-methyltransferase"  
"JS1\_D03\_00590" 12499 "s59E13H2" 2.99514 "Acryloyl-CoA reductase electron transfer subunit beta"  
"JS1\_D03\_00590" 12499 "s59E25H2" 0 "Acryloyl-CoA reductase electron transfer subunit beta"  
"JS1\_D03\_00590" 12499 "s59E5H2" 0.1409785 "Acryloyl-CoA reductase electron transfer subunit beta"  
"JS1\_D03\_00590" 12499 "s63E6H2" 0.907328 "Acryloyl-CoA reductase electron transfer subunit beta"  
"JS1\_D03\_00591" 12500 "s59E13H2" 3.196787 "Acryloyl-CoA reductase electron transfer subunit gamma"  
"JS1\_D03\_00591" 12500 "s59E25H2" 0 "Acryloyl-CoA reductase electron transfer subunit gamma"

"JS1\_D03\_00591" 12500 "s59E5H2" 0.2433609 "Acryloyl-CoA reductase electron transfer subunit gamma"  
"JS1\_D03\_00591" 12500 "s63E6H2" 1.115954 "Acryloyl-CoA reductase electron transfer subunit gamma"  
"JS1\_D03\_00592" 12501 "s59E13H2" 3.230071 "bifunctional homocysteine S-methyltransferase/5,10-methylenetetrahydrofolate reductase protein"  
"JS1\_D03\_00592" 12501 "s59E25H2" 0 "bifunctional homocysteine S-methyltransferase/5,10-methylenetetrahydrofolate reductase protein"  
"JS1\_D03\_00592" 12501 "s59E5H2" 0.2574171 "bifunctional homocysteine S-methyltransferase/5,10-methylenetetrahydrofolate reductase protein"  
"JS1\_D03\_00592" 12501 "s63E6H2" 0.885786 "bifunctional homocysteine S-methyltransferase/5,10-methylenetetrahydrofolate reductase protein"  
"JS1\_D03\_00593" 12502 "s59E13H2" 2.069558 "Trimethylamine corrinoid protein"  
"JS1\_D03\_00593" 12502 "s59E25H2" 0 "Trimethylamine corrinoid protein"  
"JS1\_D03\_00593" 12502 "s59E5H2" 0.3205979 "Trimethylamine corrinoid protein"  
"JS1\_D03\_00593" 12502 "s63E6H2" 0.3960374 "Trimethylamine corrinoid protein"  
"JS1\_D03\_00594" 12503 "s59E13H2" 0 "N-carbamoyl-D-amino acid hydrolase"  
"JS1\_D03\_00594" 12503 "s59E25H2" 0 "N-carbamoyl-D-amino acid hydrolase"  
"JS1\_D03\_00594" 12503 "s59E5H2" 0.4053502 "N-carbamoyl-D-amino acid hydrolase"  
"JS1\_D03\_00594" 12503 "s63E6H2" 0.04416195 "N-carbamoyl-D-amino acid hydrolase"  
"JS1\_D03\_00595" 12504 "s59E13H2" 0 "Trimethylamine methyltransferase MttB"  
"JS1\_D03\_00595" 12504 "s59E25H2" 0 "Trimethylamine methyltransferase MttB"  
"JS1\_D03\_00595" 12504 "s59E5H2" 0.5234745 "Trimethylamine methyltransferase MttB"  
"JS1\_D03\_00595" 12504 "s63E6H2" 0.06894477 "Trimethylamine methyltransferase MttB"  
"JS1\_D03\_00596" 12505 "s59E13H2" 0.4567973 "Putative osmoprotectant uptake system substrate-binding protein OsmF precursor"  
"JS1\_D03\_00596" 12505 "s59E25H2" 0 "Putative osmoprotectant uptake system substrate-binding protein OsmF precursor"  
"JS1\_D03\_00596" 12505 "s59E5H2" 0.7467189 "Putative osmoprotectant uptake system substrate-binding protein OsmF precursor"  
"JS1\_D03\_00596" 12505 "s63E6H2" 0.1024027 "Putative osmoprotectant uptake system substrate-binding protein OsmF precursor"  
"JS1\_D03\_00597" 12506 "s59E13H2" 0.4524463 "Glycine betaine/carnitine/choline transport system permease protein OpuCB"  
"JS1\_D03\_00597" 12506 "s59E25H2" 0 "Glycine betaine/carnitine/choline transport system permease protein OpuCB"  
"JS1\_D03\_00597" 12506 "s59E5H2" 0.6814432 "Glycine betaine/carnitine/choline transport system permease protein OpuCB"  
"JS1\_D03\_00597" 12506 "s63E6H2" 0.07962181 "Glycine betaine/carnitine/choline transport system permease protein OpuCB"  
"JS1\_D03\_00598" 12507 "s59E13H2" 0.2237925 "Carnitine transport ATP-binding protein OpuCA"  
"JS1\_D03\_00598" 12507 "s59E25H2" 0 "Carnitine transport ATP-binding protein OpuCA"  
"JS1\_D03\_00598" 12507 "s59E5H2" 0.6929511 "Carnitine transport ATP-binding protein OpuCA"  
"JS1\_D03\_00598" 12507 "s63E6H2" 0.1147194 "Carnitine transport ATP-binding protein OpuCA"  
"JS1\_D03\_00599" 12508 "s59E13H2" 0.3308093 "Carnitine transport permease protein OpuCB"  
"JS1\_D03\_00599" 12508 "s59E25H2" 0 "Carnitine transport permease protein OpuCB"  
"JS1\_D03\_00599" 12508 "s59E5H2" 1.032647 "Carnitine transport permease protein OpuCB"  
"JS1\_D03\_00599" 12508 "s63E6H2" 0.1329657 "Carnitine transport permease protein OpuCB"  
"JS1\_D03\_00600" 12509 "s59E13H2" 0.07186962 "Trimethylamine methyltransferase MttB"  
"JS1\_D03\_00600" 12509 "s59E25H2" 0 "Trimethylamine methyltransferase MttB"  
"JS1\_D03\_00600" 12509 "s59E5H2" 1.178786 "Trimethylamine methyltransferase MttB"  
"JS1\_D03\_00600" 12509 "s63E6H2" 0.3165165 "Trimethylamine methyltransferase MttB"  
"JS1\_D03\_00601" 12510 "s59E13H2" 0.04538214 "HTH-type transcriptional regulator YesS"  
"JS1\_D03\_00601" 12510 "s59E25H2" 0 "HTH-type transcriptional regulator YesS"  
"JS1\_D03\_00601" 12510 "s59E5H2" 1.365344 "HTH-type transcriptional regulator YesS"  
"JS1\_D03\_00601" 12510 "s63E6H2" 0.1553928 "HTH-type transcriptional regulator YesS"  
"JS1\_D03\_00602" 12511 "s59E13H2" 2.219084 "DNA polymerase/3'-5' exonuclease PolX"  
"JS1\_D03\_00602" 12511 "s59E25H2" 0 "DNA polymerase/3'-5' exonuclease PolX"  
"JS1\_D03\_00602" 12511 "s59E5H2" 0.4826333 "DNA polymerase/3'-5' exonuclease PolX"  
"JS1\_D03\_00602" 12511 "s63E6H2" 0.1569106 "DNA polymerase/3'-5' exonuclease PolX"  
"JS1\_D03\_00603" 12512 "s59E13H2" 0.1577666 "Uracil DNA glycosylase superfamily protein"

"JS1\_D03\_00603" 12512 "s59E25H2" 0 "Uracil DNA glycosylase superfamily protein"  
"JS1\_D03\_00603" 12512 "s59E5H2" 0.4121033 "Uracil DNA glycosylase superfamily protein"  
"JS1\_D03\_00603" 12512 "s63E6H2" 0.18486 "Uracil DNA glycosylase superfamily protein"  
"JS1\_D03\_00604" 12513 "s59E13H2" 0.2521826 "putative protease YhbU precursor"  
"JS1\_D03\_00604" 12513 "s59E25H2" 0 "putative protease YhbU precursor"  
"JS1\_D03\_00604" 12513 "s59E5H2" 0.4819102 "putative protease YhbU precursor"  
"JS1\_D03\_00604" 12513 "s63E6H2" 2.557587 "putative protease YhbU precursor"  
"JS1\_D03\_00605" 12514 "s59E13H2" 0.03512829 "Putative GTP cyclohydrolase 1 type 2"  
"JS1\_D03\_00605" 12514 "s59E25H2" 0 "Putative GTP cyclohydrolase 1 type 2"  
"JS1\_D03\_00605" 12514 "s59E5H2" 0.1501515 "Putative GTP cyclohydrolase 1 type 2"  
"JS1\_D03\_00605" 12514 "s63E6H2" 2.66672 "Putative GTP cyclohydrolase 1 type 2"  
"JS1\_D03\_00606" 12515 "s59E13H2" 0.2906076 "hypothetical protein"  
"JS1\_D03\_00606" 12515 "s59E25H2" 0 "hypothetical protein"  
"JS1\_D03\_00606" 12515 "s59E5H2" 0.3332841 "hypothetical protein"  
"JS1\_D03\_00606" 12515 "s63E6H2" 2.334222 "hypothetical protein"  
"JS1\_D03\_00607" 12516 "s59E13H2" 0.4144065 "Transketolase 2"  
"JS1\_D03\_00607" 12516 "s59E25H2" 0 "Transketolase 2"  
"JS1\_D03\_00607" 12516 "s59E5H2" 0.8294204 "Transketolase 2"  
"JS1\_D03\_00607" 12516 "s63E6H2" 2.903391 "Transketolase 2"  
"JS1\_D03\_00608" 12517 "s59E13H2" 0.2074772 "2-hydroxy-3-oxopropionate reductase"  
"JS1\_D03\_00608" 12517 "s59E25H2" 0 "2-hydroxy-3-oxopropionate reductase"  
"JS1\_D03\_00608" 12517 "s59E5H2" 0.7736721 "2-hydroxy-3-oxopropionate reductase"  
"JS1\_D03\_00608" 12517 "s63E6H2" 0.1774769 "2-hydroxy-3-oxopropionate reductase"  
"JS1\_D03\_00609" 12518 "s59E13H2" 0.1450184 "Xylose isomerase-like TIM barrel"  
"JS1\_D03\_00609" 12518 "s59E25H2" 0 "Xylose isomerase-like TIM barrel"  
"JS1\_D03\_00609" 12518 "s59E5H2" 0.4196801 "Xylose isomerase-like TIM barrel"  
"JS1\_D03\_00609" 12518 "s63E6H2" 1.174618 "Xylose isomerase-like TIM barrel"  
"JS1\_D03\_00610" 12519 "s59E13H2" 0.1044279 "HTH-type transcriptional regulator LutR"  
"JS1\_D03\_00610" 12519 "s59E25H2" 0 "HTH-type transcriptional regulator LutR"  
"JS1\_D03\_00610" 12519 "s59E5H2" 0.1901106 "HTH-type transcriptional regulator LutR"  
"JS1\_D03\_00610" 12519 "s63E6H2" 0.2804688 "HTH-type transcriptional regulator LutR"  
"JS1\_D03\_00611" 12520 "s59E13H2" 0.05663326 "RutC family protein"  
"JS1\_D03\_00611" 12520 "s59E25H2" 0 "RutC family protein"  
"JS1\_D03\_00611" 12520 "s59E5H2" 0.2950368 "RutC family protein"  
"JS1\_D03\_00611" 12520 "s63E6H2" 0.1612504 "RutC family protein"  
"JS1\_D03\_00612" 12521 "s59E13H2" 0.05738494 "Sialic acid TRAP transporter permease protein SiaT"  
"JS1\_D03\_00612" 12521 "s59E25H2" 0 "Sialic acid TRAP transporter permease protein SiaT"  
"JS1\_D03\_00612" 12521 "s59E5H2" 0.2652409 "Sialic acid TRAP transporter permease protein SiaT"  
"JS1\_D03\_00612" 12521 "s63E6H2" 0.2310358 "Sialic acid TRAP transporter permease protein SiaT"  
"JS1\_D03\_00613" 12522 "s59E13H2" 2.056837 "Tripartite ATP-independent periplasmic transporters, DctQ component"  
"JS1\_D03\_00613" 12522 "s59E25H2" 0 "Tripartite ATP-independent periplasmic transporters, DctQ component"  
"JS1\_D03\_00613" 12522 "s59E5H2" 0.1361468 "Tripartite ATP-independent periplasmic transporters, DctQ component"  
"JS1\_D03\_00613" 12522 "s63E6H2" 0.04235238 "Tripartite ATP-independent periplasmic transporters, DctQ component"  
"JS1\_D03\_00614" 12523 "s59E13H2" 4.736347 "Lactate-binding periplasmic protein precursor"  
"JS1\_D03\_00614" 12523 "s59E25H2" 0 "Lactate-binding periplasmic protein precursor"  
"JS1\_D03\_00614" 12523 "s59E5H2" 0.3461755 "Lactate-binding periplasmic protein precursor"  
"JS1\_D03\_00614" 12523 "s63E6H2" 0.1487539 "Lactate-binding periplasmic protein precursor"

"JS1\_D03\_00615" 12524 "s59E13H2" 5.014173 "hypothetical protein"  
"JS1\_D03\_00615" 12524 "s59E25H2" 0 "hypothetical protein"  
"JS1\_D03\_00615" 12524 "s59E5H2" 0.5425362 "hypothetical protein"  
"JS1\_D03\_00615" 12524 "s63E6H2" 3.776487 "hypothetical protein"  
"JS1\_D03\_00617" 12526 "s59E13H2" 0 "hypothetical protein"  
"JS1\_D03\_00617" 12526 "s59E25H2" 0 "hypothetical protein"  
"JS1\_D03\_00617" 12526 "s59E5H2" 0.06982422 "hypothetical protein"  
"JS1\_D03\_00617" 12526 "s63E6H2" 0.03546252 "hypothetical protein"  
"JS1\_D03\_00618" 12527 "s59E13H2" 0 "hypothetical protein"  
"JS1\_D03\_00618" 12527 "s59E25H2" 0 "hypothetical protein"  
"JS1\_D03\_00618" 12527 "s59E5H2" 0.0520937 "hypothetical protein"  
"JS1\_D03\_00618" 12527 "s63E6H2" 0.02202729 "hypothetical protein"  
"JS1\_D03\_00619" 12528 "s59E13H2" 6.127701 "FMN reductase [NAD(P)H]"  
"JS1\_D03\_00619" 12528 "s59E25H2" 0 "FMN reductase [NAD(P)H]"  
"JS1\_D03\_00619" 12528 "s59E5H2" 0.2384673 "FMN reductase [NAD(P)H]"  
"JS1\_D03\_00619" 12528 "s63E6H2" 0.1992538 "FMN reductase [NAD(P)H]"  
"JS1\_D03\_00620" 12529 "s59E13H2" 0.6958905 "hypothetical protein"  
"JS1\_D03\_00620" 12529 "s59E25H2" 0 "hypothetical protein"  
"JS1\_D03\_00620" 12529 "s59E5H2" 0.03121034 "hypothetical protein"  
"JS1\_D03\_00620" 12529 "s63E6H2" 0.00434235 "hypothetical protein"  
"JS1\_D03\_00621" 12530 "s59E13H2" 0.6517648 "hypothetical protein"  
"JS1\_D03\_00621" 12530 "s59E25H2" 0 "hypothetical protein"  
"JS1\_D03\_00621" 12530 "s59E5H2" 0.1402229 "hypothetical protein"  
"JS1\_D03\_00621" 12530 "s63E6H2" 0.08214278 "hypothetical protein"  
"JS1\_D03\_00622" 12531 "s59E13H2" 5.208092 "pyrroloquinoline quinone biosynthesis protein PqqE"  
"JS1\_D03\_00622" 12531 "s59E25H2" 0.3128964 "pyrroloquinoline quinone biosynthesis protein PqqE"  
"JS1\_D03\_00622" 12531 "s59E5H2" 0.3550815 "pyrroloquinoline quinone biosynthesis protein PqqE"  
"JS1\_D03\_00622" 12531 "s63E6H2" 0.4551456 "pyrroloquinoline quinone biosynthesis protein PqqE"  
"JS1\_D03\_00623" 12532 "s59E13H2" 4.892141 "putative inner membrane transporter yjJE"  
"JS1\_D03\_00623" 12532 "s59E25H2" 0 "putative inner membrane transporter yjJE"  
"JS1\_D03\_00623" 12532 "s59E5H2" 0.1432036 "putative inner membrane transporter yjJE"  
"JS1\_D03\_00623" 12532 "s63E6H2" 0.2759275 "putative inner membrane transporter yjJE"  
"JS1\_D03\_00624" 12533 "s59E13H2" 3.767012 "Radical SAM superfamily protein"  
"JS1\_D03\_00624" 12533 "s59E25H2" 0 "Radical SAM superfamily protein"  
"JS1\_D03\_00624" 12533 "s59E5H2" 0.196447 "Radical SAM superfamily protein"  
"JS1\_D03\_00624" 12533 "s63E6H2" 0.2105651 "Radical SAM superfamily protein"  
"JS1\_D03\_00625" 12534 "s59E13H2" 2.249117 "dUMP phosphatase"  
"JS1\_D03\_00625" 12534 "s59E25H2" 0 "dUMP phosphatase"  
"JS1\_D03\_00625" 12534 "s59E5H2" 0.2356483 "dUMP phosphatase"  
"JS1\_D03\_00625" 12534 "s63E6H2" 0.1064185 "dUMP phosphatase"  
"JS1\_D03\_00626" 12535 "s59E13H2" 0.1866975 "Signal peptidase IB"  
"JS1\_D03\_00626" 12535 "s59E25H2" 0 "Signal peptidase IB"  
"JS1\_D03\_00626" 12535 "s59E5H2" 0.1161696 "Signal peptidase IB"  
"JS1\_D03\_00626" 12535 "s63E6H2" 0.2194613 "Signal peptidase IB"  
"JS1\_D03\_00628" 12537 "s59E13H2" 0 "hypothetical protein"  
"JS1\_D03\_00628" 12537 "s59E25H2" 0 "hypothetical protein"  
"JS1\_D03\_00628" 12537 "s59E5H2" 0.3510905 "hypothetical protein"



"JS1\_D03\_00628" 12537 "s63E6H2" 0.2659024 "hypothetical protein"  
"JS1\_D03\_00630" 12539 "s59E13H2" 0.05229575 "Transaldolase"  
"JS1\_D03\_00630" 12539 "s59E25H2" 0 "Transaldolase"  
"JS1\_D03\_00630" 12539 "s59E5H2" 0.01585763 "Transaldolase"  
"JS1\_D03\_00630" 12539 "s63E6H2" 0.1876959 "Transaldolase"  
"JS1\_D03\_00631" 12540 "s59E13H2" 3.834835 "hypothetical protein"  
"JS1\_D03\_00631" 12540 "s59E25H2" 0 "hypothetical protein"  
"JS1\_D03\_00631" 12540 "s59E5H2" 0.08590113 "hypothetical protein"  
"JS1\_D03\_00631" 12540 "s63E6H2" 0.1275861 "hypothetical protein"  
"JS1\_D03\_00632" 12541 "s59E13H2" 1.575381 "hypothetical protein"  
"JS1\_D03\_00632" 12541 "s59E25H2" 0 "hypothetical protein"  
"JS1\_D03\_00632" 12541 "s59E5H2" 0.05332807 "hypothetical protein"  
"JS1\_D03\_00632" 12541 "s63E6H2" 0.3750851 "hypothetical protein"  
"JS1\_D03\_00633" 12542 "s59E13H2" 0.3461652 "Phosphoglycolate phosphatase"  
"JS1\_D03\_00633" 12542 "s59E25H2" 0 "Phosphoglycolate phosphatase"  
"JS1\_D03\_00633" 12542 "s59E5H2" 0.4277095 "Phosphoglycolate phosphatase"  
"JS1\_D03\_00633" 12542 "s63E6H2" 0.5085964 "Phosphoglycolate phosphatase"  
"JS1\_D03\_00634" 12543 "s59E13H2" 0.2046725 "Cupin domain protein"  
"JS1\_D03\_00634" 12543 "s59E25H2" 0 "Cupin domain protein"  
"JS1\_D03\_00634" 12543 "s59E5H2" 0.091191 "Cupin domain protein"  
"JS1\_D03\_00634" 12543 "s63E6H2" 0.2508069 "Cupin domain protein"  
"JS1\_D03\_00635" 12544 "s59E13H2" 0.09020057 "ADP-ribose pyrophosphatase"  
"JS1\_D03\_00635" 12544 "s59E25H2" 0 "ADP-ribose pyrophosphatase"  
"JS1\_D03\_00635" 12544 "s59E5H2" 0.3441353 "ADP-ribose pyrophosphatase"  
"JS1\_D03\_00635" 12544 "s63E6H2" 0.4954924 "ADP-ribose pyrophosphatase"  
"JS1\_D03\_00636" 12545 "s59E13H2" 0.200107 "hypothetical protein"  
"JS1\_D03\_00636" 12545 "s59E25H2" 0 "hypothetical protein"  
"JS1\_D03\_00636" 12545 "s59E5H2" 0.43822 "hypothetical protein"  
"JS1\_D03\_00636" 12545 "s63E6H2" 0.4296195 "hypothetical protein"  
"JS1\_D03\_00637" 12546 "s59E13H2" 0.2509837 "Tetratricopeptide repeat protein"  
"JS1\_D03\_00637" 12546 "s59E25H2" 0 "Tetratricopeptide repeat protein"  
"JS1\_D03\_00637" 12546 "s59E5H2" 0.3174992 "Tetratricopeptide repeat protein"  
"JS1\_D03\_00637" 12546 "s63E6H2" 0.4686725 "Tetratricopeptide repeat protein"  
"JS1\_D03\_00638" 12547 "s59E13H2" 0.1101988 "Putative ski2-type helicase"  
"JS1\_D03\_00638" 12547 "s59E25H2" 0.1103811 "Putative ski2-type helicase"  
"JS1\_D03\_00638" 12547 "s59E5H2" 0.4789527 "Putative ski2-type helicase"  
"JS1\_D03\_00638" 12547 "s63E6H2" 0.4610674 "Putative ski2-type helicase"  
"JS1\_D03\_00639" 12548 "s59E13H2" 2.330677 "putative endonuclease 4"  
"JS1\_D03\_00639" 12548 "s59E25H2" 0 "putative endonuclease 4"  
"JS1\_D03\_00639" 12548 "s59E5H2" 0.2145068 "putative endonuclease 4"  
"JS1\_D03\_00639" 12548 "s63E6H2" 0.3416632 "putative endonuclease 4"  
"JS1\_D03\_00640" 12549 "s59E13H2" 2.604852 "hypothetical protein"  
"JS1\_D03\_00640" 12549 "s59E25H2" 0 "hypothetical protein"  
"JS1\_D03\_00640" 12549 "s59E5H2" 0.1339643 "hypothetical protein"  
"JS1\_D03\_00640" 12549 "s63E6H2" 0.1306207 "hypothetical protein"  
"JS1\_D03\_00642" 12551 "s59E13H2" 0.7256066 "hypothetical protein"  
"JS1\_D03\_00642" 12551 "s59E25H2" 0 "hypothetical protein"

"JS1\_D03\_00642" 12551 "s59E5H2" 0.296585 "hypothetical protein"  
"JS1\_D03\_00642" 12551 "s63E6H2" 0.8370518 "hypothetical protein"  
"JS1\_D03\_00644" 12553 "s59E13H2" 0.03900689 "Coenzyme A disulfide reductase"  
"JS1\_D03\_00644" 12553 "s59E25H2" 0 "Coenzyme A disulfide reductase"  
"JS1\_D03\_00644" 12553 "s59E5H2" 0.1292891 "Coenzyme A disulfide reductase"  
"JS1\_D03\_00644" 12553 "s63E6H2" 0.02796018 "Coenzyme A disulfide reductase"  
"JS1\_D03\_00645" 12554 "s59E13H2" 0.09403961 "Coenzyme A disulfide reductase"  
"JS1\_D03\_00645" 12554 "s59E25H2" 0 "Coenzyme A disulfide reductase"  
"JS1\_D03\_00645" 12554 "s59E5H2" 0.1271 "Coenzyme A disulfide reductase"  
"JS1\_D03\_00645" 12554 "s63E6H2" 0.01530968 "Coenzyme A disulfide reductase"  
"JS1\_D03\_00646" 12555 "s59E13H2" 0.02504716 "DNA-directed RNA polymerase subunit beta"  
"JS1\_D03\_00646" 12555 "s59E25H2" 0 "DNA-directed RNA polymerase subunit beta"  
"JS1\_D03\_00646" 12555 "s59E5H2" 0.01547484 "DNA-directed RNA polymerase subunit beta"  
"JS1\_D03\_00646" 12555 "s63E6H2" 0.009198763 "DNA-directed RNA polymerase subunit beta"  
"JS1\_D03\_00648" 12557 "s59E13H2" 0 "hypothetical protein"  
"JS1\_D03\_00648" 12557 "s59E25H2" 0 "hypothetical protein"  
"JS1\_D03\_00648" 12557 "s59E5H2" 0.007830817 "hypothetical protein"  
"JS1\_D03\_00648" 12557 "s63E6H2" 0.0006309841 "hypothetical protein"  
"JS1\_D03\_00649" 12558 "s59E13H2" 0 "Modification methylase BamHI"  
"JS1\_D03\_00649" 12558 "s59E25H2" 0 "Modification methylase BamHI"  
"JS1\_D03\_00649" 12558 "s59E5H2" 0 "Modification methylase BamHI"  
"JS1\_D03\_00649" 12558 "s63E6H2" 0 "Modification methylase BamHI"  
"JS1\_D03\_00650" 12559 "s59E13H2" 0.1287707 "N-isopropylammelide isopropyl amidohydrolase"  
"JS1\_D03\_00650" 12559 "s59E25H2" 0 "N-isopropylammelide isopropyl amidohydrolase"  
"JS1\_D03\_00650" 12559 "s59E5H2" 0.01666878 "N-isopropylammelide isopropyl amidohydrolase"  
"JS1\_D03\_00650" 12559 "s63E6H2" 0.1076982 "N-isopropylammelide isopropyl amidohydrolase"  
"JS1\_D03\_00651" 12560 "s59E13H2" 0.1091026 "beta-methylgalactoside transporter inner membrane component"  
"JS1\_D03\_00651" 12560 "s59E25H2" 0 "beta-methylgalactoside transporter inner membrane component"  
"JS1\_D03\_00651" 12560 "s59E5H2" 0.02047349 "beta-methylgalactoside transporter inner membrane component"  
"JS1\_D03\_00651" 12560 "s63E6H2" 0.2781515 "beta-methylgalactoside transporter inner membrane component"  
"JS1\_D03\_00652" 12561 "s59E13H2" 0.2600029 "D-allose transporter subunit"  
"JS1\_D03\_00652" 12561 "s59E25H2" 0 "D-allose transporter subunit"  
"JS1\_D03\_00652" 12561 "s59E5H2" 0.01641018 "D-allose transporter subunit"  
"JS1\_D03\_00652" 12561 "s63E6H2" 0.608696 "D-allose transporter subunit"  
"JS1\_D03\_00653" 12562 "s59E13H2" 0.08947608 "Galactose/methyl galactoside import ATP-binding protein MglA"  
"JS1\_D03\_00653" 12562 "s59E25H2" 0 "Galactose/methyl galactoside import ATP-binding protein MglA"  
"JS1\_D03\_00653" 12562 "s59E5H2" 0.01244925 "Galactose/methyl galactoside import ATP-binding protein MglA"  
"JS1\_D03\_00653" 12562 "s63E6H2" 0.2404537 "Galactose/methyl galactoside import ATP-binding protein MglA"  
"JS1\_D03\_00654" 12563 "s59E13H2" 0.1456292 "Purine-binding protein precursor"  
"JS1\_D03\_00654" 12563 "s59E25H2" 0 "Purine-binding protein precursor"  
"JS1\_D03\_00654" 12563 "s59E5H2" 0.4781473 "Purine-binding protein precursor"  
"JS1\_D03\_00654" 12563 "s63E6H2" 0.1993439 "Purine-binding protein precursor"  
"JS1\_D03\_00655" 12564 "s59E13H2" 0.0707107 "4-hydroxybenzoyl-CoA reductase subunit alpha"  
"JS1\_D03\_00655" 12564 "s59E25H2" 0 "4-hydroxybenzoyl-CoA reductase subunit alpha"  
"JS1\_D03\_00655" 12564 "s59E5H2" 0.6875169 "4-hydroxybenzoyl-CoA reductase subunit alpha"  
"JS1\_D03\_00655" 12564 "s63E6H2" 0.5093686 "4-hydroxybenzoyl-CoA reductase subunit alpha"  
"JS1\_D03\_00656" 12565 "s59E13H2" 0.05987351 "Glyceraldehyde dehydrogenase small chain"

"JS1\_D03\_00656" 12565 "s59E25H2" 0 "Glyceraldehyde dehydrogenase small chain"  
"JS1\_D03\_00656" 12565 "s59E5H2" 0.7932873 "Glyceraldehyde dehydrogenase small chain"  
"JS1\_D03\_00656" 12565 "s63E6H2" 0.9622483 "Glyceraldehyde dehydrogenase small chain"  
"JS1\_D03\_00657" 12566 "s59E13H2" 0.002840059 "Uracil permease"  
"JS1\_D03\_00657" 12566 "s59E25H2" 0 "Uracil permease"  
"JS1\_D03\_00657" 12566 "s59E5H2" 0.6809588 "Uracil permease"  
"JS1\_D03\_00657" 12566 "s63E6H2" 0.4292365 "Uracil permease"  
"JS1\_D03\_00658" 12567 "s59E13H2" 0.01458178 "4-hydroxybenzoyl-CoA reductase subunit alpha"  
"JS1\_D03\_00658" 12567 "s59E25H2" 0 "4-hydroxybenzoyl-CoA reductase subunit alpha"  
"JS1\_D03\_00658" 12567 "s59E5H2" 0.09212582 "4-hydroxybenzoyl-CoA reductase subunit alpha"  
"JS1\_D03\_00658" 12567 "s63E6H2" 0.2385931 "4-hydroxybenzoyl-CoA reductase subunit alpha"  
"JS1\_D03\_00659" 12568 "s59E13H2" 0.0160137 "Nicotinate dehydrogenase small FeS subunit"  
"JS1\_D03\_00659" 12568 "s59E25H2" 0 "Nicotinate dehydrogenase small FeS subunit"  
"JS1\_D03\_00659" 12568 "s59E5H2" 0 "Nicotinate dehydrogenase small FeS subunit"  
"JS1\_D03\_00659" 12568 "s63E6H2" 0.4729259 "Nicotinate dehydrogenase small FeS subunit"  
"JS1\_D03\_00660" 12569 "s59E13H2" 0.009070027 "Carbon monoxide dehydrogenase medium chain"  
"JS1\_D03\_00660" 12569 "s59E25H2" 0 "Carbon monoxide dehydrogenase medium chain"  
"JS1\_D03\_00660" 12569 "s59E5H2" 0 "Carbon monoxide dehydrogenase medium chain"  
"JS1\_D03\_00660" 12569 "s63E6H2" 0.5479423 "Carbon monoxide dehydrogenase medium chain"  
"JS1\_D03\_00661" 12570 "s59E13H2" 0.05349988 "D-aminopeptidase"  
"JS1\_D03\_00661" 12570 "s59E25H2" 0 "D-aminopeptidase"  
"JS1\_D03\_00661" 12570 "s59E5H2" 0.1705571 "D-aminopeptidase"  
"JS1\_D03\_00661" 12570 "s63E6H2" 0.4036542 "D-aminopeptidase"  
"JS1\_D03\_00662" 12571 "s59E13H2" 0.006752721 "hypothetical protein"  
"JS1\_D03\_00662" 12571 "s59E25H2" 0 "hypothetical protein"  
"JS1\_D03\_00662" 12571 "s59E5H2" 0.05099941 "hypothetical protein"  
"JS1\_D03\_00662" 12571 "s63E6H2" 0.2003126 "hypothetical protein"  
"JS1\_D03\_00663" 12572 "s59E13H2" 0.00479696 "NH(3)-dependent NAD(+) synthetase"  
"JS1\_D03\_00663" 12572 "s59E25H2" 0 "NH(3)-dependent NAD(+) synthetase"  
"JS1\_D03\_00663" 12572 "s59E5H2" 0.01755001 "NH(3)-dependent NAD(+) synthetase"  
"JS1\_D03\_00663" 12572 "s63E6H2" 0.2379816 "NH(3)-dependent NAD(+) synthetase"  
"JS1\_D03\_00664" 12573 "s59E13H2" 0.1351372 "transcriptional regulator SlyA"  
"JS1\_D03\_00664" 12573 "s59E25H2" 0 "transcriptional regulator SlyA"  
"JS1\_D03\_00664" 12573 "s59E5H2" 0.1433966 "transcriptional regulator SlyA"  
"JS1\_D03\_00664" 12573 "s63E6H2" 0.398729 "transcriptional regulator SlyA"  
"JS1\_D03\_00665" 12574 "s59E13H2" 0.274829 "Cadmium, cobalt and zinc/H(+)-K(+) antiporter"  
"JS1\_D03\_00665" 12574 "s59E25H2" 0 "Cadmium, cobalt and zinc/H(+)-K(+) antiporter"  
"JS1\_D03\_00665" 12574 "s59E5H2" 0.3118949 "Cadmium, cobalt and zinc/H(+)-K(+) antiporter"  
"JS1\_D03\_00665" 12574 "s63E6H2" 0.9236922 "Cadmium, cobalt and zinc/H(+)-K(+) antiporter"  
"JS1\_D03\_00666" 12575 "s59E13H2" 0.05022615 "putative ATP-dependent RNA helicase"  
"JS1\_D03\_00666" 12575 "s59E25H2" 0 "putative ATP-dependent RNA helicase"  
"JS1\_D03\_00666" 12575 "s59E5H2" 0.08376062 "putative ATP-dependent RNA helicase"  
"JS1\_D03\_00666" 12575 "s63E6H2" 0.4646976 "putative ATP-dependent RNA helicase"  
"JS1\_D03\_00667" 12576 "s59E13H2" 0 "Alpha/beta hydrolase family protein"  
"JS1\_D03\_00667" 12576 "s59E25H2" 0 "Alpha/beta hydrolase family protein"  
"JS1\_D03\_00667" 12576 "s59E5H2" 0.006696489 "Alpha/beta hydrolase family protein"  
"JS1\_D03\_00667" 12576 "s63E6H2" 0.01523034 "Alpha/beta hydrolase family protein"

"JS1\_D03\_00668" 12577 "s59E13H2" 0 "ABC-2 type transporter"  
"JS1\_D03\_00668" 12577 "s59E25H2" 0 "ABC-2 type transporter"  
"JS1\_D03\_00668" 12577 "s59E5H2" 0.05804201 "ABC-2 type transporter"  
"JS1\_D03\_00668" 12577 "s63E6H2" 0.01229367 "ABC-2 type transporter"  
"JS1\_D03\_00669" 12578 "s59E13H2" 0 "putative ABC transporter ATP-binding protein YbhF"  
"JS1\_D03\_00669" 12578 "s59E25H2" 0 "putative ABC transporter ATP-binding protein YbhF"  
"JS1\_D03\_00669" 12578 "s59E5H2" 0.04045869 "putative ABC transporter ATP-binding protein YbhF"  
"JS1\_D03\_00669" 12578 "s63E6H2" 0.01025797 "putative ABC transporter ATP-binding protein YbhF"  
"JS1\_D03\_00670" 12579 "s59E13H2" 11.24278 "Swarming motility protein SwrC"  
"JS1\_D03\_00670" 12579 "s59E25H2" 0.1296654 "Swarming motility protein SwrC"  
"JS1\_D03\_00670" 12579 "s59E5H2" 4.612066 "Swarming motility protein SwrC"  
"JS1\_D03\_00670" 12579 "s63E6H2" 5.390075 "Swarming motility protein SwrC"  
"JS1\_D03\_00671" 12580 "s59E13H2" 7.50219 "Macrolide export protein MacA"  
"JS1\_D03\_00671" 12580 "s59E25H2" 0 "Macrolide export protein MacA"  
"JS1\_D03\_00671" 12580 "s59E5H2" 4.026888 "Macrolide export protein MacA"  
"JS1\_D03\_00671" 12580 "s63E6H2" 3.268446 "Macrolide export protein MacA"  
"JS1\_D03\_00672" 12581 "s59E13H2" 1.103349 "Outer membrane protein TolC precursor"  
"JS1\_D03\_00672" 12581 "s59E25H2" 0 "Outer membrane protein TolC precursor"  
"JS1\_D03\_00672" 12581 "s59E5H2" 0.6542326 "Outer membrane protein TolC precursor"  
"JS1\_D03\_00672" 12581 "s63E6H2" 1.017147 "Outer membrane protein TolC precursor"  
"JS1\_D03\_00673" 12582 "s59E13H2" 3.366326 "hypothetical protein"  
"JS1\_D03\_00673" 12582 "s59E25H2" 0 "hypothetical protein"  
"JS1\_D03\_00673" 12582 "s59E5H2" 1.168265 "hypothetical protein"  
"JS1\_D03\_00673" 12582 "s63E6H2" 1.02749 "hypothetical protein"  
"JS1\_D03\_00675" 12584 "s59E13H2" 0.007879382 "hypothetical protein"  
"JS1\_D03\_00675" 12584 "s59E25H2" 0 "hypothetical protein"  
"JS1\_D03\_00675" 12584 "s59E5H2" 0.0156629 "hypothetical protein"  
"JS1\_D03\_00675" 12584 "s63E6H2" 0.06308846 "hypothetical protein"  
"JS1\_D03\_00676" 12585 "s59E13H2" 0.04491013 "Peptidase M15"  
"JS1\_D03\_00676" 12585 "s59E25H2" 0 "Peptidase M15"  
"JS1\_D03\_00676" 12585 "s59E5H2" 0 "Peptidase M15"  
"JS1\_D03\_00676" 12585 "s63E6H2" 0.2253486 "Peptidase M15"  
"JS1\_D03\_00677" 12586 "s59E13H2" 0.03941502 "YvrJ protein family protein"  
"JS1\_D03\_00677" 12586 "s59E25H2" 0 "YvrJ protein family protein"  
"JS1\_D03\_00677" 12586 "s59E5H2" 0 "YvrJ protein family protein"  
"JS1\_D03\_00677" 12586 "s63E6H2" 0.1476562 "YvrJ protein family protein"  
"JS1\_D03\_00678" 12587 "s59E13H2" 0 "Trehalose/maltose transport system permease protein MalF"  
"JS1\_D03\_00678" 12587 "s59E25H2" 0 "Trehalose/maltose transport system permease protein MalF"  
"JS1\_D03\_00678" 12587 "s59E5H2" 0.04017247 "Trehalose/maltose transport system permease protein MalF"  
"JS1\_D03\_00678" 12587 "s63E6H2" 2.408278 "Trehalose/maltose transport system permease protein MalF"  
"JS1\_D03\_00679" 12588 "s59E13H2" 0 "Trehalose/maltose transport system permease protein MalG"  
"JS1\_D03\_00679" 12588 "s59E25H2" 0 "Trehalose/maltose transport system permease protein MalG"  
"JS1\_D03\_00679" 12588 "s59E5H2" 0.05491542 "Trehalose/maltose transport system permease protein MalG"  
"JS1\_D03\_00679" 12588 "s63E6H2" 0.1834193 "Trehalose/maltose transport system permease protein MalG"  
"JS1\_D03\_00680" 12589 "s59E13H2" 0 "Bacterial extracellular solute-binding protein"  
"JS1\_D03\_00680" 12589 "s59E25H2" 0 "Bacterial extracellular solute-binding protein"  
"JS1\_D03\_00680" 12589 "s59E5H2" 0.1110434 "Bacterial extracellular solute-binding protein"

"JS1\_D03\_00680" 12589 "s63E6H2" 0.1611918 "Bacterial extracellular solute-binding protein"  
"JS1\_D03\_00681" 12590 "s59E13H2" 0.003453717 "L-glyceraldehyde 3-phosphate reductase"  
"JS1\_D03\_00681" 12590 "s59E25H2" 0 "L-glyceraldehyde 3-phosphate reductase"  
"JS1\_D03\_00681" 12590 "s59E5H2" 0.04948507 "L-glyceraldehyde 3-phosphate reductase"  
"JS1\_D03\_00681" 12590 "s63E6H2" 0.4252135 "L-glyceraldehyde 3-phosphate reductase"  
"JS1\_D03\_00682" 12591 "s59E13H2" 4.321942 "Xylulose kinase"  
"JS1\_D03\_00682" 12591 "s59E25H2" 0.1633987 "Xylulose kinase"  
"JS1\_D03\_00682" 12591 "s59E5H2" 0.04522332 "Xylulose kinase"  
"JS1\_D03\_00682" 12591 "s63E6H2" 0.3438732 "Xylulose kinase"  
"JS1\_D03\_00683" 12592 "s59E13H2" 0 "methylcobalamin:coenzyme M methyltransferase"  
"JS1\_D03\_00683" 12592 "s59E25H2" 0 "methylcobalamin:coenzyme M methyltransferase"  
"JS1\_D03\_00683" 12592 "s59E5H2" 0 "methylcobalamin:coenzyme M methyltransferase"  
"JS1\_D03\_00683" 12592 "s63E6H2" 1.371868 "methylcobalamin:coenzyme M methyltransferase"  
"JS1\_D03\_00684" 12593 "s59E13H2" 0 "Bacterial extracellular solute-binding protein"  
"JS1\_D03\_00684" 12593 "s59E25H2" 0 "Bacterial extracellular solute-binding protein"  
"JS1\_D03\_00684" 12593 "s59E5H2" 0.01110928 "Bacterial extracellular solute-binding protein"  
"JS1\_D03\_00684" 12593 "s63E6H2" 1.201736 "Bacterial extracellular solute-binding protein"  
"JS1\_D03\_00685" 12594 "s59E13H2" 0.04862362 "Alpha-glucosidase"  
"JS1\_D03\_00685" 12594 "s59E25H2" 0 "Alpha-glucosidase"  
"JS1\_D03\_00685" 12594 "s59E5H2" 0.0225672 "Alpha-glucosidase"  
"JS1\_D03\_00685" 12594 "s63E6H2" 1.528752 "Alpha-glucosidase"  
"JS1\_D03\_00686" 12595 "s59E13H2" 0.0148992 "Mannosylglycerate hydrolase"  
"JS1\_D03\_00686" 12595 "s59E25H2" 0 "Mannosylglycerate hydrolase"  
"JS1\_D03\_00686" 12595 "s59E5H2" 0.3180386 "Mannosylglycerate hydrolase"  
"JS1\_D03\_00686" 12595 "s63E6H2" 0.9263847 "Mannosylglycerate hydrolase"  
"JS1\_D03\_00687" 12596 "s59E13H2" 0.03235054 "PHP domain protein"  
"JS1\_D03\_00687" 12596 "s59E25H2" 0.1526419 "PHP domain protein"  
"JS1\_D03\_00687" 12596 "s59E5H2" 0.0531931 "PHP domain protein"  
"JS1\_D03\_00687" 12596 "s63E6H2" 0.6938758 "PHP domain protein"  
"JS1\_D03\_00688" 12597 "s59E13H2" 0 "putative D,D-dipeptide transport ATP-binding protein DdpF"  
"JS1\_D03\_00688" 12597 "s59E25H2" 0 "putative D,D-dipeptide transport ATP-binding protein DdpF"  
"JS1\_D03\_00688" 12597 "s59E5H2" 0 "putative D,D-dipeptide transport ATP-binding protein DdpF"  
"JS1\_D03\_00688" 12597 "s63E6H2" 0.7568056 "putative D,D-dipeptide transport ATP-binding protein DdpF"  
"JS1\_D03\_00689" 12598 "s59E13H2" 0 "Oligopeptide transport ATP-binding protein OppD"  
"JS1\_D03\_00689" 12598 "s59E25H2" 0 "Oligopeptide transport ATP-binding protein OppD"  
"JS1\_D03\_00689" 12598 "s59E5H2" 0.009140329 "Oligopeptide transport ATP-binding protein OppD"  
"JS1\_D03\_00689" 12598 "s63E6H2" 0.8490857 "Oligopeptide transport ATP-binding protein OppD"  
"JS1\_D03\_00690" 12599 "s59E13H2" 0.2418319 "hypothetical protein"  
"JS1\_D03\_00690" 12599 "s59E25H2" 0 "hypothetical protein"  
"JS1\_D03\_00690" 12599 "s59E5H2" 0.1248727 "hypothetical protein"  
"JS1\_D03\_00690" 12599 "s63E6H2" 0.0363764 "hypothetical protein"  
"JS1\_D03\_00691" 12600 "s59E13H2" 0.07108884 "5'-methylthioadenosine/S-adenosylhomocysteine nucleosidase"  
"JS1\_D03\_00691" 12600 "s59E25H2" 0 "5'-methylthioadenosine/S-adenosylhomocysteine nucleosidase"  
"JS1\_D03\_00691" 12600 "s59E5H2" 0.02943122 "5'-methylthioadenosine/S-adenosylhomocysteine nucleosidase"  
"JS1\_D03\_00691" 12600 "s63E6H2" 0.009160803 "5'-methylthioadenosine/S-adenosylhomocysteine nucleosidase"  
"JS1\_D03\_00692" 12601 "s59E13H2" 0 "hypothetical protein"  
"JS1\_D03\_00692" 12601 "s59E25H2" 0 "hypothetical protein"

"JS1\_D03\_00692" 12601 "s59E5H2" 0.009449124 "hypothetical protein"  
"JS1\_D03\_00692" 12601 "s63E6H2" 0.01875895 "hypothetical protein"  
"JS1\_D03\_00693" 12602 "s59E13H2" 0 "hypothetical protein"  
"JS1\_D03\_00693" 12602 "s59E25H2" 0 "hypothetical protein"  
"JS1\_D03\_00693" 12602 "s59E5H2" 0 "hypothetical protein"  
"JS1\_D03\_00693" 12602 "s63E6H2" 0.02023312 "hypothetical protein"  
"JS1\_D03\_00694" 12603 "s59E13H2" 0 "Reverse rubrerythrin-2"  
"JS1\_D03\_00694" 12603 "s59E25H2" 0 "Reverse rubrerythrin-2"  
"JS1\_D03\_00694" 12603 "s59E5H2" 0.7933924 "Reverse rubrerythrin-2"  
"JS1\_D03\_00694" 12603 "s63E6H2" 0.03826268 "Reverse rubrerythrin-2"  
"JS1\_D03\_00695" 12604 "s59E13H2" 0 "hypothetical protein"  
"JS1\_D03\_00695" 12604 "s59E25H2" 0 "hypothetical protein"  
"JS1\_D03\_00695" 12604 "s59E5H2" 0 "hypothetical protein"  
"JS1\_D03\_00695" 12604 "s63E6H2" 0 "hypothetical protein"  
"JS1\_D03\_00696" 12605 "s59E13H2" 0 "hypothetical protein"  
"JS1\_D03\_00696" 12605 "s59E25H2" 0 "hypothetical protein"  
"JS1\_D03\_00696" 12605 "s59E5H2" 0.0212906 "hypothetical protein"  
"JS1\_D03\_00696" 12605 "s63E6H2" 0 "hypothetical protein"  
"JS1\_D03\_00697" 12606 "s59E13H2" 0 "Cupin domain protein"  
"JS1\_D03\_00697" 12606 "s59E25H2" 0 "Cupin domain protein"  
"JS1\_D03\_00697" 12606 "s59E5H2" 0 "Cupin domain protein"  
"JS1\_D03\_00697" 12606 "s63E6H2" 0 "Cupin domain protein"  
"JS1\_D03\_00698" 12607 "s59E13H2" 0.007820211 "Copper-exporting P-type ATPase B"  
"JS1\_D03\_00698" 12607 "s59E25H2" 0 "Copper-exporting P-type ATPase B"  
"JS1\_D03\_00698" 12607 "s59E5H2" 0.3570859 "Copper-exporting P-type ATPase B"  
"JS1\_D03\_00698" 12607 "s63E6H2" 3.82831 "Copper-exporting P-type ATPase B"  
"JS1\_D03\_00701" 12610 "s59E13H2" 0.001995391 "Galactose/methyl galactoside import ATP-binding protein MglA"  
"JS1\_D03\_00701" 12610 "s59E25H2" 0 "Galactose/methyl galactoside import ATP-binding protein MglA"  
"JS1\_D03\_00701" 12610 "s59E5H2" 0 "Galactose/methyl galactoside import ATP-binding protein MglA"  
"JS1\_D03\_00701" 12610 "s63E6H2" 0.4453203 "Galactose/methyl galactoside import ATP-binding protein MglA"  
"JS1\_D03\_00702" 12611 "s59E13H2" 0 "Branched-chain amino acid transport system / permease component"  
"JS1\_D03\_00702" 12611 "s59E25H2" 0.4752381 "Branched-chain amino acid transport system / permease component"  
"JS1\_D03\_00702" 12611 "s59E5H2" 0 "Branched-chain amino acid transport system / permease component"  
"JS1\_D03\_00702" 12611 "s63E6H2" 1.158087 "Branched-chain amino acid transport system / permease component"  
"JS1\_D03\_00703" 12612 "s59E13H2" 0 "L-arabinose transporter permease protein"  
"JS1\_D03\_00703" 12612 "s59E25H2" 0 "L-arabinose transporter permease protein"  
"JS1\_D03\_00703" 12612 "s59E5H2" 0 "L-arabinose transporter permease protein"  
"JS1\_D03\_00703" 12612 "s63E6H2" 0.5953771 "L-arabinose transporter permease protein"  
"JS1\_D03\_00704" 12613 "s59E13H2" 0.009432062 "Xaa-Pro dipeptidase"  
"JS1\_D03\_00704" 12613 "s59E25H2" 0 "Xaa-Pro dipeptidase"  
"JS1\_D03\_00704" 12613 "s59E5H2" 0 "Xaa-Pro dipeptidase"  
"JS1\_D03\_00704" 12613 "s63E6H2" 0.04943495 "Xaa-Pro dipeptidase"  
"JS1\_D03\_00705" 12614 "s59E13H2" 0.5564996 "Tungsten-containing aldehyde ferredoxin oxidoreductase"  
"JS1\_D03\_00705" 12614 "s59E25H2" 0 "Tungsten-containing aldehyde ferredoxin oxidoreductase"  
"JS1\_D03\_00705" 12614 "s59E5H2" 0.06289214 "Tungsten-containing aldehyde ferredoxin oxidoreductase"  
"JS1\_D03\_00705" 12614 "s63E6H2" 0.1639584 "Tungsten-containing aldehyde ferredoxin oxidoreductase"  
"JS1\_D03\_00706" 12615 "s59E13H2" 0.06073476 "4-hydroxy-tetrahydrodipicolinate synthase"

"JS1\_D03\_00706" 12615 "s59E25H2" 0 "4-hydroxy-tetrahydrodipicolinate synthase"  
"JS1\_D03\_00706" 12615 "s59E5H2" 0.01252562 "4-hydroxy-tetrahydrodipicolinate synthase"  
"JS1\_D03\_00706" 12615 "s63E6H2" 0.2705015 "4-hydroxy-tetrahydrodipicolinate synthase"  
"JS1\_D03\_00707" 12616 "s59E13H2" 0.02306422 "L-serine dehydratase, alpha chain"  
"JS1\_D03\_00707" 12616 "s59E25H2" 0 "L-serine dehydratase, alpha chain"  
"JS1\_D03\_00707" 12616 "s59E5H2" 0.02307898 "L-serine dehydratase, alpha chain"  
"JS1\_D03\_00707" 12616 "s63E6H2" 0.2804195 "L-serine dehydratase, alpha chain"  
"JS1\_D03\_00708" 12617 "s59E13H2" 0 "hypothetical protein"  
"JS1\_D03\_00708" 12617 "s59E25H2" 0 "hypothetical protein"  
"JS1\_D03\_00708" 12617 "s59E5H2" 0.0221976 "hypothetical protein"  
"JS1\_D03\_00708" 12617 "s63E6H2" 0.4043819 "hypothetical protein"  
"JS1\_D03\_00709" 12618 "s59E13H2" 0.007613554 "hypothetical protein"  
"JS1\_D03\_00709" 12618 "s59E25H2" 0 "hypothetical protein"  
"JS1\_D03\_00709" 12618 "s59E5H2" 0.07601988 "hypothetical protein"  
"JS1\_D03\_00709" 12618 "s63E6H2" 0.2361612 "hypothetical protein"  
"JS1\_D03\_00710" 12619 "s59E13H2" 0.01169202 "hypothetical protein"  
"JS1\_D03\_00710" 12619 "s59E25H2" 0 "hypothetical protein"  
"JS1\_D03\_00710" 12619 "s59E5H2" 0.08098146 "hypothetical protein"  
"JS1\_D03\_00710" 12619 "s63E6H2" 0.2933981 "hypothetical protein"  
"JS1\_D03\_00711" 12620 "s59E13H2" 0.0121277 "methylcobalamin:coenzyme M methyltransferase"  
"JS1\_D03\_00711" 12620 "s59E25H2" 0 "methylcobalamin:coenzyme M methyltransferase"  
"JS1\_D03\_00711" 12620 "s59E5H2" 0 "methylcobalamin:coenzyme M methyltransferase"  
"JS1\_D03\_00711" 12620 "s63E6H2" 0.5579626 "methylcobalamin:coenzyme M methyltransferase"  
"JS1\_D03\_00712" 12621 "s59E13H2" 0.2156421 "hypothetical protein"  
"JS1\_D03\_00712" 12621 "s59E25H2" 0 "hypothetical protein"  
"JS1\_D03\_00712" 12621 "s59E5H2" 1.075236 "hypothetical protein"  
"JS1\_D03\_00712" 12621 "s63E6H2" 1.095757 "hypothetical protein"  
"JS1\_D03\_00713" 12622 "s59E13H2" 0.3519876 "Arabinose metabolism transcriptional repressor"  
"JS1\_D03\_00713" 12622 "s59E25H2" 0 "Arabinose metabolism transcriptional repressor"  
"JS1\_D03\_00713" 12622 "s59E5H2" 0.7173318 "Arabinose metabolism transcriptional repressor"  
"JS1\_D03\_00713" 12622 "s63E6H2" 0.4629832 "Arabinose metabolism transcriptional repressor"  
"JS1\_D03\_00714" 12623 "s59E13H2" 0.3790798 "L-ribulose-5-phosphate 4-epimerase UlaF"  
"JS1\_D03\_00714" 12623 "s59E25H2" 0 "L-ribulose-5-phosphate 4-epimerase UlaF"  
"JS1\_D03\_00714" 12623 "s59E5H2" 0.2730743 "L-ribulose-5-phosphate 4-epimerase UlaF"  
"JS1\_D03\_00714" 12623 "s63E6H2" 0.7287951 "L-ribulose-5-phosphate 4-epimerase UlaF"  
"JS1\_D03\_00715" 12624 "s59E13H2" 0.5071313 "Xylulose kinase"  
"JS1\_D03\_00715" 12624 "s59E25H2" 0 "Xylulose kinase"  
"JS1\_D03\_00715" 12624 "s59E5H2" 0.625939 "Xylulose kinase"  
"JS1\_D03\_00715" 12624 "s63E6H2" 1.424896 "Xylulose kinase"  
"JS1\_D03\_00717" 12626 "s59E13H2" 2.454967 "D-tagatose-1,6-bisphosphate aldolase subunit GatY"  
"JS1\_D03\_00717" 12626 "s59E25H2" 0 "D-tagatose-1,6-bisphosphate aldolase subunit GatY"  
"JS1\_D03\_00717" 12626 "s59E5H2" 0.4620255 "D-tagatose-1,6-bisphosphate aldolase subunit GatY"  
"JS1\_D03\_00717" 12626 "s63E6H2" 2.035991 "D-tagatose-1,6-bisphosphate aldolase subunit GatY"  
"JS1\_D03\_00718" 12627 "s59E13H2" 2.46421 "Xylulose kinase"  
"JS1\_D03\_00718" 12627 "s59E25H2" 0 "Xylulose kinase"  
"JS1\_D03\_00718" 12627 "s59E5H2" 0.7180273 "Xylulose kinase"  
"JS1\_D03\_00718" 12627 "s63E6H2" 1.110488 "Xylulose kinase"

"JS1\_D03\_00719" 12628 "s59E13H2" 4.639833 "Trehalose/maltose-binding protein MalE precursor"  
"JS1\_D03\_00719" 12628 "s59E25H2" 0 "Trehalose/maltose-binding protein MalE precursor"  
"JS1\_D03\_00719" 12628 "s59E5H2" 0.5385474 "Trehalose/maltose-binding protein MalE precursor"  
"JS1\_D03\_00719" 12628 "s63E6H2" 1.262909 "Trehalose/maltose-binding protein MalE precursor"  
"JS1\_D03\_00720" 12629 "s59E13H2" 4.017015 "Lactose transport system permease protein LacF"  
"JS1\_D03\_00720" 12629 "s59E25H2" 0 "Lactose transport system permease protein LacF"  
"JS1\_D03\_00720" 12629 "s59E5H2" 0.9442979 "Lactose transport system permease protein LacF"  
"JS1\_D03\_00720" 12629 "s63E6H2" 1.021581 "Lactose transport system permease protein LacF"  
"JS1\_D03\_00721" 12630 "s59E13H2" 1.932376 "L-arabinose transport system permease protein AraQ"  
"JS1\_D03\_00721" 12630 "s59E25H2" 0 "L-arabinose transport system permease protein AraQ"  
"JS1\_D03\_00721" 12630 "s59E5H2" 0.2270753 "L-arabinose transport system permease protein AraQ"  
"JS1\_D03\_00721" 12630 "s63E6H2" 0.8109675 "L-arabinose transport system permease protein AraQ"  
"JS1\_D03\_00722" 12631 "s59E13H2" 1.30443 "Alpha-D-glucose-1-phosphate phosphatase YihX"  
"JS1\_D03\_00722" 12631 "s59E25H2" 0 "Alpha-D-glucose-1-phosphate phosphatase YihX"  
"JS1\_D03\_00722" 12631 "s59E5H2" 0.4926376 "Alpha-D-glucose-1-phosphate phosphatase YihX"  
"JS1\_D03\_00722" 12631 "s63E6H2" 0.8620753 "Alpha-D-glucose-1-phosphate phosphatase YihX"  
"JS1\_D03\_00723" 12632 "s59E13H2" 0.0751956 "HTH-type transcriptional regulator PuuR"  
"JS1\_D03\_00723" 12632 "s59E25H2" 0 "HTH-type transcriptional regulator PuuR"  
"JS1\_D03\_00723" 12632 "s59E5H2" 0.2800394 "HTH-type transcriptional regulator PuuR"  
"JS1\_D03\_00723" 12632 "s63E6H2" 0.5934044 "HTH-type transcriptional regulator PuuR"  
"JS1\_D03\_00724" 12633 "s59E13H2" 0.003651809 "ATP-dependent protease ATPase subunit HslU"  
"JS1\_D03\_00724" 12633 "s59E25H2" 0 "ATP-dependent protease ATPase subunit HslU"  
"JS1\_D03\_00724" 12633 "s59E5H2" 0.4125138 "ATP-dependent protease ATPase subunit HslU"  
"JS1\_D03\_00724" 12633 "s63E6H2" 0.02740179 "ATP-dependent protease ATPase subunit HslU"  
"JS1\_D03\_00725" 12634 "s59E13H2" 0 "ATP-dependent protease subunit HslV"  
"JS1\_D03\_00725" 12634 "s59E25H2" 0 "ATP-dependent protease subunit HslV"  
"JS1\_D03\_00725" 12634 "s59E5H2" 0.05555484 "ATP-dependent protease subunit HslV"  
"JS1\_D03\_00725" 12634 "s63E6H2" 0.03603091 "ATP-dependent protease subunit HslV"  
"JS1\_D03\_00726" 12635 "s59E13H2" 0.02789893 "NifU-like protein"  
"JS1\_D03\_00726" 12635 "s59E25H2" 0 "NifU-like protein"  
"JS1\_D03\_00726" 12635 "s59E5H2" 0.05860184 "NifU-like protein"  
"JS1\_D03\_00726" 12635 "s63E6H2" 0.1335723 "NifU-like protein"  
"JS1\_D03\_00728" 12637 "s59E13H2" 0.03274149 "Aspartokinase"  
"JS1\_D03\_00728" 12637 "s59E25H2" 0.3098135 "Aspartokinase"  
"JS1\_D03\_00728" 12637 "s59E5H2" 0.1731487 "Aspartokinase"  
"JS1\_D03\_00728" 12637 "s63E6H2" 0.3443994 "Aspartokinase"  
"JS1\_D03\_00729" 12638 "s59E13H2" 0 "hypothetical protein"  
"JS1\_D03\_00729" 12638 "s59E25H2" 0 "hypothetical protein"  
"JS1\_D03\_00729" 12638 "s59E5H2" 0 "hypothetical protein"  
"JS1\_D03\_00729" 12638 "s63E6H2" 0.2288619 "hypothetical protein"  
"JS1\_D03\_00730" 12639 "s59E13H2" 0 "hypothetical protein"  
"JS1\_D03\_00730" 12639 "s59E25H2" 0 "hypothetical protein"  
"JS1\_D03\_00730" 12639 "s59E5H2" 0 "hypothetical protein"  
"JS1\_D03\_00730" 12639 "s63E6H2" 0.2169482 "hypothetical protein"  
"JS1\_D03\_00732" 12641 "s59E13H2" 0.06308694 "DNA alkylation repair enzyme"  
"JS1\_D03\_00732" 12641 "s59E25H2" 0 "DNA alkylation repair enzyme"  
"JS1\_D03\_00732" 12641 "s59E5H2" 0.8936467 "DNA alkylation repair enzyme"



"JS1\_D03\_00732" 12641 "s63E6H2" 1.487299 "DNA alkylation repair enzyme"  
"JS1\_D03\_00733" 12642 "s59E13H2" 0.0202746 "Isoprenylcysteine carboxyl methyltransferase (ICMT) family protein"  
"JS1\_D03\_00733" 12642 "s59E25H2" 0 "Isoprenylcysteine carboxyl methyltransferase (ICMT) family protein"  
"JS1\_D03\_00733" 12642 "s59E5H2" 1.062465 "Isoprenylcysteine carboxyl methyltransferase (ICMT) family protein"  
"JS1\_D03\_00733" 12642 "s63E6H2" 0.7694205 "Isoprenylcysteine carboxyl methyltransferase (ICMT) family protein"  
"JS1\_D03\_00734" 12643 "s59E13H2" 0 "hypothetical protein"  
"JS1\_D03\_00734" 12643 "s59E25H2" 0 "hypothetical protein"  
"JS1\_D03\_00734" 12643 "s59E5H2" 0.09706518 "hypothetical protein"  
"JS1\_D03\_00734" 12643 "s63E6H2" 0.9665044 "hypothetical protein"  
"JS1\_D03\_00735" 12644 "s59E13H2" 3.431129 "hypothetical protein"  
"JS1\_D03\_00735" 12644 "s59E25H2" 0 "hypothetical protein"  
"JS1\_D03\_00735" 12644 "s59E5H2" 0.1477624 "hypothetical protein"  
"JS1\_D03\_00735" 12644 "s63E6H2" 0.3424577 "hypothetical protein"  
"JS1\_D03\_00737" 12646 "s59E13H2" 0.04261401 "hypothetical protein"  
"JS1\_D03\_00737" 12646 "s59E25H2" 0 "hypothetical protein"  
"JS1\_D03\_00737" 12646 "s59E5H2" 0.04817917 "hypothetical protein"  
"JS1\_D03\_00737" 12646 "s63E6H2" 0.7300876 "hypothetical protein"  
"JS1\_D03\_00742" 12651 "s59E13H2" 0 "Na+/Pi-cotransporter"  
"JS1\_D03\_00742" 12651 "s59E25H2" 0 "Na+/Pi-cotransporter"  
"JS1\_D03\_00742" 12651 "s59E5H2" 0 "Na+/Pi-cotransporter"  
"JS1\_D03\_00742" 12651 "s63E6H2" 0.4128407 "Na+/Pi-cotransporter"  
"JS1\_D03\_00743" 12652 "s59E13H2" 0 "putative membrane protein"  
"JS1\_D03\_00743" 12652 "s59E25H2" 0 "putative membrane protein"  
"JS1\_D03\_00743" 12652 "s59E5H2" 0 "putative membrane protein"  
"JS1\_D03\_00743" 12652 "s63E6H2" 0.4786871 "putative membrane protein"  
"JS1\_D03\_00745" 12654 "s59E13H2" 0.01161847 "Deoxyguanosinetriphosphate triphosphohydrolase"  
"JS1\_D03\_00745" 12654 "s59E25H2" 0 "Deoxyguanosinetriphosphate triphosphohydrolase"  
"JS1\_D03\_00745" 12654 "s59E5H2" 0 "Deoxyguanosinetriphosphate triphosphohydrolase"  
"JS1\_D03\_00745" 12654 "s63E6H2" 0 "Deoxyguanosinetriphosphate triphosphohydrolase"  
"JS1\_D03\_00746" 12655 "s59E13H2" 0 "hypothetical protein"  
"JS1\_D03\_00746" 12655 "s59E25H2" 0 "hypothetical protein"  
"JS1\_D03\_00746" 12655 "s59E5H2" 0 "hypothetical protein"  
"JS1\_D03\_00746" 12655 "s63E6H2" 0 "hypothetical protein"  
"JS1\_D03\_00747" 12656 "s59E13H2" 0.02685426 "putative metallophosphoesterase YhaO"  
"JS1\_D03\_00747" 12656 "s59E25H2" 0 "putative metallophosphoesterase YhaO"  
"JS1\_D03\_00747" 12656 "s59E5H2" 0.006395586 "putative metallophosphoesterase YhaO"  
"JS1\_D03\_00747" 12656 "s63E6H2" 0.04552461 "putative metallophosphoesterase YhaO"  
"JS1\_D03\_00748" 12657 "s59E13H2" 0.01435443 "DNA double-strand break repair Rad50 ATPase"  
"JS1\_D03\_00748" 12657 "s59E25H2" 0 "DNA double-strand break repair Rad50 ATPase"  
"JS1\_D03\_00748" 12657 "s59E5H2" 0.01835078 "DNA double-strand break repair Rad50 ATPase"  
"JS1\_D03\_00748" 12657 "s63E6H2" 0.01909711 "DNA double-strand break repair Rad50 ATPase"  
"JS1\_D03\_00749" 12658 "s59E13H2" 0 "hypothetical protein"  
"JS1\_D03\_00749" 12658 "s59E25H2" 0 "hypothetical protein"  
"JS1\_D03\_00749" 12658 "s59E5H2" 0.005099465 "hypothetical protein"  
"JS1\_D03\_00749" 12658 "s63E6H2" 0.03396411 "hypothetical protein"  
"JS1\_D03\_00750" 12659 "s59E13H2" 0.06083328 "recombination protein F"  
"JS1\_D03\_00750" 12659 "s59E25H2" 0 "recombination protein F"

"JS1\_D03\_00750" 12659 "s59E5H2" 0.0008237117 "recombination protein F"  
"JS1\_D03\_00750" 12659 "s63E6H2" 0.1896155 "recombination protein F"  
"JS1\_D03\_00755" 12664 "s59E13H2" 0 "hypothetical protein"  
"JS1\_D03\_00755" 12664 "s59E25H2" 0 "hypothetical protein"  
"JS1\_D03\_00755" 12664 "s59E5H2" 0 "hypothetical protein"  
"JS1\_D03\_00755" 12664 "s63E6H2" 0.002897562 "hypothetical protein"  
"JS1\_D03\_00756" 12665 "s59E13H2" 0 "hypothetical protein"  
"JS1\_D03\_00756" 12665 "s59E25H2" 0 "hypothetical protein"  
"JS1\_D03\_00756" 12665 "s59E5H2" 0 "hypothetical protein"  
"JS1\_D03\_00756" 12665 "s63E6H2" 0 "hypothetical protein"  
"JS1\_D03\_00757" 12666 "s59E13H2" 0 "hypothetical protein"  
"JS1\_D03\_00757" 12666 "s59E25H2" 0 "hypothetical protein"  
"JS1\_D03\_00757" 12666 "s59E5H2" 0 "hypothetical protein"  
"JS1\_D03\_00757" 12666 "s63E6H2" 0 "hypothetical protein"  
"JS1\_D03\_00758" 12667 "s59E13H2" 0 "hypothetical protein"  
"JS1\_D03\_00758" 12667 "s59E25H2" 0 "hypothetical protein"  
"JS1\_D03\_00758" 12667 "s59E5H2" 0 "hypothetical protein"  
"JS1\_D03\_00758" 12667 "s63E6H2" 0 "hypothetical protein"  
"JS1\_D03\_00760" 12669 "s59E13H2" 0 "hypothetical protein"  
"JS1\_D03\_00760" 12669 "s59E25H2" 0 "hypothetical protein"  
"JS1\_D03\_00760" 12669 "s59E5H2" 0 "hypothetical protein"  
"JS1\_D03\_00760" 12669 "s63E6H2" 0 "hypothetical protein"  
"JS1\_D03\_00763" 12672 "s59E13H2" 0 "ATP-dependent DNA helicase UvrD1"  
"JS1\_D03\_00763" 12672 "s59E25H2" 0 "ATP-dependent DNA helicase UvrD1"  
"JS1\_D03\_00763" 12672 "s59E5H2" 0 "ATP-dependent DNA helicase UvrD1"  
"JS1\_D03\_00763" 12672 "s63E6H2" 0 "ATP-dependent DNA helicase UvrD1"  
"JS1\_D03\_00764" 12673 "s59E13H2" 0.03555435 "Endonuclease III"  
"JS1\_D03\_00764" 12673 "s59E25H2" 0 "Endonuclease III"  
"JS1\_D03\_00764" 12673 "s59E5H2" 0.1078799 "Endonuclease III"  
"JS1\_D03\_00764" 12673 "s63E6H2" 0.0754148 "Endonuclease III"  
"JS1\_D03\_00765" 12674 "s59E13H2" 0.04770519 "Trehalose synthase"  
"JS1\_D03\_00765" 12674 "s59E25H2" 0 "Trehalose synthase"  
"JS1\_D03\_00765" 12674 "s59E5H2" 0.4596356 "Trehalose synthase"  
"JS1\_D03\_00765" 12674 "s63E6H2" 0.1713767 "Trehalose synthase"  
"JS1\_D03\_00766" 12675 "s59E13H2" 0 "N-acetylglucosamine repressor"  
"JS1\_D03\_00766" 12675 "s59E25H2" 0 "N-acetylglucosamine repressor"  
"JS1\_D03\_00766" 12675 "s59E5H2" 0.2098776 "N-acetylglucosamine repressor"  
"JS1\_D03\_00766" 12675 "s63E6H2" 0.03453133 "N-acetylglucosamine repressor"  
"JS1\_D03\_00767" 12676 "s59E13H2" 0.02874216 "Multiple sugar-binding protein precursor"  
"JS1\_D03\_00767" 12676 "s59E25H2" 0 "Multiple sugar-binding protein precursor"  
"JS1\_D03\_00767" 12676 "s59E5H2" 0.2741407 "Multiple sugar-binding protein precursor"  
"JS1\_D03\_00767" 12676 "s63E6H2" 0.2428576 "Multiple sugar-binding protein precursor"  
"JS1\_D03\_00768" 12677 "s59E13H2" 0.02923261 "Lactose transport system permease protein LacF"  
"JS1\_D03\_00768" 12677 "s59E25H2" 0 "Lactose transport system permease protein LacF"  
"JS1\_D03\_00768" 12677 "s59E5H2" 1.124255 "Lactose transport system permease protein LacF"  
"JS1\_D03\_00768" 12677 "s63E6H2" 0.03552171 "Lactose transport system permease protein LacF"  
"JS1\_D03\_00769" 12678 "s59E13H2" 0.004265451 "L-arabinose transport system permease protein AraQ"

"JS1\_D03\_00769" 12678 "s59E25H2" 0 "L-arabinose transport system permease protein AraQ"  
"JS1\_D03\_00769" 12678 "s59E5H2" 0.2191502 "L-arabinose transport system permease protein AraQ"  
"JS1\_D03\_00769" 12678 "s63E6H2" 0.03349611 "L-arabinose transport system permease protein AraQ"  
"JS1\_D03\_00770" 12679 "s59E13H2" 0.09622495 "preprotein translocase subunit SecY"  
"JS1\_D03\_00770" 12679 "s59E25H2" 0 "preprotein translocase subunit SecY"  
"JS1\_D03\_00770" 12679 "s59E5H2" 0.03027293 "preprotein translocase subunit SecY"  
"JS1\_D03\_00770" 12679 "s63E6H2" 0.214631 "preprotein translocase subunit SecY"  
"JS1\_D03\_00776" 12685 "s59E13H2" 0.7343641 "LPS-assembly protein LptD"  
"JS1\_D03\_00776" 12685 "s59E25H2" 0 "LPS-assembly protein LptD"  
"JS1\_D03\_00776" 12685 "s59E5H2" 0.3837014 "LPS-assembly protein LptD"  
"JS1\_D03\_00776" 12685 "s63E6H2" 1.326112 "LPS-assembly protein LptD"  
"JS1\_D03\_00777" 12686 "s59E13H2" 0.03480174 "Lipopolysaccharide-assembly, LptC-related"  
"JS1\_D03\_00777" 12686 "s59E25H2" 0 "Lipopolysaccharide-assembly, LptC-related"  
"JS1\_D03\_00777" 12686 "s59E5H2" 0.2499932 "Lipopolysaccharide-assembly, LptC-related"  
"JS1\_D03\_00777" 12686 "s63E6H2" 0.8710115 "Lipopolysaccharide-assembly, LptC-related"  
"JS1\_D03\_00778" 12687 "s59E13H2" 0.1552618 "Clostripain precursor"  
"JS1\_D03\_00778" 12687 "s59E25H2" 0 "Clostripain precursor"  
"JS1\_D03\_00778" 12687 "s59E5H2" 0.01899999 "Clostripain precursor"  
"JS1\_D03\_00778" 12687 "s63E6H2" 0.120356 "Clostripain precursor"  
"JS1\_D03\_00780" 12689 "s59E13H2" 0.1268862 "Acetylglutamate kinase"  
"JS1\_D03\_00780" 12689 "s59E25H2" 0 "Acetylglutamate kinase"  
"JS1\_D03\_00780" 12689 "s59E5H2" 0.03092955 "Acetylglutamate kinase"  
"JS1\_D03\_00780" 12689 "s63E6H2" 0.1584903 "Acetylglutamate kinase"  
"JS1\_D03\_00781" 12690 "s59E13H2" 0.2796347 "Acetylornithine aminotransferase"  
"JS1\_D03\_00781" 12690 "s59E25H2" 0 "Acetylornithine aminotransferase"  
"JS1\_D03\_00781" 12690 "s59E5H2" 0.009770708 "Acetylornithine aminotransferase"  
"JS1\_D03\_00781" 12690 "s63E6H2" 0.04047742 "Acetylornithine aminotransferase"  
"JS1\_D03\_00782" 12691 "s59E13H2" 2.29767 "Argininosuccinate synthase"  
"JS1\_D03\_00782" 12691 "s59E25H2" 0 "Argininosuccinate synthase"  
"JS1\_D03\_00782" 12691 "s59E5H2" 0.1004587 "Argininosuccinate synthase"  
"JS1\_D03\_00782" 12691 "s63E6H2" 0.1131558 "Argininosuccinate synthase"  
"JS1\_D03\_00783" 12692 "s59E13H2" 0.4441376 "Argininosuccinate lyase 1"  
"JS1\_D03\_00783" 12692 "s59E25H2" 0 "Argininosuccinate lyase 1"  
"JS1\_D03\_00783" 12692 "s59E5H2" 0.05921933 "Argininosuccinate lyase 1"  
"JS1\_D03\_00783" 12692 "s63E6H2" 0.1140761 "Argininosuccinate lyase 1"  
"JS1\_D03\_00784" 12693 "s59E13H2" 0.164665 "L(+)-tartrate dehydratase subunit alpha"  
"JS1\_D03\_00784" 12693 "s59E25H2" 0 "L(+)-tartrate dehydratase subunit alpha"  
"JS1\_D03\_00784" 12693 "s59E5H2" 0 "L(+)-tartrate dehydratase subunit alpha"  
"JS1\_D03\_00784" 12693 "s63E6H2" 0.009578833 "L(+)-tartrate dehydratase subunit alpha"  
"JS1\_D03\_00785" 12694 "s59E13H2" 1.624927 "Fumarate hydratase class I, anaerobic"  
"JS1\_D03\_00785" 12694 "s59E25H2" 0 "Fumarate hydratase class I, anaerobic"  
"JS1\_D03\_00785" 12694 "s59E5H2" 0.003855763 "Fumarate hydratase class I, anaerobic"  
"JS1\_D03\_00785" 12694 "s63E6H2" 0.03711105 "Fumarate hydratase class I, anaerobic"  
"JS1\_D03\_00786" 12695 "s59E13H2" 0.580792 "NAD-dependent malic enzyme"  
"JS1\_D03\_00786" 12695 "s59E25H2" 0 "NAD-dependent malic enzyme"  
"JS1\_D03\_00786" 12695 "s59E5H2" 0.1464708 "NAD-dependent malic enzyme"  
"JS1\_D03\_00786" 12695 "s63E6H2" 0.04550162 "NAD-dependent malic enzyme"

"JS1\_D03\_00789" 12698 "s59E13H2" 0 "50S ribosomal protein L3"  
"JS1\_D03\_00789" 12698 "s59E25H2" 0 "50S ribosomal protein L3"  
"JS1\_D03\_00789" 12698 "s59E5H2" 0 "50S ribosomal protein L3"  
"JS1\_D03\_00789" 12698 "s63E6H2" 0.08894858 "50S ribosomal protein L3"  
"JS1\_D03\_00790" 12699 "s59E13H2" 0 "50S ribosomal protein L4"  
"JS1\_D03\_00790" 12699 "s59E25H2" 0 "50S ribosomal protein L4"  
"JS1\_D03\_00790" 12699 "s59E5H2" 0 "50S ribosomal protein L4"  
"JS1\_D03\_00790" 12699 "s63E6H2" 0.004550782 "50S ribosomal protein L4"  
"JS1\_D03\_00791" 12700 "s59E13H2" 0.002567785 "Glutamate--tRNA ligase"  
"JS1\_D03\_00791" 12700 "s59E25H2" 0 "Glutamate--tRNA ligase"  
"JS1\_D03\_00791" 12700 "s59E5H2" 0.004296822 "Glutamate--tRNA ligase"  
"JS1\_D03\_00791" 12700 "s63E6H2" 0.01404937 "Glutamate--tRNA ligase"  
"JS1\_D03\_00794" 12703 "s59E13H2" 0 "Transcription elongation factor GreA"  
"JS1\_D03\_00794" 12703 "s59E25H2" 0 "Transcription elongation factor GreA"  
"JS1\_D03\_00794" 12703 "s59E5H2" 0.008324037 "Transcription elongation factor GreA"  
"JS1\_D03\_00794" 12703 "s63E6H2" 0.01530521 "Transcription elongation factor GreA"  
"JS1\_D03\_00795" 12704 "s59E13H2" 0 "Threonylcarbamoyl-AMP synthase"  
"JS1\_D03\_00795" 12704 "s59E25H2" 0 "Threonylcarbamoyl-AMP synthase"  
"JS1\_D03\_00795" 12704 "s59E5H2" 0 "Threonylcarbamoyl-AMP synthase"  
"JS1\_D03\_00795" 12704 "s63E6H2" 0.02014545 "Threonylcarbamoyl-AMP synthase"  
"JS1\_D03\_00796" 12705 "s59E13H2" 0.02596052 "Chorismate mutase AroH"  
"JS1\_D03\_00796" 12705 "s59E25H2" 0 "Chorismate mutase AroH"  
"JS1\_D03\_00796" 12705 "s59E5H2" 0.06279999 "Chorismate mutase AroH"  
"JS1\_D03\_00796" 12705 "s63E6H2" 0.1077078 "Chorismate mutase AroH"  
"JS1\_D03\_00797" 12706 "s59E13H2" 0.01047632 "Phospho-2-dehydro-3-deoxyheptonate aldolase"  
"JS1\_D03\_00797" 12706 "s59E25H2" 0 "Phospho-2-dehydro-3-deoxyheptonate aldolase"  
"JS1\_D03\_00797" 12706 "s59E5H2" 0.09884076 "Phospho-2-dehydro-3-deoxyheptonate aldolase"  
"JS1\_D03\_00797" 12706 "s63E6H2" 0.288925 "Phospho-2-dehydro-3-deoxyheptonate aldolase"  
"JS1\_D03\_00798" 12707 "s59E13H2" 0.00159062 "3-phosphoshikimate 1-carboxyvinyltransferase 1"  
"JS1\_D03\_00798" 12707 "s59E25H2" 0 "3-phosphoshikimate 1-carboxyvinyltransferase 1"  
"JS1\_D03\_00798" 12707 "s59E5H2" 0.1453275 "3-phosphoshikimate 1-carboxyvinyltransferase 1"  
"JS1\_D03\_00798" 12707 "s63E6H2" 0.2565979 "3-phosphoshikimate 1-carboxyvinyltransferase 1"  
"JS1\_D03\_00799" 12708 "s59E13H2" 0 "Shikimate dehydrogenase"  
"JS1\_D03\_00799" 12708 "s59E25H2" 0 "Shikimate dehydrogenase"  
"JS1\_D03\_00799" 12708 "s59E5H2" 0.02118557 "Shikimate dehydrogenase"  
"JS1\_D03\_00799" 12708 "s63E6H2" 0.1202886 "Shikimate dehydrogenase"  
"JS1\_D03\_00800" 12709 "s59E13H2" 0.001271257 "Chorismate synthase"  
"JS1\_D03\_00800" 12709 "s59E25H2" 0 "Chorismate synthase"  
"JS1\_D03\_00800" 12709 "s59E5H2" 0.04831068 "Chorismate synthase"  
"JS1\_D03\_00800" 12709 "s63E6H2" 0.1585589 "Chorismate synthase"  
"JS1\_D03\_00801" 12710 "s59E13H2" 0.02231755 "Shikimate kinase"  
"JS1\_D03\_00801" 12710 "s59E25H2" 0 "Shikimate kinase"  
"JS1\_D03\_00801" 12710 "s59E5H2" 0.149445 "Shikimate kinase"  
"JS1\_D03\_00801" 12710 "s63E6H2" 0.205973 "Shikimate kinase"  
"JS1\_D03\_00802" 12711 "s59E13H2" 0.03958396 "3-dehydroquinate synthase"  
"JS1\_D03\_00802" 12711 "s59E25H2" 0 "3-dehydroquinate synthase"  
"JS1\_D03\_00802" 12711 "s59E5H2" 0.3372692 "3-dehydroquinate synthase"

"JS1\_D03\_00802" 12711 "s63E6H2" 0.3341318 "3-dehydroquinase synthase"  
"JS1\_D03\_00803" 12712 "s59E13H2" 0.02565637 "3-dehydroquinase dehydratase"  
"JS1\_D03\_00803" 12712 "s59E25H2" 0 "3-dehydroquinase dehydratase"  
"JS1\_D03\_00803" 12712 "s59E5H2" 0.09218645 "3-dehydroquinase dehydratase"  
"JS1\_D03\_00803" 12712 "s63E6H2" 0.07979068 "3-dehydroquinase dehydratase"  
"JS1\_D03\_00804" 12713 "s59E13H2" 0.001983898 "prephenate dehydrogenase"  
"JS1\_D03\_00804" 12713 "s59E25H2" 0 "prephenate dehydrogenase"  
"JS1\_D03\_00804" 12713 "s59E5H2" 0.01502324 "prephenate dehydrogenase"  
"JS1\_D03\_00804" 12713 "s63E6H2" 0.04634327 "prephenate dehydrogenase"  
"JS1\_D03\_00805" 12714 "s59E13H2" 0.5696051 "SsrA-binding protein"  
"JS1\_D03\_00805" 12714 "s59E25H2" 0 "SsrA-binding protein"  
"JS1\_D03\_00805" 12714 "s59E5H2" 0.3085295 "SsrA-binding protein"  
"JS1\_D03\_00805" 12714 "s63E6H2" 0.2422217 "SsrA-binding protein"  
"JS1\_D03\_00808" 12717 "s59E13H2" 0 "hypothetical protein"  
"JS1\_D03\_00808" 12717 "s59E25H2" 0 "hypothetical protein"  
"JS1\_D03\_00808" 12717 "s59E5H2" 0 "hypothetical protein"  
"JS1\_D03\_00808" 12717 "s63E6H2" 0.00306406 "hypothetical protein"  
"JS1\_D03\_00810" 12719 "s59E13H2" 0 "hypothetical protein"  
"JS1\_D03\_00810" 12719 "s59E25H2" 0 "hypothetical protein"  
"JS1\_D03\_00810" 12719 "s59E5H2" 0 "hypothetical protein"  
"JS1\_D03\_00810" 12719 "s63E6H2" 0 "hypothetical protein"  
"JS1\_D03\_00811" 12720 "s59E13H2" 0 "hypothetical protein"  
"JS1\_D03\_00811" 12720 "s59E25H2" 0 "hypothetical protein"  
"JS1\_D03\_00811" 12720 "s59E5H2" 0 "hypothetical protein"  
"JS1\_D03\_00811" 12720 "s63E6H2" 0 "hypothetical protein"  
"JS1\_D03\_00812" 12721 "s59E13H2" 0.003566971 "hypothetical protein"  
"JS1\_D03\_00812" 12721 "s59E25H2" 0 "hypothetical protein"  
"JS1\_D03\_00812" 12721 "s59E5H2" 0 "hypothetical protein"  
"JS1\_D03\_00812" 12721 "s63E6H2" 0 "hypothetical protein"  
"JS1\_D03\_00813" 12722 "s59E13H2" 0.045033 "hypothetical protein"  
"JS1\_D03\_00813" 12722 "s59E25H2" 0 "hypothetical protein"  
"JS1\_D03\_00813" 12722 "s59E5H2" 0 "hypothetical protein"  
"JS1\_D03\_00813" 12722 "s63E6H2" 0 "hypothetical protein"  
"JS1\_D03\_00814" 12723 "s59E13H2" 0.01598682 "hypothetical protein"  
"JS1\_D03\_00814" 12723 "s59E25H2" 0 "hypothetical protein"  
"JS1\_D03\_00814" 12723 "s59E5H2" 0 "hypothetical protein"  
"JS1\_D03\_00814" 12723 "s63E6H2" 0.007970624 "hypothetical protein"  
"JS1\_D03\_00815" 12724 "s59E13H2" 0.00290642 "ComEC family competence protein"  
"JS1\_D03\_00815" 12724 "s59E25H2" 0 "ComEC family competence protein"  
"JS1\_D03\_00815" 12724 "s59E5H2" 0 "ComEC family competence protein"  
"JS1\_D03\_00815" 12724 "s63E6H2" 0.003654502 "ComEC family competence protein"  
"JS1\_D03\_00816" 12725 "s59E13H2" 0 "hypothetical protein"  
"JS1\_D03\_00816" 12725 "s59E25H2" 0 "hypothetical protein"  
"JS1\_D03\_00816" 12725 "s59E5H2" 0 "hypothetical protein"  
"JS1\_D03\_00816" 12725 "s63E6H2" 0.00938162 "hypothetical protein"  
"JS1\_D03\_00817" 12726 "s59E13H2" 0 "hypothetical protein"  
"JS1\_D03\_00817" 12726 "s59E25H2" 0 "hypothetical protein"

"JS1\_D03\_00817" 12726 "s59E5H2" 0 "hypothetical protein"  
"JS1\_D03\_00817" 12726 "s63E6H2" 0 "hypothetical protein"  
"JS1\_D03\_00818" 12727 "s59E13H2" 0 "hypothetical protein"  
"JS1\_D03\_00818" 12727 "s59E25H2" 0 "hypothetical protein"  
"JS1\_D03\_00818" 12727 "s59E5H2" 0 "hypothetical protein"  
"JS1\_D03\_00818" 12727 "s63E6H2" 0 "hypothetical protein"  
"JS1\_D03\_00819" 12728 "s59E13H2" 0 "Ion channel"  
"JS1\_D03\_00819" 12728 "s59E25H2" 0 "Ion channel"  
"JS1\_D03\_00819" 12728 "s59E5H2" 0 "Ion channel"  
"JS1\_D03\_00819" 12728 "s63E6H2" 0.00259256 "Ion channel"  
"JS1\_D03\_00820" 12729 "s59E13H2" 0 "GDP-mannose-dependent alpha-(1-6)-phosphatidylinositol monomannoside mannosyltransferase"  
"JS1\_D03\_00820" 12729 "s59E25H2" 0 "GDP-mannose-dependent alpha-(1-6)-phosphatidylinositol monomannoside mannosyltransferase"  
"JS1\_D03\_00820" 12729 "s59E5H2" 0 "GDP-mannose-dependent alpha-(1-6)-phosphatidylinositol monomannoside mannosyltransferase"  
"JS1\_D03\_00820" 12729 "s63E6H2" 0.001304189 "GDP-mannose-dependent alpha-(1-6)-phosphatidylinositol monomannoside mannosyltransferase"  
"JS1\_D03\_00821" 12730 "s59E13H2" 0 "Polysaccharide biosynthesis protein"  
"JS1\_D03\_00821" 12730 "s59E25H2" 0 "Polysaccharide biosynthesis protein"  
"JS1\_D03\_00821" 12730 "s59E5H2" 0.00317496 "Polysaccharide biosynthesis protein"  
"JS1\_D03\_00821" 12730 "s63E6H2" 0.002765081 "Polysaccharide biosynthesis protein"  
"JS1\_D03\_00822" 12731 "s59E13H2" 0 "coproporphyrinogen III oxidase"  
"JS1\_D03\_00822" 12731 "s59E25H2" 0 "coproporphyrinogen III oxidase"  
"JS1\_D03\_00822" 12731 "s59E5H2" 0 "coproporphyrinogen III oxidase"  
"JS1\_D03\_00822" 12731 "s63E6H2" 0 "coproporphyrinogen III oxidase"  
"JS1\_D03\_00823" 12732 "s59E13H2" 0 "hypothetical protein"  
"JS1\_D03\_00823" 12732 "s59E25H2" 0 "hypothetical protein"  
"JS1\_D03\_00823" 12732 "s59E5H2" 0 "hypothetical protein"  
"JS1\_D03\_00823" 12732 "s63E6H2" 0.02603824 "hypothetical protein"  
"JS1\_D03\_00825" 12734 "s59E13H2" 0 "hypothetical protein"  
"JS1\_D03\_00825" 12734 "s59E25H2" 0 "hypothetical protein"  
"JS1\_D03\_00825" 12734 "s59E5H2" 0 "hypothetical protein"  
"JS1\_D03\_00825" 12734 "s63E6H2" 0 "hypothetical protein"  
"JS1\_D03\_00827" 12736 "s59E13H2" 0 "hypothetical protein"  
"JS1\_D03\_00827" 12736 "s59E25H2" 0 "hypothetical protein"  
"JS1\_D03\_00827" 12736 "s59E5H2" 0 "hypothetical protein"  
"JS1\_D03\_00827" 12736 "s63E6H2" 0 "hypothetical protein"  
"JS1\_D03\_00830" 12739 "s59E13H2" 0 "Inner membrane ABC transporter permease protein YcjP"  
"JS1\_D03\_00830" 12739 "s59E25H2" 0 "Inner membrane ABC transporter permease protein YcjP"  
"JS1\_D03\_00830" 12739 "s59E5H2" 0.07077568 "Inner membrane ABC transporter permease protein YcjP"  
"JS1\_D03\_00830" 12739 "s63E6H2" 0.2901731 "Inner membrane ABC transporter permease protein YcjP"  
"JS1\_D03\_00831" 12740 "s59E13H2" 0 "hypothetical protein"  
"JS1\_D03\_00831" 12740 "s59E25H2" 0 "hypothetical protein"  
"JS1\_D03\_00831" 12740 "s59E5H2" 0.1077566 "hypothetical protein"  
"JS1\_D03\_00831" 12740 "s63E6H2" 0.3053396 "hypothetical protein"  
"JS1\_D03\_00832" 12741 "s59E13H2" 0.001262159 "Methionine--tRNA ligase"  
"JS1\_D03\_00832" 12741 "s59E25H2" 0 "Methionine--tRNA ligase"  
"JS1\_D03\_00832" 12741 "s59E5H2" 0 "Methionine--tRNA ligase"  
"JS1\_D03\_00832" 12741 "s63E6H2" 0 "Methionine--tRNA ligase"  
"JS1\_D03\_00833" 12742 "s59E13H2" 0 "Methionine--tRNA ligase"

"JS1\_D03\_00833" 12742 "s59E25H2" 0 "Methionine--tRNA ligase"  
"JS1\_D03\_00833" 12742 "s59E5H2" 0 "Methionine--tRNA ligase"  
"JS1\_D03\_00833" 12742 "s63E6H2" 0 "Methionine--tRNA ligase"  
"JS1\_D03\_00834" 12743 "s59E13H2" 0.009949038 "Membrane-bound lytic murein transglycosylase C precursor"  
"JS1\_D03\_00834" 12743 "s59E25H2" 0 "Membrane-bound lytic murein transglycosylase C precursor"  
"JS1\_D03\_00834" 12743 "s59E5H2" 0.00251689 "Membrane-bound lytic murein transglycosylase C precursor"  
"JS1\_D03\_00834" 12743 "s63E6H2" 0.01435156 "Membrane-bound lytic murein transglycosylase C precursor"  
"JS1\_D03\_00836" 12745 "s59E13H2" 0.09160162 "Riboflavin transporter RibU"  
"JS1\_D03\_00836" 12745 "s59E25H2" 0 "Riboflavin transporter RibU"  
"JS1\_D03\_00836" 12745 "s59E5H2" 0.05745853 "Riboflavin transporter RibU"  
"JS1\_D03\_00836" 12745 "s63E6H2" 0.07431388 "Riboflavin transporter RibU"  
"JS1\_D03\_00837" 12746 "s59E13H2" 0.01346926 "Mannose-1-phosphate guanylyltransferase 1"  
"JS1\_D03\_00837" 12746 "s59E25H2" 0 "Mannose-1-phosphate guanylyltransferase 1"  
"JS1\_D03\_00837" 12746 "s59E5H2" 0.02607909 "Mannose-1-phosphate guanylyltransferase 1"  
"JS1\_D03\_00837" 12746 "s63E6H2" 0.08301645 "Mannose-1-phosphate guanylyltransferase 1"  
"JS1\_D03\_00839" 12748 "s59E13H2" 0.1610272 "S-adenosylmethionine synthase"  
"JS1\_D03\_00839" 12748 "s59E25H2" 0 "S-adenosylmethionine synthase"  
"JS1\_D03\_00839" 12748 "s59E5H2" 0.07034588 "S-adenosylmethionine synthase"  
"JS1\_D03\_00839" 12748 "s63E6H2" 0.4117115 "S-adenosylmethionine synthase"  
"JS1\_D03\_00840" 12749 "s59E13H2" 0.05951341 "Twitching mobility protein"  
"JS1\_D03\_00840" 12749 "s59E25H2" 0 "Twitching mobility protein"  
"JS1\_D03\_00840" 12749 "s59E5H2" 0.09367298 "Twitching mobility protein"  
"JS1\_D03\_00840" 12749 "s63E6H2" 0.513989 "Twitching mobility protein"  
"JS1\_D03\_00842" 12751 "s59E13H2" 0.03717129 "bacteriophage N4 adsorption protein B"  
"JS1\_D03\_00842" 12751 "s59E25H2" 0 "bacteriophage N4 adsorption protein B"  
"JS1\_D03\_00842" 12751 "s59E5H2" 0.0861488 "bacteriophage N4 adsorption protein B"  
"JS1\_D03\_00842" 12751 "s63E6H2" 0.1915303 "bacteriophage N4 adsorption protein B"  
"JS1\_D03\_00843" 12752 "s59E13H2" 0.006462987 "Twitching mobility protein"  
"JS1\_D03\_00843" 12752 "s59E25H2" 0 "Twitching mobility protein"  
"JS1\_D03\_00843" 12752 "s59E5H2" 0.06054523 "Twitching mobility protein"  
"JS1\_D03\_00843" 12752 "s63E6H2" 0.1641982 "Twitching mobility protein"  
"JS1\_D03\_00844" 12753 "s59E13H2" 0.01433931 "Histidine--tRNA ligase"  
"JS1\_D03\_00844" 12753 "s59E25H2" 0 "Histidine--tRNA ligase"  
"JS1\_D03\_00844" 12753 "s59E5H2" 0.04529177 "Histidine--tRNA ligase"  
"JS1\_D03\_00844" 12753 "s63E6H2" 0.1103311 "Histidine--tRNA ligase"  
"JS1\_D03\_00845" 12754 "s59E13H2" 0.0248115 "Asparagine--tRNA ligase"  
"JS1\_D03\_00845" 12754 "s59E25H2" 0 "Asparagine--tRNA ligase"  
"JS1\_D03\_00845" 12754 "s59E5H2" 0.06523471 "Asparagine--tRNA ligase"  
"JS1\_D03\_00845" 12754 "s63E6H2" 0.1979053 "Asparagine--tRNA ligase"  
"JS1\_D03\_00846" 12755 "s59E13H2" 0.04303653 "hypothetical protein"  
"JS1\_D03\_00846" 12755 "s59E25H2" 0 "hypothetical protein"  
"JS1\_D03\_00846" 12755 "s59E5H2" 0.1467095 "hypothetical protein"  
"JS1\_D03\_00846" 12755 "s63E6H2" 0.1152553 "hypothetical protein"  
"JS1\_D03\_00847" 12756 "s59E13H2" 0.02956223 "Aspartate--tRNA ligase"  
"JS1\_D03\_00847" 12756 "s59E25H2" 0 "Aspartate--tRNA ligase"  
"JS1\_D03\_00847" 12756 "s59E5H2" 0.04654509 "Aspartate--tRNA ligase"  
"JS1\_D03\_00847" 12756 "s63E6H2" 0.1828242 "Aspartate--tRNA ligase"

"JS1\_D03\_00849" 12758 "s59E13H2" 0.004831284 "putative 5-formyltetrahydrofolate cyclo-ligase"  
"JS1\_D03\_00849" 12758 "s59E25H2" 0.4066318 "putative 5-formyltetrahydrofolate cyclo-ligase"  
"JS1\_D03\_00849" 12758 "s59E5H2" 0.006507327 "putative 5-formyltetrahydrofolate cyclo-ligase"  
"JS1\_D03\_00849" 12758 "s63E6H2" 0.0678907 "putative 5-formyltetrahydrofolate cyclo-ligase"  
"JS1\_D03\_00850" 12759 "s59E13H2" 0.02629313 "30S ribosomal protein S1"  
"JS1\_D03\_00850" 12759 "s59E25H2" 0 "30S ribosomal protein S1"  
"JS1\_D03\_00850" 12759 "s59E5H2" 0.02664396 "30S ribosomal protein S1"  
"JS1\_D03\_00850" 12759 "s63E6H2" 0.2976811 "30S ribosomal protein S1"  
"JS1\_D03\_00851" 12760 "s59E13H2" 0.005411264 "Type II secretion system protein E"  
"JS1\_D03\_00851" 12760 "s59E25H2" 0 "Type II secretion system protein E"  
"JS1\_D03\_00851" 12760 "s59E5H2" 0.06275754 "Type II secretion system protein E"  
"JS1\_D03\_00851" 12760 "s63E6H2" 0.2730552 "Type II secretion system protein E"  
"JS1\_D03\_00852" 12761 "s59E13H2" 0.009870843 "Alanine--tRNA ligase"  
"JS1\_D03\_00852" 12761 "s59E25H2" 0.09410431 "Alanine--tRNA ligase"  
"JS1\_D03\_00852" 12761 "s59E5H2" 0.0183684 "Alanine--tRNA ligase"  
"JS1\_D03\_00852" 12761 "s63E6H2" 0.1107506 "Alanine--tRNA ligase"  
"JS1\_D03\_00853" 12762 "s59E13H2" 0.006714079 "Putative Holliday junction resolvase"  
"JS1\_D03\_00853" 12762 "s59E25H2" 0 "Putative Holliday junction resolvase"  
"JS1\_D03\_00853" 12762 "s59E5H2" 0 "Putative Holliday junction resolvase"  
"JS1\_D03\_00853" 12762 "s63E6H2" 0.06939115 "Putative Holliday junction resolvase"  
"JS1\_D03\_00854" 12763 "s59E13H2" 0 "putative aminodeoxychorismate lyase"  
"JS1\_D03\_00854" 12763 "s59E25H2" 0 "putative aminodeoxychorismate lyase"  
"JS1\_D03\_00854" 12763 "s59E5H2" 0.004536393 "putative aminodeoxychorismate lyase"  
"JS1\_D03\_00854" 12763 "s63E6H2" 0.01866484 "putative aminodeoxychorismate lyase"  
"JS1\_D03\_00856" 12765 "s59E13H2" 0.03092238 "Methionine--tRNA ligase"  
"JS1\_D03\_00856" 12765 "s59E25H2" 0 "Methionine--tRNA ligase"  
"JS1\_D03\_00856" 12765 "s59E5H2" 0.05119124 "Methionine--tRNA ligase"  
"JS1\_D03\_00856" 12765 "s63E6H2" 0.05984572 "Methionine--tRNA ligase"  
"JS1\_D03\_00857" 12766 "s59E13H2" 0.003095485 "N5-glutamine S-adenosyl-L-methionine-dependent methyltransferase"  
"JS1\_D03\_00857" 12766 "s59E25H2" 0 "N5-glutamine S-adenosyl-L-methionine-dependent methyltransferase"  
"JS1\_D03\_00857" 12766 "s59E5H2" 0 "N5-glutamine S-adenosyl-L-methionine-dependent methyltransferase"  
"JS1\_D03\_00857" 12766 "s63E6H2" 0.005389441 "N5-glutamine S-adenosyl-L-methionine-dependent methyltransferase"  
"JS1\_D03\_00858" 12767 "s59E13H2" 0.004019322 "Ribosomal RNA small subunit methyltransferase I"  
"JS1\_D03\_00858" 12767 "s59E25H2" 0 "Ribosomal RNA small subunit methyltransferase I"  
"JS1\_D03\_00858" 12767 "s59E5H2" 0.03786477 "Ribosomal RNA small subunit methyltransferase I"  
"JS1\_D03\_00858" 12767 "s63E6H2" 0.04060573 "Ribosomal RNA small subunit methyltransferase I"  
"JS1\_D03\_00859" 12768 "s59E13H2" 0.01372609 "Release factor glutamine methyltransferase"  
"JS1\_D03\_00859" 12768 "s59E25H2" 0 "Release factor glutamine methyltransferase"  
"JS1\_D03\_00859" 12768 "s59E5H2" 0.07227163 "Release factor glutamine methyltransferase"  
"JS1\_D03\_00859" 12768 "s63E6H2" 0.09550615 "Release factor glutamine methyltransferase"  
"JS1\_D03\_00860" 12769 "s59E13H2" 0.007951581 "hypothetical protein"  
"JS1\_D03\_00860" 12769 "s59E25H2" 0 "hypothetical protein"  
"JS1\_D03\_00860" 12769 "s59E5H2" 0.08130603 "hypothetical protein"  
"JS1\_D03\_00860" 12769 "s63E6H2" 0.04038589 "hypothetical protein"  
"JS1\_D03\_00861" 12770 "s59E13H2" 0.0002622148 "DNA polymerase III subunit tau"  
"JS1\_D03\_00861" 12770 "s59E25H2" 0 "DNA polymerase III subunit tau"  
"JS1\_D03\_00861" 12770 "s59E5H2" 0.002299879 "DNA polymerase III subunit tau"



"JS1\_D03\_00861" 12770 "s63E6H2" 0.05011795 "DNA polymerase III subunit tau"  
"JS1\_D03\_00862" 12771 "s59E13H2" 0 "Thymidylate kinase"  
"JS1\_D03\_00862" 12771 "s59E25H2" 0 "Thymidylate kinase"  
"JS1\_D03\_00862" 12771 "s59E5H2" 0.066852 "Thymidylate kinase"  
"JS1\_D03\_00862" 12771 "s63E6H2" 0.04022601 "Thymidylate kinase"  
"JS1\_D03\_00863" 12772 "s59E13H2" 0.01088635 "Methylated protein"  
"JS1\_D03\_00863" 12772 "s59E25H2" 0 "Methylated protein"  
"JS1\_D03\_00863" 12772 "s59E5H2" 0.4223997 "Methylated protein"  
"JS1\_D03\_00863" 12772 "s63E6H2" 0.1211966 "Methylated protein"  
"JS1\_D03\_00864" 12773 "s59E13H2" 0.003727542 "Tagatose-6-phosphate kinase"  
"JS1\_D03\_00864" 12773 "s59E25H2" 0 "Tagatose-6-phosphate kinase"  
"JS1\_D03\_00864" 12773 "s59E5H2" 0.05768805 "Tagatose-6-phosphate kinase"  
"JS1\_D03\_00864" 12773 "s63E6H2" 0.08826373 "Tagatose-6-phosphate kinase"  
"JS1\_D03\_00865" 12774 "s59E13H2" 0.005152291 "Rhomboid protease GluP"  
"JS1\_D03\_00865" 12774 "s59E25H2" 0 "Rhomboid protease GluP"  
"JS1\_D03\_00865" 12774 "s59E5H2" 0.1482593 "Rhomboid protease GluP"  
"JS1\_D03\_00865" 12774 "s63E6H2" 0.08529018 "Rhomboid protease GluP"  
"JS1\_D03\_00866" 12775 "s59E13H2" 0.009075907 "UDP-N-acetylglucosamine 2-epimerase"  
"JS1\_D03\_00866" 12775 "s59E25H2" 0 "UDP-N-acetylglucosamine 2-epimerase"  
"JS1\_D03\_00866" 12775 "s59E5H2" 0.3784278 "UDP-N-acetylglucosamine 2-epimerase"  
"JS1\_D03\_00866" 12775 "s63E6H2" 0.1048336 "UDP-N-acetylglucosamine 2-epimerase"  
"JS1\_D03\_00867" 12776 "s59E13H2" 0.006798935 "tRNA-specific adenosine deaminase"  
"JS1\_D03\_00867" 12776 "s59E25H2" 0 "tRNA-specific adenosine deaminase"  
"JS1\_D03\_00867" 12776 "s59E5H2" 0.2462431 "tRNA-specific adenosine deaminase"  
"JS1\_D03\_00867" 12776 "s63E6H2" 0.08228948 "tRNA-specific adenosine deaminase"  
"JS1\_D03\_00868" 12777 "s59E13H2" 0.02322947 "Uracil phosphoribosyltransferase"  
"JS1\_D03\_00868" 12777 "s59E25H2" 0 "Uracil phosphoribosyltransferase"  
"JS1\_D03\_00868" 12777 "s59E5H2" 0.5535149 "Uracil phosphoribosyltransferase"  
"JS1\_D03\_00868" 12777 "s63E6H2" 0.2090021 "Uracil phosphoribosyltransferase"  
"JS1\_D03\_00869" 12778 "s59E13H2" 0 "Putative sugar phosphate isomerase YwIF"  
"JS1\_D03\_00869" 12778 "s59E25H2" 0 "Putative sugar phosphate isomerase YwIF"  
"JS1\_D03\_00869" 12778 "s59E5H2" 0 "Putative sugar phosphate isomerase YwIF"  
"JS1\_D03\_00869" 12778 "s63E6H2" 0.06881809 "Putative sugar phosphate isomerase YwIF"  
"JS1\_D03\_00870" 12779 "s59E13H2" 0 "Low molecular weight protein-tyrosine-phosphatase YwIE"  
"JS1\_D03\_00870" 12779 "s59E25H2" 0 "Low molecular weight protein-tyrosine-phosphatase YwIE"  
"JS1\_D03\_00870" 12779 "s59E5H2" 0 "Low molecular weight protein-tyrosine-phosphatase YwIE"  
"JS1\_D03\_00870" 12779 "s63E6H2" 0.06058537 "Low molecular weight protein-tyrosine-phosphatase YwIE"  
"JS1\_D03\_00871" 12780 "s59E13H2" 0.007764028 "Release factor glutamine methyltransferase"  
"JS1\_D03\_00871" 12780 "s59E25H2" 0 "Release factor glutamine methyltransferase"  
"JS1\_D03\_00871" 12780 "s59E5H2" 0.01095003 "Release factor glutamine methyltransferase"  
"JS1\_D03\_00871" 12780 "s63E6H2" 0.05248053 "Release factor glutamine methyltransferase"  
"JS1\_D03\_00872" 12781 "s59E13H2" 0.06210026 "Peptide chain release factor 1"  
"JS1\_D03\_00872" 12781 "s59E25H2" 0 "Peptide chain release factor 1"  
"JS1\_D03\_00872" 12781 "s59E5H2" 0.03719162 "Peptide chain release factor 1"  
"JS1\_D03\_00872" 12781 "s63E6H2" 0.1018778 "Peptide chain release factor 1"  
"JS1\_D03\_00875" 12784 "s59E13H2" 0 "AAA-like domain protein"  
"JS1\_D03\_00875" 12784 "s59E25H2" 0 "AAA-like domain protein"

"JS1\_D03\_00875" 12784 "s59E5H2" 0 "AAA-like domain protein"  
"JS1\_D03\_00875" 12784 "s63E6H2" 0.001318368 "AAA-like domain protein"  
"JS1\_D03\_00876" 12785 "s59E13H2" 0 "hypothetical protein"  
"JS1\_D03\_00876" 12785 "s59E25H2" 0 "hypothetical protein"  
"JS1\_D03\_00876" 12785 "s59E5H2" 0 "hypothetical protein"  
"JS1\_D03\_00876" 12785 "s63E6H2" 0 "hypothetical protein"  
"JS1\_D03\_00877" 12786 "s59E13H2" 0 "hypothetical protein"  
"JS1\_D03\_00877" 12786 "s59E25H2" 0 "hypothetical protein"  
"JS1\_D03\_00877" 12786 "s59E5H2" 0 "hypothetical protein"  
"JS1\_D03\_00877" 12786 "s63E6H2" 0 "hypothetical protein"  
"JS1\_D03\_00878" 12787 "s59E13H2" 0.01852999 "Transposase IS200 like protein"  
"JS1\_D03\_00878" 12787 "s59E25H2" 0 "Transposase IS200 like protein"  
"JS1\_D03\_00878" 12787 "s59E5H2" 0.07310172 "Transposase IS200 like protein"  
"JS1\_D03\_00878" 12787 "s63E6H2" 0.6205662 "Transposase IS200 like protein"  
"JS1\_D03\_00879" 12788 "s59E13H2" 0.08742969 "Naphthalene 1,2-dioxygenase/salicylate 5-hydroxylase systems, ferredoxin component"  
"JS1\_D03\_00879" 12788 "s59E25H2" 0 "Naphthalene 1,2-dioxygenase/salicylate 5-hydroxylase systems, ferredoxin component"  
"JS1\_D03\_00879" 12788 "s59E5H2" 0.01827504 "Naphthalene 1,2-dioxygenase/salicylate 5-hydroxylase systems, ferredoxin component"  
"JS1\_D03\_00879" 12788 "s63E6H2" 0.2588304 "Naphthalene 1,2-dioxygenase/salicylate 5-hydroxylase systems, ferredoxin component"  
"JS1\_D03\_00880" 12789 "s59E13H2" 0.02887075 "hypothetical protein"  
"JS1\_D03\_00880" 12789 "s59E25H2" 0 "hypothetical protein"  
"JS1\_D03\_00880" 12789 "s59E5H2" 0.03091977 "hypothetical protein"  
"JS1\_D03\_00880" 12789 "s63E6H2" 0.03531274 "hypothetical protein"  
"JS1\_D03\_00882" 12791 "s59E13H2" 9.002466 "Sodium-dependent dicarboxylate transporter SdcS"  
"JS1\_D03\_00882" 12791 "s59E25H2" 0 "Sodium-dependent dicarboxylate transporter SdcS"  
"JS1\_D03\_00882" 12791 "s59E5H2" 1.281996 "Sodium-dependent dicarboxylate transporter SdcS"  
"JS1\_D03\_00882" 12791 "s63E6H2" 2.797765 "Sodium-dependent dicarboxylate transporter SdcS"  
"JS1\_D03\_00883" 12792 "s59E13H2" 8.209836 "Beta-lactamase hydrolase-like protein"  
"JS1\_D03\_00883" 12792 "s59E25H2" 0 "Beta-lactamase hydrolase-like protein"  
"JS1\_D03\_00883" 12792 "s59E5H2" 2.136613 "Beta-lactamase hydrolase-like protein"  
"JS1\_D03\_00883" 12792 "s63E6H2" 3.791791 "Beta-lactamase hydrolase-like protein"  
"JS1\_D03\_00884" 12793 "s59E13H2" 9.641028 "putative inner membrane protein"  
"JS1\_D03\_00884" 12793 "s59E25H2" 0 "putative inner membrane protein"  
"JS1\_D03\_00884" 12793 "s59E5H2" 2.617411 "putative inner membrane protein"  
"JS1\_D03\_00884" 12793 "s63E6H2" 3.922533 "putative inner membrane protein"  
"JS1\_D03\_00885" 12794 "s59E13H2" 10.42227 "putative inner membrane protein"  
"JS1\_D03\_00885" 12794 "s59E25H2" 0 "putative inner membrane protein"  
"JS1\_D03\_00885" 12794 "s59E5H2" 2.765254 "putative inner membrane protein"  
"JS1\_D03\_00885" 12794 "s63E6H2" 3.450068 "putative inner membrane protein"  
"JS1\_D03\_00888" 12797 "s59E13H2" 0.2107026 "DNA alkylation repair enzyme"  
"JS1\_D03\_00888" 12797 "s59E25H2" 0 "DNA alkylation repair enzyme"  
"JS1\_D03\_00888" 12797 "s59E5H2" 0.01997395 "DNA alkylation repair enzyme"  
"JS1\_D03\_00888" 12797 "s63E6H2" 0.7095497 "DNA alkylation repair enzyme"  
"JS1\_D03\_00889" 12798 "s59E13H2" 0.6078392 "NADPH-dependent oxidoreductase"  
"JS1\_D03\_00889" 12798 "s59E25H2" 0 "NADPH-dependent oxidoreductase"  
"JS1\_D03\_00889" 12798 "s59E5H2" 0.02420568 "NADPH-dependent oxidoreductase"  
"JS1\_D03\_00889" 12798 "s63E6H2" 0.9324695 "NADPH-dependent oxidoreductase"  
"JS1\_D03\_00890" 12799 "s59E13H2" 0 "hypothetical protein"

"JS1\_D03\_00890" 12799 "s59E25H2" 0 "hypothetical protein"  
"JS1\_D03\_00890" 12799 "s59E5H2" 0 "hypothetical protein"  
"JS1\_D03\_00890" 12799 "s63E6H2" 0 "hypothetical protein"  
"JS1\_D03\_00891" 12800 "s59E13H2" 0 "hypothetical protein"  
"JS1\_D03\_00891" 12800 "s59E25H2" 0 "hypothetical protein"  
"JS1\_D03\_00891" 12800 "s59E5H2" 0 "hypothetical protein"  
"JS1\_D03\_00891" 12800 "s63E6H2" 0.00368934 "hypothetical protein"  
"JS1\_D03\_00892" 12801 "s59E13H2" 0.6077088 "ADP-ribosyl-[dinitrogen reductase] glycohydrolase"  
"JS1\_D03\_00892" 12801 "s59E25H2" 0 "ADP-ribosyl-[dinitrogen reductase] glycohydrolase"  
"JS1\_D03\_00892" 12801 "s59E5H2" 0.01420785 "ADP-ribosyl-[dinitrogen reductase] glycohydrolase"  
"JS1\_D03\_00892" 12801 "s63E6H2" 0.008321297 "ADP-ribosyl-[dinitrogen reductase] glycohydrolase"  
"JS1\_D03\_00893" 12802 "s59E13H2" 0.2519232 "ubiquinone/menaquinone biosynthesis methyltransferase"  
"JS1\_D03\_00893" 12802 "s59E25H2" 0 "ubiquinone/menaquinone biosynthesis methyltransferase"  
"JS1\_D03\_00893" 12802 "s59E5H2" 0.08907064 "ubiquinone/menaquinone biosynthesis methyltransferase"  
"JS1\_D03\_00893" 12802 "s63E6H2" 0.02479443 "ubiquinone/menaquinone biosynthesis methyltransferase"  
"JS1\_D03\_00894" 12803 "s59E13H2" 0 "Trehalose/maltose-binding protein MalE precursor"  
"JS1\_D03\_00894" 12803 "s59E25H2" 0 "Trehalose/maltose-binding protein MalE precursor"  
"JS1\_D03\_00894" 12803 "s59E5H2" 0 "Trehalose/maltose-binding protein MalE precursor"  
"JS1\_D03\_00894" 12803 "s63E6H2" 0.1339024 "Trehalose/maltose-binding protein MalE precursor"  
"JS1\_D03\_00895" 12804 "s59E13H2" 0 "Trehalose/maltose transport system permease protein MalF"  
"JS1\_D03\_00895" 12804 "s59E25H2" 0 "Trehalose/maltose transport system permease protein MalF"  
"JS1\_D03\_00895" 12804 "s59E5H2" 0.02090842 "Trehalose/maltose transport system permease protein MalF"  
"JS1\_D03\_00895" 12804 "s63E6H2" 0.1811819 "Trehalose/maltose transport system permease protein MalF"  
"JS1\_D03\_00896" 12805 "s59E13H2" 0 "Trehalose/maltose transport system permease protein MalG"  
"JS1\_D03\_00896" 12805 "s59E25H2" 0 "Trehalose/maltose transport system permease protein MalG"  
"JS1\_D03\_00896" 12805 "s59E5H2" 0.0102719 "Trehalose/maltose transport system permease protein MalG"  
"JS1\_D03\_00896" 12805 "s63E6H2" 0.1594432 "Trehalose/maltose transport system permease protein MalG"  
"JS1\_D03\_00898" 12807 "s59E13H2" 0.07941888 "putative tautomerase"  
"JS1\_D03\_00898" 12807 "s59E25H2" 0 "putative tautomerase"  
"JS1\_D03\_00898" 12807 "s59E5H2" 0 "putative tautomerase"  
"JS1\_D03\_00898" 12807 "s63E6H2" 1.862546 "putative tautomerase"  
"JS1\_D03\_00899" 12808 "s59E13H2" 0.002163962 "hypothetical protein"  
"JS1\_D03\_00899" 12808 "s59E25H2" 0 "hypothetical protein"  
"JS1\_D03\_00899" 12808 "s59E5H2" 0.1266316 "hypothetical protein"  
"JS1\_D03\_00899" 12808 "s63E6H2" 1.227341 "hypothetical protein"  
"JS1\_D03\_00900" 12809 "s59E13H2" 1.065714 "Acetyl-CoA decarboxylase/synthase complex subunit gamma"  
"JS1\_D03\_00900" 12809 "s59E25H2" 0 "Acetyl-CoA decarboxylase/synthase complex subunit gamma"  
"JS1\_D03\_00900" 12809 "s59E5H2" 0.0844768 "Acetyl-CoA decarboxylase/synthase complex subunit gamma"  
"JS1\_D03\_00900" 12809 "s63E6H2" 2.276639 "Acetyl-CoA decarboxylase/synthase complex subunit gamma"  
"JS1\_D03\_00901" 12810 "s59E13H2" 1.106867 "Ferredoxin"  
"JS1\_D03\_00901" 12810 "s59E25H2" 0 "Ferredoxin"  
"JS1\_D03\_00901" 12810 "s59E5H2" 0.1161841 "Ferredoxin"  
"JS1\_D03\_00901" 12810 "s63E6H2" 1.754361 "Ferredoxin"  
"JS1\_D03\_00902" 12811 "s59E13H2" 0.02003371 "hypothetical protein"  
"JS1\_D03\_00902" 12811 "s59E25H2" 0 "hypothetical protein"  
"JS1\_D03\_00902" 12811 "s59E5H2" 0.02956945 "hypothetical protein"  
"JS1\_D03\_00902" 12811 "s63E6H2" 0.227083 "hypothetical protein"

"JS1\_D03\_00903" 12812 "s59E13H2" 0.005761894 "hypothetical protein"  
"JS1\_D03\_00903" 12812 "s59E25H2" 0 "hypothetical protein"  
"JS1\_D03\_00903" 12812 "s59E5H2" 0.02391632 "hypothetical protein"  
"JS1\_D03\_00903" 12812 "s63E6H2" 0.3831558 "hypothetical protein"  
"JS1\_D03\_00904" 12813 "s59E13H2" 2.387085 "hypothetical protein"  
"JS1\_D03\_00904" 12813 "s59E25H2" 0 "hypothetical protein"  
"JS1\_D03\_00904" 12813 "s59E5H2" 0.05790818 "hypothetical protein"  
"JS1\_D03\_00904" 12813 "s63E6H2" 0.05706378 "hypothetical protein"  
"JS1\_D03\_00906" 12815 "s59E13H2" 0.001488012 "50S ribosomal protein L29"  
"JS1\_D03\_00906" 12815 "s59E25H2" 0 "50S ribosomal protein L29"  
"JS1\_D03\_00906" 12815 "s59E5H2" 0 "50S ribosomal protein L29"  
"JS1\_D03\_00906" 12815 "s63E6H2" 0.03922805 "50S ribosomal protein L29"  
"JS1\_D03\_00907" 12816 "s59E13H2" 0.004529223 "30S ribosomal protein S17"  
"JS1\_D03\_00907" 12816 "s59E25H2" 0 "30S ribosomal protein S17"  
"JS1\_D03\_00907" 12816 "s59E5H2" 0 "30S ribosomal protein S17"  
"JS1\_D03\_00907" 12816 "s63E6H2" 0.06651874 "30S ribosomal protein S17"  
"JS1\_D03\_00908" 12817 "s59E13H2" 0.009198724 "50S ribosomal protein L14"  
"JS1\_D03\_00908" 12817 "s59E25H2" 0 "50S ribosomal protein L14"  
"JS1\_D03\_00908" 12817 "s59E5H2" 0.01313634 "50S ribosomal protein L14"  
"JS1\_D03\_00908" 12817 "s63E6H2" 0.08901464 "50S ribosomal protein L14"  
"JS1\_D03\_00909" 12818 "s59E13H2" 0.0032167 "50S ribosomal protein L24"  
"JS1\_D03\_00909" 12818 "s59E25H2" 0 "50S ribosomal protein L24"  
"JS1\_D03\_00909" 12818 "s59E5H2" 0.01611436 "50S ribosomal protein L24"  
"JS1\_D03\_00909" 12818 "s63E6H2" 0.1013032 "50S ribosomal protein L24"  
"JS1\_D03\_00910" 12819 "s59E13H2" 0 "50S ribosomal protein L5"  
"JS1\_D03\_00910" 12819 "s59E25H2" 0 "50S ribosomal protein L5"  
"JS1\_D03\_00910" 12819 "s59E5H2" 0.01305945 "50S ribosomal protein L5"  
"JS1\_D03\_00910" 12819 "s63E6H2" 0.07735333 "50S ribosomal protein L5"  
"JS1\_D03\_00911" 12820 "s59E13H2" 0 "30S ribosomal protein S14 type Z"  
"JS1\_D03\_00911" 12820 "s59E25H2" 0 "30S ribosomal protein S14 type Z"  
"JS1\_D03\_00911" 12820 "s59E5H2" 0 "30S ribosomal protein S14 type Z"  
"JS1\_D03\_00911" 12820 "s63E6H2" 0.009282356 "30S ribosomal protein S14 type Z"  
"JS1\_D03\_00914" 12823 "s59E13H2" 0.001703851 "hypothetical protein"  
"JS1\_D03\_00914" 12823 "s59E25H2" 0 "hypothetical protein"  
"JS1\_D03\_00914" 12823 "s59E5H2" 0.006258483 "hypothetical protein"  
"JS1\_D03\_00914" 12823 "s63E6H2" 0.05773911 "hypothetical protein"  
"JS1\_D03\_00915" 12824 "s59E13H2" 0.0008406544 "LPS-assembly protein LptD"  
"JS1\_D03\_00915" 12824 "s59E25H2" 0 "LPS-assembly protein LptD"  
"JS1\_D03\_00915" 12824 "s59E5H2" 0.01698571 "LPS-assembly protein LptD"  
"JS1\_D03\_00915" 12824 "s63E6H2" 0.187216 "LPS-assembly protein LptD"  
"JS1\_D03\_00917" 12826 "s59E13H2" 0.002227963 "ATP-dependent helicase/deoxyribonuclease subunit B"  
"JS1\_D03\_00917" 12826 "s59E25H2" 0 "ATP-dependent helicase/deoxyribonuclease subunit B"  
"JS1\_D03\_00917" 12826 "s59E5H2" 0.06330899 "ATP-dependent helicase/deoxyribonuclease subunit B"  
"JS1\_D03\_00917" 12826 "s63E6H2" 0.5992307 "ATP-dependent helicase/deoxyribonuclease subunit B"  
"JS1\_D03\_00918" 12827 "s59E13H2" 0.001572989 "ATP-dependent helicase/nuclease subunit A"  
"JS1\_D03\_00918" 12827 "s59E25H2" 0 "ATP-dependent helicase/nuclease subunit A"  
"JS1\_D03\_00918" 12827 "s59E5H2" 0.1806982 "ATP-dependent helicase/nuclease subunit A"

"JS1\_D03\_00918" 12827 "s63E6H2" 0.5552767 "ATP-dependent helicase/nuclease subunit A"  
"JS1\_D03\_00919" 12828 "s59E13H2" 0.04528248 "DegV domain-containing protein"  
"JS1\_D03\_00919" 12828 "s59E25H2" 0 "DegV domain-containing protein"  
"JS1\_D03\_00919" 12828 "s59E5H2" 0.3038736 "DegV domain-containing protein"  
"JS1\_D03\_00919" 12828 "s63E6H2" 1.46318 "DegV domain-containing protein"  
"JS1\_D03\_00920" 12829 "s59E13H2" 0 "protease TldD"  
"JS1\_D03\_00920" 12829 "s59E25H2" 0 "protease TldD"  
"JS1\_D03\_00920" 12829 "s59E5H2" 0 "protease TldD"  
"JS1\_D03\_00920" 12829 "s63E6H2" 1.157671 "protease TldD"  
"JS1\_D03\_00921" 12830 "s59E13H2" 0 "Putative modulator of DNA gyrase"  
"JS1\_D03\_00921" 12830 "s59E25H2" 0 "Putative modulator of DNA gyrase"  
"JS1\_D03\_00921" 12830 "s59E5H2" 0.004956607 "Putative modulator of DNA gyrase"  
"JS1\_D03\_00921" 12830 "s63E6H2" 1.658971 "Putative modulator of DNA gyrase"  
"JS1\_D03\_00922" 12831 "s59E13H2" 0 "HTH-type transcriptional repressor KstR2"  
"JS1\_D03\_00922" 12831 "s59E25H2" 0 "HTH-type transcriptional repressor KstR2"  
"JS1\_D03\_00922" 12831 "s59E5H2" 0 "HTH-type transcriptional repressor KstR2"  
"JS1\_D03\_00922" 12831 "s63E6H2" 1.524492 "HTH-type transcriptional repressor KstR2"  
"JS1\_D03\_00923" 12832 "s59E13H2" 0 "hypothetical protein"  
"JS1\_D03\_00923" 12832 "s59E25H2" 0 "hypothetical protein"  
"JS1\_D03\_00923" 12832 "s59E5H2" 0.001604081 "hypothetical protein"  
"JS1\_D03\_00923" 12832 "s63E6H2" 1.415459 "hypothetical protein"  
"JS1\_D03\_00924" 12833 "s59E13H2" 0.1003009 "hypothetical protein"  
"JS1\_D03\_00924" 12833 "s59E25H2" 0 "hypothetical protein"  
"JS1\_D03\_00924" 12833 "s59E5H2" 0.4846128 "hypothetical protein"  
"JS1\_D03\_00924" 12833 "s63E6H2" 0.6842811 "hypothetical protein"  
"JS1\_D03\_00925" 12834 "s59E13H2" 0.2038215 "MMPL family protein"  
"JS1\_D03\_00925" 12834 "s59E25H2" 0 "MMPL family protein"  
"JS1\_D03\_00925" 12834 "s59E5H2" 0.4379199 "MMPL family protein"  
"JS1\_D03\_00925" 12834 "s63E6H2" 0.690365 "MMPL family protein"  
"JS1\_D03\_00926" 12835 "s59E13H2" 0.001908037 "Protein-export membrane protein SecF"  
"JS1\_D03\_00926" 12835 "s59E25H2" 0 "Protein-export membrane protein SecF"  
"JS1\_D03\_00926" 12835 "s59E5H2" 0.1612314 "Protein-export membrane protein SecF"  
"JS1\_D03\_00926" 12835 "s63E6H2" 0.2132535 "Protein-export membrane protein SecF"  
"JS1\_D03\_00927" 12836 "s59E13H2" 0.003369958 "Radical SAM superfamily protein"  
"JS1\_D03\_00927" 12836 "s59E25H2" 0 "Radical SAM superfamily protein"  
"JS1\_D03\_00927" 12836 "s59E5H2" 0.06924546 "Radical SAM superfamily protein"  
"JS1\_D03\_00927" 12836 "s63E6H2" 0.05986215 "Radical SAM superfamily protein"  
"JS1\_D03\_00928" 12837 "s59E13H2" 0.1358425 "Biotin transporter BioY"  
"JS1\_D03\_00928" 12837 "s59E25H2" 0.4588015 "Biotin transporter BioY"  
"JS1\_D03\_00928" 12837 "s59E5H2" 1.383765 "Biotin transporter BioY"  
"JS1\_D03\_00928" 12837 "s63E6H2" 4.322341 "Biotin transporter BioY"  
"JS1\_D03\_00929" 12838 "s59E13H2" 0.02334421 "Bifunctional ligase/repressor BirA"  
"JS1\_D03\_00929" 12838 "s59E25H2" 0 "Bifunctional ligase/repressor BirA"  
"JS1\_D03\_00929" 12838 "s59E5H2" 0.3652774 "Bifunctional ligase/repressor BirA"  
"JS1\_D03\_00929" 12838 "s63E6H2" 9.907234 "Bifunctional ligase/repressor BirA"  
"JS1\_D03\_00930" 12839 "s59E13H2" 0.01859939 "hypothetical protein"  
"JS1\_D03\_00930" 12839 "s59E25H2" 0 "hypothetical protein"

"JS1\_D03\_00930" 12839 "s59E5H2" 0.5634372 "hypothetical protein"  
"JS1\_D03\_00930" 12839 "s63E6H2" 0.05766385 "hypothetical protein"  
"JS1\_D03\_00931" 12840 "s59E13H2" 0.03866041 "Deoxyadenosine/deoxycytidine kinase"  
"JS1\_D03\_00931" 12840 "s59E25H2" 0 "Deoxyadenosine/deoxycytidine kinase"  
"JS1\_D03\_00931" 12840 "s59E5H2" 0.7443377 "Deoxyadenosine/deoxycytidine kinase"  
"JS1\_D03\_00931" 12840 "s63E6H2" 5.922614 "Deoxyadenosine/deoxycytidine kinase"  
"JS1\_D03\_00932" 12841 "s59E13H2" 0.1431969 "Deoxyguanosine kinase"  
"JS1\_D03\_00932" 12841 "s59E25H2" 0 "Deoxyguanosine kinase"  
"JS1\_D03\_00932" 12841 "s59E5H2" 1.305353 "Deoxyguanosine kinase"  
"JS1\_D03\_00932" 12841 "s63E6H2" 6.822738 "Deoxyguanosine kinase"  
"JS1\_D03\_00933" 12842 "s59E13H2" 0.09452658 "Octanoyltransferase LipM"  
"JS1\_D03\_00933" 12842 "s59E25H2" 0 "Octanoyltransferase LipM"  
"JS1\_D03\_00933" 12842 "s59E5H2" 0.4336309 "Octanoyltransferase LipM"  
"JS1\_D03\_00933" 12842 "s63E6H2" 5.141081 "Octanoyltransferase LipM"  
"JS1\_D03\_00934" 12843 "s59E13H2" 0.4907384 "Carbon starvation protein A"  
"JS1\_D03\_00934" 12843 "s59E25H2" 0 "Carbon starvation protein A"  
"JS1\_D03\_00934" 12843 "s59E5H2" 0.04830311 "Carbon starvation protein A"  
"JS1\_D03\_00934" 12843 "s63E6H2" 0.1227669 "Carbon starvation protein A"  
"JS1\_D03\_00937" 12846 "s59E13H2" 0.002482836 "hypothetical protein"  
"JS1\_D03\_00937" 12846 "s59E25H2" 0 "hypothetical protein"  
"JS1\_D03\_00937" 12846 "s59E5H2" 0 "hypothetical protein"  
"JS1\_D03\_00937" 12846 "s63E6H2" 0 "hypothetical protein"  
"JS1\_D03\_00939" 12848 "s59E13H2" 0.5607256 "Radical SAM superfamily protein"  
"JS1\_D03\_00939" 12848 "s59E25H2" 0 "Radical SAM superfamily protein"  
"JS1\_D03\_00939" 12848 "s59E5H2" 0.485917 "Radical SAM superfamily protein"  
"JS1\_D03\_00939" 12848 "s63E6H2" 0.02367723 "Radical SAM superfamily protein"  
"JS1\_D03\_00940" 12849 "s59E13H2" 0.2474891 "Septum site-determining protein MinD"  
"JS1\_D03\_00940" 12849 "s59E25H2" 0 "Septum site-determining protein MinD"  
"JS1\_D03\_00940" 12849 "s59E5H2" 0.7124935 "Septum site-determining protein MinD"  
"JS1\_D03\_00940" 12849 "s63E6H2" 0.1030043 "Septum site-determining protein MinD"  
"JS1\_D03\_00941" 12850 "s59E13H2" 0.2272633 "Heterodisulfide reductase subunit A-like protein"  
"JS1\_D03\_00941" 12850 "s59E25H2" 0 "Heterodisulfide reductase subunit A-like protein"  
"JS1\_D03\_00941" 12850 "s59E5H2" 0.2153293 "Heterodisulfide reductase subunit A-like protein"  
"JS1\_D03\_00941" 12850 "s63E6H2" 0.265483 "Heterodisulfide reductase subunit A-like protein"  
"JS1\_D03\_00942" 12851 "s59E13H2" 0.1348757 "Dinitrogenase iron-molybdenum cofactor"  
"JS1\_D03\_00942" 12851 "s59E25H2" 0 "Dinitrogenase iron-molybdenum cofactor"  
"JS1\_D03\_00942" 12851 "s59E5H2" 0.02275331 "Dinitrogenase iron-molybdenum cofactor"  
"JS1\_D03\_00942" 12851 "s63E6H2" 0.0320115 "Dinitrogenase iron-molybdenum cofactor"  
"JS1\_D03\_00943" 12852 "s59E13H2" 0.2710042 "Dinitrogenase iron-molybdenum cofactor"  
"JS1\_D03\_00943" 12852 "s59E25H2" 0 "Dinitrogenase iron-molybdenum cofactor"  
"JS1\_D03\_00943" 12852 "s59E5H2" 0.2488435 "Dinitrogenase iron-molybdenum cofactor"  
"JS1\_D03\_00943" 12852 "s63E6H2" 0.08621388 "Dinitrogenase iron-molybdenum cofactor"  
"JS1\_D03\_00944" 12853 "s59E13H2" 0.09036425 "hypothetical protein"  
"JS1\_D03\_00944" 12853 "s59E25H2" 0 "hypothetical protein"  
"JS1\_D03\_00944" 12853 "s59E5H2" 0.008401038 "hypothetical protein"  
"JS1\_D03\_00944" 12853 "s63E6H2" 0.02496425 "hypothetical protein"  
"JS1\_D03\_00945" 12854 "s59E13H2" 0.5922832 "Ferric uptake regulation protein"

"JS1\_D03\_00945" 12854 "s59E25H2" 0 "Ferric uptake regulation protein"  
"JS1\_D03\_00945" 12854 "s59E5H2" 0.2830636 "Ferric uptake regulation protein"  
"JS1\_D03\_00945" 12854 "s63E6H2" 0.1457256 "Ferric uptake regulation protein"  
"JS1\_D03\_00946" 12855 "s59E13H2" 0.2833449 "hypothetical protein"  
"JS1\_D03\_00946" 12855 "s59E25H2" 0 "hypothetical protein"  
"JS1\_D03\_00946" 12855 "s59E5H2" 0.3761275 "hypothetical protein"  
"JS1\_D03\_00946" 12855 "s63E6H2" 0.4676567 "hypothetical protein"  
"JS1\_D03\_00947" 12856 "s59E13H2" 0.05020511 "FeoA domain protein"  
"JS1\_D03\_00947" 12856 "s59E25H2" 0 "FeoA domain protein"  
"JS1\_D03\_00947" 12856 "s59E5H2" 0.03803522 "FeoA domain protein"  
"JS1\_D03\_00947" 12856 "s63E6H2" 0.3786046 "FeoA domain protein"  
"JS1\_D03\_00948" 12857 "s59E13H2" 0.0706098 "Transcriptional regulator MntR"  
"JS1\_D03\_00948" 12857 "s59E25H2" 0 "Transcriptional regulator MntR"  
"JS1\_D03\_00948" 12857 "s59E5H2" 0.1305711 "Transcriptional regulator MntR"  
"JS1\_D03\_00948" 12857 "s63E6H2" 0.3286106 "Transcriptional regulator MntR"  
"JS1\_D03\_00949" 12858 "s59E13H2" 0.1101653 "Sulfur carrier protein ThiS"  
"JS1\_D03\_00949" 12858 "s59E25H2" 0 "Sulfur carrier protein ThiS"  
"JS1\_D03\_00949" 12858 "s59E5H2" 0.01310039 "Sulfur carrier protein ThiS"  
"JS1\_D03\_00949" 12858 "s63E6H2" 0.1031637 "Sulfur carrier protein ThiS"  
"JS1\_D03\_00950" 12859 "s59E13H2" 0.7562648 "Tungsten-containing aldehyde ferredoxin oxidoreductase"  
"JS1\_D03\_00950" 12859 "s59E25H2" 0 "Tungsten-containing aldehyde ferredoxin oxidoreductase"  
"JS1\_D03\_00950" 12859 "s59E5H2" 0.4496892 "Tungsten-containing aldehyde ferredoxin oxidoreductase"  
"JS1\_D03\_00950" 12859 "s63E6H2" 1.139144 "Tungsten-containing aldehyde ferredoxin oxidoreductase"  
"JS1\_D03\_00951" 12860 "s59E13H2" 1.449334 "Malate-2H(+)/Na(+)-lactate antiporter"  
"JS1\_D03\_00951" 12860 "s59E25H2" 0 "Malate-2H(+)/Na(+)-lactate antiporter"  
"JS1\_D03\_00951" 12860 "s59E5H2" 0.5064043 "Malate-2H(+)/Na(+)-lactate antiporter"  
"JS1\_D03\_00951" 12860 "s63E6H2" 0.7465476 "Malate-2H(+)/Na(+)-lactate antiporter"  
"JS1\_D03\_00952" 12861 "s59E13H2" 0.01873184 "Cyclic 2,3-diphosphoglycerate synthetase"  
"JS1\_D03\_00952" 12861 "s59E25H2" 0 "Cyclic 2,3-diphosphoglycerate synthetase"  
"JS1\_D03\_00952" 12861 "s59E5H2" 0.05790254 "Cyclic 2,3-diphosphoglycerate synthetase"  
"JS1\_D03\_00952" 12861 "s63E6H2" 0.3003105 "Cyclic 2,3-diphosphoglycerate synthetase"  
"JS1\_D03\_00953" 12862 "s59E13H2" 0.04616808 "5-aminovalerate aminotransferase DavT"  
"JS1\_D03\_00953" 12862 "s59E25H2" 0 "5-aminovalerate aminotransferase DavT"  
"JS1\_D03\_00953" 12862 "s59E5H2" 0.09976738 "5-aminovalerate aminotransferase DavT"  
"JS1\_D03\_00953" 12862 "s63E6H2" 0.4121013 "5-aminovalerate aminotransferase DavT"  
"JS1\_D03\_00954" 12863 "s59E13H2" 0.3654005 "Lysine 6-dehydrogenase"  
"JS1\_D03\_00954" 12863 "s59E25H2" 0 "Lysine 6-dehydrogenase"  
"JS1\_D03\_00954" 12863 "s59E5H2" 0.2787116 "Lysine 6-dehydrogenase"  
"JS1\_D03\_00954" 12863 "s63E6H2" 0.988346 "Lysine 6-dehydrogenase"  
"JS1\_D03\_00956" 12865 "s59E13H2" 0.1738898 "Lysine 6-dehydrogenase"  
"JS1\_D03\_00956" 12865 "s59E25H2" 0 "Lysine 6-dehydrogenase"  
"JS1\_D03\_00956" 12865 "s59E5H2" 0.1343278 "Lysine 6-dehydrogenase"  
"JS1\_D03\_00956" 12865 "s63E6H2" 0.4966999 "Lysine 6-dehydrogenase"  
"JS1\_D03\_00957" 12866 "s59E13H2" 0 "2-oxoglutarate synthase subunit KorC"  
"JS1\_D03\_00957" 12866 "s59E25H2" 0 "2-oxoglutarate synthase subunit KorC"  
"JS1\_D03\_00957" 12866 "s59E5H2" 0 "2-oxoglutarate synthase subunit KorC"  
"JS1\_D03\_00957" 12866 "s63E6H2" 0.0261851 "2-oxoglutarate synthase subunit KorC"

"JS1\_D03\_00958" 12867 "s59E13H2" 0 "2-oxoglutarate synthase subunit KorB"  
"JS1\_D03\_00958" 12867 "s59E25H2" 0 "2-oxoglutarate synthase subunit KorB"  
"JS1\_D03\_00958" 12867 "s59E5H2" 0 "2-oxoglutarate synthase subunit KorB"  
"JS1\_D03\_00958" 12867 "s63E6H2" 0.02053152 "2-oxoglutarate synthase subunit KorB"  
"JS1\_D03\_00959" 12868 "s59E13H2" 0.0023246 "2-oxoglutarate synthase subunit KorA"  
"JS1\_D03\_00959" 12868 "s59E25H2" 0 "2-oxoglutarate synthase subunit KorA"  
"JS1\_D03\_00959" 12868 "s59E5H2" 0 "2-oxoglutarate synthase subunit KorA"  
"JS1\_D03\_00959" 12868 "s63E6H2" 0.04805079 "2-oxoglutarate synthase subunit KorA"  
"JS1\_D03\_00960" 12869 "s59E13H2" 0 "hypothetical protein"  
"JS1\_D03\_00960" 12869 "s59E25H2" 0 "hypothetical protein"  
"JS1\_D03\_00960" 12869 "s59E5H2" 0 "hypothetical protein"  
"JS1\_D03\_00960" 12869 "s63E6H2" 0 "hypothetical protein"  
"JS1\_D03\_00961" 12870 "s59E13H2" 0 "ComEC family competence protein"  
"JS1\_D03\_00961" 12870 "s59E25H2" 0 "ComEC family competence protein"  
"JS1\_D03\_00961" 12870 "s59E5H2" 0 "ComEC family competence protein"  
"JS1\_D03\_00961" 12870 "s63E6H2" 0 "ComEC family competence protein"  
"JS1\_D03\_00962" 12871 "s59E13H2" 0 "hypothetical protein"  
"JS1\_D03\_00962" 12871 "s59E25H2" 0 "hypothetical protein"  
"JS1\_D03\_00962" 12871 "s59E5H2" 0 "hypothetical protein"  
"JS1\_D03\_00962" 12871 "s63E6H2" 0 "hypothetical protein"  
"JS1\_D03\_00963" 12872 "s59E13H2" 0 "Tetratricopeptide repeat protein"  
"JS1\_D03\_00963" 12872 "s59E25H2" 0 "Tetratricopeptide repeat protein"  
"JS1\_D03\_00963" 12872 "s59E5H2" 0 "Tetratricopeptide repeat protein"  
"JS1\_D03\_00963" 12872 "s63E6H2" 0.004177389 "Tetratricopeptide repeat protein"  
"JS1\_D03\_00964" 12873 "s59E13H2" 0 "hypothetical protein"  
"JS1\_D03\_00964" 12873 "s59E25H2" 0 "hypothetical protein"  
"JS1\_D03\_00964" 12873 "s59E5H2" 0 "hypothetical protein"  
"JS1\_D03\_00964" 12873 "s63E6H2" 0 "hypothetical protein"  
"JS1\_D03\_00966" 12875 "s59E13H2" 0 "N-6 DNA Methylase"  
"JS1\_D03\_00966" 12875 "s59E25H2" 0 "N-6 DNA Methylase"  
"JS1\_D03\_00966" 12875 "s59E5H2" 0 "N-6 DNA Methylase"  
"JS1\_D03\_00966" 12875 "s63E6H2" 0 "N-6 DNA Methylase"  
"JS1\_D03\_00967" 12876 "s59E13H2" 0 "hypothetical protein"  
"JS1\_D03\_00967" 12876 "s59E25H2" 0 "hypothetical protein"  
"JS1\_D03\_00967" 12876 "s59E5H2" 0 "hypothetical protein"  
"JS1\_D03\_00967" 12876 "s63E6H2" 0.001691568 "hypothetical protein"  
"JS1\_D03\_00970" 12879 "s59E13H2" 0.003930193 "hypothetical protein"  
"JS1\_D03\_00970" 12879 "s59E25H2" 0 "hypothetical protein"  
"JS1\_D03\_00970" 12879 "s59E5H2" 0.00780931 "hypothetical protein"  
"JS1\_D03\_00970" 12879 "s63E6H2" 0.004411192 "hypothetical protein"  
"JS1\_D03\_00971" 12880 "s59E13H2" 0.0236697 "Replicative DNA helicase"  
"JS1\_D03\_00971" 12880 "s59E25H2" 0 "Replicative DNA helicase"  
"JS1\_D03\_00971" 12880 "s59E5H2" 0.01801304 "Replicative DNA helicase"  
"JS1\_D03\_00971" 12880 "s63E6H2" 0.0006659629 "Replicative DNA helicase"  
"JS1\_D03\_00972" 12881 "s59E13H2" 0.01434398 "Helix-turn-helix"  
"JS1\_D03\_00972" 12881 "s59E25H2" 0 "Helix-turn-helix"  
"JS1\_D03\_00972" 12881 "s59E5H2" 0.01628378 "Helix-turn-helix"



"JS1\_D03\_00972" 12881 "s63E6H2" 0 "Helix-turn-helix"  
"JS1\_D03\_00974" 12883 "s59E13H2" 0.2116071 "hypothetical protein"  
"JS1\_D03\_00974" 12883 "s59E25H2" 0 "hypothetical protein"  
"JS1\_D03\_00974" 12883 "s59E5H2" 0.6182015 "hypothetical protein"  
"JS1\_D03\_00974" 12883 "s63E6H2" 2.68848 "hypothetical protein"  
"JS1\_D03\_00975" 12884 "s59E13H2" 0 "Serine/threonine-protein kinase PK-1"  
"JS1\_D03\_00975" 12884 "s59E25H2" 0.2820513 "Serine/threonine-protein kinase PK-1"  
"JS1\_D03\_00975" 12884 "s59E5H2" 0 "Serine/threonine-protein kinase PK-1"  
"JS1\_D03\_00975" 12884 "s63E6H2" 2.652229 "Serine/threonine-protein kinase PK-1"  
"JS1\_D03\_00976" 12885 "s59E13H2" 0.004632065 "Ribosomal RNA small subunit methyltransferase B"  
"JS1\_D03\_00976" 12885 "s59E25H2" 0.1795977 "Ribosomal RNA small subunit methyltransferase B"  
"JS1\_D03\_00976" 12885 "s59E5H2" 0.008874526 "Ribosomal RNA small subunit methyltransferase B"  
"JS1\_D03\_00976" 12885 "s63E6H2" 3.59597 "Ribosomal RNA small subunit methyltransferase B"  
"JS1\_D03\_00977" 12886 "s59E13H2" 0.02228252 "Putative neutral zinc metallopeptidase"  
"JS1\_D03\_00977" 12886 "s59E25H2" 0.3185841 "Putative neutral zinc metallopeptidase"  
"JS1\_D03\_00977" 12886 "s59E5H2" 0.1482967 "Putative neutral zinc metallopeptidase"  
"JS1\_D03\_00977" 12886 "s63E6H2" 4.176624 "Putative neutral zinc metallopeptidase"  
"JS1\_D03\_00978" 12887 "s59E13H2" 0.008479611 "Methionyl-tRNA formyltransferase"  
"JS1\_D03\_00978" 12887 "s59E25H2" 0 "Methionyl-tRNA formyltransferase"  
"JS1\_D03\_00978" 12887 "s59E5H2" 0.005033549 "Methionyl-tRNA formyltransferase"  
"JS1\_D03\_00978" 12887 "s63E6H2" 2.748843 "Methionyl-tRNA formyltransferase"  
"JS1\_D03\_00979" 12888 "s59E13H2" 0 "Peptide deformylase 1"  
"JS1\_D03\_00979" 12888 "s59E25H2" 0 "Peptide deformylase 1"  
"JS1\_D03\_00979" 12888 "s59E5H2" 0 "Peptide deformylase 1"  
"JS1\_D03\_00979" 12888 "s63E6H2" 2.81408 "Peptide deformylase 1"  
"JS1\_D03\_00980" 12889 "s59E13H2" 0.09260252 "Primosomal protein N"  
"JS1\_D03\_00980" 12889 "s59E25H2" 0.2958215 "Primosomal protein N"  
"JS1\_D03\_00980" 12889 "s59E5H2" 0.5216391 "Primosomal protein N"  
"JS1\_D03\_00980" 12889 "s63E6H2" 2.446123 "Primosomal protein N"  
"JS1\_D03\_00981" 12890 "s59E13H2" 0.002609804 "Coenzyme A biosynthesis bifunctional protein CoaBC"  
"JS1\_D03\_00981" 12890 "s59E25H2" 0.05862647 "Coenzyme A biosynthesis bifunctional protein CoaBC"  
"JS1\_D03\_00981" 12890 "s59E5H2" 0.06450749 "Coenzyme A biosynthesis bifunctional protein CoaBC"  
"JS1\_D03\_00981" 12890 "s63E6H2" 0.09080239 "Coenzyme A biosynthesis bifunctional protein CoaBC"  
"JS1\_D03\_00982" 12891 "s59E13H2" 0 "DNA-directed RNA polymerase subunit omega"  
"JS1\_D03\_00982" 12891 "s59E25H2" 0 "DNA-directed RNA polymerase subunit omega"  
"JS1\_D03\_00982" 12891 "s59E5H2" 0.005014829 "DNA-directed RNA polymerase subunit omega"  
"JS1\_D03\_00982" 12891 "s63E6H2" 0.02652191 "DNA-directed RNA polymerase subunit omega"  
"JS1\_D03\_00983" 12892 "s59E13H2" 0 "Guanylate kinase"  
"JS1\_D03\_00983" 12892 "s59E25H2" 0 "Guanylate kinase"  
"JS1\_D03\_00983" 12892 "s59E5H2" 0.01789736 "Guanylate kinase"  
"JS1\_D03\_00983" 12892 "s63E6H2" 0.0791609 "Guanylate kinase"  
"JS1\_D03\_00984" 12893 "s59E13H2" 0 "hypothetical protein"  
"JS1\_D03\_00984" 12893 "s59E25H2" 0 "hypothetical protein"  
"JS1\_D03\_00984" 12893 "s59E5H2" 0.01201508 "hypothetical protein"  
"JS1\_D03\_00984" 12893 "s63E6H2" 0.0927415 "hypothetical protein"  
"JS1\_D03\_00985" 12894 "s59E13H2" 0.001985044 "hypothetical protein"  
"JS1\_D03\_00985" 12894 "s59E25H2" 0 "hypothetical protein"

"JS1\_D03\_00985" 12894 "s59E5H2" 0.003701309 "hypothetical protein"  
"JS1\_D03\_00985" 12894 "s63E6H2" 0.1248753 "hypothetical protein"  
"JS1\_D03\_00986" 12895 "s59E13H2" 0.03867507 "hypothetical protein"  
"JS1\_D03\_00986" 12895 "s59E25H2" 0 "hypothetical protein"  
"JS1\_D03\_00986" 12895 "s59E5H2" 0.1671144 "hypothetical protein"  
"JS1\_D03\_00986" 12895 "s63E6H2" 0.7705209 "hypothetical protein"  
"JS1\_D03\_00987" 12896 "s59E13H2" 0.01208628 "Ribosomal large subunit pseudouridine synthase D"  
"JS1\_D03\_00987" 12896 "s59E25H2" 0 "Ribosomal large subunit pseudouridine synthase D"  
"JS1\_D03\_00987" 12896 "s59E5H2" 0.06416708 "Ribosomal large subunit pseudouridine synthase D"  
"JS1\_D03\_00987" 12896 "s63E6H2" 0.6779846 "Ribosomal large subunit pseudouridine synthase D"  
"JS1\_D03\_00988" 12897 "s59E13H2" 0 "Prolipoprotein diacylglyceryl transferase"  
"JS1\_D03\_00988" 12897 "s59E25H2" 0 "Prolipoprotein diacylglyceryl transferase"  
"JS1\_D03\_00988" 12897 "s59E5H2" 0.006035025 "Prolipoprotein diacylglyceryl transferase"  
"JS1\_D03\_00988" 12897 "s63E6H2" 0.1300095 "Prolipoprotein diacylglyceryl transferase"  
"JS1\_D03\_00989" 12898 "s59E13H2" 0.4798462 "Lipoprotein signal peptidase"  
"JS1\_D03\_00989" 12898 "s59E25H2" 0.1325967 "Lipoprotein signal peptidase"  
"JS1\_D03\_00989" 12898 "s59E5H2" 0.3832298 "Lipoprotein signal peptidase"  
"JS1\_D03\_00989" 12898 "s63E6H2" 0.5821116 "Lipoprotein signal peptidase"  
"JS1\_D03\_00990" 12899 "s59E13H2" 0.4214852 "Isoleucine--tRNA ligase"  
"JS1\_D03\_00990" 12899 "s59E25H2" 0 "Isoleucine--tRNA ligase"  
"JS1\_D03\_00990" 12899 "s59E5H2" 1.82692 "Isoleucine--tRNA ligase"  
"JS1\_D03\_00990" 12899 "s63E6H2" 1.48669 "Isoleucine--tRNA ligase"  
"JS1\_D03\_00992" 12901 "s59E13H2" 0 "hypothetical protein"  
"JS1\_D03\_00992" 12901 "s59E25H2" 0 "hypothetical protein"  
"JS1\_D03\_00992" 12901 "s59E5H2" 0 "hypothetical protein"  
"JS1\_D03\_00992" 12901 "s63E6H2" 0.477175 "hypothetical protein"  
"JS1\_D03\_00993" 12902 "s59E13H2" 0.1434475 "Septum site-determining protein DivIVA"  
"JS1\_D03\_00993" 12902 "s59E25H2" 0 "Septum site-determining protein DivIVA"  
"JS1\_D03\_00993" 12902 "s59E5H2" 0.3530915 "Septum site-determining protein DivIVA"  
"JS1\_D03\_00993" 12902 "s63E6H2" 0.6673135 "Septum site-determining protein DivIVA"  
"JS1\_D03\_00994" 12903 "s59E13H2" 0.1696134 "YGGT family protein"  
"JS1\_D03\_00994" 12903 "s59E25H2" 0 "YGGT family protein"  
"JS1\_D03\_00994" 12903 "s59E5H2" 0.4793869 "YGGT family protein"  
"JS1\_D03\_00994" 12903 "s63E6H2" 0.9691513 "YGGT family protein"  
"JS1\_D03\_00995" 12904 "s59E13H2" 0.09945384 "hypothetical protein"  
"JS1\_D03\_00995" 12904 "s59E25H2" 0 "hypothetical protein"  
"JS1\_D03\_00995" 12904 "s59E5H2" 0.1066387 "hypothetical protein"  
"JS1\_D03\_00995" 12904 "s63E6H2" 0.8942396 "hypothetical protein"  
"JS1\_D03\_00996" 12905 "s59E13H2" 0.1138308 "hypothetical protein"  
"JS1\_D03\_00996" 12905 "s59E25H2" 0 "hypothetical protein"  
"JS1\_D03\_00996" 12905 "s59E5H2" 0.470093 "hypothetical protein"  
"JS1\_D03\_00996" 12905 "s63E6H2" 0.6348035 "hypothetical protein"  
"JS1\_D03\_00997" 12906 "s59E13H2" 0.4892194 "High-affinity branched-chain amino acid transport ATP-binding protein LivF"  
"JS1\_D03\_00997" 12906 "s59E25H2" 0 "High-affinity branched-chain amino acid transport ATP-binding protein LivF"  
"JS1\_D03\_00997" 12906 "s59E5H2" 1.013563 "High-affinity branched-chain amino acid transport ATP-binding protein LivF"  
"JS1\_D03\_00997" 12906 "s63E6H2" 1.526833 "High-affinity branched-chain amino acid transport ATP-binding protein LivF"  
"JS1\_D03\_00998" 12907 "s59E13H2" 0.3524002 "putative branched-chain amino acid transport ATP-binding protein LivG"

"JS1\_D03\_00998" 12907 "s59E25H2" 0 "putative branched-chain amino acid transport ATP-binding protein LivG"  
"JS1\_D03\_00998" 12907 "s59E5H2" 0.7852534 "putative branched-chain amino acid transport ATP-binding protein LivG"  
"JS1\_D03\_00998" 12907 "s63E6H2" 1.244501 "putative branched-chain amino acid transport ATP-binding protein LivG"  
"JS1\_D03\_00999" 12908 "s59E13H2" 0.07956112 "leucine/isoleucine/valine transporter permease subunit"  
"JS1\_D03\_00999" 12908 "s59E25H2" 0 "leucine/isoleucine/valine transporter permease subunit"  
"JS1\_D03\_00999" 12908 "s59E5H2" 0.6249063 "leucine/isoleucine/valine transporter permease subunit"  
"JS1\_D03\_00999" 12908 "s63E6H2" 1.003612 "leucine/isoleucine/valine transporter permease subunit"  
"JS1\_D03\_01000" 12909 "s59E13H2" 0.04782733 "High-affinity branched-chain amino acid transport system permease protein LivH"  
"JS1\_D03\_01000" 12909 "s59E25H2" 0 "High-affinity branched-chain amino acid transport system permease protein LivH"  
"JS1\_D03\_01000" 12909 "s59E5H2" 0.4707269 "High-affinity branched-chain amino acid transport system permease protein LivH"  
"JS1\_D03\_01000" 12909 "s63E6H2" 1.864249 "High-affinity branched-chain amino acid transport system permease protein LivH"  
"JS1\_D03\_01001" 12910 "s59E13H2" 0.05445865 "Leucine-specific-binding protein precursor"  
"JS1\_D03\_01001" 12910 "s59E25H2" 0 "Leucine-specific-binding protein precursor"  
"JS1\_D03\_01001" 12910 "s59E5H2" 0.1045358 "Leucine-specific-binding protein precursor"  
"JS1\_D03\_01001" 12910 "s63E6H2" 1.891112 "Leucine-specific-binding protein precursor"  
"JS1\_D03\_01002" 12911 "s59E13H2" 0 "Sarcosine oxidase subunit beta"  
"JS1\_D03\_01002" 12911 "s59E25H2" 0 "Sarcosine oxidase subunit beta"  
"JS1\_D03\_01002" 12911 "s59E5H2" 0.01523563 "Sarcosine oxidase subunit beta"  
"JS1\_D03\_01002" 12911 "s63E6H2" 0.2477178 "Sarcosine oxidase subunit beta"  
"JS1\_D03\_01003" 12912 "s59E13H2" 0.00466254 "Hydrogen cyanide synthase subunit HcnB"  
"JS1\_D03\_01003" 12912 "s59E25H2" 0 "Hydrogen cyanide synthase subunit HcnB"  
"JS1\_D03\_01003" 12912 "s59E5H2" 0.09406368 "Hydrogen cyanide synthase subunit HcnB"  
"JS1\_D03\_01003" 12912 "s63E6H2" 0.6801233 "Hydrogen cyanide synthase subunit HcnB"  
"JS1\_D03\_01004" 12913 "s59E13H2" 0.02498706 "ferredoxin"  
"JS1\_D03\_01004" 12913 "s59E25H2" 0 "ferredoxin"  
"JS1\_D03\_01004" 12913 "s59E5H2" 0.08030993 "ferredoxin"  
"JS1\_D03\_01004" 12913 "s63E6H2" 0.7981814 "ferredoxin"  
"JS1\_D03\_01005" 12914 "s59E13H2" 0.07806599 "Hydrogen cyanide synthase subunit HcnB"  
"JS1\_D03\_01005" 12914 "s59E25H2" 0 "Hydrogen cyanide synthase subunit HcnB"  
"JS1\_D03\_01005" 12914 "s59E5H2" 0.08290091 "Hydrogen cyanide synthase subunit HcnB"  
"JS1\_D03\_01005" 12914 "s63E6H2" 0.737062 "Hydrogen cyanide synthase subunit HcnB"  
"JS1\_D03\_01006" 12915 "s59E13H2" 0.0212532 "Hydrogen cyanide synthase subunit HcnA"  
"JS1\_D03\_01006" 12915 "s59E25H2" 0 "Hydrogen cyanide synthase subunit HcnA"  
"JS1\_D03\_01006" 12915 "s59E5H2" 0.06458203 "Hydrogen cyanide synthase subunit HcnA"  
"JS1\_D03\_01006" 12915 "s63E6H2" 0.1164402 "Hydrogen cyanide synthase subunit HcnA"  
"JS1\_D03\_01007" 12916 "s59E13H2" 0.0123235 "Laccase domain protein"  
"JS1\_D03\_01007" 12916 "s59E25H2" 0 "Laccase domain protein"  
"JS1\_D03\_01007" 12916 "s59E5H2" 0.1436344 "Laccase domain protein"  
"JS1\_D03\_01007" 12916 "s63E6H2" 0.2103008 "Laccase domain protein"  
"JS1\_D03\_01009" 12918 "s59E13H2" 0.2576113 "molybdenum cofactor biosynthesis protein A"  
"JS1\_D03\_01009" 12918 "s59E25H2" 0 "molybdenum cofactor biosynthesis protein A"  
"JS1\_D03\_01009" 12918 "s59E5H2" 0.0487036 "molybdenum cofactor biosynthesis protein A"  
"JS1\_D03\_01009" 12918 "s63E6H2" 0.4818029 "molybdenum cofactor biosynthesis protein A"  
"JS1\_D03\_01010" 12919 "s59E13H2" 0.3370871 "hypothetical protein"  
"JS1\_D03\_01010" 12919 "s59E25H2" 0 "hypothetical protein"  
"JS1\_D03\_01010" 12919 "s59E5H2" 0.6352456 "hypothetical protein"  
"JS1\_D03\_01010" 12919 "s63E6H2" 0.6790924 "hypothetical protein"

"JS1\_D03\_01011" 12920 "s59E13H2" 0.09206774 "Anaerobic ribonucleoside-triphosphate reductase"  
"JS1\_D03\_01011" 12920 "s59E25H2" 0 "Anaerobic ribonucleoside-triphosphate reductase"  
"JS1\_D03\_01011" 12920 "s59E5H2" 0.4157939 "Anaerobic ribonucleoside-triphosphate reductase"  
"JS1\_D03\_01011" 12920 "s63E6H2" 0.6934949 "Anaerobic ribonucleoside-triphosphate reductase"  
"JS1\_D03\_01012" 12921 "s59E13H2" 0.03445337 "Transcriptional repressor NrdR"  
"JS1\_D03\_01012" 12921 "s59E25H2" 0 "Transcriptional repressor NrdR"  
"JS1\_D03\_01012" 12921 "s59E5H2" 0.3435807 "Transcriptional repressor NrdR"  
"JS1\_D03\_01012" 12921 "s63E6H2" 0.6331513 "Transcriptional repressor NrdR"  
"JS1\_D03\_01013" 12922 "s59E13H2" 0.1622709 "Cell division protein FtsZ"  
"JS1\_D03\_01013" 12922 "s59E25H2" 0 "Cell division protein FtsZ"  
"JS1\_D03\_01013" 12922 "s59E5H2" 0.3420079 "Cell division protein FtsZ"  
"JS1\_D03\_01013" 12922 "s63E6H2" 0.6842329 "Cell division protein FtsZ"  
"JS1\_D03\_01014" 12923 "s59E13H2" 0.0158592 "Cell division protein FtsA"  
"JS1\_D03\_01014" 12923 "s59E25H2" 0 "Cell division protein FtsA"  
"JS1\_D03\_01014" 12923 "s59E5H2" 0.2012924 "Cell division protein FtsA"  
"JS1\_D03\_01014" 12923 "s63E6H2" 0.1566043 "Cell division protein FtsA"  
"JS1\_D03\_01015" 12924 "s59E13H2" 0.004113246 "Cell division protein DivIB"  
"JS1\_D03\_01015" 12924 "s59E25H2" 0 "Cell division protein DivIB"  
"JS1\_D03\_01015" 12924 "s59E5H2" 0.03158286 "Cell division protein DivIB"  
"JS1\_D03\_01015" 12924 "s63E6H2" 0.04731338 "Cell division protein DivIB"  
"JS1\_D03\_01016" 12925 "s59E13H2" 0 "UDP-N-acetylenolpyruvoylglucosamine reductase"  
"JS1\_D03\_01016" 12925 "s59E25H2" 0 "UDP-N-acetylenolpyruvoylglucosamine reductase"  
"JS1\_D03\_01016" 12925 "s59E5H2" 0.007253898 "UDP-N-acetylenolpyruvoylglucosamine reductase"  
"JS1\_D03\_01016" 12925 "s63E6H2" 0.0302504 "UDP-N-acetylenolpyruvoylglucosamine reductase"  
"JS1\_D03\_01017" 12926 "s59E13H2" 0 "YcfA-like protein"  
"JS1\_D03\_01017" 12926 "s59E25H2" 0 "YcfA-like protein"  
"JS1\_D03\_01017" 12926 "s59E5H2" 0.2154454 "YcfA-like protein"  
"JS1\_D03\_01017" 12926 "s63E6H2" 0.1153199 "YcfA-like protein"  
"JS1\_D03\_01018" 12927 "s59E13H2" 0 "hypothetical protein"  
"JS1\_D03\_01018" 12927 "s59E25H2" 0 "hypothetical protein"  
"JS1\_D03\_01018" 12927 "s59E5H2" 0.2015298 "hypothetical protein"  
"JS1\_D03\_01018" 12927 "s63E6H2" 0.02507369 "hypothetical protein"  
"JS1\_D03\_01023" 12932 "s59E13H2" 0 "HEPN domain protein"  
"JS1\_D03\_01023" 12932 "s59E25H2" 0 "HEPN domain protein"  
"JS1\_D03\_01023" 12932 "s59E5H2" 0 "HEPN domain protein"  
"JS1\_D03\_01023" 12932 "s63E6H2" 0.01882825 "HEPN domain protein"  
"JS1\_D03\_01025" 12934 "s59E13H2" 0 "hypothetical protein"  
"JS1\_D03\_01025" 12934 "s59E25H2" 0 "hypothetical protein"  
"JS1\_D03\_01025" 12934 "s59E5H2" 0.07163718 "hypothetical protein"  
"JS1\_D03\_01025" 12934 "s63E6H2" 0.00428627 "hypothetical protein"  
"JS1\_D03\_01026" 12935 "s59E13H2" 0 "Archaeal ATPase"  
"JS1\_D03\_01026" 12935 "s59E25H2" 0 "Archaeal ATPase"  
"JS1\_D03\_01026" 12935 "s59E5H2" 0.1437718 "Archaeal ATPase"  
"JS1\_D03\_01026" 12935 "s63E6H2" 0.001164724 "Archaeal ATPase"  
"JS1\_D03\_01027" 12936 "s59E13H2" 0 "Nucleotidyltransferase domain protein"  
"JS1\_D03\_01027" 12936 "s59E25H2" 0 "Nucleotidyltransferase domain protein"  
"JS1\_D03\_01027" 12936 "s59E5H2" 0.5632659 "Nucleotidyltransferase domain protein"

"JS1\_D03\_01027" 12936 "s63E6H2" 4.828254 "Nucleotidyltransferase domain protein"  
"JS1\_D03\_01028" 12937 "s59E13H2" 0 "hypothetical protein"  
"JS1\_D03\_01028" 12937 "s59E25H2" 0 "hypothetical protein"  
"JS1\_D03\_01028" 12937 "s59E5H2" 0 "hypothetical protein"  
"JS1\_D03\_01028" 12937 "s63E6H2" 0.03233773 "hypothetical protein"  
"JS1\_D03\_01029" 12938 "s59E13H2" 0.004334645 "MarR family protein"  
"JS1\_D03\_01029" 12938 "s59E25H2" 0 "MarR family protein"  
"JS1\_D03\_01029" 12938 "s59E5H2" 0.07659456 "MarR family protein"  
"JS1\_D03\_01029" 12938 "s63E6H2" 2.418226 "MarR family protein"  
"JS1\_D03\_01030" 12939 "s59E13H2" 0 "dTDP-3-amino-3,6-dideoxy-alpha-D-galactopyranose 3-N-acetyltransferase"  
"JS1\_D03\_01030" 12939 "s59E25H2" 0 "dTDP-3-amino-3,6-dideoxy-alpha-D-galactopyranose 3-N-acetyltransferase"  
"JS1\_D03\_01030" 12939 "s59E5H2" 0 "dTDP-3-amino-3,6-dideoxy-alpha-D-galactopyranose 3-N-acetyltransferase"  
"JS1\_D03\_01030" 12939 "s63E6H2" 0 "dTDP-3-amino-3,6-dideoxy-alpha-D-galactopyranose 3-N-acetyltransferase"  
"JS1\_D03\_01031" 12940 "s59E13H2" 0 "hypothetical protein"  
"JS1\_D03\_01031" 12940 "s59E25H2" 0 "hypothetical protein"  
"JS1\_D03\_01031" 12940 "s59E5H2" 0 "hypothetical protein"  
"JS1\_D03\_01031" 12940 "s63E6H2" 0 "hypothetical protein"  
"JS1\_D03\_01032" 12941 "s59E13H2" 0 "dTDP-3-amino-3,6-dideoxy-alpha-D-galactopyranose transaminase"  
"JS1\_D03\_01032" 12941 "s59E25H2" 0 "dTDP-3-amino-3,6-dideoxy-alpha-D-galactopyranose transaminase"  
"JS1\_D03\_01032" 12941 "s59E5H2" 0.003428877 "dTDP-3-amino-3,6-dideoxy-alpha-D-galactopyranose transaminase"  
"JS1\_D03\_01032" 12941 "s63E6H2" 0.004757481 "dTDP-3-amino-3,6-dideoxy-alpha-D-galactopyranose transaminase"  
"JS1\_D03\_01033" 12942 "s59E13H2" 0 "Inositol 2-dehydrogenase"  
"JS1\_D03\_01033" 12942 "s59E25H2" 0 "Inositol 2-dehydrogenase"  
"JS1\_D03\_01033" 12942 "s59E5H2" 0 "Inositol 2-dehydrogenase"  
"JS1\_D03\_01033" 12942 "s63E6H2" 0 "Inositol 2-dehydrogenase"  
"JS1\_D03\_01034" 12943 "s59E13H2" 0.007827653 "UDP-N-acetyl-D-glucosamine 6-dehydrogenase"  
"JS1\_D03\_01034" 12943 "s59E25H2" 0 "UDP-N-acetyl-D-glucosamine 6-dehydrogenase"  
"JS1\_D03\_01034" 12943 "s59E5H2" 0 "UDP-N-acetyl-D-glucosamine 6-dehydrogenase"  
"JS1\_D03\_01034" 12943 "s63E6H2" 0 "UDP-N-acetyl-D-glucosamine 6-dehydrogenase"  
"JS1\_D03\_01035" 12944 "s59E13H2" 0 "dTDP-3-amino-3,6-dideoxy-alpha-D-galactopyranose 3-N-acetyltransferase"  
"JS1\_D03\_01035" 12944 "s59E25H2" 0 "dTDP-3-amino-3,6-dideoxy-alpha-D-galactopyranose 3-N-acetyltransferase"  
"JS1\_D03\_01035" 12944 "s59E5H2" 0 "dTDP-3-amino-3,6-dideoxy-alpha-D-galactopyranose 3-N-acetyltransferase"  
"JS1\_D03\_01035" 12944 "s63E6H2" 0 "dTDP-3-amino-3,6-dideoxy-alpha-D-galactopyranose 3-N-acetyltransferase"  
"JS1\_D03\_01036" 12945 "s59E13H2" 0 "UDP-2-acetamido-2-deoxy-3-oxo-D-glucuronate aminotransferase"  
"JS1\_D03\_01036" 12945 "s59E25H2" 0 "UDP-2-acetamido-2-deoxy-3-oxo-D-glucuronate aminotransferase"  
"JS1\_D03\_01036" 12945 "s59E5H2" 0 "UDP-2-acetamido-2-deoxy-3-oxo-D-glucuronate aminotransferase"  
"JS1\_D03\_01036" 12945 "s63E6H2" 0 "UDP-2-acetamido-2-deoxy-3-oxo-D-glucuronate aminotransferase"  
"JS1\_D03\_01037" 12946 "s59E13H2" 0 "UDP-4-amino-4-deoxy-L-arabinose--oxoglutarate aminotransferase"  
"JS1\_D03\_01037" 12946 "s59E25H2" 0 "UDP-4-amino-4-deoxy-L-arabinose--oxoglutarate aminotransferase"  
"JS1\_D03\_01037" 12946 "s59E5H2" 0 "UDP-4-amino-4-deoxy-L-arabinose--oxoglutarate aminotransferase"  
"JS1\_D03\_01037" 12946 "s63E6H2" 0 "UDP-4-amino-4-deoxy-L-arabinose--oxoglutarate aminotransferase"  
"JS1\_D03\_01038" 12947 "s59E13H2" 0 "ADP-L-glycero-D-manno-heptose-6-epimerase"  
"JS1\_D03\_01038" 12947 "s59E25H2" 0 "ADP-L-glycero-D-manno-heptose-6-epimerase"  
"JS1\_D03\_01038" 12947 "s59E5H2" 0 "ADP-L-glycero-D-manno-heptose-6-epimerase"  
"JS1\_D03\_01038" 12947 "s63E6H2" 0 "ADP-L-glycero-D-manno-heptose-6-epimerase"  
"JS1\_D03\_01039" 12948 "s59E13H2" 0 "dTDP-glucose 4,6-dehydratase"  
"JS1\_D03\_01039" 12948 "s59E25H2" 0 "dTDP-glucose 4,6-dehydratase"

"JS1\_D03\_01039" 12948 "s59E5H2" 0 "dTDP-glucose 4,6-dehydratase"  
"JS1\_D03\_01039" 12948 "s63E6H2" 0 "dTDP-glucose 4,6-dehydratase"  
"JS1\_D03\_01040" 12949 "s59E13H2" 0 "4-carboxy-2-hydroxymuconate-6-semialdehyde dehydrogenase"  
"JS1\_D03\_01040" 12949 "s59E25H2" 0 "4-carboxy-2-hydroxymuconate-6-semialdehyde dehydrogenase"  
"JS1\_D03\_01040" 12949 "s59E5H2" 0 "4-carboxy-2-hydroxymuconate-6-semialdehyde dehydrogenase"  
"JS1\_D03\_01040" 12949 "s63E6H2" 0.006098287 "4-carboxy-2-hydroxymuconate-6-semialdehyde dehydrogenase"  
"JS1\_D03\_01041" 12950 "s59E13H2" 0 "dTDP-glucose 4,6-dehydratase"  
"JS1\_D03\_01041" 12950 "s59E25H2" 0 "dTDP-glucose 4,6-dehydratase"  
"JS1\_D03\_01041" 12950 "s59E5H2" 0 "dTDP-glucose 4,6-dehydratase"  
"JS1\_D03\_01041" 12950 "s63E6H2" 0 "dTDP-glucose 4,6-dehydratase"  
"JS1\_D03\_01042" 12951 "s59E13H2" 0 "phosphodiesterase"  
"JS1\_D03\_01042" 12951 "s59E25H2" 0 "phosphodiesterase"  
"JS1\_D03\_01042" 12951 "s59E5H2" 0 "phosphodiesterase"  
"JS1\_D03\_01042" 12951 "s63E6H2" 0 "phosphodiesterase"  
"JS1\_D03\_01043" 12952 "s59E13H2" 0 "Coenzyme gamma-F420-2:alpha-L-glutamate ligase"  
"JS1\_D03\_01043" 12952 "s59E25H2" 0 "Coenzyme gamma-F420-2:alpha-L-glutamate ligase"  
"JS1\_D03\_01043" 12952 "s59E5H2" 0 "Coenzyme gamma-F420-2:alpha-L-glutamate ligase"  
"JS1\_D03\_01043" 12952 "s63E6H2" 0 "Coenzyme gamma-F420-2:alpha-L-glutamate ligase"  
"JS1\_D03\_01044" 12953 "s59E13H2" 0 "bifunctional 3-demethylubiquinone-9 3-methyltransferase/ 2-octaprenyl-6-hydroxy phenol methylase"  
"JS1\_D03\_01044" 12953 "s59E25H2" 0 "bifunctional 3-demethylubiquinone-9 3-methyltransferase/ 2-octaprenyl-6-hydroxy phenol methylase"  
"JS1\_D03\_01044" 12953 "s59E5H2" 0 "bifunctional 3-demethylubiquinone-9 3-methyltransferase/ 2-octaprenyl-6-hydroxy phenol methylase"  
"JS1\_D03\_01044" 12953 "s63E6H2" 0 "bifunctional 3-demethylubiquinone-9 3-methyltransferase/ 2-octaprenyl-6-hydroxy phenol methylase"  
"JS1\_D03\_01045" 12954 "s59E13H2" 0 "Imidazole glycerol phosphate synthase subunit HisH 1"  
"JS1\_D03\_01045" 12954 "s59E25H2" 0 "Imidazole glycerol phosphate synthase subunit HisH 1"  
"JS1\_D03\_01045" 12954 "s59E5H2" 0 "Imidazole glycerol phosphate synthase subunit HisH 1"  
"JS1\_D03\_01045" 12954 "s63E6H2" 0 "Imidazole glycerol phosphate synthase subunit HisH 1"  
"JS1\_D03\_01047" 12956 "s59E13H2" 0 "tRNA(Ile)-lysine synthase"  
"JS1\_D03\_01047" 12956 "s59E25H2" 0 "tRNA(Ile)-lysine synthase"  
"JS1\_D03\_01047" 12956 "s59E5H2" 0 "tRNA(Ile)-lysine synthase"  
"JS1\_D03\_01047" 12956 "s63E6H2" 0 "tRNA(Ile)-lysine synthase"  
"JS1\_D03\_01048" 12957 "s59E13H2" 0 "Glycosyl transferases group 1"  
"JS1\_D03\_01048" 12957 "s59E25H2" 0 "Glycosyl transferases group 1"  
"JS1\_D03\_01048" 12957 "s59E5H2" 0 "Glycosyl transferases group 1"  
"JS1\_D03\_01048" 12957 "s63E6H2" 0.00477403 "Glycosyl transferases group 1"  
"JS1\_D03\_01049" 12958 "s59E13H2" 0.04244852 "Carbon monoxide dehydrogenase medium chain"  
"JS1\_D03\_01049" 12958 "s59E25H2" 0 "Carbon monoxide dehydrogenase medium chain"  
"JS1\_D03\_01049" 12958 "s59E5H2" 0.08812898 "Carbon monoxide dehydrogenase medium chain"  
"JS1\_D03\_01049" 12958 "s63E6H2" 5.915533 "Carbon monoxide dehydrogenase medium chain"  
"JS1\_D03\_01050" 12959 "s59E13H2" 0.0637458 "Nicotinate dehydrogenase small FeS subunit"  
"JS1\_D03\_01050" 12959 "s59E25H2" 0 "Nicotinate dehydrogenase small FeS subunit"  
"JS1\_D03\_01050" 12959 "s59E5H2" 0.3042916 "Nicotinate dehydrogenase small FeS subunit"  
"JS1\_D03\_01050" 12959 "s63E6H2" 5.515098 "Nicotinate dehydrogenase small FeS subunit"  
"JS1\_D03\_01051" 12960 "s59E13H2" 0.00527235 "Nicotinate dehydrogenase large molybdopterin subunit"  
"JS1\_D03\_01051" 12960 "s59E25H2" 0.04996097 "Nicotinate dehydrogenase large molybdopterin subunit"  
"JS1\_D03\_01051" 12960 "s59E5H2" 0.9177663 "Nicotinate dehydrogenase large molybdopterin subunit"  
"JS1\_D03\_01051" 12960 "s63E6H2" 12.07026 "Nicotinate dehydrogenase large molybdopterin subunit"  
"JS1\_D03\_01052" 12961 "s59E13H2" 0.02430605 "Nicotinate dehydrogenase medium molybdopterin subunit"

"JS1\_D03\_01052" 12961 "s59E25H2" 0.5055388 "Nicotinate dehydrogenase medium molybdopterin subunit"  
"JS1\_D03\_01052" 12961 "s59E5H2" 0.9687857 "Nicotinate dehydrogenase medium molybdopterin subunit"  
"JS1\_D03\_01052" 12961 "s63E6H2" 14.8994 "Nicotinate dehydrogenase medium molybdopterin subunit"  
"JS1\_D03\_01053" 12962 "s59E13H2" 2.498192 "DNA polymerase IV"  
"JS1\_D03\_01053" 12962 "s59E25H2" 0.203749 "DNA polymerase IV"  
"JS1\_D03\_01053" 12962 "s59E5H2" 0.523849 "DNA polymerase IV"  
"JS1\_D03\_01053" 12962 "s63E6H2" 10.79815 "DNA polymerase IV"  
"JS1\_D03\_01054" 12963 "s59E13H2" 6.756939 "DNA polymerase III subunit alpha"  
"JS1\_D03\_01054" 12963 "s59E25H2" 0.2844444 "DNA polymerase III subunit alpha"  
"JS1\_D03\_01054" 12963 "s59E5H2" 3.860492 "DNA polymerase III subunit alpha"  
"JS1\_D03\_01054" 12963 "s63E6H2" 10.54497 "DNA polymerase III subunit alpha"  
"JS1\_D03\_01055" 12964 "s59E13H2" 0.127808 "hypothetical protein"  
"JS1\_D03\_01055" 12964 "s59E25H2" 0.5982906 "hypothetical protein"  
"JS1\_D03\_01055" 12964 "s59E5H2" 5.311312 "hypothetical protein"  
"JS1\_D03\_01055" 12964 "s63E6H2" 3.35726 "hypothetical protein"  
"JS1\_D03\_01056" 12965 "s59E13H2" 0.06337318 "LexA repressor"  
"JS1\_D03\_01056" 12965 "s59E25H2" 0.4084967 "LexA repressor"  
"JS1\_D03\_01056" 12965 "s59E5H2" 1.654391 "LexA repressor"  
"JS1\_D03\_01056" 12965 "s63E6H2" 2.004695 "LexA repressor"  
"JS1\_D03\_01057" 12966 "s59E13H2" 0.07417085 "hypothetical protein"  
"JS1\_D03\_01057" 12966 "s59E25H2" 0 "hypothetical protein"  
"JS1\_D03\_01057" 12966 "s59E5H2" 2.143611 "hypothetical protein"  
"JS1\_D03\_01057" 12966 "s63E6H2" 0.2331217 "hypothetical protein"  
"JS1\_D03\_01058" 12967 "s59E13H2" 0.04774415 "Sporulation thiol-disulfide oxidoreductase A precursor"  
"JS1\_D03\_01058" 12967 "s59E25H2" 0 "Sporulation thiol-disulfide oxidoreductase A precursor"  
"JS1\_D03\_01058" 12967 "s59E5H2" 1.104677 "Sporulation thiol-disulfide oxidoreductase A precursor"  
"JS1\_D03\_01058" 12967 "s63E6H2" 0.09045944 "Sporulation thiol-disulfide oxidoreductase A precursor"  
"JS1\_D03\_01059" 12968 "s59E13H2" 0 "hypothetical protein"  
"JS1\_D03\_01059" 12968 "s59E25H2" 0 "hypothetical protein"  
"JS1\_D03\_01059" 12968 "s59E5H2" 0 "hypothetical protein"  
"JS1\_D03\_01059" 12968 "s63E6H2" 0.003916696 "hypothetical protein"  
"JS1\_D03\_01060" 12969 "s59E13H2" 0.06855368 "hypothetical protein"  
"JS1\_D03\_01060" 12969 "s59E25H2" 0 "hypothetical protein"  
"JS1\_D03\_01060" 12969 "s59E5H2" 1.494828 "hypothetical protein"  
"JS1\_D03\_01060" 12969 "s63E6H2" 0.3746734 "hypothetical protein"  
"JS1\_D03\_01061" 12970 "s59E13H2" 0.03711701 "HTH-type transcriptional repressor AseR"  
"JS1\_D03\_01061" 12970 "s59E25H2" 0 "HTH-type transcriptional repressor AseR"  
"JS1\_D03\_01061" 12970 "s59E5H2" 1.359681 "HTH-type transcriptional repressor AseR"  
"JS1\_D03\_01061" 12970 "s63E6H2" 0.2882372 "HTH-type transcriptional repressor AseR"  
"JS1\_D03\_01062" 12971 "s59E13H2" 0.1582557 "Peptidase family C69"  
"JS1\_D03\_01062" 12971 "s59E25H2" 0 "Peptidase family C69"  
"JS1\_D03\_01062" 12971 "s59E5H2" 2.078089 "Peptidase family C69"  
"JS1\_D03\_01062" 12971 "s63E6H2" 0.6302243 "Peptidase family C69"  
"JS1\_D03\_01063" 12972 "s59E13H2" 0.03811264 "flavodoxin"  
"JS1\_D03\_01063" 12972 "s59E25H2" 0 "flavodoxin"  
"JS1\_D03\_01063" 12972 "s59E5H2" 0.349086 "flavodoxin"  
"JS1\_D03\_01063" 12972 "s63E6H2" 0.08593564 "flavodoxin"

"JS1\_D03\_01064" 12973 "s59E13H2" 0.00329196 "Possibl zinc metallo-peptidase"  
"JS1\_D03\_01064" 12973 "s59E25H2" 0 "Possibl zinc metallo-peptidase"  
"JS1\_D03\_01064" 12973 "s59E5H2" 0.07091086 "Possibl zinc metallo-peptidase"  
"JS1\_D03\_01064" 12973 "s63E6H2" 0.1490741 "Possibl zinc metallo-peptidase"  
"JS1\_D03\_01065" 12974 "s59E13H2" 0 "3'-5' exoribonuclease YhaM"  
"JS1\_D03\_01065" 12974 "s59E25H2" 0 "3'-5' exoribonuclease YhaM"  
"JS1\_D03\_01065" 12974 "s59E5H2" 0 "3'-5' exoribonuclease YhaM"  
"JS1\_D03\_01065" 12974 "s63E6H2" 0.04600835 "3'-5' exoribonuclease YhaM"  
"JS1\_D03\_01066" 12975 "s59E13H2" 0 "L-asparaginase II"  
"JS1\_D03\_01066" 12975 "s59E25H2" 0 "L-asparaginase II"  
"JS1\_D03\_01066" 12975 "s59E5H2" 0 "L-asparaginase II"  
"JS1\_D03\_01066" 12975 "s63E6H2" 0.02358303 "L-asparaginase II"  
"JS1\_D03\_01067" 12976 "s59E13H2" 0.5928489 "protease TldD"  
"JS1\_D03\_01067" 12976 "s59E25H2" 0 "protease TldD"  
"JS1\_D03\_01067" 12976 "s59E5H2" 1.035316 "protease TldD"  
"JS1\_D03\_01067" 12976 "s63E6H2" 0.7799937 "protease TldD"  
"JS1\_D03\_01068" 12977 "s59E13H2" 0.2435675 "protease TldD"  
"JS1\_D03\_01068" 12977 "s59E25H2" 0 "protease TldD"  
"JS1\_D03\_01068" 12977 "s59E5H2" 0.06274952 "protease TldD"  
"JS1\_D03\_01068" 12977 "s63E6H2" 0.8675433 "protease TldD"  
"JS1\_D03\_01069" 12978 "s59E13H2" 0.09901057 "hypothetical protein"  
"JS1\_D03\_01069" 12978 "s59E25H2" 0 "hypothetical protein"  
"JS1\_D03\_01069" 12978 "s59E5H2" 0.4654864 "hypothetical protein"  
"JS1\_D03\_01069" 12978 "s63E6H2" 1.286115 "hypothetical protein"  
"JS1\_D03\_01070" 12979 "s59E13H2" 0.03004259 "Formamidase"  
"JS1\_D03\_01070" 12979 "s59E25H2" 0 "Formamidase"  
"JS1\_D03\_01070" 12979 "s59E5H2" 0.1197071 "Formamidase"  
"JS1\_D03\_01070" 12979 "s63E6H2" 0.2129255 "Formamidase"  
"JS1\_D03\_01071" 12980 "s59E13H2" 0.06136378 "Carbon-nitrogen hydrolase"  
"JS1\_D03\_01071" 12980 "s59E25H2" 0 "Carbon-nitrogen hydrolase"  
"JS1\_D03\_01071" 12980 "s59E5H2" 0.5767924 "Carbon-nitrogen hydrolase"  
"JS1\_D03\_01071" 12980 "s63E6H2" 0.7658441 "Carbon-nitrogen hydrolase"  
"JS1\_D03\_01072" 12981 "s59E13H2" 0.2527147 "Inner membrane symporter YicJ"  
"JS1\_D03\_01072" 12981 "s59E25H2" 0 "Inner membrane symporter YicJ"  
"JS1\_D03\_01072" 12981 "s59E5H2" 2.616388 "Inner membrane symporter YicJ"  
"JS1\_D03\_01072" 12981 "s63E6H2" 2.567813 "Inner membrane symporter YicJ"  
"JS1\_D03\_01073" 12982 "s59E13H2" 0 "Alpha-monoglucosyldiacylglycerol synthase"  
"JS1\_D03\_01073" 12982 "s59E25H2" 0 "Alpha-monoglucosyldiacylglycerol synthase"  
"JS1\_D03\_01073" 12982 "s59E5H2" 0 "Alpha-monoglucosyldiacylglycerol synthase"  
"JS1\_D03\_01073" 12982 "s63E6H2" 0.04997519 "Alpha-monoglucosyldiacylglycerol synthase"  
"JS1\_D03\_01074" 12983 "s59E13H2" 0 "Diacetylchitobiose deacetylase"  
"JS1\_D03\_01074" 12983 "s59E25H2" 0 "Diacetylchitobiose deacetylase"  
"JS1\_D03\_01074" 12983 "s59E5H2" 0.004889253 "Diacetylchitobiose deacetylase"  
"JS1\_D03\_01074" 12983 "s63E6H2" 0.05613879 "Diacetylchitobiose deacetylase"  
"JS1\_D03\_01075" 12984 "s59E13H2" 0 "hypothetical protein"  
"JS1\_D03\_01075" 12984 "s59E25H2" 0 "hypothetical protein"  
"JS1\_D03\_01075" 12984 "s59E5H2" 0.01154367 "hypothetical protein"



"JS1\_D03\_01075" 12984 "s63E6H2" 0.0129519 "hypothetical protein"  
"JS1\_D03\_01076" 12985 "s59E13H2" 2.59532 "hypothetical protein"  
"JS1\_D03\_01076" 12985 "s59E25H2" 0 "hypothetical protein"  
"JS1\_D03\_01076" 12985 "s59E5H2" 0.2034667 "hypothetical protein"  
"JS1\_D03\_01076" 12985 "s63E6H2" 2.059974 "hypothetical protein"  
"JS1\_D03\_01077" 12986 "s59E13H2" 0 "hypothetical protein"  
"JS1\_D03\_01077" 12986 "s59E25H2" 0 "hypothetical protein"  
"JS1\_D03\_01077" 12986 "s59E5H2" 0.6807361 "hypothetical protein"  
"JS1\_D03\_01077" 12986 "s63E6H2" 1.042701 "hypothetical protein"  
"JS1\_D03\_01078" 12987 "s59E13H2" 0 "Magnesium transport protein CorA"  
"JS1\_D03\_01078" 12987 "s59E25H2" 0 "Magnesium transport protein CorA"  
"JS1\_D03\_01078" 12987 "s59E5H2" 1.842384 "Magnesium transport protein CorA"  
"JS1\_D03\_01078" 12987 "s63E6H2" 0.2399782 "Magnesium transport protein CorA"  
"JS1\_D03\_01079" 12988 "s59E13H2" 0 "tRNA-specific 2-thiouridylase MnmA"  
"JS1\_D03\_01079" 12988 "s59E25H2" 0 "tRNA-specific 2-thiouridylase MnmA"  
"JS1\_D03\_01079" 12988 "s59E5H2" 0 "tRNA-specific 2-thiouridylase MnmA"  
"JS1\_D03\_01079" 12988 "s63E6H2" 0.1620583 "tRNA-specific 2-thiouridylase MnmA"  
"JS1\_D03\_01080" 12989 "s59E13H2" 0 "GMP synthase [glutamine-hydrolyzing] subunit B"  
"JS1\_D03\_01080" 12989 "s59E25H2" 0 "GMP synthase [glutamine-hydrolyzing] subunit B"  
"JS1\_D03\_01080" 12989 "s59E5H2" 0 "GMP synthase [glutamine-hydrolyzing] subunit B"  
"JS1\_D03\_01080" 12989 "s63E6H2" 0.1277572 "GMP synthase [glutamine-hydrolyzing] subunit B"  
"JS1\_D03\_01081" 12990 "s59E13H2" 0 "thiamine biosynthesis protein ThiI"  
"JS1\_D03\_01081" 12990 "s59E25H2" 0 "thiamine biosynthesis protein ThiI"  
"JS1\_D03\_01081" 12990 "s59E5H2" 0 "thiamine biosynthesis protein ThiI"  
"JS1\_D03\_01081" 12990 "s63E6H2" 0.03497874 "thiamine biosynthesis protein ThiI"  
"JS1\_D03\_01082" 12991 "s59E13H2" 0.005365743 "30S ribosomal protein S3"  
"JS1\_D03\_01082" 12991 "s59E25H2" 0 "30S ribosomal protein S3"  
"JS1\_D03\_01082" 12991 "s59E5H2" 0.01508684 "30S ribosomal protein S3"  
"JS1\_D03\_01082" 12991 "s63E6H2" 0.177507 "30S ribosomal protein S3"  
"JS1\_D03\_01083" 12992 "s59E13H2" 0.01090203 "50S ribosomal protein L16"  
"JS1\_D03\_01083" 12992 "s59E25H2" 0 "50S ribosomal protein L16"  
"JS1\_D03\_01083" 12992 "s59E5H2" 0.06660991 "50S ribosomal protein L16"  
"JS1\_D03\_01083" 12992 "s63E6H2" 0.263364 "50S ribosomal protein L16"  
"JS1\_D03\_01084" 12993 "s59E13H2" 0.001545687 "Adenylate kinase"  
"JS1\_D03\_01084" 12993 "s59E25H2" 0 "Adenylate kinase"  
"JS1\_D03\_01084" 12993 "s59E5H2" 0.02540099 "Adenylate kinase"  
"JS1\_D03\_01084" 12993 "s63E6H2" 0.06635334 "Adenylate kinase"  
"JS1\_D03\_01087" 12996 "s59E13H2" 0 "hypothetical protein"  
"JS1\_D03\_01087" 12996 "s59E25H2" 0 "hypothetical protein"  
"JS1\_D03\_01087" 12996 "s59E5H2" 0.02710814 "hypothetical protein"  
"JS1\_D03\_01087" 12996 "s63E6H2" 0.1424148 "hypothetical protein"  
"JS1\_D03\_01090" 12999 "s59E13H2" 0 "Mannosylfructose-phosphate phosphatase"  
"JS1\_D03\_01090" 12999 "s59E25H2" 0 "Mannosylfructose-phosphate phosphatase"  
"JS1\_D03\_01090" 12999 "s59E5H2" 0.0307543 "Mannosylfructose-phosphate phosphatase"  
"JS1\_D03\_01090" 12999 "s63E6H2" 0.08867782 "Mannosylfructose-phosphate phosphatase"  
"JS1\_D03\_01091" 13000 "s59E13H2" 0.004942979 "D-inositol 3-phosphate glycosyltransferase"  
"JS1\_D03\_01091" 13000 "s59E25H2" 0 "D-inositol 3-phosphate glycosyltransferase"

"JS1\_D03\_01091" 13000 "s59E5H2" 0.007030088 "D-inositol 3-phosphate glycosyltransferase"  
"JS1\_D03\_01091" 13000 "s63E6H2" 0.05145349 "D-inositol 3-phosphate glycosyltransferase"  
"JS1\_D03\_01094" 13003 "s59E13H2" 0 "Acyl carrier protein"  
"JS1\_D03\_01094" 13003 "s59E25H2" 0 "Acyl carrier protein"  
"JS1\_D03\_01094" 13003 "s59E5H2" 0.01487743 "Acyl carrier protein"  
"JS1\_D03\_01094" 13003 "s63E6H2" 0.03697609 "Acyl carrier protein"  
"JS1\_D03\_01095" 13004 "s59E13H2" 0 "hypothetical protein"  
"JS1\_D03\_01095" 13004 "s59E25H2" 0 "hypothetical protein"  
"JS1\_D03\_01095" 13004 "s59E5H2" 0.004238361 "hypothetical protein"  
"JS1\_D03\_01095" 13004 "s63E6H2" 0.02789321 "hypothetical protein"  
"JS1\_D03\_01097" 13006 "s59E13H2" 6.302462 "hypothetical protein"  
"JS1\_D03\_01097" 13006 "s59E25H2" 0 "hypothetical protein"  
"JS1\_D03\_01097" 13006 "s59E5H2" 0.1528856 "hypothetical protein"  
"JS1\_D03\_01097" 13006 "s63E6H2" 0.07637107 "hypothetical protein"  
"JS1\_D03\_01099" 13008 "s59E13H2" 0.111083 "Glycine betaine transport ATP-binding protein OpuAA"  
"JS1\_D03\_01099" 13008 "s59E25H2" 0 "Glycine betaine transport ATP-binding protein OpuAA"  
"JS1\_D03\_01099" 13008 "s59E5H2" 1.304914 "Glycine betaine transport ATP-binding protein OpuAA"  
"JS1\_D03\_01099" 13008 "s63E6H2" 0.02447185 "Glycine betaine transport ATP-binding protein OpuAA"  
"JS1\_D03\_01100" 13009 "s59E13H2" 0.461525 "Glycine betaine transport system permease protein OpuAB"  
"JS1\_D03\_01100" 13009 "s59E25H2" 0 "Glycine betaine transport system permease protein OpuAB"  
"JS1\_D03\_01100" 13009 "s59E5H2" 1.282139 "Glycine betaine transport system permease protein OpuAB"  
"JS1\_D03\_01100" 13009 "s63E6H2" 0.891029 "Glycine betaine transport system permease protein OpuAB"  
"JS1\_D03\_01101" 13010 "s59E13H2" 0.2287918 "glycine betaine transporter periplasmic subunit"  
"JS1\_D03\_01101" 13010 "s59E25H2" 0 "glycine betaine transporter periplasmic subunit"  
"JS1\_D03\_01101" 13010 "s59E5H2" 0.968918 "glycine betaine transporter periplasmic subunit"  
"JS1\_D03\_01101" 13010 "s63E6H2" 0.3199757 "glycine betaine transporter periplasmic subunit"  
"JS1\_D03\_01102" 13011 "s59E13H2" 2.390274 "hypothetical protein"  
"JS1\_D03\_01102" 13011 "s59E25H2" 0 "hypothetical protein"  
"JS1\_D03\_01102" 13011 "s59E5H2" 0.4724789 "hypothetical protein"  
"JS1\_D03\_01102" 13011 "s63E6H2" 0.5485793 "hypothetical protein"  
"JS1\_D03\_01103" 13012 "s59E13H2" 0 "hypothetical protein"  
"JS1\_D03\_01103" 13012 "s59E25H2" 0 "hypothetical protein"  
"JS1\_D03\_01103" 13012 "s59E5H2" 0 "hypothetical protein"  
"JS1\_D03\_01103" 13012 "s63E6H2" 0.9058704 "hypothetical protein"  
"JS1\_D03\_01104" 13013 "s59E13H2" 0.04498319 "Bacterial Ig-like domain (group 2)"  
"JS1\_D03\_01104" 13013 "s59E25H2" 0 "Bacterial Ig-like domain (group 2)"  
"JS1\_D03\_01104" 13013 "s59E5H2" 0.09498206 "Bacterial Ig-like domain (group 2)"  
"JS1\_D03\_01104" 13013 "s63E6H2" 0.05765052 "Bacterial Ig-like domain (group 2)"  
"JS1\_D03\_01105" 13014 "s59E13H2" 0.003966104 "hypothetical protein"  
"JS1\_D03\_01105" 13014 "s59E25H2" 0 "hypothetical protein"  
"JS1\_D03\_01105" 13014 "s59E5H2" 0.05624585 "hypothetical protein"  
"JS1\_D03\_01105" 13014 "s63E6H2" 0.07000631 "hypothetical protein"  
"JS1\_D03\_01106" 13015 "s59E13H2" 0.05035866 "Outer membrane protein alpha precursor"  
"JS1\_D03\_01106" 13015 "s59E25H2" 0 "Outer membrane protein alpha precursor"  
"JS1\_D03\_01106" 13015 "s59E5H2" 0.1914059 "Outer membrane protein alpha precursor"  
"JS1\_D03\_01106" 13015 "s63E6H2" 0.3130592 "Outer membrane protein alpha precursor"  
"JS1\_D03\_01107" 13016 "s59E13H2" 0.0009358653 "hypothetical protein"

"JS1\_D03\_01107" 13016 "s59E25H2" 0 "hypothetical protein"  
"JS1\_D03\_01107" 13016 "s59E5H2" 0.001899812 "hypothetical protein"  
"JS1\_D03\_01107" 13016 "s63E6H2" 0.04281361 "hypothetical protein"  
"JS1\_D03\_01108" 13017 "s59E13H2" 0.4096777 "Lipopolysaccharide export system ATP-binding protein LptB"  
"JS1\_D03\_01108" 13017 "s59E25H2" 0 "Lipopolysaccharide export system ATP-binding protein LptB"  
"JS1\_D03\_01108" 13017 "s59E5H2" 0.645644 "Lipopolysaccharide export system ATP-binding protein LptB"  
"JS1\_D03\_01108" 13017 "s63E6H2" 1.137155 "Lipopolysaccharide export system ATP-binding protein LptB"  
"JS1\_D03\_01109" 13018 "s59E13H2" 0.2071599 "3-hydroxyacyl-[acyl-carrier-protein] dehydratase FabZ"  
"JS1\_D03\_01109" 13018 "s59E25H2" 0 "3-hydroxyacyl-[acyl-carrier-protein] dehydratase FabZ"  
"JS1\_D03\_01109" 13018 "s59E5H2" 0.4075607 "3-hydroxyacyl-[acyl-carrier-protein] dehydratase FabZ"  
"JS1\_D03\_01109" 13018 "s63E6H2" 0.52357 "3-hydroxyacyl-[acyl-carrier-protein] dehydratase FabZ"  
"JS1\_D03\_01110" 13019 "s59E13H2" 0.0591664 "Outer membrane protein (OmpH-like)"  
"JS1\_D03\_01110" 13019 "s59E25H2" 0 "Outer membrane protein (OmpH-like)"  
"JS1\_D03\_01110" 13019 "s59E5H2" 0.1492356 "Outer membrane protein (OmpH-like)"  
"JS1\_D03\_01110" 13019 "s63E6H2" 0.2509706 "Outer membrane protein (OmpH-like)"  
"JS1\_D03\_01111" 13020 "s59E13H2" 0.1366702 "Outer membrane protein assembly factor BamA precursor"  
"JS1\_D03\_01111" 13020 "s59E25H2" 0 "Outer membrane protein assembly factor BamA precursor"  
"JS1\_D03\_01111" 13020 "s59E5H2" 0.505571 "Outer membrane protein assembly factor BamA precursor"  
"JS1\_D03\_01111" 13020 "s63E6H2" 0.3091693 "Outer membrane protein assembly factor BamA precursor"  
"JS1\_D03\_01112" 13021 "s59E13H2" 0.04037239 "putative assembly protein"  
"JS1\_D03\_01112" 13021 "s59E25H2" 0 "putative assembly protein"  
"JS1\_D03\_01112" 13021 "s59E5H2" 0.1647958 "putative assembly protein"  
"JS1\_D03\_01112" 13021 "s63E6H2" 0.222422 "putative assembly protein"  
"JS1\_D03\_01113" 13022 "s59E13H2" 0.01439491 "Nucleoside triphosphate pyrophosphohydrolase/pyrophosphatase MazG"  
"JS1\_D03\_01113" 13022 "s59E25H2" 0 "Nucleoside triphosphate pyrophosphohydrolase/pyrophosphatase MazG"  
"JS1\_D03\_01113" 13022 "s59E5H2" 0.1523981 "Nucleoside triphosphate pyrophosphohydrolase/pyrophosphatase MazG"  
"JS1\_D03\_01113" 13022 "s63E6H2" 0.2680573 "Nucleoside triphosphate pyrophosphohydrolase/pyrophosphatase MazG"  
"JS1\_D03\_01114" 13023 "s59E13H2" 0.03138691 "preprotein translocase subunit SecY"  
"JS1\_D03\_01114" 13023 "s59E25H2" 0 "preprotein translocase subunit SecY"  
"JS1\_D03\_01114" 13023 "s59E5H2" 0.01753514 "preprotein translocase subunit SecY"  
"JS1\_D03\_01114" 13023 "s63E6H2" 0.04658032 "preprotein translocase subunit SecY"  
"JS1\_D03\_01119" 13028 "s59E13H2" 0.01111648 "Serine hydroxymethyltransferase"  
"JS1\_D03\_01119" 13028 "s59E25H2" 0 "Serine hydroxymethyltransferase"  
"JS1\_D03\_01119" 13028 "s59E5H2" 0.122863 "Serine hydroxymethyltransferase"  
"JS1\_D03\_01119" 13028 "s63E6H2" 0.1081787 "Serine hydroxymethyltransferase"  
"JS1\_D03\_01120" 13029 "s59E13H2" 0.004630639 "Xaa-Pro dipeptidase"  
"JS1\_D03\_01120" 13029 "s59E25H2" 0 "Xaa-Pro dipeptidase"  
"JS1\_D03\_01120" 13029 "s59E5H2" 0.02094203 "Xaa-Pro dipeptidase"  
"JS1\_D03\_01120" 13029 "s63E6H2" 0.01690188 "Xaa-Pro dipeptidase"  
"JS1\_D03\_01121" 13030 "s59E13H2" 0 "Shikimate kinase 1"  
"JS1\_D03\_01121" 13030 "s59E25H2" 0 "Shikimate kinase 1"  
"JS1\_D03\_01121" 13030 "s59E5H2" 0 "Shikimate kinase 1"  
"JS1\_D03\_01121" 13030 "s63E6H2" 0.0179368 "Shikimate kinase 1"  
"JS1\_D03\_01122" 13031 "s59E13H2" 0.01110509 "Ribosomal protein S12 methylthiotransferase RimO"  
"JS1\_D03\_01122" 13031 "s59E25H2" 0 "Ribosomal protein S12 methylthiotransferase RimO"  
"JS1\_D03\_01122" 13031 "s59E5H2" 0.03481714 "Ribosomal protein S12 methylthiotransferase RimO"  
"JS1\_D03\_01122" 13031 "s63E6H2" 0.04829884 "Ribosomal protein S12 methylthiotransferase RimO"

"JS1\_D03\_01123" 13032 "s59E13H2" 0.004919318 "hypothetical protein"  
"JS1\_D03\_01123" 13032 "s59E25H2" 0 "hypothetical protein"  
"JS1\_D03\_01123" 13032 "s59E5H2" 0 "hypothetical protein"  
"JS1\_D03\_01123" 13032 "s63E6H2" 0.02833478 "hypothetical protein"  
"JS1\_D03\_01124" 13033 "s59E13H2" 0.2959464 "hypothetical protein"  
"JS1\_D03\_01124" 13033 "s59E25H2" 0 "hypothetical protein"  
"JS1\_D03\_01124" 13033 "s59E5H2" 0.02386727 "hypothetical protein"  
"JS1\_D03\_01124" 13033 "s63E6H2" 0.03856357 "hypothetical protein"  
"JS1\_D03\_01126" 13035 "s59E13H2" 0 "Adenylate cyclase 2"  
"JS1\_D03\_01126" 13035 "s59E25H2" 0 "Adenylate cyclase 2"  
"JS1\_D03\_01126" 13035 "s59E5H2" 0.01359767 "Adenylate cyclase 2"  
"JS1\_D03\_01126" 13035 "s63E6H2" 0.04804956 "Adenylate cyclase 2"  
"JS1\_D03\_01127" 13036 "s59E13H2" 1.628733 "hypothetical protein"  
"JS1\_D03\_01127" 13036 "s59E25H2" 0 "hypothetical protein"  
"JS1\_D03\_01127" 13036 "s59E5H2" 0.008406084 "hypothetical protein"  
"JS1\_D03\_01127" 13036 "s63E6H2" 0.05536861 "hypothetical protein"  
"JS1\_D03\_01128" 13037 "s59E13H2" 2.408869 "hypothetical protein"  
"JS1\_D03\_01128" 13037 "s59E25H2" 0 "hypothetical protein"  
"JS1\_D03\_01128" 13037 "s59E5H2" 0.00471614 "hypothetical protein"  
"JS1\_D03\_01128" 13037 "s63E6H2" 0.06047972 "hypothetical protein"  
"JS1\_D03\_01129" 13038 "s59E13H2" 0 "HEPN domain protein"  
"JS1\_D03\_01129" 13038 "s59E25H2" 0 "HEPN domain protein"  
"JS1\_D03\_01129" 13038 "s59E5H2" 0.006847704 "HEPN domain protein"  
"JS1\_D03\_01129" 13038 "s63E6H2" 0.02597233 "HEPN domain protein"  
"JS1\_D03\_01130" 13039 "s59E13H2" 0 "Nucleotidyltransferase domain protein"  
"JS1\_D03\_01130" 13039 "s59E25H2" 0 "Nucleotidyltransferase domain protein"  
"JS1\_D03\_01130" 13039 "s59E5H2" 0.02156214 "Nucleotidyltransferase domain protein"  
"JS1\_D03\_01130" 13039 "s63E6H2" 0.03852223 "Nucleotidyltransferase domain protein"  
"JS1\_D03\_01133" 13042 "s59E13H2" 0.0974203 "hypothetical protein"  
"JS1\_D03\_01133" 13042 "s59E25H2" 0 "hypothetical protein"  
"JS1\_D03\_01133" 13042 "s59E5H2" 0.0969767 "hypothetical protein"  
"JS1\_D03\_01133" 13042 "s63E6H2" 0.04303961 "hypothetical protein"  
"JS1\_D03\_01134" 13043 "s59E13H2" 0.02944305 "Type IV pilus biogenesis and competence protein PilQ precursor"  
"JS1\_D03\_01134" 13043 "s59E25H2" 0 "Type IV pilus biogenesis and competence protein PilQ precursor"  
"JS1\_D03\_01134" 13043 "s59E5H2" 0.02799724 "Type IV pilus biogenesis and competence protein PilQ precursor"  
"JS1\_D03\_01134" 13043 "s63E6H2" 0.02913993 "Type IV pilus biogenesis and competence protein PilQ precursor"  
"JS1\_D03\_01135" 13044 "s59E13H2" 0.001950166 "hypothetical protein"  
"JS1\_D03\_01135" 13044 "s59E25H2" 0 "hypothetical protein"  
"JS1\_D03\_01135" 13044 "s59E5H2" 0.01805512 "hypothetical protein"  
"JS1\_D03\_01135" 13044 "s63E6H2" 0.0166849 "hypothetical protein"  
"JS1\_D03\_01136" 13045 "s59E13H2" 0.01096602 "Pilus assembly protein, PilO"  
"JS1\_D03\_01136" 13045 "s59E25H2" 0 "Pilus assembly protein, PilO"  
"JS1\_D03\_01136" 13045 "s59E5H2" 0.02237511 "Pilus assembly protein, PilO"  
"JS1\_D03\_01136" 13045 "s63E6H2" 0.01092081 "Pilus assembly protein, PilO"  
"JS1\_D03\_01137" 13046 "s59E13H2" 0.04216291 "hypothetical protein"  
"JS1\_D03\_01137" 13046 "s59E25H2" 0 "hypothetical protein"  
"JS1\_D03\_01137" 13046 "s59E5H2" 0.03885669 "hypothetical protein"

"JS1\_D03\_01137" 13046 "s63E6H2" 0.0229126 "hypothetical protein"  
"JS1\_D03\_01138" 13047 "s59E13H2" 0.0002808361 "Competence protein A"  
"JS1\_D03\_01138" 13047 "s59E25H2" 0 "Competence protein A"  
"JS1\_D03\_01138" 13047 "s59E5H2" 0.002146342 "Competence protein A"  
"JS1\_D03\_01138" 13047 "s63E6H2" 0.002505923 "Competence protein A"  
"JS1\_D03\_01139" 13048 "s59E13H2" 0 "hypothetical protein"  
"JS1\_D03\_01139" 13048 "s59E25H2" 0 "hypothetical protein"  
"JS1\_D03\_01139" 13048 "s59E5H2" 0 "hypothetical protein"  
"JS1\_D03\_01139" 13048 "s63E6H2" 0.0105718 "hypothetical protein"  
"JS1\_D03\_01140" 13049 "s59E13H2" 0 "hypothetical protein"  
"JS1\_D03\_01140" 13049 "s59E25H2" 0 "hypothetical protein"  
"JS1\_D03\_01140" 13049 "s59E5H2" 0 "hypothetical protein"  
"JS1\_D03\_01140" 13049 "s63E6H2" 0 "hypothetical protein"  
"JS1\_D03\_01141" 13050 "s59E13H2" 0.06010791 "Copper-exporting P-type ATPase B"  
"JS1\_D03\_01141" 13050 "s59E25H2" 0 "Copper-exporting P-type ATPase B"  
"JS1\_D03\_01141" 13050 "s59E5H2" 2.394856 "Copper-exporting P-type ATPase B"  
"JS1\_D03\_01141" 13050 "s63E6H2" 3.310414 "Copper-exporting P-type ATPase B"  
"JS1\_D03\_01142" 13051 "s59E13H2" 0 "hypothetical protein"  
"JS1\_D03\_01142" 13051 "s59E25H2" 0 "hypothetical protein"  
"JS1\_D03\_01142" 13051 "s59E5H2" 0 "hypothetical protein"  
"JS1\_D03\_01142" 13051 "s63E6H2" 0.07522411 "hypothetical protein"  
"JS1\_D03\_01143" 13052 "s59E13H2" 0 "hypothetical protein"  
"JS1\_D03\_01143" 13052 "s59E25H2" 0 "hypothetical protein"  
"JS1\_D03\_01143" 13052 "s59E5H2" 0 "hypothetical protein"  
"JS1\_D03\_01143" 13052 "s63E6H2" 0.005347523 "hypothetical protein"  
"JS1\_D03\_01144" 13053 "s59E13H2" 0 "ubiquinone/menaquinone biosynthesis methyltransferase"  
"JS1\_D03\_01144" 13053 "s59E25H2" 0 "ubiquinone/menaquinone biosynthesis methyltransferase"  
"JS1\_D03\_01144" 13053 "s59E5H2" 0 "ubiquinone/menaquinone biosynthesis methyltransferase"  
"JS1\_D03\_01144" 13053 "s63E6H2" 0.003862457 "ubiquinone/menaquinone biosynthesis methyltransferase"  
"JS1\_D03\_01145" 13054 "s59E13H2" 0 "hypothetical protein"  
"JS1\_D03\_01145" 13054 "s59E25H2" 0 "hypothetical protein"  
"JS1\_D03\_01145" 13054 "s59E5H2" 0 "hypothetical protein"  
"JS1\_D03\_01145" 13054 "s63E6H2" 0 "hypothetical protein"  
"JS1\_D03\_01146" 13055 "s59E13H2" 0 "hypothetical protein"  
"JS1\_D03\_01146" 13055 "s59E25H2" 0 "hypothetical protein"  
"JS1\_D03\_01146" 13055 "s59E5H2" 0 "hypothetical protein"  
"JS1\_D03\_01146" 13055 "s63E6H2" 0 "hypothetical protein"  
"JS1\_D03\_01147" 13056 "s59E13H2" 0 "hypothetical protein"  
"JS1\_D03\_01147" 13056 "s59E25H2" 0 "hypothetical protein"  
"JS1\_D03\_01147" 13056 "s59E5H2" 0.01621173 "hypothetical protein"  
"JS1\_D03\_01147" 13056 "s63E6H2" 0.009705532 "hypothetical protein"  
"JS1\_D03\_01148" 13057 "s59E13H2" 0 "hypothetical protein"  
"JS1\_D03\_01148" 13057 "s59E25H2" 0 "hypothetical protein"  
"JS1\_D03\_01148" 13057 "s59E5H2" 0 "hypothetical protein"  
"JS1\_D03\_01148" 13057 "s63E6H2" 0 "hypothetical protein"  
"JS1\_D03\_01149" 13058 "s59E13H2" 0 "hypothetical protein"  
"JS1\_D03\_01149" 13058 "s59E25H2" 0 "hypothetical protein"

"JS1\_D03\_01149" 13058 "s59E5H2" 0 "hypothetical protein"  
"JS1\_D03\_01149" 13058 "s63E6H2" 0 "hypothetical protein"  
"JS1\_D03\_01150" 13059 "s59E13H2" 0 "hypothetical protein"  
"JS1\_D03\_01150" 13059 "s59E25H2" 0 "hypothetical protein"  
"JS1\_D03\_01150" 13059 "s59E5H2" 0 "hypothetical protein"  
"JS1\_D03\_01150" 13059 "s63E6H2" 0 "hypothetical protein"  
"JS1\_D03\_01151" 13060 "s59E13H2" 0.009857967 "hypothetical protein"  
"JS1\_D03\_01151" 13060 "s59E25H2" 0 "hypothetical protein"  
"JS1\_D03\_01151" 13060 "s59E5H2" 0 "hypothetical protein"  
"JS1\_D03\_01151" 13060 "s63E6H2" 0 "hypothetical protein"  
"JS1\_D03\_01153" 13062 "s59E13H2" 0 "hypothetical protein"  
"JS1\_D03\_01153" 13062 "s59E25H2" 0 "hypothetical protein"  
"JS1\_D03\_01153" 13062 "s59E5H2" 0.03488841 "hypothetical protein"  
"JS1\_D03\_01153" 13062 "s63E6H2" 0.004728336 "hypothetical protein"  
"JS1\_D03\_01154" 13063 "s59E13H2" 0.3575065 "hypothetical protein"  
"JS1\_D03\_01154" 13063 "s59E25H2" 0 "hypothetical protein"  
"JS1\_D03\_01154" 13063 "s59E5H2" 0.06808564 "hypothetical protein"  
"JS1\_D03\_01154" 13063 "s63E6H2" 0.1814985 "hypothetical protein"  
"JS1\_D03\_01156" 13065 "s59E13H2" 0.141872 "Transposase IS200 like protein"  
"JS1\_D03\_01156" 13065 "s59E25H2" 0 "Transposase IS200 like protein"  
"JS1\_D03\_01156" 13065 "s59E5H2" 0.6232143 "Transposase IS200 like protein"  
"JS1\_D03\_01156" 13065 "s63E6H2" 0.6168756 "Transposase IS200 like protein"  
"JS1\_D03\_01157" 13066 "s59E13H2" 0 "hypothetical protein"  
"JS1\_D03\_01157" 13066 "s59E25H2" 0 "hypothetical protein"  
"JS1\_D03\_01157" 13066 "s59E5H2" 0 "hypothetical protein"  
"JS1\_D03\_01157" 13066 "s63E6H2" 0 "hypothetical protein"  
"JS1\_D03\_01158" 13067 "s59E13H2" 0.04949278 "Demethylrebeccamycin-D-glucose O-methyltransferase"  
"JS1\_D03\_01158" 13067 "s59E25H2" 0 "Demethylrebeccamycin-D-glucose O-methyltransferase"  
"JS1\_D03\_01158" 13067 "s59E5H2" 0.1286174 "Demethylrebeccamycin-D-glucose O-methyltransferase"  
"JS1\_D03\_01158" 13067 "s63E6H2" 0.004464604 "Demethylrebeccamycin-D-glucose O-methyltransferase"  
"JS1\_D03\_01159" 13068 "s59E13H2" 0.8123445 "Mycothioli acetyltransferase"  
"JS1\_D03\_01159" 13068 "s59E25H2" 0 "Mycothioli acetyltransferase"  
"JS1\_D03\_01159" 13068 "s59E5H2" 0.08259311 "Mycothioli acetyltransferase"  
"JS1\_D03\_01159" 13068 "s63E6H2" 0.07552829 "Mycothioli acetyltransferase"  
"JS1\_D03\_01160" 13069 "s59E13H2" 0 "hypothetical protein"  
"JS1\_D03\_01160" 13069 "s59E25H2" 0 "hypothetical protein"  
"JS1\_D03\_01160" 13069 "s59E5H2" 0 "hypothetical protein"  
"JS1\_D03\_01160" 13069 "s63E6H2" 0 "hypothetical protein"  
"JS1\_D03\_01164" 13073 "s59E13H2" 0 "30S ribosomal protein S2"  
"JS1\_D03\_01164" 13073 "s59E25H2" 0 "30S ribosomal protein S2"  
"JS1\_D03\_01164" 13073 "s59E5H2" 0 "30S ribosomal protein S2"  
"JS1\_D03\_01164" 13073 "s63E6H2" 0.04132366 "30S ribosomal protein S2"  
"JS1\_D03\_01165" 13074 "s59E13H2" 0 "Elongation factor Ts"  
"JS1\_D03\_01165" 13074 "s59E25H2" 0 "Elongation factor Ts"  
"JS1\_D03\_01165" 13074 "s59E5H2" 0.004971598 "Elongation factor Ts"  
"JS1\_D03\_01165" 13074 "s63E6H2" 0.01386078 "Elongation factor Ts"  
"JS1\_D03\_01166" 13075 "s59E13H2" 0.00797961 "Uridylate kinase"

"JS1\_D03\_01166" 13075 "s59E25H2" 0 "Uridylate kinase"  
"JS1\_D03\_01166" 13075 "s59E5H2" 0.06435157 "Uridylate kinase"  
"JS1\_D03\_01166" 13075 "s63E6H2" 0.09325799 "Uridylate kinase"  
"JS1\_D03\_01167" 13076 "s59E13H2" 0.03598709 "Ribosome-recycling factor"  
"JS1\_D03\_01167" 13076 "s59E25H2" 0 "Ribosome-recycling factor"  
"JS1\_D03\_01167" 13076 "s59E5H2" 0.04047122 "Ribosome-recycling factor"  
"JS1\_D03\_01167" 13076 "s63E6H2" 0.07741834 "Ribosome-recycling factor"  
"JS1\_D03\_01168" 13077 "s59E13H2" 0.02546316 "Ferredoxin"  
"JS1\_D03\_01168" 13077 "s59E25H2" 0 "Ferredoxin"  
"JS1\_D03\_01168" 13077 "s59E5H2" 0.073095 "Ferredoxin"  
"JS1\_D03\_01168" 13077 "s63E6H2" 0.02243293 "Ferredoxin"  
"JS1\_D03\_01169" 13078 "s59E13H2" 0.01402203 "Isoprenyl transferase"  
"JS1\_D03\_01169" 13078 "s59E25H2" 0 "Isoprenyl transferase"  
"JS1\_D03\_01169" 13078 "s59E5H2" 0.1021791 "Isoprenyl transferase"  
"JS1\_D03\_01169" 13078 "s63E6H2" 0.08182417 "Isoprenyl transferase"  
"JS1\_D03\_01170" 13079 "s59E13H2" 0.006820204 "Phosphatidate cytidyltransferase"  
"JS1\_D03\_01170" 13079 "s59E25H2" 0 "Phosphatidate cytidyltransferase"  
"JS1\_D03\_01170" 13079 "s59E5H2" 0.02114231 "Phosphatidate cytidyltransferase"  
"JS1\_D03\_01170" 13079 "s63E6H2" 0.0439824 "Phosphatidate cytidyltransferase"  
"JS1\_D03\_01171" 13080 "s59E13H2" 0.01247985 "1-deoxy-D-xylulose 5-phosphate reductoisomerase"  
"JS1\_D03\_01171" 13080 "s59E25H2" 0 "1-deoxy-D-xylulose 5-phosphate reductoisomerase"  
"JS1\_D03\_01171" 13080 "s59E5H2" 0.01331678 "1-deoxy-D-xylulose 5-phosphate reductoisomerase"  
"JS1\_D03\_01171" 13080 "s63E6H2" 0.05036609 "1-deoxy-D-xylulose 5-phosphate reductoisomerase"  
"JS1\_D03\_01172" 13081 "s59E13H2" 0.007022026 "Regulator of sigma-W protease RasP"  
"JS1\_D03\_01172" 13081 "s59E25H2" 0 "Regulator of sigma-W protease RasP"  
"JS1\_D03\_01172" 13081 "s59E5H2" 0.05845204 "Regulator of sigma-W protease RasP"  
"JS1\_D03\_01172" 13081 "s63E6H2" 0.05883034 "Regulator of sigma-W protease RasP"  
"JS1\_D03\_01173" 13082 "s59E13H2" 0.00778128 "4-hydroxy-3-methylbut-2-en-1-yl diphosphate synthase"  
"JS1\_D03\_01173" 13082 "s59E25H2" 0 "4-hydroxy-3-methylbut-2-en-1-yl diphosphate synthase"  
"JS1\_D03\_01173" 13082 "s59E5H2" 0.008698603 "4-hydroxy-3-methylbut-2-en-1-yl diphosphate synthase"  
"JS1\_D03\_01173" 13082 "s63E6H2" 0.01070948 "4-hydroxy-3-methylbut-2-en-1-yl diphosphate synthase"  
"JS1\_D03\_01174" 13083 "s59E13H2" 0 "V-type ATP synthase subunit H"  
"JS1\_D03\_01174" 13083 "s59E25H2" 0 "V-type ATP synthase subunit H"  
"JS1\_D03\_01174" 13083 "s59E5H2" 0.02334897 "V-type ATP synthase subunit H"  
"JS1\_D03\_01174" 13083 "s63E6H2" 0.01414677 "V-type ATP synthase subunit H"  
"JS1\_D03\_01175" 13084 "s59E13H2" 0.000843736 "V-type ATP synthase subunit I"  
"JS1\_D03\_01175" 13084 "s59E25H2" 0 "V-type ATP synthase subunit I"  
"JS1\_D03\_01175" 13084 "s59E5H2" 0.01623611 "V-type ATP synthase subunit I"  
"JS1\_D03\_01175" 13084 "s63E6H2" 0.01337444 "V-type ATP synthase subunit I"  
"JS1\_D03\_01176" 13085 "s59E13H2" 0 "V-type sodium ATPase subunit K"  
"JS1\_D03\_01176" 13085 "s59E25H2" 0 "V-type sodium ATPase subunit K"  
"JS1\_D03\_01176" 13085 "s59E5H2" 0.05013062 "V-type sodium ATPase subunit K"  
"JS1\_D03\_01176" 13085 "s63E6H2" 0.03911392 "V-type sodium ATPase subunit K"  
"JS1\_D03\_01177" 13086 "s59E13H2" 0 "V-type ATP synthase subunit E"  
"JS1\_D03\_01177" 13086 "s59E25H2" 0 "V-type ATP synthase subunit E"  
"JS1\_D03\_01177" 13086 "s59E5H2" 0.05200246 "V-type ATP synthase subunit E"  
"JS1\_D03\_01177" 13086 "s63E6H2" 0.009480433 "V-type ATP synthase subunit E"

"JS1\_D03\_01178" 13087 "s59E13H2" 0.003293368 "V-type sodium ATPase subunit C"  
"JS1\_D03\_01178" 13087 "s59E25H2" 0 "V-type sodium ATPase subunit C"  
"JS1\_D03\_01178" 13087 "s59E5H2" 0.1894746 "V-type sodium ATPase subunit C"  
"JS1\_D03\_01178" 13087 "s63E6H2" 0.01387414 "V-type sodium ATPase subunit C"  
"JS1\_D03\_01179" 13088 "s59E13H2" 0.1373389 "V-type sodium ATPase subunit G"  
"JS1\_D03\_01179" 13088 "s59E25H2" 0 "V-type sodium ATPase subunit G"  
"JS1\_D03\_01179" 13088 "s59E5H2" 0.2933552 "V-type sodium ATPase subunit G"  
"JS1\_D03\_01179" 13088 "s63E6H2" 0.04764664 "V-type sodium ATPase subunit G"  
"JS1\_D03\_01180" 13089 "s59E13H2" 0.08004282 "V-type sodium ATPase catalytic subunit A"  
"JS1\_D03\_01180" 13089 "s59E25H2" 0 "V-type sodium ATPase catalytic subunit A"  
"JS1\_D03\_01180" 13089 "s59E5H2" 0.2229737 "V-type sodium ATPase catalytic subunit A"  
"JS1\_D03\_01180" 13089 "s63E6H2" 0.1061953 "V-type sodium ATPase catalytic subunit A"  
"JS1\_D03\_01181" 13090 "s59E13H2" 0.07627524 "V-type sodium ATPase subunit B"  
"JS1\_D03\_01181" 13090 "s59E25H2" 0 "V-type sodium ATPase subunit B"  
"JS1\_D03\_01181" 13090 "s59E5H2" 0.5080709 "V-type sodium ATPase subunit B"  
"JS1\_D03\_01181" 13090 "s63E6H2" 0.3594138 "V-type sodium ATPase subunit B"  
"JS1\_D03\_01182" 13091 "s59E13H2" 0.01319086 "V-type sodium ATPase subunit D"  
"JS1\_D03\_01182" 13091 "s59E25H2" 0 "V-type sodium ATPase subunit D"  
"JS1\_D03\_01182" 13091 "s59E5H2" 0.2123527 "V-type sodium ATPase subunit D"  
"JS1\_D03\_01182" 13091 "s63E6H2" 0.05092635 "V-type sodium ATPase subunit D"  
"JS1\_D03\_01183" 13092 "s59E13H2" 0.07135397 "phosphodiesterase"  
"JS1\_D03\_01183" 13092 "s59E25H2" 0 "phosphodiesterase"  
"JS1\_D03\_01183" 13092 "s59E5H2" 0.3187425 "phosphodiesterase"  
"JS1\_D03\_01183" 13092 "s63E6H2" 0.1691035 "phosphodiesterase"  
"JS1\_D03\_01185" 13094 "s59E13H2" 0.05572391 "1-acyl-sn-glycerol-3-phosphate acyltransferase"  
"JS1\_D03\_01185" 13094 "s59E25H2" 0 "1-acyl-sn-glycerol-3-phosphate acyltransferase"  
"JS1\_D03\_01185" 13094 "s59E5H2" 0.2424643 "1-acyl-sn-glycerol-3-phosphate acyltransferase"  
"JS1\_D03\_01185" 13094 "s63E6H2" 0.2767411 "1-acyl-sn-glycerol-3-phosphate acyltransferase"  
"JS1\_D03\_01186" 13095 "s59E13H2" 0.08538455 "Serine/threonine-protein kinase PknD"  
"JS1\_D03\_01186" 13095 "s59E25H2" 0 "Serine/threonine-protein kinase PknD"  
"JS1\_D03\_01186" 13095 "s59E5H2" 0.6660377 "Serine/threonine-protein kinase PknD"  
"JS1\_D03\_01186" 13095 "s63E6H2" 0.5144267 "Serine/threonine-protein kinase PknD"  
"JS1\_D03\_01187" 13096 "s59E13H2" 0 "Glutamate 2,3-aminomutase"  
"JS1\_D03\_01187" 13096 "s59E25H2" 0 "Glutamate 2,3-aminomutase"  
"JS1\_D03\_01187" 13096 "s59E5H2" 0.007157687 "Glutamate 2,3-aminomutase"  
"JS1\_D03\_01187" 13096 "s63E6H2" 0.01750001 "Glutamate 2,3-aminomutase"  
"JS1\_D03\_01188" 13097 "s59E13H2" 0 "Polysaccharide biosynthesis protein"  
"JS1\_D03\_01188" 13097 "s59E25H2" 0 "Polysaccharide biosynthesis protein"  
"JS1\_D03\_01188" 13097 "s59E5H2" 0 "Polysaccharide biosynthesis protein"  
"JS1\_D03\_01188" 13097 "s63E6H2" 0.01375077 "Polysaccharide biosynthesis protein"  
"JS1\_D03\_01189" 13098 "s59E13H2" 0 "hypothetical protein"  
"JS1\_D03\_01189" 13098 "s59E25H2" 0 "hypothetical protein"  
"JS1\_D03\_01189" 13098 "s59E5H2" 0 "hypothetical protein"  
"JS1\_D03\_01189" 13098 "s63E6H2" 0 "hypothetical protein"  
"JS1\_D03\_01190" 13099 "s59E13H2" 0 "GDP-mannose-dependent alpha-(1-6)-phosphatidylinositol monomannoside mannosyltransferase"  
"JS1\_D03\_01190" 13099 "s59E25H2" 0 "GDP-mannose-dependent alpha-(1-6)-phosphatidylinositol monomannoside mannosyltransferase"  
"JS1\_D03\_01190" 13099 "s59E5H2" 0 "GDP-mannose-dependent alpha-(1-6)-phosphatidylinositol monomannoside mannosyltransferase"



"JS1\_D03\_01190" 13099 "s63E6H2" 0.001211933 "GDP-mannose-dependent alpha-(1-6)-phosphatidylinositol monomannoside mannosyltransferase"  
"JS1\_D03\_01191" 13100 "s59E13H2" 0 "O-Antigen ligase"  
"JS1\_D03\_01191" 13100 "s59E25H2" 0 "O-Antigen ligase"  
"JS1\_D03\_01191" 13100 "s59E5H2" 0 "O-Antigen ligase"  
"JS1\_D03\_01191" 13100 "s63E6H2" 0.003965298 "O-Antigen ligase"  
"JS1\_D03\_01192" 13101 "s59E13H2" 0 "Putative teichuronic acid biosynthesis glycosyltransferase TuaC"  
"JS1\_D03\_01192" 13101 "s59E25H2" 0 "Putative teichuronic acid biosynthesis glycosyltransferase TuaC"  
"JS1\_D03\_01192" 13101 "s59E5H2" 0 "Putative teichuronic acid biosynthesis glycosyltransferase TuaC"  
"JS1\_D03\_01192" 13101 "s63E6H2" 0.01455345 "Putative teichuronic acid biosynthesis glycosyltransferase TuaC"  
"JS1\_D03\_01193" 13102 "s59E13H2" 0 "hypothetical protein"  
"JS1\_D03\_01193" 13102 "s59E25H2" 0 "hypothetical protein"  
"JS1\_D03\_01193" 13102 "s59E5H2" 0 "hypothetical protein"  
"JS1\_D03\_01193" 13102 "s63E6H2" 0 "hypothetical protein"  
"JS1\_D03\_01195" 13104 "s59E13H2" 0 "putative glycosyl transferase"  
"JS1\_D03\_01195" 13104 "s59E25H2" 0 "putative glycosyl transferase"  
"JS1\_D03\_01195" 13104 "s59E5H2" 0 "putative glycosyl transferase"  
"JS1\_D03\_01195" 13104 "s63E6H2" 0 "putative glycosyl transferase"  
"JS1\_D03\_01196" 13105 "s59E13H2" 0 "Alpha-D-kanosaminyltransferase"  
"JS1\_D03\_01196" 13105 "s59E25H2" 0 "Alpha-D-kanosaminyltransferase"  
"JS1\_D03\_01196" 13105 "s59E5H2" 0 "Alpha-D-kanosaminyltransferase"  
"JS1\_D03\_01196" 13105 "s63E6H2" 0 "Alpha-D-kanosaminyltransferase"  
"JS1\_D03\_01197" 13106 "s59E13H2" 0 "putative sugar transferase EpsL"  
"JS1\_D03\_01197" 13106 "s59E25H2" 0 "putative sugar transferase EpsL"  
"JS1\_D03\_01197" 13106 "s59E5H2" 0 "putative sugar transferase EpsL"  
"JS1\_D03\_01197" 13106 "s63E6H2" 0.0192184 "putative sugar transferase EpsL"  
"JS1\_D03\_01198" 13107 "s59E13H2" 0 "Galactoside O-acetyltransferase"  
"JS1\_D03\_01198" 13107 "s59E25H2" 0 "Galactoside O-acetyltransferase"  
"JS1\_D03\_01198" 13107 "s59E5H2" 0 "Galactoside O-acetyltransferase"  
"JS1\_D03\_01198" 13107 "s63E6H2" 0.02103828 "Galactoside O-acetyltransferase"  
"JS1\_D03\_01199" 13108 "s59E13H2" 0 "Putative pyridoxal phosphate-dependent aminotransferase EpsN"  
"JS1\_D03\_01199" 13108 "s59E25H2" 0 "Putative pyridoxal phosphate-dependent aminotransferase EpsN"  
"JS1\_D03\_01199" 13108 "s59E5H2" 0.004591185 "Putative pyridoxal phosphate-dependent aminotransferase EpsN"  
"JS1\_D03\_01199" 13108 "s63E6H2" 0.02214637 "Putative pyridoxal phosphate-dependent aminotransferase EpsN"  
"JS1\_D03\_01200" 13109 "s59E13H2" 0 "hypothetical protein"  
"JS1\_D03\_01200" 13109 "s59E25H2" 0 "hypothetical protein"  
"JS1\_D03\_01200" 13109 "s59E5H2" 0 "hypothetical protein"  
"JS1\_D03\_01200" 13109 "s63E6H2" 0.03205993 "hypothetical protein"  
"JS1\_D03\_01201" 13110 "s59E13H2" 0.05896943 "mRNA interferase MazF9"  
"JS1\_D03\_01201" 13110 "s59E25H2" 0 "mRNA interferase MazF9"  
"JS1\_D03\_01201" 13110 "s59E5H2" 0.0008666649 "mRNA interferase MazF9"  
"JS1\_D03\_01201" 13110 "s63E6H2" 0.02305542 "mRNA interferase MazF9"  
"JS1\_D03\_01202" 13111 "s59E13H2" 0.1325223 "hypothetical protein"  
"JS1\_D03\_01202" 13111 "s59E25H2" 0 "hypothetical protein"  
"JS1\_D03\_01202" 13111 "s59E5H2" 0.04621766 "hypothetical protein"  
"JS1\_D03\_01202" 13111 "s63E6H2" 0.0376756 "hypothetical protein"  
"JS1\_D03\_01203" 13112 "s59E13H2" 0.006009632 "UDP-N-acetyl-alpha-D-glucosamine C6 dehydratase"  
"JS1\_D03\_01203" 13112 "s59E25H2" 0 "UDP-N-acetyl-alpha-D-glucosamine C6 dehydratase"

"JS1\_D03\_01203" 13112 "s59E5H2" 0.002040517 "UDP-N-acetyl-alpha-D-glucosamine C6 dehydratase"  
"JS1\_D03\_01203" 13112 "s63E6H2" 0.07320113 "UDP-N-acetyl-alpha-D-glucosamine C6 dehydratase"  
"JS1\_D03\_01204" 13113 "s59E13H2" 0 "Nucleotidyltransferase domain protein"  
"JS1\_D03\_01204" 13113 "s59E25H2" 0 "Nucleotidyltransferase domain protein"  
"JS1\_D03\_01204" 13113 "s59E5H2" 0 "Nucleotidyltransferase domain protein"  
"JS1\_D03\_01204" 13113 "s63E6H2" 0.02474059 "Nucleotidyltransferase domain protein"  
"JS1\_D03\_01205" 13114 "s59E13H2" 0 "hypothetical protein"  
"JS1\_D03\_01205" 13114 "s59E25H2" 0 "hypothetical protein"  
"JS1\_D03\_01205" 13114 "s59E5H2" 0 "hypothetical protein"  
"JS1\_D03\_01205" 13114 "s63E6H2" 0.04207469 "hypothetical protein"  
"JS1\_D03\_01206" 13115 "s59E13H2" 0.01114201 "Pseudouridine kinase"  
"JS1\_D03\_01206" 13115 "s59E25H2" 0 "Pseudouridine kinase"  
"JS1\_D03\_01206" 13115 "s59E5H2" 0.001781007 "Pseudouridine kinase"  
"JS1\_D03\_01206" 13115 "s63E6H2" 0.03044211 "Pseudouridine kinase"  
"JS1\_D03\_01207" 13116 "s59E13H2" 0.004041328 "Pseudouridine-5'-phosphate glycosidase"  
"JS1\_D03\_01207" 13116 "s59E25H2" 0 "Pseudouridine-5'-phosphate glycosidase"  
"JS1\_D03\_01207" 13116 "s59E5H2" 0.009006518 "Pseudouridine-5'-phosphate glycosidase"  
"JS1\_D03\_01207" 13116 "s63E6H2" 0.02017986 "Pseudouridine-5'-phosphate glycosidase"  
"JS1\_D03\_01208" 13117 "s59E13H2" 0.02257587 "Pseudouridine-5'-phosphate glycosidase"  
"JS1\_D03\_01208" 13117 "s59E25H2" 0 "Pseudouridine-5'-phosphate glycosidase"  
"JS1\_D03\_01208" 13117 "s59E5H2" 0.01540887 "Pseudouridine-5'-phosphate glycosidase"  
"JS1\_D03\_01208" 13117 "s63E6H2" 0.1023405 "Pseudouridine-5'-phosphate glycosidase"  
"JS1\_D03\_01209" 13118 "s59E13H2" 0.08136869 "Phage shock protein C"  
"JS1\_D03\_01209" 13118 "s59E25H2" 0 "Phage shock protein C"  
"JS1\_D03\_01209" 13118 "s59E5H2" 0.8143146 "Phage shock protein C"  
"JS1\_D03\_01209" 13118 "s63E6H2" 0.1820965 "Phage shock protein C"  
"JS1\_D03\_01210" 13119 "s59E13H2" 0.1201311 "Epoxyqueuosine reductase"  
"JS1\_D03\_01210" 13119 "s59E25H2" 0 "Epoxyqueuosine reductase"  
"JS1\_D03\_01210" 13119 "s59E5H2" 0.09650041 "Epoxyqueuosine reductase"  
"JS1\_D03\_01210" 13119 "s63E6H2" 0.1971989 "Epoxyqueuosine reductase"  
"JS1\_D03\_01211" 13120 "s59E13H2" 0.8253411 "putative ABC transporter ATP-binding protein YbhF"  
"JS1\_D03\_01211" 13120 "s59E25H2" 0 "putative ABC transporter ATP-binding protein YbhF"  
"JS1\_D03\_01211" 13120 "s59E5H2" 1.870621 "putative ABC transporter ATP-binding protein YbhF"  
"JS1\_D03\_01211" 13120 "s63E6H2" 1.052791 "putative ABC transporter ATP-binding protein YbhF"  
"JS1\_D03\_01212" 13121 "s59E13H2" 0.5924545 "ABC-2 family transporter protein"  
"JS1\_D03\_01212" 13121 "s59E25H2" 0 "ABC-2 family transporter protein"  
"JS1\_D03\_01212" 13121 "s59E5H2" 1.517535 "ABC-2 family transporter protein"  
"JS1\_D03\_01212" 13121 "s63E6H2" 0.8076341 "ABC-2 family transporter protein"  
"JS1\_D03\_01213" 13122 "s59E13H2" 0 "Acyl-CoA dehydrogenase"  
"JS1\_D03\_01213" 13122 "s59E25H2" 0 "Acyl-CoA dehydrogenase"  
"JS1\_D03\_01213" 13122 "s59E5H2" 0 "Acyl-CoA dehydrogenase"  
"JS1\_D03\_01213" 13122 "s63E6H2" 0.06808489 "Acyl-CoA dehydrogenase"  
"JS1\_D03\_01214" 13123 "s59E13H2" 0 "PEGA domain protein"  
"JS1\_D03\_01214" 13123 "s59E25H2" 0 "PEGA domain protein"  
"JS1\_D03\_01214" 13123 "s59E5H2" 0.7417303 "PEGA domain protein"  
"JS1\_D03\_01214" 13123 "s63E6H2" 0.1820591 "PEGA domain protein"  
"JS1\_D03\_01215" 13124 "s59E13H2" 0.1065954 "Protein-L-isoaspartate O-methyltransferase"

"JS1\_D03\_01215" 13124 "s59E25H2" 0 "Protein-L-isoaspartate O-methyltransferase"  
"JS1\_D03\_01215" 13124 "s59E5H2" 0.3980512 "Protein-L-isoaspartate O-methyltransferase"  
"JS1\_D03\_01215" 13124 "s63E6H2" 0.1965554 "Protein-L-isoaspartate O-methyltransferase"  
"JS1\_D03\_01216" 13125 "s59E13H2" 0.6542615 "hypothetical protein"  
"JS1\_D03\_01216" 13125 "s59E25H2" 0 "hypothetical protein"  
"JS1\_D03\_01216" 13125 "s59E5H2" 0.9999267 "hypothetical protein"  
"JS1\_D03\_01216" 13125 "s63E6H2" 1.219393 "hypothetical protein"  
"JS1\_D03\_01217" 13126 "s59E13H2" 0.8588761 "Alanine--tRNA ligase"  
"JS1\_D03\_01217" 13126 "s59E25H2" 0 "Alanine--tRNA ligase"  
"JS1\_D03\_01217" 13126 "s59E5H2" 0.1184192 "Alanine--tRNA ligase"  
"JS1\_D03\_01217" 13126 "s63E6H2" 0.5200021 "Alanine--tRNA ligase"  
"JS1\_D03\_01218" 13127 "s59E13H2" 3.169673 "putative deoxyribonuclease YcfH"  
"JS1\_D03\_01218" 13127 "s59E25H2" 0 "putative deoxyribonuclease YcfH"  
"JS1\_D03\_01218" 13127 "s59E5H2" 0.08689489 "putative deoxyribonuclease YcfH"  
"JS1\_D03\_01218" 13127 "s63E6H2" 0.3320589 "putative deoxyribonuclease YcfH"  
"JS1\_D03\_01219" 13128 "s59E13H2" 4.81197 "hypothetical protein"  
"JS1\_D03\_01219" 13128 "s59E25H2" 0 "hypothetical protein"  
"JS1\_D03\_01219" 13128 "s59E5H2" 0.1912813 "hypothetical protein"  
"JS1\_D03\_01219" 13128 "s63E6H2" 0.7066879 "hypothetical protein"  
"JS1\_D03\_01220" 13129 "s59E13H2" 0.2183986 "hypothetical protein"  
"JS1\_D03\_01220" 13129 "s59E25H2" 0 "hypothetical protein"  
"JS1\_D03\_01220" 13129 "s59E5H2" 0.05850143 "hypothetical protein"  
"JS1\_D03\_01220" 13129 "s63E6H2" 0.3427123 "hypothetical protein"  
"JS1\_D03\_01221" 13130 "s59E13H2" 0.003518142 "hypothetical protein"  
"JS1\_D03\_01221" 13130 "s59E25H2" 0 "hypothetical protein"  
"JS1\_D03\_01221" 13130 "s59E5H2" 0.003686194 "hypothetical protein"  
"JS1\_D03\_01221" 13130 "s63E6H2" 0.07311133 "hypothetical protein"  
"JS1\_D03\_01222" 13131 "s59E13H2" 0.8037206 "hypothetical protein"  
"JS1\_D03\_01222" 13131 "s59E25H2" 0 "hypothetical protein"  
"JS1\_D03\_01222" 13131 "s59E5H2" 0.1897373 "hypothetical protein"  
"JS1\_D03\_01222" 13131 "s63E6H2" 0.4322407 "hypothetical protein"  
"JS1\_D03\_01223" 13132 "s59E13H2" 0.01490968 "hypothetical protein"  
"JS1\_D03\_01223" 13132 "s59E25H2" 0 "hypothetical protein"  
"JS1\_D03\_01223" 13132 "s59E5H2" 0.03715682 "hypothetical protein"  
"JS1\_D03\_01223" 13132 "s63E6H2" 0.1118086 "hypothetical protein"  
"JS1\_D03\_01224" 13133 "s59E13H2" 0 "hypothetical protein"  
"JS1\_D03\_01224" 13133 "s59E25H2" 0 "hypothetical protein"  
"JS1\_D03\_01224" 13133 "s59E5H2" 0 "hypothetical protein"  
"JS1\_D03\_01224" 13133 "s63E6H2" 0 "hypothetical protein"  
"JS1\_D03\_01225" 13134 "s59E13H2" 0.03073786 "hypothetical protein"  
"JS1\_D03\_01225" 13134 "s59E25H2" 0 "hypothetical protein"  
"JS1\_D03\_01225" 13134 "s59E5H2" 0.09097204 "hypothetical protein"  
"JS1\_D03\_01225" 13134 "s63E6H2" 0.1772497 "hypothetical protein"  
"JS1\_D03\_01226" 13135 "s59E13H2" 0.2406928 "NTE family protein RssA"  
"JS1\_D03\_01226" 13135 "s59E25H2" 0 "NTE family protein RssA"  
"JS1\_D03\_01226" 13135 "s59E5H2" 0.2183785 "NTE family protein RssA"  
"JS1\_D03\_01226" 13135 "s63E6H2" 0.4088162 "NTE family protein RssA"

"JS1\_D03\_01228" 13137 "s59E13H2" 0.08697273 "50S ribosomal protein L22"  
"JS1\_D03\_01228" 13137 "s59E25H2" 0 "50S ribosomal protein L22"  
"JS1\_D03\_01228" 13137 "s59E5H2" 0.03112653 "50S ribosomal protein L22"  
"JS1\_D03\_01228" 13137 "s63E6H2" 0.05411378 "50S ribosomal protein L22"  
"JS1\_D03\_01229" 13138 "s59E13H2" 0 "Adenylate kinase"  
"JS1\_D03\_01229" 13138 "s59E25H2" 0 "Adenylate kinase"  
"JS1\_D03\_01229" 13138 "s59E5H2" 0 "Adenylate kinase"  
"JS1\_D03\_01229" 13138 "s63E6H2" 0.02190596 "Adenylate kinase"  
"JS1\_D03\_01230" 13139 "s59E13H2" 0.002029327 "Endonuclease YhcR precursor"  
"JS1\_D03\_01230" 13139 "s59E25H2" 0.1705426 "Endonuclease YhcR precursor"  
"JS1\_D03\_01230" 13139 "s59E5H2" 0.01942209 "Endonuclease YhcR precursor"  
"JS1\_D03\_01230" 13139 "s63E6H2" 0.9618601 "Endonuclease YhcR precursor"  
"JS1\_D03\_01231" 13140 "s59E13H2" 0.03634018 "Leucine-, isoleucine-, valine-, threonine-, and alanine-binding protein precursor"  
"JS1\_D03\_01231" 13140 "s59E25H2" 0 "Leucine-, isoleucine-, valine-, threonine-, and alanine-binding protein precursor"  
"JS1\_D03\_01231" 13140 "s59E5H2" 0.1850189 "Leucine-, isoleucine-, valine-, threonine-, and alanine-binding protein precursor"  
"JS1\_D03\_01231" 13140 "s63E6H2" 7.777866 "Leucine-, isoleucine-, valine-, threonine-, and alanine-binding protein precursor"  
"JS1\_D03\_01232" 13141 "s59E13H2" 0.7570626 "High-affinity branched-chain amino acid transport system permease protein LivH"  
"JS1\_D03\_01232" 13141 "s59E25H2" 0.8310962 "High-affinity branched-chain amino acid transport system permease protein LivH"  
"JS1\_D03\_01232" 13141 "s59E5H2" 0.2207625 "High-affinity branched-chain amino acid transport system permease protein LivH"  
"JS1\_D03\_01232" 13141 "s63E6H2" 9.341257 "High-affinity branched-chain amino acid transport system permease protein LivH"  
"JS1\_D03\_01233" 13142 "s59E13H2" 0.7255504 "leucine/isoleucine/valine transporter permease subunit"  
"JS1\_D03\_01233" 13142 "s59E25H2" 0.2350187 "leucine/isoleucine/valine transporter permease subunit"  
"JS1\_D03\_01233" 13142 "s59E5H2" 0.3403553 "leucine/isoleucine/valine transporter permease subunit"  
"JS1\_D03\_01233" 13142 "s63E6H2" 9.585463 "leucine/isoleucine/valine transporter permease subunit"  
"JS1\_D03\_01234" 13143 "s59E13H2" 0.6171274 "putative branched-chain amino acid transport ATP-binding protein LivG"  
"JS1\_D03\_01234" 13143 "s59E25H2" 0 "putative branched-chain amino acid transport ATP-binding protein LivG"  
"JS1\_D03\_01234" 13143 "s59E5H2" 0.5577166 "putative branched-chain amino acid transport ATP-binding protein LivG"  
"JS1\_D03\_01234" 13143 "s63E6H2" 6.388606 "putative branched-chain amino acid transport ATP-binding protein LivG"  
"JS1\_D03\_01235" 13144 "s59E13H2" 0.3505816 "High-affinity branched-chain amino acid transport ATP-binding protein LivF"  
"JS1\_D03\_01235" 13144 "s59E25H2" 0 "High-affinity branched-chain amino acid transport ATP-binding protein LivF"  
"JS1\_D03\_01235" 13144 "s59E5H2" 0.376871 "High-affinity branched-chain amino acid transport ATP-binding protein LivF"  
"JS1\_D03\_01235" 13144 "s63E6H2" 0.4316037 "High-affinity branched-chain amino acid transport ATP-binding protein LivF"  
"JS1\_D03\_01236" 13145 "s59E13H2" 0.008121057 "Poly-beta-1,6-N-acetyl-D-glucosamine N-deacetylase precursor"  
"JS1\_D03\_01236" 13145 "s59E25H2" 0 "Poly-beta-1,6-N-acetyl-D-glucosamine N-deacetylase precursor"  
"JS1\_D03\_01236" 13145 "s59E5H2" 0.5839403 "Poly-beta-1,6-N-acetyl-D-glucosamine N-deacetylase precursor"  
"JS1\_D03\_01236" 13145 "s63E6H2" 0.05665876 "Poly-beta-1,6-N-acetyl-D-glucosamine N-deacetylase precursor"  
"JS1\_D03\_01237" 13146 "s59E13H2" 0.02405224 "Pyrimidine 5'-nucleotidase YjjG"  
"JS1\_D03\_01237" 13146 "s59E25H2" 0 "Pyrimidine 5'-nucleotidase YjjG"  
"JS1\_D03\_01237" 13146 "s59E5H2" 0.04440605 "Pyrimidine 5'-nucleotidase YjjG"  
"JS1\_D03\_01237" 13146 "s63E6H2" 0.05744488 "Pyrimidine 5'-nucleotidase YjjG"  
"JS1\_D03\_01238" 13147 "s59E13H2" 0.2218851 "hypothetical protein"  
"JS1\_D03\_01238" 13147 "s59E25H2" 0 "hypothetical protein"  
"JS1\_D03\_01238" 13147 "s59E5H2" 0.466393 "hypothetical protein"  
"JS1\_D03\_01238" 13147 "s63E6H2" 0.3827734 "hypothetical protein"  
"JS1\_D03\_01239" 13148 "s59E13H2" 0.2871252 "putative sulfoacetate transporter SauU"  
"JS1\_D03\_01239" 13148 "s59E25H2" 0 "putative sulfoacetate transporter SauU"  
"JS1\_D03\_01239" 13148 "s59E5H2" 0.7235589 "putative sulfoacetate transporter SauU"

"JS1\_D03\_01239" 13148 "s63E6H2" 0.6284569 "putative sulfoacetate transporter SauU"  
"JS1\_D03\_01240" 13149 "s59E13H2" 0.1207652 "Adenosine specific kinase"  
"JS1\_D03\_01240" 13149 "s59E25H2" 0 "Adenosine specific kinase"  
"JS1\_D03\_01240" 13149 "s59E5H2" 0.0815957 "Adenosine specific kinase"  
"JS1\_D03\_01240" 13149 "s63E6H2" 0.08531144 "Adenosine specific kinase"  
"JS1\_D03\_01241" 13150 "s59E13H2" 0.005680614 "DNA-directed RNA polymerase subunit beta"  
"JS1\_D03\_01241" 13150 "s59E25H2" 0 "DNA-directed RNA polymerase subunit beta"  
"JS1\_D03\_01241" 13150 "s59E5H2" 0.02401481 "DNA-directed RNA polymerase subunit beta"  
"JS1\_D03\_01241" 13150 "s63E6H2" 0.02878945 "DNA-directed RNA polymerase subunit beta"  
"JS1\_D03\_01242" 13151 "s59E13H2" 0 "50S ribosomal protein L18"  
"JS1\_D03\_01242" 13151 "s59E25H2" 0 "50S ribosomal protein L18"  
"JS1\_D03\_01242" 13151 "s59E5H2" 0.01936762 "50S ribosomal protein L18"  
"JS1\_D03\_01242" 13151 "s63E6H2" 0.005284929 "50S ribosomal protein L18"  
"JS1\_D03\_01243" 13152 "s59E13H2" 0.005744804 "50S ribosomal protein L6"  
"JS1\_D03\_01243" 13152 "s59E25H2" 0 "50S ribosomal protein L6"  
"JS1\_D03\_01243" 13152 "s59E5H2" 0 "50S ribosomal protein L6"  
"JS1\_D03\_01243" 13152 "s63E6H2" 0.004469404 "50S ribosomal protein L6"  
"JS1\_D03\_01244" 13153 "s59E13H2" 0.008489658 "30S ribosomal protein S8"  
"JS1\_D03\_01244" 13153 "s59E25H2" 0 "30S ribosomal protein S8"  
"JS1\_D03\_01244" 13153 "s59E5H2" 0.02015293 "30S ribosomal protein S8"  
"JS1\_D03\_01244" 13153 "s63E6H2" 0.0824437 "30S ribosomal protein S8"  
"JS1\_D03\_01245" 13154 "s59E13H2" 0 "30S ribosomal protein S14 type Z"  
"JS1\_D03\_01245" 13154 "s59E25H2" 0 "30S ribosomal protein S14 type Z"  
"JS1\_D03\_01245" 13154 "s59E5H2" 0 "30S ribosomal protein S14 type Z"  
"JS1\_D03\_01245" 13154 "s63E6H2" 0.1064856 "30S ribosomal protein S14 type Z"  
"JS1\_D03\_01251" 13160 "s59E13H2" 0 "hypothetical protein"  
"JS1\_D03\_01251" 13160 "s59E25H2" 0 "hypothetical protein"  
"JS1\_D03\_01251" 13160 "s59E5H2" 0.6352236 "hypothetical protein"  
"JS1\_D03\_01251" 13160 "s63E6H2" 0.07509979 "hypothetical protein"  
"JS1\_D03\_01252" 13161 "s59E13H2" 0 "hypothetical protein"  
"JS1\_D03\_01252" 13161 "s59E25H2" 0 "hypothetical protein"  
"JS1\_D03\_01252" 13161 "s59E5H2" 0 "hypothetical protein"  
"JS1\_D03\_01252" 13161 "s63E6H2" 0.006027988 "hypothetical protein"  
"JS1\_D03\_01253" 13162 "s59E13H2" 0 "sporulation sigma factor SigG"  
"JS1\_D03\_01253" 13162 "s59E25H2" 0 "sporulation sigma factor SigG"  
"JS1\_D03\_01253" 13162 "s59E5H2" 0 "sporulation sigma factor SigG"  
"JS1\_D03\_01253" 13162 "s63E6H2" 0.0243474 "sporulation sigma factor SigG"  
"JS1\_D03\_01254" 13163 "s59E13H2" 0 "RNA polymerase factor sigma-70"  
"JS1\_D03\_01254" 13163 "s59E25H2" 0 "RNA polymerase factor sigma-70"  
"JS1\_D03\_01254" 13163 "s59E5H2" 0 "RNA polymerase factor sigma-70"  
"JS1\_D03\_01254" 13163 "s63E6H2" 0.03908383 "RNA polymerase factor sigma-70"  
"JS1\_D03\_01256" 13165 "s59E13H2" 0.003632857 "30S ribosomal protein S7"  
"JS1\_D03\_01256" 13165 "s59E25H2" 0 "30S ribosomal protein S7"  
"JS1\_D03\_01256" 13165 "s59E5H2" 0.0267442 "30S ribosomal protein S7"  
"JS1\_D03\_01256" 13165 "s63E6H2" 0.1449994 "30S ribosomal protein S7"  
"JS1\_D03\_01257" 13166 "s59E13H2" 0.007982842 "Elongation factor G"  
"JS1\_D03\_01257" 13166 "s59E25H2" 0 "Elongation factor G"

"JS1\_D03\_01257" 13166 "s59E5H2" 0.02273104 "Elongation factor G"  
"JS1\_D03\_01257" 13166 "s63E6H2" 0.2666198 "Elongation factor G"  
"JS1\_D03\_01258" 13167 "s59E13H2" 0.09150797 "Inosine-5'-monophosphate dehydrogenase"  
"JS1\_D03\_01258" 13167 "s59E25H2" 0 "Inosine-5'-monophosphate dehydrogenase"  
"JS1\_D03\_01258" 13167 "s59E5H2" 0.2438658 "Inosine-5'-monophosphate dehydrogenase"  
"JS1\_D03\_01258" 13167 "s63E6H2" 0.1637528 "Inosine-5'-monophosphate dehydrogenase"  
"JS1\_D03\_01259" 13168 "s59E13H2" 0.2508158 "lipoprotein Nlpl"  
"JS1\_D03\_01259" 13168 "s59E25H2" 0 "lipoprotein Nlpl"  
"JS1\_D03\_01259" 13168 "s59E5H2" 0.0666583 "lipoprotein Nlpl"  
"JS1\_D03\_01259" 13168 "s63E6H2" 0.3374062 "lipoprotein Nlpl"  
"JS1\_D03\_01260" 13169 "s59E13H2" 0.1777331 "Membrane dipeptidase (Peptidase family M19)"  
"JS1\_D03\_01260" 13169 "s59E25H2" 0 "Membrane dipeptidase (Peptidase family M19)"  
"JS1\_D03\_01260" 13169 "s59E5H2" 0.2569535 "Membrane dipeptidase (Peptidase family M19)"  
"JS1\_D03\_01260" 13169 "s63E6H2" 0.5551627 "Membrane dipeptidase (Peptidase family M19)"  
"JS1\_D03\_01261" 13170 "s59E13H2" 0.04252149 "Ureidoglycolate lyase"  
"JS1\_D03\_01261" 13170 "s59E25H2" 0.3255208 "Ureidoglycolate lyase"  
"JS1\_D03\_01261" 13170 "s59E5H2" 0.3847542 "Ureidoglycolate lyase"  
"JS1\_D03\_01261" 13170 "s63E6H2" 0.5487271 "Ureidoglycolate lyase"  
"JS1\_D03\_01263" 13172 "s59E13H2" 0.3081026 "Folate transporter FolT"  
"JS1\_D03\_01263" 13172 "s59E25H2" 0 "Folate transporter FolT"  
"JS1\_D03\_01263" 13172 "s59E5H2" 0.004732238 "Folate transporter FolT"  
"JS1\_D03\_01263" 13172 "s63E6H2" 0.3228091 "Folate transporter FolT"  
"JS1\_D03\_01264" 13173 "s59E13H2" 1.654475 "Sorbitol dehydrogenase"  
"JS1\_D03\_01264" 13173 "s59E25H2" 0.7261209 "Sorbitol dehydrogenase"  
"JS1\_D03\_01264" 13173 "s59E5H2" 0.5818053 "Sorbitol dehydrogenase"  
"JS1\_D03\_01264" 13173 "s63E6H2" 1.046847 "Sorbitol dehydrogenase"  
"JS1\_D03\_01265" 13174 "s59E13H2" 0.460117 "1-deoxy-D-xylulose 5-phosphate reductoisomerase"  
"JS1\_D03\_01265" 13174 "s59E25H2" 0 "1-deoxy-D-xylulose 5-phosphate reductoisomerase"  
"JS1\_D03\_01265" 13174 "s59E5H2" 0.2238196 "1-deoxy-D-xylulose 5-phosphate reductoisomerase"  
"JS1\_D03\_01265" 13174 "s63E6H2" 0.2704921 "1-deoxy-D-xylulose 5-phosphate reductoisomerase"  
"JS1\_D03\_01266" 13175 "s59E13H2" 1.087449 "Transposase IS116/IS110/IS902 family protein"  
"JS1\_D03\_01266" 13175 "s59E25H2" 0 "Transposase IS116/IS110/IS902 family protein"  
"JS1\_D03\_01266" 13175 "s59E5H2" 0.5292875 "Transposase IS116/IS110/IS902 family protein"  
"JS1\_D03\_01266" 13175 "s63E6H2" 0.8266876 "Transposase IS116/IS110/IS902 family protein"  
"JS1\_D03\_01267" 13176 "s59E13H2" 1.874377 "hypothetical protein"  
"JS1\_D03\_01267" 13176 "s59E25H2" 0 "hypothetical protein"  
"JS1\_D03\_01267" 13176 "s59E5H2" 0.04365965 "hypothetical protein"  
"JS1\_D03\_01267" 13176 "s63E6H2" 1.986939 "hypothetical protein"  
"JS1\_D03\_01268" 13177 "s59E13H2" 0.004036246 "Leucine carboxyl methyltransferase"  
"JS1\_D03\_01268" 13177 "s59E25H2" 0 "Leucine carboxyl methyltransferase"  
"JS1\_D03\_01268" 13177 "s59E5H2" 0.0006642681 "Leucine carboxyl methyltransferase"  
"JS1\_D03\_01268" 13177 "s63E6H2" 0.04188179 "Leucine carboxyl methyltransferase"  
"JS1\_D03\_01269" 13178 "s59E13H2" 0.07622347 "Phytoene desaturase (lycopene-forming)"  
"JS1\_D03\_01269" 13178 "s59E25H2" 0 "Phytoene desaturase (lycopene-forming)"  
"JS1\_D03\_01269" 13178 "s59E5H2" 0.1531915 "Phytoene desaturase (lycopene-forming)"  
"JS1\_D03\_01269" 13178 "s63E6H2" 1.407886 "Phytoene desaturase (lycopene-forming)"  
"JS1\_D03\_01270" 13179 "s59E13H2" 0.002284435 "DNA-directed RNA polymerase subunit beta"

"JS1\_D03\_01270" 13179 "s59E25H2" 0 "DNA-directed RNA polymerase subunit beta"  
"JS1\_D03\_01270" 13179 "s59E5H2" 0.004552454 "DNA-directed RNA polymerase subunit beta"  
"JS1\_D03\_01270" 13179 "s63E6H2" 0.004908558 "DNA-directed RNA polymerase subunit beta"  
"JS1\_D03\_01271" 13180 "s59E13H2" 0 "Type II secretion system protein F"  
"JS1\_D03\_01271" 13180 "s59E25H2" 0 "Type II secretion system protein F"  
"JS1\_D03\_01271" 13180 "s59E5H2" 0 "Type II secretion system protein F"  
"JS1\_D03\_01271" 13180 "s63E6H2" 0.06205941 "Type II secretion system protein F"  
"JS1\_D03\_01276" 13185 "s59E13H2" 0.01578347 "RNA polymerase sigma-B factor"  
"JS1\_D03\_01276" 13185 "s59E25H2" 0 "RNA polymerase sigma-B factor"  
"JS1\_D03\_01276" 13185 "s59E5H2" 0.0245324 "RNA polymerase sigma-B factor"  
"JS1\_D03\_01276" 13185 "s63E6H2" 0.7987016 "RNA polymerase sigma-B factor"  
"JS1\_D03\_01277" 13186 "s59E13H2" 0.002445173 "RNA polymerase sigma factor SigF"  
"JS1\_D03\_01277" 13186 "s59E25H2" 0 "RNA polymerase sigma factor SigF"  
"JS1\_D03\_01277" 13186 "s59E5H2" 0.04211872 "RNA polymerase sigma factor SigF"  
"JS1\_D03\_01277" 13186 "s63E6H2" 2.572442 "RNA polymerase sigma factor SigF"  
"JS1\_D03\_01278" 13187 "s59E13H2" 0.004614106 "Type II secretion system protein F"  
"JS1\_D03\_01278" 13187 "s59E25H2" 0.2054455 "Type II secretion system protein F"  
"JS1\_D03\_01278" 13187 "s59E5H2" 0.006968905 "Type II secretion system protein F"  
"JS1\_D03\_01278" 13187 "s63E6H2" 0.8083399 "Type II secretion system protein F"  
"JS1\_D03\_01279" 13188 "s59E13H2" 0.663293 "hypothetical protein"  
"JS1\_D03\_01279" 13188 "s59E25H2" 0 "hypothetical protein"  
"JS1\_D03\_01279" 13188 "s59E5H2" 0.02463283 "hypothetical protein"  
"JS1\_D03\_01279" 13188 "s63E6H2" 0.7979574 "hypothetical protein"  
"JS1\_D03\_01280" 13189 "s59E13H2" 0.1042495 "Cyclic di-GMP phosphodiesterase response regulator RpfG"  
"JS1\_D03\_01280" 13189 "s59E25H2" 0 "Cyclic di-GMP phosphodiesterase response regulator RpfG"  
"JS1\_D03\_01280" 13189 "s59E5H2" 0.2070742 "Cyclic di-GMP phosphodiesterase response regulator RpfG"  
"JS1\_D03\_01280" 13189 "s63E6H2" 1.013953 "Cyclic di-GMP phosphodiesterase response regulator RpfG"  
"JS1\_D03\_01281" 13190 "s59E13H2" 0.01103524 "Type II secretion system protein E"  
"JS1\_D03\_01281" 13190 "s59E25H2" 0 "Type II secretion system protein E"  
"JS1\_D03\_01281" 13190 "s59E5H2" 0.07498632 "Type II secretion system protein E"  
"JS1\_D03\_01281" 13190 "s63E6H2" 1.252348 "Type II secretion system protein E"  
"JS1\_D03\_01282" 13191 "s59E13H2" 0.2098316 "hypothetical protein"  
"JS1\_D03\_01282" 13191 "s59E25H2" 0 "hypothetical protein"  
"JS1\_D03\_01282" 13191 "s59E5H2" 0.1259773 "hypothetical protein"  
"JS1\_D03\_01282" 13191 "s63E6H2" 0.7393746 "hypothetical protein"  
"JS1\_D03\_01283" 13192 "s59E13H2" 0.003256364 "Mitochondrial PGP phosphatase"  
"JS1\_D03\_01283" 13192 "s59E25H2" 0 "Mitochondrial PGP phosphatase"  
"JS1\_D03\_01283" 13192 "s59E5H2" 0.0620539 "Mitochondrial PGP phosphatase"  
"JS1\_D03\_01283" 13192 "s63E6H2" 0.765 "Mitochondrial PGP phosphatase"  
"JS1\_D03\_01284" 13193 "s59E13H2" 0.005648578 "Uridine kinase"  
"JS1\_D03\_01284" 13193 "s59E25H2" 0 "Uridine kinase"  
"JS1\_D03\_01284" 13193 "s59E5H2" 0.09631676 "Uridine kinase"  
"JS1\_D03\_01284" 13193 "s63E6H2" 0.01480088 "Uridine kinase"  
"JS1\_D03\_01285" 13194 "s59E13H2" 0 "hypothetical protein"  
"JS1\_D03\_01285" 13194 "s59E25H2" 0 "hypothetical protein"  
"JS1\_D03\_01285" 13194 "s59E5H2" 0 "hypothetical protein"  
"JS1\_D03\_01285" 13194 "s63E6H2" 0.07076796 "hypothetical protein"

"JS1\_D03\_01286" 13195 "s59E13H2" 0 "hypothetical protein"  
"JS1\_D03\_01286" 13195 "s59E25H2" 0 "hypothetical protein"  
"JS1\_D03\_01286" 13195 "s59E5H2" 0 "hypothetical protein"  
"JS1\_D03\_01286" 13195 "s63E6H2" 0.2004392 "hypothetical protein"  
"JS1\_D03\_01287" 13196 "s59E13H2" 0.01455471 "Ribonuclease G"  
"JS1\_D03\_01287" 13196 "s59E25H2" 0 "Ribonuclease G"  
"JS1\_D03\_01287" 13196 "s59E5H2" 0.1377359 "Ribonuclease G"  
"JS1\_D03\_01287" 13196 "s63E6H2" 0.2507069 "Ribonuclease G"  
"JS1\_D03\_01288" 13197 "s59E13H2" 0 "50S ribosomal protein L21"  
"JS1\_D03\_01288" 13197 "s59E25H2" 0 "50S ribosomal protein L21"  
"JS1\_D03\_01288" 13197 "s59E5H2" 0.01413331 "50S ribosomal protein L21"  
"JS1\_D03\_01288" 13197 "s63E6H2" 0.1707462 "50S ribosomal protein L21"  
"JS1\_D03\_01289" 13198 "s59E13H2" 0 "50S ribosomal protein L27"  
"JS1\_D03\_01289" 13198 "s59E25H2" 0 "50S ribosomal protein L27"  
"JS1\_D03\_01289" 13198 "s59E5H2" 0 "50S ribosomal protein L27"  
"JS1\_D03\_01289" 13198 "s63E6H2" 0.1569202 "50S ribosomal protein L27"  
"JS1\_D03\_01290" 13199 "s59E13H2" 0.07035766 "GTPase ObgE"  
"JS1\_D03\_01290" 13199 "s59E25H2" 0 "GTPase ObgE"  
"JS1\_D03\_01290" 13199 "s59E5H2" 0.04895085 "GTPase ObgE"  
"JS1\_D03\_01290" 13199 "s63E6H2" 0.1737522 "GTPase ObgE"  
"JS1\_D03\_01291" 13200 "s59E13H2" 0.06637035 "tol-pal system protein YbgF"  
"JS1\_D03\_01291" 13200 "s59E25H2" 0 "tol-pal system protein YbgF"  
"JS1\_D03\_01291" 13200 "s59E5H2" 0.06996407 "tol-pal system protein YbgF"  
"JS1\_D03\_01291" 13200 "s63E6H2" 0.1714921 "tol-pal system protein YbgF"  
"JS1\_D03\_01292" 13201 "s59E13H2" 0.08324241 "Biopolymer transport protein ExbB"  
"JS1\_D03\_01292" 13201 "s59E25H2" 0 "Biopolymer transport protein ExbB"  
"JS1\_D03\_01292" 13201 "s59E5H2" 0.2040631 "Biopolymer transport protein ExbB"  
"JS1\_D03\_01292" 13201 "s63E6H2" 0.3224612 "Biopolymer transport protein ExbB"  
"JS1\_D03\_01293" 13202 "s59E13H2" 0.01291269 "biopolymer transport protein ExbD"  
"JS1\_D03\_01293" 13202 "s59E25H2" 0 "biopolymer transport protein ExbD"  
"JS1\_D03\_01293" 13202 "s59E5H2" 0.05463078 "biopolymer transport protein ExbD"  
"JS1\_D03\_01293" 13202 "s63E6H2" 0.2474611 "biopolymer transport protein ExbD"  
"JS1\_D03\_01294" 13203 "s59E13H2" 0.4915799 "Putative lipoprotein YerB precursor"  
"JS1\_D03\_01294" 13203 "s59E25H2" 0 "Putative lipoprotein YerB precursor"  
"JS1\_D03\_01294" 13203 "s59E5H2" 0.1706309 "Putative lipoprotein YerB precursor"  
"JS1\_D03\_01294" 13203 "s63E6H2" 0.1361785 "Putative lipoprotein YerB precursor"  
"JS1\_D03\_01295" 13204 "s59E13H2" 0.07998932 "Tyrosine recombinase XerD"  
"JS1\_D03\_01295" 13204 "s59E25H2" 0 "Tyrosine recombinase XerD"  
"JS1\_D03\_01295" 13204 "s59E5H2" 0.07893087 "Tyrosine recombinase XerD"  
"JS1\_D03\_01295" 13204 "s63E6H2" 0.2189937 "Tyrosine recombinase XerD"  
"JS1\_D03\_01296" 13205 "s59E13H2" 0.1153553 "Purine nucleoside phosphorylase 1"  
"JS1\_D03\_01296" 13205 "s59E25H2" 0 "Purine nucleoside phosphorylase 1"  
"JS1\_D03\_01296" 13205 "s59E5H2" 0.1667185 "Purine nucleoside phosphorylase 1"  
"JS1\_D03\_01296" 13205 "s63E6H2" 0.3973198 "Purine nucleoside phosphorylase 1"  
"JS1\_D03\_01297" 13206 "s59E13H2" 0.1475677 "Putative small multi-drug export protein"  
"JS1\_D03\_01297" 13206 "s59E25H2" 0 "Putative small multi-drug export protein"  
"JS1\_D03\_01297" 13206 "s59E5H2" 0.1249963 "Putative small multi-drug export protein"



"JS1\_D03\_01297" 13206 "s63E6H2" 0.4145837 "Putative small multi-drug export protein"  
"JS1\_D03\_01298" 13207 "s59E13H2" 0.2307876 "Methylthioribose-1-phosphate isomerase"  
"JS1\_D03\_01298" 13207 "s59E25H2" 0 "Methylthioribose-1-phosphate isomerase"  
"JS1\_D03\_01298" 13207 "s59E5H2" 0.1437503 "Methylthioribose-1-phosphate isomerase"  
"JS1\_D03\_01298" 13207 "s63E6H2" 0.335421 "Methylthioribose-1-phosphate isomerase"  
"JS1\_D03\_01299" 13208 "s59E13H2" 0.1159155 "UDP-N-acetylglucosamine 1-carboxyvinyltransferase 1"  
"JS1\_D03\_01299" 13208 "s59E25H2" 0 "UDP-N-acetylglucosamine 1-carboxyvinyltransferase 1"  
"JS1\_D03\_01299" 13208 "s59E5H2" 0.1459826 "UDP-N-acetylglucosamine 1-carboxyvinyltransferase 1"  
"JS1\_D03\_01299" 13208 "s63E6H2" 0.5492828 "UDP-N-acetylglucosamine 1-carboxyvinyltransferase 1"  
"JS1\_D03\_01300" 13209 "s59E13H2" 0.584858 "Rod shape-determining protein MreB"  
"JS1\_D03\_01300" 13209 "s59E25H2" 0 "Rod shape-determining protein MreB"  
"JS1\_D03\_01300" 13209 "s59E5H2" 0.1694182 "Rod shape-determining protein MreB"  
"JS1\_D03\_01300" 13209 "s63E6H2" 0.7076843 "Rod shape-determining protein MreB"  
"JS1\_D03\_01301" 13210 "s59E13H2" 0.01141401 "SpoIVB peptidase S55"  
"JS1\_D03\_01301" 13210 "s59E25H2" 0 "SpoIVB peptidase S55"  
"JS1\_D03\_01301" 13210 "s59E5H2" 0.01304912 "SpoIVB peptidase S55"  
"JS1\_D03\_01301" 13210 "s63E6H2" 0.6653234 "SpoIVB peptidase S55"  
"JS1\_D03\_01302" 13211 "s59E13H2" 0.4761339 "Putative 2-C-methyl-D-erythritol 4-phosphate cytidyltransferase 2"  
"JS1\_D03\_01302" 13211 "s59E25H2" 0 "Putative 2-C-methyl-D-erythritol 4-phosphate cytidyltransferase 2"  
"JS1\_D03\_01302" 13211 "s59E5H2" 0.07588373 "Putative 2-C-methyl-D-erythritol 4-phosphate cytidyltransferase 2"  
"JS1\_D03\_01302" 13211 "s63E6H2" 0.4331408 "Putative 2-C-methyl-D-erythritol 4-phosphate cytidyltransferase 2"  
"JS1\_D03\_01303" 13212 "s59E13H2" 0.2773887 "4-diphosphocytidyl-2-C-methyl-D-erythritol kinase"  
"JS1\_D03\_01303" 13212 "s59E25H2" 0 "4-diphosphocytidyl-2-C-methyl-D-erythritol kinase"  
"JS1\_D03\_01303" 13212 "s59E5H2" 0.1123673 "4-diphosphocytidyl-2-C-methyl-D-erythritol kinase"  
"JS1\_D03\_01303" 13212 "s63E6H2" 0.4994228 "4-diphosphocytidyl-2-C-methyl-D-erythritol kinase"  
"JS1\_D03\_01304" 13213 "s59E13H2" 0.1605048 "2-C-methyl-D-erythritol 2,4-cyclodiphosphate synthase"  
"JS1\_D03\_01304" 13213 "s59E25H2" 0 "2-C-methyl-D-erythritol 2,4-cyclodiphosphate synthase"  
"JS1\_D03\_01304" 13213 "s59E5H2" 0.04717882 "2-C-methyl-D-erythritol 2,4-cyclodiphosphate synthase"  
"JS1\_D03\_01304" 13213 "s63E6H2" 0.3726331 "2-C-methyl-D-erythritol 2,4-cyclodiphosphate synthase"  
"JS1\_D03\_01305" 13214 "s59E13H2" 0.002988731 "50S ribosomal protein L7/L12"  
"JS1\_D03\_01305" 13214 "s59E25H2" 0 "50S ribosomal protein L7/L12"  
"JS1\_D03\_01305" 13214 "s59E5H2" 0 "50S ribosomal protein L7/L12"  
"JS1\_D03\_01305" 13214 "s63E6H2" 0.00661756 "50S ribosomal protein L7/L12"  
"JS1\_D03\_01307" 13216 "s59E13H2" 0 "50S ribosomal protein L10"  
"JS1\_D03\_01307" 13216 "s59E25H2" 0 "50S ribosomal protein L10"  
"JS1\_D03\_01307" 13216 "s59E5H2" 0 "50S ribosomal protein L10"  
"JS1\_D03\_01307" 13216 "s63E6H2" 0 "50S ribosomal protein L10"  
"JS1\_D03\_01309" 13218 "s59E13H2" 0 "50S ribosomal protein L1"  
"JS1\_D03\_01309" 13218 "s59E25H2" 0 "50S ribosomal protein L1"  
"JS1\_D03\_01309" 13218 "s59E5H2" 0.02653232 "50S ribosomal protein L1"  
"JS1\_D03\_01309" 13218 "s63E6H2" 0.05938934 "50S ribosomal protein L1"  
"JS1\_D03\_01310" 13219 "s59E13H2" 0.01280125 "DNA utilization protein GntX"  
"JS1\_D03\_01310" 13219 "s59E25H2" 0 "DNA utilization protein GntX"  
"JS1\_D03\_01310" 13219 "s59E5H2" 0.1279692 "DNA utilization protein GntX"  
"JS1\_D03\_01310" 13219 "s63E6H2" 0.419277 "DNA utilization protein GntX"  
"JS1\_D03\_01311" 13220 "s59E13H2" 0 "hypothetical protein"  
"JS1\_D03\_01311" 13220 "s59E25H2" 0 "hypothetical protein"

"JS1\_D03\_01311" 13220 "s59E5H2" 0.04000119 "hypothetical protein"  
"JS1\_D03\_01311" 13220 "s63E6H2" 0.1618446 "hypothetical protein"  
"JS1\_D03\_01314" 13223 "s59E13H2" 0.268692 "Molybdopterin-guanine dinucleotide biosynthesis adapter protein"  
"JS1\_D03\_01314" 13223 "s59E25H2" 0 "Molybdopterin-guanine dinucleotide biosynthesis adapter protein"  
"JS1\_D03\_01314" 13223 "s59E5H2" 0.4623568 "Molybdopterin-guanine dinucleotide biosynthesis adapter protein"  
"JS1\_D03\_01314" 13223 "s63E6H2" 0.287753 "Molybdopterin-guanine dinucleotide biosynthesis adapter protein"  
"JS1\_D03\_01315" 13224 "s59E13H2" 0.03497044 "hypothetical protein"  
"JS1\_D03\_01315" 13224 "s59E25H2" 0 "hypothetical protein"  
"JS1\_D03\_01315" 13224 "s59E5H2" 0.2016372 "hypothetical protein"  
"JS1\_D03\_01315" 13224 "s63E6H2" 0.2143733 "hypothetical protein"  
"JS1\_D03\_01316" 13225 "s59E13H2" 0 "Cyclic di-GMP phosphodiesterase response regulator RpfG"  
"JS1\_D03\_01316" 13225 "s59E25H2" 0 "Cyclic di-GMP phosphodiesterase response regulator RpfG"  
"JS1\_D03\_01316" 13225 "s59E5H2" 0.03906134 "Cyclic di-GMP phosphodiesterase response regulator RpfG"  
"JS1\_D03\_01316" 13225 "s63E6H2" 0.4122907 "Cyclic di-GMP phosphodiesterase response regulator RpfG"  
"JS1\_D03\_01318" 13227 "s59E13H2" 0.1666267 "Zinc ribbon domain protein"  
"JS1\_D03\_01318" 13227 "s59E25H2" 0 "Zinc ribbon domain protein"  
"JS1\_D03\_01318" 13227 "s59E5H2" 0.06286182 "Zinc ribbon domain protein"  
"JS1\_D03\_01318" 13227 "s63E6H2" 0.5362595 "Zinc ribbon domain protein"  
"JS1\_D03\_01319" 13228 "s59E13H2" 2.611149 "NTE family protein RssA"  
"JS1\_D03\_01319" 13228 "s59E25H2" 0 "NTE family protein RssA"  
"JS1\_D03\_01319" 13228 "s59E5H2" 0.1615984 "NTE family protein RssA"  
"JS1\_D03\_01319" 13228 "s63E6H2" 1.195372 "NTE family protein RssA"  
"JS1\_D03\_01320" 13229 "s59E13H2" 1.052173 "Isochorismatase"  
"JS1\_D03\_01320" 13229 "s59E25H2" 0 "Isochorismatase"  
"JS1\_D03\_01320" 13229 "s59E5H2" 0.2253804 "Isochorismatase"  
"JS1\_D03\_01320" 13229 "s63E6H2" 0.9889676 "Isochorismatase"  
"JS1\_D03\_01321" 13230 "s59E13H2" 9.709123 "Fluoroacetyl-CoA thioesterase"  
"JS1\_D03\_01321" 13230 "s59E25H2" 0 "Fluoroacetyl-CoA thioesterase"  
"JS1\_D03\_01321" 13230 "s59E5H2" 0.6522404 "Fluoroacetyl-CoA thioesterase"  
"JS1\_D03\_01321" 13230 "s63E6H2" 1.286331 "Fluoroacetyl-CoA thioesterase"  
"JS1\_D03\_01322" 13231 "s59E13H2" 0.32207 "D-arabitol-phosphate dehydrogenase"  
"JS1\_D03\_01322" 13231 "s59E25H2" 0 "D-arabitol-phosphate dehydrogenase"  
"JS1\_D03\_01322" 13231 "s59E5H2" 0.2297142 "D-arabitol-phosphate dehydrogenase"  
"JS1\_D03\_01322" 13231 "s63E6H2" 0.1786256 "D-arabitol-phosphate dehydrogenase"  
"JS1\_D03\_01323" 13232 "s59E13H2" 0.06491886 "hypothetical protein"  
"JS1\_D03\_01323" 13232 "s59E25H2" 0 "hypothetical protein"  
"JS1\_D03\_01323" 13232 "s59E5H2" 0.08929741 "hypothetical protein"  
"JS1\_D03\_01323" 13232 "s63E6H2" 0.2584529 "hypothetical protein"  
"JS1\_D03\_01325" 13234 "s59E13H2" 0.02159002 "Sialic acid TRAP transporter permease protein SiaT"  
"JS1\_D03\_01325" 13234 "s59E25H2" 0 "Sialic acid TRAP transporter permease protein SiaT"  
"JS1\_D03\_01325" 13234 "s59E5H2" 0.2584199 "Sialic acid TRAP transporter permease protein SiaT"  
"JS1\_D03\_01325" 13234 "s63E6H2" 0.03313969 "Sialic acid TRAP transporter permease protein SiaT"  
"JS1\_D03\_01326" 13235 "s59E13H2" 0.01743424 "HTH-type transcriptional repressor YtrA"  
"JS1\_D03\_01326" 13235 "s59E25H2" 0 "HTH-type transcriptional repressor YtrA"  
"JS1\_D03\_01326" 13235 "s59E5H2" 0.2082047 "HTH-type transcriptional repressor YtrA"  
"JS1\_D03\_01326" 13235 "s63E6H2" 0.147899 "HTH-type transcriptional repressor YtrA"  
"JS1\_D03\_01327" 13236 "s59E13H2" 0.005209539 "Ferredoxin"

"JS1\_D03\_01327" 13236 "s59E25H2" 0 "Ferredoxin"  
"JS1\_D03\_01327" 13236 "s59E5H2" 0.2437764 "Ferredoxin"  
"JS1\_D03\_01327" 13236 "s63E6H2" 0.1299667 "Ferredoxin"  
"JS1\_D03\_01328" 13237 "s59E13H2" 0.06815879 "2-oxoglutarate synthase subunit KorA"  
"JS1\_D03\_01328" 13237 "s59E25H2" 0 "2-oxoglutarate synthase subunit KorA"  
"JS1\_D03\_01328" 13237 "s59E5H2" 0.1949338 "2-oxoglutarate synthase subunit KorA"  
"JS1\_D03\_01328" 13237 "s63E6H2" 0.2545775 "2-oxoglutarate synthase subunit KorA"  
"JS1\_D03\_01329" 13238 "s59E13H2" 0.03680248 "2-oxoglutarate synthase subunit KorB"  
"JS1\_D03\_01329" 13238 "s59E25H2" 0 "2-oxoglutarate synthase subunit KorB"  
"JS1\_D03\_01329" 13238 "s59E5H2" 0.1733951 "2-oxoglutarate synthase subunit KorB"  
"JS1\_D03\_01329" 13238 "s63E6H2" 0.1004111 "2-oxoglutarate synthase subunit KorB"  
"JS1\_D03\_01330" 13239 "s59E13H2" 0.04595704 "2-oxoglutarate synthase subunit KorC"  
"JS1\_D03\_01330" 13239 "s59E25H2" 0 "2-oxoglutarate synthase subunit KorC"  
"JS1\_D03\_01330" 13239 "s59E5H2" 0.2761837 "2-oxoglutarate synthase subunit KorC"  
"JS1\_D03\_01330" 13239 "s63E6H2" 0.1243899 "2-oxoglutarate synthase subunit KorC"  
"JS1\_D03\_01331" 13240 "s59E13H2" 0.06501938 "Acetate kinase"  
"JS1\_D03\_01331" 13240 "s59E25H2" 0 "Acetate kinase"  
"JS1\_D03\_01331" 13240 "s59E5H2" 0.2232159 "Acetate kinase"  
"JS1\_D03\_01331" 13240 "s63E6H2" 0.06168312 "Acetate kinase"  
"JS1\_D03\_01332" 13241 "s59E13H2" 0.06262465 "Sulfide dehydrogenase subunit beta precursor"  
"JS1\_D03\_01332" 13241 "s59E25H2" 0 "Sulfide dehydrogenase subunit beta precursor"  
"JS1\_D03\_01332" 13241 "s59E5H2" 0.2909987 "Sulfide dehydrogenase subunit beta precursor"  
"JS1\_D03\_01332" 13241 "s63E6H2" 0.130067 "Sulfide dehydrogenase subunit beta precursor"  
"JS1\_D03\_01333" 13242 "s59E13H2" 0.1023985 "Sulfide dehydrogenase subunit alpha precursor"  
"JS1\_D03\_01333" 13242 "s59E25H2" 0 "Sulfide dehydrogenase subunit alpha precursor"  
"JS1\_D03\_01333" 13242 "s59E5H2" 0.1706189 "Sulfide dehydrogenase subunit alpha precursor"  
"JS1\_D03\_01333" 13242 "s63E6H2" 0.2298217 "Sulfide dehydrogenase subunit alpha precursor"  
"JS1\_D03\_01334" 13243 "s59E13H2" 0.04096604 "Glutamate dehydrogenase"  
"JS1\_D03\_01334" 13243 "s59E25H2" 0 "Glutamate dehydrogenase"  
"JS1\_D03\_01334" 13243 "s59E5H2" 0.01838572 "Glutamate dehydrogenase"  
"JS1\_D03\_01334" 13243 "s63E6H2" 0.3668816 "Glutamate dehydrogenase"  
"JS1\_D03\_01335" 13244 "s59E13H2" 0.1110834 "hypothetical protein"  
"JS1\_D03\_01335" 13244 "s59E25H2" 0 "hypothetical protein"  
"JS1\_D03\_01335" 13244 "s59E5H2" 0.2081306 "hypothetical protein"  
"JS1\_D03\_01335" 13244 "s63E6H2" 0.09741123 "hypothetical protein"  
"JS1\_D03\_01336" 13245 "s59E13H2" 0.128252 "Methylmalonyl-CoA mutase"  
"JS1\_D03\_01336" 13245 "s59E25H2" 0 "Methylmalonyl-CoA mutase"  
"JS1\_D03\_01336" 13245 "s59E5H2" 0.07230626 "Methylmalonyl-CoA mutase"  
"JS1\_D03\_01336" 13245 "s63E6H2" 0.1861312 "Methylmalonyl-CoA mutase"  
"JS1\_D03\_01337" 13246 "s59E13H2" 0.1222147 "Methylmalonyl-CoA mutase"  
"JS1\_D03\_01337" 13246 "s59E25H2" 0 "Methylmalonyl-CoA mutase"  
"JS1\_D03\_01337" 13246 "s59E5H2" 0.0740172 "Methylmalonyl-CoA mutase"  
"JS1\_D03\_01337" 13246 "s63E6H2" 0.5071141 "Methylmalonyl-CoA mutase"  
"JS1\_D03\_01338" 13247 "s59E13H2" 0.06877586 "putative GTPase/MT1543"  
"JS1\_D03\_01338" 13247 "s59E25H2" 0 "putative GTPase/MT1543"  
"JS1\_D03\_01338" 13247 "s59E5H2" 0.04770929 "putative GTPase/MT1543"  
"JS1\_D03\_01338" 13247 "s63E6H2" 0.5553996 "putative GTPase/MT1543"

"JS1\_D03\_01339" 13248 "s59E13H2" 0.04516842 "putative lyase"  
"JS1\_D03\_01339" 13248 "s59E25H2" 0 "putative lyase"  
"JS1\_D03\_01339" 13248 "s59E5H2" 0.1033148 "putative lyase"  
"JS1\_D03\_01339" 13248 "s63E6H2" 0.6872749 "putative lyase"  
"JS1\_D03\_01340" 13249 "s59E13H2" 0.08566503 "Methylmalonyl-CoA carboxyltransferase 12S subunit"  
"JS1\_D03\_01340" 13249 "s59E25H2" 0 "Methylmalonyl-CoA carboxyltransferase 12S subunit"  
"JS1\_D03\_01340" 13249 "s59E5H2" 0.1368158 "Methylmalonyl-CoA carboxyltransferase 12S subunit"  
"JS1\_D03\_01340" 13249 "s63E6H2" 0.8673315 "Methylmalonyl-CoA carboxyltransferase 12S subunit"  
"JS1\_D03\_01341" 13250 "s59E13H2" 0 "Oxaloacetate decarboxylase, gamma chain"  
"JS1\_D03\_01341" 13250 "s59E25H2" 0 "Oxaloacetate decarboxylase, gamma chain"  
"JS1\_D03\_01341" 13250 "s59E5H2" 0 "Oxaloacetate decarboxylase, gamma chain"  
"JS1\_D03\_01341" 13250 "s63E6H2" 0.7650105 "Oxaloacetate decarboxylase, gamma chain"  
"JS1\_D03\_01342" 13251 "s59E13H2" 0.002116919 "2-oxoglutarate carboxylase large subunit"  
"JS1\_D03\_01342" 13251 "s59E25H2" 0 "2-oxoglutarate carboxylase large subunit"  
"JS1\_D03\_01342" 13251 "s59E5H2" 0.003955036 "2-oxoglutarate carboxylase large subunit"  
"JS1\_D03\_01342" 13251 "s63E6H2" 0.8126131 "2-oxoglutarate carboxylase large subunit"  
"JS1\_D03\_01343" 13252 "s59E13H2" 0.08326199 "Glutaconyl-CoA decarboxylase subunit beta"  
"JS1\_D03\_01343" 13252 "s59E25H2" 0 "Glutaconyl-CoA decarboxylase subunit beta"  
"JS1\_D03\_01343" 13252 "s59E5H2" 0.1675502 "Glutaconyl-CoA decarboxylase subunit beta"  
"JS1\_D03\_01343" 13252 "s63E6H2" 0.8542679 "Glutaconyl-CoA decarboxylase subunit beta"  
"JS1\_D03\_01344" 13253 "s59E13H2" 0.03345111 "hypothetical protein"  
"JS1\_D03\_01344" 13253 "s59E25H2" 0 "hypothetical protein"  
"JS1\_D03\_01344" 13253 "s59E5H2" 0.07022668 "hypothetical protein"  
"JS1\_D03\_01344" 13253 "s63E6H2" 0.4118092 "hypothetical protein"  
"JS1\_D03\_01345" 13254 "s59E13H2" 0.02339441 "colanic acid biosynthesis protein"  
"JS1\_D03\_01345" 13254 "s59E25H2" 0 "colanic acid biosynthesis protein"  
"JS1\_D03\_01345" 13254 "s59E5H2" 0.1620887 "colanic acid biosynthesis protein"  
"JS1\_D03\_01345" 13254 "s63E6H2" 0.09809641 "colanic acid biosynthesis protein"  
"JS1\_D03\_01346" 13255 "s59E13H2" 0.03191329 "Cell division ATP-binding protein FtsE"  
"JS1\_D03\_01346" 13255 "s59E25H2" 0 "Cell division ATP-binding protein FtsE"  
"JS1\_D03\_01346" 13255 "s59E5H2" 0.2991605 "Cell division ATP-binding protein FtsE"  
"JS1\_D03\_01346" 13255 "s63E6H2" 0.219737 "Cell division ATP-binding protein FtsE"  
"JS1\_D03\_01347" 13256 "s59E13H2" 0.005438723 "Cell division protein FtsX"  
"JS1\_D03\_01347" 13256 "s59E25H2" 0 "Cell division protein FtsX"  
"JS1\_D03\_01347" 13256 "s59E5H2" 0.03322947 "Cell division protein FtsX"  
"JS1\_D03\_01347" 13256 "s63E6H2" 0.2584969 "Cell division protein FtsX"  
"JS1\_D03\_01348" 13257 "s59E13H2" 0 "Murein hydrolase activator EnvC precursor"  
"JS1\_D03\_01348" 13257 "s59E25H2" 0 "Murein hydrolase activator EnvC precursor"  
"JS1\_D03\_01348" 13257 "s59E5H2" 0.0134097 "Murein hydrolase activator EnvC precursor"  
"JS1\_D03\_01348" 13257 "s63E6H2" 0.1189339 "Murein hydrolase activator EnvC precursor"  
"JS1\_D03\_01349" 13258 "s59E13H2" 0.02470942 "putative CtpA-like serine protease"  
"JS1\_D03\_01349" 13258 "s59E25H2" 0 "putative CtpA-like serine protease"  
"JS1\_D03\_01349" 13258 "s59E5H2" 0.08467956 "putative CtpA-like serine protease"  
"JS1\_D03\_01349" 13258 "s63E6H2" 0.0624953 "putative CtpA-like serine protease"  
"JS1\_D03\_01350" 13259 "s59E13H2" 0 "Digeranylglycerophospholipid reductase"  
"JS1\_D03\_01350" 13259 "s59E25H2" 0 "Digeranylglycerophospholipid reductase"  
"JS1\_D03\_01350" 13259 "s59E5H2" 0.03422477 "Digeranylglycerophospholipid reductase"

"JS1\_D03\_01350" 13259 "s63E6H2" 0.4823079 "Digeranylgeranylglycerophospholipid reductase"  
"JS1\_D03\_01351" 13260 "s59E13H2" 0.008889873 "Bifunctional protein GlnU"  
"JS1\_D03\_01351" 13260 "s59E25H2" 0 "Bifunctional protein GlnU"  
"JS1\_D03\_01351" 13260 "s59E5H2" 0.0837758 "Bifunctional protein GlnU"  
"JS1\_D03\_01351" 13260 "s63E6H2" 1.756863 "Bifunctional protein GlnU"  
"JS1\_D03\_01352" 13261 "s59E13H2" 0.01091331 "translocation protein TolB"  
"JS1\_D03\_01352" 13261 "s59E25H2" 0 "translocation protein TolB"  
"JS1\_D03\_01352" 13261 "s59E5H2" 0.04273584 "translocation protein TolB"  
"JS1\_D03\_01352" 13261 "s63E6H2" 2.02001 "translocation protein TolB"  
"JS1\_D03\_01353" 13262 "s59E13H2" 0.003764583 "Transposase IS200 like protein"  
"JS1\_D03\_01353" 13262 "s59E25H2" 0 "Transposase IS200 like protein"  
"JS1\_D03\_01353" 13262 "s59E5H2" 0.01124089 "Transposase IS200 like protein"  
"JS1\_D03\_01353" 13262 "s63E6H2" 0.009990935 "Transposase IS200 like protein"  
"JS1\_D03\_01354" 13263 "s59E13H2" 0.006037968 "Amidohydrolase"  
"JS1\_D03\_01354" 13263 "s59E25H2" 0 "Amidohydrolase"  
"JS1\_D03\_01354" 13263 "s59E5H2" 0.1641278 "Amidohydrolase"  
"JS1\_D03\_01354" 13263 "s63E6H2" 12.63 "Amidohydrolase"  
"JS1\_D03\_01355" 13264 "s59E13H2" 0.001332566 "hypothetical protein"  
"JS1\_D03\_01355" 13264 "s59E25H2" 0 "hypothetical protein"  
"JS1\_D03\_01355" 13264 "s59E5H2" 0.047145 "hypothetical protein"  
"JS1\_D03\_01355" 13264 "s63E6H2" 0.4835079 "hypothetical protein"  
"JS1\_D03\_01356" 13265 "s59E13H2" 0.01637692 "Bifunctional phosphoglucose/phosphomannose isomerase"  
"JS1\_D03\_01356" 13265 "s59E25H2" 0 "Bifunctional phosphoglucose/phosphomannose isomerase"  
"JS1\_D03\_01356" 13265 "s59E5H2" 0.07147315 "Bifunctional phosphoglucose/phosphomannose isomerase"  
"JS1\_D03\_01356" 13265 "s63E6H2" 0.04424372 "Bifunctional phosphoglucose/phosphomannose isomerase"  
"JS1\_D03\_01357" 13266 "s59E13H2" 0 "Elongation factor P"  
"JS1\_D03\_01357" 13266 "s59E25H2" 0 "Elongation factor P"  
"JS1\_D03\_01357" 13266 "s59E5H2" 0 "Elongation factor P"  
"JS1\_D03\_01357" 13266 "s63E6H2" 0.006693359 "Elongation factor P"  
"JS1\_D03\_01358" 13267 "s59E13H2" 0 "hypothetical protein"  
"JS1\_D03\_01358" 13267 "s59E25H2" 0 "hypothetical protein"  
"JS1\_D03\_01358" 13267 "s59E5H2" 0 "hypothetical protein"  
"JS1\_D03\_01358" 13267 "s63E6H2" 0.02508777 "hypothetical protein"  
"JS1\_D03\_01359" 13268 "s59E13H2" 0 "hypothetical protein"  
"JS1\_D03\_01359" 13268 "s59E25H2" 0 "hypothetical protein"  
"JS1\_D03\_01359" 13268 "s59E5H2" 0.02782439 "hypothetical protein"  
"JS1\_D03\_01359" 13268 "s63E6H2" 0.01037647 "hypothetical protein"  
"JS1\_D03\_01360" 13269 "s59E13H2" 0.008731248 "Exodeoxyribonuclease 7 large subunit"  
"JS1\_D03\_01360" 13269 "s59E25H2" 0 "Exodeoxyribonuclease 7 large subunit"  
"JS1\_D03\_01360" 13269 "s59E5H2" 0.006563775 "Exodeoxyribonuclease 7 large subunit"  
"JS1\_D03\_01360" 13269 "s63E6H2" 0.03029265 "Exodeoxyribonuclease 7 large subunit"  
"JS1\_D03\_01361" 13270 "s59E13H2" 0.004894676 "Exodeoxyribonuclease 7 small subunit"  
"JS1\_D03\_01361" 13270 "s59E25H2" 0 "Exodeoxyribonuclease 7 small subunit"  
"JS1\_D03\_01361" 13270 "s59E5H2" 0 "Exodeoxyribonuclease 7 small subunit"  
"JS1\_D03\_01361" 13270 "s63E6H2" 0.0644855 "Exodeoxyribonuclease 7 small subunit"  
"JS1\_D03\_01362" 13271 "s59E13H2" 0 "Farnesyl diphosphate synthase"  
"JS1\_D03\_01362" 13271 "s59E25H2" 0 "Farnesyl diphosphate synthase"

"JS1\_D03\_01362" 13271 "s59E5H2" 0.009339163 "Farnesyl diphosphate synthase"  
"JS1\_D03\_01362" 13271 "s63E6H2" 0.03202042 "Farnesyl diphosphate synthase"  
"JS1\_D03\_01363" 13272 "s59E13H2" 0 "Ribonuclease PH"  
"JS1\_D03\_01363" 13272 "s59E25H2" 0 "Ribonuclease PH"  
"JS1\_D03\_01363" 13272 "s59E5H2" 0.01114277 "Ribonuclease PH"  
"JS1\_D03\_01363" 13272 "s63E6H2" 0.1171059 "Ribonuclease PH"  
"JS1\_D03\_01364" 13273 "s59E13H2" 0 "Non-canonical purine NTP pyrophosphatase"  
"JS1\_D03\_01364" 13273 "s59E25H2" 0 "Non-canonical purine NTP pyrophosphatase"  
"JS1\_D03\_01364" 13273 "s59E5H2" 0.007177502 "Non-canonical purine NTP pyrophosphatase"  
"JS1\_D03\_01364" 13273 "s63E6H2" 0.03734866 "Non-canonical purine NTP pyrophosphatase"  
"JS1\_D03\_01372" 13281 "s59E13H2" 0.04619513 "Trigger factor"  
"JS1\_D03\_01372" 13281 "s59E25H2" 0 "Trigger factor"  
"JS1\_D03\_01372" 13281 "s59E5H2" 0.01881453 "Trigger factor"  
"JS1\_D03\_01372" 13281 "s63E6H2" 0.06418577 "Trigger factor"  
"JS1\_D03\_01373" 13282 "s59E13H2" 0.1091108 "ATP-dependent Clp protease proteolytic subunit"  
"JS1\_D03\_01373" 13282 "s59E25H2" 0 "ATP-dependent Clp protease proteolytic subunit"  
"JS1\_D03\_01373" 13282 "s59E5H2" 0.03318381 "ATP-dependent Clp protease proteolytic subunit"  
"JS1\_D03\_01373" 13282 "s63E6H2" 0.06776829 "ATP-dependent Clp protease proteolytic subunit"  
"JS1\_D03\_01374" 13283 "s59E13H2" 0.01648089 "hypothetical protein"  
"JS1\_D03\_01374" 13283 "s59E25H2" 0 "hypothetical protein"  
"JS1\_D03\_01374" 13283 "s59E5H2" 0 "hypothetical protein"  
"JS1\_D03\_01374" 13283 "s63E6H2" 0.002093978 "hypothetical protein"  
"JS1\_D03\_01375" 13284 "s59E13H2" 0.02081756 "ATP-dependent Clp protease ATP-binding subunit ClpX"  
"JS1\_D03\_01375" 13284 "s59E25H2" 0 "ATP-dependent Clp protease ATP-binding subunit ClpX"  
"JS1\_D03\_01375" 13284 "s59E5H2" 0.06287144 "ATP-dependent Clp protease ATP-binding subunit ClpX"  
"JS1\_D03\_01375" 13284 "s63E6H2" 0.02274476 "ATP-dependent Clp protease ATP-binding subunit ClpX"  
"JS1\_D03\_01376" 13285 "s59E13H2" 0.0007626746 "DNA-directed RNA polymerase subunit beta"  
"JS1\_D03\_01376" 13285 "s59E25H2" 0 "DNA-directed RNA polymerase subunit beta"  
"JS1\_D03\_01376" 13285 "s59E5H2" 0 "DNA-directed RNA polymerase subunit beta"  
"JS1\_D03\_01376" 13285 "s63E6H2" 0.001858449 "DNA-directed RNA polymerase subunit beta"  
"JS1\_D03\_01377" 13286 "s59E13H2" 0.09374847 "Trehalose/maltose import ATP-binding protein MalK"  
"JS1\_D03\_01377" 13286 "s59E25H2" 0 "Trehalose/maltose import ATP-binding protein MalK"  
"JS1\_D03\_01377" 13286 "s59E5H2" 0.4080839 "Trehalose/maltose import ATP-binding protein MalK"  
"JS1\_D03\_01377" 13286 "s63E6H2" 1.033092 "Trehalose/maltose import ATP-binding protein MalK"  
"JS1\_D03\_01378" 13287 "s59E13H2" 0.05637103 "ureidoglycolate hydrolase"  
"JS1\_D03\_01378" 13287 "s59E25H2" 0 "ureidoglycolate hydrolase"  
"JS1\_D03\_01378" 13287 "s59E5H2" 0.3980013 "ureidoglycolate hydrolase"  
"JS1\_D03\_01378" 13287 "s63E6H2" 0.6701379 "ureidoglycolate hydrolase"  
"JS1\_D03\_01379" 13288 "s59E13H2" 0.05675867 "putative D-lyxose ketol-isomerase"  
"JS1\_D03\_01379" 13288 "s59E25H2" 0 "putative D-lyxose ketol-isomerase"  
"JS1\_D03\_01379" 13288 "s59E5H2" 0.3528241 "putative D-lyxose ketol-isomerase"  
"JS1\_D03\_01379" 13288 "s63E6H2" 1.417776 "putative D-lyxose ketol-isomerase"  
"JS1\_D03\_01380" 13289 "s59E13H2" 0.276195 "putative sugar kinase YdjH"  
"JS1\_D03\_01380" 13289 "s59E25H2" 0 "putative sugar kinase YdjH"  
"JS1\_D03\_01380" 13289 "s59E5H2" 0.2852111 "putative sugar kinase YdjH"  
"JS1\_D03\_01380" 13289 "s63E6H2" 1.452671 "putative sugar kinase YdjH"  
"JS1\_D03\_01381" 13290 "s59E13H2" 0.5889475 "Mannitol-1-phosphate 5-dehydrogenase"

"JS1\_D03\_01381" 13290 "s59E25H2" 0 "Mannitol-1-phosphate 5-dehydrogenase"  
"JS1\_D03\_01381" 13290 "s59E5H2" 0.4821399 "Mannitol-1-phosphate 5-dehydrogenase"  
"JS1\_D03\_01381" 13290 "s63E6H2" 1.277936 "Mannitol-1-phosphate 5-dehydrogenase"  
"JS1\_D03\_01382" 13291 "s59E13H2" 0.6845127 "Xylose import ATP-binding protein XylG"  
"JS1\_D03\_01382" 13291 "s59E25H2" 0 "Xylose import ATP-binding protein XylG"  
"JS1\_D03\_01382" 13291 "s59E5H2" 0.358682 "Xylose import ATP-binding protein XylG"  
"JS1\_D03\_01382" 13291 "s63E6H2" 0.8554351 "Xylose import ATP-binding protein XylG"  
"JS1\_D03\_01383" 13292 "s59E13H2" 0.8392051 "Ribose transport system permease protein RbsC"  
"JS1\_D03\_01383" 13292 "s59E25H2" 0 "Ribose transport system permease protein RbsC"  
"JS1\_D03\_01383" 13292 "s59E5H2" 1.654452 "Ribose transport system permease protein RbsC"  
"JS1\_D03\_01383" 13292 "s63E6H2" 0.8480046 "Ribose transport system permease protein RbsC"  
"JS1\_D03\_01384" 13293 "s59E13H2" 0.8923943 "Ribose transport system permease protein RbsC"  
"JS1\_D03\_01384" 13293 "s59E25H2" 0 "Ribose transport system permease protein RbsC"  
"JS1\_D03\_01384" 13293 "s59E5H2" 0.5916031 "Ribose transport system permease protein RbsC"  
"JS1\_D03\_01384" 13293 "s63E6H2" 0.6998692 "Ribose transport system permease protein RbsC"  
"JS1\_D03\_01385" 13294 "s59E13H2" 0.9467612 "D-ribose-binding periplasmic protein precursor"  
"JS1\_D03\_01385" 13294 "s59E25H2" 0 "D-ribose-binding periplasmic protein precursor"  
"JS1\_D03\_01385" 13294 "s59E5H2" 1.000596 "D-ribose-binding periplasmic protein precursor"  
"JS1\_D03\_01385" 13294 "s63E6H2" 0.8641224 "D-ribose-binding periplasmic protein precursor"  
"JS1\_D03\_01386" 13295 "s59E13H2" 0 "putative nicotinate-nucleotide adenyllyltransferase"  
"JS1\_D03\_01386" 13295 "s59E25H2" 0 "putative nicotinate-nucleotide adenyllyltransferase"  
"JS1\_D03\_01386" 13295 "s59E5H2" 0 "putative nicotinate-nucleotide adenyllyltransferase"  
"JS1\_D03\_01386" 13295 "s63E6H2" 0.2940915 "putative nicotinate-nucleotide adenyllyltransferase"  
"JS1\_D03\_01387" 13296 "s59E13H2" 0 "putative nicotinate-nucleotide adenyllyltransferase"  
"JS1\_D03\_01387" 13296 "s59E25H2" 0 "putative nicotinate-nucleotide adenyllyltransferase"  
"JS1\_D03\_01387" 13296 "s59E5H2" 0.00404586 "putative nicotinate-nucleotide adenyllyltransferase"  
"JS1\_D03\_01387" 13296 "s63E6H2" 0.4047979 "putative nicotinate-nucleotide adenyllyltransferase"  
"JS1\_D03\_01391" 13300 "s59E13H2" 0.002622772 "Elongation factor Tu"  
"JS1\_D03\_01391" 13300 "s59E25H2" 0 "Elongation factor Tu"  
"JS1\_D03\_01391" 13300 "s59E5H2" 0 "Elongation factor Tu"  
"JS1\_D03\_01391" 13300 "s63E6H2" 0.03626484 "Elongation factor Tu"  
"JS1\_D03\_01392" 13301 "s59E13H2" 0.06361328 "30S ribosomal protein S10"  
"JS1\_D03\_01392" 13301 "s59E25H2" 0 "30S ribosomal protein S10"  
"JS1\_D03\_01392" 13301 "s59E5H2" 0 "30S ribosomal protein S10"  
"JS1\_D03\_01392" 13301 "s63E6H2" 0.01623111 "30S ribosomal protein S10"  
"JS1\_D03\_01394" 13303 "s59E13H2" 0 "50S ribosomal protein L4"  
"JS1\_D03\_01394" 13303 "s59E25H2" 0 "50S ribosomal protein L4"  
"JS1\_D03\_01394" 13303 "s59E5H2" 0.01379556 "50S ribosomal protein L4"  
"JS1\_D03\_01394" 13303 "s63E6H2" 0.1579446 "50S ribosomal protein L4"  
"JS1\_D03\_01395" 13304 "s59E13H2" 0.00229438 "50S ribosomal protein L23"  
"JS1\_D03\_01395" 13304 "s59E25H2" 0 "50S ribosomal protein L23"  
"JS1\_D03\_01395" 13304 "s59E5H2" 0.02015208 "50S ribosomal protein L23"  
"JS1\_D03\_01395" 13304 "s63E6H2" 0.158737 "50S ribosomal protein L23"  
"JS1\_D03\_01396" 13305 "s59E13H2" 0.02165908 "50S ribosomal protein L2"  
"JS1\_D03\_01396" 13305 "s59E25H2" 0 "50S ribosomal protein L2"  
"JS1\_D03\_01396" 13305 "s59E5H2" 0.03802176 "50S ribosomal protein L2"  
"JS1\_D03\_01396" 13305 "s63E6H2" 0.3097157 "50S ribosomal protein L2"

"JS1\_D03\_01397" 13306 "s59E13H2" 0 "50S ribosomal protein L6"  
"JS1\_D03\_01397" 13306 "s59E25H2" 0 "50S ribosomal protein L6"  
"JS1\_D03\_01397" 13306 "s59E5H2" 0 "50S ribosomal protein L6"  
"JS1\_D03\_01397" 13306 "s63E6H2" 0.002244966 "50S ribosomal protein L6"  
"JS1\_D03\_01408" 13317 "s59E13H2" 0 "hypothetical protein"  
"JS1\_D03\_01408" 13317 "s59E25H2" 0 "hypothetical protein"  
"JS1\_D03\_01408" 13317 "s59E5H2" 0 "hypothetical protein"  
"JS1\_D03\_01408" 13317 "s63E6H2" 0.05955643 "hypothetical protein"  
"JS1\_D03\_01409" 13318 "s59E13H2" 0 "hypothetical protein"  
"JS1\_D03\_01409" 13318 "s59E25H2" 0 "hypothetical protein"  
"JS1\_D03\_01409" 13318 "s59E5H2" 0.04506595 "hypothetical protein"  
"JS1\_D03\_01409" 13318 "s63E6H2" 0.1270959 "hypothetical protein"  
"JS1\_D03\_01410" 13319 "s59E13H2" 0.07156824 "Glucokinase"  
"JS1\_D03\_01410" 13319 "s59E25H2" 0 "Glucokinase"  
"JS1\_D03\_01410" 13319 "s59E5H2" 0.3403954 "Glucokinase"  
"JS1\_D03\_01410" 13319 "s63E6H2" 0.1621909 "Glucokinase"  
"JS1\_D03\_01411" 13320 "s59E13H2" 0.1023536 "LysM domain/BON superfamily protein"  
"JS1\_D03\_01411" 13320 "s59E25H2" 0 "LysM domain/BON superfamily protein"  
"JS1\_D03\_01411" 13320 "s59E5H2" 0.2983233 "LysM domain/BON superfamily protein"  
"JS1\_D03\_01411" 13320 "s63E6H2" 0.2825306 "LysM domain/BON superfamily protein"  
"JS1\_D03\_01412" 13321 "s59E13H2" 0.03050547 "Long-chain-fatty-acid--CoA ligase FadD15"  
"JS1\_D03\_01412" 13321 "s59E25H2" 0 "Long-chain-fatty-acid--CoA ligase FadD15"  
"JS1\_D03\_01412" 13321 "s59E5H2" 0.03418253 "Long-chain-fatty-acid--CoA ligase FadD15"  
"JS1\_D03\_01412" 13321 "s63E6H2" 1.06991 "Long-chain-fatty-acid--CoA ligase FadD15"  
"JS1\_D03\_01414" 13323 "s59E13H2" 0.5954366 "NAD-dependent malic enzyme"  
"JS1\_D03\_01414" 13323 "s59E25H2" 0 "NAD-dependent malic enzyme"  
"JS1\_D03\_01414" 13323 "s59E5H2" 0.00907085 "NAD-dependent malic enzyme"  
"JS1\_D03\_01414" 13323 "s63E6H2" 0.02749638 "NAD-dependent malic enzyme"  
"JS1\_D03\_01415" 13324 "s59E13H2" 0.06401803 "DNA-directed RNA polymerase subunit beta"  
"JS1\_D03\_01415" 13324 "s59E25H2" 0 "DNA-directed RNA polymerase subunit beta"  
"JS1\_D03\_01415" 13324 "s59E5H2" 0.01524798 "DNA-directed RNA polymerase subunit beta"  
"JS1\_D03\_01415" 13324 "s63E6H2" 0.04014783 "DNA-directed RNA polymerase subunit beta"  
"JS1\_D03\_01417" 13326 "s59E13H2" 0 "mRNA interferase MazF4"  
"JS1\_D03\_01417" 13326 "s59E25H2" 0 "mRNA interferase MazF4"  
"JS1\_D03\_01417" 13326 "s59E5H2" 1.18259 "mRNA interferase MazF4"  
"JS1\_D03\_01417" 13326 "s63E6H2" 0.8690516 "mRNA interferase MazF4"  
"JS1\_D03\_01418" 13327 "s59E13H2" 0 "hypothetical protein"  
"JS1\_D03\_01418" 13327 "s59E25H2" 0 "hypothetical protein"  
"JS1\_D03\_01418" 13327 "s59E5H2" 0 "hypothetical protein"  
"JS1\_D03\_01418" 13327 "s63E6H2" 0 "hypothetical protein"  
"JS1\_D03\_01424" 13333 "s59E13H2" 0 "Ribonuclease HII"  
"JS1\_D03\_01424" 13333 "s59E25H2" 0 "Ribonuclease HII"  
"JS1\_D03\_01424" 13333 "s59E5H2" 0 "Ribonuclease HII"  
"JS1\_D03\_01424" 13333 "s63E6H2" 0.03116179 "Ribonuclease HII"  
"JS1\_D03\_01425" 13334 "s59E13H2" 0 "hypothetical protein"  
"JS1\_D03\_01425" 13334 "s59E25H2" 0 "hypothetical protein"  
"JS1\_D03\_01425" 13334 "s59E5H2" 0 "hypothetical protein"



"JS1\_D03\_01425" 13334 "s63E6H2" 0.006520528 "hypothetical protein"  
"JS1\_D03\_01426" 13335 "s59E13H2" 0.0175203 "Competence protein ComM"  
"JS1\_D03\_01426" 13335 "s59E25H2" 0 "Competence protein ComM"  
"JS1\_D03\_01426" 13335 "s59E5H2" 0.007145406 "Competence protein ComM"  
"JS1\_D03\_01426" 13335 "s63E6H2" 0.02228281 "Competence protein ComM"  
"JS1\_D03\_01427" 13336 "s59E13H2" 0 "Ribulose-phosphate 3-epimerase"  
"JS1\_D03\_01427" 13336 "s59E25H2" 0 "Ribulose-phosphate 3-epimerase"  
"JS1\_D03\_01427" 13336 "s59E5H2" 0 "Ribulose-phosphate 3-epimerase"  
"JS1\_D03\_01427" 13336 "s63E6H2" 0.008568375 "Ribulose-phosphate 3-epimerase"  
"JS1\_D03\_01428" 13337 "s59E13H2" 0.002475188 "GTPase Der"  
"JS1\_D03\_01428" 13337 "s59E25H2" 0 "GTPase Der"  
"JS1\_D03\_01428" 13337 "s59E5H2" 0.02698304 "GTPase Der"  
"JS1\_D03\_01428" 13337 "s63E6H2" 0.0205564 "GTPase Der"  
"JS1\_D03\_01429" 13338 "s59E13H2" 0 "Glycerol-3-phosphate acyltransferase"  
"JS1\_D03\_01429" 13338 "s59E25H2" 0 "Glycerol-3-phosphate acyltransferase"  
"JS1\_D03\_01429" 13338 "s59E5H2" 0.03124638 "Glycerol-3-phosphate acyltransferase"  
"JS1\_D03\_01429" 13338 "s63E6H2" 0.02441748 "Glycerol-3-phosphate acyltransferase"  
"JS1\_D03\_01430" 13339 "s59E13H2" 0.0008105433 "ferredoxin"  
"JS1\_D03\_01430" 13339 "s59E25H2" 0 "ferredoxin"  
"JS1\_D03\_01430" 13339 "s59E5H2" 0.04283588 "ferredoxin"  
"JS1\_D03\_01430" 13339 "s63E6H2" 0.02035766 "ferredoxin"  
"JS1\_D03\_01431" 13340 "s59E13H2" 0.0002550384 "DNA topoisomerase 1"  
"JS1\_D03\_01431" 13340 "s59E25H2" 0 "DNA topoisomerase 1"  
"JS1\_D03\_01431" 13340 "s59E5H2" 0.008345182 "DNA topoisomerase 1"  
"JS1\_D03\_01431" 13340 "s63E6H2" 0.0192395 "DNA topoisomerase 1"  
"JS1\_D03\_01433" 13342 "s59E13H2" 0.006344112 "Elongation factor Tu"  
"JS1\_D03\_01433" 13342 "s59E25H2" 0 "Elongation factor Tu"  
"JS1\_D03\_01433" 13342 "s59E5H2" 0.04611139 "Elongation factor Tu"  
"JS1\_D03\_01433" 13342 "s63E6H2" 0.177591 "Elongation factor Tu"  
"JS1\_D03\_01434" 13343 "s59E13H2" 0 "UDP-N-acetylmuramoylalanine--D-glutamate ligase"  
"JS1\_D03\_01434" 13343 "s59E25H2" 0 "UDP-N-acetylmuramoylalanine--D-glutamate ligase"  
"JS1\_D03\_01434" 13343 "s59E5H2" 0 "UDP-N-acetylmuramoylalanine--D-glutamate ligase"  
"JS1\_D03\_01434" 13343 "s63E6H2" 0 "UDP-N-acetylmuramoylalanine--D-glutamate ligase"  
"JS1\_D03\_01435" 13344 "s59E13H2" 0.0008637664 "Acyltransferase family protein"  
"JS1\_D03\_01435" 13344 "s59E25H2" 0 "Acyltransferase family protein"  
"JS1\_D03\_01435" 13344 "s59E5H2" 0.4119899 "Acyltransferase family protein"  
"JS1\_D03\_01435" 13344 "s63E6H2" 0.03793795 "Acyltransferase family protein"  
"JS1\_D03\_01436" 13345 "s59E13H2" 0 "7,8-dihydropterin-6-methyl-4-(beta-D-ribofuranosyl)-aminobenzene-5'-phosphate synthase"  
"JS1\_D03\_01436" 13345 "s59E25H2" 0 "7,8-dihydropterin-6-methyl-4-(beta-D-ribofuranosyl)-aminobenzene-5'-phosphate synthase"  
"JS1\_D03\_01436" 13345 "s59E5H2" 2.059566 "7,8-dihydropterin-6-methyl-4-(beta-D-ribofuranosyl)-aminobenzene-5'-phosphate synthase"  
"JS1\_D03\_01436" 13345 "s63E6H2" 0.03609962 "7,8-dihydropterin-6-methyl-4-(beta-D-ribofuranosyl)-aminobenzene-5'-phosphate synthase"  
"JS1\_D03\_01437" 13346 "s59E13H2" 0.03822603 "Purine nucleoside phosphorylase DeoD-type"  
"JS1\_D03\_01437" 13346 "s59E25H2" 0 "Purine nucleoside phosphorylase DeoD-type"  
"JS1\_D03\_01437" 13346 "s59E5H2" 0.9804403 "Purine nucleoside phosphorylase DeoD-type"  
"JS1\_D03\_01437" 13346 "s63E6H2" 0.06800664 "Purine nucleoside phosphorylase DeoD-type"  
"JS1\_D03\_01440" 13349 "s59E13H2" 0.9854424 "tRNA uridine 5-carboxymethylaminomethyl modification enzyme MnmG"  
"JS1\_D03\_01440" 13349 "s59E25H2" 0.1333333 "tRNA uridine 5-carboxymethylaminomethyl modification enzyme MnmG"

"JS1\_D03\_01440" 13349 "s59E5H2" 2.350943 "tRNA uridine 5-carboxymethylaminomethyl modification enzyme MnmG"  
"JS1\_D03\_01440" 13349 "s63E6H2" 0.3492365 "tRNA uridine 5-carboxymethylaminomethyl modification enzyme MnmG"  
"JS1\_D03\_01441" 13350 "s59E13H2" 1.679592 "RNA polymerase-binding transcription factor CarD"  
"JS1\_D03\_01441" 13350 "s59E25H2" 0 "RNA polymerase-binding transcription factor CarD"  
"JS1\_D03\_01441" 13350 "s59E5H2" 0.9465408 "RNA polymerase-binding transcription factor CarD"  
"JS1\_D03\_01441" 13350 "s63E6H2" 0.2126644 "RNA polymerase-binding transcription factor CarD"  
"JS1\_D03\_01442" 13351 "s59E13H2" 5.965089 "Oligopeptide transport ATP-binding protein OppF"  
"JS1\_D03\_01442" 13351 "s59E25H2" 0 "Oligopeptide transport ATP-binding protein OppF"  
"JS1\_D03\_01442" 13351 "s59E5H2" 2.205183 "Oligopeptide transport ATP-binding protein OppF"  
"JS1\_D03\_01442" 13351 "s63E6H2" 0.35674 "Oligopeptide transport ATP-binding protein OppF"  
"JS1\_D03\_01443" 13352 "s59E13H2" 4.967672 "Oligopeptide transport ATP-binding protein OppD"  
"JS1\_D03\_01443" 13352 "s59E25H2" 0 "Oligopeptide transport ATP-binding protein OppD"  
"JS1\_D03\_01443" 13352 "s59E5H2" 2.090309 "Oligopeptide transport ATP-binding protein OppD"  
"JS1\_D03\_01443" 13352 "s63E6H2" 0.3365171 "Oligopeptide transport ATP-binding protein OppD"  
"JS1\_D03\_01444" 13353 "s59E13H2" 1.206898 "Glutathione transport system permease protein GsiD"  
"JS1\_D03\_01444" 13353 "s59E25H2" 0.4512472 "Glutathione transport system permease protein GsiD"  
"JS1\_D03\_01444" 13353 "s59E5H2" 1.198437 "Glutathione transport system permease protein GsiD"  
"JS1\_D03\_01444" 13353 "s63E6H2" 0.2010094 "Glutathione transport system permease protein GsiD"  
"JS1\_D03\_01445" 13354 "s59E13H2" 1.270133 "Dipeptide transport system permease protein DppB"  
"JS1\_D03\_01445" 13354 "s59E25H2" 0 "Dipeptide transport system permease protein DppB"  
"JS1\_D03\_01445" 13354 "s59E5H2" 1.671518 "Dipeptide transport system permease protein DppB"  
"JS1\_D03\_01445" 13354 "s63E6H2" 0.3153004 "Dipeptide transport system permease protein DppB"  
"JS1\_D03\_01446" 13355 "s59E13H2" 0.3536334 "Periplasmic dipeptide transport protein precursor"  
"JS1\_D03\_01446" 13355 "s59E25H2" 0 "Periplasmic dipeptide transport protein precursor"  
"JS1\_D03\_01446" 13355 "s59E5H2" 1.712901 "Periplasmic dipeptide transport protein precursor"  
"JS1\_D03\_01446" 13355 "s63E6H2" 0.1558529 "Periplasmic dipeptide transport protein precursor"  
"JS1\_D03\_01447" 13356 "s59E13H2" 1.57777 "Murein hydrolase activator NlpD precursor"  
"JS1\_D03\_01447" 13356 "s59E25H2" 0 "Murein hydrolase activator NlpD precursor"  
"JS1\_D03\_01447" 13356 "s59E5H2" 0.473418 "Murein hydrolase activator NlpD precursor"  
"JS1\_D03\_01447" 13356 "s63E6H2" 0.2901781 "Murein hydrolase activator NlpD precursor"  
"JS1\_D03\_01448" 13357 "s59E13H2" 0 "Helix-turn-helix domain protein"  
"JS1\_D03\_01448" 13357 "s59E25H2" 0 "Helix-turn-helix domain protein"  
"JS1\_D03\_01448" 13357 "s59E5H2" 0.1115908 "Helix-turn-helix domain protein"  
"JS1\_D03\_01448" 13357 "s63E6H2" 0.1602906 "Helix-turn-helix domain protein"  
"JS1\_D03\_01449" 13358 "s59E13H2" 0.5964891 "hypothetical protein"  
"JS1\_D03\_01449" 13358 "s59E25H2" 0 "hypothetical protein"  
"JS1\_D03\_01449" 13358 "s59E5H2" 0.5766606 "hypothetical protein"  
"JS1\_D03\_01449" 13358 "s63E6H2" 0.2422953 "hypothetical protein"  
"JS1\_D03\_01450" 13359 "s59E13H2" 1.706658 "Soluble lytic murein transglycosylase precursor"  
"JS1\_D03\_01450" 13359 "s59E25H2" 0 "Soluble lytic murein transglycosylase precursor"  
"JS1\_D03\_01450" 13359 "s59E5H2" 0.4992204 "Soluble lytic murein transglycosylase precursor"  
"JS1\_D03\_01450" 13359 "s63E6H2" 0.2143731 "Soluble lytic murein transglycosylase precursor"  
"JS1\_D03\_01451" 13360 "s59E13H2" 0.1025567 "B3/4 domain protein"  
"JS1\_D03\_01451" 13360 "s59E25H2" 0 "B3/4 domain protein"  
"JS1\_D03\_01451" 13360 "s59E5H2" 0.03401845 "B3/4 domain protein"  
"JS1\_D03\_01451" 13360 "s63E6H2" 0.6724176 "B3/4 domain protein"  
"JS1\_D03\_01452" 13361 "s59E13H2" 0.439875 "hypothetical protein"

"JS1\_D03\_01452" 13361 "s59E25H2" 0 "hypothetical protein"  
"JS1\_D03\_01452" 13361 "s59E5H2" 0.5919984 "hypothetical protein"  
"JS1\_D03\_01452" 13361 "s63E6H2" 0.103869 "hypothetical protein"  
"JS1\_D03\_01453" 13362 "s59E13H2" 0.005761894 "hypothetical protein"  
"JS1\_D03\_01453" 13362 "s59E25H2" 0 "hypothetical protein"  
"JS1\_D03\_01453" 13362 "s59E5H2" 0.006607752 "hypothetical protein"  
"JS1\_D03\_01453" 13362 "s63E6H2" 0 "hypothetical protein"  
"JS1\_D03\_01454" 13363 "s59E13H2" 0 "Protein-glutamine gamma-glutamyltransferase"  
"JS1\_D03\_01454" 13363 "s59E25H2" 0 "Protein-glutamine gamma-glutamyltransferase"  
"JS1\_D03\_01454" 13363 "s59E5H2" 0.04168032 "Protein-glutamine gamma-glutamyltransferase"  
"JS1\_D03\_01454" 13363 "s63E6H2" 0.0325392 "Protein-glutamine gamma-glutamyltransferase"  
"JS1\_D03\_01455" 13364 "s59E13H2" 0 "hypothetical protein"  
"JS1\_D03\_01455" 13364 "s59E25H2" 0 "hypothetical protein"  
"JS1\_D03\_01455" 13364 "s59E5H2" 0.06779452 "hypothetical protein"  
"JS1\_D03\_01455" 13364 "s63E6H2" 0.0005296351 "hypothetical protein"  
"JS1\_D03\_01456" 13365 "s59E13H2" 0.001909846 "hypothetical protein"  
"JS1\_D03\_01456" 13365 "s59E25H2" 0 "hypothetical protein"  
"JS1\_D03\_01456" 13365 "s59E5H2" 0 "hypothetical protein"  
"JS1\_D03\_01456" 13365 "s63E6H2" 7.78327e-05 "hypothetical protein"  
"JS1\_D03\_01458" 13367 "s59E13H2" 0.02315724 "hypothetical protein"  
"JS1\_D03\_01458" 13367 "s59E25H2" 0 "hypothetical protein"  
"JS1\_D03\_01458" 13367 "s59E5H2" 0.003323471 "hypothetical protein"  
"JS1\_D03\_01458" 13367 "s63E6H2" 0.0116532 "hypothetical protein"  
"JS1\_D03\_01460" 13369 "s59E13H2" 0 "CobQ/CobB/MinD/ParA nucleotide binding domain protein"  
"JS1\_D03\_01460" 13369 "s59E25H2" 0 "CobQ/CobB/MinD/ParA nucleotide binding domain protein"  
"JS1\_D03\_01460" 13369 "s59E5H2" 0 "CobQ/CobB/MinD/ParA nucleotide binding domain protein"  
"JS1\_D03\_01460" 13369 "s63E6H2" 0 "CobQ/CobB/MinD/ParA nucleotide binding domain protein"  
"JS1\_D03\_01463" 13372 "s59E13H2" 0 "hypothetical protein"  
"JS1\_D03\_01463" 13372 "s59E25H2" 0 "hypothetical protein"  
"JS1\_D03\_01463" 13372 "s59E5H2" 0 "hypothetical protein"  
"JS1\_D03\_01463" 13372 "s63E6H2" 0 "hypothetical protein"  
"JS1\_D03\_01464" 13373 "s59E13H2" 0 "hypothetical protein"  
"JS1\_D03\_01464" 13373 "s59E25H2" 0 "hypothetical protein"  
"JS1\_D03\_01464" 13373 "s59E5H2" 0 "hypothetical protein"  
"JS1\_D03\_01464" 13373 "s63E6H2" 0 "hypothetical protein"  
"JS1\_D03\_01465" 13374 "s59E13H2" 0 "hypothetical protein"  
"JS1\_D03\_01465" 13374 "s59E25H2" 0 "hypothetical protein"  
"JS1\_D03\_01465" 13374 "s59E5H2" 0 "hypothetical protein"  
"JS1\_D03\_01465" 13374 "s63E6H2" 0.0003708499 "hypothetical protein"  
"JS1\_D03\_01467" 13376 "s59E13H2" 0 "hypothetical protein"  
"JS1\_D03\_01467" 13376 "s59E25H2" 0 "hypothetical protein"  
"JS1\_D03\_01467" 13376 "s59E5H2" 0 "hypothetical protein"  
"JS1\_D03\_01467" 13376 "s63E6H2" 0.009848449 "hypothetical protein"  
"JS1\_D03\_01468" 13377 "s59E13H2" 0 "hypothetical protein"  
"JS1\_D03\_01468" 13377 "s59E25H2" 0 "hypothetical protein"  
"JS1\_D03\_01468" 13377 "s59E5H2" 0 "hypothetical protein"  
"JS1\_D03\_01468" 13377 "s63E6H2" 0 "hypothetical protein"

"JS1\_D03\_01469" 13378 "s59E13H2" 0 "Helix-turn-helix domain protein"  
"JS1\_D03\_01469" 13378 "s59E25H2" 0 "Helix-turn-helix domain protein"  
"JS1\_D03\_01469" 13378 "s59E5H2" 0 "Helix-turn-helix domain protein"  
"JS1\_D03\_01469" 13378 "s63E6H2" 0 "Helix-turn-helix domain protein"  
"JS1\_D03\_01470" 13379 "s59E13H2" 0 "hypothetical protein"  
"JS1\_D03\_01470" 13379 "s59E25H2" 0 "hypothetical protein"  
"JS1\_D03\_01470" 13379 "s59E5H2" 0 "hypothetical protein"  
"JS1\_D03\_01470" 13379 "s63E6H2" 0 "hypothetical protein"  
"JS1\_D03\_01471" 13380 "s59E13H2" 0 "hypothetical protein"  
"JS1\_D03\_01471" 13380 "s59E25H2" 0 "hypothetical protein"  
"JS1\_D03\_01471" 13380 "s59E5H2" 0 "hypothetical protein"  
"JS1\_D03\_01471" 13380 "s63E6H2" 0 "hypothetical protein"  
"JS1\_D03\_01472" 13381 "s59E13H2" 0 "hypothetical protein"  
"JS1\_D03\_01472" 13381 "s59E25H2" 0 "hypothetical protein"  
"JS1\_D03\_01472" 13381 "s59E5H2" 0 "hypothetical protein"  
"JS1\_D03\_01472" 13381 "s63E6H2" 0 "hypothetical protein"  
"JS1\_D03\_01473" 13382 "s59E13H2" 0.003267021 "hypothetical protein"  
"JS1\_D03\_01473" 13382 "s59E25H2" 0 "hypothetical protein"  
"JS1\_D03\_01473" 13382 "s59E5H2" 0 "hypothetical protein"  
"JS1\_D03\_01473" 13382 "s63E6H2" 0 "hypothetical protein"  
"JS1\_D03\_01474" 13383 "s59E13H2" 0.003193895 "hypothetical protein"  
"JS1\_D03\_01474" 13383 "s59E25H2" 0 "hypothetical protein"  
"JS1\_D03\_01474" 13383 "s59E5H2" 0 "hypothetical protein"  
"JS1\_D03\_01474" 13383 "s63E6H2" 0 "hypothetical protein"  
"JS1\_D03\_01475" 13384 "s59E13H2" 0 "hypothetical protein"  
"JS1\_D03\_01475" 13384 "s59E25H2" 0 "hypothetical protein"  
"JS1\_D03\_01475" 13384 "s59E5H2" 0 "hypothetical protein"  
"JS1\_D03\_01475" 13384 "s63E6H2" 0 "hypothetical protein"  
"JS1\_D03\_01477" 13386 "s59E13H2" 0 "hypothetical protein"  
"JS1\_D03\_01477" 13386 "s59E25H2" 0 "hypothetical protein"  
"JS1\_D03\_01477" 13386 "s59E5H2" 0 "hypothetical protein"  
"JS1\_D03\_01477" 13386 "s63E6H2" 0 "hypothetical protein"  
"JS1\_D03\_01478" 13387 "s59E13H2" 0 "hypothetical protein"  
"JS1\_D03\_01478" 13387 "s59E25H2" 0 "hypothetical protein"  
"JS1\_D03\_01478" 13387 "s59E5H2" 0 "hypothetical protein"  
"JS1\_D03\_01478" 13387 "s63E6H2" 0 "hypothetical protein"  
"JS1\_D03\_01480" 13389 "s59E13H2" 0.07129197 "tRNA pseudouridine synthase A"  
"JS1\_D03\_01480" 13389 "s59E25H2" 0 "tRNA pseudouridine synthase A"  
"JS1\_D03\_01480" 13389 "s59E5H2" 0.07621378 "tRNA pseudouridine synthase A"  
"JS1\_D03\_01480" 13389 "s63E6H2" 0.2409255 "tRNA pseudouridine synthase A"  
"JS1\_D03\_01481" 13390 "s59E13H2" 0.2398721 "Energy-coupling factor transporter transmembrane protein EcfT"  
"JS1\_D03\_01481" 13390 "s59E25H2" 0 "Energy-coupling factor transporter transmembrane protein EcfT"  
"JS1\_D03\_01481" 13390 "s59E5H2" 0.5142857 "Energy-coupling factor transporter transmembrane protein EcfT"  
"JS1\_D03\_01481" 13390 "s63E6H2" 0.8969238 "Energy-coupling factor transporter transmembrane protein EcfT"  
"JS1\_D03\_01482" 13391 "s59E13H2" 0.1666294 "Energy-coupling factor transporter ATP-binding protein EcfA2"  
"JS1\_D03\_01482" 13391 "s59E25H2" 0 "Energy-coupling factor transporter ATP-binding protein EcfA2"  
"JS1\_D03\_01482" 13391 "s59E5H2" 0.3461495 "Energy-coupling factor transporter ATP-binding protein EcfA2"

"JS1\_D03\_01482" 13391 "s63E6H2" 1.002971 "Energy-coupling factor transporter ATP-binding protein EcfA2"  
"JS1\_D03\_01483" 13392 "s59E13H2" 0.2327277 "Energy-coupling factor transporter ATP-binding protein EcfA1"  
"JS1\_D03\_01483" 13392 "s59E25H2" 0 "Energy-coupling factor transporter ATP-binding protein EcfA1"  
"JS1\_D03\_01483" 13392 "s59E5H2" 0.2454452 "Energy-coupling factor transporter ATP-binding protein EcfA1"  
"JS1\_D03\_01483" 13392 "s63E6H2" 2.531105 "Energy-coupling factor transporter ATP-binding protein EcfA1"  
"JS1\_D03\_01484" 13393 "s59E13H2" 0.06442765 "50S ribosomal protein L17"  
"JS1\_D03\_01484" 13393 "s59E25H2" 0 "50S ribosomal protein L17"  
"JS1\_D03\_01484" 13393 "s59E5H2" 0.07432667 "50S ribosomal protein L17"  
"JS1\_D03\_01484" 13393 "s63E6H2" 0.8059008 "50S ribosomal protein L17"  
"JS1\_D03\_01485" 13394 "s59E13H2" 0.03146268 "DNA-directed RNA polymerase subunit alpha"  
"JS1\_D03\_01485" 13394 "s59E25H2" 0 "DNA-directed RNA polymerase subunit alpha"  
"JS1\_D03\_01485" 13394 "s59E5H2" 0.02481422 "DNA-directed RNA polymerase subunit alpha"  
"JS1\_D03\_01485" 13394 "s63E6H2" 0.1913682 "DNA-directed RNA polymerase subunit alpha"  
"JS1\_D03\_01486" 13395 "s59E13H2" 0.06875378 "30S ribosomal protein S4"  
"JS1\_D03\_01486" 13395 "s59E25H2" 0 "30S ribosomal protein S4"  
"JS1\_D03\_01486" 13395 "s59E5H2" 0.04702171 "30S ribosomal protein S4"  
"JS1\_D03\_01486" 13395 "s63E6H2" 0.2718297 "30S ribosomal protein S4"  
"JS1\_D03\_01487" 13396 "s59E13H2" 0.05371263 "30S ribosomal protein S11"  
"JS1\_D03\_01487" 13396 "s59E25H2" 0 "30S ribosomal protein S11"  
"JS1\_D03\_01487" 13396 "s59E5H2" 0.1858208 "30S ribosomal protein S11"  
"JS1\_D03\_01487" 13396 "s63E6H2" 0.2381976 "30S ribosomal protein S11"  
"JS1\_D03\_01488" 13397 "s59E13H2" 0.01473923 "30S ribosomal protein S13"  
"JS1\_D03\_01488" 13397 "s59E25H2" 0 "30S ribosomal protein S13"  
"JS1\_D03\_01488" 13397 "s59E5H2" 0.01908524 "30S ribosomal protein S13"  
"JS1\_D03\_01488" 13397 "s63E6H2" 0.1115984 "30S ribosomal protein S13"  
"JS1\_D03\_01489" 13398 "s59E13H2" 0.02039118 "50S ribosomal protein L36"  
"JS1\_D03\_01489" 13398 "s59E25H2" 0 "50S ribosomal protein L36"  
"JS1\_D03\_01489" 13398 "s59E5H2" 0.01939865 "50S ribosomal protein L36"  
"JS1\_D03\_01489" 13398 "s63E6H2" 0.04650397 "50S ribosomal protein L36"  
"JS1\_D03\_01490" 13399 "s59E13H2" 0.03477796 "Translation initiation factor IF-1"  
"JS1\_D03\_01490" 13399 "s59E25H2" 0 "Translation initiation factor IF-1"  
"JS1\_D03\_01490" 13399 "s59E5H2" 0.04901047 "Translation initiation factor IF-1"  
"JS1\_D03\_01490" 13399 "s63E6H2" 0.06585897 "Translation initiation factor IF-1"  
"JS1\_D03\_01491" 13400 "s59E13H2" 0.003526977 "Methionine aminopeptidase 1"  
"JS1\_D03\_01491" 13400 "s59E25H2" 0 "Methionine aminopeptidase 1"  
"JS1\_D03\_01491" 13400 "s59E5H2" 0.01034931 "Methionine aminopeptidase 1"  
"JS1\_D03\_01491" 13400 "s63E6H2" 0.07156368 "Methionine aminopeptidase 1"  
"JS1\_D03\_01492" 13401 "s59E13H2" 0.03681105 "hypothetical protein"  
"JS1\_D03\_01492" 13401 "s59E25H2" 0.1683417 "hypothetical protein"  
"JS1\_D03\_01492" 13401 "s59E5H2" 1.024123 "hypothetical protein"  
"JS1\_D03\_01492" 13401 "s63E6H2" 1.673526 "hypothetical protein"  
"JS1\_D03\_01493" 13402 "s59E13H2" 0.1166833 "Sulfide dehydrogenase subunit alpha precursor"  
"JS1\_D03\_01493" 13402 "s59E25H2" 0.05534591 "Sulfide dehydrogenase subunit alpha precursor"  
"JS1\_D03\_01493" 13402 "s59E5H2" 1.187438 "Sulfide dehydrogenase subunit alpha precursor"  
"JS1\_D03\_01493" 13402 "s63E6H2" 3.147978 "Sulfide dehydrogenase subunit alpha precursor"  
"JS1\_D03\_01494" 13403 "s59E13H2" 0 "Bacterial extracellular solute-binding protein"  
"JS1\_D03\_01494" 13403 "s59E25H2" 0 "Bacterial extracellular solute-binding protein"

"JS1\_D03\_01494" 13403 "s59E5H2" 0.08538179 "Bacterial extracellular solute-binding protein"  
"JS1\_D03\_01494" 13403 "s63E6H2" 0.6054501 "Bacterial extracellular solute-binding protein"  
"JS1\_D03\_01495" 13404 "s59E13H2" 0 "hypothetical protein"  
"JS1\_D03\_01495" 13404 "s59E25H2" 0 "hypothetical protein"  
"JS1\_D03\_01495" 13404 "s59E5H2" 0 "hypothetical protein"  
"JS1\_D03\_01495" 13404 "s63E6H2" 0.007615813 "hypothetical protein"  
"JS1\_D03\_01496" 13405 "s59E13H2" 0.4013651 "Lipopolysaccharide export system permease protein LptF"  
"JS1\_D03\_01496" 13405 "s59E25H2" 0 "Lipopolysaccharide export system permease protein LptF"  
"JS1\_D03\_01496" 13405 "s59E5H2" 0.427832 "Lipopolysaccharide export system permease protein LptF"  
"JS1\_D03\_01496" 13405 "s63E6H2" 0.3433162 "Lipopolysaccharide export system permease protein LptF"  
"JS1\_D03\_01498" 13407 "s59E13H2" 0.02864806 "NADPH-dependent FMN reductase"  
"JS1\_D03\_01498" 13407 "s59E25H2" 0 "NADPH-dependent FMN reductase"  
"JS1\_D03\_01498" 13407 "s59E5H2" 0.2334459 "NADPH-dependent FMN reductase"  
"JS1\_D03\_01498" 13407 "s63E6H2" 0.1077645 "NADPH-dependent FMN reductase"  
"JS1\_D03\_01499" 13408 "s59E13H2" 0.2558631 "putative dual-specificity RNA methyltransferase RlmN"  
"JS1\_D03\_01499" 13408 "s59E25H2" 0 "putative dual-specificity RNA methyltransferase RlmN"  
"JS1\_D03\_01499" 13408 "s59E5H2" 0.04872973 "putative dual-specificity RNA methyltransferase RlmN"  
"JS1\_D03\_01499" 13408 "s63E6H2" 0.08395209 "putative dual-specificity RNA methyltransferase RlmN"  
"JS1\_D03\_01501" 13410 "s59E13H2" 0.006831556 "Putative zinc ribbon domain protein"  
"JS1\_D03\_01501" 13410 "s59E25H2" 0 "Putative zinc ribbon domain protein"  
"JS1\_D03\_01501" 13410 "s59E5H2" 0.02201593 "Putative zinc ribbon domain protein"  
"JS1\_D03\_01501" 13410 "s63E6H2" 0.1207435 "Putative zinc ribbon domain protein"  
"JS1\_D03\_01505" 13414 "s59E13H2" 0.05350332 "cell division protein MraZ"  
"JS1\_D03\_01505" 13414 "s59E25H2" 0 "cell division protein MraZ"  
"JS1\_D03\_01505" 13414 "s59E5H2" 0.7248371 "cell division protein MraZ"  
"JS1\_D03\_01505" 13414 "s63E6H2" 0.6377344 "cell division protein MraZ"  
"JS1\_D03\_01506" 13415 "s59E13H2" 0.01335773 "Ribosomal RNA small subunit methyltransferase H"  
"JS1\_D03\_01506" 13415 "s59E25H2" 0 "Ribosomal RNA small subunit methyltransferase H"  
"JS1\_D03\_01506" 13415 "s59E5H2" 0.2257615 "Ribosomal RNA small subunit methyltransferase H"  
"JS1\_D03\_01506" 13415 "s63E6H2" 0.4102932 "Ribosomal RNA small subunit methyltransferase H"  
"JS1\_D03\_01507" 13416 "s59E13H2" 0.00523641 "Cell division protein FtsL"  
"JS1\_D03\_01507" 13416 "s59E25H2" 0 "Cell division protein FtsL"  
"JS1\_D03\_01507" 13416 "s59E5H2" 0.07973526 "Cell division protein FtsL"  
"JS1\_D03\_01507" 13416 "s63E6H2" 0.1316766 "Cell division protein FtsL"  
"JS1\_D03\_01508" 13417 "s59E13H2" 0.02052024 "Stage V sporulation protein D"  
"JS1\_D03\_01508" 13417 "s59E25H2" 0 "Stage V sporulation protein D"  
"JS1\_D03\_01508" 13417 "s59E5H2" 0.09700116 "Stage V sporulation protein D"  
"JS1\_D03\_01508" 13417 "s63E6H2" 0.3753979 "Stage V sporulation protein D"  
"JS1\_D03\_01509" 13418 "s59E13H2" 1.463831 "hypothetical protein"  
"JS1\_D03\_01509" 13418 "s59E25H2" 0 "hypothetical protein"  
"JS1\_D03\_01509" 13418 "s59E5H2" 0.03063602 "hypothetical protein"  
"JS1\_D03\_01509" 13418 "s63E6H2" 0.09609954 "hypothetical protein"  
"JS1\_D03\_01510" 13419 "s59E13H2" 0 "hypothetical protein"  
"JS1\_D03\_01510" 13419 "s59E25H2" 0 "hypothetical protein"  
"JS1\_D03\_01510" 13419 "s59E5H2" 0 "hypothetical protein"  
"JS1\_D03\_01510" 13419 "s63E6H2" 0.005117594 "hypothetical protein"  
"JS1\_D03\_01513" 13422 "s59E13H2" 0.007174757 "hypothetical protein"

"JS1\_D03\_01513" 13422 "s59E25H2" 0 "hypothetical protein"  
"JS1\_D03\_01513" 13422 "s59E5H2" 0.003925229 "hypothetical protein"  
"JS1\_D03\_01513" 13422 "s63E6H2" 0.01620136 "hypothetical protein"  
"JS1\_D03\_01514" 13423 "s59E13H2" 0.04269532 "HTH-type transcriptional repressor NsrR"  
"JS1\_D03\_01514" 13423 "s59E25H2" 0 "HTH-type transcriptional repressor NsrR"  
"JS1\_D03\_01514" 13423 "s59E5H2" 0.04899546 "HTH-type transcriptional repressor NsrR"  
"JS1\_D03\_01514" 13423 "s63E6H2" 0.07665909 "HTH-type transcriptional repressor NsrR"  
"JS1\_D03\_01515" 13424 "s59E13H2" 0.03835461 "Desulfoferrodoxin"  
"JS1\_D03\_01515" 13424 "s59E25H2" 0 "Desulfoferrodoxin"  
"JS1\_D03\_01515" 13424 "s59E5H2" 0.11277 "Desulfoferrodoxin"  
"JS1\_D03\_01515" 13424 "s63E6H2" 0.298702 "Desulfoferrodoxin"  
"JS1\_D03\_01516" 13425 "s59E13H2" 0.05708781 "High molecular weight rubredoxin"  
"JS1\_D03\_01516" 13425 "s59E25H2" 0 "High molecular weight rubredoxin"  
"JS1\_D03\_01516" 13425 "s59E5H2" 0.7448204 "High molecular weight rubredoxin"  
"JS1\_D03\_01516" 13425 "s63E6H2" 0.2691284 "High molecular weight rubredoxin"  
"JS1\_D03\_01517" 13426 "s59E13H2" 0.02175989 "Nitric oxide reductase"  
"JS1\_D03\_01517" 13426 "s59E25H2" 0 "Nitric oxide reductase"  
"JS1\_D03\_01517" 13426 "s59E5H2" 0.08119652 "Nitric oxide reductase"  
"JS1\_D03\_01517" 13426 "s63E6H2" 0.05961426 "Nitric oxide reductase"  
"JS1\_D03\_01518" 13427 "s59E13H2" 0.02845705 "Rubrerythrin-1"  
"JS1\_D03\_01518" 13427 "s59E25H2" 0 "Rubrerythrin-1"  
"JS1\_D03\_01518" 13427 "s59E5H2" 0.1222974 "Rubrerythrin-1"  
"JS1\_D03\_01518" 13427 "s63E6H2" 0.2245262 "Rubrerythrin-1"  
"JS1\_D03\_01519" 13428 "s59E13H2" 0.004350823 "Fe/S biogenesis protein NfuA"  
"JS1\_D03\_01519" 13428 "s59E25H2" 0 "Fe/S biogenesis protein NfuA"  
"JS1\_D03\_01519" 13428 "s59E5H2" 0.2157561 "Fe/S biogenesis protein NfuA"  
"JS1\_D03\_01519" 13428 "s63E6H2" 0.6993935 "Fe/S biogenesis protein NfuA"  
"JS1\_D03\_01520" 13429 "s59E13H2" 0 "putative ferritin-1"  
"JS1\_D03\_01520" 13429 "s59E25H2" 0 "putative ferritin-1"  
"JS1\_D03\_01520" 13429 "s59E5H2" 0.06949681 "putative ferritin-1"  
"JS1\_D03\_01520" 13429 "s63E6H2" 0.007328136 "putative ferritin-1"  
"JS1\_D03\_01521" 13430 "s59E13H2" 0.07572913 "hypothetical protein"  
"JS1\_D03\_01521" 13430 "s59E25H2" 0 "hypothetical protein"  
"JS1\_D03\_01521" 13430 "s59E5H2" 0.2368825 "hypothetical protein"  
"JS1\_D03\_01521" 13430 "s63E6H2" 0.1916686 "hypothetical protein"  
"JS1\_D03\_01522" 13431 "s59E13H2" 0.07319284 "putative multidrug resistance ABC transporter ATP-binding/permease protein YheI"  
"JS1\_D03\_01522" 13431 "s59E25H2" 0 "putative multidrug resistance ABC transporter ATP-binding/permease protein YheI"  
"JS1\_D03\_01522" 13431 "s59E5H2" 1.480749 "putative multidrug resistance ABC transporter ATP-binding/permease protein YheI"  
"JS1\_D03\_01522" 13431 "s63E6H2" 0.8352864 "putative multidrug resistance ABC transporter ATP-binding/permease protein YheI"  
"JS1\_D03\_01523" 13432 "s59E13H2" 0.1412614 "putative multidrug resistance ABC transporter ATP-binding/permease protein YheH"  
"JS1\_D03\_01523" 13432 "s59E25H2" 0 "putative multidrug resistance ABC transporter ATP-binding/permease protein YheH"  
"JS1\_D03\_01523" 13432 "s59E5H2" 0.996289 "putative multidrug resistance ABC transporter ATP-binding/permease protein YheH"  
"JS1\_D03\_01523" 13432 "s63E6H2" 0.4531345 "putative multidrug resistance ABC transporter ATP-binding/permease protein YheH"  
"JS1\_D03\_01524" 13433 "s59E13H2" 0 "Transposase IS200 like protein"  
"JS1\_D03\_01524" 13433 "s59E25H2" 0 "Transposase IS200 like protein"  
"JS1\_D03\_01524" 13433 "s59E5H2" 0.04369679 "Transposase IS200 like protein"  
"JS1\_D03\_01524" 13433 "s63E6H2" 0.01999107 "Transposase IS200 like protein"

"JS1\_D03\_01525" 13434 "s59E13H2" 0.02738401 "Dimethyl sulfoxide reductase DmsA precursor"  
"JS1\_D03\_01525" 13434 "s59E25H2" 0 "Dimethyl sulfoxide reductase DmsA precursor"  
"JS1\_D03\_01525" 13434 "s59E5H2" 0.03644647 "Dimethyl sulfoxide reductase DmsA precursor"  
"JS1\_D03\_01525" 13434 "s63E6H2" 0.4497627 "Dimethyl sulfoxide reductase DmsA precursor"  
"JS1\_D03\_01526" 13435 "s59E13H2" 0.3684671 "Putative NAD(P)H nitroreductase"  
"JS1\_D03\_01526" 13435 "s59E25H2" 0 "Putative NAD(P)H nitroreductase"  
"JS1\_D03\_01526" 13435 "s59E5H2" 0.1463234 "Putative NAD(P)H nitroreductase"  
"JS1\_D03\_01526" 13435 "s63E6H2" 1.013685 "Putative NAD(P)H nitroreductase"  
"JS1\_D03\_01527" 13436 "s59E13H2" 0.0002041474 "Acylamino-acid-releasing enzyme"  
"JS1\_D03\_01527" 13436 "s59E25H2" 0 "Acylamino-acid-releasing enzyme"  
"JS1\_D03\_01527" 13436 "s59E5H2" 0.01557448 "Acylamino-acid-releasing enzyme"  
"JS1\_D03\_01527" 13436 "s63E6H2" 0.7672841 "Acylamino-acid-releasing enzyme"  
"JS1\_D03\_01528" 13437 "s59E13H2" 0 "Oligopeptide transport system permease protein OppC"  
"JS1\_D03\_01528" 13437 "s59E25H2" 0 "Oligopeptide transport system permease protein OppC"  
"JS1\_D03\_01528" 13437 "s59E5H2" 0.009165644 "Oligopeptide transport system permease protein OppC"  
"JS1\_D03\_01528" 13437 "s63E6H2" 1.093119 "Oligopeptide transport system permease protein OppC"  
"JS1\_D03\_01529" 13438 "s59E13H2" 0 "Dipeptide transport system permease protein DppB"  
"JS1\_D03\_01529" 13438 "s59E25H2" 0 "Dipeptide transport system permease protein DppB"  
"JS1\_D03\_01529" 13438 "s59E5H2" 0 "Dipeptide transport system permease protein DppB"  
"JS1\_D03\_01529" 13438 "s63E6H2" 2.400083 "Dipeptide transport system permease protein DppB"  
"JS1\_D03\_01530" 13439 "s59E13H2" 0 "Nickel-binding periplasmic protein precursor"  
"JS1\_D03\_01530" 13439 "s59E25H2" 0 "Nickel-binding periplasmic protein precursor"  
"JS1\_D03\_01530" 13439 "s59E5H2" 0.008300125 "Nickel-binding periplasmic protein precursor"  
"JS1\_D03\_01530" 13439 "s63E6H2" 5.149231 "Nickel-binding periplasmic protein precursor"  
"JS1\_D03\_01531" 13440 "s59E13H2" 0.1355406 "spermidine synthase"  
"JS1\_D03\_01531" 13440 "s59E25H2" 0.1364247 "spermidine synthase"  
"JS1\_D03\_01531" 13440 "s59E5H2" 0.2599652 "spermidine synthase"  
"JS1\_D03\_01531" 13440 "s63E6H2" 2.436128 "spermidine synthase"  
"JS1\_D03\_01532" 13441 "s59E13H2" 0 "Multiple sugar-binding protein precursor"  
"JS1\_D03\_01532" 13441 "s59E25H2" 0 "Multiple sugar-binding protein precursor"  
"JS1\_D03\_01532" 13441 "s59E5H2" 0 "Multiple sugar-binding protein precursor"  
"JS1\_D03\_01532" 13441 "s63E6H2" 0.00234261 "Multiple sugar-binding protein precursor"  
"JS1\_D03\_01533" 13442 "s59E13H2" 0 "Lactose transport system permease protein LacF"  
"JS1\_D03\_01533" 13442 "s59E25H2" 0 "Lactose transport system permease protein LacF"  
"JS1\_D03\_01533" 13442 "s59E5H2" 0 "Lactose transport system permease protein LacF"  
"JS1\_D03\_01533" 13442 "s63E6H2" 0 "Lactose transport system permease protein LacF"  
"JS1\_D03\_01534" 13443 "s59E13H2" 0 "L-arabinose transport system permease protein AraQ"  
"JS1\_D03\_01534" 13443 "s59E25H2" 0 "L-arabinose transport system permease protein AraQ"  
"JS1\_D03\_01534" 13443 "s59E5H2" 0 "L-arabinose transport system permease protein AraQ"  
"JS1\_D03\_01534" 13443 "s63E6H2" 0 "L-arabinose transport system permease protein AraQ"  
"JS1\_D03\_01535" 13444 "s59E13H2" 0 "hypothetical protein"  
"JS1\_D03\_01535" 13444 "s59E25H2" 0 "hypothetical protein"  
"JS1\_D03\_01535" 13444 "s59E5H2" 0 "hypothetical protein"  
"JS1\_D03\_01535" 13444 "s63E6H2" 0.02533037 "hypothetical protein"  
"JS1\_D03\_01536" 13445 "s59E13H2" 2.198081 "Vegetative catalase"  
"JS1\_D03\_01536" 13445 "s59E25H2" 0.162585 "Vegetative catalase"  
"JS1\_D03\_01536" 13445 "s59E5H2" 0.30456 "Vegetative catalase"



"JS1\_D03\_01536" 13445 "s63E6H2" 1.694922 "Vegetative catalase"  
"JS1\_D03\_01537" 13446 "s59E13H2" 0.1297514 "Beta-1,4-mannooligosaccharide phosphorylase"  
"JS1\_D03\_01537" 13446 "s59E25H2" 0 "Beta-1,4-mannooligosaccharide phosphorylase"  
"JS1\_D03\_01537" 13446 "s59E5H2" 1.087487 "Beta-1,4-mannooligosaccharide phosphorylase"  
"JS1\_D03\_01537" 13446 "s63E6H2" 2.772336 "Beta-1,4-mannooligosaccharide phosphorylase"  
"JS1\_D03\_01538" 13447 "s59E13H2" 0.1082122 "hypothetical protein"  
"JS1\_D03\_01538" 13447 "s59E25H2" 0 "hypothetical protein"  
"JS1\_D03\_01538" 13447 "s59E5H2" 0.8862905 "hypothetical protein"  
"JS1\_D03\_01538" 13447 "s63E6H2" 3.248355 "hypothetical protein"  
"JS1\_D03\_01539" 13448 "s59E13H2" 0.2709087 "Glycosyl transferases group 1"  
"JS1\_D03\_01539" 13448 "s59E25H2" 0 "Glycosyl transferases group 1"  
"JS1\_D03\_01539" 13448 "s59E5H2" 0.7747857 "Glycosyl transferases group 1"  
"JS1\_D03\_01539" 13448 "s63E6H2" 2.28213 "Glycosyl transferases group 1"  
"JS1\_D03\_01540" 13449 "s59E13H2" 0.4606656 "hypothetical protein"  
"JS1\_D03\_01540" 13449 "s59E25H2" 0 "hypothetical protein"  
"JS1\_D03\_01540" 13449 "s59E5H2" 0.1452613 "hypothetical protein"  
"JS1\_D03\_01540" 13449 "s63E6H2" 1.388124 "hypothetical protein"  
"JS1\_D03\_01541" 13450 "s59E13H2" 0.5584756 "Cyclic di-GMP phosphodiesterase response regulator RpfG"  
"JS1\_D03\_01541" 13450 "s59E25H2" 0 "Cyclic di-GMP phosphodiesterase response regulator RpfG"  
"JS1\_D03\_01541" 13450 "s59E5H2" 0.1018864 "Cyclic di-GMP phosphodiesterase response regulator RpfG"  
"JS1\_D03\_01541" 13450 "s63E6H2" 2.325633 "Cyclic di-GMP phosphodiesterase response regulator RpfG"  
"JS1\_D03\_01542" 13451 "s59E13H2" 0 "hypothetical protein"  
"JS1\_D03\_01542" 13451 "s59E25H2" 0 "hypothetical protein"  
"JS1\_D03\_01542" 13451 "s59E5H2" 0.1162046 "hypothetical protein"  
"JS1\_D03\_01542" 13451 "s63E6H2" 0.2206659 "hypothetical protein"  
"JS1\_D03\_01543" 13452 "s59E13H2" 0.04014276 "2-hydroxyglutaryl-CoA dehydratase, D-component"  
"JS1\_D03\_01543" 13452 "s59E25H2" 0 "2-hydroxyglutaryl-CoA dehydratase, D-component"  
"JS1\_D03\_01543" 13452 "s59E5H2" 0.6156463 "2-hydroxyglutaryl-CoA dehydratase, D-component"  
"JS1\_D03\_01543" 13452 "s63E6H2" 1.762952 "2-hydroxyglutaryl-CoA dehydratase, D-component"  
"JS1\_D03\_01544" 13453 "s59E13H2" 0.03867619 "R-phenyllactate dehydratase activator"  
"JS1\_D03\_01544" 13453 "s59E25H2" 0 "R-phenyllactate dehydratase activator"  
"JS1\_D03\_01544" 13453 "s59E5H2" 0.4539777 "R-phenyllactate dehydratase activator"  
"JS1\_D03\_01544" 13453 "s63E6H2" 0.8288252 "R-phenyllactate dehydratase activator"  
"JS1\_D03\_01546" 13455 "s59E13H2" 0 "hypothetical protein"  
"JS1\_D03\_01546" 13455 "s59E25H2" 0 "hypothetical protein"  
"JS1\_D03\_01546" 13455 "s59E5H2" 0 "hypothetical protein"  
"JS1\_D03\_01546" 13455 "s63E6H2" 0.05327172 "hypothetical protein"  
"JS1\_D03\_01547" 13456 "s59E13H2" 0.8837068 "Iron-sulfur flavoprotein"  
"JS1\_D03\_01547" 13456 "s59E25H2" 0 "Iron-sulfur flavoprotein"  
"JS1\_D03\_01547" 13456 "s59E5H2" 0.2230645 "Iron-sulfur flavoprotein"  
"JS1\_D03\_01547" 13456 "s63E6H2" 0.9410469 "Iron-sulfur flavoprotein"  
"JS1\_D03\_01548" 13457 "s59E13H2" 0 "hypothetical protein"  
"JS1\_D03\_01548" 13457 "s59E25H2" 0 "hypothetical protein"  
"JS1\_D03\_01548" 13457 "s59E5H2" 0.5758407 "hypothetical protein"  
"JS1\_D03\_01548" 13457 "s63E6H2" 0.1489291 "hypothetical protein"  
"JS1\_D03\_01549" 13458 "s59E13H2" 0.007767078 "hypothetical protein"  
"JS1\_D03\_01549" 13458 "s59E25H2" 0 "hypothetical protein"

"JS1\_D03\_01549" 13458 "s59E5H2" 0.01526605 "hypothetical protein"  
"JS1\_D03\_01549" 13458 "s63E6H2" 0.06540302 "hypothetical protein"  
"JS1\_D03\_01550" 13459 "s59E13H2" 0 "putative diguanylate cyclase AdrA"  
"JS1\_D03\_01550" 13459 "s59E25H2" 0 "putative diguanylate cyclase AdrA"  
"JS1\_D03\_01550" 13459 "s59E5H2" 0.01480367 "putative diguanylate cyclase AdrA"  
"JS1\_D03\_01550" 13459 "s63E6H2" 0 "putative diguanylate cyclase AdrA"  
"JS1\_D03\_01551" 13460 "s59E13H2" 0.7674993 "Glutamine cyclotransferase"  
"JS1\_D03\_01551" 13460 "s59E25H2" 0 "Glutamine cyclotransferase"  
"JS1\_D03\_01551" 13460 "s59E5H2" 0.02452152 "Glutamine cyclotransferase"  
"JS1\_D03\_01551" 13460 "s63E6H2" 0.2842355 "Glutamine cyclotransferase"  
"JS1\_D03\_01552" 13461 "s59E13H2" 1.762401 "Glutamine cyclotransferase"  
"JS1\_D03\_01552" 13461 "s59E25H2" 0 "Glutamine cyclotransferase"  
"JS1\_D03\_01552" 13461 "s59E5H2" 0.03648795 "Glutamine cyclotransferase"  
"JS1\_D03\_01552" 13461 "s63E6H2" 0.3436098 "Glutamine cyclotransferase"  
"JS1\_D03\_01553" 13462 "s59E13H2" 0 "AsnC family protein"  
"JS1\_D03\_01553" 13462 "s59E25H2" 0 "AsnC family protein"  
"JS1\_D03\_01553" 13462 "s59E5H2" 0 "AsnC family protein"  
"JS1\_D03\_01553" 13462 "s63E6H2" 0.01791791 "AsnC family protein"  
"JS1\_D03\_01554" 13463 "s59E13H2" 0.003617202 "tRNA dimethylallyltransferase"  
"JS1\_D03\_01554" 13463 "s59E25H2" 0 "tRNA dimethylallyltransferase"  
"JS1\_D03\_01554" 13463 "s59E5H2" 0.1105066 "tRNA dimethylallyltransferase"  
"JS1\_D03\_01554" 13463 "s63E6H2" 0.02030919 "tRNA dimethylallyltransferase"  
"JS1\_D03\_01555" 13464 "s59E13H2" 0.00129565 "(Dimethylallyl)adenosine tRNA methylthiotransferase MiaB"  
"JS1\_D03\_01555" 13464 "s59E25H2" 0 "(Dimethylallyl)adenosine tRNA methylthiotransferase MiaB"  
"JS1\_D03\_01555" 13464 "s59E5H2" 0.01195707 "(Dimethylallyl)adenosine tRNA methylthiotransferase MiaB"  
"JS1\_D03\_01555" 13464 "s63E6H2" 0.03595767 "(Dimethylallyl)adenosine tRNA methylthiotransferase MiaB"  
"JS1\_D03\_01556" 13465 "s59E13H2" 0.02345392 "Ribonuclease Y"  
"JS1\_D03\_01556" 13465 "s59E25H2" 0 "Ribonuclease Y"  
"JS1\_D03\_01556" 13465 "s59E5H2" 0.07602819 "Ribonuclease Y"  
"JS1\_D03\_01556" 13465 "s63E6H2" 0.09125524 "Ribonuclease Y"  
"JS1\_D03\_01557" 13466 "s59E13H2" 0 "recombination regulator RecX"  
"JS1\_D03\_01557" 13466 "s59E25H2" 0 "recombination regulator RecX"  
"JS1\_D03\_01557" 13466 "s59E5H2" 0 "recombination regulator RecX"  
"JS1\_D03\_01557" 13466 "s63E6H2" 0 "recombination regulator RecX"  
"JS1\_D03\_01558" 13467 "s59E13H2" 0.01278181 "DNA repair and recombination protein RadA"  
"JS1\_D03\_01558" 13467 "s59E25H2" 0 "DNA repair and recombination protein RadA"  
"JS1\_D03\_01558" 13467 "s59E5H2" 0.1863188 "DNA repair and recombination protein RadA"  
"JS1\_D03\_01558" 13467 "s63E6H2" 0.2897969 "DNA repair and recombination protein RadA"  
"JS1\_D03\_01559" 13468 "s59E13H2" 0 "2'-5'-RNA ligase"  
"JS1\_D03\_01559" 13468 "s59E25H2" 0 "2'-5'-RNA ligase"  
"JS1\_D03\_01559" 13468 "s59E5H2" 0 "2'-5'-RNA ligase"  
"JS1\_D03\_01559" 13468 "s63E6H2" 0.09337492 "2'-5'-RNA ligase"  
"JS1\_D03\_01560" 13469 "s59E13H2" 0 "hypothetical protein"  
"JS1\_D03\_01560" 13469 "s59E25H2" 0 "hypothetical protein"  
"JS1\_D03\_01560" 13469 "s59E5H2" 0 "hypothetical protein"  
"JS1\_D03\_01560" 13469 "s63E6H2" 0.06208726 "hypothetical protein"  
"JS1\_D03\_01561" 13470 "s59E13H2" 0.199537 "Helix-turn-helix domain protein"

"JS1\_D03\_01561" 13470 "s59E25H2" 0 "Helix-turn-helix domain protein"  
"JS1\_D03\_01561" 13470 "s59E5H2" 0.01664405 "Helix-turn-helix domain protein"  
"JS1\_D03\_01561" 13470 "s63E6H2" 0.1318064 "Helix-turn-helix domain protein"  
"JS1\_D03\_01562" 13471 "s59E13H2" 0.7290952 "Branched-chain amino acid transport system / permease component"  
"JS1\_D03\_01562" 13471 "s59E25H2" 0 "Branched-chain amino acid transport system / permease component"  
"JS1\_D03\_01562" 13471 "s59E5H2" 0.03190881 "Branched-chain amino acid transport system / permease component"  
"JS1\_D03\_01562" 13471 "s63E6H2" 0.3429491 "Branched-chain amino acid transport system / permease component"  
"JS1\_D03\_01563" 13472 "s59E13H2" 0.2918971 "hypothetical protein"  
"JS1\_D03\_01563" 13472 "s59E25H2" 0 "hypothetical protein"  
"JS1\_D03\_01563" 13472 "s59E5H2" 0 "hypothetical protein"  
"JS1\_D03\_01563" 13472 "s63E6H2" 0.1399103 "hypothetical protein"  
"JS1\_D03\_01564" 13473 "s59E13H2" 0.03351482 "tRNA-specific adenosine deaminase"  
"JS1\_D03\_01564" 13473 "s59E25H2" 0 "tRNA-specific adenosine deaminase"  
"JS1\_D03\_01564" 13473 "s59E5H2" 0 "tRNA-specific adenosine deaminase"  
"JS1\_D03\_01564" 13473 "s63E6H2" 0.5275182 "tRNA-specific adenosine deaminase"  
"JS1\_D03\_01565" 13474 "s59E13H2" 0.512512 "tol-pal system protein YbgF"  
"JS1\_D03\_01565" 13474 "s59E25H2" 0 "tol-pal system protein YbgF"  
"JS1\_D03\_01565" 13474 "s59E5H2" 0.1108312 "tol-pal system protein YbgF"  
"JS1\_D03\_01565" 13474 "s63E6H2" 0.5298286 "tol-pal system protein YbgF"  
"JS1\_D03\_01566" 13475 "s59E13H2" 0.06297229 "ECF RNA polymerase sigma factor SigW"  
"JS1\_D03\_01566" 13475 "s59E25H2" 0 "ECF RNA polymerase sigma factor SigW"  
"JS1\_D03\_01566" 13475 "s59E5H2" 0.03167212 "ECF RNA polymerase sigma factor SigW"  
"JS1\_D03\_01566" 13475 "s63E6H2" 0.1694399 "ECF RNA polymerase sigma factor SigW"  
"JS1\_D03\_01567" 13476 "s59E13H2" 0.01313507 "Anti-sigma-W factor RsiW"  
"JS1\_D03\_01567" 13476 "s59E25H2" 0 "Anti-sigma-W factor RsiW"  
"JS1\_D03\_01567" 13476 "s59E5H2" 0.06585444 "Anti-sigma-W factor RsiW"  
"JS1\_D03\_01567" 13476 "s63E6H2" 0.005898972 "Anti-sigma-W factor RsiW"  
"JS1\_D03\_01568" 13477 "s59E13H2" 0.003694691 "hypothetical protein"  
"JS1\_D03\_01568" 13477 "s59E25H2" 0 "hypothetical protein"  
"JS1\_D03\_01568" 13477 "s59E5H2" 0.02274872 "hypothetical protein"  
"JS1\_D03\_01568" 13477 "s63E6H2" 0.01077276 "hypothetical protein"  
"JS1\_D03\_01569" 13478 "s59E13H2" 0.1630278 "hypothetical protein"  
"JS1\_D03\_01569" 13478 "s59E25H2" 0 "hypothetical protein"  
"JS1\_D03\_01569" 13478 "s59E5H2" 0.004994524 "hypothetical protein"  
"JS1\_D03\_01569" 13478 "s63E6H2" 0.02311972 "hypothetical protein"  
"JS1\_D03\_01570" 13479 "s59E13H2" 0.001733858 "hypothetical protein"  
"JS1\_D03\_01570" 13479 "s59E25H2" 0 "hypothetical protein"  
"JS1\_D03\_01570" 13479 "s59E5H2" 0 "hypothetical protein"  
"JS1\_D03\_01570" 13479 "s63E6H2" 0.02172685 "hypothetical protein"  
"JS1\_D03\_01571" 13480 "s59E13H2" 0.364366 "hypothetical protein"  
"JS1\_D03\_01571" 13480 "s59E25H2" 0 "hypothetical protein"  
"JS1\_D03\_01571" 13480 "s59E5H2" 0 "hypothetical protein"  
"JS1\_D03\_01571" 13480 "s63E6H2" 0.06170356 "hypothetical protein"  
"JS1\_D03\_01572" 13481 "s59E13H2" 0 "hypothetical protein"  
"JS1\_D03\_01572" 13481 "s59E25H2" 0 "hypothetical protein"  
"JS1\_D03\_01572" 13481 "s59E5H2" 0 "hypothetical protein"  
"JS1\_D03\_01572" 13481 "s63E6H2" 0.0274533 "hypothetical protein"

"JS1\_D03\_01573" 13482 "s59E13H2" 0 "hypothetical protein"  
"JS1\_D03\_01573" 13482 "s59E25H2" 0 "hypothetical protein"  
"JS1\_D03\_01573" 13482 "s59E5H2" 0.008425835 "hypothetical protein"  
"JS1\_D03\_01573" 13482 "s63E6H2" 0.01571816 "hypothetical protein"  
"JS1\_D03\_01574" 13483 "s59E13H2" 0 "hypothetical protein"  
"JS1\_D03\_01574" 13483 "s59E25H2" 0 "hypothetical protein"  
"JS1\_D03\_01574" 13483 "s59E5H2" 0.007755469 "hypothetical protein"  
"JS1\_D03\_01574" 13483 "s63E6H2" 0.1466621 "hypothetical protein"  
"JS1\_D03\_01575" 13484 "s59E13H2" 0.003680465 "hypothetical protein"  
"JS1\_D03\_01575" 13484 "s59E25H2" 0 "hypothetical protein"  
"JS1\_D03\_01575" 13484 "s59E5H2" 0 "hypothetical protein"  
"JS1\_D03\_01575" 13484 "s63E6H2" 0.01402913 "hypothetical protein"  
"JS1\_D03\_01577" 13486 "s59E13H2" 0.003370637 "Soluble hydrogenase 42 kDa subunit"  
"JS1\_D03\_01577" 13486 "s59E25H2" 0 "Soluble hydrogenase 42 kDa subunit"  
"JS1\_D03\_01577" 13486 "s59E5H2" 0.01123166 "Soluble hydrogenase 42 kDa subunit"  
"JS1\_D03\_01577" 13486 "s63E6H2" 0.3436076 "Soluble hydrogenase 42 kDa subunit"  
"JS1\_D03\_01578" 13487 "s59E13H2" 0.002364442 "D-3-phosphoglycerate dehydrogenase"  
"JS1\_D03\_01578" 13487 "s59E25H2" 0 "D-3-phosphoglycerate dehydrogenase"  
"JS1\_D03\_01578" 13487 "s59E5H2" 0.300889 "D-3-phosphoglycerate dehydrogenase"  
"JS1\_D03\_01578" 13487 "s63E6H2" 0.3527927 "D-3-phosphoglycerate dehydrogenase"  
"JS1\_D03\_01579" 13488 "s59E13H2" 0.03000682 "ParB-like nuclease domain protein"  
"JS1\_D03\_01579" 13488 "s59E25H2" 0 "ParB-like nuclease domain protein"  
"JS1\_D03\_01579" 13488 "s59E5H2" 0.1058646 "ParB-like nuclease domain protein"  
"JS1\_D03\_01579" 13488 "s63E6H2" 1.229589 "ParB-like nuclease domain protein"  
"JS1\_D03\_01580" 13489 "s59E13H2" 0.02778347 "Bifunctional homocysteine S-methyltransferase/5,10-methylenetetrahydrofolate reductase"  
"JS1\_D03\_01580" 13489 "s59E25H2" 0 "Bifunctional homocysteine S-methyltransferase/5,10-methylenetetrahydrofolate reductase"  
"JS1\_D03\_01580" 13489 "s59E5H2" 0.1796528 "Bifunctional homocysteine S-methyltransferase/5,10-methylenetetrahydrofolate reductase"  
"JS1\_D03\_01580" 13489 "s63E6H2" 0.05616203 "Bifunctional homocysteine S-methyltransferase/5,10-methylenetetrahydrofolate reductase"  
"JS1\_D03\_01582" 13491 "s59E13H2" 0.005534876 "putative transcriptional regulatory protein pdtaR"  
"JS1\_D03\_01582" 13491 "s59E25H2" 0 "putative transcriptional regulatory protein pdtaR"  
"JS1\_D03\_01582" 13491 "s59E5H2" 0.005518888 "putative transcriptional regulatory protein pdtaR"  
"JS1\_D03\_01582" 13491 "s63E6H2" 0.1288378 "putative transcriptional regulatory protein pdtaR"  
"JS1\_D03\_01583" 13492 "s59E13H2" 0.01239886 "Glutamate dehydrogenase"  
"JS1\_D03\_01583" 13492 "s59E25H2" 0 "Glutamate dehydrogenase"  
"JS1\_D03\_01583" 13492 "s59E5H2" 0 "Glutamate dehydrogenase"  
"JS1\_D03\_01583" 13492 "s63E6H2" 0.09884312 "Glutamate dehydrogenase"  
"JS1\_D03\_01584" 13493 "s59E13H2" 0.008719051 "(R)-citramalate synthase CimA"  
"JS1\_D03\_01584" 13493 "s59E25H2" 0 "(R)-citramalate synthase CimA"  
"JS1\_D03\_01584" 13493 "s59E5H2" 0 "(R)-citramalate synthase CimA"  
"JS1\_D03\_01584" 13493 "s63E6H2" 0.1774199 "(R)-citramalate synthase CimA"  
"JS1\_D03\_01585" 13494 "s59E13H2" 0 "Methanogen homoaconitase large subunit"  
"JS1\_D03\_01585" 13494 "s59E25H2" 0 "Methanogen homoaconitase large subunit"  
"JS1\_D03\_01585" 13494 "s59E5H2" 0 "Methanogen homoaconitase large subunit"  
"JS1\_D03\_01585" 13494 "s63E6H2" 0.1366348 "Methanogen homoaconitase large subunit"  
"JS1\_D03\_01586" 13495 "s59E13H2" 0 "Isocitrate dehydrogenase [NADP]"  
"JS1\_D03\_01586" 13495 "s59E25H2" 0 "Isocitrate dehydrogenase [NADP]"  
"JS1\_D03\_01586" 13495 "s59E5H2" 0 "Isocitrate dehydrogenase [NADP]"

"JS1\_D03\_01586" 13495 "s63E6H2" 0.09847005 "Isocitrate dehydrogenase [NADP]"  
"JS1\_D03\_01587" 13496 "s59E13H2" 0.0115801 "Dihydroxy-acid dehydratase"  
"JS1\_D03\_01587" 13496 "s59E25H2" 0 "Dihydroxy-acid dehydratase"  
"JS1\_D03\_01587" 13496 "s59E5H2" 0.1473785 "Dihydroxy-acid dehydratase"  
"JS1\_D03\_01587" 13496 "s63E6H2" 0.1757654 "Dihydroxy-acid dehydratase"  
"JS1\_D03\_01590" 13499 "s59E13H2" 0.02438828 "Acetolactate synthase large subunit"  
"JS1\_D03\_01590" 13499 "s59E25H2" 0 "Acetolactate synthase large subunit"  
"JS1\_D03\_01590" 13499 "s59E5H2" 0.7811513 "Acetolactate synthase large subunit"  
"JS1\_D03\_01590" 13499 "s63E6H2" 0.4769241 "Acetolactate synthase large subunit"  
"JS1\_D03\_01591" 13500 "s59E13H2" 0.006494521 "Putative acetolactate synthase small subunit"  
"JS1\_D03\_01591" 13500 "s59E25H2" 0 "Putative acetolactate synthase small subunit"  
"JS1\_D03\_01591" 13500 "s59E5H2" 0.7485031 "Putative acetolactate synthase small subunit"  
"JS1\_D03\_01591" 13500 "s63E6H2" 0.4624635 "Putative acetolactate synthase small subunit"  
"JS1\_D03\_01592" 13501 "s59E13H2" 0.00377629 "Ketol-acid reductoisomerase"  
"JS1\_D03\_01592" 13501 "s59E25H2" 0 "Ketol-acid reductoisomerase"  
"JS1\_D03\_01592" 13501 "s59E5H2" 0.8925837 "Ketol-acid reductoisomerase"  
"JS1\_D03\_01592" 13501 "s63E6H2" 0.3442807 "Ketol-acid reductoisomerase"  
"JS1\_D03\_01593" 13502 "s59E13H2" 0.0227876 "Prephenate dehydratase"  
"JS1\_D03\_01593" 13502 "s59E25H2" 0 "Prephenate dehydratase"  
"JS1\_D03\_01593" 13502 "s59E5H2" 1.827015 "Prephenate dehydratase"  
"JS1\_D03\_01593" 13502 "s63E6H2" 0.6879434 "Prephenate dehydratase"  
"JS1\_D03\_01594" 13503 "s59E13H2" 0.117241 "2-isopropylmalate synthase"  
"JS1\_D03\_01594" 13503 "s59E25H2" 0 "2-isopropylmalate synthase"  
"JS1\_D03\_01594" 13503 "s59E5H2" 1.725847 "2-isopropylmalate synthase"  
"JS1\_D03\_01594" 13503 "s63E6H2" 0.8879153 "2-isopropylmalate synthase"  
"JS1\_D03\_01595" 13504 "s59E13H2" 0.1381514 "(R)-citramalate synthase CimA"  
"JS1\_D03\_01595" 13504 "s59E25H2" 0 "(R)-citramalate synthase CimA"  
"JS1\_D03\_01595" 13504 "s59E5H2" 2.106369 "(R)-citramalate synthase CimA"  
"JS1\_D03\_01595" 13504 "s63E6H2" 0.6692568 "(R)-citramalate synthase CimA"  
"JS1\_D03\_01596" 13505 "s59E13H2" 0.01975844 "hypothetical protein"  
"JS1\_D03\_01596" 13505 "s59E25H2" 0 "hypothetical protein"  
"JS1\_D03\_01596" 13505 "s59E5H2" 1.96687 "hypothetical protein"  
"JS1\_D03\_01596" 13505 "s63E6H2" 0.5173889 "hypothetical protein"  
"JS1\_D03\_01597" 13506 "s59E13H2" 0.1509261 "Ferredoxin"  
"JS1\_D03\_01597" 13506 "s59E25H2" 0 "Ferredoxin"  
"JS1\_D03\_01597" 13506 "s59E5H2" 2.715267 "Ferredoxin"  
"JS1\_D03\_01597" 13506 "s63E6H2" 0.8847899 "Ferredoxin"  
"JS1\_D03\_01598" 13507 "s59E13H2" 0.2289988 "hypothetical protein"  
"JS1\_D03\_01598" 13507 "s59E25H2" 0 "hypothetical protein"  
"JS1\_D03\_01598" 13507 "s59E5H2" 2.559839 "hypothetical protein"  
"JS1\_D03\_01598" 13507 "s63E6H2" 1.069228 "hypothetical protein"  
"JS1\_D03\_01599" 13508 "s59E13H2" 0.0161018 "Pyrroline-5-carboxylate reductase"  
"JS1\_D03\_01599" 13508 "s59E25H2" 0 "Pyrroline-5-carboxylate reductase"  
"JS1\_D03\_01599" 13508 "s59E5H2" 1.480113 "Pyrroline-5-carboxylate reductase"  
"JS1\_D03\_01599" 13508 "s63E6H2" 0.5780077 "Pyrroline-5-carboxylate reductase"  
"JS1\_D03\_01600" 13509 "s59E13H2" 0.2208277 "2,3-dimethylmalate dehydratase large subunit"  
"JS1\_D03\_01600" 13509 "s59E25H2" 0.6642914 "2,3-dimethylmalate dehydratase large subunit"

"JS1\_D03\_01600" 13509 "s59E5H2" 0.802577 "2,3-dimethylmalate dehydratase large subunit"  
"JS1\_D03\_01600" 13509 "s63E6H2" 1.422486 "2,3-dimethylmalate dehydratase large subunit"  
"JS1\_D03\_01601" 13510 "s59E13H2" 0.03135537 "2,3-dimethylmalate dehydratase small subunit"  
"JS1\_D03\_01601" 13510 "s59E25H2" 0.1031746 "2,3-dimethylmalate dehydratase small subunit"  
"JS1\_D03\_01601" 13510 "s59E5H2" 0.4501329 "2,3-dimethylmalate dehydratase small subunit"  
"JS1\_D03\_01601" 13510 "s63E6H2" 1.041935 "2,3-dimethylmalate dehydratase small subunit"  
"JS1\_D03\_01602" 13511 "s59E13H2" 0 "D-malate dehydrogenase [decarboxylating]"  
"JS1\_D03\_01602" 13511 "s59E25H2" 0 "D-malate dehydrogenase [decarboxylating]"  
"JS1\_D03\_01602" 13511 "s59E5H2" 0.03131975 "D-malate dehydrogenase [decarboxylating]"  
"JS1\_D03\_01602" 13511 "s63E6H2" 0.1904522 "D-malate dehydrogenase [decarboxylating]"  
"JS1\_D03\_01603" 13512 "s59E13H2" 0 "L-2-hydroxyglutarate oxidase LhgO"  
"JS1\_D03\_01603" 13512 "s59E25H2" 0 "L-2-hydroxyglutarate oxidase LhgO"  
"JS1\_D03\_01603" 13512 "s59E5H2" 0.02005164 "L-2-hydroxyglutarate oxidase LhgO"  
"JS1\_D03\_01603" 13512 "s63E6H2" 0.07705287 "L-2-hydroxyglutarate oxidase LhgO"  
"JS1\_D03\_01604" 13513 "s59E13H2" 0.002809315 "Thioredoxin reductase"  
"JS1\_D03\_01604" 13513 "s59E25H2" 0 "Thioredoxin reductase"  
"JS1\_D03\_01604" 13513 "s59E5H2" 0.009861151 "Thioredoxin reductase"  
"JS1\_D03\_01604" 13513 "s63E6H2" 0.02672817 "Thioredoxin reductase"  
"JS1\_D03\_01605" 13514 "s59E13H2" 0.003948748 "hypothetical protein"  
"JS1\_D03\_01605" 13514 "s59E25H2" 0 "hypothetical protein"  
"JS1\_D03\_01605" 13514 "s59E5H2" 0.01595842 "hypothetical protein"  
"JS1\_D03\_01605" 13514 "s63E6H2" 0.06837618 "hypothetical protein"  
"JS1\_D03\_01607" 13516 "s59E13H2" 0.07130433 "Bifunctional protein PyrR"  
"JS1\_D03\_01607" 13516 "s59E25H2" 0 "Bifunctional protein PyrR"  
"JS1\_D03\_01607" 13516 "s59E5H2" 0.06050608 "Bifunctional protein PyrR"  
"JS1\_D03\_01607" 13516 "s63E6H2" 0.1038352 "Bifunctional protein PyrR"  
"JS1\_D03\_01608" 13517 "s59E13H2" 0.0007701127 "Dihydroorotate dehydrogenase B (NAD(+) ), electron transfer subunit"  
"JS1\_D03\_01608" 13517 "s59E25H2" 0 "Dihydroorotate dehydrogenase B (NAD(+) ), electron transfer subunit"  
"JS1\_D03\_01608" 13517 "s59E5H2" 0 "Dihydroorotate dehydrogenase B (NAD(+) ), electron transfer subunit"  
"JS1\_D03\_01608" 13517 "s63E6H2" 0.01256673 "Dihydroorotate dehydrogenase B (NAD(+) ), electron transfer subunit"  
"JS1\_D03\_01609" 13518 "s59E13H2" 0.0124378 "Dihydroorotate dehydrogenase B (NAD(+) ), catalytic subunit"  
"JS1\_D03\_01609" 13518 "s59E25H2" 0 "Dihydroorotate dehydrogenase B (NAD(+) ), catalytic subunit"  
"JS1\_D03\_01609" 13518 "s59E5H2" 0 "Dihydroorotate dehydrogenase B (NAD(+) ), catalytic subunit"  
"JS1\_D03\_01609" 13518 "s63E6H2" 0.02684693 "Dihydroorotate dehydrogenase B (NAD(+) ), catalytic subunit"  
"JS1\_D03\_01610" 13519 "s59E13H2" 0.0336187 "Orotidine 5'-phosphate decarboxylase"  
"JS1\_D03\_01610" 13519 "s59E25H2" 0 "Orotidine 5'-phosphate decarboxylase"  
"JS1\_D03\_01610" 13519 "s59E5H2" 1.256208 "Orotidine 5'-phosphate decarboxylase"  
"JS1\_D03\_01610" 13519 "s63E6H2" 0.02055738 "Orotidine 5'-phosphate decarboxylase"  
"JS1\_D03\_01611" 13520 "s59E13H2" 0.00126033 "Orotate phosphoribosyltransferase"  
"JS1\_D03\_01611" 13520 "s59E25H2" 0 "Orotate phosphoribosyltransferase"  
"JS1\_D03\_01611" 13520 "s59E5H2" 0.04470004 "Orotate phosphoribosyltransferase"  
"JS1\_D03\_01611" 13520 "s63E6H2" 0.0385853 "Orotate phosphoribosyltransferase"  
"JS1\_D03\_01614" 13523 "s59E13H2" 0 "hypothetical protein"  
"JS1\_D03\_01614" 13523 "s59E25H2" 0 "hypothetical protein"  
"JS1\_D03\_01614" 13523 "s59E5H2" 0.05711192 "hypothetical protein"  
"JS1\_D03\_01614" 13523 "s63E6H2" 0.05418382 "hypothetical protein"  
"JS1\_D03\_01615" 13524 "s59E13H2" 0.05324438 "RNA polymerase sigma-H factor"

"JS1\_D03\_01615" 13524 "s59E25H2" 0 "RNA polymerase sigma-H factor"  
"JS1\_D03\_01615" 13524 "s59E5H2" 0.05527883 "RNA polymerase sigma-H factor"  
"JS1\_D03\_01615" 13524 "s63E6H2" 0.1232785 "RNA polymerase sigma-H factor"  
"JS1\_D03\_01616" 13525 "s59E13H2" 0.01700256 "Cysteine--tRNA ligase"  
"JS1\_D03\_01616" 13525 "s59E25H2" 0 "Cysteine--tRNA ligase"  
"JS1\_D03\_01616" 13525 "s59E5H2" 0.03043975 "Cysteine--tRNA ligase"  
"JS1\_D03\_01616" 13525 "s63E6H2" 0.1054385 "Cysteine--tRNA ligase"  
"JS1\_D03\_01617" 13526 "s59E13H2" 0.00451959 "putative PIN and TRAM-domain containing protein precursor"  
"JS1\_D03\_01617" 13526 "s59E25H2" 0 "putative PIN and TRAM-domain containing protein precursor"  
"JS1\_D03\_01617" 13526 "s59E5H2" 0.01691784 "putative PIN and TRAM-domain containing protein precursor"  
"JS1\_D03\_01617" 13526 "s63E6H2" 0.1769154 "putative PIN and TRAM-domain containing protein precursor"  
"JS1\_D03\_01618" 13527 "s59E13H2" 0.333599 "lipoprotein Nlpl"  
"JS1\_D03\_01618" 13527 "s59E25H2" 0 "lipoprotein Nlpl"  
"JS1\_D03\_01618" 13527 "s59E5H2" 0.2504473 "lipoprotein Nlpl"  
"JS1\_D03\_01618" 13527 "s63E6H2" 0.3798905 "lipoprotein Nlpl"  
"JS1\_D03\_01619" 13528 "s59E13H2" 0.008832499 "hypothetical protein"  
"JS1\_D03\_01619" 13528 "s59E25H2" 0 "hypothetical protein"  
"JS1\_D03\_01619" 13528 "s59E5H2" 0.00141531 "hypothetical protein"  
"JS1\_D03\_01619" 13528 "s63E6H2" 0.03295361 "hypothetical protein"  
"JS1\_D03\_01620" 13529 "s59E13H2" 0.02319466 "DNA repair protein RecO"  
"JS1\_D03\_01620" 13529 "s59E25H2" 0 "DNA repair protein RecO"  
"JS1\_D03\_01620" 13529 "s59E5H2" 0.09655133 "DNA repair protein RecO"  
"JS1\_D03\_01620" 13529 "s63E6H2" 0.07794401 "DNA repair protein RecO"  
"JS1\_D03\_01621" 13530 "s59E13H2" 0.01670706 "Glycine--tRNA ligase alpha subunit"  
"JS1\_D03\_01621" 13530 "s59E25H2" 0 "Glycine--tRNA ligase alpha subunit"  
"JS1\_D03\_01621" 13530 "s59E5H2" 0.05908541 "Glycine--tRNA ligase alpha subunit"  
"JS1\_D03\_01621" 13530 "s63E6H2" 0.06870491 "Glycine--tRNA ligase alpha subunit"  
"JS1\_D03\_01626" 13535 "s59E13H2" 0 "30S ribosomal protein S12"  
"JS1\_D03\_01626" 13535 "s59E25H2" 0 "30S ribosomal protein S12"  
"JS1\_D03\_01626" 13535 "s59E5H2" 0.006819221 "30S ribosomal protein S12"  
"JS1\_D03\_01626" 13535 "s63E6H2" 0.07324096 "30S ribosomal protein S12"  
"JS1\_D03\_01627" 13536 "s59E13H2" 0 "Tripartite tricarboxylate transporter family receptor"  
"JS1\_D03\_01627" 13536 "s59E25H2" 0 "Tripartite tricarboxylate transporter family receptor"  
"JS1\_D03\_01627" 13536 "s59E5H2" 0 "Tripartite tricarboxylate transporter family receptor"  
"JS1\_D03\_01627" 13536 "s63E6H2" 0 "Tripartite tricarboxylate transporter family receptor"  
"JS1\_D03\_01628" 13537 "s59E13H2" 0 "Tripartite tricarboxylate transporter TctB family protein"  
"JS1\_D03\_01628" 13537 "s59E25H2" 0 "Tripartite tricarboxylate transporter TctB family protein"  
"JS1\_D03\_01628" 13537 "s59E5H2" 0 "Tripartite tricarboxylate transporter TctB family protein"  
"JS1\_D03\_01628" 13537 "s63E6H2" 0 "Tripartite tricarboxylate transporter TctB family protein"  
"JS1\_D03\_01629" 13538 "s59E13H2" 0 "Tripartite tricarboxylate transporter TctA family protein"  
"JS1\_D03\_01629" 13538 "s59E25H2" 0 "Tripartite tricarboxylate transporter TctA family protein"  
"JS1\_D03\_01629" 13538 "s59E5H2" 0.005296903 "Tripartite tricarboxylate transporter TctA family protein"  
"JS1\_D03\_01629" 13538 "s63E6H2" 0 "Tripartite tricarboxylate transporter TctA family protein"  
"JS1\_D03\_01630" 13539 "s59E13H2" 0.1384602 "4-hydroxy-tetrahydrodipicolinate synthase"  
"JS1\_D03\_01630" 13539 "s59E25H2" 0 "4-hydroxy-tetrahydrodipicolinate synthase"  
"JS1\_D03\_01630" 13539 "s59E5H2" 0.2524474 "4-hydroxy-tetrahydrodipicolinate synthase"  
"JS1\_D03\_01630" 13539 "s63E6H2" 1.019235 "4-hydroxy-tetrahydrodipicolinate synthase"

"JS1\_D03\_01631" 13540 "s59E13H2" 0.1679212 "L-fucose isomerase"  
"JS1\_D03\_01631" 13540 "s59E25H2" 0 "L-fucose isomerase"  
"JS1\_D03\_01631" 13540 "s59E5H2" 0.07409402 "L-fucose isomerase"  
"JS1\_D03\_01631" 13540 "s63E6H2" 1.467528 "L-fucose isomerase"  
"JS1\_D03\_01632" 13541 "s59E13H2" 0.2874179 "methylcobalamin:coenzyme M methyltransferase"  
"JS1\_D03\_01632" 13541 "s59E25H2" 0 "methylcobalamin:coenzyme M methyltransferase"  
"JS1\_D03\_01632" 13541 "s59E5H2" 0.8610136 "methylcobalamin:coenzyme M methyltransferase"  
"JS1\_D03\_01632" 13541 "s63E6H2" 0.8351202 "methylcobalamin:coenzyme M methyltransferase"  
"JS1\_D03\_01633" 13542 "s59E13H2" 3.092246 "Sialic acid-binding periplasmic protein SiaP precursor"  
"JS1\_D03\_01633" 13542 "s59E25H2" 0 "Sialic acid-binding periplasmic protein SiaP precursor"  
"JS1\_D03\_01633" 13542 "s59E5H2" 0.450994 "Sialic acid-binding periplasmic protein SiaP precursor"  
"JS1\_D03\_01633" 13542 "s63E6H2" 0.09665529 "Sialic acid-binding periplasmic protein SiaP precursor"  
"JS1\_D03\_01634" 13543 "s59E13H2" 2.451557 "Tripartite ATP-independent periplasmic transporters, DctQ component"  
"JS1\_D03\_01634" 13543 "s59E25H2" 0 "Tripartite ATP-independent periplasmic transporters, DctQ component"  
"JS1\_D03\_01634" 13543 "s59E5H2" 0.5980328 "Tripartite ATP-independent periplasmic transporters, DctQ component"  
"JS1\_D03\_01634" 13543 "s63E6H2" 0.06161312 "Tripartite ATP-independent periplasmic transporters, DctQ component"  
"JS1\_D03\_01635" 13544 "s59E13H2" 0.7425095 "hypothetical protein"  
"JS1\_D03\_01635" 13544 "s59E25H2" 0 "hypothetical protein"  
"JS1\_D03\_01635" 13544 "s59E5H2" 0.2065307 "hypothetical protein"  
"JS1\_D03\_01635" 13544 "s63E6H2" 0.01621144 "hypothetical protein"  
"JS1\_D03\_01637" 13546 "s59E13H2" 1.875499 "Sialic acid TRAP transporter permease protein SiaT"  
"JS1\_D03\_01637" 13546 "s59E25H2" 0 "Sialic acid TRAP transporter permease protein SiaT"  
"JS1\_D03\_01637" 13546 "s59E5H2" 0.5288413 "Sialic acid TRAP transporter permease protein SiaT"  
"JS1\_D03\_01637" 13546 "s63E6H2" 0.03666998 "Sialic acid TRAP transporter permease protein SiaT"  
"JS1\_D03\_01640" 13549 "s59E13H2" 0 "50S ribosomal protein L16"  
"JS1\_D03\_01640" 13549 "s59E25H2" 0 "50S ribosomal protein L16"  
"JS1\_D03\_01640" 13549 "s59E5H2" 0 "50S ribosomal protein L16"  
"JS1\_D03\_01640" 13549 "s63E6H2" 0 "50S ribosomal protein L16"  
"JS1\_D03\_01642" 13551 "s59E13H2" 1.846135 "50S ribosomal protein L22"  
"JS1\_D03\_01642" 13551 "s59E25H2" 0 "50S ribosomal protein L22"  
"JS1\_D03\_01642" 13551 "s59E5H2" 0.04435906 "50S ribosomal protein L22"  
"JS1\_D03\_01642" 13551 "s63E6H2" 0.2644931 "50S ribosomal protein L22"  
"JS1\_D03\_01645" 13554 "s59E13H2" 0 "hypothetical protein"  
"JS1\_D03\_01645" 13554 "s59E25H2" 0 "hypothetical protein"  
"JS1\_D03\_01645" 13554 "s59E5H2" 0 "hypothetical protein"  
"JS1\_D03\_01645" 13554 "s63E6H2" 0.01151797 "hypothetical protein"  
"JS1\_D03\_01646" 13555 "s59E13H2" 0 "DctM-like transporters"  
"JS1\_D03\_01646" 13555 "s59E25H2" 0 "DctM-like transporters"  
"JS1\_D03\_01646" 13555 "s59E5H2" 0 "DctM-like transporters"  
"JS1\_D03\_01646" 13555 "s63E6H2" 0.004545263 "DctM-like transporters"  
"JS1\_D03\_01648" 13557 "s59E13H2" 0 "hypothetical protein"  
"JS1\_D03\_01648" 13557 "s59E25H2" 0 "hypothetical protein"  
"JS1\_D03\_01648" 13557 "s59E5H2" 1.84176 "hypothetical protein"  
"JS1\_D03\_01648" 13557 "s63E6H2" 3.295353 "hypothetical protein"  
"JS1\_D03\_01649" 13558 "s59E13H2" 2.069502 "4'-demethylrebeccamycin synthase"  
"JS1\_D03\_01649" 13558 "s59E25H2" 0 "4'-demethylrebeccamycin synthase"  
"JS1\_D03\_01649" 13558 "s59E5H2" 0.9874841 "4'-demethylrebeccamycin synthase"



"JS1\_D03\_01649" 13558 "s63E6H2" 2.32166 "4'-demethylrebeccamycin synthase"  
"JS1\_D03\_01650" 13559 "s59E13H2" 0.02104373 "Serine protease Do-like HtrA"  
"JS1\_D03\_01650" 13559 "s59E25H2" 0 "Serine protease Do-like HtrA"  
"JS1\_D03\_01650" 13559 "s59E5H2" 0.01485811 "Serine protease Do-like HtrA"  
"JS1\_D03\_01650" 13559 "s63E6H2" 0.991987 "Serine protease Do-like HtrA"  
"JS1\_D03\_01651" 13560 "s59E13H2" 1.551571 "RNA recognition motif. (a.k.a. RRM, RBD, or RNP domain)"  
"JS1\_D03\_01651" 13560 "s59E25H2" 0 "RNA recognition motif. (a.k.a. RRM, RBD, or RNP domain)"  
"JS1\_D03\_01651" 13560 "s59E5H2" 18.23408 "RNA recognition motif. (a.k.a. RRM, RBD, or RNP domain)"  
"JS1\_D03\_01651" 13560 "s63E6H2" 2.776347 "RNA recognition motif. (a.k.a. RRM, RBD, or RNP domain)"  
"JS1\_D03\_01652" 13561 "s59E13H2" 0.01496432 "Glutamine--tRNA ligase"  
"JS1\_D03\_01652" 13561 "s59E25H2" 0 "Glutamine--tRNA ligase"  
"JS1\_D03\_01652" 13561 "s59E5H2" 0.2047112 "Glutamine--tRNA ligase"  
"JS1\_D03\_01652" 13561 "s63E6H2" 0.2339599 "Glutamine--tRNA ligase"  
"JS1\_D03\_01653" 13562 "s59E13H2" 0.006034901 "AI-2 transport protein TqsA"  
"JS1\_D03\_01653" 13562 "s59E25H2" 0 "AI-2 transport protein TqsA"  
"JS1\_D03\_01653" 13562 "s59E5H2" 0.2751609 "AI-2 transport protein TqsA"  
"JS1\_D03\_01653" 13562 "s63E6H2" 0.3743609 "AI-2 transport protein TqsA"  
"JS1\_D03\_01654" 13563 "s59E13H2" 0.02153514 "N-acetylmuramoyl-L-alanine amidase AmiC precursor"  
"JS1\_D03\_01654" 13563 "s59E25H2" 0 "N-acetylmuramoyl-L-alanine amidase AmiC precursor"  
"JS1\_D03\_01654" 13563 "s59E5H2" 0.07339865 "N-acetylmuramoyl-L-alanine amidase AmiC precursor"  
"JS1\_D03\_01654" 13563 "s63E6H2" 0.1775201 "N-acetylmuramoyl-L-alanine amidase AmiC precursor"  
"JS1\_D03\_01655" 13564 "s59E13H2" 0 "Sporulation and spore germination"  
"JS1\_D03\_01655" 13564 "s59E25H2" 0 "Sporulation and spore germination"  
"JS1\_D03\_01655" 13564 "s59E5H2" 0.005481479 "Sporulation and spore germination"  
"JS1\_D03\_01655" 13564 "s63E6H2" 0.171529 "Sporulation and spore germination"  
"JS1\_D03\_01656" 13565 "s59E13H2" 0 "Divergent PAP2 family protein"  
"JS1\_D03\_01656" 13565 "s59E25H2" 0 "Divergent PAP2 family protein"  
"JS1\_D03\_01656" 13565 "s59E5H2" 0.01368298 "Divergent PAP2 family protein"  
"JS1\_D03\_01656" 13565 "s63E6H2" 0.1423827 "Divergent PAP2 family protein"  
"JS1\_D03\_01657" 13566 "s59E13H2" 0.01671694 "16S/23S rRNA (cytidine-2'-O)-methyltransferase TlyA"  
"JS1\_D03\_01657" 13566 "s59E25H2" 0 "16S/23S rRNA (cytidine-2'-O)-methyltransferase TlyA"  
"JS1\_D03\_01657" 13566 "s59E5H2" 0.1645843 "16S/23S rRNA (cytidine-2'-O)-methyltransferase TlyA"  
"JS1\_D03\_01657" 13566 "s63E6H2" 0.1791775 "16S/23S rRNA (cytidine-2'-O)-methyltransferase TlyA"  
"JS1\_D03\_01658" 13567 "s59E13H2" 0.008879209 "hypothetical protein"  
"JS1\_D03\_01658" 13567 "s59E25H2" 0 "hypothetical protein"  
"JS1\_D03\_01658" 13567 "s59E5H2" 0.1918388 "hypothetical protein"  
"JS1\_D03\_01658" 13567 "s63E6H2" 0.2010285 "hypothetical protein"  
"JS1\_D03\_01659" 13568 "s59E13H2" 0.00451755 "putative inorganic polyphosphate/ATP-NAD kinase"  
"JS1\_D03\_01659" 13568 "s59E25H2" 0 "putative inorganic polyphosphate/ATP-NAD kinase"  
"JS1\_D03\_01659" 13568 "s59E5H2" 0.09106797 "putative inorganic polyphosphate/ATP-NAD kinase"  
"JS1\_D03\_01659" 13568 "s63E6H2" 0.06527054 "putative inorganic polyphosphate/ATP-NAD kinase"  
"JS1\_D03\_01660" 13569 "s59E13H2" 0.007142048 "DNA repair protein RecN"  
"JS1\_D03\_01660" 13569 "s59E25H2" 0 "DNA repair protein RecN"  
"JS1\_D03\_01660" 13569 "s59E5H2" 0.0718569 "DNA repair protein RecN"  
"JS1\_D03\_01660" 13569 "s63E6H2" 0.0122436 "DNA repair protein RecN"  
"JS1\_D03\_01661" 13570 "s59E13H2" 0.006643301 "Arginine utilization regulatory protein RocR"  
"JS1\_D03\_01661" 13570 "s59E25H2" 0 "Arginine utilization regulatory protein RocR"

"JS1\_D03\_01661" 13570 "s59E5H2" 0.1637716 "Arginine utilization regulatory protein RocR"  
"JS1\_D03\_01661" 13570 "s63E6H2" 0.04706693 "Arginine utilization regulatory protein RocR"  
"JS1\_D03\_01662" 13571 "s59E13H2" 0.03671199 "2-aminoadipate transaminase"  
"JS1\_D03\_01662" 13571 "s59E25H2" 0 "2-aminoadipate transaminase"  
"JS1\_D03\_01662" 13571 "s59E5H2" 0.08275742 "2-aminoadipate transaminase"  
"JS1\_D03\_01662" 13571 "s63E6H2" 0.05611806 "2-aminoadipate transaminase"  
"JS1\_D03\_01663" 13572 "s59E13H2" 0.01203356 "Phosphate acetyltransferase"  
"JS1\_D03\_01663" 13572 "s59E25H2" 0 "Phosphate acetyltransferase"  
"JS1\_D03\_01663" 13572 "s59E5H2" 0.1754765 "Phosphate acetyltransferase"  
"JS1\_D03\_01663" 13572 "s63E6H2" 0.0617895 "Phosphate acetyltransferase"  
"JS1\_D03\_01664" 13573 "s59E13H2" 0.0018069 "Butyrate kinase 2"  
"JS1\_D03\_01664" 13573 "s59E25H2" 0 "Butyrate kinase 2"  
"JS1\_D03\_01664" 13573 "s59E5H2" 0.0326046 "Butyrate kinase 2"  
"JS1\_D03\_01664" 13573 "s63E6H2" 0.0176039 "Butyrate kinase 2"  
"JS1\_D03\_01665" 13574 "s59E13H2" 0 "hypothetical protein"  
"JS1\_D03\_01665" 13574 "s59E25H2" 0 "hypothetical protein"  
"JS1\_D03\_01665" 13574 "s59E5H2" 0 "hypothetical protein"  
"JS1\_D03\_01665" 13574 "s63E6H2" 0.0149027 "hypothetical protein"  
"JS1\_D03\_01666" 13575 "s59E13H2" 0.007160169 "Ketoisovalerate oxidoreductase subunit VorC"  
"JS1\_D03\_01666" 13575 "s59E25H2" 0 "Ketoisovalerate oxidoreductase subunit VorC"  
"JS1\_D03\_01666" 13575 "s59E5H2" 0 "Ketoisovalerate oxidoreductase subunit VorC"  
"JS1\_D03\_01666" 13575 "s63E6H2" 0.007897116 "Ketoisovalerate oxidoreductase subunit VorC"  
"JS1\_D03\_01667" 13576 "s59E13H2" 0.02138566 "Ketoisovalerate oxidoreductase subunit VorB"  
"JS1\_D03\_01667" 13576 "s59E25H2" 0 "Ketoisovalerate oxidoreductase subunit VorB"  
"JS1\_D03\_01667" 13576 "s59E5H2" 0.01843147 "Ketoisovalerate oxidoreductase subunit VorB"  
"JS1\_D03\_01667" 13576 "s63E6H2" 0.07148762 "Ketoisovalerate oxidoreductase subunit VorB"  
"JS1\_D03\_01668" 13577 "s59E13H2" 0.1015219 "Ketoisovalerate oxidoreductase subunit VorA"  
"JS1\_D03\_01668" 13577 "s59E25H2" 0 "Ketoisovalerate oxidoreductase subunit VorA"  
"JS1\_D03\_01668" 13577 "s59E5H2" 0.008008205 "Ketoisovalerate oxidoreductase subunit VorA"  
"JS1\_D03\_01668" 13577 "s63E6H2" 0.1949523 "Ketoisovalerate oxidoreductase subunit VorA"  
"JS1\_D03\_01669" 13578 "s59E13H2" 0.02207757 "Ketoisovalerate oxidoreductase subunit VorA"  
"JS1\_D03\_01669" 13578 "s59E25H2" 0 "Ketoisovalerate oxidoreductase subunit VorA"  
"JS1\_D03\_01669" 13578 "s59E5H2" 0.003512542 "Ketoisovalerate oxidoreductase subunit VorA"  
"JS1\_D03\_01669" 13578 "s63E6H2" 0.1742505 "Ketoisovalerate oxidoreductase subunit VorA"  
"JS1\_D03\_01670" 13579 "s59E13H2" 0.004149924 "Peptidase T"  
"JS1\_D03\_01670" 13579 "s59E25H2" 0 "Peptidase T"  
"JS1\_D03\_01670" 13579 "s59E5H2" 0.03601649 "Peptidase T"  
"JS1\_D03\_01670" 13579 "s63E6H2" 0.1821631 "Peptidase T"  
"JS1\_D03\_01671" 13580 "s59E13H2" 0 "ADP-ribose pyrophosphatase"  
"JS1\_D03\_01671" 13580 "s59E25H2" 0 "ADP-ribose pyrophosphatase"  
"JS1\_D03\_01671" 13580 "s59E5H2" 0.04233545 "ADP-ribose pyrophosphatase"  
"JS1\_D03\_01671" 13580 "s63E6H2" 0.1943856 "ADP-ribose pyrophosphatase"  
"JS1\_D03\_01672" 13581 "s59E13H2" 0.0734031 "hypothetical protein"  
"JS1\_D03\_01672" 13581 "s59E25H2" 0 "hypothetical protein"  
"JS1\_D03\_01672" 13581 "s59E5H2" 0.118396 "hypothetical protein"  
"JS1\_D03\_01672" 13581 "s63E6H2" 0.1897295 "hypothetical protein"  
"JS1\_D03\_01673" 13582 "s59E13H2" 0.0816538 "DNA primase"

"JS1\_D03\_01673" 13582 "s59E25H2" 0 "DNA primase"  
"JS1\_D03\_01673" 13582 "s59E5H2" 0.3387577 "DNA primase"  
"JS1\_D03\_01673" 13582 "s63E6H2" 0.1726436 "DNA primase"  
"JS1\_D03\_01674" 13583 "s59E13H2" 0.1856144 "RNA polymerase sigma factor SigA"  
"JS1\_D03\_01674" 13583 "s59E25H2" 0 "RNA polymerase sigma factor SigA"  
"JS1\_D03\_01674" 13583 "s59E5H2" 1.7866 "RNA polymerase sigma factor SigA"  
"JS1\_D03\_01674" 13583 "s63E6H2" 0.2648472 "RNA polymerase sigma factor SigA"  
"JS1\_D03\_01676" 13585 "s59E13H2" 0 "Methyltransferase domain protein"  
"JS1\_D03\_01676" 13585 "s59E25H2" 0 "Methyltransferase domain protein"  
"JS1\_D03\_01676" 13585 "s59E5H2" 0 "Methyltransferase domain protein"  
"JS1\_D03\_01676" 13585 "s63E6H2" 0 "Methyltransferase domain protein"  
"JS1\_D03\_01677" 13586 "s59E13H2" 0 "hypothetical protein"  
"JS1\_D03\_01677" 13586 "s59E25H2" 0 "hypothetical protein"  
"JS1\_D03\_01677" 13586 "s59E5H2" 0 "hypothetical protein"  
"JS1\_D03\_01677" 13586 "s63E6H2" 0 "hypothetical protein"  
"JS1\_D03\_01678" 13587 "s59E13H2" 0 "hypothetical protein"  
"JS1\_D03\_01678" 13587 "s59E25H2" 0 "hypothetical protein"  
"JS1\_D03\_01678" 13587 "s59E5H2" 0 "hypothetical protein"  
"JS1\_D03\_01678" 13587 "s63E6H2" 0.03285761 "hypothetical protein"  
"JS1\_D03\_01679" 13588 "s59E13H2" 0 "hypothetical protein"  
"JS1\_D03\_01679" 13588 "s59E25H2" 0 "hypothetical protein"  
"JS1\_D03\_01679" 13588 "s59E5H2" 0 "hypothetical protein"  
"JS1\_D03\_01679" 13588 "s63E6H2" 0 "hypothetical protein"  
"JS1\_D03\_01680" 13589 "s59E13H2" 0 "hypothetical protein"  
"JS1\_D03\_01680" 13589 "s59E25H2" 0 "hypothetical protein"  
"JS1\_D03\_01680" 13589 "s59E5H2" 0 "hypothetical protein"  
"JS1\_D03\_01680" 13589 "s63E6H2" 0 "hypothetical protein"  
"JS1\_D03\_01682" 13591 "s59E13H2" 0 "OsmC-like protein"  
"JS1\_D03\_01682" 13591 "s59E25H2" 0 "OsmC-like protein"  
"JS1\_D03\_01682" 13591 "s59E5H2" 0 "OsmC-like protein"  
"JS1\_D03\_01682" 13591 "s63E6H2" 0.2199186 "OsmC-like protein"  
"JS1\_D03\_01683" 13592 "s59E13H2" 0.0008823993 "Translation initiation factor IF-2"  
"JS1\_D03\_01683" 13592 "s59E25H2" 0 "Translation initiation factor IF-2"  
"JS1\_D03\_01683" 13592 "s59E5H2" 0.02210691 "Translation initiation factor IF-2"  
"JS1\_D03\_01683" 13592 "s63E6H2" 0.03901424 "Translation initiation factor IF-2"  
"JS1\_D03\_01684" 13593 "s59E13H2" 0 "hypothetical protein"  
"JS1\_D03\_01684" 13593 "s59E25H2" 0 "hypothetical protein"  
"JS1\_D03\_01684" 13593 "s59E5H2" 0 "hypothetical protein"  
"JS1\_D03\_01684" 13593 "s63E6H2" 0.01273451 "hypothetical protein"  
"JS1\_D03\_01685" 13594 "s59E13H2" 0 "hypothetical protein"  
"JS1\_D03\_01685" 13594 "s59E25H2" 0 "hypothetical protein"  
"JS1\_D03\_01685" 13594 "s59E5H2" 0 "hypothetical protein"  
"JS1\_D03\_01685" 13594 "s63E6H2" 0.0272972 "hypothetical protein"  
"JS1\_D03\_01687" 13596 "s59E13H2" 0.03720188 "hypothetical protein"  
"JS1\_D03\_01687" 13596 "s59E25H2" 0 "hypothetical protein"  
"JS1\_D03\_01687" 13596 "s59E5H2" 0.3969418 "hypothetical protein"  
"JS1\_D03\_01687" 13596 "s63E6H2" 0.3206365 "hypothetical protein"

"JS1\_D03\_01688" 13597 "s59E13H2" 0.04287382 "hypothetical protein"  
"JS1\_D03\_01688" 13597 "s59E25H2" 0 "hypothetical protein"  
"JS1\_D03\_01688" 13597 "s59E5H2" 0.05581088 "hypothetical protein"  
"JS1\_D03\_01688" 13597 "s63E6H2" 0.1985237 "hypothetical protein"  
"JS1\_D03\_01689" 13598 "s59E13H2" 0.2569705 "Transposase IS116/IS110/IS902 family protein"  
"JS1\_D03\_01689" 13598 "s59E25H2" 0 "Transposase IS116/IS110/IS902 family protein"  
"JS1\_D03\_01689" 13598 "s59E5H2" 0.3804388 "Transposase IS116/IS110/IS902 family protein"  
"JS1\_D03\_01689" 13598 "s63E6H2" 0.6923376 "Transposase IS116/IS110/IS902 family protein"  
"JS1\_D03\_01690" 13599 "s59E13H2" 0.02614687 "Type 4 prepilin-like proteins leader peptide-processing enzyme"  
"JS1\_D03\_01690" 13599 "s59E25H2" 0 "Type 4 prepilin-like proteins leader peptide-processing enzyme"  
"JS1\_D03\_01690" 13599 "s59E5H2" 0.5629144 "Type 4 prepilin-like proteins leader peptide-processing enzyme"  
"JS1\_D03\_01690" 13599 "s63E6H2" 0.4512368 "Type 4 prepilin-like proteins leader peptide-processing enzyme"  
"JS1\_D03\_01691" 13600 "s59E13H2" 0.0005983305 "Nucleotidyltransferase domain protein"  
"JS1\_D03\_01691" 13600 "s59E25H2" 0 "Nucleotidyltransferase domain protein"  
"JS1\_D03\_01691" 13600 "s59E5H2" 0.65919 "Nucleotidyltransferase domain protein"  
"JS1\_D03\_01691" 13600 "s63E6H2" 0.3248334 "Nucleotidyltransferase domain protein"  
"JS1\_D03\_01692" 13601 "s59E13H2" 0 "HEPN domain protein"  
"JS1\_D03\_01692" 13601 "s59E25H2" 0 "HEPN domain protein"  
"JS1\_D03\_01692" 13601 "s59E5H2" 0.4454194 "HEPN domain protein"  
"JS1\_D03\_01692" 13601 "s63E6H2" 0.3134312 "HEPN domain protein"  
"JS1\_D03\_01693" 13602 "s59E13H2" 0 "hypothetical protein"  
"JS1\_D03\_01693" 13602 "s59E25H2" 0 "hypothetical protein"  
"JS1\_D03\_01693" 13602 "s59E5H2" 0.0190559 "hypothetical protein"  
"JS1\_D03\_01693" 13602 "s63E6H2" 0.1970665 "hypothetical protein"  
"JS1\_D03\_01695" 13604 "s59E13H2" 0 "lipoprotein Nlpl"  
"JS1\_D03\_01695" 13604 "s59E25H2" 0 "lipoprotein Nlpl"  
"JS1\_D03\_01695" 13604 "s59E5H2" 0.01873834 "lipoprotein Nlpl"  
"JS1\_D03\_01695" 13604 "s63E6H2" 0 "lipoprotein Nlpl"  
"JS1\_D03\_01696" 13605 "s59E13H2" 0 "putative major pilin subunit"  
"JS1\_D03\_01696" 13605 "s59E25H2" 0 "putative major pilin subunit"  
"JS1\_D03\_01696" 13605 "s59E5H2" 0.03535804 "putative major pilin subunit"  
"JS1\_D03\_01696" 13605 "s63E6H2" 0 "putative major pilin subunit"  
"JS1\_D03\_01698" 13607 "s59E13H2" 0.04271249 "Plasmid stabilisation system protein"  
"JS1\_D03\_01698" 13607 "s59E25H2" 0 "Plasmid stabilisation system protein"  
"JS1\_D03\_01698" 13607 "s59E5H2" 0.01044756 "Plasmid stabilisation system protein"  
"JS1\_D03\_01698" 13607 "s63E6H2" 0.3925645 "Plasmid stabilisation system protein"  
"JS1\_D03\_01699" 13608 "s59E13H2" 0 "DNA repair protein RadA"  
"JS1\_D03\_01699" 13608 "s59E25H2" 0 "DNA repair protein RadA"  
"JS1\_D03\_01699" 13608 "s59E5H2" 0.03382708 "DNA repair protein RadA"  
"JS1\_D03\_01699" 13608 "s63E6H2" 0.1429028 "DNA repair protein RadA"  
"JS1\_D03\_01701" 13610 "s59E13H2" 0.02104383 "putative oxidoreductase UxuB"  
"JS1\_D03\_01701" 13610 "s59E25H2" 0 "putative oxidoreductase UxuB"  
"JS1\_D03\_01701" 13610 "s59E5H2" 0.07162638 "putative oxidoreductase UxuB"  
"JS1\_D03\_01701" 13610 "s63E6H2" 0.2641212 "putative oxidoreductase UxuB"  
"JS1\_D03\_01702" 13611 "s59E13H2" 0.02310568 "6-phosphogluconate dehydrogenase, decarboxylating"  
"JS1\_D03\_01702" 13611 "s59E25H2" 0 "6-phosphogluconate dehydrogenase, decarboxylating"  
"JS1\_D03\_01702" 13611 "s59E5H2" 0.2993112 "6-phosphogluconate dehydrogenase, decarboxylating"

"JS1\_D03\_01702" 13611 "s63E6H2" 0.5988243 "6-phosphogluconate dehydrogenase, decarboxylating"  
"JS1\_D03\_01703" 13612 "s59E13H2" 0.009399302 "hypothetical protein"  
"JS1\_D03\_01703" 13612 "s59E25H2" 0 "hypothetical protein"  
"JS1\_D03\_01703" 13612 "s59E5H2" 0.3187293 "hypothetical protein"  
"JS1\_D03\_01703" 13612 "s63E6H2" 0.04638431 "hypothetical protein"  
"JS1\_D03\_01704" 13613 "s59E13H2" 0.3680959 "6-phosphofructokinase 1"  
"JS1\_D03\_01704" 13613 "s59E25H2" 0 "6-phosphofructokinase 1"  
"JS1\_D03\_01704" 13613 "s59E5H2" 0.7093435 "6-phosphofructokinase 1"  
"JS1\_D03\_01704" 13613 "s63E6H2" 0.1682122 "6-phosphofructokinase 1"  
"JS1\_D03\_01705" 13614 "s59E13H2" 0.01015357 "hypothetical protein"  
"JS1\_D03\_01705" 13614 "s59E25H2" 0 "hypothetical protein"  
"JS1\_D03\_01705" 13614 "s59E5H2" 0.298799 "hypothetical protein"  
"JS1\_D03\_01705" 13614 "s63E6H2" 0.5634989 "hypothetical protein"  
"JS1\_D03\_01706" 13615 "s59E13H2" 0.04465421 "putative binding protein component of ABC iron transporter precursor"  
"JS1\_D03\_01706" 13615 "s59E25H2" 0 "putative binding protein component of ABC iron transporter precursor"  
"JS1\_D03\_01706" 13615 "s59E5H2" 0.02774545 "putative binding protein component of ABC iron transporter precursor"  
"JS1\_D03\_01706" 13615 "s63E6H2" 0.7859402 "putative binding protein component of ABC iron transporter precursor"  
"JS1\_D03\_01707" 13616 "s59E13H2" 0.100128 "Putative 2-aminoethylphosphonate transport system permease protein PhnV"  
"JS1\_D03\_01707" 13616 "s59E25H2" 0 "Putative 2-aminoethylphosphonate transport system permease protein PhnV"  
"JS1\_D03\_01707" 13616 "s59E5H2" 0.6329307 "Putative 2-aminoethylphosphonate transport system permease protein PhnV"  
"JS1\_D03\_01707" 13616 "s63E6H2" 0.8456754 "Putative 2-aminoethylphosphonate transport system permease protein PhnV"  
"JS1\_D03\_01708" 13617 "s59E13H2" 1.034274 "Trehalose/maltose import ATP-binding protein Malk"  
"JS1\_D03\_01708" 13617 "s59E25H2" 0 "Trehalose/maltose import ATP-binding protein Malk"  
"JS1\_D03\_01708" 13617 "s59E5H2" 1.599705 "Trehalose/maltose import ATP-binding protein Malk"  
"JS1\_D03\_01708" 13617 "s63E6H2" 0.6333977 "Trehalose/maltose import ATP-binding protein Malk"  
"JS1\_D03\_01709" 13618 "s59E13H2" 0.1934273 "pfkB family carbohydrate kinase"  
"JS1\_D03\_01709" 13618 "s59E25H2" 0 "pfkB family carbohydrate kinase"  
"JS1\_D03\_01709" 13618 "s59E5H2" 0.5877474 "pfkB family carbohydrate kinase"  
"JS1\_D03\_01709" 13618 "s63E6H2" 0.1745702 "pfkB family carbohydrate kinase"  
"JS1\_D03\_01710" 13619 "s59E13H2" 0.05382567 "Bifunctional IPC transferase and DIPP synthase"  
"JS1\_D03\_01710" 13619 "s59E25H2" 0 "Bifunctional IPC transferase and DIPP synthase"  
"JS1\_D03\_01710" 13619 "s59E5H2" 0.7357161 "Bifunctional IPC transferase and DIPP synthase"  
"JS1\_D03\_01710" 13619 "s63E6H2" 0.1206208 "Bifunctional IPC transferase and DIPP synthase"  
"JS1\_D03\_01711" 13620 "s59E13H2" 0.02659265 "Trehalose/maltose import ATP-binding protein Malk"  
"JS1\_D03\_01711" 13620 "s59E25H2" 0 "Trehalose/maltose import ATP-binding protein Malk"  
"JS1\_D03\_01711" 13620 "s59E5H2" 2.607118 "Trehalose/maltose import ATP-binding protein Malk"  
"JS1\_D03\_01711" 13620 "s63E6H2" 0.002810132 "Trehalose/maltose import ATP-binding protein Malk"  
"JS1\_D03\_01712" 13621 "s59E13H2" 0.00270918 "maltose ABC transporter periplasmic protein"  
"JS1\_D03\_01712" 13621 "s59E25H2" 0 "maltose ABC transporter periplasmic protein"  
"JS1\_D03\_01712" 13621 "s59E5H2" 0.117739 "maltose ABC transporter periplasmic protein"  
"JS1\_D03\_01712" 13621 "s63E6H2" 0.09760563 "maltose ABC transporter periplasmic protein"  
"JS1\_D03\_01713" 13622 "s59E13H2" 0.07891975 "Lactose transport system permease protein LacF"  
"JS1\_D03\_01713" 13622 "s59E25H2" 0 "Lactose transport system permease protein LacF"  
"JS1\_D03\_01713" 13622 "s59E5H2" 1.338417 "Lactose transport system permease protein LacF"  
"JS1\_D03\_01713" 13622 "s63E6H2" 0.07415165 "Lactose transport system permease protein LacF"  
"JS1\_D03\_01714" 13623 "s59E13H2" 0.1280602 "Trehalose transport system permease protein SugB"  
"JS1\_D03\_01714" 13623 "s59E25H2" 0 "Trehalose transport system permease protein SugB"

"JS1\_D03\_01714" 13623 "s59E5H2" 2.038265 "Trehalose transport system permease protein SugB"  
"JS1\_D03\_01714" 13623 "s63E6H2" 0.07892944 "Trehalose transport system permease protein SugB"  
"JS1\_D03\_01715" 13624 "s59E13H2" 0.007709432 "endonuclease IV"  
"JS1\_D03\_01715" 13624 "s59E25H2" 0 "endonuclease IV"  
"JS1\_D03\_01715" 13624 "s59E5H2" 1.674459 "endonuclease IV"  
"JS1\_D03\_01715" 13624 "s63E6H2" 0.1601544 "endonuclease IV"  
"JS1\_D03\_01716" 13625 "s59E13H2" 0 "pfkB family carbohydrate kinase"  
"JS1\_D03\_01716" 13625 "s59E25H2" 0 "pfkB family carbohydrate kinase"  
"JS1\_D03\_01716" 13625 "s59E5H2" 0.2444486 "pfkB family carbohydrate kinase"  
"JS1\_D03\_01716" 13625 "s63E6H2" 0.3499222 "pfkB family carbohydrate kinase"  
"JS1\_D03\_01717" 13626 "s59E13H2" 0.04510919 "Transcriptional regulator KdgR"  
"JS1\_D03\_01717" 13626 "s59E25H2" 0 "Transcriptional regulator KdgR"  
"JS1\_D03\_01717" 13626 "s59E5H2" 0.1112667 "Transcriptional regulator KdgR"  
"JS1\_D03\_01717" 13626 "s63E6H2" 1.382972 "Transcriptional regulator KdgR"  
"JS1\_D03\_01718" 13627 "s59E13H2" 0.2945835 "Indolepyruvate oxidoreductase subunit IorA"  
"JS1\_D03\_01718" 13627 "s59E25H2" 0 "Indolepyruvate oxidoreductase subunit IorA"  
"JS1\_D03\_01718" 13627 "s59E5H2" 0.2988259 "Indolepyruvate oxidoreductase subunit IorA"  
"JS1\_D03\_01718" 13627 "s63E6H2" 0.5352113 "Indolepyruvate oxidoreductase subunit IorA"  
"JS1\_D03\_01719" 13628 "s59E13H2" 0.1647559 "Indolepyruvate oxidoreductase subunit IorB"  
"JS1\_D03\_01719" 13628 "s59E25H2" 0 "Indolepyruvate oxidoreductase subunit IorB"  
"JS1\_D03\_01719" 13628 "s59E5H2" 0.3152868 "Indolepyruvate oxidoreductase subunit IorB"  
"JS1\_D03\_01719" 13628 "s63E6H2" 0.453581 "Indolepyruvate oxidoreductase subunit IorB"  
"JS1\_D03\_01720" 13629 "s59E13H2" 0.001481948 "Aspartate aminotransferase"  
"JS1\_D03\_01720" 13629 "s59E25H2" 0 "Aspartate aminotransferase"  
"JS1\_D03\_01720" 13629 "s59E5H2" 0.01036214 "Aspartate aminotransferase"  
"JS1\_D03\_01720" 13629 "s63E6H2" 0.05491207 "Aspartate aminotransferase"  
"JS1\_D03\_01721" 13630 "s59E13H2" 0.02186323 "Butyrate kinase 2"  
"JS1\_D03\_01721" 13630 "s59E25H2" 0 "Butyrate kinase 2"  
"JS1\_D03\_01721" 13630 "s59E5H2" 0.1163511 "Butyrate kinase 2"  
"JS1\_D03\_01721" 13630 "s63E6H2" 0.6789735 "Butyrate kinase 2"  
"JS1\_D03\_01722" 13631 "s59E13H2" 0.4803378 "Phosphate acetyltransferase"  
"JS1\_D03\_01722" 13631 "s59E25H2" 0 "Phosphate acetyltransferase"  
"JS1\_D03\_01722" 13631 "s59E5H2" 0.2796524 "Phosphate acetyltransferase"  
"JS1\_D03\_01722" 13631 "s63E6H2" 0.9462549 "Phosphate acetyltransferase"  
"JS1\_D03\_01723" 13632 "s59E13H2" 0 "hypothetical protein"  
"JS1\_D03\_01723" 13632 "s59E25H2" 0 "hypothetical protein"  
"JS1\_D03\_01723" 13632 "s59E5H2" 0 "hypothetical protein"  
"JS1\_D03\_01723" 13632 "s63E6H2" 0.09611067 "hypothetical protein"  
"JS1\_D03\_01724" 13633 "s59E13H2" 0.02499041 "Transposase DDE domain protein"  
"JS1\_D03\_01724" 13633 "s59E25H2" 0 "Transposase DDE domain protein"  
"JS1\_D03\_01724" 13633 "s59E5H2" 0.6239942 "Transposase DDE domain protein"  
"JS1\_D03\_01724" 13633 "s63E6H2" 1.401751 "Transposase DDE domain protein"  
"JS1\_D03\_01725" 13634 "s59E13H2" 0.03449764 "D-glutamate deacylase"  
"JS1\_D03\_01725" 13634 "s59E25H2" 0 "D-glutamate deacylase"  
"JS1\_D03\_01725" 13634 "s59E5H2" 0.1482877 "D-glutamate deacylase"  
"JS1\_D03\_01725" 13634 "s63E6H2" 2.659957 "D-glutamate deacylase"  
"JS1\_D03\_01726" 13635 "s59E13H2" 2.26885 "GTP-binding protein TypA/BipA"

"JS1\_D03\_01726" 13635 "s59E25H2" 0.1376096 "GTP-binding protein TypA/BipA"  
"JS1\_D03\_01726" 13635 "s59E5H2" 1.146687 "GTP-binding protein TypA/BipA"  
"JS1\_D03\_01726" 13635 "s63E6H2" 8.889731 "GTP-binding protein TypA/BipA"  
"JS1\_D03\_01727" 13636 "s59E13H2" 0.1682591 "Transcriptional repressor PagR"  
"JS1\_D03\_01727" 13636 "s59E25H2" 0 "Transcriptional repressor PagR"  
"JS1\_D03\_01727" 13636 "s59E5H2" 0.2368219 "Transcriptional repressor PagR"  
"JS1\_D03\_01727" 13636 "s63E6H2" 4.21248 "Transcriptional repressor PagR"  
"JS1\_D03\_01728" 13637 "s59E13H2" 0.1568072 "Coenzyme A disulfide reductase"  
"JS1\_D03\_01728" 13637 "s59E25H2" 0 "Coenzyme A disulfide reductase"  
"JS1\_D03\_01728" 13637 "s59E5H2" 0.3333933 "Coenzyme A disulfide reductase"  
"JS1\_D03\_01728" 13637 "s63E6H2" 0.05375285 "Coenzyme A disulfide reductase"  
"JS1\_D03\_01730" 13639 "s59E13H2" 0.02067181 "UDP-N-acetylmuramoylalanine--D-glutamate ligase"  
"JS1\_D03\_01730" 13639 "s59E25H2" 0 "UDP-N-acetylmuramoylalanine--D-glutamate ligase"  
"JS1\_D03\_01730" 13639 "s59E5H2" 0.7057876 "UDP-N-acetylmuramoylalanine--D-glutamate ligase"  
"JS1\_D03\_01730" 13639 "s63E6H2" 0.09966811 "UDP-N-acetylmuramoylalanine--D-glutamate ligase"  
"JS1\_D03\_01731" 13640 "s59E13H2" 0.01017964 "tRNA-specific adenosine deaminase"  
"JS1\_D03\_01731" 13640 "s59E25H2" 0 "tRNA-specific adenosine deaminase"  
"JS1\_D03\_01731" 13640 "s59E5H2" 0.7323343 "tRNA-specific adenosine deaminase"  
"JS1\_D03\_01731" 13640 "s63E6H2" 0.1491383 "tRNA-specific adenosine deaminase"  
"JS1\_D03\_01737" 13646 "s59E13H2" 0.02133929 "DNA polymerase III subunit tau"  
"JS1\_D03\_01737" 13646 "s59E25H2" 0 "DNA polymerase III subunit tau"  
"JS1\_D03\_01737" 13646 "s59E5H2" 1.028871 "DNA polymerase III subunit tau"  
"JS1\_D03\_01737" 13646 "s63E6H2" 0.1227023 "DNA polymerase III subunit tau"  
"JS1\_D03\_01738" 13647 "s59E13H2" 0.03560601 "Nucleoid-associated protein"  
"JS1\_D03\_01738" 13647 "s59E25H2" 0 "Nucleoid-associated protein"  
"JS1\_D03\_01738" 13647 "s59E5H2" 0.9329949 "Nucleoid-associated protein"  
"JS1\_D03\_01738" 13647 "s63E6H2" 0.392277 "Nucleoid-associated protein"  
"JS1\_D03\_01739" 13648 "s59E13H2" 0.0305541 "Recombination protein RecR"  
"JS1\_D03\_01739" 13648 "s59E25H2" 0 "Recombination protein RecR"  
"JS1\_D03\_01739" 13648 "s59E5H2" 0.7300095 "Recombination protein RecR"  
"JS1\_D03\_01739" 13648 "s63E6H2" 0.4985218 "Recombination protein RecR"  
"JS1\_D03\_01740" 13649 "s59E13H2" 0.1688093 "Pyruvate-flavodoxin oxidoreductase"  
"JS1\_D03\_01740" 13649 "s59E25H2" 0 "Pyruvate-flavodoxin oxidoreductase"  
"JS1\_D03\_01740" 13649 "s59E5H2" 0.1080057 "Pyruvate-flavodoxin oxidoreductase"  
"JS1\_D03\_01740" 13649 "s63E6H2" 0.2277286 "Pyruvate-flavodoxin oxidoreductase"  
"JS1\_D03\_01745" 13654 "s59E13H2" 0.1240878 "50S ribosomal protein L33"  
"JS1\_D03\_01745" 13654 "s59E25H2" 0 "50S ribosomal protein L33"  
"JS1\_D03\_01745" 13654 "s59E5H2" 0.1529307 "50S ribosomal protein L33"  
"JS1\_D03\_01745" 13654 "s63E6H2" 0.2022377 "50S ribosomal protein L33"  
"JS1\_D03\_01746" 13655 "s59E13H2" 0.03097142 "preprotein translocase subunit SecE"  
"JS1\_D03\_01746" 13655 "s59E25H2" 0 "preprotein translocase subunit SecE"  
"JS1\_D03\_01746" 13655 "s59E5H2" 0.06154006 "preprotein translocase subunit SecE"  
"JS1\_D03\_01746" 13655 "s63E6H2" 0.07110652 "preprotein translocase subunit SecE"  
"JS1\_D03\_01747" 13656 "s59E13H2" 0 "hypothetical protein"  
"JS1\_D03\_01747" 13656 "s59E25H2" 0 "hypothetical protein"  
"JS1\_D03\_01747" 13656 "s59E5H2" 0 "hypothetical protein"  
"JS1\_D03\_01747" 13656 "s63E6H2" 0.08516698 "hypothetical protein"

"JS1\_D03\_01748" 13657 "s59E13H2" 0.02479045 "50S ribosomal protein L11"  
"JS1\_D03\_01748" 13657 "s59E25H2" 0 "50S ribosomal protein L11"  
"JS1\_D03\_01748" 13657 "s59E5H2" 0.01349088 "50S ribosomal protein L11"  
"JS1\_D03\_01748" 13657 "s63E6H2" 0.1043257 "50S ribosomal protein L11"  
"JS1\_D03\_01749" 13658 "s59E13H2" 0.007071519 "50S ribosomal protein L1"  
"JS1\_D03\_01749" 13658 "s59E25H2" 0 "50S ribosomal protein L1"  
"JS1\_D03\_01749" 13658 "s59E5H2" 0.05912779 "50S ribosomal protein L1"  
"JS1\_D03\_01749" 13658 "s63E6H2" 0.05350619 "50S ribosomal protein L1"  
"JS1\_D03\_01752" 13661 "s59E13H2" 0 "50S ribosomal protein L7/L12"  
"JS1\_D03\_01752" 13661 "s59E25H2" 0 "50S ribosomal protein L7/L12"  
"JS1\_D03\_01752" 13661 "s59E5H2" 0 "50S ribosomal protein L7/L12"  
"JS1\_D03\_01752" 13661 "s63E6H2" 0.01154295 "50S ribosomal protein L7/L12"  
"JS1\_D03\_01759" 13668 "s59E13H2" 0 "Adenylate kinase"  
"JS1\_D03\_01759" 13668 "s59E25H2" 0 "Adenylate kinase"  
"JS1\_D03\_01759" 13668 "s59E5H2" 0 "Adenylate kinase"  
"JS1\_D03\_01759" 13668 "s63E6H2" 0.005415663 "Adenylate kinase"  
"JS1\_D03\_01760" 13669 "s59E13H2" 0 "Methionine aminopeptidase 1, mitochondrial"  
"JS1\_D03\_01760" 13669 "s59E25H2" 0 "Methionine aminopeptidase 1, mitochondrial"  
"JS1\_D03\_01760" 13669 "s59E5H2" 0 "Methionine aminopeptidase 1, mitochondrial"  
"JS1\_D03\_01760" 13669 "s63E6H2" 0.0202235 "Methionine aminopeptidase 1, mitochondrial"  
"JS1\_E13\_00001" 13670 "s59E13H2" 0.004783495 "hypothetical protein"  
"JS1\_E13\_00001" 13670 "s59E25H2" 0 "hypothetical protein"  
"JS1\_E13\_00001" 13670 "s59E5H2" 0.1370318 "hypothetical protein"  
"JS1\_E13\_00001" 13670 "s63E6H2" 0.08293431 "hypothetical protein"  
"JS1\_E13\_00002" 13671 "s59E13H2" 0.2348676 "Maltodextrin phosphorylase"  
"JS1\_E13\_00002" 13671 "s59E25H2" 0 "Maltodextrin phosphorylase"  
"JS1\_E13\_00002" 13671 "s59E5H2" 0.2310195 "Maltodextrin phosphorylase"  
"JS1\_E13\_00002" 13671 "s63E6H2" 0.04473353 "Maltodextrin phosphorylase"  
"JS1\_E13\_00003" 13672 "s59E13H2" 1.336315 "Bifunctional trehalose-6-phosphate synthase/phosphatase"  
"JS1\_E13\_00003" 13672 "s59E25H2" 0.1010638 "Bifunctional trehalose-6-phosphate synthase/phosphatase"  
"JS1\_E13\_00003" 13672 "s59E5H2" 0.5470885 "Bifunctional trehalose-6-phosphate synthase/phosphatase"  
"JS1\_E13\_00003" 13672 "s63E6H2" 0.1188156 "Bifunctional trehalose-6-phosphate synthase/phosphatase"  
"JS1\_E13\_00004" 13673 "s59E13H2" 2.049502 "Trehalose-phosphate phosphatase"  
"JS1\_E13\_00004" 13673 "s59E25H2" 0 "Trehalose-phosphate phosphatase"  
"JS1\_E13\_00004" 13673 "s59E5H2" 0.1748626 "Trehalose-phosphate phosphatase"  
"JS1\_E13\_00004" 13673 "s63E6H2" 0.0577236 "Trehalose-phosphate phosphatase"  
"JS1\_E13\_00005" 13674 "s59E13H2" 1.393564 "Trehalose synthase"  
"JS1\_E13\_00005" 13674 "s59E25H2" 0 "Trehalose synthase"  
"JS1\_E13\_00005" 13674 "s59E5H2" 0.1376321 "Trehalose synthase"  
"JS1\_E13\_00005" 13674 "s63E6H2" 0.02901868 "Trehalose synthase"  
"JS1\_E13\_00006" 13675 "s59E13H2" 0.0217648 "Multiple sugar-binding protein precursor"  
"JS1\_E13\_00006" 13675 "s59E25H2" 0 "Multiple sugar-binding protein precursor"  
"JS1\_E13\_00006" 13675 "s59E5H2" 0.2722506 "Multiple sugar-binding protein precursor"  
"JS1\_E13\_00006" 13675 "s63E6H2" 0.2025907 "Multiple sugar-binding protein precursor"  
"JS1\_E13\_00007" 13676 "s59E13H2" 0.03629975 "Lactose transport system permease protein LacF"  
"JS1\_E13\_00007" 13676 "s59E25H2" 0 "Lactose transport system permease protein LacF"  
"JS1\_E13\_00007" 13676 "s59E5H2" 1.239074 "Lactose transport system permease protein LacF"



"JS1\_E13\_00007" 13676 "s63E6H2" 0.04201882 "Lactose transport system permease protein LacF"  
"JS1\_E13\_00008" 13677 "s59E13H2" 0.04143465 "L-arabinose transport system permease protein AraQ"  
"JS1\_E13\_00008" 13677 "s59E25H2" 0 "L-arabinose transport system permease protein AraQ"  
"JS1\_E13\_00008" 13677 "s59E5H2" 0.8123189 "L-arabinose transport system permease protein AraQ"  
"JS1\_E13\_00008" 13677 "s63E6H2" 0.02581403 "L-arabinose transport system permease protein AraQ"  
"JS1\_E13\_00010" 13679 "s59E13H2" 0 "hypothetical protein"  
"JS1\_E13\_00010" 13679 "s59E25H2" 0 "hypothetical protein"  
"JS1\_E13\_00010" 13679 "s59E5H2" 0 "hypothetical protein"  
"JS1\_E13\_00010" 13679 "s63E6H2" 0.01060593 "hypothetical protein"  
"JS1\_E13\_00011" 13680 "s59E13H2" 0.05249251 "deoxyguanosinetriphosphate triphosphohydrolase-like protein"  
"JS1\_E13\_00011" 13680 "s59E25H2" 0 "deoxyguanosinetriphosphate triphosphohydrolase-like protein"  
"JS1\_E13\_00011" 13680 "s59E5H2" 0.8780575 "deoxyguanosinetriphosphate triphosphohydrolase-like protein"  
"JS1\_E13\_00011" 13680 "s63E6H2" 0.1027788 "deoxyguanosinetriphosphate triphosphohydrolase-like protein"  
"JS1\_E13\_00012" 13681 "s59E13H2" 0.09667735 "O-acetyl-ADP-ribose deacetylase"  
"JS1\_E13\_00012" 13681 "s59E25H2" 0 "O-acetyl-ADP-ribose deacetylase"  
"JS1\_E13\_00012" 13681 "s59E5H2" 0.518744 "O-acetyl-ADP-ribose deacetylase"  
"JS1\_E13\_00012" 13681 "s63E6H2" 0.1625621 "O-acetyl-ADP-ribose deacetylase"  
"JS1\_E13\_00013" 13682 "s59E13H2" 0.07786011 "Murein DD-endopeptidase MepM"  
"JS1\_E13\_00013" 13682 "s59E25H2" 0 "Murein DD-endopeptidase MepM"  
"JS1\_E13\_00013" 13682 "s59E5H2" 0.4975467 "Murein DD-endopeptidase MepM"  
"JS1\_E13\_00013" 13682 "s63E6H2" 0.259043 "Murein DD-endopeptidase MepM"  
"JS1\_E13\_00014" 13683 "s59E13H2" 0.1581467 "hypothetical protein"  
"JS1\_E13\_00014" 13683 "s59E25H2" 0 "hypothetical protein"  
"JS1\_E13\_00014" 13683 "s59E5H2" 1.079159 "hypothetical protein"  
"JS1\_E13\_00014" 13683 "s63E6H2" 0.1096941 "hypothetical protein"  
"JS1\_E13\_00015" 13684 "s59E13H2" 0.5678249 "ECF RNA polymerase sigma factor SigW"  
"JS1\_E13\_00015" 13684 "s59E25H2" 0 "ECF RNA polymerase sigma factor SigW"  
"JS1\_E13\_00015" 13684 "s59E5H2" 1.529362 "ECF RNA polymerase sigma factor SigW"  
"JS1\_E13\_00015" 13684 "s63E6H2" 0.1591061 "ECF RNA polymerase sigma factor SigW"  
"JS1\_E13\_00016" 13685 "s59E13H2" 0.7528643 "hypothetical protein"  
"JS1\_E13\_00016" 13685 "s59E25H2" 0 "hypothetical protein"  
"JS1\_E13\_00016" 13685 "s59E5H2" 0.5018997 "hypothetical protein"  
"JS1\_E13\_00016" 13685 "s63E6H2" 0.07630882 "hypothetical protein"  
"JS1\_E13\_00017" 13686 "s59E13H2" 0.8377498 "tetratricopeptide repeat protein"  
"JS1\_E13\_00017" 13686 "s59E25H2" 0 "tetratricopeptide repeat protein"  
"JS1\_E13\_00017" 13686 "s59E5H2" 0.5105721 "tetratricopeptide repeat protein"  
"JS1\_E13\_00017" 13686 "s63E6H2" 0.1528194 "tetratricopeptide repeat protein"  
"JS1\_E13\_00018" 13687 "s59E13H2" 1.26595 "Alpha-monoglucosyldiacylglycerol synthase"  
"JS1\_E13\_00018" 13687 "s59E25H2" 0 "Alpha-monoglucosyldiacylglycerol synthase"  
"JS1\_E13\_00018" 13687 "s59E5H2" 1.291609 "Alpha-monoglucosyldiacylglycerol synthase"  
"JS1\_E13\_00018" 13687 "s63E6H2" 0.6904041 "Alpha-monoglucosyldiacylglycerol synthase"  
"JS1\_E13\_00019" 13688 "s59E13H2" 0.7103374 "hypothetical protein"  
"JS1\_E13\_00019" 13688 "s59E25H2" 0 "hypothetical protein"  
"JS1\_E13\_00019" 13688 "s59E5H2" 1.120936 "hypothetical protein"  
"JS1\_E13\_00019" 13688 "s63E6H2" 0.3490129 "hypothetical protein"  
"JS1\_E13\_00023" 13692 "s59E13H2" 0.1696908 "hypothetical protein"  
"JS1\_E13\_00023" 13692 "s59E25H2" 0 "hypothetical protein"

"JS1\_E13\_00023" 13692 "s59E5H2" 0.01475074 "hypothetical protein"  
"JS1\_E13\_00023" 13692 "s63E6H2" 0.1180115 "hypothetical protein"  
"JS1\_E13\_00025" 13694 "s59E13H2" 0.004117017 "hypothetical protein"  
"JS1\_E13\_00025" 13694 "s59E25H2" 0 "hypothetical protein"  
"JS1\_E13\_00025" 13694 "s59E5H2" 0.1409815 "hypothetical protein"  
"JS1\_E13\_00025" 13694 "s63E6H2" 0.7084834 "hypothetical protein"  
"JS1\_E13\_00028" 13697 "s59E13H2" 1.216823 "2-amino-3-ketobutyrate coenzyme A ligase"  
"JS1\_E13\_00028" 13697 "s59E25H2" 0 "2-amino-3-ketobutyrate coenzyme A ligase"  
"JS1\_E13\_00028" 13697 "s59E5H2" 2.701535 "2-amino-3-ketobutyrate coenzyme A ligase"  
"JS1\_E13\_00028" 13697 "s63E6H2" 1.023071 "2-amino-3-ketobutyrate coenzyme A ligase"  
"JS1\_E13\_00029" 13698 "s59E13H2" 0.7623402 "putative epimerase/dehydratase"  
"JS1\_E13\_00029" 13698 "s59E25H2" 0 "putative epimerase/dehydratase"  
"JS1\_E13\_00029" 13698 "s59E5H2" 0.6254351 "putative epimerase/dehydratase"  
"JS1\_E13\_00029" 13698 "s63E6H2" 1.439601 "putative epimerase/dehydratase"  
"JS1\_E13\_00030" 13699 "s59E13H2" 0.4244918 "putative HTH-type transcriptional regulator YdfH"  
"JS1\_E13\_00030" 13699 "s59E25H2" 0 "putative HTH-type transcriptional regulator YdfH"  
"JS1\_E13\_00030" 13699 "s59E5H2" 0.2265486 "putative HTH-type transcriptional regulator YdfH"  
"JS1\_E13\_00030" 13699 "s63E6H2" 1.688367 "putative HTH-type transcriptional regulator YdfH"  
"JS1\_E13\_00031" 13700 "s59E13H2" 0.8390917 "Malate dehydrogenase"  
"JS1\_E13\_00031" 13700 "s59E25H2" 0 "Malate dehydrogenase"  
"JS1\_E13\_00031" 13700 "s59E5H2" 1.439671 "Malate dehydrogenase"  
"JS1\_E13\_00031" 13700 "s63E6H2" 0.721404 "Malate dehydrogenase"  
"JS1\_E13\_00032" 13701 "s59E13H2" 0.5750968 "hypothetical protein"  
"JS1\_E13\_00032" 13701 "s59E25H2" 0 "hypothetical protein"  
"JS1\_E13\_00032" 13701 "s59E5H2" 0.8756861 "hypothetical protein"  
"JS1\_E13\_00032" 13701 "s63E6H2" 0.5843315 "hypothetical protein"  
"JS1\_E13\_00034" 13703 "s59E13H2" 0.003853333 "hypothetical protein"  
"JS1\_E13\_00034" 13703 "s59E25H2" 0 "hypothetical protein"  
"JS1\_E13\_00034" 13703 "s59E5H2" 0.2614427 "hypothetical protein"  
"JS1\_E13\_00034" 13703 "s63E6H2" 0.6378687 "hypothetical protein"  
"JS1\_E13\_00035" 13704 "s59E13H2" 0 "Flavodoxin"  
"JS1\_E13\_00035" 13704 "s59E25H2" 0 "Flavodoxin"  
"JS1\_E13\_00035" 13704 "s59E5H2" 0.1958365 "Flavodoxin"  
"JS1\_E13\_00035" 13704 "s63E6H2" 0.5389829 "Flavodoxin"  
"JS1\_E13\_00036" 13705 "s59E13H2" 0.0025168 "Endonuclease YhcR precursor"  
"JS1\_E13\_00036" 13705 "s59E25H2" 0 "Endonuclease YhcR precursor"  
"JS1\_E13\_00036" 13705 "s59E5H2" 0.01582507 "Endonuclease YhcR precursor"  
"JS1\_E13\_00036" 13705 "s63E6H2" 0.1364074 "Endonuclease YhcR precursor"  
"JS1\_E13\_00037" 13706 "s59E13H2" 0.04671778 "Leucine-, isoleucine-, valine-, threonine-, and alanine-binding protein precursor"  
"JS1\_E13\_00037" 13706 "s59E25H2" 0.1969697 "Leucine-, isoleucine-, valine-, threonine-, and alanine-binding protein precursor"  
"JS1\_E13\_00037" 13706 "s59E5H2" 0.2411242 "Leucine-, isoleucine-, valine-, threonine-, and alanine-binding protein precursor"  
"JS1\_E13\_00037" 13706 "s63E6H2" 6.617838 "Leucine-, isoleucine-, valine-, threonine-, and alanine-binding protein precursor"  
"JS1\_E13\_00038" 13707 "s59E13H2" 0.8199508 "High-affinity branched-chain amino acid transport system permease protein LivH"  
"JS1\_E13\_00038" 13707 "s59E25H2" 0.2729306 "High-affinity branched-chain amino acid transport system permease protein LivH"  
"JS1\_E13\_00038" 13707 "s59E5H2" 0.2356323 "High-affinity branched-chain amino acid transport system permease protein LivH"  
"JS1\_E13\_00038" 13707 "s63E6H2" 8.327307 "High-affinity branched-chain amino acid transport system permease protein LivH"  
"JS1\_E13\_00039" 13708 "s59E13H2" 0.860455 "leucine/isoleucine/valine transporter permease subunit"

"JS1\_E13\_00039" 13708 "s59E25H2" 0 "leucine/isoleucine/valine transporter permease subunit"  
"JS1\_E13\_00039" 13708 "s59E5H2" 0.3383516 "leucine/isoleucine/valine transporter permease subunit"  
"JS1\_E13\_00039" 13708 "s63E6H2" 9.558413 "leucine/isoleucine/valine transporter permease subunit"  
"JS1\_E13\_00040" 13709 "s59E13H2" 0.6790599 "putative branched-chain amino acid transport ATP-binding protein LivG"  
"JS1\_E13\_00040" 13709 "s59E25H2" 0 "putative branched-chain amino acid transport ATP-binding protein LivG"  
"JS1\_E13\_00040" 13709 "s59E5H2" 0.6408661 "putative branched-chain amino acid transport ATP-binding protein LivG"  
"JS1\_E13\_00040" 13709 "s63E6H2" 6.191772 "putative branched-chain amino acid transport ATP-binding protein LivG"  
"JS1\_E13\_00041" 13710 "s59E13H2" 0.66677 "High-affinity branched-chain amino acid transport ATP-binding protein LivF"  
"JS1\_E13\_00041" 13710 "s59E25H2" 0 "High-affinity branched-chain amino acid transport ATP-binding protein LivF"  
"JS1\_E13\_00041" 13710 "s59E5H2" 0.3603374 "High-affinity branched-chain amino acid transport ATP-binding protein LivF"  
"JS1\_E13\_00041" 13710 "s63E6H2" 0.6348417 "High-affinity branched-chain amino acid transport ATP-binding protein LivF"  
"JS1\_E13\_00042" 13711 "s59E13H2" 0.09259165 "Poly-beta-1,6-N-acetyl-D-glucosamine N-deacetylase precursor"  
"JS1\_E13\_00042" 13711 "s59E25H2" 0 "Poly-beta-1,6-N-acetyl-D-glucosamine N-deacetylase precursor"  
"JS1\_E13\_00042" 13711 "s59E5H2" 0.5497172 "Poly-beta-1,6-N-acetyl-D-glucosamine N-deacetylase precursor"  
"JS1\_E13\_00042" 13711 "s63E6H2" 0.1806192 "Poly-beta-1,6-N-acetyl-D-glucosamine N-deacetylase precursor"  
"JS1\_E13\_00043" 13712 "s59E13H2" 0.5234859 "Pyrimidine 5'-nucleotidase YjjG"  
"JS1\_E13\_00043" 13712 "s59E25H2" 0 "Pyrimidine 5'-nucleotidase YjjG"  
"JS1\_E13\_00043" 13712 "s59E5H2" 0.7962046 "Pyrimidine 5'-nucleotidase YjjG"  
"JS1\_E13\_00043" 13712 "s63E6H2" 0.9728698 "Pyrimidine 5'-nucleotidase YjjG"  
"JS1\_E13\_00044" 13713 "s59E13H2" 0.3314849 "putative sulfoacetate transporter SauU"  
"JS1\_E13\_00044" 13713 "s59E25H2" 0 "putative sulfoacetate transporter SauU"  
"JS1\_E13\_00044" 13713 "s59E5H2" 0.6571679 "putative sulfoacetate transporter SauU"  
"JS1\_E13\_00044" 13713 "s63E6H2" 0.8952943 "putative sulfoacetate transporter SauU"  
"JS1\_E13\_00045" 13714 "s59E13H2" 0.5740164 "Adenosine specific kinase"  
"JS1\_E13\_00045" 13714 "s59E25H2" 0 "Adenosine specific kinase"  
"JS1\_E13\_00045" 13714 "s59E5H2" 0.8128019 "Adenosine specific kinase"  
"JS1\_E13\_00045" 13714 "s63E6H2" 0.5646817 "Adenosine specific kinase"  
"JS1\_E13\_00046" 13715 "s59E13H2" 1.115683 "Phage shock protein C"  
"JS1\_E13\_00046" 13715 "s59E25H2" 0 "Phage shock protein C"  
"JS1\_E13\_00046" 13715 "s59E5H2" 1.207911 "Phage shock protein C"  
"JS1\_E13\_00046" 13715 "s63E6H2" 0.7680682 "Phage shock protein C"  
"JS1\_E13\_00047" 13716 "s59E13H2" 1.309906 "Epoxyqueuosine reductase"  
"JS1\_E13\_00047" 13716 "s59E25H2" 0 "Epoxyqueuosine reductase"  
"JS1\_E13\_00047" 13716 "s59E5H2" 0.5103721 "Epoxyqueuosine reductase"  
"JS1\_E13\_00047" 13716 "s63E6H2" 0.9575904 "Epoxyqueuosine reductase"  
"JS1\_E13\_00048" 13717 "s59E13H2" 1.07789 "Epoxyqueuosine reductase"  
"JS1\_E13\_00048" 13717 "s59E25H2" 0 "Epoxyqueuosine reductase"  
"JS1\_E13\_00048" 13717 "s59E5H2" 0.3309454 "Epoxyqueuosine reductase"  
"JS1\_E13\_00048" 13717 "s63E6H2" 0.7738181 "Epoxyqueuosine reductase"  
"JS1\_E13\_00049" 13718 "s59E13H2" 2.108159 "putative ABC transporter ATP-binding protein YbhF"  
"JS1\_E13\_00049" 13718 "s59E25H2" 0 "putative ABC transporter ATP-binding protein YbhF"  
"JS1\_E13\_00049" 13718 "s59E5H2" 3.449345 "putative ABC transporter ATP-binding protein YbhF"  
"JS1\_E13\_00049" 13718 "s63E6H2" 1.706368 "putative ABC transporter ATP-binding protein YbhF"  
"JS1\_E13\_00050" 13719 "s59E13H2" 1.494555 "ABC-2 family transporter protein"  
"JS1\_E13\_00050" 13719 "s59E25H2" 0 "ABC-2 family transporter protein"  
"JS1\_E13\_00050" 13719 "s59E5H2" 1.768192 "ABC-2 family transporter protein"  
"JS1\_E13\_00050" 13719 "s63E6H2" 1.382534 "ABC-2 family transporter protein"

"JS1\_E13\_00051" 13720 "s59E13H2" 0 "tRNA3(Ser)-specific nuclease WapA precursor"  
"JS1\_E13\_00051" 13720 "s59E25H2" 0 "tRNA3(Ser)-specific nuclease WapA precursor"  
"JS1\_E13\_00051" 13720 "s59E5H2" 1.197538 "tRNA3(Ser)-specific nuclease WapA precursor"  
"JS1\_E13\_00051" 13720 "s63E6H2" 0.3942532 "tRNA3(Ser)-specific nuclease WapA precursor"  
"JS1\_E13\_00052" 13721 "s59E13H2" 1.191083 "Protein-L-isoaspartate O-methyltransferase"  
"JS1\_E13\_00052" 13721 "s59E25H2" 0 "Protein-L-isoaspartate O-methyltransferase"  
"JS1\_E13\_00052" 13721 "s59E5H2" 2.101719 "Protein-L-isoaspartate O-methyltransferase"  
"JS1\_E13\_00052" 13721 "s63E6H2" 1.146356 "Protein-L-isoaspartate O-methyltransferase"  
"JS1\_E13\_00053" 13722 "s59E13H2" 0.5789372 "hypothetical protein"  
"JS1\_E13\_00053" 13722 "s59E25H2" 0 "hypothetical protein"  
"JS1\_E13\_00053" 13722 "s59E5H2" 1.218232 "hypothetical protein"  
"JS1\_E13\_00053" 13722 "s63E6H2" 1.714569 "hypothetical protein"  
"JS1\_E13\_00054" 13723 "s59E13H2" 0.2272083 "Capsule biosynthesis protein CapA"  
"JS1\_E13\_00054" 13723 "s59E25H2" 0 "Capsule biosynthesis protein CapA"  
"JS1\_E13\_00054" 13723 "s59E5H2" 0.1230374 "Capsule biosynthesis protein CapA"  
"JS1\_E13\_00054" 13723 "s63E6H2" 0.3669046 "Capsule biosynthesis protein CapA"  
"JS1\_E13\_00055" 13724 "s59E13H2" 0.3981426 "spermidine synthase"  
"JS1\_E13\_00055" 13724 "s59E25H2" 0 "spermidine synthase"  
"JS1\_E13\_00055" 13724 "s59E5H2" 1.526725 "spermidine synthase"  
"JS1\_E13\_00055" 13724 "s63E6H2" 0.4196877 "spermidine synthase"  
"JS1\_E13\_00056" 13725 "s59E13H2" 0.2561433 "hypothetical protein"  
"JS1\_E13\_00056" 13725 "s59E25H2" 0 "hypothetical protein"  
"JS1\_E13\_00056" 13725 "s59E5H2" 0.3970819 "hypothetical protein"  
"JS1\_E13\_00056" 13725 "s63E6H2" 0.1599771 "hypothetical protein"  
"JS1\_E13\_00057" 13726 "s59E13H2" 0.04492582 "NTE family protein RssA"  
"JS1\_E13\_00057" 13726 "s59E25H2" 0 "NTE family protein RssA"  
"JS1\_E13\_00057" 13726 "s59E5H2" 0.07872939 "NTE family protein RssA"  
"JS1\_E13\_00057" 13726 "s63E6H2" 0.1136947 "NTE family protein RssA"  
"JS1\_E13\_00058" 13727 "s59E13H2" 0.2186847 "NTE family protein RssA"  
"JS1\_E13\_00058" 13727 "s59E25H2" 0 "NTE family protein RssA"  
"JS1\_E13\_00058" 13727 "s59E5H2" 0.04598178 "NTE family protein RssA"  
"JS1\_E13\_00058" 13727 "s63E6H2" 0.1779921 "NTE family protein RssA"  
"JS1\_E13\_00059" 13728 "s59E13H2" 0.04042938 "Helix-turn-helix domain protein"  
"JS1\_E13\_00059" 13728 "s59E25H2" 0 "Helix-turn-helix domain protein"  
"JS1\_E13\_00059" 13728 "s59E5H2" 0.183733 "Helix-turn-helix domain protein"  
"JS1\_E13\_00059" 13728 "s63E6H2" 0.0279584 "Helix-turn-helix domain protein"  
"JS1\_E13\_00060" 13729 "s59E13H2" 0.06829842 "hypothetical protein"  
"JS1\_E13\_00060" 13729 "s59E25H2" 0 "hypothetical protein"  
"JS1\_E13\_00060" 13729 "s59E5H2" 0.1251143 "hypothetical protein"  
"JS1\_E13\_00060" 13729 "s63E6H2" 0.006285367 "hypothetical protein"  
"JS1\_E13\_00061" 13730 "s59E13H2" 0.002823715 "PEGA domain protein"  
"JS1\_E13\_00061" 13730 "s59E25H2" 0 "PEGA domain protein"  
"JS1\_E13\_00061" 13730 "s59E5H2" 0.01054754 "PEGA domain protein"  
"JS1\_E13\_00061" 13730 "s63E6H2" 0.6448183 "PEGA domain protein"  
"JS1\_E13\_00062" 13731 "s59E13H2" 0.2957551 "hypothetical protein"  
"JS1\_E13\_00062" 13731 "s59E25H2" 0 "hypothetical protein"  
"JS1\_E13\_00062" 13731 "s59E5H2" 0.06489433 "hypothetical protein"

"JS1\_E13\_00062" 13731 "s63E6H2" 1.058943 "hypothetical protein"  
"JS1\_E13\_00063" 13732 "s59E13H2" 0.01287725 "hypothetical protein"  
"JS1\_E13\_00063" 13732 "s59E25H2" 0 "hypothetical protein"  
"JS1\_E13\_00063" 13732 "s59E5H2" 0.009493357 "hypothetical protein"  
"JS1\_E13\_00063" 13732 "s63E6H2" 0.03803664 "hypothetical protein"  
"JS1\_E13\_00064" 13733 "s59E13H2" 0.002530376 "hypothetical protein"  
"JS1\_E13\_00064" 13733 "s59E25H2" 0 "hypothetical protein"  
"JS1\_E13\_00064" 13733 "s59E5H2" 0 "hypothetical protein"  
"JS1\_E13\_00064" 13733 "s63E6H2" 0 "hypothetical protein"  
"JS1\_E13\_00065" 13734 "s59E13H2" 0.005528804 "hypothetical protein"  
"JS1\_E13\_00065" 13734 "s59E25H2" 0 "hypothetical protein"  
"JS1\_E13\_00065" 13734 "s59E5H2" 0 "hypothetical protein"  
"JS1\_E13\_00065" 13734 "s63E6H2" 0 "hypothetical protein"  
"JS1\_E13\_00066" 13735 "s59E13H2" 0 "hypothetical protein"  
"JS1\_E13\_00066" 13735 "s59E25H2" 0 "hypothetical protein"  
"JS1\_E13\_00066" 13735 "s59E5H2" 0 "hypothetical protein"  
"JS1\_E13\_00066" 13735 "s63E6H2" 0 "hypothetical protein"  
"JS1\_E13\_00067" 13736 "s59E13H2" 0 "hypothetical protein"  
"JS1\_E13\_00067" 13736 "s59E25H2" 0 "hypothetical protein"  
"JS1\_E13\_00067" 13736 "s59E5H2" 0 "hypothetical protein"  
"JS1\_E13\_00067" 13736 "s63E6H2" 0 "hypothetical protein"  
"JS1\_E13\_00068" 13737 "s59E13H2" 0 "hypothetical protein"  
"JS1\_E13\_00068" 13737 "s59E25H2" 0 "hypothetical protein"  
"JS1\_E13\_00068" 13737 "s59E5H2" 0 "hypothetical protein"  
"JS1\_E13\_00068" 13737 "s63E6H2" 0 "hypothetical protein"  
"JS1\_E13\_00071" 13740 "s59E13H2" 1.539365 "Group II intron-encoded protein LtrA"  
"JS1\_E13\_00071" 13740 "s59E25H2" 0 "Group II intron-encoded protein LtrA"  
"JS1\_E13\_00071" 13740 "s59E5H2" 3.881964 "Group II intron-encoded protein LtrA"  
"JS1\_E13\_00071" 13740 "s63E6H2" 16.02696 "Group II intron-encoded protein LtrA"  
"JS1\_E13\_00072" 13741 "s59E13H2" 0 "Calcineurin-like phosphoesterase"  
"JS1\_E13\_00072" 13741 "s59E25H2" 0 "Calcineurin-like phosphoesterase"  
"JS1\_E13\_00072" 13741 "s59E5H2" 0 "Calcineurin-like phosphoesterase"  
"JS1\_E13\_00072" 13741 "s63E6H2" 0 "Calcineurin-like phosphoesterase"  
"JS1\_E13\_00073" 13742 "s59E13H2" 0 "hypothetical protein"  
"JS1\_E13\_00073" 13742 "s59E25H2" 0 "hypothetical protein"  
"JS1\_E13\_00073" 13742 "s59E5H2" 0 "hypothetical protein"  
"JS1\_E13\_00073" 13742 "s63E6H2" 0 "hypothetical protein"  
"JS1\_E13\_00074" 13743 "s59E13H2" 0.04195838 "Acetyltransferase (GNAT) family protein"  
"JS1\_E13\_00074" 13743 "s59E25H2" 0 "Acetyltransferase (GNAT) family protein"  
"JS1\_E13\_00074" 13743 "s59E5H2" 0.2591912 "Acetyltransferase (GNAT) family protein"  
"JS1\_E13\_00074" 13743 "s63E6H2" 10.59537 "Acetyltransferase (GNAT) family protein"  
"JS1\_E13\_00075" 13744 "s59E13H2" 0.05784538 "Nucleoside diphosphate kinase"  
"JS1\_E13\_00075" 13744 "s59E25H2" 0 "Nucleoside diphosphate kinase"  
"JS1\_E13\_00075" 13744 "s59E5H2" 0.3706716 "Nucleoside diphosphate kinase"  
"JS1\_E13\_00075" 13744 "s63E6H2" 0.02270288 "Nucleoside diphosphate kinase"  
"JS1\_E13\_00076" 13745 "s59E13H2" 0.09625036 "Fe/S biogenesis protein NfuA"  
"JS1\_E13\_00076" 13745 "s59E25H2" 0 "Fe/S biogenesis protein NfuA"

"JS1\_E13\_00076" 13745 "s59E5H2" 0.5509068 "Fe/S biogenesis protein NfuA"  
"JS1\_E13\_00076" 13745 "s63E6H2" 0.04638881 "Fe/S biogenesis protein NfuA"  
"JS1\_E13\_00077" 13746 "s59E13H2" 0.128526 "nicotinic acid mononucleotide adenyltransferase"  
"JS1\_E13\_00077" 13746 "s59E25H2" 0 "nicotinic acid mononucleotide adenyltransferase"  
"JS1\_E13\_00077" 13746 "s59E5H2" 1.395743 "nicotinic acid mononucleotide adenyltransferase"  
"JS1\_E13\_00077" 13746 "s63E6H2" 0.2076572 "nicotinic acid mononucleotide adenyltransferase"  
"JS1\_E13\_00078" 13747 "s59E13H2" 0.106401 "L-lactate dehydrogenase"  
"JS1\_E13\_00078" 13747 "s59E25H2" 0 "L-lactate dehydrogenase"  
"JS1\_E13\_00078" 13747 "s59E5H2" 0.4443056 "L-lactate dehydrogenase"  
"JS1\_E13\_00078" 13747 "s63E6H2" 0.1722075 "L-lactate dehydrogenase"  
"JS1\_E13\_00079" 13748 "s59E13H2" 0.1461401 "NADPH-dependent FMN reductase"  
"JS1\_E13\_00079" 13748 "s59E25H2" 0 "NADPH-dependent FMN reductase"  
"JS1\_E13\_00079" 13748 "s59E5H2" 0.5877022 "NADPH-dependent FMN reductase"  
"JS1\_E13\_00079" 13748 "s63E6H2" 0.1948952 "NADPH-dependent FMN reductase"  
"JS1\_E13\_00080" 13749 "s59E13H2" 0.8899721 "putative dual-specificity RNA methyltransferase RlmN"  
"JS1\_E13\_00080" 13749 "s59E25H2" 0 "putative dual-specificity RNA methyltransferase RlmN"  
"JS1\_E13\_00080" 13749 "s59E5H2" 0.7036676 "putative dual-specificity RNA methyltransferase RlmN"  
"JS1\_E13\_00080" 13749 "s63E6H2" 0.1729114 "putative dual-specificity RNA methyltransferase RlmN"  
"JS1\_E13\_00082" 13751 "s59E13H2" 0.07791816 "Putative zinc ribbon domain protein"  
"JS1\_E13\_00082" 13751 "s59E25H2" 0 "Putative zinc ribbon domain protein"  
"JS1\_E13\_00082" 13751 "s59E5H2" 0.3451494 "Putative zinc ribbon domain protein"  
"JS1\_E13\_00082" 13751 "s63E6H2" 0.1679563 "Putative zinc ribbon domain protein"  
"JS1\_E13\_00086" 13755 "s59E13H2" 0.074354 "cell division protein MraZ"  
"JS1\_E13\_00086" 13755 "s59E25H2" 0 "cell division protein MraZ"  
"JS1\_E13\_00086" 13755 "s59E5H2" 0.9476733 "cell division protein MraZ"  
"JS1\_E13\_00086" 13755 "s63E6H2" 0.7723371 "cell division protein MraZ"  
"JS1\_E13\_00087" 13756 "s59E13H2" 0.05460481 "Ribosomal RNA small subunit methyltransferase H"  
"JS1\_E13\_00087" 13756 "s59E25H2" 0 "Ribosomal RNA small subunit methyltransferase H"  
"JS1\_E13\_00087" 13756 "s59E5H2" 0.6590189 "Ribosomal RNA small subunit methyltransferase H"  
"JS1\_E13\_00087" 13756 "s63E6H2" 1.014318 "Ribosomal RNA small subunit methyltransferase H"  
"JS1\_E13\_00088" 13757 "s59E13H2" 0.09280432 "Cell division protein FtsL"  
"JS1\_E13\_00088" 13757 "s59E25H2" 0 "Cell division protein FtsL"  
"JS1\_E13\_00088" 13757 "s59E5H2" 0.4649569 "Cell division protein FtsL"  
"JS1\_E13\_00088" 13757 "s63E6H2" 0.3269583 "Cell division protein FtsL"  
"JS1\_E13\_00089" 13758 "s59E13H2" 0.08867864 "Stage V sporulation protein D"  
"JS1\_E13\_00089" 13758 "s59E25H2" 0 "Stage V sporulation protein D"  
"JS1\_E13\_00089" 13758 "s59E5H2" 0.718855 "Stage V sporulation protein D"  
"JS1\_E13\_00089" 13758 "s63E6H2" 0.8288568 "Stage V sporulation protein D"  
"JS1\_E13\_00090" 13759 "s59E13H2" 0.1261592 "UDP-N-acetylmuramoyl-L-alanyl-D-glutamate--L-lysine ligase"  
"JS1\_E13\_00090" 13759 "s59E25H2" 0 "UDP-N-acetylmuramoyl-L-alanyl-D-glutamate--L-lysine ligase"  
"JS1\_E13\_00090" 13759 "s59E5H2" 0.7720439 "UDP-N-acetylmuramoyl-L-alanyl-D-glutamate--L-lysine ligase"  
"JS1\_E13\_00090" 13759 "s63E6H2" 0.4690752 "UDP-N-acetylmuramoyl-L-alanyl-D-glutamate--L-lysine ligase"  
"JS1\_E13\_00091" 13760 "s59E13H2" 0.5643731 "UDP-N-acetylmuramoyl-tripeptide--D-alanyl-D-alanine ligase"  
"JS1\_E13\_00091" 13760 "s59E25H2" 0 "UDP-N-acetylmuramoyl-tripeptide--D-alanyl-D-alanine ligase"  
"JS1\_E13\_00091" 13760 "s59E5H2" 1.496578 "UDP-N-acetylmuramoyl-tripeptide--D-alanyl-D-alanine ligase"  
"JS1\_E13\_00091" 13760 "s63E6H2" 1.137018 "UDP-N-acetylmuramoyl-tripeptide--D-alanyl-D-alanine ligase"  
"JS1\_E13\_00092" 13761 "s59E13H2" 1.015451 "Phospho-N-acetylmuramoyl-pentapeptide-transferase"

"JS1\_E13\_00092" 13761 "s59E25H2" 0 "Phospho-N-acetylmuramoyl-pentapeptide-transferase"  
"JS1\_E13\_00092" 13761 "s59E5H2" 1.301081 "Phospho-N-acetylmuramoyl-pentapeptide-transferase"  
"JS1\_E13\_00092" 13761 "s63E6H2" 2.066409 "Phospho-N-acetylmuramoyl-pentapeptide-transferase"  
"JS1\_E13\_00093" 13762 "s59E13H2" 0.8226235 "Lipid II flippase FtsW"  
"JS1\_E13\_00093" 13762 "s59E25H2" 0 "Lipid II flippase FtsW"  
"JS1\_E13\_00093" 13762 "s59E5H2" 1.463617 "Lipid II flippase FtsW"  
"JS1\_E13\_00093" 13762 "s63E6H2" 1.475906 "Lipid II flippase FtsW"  
"JS1\_E13\_00094" 13763 "s59E13H2" 0.8112779 "UDP-N-acetylglucosamine--N-acetylmuramyl-(pentapeptide) pyrophosphoryl-undecaprenol N-acetylglucosamine transferase"  
"JS1\_E13\_00094" 13763 "s59E25H2" 0 "UDP-N-acetylglucosamine--N-acetylmuramyl-(pentapeptide) pyrophosphoryl-undecaprenol N-acetylglucosamine transferase"  
"JS1\_E13\_00094" 13763 "s59E5H2" 1.492801 "UDP-N-acetylglucosamine--N-acetylmuramyl-(pentapeptide) pyrophosphoryl-undecaprenol N-acetylglucosamine transferase"  
"JS1\_E13\_00094" 13763 "s63E6H2" 1.181992 "UDP-N-acetylglucosamine--N-acetylmuramyl-(pentapeptide) pyrophosphoryl-undecaprenol N-acetylglucosamine transferase"  
"JS1\_E13\_00095" 13764 "s59E13H2" 0.7179684 "UDP-N-acetylmuramate--L-alanine ligase"  
"JS1\_E13\_00095" 13764 "s59E25H2" 0 "UDP-N-acetylmuramate--L-alanine ligase"  
"JS1\_E13\_00095" 13764 "s59E5H2" 1.414774 "UDP-N-acetylmuramate--L-alanine ligase"  
"JS1\_E13\_00095" 13764 "s63E6H2" 1.069018 "UDP-N-acetylmuramate--L-alanine ligase"  
"JS1\_E13\_00096" 13765 "s59E13H2" 0.6594586 "UDP-N-acetylenolpyruvoylglucosamine reductase"  
"JS1\_E13\_00096" 13765 "s59E25H2" 0 "UDP-N-acetylenolpyruvoylglucosamine reductase"  
"JS1\_E13\_00096" 13765 "s59E5H2" 0.3195217 "UDP-N-acetylenolpyruvoylglucosamine reductase"  
"JS1\_E13\_00096" 13765 "s63E6H2" 0.7528818 "UDP-N-acetylenolpyruvoylglucosamine reductase"  
"JS1\_E13\_00097" 13766 "s59E13H2" 0.02597598 "Cell division protein DivIB"  
"JS1\_E13\_00097" 13766 "s59E25H2" 0 "Cell division protein DivIB"  
"JS1\_E13\_00097" 13766 "s59E5H2" 0.1925561 "Cell division protein DivIB"  
"JS1\_E13\_00097" 13766 "s63E6H2" 1.09523 "Cell division protein DivIB"  
"JS1\_E13\_00098" 13767 "s59E13H2" 0.1771178 "Cell division protein FtsA"  
"JS1\_E13\_00098" 13767 "s59E25H2" 0 "Cell division protein FtsA"  
"JS1\_E13\_00098" 13767 "s59E5H2" 0.3942892 "Cell division protein FtsA"  
"JS1\_E13\_00098" 13767 "s63E6H2" 1.272024 "Cell division protein FtsA"  
"JS1\_E13\_00099" 13768 "s59E13H2" 0.2568972 "Cell division protein FtsZ"  
"JS1\_E13\_00099" 13768 "s59E25H2" 0 "Cell division protein FtsZ"  
"JS1\_E13\_00099" 13768 "s59E5H2" 0.5629252 "Cell division protein FtsZ"  
"JS1\_E13\_00099" 13768 "s63E6H2" 1.601626 "Cell division protein FtsZ"  
"JS1\_E13\_00100" 13769 "s59E13H2" 0.08561562 "Transcriptional repressor NrdR"  
"JS1\_E13\_00100" 13769 "s59E25H2" 0 "Transcriptional repressor NrdR"  
"JS1\_E13\_00100" 13769 "s59E5H2" 0.3360512 "Transcriptional repressor NrdR"  
"JS1\_E13\_00100" 13769 "s63E6H2" 1.475308 "Transcriptional repressor NrdR"  
"JS1\_E13\_00101" 13770 "s59E13H2" 0.2931437 "Anaerobic ribonucleoside-triphosphate reductase"  
"JS1\_E13\_00101" 13770 "s59E25H2" 0 "Anaerobic ribonucleoside-triphosphate reductase"  
"JS1\_E13\_00101" 13770 "s59E5H2" 0.4695123 "Anaerobic ribonucleoside-triphosphate reductase"  
"JS1\_E13\_00101" 13770 "s63E6H2" 1.302105 "Anaerobic ribonucleoside-triphosphate reductase"  
"JS1\_E13\_00102" 13771 "s59E13H2" 0.8253152 "hypothetical protein"  
"JS1\_E13\_00102" 13771 "s59E25H2" 0 "hypothetical protein"  
"JS1\_E13\_00102" 13771 "s59E5H2" 0.5497367 "hypothetical protein"  
"JS1\_E13\_00102" 13771 "s63E6H2" 1.182744 "hypothetical protein"  
"JS1\_E13\_00103" 13772 "s59E13H2" 0.886794 "molybdenum cofactor biosynthesis protein A"  
"JS1\_E13\_00103" 13772 "s59E25H2" 0 "molybdenum cofactor biosynthesis protein A"  
"JS1\_E13\_00103" 13772 "s59E5H2" 0.1919414 "molybdenum cofactor biosynthesis protein A"  
"JS1\_E13\_00103" 13772 "s63E6H2" 0.3238269 "molybdenum cofactor biosynthesis protein A"

"JS1\_E13\_00104" 13773 "s59E13H2" 0.3019466 "Laccase domain protein"  
"JS1\_E13\_00104" 13773 "s59E25H2" 0 "Laccase domain protein"  
"JS1\_E13\_00104" 13773 "s59E5H2" 0.05161126 "Laccase domain protein"  
"JS1\_E13\_00104" 13773 "s63E6H2" 0.342753 "Laccase domain protein"  
"JS1\_E13\_00105" 13774 "s59E13H2" 1.331905 "Hydrogen cyanide synthase subunit HcnA"  
"JS1\_E13\_00105" 13774 "s59E25H2" 0 "Hydrogen cyanide synthase subunit HcnA"  
"JS1\_E13\_00105" 13774 "s59E5H2" 0.1167139 "Hydrogen cyanide synthase subunit HcnA"  
"JS1\_E13\_00105" 13774 "s63E6H2" 1.072558 "Hydrogen cyanide synthase subunit HcnA"  
"JS1\_E13\_00106" 13775 "s59E13H2" 0.4289851 "Hydrogen cyanide synthase subunit HcnB"  
"JS1\_E13\_00106" 13775 "s59E25H2" 0 "Hydrogen cyanide synthase subunit HcnB"  
"JS1\_E13\_00106" 13775 "s59E5H2" 0.3074192 "Hydrogen cyanide synthase subunit HcnB"  
"JS1\_E13\_00106" 13775 "s63E6H2" 1.713062 "Hydrogen cyanide synthase subunit HcnB"  
"JS1\_E13\_00107" 13776 "s59E13H2" 0.1815996 "ferredoxin"  
"JS1\_E13\_00107" 13776 "s59E25H2" 0 "ferredoxin"  
"JS1\_E13\_00107" 13776 "s59E5H2" 0.1238993 "ferredoxin"  
"JS1\_E13\_00107" 13776 "s63E6H2" 1.671341 "ferredoxin"  
"JS1\_E13\_00108" 13777 "s59E13H2" 0.1499911 "Hydrogen cyanide synthase subunit HcnB"  
"JS1\_E13\_00108" 13777 "s59E25H2" 0 "Hydrogen cyanide synthase subunit HcnB"  
"JS1\_E13\_00108" 13777 "s59E5H2" 0.04471588 "Hydrogen cyanide synthase subunit HcnB"  
"JS1\_E13\_00108" 13777 "s63E6H2" 1.457025 "Hydrogen cyanide synthase subunit HcnB"  
"JS1\_E13\_00109" 13778 "s59E13H2" 0.1396325 "Sarcosine oxidase subunit beta"  
"JS1\_E13\_00109" 13778 "s59E25H2" 0 "Sarcosine oxidase subunit beta"  
"JS1\_E13\_00109" 13778 "s59E5H2" 0.0315769 "Sarcosine oxidase subunit beta"  
"JS1\_E13\_00109" 13778 "s63E6H2" 1.550446 "Sarcosine oxidase subunit beta"  
"JS1\_E13\_00110" 13779 "s59E13H2" 0.05198768 "Leucine-specific-binding protein precursor"  
"JS1\_E13\_00110" 13779 "s59E25H2" 0 "Leucine-specific-binding protein precursor"  
"JS1\_E13\_00110" 13779 "s59E5H2" 0.1147356 "Leucine-specific-binding protein precursor"  
"JS1\_E13\_00110" 13779 "s63E6H2" 1.661276 "Leucine-specific-binding protein precursor"  
"JS1\_E13\_00111" 13780 "s59E13H2" 0.06010639 "High-affinity branched-chain amino acid transport system permease protein LivH"  
"JS1\_E13\_00111" 13780 "s59E25H2" 0 "High-affinity branched-chain amino acid transport system permease protein LivH"  
"JS1\_E13\_00111" 13780 "s59E5H2" 0.8702963 "High-affinity branched-chain amino acid transport system permease protein LivH"  
"JS1\_E13\_00111" 13780 "s63E6H2" 2.216974 "High-affinity branched-chain amino acid transport system permease protein LivH"  
"JS1\_E13\_00112" 13781 "s59E13H2" 0.2300846 "High-affinity branched-chain amino acid transport system permease protein LivH"  
"JS1\_E13\_00112" 13781 "s59E25H2" 0 "High-affinity branched-chain amino acid transport system permease protein LivH"  
"JS1\_E13\_00112" 13781 "s59E5H2" 1.626918 "High-affinity branched-chain amino acid transport system permease protein LivH"  
"JS1\_E13\_00112" 13781 "s63E6H2" 1.513609 "High-affinity branched-chain amino acid transport system permease protein LivH"  
"JS1\_E13\_00113" 13782 "s59E13H2" 0.7582907 "putative branched-chain amino acid transport ATP-binding protein LivG"  
"JS1\_E13\_00113" 13782 "s59E25H2" 0 "putative branched-chain amino acid transport ATP-binding protein LivG"  
"JS1\_E13\_00113" 13782 "s59E5H2" 1.931869 "putative branched-chain amino acid transport ATP-binding protein LivG"  
"JS1\_E13\_00113" 13782 "s63E6H2" 1.579641 "putative branched-chain amino acid transport ATP-binding protein LivG"  
"JS1\_E13\_00114" 13783 "s59E13H2" 1.072509 "High-affinity branched-chain amino acid transport ATP-binding protein LivF"  
"JS1\_E13\_00114" 13783 "s59E25H2" 0 "High-affinity branched-chain amino acid transport ATP-binding protein LivF"  
"JS1\_E13\_00114" 13783 "s59E5H2" 2.388067 "High-affinity branched-chain amino acid transport ATP-binding protein LivF"  
"JS1\_E13\_00114" 13783 "s63E6H2" 2.150462 "High-affinity branched-chain amino acid transport ATP-binding protein LivF"  
"JS1\_E13\_00115" 13784 "s59E13H2" 0.5720403 "hypothetical protein"  
"JS1\_E13\_00115" 13784 "s59E25H2" 0 "hypothetical protein"  
"JS1\_E13\_00115" 13784 "s59E5H2" 1.69161 "hypothetical protein"



"JS1\_E13\_00115" 13784 "s63E6H2" 0.6720007 "hypothetical protein"  
"JS1\_E13\_00116" 13785 "s59E13H2" 0.6128414 "hypothetical protein"  
"JS1\_E13\_00116" 13785 "s59E25H2" 0 "hypothetical protein"  
"JS1\_E13\_00116" 13785 "s59E5H2" 1.981064 "hypothetical protein"  
"JS1\_E13\_00116" 13785 "s63E6H2" 0.7129051 "hypothetical protein"  
"JS1\_E13\_00117" 13786 "s59E13H2" 0.1450952 "Branched-chain amino acid transport system / permease component"  
"JS1\_E13\_00117" 13786 "s59E25H2" 0 "Branched-chain amino acid transport system / permease component"  
"JS1\_E13\_00117" 13786 "s59E5H2" 0.03769664 "Branched-chain amino acid transport system / permease component"  
"JS1\_E13\_00117" 13786 "s63E6H2" 0.3369266 "Branched-chain amino acid transport system / permease component"  
"JS1\_E13\_00118" 13787 "s59E13H2" 0.8269931 "Helix-turn-helix domain protein"  
"JS1\_E13\_00118" 13787 "s59E25H2" 0 "Helix-turn-helix domain protein"  
"JS1\_E13\_00118" 13787 "s59E5H2" 0.08842051 "Helix-turn-helix domain protein"  
"JS1\_E13\_00118" 13787 "s63E6H2" 0.2679366 "Helix-turn-helix domain protein"  
"JS1\_E13\_00119" 13788 "s59E13H2" 0.104122 "hypothetical protein"  
"JS1\_E13\_00119" 13788 "s59E25H2" 0 "hypothetical protein"  
"JS1\_E13\_00119" 13788 "s59E5H2" 0.1647612 "hypothetical protein"  
"JS1\_E13\_00119" 13788 "s63E6H2" 0.1831304 "hypothetical protein"  
"JS1\_E13\_00120" 13789 "s59E13H2" 0.06939812 "2'-5'-RNA ligase"  
"JS1\_E13\_00120" 13789 "s59E25H2" 0 "2'-5'-RNA ligase"  
"JS1\_E13\_00120" 13789 "s59E5H2" 0.1164812 "2'-5'-RNA ligase"  
"JS1\_E13\_00120" 13789 "s63E6H2" 0.1910892 "2'-5'-RNA ligase"  
"JS1\_E13\_00121" 13790 "s59E13H2" 0.07308036 "DNA repair and recombination protein RadA"  
"JS1\_E13\_00121" 13790 "s59E25H2" 0 "DNA repair and recombination protein RadA"  
"JS1\_E13\_00121" 13790 "s59E5H2" 0.2899788 "DNA repair and recombination protein RadA"  
"JS1\_E13\_00121" 13790 "s63E6H2" 0.3963068 "DNA repair and recombination protein RadA"  
"JS1\_E13\_00122" 13791 "s59E13H2" 0.07338263 "recombination regulator RecX"  
"JS1\_E13\_00122" 13791 "s59E25H2" 0 "recombination regulator RecX"  
"JS1\_E13\_00122" 13791 "s59E5H2" 0.2478979 "recombination regulator RecX"  
"JS1\_E13\_00122" 13791 "s63E6H2" 0.1746074 "recombination regulator RecX"  
"JS1\_E13\_00123" 13792 "s59E13H2" 0.1103965 "Ribonuclease Y"  
"JS1\_E13\_00123" 13792 "s59E25H2" 0 "Ribonuclease Y"  
"JS1\_E13\_00123" 13792 "s59E5H2" 0.813834 "Ribonuclease Y"  
"JS1\_E13\_00123" 13792 "s63E6H2" 0.169308 "Ribonuclease Y"  
"JS1\_E13\_00124" 13793 "s59E13H2" 0.1245569 "(Dimethylallyl)adenosine tRNA methylthiotransferase MiaB"  
"JS1\_E13\_00124" 13793 "s59E25H2" 0 "(Dimethylallyl)adenosine tRNA methylthiotransferase MiaB"  
"JS1\_E13\_00124" 13793 "s59E5H2" 0.8652113 "(Dimethylallyl)adenosine tRNA methylthiotransferase MiaB"  
"JS1\_E13\_00124" 13793 "s63E6H2" 0.1087777 "(Dimethylallyl)adenosine tRNA methylthiotransferase MiaB"  
"JS1\_E13\_00125" 13794 "s59E13H2" 0.09932145 "tRNA dimethylallyltransferase"  
"JS1\_E13\_00125" 13794 "s59E25H2" 0 "tRNA dimethylallyltransferase"  
"JS1\_E13\_00125" 13794 "s59E5H2" 0.4250219 "tRNA dimethylallyltransferase"  
"JS1\_E13\_00125" 13794 "s63E6H2" 0.03224275 "tRNA dimethylallyltransferase"  
"JS1\_E13\_00126" 13795 "s59E13H2" 0 "hypothetical protein"  
"JS1\_E13\_00126" 13795 "s59E25H2" 0 "hypothetical protein"  
"JS1\_E13\_00126" 13795 "s59E5H2" 0 "hypothetical protein"  
"JS1\_E13\_00126" 13795 "s63E6H2" 0 "hypothetical protein"  
"JS1\_E13\_00127" 13796 "s59E13H2" 0.1560594 "Peptide methionine sulfoxide reductase MsrA/MsrB"  
"JS1\_E13\_00127" 13796 "s59E25H2" 0 "Peptide methionine sulfoxide reductase MsrA/MsrB"

"JS1\_E13\_00127" 13796 "s59E5H2" 0.6503496 "Peptide methionine sulfoxide reductase MsrA/MsrB"  
"JS1\_E13\_00127" 13796 "s63E6H2" 1.053943 "Peptide methionine sulfoxide reductase MsrA/MsrB"  
"JS1\_E13\_00128" 13797 "s59E13H2" 0 "Glutaredoxin-3"  
"JS1\_E13\_00128" 13797 "s59E25H2" 0 "Glutaredoxin-3"  
"JS1\_E13\_00128" 13797 "s59E5H2" 0 "Glutaredoxin-3"  
"JS1\_E13\_00128" 13797 "s63E6H2" 0.1108637 "Glutaredoxin-3"  
"JS1\_E13\_00129" 13798 "s59E13H2" 1.935942 "putative manganese efflux pump MntP"  
"JS1\_E13\_00129" 13798 "s59E25H2" 0 "putative manganese efflux pump MntP"  
"JS1\_E13\_00129" 13798 "s59E5H2" 0.04811701 "putative manganese efflux pump MntP"  
"JS1\_E13\_00129" 13798 "s63E6H2" 0.03361653 "putative manganese efflux pump MntP"  
"JS1\_E13\_00131" 13800 "s59E13H2" 2.806629 "Catalase HP11"  
"JS1\_E13\_00131" 13800 "s59E25H2" 0.1639232 "Catalase HP11"  
"JS1\_E13\_00131" 13800 "s59E5H2" 0.320254 "Catalase HP11"  
"JS1\_E13\_00131" 13800 "s63E6H2" 1.608489 "Catalase HP11"  
"JS1\_E13\_00132" 13801 "s59E13H2" 0.009730804 "hypothetical protein"  
"JS1\_E13\_00132" 13801 "s59E25H2" 0 "hypothetical protein"  
"JS1\_E13\_00132" 13801 "s59E5H2" 2.184736 "hypothetical protein"  
"JS1\_E13\_00132" 13801 "s63E6H2" 4.345341 "hypothetical protein"  
"JS1\_E13\_00133" 13802 "s59E13H2" 0.04838866 "R-phenyllactate dehydratase activator"  
"JS1\_E13\_00133" 13802 "s59E25H2" 0 "R-phenyllactate dehydratase activator"  
"JS1\_E13\_00133" 13802 "s59E5H2" 0.394764 "R-phenyllactate dehydratase activator"  
"JS1\_E13\_00133" 13802 "s63E6H2" 0.7464305 "R-phenyllactate dehydratase activator"  
"JS1\_E13\_00134" 13803 "s59E13H2" 0.06101639 "hypothetical protein"  
"JS1\_E13\_00134" 13803 "s59E25H2" 0 "hypothetical protein"  
"JS1\_E13\_00134" 13803 "s59E5H2" 0.5738311 "hypothetical protein"  
"JS1\_E13\_00134" 13803 "s63E6H2" 1.64836 "hypothetical protein"  
"JS1\_E13\_00135" 13804 "s59E13H2" 0.03544097 "2-hydroxyglutaryl-CoA dehydratase, D-component"  
"JS1\_E13\_00135" 13804 "s59E25H2" 0 "2-hydroxyglutaryl-CoA dehydratase, D-component"  
"JS1\_E13\_00135" 13804 "s59E5H2" 0.6367999 "2-hydroxyglutaryl-CoA dehydratase, D-component"  
"JS1\_E13\_00135" 13804 "s63E6H2" 1.738217 "2-hydroxyglutaryl-CoA dehydratase, D-component"  
"JS1\_E13\_00136" 13805 "s59E13H2" 0.2427508 "Isoaspartyl dipeptidase"  
"JS1\_E13\_00136" 13805 "s59E25H2" 0 "Isoaspartyl dipeptidase"  
"JS1\_E13\_00136" 13805 "s59E5H2" 0.1749397 "Isoaspartyl dipeptidase"  
"JS1\_E13\_00136" 13805 "s63E6H2" 0.438352 "Isoaspartyl dipeptidase"  
"JS1\_E13\_00139" 13808 "s59E13H2" 0.8207992 "Cyclic di-GMP phosphodiesterase response regulator RpfG"  
"JS1\_E13\_00139" 13808 "s59E25H2" 0 "Cyclic di-GMP phosphodiesterase response regulator RpfG"  
"JS1\_E13\_00139" 13808 "s59E5H2" 0.1428887 "Cyclic di-GMP phosphodiesterase response regulator RpfG"  
"JS1\_E13\_00139" 13808 "s63E6H2" 2.61518 "Cyclic di-GMP phosphodiesterase response regulator RpfG"  
"JS1\_E13\_00140" 13809 "s59E13H2" 0.4234539 "EamA-like transporter family protein"  
"JS1\_E13\_00140" 13809 "s59E25H2" 0 "EamA-like transporter family protein"  
"JS1\_E13\_00140" 13809 "s59E5H2" 1.213872 "EamA-like transporter family protein"  
"JS1\_E13\_00140" 13809 "s63E6H2" 0.5293978 "EamA-like transporter family protein"  
"JS1\_E13\_00141" 13810 "s59E13H2" 0.7845875 "Bacterial extracellular solute-binding protein"  
"JS1\_E13\_00141" 13810 "s59E25H2" 0 "Bacterial extracellular solute-binding protein"  
"JS1\_E13\_00141" 13810 "s59E5H2" 0.3840775 "Bacterial extracellular solute-binding protein"  
"JS1\_E13\_00141" 13810 "s63E6H2" 0.08945309 "Bacterial extracellular solute-binding protein"  
"JS1\_E13\_00142" 13811 "s59E13H2" 0.6270734 "L-arabinose transport system permease protein AraP"

"JS1\_E13\_00142" 13811 "s59E25H2" 0 "L-arabinose transport system permease protein AraP"  
"JS1\_E13\_00142" 13811 "s59E5H2" 1.89323 "L-arabinose transport system permease protein AraP"  
"JS1\_E13\_00142" 13811 "s63E6H2" 0.0582175 "L-arabinose transport system permease protein AraP"  
"JS1\_E13\_00143" 13812 "s59E13H2" 0.453844 "L-arabinose transport system permease protein AraQ"  
"JS1\_E13\_00143" 13812 "s59E25H2" 0 "L-arabinose transport system permease protein AraQ"  
"JS1\_E13\_00143" 13812 "s59E5H2" 1.492458 "L-arabinose transport system permease protein AraQ"  
"JS1\_E13\_00143" 13812 "s63E6H2" 0.07342137 "L-arabinose transport system permease protein AraQ"  
"JS1\_E13\_00144" 13813 "s59E13H2" 2.513267 "Beta-xylosidase"  
"JS1\_E13\_00144" 13813 "s59E25H2" 0.2853717 "Beta-xylosidase"  
"JS1\_E13\_00144" 13813 "s59E5H2" 1.097295 "Beta-xylosidase"  
"JS1\_E13\_00144" 13813 "s63E6H2" 0.528213 "Beta-xylosidase"  
"JS1\_E13\_00145" 13814 "s59E13H2" 0.5251778 "Xylose isomerase"  
"JS1\_E13\_00145" 13814 "s59E25H2" 0 "Xylose isomerase"  
"JS1\_E13\_00145" 13814 "s59E5H2" 1.019604 "Xylose isomerase"  
"JS1\_E13\_00145" 13814 "s63E6H2" 1.160398 "Xylose isomerase"  
"JS1\_E13\_00146" 13815 "s59E13H2" 0.1513698 "D-xylose-binding periplasmic protein precursor"  
"JS1\_E13\_00146" 13815 "s59E25H2" 0 "D-xylose-binding periplasmic protein precursor"  
"JS1\_E13\_00146" 13815 "s59E5H2" 0.699131 "D-xylose-binding periplasmic protein precursor"  
"JS1\_E13\_00146" 13815 "s63E6H2" 1.946087 "D-xylose-binding periplasmic protein precursor"  
"JS1\_E13\_00147" 13816 "s59E13H2" 0.206476 "Xylose import ATP-binding protein XylG"  
"JS1\_E13\_00147" 13816 "s59E25H2" 0.1627604 "Xylose import ATP-binding protein XylG"  
"JS1\_E13\_00147" 13816 "s59E5H2" 0.3516764 "Xylose import ATP-binding protein XylG"  
"JS1\_E13\_00147" 13816 "s63E6H2" 1.950023 "Xylose import ATP-binding protein XylG"  
"JS1\_E13\_00148" 13817 "s59E13H2" 0.1854825 "Xylose transport system permease protein XylH"  
"JS1\_E13\_00148" 13817 "s59E25H2" 0 "Xylose transport system permease protein XylH"  
"JS1\_E13\_00148" 13817 "s59E5H2" 0.3943919 "Xylose transport system permease protein XylH"  
"JS1\_E13\_00148" 13817 "s63E6H2" 2.323919 "Xylose transport system permease protein XylH"  
"JS1\_E13\_00149" 13818 "s59E13H2" 0.3048217 "N-acetylglucosamine repressor"  
"JS1\_E13\_00149" 13818 "s59E25H2" 0 "N-acetylglucosamine repressor"  
"JS1\_E13\_00149" 13818 "s59E5H2" 1.513316 "N-acetylglucosamine repressor"  
"JS1\_E13\_00149" 13818 "s63E6H2" 2.474695 "N-acetylglucosamine repressor"  
"JS1\_E13\_00150" 13819 "s59E13H2" 0.5078503 "Xylulose kinase"  
"JS1\_E13\_00150" 13819 "s59E25H2" 0 "Xylulose kinase"  
"JS1\_E13\_00150" 13819 "s59E5H2" 1.824217 "Xylulose kinase"  
"JS1\_E13\_00150" 13819 "s63E6H2" 2.155679 "Xylulose kinase"  
"JS1\_E13\_00151" 13820 "s59E13H2" 0.6609006 "Beta-glucosidase A"  
"JS1\_E13\_00151" 13820 "s59E25H2" 0 "Beta-glucosidase A"  
"JS1\_E13\_00151" 13820 "s59E5H2" 2.108988 "Beta-glucosidase A"  
"JS1\_E13\_00151" 13820 "s63E6H2" 1.949539 "Beta-glucosidase A"  
"JS1\_E13\_00152" 13821 "s59E13H2" 1.117514 "hypothetical protein"  
"JS1\_E13\_00152" 13821 "s59E25H2" 0 "hypothetical protein"  
"JS1\_E13\_00152" 13821 "s59E5H2" 1.690302 "hypothetical protein"  
"JS1\_E13\_00152" 13821 "s63E6H2" 1.570171 "hypothetical protein"  
"JS1\_E13\_00155" 13824 "s59E13H2" 0.5567336 "Antitoxin MazE"  
"JS1\_E13\_00155" 13824 "s59E25H2" 0 "Antitoxin MazE"  
"JS1\_E13\_00155" 13824 "s59E5H2" 0.5617399 "Antitoxin MazE"  
"JS1\_E13\_00155" 13824 "s63E6H2" 2.948981 "Antitoxin MazE"

"JS1\_E13\_00156" 13825 "s59E13H2" 0.4220925 "mRNA interferase MazF"  
"JS1\_E13\_00156" 13825 "s59E25H2" 0 "mRNA interferase MazF"  
"JS1\_E13\_00156" 13825 "s59E5H2" 0.4927808 "mRNA interferase MazF"  
"JS1\_E13\_00156" 13825 "s63E6H2" 2.842697 "mRNA interferase MazF"  
"JS1\_E13\_00157" 13826 "s59E13H2" 0.3756738 "B3/4 domain protein"  
"JS1\_E13\_00157" 13826 "s59E25H2" 0 "B3/4 domain protein"  
"JS1\_E13\_00157" 13826 "s59E5H2" 1.140608 "B3/4 domain protein"  
"JS1\_E13\_00157" 13826 "s63E6H2" 2.6674 "B3/4 domain protein"  
"JS1\_E13\_00159" 13828 "s59E13H2" 0.1733395 "Trehalose/maltose-binding protein MalE precursor"  
"JS1\_E13\_00159" 13828 "s59E25H2" 0 "Trehalose/maltose-binding protein MalE precursor"  
"JS1\_E13\_00159" 13828 "s59E5H2" 1.23461 "Trehalose/maltose-binding protein MalE precursor"  
"JS1\_E13\_00159" 13828 "s63E6H2" 0.1658332 "Trehalose/maltose-binding protein MalE precursor"  
"JS1\_E13\_00160" 13829 "s59E13H2" 0.1746653 "Trehalose/maltose transport system permease protein MalF"  
"JS1\_E13\_00160" 13829 "s59E25H2" 0 "Trehalose/maltose transport system permease protein MalF"  
"JS1\_E13\_00160" 13829 "s59E5H2" 1.591811 "Trehalose/maltose transport system permease protein MalF"  
"JS1\_E13\_00160" 13829 "s63E6H2" 0.02530617 "Trehalose/maltose transport system permease protein MalF"  
"JS1\_E13\_00161" 13830 "s59E13H2" 0.09472071 "Trehalose/maltose import ATP-binding protein MalK"  
"JS1\_E13\_00161" 13830 "s59E25H2" 0 "Trehalose/maltose import ATP-binding protein MalK"  
"JS1\_E13\_00161" 13830 "s59E5H2" 0.9706237 "Trehalose/maltose import ATP-binding protein MalK"  
"JS1\_E13\_00161" 13830 "s63E6H2" 0.1009946 "Trehalose/maltose import ATP-binding protein MalK"  
"JS1\_E13\_00162" 13831 "s59E13H2" 0.1144247 "PHP domain protein"  
"JS1\_E13\_00162" 13831 "s59E25H2" 0 "PHP domain protein"  
"JS1\_E13\_00162" 13831 "s59E5H2" 0.6941752 "PHP domain protein"  
"JS1\_E13\_00162" 13831 "s63E6H2" 0.3289518 "PHP domain protein"  
"JS1\_E13\_00163" 13832 "s59E13H2" 0.07206965 "Mannosylglycerate hydrolase"  
"JS1\_E13\_00163" 13832 "s59E25H2" 0 "Mannosylglycerate hydrolase"  
"JS1\_E13\_00163" 13832 "s59E5H2" 0.6811756 "Mannosylglycerate hydrolase"  
"JS1\_E13\_00163" 13832 "s63E6H2" 0.1706051 "Mannosylglycerate hydrolase"  
"JS1\_E13\_00164" 13833 "s59E13H2" 0.1362594 "Alpha-glucosidase"  
"JS1\_E13\_00164" 13833 "s59E25H2" 0 "Alpha-glucosidase"  
"JS1\_E13\_00164" 13833 "s59E5H2" 0.09607348 "Alpha-glucosidase"  
"JS1\_E13\_00164" 13833 "s63E6H2" 0.492898 "Alpha-glucosidase"  
"JS1\_E13\_00165" 13834 "s59E13H2" 0.321972 "hypothetical protein"  
"JS1\_E13\_00165" 13834 "s59E25H2" 0 "hypothetical protein"  
"JS1\_E13\_00165" 13834 "s59E5H2" 0.1027861 "hypothetical protein"  
"JS1\_E13\_00165" 13834 "s63E6H2" 0.04768399 "hypothetical protein"  
"JS1\_E13\_00166" 13835 "s59E13H2" 0.05443991 "DNA alkylation repair enzyme"  
"JS1\_E13\_00166" 13835 "s59E25H2" 0.3144105 "DNA alkylation repair enzyme"  
"JS1\_E13\_00166" 13835 "s59E5H2" 1.440602 "DNA alkylation repair enzyme"  
"JS1\_E13\_00166" 13835 "s63E6H2" 2.795137 "DNA alkylation repair enzyme"  
"JS1\_E13\_00167" 13836 "s59E13H2" 0.02032478 "Isoprenylcysteine carboxyl methyltransferase (ICMT) family protein"  
"JS1\_E13\_00167" 13836 "s59E25H2" 0 "Isoprenylcysteine carboxyl methyltransferase (ICMT) family protein"  
"JS1\_E13\_00167" 13836 "s59E5H2" 0.9778271 "Isoprenylcysteine carboxyl methyltransferase (ICMT) family protein"  
"JS1\_E13\_00167" 13836 "s63E6H2" 0.7969045 "Isoprenylcysteine carboxyl methyltransferase (ICMT) family protein"  
"JS1\_E13\_00170" 13839 "s59E13H2" 0.04968852 "Digeranylgeranyllycerophospholipid reductase"  
"JS1\_E13\_00170" 13839 "s59E25H2" 0 "Digeranylgeranyllycerophospholipid reductase"  
"JS1\_E13\_00170" 13839 "s59E5H2" 0.008185727 "Digeranylgeranyllycerophospholipid reductase"

"JS1\_E13\_00170" 13839 "s63E6H2" 0.3982883 "Digeranylgeranylglycerophospholipid reductase"  
"JS1\_E13\_00171" 13840 "s59E13H2" 0.04613616 "Bifunctional protein GlmU"  
"JS1\_E13\_00171" 13840 "s59E25H2" 0 "Bifunctional protein GlmU"  
"JS1\_E13\_00171" 13840 "s59E5H2" 0.1275232 "Bifunctional protein GlmU"  
"JS1\_E13\_00171" 13840 "s63E6H2" 1.969826 "Bifunctional protein GlmU"  
"JS1\_E13\_00172" 13841 "s59E13H2" 0.1071941 "translocation protein TolB"  
"JS1\_E13\_00172" 13841 "s59E25H2" 0 "translocation protein TolB"  
"JS1\_E13\_00172" 13841 "s59E5H2" 0.1009875 "translocation protein TolB"  
"JS1\_E13\_00172" 13841 "s63E6H2" 2.206409 "translocation protein TolB"  
"JS1\_E13\_00173" 13842 "s59E13H2" 0.1130778 "Transposase IS200 like protein"  
"JS1\_E13\_00173" 13842 "s59E25H2" 0 "Transposase IS200 like protein"  
"JS1\_E13\_00173" 13842 "s59E5H2" 0.02493545 "Transposase IS200 like protein"  
"JS1\_E13\_00173" 13842 "s63E6H2" 8.657953 "Transposase IS200 like protein"  
"JS1\_E13\_00174" 13843 "s59E13H2" 0.009170126 "Amidohydrolase"  
"JS1\_E13\_00174" 13843 "s59E25H2" 0 "Amidohydrolase"  
"JS1\_E13\_00174" 13843 "s59E5H2" 0.1773737 "Amidohydrolase"  
"JS1\_E13\_00174" 13843 "s63E6H2" 12.63858 "Amidohydrolase"  
"JS1\_E13\_00175" 13844 "s59E13H2" 0.3703697 "hypothetical protein"  
"JS1\_E13\_00175" 13844 "s59E25H2" 0 "hypothetical protein"  
"JS1\_E13\_00175" 13844 "s59E5H2" 0.1138775 "hypothetical protein"  
"JS1\_E13\_00175" 13844 "s63E6H2" 1.535961 "hypothetical protein"  
"JS1\_E13\_00176" 13845 "s59E13H2" 6.648109 "Bifunctional phosphoglucose/phosphomannose isomerase"  
"JS1\_E13\_00176" 13845 "s59E25H2" 0 "Bifunctional phosphoglucose/phosphomannose isomerase"  
"JS1\_E13\_00176" 13845 "s59E5H2" 0.7443705 "Bifunctional phosphoglucose/phosphomannose isomerase"  
"JS1\_E13\_00176" 13845 "s63E6H2" 0.9068192 "Bifunctional phosphoglucose/phosphomannose isomerase"  
"JS1\_E13\_00177" 13846 "s59E13H2" 6.280817 "putative undecaprenyl-phosphate N-acetylglucosaminyl 1-phosphate transferase"  
"JS1\_E13\_00177" 13846 "s59E25H2" 0 "putative undecaprenyl-phosphate N-acetylglucosaminyl 1-phosphate transferase"  
"JS1\_E13\_00177" 13846 "s59E5H2" 0.7196676 "putative undecaprenyl-phosphate N-acetylglucosaminyl 1-phosphate transferase"  
"JS1\_E13\_00177" 13846 "s63E6H2" 0.3703301 "putative undecaprenyl-phosphate N-acetylglucosaminyl 1-phosphate transferase"  
"JS1\_E13\_00178" 13847 "s59E13H2" 4.679109 "UDP-glucose 4-epimerase"  
"JS1\_E13\_00178" 13847 "s59E25H2" 0 "UDP-glucose 4-epimerase"  
"JS1\_E13\_00178" 13847 "s59E5H2" 0.8581321 "UDP-glucose 4-epimerase"  
"JS1\_E13\_00178" 13847 "s63E6H2" 1.837367 "UDP-glucose 4-epimerase"  
"JS1\_E13\_00179" 13848 "s59E13H2" 0.1517158 "Putative N-acetylmannosaminyltransferase"  
"JS1\_E13\_00179" 13848 "s59E25H2" 0 "Putative N-acetylmannosaminyltransferase"  
"JS1\_E13\_00179" 13848 "s59E5H2" 0.8558875 "Putative N-acetylmannosaminyltransferase"  
"JS1\_E13\_00179" 13848 "s63E6H2" 1.456364 "Putative N-acetylmannosaminyltransferase"  
"JS1\_E13\_00180" 13849 "s59E13H2" 0.2209432 "rod shape-determining protein MreD"  
"JS1\_E13\_00180" 13849 "s59E25H2" 0 "rod shape-determining protein MreD"  
"JS1\_E13\_00180" 13849 "s59E5H2" 0.4643385 "rod shape-determining protein MreD"  
"JS1\_E13\_00180" 13849 "s63E6H2" 2.029463 "rod shape-determining protein MreD"  
"JS1\_E13\_00181" 13850 "s59E13H2" 0.2291166 "Stage V sporulation protein D"  
"JS1\_E13\_00181" 13850 "s59E25H2" 0 "Stage V sporulation protein D"  
"JS1\_E13\_00181" 13850 "s59E5H2" 0.3011302 "Stage V sporulation protein D"  
"JS1\_E13\_00181" 13850 "s63E6H2" 0.5423112 "Stage V sporulation protein D"  
"JS1\_E13\_00182" 13851 "s59E13H2" 0.2269356 "Lipid II flippase FtsW"  
"JS1\_E13\_00182" 13851 "s59E25H2" 0 "Lipid II flippase FtsW"

"JS1\_E13\_00182" 13851 "s59E5H2" 0.2765878 "Lipid II flippase FtsW"  
"JS1\_E13\_00182" 13851 "s63E6H2" 0.9557097 "Lipid II flippase FtsW"  
"JS1\_E13\_00183" 13852 "s59E13H2" 0.07518955 "putative membrane protein Ydfk"  
"JS1\_E13\_00183" 13852 "s59E25H2" 0 "putative membrane protein Ydfk"  
"JS1\_E13\_00183" 13852 "s59E5H2" 0.08418724 "putative membrane protein Ydfk"  
"JS1\_E13\_00183" 13852 "s63E6H2" 0.3734408 "putative membrane protein Ydfk"  
"JS1\_E13\_00184" 13853 "s59E13H2" 0.04855315 "hypothetical protein"  
"JS1\_E13\_00184" 13853 "s59E25H2" 0 "hypothetical protein"  
"JS1\_E13\_00184" 13853 "s59E5H2" 0.5481649 "hypothetical protein"  
"JS1\_E13\_00184" 13853 "s63E6H2" 0.3661951 "hypothetical protein"  
"JS1\_E13\_00185" 13854 "s59E13H2" 0.08943172 "hypothetical protein"  
"JS1\_E13\_00185" 13854 "s59E25H2" 0 "hypothetical protein"  
"JS1\_E13\_00185" 13854 "s59E5H2" 0.4099999 "hypothetical protein"  
"JS1\_E13\_00185" 13854 "s63E6H2" 0.4675497 "hypothetical protein"  
"JS1\_E13\_00186" 13855 "s59E13H2" 0.03821953 "Ribosomal silencing factor RsfS"  
"JS1\_E13\_00186" 13855 "s59E25H2" 0 "Ribosomal silencing factor RsfS"  
"JS1\_E13\_00186" 13855 "s59E5H2" 0.2643272 "Ribosomal silencing factor RsfS"  
"JS1\_E13\_00186" 13855 "s63E6H2" 0.3486726 "Ribosomal silencing factor RsfS"  
"JS1\_E13\_00187" 13856 "s59E13H2" 0.03398555 "Putative transcriptional regulator YvhJ"  
"JS1\_E13\_00187" 13856 "s59E25H2" 0 "Putative transcriptional regulator YvhJ"  
"JS1\_E13\_00187" 13856 "s59E5H2" 0.2277988 "Putative transcriptional regulator YvhJ"  
"JS1\_E13\_00187" 13856 "s63E6H2" 0.3977651 "Putative transcriptional regulator YvhJ"  
"JS1\_E13\_00188" 13857 "s59E13H2" 0.03662308 "putative nicotinate-nucleotide adenyllyltransferase"  
"JS1\_E13\_00188" 13857 "s59E25H2" 0 "putative nicotinate-nucleotide adenyllyltransferase"  
"JS1\_E13\_00188" 13857 "s59E5H2" 0.4018416 "putative nicotinate-nucleotide adenyllyltransferase"  
"JS1\_E13\_00188" 13857 "s63E6H2" 0.3189558 "putative nicotinate-nucleotide adenyllyltransferase"  
"JS1\_E13\_00189" 13858 "s59E13H2" 0.2117389 "putative nicotinate-nucleotide adenyllyltransferase"  
"JS1\_E13\_00189" 13858 "s59E25H2" 0 "putative nicotinate-nucleotide adenyllyltransferase"  
"JS1\_E13\_00189" 13858 "s59E5H2" 0.334703 "putative nicotinate-nucleotide adenyllyltransferase"  
"JS1\_E13\_00189" 13858 "s63E6H2" 0.2133693 "putative nicotinate-nucleotide adenyllyltransferase"  
"JS1\_E13\_00190" 13859 "s59E13H2" 0.7585436 "lipoprotein Nlpl"  
"JS1\_E13\_00190" 13859 "s59E25H2" 0 "lipoprotein Nlpl"  
"JS1\_E13\_00190" 13859 "s59E5H2" 0.3315117 "lipoprotein Nlpl"  
"JS1\_E13\_00190" 13859 "s63E6H2" 0.2472928 "lipoprotein Nlpl"  
"JS1\_E13\_00191" 13860 "s59E13H2" 0.7417894 "hypothetical protein"  
"JS1\_E13\_00191" 13860 "s59E25H2" 0 "hypothetical protein"  
"JS1\_E13\_00191" 13860 "s59E5H2" 0.1251906 "hypothetical protein"  
"JS1\_E13\_00191" 13860 "s63E6H2" 0.1282331 "hypothetical protein"  
"JS1\_E13\_00192" 13861 "s59E13H2" 0.6980807 "2-C-methyl-D-erythritol 2,4-cyclodiphosphate synthase"  
"JS1\_E13\_00192" 13861 "s59E25H2" 0 "2-C-methyl-D-erythritol 2,4-cyclodiphosphate synthase"  
"JS1\_E13\_00192" 13861 "s59E5H2" 0.09949951 "2-C-methyl-D-erythritol 2,4-cyclodiphosphate synthase"  
"JS1\_E13\_00192" 13861 "s63E6H2" 0.2724535 "2-C-methyl-D-erythritol 2,4-cyclodiphosphate synthase"  
"JS1\_E13\_00193" 13862 "s59E13H2" 0.6588924 "4-diphosphocytidyl-2-C-methyl-D-erythritol kinase"  
"JS1\_E13\_00193" 13862 "s59E25H2" 0 "4-diphosphocytidyl-2-C-methyl-D-erythritol kinase"  
"JS1\_E13\_00193" 13862 "s59E5H2" 0.2666433 "4-diphosphocytidyl-2-C-methyl-D-erythritol kinase"  
"JS1\_E13\_00193" 13862 "s63E6H2" 0.3062318 "4-diphosphocytidyl-2-C-methyl-D-erythritol kinase"  
"JS1\_E13\_00194" 13863 "s59E13H2" 0.8376577 "Putative 2-C-methyl-D-erythritol 4-phosphate cytidyllyltransferase 2"

"JS1\_E13\_00194" 13863 "s59E25H2" 0 "Putative 2-C-methyl-D-erythritol 4-phosphate cytidyltransferase 2"  
"JS1\_E13\_00194" 13863 "s59E5H2" 0.1934875 "Putative 2-C-methyl-D-erythritol 4-phosphate cytidyltransferase 2"  
"JS1\_E13\_00194" 13863 "s63E6H2" 0.3243404 "Putative 2-C-methyl-D-erythritol 4-phosphate cytidyltransferase 2"  
"JS1\_E13\_00195" 13864 "s59E13H2" 0.8891981 "SpoIVB peptidase S55"  
"JS1\_E13\_00195" 13864 "s59E25H2" 0 "SpoIVB peptidase S55"  
"JS1\_E13\_00195" 13864 "s59E5H2" 0.1864261 "SpoIVB peptidase S55"  
"JS1\_E13\_00195" 13864 "s63E6H2" 0.1222063 "SpoIVB peptidase S55"  
"JS1\_E13\_00196" 13865 "s59E13H2" 1.671989 "Rod shape-determining protein MreB"  
"JS1\_E13\_00196" 13865 "s59E25H2" 0 "Rod shape-determining protein MreB"  
"JS1\_E13\_00196" 13865 "s59E5H2" 0.2198547 "Rod shape-determining protein MreB"  
"JS1\_E13\_00196" 13865 "s63E6H2" 0.4089563 "Rod shape-determining protein MreB"  
"JS1\_E13\_00197" 13866 "s59E13H2" 0.6095999 "UDP-N-acetylglucosamine 1-carboxyvinyltransferase 1"  
"JS1\_E13\_00197" 13866 "s59E25H2" 0 "UDP-N-acetylglucosamine 1-carboxyvinyltransferase 1"  
"JS1\_E13\_00197" 13866 "s59E5H2" 0.4610639 "UDP-N-acetylglucosamine 1-carboxyvinyltransferase 1"  
"JS1\_E13\_00197" 13866 "s63E6H2" 0.2402498 "UDP-N-acetylglucosamine 1-carboxyvinyltransferase 1"  
"JS1\_E13\_00198" 13867 "s59E13H2" 0.06276247 "Intracellular exo-alpha-(1-"  
"JS1\_E13\_00198" 13867 "s59E25H2" 0 "Intracellular exo-alpha-(1-"  
"JS1\_E13\_00198" 13867 "s59E5H2" 0.03631579 "Intracellular exo-alpha-(1-"  
"JS1\_E13\_00198" 13867 "s63E6H2" 0.05232582 "Intracellular exo-alpha-(1-"  
"JS1\_E13\_00199" 13868 "s59E13H2" 0.3321994 "hypothetical protein"  
"JS1\_E13\_00199" 13868 "s59E25H2" 0 "hypothetical protein"  
"JS1\_E13\_00199" 13868 "s59E5H2" 0.3711608 "hypothetical protein"  
"JS1\_E13\_00199" 13868 "s63E6H2" 0.4741724 "hypothetical protein"  
"JS1\_E13\_00200" 13869 "s59E13H2" 0.3139953 "Autoinducer 2 import ATP-binding protein LsrA"  
"JS1\_E13\_00200" 13869 "s59E25H2" 0 "Autoinducer 2 import ATP-binding protein LsrA"  
"JS1\_E13\_00200" 13869 "s59E5H2" 0.1888367 "Autoinducer 2 import ATP-binding protein LsrA"  
"JS1\_E13\_00200" 13869 "s63E6H2" 0.6826656 "Autoinducer 2 import ATP-binding protein LsrA"  
"JS1\_E13\_00201" 13870 "s59E13H2" 0.4383581 "Arginine transport ATP-binding protein ArtM"  
"JS1\_E13\_00201" 13870 "s59E25H2" 0 "Arginine transport ATP-binding protein ArtM"  
"JS1\_E13\_00201" 13870 "s59E5H2" 0.1899434 "Arginine transport ATP-binding protein ArtM"  
"JS1\_E13\_00201" 13870 "s63E6H2" 0.1967754 "Arginine transport ATP-binding protein ArtM"  
"JS1\_E13\_00202" 13871 "s59E13H2" 0.2951819 "Ribose transport system permease protein RbsC"  
"JS1\_E13\_00202" 13871 "s59E25H2" 0 "Ribose transport system permease protein RbsC"  
"JS1\_E13\_00202" 13871 "s59E5H2" 0.1536605 "Ribose transport system permease protein RbsC"  
"JS1\_E13\_00202" 13871 "s63E6H2" 0.1762076 "Ribose transport system permease protein RbsC"  
"JS1\_E13\_00204" 13873 "s59E13H2" 0.2811665 "hypothetical protein"  
"JS1\_E13\_00204" 13873 "s59E25H2" 0 "hypothetical protein"  
"JS1\_E13\_00204" 13873 "s59E5H2" 1.035998 "hypothetical protein"  
"JS1\_E13\_00204" 13873 "s63E6H2" 1.070295 "hypothetical protein"  
"JS1\_E13\_00205" 13874 "s59E13H2" 0.5364133 "Arabinose metabolism transcriptional repressor"  
"JS1\_E13\_00205" 13874 "s59E25H2" 0 "Arabinose metabolism transcriptional repressor"  
"JS1\_E13\_00205" 13874 "s59E5H2" 1.082812 "Arabinose metabolism transcriptional repressor"  
"JS1\_E13\_00205" 13874 "s63E6H2" 0.4030692 "Arabinose metabolism transcriptional repressor"  
"JS1\_E13\_00206" 13875 "s59E13H2" 0.6963068 "L-ribulose-5-phosphate 4-epimerase UlaF"  
"JS1\_E13\_00206" 13875 "s59E25H2" 0 "L-ribulose-5-phosphate 4-epimerase UlaF"  
"JS1\_E13\_00206" 13875 "s59E5H2" 0.4996092 "L-ribulose-5-phosphate 4-epimerase UlaF"  
"JS1\_E13\_00206" 13875 "s63E6H2" 0.5772106 "L-ribulose-5-phosphate 4-epimerase UlaF"

"JS1\_E13\_00207" 13876 "s59E13H2" 0.6538032 "Xylulose kinase"  
"JS1\_E13\_00207" 13876 "s59E25H2" 0 "Xylulose kinase"  
"JS1\_E13\_00207" 13876 "s59E5H2" 0.8157172 "Xylulose kinase"  
"JS1\_E13\_00207" 13876 "s63E6H2" 1.187583 "Xylulose kinase"  
"JS1\_E13\_00208" 13877 "s59E13H2" 0.9573378 "Alpha-D-glucose-1-phosphate phosphatase YihX"  
"JS1\_E13\_00208" 13877 "s59E25H2" 0 "Alpha-D-glucose-1-phosphate phosphatase YihX"  
"JS1\_E13\_00208" 13877 "s59E5H2" 0.482837 "Alpha-D-glucose-1-phosphate phosphatase YihX"  
"JS1\_E13\_00208" 13877 "s63E6H2" 0.4667693 "Alpha-D-glucose-1-phosphate phosphatase YihX"  
"JS1\_E13\_00209" 13878 "s59E13H2" 0.03557606 "Allantoinase"  
"JS1\_E13\_00209" 13878 "s59E25H2" 0 "Allantoinase"  
"JS1\_E13\_00209" 13878 "s59E5H2" 0.1647898 "Allantoinase"  
"JS1\_E13\_00209" 13878 "s63E6H2" 0.1261596 "Allantoinase"  
"JS1\_E13\_00210" 13879 "s59E13H2" 0.04444086 "Ornithine carbamoyltransferase"  
"JS1\_E13\_00210" 13879 "s59E25H2" 0 "Ornithine carbamoyltransferase"  
"JS1\_E13\_00210" 13879 "s59E5H2" 0.2610847 "Ornithine carbamoyltransferase"  
"JS1\_E13\_00210" 13879 "s63E6H2" 0.4578496 "Ornithine carbamoyltransferase"  
"JS1\_E13\_00211" 13880 "s59E13H2" 0.06682781 "Carbamate kinase"  
"JS1\_E13\_00211" 13880 "s59E25H2" 0 "Carbamate kinase"  
"JS1\_E13\_00211" 13880 "s59E5H2" 0.08368391 "Carbamate kinase"  
"JS1\_E13\_00211" 13880 "s63E6H2" 0.2897411 "Carbamate kinase"  
"JS1\_E13\_00212" 13881 "s59E13H2" 0.07352095 "Threonine synthase"  
"JS1\_E13\_00212" 13881 "s59E25H2" 0 "Threonine synthase"  
"JS1\_E13\_00212" 13881 "s59E5H2" 0.1973863 "Threonine synthase"  
"JS1\_E13\_00212" 13881 "s63E6H2" 0.463514 "Threonine synthase"  
"JS1\_E13\_00213" 13882 "s59E13H2" 0.0754419 "putative succinyl-diaminopimelate desuccinylase"  
"JS1\_E13\_00213" 13882 "s59E25H2" 0 "putative succinyl-diaminopimelate desuccinylase"  
"JS1\_E13\_00213" 13882 "s59E5H2" 0.2502371 "putative succinyl-diaminopimelate desuccinylase"  
"JS1\_E13\_00213" 13882 "s63E6H2" 0.9217824 "putative succinyl-diaminopimelate desuccinylase"  
"JS1\_E13\_00214" 13883 "s59E13H2" 0.05803945 "Cysteine synthase"  
"JS1\_E13\_00214" 13883 "s59E25H2" 0 "Cysteine synthase"  
"JS1\_E13\_00214" 13883 "s59E5H2" 0.3456839 "Cysteine synthase"  
"JS1\_E13\_00214" 13883 "s63E6H2" 0.934051 "Cysteine synthase"  
"JS1\_E13\_00215" 13884 "s59E13H2" 0.3031443 "Aspartate carbamoyltransferase"  
"JS1\_E13\_00215" 13884 "s59E25H2" 0 "Aspartate carbamoyltransferase"  
"JS1\_E13\_00215" 13884 "s59E5H2" 0.7711449 "Aspartate carbamoyltransferase"  
"JS1\_E13\_00215" 13884 "s63E6H2" 1.559331 "Aspartate carbamoyltransferase"  
"JS1\_E13\_00216" 13885 "s59E13H2" 3.833103 "putative xanthine dehydrogenase subunit D"  
"JS1\_E13\_00216" 13885 "s59E25H2" 0 "putative xanthine dehydrogenase subunit D"  
"JS1\_E13\_00216" 13885 "s59E5H2" 0.7084196 "putative xanthine dehydrogenase subunit D"  
"JS1\_E13\_00216" 13885 "s63E6H2" 1.12125 "putative xanthine dehydrogenase subunit D"  
"JS1\_E13\_00217" 13886 "s59E13H2" 3.336659 "Glyceraldehyde dehydrogenase medium chain"  
"JS1\_E13\_00217" 13886 "s59E25H2" 0 "Glyceraldehyde dehydrogenase medium chain"  
"JS1\_E13\_00217" 13886 "s59E5H2" 0.4803394 "Glyceraldehyde dehydrogenase medium chain"  
"JS1\_E13\_00217" 13886 "s63E6H2" 0.6064212 "Glyceraldehyde dehydrogenase medium chain"  
"JS1\_E13\_00218" 13887 "s59E13H2" 2.539888 "Nicotinate dehydrogenase small FeS subunit"  
"JS1\_E13\_00218" 13887 "s59E25H2" 0 "Nicotinate dehydrogenase small FeS subunit"  
"JS1\_E13\_00218" 13887 "s59E5H2" 0.2019833 "Nicotinate dehydrogenase small FeS subunit"



"JS1\_E13\_00218" 13887 "s63E6H2" 0.5987554 "Nicotinate dehydrogenase small FeS subunit"  
"JS1\_E13\_00219" 13888 "s59E13H2" 1.18913 "8-oxoguanine deaminase"  
"JS1\_E13\_00219" 13888 "s59E25H2" 0 "8-oxoguanine deaminase"  
"JS1\_E13\_00219" 13888 "s59E5H2" 0.8403857 "8-oxoguanine deaminase"  
"JS1\_E13\_00219" 13888 "s63E6H2" 0.1477997 "8-oxoguanine deaminase"  
"JS1\_E13\_00220" 13889 "s59E13H2" 0.1615922 "5-methylthioadenosine/S-adenosylhomocysteine deaminase"  
"JS1\_E13\_00220" 13889 "s59E25H2" 0.1816817 "5-methylthioadenosine/S-adenosylhomocysteine deaminase"  
"JS1\_E13\_00220" 13889 "s59E5H2" 0.3390589 "5-methylthioadenosine/S-adenosylhomocysteine deaminase"  
"JS1\_E13\_00220" 13889 "s63E6H2" 1.077842 "5-methylthioadenosine/S-adenosylhomocysteine deaminase"  
"JS1\_E13\_00221" 13890 "s59E13H2" 0.1042861 "Cell wall-binding protein YocH precursor"  
"JS1\_E13\_00221" 13890 "s59E25H2" 0 "Cell wall-binding protein YocH precursor"  
"JS1\_E13\_00221" 13890 "s59E5H2" 0.2114768 "Cell wall-binding protein YocH precursor"  
"JS1\_E13\_00221" 13890 "s63E6H2" 0.2429418 "Cell wall-binding protein YocH precursor"  
"JS1\_E13\_00222" 13891 "s59E13H2" 0.2482549 "Galactose/methyl galactoside import ATP-binding protein MglA"  
"JS1\_E13\_00222" 13891 "s59E25H2" 0.1588542 "Galactose/methyl galactoside import ATP-binding protein MglA"  
"JS1\_E13\_00222" 13891 "s59E5H2" 1.10263 "Galactose/methyl galactoside import ATP-binding protein MglA"  
"JS1\_E13\_00222" 13891 "s63E6H2" 1.127427 "Galactose/methyl galactoside import ATP-binding protein MglA"  
"JS1\_E13\_00223" 13892 "s59E13H2" 0.2758794 "D-allose transporter subunit"  
"JS1\_E13\_00223" 13892 "s59E25H2" 0 "D-allose transporter subunit"  
"JS1\_E13\_00223" 13892 "s59E5H2" 2.594358 "D-allose transporter subunit"  
"JS1\_E13\_00223" 13892 "s63E6H2" 0.802106 "D-allose transporter subunit"  
"JS1\_E13\_00224" 13893 "s59E13H2" 0.2055939 "Branched-chain amino acid transport system / permease component"  
"JS1\_E13\_00224" 13893 "s59E25H2" 0 "Branched-chain amino acid transport system / permease component"  
"JS1\_E13\_00224" 13893 "s59E5H2" 2.814374 "Branched-chain amino acid transport system / permease component"  
"JS1\_E13\_00224" 13893 "s63E6H2" 0.8498978 "Branched-chain amino acid transport system / permease component"  
"JS1\_E13\_00225" 13894 "s59E13H2" 0.142156 "Purine-binding protein precursor"  
"JS1\_E13\_00225" 13894 "s59E25H2" 0 "Purine-binding protein precursor"  
"JS1\_E13\_00225" 13894 "s59E5H2" 0.6679674 "Purine-binding protein precursor"  
"JS1\_E13\_00225" 13894 "s63E6H2" 2.251415 "Purine-binding protein precursor"  
"JS1\_E13\_00226" 13895 "s59E13H2" 0.1905645 "hypothetical protein"  
"JS1\_E13\_00226" 13895 "s59E25H2" 0 "hypothetical protein"  
"JS1\_E13\_00226" 13895 "s59E5H2" 0.3300207 "hypothetical protein"  
"JS1\_E13\_00226" 13895 "s63E6H2" 2.076292 "hypothetical protein"  
"JS1\_E13\_00227" 13896 "s59E13H2" 0.05324994 "Uridine phosphorylase"  
"JS1\_E13\_00227" 13896 "s59E25H2" 0 "Uridine phosphorylase"  
"JS1\_E13\_00227" 13896 "s59E5H2" 0.2620186 "Uridine phosphorylase"  
"JS1\_E13\_00227" 13896 "s63E6H2" 2.368017 "Uridine phosphorylase"  
"JS1\_E13\_00229" 13898 "s59E13H2" 0.3198285 "hypothetical protein"  
"JS1\_E13\_00229" 13898 "s59E25H2" 0 "hypothetical protein"  
"JS1\_E13\_00229" 13898 "s59E5H2" 2.403539 "hypothetical protein"  
"JS1\_E13\_00229" 13898 "s63E6H2" 6.437236 "hypothetical protein"  
"JS1\_E13\_00230" 13899 "s59E13H2" 0.04863548 "hypothetical protein"  
"JS1\_E13\_00230" 13899 "s59E25H2" 0 "hypothetical protein"  
"JS1\_E13\_00230" 13899 "s59E5H2" 0.3255606 "hypothetical protein"  
"JS1\_E13\_00230" 13899 "s63E6H2" 1.40623 "hypothetical protein"  
"JS1\_E13\_00231" 13900 "s59E13H2" 0 "hypothetical protein"  
"JS1\_E13\_00231" 13900 "s59E25H2" 0 "hypothetical protein"

"JS1\_E13\_00231" 13900 "s59E5H2" 0.01782923 "hypothetical protein"  
"JS1\_E13\_00231" 13900 "s63E6H2" 0.01929933 "hypothetical protein"  
"JS1\_E13\_00232" 13901 "s59E13H2" 0 "glucosamine-6-phosphate deaminase-like protein"  
"JS1\_E13\_00232" 13901 "s59E25H2" 0 "glucosamine-6-phosphate deaminase-like protein"  
"JS1\_E13\_00232" 13901 "s59E5H2" 0.007494475 "glucosamine-6-phosphate deaminase-like protein"  
"JS1\_E13\_00232" 13901 "s63E6H2" 0.04026235 "glucosamine-6-phosphate deaminase-like protein"  
"JS1\_E13\_00233" 13902 "s59E13H2" 0 "Alpha-monoglucosyldiacylglycerol synthase"  
"JS1\_E13\_00233" 13902 "s59E25H2" 0 "Alpha-monoglucosyldiacylglycerol synthase"  
"JS1\_E13\_00233" 13902 "s59E5H2" 0 "Alpha-monoglucosyldiacylglycerol synthase"  
"JS1\_E13\_00233" 13902 "s63E6H2" 0.05078173 "Alpha-monoglucosyldiacylglycerol synthase"  
"JS1\_E13\_00235" 13904 "s59E13H2" 0 "hypothetical protein"  
"JS1\_E13\_00235" 13904 "s59E25H2" 0 "hypothetical protein"  
"JS1\_E13\_00235" 13904 "s59E5H2" 0.08543507 "hypothetical protein"  
"JS1\_E13\_00235" 13904 "s63E6H2" 0.03302224 "hypothetical protein"  
"JS1\_E13\_00236" 13905 "s59E13H2" 0 "Protein of unknown function (Hypoth\_ymh)"  
"JS1\_E13\_00236" 13905 "s59E25H2" 0 "Protein of unknown function (Hypoth\_ymh)"  
"JS1\_E13\_00236" 13905 "s59E5H2" 0 "Protein of unknown function (Hypoth\_ymh)"  
"JS1\_E13\_00236" 13905 "s63E6H2" 0 "Protein of unknown function (Hypoth\_ymh)"  
"JS1\_E13\_00238" 13907 "s59E13H2" 0.01425193 "Endonuclease/Exonuclease/phosphatase family protein"  
"JS1\_E13\_00238" 13907 "s59E25H2" 0 "Endonuclease/Exonuclease/phosphatase family protein"  
"JS1\_E13\_00238" 13907 "s59E5H2" 0 "Endonuclease/Exonuclease/phosphatase family protein"  
"JS1\_E13\_00238" 13907 "s63E6H2" 0.00310115 "Endonuclease/Exonuclease/phosphatase family protein"  
"JS1\_E13\_00239" 13908 "s59E13H2" 0.01022881 "hypothetical protein"  
"JS1\_E13\_00239" 13908 "s59E25H2" 0 "hypothetical protein"  
"JS1\_E13\_00239" 13908 "s59E5H2" 0.09446248 "hypothetical protein"  
"JS1\_E13\_00239" 13908 "s63E6H2" 0 "hypothetical protein"  
"JS1\_E13\_00240" 13909 "s59E13H2" 0.9636275 "Transposase IS116/IS110/IS902 family protein"  
"JS1\_E13\_00240" 13909 "s59E25H2" 0 "Transposase IS116/IS110/IS902 family protein"  
"JS1\_E13\_00240" 13909 "s59E5H2" 0.05675686 "Transposase IS116/IS110/IS902 family protein"  
"JS1\_E13\_00240" 13909 "s63E6H2" 0.0009361869 "Transposase IS116/IS110/IS902 family protein"  
"JS1\_E13\_00241" 13910 "s59E13H2" 0.8789272 "Transposase"  
"JS1\_E13\_00241" 13910 "s59E25H2" 0 "Transposase"  
"JS1\_E13\_00241" 13910 "s59E5H2" 0.06700849 "Transposase"  
"JS1\_E13\_00241" 13910 "s63E6H2" 0.003120702 "Transposase"  
"JS1\_E13\_00242" 13911 "s59E13H2" 0 "Papain family cysteine protease"  
"JS1\_E13\_00242" 13911 "s59E25H2" 0 "Papain family cysteine protease"  
"JS1\_E13\_00242" 13911 "s59E5H2" 0 "Papain family cysteine protease"  
"JS1\_E13\_00242" 13911 "s63E6H2" 0 "Papain family cysteine protease"  
"JS1\_E13\_00243" 13912 "s59E13H2" 0.9994492 "hypothetical protein"  
"JS1\_E13\_00243" 13912 "s59E25H2" 0 "hypothetical protein"  
"JS1\_E13\_00243" 13912 "s59E5H2" 1.269982 "hypothetical protein"  
"JS1\_E13\_00243" 13912 "s63E6H2" 0.1033243 "hypothetical protein"  
"JS1\_E13\_00245" 13914 "s59E13H2" 0.0832647 "N-6 DNA Methylase"  
"JS1\_E13\_00245" 13914 "s59E25H2" 0 "N-6 DNA Methylase"  
"JS1\_E13\_00245" 13914 "s59E5H2" 0.2819791 "N-6 DNA Methylase"  
"JS1\_E13\_00245" 13914 "s63E6H2" 0.0900153 "N-6 DNA Methylase"  
"JS1\_E13\_00246" 13915 "s59E13H2" 1.070374 "Aminopeptidase 2"

"JS1\_E13\_00246" 13915 "s59E25H2" 0 "Aminopeptidase 2"  
"JS1\_E13\_00246" 13915 "s59E5H2" 1.289633 "Aminopeptidase 2"  
"JS1\_E13\_00246" 13915 "s63E6H2" 0.8200536 "Aminopeptidase 2"  
"JS1\_E13\_00247" 13916 "s59E13H2" 2.378744 "Aminopeptidase 2"  
"JS1\_E13\_00247" 13916 "s59E25H2" 0 "Aminopeptidase 2"  
"JS1\_E13\_00247" 13916 "s59E5H2" 1.296727 "Aminopeptidase 2"  
"JS1\_E13\_00247" 13916 "s63E6H2" 0.7755763 "Aminopeptidase 2"  
"JS1\_E13\_00248" 13917 "s59E13H2" 2.367164 "putative ATP-dependent RNA helicase"  
"JS1\_E13\_00248" 13917 "s59E25H2" 0 "putative ATP-dependent RNA helicase"  
"JS1\_E13\_00248" 13917 "s59E5H2" 1.379215 "putative ATP-dependent RNA helicase"  
"JS1\_E13\_00248" 13917 "s63E6H2" 0.441841 "putative ATP-dependent RNA helicase"  
"JS1\_E13\_00250" 13919 "s59E13H2" 2.372288 "hypothetical protein"  
"JS1\_E13\_00250" 13919 "s59E25H2" 0.1657559 "hypothetical protein"  
"JS1\_E13\_00250" 13919 "s59E5H2" 1.296112 "hypothetical protein"  
"JS1\_E13\_00250" 13919 "s63E6H2" 0.2457129 "hypothetical protein"  
"JS1\_E13\_00251" 13920 "s59E13H2" 2.619927 "Serine/threonine-protein kinase PK-1"  
"JS1\_E13\_00251" 13920 "s59E25H2" 1.681319 "Serine/threonine-protein kinase PK-1"  
"JS1\_E13\_00251" 13920 "s59E5H2" 0.5253373 "Serine/threonine-protein kinase PK-1"  
"JS1\_E13\_00251" 13920 "s63E6H2" 0.1328648 "Serine/threonine-protein kinase PK-1"  
"JS1\_E13\_00252" 13921 "s59E13H2" 1.912148 "Ribosomal RNA small subunit methyltransferase B"  
"JS1\_E13\_00252" 13921 "s59E25H2" 0.02873563 "Ribosomal RNA small subunit methyltransferase B"  
"JS1\_E13\_00252" 13921 "s59E5H2" 0.4427946 "Ribosomal RNA small subunit methyltransferase B"  
"JS1\_E13\_00252" 13921 "s63E6H2" 0.3332385 "Ribosomal RNA small subunit methyltransferase B"  
"JS1\_E13\_00253" 13922 "s59E13H2" 0.1782715 "Putative neutral zinc metallopeptidase"  
"JS1\_E13\_00253" 13922 "s59E25H2" 0 "Putative neutral zinc metallopeptidase"  
"JS1\_E13\_00253" 13922 "s59E5H2" 0.7091502 "Putative neutral zinc metallopeptidase"  
"JS1\_E13\_00253" 13922 "s63E6H2" 2.079135 "Putative neutral zinc metallopeptidase"  
"JS1\_E13\_00254" 13923 "s59E13H2" 0.1491005 "Methionyl-tRNA formyltransferase"  
"JS1\_E13\_00254" 13923 "s59E25H2" 0 "Methionyl-tRNA formyltransferase"  
"JS1\_E13\_00254" 13923 "s59E5H2" 0.4235613 "Methionyl-tRNA formyltransferase"  
"JS1\_E13\_00254" 13923 "s63E6H2" 1.108585 "Methionyl-tRNA formyltransferase"  
"JS1\_E13\_00255" 13924 "s59E13H2" 0.08064396 "Peptide deformylase 1"  
"JS1\_E13\_00255" 13924 "s59E25H2" 0.4901961 "Peptide deformylase 1"  
"JS1\_E13\_00255" 13924 "s59E5H2" 0.9208582 "Peptide deformylase 1"  
"JS1\_E13\_00255" 13924 "s63E6H2" 1.093581 "Peptide deformylase 1"  
"JS1\_E13\_00256" 13925 "s59E13H2" 0.1626313 "Primosomal protein N"  
"JS1\_E13\_00256" 13925 "s59E25H2" 0.1106259 "Primosomal protein N"  
"JS1\_E13\_00256" 13925 "s59E5H2" 0.7134893 "Primosomal protein N"  
"JS1\_E13\_00256" 13925 "s63E6H2" 2.308761 "Primosomal protein N"  
"JS1\_E13\_00257" 13926 "s59E13H2" 1.172728 "Coenzyme A biosynthesis bifunctional protein CoaBC"  
"JS1\_E13\_00257" 13926 "s59E25H2" 1.076214 "Coenzyme A biosynthesis bifunctional protein CoaBC"  
"JS1\_E13\_00257" 13926 "s59E5H2" 0.7039341 "Coenzyme A biosynthesis bifunctional protein CoaBC"  
"JS1\_E13\_00257" 13926 "s63E6H2" 1.514782 "Coenzyme A biosynthesis bifunctional protein CoaBC"  
"JS1\_E13\_00258" 13927 "s59E13H2" 1.227512 "DNA-directed RNA polymerase subunit omega"  
"JS1\_E13\_00258" 13927 "s59E25H2" 0 "DNA-directed RNA polymerase subunit omega"  
"JS1\_E13\_00258" 13927 "s59E5H2" 0.02672546 "DNA-directed RNA polymerase subunit omega"  
"JS1\_E13\_00258" 13927 "s63E6H2" 0.02777725 "DNA-directed RNA polymerase subunit omega"

"JS1\_E13\_00259" 13928 "s59E13H2" 0.8955881 "Guanylate kinase"  
"JS1\_E13\_00259" 13928 "s59E25H2" 0 "Guanylate kinase"  
"JS1\_E13\_00259" 13928 "s59E5H2" 0.2061876 "Guanylate kinase"  
"JS1\_E13\_00259" 13928 "s63E6H2" 0.4335079 "Guanylate kinase"  
"JS1\_E13\_00260" 13929 "s59E13H2" 0.7603548 "hypothetical protein"  
"JS1\_E13\_00260" 13929 "s59E25H2" 0 "hypothetical protein"  
"JS1\_E13\_00260" 13929 "s59E5H2" 0.1646468 "hypothetical protein"  
"JS1\_E13\_00260" 13929 "s63E6H2" 1.394442 "hypothetical protein"  
"JS1\_E13\_00261" 13930 "s59E13H2" 0.7447045 "hypothetical protein"  
"JS1\_E13\_00261" 13930 "s59E25H2" 0 "hypothetical protein"  
"JS1\_E13\_00261" 13930 "s59E5H2" 0.6140378 "hypothetical protein"  
"JS1\_E13\_00261" 13930 "s63E6H2" 1.111823 "hypothetical protein"  
"JS1\_E13\_00262" 13931 "s59E13H2" 0.6482058 "hypothetical protein"  
"JS1\_E13\_00262" 13931 "s59E25H2" 0 "hypothetical protein"  
"JS1\_E13\_00262" 13931 "s59E5H2" 0.8355503 "hypothetical protein"  
"JS1\_E13\_00262" 13931 "s63E6H2" 0.8171358 "hypothetical protein"  
"JS1\_E13\_00264" 13933 "s59E13H2" 0.06980481 "Nicotinate-nucleotide--dimethylbenzimidazole phosphoribosyltransferase"  
"JS1\_E13\_00264" 13933 "s59E25H2" 0 "Nicotinate-nucleotide--dimethylbenzimidazole phosphoribosyltransferase"  
"JS1\_E13\_00264" 13933 "s59E5H2" 0.5640065 "Nicotinate-nucleotide--dimethylbenzimidazole phosphoribosyltransferase"  
"JS1\_E13\_00264" 13933 "s63E6H2" 1.698343 "Nicotinate-nucleotide--dimethylbenzimidazole phosphoribosyltransferase"  
"JS1\_E13\_00265" 13934 "s59E13H2" 0.1021674 "Bifunctional adenosylcobalamin biosynthesis protein CobP"  
"JS1\_E13\_00265" 13934 "s59E25H2" 0 "Bifunctional adenosylcobalamin biosynthesis protein CobP"  
"JS1\_E13\_00265" 13934 "s59E5H2" 1.392112 "Bifunctional adenosylcobalamin biosynthesis protein CobP"  
"JS1\_E13\_00265" 13934 "s63E6H2" 2.487437 "Bifunctional adenosylcobalamin biosynthesis protein CobP"  
"JS1\_E13\_00266" 13935 "s59E13H2" 0.07638715 "Cobalamin synthase"  
"JS1\_E13\_00266" 13935 "s59E25H2" 0 "Cobalamin synthase"  
"JS1\_E13\_00266" 13935 "s59E5H2" 1.490237 "Cobalamin synthase"  
"JS1\_E13\_00266" 13935 "s63E6H2" 2.679134 "Cobalamin synthase"  
"JS1\_E13\_00267" 13936 "s59E13H2" 1.27052 "Hemin import ATP-binding protein HmuV"  
"JS1\_E13\_00267" 13936 "s59E25H2" 0 "Hemin import ATP-binding protein HmuV"  
"JS1\_E13\_00267" 13936 "s59E5H2" 1.897121 "Hemin import ATP-binding protein HmuV"  
"JS1\_E13\_00267" 13936 "s63E6H2" 3.107599 "Hemin import ATP-binding protein HmuV"  
"JS1\_E13\_00268" 13937 "s59E13H2" 1.375863 "Hemin transport system permease protein HmuU"  
"JS1\_E13\_00268" 13937 "s59E25H2" 0 "Hemin transport system permease protein HmuU"  
"JS1\_E13\_00268" 13937 "s59E5H2" 1.81963 "Hemin transport system permease protein HmuU"  
"JS1\_E13\_00268" 13937 "s63E6H2" 3.748754 "Hemin transport system permease protein HmuU"  
"JS1\_E13\_00269" 13938 "s59E13H2" 1.920423 "Vitamin B12-binding protein precursor"  
"JS1\_E13\_00269" 13938 "s59E25H2" 0 "Vitamin B12-binding protein precursor"  
"JS1\_E13\_00269" 13938 "s59E5H2" 1.781178 "Vitamin B12-binding protein precursor"  
"JS1\_E13\_00269" 13938 "s63E6H2" 3.730453 "Vitamin B12-binding protein precursor"  
"JS1\_E13\_00271" 13940 "s59E13H2" 0.2196976 "Cob(I)yrinic acid a,c-diamide adenosyltransferase"  
"JS1\_E13\_00271" 13940 "s59E25H2" 0.3699422 "Cob(I)yrinic acid a,c-diamide adenosyltransferase"  
"JS1\_E13\_00271" 13940 "s59E5H2" 0.640504 "Cob(I)yrinic acid a,c-diamide adenosyltransferase"  
"JS1\_E13\_00271" 13940 "s63E6H2" 3.527183 "Cob(I)yrinic acid a,c-diamide adenosyltransferase"  
"JS1\_E13\_00272" 13941 "s59E13H2" 0.3008694 "GMP synthase [glutamine-hydrolyzing]"  
"JS1\_E13\_00272" 13941 "s59E25H2" 0 "GMP synthase [glutamine-hydrolyzing]"  
"JS1\_E13\_00272" 13941 "s59E5H2" 0.8333224 "GMP synthase [glutamine-hydrolyzing]"

"JS1\_E13\_00272" 13941 "s63E6H2" 2.666693 "GMP synthase [glutamine-hydrolyzing]"  
"JS1\_E13\_00273" 13942 "s59E13H2" 0.8996358 "N5-carboxyaminoimidazole ribonucleotide mutase"  
"JS1\_E13\_00273" 13942 "s59E25H2" 0 "N5-carboxyaminoimidazole ribonucleotide mutase"  
"JS1\_E13\_00273" 13942 "s59E5H2" 0.8050973 "N5-carboxyaminoimidazole ribonucleotide mutase"  
"JS1\_E13\_00273" 13942 "s63E6H2" 0.1266158 "N5-carboxyaminoimidazole ribonucleotide mutase"  
"JS1\_E13\_00274" 13943 "s59E13H2" 0.3222571 "hypothetical protein"  
"JS1\_E13\_00274" 13943 "s59E25H2" 0 "hypothetical protein"  
"JS1\_E13\_00274" 13943 "s59E5H2" 1.119261 "hypothetical protein"  
"JS1\_E13\_00274" 13943 "s63E6H2" 0.1411384 "hypothetical protein"  
"JS1\_E13\_00275" 13944 "s59E13H2" 0.06944419 "hypothetical protein"  
"JS1\_E13\_00275" 13944 "s59E25H2" 0 "hypothetical protein"  
"JS1\_E13\_00275" 13944 "s59E5H2" 0.4108274 "hypothetical protein"  
"JS1\_E13\_00275" 13944 "s63E6H2" 0.03215431 "hypothetical protein"  
"JS1\_E13\_00276" 13945 "s59E13H2" 0.04148577 "hypothetical protein"  
"JS1\_E13\_00276" 13945 "s59E25H2" 0 "hypothetical protein"  
"JS1\_E13\_00276" 13945 "s59E5H2" 0.4836706 "hypothetical protein"  
"JS1\_E13\_00276" 13945 "s63E6H2" 0.03868779 "hypothetical protein"  
"JS1\_E13\_00277" 13946 "s59E13H2" 0.6572368 "ATP-dependent RecD-like DNA helicase"  
"JS1\_E13\_00277" 13946 "s59E25H2" 0 "ATP-dependent RecD-like DNA helicase"  
"JS1\_E13\_00277" 13946 "s59E5H2" 0.7440496 "ATP-dependent RecD-like DNA helicase"  
"JS1\_E13\_00277" 13946 "s63E6H2" 0.1412277 "ATP-dependent RecD-like DNA helicase"  
"JS1\_E13\_00278" 13947 "s59E13H2" 0.2513103 "2,3-bisphosphoglycerate-independent phosphoglycerate mutase"  
"JS1\_E13\_00278" 13947 "s59E25H2" 0 "2,3-bisphosphoglycerate-independent phosphoglycerate mutase"  
"JS1\_E13\_00278" 13947 "s59E5H2" 0.4623227 "2,3-bisphosphoglycerate-independent phosphoglycerate mutase"  
"JS1\_E13\_00278" 13947 "s63E6H2" 0.07665738 "2,3-bisphosphoglycerate-independent phosphoglycerate mutase"  
"JS1\_E13\_00279" 13948 "s59E13H2" 0.0460339 "putative 2-phosphosulfolactate phosphatase"  
"JS1\_E13\_00279" 13948 "s59E25H2" 0 "putative 2-phosphosulfolactate phosphatase"  
"JS1\_E13\_00279" 13948 "s59E5H2" 0.3301991 "putative 2-phosphosulfolactate phosphatase"  
"JS1\_E13\_00279" 13948 "s63E6H2" 0.09491427 "putative 2-phosphosulfolactate phosphatase"  
"JS1\_E13\_00280" 13949 "s59E13H2" 0.06230976 "Purine catabolism protein PucG"  
"JS1\_E13\_00280" 13949 "s59E25H2" 0 "Purine catabolism protein PucG"  
"JS1\_E13\_00280" 13949 "s59E5H2" 0.2929117 "Purine catabolism protein PucG"  
"JS1\_E13\_00280" 13949 "s63E6H2" 0.0775493 "Purine catabolism protein PucG"  
"JS1\_E13\_00281" 13950 "s59E13H2" 0.02127813 "VanZ like family protein"  
"JS1\_E13\_00281" 13950 "s59E25H2" 0 "VanZ like family protein"  
"JS1\_E13\_00281" 13950 "s59E5H2" 0.2025595 "VanZ like family protein"  
"JS1\_E13\_00281" 13950 "s63E6H2" 0.04886311 "VanZ like family protein"  
"JS1\_E13\_00282" 13951 "s59E13H2" 0.2674505 "Tetrahedral aminopeptidase"  
"JS1\_E13\_00282" 13951 "s59E25H2" 0 "Tetrahedral aminopeptidase"  
"JS1\_E13\_00282" 13951 "s59E5H2" 0.426117 "Tetrahedral aminopeptidase"  
"JS1\_E13\_00282" 13951 "s63E6H2" 0.1268324 "Tetrahedral aminopeptidase"  
"JS1\_E13\_00283" 13952 "s59E13H2" 0.06569507 "putative A/G-specific adenine glycosylase YfhQ"  
"JS1\_E13\_00283" 13952 "s59E25H2" 0 "putative A/G-specific adenine glycosylase YfhQ"  
"JS1\_E13\_00283" 13952 "s59E5H2" 0.1530012 "putative A/G-specific adenine glycosylase YfhQ"  
"JS1\_E13\_00283" 13952 "s63E6H2" 0.07980609 "putative A/G-specific adenine glycosylase YfhQ"  
"JS1\_E13\_00284" 13953 "s59E13H2" 0.02487767 "Trehalose synthase"  
"JS1\_E13\_00284" 13953 "s59E25H2" 0 "Trehalose synthase"

"JS1\_E13\_00284" 13953 "s59E5H2" 0.286026 "Trehalose synthase"  
"JS1\_E13\_00284" 13953 "s63E6H2" 0.1170448 "Trehalose synthase"  
"JS1\_E13\_00285" 13954 "s59E13H2" 0.04027816 "4-alpha-glucanotransferase"  
"JS1\_E13\_00285" 13954 "s59E25H2" 0 "4-alpha-glucanotransferase"  
"JS1\_E13\_00285" 13954 "s59E5H2" 0.1933637 "4-alpha-glucanotransferase"  
"JS1\_E13\_00285" 13954 "s63E6H2" 0.1892766 "4-alpha-glucanotransferase"  
"JS1\_E13\_00286" 13955 "s59E13H2" 0.06807377 "Glycosyl hydrolase family 57"  
"JS1\_E13\_00286" 13955 "s59E25H2" 0 "Glycosyl hydrolase family 57"  
"JS1\_E13\_00286" 13955 "s59E5H2" 0.1076738 "Glycosyl hydrolase family 57"  
"JS1\_E13\_00286" 13955 "s63E6H2" 0.4247621 "Glycosyl hydrolase family 57"  
"JS1\_E13\_00287" 13956 "s59E13H2" 0.7936443 "1,4-alpha-glucan branching enzyme GlgB"  
"JS1\_E13\_00287" 13956 "s59E25H2" 0 "1,4-alpha-glucan branching enzyme GlgB"  
"JS1\_E13\_00287" 13956 "s59E5H2" 0.5824542 "1,4-alpha-glucan branching enzyme GlgB"  
"JS1\_E13\_00287" 13956 "s63E6H2" 0.6426619 "1,4-alpha-glucan branching enzyme GlgB"  
"JS1\_E13\_00288" 13957 "s59E13H2" 0.03557307 "Trehalose synthase/amylose TreS"  
"JS1\_E13\_00288" 13957 "s59E25H2" 0 "Trehalose synthase/amylose TreS"  
"JS1\_E13\_00288" 13957 "s59E5H2" 0.764364 "Trehalose synthase/amylose TreS"  
"JS1\_E13\_00288" 13957 "s63E6H2" 0.5236087 "Trehalose synthase/amylose TreS"  
"JS1\_E13\_00289" 13958 "s59E13H2" 0.02145239 "Alpha-1,4-glucan:maltose-1-phosphate maltosyltransferase 2"  
"JS1\_E13\_00289" 13958 "s59E25H2" 0 "Alpha-1,4-glucan:maltose-1-phosphate maltosyltransferase 2"  
"JS1\_E13\_00289" 13958 "s59E5H2" 0.1845547 "Alpha-1,4-glucan:maltose-1-phosphate maltosyltransferase 2"  
"JS1\_E13\_00289" 13958 "s63E6H2" 0.7617862 "Alpha-1,4-glucan:maltose-1-phosphate maltosyltransferase 2"  
"JS1\_E13\_00290" 13959 "s59E13H2" 0 "hypothetical protein"  
"JS1\_E13\_00290" 13959 "s59E25H2" 0 "hypothetical protein"  
"JS1\_E13\_00290" 13959 "s59E5H2" 0 "hypothetical protein"  
"JS1\_E13\_00290" 13959 "s63E6H2" 0 "hypothetical protein"  
"JS1\_E13\_00291" 13960 "s59E13H2" 0 "hypothetical protein"  
"JS1\_E13\_00291" 13960 "s59E25H2" 0 "hypothetical protein"  
"JS1\_E13\_00291" 13960 "s59E5H2" 0 "hypothetical protein"  
"JS1\_E13\_00291" 13960 "s63E6H2" 0 "hypothetical protein"  
"JS1\_E13\_00292" 13961 "s59E13H2" 0 "putative methyltransferase"  
"JS1\_E13\_00292" 13961 "s59E25H2" 0 "putative methyltransferase"  
"JS1\_E13\_00292" 13961 "s59E5H2" 0 "putative methyltransferase"  
"JS1\_E13\_00292" 13961 "s63E6H2" 0 "putative methyltransferase"  
"JS1\_E13\_00293" 13962 "s59E13H2" 0 "hypothetical protein"  
"JS1\_E13\_00293" 13962 "s59E25H2" 0 "hypothetical protein"  
"JS1\_E13\_00293" 13962 "s59E5H2" 0 "hypothetical protein"  
"JS1\_E13\_00293" 13962 "s63E6H2" 0 "hypothetical protein"  
"JS1\_E13\_00294" 13963 "s59E13H2" 0 "hypothetical protein"  
"JS1\_E13\_00294" 13963 "s59E25H2" 0 "hypothetical protein"  
"JS1\_E13\_00294" 13963 "s59E5H2" 0 "hypothetical protein"  
"JS1\_E13\_00294" 13963 "s63E6H2" 0 "hypothetical protein"  
"JS1\_E13\_00295" 13964 "s59E13H2" 0 "Type III restriction enzyme, res subunit"  
"JS1\_E13\_00295" 13964 "s59E25H2" 0 "Type III restriction enzyme, res subunit"  
"JS1\_E13\_00295" 13964 "s59E5H2" 0 "Type III restriction enzyme, res subunit"  
"JS1\_E13\_00295" 13964 "s63E6H2" 0 "Type III restriction enzyme, res subunit"  
"JS1\_E13\_00296" 13965 "s59E13H2" 0 "hypothetical protein"

"JS1\_E13\_00296" 13965 "s59E25H2" 0 "hypothetical protein"  
"JS1\_E13\_00296" 13965 "s59E5H2" 0 "hypothetical protein"  
"JS1\_E13\_00296" 13965 "s63E6H2" 0 "hypothetical protein"  
"JS1\_E13\_00299" 13968 "s59E13H2" 0 "hypothetical protein"  
"JS1\_E13\_00299" 13968 "s59E25H2" 0 "hypothetical protein"  
"JS1\_E13\_00299" 13968 "s59E5H2" 0 "hypothetical protein"  
"JS1\_E13\_00299" 13968 "s63E6H2" 0 "hypothetical protein"  
"JS1\_E13\_00300" 13969 "s59E13H2" 0.4819417 "Ribosomal protein S6 modification protein"  
"JS1\_E13\_00300" 13969 "s59E25H2" 0 "Ribosomal protein S6 modification protein"  
"JS1\_E13\_00300" 13969 "s59E5H2" 0.9716729 "Ribosomal protein S6 modification protein"  
"JS1\_E13\_00300" 13969 "s63E6H2" 8.464311 "Ribosomal protein S6 modification protein"  
"JS1\_E13\_00301" 13970 "s59E13H2" 0.6785387 "hypothetical protein"  
"JS1\_E13\_00301" 13970 "s59E25H2" 0 "hypothetical protein"  
"JS1\_E13\_00301" 13970 "s59E5H2" 0.5092243 "hypothetical protein"  
"JS1\_E13\_00301" 13970 "s63E6H2" 9.390413 "hypothetical protein"  
"JS1\_E13\_00302" 13971 "s59E13H2" 0.7541103 "Heterodisulfide reductase subunit A-like protein"  
"JS1\_E13\_00302" 13971 "s59E25H2" 0 "Heterodisulfide reductase subunit A-like protein"  
"JS1\_E13\_00302" 13971 "s59E5H2" 0.9381747 "Heterodisulfide reductase subunit A-like protein"  
"JS1\_E13\_00302" 13971 "s63E6H2" 14.83002 "Heterodisulfide reductase subunit A-like protein"  
"JS1\_E13\_00303" 13972 "s59E13H2" 0.1878448 "Multidrug export protein MepA"  
"JS1\_E13\_00303" 13972 "s59E25H2" 0 "Multidrug export protein MepA"  
"JS1\_E13\_00303" 13972 "s59E5H2" 1.364158 "Multidrug export protein MepA"  
"JS1\_E13\_00303" 13972 "s63E6H2" 1.397951 "Multidrug export protein MepA"  
"JS1\_E13\_00304" 13973 "s59E13H2" 0.1791957 "Aromatic amino acid exporter YddG"  
"JS1\_E13\_00304" 13973 "s59E25H2" 0 "Aromatic amino acid exporter YddG"  
"JS1\_E13\_00304" 13973 "s59E5H2" 0.6328291 "Aromatic amino acid exporter YddG"  
"JS1\_E13\_00304" 13973 "s63E6H2" 0.7805067 "Aromatic amino acid exporter YddG"  
"JS1\_E13\_00305" 13974 "s59E13H2" 0.3476359 "L-fucose phosphate aldolase"  
"JS1\_E13\_00305" 13974 "s59E25H2" 0 "L-fucose phosphate aldolase"  
"JS1\_E13\_00305" 13974 "s59E5H2" 0.5126123 "L-fucose phosphate aldolase"  
"JS1\_E13\_00305" 13974 "s63E6H2" 0.6191162 "L-fucose phosphate aldolase"  
"JS1\_E13\_00306" 13975 "s59E13H2" 0.554699 "putative diguanylate cyclase YeaP"  
"JS1\_E13\_00306" 13975 "s59E25H2" 0 "putative diguanylate cyclase YeaP"  
"JS1\_E13\_00306" 13975 "s59E5H2" 0.4982646 "putative diguanylate cyclase YeaP"  
"JS1\_E13\_00306" 13975 "s63E6H2" 0.8800939 "putative diguanylate cyclase YeaP"  
"JS1\_E13\_00307" 13976 "s59E13H2" 0.8510395 "Diacylglycerol kinase"  
"JS1\_E13\_00307" 13976 "s59E25H2" 0 "Diacylglycerol kinase"  
"JS1\_E13\_00307" 13976 "s59E5H2" 2.665762 "Diacylglycerol kinase"  
"JS1\_E13\_00307" 13976 "s63E6H2" 4.164374 "Diacylglycerol kinase"  
"JS1\_E13\_00308" 13977 "s59E13H2" 0.4562001 "N-carbamoyl-D-amino acid hydrolase"  
"JS1\_E13\_00308" 13977 "s59E25H2" 0 "N-carbamoyl-D-amino acid hydrolase"  
"JS1\_E13\_00308" 13977 "s59E5H2" 2.249135 "N-carbamoyl-D-amino acid hydrolase"  
"JS1\_E13\_00308" 13977 "s63E6H2" 3.253298 "N-carbamoyl-D-amino acid hydrolase"  
"JS1\_E13\_00309" 13978 "s59E13H2" 0.4422177 "Spermidine N(1)-acetyltransferase"  
"JS1\_E13\_00309" 13978 "s59E25H2" 0 "Spermidine N(1)-acetyltransferase"  
"JS1\_E13\_00309" 13978 "s59E5H2" 2.323199 "Spermidine N(1)-acetyltransferase"  
"JS1\_E13\_00309" 13978 "s63E6H2" 3.423365 "Spermidine N(1)-acetyltransferase"

"JS1\_E13\_00310" 13979 "s59E13H2" 0.6320419 "Replication-associated recombination protein A"  
"JS1\_E13\_00310" 13979 "s59E25H2" 0.1610487 "Replication-associated recombination protein A"  
"JS1\_E13\_00310" 13979 "s59E5H2" 2.771101 "Replication-associated recombination protein A"  
"JS1\_E13\_00310" 13979 "s63E6H2" 5.328226 "Replication-associated recombination protein A"  
"JS1\_E13\_00311" 13980 "s59E13H2" 0.2073067 "putative adenylyltransferase"  
"JS1\_E13\_00311" 13980 "s59E25H2" 0 "putative adenylyltransferase"  
"JS1\_E13\_00311" 13980 "s59E5H2" 2.250701 "putative adenylyltransferase"  
"JS1\_E13\_00311" 13980 "s63E6H2" 4.21606 "putative adenylyltransferase"  
"JS1\_E13\_00312" 13981 "s59E13H2" 0.8613556 "D-alanine--D-alanine ligase"  
"JS1\_E13\_00312" 13981 "s59E25H2" 0 "D-alanine--D-alanine ligase"  
"JS1\_E13\_00312" 13981 "s59E5H2" 5.179556 "D-alanine--D-alanine ligase"  
"JS1\_E13\_00312" 13981 "s63E6H2" 8.581813 "D-alanine--D-alanine ligase"  
"JS1\_E13\_00313" 13982 "s59E13H2" 25.38999 "Methionine aminopeptidase"  
"JS1\_E13\_00313" 13982 "s59E25H2" 0.351314 "Methionine aminopeptidase"  
"JS1\_E13\_00313" 13982 "s59E5H2" 9.729484 "Methionine aminopeptidase"  
"JS1\_E13\_00313" 13982 "s63E6H2" 11.41478 "Methionine aminopeptidase"  
"JS1\_E13\_00314" 13983 "s59E13H2" 24.57249 "Adenosylcobalamin-dependent ribonucleoside-triphosphate reductase"  
"JS1\_E13\_00314" 13983 "s59E25H2" 0.1333333 "Adenosylcobalamin-dependent ribonucleoside-triphosphate reductase"  
"JS1\_E13\_00314" 13983 "s59E5H2" 7.462921 "Adenosylcobalamin-dependent ribonucleoside-triphosphate reductase"  
"JS1\_E13\_00314" 13983 "s63E6H2" 8.635985 "Adenosylcobalamin-dependent ribonucleoside-triphosphate reductase"  
"JS1\_E13\_00315" 13984 "s59E13H2" 0 "hypothetical protein"  
"JS1\_E13\_00315" 13984 "s59E25H2" 0 "hypothetical protein"  
"JS1\_E13\_00315" 13984 "s59E5H2" 0 "hypothetical protein"  
"JS1\_E13\_00315" 13984 "s63E6H2" 0 "hypothetical protein"  
"JS1\_E13\_00318" 13987 "s59E13H2" 0 "Phosphoadenosine phosphosulfate reductase"  
"JS1\_E13\_00318" 13987 "s59E25H2" 0 "Phosphoadenosine phosphosulfate reductase"  
"JS1\_E13\_00318" 13987 "s59E5H2" 0 "Phosphoadenosine phosphosulfate reductase"  
"JS1\_E13\_00318" 13987 "s63E6H2" 0 "Phosphoadenosine phosphosulfate reductase"  
"JS1\_E13\_00319" 13988 "s59E13H2" 0 "Chromate resistance exported protein"  
"JS1\_E13\_00319" 13988 "s59E25H2" 0 "Chromate resistance exported protein"  
"JS1\_E13\_00319" 13988 "s59E5H2" 0 "Chromate resistance exported protein"  
"JS1\_E13\_00319" 13988 "s63E6H2" 0 "Chromate resistance exported protein"  
"JS1\_E13\_00320" 13989 "s59E13H2" 0 "hypothetical protein"  
"JS1\_E13\_00320" 13989 "s59E25H2" 0 "hypothetical protein"  
"JS1\_E13\_00320" 13989 "s59E5H2" 0 "hypothetical protein"  
"JS1\_E13\_00320" 13989 "s63E6H2" 0 "hypothetical protein"  
"JS1\_E13\_00321" 13990 "s59E13H2" 0 "Calcineurin-like phosphoesterase"  
"JS1\_E13\_00321" 13990 "s59E25H2" 0 "Calcineurin-like phosphoesterase"  
"JS1\_E13\_00321" 13990 "s59E5H2" 0 "Calcineurin-like phosphoesterase"  
"JS1\_E13\_00321" 13990 "s63E6H2" 0 "Calcineurin-like phosphoesterase"  
"JS1\_E13\_00323" 13992 "s59E13H2" 0.002987798 "hypothetical protein"  
"JS1\_E13\_00323" 13992 "s59E25H2" 0 "hypothetical protein"  
"JS1\_E13\_00323" 13992 "s59E5H2" 0.08041799 "hypothetical protein"  
"JS1\_E13\_00323" 13992 "s63E6H2" 0.06769738 "hypothetical protein"  
"JS1\_E13\_00324" 13993 "s59E13H2" 0 "hypothetical protein"  
"JS1\_E13\_00324" 13993 "s59E25H2" 0 "hypothetical protein"  
"JS1\_E13\_00324" 13993 "s59E5H2" 0 "hypothetical protein"



"JS1\_E13\_00324" 13993 "s63E6H2" 0.001397538 "hypothetical protein"  
"JS1\_E13\_00325" 13994 "s59E13H2" 0.002813751 "hypothetical protein"  
"JS1\_E13\_00325" 13994 "s59E25H2" 0 "hypothetical protein"  
"JS1\_E13\_00325" 13994 "s59E5H2" 0.01290643 "hypothetical protein"  
"JS1\_E13\_00325" 13994 "s63E6H2" 0.007476149 "hypothetical protein"  
"JS1\_E13\_00327" 13996 "s59E13H2" 0.00290642 "ComEC family competence protein"  
"JS1\_E13\_00327" 13996 "s59E25H2" 0 "ComEC family competence protein"  
"JS1\_E13\_00327" 13996 "s59E5H2" 0 "ComEC family competence protein"  
"JS1\_E13\_00327" 13996 "s63E6H2" 0.005657838 "ComEC family competence protein"  
"JS1\_E13\_00328" 13997 "s59E13H2" 0 "hypothetical protein"  
"JS1\_E13\_00328" 13997 "s59E25H2" 0 "hypothetical protein"  
"JS1\_E13\_00328" 13997 "s59E5H2" 0 "hypothetical protein"  
"JS1\_E13\_00328" 13997 "s63E6H2" 0.01753737 "hypothetical protein"  
"JS1\_E13\_00329" 13998 "s59E13H2" 0 "ATPase family associated with various cellular activities (AAA)"  
"JS1\_E13\_00329" 13998 "s59E25H2" 0 "ATPase family associated with various cellular activities (AAA)"  
"JS1\_E13\_00329" 13998 "s59E5H2" 0 "ATPase family associated with various cellular activities (AAA)"  
"JS1\_E13\_00329" 13998 "s63E6H2" 0 "ATPase family associated with various cellular activities (AAA)"  
"JS1\_E13\_00331" 14000 "s59E13H2" 0 "hypothetical protein"  
"JS1\_E13\_00331" 14000 "s59E25H2" 0 "hypothetical protein"  
"JS1\_E13\_00331" 14000 "s59E5H2" 0 "hypothetical protein"  
"JS1\_E13\_00331" 14000 "s63E6H2" 0 "hypothetical protein"  
"JS1\_E13\_00332" 14001 "s59E13H2" 0 "lipoprotein Nlpl"  
"JS1\_E13\_00332" 14001 "s59E25H2" 0 "lipoprotein Nlpl"  
"JS1\_E13\_00332" 14001 "s59E5H2" 0 "lipoprotein Nlpl"  
"JS1\_E13\_00332" 14001 "s63E6H2" 0.009451516 "lipoprotein Nlpl"  
"JS1\_E13\_00333" 14002 "s59E13H2" 0 "Modification methylase MbolI"  
"JS1\_E13\_00333" 14002 "s59E25H2" 0 "Modification methylase MbolI"  
"JS1\_E13\_00333" 14002 "s59E5H2" 0 "Modification methylase MbolI"  
"JS1\_E13\_00333" 14002 "s63E6H2" 0 "Modification methylase MbolI"  
"JS1\_E13\_00334" 14003 "s59E13H2" 0 "Cardiolipin synthase"  
"JS1\_E13\_00334" 14003 "s59E25H2" 0 "Cardiolipin synthase"  
"JS1\_E13\_00334" 14003 "s59E5H2" 0 "Cardiolipin synthase"  
"JS1\_E13\_00334" 14003 "s63E6H2" 3.184959e-05 "Cardiolipin synthase"  
"JS1\_E13\_00336" 14005 "s59E13H2" 0.00177038 "Phospholipase D precursor"  
"JS1\_E13\_00336" 14005 "s59E25H2" 0 "Phospholipase D precursor"  
"JS1\_E13\_00336" 14005 "s59E5H2" 0.03378739 "Phospholipase D precursor"  
"JS1\_E13\_00336" 14005 "s63E6H2" 1.282232 "Phospholipase D precursor"  
"JS1\_E13\_00337" 14006 "s59E13H2" 0.02212611 "Putative ski2-type helicase"  
"JS1\_E13\_00337" 14006 "s59E25H2" 0 "Putative ski2-type helicase"  
"JS1\_E13\_00337" 14006 "s59E5H2" 0.1298873 "Putative ski2-type helicase"  
"JS1\_E13\_00337" 14006 "s63E6H2" 0.1556682 "Putative ski2-type helicase"  
"JS1\_E13\_00338" 14007 "s59E13H2" 0 "hypothetical protein"  
"JS1\_E13\_00338" 14007 "s59E25H2" 0 "hypothetical protein"  
"JS1\_E13\_00338" 14007 "s59E5H2" 0 "hypothetical protein"  
"JS1\_E13\_00338" 14007 "s63E6H2" 0.01637355 "hypothetical protein"  
"JS1\_E13\_00339" 14008 "s59E13H2" 0.04021385 "Cyclic di-GMP phosphodiesterase response regulator RpfG"  
"JS1\_E13\_00339" 14008 "s59E25H2" 0 "Cyclic di-GMP phosphodiesterase response regulator RpfG"

"JS1\_E13\_00339" 14008 "s59E5H2" 0.2706269 "Cyclic di-GMP phosphodiesterase response regulator RpfG"  
"JS1\_E13\_00339" 14008 "s63E6H2" 0.1722806 "Cyclic di-GMP phosphodiesterase response regulator RpfG"  
"JS1\_E13\_00340" 14009 "s59E13H2" 0.0156493 "Cyclic di-GMP phosphodiesterase response regulator RpfG"  
"JS1\_E13\_00340" 14009 "s59E25H2" 0 "Cyclic di-GMP phosphodiesterase response regulator RpfG"  
"JS1\_E13\_00340" 14009 "s59E5H2" 0.04394405 "Cyclic di-GMP phosphodiesterase response regulator RpfG"  
"JS1\_E13\_00340" 14009 "s63E6H2" 0.05815008 "Cyclic di-GMP phosphodiesterase response regulator RpfG"  
"JS1\_E13\_00341" 14010 "s59E13H2" 0.02086678 "hypothetical protein"  
"JS1\_E13\_00341" 14010 "s59E25H2" 0 "hypothetical protein"  
"JS1\_E13\_00341" 14010 "s59E5H2" 0.03174798 "hypothetical protein"  
"JS1\_E13\_00341" 14010 "s63E6H2" 0.00607929 "hypothetical protein"  
"JS1\_E13\_00343" 14012 "s59E13H2" 0 "hypothetical protein"  
"JS1\_E13\_00343" 14012 "s59E25H2" 0 "hypothetical protein"  
"JS1\_E13\_00343" 14012 "s59E5H2" 0 "hypothetical protein"  
"JS1\_E13\_00343" 14012 "s63E6H2" 0.0133851 "hypothetical protein"  
"JS1\_E13\_00344" 14013 "s59E13H2" 0.1544162 "hypothetical protein"  
"JS1\_E13\_00344" 14013 "s59E25H2" 0 "hypothetical protein"  
"JS1\_E13\_00344" 14013 "s59E5H2" 0 "hypothetical protein"  
"JS1\_E13\_00344" 14013 "s63E6H2" 0.07937739 "hypothetical protein"  
"JS1\_E13\_00345" 14014 "s59E13H2" 0.002190974 "Acryloyl-coenzyme A reductase"  
"JS1\_E13\_00345" 14014 "s59E25H2" 0 "Acryloyl-coenzyme A reductase"  
"JS1\_E13\_00345" 14014 "s59E5H2" 0 "Acryloyl-coenzyme A reductase"  
"JS1\_E13\_00345" 14014 "s63E6H2" 0.07581077 "Acryloyl-coenzyme A reductase"  
"JS1\_E13\_00346" 14015 "s59E13H2" 0.0001225655 "hypothetical protein"  
"JS1\_E13\_00346" 14015 "s59E25H2" 0 "hypothetical protein"  
"JS1\_E13\_00346" 14015 "s59E5H2" 0.01190289 "hypothetical protein"  
"JS1\_E13\_00346" 14015 "s63E6H2" 0.05887359 "hypothetical protein"  
"JS1\_E13\_00347" 14016 "s59E13H2" 0 "NADH oxidase"  
"JS1\_E13\_00347" 14016 "s59E25H2" 0 "NADH oxidase"  
"JS1\_E13\_00347" 14016 "s59E5H2" 0 "NADH oxidase"  
"JS1\_E13\_00347" 14016 "s63E6H2" 0.0009049536 "NADH oxidase"  
"JS1\_E13\_00348" 14017 "s59E13H2" 0 "Membrane-bound lysozyme-inhibitor of c-type lysozyme"  
"JS1\_E13\_00348" 14017 "s59E25H2" 0 "Membrane-bound lysozyme-inhibitor of c-type lysozyme"  
"JS1\_E13\_00348" 14017 "s59E5H2" 0 "Membrane-bound lysozyme-inhibitor of c-type lysozyme"  
"JS1\_E13\_00348" 14017 "s63E6H2" 0.01401255 "Membrane-bound lysozyme-inhibitor of c-type lysozyme"  
"JS1\_E13\_00349" 14018 "s59E13H2" 0 "hypothetical protein"  
"JS1\_E13\_00349" 14018 "s59E25H2" 0 "hypothetical protein"  
"JS1\_E13\_00349" 14018 "s59E5H2" 1.842977 "hypothetical protein"  
"JS1\_E13\_00349" 14018 "s63E6H2" 0.009873132 "hypothetical protein"  
"JS1\_E13\_00351" 14020 "s59E13H2" 1.323096 "hypothetical protein"  
"JS1\_E13\_00351" 14020 "s59E25H2" 0 "hypothetical protein"  
"JS1\_E13\_00351" 14020 "s59E5H2" 1.308744 "hypothetical protein"  
"JS1\_E13\_00351" 14020 "s63E6H2" 1.230043 "hypothetical protein"  
"JS1\_E13\_00352" 14021 "s59E13H2" 0.8808423 "hypothetical protein"  
"JS1\_E13\_00352" 14021 "s59E25H2" 0 "hypothetical protein"  
"JS1\_E13\_00352" 14021 "s59E5H2" 0.2112174 "hypothetical protein"  
"JS1\_E13\_00352" 14021 "s63E6H2" 2.987372 "hypothetical protein"  
"JS1\_E13\_00353" 14022 "s59E13H2" 0.0582351 "SnoA-like domain protein"

"JS1\_E13\_00353" 14022 "s59E25H2" 0 "Snoal-like domain protein"  
"JS1\_E13\_00353" 14022 "s59E5H2" 2.083673 "Snoal-like domain protein"  
"JS1\_E13\_00353" 14022 "s63E6H2" 0.4567223 "Snoal-like domain protein"  
"JS1\_E13\_00354" 14023 "s59E13H2" 0 "2-dehydropantoate 2-reductase"  
"JS1\_E13\_00354" 14023 "s59E25H2" 0 "2-dehydropantoate 2-reductase"  
"JS1\_E13\_00354" 14023 "s59E5H2" 0 "2-dehydropantoate 2-reductase"  
"JS1\_E13\_00354" 14023 "s63E6H2" 0.004676377 "2-dehydropantoate 2-reductase"  
"JS1\_E13\_00355" 14024 "s59E13H2" 0 "Cysteine synthase"  
"JS1\_E13\_00355" 14024 "s59E25H2" 0 "Cysteine synthase"  
"JS1\_E13\_00355" 14024 "s59E5H2" 0.08564852 "Cysteine synthase"  
"JS1\_E13\_00355" 14024 "s63E6H2" 0.02084885 "Cysteine synthase"  
"JS1\_E13\_00358" 14027 "s59E13H2" 0.4715089 "RNA polymerase sigma factor SigA"  
"JS1\_E13\_00358" 14027 "s59E25H2" 0 "RNA polymerase sigma factor SigA"  
"JS1\_E13\_00358" 14027 "s59E5H2" 1.159644 "RNA polymerase sigma factor SigA"  
"JS1\_E13\_00358" 14027 "s63E6H2" 0.1646419 "RNA polymerase sigma factor SigA"  
"JS1\_E13\_00359" 14028 "s59E13H2" 0.2615318 "DNA primase"  
"JS1\_E13\_00359" 14028 "s59E25H2" 0 "DNA primase"  
"JS1\_E13\_00359" 14028 "s59E5H2" 1.138363 "DNA primase"  
"JS1\_E13\_00359" 14028 "s63E6H2" 0.0990931 "DNA primase"  
"JS1\_E13\_00360" 14029 "s59E13H2" 0.4339687 "hypothetical protein"  
"JS1\_E13\_00360" 14029 "s59E25H2" 0 "hypothetical protein"  
"JS1\_E13\_00360" 14029 "s59E5H2" 0.3394663 "hypothetical protein"  
"JS1\_E13\_00360" 14029 "s63E6H2" 0.09624548 "hypothetical protein"  
"JS1\_E13\_00361" 14030 "s59E13H2" 0.3710809 "ADP-ribose pyrophosphatase"  
"JS1\_E13\_00361" 14030 "s59E25H2" 0 "ADP-ribose pyrophosphatase"  
"JS1\_E13\_00361" 14030 "s59E5H2" 0.3617618 "ADP-ribose pyrophosphatase"  
"JS1\_E13\_00361" 14030 "s63E6H2" 0.07805132 "ADP-ribose pyrophosphatase"  
"JS1\_E13\_00362" 14031 "s59E13H2" 0.3856959 "Peptidase T"  
"JS1\_E13\_00362" 14031 "s59E25H2" 0 "Peptidase T"  
"JS1\_E13\_00362" 14031 "s59E5H2" 0.2722202 "Peptidase T"  
"JS1\_E13\_00362" 14031 "s63E6H2" 0.04883749 "Peptidase T"  
"JS1\_E13\_00363" 14032 "s59E13H2" 0.2723173 "Ketoisovalerate oxidoreductase subunit VorA"  
"JS1\_E13\_00363" 14032 "s59E25H2" 0 "Ketoisovalerate oxidoreductase subunit VorA"  
"JS1\_E13\_00363" 14032 "s59E5H2" 0.01479283 "Ketoisovalerate oxidoreductase subunit VorA"  
"JS1\_E13\_00363" 14032 "s63E6H2" 0.08737422 "Ketoisovalerate oxidoreductase subunit VorA"  
"JS1\_E13\_00364" 14033 "s59E13H2" 0.3284492 "Ketoisovalerate oxidoreductase subunit VorA"  
"JS1\_E13\_00364" 14033 "s59E25H2" 0 "Ketoisovalerate oxidoreductase subunit VorA"  
"JS1\_E13\_00364" 14033 "s59E5H2" 0.02625997 "Ketoisovalerate oxidoreductase subunit VorA"  
"JS1\_E13\_00364" 14033 "s63E6H2" 0.171449 "Ketoisovalerate oxidoreductase subunit VorA"  
"JS1\_E13\_00369" 14038 "s59E13H2" 0.5602764 "NH(3)-dependent NAD(+) synthetase"  
"JS1\_E13\_00369" 14038 "s59E25H2" 0 "NH(3)-dependent NAD(+) synthetase"  
"JS1\_E13\_00369" 14038 "s59E5H2" 0.1795399 "NH(3)-dependent NAD(+) synthetase"  
"JS1\_E13\_00369" 14038 "s63E6H2" 1.569895 "NH(3)-dependent NAD(+) synthetase"  
"JS1\_E13\_00370" 14039 "s59E13H2" 0.6771019 "putative transcriptional regulatory protein"  
"JS1\_E13\_00370" 14039 "s59E25H2" 0 "putative transcriptional regulatory protein"  
"JS1\_E13\_00370" 14039 "s59E5H2" 0.2498938 "putative transcriptional regulatory protein"  
"JS1\_E13\_00370" 14039 "s63E6H2" 1.338501 "putative transcriptional regulatory protein"

"JS1\_E13\_00371" 14040 "s59E13H2" 0.8153106 "Crossover junction endodeoxyribonuclease RuvC"  
"JS1\_E13\_00371" 14040 "s59E25H2" 0 "Crossover junction endodeoxyribonuclease RuvC"  
"JS1\_E13\_00371" 14040 "s59E5H2" 4.498085 "Crossover junction endodeoxyribonuclease RuvC"  
"JS1\_E13\_00371" 14040 "s63E6H2" 0.1048322 "Crossover junction endodeoxyribonuclease RuvC"  
"JS1\_E13\_00372" 14041 "s59E13H2" 0.6671484 "Holliday junction ATP-dependent DNA helicase RuvA"  
"JS1\_E13\_00372" 14041 "s59E25H2" 0 "Holliday junction ATP-dependent DNA helicase RuvA"  
"JS1\_E13\_00372" 14041 "s59E5H2" 0.2516796 "Holliday junction ATP-dependent DNA helicase RuvA"  
"JS1\_E13\_00372" 14041 "s63E6H2" 0.02001742 "Holliday junction ATP-dependent DNA helicase RuvA"  
"JS1\_E13\_00373" 14042 "s59E13H2" 0.5325232 "Holliday junction ATP-dependent DNA helicase RuvB"  
"JS1\_E13\_00373" 14042 "s59E25H2" 0 "Holliday junction ATP-dependent DNA helicase RuvB"  
"JS1\_E13\_00373" 14042 "s59E5H2" 0.1388268 "Holliday junction ATP-dependent DNA helicase RuvB"  
"JS1\_E13\_00373" 14042 "s63E6H2" 0.09220848 "Holliday junction ATP-dependent DNA helicase RuvB"  
"JS1\_E13\_00374" 14043 "s59E13H2" 0.8345172 "Amidase enhancer precursor"  
"JS1\_E13\_00374" 14043 "s59E25H2" 0 "Amidase enhancer precursor"  
"JS1\_E13\_00374" 14043 "s59E5H2" 0.242771 "Amidase enhancer precursor"  
"JS1\_E13\_00374" 14043 "s63E6H2" 0.02932031 "Amidase enhancer precursor"  
"JS1\_E13\_00375" 14044 "s59E13H2" 1.268824 "S-adenosylmethionine:tRNA ribosyltransferase-isomerase"  
"JS1\_E13\_00375" 14044 "s59E25H2" 0 "S-adenosylmethionine:tRNA ribosyltransferase-isomerase"  
"JS1\_E13\_00375" 14044 "s59E5H2" 0.2337546 "S-adenosylmethionine:tRNA ribosyltransferase-isomerase"  
"JS1\_E13\_00375" 14044 "s63E6H2" 0.07777237 "S-adenosylmethionine:tRNA ribosyltransferase-isomerase"  
"JS1\_E13\_00376" 14045 "s59E13H2" 0.6051428 "Queuine tRNA-ribosyltransferase"  
"JS1\_E13\_00376" 14045 "s59E25H2" 0 "Queuine tRNA-ribosyltransferase"  
"JS1\_E13\_00376" 14045 "s59E5H2" 0.2508875 "Queuine tRNA-ribosyltransferase"  
"JS1\_E13\_00376" 14045 "s63E6H2" 0.07622115 "Queuine tRNA-ribosyltransferase"  
"JS1\_E13\_00377" 14046 "s59E13H2" 0.004690361 "preprotein translocase subunit YajC"  
"JS1\_E13\_00377" 14046 "s59E25H2" 0 "preprotein translocase subunit YajC"  
"JS1\_E13\_00377" 14046 "s59E5H2" 0.160875 "preprotein translocase subunit YajC"  
"JS1\_E13\_00377" 14046 "s63E6H2" 0.06200409 "preprotein translocase subunit YajC"  
"JS1\_E13\_00378" 14047 "s59E13H2" 0.09048111 "preprotein translocase subunit SecD"  
"JS1\_E13\_00378" 14047 "s59E25H2" 0 "preprotein translocase subunit SecD"  
"JS1\_E13\_00378" 14047 "s59E5H2" 0.5190613 "preprotein translocase subunit SecD"  
"JS1\_E13\_00378" 14047 "s63E6H2" 0.2188697 "preprotein translocase subunit SecD"  
"JS1\_E13\_00379" 14048 "s59E13H2" 0.02208306 "Protein-export membrane protein SecF"  
"JS1\_E13\_00379" 14048 "s59E25H2" 0 "Protein-export membrane protein SecF"  
"JS1\_E13\_00379" 14048 "s59E5H2" 0.6243377 "Protein-export membrane protein SecF"  
"JS1\_E13\_00379" 14048 "s63E6H2" 0.1900592 "Protein-export membrane protein SecF"  
"JS1\_E13\_00380" 14049 "s59E13H2" 0.01706709 "Single-stranded-DNA-specific exonuclease RecJ"  
"JS1\_E13\_00380" 14049 "s59E25H2" 0 "Single-stranded-DNA-specific exonuclease RecJ"  
"JS1\_E13\_00380" 14049 "s59E5H2" 0.4358385 "Single-stranded-DNA-specific exonuclease RecJ"  
"JS1\_E13\_00380" 14049 "s63E6H2" 0.3902235 "Single-stranded-DNA-specific exonuclease RecJ"  
"JS1\_E13\_00381" 14050 "s59E13H2" 0.02053173 "Adenine phosphoribosyltransferase"  
"JS1\_E13\_00381" 14050 "s59E25H2" 0 "Adenine phosphoribosyltransferase"  
"JS1\_E13\_00381" 14050 "s59E5H2" 0.1105459 "Adenine phosphoribosyltransferase"  
"JS1\_E13\_00381" 14050 "s63E6H2" 0.2406532 "Adenine phosphoribosyltransferase"  
"JS1\_E13\_00382" 14051 "s59E13H2" 0.06399346 "GTP pyrophosphokinase"  
"JS1\_E13\_00382" 14051 "s59E25H2" 0 "GTP pyrophosphokinase"  
"JS1\_E13\_00382" 14051 "s59E5H2" 0.124469 "GTP pyrophosphokinase"

"JS1\_E13\_00382" 14051 "s63E6H2" 0.3534018 "GTP pyrophosphokinase"  
"JS1\_E13\_00383" 14052 "s59E13H2" 0.01775995 "D-tyrosyl-tRNA(Tyr) deacylase"  
"JS1\_E13\_00383" 14052 "s59E25H2" 0 "D-tyrosyl-tRNA(Tyr) deacylase"  
"JS1\_E13\_00383" 14052 "s59E5H2" 0.05202165 "D-tyrosyl-tRNA(Tyr) deacylase"  
"JS1\_E13\_00383" 14052 "s63E6H2" 0.2595451 "D-tyrosyl-tRNA(Tyr) deacylase"  
"JS1\_E13\_00384" 14053 "s59E13H2" 0.02977409 "putative glycerophosphoryl diester phosphodiesterase 1"  
"JS1\_E13\_00384" 14053 "s59E25H2" 0 "putative glycerophosphoryl diester phosphodiesterase 1"  
"JS1\_E13\_00384" 14053 "s59E5H2" 0.05765247 "putative glycerophosphoryl diester phosphodiesterase 1"  
"JS1\_E13\_00384" 14053 "s63E6H2" 0.2920418 "putative glycerophosphoryl diester phosphodiesterase 1"  
"JS1\_E13\_00385" 14054 "s59E13H2" 0.01723441 "Beta-lactamase hydrolase-like protein"  
"JS1\_E13\_00385" 14054 "s59E25H2" 0 "Beta-lactamase hydrolase-like protein"  
"JS1\_E13\_00385" 14054 "s59E5H2" 0.1809795 "Beta-lactamase hydrolase-like protein"  
"JS1\_E13\_00385" 14054 "s63E6H2" 0.4595171 "Beta-lactamase hydrolase-like protein"  
"JS1\_E13\_00386" 14055 "s59E13H2" 0.01046382 "Adenosylhomocysteinase"  
"JS1\_E13\_00386" 14055 "s59E25H2" 0 "Adenosylhomocysteinase"  
"JS1\_E13\_00386" 14055 "s59E5H2" 0.2023436 "Adenosylhomocysteinase"  
"JS1\_E13\_00386" 14055 "s63E6H2" 0.4196403 "Adenosylhomocysteinase"  
"JS1\_E13\_00387" 14056 "s59E13H2" 0.2839716 "Pyruvate, phosphate dikinase"  
"JS1\_E13\_00387" 14056 "s59E25H2" 0 "Pyruvate, phosphate dikinase"  
"JS1\_E13\_00387" 14056 "s59E5H2" 0.1078697 "Pyruvate, phosphate dikinase"  
"JS1\_E13\_00387" 14056 "s63E6H2" 0.07873755 "Pyruvate, phosphate dikinase"  
"JS1\_E13\_00388" 14057 "s59E13H2" 0.107417 "Pyruvate, phosphate dikinase"  
"JS1\_E13\_00388" 14057 "s59E25H2" 0 "Pyruvate, phosphate dikinase"  
"JS1\_E13\_00388" 14057 "s59E5H2" 0.1842312 "Pyruvate, phosphate dikinase"  
"JS1\_E13\_00388" 14057 "s63E6H2" 0.1261992 "Pyruvate, phosphate dikinase"  
"JS1\_E13\_00389" 14058 "s59E13H2" 0.0619419 "Putative K(+)-stimulated pyrophosphate-energized sodium pump"  
"JS1\_E13\_00389" 14058 "s59E25H2" 0 "Putative K(+)-stimulated pyrophosphate-energized sodium pump"  
"JS1\_E13\_00389" 14058 "s59E5H2" 0.3206266 "Putative K(+)-stimulated pyrophosphate-energized sodium pump"  
"JS1\_E13\_00389" 14058 "s63E6H2" 0.07817979 "Putative K(+)-stimulated pyrophosphate-energized sodium pump"  
"JS1\_E13\_00390" 14059 "s59E13H2" 0.08411086 "Pyrimidine-nucleoside phosphorylase"  
"JS1\_E13\_00390" 14059 "s59E25H2" 0 "Pyrimidine-nucleoside phosphorylase"  
"JS1\_E13\_00390" 14059 "s59E5H2" 0.2444812 "Pyrimidine-nucleoside phosphorylase"  
"JS1\_E13\_00390" 14059 "s63E6H2" 0.09374182 "Pyrimidine-nucleoside phosphorylase"  
"JS1\_E13\_00391" 14060 "s59E13H2" 0.0480185 "Bifunctional oligoribonuclease and PAP phosphatase NrnA"  
"JS1\_E13\_00391" 14060 "s59E25H2" 0 "Bifunctional oligoribonuclease and PAP phosphatase NrnA"  
"JS1\_E13\_00391" 14060 "s59E5H2" 0.2744383 "Bifunctional oligoribonuclease and PAP phosphatase NrnA"  
"JS1\_E13\_00391" 14060 "s63E6H2" 0.09069027 "Bifunctional oligoribonuclease and PAP phosphatase NrnA"  
"JS1\_E13\_00392" 14061 "s59E13H2" 0.06728286 "Poly(A) polymerase I"  
"JS1\_E13\_00392" 14061 "s59E25H2" 0 "Poly(A) polymerase I"  
"JS1\_E13\_00392" 14061 "s59E5H2" 0.3737175 "Poly(A) polymerase I"  
"JS1\_E13\_00392" 14061 "s63E6H2" 0.09905666 "Poly(A) polymerase I"  
"JS1\_E13\_00393" 14062 "s59E13H2" 0.02958166 "CCA-adding enzyme"  
"JS1\_E13\_00393" 14062 "s59E25H2" 0 "CCA-adding enzyme"  
"JS1\_E13\_00393" 14062 "s59E5H2" 0.1666794 "CCA-adding enzyme"  
"JS1\_E13\_00393" 14062 "s63E6H2" 0.06180102 "CCA-adding enzyme"  
"JS1\_E13\_00394" 14063 "s59E13H2" 0.04903263 "Peptidase family M50"  
"JS1\_E13\_00394" 14063 "s59E25H2" 0 "Peptidase family M50"

"JS1\_E13\_00394" 14063 "s59E5H2" 0.2382474 "Peptidase family M50"  
"JS1\_E13\_00394" 14063 "s63E6H2" 0.07103762 "Peptidase family M50"  
"JS1\_E13\_00395" 14064 "s59E13H2" 0.04237115 "Tryptophan--tRNA ligase"  
"JS1\_E13\_00395" 14064 "s59E25H2" 0 "Tryptophan--tRNA ligase"  
"JS1\_E13\_00395" 14064 "s59E5H2" 0.1568485 "Tryptophan--tRNA ligase"  
"JS1\_E13\_00395" 14064 "s63E6H2" 0.07290081 "Tryptophan--tRNA ligase"  
"JS1\_E13\_00396" 14065 "s59E13H2" 0.08802602 "Tryptophan--tRNA ligase"  
"JS1\_E13\_00396" 14065 "s59E25H2" 0 "Tryptophan--tRNA ligase"  
"JS1\_E13\_00396" 14065 "s59E5H2" 0.1742002 "Tryptophan--tRNA ligase"  
"JS1\_E13\_00396" 14065 "s63E6H2" 0.08217287 "Tryptophan--tRNA ligase"  
"JS1\_E13\_00397" 14066 "s59E13H2" 0.08781848 "Tryptophan--tRNA ligase"  
"JS1\_E13\_00397" 14066 "s59E25H2" 0 "Tryptophan--tRNA ligase"  
"JS1\_E13\_00397" 14066 "s59E5H2" 0.2156186 "Tryptophan--tRNA ligase"  
"JS1\_E13\_00397" 14066 "s63E6H2" 0.05381084 "Tryptophan--tRNA ligase"  
"JS1\_E13\_00398" 14067 "s59E13H2" 1.34872 "Segregation and condensation protein A"  
"JS1\_E13\_00398" 14067 "s59E25H2" 0 "Segregation and condensation protein A"  
"JS1\_E13\_00398" 14067 "s59E5H2" 0.4110439 "Segregation and condensation protein A"  
"JS1\_E13\_00398" 14067 "s63E6H2" 0.08379479 "Segregation and condensation protein A"  
"JS1\_E13\_00399" 14068 "s59E13H2" 5.118625 "Segregation and condensation protein B"  
"JS1\_E13\_00399" 14068 "s59E25H2" 0 "Segregation and condensation protein B"  
"JS1\_E13\_00399" 14068 "s59E5H2" 0.2164921 "Segregation and condensation protein B"  
"JS1\_E13\_00399" 14068 "s63E6H2" 0.1887475 "Segregation and condensation protein B"  
"JS1\_E13\_00400" 14069 "s59E13H2" 4.055628 "Ribosomal large subunit pseudouridine synthase B"  
"JS1\_E13\_00400" 14069 "s59E25H2" 0 "Ribosomal large subunit pseudouridine synthase B"  
"JS1\_E13\_00400" 14069 "s59E5H2" 0.03635358 "Ribosomal large subunit pseudouridine synthase B"  
"JS1\_E13\_00400" 14069 "s63E6H2" 0.08225463 "Ribosomal large subunit pseudouridine synthase B"  
"JS1\_E13\_00401" 14070 "s59E13H2" 4.390525 "Cytidylate kinase"  
"JS1\_E13\_00401" 14070 "s59E25H2" 0 "Cytidylate kinase"  
"JS1\_E13\_00401" 14070 "s59E5H2" 0.03675571 "Cytidylate kinase"  
"JS1\_E13\_00401" 14070 "s63E6H2" 0.1278703 "Cytidylate kinase"  
"JS1\_E13\_00402" 14071 "s59E13H2" 4.059982 "4-hydroxy-3-methylbut-2-enyl diphosphate reductase"  
"JS1\_E13\_00402" 14071 "s59E25H2" 0 "4-hydroxy-3-methylbut-2-enyl diphosphate reductase"  
"JS1\_E13\_00402" 14071 "s59E5H2" 0.1206936 "4-hydroxy-3-methylbut-2-enyl diphosphate reductase"  
"JS1\_E13\_00402" 14071 "s63E6H2" 0.3134753 "4-hydroxy-3-methylbut-2-enyl diphosphate reductase"  
"JS1\_E13\_00403" 14072 "s59E13H2" 5.767327 "50S ribosomal protein L28"  
"JS1\_E13\_00403" 14072 "s59E25H2" 0 "50S ribosomal protein L28"  
"JS1\_E13\_00403" 14072 "s59E5H2" 0.1487362 "50S ribosomal protein L28"  
"JS1\_E13\_00403" 14072 "s63E6H2" 0.3034177 "50S ribosomal protein L28"  
"JS1\_E13\_00404" 14073 "s59E13H2" 5.953813 "Ribosomal RNA small subunit methyltransferase D"  
"JS1\_E13\_00404" 14073 "s59E25H2" 0 "Ribosomal RNA small subunit methyltransferase D"  
"JS1\_E13\_00404" 14073 "s59E5H2" 0.0747541 "Ribosomal RNA small subunit methyltransferase D"  
"JS1\_E13\_00404" 14073 "s63E6H2" 0.1206597 "Ribosomal RNA small subunit methyltransferase D"  
"JS1\_E13\_00405" 14074 "s59E13H2" 6.480831 "Phosphopantetheine adenylyltransferase"  
"JS1\_E13\_00405" 14074 "s59E25H2" 0 "Phosphopantetheine adenylyltransferase"  
"JS1\_E13\_00405" 14074 "s59E5H2" 0.1094951 "Phosphopantetheine adenylyltransferase"  
"JS1\_E13\_00405" 14074 "s63E6H2" 0.3672904 "Phosphopantetheine adenylyltransferase"  
"JS1\_E13\_00406" 14075 "s59E13H2" 5.831231 "Lon protease"

"JS1\_E13\_00406" 14075 "s59E25H2" 0 "Lon protease"  
"JS1\_E13\_00406" 14075 "s59E5H2" 0.2589632 "Lon protease"  
"JS1\_E13\_00406" 14075 "s63E6H2" 0.5203394 "Lon protease"  
"JS1\_E13\_00407" 14076 "s59E13H2" 4.810915 "hypothetical protein"  
"JS1\_E13\_00407" 14076 "s59E25H2" 0.3756614 "hypothetical protein"  
"JS1\_E13\_00407" 14076 "s59E5H2" 0.2344268 "hypothetical protein"  
"JS1\_E13\_00407" 14076 "s63E6H2" 0.365148 "hypothetical protein"  
"JS1\_E13\_00408" 14077 "s59E13H2" 1.107834 "Phosphate acetyltransferase"  
"JS1\_E13\_00408" 14077 "s59E25H2" 0 "Phosphate acetyltransferase"  
"JS1\_E13\_00408" 14077 "s59E5H2" 0.1258432 "Phosphate acetyltransferase"  
"JS1\_E13\_00408" 14077 "s63E6H2" 0.1018069 "Phosphate acetyltransferase"  
"JS1\_E13\_00409" 14078 "s59E13H2" 0.161099 "Acetate kinase"  
"JS1\_E13\_00409" 14078 "s59E25H2" 0 "Acetate kinase"  
"JS1\_E13\_00409" 14078 "s59E5H2" 0.05775052 "Acetate kinase"  
"JS1\_E13\_00409" 14078 "s63E6H2" 0.1128726 "Acetate kinase"  
"JS1\_E13\_00410" 14079 "s59E13H2" 0 "50S ribosomal protein L32"  
"JS1\_E13\_00410" 14079 "s59E25H2" 0 "50S ribosomal protein L32"  
"JS1\_E13\_00410" 14079 "s59E5H2" 0.04142998 "50S ribosomal protein L32"  
"JS1\_E13\_00410" 14079 "s63E6H2" 0.01304898 "50S ribosomal protein L32"  
"JS1\_E13\_00411" 14080 "s59E13H2" 0 "Transcription factor FapR"  
"JS1\_E13\_00411" 14080 "s59E25H2" 0 "Transcription factor FapR"  
"JS1\_E13\_00411" 14080 "s59E5H2" 0.00482492 "Transcription factor FapR"  
"JS1\_E13\_00411" 14080 "s63E6H2" 0.002098802 "Transcription factor FapR"  
"JS1\_E13\_00412" 14081 "s59E13H2" 0.04766501 "Phosphate acyltransferase"  
"JS1\_E13\_00412" 14081 "s59E25H2" 0 "Phosphate acyltransferase"  
"JS1\_E13\_00412" 14081 "s59E5H2" 0.01486904 "Phosphate acyltransferase"  
"JS1\_E13\_00412" 14081 "s63E6H2" 0.006893591 "Phosphate acyltransferase"  
"JS1\_E13\_00413" 14082 "s59E13H2" 0 "3-oxoacyl-[acyl-carrier-protein] synthase 3 protein 1"  
"JS1\_E13\_00413" 14082 "s59E25H2" 0 "3-oxoacyl-[acyl-carrier-protein] synthase 3 protein 1"  
"JS1\_E13\_00413" 14082 "s59E5H2" 0.007205214 "3-oxoacyl-[acyl-carrier-protein] synthase 3 protein 1"  
"JS1\_E13\_00413" 14082 "s63E6H2" 0 "3-oxoacyl-[acyl-carrier-protein] synthase 3 protein 1"  
"JS1\_E13\_00414" 14083 "s59E13H2" 0 "N-acetylglucosamine-6-phosphate deacetylase"  
"JS1\_E13\_00414" 14083 "s59E25H2" 0 "N-acetylglucosamine-6-phosphate deacetylase"  
"JS1\_E13\_00414" 14083 "s59E5H2" 0.02147779 "N-acetylglucosamine-6-phosphate deacetylase"  
"JS1\_E13\_00414" 14083 "s63E6H2" 0.4805534 "N-acetylglucosamine-6-phosphate deacetylase"  
"JS1\_E13\_00415" 14084 "s59E13H2" 0 "putative FAD-linked oxidoreductase"  
"JS1\_E13\_00415" 14084 "s59E25H2" 0 "putative FAD-linked oxidoreductase"  
"JS1\_E13\_00415" 14084 "s59E5H2" 0.03799948 "putative FAD-linked oxidoreductase"  
"JS1\_E13\_00415" 14084 "s63E6H2" 0.006303014 "putative FAD-linked oxidoreductase"  
"JS1\_E13\_00416" 14085 "s59E13H2" 0.001725097 "Acryloyl-CoA reductase electron transfer subunit beta"  
"JS1\_E13\_00416" 14085 "s59E25H2" 0 "Acryloyl-CoA reductase electron transfer subunit beta"  
"JS1\_E13\_00416" 14085 "s59E5H2" 0.01568099 "Acryloyl-CoA reductase electron transfer subunit beta"  
"JS1\_E13\_00416" 14085 "s63E6H2" 0.02785738 "Acryloyl-CoA reductase electron transfer subunit beta"  
"JS1\_E13\_00417" 14086 "s59E13H2" 0 "Acryloyl-CoA reductase electron transfer subunit gamma"  
"JS1\_E13\_00417" 14086 "s59E25H2" 0 "Acryloyl-CoA reductase electron transfer subunit gamma"  
"JS1\_E13\_00417" 14086 "s59E5H2" 0.0211687 "Acryloyl-CoA reductase electron transfer subunit gamma"  
"JS1\_E13\_00417" 14086 "s63E6H2" 0.01905301 "Acryloyl-CoA reductase electron transfer subunit gamma"

"JS1\_E13\_00418" 14087 "s59E13H2" 0 "Glucosamine kinase GspK"  
"JS1\_E13\_00418" 14087 "s59E25H2" 0 "Glucosamine kinase GspK"  
"JS1\_E13\_00418" 14087 "s59E5H2" 0 "Glucosamine kinase GspK"  
"JS1\_E13\_00418" 14087 "s63E6H2" 0.0003899439 "Glucosamine kinase GspK"  
"JS1\_E13\_00419" 14088 "s59E13H2" 0 "putative periplasmic esterase"  
"JS1\_E13\_00419" 14088 "s59E25H2" 0 "putative periplasmic esterase"  
"JS1\_E13\_00419" 14088 "s59E5H2" 0 "putative periplasmic esterase"  
"JS1\_E13\_00419" 14088 "s63E6H2" 0 "putative periplasmic esterase"  
"JS1\_E13\_00420" 14089 "s59E13H2" 0 "L-arabinose transport system permease protein AraQ"  
"JS1\_E13\_00420" 14089 "s59E25H2" 0 "L-arabinose transport system permease protein AraQ"  
"JS1\_E13\_00420" 14089 "s59E5H2" 0 "L-arabinose transport system permease protein AraQ"  
"JS1\_E13\_00420" 14089 "s63E6H2" 0 "L-arabinose transport system permease protein AraQ"  
"JS1\_E13\_00421" 14090 "s59E13H2" 0 "Lactose transport system permease protein LacF"  
"JS1\_E13\_00421" 14090 "s59E25H2" 0 "Lactose transport system permease protein LacF"  
"JS1\_E13\_00421" 14090 "s59E5H2" 0 "Lactose transport system permease protein LacF"  
"JS1\_E13\_00421" 14090 "s63E6H2" 0 "Lactose transport system permease protein LacF"  
"JS1\_E13\_00422" 14091 "s59E13H2" 0.002805758 "Multiple sugar-binding protein precursor"  
"JS1\_E13\_00422" 14091 "s59E25H2" 0 "Multiple sugar-binding protein precursor"  
"JS1\_E13\_00422" 14091 "s59E5H2" 0 "Multiple sugar-binding protein precursor"  
"JS1\_E13\_00422" 14091 "s63E6H2" 0 "Multiple sugar-binding protein precursor"  
"JS1\_E13\_00423" 14092 "s59E13H2" 0.003075918 "N-acetylmuramic acid 6-phosphate etherase"  
"JS1\_E13\_00423" 14092 "s59E25H2" 0 "N-acetylmuramic acid 6-phosphate etherase"  
"JS1\_E13\_00423" 14092 "s59E5H2" 0 "N-acetylmuramic acid 6-phosphate etherase"  
"JS1\_E13\_00423" 14092 "s63E6H2" 0.00100646 "N-acetylmuramic acid 6-phosphate etherase"  
"JS1\_E13\_00424" 14093 "s59E13H2" 0 "putative HTH-type transcriptional regulator YbbH"  
"JS1\_E13\_00424" 14093 "s59E25H2" 0 "putative HTH-type transcriptional regulator YbbH"  
"JS1\_E13\_00424" 14093 "s59E5H2" 0 "putative HTH-type transcriptional regulator YbbH"  
"JS1\_E13\_00424" 14093 "s63E6H2" 0.004956538 "putative HTH-type transcriptional regulator YbbH"  
"JS1\_E13\_00425" 14094 "s59E13H2" 1.025523 "protease TldD"  
"JS1\_E13\_00425" 14094 "s59E25H2" 0 "protease TldD"  
"JS1\_E13\_00425" 14094 "s59E5H2" 0.1543676 "protease TldD"  
"JS1\_E13\_00425" 14094 "s63E6H2" 0.9518187 "protease TldD"  
"JS1\_E13\_00426" 14095 "s59E13H2" 0.7657138 "protease TldD"  
"JS1\_E13\_00426" 14095 "s59E25H2" 0.1298322 "protease TldD"  
"JS1\_E13\_00426" 14095 "s59E5H2" 11.55881 "protease TldD"  
"JS1\_E13\_00426" 14095 "s63E6H2" 0.8992116 "protease TldD"  
"JS1\_E13\_00427" 14096 "s59E13H2" 0.2057592 "3'-5' exoribonuclease YhaM"  
"JS1\_E13\_00427" 14096 "s59E25H2" 0 "3'-5' exoribonuclease YhaM"  
"JS1\_E13\_00427" 14096 "s59E5H2" 0.1042922 "3'-5' exoribonuclease YhaM"  
"JS1\_E13\_00427" 14096 "s63E6H2" 0.5905405 "3'-5' exoribonuclease YhaM"  
"JS1\_E13\_00428" 14097 "s59E13H2" 1.244815 "Glucosamine-6-phosphate deaminase 1"  
"JS1\_E13\_00428" 14097 "s59E25H2" 0 "Glucosamine-6-phosphate deaminase 1"  
"JS1\_E13\_00428" 14097 "s59E5H2" 0.395474 "Glucosamine-6-phosphate deaminase 1"  
"JS1\_E13\_00428" 14097 "s63E6H2" 0.9534764 "Glucosamine-6-phosphate deaminase 1"  
"JS1\_E13\_00429" 14098 "s59E13H2" 1.520346 "N-acetylglucosamine-6-phosphate deacetylase"  
"JS1\_E13\_00429" 14098 "s59E25H2" 0 "N-acetylglucosamine-6-phosphate deacetylase"  
"JS1\_E13\_00429" 14098 "s59E5H2" 0.241247 "N-acetylglucosamine-6-phosphate deacetylase"



"JS1\_E13\_00429" 14098 "s63E6H2" 1.029247 "N-acetylglucosamine-6-phosphate deacetylase"  
"JS1\_E13\_00430" 14099 "s59E13H2" 0.2012933 "hypothetical protein"  
"JS1\_E13\_00430" 14099 "s59E25H2" 0 "hypothetical protein"  
"JS1\_E13\_00430" 14099 "s59E5H2" 0.7784243 "hypothetical protein"  
"JS1\_E13\_00430" 14099 "s63E6H2" 0.9485309 "hypothetical protein"  
"JS1\_E13\_00431" 14100 "s59E13H2" 0 "Cellobiose 2-epimerase"  
"JS1\_E13\_00431" 14100 "s59E25H2" 0 "Cellobiose 2-epimerase"  
"JS1\_E13\_00431" 14100 "s59E5H2" 0 "Cellobiose 2-epimerase"  
"JS1\_E13\_00431" 14100 "s63E6H2" 0.00171817 "Cellobiose 2-epimerase"  
"JS1\_E13\_00432" 14101 "s59E13H2" 0 "methylcobalamin:coenzyme M methyltransferase"  
"JS1\_E13\_00432" 14101 "s59E25H2" 0 "methylcobalamin:coenzyme M methyltransferase"  
"JS1\_E13\_00432" 14101 "s59E5H2" 0 "methylcobalamin:coenzyme M methyltransferase"  
"JS1\_E13\_00432" 14101 "s63E6H2" 0.0006063333 "methylcobalamin:coenzyme M methyltransferase"  
"JS1\_E13\_00433" 14102 "s59E13H2" 0.5238513 "hypothetical protein"  
"JS1\_E13\_00433" 14102 "s59E25H2" 0 "hypothetical protein"  
"JS1\_E13\_00433" 14102 "s59E5H2" 0.8366508 "hypothetical protein"  
"JS1\_E13\_00433" 14102 "s63E6H2" 1.28554 "hypothetical protein"  
"JS1\_E13\_00434" 14103 "s59E13H2" 0.7875451 "Ribosomal large subunit pseudouridine synthase D"  
"JS1\_E13\_00434" 14103 "s59E25H2" 0 "Ribosomal large subunit pseudouridine synthase D"  
"JS1\_E13\_00434" 14103 "s59E5H2" 2.725279 "Ribosomal large subunit pseudouridine synthase D"  
"JS1\_E13\_00434" 14103 "s63E6H2" 1.383385 "Ribosomal large subunit pseudouridine synthase D"  
"JS1\_E13\_00435" 14104 "s59E13H2" 0 "Blue-light-activated protein"  
"JS1\_E13\_00435" 14104 "s59E25H2" 0 "Blue-light-activated protein"  
"JS1\_E13\_00435" 14104 "s59E5H2" 0.004663052 "Blue-light-activated protein"  
"JS1\_E13\_00435" 14104 "s63E6H2" 0.0152846 "Blue-light-activated protein"  
"JS1\_E13\_00436" 14105 "s59E13H2" 0 "Chemotaxis protein methyltransferase Cher2"  
"JS1\_E13\_00436" 14105 "s59E25H2" 0 "Chemotaxis protein methyltransferase Cher2"  
"JS1\_E13\_00436" 14105 "s59E5H2" 0 "Chemotaxis protein methyltransferase Cher2"  
"JS1\_E13\_00436" 14105 "s63E6H2" 0.01067214 "Chemotaxis protein methyltransferase Cher2"  
"JS1\_E13\_00437" 14106 "s59E13H2" 0 "hypothetical protein"  
"JS1\_E13\_00437" 14106 "s59E25H2" 0 "hypothetical protein"  
"JS1\_E13\_00437" 14106 "s59E5H2" 0.001696577 "hypothetical protein"  
"JS1\_E13\_00437" 14106 "s63E6H2" 0.03051426 "hypothetical protein"  
"JS1\_E13\_00440" 14109 "s59E13H2" 0 "hypothetical protein"  
"JS1\_E13\_00440" 14109 "s59E25H2" 0 "hypothetical protein"  
"JS1\_E13\_00440" 14109 "s59E5H2" 0 "hypothetical protein"  
"JS1\_E13\_00440" 14109 "s63E6H2" 0.04501012 "hypothetical protein"  
"JS1\_E13\_00441" 14110 "s59E13H2" 0.003239591 "hypothetical protein"  
"JS1\_E13\_00441" 14110 "s59E25H2" 0 "hypothetical protein"  
"JS1\_E13\_00441" 14110 "s59E5H2" 0 "hypothetical protein"  
"JS1\_E13\_00441" 14110 "s63E6H2" 0.04510888 "hypothetical protein"  
"JS1\_E13\_00442" 14111 "s59E13H2" 0 "hypothetical protein"  
"JS1\_E13\_00442" 14111 "s59E25H2" 0 "hypothetical protein"  
"JS1\_E13\_00442" 14111 "s59E5H2" 0 "hypothetical protein"  
"JS1\_E13\_00442" 14111 "s63E6H2" 0.3752948 "hypothetical protein"  
"JS1\_E13\_00443" 14112 "s59E13H2" 0.02080758 "Transcriptional regulatory protein ZraR"  
"JS1\_E13\_00443" 14112 "s59E25H2" 0 "Transcriptional regulatory protein ZraR"

"JS1\_E13\_00443" 14112 "s59E5H2" 0.1942533 "Transcriptional regulatory protein ZraR"  
"JS1\_E13\_00443" 14112 "s63E6H2" 0.165555 "Transcriptional regulatory protein ZraR"  
"JS1\_E13\_00444" 14113 "s59E13H2" 0.005335949 "Sporulation kinase E"  
"JS1\_E13\_00444" 14113 "s59E25H2" 0 "Sporulation kinase E"  
"JS1\_E13\_00444" 14113 "s59E5H2" 0.01030363 "Sporulation kinase E"  
"JS1\_E13\_00444" 14113 "s63E6H2" 0.04813498 "Sporulation kinase E"  
"JS1\_E13\_00445" 14114 "s59E13H2" 0.7541813 "Prolipoprotein diacylglyceryl transferase"  
"JS1\_E13\_00445" 14114 "s59E25H2" 0 "Prolipoprotein diacylglyceryl transferase"  
"JS1\_E13\_00445" 14114 "s59E5H2" 3.0699 "Prolipoprotein diacylglyceryl transferase"  
"JS1\_E13\_00445" 14114 "s63E6H2" 1.12419 "Prolipoprotein diacylglyceryl transferase"  
"JS1\_E13\_00446" 14115 "s59E13H2" 0.771826 "Lipoprotein signal peptidase"  
"JS1\_E13\_00446" 14115 "s59E25H2" 0.1333333 "Lipoprotein signal peptidase"  
"JS1\_E13\_00446" 14115 "s59E5H2" 3.392035 "Lipoprotein signal peptidase"  
"JS1\_E13\_00446" 14115 "s63E6H2" 0.8884431 "Lipoprotein signal peptidase"  
"JS1\_E13\_00447" 14116 "s59E13H2" 0.5338855 "Isoleucine--tRNA ligase"  
"JS1\_E13\_00447" 14116 "s59E25H2" 0 "Isoleucine--tRNA ligase"  
"JS1\_E13\_00447" 14116 "s59E5H2" 2.722087 "Isoleucine--tRNA ligase"  
"JS1\_E13\_00447" 14116 "s63E6H2" 1.597702 "Isoleucine--tRNA ligase"  
"JS1\_E13\_00448" 14117 "s59E13H2" 0.6907705 "Isoleucine--tRNA ligase"  
"JS1\_E13\_00448" 14117 "s59E25H2" 0 "Isoleucine--tRNA ligase"  
"JS1\_E13\_00448" 14117 "s59E5H2" 1.952857 "Isoleucine--tRNA ligase"  
"JS1\_E13\_00448" 14117 "s63E6H2" 1.442932 "Isoleucine--tRNA ligase"  
"JS1\_E13\_00451" 14120 "s59E13H2" 0.1123337 "Glycine betaine transport ATP-binding protein OpuAA"  
"JS1\_E13\_00451" 14120 "s59E25H2" 0 "Glycine betaine transport ATP-binding protein OpuAA"  
"JS1\_E13\_00451" 14120 "s59E5H2" 1.251714 "Glycine betaine transport ATP-binding protein OpuAA"  
"JS1\_E13\_00451" 14120 "s63E6H2" 0.02447185 "Glycine betaine transport ATP-binding protein OpuAA"  
"JS1\_E13\_00452" 14121 "s59E13H2" 0.4591984 "Glycine betaine transport system permease protein OpuAB"  
"JS1\_E13\_00452" 14121 "s59E25H2" 0 "Glycine betaine transport system permease protein OpuAB"  
"JS1\_E13\_00452" 14121 "s59E5H2" 1.246439 "Glycine betaine transport system permease protein OpuAB"  
"JS1\_E13\_00452" 14121 "s63E6H2" 0.8780584 "Glycine betaine transport system permease protein OpuAB"  
"JS1\_E13\_00453" 14122 "s59E13H2" 0.2287432 "glycine betaine transporter periplasmic subunit"  
"JS1\_E13\_00453" 14122 "s59E25H2" 0 "glycine betaine transporter periplasmic subunit"  
"JS1\_E13\_00453" 14122 "s59E5H2" 0.959809 "glycine betaine transporter periplasmic subunit"  
"JS1\_E13\_00453" 14122 "s63E6H2" 0.3129924 "glycine betaine transporter periplasmic subunit"  
"JS1\_E13\_00454" 14123 "s59E13H2" 0 "hypothetical protein"  
"JS1\_E13\_00454" 14123 "s59E25H2" 0 "hypothetical protein"  
"JS1\_E13\_00454" 14123 "s59E5H2" 0 "hypothetical protein"  
"JS1\_E13\_00454" 14123 "s63E6H2" 0.002705499 "hypothetical protein"  
"JS1\_E13\_00457" 14126 "s59E13H2" 0.6290754 "SsrA-binding protein"  
"JS1\_E13\_00457" 14126 "s59E25H2" 0 "SsrA-binding protein"  
"JS1\_E13\_00457" 14126 "s59E5H2" 0.3552396 "SsrA-binding protein"  
"JS1\_E13\_00457" 14126 "s63E6H2" 0.271187 "SsrA-binding protein"  
"JS1\_E13\_00458" 14127 "s59E13H2" 0.08229581 "prephenate dehydrogenase"  
"JS1\_E13\_00458" 14127 "s59E25H2" 0 "prephenate dehydrogenase"  
"JS1\_E13\_00458" 14127 "s59E5H2" 0.2753377 "prephenate dehydrogenase"  
"JS1\_E13\_00458" 14127 "s63E6H2" 0.08435277 "prephenate dehydrogenase"  
"JS1\_E13\_00459" 14128 "s59E13H2" 0.04765354 "3-dehydroquinate dehydratase"

"JS1\_E13\_00459" 14128 "s59E25H2" 0 "3-dehydroquinone dehydratase"  
"JS1\_E13\_00459" 14128 "s59E5H2" 0.4266207 "3-dehydroquinone dehydratase"  
"JS1\_E13\_00459" 14128 "s63E6H2" 0.1917678 "3-dehydroquinone dehydratase"  
"JS1\_E13\_00460" 14129 "s59E13H2" 0.07469413 "3-dehydroquinone synthase"  
"JS1\_E13\_00460" 14129 "s59E25H2" 0 "3-dehydroquinone synthase"  
"JS1\_E13\_00460" 14129 "s59E5H2" 0.5772334 "3-dehydroquinone synthase"  
"JS1\_E13\_00460" 14129 "s63E6H2" 0.3246826 "3-dehydroquinone synthase"  
"JS1\_E13\_00461" 14130 "s59E13H2" 0.06906494 "Shikimate kinase 1"  
"JS1\_E13\_00461" 14130 "s59E25H2" 0 "Shikimate kinase 1"  
"JS1\_E13\_00461" 14130 "s59E5H2" 0.1884376 "Shikimate kinase 1"  
"JS1\_E13\_00461" 14130 "s63E6H2" 0.1033598 "Shikimate kinase 1"  
"JS1\_E13\_00462" 14131 "s59E13H2" 0.05290851 "Chorismate synthase"  
"JS1\_E13\_00462" 14131 "s59E25H2" 0 "Chorismate synthase"  
"JS1\_E13\_00462" 14131 "s59E5H2" 0.1409109 "Chorismate synthase"  
"JS1\_E13\_00462" 14131 "s63E6H2" 0.08932693 "Chorismate synthase"  
"JS1\_E13\_00463" 14132 "s59E13H2" 0 "Shikimate dehydrogenase"  
"JS1\_E13\_00463" 14132 "s59E25H2" 0 "Shikimate dehydrogenase"  
"JS1\_E13\_00463" 14132 "s59E5H2" 0.1057222 "Shikimate dehydrogenase"  
"JS1\_E13\_00463" 14132 "s63E6H2" 0.06075082 "Shikimate dehydrogenase"  
"JS1\_E13\_00464" 14133 "s59E13H2" 0.01075151 "3-phosphoshikimate 1-carboxyvinyltransferase 1"  
"JS1\_E13\_00464" 14133 "s59E25H2" 0 "3-phosphoshikimate 1-carboxyvinyltransferase 1"  
"JS1\_E13\_00464" 14133 "s59E5H2" 0.8332831 "3-phosphoshikimate 1-carboxyvinyltransferase 1"  
"JS1\_E13\_00464" 14133 "s63E6H2" 0.1508606 "3-phosphoshikimate 1-carboxyvinyltransferase 1"  
"JS1\_E13\_00465" 14134 "s59E13H2" 0.02294751 "Phospho-2-dehydro-3-deoxyheptonate aldolase"  
"JS1\_E13\_00465" 14134 "s59E25H2" 0 "Phospho-2-dehydro-3-deoxyheptonate aldolase"  
"JS1\_E13\_00465" 14134 "s59E5H2" 0.2517976 "Phospho-2-dehydro-3-deoxyheptonate aldolase"  
"JS1\_E13\_00465" 14134 "s63E6H2" 0.1948086 "Phospho-2-dehydro-3-deoxyheptonate aldolase"  
"JS1\_E13\_00466" 14135 "s59E13H2" 0.04960251 "Chorismate mutase AroH"  
"JS1\_E13\_00466" 14135 "s59E25H2" 0 "Chorismate mutase AroH"  
"JS1\_E13\_00466" 14135 "s59E5H2" 0.1161022 "Chorismate mutase AroH"  
"JS1\_E13\_00466" 14135 "s63E6H2" 0.0524262 "Chorismate mutase AroH"  
"JS1\_E13\_00467" 14136 "s59E13H2" 0.03121518 "Threonylcarbamoyl-AMP synthase"  
"JS1\_E13\_00467" 14136 "s59E25H2" 0 "Threonylcarbamoyl-AMP synthase"  
"JS1\_E13\_00467" 14136 "s59E5H2" 0.1512262 "Threonylcarbamoyl-AMP synthase"  
"JS1\_E13\_00467" 14136 "s63E6H2" 0.08040945 "Threonylcarbamoyl-AMP synthase"  
"JS1\_E13\_00468" 14137 "s59E13H2" 0.02574012 "Transcription elongation factor GreA"  
"JS1\_E13\_00468" 14137 "s59E25H2" 0 "Transcription elongation factor GreA"  
"JS1\_E13\_00468" 14137 "s59E5H2" 0.1486936 "Transcription elongation factor GreA"  
"JS1\_E13\_00468" 14137 "s63E6H2" 0.06221269 "Transcription elongation factor GreA"  
"JS1\_E13\_00471" 14140 "s59E13H2" 0.05823439 "Glutamate--tRNA ligase"  
"JS1\_E13\_00471" 14140 "s59E25H2" 0 "Glutamate--tRNA ligase"  
"JS1\_E13\_00471" 14140 "s59E5H2" 0.4258195 "Glutamate--tRNA ligase"  
"JS1\_E13\_00471" 14140 "s63E6H2" 0.1181784 "Glutamate--tRNA ligase"  
"JS1\_E13\_00472" 14141 "s59E13H2" 0.04577204 "Divergent polysaccharide deacetylase"  
"JS1\_E13\_00472" 14141 "s59E25H2" 0 "Divergent polysaccharide deacetylase"  
"JS1\_E13\_00472" 14141 "s59E5H2" 0.3540974 "Divergent polysaccharide deacetylase"  
"JS1\_E13\_00472" 14141 "s63E6H2" 0.1198772 "Divergent polysaccharide deacetylase"

"JS1\_E13\_00473" 14142 "s59E13H2" 0.0826084 "Carboxy-terminal processing protease CtpB precursor"  
"JS1\_E13\_00473" 14142 "s59E25H2" 0 "Carboxy-terminal processing protease CtpB precursor"  
"JS1\_E13\_00473" 14142 "s59E5H2" 0.1543117 "Carboxy-terminal processing protease CtpB precursor"  
"JS1\_E13\_00473" 14142 "s63E6H2" 0.1469787 "Carboxy-terminal processing protease CtpB precursor"  
"JS1\_E13\_00474" 14143 "s59E13H2" 0.003659297 "Glycerol kinase"  
"JS1\_E13\_00474" 14143 "s59E25H2" 0 "Glycerol kinase"  
"JS1\_E13\_00474" 14143 "s59E5H2" 0.02497262 "Glycerol kinase"  
"JS1\_E13\_00474" 14143 "s63E6H2" 0.1598065 "Glycerol kinase"  
"JS1\_E13\_00475" 14144 "s59E13H2" 0.007091406 "Deoxyribose-phosphate aldolase"  
"JS1\_E13\_00475" 14144 "s59E25H2" 0 "Deoxyribose-phosphate aldolase"  
"JS1\_E13\_00475" 14144 "s59E5H2" 0.02688389 "Deoxyribose-phosphate aldolase"  
"JS1\_E13\_00475" 14144 "s63E6H2" 0.1609274 "Deoxyribose-phosphate aldolase"  
"JS1\_E13\_00476" 14145 "s59E13H2" 0.007378893 "3-oxoacyl-[acyl-carrier-protein] reductase FabG"  
"JS1\_E13\_00476" 14145 "s59E25H2" 0 "3-oxoacyl-[acyl-carrier-protein] reductase FabG"  
"JS1\_E13\_00476" 14145 "s59E5H2" 0.02661594 "3-oxoacyl-[acyl-carrier-protein] reductase FabG"  
"JS1\_E13\_00476" 14145 "s63E6H2" 0.1341564 "3-oxoacyl-[acyl-carrier-protein] reductase FabG"  
"JS1\_E13\_00477" 14146 "s59E13H2" 0.005995908 "Glucose 1-dehydrogenase 1"  
"JS1\_E13\_00477" 14146 "s59E25H2" 0 "Glucose 1-dehydrogenase 1"  
"JS1\_E13\_00477" 14146 "s59E5H2" 0.01258933 "Glucose 1-dehydrogenase 1"  
"JS1\_E13\_00477" 14146 "s63E6H2" 0.1615651 "Glucose 1-dehydrogenase 1"  
"JS1\_E13\_00478" 14147 "s59E13H2" 0.2486716 "HTH-type transcriptional repressor YvoA"  
"JS1\_E13\_00478" 14147 "s59E25H2" 0 "HTH-type transcriptional repressor YvoA"  
"JS1\_E13\_00478" 14147 "s59E5H2" 0.0391998 "HTH-type transcriptional repressor YvoA"  
"JS1\_E13\_00478" 14147 "s63E6H2" 0.008379127 "HTH-type transcriptional repressor YvoA"  
"JS1\_E13\_00479" 14148 "s59E13H2" 0.2222154 "Inositol 2-dehydrogenase"  
"JS1\_E13\_00479" 14148 "s59E25H2" 0 "Inositol 2-dehydrogenase"  
"JS1\_E13\_00479" 14148 "s59E5H2" 0.02826661 "Inositol 2-dehydrogenase"  
"JS1\_E13\_00479" 14148 "s63E6H2" 0.005371838 "Inositol 2-dehydrogenase"  
"JS1\_E13\_00480" 14149 "s59E13H2" 0.08805484 "D-tagatose 3-epimerase"  
"JS1\_E13\_00480" 14149 "s59E25H2" 0 "D-tagatose 3-epimerase"  
"JS1\_E13\_00480" 14149 "s59E5H2" 0.01889453 "D-tagatose 3-epimerase"  
"JS1\_E13\_00480" 14149 "s63E6H2" 0.01698033 "D-tagatose 3-epimerase"  
"JS1\_E13\_00481" 14150 "s59E13H2" 0.1290156 "3-oxoacyl-[acyl-carrier-protein] reductase FabG"  
"JS1\_E13\_00481" 14150 "s59E25H2" 0 "3-oxoacyl-[acyl-carrier-protein] reductase FabG"  
"JS1\_E13\_00481" 14150 "s59E5H2" 0.009838993 "3-oxoacyl-[acyl-carrier-protein] reductase FabG"  
"JS1\_E13\_00481" 14150 "s63E6H2" 0.006491034 "3-oxoacyl-[acyl-carrier-protein] reductase FabG"  
"JS1\_E13\_00482" 14151 "s59E13H2" 0.2881858 "Xylulose kinase"  
"JS1\_E13\_00482" 14151 "s59E25H2" 0 "Xylulose kinase"  
"JS1\_E13\_00482" 14151 "s59E5H2" 0.3433201 "Xylulose kinase"  
"JS1\_E13\_00482" 14151 "s63E6H2" 0.09765127 "Xylulose kinase"  
"JS1\_E13\_00483" 14152 "s59E13H2" 0.2061633 "Glucose-6-phosphate isomerase"  
"JS1\_E13\_00483" 14152 "s59E25H2" 0 "Glucose-6-phosphate isomerase"  
"JS1\_E13\_00483" 14152 "s59E5H2" 0.6384128 "Glucose-6-phosphate isomerase"  
"JS1\_E13\_00483" 14152 "s63E6H2" 0.09232718 "Glucose-6-phosphate isomerase"  
"JS1\_E13\_00484" 14153 "s59E13H2" 0.04082577 "D-ribose-binding periplasmic protein precursor"  
"JS1\_E13\_00484" 14153 "s59E25H2" 0 "D-ribose-binding periplasmic protein precursor"  
"JS1\_E13\_00484" 14153 "s59E5H2" 0.7140596 "D-ribose-binding periplasmic protein precursor"

"JS1\_E13\_00484" 14153 "s63E6H2" 0.3154637 "D-ribose-binding periplasmic protein precursor"  
"JS1\_E13\_00485" 14154 "s59E13H2" 0.1140487 "Ribose import ATP-binding protein RbsA"  
"JS1\_E13\_00485" 14154 "s59E25H2" 0 "Ribose import ATP-binding protein RbsA"  
"JS1\_E13\_00485" 14154 "s59E5H2" 0.9586398 "Ribose import ATP-binding protein RbsA"  
"JS1\_E13\_00485" 14154 "s63E6H2" 0.4746004 "Ribose import ATP-binding protein RbsA"  
"JS1\_E13\_00486" 14155 "s59E13H2" 0.0002660609 "putative D,D-dipeptide transport ATP-binding protein DdpD"  
"JS1\_E13\_00486" 14155 "s59E25H2" 0 "putative D,D-dipeptide transport ATP-binding protein DdpD"  
"JS1\_E13\_00486" 14155 "s59E5H2" 0.1703561 "putative D,D-dipeptide transport ATP-binding protein DdpD"  
"JS1\_E13\_00486" 14155 "s63E6H2" 0.2635688 "putative D,D-dipeptide transport ATP-binding protein DdpD"  
"JS1\_E13\_00487" 14156 "s59E13H2" 0 "hypothetical protein"  
"JS1\_E13\_00487" 14156 "s59E25H2" 0.1763441 "hypothetical protein"  
"JS1\_E13\_00487" 14156 "s59E5H2" 0.0926916 "hypothetical protein"  
"JS1\_E13\_00487" 14156 "s63E6H2" 0.3669668 "hypothetical protein"  
"JS1\_E13\_00488" 14157 "s59E13H2" 0 "Cyclopentanol dehydrogenase"  
"JS1\_E13\_00488" 14157 "s59E25H2" 0 "Cyclopentanol dehydrogenase"  
"JS1\_E13\_00488" 14157 "s59E5H2" 0.08440909 "Cyclopentanol dehydrogenase"  
"JS1\_E13\_00488" 14157 "s63E6H2" 0.06541316 "Cyclopentanol dehydrogenase"  
"JS1\_E13\_00489" 14158 "s59E13H2" 0.4467874 "Glyoxylate reductase"  
"JS1\_E13\_00489" 14158 "s59E25H2" 0 "Glyoxylate reductase"  
"JS1\_E13\_00489" 14158 "s59E5H2" 0.6433665 "Glyoxylate reductase"  
"JS1\_E13\_00489" 14158 "s63E6H2" 0.0477058 "Glyoxylate reductase"  
"JS1\_E13\_00490" 14159 "s59E13H2" 0.7987075 "ThiS family protein"  
"JS1\_E13\_00490" 14159 "s59E25H2" 0 "ThiS family protein"  
"JS1\_E13\_00490" 14159 "s59E5H2" 0.8959439 "ThiS family protein"  
"JS1\_E13\_00490" 14159 "s63E6H2" 0.01773126 "ThiS family protein"  
"JS1\_E13\_00491" 14160 "s59E13H2" 0.3698592 "Tungsten-containing aldehyde ferredoxin oxidoreductase"  
"JS1\_E13\_00491" 14160 "s59E25H2" 0 "Tungsten-containing aldehyde ferredoxin oxidoreductase"  
"JS1\_E13\_00491" 14160 "s59E5H2" 0.8249703 "Tungsten-containing aldehyde ferredoxin oxidoreductase"  
"JS1\_E13\_00491" 14160 "s63E6H2" 0.04822636 "Tungsten-containing aldehyde ferredoxin oxidoreductase"  
"JS1\_E13\_00492" 14161 "s59E13H2" 0.02771349 "Ribose transport system permease protein RbsC"  
"JS1\_E13\_00492" 14161 "s59E25H2" 0 "Ribose transport system permease protein RbsC"  
"JS1\_E13\_00492" 14161 "s59E5H2" 1.324272 "Ribose transport system permease protein RbsC"  
"JS1\_E13\_00492" 14161 "s63E6H2" 0.1238585 "Ribose transport system permease protein RbsC"  
"JS1\_E13\_00493" 14162 "s59E13H2" 1.820735 "Polyribonucleotide nucleotidyltransferase"  
"JS1\_E13\_00493" 14162 "s59E25H2" 0 "Polyribonucleotide nucleotidyltransferase"  
"JS1\_E13\_00493" 14162 "s59E5H2" 0.1070867 "Polyribonucleotide nucleotidyltransferase"  
"JS1\_E13\_00493" 14162 "s63E6H2" 0.02267104 "Polyribonucleotide nucleotidyltransferase"  
"JS1\_E13\_00494" 14163 "s59E13H2" 2.856135 "Deoxyuridine 5'-triphosphate nucleotidohydrolase"  
"JS1\_E13\_00494" 14163 "s59E25H2" 0 "Deoxyuridine 5'-triphosphate nucleotidohydrolase"  
"JS1\_E13\_00494" 14163 "s59E5H2" 0.1563004 "Deoxyuridine 5'-triphosphate nucleotidohydrolase"  
"JS1\_E13\_00494" 14163 "s63E6H2" 0.07728829 "Deoxyuridine 5'-triphosphate nucleotidohydrolase"  
"JS1\_E13\_00495" 14164 "s59E13H2" 1.054746 "hypothetical protein"  
"JS1\_E13\_00495" 14164 "s59E25H2" 0 "hypothetical protein"  
"JS1\_E13\_00495" 14164 "s59E5H2" 0.2179577 "hypothetical protein"  
"JS1\_E13\_00495" 14164 "s63E6H2" 0.075113 "hypothetical protein"  
"JS1\_E13\_00496" 14165 "s59E13H2" 4.664858 "hypothetical protein"  
"JS1\_E13\_00496" 14165 "s59E25H2" 0 "hypothetical protein"

"JS1\_E13\_00496" 14165 "s59E5H2" 0.0504432 "hypothetical protein"  
"JS1\_E13\_00496" 14165 "s63E6H2" 0.1195631 "hypothetical protein"  
"JS1\_E13\_00497" 14166 "s59E13H2" 4.381427 "Undecaprenyl-diphosphatase"  
"JS1\_E13\_00497" 14166 "s59E25H2" 0 "Undecaprenyl-diphosphatase"  
"JS1\_E13\_00497" 14166 "s59E5H2" 0.2092058 "Undecaprenyl-diphosphatase"  
"JS1\_E13\_00497" 14166 "s63E6H2" 0.144596 "Undecaprenyl-diphosphatase"  
"JS1\_E13\_00498" 14167 "s59E13H2" 3.715066 "DNA translocase SpoIIIE"  
"JS1\_E13\_00498" 14167 "s59E25H2" 0 "DNA translocase SpoIIIE"  
"JS1\_E13\_00498" 14167 "s59E5H2" 0.1944582 "DNA translocase SpoIIIE"  
"JS1\_E13\_00498" 14167 "s63E6H2" 0.1026499 "DNA translocase SpoIIIE"  
"JS1\_E13\_00499" 14168 "s59E13H2" 0.7401266 "Membrane lipoprotein TmpC precursor"  
"JS1\_E13\_00499" 14168 "s59E25H2" 0 "Membrane lipoprotein TmpC precursor"  
"JS1\_E13\_00499" 14168 "s59E5H2" 0.1574524 "Membrane lipoprotein TmpC precursor"  
"JS1\_E13\_00499" 14168 "s63E6H2" 0.06941244 "Membrane lipoprotein TmpC precursor"  
"JS1\_E13\_00500" 14169 "s59E13H2" 2.290681 "Galactose/methyl galactoside import ATP-binding protein MglA"  
"JS1\_E13\_00500" 14169 "s59E25H2" 0 "Galactose/methyl galactoside import ATP-binding protein MglA"  
"JS1\_E13\_00500" 14169 "s59E5H2" 0.2905787 "Galactose/methyl galactoside import ATP-binding protein MglA"  
"JS1\_E13\_00500" 14169 "s63E6H2" 0.2053528 "Galactose/methyl galactoside import ATP-binding protein MglA"  
"JS1\_E13\_00501" 14170 "s59E13H2" 2.094579 "Branched-chain amino acid transport system / permease component"  
"JS1\_E13\_00501" 14170 "s59E25H2" 0 "Branched-chain amino acid transport system / permease component"  
"JS1\_E13\_00501" 14170 "s59E5H2" 0.2484358 "Branched-chain amino acid transport system / permease component"  
"JS1\_E13\_00501" 14170 "s63E6H2" 0.3060774 "Branched-chain amino acid transport system / permease component"  
"JS1\_E13\_00502" 14171 "s59E13H2" 1.172652 "L-arabinose transporter permease protein"  
"JS1\_E13\_00502" 14171 "s59E25H2" 0 "L-arabinose transporter permease protein"  
"JS1\_E13\_00502" 14171 "s59E5H2" 0.07945278 "L-arabinose transporter permease protein"  
"JS1\_E13\_00502" 14171 "s63E6H2" 0.7672044 "L-arabinose transporter permease protein"  
"JS1\_E13\_00503" 14172 "s59E13H2" 0.1991286 "Chaperone protein DnaK"  
"JS1\_E13\_00503" 14172 "s59E25H2" 0 "Chaperone protein DnaK"  
"JS1\_E13\_00503" 14172 "s59E5H2" 0.06909356 "Chaperone protein DnaK"  
"JS1\_E13\_00503" 14172 "s63E6H2" 0.3130742 "Chaperone protein DnaK"  
"JS1\_E13\_00504" 14173 "s59E13H2" 0.1916725 "heat shock protein GrpE"  
"JS1\_E13\_00504" 14173 "s59E25H2" 0 "heat shock protein GrpE"  
"JS1\_E13\_00504" 14173 "s59E5H2" 0.0398411 "heat shock protein GrpE"  
"JS1\_E13\_00504" 14173 "s63E6H2" 0.1023443 "heat shock protein GrpE"  
"JS1\_E13\_00505" 14174 "s59E13H2" 0.08752454 "Heat-inducible transcription repressor HrcA"  
"JS1\_E13\_00505" 14174 "s59E25H2" 0 "Heat-inducible transcription repressor HrcA"  
"JS1\_E13\_00505" 14174 "s59E5H2" 0.1381925 "Heat-inducible transcription repressor HrcA"  
"JS1\_E13\_00505" 14174 "s63E6H2" 0.1350168 "Heat-inducible transcription repressor HrcA"  
"JS1\_E13\_00506" 14175 "s59E13H2" 0.1639466 "Oxygen-independent coproporphyrinogen-III oxidase 1"  
"JS1\_E13\_00506" 14175 "s59E25H2" 0 "Oxygen-independent coproporphyrinogen-III oxidase 1"  
"JS1\_E13\_00506" 14175 "s59E5H2" 0.1431573 "Oxygen-independent coproporphyrinogen-III oxidase 1"  
"JS1\_E13\_00506" 14175 "s63E6H2" 0.1239943 "Oxygen-independent coproporphyrinogen-III oxidase 1"  
"JS1\_E13\_00507" 14176 "s59E13H2" 0.9933686 "Elongation factor 4"  
"JS1\_E13\_00507" 14176 "s59E25H2" 0 "Elongation factor 4"  
"JS1\_E13\_00507" 14176 "s59E5H2" 0.2527286 "Elongation factor 4"  
"JS1\_E13\_00507" 14176 "s63E6H2" 0.1096948 "Elongation factor 4"  
"JS1\_E13\_00508" 14177 "s59E13H2" 0.09511943 "Adenylosuccinate lyase"

"JS1\_E13\_00508" 14177 "s59E25H2" 0 "Adenylosuccinate lyase"  
"JS1\_E13\_00508" 14177 "s59E5H2" 0.748839 "Adenylosuccinate lyase"  
"JS1\_E13\_00508" 14177 "s63E6H2" 0.2519776 "Adenylosuccinate lyase"  
"JS1\_E13\_00509" 14178 "s59E13H2" 0.1067763 "S-adenosylmethionine decarboxylase proenzyme precursor"  
"JS1\_E13\_00509" 14178 "s59E25H2" 0 "S-adenosylmethionine decarboxylase proenzyme precursor"  
"JS1\_E13\_00509" 14178 "s59E5H2" 0.03675484 "S-adenosylmethionine decarboxylase proenzyme precursor"  
"JS1\_E13\_00509" 14178 "s63E6H2" 0.1120569 "S-adenosylmethionine decarboxylase proenzyme precursor"  
"JS1\_E13\_00510" 14179 "s59E13H2" 0.2334652 "S-adenosylmethionine decarboxylase proenzyme"  
"JS1\_E13\_00510" 14179 "s59E25H2" 0 "S-adenosylmethionine decarboxylase proenzyme"  
"JS1\_E13\_00510" 14179 "s59E5H2" 0.3366045 "S-adenosylmethionine decarboxylase proenzyme"  
"JS1\_E13\_00510" 14179 "s63E6H2" 0.1563201 "S-adenosylmethionine decarboxylase proenzyme"  
"JS1\_E13\_00511" 14180 "s59E13H2" 0.3976813 "Spermidine synthase"  
"JS1\_E13\_00511" 14180 "s59E25H2" 0 "Spermidine synthase"  
"JS1\_E13\_00511" 14180 "s59E5H2" 0.1599596 "Spermidine synthase"  
"JS1\_E13\_00511" 14180 "s63E6H2" 0.206481 "Spermidine synthase"  
"JS1\_E13\_00512" 14181 "s59E13H2" 0.1933842 "Glutamate racemase"  
"JS1\_E13\_00512" 14181 "s59E25H2" 0 "Glutamate racemase"  
"JS1\_E13\_00512" 14181 "s59E5H2" 0.752435 "Glutamate racemase"  
"JS1\_E13\_00512" 14181 "s63E6H2" 0.2397818 "Glutamate racemase"  
"JS1\_E13\_00513" 14182 "s59E13H2" 0.1199974 "Branched-chain-amino-acid aminotransferase"  
"JS1\_E13\_00513" 14182 "s59E25H2" 0 "Branched-chain-amino-acid aminotransferase"  
"JS1\_E13\_00513" 14182 "s59E5H2" 0.5102326 "Branched-chain-amino-acid aminotransferase"  
"JS1\_E13\_00513" 14182 "s63E6H2" 0.07213555 "Branched-chain-amino-acid aminotransferase"  
"JS1\_E13\_00514" 14183 "s59E13H2" 0.1741149 "Aspartate aminotransferase"  
"JS1\_E13\_00514" 14183 "s59E25H2" 0 "Aspartate aminotransferase"  
"JS1\_E13\_00514" 14183 "s59E5H2" 0.6813256 "Aspartate aminotransferase"  
"JS1\_E13\_00514" 14183 "s63E6H2" 0.1911386 "Aspartate aminotransferase"  
"JS1\_E13\_00515" 14184 "s59E13H2" 0.1584913 "hypothetical protein"  
"JS1\_E13\_00515" 14184 "s59E25H2" 0 "hypothetical protein"  
"JS1\_E13\_00515" 14184 "s59E5H2" 1.008832 "hypothetical protein"  
"JS1\_E13\_00515" 14184 "s63E6H2" 0.1520205 "hypothetical protein"  
"JS1\_E13\_00516" 14185 "s59E13H2" 0.2432639 "ATP-dependent DNA helicase PcrA"  
"JS1\_E13\_00516" 14185 "s59E25H2" 0 "ATP-dependent DNA helicase PcrA"  
"JS1\_E13\_00516" 14185 "s59E5H2" 0.6194365 "ATP-dependent DNA helicase PcrA"  
"JS1\_E13\_00516" 14185 "s63E6H2" 0.1514127 "ATP-dependent DNA helicase PcrA"  
"JS1\_E13\_00517" 14186 "s59E13H2" 0.2236958 "Adenylosuccinate lyase"  
"JS1\_E13\_00517" 14186 "s59E25H2" 0 "Adenylosuccinate lyase"  
"JS1\_E13\_00517" 14186 "s59E5H2" 0.7812935 "Adenylosuccinate lyase"  
"JS1\_E13\_00517" 14186 "s63E6H2" 0.1579009 "Adenylosuccinate lyase"  
"JS1\_E13\_00518" 14187 "s59E13H2" 0.06607276 "Adenylosuccinate synthetase"  
"JS1\_E13\_00518" 14187 "s59E25H2" 0 "Adenylosuccinate synthetase"  
"JS1\_E13\_00518" 14187 "s59E5H2" 0.9035539 "Adenylosuccinate synthetase"  
"JS1\_E13\_00518" 14187 "s63E6H2" 0.2339494 "Adenylosuccinate synthetase"  
"JS1\_E13\_00519" 14188 "s59E13H2" 0.6974652 "GMP synthase [glutamine-hydrolyzing]"  
"JS1\_E13\_00519" 14188 "s59E25H2" 0 "GMP synthase [glutamine-hydrolyzing]"  
"JS1\_E13\_00519" 14188 "s59E5H2" 1.0902 "GMP synthase [glutamine-hydrolyzing]"  
"JS1\_E13\_00519" 14188 "s63E6H2" 0.1303774 "GMP synthase [glutamine-hydrolyzing]"

"JS1\_E13\_00521" 14190 "s59E13H2" 2.4725 "Formate--tetrahydrofolate ligase"  
"JS1\_E13\_00521" 14190 "s59E25H2" 0 "Formate--tetrahydrofolate ligase"  
"JS1\_E13\_00521" 14190 "s59E5H2" 0.355121 "Formate--tetrahydrofolate ligase"  
"JS1\_E13\_00521" 14190 "s63E6H2" 0.82717 "Formate--tetrahydrofolate ligase"  
"JS1\_E13\_00522" 14191 "s59E13H2" 7.041594 "Glycine cleavage system H protein"  
"JS1\_E13\_00522" 14191 "s59E25H2" 0 "Glycine cleavage system H protein"  
"JS1\_E13\_00522" 14191 "s59E5H2" 0.05441613 "Glycine cleavage system H protein"  
"JS1\_E13\_00522" 14191 "s63E6H2" 0.1151923 "Glycine cleavage system H protein"  
"JS1\_E13\_00523" 14192 "s59E13H2" 12.01942 "putative glycine dehydrogenase (decarboxylating) subunit 1"  
"JS1\_E13\_00523" 14192 "s59E25H2" 0 "putative glycine dehydrogenase (decarboxylating) subunit 1"  
"JS1\_E13\_00523" 14192 "s59E5H2" 0.4617931 "putative glycine dehydrogenase (decarboxylating) subunit 1"  
"JS1\_E13\_00523" 14192 "s63E6H2" 0.3541593 "putative glycine dehydrogenase (decarboxylating) subunit 1"  
"JS1\_E13\_00524" 14193 "s59E13H2" 12.89541 "putative glycine dehydrogenase (decarboxylating) subunit 2"  
"JS1\_E13\_00524" 14193 "s59E25H2" 0.1474104 "putative glycine dehydrogenase (decarboxylating) subunit 2"  
"JS1\_E13\_00524" 14193 "s59E5H2" 1.597168 "putative glycine dehydrogenase (decarboxylating) subunit 2"  
"JS1\_E13\_00524" 14193 "s63E6H2" 0.4049711 "putative glycine dehydrogenase (decarboxylating) subunit 2"  
"JS1\_E13\_00525" 14194 "s59E13H2" 13.82506 "Aminomethyltransferase"  
"JS1\_E13\_00525" 14194 "s59E25H2" 0 "Aminomethyltransferase"  
"JS1\_E13\_00525" 14194 "s59E5H2" 1.783982 "Aminomethyltransferase"  
"JS1\_E13\_00525" 14194 "s63E6H2" 0.5893452 "Aminomethyltransferase"  
"JS1\_E13\_00526" 14195 "s59E13H2" 0.7360388 "chromosomal replication initiation protein"  
"JS1\_E13\_00526" 14195 "s59E25H2" 0.2536688 "chromosomal replication initiation protein"  
"JS1\_E13\_00526" 14195 "s59E5H2" 2.38598 "chromosomal replication initiation protein"  
"JS1\_E13\_00526" 14195 "s63E6H2" 3.513778 "chromosomal replication initiation protein"  
"JS1\_E13\_00528" 14197 "s59E13H2" 0.4954379 "hypothetical protein"  
"JS1\_E13\_00528" 14197 "s59E25H2" 0 "hypothetical protein"  
"JS1\_E13\_00528" 14197 "s59E5H2" 0.1608945 "hypothetical protein"  
"JS1\_E13\_00528" 14197 "s63E6H2" 1.467372 "hypothetical protein"  
"JS1\_E13\_00529" 14198 "s59E13H2" 0.2743961 "Glycosyl transferases group 1"  
"JS1\_E13\_00529" 14198 "s59E25H2" 0 "Glycosyl transferases group 1"  
"JS1\_E13\_00529" 14198 "s59E5H2" 0.8512709 "Glycosyl transferases group 1"  
"JS1\_E13\_00529" 14198 "s63E6H2" 2.480153 "Glycosyl transferases group 1"  
"JS1\_E13\_00530" 14199 "s59E13H2" 0.1263389 "hypothetical protein"  
"JS1\_E13\_00530" 14199 "s59E25H2" 0 "hypothetical protein"  
"JS1\_E13\_00530" 14199 "s59E5H2" 0.9466178 "hypothetical protein"  
"JS1\_E13\_00530" 14199 "s63E6H2" 3.429125 "hypothetical protein"  
"JS1\_E13\_00531" 14200 "s59E13H2" 0.01378067 "Beta-1,4-mannooligosaccharide phosphorylase"  
"JS1\_E13\_00531" 14200 "s59E25H2" 0 "Beta-1,4-mannooligosaccharide phosphorylase"  
"JS1\_E13\_00531" 14200 "s59E5H2" 0.2253001 "Beta-1,4-mannooligosaccharide phosphorylase"  
"JS1\_E13\_00531" 14200 "s63E6H2" 0.1105478 "Beta-1,4-mannooligosaccharide phosphorylase"  
"JS1\_E13\_00532" 14201 "s59E13H2" 0.1695489 "HTH-type transcriptional regulator DegA"  
"JS1\_E13\_00532" 14201 "s59E25H2" 0 "HTH-type transcriptional regulator DegA"  
"JS1\_E13\_00532" 14201 "s59E5H2" 2.077212 "HTH-type transcriptional regulator DegA"  
"JS1\_E13\_00532" 14201 "s63E6H2" 0.1560943 "HTH-type transcriptional regulator DegA"  
"JS1\_E13\_00533" 14202 "s59E13H2" 0.6618311 "Glycosyl transferases group 1"  
"JS1\_E13\_00533" 14202 "s59E25H2" 0 "Glycosyl transferases group 1"  
"JS1\_E13\_00533" 14202 "s59E5H2" 1.346571 "Glycosyl transferases group 1"



"JS1\_E13\_00533" 14202 "s63E6H2" 1.86215 "Glycosyl transferases group 1"  
"JS1\_E13\_00535" 14204 "s59E13H2" 0.8573166 "Carbohydrate diacid regulator"  
"JS1\_E13\_00535" 14204 "s59E25H2" 0 "Carbohydrate diacid regulator"  
"JS1\_E13\_00535" 14204 "s59E5H2" 0.5567882 "Carbohydrate diacid regulator"  
"JS1\_E13\_00535" 14204 "s63E6H2" 3.418413 "Carbohydrate diacid regulator"  
"JS1\_E13\_00536" 14205 "s59E13H2" 4.837721 "Photosystem I assembly protein Ycf3"  
"JS1\_E13\_00536" 14205 "s59E25H2" 0 "Photosystem I assembly protein Ycf3"  
"JS1\_E13\_00536" 14205 "s59E5H2" 0.6906636 "Photosystem I assembly protein Ycf3"  
"JS1\_E13\_00536" 14205 "s63E6H2" 5.569062 "Photosystem I assembly protein Ycf3"  
"JS1\_E13\_00537" 14206 "s59E13H2" 6.285805 "hypothetical protein"  
"JS1\_E13\_00537" 14206 "s59E25H2" 0 "hypothetical protein"  
"JS1\_E13\_00537" 14206 "s59E5H2" 0.4827067 "hypothetical protein"  
"JS1\_E13\_00537" 14206 "s63E6H2" 1.69268 "hypothetical protein"  
"JS1\_E13\_00538" 14207 "s59E13H2" 7.8701 "Chaperone protein ClpB 1"  
"JS1\_E13\_00538" 14207 "s59E25H2" 0.09199384 "Chaperone protein ClpB 1"  
"JS1\_E13\_00538" 14207 "s59E5H2" 0.2339719 "Chaperone protein ClpB 1"  
"JS1\_E13\_00538" 14207 "s63E6H2" 3.867563 "Chaperone protein ClpB 1"  
"JS1\_E13\_00539" 14208 "s59E13H2" 4.55658 "Histidinol-phosphate aminotransferase 2"  
"JS1\_E13\_00539" 14208 "s59E25H2" 0 "Histidinol-phosphate aminotransferase 2"  
"JS1\_E13\_00539" 14208 "s59E5H2" 0.9008541 "Histidinol-phosphate aminotransferase 2"  
"JS1\_E13\_00539" 14208 "s63E6H2" 2.328212 "Histidinol-phosphate aminotransferase 2"  
"JS1\_E13\_00540" 14209 "s59E13H2" 3.10986 "B3/4 domain protein"  
"JS1\_E13\_00540" 14209 "s59E25H2" 0 "B3/4 domain protein"  
"JS1\_E13\_00540" 14209 "s59E5H2" 1.018369 "B3/4 domain protein"  
"JS1\_E13\_00540" 14209 "s63E6H2" 1.137612 "B3/4 domain protein"  
"JS1\_E13\_00541" 14210 "s59E13H2" 0.3739805 "Putative small multi-drug export protein"  
"JS1\_E13\_00541" 14210 "s59E25H2" 0 "Putative small multi-drug export protein"  
"JS1\_E13\_00541" 14210 "s59E5H2" 0.2643325 "Putative small multi-drug export protein"  
"JS1\_E13\_00541" 14210 "s63E6H2" 0.2674358 "Putative small multi-drug export protein"  
"JS1\_E13\_00542" 14211 "s59E13H2" 0.3743036 "Purine nucleoside phosphorylase 1"  
"JS1\_E13\_00542" 14211 "s59E25H2" 0 "Purine nucleoside phosphorylase 1"  
"JS1\_E13\_00542" 14211 "s59E5H2" 0.2684073 "Purine nucleoside phosphorylase 1"  
"JS1\_E13\_00542" 14211 "s63E6H2" 0.2570839 "Purine nucleoside phosphorylase 1"  
"JS1\_E13\_00543" 14212 "s59E13H2" 0.2699635 "Tyrosine recombinase XerD"  
"JS1\_E13\_00543" 14212 "s59E25H2" 0 "Tyrosine recombinase XerD"  
"JS1\_E13\_00543" 14212 "s59E5H2" 0.2044727 "Tyrosine recombinase XerD"  
"JS1\_E13\_00543" 14212 "s63E6H2" 0.1155437 "Tyrosine recombinase XerD"  
"JS1\_E13\_00544" 14213 "s59E13H2" 0.7258168 "Putative lipoprotein YerB precursor"  
"JS1\_E13\_00544" 14213 "s59E25H2" 0 "Putative lipoprotein YerB precursor"  
"JS1\_E13\_00544" 14213 "s59E5H2" 0.3107086 "Putative lipoprotein YerB precursor"  
"JS1\_E13\_00544" 14213 "s63E6H2" 0.1047138 "Putative lipoprotein YerB precursor"  
"JS1\_E13\_00545" 14214 "s59E13H2" 0.2357794 "Biopolymer transport protein ExbD"  
"JS1\_E13\_00545" 14214 "s59E25H2" 0 "Biopolymer transport protein ExbD"  
"JS1\_E13\_00545" 14214 "s59E5H2" 0.3645076 "Biopolymer transport protein ExbD"  
"JS1\_E13\_00545" 14214 "s63E6H2" 0.08176718 "Biopolymer transport protein ExbD"  
"JS1\_E13\_00546" 14215 "s59E13H2" 0.1643093 "Biopolymer transport protein ExbB"  
"JS1\_E13\_00546" 14215 "s59E25H2" 0 "Biopolymer transport protein ExbB"

"JS1\_E13\_00546" 14215 "s59E5H2" 0.8044924 "Biopolymer transport protein ExbB"  
"JS1\_E13\_00546" 14215 "s63E6H2" 0.2307809 "Biopolymer transport protein ExbB"  
"JS1\_E13\_00547" 14216 "s59E13H2" 0.3101011 "Outer membrane protein assembly factor BamD precursor"  
"JS1\_E13\_00547" 14216 "s59E25H2" 0 "Outer membrane protein assembly factor BamD precursor"  
"JS1\_E13\_00547" 14216 "s59E5H2" 0.21538 "Outer membrane protein assembly factor BamD precursor"  
"JS1\_E13\_00547" 14216 "s63E6H2" 0.04894054 "Outer membrane protein assembly factor BamD precursor"  
"JS1\_E13\_00548" 14217 "s59E13H2" 0.2566581 "GTPase ObgE"  
"JS1\_E13\_00548" 14217 "s59E25H2" 0 "GTPase ObgE"  
"JS1\_E13\_00548" 14217 "s59E5H2" 0.2558146 "GTPase ObgE"  
"JS1\_E13\_00548" 14217 "s63E6H2" 0.08017655 "GTPase ObgE"  
"JS1\_E13\_00549" 14218 "s59E13H2" 0.02766247 "50S ribosomal protein L27"  
"JS1\_E13\_00549" 14218 "s59E25H2" 0 "50S ribosomal protein L27"  
"JS1\_E13\_00549" 14218 "s59E5H2" 0.1707512 "50S ribosomal protein L27"  
"JS1\_E13\_00549" 14218 "s63E6H2" 0.06582403 "50S ribosomal protein L27"  
"JS1\_E13\_00550" 14219 "s59E13H2" 0.03633851 "50S ribosomal protein L21"  
"JS1\_E13\_00550" 14219 "s59E25H2" 0 "50S ribosomal protein L21"  
"JS1\_E13\_00550" 14219 "s59E5H2" 0.1690281 "50S ribosomal protein L21"  
"JS1\_E13\_00550" 14219 "s63E6H2" 0.04130799 "50S ribosomal protein L21"  
"JS1\_E13\_00551" 14220 "s59E13H2" 0.03831053 "Ribonuclease G"  
"JS1\_E13\_00551" 14220 "s59E25H2" 0 "Ribonuclease G"  
"JS1\_E13\_00551" 14220 "s59E5H2" 0.3502224 "Ribonuclease G"  
"JS1\_E13\_00551" 14220 "s63E6H2" 0.1272143 "Ribonuclease G"  
"JS1\_E13\_00552" 14221 "s59E13H2" 0.03763748 "hypothetical protein"  
"JS1\_E13\_00552" 14221 "s59E25H2" 0 "hypothetical protein"  
"JS1\_E13\_00552" 14221 "s59E5H2" 0.4175197 "hypothetical protein"  
"JS1\_E13\_00552" 14221 "s63E6H2" 0.1376368 "hypothetical protein"  
"JS1\_E13\_00553" 14222 "s59E13H2" 0.1322676 "Radical SAM superfamily protein"  
"JS1\_E13\_00553" 14222 "s59E25H2" 0 "Radical SAM superfamily protein"  
"JS1\_E13\_00553" 14222 "s59E5H2" 0.2795629 "Radical SAM superfamily protein"  
"JS1\_E13\_00553" 14222 "s63E6H2" 0.2636942 "Radical SAM superfamily protein"  
"JS1\_E13\_00561" 14230 "s59E13H2" 0.02138585 "Non-canonical purine NTP pyrophosphatase"  
"JS1\_E13\_00561" 14230 "s59E25H2" 0 "Non-canonical purine NTP pyrophosphatase"  
"JS1\_E13\_00561" 14230 "s59E5H2" 0.03618738 "Non-canonical purine NTP pyrophosphatase"  
"JS1\_E13\_00561" 14230 "s63E6H2" 0.09978907 "Non-canonical purine NTP pyrophosphatase"  
"JS1\_E13\_00562" 14231 "s59E13H2" 0.02193982 "Ribonuclease PH"  
"JS1\_E13\_00562" 14231 "s59E25H2" 0 "Ribonuclease PH"  
"JS1\_E13\_00562" 14231 "s59E5H2" 0.1449007 "Ribonuclease PH"  
"JS1\_E13\_00562" 14231 "s63E6H2" 0.2798902 "Ribonuclease PH"  
"JS1\_E13\_00563" 14232 "s59E13H2" 0.0316435 "Farnesyl diphosphate synthase"  
"JS1\_E13\_00563" 14232 "s59E25H2" 0 "Farnesyl diphosphate synthase"  
"JS1\_E13\_00563" 14232 "s59E5H2" 0.06680514 "Farnesyl diphosphate synthase"  
"JS1\_E13\_00563" 14232 "s63E6H2" 0.1614507 "Farnesyl diphosphate synthase"  
"JS1\_E13\_00564" 14233 "s59E13H2" 0.02207757 "Exodeoxyribonuclease 7 small subunit"  
"JS1\_E13\_00564" 14233 "s59E25H2" 0 "Exodeoxyribonuclease 7 small subunit"  
"JS1\_E13\_00564" 14233 "s59E5H2" 0.04839502 "Exodeoxyribonuclease 7 small subunit"  
"JS1\_E13\_00564" 14233 "s63E6H2" 0.2256542 "Exodeoxyribonuclease 7 small subunit"  
"JS1\_E13\_00565" 14234 "s59E13H2" 0.03497784 "Exodeoxyribonuclease 7 large subunit"

"JS1\_E13\_00565" 14234 "s59E25H2" 0 "Exodeoxyribonuclease 7 large subunit"  
"JS1\_E13\_00565" 14234 "s59E5H2" 0.0758544 "Exodeoxyribonuclease 7 large subunit"  
"JS1\_E13\_00565" 14234 "s63E6H2" 0.1857028 "Exodeoxyribonuclease 7 large subunit"  
"JS1\_E13\_00566" 14235 "s59E13H2" 0.02604834 "hypothetical protein"  
"JS1\_E13\_00566" 14235 "s59E25H2" 0 "hypothetical protein"  
"JS1\_E13\_00566" 14235 "s59E5H2" 0.07614602 "hypothetical protein"  
"JS1\_E13\_00566" 14235 "s63E6H2" 0.2253329 "hypothetical protein"  
"JS1\_E13\_00567" 14236 "s59E13H2" 0.03474531 "hypothetical protein"  
"JS1\_E13\_00567" 14236 "s59E25H2" 0 "hypothetical protein"  
"JS1\_E13\_00567" 14236 "s59E5H2" 0.09003981 "hypothetical protein"  
"JS1\_E13\_00567" 14236 "s63E6H2" 0.1494135 "hypothetical protein"  
"JS1\_E13\_00568" 14237 "s59E13H2" 0.01244278 "hypothetical protein"  
"JS1\_E13\_00568" 14237 "s59E25H2" 0 "hypothetical protein"  
"JS1\_E13\_00568" 14237 "s59E5H2" 0 "hypothetical protein"  
"JS1\_E13\_00568" 14237 "s63E6H2" 0.05733108 "hypothetical protein"  
"JS1\_E13\_00569" 14238 "s59E13H2" 0.03580011 "Elongation factor P"  
"JS1\_E13\_00569" 14238 "s59E25H2" 0 "Elongation factor P"  
"JS1\_E13\_00569" 14238 "s59E5H2" 0.1512223 "Elongation factor P"  
"JS1\_E13\_00569" 14238 "s63E6H2" 0.1342237 "Elongation factor P"  
"JS1\_E13\_00570" 14239 "s59E13H2" 0.05117207 "Serine hydroxymethyltransferase"  
"JS1\_E13\_00570" 14239 "s59E25H2" 0 "Serine hydroxymethyltransferase"  
"JS1\_E13\_00570" 14239 "s59E5H2" 0.1716435 "Serine hydroxymethyltransferase"  
"JS1\_E13\_00570" 14239 "s63E6H2" 0.1010094 "Serine hydroxymethyltransferase"  
"JS1\_E13\_00571" 14240 "s59E13H2" 0.07234841 "Xaa-Pro dipeptidase"  
"JS1\_E13\_00571" 14240 "s59E25H2" 0 "Xaa-Pro dipeptidase"  
"JS1\_E13\_00571" 14240 "s59E5H2" 0.1693275 "Xaa-Pro dipeptidase"  
"JS1\_E13\_00571" 14240 "s63E6H2" 0.02371819 "Xaa-Pro dipeptidase"  
"JS1\_E13\_00572" 14241 "s59E13H2" 0.06267814 "Ribosomal protein S12 methylthiotransferase RimO"  
"JS1\_E13\_00572" 14241 "s59E25H2" 0.3713647 "Ribosomal protein S12 methylthiotransferase RimO"  
"JS1\_E13\_00572" 14241 "s59E5H2" 0.08798582 "Ribosomal protein S12 methylthiotransferase RimO"  
"JS1\_E13\_00572" 14241 "s63E6H2" 0.08264842 "Ribosomal protein S12 methylthiotransferase RimO"  
"JS1\_E13\_00573" 14242 "s59E13H2" 0.05658415 "hypothetical protein"  
"JS1\_E13\_00573" 14242 "s59E25H2" 0 "hypothetical protein"  
"JS1\_E13\_00573" 14242 "s59E5H2" 0.04453568 "hypothetical protein"  
"JS1\_E13\_00573" 14242 "s63E6H2" 0.02340876 "hypothetical protein"  
"JS1\_E13\_00574" 14243 "s59E13H2" 0.04392913 "hypothetical protein"  
"JS1\_E13\_00574" 14243 "s59E25H2" 0 "hypothetical protein"  
"JS1\_E13\_00574" 14243 "s59E5H2" 0.005403911 "hypothetical protein"  
"JS1\_E13\_00574" 14243 "s63E6H2" 0.02080161 "hypothetical protein"  
"JS1\_E13\_00576" 14245 "s59E13H2" 0.0005638451 "Adenylate cyclase 2"  
"JS1\_E13\_00576" 14245 "s59E25H2" 0 "Adenylate cyclase 2"  
"JS1\_E13\_00576" 14245 "s59E5H2" 0.02125293 "Adenylate cyclase 2"  
"JS1\_E13\_00576" 14245 "s63E6H2" 0.0424407 "Adenylate cyclase 2"  
"JS1\_E13\_00578" 14247 "s59E13H2" 0.01866817 "Nucleotidyltransferase domain protein"  
"JS1\_E13\_00578" 14247 "s59E25H2" 0 "Nucleotidyltransferase domain protein"  
"JS1\_E13\_00578" 14247 "s59E5H2" 0 "Nucleotidyltransferase domain protein"  
"JS1\_E13\_00578" 14247 "s63E6H2" 0.08371252 "Nucleotidyltransferase domain protein"

"JS1\_E13\_00579" 14248 "s59E13H2" 0.5671275 "hypothetical protein"  
"JS1\_E13\_00579" 14248 "s59E25H2" 0 "hypothetical protein"  
"JS1\_E13\_00579" 14248 "s59E5H2" 0.104169 "hypothetical protein"  
"JS1\_E13\_00579" 14248 "s63E6H2" 0.0578826 "hypothetical protein"  
"JS1\_E13\_00581" 14250 "s59E13H2" 0 "putative major pilin subunit"  
"JS1\_E13\_00581" 14250 "s59E25H2" 0 "putative major pilin subunit"  
"JS1\_E13\_00581" 14250 "s59E5H2" 0.01293998 "putative major pilin subunit"  
"JS1\_E13\_00581" 14250 "s63E6H2" 0 "putative major pilin subunit"  
"JS1\_E13\_00584" 14253 "s59E13H2" 0 "putative major pilin subunit"  
"JS1\_E13\_00584" 14253 "s59E25H2" 0 "putative major pilin subunit"  
"JS1\_E13\_00584" 14253 "s59E5H2" 0 "putative major pilin subunit"  
"JS1\_E13\_00584" 14253 "s63E6H2" 0.002701906 "putative major pilin subunit"  
"JS1\_E13\_00585" 14254 "s59E13H2" 0 "hypothetical protein"  
"JS1\_E13\_00585" 14254 "s59E25H2" 0 "hypothetical protein"  
"JS1\_E13\_00585" 14254 "s59E5H2" 0 "hypothetical protein"  
"JS1\_E13\_00585" 14254 "s63E6H2" 0 "hypothetical protein"  
"JS1\_E13\_00586" 14255 "s59E13H2" 0.09318998 "hypothetical protein"  
"JS1\_E13\_00586" 14255 "s59E25H2" 0 "hypothetical protein"  
"JS1\_E13\_00586" 14255 "s59E5H2" 0.0486352 "hypothetical protein"  
"JS1\_E13\_00586" 14255 "s63E6H2" 6.53687e-05 "hypothetical protein"  
"JS1\_E13\_00587" 14256 "s59E13H2" 0.01879793 "hypothetical protein"  
"JS1\_E13\_00587" 14256 "s59E25H2" 0 "hypothetical protein"  
"JS1\_E13\_00587" 14256 "s59E5H2" 0.3049468 "hypothetical protein"  
"JS1\_E13\_00587" 14256 "s63E6H2" 0.06356755 "hypothetical protein"  
"JS1\_E13\_00588" 14257 "s59E13H2" 0.06100634 "Type 4 prepilin-like proteins leader peptide-processing enzyme"  
"JS1\_E13\_00588" 14257 "s59E25H2" 0 "Type 4 prepilin-like proteins leader peptide-processing enzyme"  
"JS1\_E13\_00588" 14257 "s59E5H2" 1.123823 "Type 4 prepilin-like proteins leader peptide-processing enzyme"  
"JS1\_E13\_00588" 14257 "s63E6H2" 0.6157022 "Type 4 prepilin-like proteins leader peptide-processing enzyme"  
"JS1\_E13\_00589" 14258 "s59E13H2" 0.06022158 "hypothetical protein"  
"JS1\_E13\_00589" 14258 "s59E25H2" 0 "hypothetical protein"  
"JS1\_E13\_00589" 14258 "s59E5H2" 0.461894 "hypothetical protein"  
"JS1\_E13\_00589" 14258 "s63E6H2" 0.2726206 "hypothetical protein"  
"JS1\_E13\_00590" 14259 "s59E13H2" 0 "hypothetical protein"  
"JS1\_E13\_00590" 14259 "s59E25H2" 0 "hypothetical protein"  
"JS1\_E13\_00590" 14259 "s59E5H2" 0.02871043 "hypothetical protein"  
"JS1\_E13\_00590" 14259 "s63E6H2" 0 "hypothetical protein"  
"JS1\_E13\_00591" 14260 "s59E13H2" 0 "hypothetical protein"  
"JS1\_E13\_00591" 14260 "s59E25H2" 0 "hypothetical protein"  
"JS1\_E13\_00591" 14260 "s59E5H2" 0 "hypothetical protein"  
"JS1\_E13\_00591" 14260 "s63E6H2" 0 "hypothetical protein"  
"JS1\_E13\_00592" 14261 "s59E13H2" 0 "hypothetical protein"  
"JS1\_E13\_00592" 14261 "s59E25H2" 0 "hypothetical protein"  
"JS1\_E13\_00592" 14261 "s59E5H2" 0.01789624 "hypothetical protein"  
"JS1\_E13\_00592" 14261 "s63E6H2" 0 "hypothetical protein"  
"JS1\_E13\_00593" 14262 "s59E13H2" 0.04820313 "Competence protein A"  
"JS1\_E13\_00593" 14262 "s59E25H2" 0 "Competence protein A"  
"JS1\_E13\_00593" 14262 "s59E5H2" 0.3841791 "Competence protein A"

"JS1\_E13\_00593" 14262 "s63E6H2" 0.04508284 "Competence protein A"  
"JS1\_E13\_00596" 14265 "s59E13H2" 0.4523657 "RNA polymerase sigma factor SigF"  
"JS1\_E13\_00596" 14265 "s59E25H2" 0 "RNA polymerase sigma factor SigF"  
"JS1\_E13\_00596" 14265 "s59E5H2" 0.109367 "RNA polymerase sigma factor SigF"  
"JS1\_E13\_00596" 14265 "s63E6H2" 0.01877203 "RNA polymerase sigma factor SigF"  
"JS1\_E13\_00597" 14266 "s59E13H2" 0.4048564 "RNA polymerase sigma-F factor"  
"JS1\_E13\_00597" 14266 "s59E25H2" 0 "RNA polymerase sigma-F factor"  
"JS1\_E13\_00597" 14266 "s59E5H2" 0.1203846 "RNA polymerase sigma-F factor"  
"JS1\_E13\_00597" 14266 "s63E6H2" 0.1442767 "RNA polymerase sigma-F factor"  
"JS1\_E13\_00598" 14267 "s59E13H2" 0.5097956 "Type II secretion system protein F"  
"JS1\_E13\_00598" 14267 "s59E25H2" 0.140264 "Type II secretion system protein F"  
"JS1\_E13\_00598" 14267 "s59E5H2" 0.6177045 "Type II secretion system protein F"  
"JS1\_E13\_00598" 14267 "s63E6H2" 0.2386974 "Type II secretion system protein F"  
"JS1\_E13\_00599" 14268 "s59E13H2" 0.515264 "Cyclic di-GMP phosphodiesterase response regulator RpfG"  
"JS1\_E13\_00599" 14268 "s59E25H2" 0 "Cyclic di-GMP phosphodiesterase response regulator RpfG"  
"JS1\_E13\_00599" 14268 "s59E5H2" 0.5255685 "Cyclic di-GMP phosphodiesterase response regulator RpfG"  
"JS1\_E13\_00599" 14268 "s63E6H2" 0.33143 "Cyclic di-GMP phosphodiesterase response regulator RpfG"  
"JS1\_E13\_00600" 14269 "s59E13H2" 0.5365453 "Type II secretion system protein E"  
"JS1\_E13\_00600" 14269 "s59E25H2" 0 "Type II secretion system protein E"  
"JS1\_E13\_00600" 14269 "s59E5H2" 0.5056798 "Type II secretion system protein E"  
"JS1\_E13\_00600" 14269 "s63E6H2" 0.4818416 "Type II secretion system protein E"  
"JS1\_E13\_00601" 14270 "s59E13H2" 0.102668 "Ornithine carbamoyltransferase"  
"JS1\_E13\_00601" 14270 "s59E25H2" 0 "Ornithine carbamoyltransferase"  
"JS1\_E13\_00601" 14270 "s59E5H2" 0.1746864 "Ornithine carbamoyltransferase"  
"JS1\_E13\_00601" 14270 "s63E6H2" 1.635704 "Ornithine carbamoyltransferase"  
"JS1\_E13\_00602" 14271 "s59E13H2" 0.1886425 "DNA integrity scanning protein DisA"  
"JS1\_E13\_00602" 14271 "s59E25H2" 0.5950617 "DNA integrity scanning protein DisA"  
"JS1\_E13\_00602" 14271 "s59E5H2" 0.1225687 "DNA integrity scanning protein DisA"  
"JS1\_E13\_00602" 14271 "s63E6H2" 2.887753 "DNA integrity scanning protein DisA"  
"JS1\_E13\_00603" 14272 "s59E13H2" 0.183791 "YbbR-like protein"  
"JS1\_E13\_00603" 14272 "s59E25H2" 0 "YbbR-like protein"  
"JS1\_E13\_00603" 14272 "s59E5H2" 0.1394424 "YbbR-like protein"  
"JS1\_E13\_00603" 14272 "s63E6H2" 1.032544 "YbbR-like protein"  
"JS1\_E13\_00604" 14273 "s59E13H2" 0.2004555 "Phosphoglucosamine mutase"  
"JS1\_E13\_00604" 14273 "s59E25H2" 0.8097345 "Phosphoglucosamine mutase"  
"JS1\_E13\_00604" 14273 "s59E5H2" 0.1243617 "Phosphoglucosamine mutase"  
"JS1\_E13\_00604" 14273 "s63E6H2" 0.1910896 "Phosphoglucosamine mutase"  
"JS1\_E13\_00606" 14275 "s59E13H2" 0.1772877 "Glutamine--fructose-6-phosphate aminotransferase [isomerizing]"  
"JS1\_E13\_00606" 14275 "s59E25H2" 0 "Glutamine--fructose-6-phosphate aminotransferase [isomerizing]"  
"JS1\_E13\_00606" 14275 "s59E5H2" 0.07053035 "Glutamine--fructose-6-phosphate aminotransferase [isomerizing]"  
"JS1\_E13\_00606" 14275 "s63E6H2" 0.09353022 "Glutamine--fructose-6-phosphate aminotransferase [isomerizing]"  
"JS1\_E13\_00607" 14276 "s59E13H2" 0.2194876 "Glutamine--fructose-6-phosphate aminotransferase [isomerizing]"  
"JS1\_E13\_00607" 14276 "s59E25H2" 0.1591943 "Glutamine--fructose-6-phosphate aminotransferase [isomerizing]"  
"JS1\_E13\_00607" 14276 "s59E5H2" 0.2090566 "Glutamine--fructose-6-phosphate aminotransferase [isomerizing]"  
"JS1\_E13\_00607" 14276 "s63E6H2" 0.2382931 "Glutamine--fructose-6-phosphate aminotransferase [isomerizing]"  
"JS1\_E13\_00608" 14277 "s59E13H2" 0.08903577 "Glutamine synthetase"  
"JS1\_E13\_00608" 14277 "s59E25H2" 0.5018811 "Glutamine synthetase"

"JS1\_E13\_00608" 14277 "s59E5H2" 0.1504678 "Glutamine synthetase"  
"JS1\_E13\_00608" 14277 "s63E6H2" 0.1755812 "Glutamine synthetase"  
"JS1\_E13\_00609" 14278 "s59E13H2" 1.163863 "L-allo-threonine aldolase"  
"JS1\_E13\_00609" 14278 "s59E25H2" 0 "L-allo-threonine aldolase"  
"JS1\_E13\_00609" 14278 "s59E5H2" 0.383892 "L-allo-threonine aldolase"  
"JS1\_E13\_00609" 14278 "s63E6H2" 0.1358856 "L-allo-threonine aldolase"  
"JS1\_E13\_00610" 14279 "s59E13H2" 3.380257 "Thioesterase superfamily protein"  
"JS1\_E13\_00610" 14279 "s59E25H2" 1.50463 "Thioesterase superfamily protein"  
"JS1\_E13\_00610" 14279 "s59E5H2" 0.4342643 "Thioesterase superfamily protein"  
"JS1\_E13\_00610" 14279 "s63E6H2" 0.1138319 "Thioesterase superfamily protein"  
"JS1\_E13\_00611" 14280 "s59E13H2" 3.970361 "phage T7 F exclusion suppressor FxsA"  
"JS1\_E13\_00611" 14280 "s59E25H2" 0 "phage T7 F exclusion suppressor FxsA"  
"JS1\_E13\_00611" 14280 "s59E5H2" 0.1865577 "phage T7 F exclusion suppressor FxsA"  
"JS1\_E13\_00611" 14280 "s63E6H2" 0.1861552 "phage T7 F exclusion suppressor FxsA"  
"JS1\_E13\_00612" 14281 "s59E13H2" 5.880757 "Holo-[acyl-carrier-protein] synthase"  
"JS1\_E13\_00612" 14281 "s59E25H2" 0.6282051 "Holo-[acyl-carrier-protein] synthase"  
"JS1\_E13\_00612" 14281 "s59E5H2" 0.4390054 "Holo-[acyl-carrier-protein] synthase"  
"JS1\_E13\_00612" 14281 "s63E6H2" 0.1934773 "Holo-[acyl-carrier-protein] synthase"  
"JS1\_E13\_00613" 14282 "s59E13H2" 8.893551 "Bifunctional NAD(P)H-hydrate repair enzyme Nnr"  
"JS1\_E13\_00613" 14282 "s59E25H2" 0.2168285 "Bifunctional NAD(P)H-hydrate repair enzyme Nnr"  
"JS1\_E13\_00613" 14282 "s59E5H2" 0.7840288 "Bifunctional NAD(P)H-hydrate repair enzyme Nnr"  
"JS1\_E13\_00613" 14282 "s63E6H2" 0.2524223 "Bifunctional NAD(P)H-hydrate repair enzyme Nnr"  
"JS1\_E13\_00614" 14283 "s59E13H2" 8.941748 "Alanine racemase"  
"JS1\_E13\_00614" 14283 "s59E25H2" 0.3731976 "Alanine racemase"  
"JS1\_E13\_00614" 14283 "s59E5H2" 0.5062351 "Alanine racemase"  
"JS1\_E13\_00614" 14283 "s63E6H2" 0.1814763 "Alanine racemase"  
"JS1\_E13\_00615" 14284 "s59E13H2" 16.86505 "tRNA threonylcarbamoyladenosine biosynthesis protein TsaE"  
"JS1\_E13\_00615" 14284 "s59E25H2" 0.9266247 "tRNA threonylcarbamoyladenosine biosynthesis protein TsaE"  
"JS1\_E13\_00615" 14284 "s59E5H2" 0.7877135 "tRNA threonylcarbamoyladenosine biosynthesis protein TsaE"  
"JS1\_E13\_00615" 14284 "s63E6H2" 0.3084889 "tRNA threonylcarbamoyladenosine biosynthesis protein TsaE"  
"JS1\_E13\_00616" 14285 "s59E13H2" 15.7486 "tRNA threonylcarbamoyladenosine biosynthesis protein TsaB"  
"JS1\_E13\_00616" 14285 "s59E25H2" 0.1082621 "tRNA threonylcarbamoyladenosine biosynthesis protein TsaB"  
"JS1\_E13\_00616" 14285 "s59E5H2" 0.5148264 "tRNA threonylcarbamoyladenosine biosynthesis protein TsaB"  
"JS1\_E13\_00616" 14285 "s63E6H2" 0.4519545 "tRNA threonylcarbamoyladenosine biosynthesis protein TsaB"  
"JS1\_E13\_00617" 14286 "s59E13H2" 0.1159212 "Asparagine--tRNA ligase"  
"JS1\_E13\_00617" 14286 "s59E25H2" 0 "Asparagine--tRNA ligase"  
"JS1\_E13\_00617" 14286 "s59E5H2" 0.1171848 "Asparagine--tRNA ligase"  
"JS1\_E13\_00617" 14286 "s63E6H2" 0.6292815 "Asparagine--tRNA ligase"  
"JS1\_E13\_00618" 14287 "s59E13H2" 0.125078 "Aspartate--tRNA ligase"  
"JS1\_E13\_00618" 14287 "s59E25H2" 0 "Aspartate--tRNA ligase"  
"JS1\_E13\_00618" 14287 "s59E5H2" 0.09171464 "Aspartate--tRNA ligase"  
"JS1\_E13\_00618" 14287 "s63E6H2" 0.5583635 "Aspartate--tRNA ligase"  
"JS1\_E13\_00620" 14289 "s59E13H2" 0.1053568 "putative 5-formyltetrahydrofolate cyclo-ligase"  
"JS1\_E13\_00620" 14289 "s59E25H2" 0.4084967 "putative 5-formyltetrahydrofolate cyclo-ligase"  
"JS1\_E13\_00620" 14289 "s59E5H2" 0.08537649 "putative 5-formyltetrahydrofolate cyclo-ligase"  
"JS1\_E13\_00620" 14289 "s63E6H2" 0.3873262 "putative 5-formyltetrahydrofolate cyclo-ligase"  
"JS1\_E13\_00621" 14290 "s59E13H2" 0.08908684 "30S ribosomal protein S1"

"JS1\_E13\_00621" 14290 "s59E25H2" 0 "30S ribosomal protein S1"  
"JS1\_E13\_00621" 14290 "s59E5H2" 0.1048016 "30S ribosomal protein S1"  
"JS1\_E13\_00621" 14290 "s63E6H2" 0.5877686 "30S ribosomal protein S1"  
"JS1\_E13\_00622" 14291 "s59E13H2" 0.01566224 "Type II secretion system protein E"  
"JS1\_E13\_00622" 14291 "s59E25H2" 0 "Type II secretion system protein E"  
"JS1\_E13\_00622" 14291 "s59E5H2" 0.2086646 "Type II secretion system protein E"  
"JS1\_E13\_00622" 14291 "s63E6H2" 0.8263653 "Type II secretion system protein E"  
"JS1\_E13\_00623" 14292 "s59E13H2" 0.08385616 "Alanine--tRNA ligase"  
"JS1\_E13\_00623" 14292 "s59E25H2" 0 "Alanine--tRNA ligase"  
"JS1\_E13\_00623" 14292 "s59E5H2" 0.08844156 "Alanine--tRNA ligase"  
"JS1\_E13\_00623" 14292 "s63E6H2" 0.2426179 "Alanine--tRNA ligase"  
"JS1\_E13\_00624" 14293 "s59E13H2" 0.07535225 "Putative Holliday junction resolvase"  
"JS1\_E13\_00624" 14293 "s59E25H2" 0 "Putative Holliday junction resolvase"  
"JS1\_E13\_00624" 14293 "s59E5H2" 0.08957733 "Putative Holliday junction resolvase"  
"JS1\_E13\_00624" 14293 "s63E6H2" 0.1111159 "Putative Holliday junction resolvase"  
"JS1\_E13\_00625" 14294 "s59E13H2" 0.003798599 "putative aminodeoxychorismate lyase"  
"JS1\_E13\_00625" 14294 "s59E25H2" 0 "putative aminodeoxychorismate lyase"  
"JS1\_E13\_00625" 14294 "s59E5H2" 0.0519829 "putative aminodeoxychorismate lyase"  
"JS1\_E13\_00625" 14294 "s63E6H2" 0.1233382 "putative aminodeoxychorismate lyase"  
"JS1\_E13\_00626" 14295 "s59E13H2" 0.01653658 "Uridine kinase"  
"JS1\_E13\_00626" 14295 "s59E25H2" 0 "Uridine kinase"  
"JS1\_E13\_00626" 14295 "s59E5H2" 0.1647398 "Uridine kinase"  
"JS1\_E13\_00626" 14295 "s63E6H2" 0.0772328 "Uridine kinase"  
"JS1\_E13\_00627" 14296 "s59E13H2" 0.008016615 "Mitochondrial PGP phosphatase"  
"JS1\_E13\_00627" 14296 "s59E25H2" 0 "Mitochondrial PGP phosphatase"  
"JS1\_E13\_00627" 14296 "s59E5H2" 0.0971788 "Mitochondrial PGP phosphatase"  
"JS1\_E13\_00627" 14296 "s63E6H2" 0.1968385 "Mitochondrial PGP phosphatase"  
"JS1\_E13\_00628" 14297 "s59E13H2" 0.6031113 "hypothetical protein"  
"JS1\_E13\_00628" 14297 "s59E25H2" 0 "hypothetical protein"  
"JS1\_E13\_00628" 14297 "s59E5H2" 0.2727587 "hypothetical protein"  
"JS1\_E13\_00628" 14297 "s63E6H2" 0.3274246 "hypothetical protein"  
"JS1\_E13\_00629" 14298 "s59E13H2" 0.3902625 "30S ribosomal protein S20"  
"JS1\_E13\_00629" 14298 "s59E25H2" 0 "30S ribosomal protein S20"  
"JS1\_E13\_00629" 14298 "s59E5H2" 0.3786692 "30S ribosomal protein S20"  
"JS1\_E13\_00629" 14298 "s63E6H2" 0.0468303 "30S ribosomal protein S20"  
"JS1\_E13\_00630" 14299 "s59E13H2" 0.6880612 "DNA polymerase III subunit delta"  
"JS1\_E13\_00630" 14299 "s59E25H2" 0 "DNA polymerase III subunit delta"  
"JS1\_E13\_00630" 14299 "s59E5H2" 0.7068111 "DNA polymerase III subunit delta"  
"JS1\_E13\_00630" 14299 "s63E6H2" 0.05441538 "DNA polymerase III subunit delta"  
"JS1\_E13\_00632" 14301 "s59E13H2" 0.5087036 "ComEC family competence protein"  
"JS1\_E13\_00632" 14301 "s59E25H2" 0 "ComEC family competence protein"  
"JS1\_E13\_00632" 14301 "s59E5H2" 0.8566681 "ComEC family competence protein"  
"JS1\_E13\_00632" 14301 "s63E6H2" 0.07175886 "ComEC family competence protein"  
"JS1\_E13\_00633" 14302 "s59E13H2" 0.6440592 "ComE operon protein 1"  
"JS1\_E13\_00633" 14302 "s59E25H2" 0 "ComE operon protein 1"  
"JS1\_E13\_00633" 14302 "s59E5H2" 0.8964275 "ComE operon protein 1"  
"JS1\_E13\_00633" 14302 "s63E6H2" 0.08433893 "ComE operon protein 1"

"JS1\_E13\_00634" 14303 "s59E13H2" 0.3480174 "hypothetical protein"  
"JS1\_E13\_00634" 14303 "s59E25H2" 0 "hypothetical protein"  
"JS1\_E13\_00634" 14303 "s59E5H2" 0.3102399 "hypothetical protein"  
"JS1\_E13\_00634" 14303 "s63E6H2" 0.032267 "hypothetical protein"  
"JS1\_E13\_00635" 14304 "s59E13H2" 0.8510756 "Folypolyglutamate synthase"  
"JS1\_E13\_00635" 14304 "s59E25H2" 0.3695492 "Folypolyglutamate synthase"  
"JS1\_E13\_00635" 14304 "s59E5H2" 0.3201607 "Folypolyglutamate synthase"  
"JS1\_E13\_00635" 14304 "s63E6H2" 0.08269272 "Folypolyglutamate synthase"  
"JS1\_E13\_00636" 14305 "s59E13H2" 0.6922997 "Valine--tRNA ligase"  
"JS1\_E13\_00636" 14305 "s59E25H2" 0 "Valine--tRNA ligase"  
"JS1\_E13\_00636" 14305 "s59E5H2" 0.3742467 "Valine--tRNA ligase"  
"JS1\_E13\_00636" 14305 "s63E6H2" 0.1859152 "Valine--tRNA ligase"  
"JS1\_E13\_00638" 14307 "s59E13H2" 0.3005177 "Lon protease 1"  
"JS1\_E13\_00638" 14307 "s59E25H2" 0 "Lon protease 1"  
"JS1\_E13\_00638" 14307 "s59E5H2" 0.1928568 "Lon protease 1"  
"JS1\_E13\_00638" 14307 "s63E6H2" 0.1202633 "Lon protease 1"  
"JS1\_E13\_00639" 14308 "s59E13H2" 0.1222835 "ATP-dependent Clp protease ATP-binding subunit ClpX"  
"JS1\_E13\_00639" 14308 "s59E25H2" 0 "ATP-dependent Clp protease ATP-binding subunit ClpX"  
"JS1\_E13\_00639" 14308 "s59E5H2" 0.1309116 "ATP-dependent Clp protease ATP-binding subunit ClpX"  
"JS1\_E13\_00639" 14308 "s63E6H2" 0.08264123 "ATP-dependent Clp protease ATP-binding subunit ClpX"  
"JS1\_E13\_00640" 14309 "s59E13H2" 0.02210333 "hypothetical protein"  
"JS1\_E13\_00640" 14309 "s59E25H2" 0 "hypothetical protein"  
"JS1\_E13\_00640" 14309 "s59E5H2" 0 "hypothetical protein"  
"JS1\_E13\_00640" 14309 "s63E6H2" 0 "hypothetical protein"  
"JS1\_E13\_00641" 14310 "s59E13H2" 0.27481 "ATP-dependent Clp protease proteolytic subunit"  
"JS1\_E13\_00641" 14310 "s59E25H2" 0 "ATP-dependent Clp protease proteolytic subunit"  
"JS1\_E13\_00641" 14310 "s59E5H2" 0.08469748 "ATP-dependent Clp protease proteolytic subunit"  
"JS1\_E13\_00641" 14310 "s63E6H2" 0.1015252 "ATP-dependent Clp protease proteolytic subunit"  
"JS1\_E13\_00642" 14311 "s59E13H2" 0.2132173 "Trigger factor"  
"JS1\_E13\_00642" 14311 "s59E25H2" 0 "Trigger factor"  
"JS1\_E13\_00642" 14311 "s59E5H2" 0.06015674 "Trigger factor"  
"JS1\_E13\_00642" 14311 "s63E6H2" 0.08553063 "Trigger factor"  
"JS1\_E13\_00643" 14312 "s59E13H2" 0.2492966 "putative zinc-type alcohol dehydrogenase-like protein YjmD"  
"JS1\_E13\_00643" 14312 "s59E25H2" 0.007843137 "putative zinc-type alcohol dehydrogenase-like protein YjmD"  
"JS1\_E13\_00643" 14312 "s59E5H2" 0.3954232 "putative zinc-type alcohol dehydrogenase-like protein YjmD"  
"JS1\_E13\_00643" 14312 "s63E6H2" 0.6899398 "putative zinc-type alcohol dehydrogenase-like protein YjmD"  
"JS1\_E13\_00644" 14313 "s59E13H2" 0.2121008 "Amidohydrolase"  
"JS1\_E13\_00644" 14313 "s59E25H2" 0.2701754 "Amidohydrolase"  
"JS1\_E13\_00644" 14313 "s59E5H2" 0.3885696 "Amidohydrolase"  
"JS1\_E13\_00644" 14313 "s63E6H2" 0.676273 "Amidohydrolase"  
"JS1\_E13\_00645" 14314 "s59E13H2" 0.2797925 "Pyridoxal 4-dehydrogenase"  
"JS1\_E13\_00645" 14314 "s59E25H2" 0 "Pyridoxal 4-dehydrogenase"  
"JS1\_E13\_00645" 14314 "s59E5H2" 0.6456056 "Pyridoxal 4-dehydrogenase"  
"JS1\_E13\_00645" 14314 "s63E6H2" 0.9980288 "Pyridoxal 4-dehydrogenase"  
"JS1\_E13\_00646" 14315 "s59E13H2" 0.2401027 "hypothetical protein"  
"JS1\_E13\_00646" 14315 "s59E25H2" 0 "hypothetical protein"  
"JS1\_E13\_00646" 14315 "s59E5H2" 0.6982356 "hypothetical protein"



"JS1\_E13\_00646" 14315 "s63E6H2" 1.481669 "hypothetical protein"  
"JS1\_E13\_00647" 14316 "s59E13H2" 0.2026121 "Cell division protein FtsZ"  
"JS1\_E13\_00647" 14316 "s59E25H2" 0 "Cell division protein FtsZ"  
"JS1\_E13\_00647" 14316 "s59E5H2" 0.8473776 "Cell division protein FtsZ"  
"JS1\_E13\_00647" 14316 "s63E6H2" 1.044046 "Cell division protein FtsZ"  
"JS1\_E13\_00648" 14317 "s59E13H2" 0.2216494 "Cell division protein FtsZ"  
"JS1\_E13\_00648" 14317 "s59E25H2" 0 "Cell division protein FtsZ"  
"JS1\_E13\_00648" 14317 "s59E5H2" 0.7573195 "Cell division protein FtsZ"  
"JS1\_E13\_00648" 14317 "s63E6H2" 1.3262 "Cell division protein FtsZ"  
"JS1\_E13\_00649" 14318 "s59E13H2" 0.1254161 "Sporulation initiation inhibitor protein Soj"  
"JS1\_E13\_00649" 14318 "s59E25H2" 0.5625774 "Sporulation initiation inhibitor protein Soj"  
"JS1\_E13\_00649" 14318 "s59E5H2" 0.6090348 "Sporulation initiation inhibitor protein Soj"  
"JS1\_E13\_00649" 14318 "s63E6H2" 1.683104 "Sporulation initiation inhibitor protein Soj"  
"JS1\_E13\_00650" 14319 "s59E13H2" 0.04821905 "Long-chain-fatty-acid--CoA ligase FadD15"  
"JS1\_E13\_00650" 14319 "s59E25H2" 0 "Long-chain-fatty-acid--CoA ligase FadD15"  
"JS1\_E13\_00650" 14319 "s59E5H2" 0.1525915 "Long-chain-fatty-acid--CoA ligase FadD15"  
"JS1\_E13\_00650" 14319 "s63E6H2" 1.480613 "Long-chain-fatty-acid--CoA ligase FadD15"  
"JS1\_E13\_00651" 14320 "s59E13H2" 0.09074351 "LysM domain/BON superfamily protein"  
"JS1\_E13\_00651" 14320 "s59E25H2" 0 "LysM domain/BON superfamily protein"  
"JS1\_E13\_00651" 14320 "s59E5H2" 0.4593438 "LysM domain/BON superfamily protein"  
"JS1\_E13\_00651" 14320 "s63E6H2" 0.3848602 "LysM domain/BON superfamily protein"  
"JS1\_E13\_00652" 14321 "s59E13H2" 0.03007169 "Glucokinase"  
"JS1\_E13\_00652" 14321 "s59E25H2" 0 "Glucokinase"  
"JS1\_E13\_00652" 14321 "s59E5H2" 0.2759382 "Glucokinase"  
"JS1\_E13\_00652" 14321 "s63E6H2" 0.1165046 "Glucokinase"  
"JS1\_E13\_00653" 14322 "s59E13H2" 0.006335728 "Glycosyl transferase family 2"  
"JS1\_E13\_00653" 14322 "s59E25H2" 0 "Glycosyl transferase family 2"  
"JS1\_E13\_00653" 14322 "s59E5H2" 0.1573941 "Glycosyl transferase family 2"  
"JS1\_E13\_00653" 14322 "s63E6H2" 0.06975295 "Glycosyl transferase family 2"  
"JS1\_E13\_00654" 14323 "s59E13H2" 0.008313211 "Bifunctional protein GImU"  
"JS1\_E13\_00654" 14323 "s59E25H2" 0 "Bifunctional protein GImU"  
"JS1\_E13\_00654" 14323 "s59E5H2" 0.2784761 "Bifunctional protein GImU"  
"JS1\_E13\_00654" 14323 "s63E6H2" 0.02627424 "Bifunctional protein GImU"  
"JS1\_E13\_00655" 14324 "s59E13H2" 0.01018824 "Inner membrane ABC transporter permease protein YcjP"  
"JS1\_E13\_00655" 14324 "s59E25H2" 0 "Inner membrane ABC transporter permease protein YcjP"  
"JS1\_E13\_00655" 14324 "s59E5H2" 0.3688024 "Inner membrane ABC transporter permease protein YcjP"  
"JS1\_E13\_00655" 14324 "s63E6H2" 0.05558519 "Inner membrane ABC transporter permease protein YcjP"  
"JS1\_E13\_00656" 14325 "s59E13H2" 0.04707084 "Trehalose/maltose transport system permease protein MalF"  
"JS1\_E13\_00656" 14325 "s59E25H2" 0 "Trehalose/maltose transport system permease protein MalF"  
"JS1\_E13\_00656" 14325 "s59E5H2" 0.3851103 "Trehalose/maltose transport system permease protein MalF"  
"JS1\_E13\_00656" 14325 "s63E6H2" 0.3037061 "Trehalose/maltose transport system permease protein MalF"  
"JS1\_E13\_00658" 14327 "s59E13H2" 1.011975 "Hydrogenase isoenzymes nickel incorporation protein HypB"  
"JS1\_E13\_00658" 14327 "s59E25H2" 0 "Hydrogenase isoenzymes nickel incorporation protein HypB"  
"JS1\_E13\_00658" 14327 "s59E5H2" 0.3631919 "Hydrogenase isoenzymes nickel incorporation protein HypB"  
"JS1\_E13\_00658" 14327 "s63E6H2" 1.261453 "Hydrogenase isoenzymes nickel incorporation protein HypB"  
"JS1\_E13\_00659" 14328 "s59E13H2" 0.556549 "Holliday junction resolvase-like protein"  
"JS1\_E13\_00659" 14328 "s59E25H2" 0 "Holliday junction resolvase-like protein"

"JS1\_E13\_00659" 14328 "s59E5H2" 0.2136714 "Holliday junction resolvase-like protein"  
"JS1\_E13\_00659" 14328 "s63E6H2" 0.4346322 "Holliday junction resolvase-like protein"  
"JS1\_E13\_00660" 14329 "s59E13H2" 0.4858041 "formate dehydrogenase accessory protein"  
"JS1\_E13\_00660" 14329 "s59E25H2" 0 "formate dehydrogenase accessory protein"  
"JS1\_E13\_00660" 14329 "s59E5H2" 0.1521683 "formate dehydrogenase accessory protein"  
"JS1\_E13\_00660" 14329 "s63E6H2" 0.4251418 "formate dehydrogenase accessory protein"  
"JS1\_E13\_00661" 14330 "s59E13H2" 8.207189e-05 "putative molybdenum cofactor guanylyltransferase"  
"JS1\_E13\_00661" 14330 "s59E25H2" 0 "putative molybdenum cofactor guanylyltransferase"  
"JS1\_E13\_00661" 14330 "s59E5H2" 0.0002152 "putative molybdenum cofactor guanylyltransferase"  
"JS1\_E13\_00661" 14330 "s63E6H2" 0.3048791 "putative molybdenum cofactor guanylyltransferase"  
"JS1\_E13\_00662" 14331 "s59E13H2" 0.0009428692 "Formate dehydrogenase subunit alpha"  
"JS1\_E13\_00662" 14331 "s59E25H2" 0 "Formate dehydrogenase subunit alpha"  
"JS1\_E13\_00662" 14331 "s59E5H2" 0.01777286 "Formate dehydrogenase subunit alpha"  
"JS1\_E13\_00662" 14331 "s63E6H2" 0.1018304 "Formate dehydrogenase subunit alpha"  
"JS1\_E13\_00663" 14332 "s59E13H2" 0 "NADP-reducing hydrogenase subunit HndC"  
"JS1\_E13\_00663" 14332 "s59E25H2" 0 "NADP-reducing hydrogenase subunit HndC"  
"JS1\_E13\_00663" 14332 "s59E5H2" 0 "NADP-reducing hydrogenase subunit HndC"  
"JS1\_E13\_00663" 14332 "s63E6H2" 0.0444195 "NADP-reducing hydrogenase subunit HndC"  
"JS1\_E13\_00664" 14333 "s59E13H2" 0 "NADP-reducing hydrogenase subunit HndA"  
"JS1\_E13\_00664" 14333 "s59E25H2" 0 "NADP-reducing hydrogenase subunit HndA"  
"JS1\_E13\_00664" 14333 "s59E5H2" 0 "NADP-reducing hydrogenase subunit HndA"  
"JS1\_E13\_00664" 14333 "s63E6H2" 0.06956444 "NADP-reducing hydrogenase subunit HndA"  
"JS1\_E13\_00665" 14334 "s59E13H2" 0 "NADP-reducing hydrogenase subunit HndA"  
"JS1\_E13\_00665" 14334 "s59E25H2" 0 "NADP-reducing hydrogenase subunit HndA"  
"JS1\_E13\_00665" 14334 "s59E5H2" 0 "NADP-reducing hydrogenase subunit HndA"  
"JS1\_E13\_00665" 14334 "s63E6H2" 0.09978291 "NADP-reducing hydrogenase subunit HndA"  
"JS1\_E13\_00666" 14335 "s59E13H2" 0 "hypothetical protein"  
"JS1\_E13\_00666" 14335 "s59E25H2" 0 "hypothetical protein"  
"JS1\_E13\_00666" 14335 "s59E5H2" 0 "hypothetical protein"  
"JS1\_E13\_00666" 14335 "s63E6H2" 0.1206668 "hypothetical protein"  
"JS1\_E13\_00667" 14336 "s59E13H2" 0 "hypothetical protein"  
"JS1\_E13\_00667" 14336 "s59E25H2" 0 "hypothetical protein"  
"JS1\_E13\_00667" 14336 "s59E5H2" 0 "hypothetical protein"  
"JS1\_E13\_00667" 14336 "s63E6H2" 0 "hypothetical protein"  
"JS1\_E13\_00668" 14337 "s59E13H2" 0 "NADP-reducing hydrogenase subunit HndC"  
"JS1\_E13\_00668" 14337 "s59E25H2" 0 "NADP-reducing hydrogenase subunit HndC"  
"JS1\_E13\_00668" 14337 "s59E5H2" 0 "NADP-reducing hydrogenase subunit HndC"  
"JS1\_E13\_00668" 14337 "s63E6H2" 0.02507918 "NADP-reducing hydrogenase subunit HndC"  
"JS1\_E13\_00669" 14338 "s59E13H2" 0 "NADP-reducing hydrogenase subunit HndC"  
"JS1\_E13\_00669" 14338 "s59E25H2" 0 "NADP-reducing hydrogenase subunit HndC"  
"JS1\_E13\_00669" 14338 "s59E5H2" 0 "NADP-reducing hydrogenase subunit HndC"  
"JS1\_E13\_00669" 14338 "s63E6H2" 0.005714652 "NADP-reducing hydrogenase subunit HndC"  
"JS1\_E13\_00670" 14339 "s59E13H2" 0.01657503 "30S ribosomal protein S3"  
"JS1\_E13\_00670" 14339 "s59E25H2" 0 "30S ribosomal protein S3"  
"JS1\_E13\_00670" 14339 "s59E5H2" 0.02357025 "30S ribosomal protein S3"  
"JS1\_E13\_00670" 14339 "s63E6H2" 0.09963999 "30S ribosomal protein S3"  
"JS1\_E13\_00671" 14340 "s59E13H2" 2.905825 "50S ribosomal protein L22"

"JS1\_E13\_00671" 14340 "s59E25H2" 0 "50S ribosomal protein L22"  
"JS1\_E13\_00671" 14340 "s59E5H2" 0.08716743 "50S ribosomal protein L22"  
"JS1\_E13\_00671" 14340 "s63E6H2" 0.2330042 "50S ribosomal protein L22"  
"JS1\_E13\_00672" 14341 "s59E13H2" 0.03302076 "30S ribosomal protein S19"  
"JS1\_E13\_00672" 14341 "s59E25H2" 0 "30S ribosomal protein S19"  
"JS1\_E13\_00672" 14341 "s59E5H2" 0.03646218 "30S ribosomal protein S19"  
"JS1\_E13\_00672" 14341 "s63E6H2" 0.2782608 "30S ribosomal protein S19"  
"JS1\_E13\_00673" 14342 "s59E13H2" 0.0258291 "50S ribosomal protein L2"  
"JS1\_E13\_00673" 14342 "s59E25H2" 0 "50S ribosomal protein L2"  
"JS1\_E13\_00673" 14342 "s59E5H2" 0.06486637 "50S ribosomal protein L2"  
"JS1\_E13\_00673" 14342 "s63E6H2" 0.3076602 "50S ribosomal protein L2"  
"JS1\_E13\_00674" 14343 "s59E13H2" 0.02359588 "50S ribosomal protein L23"  
"JS1\_E13\_00674" 14343 "s59E25H2" 0 "50S ribosomal protein L23"  
"JS1\_E13\_00674" 14343 "s59E5H2" 0.06985681 "50S ribosomal protein L23"  
"JS1\_E13\_00674" 14343 "s63E6H2" 0.149217 "50S ribosomal protein L23"  
"JS1\_E13\_00675" 14344 "s59E13H2" 0.03024122 "50S ribosomal protein L4"  
"JS1\_E13\_00675" 14344 "s59E25H2" 0 "50S ribosomal protein L4"  
"JS1\_E13\_00675" 14344 "s59E5H2" 0.1103645 "50S ribosomal protein L4"  
"JS1\_E13\_00675" 14344 "s63E6H2" 0.07755965 "50S ribosomal protein L4"  
"JS1\_E13\_00676" 14345 "s59E13H2" 0.04992644 "50S ribosomal protein L3"  
"JS1\_E13\_00676" 14345 "s59E25H2" 0 "50S ribosomal protein L3"  
"JS1\_E13\_00676" 14345 "s59E5H2" 0.1459576 "50S ribosomal protein L3"  
"JS1\_E13\_00676" 14345 "s63E6H2" 0.07173367 "50S ribosomal protein L3"  
"JS1\_E13\_00677" 14346 "s59E13H2" 3.485157 "30S ribosomal protein S10"  
"JS1\_E13\_00677" 14346 "s59E25H2" 0 "30S ribosomal protein S10"  
"JS1\_E13\_00677" 14346 "s59E5H2" 0.09858202 "30S ribosomal protein S10"  
"JS1\_E13\_00677" 14346 "s63E6H2" 0.2979245 "30S ribosomal protein S10"  
"JS1\_E13\_00678" 14347 "s59E13H2" 0.2470543 "Elongation factor Tu"  
"JS1\_E13\_00678" 14347 "s59E25H2" 0 "Elongation factor Tu"  
"JS1\_E13\_00678" 14347 "s59E5H2" 0.3581073 "Elongation factor Tu"  
"JS1\_E13\_00678" 14347 "s63E6H2" 0.9928795 "Elongation factor Tu"  
"JS1\_E13\_00682" 14351 "s59E13H2" 0.1618027 "RNA polymerase sigma-H factor"  
"JS1\_E13\_00682" 14351 "s59E25H2" 0 "RNA polymerase sigma-H factor"  
"JS1\_E13\_00682" 14351 "s59E5H2" 0.1242387 "RNA polymerase sigma-H factor"  
"JS1\_E13\_00682" 14351 "s63E6H2" 0.380066 "RNA polymerase sigma-H factor"  
"JS1\_E13\_00683" 14352 "s59E13H2" 0.0652417 "Cysteine--tRNA ligase"  
"JS1\_E13\_00683" 14352 "s59E25H2" 0 "Cysteine--tRNA ligase"  
"JS1\_E13\_00683" 14352 "s59E5H2" 0.1364088 "Cysteine--tRNA ligase"  
"JS1\_E13\_00683" 14352 "s63E6H2" 0.1152927 "Cysteine--tRNA ligase"  
"JS1\_E13\_00684" 14353 "s59E13H2" 0.03974271 "putative PIN and TRAM-domain containing protein precursor"  
"JS1\_E13\_00684" 14353 "s59E25H2" 0 "putative PIN and TRAM-domain containing protein precursor"  
"JS1\_E13\_00684" 14353 "s59E5H2" 0.2242119 "putative PIN and TRAM-domain containing protein precursor"  
"JS1\_E13\_00684" 14353 "s63E6H2" 0.554415 "putative PIN and TRAM-domain containing protein precursor"  
"JS1\_E13\_00685" 14354 "s59E13H2" 0.1165541 "hypothetical protein"  
"JS1\_E13\_00685" 14354 "s59E25H2" 0 "hypothetical protein"  
"JS1\_E13\_00685" 14354 "s59E5H2" 0.3881471 "hypothetical protein"  
"JS1\_E13\_00685" 14354 "s63E6H2" 0.7572753 "hypothetical protein"

"JS1\_E13\_00686" 14355 "s59E13H2" 0.1236719 "hypothetical protein"  
"JS1\_E13\_00686" 14355 "s59E25H2" 0 "hypothetical protein"  
"JS1\_E13\_00686" 14355 "s59E5H2" 0.487874 "hypothetical protein"  
"JS1\_E13\_00686" 14355 "s63E6H2" 0.6376661 "hypothetical protein"  
"JS1\_E13\_00687" 14356 "s59E13H2" 0.09024589 "Negative regulator of genetic competence ClpC/MecB"  
"JS1\_E13\_00687" 14356 "s59E25H2" 0 "Negative regulator of genetic competence ClpC/MecB"  
"JS1\_E13\_00687" 14356 "s59E5H2" 0.4323461 "Negative regulator of genetic competence ClpC/MecB"  
"JS1\_E13\_00687" 14356 "s63E6H2" 0.1413466 "Negative regulator of genetic competence ClpC/MecB"  
"JS1\_E13\_00688" 14357 "s59E13H2" 0.04770618 "Ribosomal RNA small subunit methyltransferase I"  
"JS1\_E13\_00688" 14357 "s59E25H2" 0 "Ribosomal RNA small subunit methyltransferase I"  
"JS1\_E13\_00688" 14357 "s59E5H2" 0.07069909 "Ribosomal RNA small subunit methyltransferase I"  
"JS1\_E13\_00688" 14357 "s63E6H2" 0.05426536 "Ribosomal RNA small subunit methyltransferase I"  
"JS1\_E13\_00689" 14358 "s59E13H2" 0.07016246 "Release factor glutamine methyltransferase"  
"JS1\_E13\_00689" 14358 "s59E25H2" 0 "Release factor glutamine methyltransferase"  
"JS1\_E13\_00689" 14358 "s59E5H2" 0.1622313 "Release factor glutamine methyltransferase"  
"JS1\_E13\_00689" 14358 "s63E6H2" 0.1072383 "Release factor glutamine methyltransferase"  
"JS1\_E13\_00690" 14359 "s59E13H2" 0.05575706 "hypothetical protein"  
"JS1\_E13\_00690" 14359 "s59E25H2" 0 "hypothetical protein"  
"JS1\_E13\_00690" 14359 "s59E5H2" 0.2902779 "hypothetical protein"  
"JS1\_E13\_00690" 14359 "s63E6H2" 0.09733174 "hypothetical protein"  
"JS1\_E13\_00691" 14360 "s59E13H2" 0.04661903 "DNA polymerase III subunit tau"  
"JS1\_E13\_00691" 14360 "s59E25H2" 0 "DNA polymerase III subunit tau"  
"JS1\_E13\_00691" 14360 "s59E5H2" 0.4254776 "DNA polymerase III subunit tau"  
"JS1\_E13\_00691" 14360 "s63E6H2" 0.07172114 "DNA polymerase III subunit tau"  
"JS1\_E13\_00692" 14361 "s59E13H2" 0.03652998 "Thymidylate kinase"  
"JS1\_E13\_00692" 14361 "s59E25H2" 0 "Thymidylate kinase"  
"JS1\_E13\_00692" 14361 "s59E5H2" 0.730506 "Thymidylate kinase"  
"JS1\_E13\_00692" 14361 "s63E6H2" 0.08737489 "Thymidylate kinase"  
"JS1\_E13\_00693" 14362 "s59E13H2" 0.0228168 "Inosine-5'-monophosphate dehydrogenase"  
"JS1\_E13\_00693" 14362 "s59E25H2" 0 "Inosine-5'-monophosphate dehydrogenase"  
"JS1\_E13\_00693" 14362 "s59E5H2" 0.7804536 "Inosine-5'-monophosphate dehydrogenase"  
"JS1\_E13\_00693" 14362 "s63E6H2" 0.1136814 "Inosine-5'-monophosphate dehydrogenase"  
"JS1\_E13\_00694" 14363 "s59E13H2" 0.02869462 "Tagatose-6-phosphate kinase"  
"JS1\_E13\_00694" 14363 "s59E25H2" 0 "Tagatose-6-phosphate kinase"  
"JS1\_E13\_00694" 14363 "s59E5H2" 0.8457902 "Tagatose-6-phosphate kinase"  
"JS1\_E13\_00694" 14363 "s63E6H2" 0.07642442 "Tagatose-6-phosphate kinase"  
"JS1\_E13\_00695" 14364 "s59E13H2" 0.01634307 "Rhomboid protease GluP"  
"JS1\_E13\_00695" 14364 "s59E25H2" 0 "Rhomboid protease GluP"  
"JS1\_E13\_00695" 14364 "s59E5H2" 0.6477007 "Rhomboid protease GluP"  
"JS1\_E13\_00695" 14364 "s63E6H2" 0.1382025 "Rhomboid protease GluP"  
"JS1\_E13\_00696" 14365 "s59E13H2" 0.04401047 "UDP-N-acetylglucosamine 2-epimerase"  
"JS1\_E13\_00696" 14365 "s59E25H2" 0 "UDP-N-acetylglucosamine 2-epimerase"  
"JS1\_E13\_00696" 14365 "s59E5H2" 1.788902 "UDP-N-acetylglucosamine 2-epimerase"  
"JS1\_E13\_00696" 14365 "s63E6H2" 0.08652336 "UDP-N-acetylglucosamine 2-epimerase"  
"JS1\_E13\_00697" 14366 "s59E13H2" 0.02952994 "tRNA-specific adenosine deaminase"  
"JS1\_E13\_00697" 14366 "s59E25H2" 0 "tRNA-specific adenosine deaminase"  
"JS1\_E13\_00697" 14366 "s59E5H2" 1.481292 "tRNA-specific adenosine deaminase"

"JS1\_E13\_00697" 14366 "s63E6H2" 0.08523328 "tRNA-specific adenosine deaminase"  
"JS1\_E13\_00698" 14367 "s59E13H2" 0.03063773 "Uracil phosphoribosyltransferase"  
"JS1\_E13\_00698" 14367 "s59E25H2" 0 "Uracil phosphoribosyltransferase"  
"JS1\_E13\_00698" 14367 "s59E5H2" 0.4830839 "Uracil phosphoribosyltransferase"  
"JS1\_E13\_00698" 14367 "s63E6H2" 0.1866728 "Uracil phosphoribosyltransferase"  
"JS1\_E13\_00699" 14368 "s59E13H2" 0.04546979 "Putative sugar phosphate isomerase YwIF"  
"JS1\_E13\_00699" 14368 "s59E25H2" 0 "Putative sugar phosphate isomerase YwIF"  
"JS1\_E13\_00699" 14368 "s59E5H2" 0.08656583 "Putative sugar phosphate isomerase YwIF"  
"JS1\_E13\_00699" 14368 "s63E6H2" 0.09906273 "Putative sugar phosphate isomerase YwIF"  
"JS1\_E13\_00700" 14369 "s59E13H2" 0.0637458 "Low molecular weight protein-tyrosine-phosphatase YwIE"  
"JS1\_E13\_00700" 14369 "s59E25H2" 0 "Low molecular weight protein-tyrosine-phosphatase YwIE"  
"JS1\_E13\_00700" 14369 "s59E5H2" 0.4481064 "Low molecular weight protein-tyrosine-phosphatase YwIE"  
"JS1\_E13\_00700" 14369 "s63E6H2" 0.1166645 "Low molecular weight protein-tyrosine-phosphatase YwIE"  
"JS1\_E13\_00701" 14370 "s59E13H2" 0.02932018 "Release factor glutamine methyltransferase"  
"JS1\_E13\_00701" 14370 "s59E25H2" 0 "Release factor glutamine methyltransferase"  
"JS1\_E13\_00701" 14370 "s59E5H2" 0.06522951 "Release factor glutamine methyltransferase"  
"JS1\_E13\_00701" 14370 "s63E6H2" 0.08395337 "Release factor glutamine methyltransferase"  
"JS1\_E13\_00702" 14371 "s59E13H2" 0.3295598 "Peptide chain release factor 1"  
"JS1\_E13\_00702" 14371 "s59E25H2" 0 "Peptide chain release factor 1"  
"JS1\_E13\_00702" 14371 "s59E5H2" 0.06526026 "Peptide chain release factor 1"  
"JS1\_E13\_00702" 14371 "s63E6H2" 0.104054 "Peptide chain release factor 1"  
"JS1\_E13\_00703" 14372 "s59E13H2" 0 "UDP-N-acetylglucosamine 2-epimerase"  
"JS1\_E13\_00703" 14372 "s59E25H2" 0 "UDP-N-acetylglucosamine 2-epimerase"  
"JS1\_E13\_00703" 14372 "s59E5H2" 0 "UDP-N-acetylglucosamine 2-epimerase"  
"JS1\_E13\_00703" 14372 "s63E6H2" 0 "UDP-N-acetylglucosamine 2-epimerase"  
"JS1\_E13\_00704" 14373 "s59E13H2" 0 "hypothetical protein"  
"JS1\_E13\_00704" 14373 "s59E25H2" 0 "hypothetical protein"  
"JS1\_E13\_00704" 14373 "s59E5H2" 0 "hypothetical protein"  
"JS1\_E13\_00704" 14373 "s63E6H2" 0 "hypothetical protein"  
"JS1\_E13\_00705" 14374 "s59E13H2" 0 "putative glycosyl transferase"  
"JS1\_E13\_00705" 14374 "s59E25H2" 0 "putative glycosyl transferase"  
"JS1\_E13\_00705" 14374 "s59E5H2" 0 "putative glycosyl transferase"  
"JS1\_E13\_00705" 14374 "s63E6H2" 0 "putative glycosyl transferase"  
"JS1\_E13\_00706" 14375 "s59E13H2" 0 "Mannosylfructose-phosphate synthase"  
"JS1\_E13\_00706" 14375 "s59E25H2" 0 "Mannosylfructose-phosphate synthase"  
"JS1\_E13\_00706" 14375 "s59E5H2" 0 "Mannosylfructose-phosphate synthase"  
"JS1\_E13\_00706" 14375 "s63E6H2" 0 "Mannosylfructose-phosphate synthase"  
"JS1\_E13\_00707" 14376 "s59E13H2" 0 "D-glycero-alpha-D-manno-heptose 1-phosphate guanylyltransferase"  
"JS1\_E13\_00707" 14376 "s59E25H2" 0 "D-glycero-alpha-D-manno-heptose 1-phosphate guanylyltransferase"  
"JS1\_E13\_00707" 14376 "s59E5H2" 0 "D-glycero-alpha-D-manno-heptose 1-phosphate guanylyltransferase"  
"JS1\_E13\_00707" 14376 "s63E6H2" 0 "D-glycero-alpha-D-manno-heptose 1-phosphate guanylyltransferase"  
"JS1\_E13\_00708" 14377 "s59E13H2" 0 "D-glycero-alpha-D-manno-heptose 7-phosphate kinase"  
"JS1\_E13\_00708" 14377 "s59E25H2" 0 "D-glycero-alpha-D-manno-heptose 7-phosphate kinase"  
"JS1\_E13\_00708" 14377 "s59E5H2" 0 "D-glycero-alpha-D-manno-heptose 7-phosphate kinase"  
"JS1\_E13\_00708" 14377 "s63E6H2" 0 "D-glycero-alpha-D-manno-heptose 7-phosphate kinase"  
"JS1\_E13\_00709" 14378 "s59E13H2" 0 "Phosphoheptose isomerase"  
"JS1\_E13\_00709" 14378 "s59E25H2" 0 "Phosphoheptose isomerase"

"JS1\_E13\_00709" 14378 "s59E5H2" 0 "Phosphoheptose isomerase"  
"JS1\_E13\_00709" 14378 "s63E6H2" 0 "Phosphoheptose isomerase"  
"JS1\_E13\_00710" 14379 "s59E13H2" 0 "D-glycero-alpha-D-manno-heptose-1,7-bisphosphate 7-phosphatase"  
"JS1\_E13\_00710" 14379 "s59E25H2" 0 "D-glycero-alpha-D-manno-heptose-1,7-bisphosphate 7-phosphatase"  
"JS1\_E13\_00710" 14379 "s59E5H2" 0 "D-glycero-alpha-D-manno-heptose-1,7-bisphosphate 7-phosphatase"  
"JS1\_E13\_00710" 14379 "s63E6H2" 0 "D-glycero-alpha-D-manno-heptose-1,7-bisphosphate 7-phosphatase"  
"JS1\_E13\_00711" 14380 "s59E13H2" 0 "Glucose-1-phosphate thymidyltransferase 2"  
"JS1\_E13\_00711" 14380 "s59E25H2" 0 "Glucose-1-phosphate thymidyltransferase 2"  
"JS1\_E13\_00711" 14380 "s59E5H2" 0 "Glucose-1-phosphate thymidyltransferase 2"  
"JS1\_E13\_00711" 14380 "s63E6H2" 0 "Glucose-1-phosphate thymidyltransferase 2"  
"JS1\_E13\_00712" 14381 "s59E13H2" 0 "Demethyldecabamoylnovobiocin O-methyltransferase"  
"JS1\_E13\_00712" 14381 "s59E25H2" 0 "Demethyldecabamoylnovobiocin O-methyltransferase"  
"JS1\_E13\_00712" 14381 "s59E5H2" 0 "Demethyldecabamoylnovobiocin O-methyltransferase"  
"JS1\_E13\_00712" 14381 "s63E6H2" 0 "Demethyldecabamoylnovobiocin O-methyltransferase"  
"JS1\_E13\_00713" 14382 "s59E13H2" 0 "Phosphoheptose isomerase"  
"JS1\_E13\_00713" 14382 "s59E25H2" 0 "Phosphoheptose isomerase"  
"JS1\_E13\_00713" 14382 "s59E5H2" 0 "Phosphoheptose isomerase"  
"JS1\_E13\_00713" 14382 "s63E6H2" 0 "Phosphoheptose isomerase"  
"JS1\_E13\_00714" 14383 "s59E13H2" 0 "hypothetical protein"  
"JS1\_E13\_00714" 14383 "s59E25H2" 0 "hypothetical protein"  
"JS1\_E13\_00714" 14383 "s59E5H2" 0 "hypothetical protein"  
"JS1\_E13\_00714" 14383 "s63E6H2" 0 "hypothetical protein"  
"JS1\_E13\_00715" 14384 "s59E13H2" 0 "D-glycero-alpha-D-manno-heptose-1,7-bisphosphate 7-phosphatase"  
"JS1\_E13\_00715" 14384 "s59E25H2" 0 "D-glycero-alpha-D-manno-heptose-1,7-bisphosphate 7-phosphatase"  
"JS1\_E13\_00715" 14384 "s59E5H2" 0 "D-glycero-alpha-D-manno-heptose-1,7-bisphosphate 7-phosphatase"  
"JS1\_E13\_00715" 14384 "s63E6H2" 0 "D-glycero-alpha-D-manno-heptose-1,7-bisphosphate 7-phosphatase"  
"JS1\_E13\_00716" 14385 "s59E13H2" 0 "GDP-mannose-dependent alpha-(1-6)-phosphatidylinositol monomannoside mannosyltransferase"  
"JS1\_E13\_00716" 14385 "s59E25H2" 0 "GDP-mannose-dependent alpha-(1-6)-phosphatidylinositol monomannoside mannosyltransferase"  
"JS1\_E13\_00716" 14385 "s59E5H2" 0 "GDP-mannose-dependent alpha-(1-6)-phosphatidylinositol monomannoside mannosyltransferase"  
"JS1\_E13\_00716" 14385 "s63E6H2" 0 "GDP-mannose-dependent alpha-(1-6)-phosphatidylinositol monomannoside mannosyltransferase"  
"JS1\_E13\_00717" 14386 "s59E13H2" 0 "UDP-glucose 4-epimerase"  
"JS1\_E13\_00717" 14386 "s59E25H2" 0 "UDP-glucose 4-epimerase"  
"JS1\_E13\_00717" 14386 "s59E5H2" 0.01451336 "UDP-glucose 4-epimerase"  
"JS1\_E13\_00717" 14386 "s63E6H2" 0.004361649 "UDP-glucose 4-epimerase"  
"JS1\_E13\_00718" 14387 "s59E13H2" 0.008840577 "hypothetical protein"  
"JS1\_E13\_00718" 14387 "s59E25H2" 0 "hypothetical protein"  
"JS1\_E13\_00718" 14387 "s59E5H2" 0.01098356 "hypothetical protein"  
"JS1\_E13\_00718" 14387 "s63E6H2" 0 "hypothetical protein"  
"JS1\_E13\_00719" 14388 "s59E13H2" 0.1049682 "mRNA interferase MazF9"  
"JS1\_E13\_00719" 14388 "s59E25H2" 0 "mRNA interferase MazF9"  
"JS1\_E13\_00719" 14388 "s59E5H2" 0.0008666649 "mRNA interferase MazF9"  
"JS1\_E13\_00719" 14388 "s63E6H2" 0.0001720554 "mRNA interferase MazF9"  
"JS1\_E13\_00720" 14389 "s59E13H2" 0.1932618 "hypothetical protein"  
"JS1\_E13\_00720" 14389 "s59E25H2" 0 "hypothetical protein"  
"JS1\_E13\_00720" 14389 "s59E5H2" 0.04621766 "hypothetical protein"  
"JS1\_E13\_00720" 14389 "s63E6H2" 0.0345293 "hypothetical protein"  
"JS1\_E13\_00721" 14390 "s59E13H2" 0 "putative undecaprenyl-phosphate N-acetylglucosaminyl 1-phosphate transferase"

"JS1\_E13\_00721" 14390 "s59E25H2" 0 "putative undecaprenyl-phosphate N-acetylglucosaminyl 1-phosphate transferase"  
"JS1\_E13\_00721" 14390 "s59E5H2" 0 "putative undecaprenyl-phosphate N-acetylglucosaminyl 1-phosphate transferase"  
"JS1\_E13\_00721" 14390 "s63E6H2" 0 "putative undecaprenyl-phosphate N-acetylglucosaminyl 1-phosphate transferase"  
"JS1\_E13\_00722" 14391 "s59E13H2" 0 "hypothetical protein"  
"JS1\_E13\_00722" 14391 "s59E25H2" 0 "hypothetical protein"  
"JS1\_E13\_00722" 14391 "s59E5H2" 0 "hypothetical protein"  
"JS1\_E13\_00722" 14391 "s63E6H2" 0 "hypothetical protein"  
"JS1\_E13\_00723" 14392 "s59E13H2" 0 "Bifunctional AAC/APH"  
"JS1\_E13\_00723" 14392 "s59E25H2" 0 "Bifunctional AAC/APH"  
"JS1\_E13\_00723" 14392 "s59E5H2" 0 "Bifunctional AAC/APH"  
"JS1\_E13\_00723" 14392 "s63E6H2" 0 "Bifunctional AAC/APH"  
"JS1\_E13\_00724" 14393 "s59E13H2" 0 "Phosphoserine phosphatase"  
"JS1\_E13\_00724" 14393 "s59E25H2" 0 "Phosphoserine phosphatase"  
"JS1\_E13\_00724" 14393 "s59E5H2" 0 "Phosphoserine phosphatase"  
"JS1\_E13\_00724" 14393 "s63E6H2" 0 "Phosphoserine phosphatase"  
"JS1\_E13\_00725" 14394 "s59E13H2" 0 "hypothetical protein"  
"JS1\_E13\_00725" 14394 "s59E25H2" 0 "hypothetical protein"  
"JS1\_E13\_00725" 14394 "s59E5H2" 0.467232 "hypothetical protein"  
"JS1\_E13\_00725" 14394 "s63E6H2" 0.01164037 "hypothetical protein"  
"JS1\_E13\_00726" 14395 "s59E13H2" 0 "hypothetical protein"  
"JS1\_E13\_00726" 14395 "s59E25H2" 0 "hypothetical protein"  
"JS1\_E13\_00726" 14395 "s59E5H2" 0.1719202 "hypothetical protein"  
"JS1\_E13\_00726" 14395 "s63E6H2" 0.002168635 "hypothetical protein"  
"JS1\_E13\_00727" 14396 "s59E13H2" 4.362583 "SpoVT / AbrB like domain protein"  
"JS1\_E13\_00727" 14396 "s59E25H2" 0 "SpoVT / AbrB like domain protein"  
"JS1\_E13\_00727" 14396 "s59E5H2" 1.319148 "SpoVT / AbrB like domain protein"  
"JS1\_E13\_00727" 14396 "s63E6H2" 0.02625451 "SpoVT / AbrB like domain protein"  
"JS1\_E13\_00728" 14397 "s59E13H2" 5.407407 "hypothetical protein"  
"JS1\_E13\_00728" 14397 "s59E25H2" 0 "hypothetical protein"  
"JS1\_E13\_00728" 14397 "s59E5H2" 1.14635 "hypothetical protein"  
"JS1\_E13\_00728" 14397 "s63E6H2" 0.0376916 "hypothetical protein"  
"JS1\_E13\_00729" 14398 "s59E13H2" 8.1574 "Undecaprenyl-diphosphatase"  
"JS1\_E13\_00729" 14398 "s59E25H2" 0 "Undecaprenyl-diphosphatase"  
"JS1\_E13\_00729" 14398 "s59E5H2" 1.446973 "Undecaprenyl-diphosphatase"  
"JS1\_E13\_00729" 14398 "s63E6H2" 1.398277 "Undecaprenyl-diphosphatase"  
"JS1\_E13\_00730" 14399 "s59E13H2" 4.383905 "hypothetical protein"  
"JS1\_E13\_00730" 14399 "s59E25H2" 0 "hypothetical protein"  
"JS1\_E13\_00730" 14399 "s59E5H2" 0.9374832 "hypothetical protein"  
"JS1\_E13\_00730" 14399 "s63E6H2" 0.4671517 "hypothetical protein"  
"JS1\_E13\_00731" 14400 "s59E13H2" 5.163592 "Outer membrane protein TolC precursor"  
"JS1\_E13\_00731" 14400 "s59E25H2" 0 "Outer membrane protein TolC precursor"  
"JS1\_E13\_00731" 14400 "s59E5H2" 0.920462 "Outer membrane protein TolC precursor"  
"JS1\_E13\_00731" 14400 "s63E6H2" 0.6481229 "Outer membrane protein TolC precursor"  
"JS1\_E13\_00732" 14401 "s59E13H2" 7.529377 "Macrolide export protein MacA"  
"JS1\_E13\_00732" 14401 "s59E25H2" 0 "Macrolide export protein MacA"  
"JS1\_E13\_00732" 14401 "s59E5H2" 4.121501 "Macrolide export protein MacA"  
"JS1\_E13\_00732" 14401 "s63E6H2" 3.212266 "Macrolide export protein MacA"

"JS1\_E13\_00733" 14402 "s59E13H2" 11.46656 "Swarming motility protein SwrC"  
"JS1\_E13\_00733" 14402 "s59E25H2" 0.1296654 "Swarming motility protein SwrC"  
"JS1\_E13\_00733" 14402 "s59E5H2" 4.770109 "Swarming motility protein SwrC"  
"JS1\_E13\_00733" 14402 "s63E6H2" 5.367837 "Swarming motility protein SwrC"  
"JS1\_E13\_00734" 14403 "s59E13H2" 9.72367 "hypothetical protein"  
"JS1\_E13\_00734" 14403 "s59E25H2" 0 "hypothetical protein"  
"JS1\_E13\_00734" 14403 "s59E5H2" 1.935835 "hypothetical protein"  
"JS1\_E13\_00734" 14403 "s63E6H2" 0.09681992 "hypothetical protein"  
"JS1\_E13\_00735" 14404 "s59E13H2" 0 "DNA-directed RNA polymerase subunit beta"  
"JS1\_E13\_00735" 14404 "s59E25H2" 0 "DNA-directed RNA polymerase subunit beta"  
"JS1\_E13\_00735" 14404 "s59E5H2" 0 "DNA-directed RNA polymerase subunit beta"  
"JS1\_E13\_00735" 14404 "s63E6H2" 0 "DNA-directed RNA polymerase subunit beta"  
"JS1\_E13\_00736" 14405 "s59E13H2" 0.04719642 "DNA-directed RNA polymerase subunit beta"  
"JS1\_E13\_00736" 14405 "s59E25H2" 0 "DNA-directed RNA polymerase subunit beta"  
"JS1\_E13\_00736" 14405 "s59E5H2" 0.1171723 "DNA-directed RNA polymerase subunit beta"  
"JS1\_E13\_00736" 14405 "s63E6H2" 0.06468913 "DNA-directed RNA polymerase subunit beta"  
"JS1\_E13\_00737" 14406 "s59E13H2" 0.1168382 "DNA-directed RNA polymerase subunit beta"  
"JS1\_E13\_00737" 14406 "s59E25H2" 0.1318925 "DNA-directed RNA polymerase subunit beta"  
"JS1\_E13\_00737" 14406 "s59E5H2" 0.1181089 "DNA-directed RNA polymerase subunit beta"  
"JS1\_E13\_00737" 14406 "s63E6H2" 0.1186683 "DNA-directed RNA polymerase subunit beta"  
"JS1\_E13\_00738" 14407 "s59E13H2" 0.02083724 "50S ribosomal protein L7/L12"  
"JS1\_E13\_00738" 14407 "s59E25H2" 0 "50S ribosomal protein L7/L12"  
"JS1\_E13\_00738" 14407 "s59E5H2" 0.05032177 "50S ribosomal protein L7/L12"  
"JS1\_E13\_00738" 14407 "s63E6H2" 0.07763679 "50S ribosomal protein L7/L12"  
"JS1\_E13\_00739" 14408 "s59E13H2" 0.02984628 "50S ribosomal protein L10"  
"JS1\_E13\_00739" 14408 "s59E25H2" 0 "50S ribosomal protein L10"  
"JS1\_E13\_00739" 14408 "s59E5H2" 0.06836992 "50S ribosomal protein L10"  
"JS1\_E13\_00739" 14408 "s63E6H2" 0.09315979 "50S ribosomal protein L10"  
"JS1\_E13\_00741" 14410 "s59E13H2" 0.04065349 "50S ribosomal protein L1"  
"JS1\_E13\_00741" 14410 "s59E25H2" 0 "50S ribosomal protein L1"  
"JS1\_E13\_00741" 14410 "s59E5H2" 0.1582238 "50S ribosomal protein L1"  
"JS1\_E13\_00741" 14410 "s63E6H2" 0.1223536 "50S ribosomal protein L1"  
"JS1\_E13\_00742" 14411 "s59E13H2" 0.201841 "50S ribosomal protein L11"  
"JS1\_E13\_00742" 14411 "s59E25H2" 0 "50S ribosomal protein L11"  
"JS1\_E13\_00742" 14411 "s59E5H2" 0.1070275 "50S ribosomal protein L11"  
"JS1\_E13\_00742" 14411 "s63E6H2" 0.09624135 "50S ribosomal protein L11"  
"JS1\_E13\_00743" 14412 "s59E13H2" 0.01323228 "hypothetical protein"  
"JS1\_E13\_00743" 14412 "s59E25H2" 0 "hypothetical protein"  
"JS1\_E13\_00743" 14412 "s59E5H2" 0.1320823 "hypothetical protein"  
"JS1\_E13\_00743" 14412 "s63E6H2" 0.09020412 "hypothetical protein"  
"JS1\_E13\_00744" 14413 "s59E13H2" 0.09651317 "preprotein translocase subunit SecE"  
"JS1\_E13\_00744" 14413 "s59E25H2" 0 "preprotein translocase subunit SecE"  
"JS1\_E13\_00744" 14413 "s59E5H2" 0.2660821 "preprotein translocase subunit SecE"  
"JS1\_E13\_00744" 14413 "s63E6H2" 0.189698 "preprotein translocase subunit SecE"  
"JS1\_E13\_00746" 14415 "s59E13H2" 0.2838345 "50S ribosomal protein L33"  
"JS1\_E13\_00746" 14415 "s59E25H2" 0 "50S ribosomal protein L33"  
"JS1\_E13\_00746" 14415 "s59E5H2" 0.258415 "50S ribosomal protein L33"



"JS1\_E13\_00746" 14415 "s63E6H2" 0.3917899 "50S ribosomal protein L33"  
"JS1\_E13\_00747" 14416 "s59E13H2" 0 "isoaspartyl dipeptidase"  
"JS1\_E13\_00747" 14416 "s59E25H2" 0 "isoaspartyl dipeptidase"  
"JS1\_E13\_00747" 14416 "s59E5H2" 0 "isoaspartyl dipeptidase"  
"JS1\_E13\_00747" 14416 "s63E6H2" 0.4454018 "isoaspartyl dipeptidase"  
"JS1\_E13\_00749" 14418 "s59E13H2" 0.08248865 "RNA polymerase factor sigma-70"  
"JS1\_E13\_00749" 14418 "s59E25H2" 0 "RNA polymerase factor sigma-70"  
"JS1\_E13\_00749" 14418 "s59E5H2" 0.1428318 "RNA polymerase factor sigma-70"  
"JS1\_E13\_00749" 14418 "s63E6H2" 0.1440067 "RNA polymerase factor sigma-70"  
"JS1\_E13\_00750" 14419 "s59E13H2" 0.2242054 "Sigma-70, region 4"  
"JS1\_E13\_00750" 14419 "s59E25H2" 0 "Sigma-70, region 4"  
"JS1\_E13\_00750" 14419 "s59E5H2" 1.064651 "Sigma-70, region 4"  
"JS1\_E13\_00750" 14419 "s63E6H2" 0.6730469 "Sigma-70, region 4"  
"JS1\_E13\_00751" 14420 "s59E13H2" 1.07409 "hypothetical protein"  
"JS1\_E13\_00751" 14420 "s59E25H2" 0 "hypothetical protein"  
"JS1\_E13\_00751" 14420 "s59E5H2" 0.3064586 "hypothetical protein"  
"JS1\_E13\_00751" 14420 "s63E6H2" 3.197653 "hypothetical protein"  
"JS1\_E13\_00752" 14421 "s59E13H2" 1.152539 "hypothetical protein"  
"JS1\_E13\_00752" 14421 "s59E25H2" 0 "hypothetical protein"  
"JS1\_E13\_00752" 14421 "s59E5H2" 2.075517 "hypothetical protein"  
"JS1\_E13\_00752" 14421 "s63E6H2" 8.469564 "hypothetical protein"  
"JS1\_E13\_00753" 14422 "s59E13H2" 0.1930223 "hypothetical protein"  
"JS1\_E13\_00753" 14422 "s59E25H2" 0 "hypothetical protein"  
"JS1\_E13\_00753" 14422 "s59E5H2" 0.3794652 "hypothetical protein"  
"JS1\_E13\_00753" 14422 "s63E6H2" 0.06178218 "hypothetical protein"  
"JS1\_E13\_00754" 14423 "s59E13H2" 3.449696 "Peptidase M15"  
"JS1\_E13\_00754" 14423 "s59E25H2" 0 "Peptidase M15"  
"JS1\_E13\_00754" 14423 "s59E5H2" 0.812532 "Peptidase M15"  
"JS1\_E13\_00754" 14423 "s63E6H2" 0.4381628 "Peptidase M15"  
"JS1\_E13\_00755" 14424 "s59E13H2" 1.606227 "YvrJ protein family protein"  
"JS1\_E13\_00755" 14424 "s59E25H2" 0 "YvrJ protein family protein"  
"JS1\_E13\_00755" 14424 "s59E5H2" 1.135242 "YvrJ protein family protein"  
"JS1\_E13\_00755" 14424 "s63E6H2" 3.774 "YvrJ protein family protein"  
"JS1\_E13\_00756" 14425 "s59E13H2" 0.4089008 "Inner membrane symporter YicJ"  
"JS1\_E13\_00756" 14425 "s59E25H2" 0 "Inner membrane symporter YicJ"  
"JS1\_E13\_00756" 14425 "s59E5H2" 3.964443 "Inner membrane symporter YicJ"  
"JS1\_E13\_00756" 14425 "s63E6H2" 1.796768 "Inner membrane symporter YicJ"  
"JS1\_E13\_00757" 14426 "s59E13H2" 0.2526562 "Carbon-nitrogen hydrolase"  
"JS1\_E13\_00757" 14426 "s59E25H2" 0 "Carbon-nitrogen hydrolase"  
"JS1\_E13\_00757" 14426 "s59E5H2" 2.39993 "Carbon-nitrogen hydrolase"  
"JS1\_E13\_00757" 14426 "s63E6H2" 0.9766223 "Carbon-nitrogen hydrolase"  
"JS1\_E13\_00758" 14427 "s59E13H2" 0.118794 "Formamidase"  
"JS1\_E13\_00758" 14427 "s59E25H2" 0 "Formamidase"  
"JS1\_E13\_00758" 14427 "s59E5H2" 0.7256326 "Formamidase"  
"JS1\_E13\_00758" 14427 "s63E6H2" 0.6568354 "Formamidase"  
"JS1\_E13\_00759" 14428 "s59E13H2" 0.1666202 "hypothetical protein"  
"JS1\_E13\_00759" 14428 "s59E25H2" 0 "hypothetical protein"

"JS1\_E13\_00759" 14428 "s59E5H2" 0.9572694 "hypothetical protein"  
"JS1\_E13\_00759" 14428 "s63E6H2" 1.664126 "hypothetical protein"  
"JS1\_E13\_00760" 14429 "s59E13H2" 0 "Glucosamine-6-phosphate deaminase"  
"JS1\_E13\_00760" 14429 "s59E25H2" 0 "Glucosamine-6-phosphate deaminase"  
"JS1\_E13\_00760" 14429 "s59E5H2" 0 "Glucosamine-6-phosphate deaminase"  
"JS1\_E13\_00760" 14429 "s63E6H2" 1.165795 "Glucosamine-6-phosphate deaminase"  
"JS1\_E13\_00761" 14430 "s59E13H2" 0.0003357872 "hypothetical protein"  
"JS1\_E13\_00761" 14430 "s59E25H2" 0 "hypothetical protein"  
"JS1\_E13\_00761" 14430 "s59E5H2" 0.2261071 "hypothetical protein"  
"JS1\_E13\_00761" 14430 "s63E6H2" 0.003256263 "hypothetical protein"  
"JS1\_E13\_00762" 14431 "s59E13H2" 1.497714 "hypothetical protein"  
"JS1\_E13\_00762" 14431 "s59E25H2" 0 "hypothetical protein"  
"JS1\_E13\_00762" 14431 "s59E5H2" 0.195781 "hypothetical protein"  
"JS1\_E13\_00762" 14431 "s63E6H2" 0.659005 "hypothetical protein"  
"JS1\_E13\_00763" 14432 "s59E13H2" 0.04931899 "Transposase IS200 like protein"  
"JS1\_E13\_00763" 14432 "s59E25H2" 0 "Transposase IS200 like protein"  
"JS1\_E13\_00763" 14432 "s59E5H2" 0.4032083 "Transposase IS200 like protein"  
"JS1\_E13\_00763" 14432 "s63E6H2" 1.629321 "Transposase IS200 like protein"  
"JS1\_E13\_00764" 14433 "s59E13H2" 0 "ferredoxin"  
"JS1\_E13\_00764" 14433 "s59E25H2" 0 "ferredoxin"  
"JS1\_E13\_00764" 14433 "s59E5H2" 0 "ferredoxin"  
"JS1\_E13\_00764" 14433 "s63E6H2" 0.1081059 "ferredoxin"  
"JS1\_E13\_00765" 14434 "s59E13H2" 0 "hypothetical protein"  
"JS1\_E13\_00765" 14434 "s59E25H2" 0 "hypothetical protein"  
"JS1\_E13\_00765" 14434 "s59E5H2" 0 "hypothetical protein"  
"JS1\_E13\_00765" 14434 "s63E6H2" 0.001039195 "hypothetical protein"  
"JS1\_E13\_00766" 14435 "s59E13H2" 0 "Peptidase family C69"  
"JS1\_E13\_00766" 14435 "s59E25H2" 0 "Peptidase family C69"  
"JS1\_E13\_00766" 14435 "s59E5H2" 0 "Peptidase family C69"  
"JS1\_E13\_00766" 14435 "s63E6H2" 0 "Peptidase family C69"  
"JS1\_E13\_00767" 14436 "s59E13H2" 0 "2-keto-3-deoxy-L-rhamnonate aldolase"  
"JS1\_E13\_00767" 14436 "s59E25H2" 0 "2-keto-3-deoxy-L-rhamnonate aldolase"  
"JS1\_E13\_00767" 14436 "s59E5H2" 0 "2-keto-3-deoxy-L-rhamnonate aldolase"  
"JS1\_E13\_00767" 14436 "s63E6H2" 0.01306451 "2-keto-3-deoxy-L-rhamnonate aldolase"  
"JS1\_E13\_00768" 14437 "s59E13H2" 0.0004976645 "Aspartate aminotransferase"  
"JS1\_E13\_00768" 14437 "s59E25H2" 0 "Aspartate aminotransferase"  
"JS1\_E13\_00768" 14437 "s59E5H2" 0 "Aspartate aminotransferase"  
"JS1\_E13\_00768" 14437 "s63E6H2" 0.02081184 "Aspartate aminotransferase"  
"JS1\_E13\_00769" 14438 "s59E13H2" 0.007227809 "Iron-sulfur flavoprotein"  
"JS1\_E13\_00769" 14438 "s59E25H2" 0 "Iron-sulfur flavoprotein"  
"JS1\_E13\_00769" 14438 "s59E5H2" 0.01282061 "Iron-sulfur flavoprotein"  
"JS1\_E13\_00769" 14438 "s63E6H2" 0.0308887 "Iron-sulfur flavoprotein"  
"JS1\_E13\_00770" 14439 "s59E13H2" 0.009935861 "Tungsten-containing aldehyde ferredoxin oxidoreductase"  
"JS1\_E13\_00770" 14439 "s59E25H2" 0 "Tungsten-containing aldehyde ferredoxin oxidoreductase"  
"JS1\_E13\_00770" 14439 "s59E5H2" 0.005106867 "Tungsten-containing aldehyde ferredoxin oxidoreductase"  
"JS1\_E13\_00770" 14439 "s63E6H2" 0.0246042 "Tungsten-containing aldehyde ferredoxin oxidoreductase"  
"JS1\_E13\_00771" 14440 "s59E13H2" 0.04350843 "hypothetical protein"

"JS1\_E13\_00771" 14440 "s59E25H2" 0 "hypothetical protein"  
"JS1\_E13\_00771" 14440 "s59E5H2" 0.08067356 "hypothetical protein"  
"JS1\_E13\_00771" 14440 "s63E6H2" 0.1989488 "hypothetical protein"  
"JS1\_E13\_00772" 14441 "s59E13H2" 0 "hypothetical protein"  
"JS1\_E13\_00772" 14441 "s59E25H2" 0 "hypothetical protein"  
"JS1\_E13\_00772" 14441 "s59E5H2" 0 "hypothetical protein"  
"JS1\_E13\_00772" 14441 "s63E6H2" 0 "hypothetical protein"  
"JS1\_E13\_00773" 14442 "s59E13H2" 0 "hypothetical protein"  
"JS1\_E13\_00773" 14442 "s59E25H2" 0 "hypothetical protein"  
"JS1\_E13\_00773" 14442 "s59E5H2" 0.001627481 "hypothetical protein"  
"JS1\_E13\_00773" 14442 "s63E6H2" 0.002750267 "hypothetical protein"  
"JS1\_E13\_00774" 14443 "s59E13H2" 0 "hypothetical protein"  
"JS1\_E13\_00774" 14443 "s59E25H2" 0 "hypothetical protein"  
"JS1\_E13\_00774" 14443 "s59E5H2" 0.06313569 "hypothetical protein"  
"JS1\_E13\_00774" 14443 "s63E6H2" 0 "hypothetical protein"  
"JS1\_E13\_00775" 14444 "s59E13H2" 0.8348454 "putative ABC transporter ATP-binding protein YbhF"  
"JS1\_E13\_00775" 14444 "s59E25H2" 0 "putative ABC transporter ATP-binding protein YbhF"  
"JS1\_E13\_00775" 14444 "s59E5H2" 1.237337 "putative ABC transporter ATP-binding protein YbhF"  
"JS1\_E13\_00775" 14444 "s63E6H2" 1.884626 "putative ABC transporter ATP-binding protein YbhF"  
"JS1\_E13\_00776" 14445 "s59E13H2" 1.534363 "ABC-2 type transporter"  
"JS1\_E13\_00776" 14445 "s59E25H2" 0 "ABC-2 type transporter"  
"JS1\_E13\_00776" 14445 "s59E5H2" 1.343879 "ABC-2 type transporter"  
"JS1\_E13\_00776" 14445 "s63E6H2" 1.400921 "ABC-2 type transporter"  
"JS1\_E13\_00777" 14446 "s59E13H2" 0.0573031 "Leucine--tRNA ligase subunit alpha"  
"JS1\_E13\_00777" 14446 "s59E25H2" 0.3477601 "Leucine--tRNA ligase subunit alpha"  
"JS1\_E13\_00777" 14446 "s59E5H2" 0.7146826 "Leucine--tRNA ligase subunit alpha"  
"JS1\_E13\_00777" 14446 "s63E6H2" 0.8626452 "Leucine--tRNA ligase subunit alpha"  
"JS1\_E13\_00780" 14449 "s59E13H2" 0.1209297 "hypothetical protein"  
"JS1\_E13\_00780" 14449 "s59E25H2" 0 "hypothetical protein"  
"JS1\_E13\_00780" 14449 "s59E5H2" 0.747464 "hypothetical protein"  
"JS1\_E13\_00780" 14449 "s63E6H2" 1.129228 "hypothetical protein"  
"JS1\_E13\_00782" 14451 "s59E13H2" 0.1504793 "Elongation factor G"  
"JS1\_E13\_00782" 14451 "s59E25H2" 0.2366667 "Elongation factor G"  
"JS1\_E13\_00782" 14451 "s59E5H2" 1.042731 "Elongation factor G"  
"JS1\_E13\_00782" 14451 "s63E6H2" 1.210491 "Elongation factor G"  
"JS1\_E13\_00783" 14452 "s59E13H2" 0.1598498 "Lipoyl synthase"  
"JS1\_E13\_00783" 14452 "s59E25H2" 0 "Lipoyl synthase"  
"JS1\_E13\_00783" 14452 "s59E5H2" 0.9130545 "Lipoyl synthase"  
"JS1\_E13\_00783" 14452 "s63E6H2" 0.8627877 "Lipoyl synthase"  
"JS1\_E13\_00784" 14453 "s59E13H2" 0.5105052 "Inosose isomerase"  
"JS1\_E13\_00784" 14453 "s59E25H2" 0 "Inosose isomerase"  
"JS1\_E13\_00784" 14453 "s59E5H2" 1.428747 "Inosose isomerase"  
"JS1\_E13\_00784" 14453 "s63E6H2" 1.111658 "Inosose isomerase"  
"JS1\_E13\_00785" 14454 "s59E13H2" 0.5109584 "Thioredoxin reductase"  
"JS1\_E13\_00785" 14454 "s59E25H2" 0 "Thioredoxin reductase"  
"JS1\_E13\_00785" 14454 "s59E5H2" 0.5543862 "Thioredoxin reductase"  
"JS1\_E13\_00785" 14454 "s63E6H2" 0.6604584 "Thioredoxin reductase"

"JS1\_E13\_00786" 14455 "s59E13H2" 0.2126681 "Na(+)/H(+) antiporter subunit B"  
"JS1\_E13\_00786" 14455 "s59E25H2" 0 "Na(+)/H(+) antiporter subunit B"  
"JS1\_E13\_00786" 14455 "s59E5H2" 1.785954 "Na(+)/H(+) antiporter subunit B"  
"JS1\_E13\_00786" 14455 "s63E6H2" 0.7595687 "Na(+)/H(+) antiporter subunit B"  
"JS1\_E13\_00787" 14456 "s59E13H2" 0.3639578 "putative monovalent cation/H+ antiporter subunit B"  
"JS1\_E13\_00787" 14456 "s59E25H2" 0 "putative monovalent cation/H+ antiporter subunit B"  
"JS1\_E13\_00787" 14456 "s59E5H2" 2.575444 "putative monovalent cation/H+ antiporter subunit B"  
"JS1\_E13\_00787" 14456 "s63E6H2" 1.213269 "putative monovalent cation/H+ antiporter subunit B"  
"JS1\_E13\_00788" 14457 "s59E13H2" 1.457886 "Glutamine-binding periplasmic protein precursor"  
"JS1\_E13\_00788" 14457 "s59E25H2" 0 "Glutamine-binding periplasmic protein precursor"  
"JS1\_E13\_00788" 14457 "s59E5H2" 2.7328 "Glutamine-binding periplasmic protein precursor"  
"JS1\_E13\_00788" 14457 "s63E6H2" 1.796413 "Glutamine-binding periplasmic protein precursor"  
"JS1\_E13\_00789" 14458 "s59E13H2" 1.694659 "Na(+)/H(+) antiporter subunit G"  
"JS1\_E13\_00789" 14458 "s59E25H2" 0 "Na(+)/H(+) antiporter subunit G"  
"JS1\_E13\_00789" 14458 "s59E5H2" 2.406542 "Na(+)/H(+) antiporter subunit G"  
"JS1\_E13\_00789" 14458 "s63E6H2" 1.690493 "Na(+)/H(+) antiporter subunit G"  
"JS1\_E13\_00790" 14459 "s59E13H2" 1.6342 "putative monovalent cation/H+ antiporter subunit F"  
"JS1\_E13\_00790" 14459 "s59E25H2" 0 "putative monovalent cation/H+ antiporter subunit F"  
"JS1\_E13\_00790" 14459 "s59E5H2" 2.691026 "putative monovalent cation/H+ antiporter subunit F"  
"JS1\_E13\_00790" 14459 "s63E6H2" 1.412695 "putative monovalent cation/H+ antiporter subunit F"  
"JS1\_E13\_00791" 14460 "s59E13H2" 1.52956 "Na(+)/H(+) antiporter subunit E1"  
"JS1\_E13\_00791" 14460 "s59E25H2" 0 "Na(+)/H(+) antiporter subunit E1"  
"JS1\_E13\_00791" 14460 "s59E5H2" 1.556424 "Na(+)/H(+) antiporter subunit E1"  
"JS1\_E13\_00791" 14460 "s63E6H2" 1.100742 "Na(+)/H(+) antiporter subunit E1"  
"JS1\_E13\_00792" 14461 "s59E13H2" 0.2345076 "hypothetical protein"  
"JS1\_E13\_00792" 14461 "s59E25H2" 0 "hypothetical protein"  
"JS1\_E13\_00792" 14461 "s59E5H2" 0.0504365 "hypothetical protein"  
"JS1\_E13\_00792" 14461 "s63E6H2" 0.1345667 "hypothetical protein"  
"JS1\_E13\_00793" 14462 "s59E13H2" 2.065999 "Pyruvate formate-lyase 1-activating enzyme"  
"JS1\_E13\_00793" 14462 "s59E25H2" 0 "Pyruvate formate-lyase 1-activating enzyme"  
"JS1\_E13\_00793" 14462 "s59E5H2" 0.5983249 "Pyruvate formate-lyase 1-activating enzyme"  
"JS1\_E13\_00793" 14462 "s63E6H2" 0.8925785 "Pyruvate formate-lyase 1-activating enzyme"  
"JS1\_E13\_00794" 14463 "s59E13H2" 1.504091 "hypothetical protein"  
"JS1\_E13\_00794" 14463 "s59E25H2" 0 "hypothetical protein"  
"JS1\_E13\_00794" 14463 "s59E5H2" 7.311708 "hypothetical protein"  
"JS1\_E13\_00794" 14463 "s63E6H2" 0.4665536 "hypothetical protein"  
"JS1\_E13\_00795" 14464 "s59E13H2" 1.045135 "Hydrogenase expression/formation protein HypE"  
"JS1\_E13\_00795" 14464 "s59E25H2" 0 "Hydrogenase expression/formation protein HypE"  
"JS1\_E13\_00795" 14464 "s59E5H2" 0.07297685 "Hydrogenase expression/formation protein HypE"  
"JS1\_E13\_00795" 14464 "s63E6H2" 0.574093 "Hydrogenase expression/formation protein HypE"  
"JS1\_E13\_00796" 14465 "s59E13H2" 1.494272 "Hydrogenase expression/formation protein HypD"  
"JS1\_E13\_00796" 14465 "s59E25H2" 0 "Hydrogenase expression/formation protein HypD"  
"JS1\_E13\_00796" 14465 "s59E5H2" 0.6638367 "Hydrogenase expression/formation protein HypD"  
"JS1\_E13\_00796" 14465 "s63E6H2" 0.9998079 "Hydrogenase expression/formation protein HypD"  
"JS1\_E13\_00797" 14466 "s59E13H2" 1.355128 "Hydrogenase isoenzymes formation protein HypD"  
"JS1\_E13\_00797" 14466 "s59E25H2" 0 "Hydrogenase isoenzymes formation protein HypD"  
"JS1\_E13\_00797" 14466 "s59E5H2" 1.131747 "Hydrogenase isoenzymes formation protein HypD"

"JS1\_E13\_00797" 14466 "s63E6H2" 0.9910543 "Hydrogenase isoenzymes formation protein HypD"  
"JS1\_E13\_00798" 14467 "s59E13H2" 0.9627377 "Hydrogenase isoenzymes formation protein HypC"  
"JS1\_E13\_00798" 14467 "s59E25H2" 0 "Hydrogenase isoenzymes formation protein HypC"  
"JS1\_E13\_00798" 14467 "s59E5H2" 0.3986885 "Hydrogenase isoenzymes formation protein HypC"  
"JS1\_E13\_00798" 14467 "s63E6H2" 0.7972594 "Hydrogenase isoenzymes formation protein HypC"  
"JS1\_E13\_00799" 14468 "s59E13H2" 0.9093057 "Carbamoyltransferase HypF"  
"JS1\_E13\_00799" 14468 "s59E25H2" 0 "Carbamoyltransferase HypF"  
"JS1\_E13\_00799" 14468 "s59E5H2" 0.4305888 "Carbamoyltransferase HypF"  
"JS1\_E13\_00799" 14468 "s63E6H2" 0.5415779 "Carbamoyltransferase HypF"  
"JS1\_E13\_00800" 14469 "s59E13H2" 0.03582812 "Phenylalanine--tRNA ligase alpha subunit"  
"JS1\_E13\_00800" 14469 "s59E25H2" 0 "Phenylalanine--tRNA ligase alpha subunit"  
"JS1\_E13\_00800" 14469 "s59E5H2" 0.1016889 "Phenylalanine--tRNA ligase alpha subunit"  
"JS1\_E13\_00800" 14469 "s63E6H2" 0.4700244 "Phenylalanine--tRNA ligase alpha subunit"  
"JS1\_E13\_00802" 14471 "s59E13H2" 0.2820619 "50S ribosomal protein L20"  
"JS1\_E13\_00802" 14471 "s59E25H2" 0 "50S ribosomal protein L20"  
"JS1\_E13\_00802" 14471 "s59E5H2" 0.2815937 "50S ribosomal protein L20"  
"JS1\_E13\_00802" 14471 "s63E6H2" 0.388734 "50S ribosomal protein L20"  
"JS1\_E13\_00803" 14472 "s59E13H2" 0.02950857 "50S ribosomal protein L35"  
"JS1\_E13\_00803" 14472 "s59E25H2" 0 "50S ribosomal protein L35"  
"JS1\_E13\_00803" 14472 "s59E5H2" 0.3054028 "50S ribosomal protein L35"  
"JS1\_E13\_00803" 14472 "s63E6H2" 0.3163994 "50S ribosomal protein L35"  
"JS1\_E13\_00804" 14473 "s59E13H2" 0.07507191 "Translation initiation factor IF-3"  
"JS1\_E13\_00804" 14473 "s59E25H2" 0 "Translation initiation factor IF-3"  
"JS1\_E13\_00804" 14473 "s59E5H2" 0.2855949 "Translation initiation factor IF-3"  
"JS1\_E13\_00804" 14473 "s63E6H2" 0.2916072 "Translation initiation factor IF-3"  
"JS1\_E13\_00805" 14474 "s59E13H2" 0.08704666 "Threonine--tRNA ligase 2"  
"JS1\_E13\_00805" 14474 "s59E25H2" 0 "Threonine--tRNA ligase 2"  
"JS1\_E13\_00805" 14474 "s59E5H2" 0.1753984 "Threonine--tRNA ligase 2"  
"JS1\_E13\_00805" 14474 "s63E6H2" 0.2341575 "Threonine--tRNA ligase 2"  
"JS1\_E13\_00813" 14482 "s59E13H2" 0.04851798 "Single-stranded DNA-binding protein ssb"  
"JS1\_E13\_00813" 14482 "s59E25H2" 0 "Single-stranded DNA-binding protein ssb"  
"JS1\_E13\_00813" 14482 "s59E5H2" 0.3624247 "Single-stranded DNA-binding protein ssb"  
"JS1\_E13\_00813" 14482 "s63E6H2" 0.2329306 "Single-stranded DNA-binding protein ssb"  
"JS1\_E13\_00814" 14483 "s59E13H2" 0.005138366 "Leucine--tRNA ligase"  
"JS1\_E13\_00814" 14483 "s59E25H2" 0 "Leucine--tRNA ligase"  
"JS1\_E13\_00814" 14483 "s59E5H2" 0.8827069 "Leucine--tRNA ligase"  
"JS1\_E13\_00814" 14483 "s63E6H2" 0.1266354 "Leucine--tRNA ligase"  
"JS1\_E13\_00815" 14484 "s59E13H2" 0.03963041 "30S ribosomal protein S3"  
"JS1\_E13\_00815" 14484 "s59E25H2" 0 "30S ribosomal protein S3"  
"JS1\_E13\_00815" 14484 "s59E5H2" 0.02778732 "30S ribosomal protein S3"  
"JS1\_E13\_00815" 14484 "s63E6H2" 0.1229921 "30S ribosomal protein S3"  
"JS1\_E13\_00816" 14485 "s59E13H2" 0.02986136 "50S ribosomal protein L16"  
"JS1\_E13\_00816" 14485 "s59E25H2" 0 "50S ribosomal protein L16"  
"JS1\_E13\_00816" 14485 "s59E5H2" 0.1978751 "50S ribosomal protein L16"  
"JS1\_E13\_00816" 14485 "s63E6H2" 0.2348072 "50S ribosomal protein L16"  
"JS1\_E13\_00817" 14486 "s59E13H2" 0.04616901 "50S ribosomal protein L29"  
"JS1\_E13\_00817" 14486 "s59E25H2" 0 "50S ribosomal protein L29"

"JS1\_E13\_00817" 14486 "s59E5H2" 0.05701518 "50S ribosomal protein L29"  
"JS1\_E13\_00817" 14486 "s63E6H2" 0.1752715 "50S ribosomal protein L29"  
"JS1\_E13\_00818" 14487 "s59E13H2" 0.02496465 "30S ribosomal protein S17"  
"JS1\_E13\_00818" 14487 "s59E25H2" 0 "30S ribosomal protein S17"  
"JS1\_E13\_00818" 14487 "s59E5H2" 0.06151661 "30S ribosomal protein S17"  
"JS1\_E13\_00818" 14487 "s63E6H2" 0.1245076 "30S ribosomal protein S17"  
"JS1\_E13\_00819" 14488 "s59E13H2" 0.03719074 "50S ribosomal protein L14"  
"JS1\_E13\_00819" 14488 "s59E25H2" 0 "50S ribosomal protein L14"  
"JS1\_E13\_00819" 14488 "s59E5H2" 0.1109339 "50S ribosomal protein L14"  
"JS1\_E13\_00819" 14488 "s63E6H2" 0.1548159 "50S ribosomal protein L14"  
"JS1\_E13\_00820" 14489 "s59E13H2" 0.1238221 "50S ribosomal protein L24"  
"JS1\_E13\_00820" 14489 "s59E25H2" 0 "50S ribosomal protein L24"  
"JS1\_E13\_00820" 14489 "s59E5H2" 0.1517963 "50S ribosomal protein L24"  
"JS1\_E13\_00820" 14489 "s63E6H2" 0.2564438 "50S ribosomal protein L24"  
"JS1\_E13\_00821" 14490 "s59E13H2" 0.1578662 "50S ribosomal protein L5"  
"JS1\_E13\_00821" 14490 "s59E25H2" 0 "50S ribosomal protein L5"  
"JS1\_E13\_00821" 14490 "s59E5H2" 0.1325759 "50S ribosomal protein L5"  
"JS1\_E13\_00821" 14490 "s63E6H2" 0.1731697 "50S ribosomal protein L5"  
"JS1\_E13\_00822" 14491 "s59E13H2" 0.2513736 "30S ribosomal protein S14 type Z"  
"JS1\_E13\_00822" 14491 "s59E25H2" 0 "30S ribosomal protein S14 type Z"  
"JS1\_E13\_00822" 14491 "s59E5H2" 0.06109906 "30S ribosomal protein S14 type Z"  
"JS1\_E13\_00822" 14491 "s63E6H2" 0.1620163 "30S ribosomal protein S14 type Z"  
"JS1\_E13\_00823" 14492 "s59E13H2" 0.1347711 "30S ribosomal protein S8"  
"JS1\_E13\_00823" 14492 "s59E25H2" 0 "30S ribosomal protein S8"  
"JS1\_E13\_00823" 14492 "s59E5H2" 0.08028668 "30S ribosomal protein S8"  
"JS1\_E13\_00823" 14492 "s63E6H2" 0.1789505 "30S ribosomal protein S8"  
"JS1\_E13\_00824" 14493 "s59E13H2" 0.4176833 "50S ribosomal protein L6"  
"JS1\_E13\_00824" 14493 "s59E25H2" 0 "50S ribosomal protein L6"  
"JS1\_E13\_00824" 14493 "s59E5H2" 0.03665653 "50S ribosomal protein L6"  
"JS1\_E13\_00824" 14493 "s63E6H2" 0.1997947 "50S ribosomal protein L6"  
"JS1\_E13\_00825" 14494 "s59E13H2" 0.2109293 "50S ribosomal protein L18"  
"JS1\_E13\_00825" 14494 "s59E25H2" 0 "50S ribosomal protein L18"  
"JS1\_E13\_00825" 14494 "s59E5H2" 0.00753004 "50S ribosomal protein L18"  
"JS1\_E13\_00825" 14494 "s63E6H2" 0.1111547 "50S ribosomal protein L18"  
"JS1\_E13\_00826" 14495 "s59E13H2" 0.09147309 "30S ribosomal protein S5"  
"JS1\_E13\_00826" 14495 "s59E25H2" 0 "30S ribosomal protein S5"  
"JS1\_E13\_00826" 14495 "s59E5H2" 0.08774638 "30S ribosomal protein S5"  
"JS1\_E13\_00826" 14495 "s63E6H2" 0.1445259 "30S ribosomal protein S5"  
"JS1\_E13\_00827" 14496 "s59E13H2" 0.1677702 "50S ribosomal protein L15"  
"JS1\_E13\_00827" 14496 "s59E25H2" 0 "50S ribosomal protein L15"  
"JS1\_E13\_00827" 14496 "s59E5H2" 0.1276352 "50S ribosomal protein L15"  
"JS1\_E13\_00827" 14496 "s63E6H2" 0.2843757 "50S ribosomal protein L15"  
"JS1\_E13\_00828" 14497 "s59E13H2" 0.4736161 "preprotein translocase subunit SecY"  
"JS1\_E13\_00828" 14497 "s59E25H2" 0 "preprotein translocase subunit SecY"  
"JS1\_E13\_00828" 14497 "s59E5H2" 0.137244 "preprotein translocase subunit SecY"  
"JS1\_E13\_00828" 14497 "s63E6H2" 0.8024902 "preprotein translocase subunit SecY"  
"JS1\_E13\_00829" 14498 "s59E13H2" 0.1128758 "Adenylate kinase"

"JS1\_E13\_00829" 14498 "s59E25H2" 0 "Adenylate kinase"  
"JS1\_E13\_00829" 14498 "s59E5H2" 0.02263954 "Adenylate kinase"  
"JS1\_E13\_00829" 14498 "s63E6H2" 0.6525531 "Adenylate kinase"  
"JS1\_E13\_00830" 14499 "s59E13H2" 0.2144128 "30S ribosomal protein S13"  
"JS1\_E13\_00830" 14499 "s59E25H2" 0 "30S ribosomal protein S13"  
"JS1\_E13\_00830" 14499 "s59E5H2" 0.1077435 "30S ribosomal protein S13"  
"JS1\_E13\_00830" 14499 "s63E6H2" 0.9044333 "30S ribosomal protein S13"  
"JS1\_E13\_00831" 14500 "s59E13H2" 0.1601396 "Translation initiation factor IF-1"  
"JS1\_E13\_00831" 14500 "s59E25H2" 0 "Translation initiation factor IF-1"  
"JS1\_E13\_00831" 14500 "s59E5H2" 0.07805649 "Translation initiation factor IF-1"  
"JS1\_E13\_00831" 14500 "s63E6H2" 0.7166807 "Translation initiation factor IF-1"  
"JS1\_E13\_00832" 14501 "s59E13H2" 0.1362541 "methionine aminopeptidase"  
"JS1\_E13\_00832" 14501 "s59E25H2" 0 "methionine aminopeptidase"  
"JS1\_E13\_00832" 14501 "s59E5H2" 0.01621173 "methionine aminopeptidase"  
"JS1\_E13\_00832" 14501 "s63E6H2" 0.8612327 "methionine aminopeptidase"  
"JS1\_E13\_00833" 14502 "s59E13H2" 0.1000496 "hypothetical protein"  
"JS1\_E13\_00833" 14502 "s59E25H2" 0 "hypothetical protein"  
"JS1\_E13\_00833" 14502 "s59E5H2" 0.00129224 "hypothetical protein"  
"JS1\_E13\_00833" 14502 "s63E6H2" 0.6033915 "hypothetical protein"  
"JS1\_E13\_00834" 14503 "s59E13H2" 1.074438 "Phenylalanine--tRNA ligase beta subunit"  
"JS1\_E13\_00834" 14503 "s59E25H2" 0 "Phenylalanine--tRNA ligase beta subunit"  
"JS1\_E13\_00834" 14503 "s59E5H2" 0.4504181 "Phenylalanine--tRNA ligase beta subunit"  
"JS1\_E13\_00834" 14503 "s63E6H2" 0.3389643 "Phenylalanine--tRNA ligase beta subunit"  
"JS1\_E13\_00835" 14504 "s59E13H2" 1.104828 "colicin V production protein"  
"JS1\_E13\_00835" 14504 "s59E25H2" 0 "colicin V production protein"  
"JS1\_E13\_00835" 14504 "s59E5H2" 0.4026192 "colicin V production protein"  
"JS1\_E13\_00835" 14504 "s63E6H2" 0.5274463 "colicin V production protein"  
"JS1\_E13\_00836" 14505 "s59E13H2" 1.345952 "Endonuclease MutS2"  
"JS1\_E13\_00836" 14505 "s59E25H2" 0 "Endonuclease MutS2"  
"JS1\_E13\_00836" 14505 "s59E5H2" 0.4494671 "Endonuclease MutS2"  
"JS1\_E13\_00836" 14505 "s63E6H2" 0.7706739 "Endonuclease MutS2"  
"JS1\_E13\_00837" 14506 "s59E13H2" 0.9776747 "Penicillin-binding protein 2D"  
"JS1\_E13\_00837" 14506 "s59E25H2" 0 "Penicillin-binding protein 2D"  
"JS1\_E13\_00837" 14506 "s59E5H2" 0.3800775 "Penicillin-binding protein 2D"  
"JS1\_E13\_00837" 14506 "s63E6H2" 0.9703855 "Penicillin-binding protein 2D"  
"JS1\_E13\_00838" 14507 "s59E13H2" 0.954878 "Queuosine precursor transporter QueT"  
"JS1\_E13\_00838" 14507 "s59E25H2" 0 "Queuosine precursor transporter QueT"  
"JS1\_E13\_00838" 14507 "s59E5H2" 0.4100737 "Queuosine precursor transporter QueT"  
"JS1\_E13\_00838" 14507 "s63E6H2" 0.7496232 "Queuosine precursor transporter QueT"  
"JS1\_E13\_00839" 14508 "s59E13H2" 1.176606 "Tyrosine--tRNA ligase"  
"JS1\_E13\_00839" 14508 "s59E25H2" 0 "Tyrosine--tRNA ligase"  
"JS1\_E13\_00839" 14508 "s59E5H2" 0.8415363 "Tyrosine--tRNA ligase"  
"JS1\_E13\_00839" 14508 "s63E6H2" 1.225039 "Tyrosine--tRNA ligase"  
"JS1\_E13\_00840" 14509 "s59E13H2" 0.1089216 "Outer membrane efflux protein"  
"JS1\_E13\_00840" 14509 "s59E25H2" 0 "Outer membrane efflux protein"  
"JS1\_E13\_00840" 14509 "s59E5H2" 1.642291 "Outer membrane efflux protein"  
"JS1\_E13\_00840" 14509 "s63E6H2" 0.08688498 "Outer membrane efflux protein"

"JS1\_E13\_00841" 14510 "s59E13H2" 0.03915049 "putative DMT superfamily transporter inner membrane protein"  
"JS1\_E13\_00841" 14510 "s59E25H2" 0 "putative DMT superfamily transporter inner membrane protein"  
"JS1\_E13\_00841" 14510 "s59E5H2" 2.632629 "putative DMT superfamily transporter inner membrane protein"  
"JS1\_E13\_00841" 14510 "s63E6H2" 0.1095428 "putative DMT superfamily transporter inner membrane protein"  
"JS1\_E13\_00842" 14511 "s59E13H2" 0.7358862 "hypothetical protein"  
"JS1\_E13\_00842" 14511 "s59E25H2" 0 "hypothetical protein"  
"JS1\_E13\_00842" 14511 "s59E5H2" 2.36373 "hypothetical protein"  
"JS1\_E13\_00842" 14511 "s63E6H2" 0.1693981 "hypothetical protein"  
"JS1\_E13\_00843" 14512 "s59E13H2" 0.6457648 "hypothetical protein"  
"JS1\_E13\_00843" 14512 "s59E25H2" 0 "hypothetical protein"  
"JS1\_E13\_00843" 14512 "s59E5H2" 1.249099 "hypothetical protein"  
"JS1\_E13\_00843" 14512 "s63E6H2" 0.1064897 "hypothetical protein"  
"JS1\_E13\_00844" 14513 "s59E13H2" 1.203525 "Threonine synthase"  
"JS1\_E13\_00844" 14513 "s59E25H2" 0 "Threonine synthase"  
"JS1\_E13\_00844" 14513 "s59E5H2" 1.830154 "Threonine synthase"  
"JS1\_E13\_00844" 14513 "s63E6H2" 0.04128373 "Threonine synthase"  
"JS1\_E13\_00845" 14514 "s59E13H2" 1.296839 "hypothetical protein"  
"JS1\_E13\_00845" 14514 "s59E25H2" 0 "hypothetical protein"  
"JS1\_E13\_00845" 14514 "s59E5H2" 1.227961 "hypothetical protein"  
"JS1\_E13\_00845" 14514 "s63E6H2" 0.06971698 "hypothetical protein"  
"JS1\_E13\_00847" 14516 "s59E13H2" 1.235038 "Iron-sulfur flavoprotein"  
"JS1\_E13\_00847" 14516 "s59E25H2" 0 "Iron-sulfur flavoprotein"  
"JS1\_E13\_00847" 14516 "s59E5H2" 0.2509816 "Iron-sulfur flavoprotein"  
"JS1\_E13\_00847" 14516 "s63E6H2" 0.6525404 "Iron-sulfur flavoprotein"  
"JS1\_E13\_00848" 14517 "s59E13H2" 0.1056143 "PEGA domain protein"  
"JS1\_E13\_00848" 14517 "s59E25H2" 0 "PEGA domain protein"  
"JS1\_E13\_00848" 14517 "s59E5H2" 0.6079803 "PEGA domain protein"  
"JS1\_E13\_00848" 14517 "s63E6H2" 0.8271524 "PEGA domain protein"  
"JS1\_E13\_00849" 14518 "s59E13H2" 0.01696224 "AI-2 transport protein TqsA"  
"JS1\_E13\_00849" 14518 "s59E25H2" 0 "AI-2 transport protein TqsA"  
"JS1\_E13\_00849" 14518 "s59E5H2" 0.4734922 "AI-2 transport protein TqsA"  
"JS1\_E13\_00849" 14518 "s63E6H2" 0.4502903 "AI-2 transport protein TqsA"  
"JS1\_E13\_00850" 14519 "s59E13H2" 0.720361 "Glutamine--tRNA ligase"  
"JS1\_E13\_00850" 14519 "s59E25H2" 0.2928404 "Glutamine--tRNA ligase"  
"JS1\_E13\_00850" 14519 "s59E5H2" 0.595001 "Glutamine--tRNA ligase"  
"JS1\_E13\_00850" 14519 "s63E6H2" 0.2353941 "Glutamine--tRNA ligase"  
"JS1\_E13\_00851" 14520 "s59E13H2" 0.05981984 "2-keto-3-deoxy-L-rhamnonate aldolase"  
"JS1\_E13\_00851" 14520 "s59E25H2" 0 "2-keto-3-deoxy-L-rhamnonate aldolase"  
"JS1\_E13\_00851" 14520 "s59E5H2" 0.1948862 "2-keto-3-deoxy-L-rhamnonate aldolase"  
"JS1\_E13\_00851" 14520 "s63E6H2" 0.2189687 "2-keto-3-deoxy-L-rhamnonate aldolase"  
"JS1\_E13\_00852" 14521 "s59E13H2" 0.001863492 "hypothetical protein"  
"JS1\_E13\_00852" 14521 "s59E25H2" 0 "hypothetical protein"  
"JS1\_E13\_00852" 14521 "s59E5H2" 0.005555422 "hypothetical protein"  
"JS1\_E13\_00852" 14521 "s63E6H2" 0 "hypothetical protein"  
"JS1\_E13\_00853" 14522 "s59E13H2" 0.6061945 "tetratricopeptide repeat protein"  
"JS1\_E13\_00853" 14522 "s59E25H2" 0 "tetratricopeptide repeat protein"  
"JS1\_E13\_00853" 14522 "s59E5H2" 0.07948471 "tetratricopeptide repeat protein"



"JS1\_E13\_00853" 14522 "s63E6H2" 2.41052 "tetratricopeptide repeat protein"  
"JS1\_E13\_00854" 14523 "s59E13H2" 0.06861598 "hypothetical protein"  
"JS1\_E13\_00854" 14523 "s59E25H2" 0 "hypothetical protein"  
"JS1\_E13\_00854" 14523 "s59E5H2" 0.03067085 "hypothetical protein"  
"JS1\_E13\_00854" 14523 "s63E6H2" 0.9540925 "hypothetical protein"  
"JS1\_E13\_00855" 14524 "s59E13H2" 0.02270451 "hypothetical protein"  
"JS1\_E13\_00855" 14524 "s59E25H2" 0 "hypothetical protein"  
"JS1\_E13\_00855" 14524 "s59E5H2" 0.006250607 "hypothetical protein"  
"JS1\_E13\_00855" 14524 "s63E6H2" 1.315209 "hypothetical protein"  
"JS1\_E13\_00856" 14525 "s59E13H2" 0.1053128 "PEGA domain protein"  
"JS1\_E13\_00856" 14525 "s59E25H2" 0 "PEGA domain protein"  
"JS1\_E13\_00856" 14525 "s59E5H2" 0.475349 "PEGA domain protein"  
"JS1\_E13\_00856" 14525 "s63E6H2" 0.8591556 "PEGA domain protein"  
"JS1\_E13\_00857" 14526 "s59E13H2" 2.435864 "23S rRNA (uridine(2479)-2'-O)-methyltransferase"  
"JS1\_E13\_00857" 14526 "s59E25H2" 0 "23S rRNA (uridine(2479)-2'-O)-methyltransferase"  
"JS1\_E13\_00857" 14526 "s59E5H2" 0.5433405 "23S rRNA (uridine(2479)-2'-O)-methyltransferase"  
"JS1\_E13\_00857" 14526 "s63E6H2" 0.2928191 "23S rRNA (uridine(2479)-2'-O)-methyltransferase"  
"JS1\_E13\_00858" 14527 "s59E13H2" 3.276575 "Demethylrebeccamycin-D-glucose O-methyltransferase"  
"JS1\_E13\_00858" 14527 "s59E25H2" 0 "Demethylrebeccamycin-D-glucose O-methyltransferase"  
"JS1\_E13\_00858" 14527 "s59E5H2" 0.1666206 "Demethylrebeccamycin-D-glucose O-methyltransferase"  
"JS1\_E13\_00858" 14527 "s63E6H2" 0.0443563 "Demethylrebeccamycin-D-glucose O-methyltransferase"  
"JS1\_E13\_00859" 14528 "s59E13H2" 3.989782 "hypothetical protein"  
"JS1\_E13\_00859" 14528 "s59E25H2" 0 "hypothetical protein"  
"JS1\_E13\_00859" 14528 "s59E5H2" 0.2463018 "hypothetical protein"  
"JS1\_E13\_00859" 14528 "s63E6H2" 0.02596612 "hypothetical protein"  
"JS1\_E13\_00860" 14529 "s59E13H2" 2.40689 "Radical SAM superfamily protein"  
"JS1\_E13\_00860" 14529 "s59E25H2" 0 "Radical SAM superfamily protein"  
"JS1\_E13\_00860" 14529 "s59E5H2" 0.2019637 "Radical SAM superfamily protein"  
"JS1\_E13\_00860" 14529 "s63E6H2" 0.2949977 "Radical SAM superfamily protein"  
"JS1\_E13\_00861" 14530 "s59E13H2" 0.03005115 "dihydrolipoamide dehydrogenase"  
"JS1\_E13\_00861" 14530 "s59E25H2" 0 "dihydrolipoamide dehydrogenase"  
"JS1\_E13\_00861" 14530 "s59E5H2" 0.3814929 "dihydrolipoamide dehydrogenase"  
"JS1\_E13\_00861" 14530 "s63E6H2" 0.2003682 "dihydrolipoamide dehydrogenase"  
"JS1\_E13\_00862" 14531 "s59E13H2" 0.0664435 "5'-nucleotidase SurE"  
"JS1\_E13\_00862" 14531 "s59E25H2" 0 "5'-nucleotidase SurE"  
"JS1\_E13\_00862" 14531 "s59E5H2" 0.5676419 "5'-nucleotidase SurE"  
"JS1\_E13\_00862" 14531 "s63E6H2" 0.252121 "5'-nucleotidase SurE"  
"JS1\_E13\_00863" 14532 "s59E13H2" 0.04798071 "hypothetical protein"  
"JS1\_E13\_00863" 14532 "s59E25H2" 0 "hypothetical protein"  
"JS1\_E13\_00863" 14532 "s59E5H2" 0.5262058 "hypothetical protein"  
"JS1\_E13\_00863" 14532 "s63E6H2" 0.1671242 "hypothetical protein"  
"JS1\_E13\_00864" 14533 "s59E13H2" 0.05587441 "Protein-L-isoaspartate O-methyltransferase"  
"JS1\_E13\_00864" 14533 "s59E25H2" 0 "Protein-L-isoaspartate O-methyltransferase"  
"JS1\_E13\_00864" 14533 "s59E5H2" 0.429305 "Protein-L-isoaspartate O-methyltransferase"  
"JS1\_E13\_00864" 14533 "s63E6H2" 0.5183263 "Protein-L-isoaspartate O-methyltransferase"  
"JS1\_E13\_00866" 14535 "s59E13H2" 0.08100015 "Vancomycin B-type resistance protein VanW"  
"JS1\_E13\_00866" 14535 "s59E25H2" 0.3377483 "Vancomycin B-type resistance protein VanW"

"JS1\_E13\_00866" 14535 "s59E5H2" 0.3214074 "Vancomycin B-type resistance protein VanW"  
"JS1\_E13\_00866" 14535 "s63E6H2" 0.5103696 "Vancomycin B-type resistance protein VanW"  
"JS1\_E13\_00867" 14536 "s59E13H2" 0.0130284 "Ribonuclease 3"  
"JS1\_E13\_00867" 14536 "s59E25H2" 0 "Ribonuclease 3"  
"JS1\_E13\_00867" 14536 "s59E5H2" 0.02600208 "Ribonuclease 3"  
"JS1\_E13\_00867" 14536 "s63E6H2" 0.06204776 "Ribonuclease 3"  
"JS1\_E13\_00868" 14537 "s59E13H2" 0.06246625 "3-oxoacyl-[acyl-carrier-protein] synthase 2"  
"JS1\_E13\_00868" 14537 "s59E25H2" 0 "3-oxoacyl-[acyl-carrier-protein] synthase 2"  
"JS1\_E13\_00868" 14537 "s59E5H2" 0.07090191 "3-oxoacyl-[acyl-carrier-protein] synthase 2"  
"JS1\_E13\_00868" 14537 "s63E6H2" 0.06021671 "3-oxoacyl-[acyl-carrier-protein] synthase 2"  
"JS1\_E13\_00869" 14538 "s59E13H2" 0.007635695 "Acyl carrier protein"  
"JS1\_E13\_00869" 14538 "s59E25H2" 0 "Acyl carrier protein"  
"JS1\_E13\_00869" 14538 "s59E5H2" 0.01750867 "Acyl carrier protein"  
"JS1\_E13\_00869" 14538 "s63E6H2" 0.01694095 "Acyl carrier protein"  
"JS1\_E13\_00870" 14539 "s59E13H2" 0.04808391 "3-oxoacyl-[acyl-carrier-protein] reductase FabG"  
"JS1\_E13\_00870" 14539 "s59E25H2" 0 "3-oxoacyl-[acyl-carrier-protein] reductase FabG"  
"JS1\_E13\_00870" 14539 "s59E5H2" 0.07070659 "3-oxoacyl-[acyl-carrier-protein] reductase FabG"  
"JS1\_E13\_00870" 14539 "s63E6H2" 0.04205045 "3-oxoacyl-[acyl-carrier-protein] reductase FabG"  
"JS1\_E13\_00871" 14540 "s59E13H2" 0.01027614 "Malonyl CoA-acyl carrier protein transacylase"  
"JS1\_E13\_00871" 14540 "s59E25H2" 0 "Malonyl CoA-acyl carrier protein transacylase"  
"JS1\_E13\_00871" 14540 "s59E5H2" 0.01634811 "Malonyl CoA-acyl carrier protein transacylase"  
"JS1\_E13\_00871" 14540 "s63E6H2" 0.009710243 "Malonyl CoA-acyl carrier protein transacylase"  
"JS1\_E13\_00872" 14541 "s59E13H2" 0.002353554 "3-oxoacyl-[acyl-carrier-protein] synthase 3"  
"JS1\_E13\_00872" 14541 "s59E25H2" 0 "3-oxoacyl-[acyl-carrier-protein] synthase 3"  
"JS1\_E13\_00872" 14541 "s59E5H2" 0.01186901 "3-oxoacyl-[acyl-carrier-protein] synthase 3"  
"JS1\_E13\_00872" 14541 "s63E6H2" 0.01757055 "3-oxoacyl-[acyl-carrier-protein] synthase 3"  
"JS1\_E13\_00876" 14545 "s59E13H2" 0.003967264 "Putative sigma-54 modulation protein"  
"JS1\_E13\_00876" 14545 "s59E25H2" 0 "Putative sigma-54 modulation protein"  
"JS1\_E13\_00876" 14545 "s59E5H2" 0.143744 "Putative sigma-54 modulation protein"  
"JS1\_E13\_00876" 14545 "s63E6H2" 0.2336136 "Putative sigma-54 modulation protein"  
"JS1\_E13\_00878" 14547 "s59E13H2" 0.01120623 "hypothetical protein"  
"JS1\_E13\_00878" 14547 "s59E25H2" 0 "hypothetical protein"  
"JS1\_E13\_00878" 14547 "s59E5H2" 0.4051132 "hypothetical protein"  
"JS1\_E13\_00878" 14547 "s63E6H2" 0.2562758 "hypothetical protein"  
"JS1\_E13\_00879" 14548 "s59E13H2" 0.01671251 "Cyclic di-GMP phosphodiesterase response regulator RpfG"  
"JS1\_E13\_00879" 14548 "s59E25H2" 0 "Cyclic di-GMP phosphodiesterase response regulator RpfG"  
"JS1\_E13\_00879" 14548 "s59E5H2" 0.1579957 "Cyclic di-GMP phosphodiesterase response regulator RpfG"  
"JS1\_E13\_00879" 14548 "s63E6H2" 0.05985083 "Cyclic di-GMP phosphodiesterase response regulator RpfG"  
"JS1\_E13\_00880" 14549 "s59E13H2" 0.02231299 "hypothetical protein"  
"JS1\_E13\_00880" 14549 "s59E25H2" 0 "hypothetical protein"  
"JS1\_E13\_00880" 14549 "s59E5H2" 0.2921322 "hypothetical protein"  
"JS1\_E13\_00880" 14549 "s63E6H2" 0.08619349 "hypothetical protein"  
"JS1\_E13\_00881" 14550 "s59E13H2" 0.03510529 "preprotein translocase subunit SecA"  
"JS1\_E13\_00881" 14550 "s59E25H2" 0 "preprotein translocase subunit SecA"  
"JS1\_E13\_00881" 14550 "s59E5H2" 0.2254003 "preprotein translocase subunit SecA"  
"JS1\_E13\_00881" 14550 "s63E6H2" 0.1236098 "preprotein translocase subunit SecA"  
"JS1\_E13\_00882" 14551 "s59E13H2" 0.02113875 "Peptide chain release factor 2"

"JS1\_E13\_00882" 14551 "s59E25H2" 0 "Peptide chain release factor 2"  
"JS1\_E13\_00882" 14551 "s59E5H2" 0.1714989 "Peptide chain release factor 2"  
"JS1\_E13\_00882" 14551 "s63E6H2" 0.1897713 "Peptide chain release factor 2"  
"JS1\_E13\_00883" 14552 "s59E13H2" 0.05346726 "short chain dehydrogenase"  
"JS1\_E13\_00883" 14552 "s59E25H2" 0 "short chain dehydrogenase"  
"JS1\_E13\_00883" 14552 "s59E5H2" 0.1931025 "short chain dehydrogenase"  
"JS1\_E13\_00883" 14552 "s63E6H2" 1.094419 "short chain dehydrogenase"  
"JS1\_E13\_00884" 14553 "s59E13H2" 0.06569171 "Glycerol-3-phosphate regulon repressor"  
"JS1\_E13\_00884" 14553 "s59E25H2" 0 "Glycerol-3-phosphate regulon repressor"  
"JS1\_E13\_00884" 14553 "s59E5H2" 0.3876234 "Glycerol-3-phosphate regulon repressor"  
"JS1\_E13\_00884" 14553 "s63E6H2" 1.688048 "Glycerol-3-phosphate regulon repressor"  
"JS1\_E13\_00885" 14554 "s59E13H2" 0.1743853 "L-fucose isomerase"  
"JS1\_E13\_00885" 14554 "s59E25H2" 0 "L-fucose isomerase"  
"JS1\_E13\_00885" 14554 "s59E5H2" 0.1318771 "L-fucose isomerase"  
"JS1\_E13\_00885" 14554 "s63E6H2" 0.6643611 "L-fucose isomerase"  
"JS1\_E13\_00886" 14555 "s59E13H2" 0.2029046 "L-fucose mutarotase"  
"JS1\_E13\_00886" 14555 "s59E25H2" 0 "L-fucose mutarotase"  
"JS1\_E13\_00886" 14555 "s59E5H2" 0.5273831 "L-fucose mutarotase"  
"JS1\_E13\_00886" 14555 "s63E6H2" 0.5393343 "L-fucose mutarotase"  
"JS1\_E13\_00887" 14556 "s59E13H2" 0.02246638 "Ribose import ATP-binding protein RbsA"  
"JS1\_E13\_00887" 14556 "s59E25H2" 0 "Ribose import ATP-binding protein RbsA"  
"JS1\_E13\_00887" 14556 "s59E5H2" 0.3299527 "Ribose import ATP-binding protein RbsA"  
"JS1\_E13\_00887" 14556 "s63E6H2" 0 "Ribose import ATP-binding protein RbsA"  
"JS1\_E13\_00888" 14557 "s59E13H2" 0.4594913 "Ribose transport system permease protein RbsC"  
"JS1\_E13\_00888" 14557 "s59E25H2" 0 "Ribose transport system permease protein RbsC"  
"JS1\_E13\_00888" 14557 "s59E5H2" 0.165353 "Ribose transport system permease protein RbsC"  
"JS1\_E13\_00888" 14557 "s63E6H2" 0.003120952 "Ribose transport system permease protein RbsC"  
"JS1\_E13\_00889" 14558 "s59E13H2" 0.2377205 "ABC transporter periplasmic-binding protein YtfQ precursor"  
"JS1\_E13\_00889" 14558 "s59E25H2" 0 "ABC transporter periplasmic-binding protein YtfQ precursor"  
"JS1\_E13\_00889" 14558 "s59E5H2" 0.2880357 "ABC transporter periplasmic-binding protein YtfQ precursor"  
"JS1\_E13\_00889" 14558 "s63E6H2" 0 "ABC transporter periplasmic-binding protein YtfQ precursor"  
"JS1\_E13\_00890" 14559 "s59E13H2" 0.2325853 "hypothetical protein"  
"JS1\_E13\_00890" 14559 "s59E25H2" 0 "hypothetical protein"  
"JS1\_E13\_00890" 14559 "s59E5H2" 0.02050792 "hypothetical protein"  
"JS1\_E13\_00890" 14559 "s63E6H2" 0.1791566 "hypothetical protein"  
"JS1\_E13\_00891" 14560 "s59E13H2" 0.02002368 "hypothetical protein"  
"JS1\_E13\_00891" 14560 "s59E25H2" 0 "hypothetical protein"  
"JS1\_E13\_00891" 14560 "s59E5H2" 0.009661538 "hypothetical protein"  
"JS1\_E13\_00891" 14560 "s63E6H2" 0.1226297 "hypothetical protein"  
"JS1\_E13\_00892" 14561 "s59E13H2" 0.04071183 "Translation initiation factor IF-2"  
"JS1\_E13\_00892" 14561 "s59E25H2" 0 "Translation initiation factor IF-2"  
"JS1\_E13\_00892" 14561 "s59E5H2" 0.1288196 "Translation initiation factor IF-2"  
"JS1\_E13\_00892" 14561 "s63E6H2" 0.07922123 "Translation initiation factor IF-2"  
"JS1\_E13\_00893" 14562 "s59E13H2" 0.02081201 "Ribosome-binding factor A"  
"JS1\_E13\_00893" 14562 "s59E25H2" 0 "Ribosome-binding factor A"  
"JS1\_E13\_00893" 14562 "s59E5H2" 0.06974024 "Ribosome-binding factor A"  
"JS1\_E13\_00893" 14562 "s63E6H2" 0.04301775 "Ribosome-binding factor A"

"JS1\_E13\_00894" 14563 "s59E13H2" 0.0380071 "Bifunctional oligoribonuclease and PAP phosphatase NrnA"  
"JS1\_E13\_00894" 14563 "s59E25H2" 0 "Bifunctional oligoribonuclease and PAP phosphatase NrnA"  
"JS1\_E13\_00894" 14563 "s59E5H2" 0.04765564 "Bifunctional oligoribonuclease and PAP phosphatase NrnA"  
"JS1\_E13\_00894" 14563 "s63E6H2" 0.05536868 "Bifunctional oligoribonuclease and PAP phosphatase NrnA"  
"JS1\_E13\_00895" 14564 "s59E13H2" 0.04667825 "tRNA pseudouridine synthase B"  
"JS1\_E13\_00895" 14564 "s59E25H2" 0 "tRNA pseudouridine synthase B"  
"JS1\_E13\_00895" 14564 "s59E5H2" 0.07656415 "tRNA pseudouridine synthase B"  
"JS1\_E13\_00895" 14564 "s63E6H2" 0.05073288 "tRNA pseudouridine synthase B"  
"JS1\_E13\_00896" 14565 "s59E13H2" 0.02957541 "Riboflavin biosynthesis protein RibF"  
"JS1\_E13\_00896" 14565 "s59E25H2" 0 "Riboflavin biosynthesis protein RibF"  
"JS1\_E13\_00896" 14565 "s59E5H2" 0.009555696 "Riboflavin biosynthesis protein RibF"  
"JS1\_E13\_00896" 14565 "s63E6H2" 0.02090683 "Riboflavin biosynthesis protein RibF"  
"JS1\_E13\_00897" 14566 "s59E13H2" 0.0627496 "hypothetical protein"  
"JS1\_E13\_00897" 14566 "s59E25H2" 0 "hypothetical protein"  
"JS1\_E13\_00897" 14566 "s59E5H2" 0.2602227 "hypothetical protein"  
"JS1\_E13\_00897" 14566 "s63E6H2" 1.161744 "hypothetical protein"  
"JS1\_E13\_00898" 14567 "s59E13H2" 0.03507576 "SigmaW regulon antibacterial"  
"JS1\_E13\_00898" 14567 "s59E25H2" 0 "SigmaW regulon antibacterial"  
"JS1\_E13\_00898" 14567 "s59E5H2" 0.2532732 "SigmaW regulon antibacterial"  
"JS1\_E13\_00898" 14567 "s63E6H2" 1.08155 "SigmaW regulon antibacterial"  
"JS1\_E13\_00899" 14568 "s59E13H2" 0.03556125 "hypothetical protein"  
"JS1\_E13\_00899" 14568 "s59E25H2" 0 "hypothetical protein"  
"JS1\_E13\_00899" 14568 "s59E5H2" 0.07404818 "hypothetical protein"  
"JS1\_E13\_00899" 14568 "s63E6H2" 0.4522635 "hypothetical protein"  
"JS1\_E13\_00900" 14569 "s59E13H2" 0.05073873 "PhoH-like protein"  
"JS1\_E13\_00900" 14569 "s59E25H2" 0 "PhoH-like protein"  
"JS1\_E13\_00900" 14569 "s59E5H2" 0.3350641 "PhoH-like protein"  
"JS1\_E13\_00900" 14569 "s63E6H2" 0.5990289 "PhoH-like protein"  
"JS1\_E13\_00901" 14570 "s59E13H2" 0.01979869 "hypothetical protein"  
"JS1\_E13\_00901" 14570 "s59E25H2" 0 "hypothetical protein"  
"JS1\_E13\_00901" 14570 "s59E5H2" 0.2882895 "hypothetical protein"  
"JS1\_E13\_00901" 14570 "s63E6H2" 0.5226367 "hypothetical protein"  
"JS1\_E13\_00902" 14571 "s59E13H2" 0.105455 "hypothetical protein"  
"JS1\_E13\_00902" 14571 "s59E25H2" 0 "hypothetical protein"  
"JS1\_E13\_00902" 14571 "s59E5H2" 0.3590365 "hypothetical protein"  
"JS1\_E13\_00902" 14571 "s63E6H2" 0.602784 "hypothetical protein"  
"JS1\_E13\_00903" 14572 "s59E13H2" 0.1534537 "NMT1/THI5 like protein"  
"JS1\_E13\_00903" 14572 "s59E25H2" 0 "NMT1/THI5 like protein"  
"JS1\_E13\_00903" 14572 "s59E5H2" 0.04199324 "NMT1/THI5 like protein"  
"JS1\_E13\_00903" 14572 "s63E6H2" 0.4999698 "NMT1/THI5 like protein"  
"JS1\_E13\_00904" 14573 "s59E13H2" 0.08712015 "hypothetical protein"  
"JS1\_E13\_00904" 14573 "s59E25H2" 0 "hypothetical protein"  
"JS1\_E13\_00904" 14573 "s59E5H2" 0.03701051 "hypothetical protein"  
"JS1\_E13\_00904" 14573 "s63E6H2" 0.08992872 "hypothetical protein"  
"JS1\_E13\_00905" 14574 "s59E13H2" 0.04361944 "ATP-dependent protease ATPase subunit HslU"  
"JS1\_E13\_00905" 14574 "s59E25H2" 0 "ATP-dependent protease ATPase subunit HslU"  
"JS1\_E13\_00905" 14574 "s59E5H2" 1.963119 "ATP-dependent protease ATPase subunit HslU"

"JS1\_E13\_00905" 14574 "s63E6H2" 0.08246309 "ATP-dependent protease ATPase subunit HslU"  
"JS1\_E13\_00906" 14575 "s59E13H2" 0.04586405 "30S ribosomal protein S2"  
"JS1\_E13\_00906" 14575 "s59E25H2" 0 "30S ribosomal protein S2"  
"JS1\_E13\_00906" 14575 "s59E5H2" 0.0824437 "30S ribosomal protein S2"  
"JS1\_E13\_00906" 14575 "s63E6H2" 0.02816567 "30S ribosomal protein S2"  
"JS1\_E13\_00907" 14576 "s59E13H2" 0.06600857 "Elongation factor Ts"  
"JS1\_E13\_00907" 14576 "s59E25H2" 0 "Elongation factor Ts"  
"JS1\_E13\_00907" 14576 "s59E5H2" 0.05963216 "Elongation factor Ts"  
"JS1\_E13\_00907" 14576 "s63E6H2" 0.01952465 "Elongation factor Ts"  
"JS1\_E13\_00908" 14577 "s59E13H2" 0.06678335 "Uridylate kinase"  
"JS1\_E13\_00908" 14577 "s59E25H2" 0 "Uridylate kinase"  
"JS1\_E13\_00908" 14577 "s59E5H2" 0.1267893 "Uridylate kinase"  
"JS1\_E13\_00908" 14577 "s63E6H2" 0.05456162 "Uridylate kinase"  
"JS1\_E13\_00909" 14578 "s59E13H2" 0.07000579 "Ribosome-recycling factor"  
"JS1\_E13\_00909" 14578 "s59E25H2" 0 "Ribosome-recycling factor"  
"JS1\_E13\_00909" 14578 "s59E5H2" 0.06988789 "Ribosome-recycling factor"  
"JS1\_E13\_00909" 14578 "s63E6H2" 0.1797171 "Ribosome-recycling factor"  
"JS1\_E13\_00910" 14579 "s59E13H2" 0.03431101 "DNA topoisomerase 1"  
"JS1\_E13\_00910" 14579 "s59E25H2" 0 "DNA topoisomerase 1"  
"JS1\_E13\_00910" 14579 "s59E5H2" 0.148953 "DNA topoisomerase 1"  
"JS1\_E13\_00910" 14579 "s63E6H2" 0.07214942 "DNA topoisomerase 1"  
"JS1\_E13\_00911" 14580 "s59E13H2" 0.03765508 "Tyrosine recombinase XerD"  
"JS1\_E13\_00911" 14580 "s59E25H2" 0 "Tyrosine recombinase XerD"  
"JS1\_E13\_00911" 14580 "s59E5H2" 0.2242177 "Tyrosine recombinase XerD"  
"JS1\_E13\_00911" 14580 "s63E6H2" 0.08228777 "Tyrosine recombinase XerD"  
"JS1\_E13\_00912" 14581 "s59E13H2" 0.04000783 "ATP-dependent protease subunit ClpQ"  
"JS1\_E13\_00912" 14581 "s59E25H2" 0 "ATP-dependent protease subunit ClpQ"  
"JS1\_E13\_00912" 14581 "s59E5H2" 0.248365 "ATP-dependent protease subunit ClpQ"  
"JS1\_E13\_00912" 14581 "s63E6H2" 0.07353868 "ATP-dependent protease subunit ClpQ"  
"JS1\_E13\_00913" 14582 "s59E13H2" 0.05705024 "cyclic 3',5'-adenosine monophosphate phosphodiesterase"  
"JS1\_E13\_00913" 14582 "s59E25H2" 0 "cyclic 3',5'-adenosine monophosphate phosphodiesterase"  
"JS1\_E13\_00913" 14582 "s59E5H2" 2.092989 "cyclic 3',5'-adenosine monophosphate phosphodiesterase"  
"JS1\_E13\_00913" 14582 "s63E6H2" 0.9022483 "cyclic 3',5'-adenosine monophosphate phosphodiesterase"  
"JS1\_E13\_00914" 14583 "s59E13H2" 0.02212151 "hypothetical protein"  
"JS1\_E13\_00914" 14583 "s59E25H2" 0 "hypothetical protein"  
"JS1\_E13\_00914" 14583 "s59E5H2" 1.035326 "hypothetical protein"  
"JS1\_E13\_00914" 14583 "s63E6H2" 0.1312411 "hypothetical protein"  
"JS1\_E13\_00915" 14584 "s59E13H2" 0.7508481 "2,6-dihydropseudooxynicotine hydrolase"  
"JS1\_E13\_00915" 14584 "s59E25H2" 0 "2,6-dihydropseudooxynicotine hydrolase"  
"JS1\_E13\_00915" 14584 "s59E5H2" 2.899651 "2,6-dihydropseudooxynicotine hydrolase"  
"JS1\_E13\_00915" 14584 "s63E6H2" 2.349264 "2,6-dihydropseudooxynicotine hydrolase"  
"JS1\_E13\_00917" 14586 "s59E13H2" 0.491999 "Cyclic di-GMP phosphodiesterase response regulator RpfG"  
"JS1\_E13\_00917" 14586 "s59E25H2" 0 "Cyclic di-GMP phosphodiesterase response regulator RpfG"  
"JS1\_E13\_00917" 14586 "s59E5H2" 1.009626 "Cyclic di-GMP phosphodiesterase response regulator RpfG"  
"JS1\_E13\_00917" 14586 "s63E6H2" 0.03673679 "Cyclic di-GMP phosphodiesterase response regulator RpfG"  
"JS1\_E13\_00920" 14589 "s59E13H2" 0.05276183 "Phosphoserine phosphatase 1"  
"JS1\_E13\_00920" 14589 "s59E25H2" 0 "Phosphoserine phosphatase 1"

"JS1\_E13\_00920" 14589 "s59E5H2" 0.1444835 "Phosphoserine phosphatase 1"  
"JS1\_E13\_00920" 14589 "s63E6H2" 0.2088289 "Phosphoserine phosphatase 1"  
"JS1\_E13\_00921" 14590 "s59E13H2" 0.01689215 "Tail-specific protease precursor"  
"JS1\_E13\_00921" 14590 "s59E25H2" 0 "Tail-specific protease precursor"  
"JS1\_E13\_00921" 14590 "s59E5H2" 0.04407345 "Tail-specific protease precursor"  
"JS1\_E13\_00921" 14590 "s63E6H2" 0.05313457 "Tail-specific protease precursor"  
"JS1\_E13\_00922" 14591 "s59E13H2" 0.03671584 "Carboxy-terminal processing protease CtpA precursor"  
"JS1\_E13\_00922" 14591 "s59E25H2" 0 "Carboxy-terminal processing protease CtpA precursor"  
"JS1\_E13\_00922" 14591 "s59E5H2" 0.1065054 "Carboxy-terminal processing protease CtpA precursor"  
"JS1\_E13\_00922" 14591 "s63E6H2" 0.03078964 "Carboxy-terminal processing protease CtpA precursor"  
"JS1\_E13\_00923" 14592 "s59E13H2" 0.04941253 "Murein hydrolase activator NlpD precursor"  
"JS1\_E13\_00923" 14592 "s59E25H2" 0 "Murein hydrolase activator NlpD precursor"  
"JS1\_E13\_00923" 14592 "s59E5H2" 0.1331956 "Murein hydrolase activator NlpD precursor"  
"JS1\_E13\_00923" 14592 "s63E6H2" 0.04853705 "Murein hydrolase activator NlpD precursor"  
"JS1\_E13\_00924" 14593 "s59E13H2" 0.09809169 "colanic acid biosynthesis protein"  
"JS1\_E13\_00924" 14593 "s59E25H2" 0 "colanic acid biosynthesis protein"  
"JS1\_E13\_00924" 14593 "s59E5H2" 0.2381448 "colanic acid biosynthesis protein"  
"JS1\_E13\_00924" 14593 "s63E6H2" 0.07942852 "colanic acid biosynthesis protein"  
"JS1\_E13\_00925" 14594 "s59E13H2" 0.1451503 "Cell division ATP-binding protein FtsE"  
"JS1\_E13\_00925" 14594 "s59E25H2" 0 "Cell division ATP-binding protein FtsE"  
"JS1\_E13\_00925" 14594 "s59E5H2" 0.69086 "Cell division ATP-binding protein FtsE"  
"JS1\_E13\_00925" 14594 "s63E6H2" 0.2273474 "Cell division ATP-binding protein FtsE"  
"JS1\_E13\_00926" 14595 "s59E13H2" 0.1199012 "Cell division protein FtsX"  
"JS1\_E13\_00926" 14595 "s59E25H2" 0 "Cell division protein FtsX"  
"JS1\_E13\_00926" 14595 "s59E5H2" 0.3133839 "Cell division protein FtsX"  
"JS1\_E13\_00926" 14595 "s63E6H2" 0.1387622 "Cell division protein FtsX"  
"JS1\_E13\_00927" 14596 "s59E13H2" 0.1164871 "Cell division protein FtsX"  
"JS1\_E13\_00927" 14596 "s59E25H2" 0 "Cell division protein FtsX"  
"JS1\_E13\_00927" 14596 "s59E5H2" 0.416695 "Cell division protein FtsX"  
"JS1\_E13\_00927" 14596 "s63E6H2" 0.1319629 "Cell division protein FtsX"  
"JS1\_E13\_00928" 14597 "s59E13H2" 0.04141869 "Murein hydrolase activator EnvC precursor"  
"JS1\_E13\_00928" 14597 "s59E25H2" 0 "Murein hydrolase activator EnvC precursor"  
"JS1\_E13\_00928" 14597 "s59E5H2" 0.2357573 "Murein hydrolase activator EnvC precursor"  
"JS1\_E13\_00928" 14597 "s63E6H2" 0.072286 "Murein hydrolase activator EnvC precursor"  
"JS1\_E13\_00930" 14599 "s59E13H2" 0.07764444 "putative CtpA-like serine protease"  
"JS1\_E13\_00930" 14599 "s59E25H2" 0 "putative CtpA-like serine protease"  
"JS1\_E13\_00930" 14599 "s59E5H2" 0.1485768 "putative CtpA-like serine protease"  
"JS1\_E13\_00930" 14599 "s63E6H2" 0.1066869 "putative CtpA-like serine protease"  
"JS1\_E13\_00931" 14600 "s59E13H2" 0.05143981 "colanic acid biosynthesis protein"  
"JS1\_E13\_00931" 14600 "s59E25H2" 0 "colanic acid biosynthesis protein"  
"JS1\_E13\_00931" 14600 "s59E5H2" 0.1119133 "colanic acid biosynthesis protein"  
"JS1\_E13\_00931" 14600 "s63E6H2" 0.0322413 "colanic acid biosynthesis protein"  
"JS1\_E13\_00939" 14608 "s59E13H2" 0.241335 "hypothetical protein"  
"JS1\_E13\_00939" 14608 "s59E25H2" 0 "hypothetical protein"  
"JS1\_E13\_00939" 14608 "s59E5H2" 0 "hypothetical protein"  
"JS1\_E13\_00939" 14608 "s63E6H2" 0.0314479 "hypothetical protein"  
"JS1\_E13\_00940" 14609 "s59E13H2" 0.0008222266 "GDP-L-fucose synthase"

"JS1\_E13\_00940" 14609 "s59E25H2" 0 "GDP-L-fucose synthase"  
"JS1\_E13\_00940" 14609 "s59E5H2" 0 "GDP-L-fucose synthase"  
"JS1\_E13\_00940" 14609 "s63E6H2" 7.76906e-05 "GDP-L-fucose synthase"  
"JS1\_E13\_00942" 14611 "s59E13H2" 0 "GDP-mannose 4,6-dehydratase"  
"JS1\_E13\_00942" 14611 "s59E25H2" 0 "GDP-mannose 4,6-dehydratase"  
"JS1\_E13\_00942" 14611 "s59E5H2" 0.01568828 "GDP-mannose 4,6-dehydratase"  
"JS1\_E13\_00942" 14611 "s63E6H2" 0 "GDP-mannose 4,6-dehydratase"  
"JS1\_E13\_00943" 14612 "s59E13H2" 0 "N-glycosyltransferase"  
"JS1\_E13\_00943" 14612 "s59E25H2" 0 "N-glycosyltransferase"  
"JS1\_E13\_00943" 14612 "s59E5H2" 0 "N-glycosyltransferase"  
"JS1\_E13\_00943" 14612 "s63E6H2" 0 "N-glycosyltransferase"  
"JS1\_E13\_00944" 14613 "s59E13H2" 0 "dTDP-glucose 4,6-dehydratase"  
"JS1\_E13\_00944" 14613 "s59E25H2" 0 "dTDP-glucose 4,6-dehydratase"  
"JS1\_E13\_00944" 14613 "s59E5H2" 0.01987359 "dTDP-glucose 4,6-dehydratase"  
"JS1\_E13\_00944" 14613 "s63E6H2" 0 "dTDP-glucose 4,6-dehydratase"  
"JS1\_E13\_00945" 14614 "s59E13H2" 0.01519926 "Acetate kinase"  
"JS1\_E13\_00945" 14614 "s59E25H2" 0 "Acetate kinase"  
"JS1\_E13\_00945" 14614 "s59E5H2" 0.009044045 "Acetate kinase"  
"JS1\_E13\_00945" 14614 "s63E6H2" 0.004967568 "Acetate kinase"  
"JS1\_E13\_00951" 14620 "s59E13H2" 0.01632084 "Demethylmenaquinone methyltransferase"  
"JS1\_E13\_00951" 14620 "s59E25H2" 0 "Demethylmenaquinone methyltransferase"  
"JS1\_E13\_00951" 14620 "s59E5H2" 0.06668756 "Demethylmenaquinone methyltransferase"  
"JS1\_E13\_00951" 14620 "s63E6H2" 0.1848299 "Demethylmenaquinone methyltransferase"  
"JS1\_E13\_00952" 14621 "s59E13H2" 0 "Magnesium-protoporphyrin O-methyltransferase"  
"JS1\_E13\_00952" 14621 "s59E25H2" 0 "Magnesium-protoporphyrin O-methyltransferase"  
"JS1\_E13\_00952" 14621 "s59E5H2" 0.01231349 "Magnesium-protoporphyrin O-methyltransferase"  
"JS1\_E13\_00952" 14621 "s63E6H2" 0 "Magnesium-protoporphyrin O-methyltransferase"  
"JS1\_E13\_00953" 14622 "s59E13H2" 0 "Aminoglycoside N(6')-acetyltransferase type 1"  
"JS1\_E13\_00953" 14622 "s59E25H2" 0 "Aminoglycoside N(6')-acetyltransferase type 1"  
"JS1\_E13\_00953" 14622 "s59E5H2" 1.107477 "Aminoglycoside N(6')-acetyltransferase type 1"  
"JS1\_E13\_00953" 14622 "s63E6H2" 0.01684639 "Aminoglycoside N(6')-acetyltransferase type 1"  
"JS1\_E13\_00954" 14623 "s59E13H2" 0 "hypothetical protein"  
"JS1\_E13\_00954" 14623 "s59E25H2" 0 "hypothetical protein"  
"JS1\_E13\_00954" 14623 "s59E5H2" 0.01536956 "hypothetical protein"  
"JS1\_E13\_00954" 14623 "s63E6H2" 0 "hypothetical protein"  
"JS1\_E13\_00955" 14624 "s59E13H2" 0.0009593921 "Amidohydrolase"  
"JS1\_E13\_00955" 14624 "s59E25H2" 0 "Amidohydrolase"  
"JS1\_E13\_00955" 14624 "s59E5H2" 0.2436574 "Amidohydrolase"  
"JS1\_E13\_00955" 14624 "s63E6H2" 1.88161 "Amidohydrolase"  
"JS1\_E13\_00956" 14625 "s59E13H2" 6.684463 "Transposase IS200 like protein"  
"JS1\_E13\_00956" 14625 "s59E25H2" 0 "Transposase IS200 like protein"  
"JS1\_E13\_00956" 14625 "s59E5H2" 0.03464191 "Transposase IS200 like protein"  
"JS1\_E13\_00956" 14625 "s63E6H2" 2.9122 "Transposase IS200 like protein"  
"JS1\_E13\_00957" 14626 "s59E13H2" 0 "hypothetical protein"  
"JS1\_E13\_00957" 14626 "s59E25H2" 0 "hypothetical protein"  
"JS1\_E13\_00957" 14626 "s59E5H2" 0.1885747 "hypothetical protein"  
"JS1\_E13\_00957" 14626 "s63E6H2" 0 "hypothetical protein"

"JS1\_E13\_00970" 14639 "s59E13H2" 0 "3-oxoacyl-[acyl-carrier-protein] synthase 3"  
"JS1\_E13\_00970" 14639 "s59E25H2" 0 "3-oxoacyl-[acyl-carrier-protein] synthase 3"  
"JS1\_E13\_00970" 14639 "s59E5H2" 0 "3-oxoacyl-[acyl-carrier-protein] synthase 3"  
"JS1\_E13\_00970" 14639 "s63E6H2" 0.002950874 "3-oxoacyl-[acyl-carrier-protein] synthase 3"  
"JS1\_E13\_00976" 14645 "s59E13H2" 0 "50S ribosomal protein L32"  
"JS1\_E13\_00976" 14645 "s59E25H2" 0 "50S ribosomal protein L32"  
"JS1\_E13\_00976" 14645 "s59E5H2" 0 "50S ribosomal protein L32"  
"JS1\_E13\_00976" 14645 "s63E6H2" 0 "50S ribosomal protein L32"  
"JS1\_E13\_00977" 14646 "s59E13H2" 0.04177063 "Elongation factor G"  
"JS1\_E13\_00977" 14646 "s59E25H2" 0 "Elongation factor G"  
"JS1\_E13\_00977" 14646 "s59E5H2" 0.1150452 "Elongation factor G"  
"JS1\_E13\_00977" 14646 "s63E6H2" 0.201618 "Elongation factor G"  
"JS1\_E13\_00978" 14647 "s59E13H2" 0.008388061 "30S ribosomal protein S7"  
"JS1\_E13\_00978" 14647 "s59E25H2" 0 "30S ribosomal protein S7"  
"JS1\_E13\_00978" 14647 "s59E5H2" 0.07204067 "30S ribosomal protein S7"  
"JS1\_E13\_00978" 14647 "s63E6H2" 0.1589521 "30S ribosomal protein S7"  
"JS1\_E13\_00979" 14648 "s59E13H2" 0.01290469 "30S ribosomal protein S12"  
"JS1\_E13\_00979" 14648 "s59E25H2" 0 "30S ribosomal protein S12"  
"JS1\_E13\_00979" 14648 "s59E5H2" 0.1393706 "30S ribosomal protein S12"  
"JS1\_E13\_00979" 14648 "s63E6H2" 0.2683056 "30S ribosomal protein S12"  
"JS1\_E13\_00980" 14649 "s59E13H2" 0.1964825 "DNA-directed RNA polymerase subunit beta"  
"JS1\_E13\_00980" 14649 "s59E25H2" 0 "DNA-directed RNA polymerase subunit beta"  
"JS1\_E13\_00980" 14649 "s59E5H2" 0.06888052 "DNA-directed RNA polymerase subunit beta"  
"JS1\_E13\_00980" 14649 "s63E6H2" 0.09411088 "DNA-directed RNA polymerase subunit beta"  
"JS1\_E13\_00981" 14650 "s59E13H2" 0.0550992 "Ketoisovalerate oxidoreductase subunit VorC"  
"JS1\_E13\_00981" 14650 "s59E25H2" 0 "Ketoisovalerate oxidoreductase subunit VorC"  
"JS1\_E13\_00981" 14650 "s59E5H2" 0.1475744 "Ketoisovalerate oxidoreductase subunit VorC"  
"JS1\_E13\_00981" 14650 "s63E6H2" 0.008880531 "Ketoisovalerate oxidoreductase subunit VorC"  
"JS1\_E13\_00982" 14651 "s59E13H2" 0.06115515 "hypothetical protein"  
"JS1\_E13\_00982" 14651 "s59E25H2" 0 "hypothetical protein"  
"JS1\_E13\_00982" 14651 "s59E5H2" 0.1778929 "hypothetical protein"  
"JS1\_E13\_00982" 14651 "s63E6H2" 0.03977437 "hypothetical protein"  
"JS1\_E13\_00983" 14652 "s59E13H2" 0.06621293 "putative butyrate kinase 2"  
"JS1\_E13\_00983" 14652 "s59E25H2" 0 "putative butyrate kinase 2"  
"JS1\_E13\_00983" 14652 "s59E5H2" 0.05031083 "putative butyrate kinase 2"  
"JS1\_E13\_00983" 14652 "s63E6H2" 0.06156262 "putative butyrate kinase 2"  
"JS1\_E13\_00984" 14653 "s59E13H2" 0.06577406 "Butyrate kinase 2"  
"JS1\_E13\_00984" 14653 "s59E25H2" 0 "Butyrate kinase 2"  
"JS1\_E13\_00984" 14653 "s59E5H2" 0.1318864 "Butyrate kinase 2"  
"JS1\_E13\_00984" 14653 "s63E6H2" 0.04272113 "Butyrate kinase 2"  
"JS1\_E13\_00985" 14654 "s59E13H2" 0.0602666 "Phosphate acetyltransferase"  
"JS1\_E13\_00985" 14654 "s59E25H2" 0 "Phosphate acetyltransferase"  
"JS1\_E13\_00985" 14654 "s59E5H2" 0.1111965 "Phosphate acetyltransferase"  
"JS1\_E13\_00985" 14654 "s63E6H2" 0.06976234 "Phosphate acetyltransferase"  
"JS1\_E13\_00986" 14655 "s59E13H2" 0.0626218 "2-aminoadipate transaminase"  
"JS1\_E13\_00986" 14655 "s59E25H2" 0 "2-aminoadipate transaminase"  
"JS1\_E13\_00986" 14655 "s59E5H2" 0.135473 "2-aminoadipate transaminase"



"JS1\_E13\_00986" 14655 "s63E6H2" 0.101875 "2-aminoadipate transaminase"  
"JS1\_E13\_00987" 14656 "s59E13H2" 0.1558104 "Rhamnulokinase"  
"JS1\_E13\_00987" 14656 "s59E25H2" 0 "Rhamnulokinase"  
"JS1\_E13\_00987" 14656 "s59E5H2" 0.1563161 "Rhamnulokinase"  
"JS1\_E13\_00987" 14656 "s63E6H2" 0.04777755 "Rhamnulokinase"  
"JS1\_E13\_00988" 14657 "s59E13H2" 0.4362158 "Dihydrolipoyllysine-residue acetyltransferase component of pyruvate dehydrogenase complex"  
"JS1\_E13\_00988" 14657 "s59E25H2" 0 "Dihydrolipoyllysine-residue acetyltransferase component of pyruvate dehydrogenase complex"  
"JS1\_E13\_00988" 14657 "s59E5H2" 0.3159845 "Dihydrolipoyllysine-residue acetyltransferase component of pyruvate dehydrogenase complex"  
"JS1\_E13\_00988" 14657 "s63E6H2" 0.1616963 "Dihydrolipoyllysine-residue acetyltransferase component of pyruvate dehydrogenase complex"  
"JS1\_E13\_00992" 14661 "s59E13H2" 0.003792173 "Malonyl CoA-acyl carrier protein transacylase"  
"JS1\_E13\_00992" 14661 "s59E25H2" 0 "Malonyl CoA-acyl carrier protein transacylase"  
"JS1\_E13\_00992" 14661 "s59E5H2" 0.004487994 "Malonyl CoA-acyl carrier protein transacylase"  
"JS1\_E13\_00992" 14661 "s63E6H2" 0.01985214 "Malonyl CoA-acyl carrier protein transacylase"  
"JS1\_E13\_00993" 14662 "s59E13H2" 0.00360264 "Malonyl CoA-acyl carrier protein transacylase"  
"JS1\_E13\_00993" 14662 "s59E25H2" 0 "Malonyl CoA-acyl carrier protein transacylase"  
"JS1\_E13\_00993" 14662 "s59E5H2" 0 "Malonyl CoA-acyl carrier protein transacylase"  
"JS1\_E13\_00993" 14662 "s63E6H2" 0.008386302 "Malonyl CoA-acyl carrier protein transacylase"  
"JS1\_E13\_00994" 14663 "s59E13H2" 0.05356401 "glutamyl-tRNA(Gln) amidotransferase subunit E"  
"JS1\_E13\_00994" 14663 "s59E25H2" 0 "glutamyl-tRNA(Gln) amidotransferase subunit E"  
"JS1\_E13\_00994" 14663 "s59E5H2" 0.2237427 "glutamyl-tRNA(Gln) amidotransferase subunit E"  
"JS1\_E13\_00994" 14663 "s63E6H2" 0.06767756 "glutamyl-tRNA(Gln) amidotransferase subunit E"  
"JS1\_E13\_00995" 14664 "s59E13H2" 0.04902037 "30S ribosomal protein S21"  
"JS1\_E13\_00995" 14664 "s59E25H2" 0 "30S ribosomal protein S21"  
"JS1\_E13\_00995" 14664 "s59E5H2" 0.3328981 "30S ribosomal protein S21"  
"JS1\_E13\_00995" 14664 "s63E6H2" 0.1487335 "30S ribosomal protein S21"  
"JS1\_E13\_00996" 14665 "s59E13H2" 6.368685 "Putative peptidyl-prolyl cis-trans isomerase Cbf2 precursor"  
"JS1\_E13\_00996" 14665 "s59E25H2" 0 "Putative peptidyl-prolyl cis-trans isomerase Cbf2 precursor"  
"JS1\_E13\_00996" 14665 "s59E5H2" 0.3708155 "Putative peptidyl-prolyl cis-trans isomerase Cbf2 precursor"  
"JS1\_E13\_00996" 14665 "s63E6H2" 0.3075428 "Putative peptidyl-prolyl cis-trans isomerase Cbf2 precursor"  
"JS1\_E13\_00997" 14666 "s59E13H2" 0.1952889 "aspartoacylase"  
"JS1\_E13\_00997" 14666 "s59E25H2" 0 "aspartoacylase"  
"JS1\_E13\_00997" 14666 "s59E5H2" 0.5025427 "aspartoacylase"  
"JS1\_E13\_00997" 14666 "s63E6H2" 0.2533432 "aspartoacylase"  
"JS1\_E13\_00998" 14667 "s59E13H2" 0.3218577 "hypothetical protein"  
"JS1\_E13\_00998" 14667 "s59E25H2" 0 "hypothetical protein"  
"JS1\_E13\_00998" 14667 "s59E5H2" 0.06121479 "hypothetical protein"  
"JS1\_E13\_00998" 14667 "s63E6H2" 0.1423816 "hypothetical protein"  
"JS1\_E13\_00999" 14668 "s59E13H2" 0.1625774 "hypothetical protein"  
"JS1\_E13\_00999" 14668 "s59E25H2" 0 "hypothetical protein"  
"JS1\_E13\_00999" 14668 "s59E5H2" 0.07544691 "hypothetical protein"  
"JS1\_E13\_00999" 14668 "s63E6H2" 0.1107188 "hypothetical protein"  
"JS1\_E13\_01000" 14669 "s59E13H2" 0 "hypothetical protein"  
"JS1\_E13\_01000" 14669 "s59E25H2" 0 "hypothetical protein"  
"JS1\_E13\_01000" 14669 "s59E5H2" 0 "hypothetical protein"  
"JS1\_E13\_01000" 14669 "s63E6H2" 0 "hypothetical protein"  
"JS1\_E13\_01002" 14671 "s59E13H2" 0.5486727 "Putative serine protease HtrA"  
"JS1\_E13\_01002" 14671 "s59E25H2" 0 "Putative serine protease HtrA"

"JS1\_E13\_01002" 14671 "s59E5H2" 0.02714237 "Putative serine protease HtrA"  
"JS1\_E13\_01002" 14671 "s63E6H2" 0.0398587 "Putative serine protease HtrA"  
"JS1\_E13\_01003" 14672 "s59E13H2" 0.349006 "Sporulation initiation phosphotransferase F"  
"JS1\_E13\_01003" 14672 "s59E25H2" 0 "Sporulation initiation phosphotransferase F"  
"JS1\_E13\_01003" 14672 "s59E5H2" 0.3893495 "Sporulation initiation phosphotransferase F"  
"JS1\_E13\_01003" 14672 "s63E6H2" 0.1208991 "Sporulation initiation phosphotransferase F"  
"JS1\_E13\_01004" 14673 "s59E13H2" 0.6246014 "DctM-like transporters"  
"JS1\_E13\_01004" 14673 "s59E25H2" 0 "DctM-like transporters"  
"JS1\_E13\_01004" 14673 "s59E5H2" 0.04967199 "DctM-like transporters"  
"JS1\_E13\_01004" 14673 "s63E6H2" 0.2034382 "DctM-like transporters"  
"JS1\_E13\_01005" 14674 "s59E13H2" 0.0793395 "Magnesium and cobalt efflux protein CorC"  
"JS1\_E13\_01005" 14674 "s59E25H2" 0 "Magnesium and cobalt efflux protein CorC"  
"JS1\_E13\_01005" 14674 "s59E5H2" 0.1987573 "Magnesium and cobalt efflux protein CorC"  
"JS1\_E13\_01005" 14674 "s63E6H2" 0.2182865 "Magnesium and cobalt efflux protein CorC"  
"JS1\_E13\_01006" 14675 "s59E13H2" 0.0971669 "Magnesium and cobalt efflux protein CorC"  
"JS1\_E13\_01006" 14675 "s59E25H2" 0 "Magnesium and cobalt efflux protein CorC"  
"JS1\_E13\_01006" 14675 "s59E5H2" 0.09849422 "Magnesium and cobalt efflux protein CorC"  
"JS1\_E13\_01006" 14675 "s63E6H2" 0.1839343 "Magnesium and cobalt efflux protein CorC"  
"JS1\_E13\_01007" 14676 "s59E13H2" 0.03349617 "ferredoxin"  
"JS1\_E13\_01007" 14676 "s59E25H2" 0 "ferredoxin"  
"JS1\_E13\_01007" 14676 "s59E5H2" 0.2430295 "ferredoxin"  
"JS1\_E13\_01007" 14676 "s63E6H2" 0.05482893 "ferredoxin"  
"JS1\_E13\_01008" 14677 "s59E13H2" 0.03797014 "DNA topoisomerase 1"  
"JS1\_E13\_01008" 14677 "s59E25H2" 0 "DNA topoisomerase 1"  
"JS1\_E13\_01008" 14677 "s59E5H2" 0.115675 "DNA topoisomerase 1"  
"JS1\_E13\_01008" 14677 "s63E6H2" 0.01917766 "DNA topoisomerase 1"  
"JS1\_E13\_01009" 14678 "s59E13H2" 0.06003775 "Ferredoxin"  
"JS1\_E13\_01009" 14678 "s59E25H2" 0 "Ferredoxin"  
"JS1\_E13\_01009" 14678 "s59E5H2" 0.1383212 "Ferredoxin"  
"JS1\_E13\_01009" 14678 "s63E6H2" 0.02485043 "Ferredoxin"  
"JS1\_E13\_01010" 14679 "s59E13H2" 0.03400821 "Ditrans, polycis-undecaprenyl-diphosphate synthase ((2E,6E)-farnesyl-diphosphate specific)"  
"JS1\_E13\_01010" 14679 "s59E25H2" 0 "Ditrans, polycis-undecaprenyl-diphosphate synthase ((2E,6E)-farnesyl-diphosphate specific)"  
"JS1\_E13\_01010" 14679 "s59E5H2" 0.1621822 "Ditrans, polycis-undecaprenyl-diphosphate synthase ((2E,6E)-farnesyl-diphosphate specific)"  
"JS1\_E13\_01010" 14679 "s63E6H2" 0.08966547 "Ditrans, polycis-undecaprenyl-diphosphate synthase ((2E,6E)-farnesyl-diphosphate specific)"  
"JS1\_E13\_01011" 14680 "s59E13H2" 0.03554799 "Phosphatidate cytidyltransferase"  
"JS1\_E13\_01011" 14680 "s59E25H2" 0 "Phosphatidate cytidyltransferase"  
"JS1\_E13\_01011" 14680 "s59E5H2" 0.1456492 "Phosphatidate cytidyltransferase"  
"JS1\_E13\_01011" 14680 "s63E6H2" 0.04853078 "Phosphatidate cytidyltransferase"  
"JS1\_E13\_01012" 14681 "s59E13H2" 5.646398 "NTE family protein RssA"  
"JS1\_E13\_01012" 14681 "s59E25H2" 0 "NTE family protein RssA"  
"JS1\_E13\_01012" 14681 "s59E5H2" 0.4240281 "NTE family protein RssA"  
"JS1\_E13\_01012" 14681 "s63E6H2" 2.395354 "NTE family protein RssA"  
"JS1\_E13\_01013" 14682 "s59E13H2" 4.489142 "Isochorismatase"  
"JS1\_E13\_01013" 14682 "s59E25H2" 0 "Isochorismatase"  
"JS1\_E13\_01013" 14682 "s59E5H2" 0.3251974 "Isochorismatase"  
"JS1\_E13\_01013" 14682 "s63E6H2" 2.206549 "Isochorismatase"  
"JS1\_E13\_01014" 14683 "s59E13H2" 11.82458 "Fluoroacetyl-CoA thioesterase"

"JS1\_E13\_01014" 14683 "s59E25H2" 0 "Fluoroacetyl-CoA thioesterase"  
"JS1\_E13\_01014" 14683 "s59E5H2" 0.771142 "Fluoroacetyl-CoA thioesterase"  
"JS1\_E13\_01014" 14683 "s63E6H2" 1.749341 "Fluoroacetyl-CoA thioesterase"  
"JS1\_E13\_01015" 14684 "s59E13H2" 3.624182 "D-arabitol-phosphate dehydrogenase"  
"JS1\_E13\_01015" 14684 "s59E25H2" 0 "D-arabitol-phosphate dehydrogenase"  
"JS1\_E13\_01015" 14684 "s59E5H2" 0.5629864 "D-arabitol-phosphate dehydrogenase"  
"JS1\_E13\_01015" 14684 "s63E6H2" 1.521292 "D-arabitol-phosphate dehydrogenase"  
"JS1\_E13\_01016" 14685 "s59E13H2" 0.02311907 "acetyl-CoA decarboxylase/synthase complex subunit gamma"  
"JS1\_E13\_01016" 14685 "s59E25H2" 0 "acetyl-CoA decarboxylase/synthase complex subunit gamma"  
"JS1\_E13\_01016" 14685 "s59E5H2" 0.1932284 "acetyl-CoA decarboxylase/synthase complex subunit gamma"  
"JS1\_E13\_01016" 14685 "s63E6H2" 0.09713836 "acetyl-CoA decarboxylase/synthase complex subunit gamma"  
"JS1\_E13\_01017" 14686 "s59E13H2" 2.38729 "Benzylsuccinate synthase alpha subunit"  
"JS1\_E13\_01017" 14686 "s59E25H2" 0 "Benzylsuccinate synthase alpha subunit"  
"JS1\_E13\_01017" 14686 "s59E5H2" 7.951078 "Benzylsuccinate synthase alpha subunit"  
"JS1\_E13\_01017" 14686 "s63E6H2" 1.57731 "Benzylsuccinate synthase alpha subunit"  
"JS1\_E13\_01018" 14687 "s59E13H2" 1.242285 "RNA recognition motif. (a.k.a. RRM, RBD, or RNP domain)"  
"JS1\_E13\_01018" 14687 "s59E25H2" 0 "RNA recognition motif. (a.k.a. RRM, RBD, or RNP domain)"  
"JS1\_E13\_01018" 14687 "s59E5H2" 18.19018 "RNA recognition motif. (a.k.a. RRM, RBD, or RNP domain)"  
"JS1\_E13\_01018" 14687 "s63E6H2" 3.284981 "RNA recognition motif. (a.k.a. RRM, RBD, or RNP domain)"  
"JS1\_E13\_01019" 14688 "s59E13H2" 0.2625948 "1,3-propanediol dehydrogenase"  
"JS1\_E13\_01019" 14688 "s59E25H2" 0 "1,3-propanediol dehydrogenase"  
"JS1\_E13\_01019" 14688 "s59E5H2" 11.77441 "1,3-propanediol dehydrogenase"  
"JS1\_E13\_01019" 14688 "s63E6H2" 6.153276 "1,3-propanediol dehydrogenase"  
"JS1\_E13\_01020" 14689 "s59E13H2" 0.1195603 "colanic acid exporter"  
"JS1\_E13\_01020" 14689 "s59E25H2" 0 "colanic acid exporter"  
"JS1\_E13\_01020" 14689 "s59E5H2" 0.002495977 "colanic acid exporter"  
"JS1\_E13\_01020" 14689 "s63E6H2" 0.03335431 "colanic acid exporter"  
"JS1\_E13\_01022" 14691 "s59E13H2" 0 "Glucose-1-phosphate thymidyltransferase 1"  
"JS1\_E13\_01022" 14691 "s59E25H2" 0 "Glucose-1-phosphate thymidyltransferase 1"  
"JS1\_E13\_01022" 14691 "s59E5H2" 0 "Glucose-1-phosphate thymidyltransferase 1"  
"JS1\_E13\_01022" 14691 "s63E6H2" 0.003439417 "Glucose-1-phosphate thymidyltransferase 1"  
"JS1\_E13\_01023" 14692 "s59E13H2" 0.005761198 "dTDP-4-dehydrorhamnose 3,5-epimerase"  
"JS1\_E13\_01023" 14692 "s59E25H2" 0 "dTDP-4-dehydrorhamnose 3,5-epimerase"  
"JS1\_E13\_01023" 14692 "s59E5H2" 0.02367895 "dTDP-4-dehydrorhamnose 3,5-epimerase"  
"JS1\_E13\_01023" 14692 "s63E6H2" 0.08590834 "dTDP-4-dehydrorhamnose 3,5-epimerase"  
"JS1\_E13\_01024" 14693 "s59E13H2" 0.1569062 "hypothetical protein"  
"JS1\_E13\_01024" 14693 "s59E25H2" 0 "hypothetical protein"  
"JS1\_E13\_01024" 14693 "s59E5H2" 0.08069398 "hypothetical protein"  
"JS1\_E13\_01024" 14693 "s63E6H2" 0.1424344 "hypothetical protein"  
"JS1\_E13\_01025" 14694 "s59E13H2" 0.1373573 "50S ribosomal protein L31"  
"JS1\_E13\_01025" 14694 "s59E25H2" 0 "50S ribosomal protein L31"  
"JS1\_E13\_01025" 14694 "s59E5H2" 0.05622988 "50S ribosomal protein L31"  
"JS1\_E13\_01025" 14694 "s63E6H2" 0.04644358 "50S ribosomal protein L31"  
"JS1\_E13\_01026" 14695 "s59E13H2" 0.08973796 "Thymidine kinase"  
"JS1\_E13\_01026" 14695 "s59E25H2" 0 "Thymidine kinase"  
"JS1\_E13\_01026" 14695 "s59E5H2" 0.1739611 "Thymidine kinase"  
"JS1\_E13\_01026" 14695 "s63E6H2" 0.20216 "Thymidine kinase"

"JS1\_E13\_01027" 14696 "s59E13H2" 0.08811417 "Thymidylate synthase ThyX"  
"JS1\_E13\_01027" 14696 "s59E25H2" 0 "Thymidylate synthase ThyX"  
"JS1\_E13\_01027" 14696 "s59E5H2" 0.1920951 "Thymidylate synthase ThyX"  
"JS1\_E13\_01027" 14696 "s63E6H2" 0.2740135 "Thymidylate synthase ThyX"  
"JS1\_E13\_01028" 14697 "s59E13H2" 0.05569825 "Peptidase M15"  
"JS1\_E13\_01028" 14697 "s59E25H2" 0 "Peptidase M15"  
"JS1\_E13\_01028" 14697 "s59E5H2" 1.332355 "Peptidase M15"  
"JS1\_E13\_01028" 14697 "s63E6H2" 0.203173 "Peptidase M15"  
"JS1\_E13\_01030" 14699 "s59E13H2" 0.2090428 "hypothetical protein"  
"JS1\_E13\_01030" 14699 "s59E25H2" 0 "hypothetical protein"  
"JS1\_E13\_01030" 14699 "s59E5H2" 0.05038352 "hypothetical protein"  
"JS1\_E13\_01030" 14699 "s63E6H2" 0.1086226 "hypothetical protein"  
"JS1\_E13\_01032" 14701 "s59E13H2" 0 "Acyl carrier protein"  
"JS1\_E13\_01032" 14701 "s59E25H2" 0 "Acyl carrier protein"  
"JS1\_E13\_01032" 14701 "s59E5H2" 0.01487743 "Acyl carrier protein"  
"JS1\_E13\_01032" 14701 "s63E6H2" 0.03697609 "Acyl carrier protein"  
"JS1\_E13\_01033" 14702 "s59E13H2" 0 "hypothetical protein"  
"JS1\_E13\_01033" 14702 "s59E25H2" 0 "hypothetical protein"  
"JS1\_E13\_01033" 14702 "s59E5H2" 0 "hypothetical protein"  
"JS1\_E13\_01033" 14702 "s63E6H2" 0.09348096 "hypothetical protein"  
"JS1\_E13\_01034" 14703 "s59E13H2" 0 "Kappa-carrageenase precursor"  
"JS1\_E13\_01034" 14703 "s59E25H2" 0 "Kappa-carrageenase precursor"  
"JS1\_E13\_01034" 14703 "s59E5H2" 0 "Kappa-carrageenase precursor"  
"JS1\_E13\_01034" 14703 "s63E6H2" 0.02661452 "Kappa-carrageenase precursor"  
"JS1\_E13\_01035" 14704 "s59E13H2" 0.006182749 "3-oxoacyl-[acyl-carrier-protein] synthase 3"  
"JS1\_E13\_01035" 14704 "s59E25H2" 0 "3-oxoacyl-[acyl-carrier-protein] synthase 3"  
"JS1\_E13\_01035" 14704 "s59E5H2" 0.008828011 "3-oxoacyl-[acyl-carrier-protein] synthase 3"  
"JS1\_E13\_01035" 14704 "s63E6H2" 0.01046684 "3-oxoacyl-[acyl-carrier-protein] synthase 3"  
"JS1\_E13\_01038" 14707 "s59E13H2" 12.47519 "DNA polymerase III subunit alpha"  
"JS1\_E13\_01038" 14707 "s59E25H2" 0.1902588 "DNA polymerase III subunit alpha"  
"JS1\_E13\_01038" 14707 "s59E5H2" 4.710298 "DNA polymerase III subunit alpha"  
"JS1\_E13\_01038" 14707 "s63E6H2" 7.841247 "DNA polymerase III subunit alpha"  
"JS1\_E13\_01039" 14708 "s59E13H2" 0.004595286 "Chaperone protein DnaK"  
"JS1\_E13\_01039" 14708 "s59E25H2" 0 "Chaperone protein DnaK"  
"JS1\_E13\_01039" 14708 "s59E5H2" 0.04839178 "Chaperone protein DnaK"  
"JS1\_E13\_01039" 14708 "s63E6H2" 0.2721441 "Chaperone protein DnaK"  
"JS1\_E13\_01040" 14709 "s59E13H2" 0.1097622 "Chaperone protein DnaJ"  
"JS1\_E13\_01040" 14709 "s59E25H2" 0.1128748 "Chaperone protein DnaJ"  
"JS1\_E13\_01040" 14709 "s59E5H2" 0.03725553 "Chaperone protein DnaJ"  
"JS1\_E13\_01040" 14709 "s63E6H2" 0.4523924 "Chaperone protein DnaJ"  
"JS1\_E13\_01041" 14710 "s59E13H2" 0.01127101 "3-oxoacyl-[acyl-carrier-protein] synthase 2"  
"JS1\_E13\_01041" 14710 "s59E25H2" 0 "3-oxoacyl-[acyl-carrier-protein] synthase 2"  
"JS1\_E13\_01041" 14710 "s59E5H2" 0.004935364 "3-oxoacyl-[acyl-carrier-protein] synthase 2"  
"JS1\_E13\_01041" 14710 "s63E6H2" 0.01304295 "3-oxoacyl-[acyl-carrier-protein] synthase 2"  
"JS1\_E13\_01043" 14712 "s59E13H2" 0.00700898 "Chromosome partition protein Smc"  
"JS1\_E13\_01043" 14712 "s59E25H2" 0 "Chromosome partition protein Smc"  
"JS1\_E13\_01043" 14712 "s59E5H2" 0.06171835 "Chromosome partition protein Smc"

"JS1\_E13\_01043" 14712 "s63E6H2" 0.0230773 "Chromosome partition protein Smc"  
"JS1\_E13\_01044" 14713 "s59E13H2" 0 "hypothetical protein"  
"JS1\_E13\_01044" 14713 "s59E25H2" 0 "hypothetical protein"  
"JS1\_E13\_01044" 14713 "s59E5H2" 0 "hypothetical protein"  
"JS1\_E13\_01044" 14713 "s63E6H2" 0 "hypothetical protein"  
"JS1\_E13\_01045" 14714 "s59E13H2" 0 "30S ribosomal protein S16"  
"JS1\_E13\_01045" 14714 "s59E25H2" 0 "30S ribosomal protein S16"  
"JS1\_E13\_01045" 14714 "s59E5H2" 0 "30S ribosomal protein S16"  
"JS1\_E13\_01045" 14714 "s63E6H2" 0 "30S ribosomal protein S16"  
"JS1\_E13\_01046" 14715 "s59E13H2" 0.002392135 "Signal recognition particle protein"  
"JS1\_E13\_01046" 14715 "s59E25H2" 0 "Signal recognition particle protein"  
"JS1\_E13\_01046" 14715 "s59E5H2" 0 "Signal recognition particle protein"  
"JS1\_E13\_01046" 14715 "s63E6H2" 0 "Signal recognition particle protein"  
"JS1\_E13\_01048" 14717 "s59E13H2" 0 "30S ribosomal protein S16"  
"JS1\_E13\_01048" 14717 "s59E25H2" 0 "30S ribosomal protein S16"  
"JS1\_E13\_01048" 14717 "s59E5H2" 0 "30S ribosomal protein S16"  
"JS1\_E13\_01048" 14717 "s63E6H2" 0 "30S ribosomal protein S16"  
"JS1\_E13\_01051" 14720 "s59E13H2" 0 "30S ribosomal protein S16"  
"JS1\_E13\_01051" 14720 "s59E25H2" 0 "30S ribosomal protein S16"  
"JS1\_E13\_01051" 14720 "s59E5H2" 0 "30S ribosomal protein S16"  
"JS1\_E13\_01051" 14720 "s63E6H2" 0 "30S ribosomal protein S16"  
"JS1\_E13\_01052" 14721 "s59E13H2" 0 "hypothetical protein"  
"JS1\_E13\_01052" 14721 "s59E25H2" 0 "hypothetical protein"  
"JS1\_E13\_01052" 14721 "s59E5H2" 0 "hypothetical protein"  
"JS1\_E13\_01052" 14721 "s63E6H2" 0 "hypothetical protein"  
"JS1\_E13\_01054" 14723 "s59E13H2" 0 "30S ribosomal protein S16"  
"JS1\_E13\_01054" 14723 "s59E25H2" 0 "30S ribosomal protein S16"  
"JS1\_E13\_01054" 14723 "s59E5H2" 0.01184954 "30S ribosomal protein S16"  
"JS1\_E13\_01054" 14723 "s63E6H2" 0 "30S ribosomal protein S16"  
"JS1\_E13\_01055" 14724 "s59E13H2" 0 "hypothetical protein"  
"JS1\_E13\_01055" 14724 "s59E25H2" 0 "hypothetical protein"  
"JS1\_E13\_01055" 14724 "s59E5H2" 0 "hypothetical protein"  
"JS1\_E13\_01055" 14724 "s63E6H2" 0 "hypothetical protein"  
"JS1\_E13\_01056" 14725 "s59E13H2" 0 "hypothetical protein"  
"JS1\_E13\_01056" 14725 "s59E25H2" 0 "hypothetical protein"  
"JS1\_E13\_01056" 14725 "s59E5H2" 0 "hypothetical protein"  
"JS1\_E13\_01056" 14725 "s63E6H2" 0 "hypothetical protein"  
"JS1\_E13\_01057" 14726 "s59E13H2" 0 "Cytidine deaminase"  
"JS1\_E13\_01057" 14726 "s59E25H2" 0 "Cytidine deaminase"  
"JS1\_E13\_01057" 14726 "s59E5H2" 0 "Cytidine deaminase"  
"JS1\_E13\_01057" 14726 "s63E6H2" 0 "Cytidine deaminase"  
"JS1\_E13\_01058" 14727 "s59E13H2" 1.50701 "hypothetical protein"  
"JS1\_E13\_01058" 14727 "s59E25H2" 0.281761 "hypothetical protein"  
"JS1\_E13\_01058" 14727 "s59E5H2" 0.4117576 "hypothetical protein"  
"JS1\_E13\_01058" 14727 "s63E6H2" 1.373935 "hypothetical protein"  
"JS1\_E13\_01060" 14729 "s59E13H2" 2.670922 "Zinc ribbon domain protein"  
"JS1\_E13\_01060" 14729 "s59E25H2" 0.7608696 "Zinc ribbon domain protein"

"JS1\_E13\_01060" 14729 "s59E5H2" 0.06590422 "Zinc ribbon domain protein"  
"JS1\_E13\_01060" 14729 "s63E6H2" 1.311937 "Zinc ribbon domain protein"  
"JS1\_E13\_01061" 14730 "s59E13H2" 6.544581 "60 kDa chaperonin"  
"JS1\_E13\_01061" 14730 "s59E25H2" 0 "60 kDa chaperonin"  
"JS1\_E13\_01061" 14730 "s59E5H2" 1.176966 "60 kDa chaperonin"  
"JS1\_E13\_01061" 14730 "s63E6H2" 0.5023723 "60 kDa chaperonin"  
"JS1\_E13\_01062" 14731 "s59E13H2" 2.280173 "Amino-acid carrier protein AlST"  
"JS1\_E13\_01062" 14731 "s59E25H2" 0 "Amino-acid carrier protein AlST"  
"JS1\_E13\_01062" 14731 "s59E5H2" 2.283268 "Amino-acid carrier protein AlST"  
"JS1\_E13\_01062" 14731 "s63E6H2" 0.3280853 "Amino-acid carrier protein AlST"  
"JS1\_E13\_01063" 14732 "s59E13H2" 0 "Signal recognition particle protein"  
"JS1\_E13\_01063" 14732 "s59E25H2" 0 "Signal recognition particle protein"  
"JS1\_E13\_01063" 14732 "s59E5H2" 0 "Signal recognition particle protein"  
"JS1\_E13\_01063" 14732 "s63E6H2" 0 "Signal recognition particle protein"  
"JS1\_E13\_01066" 14735 "s59E13H2" 0.9176929 "hypothetical protein"  
"JS1\_E13\_01066" 14735 "s59E25H2" 0 "hypothetical protein"  
"JS1\_E13\_01066" 14735 "s59E5H2" 0.07266276 "hypothetical protein"  
"JS1\_E13\_01066" 14735 "s63E6H2" 0.08116023 "hypothetical protein"  
"JS1\_E13\_01067" 14736 "s59E13H2" 0.0001460492 "hypothetical protein"  
"JS1\_E13\_01067" 14736 "s59E25H2" 0 "hypothetical protein"  
"JS1\_E13\_01067" 14736 "s59E5H2" 0.0003829543 "hypothetical protein"  
"JS1\_E13\_01067" 14736 "s63E6H2" 0 "hypothetical protein"  
"JS1\_E13\_01068" 14737 "s59E13H2" 0.0156661 "Competence protein ComM"  
"JS1\_E13\_01068" 14737 "s59E25H2" 0 "Competence protein ComM"  
"JS1\_E13\_01068" 14737 "s59E5H2" 0.06096567 "Competence protein ComM"  
"JS1\_E13\_01068" 14737 "s63E6H2" 0.01006497 "Competence protein ComM"  
"JS1\_E13\_01069" 14738 "s59E13H2" 0.05419063 "Competence protein ComM"  
"JS1\_E13\_01069" 14738 "s59E25H2" 0 "Competence protein ComM"  
"JS1\_E13\_01069" 14738 "s59E5H2" 0.02359916 "Competence protein ComM"  
"JS1\_E13\_01069" 14738 "s63E6H2" 0.004533112 "Competence protein ComM"  
"JS1\_E13\_01070" 14739 "s59E13H2" 0.06208764 "Competence protein ComM"  
"JS1\_E13\_01070" 14739 "s59E25H2" 0 "Competence protein ComM"  
"JS1\_E13\_01070" 14739 "s59E5H2" 0.02521382 "Competence protein ComM"  
"JS1\_E13\_01070" 14739 "s63E6H2" 0.006129079 "Competence protein ComM"  
"JS1\_E13\_01071" 14740 "s59E13H2" 0 "Competence protein ComM"  
"JS1\_E13\_01071" 14740 "s59E25H2" 0 "Competence protein ComM"  
"JS1\_E13\_01071" 14740 "s59E5H2" 0 "Competence protein ComM"  
"JS1\_E13\_01071" 14740 "s63E6H2" 0 "Competence protein ComM"  
"JS1\_E13\_01074" 14743 "s59E13H2" 0.7288109 "hypothetical protein"  
"JS1\_E13\_01074" 14743 "s59E25H2" 0 "hypothetical protein"  
"JS1\_E13\_01074" 14743 "s59E5H2" 0.07038594 "hypothetical protein"  
"JS1\_E13\_01074" 14743 "s63E6H2" 0.1119687 "hypothetical protein"  
"JS1\_E13\_01075" 14744 "s59E13H2" 0.004309907 "Malonyl CoA-acyl carrier protein transacylase"  
"JS1\_E13\_01075" 14744 "s59E25H2" 0 "Malonyl CoA-acyl carrier protein transacylase"  
"JS1\_E13\_01075" 14744 "s59E5H2" 0.008288207 "Malonyl CoA-acyl carrier protein transacylase"  
"JS1\_E13\_01075" 14744 "s63E6H2" 0.00965973 "Malonyl CoA-acyl carrier protein transacylase"  
"JS1\_E13\_01076" 14745 "s59E13H2" 0.0151841 "Ribonuclease 3"

"JS1\_E13\_01076" 14745 "s59E25H2" 0 "Ribonuclease 3"  
"JS1\_E13\_01076" 14745 "s59E5H2" 0.02338163 "Ribonuclease 3"  
"JS1\_E13\_01076" 14745 "s63E6H2" 0.03039645 "Ribonuclease 3"  
"JS1\_E13\_01079" 14748 "s59E13H2" 0 "hypothetical protein"  
"JS1\_E13\_01079" 14748 "s59E25H2" 0 "hypothetical protein"  
"JS1\_E13\_01079" 14748 "s59E5H2" 0 "hypothetical protein"  
"JS1\_E13\_01079" 14748 "s63E6H2" 0.08837268 "hypothetical protein"  
"JS1\_E13\_01083" 14752 "s59E13H2" 0.03836396 "Acyl carrier protein"  
"JS1\_E13\_01083" 14752 "s59E25H2" 0 "Acyl carrier protein"  
"JS1\_E13\_01083" 14752 "s59E5H2" 0.08329228 "Acyl carrier protein"  
"JS1\_E13\_01083" 14752 "s63E6H2" 0.05166045 "Acyl carrier protein"  
"JS1\_E13\_01084" 14753 "s59E13H2" 0 "hypothetical protein"  
"JS1\_E13\_01084" 14753 "s59E25H2" 0 "hypothetical protein"  
"JS1\_E13\_01084" 14753 "s59E5H2" 0.02043548 "hypothetical protein"  
"JS1\_E13\_01084" 14753 "s63E6H2" 0 "hypothetical protein"  
"JS1\_E13\_01087" 14756 "s59E13H2" 0.4012256 "hypothetical protein"  
"JS1\_E13\_01087" 14756 "s59E25H2" 0 "hypothetical protein"  
"JS1\_E13\_01087" 14756 "s59E5H2" 0 "hypothetical protein"  
"JS1\_E13\_01087" 14756 "s63E6H2" 0 "hypothetical protein"  
"JS1\_E13\_01088" 14757 "s59E13H2" 0.4283402 "hypothetical protein"  
"JS1\_E13\_01088" 14757 "s59E25H2" 0 "hypothetical protein"  
"JS1\_E13\_01088" 14757 "s59E5H2" 0 "hypothetical protein"  
"JS1\_E13\_01088" 14757 "s63E6H2" 0 "hypothetical protein"  
"JS1\_E13\_01091" 14760 "s59E13H2" 0 "3-oxoacyl-[acyl-carrier-protein] synthase 3"  
"JS1\_E13\_01091" 14760 "s59E25H2" 0 "3-oxoacyl-[acyl-carrier-protein] synthase 3"  
"JS1\_E13\_01091" 14760 "s59E5H2" 0.01330468 "3-oxoacyl-[acyl-carrier-protein] synthase 3"  
"JS1\_E13\_01091" 14760 "s63E6H2" 0.008941705 "3-oxoacyl-[acyl-carrier-protein] synthase 3"  
"JS1\_E13\_01092" 14761 "s59E13H2" 0 "Dipeptide transport system permease protein DppB"  
"JS1\_E13\_01092" 14761 "s59E25H2" 0 "Dipeptide transport system permease protein DppB"  
"JS1\_E13\_01092" 14761 "s59E5H2" 0 "Dipeptide transport system permease protein DppB"  
"JS1\_E13\_01092" 14761 "s63E6H2" 0 "Dipeptide transport system permease protein DppB"  
"JS1\_E13\_01093" 14762 "s59E13H2" 0 "Oligopeptide transport system permease protein OppC"  
"JS1\_E13\_01093" 14762 "s59E25H2" 0 "Oligopeptide transport system permease protein OppC"  
"JS1\_E13\_01093" 14762 "s59E5H2" 0 "Oligopeptide transport system permease protein OppC"  
"JS1\_E13\_01093" 14762 "s63E6H2" 0 "Oligopeptide transport system permease protein OppC"  
"JS1\_E13\_01094" 14763 "s59E13H2" 0 "Signal recognition particle receptor FtsY"  
"JS1\_E13\_01094" 14763 "s59E25H2" 0 "Signal recognition particle receptor FtsY"  
"JS1\_E13\_01094" 14763 "s59E5H2" 0 "Signal recognition particle receptor FtsY"  
"JS1\_E13\_01094" 14763 "s63E6H2" 0.01738359 "Signal recognition particle receptor FtsY"  
"JS1\_E13\_01096" 14765 "s59E13H2" 0 "hypothetical protein"  
"JS1\_E13\_01096" 14765 "s59E25H2" 0 "hypothetical protein"  
"JS1\_E13\_01096" 14765 "s59E5H2" 0 "hypothetical protein"  
"JS1\_E13\_01096" 14765 "s63E6H2" 0 "hypothetical protein"  
"JS1\_E13\_01101" 14770 "s59E13H2" 0.03041692 "Competence protein ComM"  
"JS1\_E13\_01101" 14770 "s59E25H2" 0 "Competence protein ComM"  
"JS1\_E13\_01101" 14770 "s59E5H2" 0.0215605 "Competence protein ComM"  
"JS1\_E13\_01101" 14770 "s63E6H2" 0.001647336 "Competence protein ComM"

"JS1\_E13\_01106" 14775 "s59E13H2" 0.0003377992 "Signal recognition particle protein"  
"JS1\_E13\_01106" 14775 "s59E25H2" 0 "Signal recognition particle protein"  
"JS1\_E13\_01106" 14775 "s59E5H2" 0.02163354 "Signal recognition particle protein"  
"JS1\_E13\_01106" 14775 "s63E6H2" 0 "Signal recognition particle protein"  
"JS1\_E13\_01107" 14776 "s59E13H2" 0.02218478 "Signal recognition particle protein"  
"JS1\_E13\_01107" 14776 "s59E25H2" 0 "Signal recognition particle protein"  
"JS1\_E13\_01107" 14776 "s59E5H2" 0.0150009 "Signal recognition particle protein"  
"JS1\_E13\_01107" 14776 "s63E6H2" 0.001816219 "Signal recognition particle protein"  
"JS1\_E13\_01108" 14777 "s59E13H2" 0 "30S ribosomal protein S16"  
"JS1\_E13\_01108" 14777 "s59E25H2" 0 "30S ribosomal protein S16"  
"JS1\_E13\_01108" 14777 "s59E5H2" 0 "30S ribosomal protein S16"  
"JS1\_E13\_01108" 14777 "s63E6H2" 0 "30S ribosomal protein S16"  
"JS1\_E13\_01113" 14782 "s59E13H2" 0.001738898 "3-oxoacyl-[acyl-carrier-protein] reductase FabG"  
"JS1\_E13\_01113" 14782 "s59E25H2" 0 "3-oxoacyl-[acyl-carrier-protein] reductase FabG"  
"JS1\_E13\_01113" 14782 "s59E5H2" 0.01918388 "3-oxoacyl-[acyl-carrier-protein] reductase FabG"  
"JS1\_E13\_01113" 14782 "s63E6H2" 0.0120066 "3-oxoacyl-[acyl-carrier-protein] reductase FabG"  
"JS1\_E13\_01114" 14783 "s59E13H2" 0 "3-oxoacyl-[acyl-carrier-protein] reductase FabG"  
"JS1\_E13\_01114" 14783 "s59E25H2" 0 "3-oxoacyl-[acyl-carrier-protein] reductase FabG"  
"JS1\_E13\_01114" 14783 "s59E5H2" 0 "3-oxoacyl-[acyl-carrier-protein] reductase FabG"  
"JS1\_E13\_01114" 14783 "s63E6H2" 0.007707077 "3-oxoacyl-[acyl-carrier-protein] reductase FabG"  
"JS1\_E13\_01115" 14784 "s59E13H2" 0.009554842 "Malonyl CoA-acyl carrier protein transacylase"  
"JS1\_E13\_01115" 14784 "s59E25H2" 0 "Malonyl CoA-acyl carrier protein transacylase"  
"JS1\_E13\_01115" 14784 "s59E5H2" 0.01209216 "Malonyl CoA-acyl carrier protein transacylase"  
"JS1\_E13\_01115" 14784 "s63E6H2" 0.003035101 "Malonyl CoA-acyl carrier protein transacylase"  
"JS1\_E13\_01118" 14787 "s59E13H2" 0 "30S ribosomal protein S16"  
"JS1\_E13\_01118" 14787 "s59E25H2" 0 "30S ribosomal protein S16"  
"JS1\_E13\_01118" 14787 "s59E5H2" 0 "30S ribosomal protein S16"  
"JS1\_E13\_01118" 14787 "s63E6H2" 0 "30S ribosomal protein S16"  
"JS1\_E13\_01120" 14789 "s59E13H2" 0.02940203 "Ribosome maturation factor RimM"  
"JS1\_E13\_01120" 14789 "s59E25H2" 0 "Ribosome maturation factor RimM"  
"JS1\_E13\_01120" 14789 "s59E5H2" 0.003147333 "Ribosome maturation factor RimM"  
"JS1\_E13\_01120" 14789 "s63E6H2" 0 "Ribosome maturation factor RimM"  
"JS1\_E13\_01121" 14790 "s59E13H2" 0 "Ribosome maturation factor RimM"  
"JS1\_E13\_01121" 14790 "s59E25H2" 0 "Ribosome maturation factor RimM"  
"JS1\_E13\_01121" 14790 "s59E5H2" 0 "Ribosome maturation factor RimM"  
"JS1\_E13\_01121" 14790 "s63E6H2" 0 "Ribosome maturation factor RimM"  
"JS1\_E13\_01123" 14792 "s59E13H2" 0 "30S ribosomal protein S16"  
"JS1\_E13\_01123" 14792 "s59E25H2" 0 "30S ribosomal protein S16"  
"JS1\_E13\_01123" 14792 "s59E5H2" 0 "30S ribosomal protein S16"  
"JS1\_E13\_01123" 14792 "s63E6H2" 0 "30S ribosomal protein S16"  
"JS1\_E13\_01124" 14793 "s59E13H2" 0.05978804 "Ribosome maturation factor RimM"  
"JS1\_E13\_01124" 14793 "s59E25H2" 0 "Ribosome maturation factor RimM"  
"JS1\_E13\_01124" 14793 "s59E5H2" 0.01731253 "Ribosome maturation factor RimM"  
"JS1\_E13\_01124" 14793 "s63E6H2" 0 "Ribosome maturation factor RimM"  
"JS1\_E13\_01125" 14794 "s59E13H2" 0 "16S rRNA-processing protein RimM"  
"JS1\_E13\_01125" 14794 "s59E25H2" 0 "16S rRNA-processing protein RimM"  
"JS1\_E13\_01125" 14794 "s59E5H2" 0.001228162 "16S rRNA-processing protein RimM"



"JS1\_E13\_01125" 14794 "s63E6H2" 0 "16S rRNA-processing protein RimM"  
"JS1\_E13\_01130" 14799 "s59E13H2" 0.05983954 "Ribosome maturation factor RimM"  
"JS1\_E13\_01130" 14799 "s59E25H2" 0 "Ribosome maturation factor RimM"  
"JS1\_E13\_01130" 14799 "s59E5H2" 0 "Ribosome maturation factor RimM"  
"JS1\_E13\_01130" 14799 "s63E6H2" 0.002354407 "Ribosome maturation factor RimM"  
"JS1\_E13\_01133" 14802 "s59E13H2" 0.003871308 "Ribosome maturation factor RimM"  
"JS1\_E13\_01133" 14802 "s59E25H2" 0 "Ribosome maturation factor RimM"  
"JS1\_E13\_01133" 14802 "s59E5H2" 0 "Ribosome maturation factor RimM"  
"JS1\_E13\_01133" 14802 "s63E6H2" 0 "Ribosome maturation factor RimM"  
"JS1\_E13\_01134" 14803 "s59E13H2" 0 "16S rRNA-processing protein RimM"  
"JS1\_E13\_01134" 14803 "s59E25H2" 0 "16S rRNA-processing protein RimM"  
"JS1\_E13\_01134" 14803 "s59E5H2" 0 "16S rRNA-processing protein RimM"  
"JS1\_E13\_01134" 14803 "s63E6H2" 0 "16S rRNA-processing protein RimM"  
"JS1\_E13\_01135" 14804 "s59E13H2" 0 "16S rRNA-processing protein RimM"  
"JS1\_E13\_01135" 14804 "s59E25H2" 0 "16S rRNA-processing protein RimM"  
"JS1\_E13\_01135" 14804 "s59E5H2" 0 "16S rRNA-processing protein RimM"  
"JS1\_E13\_01135" 14804 "s63E6H2" 0 "16S rRNA-processing protein RimM"  
"JS1\_E13\_01138" 14807 "s59E13H2" 0.03002028 "Ribosome maturation factor RimM"  
"JS1\_E13\_01138" 14807 "s59E25H2" 0 "Ribosome maturation factor RimM"  
"JS1\_E13\_01138" 14807 "s59E5H2" 0 "Ribosome maturation factor RimM"  
"JS1\_E13\_01138" 14807 "s63E6H2" 0 "Ribosome maturation factor RimM"  
"JS1\_E13\_01142" 14811 "s59E13H2" 0.04452115 "Ribosome maturation factor RimM"  
"JS1\_E13\_01142" 14811 "s59E25H2" 0 "Ribosome maturation factor RimM"  
"JS1\_E13\_01142" 14811 "s59E5H2" 0 "Ribosome maturation factor RimM"  
"JS1\_E13\_01142" 14811 "s63E6H2" 0 "Ribosome maturation factor RimM"  
"JS1\_E13\_01145" 14814 "s59E13H2" 0.00953605 "Tyrosine-protein phosphatase YwqE"  
"JS1\_E13\_01145" 14814 "s59E25H2" 0 "Tyrosine-protein phosphatase YwqE"  
"JS1\_E13\_01145" 14814 "s59E5H2" 1.519155 "Tyrosine-protein phosphatase YwqE"  
"JS1\_E13\_01145" 14814 "s63E6H2" 0.02031517 "Tyrosine-protein phosphatase YwqE"  
"JS1\_E13\_01146" 14815 "s59E13H2" 0 "hypothetical protein"  
"JS1\_E13\_01146" 14815 "s59E25H2" 0 "hypothetical protein"  
"JS1\_E13\_01146" 14815 "s59E5H2" 0 "hypothetical protein"  
"JS1\_E13\_01146" 14815 "s63E6H2" 0.03131905 "hypothetical protein"  
"JS1\_E13\_01148" 14817 "s59E13H2" 0.001288073 "3-oxoacyl-[acyl-carrier-protein] synthase 3"  
"JS1\_E13\_01148" 14817 "s59E25H2" 0 "3-oxoacyl-[acyl-carrier-protein] synthase 3"  
"JS1\_E13\_01148" 14817 "s59E5H2" 0.005832793 "3-oxoacyl-[acyl-carrier-protein] synthase 3"  
"JS1\_E13\_01148" 14817 "s63E6H2" 0 "3-oxoacyl-[acyl-carrier-protein] synthase 3"  
"JS1\_E13\_01149" 14818 "s59E13H2" 0 "tRNA (guanine-N(1)-methyltransferase"  
"JS1\_E13\_01149" 14818 "s59E25H2" 0 "tRNA (guanine-N(1)-methyltransferase"  
"JS1\_E13\_01149" 14818 "s59E5H2" 0 "tRNA (guanine-N(1)-methyltransferase"  
"JS1\_E13\_01149" 14818 "s63E6H2" 0 "tRNA (guanine-N(1)-methyltransferase"  
"JS1\_E13\_01151" 14820 "s59E13H2" 0 "Ribulose-phosphate 3-epimerase"  
"JS1\_E13\_01151" 14820 "s59E25H2" 0 "Ribulose-phosphate 3-epimerase"  
"JS1\_E13\_01151" 14820 "s59E5H2" 0.02455559 "Ribulose-phosphate 3-epimerase"  
"JS1\_E13\_01151" 14820 "s63E6H2" 0.002635409 "Ribulose-phosphate 3-epimerase"  
"JS1\_E13\_01155" 14824 "s59E13H2" 0.01056122 "Chromosome partition protein Smc"  
"JS1\_E13\_01155" 14824 "s59E25H2" 0 "Chromosome partition protein Smc"

"JS1\_E13\_01155" 14824 "s59E5H2" 0.02907427 "Chromosome partition protein Smc"  
"JS1\_E13\_01155" 14824 "s63E6H2" 0.02476405 "Chromosome partition protein Smc"  
"JS1\_E13\_01156" 14825 "s59E13H2" 0 "hypothetical protein"  
"JS1\_E13\_01156" 14825 "s59E25H2" 0 "hypothetical protein"  
"JS1\_E13\_01156" 14825 "s59E5H2" 0 "hypothetical protein"  
"JS1\_E13\_01156" 14825 "s63E6H2" 0.004101886 "hypothetical protein"  
"JS1\_E13\_01158" 14827 "s59E13H2" 0 "hypothetical protein"  
"JS1\_E13\_01158" 14827 "s59E25H2" 0 "hypothetical protein"  
"JS1\_E13\_01158" 14827 "s59E5H2" 0.001094463 "hypothetical protein"  
"JS1\_E13\_01158" 14827 "s63E6H2" 0 "hypothetical protein"  
"JS1\_E13\_01159" 14828 "s59E13H2" 0 "mRNA interferase EndoA"  
"JS1\_E13\_01159" 14828 "s59E25H2" 0 "mRNA interferase EndoA"  
"JS1\_E13\_01159" 14828 "s59E5H2" 0.02569228 "mRNA interferase EndoA"  
"JS1\_E13\_01159" 14828 "s63E6H2" 0.004461701 "mRNA interferase EndoA"  
"JS1\_E13\_01161" 14830 "s59E13H2" 0.02322598 "3-oxoacyl-[acyl-carrier-protein] reductase FabG"  
"JS1\_E13\_01161" 14830 "s59E25H2" 0 "3-oxoacyl-[acyl-carrier-protein] reductase FabG"  
"JS1\_E13\_01161" 14830 "s59E5H2" 0.02531306 "3-oxoacyl-[acyl-carrier-protein] reductase FabG"  
"JS1\_E13\_01161" 14830 "s63E6H2" 0.02428161 "3-oxoacyl-[acyl-carrier-protein] reductase FabG"  
"JS1\_E13\_01162" 14831 "s59E13H2" 0.02666311 "GTPase Der"  
"JS1\_E13\_01162" 14831 "s59E25H2" 0 "GTPase Der"  
"JS1\_E13\_01162" 14831 "s59E5H2" 0.06102782 "GTPase Der"  
"JS1\_E13\_01162" 14831 "s63E6H2" 0.04554596 "GTPase Der"  
"JS1\_E13\_01163" 14832 "s59E13H2" 0 "Ribulose-phosphate 3-epimerase"  
"JS1\_E13\_01163" 14832 "s59E25H2" 0 "Ribulose-phosphate 3-epimerase"  
"JS1\_E13\_01163" 14832 "s59E5H2" 0.01367017 "Ribulose-phosphate 3-epimerase"  
"JS1\_E13\_01163" 14832 "s63E6H2" 0 "Ribulose-phosphate 3-epimerase"  
"JS1\_E13\_01165" 14834 "s59E13H2" 0.00868012 "putative glycerol-3-phosphate acyltransferase"  
"JS1\_E13\_01165" 14834 "s59E25H2" 0 "putative glycerol-3-phosphate acyltransferase"  
"JS1\_E13\_01165" 14834 "s59E5H2" 0.02523314 "putative glycerol-3-phosphate acyltransferase"  
"JS1\_E13\_01165" 14834 "s63E6H2" 0.03339422 "putative glycerol-3-phosphate acyltransferase"  
"JS1\_E13\_01167" 14836 "s59E13H2" 0.008276616 "Ribonuclease HII"  
"JS1\_E13\_01167" 14836 "s59E25H2" 0 "Ribonuclease HII"  
"JS1\_E13\_01167" 14836 "s59E5H2" 0.02899889 "Ribonuclease HII"  
"JS1\_E13\_01167" 14836 "s63E6H2" 0.0002591945 "Ribonuclease HII"  
"JS1\_E13\_01169" 14838 "s59E13H2" 0.006859559 "Ribulose-phosphate 3-epimerase"  
"JS1\_E13\_01169" 14838 "s59E25H2" 0 "Ribulose-phosphate 3-epimerase"  
"JS1\_E13\_01169" 14838 "s59E5H2" 0.04607713 "Ribulose-phosphate 3-epimerase"  
"JS1\_E13\_01169" 14838 "s63E6H2" 0.0101921 "Ribulose-phosphate 3-epimerase"  
"JS1\_E13\_01170" 14839 "s59E13H2" 0 "Malonyl CoA-acyl carrier protein transacylase"  
"JS1\_E13\_01170" 14839 "s59E25H2" 0 "Malonyl CoA-acyl carrier protein transacylase"  
"JS1\_E13\_01170" 14839 "s59E5H2" 0.01381321 "Malonyl CoA-acyl carrier protein transacylase"  
"JS1\_E13\_01170" 14839 "s63E6H2" 0.002719967 "Malonyl CoA-acyl carrier protein transacylase"  
"JS1\_E13\_01172" 14841 "s59E13H2" 0 "Signal recognition particle protein"  
"JS1\_E13\_01172" 14841 "s59E25H2" 0 "Signal recognition particle protein"  
"JS1\_E13\_01172" 14841 "s59E5H2" 0 "Signal recognition particle protein"  
"JS1\_E13\_01172" 14841 "s63E6H2" 0 "Signal recognition particle protein"  
"JS1\_E13\_01174" 14843 "s59E13H2" 0 "Signal recognition particle protein"

"JS1\_E13\_01174" 14843 "s59E25H2" 0 "Signal recognition particle protein"  
"JS1\_E13\_01174" 14843 "s59E5H2" 0 "Signal recognition particle protein"  
"JS1\_E13\_01174" 14843 "s63E6H2" 0 "Signal recognition particle protein"  
"JS1\_E13\_01175" 14844 "s59E13H2" 0.01372598 "Signal recognition particle protein"  
"JS1\_E13\_01175" 14844 "s59E25H2" 0 "Signal recognition particle protein"  
"JS1\_E13\_01175" 14844 "s59E5H2" 0.005164092 "Signal recognition particle protein"  
"JS1\_E13\_01175" 14844 "s63E6H2" 0.002212286 "Signal recognition particle protein"  
"JS1\_E13\_01176" 14845 "s59E13H2" 0.4340895 "Methylthioribose-1-phosphate isomerase"  
"JS1\_E13\_01176" 14845 "s59E25H2" 0 "Methylthioribose-1-phosphate isomerase"  
"JS1\_E13\_01176" 14845 "s59E5H2" 0.2891171 "Methylthioribose-1-phosphate isomerase"  
"JS1\_E13\_01176" 14845 "s63E6H2" 0.1642759 "Methylthioribose-1-phosphate isomerase"  
"JS1\_E13\_01178" 14847 "s59E13H2" 0 "Ribulose-phosphate 3-epimerase"  
"JS1\_E13\_01178" 14847 "s59E25H2" 0 "Ribulose-phosphate 3-epimerase"  
"JS1\_E13\_01178" 14847 "s59E5H2" 0.01697933 "Ribulose-phosphate 3-epimerase"  
"JS1\_E13\_01178" 14847 "s63E6H2" 0 "Ribulose-phosphate 3-epimerase"  
"JS1\_E13\_01181" 14850 "s59E13H2" 0.002997125 "ribulose-phosphate 3-epimerase"  
"JS1\_E13\_01181" 14850 "s59E25H2" 0 "ribulose-phosphate 3-epimerase"  
"JS1\_E13\_01181" 14850 "s59E5H2" 0 "ribulose-phosphate 3-epimerase"  
"JS1\_E13\_01181" 14850 "s63E6H2" 0 "ribulose-phosphate 3-epimerase"  
"JS1\_E13\_01182" 14851 "s59E13H2" 0.01031136 "Ribulose-phosphate 3-epimerase"  
"JS1\_E13\_01182" 14851 "s59E25H2" 0 "Ribulose-phosphate 3-epimerase"  
"JS1\_E13\_01182" 14851 "s59E5H2" 0.02854829 "Ribulose-phosphate 3-epimerase"  
"JS1\_E13\_01182" 14851 "s63E6H2" 0.02001099 "Ribulose-phosphate 3-epimerase"  
"JS1\_E13\_01183" 14852 "s59E13H2" 0.01154269 "Competence protein ComM"  
"JS1\_E13\_01183" 14852 "s59E25H2" 0 "Competence protein ComM"  
"JS1\_E13\_01183" 14852 "s59E5H2" 0.02895285 "Competence protein ComM"  
"JS1\_E13\_01183" 14852 "s63E6H2" 0.002166184 "Competence protein ComM"  
"JS1\_E13\_01184" 14853 "s59E13H2" 0.009274123 "Competence protein ComM"  
"JS1\_E13\_01184" 14853 "s59E25H2" 0 "Competence protein ComM"  
"JS1\_E13\_01184" 14853 "s59E5H2" 0.01802108 "Competence protein ComM"  
"JS1\_E13\_01184" 14853 "s63E6H2" 0.002270687 "Competence protein ComM"  
"JS1\_E13\_01186" 14855 "s59E13H2" 0 "Signal recognition particle protein"  
"JS1\_E13\_01186" 14855 "s59E25H2" 0 "Signal recognition particle protein"  
"JS1\_E13\_01186" 14855 "s59E5H2" 0 "Signal recognition particle protein"  
"JS1\_E13\_01186" 14855 "s63E6H2" 0 "Signal recognition particle protein"  
"JS1\_E13\_01187" 14856 "s59E13H2" 0 "Signal recognition particle protein"  
"JS1\_E13\_01187" 14856 "s59E25H2" 0 "Signal recognition particle protein"  
"JS1\_E13\_01187" 14856 "s59E5H2" 0 "Signal recognition particle protein"  
"JS1\_E13\_01187" 14856 "s63E6H2" 0 "Signal recognition particle protein"  
"JS1\_E13\_01188" 14857 "s59E13H2" 0.003045806 "Signal recognition particle protein"  
"JS1\_E13\_01188" 14857 "s59E25H2" 0 "Signal recognition particle protein"  
"JS1\_E13\_01188" 14857 "s59E5H2" 0 "Signal recognition particle protein"  
"JS1\_E13\_01188" 14857 "s63E6H2" 0 "Signal recognition particle protein"  
"JS1\_E13\_01192" 14861 "s59E13H2" 0 "Signal recognition particle protein"  
"JS1\_E13\_01192" 14861 "s59E25H2" 0 "Signal recognition particle protein"  
"JS1\_E13\_01192" 14861 "s59E5H2" 0 "Signal recognition particle protein"  
"JS1\_E13\_01192" 14861 "s63E6H2" 0 "Signal recognition particle protein"

"JS1\_E13\_01194" 14863 "s59E13H2" 0 "tRNA (guanine-N(1)-methyltransferase"  
"JS1\_E13\_01194" 14863 "s59E25H2" 0 "tRNA (guanine-N(1)-methyltransferase"  
"JS1\_E13\_01194" 14863 "s59E5H2" 0.01046742 "tRNA (guanine-N(1)-methyltransferase"  
"JS1\_E13\_01194" 14863 "s63E6H2" 0.002002496 "tRNA (guanine-N(1)-methyltransferase"  
"JS1\_E13\_01195" 14864 "s59E13H2" 0 "50S ribosomal protein L19"  
"JS1\_E13\_01195" 14864 "s59E25H2" 0 "50S ribosomal protein L19"  
"JS1\_E13\_01195" 14864 "s59E5H2" 0 "50S ribosomal protein L19"  
"JS1\_E13\_01195" 14864 "s63E6H2" 0 "50S ribosomal protein L19"  
"JS1\_E13\_01197" 14866 "s59E13H2" 9.507182 "Transposase IS116/IS110/IS902 family protein"  
"JS1\_E13\_01197" 14866 "s59E25H2" 0 "Transposase IS116/IS110/IS902 family protein"  
"JS1\_E13\_01197" 14866 "s59E5H2" 1.227884 "Transposase IS116/IS110/IS902 family protein"  
"JS1\_E13\_01197" 14866 "s63E6H2" 2.018611 "Transposase IS116/IS110/IS902 family protein"  
"JS1\_E13\_01198" 14867 "s59E13H2" 0.7644849 "Septum site-determining protein DivIVA"  
"JS1\_E13\_01198" 14867 "s59E25H2" 0 "Septum site-determining protein DivIVA"  
"JS1\_E13\_01198" 14867 "s59E5H2" 2.11028 "Septum site-determining protein DivIVA"  
"JS1\_E13\_01198" 14867 "s63E6H2" 1.820039 "Septum site-determining protein DivIVA"  
"JS1\_E13\_01199" 14868 "s59E13H2" 0.560094 "hypothetical protein"  
"JS1\_E13\_01199" 14868 "s59E25H2" 0 "hypothetical protein"  
"JS1\_E13\_01199" 14868 "s59E5H2" 1.070289 "hypothetical protein"  
"JS1\_E13\_01199" 14868 "s63E6H2" 1.20728 "hypothetical protein"  
"JS1\_E13\_01200" 14869 "s59E13H2" 0.07266596 "Glycine--tRNA ligase alpha subunit"  
"JS1\_E13\_01200" 14869 "s59E25H2" 0 "Glycine--tRNA ligase alpha subunit"  
"JS1\_E13\_01200" 14869 "s59E5H2" 0.2361695 "Glycine--tRNA ligase alpha subunit"  
"JS1\_E13\_01200" 14869 "s63E6H2" 0.3015048 "Glycine--tRNA ligase alpha subunit"  
"JS1\_E13\_01202" 14871 "s59E13H2" 15.47112 "tRNA N6-adenosine threonylcarbamoyltransferase"  
"JS1\_E13\_01202" 14871 "s59E25H2" 0 "tRNA N6-adenosine threonylcarbamoyltransferase"  
"JS1\_E13\_01202" 14871 "s59E5H2" 0.9722761 "tRNA N6-adenosine threonylcarbamoyltransferase"  
"JS1\_E13\_01202" 14871 "s63E6H2" 0.5206796 "tRNA N6-adenosine threonylcarbamoyltransferase"  
"JS1\_E13\_01203" 14872 "s59E13H2" 0 "Ribonuclease HII"  
"JS1\_E13\_01203" 14872 "s59E25H2" 0 "Ribonuclease HII"  
"JS1\_E13\_01203" 14872 "s59E5H2" 0.06484693 "Ribonuclease HII"  
"JS1\_E13\_01203" 14872 "s63E6H2" 0.005277161 "Ribonuclease HII"  
"JS1\_E13\_01204" 14873 "s59E13H2" 0 "hypothetical protein"  
"JS1\_E13\_01204" 14873 "s59E25H2" 0 "hypothetical protein"  
"JS1\_E13\_01204" 14873 "s59E5H2" 0.01267841 "hypothetical protein"  
"JS1\_E13\_01204" 14873 "s63E6H2" 0 "hypothetical protein"  
"JS1\_E13\_01206" 14875 "s59E13H2" 0.02925638 "3-oxoacyl-[acyl-carrier-protein] synthase 2"  
"JS1\_E13\_01206" 14875 "s59E25H2" 0 "3-oxoacyl-[acyl-carrier-protein] synthase 2"  
"JS1\_E13\_01206" 14875 "s59E5H2" 0.01171368 "3-oxoacyl-[acyl-carrier-protein] synthase 2"  
"JS1\_E13\_01206" 14875 "s63E6H2" 0.008814384 "3-oxoacyl-[acyl-carrier-protein] synthase 2"  
"JS1\_E13\_01207" 14876 "s59E13H2" 0 "Ribonuclease 3"  
"JS1\_E13\_01207" 14876 "s59E25H2" 0 "Ribonuclease 3"  
"JS1\_E13\_01207" 14876 "s59E5H2" 0 "Ribonuclease 3"  
"JS1\_E13\_01207" 14876 "s63E6H2" 0 "Ribonuclease 3"  
"JS1\_E13\_01208" 14877 "s59E13H2" 0 "Signal recognition particle protein"  
"JS1\_E13\_01208" 14877 "s59E25H2" 0 "Signal recognition particle protein"  
"JS1\_E13\_01208" 14877 "s59E5H2" 0 "Signal recognition particle protein"

"JS1\_E13\_01208" 14877 "s63E6H2" 0 "Signal recognition particle protein"  
"JS1\_E13\_01209" 14878 "s59E13H2" 0 "Signal recognition particle protein"  
"JS1\_E13\_01209" 14878 "s59E25H2" 0 "Signal recognition particle protein"  
"JS1\_E13\_01209" 14878 "s59E5H2" 0 "Signal recognition particle protein"  
"JS1\_E13\_01209" 14878 "s63E6H2" 0 "Signal recognition particle protein"  
"JS1\_E13\_01210" 14879 "s59E13H2" 0.0007454677 "Signal recognition particle protein"  
"JS1\_E13\_01210" 14879 "s59E25H2" 0 "Signal recognition particle protein"  
"JS1\_E13\_01210" 14879 "s59E5H2" 0 "Signal recognition particle protein"  
"JS1\_E13\_01210" 14879 "s63E6H2" 0 "Signal recognition particle protein"  
"JS1\_E13\_01211" 14880 "s59E13H2" 0 "Signal recognition particle protein"  
"JS1\_E13\_01211" 14880 "s59E25H2" 0 "Signal recognition particle protein"  
"JS1\_E13\_01211" 14880 "s59E5H2" 0 "Signal recognition particle protein"  
"JS1\_E13\_01211" 14880 "s63E6H2" 0 "Signal recognition particle protein"  
"JS1\_E13\_01213" 14882 "s59E13H2" 0 "50S ribosomal protein L19"  
"JS1\_E13\_01213" 14882 "s59E25H2" 0 "50S ribosomal protein L19"  
"JS1\_E13\_01213" 14882 "s59E5H2" 0 "50S ribosomal protein L19"  
"JS1\_E13\_01213" 14882 "s63E6H2" 0 "50S ribosomal protein L19"  
"JS1\_E13\_01217" 14886 "s59E13H2" 0 "16S rRNA-processing protein RimM"  
"JS1\_E13\_01217" 14886 "s59E25H2" 0 "16S rRNA-processing protein RimM"  
"JS1\_E13\_01217" 14886 "s59E5H2" 0 "16S rRNA-processing protein RimM"  
"JS1\_E13\_01217" 14886 "s63E6H2" 0 "16S rRNA-processing protein RimM"  
"JS1\_E13\_01219" 14888 "s59E13H2" 0 "Ribulose-phosphate 3-epimerase"  
"JS1\_E13\_01219" 14888 "s59E25H2" 0 "Ribulose-phosphate 3-epimerase"  
"JS1\_E13\_01219" 14888 "s59E5H2" 0.009425426 "Ribulose-phosphate 3-epimerase"  
"JS1\_E13\_01219" 14888 "s63E6H2" 0 "Ribulose-phosphate 3-epimerase"  
"JS1\_E13\_01221" 14890 "s59E13H2" 0.04061804 "Ribosome maturation factor RimM"  
"JS1\_E13\_01221" 14890 "s59E25H2" 0 "Ribosome maturation factor RimM"  
"JS1\_E13\_01221" 14890 "s59E5H2" 0.01570193 "Ribosome maturation factor RimM"  
"JS1\_E13\_01221" 14890 "s63E6H2" 0.003335962 "Ribosome maturation factor RimM"  
"JS1\_E13\_01222" 14891 "s59E13H2" 5.923875 "hypothetical protein"  
"JS1\_E13\_01222" 14891 "s59E25H2" 0 "hypothetical protein"  
"JS1\_E13\_01222" 14891 "s59E5H2" 0.142956 "hypothetical protein"  
"JS1\_E13\_01222" 14891 "s63E6H2" 0.07637107 "hypothetical protein"  
"JS1\_E13\_01225" 14894 "s59E13H2" 0.004493277 "GTPase Der"  
"JS1\_E13\_01225" 14894 "s59E25H2" 0 "GTPase Der"  
"JS1\_E13\_01225" 14894 "s59E5H2" 0.02115484 "GTPase Der"  
"JS1\_E13\_01225" 14894 "s63E6H2" 0.007964341 "GTPase Der"  
"JS1\_E13\_01226" 14895 "s59E13H2" 0.006712956 "Ribonuclease HII"  
"JS1\_E13\_01226" 14895 "s59E25H2" 0 "Ribonuclease HII"  
"JS1\_E13\_01226" 14895 "s59E5H2" 0.04260293 "Ribonuclease HII"  
"JS1\_E13\_01226" 14895 "s63E6H2" 0.01174622 "Ribonuclease HII"  
"JS1\_E13\_01228" 14897 "s59E13H2" 0 "hypothetical protein"  
"JS1\_E13\_01228" 14897 "s59E25H2" 0 "hypothetical protein"  
"JS1\_E13\_01228" 14897 "s59E5H2" 0 "hypothetical protein"  
"JS1\_E13\_01228" 14897 "s63E6H2" 0 "hypothetical protein"  
"JS1\_E13\_01232" 14901 "s59E13H2" 0 "Ribulose-phosphate 3-epimerase"  
"JS1\_E13\_01232" 14901 "s59E25H2" 0 "Ribulose-phosphate 3-epimerase"

"JS1\_E13\_01232" 14901 "s59E5H2" 0 "Ribulose-phosphate 3-epimerase"  
"JS1\_E13\_01232" 14901 "s63E6H2" 0 "Ribulose-phosphate 3-epimerase"  
"JS1\_E13\_01235" 14904 "s59E13H2" 0 "50S ribosomal protein L19"  
"JS1\_E13\_01235" 14904 "s59E25H2" 0 "50S ribosomal protein L19"  
"JS1\_E13\_01235" 14904 "s59E5H2" 0.01275677 "50S ribosomal protein L19"  
"JS1\_E13\_01235" 14904 "s63E6H2" 0 "50S ribosomal protein L19"  
"JS1\_E13\_01236" 14905 "s59E13H2" 0 "Competence protein ComM"  
"JS1\_E13\_01236" 14905 "s59E25H2" 0 "Competence protein ComM"  
"JS1\_E13\_01236" 14905 "s59E5H2" 0.0159879 "Competence protein ComM"  
"JS1\_E13\_01236" 14905 "s63E6H2" 0.0027099 "Competence protein ComM"  
"JS1\_E13\_01238" 14907 "s59E13H2" 0.004180381 "tRNA pseudouridine synthase B"  
"JS1\_E13\_01238" 14907 "s59E25H2" 0 "tRNA pseudouridine synthase B"  
"JS1\_E13\_01238" 14907 "s59E5H2" 0 "tRNA pseudouridine synthase B"  
"JS1\_E13\_01238" 14907 "s63E6H2" 0.0007215318 "tRNA pseudouridine synthase B"  
"JS1\_E13\_01239" 14908 "s59E13H2" 0 "hypothetical protein"  
"JS1\_E13\_01239" 14908 "s59E25H2" 0 "hypothetical protein"  
"JS1\_E13\_01239" 14908 "s59E5H2" 0.009817792 "hypothetical protein"  
"JS1\_E13\_01239" 14908 "s63E6H2" 0.007162115 "hypothetical protein"  
"JS1\_E13\_01240" 14909 "s59E13H2" 1.02722 "10 kDa chaperonin"  
"JS1\_E13\_01240" 14909 "s59E25H2" 0 "10 kDa chaperonin"  
"JS1\_E13\_01240" 14909 "s59E5H2" 0.1949268 "10 kDa chaperonin"  
"JS1\_E13\_01240" 14909 "s63E6H2" 0.005838048 "10 kDa chaperonin"  
"JS1\_E13\_01243" 14912 "s59E13H2" 0 "hypothetical protein"  
"JS1\_E13\_01243" 14912 "s59E25H2" 0 "hypothetical protein"  
"JS1\_E13\_01243" 14912 "s59E5H2" 0 "hypothetical protein"  
"JS1\_E13\_01243" 14912 "s63E6H2" 0 "hypothetical protein"  
"JS1\_E13\_01244" 14913 "s59E13H2" 0.1161764 "Phosphate acetyltransferase"  
"JS1\_E13\_01244" 14913 "s59E25H2" 0 "Phosphate acetyltransferase"  
"JS1\_E13\_01244" 14913 "s59E5H2" 0.03477603 "Phosphate acetyltransferase"  
"JS1\_E13\_01244" 14913 "s63E6H2" 0.02272746 "Phosphate acetyltransferase"  
"JS1\_E13\_01245" 14914 "s59E13H2" 0 "hypothetical protein"  
"JS1\_E13\_01245" 14914 "s59E25H2" 0 "hypothetical protein"  
"JS1\_E13\_01245" 14914 "s59E5H2" 0 "hypothetical protein"  
"JS1\_E13\_01245" 14914 "s63E6H2" 0 "hypothetical protein"  
"JS1\_E13\_01246" 14915 "s59E13H2" 0 "30S ribosomal protein S16"  
"JS1\_E13\_01246" 14915 "s59E25H2" 0 "30S ribosomal protein S16"  
"JS1\_E13\_01246" 14915 "s59E5H2" 0 "30S ribosomal protein S16"  
"JS1\_E13\_01246" 14915 "s63E6H2" 0 "30S ribosomal protein S16"  
"JS1\_E13\_01247" 14916 "s59E13H2" 0 "hypothetical protein"  
"JS1\_E13\_01247" 14916 "s59E25H2" 0 "hypothetical protein"  
"JS1\_E13\_01247" 14916 "s59E5H2" 0 "hypothetical protein"  
"JS1\_E13\_01247" 14916 "s63E6H2" 0 "hypothetical protein"  
"JS1\_E13\_01248" 14917 "s59E13H2" 0 "30S ribosomal protein S16"  
"JS1\_E13\_01248" 14917 "s59E25H2" 0 "30S ribosomal protein S16"  
"JS1\_E13\_01248" 14917 "s59E5H2" 0 "30S ribosomal protein S16"  
"JS1\_E13\_01248" 14917 "s63E6H2" 0 "30S ribosomal protein S16"  
"JS1\_E13\_01253" 14922 "s59E13H2" 0.005283575 "50S ribosomal protein L19"

"JS1\_E13\_01253" 14922 "s59E25H2" 0 "50S ribosomal protein L19"  
"JS1\_E13\_01253" 14922 "s59E5H2" 0.03668424 "50S ribosomal protein L19"  
"JS1\_E13\_01253" 14922 "s63E6H2" 0.02605131 "50S ribosomal protein L19"  
"JS1\_E13\_01255" 14924 "s59E13H2" 0.05209449 "Ribosome maturation factor RimM"  
"JS1\_E13\_01255" 14924 "s59E25H2" 0 "Ribosome maturation factor RimM"  
"JS1\_E13\_01255" 14924 "s59E5H2" 0 "Ribosome maturation factor RimM"  
"JS1\_E13\_01255" 14924 "s63E6H2" 0 "Ribosome maturation factor RimM"  
"JS1\_E13\_01257" 14926 "s59E13H2" 0.02088213 "Competence protein ComM"  
"JS1\_E13\_01257" 14926 "s59E25H2" 0 "Competence protein ComM"  
"JS1\_E13\_01257" 14926 "s59E5H2" 0.00898266 "Competence protein ComM"  
"JS1\_E13\_01257" 14926 "s63E6H2" 0.003341596 "Competence protein ComM"  
"JS1\_E13\_01258" 14927 "s59E13H2" 0.2154333 "Catabolite control protein A"  
"JS1\_E13\_01258" 14927 "s59E25H2" 0 "Catabolite control protein A"  
"JS1\_E13\_01258" 14927 "s59E5H2" 0.1563945 "Catabolite control protein A"  
"JS1\_E13\_01258" 14927 "s63E6H2" 0.003660862 "Catabolite control protein A"  
"JS1\_E13\_01259" 14928 "s59E13H2" 0 "hypothetical protein"  
"JS1\_E13\_01259" 14928 "s59E25H2" 0 "hypothetical protein"  
"JS1\_E13\_01259" 14928 "s59E5H2" 0 "hypothetical protein"  
"JS1\_E13\_01259" 14928 "s63E6H2" 0 "hypothetical protein"  
"JS1\_E13\_01262" 14931 "s59E13H2" 0.0004337388 "Competence protein ComM"  
"JS1\_E13\_01262" 14931 "s59E25H2" 0 "Competence protein ComM"  
"JS1\_E13\_01262" 14931 "s59E5H2" 0 "Competence protein ComM"  
"JS1\_E13\_01262" 14931 "s63E6H2" 0.003453202 "Competence protein ComM"  
"JS1\_E13\_01263" 14932 "s59E13H2" 0.0266079 "Competence protein ComM"  
"JS1\_E13\_01263" 14932 "s59E25H2" 0 "Competence protein ComM"  
"JS1\_E13\_01263" 14932 "s59E5H2" 0 "Competence protein ComM"  
"JS1\_E13\_01263" 14932 "s63E6H2" 0 "Competence protein ComM"  
"JS1\_E13\_01264" 14933 "s59E13H2" 0.00259925 "Chromosome partition protein Smc"  
"JS1\_E13\_01264" 14933 "s59E25H2" 0 "Chromosome partition protein Smc"  
"JS1\_E13\_01264" 14933 "s59E5H2" 0.01211639 "Chromosome partition protein Smc"  
"JS1\_E13\_01264" 14933 "s63E6H2" 0.004498129 "Chromosome partition protein Smc"  
"JS1\_E13\_01265" 14934 "s59E13H2" 0.007505905 "Signal recognition particle receptor FtsY"  
"JS1\_E13\_01265" 14934 "s59E25H2" 0 "Signal recognition particle receptor FtsY"  
"JS1\_E13\_01265" 14934 "s59E5H2" 0.02434914 "Signal recognition particle receptor FtsY"  
"JS1\_E13\_01265" 14934 "s63E6H2" 0.03012836 "Signal recognition particle receptor FtsY"  
"JS1\_E13\_01266" 14935 "s59E13H2" 0.003270067 "GTPase Der"  
"JS1\_E13\_01266" 14935 "s59E25H2" 0 "GTPase Der"  
"JS1\_E13\_01266" 14935 "s59E5H2" 0.00780912 "GTPase Der"  
"JS1\_E13\_01266" 14935 "s63E6H2" 0 "GTPase Der"  
"JS1\_E13\_01267" 14936 "s59E13H2" 0.006474922 "GTPase Der"  
"JS1\_E13\_01267" 14936 "s59E25H2" 0 "GTPase Der"  
"JS1\_E13\_01267" 14936 "s59E5H2" 0.06082695 "GTPase Der"  
"JS1\_E13\_01267" 14936 "s63E6H2" 0.02295797 "GTPase Der"  
"JS1\_E13\_01268" 14937 "s59E13H2" 0 "50S ribosomal protein L19"  
"JS1\_E13\_01268" 14937 "s59E25H2" 0 "50S ribosomal protein L19"  
"JS1\_E13\_01268" 14937 "s59E5H2" 0 "50S ribosomal protein L19"  
"JS1\_E13\_01268" 14937 "s63E6H2" 0 "50S ribosomal protein L19"

"JS1\_E13\_01270" 14939 "s59E13H2" 0 "tRNA (guanine-N(1)-methyltransferase"  
"JS1\_E13\_01270" 14939 "s59E25H2" 0 "tRNA (guanine-N(1)-methyltransferase"  
"JS1\_E13\_01270" 14939 "s59E5H2" 0 "tRNA (guanine-N(1)-methyltransferase"  
"JS1\_E13\_01270" 14939 "s63E6H2" 0 "tRNA (guanine-N(1)-methyltransferase"  
"JS1\_E13\_01271" 14940 "s59E13H2" 0.01961223 "Glycine--tRNA ligase beta subunit"  
"JS1\_E13\_01271" 14940 "s59E25H2" 0 "Glycine--tRNA ligase beta subunit"  
"JS1\_E13\_01271" 14940 "s59E5H2" 0.0610716 "Glycine--tRNA ligase beta subunit"  
"JS1\_E13\_01271" 14940 "s63E6H2" 0.0143932 "Glycine--tRNA ligase beta subunit"  
"JS1\_E13\_01273" 14942 "s59E13H2" 0 "hypothetical protein"  
"JS1\_E13\_01273" 14942 "s59E25H2" 0 "hypothetical protein"  
"JS1\_E13\_01273" 14942 "s59E5H2" 0 "hypothetical protein"  
"JS1\_E13\_01273" 14942 "s63E6H2" 0 "hypothetical protein"  
"JS1\_E13\_01274" 14943 "s59E13H2" 0.007325571 "Putative pyruvate, phosphate dikinase regulatory protein"  
"JS1\_E13\_01274" 14943 "s59E25H2" 0 "Putative pyruvate, phosphate dikinase regulatory protein"  
"JS1\_E13\_01274" 14943 "s59E5H2" 0.03202105 "Putative pyruvate, phosphate dikinase regulatory protein"  
"JS1\_E13\_01274" 14943 "s63E6H2" 0.05055296 "Putative pyruvate, phosphate dikinase regulatory protein"  
"JS1\_E13\_01275" 14944 "s59E13H2" 0 "tRNA (guanine-N(1)-methyltransferase"  
"JS1\_E13\_01275" 14944 "s59E25H2" 0 "tRNA (guanine-N(1)-methyltransferase"  
"JS1\_E13\_01275" 14944 "s59E5H2" 0 "tRNA (guanine-N(1)-methyltransferase"  
"JS1\_E13\_01275" 14944 "s63E6H2" 0 "tRNA (guanine-N(1)-methyltransferase"  
"JS1\_E13\_01277" 14946 "s59E13H2" 0.01269564 "tRNA (guanine-N(1)-methyltransferase"  
"JS1\_E13\_01277" 14946 "s59E25H2" 0 "tRNA (guanine-N(1)-methyltransferase"  
"JS1\_E13\_01277" 14946 "s59E5H2" 0.01579201 "tRNA (guanine-N(1)-methyltransferase"  
"JS1\_E13\_01277" 14946 "s63E6H2" 0.007181038 "tRNA (guanine-N(1)-methyltransferase"  
"JS1\_E13\_01278" 14947 "s59E13H2" 0 "Competence protein ComM"  
"JS1\_E13\_01278" 14947 "s59E25H2" 0 "Competence protein ComM"  
"JS1\_E13\_01278" 14947 "s59E5H2" 0 "Competence protein ComM"  
"JS1\_E13\_01278" 14947 "s63E6H2" 0 "Competence protein ComM"  
"JS1\_E13\_01279" 14948 "s59E13H2" 0.0136556 "Signal recognition particle receptor FtsY"  
"JS1\_E13\_01279" 14948 "s59E25H2" 0 "Signal recognition particle receptor FtsY"  
"JS1\_E13\_01279" 14948 "s59E5H2" 0.01327575 "Signal recognition particle receptor FtsY"  
"JS1\_E13\_01279" 14948 "s63E6H2" 0.01010024 "Signal recognition particle receptor FtsY"  
"JS1\_E13\_01280" 14949 "s59E13H2" 0.004828 "Signal recognition particle receptor FtsY"  
"JS1\_E13\_01280" 14949 "s59E25H2" 0 "Signal recognition particle receptor FtsY"  
"JS1\_E13\_01280" 14949 "s59E5H2" 0.007883352 "Signal recognition particle receptor FtsY"  
"JS1\_E13\_01280" 14949 "s63E6H2" 0.0214444 "Signal recognition particle receptor FtsY"  
"JS1\_E13\_01281" 14950 "s59E13H2" 0 "tRNA (guanine-N(1)-methyltransferase"  
"JS1\_E13\_01281" 14950 "s59E25H2" 0 "tRNA (guanine-N(1)-methyltransferase"  
"JS1\_E13\_01281" 14950 "s59E5H2" 0.005796503 "tRNA (guanine-N(1)-methyltransferase"  
"JS1\_E13\_01281" 14950 "s63E6H2" 0 "tRNA (guanine-N(1)-methyltransferase"  
"JS1\_E13\_01284" 14953 "s59E13H2" 0 "hypothetical protein"  
"JS1\_E13\_01284" 14953 "s59E25H2" 0 "hypothetical protein"  
"JS1\_E13\_01284" 14953 "s59E5H2" 0 "hypothetical protein"  
"JS1\_E13\_01284" 14953 "s63E6H2" 0 "hypothetical protein"  
"JS1\_E13\_01285" 14954 "s59E13H2" 0.007001733 "Chromosome partition protein Smc"  
"JS1\_E13\_01285" 14954 "s59E25H2" 0 "Chromosome partition protein Smc"  
"JS1\_E13\_01285" 14954 "s59E5H2" 0.01333502 "Chromosome partition protein Smc"



"JS1\_E13\_01285" 14954 "s63E6H2" 0 "Chromosome partition protein Smc"  
"JS1\_E15\_00001" 5487 "s59E13H2" 0.2158991 "hypothetical protein"  
"JS1\_E15\_00001" 5487 "s59E25H2" 0 "hypothetical protein"  
"JS1\_E15\_00001" 5487 "s59E5H2" 0.6815831 "hypothetical protein"  
"JS1\_E15\_00001" 5487 "s63E6H2" 0.5757382 "hypothetical protein"  
"JS1\_E15\_00002" 5488 "s59E13H2" 0.1738491 "ADP-ribose pyrophosphatase"  
"JS1\_E15\_00002" 5488 "s59E25H2" 0 "ADP-ribose pyrophosphatase"  
"JS1\_E15\_00002" 5488 "s59E5H2" 0.2973731 "ADP-ribose pyrophosphatase"  
"JS1\_E15\_00002" 5488 "s63E6H2" 0.3140492 "ADP-ribose pyrophosphatase"  
"JS1\_E15\_00003" 5489 "s59E13H2" 0.00563967 "Cupin domain protein"  
"JS1\_E15\_00003" 5489 "s59E25H2" 0 "Cupin domain protein"  
"JS1\_E15\_00003" 5489 "s59E5H2" 0.3748172 "Cupin domain protein"  
"JS1\_E15\_00003" 5489 "s63E6H2" 0.3305089 "Cupin domain protein"  
"JS1\_E15\_00004" 5490 "s59E13H2" 0.01749804 "haloacid dehalogenase-like hydrolase"  
"JS1\_E15\_00004" 5490 "s59E25H2" 0 "haloacid dehalogenase-like hydrolase"  
"JS1\_E15\_00004" 5490 "s59E5H2" 0.2371507 "haloacid dehalogenase-like hydrolase"  
"JS1\_E15\_00004" 5490 "s63E6H2" 0.00714546 "haloacid dehalogenase-like hydrolase"  
"JS1\_E15\_00006" 5492 "s59E13H2" 0.08602417 "hypothetical protein"  
"JS1\_E15\_00006" 5492 "s59E25H2" 0 "hypothetical protein"  
"JS1\_E15\_00006" 5492 "s59E5H2" 0.3727142 "hypothetical protein"  
"JS1\_E15\_00006" 5492 "s63E6H2" 0.02912055 "hypothetical protein"  
"JS1\_E15\_00007" 5493 "s59E13H2" 4.150442 "hypothetical protein"  
"JS1\_E15\_00007" 5493 "s59E25H2" 0 "hypothetical protein"  
"JS1\_E15\_00007" 5493 "s59E5H2" 1.046476 "hypothetical protein"  
"JS1\_E15\_00007" 5493 "s63E6H2" 0.3672581 "hypothetical protein"  
"JS1\_E15\_00008" 5494 "s59E13H2" 3.24755 "DNA replication protein DnaC"  
"JS1\_E15\_00008" 5494 "s59E25H2" 0 "DNA replication protein DnaC"  
"JS1\_E15\_00008" 5494 "s59E5H2" 1.159937 "DNA replication protein DnaC"  
"JS1\_E15\_00008" 5494 "s63E6H2" 0.03344761 "DNA replication protein DnaC"  
"JS1\_E15\_00009" 5495 "s59E13H2" 0.001347254 "phospho-N-acetylmuramoyl-pentapeptide-transferase"  
"JS1\_E15\_00009" 5495 "s59E25H2" 0 "phospho-N-acetylmuramoyl-pentapeptide-transferase"  
"JS1\_E15\_00009" 5495 "s59E5H2" 0 "phospho-N-acetylmuramoyl-pentapeptide-transferase"  
"JS1\_E15\_00009" 5495 "s63E6H2" 0 "phospho-N-acetylmuramoyl-pentapeptide-transferase"  
"JS1\_E15\_00010" 5496 "s59E13H2" 0.04047768 "GDP-L-fucose synthase"  
"JS1\_E15\_00010" 5496 "s59E25H2" 0 "GDP-L-fucose synthase"  
"JS1\_E15\_00010" 5496 "s59E5H2" 0.008660114 "GDP-L-fucose synthase"  
"JS1\_E15\_00010" 5496 "s63E6H2" 0.003253979 "GDP-L-fucose synthase"  
"JS1\_E15\_00011" 5497 "s59E13H2" 0.01803962 "GDP-mannose 4,6-dehydratase"  
"JS1\_E15\_00011" 5497 "s59E25H2" 0 "GDP-mannose 4,6-dehydratase"  
"JS1\_E15\_00011" 5497 "s59E5H2" 0 "GDP-mannose 4,6-dehydratase"  
"JS1\_E15\_00011" 5497 "s63E6H2" 0.002574894 "GDP-mannose 4,6-dehydratase"  
"JS1\_E15\_00012" 5498 "s59E13H2" 0.0940104 "2,3-diketo-L-gulonate-binding periplasmic protein YiaO precursor"  
"JS1\_E15\_00012" 5498 "s59E25H2" 0 "2,3-diketo-L-gulonate-binding periplasmic protein YiaO precursor"  
"JS1\_E15\_00012" 5498 "s59E5H2" 0.008163706 "2,3-diketo-L-gulonate-binding periplasmic protein YiaO precursor"  
"JS1\_E15\_00012" 5498 "s63E6H2" 0 "2,3-diketo-L-gulonate-binding periplasmic protein YiaO precursor"  
"JS1\_E15\_00013" 5499 "s59E13H2" 4.233212 "NAD-dependent malic enzyme"  
"JS1\_E15\_00013" 5499 "s59E25H2" 0 "NAD-dependent malic enzyme"

"JS1\_E15\_00013" 5499 "s59E5H2" 0.4273777 "NAD-dependent malic enzyme"  
"JS1\_E15\_00013" 5499 "s63E6H2" 0.03398923 "NAD-dependent malic enzyme"  
"JS1\_E15\_00014" 5500 "s59E13H2" 6.479617 "Fumarate hydratase class I, anaerobic"  
"JS1\_E15\_00014" 5500 "s59E25H2" 0 "Fumarate hydratase class I, anaerobic"  
"JS1\_E15\_00014" 5500 "s59E5H2" 0.3078477 "Fumarate hydratase class I, anaerobic"  
"JS1\_E15\_00014" 5500 "s63E6H2" 0.1293191 "Fumarate hydratase class I, anaerobic"  
"JS1\_E15\_00015" 5501 "s59E13H2" 2.632231 "L(+)-tartrate dehydratase subunit alpha"  
"JS1\_E15\_00015" 5501 "s59E25H2" 0 "L(+)-tartrate dehydratase subunit alpha"  
"JS1\_E15\_00015" 5501 "s59E5H2" 0.2952797 "L(+)-tartrate dehydratase subunit alpha"  
"JS1\_E15\_00015" 5501 "s63E6H2" 0.02495671 "L(+)-tartrate dehydratase subunit alpha"  
"JS1\_E15\_00016" 5502 "s59E13H2" 0 "putative HTH-type transcriptional regulator YdfH"  
"JS1\_E15\_00016" 5502 "s59E25H2" 0 "putative HTH-type transcriptional regulator YdfH"  
"JS1\_E15\_00016" 5502 "s59E5H2" 0 "putative HTH-type transcriptional regulator YdfH"  
"JS1\_E15\_00016" 5502 "s63E6H2" 0 "putative HTH-type transcriptional regulator YdfH"  
"JS1\_E15\_00017" 5503 "s59E13H2" 0.02845711 "Trehalose synthase/amylose TreS"  
"JS1\_E15\_00017" 5503 "s59E25H2" 0 "Trehalose synthase/amylose TreS"  
"JS1\_E15\_00017" 5503 "s59E5H2" 0.4077941 "Trehalose synthase/amylose TreS"  
"JS1\_E15\_00017" 5503 "s63E6H2" 0.6688426 "Trehalose synthase/amylose TreS"  
"JS1\_E15\_00018" 5504 "s59E13H2" 1.174954 "1,4-alpha-glucan branching enzyme GlgB"  
"JS1\_E15\_00018" 5504 "s59E25H2" 0 "1,4-alpha-glucan branching enzyme GlgB"  
"JS1\_E15\_00018" 5504 "s59E5H2" 0.6185587 "1,4-alpha-glucan branching enzyme GlgB"  
"JS1\_E15\_00018" 5504 "s63E6H2" 0.6318333 "1,4-alpha-glucan branching enzyme GlgB"  
"JS1\_E15\_00019" 5505 "s59E13H2" 0.04453051 "Glycosyl hydrolase family 57"  
"JS1\_E15\_00019" 5505 "s59E25H2" 0 "Glycosyl hydrolase family 57"  
"JS1\_E15\_00019" 5505 "s59E5H2" 0.07071931 "Glycosyl hydrolase family 57"  
"JS1\_E15\_00019" 5505 "s63E6H2" 0.2144948 "Glycosyl hydrolase family 57"  
"JS1\_E15\_00020" 5506 "s59E13H2" 0.03057247 "4-alpha-glucanotransferase"  
"JS1\_E15\_00020" 5506 "s59E25H2" 0 "4-alpha-glucanotransferase"  
"JS1\_E15\_00020" 5506 "s59E5H2" 0.1428559 "4-alpha-glucanotransferase"  
"JS1\_E15\_00020" 5506 "s63E6H2" 0.09352475 "4-alpha-glucanotransferase"  
"JS1\_E15\_00021" 5507 "s59E13H2" 0.06571427 "Trehalose synthase"  
"JS1\_E15\_00021" 5507 "s59E25H2" 0 "Trehalose synthase"  
"JS1\_E15\_00021" 5507 "s59E5H2" 0.3177394 "Trehalose synthase"  
"JS1\_E15\_00021" 5507 "s63E6H2" 0.1557984 "Trehalose synthase"  
"JS1\_E15\_00022" 5508 "s59E13H2" 0.1806908 "Ultraviolet N-glycosylase/AP lyase"  
"JS1\_E15\_00022" 5508 "s59E25H2" 0 "Ultraviolet N-glycosylase/AP lyase"  
"JS1\_E15\_00022" 5508 "s59E5H2" 0.2480275 "Ultraviolet N-glycosylase/AP lyase"  
"JS1\_E15\_00022" 5508 "s63E6H2" 0.120397 "Ultraviolet N-glycosylase/AP lyase"  
"JS1\_E15\_00023" 5509 "s59E13H2" 0.1357332 "Glutathione transport system permease protein GsiC"  
"JS1\_E15\_00023" 5509 "s59E25H2" 0 "Glutathione transport system permease protein GsiC"  
"JS1\_E15\_00023" 5509 "s59E5H2" 1.049685 "Glutathione transport system permease protein GsiC"  
"JS1\_E15\_00023" 5509 "s63E6H2" 0.2901034 "Glutathione transport system permease protein GsiC"  
"JS1\_E15\_00024" 5510 "s59E13H2" 0.2936342 "Glutathione transport system permease protein GsiD"  
"JS1\_E15\_00024" 5510 "s59E25H2" 0 "Glutathione transport system permease protein GsiD"  
"JS1\_E15\_00024" 5510 "s59E5H2" 0.9384792 "Glutathione transport system permease protein GsiD"  
"JS1\_E15\_00024" 5510 "s63E6H2" 0.2862467 "Glutathione transport system permease protein GsiD"  
"JS1\_E15\_00025" 5511 "s59E13H2" 5.710063 "Pyruvate kinase"

"JS1\_E15\_00025" 5511 "s59E25H2" 0 "Pyruvate kinase"  
"JS1\_E15\_00025" 5511 "s59E5H2" 2.883527 "Pyruvate kinase"  
"JS1\_E15\_00025" 5511 "s63E6H2" 2.633646 "Pyruvate kinase"  
"JS1\_E15\_00026" 5512 "s59E13H2" 6.763587 "CGGC domain protein"  
"JS1\_E15\_00026" 5512 "s59E25H2" 0.1044444 "CGGC domain protein"  
"JS1\_E15\_00026" 5512 "s59E5H2" 2.496859 "CGGC domain protein"  
"JS1\_E15\_00026" 5512 "s63E6H2" 1.118279 "CGGC domain protein"  
"JS1\_E15\_00027" 5513 "s59E13H2" 7.405354 "hypothetical protein"  
"JS1\_E15\_00027" 5513 "s59E25H2" 1.294118 "hypothetical protein"  
"JS1\_E15\_00027" 5513 "s59E5H2" 4.065807 "hypothetical protein"  
"JS1\_E15\_00027" 5513 "s63E6H2" 2.412137 "hypothetical protein"  
"JS1\_E15\_00028" 5514 "s59E13H2" 7.615129 "hypothetical protein"  
"JS1\_E15\_00028" 5514 "s59E25H2" 0.07407407 "hypothetical protein"  
"JS1\_E15\_00028" 5514 "s59E5H2" 5.800298 "hypothetical protein"  
"JS1\_E15\_00028" 5514 "s63E6H2" 2.556022 "hypothetical protein"  
"JS1\_E15\_00029" 5515 "s59E13H2" 7.56215 "hypothetical protein"  
"JS1\_E15\_00029" 5515 "s59E25H2" 0 "hypothetical protein"  
"JS1\_E15\_00029" 5515 "s59E5H2" 5.086344 "hypothetical protein"  
"JS1\_E15\_00029" 5515 "s63E6H2" 1.582789 "hypothetical protein"  
"JS1\_E15\_00030" 5516 "s59E13H2" 5.957711 "ABC transporter ATP-binding protein YtrB"  
"JS1\_E15\_00030" 5516 "s59E25H2" 0 "ABC transporter ATP-binding protein YtrB"  
"JS1\_E15\_00030" 5516 "s59E5H2" 4.926612 "ABC transporter ATP-binding protein YtrB"  
"JS1\_E15\_00030" 5516 "s63E6H2" 3.802126 "ABC transporter ATP-binding protein YtrB"  
"JS1\_E15\_00031" 5517 "s59E13H2" 4.433169 "HTH-type transcriptional repressor YtrA"  
"JS1\_E15\_00031" 5517 "s59E25H2" 0 "HTH-type transcriptional repressor YtrA"  
"JS1\_E15\_00031" 5517 "s59E5H2" 1.829178 "HTH-type transcriptional repressor YtrA"  
"JS1\_E15\_00031" 5517 "s63E6H2" 3.210655 "HTH-type transcriptional repressor YtrA"  
"JS1\_E15\_00033" 5519 "s59E13H2" 0.4316115 "hypothetical protein"  
"JS1\_E15\_00033" 5519 "s59E25H2" 0 "hypothetical protein"  
"JS1\_E15\_00033" 5519 "s59E5H2" 0.8143488 "hypothetical protein"  
"JS1\_E15\_00033" 5519 "s63E6H2" 0.6927715 "hypothetical protein"  
"JS1\_E15\_00034" 5520 "s59E13H2" 0.05304435 "dTDP-3-amino-3,4,6-trideoxy-alpha-D-glucopyranose"  
"JS1\_E15\_00034" 5520 "s59E25H2" 0 "dTDP-3-amino-3,4,6-trideoxy-alpha-D-glucopyranose"  
"JS1\_E15\_00034" 5520 "s59E5H2" 0.6522626 "dTDP-3-amino-3,4,6-trideoxy-alpha-D-glucopyranose"  
"JS1\_E15\_00034" 5520 "s63E6H2" 0.5485983 "dTDP-3-amino-3,4,6-trideoxy-alpha-D-glucopyranose"  
"JS1\_E15\_00035" 5521 "s59E13H2" 0.02552989 "dephospho-CoA kinase/protein folding accessory domain-containing protein"  
"JS1\_E15\_00035" 5521 "s59E25H2" 0 "dephospho-CoA kinase/protein folding accessory domain-containing protein"  
"JS1\_E15\_00035" 5521 "s59E5H2" 0.733505 "dephospho-CoA kinase/protein folding accessory domain-containing protein"  
"JS1\_E15\_00035" 5521 "s63E6H2" 1.644288 "dephospho-CoA kinase/protein folding accessory domain-containing protein"  
"JS1\_E15\_00036" 5522 "s59E13H2" 0.5641622 "Putative ankyrin repeat protein"  
"JS1\_E15\_00036" 5522 "s59E25H2" 0 "Putative ankyrin repeat protein"  
"JS1\_E15\_00036" 5522 "s59E5H2" 0.117637 "Putative ankyrin repeat protein"  
"JS1\_E15\_00036" 5522 "s63E6H2" 0.1628332 "Putative ankyrin repeat protein"  
"JS1\_E15\_00037" 5523 "s59E13H2" 0.1546325 "hypothetical protein"  
"JS1\_E15\_00037" 5523 "s59E25H2" 0 "hypothetical protein"  
"JS1\_E15\_00037" 5523 "s59E5H2" 0.4088463 "hypothetical protein"  
"JS1\_E15\_00037" 5523 "s63E6H2" 0.4056826 "hypothetical protein"

"JS1\_E15\_00038" 5524 "s59E13H2" 9.726381 "putative sugar-binding periplasmic protein precursor"  
"JS1\_E15\_00038" 5524 "s59E25H2" 0 "putative sugar-binding periplasmic protein precursor"  
"JS1\_E15\_00038" 5524 "s59E5H2" 0.7950182 "putative sugar-binding periplasmic protein precursor"  
"JS1\_E15\_00038" 5524 "s63E6H2" 0.06815559 "putative sugar-binding periplasmic protein precursor"  
"JS1\_E15\_00039" 5525 "s59E13H2" 0.2221873 "putative mannose-6-phosphate isomerase GmuF"  
"JS1\_E15\_00039" 5525 "s59E25H2" 0 "putative mannose-6-phosphate isomerase GmuF"  
"JS1\_E15\_00039" 5525 "s59E5H2" 0.06218179 "putative mannose-6-phosphate isomerase GmuF"  
"JS1\_E15\_00039" 5525 "s63E6H2" 0.3182378 "putative mannose-6-phosphate isomerase GmuF"  
"JS1\_E15\_00040" 5526 "s59E13H2" 0.1538746 "hypothetical protein"  
"JS1\_E15\_00040" 5526 "s59E25H2" 0 "hypothetical protein"  
"JS1\_E15\_00040" 5526 "s59E5H2" 0.07101917 "hypothetical protein"  
"JS1\_E15\_00040" 5526 "s63E6H2" 0.2633542 "hypothetical protein"  
"JS1\_E15\_00041" 5527 "s59E13H2" 0.2469165 "2,3-dimethylmalate dehydratase large subunit"  
"JS1\_E15\_00041" 5527 "s59E25H2" 0.7959596 "2,3-dimethylmalate dehydratase large subunit"  
"JS1\_E15\_00041" 5527 "s59E5H2" 0.2643004 "2,3-dimethylmalate dehydratase large subunit"  
"JS1\_E15\_00041" 5527 "s63E6H2" 0.4626401 "2,3-dimethylmalate dehydratase large subunit"  
"JS1\_E15\_00042" 5528 "s59E13H2" 0.3055824 "Vitamin B12 dependent methionine synthase, activation domain"  
"JS1\_E15\_00042" 5528 "s59E25H2" 0 "Vitamin B12 dependent methionine synthase, activation domain"  
"JS1\_E15\_00042" 5528 "s59E5H2" 0.0793905 "Vitamin B12 dependent methionine synthase, activation domain"  
"JS1\_E15\_00042" 5528 "s63E6H2" 0.3160702 "Vitamin B12 dependent methionine synthase, activation domain"  
"JS1\_E15\_00043" 5529 "s59E13H2" 0.1395707 "Bifunctional homocysteine S-methyltransferase/5,10-methylenetetrahydrofolate reductase"  
"JS1\_E15\_00043" 5529 "s59E25H2" 0 "Bifunctional homocysteine S-methyltransferase/5,10-methylenetetrahydrofolate reductase"  
"JS1\_E15\_00043" 5529 "s59E5H2" 0.1087349 "Bifunctional homocysteine S-methyltransferase/5,10-methylenetetrahydrofolate reductase"  
"JS1\_E15\_00043" 5529 "s63E6H2" 0.3594028 "Bifunctional homocysteine S-methyltransferase/5,10-methylenetetrahydrofolate reductase"  
"JS1\_E15\_00044" 5530 "s59E13H2" 0.08536014 "5-methyltetrahydrofolate:corrinoid/iron-sulfur protein co-methyltransferase"  
"JS1\_E15\_00044" 5530 "s59E25H2" 0 "5-methyltetrahydrofolate:corrinoid/iron-sulfur protein co-methyltransferase"  
"JS1\_E15\_00044" 5530 "s59E5H2" 0.1690189 "5-methyltetrahydrofolate:corrinoid/iron-sulfur protein co-methyltransferase"  
"JS1\_E15\_00044" 5530 "s63E6H2" 0.2962382 "5-methyltetrahydrofolate:corrinoid/iron-sulfur protein co-methyltransferase"  
"JS1\_E15\_00045" 5531 "s59E13H2" 0.04605346 "Dimethylamine corrinoid protein"  
"JS1\_E15\_00045" 5531 "s59E25H2" 0 "Dimethylamine corrinoid protein"  
"JS1\_E15\_00045" 5531 "s59E5H2" 0.1185292 "Dimethylamine corrinoid protein"  
"JS1\_E15\_00045" 5531 "s63E6H2" 0.2798098 "Dimethylamine corrinoid protein"  
"JS1\_E15\_00046" 5532 "s59E13H2" 0.05010413 "Pyrroline-5-carboxylate reductase"  
"JS1\_E15\_00046" 5532 "s59E25H2" 0 "Pyrroline-5-carboxylate reductase"  
"JS1\_E15\_00046" 5532 "s59E5H2" 2.155306 "Pyrroline-5-carboxylate reductase"  
"JS1\_E15\_00046" 5532 "s63E6H2" 0.5424574 "Pyrroline-5-carboxylate reductase"  
"JS1\_E15\_00047" 5533 "s59E13H2" 0.2549922 "hypothetical protein"  
"JS1\_E15\_00047" 5533 "s59E25H2" 0 "hypothetical protein"  
"JS1\_E15\_00047" 5533 "s59E5H2" 1.851022 "hypothetical protein"  
"JS1\_E15\_00047" 5533 "s63E6H2" 1.026407 "hypothetical protein"  
"JS1\_E15\_00048" 5534 "s59E13H2" 0.1793111 "Ferredoxin"  
"JS1\_E15\_00048" 5534 "s59E25H2" 0 "Ferredoxin"  
"JS1\_E15\_00048" 5534 "s59E5H2" 2.383204 "Ferredoxin"  
"JS1\_E15\_00048" 5534 "s63E6H2" 0.7656776 "Ferredoxin"  
"JS1\_E15\_00049" 5535 "s59E13H2" 0.1725538 "hypothetical protein"  
"JS1\_E15\_00049" 5535 "s59E25H2" 0 "hypothetical protein"  
"JS1\_E15\_00049" 5535 "s59E5H2" 0.7879237 "hypothetical protein"

"JS1\_E15\_00049" 5535 "s63E6H2" 0.5099377 "hypothetical protein"  
"JS1\_E15\_00050" 5536 "s59E13H2" 0.1546938 "(R)-citramalate synthase CimA"  
"JS1\_E15\_00050" 5536 "s59E25H2" 0 "(R)-citramalate synthase CimA"  
"JS1\_E15\_00050" 5536 "s59E5H2" 1.502443 "(R)-citramalate synthase CimA"  
"JS1\_E15\_00050" 5536 "s63E6H2" 0.6487504 "(R)-citramalate synthase CimA"  
"JS1\_E15\_00051" 5537 "s59E13H2" 0.1391741 "2-isopropylmalate synthase"  
"JS1\_E15\_00051" 5537 "s59E25H2" 0 "2-isopropylmalate synthase"  
"JS1\_E15\_00051" 5537 "s59E5H2" 0.155444 "2-isopropylmalate synthase"  
"JS1\_E15\_00051" 5537 "s63E6H2" 0.4560283 "2-isopropylmalate synthase"  
"JS1\_E15\_00052" 5538 "s59E13H2" 0.3474604 "Vitamin B12 dependent methionine synthase, activation domain"  
"JS1\_E15\_00052" 5538 "s59E25H2" 0 "Vitamin B12 dependent methionine synthase, activation domain"  
"JS1\_E15\_00052" 5538 "s59E5H2" 0.1050238 "Vitamin B12 dependent methionine synthase, activation domain"  
"JS1\_E15\_00052" 5538 "s63E6H2" 0.320778 "Vitamin B12 dependent methionine synthase, activation domain"  
"JS1\_E15\_00054" 5540 "s59E13H2" 0.0301409 "D-3-phosphoglycerate dehydrogenase"  
"JS1\_E15\_00054" 5540 "s59E25H2" 0 "D-3-phosphoglycerate dehydrogenase"  
"JS1\_E15\_00054" 5540 "s59E5H2" 0.7325052 "D-3-phosphoglycerate dehydrogenase"  
"JS1\_E15\_00054" 5540 "s63E6H2" 0.1699066 "D-3-phosphoglycerate dehydrogenase"  
"JS1\_E15\_00055" 5541 "s59E13H2" 0.03966085 "hypothetical protein"  
"JS1\_E15\_00055" 5541 "s59E25H2" 0 "hypothetical protein"  
"JS1\_E15\_00055" 5541 "s59E5H2" 0.115813 "hypothetical protein"  
"JS1\_E15\_00055" 5541 "s63E6H2" 0.1513084 "hypothetical protein"  
"JS1\_E15\_00056" 5542 "s59E13H2" 0.04769218 "Bifunctional homocysteine S-methyltransferase/5,10-methylenetetrahydrofolate reductase"  
"JS1\_E15\_00056" 5542 "s59E25H2" 0 "Bifunctional homocysteine S-methyltransferase/5,10-methylenetetrahydrofolate reductase"  
"JS1\_E15\_00056" 5542 "s59E5H2" 0.3396898 "Bifunctional homocysteine S-methyltransferase/5,10-methylenetetrahydrofolate reductase"  
"JS1\_E15\_00056" 5542 "s63E6H2" 0.04073799 "Bifunctional homocysteine S-methyltransferase/5,10-methylenetetrahydrofolate reductase"  
"JS1\_E15\_00057" 5543 "s59E13H2" 0.02853383 "Dihydroxy-acid dehydratase"  
"JS1\_E15\_00057" 5543 "s59E25H2" 0 "Dihydroxy-acid dehydratase"  
"JS1\_E15\_00057" 5543 "s59E5H2" 0.4823527 "Dihydroxy-acid dehydratase"  
"JS1\_E15\_00057" 5543 "s63E6H2" 0.0591359 "Dihydroxy-acid dehydratase"  
"JS1\_E15\_00060" 5546 "s59E13H2" 0.04911373 "Acetolactate synthase large subunit"  
"JS1\_E15\_00060" 5546 "s59E25H2" 0 "Acetolactate synthase large subunit"  
"JS1\_E15\_00060" 5546 "s59E5H2" 0.7243375 "Acetolactate synthase large subunit"  
"JS1\_E15\_00060" 5546 "s63E6H2" 0.3574375 "Acetolactate synthase large subunit"  
"JS1\_E15\_00061" 5547 "s59E13H2" 0.009826797 "Acetolactate synthase small subunit"  
"JS1\_E15\_00061" 5547 "s59E25H2" 0 "Acetolactate synthase small subunit"  
"JS1\_E15\_00061" 5547 "s59E5H2" 0.8082617 "Acetolactate synthase small subunit"  
"JS1\_E15\_00061" 5547 "s63E6H2" 0.4438117 "Acetolactate synthase small subunit"  
"JS1\_E15\_00062" 5548 "s59E13H2" 0.007258952 "Ketol-acid reductoisomerase"  
"JS1\_E15\_00062" 5548 "s59E25H2" 0 "Ketol-acid reductoisomerase"  
"JS1\_E15\_00062" 5548 "s59E5H2" 0.04313028 "Ketol-acid reductoisomerase"  
"JS1\_E15\_00062" 5548 "s63E6H2" 0.03069947 "Ketol-acid reductoisomerase"  
"JS1\_E15\_00063" 5549 "s59E13H2" 0.01124363 "D-3-phosphoglycerate dehydrogenase"  
"JS1\_E15\_00063" 5549 "s59E25H2" 0 "D-3-phosphoglycerate dehydrogenase"  
"JS1\_E15\_00063" 5549 "s59E5H2" 0.1683347 "D-3-phosphoglycerate dehydrogenase"  
"JS1\_E15\_00063" 5549 "s63E6H2" 0.009979622 "D-3-phosphoglycerate dehydrogenase"  
"JS1\_E15\_00064" 5550 "s59E13H2" 0.8641756 "Soluble hydrogenase 42 kDa subunit"  
"JS1\_E15\_00064" 5550 "s59E25H2" 0 "Soluble hydrogenase 42 kDa subunit"

"JS1\_E15\_00064" 5550 "s59E5H2" 0.3572787 "Soluble hydrogenase 42 kDa subunit"  
"JS1\_E15\_00064" 5550 "s63E6H2" 0.0167961 "Soluble hydrogenase 42 kDa subunit"  
"JS1\_E15\_00065" 5551 "s59E13H2" 0.07497348 "Trp repressor protein"  
"JS1\_E15\_00065" 5551 "s59E25H2" 0 "Trp repressor protein"  
"JS1\_E15\_00065" 5551 "s59E5H2" 0.07661783 "Trp repressor protein"  
"JS1\_E15\_00065" 5551 "s63E6H2" 0.01829806 "Trp repressor protein"  
"JS1\_E15\_00066" 5552 "s59E13H2" 0.02148442 "Phosphoribosyl-AMP cyclohydrolase"  
"JS1\_E15\_00066" 5552 "s59E25H2" 0 "Phosphoribosyl-AMP cyclohydrolase"  
"JS1\_E15\_00066" 5552 "s59E5H2" 0.05749407 "Phosphoribosyl-AMP cyclohydrolase"  
"JS1\_E15\_00066" 5552 "s63E6H2" 0.02523902 "Phosphoribosyl-AMP cyclohydrolase"  
"JS1\_E15\_00067" 5553 "s59E13H2" 0.004336511 "Imidazole glycerol phosphate synthase subunit HisF"  
"JS1\_E15\_00067" 5553 "s59E25H2" 0 "Imidazole glycerol phosphate synthase subunit HisF"  
"JS1\_E15\_00067" 5553 "s59E5H2" 0.1043956 "Imidazole glycerol phosphate synthase subunit HisF"  
"JS1\_E15\_00067" 5553 "s63E6H2" 0.02293618 "Imidazole glycerol phosphate synthase subunit HisF"  
"JS1\_E15\_00068" 5554 "s59E13H2" 0.01025688 "1-(5-phosphoribosyl)-5-[(5-phosphoribosylamino)methylideneamino] imidazole-4-carboxamide isomerase"  
"JS1\_E15\_00068" 5554 "s59E25H2" 0 "1-(5-phosphoribosyl)-5-[(5-phosphoribosylamino)methylideneamino] imidazole-4-carboxamide isomerase"  
"JS1\_E15\_00068" 5554 "s59E5H2" 0.01469953 "1-(5-phosphoribosyl)-5-[(5-phosphoribosylamino)methylideneamino] imidazole-4-carboxamide isomerase"  
"JS1\_E15\_00068" 5554 "s63E6H2" 0.02844507 "1-(5-phosphoribosyl)-5-[(5-phosphoribosylamino)methylideneamino] imidazole-4-carboxamide isomerase"  
"JS1\_E15\_00069" 5555 "s59E13H2" 0.02289268 "Imidazole glycerol phosphate synthase subunit HisH 1"  
"JS1\_E15\_00069" 5555 "s59E25H2" 0 "Imidazole glycerol phosphate synthase subunit HisH 1"  
"JS1\_E15\_00069" 5555 "s59E5H2" 0.07922238 "Imidazole glycerol phosphate synthase subunit HisH 1"  
"JS1\_E15\_00069" 5555 "s63E6H2" 0.08597571 "Imidazole glycerol phosphate synthase subunit HisH 1"  
"JS1\_E15\_00070" 5556 "s59E13H2" 0.02096807 "Imidazoleglycerol-phosphate dehydratase"  
"JS1\_E15\_00070" 5556 "s59E25H2" 0 "Imidazoleglycerol-phosphate dehydratase"  
"JS1\_E15\_00070" 5556 "s59E5H2" 0.2125626 "Imidazoleglycerol-phosphate dehydratase"  
"JS1\_E15\_00070" 5556 "s63E6H2" 0.06681316 "Imidazoleglycerol-phosphate dehydratase"  
"JS1\_E15\_00071" 5557 "s59E13H2" 0.03683287 "Pyrophosphatase PpaX"  
"JS1\_E15\_00071" 5557 "s59E25H2" 0 "Pyrophosphatase PpaX"  
"JS1\_E15\_00071" 5557 "s59E5H2" 0.05495289 "Pyrophosphatase PpaX"  
"JS1\_E15\_00071" 5557 "s63E6H2" 0.0487702 "Pyrophosphatase PpaX"  
"JS1\_E15\_00072" 5558 "s59E13H2" 0.0575219 "Histidinol dehydrogenase"  
"JS1\_E15\_00072" 5558 "s59E25H2" 0 "Histidinol dehydrogenase"  
"JS1\_E15\_00072" 5558 "s59E5H2" 0.06159963 "Histidinol dehydrogenase"  
"JS1\_E15\_00072" 5558 "s63E6H2" 0.05644723 "Histidinol dehydrogenase"  
"JS1\_E15\_00073" 5559 "s59E13H2" 0.2072908 "ATP phosphoribosyltransferase"  
"JS1\_E15\_00073" 5559 "s59E25H2" 0 "ATP phosphoribosyltransferase"  
"JS1\_E15\_00073" 5559 "s59E5H2" 0.03391013 "ATP phosphoribosyltransferase"  
"JS1\_E15\_00073" 5559 "s63E6H2" 0.0432541 "ATP phosphoribosyltransferase"  
"JS1\_E15\_00074" 5560 "s59E13H2" 0.1849056 "ATP phosphoribosyltransferase regulatory subunit"  
"JS1\_E15\_00074" 5560 "s59E25H2" 0 "ATP phosphoribosyltransferase regulatory subunit"  
"JS1\_E15\_00074" 5560 "s59E5H2" 0.04716022 "ATP phosphoribosyltransferase regulatory subunit"  
"JS1\_E15\_00074" 5560 "s63E6H2" 0.1611893 "ATP phosphoribosyltransferase regulatory subunit"  
"JS1\_E15\_00075" 5561 "s59E13H2" 0.8643905 "hypothetical protein"  
"JS1\_E15\_00075" 5561 "s59E25H2" 0 "hypothetical protein"  
"JS1\_E15\_00075" 5561 "s59E5H2" 0.5394841 "hypothetical protein"  
"JS1\_E15\_00075" 5561 "s63E6H2" 2.341759 "hypothetical protein"  
"JS1\_E15\_00076" 5562 "s59E13H2" 0.5541844 "hypothetical protein"

"JS1\_E15\_00076" 5562 "s59E25H2" 0 "hypothetical protein"  
"JS1\_E15\_00076" 5562 "s59E5H2" 0.04090146 "hypothetical protein"  
"JS1\_E15\_00076" 5562 "s63E6H2" 0.04152361 "hypothetical protein"  
"JS1\_E15\_00078" 5564 "s59E13H2" 2.011527 "ribosomal-protein-alanine N-acetyltransferase"  
"JS1\_E15\_00078" 5564 "s59E25H2" 0 "ribosomal-protein-alanine N-acetyltransferase"  
"JS1\_E15\_00078" 5564 "s59E5H2" 0.4482334 "ribosomal-protein-alanine N-acetyltransferase"  
"JS1\_E15\_00078" 5564 "s63E6H2" 0.7346233 "ribosomal-protein-alanine N-acetyltransferase"  
"JS1\_E15\_00079" 5565 "s59E13H2" 0.1239897 "Glyoxalase-like domain protein"  
"JS1\_E15\_00079" 5565 "s59E25H2" 0 "Glyoxalase-like domain protein"  
"JS1\_E15\_00079" 5565 "s59E5H2" 0.05187066 "Glyoxalase-like domain protein"  
"JS1\_E15\_00079" 5565 "s63E6H2" 0 "Glyoxalase-like domain protein"  
"JS1\_E15\_00080" 5566 "s59E13H2" 6.644124 "NnrU protein"  
"JS1\_E15\_00080" 5566 "s59E25H2" 0 "NnrU protein"  
"JS1\_E15\_00080" 5566 "s59E5H2" 0.0486352 "NnrU protein"  
"JS1\_E15\_00080" 5566 "s63E6H2" 0.07937386 "NnrU protein"  
"JS1\_E15\_00082" 5568 "s59E13H2" 0.1670901 "hypothetical protein"  
"JS1\_E15\_00082" 5568 "s59E25H2" 0 "hypothetical protein"  
"JS1\_E15\_00082" 5568 "s59E5H2" 0.9134347 "hypothetical protein"  
"JS1\_E15\_00082" 5568 "s63E6H2" 0.04011383 "hypothetical protein"  
"JS1\_E15\_00083" 5569 "s59E13H2" 0 "hypothetical protein"  
"JS1\_E15\_00083" 5569 "s59E25H2" 0 "hypothetical protein"  
"JS1\_E15\_00083" 5569 "s59E5H2" 0 "hypothetical protein"  
"JS1\_E15\_00083" 5569 "s63E6H2" 0 "hypothetical protein"  
"JS1\_E15\_00084" 5570 "s59E13H2" 0 "hypothetical protein"  
"JS1\_E15\_00084" 5570 "s59E25H2" 0 "hypothetical protein"  
"JS1\_E15\_00084" 5570 "s59E5H2" 0 "hypothetical protein"  
"JS1\_E15\_00084" 5570 "s63E6H2" 0 "hypothetical protein"  
"JS1\_E15\_00088" 5574 "s59E13H2" 0.0530789 "Acyl carrier protein"  
"JS1\_E15\_00088" 5574 "s59E25H2" 0 "Acyl carrier protein"  
"JS1\_E15\_00088" 5574 "s59E5H2" 0 "Acyl carrier protein"  
"JS1\_E15\_00088" 5574 "s63E6H2" 0.005322756 "Acyl carrier protein"  
"JS1\_E15\_00089" 5575 "s59E13H2" 0.3199825 "Inositol-3-phosphate synthase"  
"JS1\_E15\_00089" 5575 "s59E25H2" 0 "Inositol-3-phosphate synthase"  
"JS1\_E15\_00089" 5575 "s59E5H2" 0 "Inositol-3-phosphate synthase"  
"JS1\_E15\_00089" 5575 "s63E6H2" 0 "Inositol-3-phosphate synthase"  
"JS1\_E15\_00090" 5576 "s59E13H2" 0.9422699 "Bifunctional IPC transferase and DIPP synthase"  
"JS1\_E15\_00090" 5576 "s59E25H2" 0 "Bifunctional IPC transferase and DIPP synthase"  
"JS1\_E15\_00090" 5576 "s59E5H2" 0.008467352 "Bifunctional IPC transferase and DIPP synthase"  
"JS1\_E15\_00090" 5576 "s63E6H2" 0.06787851 "Bifunctional IPC transferase and DIPP synthase"  
"JS1\_E15\_00091" 5577 "s59E13H2" 0.08804592 "hypothetical protein"  
"JS1\_E15\_00091" 5577 "s59E25H2" 0 "hypothetical protein"  
"JS1\_E15\_00091" 5577 "s59E5H2" 0.01330611 "hypothetical protein"  
"JS1\_E15\_00091" 5577 "s63E6H2" 0.01453123 "hypothetical protein"  
"JS1\_E15\_00092" 5578 "s59E13H2" 0.08985663 "Pyruvate, phosphate dikinase"  
"JS1\_E15\_00092" 5578 "s59E25H2" 0 "Pyruvate, phosphate dikinase"  
"JS1\_E15\_00092" 5578 "s59E5H2" 2.356026 "Pyruvate, phosphate dikinase"  
"JS1\_E15\_00092" 5578 "s63E6H2" 0.02222703 "Pyruvate, phosphate dikinase"

"JS1\_E15\_00093" 5579 "s59E13H2" 0.04021202 "Glyceraldehyde-3-phosphate dehydrogenase 2"  
"JS1\_E15\_00093" 5579 "s59E25H2" 0.3741987 "Glyceraldehyde-3-phosphate dehydrogenase 2"  
"JS1\_E15\_00093" 5579 "s59E5H2" 4.634425 "Glyceraldehyde-3-phosphate dehydrogenase 2"  
"JS1\_E15\_00093" 5579 "s63E6H2" 0.03132198 "Glyceraldehyde-3-phosphate dehydrogenase 2"  
"JS1\_E15\_00094" 5580 "s59E13H2" 0 "hypothetical protein"  
"JS1\_E15\_00094" 5580 "s59E25H2" 0 "hypothetical protein"  
"JS1\_E15\_00094" 5580 "s59E5H2" 0 "hypothetical protein"  
"JS1\_E15\_00094" 5580 "s63E6H2" 0 "hypothetical protein"  
"JS1\_E15\_00095" 5581 "s59E13H2" 1.376568 "transcriptional repressor Dica"  
"JS1\_E15\_00095" 5581 "s59E25H2" 0 "transcriptional repressor Dica"  
"JS1\_E15\_00095" 5581 "s59E5H2" 0 "transcriptional repressor Dica"  
"JS1\_E15\_00095" 5581 "s63E6H2" 0 "transcriptional repressor Dica"  
"JS1\_E15\_00096" 5582 "s59E13H2" 0 "OPT oligopeptide transporter protein"  
"JS1\_E15\_00096" 5582 "s59E25H2" 0 "OPT oligopeptide transporter protein"  
"JS1\_E15\_00096" 5582 "s59E5H2" 0 "OPT oligopeptide transporter protein"  
"JS1\_E15\_00096" 5582 "s63E6H2" 0.07658263 "OPT oligopeptide transporter protein"  
"JS1\_E15\_00097" 5583 "s59E13H2" 0 "Asp/Glu/Hydantoin racemase"  
"JS1\_E15\_00097" 5583 "s59E25H2" 0 "Asp/Glu/Hydantoin racemase"  
"JS1\_E15\_00097" 5583 "s59E5H2" 0 "Asp/Glu/Hydantoin racemase"  
"JS1\_E15\_00097" 5583 "s63E6H2" 0.01741263 "Asp/Glu/Hydantoin racemase"  
"JS1\_E15\_00098" 5584 "s59E13H2" 0.003187182 "hypothetical protein"  
"JS1\_E15\_00098" 5584 "s59E25H2" 0 "hypothetical protein"  
"JS1\_E15\_00098" 5584 "s59E5H2" 0 "hypothetical protein"  
"JS1\_E15\_00098" 5584 "s63E6H2" 0.01073505 "hypothetical protein"  
"JS1\_E15\_00099" 5585 "s59E13H2" 0 "hypothetical protein"  
"JS1\_E15\_00099" 5585 "s59E25H2" 0 "hypothetical protein"  
"JS1\_E15\_00099" 5585 "s59E5H2" 0.01362272 "hypothetical protein"  
"JS1\_E15\_00099" 5585 "s63E6H2" 0.01151351 "hypothetical protein"  
"JS1\_E15\_00101" 5587 "s59E13H2" 0 "hypothetical protein"  
"JS1\_E15\_00101" 5587 "s59E25H2" 0 "hypothetical protein"  
"JS1\_E15\_00101" 5587 "s59E5H2" 0 "hypothetical protein"  
"JS1\_E15\_00101" 5587 "s63E6H2" 0.001981795 "hypothetical protein"  
"JS1\_E15\_00102" 5588 "s59E13H2" 0 "2,5-dihydroxypyridine 5,6-dioxygenase"  
"JS1\_E15\_00102" 5588 "s59E25H2" 0 "2,5-dihydroxypyridine 5,6-dioxygenase"  
"JS1\_E15\_00102" 5588 "s59E5H2" 0.008394755 "2,5-dihydroxypyridine 5,6-dioxygenase"  
"JS1\_E15\_00102" 5588 "s63E6H2" 0.02682152 "2,5-dihydroxypyridine 5,6-dioxygenase"  
"JS1\_E15\_00103" 5589 "s59E13H2" 0.2134647 "Helix-turn-helix"  
"JS1\_E15\_00103" 5589 "s59E25H2" 0 "Helix-turn-helix"  
"JS1\_E15\_00103" 5589 "s59E5H2" 0 "Helix-turn-helix"  
"JS1\_E15\_00103" 5589 "s63E6H2" 0.0006055997 "Helix-turn-helix"  
"JS1\_E15\_00104" 5590 "s59E13H2" 0 "Aspartate carbamoyltransferase"  
"JS1\_E15\_00104" 5590 "s59E25H2" 0 "Aspartate carbamoyltransferase"  
"JS1\_E15\_00104" 5590 "s59E5H2" 0.07227731 "Aspartate carbamoyltransferase"  
"JS1\_E15\_00104" 5590 "s63E6H2" 0.005515484 "Aspartate carbamoyltransferase"  
"JS1\_E15\_00105" 5591 "s59E13H2" 0.07733498 "hypothetical protein"  
"JS1\_E15\_00105" 5591 "s59E25H2" 0 "hypothetical protein"  
"JS1\_E15\_00105" 5591 "s59E5H2" 1.08654 "hypothetical protein"



"JS1\_E15\_00105" 5591 "s63E6H2" 0.04567379 "hypothetical protein"  
"JS1\_E15\_00106" 5592 "s59E13H2" 9.12857 "Phage Terminase"  
"JS1\_E15\_00106" 5592 "s59E25H2" 0.110231 "Phage Terminase"  
"JS1\_E15\_00106" 5592 "s59E5H2" 0.7669808 "Phage Terminase"  
"JS1\_E15\_00106" 5592 "s63E6H2" 0.02318958 "Phage Terminase"  
"JS1\_E15\_00107" 5593 "s59E13H2" 0.2414396 "putative tyrosine recombinase XerC-like protein"  
"JS1\_E15\_00107" 5593 "s59E25H2" 0 "putative tyrosine recombinase XerC-like protein"  
"JS1\_E15\_00107" 5593 "s59E5H2" 0.2618517 "putative tyrosine recombinase XerC-like protein"  
"JS1\_E15\_00107" 5593 "s63E6H2" 0.01191709 "putative tyrosine recombinase XerC-like protein"  
"JS1\_E15\_00109" 5595 "s59E13H2" 0.08376822 "hypothetical protein"  
"JS1\_E15\_00109" 5595 "s59E25H2" 0 "hypothetical protein"  
"JS1\_E15\_00109" 5595 "s59E5H2" 0 "hypothetical protein"  
"JS1\_E15\_00109" 5595 "s63E6H2" 0 "hypothetical protein"  
"JS1\_E15\_00111" 5597 "s59E13H2" 0.07439943 "hypothetical protein"  
"JS1\_E15\_00111" 5597 "s59E25H2" 0 "hypothetical protein"  
"JS1\_E15\_00111" 5597 "s59E5H2" 0.03949296 "hypothetical protein"  
"JS1\_E15\_00111" 5597 "s63E6H2" 0.0008188997 "hypothetical protein"  
"JS1\_E15\_00112" 5598 "s59E13H2" 0.06911647 "hypothetical protein"  
"JS1\_E15\_00112" 5598 "s59E25H2" 0 "hypothetical protein"  
"JS1\_E15\_00112" 5598 "s59E5H2" 0.06244519 "hypothetical protein"  
"JS1\_E15\_00112" 5598 "s63E6H2" 0.00479456 "hypothetical protein"  
"JS1\_E15\_00114" 5600 "s59E13H2" 0.02204877 "hypothetical protein"  
"JS1\_E15\_00114" 5600 "s59E25H2" 0 "hypothetical protein"  
"JS1\_E15\_00114" 5600 "s59E5H2" 0 "hypothetical protein"  
"JS1\_E15\_00114" 5600 "s63E6H2" 0 "hypothetical protein"  
"JS1\_E15\_00118" 5604 "s59E13H2" 0.08310551 "RNA polymerase factor sigma-70"  
"JS1\_E15\_00118" 5604 "s59E25H2" 0 "RNA polymerase factor sigma-70"  
"JS1\_E15\_00118" 5604 "s59E5H2" 0.3998894 "RNA polymerase factor sigma-70"  
"JS1\_E15\_00118" 5604 "s63E6H2" 0.9405051 "RNA polymerase factor sigma-70"  
"JS1\_E15\_00119" 5605 "s59E13H2" 0.1468288 "Sigma-70, region 4"  
"JS1\_E15\_00119" 5605 "s59E25H2" 0 "Sigma-70, region 4"  
"JS1\_E15\_00119" 5605 "s59E5H2" 1.157082 "Sigma-70, region 4"  
"JS1\_E15\_00119" 5605 "s63E6H2" 0.8215207 "Sigma-70, region 4"  
"JS1\_E15\_00120" 5606 "s59E13H2" 0.7108128 "hypothetical protein"  
"JS1\_E15\_00120" 5606 "s59E25H2" 0 "hypothetical protein"  
"JS1\_E15\_00120" 5606 "s59E5H2" 1.196397 "hypothetical protein"  
"JS1\_E15\_00120" 5606 "s63E6H2" 5.87238 "hypothetical protein"  
"JS1\_E15\_00121" 5607 "s59E13H2" 1.203802 "hypothetical protein"  
"JS1\_E15\_00121" 5607 "s59E25H2" 0 "hypothetical protein"  
"JS1\_E15\_00121" 5607 "s59E5H2" 2.7709 "hypothetical protein"  
"JS1\_E15\_00121" 5607 "s63E6H2" 11.2955 "hypothetical protein"  
"JS1\_E15\_00122" 5608 "s59E13H2" 1.174055 "hypothetical protein"  
"JS1\_E15\_00122" 5608 "s59E25H2" 0 "hypothetical protein"  
"JS1\_E15\_00122" 5608 "s59E5H2" 2.075058 "hypothetical protein"  
"JS1\_E15\_00122" 5608 "s63E6H2" 2.612362 "hypothetical protein"  
"JS1\_E15\_00123" 5609 "s59E13H2" 6.278052 "Peptidase M15"  
"JS1\_E15\_00123" 5609 "s59E25H2" 0 "Peptidase M15"

"JS1\_E15\_00123" 5609 "s59E5H2" 1.982937 "Peptidase M15"  
"JS1\_E15\_00123" 5609 "s63E6H2" 5.227615 "Peptidase M15"  
"JS1\_E15\_00124" 5610 "s59E13H2" 2.050019 "YvrJ protein family protein"  
"JS1\_E15\_00124" 5610 "s59E25H2" 0 "YvrJ protein family protein"  
"JS1\_E15\_00124" 5610 "s59E5H2" 1.094952 "YvrJ protein family protein"  
"JS1\_E15\_00124" 5610 "s63E6H2" 5.037187 "YvrJ protein family protein"  
"JS1\_E15\_00125" 5611 "s59E13H2" 0.398199 "Protein ArsC"  
"JS1\_E15\_00125" 5611 "s59E25H2" 0 "Protein ArsC"  
"JS1\_E15\_00125" 5611 "s59E5H2" 0.9990783 "Protein ArsC"  
"JS1\_E15\_00125" 5611 "s63E6H2" 0.07639943 "Protein ArsC"  
"JS1\_E15\_00126" 5612 "s59E13H2" 0.4041489 "Inner membrane symporter YicJ"  
"JS1\_E15\_00126" 5612 "s59E25H2" 0 "Inner membrane symporter YicJ"  
"JS1\_E15\_00126" 5612 "s59E5H2" 3.937217 "Inner membrane symporter YicJ"  
"JS1\_E15\_00126" 5612 "s63E6H2" 2.024696 "Inner membrane symporter YicJ"  
"JS1\_E15\_00127" 5613 "s59E13H2" 0.271602 "Carbon-nitrogen hydrolase"  
"JS1\_E15\_00127" 5613 "s59E25H2" 0 "Carbon-nitrogen hydrolase"  
"JS1\_E15\_00127" 5613 "s59E5H2" 2.266148 "Carbon-nitrogen hydrolase"  
"JS1\_E15\_00127" 5613 "s63E6H2" 0.7635125 "Carbon-nitrogen hydrolase"  
"JS1\_E15\_00128" 5614 "s59E13H2" 0.1303684 "Formamidase"  
"JS1\_E15\_00128" 5614 "s59E25H2" 0 "Formamidase"  
"JS1\_E15\_00128" 5614 "s59E5H2" 0.8458833 "Formamidase"  
"JS1\_E15\_00128" 5614 "s63E6H2" 0.9003485 "Formamidase"  
"JS1\_E15\_00129" 5615 "s59E13H2" 0.1956731 "hypothetical protein"  
"JS1\_E15\_00129" 5615 "s59E25H2" 0 "hypothetical protein"  
"JS1\_E15\_00129" 5615 "s59E5H2" 0.6758871 "hypothetical protein"  
"JS1\_E15\_00129" 5615 "s63E6H2" 1.322417 "hypothetical protein"  
"JS1\_E15\_00130" 5616 "s59E13H2" 7.172689 "Integrase core domain protein"  
"JS1\_E15\_00130" 5616 "s59E25H2" 0 "Integrase core domain protein"  
"JS1\_E15\_00130" 5616 "s59E5H2" 2.108872 "Integrase core domain protein"  
"JS1\_E15\_00130" 5616 "s63E6H2" 3.885278 "Integrase core domain protein"  
"JS1\_E15\_00131" 5617 "s59E13H2" 1.04463 "protease TldD"  
"JS1\_E15\_00131" 5617 "s59E25H2" 0 "protease TldD"  
"JS1\_E15\_00131" 5617 "s59E5H2" 0.1510751 "protease TldD"  
"JS1\_E15\_00131" 5617 "s63E6H2" 0.8409221 "protease TldD"  
"JS1\_E15\_00132" 5618 "s59E13H2" 0.8986748 "protease TldD"  
"JS1\_E15\_00132" 5618 "s59E25H2" 0.130117 "protease TldD"  
"JS1\_E15\_00132" 5618 "s59E5H2" 11.57482 "protease TldD"  
"JS1\_E15\_00132" 5618 "s63E6H2" 0.8453768 "protease TldD"  
"JS1\_E15\_00133" 5619 "s59E13H2" 0.2395584 "3'-5' exoribonuclease YhaM"  
"JS1\_E15\_00133" 5619 "s59E25H2" 0 "3'-5' exoribonuclease YhaM"  
"JS1\_E15\_00133" 5619 "s59E5H2" 0.06131983 "3'-5' exoribonuclease YhaM"  
"JS1\_E15\_00133" 5619 "s63E6H2" 0.5537371 "3'-5' exoribonuclease YhaM"  
"JS1\_E15\_00134" 5620 "s59E13H2" 1.247699 "Glucosamine-6-phosphate deaminase 1"  
"JS1\_E15\_00134" 5620 "s59E25H2" 0 "Glucosamine-6-phosphate deaminase 1"  
"JS1\_E15\_00134" 5620 "s59E5H2" 0.3998455 "Glucosamine-6-phosphate deaminase 1"  
"JS1\_E15\_00134" 5620 "s63E6H2" 0.9442916 "Glucosamine-6-phosphate deaminase 1"  
"JS1\_E15\_00135" 5621 "s59E13H2" 1.528446 "N-acetylglucosamine-6-phosphate deacetylase"

"JS1\_E15\_00135" 5621 "s59E25H2" 0 "N-acetylglucosamine-6-phosphate deacetylase"  
"JS1\_E15\_00135" 5621 "s59E5H2" 0.2786776 "N-acetylglucosamine-6-phosphate deacetylase"  
"JS1\_E15\_00135" 5621 "s63E6H2" 1.136889 "N-acetylglucosamine-6-phosphate deacetylase"  
"JS1\_E15\_00136" 5622 "s59E13H2" 0.3297428 "hypothetical protein"  
"JS1\_E15\_00136" 5622 "s59E25H2" 0 "hypothetical protein"  
"JS1\_E15\_00136" 5622 "s59E5H2" 0.8819483 "hypothetical protein"  
"JS1\_E15\_00136" 5622 "s63E6H2" 1.319774 "hypothetical protein"  
"JS1\_E15\_00137" 5623 "s59E13H2" 0.1876476 "Xylose isomerase-like TIM barrel"  
"JS1\_E15\_00137" 5623 "s59E25H2" 0 "Xylose isomerase-like TIM barrel"  
"JS1\_E15\_00137" 5623 "s59E5H2" 0.0508802 "Xylose isomerase-like TIM barrel"  
"JS1\_E15\_00137" 5623 "s63E6H2" 0.03193117 "Xylose isomerase-like TIM barrel"  
"JS1\_E15\_00138" 5624 "s59E13H2" 0.09577528 "Inositol 2-dehydrogenase"  
"JS1\_E15\_00138" 5624 "s59E25H2" 0 "Inositol 2-dehydrogenase"  
"JS1\_E15\_00138" 5624 "s59E5H2" 0.02916829 "Inositol 2-dehydrogenase"  
"JS1\_E15\_00138" 5624 "s63E6H2" 0.0008117746 "Inositol 2-dehydrogenase"  
"JS1\_E15\_00139" 5625 "s59E13H2" 0.06199778 "hypothetical protein"  
"JS1\_E15\_00139" 5625 "s59E25H2" 0 "hypothetical protein"  
"JS1\_E15\_00139" 5625 "s59E5H2" 0.01804357 "hypothetical protein"  
"JS1\_E15\_00139" 5625 "s63E6H2" 0 "hypothetical protein"  
"JS1\_E15\_00140" 5626 "s59E13H2" 0.07679922 "Inositol 2-dehydrogenase"  
"JS1\_E15\_00140" 5626 "s59E25H2" 0 "Inositol 2-dehydrogenase"  
"JS1\_E15\_00140" 5626 "s59E5H2" 0.01463395 "Inositol 2-dehydrogenase"  
"JS1\_E15\_00140" 5626 "s63E6H2" 0 "Inositol 2-dehydrogenase"  
"JS1\_E15\_00141" 5627 "s59E13H2" 0.3165567 "fructoselysine 3-epimerase"  
"JS1\_E15\_00141" 5627 "s59E25H2" 0 "fructoselysine 3-epimerase"  
"JS1\_E15\_00141" 5627 "s59E5H2" 0.160809 "fructoselysine 3-epimerase"  
"JS1\_E15\_00141" 5627 "s63E6H2" 0 "fructoselysine 3-epimerase"  
"JS1\_E15\_00142" 5628 "s59E13H2" 6.963614 "Tetratricopeptide repeat protein"  
"JS1\_E15\_00142" 5628 "s59E25H2" 0 "Tetratricopeptide repeat protein"  
"JS1\_E15\_00142" 5628 "s59E5H2" 0.09746339 "Tetratricopeptide repeat protein"  
"JS1\_E15\_00142" 5628 "s63E6H2" 0 "Tetratricopeptide repeat protein"  
"JS1\_E15\_00143" 5629 "s59E13H2" 0.5117144 "hypothetical protein"  
"JS1\_E15\_00143" 5629 "s59E25H2" 0 "hypothetical protein"  
"JS1\_E15\_00143" 5629 "s59E5H2" 1.163592 "hypothetical protein"  
"JS1\_E15\_00143" 5629 "s63E6H2" 1.616286 "hypothetical protein"  
"JS1\_E15\_00144" 5630 "s59E13H2" 1.790385 "Protein-L-isoaspartate O-methyltransferase"  
"JS1\_E15\_00144" 5630 "s59E25H2" 0 "Protein-L-isoaspartate O-methyltransferase"  
"JS1\_E15\_00144" 5630 "s59E5H2" 2.254369 "Protein-L-isoaspartate O-methyltransferase"  
"JS1\_E15\_00144" 5630 "s63E6H2" 1.29421 "Protein-L-isoaspartate O-methyltransferase"  
"JS1\_E15\_00145" 5631 "s59E13H2" 1.675632 "ABC-2 family transporter protein"  
"JS1\_E15\_00145" 5631 "s59E25H2" 0 "ABC-2 family transporter protein"  
"JS1\_E15\_00145" 5631 "s59E5H2" 1.364394 "ABC-2 family transporter protein"  
"JS1\_E15\_00145" 5631 "s63E6H2" 1.152742 "ABC-2 family transporter protein"  
"JS1\_E15\_00148" 5634 "s59E13H2" 0.007210742 "hypothetical protein"  
"JS1\_E15\_00148" 5634 "s59E25H2" 0 "hypothetical protein"  
"JS1\_E15\_00148" 5634 "s59E5H2" 0 "hypothetical protein"  
"JS1\_E15\_00148" 5634 "s63E6H2" 0 "hypothetical protein"

"JS1\_E15\_00151" 5637 "s59E13H2" 0.006268621 "hypothetical protein"  
"JS1\_E15\_00151" 5637 "s59E25H2" 0 "hypothetical protein"  
"JS1\_E15\_00151" 5637 "s59E5H2" 0 "hypothetical protein"  
"JS1\_E15\_00151" 5637 "s63E6H2" 0 "hypothetical protein"  
"JS1\_E15\_00155" 5641 "s59E13H2" 0.006964408 "Phage protein Gp37/Gp68"  
"JS1\_E15\_00155" 5641 "s59E25H2" 0 "Phage protein Gp37/Gp68"  
"JS1\_E15\_00155" 5641 "s59E5H2" 0 "Phage protein Gp37/Gp68"  
"JS1\_E15\_00155" 5641 "s63E6H2" 0.0006241096 "Phage protein Gp37/Gp68"  
"JS1\_E15\_00157" 5643 "s59E13H2" 0.2009518 "Transposase IS116/IS110/IS902 family protein"  
"JS1\_E15\_00157" 5643 "s59E25H2" 0 "Transposase IS116/IS110/IS902 family protein"  
"JS1\_E15\_00157" 5643 "s59E5H2" 0 "Transposase IS116/IS110/IS902 family protein"  
"JS1\_E15\_00157" 5643 "s63E6H2" 0.001537741 "Transposase IS116/IS110/IS902 family protein"  
"JS1\_E15\_00159" 5645 "s59E13H2" 0.06469376 "ATP-dependent Clp protease proteolytic subunit 1"  
"JS1\_E15\_00159" 5645 "s59E25H2" 0 "ATP-dependent Clp protease proteolytic subunit 1"  
"JS1\_E15\_00159" 5645 "s59E5H2" 0.004118515 "ATP-dependent Clp protease proteolytic subunit 1"  
"JS1\_E15\_00159" 5645 "s63E6H2" 0 "ATP-dependent Clp protease proteolytic subunit 1"  
"JS1\_E15\_00164" 5650 "s59E13H2" 0.03617708 "hypothetical protein"  
"JS1\_E15\_00164" 5650 "s59E25H2" 0 "hypothetical protein"  
"JS1\_E15\_00164" 5650 "s59E5H2" 0 "hypothetical protein"  
"JS1\_E15\_00164" 5650 "s63E6H2" 0 "hypothetical protein"  
"JS1\_E15\_00166" 5652 "s59E13H2" 0 "hypothetical protein"  
"JS1\_E15\_00166" 5652 "s59E25H2" 0 "hypothetical protein"  
"JS1\_E15\_00166" 5652 "s59E5H2" 0 "hypothetical protein"  
"JS1\_E15\_00166" 5652 "s63E6H2" 0 "hypothetical protein"  
"JS1\_E15\_00167" 5653 "s59E13H2" 0.004589092 "hypothetical protein"  
"JS1\_E15\_00167" 5653 "s59E25H2" 0 "hypothetical protein"  
"JS1\_E15\_00167" 5653 "s59E5H2" 0 "hypothetical protein"  
"JS1\_E15\_00167" 5653 "s63E6H2" 0 "hypothetical protein"  
"JS1\_E15\_00168" 5654 "s59E13H2" 0 "hypothetical protein"  
"JS1\_E15\_00168" 5654 "s59E25H2" 0 "hypothetical protein"  
"JS1\_E15\_00168" 5654 "s59E5H2" 0 "hypothetical protein"  
"JS1\_E15\_00168" 5654 "s63E6H2" 0 "hypothetical protein"  
"JS1\_E15\_00169" 5655 "s59E13H2" 0.001180515 "Modification methylase DpnIIB"  
"JS1\_E15\_00169" 5655 "s59E25H2" 0 "Modification methylase DpnIIB"  
"JS1\_E15\_00169" 5655 "s59E5H2" 0 "Modification methylase DpnIIB"  
"JS1\_E15\_00169" 5655 "s63E6H2" 0 "Modification methylase DpnIIB"  
"JS1\_E15\_00170" 5656 "s59E13H2" 0.02392364 "Modification methylase MwoI"  
"JS1\_E15\_00170" 5656 "s59E25H2" 0 "Modification methylase MwoI"  
"JS1\_E15\_00170" 5656 "s59E5H2" 0 "Modification methylase MwoI"  
"JS1\_E15\_00170" 5656 "s63E6H2" 0.001967408 "Modification methylase MwoI"  
"JS1\_E15\_00171" 5657 "s59E13H2" 0 "Modification methylase DpnIIB"  
"JS1\_E15\_00171" 5657 "s59E25H2" 0 "Modification methylase DpnIIB"  
"JS1\_E15\_00171" 5657 "s59E5H2" 0 "Modification methylase DpnIIB"  
"JS1\_E15\_00171" 5657 "s63E6H2" 0 "Modification methylase DpnIIB"  
"JS1\_E15\_00172" 5658 "s59E13H2" 0.1191453 "putative methyltransferase"  
"JS1\_E15\_00172" 5658 "s59E25H2" 0 "putative methyltransferase"  
"JS1\_E15\_00172" 5658 "s59E5H2" 0 "putative methyltransferase"

"JS1\_E15\_00172" 5658 "s63E6H2" 0.004524016 "putative methyltransferase"  
"JS1\_E15\_00173" 5659 "s59E13H2" 0.0001070091 "hypothetical protein"  
"JS1\_E15\_00173" 5659 "s59E25H2" 0 "hypothetical protein"  
"JS1\_E15\_00173" 5659 "s59E5H2" 0 "hypothetical protein"  
"JS1\_E15\_00173" 5659 "s63E6H2" 0 "hypothetical protein"  
"JS1\_E15\_00175" 5661 "s59E13H2" 0.164253 "Phage portal protein"  
"JS1\_E15\_00175" 5661 "s59E25H2" 0 "Phage portal protein"  
"JS1\_E15\_00175" 5661 "s59E5H2" 0 "Phage portal protein"  
"JS1\_E15\_00175" 5661 "s63E6H2" 0.01000783 "Phage portal protein"  
"JS1\_E15\_00177" 5663 "s59E13H2" 0.07990082 "Phage portal protein"  
"JS1\_E15\_00177" 5663 "s59E25H2" 0 "Phage portal protein"  
"JS1\_E15\_00177" 5663 "s59E5H2" 0 "Phage portal protein"  
"JS1\_E15\_00177" 5663 "s63E6H2" 0.003124724 "Phage portal protein"  
"JS1\_E15\_00180" 5666 "s59E13H2" 0.01920304 "Phage Mu protein F like protein"  
"JS1\_E15\_00180" 5666 "s59E25H2" 0 "Phage Mu protein F like protein"  
"JS1\_E15\_00180" 5666 "s59E5H2" 0.007448374 "Phage Mu protein F like protein"  
"JS1\_E15\_00180" 5666 "s63E6H2" 0.006115283 "Phage Mu protein F like protein"  
"JS1\_E15\_00182" 5668 "s59E13H2" 0.1041669 "ATP-dependent DNA ligase"  
"JS1\_E15\_00182" 5668 "s59E25H2" 0 "ATP-dependent DNA ligase"  
"JS1\_E15\_00182" 5668 "s59E5H2" 0 "ATP-dependent DNA ligase"  
"JS1\_E15\_00182" 5668 "s63E6H2" 0.002804348 "ATP-dependent DNA ligase"  
"JS1\_E15\_00183" 5669 "s59E13H2" 0.1787899 "Modification methylase DpnIIA"  
"JS1\_E15\_00183" 5669 "s59E25H2" 0 "Modification methylase DpnIIA"  
"JS1\_E15\_00183" 5669 "s59E5H2" 0.001487861 "Modification methylase DpnIIA"  
"JS1\_E15\_00183" 5669 "s63E6H2" 0.007853532 "Modification methylase DpnIIA"  
"JS1\_E15\_00184" 5670 "s59E13H2" 1.40488 "hypothetical protein"  
"JS1\_E15\_00184" 5670 "s59E25H2" 0 "hypothetical protein"  
"JS1\_E15\_00184" 5670 "s59E5H2" 0 "hypothetical protein"  
"JS1\_E15\_00184" 5670 "s63E6H2" 0.007588773 "hypothetical protein"  
"JS1\_E15\_00187" 5673 "s59E13H2" 0 "hypothetical protein"  
"JS1\_E15\_00187" 5673 "s59E25H2" 0 "hypothetical protein"  
"JS1\_E15\_00187" 5673 "s59E5H2" 0 "hypothetical protein"  
"JS1\_E15\_00187" 5673 "s63E6H2" 0 "hypothetical protein"  
"JS1\_E15\_00190" 5676 "s59E13H2" 4.716557 "hypothetical protein"  
"JS1\_E15\_00190" 5676 "s59E25H2" 0 "hypothetical protein"  
"JS1\_E15\_00190" 5676 "s59E5H2" 0 "hypothetical protein"  
"JS1\_E15\_00190" 5676 "s63E6H2" 0.02232825 "hypothetical protein"  
"JS1\_E15\_00192" 5678 "s59E13H2" 0.001109563 "DNA double-strand break repair Rad50 ATPase"  
"JS1\_E15\_00192" 5678 "s59E25H2" 0 "DNA double-strand break repair Rad50 ATPase"  
"JS1\_E15\_00192" 5678 "s59E5H2" 0 "DNA double-strand break repair Rad50 ATPase"  
"JS1\_E15\_00192" 5678 "s63E6H2" 0 "DNA double-strand break repair Rad50 ATPase"  
"JS1\_E15\_00193" 5679 "s59E13H2" 0.09373489 "DNA double-strand break repair protein Mre11"  
"JS1\_E15\_00193" 5679 "s59E25H2" 0 "DNA double-strand break repair protein Mre11"  
"JS1\_E15\_00193" 5679 "s59E5H2" 0.03468709 "DNA double-strand break repair protein Mre11"  
"JS1\_E15\_00193" 5679 "s63E6H2" 0.05178927 "DNA double-strand break repair protein Mre11"  
"JS1\_E15\_00194" 5680 "s59E13H2" 0.3078518 "hypothetical protein"  
"JS1\_E15\_00194" 5680 "s59E25H2" 0 "hypothetical protein"

"JS1\_E15\_00194" 5680 "s59E5H2" 0.01245141 "hypothetical protein"  
"JS1\_E15\_00194" 5680 "s63E6H2" 0 "hypothetical protein"  
"JS1\_E15\_00195" 5681 "s59E13H2" 0.4322794 "hypothetical protein"  
"JS1\_E15\_00195" 5681 "s59E25H2" 0 "hypothetical protein"  
"JS1\_E15\_00195" 5681 "s59E5H2" 0 "hypothetical protein"  
"JS1\_E15\_00195" 5681 "s63E6H2" 0.0030071 "hypothetical protein"  
"JS1\_E15\_00198" 5684 "s59E13H2" 0.1610336 "hypothetical protein"  
"JS1\_E15\_00198" 5684 "s59E25H2" 0 "hypothetical protein"  
"JS1\_E15\_00198" 5684 "s59E5H2" 0.004660516 "hypothetical protein"  
"JS1\_E15\_00198" 5684 "s63E6H2" 0.002659019 "hypothetical protein"  
"JS1\_E15\_00201" 5687 "s59E13H2" 2.016919 "Oligopeptide transport ATP-binding protein OppD"  
"JS1\_E15\_00201" 5687 "s59E25H2" 0.2429543 "Oligopeptide transport ATP-binding protein OppD"  
"JS1\_E15\_00201" 5687 "s59E5H2" 1.08721 "Oligopeptide transport ATP-binding protein OppD"  
"JS1\_E15\_00201" 5687 "s63E6H2" 2.551003 "Oligopeptide transport ATP-binding protein OppD"  
"JS1\_E15\_00202" 5688 "s59E13H2" 0.8866526 "Putative nicotinate phosphoribosyltransferase"  
"JS1\_E15\_00202" 5688 "s59E25H2" 0.2788889 "Putative nicotinate phosphoribosyltransferase"  
"JS1\_E15\_00202" 5688 "s59E5H2" 0.503032 "Putative nicotinate phosphoribosyltransferase"  
"JS1\_E15\_00202" 5688 "s63E6H2" 0.4555482 "Putative nicotinate phosphoribosyltransferase"  
"JS1\_E15\_00205" 5691 "s59E13H2" 6.030782 "Group II intron-encoded protein LtrA"  
"JS1\_E15\_00205" 5691 "s59E25H2" 0 "Group II intron-encoded protein LtrA"  
"JS1\_E15\_00205" 5691 "s59E5H2" 3.099536 "Group II intron-encoded protein LtrA"  
"JS1\_E15\_00205" 5691 "s63E6H2" 15.17828 "Group II intron-encoded protein LtrA"  
"JS1\_E15\_00206" 5692 "s59E13H2" 0 "hypothetical protein"  
"JS1\_E15\_00206" 5692 "s59E25H2" 0 "hypothetical protein"  
"JS1\_E15\_00206" 5692 "s59E5H2" 0 "hypothetical protein"  
"JS1\_E15\_00206" 5692 "s63E6H2" 0 "hypothetical protein"  
"JS1\_E15\_00207" 5693 "s59E13H2" 0.8218737 "putative ABC transporter ATP-binding protein YbhF"  
"JS1\_E15\_00207" 5693 "s59E25H2" 0 "putative ABC transporter ATP-binding protein YbhF"  
"JS1\_E15\_00207" 5693 "s59E5H2" 1.220401 "putative ABC transporter ATP-binding protein YbhF"  
"JS1\_E15\_00207" 5693 "s63E6H2" 1.887388 "putative ABC transporter ATP-binding protein YbhF"  
"JS1\_E15\_00208" 5694 "s59E13H2" 0.2072242 "Oligopeptide-binding protein OppA precursor"  
"JS1\_E15\_00208" 5694 "s59E25H2" 0 "Oligopeptide-binding protein OppA precursor"  
"JS1\_E15\_00208" 5694 "s59E5H2" 0.1494844 "Oligopeptide-binding protein OppA precursor"  
"JS1\_E15\_00208" 5694 "s63E6H2" 0.4065859 "Oligopeptide-binding protein OppA precursor"  
"JS1\_E15\_00209" 5695 "s59E13H2" 0.01432168 "Chromosome partition protein Smc"  
"JS1\_E15\_00209" 5695 "s59E25H2" 0 "Chromosome partition protein Smc"  
"JS1\_E15\_00209" 5695 "s59E5H2" 0.01497149 "Chromosome partition protein Smc"  
"JS1\_E15\_00209" 5695 "s63E6H2" 0.03955192 "Chromosome partition protein Smc"  
"JS1\_E15\_00210" 5696 "s59E13H2" 0.01896362 "Signal recognition particle receptor FtsY"  
"JS1\_E15\_00210" 5696 "s59E25H2" 0 "Signal recognition particle receptor FtsY"  
"JS1\_E15\_00210" 5696 "s59E5H2" 0.03971082 "Signal recognition particle receptor FtsY"  
"JS1\_E15\_00210" 5696 "s63E6H2" 0.05740671 "Signal recognition particle receptor FtsY"  
"JS1\_E15\_00211" 5697 "s59E13H2" 0.09776472 "Signal recognition particle protein"  
"JS1\_E15\_00211" 5697 "s59E25H2" 0 "Signal recognition particle protein"  
"JS1\_E15\_00211" 5697 "s59E5H2" 0.1056965 "Signal recognition particle protein"  
"JS1\_E15\_00211" 5697 "s63E6H2" 0.03128207 "Signal recognition particle protein"  
"JS1\_E15\_00212" 5698 "s59E13H2" 0.1660458 "Signal recognition particle protein"

"JS1\_E15\_00212" 5698 "s59E25H2" 0 "Signal recognition particle protein"  
"JS1\_E15\_00212" 5698 "s59E5H2" 0.07211948 "Signal recognition particle protein"  
"JS1\_E15\_00212" 5698 "s63E6H2" 0.004791465 "Signal recognition particle protein"  
"JS1\_E15\_00213" 5699 "s59E13H2" 0.004659572 "Signal recognition particle protein"  
"JS1\_E15\_00213" 5699 "s59E25H2" 0 "Signal recognition particle protein"  
"JS1\_E15\_00213" 5699 "s59E5H2" 0.03987352 "Signal recognition particle protein"  
"JS1\_E15\_00213" 5699 "s63E6H2" 0.009482905 "Signal recognition particle protein"  
"JS1\_E15\_00214" 5700 "s59E13H2" 0.01773816 "30S ribosomal protein S16"  
"JS1\_E15\_00214" 5700 "s59E25H2" 0 "30S ribosomal protein S16"  
"JS1\_E15\_00214" 5700 "s59E5H2" 0.02011817 "30S ribosomal protein S16"  
"JS1\_E15\_00214" 5700 "s63E6H2" 0.01784723 "30S ribosomal protein S16"  
"JS1\_E15\_00215" 5701 "s59E13H2" 0.02553395 "hypothetical protein"  
"JS1\_E15\_00215" 5701 "s59E25H2" 0 "hypothetical protein"  
"JS1\_E15\_00215" 5701 "s59E5H2" 0.03740629 "hypothetical protein"  
"JS1\_E15\_00215" 5701 "s63E6H2" 0.0240803 "hypothetical protein"  
"JS1\_E15\_00216" 5702 "s59E13H2" 0.9767152 "Ribosome maturation factor RimM"  
"JS1\_E15\_00216" 5702 "s59E25H2" 0 "Ribosome maturation factor RimM"  
"JS1\_E15\_00216" 5702 "s59E5H2" 0.03499827 "Ribosome maturation factor RimM"  
"JS1\_E15\_00216" 5702 "s63E6H2" 0.007402429 "Ribosome maturation factor RimM"  
"JS1\_E15\_00217" 5703 "s59E13H2" 0.01785359 "tRNA (guanine-N(1)-methyltransferase"  
"JS1\_E15\_00217" 5703 "s59E25H2" 0 "tRNA (guanine-N(1)-methyltransferase"  
"JS1\_E15\_00217" 5703 "s59E5H2" 0.07611734 "tRNA (guanine-N(1)-methyltransferase"  
"JS1\_E15\_00217" 5703 "s63E6H2" 0.01383019 "tRNA (guanine-N(1)-methyltransferase"  
"JS1\_E15\_00218" 5704 "s59E13H2" 0.01749987 "50S ribosomal protein L19"  
"JS1\_E15\_00218" 5704 "s59E25H2" 0 "50S ribosomal protein L19"  
"JS1\_E15\_00218" 5704 "s59E5H2" 0.06968695 "50S ribosomal protein L19"  
"JS1\_E15\_00218" 5704 "s63E6H2" 0.04343608 "50S ribosomal protein L19"  
"JS1\_E15\_00219" 5705 "s59E13H2" 0.03143852 "Ribonuclease HII"  
"JS1\_E15\_00219" 5705 "s59E25H2" 0 "Ribonuclease HII"  
"JS1\_E15\_00219" 5705 "s59E5H2" 0.1124592 "Ribonuclease HII"  
"JS1\_E15\_00219" 5705 "s63E6H2" 0.04342231 "Ribonuclease HII"  
"JS1\_E15\_00220" 5706 "s59E13H2" 0.03350003 "hypothetical protein"  
"JS1\_E15\_00220" 5706 "s59E25H2" 0 "hypothetical protein"  
"JS1\_E15\_00220" 5706 "s59E5H2" 0.09484502 "hypothetical protein"  
"JS1\_E15\_00220" 5706 "s63E6H2" 0.01453604 "hypothetical protein"  
"JS1\_E15\_00221" 5707 "s59E13H2" 0.2294644 "Competence protein ComM"  
"JS1\_E15\_00221" 5707 "s59E25H2" 0 "Competence protein ComM"  
"JS1\_E15\_00221" 5707 "s59E5H2" 0.2018652 "Competence protein ComM"  
"JS1\_E15\_00221" 5707 "s63E6H2" 0.04650063 "Competence protein ComM"  
"JS1\_E15\_00222" 5708 "s59E13H2" 0.0171296 "Ribulose-phosphate 3-epimerase"  
"JS1\_E15\_00222" 5708 "s59E25H2" 0 "Ribulose-phosphate 3-epimerase"  
"JS1\_E15\_00222" 5708 "s59E5H2" 0.1501004 "Ribulose-phosphate 3-epimerase"  
"JS1\_E15\_00222" 5708 "s63E6H2" 0.0345881 "Ribulose-phosphate 3-epimerase"  
"JS1\_E15\_00223" 5709 "s59E13H2" 0.08796984 "GTPase Der"  
"JS1\_E15\_00223" 5709 "s59E25H2" 0 "GTPase Der"  
"JS1\_E15\_00223" 5709 "s59E5H2" 0.1689708 "GTPase Der"  
"JS1\_E15\_00223" 5709 "s63E6H2" 0.08564493 "GTPase Der"

"JS1\_E15\_00224" 5710 "s59E13H2" 0.007965646 "Glycerol-3-phosphate acyltransferase"  
"JS1\_E15\_00224" 5710 "s59E25H2" 0 "Glycerol-3-phosphate acyltransferase"  
"JS1\_E15\_00224" 5710 "s59E5H2" 0.09055563 "Glycerol-3-phosphate acyltransferase"  
"JS1\_E15\_00224" 5710 "s63E6H2" 0.05062062 "Glycerol-3-phosphate acyltransferase"  
"JS1\_E15\_00225" 5711 "s59E13H2" 0.03349617 "hypothetical protein"  
"JS1\_E15\_00225" 5711 "s59E25H2" 0 "hypothetical protein"  
"JS1\_E15\_00225" 5711 "s59E5H2" 0.2490339 "hypothetical protein"  
"JS1\_E15\_00225" 5711 "s63E6H2" 0.05758026 "hypothetical protein"  
"JS1\_E15\_00226" 5712 "s59E13H2" 0.03581651 "DNA topoisomerase 1"  
"JS1\_E15\_00226" 5712 "s59E25H2" 0 "DNA topoisomerase 1"  
"JS1\_E15\_00226" 5712 "s59E5H2" 0.148781 "DNA topoisomerase 1"  
"JS1\_E15\_00226" 5712 "s63E6H2" 0.06610613 "DNA topoisomerase 1"  
"JS1\_E15\_00228" 5714 "s59E13H2" 0.03945328 "Tyrosine recombinase XerD"  
"JS1\_E15\_00228" 5714 "s59E25H2" 0 "Tyrosine recombinase XerD"  
"JS1\_E15\_00228" 5714 "s59E5H2" 0.1734424 "Tyrosine recombinase XerD"  
"JS1\_E15\_00228" 5714 "s63E6H2" 0.08407343 "Tyrosine recombinase XerD"  
"JS1\_E15\_00229" 5715 "s59E13H2" 0.04000783 "ATP-dependent protease subunit ClpQ"  
"JS1\_E15\_00229" 5715 "s59E25H2" 0 "ATP-dependent protease subunit ClpQ"  
"JS1\_E15\_00229" 5715 "s59E5H2" 0.2607694 "ATP-dependent protease subunit ClpQ"  
"JS1\_E15\_00229" 5715 "s63E6H2" 0.07359625 "ATP-dependent protease subunit ClpQ"  
"JS1\_E15\_00230" 5716 "s59E13H2" 0.03471034 "ATP-dependent protease ATPase subunit ClpY"  
"JS1\_E15\_00230" 5716 "s59E25H2" 0 "ATP-dependent protease ATPase subunit ClpY"  
"JS1\_E15\_00230" 5716 "s59E5H2" 0.944446 "ATP-dependent protease ATPase subunit ClpY"  
"JS1\_E15\_00230" 5716 "s63E6H2" 0.06726058 "ATP-dependent protease ATPase subunit ClpY"  
"JS1\_E15\_00231" 5717 "s59E13H2" 0.04231806 "30S ribosomal protein S2"  
"JS1\_E15\_00231" 5717 "s59E25H2" 0 "30S ribosomal protein S2"  
"JS1\_E15\_00231" 5717 "s59E5H2" 0.07340691 "30S ribosomal protein S2"  
"JS1\_E15\_00231" 5717 "s63E6H2" 0.02603707 "30S ribosomal protein S2"  
"JS1\_E15\_00232" 5718 "s59E13H2" 0.06476816 "Elongation factor Ts"  
"JS1\_E15\_00232" 5718 "s59E25H2" 0 "Elongation factor Ts"  
"JS1\_E15\_00232" 5718 "s59E5H2" 0.05965918 "Elongation factor Ts"  
"JS1\_E15\_00232" 5718 "s63E6H2" 0.02205769 "Elongation factor Ts"  
"JS1\_E15\_00233" 5719 "s59E13H2" 0.06244294 "Purine catabolism protein PucG"  
"JS1\_E15\_00233" 5719 "s59E25H2" 0 "Purine catabolism protein PucG"  
"JS1\_E15\_00233" 5719 "s59E5H2" 0.2864355 "Purine catabolism protein PucG"  
"JS1\_E15\_00233" 5719 "s63E6H2" 0.07061288 "Purine catabolism protein PucG"  
"JS1\_E15\_00234" 5720 "s59E13H2" 17.42467 "Sodium:neurotransmitter symporter family protein"  
"JS1\_E15\_00234" 5720 "s59E25H2" 0 "Sodium:neurotransmitter symporter family protein"  
"JS1\_E15\_00234" 5720 "s59E5H2" 0.7762743 "Sodium:neurotransmitter symporter family protein"  
"JS1\_E15\_00234" 5720 "s63E6H2" 1.547324 "Sodium:neurotransmitter symporter family protein"  
"JS1\_E15\_00236" 5722 "s59E13H2" 0.456932 "Heterodisulfide reductase subunit A-like protein"  
"JS1\_E15\_00236" 5722 "s59E25H2" 0 "Heterodisulfide reductase subunit A-like protein"  
"JS1\_E15\_00236" 5722 "s59E5H2" 0.5486624 "Heterodisulfide reductase subunit A-like protein"  
"JS1\_E15\_00236" 5722 "s63E6H2" 0.3437073 "Heterodisulfide reductase subunit A-like protein"  
"JS1\_E15\_00237" 5723 "s59E13H2" 0.6704152 "Septum site-determining protein MinD"  
"JS1\_E15\_00237" 5723 "s59E25H2" 0 "Septum site-determining protein MinD"  
"JS1\_E15\_00237" 5723 "s59E5H2" 1.001736 "Septum site-determining protein MinD"



"JS1\_E15\_00237" 5723 "s63E6H2" 0.2027129 "Septum site-determining protein MinD"  
"JS1\_E15\_00238" 5724 "s59E13H2" 1.389055 "Radical SAM superfamily protein"  
"JS1\_E15\_00238" 5724 "s59E25H2" 0 "Radical SAM superfamily protein"  
"JS1\_E15\_00238" 5724 "s59E5H2" 0.4496122 "Radical SAM superfamily protein"  
"JS1\_E15\_00238" 5724 "s63E6H2" 0.1005887 "Radical SAM superfamily protein"  
"JS1\_E15\_00239" 5725 "s59E13H2" 0.8866062 "Demethylmenaquinone methyltransferase"  
"JS1\_E15\_00239" 5725 "s59E25H2" 0 "Demethylmenaquinone methyltransferase"  
"JS1\_E15\_00239" 5725 "s59E5H2" 0.419009 "Demethylmenaquinone methyltransferase"  
"JS1\_E15\_00239" 5725 "s63E6H2" 0.01210068 "Demethylmenaquinone methyltransferase"  
"JS1\_E15\_00240" 5726 "s59E13H2" 0.5343532 "hypothetical protein"  
"JS1\_E15\_00240" 5726 "s59E25H2" 0 "hypothetical protein"  
"JS1\_E15\_00240" 5726 "s59E5H2" 0.183733 "hypothetical protein"  
"JS1\_E15\_00240" 5726 "s63E6H2" 0.01159237 "hypothetical protein"  
"JS1\_E15\_00241" 5727 "s59E13H2" 0.2417169 "Septum site-determining protein MinD"  
"JS1\_E15\_00241" 5727 "s59E25H2" 0 "Septum site-determining protein MinD"  
"JS1\_E15\_00241" 5727 "s59E5H2" 0.651143 "Septum site-determining protein MinD"  
"JS1\_E15\_00241" 5727 "s63E6H2" 0.1072596 "Septum site-determining protein MinD"  
"JS1\_E15\_00242" 5728 "s59E13H2" 0.2330421 "7,8-dihydropterin-6-methyl-4-(beta-D-ribofuranosyl)-aminobenzene-5'-phosphate synthase"  
"JS1\_E15\_00242" 5728 "s59E25H2" 0 "7,8-dihydropterin-6-methyl-4-(beta-D-ribofuranosyl)-aminobenzene-5'-phosphate synthase"  
"JS1\_E15\_00242" 5728 "s59E5H2" 0.6371765 "7,8-dihydropterin-6-methyl-4-(beta-D-ribofuranosyl)-aminobenzene-5'-phosphate synthase"  
"JS1\_E15\_00242" 5728 "s63E6H2" 0.1207631 "7,8-dihydropterin-6-methyl-4-(beta-D-ribofuranosyl)-aminobenzene-5'-phosphate synthase"  
"JS1\_E15\_00244" 5730 "s59E13H2" 0.2204764 "putative permease"  
"JS1\_E15\_00244" 5730 "s59E25H2" 0 "putative permease"  
"JS1\_E15\_00244" 5730 "s59E5H2" 1.058025 "putative permease"  
"JS1\_E15\_00244" 5730 "s63E6H2" 0.1045059 "putative permease"  
"JS1\_E15\_00245" 5731 "s59E13H2" 0.3238259 "putative permease"  
"JS1\_E15\_00245" 5731 "s59E25H2" 0 "putative permease"  
"JS1\_E15\_00245" 5731 "s59E5H2" 0.7478086 "putative permease"  
"JS1\_E15\_00245" 5731 "s63E6H2" 0.07760647 "putative permease"  
"JS1\_E15\_00246" 5732 "s59E13H2" 0.949971 "Flavin reductase like domain protein"  
"JS1\_E15\_00246" 5732 "s59E25H2" 0 "Flavin reductase like domain protein"  
"JS1\_E15\_00246" 5732 "s59E5H2" 2.225009 "Flavin reductase like domain protein"  
"JS1\_E15\_00246" 5732 "s63E6H2" 0.01113989 "Flavin reductase like domain protein"  
"JS1\_E15\_00247" 5733 "s59E13H2" 0.3999783 "hypothetical protein"  
"JS1\_E15\_00247" 5733 "s59E25H2" 0 "hypothetical protein"  
"JS1\_E15\_00247" 5733 "s59E5H2" 1.449766 "hypothetical protein"  
"JS1\_E15\_00247" 5733 "s63E6H2" 0.04903683 "hypothetical protein"  
"JS1\_E15\_00249" 5735 "s59E13H2" 0.1416468 "Ferric uptake regulation protein"  
"JS1\_E15\_00249" 5735 "s59E25H2" 0 "Ferric uptake regulation protein"  
"JS1\_E15\_00249" 5735 "s59E5H2" 0.09950401 "Ferric uptake regulation protein"  
"JS1\_E15\_00249" 5735 "s63E6H2" 0.008240815 "Ferric uptake regulation protein"  
"JS1\_E15\_00250" 5736 "s59E13H2" 0.1632306 "FeoA domain protein"  
"JS1\_E15\_00250" 5736 "s59E25H2" 0 "FeoA domain protein"  
"JS1\_E15\_00250" 5736 "s59E5H2" 0.08288336 "FeoA domain protein"  
"JS1\_E15\_00250" 5736 "s63E6H2" 0 "FeoA domain protein"  
"JS1\_E15\_00251" 5737 "s59E13H2" 0.1323698 "FeoA domain protein"  
"JS1\_E15\_00251" 5737 "s59E25H2" 0 "FeoA domain protein"

"JS1\_E15\_00251" 5737 "s59E5H2" 0.120237 "FeoA domain protein"  
"JS1\_E15\_00251" 5737 "s63E6H2" 0.006959187 "FeoA domain protein"  
"JS1\_E15\_00252" 5738 "s59E13H2" 0.1438275 "hypothetical protein"  
"JS1\_E15\_00252" 5738 "s59E25H2" 0 "hypothetical protein"  
"JS1\_E15\_00252" 5738 "s59E5H2" 0.2239112 "hypothetical protein"  
"JS1\_E15\_00252" 5738 "s63E6H2" 0.002816394 "hypothetical protein"  
"JS1\_E15\_00253" 5739 "s59E13H2" 0.1427814 "hypothetical protein"  
"JS1\_E15\_00253" 5739 "s59E25H2" 0 "hypothetical protein"  
"JS1\_E15\_00253" 5739 "s59E5H2" 0.04014906 "hypothetical protein"  
"JS1\_E15\_00253" 5739 "s63E6H2" 0 "hypothetical protein"  
"JS1\_E15\_00254" 5740 "s59E13H2" 0.1030806 "hypothetical protein"  
"JS1\_E15\_00254" 5740 "s59E25H2" 0 "hypothetical protein"  
"JS1\_E15\_00254" 5740 "s59E5H2" 0.02716561 "hypothetical protein"  
"JS1\_E15\_00254" 5740 "s63E6H2" 0 "hypothetical protein"  
"JS1\_E15\_00255" 5741 "s59E13H2" 0.1513894 "Acetoin utilization protein AcuC"  
"JS1\_E15\_00255" 5741 "s59E25H2" 0 "Acetoin utilization protein AcuC"  
"JS1\_E15\_00255" 5741 "s59E5H2" 0.1546682 "Acetoin utilization protein AcuC"  
"JS1\_E15\_00255" 5741 "s63E6H2" 0.001565027 "Acetoin utilization protein AcuC"  
"JS1\_E15\_00256" 5742 "s59E13H2" 0.08185537 "Fructose-bisphosphate aldolase class 1"  
"JS1\_E15\_00256" 5742 "s59E25H2" 0 "Fructose-bisphosphate aldolase class 1"  
"JS1\_E15\_00256" 5742 "s59E5H2" 0.2135392 "Fructose-bisphosphate aldolase class 1"  
"JS1\_E15\_00256" 5742 "s63E6H2" 0.02468088 "Fructose-bisphosphate aldolase class 1"  
"JS1\_E15\_00257" 5743 "s59E13H2" 0.06450668 "Demethylmenaquinone methyltransferase"  
"JS1\_E15\_00257" 5743 "s59E25H2" 0 "Demethylmenaquinone methyltransferase"  
"JS1\_E15\_00257" 5743 "s59E5H2" 0.0834604 "Demethylmenaquinone methyltransferase"  
"JS1\_E15\_00257" 5743 "s63E6H2" 0.05195541 "Demethylmenaquinone methyltransferase"  
"JS1\_E15\_00258" 5744 "s59E13H2" 0.144853 "hypothetical protein"  
"JS1\_E15\_00258" 5744 "s59E25H2" 0 "hypothetical protein"  
"JS1\_E15\_00258" 5744 "s59E5H2" 0.06735589 "hypothetical protein"  
"JS1\_E15\_00258" 5744 "s63E6H2" 0.008781196 "hypothetical protein"  
"JS1\_E15\_00259" 5745 "s59E13H2" 0.123883 "Peptide deformylase"  
"JS1\_E15\_00259" 5745 "s59E25H2" 0 "Peptide deformylase"  
"JS1\_E15\_00259" 5745 "s59E5H2" 0.0619235 "Peptide deformylase"  
"JS1\_E15\_00259" 5745 "s63E6H2" 0.02356417 "Peptide deformylase"  
"JS1\_E15\_00260" 5746 "s59E13H2" 0.1201013 "Pyruvate formate-lyase 1-activating enzyme"  
"JS1\_E15\_00260" 5746 "s59E25H2" 0 "Pyruvate formate-lyase 1-activating enzyme"  
"JS1\_E15\_00260" 5746 "s59E5H2" 0.05689161 "Pyruvate formate-lyase 1-activating enzyme"  
"JS1\_E15\_00260" 5746 "s63E6H2" 0.03348066 "Pyruvate formate-lyase 1-activating enzyme"  
"JS1\_E15\_00261" 5747 "s59E13H2" 0.0870197 "manganese transport regulator MntR"  
"JS1\_E15\_00261" 5747 "s59E25H2" 0 "manganese transport regulator MntR"  
"JS1\_E15\_00261" 5747 "s59E5H2" 0.0366943 "manganese transport regulator MntR"  
"JS1\_E15\_00261" 5747 "s63E6H2" 0.01147221 "manganese transport regulator MntR"  
"JS1\_E15\_00262" 5748 "s59E13H2" 0.45381 "hypothetical protein"  
"JS1\_E15\_00262" 5748 "s59E25H2" 0 "hypothetical protein"  
"JS1\_E15\_00262" 5748 "s59E5H2" 0.2223512 "hypothetical protein"  
"JS1\_E15\_00262" 5748 "s63E6H2" 0.04186308 "hypothetical protein"  
"JS1\_E15\_00263" 5749 "s59E13H2" 0.3441001 "Pyruvate, phosphate dikinase"

"JS1\_E15\_00263" 5749 "s59E25H2" 0 "Pyruvate, phosphate dikinase"  
"JS1\_E15\_00263" 5749 "s59E5H2" 1.879763 "Pyruvate, phosphate dikinase"  
"JS1\_E15\_00263" 5749 "s63E6H2" 0.1444039 "Pyruvate, phosphate dikinase"  
"JS1\_E15\_00264" 5750 "s59E13H2" 0.2145721 "Bifunctional ligase/repressor BirA"  
"JS1\_E15\_00264" 5750 "s59E25H2" 0 "Bifunctional ligase/repressor BirA"  
"JS1\_E15\_00264" 5750 "s59E5H2" 1.267251 "Bifunctional ligase/repressor BirA"  
"JS1\_E15\_00264" 5750 "s63E6H2" 1.132793 "Bifunctional ligase/repressor BirA"  
"JS1\_E15\_00265" 5751 "s59E13H2" 0.1954044 "hypothetical protein"  
"JS1\_E15\_00265" 5751 "s59E25H2" 0 "hypothetical protein"  
"JS1\_E15\_00265" 5751 "s59E5H2" 2.44368 "hypothetical protein"  
"JS1\_E15\_00265" 5751 "s63E6H2" 0.9257953 "hypothetical protein"  
"JS1\_E15\_00266" 5752 "s59E13H2" 0.1873964 "Deoxyadenosine/deoxycytidine kinase"  
"JS1\_E15\_00266" 5752 "s59E25H2" 0 "Deoxyadenosine/deoxycytidine kinase"  
"JS1\_E15\_00266" 5752 "s59E5H2" 1.71072 "Deoxyadenosine/deoxycytidine kinase"  
"JS1\_E15\_00266" 5752 "s63E6H2" 12.7042 "Deoxyadenosine/deoxycytidine kinase"  
"JS1\_E15\_00267" 5753 "s59E13H2" 0.2187147 "Deoxyguanosine kinase"  
"JS1\_E15\_00267" 5753 "s59E25H2" 0 "Deoxyguanosine kinase"  
"JS1\_E15\_00267" 5753 "s59E5H2" 1.621534 "Deoxyguanosine kinase"  
"JS1\_E15\_00267" 5753 "s63E6H2" 11.37859 "Deoxyguanosine kinase"  
"JS1\_E15\_00268" 5754 "s59E13H2" 0.1888094 "Octanoyltransferase LipM"  
"JS1\_E15\_00268" 5754 "s59E25H2" 0 "Octanoyltransferase LipM"  
"JS1\_E15\_00268" 5754 "s59E5H2" 0.9532721 "Octanoyltransferase LipM"  
"JS1\_E15\_00268" 5754 "s63E6H2" 5.626216 "Octanoyltransferase LipM"  
"JS1\_E15\_00269" 5755 "s59E13H2" 0.5400116 "Carbon starvation protein A"  
"JS1\_E15\_00269" 5755 "s59E25H2" 0 "Carbon starvation protein A"  
"JS1\_E15\_00269" 5755 "s59E5H2" 0.03400461 "Carbon starvation protein A"  
"JS1\_E15\_00269" 5755 "s63E6H2" 0.02760823 "Carbon starvation protein A"  
"JS1\_E15\_00272" 5758 "s59E13H2" 0.1827139 "Prolipoprotein diacylglyceryl transferase"  
"JS1\_E15\_00272" 5758 "s59E25H2" 0 "Prolipoprotein diacylglyceryl transferase"  
"JS1\_E15\_00272" 5758 "s59E5H2" 0.01366872 "Prolipoprotein diacylglyceryl transferase"  
"JS1\_E15\_00272" 5758 "s63E6H2" 0.005983928 "Prolipoprotein diacylglyceryl transferase"  
"JS1\_E15\_00273" 5759 "s59E13H2" 0.2258421 "putative ABC transporter ATP-binding protein/MT0079"  
"JS1\_E15\_00273" 5759 "s59E25H2" 0 "putative ABC transporter ATP-binding protein/MT0079"  
"JS1\_E15\_00273" 5759 "s59E5H2" 0 "putative ABC transporter ATP-binding protein/MT0079"  
"JS1\_E15\_00273" 5759 "s63E6H2" 0 "putative ABC transporter ATP-binding protein/MT0079"  
"JS1\_E15\_00274" 5760 "s59E13H2" 0.3083646 "putative siderophore transport system ATP-binding protein YusV"  
"JS1\_E15\_00274" 5760 "s59E25H2" 0 "putative siderophore transport system ATP-binding protein YusV"  
"JS1\_E15\_00274" 5760 "s59E5H2" 0 "putative siderophore transport system ATP-binding protein YusV"  
"JS1\_E15\_00274" 5760 "s63E6H2" 0.006816173 "putative siderophore transport system ATP-binding protein YusV"  
"JS1\_E15\_00275" 5761 "s59E13H2" 0.272766 "Thioredoxin-1"  
"JS1\_E15\_00275" 5761 "s59E25H2" 0 "Thioredoxin-1"  
"JS1\_E15\_00275" 5761 "s59E5H2" 0.0217978 "Thioredoxin-1"  
"JS1\_E15\_00275" 5761 "s63E6H2" 0.001832894 "Thioredoxin-1"  
"JS1\_E15\_00276" 5762 "s59E13H2" 0.2335276 "Thioredoxin reductase"  
"JS1\_E15\_00276" 5762 "s59E25H2" 0 "Thioredoxin reductase"  
"JS1\_E15\_00276" 5762 "s59E5H2" 0.01531108 "Thioredoxin reductase"  
"JS1\_E15\_00276" 5762 "s63E6H2" 0.006004237 "Thioredoxin reductase"

"JS1\_E15\_00277" 5763 "s59E13H2" 0.1604323 "10 kDa chaperonin"  
"JS1\_E15\_00277" 5763 "s59E25H2" 0 "10 kDa chaperonin"  
"JS1\_E15\_00277" 5763 "s59E5H2" 0.02349526 "10 kDa chaperonin"  
"JS1\_E15\_00277" 5763 "s63E6H2" 0.005022022 "10 kDa chaperonin"  
"JS1\_E15\_00278" 5764 "s59E13H2" 0.1162618 "Glutaredoxin-like protein NrdH"  
"JS1\_E15\_00278" 5764 "s59E25H2" 0 "Glutaredoxin-like protein NrdH"  
"JS1\_E15\_00278" 5764 "s59E5H2" 0 "Glutaredoxin-like protein NrdH"  
"JS1\_E15\_00278" 5764 "s63E6H2" 0.006860564 "Glutaredoxin-like protein NrdH"  
"JS1\_E15\_00279" 5765 "s59E13H2" 0.1406662 "transcriptional repressor MprA"  
"JS1\_E15\_00279" 5765 "s59E25H2" 0 "transcriptional repressor MprA"  
"JS1\_E15\_00279" 5765 "s59E5H2" 0 "transcriptional repressor MprA"  
"JS1\_E15\_00279" 5765 "s63E6H2" 0.005750985 "transcriptional repressor MprA"  
"JS1\_E15\_00281" 5767 "s59E13H2" 0.3663094 "hypothetical protein"  
"JS1\_E15\_00281" 5767 "s59E25H2" 0 "hypothetical protein"  
"JS1\_E15\_00281" 5767 "s59E5H2" 0.09661642 "hypothetical protein"  
"JS1\_E15\_00281" 5767 "s63E6H2" 0.000177474 "hypothetical protein"  
"JS1\_E15\_00282" 5768 "s59E13H2" 0.1142649 "FeoA domain protein"  
"JS1\_E15\_00282" 5768 "s59E25H2" 0 "FeoA domain protein"  
"JS1\_E15\_00282" 5768 "s59E5H2" 0.1208675 "FeoA domain protein"  
"JS1\_E15\_00282" 5768 "s63E6H2" 0.004694562 "FeoA domain protein"  
"JS1\_E15\_00283" 5769 "s59E13H2" 0.07112093 "Uridylate kinase"  
"JS1\_E15\_00283" 5769 "s59E25H2" 0 "Uridylate kinase"  
"JS1\_E15\_00283" 5769 "s59E5H2" 0.2048082 "Uridylate kinase"  
"JS1\_E15\_00283" 5769 "s63E6H2" 0.09303002 "Uridylate kinase"  
"JS1\_E15\_00284" 5770 "s59E13H2" 0.08653356 "Ribosome-recycling factor"  
"JS1\_E15\_00284" 5770 "s59E25H2" 0 "Ribosome-recycling factor"  
"JS1\_E15\_00284" 5770 "s59E5H2" 0.09851969 "Ribosome-recycling factor"  
"JS1\_E15\_00284" 5770 "s63E6H2" 0.1815725 "Ribosome-recycling factor"  
"JS1\_E15\_00285" 5771 "s59E13H2" 0.06003775 "Ferredoxin"  
"JS1\_E15\_00285" 5771 "s59E25H2" 0 "Ferredoxin"  
"JS1\_E15\_00285" 5771 "s59E5H2" 0.1436303 "Ferredoxin"  
"JS1\_E15\_00285" 5771 "s63E6H2" 0.02485043 "Ferredoxin"  
"JS1\_E15\_00286" 5772 "s59E13H2" 0.03400821 "Ditrans, polycis-undecaprenyl-diphosphate synthase ((2E,6E)-farnesyl-diphosphate specific)"  
"JS1\_E15\_00286" 5772 "s59E25H2" 0 "Ditrans, polycis-undecaprenyl-diphosphate synthase ((2E,6E)-farnesyl-diphosphate specific)"  
"JS1\_E15\_00286" 5772 "s59E5H2" 0.1550922 "Ditrans, polycis-undecaprenyl-diphosphate synthase ((2E,6E)-farnesyl-diphosphate specific)"  
"JS1\_E15\_00286" 5772 "s63E6H2" 0.09369401 "Ditrans, polycis-undecaprenyl-diphosphate synthase ((2E,6E)-farnesyl-diphosphate specific)"  
"JS1\_E15\_00287" 5773 "s59E13H2" 0.04422257 "Phosphatidate cytidyltransferase"  
"JS1\_E15\_00287" 5773 "s59E25H2" 0 "Phosphatidate cytidyltransferase"  
"JS1\_E15\_00287" 5773 "s59E5H2" 0.1312832 "Phosphatidate cytidyltransferase"  
"JS1\_E15\_00287" 5773 "s63E6H2" 0.04975928 "Phosphatidate cytidyltransferase"  
"JS1\_E15\_00288" 5774 "s59E13H2" 0.06209371 "1-deoxy-D-xylulose 5-phosphate reductoisomerase"  
"JS1\_E15\_00288" 5774 "s59E25H2" 0 "1-deoxy-D-xylulose 5-phosphate reductoisomerase"  
"JS1\_E15\_00288" 5774 "s59E5H2" 0.08665706 "1-deoxy-D-xylulose 5-phosphate reductoisomerase"  
"JS1\_E15\_00288" 5774 "s63E6H2" 0.03688207 "1-deoxy-D-xylulose 5-phosphate reductoisomerase"  
"JS1\_E15\_00289" 5775 "s59E13H2" 0.05516779 "Regulator of sigma-W protease RasP"  
"JS1\_E15\_00289" 5775 "s59E25H2" 0 "Regulator of sigma-W protease RasP"  
"JS1\_E15\_00289" 5775 "s59E5H2" 0.1738515 "Regulator of sigma-W protease RasP"

"JS1\_E15\_00289" 5775 "s63E6H2" 0.03943432 "Regulator of sigma-W protease RasP"  
"JS1\_E15\_00290" 5776 "s59E13H2" 0.03651521 "4-hydroxy-3-methylbut-2-en-1-yl diphosphate synthase"  
"JS1\_E15\_00290" 5776 "s59E25H2" 0 "4-hydroxy-3-methylbut-2-en-1-yl diphosphate synthase"  
"JS1\_E15\_00290" 5776 "s59E5H2" 0.1264608 "4-hydroxy-3-methylbut-2-en-1-yl diphosphate synthase"  
"JS1\_E15\_00290" 5776 "s63E6H2" 0.02965169 "4-hydroxy-3-methylbut-2-en-1-yl diphosphate synthase"  
"JS1\_E15\_00291" 5777 "s59E13H2" 0.02434457 "hypothetical protein"  
"JS1\_E15\_00291" 5777 "s59E25H2" 0 "hypothetical protein"  
"JS1\_E15\_00291" 5777 "s59E5H2" 0.1480468 "hypothetical protein"  
"JS1\_E15\_00291" 5777 "s63E6H2" 0.01626879 "hypothetical protein"  
"JS1\_E15\_00292" 5778 "s59E13H2" 0.03020715 "V-type ATP synthase subunit I"  
"JS1\_E15\_00292" 5778 "s59E25H2" 0 "V-type ATP synthase subunit I"  
"JS1\_E15\_00292" 5778 "s59E5H2" 0.2222267 "V-type ATP synthase subunit I"  
"JS1\_E15\_00292" 5778 "s63E6H2" 0.05385733 "V-type ATP synthase subunit I"  
"JS1\_E15\_00293" 5779 "s59E13H2" 0.06777693 "V-type sodium ATPase subunit K"  
"JS1\_E15\_00293" 5779 "s59E25H2" 0 "V-type sodium ATPase subunit K"  
"JS1\_E15\_00293" 5779 "s59E5H2" 1.026063 "V-type sodium ATPase subunit K"  
"JS1\_E15\_00293" 5779 "s63E6H2" 0.09867057 "V-type sodium ATPase subunit K"  
"JS1\_E15\_00294" 5780 "s59E13H2" 1.006033 "V-type ATP synthase subunit E"  
"JS1\_E15\_00294" 5780 "s59E25H2" 0 "V-type ATP synthase subunit E"  
"JS1\_E15\_00294" 5780 "s59E5H2" 0.199293 "V-type ATP synthase subunit E"  
"JS1\_E15\_00294" 5780 "s63E6H2" 0.07656646 "V-type ATP synthase subunit E"  
"JS1\_E15\_00295" 5781 "s59E13H2" 0.02697927 "V-type sodium ATPase subunit C"  
"JS1\_E15\_00295" 5781 "s59E25H2" 0 "V-type sodium ATPase subunit C"  
"JS1\_E15\_00295" 5781 "s59E5H2" 0.3432097 "V-type sodium ATPase subunit C"  
"JS1\_E15\_00295" 5781 "s63E6H2" 0.04305588 "V-type sodium ATPase subunit C"  
"JS1\_E15\_00296" 5782 "s59E13H2" 0.105759 "V-type sodium ATPase subunit G"  
"JS1\_E15\_00296" 5782 "s59E25H2" 0 "V-type sodium ATPase subunit G"  
"JS1\_E15\_00296" 5782 "s59E5H2" 0.5005806 "V-type sodium ATPase subunit G"  
"JS1\_E15\_00296" 5782 "s63E6H2" 0.06610995 "V-type sodium ATPase subunit G"  
"JS1\_E15\_00297" 5783 "s59E13H2" 0.44721 "Tetrahedral aminopeptidase"  
"JS1\_E15\_00297" 5783 "s59E25H2" 0 "Tetrahedral aminopeptidase"  
"JS1\_E15\_00297" 5783 "s59E5H2" 0.4563975 "Tetrahedral aminopeptidase"  
"JS1\_E15\_00297" 5783 "s63E6H2" 0.134548 "Tetrahedral aminopeptidase"  
"JS1\_E15\_00298" 5784 "s59E13H2" 5.899517 "OsmC-like protein"  
"JS1\_E15\_00298" 5784 "s59E25H2" 0 "OsmC-like protein"  
"JS1\_E15\_00298" 5784 "s59E5H2" 0.4418238 "OsmC-like protein"  
"JS1\_E15\_00298" 5784 "s63E6H2" 0.2007381 "OsmC-like protein"  
"JS1\_E15\_00299" 5785 "s59E13H2" 4.186297 "Bifunctional protein FOLD protein"  
"JS1\_E15\_00299" 5785 "s59E25H2" 0 "Bifunctional protein FOLD protein"  
"JS1\_E15\_00299" 5785 "s59E5H2" 2.366499 "Bifunctional protein FOLD protein"  
"JS1\_E15\_00299" 5785 "s63E6H2" 0.3772054 "Bifunctional protein FOLD protein"  
"JS1\_E20\_00001" 5786 "s59E13H2" 0.2894927 "Outer membrane protein assembly factor BamA precursor"  
"JS1\_E20\_00001" 5786 "s59E25H2" 0 "Outer membrane protein assembly factor BamA precursor"  
"JS1\_E20\_00001" 5786 "s59E5H2" 0.7019542 "Outer membrane protein assembly factor BamA precursor"  
"JS1\_E20\_00001" 5786 "s63E6H2" 0.414275 "Outer membrane protein assembly factor BamA precursor"  
"JS1\_E20\_00002" 5787 "s59E13H2" 0.2902675 "Outer membrane protein (OmpH-like)"  
"JS1\_E20\_00002" 5787 "s59E25H2" 0 "Outer membrane protein (OmpH-like)"

"JS1\_E20\_00002" 5787 "s59E5H2" 0.7169383 "Outer membrane protein (OmpH-like)"  
"JS1\_E20\_00002" 5787 "s63E6H2" 1.05887 "Outer membrane protein (OmpH-like)"  
"JS1\_E20\_00003" 5788 "s59E13H2" 0.4802602 "3-hydroxyacyl-[acyl-carrier-protein] dehydratase FabZ"  
"JS1\_E20\_00003" 5788 "s59E25H2" 0 "3-hydroxyacyl-[acyl-carrier-protein] dehydratase FabZ"  
"JS1\_E20\_00003" 5788 "s59E5H2" 0.7385219 "3-hydroxyacyl-[acyl-carrier-protein] dehydratase FabZ"  
"JS1\_E20\_00003" 5788 "s63E6H2" 1.049719 "3-hydroxyacyl-[acyl-carrier-protein] dehydratase FabZ"  
"JS1\_E20\_00004" 5789 "s59E13H2" 0.4349602 "Lipopolysaccharide export system ATP-binding protein LptB"  
"JS1\_E20\_00004" 5789 "s59E25H2" 0 "Lipopolysaccharide export system ATP-binding protein LptB"  
"JS1\_E20\_00004" 5789 "s59E5H2" 0.7637004 "Lipopolysaccharide export system ATP-binding protein LptB"  
"JS1\_E20\_00004" 5789 "s63E6H2" 1.191373 "Lipopolysaccharide export system ATP-binding protein LptB"  
"JS1\_E20\_00005" 5790 "s59E13H2" 0.05638667 "hypothetical protein"  
"JS1\_E20\_00005" 5790 "s59E25H2" 0 "hypothetical protein"  
"JS1\_E20\_00005" 5790 "s59E5H2" 0.1666422 "hypothetical protein"  
"JS1\_E20\_00005" 5790 "s63E6H2" 0.2540495 "hypothetical protein"  
"JS1\_E20\_00007" 5792 "s59E13H2" 0 "5-methylcytosine-specific restriction enzyme subunit McrC"  
"JS1\_E20\_00007" 5792 "s59E25H2" 0 "5-methylcytosine-specific restriction enzyme subunit McrC"  
"JS1\_E20\_00007" 5792 "s59E5H2" 0 "5-methylcytosine-specific restriction enzyme subunit McrC"  
"JS1\_E20\_00007" 5792 "s63E6H2" 0.004748962 "5-methylcytosine-specific restriction enzyme subunit McrC"  
"JS1\_E20\_00011" 5796 "s59E13H2" 3.482814 "Transposase IS200 like protein"  
"JS1\_E20\_00011" 5796 "s59E25H2" 0 "Transposase IS200 like protein"  
"JS1\_E20\_00011" 5796 "s59E5H2" 0.01715271 "Transposase IS200 like protein"  
"JS1\_E20\_00011" 5796 "s63E6H2" 1.764415 "Transposase IS200 like protein"  
"JS1\_E20\_00012" 5797 "s59E13H2" 0.4943891 "hypothetical protein"  
"JS1\_E20\_00012" 5797 "s59E25H2" 0 "hypothetical protein"  
"JS1\_E20\_00012" 5797 "s59E5H2" 0.01600119 "hypothetical protein"  
"JS1\_E20\_00012" 5797 "s63E6H2" 0.9659754 "hypothetical protein"  
"JS1\_E20\_00013" 5798 "s59E13H2" 0 "hypothetical protein"  
"JS1\_E20\_00013" 5798 "s59E25H2" 0 "hypothetical protein"  
"JS1\_E20\_00013" 5798 "s59E5H2" 0 "hypothetical protein"  
"JS1\_E20\_00013" 5798 "s63E6H2" 0 "hypothetical protein"  
"JS1\_E20\_00014" 5799 "s59E13H2" 0.006560584 "Methenyltetrahydrofolate cyclohydrolase"  
"JS1\_E20\_00014" 5799 "s59E25H2" 0 "Methenyltetrahydrofolate cyclohydrolase"  
"JS1\_E20\_00014" 5799 "s59E5H2" 0.05231786 "Methenyltetrahydrofolate cyclohydrolase"  
"JS1\_E20\_00014" 5799 "s63E6H2" 0.04837914 "Methenyltetrahydrofolate cyclohydrolase"  
"JS1\_E20\_00015" 5800 "s59E13H2" 0.006987462 "putative HTH-type transcriptional regulator YbbH"  
"JS1\_E20\_00015" 5800 "s59E25H2" 0 "putative HTH-type transcriptional regulator YbbH"  
"JS1\_E20\_00015" 5800 "s59E5H2" 0.1386447 "putative HTH-type transcriptional regulator YbbH"  
"JS1\_E20\_00015" 5800 "s63E6H2" 0.02696336 "putative HTH-type transcriptional regulator YbbH"  
"JS1\_E20\_00016" 5801 "s59E13H2" 0.02460303 "Glutamate 2,3-aminomutase"  
"JS1\_E20\_00016" 5801 "s59E25H2" 0 "Glutamate 2,3-aminomutase"  
"JS1\_E20\_00016" 5801 "s59E5H2" 0.09550748 "Glutamate 2,3-aminomutase"  
"JS1\_E20\_00016" 5801 "s63E6H2" 0.006534406 "Glutamate 2,3-aminomutase"  
"JS1\_E20\_00017" 5802 "s59E13H2" 0 "hypothetical protein"  
"JS1\_E20\_00017" 5802 "s59E25H2" 0 "hypothetical protein"  
"JS1\_E20\_00017" 5802 "s59E5H2" 0 "hypothetical protein"  
"JS1\_E20\_00017" 5802 "s63E6H2" 0 "hypothetical protein"  
"JS1\_E20\_00018" 5803 "s59E13H2" 0.04137378 "Transposase"

"JS1\_E20\_00018" 5803 "s59E25H2" 0 "Transposase"  
"JS1\_E20\_00018" 5803 "s59E5H2" 0.5404843 "Transposase"  
"JS1\_E20\_00018" 5803 "s63E6H2" 0.2940769 "Transposase"  
"JS1\_E20\_00019" 5804 "s59E13H2" 0.0343693 "IS2 transposase TnpB"  
"JS1\_E20\_00019" 5804 "s59E25H2" 0 "IS2 transposase TnpB"  
"JS1\_E20\_00019" 5804 "s59E5H2" 0.4828919 "IS2 transposase TnpB"  
"JS1\_E20\_00019" 5804 "s63E6H2" 0.8708036 "IS2 transposase TnpB"  
"JS1\_E20\_00020" 5805 "s59E13H2" 0.002121755 "Xylose import ATP-binding protein XylG"  
"JS1\_E20\_00020" 5805 "s59E25H2" 0 "Xylose import ATP-binding protein XylG"  
"JS1\_E20\_00020" 5805 "s59E5H2" 0.004765811 "Xylose import ATP-binding protein XylG"  
"JS1\_E20\_00020" 5805 "s63E6H2" 0.0008150585 "Xylose import ATP-binding protein XylG"  
"JS1\_E20\_00021" 5806 "s59E13H2" 0.01640806 "L-arabinose transporter permease protein"  
"JS1\_E20\_00021" 5806 "s59E25H2" 0 "L-arabinose transporter permease protein"  
"JS1\_E20\_00021" 5806 "s59E5H2" 0 "L-arabinose transporter permease protein"  
"JS1\_E20\_00021" 5806 "s63E6H2" 0 "L-arabinose transporter permease protein"  
"JS1\_E20\_00022" 5807 "s59E13H2" 0.00762772 "branched-chain amino acid transporter permease subunit LivH"  
"JS1\_E20\_00022" 5807 "s59E25H2" 0 "branched-chain amino acid transporter permease subunit LivH"  
"JS1\_E20\_00022" 5807 "s59E5H2" 0 "branched-chain amino acid transporter permease subunit LivH"  
"JS1\_E20\_00022" 5807 "s63E6H2" 0.003945071 "branched-chain amino acid transporter permease subunit LivH"  
"JS1\_E20\_00023" 5808 "s59E13H2" 0 "hypothetical protein"  
"JS1\_E20\_00023" 5808 "s59E25H2" 0 "hypothetical protein"  
"JS1\_E20\_00023" 5808 "s59E5H2" 0 "hypothetical protein"  
"JS1\_E20\_00023" 5808 "s63E6H2" 0.009621553 "hypothetical protein"  
"JS1\_E20\_00024" 5809 "s59E13H2" 0 "hypothetical protein"  
"JS1\_E20\_00024" 5809 "s59E25H2" 0 "hypothetical protein"  
"JS1\_E20\_00024" 5809 "s59E5H2" 0.01055764 "hypothetical protein"  
"JS1\_E20\_00024" 5809 "s63E6H2" 0.01061999 "hypothetical protein"  
"JS1\_E20\_00027" 5812 "s59E13H2" 0.8064988 "Reverse transcriptase (RNA-dependent DNA polymerase)"  
"JS1\_E20\_00027" 5812 "s59E25H2" 0 "Reverse transcriptase (RNA-dependent DNA polymerase)"  
"JS1\_E20\_00027" 5812 "s59E5H2" 3.483789 "Reverse transcriptase (RNA-dependent DNA polymerase)"  
"JS1\_E20\_00027" 5812 "s63E6H2" 21.22509 "Reverse transcriptase (RNA-dependent DNA polymerase)"  
"JS1\_E20\_00028" 5813 "s59E13H2" 4.893666 "Reverse transcriptase (RNA-dependent DNA polymerase)"  
"JS1\_E20\_00028" 5813 "s59E25H2" 0 "Reverse transcriptase (RNA-dependent DNA polymerase)"  
"JS1\_E20\_00028" 5813 "s59E5H2" 5.034634 "Reverse transcriptase (RNA-dependent DNA polymerase)"  
"JS1\_E20\_00028" 5813 "s63E6H2" 17.65069 "Reverse transcriptase (RNA-dependent DNA polymerase)"  
"JS1\_E20\_00030" 5815 "s59E13H2" 0 "Lysine 6-dehydrogenase"  
"JS1\_E20\_00030" 5815 "s59E25H2" 0 "Lysine 6-dehydrogenase"  
"JS1\_E20\_00030" 5815 "s59E5H2" 0 "Lysine 6-dehydrogenase"  
"JS1\_E20\_00030" 5815 "s63E6H2" 0 "Lysine 6-dehydrogenase"  
"JS1\_E20\_00032" 5817 "s59E13H2" 0 "Membrane dipeptidase (Peptidase family M19)"  
"JS1\_E20\_00032" 5817 "s59E25H2" 0 "Membrane dipeptidase (Peptidase family M19)"  
"JS1\_E20\_00032" 5817 "s59E5H2" 0 "Membrane dipeptidase (Peptidase family M19)"  
"JS1\_E20\_00032" 5817 "s63E6H2" 0 "Membrane dipeptidase (Peptidase family M19)"  
"JS1\_E20\_00033" 5818 "s59E13H2" 0 "Lysine 6-dehydrogenase"  
"JS1\_E20\_00033" 5818 "s59E25H2" 0 "Lysine 6-dehydrogenase"  
"JS1\_E20\_00033" 5818 "s59E5H2" 0 "Lysine 6-dehydrogenase"  
"JS1\_E20\_00033" 5818 "s63E6H2" 0 "Lysine 6-dehydrogenase"

"JS1\_E20\_00034" 5819 "s59E13H2" 0 "alanine racemase"  
"JS1\_E20\_00034" 5819 "s59E25H2" 0 "alanine racemase"  
"JS1\_E20\_00034" 5819 "s59E5H2" 0 "alanine racemase"  
"JS1\_E20\_00034" 5819 "s63E6H2" 0 "alanine racemase"  
"JS1\_E20\_00035" 5820 "s59E13H2" 0.005023484 "L-arabinose transport system permease protein AraQ"  
"JS1\_E20\_00035" 5820 "s59E25H2" 0 "L-arabinose transport system permease protein AraQ"  
"JS1\_E20\_00035" 5820 "s59E5H2" 0.4289771 "L-arabinose transport system permease protein AraQ"  
"JS1\_E20\_00035" 5820 "s63E6H2" 0.147454 "L-arabinose transport system permease protein AraQ"  
"JS1\_E20\_00036" 5821 "s59E13H2" 0.006881281 "Amidohydrolase"  
"JS1\_E20\_00036" 5821 "s59E25H2" 0 "Amidohydrolase"  
"JS1\_E20\_00036" 5821 "s59E5H2" 0.5461414 "Amidohydrolase"  
"JS1\_E20\_00036" 5821 "s63E6H2" 0.2268887 "Amidohydrolase"  
"JS1\_E20\_00037" 5822 "s59E13H2" 0.003332888 "Argininosuccinate lyase 1"  
"JS1\_E20\_00037" 5822 "s59E25H2" 0 "Argininosuccinate lyase 1"  
"JS1\_E20\_00037" 5822 "s59E5H2" 0.8513665 "Argininosuccinate lyase 1"  
"JS1\_E20\_00037" 5822 "s63E6H2" 0.3183456 "Argininosuccinate lyase 1"  
"JS1\_E20\_00038" 5823 "s59E13H2" 0.2210021 "6-phosphofructokinase isozyme 1"  
"JS1\_E20\_00038" 5823 "s59E25H2" 0 "6-phosphofructokinase isozyme 1"  
"JS1\_E20\_00038" 5823 "s59E5H2" 0.8693382 "6-phosphofructokinase isozyme 1"  
"JS1\_E20\_00038" 5823 "s63E6H2" 0.2932657 "6-phosphofructokinase isozyme 1"  
"JS1\_E20\_00039" 5824 "s59E13H2" 0.004152593 "glucosamine--fructose-6-phosphate aminotransferase"  
"JS1\_E20\_00039" 5824 "s59E25H2" 0 "glucosamine--fructose-6-phosphate aminotransferase"  
"JS1\_E20\_00039" 5824 "s59E5H2" 0.2413693 "glucosamine--fructose-6-phosphate aminotransferase"  
"JS1\_E20\_00039" 5824 "s63E6H2" 0.7806231 "glucosamine--fructose-6-phosphate aminotransferase"  
"JS1\_E20\_00040" 5825 "s59E13H2" 0.2419845 "hypothetical protein"  
"JS1\_E20\_00040" 5825 "s59E25H2" 0 "hypothetical protein"  
"JS1\_E20\_00040" 5825 "s59E5H2" 0.0667996 "hypothetical protein"  
"JS1\_E20\_00040" 5825 "s63E6H2" 0 "hypothetical protein"  
"JS1\_E20\_00041" 5826 "s59E13H2" 0.2095623 "hypothetical protein"  
"JS1\_E20\_00041" 5826 "s59E25H2" 0 "hypothetical protein"  
"JS1\_E20\_00041" 5826 "s59E5H2" 0.5494756 "hypothetical protein"  
"JS1\_E20\_00041" 5826 "s63E6H2" 4.750366 "hypothetical protein"  
"JS1\_E20\_00042" 5827 "s59E13H2" 0.03313509 "Methylmalonate semialdehyde dehydrogenase [acylating]"  
"JS1\_E20\_00042" 5827 "s59E25H2" 0 "Methylmalonate semialdehyde dehydrogenase [acylating]"  
"JS1\_E20\_00042" 5827 "s59E5H2" 0.1452261 "Methylmalonate semialdehyde dehydrogenase [acylating]"  
"JS1\_E20\_00042" 5827 "s63E6H2" 0.03161392 "Methylmalonate semialdehyde dehydrogenase [acylating]"  
"JS1\_E20\_00043" 5828 "s59E13H2" 0.2770752 "Homoserine dehydrogenase"  
"JS1\_E20\_00043" 5828 "s59E25H2" 0 "Homoserine dehydrogenase"  
"JS1\_E20\_00043" 5828 "s59E5H2" 0.05970693 "Homoserine dehydrogenase"  
"JS1\_E20\_00043" 5828 "s63E6H2" 0.1758423 "Homoserine dehydrogenase"  
"JS1\_E20\_00044" 5829 "s59E13H2" 0.2462616 "Homoserine kinase"  
"JS1\_E20\_00044" 5829 "s59E25H2" 0 "Homoserine kinase"  
"JS1\_E20\_00044" 5829 "s59E5H2" 0.2199017 "Homoserine kinase"  
"JS1\_E20\_00044" 5829 "s63E6H2" 0.4192369 "Homoserine kinase"  
"JS1\_E20\_00045" 5830 "s59E13H2" 1.128128 "Aspartokinase"  
"JS1\_E20\_00045" 5830 "s59E25H2" 0 "Aspartokinase"  
"JS1\_E20\_00045" 5830 "s59E5H2" 0.4264521 "Aspartokinase"



"JS1\_E20\_00045" 5830 "s63E6H2" 0.8238074 "Aspartokinase"  
"JS1\_E20\_00046" 5831 "s59E13H2" 1.312455 "Aspartate-semialdehyde dehydrogenase"  
"JS1\_E20\_00046" 5831 "s59E25H2" 0 "Aspartate-semialdehyde dehydrogenase"  
"JS1\_E20\_00046" 5831 "s59E5H2" 0.4258573 "Aspartate-semialdehyde dehydrogenase"  
"JS1\_E20\_00046" 5831 "s63E6H2" 1.44394 "Aspartate-semialdehyde dehydrogenase"  
"JS1\_E20\_00047" 5832 "s59E13H2" 0.1733918 "Glucose 1-dehydrogenase 1"  
"JS1\_E20\_00047" 5832 "s59E25H2" 0 "Glucose 1-dehydrogenase 1"  
"JS1\_E20\_00047" 5832 "s59E5H2" 0.1108402 "Glucose 1-dehydrogenase 1"  
"JS1\_E20\_00047" 5832 "s63E6H2" 0.07776237 "Glucose 1-dehydrogenase 1"  
"JS1\_E20\_00048" 5833 "s59E13H2" 0.8020224 "TraB family protein"  
"JS1\_E20\_00048" 5833 "s59E25H2" 0 "TraB family protein"  
"JS1\_E20\_00048" 5833 "s59E5H2" 0.5356351 "TraB family protein"  
"JS1\_E20\_00048" 5833 "s63E6H2" 0.6115683 "TraB family protein"  
"JS1\_E20\_00049" 5834 "s59E13H2" 0.01470221 "flavodoxin"  
"JS1\_E20\_00049" 5834 "s59E25H2" 0 "flavodoxin"  
"JS1\_E20\_00049" 5834 "s59E5H2" 0.2005487 "flavodoxin"  
"JS1\_E20\_00049" 5834 "s63E6H2" 0.2060641 "flavodoxin"  
"JS1\_E20\_00050" 5835 "s59E13H2" 0.08889266 "flavodoxin"  
"JS1\_E20\_00050" 5835 "s59E25H2" 0 "flavodoxin"  
"JS1\_E20\_00050" 5835 "s59E5H2" 0.05309835 "flavodoxin"  
"JS1\_E20\_00050" 5835 "s63E6H2" 0.2054078 "flavodoxin"  
"JS1\_E20\_00051" 5836 "s59E13H2" 0.1462984 "Oxygen-insensitive NADPH nitroreductase"  
"JS1\_E20\_00051" 5836 "s59E25H2" 0 "Oxygen-insensitive NADPH nitroreductase"  
"JS1\_E20\_00051" 5836 "s59E5H2" 0.05917386 "Oxygen-insensitive NADPH nitroreductase"  
"JS1\_E20\_00051" 5836 "s63E6H2" 7.702716 "Oxygen-insensitive NADPH nitroreductase"  
"JS1\_E20\_00052" 5837 "s59E13H2" 0.09884608 "hypothetical protein"  
"JS1\_E20\_00052" 5837 "s59E25H2" 0 "hypothetical protein"  
"JS1\_E20\_00052" 5837 "s59E5H2" 0.4169945 "hypothetical protein"  
"JS1\_E20\_00052" 5837 "s63E6H2" 3.108233 "hypothetical protein"  
"JS1\_E20\_00053" 5838 "s59E13H2" 2.358912 "putative tRNA-dihydrouridine synthase"  
"JS1\_E20\_00053" 5838 "s59E25H2" 0 "putative tRNA-dihydrouridine synthase"  
"JS1\_E20\_00053" 5838 "s59E5H2" 0.2800334 "putative tRNA-dihydrouridine synthase"  
"JS1\_E20\_00053" 5838 "s63E6H2" 0.2666054 "putative tRNA-dihydrouridine synthase"  
"JS1\_E20\_00055" 5840 "s59E13H2" 2.3733 "hypothetical protein"  
"JS1\_E20\_00055" 5840 "s59E25H2" 0 "hypothetical protein"  
"JS1\_E20\_00055" 5840 "s59E5H2" 3.960799 "hypothetical protein"  
"JS1\_E20\_00055" 5840 "s63E6H2" 0.2171528 "hypothetical protein"  
"JS1\_E20\_00056" 5841 "s59E13H2" 0 "Capreomycin synthase"  
"JS1\_E20\_00056" 5841 "s59E25H2" 0 "Capreomycin synthase"  
"JS1\_E20\_00056" 5841 "s59E5H2" 0.06607838 "Capreomycin synthase"  
"JS1\_E20\_00056" 5841 "s63E6H2" 0.001781954 "Capreomycin synthase"  
"JS1\_E20\_00057" 5842 "s59E13H2" 0.1441147 "Diacylglycerol kinase"  
"JS1\_E20\_00057" 5842 "s59E25H2" 0 "Diacylglycerol kinase"  
"JS1\_E20\_00057" 5842 "s59E5H2" 0.1764263 "Diacylglycerol kinase"  
"JS1\_E20\_00057" 5842 "s63E6H2" 7.838345 "Diacylglycerol kinase"  
"JS1\_E20\_00058" 5843 "s59E13H2" 0.1519578 "1-acyl-sn-glycerol-3-phosphate acyltransferase"  
"JS1\_E20\_00058" 5843 "s59E25H2" 0 "1-acyl-sn-glycerol-3-phosphate acyltransferase"

"JS1\_E20\_00058" 5843 "s59E5H2" 0.1552772 "1-acyl-sn-glycerol-3-phosphate acyltransferase"  
"JS1\_E20\_00058" 5843 "s63E6H2" 8.565637 "1-acyl-sn-glycerol-3-phosphate acyltransferase"  
"JS1\_E20\_00059" 5844 "s59E13H2" 0.07685642 "Methionine--tRNA ligase"  
"JS1\_E20\_00059" 5844 "s59E25H2" 0 "Methionine--tRNA ligase"  
"JS1\_E20\_00059" 5844 "s59E5H2" 0.09972672 "Methionine--tRNA ligase"  
"JS1\_E20\_00059" 5844 "s63E6H2" 0.1539417 "Methionine--tRNA ligase"  
"JS1\_E20\_00060" 5845 "s59E13H2" 0.3502587 "Glyoxalase-like domain protein"  
"JS1\_E20\_00060" 5845 "s59E25H2" 0 "Glyoxalase-like domain protein"  
"JS1\_E20\_00060" 5845 "s59E5H2" 0.09016217 "Glyoxalase-like domain protein"  
"JS1\_E20\_00060" 5845 "s63E6H2" 6.888381 "Glyoxalase-like domain protein"  
"JS1\_E20\_00061" 5846 "s59E13H2" 0 "hypothetical protein"  
"JS1\_E20\_00061" 5846 "s59E25H2" 0 "hypothetical protein"  
"JS1\_E20\_00061" 5846 "s59E5H2" 0.03793474 "hypothetical protein"  
"JS1\_E20\_00061" 5846 "s63E6H2" 0 "hypothetical protein"  
"JS1\_E20\_00062" 5847 "s59E13H2" 0.23101 "putative metallo-hydrolase YfIN"  
"JS1\_E20\_00062" 5847 "s59E25H2" 0 "putative metallo-hydrolase YfIN"  
"JS1\_E20\_00062" 5847 "s59E5H2" 0.1419509 "putative metallo-hydrolase YfIN"  
"JS1\_E20\_00062" 5847 "s63E6H2" 1.318543 "putative metallo-hydrolase YfIN"  
"JS1\_E20\_00063" 5848 "s59E13H2" 0.03045248 "Alpha/beta hydrolase family protein"  
"JS1\_E20\_00063" 5848 "s59E25H2" 0 "Alpha/beta hydrolase family protein"  
"JS1\_E20\_00063" 5848 "s59E5H2" 0 "Alpha/beta hydrolase family protein"  
"JS1\_E20\_00063" 5848 "s63E6H2" 3.691138 "Alpha/beta hydrolase family protein"  
"JS1\_E20\_00064" 5849 "s59E13H2" 0.4221751 "Sulfhydrogenase 1 subunit beta"  
"JS1\_E20\_00064" 5849 "s59E25H2" 0 "Sulfhydrogenase 1 subunit beta"  
"JS1\_E20\_00064" 5849 "s59E5H2" 0.1658468 "Sulfhydrogenase 1 subunit beta"  
"JS1\_E20\_00064" 5849 "s63E6H2" 0.03057911 "Sulfhydrogenase 1 subunit beta"  
"JS1\_E20\_00065" 5850 "s59E13H2" 0.6766537 "Sulfhydrogenase 2 subunit gamma"  
"JS1\_E20\_00065" 5850 "s59E25H2" 0 "Sulfhydrogenase 2 subunit gamma"  
"JS1\_E20\_00065" 5850 "s59E5H2" 0.2098422 "Sulfhydrogenase 2 subunit gamma"  
"JS1\_E20\_00065" 5850 "s63E6H2" 0.1115335 "Sulfhydrogenase 2 subunit gamma"  
"JS1\_E20\_00066" 5851 "s59E13H2" 0.3121956 "Sulfhydrogenase 1 subunit delta"  
"JS1\_E20\_00066" 5851 "s59E25H2" 0 "Sulfhydrogenase 1 subunit delta"  
"JS1\_E20\_00066" 5851 "s59E5H2" 0.1486709 "Sulfhydrogenase 1 subunit delta"  
"JS1\_E20\_00066" 5851 "s63E6H2" 0.07007806 "Sulfhydrogenase 1 subunit delta"  
"JS1\_E20\_00067" 5852 "s59E13H2" 0.01811142 "Sulfhydrogenase 1 subunit alpha"  
"JS1\_E20\_00067" 5852 "s59E25H2" 0 "Sulfhydrogenase 1 subunit alpha"  
"JS1\_E20\_00067" 5852 "s59E5H2" 0.05067145 "Sulfhydrogenase 1 subunit alpha"  
"JS1\_E20\_00067" 5852 "s63E6H2" 0.01395006 "Sulfhydrogenase 1 subunit alpha"  
"JS1\_E20\_00068" 5853 "s59E13H2" 0.05413418 "Zinc-type alcohol dehydrogenase-like protein"  
"JS1\_E20\_00068" 5853 "s59E25H2" 0 "Zinc-type alcohol dehydrogenase-like protein"  
"JS1\_E20\_00068" 5853 "s59E5H2" 0.02199774 "Zinc-type alcohol dehydrogenase-like protein"  
"JS1\_E20\_00068" 5853 "s63E6H2" 0.003367149 "Zinc-type alcohol dehydrogenase-like protein"  
"JS1\_E20\_00069" 5854 "s59E13H2" 0.3644809 "hypothetical protein"  
"JS1\_E20\_00069" 5854 "s59E25H2" 0 "hypothetical protein"  
"JS1\_E20\_00069" 5854 "s59E5H2" 0.2199117 "hypothetical protein"  
"JS1\_E20\_00069" 5854 "s63E6H2" 0.01222727 "hypothetical protein"  
"JS1\_E20\_00070" 5855 "s59E13H2" 0.001253828 "Quinone oxidoreductase 1"

"JS1\_E20\_00070" 5855 "s59E25H2" 0 "Quinone oxidoreductase 1"  
"JS1\_E20\_00070" 5855 "s59E5H2" 0.1005029 "Quinone oxidoreductase 1"  
"JS1\_E20\_00070" 5855 "s63E6H2" 0.2314722 "Quinone oxidoreductase 1"  
"JS1\_E20\_00071" 5856 "s59E13H2" 0.002498417 "hypothetical protein"  
"JS1\_E20\_00071" 5856 "s59E25H2" 0 "hypothetical protein"  
"JS1\_E20\_00071" 5856 "s59E5H2" 0.05487765 "hypothetical protein"  
"JS1\_E20\_00071" 5856 "s63E6H2" 0.1197428 "hypothetical protein"  
"JS1\_E20\_00072" 5857 "s59E13H2" 0 "hypothetical protein"  
"JS1\_E20\_00072" 5857 "s59E25H2" 0 "hypothetical protein"  
"JS1\_E20\_00072" 5857 "s59E5H2" 0.1032058 "hypothetical protein"  
"JS1\_E20\_00072" 5857 "s63E6H2" 0.1430294 "hypothetical protein"  
"JS1\_E20\_00074" 5859 "s59E13H2" 0.00284702 "hypothetical protein"  
"JS1\_E20\_00074" 5859 "s59E25H2" 0 "hypothetical protein"  
"JS1\_E20\_00074" 5859 "s59E5H2" 2.280411 "hypothetical protein"  
"JS1\_E20\_00074" 5859 "s63E6H2" 0.4062297 "hypothetical protein"  
"JS1\_E20\_00075" 5860 "s59E13H2" 0 "Transcriptional regulator PadR-like family protein"  
"JS1\_E20\_00075" 5860 "s59E25H2" 0 "Transcriptional regulator PadR-like family protein"  
"JS1\_E20\_00075" 5860 "s59E5H2" 2.438239 "Transcriptional regulator PadR-like family protein"  
"JS1\_E20\_00075" 5860 "s63E6H2" 0.3984852 "Transcriptional regulator PadR-like family protein"  
"JS1\_E20\_00076" 5861 "s59E13H2" 0.260865 "DsrE/DsrF-like family protein"  
"JS1\_E20\_00076" 5861 "s59E25H2" 0 "DsrE/DsrF-like family protein"  
"JS1\_E20\_00076" 5861 "s59E5H2" 0.08143459 "DsrE/DsrF-like family protein"  
"JS1\_E20\_00076" 5861 "s63E6H2" 0.01097796 "DsrE/DsrF-like family protein"  
"JS1\_E20\_00077" 5862 "s59E13H2" 0.345425 "Exodeoxyribonuclease"  
"JS1\_E20\_00077" 5862 "s59E25H2" 0 "Exodeoxyribonuclease"  
"JS1\_E20\_00077" 5862 "s59E5H2" 1.975035 "Exodeoxyribonuclease"  
"JS1\_E20\_00077" 5862 "s63E6H2" 0.1590393 "Exodeoxyribonuclease"  
"JS1\_E20\_00078" 5863 "s59E13H2" 0 "Phospho-2-dehydro-3-deoxyheptonate aldolase"  
"JS1\_E20\_00078" 5863 "s59E25H2" 0 "Phospho-2-dehydro-3-deoxyheptonate aldolase"  
"JS1\_E20\_00078" 5863 "s59E5H2" 0.01589479 "Phospho-2-dehydro-3-deoxyheptonate aldolase"  
"JS1\_E20\_00078" 5863 "s63E6H2" 0.2624791 "Phospho-2-dehydro-3-deoxyheptonate aldolase"  
"JS1\_E20\_00079" 5864 "s59E13H2" 0.5206614 "Hydrogenase 3 maturation protease"  
"JS1\_E20\_00079" 5864 "s59E25H2" 0 "Hydrogenase 3 maturation protease"  
"JS1\_E20\_00079" 5864 "s59E5H2" 0.5259918 "Hydrogenase 3 maturation protease"  
"JS1\_E20\_00079" 5864 "s63E6H2" 0.2452861 "Hydrogenase 3 maturation protease"  
"JS1\_E20\_00080" 5865 "s59E13H2" 0.3960953 "F420-non-reducing hydrogenase subunit A"  
"JS1\_E20\_00080" 5865 "s59E25H2" 0 "F420-non-reducing hydrogenase subunit A"  
"JS1\_E20\_00080" 5865 "s59E5H2" 0.2478908 "F420-non-reducing hydrogenase subunit A"  
"JS1\_E20\_00080" 5865 "s63E6H2" 0.1807739 "F420-non-reducing hydrogenase subunit A"  
"JS1\_E20\_00081" 5866 "s59E13H2" 8.552496 "3-chloro-4-hydroxyphenylacetate reductive dehalogenase precursor"  
"JS1\_E20\_00081" 5866 "s59E25H2" 0 "3-chloro-4-hydroxyphenylacetate reductive dehalogenase precursor"  
"JS1\_E20\_00081" 5866 "s59E5H2" 0.9089605 "3-chloro-4-hydroxyphenylacetate reductive dehalogenase precursor"  
"JS1\_E20\_00081" 5866 "s63E6H2" 0.2738358 "3-chloro-4-hydroxyphenylacetate reductive dehalogenase precursor"  
"JS1\_E20\_00082" 5867 "s59E13H2" 0 "Ferrous-iron efflux pump FieF"  
"JS1\_E20\_00082" 5867 "s59E25H2" 0 "Ferrous-iron efflux pump FieF"  
"JS1\_E20\_00082" 5867 "s59E5H2" 0.1923067 "Ferrous-iron efflux pump FieF"  
"JS1\_E20\_00082" 5867 "s63E6H2" 0.0122087 "Ferrous-iron efflux pump FieF"

"JS1\_E20\_00083" 5868 "s59E13H2" 0.05125057 "hypothetical protein"  
"JS1\_E20\_00083" 5868 "s59E25H2" 0 "hypothetical protein"  
"JS1\_E20\_00083" 5868 "s59E5H2" 0.9903567 "hypothetical protein"  
"JS1\_E20\_00083" 5868 "s63E6H2" 0.1240561 "hypothetical protein"  
"JS1\_E20\_00084" 5869 "s59E13H2" 0.03504613 "L-lactate dehydrogenase"  
"JS1\_E20\_00084" 5869 "s59E25H2" 0 "L-lactate dehydrogenase"  
"JS1\_E20\_00084" 5869 "s59E5H2" 0.182535 "L-lactate dehydrogenase"  
"JS1\_E20\_00084" 5869 "s63E6H2" 0.06300488 "L-lactate dehydrogenase"  
"JS1\_E20\_00085" 5870 "s59E13H2" 0.08094497 "NADPH-dependent FMN reductase"  
"JS1\_E20\_00085" 5870 "s59E25H2" 0 "NADPH-dependent FMN reductase"  
"JS1\_E20\_00085" 5870 "s59E5H2" 0.5819078 "NADPH-dependent FMN reductase"  
"JS1\_E20\_00085" 5870 "s63E6H2" 0.1533715 "NADPH-dependent FMN reductase"  
"JS1\_E20\_00086" 5871 "s59E13H2" 0.06853888 "Sporulation initiation inhibitor protein Soj"  
"JS1\_E20\_00086" 5871 "s59E25H2" 0.5625774 "Sporulation initiation inhibitor protein Soj"  
"JS1\_E20\_00086" 5871 "s59E5H2" 0.4197372 "Sporulation initiation inhibitor protein Soj"  
"JS1\_E20\_00086" 5871 "s63E6H2" 0.7458241 "Sporulation initiation inhibitor protein Soj"  
"JS1\_E20\_00087" 5872 "s59E13H2" 0.2980085 "Cell division protein FtsZ"  
"JS1\_E20\_00087" 5872 "s59E25H2" 0 "Cell division protein FtsZ"  
"JS1\_E20\_00087" 5872 "s59E5H2" 0.9974501 "Cell division protein FtsZ"  
"JS1\_E20\_00087" 5872 "s63E6H2" 1.103282 "Cell division protein FtsZ"  
"JS1\_E20\_00088" 5873 "s59E13H2" 0.1619091 "hypothetical protein"  
"JS1\_E20\_00088" 5873 "s59E25H2" 0 "hypothetical protein"  
"JS1\_E20\_00088" 5873 "s59E5H2" 0.3517516 "hypothetical protein"  
"JS1\_E20\_00088" 5873 "s63E6H2" 0.9042795 "hypothetical protein"  
"JS1\_E20\_00089" 5874 "s59E13H2" 0.03598992 "DNA-bindng transcriptional repressor SrlR"  
"JS1\_E20\_00089" 5874 "s59E25H2" 0 "DNA-bindng transcriptional repressor SrlR"  
"JS1\_E20\_00089" 5874 "s59E5H2" 0.17968 "DNA-bindng transcriptional repressor SrlR"  
"JS1\_E20\_00089" 5874 "s63E6H2" 0.8289019 "DNA-bindng transcriptional repressor SrlR"  
"JS1\_E20\_00090" 5875 "s59E13H2" 3.087091 "hypothetical protein"  
"JS1\_E20\_00090" 5875 "s59E25H2" 0.3679176 "hypothetical protein"  
"JS1\_E20\_00090" 5875 "s59E5H2" 0.1168581 "hypothetical protein"  
"JS1\_E20\_00090" 5875 "s63E6H2" 0.2494164 "hypothetical protein"  
"JS1\_E20\_00091" 5876 "s59E13H2" 1.710991 "hypothetical protein"  
"JS1\_E20\_00091" 5876 "s59E25H2" 0 "hypothetical protein"  
"JS1\_E20\_00091" 5876 "s59E5H2" 0.1958672 "hypothetical protein"  
"JS1\_E20\_00091" 5876 "s63E6H2" 0.5222662 "hypothetical protein"  
"JS1\_E20\_00092" 5877 "s59E13H2" 0.6182749 "Dihydroneopterin 2',3'-cyclic phosphate phosphodiesterase"  
"JS1\_E20\_00092" 5877 "s59E25H2" 0 "Dihydroneopterin 2',3'-cyclic phosphate phosphodiesterase"  
"JS1\_E20\_00092" 5877 "s59E5H2" 0.09342354 "Dihydroneopterin 2',3'-cyclic phosphate phosphodiesterase"  
"JS1\_E20\_00092" 5877 "s63E6H2" 0.2008684 "Dihydroneopterin 2',3'-cyclic phosphate phosphodiesterase"  
"JS1\_E20\_00093" 5878 "s59E13H2" 0 "hypothetical protein"  
"JS1\_E20\_00093" 5878 "s59E25H2" 0 "hypothetical protein"  
"JS1\_E20\_00093" 5878 "s59E5H2" 0 "hypothetical protein"  
"JS1\_E20\_00093" 5878 "s63E6H2" 0.003575084 "hypothetical protein"  
"JS1\_E20\_00094" 5879 "s59E13H2" 0.7822282 "Isopropylmalate/citramalate isomerase large subunit"  
"JS1\_E20\_00094" 5879 "s59E25H2" 0 "Isopropylmalate/citramalate isomerase large subunit"  
"JS1\_E20\_00094" 5879 "s59E5H2" 0.1250491 "Isopropylmalate/citramalate isomerase large subunit"

"JS1\_E20\_00094" 5879 "s63E6H2" 0.08986251 "Isopropylmalate/citramalate isomerase large subunit"  
"JS1\_E20\_00095" 5880 "s59E13H2" 0.002660434 "Glutamate dehydrogenase"  
"JS1\_E20\_00095" 5880 "s59E25H2" 0 "Glutamate dehydrogenase"  
"JS1\_E20\_00095" 5880 "s59E5H2" 0 "Glutamate dehydrogenase"  
"JS1\_E20\_00095" 5880 "s63E6H2" 0.0325256 "Glutamate dehydrogenase"  
"JS1\_E20\_00096" 5881 "s59E13H2" 0.004370677 "putative transcriptional regulatory protein pdtaR"  
"JS1\_E20\_00096" 5881 "s59E25H2" 0 "putative transcriptional regulatory protein pdtaR"  
"JS1\_E20\_00096" 5881 "s59E5H2" 0.006806628 "putative transcriptional regulatory protein pdtaR"  
"JS1\_E20\_00096" 5881 "s63E6H2" 0.09600104 "putative transcriptional regulatory protein pdtaR"  
"JS1\_E20\_00098" 5883 "s59E13H2" 0.005757426 "Bifunctional homocysteine S-methyltransferase/5,10-methylenetetrahydrofolate reductase"  
"JS1\_E20\_00098" 5883 "s59E25H2" 0 "Bifunctional homocysteine S-methyltransferase/5,10-methylenetetrahydrofolate reductase"  
"JS1\_E20\_00098" 5883 "s59E5H2" 0.1414809 "Bifunctional homocysteine S-methyltransferase/5,10-methylenetetrahydrofolate reductase"  
"JS1\_E20\_00098" 5883 "s63E6H2" 0.02513317 "Bifunctional homocysteine S-methyltransferase/5,10-methylenetetrahydrofolate reductase"  
"JS1\_E20\_00099" 5884 "s59E13H2" 0.004111901 "hypothetical protein"  
"JS1\_E20\_00099" 5884 "s59E25H2" 0 "hypothetical protein"  
"JS1\_E20\_00099" 5884 "s59E5H2" 0.01655029 "hypothetical protein"  
"JS1\_E20\_00099" 5884 "s63E6H2" 0.2432644 "hypothetical protein"  
"JS1\_E20\_00100" 5885 "s59E13H2" 0.006408267 "D-3-phosphoglycerate dehydrogenase"  
"JS1\_E20\_00100" 5885 "s59E25H2" 0 "D-3-phosphoglycerate dehydrogenase"  
"JS1\_E20\_00100" 5885 "s59E5H2" 0.5278469 "D-3-phosphoglycerate dehydrogenase"  
"JS1\_E20\_00100" 5885 "s63E6H2" 0.1234993 "D-3-phosphoglycerate dehydrogenase"  
"JS1\_E20\_00101" 5886 "s59E13H2" 0.5331972 "Soluble hydrogenase 42 kDa subunit"  
"JS1\_E20\_00101" 5886 "s59E25H2" 0 "Soluble hydrogenase 42 kDa subunit"  
"JS1\_E20\_00101" 5886 "s59E5H2" 0.1727889 "Soluble hydrogenase 42 kDa subunit"  
"JS1\_E20\_00101" 5886 "s63E6H2" 0.008974189 "Soluble hydrogenase 42 kDa subunit"  
"JS1\_E20\_00102" 5887 "s59E13H2" 0.03865749 "Trp repressor protein"  
"JS1\_E20\_00102" 5887 "s59E25H2" 0 "Trp repressor protein"  
"JS1\_E20\_00102" 5887 "s59E5H2" 0.05013331 "Trp repressor protein"  
"JS1\_E20\_00102" 5887 "s63E6H2" 0.01368342 "Trp repressor protein"  
"JS1\_E20\_00103" 5888 "s59E13H2" 0.02256767 "Phosphoribosyl-AMP cyclohydrolase"  
"JS1\_E20\_00103" 5888 "s59E25H2" 0 "Phosphoribosyl-AMP cyclohydrolase"  
"JS1\_E20\_00103" 5888 "s59E5H2" 0.03753946 "Phosphoribosyl-AMP cyclohydrolase"  
"JS1\_E20\_00103" 5888 "s63E6H2" 0.02079582 "Phosphoribosyl-AMP cyclohydrolase"  
"JS1\_E20\_00104" 5889 "s59E13H2" 8.782314e-05 "Imidazole glycerol phosphate synthase subunit HisF"  
"JS1\_E20\_00104" 5889 "s59E25H2" 0 "Imidazole glycerol phosphate synthase subunit HisF"  
"JS1\_E20\_00104" 5889 "s59E5H2" 0.1002589 "Imidazole glycerol phosphate synthase subunit HisF"  
"JS1\_E20\_00104" 5889 "s63E6H2" 0.01529801 "Imidazole glycerol phosphate synthase subunit HisF"  
"JS1\_E20\_00105" 5890 "s59E13H2" 0 "1-(5-phosphoribosyl)-5-[(5-phosphoribosylamino)methylideneamino] imidazole-4-carboxamide isomerase"  
"JS1\_E20\_00105" 5890 "s59E25H2" 0 "1-(5-phosphoribosyl)-5-[(5-phosphoribosylamino)methylideneamino] imidazole-4-carboxamide isomerase"  
"JS1\_E20\_00105" 5890 "s59E5H2" 0.09237709 "1-(5-phosphoribosyl)-5-[(5-phosphoribosylamino)methylideneamino] imidazole-4-carboxamide isomerase"  
"JS1\_E20\_00105" 5890 "s63E6H2" 0 "1-(5-phosphoribosyl)-5-[(5-phosphoribosylamino)methylideneamino] imidazole-4-carboxamide isomerase"  
"JS1\_E20\_00106" 5891 "s59E13H2" 0 "Imidazole glycerol phosphate synthase subunit HisH 1"  
"JS1\_E20\_00106" 5891 "s59E25H2" 0 "Imidazole glycerol phosphate synthase subunit HisH 1"  
"JS1\_E20\_00106" 5891 "s59E5H2" 0.1426321 "Imidazole glycerol phosphate synthase subunit HisH 1"  
"JS1\_E20\_00106" 5891 "s63E6H2" 0.001208064 "Imidazole glycerol phosphate synthase subunit HisH 1"  
"JS1\_E20\_00107" 5892 "s59E13H2" 0 "Imidazoleglycerol-phosphate dehydratase"  
"JS1\_E20\_00107" 5892 "s59E25H2" 0 "Imidazoleglycerol-phosphate dehydratase"

"JS1\_E20\_00107" 5892 "s59E5H2" 0.03417018 "Imidazoleglycerol-phosphate dehydratase"  
"JS1\_E20\_00107" 5892 "s63E6H2" 0.02073509 "Imidazoleglycerol-phosphate dehydratase"  
"JS1\_E20\_00108" 5893 "s59E13H2" 0.003095881 "Pyrophosphatase PpaX"  
"JS1\_E20\_00108" 5893 "s59E25H2" 0 "Pyrophosphatase PpaX"  
"JS1\_E20\_00108" 5893 "s59E5H2" 0.007073924 "Pyrophosphatase PpaX"  
"JS1\_E20\_00108" 5893 "s63E6H2" 0.001559701 "Pyrophosphatase PpaX"  
"JS1\_E20\_00109" 5894 "s59E13H2" 1.070915e-05 "Histidinol dehydrogenase"  
"JS1\_E20\_00109" 5894 "s59E25H2" 0 "Histidinol dehydrogenase"  
"JS1\_E20\_00109" 5894 "s59E5H2" 0.08716146 "Histidinol dehydrogenase"  
"JS1\_E20\_00109" 5894 "s63E6H2" 0.009823271 "Histidinol dehydrogenase"  
"JS1\_E20\_00110" 5895 "s59E13H2" 0 "ATP phosphoribosyltransferase"  
"JS1\_E20\_00110" 5895 "s59E25H2" 0 "ATP phosphoribosyltransferase"  
"JS1\_E20\_00110" 5895 "s59E5H2" 0.08738289 "ATP phosphoribosyltransferase"  
"JS1\_E20\_00110" 5895 "s63E6H2" 0 "ATP phosphoribosyltransferase"  
"JS1\_E20\_00111" 5896 "s59E13H2" 0 "ATP phosphoribosyltransferase regulatory subunit"  
"JS1\_E20\_00111" 5896 "s59E25H2" 0 "ATP phosphoribosyltransferase regulatory subunit"  
"JS1\_E20\_00111" 5896 "s59E5H2" 0.09099405 "ATP phosphoribosyltransferase regulatory subunit"  
"JS1\_E20\_00111" 5896 "s63E6H2" 0.001220741 "ATP phosphoribosyltransferase regulatory subunit"  
"JS1\_E20\_00112" 5897 "s59E13H2" 0 "4-alpha-glucanotransferase"  
"JS1\_E20\_00112" 5897 "s59E25H2" 0 "4-alpha-glucanotransferase"  
"JS1\_E20\_00112" 5897 "s59E5H2" 0.09186648 "4-alpha-glucanotransferase"  
"JS1\_E20\_00112" 5897 "s63E6H2" 1.40057 "4-alpha-glucanotransferase"  
"JS1\_E20\_00113" 5898 "s59E13H2" 0.004261434 "Maltodextrin phosphorylase"  
"JS1\_E20\_00113" 5898 "s59E25H2" 0.1558038 "Maltodextrin phosphorylase"  
"JS1\_E20\_00113" 5898 "s59E5H2" 0.08778085 "Maltodextrin phosphorylase"  
"JS1\_E20\_00113" 5898 "s63E6H2" 1.498445 "Maltodextrin phosphorylase"  
"JS1\_E20\_00114" 5899 "s59E13H2" 0 "Maltose transport system permease protein MalG"  
"JS1\_E20\_00114" 5899 "s59E25H2" 0 "Maltose transport system permease protein MalG"  
"JS1\_E20\_00114" 5899 "s59E5H2" 0.06018901 "Maltose transport system permease protein MalG"  
"JS1\_E20\_00114" 5899 "s63E6H2" 2.358259 "Maltose transport system permease protein MalG"  
"JS1\_E20\_00115" 5900 "s59E13H2" 0 "Trehalose/maltose transport system permease protein MalF"  
"JS1\_E20\_00115" 5900 "s59E25H2" 0 "Trehalose/maltose transport system permease protein MalF"  
"JS1\_E20\_00115" 5900 "s59E5H2" 0.06521249 "Trehalose/maltose transport system permease protein MalF"  
"JS1\_E20\_00115" 5900 "s63E6H2" 2.489529 "Trehalose/maltose transport system permease protein MalF"  
"JS1\_E20\_00116" 5901 "s59E13H2" 0 "Maltotriose-binding protein precursor"  
"JS1\_E20\_00116" 5901 "s59E25H2" 0 "Maltotriose-binding protein precursor"  
"JS1\_E20\_00116" 5901 "s59E5H2" 0.068159 "Maltotriose-binding protein precursor"  
"JS1\_E20\_00116" 5901 "s63E6H2" 4.235807 "Maltotriose-binding protein precursor"  
"JS1\_E20\_00117" 5902 "s59E13H2" 0.1143271 "UDP-N-acetylenolpyruvoylglucosamine reductase"  
"JS1\_E20\_00117" 5902 "s59E25H2" 0 "UDP-N-acetylenolpyruvoylglucosamine reductase"  
"JS1\_E20\_00117" 5902 "s59E5H2" 0.1148844 "UDP-N-acetylenolpyruvoylglucosamine reductase"  
"JS1\_E20\_00117" 5902 "s63E6H2" 0.4448911 "UDP-N-acetylenolpyruvoylglucosamine reductase"  
"JS1\_E20\_00118" 5903 "s59E13H2" 0.01202996 "Cell division protein DivIB"  
"JS1\_E20\_00118" 5903 "s59E25H2" 0 "Cell division protein DivIB"  
"JS1\_E20\_00118" 5903 "s59E5H2" 0.07703938 "Cell division protein DivIB"  
"JS1\_E20\_00118" 5903 "s63E6H2" 0.3667477 "Cell division protein DivIB"  
"JS1\_E20\_00119" 5904 "s59E13H2" 0.1474204 "Cell division protein FtsA"

"JS1\_E20\_00119" 5904 "s59E25H2" 0 "Cell division protein FtsA"  
"JS1\_E20\_00119" 5904 "s59E5H2" 0.4454367 "Cell division protein FtsA"  
"JS1\_E20\_00119" 5904 "s63E6H2" 1.166439 "Cell division protein FtsA"  
"JS1\_E20\_00120" 5905 "s59E13H2" 0.1511183 "Cell division protein FtsZ"  
"JS1\_E20\_00120" 5905 "s59E25H2" 0 "Cell division protein FtsZ"  
"JS1\_E20\_00120" 5905 "s59E5H2" 0.5277615 "Cell division protein FtsZ"  
"JS1\_E20\_00120" 5905 "s63E6H2" 1.31261 "Cell division protein FtsZ"  
"JS1\_E20\_00121" 5906 "s59E13H2" 0.08227693 "Transcriptional repressor NrdR"  
"JS1\_E20\_00121" 5906 "s59E25H2" 0 "Transcriptional repressor NrdR"  
"JS1\_E20\_00121" 5906 "s59E5H2" 0.3914233 "Transcriptional repressor NrdR"  
"JS1\_E20\_00121" 5906 "s63E6H2" 1.373176 "Transcriptional repressor NrdR"  
"JS1\_E20\_00122" 5907 "s59E13H2" 0.1599758 "Anaerobic ribonucleoside-triphosphate reductase"  
"JS1\_E20\_00122" 5907 "s59E25H2" 0 "Anaerobic ribonucleoside-triphosphate reductase"  
"JS1\_E20\_00122" 5907 "s59E5H2" 0.4993574 "Anaerobic ribonucleoside-triphosphate reductase"  
"JS1\_E20\_00122" 5907 "s63E6H2" 0.8051289 "Anaerobic ribonucleoside-triphosphate reductase"  
"JS1\_E20\_00123" 5908 "s59E13H2" 0.03218666 "hypothetical protein"  
"JS1\_E20\_00123" 5908 "s59E25H2" 0 "hypothetical protein"  
"JS1\_E20\_00123" 5908 "s59E5H2" 0.06859788 "hypothetical protein"  
"JS1\_E20\_00123" 5908 "s63E6H2" 0.1451877 "hypothetical protein"  
"JS1\_E20\_00124" 5909 "s59E13H2" 0.02891805 "pyruvate formate lyase-activating enzyme 1"  
"JS1\_E20\_00124" 5909 "s59E25H2" 0 "pyruvate formate lyase-activating enzyme 1"  
"JS1\_E20\_00124" 5909 "s59E5H2" 0.1032443 "pyruvate formate lyase-activating enzyme 1"  
"JS1\_E20\_00124" 5909 "s63E6H2" 0.03281619 "pyruvate formate lyase-activating enzyme 1"  
"JS1\_E20\_00126" 5911 "s59E13H2" 0.00779284 "hypothetical protein"  
"JS1\_E20\_00126" 5911 "s59E25H2" 0 "hypothetical protein"  
"JS1\_E20\_00126" 5911 "s59E5H2" 0.3229587 "hypothetical protein"  
"JS1\_E20\_00126" 5911 "s63E6H2" 0.03461818 "hypothetical protein"  
"JS1\_E20\_00127" 5912 "s59E13H2" 0.1326782 "UDP-N-acetylmuramoyl-L-alanyl-D-glutamate--L-lysine ligase"  
"JS1\_E20\_00127" 5912 "s59E25H2" 0 "UDP-N-acetylmuramoyl-L-alanyl-D-glutamate--L-lysine ligase"  
"JS1\_E20\_00127" 5912 "s59E5H2" 0.6166541 "UDP-N-acetylmuramoyl-L-alanyl-D-glutamate--L-lysine ligase"  
"JS1\_E20\_00127" 5912 "s63E6H2" 0.0729427 "UDP-N-acetylmuramoyl-L-alanyl-D-glutamate--L-lysine ligase"  
"JS1\_E20\_00128" 5913 "s59E13H2" 0.05903178 "Stage V sporulation protein D"  
"JS1\_E20\_00128" 5913 "s59E25H2" 0 "Stage V sporulation protein D"  
"JS1\_E20\_00128" 5913 "s59E5H2" 0.6813351 "Stage V sporulation protein D"  
"JS1\_E20\_00128" 5913 "s63E6H2" 0.5635963 "Stage V sporulation protein D"  
"JS1\_E20\_00129" 5914 "s59E13H2" 0.07416144 "Cell division protein FtsL"  
"JS1\_E20\_00129" 5914 "s59E25H2" 0 "Cell division protein FtsL"  
"JS1\_E20\_00129" 5914 "s59E5H2" 0.3014426 "Cell division protein FtsL"  
"JS1\_E20\_00129" 5914 "s63E6H2" 0.1507691 "Cell division protein FtsL"  
"JS1\_E20\_00130" 5915 "s59E13H2" 0.05452263 "Ribosomal RNA small subunit methyltransferase H"  
"JS1\_E20\_00130" 5915 "s59E25H2" 0 "Ribosomal RNA small subunit methyltransferase H"  
"JS1\_E20\_00130" 5915 "s59E5H2" 0.5248202 "Ribosomal RNA small subunit methyltransferase H"  
"JS1\_E20\_00130" 5915 "s63E6H2" 0.8208535 "Ribosomal RNA small subunit methyltransferase H"  
"JS1\_E20\_00131" 5916 "s59E13H2" 0.06846106 "cell division protein MraZ"  
"JS1\_E20\_00131" 5916 "s59E25H2" 0 "cell division protein MraZ"  
"JS1\_E20\_00131" 5916 "s59E5H2" 0.8280368 "cell division protein MraZ"  
"JS1\_E20\_00131" 5916 "s63E6H2" 0.8777396 "cell division protein MraZ"

"JS1\_E20\_00135" 5920 "s59E13H2" 0.06387116 "Putative zinc ribbon domain protein"  
"JS1\_E20\_00135" 5920 "s59E25H2" 0 "Putative zinc ribbon domain protein"  
"JS1\_E20\_00135" 5920 "s59E5H2" 0.3324875 "Putative zinc ribbon domain protein"  
"JS1\_E20\_00135" 5920 "s63E6H2" 0.09129957 "Putative zinc ribbon domain protein"  
"JS1\_E20\_00138" 5923 "s59E13H2" 0.008929477 "Sporulation kinase E"  
"JS1\_E20\_00138" 5923 "s59E25H2" 0 "Sporulation kinase E"  
"JS1\_E20\_00138" 5923 "s59E5H2" 0.1162754 "Sporulation kinase E"  
"JS1\_E20\_00138" 5923 "s63E6H2" 0.02781549 "Sporulation kinase E"  
"JS1\_E20\_00139" 5924 "s59E13H2" 0.03135443 "Transcriptional regulatory protein ZraR"  
"JS1\_E20\_00139" 5924 "s59E25H2" 0 "Transcriptional regulatory protein ZraR"  
"JS1\_E20\_00139" 5924 "s59E5H2" 0.6011218 "Transcriptional regulatory protein ZraR"  
"JS1\_E20\_00139" 5924 "s63E6H2" 0.08674413 "Transcriptional regulatory protein ZraR"  
"JS1\_E20\_00140" 5925 "s59E13H2" 0.02709114 "Transcriptional regulatory protein ZraR"  
"JS1\_E20\_00140" 5925 "s59E25H2" 0 "Transcriptional regulatory protein ZraR"  
"JS1\_E20\_00140" 5925 "s59E5H2" 0.02893171 "Transcriptional regulatory protein ZraR"  
"JS1\_E20\_00140" 5925 "s63E6H2" 0.01279768 "Transcriptional regulatory protein ZraR"  
"JS1\_E20\_00141" 5926 "s59E13H2" 0 "Gas vesicle structural protein"  
"JS1\_E20\_00141" 5926 "s59E25H2" 0 "Gas vesicle structural protein"  
"JS1\_E20\_00141" 5926 "s59E5H2" 0.1241333 "Gas vesicle structural protein"  
"JS1\_E20\_00141" 5926 "s63E6H2" 0.07961814 "Gas vesicle structural protein"  
"JS1\_E20\_00142" 5927 "s59E13H2" 0.01102546 "hypothetical protein"  
"JS1\_E20\_00142" 5927 "s59E25H2" 0 "hypothetical protein"  
"JS1\_E20\_00142" 5927 "s59E5H2" 0.1814369 "hypothetical protein"  
"JS1\_E20\_00142" 5927 "s63E6H2" 0.1113232 "hypothetical protein"  
"JS1\_E20\_00143" 5928 "s59E13H2" 0.008997935 "hypothetical protein"  
"JS1\_E20\_00143" 5928 "s59E25H2" 0 "hypothetical protein"  
"JS1\_E20\_00143" 5928 "s59E5H2" 0.1386552 "hypothetical protein"  
"JS1\_E20\_00143" 5928 "s63E6H2" 0.03083477 "hypothetical protein"  
"JS1\_E20\_00144" 5929 "s59E13H2" 0.007535225 "Chaperone protein DnaJ"  
"JS1\_E20\_00144" 5929 "s59E25H2" 0 "Chaperone protein DnaJ"  
"JS1\_E20\_00144" 5929 "s59E5H2" 0.1564132 "Chaperone protein DnaJ"  
"JS1\_E20\_00144" 5929 "s63E6H2" 0.01161445 "Chaperone protein DnaJ"  
"JS1\_E20\_00145" 5930 "s59E13H2" 0.0132324 "Denitrification regulatory protein NirQ"  
"JS1\_E20\_00145" 5930 "s59E25H2" 0 "Denitrification regulatory protein NirQ"  
"JS1\_E20\_00145" 5930 "s59E5H2" 0.662779 "Denitrification regulatory protein NirQ"  
"JS1\_E20\_00145" 5930 "s63E6H2" 0.0325562 "Denitrification regulatory protein NirQ"  
"JS1\_E20\_00147" 5932 "s59E13H2" 0.003684808 "hypothetical protein"  
"JS1\_E20\_00147" 5932 "s59E25H2" 0 "hypothetical protein"  
"JS1\_E20\_00147" 5932 "s59E5H2" 0.04023984 "hypothetical protein"  
"JS1\_E20\_00147" 5932 "s63E6H2" 0.03307423 "hypothetical protein"  
"JS1\_E20\_00148" 5933 "s59E13H2" 0.005269388 "chaperone protein DnaJ"  
"JS1\_E20\_00148" 5933 "s59E25H2" 0 "chaperone protein DnaJ"  
"JS1\_E20\_00148" 5933 "s59E5H2" 0.07127431 "chaperone protein DnaJ"  
"JS1\_E20\_00148" 5933 "s63E6H2" 0.02872311 "chaperone protein DnaJ"  
"JS1\_E20\_00149" 5934 "s59E13H2" 0 "hypothetical protein"  
"JS1\_E20\_00149" 5934 "s59E25H2" 0 "hypothetical protein"  
"JS1\_E20\_00149" 5934 "s59E5H2" 0.2435763 "hypothetical protein"



"JS1\_E20\_00149" 5934 "s63E6H2" 0.0151607 "hypothetical protein"  
"JS1\_E20\_00150" 5935 "s59E13H2" 0 "Hsp20/alpha crystallin family protein"  
"JS1\_E20\_00150" 5935 "s59E25H2" 0 "Hsp20/alpha crystallin family protein"  
"JS1\_E20\_00150" 5935 "s59E5H2" 0.1573967 "Hsp20/alpha crystallin family protein"  
"JS1\_E20\_00150" 5935 "s63E6H2" 0.05556377 "Hsp20/alpha crystallin family protein"  
"JS1\_E20\_00151" 5936 "s59E13H2" 0 "VCP-like ATPase"  
"JS1\_E20\_00151" 5936 "s59E25H2" 0 "VCP-like ATPase"  
"JS1\_E20\_00151" 5936 "s59E5H2" 0.2967816 "VCP-like ATPase"  
"JS1\_E20\_00151" 5936 "s63E6H2" 0.03358885 "VCP-like ATPase"  
"JS1\_E20\_00152" 5937 "s59E13H2" 0 "chaperone protein DnaJ"  
"JS1\_E20\_00152" 5937 "s59E25H2" 0 "chaperone protein DnaJ"  
"JS1\_E20\_00152" 5937 "s59E5H2" 0.1675212 "chaperone protein DnaJ"  
"JS1\_E20\_00152" 5937 "s63E6H2" 0.03116351 "chaperone protein DnaJ"  
"JS1\_E20\_00153" 5938 "s59E13H2" 0 "Gas vesicle synthesis protein GvpL/GvpF"  
"JS1\_E20\_00153" 5938 "s59E25H2" 0 "Gas vesicle synthesis protein GvpL/GvpF"  
"JS1\_E20\_00153" 5938 "s59E5H2" 0.2077667 "Gas vesicle synthesis protein GvpL/GvpF"  
"JS1\_E20\_00153" 5938 "s63E6H2" 0.07600295 "Gas vesicle synthesis protein GvpL/GvpF"  
"JS1\_E20\_00154" 5939 "s59E13H2" 0 "Gas vesicle synthesis protein GvpL/GvpF"  
"JS1\_E20\_00154" 5939 "s59E25H2" 0 "Gas vesicle synthesis protein GvpL/GvpF"  
"JS1\_E20\_00154" 5939 "s59E5H2" 0.2258666 "Gas vesicle synthesis protein GvpL/GvpF"  
"JS1\_E20\_00154" 5939 "s63E6H2" 0.06362673 "Gas vesicle synthesis protein GvpL/GvpF"  
"JS1\_E20\_00155" 5940 "s59E13H2" 0 "Gas vesicle protein G"  
"JS1\_E20\_00155" 5940 "s59E25H2" 0 "Gas vesicle protein G"  
"JS1\_E20\_00155" 5940 "s59E5H2" 0.4015822 "Gas vesicle protein G"  
"JS1\_E20\_00155" 5940 "s63E6H2" 0.04121221 "Gas vesicle protein G"  
"JS1\_E20\_00156" 5941 "s59E13H2" 0.001620061 "Putative arsenical pump-driving ATPase"  
"JS1\_E20\_00156" 5941 "s59E25H2" 0 "Putative arsenical pump-driving ATPase"  
"JS1\_E20\_00156" 5941 "s59E5H2" 0.6104837 "Putative arsenical pump-driving ATPase"  
"JS1\_E20\_00156" 5941 "s63E6H2" 0.1309605 "Putative arsenical pump-driving ATPase"  
"JS1\_E20\_00157" 5942 "s59E13H2" 0 "Gas vesicle synthesis protein GvpO"  
"JS1\_E20\_00157" 5942 "s59E25H2" 0 "Gas vesicle synthesis protein GvpO"  
"JS1\_E20\_00157" 5942 "s59E5H2" 0.2830298 "Gas vesicle synthesis protein GvpO"  
"JS1\_E20\_00157" 5942 "s63E6H2" 0.09270917 "Gas vesicle synthesis protein GvpO"  
"JS1\_E20\_00158" 5943 "s59E13H2" 0 "Gas vesicle structural protein"  
"JS1\_E20\_00158" 5943 "s59E25H2" 0 "Gas vesicle structural protein"  
"JS1\_E20\_00158" 5943 "s59E5H2" 0.2157962 "Gas vesicle structural protein"  
"JS1\_E20\_00158" 5943 "s63E6H2" 0.7686586 "Gas vesicle structural protein"  
"JS1\_E20\_00159" 5944 "s59E13H2" 0 "Gas vesicle protein K"  
"JS1\_E20\_00159" 5944 "s59E25H2" 0 "Gas vesicle protein K"  
"JS1\_E20\_00159" 5944 "s59E5H2" 0.09408347 "Gas vesicle protein K"  
"JS1\_E20\_00159" 5944 "s63E6H2" 0.03088141 "Gas vesicle protein K"  
"JS1\_E20\_00160" 5945 "s59E13H2" 0.0009910583 "Gas vesicle synthesis protein GvpL/GvpF"  
"JS1\_E20\_00160" 5945 "s59E25H2" 0 "Gas vesicle synthesis protein GvpL/GvpF"  
"JS1\_E20\_00160" 5945 "s59E5H2" 0.1626259 "Gas vesicle synthesis protein GvpL/GvpF"  
"JS1\_E20\_00160" 5945 "s63E6H2" 0.001994643 "Gas vesicle synthesis protein GvpL/GvpF"  
"JS1\_E20\_00161" 5946 "s59E13H2" 0.004378671 "Gas vesicle structural protein"  
"JS1\_E20\_00161" 5946 "s59E25H2" 0 "Gas vesicle structural protein"

"JS1\_E20\_00161" 5946 "s59E5H2" 0.313085 "Gas vesicle structural protein"  
"JS1\_E20\_00161" 5946 "s63E6H2" 0.1029512 "Gas vesicle structural protein"  
"JS1\_E20\_00162" 5947 "s59E13H2" 0 "Sporulation kinase A"  
"JS1\_E20\_00162" 5947 "s59E25H2" 0 "Sporulation kinase A"  
"JS1\_E20\_00162" 5947 "s59E5H2" 0.1480493 "Sporulation kinase A"  
"JS1\_E20\_00162" 5947 "s63E6H2" 0.06697267 "Sporulation kinase A"  
"JS1\_E20\_00163" 5948 "s59E13H2" 0.003472302 "Transcriptional regulatory protein ZraR"  
"JS1\_E20\_00163" 5948 "s59E25H2" 0 "Transcriptional regulatory protein ZraR"  
"JS1\_E20\_00163" 5948 "s59E5H2" 0.1496448 "Transcriptional regulatory protein ZraR"  
"JS1\_E20\_00163" 5948 "s63E6H2" 0.1434155 "Transcriptional regulatory protein ZraR"  
"JS1\_E20\_00164" 5949 "s59E13H2" 0 "hypothetical protein"  
"JS1\_E20\_00164" 5949 "s59E25H2" 0 "hypothetical protein"  
"JS1\_E20\_00164" 5949 "s59E5H2" 0.1228294 "hypothetical protein"  
"JS1\_E20\_00164" 5949 "s63E6H2" 0.1279389 "hypothetical protein"  
"JS1\_E20\_00165" 5950 "s59E13H2" 0 "hypothetical protein"  
"JS1\_E20\_00165" 5950 "s59E25H2" 0 "hypothetical protein"  
"JS1\_E20\_00165" 5950 "s59E5H2" 0.1297323 "hypothetical protein"  
"JS1\_E20\_00165" 5950 "s63E6H2" 0.02798106 "hypothetical protein"  
"JS1\_E20\_00166" 5951 "s59E13H2" 0.01341758 "Cyclic di-GMP phosphodiesterase response regulator RpfG"  
"JS1\_E20\_00166" 5951 "s59E25H2" 0 "Cyclic di-GMP phosphodiesterase response regulator RpfG"  
"JS1\_E20\_00166" 5951 "s59E5H2" 1.857746 "Cyclic di-GMP phosphodiesterase response regulator RpfG"  
"JS1\_E20\_00166" 5951 "s63E6H2" 0.0140331 "Cyclic di-GMP phosphodiesterase response regulator RpfG"  
"JS1\_E20\_00167" 5952 "s59E13H2" 0.01790491 "putative diguanylate cyclase YcdT"  
"JS1\_E20\_00167" 5952 "s59E25H2" 0 "putative diguanylate cyclase YcdT"  
"JS1\_E20\_00167" 5952 "s59E5H2" 1.880892 "putative diguanylate cyclase YcdT"  
"JS1\_E20\_00167" 5952 "s63E6H2" 0.03235716 "putative diguanylate cyclase YcdT"  
"JS1\_E20\_00168" 5953 "s59E13H2" 0.01393184 "Cyclic di-GMP phosphodiesterase response regulator RpfG"  
"JS1\_E20\_00168" 5953 "s59E25H2" 0 "Cyclic di-GMP phosphodiesterase response regulator RpfG"  
"JS1\_E20\_00168" 5953 "s59E5H2" 0.5033099 "Cyclic di-GMP phosphodiesterase response regulator RpfG"  
"JS1\_E20\_00168" 5953 "s63E6H2" 0.009716934 "Cyclic di-GMP phosphodiesterase response regulator RpfG"  
"JS1\_E20\_00169" 5954 "s59E13H2" 0.02932854 "Cyclic di-GMP phosphodiesterase response regulator RpfG"  
"JS1\_E20\_00169" 5954 "s59E25H2" 0 "Cyclic di-GMP phosphodiesterase response regulator RpfG"  
"JS1\_E20\_00169" 5954 "s59E5H2" 0.4920972 "Cyclic di-GMP phosphodiesterase response regulator RpfG"  
"JS1\_E20\_00169" 5954 "s63E6H2" 0.01051915 "Cyclic di-GMP phosphodiesterase response regulator RpfG"  
"JS1\_E20\_00170" 5955 "s59E13H2" 0.04554257 "Cyclic di-GMP phosphodiesterase response regulator RpfG"  
"JS1\_E20\_00170" 5955 "s59E25H2" 0 "Cyclic di-GMP phosphodiesterase response regulator RpfG"  
"JS1\_E20\_00170" 5955 "s59E5H2" 0.2829787 "Cyclic di-GMP phosphodiesterase response regulator RpfG"  
"JS1\_E20\_00170" 5955 "s63E6H2" 0.117005 "Cyclic di-GMP phosphodiesterase response regulator RpfG"  
"JS1\_E20\_00171" 5956 "s59E13H2" 0.08268001 "hypothetical protein"  
"JS1\_E20\_00171" 5956 "s59E25H2" 0 "hypothetical protein"  
"JS1\_E20\_00171" 5956 "s59E5H2" 1.718842 "hypothetical protein"  
"JS1\_E20\_00171" 5956 "s63E6H2" 0.3402084 "hypothetical protein"  
"JS1\_E20\_00172" 5957 "s59E13H2" 0.1111929 "Plasmid stabilisation system protein"  
"JS1\_E20\_00172" 5957 "s59E25H2" 0 "Plasmid stabilisation system protein"  
"JS1\_E20\_00172" 5957 "s59E5H2" 0.658095 "Plasmid stabilisation system protein"  
"JS1\_E20\_00172" 5957 "s63E6H2" 0.001160975 "Plasmid stabilisation system protein"  
"JS1\_E20\_00174" 5959 "s59E13H2" 0.06008144 "hypothetical protein"

"JS1\_E20\_00174" 5959 "s59E25H2" 0 "hypothetical protein"  
"JS1\_E20\_00174" 5959 "s59E5H2" 0.6758224 "hypothetical protein"  
"JS1\_E20\_00174" 5959 "s63E6H2" 2.501765e-05 "hypothetical protein"  
"JS1\_E20\_00175" 5960 "s59E13H2" 0 "Sulfate adenyltransferase"  
"JS1\_E20\_00175" 5960 "s59E25H2" 0 "Sulfate adenyltransferase"  
"JS1\_E20\_00175" 5960 "s59E5H2" 0.01214593 "Sulfate adenyltransferase"  
"JS1\_E20\_00175" 5960 "s63E6H2" 0.006026216 "Sulfate adenyltransferase"  
"JS1\_E20\_00176" 5961 "s59E13H2" 0 "Tripartite tricarboxylate transporter family receptor"  
"JS1\_E20\_00176" 5961 "s59E25H2" 0 "Tripartite tricarboxylate transporter family receptor"  
"JS1\_E20\_00176" 5961 "s59E5H2" 0 "Tripartite tricarboxylate transporter family receptor"  
"JS1\_E20\_00176" 5961 "s63E6H2" 0 "Tripartite tricarboxylate transporter family receptor"  
"JS1\_E20\_00177" 5962 "s59E13H2" 0 "putative hydrolase YxeP"  
"JS1\_E20\_00177" 5962 "s59E25H2" 0 "putative hydrolase YxeP"  
"JS1\_E20\_00177" 5962 "s59E5H2" 0.00328046 "putative hydrolase YxeP"  
"JS1\_E20\_00177" 5962 "s63E6H2" 0 "putative hydrolase YxeP"  
"JS1\_E20\_00178" 5963 "s59E13H2" 0 "Tripartite tricarboxylate transporter TctA family protein"  
"JS1\_E20\_00178" 5963 "s59E25H2" 0 "Tripartite tricarboxylate transporter TctA family protein"  
"JS1\_E20\_00178" 5963 "s59E5H2" 0.01220803 "Tripartite tricarboxylate transporter TctA family protein"  
"JS1\_E20\_00178" 5963 "s63E6H2" 0 "Tripartite tricarboxylate transporter TctA family protein"  
"JS1\_E20\_00179" 5964 "s59E13H2" 0 "Tripartite tricarboxylate transporter TctB family protein"  
"JS1\_E20\_00179" 5964 "s59E25H2" 0 "Tripartite tricarboxylate transporter TctB family protein"  
"JS1\_E20\_00179" 5964 "s59E5H2" 0.02727174 "Tripartite tricarboxylate transporter TctB family protein"  
"JS1\_E20\_00179" 5964 "s63E6H2" 0 "Tripartite tricarboxylate transporter TctB family protein"  
"JS1\_E20\_00180" 5965 "s59E13H2" 0 "Tripartite tricarboxylate transporter family receptor"  
"JS1\_E20\_00180" 5965 "s59E25H2" 0 "Tripartite tricarboxylate transporter family receptor"  
"JS1\_E20\_00180" 5965 "s59E5H2" 0.008770834 "Tripartite tricarboxylate transporter family receptor"  
"JS1\_E20\_00180" 5965 "s63E6H2" 0 "Tripartite tricarboxylate transporter family receptor"  
"JS1\_E20\_00181" 5966 "s59E13H2" 0 "Tripartite tricarboxylate transporter TctA family protein"  
"JS1\_E20\_00181" 5966 "s59E25H2" 0 "Tripartite tricarboxylate transporter TctA family protein"  
"JS1\_E20\_00181" 5966 "s59E5H2" 0.005287356 "Tripartite tricarboxylate transporter TctA family protein"  
"JS1\_E20\_00181" 5966 "s63E6H2" 0 "Tripartite tricarboxylate transporter TctA family protein"  
"JS1\_E20\_00182" 5967 "s59E13H2" 0 "Tripartite tricarboxylate transporter TctB family protein"  
"JS1\_E20\_00182" 5967 "s59E25H2" 0 "Tripartite tricarboxylate transporter TctB family protein"  
"JS1\_E20\_00182" 5967 "s59E5H2" 0 "Tripartite tricarboxylate transporter TctB family protein"  
"JS1\_E20\_00182" 5967 "s63E6H2" 0 "Tripartite tricarboxylate transporter TctB family protein"  
"JS1\_E20\_00183" 5968 "s59E13H2" 0 "Tripartite tricarboxylate transporter family receptor"  
"JS1\_E20\_00183" 5968 "s59E25H2" 0 "Tripartite tricarboxylate transporter family receptor"  
"JS1\_E20\_00183" 5968 "s59E5H2" 0.007588825 "Tripartite tricarboxylate transporter family receptor"  
"JS1\_E20\_00183" 5968 "s63E6H2" 0 "Tripartite tricarboxylate transporter family receptor"  
"JS1\_E20\_00185" 5970 "s59E13H2" 0 "N-acyl-L-amino acid amidohydrolase"  
"JS1\_E20\_00185" 5970 "s59E25H2" 0 "N-acyl-L-amino acid amidohydrolase"  
"JS1\_E20\_00185" 5970 "s59E5H2" 0.007496755 "N-acyl-L-amino acid amidohydrolase"  
"JS1\_E20\_00185" 5970 "s63E6H2" 0 "N-acyl-L-amino acid amidohydrolase"  
"JS1\_E20\_00188" 5973 "s59E13H2" 0 "Putative acetyltransferase EpsM"  
"JS1\_E20\_00188" 5973 "s59E25H2" 0 "Putative acetyltransferase EpsM"  
"JS1\_E20\_00188" 5973 "s59E5H2" 0.03030572 "Putative acetyltransferase EpsM"  
"JS1\_E20\_00188" 5973 "s63E6H2" 0.01590108 "Putative acetyltransferase EpsM"

"JS1\_E20\_00189" 5974 "s59E13H2" 0 "dTDP-glucose 4,6-dehydratase"  
"JS1\_E20\_00189" 5974 "s59E25H2" 0 "dTDP-glucose 4,6-dehydratase"  
"JS1\_E20\_00189" 5974 "s59E5H2" 0.02271144 "dTDP-glucose 4,6-dehydratase"  
"JS1\_E20\_00189" 5974 "s63E6H2" 0.01091458 "dTDP-glucose 4,6-dehydratase"  
"JS1\_E20\_00190" 5975 "s59E13H2" 0 "dTDP-4-dehydrorhamnose reductase"  
"JS1\_E20\_00190" 5975 "s59E25H2" 0 "dTDP-4-dehydrorhamnose reductase"  
"JS1\_E20\_00190" 5975 "s59E5H2" 0.2262888 "dTDP-4-dehydrorhamnose reductase"  
"JS1\_E20\_00190" 5975 "s63E6H2" 0.08884962 "dTDP-4-dehydrorhamnose reductase"  
"JS1\_E20\_00191" 5976 "s59E13H2" 0 "dTDP-4-dehydrorhamnose 3,5-epimerase"  
"JS1\_E20\_00191" 5976 "s59E25H2" 0 "dTDP-4-dehydrorhamnose 3,5-epimerase"  
"JS1\_E20\_00191" 5976 "s59E5H2" 0.09225479 "dTDP-4-dehydrorhamnose 3,5-epimerase"  
"JS1\_E20\_00191" 5976 "s63E6H2" 0.02481466 "dTDP-4-dehydrorhamnose 3,5-epimerase"  
"JS1\_E20\_00192" 5977 "s59E13H2" 0 "Glucose-1-phosphate thymidyltransferase 1"  
"JS1\_E20\_00192" 5977 "s59E25H2" 0 "Glucose-1-phosphate thymidyltransferase 1"  
"JS1\_E20\_00192" 5977 "s59E5H2" 0.01189952 "Glucose-1-phosphate thymidyltransferase 1"  
"JS1\_E20\_00192" 5977 "s63E6H2" 0 "Glucose-1-phosphate thymidyltransferase 1"  
"JS1\_E20\_00193" 5978 "s59E13H2" 0 "Galactofuranosyl transferase G1fT1"  
"JS1\_E20\_00193" 5978 "s59E25H2" 0 "Galactofuranosyl transferase G1fT1"  
"JS1\_E20\_00193" 5978 "s59E5H2" 0.03290414 "Galactofuranosyl transferase G1fT1"  
"JS1\_E20\_00193" 5978 "s63E6H2" 0.1789376 "Galactofuranosyl transferase G1fT1"  
"JS1\_E20\_00194" 5979 "s59E13H2" 0 "UDP-galactopyranose mutase"  
"JS1\_E20\_00194" 5979 "s59E25H2" 0 "UDP-galactopyranose mutase"  
"JS1\_E20\_00194" 5979 "s59E5H2" 0.1722988 "UDP-galactopyranose mutase"  
"JS1\_E20\_00194" 5979 "s63E6H2" 0.1268458 "UDP-galactopyranose mutase"  
"JS1\_E20\_00195" 5980 "s59E13H2" 0 "D-inositol-3-phosphate glycosyltransferase"  
"JS1\_E20\_00195" 5980 "s59E25H2" 0 "D-inositol-3-phosphate glycosyltransferase"  
"JS1\_E20\_00195" 5980 "s59E5H2" 0.6458407 "D-inositol-3-phosphate glycosyltransferase"  
"JS1\_E20\_00195" 5980 "s63E6H2" 0.104799 "D-inositol-3-phosphate glycosyltransferase"  
"JS1\_E20\_00196" 5981 "s59E13H2" 0 "bifunctional UDP-glucuronic acid decarboxylase/UDP-4-amino-4-deoxy-L-arabinose formyltransferase"  
"JS1\_E20\_00196" 5981 "s59E25H2" 0 "bifunctional UDP-glucuronic acid decarboxylase/UDP-4-amino-4-deoxy-L-arabinose formyltransferase"  
"JS1\_E20\_00196" 5981 "s59E5H2" 0.03263401 "bifunctional UDP-glucuronic acid decarboxylase/UDP-4-amino-4-deoxy-L-arabinose formyltransferase"  
"JS1\_E20\_00196" 5981 "s63E6H2" 0.008026768 "bifunctional UDP-glucuronic acid decarboxylase/UDP-4-amino-4-deoxy-L-arabinose formyltransferase"  
"JS1\_E20\_00197" 5982 "s59E13H2" 0.01100239 "UDP-glucose 6-dehydrogenase Tuad"  
"JS1\_E20\_00197" 5982 "s59E25H2" 0 "UDP-glucose 6-dehydrogenase Tuad"  
"JS1\_E20\_00197" 5982 "s59E5H2" 0.201903 "UDP-glucose 6-dehydrogenase Tuad"  
"JS1\_E20\_00197" 5982 "s63E6H2" 0.02901606 "UDP-glucose 6-dehydrogenase Tuad"  
"JS1\_E20\_00198" 5983 "s59E13H2" 0 "hypothetical protein"  
"JS1\_E20\_00198" 5983 "s59E25H2" 0 "hypothetical protein"  
"JS1\_E20\_00198" 5983 "s59E5H2" 0.8247514 "hypothetical protein"  
"JS1\_E20\_00198" 5983 "s63E6H2" 0 "hypothetical protein"  
"JS1\_E20\_00199" 5984 "s59E13H2" 0 "hypothetical protein"  
"JS1\_E20\_00199" 5984 "s59E25H2" 0 "hypothetical protein"  
"JS1\_E20\_00199" 5984 "s59E5H2" 0.4972932 "hypothetical protein"  
"JS1\_E20\_00199" 5984 "s63E6H2" 0 "hypothetical protein"  
"JS1\_E20\_00200" 5985 "s59E13H2" 0.0003081892 "Putative ski2-type helicase"  
"JS1\_E20\_00200" 5985 "s59E25H2" 0 "Putative ski2-type helicase"  
"JS1\_E20\_00200" 5985 "s59E5H2" 0.4447452 "Putative ski2-type helicase"

"JS1\_E20\_00200" 5985 "s63E6H2" 0.003798002 "Putative ski2-type helicase"  
"JS1\_E20\_00201" 5986 "s59E13H2" 0 "hypothetical protein"  
"JS1\_E20\_00201" 5986 "s59E25H2" 0 "hypothetical protein"  
"JS1\_E20\_00201" 5986 "s59E5H2" 0.4661912 "hypothetical protein"  
"JS1\_E20\_00201" 5986 "s63E6H2" 0.3147839 "hypothetical protein"  
"JS1\_E20\_00202" 5987 "s59E13H2" 0 "RNA polymerase factor sigma-70"  
"JS1\_E20\_00202" 5987 "s59E25H2" 0 "RNA polymerase factor sigma-70"  
"JS1\_E20\_00202" 5987 "s59E5H2" 0.6340074 "RNA polymerase factor sigma-70"  
"JS1\_E20\_00202" 5987 "s63E6H2" 0.02126786 "RNA polymerase factor sigma-70"  
"JS1\_E20\_00203" 5988 "s59E13H2" 0.02574607 "Sigma-70, region 4"  
"JS1\_E20\_00203" 5988 "s59E25H2" 0 "Sigma-70, region 4"  
"JS1\_E20\_00203" 5988 "s59E5H2" 1.434537 "Sigma-70, region 4"  
"JS1\_E20\_00203" 5988 "s63E6H2" 0.05804058 "Sigma-70, region 4"  
"JS1\_E20\_00204" 5989 "s59E13H2" 0.02928671 "hypothetical protein"  
"JS1\_E20\_00204" 5989 "s59E25H2" 0 "hypothetical protein"  
"JS1\_E20\_00204" 5989 "s59E5H2" 0.5558918 "hypothetical protein"  
"JS1\_E20\_00204" 5989 "s63E6H2" 0.892989 "hypothetical protein"  
"JS1\_E20\_00205" 5990 "s59E13H2" 0.1912661 "hypothetical protein"  
"JS1\_E20\_00205" 5990 "s59E25H2" 0 "hypothetical protein"  
"JS1\_E20\_00205" 5990 "s59E5H2" 0.9987734 "hypothetical protein"  
"JS1\_E20\_00205" 5990 "s63E6H2" 7.083953 "hypothetical protein"  
"JS1\_E20\_00206" 5991 "s59E13H2" 0.9541394 "hypothetical protein"  
"JS1\_E20\_00206" 5991 "s59E25H2" 0 "hypothetical protein"  
"JS1\_E20\_00206" 5991 "s59E5H2" 1.327618 "hypothetical protein"  
"JS1\_E20\_00206" 5991 "s63E6H2" 0.6899435 "hypothetical protein"  
"JS1\_E20\_00207" 5992 "s59E13H2" 0.02236919 "Peptidase M15"  
"JS1\_E20\_00207" 5992 "s59E25H2" 0 "Peptidase M15"  
"JS1\_E20\_00207" 5992 "s59E5H2" 0.4612778 "Peptidase M15"  
"JS1\_E20\_00207" 5992 "s63E6H2" 0.1101567 "Peptidase M15"  
"JS1\_E20\_00208" 5993 "s59E13H2" 0 "hypothetical protein"  
"JS1\_E20\_00208" 5993 "s59E25H2" 0 "hypothetical protein"  
"JS1\_E20\_00208" 5993 "s59E5H2" 0.01795299 "hypothetical protein"  
"JS1\_E20\_00208" 5993 "s63E6H2" 0 "hypothetical protein"  
"JS1\_E20\_00209" 5994 "s59E13H2" 0 "hypothetical protein"  
"JS1\_E20\_00209" 5994 "s59E25H2" 0 "hypothetical protein"  
"JS1\_E20\_00209" 5994 "s59E5H2" 0.06057407 "hypothetical protein"  
"JS1\_E20\_00209" 5994 "s63E6H2" 0 "hypothetical protein"  
"JS1\_E20\_00210" 5995 "s59E13H2" 0 "SpoVT / AbrB like domain protein"  
"JS1\_E20\_00210" 5995 "s59E25H2" 0 "SpoVT / AbrB like domain protein"  
"JS1\_E20\_00210" 5995 "s59E5H2" 0.02954138 "SpoVT / AbrB like domain protein"  
"JS1\_E20\_00210" 5995 "s63E6H2" 0 "SpoVT / AbrB like domain protein"  
"JS1\_E20\_00212" 5997 "s59E13H2" 0 "hypothetical protein"  
"JS1\_E20\_00212" 5997 "s59E25H2" 0 "hypothetical protein"  
"JS1\_E20\_00212" 5997 "s59E5H2" 0 "hypothetical protein"  
"JS1\_E20\_00212" 5997 "s63E6H2" 0 "hypothetical protein"  
"JS1\_E20\_00214" 5999 "s59E13H2" 0 "Plasmid pRiA4b ORF-3-like protein"  
"JS1\_E20\_00214" 5999 "s59E25H2" 0 "Plasmid pRiA4b ORF-3-like protein"

"JS1\_E20\_00214" 5999 "s59E5H2" 0 "Plasmid pRiA4b ORF-3-like protein"  
"JS1\_E20\_00214" 5999 "s63E6H2" 0 "Plasmid pRiA4b ORF-3-like protein"  
"JS1\_E20\_00215" 6000 "s59E13H2" 0 "UDP-N-acetylglactosamine-undecaprenyl-phosphate N-acetylglactosaminephosphotransferase"  
"JS1\_E20\_00215" 6000 "s59E25H2" 0 "UDP-N-acetylglactosamine-undecaprenyl-phosphate N-acetylglactosaminephosphotransferase"  
"JS1\_E20\_00215" 6000 "s59E5H2" 0 "UDP-N-acetylglactosamine-undecaprenyl-phosphate N-acetylglactosaminephosphotransferase"  
"JS1\_E20\_00215" 6000 "s63E6H2" 0.002546583 "UDP-N-acetylglactosamine-undecaprenyl-phosphate N-acetylglactosaminephosphotransferase"  
"JS1\_E20\_00216" 6001 "s59E13H2" 0 "dTDP-glucose 4,6-dehydratase"  
"JS1\_E20\_00216" 6001 "s59E25H2" 0 "dTDP-glucose 4,6-dehydratase"  
"JS1\_E20\_00216" 6001 "s59E5H2" 0 "dTDP-glucose 4,6-dehydratase"  
"JS1\_E20\_00216" 6001 "s63E6H2" 0 "dTDP-glucose 4,6-dehydratase"  
"JS1\_E20\_00217" 6002 "s59E13H2" 0 "GDP-6-deoxy-D-mannose reductase"  
"JS1\_E20\_00217" 6002 "s59E25H2" 0 "GDP-6-deoxy-D-mannose reductase"  
"JS1\_E20\_00217" 6002 "s59E5H2" 0 "GDP-6-deoxy-D-mannose reductase"  
"JS1\_E20\_00217" 6002 "s63E6H2" 0 "GDP-6-deoxy-D-mannose reductase"  
"JS1\_E20\_00218" 6003 "s59E13H2" 0 "GDP-mannose 4,6-dehydratase"  
"JS1\_E20\_00218" 6003 "s59E25H2" 0 "GDP-mannose 4,6-dehydratase"  
"JS1\_E20\_00218" 6003 "s59E5H2" 0 "GDP-mannose 4,6-dehydratase"  
"JS1\_E20\_00218" 6003 "s63E6H2" 0.7014644 "GDP-mannose 4,6-dehydratase"  
"JS1\_E20\_00219" 6004 "s59E13H2" 0 "UDP-glucose 4-epimerase"  
"JS1\_E20\_00219" 6004 "s59E25H2" 0 "UDP-glucose 4-epimerase"  
"JS1\_E20\_00219" 6004 "s59E5H2" 0 "UDP-glucose 4-epimerase"  
"JS1\_E20\_00219" 6004 "s63E6H2" 0.0009162987 "UDP-glucose 4-epimerase"  
"JS1\_E20\_00220" 6005 "s59E13H2" 0 "Alpha-D-kanosaminyltransferase"  
"JS1\_E20\_00220" 6005 "s59E25H2" 0 "Alpha-D-kanosaminyltransferase"  
"JS1\_E20\_00220" 6005 "s59E5H2" 0 "Alpha-D-kanosaminyltransferase"  
"JS1\_E20\_00220" 6005 "s63E6H2" 0 "Alpha-D-kanosaminyltransferase"  
"JS1\_E20\_00221" 6006 "s59E13H2" 0 "D-arabitol-phosphate dehydrogenase"  
"JS1\_E20\_00221" 6006 "s59E25H2" 0 "D-arabitol-phosphate dehydrogenase"  
"JS1\_E20\_00221" 6006 "s59E5H2" 0 "D-arabitol-phosphate dehydrogenase"  
"JS1\_E20\_00221" 6006 "s63E6H2" 0 "D-arabitol-phosphate dehydrogenase"  
"JS1\_E20\_00222" 6007 "s59E13H2" 0 "hypothetical protein"  
"JS1\_E20\_00222" 6007 "s59E25H2" 0 "hypothetical protein"  
"JS1\_E20\_00222" 6007 "s59E5H2" 0 "hypothetical protein"  
"JS1\_E20\_00222" 6007 "s63E6H2" 0 "hypothetical protein"  
"JS1\_E20\_00223" 6008 "s59E13H2" 0.08811042 "putative permease YjgP/YjgQ family protein"  
"JS1\_E20\_00223" 6008 "s59E25H2" 0 "putative permease YjgP/YjgQ family protein"  
"JS1\_E20\_00223" 6008 "s59E5H2" 0.2117867 "putative permease YjgP/YjgQ family protein"  
"JS1\_E20\_00223" 6008 "s63E6H2" 0.131849 "putative permease YjgP/YjgQ family protein"  
"JS1\_E20\_00224" 6009 "s59E13H2" 0.02384864 "LPS-assembly protein LptD"  
"JS1\_E20\_00224" 6009 "s59E25H2" 0 "LPS-assembly protein LptD"  
"JS1\_E20\_00224" 6009 "s59E5H2" 0.2322442 "LPS-assembly protein LptD"  
"JS1\_E20\_00224" 6009 "s63E6H2" 0.04941371 "LPS-assembly protein LptD"  
"JS1\_E20\_00225" 6010 "s59E13H2" 0.0003785357 "hypothetical protein"  
"JS1\_E20\_00225" 6010 "s59E25H2" 0 "hypothetical protein"  
"JS1\_E20\_00225" 6010 "s59E5H2" 0.1180589 "hypothetical protein"  
"JS1\_E20\_00225" 6010 "s63E6H2" 0 "hypothetical protein"  
"JS1\_E20\_00226" 6011 "s59E13H2" 0.6342402 "LPS-assembly protein LptD"

"JS1\_E20\_00226" 6011 "s59E25H2" 0 "LPS-assembly protein LptD"  
"JS1\_E20\_00226" 6011 "s59E5H2" 0.882141 "LPS-assembly protein LptD"  
"JS1\_E20\_00226" 6011 "s63E6H2" 1.31566 "LPS-assembly protein LptD"  
"JS1\_E20\_00227" 6012 "s59E13H2" 0.1473753 "Lipopolysaccharide-assembly, LptC-related"  
"JS1\_E20\_00227" 6012 "s59E25H2" 0 "Lipopolysaccharide-assembly, LptC-related"  
"JS1\_E20\_00227" 6012 "s59E5H2" 0.3916034 "Lipopolysaccharide-assembly, LptC-related"  
"JS1\_E20\_00227" 6012 "s63E6H2" 1.141607 "Lipopolysaccharide-assembly, LptC-related"  
"JS1\_E20\_00228" 6013 "s59E13H2" 0.06915716 "Clostripain precursor"  
"JS1\_E20\_00228" 6013 "s59E25H2" 0 "Clostripain precursor"  
"JS1\_E20\_00228" 6013 "s59E5H2" 0.03271557 "Clostripain precursor"  
"JS1\_E20\_00228" 6013 "s63E6H2" 0.2268855 "Clostripain precursor"  
"JS1\_E20\_00229" 6014 "s59E13H2" 0 "hypothetical protein"  
"JS1\_E20\_00229" 6014 "s59E25H2" 0 "hypothetical protein"  
"JS1\_E20\_00229" 6014 "s59E5H2" 0.003767864 "hypothetical protein"  
"JS1\_E20\_00229" 6014 "s63E6H2" 0 "hypothetical protein"  
"JS1\_E20\_00230" 6015 "s59E13H2" 0.003269723 "Bacterial Ig-like domain (group 2)"  
"JS1\_E20\_00230" 6015 "s59E25H2" 0 "Bacterial Ig-like domain (group 2)"  
"JS1\_E20\_00230" 6015 "s59E5H2" 0.03417148 "Bacterial Ig-like domain (group 2)"  
"JS1\_E20\_00230" 6015 "s63E6H2" 0.2195499 "Bacterial Ig-like domain (group 2)"  
"JS1\_E20\_00231" 6016 "s59E13H2" 0 "hypothetical protein"  
"JS1\_E20\_00231" 6016 "s59E25H2" 0 "hypothetical protein"  
"JS1\_E20\_00231" 6016 "s59E5H2" 0.05935295 "hypothetical protein"  
"JS1\_E20\_00231" 6016 "s63E6H2" 0 "hypothetical protein"  
"JS1\_E20\_00232" 6017 "s59E13H2" 0.01741507 "hypothetical protein"  
"JS1\_E20\_00232" 6017 "s59E25H2" 0 "hypothetical protein"  
"JS1\_E20\_00232" 6017 "s59E5H2" 0.2073295 "hypothetical protein"  
"JS1\_E20\_00232" 6017 "s63E6H2" 0.1031394 "hypothetical protein"  
"JS1\_E20\_00233" 6018 "s59E13H2" 0.1141728 "Outer membrane protein alpha precursor"  
"JS1\_E20\_00233" 6018 "s59E25H2" 0.005494505 "Outer membrane protein alpha precursor"  
"JS1\_E20\_00233" 6018 "s59E5H2" 0.6022985 "Outer membrane protein alpha precursor"  
"JS1\_E20\_00233" 6018 "s63E6H2" 0.5569416 "Outer membrane protein alpha precursor"  
"JS1\_E20\_00234" 6019 "s59E13H2" 5.232416 "Oligopeptide transport ATP-binding protein OppF"  
"JS1\_E20\_00234" 6019 "s59E25H2" 0 "Oligopeptide transport ATP-binding protein OppF"  
"JS1\_E20\_00234" 6019 "s59E5H2" 1.827591 "Oligopeptide transport ATP-binding protein OppF"  
"JS1\_E20\_00234" 6019 "s63E6H2" 0.2558937 "Oligopeptide transport ATP-binding protein OppF"  
"JS1\_E20\_00235" 6020 "s59E13H2" 2.877386 "RNA polymerase-binding transcription factor CarD"  
"JS1\_E20\_00235" 6020 "s59E25H2" 0 "RNA polymerase-binding transcription factor CarD"  
"JS1\_E20\_00235" 6020 "s59E5H2" 1.493838 "RNA polymerase-binding transcription factor CarD"  
"JS1\_E20\_00235" 6020 "s63E6H2" 0.14934 "RNA polymerase-binding transcription factor CarD"  
"JS1\_E20\_00236" 6021 "s59E13H2" 0.5125237 "Bifunctional protein FOLD protein"  
"JS1\_E20\_00236" 6021 "s59E25H2" 0 "Bifunctional protein FOLD protein"  
"JS1\_E20\_00236" 6021 "s59E5H2" 0.1256176 "Bifunctional protein FOLD protein"  
"JS1\_E20\_00236" 6021 "s63E6H2" 0.02573356 "Bifunctional protein FOLD protein"  
"JS1\_E20\_00237" 6022 "s59E13H2" 2.230967 "tRNA uridine 5-carboxymethylaminomethyl modification enzyme MnmG"  
"JS1\_E20\_00237" 6022 "s59E25H2" 0.132908 "tRNA uridine 5-carboxymethylaminomethyl modification enzyme MnmG"  
"JS1\_E20\_00237" 6022 "s59E5H2" 3.82621 "tRNA uridine 5-carboxymethylaminomethyl modification enzyme MnmG"  
"JS1\_E20\_00237" 6022 "s63E6H2" 0.3160746 "tRNA uridine 5-carboxymethylaminomethyl modification enzyme MnmG"

"JS1\_E20\_00240" 6025 "s59E13H2" 0.1834116 "Purine nucleoside phosphorylase DeoD-type"  
"JS1\_E20\_00240" 6025 "s59E25H2" 0 "Purine nucleoside phosphorylase DeoD-type"  
"JS1\_E20\_00240" 6025 "s59E5H2" 1.83696 "Purine nucleoside phosphorylase DeoD-type"  
"JS1\_E20\_00240" 6025 "s63E6H2" 0.05025373 "Purine nucleoside phosphorylase DeoD-type"  
"JS1\_E20\_00241" 6026 "s59E13H2" 0 "7,8-dihydropterin-6-methyl-4-(beta-D-ribofuranosyl)-aminobenzene-5'-phosphate synthase"  
"JS1\_E20\_00241" 6026 "s59E25H2" 0 "7,8-dihydropterin-6-methyl-4-(beta-D-ribofuranosyl)-aminobenzene-5'-phosphate synthase"  
"JS1\_E20\_00241" 6026 "s59E5H2" 2.972112 "7,8-dihydropterin-6-methyl-4-(beta-D-ribofuranosyl)-aminobenzene-5'-phosphate synthase"  
"JS1\_E20\_00241" 6026 "s63E6H2" 0.02453163 "7,8-dihydropterin-6-methyl-4-(beta-D-ribofuranosyl)-aminobenzene-5'-phosphate synthase"  
"JS1\_E20\_00242" 6027 "s59E13H2" 0.1436853 "Acyltransferase family protein"  
"JS1\_E20\_00242" 6027 "s59E25H2" 0 "Acyltransferase family protein"  
"JS1\_E20\_00242" 6027 "s59E5H2" 3.484717 "Acyltransferase family protein"  
"JS1\_E20\_00242" 6027 "s63E6H2" 0.1099676 "Acyltransferase family protein"  
"JS1\_E20\_00243" 6028 "s59E13H2" 0 "UDP-N-acetylmuramoylalanine--D-glutamate ligase"  
"JS1\_E20\_00243" 6028 "s59E25H2" 0 "UDP-N-acetylmuramoylalanine--D-glutamate ligase"  
"JS1\_E20\_00243" 6028 "s59E5H2" 1.354311 "UDP-N-acetylmuramoylalanine--D-glutamate ligase"  
"JS1\_E20\_00243" 6028 "s63E6H2" 0.1430053 "UDP-N-acetylmuramoylalanine--D-glutamate ligase"  
"JS1\_E20\_00244" 6029 "s59E13H2" 0.02942094 "hypothetical protein"  
"JS1\_E20\_00244" 6029 "s59E25H2" 0 "hypothetical protein"  
"JS1\_E20\_00244" 6029 "s59E5H2" 0.8178961 "hypothetical protein"  
"JS1\_E20\_00244" 6029 "s63E6H2" 0.0011412 "hypothetical protein"  
"JS1\_E20\_00245" 6030 "s59E13H2" 0.02639097 "putative diguanylate cyclase YedQ"  
"JS1\_E20\_00245" 6030 "s59E25H2" 0 "putative diguanylate cyclase YedQ"  
"JS1\_E20\_00245" 6030 "s59E5H2" 0.5444765 "putative diguanylate cyclase YedQ"  
"JS1\_E20\_00245" 6030 "s63E6H2" 0.006562486 "putative diguanylate cyclase YedQ"  
"JS1\_E20\_00246" 6031 "s59E13H2" 0 "putative nicotinate-nucleotide adenyltransferase"  
"JS1\_E20\_00246" 6031 "s59E25H2" 0 "putative nicotinate-nucleotide adenyltransferase"  
"JS1\_E20\_00246" 6031 "s59E5H2" 0.03386451 "putative nicotinate-nucleotide adenyltransferase"  
"JS1\_E20\_00246" 6031 "s63E6H2" 0.03026135 "putative nicotinate-nucleotide adenyltransferase"  
"JS1\_E20\_00247" 6032 "s59E13H2" 0.01234398 "Putative transcriptional regulator YvhJ"  
"JS1\_E20\_00247" 6032 "s59E25H2" 0 "Putative transcriptional regulator YvhJ"  
"JS1\_E20\_00247" 6032 "s59E5H2" 0.1586561 "Putative transcriptional regulator YvhJ"  
"JS1\_E20\_00247" 6032 "s63E6H2" 0.1342471 "Putative transcriptional regulator YvhJ"  
"JS1\_E20\_00248" 6033 "s59E13H2" 0.02697592 "Ribosomal silencing factor RsfS"  
"JS1\_E20\_00248" 6033 "s59E25H2" 0 "Ribosomal silencing factor RsfS"  
"JS1\_E20\_00248" 6033 "s59E5H2" 0.2129827 "Ribosomal silencing factor RsfS"  
"JS1\_E20\_00248" 6033 "s63E6H2" 0.2956658 "Ribosomal silencing factor RsfS"  
"JS1\_E20\_00249" 6034 "s59E13H2" 0.04257496 "hypothetical protein"  
"JS1\_E20\_00249" 6034 "s59E25H2" 0 "hypothetical protein"  
"JS1\_E20\_00249" 6034 "s59E5H2" 0.1777625 "hypothetical protein"  
"JS1\_E20\_00249" 6034 "s63E6H2" 0.1957629 "hypothetical protein"  
"JS1\_E20\_00250" 6035 "s59E13H2" 0.01366918 "hypothetical protein"  
"JS1\_E20\_00250" 6035 "s59E25H2" 0 "hypothetical protein"  
"JS1\_E20\_00250" 6035 "s59E5H2" 0.1672301 "hypothetical protein"  
"JS1\_E20\_00250" 6035 "s63E6H2" 0.08921067 "hypothetical protein"  
"JS1\_E20\_00253" 6038 "s59E13H2" 1.290334 "Glutamine cyclotransferase"  
"JS1\_E20\_00253" 6038 "s59E25H2" 0 "Glutamine cyclotransferase"  
"JS1\_E20\_00253" 6038 "s59E5H2" 0.05179894 "Glutamine cyclotransferase"



"JS1\_E20\_00253" 6038 "s63E6H2" 0.1757983 "Glutamine cyclotransferase"  
"JS1\_E20\_00254" 6039 "s59E13H2" 3.25684 "hypothetical protein"  
"JS1\_E20\_00254" 6039 "s59E25H2" 0 "hypothetical protein"  
"JS1\_E20\_00254" 6039 "s59E5H2" 1.295858 "hypothetical protein"  
"JS1\_E20\_00254" 6039 "s63E6H2" 0.04311953 "hypothetical protein"  
"JS1\_E20\_00255" 6040 "s59E13H2" 0.007698547 "hypothetical protein"  
"JS1\_E20\_00255" 6040 "s59E25H2" 0 "hypothetical protein"  
"JS1\_E20\_00255" 6040 "s59E5H2" 1.661912 "hypothetical protein"  
"JS1\_E20\_00255" 6040 "s63E6H2" 0 "hypothetical protein"  
"JS1\_E20\_00256" 6041 "s59E13H2" 0.005152291 "Beta-1,4-mannooligosaccharide phosphorylase"  
"JS1\_E20\_00256" 6041 "s59E25H2" 0 "Beta-1,4-mannooligosaccharide phosphorylase"  
"JS1\_E20\_00256" 6041 "s59E5H2" 1.438477 "Beta-1,4-mannooligosaccharide phosphorylase"  
"JS1\_E20\_00256" 6041 "s63E6H2" 0.002333465 "Beta-1,4-mannooligosaccharide phosphorylase"  
"JS1\_E20\_00257" 6042 "s59E13H2" 0 "Beta-1,4-mannooligosaccharide phosphorylase"  
"JS1\_E20\_00257" 6042 "s59E25H2" 0 "Beta-1,4-mannooligosaccharide phosphorylase"  
"JS1\_E20\_00257" 6042 "s59E5H2" 2.119166 "Beta-1,4-mannooligosaccharide phosphorylase"  
"JS1\_E20\_00257" 6042 "s63E6H2" 0.01185448 "Beta-1,4-mannooligosaccharide phosphorylase"  
"JS1\_E20\_00258" 6043 "s59E13H2" 0 "hypothetical protein"  
"JS1\_E20\_00258" 6043 "s59E25H2" 0 "hypothetical protein"  
"JS1\_E20\_00258" 6043 "s59E5H2" 0.2720843 "hypothetical protein"  
"JS1\_E20\_00258" 6043 "s63E6H2" 0.01241434 "hypothetical protein"  
"JS1\_E20\_00262" 6047 "s59E13H2" 0.09821506 "hypothetical protein"  
"JS1\_E20\_00262" 6047 "s59E25H2" 0 "hypothetical protein"  
"JS1\_E20\_00262" 6047 "s59E5H2" 0.372748 "hypothetical protein"  
"JS1\_E20\_00262" 6047 "s63E6H2" 0.06798444 "hypothetical protein"  
"JS1\_E20\_00263" 6048 "s59E13H2" 0 "AsnC family protein"  
"JS1\_E20\_00263" 6048 "s59E25H2" 0 "AsnC family protein"  
"JS1\_E20\_00263" 6048 "s59E5H2" 0 "AsnC family protein"  
"JS1\_E20\_00263" 6048 "s63E6H2" 0 "AsnC family protein"  
"JS1\_E20\_00265" 6050 "s59E13H2" 0.01745164 "Peptidase M15"  
"JS1\_E20\_00265" 6050 "s59E25H2" 0 "Peptidase M15"  
"JS1\_E20\_00265" 6050 "s59E5H2" 0.0619259 "Peptidase M15"  
"JS1\_E20\_00265" 6050 "s63E6H2" 0.9470821 "Peptidase M15"  
"JS1\_E20\_00266" 6051 "s59E13H2" 0.005868781 "hypothetical protein"  
"JS1\_E20\_00266" 6051 "s59E25H2" 0 "hypothetical protein"  
"JS1\_E20\_00266" 6051 "s59E5H2" 0.1216302 "hypothetical protein"  
"JS1\_E20\_00266" 6051 "s63E6H2" 0.4425849 "hypothetical protein"  
"JS1\_E20\_00267" 6052 "s59E13H2" 0.01686668 "hypothetical protein"  
"JS1\_E20\_00267" 6052 "s59E25H2" 0 "hypothetical protein"  
"JS1\_E20\_00267" 6052 "s59E5H2" 0.245195 "hypothetical protein"  
"JS1\_E20\_00267" 6052 "s63E6H2" 0.211105 "hypothetical protein"  
"JS1\_E20\_00268" 6053 "s59E13H2" 0.007138635 "hypothetical protein"  
"JS1\_E20\_00268" 6053 "s59E25H2" 0 "hypothetical protein"  
"JS1\_E20\_00268" 6053 "s59E5H2" 0.3066719 "hypothetical protein"  
"JS1\_E20\_00268" 6053 "s63E6H2" 0.2891395 "hypothetical protein"  
"JS1\_E20\_00269" 6054 "s59E13H2" 0 "putative DNA-binding protein"  
"JS1\_E20\_00269" 6054 "s59E25H2" 0 "putative DNA-binding protein"

"JS1\_E20\_00269" 6054 "s59E5H2" 0 "putative DNA-binding protein"  
"JS1\_E20\_00269" 6054 "s63E6H2" 0.1558536 "putative DNA-binding protein"  
"JS1\_E20\_00270" 6055 "s59E13H2" 0 "RNA polymerase factor sigma-70"  
"JS1\_E20\_00270" 6055 "s59E25H2" 0 "RNA polymerase factor sigma-70"  
"JS1\_E20\_00270" 6055 "s59E5H2" 0 "RNA polymerase factor sigma-70"  
"JS1\_E20\_00270" 6055 "s63E6H2" 0 "RNA polymerase factor sigma-70"  
"JS1\_E20\_00271" 6056 "s59E13H2" 0.03214327 "hypothetical protein"  
"JS1\_E20\_00271" 6056 "s59E25H2" 0 "hypothetical protein"  
"JS1\_E20\_00271" 6056 "s59E5H2" 0.2442404 "hypothetical protein"  
"JS1\_E20\_00271" 6056 "s63E6H2" 0.8792126 "hypothetical protein"  
"JS1\_E20\_00273" 6058 "s59E13H2" 0.006280739 "Putative ski2-type helicase"  
"JS1\_E20\_00273" 6058 "s59E25H2" 0 "Putative ski2-type helicase"  
"JS1\_E20\_00273" 6058 "s59E5H2" 0.3605368 "Putative ski2-type helicase"  
"JS1\_E20\_00273" 6058 "s63E6H2" 0.1765697 "Putative ski2-type helicase"  
"JS1\_E20\_00274" 6059 "s59E13H2" 0.3582968 "hypothetical protein"  
"JS1\_E20\_00274" 6059 "s59E25H2" 0 "hypothetical protein"  
"JS1\_E20\_00274" 6059 "s59E5H2" 0.399629 "hypothetical protein"  
"JS1\_E20\_00274" 6059 "s63E6H2" 0.1848202 "hypothetical protein"  
"JS1\_E20\_00275" 6060 "s59E13H2" 0.2600593 "DNA primase"  
"JS1\_E20\_00275" 6060 "s59E25H2" 0 "DNA primase"  
"JS1\_E20\_00275" 6060 "s59E5H2" 1.113251 "DNA primase"  
"JS1\_E20\_00275" 6060 "s63E6H2" 0.08946414 "DNA primase"  
"JS1\_E20\_00276" 6061 "s59E13H2" 0.2124503 "RNA polymerase sigma factor SigA"  
"JS1\_E20\_00276" 6061 "s59E25H2" 0 "RNA polymerase sigma factor SigA"  
"JS1\_E20\_00276" 6061 "s59E5H2" 0.9172297 "RNA polymerase sigma factor SigA"  
"JS1\_E20\_00276" 6061 "s63E6H2" 0.08488489 "RNA polymerase sigma factor SigA"  
"JS1\_E20\_00278" 6063 "s59E13H2" 0.3899876 "hypothetical protein"  
"JS1\_E20\_00278" 6063 "s59E25H2" 0 "hypothetical protein"  
"JS1\_E20\_00278" 6063 "s59E5H2" 0.2067465 "hypothetical protein"  
"JS1\_E20\_00278" 6063 "s63E6H2" 0.01914546 "hypothetical protein"  
"JS1\_E20\_00279" 6064 "s59E13H2" 0.3654133 "ADP-ribose pyrophosphatase"  
"JS1\_E20\_00279" 6064 "s59E25H2" 0 "ADP-ribose pyrophosphatase"  
"JS1\_E20\_00279" 6064 "s59E5H2" 0.3168493 "ADP-ribose pyrophosphatase"  
"JS1\_E20\_00279" 6064 "s63E6H2" 0.06473318 "ADP-ribose pyrophosphatase"  
"JS1\_E20\_00280" 6065 "s59E13H2" 0.3887669 "Peptidase T"  
"JS1\_E20\_00280" 6065 "s59E25H2" 0 "Peptidase T"  
"JS1\_E20\_00280" 6065 "s59E5H2" 0.2622394 "Peptidase T"  
"JS1\_E20\_00280" 6065 "s63E6H2" 0.04014898 "Peptidase T"  
"JS1\_E20\_00281" 6066 "s59E13H2" 0.3135716 "Ketoisovalerate oxidoreductase subunit VorA"  
"JS1\_E20\_00281" 6066 "s59E25H2" 0 "Ketoisovalerate oxidoreductase subunit VorA"  
"JS1\_E20\_00281" 6066 "s59E5H2" 0.02179678 "Ketoisovalerate oxidoreductase subunit VorA"  
"JS1\_E20\_00281" 6066 "s63E6H2" 0.08402325 "Ketoisovalerate oxidoreductase subunit VorA"  
"JS1\_E20\_00282" 6067 "s59E13H2" 0.3218102 "Ketoisovalerate oxidoreductase subunit VorA"  
"JS1\_E20\_00282" 6067 "s59E25H2" 0 "Ketoisovalerate oxidoreductase subunit VorA"  
"JS1\_E20\_00282" 6067 "s59E5H2" 0.02625997 "Ketoisovalerate oxidoreductase subunit VorA"  
"JS1\_E20\_00282" 6067 "s63E6H2" 0.1655406 "Ketoisovalerate oxidoreductase subunit VorA"  
"JS1\_E20\_00283" 6068 "s59E13H2" 0.05071868 "Ketoisovalerate oxidoreductase subunit VorB"

"JS1\_E20\_00283" 6068 "s59E25H2" 0 "Ketoisovalerate oxidoreductase subunit VorB"  
"JS1\_E20\_00283" 6068 "s59E5H2" 0.03101508 "Ketoisovalerate oxidoreductase subunit VorB"  
"JS1\_E20\_00283" 6068 "s63E6H2" 0.05762409 "Ketoisovalerate oxidoreductase subunit VorB"  
"JS1\_E20\_00284" 6069 "s59E13H2" 0.006410056 "Ketoisovalerate oxidoreductase subunit VorC"  
"JS1\_E20\_00284" 6069 "s59E25H2" 0 "Ketoisovalerate oxidoreductase subunit VorC"  
"JS1\_E20\_00284" 6069 "s59E5H2" 0.01056941 "Ketoisovalerate oxidoreductase subunit VorC"  
"JS1\_E20\_00284" 6069 "s63E6H2" 0 "Ketoisovalerate oxidoreductase subunit VorC"  
"JS1\_E20\_00285" 6070 "s59E13H2" 0.03678458 "hypothetical protein"  
"JS1\_E20\_00285" 6070 "s59E25H2" 0 "hypothetical protein"  
"JS1\_E20\_00285" 6070 "s59E5H2" 0.07308608 "hypothetical protein"  
"JS1\_E20\_00285" 6070 "s63E6H2" 0.01932832 "hypothetical protein"  
"JS1\_E20\_00286" 6071 "s59E13H2" 0.06572193 "Butyrate kinase 2"  
"JS1\_E20\_00286" 6071 "s59E25H2" 0 "Butyrate kinase 2"  
"JS1\_E20\_00286" 6071 "s59E5H2" 0.09828174 "Butyrate kinase 2"  
"JS1\_E20\_00286" 6071 "s63E6H2" 0.04120219 "Butyrate kinase 2"  
"JS1\_E20\_00287" 6072 "s59E13H2" 0.02419634 "Phosphate acetyltransferase"  
"JS1\_E20\_00287" 6072 "s59E25H2" 0 "Phosphate acetyltransferase"  
"JS1\_E20\_00287" 6072 "s59E5H2" 0.1178584 "Phosphate acetyltransferase"  
"JS1\_E20\_00287" 6072 "s63E6H2" 0.06254028 "Phosphate acetyltransferase"  
"JS1\_E20\_00288" 6073 "s59E13H2" 0.05072647 "2-aminoadipate transaminase"  
"JS1\_E20\_00288" 6073 "s59E25H2" 0 "2-aminoadipate transaminase"  
"JS1\_E20\_00288" 6073 "s59E5H2" 0.1116362 "2-aminoadipate transaminase"  
"JS1\_E20\_00288" 6073 "s63E6H2" 0.06094337 "2-aminoadipate transaminase"  
"JS1\_E20\_00289" 6074 "s59E13H2" 0.02840082 "Arginine utilization regulatory protein RocR"  
"JS1\_E20\_00289" 6074 "s59E25H2" 0 "Arginine utilization regulatory protein RocR"  
"JS1\_E20\_00289" 6074 "s59E5H2" 0.1078904 "Arginine utilization regulatory protein RocR"  
"JS1\_E20\_00289" 6074 "s63E6H2" 0.01908325 "Arginine utilization regulatory protein RocR"  
"JS1\_E20\_00290" 6075 "s59E13H2" 0.02695089 "DNA repair protein RecN"  
"JS1\_E20\_00290" 6075 "s59E25H2" 0 "DNA repair protein RecN"  
"JS1\_E20\_00290" 6075 "s59E5H2" 0.1452821 "DNA repair protein RecN"  
"JS1\_E20\_00290" 6075 "s63E6H2" 0.01516988 "DNA repair protein RecN"  
"JS1\_E20\_00291" 6076 "s59E13H2" 0.01208664 "putative inorganic polyphosphate/ATP-NAD kinase"  
"JS1\_E20\_00291" 6076 "s59E25H2" 0 "putative inorganic polyphosphate/ATP-NAD kinase"  
"JS1\_E20\_00291" 6076 "s59E5H2" 0.09686185 "putative inorganic polyphosphate/ATP-NAD kinase"  
"JS1\_E20\_00291" 6076 "s63E6H2" 0.002506924 "putative inorganic polyphosphate/ATP-NAD kinase"  
"JS1\_E20\_00292" 6077 "s59E13H2" 0.01295575 "hypothetical protein"  
"JS1\_E20\_00292" 6077 "s59E25H2" 0 "hypothetical protein"  
"JS1\_E20\_00292" 6077 "s59E5H2" 0.1855442 "hypothetical protein"  
"JS1\_E20\_00292" 6077 "s63E6H2" 0.01153506 "hypothetical protein"  
"JS1\_E20\_00293" 6078 "s59E13H2" 0.0194807 "16S/23S rRNA (cytidine-2'-O)-methyltransferase TlyA"  
"JS1\_E20\_00293" 6078 "s59E25H2" 0 "16S/23S rRNA (cytidine-2'-O)-methyltransferase TlyA"  
"JS1\_E20\_00293" 6078 "s59E5H2" 0.1745502 "16S/23S rRNA (cytidine-2'-O)-methyltransferase TlyA"  
"JS1\_E20\_00293" 6078 "s63E6H2" 0.04185752 "16S/23S rRNA (cytidine-2'-O)-methyltransferase TlyA"  
"JS1\_E20\_00294" 6079 "s59E13H2" 0 "Divergent PAP2 family protein"  
"JS1\_E20\_00294" 6079 "s59E25H2" 0 "Divergent PAP2 family protein"  
"JS1\_E20\_00294" 6079 "s59E5H2" 0.0677199 "Divergent PAP2 family protein"  
"JS1\_E20\_00294" 6079 "s63E6H2" 0.006156243 "Divergent PAP2 family protein"

"JS1\_E20\_00295" 6080 "s59E13H2" 0.005513444 "Sporulation and spore germination"  
"JS1\_E20\_00295" 6080 "s59E25H2" 0 "Sporulation and spore germination"  
"JS1\_E20\_00295" 6080 "s59E5H2" 0.1225059 "Sporulation and spore germination"  
"JS1\_E20\_00295" 6080 "s63E6H2" 0.04208963 "Sporulation and spore germination"  
"JS1\_E20\_00296" 6081 "s59E13H2" 0.05357051 "N-acetylmuramoyl-L-alanine amidase AmiC precursor"  
"JS1\_E20\_00296" 6081 "s59E25H2" 0 "N-acetylmuramoyl-L-alanine amidase AmiC precursor"  
"JS1\_E20\_00296" 6081 "s59E5H2" 0.4366424 "N-acetylmuramoyl-L-alanine amidase AmiC precursor"  
"JS1\_E20\_00296" 6081 "s63E6H2" 0.138466 "N-acetylmuramoyl-L-alanine amidase AmiC precursor"  
"JS1\_E20\_00297" 6082 "s59E13H2" 0.005670898 "AI-2 transport protein TqsA"  
"JS1\_E20\_00297" 6082 "s59E25H2" 0 "AI-2 transport protein TqsA"  
"JS1\_E20\_00297" 6082 "s59E5H2" 0.558162 "AI-2 transport protein TqsA"  
"JS1\_E20\_00297" 6082 "s63E6H2" 0.1571314 "AI-2 transport protein TqsA"  
"JS1\_E20\_00298" 6083 "s59E13H2" 0.5850943 "Glutamine--tRNA ligase"  
"JS1\_E20\_00298" 6083 "s59E25H2" 0 "Glutamine--tRNA ligase"  
"JS1\_E20\_00298" 6083 "s59E5H2" 0.5040955 "Glutamine--tRNA ligase"  
"JS1\_E20\_00298" 6083 "s63E6H2" 0.1994856 "Glutamine--tRNA ligase"  
"JS1\_E20\_00299" 6084 "s59E13H2" 0 "UDP-N-acetyl-alpha-D-glucosamine C6 dehydratase"  
"JS1\_E20\_00299" 6084 "s59E25H2" 0 "UDP-N-acetyl-alpha-D-glucosamine C6 dehydratase"  
"JS1\_E20\_00299" 6084 "s59E5H2" 0.05449342 "UDP-N-acetyl-alpha-D-glucosamine C6 dehydratase"  
"JS1\_E20\_00299" 6084 "s63E6H2" 0.003317606 "UDP-N-acetyl-alpha-D-glucosamine C6 dehydratase"  
"JS1\_E20\_00300" 6085 "s59E13H2" 0 "Pseudouridine kinase"  
"JS1\_E20\_00300" 6085 "s59E25H2" 0 "Pseudouridine kinase"  
"JS1\_E20\_00300" 6085 "s59E5H2" 0.01406149 "Pseudouridine kinase"  
"JS1\_E20\_00300" 6085 "s63E6H2" 0.05805562 "Pseudouridine kinase"  
"JS1\_E20\_00301" 6086 "s59E13H2" 0 "Pseudouridine-5'-phosphate glycosidase"  
"JS1\_E20\_00301" 6086 "s59E25H2" 0 "Pseudouridine-5'-phosphate glycosidase"  
"JS1\_E20\_00301" 6086 "s59E5H2" 0.00352583 "Pseudouridine-5'-phosphate glycosidase"  
"JS1\_E20\_00301" 6086 "s63E6H2" 0.004365129 "Pseudouridine-5'-phosphate glycosidase"  
"JS1\_E20\_00302" 6087 "s59E13H2" 0.002932421 "Digeranylgeranyllycerophospholipid reductase"  
"JS1\_E20\_00302" 6087 "s59E25H2" 0 "Digeranylgeranyllycerophospholipid reductase"  
"JS1\_E20\_00302" 6087 "s59E5H2" 0.0004854577 "Digeranylgeranyllycerophospholipid reductase"  
"JS1\_E20\_00302" 6087 "s63E6H2" 0.04076334 "Digeranylgeranyllycerophospholipid reductase"  
"JS1\_E20\_00303" 6088 "s59E13H2" 0.0009339434 "Glucose-1-phosphate thymidyltransferase"  
"JS1\_E20\_00303" 6088 "s59E25H2" 0 "Glucose-1-phosphate thymidyltransferase"  
"JS1\_E20\_00303" 6088 "s59E5H2" 0 "Glucose-1-phosphate thymidyltransferase"  
"JS1\_E20\_00303" 6088 "s63E6H2" 0 "Glucose-1-phosphate thymidyltransferase"  
"JS1\_E20\_00304" 6089 "s59E13H2" 0.01840819 "translocation protein TolB"  
"JS1\_E20\_00304" 6089 "s59E25H2" 0 "translocation protein TolB"  
"JS1\_E20\_00304" 6089 "s59E5H2" 0.06239609 "translocation protein TolB"  
"JS1\_E20\_00304" 6089 "s63E6H2" 0.828194 "translocation protein TolB"  
"JS1\_E20\_00305" 6090 "s59E13H2" 0.00673238 "Transposase IS200 like protein"  
"JS1\_E20\_00305" 6090 "s59E25H2" 0 "Transposase IS200 like protein"  
"JS1\_E20\_00305" 6090 "s59E5H2" 0.1381354 "Transposase IS200 like protein"  
"JS1\_E20\_00305" 6090 "s63E6H2" 0.07639389 "Transposase IS200 like protein"  
"JS1\_E20\_00306" 6091 "s59E13H2" 0.008859041 "Amidohydrolase"  
"JS1\_E20\_00306" 6091 "s59E25H2" 0 "Amidohydrolase"  
"JS1\_E20\_00306" 6091 "s59E5H2" 0.2510815 "Amidohydrolase"

"JS1\_E20\_00306" 6091 "s63E6H2" 6.082238 "Amidohydrolase"  
"JS1\_E20\_00307" 6092 "s59E13H2" 0.01529493 "hypothetical protein"  
"JS1\_E20\_00307" 6092 "s59E25H2" 0 "hypothetical protein"  
"JS1\_E20\_00307" 6092 "s59E5H2" 0.05086861 "hypothetical protein"  
"JS1\_E20\_00307" 6092 "s63E6H2" 1.899465 "hypothetical protein"  
"JS1\_E20\_00308" 6093 "s59E13H2" 0.7704802 "Bifunctional phosphoglucose/phosphomannose isomerase"  
"JS1\_E20\_00308" 6093 "s59E25H2" 0 "Bifunctional phosphoglucose/phosphomannose isomerase"  
"JS1\_E20\_00308" 6093 "s59E5H2" 0.2771821 "Bifunctional phosphoglucose/phosphomannose isomerase"  
"JS1\_E20\_00308" 6093 "s63E6H2" 0.9152245 "Bifunctional phosphoglucose/phosphomannose isomerase"  
"JS1\_E20\_00309" 6094 "s59E13H2" 1.307764 "putative undecaprenyl-phosphate N-acetylglucosaminyl 1-phosphate transferase"  
"JS1\_E20\_00309" 6094 "s59E25H2" 0 "putative undecaprenyl-phosphate N-acetylglucosaminyl 1-phosphate transferase"  
"JS1\_E20\_00309" 6094 "s59E5H2" 0.3387971 "putative undecaprenyl-phosphate N-acetylglucosaminyl 1-phosphate transferase"  
"JS1\_E20\_00309" 6094 "s63E6H2" 0.620331 "putative undecaprenyl-phosphate N-acetylglucosaminyl 1-phosphate transferase"  
"JS1\_E20\_00311" 6096 "s59E13H2" 0.02658582 "cell division protein FtsB"  
"JS1\_E20\_00311" 6096 "s59E25H2" 0 "cell division protein FtsB"  
"JS1\_E20\_00311" 6096 "s59E5H2" 0.4501458 "cell division protein FtsB"  
"JS1\_E20\_00311" 6096 "s63E6H2" 0.2727575 "cell division protein FtsB"  
"JS1\_E20\_00312" 6097 "s59E13H2" 0.08063275 "Enolase"  
"JS1\_E20\_00312" 6097 "s59E25H2" 0 "Enolase"  
"JS1\_E20\_00312" 6097 "s59E5H2" 0.3943842 "Enolase"  
"JS1\_E20\_00312" 6097 "s63E6H2" 0.3383331 "Enolase"  
"JS1\_E20\_00313" 6098 "s59E13H2" 0.073893 "Magnesium transporter MgtE"  
"JS1\_E20\_00313" 6098 "s59E25H2" 0 "Magnesium transporter MgtE"  
"JS1\_E20\_00313" 6098 "s59E5H2" 0.4192534 "Magnesium transporter MgtE"  
"JS1\_E20\_00313" 6098 "s63E6H2" 0.2846467 "Magnesium transporter MgtE"  
"JS1\_E20\_00314" 6099 "s59E13H2" 0.006226167 "S4 domain protein"  
"JS1\_E20\_00314" 6099 "s59E25H2" 0 "S4 domain protein"  
"JS1\_E20\_00314" 6099 "s59E5H2" 0.1004277 "S4 domain protein"  
"JS1\_E20\_00314" 6099 "s63E6H2" 0.01088352 "S4 domain protein"  
"JS1\_E20\_00315" 6100 "s59E13H2" 0.14465 "Lysine--tRNA ligase"  
"JS1\_E20\_00315" 6100 "s59E25H2" 0 "Lysine--tRNA ligase"  
"JS1\_E20\_00315" 6100 "s59E5H2" 0.2420055 "Lysine--tRNA ligase"  
"JS1\_E20\_00315" 6100 "s63E6H2" 0.1979297 "Lysine--tRNA ligase"  
"JS1\_E20\_00316" 6101 "s59E13H2" 0.04926144 "Transcription elongation factor GreA"  
"JS1\_E20\_00316" 6101 "s59E25H2" 0 "Transcription elongation factor GreA"  
"JS1\_E20\_00316" 6101 "s59E5H2" 0.2397216 "Transcription elongation factor GreA"  
"JS1\_E20\_00316" 6101 "s63E6H2" 0.1266262 "Transcription elongation factor GreA"  
"JS1\_E20\_00317" 6102 "s59E13H2" 0.009484368 "Putative pyridoxal phosphate-dependent acyltransferase"  
"JS1\_E20\_00317" 6102 "s59E25H2" 0 "Putative pyridoxal phosphate-dependent acyltransferase"  
"JS1\_E20\_00317" 6102 "s59E5H2" 0.1778254 "Putative pyridoxal phosphate-dependent acyltransferase"  
"JS1\_E20\_00317" 6102 "s63E6H2" 0.1516096 "Putative pyridoxal phosphate-dependent acyltransferase"  
"JS1\_E20\_00318" 6103 "s59E13H2" 0.03651495 "hypothetical protein"  
"JS1\_E20\_00318" 6103 "s59E25H2" 0 "hypothetical protein"  
"JS1\_E20\_00318" 6103 "s59E5H2" 0.2622769 "hypothetical protein"  
"JS1\_E20\_00318" 6103 "s63E6H2" 0.1084575 "hypothetical protein"  
"JS1\_E20\_00319" 6104 "s59E13H2" 0.009154885 "hypothetical protein"  
"JS1\_E20\_00319" 6104 "s59E25H2" 0 "hypothetical protein"

"JS1\_E20\_00319" 6104 "s59E5H2" 0.2758465 "hypothetical protein"  
"JS1\_E20\_00319" 6104 "s63E6H2" 0.06968603 "hypothetical protein"  
"JS1\_E20\_00321" 6106 "s59E13H2" 0.03892482 "tRNA-specific 2-thiouridylase MnmA"  
"JS1\_E20\_00321" 6106 "s59E25H2" 0 "tRNA-specific 2-thiouridylase MnmA"  
"JS1\_E20\_00321" 6106 "s59E5H2" 0.2981415 "tRNA-specific 2-thiouridylase MnmA"  
"JS1\_E20\_00321" 6106 "s63E6H2" 0.06268037 "tRNA-specific 2-thiouridylase MnmA"  
"JS1\_E20\_00322" 6107 "s59E13H2" 0.02187032 "hypothetical protein"  
"JS1\_E20\_00322" 6107 "s59E25H2" 0 "hypothetical protein"  
"JS1\_E20\_00322" 6107 "s59E5H2" 0.2443374 "hypothetical protein"  
"JS1\_E20\_00322" 6107 "s63E6H2" 0.02794658 "hypothetical protein"  
"JS1\_E20\_00323" 6108 "s59E13H2" 0.01403008 "HTH-type transcriptional regulator CymR"  
"JS1\_E20\_00323" 6108 "s59E25H2" 0 "HTH-type transcriptional regulator CymR"  
"JS1\_E20\_00323" 6108 "s59E5H2" 0.148469 "HTH-type transcriptional regulator CymR"  
"JS1\_E20\_00323" 6108 "s63E6H2" 0.06507957 "HTH-type transcriptional regulator CymR"  
"JS1\_E20\_00324" 6109 "s59E13H2" 0.115409 "Oligo-1,6-glucosidase"  
"JS1\_E20\_00324" 6109 "s59E25H2" 0 "Oligo-1,6-glucosidase"  
"JS1\_E20\_00324" 6109 "s59E5H2" 0.6595859 "Oligo-1,6-glucosidase"  
"JS1\_E20\_00324" 6109 "s63E6H2" 0.7763615 "Oligo-1,6-glucosidase"  
"JS1\_E20\_00325" 6110 "s59E13H2" 0.02774758 "Ferredoxin"  
"JS1\_E20\_00325" 6110 "s59E25H2" 0 "Ferredoxin"  
"JS1\_E20\_00325" 6110 "s59E5H2" 0.3842878 "Ferredoxin"  
"JS1\_E20\_00325" 6110 "s63E6H2" 0.05657661 "Ferredoxin"  
"JS1\_E20\_00326" 6111 "s59E13H2" 0.114848 "Ribonuclease Z"  
"JS1\_E20\_00326" 6111 "s59E25H2" 0 "Ribonuclease Z"  
"JS1\_E20\_00326" 6111 "s59E5H2" 0.4968007 "Ribonuclease Z"  
"JS1\_E20\_00326" 6111 "s63E6H2" 0.1728557 "Ribonuclease Z"  
"JS1\_E20\_00327" 6112 "s59E13H2" 0.1784308 "Molybdopterin adenyllyltransferase"  
"JS1\_E20\_00327" 6112 "s59E25H2" 0 "Molybdopterin adenyllyltransferase"  
"JS1\_E20\_00327" 6112 "s59E5H2" 0.3836457 "Molybdopterin adenyllyltransferase"  
"JS1\_E20\_00327" 6112 "s63E6H2" 0.1525218 "Molybdopterin adenyllyltransferase"  
"JS1\_E20\_00328" 6113 "s59E13H2" 0.179946 "MOSC domain protein"  
"JS1\_E20\_00328" 6113 "s59E25H2" 0 "MOSC domain protein"  
"JS1\_E20\_00328" 6113 "s59E5H2" 0.1500983 "MOSC domain protein"  
"JS1\_E20\_00328" 6113 "s63E6H2" 0.1081694 "MOSC domain protein"  
"JS1\_E20\_00329" 6114 "s59E13H2" 0.1469893 "Cyclic pyranopterin monophosphate synthase accessory protein"  
"JS1\_E20\_00329" 6114 "s59E25H2" 0 "Cyclic pyranopterin monophosphate synthase accessory protein"  
"JS1\_E20\_00329" 6114 "s59E5H2" 0.263522 "Cyclic pyranopterin monophosphate synthase accessory protein"  
"JS1\_E20\_00329" 6114 "s63E6H2" 0.2083194 "Cyclic pyranopterin monophosphate synthase accessory protein"  
"JS1\_E20\_00330" 6115 "s59E13H2" 0.1400455 "MOSC domain protein"  
"JS1\_E20\_00330" 6115 "s59E25H2" 0 "MOSC domain protein"  
"JS1\_E20\_00330" 6115 "s59E5H2" 0.2811484 "MOSC domain protein"  
"JS1\_E20\_00330" 6115 "s63E6H2" 0.05436 "MOSC domain protein"  
"JS1\_E20\_00331" 6116 "s59E13H2" 0.1796212 "Cyclic pyranopterin monophosphate synthase"  
"JS1\_E20\_00331" 6116 "s59E25H2" 0 "Cyclic pyranopterin monophosphate synthase"  
"JS1\_E20\_00331" 6116 "s59E5H2" 0.3142557 "Cyclic pyranopterin monophosphate synthase"  
"JS1\_E20\_00331" 6116 "s63E6H2" 0.2337508 "Cyclic pyranopterin monophosphate synthase"  
"JS1\_E20\_00332" 6117 "s59E13H2" 0.72923 "Maltotriose-binding protein precursor"

"JS1\_E20\_00332" 6117 "s59E25H2" 0 "Maltotriose-binding protein precursor"  
"JS1\_E20\_00332" 6117 "s59E5H2" 0.0244042 "Maltotriose-binding protein precursor"  
"JS1\_E20\_00332" 6117 "s63E6H2" 0.1181694 "Maltotriose-binding protein precursor"  
"JS1\_E20\_00333" 6118 "s59E13H2" 1.142885 "Lactose transport system permease protein LacF"  
"JS1\_E20\_00333" 6118 "s59E25H2" 0 "Lactose transport system permease protein LacF"  
"JS1\_E20\_00333" 6118 "s59E5H2" 0.01825895 "Lactose transport system permease protein LacF"  
"JS1\_E20\_00333" 6118 "s63E6H2" 0.1619691 "Lactose transport system permease protein LacF"  
"JS1\_E20\_00334" 6119 "s59E13H2" 0.9982308 "Trehalose transport system permease protein SugB"  
"JS1\_E20\_00334" 6119 "s59E25H2" 0.2671233 "Trehalose transport system permease protein SugB"  
"JS1\_E20\_00334" 6119 "s59E5H2" 0.02929586 "Trehalose transport system permease protein SugB"  
"JS1\_E20\_00334" 6119 "s63E6H2" 0.09385424 "Trehalose transport system permease protein SugB"  
"JS1\_E20\_00335" 6120 "s59E13H2" 1.043429 "hypothetical protein"  
"JS1\_E20\_00335" 6120 "s59E25H2" 0 "hypothetical protein"  
"JS1\_E20\_00335" 6120 "s59E5H2" 0.01479613 "hypothetical protein"  
"JS1\_E20\_00335" 6120 "s63E6H2" 0.1056098 "hypothetical protein"  
"JS1\_E20\_00336" 6121 "s59E13H2" 1.36795 "Alpha-xylosidase"  
"JS1\_E20\_00336" 6121 "s59E25H2" 0 "Alpha-xylosidase"  
"JS1\_E20\_00336" 6121 "s59E5H2" 0.05500521 "Alpha-xylosidase"  
"JS1\_E20\_00336" 6121 "s63E6H2" 0.08600251 "Alpha-xylosidase"  
"JS1\_E20\_00338" 6123 "s59E13H2" 6.058534 "hypothetical protein"  
"JS1\_E20\_00338" 6123 "s59E25H2" 0.389694 "hypothetical protein"  
"JS1\_E20\_00338" 6123 "s59E5H2" 0.5335775 "hypothetical protein"  
"JS1\_E20\_00338" 6123 "s63E6H2" 0.2842288 "hypothetical protein"  
"JS1\_E20\_00339" 6124 "s59E13H2" 2.662885 "hypothetical protein"  
"JS1\_E20\_00339" 6124 "s59E25H2" 0 "hypothetical protein"  
"JS1\_E20\_00339" 6124 "s59E5H2" 0.09291042 "hypothetical protein"  
"JS1\_E20\_00339" 6124 "s63E6H2" 0.3797368 "hypothetical protein"  
"JS1\_E20\_00341" 6126 "s59E13H2" 0.03663775 "Outer membrane lipoprotein Blc precursor"  
"JS1\_E20\_00341" 6126 "s59E25H2" 0 "Outer membrane lipoprotein Blc precursor"  
"JS1\_E20\_00341" 6126 "s59E5H2" 0.409628 "Outer membrane lipoprotein Blc precursor"  
"JS1\_E20\_00341" 6126 "s63E6H2" 1.81903 "Outer membrane lipoprotein Blc precursor"  
"JS1\_E20\_00342" 6127 "s59E13H2" 0.5107936 "Lipoprotein-releasing system ATP-binding protein LolD"  
"JS1\_E20\_00342" 6127 "s59E25H2" 0 "Lipoprotein-releasing system ATP-binding protein LolD"  
"JS1\_E20\_00342" 6127 "s59E5H2" 1.249417 "Lipoprotein-releasing system ATP-binding protein LolD"  
"JS1\_E20\_00342" 6127 "s63E6H2" 1.666097 "Lipoprotein-releasing system ATP-binding protein LolD"  
"JS1\_E20\_00343" 6128 "s59E13H2" 0.7604375 "Lipoprotein-releasing system transmembrane protein LolE"  
"JS1\_E20\_00343" 6128 "s59E25H2" 0 "Lipoprotein-releasing system transmembrane protein LolE"  
"JS1\_E20\_00343" 6128 "s59E5H2" 2.098966 "Lipoprotein-releasing system transmembrane protein LolE"  
"JS1\_E20\_00343" 6128 "s63E6H2" 0.8119381 "Lipoprotein-releasing system transmembrane protein LolE"  
"JS1\_E20\_00344" 6129 "s59E13H2" 1.456014 "Multidrug resistance protein MdtN"  
"JS1\_E20\_00344" 6129 "s59E25H2" 0 "Multidrug resistance protein MdtN"  
"JS1\_E20\_00344" 6129 "s59E5H2" 1.459357 "Multidrug resistance protein MdtN"  
"JS1\_E20\_00344" 6129 "s63E6H2" 0.4438754 "Multidrug resistance protein MdtN"  
"JS1\_E20\_00346" 6131 "s59E13H2" 1.770897 "DinB superfamily protein"  
"JS1\_E20\_00346" 6131 "s59E25H2" 0 "DinB superfamily protein"  
"JS1\_E20\_00346" 6131 "s59E5H2" 0.9897884 "DinB superfamily protein"  
"JS1\_E20\_00346" 6131 "s63E6H2" 0.2778097 "DinB superfamily protein"

"JS1\_E20\_00347" 6132 "s59E13H2" 1.142274 "ferredoxin"  
"JS1\_E20\_00347" 6132 "s59E25H2" 0 "ferredoxin"  
"JS1\_E20\_00347" 6132 "s59E5H2" 0.514059 "ferredoxin"  
"JS1\_E20\_00347" 6132 "s63E6H2" 0.829576 "ferredoxin"  
"JS1\_E20\_00348" 6133 "s59E13H2" 0.1207261 "IMPACT family member YigZ"  
"JS1\_E20\_00348" 6133 "s59E25H2" 0 "IMPACT family member YigZ"  
"JS1\_E20\_00348" 6133 "s59E5H2" 0.08098291 "IMPACT family member YigZ"  
"JS1\_E20\_00348" 6133 "s63E6H2" 0.2098207 "IMPACT family member YigZ"  
"JS1\_E20\_00349" 6134 "s59E13H2" 0.02814879 "hypothetical protein"  
"JS1\_E20\_00349" 6134 "s59E25H2" 0 "hypothetical protein"  
"JS1\_E20\_00349" 6134 "s59E5H2" 0.4864303 "hypothetical protein"  
"JS1\_E20\_00349" 6134 "s63E6H2" 0.4394038 "hypothetical protein"  
"JS1\_E20\_00350" 6135 "s59E13H2" 1.749788 "4'-demethylrebeccamycin synthase"  
"JS1\_E20\_00350" 6135 "s59E25H2" 0 "4'-demethylrebeccamycin synthase"  
"JS1\_E20\_00350" 6135 "s59E5H2" 0.8906264 "4'-demethylrebeccamycin synthase"  
"JS1\_E20\_00350" 6135 "s63E6H2" 1.943482 "4'-demethylrebeccamycin synthase"  
"JS1\_E20\_00351" 6136 "s59E13H2" 0.7447314 "Acetyltransferase (GNAT) family protein"  
"JS1\_E20\_00351" 6136 "s59E25H2" 0 "Acetyltransferase (GNAT) family protein"  
"JS1\_E20\_00351" 6136 "s59E5H2" 0.2745701 "Acetyltransferase (GNAT) family protein"  
"JS1\_E20\_00351" 6136 "s63E6H2" 0.2870534 "Acetyltransferase (GNAT) family protein"  
"JS1\_E20\_00352" 6137 "s59E13H2" 0 "Ultraviolet N-glycosylase/AP lyase"  
"JS1\_E20\_00352" 6137 "s59E25H2" 0 "Ultraviolet N-glycosylase/AP lyase"  
"JS1\_E20\_00352" 6137 "s59E5H2" 0.04813306 "Ultraviolet N-glycosylase/AP lyase"  
"JS1\_E20\_00352" 6137 "s63E6H2" 0 "Ultraviolet N-glycosylase/AP lyase"  
"JS1\_E20\_00354" 6139 "s59E13H2" 0.005550422 "Helix-turn-helix domain protein"  
"JS1\_E20\_00354" 6139 "s59E25H2" 0 "Helix-turn-helix domain protein"  
"JS1\_E20\_00354" 6139 "s59E5H2" 0.03618983 "Helix-turn-helix domain protein"  
"JS1\_E20\_00354" 6139 "s63E6H2" 0.182829 "Helix-turn-helix domain protein"  
"JS1\_E20\_00356" 6141 "s59E13H2" 0.07614811 "chromosomal replication initiation protein"  
"JS1\_E20\_00356" 6141 "s59E25H2" 0 "chromosomal replication initiation protein"  
"JS1\_E20\_00356" 6141 "s59E5H2" 0.4382419 "chromosomal replication initiation protein"  
"JS1\_E20\_00356" 6141 "s63E6H2" 0.4969835 "chromosomal replication initiation protein"  
"JS1\_E20\_00357" 6142 "s59E13H2" 0.01441783 "Phenylalanine--tRNA ligase alpha subunit"  
"JS1\_E20\_00357" 6142 "s59E25H2" 0 "Phenylalanine--tRNA ligase alpha subunit"  
"JS1\_E20\_00357" 6142 "s59E5H2" 0.08596221 "Phenylalanine--tRNA ligase alpha subunit"  
"JS1\_E20\_00357" 6142 "s63E6H2" 0.3154251 "Phenylalanine--tRNA ligase alpha subunit"  
"JS1\_E20\_00358" 6143 "s59E13H2" 0.3239331 "Phenylalanine--tRNA ligase beta subunit"  
"JS1\_E20\_00358" 6143 "s59E25H2" 0 "Phenylalanine--tRNA ligase beta subunit"  
"JS1\_E20\_00358" 6143 "s59E5H2" 0.1829057 "Phenylalanine--tRNA ligase beta subunit"  
"JS1\_E20\_00358" 6143 "s63E6H2" 0.1863465 "Phenylalanine--tRNA ligase beta subunit"  
"JS1\_E20\_00359" 6144 "s59E13H2" 0.2710035 "colicin V production protein"  
"JS1\_E20\_00359" 6144 "s59E25H2" 0 "colicin V production protein"  
"JS1\_E20\_00359" 6144 "s59E5H2" 0.272457 "colicin V production protein"  
"JS1\_E20\_00359" 6144 "s63E6H2" 0.1289977 "colicin V production protein"  
"JS1\_E20\_00360" 6145 "s59E13H2" 0.7180668 "Endonuclease MutS2"  
"JS1\_E20\_00360" 6145 "s59E25H2" 0 "Endonuclease MutS2"  
"JS1\_E20\_00360" 6145 "s59E5H2" 0.4156672 "Endonuclease MutS2"



"JS1\_E20\_00360" 6145 "s63E6H2" 0.4683596 "Endonuclease MutS2"  
"JS1\_E20\_00361" 6146 "s59E13H2" 0.3211539 "Penicillin-binding protein 1A"  
"JS1\_E20\_00361" 6146 "s59E25H2" 0 "Penicillin-binding protein 1A"  
"JS1\_E20\_00361" 6146 "s59E5H2" 0.2566373 "Penicillin-binding protein 1A"  
"JS1\_E20\_00361" 6146 "s63E6H2" 0.3766981 "Penicillin-binding protein 1A"  
"JS1\_E20\_00362" 6147 "s59E13H2" 0.51917 "Crossover junction endodeoxyribonuclease RuvC"  
"JS1\_E20\_00362" 6147 "s59E25H2" 0 "Crossover junction endodeoxyribonuclease RuvC"  
"JS1\_E20\_00362" 6147 "s59E5H2" 2.579658 "Crossover junction endodeoxyribonuclease RuvC"  
"JS1\_E20\_00362" 6147 "s63E6H2" 0.07481981 "Crossover junction endodeoxyribonuclease RuvC"  
"JS1\_E20\_00363" 6148 "s59E13H2" 0.639178 "putative transcriptional regulatory protein"  
"JS1\_E20\_00363" 6148 "s59E25H2" 0 "putative transcriptional regulatory protein"  
"JS1\_E20\_00363" 6148 "s59E5H2" 0.2309059 "putative transcriptional regulatory protein"  
"JS1\_E20\_00363" 6148 "s63E6H2" 1.128602 "putative transcriptional regulatory protein"  
"JS1\_E20\_00364" 6149 "s59E13H2" 0.07976323 "putative NH(3)-dependent NAD(+) synthetase"  
"JS1\_E20\_00364" 6149 "s59E25H2" 0 "putative NH(3)-dependent NAD(+) synthetase"  
"JS1\_E20\_00364" 6149 "s59E5H2" 0.02701955 "putative NH(3)-dependent NAD(+) synthetase"  
"JS1\_E20\_00364" 6149 "s63E6H2" 0.3015597 "putative NH(3)-dependent NAD(+) synthetase"  
"JS1\_E20\_00370" 6155 "s59E13H2" 0.005817405 "putative cation efflux system protein/MT2084"  
"JS1\_E20\_00370" 6155 "s59E25H2" 0 "putative cation efflux system protein/MT2084"  
"JS1\_E20\_00370" 6155 "s59E5H2" 0.1212862 "putative cation efflux system protein/MT2084"  
"JS1\_E20\_00370" 6155 "s63E6H2" 0.5156501 "putative cation efflux system protein/MT2084"  
"JS1\_E20\_00371" 6156 "s59E13H2" 0.001538035 "Ubiquinone/menaquinone biosynthesis C-methyltransferase UbiE"  
"JS1\_E20\_00371" 6156 "s59E25H2" 0 "Ubiquinone/menaquinone biosynthesis C-methyltransferase UbiE"  
"JS1\_E20\_00371" 6156 "s59E5H2" 0.1952096 "Ubiquinone/menaquinone biosynthesis C-methyltransferase UbiE"  
"JS1\_E20\_00371" 6156 "s63E6H2" 0.3220318 "Ubiquinone/menaquinone biosynthesis C-methyltransferase UbiE"  
"JS1\_E20\_00372" 6157 "s59E13H2" 0.001583785 "hypothetical protein"  
"JS1\_E20\_00372" 6157 "s59E25H2" 0 "hypothetical protein"  
"JS1\_E20\_00372" 6157 "s59E5H2" 0.1453348 "hypothetical protein"  
"JS1\_E20\_00372" 6157 "s63E6H2" 0.7280021 "hypothetical protein"  
"JS1\_E20\_00373" 6158 "s59E13H2" 0.1246981 "Microcin C7 self-immunity protein MccF"  
"JS1\_E20\_00373" 6158 "s59E25H2" 0 "Microcin C7 self-immunity protein MccF"  
"JS1\_E20\_00373" 6158 "s59E5H2" 0.7655592 "Microcin C7 self-immunity protein MccF"  
"JS1\_E20\_00373" 6158 "s63E6H2" 0.7707169 "Microcin C7 self-immunity protein MccF"  
"JS1\_E20\_00374" 6159 "s59E13H2" 0.07404271 "hypothetical protein"  
"JS1\_E20\_00374" 6159 "s59E25H2" 0 "hypothetical protein"  
"JS1\_E20\_00374" 6159 "s59E5H2" 0.3213326 "hypothetical protein"  
"JS1\_E20\_00374" 6159 "s63E6H2" 0.1993782 "hypothetical protein"  
"JS1\_E20\_00375" 6160 "s59E13H2" 0.9521477 "D-aminopeptidase"  
"JS1\_E20\_00375" 6160 "s59E25H2" 0 "D-aminopeptidase"  
"JS1\_E20\_00375" 6160 "s59E5H2" 0.9132762 "D-aminopeptidase"  
"JS1\_E20\_00375" 6160 "s63E6H2" 0.07674601 "D-aminopeptidase"  
"JS1\_E20\_00376" 6161 "s59E13H2" 0.5871872 "hypothetical protein"  
"JS1\_E20\_00376" 6161 "s59E25H2" 0 "hypothetical protein"  
"JS1\_E20\_00376" 6161 "s59E5H2" 0.7574249 "hypothetical protein"  
"JS1\_E20\_00376" 6161 "s63E6H2" 0.3196525 "hypothetical protein"  
"JS1\_E20\_00377" 6162 "s59E13H2" 0.05637465 "hypothetical protein"  
"JS1\_E20\_00377" 6162 "s59E25H2" 0 "hypothetical protein"

"JS1\_E20\_00377" 6162 "s59E5H2" 0.9242022 "hypothetical protein"  
"JS1\_E20\_00377" 6162 "s63E6H2" 0.1153689 "hypothetical protein"  
"JS1\_E20\_00378" 6163 "s59E13H2" 0 "Acetyltransferase (GNAT) family protein"  
"JS1\_E20\_00378" 6163 "s59E25H2" 0 "Acetyltransferase (GNAT) family protein"  
"JS1\_E20\_00378" 6163 "s59E5H2" 0.002670168 "Acetyltransferase (GNAT) family protein"  
"JS1\_E20\_00378" 6163 "s63E6H2" 0.03026533 "Acetyltransferase (GNAT) family protein"  
"JS1\_E20\_00379" 6164 "s59E13H2" 0.097434 "hypothetical protein"  
"JS1\_E20\_00379" 6164 "s59E25H2" 0 "hypothetical protein"  
"JS1\_E20\_00379" 6164 "s59E5H2" 0.956119 "hypothetical protein"  
"JS1\_E20\_00379" 6164 "s63E6H2" 0.07073031 "hypothetical protein"  
"JS1\_E20\_00380" 6165 "s59E13H2" 0.1308386 "Pyruvate kinase, alpha/beta domain"  
"JS1\_E20\_00380" 6165 "s59E25H2" 0 "Pyruvate kinase, alpha/beta domain"  
"JS1\_E20\_00380" 6165 "s59E5H2" 1.241925 "Pyruvate kinase, alpha/beta domain"  
"JS1\_E20\_00380" 6165 "s63E6H2" 0.04576631 "Pyruvate kinase, alpha/beta domain"  
"JS1\_E20\_00381" 6166 "s59E13H2" 0.3171486 "metal-dependent hydrolase"  
"JS1\_E20\_00381" 6166 "s59E25H2" 0.2493225 "metal-dependent hydrolase"  
"JS1\_E20\_00381" 6166 "s59E5H2" 2.150251 "metal-dependent hydrolase"  
"JS1\_E20\_00381" 6166 "s63E6H2" 0.01163138 "metal-dependent hydrolase"  
"JS1\_E20\_00382" 6167 "s59E13H2" 0.4417843 "Putative ribosome biogenesis GTPase RsgA"  
"JS1\_E20\_00382" 6167 "s59E25H2" 0 "Putative ribosome biogenesis GTPase RsgA"  
"JS1\_E20\_00382" 6167 "s59E5H2" 2.749042 "Putative ribosome biogenesis GTPase RsgA"  
"JS1\_E20\_00382" 6167 "s63E6H2" 0.2970712 "Putative ribosome biogenesis GTPase RsgA"  
"JS1\_E20\_00383" 6168 "s59E13H2" 0.3752929 "hypothetical protein"  
"JS1\_E20\_00383" 6168 "s59E25H2" 0 "hypothetical protein"  
"JS1\_E20\_00383" 6168 "s59E5H2" 0.896809 "hypothetical protein"  
"JS1\_E20\_00383" 6168 "s63E6H2" 0.5580112 "hypothetical protein"  
"JS1\_E20\_00384" 6169 "s59E13H2" 0.3146896 "Peptidase M15"  
"JS1\_E20\_00384" 6169 "s59E25H2" 0 "Peptidase M15"  
"JS1\_E20\_00384" 6169 "s59E5H2" 0.6543055 "Peptidase M15"  
"JS1\_E20\_00384" 6169 "s63E6H2" 1.391347 "Peptidase M15"  
"JS1\_E20\_00385" 6170 "s59E13H2" 0.0481802 "hypothetical protein"  
"JS1\_E20\_00385" 6170 "s59E25H2" 0 "hypothetical protein"  
"JS1\_E20\_00385" 6170 "s59E5H2" 0.3664115 "hypothetical protein"  
"JS1\_E20\_00385" 6170 "s63E6H2" 1.620485 "hypothetical protein"  
"JS1\_E20\_00386" 6171 "s59E13H2" 1.00214 "hypothetical protein"  
"JS1\_E20\_00386" 6171 "s59E25H2" 0 "hypothetical protein"  
"JS1\_E20\_00386" 6171 "s59E5H2" 2.839013 "hypothetical protein"  
"JS1\_E20\_00386" 6171 "s63E6H2" 6.668112 "hypothetical protein"  
"JS1\_E20\_00387" 6172 "s59E13H2" 0.03480847 "hypothetical protein"  
"JS1\_E20\_00387" 6172 "s59E25H2" 0 "hypothetical protein"  
"JS1\_E20\_00387" 6172 "s59E5H2" 0.07529923 "hypothetical protein"  
"JS1\_E20\_00387" 6172 "s63E6H2" 0.04076857 "hypothetical protein"  
"JS1\_E20\_00388" 6173 "s59E13H2" 0.01138502 "Sigma-70, region 4"  
"JS1\_E20\_00388" 6173 "s59E25H2" 0 "Sigma-70, region 4"  
"JS1\_E20\_00388" 6173 "s59E5H2" 0.03210084 "Sigma-70, region 4"  
"JS1\_E20\_00388" 6173 "s63E6H2" 0.0120376 "Sigma-70, region 4"  
"JS1\_E20\_00389" 6174 "s59E13H2" 0 "RNA polymerase factor sigma-70"

"JS1\_E20\_00389" 6174 "s59E25H2" 0 "RNA polymerase factor sigma-70"  
"JS1\_E20\_00389" 6174 "s59E5H2" 0.03584916 "RNA polymerase factor sigma-70"  
"JS1\_E20\_00389" 6174 "s63E6H2" 0.005192726 "RNA polymerase factor sigma-70"  
"JS1\_E20\_00391" 6176 "s59E13H2" 0.006154543 "L-glutamyl-[Btrl acyl-carrier protein] decarboxylase"  
"JS1\_E20\_00391" 6176 "s59E25H2" 0 "L-glutamyl-[Btrl acyl-carrier protein] decarboxylase"  
"JS1\_E20\_00391" 6176 "s59E5H2" 0.1011623 "L-glutamyl-[Btrl acyl-carrier protein] decarboxylase"  
"JS1\_E20\_00391" 6176 "s63E6H2" 0.02397695 "L-glutamyl-[Btrl acyl-carrier protein] decarboxylase"  
"JS1\_E20\_00392" 6177 "s59E13H2" 0.01513446 "Putative ski2-type helicase"  
"JS1\_E20\_00392" 6177 "s59E25H2" 0 "Putative ski2-type helicase"  
"JS1\_E20\_00392" 6177 "s59E5H2" 0.009188859 "Putative ski2-type helicase"  
"JS1\_E20\_00392" 6177 "s63E6H2" 0.001655539 "Putative ski2-type helicase"  
"JS1\_E20\_00393" 6178 "s59E13H2" 0.001132024 "hypothetical protein"  
"JS1\_E20\_00393" 6178 "s59E25H2" 0 "hypothetical protein"  
"JS1\_E20\_00393" 6178 "s59E5H2" 0.05817317 "hypothetical protein"  
"JS1\_E20\_00393" 6178 "s63E6H2" 0.08774494 "hypothetical protein"  
"JS1\_E20\_00397" 6182 "s59E13H2" 0.03285592 "Phosphoenolpyruvate carboxykinase [GTP]"  
"JS1\_E20\_00397" 6182 "s59E25H2" 0 "Phosphoenolpyruvate carboxykinase [GTP]"  
"JS1\_E20\_00397" 6182 "s59E5H2" 0.04651412 "Phosphoenolpyruvate carboxykinase [GTP]"  
"JS1\_E20\_00397" 6182 "s63E6H2" 0 "Phosphoenolpyruvate carboxykinase [GTP]"  
"JS1\_E20\_00398" 6183 "s59E13H2" 0.02290538 "N-acetylglucosamine repressor"  
"JS1\_E20\_00398" 6183 "s59E25H2" 0 "N-acetylglucosamine repressor"  
"JS1\_E20\_00398" 6183 "s59E5H2" 0.0340262 "N-acetylglucosamine repressor"  
"JS1\_E20\_00398" 6183 "s63E6H2" 1.382621 "N-acetylglucosamine repressor"  
"JS1\_E20\_00399" 6184 "s59E13H2" 0.01252763 "sn-glycerol-3-phosphate-binding periplasmic protein UgpB precursor"  
"JS1\_E20\_00399" 6184 "s59E25H2" 0 "sn-glycerol-3-phosphate-binding periplasmic protein UgpB precursor"  
"JS1\_E20\_00399" 6184 "s59E5H2" 0.6347391 "sn-glycerol-3-phosphate-binding periplasmic protein UgpB precursor"  
"JS1\_E20\_00399" 6184 "s63E6H2" 0.2030965 "sn-glycerol-3-phosphate-binding periplasmic protein UgpB precursor"  
"JS1\_E20\_00400" 6185 "s59E13H2" 0 "Lactose transport system permease protein LacF"  
"JS1\_E20\_00400" 6185 "s59E25H2" 0 "Lactose transport system permease protein LacF"  
"JS1\_E20\_00400" 6185 "s59E5H2" 0.07459198 "Lactose transport system permease protein LacF"  
"JS1\_E20\_00400" 6185 "s63E6H2" 0.06277204 "Lactose transport system permease protein LacF"  
"JS1\_E20\_00401" 6186 "s59E13H2" 0.04044513 "Long-chain-fatty-acid--CoA ligase FadD15"  
"JS1\_E20\_00401" 6186 "s59E25H2" 0 "Long-chain-fatty-acid--CoA ligase FadD15"  
"JS1\_E20\_00401" 6186 "s59E5H2" 0.1298054 "Long-chain-fatty-acid--CoA ligase FadD15"  
"JS1\_E20\_00401" 6186 "s63E6H2" 1.192502 "Long-chain-fatty-acid--CoA ligase FadD15"  
"JS1\_E20\_00402" 6187 "s59E13H2" 0.02302861 "Long-chain-fatty-acid--CoA ligase FadD15"  
"JS1\_E20\_00402" 6187 "s59E25H2" 0 "Long-chain-fatty-acid--CoA ligase FadD15"  
"JS1\_E20\_00402" 6187 "s59E5H2" 0.4161682 "Long-chain-fatty-acid--CoA ligase FadD15"  
"JS1\_E20\_00402" 6187 "s63E6H2" 0.344521 "Long-chain-fatty-acid--CoA ligase FadD15"  
"JS1\_E20\_00403" 6188 "s59E13H2" 0.06125167 "LysM domain/BON superfamily protein"  
"JS1\_E20\_00403" 6188 "s59E25H2" 0 "LysM domain/BON superfamily protein"  
"JS1\_E20\_00403" 6188 "s59E5H2" 0.3885189 "LysM domain/BON superfamily protein"  
"JS1\_E20\_00403" 6188 "s63E6H2" 0.2833873 "LysM domain/BON superfamily protein"  
"JS1\_E20\_00404" 6189 "s59E13H2" 0.02741158 "Glucokinase"  
"JS1\_E20\_00404" 6189 "s59E25H2" 0 "Glucokinase"  
"JS1\_E20\_00404" 6189 "s59E5H2" 0.3725777 "Glucokinase"  
"JS1\_E20\_00404" 6189 "s63E6H2" 0.1404505 "Glucokinase"

"JS1\_E20\_00405" 6190 "s59E13H2" 0.00787706 "Glucosyl-3-phosphoglycerate synthase"  
"JS1\_E20\_00405" 6190 "s59E25H2" 0 "Glucosyl-3-phosphoglycerate synthase"  
"JS1\_E20\_00405" 6190 "s59E5H2" 0.179396 "Glucosyl-3-phosphoglycerate synthase"  
"JS1\_E20\_00405" 6190 "s63E6H2" 0.044649 "Glucosyl-3-phosphoglycerate synthase"  
"JS1\_E20\_00406" 6191 "s59E13H2" 0.0154818 "glucose-1-phosphate adenyllyltransferase"  
"JS1\_E20\_00406" 6191 "s59E25H2" 0 "glucose-1-phosphate adenyllyltransferase"  
"JS1\_E20\_00406" 6191 "s59E5H2" 0.4581122 "glucose-1-phosphate adenyllyltransferase"  
"JS1\_E20\_00406" 6191 "s63E6H2" 0.04641178 "glucose-1-phosphate adenyllyltransferase"  
"JS1\_E20\_00407" 6192 "s59E13H2" 0.02288358 "putative diguanylate cyclase YegE"  
"JS1\_E20\_00407" 6192 "s59E25H2" 0 "putative diguanylate cyclase YegE"  
"JS1\_E20\_00407" 6192 "s59E5H2" 0.2223746 "putative diguanylate cyclase YegE"  
"JS1\_E20\_00407" 6192 "s63E6H2" 0.2049088 "putative diguanylate cyclase YegE"  
"JS1\_E20\_00408" 6193 "s59E13H2" 0.07937089 "putative D,D-dipeptide-binding periplasmic protein DdpA precursor"  
"JS1\_E20\_00408" 6193 "s59E25H2" 0 "putative D,D-dipeptide-binding periplasmic protein DdpA precursor"  
"JS1\_E20\_00408" 6193 "s59E5H2" 1.12452 "putative D,D-dipeptide-binding periplasmic protein DdpA precursor"  
"JS1\_E20\_00408" 6193 "s63E6H2" 0.04911477 "putative D,D-dipeptide-binding periplasmic protein DdpA precursor"  
"JS1\_E20\_00409" 6194 "s59E13H2" 0.005432975 "putative D,D-dipeptide transport system permease protein DdpB"  
"JS1\_E20\_00409" 6194 "s59E25H2" 0 "putative D,D-dipeptide transport system permease protein DdpB"  
"JS1\_E20\_00409" 6194 "s59E5H2" 0.1193861 "putative D,D-dipeptide transport system permease protein DdpB"  
"JS1\_E20\_00409" 6194 "s63E6H2" 0.01302359 "putative D,D-dipeptide transport system permease protein DdpB"  
"JS1\_E20\_00410" 6195 "s59E13H2" 0.01573127 "putative D,D-dipeptide transport system permease protein DdpC"  
"JS1\_E20\_00410" 6195 "s59E25H2" 0 "putative D,D-dipeptide transport system permease protein DdpC"  
"JS1\_E20\_00410" 6195 "s59E5H2" 0.4133376 "putative D,D-dipeptide transport system permease protein DdpC"  
"JS1\_E20\_00410" 6195 "s63E6H2" 0.005749252 "putative D,D-dipeptide transport system permease protein DdpC"  
"JS1\_E20\_00411" 6196 "s59E13H2" 0.01047336 "Oligopeptide transport ATP-binding protein OppD"  
"JS1\_E20\_00411" 6196 "s59E25H2" 0 "Oligopeptide transport ATP-binding protein OppD"  
"JS1\_E20\_00411" 6196 "s59E5H2" 0.406225 "Oligopeptide transport ATP-binding protein OppD"  
"JS1\_E20\_00411" 6196 "s63E6H2" 0.002905714 "Oligopeptide transport ATP-binding protein OppD"  
"JS1\_E20\_00412" 6197 "s59E13H2" 0.01648571 "Oligopeptide transport ATP-binding protein OppF"  
"JS1\_E20\_00412" 6197 "s59E25H2" 0 "Oligopeptide transport ATP-binding protein OppF"  
"JS1\_E20\_00412" 6197 "s59E5H2" 0.6697951 "Oligopeptide transport ATP-binding protein OppF"  
"JS1\_E20\_00412" 6197 "s63E6H2" 0 "Oligopeptide transport ATP-binding protein OppF"  
"JS1\_E20\_00414" 6199 "s59E13H2" 0.313634 "beta-methylgalactoside transporter inner membrane component"  
"JS1\_E20\_00414" 6199 "s59E25H2" 0 "beta-methylgalactoside transporter inner membrane component"  
"JS1\_E20\_00414" 6199 "s59E5H2" 0.5147153 "beta-methylgalactoside transporter inner membrane component"  
"JS1\_E20\_00414" 6199 "s63E6H2" 3.110792 "beta-methylgalactoside transporter inner membrane component"  
"JS1\_E20\_00415" 6200 "s59E13H2" 0.4738639 "beta-methylgalactoside transporter inner membrane component"  
"JS1\_E20\_00415" 6200 "s59E25H2" 0 "beta-methylgalactoside transporter inner membrane component"  
"JS1\_E20\_00415" 6200 "s59E5H2" 0.4724109 "beta-methylgalactoside transporter inner membrane component"  
"JS1\_E20\_00415" 6200 "s63E6H2" 0.8192255 "beta-methylgalactoside transporter inner membrane component"  
"JS1\_E20\_00416" 6201 "s59E13H2" 0.1880098 "Purine-binding protein precursor"  
"JS1\_E20\_00416" 6201 "s59E25H2" 0 "Purine-binding protein precursor"  
"JS1\_E20\_00416" 6201 "s59E5H2" 0.9912484 "Purine-binding protein precursor"  
"JS1\_E20\_00416" 6201 "s63E6H2" 0.4117491 "Purine-binding protein precursor"  
"JS1\_E20\_00417" 6202 "s59E13H2" 0.2013095 "Galactose/methyl galactoside import ATP-binding protein MglA"  
"JS1\_E20\_00417" 6202 "s59E25H2" 0 "Galactose/methyl galactoside import ATP-binding protein MglA"  
"JS1\_E20\_00417" 6202 "s59E5H2" 1.072829 "Galactose/methyl galactoside import ATP-binding protein MglA"

"JS1\_E20\_00417" 6202 "s63E6H2" 0.8638778 "Galactose/methyl galactoside import ATP-binding protein MglA"  
"JS1\_E20\_00419" 6204 "s59E13H2" 0.01330162 "DNA-directed RNA polymerase subunit beta"  
"JS1\_E20\_00419" 6204 "s59E25H2" 0 "DNA-directed RNA polymerase subunit beta"  
"JS1\_E20\_00419" 6204 "s59E5H2" 0.09328723 "DNA-directed RNA polymerase subunit beta"  
"JS1\_E20\_00419" 6204 "s63E6H2" 0.08053394 "DNA-directed RNA polymerase subunit beta"  
"JS1\_E20\_00420" 6205 "s59E13H2" 0.007154841 "30S ribosomal protein S12"  
"JS1\_E20\_00420" 6205 "s59E25H2" 0 "30S ribosomal protein S12"  
"JS1\_E20\_00420" 6205 "s59E5H2" 0.1209969 "30S ribosomal protein S12"  
"JS1\_E20\_00420" 6205 "s63E6H2" 0.1994925 "30S ribosomal protein S12"  
"JS1\_E20\_00421" 6206 "s59E13H2" 0.006483026 "30S ribosomal protein S7"  
"JS1\_E20\_00421" 6206 "s59E25H2" 0 "30S ribosomal protein S7"  
"JS1\_E20\_00421" 6206 "s59E5H2" 0.07235045 "30S ribosomal protein S7"  
"JS1\_E20\_00421" 6206 "s63E6H2" 0.1041611 "30S ribosomal protein S7"  
"JS1\_E20\_00422" 6207 "s59E13H2" 0.03104742 "Elongation factor G"  
"JS1\_E20\_00422" 6207 "s59E25H2" 0 "Elongation factor G"  
"JS1\_E20\_00422" 6207 "s59E5H2" 0.1203391 "Elongation factor G"  
"JS1\_E20\_00422" 6207 "s63E6H2" 0.1025703 "Elongation factor G"  
"JS1\_E20\_00423" 6208 "s59E13H2" 0.1797762 "Elongation factor Tu"  
"JS1\_E20\_00423" 6208 "s59E25H2" 0 "Elongation factor Tu"  
"JS1\_E20\_00423" 6208 "s59E5H2" 0.3636737 "Elongation factor Tu"  
"JS1\_E20\_00423" 6208 "s63E6H2" 0.8369358 "Elongation factor Tu"  
"JS1\_E20\_00424" 6209 "s59E13H2" 1.574508 "30S ribosomal protein S10"  
"JS1\_E20\_00424" 6209 "s59E25H2" 0 "30S ribosomal protein S10"  
"JS1\_E20\_00424" 6209 "s59E5H2" 0.07995689 "30S ribosomal protein S10"  
"JS1\_E20\_00424" 6209 "s63E6H2" 0.1090731 "30S ribosomal protein S10"  
"JS1\_E20\_00425" 6210 "s59E13H2" 0.04277021 "50S ribosomal protein L3"  
"JS1\_E20\_00425" 6210 "s59E25H2" 0 "50S ribosomal protein L3"  
"JS1\_E20\_00425" 6210 "s59E5H2" 0.1434115 "50S ribosomal protein L3"  
"JS1\_E20\_00425" 6210 "s63E6H2" 0.05712973 "50S ribosomal protein L3"  
"JS1\_E20\_00426" 6211 "s59E13H2" 0.03024122 "50S ribosomal protein L4"  
"JS1\_E20\_00426" 6211 "s59E25H2" 0 "50S ribosomal protein L4"  
"JS1\_E20\_00426" 6211 "s59E5H2" 0.1218478 "50S ribosomal protein L4"  
"JS1\_E20\_00426" 6211 "s63E6H2" 0.07476357 "50S ribosomal protein L4"  
"JS1\_E20\_00427" 6212 "s59E13H2" 0.02359588 "50S ribosomal protein L23"  
"JS1\_E20\_00427" 6212 "s59E25H2" 0 "50S ribosomal protein L23"  
"JS1\_E20\_00427" 6212 "s59E5H2" 0.07115149 "50S ribosomal protein L23"  
"JS1\_E20\_00427" 6212 "s63E6H2" 0.1493859 "50S ribosomal protein L23"  
"JS1\_E20\_00428" 6213 "s59E13H2" 0.01826469 "50S ribosomal protein L2"  
"JS1\_E20\_00428" 6213 "s59E25H2" 0 "50S ribosomal protein L2"  
"JS1\_E20\_00428" 6213 "s59E5H2" 0.0673545 "50S ribosomal protein L2"  
"JS1\_E20\_00428" 6213 "s63E6H2" 0.1883559 "50S ribosomal protein L2"  
"JS1\_E20\_00429" 6214 "s59E13H2" 0.025333 "30S ribosomal protein S19"  
"JS1\_E20\_00429" 6214 "s59E25H2" 0 "30S ribosomal protein S19"  
"JS1\_E20\_00429" 6214 "s59E5H2" 0.02656449 "30S ribosomal protein S19"  
"JS1\_E20\_00429" 6214 "s63E6H2" 0.2205609 "30S ribosomal protein S19"  
"JS1\_E20\_00430" 6215 "s59E13H2" 1.264164 "50S ribosomal protein L22"  
"JS1\_E20\_00430" 6215 "s59E25H2" 0 "50S ribosomal protein L22"

"JS1\_E20\_00430" 6215 "s59E5H2" 0.08956395 "50S ribosomal protein L22"  
"JS1\_E20\_00430" 6215 "s63E6H2" 0.2245989 "50S ribosomal protein L22"  
"JS1\_E20\_00431" 6216 "s59E13H2" 0.0275574 "30S ribosomal protein S3"  
"JS1\_E20\_00431" 6216 "s59E25H2" 0 "30S ribosomal protein S3"  
"JS1\_E20\_00431" 6216 "s59E5H2" 0.0517452 "30S ribosomal protein S3"  
"JS1\_E20\_00431" 6216 "s63E6H2" 0.1307668 "30S ribosomal protein S3"  
"JS1\_E20\_00432" 6217 "s59E13H2" 0.02407326 "50S ribosomal protein L16"  
"JS1\_E20\_00432" 6217 "s59E25H2" 0 "50S ribosomal protein L16"  
"JS1\_E20\_00432" 6217 "s59E5H2" 0.3734831 "50S ribosomal protein L16"  
"JS1\_E20\_00432" 6217 "s63E6H2" 0.1800936 "50S ribosomal protein L16"  
"JS1\_E20\_00433" 6218 "s59E13H2" 0.04616901 "50S ribosomal protein L29"  
"JS1\_E20\_00433" 6218 "s59E25H2" 0 "50S ribosomal protein L29"  
"JS1\_E20\_00433" 6218 "s59E5H2" 0.05701518 "50S ribosomal protein L29"  
"JS1\_E20\_00433" 6218 "s63E6H2" 0.1044346 "50S ribosomal protein L29"  
"JS1\_E20\_00434" 6219 "s59E13H2" 0.0156366 "30S ribosomal protein S17"  
"JS1\_E20\_00434" 6219 "s59E25H2" 0 "30S ribosomal protein S17"  
"JS1\_E20\_00434" 6219 "s59E5H2" 0.03493691 "30S ribosomal protein S17"  
"JS1\_E20\_00434" 6219 "s63E6H2" 0.09302727 "30S ribosomal protein S17"  
"JS1\_E20\_00435" 6220 "s59E13H2" 0.0304802 "50S ribosomal protein L14"  
"JS1\_E20\_00435" 6220 "s59E25H2" 0 "50S ribosomal protein L14"  
"JS1\_E20\_00435" 6220 "s59E5H2" 0.09529335 "50S ribosomal protein L14"  
"JS1\_E20\_00435" 6220 "s63E6H2" 0.1403014 "50S ribosomal protein L14"  
"JS1\_E20\_00436" 6221 "s59E13H2" 0.1057751 "50S ribosomal protein L24"  
"JS1\_E20\_00436" 6221 "s59E25H2" 0 "50S ribosomal protein L24"  
"JS1\_E20\_00436" 6221 "s59E5H2" 0.1277465 "50S ribosomal protein L24"  
"JS1\_E20\_00436" 6221 "s63E6H2" 0.2241304 "50S ribosomal protein L24"  
"JS1\_E20\_00437" 6222 "s59E13H2" 0.1376177 "50S ribosomal protein L5"  
"JS1\_E20\_00437" 6222 "s59E25H2" 0 "50S ribosomal protein L5"  
"JS1\_E20\_00437" 6222 "s59E5H2" 0.1074177 "50S ribosomal protein L5"  
"JS1\_E20\_00437" 6222 "s63E6H2" 0.147389 "50S ribosomal protein L5"  
"JS1\_E20\_00438" 6223 "s59E13H2" 0.1750117 "30S ribosomal protein S14 type Z"  
"JS1\_E20\_00438" 6223 "s59E25H2" 0 "30S ribosomal protein S14 type Z"  
"JS1\_E20\_00438" 6223 "s59E5H2" 0.09003613 "30S ribosomal protein S14 type Z"  
"JS1\_E20\_00438" 6223 "s63E6H2" 0.1297569 "30S ribosomal protein S14 type Z"  
"JS1\_E20\_00439" 6224 "s59E13H2" 0.09289813 "30S ribosomal protein S8"  
"JS1\_E20\_00439" 6224 "s59E25H2" 0 "30S ribosomal protein S8"  
"JS1\_E20\_00439" 6224 "s59E5H2" 0.07285122 "30S ribosomal protein S8"  
"JS1\_E20\_00439" 6224 "s63E6H2" 0.1173653 "30S ribosomal protein S8"  
"JS1\_E20\_00440" 6225 "s59E13H2" 0.2240345 "50S ribosomal protein L6"  
"JS1\_E20\_00440" 6225 "s59E25H2" 0 "50S ribosomal protein L6"  
"JS1\_E20\_00440" 6225 "s59E5H2" 0.0513972 "50S ribosomal protein L6"  
"JS1\_E20\_00440" 6225 "s63E6H2" 0.1017718 "50S ribosomal protein L6"  
"JS1\_E20\_00441" 6226 "s59E13H2" 0.04657967 "50S ribosomal protein L18"  
"JS1\_E20\_00441" 6226 "s59E25H2" 0 "50S ribosomal protein L18"  
"JS1\_E20\_00441" 6226 "s59E5H2" 0.002126129 "50S ribosomal protein L18"  
"JS1\_E20\_00441" 6226 "s63E6H2" 0.03069543 "50S ribosomal protein L18"  
"JS1\_E20\_00442" 6227 "s59E13H2" 0.05191716 "30S ribosomal protein S5"

"JS1\_E20\_00442" 6227 "s59E25H2" 0 "30S ribosomal protein S5"  
"JS1\_E20\_00442" 6227 "s59E5H2" 0.05989086 "30S ribosomal protein S5"  
"JS1\_E20\_00442" 6227 "s63E6H2" 0.09232011 "30S ribosomal protein S5"  
"JS1\_E20\_00443" 6228 "s59E13H2" 0.1267148 "50S ribosomal protein L15"  
"JS1\_E20\_00443" 6228 "s59E25H2" 0 "50S ribosomal protein L15"  
"JS1\_E20\_00443" 6228 "s59E5H2" 0.066685 "50S ribosomal protein L15"  
"JS1\_E20\_00443" 6228 "s63E6H2" 0.1629553 "50S ribosomal protein L15"  
"JS1\_E20\_00444" 6229 "s59E13H2" 0.1975575 "preprotein translocase subunit SecY"  
"JS1\_E20\_00444" 6229 "s59E25H2" 0 "preprotein translocase subunit SecY"  
"JS1\_E20\_00444" 6229 "s59E5H2" 0.07484991 "preprotein translocase subunit SecY"  
"JS1\_E20\_00444" 6229 "s63E6H2" 0.3672964 "preprotein translocase subunit SecY"  
"JS1\_E20\_00445" 6230 "s59E13H2" 0.05783506 "Adenylate kinase"  
"JS1\_E20\_00445" 6230 "s59E25H2" 0 "Adenylate kinase"  
"JS1\_E20\_00445" 6230 "s59E5H2" 0.02736819 "Adenylate kinase"  
"JS1\_E20\_00445" 6230 "s63E6H2" 0.3932675 "Adenylate kinase"  
"JS1\_E20\_00446" 6231 "s59E13H2" 0.02056436 "Methionine aminopeptidase 1"  
"JS1\_E20\_00446" 6231 "s59E25H2" 0 "Methionine aminopeptidase 1"  
"JS1\_E20\_00446" 6231 "s59E5H2" 0.0008543733 "Methionine aminopeptidase 1"  
"JS1\_E20\_00446" 6231 "s63E6H2" 0.1152182 "Methionine aminopeptidase 1"  
"JS1\_E20\_00447" 6232 "s59E13H2" 0.1339918 "Translation initiation factor IF-1"  
"JS1\_E20\_00447" 6232 "s59E25H2" 0 "Translation initiation factor IF-1"  
"JS1\_E20\_00447" 6232 "s59E5H2" 0.07715584 "Translation initiation factor IF-1"  
"JS1\_E20\_00447" 6232 "s63E6H2" 0.5457851 "Translation initiation factor IF-1"  
"JS1\_E20\_00448" 6233 "s59E13H2" 0.25486 "50S ribosomal protein L36"  
"JS1\_E20\_00448" 6233 "s59E25H2" 0 "50S ribosomal protein L36"  
"JS1\_E20\_00448" 6233 "s59E5H2" 0.09408347 "50S ribosomal protein L36"  
"JS1\_E20\_00448" 6233 "s63E6H2" 0.6821275 "50S ribosomal protein L36"  
"JS1\_E20\_00449" 6234 "s59E13H2" 0.2202604 "30S ribosomal protein S13"  
"JS1\_E20\_00449" 6234 "s59E25H2" 0 "30S ribosomal protein S13"  
"JS1\_E20\_00449" 6234 "s59E5H2" 0.1292221 "30S ribosomal protein S13"  
"JS1\_E20\_00449" 6234 "s63E6H2" 1.185124 "30S ribosomal protein S13"  
"JS1\_E20\_00450" 6235 "s59E13H2" 0.1406751 "30S ribosomal protein S11"  
"JS1\_E20\_00450" 6235 "s59E25H2" 0 "30S ribosomal protein S11"  
"JS1\_E20\_00450" 6235 "s59E5H2" 0.1567544 "30S ribosomal protein S11"  
"JS1\_E20\_00450" 6235 "s63E6H2" 0.6778408 "30S ribosomal protein S11"  
"JS1\_E20\_00451" 6236 "s59E13H2" 0.1263921 "30S ribosomal protein S4"  
"JS1\_E20\_00451" 6236 "s59E25H2" 0 "30S ribosomal protein S4"  
"JS1\_E20\_00451" 6236 "s59E5H2" 0.08030812 "30S ribosomal protein S4"  
"JS1\_E20\_00451" 6236 "s63E6H2" 0.5743662 "30S ribosomal protein S4"  
"JS1\_E20\_00452" 6237 "s59E13H2" 0.2732554 "Energy-coupling factor transporter transmembrane protein EcfT"  
"JS1\_E20\_00452" 6237 "s59E25H2" 0 "Energy-coupling factor transporter transmembrane protein EcfT"  
"JS1\_E20\_00452" 6237 "s59E5H2" 0.4696933 "Energy-coupling factor transporter transmembrane protein EcfT"  
"JS1\_E20\_00452" 6237 "s63E6H2" 0.9956246 "Energy-coupling factor transporter transmembrane protein EcfT"  
"JS1\_E20\_00453" 6238 "s59E13H2" 0.281339 "Energy-coupling factor transporter ATP-binding protein EcfA2"  
"JS1\_E20\_00453" 6238 "s59E25H2" 0 "Energy-coupling factor transporter ATP-binding protein EcfA2"  
"JS1\_E20\_00453" 6238 "s59E5H2" 0.5811711 "Energy-coupling factor transporter ATP-binding protein EcfA2"  
"JS1\_E20\_00453" 6238 "s63E6H2" 1.671352 "Energy-coupling factor transporter ATP-binding protein EcfA2"

"JS1\_E20\_00454" 6239 "s59E13H2" 0.2202977 "Energy-coupling factor transporter ATP-binding protein EcfA1"  
"JS1\_E20\_00454" 6239 "s59E25H2" 0 "Energy-coupling factor transporter ATP-binding protein EcfA1"  
"JS1\_E20\_00454" 6239 "s59E5H2" 0.1786071 "Energy-coupling factor transporter ATP-binding protein EcfA1"  
"JS1\_E20\_00454" 6239 "s63E6H2" 2.542166 "Energy-coupling factor transporter ATP-binding protein EcfA1"  
"JS1\_E20\_00455" 6240 "s59E13H2" 0.1383063 "50S ribosomal protein L17"  
"JS1\_E20\_00455" 6240 "s59E25H2" 0 "50S ribosomal protein L17"  
"JS1\_E20\_00455" 6240 "s59E5H2" 0.1505768 "50S ribosomal protein L17"  
"JS1\_E20\_00455" 6240 "s63E6H2" 1.533217 "50S ribosomal protein L17"  
"JS1\_E20\_00456" 6241 "s59E13H2" 0.1693755 "DNA-directed RNA polymerase subunit alpha"  
"JS1\_E20\_00456" 6241 "s59E25H2" 0 "DNA-directed RNA polymerase subunit alpha"  
"JS1\_E20\_00456" 6241 "s59E5H2" 0.1225897 "DNA-directed RNA polymerase subunit alpha"  
"JS1\_E20\_00456" 6241 "s63E6H2" 1.0607 "DNA-directed RNA polymerase subunit alpha"  
"JS1\_E20\_00457" 6242 "s59E13H2" 0.2529746 "30S ribosomal protein S4"  
"JS1\_E20\_00457" 6242 "s59E25H2" 0 "30S ribosomal protein S4"  
"JS1\_E20\_00457" 6242 "s59E5H2" 0.08824408 "30S ribosomal protein S4"  
"JS1\_E20\_00457" 6242 "s63E6H2" 0.9296637 "30S ribosomal protein S4"  
"JS1\_E20\_00458" 6243 "s59E13H2" 0.03175312 "Ribokinase"  
"JS1\_E20\_00458" 6243 "s59E25H2" 0 "Ribokinase"  
"JS1\_E20\_00458" 6243 "s59E5H2" 0.566838 "Ribokinase"  
"JS1\_E20\_00458" 6243 "s63E6H2" 0.3839816 "Ribokinase"  
"JS1\_E20\_00459" 6244 "s59E13H2" 0.06416636 "HTH-type transcriptional regulator DegA"  
"JS1\_E20\_00459" 6244 "s59E25H2" 0 "HTH-type transcriptional regulator DegA"  
"JS1\_E20\_00459" 6244 "s59E5H2" 0.6468734 "HTH-type transcriptional regulator DegA"  
"JS1\_E20\_00459" 6244 "s63E6H2" 1.362881 "HTH-type transcriptional regulator DegA"  
"JS1\_E20\_00460" 6245 "s59E13H2" 0.09117177 "D-ribose pyranase"  
"JS1\_E20\_00460" 6245 "s59E25H2" 0 "D-ribose pyranase"  
"JS1\_E20\_00460" 6245 "s59E5H2" 0.1940835 "D-ribose pyranase"  
"JS1\_E20\_00460" 6245 "s63E6H2" 0.1570171 "D-ribose pyranase"  
"JS1\_E20\_00461" 6246 "s59E13H2" 0.005557114 "Galactose/methyl galactoside import ATP-binding protein MglA"  
"JS1\_E20\_00461" 6246 "s59E25H2" 0 "Galactose/methyl galactoside import ATP-binding protein MglA"  
"JS1\_E20\_00461" 6246 "s59E5H2" 0.2451703 "Galactose/methyl galactoside import ATP-binding protein MglA"  
"JS1\_E20\_00461" 6246 "s63E6H2" 2.457468 "Galactose/methyl galactoside import ATP-binding protein MglA"  
"JS1\_E20\_00462" 6247 "s59E13H2" 0.001543202 "Ribose transport system permease protein RbsC"  
"JS1\_E20\_00462" 6247 "s59E25H2" 0 "Ribose transport system permease protein RbsC"  
"JS1\_E20\_00462" 6247 "s59E5H2" 0.2313082 "Ribose transport system permease protein RbsC"  
"JS1\_E20\_00462" 6247 "s63E6H2" 2.529226 "Ribose transport system permease protein RbsC"  
"JS1\_E20\_00463" 6248 "s59E13H2" 0.2125818 "D-ribose-binding periplasmic protein precursor"  
"JS1\_E20\_00463" 6248 "s59E25H2" 0 "D-ribose-binding periplasmic protein precursor"  
"JS1\_E20\_00463" 6248 "s59E5H2" 0.5618052 "D-ribose-binding periplasmic protein precursor"  
"JS1\_E20\_00463" 6248 "s63E6H2" 3.550278 "D-ribose-binding periplasmic protein precursor"  
"JS1\_E20\_00464" 6249 "s59E13H2" 0.1744943 "Cyclic di-GMP phosphodiesterase Gmr"  
"JS1\_E20\_00464" 6249 "s59E25H2" 0 "Cyclic di-GMP phosphodiesterase Gmr"  
"JS1\_E20\_00464" 6249 "s59E5H2" 0.8964499 "Cyclic di-GMP phosphodiesterase Gmr"  
"JS1\_E20\_00464" 6249 "s63E6H2" 1.118274 "Cyclic di-GMP phosphodiesterase Gmr"  
"JS1\_E20\_00465" 6250 "s59E13H2" 1.035577 "L-asparaginase 1"  
"JS1\_E20\_00465" 6250 "s59E25H2" 0 "L-asparaginase 1"  
"JS1\_E20\_00465" 6250 "s59E5H2" 1.637616 "L-asparaginase 1"



"JS1\_E20\_00465" 6250 "s63E6H2" 3.267881 "L-asparaginase 1"  
"JS1\_E20\_00466" 6251 "s59E13H2" 0 "hypothetical protein"  
"JS1\_E20\_00466" 6251 "s59E25H2" 0 "hypothetical protein"  
"JS1\_E20\_00466" 6251 "s59E5H2" 0.2386017 "hypothetical protein"  
"JS1\_E20\_00466" 6251 "s63E6H2" 0.2461482 "hypothetical protein"  
"JS1\_E20\_00467" 6252 "s59E13H2" 0.005017022 "Putative electron transport protein YccM"  
"JS1\_E20\_00467" 6252 "s59E25H2" 0 "Putative electron transport protein YccM"  
"JS1\_E20\_00467" 6252 "s59E5H2" 0.02492305 "Putative electron transport protein YccM"  
"JS1\_E20\_00467" 6252 "s63E6H2" 0.2445948 "Putative electron transport protein YccM"  
"JS1\_E20\_00468" 6253 "s59E13H2" 0.002270627 "hypothetical protein"  
"JS1\_E20\_00468" 6253 "s59E25H2" 0 "hypothetical protein"  
"JS1\_E20\_00468" 6253 "s59E5H2" 0.06339547 "hypothetical protein"  
"JS1\_E20\_00468" 6253 "s63E6H2" 0.3943332 "hypothetical protein"  
"JS1\_E20\_00469" 6254 "s59E13H2" 2.098217 "Pyruvate kinase"  
"JS1\_E20\_00469" 6254 "s59E25H2" 0 "Pyruvate kinase"  
"JS1\_E20\_00469" 6254 "s59E5H2" 1.74957 "Pyruvate kinase"  
"JS1\_E20\_00469" 6254 "s63E6H2" 1.828898 "Pyruvate kinase"  
"JS1\_E20\_00470" 6255 "s59E13H2" 0.5731408 "CGGC domain protein"  
"JS1\_E20\_00470" 6255 "s59E25H2" 0 "CGGC domain protein"  
"JS1\_E20\_00470" 6255 "s59E5H2" 0.9791166 "CGGC domain protein"  
"JS1\_E20\_00470" 6255 "s63E6H2" 0.4840601 "CGGC domain protein"  
"JS1\_E20\_00471" 6256 "s59E13H2" 1.990834 "hypothetical protein"  
"JS1\_E20\_00471" 6256 "s59E25H2" 1 "hypothetical protein"  
"JS1\_E20\_00471" 6256 "s59E5H2" 2.389164 "hypothetical protein"  
"JS1\_E20\_00471" 6256 "s63E6H2" 1.522743 "hypothetical protein"  
"JS1\_E20\_00472" 6257 "s59E13H2" 0.6164072 "hypothetical protein"  
"JS1\_E20\_00472" 6257 "s59E25H2" 0.07407407 "hypothetical protein"  
"JS1\_E20\_00472" 6257 "s59E5H2" 1.253707 "hypothetical protein"  
"JS1\_E20\_00472" 6257 "s63E6H2" 0.9058329 "hypothetical protein"  
"JS1\_E20\_00473" 6258 "s59E13H2" 1.257494 "hypothetical protein"  
"JS1\_E20\_00473" 6258 "s59E25H2" 0 "hypothetical protein"  
"JS1\_E20\_00473" 6258 "s59E5H2" 1.40713 "hypothetical protein"  
"JS1\_E20\_00473" 6258 "s63E6H2" 0.7058022 "hypothetical protein"  
"JS1\_E20\_00474" 6259 "s59E13H2" 4.469706 "ABC transporter ATP-binding protein YtrB"  
"JS1\_E20\_00474" 6259 "s59E25H2" 0 "ABC transporter ATP-binding protein YtrB"  
"JS1\_E20\_00474" 6259 "s59E5H2" 3.957137 "ABC transporter ATP-binding protein YtrB"  
"JS1\_E20\_00474" 6259 "s63E6H2" 3.086709 "ABC transporter ATP-binding protein YtrB"  
"JS1\_E20\_00475" 6260 "s59E13H2" 3.007471 "HTH-type transcriptional repressor YtrA"  
"JS1\_E20\_00475" 6260 "s59E25H2" 0 "HTH-type transcriptional repressor YtrA"  
"JS1\_E20\_00475" 6260 "s59E5H2" 1.393793 "HTH-type transcriptional repressor YtrA"  
"JS1\_E20\_00475" 6260 "s63E6H2" 2.941406 "HTH-type transcriptional repressor YtrA"  
"JS1\_E20\_00476" 6261 "s59E13H2" 0.004564037 "dTDP-3-amino-3,4,6-trideoxy-alpha-D-glucopyranose"  
"JS1\_E20\_00476" 6261 "s59E25H2" 0 "dTDP-3-amino-3,4,6-trideoxy-alpha-D-glucopyranose"  
"JS1\_E20\_00476" 6261 "s59E5H2" 0.4172713 "dTDP-3-amino-3,4,6-trideoxy-alpha-D-glucopyranose"  
"JS1\_E20\_00476" 6261 "s63E6H2" 0.06269168 "dTDP-3-amino-3,4,6-trideoxy-alpha-D-glucopyranose"  
"JS1\_E20\_00477" 6262 "s59E13H2" 0 "dephospho-CoA kinase/protein folding accessory domain-containing protein"  
"JS1\_E20\_00477" 6262 "s59E25H2" 0 "dephospho-CoA kinase/protein folding accessory domain-containing protein"

"JS1\_E20\_00477" 6262 "s59E5H2" 0.3344689 "dephospho-CoA kinase/protein folding accessory domain-containing protein"  
"JS1\_E20\_00477" 6262 "s63E6H2" 0.6496576 "dephospho-CoA kinase/protein folding accessory domain-containing protein"  
"JS1\_E20\_00478" 6263 "s59E13H2" 0.005480164 "N-acetylglucosamine-6-phosphate deacetylase"  
"JS1\_E20\_00478" 6263 "s59E25H2" 0 "N-acetylglucosamine-6-phosphate deacetylase"  
"JS1\_E20\_00478" 6263 "s59E5H2" 0.1424387 "N-acetylglucosamine-6-phosphate deacetylase"  
"JS1\_E20\_00478" 6263 "s63E6H2" 1.174661 "N-acetylglucosamine-6-phosphate deacetylase"  
"JS1\_E20\_00479" 6264 "s59E13H2" 0.009406072 "Glyoxalase-like domain protein"  
"JS1\_E20\_00479" 6264 "s59E25H2" 0 "Glyoxalase-like domain protein"  
"JS1\_E20\_00479" 6264 "s59E5H2" 0.0746882 "Glyoxalase-like domain protein"  
"JS1\_E20\_00479" 6264 "s63E6H2" 0.1114536 "Glyoxalase-like domain protein"  
"JS1\_E20\_00480" 6265 "s59E13H2" 0.002521911 "hypothetical protein"  
"JS1\_E20\_00480" 6265 "s59E25H2" 0 "hypothetical protein"  
"JS1\_E20\_00480" 6265 "s59E5H2" 0.1115149 "hypothetical protein"  
"JS1\_E20\_00480" 6265 "s63E6H2" 0.003084084 "hypothetical protein"  
"JS1\_E20\_00481" 6266 "s59E13H2" 1.083142 "Ankyrin repeats (3 copies)"  
"JS1\_E20\_00481" 6266 "s59E25H2" 0 "Ankyrin repeats (3 copies)"  
"JS1\_E20\_00481" 6266 "s59E5H2" 0.1692853 "Ankyrin repeats (3 copies)"  
"JS1\_E20\_00481" 6266 "s63E6H2" 0.299718 "Ankyrin repeats (3 copies)"  
"JS1\_E20\_00482" 6267 "s59E13H2" 0.1199467 "hypothetical protein"  
"JS1\_E20\_00482" 6267 "s59E25H2" 0 "hypothetical protein"  
"JS1\_E20\_00482" 6267 "s59E5H2" 0.4210754 "hypothetical protein"  
"JS1\_E20\_00482" 6267 "s63E6H2" 0.3418655 "hypothetical protein"  
"JS1\_E20\_00483" 6268 "s59E13H2" 0.6925411 "pyruvate formate lyase II activase"  
"JS1\_E20\_00483" 6268 "s59E25H2" 0 "pyruvate formate lyase II activase"  
"JS1\_E20\_00483" 6268 "s59E5H2" 0.03287113 "pyruvate formate lyase II activase"  
"JS1\_E20\_00483" 6268 "s63E6H2" 0.05056482 "pyruvate formate lyase II activase"  
"JS1\_E20\_00484" 6269 "s59E13H2" 8.651782 "Glucose-6-phosphate 3-dehydrogenase"  
"JS1\_E20\_00484" 6269 "s59E25H2" 0 "Glucose-6-phosphate 3-dehydrogenase"  
"JS1\_E20\_00484" 6269 "s59E5H2" 0.3000644 "Glucose-6-phosphate 3-dehydrogenase"  
"JS1\_E20\_00484" 6269 "s63E6H2" 0.5880068 "Glucose-6-phosphate 3-dehydrogenase"  
"JS1\_E20\_00485" 6270 "s59E13H2" 8.999231 "ferredoxin"  
"JS1\_E20\_00485" 6270 "s59E25H2" 0 "ferredoxin"  
"JS1\_E20\_00485" 6270 "s59E5H2" 0.3515455 "ferredoxin"  
"JS1\_E20\_00485" 6270 "s63E6H2" 0.4887356 "ferredoxin"  
"JS1\_E20\_00486" 6271 "s59E13H2" 8.379201 "putative hydrolase"  
"JS1\_E20\_00486" 6271 "s59E25H2" 0 "putative hydrolase"  
"JS1\_E20\_00486" 6271 "s59E5H2" 0.5166988 "putative hydrolase"  
"JS1\_E20\_00486" 6271 "s63E6H2" 0.3150523 "putative hydrolase"  
"JS1\_E20\_00487" 6272 "s59E13H2" 3.168176 "Phosphoserine phosphatase 1"  
"JS1\_E20\_00487" 6272 "s59E25H2" 0 "Phosphoserine phosphatase 1"  
"JS1\_E20\_00487" 6272 "s59E5H2" 0.2600632 "Phosphoserine phosphatase 1"  
"JS1\_E20\_00487" 6272 "s63E6H2" 0.07749218 "Phosphoserine phosphatase 1"  
"JS1\_E20\_00488" 6273 "s59E13H2" 0.05654677 "Copper-exporting P-type ATPase B"  
"JS1\_E20\_00488" 6273 "s59E25H2" 0 "Copper-exporting P-type ATPase B"  
"JS1\_E20\_00488" 6273 "s59E5H2" 0.6453117 "Copper-exporting P-type ATPase B"  
"JS1\_E20\_00488" 6273 "s63E6H2" 3.781303 "Copper-exporting P-type ATPase B"  
"JS1\_E20\_00489" 6274 "s59E13H2" 0 "Internalin B precursor"

"JS1\_E20\_00489" 6274 "s59E25H2" 0 "Internalin B precursor"  
"JS1\_E20\_00489" 6274 "s59E5H2" 0.06338641 "Internalin B precursor"  
"JS1\_E20\_00489" 6274 "s63E6H2" 0 "Internalin B precursor"  
"JS1\_E20\_00491" 6276 "s59E13H2" 0 "Trehalose/maltose-binding protein MalE precursor"  
"JS1\_E20\_00491" 6276 "s59E25H2" 0 "Trehalose/maltose-binding protein MalE precursor"  
"JS1\_E20\_00491" 6276 "s59E5H2" 0.004777789 "Trehalose/maltose-binding protein MalE precursor"  
"JS1\_E20\_00491" 6276 "s63E6H2" 0.6392935 "Trehalose/maltose-binding protein MalE precursor"  
"JS1\_E20\_00492" 6277 "s59E13H2" 0 "Lactose transport system permease protein LacF"  
"JS1\_E20\_00492" 6277 "s59E25H2" 0 "Lactose transport system permease protein LacF"  
"JS1\_E20\_00492" 6277 "s59E5H2" 0.004754678 "Lactose transport system permease protein LacF"  
"JS1\_E20\_00492" 6277 "s63E6H2" 0.09884395 "Lactose transport system permease protein LacF"  
"JS1\_E20\_00493" 6278 "s59E13H2" 0 "Trehalose/maltose transport system permease protein MalG"  
"JS1\_E20\_00493" 6278 "s59E25H2" 0 "Trehalose/maltose transport system permease protein MalG"  
"JS1\_E20\_00493" 6278 "s59E5H2" 0 "Trehalose/maltose transport system permease protein MalG"  
"JS1\_E20\_00493" 6278 "s63E6H2" 0 "Trehalose/maltose transport system permease protein MalG"  
"JS1\_E20\_00494" 6279 "s59E13H2" 0.2224096 "Choline/Carnitine o-acyltransferase"  
"JS1\_E20\_00494" 6279 "s59E25H2" 0.2307246 "Choline/Carnitine o-acyltransferase"  
"JS1\_E20\_00494" 6279 "s59E5H2" 1.277315 "Choline/Carnitine o-acyltransferase"  
"JS1\_E20\_00494" 6279 "s63E6H2" 0.8856344 "Choline/Carnitine o-acyltransferase"  
"JS1\_E20\_00496" 6281 "s59E13H2" 0.01998353 "ubiquinone/menaquinone biosynthesis methyltransferase"  
"JS1\_E20\_00496" 6281 "s59E25H2" 0 "ubiquinone/menaquinone biosynthesis methyltransferase"  
"JS1\_E20\_00496" 6281 "s59E5H2" 0.02144409 "ubiquinone/menaquinone biosynthesis methyltransferase"  
"JS1\_E20\_00496" 6281 "s63E6H2" 0.129 "ubiquinone/menaquinone biosynthesis methyltransferase"  
"JS1\_E20\_00497" 6282 "s59E13H2" 0.01124734 "Demethylmenaquinone methyltransferase"  
"JS1\_E20\_00497" 6282 "s59E25H2" 0 "Demethylmenaquinone methyltransferase"  
"JS1\_E20\_00497" 6282 "s59E5H2" 0.02357025 "Demethylmenaquinone methyltransferase"  
"JS1\_E20\_00497" 6282 "s63E6H2" 0.1075948 "Demethylmenaquinone methyltransferase"  
"JS1\_E20\_00498" 6283 "s59E13H2" 0 "putative tautomerase"  
"JS1\_E20\_00498" 6283 "s59E25H2" 0 "putative tautomerase"  
"JS1\_E20\_00498" 6283 "s59E5H2" 0.006090122 "putative tautomerase"  
"JS1\_E20\_00498" 6283 "s63E6H2" 0.02007131 "putative tautomerase"  
"JS1\_E20\_00499" 6284 "s59E13H2" 0.11126 "Glycine betaine/carnitine transport ATP-binding protein GbuA"  
"JS1\_E20\_00499" 6284 "s59E25H2" 0 "Glycine betaine/carnitine transport ATP-binding protein GbuA"  
"JS1\_E20\_00499" 6284 "s59E5H2" 1.204577 "Glycine betaine/carnitine transport ATP-binding protein GbuA"  
"JS1\_E20\_00499" 6284 "s63E6H2" 0.02343027 "Glycine betaine/carnitine transport ATP-binding protein GbuA"  
"JS1\_E20\_00500" 6285 "s59E13H2" 0.4634694 "Glycine betaine transport system permease protein OpuAB"  
"JS1\_E20\_00500" 6285 "s59E25H2" 0 "Glycine betaine transport system permease protein OpuAB"  
"JS1\_E20\_00500" 6285 "s59E5H2" 1.058638 "Glycine betaine transport system permease protein OpuAB"  
"JS1\_E20\_00500" 6285 "s63E6H2" 0.8960269 "Glycine betaine transport system permease protein OpuAB"  
"JS1\_E20\_00501" 6286 "s59E13H2" 0.08450143 "glycine betaine transporter periplasmic subunit"  
"JS1\_E20\_00501" 6286 "s59E25H2" 0 "glycine betaine transporter periplasmic subunit"  
"JS1\_E20\_00501" 6286 "s59E5H2" 0.4511133 "glycine betaine transporter periplasmic subunit"  
"JS1\_E20\_00501" 6286 "s63E6H2" 0.1376759 "glycine betaine transporter periplasmic subunit"  
"JS1\_E20\_00502" 6287 "s59E13H2" 1.02399 "WLM domain protein"  
"JS1\_E20\_00502" 6287 "s59E25H2" 0 "WLM domain protein"  
"JS1\_E20\_00502" 6287 "s59E5H2" 1.298494 "WLM domain protein"  
"JS1\_E20\_00502" 6287 "s63E6H2" 0.04501882 "WLM domain protein"

"JS1\_E20\_00503" 6288 "s59E13H2" 0.4260576 "hypothetical protein"  
"JS1\_E20\_00503" 6288 "s59E25H2" 0 "hypothetical protein"  
"JS1\_E20\_00503" 6288 "s59E5H2" 0.6736876 "hypothetical protein"  
"JS1\_E20\_00503" 6288 "s63E6H2" 0.00057898 "hypothetical protein"  
"JS1\_E20\_00504" 6289 "s59E13H2" 1.170091 "Threonine synthase"  
"JS1\_E20\_00504" 6289 "s59E25H2" 0 "Threonine synthase"  
"JS1\_E20\_00504" 6289 "s59E5H2" 1.735159 "Threonine synthase"  
"JS1\_E20\_00504" 6289 "s63E6H2" 0.03803033 "Threonine synthase"  
"JS1\_E20\_00505" 6290 "s59E13H2" 1.058652 "hypothetical protein"  
"JS1\_E20\_00505" 6290 "s59E25H2" 0 "hypothetical protein"  
"JS1\_E20\_00505" 6290 "s59E5H2" 1.778201 "hypothetical protein"  
"JS1\_E20\_00505" 6290 "s63E6H2" 0.03799163 "hypothetical protein"  
"JS1\_E20\_00506" 6291 "s59E13H2" 0.6251554 "hypothetical protein"  
"JS1\_E20\_00506" 6291 "s59E25H2" 0 "hypothetical protein"  
"JS1\_E20\_00506" 6291 "s59E5H2" 2.495117 "hypothetical protein"  
"JS1\_E20\_00506" 6291 "s63E6H2" 0.1557487 "hypothetical protein"  
"JS1\_E20\_00507" 6292 "s59E13H2" 0.03743998 "putative inner membrane transporter YedA"  
"JS1\_E20\_00507" 6292 "s59E25H2" 0 "putative inner membrane transporter YedA"  
"JS1\_E20\_00507" 6292 "s59E5H2" 2.924098 "putative inner membrane transporter YedA"  
"JS1\_E20\_00507" 6292 "s63E6H2" 0.09939058 "putative inner membrane transporter YedA"  
"JS1\_E20\_00508" 6293 "s59E13H2" 0.1083492 "Outer membrane efflux protein"  
"JS1\_E20\_00508" 6293 "s59E25H2" 0 "Outer membrane efflux protein"  
"JS1\_E20\_00508" 6293 "s59E5H2" 1.591512 "Outer membrane efflux protein"  
"JS1\_E20\_00508" 6293 "s63E6H2" 0.08598176 "Outer membrane efflux protein"  
"JS1\_E20\_00509" 6294 "s59E13H2" 0.2898451 "Outer membrane efflux protein"  
"JS1\_E20\_00509" 6294 "s59E25H2" 0 "Outer membrane efflux protein"  
"JS1\_E20\_00509" 6294 "s59E5H2" 0.2923583 "Outer membrane efflux protein"  
"JS1\_E20\_00509" 6294 "s63E6H2" 0.08499701 "Outer membrane efflux protein"  
"JS1\_E20\_00510" 6295 "s59E13H2" 0.1521436 "Putative efflux system component YknX"  
"JS1\_E20\_00510" 6295 "s59E25H2" 0 "Putative efflux system component YknX"  
"JS1\_E20\_00510" 6295 "s59E5H2" 0.4019081 "Putative efflux system component YknX"  
"JS1\_E20\_00510" 6295 "s63E6H2" 0.5322581 "Putative efflux system component YknX"  
"JS1\_E20\_00511" 6296 "s59E13H2" 0.1030515 "putative ABC transporter ATP-binding protein"  
"JS1\_E20\_00511" 6296 "s59E25H2" 0 "putative ABC transporter ATP-binding protein"  
"JS1\_E20\_00511" 6296 "s59E5H2" 0.4815698 "putative ABC transporter ATP-binding protein"  
"JS1\_E20\_00511" 6296 "s63E6H2" 1.184108 "putative ABC transporter ATP-binding protein"  
"JS1\_E20\_00512" 6297 "s59E13H2" 0.1115636 "Macrolide export ATP-binding/permease protein MacB"  
"JS1\_E20\_00512" 6297 "s59E25H2" 0.1978654 "Macrolide export ATP-binding/permease protein MacB"  
"JS1\_E20\_00512" 6297 "s59E5H2" 0.7638415 "Macrolide export ATP-binding/permease protein MacB"  
"JS1\_E20\_00512" 6297 "s63E6H2" 0.4790261 "Macrolide export ATP-binding/permease protein MacB"  
"JS1\_E20\_00513" 6298 "s59E13H2" 0.004479873 "Trifunctional nucleotide phosphoesterase protein YfkN precursor"  
"JS1\_E20\_00513" 6298 "s59E25H2" 0 "Trifunctional nucleotide phosphoesterase protein YfkN precursor"  
"JS1\_E20\_00513" 6298 "s59E5H2" 0.3449427 "Trifunctional nucleotide phosphoesterase protein YfkN precursor"  
"JS1\_E20\_00513" 6298 "s63E6H2" 0.8939178 "Trifunctional nucleotide phosphoesterase protein YfkN precursor"  
"JS1\_E20\_00514" 6299 "s59E13H2" 0.04503286 "hypothetical protein"  
"JS1\_E20\_00514" 6299 "s59E25H2" 0 "hypothetical protein"  
"JS1\_E20\_00514" 6299 "s59E5H2" 1.207209 "hypothetical protein"

"JS1\_E20\_00514" 6299 "s63E6H2" 0.6458991 "hypothetical protein"  
"JS1\_E20\_00515" 6300 "s59E13H2" 0.02225021 "LemA family protein"  
"JS1\_E20\_00515" 6300 "s59E25H2" 0 "LemA family protein"  
"JS1\_E20\_00515" 6300 "s59E5H2" 0.9274425 "LemA family protein"  
"JS1\_E20\_00515" 6300 "s63E6H2" 0.671588 "LemA family protein"  
"JS1\_E20\_00516" 6301 "s59E13H2" 0.03083034 "galactoside permease"  
"JS1\_E20\_00516" 6301 "s59E25H2" 0 "galactoside permease"  
"JS1\_E20\_00516" 6301 "s59E5H2" 0.5320584 "galactoside permease"  
"JS1\_E20\_00516" 6301 "s63E6H2" 1.016354 "galactoside permease"  
"JS1\_E20\_00517" 6302 "s59E13H2" 0.06344563 "hypothetical protein"  
"JS1\_E20\_00517" 6302 "s59E25H2" 0 "hypothetical protein"  
"JS1\_E20\_00517" 6302 "s59E5H2" 1.157985 "hypothetical protein"  
"JS1\_E20\_00517" 6302 "s63E6H2" 0.6009103 "hypothetical protein"  
"JS1\_E20\_00518" 6303 "s59E13H2" 0.02329638 "Acetyltransferase (GNAT) family protein"  
"JS1\_E20\_00518" 6303 "s59E25H2" 0 "Acetyltransferase (GNAT) family protein"  
"JS1\_E20\_00518" 6303 "s59E5H2" 0.6624483 "Acetyltransferase (GNAT) family protein"  
"JS1\_E20\_00518" 6303 "s63E6H2" 0.7335797 "Acetyltransferase (GNAT) family protein"  
"JS1\_E20\_00519" 6304 "s59E13H2" 0 "putative inner membrane transporter YhbE"  
"JS1\_E20\_00519" 6304 "s59E25H2" 0 "putative inner membrane transporter YhbE"  
"JS1\_E20\_00519" 6304 "s59E5H2" 0 "putative inner membrane transporter YhbE"  
"JS1\_E20\_00519" 6304 "s63E6H2" 0.006905601 "putative inner membrane transporter YhbE"  
"JS1\_E20\_00520" 6305 "s59E13H2" 0.02897052 "putative inner membrane transporter YhbE"  
"JS1\_E20\_00520" 6305 "s59E25H2" 0 "putative inner membrane transporter YhbE"  
"JS1\_E20\_00520" 6305 "s59E5H2" 0.3943992 "putative inner membrane transporter YhbE"  
"JS1\_E20\_00520" 6305 "s63E6H2" 0.5385836 "putative inner membrane transporter YhbE"  
"JS1\_E20\_00521" 6306 "s59E13H2" 0.01865609 "hypothetical protein"  
"JS1\_E20\_00521" 6306 "s59E25H2" 0 "hypothetical protein"  
"JS1\_E20\_00521" 6306 "s59E5H2" 0.05215402 "hypothetical protein"  
"JS1\_E20\_00521" 6306 "s63E6H2" 0.1690891 "hypothetical protein"  
"JS1\_E20\_00522" 6307 "s59E13H2" 0.08134244 "putative inner membrane transporter YicL"  
"JS1\_E20\_00522" 6307 "s59E25H2" 0 "putative inner membrane transporter YicL"  
"JS1\_E20\_00522" 6307 "s59E5H2" 0.3545074 "putative inner membrane transporter YicL"  
"JS1\_E20\_00522" 6307 "s63E6H2" 0.1373635 "putative inner membrane transporter YicL"  
"JS1\_E20\_00523" 6308 "s59E13H2" 0.06923145 "Response regulator aspartate phosphatase G"  
"JS1\_E20\_00523" 6308 "s59E25H2" 0 "Response regulator aspartate phosphatase G"  
"JS1\_E20\_00523" 6308 "s59E5H2" 0.7674103 "Response regulator aspartate phosphatase G"  
"JS1\_E20\_00523" 6308 "s63E6H2" 0.07249256 "Response regulator aspartate phosphatase G"  
"JS1\_E20\_00524" 6309 "s59E13H2" 0.09120039 "hypothetical protein"  
"JS1\_E20\_00524" 6309 "s59E25H2" 0 "hypothetical protein"  
"JS1\_E20\_00524" 6309 "s59E5H2" 1.515822 "hypothetical protein"  
"JS1\_E20\_00524" 6309 "s63E6H2" 0.1951344 "hypothetical protein"  
"JS1\_E20\_00525" 6310 "s59E13H2" 0 "hypothetical protein"  
"JS1\_E20\_00525" 6310 "s59E25H2" 0 "hypothetical protein"  
"JS1\_E20\_00525" 6310 "s59E5H2" 0.1506626 "hypothetical protein"  
"JS1\_E20\_00525" 6310 "s63E6H2" 0.005394299 "hypothetical protein"  
"JS1\_E20\_00528" 6313 "s59E13H2" 0.3108701 "Lysine 6-dehydrogenase"  
"JS1\_E20\_00528" 6313 "s59E25H2" 0 "Lysine 6-dehydrogenase"

"JS1\_E20\_00528" 6313 "s59E5H2" 0.4018796 "Lysine 6-dehydrogenase"  
"JS1\_E20\_00528" 6313 "s63E6H2" 0.6668806 "Lysine 6-dehydrogenase"  
"JS1\_E20\_00529" 6314 "s59E13H2" 0.01684732 "2-methylcitrate dehydratase"  
"JS1\_E20\_00529" 6314 "s59E25H2" 0.1804949 "2-methylcitrate dehydratase"  
"JS1\_E20\_00529" 6314 "s59E5H2" 0.1414338 "2-methylcitrate dehydratase"  
"JS1\_E20\_00529" 6314 "s63E6H2" 0.04257272 "2-methylcitrate dehydratase"  
"JS1\_E20\_00530" 6315 "s59E13H2" 0.1601212 "3-isopropylmalate/3-methylmalate dehydrogenase"  
"JS1\_E20\_00530" 6315 "s59E25H2" 0 "3-isopropylmalate/3-methylmalate dehydrogenase"  
"JS1\_E20\_00530" 6315 "s59E5H2" 0.2412687 "3-isopropylmalate/3-methylmalate dehydrogenase"  
"JS1\_E20\_00530" 6315 "s63E6H2" 0.221233 "3-isopropylmalate/3-methylmalate dehydrogenase"  
"JS1\_E20\_00531" 6316 "s59E13H2" 0.003337279 "3-isopropylmalate dehydratase small subunit"  
"JS1\_E20\_00531" 6316 "s59E25H2" 0 "3-isopropylmalate dehydratase small subunit"  
"JS1\_E20\_00531" 6316 "s59E5H2" 0.04707953 "3-isopropylmalate dehydratase small subunit"  
"JS1\_E20\_00531" 6316 "s63E6H2" 0.02075555 "3-isopropylmalate dehydratase small subunit"  
"JS1\_E20\_00532" 6317 "s59E13H2" 7.817011 "Macrolide export protein MacA"  
"JS1\_E20\_00532" 6317 "s59E25H2" 0 "Macrolide export protein MacA"  
"JS1\_E20\_00532" 6317 "s59E5H2" 3.067738 "Macrolide export protein MacA"  
"JS1\_E20\_00532" 6317 "s63E6H2" 2.729449 "Macrolide export protein MacA"  
"JS1\_E20\_00533" 6318 "s59E13H2" 5.074318 "Outer membrane protein TolC precursor"  
"JS1\_E20\_00533" 6318 "s59E25H2" 0 "Outer membrane protein TolC precursor"  
"JS1\_E20\_00533" 6318 "s59E5H2" 0.9389543 "Outer membrane protein TolC precursor"  
"JS1\_E20\_00533" 6318 "s63E6H2" 0.7001036 "Outer membrane protein TolC precursor"  
"JS1\_E20\_00534" 6319 "s59E13H2" 4.80356 "Protein MraZ"  
"JS1\_E20\_00534" 6319 "s59E25H2" 0 "Protein MraZ"  
"JS1\_E20\_00534" 6319 "s59E5H2" 0.8331559 "Protein MraZ"  
"JS1\_E20\_00534" 6319 "s63E6H2" 0.4194948 "Protein MraZ"  
"JS1\_E20\_00535" 6320 "s59E13H2" 1.210294 "MORN repeat variant"  
"JS1\_E20\_00535" 6320 "s59E25H2" 0.1499403 "MORN repeat variant"  
"JS1\_E20\_00535" 6320 "s59E5H2" 2.096185 "MORN repeat variant"  
"JS1\_E20\_00535" 6320 "s63E6H2" 0.0279887 "MORN repeat variant"  
"JS1\_E20\_00536" 6321 "s59E13H2" 0 "Transposase IS200 like protein"  
"JS1\_E20\_00536" 6321 "s59E25H2" 0 "Transposase IS200 like protein"  
"JS1\_E20\_00536" 6321 "s59E5H2" 0.1888152 "Transposase IS200 like protein"  
"JS1\_E20\_00536" 6321 "s63E6H2" 0.08059883 "Transposase IS200 like protein"  
"JS1\_E20\_00537" 6322 "s59E13H2" 0.159434 "Kynureninase"  
"JS1\_E20\_00537" 6322 "s59E25H2" 0 "Kynureninase"  
"JS1\_E20\_00537" 6322 "s59E5H2" 0.1116347 "Kynureninase"  
"JS1\_E20\_00537" 6322 "s63E6H2" 0.120304 "Kynureninase"  
"JS1\_E20\_00538" 6323 "s59E13H2" 0.1883459 "General stress protein 69"  
"JS1\_E20\_00538" 6323 "s59E25H2" 0 "General stress protein 69"  
"JS1\_E20\_00538" 6323 "s59E5H2" 0.2122926 "General stress protein 69"  
"JS1\_E20\_00538" 6323 "s63E6H2" 0.3260222 "General stress protein 69"  
"JS1\_E20\_00539" 6324 "s59E13H2" 3.206878 "Guanidinobutyrase"  
"JS1\_E20\_00539" 6324 "s59E25H2" 0 "Guanidinobutyrase"  
"JS1\_E20\_00539" 6324 "s59E5H2" 1.201103 "Guanidinobutyrase"  
"JS1\_E20\_00539" 6324 "s63E6H2" 0.063796 "Guanidinobutyrase"  
"JS1\_E20\_00540" 6325 "s59E13H2" 0.4303012 "Phosphoenolpyruvate carboxykinase [GTP]"

"JS1\_E20\_00540" 6325 "s59E25H2" 0 "Phosphoenolpyruvate carboxykinase [GTP]"  
"JS1\_E20\_00540" 6325 "s59E5H2" 0.03057221 "Phosphoenolpyruvate carboxykinase [GTP]"  
"JS1\_E20\_00540" 6325 "s63E6H2" 2.221509 "Phosphoenolpyruvate carboxykinase [GTP]"  
"JS1\_E20\_00541" 6326 "s59E13H2" 1.095715 "L-hydantoinase"  
"JS1\_E20\_00541" 6326 "s59E25H2" 0 "L-hydantoinase"  
"JS1\_E20\_00541" 6326 "s59E5H2" 0.07445909 "L-hydantoinase"  
"JS1\_E20\_00541" 6326 "s63E6H2" 0.03042722 "L-hydantoinase"  
"JS1\_E20\_00542" 6327 "s59E13H2" 0.02544174 "Asp/Glu/Hydantoin racemase"  
"JS1\_E20\_00542" 6327 "s59E25H2" 0 "Asp/Glu/Hydantoin racemase"  
"JS1\_E20\_00542" 6327 "s59E5H2" 0.02438997 "Asp/Glu/Hydantoin racemase"  
"JS1\_E20\_00542" 6327 "s63E6H2" 0.004505188 "Asp/Glu/Hydantoin racemase"  
"JS1\_E20\_00543" 6328 "s59E13H2" 0.04044991 "D-phenylhydantoinase"  
"JS1\_E20\_00543" 6328 "s59E25H2" 0 "D-phenylhydantoinase"  
"JS1\_E20\_00543" 6328 "s59E5H2" 0.1000999 "D-phenylhydantoinase"  
"JS1\_E20\_00543" 6328 "s63E6H2" 0.0223864 "D-phenylhydantoinase"  
"JS1\_E20\_00544" 6329 "s59E13H2" 0.03915419 "Allantoinase"  
"JS1\_E20\_00544" 6329 "s59E25H2" 0 "Allantoinase"  
"JS1\_E20\_00544" 6329 "s59E5H2" 0.07211969 "Allantoinase"  
"JS1\_E20\_00544" 6329 "s63E6H2" 0.006222828 "Allantoinase"  
"JS1\_E20\_00545" 6330 "s59E13H2" 0.03326309 "Sialic acid TRAP transporter permease protein SiaT"  
"JS1\_E20\_00545" 6330 "s59E25H2" 0 "Sialic acid TRAP transporter permease protein SiaT"  
"JS1\_E20\_00545" 6330 "s59E5H2" 0.40652 "Sialic acid TRAP transporter permease protein SiaT"  
"JS1\_E20\_00545" 6330 "s63E6H2" 0.05490009 "Sialic acid TRAP transporter permease protein SiaT"  
"JS1\_E20\_00546" 6331 "s59E13H2" 0 "hypothetical protein"  
"JS1\_E20\_00546" 6331 "s59E25H2" 0 "hypothetical protein"  
"JS1\_E20\_00546" 6331 "s59E5H2" 0.7408926 "hypothetical protein"  
"JS1\_E20\_00546" 6331 "s63E6H2" 0.06426853 "hypothetical protein"  
"JS1\_E20\_00547" 6332 "s59E13H2" 0.1894218 "Tungsten-containing aldehyde ferredoxin oxidoreductase"  
"JS1\_E20\_00547" 6332 "s59E25H2" 0 "Tungsten-containing aldehyde ferredoxin oxidoreductase"  
"JS1\_E20\_00547" 6332 "s59E5H2" 0.2329102 "Tungsten-containing aldehyde ferredoxin oxidoreductase"  
"JS1\_E20\_00547" 6332 "s63E6H2" 0.03277 "Tungsten-containing aldehyde ferredoxin oxidoreductase"  
"JS1\_E20\_00548" 6333 "s59E13H2" 0.003457858 "Leucine-, isoleucine-, valine-, threonine-, and alanine-binding protein precursor"  
"JS1\_E20\_00548" 6333 "s59E25H2" 0 "Leucine-, isoleucine-, valine-, threonine-, and alanine-binding protein precursor"  
"JS1\_E20\_00548" 6333 "s59E5H2" 0.290895 "Leucine-, isoleucine-, valine-, threonine-, and alanine-binding protein precursor"  
"JS1\_E20\_00548" 6333 "s63E6H2" 0.02143933 "Leucine-, isoleucine-, valine-, threonine-, and alanine-binding protein precursor"  
"JS1\_E20\_00549" 6334 "s59E13H2" 0 "High-affinity branched-chain amino acid transport ATP-binding protein LivF"  
"JS1\_E20\_00549" 6334 "s59E25H2" 0 "High-affinity branched-chain amino acid transport ATP-binding protein LivF"  
"JS1\_E20\_00549" 6334 "s59E5H2" 0 "High-affinity branched-chain amino acid transport ATP-binding protein LivF"  
"JS1\_E20\_00549" 6334 "s63E6H2" 0.003531537 "High-affinity branched-chain amino acid transport ATP-binding protein LivF"  
"JS1\_E20\_00550" 6335 "s59E13H2" 0 "putative branched-chain amino acid transport ATP-binding protein LivG"  
"JS1\_E20\_00550" 6335 "s59E25H2" 0 "putative branched-chain amino acid transport ATP-binding protein LivG"  
"JS1\_E20\_00550" 6335 "s59E5H2" 0 "putative branched-chain amino acid transport ATP-binding protein LivG"  
"JS1\_E20\_00550" 6335 "s63E6H2" 0.003259567 "putative branched-chain amino acid transport ATP-binding protein LivG"  
"JS1\_E20\_00551" 6336 "s59E13H2" 0 "leucine/isoleucine/valine transporter permease subunit"  
"JS1\_E20\_00551" 6336 "s59E25H2" 0 "leucine/isoleucine/valine transporter permease subunit"  
"JS1\_E20\_00551" 6336 "s59E5H2" 0.06942595 "leucine/isoleucine/valine transporter permease subunit"  
"JS1\_E20\_00551" 6336 "s63E6H2" 0.0004860906 "leucine/isoleucine/valine transporter permease subunit"

"JS1\_E20\_00552" 6337 "s59E13H2" 0.02147056 "High-affinity branched-chain amino acid transport system permease protein LivH"  
"JS1\_E20\_00552" 6337 "s59E25H2" 0 "High-affinity branched-chain amino acid transport system permease protein LivH"  
"JS1\_E20\_00552" 6337 "s59E5H2" 0.09802094 "High-affinity branched-chain amino acid transport system permease protein LivH"  
"JS1\_E20\_00552" 6337 "s63E6H2" 0.009632578 "High-affinity branched-chain amino acid transport system permease protein LivH"  
"JS1\_E20\_00553" 6338 "s59E13H2" 0.003288374 "Dihydroorotate dehydrogenase B (NAD(+)), catalytic subunit"  
"JS1\_E20\_00553" 6338 "s59E25H2" 0 "Dihydroorotate dehydrogenase B (NAD(+)), catalytic subunit"  
"JS1\_E20\_00553" 6338 "s59E5H2" 0.3074048 "Dihydroorotate dehydrogenase B (NAD(+)), catalytic subunit"  
"JS1\_E20\_00553" 6338 "s63E6H2" 0.03593933 "Dihydroorotate dehydrogenase B (NAD(+)), catalytic subunit"  
"JS1\_E20\_00554" 6339 "s59E13H2" 0 "Dihydroorotate dehydrogenase B (NAD(+)), electron transfer subunit"  
"JS1\_E20\_00554" 6339 "s59E25H2" 0 "Dihydroorotate dehydrogenase B (NAD(+)), electron transfer subunit"  
"JS1\_E20\_00554" 6339 "s59E5H2" 0.2192531 "Dihydroorotate dehydrogenase B (NAD(+)), electron transfer subunit"  
"JS1\_E20\_00554" 6339 "s63E6H2" 0.01863253 "Dihydroorotate dehydrogenase B (NAD(+)), electron transfer subunit"  
"JS1\_E20\_00555" 6340 "s59E13H2" 0.04451128 "Aspartate carbamoyltransferase"  
"JS1\_E20\_00555" 6340 "s59E25H2" 0 "Aspartate carbamoyltransferase"  
"JS1\_E20\_00555" 6340 "s59E5H2" 0.04744213 "Aspartate carbamoyltransferase"  
"JS1\_E20\_00555" 6340 "s63E6H2" 0.07822151 "Aspartate carbamoyltransferase"  
"JS1\_E20\_00556" 6341 "s59E13H2" 0.2487575 "Carbamate kinase"  
"JS1\_E20\_00556" 6341 "s59E25H2" 0 "Carbamate kinase"  
"JS1\_E20\_00556" 6341 "s59E5H2" 0.01649615 "Carbamate kinase"  
"JS1\_E20\_00556" 6341 "s63E6H2" 0.008940132 "Carbamate kinase"  
"JS1\_E20\_00557" 6342 "s59E13H2" 0.01839723 "Pectin degradation repressor protein KdgR"  
"JS1\_E20\_00557" 6342 "s59E25H2" 0 "Pectin degradation repressor protein KdgR"  
"JS1\_E20\_00557" 6342 "s59E5H2" 0.3318747 "Pectin degradation repressor protein KdgR"  
"JS1\_E20\_00557" 6342 "s63E6H2" 0.1281154 "Pectin degradation repressor protein KdgR"  
"JS1\_E20\_00558" 6343 "s59E13H2" 0.1539412 "Sulfate/thiosulfate import ATP-binding protein CysA"  
"JS1\_E20\_00558" 6343 "s59E25H2" 0 "Sulfate/thiosulfate import ATP-binding protein CysA"  
"JS1\_E20\_00558" 6343 "s59E5H2" 0.6615711 "Sulfate/thiosulfate import ATP-binding protein CysA"  
"JS1\_E20\_00558" 6343 "s63E6H2" 0.5874106 "Sulfate/thiosulfate import ATP-binding protein CysA"  
"JS1\_E20\_00559" 6344 "s59E13H2" 0.116246 "Bicarbonate transport system permease protein CmpB"  
"JS1\_E20\_00559" 6344 "s59E25H2" 0 "Bicarbonate transport system permease protein CmpB"  
"JS1\_E20\_00559" 6344 "s59E5H2" 1.145565 "Bicarbonate transport system permease protein CmpB"  
"JS1\_E20\_00559" 6344 "s63E6H2" 0.9092686 "Bicarbonate transport system permease protein CmpB"  
"JS1\_E20\_00560" 6345 "s59E13H2" 0.05247562 "Taurine-binding periplasmic protein precursor"  
"JS1\_E20\_00560" 6345 "s59E25H2" 0 "Taurine-binding periplasmic protein precursor"  
"JS1\_E20\_00560" 6345 "s59E5H2" 0.2716185 "Taurine-binding periplasmic protein precursor"  
"JS1\_E20\_00560" 6345 "s63E6H2" 0.2018936 "Taurine-binding periplasmic protein precursor"  
"JS1\_E20\_00561" 6346 "s59E13H2" 0.06791052 "hypothetical protein"  
"JS1\_E20\_00561" 6346 "s59E25H2" 0 "hypothetical protein"  
"JS1\_E20\_00561" 6346 "s59E5H2" 1.0026 "hypothetical protein"  
"JS1\_E20\_00561" 6346 "s63E6H2" 0.004526783 "hypothetical protein"  
"JS1\_E20\_00562" 6347 "s59E13H2" 0.1034716 "hypothetical protein"  
"JS1\_E20\_00562" 6347 "s59E25H2" 0 "hypothetical protein"  
"JS1\_E20\_00562" 6347 "s59E5H2" 0.6349149 "hypothetical protein"  
"JS1\_E20\_00562" 6347 "s63E6H2" 0.005710848 "hypothetical protein"  
"JS1\_E20\_00563" 6348 "s59E13H2" 0.01417713 "bifunctional molybdenum cofactor biosynthesis protein MoaC/MogA"  
"JS1\_E20\_00563" 6348 "s59E25H2" 0 "bifunctional molybdenum cofactor biosynthesis protein MoaC/MogA"  
"JS1\_E20\_00563" 6348 "s59E5H2" 0.1956534 "bifunctional molybdenum cofactor biosynthesis protein MoaC/MogA"



"JS1\_E20\_00563" 6348 "s63E6H2" 0.0027476 "bifunctional molybdenum cofactor biosynthesis protein MoaC/MogA"  
"JS1\_E20\_00564" 6349 "s59E13H2" 0 "Molybdenum-pterin-binding protein MopA"  
"JS1\_E20\_00564" 6349 "s59E25H2" 0 "Molybdenum-pterin-binding protein MopA"  
"JS1\_E20\_00564" 6349 "s59E5H2" 0.008248074 "Molybdenum-pterin-binding protein MopA"  
"JS1\_E20\_00564" 6349 "s63E6H2" 0 "Molybdenum-pterin-binding protein MopA"  
"JS1\_E20\_00565" 6350 "s59E13H2" 0.01856595 "putative xanthine dehydrogenase subunit A"  
"JS1\_E20\_00565" 6350 "s59E25H2" 0 "putative xanthine dehydrogenase subunit A"  
"JS1\_E20\_00565" 6350 "s59E5H2" 0.03425914 "putative xanthine dehydrogenase subunit A"  
"JS1\_E20\_00565" 6350 "s63E6H2" 0.07302882 "putative xanthine dehydrogenase subunit A"  
"JS1\_E20\_00566" 6351 "s59E13H2" 0.007386546 "hypothetical protein"  
"JS1\_E20\_00566" 6351 "s59E25H2" 0 "hypothetical protein"  
"JS1\_E20\_00566" 6351 "s59E5H2" 0.03505511 "hypothetical protein"  
"JS1\_E20\_00566" 6351 "s63E6H2" 0.05113534 "hypothetical protein"  
"JS1\_E20\_00567" 6352 "s59E13H2" 0.01832205 "Purine catabolism protein PucB"  
"JS1\_E20\_00567" 6352 "s59E25H2" 0 "Purine catabolism protein PucB"  
"JS1\_E20\_00567" 6352 "s59E5H2" 0.06851105 "Purine catabolism protein PucB"  
"JS1\_E20\_00567" 6352 "s63E6H2" 0.09116957 "Purine catabolism protein PucB"  
"JS1\_E20\_00568" 6353 "s59E13H2" 0.01446729 "hypothetical protein"  
"JS1\_E20\_00568" 6353 "s59E25H2" 0 "hypothetical protein"  
"JS1\_E20\_00568" 6353 "s59E5H2" 0.0911885 "hypothetical protein"  
"JS1\_E20\_00568" 6353 "s63E6H2" 0.06735823 "hypothetical protein"  
"JS1\_E20\_00569" 6354 "s59E13H2" 0.5415262 "putative xanthine dehydrogenase subunit D"  
"JS1\_E20\_00569" 6354 "s59E25H2" 0 "putative xanthine dehydrogenase subunit D"  
"JS1\_E20\_00569" 6354 "s59E5H2" 0.4859093 "putative xanthine dehydrogenase subunit D"  
"JS1\_E20\_00569" 6354 "s63E6H2" 1.125333 "putative xanthine dehydrogenase subunit D"  
"JS1\_E20\_00570" 6355 "s59E13H2" 0.09807103 "Nicotinate dehydrogenase small FeS subunit"  
"JS1\_E20\_00570" 6355 "s59E25H2" 0 "Nicotinate dehydrogenase small FeS subunit"  
"JS1\_E20\_00570" 6355 "s59E5H2" 0.2828816 "Nicotinate dehydrogenase small FeS subunit"  
"JS1\_E20\_00570" 6355 "s63E6H2" 0.3715904 "Nicotinate dehydrogenase small FeS subunit"  
"JS1\_E20\_00571" 6356 "s59E13H2" 0.05539166 "Glyceraldehyde dehydrogenase medium chain"  
"JS1\_E20\_00571" 6356 "s59E25H2" 0 "Glyceraldehyde dehydrogenase medium chain"  
"JS1\_E20\_00571" 6356 "s59E5H2" 0.2426242 "Glyceraldehyde dehydrogenase medium chain"  
"JS1\_E20\_00571" 6356 "s63E6H2" 0.658183 "Glyceraldehyde dehydrogenase medium chain"  
"JS1\_E20\_00572" 6357 "s59E13H2" 0.04160257 "Glyceraldehyde dehydrogenase small chain"  
"JS1\_E20\_00572" 6357 "s59E25H2" 0 "Glyceraldehyde dehydrogenase small chain"  
"JS1\_E20\_00572" 6357 "s59E5H2" 0.2202475 "Glyceraldehyde dehydrogenase small chain"  
"JS1\_E20\_00572" 6357 "s63E6H2" 0.6325896 "Glyceraldehyde dehydrogenase small chain"  
"JS1\_E20\_00573" 6358 "s59E13H2" 0.0630326 "Carbon monoxide dehydrogenase medium chain"  
"JS1\_E20\_00573" 6358 "s59E25H2" 0 "Carbon monoxide dehydrogenase medium chain"  
"JS1\_E20\_00573" 6358 "s59E5H2" 0.3587647 "Carbon monoxide dehydrogenase medium chain"  
"JS1\_E20\_00573" 6358 "s63E6H2" 0.7894971 "Carbon monoxide dehydrogenase medium chain"  
"JS1\_E20\_00574" 6359 "s59E13H2" 0.03803327 "Xanthine dehydrogenase molybdenum-binding subunit"  
"JS1\_E20\_00574" 6359 "s59E25H2" 0 "Xanthine dehydrogenase molybdenum-binding subunit"  
"JS1\_E20\_00574" 6359 "s59E5H2" 0.2066109 "Xanthine dehydrogenase molybdenum-binding subunit"  
"JS1\_E20\_00574" 6359 "s63E6H2" 0.7022091 "Xanthine dehydrogenase molybdenum-binding subunit"  
"JS1\_E20\_00575" 6360 "s59E13H2" 0.001286938 "succinyl-CoA synthetase subunit beta"  
"JS1\_E20\_00575" 6360 "s59E25H2" 0 "succinyl-CoA synthetase subunit beta"

"JS1\_E20\_00575" 6360 "s59E5H2" 0.02547218 "succinyl-CoA synthetase subunit beta"  
"JS1\_E20\_00575" 6360 "s63E6H2" 0.1259332 "succinyl-CoA synthetase subunit beta"  
"JS1\_E20\_00576" 6361 "s59E13H2" 0.01835547 "Succinyl-CoA ligase [ADP-forming] subunit alpha"  
"JS1\_E20\_00576" 6361 "s59E25H2" 0 "Succinyl-CoA ligase [ADP-forming] subunit alpha"  
"JS1\_E20\_00576" 6361 "s59E5H2" 0.3682067 "Succinyl-CoA ligase [ADP-forming] subunit alpha"  
"JS1\_E20\_00576" 6361 "s63E6H2" 0.2055528 "Succinyl-CoA ligase [ADP-forming] subunit alpha"  
"JS1\_E20\_00577" 6362 "s59E13H2" 0.04865366 "Indolepyruvate oxidoreductase subunit lorB"  
"JS1\_E20\_00577" 6362 "s59E25H2" 0 "Indolepyruvate oxidoreductase subunit lorB"  
"JS1\_E20\_00577" 6362 "s59E5H2" 0.2746069 "Indolepyruvate oxidoreductase subunit lorB"  
"JS1\_E20\_00577" 6362 "s63E6H2" 0.3650882 "Indolepyruvate oxidoreductase subunit lorB"  
"JS1\_E20\_00578" 6363 "s59E13H2" 0.03605316 "Indolepyruvate oxidoreductase subunit lorA"  
"JS1\_E20\_00578" 6363 "s59E25H2" 0 "Indolepyruvate oxidoreductase subunit lorA"  
"JS1\_E20\_00578" 6363 "s59E5H2" 0.2628757 "Indolepyruvate oxidoreductase subunit lorA"  
"JS1\_E20\_00578" 6363 "s63E6H2" 0.2867214 "Indolepyruvate oxidoreductase subunit lorA"  
"JS1\_E20\_00579" 6364 "s59E13H2" 0.0493817 "ATP-dependent protease ATPase subunit ClpY"  
"JS1\_E20\_00579" 6364 "s59E25H2" 0 "ATP-dependent protease ATPase subunit ClpY"  
"JS1\_E20\_00579" 6364 "s59E5H2" 2.579034 "ATP-dependent protease ATPase subunit ClpY"  
"JS1\_E20\_00579" 6364 "s63E6H2" 0.0828994 "ATP-dependent protease ATPase subunit ClpY"  
"JS1\_E20\_00580" 6365 "s59E13H2" 0.01150498 "30S ribosomal protein S2"  
"JS1\_E20\_00580" 6365 "s59E25H2" 0 "30S ribosomal protein S2"  
"JS1\_E20\_00580" 6365 "s59E5H2" 0.05015647 "30S ribosomal protein S2"  
"JS1\_E20\_00580" 6365 "s63E6H2" 0.01689259 "30S ribosomal protein S2"  
"JS1\_E20\_00581" 6366 "s59E13H2" 0.01257803 "Elongation factor Ts"  
"JS1\_E20\_00581" 6366 "s59E25H2" 0 "Elongation factor Ts"  
"JS1\_E20\_00581" 6366 "s59E5H2" 0.1365838 "Elongation factor Ts"  
"JS1\_E20\_00581" 6366 "s63E6H2" 0.002502641 "Elongation factor Ts"  
"JS1\_E20\_00582" 6367 "s59E13H2" 0.03900928 "Uridylate kinase"  
"JS1\_E20\_00582" 6367 "s59E25H2" 0 "Uridylate kinase"  
"JS1\_E20\_00582" 6367 "s59E5H2" 0.1550472 "Uridylate kinase"  
"JS1\_E20\_00582" 6367 "s63E6H2" 0.04903116 "Uridylate kinase"  
"JS1\_E20\_00583" 6368 "s59E13H2" 0.07027891 "Ribosome-recycling factor"  
"JS1\_E20\_00583" 6368 "s59E25H2" 0 "Ribosome-recycling factor"  
"JS1\_E20\_00583" 6368 "s59E5H2" 0.03245252 "Ribosome-recycling factor"  
"JS1\_E20\_00583" 6368 "s63E6H2" 0.06978109 "Ribosome-recycling factor"  
"JS1\_E20\_00584" 6369 "s59E13H2" 0.04990943 "Ferredoxin"  
"JS1\_E20\_00584" 6369 "s59E25H2" 0 "Ferredoxin"  
"JS1\_E20\_00584" 6369 "s59E5H2" 0.07963658 "Ferredoxin"  
"JS1\_E20\_00584" 6369 "s63E6H2" 0.009207813 "Ferredoxin"  
"JS1\_E20\_00585" 6370 "s59E13H2" 0.02869066 "Ditrans, polycis-undecaprenyl-diphosphate synthase ((2E,6E)-farnesyl-diphosphate specific)"  
"JS1\_E20\_00585" 6370 "s59E25H2" 0 "Ditrans, polycis-undecaprenyl-diphosphate synthase ((2E,6E)-farnesyl-diphosphate specific)"  
"JS1\_E20\_00585" 6370 "s59E5H2" 0.1325573 "Ditrans, polycis-undecaprenyl-diphosphate synthase ((2E,6E)-farnesyl-diphosphate specific)"  
"JS1\_E20\_00585" 6370 "s63E6H2" 0.05560976 "Ditrans, polycis-undecaprenyl-diphosphate synthase ((2E,6E)-farnesyl-diphosphate specific)"  
"JS1\_E20\_00586" 6371 "s59E13H2" 0.01785438 "Phosphatidate cytidylyltransferase"  
"JS1\_E20\_00586" 6371 "s59E25H2" 0 "Phosphatidate cytidylyltransferase"  
"JS1\_E20\_00586" 6371 "s59E5H2" 0.03208819 "Phosphatidate cytidylyltransferase"  
"JS1\_E20\_00586" 6371 "s63E6H2" 0.01829703 "Phosphatidate cytidylyltransferase"  
"JS1\_E20\_00587" 6372 "s59E13H2" 0.04824695 "1-deoxy-D-xylulose 5-phosphate reductoisomerase"

"JS1\_E20\_00587" 6372 "s59E25H2" 0 "1-deoxy-D-xylulose 5-phosphate reductoisomerase"  
"JS1\_E20\_00587" 6372 "s59E5H2" 0.05660179 "1-deoxy-D-xylulose 5-phosphate reductoisomerase"  
"JS1\_E20\_00587" 6372 "s63E6H2" 0.02515802 "1-deoxy-D-xylulose 5-phosphate reductoisomerase"  
"JS1\_E20\_00588" 6373 "s59E13H2" 0.05481007 "Regulator of sigma-W protease RasP"  
"JS1\_E20\_00588" 6373 "s59E25H2" 0 "Regulator of sigma-W protease RasP"  
"JS1\_E20\_00588" 6373 "s59E5H2" 0.1599866 "Regulator of sigma-W protease RasP"  
"JS1\_E20\_00588" 6373 "s63E6H2" 0.03950959 "Regulator of sigma-W protease RasP"  
"JS1\_E20\_00589" 6374 "s59E13H2" 0.03568292 "4-hydroxy-3-methylbut-2-en-1-yl diphosphate synthase"  
"JS1\_E20\_00589" 6374 "s59E25H2" 0 "4-hydroxy-3-methylbut-2-en-1-yl diphosphate synthase"  
"JS1\_E20\_00589" 6374 "s59E5H2" 0.126861 "4-hydroxy-3-methylbut-2-en-1-yl diphosphate synthase"  
"JS1\_E20\_00589" 6374 "s63E6H2" 0.02928797 "4-hydroxy-3-methylbut-2-en-1-yl diphosphate synthase"  
"JS1\_E20\_00590" 6375 "s59E13H2" 0.008377333 "V-type ATP synthase subunit H"  
"JS1\_E20\_00590" 6375 "s59E25H2" 0 "V-type ATP synthase subunit H"  
"JS1\_E20\_00590" 6375 "s59E5H2" 0.1068037 "V-type ATP synthase subunit H"  
"JS1\_E20\_00590" 6375 "s63E6H2" 0.009405693 "V-type ATP synthase subunit H"  
"JS1\_E20\_00591" 6376 "s59E13H2" 0.02879162 "V-type ATP synthase subunit I"  
"JS1\_E20\_00591" 6376 "s59E25H2" 0 "V-type ATP synthase subunit I"  
"JS1\_E20\_00591" 6376 "s59E5H2" 0.2235513 "V-type ATP synthase subunit I"  
"JS1\_E20\_00591" 6376 "s63E6H2" 0.05067598 "V-type ATP synthase subunit I"  
"JS1\_E20\_00592" 6377 "s59E13H2" 0.06453973 "V-type sodium ATPase subunit K"  
"JS1\_E20\_00592" 6377 "s59E25H2" 0 "V-type sodium ATPase subunit K"  
"JS1\_E20\_00592" 6377 "s59E5H2" 0.9861288 "V-type sodium ATPase subunit K"  
"JS1\_E20\_00592" 6377 "s63E6H2" 0.08606592 "V-type sodium ATPase subunit K"  
"JS1\_E20\_00593" 6378 "s59E13H2" 0.9159712 "V-type ATP synthase subunit E"  
"JS1\_E20\_00593" 6378 "s59E25H2" 0 "V-type ATP synthase subunit E"  
"JS1\_E20\_00593" 6378 "s59E5H2" 0.1866114 "V-type ATP synthase subunit E"  
"JS1\_E20\_00593" 6378 "s63E6H2" 0.07000857 "V-type ATP synthase subunit E"  
"JS1\_E20\_00594" 6379 "s59E13H2" 0.02668287 "V-type sodium ATPase subunit C"  
"JS1\_E20\_00594" 6379 "s59E25H2" 0 "V-type sodium ATPase subunit C"  
"JS1\_E20\_00594" 6379 "s59E5H2" 0.3338757 "V-type sodium ATPase subunit C"  
"JS1\_E20\_00594" 6379 "s63E6H2" 0.04447208 "V-type sodium ATPase subunit C"  
"JS1\_E20\_00595" 6380 "s59E13H2" 0.1172453 "V-type sodium ATPase subunit G"  
"JS1\_E20\_00595" 6380 "s59E25H2" 0 "V-type sodium ATPase subunit G"  
"JS1\_E20\_00595" 6380 "s59E5H2" 0.5210064 "V-type sodium ATPase subunit G"  
"JS1\_E20\_00595" 6380 "s63E6H2" 0.0689358 "V-type sodium ATPase subunit G"  
"JS1\_E20\_00596" 6381 "s59E13H2" 0.1232269 "V-type sodium ATPase catalytic subunit A"  
"JS1\_E20\_00596" 6381 "s59E25H2" 0 "V-type sodium ATPase catalytic subunit A"  
"JS1\_E20\_00596" 6381 "s59E5H2" 0.5374074 "V-type sodium ATPase catalytic subunit A"  
"JS1\_E20\_00596" 6381 "s63E6H2" 0.4421705 "V-type sodium ATPase catalytic subunit A"  
"JS1\_E20\_00597" 6382 "s59E13H2" 0.2227857 "V-type sodium ATPase subunit B"  
"JS1\_E20\_00597" 6382 "s59E25H2" 0 "V-type sodium ATPase subunit B"  
"JS1\_E20\_00597" 6382 "s59E5H2" 0.7717267 "V-type sodium ATPase subunit B"  
"JS1\_E20\_00597" 6382 "s63E6H2" 0.6967176 "V-type sodium ATPase subunit B"  
"JS1\_E20\_00598" 6383 "s59E13H2" 0.1013112 "V-type sodium ATPase subunit D"  
"JS1\_E20\_00598" 6383 "s59E25H2" 0 "V-type sodium ATPase subunit D"  
"JS1\_E20\_00598" 6383 "s59E5H2" 0.4572109 "V-type sodium ATPase subunit D"  
"JS1\_E20\_00598" 6383 "s63E6H2" 0.5760164 "V-type sodium ATPase subunit D"

"JS1\_E20\_00599" 6384 "s59E13H2" 0.245717 "phosphodiesterase"  
"JS1\_E20\_00599" 6384 "s59E25H2" 0 "phosphodiesterase"  
"JS1\_E20\_00599" 6384 "s59E5H2" 0.7243005 "phosphodiesterase"  
"JS1\_E20\_00599" 6384 "s63E6H2" 0.472795 "phosphodiesterase"  
"JS1\_E20\_00601" 6386 "s59E13H2" 0.0517771 "1-acyl-sn-glycerol-3-phosphate acyltransferase"  
"JS1\_E20\_00601" 6386 "s59E25H2" 0 "1-acyl-sn-glycerol-3-phosphate acyltransferase"  
"JS1\_E20\_00601" 6386 "s59E5H2" 0.08385626 "1-acyl-sn-glycerol-3-phosphate acyltransferase"  
"JS1\_E20\_00601" 6386 "s63E6H2" 0.288031 "1-acyl-sn-glycerol-3-phosphate acyltransferase"  
"JS1\_E20\_00602" 6387 "s59E13H2" 0.108434 "Serine/threonine-protein kinase PknD"  
"JS1\_E20\_00602" 6387 "s59E25H2" 0 "Serine/threonine-protein kinase PknD"  
"JS1\_E20\_00602" 6387 "s59E5H2" 0.7240103 "Serine/threonine-protein kinase PknD"  
"JS1\_E20\_00602" 6387 "s63E6H2" 0.6980944 "Serine/threonine-protein kinase PknD"  
"JS1\_E20\_00603" 6388 "s59E13H2" 0.03204599 "hypothetical protein"  
"JS1\_E20\_00603" 6388 "s59E25H2" 0 "hypothetical protein"  
"JS1\_E20\_00603" 6388 "s59E5H2" 0.08219235 "hypothetical protein"  
"JS1\_E20\_00603" 6388 "s63E6H2" 0.4105859 "hypothetical protein"  
"JS1\_E20\_00605" 6390 "s59E13H2" 0.05989213 "hypothetical protein"  
"JS1\_E20\_00605" 6390 "s59E25H2" 0 "hypothetical protein"  
"JS1\_E20\_00605" 6390 "s59E5H2" 0.4983405 "hypothetical protein"  
"JS1\_E20\_00605" 6390 "s63E6H2" 0.7444065 "hypothetical protein"  
"JS1\_E20\_00608" 6393 "s59E13H2" 0.01341875 "hypothetical protein"  
"JS1\_E20\_00608" 6393 "s59E25H2" 0 "hypothetical protein"  
"JS1\_E20\_00608" 6393 "s59E5H2" 0.6630073 "hypothetical protein"  
"JS1\_E20\_00608" 6393 "s63E6H2" 0.2938861 "hypothetical protein"  
"JS1\_E20\_00609" 6394 "s59E13H2" 0 "hypothetical protein"  
"JS1\_E20\_00609" 6394 "s59E25H2" 0 "hypothetical protein"  
"JS1\_E20\_00609" 6394 "s59E5H2" 0.005187754 "hypothetical protein"  
"JS1\_E20\_00609" 6394 "s63E6H2" 0.008603642 "hypothetical protein"  
"JS1\_E20\_00610" 6395 "s59E13H2" 0.01747876 "hypothetical protein"  
"JS1\_E20\_00610" 6395 "s59E25H2" 0 "hypothetical protein"  
"JS1\_E20\_00610" 6395 "s59E5H2" 0 "hypothetical protein"  
"JS1\_E20\_00610" 6395 "s63E6H2" 0.02452867 "hypothetical protein"  
"JS1\_E20\_00611" 6396 "s59E13H2" 0 "hypothetical protein"  
"JS1\_E20\_00611" 6396 "s59E25H2" 0 "hypothetical protein"  
"JS1\_E20\_00611" 6396 "s59E5H2" 0 "hypothetical protein"  
"JS1\_E20\_00611" 6396 "s63E6H2" 0 "hypothetical protein"  
"JS1\_E20\_00612" 6397 "s59E13H2" 0 "Peptidase C13 family protein"  
"JS1\_E20\_00612" 6397 "s59E25H2" 0 "Peptidase C13 family protein"  
"JS1\_E20\_00612" 6397 "s59E5H2" 0.0490601 "Peptidase C13 family protein"  
"JS1\_E20\_00612" 6397 "s63E6H2" 0.00112761 "Peptidase C13 family protein"  
"JS1\_E20\_00613" 6398 "s59E13H2" 0 "putative HTH-type transcriptional regulator YdfH"  
"JS1\_E20\_00613" 6398 "s59E25H2" 0 "putative HTH-type transcriptional regulator YdfH"  
"JS1\_E20\_00613" 6398 "s59E5H2" 0 "putative HTH-type transcriptional regulator YdfH"  
"JS1\_E20\_00613" 6398 "s63E6H2" 0.02976944 "putative HTH-type transcriptional regulator YdfH"  
"JS1\_E20\_00614" 6399 "s59E13H2" 0 "2-oxoglutarate synthase subunit KorA"  
"JS1\_E20\_00614" 6399 "s59E25H2" 0 "2-oxoglutarate synthase subunit KorA"  
"JS1\_E20\_00614" 6399 "s59E5H2" 0 "2-oxoglutarate synthase subunit KorA"

"JS1\_E20\_00614" 6399 "s63E6H2" 0.0006737221 "2-oxoglutarate synthase subunit KorA"  
"JS1\_E20\_00615" 6400 "s59E13H2" 0 "2-oxoglutarate synthase subunit KorB"  
"JS1\_E20\_00615" 6400 "s59E25H2" 0 "2-oxoglutarate synthase subunit KorB"  
"JS1\_E20\_00615" 6400 "s59E5H2" 0 "2-oxoglutarate synthase subunit KorB"  
"JS1\_E20\_00615" 6400 "s63E6H2" 0.003690469 "2-oxoglutarate synthase subunit KorB"  
"JS1\_E20\_00616" 6401 "s59E13H2" 0 "2-oxoglutarate synthase subunit KorC"  
"JS1\_E20\_00616" 6401 "s59E25H2" 0 "2-oxoglutarate synthase subunit KorC"  
"JS1\_E20\_00616" 6401 "s59E5H2" 0.0194772 "2-oxoglutarate synthase subunit KorC"  
"JS1\_E20\_00616" 6401 "s63E6H2" 0 "2-oxoglutarate synthase subunit KorC"  
"JS1\_E20\_00617" 6402 "s59E13H2" 0 "Succinyl-CoA ligase [ADP-forming] subunit beta"  
"JS1\_E20\_00617" 6402 "s59E25H2" 0 "Succinyl-CoA ligase [ADP-forming] subunit beta"  
"JS1\_E20\_00617" 6402 "s59E5H2" 0.03136556 "Succinyl-CoA ligase [ADP-forming] subunit beta"  
"JS1\_E20\_00617" 6402 "s63E6H2" 0.0006165064 "Succinyl-CoA ligase [ADP-forming] subunit beta"  
"JS1\_E20\_00618" 6403 "s59E13H2" 0 "Succinyl-CoA ligase [ADP-forming] subunit alpha"  
"JS1\_E20\_00618" 6403 "s59E25H2" 0 "Succinyl-CoA ligase [ADP-forming] subunit alpha"  
"JS1\_E20\_00618" 6403 "s59E5H2" 0.005812454 "Succinyl-CoA ligase [ADP-forming] subunit alpha"  
"JS1\_E20\_00618" 6403 "s63E6H2" 0.0009400963 "Succinyl-CoA ligase [ADP-forming] subunit alpha"  
"JS1\_E20\_00619" 6404 "s59E13H2" 0 "2-oxoglutarate-acceptor oxidoreductase subunit OorD"  
"JS1\_E20\_00619" 6404 "s59E25H2" 0 "2-oxoglutarate-acceptor oxidoreductase subunit OorD"  
"JS1\_E20\_00619" 6404 "s59E5H2" 0 "2-oxoglutarate-acceptor oxidoreductase subunit OorD"  
"JS1\_E20\_00619" 6404 "s63E6H2" 0 "2-oxoglutarate-acceptor oxidoreductase subunit OorD"  
"JS1\_E20\_00620" 6405 "s59E13H2" 1.073604 "hypothetical protein"  
"JS1\_E20\_00620" 6405 "s59E25H2" 0 "hypothetical protein"  
"JS1\_E20\_00620" 6405 "s59E5H2" 0.2153844 "hypothetical protein"  
"JS1\_E20\_00620" 6405 "s63E6H2" 0.1476399 "hypothetical protein"  
"JS1\_E20\_00621" 6406 "s59E13H2" 1.188264 "V-type ATP synthase subunit C"  
"JS1\_E20\_00621" 6406 "s59E25H2" 0.4737345 "V-type ATP synthase subunit C"  
"JS1\_E20\_00621" 6406 "s59E5H2" 1.156623 "V-type ATP synthase subunit C"  
"JS1\_E20\_00621" 6406 "s63E6H2" 0.2510683 "V-type ATP synthase subunit C"  
"JS1\_E20\_00622" 6407 "s59E13H2" 1.332805 "V-type ATP synthase subunit I"  
"JS1\_E20\_00622" 6407 "s59E25H2" 0.1161103 "V-type ATP synthase subunit I"  
"JS1\_E20\_00622" 6407 "s59E5H2" 2.062404 "V-type ATP synthase subunit I"  
"JS1\_E20\_00622" 6407 "s63E6H2" 0.1873404 "V-type ATP synthase subunit I"  
"JS1\_E20\_00623" 6408 "s59E13H2" 1.106572 "V-type ATP synthase subunit K"  
"JS1\_E20\_00623" 6408 "s59E25H2" 0 "V-type ATP synthase subunit K"  
"JS1\_E20\_00623" 6408 "s59E5H2" 1.910566 "V-type ATP synthase subunit K"  
"JS1\_E20\_00623" 6408 "s63E6H2" 0.9067636 "V-type ATP synthase subunit K"  
"JS1\_E20\_00624" 6409 "s59E13H2" 1.623917 "V-type ATP synthase subunit F"  
"JS1\_E20\_00624" 6409 "s59E25H2" 0 "V-type ATP synthase subunit F"  
"JS1\_E20\_00624" 6409 "s59E5H2" 2.889571 "V-type ATP synthase subunit F"  
"JS1\_E20\_00624" 6409 "s63E6H2" 1.409018 "V-type ATP synthase subunit F"  
"JS1\_E20\_00625" 6410 "s59E13H2" 3.506955 "V-type ATP synthase subunit E"  
"JS1\_E20\_00625" 6410 "s59E25H2" 0 "V-type ATP synthase subunit E"  
"JS1\_E20\_00625" 6410 "s59E5H2" 3.14626 "V-type ATP synthase subunit E"  
"JS1\_E20\_00625" 6410 "s63E6H2" 1.492089 "V-type ATP synthase subunit E"  
"JS1\_E20\_00626" 6411 "s59E13H2" 5.281824 "V-type ATP synthase alpha chain"  
"JS1\_E20\_00626" 6411 "s59E25H2" 0 "V-type ATP synthase alpha chain"

"JS1\_E20\_00626" 6411 "s59E5H2" 4.033288 "V-type ATP synthase alpha chain"  
"JS1\_E20\_00626" 6411 "s63E6H2" 2.940162 "V-type ATP synthase alpha chain"  
"JS1\_E20\_00627" 6412 "s59E13H2" 7.481737 "V-type sodium ATPase subunit B"  
"JS1\_E20\_00627" 6412 "s59E25H2" 0.1259098 "V-type sodium ATPase subunit B"  
"JS1\_E20\_00627" 6412 "s59E5H2" 5.454847 "V-type sodium ATPase subunit B"  
"JS1\_E20\_00627" 6412 "s63E6H2" 3.439157 "V-type sodium ATPase subunit B"  
"JS1\_E20\_00628" 6413 "s59E13H2" 6.638944 "V-type ATP synthase subunit D"  
"JS1\_E20\_00628" 6413 "s59E25H2" 0 "V-type ATP synthase subunit D"  
"JS1\_E20\_00628" 6413 "s59E5H2" 5.41965 "V-type ATP synthase subunit D"  
"JS1\_E20\_00628" 6413 "s63E6H2" 3.598713 "V-type ATP synthase subunit D"  
"JS1\_E20\_00629" 6414 "s59E13H2" 5.228037 "Pantothenic acid transporter PanT"  
"JS1\_E20\_00629" 6414 "s59E25H2" 0 "Pantothenic acid transporter PanT"  
"JS1\_E20\_00629" 6414 "s59E5H2" 3.859436 "Pantothenic acid transporter PanT"  
"JS1\_E20\_00629" 6414 "s63E6H2" 3.581646 "Pantothenic acid transporter PanT"  
"JS1\_E20\_00630" 6415 "s59E13H2" 4.943253 "Type III pantothenate kinase"  
"JS1\_E20\_00630" 6415 "s59E25H2" 0 "Type III pantothenate kinase"  
"JS1\_E20\_00630" 6415 "s59E5H2" 2.127009 "Type III pantothenate kinase"  
"JS1\_E20\_00630" 6415 "s63E6H2" 2.307953 "Type III pantothenate kinase"  
"JS1\_E20\_00631" 6416 "s59E13H2" 2.735061 "putative nicotinate-nucleotide pyrophosphorylase [carboxylating]"  
"JS1\_E20\_00631" 6416 "s59E25H2" 0.5898345 "putative nicotinate-nucleotide pyrophosphorylase [carboxylating]"  
"JS1\_E20\_00631" 6416 "s59E5H2" 4.602005 "putative nicotinate-nucleotide pyrophosphorylase [carboxylating]"  
"JS1\_E20\_00631" 6416 "s63E6H2" 1.873492 "putative nicotinate-nucleotide pyrophosphorylase [carboxylating]"  
"JS1\_E20\_00632" 6417 "s59E13H2" 1.267166 "L-aspartate oxidase"  
"JS1\_E20\_00632" 6417 "s59E25H2" 0 "L-aspartate oxidase"  
"JS1\_E20\_00632" 6417 "s59E5H2" 1.756869 "L-aspartate oxidase"  
"JS1\_E20\_00632" 6417 "s63E6H2" 1.278263 "L-aspartate oxidase"  
"JS1\_E20\_00633" 6418 "s59E13H2" 0.0404579 "Quinolinate synthase A"  
"JS1\_E20\_00633" 6418 "s59E25H2" 0 "Quinolinate synthase A"  
"JS1\_E20\_00633" 6418 "s59E5H2" 0.1761154 "Quinolinate synthase A"  
"JS1\_E20\_00633" 6418 "s63E6H2" 0.177748 "Quinolinate synthase A"  
"JS1\_E20\_00634" 6419 "s59E13H2" 6.18924 "Oligopeptide transport ATP-binding protein OppD"  
"JS1\_E20\_00634" 6419 "s59E25H2" 0.175813 "Oligopeptide transport ATP-binding protein OppD"  
"JS1\_E20\_00634" 6419 "s59E5H2" 1.966348 "Oligopeptide transport ATP-binding protein OppD"  
"JS1\_E20\_00634" 6419 "s63E6H2" 0.3801039 "Oligopeptide transport ATP-binding protein OppD"  
"JS1\_E20\_00635" 6420 "s59E13H2" 2.510401 "Glutathione transport system permease protein GsiD"  
"JS1\_E20\_00635" 6420 "s59E25H2" 0 "Glutathione transport system permease protein GsiD"  
"JS1\_E20\_00635" 6420 "s59E5H2" 1.194209 "Glutathione transport system permease protein GsiD"  
"JS1\_E20\_00635" 6420 "s63E6H2" 0.2744089 "Glutathione transport system permease protein GsiD"  
"JS1\_E20\_00636" 6421 "s59E13H2" 1.237611 "Dipeptide transport system permease protein DppB"  
"JS1\_E20\_00636" 6421 "s59E25H2" 0 "Dipeptide transport system permease protein DppB"  
"JS1\_E20\_00636" 6421 "s59E5H2" 1.311247 "Dipeptide transport system permease protein DppB"  
"JS1\_E20\_00636" 6421 "s63E6H2" 0.3243498 "Dipeptide transport system permease protein DppB"  
"JS1\_E20\_00637" 6422 "s59E13H2" 2.744953 "Periplasmic dipeptide transport protein precursor"  
"JS1\_E20\_00637" 6422 "s59E25H2" 0 "Periplasmic dipeptide transport protein precursor"  
"JS1\_E20\_00637" 6422 "s59E5H2" 0.467473 "Periplasmic dipeptide transport protein precursor"  
"JS1\_E20\_00637" 6422 "s63E6H2" 0.2370811 "Periplasmic dipeptide transport protein precursor"  
"JS1\_E20\_00638" 6423 "s59E13H2" 1.202667 "Murein hydrolase activator NlpD precursor"

"JS1\_E20\_00638" 6423 "s59E25H2" 0 "Murein hydrolase activator NlpD precursor"  
"JS1\_E20\_00638" 6423 "s59E5H2" 0.2214048 "Murein hydrolase activator NlpD precursor"  
"JS1\_E20\_00638" 6423 "s63E6H2" 0.06459792 "Murein hydrolase activator NlpD precursor"  
"JS1\_E20\_00639" 6424 "s59E13H2" 0 "hypothetical protein"  
"JS1\_E20\_00639" 6424 "s59E25H2" 0 "hypothetical protein"  
"JS1\_E20\_00639" 6424 "s59E5H2" 0.01679072 "hypothetical protein"  
"JS1\_E20\_00639" 6424 "s63E6H2" 0.004523281 "hypothetical protein"  
"JS1\_E20\_00640" 6425 "s59E13H2" 0.2668496 "Septum site-determining protein DivIVA"  
"JS1\_E20\_00640" 6425 "s59E25H2" 0 "Septum site-determining protein DivIVA"  
"JS1\_E20\_00640" 6425 "s59E5H2" 0.5549901 "Septum site-determining protein DivIVA"  
"JS1\_E20\_00640" 6425 "s63E6H2" 0.5603132 "Septum site-determining protein DivIVA"  
"JS1\_E20\_00641" 6426 "s59E13H2" 0.3547352 "YGGT family protein"  
"JS1\_E20\_00641" 6426 "s59E25H2" 0 "YGGT family protein"  
"JS1\_E20\_00641" 6426 "s59E5H2" 0.8920056 "YGGT family protein"  
"JS1\_E20\_00641" 6426 "s63E6H2" 0.3565391 "YGGT family protein"  
"JS1\_E20\_00642" 6427 "s59E13H2" 0.5123346 "hypothetical protein"  
"JS1\_E20\_00642" 6427 "s59E25H2" 0 "hypothetical protein"  
"JS1\_E20\_00642" 6427 "s59E5H2" 1.510971 "hypothetical protein"  
"JS1\_E20\_00642" 6427 "s63E6H2" 0.2697983 "hypothetical protein"  
"JS1\_E20\_00643" 6428 "s59E13H2" 0.4905262 "hypothetical protein"  
"JS1\_E20\_00643" 6428 "s59E25H2" 0 "hypothetical protein"  
"JS1\_E20\_00643" 6428 "s59E5H2" 1.625043 "hypothetical protein"  
"JS1\_E20\_00643" 6428 "s63E6H2" 0.581488 "hypothetical protein"  
"JS1\_E20\_00644" 6429 "s59E13H2" 0.9200232 "High-affinity branched-chain amino acid transport ATP-binding protein LivF"  
"JS1\_E20\_00644" 6429 "s59E25H2" 0 "High-affinity branched-chain amino acid transport ATP-binding protein LivF"  
"JS1\_E20\_00644" 6429 "s59E5H2" 2.249323 "High-affinity branched-chain amino acid transport ATP-binding protein LivF"  
"JS1\_E20\_00644" 6429 "s63E6H2" 1.98231 "High-affinity branched-chain amino acid transport ATP-binding protein LivF"  
"JS1\_E20\_00645" 6430 "s59E13H2" 0.6274075 "putative branched-chain amino acid transport ATP-binding protein LivG"  
"JS1\_E20\_00645" 6430 "s59E25H2" 0 "putative branched-chain amino acid transport ATP-binding protein LivG"  
"JS1\_E20\_00645" 6430 "s59E5H2" 1.937454 "putative branched-chain amino acid transport ATP-binding protein LivG"  
"JS1\_E20\_00645" 6430 "s63E6H2" 1.31536 "putative branched-chain amino acid transport ATP-binding protein LivG"  
"JS1\_E20\_00646" 6431 "s59E13H2" 0.2251064 "High-affinity branched-chain amino acid transport system permease protein LivH"  
"JS1\_E20\_00646" 6431 "s59E25H2" 0 "High-affinity branched-chain amino acid transport system permease protein LivH"  
"JS1\_E20\_00646" 6431 "s59E5H2" 1.617279 "High-affinity branched-chain amino acid transport system permease protein LivH"  
"JS1\_E20\_00646" 6431 "s63E6H2" 1.435643 "High-affinity branched-chain amino acid transport system permease protein LivH"  
"JS1\_E20\_00647" 6432 "s59E13H2" 0.04818578 "High-affinity branched-chain amino acid transport system permease protein LivH"  
"JS1\_E20\_00647" 6432 "s59E25H2" 0 "High-affinity branched-chain amino acid transport system permease protein LivH"  
"JS1\_E20\_00647" 6432 "s59E5H2" 0.8211634 "High-affinity branched-chain amino acid transport system permease protein LivH"  
"JS1\_E20\_00647" 6432 "s63E6H2" 2.089243 "High-affinity branched-chain amino acid transport system permease protein LivH"  
"JS1\_E20\_00648" 6433 "s59E13H2" 0.07130823 "Leucine-specific-binding protein precursor"  
"JS1\_E20\_00648" 6433 "s59E25H2" 0 "Leucine-specific-binding protein precursor"  
"JS1\_E20\_00648" 6433 "s59E5H2" 0.1020353 "Leucine-specific-binding protein precursor"  
"JS1\_E20\_00648" 6433 "s63E6H2" 1.533059 "Leucine-specific-binding protein precursor"  
"JS1\_E20\_00649" 6434 "s59E13H2" 0.1381554 "Sarcosine oxidase subunit beta"  
"JS1\_E20\_00649" 6434 "s59E25H2" 0 "Sarcosine oxidase subunit beta"  
"JS1\_E20\_00649" 6434 "s59E5H2" 0.03215539 "Sarcosine oxidase subunit beta"  
"JS1\_E20\_00649" 6434 "s63E6H2" 1.550462 "Sarcosine oxidase subunit beta"

"JS1\_E20\_00650" 6435 "s59E13H2" 0.1393921 "Hydrogen cyanide synthase subunit HcnB"  
"JS1\_E20\_00650" 6435 "s59E25H2" 0 "Hydrogen cyanide synthase subunit HcnB"  
"JS1\_E20\_00650" 6435 "s59E5H2" 0.04097471 "Hydrogen cyanide synthase subunit HcnB"  
"JS1\_E20\_00650" 6435 "s63E6H2" 1.429925 "Hydrogen cyanide synthase subunit HcnB"  
"JS1\_E20\_00651" 6436 "s59E13H2" 0.161962 "ferredoxin"  
"JS1\_E20\_00651" 6436 "s59E25H2" 0 "ferredoxin"  
"JS1\_E20\_00651" 6436 "s59E5H2" 0.3658383 "ferredoxin"  
"JS1\_E20\_00651" 6436 "s63E6H2" 1.398481 "ferredoxin"  
"JS1\_E20\_00652" 6437 "s59E13H2" 0.1837453 "Hydrogen cyanide synthase subunit HcnB"  
"JS1\_E20\_00652" 6437 "s59E25H2" 0 "Hydrogen cyanide synthase subunit HcnB"  
"JS1\_E20\_00652" 6437 "s59E5H2" 0.2360863 "Hydrogen cyanide synthase subunit HcnB"  
"JS1\_E20\_00652" 6437 "s63E6H2" 1.549646 "Hydrogen cyanide synthase subunit HcnB"  
"JS1\_E20\_00653" 6438 "s59E13H2" 0.737147 "Lipopolysaccharide export system ATP-binding protein LptB"  
"JS1\_E20\_00653" 6438 "s59E25H2" 0 "Lipopolysaccharide export system ATP-binding protein LptB"  
"JS1\_E20\_00653" 6438 "s59E5H2" 0.7091698 "Lipopolysaccharide export system ATP-binding protein LptB"  
"JS1\_E20\_00653" 6438 "s63E6H2" 2.97044 "Lipopolysaccharide export system ATP-binding protein LptB"  
"JS1\_E20\_00654" 6439 "s59E13H2" 0.77434 "High-affinity branched-chain amino acid transport ATP-binding protein LivF"  
"JS1\_E20\_00654" 6439 "s59E25H2" 0 "High-affinity branched-chain amino acid transport ATP-binding protein LivF"  
"JS1\_E20\_00654" 6439 "s59E5H2" 0.4445694 "High-affinity branched-chain amino acid transport ATP-binding protein LivF"  
"JS1\_E20\_00654" 6439 "s63E6H2" 0.7180891 "High-affinity branched-chain amino acid transport ATP-binding protein LivF"  
"JS1\_E20\_00655" 6440 "s59E13H2" 0.240685 "Poly-beta-1,6-N-acetyl-D-glucosamine N-deacetylase precursor"  
"JS1\_E20\_00655" 6440 "s59E25H2" 0 "Poly-beta-1,6-N-acetyl-D-glucosamine N-deacetylase precursor"  
"JS1\_E20\_00655" 6440 "s59E5H2" 0.6923632 "Poly-beta-1,6-N-acetyl-D-glucosamine N-deacetylase precursor"  
"JS1\_E20\_00655" 6440 "s63E6H2" 0.190755 "Poly-beta-1,6-N-acetyl-D-glucosamine N-deacetylase precursor"  
"JS1\_E20\_00656" 6441 "s59E13H2" 0 "LexA repressor"  
"JS1\_E20\_00656" 6441 "s59E25H2" 0 "LexA repressor"  
"JS1\_E20\_00656" 6441 "s59E5H2" 1.419146 "LexA repressor"  
"JS1\_E20\_00656" 6441 "s63E6H2" 0.01300869 "LexA repressor"  
"JS1\_E20\_00657" 6442 "s59E13H2" 0 "Response regulator PleD"  
"JS1\_E20\_00657" 6442 "s59E25H2" 0 "Response regulator PleD"  
"JS1\_E20\_00657" 6442 "s59E5H2" 2.10772 "Response regulator PleD"  
"JS1\_E20\_00657" 6442 "s63E6H2" 0.08853983 "Response regulator PleD"  
"JS1\_E20\_00658" 6443 "s59E13H2" 0.01719106 "hypothetical protein"  
"JS1\_E20\_00658" 6443 "s59E25H2" 0 "hypothetical protein"  
"JS1\_E20\_00658" 6443 "s59E5H2" 1.384983 "hypothetical protein"  
"JS1\_E20\_00658" 6443 "s63E6H2" 0.03430103 "hypothetical protein"  
"JS1\_E20\_00659" 6444 "s59E13H2" 0 "Isocitrate dehydrogenase [NADP]"  
"JS1\_E20\_00659" 6444 "s59E25H2" 0 "Isocitrate dehydrogenase [NADP]"  
"JS1\_E20\_00659" 6444 "s59E5H2" 0 "Isocitrate dehydrogenase [NADP]"  
"JS1\_E20\_00659" 6444 "s63E6H2" 0.05620291 "Isocitrate dehydrogenase [NADP]"  
"JS1\_E20\_00660" 6445 "s59E13H2" 0.0008815434 "Methanogen homoacnitase large subunit"  
"JS1\_E20\_00660" 6445 "s59E25H2" 0 "Methanogen homoacnitase large subunit"  
"JS1\_E20\_00660" 6445 "s59E5H2" 0 "Methanogen homoacnitase large subunit"  
"JS1\_E20\_00660" 6445 "s63E6H2" 0.03693615 "Methanogen homoacnitase large subunit"  
"JS1\_E20\_00661" 6446 "s59E13H2" 0.009085985 "Adenosylhomocysteinase"  
"JS1\_E20\_00661" 6446 "s59E25H2" 0 "Adenosylhomocysteinase"  
"JS1\_E20\_00661" 6446 "s59E5H2" 0.1887629 "Adenosylhomocysteinase"



"JS1\_E20\_00661" 6446 "s63E6H2" 0.355399 "Adenosylhomocysteinase"  
"JS1\_E20\_00662" 6447 "s59E13H2" 0.01103751 "putative metallo-hydrolase"  
"JS1\_E20\_00662" 6447 "s59E25H2" 0 "putative metallo-hydrolase"  
"JS1\_E20\_00662" 6447 "s59E5H2" 0.1741429 "putative metallo-hydrolase"  
"JS1\_E20\_00662" 6447 "s63E6H2" 0.2568571 "putative metallo-hydrolase"  
"JS1\_E20\_00663" 6448 "s59E13H2" 0.001123546 "Cyclic di-GMP phosphodiesterase response regulator RpfG"  
"JS1\_E20\_00663" 6448 "s59E25H2" 0 "Cyclic di-GMP phosphodiesterase response regulator RpfG"  
"JS1\_E20\_00663" 6448 "s59E5H2" 0.322721 "Cyclic di-GMP phosphodiesterase response regulator RpfG"  
"JS1\_E20\_00663" 6448 "s63E6H2" 0.02556594 "Cyclic di-GMP phosphodiesterase response regulator RpfG"  
"JS1\_E20\_00664" 6449 "s59E13H2" 0.009985824 "Non-motile and phage-resistance protein"  
"JS1\_E20\_00664" 6449 "s59E25H2" 0 "Non-motile and phage-resistance protein"  
"JS1\_E20\_00664" 6449 "s59E5H2" 0.0998954 "Non-motile and phage-resistance protein"  
"JS1\_E20\_00664" 6449 "s63E6H2" 0.002475323 "Non-motile and phage-resistance protein"  
"JS1\_E20\_00665" 6450 "s59E13H2" 0.008444768 "Replication initiator protein A"  
"JS1\_E20\_00665" 6450 "s59E25H2" 0 "Replication initiator protein A"  
"JS1\_E20\_00665" 6450 "s59E5H2" 0.1331648 "Replication initiator protein A"  
"JS1\_E20\_00665" 6450 "s63E6H2" 0.110084 "Replication initiator protein A"  
"JS1\_E20\_00666" 6451 "s59E13H2" 0.08086674 "Peptidase family C69"  
"JS1\_E20\_00666" 6451 "s59E25H2" 0 "Peptidase family C69"  
"JS1\_E20\_00666" 6451 "s59E5H2" 1.394321 "Peptidase family C69"  
"JS1\_E20\_00666" 6451 "s63E6H2" 0.2657412 "Peptidase family C69"  
"JS1\_E20\_00667" 6452 "s59E13H2" 0.1044688 "hypothetical protein"  
"JS1\_E20\_00667" 6452 "s59E25H2" 0 "hypothetical protein"  
"JS1\_E20\_00667" 6452 "s59E5H2" 1.202635 "hypothetical protein"  
"JS1\_E20\_00667" 6452 "s63E6H2" 0.5103361 "hypothetical protein"  
"JS1\_E20\_00668" 6453 "s59E13H2" 0.04326004 "flavodoxin"  
"JS1\_E20\_00668" 6453 "s59E25H2" 0 "flavodoxin"  
"JS1\_E20\_00668" 6453 "s59E5H2" 1.714953 "flavodoxin"  
"JS1\_E20\_00668" 6453 "s63E6H2" 0.46516 "flavodoxin"  
"JS1\_E20\_00669" 6454 "s59E13H2" 0.02826484 "Possibl zinc metallo-peptidase"  
"JS1\_E20\_00669" 6454 "s59E25H2" 0 "Possibl zinc metallo-peptidase"  
"JS1\_E20\_00669" 6454 "s59E5H2" 0.9726627 "Possibl zinc metallo-peptidase"  
"JS1\_E20\_00669" 6454 "s63E6H2" 0.698283 "Possibl zinc metallo-peptidase"  
"JS1\_E20\_00671" 6456 "s59E13H2" 7.469288 "N-acetylglucosamine repressor"  
"JS1\_E20\_00671" 6456 "s59E25H2" 0.1637717 "N-acetylglucosamine repressor"  
"JS1\_E20\_00671" 6456 "s59E5H2" 0.9209176 "N-acetylglucosamine repressor"  
"JS1\_E20\_00671" 6456 "s63E6H2" 1.356858 "N-acetylglucosamine repressor"  
"JS1\_E20\_00672" 6457 "s59E13H2" 10.63185 "Multiple sugar-binding protein precursor"  
"JS1\_E20\_00672" 6457 "s59E25H2" 0 "Multiple sugar-binding protein precursor"  
"JS1\_E20\_00672" 6457 "s59E5H2" 0.9322254 "Multiple sugar-binding protein precursor"  
"JS1\_E20\_00672" 6457 "s63E6H2" 2.556546 "Multiple sugar-binding protein precursor"  
"JS1\_E20\_00673" 6458 "s59E13H2" 10.82231 "Lactose transport system permease protein LacF"  
"JS1\_E20\_00673" 6458 "s59E25H2" 0 "Lactose transport system permease protein LacF"  
"JS1\_E20\_00673" 6458 "s59E5H2" 0.7755795 "Lactose transport system permease protein LacF"  
"JS1\_E20\_00673" 6458 "s63E6H2" 2.605081 "Lactose transport system permease protein LacF"  
"JS1\_E20\_00674" 6459 "s59E13H2" 7.358652 "L-arabinose transport system permease protein AraQ"  
"JS1\_E20\_00674" 6459 "s59E25H2" 0 "L-arabinose transport system permease protein AraQ"

"JS1\_E20\_00674" 6459 "s59E5H2" 0.6785876 "L-arabinose transport system permease protein AraQ"  
"JS1\_E20\_00674" 6459 "s63E6H2" 1.805854 "L-arabinose transport system permease protein AraQ"  
"JS1\_E20\_00675" 6460 "s59E13H2" 2.184425 "putative lipoprotein YbbD precursor"  
"JS1\_E20\_00675" 6460 "s59E25H2" 0 "putative lipoprotein YbbD precursor"  
"JS1\_E20\_00675" 6460 "s59E5H2" 0.4424002 "putative lipoprotein YbbD precursor"  
"JS1\_E20\_00675" 6460 "s63E6H2" 1.744257 "putative lipoprotein YbbD precursor"  
"JS1\_E20\_00676" 6461 "s59E13H2" 0.9927164 "hypothetical protein"  
"JS1\_E20\_00676" 6461 "s59E25H2" 0 "hypothetical protein"  
"JS1\_E20\_00676" 6461 "s59E5H2" 0.4550592 "hypothetical protein"  
"JS1\_E20\_00676" 6461 "s63E6H2" 1.7263 "hypothetical protein"  
"JS1\_E20\_00677" 6462 "s59E13H2" 1.018252 "hypothetical protein"  
"JS1\_E20\_00677" 6462 "s59E25H2" 0 "hypothetical protein"  
"JS1\_E20\_00677" 6462 "s59E5H2" 0.2549905 "hypothetical protein"  
"JS1\_E20\_00677" 6462 "s63E6H2" 2.277356 "hypothetical protein"  
"JS1\_E20\_00678" 6463 "s59E13H2" 1.512222 "N-acetylglucosamine-6-phosphate deacetylase"  
"JS1\_E20\_00678" 6463 "s59E25H2" 0 "N-acetylglucosamine-6-phosphate deacetylase"  
"JS1\_E20\_00678" 6463 "s59E5H2" 0.2580196 "N-acetylglucosamine-6-phosphate deacetylase"  
"JS1\_E20\_00678" 6463 "s63E6H2" 0.9679665 "N-acetylglucosamine-6-phosphate deacetylase"  
"JS1\_E20\_00679" 6464 "s59E13H2" 0.8446238 "Glucosamine-6-phosphate deaminase 1"  
"JS1\_E20\_00679" 6464 "s59E25H2" 0 "Glucosamine-6-phosphate deaminase 1"  
"JS1\_E20\_00679" 6464 "s59E5H2" 0.3024872 "Glucosamine-6-phosphate deaminase 1"  
"JS1\_E20\_00679" 6464 "s63E6H2" 0.7708424 "Glucosamine-6-phosphate deaminase 1"  
"JS1\_E20\_00680" 6465 "s59E13H2" 0.5594115 "3'-5' exoribonuclease YhaM"  
"JS1\_E20\_00680" 6465 "s59E25H2" 0 "3'-5' exoribonuclease YhaM"  
"JS1\_E20\_00680" 6465 "s59E5H2" 0.09505382 "3'-5' exoribonuclease YhaM"  
"JS1\_E20\_00680" 6465 "s63E6H2" 0.03678516 "3'-5' exoribonuclease YhaM"  
"JS1\_E20\_00681" 6466 "s59E13H2" 0 "L-asparaginase II"  
"JS1\_E20\_00681" 6466 "s59E25H2" 0 "L-asparaginase II"  
"JS1\_E20\_00681" 6466 "s59E5H2" 0 "L-asparaginase II"  
"JS1\_E20\_00681" 6466 "s63E6H2" 0.006928691 "L-asparaginase II"  
"JS1\_E20\_00682" 6467 "s59E13H2" 0.2626079 "protease TldD"  
"JS1\_E20\_00682" 6467 "s59E25H2" 0 "protease TldD"  
"JS1\_E20\_00682" 6467 "s59E5H2" 0.1496186 "protease TldD"  
"JS1\_E20\_00682" 6467 "s63E6H2" 0.6160169 "protease TldD"  
"JS1\_E20\_00683" 6468 "s59E13H2" 0.01606033 "protease TldD"  
"JS1\_E20\_00683" 6468 "s59E25H2" 0 "protease TldD"  
"JS1\_E20\_00683" 6468 "s59E5H2" 0.02349097 "protease TldD"  
"JS1\_E20\_00683" 6468 "s63E6H2" 0.2656381 "protease TldD"  
"JS1\_E20\_00684" 6469 "s59E13H2" 7.118308 "Integrase core domain protein"  
"JS1\_E20\_00684" 6469 "s59E25H2" 0 "Integrase core domain protein"  
"JS1\_E20\_00684" 6469 "s59E5H2" 2.511172 "Integrase core domain protein"  
"JS1\_E20\_00684" 6469 "s63E6H2" 2.412747 "Integrase core domain protein"  
"JS1\_E20\_00685" 6470 "s59E13H2" 0.1550779 "hypothetical protein"  
"JS1\_E20\_00685" 6470 "s59E25H2" 0 "hypothetical protein"  
"JS1\_E20\_00685" 6470 "s59E5H2" 0.6850587 "hypothetical protein"  
"JS1\_E20\_00685" 6470 "s63E6H2" 1.072493 "hypothetical protein"  
"JS1\_E20\_00686" 6471 "s59E13H2" 0.1254048 "Formamidase"

"JS1\_E20\_00686" 6471 "s59E25H2" 0 "Formamidase"  
"JS1\_E20\_00686" 6471 "s59E5H2" 0.7664801 "Formamidase"  
"JS1\_E20\_00686" 6471 "s63E6H2" 0.1937238 "Formamidase"  
"JS1\_E20\_00687" 6472 "s59E13H2" 0.2286134 "Carbon-nitrogen hydrolase"  
"JS1\_E20\_00687" 6472 "s59E25H2" 0 "Carbon-nitrogen hydrolase"  
"JS1\_E20\_00687" 6472 "s59E5H2" 2.117208 "Carbon-nitrogen hydrolase"  
"JS1\_E20\_00687" 6472 "s63E6H2" 0.6312712 "Carbon-nitrogen hydrolase"  
"JS1\_E20\_00688" 6473 "s59E13H2" 0.3670649 "Inner membrane symporter YicJ"  
"JS1\_E20\_00688" 6473 "s59E25H2" 0 "Inner membrane symporter YicJ"  
"JS1\_E20\_00688" 6473 "s59E5H2" 3.641556 "Inner membrane symporter YicJ"  
"JS1\_E20\_00688" 6473 "s63E6H2" 1.734266 "Inner membrane symporter YicJ"  
"JS1\_E20\_00689" 6474 "s59E13H2" 0.01907444 "Arsenate-mycothioli transferase ArsC2"  
"JS1\_E20\_00689" 6474 "s59E25H2" 0 "Arsenate-mycothioli transferase ArsC2"  
"JS1\_E20\_00689" 6474 "s59E5H2" 0.04740878 "Arsenate-mycothioli transferase ArsC2"  
"JS1\_E20\_00689" 6474 "s63E6H2" 0.0143431 "Arsenate-mycothioli transferase ArsC2"  
"JS1\_E20\_00690" 6475 "s59E13H2" 0.7758851 "putative manganese efflux pump MntP"  
"JS1\_E20\_00690" 6475 "s59E25H2" 0 "putative manganese efflux pump MntP"  
"JS1\_E20\_00690" 6475 "s59E5H2" 0.1936401 "putative manganese efflux pump MntP"  
"JS1\_E20\_00690" 6475 "s63E6H2" 0.07806113 "putative manganese efflux pump MntP"  
"JS1\_E20\_00691" 6476 "s59E13H2" 1.373741 "LysE type translocator"  
"JS1\_E20\_00691" 6476 "s59E25H2" 0.4246795 "LysE type translocator"  
"JS1\_E20\_00691" 6476 "s59E5H2" 0.1454899 "LysE type translocator"  
"JS1\_E20\_00691" 6476 "s63E6H2" 2.648544 "LysE type translocator"  
"JS1\_E20\_00692" 6477 "s59E13H2" 0.07953389 "Phosphoserine phosphatase 1"  
"JS1\_E20\_00692" 6477 "s59E25H2" 0 "Phosphoserine phosphatase 1"  
"JS1\_E20\_00692" 6477 "s59E5H2" 0.1749516 "Phosphoserine phosphatase 1"  
"JS1\_E20\_00692" 6477 "s63E6H2" 0.2338355 "Phosphoserine phosphatase 1"  
"JS1\_E20\_00693" 6478 "s59E13H2" 0.01663464 "Nicotinate-nucleotide--dimethylbenzimidazole phosphoribosyltransferase"  
"JS1\_E20\_00693" 6478 "s59E25H2" 0 "Nicotinate-nucleotide--dimethylbenzimidazole phosphoribosyltransferase"  
"JS1\_E20\_00693" 6478 "s59E5H2" 0.1383401 "Nicotinate-nucleotide--dimethylbenzimidazole phosphoribosyltransferase"  
"JS1\_E20\_00693" 6478 "s63E6H2" 1.892628 "Nicotinate-nucleotide--dimethylbenzimidazole phosphoribosyltransferase"  
"JS1\_E20\_00694" 6479 "s59E13H2" 0.04207563 "Bifunctional adenosylcobalamin biosynthesis protein CobU"  
"JS1\_E20\_00694" 6479 "s59E25H2" 0 "Bifunctional adenosylcobalamin biosynthesis protein CobU"  
"JS1\_E20\_00694" 6479 "s59E5H2" 0.8305191 "Bifunctional adenosylcobalamin biosynthesis protein CobU"  
"JS1\_E20\_00694" 6479 "s63E6H2" 0.9556555 "Bifunctional adenosylcobalamin biosynthesis protein CobU"  
"JS1\_E20\_00695" 6480 "s59E13H2" 0.07067194 "Cobalamin synthase"  
"JS1\_E20\_00695" 6480 "s59E25H2" 0 "Cobalamin synthase"  
"JS1\_E20\_00695" 6480 "s59E5H2" 1.447986 "Cobalamin synthase"  
"JS1\_E20\_00695" 6480 "s63E6H2" 2.686668 "Cobalamin synthase"  
"JS1\_E20\_00696" 6481 "s59E13H2" 1.198008 "Hemin import ATP-binding protein HmuV"  
"JS1\_E20\_00696" 6481 "s59E25H2" 0 "Hemin import ATP-binding protein HmuV"  
"JS1\_E20\_00696" 6481 "s59E5H2" 1.880272 "Hemin import ATP-binding protein HmuV"  
"JS1\_E20\_00696" 6481 "s63E6H2" 3.136457 "Hemin import ATP-binding protein HmuV"  
"JS1\_E20\_00697" 6482 "s59E13H2" 1.339956 "Hemin transport system permease protein HmuU"  
"JS1\_E20\_00697" 6482 "s59E25H2" 0 "Hemin transport system permease protein HmuU"  
"JS1\_E20\_00697" 6482 "s59E5H2" 1.790652 "Hemin transport system permease protein HmuU"  
"JS1\_E20\_00697" 6482 "s63E6H2" 3.695069 "Hemin transport system permease protein HmuU"

"JS1\_E20\_00698" 6483 "s59E13H2" 1.681608 "Vitamin B12-binding protein precursor"  
"JS1\_E20\_00698" 6483 "s59E25H2" 0 "Vitamin B12-binding protein precursor"  
"JS1\_E20\_00698" 6483 "s59E5H2" 1.854442 "Vitamin B12-binding protein precursor"  
"JS1\_E20\_00698" 6483 "s63E6H2" 3.956836 "Vitamin B12-binding protein precursor"  
"JS1\_E20\_00699" 6484 "s59E13H2" 0.05991503 "Riboflavin transporter RibU"  
"JS1\_E20\_00699" 6484 "s59E25H2" 0 "Riboflavin transporter RibU"  
"JS1\_E20\_00699" 6484 "s59E5H2" 0.1409596 "Riboflavin transporter RibU"  
"JS1\_E20\_00699" 6484 "s63E6H2" 0.03517058 "Riboflavin transporter RibU"  
"JS1\_E20\_00701" 6486 "s59E13H2" 0.3270712 "Isoleucine--tRNA ligase"  
"JS1\_E20\_00701" 6486 "s59E25H2" 0 "Isoleucine--tRNA ligase"  
"JS1\_E20\_00701" 6486 "s59E5H2" 1.641883 "Isoleucine--tRNA ligase"  
"JS1\_E20\_00701" 6486 "s63E6H2" 0.9811835 "Isoleucine--tRNA ligase"  
"JS1\_E20\_00702" 6487 "s59E13H2" 0.6257545 "Lipoprotein signal peptidase"  
"JS1\_E20\_00702" 6487 "s59E25H2" 0 "Lipoprotein signal peptidase"  
"JS1\_E20\_00702" 6487 "s59E5H2" 3.198047 "Lipoprotein signal peptidase"  
"JS1\_E20\_00702" 6487 "s63E6H2" 0.8804208 "Lipoprotein signal peptidase"  
"JS1\_E20\_00703" 6488 "s59E13H2" 0.7647432 "Prolipoprotein diacylglyceryl transferase"  
"JS1\_E20\_00703" 6488 "s59E25H2" 0 "Prolipoprotein diacylglyceryl transferase"  
"JS1\_E20\_00703" 6488 "s59E5H2" 3.143665 "Prolipoprotein diacylglyceryl transferase"  
"JS1\_E20\_00703" 6488 "s63E6H2" 1.280212 "Prolipoprotein diacylglyceryl transferase"  
"JS1\_E20\_00704" 6489 "s59E13H2" 0.7925786 "Ribosomal large subunit pseudouridine synthase D"  
"JS1\_E20\_00704" 6489 "s59E25H2" 0 "Ribosomal large subunit pseudouridine synthase D"  
"JS1\_E20\_00704" 6489 "s59E5H2" 2.837855 "Ribosomal large subunit pseudouridine synthase D"  
"JS1\_E20\_00704" 6489 "s63E6H2" 1.304884 "Ribosomal large subunit pseudouridine synthase D"  
"JS1\_E20\_00705" 6490 "s59E13H2" 0.4760286 "hypothetical protein"  
"JS1\_E20\_00705" 6490 "s59E25H2" 0 "hypothetical protein"  
"JS1\_E20\_00705" 6490 "s59E5H2" 0.7217499 "hypothetical protein"  
"JS1\_E20\_00705" 6490 "s63E6H2" 0.9093986 "hypothetical protein"  
"JS1\_E20\_00706" 6491 "s59E13H2" 0.003107818 "L-lysine 2,3-aminomutase"  
"JS1\_E20\_00706" 6491 "s59E25H2" 0 "L-lysine 2,3-aminomutase"  
"JS1\_E20\_00706" 6491 "s59E5H2" 0.02371397 "L-lysine 2,3-aminomutase"  
"JS1\_E20\_00706" 6491 "s63E6H2" 0.01769892 "L-lysine 2,3-aminomutase"  
"JS1\_E20\_00707" 6492 "s59E13H2" 0.0210187 "Peptide chain release factor 2"  
"JS1\_E20\_00707" 6492 "s59E25H2" 0 "Peptide chain release factor 2"  
"JS1\_E20\_00707" 6492 "s59E5H2" 0.1726326 "Peptide chain release factor 2"  
"JS1\_E20\_00707" 6492 "s63E6H2" 0.1353378 "Peptide chain release factor 2"  
"JS1\_E20\_00708" 6493 "s59E13H2" 0.02767508 "preprotein translocase subunit SecA"  
"JS1\_E20\_00708" 6493 "s59E25H2" 0 "preprotein translocase subunit SecA"  
"JS1\_E20\_00708" 6493 "s59E5H2" 0.229005 "preprotein translocase subunit SecA"  
"JS1\_E20\_00708" 6493 "s63E6H2" 0.1058106 "preprotein translocase subunit SecA"  
"JS1\_E20\_00709" 6494 "s59E13H2" 0.0104391 "hypothetical protein"  
"JS1\_E20\_00709" 6494 "s59E25H2" 0 "hypothetical protein"  
"JS1\_E20\_00709" 6494 "s59E5H2" 0.2307177 "hypothetical protein"  
"JS1\_E20\_00709" 6494 "s63E6H2" 0.1419 "hypothetical protein"  
"JS1\_E20\_00710" 6495 "s59E13H2" 0.006598896 "Cyclic di-GMP phosphodiesterase response regulator RpfG"  
"JS1\_E20\_00710" 6495 "s59E25H2" 0 "Cyclic di-GMP phosphodiesterase response regulator RpfG"  
"JS1\_E20\_00710" 6495 "s59E5H2" 0.2298741 "Cyclic di-GMP phosphodiesterase response regulator RpfG"

"JS1\_E20\_00710" 6495 "s63E6H2" 0.2549509 "Cyclic di-GMP phosphodiesterase response regulator RpfG"  
"JS1\_E20\_00711" 6496 "s59E13H2" 0.08067187 "Transposase IS200 like protein"  
"JS1\_E20\_00711" 6496 "s59E25H2" 0 "Transposase IS200 like protein"  
"JS1\_E20\_00711" 6496 "s59E5H2" 0.03080734 "Transposase IS200 like protein"  
"JS1\_E20\_00711" 6496 "s63E6H2" 0.7536425 "Transposase IS200 like protein"  
"JS1\_E20\_00713" 6498 "s59E13H2" 0 "HTH-type transcriptional regulator YiaJ"  
"JS1\_E20\_00713" 6498 "s59E25H2" 0 "HTH-type transcriptional regulator YiaJ"  
"JS1\_E20\_00713" 6498 "s59E5H2" 0 "HTH-type transcriptional regulator YiaJ"  
"JS1\_E20\_00713" 6498 "s63E6H2" 0.001963104 "HTH-type transcriptional regulator YiaJ"  
"JS1\_E20\_00714" 6499 "s59E13H2" 0 "N-formyl-4-amino-5-aminomethyl-2-methylpyrimidine deformylase"  
"JS1\_E20\_00714" 6499 "s59E25H2" 0 "N-formyl-4-amino-5-aminomethyl-2-methylpyrimidine deformylase"  
"JS1\_E20\_00714" 6499 "s59E5H2" 0.2881273 "N-formyl-4-amino-5-aminomethyl-2-methylpyrimidine deformylase"  
"JS1\_E20\_00714" 6499 "s63E6H2" 0.02282983 "N-formyl-4-amino-5-aminomethyl-2-methylpyrimidine deformylase"  
"JS1\_E20\_00715" 6500 "s59E13H2" 0 "Sulfide dehydrogenase subunit alpha precursor"  
"JS1\_E20\_00715" 6500 "s59E25H2" 0 "Sulfide dehydrogenase subunit alpha precursor"  
"JS1\_E20\_00715" 6500 "s59E5H2" 0.1282135 "Sulfide dehydrogenase subunit alpha precursor"  
"JS1\_E20\_00715" 6500 "s63E6H2" 0 "Sulfide dehydrogenase subunit alpha precursor"  
"JS1\_E20\_00716" 6501 "s59E13H2" 0 "NAD-dependent dihydropyrimidine dehydrogenase subunit PreA"  
"JS1\_E20\_00716" 6501 "s59E25H2" 0 "NAD-dependent dihydropyrimidine dehydrogenase subunit PreA"  
"JS1\_E20\_00716" 6501 "s59E5H2" 0.104363 "NAD-dependent dihydropyrimidine dehydrogenase subunit PreA"  
"JS1\_E20\_00716" 6501 "s63E6H2" 0 "NAD-dependent dihydropyrimidine dehydrogenase subunit PreA"  
"JS1\_E20\_00717" 6502 "s59E13H2" 0.01153915 "Transposase IS200 like protein"  
"JS1\_E20\_00717" 6502 "s59E25H2" 0 "Transposase IS200 like protein"  
"JS1\_E20\_00717" 6502 "s59E5H2" 1.625122 "Transposase IS200 like protein"  
"JS1\_E20\_00717" 6502 "s63E6H2" 0.534354 "Transposase IS200 like protein"  
"JS1\_E20\_00718" 6503 "s59E13H2" 0.03374868 "DNA topoisomerase 1"  
"JS1\_E20\_00718" 6503 "s59E25H2" 0 "DNA topoisomerase 1"  
"JS1\_E20\_00718" 6503 "s59E5H2" 0.1262878 "DNA topoisomerase 1"  
"JS1\_E20\_00718" 6503 "s63E6H2" 0.06245088 "DNA topoisomerase 1"  
"JS1\_E20\_00719" 6504 "s59E13H2" 0.0257487 "Tyrosine recombinase XerD"  
"JS1\_E20\_00719" 6504 "s59E25H2" 0 "Tyrosine recombinase XerD"  
"JS1\_E20\_00719" 6504 "s59E5H2" 0.1941841 "Tyrosine recombinase XerD"  
"JS1\_E20\_00719" 6504 "s63E6H2" 0.06695913 "Tyrosine recombinase XerD"  
"JS1\_E20\_00720" 6505 "s59E13H2" 0.03830845 "ATP-dependent protease subunit HslV"  
"JS1\_E20\_00720" 6505 "s59E25H2" 0 "ATP-dependent protease subunit HslV"  
"JS1\_E20\_00720" 6505 "s59E5H2" 0.2837667 "ATP-dependent protease subunit HslV"  
"JS1\_E20\_00720" 6505 "s63E6H2" 0.07782181 "ATP-dependent protease subunit HslV"  
"JS1\_E20\_00721" 6506 "s59E13H2" 0 "Endonuclease YhcR precursor"  
"JS1\_E20\_00721" 6506 "s59E25H2" 0 "Endonuclease YhcR precursor"  
"JS1\_E20\_00721" 6506 "s59E5H2" 0.03830722 "Endonuclease YhcR precursor"  
"JS1\_E20\_00721" 6506 "s63E6H2" 0.07351271 "Endonuclease YhcR precursor"  
"JS1\_E20\_00722" 6507 "s59E13H2" 0.003747876 "YibE/F-like protein"  
"JS1\_E20\_00722" 6507 "s59E25H2" 0 "YibE/F-like protein"  
"JS1\_E20\_00722" 6507 "s59E5H2" 0.524896 "YibE/F-like protein"  
"JS1\_E20\_00722" 6507 "s63E6H2" 1.343058 "YibE/F-like protein"  
"JS1\_E20\_00723" 6508 "s59E13H2" 0.04676737 "Leucine-, isoleucine-, valine-, threonine-, and alanine-binding protein precursor"  
"JS1\_E20\_00723" 6508 "s59E25H2" 0.1969697 "Leucine-, isoleucine-, valine-, threonine-, and alanine-binding protein precursor"

"JS1\_E20\_00723" 6508 "s59E5H2" 0.1899316 "Leucine-, isoleucine-, valine-, threonine-, and alanine-binding protein precursor"  
"JS1\_E20\_00723" 6508 "s63E6H2" 6.058776 "Leucine-, isoleucine-, valine-, threonine-, and alanine-binding protein precursor"  
"JS1\_E20\_00724" 6509 "s59E13H2" 0.8067554 "High-affinity branched-chain amino acid transport system permease protein LivH"  
"JS1\_E20\_00724" 6509 "s59E25H2" 0.2729306 "High-affinity branched-chain amino acid transport system permease protein LivH"  
"JS1\_E20\_00724" 6509 "s59E5H2" 0.2311532 "High-affinity branched-chain amino acid transport system permease protein LivH"  
"JS1\_E20\_00724" 6509 "s63E6H2" 8.280421 "High-affinity branched-chain amino acid transport system permease protein LivH"  
"JS1\_E20\_00726" 6511 "s59E13H2" 0.06272651 "Snoal-like domain protein"  
"JS1\_E20\_00726" 6511 "s59E25H2" 0 "Snoal-like domain protein"  
"JS1\_E20\_00726" 6511 "s59E5H2" 0.03657749 "Snoal-like domain protein"  
"JS1\_E20\_00726" 6511 "s63E6H2" 0.06258498 "Snoal-like domain protein"  
"JS1\_E20\_00727" 6512 "s59E13H2" 0 "Putative penicillin-binding protein PbpX"  
"JS1\_E20\_00727" 6512 "s59E25H2" 0 "Putative penicillin-binding protein PbpX"  
"JS1\_E20\_00727" 6512 "s59E5H2" 0.005838708 "Putative penicillin-binding protein PbpX"  
"JS1\_E20\_00727" 6512 "s63E6H2" 0.009200457 "Putative penicillin-binding protein PbpX"  
"JS1\_E20\_00728" 6513 "s59E13H2" 0.004440401 "hypothetical protein"  
"JS1\_E20\_00728" 6513 "s59E25H2" 0 "hypothetical protein"  
"JS1\_E20\_00728" 6513 "s59E5H2" 0.02161564 "hypothetical protein"  
"JS1\_E20\_00728" 6513 "s63E6H2" 0.007309622 "hypothetical protein"  
"JS1\_E20\_00729" 6514 "s59E13H2" 0.01077456 "DNA polymerase I"  
"JS1\_E20\_00729" 6514 "s59E25H2" 0 "DNA polymerase I"  
"JS1\_E20\_00729" 6514 "s59E5H2" 0.1143231 "DNA polymerase I"  
"JS1\_E20\_00729" 6514 "s63E6H2" 1.351988 "DNA polymerase I"  
"JS1\_E20\_00730" 6515 "s59E13H2" 0.02219652 "Dephospho-CoA kinase"  
"JS1\_E20\_00730" 6515 "s59E25H2" 0 "Dephospho-CoA kinase"  
"JS1\_E20\_00730" 6515 "s59E5H2" 0.07194619 "Dephospho-CoA kinase"  
"JS1\_E20\_00730" 6515 "s63E6H2" 0.222649 "Dephospho-CoA kinase"  
"JS1\_E20\_00731" 6516 "s59E13H2" 0.05708621 "Adenine deaminase"  
"JS1\_E20\_00731" 6516 "s59E25H2" 0 "Adenine deaminase"  
"JS1\_E20\_00731" 6516 "s59E5H2" 0.8193029 "Adenine deaminase"  
"JS1\_E20\_00731" 6516 "s63E6H2" 1.18484 "Adenine deaminase"  
"JS1\_E20\_00732" 6517 "s59E13H2" 0.03379477 "UvrABC system protein B"  
"JS1\_E20\_00732" 6517 "s59E25H2" 0 "UvrABC system protein B"  
"JS1\_E20\_00732" 6517 "s59E5H2" 0.4051145 "UvrABC system protein B"  
"JS1\_E20\_00732" 6517 "s63E6H2" 0.4003768 "UvrABC system protein B"  
"JS1\_E20\_00733" 6518 "s59E13H2" 0.0233159 "UvrABC system protein A"  
"JS1\_E20\_00733" 6518 "s59E25H2" 0 "UvrABC system protein A"  
"JS1\_E20\_00733" 6518 "s59E5H2" 0.4800522 "UvrABC system protein A"  
"JS1\_E20\_00733" 6518 "s63E6H2" 0.1093411 "UvrABC system protein A"  
"JS1\_E20\_00734" 6519 "s59E13H2" 0.046842 "UvrABC system protein C"  
"JS1\_E20\_00734" 6519 "s59E25H2" 0 "UvrABC system protein C"  
"JS1\_E20\_00734" 6519 "s59E5H2" 0.1093302 "UvrABC system protein C"  
"JS1\_E20\_00734" 6519 "s63E6H2" 0.130482 "UvrABC system protein C"  
"JS1\_E20\_00735" 6520 "s59E13H2" 0.004567645 "Putative acetyltransferase"  
"JS1\_E20\_00735" 6520 "s59E25H2" 0 "Putative acetyltransferase"  
"JS1\_E20\_00735" 6520 "s59E5H2" 0.1095991 "Putative acetyltransferase"  
"JS1\_E20\_00735" 6520 "s63E6H2" 0.1026077 "Putative acetyltransferase"  
"JS1\_E20\_00736" 6521 "s59E13H2" 0.04263694 "DNA-directed RNA polymerase subunit delta"

"JS1\_E20\_00736" 6521 "s59E25H2" 0 "DNA-directed RNA polymerase subunit delta"  
"JS1\_E20\_00736" 6521 "s59E5H2" 0.1168116 "DNA-directed RNA polymerase subunit delta"  
"JS1\_E20\_00736" 6521 "s63E6H2" 0.1447361 "DNA-directed RNA polymerase subunit delta"  
"JS1\_E20\_00737" 6522 "s59E13H2" 0.0231212 "metal-dependent hydrolase"  
"JS1\_E20\_00737" 6522 "s59E25H2" 0 "metal-dependent hydrolase"  
"JS1\_E20\_00737" 6522 "s59E5H2" 0.9541763 "metal-dependent hydrolase"  
"JS1\_E20\_00737" 6522 "s63E6H2" 0.4200686 "metal-dependent hydrolase"  
"JS1\_E20\_00738" 6523 "s59E13H2" 0.06328378 "CTP synthase"  
"JS1\_E20\_00738" 6523 "s59E25H2" 0 "CTP synthase"  
"JS1\_E20\_00738" 6523 "s59E5H2" 0.4507124 "CTP synthase"  
"JS1\_E20\_00738" 6523 "s63E6H2" 0.3798195 "CTP synthase"  
"JS1\_E20\_00739" 6524 "s59E13H2" 0 "2-phospho-L-lactate guanylyltransferase"  
"JS1\_E20\_00739" 6524 "s59E25H2" 0 "2-phospho-L-lactate guanylyltransferase"  
"JS1\_E20\_00739" 6524 "s59E5H2" 0.007363098 "2-phospho-L-lactate guanylyltransferase"  
"JS1\_E20\_00739" 6524 "s63E6H2" 0 "2-phospho-L-lactate guanylyltransferase"  
"JS1\_E20\_00740" 6525 "s59E13H2" 0.1668286 "hypothetical protein"  
"JS1\_E20\_00740" 6525 "s59E25H2" 0 "hypothetical protein"  
"JS1\_E20\_00740" 6525 "s59E5H2" 0.1514909 "hypothetical protein"  
"JS1\_E20\_00740" 6525 "s63E6H2" 0.2164684 "hypothetical protein"  
"JS1\_E20\_00741" 6526 "s59E13H2" 0.1070284 "50S ribosomal protein L31"  
"JS1\_E20\_00741" 6526 "s59E25H2" 0 "50S ribosomal protein L31"  
"JS1\_E20\_00741" 6526 "s59E5H2" 0.07799158 "50S ribosomal protein L31"  
"JS1\_E20\_00741" 6526 "s63E6H2" 0.03132751 "50S ribosomal protein L31"  
"JS1\_E20\_00742" 6527 "s59E13H2" 0.05241536 "Thymidine kinase"  
"JS1\_E20\_00742" 6527 "s59E25H2" 0 "Thymidine kinase"  
"JS1\_E20\_00742" 6527 "s59E5H2" 0.0609098 "Thymidine kinase"  
"JS1\_E20\_00742" 6527 "s63E6H2" 0.2007613 "Thymidine kinase"  
"JS1\_E20\_00743" 6528 "s59E13H2" 0.1032402 "Curli production assembly/transport component CsgG"  
"JS1\_E20\_00743" 6528 "s59E25H2" 0 "Curli production assembly/transport component CsgG"  
"JS1\_E20\_00743" 6528 "s59E5H2" 0.5388447 "Curli production assembly/transport component CsgG"  
"JS1\_E20\_00743" 6528 "s63E6H2" 0.5698282 "Curli production assembly/transport component CsgG"  
"JS1\_E20\_00744" 6529 "s59E13H2" 0.1163343 "hypothetical protein"  
"JS1\_E20\_00744" 6529 "s59E25H2" 0 "hypothetical protein"  
"JS1\_E20\_00744" 6529 "s59E5H2" 0.1813433 "hypothetical protein"  
"JS1\_E20\_00744" 6529 "s63E6H2" 0.6914606 "hypothetical protein"  
"JS1\_E20\_00745" 6530 "s59E13H2" 0 "hypothetical protein"  
"JS1\_E20\_00745" 6530 "s59E25H2" 0 "hypothetical protein"  
"JS1\_E20\_00745" 6530 "s59E5H2" 0.0069843 "hypothetical protein"  
"JS1\_E20\_00745" 6530 "s63E6H2" 0.01292327 "hypothetical protein"  
"JS1\_E20\_00746" 6531 "s59E13H2" 0.007393175 "Magnesium transport protein CorA"  
"JS1\_E20\_00746" 6531 "s59E25H2" 0 "Magnesium transport protein CorA"  
"JS1\_E20\_00746" 6531 "s59E5H2" 1.174384 "Magnesium transport protein CorA"  
"JS1\_E20\_00746" 6531 "s63E6H2" 0.1364729 "Magnesium transport protein CorA"  
"JS1\_E20\_00747" 6532 "s59E13H2" 0.08311041 "Cysteine synthase"  
"JS1\_E20\_00747" 6532 "s59E25H2" 0 "Cysteine synthase"  
"JS1\_E20\_00747" 6532 "s59E5H2" 0.09029411 "Cysteine synthase"  
"JS1\_E20\_00747" 6532 "s63E6H2" 3.272128 "Cysteine synthase"

"JS1\_E20\_00748" 6533 "s59E13H2" 0.07410338 "Cyclic di-GMP phosphodiesterase response regulator RpfG"  
"JS1\_E20\_00748" 6533 "s59E25H2" 0 "Cyclic di-GMP phosphodiesterase response regulator RpfG"  
"JS1\_E20\_00748" 6533 "s59E5H2" 0.6975483 "Cyclic di-GMP phosphodiesterase response regulator RpfG"  
"JS1\_E20\_00748" 6533 "s63E6H2" 0.1136367 "Cyclic di-GMP phosphodiesterase response regulator RpfG"  
"JS1\_E20\_00749" 6534 "s59E13H2" 0.9700119 "Inosine-5'-monophosphate dehydrogenase"  
"JS1\_E20\_00749" 6534 "s59E25H2" 0 "Inosine-5'-monophosphate dehydrogenase"  
"JS1\_E20\_00749" 6534 "s59E5H2" 1.199004 "Inosine-5'-monophosphate dehydrogenase"  
"JS1\_E20\_00749" 6534 "s63E6H2" 0.8835332 "Inosine-5'-monophosphate dehydrogenase"  
"JS1\_E20\_00750" 6535 "s59E13H2" 0 "GDP-mannose-dependent alpha-(1-2)-phosphatidylinositol mannosyltransferase"  
"JS1\_E20\_00750" 6535 "s59E25H2" 0 "GDP-mannose-dependent alpha-(1-2)-phosphatidylinositol mannosyltransferase"  
"JS1\_E20\_00750" 6535 "s59E5H2" 0.1569822 "GDP-mannose-dependent alpha-(1-2)-phosphatidylinositol mannosyltransferase"  
"JS1\_E20\_00750" 6535 "s63E6H2" 0.01553773 "GDP-mannose-dependent alpha-(1-2)-phosphatidylinositol mannosyltransferase"  
"JS1\_E20\_00751" 6536 "s59E13H2" 0.9667446 "DNA double-strand break repair protein Mre11"  
"JS1\_E20\_00751" 6536 "s59E25H2" 0 "DNA double-strand break repair protein Mre11"  
"JS1\_E20\_00751" 6536 "s59E5H2" 0.02429187 "DNA double-strand break repair protein Mre11"  
"JS1\_E20\_00751" 6536 "s63E6H2" 0.01112606 "DNA double-strand break repair protein Mre11"  
"JS1\_E20\_00752" 6537 "s59E13H2" 2.12438 "hypothetical protein"  
"JS1\_E20\_00752" 6537 "s59E25H2" 0 "hypothetical protein"  
"JS1\_E20\_00752" 6537 "s59E5H2" 0.04595758 "hypothetical protein"  
"JS1\_E20\_00752" 6537 "s63E6H2" 0 "hypothetical protein"  
"JS1\_E20\_00754" 6539 "s59E13H2" 1.05432 "hypothetical protein"  
"JS1\_E20\_00754" 6539 "s59E25H2" 0 "hypothetical protein"  
"JS1\_E20\_00754" 6539 "s59E5H2" 0.002957364 "hypothetical protein"  
"JS1\_E20\_00754" 6539 "s63E6H2" 0.001260218 "hypothetical protein"  
"JS1\_E20\_00755" 6540 "s59E13H2" 0 "CoB--CoM heterodisulfide reductase iron-sulfur subunit A"  
"JS1\_E20\_00755" 6540 "s59E25H2" 0 "CoB--CoM heterodisulfide reductase iron-sulfur subunit A"  
"JS1\_E20\_00755" 6540 "s59E5H2" 0.002662104 "CoB--CoM heterodisulfide reductase iron-sulfur subunit A"  
"JS1\_E20\_00755" 6540 "s63E6H2" 0 "CoB--CoM heterodisulfide reductase iron-sulfur subunit A"  
"JS1\_E20\_00756" 6541 "s59E13H2" 0 "F420-non-reducing hydrogenase vhc iron-sulfur subunit D"  
"JS1\_E20\_00756" 6541 "s59E25H2" 0 "F420-non-reducing hydrogenase vhc iron-sulfur subunit D"  
"JS1\_E20\_00756" 6541 "s59E5H2" 0 "F420-non-reducing hydrogenase vhc iron-sulfur subunit D"  
"JS1\_E20\_00756" 6541 "s63E6H2" 0 "F420-non-reducing hydrogenase vhc iron-sulfur subunit D"  
"JS1\_E20\_00757" 6542 "s59E13H2" 0 "Formate dehydrogenase subunit beta"  
"JS1\_E20\_00757" 6542 "s59E25H2" 0 "Formate dehydrogenase subunit beta"  
"JS1\_E20\_00757" 6542 "s59E5H2" 0 "Formate dehydrogenase subunit beta"  
"JS1\_E20\_00757" 6542 "s63E6H2" 0 "Formate dehydrogenase subunit beta"  
"JS1\_E20\_00758" 6543 "s59E13H2" 0.001485362 "Formate dehydrogenase subunit alpha"  
"JS1\_E20\_00758" 6543 "s59E25H2" 0 "Formate dehydrogenase subunit alpha"  
"JS1\_E20\_00758" 6543 "s59E5H2" 0.0705851 "Formate dehydrogenase subunit alpha"  
"JS1\_E20\_00758" 6543 "s63E6H2" 0 "Formate dehydrogenase subunit alpha"  
"JS1\_E20\_00759" 6544 "s59E13H2" 0 "hypothetical protein"  
"JS1\_E20\_00759" 6544 "s59E25H2" 0 "hypothetical protein"  
"JS1\_E20\_00759" 6544 "s59E5H2" 0.02289998 "hypothetical protein"  
"JS1\_E20\_00759" 6544 "s63E6H2" 0 "hypothetical protein"  
"JS1\_E20\_00760" 6545 "s59E13H2" 0 "Bifunctional homocysteine S-methyltransferase/5,10-methylenetetrahydrofolate reductase"  
"JS1\_E20\_00760" 6545 "s59E25H2" 0 "Bifunctional homocysteine S-methyltransferase/5,10-methylenetetrahydrofolate reductase"  
"JS1\_E20\_00760" 6545 "s59E5H2" 0.02807914 "Bifunctional homocysteine S-methyltransferase/5,10-methylenetetrahydrofolate reductase"



"JS1\_E20\_00760" 6545 "s63E6H2" 0 "Bifunctional homocysteine S-methyltransferase/5,10-methylenetetrahydrofolate reductase"  
"JS1\_E20\_00761" 6546 "s59E13H2" 0.1509355 "5-methyltetrahydrofolate:corrinoid/iron-sulfur protein co-methyltransferase"  
"JS1\_E20\_00761" 6546 "s59E25H2" 0 "5-methyltetrahydrofolate:corrinoid/iron-sulfur protein co-methyltransferase"  
"JS1\_E20\_00761" 6546 "s59E5H2" 0.06843624 "5-methyltetrahydrofolate:corrinoid/iron-sulfur protein co-methyltransferase"  
"JS1\_E20\_00761" 6546 "s63E6H2" 0.03660286 "5-methyltetrahydrofolate:corrinoid/iron-sulfur protein co-methyltransferase"  
"JS1\_E20\_00762" 6547 "s59E13H2" 0.9100911 "Formate--tetrahydrofolate ligase"  
"JS1\_E20\_00762" 6547 "s59E25H2" 0 "Formate--tetrahydrofolate ligase"  
"JS1\_E20\_00762" 6547 "s59E5H2" 0.2309821 "Formate--tetrahydrofolate ligase"  
"JS1\_E20\_00762" 6547 "s63E6H2" 0.08693252 "Formate--tetrahydrofolate ligase"  
"JS1\_E20\_00763" 6548 "s59E13H2" 0.08528529 "4-hydroxy-2-oxovalerate aldolase"  
"JS1\_E20\_00763" 6548 "s59E25H2" 0 "4-hydroxy-2-oxovalerate aldolase"  
"JS1\_E20\_00763" 6548 "s59E5H2" 0.02146782 "4-hydroxy-2-oxovalerate aldolase"  
"JS1\_E20\_00763" 6548 "s63E6H2" 0.0004804302 "4-hydroxy-2-oxovalerate aldolase"  
"JS1\_E20\_00764" 6549 "s59E13H2" 0 "Acetaldehyde dehydrogenase"  
"JS1\_E20\_00764" 6549 "s59E25H2" 0 "Acetaldehyde dehydrogenase"  
"JS1\_E20\_00764" 6549 "s59E5H2" 0 "Acetaldehyde dehydrogenase"  
"JS1\_E20\_00764" 6549 "s63E6H2" 0 "Acetaldehyde dehydrogenase"  
"JS1\_E20\_00765" 6550 "s59E13H2" 0 "putative transaldolase"  
"JS1\_E20\_00765" 6550 "s59E25H2" 0 "putative transaldolase"  
"JS1\_E20\_00765" 6550 "s59E5H2" 0 "putative transaldolase"  
"JS1\_E20\_00765" 6550 "s63E6H2" 0 "putative transaldolase"  
"JS1\_E20\_00766" 6551 "s59E13H2" 0 "Alcohol dehydrogenase"  
"JS1\_E20\_00766" 6551 "s59E25H2" 0 "Alcohol dehydrogenase"  
"JS1\_E20\_00766" 6551 "s59E5H2" 0 "Alcohol dehydrogenase"  
"JS1\_E20\_00766" 6551 "s63E6H2" 0 "Alcohol dehydrogenase"  
"JS1\_E20\_00767" 6552 "s59E13H2" 0 "HTH-type transcriptional repressor YvoA"  
"JS1\_E20\_00767" 6552 "s59E25H2" 0 "HTH-type transcriptional repressor YvoA"  
"JS1\_E20\_00767" 6552 "s59E5H2" 0 "HTH-type transcriptional repressor YvoA"  
"JS1\_E20\_00767" 6552 "s63E6H2" 0 "HTH-type transcriptional repressor YvoA"  
"JS1\_E20\_00768" 6553 "s59E13H2" 0 "Vitamin B12 dependent methionine synthase, activation domain"  
"JS1\_E20\_00768" 6553 "s59E25H2" 0 "Vitamin B12 dependent methionine synthase, activation domain"  
"JS1\_E20\_00768" 6553 "s59E5H2" 0.08005708 "Vitamin B12 dependent methionine synthase, activation domain"  
"JS1\_E20\_00768" 6553 "s63E6H2" 0.02657942 "Vitamin B12 dependent methionine synthase, activation domain"  
"JS1\_E20\_00769" 6554 "s59E13H2" 0.1495879 "Chlorosome protein I"  
"JS1\_E20\_00769" 6554 "s59E25H2" 0 "Chlorosome protein I"  
"JS1\_E20\_00769" 6554 "s59E5H2" 0.1481536 "Chlorosome protein I"  
"JS1\_E20\_00769" 6554 "s63E6H2" 0.05487572 "Chlorosome protein I"  
"JS1\_E20\_00770" 6555 "s59E13H2" 0 "Methenyltetrahydrofolate cyclohydrolase"  
"JS1\_E20\_00770" 6555 "s59E25H2" 0 "Methenyltetrahydrofolate cyclohydrolase"  
"JS1\_E20\_00770" 6555 "s59E5H2" 0.0182285 "Methenyltetrahydrofolate cyclohydrolase"  
"JS1\_E20\_00770" 6555 "s63E6H2" 0.02827306 "Methenyltetrahydrofolate cyclohydrolase"  
"JS1\_E20\_00771" 6556 "s59E13H2" 2.585114 "Bifunctional protein FoLD protein"  
"JS1\_E20\_00771" 6556 "s59E25H2" 0 "Bifunctional protein FoLD protein"  
"JS1\_E20\_00771" 6556 "s59E5H2" 2.217025 "Bifunctional protein FoLD protein"  
"JS1\_E20\_00771" 6556 "s63E6H2" 0.3065869 "Bifunctional protein FoLD protein"  
"JS1\_E20\_00772" 6557 "s59E13H2" 0.03513164 "Folate transporter FoLT"  
"JS1\_E20\_00772" 6557 "s59E25H2" 0 "Folate transporter FoLT"

"JS1\_E20\_00772" 6557 "s59E5H2" 0.05355062 "Folate transporter FolT"  
"JS1\_E20\_00772" 6557 "s63E6H2" 0.005449608 "Folate transporter FolT"  
"JS1\_E20\_00774" 6559 "s59E13H2" 0.09134304 "Formate--tetrahydrofolate ligase"  
"JS1\_E20\_00774" 6559 "s59E25H2" 0 "Formate--tetrahydrofolate ligase"  
"JS1\_E20\_00774" 6559 "s59E5H2" 0.1434718 "Formate--tetrahydrofolate ligase"  
"JS1\_E20\_00774" 6559 "s63E6H2" 0.03564042 "Formate--tetrahydrofolate ligase"  
"JS1\_E20\_00776" 6561 "s59E13H2" 0.05076323 "ATP-dependent zinc metalloprotease FtsH"  
"JS1\_E20\_00776" 6561 "s59E25H2" 0 "ATP-dependent zinc metalloprotease FtsH"  
"JS1\_E20\_00776" 6561 "s59E5H2" 0.2076707 "ATP-dependent zinc metalloprotease FtsH"  
"JS1\_E20\_00776" 6561 "s63E6H2" 0.06061162 "ATP-dependent zinc metalloprotease FtsH"  
"JS1\_E20\_00777" 6562 "s59E13H2" 0.01161772 "Hypoxanthine-guanine phosphoribosyltransferase"  
"JS1\_E20\_00777" 6562 "s59E25H2" 0 "Hypoxanthine-guanine phosphoribosyltransferase"  
"JS1\_E20\_00777" 6562 "s59E5H2" 0.2561746 "Hypoxanthine-guanine phosphoribosyltransferase"  
"JS1\_E20\_00777" 6562 "s63E6H2" 0.09979893 "Hypoxanthine-guanine phosphoribosyltransferase"  
"JS1\_E20\_00778" 6563 "s59E13H2" 0.04585169 "tRNA(Ile)-lysidine synthase"  
"JS1\_E20\_00778" 6563 "s59E25H2" 0 "tRNA(Ile)-lysidine synthase"  
"JS1\_E20\_00778" 6563 "s59E5H2" 0.2063584 "tRNA(Ile)-lysidine synthase"  
"JS1\_E20\_00778" 6563 "s63E6H2" 0.2873203 "tRNA(Ile)-lysidine synthase"  
"JS1\_E20\_00781" 6566 "s59E13H2" 2.806474 "Tripartite tricarboxylate transporter family receptor"  
"JS1\_E20\_00781" 6566 "s59E25H2" 0.1492537 "Tripartite tricarboxylate transporter family receptor"  
"JS1\_E20\_00781" 6566 "s59E5H2" 2.335312 "Tripartite tricarboxylate transporter family receptor"  
"JS1\_E20\_00781" 6566 "s63E6H2" 9.626237 "Tripartite tricarboxylate transporter family receptor"  
"JS1\_E20\_00782" 6567 "s59E13H2" 0.09340013 "Glutamyl-tRNA(Gln) amidotransferase subunit A"  
"JS1\_E20\_00782" 6567 "s59E25H2" 0 "Glutamyl-tRNA(Gln) amidotransferase subunit A"  
"JS1\_E20\_00782" 6567 "s59E5H2" 0.5389015 "Glutamyl-tRNA(Gln) amidotransferase subunit A"  
"JS1\_E20\_00782" 6567 "s63E6H2" 0.4494344 "Glutamyl-tRNA(Gln) amidotransferase subunit A"  
"JS1\_E20\_00783" 6568 "s59E13H2" 0.07661916 "Putative N-acetylmannosaminyltransferase"  
"JS1\_E20\_00783" 6568 "s59E25H2" 0 "Putative N-acetylmannosaminyltransferase"  
"JS1\_E20\_00783" 6568 "s59E5H2" 0.3841216 "Putative N-acetylmannosaminyltransferase"  
"JS1\_E20\_00783" 6568 "s63E6H2" 0.7755762 "Putative N-acetylmannosaminyltransferase"  
"JS1\_E20\_00784" 6569 "s59E13H2" 0.1252291 "rod shape-determining protein MreD"  
"JS1\_E20\_00784" 6569 "s59E25H2" 0 "rod shape-determining protein MreD"  
"JS1\_E20\_00784" 6569 "s59E5H2" 0.3300364 "rod shape-determining protein MreD"  
"JS1\_E20\_00784" 6569 "s63E6H2" 0.08467493 "rod shape-determining protein MreD"  
"JS1\_E20\_00785" 6570 "s59E13H2" 0.05397376 "tetratricopeptide repeat protein"  
"JS1\_E20\_00785" 6570 "s59E25H2" 0 "tetratricopeptide repeat protein"  
"JS1\_E20\_00785" 6570 "s59E5H2" 0.06303581 "tetratricopeptide repeat protein"  
"JS1\_E20\_00785" 6570 "s63E6H2" 0.0348303 "tetratricopeptide repeat protein"  
"JS1\_E20\_00786" 6571 "s59E13H2" 0.04034549 "Tyrosine recombinase XerD"  
"JS1\_E20\_00786" 6571 "s59E25H2" 0 "Tyrosine recombinase XerD"  
"JS1\_E20\_00786" 6571 "s59E5H2" 0.007359273 "Tyrosine recombinase XerD"  
"JS1\_E20\_00786" 6571 "s63E6H2" 0.02859666 "Tyrosine recombinase XerD"  
"JS1\_E20\_00787" 6572 "s59E13H2" 0.272988 "Purine nucleoside phosphorylase 1"  
"JS1\_E20\_00787" 6572 "s59E25H2" 0 "Purine nucleoside phosphorylase 1"  
"JS1\_E20\_00787" 6572 "s59E5H2" 0.2526869 "Purine nucleoside phosphorylase 1"  
"JS1\_E20\_00787" 6572 "s63E6H2" 0.2202619 "Purine nucleoside phosphorylase 1"  
"JS1\_E20\_00788" 6573 "s59E13H2" 0.2947868 "Putative small multi-drug export protein"

"JS1\_E20\_00788" 6573 "s59E25H2" 0 "Putative small multi-drug export protein"  
"JS1\_E20\_00788" 6573 "s59E5H2" 0.2113176 "Putative small multi-drug export protein"  
"JS1\_E20\_00788" 6573 "s63E6H2" 0.3363874 "Putative small multi-drug export protein"  
"JS1\_E20\_00789" 6574 "s59E13H2" 0.1073498 "Methylthioribose-1-phosphate isomerase"  
"JS1\_E20\_00789" 6574 "s59E25H2" 0 "Methylthioribose-1-phosphate isomerase"  
"JS1\_E20\_00789" 6574 "s59E5H2" 0.0838533 "Methylthioribose-1-phosphate isomerase"  
"JS1\_E20\_00789" 6574 "s63E6H2" 0.0467576 "Methylthioribose-1-phosphate isomerase"  
"JS1\_E20\_00790" 6575 "s59E13H2" 0.2634148 "UDP-N-acetylglucosamine 1-carboxyvinyltransferase 1"  
"JS1\_E20\_00790" 6575 "s59E25H2" 0 "UDP-N-acetylglucosamine 1-carboxyvinyltransferase 1"  
"JS1\_E20\_00790" 6575 "s59E5H2" 0.3902753 "UDP-N-acetylglucosamine 1-carboxyvinyltransferase 1"  
"JS1\_E20\_00790" 6575 "s63E6H2" 0.2518405 "UDP-N-acetylglucosamine 1-carboxyvinyltransferase 1"  
"JS1\_E20\_00791" 6576 "s59E13H2" 1.254797 "Rod shape-determining protein MreB"  
"JS1\_E20\_00791" 6576 "s59E25H2" 0 "Rod shape-determining protein MreB"  
"JS1\_E20\_00791" 6576 "s59E5H2" 0.219233 "Rod shape-determining protein MreB"  
"JS1\_E20\_00791" 6576 "s63E6H2" 0.4579253 "Rod shape-determining protein MreB"  
"JS1\_E20\_00792" 6577 "s59E13H2" 0.3288772 "SpoIVB peptidase S55"  
"JS1\_E20\_00792" 6577 "s59E25H2" 0 "SpoIVB peptidase S55"  
"JS1\_E20\_00792" 6577 "s59E5H2" 0.1642439 "SpoIVB peptidase S55"  
"JS1\_E20\_00792" 6577 "s63E6H2" 0.08933178 "SpoIVB peptidase S55"  
"JS1\_E20\_00794" 6579 "s59E13H2" 0.399475 "Putative 2-C-methyl-D-erythritol 4-phosphate cytidyltransferase 2"  
"JS1\_E20\_00794" 6579 "s59E25H2" 0 "Putative 2-C-methyl-D-erythritol 4-phosphate cytidyltransferase 2"  
"JS1\_E20\_00794" 6579 "s59E5H2" 0.1070707 "Putative 2-C-methyl-D-erythritol 4-phosphate cytidyltransferase 2"  
"JS1\_E20\_00794" 6579 "s63E6H2" 0.3414706 "Putative 2-C-methyl-D-erythritol 4-phosphate cytidyltransferase 2"  
"JS1\_E20\_00795" 6580 "s59E13H2" 0.2472559 "4-diphosphocytidyl-2-C-methyl-D-erythritol kinase"  
"JS1\_E20\_00795" 6580 "s59E25H2" 0 "4-diphosphocytidyl-2-C-methyl-D-erythritol kinase"  
"JS1\_E20\_00795" 6580 "s59E5H2" 0.09424723 "4-diphosphocytidyl-2-C-methyl-D-erythritol kinase"  
"JS1\_E20\_00795" 6580 "s63E6H2" 0.3006981 "4-diphosphocytidyl-2-C-methyl-D-erythritol kinase"  
"JS1\_E20\_00796" 6581 "s59E13H2" 0.08936555 "2-C-methyl-D-erythritol 2,4-cyclodiphosphate synthase"  
"JS1\_E20\_00796" 6581 "s59E25H2" 0 "2-C-methyl-D-erythritol 2,4-cyclodiphosphate synthase"  
"JS1\_E20\_00796" 6581 "s59E5H2" 0.1011063 "2-C-methyl-D-erythritol 2,4-cyclodiphosphate synthase"  
"JS1\_E20\_00796" 6581 "s63E6H2" 0.05929145 "2-C-methyl-D-erythritol 2,4-cyclodiphosphate synthase"  
"JS1\_E20\_00797" 6582 "s59E13H2" 0.4281437 "hypothetical protein"  
"JS1\_E20\_00797" 6582 "s59E25H2" 0 "hypothetical protein"  
"JS1\_E20\_00797" 6582 "s59E5H2" 0.05334838 "hypothetical protein"  
"JS1\_E20\_00797" 6582 "s63E6H2" 0.09572976 "hypothetical protein"  
"JS1\_E20\_00798" 6583 "s59E13H2" 0.3941502 "lipoprotein Nlpl"  
"JS1\_E20\_00798" 6583 "s59E25H2" 0 "lipoprotein Nlpl"  
"JS1\_E20\_00798" 6583 "s59E5H2" 0.1591262 "lipoprotein Nlpl"  
"JS1\_E20\_00798" 6583 "s63E6H2" 0.07855359 "lipoprotein Nlpl"  
"JS1\_E20\_00799" 6584 "s59E13H2" 0.001383835 "putative nicotinate-nucleotide adenyltransferase"  
"JS1\_E20\_00799" 6584 "s59E25H2" 0 "putative nicotinate-nucleotide adenyltransferase"  
"JS1\_E20\_00799" 6584 "s59E5H2" 0.3591479 "putative nicotinate-nucleotide adenyltransferase"  
"JS1\_E20\_00799" 6584 "s63E6H2" 0.08884463 "putative nicotinate-nucleotide adenyltransferase"  
"JS1\_E20\_00800" 6585 "s59E13H2" 0.1025173 "putative HTH-type transcriptional regulator YdfH"  
"JS1\_E20\_00800" 6585 "s59E25H2" 0.2061856 "putative HTH-type transcriptional regulator YdfH"  
"JS1\_E20\_00800" 6585 "s59E5H2" 0.01598889 "putative HTH-type transcriptional regulator YdfH"  
"JS1\_E20\_00800" 6585 "s63E6H2" 0.1503318 "putative HTH-type transcriptional regulator YdfH"

"JS1\_E20\_00801" 6586 "s59E13H2" 0.154478 "Uracil DNA glycosylase superfamily protein"  
"JS1\_E20\_00801" 6586 "s59E25H2" 0.2142857 "Uracil DNA glycosylase superfamily protein"  
"JS1\_E20\_00801" 6586 "s59E5H2" 0.6613725 "Uracil DNA glycosylase superfamily protein"  
"JS1\_E20\_00801" 6586 "s63E6H2" 0.06940522 "Uracil DNA glycosylase superfamily protein"  
"JS1\_E20\_00803" 6588 "s59E13H2" 0.196899 "N5-carboxyaminoimidazole ribonucleotide mutase"  
"JS1\_E20\_00803" 6588 "s59E25H2" 0 "N5-carboxyaminoimidazole ribonucleotide mutase"  
"JS1\_E20\_00803" 6588 "s59E5H2" 0.4805376 "N5-carboxyaminoimidazole ribonucleotide mutase"  
"JS1\_E20\_00803" 6588 "s63E6H2" 0.01285116 "N5-carboxyaminoimidazole ribonucleotide mutase"  
"JS1\_E20\_00804" 6589 "s59E13H2" 0.02855669 "Phosphoribosylaminoimidazole-succinocarboxamide synthase"  
"JS1\_E20\_00804" 6589 "s59E25H2" 0 "Phosphoribosylaminoimidazole-succinocarboxamide synthase"  
"JS1\_E20\_00804" 6589 "s59E5H2" 0.1005825 "Phosphoribosylaminoimidazole-succinocarboxamide synthase"  
"JS1\_E20\_00804" 6589 "s63E6H2" 0.012943 "Phosphoribosylaminoimidazole-succinocarboxamide synthase"  
"JS1\_E20\_00805" 6590 "s59E13H2" 0.02891986 "D-allose-binding periplasmic protein precursor"  
"JS1\_E20\_00805" 6590 "s59E25H2" 0.2246604 "D-allose-binding periplasmic protein precursor"  
"JS1\_E20\_00805" 6590 "s59E5H2" 0.1292195 "D-allose-binding periplasmic protein precursor"  
"JS1\_E20\_00805" 6590 "s63E6H2" 0.9197387 "D-allose-binding periplasmic protein precursor"  
"JS1\_E20\_00806" 6591 "s59E13H2" 0.1162878 "Galactose/methyl galactoside import ATP-binding protein MglA"  
"JS1\_E20\_00806" 6591 "s59E25H2" 0 "Galactose/methyl galactoside import ATP-binding protein MglA"  
"JS1\_E20\_00806" 6591 "s59E5H2" 0.08486378 "Galactose/methyl galactoside import ATP-binding protein MglA"  
"JS1\_E20\_00806" 6591 "s63E6H2" 0.8136735 "Galactose/methyl galactoside import ATP-binding protein MglA"  
"JS1\_E20\_00807" 6592 "s59E13H2" 0.1779142 "Ribose transport system permease protein RbsC"  
"JS1\_E20\_00807" 6592 "s59E25H2" 0 "Ribose transport system permease protein RbsC"  
"JS1\_E20\_00807" 6592 "s59E5H2" 0.09751381 "Ribose transport system permease protein RbsC"  
"JS1\_E20\_00807" 6592 "s63E6H2" 0.9549657 "Ribose transport system permease protein RbsC"  
"JS1\_E20\_00808" 6593 "s59E13H2" 0 "L-fucose mutarotase"  
"JS1\_E20\_00808" 6593 "s59E25H2" 0 "L-fucose mutarotase"  
"JS1\_E20\_00808" 6593 "s59E5H2" 0.09058354 "L-fucose mutarotase"  
"JS1\_E20\_00808" 6593 "s63E6H2" 0.8726769 "L-fucose mutarotase"  
"JS1\_E20\_00809" 6594 "s59E13H2" 0.001772577 "putative sugar kinase"  
"JS1\_E20\_00809" 6594 "s59E25H2" 0 "putative sugar kinase"  
"JS1\_E20\_00809" 6594 "s59E5H2" 0.06763978 "putative sugar kinase"  
"JS1\_E20\_00809" 6594 "s63E6H2" 0.8282955 "putative sugar kinase"  
"JS1\_E20\_00810" 6595 "s59E13H2" 0.458504 "L-fucose isomerase"  
"JS1\_E20\_00810" 6595 "s59E25H2" 0 "L-fucose isomerase"  
"JS1\_E20\_00810" 6595 "s59E5H2" 0.521509 "L-fucose isomerase"  
"JS1\_E20\_00810" 6595 "s63E6H2" 0.5620214 "L-fucose isomerase"  
"JS1\_E20\_00811" 6596 "s59E13H2" 0.101087 "DNA-binding transcriptional repressor SrlR"  
"JS1\_E20\_00811" 6596 "s59E25H2" 0 "DNA-binding transcriptional repressor SrlR"  
"JS1\_E20\_00811" 6596 "s59E5H2" 0.504095 "DNA-binding transcriptional repressor SrlR"  
"JS1\_E20\_00811" 6596 "s63E6H2" 0.4055689 "DNA-binding transcriptional repressor SrlR"  
"JS1\_E20\_00812" 6597 "s59E13H2" 0.08546575 "Pyruvate dehydrogenase E1 component subunit beta"  
"JS1\_E20\_00812" 6597 "s59E25H2" 0 "Pyruvate dehydrogenase E1 component subunit beta"  
"JS1\_E20\_00812" 6597 "s59E5H2" 0.7194459 "Pyruvate dehydrogenase E1 component subunit beta"  
"JS1\_E20\_00812" 6597 "s63E6H2" 0.2245205 "Pyruvate dehydrogenase E1 component subunit beta"  
"JS1\_E20\_00813" 6598 "s59E13H2" 0.0438342 "Dihydrolipoyllysine-residue acetyltransferase component of pyruvate dehydrogenase complex"  
"JS1\_E20\_00813" 6598 "s59E25H2" 0 "Dihydrolipoyllysine-residue acetyltransferase component of pyruvate dehydrogenase complex"  
"JS1\_E20\_00813" 6598 "s59E5H2" 0.2267299 "Dihydrolipoyllysine-residue acetyltransferase component of pyruvate dehydrogenase complex"

"JS1\_E20\_00813" 6598 "s63E6H2" 0.07078832 "Dihydrolipoyllysine-residue acetyltransferase component of pyruvate dehydrogenase complex"  
"JS1\_E20\_00814" 6599 "s59E13H2" 0.3561332 "Rhamnulokinase"  
"JS1\_E20\_00814" 6599 "s59E25H2" 0 "Rhamnulokinase"  
"JS1\_E20\_00814" 6599 "s59E5H2" 0.4441311 "Rhamnulokinase"  
"JS1\_E20\_00814" 6599 "s63E6H2" 0.2771611 "Rhamnulokinase"  
"JS1\_E20\_00815" 6600 "s59E13H2" 0.04910349 "short chain dehydrogenase"  
"JS1\_E20\_00815" 6600 "s59E25H2" 0 "short chain dehydrogenase"  
"JS1\_E20\_00815" 6600 "s59E5H2" 0.1846781 "short chain dehydrogenase"  
"JS1\_E20\_00815" 6600 "s63E6H2" 0.9123249 "short chain dehydrogenase"  
"JS1\_E20\_00816" 6601 "s59E13H2" 0.08280467 "L-rhamnose mutarotase"  
"JS1\_E20\_00816" 6601 "s59E25H2" 0 "L-rhamnose mutarotase"  
"JS1\_E20\_00816" 6601 "s59E5H2" 0.07776485 "L-rhamnose mutarotase"  
"JS1\_E20\_00816" 6601 "s63E6H2" 1.825331 "L-rhamnose mutarotase"  
"JS1\_E20\_00817" 6602 "s59E13H2" 0.1749332 "Autoinducer 2 import system permease protein LsrD"  
"JS1\_E20\_00817" 6602 "s59E25H2" 0 "Autoinducer 2 import system permease protein LsrD"  
"JS1\_E20\_00817" 6602 "s59E5H2" 0.08720959 "Autoinducer 2 import system permease protein LsrD"  
"JS1\_E20\_00817" 6602 "s63E6H2" 1.977986 "Autoinducer 2 import system permease protein LsrD"  
"JS1\_E20\_00818" 6603 "s59E13H2" 0.3701496 "Ribose transport system permease protein RbsC"  
"JS1\_E20\_00818" 6603 "s59E25H2" 0 "Ribose transport system permease protein RbsC"  
"JS1\_E20\_00818" 6603 "s59E5H2" 0.4692809 "Ribose transport system permease protein RbsC"  
"JS1\_E20\_00818" 6603 "s63E6H2" 2.801505 "Ribose transport system permease protein RbsC"  
"JS1\_E20\_00819" 6604 "s59E13H2" 0.1402264 "Ribose import ATP-binding protein RbsA"  
"JS1\_E20\_00819" 6604 "s59E25H2" 0.6497634 "Ribose import ATP-binding protein RbsA"  
"JS1\_E20\_00819" 6604 "s59E5H2" 0.4305591 "Ribose import ATP-binding protein RbsA"  
"JS1\_E20\_00819" 6604 "s63E6H2" 2.81208 "Ribose import ATP-binding protein RbsA"  
"JS1\_E20\_00820" 6605 "s59E13H2" 1.36252 "Anaerobic regulatory protein"  
"JS1\_E20\_00820" 6605 "s59E25H2" 0 "Anaerobic regulatory protein"  
"JS1\_E20\_00820" 6605 "s59E5H2" 0.2440445 "Anaerobic regulatory protein"  
"JS1\_E20\_00820" 6605 "s63E6H2" 0.09010376 "Anaerobic regulatory protein"  
"JS1\_E20\_00821" 6606 "s59E13H2" 0.007388385 "hypothetical protein"  
"JS1\_E20\_00821" 6606 "s59E25H2" 0 "hypothetical protein"  
"JS1\_E20\_00821" 6606 "s59E5H2" 0.0941001 "hypothetical protein"  
"JS1\_E20\_00821" 6606 "s63E6H2" 0.03984772 "hypothetical protein"  
"JS1\_E20\_00822" 6607 "s59E13H2" 0.05007843 "hypothetical protein"  
"JS1\_E20\_00822" 6607 "s59E25H2" 0 "hypothetical protein"  
"JS1\_E20\_00822" 6607 "s59E5H2" 1.503638 "hypothetical protein"  
"JS1\_E20\_00822" 6607 "s63E6H2" 0.1811805 "hypothetical protein"  
"JS1\_E20\_00823" 6608 "s59E13H2" 0.03930488 "Lipoprotein-releasing system transmembrane protein LolE"  
"JS1\_E20\_00823" 6608 "s59E25H2" 0 "Lipoprotein-releasing system transmembrane protein LolE"  
"JS1\_E20\_00823" 6608 "s59E5H2" 0.7089905 "Lipoprotein-releasing system transmembrane protein LolE"  
"JS1\_E20\_00823" 6608 "s63E6H2" 0.1327961 "Lipoprotein-releasing system transmembrane protein LolE"  
"JS1\_E20\_00824" 6609 "s59E13H2" 0.03023634 "Lipoprotein-releasing system transmembrane protein LolE"  
"JS1\_E20\_00824" 6609 "s59E25H2" 0 "Lipoprotein-releasing system transmembrane protein LolE"  
"JS1\_E20\_00824" 6609 "s59E5H2" 0.8152709 "Lipoprotein-releasing system transmembrane protein LolE"  
"JS1\_E20\_00824" 6609 "s63E6H2" 0.3104363 "Lipoprotein-releasing system transmembrane protein LolE"  
"JS1\_E20\_00825" 6610 "s59E13H2" 0.002610867 "putative ABC transporter ATP-binding protein"  
"JS1\_E20\_00825" 6610 "s59E25H2" 0 "putative ABC transporter ATP-binding protein"

"JS1\_E20\_00825" 6610 "s59E5H2" 0.5347522 "putative ABC transporter ATP-binding protein"  
"JS1\_E20\_00825" 6610 "s63E6H2" 0.02549777 "putative ABC transporter ATP-binding protein"  
"JS1\_E20\_00826" 6611 "s59E13H2" 0.07987201 "Autoinducer 2-binding protein LsrB precursor"  
"JS1\_E20\_00826" 6611 "s59E25H2" 0 "Autoinducer 2-binding protein LsrB precursor"  
"JS1\_E20\_00826" 6611 "s59E5H2" 0.8088175 "Autoinducer 2-binding protein LsrB precursor"  
"JS1\_E20\_00826" 6611 "s63E6H2" 2.477793 "Autoinducer 2-binding protein LsrB precursor"  
"JS1\_E20\_00827" 6612 "s59E13H2" 0.1094678 "hypothetical protein"  
"JS1\_E20\_00827" 6612 "s59E25H2" 0 "hypothetical protein"  
"JS1\_E20\_00827" 6612 "s59E5H2" 0.1873356 "hypothetical protein"  
"JS1\_E20\_00827" 6612 "s63E6H2" 0.06544886 "hypothetical protein"  
"JS1\_E20\_00828" 6613 "s59E13H2" 0.04113141 "D-aminoacylase"  
"JS1\_E20\_00828" 6613 "s59E25H2" 0 "D-aminoacylase"  
"JS1\_E20\_00828" 6613 "s59E5H2" 0.2433727 "D-aminoacylase"  
"JS1\_E20\_00828" 6613 "s63E6H2" 0.1305424 "D-aminoacylase"  
"JS1\_E20\_00829" 6614 "s59E13H2" 0.8931934 "Gamma-glutamyl-gamma-aminobutyrate hydrolase PuuD"  
"JS1\_E20\_00829" 6614 "s59E25H2" 0 "Gamma-glutamyl-gamma-aminobutyrate hydrolase PuuD"  
"JS1\_E20\_00829" 6614 "s59E5H2" 0.01277288 "Gamma-glutamyl-gamma-aminobutyrate hydrolase PuuD"  
"JS1\_E20\_00829" 6614 "s63E6H2" 0.01633158 "Gamma-glutamyl-gamma-aminobutyrate hydrolase PuuD"  
"JS1\_E20\_00830" 6615 "s59E13H2" 0.08854704 "Transposase IS200 like protein"  
"JS1\_E20\_00830" 6615 "s59E25H2" 0 "Transposase IS200 like protein"  
"JS1\_E20\_00830" 6615 "s59E5H2" 0.7202381 "Transposase IS200 like protein"  
"JS1\_E20\_00830" 6615 "s63E6H2" 0.2630943 "Transposase IS200 like protein"  
"JS1\_E20\_00831" 6616 "s59E13H2" 0.02113542 "Opine dehydrogenase"  
"JS1\_E20\_00831" 6616 "s59E25H2" 0 "Opine dehydrogenase"  
"JS1\_E20\_00831" 6616 "s59E5H2" 0.02887077 "Opine dehydrogenase"  
"JS1\_E20\_00831" 6616 "s63E6H2" 0.02681319 "Opine dehydrogenase"  
"JS1\_E20\_00832" 6617 "s59E13H2" 0.001947033 "hypothetical protein"  
"JS1\_E20\_00832" 6617 "s59E25H2" 0 "hypothetical protein"  
"JS1\_E20\_00832" 6617 "s59E5H2" 0.06101046 "hypothetical protein"  
"JS1\_E20\_00832" 6617 "s63E6H2" 0.1752804 "hypothetical protein"  
"JS1\_E20\_00833" 6618 "s59E13H2" 0 "Transposase"  
"JS1\_E20\_00833" 6618 "s59E25H2" 0 "Transposase"  
"JS1\_E20\_00833" 6618 "s59E5H2" 0 "Transposase"  
"JS1\_E20\_00833" 6618 "s63E6H2" 0.0726431 "Transposase"  
"JS1\_E20\_00834" 6619 "s59E13H2" 0.002008495 "hypothetical protein"  
"JS1\_E20\_00834" 6619 "s59E25H2" 0 "hypothetical protein"  
"JS1\_E20\_00834" 6619 "s59E5H2" 0.2342533 "hypothetical protein"  
"JS1\_E20\_00834" 6619 "s63E6H2" 0.2330512 "hypothetical protein"  
"JS1\_E20\_00835" 6620 "s59E13H2" 0.004548267 "Aspartate racemase"  
"JS1\_E20\_00835" 6620 "s59E25H2" 0 "Aspartate racemase"  
"JS1\_E20\_00835" 6620 "s59E5H2" 0 "Aspartate racemase"  
"JS1\_E20\_00835" 6620 "s63E6H2" 0.1344428 "Aspartate racemase"  
"JS1\_E20\_00836" 6621 "s59E13H2" 1.389834 "Argininosuccinate lyase 1"  
"JS1\_E20\_00836" 6621 "s59E25H2" 0 "Argininosuccinate lyase 1"  
"JS1\_E20\_00836" 6621 "s59E5H2" 0.02605987 "Argininosuccinate lyase 1"  
"JS1\_E20\_00836" 6621 "s63E6H2" 0.07562054 "Argininosuccinate lyase 1"  
"JS1\_E20\_00837" 6622 "s59E13H2" 2.687079 "Argininosuccinate synthase"

"JS1\_E20\_00837" 6622 "s59E25H2" 0 "Argininosuccinate synthase"  
"JS1\_E20\_00837" 6622 "s59E5H2" 0.1145306 "Argininosuccinate synthase"  
"JS1\_E20\_00837" 6622 "s63E6H2" 0.09305951 "Argininosuccinate synthase"  
"JS1\_E20\_00838" 6623 "s59E13H2" 1.242356 "Acetylornithine aminotransferase"  
"JS1\_E20\_00838" 6623 "s59E25H2" 0 "Acetylornithine aminotransferase"  
"JS1\_E20\_00838" 6623 "s59E5H2" 0.05759218 "Acetylornithine aminotransferase"  
"JS1\_E20\_00838" 6623 "s63E6H2" 0.09459375 "Acetylornithine aminotransferase"  
"JS1\_E20\_00839" 6624 "s59E13H2" 0.240654 "Acetylglutamate kinase"  
"JS1\_E20\_00839" 6624 "s59E25H2" 0 "Acetylglutamate kinase"  
"JS1\_E20\_00839" 6624 "s59E5H2" 0.03788252 "Acetylglutamate kinase"  
"JS1\_E20\_00839" 6624 "s63E6H2" 0.1684005 "Acetylglutamate kinase"  
"JS1\_E20\_00840" 6625 "s59E13H2" 0.01298377 "Arginine biosynthesis bifunctional protein ArgJ"  
"JS1\_E20\_00840" 6625 "s59E25H2" 0 "Arginine biosynthesis bifunctional protein ArgJ"  
"JS1\_E20\_00840" 6625 "s59E5H2" 0.02096981 "Arginine biosynthesis bifunctional protein ArgJ"  
"JS1\_E20\_00840" 6625 "s63E6H2" 0.01724442 "Arginine biosynthesis bifunctional protein ArgJ"  
"JS1\_E20\_00841" 6626 "s59E13H2" 0.006910004 "N-acetyl-gamma-glutamyl-phosphate reductase"  
"JS1\_E20\_00841" 6626 "s59E25H2" 0 "N-acetyl-gamma-glutamyl-phosphate reductase"  
"JS1\_E20\_00841" 6626 "s59E5H2" 0.02727761 "N-acetyl-gamma-glutamyl-phosphate reductase"  
"JS1\_E20\_00841" 6626 "s63E6H2" 0.02855786 "N-acetyl-gamma-glutamyl-phosphate reductase"  
"JS1\_E20\_00843" 6628 "s59E13H2" 0.03583616 "Orotate phosphoribosyltransferase"  
"JS1\_E20\_00843" 6628 "s59E25H2" 0 "Orotate phosphoribosyltransferase"  
"JS1\_E20\_00843" 6628 "s59E5H2" 0.02180963 "Orotate phosphoribosyltransferase"  
"JS1\_E20\_00843" 6628 "s63E6H2" 0.07550789 "Orotate phosphoribosyltransferase"  
"JS1\_E20\_00844" 6629 "s59E13H2" 0.04578619 "Orotidine 5'-phosphate decarboxylase"  
"JS1\_E20\_00844" 6629 "s59E25H2" 0 "Orotidine 5'-phosphate decarboxylase"  
"JS1\_E20\_00844" 6629 "s59E5H2" 0.6746403 "Orotidine 5'-phosphate decarboxylase"  
"JS1\_E20\_00844" 6629 "s63E6H2" 0.09102187 "Orotidine 5'-phosphate decarboxylase"  
"JS1\_E20\_00845" 6630 "s59E13H2" 0.06404762 "Dihydroorotate dehydrogenase B (NAD(+) ), catalytic subunit"  
"JS1\_E20\_00845" 6630 "s59E25H2" 0 "Dihydroorotate dehydrogenase B (NAD(+) ), catalytic subunit"  
"JS1\_E20\_00845" 6630 "s59E5H2" 0.03626662 "Dihydroorotate dehydrogenase B (NAD(+) ), catalytic subunit"  
"JS1\_E20\_00845" 6630 "s63E6H2" 0.0435179 "Dihydroorotate dehydrogenase B (NAD(+) ), catalytic subunit"  
"JS1\_E20\_00846" 6631 "s59E13H2" 0.00718515 "Dihydroorotate dehydrogenase B (NAD(+) ), electron transfer subunit"  
"JS1\_E20\_00846" 6631 "s59E25H2" 0 "Dihydroorotate dehydrogenase B (NAD(+) ), electron transfer subunit"  
"JS1\_E20\_00846" 6631 "s59E5H2" 0.05478817 "Dihydroorotate dehydrogenase B (NAD(+) ), electron transfer subunit"  
"JS1\_E20\_00846" 6631 "s63E6H2" 0.06265882 "Dihydroorotate dehydrogenase B (NAD(+) ), electron transfer subunit"  
"JS1\_F07\_00001" 6632 "s59E13H2" 0.4689031 "D-ribose-binding periplasmic protein precursor"  
"JS1\_F07\_00001" 6632 "s59E25H2" 0 "D-ribose-binding periplasmic protein precursor"  
"JS1\_F07\_00001" 6632 "s59E5H2" 0.5111464 "D-ribose-binding periplasmic protein precursor"  
"JS1\_F07\_00001" 6632 "s63E6H2" 0.2725517 "D-ribose-binding periplasmic protein precursor"  
"JS1\_F07\_00002" 6633 "s59E13H2" 0.06725003 "Ribose transport system permease protein RbsC"  
"JS1\_F07\_00002" 6633 "s59E25H2" 0 "Ribose transport system permease protein RbsC"  
"JS1\_F07\_00002" 6633 "s59E5H2" 0.3403433 "Ribose transport system permease protein RbsC"  
"JS1\_F07\_00002" 6633 "s63E6H2" 0.004406243 "Ribose transport system permease protein RbsC"  
"JS1\_F07\_00003" 6634 "s59E13H2" 0.1118966 "Ribose transport system permease protein RbsC"  
"JS1\_F07\_00003" 6634 "s59E25H2" 0 "Ribose transport system permease protein RbsC"  
"JS1\_F07\_00003" 6634 "s59E5H2" 0.04860509 "Ribose transport system permease protein RbsC"  
"JS1\_F07\_00003" 6634 "s63E6H2" 0.01349636 "Ribose transport system permease protein RbsC"

"JS1\_F07\_00004" 6635 "s59E13H2" 0.1554848 "Ribose import ATP-binding protein RbsA"  
"JS1\_F07\_00004" 6635 "s59E25H2" 0 "Ribose import ATP-binding protein RbsA"  
"JS1\_F07\_00004" 6635 "s59E5H2" 0.06831044 "Ribose import ATP-binding protein RbsA"  
"JS1\_F07\_00004" 6635 "s63E6H2" 0.01440408 "Ribose import ATP-binding protein RbsA"  
"JS1\_F07\_00005" 6636 "s59E13H2" 0.735474 "Mannitol-1-phosphate 5-dehydrogenase"  
"JS1\_F07\_00005" 6636 "s59E25H2" 0 "Mannitol-1-phosphate 5-dehydrogenase"  
"JS1\_F07\_00005" 6636 "s59E5H2" 0.4109952 "Mannitol-1-phosphate 5-dehydrogenase"  
"JS1\_F07\_00005" 6636 "s63E6H2" 0.9460786 "Mannitol-1-phosphate 5-dehydrogenase"  
"JS1\_F07\_00006" 6637 "s59E13H2" 0.4525395 "putative sugar kinase YdjH"  
"JS1\_F07\_00006" 6637 "s59E25H2" 0 "putative sugar kinase YdjH"  
"JS1\_F07\_00006" 6637 "s59E5H2" 0.4626797 "putative sugar kinase YdjH"  
"JS1\_F07\_00006" 6637 "s63E6H2" 0.3799157 "putative sugar kinase YdjH"  
"JS1\_F07\_00007" 6638 "s59E13H2" 0.08370885 "putative D-lyxose ketol-isomerase"  
"JS1\_F07\_00007" 6638 "s59E25H2" 0 "putative D-lyxose ketol-isomerase"  
"JS1\_F07\_00007" 6638 "s59E5H2" 0.3273848 "putative D-lyxose ketol-isomerase"  
"JS1\_F07\_00007" 6638 "s63E6H2" 0.5821232 "putative D-lyxose ketol-isomerase"  
"JS1\_F07\_00008" 6639 "s59E13H2" 0.0590527 "ureidoglycolate hydrolase"  
"JS1\_F07\_00008" 6639 "s59E25H2" 0 "ureidoglycolate hydrolase"  
"JS1\_F07\_00008" 6639 "s59E5H2" 0.4467341 "ureidoglycolate hydrolase"  
"JS1\_F07\_00008" 6639 "s63E6H2" 0.7192239 "ureidoglycolate hydrolase"  
"JS1\_F07\_00009" 6640 "s59E13H2" 0.1011728 "Trehalose/maltose import ATP-binding protein Malk"  
"JS1\_F07\_00009" 6640 "s59E25H2" 0 "Trehalose/maltose import ATP-binding protein Malk"  
"JS1\_F07\_00009" 6640 "s59E5H2" 0.4228043 "Trehalose/maltose import ATP-binding protein Malk"  
"JS1\_F07\_00009" 6640 "s63E6H2" 0.9303749 "Trehalose/maltose import ATP-binding protein Malk"  
"JS1\_F07\_00010" 6641 "s59E13H2" 0.2119791 "Trehalose/maltose import ATP-binding protein Malk"  
"JS1\_F07\_00010" 6641 "s59E25H2" 0 "Trehalose/maltose import ATP-binding protein Malk"  
"JS1\_F07\_00010" 6641 "s59E5H2" 0.4548771 "Trehalose/maltose import ATP-binding protein Malk"  
"JS1\_F07\_00010" 6641 "s63E6H2" 0.7242547 "Trehalose/maltose import ATP-binding protein Malk"  
"JS1\_F07\_00011" 6642 "s59E13H2" 0.2230107 "Trehalose/maltose-binding protein MalE precursor"  
"JS1\_F07\_00011" 6642 "s59E25H2" 0 "Trehalose/maltose-binding protein MalE precursor"  
"JS1\_F07\_00011" 6642 "s59E5H2" 0.368099 "Trehalose/maltose-binding protein MalE precursor"  
"JS1\_F07\_00011" 6642 "s63E6H2" 0.511487 "Trehalose/maltose-binding protein MalE precursor"  
"JS1\_F07\_00012" 6643 "s59E13H2" 0.06605479 "Inner membrane ABC transporter permease protein YcjO"  
"JS1\_F07\_00012" 6643 "s59E25H2" 0 "Inner membrane ABC transporter permease protein YcjO"  
"JS1\_F07\_00012" 6643 "s59E5H2" 0.1586175 "Inner membrane ABC transporter permease protein YcjO"  
"JS1\_F07\_00012" 6643 "s63E6H2" 0.3572909 "Inner membrane ABC transporter permease protein YcjO"  
"JS1\_F07\_00013" 6644 "s59E13H2" 0.08474713 "Trehalose/maltose transport system permease protein MalG"  
"JS1\_F07\_00013" 6644 "s59E25H2" 0 "Trehalose/maltose transport system permease protein MalG"  
"JS1\_F07\_00013" 6644 "s59E5H2" 0.2322556 "Trehalose/maltose transport system permease protein MalG"  
"JS1\_F07\_00013" 6644 "s63E6H2" 0.2249337 "Trehalose/maltose transport system permease protein MalG"  
"JS1\_F07\_00014" 6645 "s59E13H2" 0.1732083 "Ribokinase"  
"JS1\_F07\_00014" 6645 "s59E25H2" 0 "Ribokinase"  
"JS1\_F07\_00014" 6645 "s59E5H2" 0.1475285 "Ribokinase"  
"JS1\_F07\_00014" 6645 "s63E6H2" 0.2994131 "Ribokinase"  
"JS1\_F07\_00015" 6646 "s59E13H2" 0.1570936 "xylose isomerase"  
"JS1\_F07\_00015" 6646 "s59E25H2" 0 "xylose isomerase"  
"JS1\_F07\_00015" 6646 "s59E5H2" 0.382017 "xylose isomerase"



"JS1\_F07\_00015" 6646 "s63E6H2" 1.514641 "xylose isomerase"  
"JS1\_F07\_00016" 6647 "s59E13H2" 0.1019939 "Ethanolamine utilization protein EutM precursor"  
"JS1\_F07\_00016" 6647 "s59E25H2" 0 "Ethanolamine utilization protein EutM precursor"  
"JS1\_F07\_00016" 6647 "s59E5H2" 0.3518546 "Ethanolamine utilization protein EutM precursor"  
"JS1\_F07\_00016" 6647 "s63E6H2" 1.390131 "Ethanolamine utilization protein EutM precursor"  
"JS1\_F07\_00017" 6648 "s59E13H2" 0.08291736 "Carbon dioxide concentrating mechanism protein CcmL"  
"JS1\_F07\_00017" 6648 "s59E25H2" 0 "Carbon dioxide concentrating mechanism protein CcmL"  
"JS1\_F07\_00017" 6648 "s59E5H2" 0.2823404 "Carbon dioxide concentrating mechanism protein CcmL"  
"JS1\_F07\_00017" 6648 "s63E6H2" 1.518632 "Carbon dioxide concentrating mechanism protein CcmL"  
"JS1\_F07\_00018" 6649 "s59E13H2" 0.1124246 "Carbon dioxide concentrating mechanism protein CcmL"  
"JS1\_F07\_00018" 6649 "s59E25H2" 0 "Carbon dioxide concentrating mechanism protein CcmL"  
"JS1\_F07\_00018" 6649 "s59E5H2" 0.452859 "Carbon dioxide concentrating mechanism protein CcmL"  
"JS1\_F07\_00018" 6649 "s63E6H2" 1.678876 "Carbon dioxide concentrating mechanism protein CcmL"  
"JS1\_F07\_00019" 6650 "s59E13H2" 0.1209369 "Electron transport complex protein RnfC"  
"JS1\_F07\_00019" 6650 "s59E25H2" 0 "Electron transport complex protein RnfC"  
"JS1\_F07\_00019" 6650 "s59E5H2" 0.7737518 "Electron transport complex protein RnfC"  
"JS1\_F07\_00019" 6650 "s63E6H2" 2.641375 "Electron transport complex protein RnfC"  
"JS1\_F07\_00020" 6651 "s59E13H2" 0.1500027 "BMC domain protein"  
"JS1\_F07\_00020" 6651 "s59E25H2" 0 "BMC domain protein"  
"JS1\_F07\_00020" 6651 "s59E5H2" 0.8389206 "BMC domain protein"  
"JS1\_F07\_00020" 6651 "s63E6H2" 3.428938 "BMC domain protein"  
"JS1\_F07\_00021" 6652 "s59E13H2" 0.1367355 "Aldehyde-alcohol dehydrogenase"  
"JS1\_F07\_00021" 6652 "s59E25H2" 0 "Aldehyde-alcohol dehydrogenase"  
"JS1\_F07\_00021" 6652 "s59E5H2" 0.8900163 "Aldehyde-alcohol dehydrogenase"  
"JS1\_F07\_00021" 6652 "s63E6H2" 3.906548 "Aldehyde-alcohol dehydrogenase"  
"JS1\_F07\_00022" 6653 "s59E13H2" 0.1660068 "Carbon dioxide concentrating mechanism protein CcmL"  
"JS1\_F07\_00022" 6653 "s59E25H2" 0 "Carbon dioxide concentrating mechanism protein CcmL"  
"JS1\_F07\_00022" 6653 "s59E5H2" 0.9904168 "Carbon dioxide concentrating mechanism protein CcmL"  
"JS1\_F07\_00022" 6653 "s63E6H2" 3.179108 "Carbon dioxide concentrating mechanism protein CcmL"  
"JS1\_F07\_00023" 6654 "s59E13H2" 0.2309573 "Carbon dioxide concentrating mechanism protein CcmL"  
"JS1\_F07\_00023" 6654 "s59E25H2" 0 "Carbon dioxide concentrating mechanism protein CcmL"  
"JS1\_F07\_00023" 6654 "s59E5H2" 0.8227454 "Carbon dioxide concentrating mechanism protein CcmL"  
"JS1\_F07\_00023" 6654 "s63E6H2" 4.532202 "Carbon dioxide concentrating mechanism protein CcmL"  
"JS1\_F07\_00024" 6655 "s59E13H2" 0.2298213 "Putative sugar phosphate isomerase YwIF"  
"JS1\_F07\_00024" 6655 "s59E25H2" 0 "Putative sugar phosphate isomerase YwIF"  
"JS1\_F07\_00024" 6655 "s59E5H2" 0.6113973 "Putative sugar phosphate isomerase YwIF"  
"JS1\_F07\_00024" 6655 "s63E6H2" 6.217664 "Putative sugar phosphate isomerase YwIF"  
"JS1\_F07\_00025" 6656 "s59E13H2" 0.2121456 "Deoxyribose-phosphate aldolase 1"  
"JS1\_F07\_00025" 6656 "s59E25H2" 0 "Deoxyribose-phosphate aldolase 1"  
"JS1\_F07\_00025" 6656 "s59E5H2" 0.520941 "Deoxyribose-phosphate aldolase 1"  
"JS1\_F07\_00025" 6656 "s63E6H2" 8.005925 "Deoxyribose-phosphate aldolase 1"  
"JS1\_F07\_00026" 6657 "s59E13H2" 0.1542088 "Phosphate propanoyltransferase"  
"JS1\_F07\_00026" 6657 "s59E25H2" 0 "Phosphate propanoyltransferase"  
"JS1\_F07\_00026" 6657 "s59E5H2" 0.5093741 "Phosphate propanoyltransferase"  
"JS1\_F07\_00026" 6657 "s63E6H2" 3.210753 "Phosphate propanoyltransferase"  
"JS1\_F07\_00027" 6658 "s59E13H2" 0.04833245 "Deoxyribose operon repressor"  
"JS1\_F07\_00027" 6658 "s59E25H2" 0 "Deoxyribose operon repressor"

"JS1\_F07\_00027" 6658 "s59E5H2" 0.7554667 "Deoxyribose operon repressor"  
"JS1\_F07\_00027" 6658 "s63E6H2" 0.5417348 "Deoxyribose operon repressor"  
"JS1\_F07\_00028" 6659 "s59E13H2" 0.02421081 "hypothetical protein"  
"JS1\_F07\_00028" 6659 "s59E25H2" 0 "hypothetical protein"  
"JS1\_F07\_00028" 6659 "s59E5H2" 0.6206444 "hypothetical protein"  
"JS1\_F07\_00028" 6659 "s63E6H2" 0.551715 "hypothetical protein"  
"JS1\_F07\_00029" 6660 "s59E13H2" 0.05484147 "Sporulation protein Ytfj (Spore\_Ytfj)"  
"JS1\_F07\_00029" 6660 "s59E25H2" 0 "Sporulation protein Ytfj (Spore\_Ytfj)"  
"JS1\_F07\_00029" 6660 "s59E5H2" 0.8127567 "Sporulation protein Ytfj (Spore\_Ytfj)"  
"JS1\_F07\_00029" 6660 "s63E6H2" 0.6334428 "Sporulation protein Ytfj (Spore\_Ytfj)"  
"JS1\_F07\_00030" 6661 "s59E13H2" 0.007226418 "2-hydroxy-3-oxopropionate reductase"  
"JS1\_F07\_00030" 6661 "s59E25H2" 0 "2-hydroxy-3-oxopropionate reductase"  
"JS1\_F07\_00030" 6661 "s59E5H2" 0.04788081 "2-hydroxy-3-oxopropionate reductase"  
"JS1\_F07\_00030" 6661 "s63E6H2" 0.06840788 "2-hydroxy-3-oxopropionate reductase"  
"JS1\_F07\_00031" 6662 "s59E13H2" 0.0300401 "Dihydroxy-acid dehydratase"  
"JS1\_F07\_00031" 6662 "s59E25H2" 0 "Dihydroxy-acid dehydratase"  
"JS1\_F07\_00031" 6662 "s59E5H2" 0.01096446 "Dihydroxy-acid dehydratase"  
"JS1\_F07\_00031" 6662 "s63E6H2" 0.0007929508 "Dihydroxy-acid dehydratase"  
"JS1\_F07\_00032" 6663 "s59E13H2" 0.07377225 "Glycerol kinase"  
"JS1\_F07\_00032" 6663 "s59E25H2" 0 "Glycerol kinase"  
"JS1\_F07\_00032" 6663 "s59E5H2" 0.05250557 "Glycerol kinase"  
"JS1\_F07\_00032" 6663 "s63E6H2" 4.864597 "Glycerol kinase"  
"JS1\_F07\_00033" 6664 "s59E13H2" 0.09406264 "Fructose-bisphosphate aldolase"  
"JS1\_F07\_00033" 6664 "s59E25H2" 0 "Fructose-bisphosphate aldolase"  
"JS1\_F07\_00033" 6664 "s59E5H2" 0.04831399 "Fructose-bisphosphate aldolase"  
"JS1\_F07\_00033" 6664 "s63E6H2" 4.209915 "Fructose-bisphosphate aldolase"  
"JS1\_F07\_00034" 6665 "s59E13H2" 0.07183011 "Glyoxylate reductase"  
"JS1\_F07\_00034" 6665 "s59E25H2" 0 "Glyoxylate reductase"  
"JS1\_F07\_00034" 6665 "s59E5H2" 0.02551355 "Glyoxylate reductase"  
"JS1\_F07\_00034" 6665 "s63E6H2" 3.096263 "Glyoxylate reductase"  
"JS1\_F07\_00035" 6666 "s59E13H2" 4.332543 "4-hydroxythreonine-4-phosphate dehydrogenase 2"  
"JS1\_F07\_00035" 6666 "s59E25H2" 0 "4-hydroxythreonine-4-phosphate dehydrogenase 2"  
"JS1\_F07\_00035" 6666 "s59E5H2" 0.0208279 "4-hydroxythreonine-4-phosphate dehydrogenase 2"  
"JS1\_F07\_00035" 6666 "s63E6H2" 0.1650861 "4-hydroxythreonine-4-phosphate dehydrogenase 2"  
"JS1\_F07\_00036" 6667 "s59E13H2" 1.894418 "hypothetical protein"  
"JS1\_F07\_00036" 6667 "s59E25H2" 0 "hypothetical protein"  
"JS1\_F07\_00036" 6667 "s59E5H2" 0.01032915 "hypothetical protein"  
"JS1\_F07\_00036" 6667 "s63E6H2" 0.163437 "hypothetical protein"  
"JS1\_F07\_00038" 6669 "s59E13H2" 0.005067939 "hypothetical protein"  
"JS1\_F07\_00038" 6669 "s59E25H2" 0 "hypothetical protein"  
"JS1\_F07\_00038" 6669 "s59E5H2" 0.1135778 "hypothetical protein"  
"JS1\_F07\_00038" 6669 "s63E6H2" 0.02180654 "hypothetical protein"  
"JS1\_F07\_00039" 6670 "s59E13H2" 0 "Transketolase"  
"JS1\_F07\_00039" 6670 "s59E25H2" 0 "Transketolase"  
"JS1\_F07\_00039" 6670 "s59E5H2" 0 "Transketolase"  
"JS1\_F07\_00039" 6670 "s63E6H2" 0 "Transketolase"  
"JS1\_F07\_00040" 6671 "s59E13H2" 0 "1-deoxy-D-xylulose-5-phosphate synthase"

"JS1\_F07\_00040" 6671 "s59E25H2" 0 "1-deoxy-D-xylulose-5-phosphate synthase"  
"JS1\_F07\_00040" 6671 "s59E5H2" 0 "1-deoxy-D-xylulose-5-phosphate synthase"  
"JS1\_F07\_00040" 6671 "s63E6H2" 0 "1-deoxy-D-xylulose-5-phosphate synthase"  
"JS1\_F07\_00041" 6672 "s59E13H2" 0 "Acetoin:2,6-dichlorophenolindophenol oxidoreductase subunit alpha"  
"JS1\_F07\_00041" 6672 "s59E25H2" 0 "Acetoin:2,6-dichlorophenolindophenol oxidoreductase subunit alpha"  
"JS1\_F07\_00041" 6672 "s59E5H2" 0 "Acetoin:2,6-dichlorophenolindophenol oxidoreductase subunit alpha"  
"JS1\_F07\_00041" 6672 "s63E6H2" 0 "Acetoin:2,6-dichlorophenolindophenol oxidoreductase subunit alpha"  
"JS1\_F07\_00042" 6673 "s59E13H2" 0.08477789 "Acetoin:2,6-dichlorophenolindophenol oxidoreductase subunit beta"  
"JS1\_F07\_00042" 6673 "s59E25H2" 0 "Acetoin:2,6-dichlorophenolindophenol oxidoreductase subunit beta"  
"JS1\_F07\_00042" 6673 "s59E5H2" 0.004122741 "Acetoin:2,6-dichlorophenolindophenol oxidoreductase subunit beta"  
"JS1\_F07\_00042" 6673 "s63E6H2" 0 "Acetoin:2,6-dichlorophenolindophenol oxidoreductase subunit beta"  
"JS1\_F07\_00043" 6674 "s59E13H2" 0.1245191 "Dihydrolipoyllysine-residue acetyltransferase component of pyruvate dehydrogenase complex"  
"JS1\_F07\_00043" 6674 "s59E25H2" 0 "Dihydrolipoyllysine-residue acetyltransferase component of pyruvate dehydrogenase complex"  
"JS1\_F07\_00043" 6674 "s59E5H2" 0.01293032 "Dihydrolipoyllysine-residue acetyltransferase component of pyruvate dehydrogenase complex"  
"JS1\_F07\_00043" 6674 "s63E6H2" 0 "Dihydrolipoyllysine-residue acetyltransferase component of pyruvate dehydrogenase complex"  
"JS1\_F07\_00044" 6675 "s59E13H2" 0.03447792 "Glyceraldehyde-3-phosphate dehydrogenase"  
"JS1\_F07\_00044" 6675 "s59E25H2" 0 "Glyceraldehyde-3-phosphate dehydrogenase"  
"JS1\_F07\_00044" 6675 "s59E5H2" 0 "Glyceraldehyde-3-phosphate dehydrogenase"  
"JS1\_F07\_00044" 6675 "s63E6H2" 0.01628296 "Glyceraldehyde-3-phosphate dehydrogenase"  
"JS1\_F07\_00045" 6676 "s59E13H2" 0.5619554 "Xylose transport system permease protein XylH"  
"JS1\_F07\_00045" 6676 "s59E25H2" 0.1303972 "Xylose transport system permease protein XylH"  
"JS1\_F07\_00045" 6676 "s59E5H2" 0.4704062 "Xylose transport system permease protein XylH"  
"JS1\_F07\_00045" 6676 "s63E6H2" 2.562925 "Xylose transport system permease protein XylH"  
"JS1\_F07\_00046" 6677 "s59E13H2" 0.6526622 "Galactose/methyl galactoside import ATP-binding protein MglA"  
"JS1\_F07\_00046" 6677 "s59E25H2" 0 "Galactose/methyl galactoside import ATP-binding protein MglA"  
"JS1\_F07\_00046" 6677 "s59E5H2" 0.6344311 "Galactose/methyl galactoside import ATP-binding protein MglA"  
"JS1\_F07\_00046" 6677 "s63E6H2" 2.460684 "Galactose/methyl galactoside import ATP-binding protein MglA"  
"JS1\_F07\_00047" 6678 "s59E13H2" 0.7408573 "Multiple sugar-binding periplasmic receptor ChvE precursor"  
"JS1\_F07\_00047" 6678 "s59E25H2" 0.4395199 "Multiple sugar-binding periplasmic receptor ChvE precursor"  
"JS1\_F07\_00047" 6678 "s59E5H2" 0.4591678 "Multiple sugar-binding periplasmic receptor ChvE precursor"  
"JS1\_F07\_00047" 6678 "s63E6H2" 2.280969 "Multiple sugar-binding periplasmic receptor ChvE precursor"  
"JS1\_F07\_00048" 6679 "s59E13H2" 0.06101397 "hypothetical protein"  
"JS1\_F07\_00048" 6679 "s59E25H2" 0 "hypothetical protein"  
"JS1\_F07\_00048" 6679 "s59E5H2" 0.698811 "hypothetical protein"  
"JS1\_F07\_00048" 6679 "s63E6H2" 1.516463 "hypothetical protein"  
"JS1\_F07\_00049" 6680 "s59E13H2" 0.5580749 "Multidrug export protein MepA"  
"JS1\_F07\_00049" 6680 "s59E25H2" 0 "Multidrug export protein MepA"  
"JS1\_F07\_00049" 6680 "s59E5H2" 3.948473 "Multidrug export protein MepA"  
"JS1\_F07\_00049" 6680 "s63E6H2" 0.4152868 "Multidrug export protein MepA"  
"JS1\_F07\_00050" 6681 "s59E13H2" 0.08226148 "putative HTH-type transcriptional regulator YusO"  
"JS1\_F07\_00050" 6681 "s59E25H2" 0.6755556 "putative HTH-type transcriptional regulator YusO"  
"JS1\_F07\_00050" 6681 "s59E5H2" 2.861083 "putative HTH-type transcriptional regulator YusO"  
"JS1\_F07\_00050" 6681 "s63E6H2" 0.3020731 "putative HTH-type transcriptional regulator YusO"  
"JS1\_F07\_00052" 6683 "s59E13H2" 0.2657091 "2,3-diketo-L-gulonate-binding periplasmic protein YiaO precursor"  
"JS1\_F07\_00052" 6683 "s59E25H2" 0 "2,3-diketo-L-gulonate-binding periplasmic protein YiaO precursor"  
"JS1\_F07\_00052" 6683 "s59E5H2" 1.710073 "2,3-diketo-L-gulonate-binding periplasmic protein YiaO precursor"  
"JS1\_F07\_00052" 6683 "s63E6H2" 0 "2,3-diketo-L-gulonate-binding periplasmic protein YiaO precursor"

"JS1\_F07\_00053" 6684 "s59E13H2" 0.217249 "2,3-diketo-L-gulonate TRAP transporter small permease protein YiaM"  
"JS1\_F07\_00053" 6684 "s59E25H2" 0 "2,3-diketo-L-gulonate TRAP transporter small permease protein YiaM"  
"JS1\_F07\_00053" 6684 "s59E5H2" 3.499778 "2,3-diketo-L-gulonate TRAP transporter small permease protein YiaM"  
"JS1\_F07\_00053" 6684 "s63E6H2" 0 "2,3-diketo-L-gulonate TRAP transporter small permease protein YiaM"  
"JS1\_F07\_00054" 6685 "s59E13H2" 0.2277385 "Sialic acid TRAP transporter permease protein SiaT"  
"JS1\_F07\_00054" 6685 "s59E25H2" 0 "Sialic acid TRAP transporter permease protein SiaT"  
"JS1\_F07\_00054" 6685 "s59E5H2" 4.616513 "Sialic acid TRAP transporter permease protein SiaT"  
"JS1\_F07\_00054" 6685 "s63E6H2" 0 "Sialic acid TRAP transporter permease protein SiaT"  
"JS1\_F07\_00055" 6686 "s59E13H2" 1.804055 "hypothetical protein"  
"JS1\_F07\_00055" 6686 "s59E25H2" 0 "hypothetical protein"  
"JS1\_F07\_00055" 6686 "s59E5H2" 2.719852 "hypothetical protein"  
"JS1\_F07\_00055" 6686 "s63E6H2" 0.2102016 "hypothetical protein"  
"JS1\_F07\_00057" 6688 "s59E13H2" 4.4079 "Isoprenylcysteine carboxyl methyltransferase (ICMT) family protein"  
"JS1\_F07\_00057" 6688 "s59E25H2" 0 "Isoprenylcysteine carboxyl methyltransferase (ICMT) family protein"  
"JS1\_F07\_00057" 6688 "s59E5H2" 0.734377 "Isoprenylcysteine carboxyl methyltransferase (ICMT) family protein"  
"JS1\_F07\_00057" 6688 "s63E6H2" 4.249641 "Isoprenylcysteine carboxyl methyltransferase (ICMT) family protein"  
"JS1\_F07\_00058" 6689 "s59E13H2" 0.3278691 "Exodeoxyribonuclease"  
"JS1\_F07\_00058" 6689 "s59E25H2" 0 "Exodeoxyribonuclease"  
"JS1\_F07\_00058" 6689 "s59E5H2" 1.712325 "Exodeoxyribonuclease"  
"JS1\_F07\_00058" 6689 "s63E6H2" 0.2237904 "Exodeoxyribonuclease"  
"JS1\_F07\_00059" 6690 "s59E13H2" 0.114197 "hypothetical protein"  
"JS1\_F07\_00059" 6690 "s59E25H2" 0 "hypothetical protein"  
"JS1\_F07\_00059" 6690 "s59E5H2" 0.4569137 "hypothetical protein"  
"JS1\_F07\_00059" 6690 "s63E6H2" 3.580873 "hypothetical protein"  
"JS1\_F07\_00060" 6691 "s59E13H2" 0.2062322 "Rubrerythrin"  
"JS1\_F07\_00060" 6691 "s59E25H2" 0 "Rubrerythrin"  
"JS1\_F07\_00060" 6691 "s59E5H2" 0.5773997 "Rubrerythrin"  
"JS1\_F07\_00060" 6691 "s63E6H2" 1.061563 "Rubrerythrin"  
"JS1\_F07\_00061" 6692 "s59E13H2" 0.4467274 "Glyoxalase-like domain protein"  
"JS1\_F07\_00061" 6692 "s59E25H2" 0 "Glyoxalase-like domain protein"  
"JS1\_F07\_00061" 6692 "s59E5H2" 0.1153943 "Glyoxalase-like domain protein"  
"JS1\_F07\_00061" 6692 "s63E6H2" 10.90596 "Glyoxalase-like domain protein"  
"JS1\_F07\_00062" 6693 "s59E13H2" 0.2545409 "FMN reductase [NAD(P)H]"  
"JS1\_F07\_00062" 6693 "s59E25H2" 0 "FMN reductase [NAD(P)H]"  
"JS1\_F07\_00062" 6693 "s59E5H2" 0.06348042 "FMN reductase [NAD(P)H]"  
"JS1\_F07\_00062" 6693 "s63E6H2" 9.268331 "FMN reductase [NAD(P)H]"  
"JS1\_F07\_00065" 6696 "s59E13H2" 0.3292117 "DNA alkylation repair enzyme"  
"JS1\_F07\_00065" 6696 "s59E25H2" 0 "DNA alkylation repair enzyme"  
"JS1\_F07\_00065" 6696 "s59E5H2" 0.5113794 "DNA alkylation repair enzyme"  
"JS1\_F07\_00065" 6696 "s63E6H2" 0.2892729 "DNA alkylation repair enzyme"  
"JS1\_F07\_00066" 6697 "s59E13H2" 0.3006952 "Dihydrolipoyl dehydrogenase"  
"JS1\_F07\_00066" 6697 "s59E25H2" 0 "Dihydrolipoyl dehydrogenase"  
"JS1\_F07\_00066" 6697 "s59E5H2" 0.5948432 "Dihydrolipoyl dehydrogenase"  
"JS1\_F07\_00066" 6697 "s63E6H2" 0.06873943 "Dihydrolipoyl dehydrogenase"  
"JS1\_F07\_00067" 6698 "s59E13H2" 0.1969945 "hypothetical protein"  
"JS1\_F07\_00067" 6698 "s59E25H2" 0 "hypothetical protein"  
"JS1\_F07\_00067" 6698 "s59E5H2" 0.307835 "hypothetical protein"

"JS1\_F07\_00067" 6698 "s63E6H2" 0.03471362 "hypothetical protein"  
"JS1\_F07\_00068" 6699 "s59E13H2" 2.836578 "putative tRNA-dihydrouridine synthase"  
"JS1\_F07\_00068" 6699 "s59E25H2" 0 "putative tRNA-dihydrouridine synthase"  
"JS1\_F07\_00068" 6699 "s59E5H2" 0.2820565 "putative tRNA-dihydrouridine synthase"  
"JS1\_F07\_00068" 6699 "s63E6H2" 0.3339207 "putative tRNA-dihydrouridine synthase"  
"JS1\_F07\_00069" 6700 "s59E13H2" 0.1742823 "1-acyl-sn-glycerol-3-phosphate acyltransferase"  
"JS1\_F07\_00069" 6700 "s59E25H2" 0 "1-acyl-sn-glycerol-3-phosphate acyltransferase"  
"JS1\_F07\_00069" 6700 "s59E5H2" 0.1408634 "1-acyl-sn-glycerol-3-phosphate acyltransferase"  
"JS1\_F07\_00069" 6700 "s63E6H2" 8.070225 "1-acyl-sn-glycerol-3-phosphate acyltransferase"  
"JS1\_F07\_00070" 6701 "s59E13H2" 0.202386 "Diacylglycerol kinase"  
"JS1\_F07\_00070" 6701 "s59E25H2" 0 "Diacylglycerol kinase"  
"JS1\_F07\_00070" 6701 "s59E5H2" 0.1993705 "Diacylglycerol kinase"  
"JS1\_F07\_00070" 6701 "s63E6H2" 9.309286 "Diacylglycerol kinase"  
"JS1\_F07\_00071" 6702 "s59E13H2" 0.2847393 "Melibiase"  
"JS1\_F07\_00071" 6702 "s59E25H2" 0 "Melibiase"  
"JS1\_F07\_00071" 6702 "s59E5H2" 0.2543783 "Melibiase"  
"JS1\_F07\_00071" 6702 "s63E6H2" 0.0711765 "Melibiase"  
"JS1\_F07\_00072" 6703 "s59E13H2" 0.4111036 "Galactose-1-phosphate uridylyltransferase"  
"JS1\_F07\_00072" 6703 "s59E25H2" 0 "Galactose-1-phosphate uridylyltransferase"  
"JS1\_F07\_00072" 6703 "s59E5H2" 0.3688906 "Galactose-1-phosphate uridylyltransferase"  
"JS1\_F07\_00072" 6703 "s63E6H2" 0.2393214 "Galactose-1-phosphate uridylyltransferase"  
"JS1\_F07\_00073" 6704 "s59E13H2" 0.4292476 "Galactokinase"  
"JS1\_F07\_00073" 6704 "s59E25H2" 0 "Galactokinase"  
"JS1\_F07\_00073" 6704 "s59E5H2" 0.4722356 "Galactokinase"  
"JS1\_F07\_00073" 6704 "s63E6H2" 0.6077635 "Galactokinase"  
"JS1\_F07\_00074" 6705 "s59E13H2" 1.461064 "Glycerol kinase"  
"JS1\_F07\_00074" 6705 "s59E25H2" 0 "Glycerol kinase"  
"JS1\_F07\_00074" 6705 "s59E5H2" 1.193562 "Glycerol kinase"  
"JS1\_F07\_00074" 6705 "s63E6H2" 2.758344 "Glycerol kinase"  
"JS1\_F07\_00075" 6706 "s59E13H2" 0.1951351 "HTH-type transcriptional regulator EthR"  
"JS1\_F07\_00075" 6706 "s59E25H2" 0 "HTH-type transcriptional regulator EthR"  
"JS1\_F07\_00075" 6706 "s59E5H2" 1.495725 "HTH-type transcriptional regulator EthR"  
"JS1\_F07\_00075" 6706 "s63E6H2" 1.709283 "HTH-type transcriptional regulator EthR"  
"JS1\_F07\_00076" 6707 "s59E13H2" 0.1323029 "hypothetical protein"  
"JS1\_F07\_00076" 6707 "s59E25H2" 0.2035685 "hypothetical protein"  
"JS1\_F07\_00076" 6707 "s59E5H2" 0.8008964 "hypothetical protein"  
"JS1\_F07\_00076" 6707 "s63E6H2" 1.116045 "hypothetical protein"  
"JS1\_F07\_00077" 6708 "s59E13H2" 0.3619307 "hypothetical protein"  
"JS1\_F07\_00077" 6708 "s59E25H2" 0 "hypothetical protein"  
"JS1\_F07\_00077" 6708 "s59E5H2" 0.8610645 "hypothetical protein"  
"JS1\_F07\_00077" 6708 "s63E6H2" 0.2945466 "hypothetical protein"  
"JS1\_F07\_00078" 6709 "s59E13H2" 0.2431884 "MMPL family protein"  
"JS1\_F07\_00078" 6709 "s59E25H2" 0 "MMPL family protein"  
"JS1\_F07\_00078" 6709 "s59E5H2" 0.4806511 "MMPL family protein"  
"JS1\_F07\_00078" 6709 "s63E6H2" 0.6576027 "MMPL family protein"  
"JS1\_F07\_00079" 6710 "s59E13H2" 0.002346691 "HTH-type transcriptional repressor YvoA"  
"JS1\_F07\_00079" 6710 "s59E25H2" 0 "HTH-type transcriptional repressor YvoA"

"JS1\_F07\_00079" 6710 "s59E5H2" 0 "HTH-type transcriptional repressor YvoA"  
"JS1\_F07\_00079" 6710 "s63E6H2" 0.01579303 "HTH-type transcriptional repressor YvoA"  
"JS1\_F07\_00080" 6711 "s59E13H2" 0.01009171 "Glucose-6-phosphate isomerase"  
"JS1\_F07\_00080" 6711 "s59E25H2" 0 "Glucose-6-phosphate isomerase"  
"JS1\_F07\_00080" 6711 "s59E5H2" 0 "Glucose-6-phosphate isomerase"  
"JS1\_F07\_00080" 6711 "s63E6H2" 0.0148676 "Glucose-6-phosphate isomerase"  
"JS1\_F07\_00081" 6712 "s59E13H2" 0.01172334 "Trehalose/maltose-binding protein MalE precursor"  
"JS1\_F07\_00081" 6712 "s59E25H2" 0 "Trehalose/maltose-binding protein MalE precursor"  
"JS1\_F07\_00081" 6712 "s59E5H2" 0.007806903 "Trehalose/maltose-binding protein MalE precursor"  
"JS1\_F07\_00081" 6712 "s63E6H2" 0.00585084 "Trehalose/maltose-binding protein MalE precursor"  
"JS1\_F07\_00082" 6713 "s59E13H2" 0.003529156 "Trehalose/maltose transport system permease protein MalF"  
"JS1\_F07\_00082" 6713 "s59E25H2" 0 "Trehalose/maltose transport system permease protein MalF"  
"JS1\_F07\_00082" 6713 "s59E5H2" 0.01533958 "Trehalose/maltose transport system permease protein MalF"  
"JS1\_F07\_00082" 6713 "s63E6H2" 0 "Trehalose/maltose transport system permease protein MalF"  
"JS1\_F07\_00083" 6714 "s59E13H2" 12.03309 "alanyl-tRNA synthetase"  
"JS1\_F07\_00083" 6714 "s59E25H2" 0.7470238 "alanyl-tRNA synthetase"  
"JS1\_F07\_00083" 6714 "s59E5H2" 0.02972151 "alanyl-tRNA synthetase"  
"JS1\_F07\_00083" 6714 "s63E6H2" 1.05141 "alanyl-tRNA synthetase"  
"JS1\_F07\_00084" 6715 "s59E13H2" 7.641174 "TPR repeat-containing protein YfgC precursor"  
"JS1\_F07\_00084" 6715 "s59E25H2" 0.1322222 "TPR repeat-containing protein YfgC precursor"  
"JS1\_F07\_00084" 6715 "s59E5H2" 0.1972608 "TPR repeat-containing protein YfgC precursor"  
"JS1\_F07\_00084" 6715 "s63E6H2" 1.576691 "TPR repeat-containing protein YfgC precursor"  
"JS1\_F07\_00085" 6716 "s59E13H2" 15.38506 "Sodium:neurotransmitter symporter family protein"  
"JS1\_F07\_00085" 6716 "s59E25H2" 0 "Sodium:neurotransmitter symporter family protein"  
"JS1\_F07\_00085" 6716 "s59E5H2" 0.4584438 "Sodium:neurotransmitter symporter family protein"  
"JS1\_F07\_00085" 6716 "s63E6H2" 1.43283 "Sodium:neurotransmitter symporter family protein"  
"JS1\_F07\_00086" 6717 "s59E13H2" 1.045587 "putative L-threonine 3-dehydrogenase"  
"JS1\_F07\_00086" 6717 "s59E25H2" 0 "putative L-threonine 3-dehydrogenase"  
"JS1\_F07\_00086" 6717 "s59E5H2" 0.3654138 "putative L-threonine 3-dehydrogenase"  
"JS1\_F07\_00086" 6717 "s63E6H2" 0.225298 "putative L-threonine 3-dehydrogenase"  
"JS1\_F07\_00087" 6718 "s59E13H2" 0.6969417 "Creatinine amidohydrolase"  
"JS1\_F07\_00087" 6718 "s59E25H2" 0 "Creatinine amidohydrolase"  
"JS1\_F07\_00087" 6718 "s59E5H2" 0.6232848 "Creatinine amidohydrolase"  
"JS1\_F07\_00087" 6718 "s63E6H2" 0.2616641 "Creatinine amidohydrolase"  
"JS1\_F07\_00088" 6719 "s59E13H2" 0.3685004 "D-tagatose 3-epimerase"  
"JS1\_F07\_00088" 6719 "s59E25H2" 0 "D-tagatose 3-epimerase"  
"JS1\_F07\_00088" 6719 "s59E5H2" 0.380035 "D-tagatose 3-epimerase"  
"JS1\_F07\_00088" 6719 "s63E6H2" 0.08679875 "D-tagatose 3-epimerase"  
"JS1\_F07\_00089" 6720 "s59E13H2" 0.3338381 "Sialic acid-binding periplasmic protein SiaP precursor"  
"JS1\_F07\_00089" 6720 "s59E25H2" 0 "Sialic acid-binding periplasmic protein SiaP precursor"  
"JS1\_F07\_00089" 6720 "s59E5H2" 0.5482321 "Sialic acid-binding periplasmic protein SiaP precursor"  
"JS1\_F07\_00089" 6720 "s63E6H2" 0.1307312 "Sialic acid-binding periplasmic protein SiaP precursor"  
"JS1\_F07\_00090" 6721 "s59E13H2" 0.2827822 "Tripartite ATP-independent periplasmic transporters, DctQ component"  
"JS1\_F07\_00090" 6721 "s59E25H2" 0 "Tripartite ATP-independent periplasmic transporters, DctQ component"  
"JS1\_F07\_00090" 6721 "s59E5H2" 0.7146596 "Tripartite ATP-independent periplasmic transporters, DctQ component"  
"JS1\_F07\_00090" 6721 "s63E6H2" 0.2029407 "Tripartite ATP-independent periplasmic transporters, DctQ component"  
"JS1\_F07\_00091" 6722 "s59E13H2" 0.7494338 "Sialic acid TRAP transporter permease protein SiaT"

"JS1\_F07\_00091" 6722 "s59E25H2" 0 "Sialic acid TRAP transporter permease protein SiaT"  
"JS1\_F07\_00091" 6722 "s59E5H2" 1.123076 "Sialic acid TRAP transporter permease protein SiaT"  
"JS1\_F07\_00091" 6722 "s63E6H2" 0.518944 "Sialic acid TRAP transporter permease protein SiaT"  
"JS1\_F07\_00092" 6723 "s59E13H2" 0.3566173 "FOF1 ATP synthase subunit delta"  
"JS1\_F07\_00092" 6723 "s59E25H2" 0 "FOF1 ATP synthase subunit delta"  
"JS1\_F07\_00092" 6723 "s59E5H2" 0.3839955 "FOF1 ATP synthase subunit delta"  
"JS1\_F07\_00092" 6723 "s63E6H2" 0.9794093 "FOF1 ATP synthase subunit delta"  
"JS1\_F07\_00093" 6724 "s59E13H2" 0.5138943 "ATP synthase subunit alpha"  
"JS1\_F07\_00093" 6724 "s59E25H2" 0 "ATP synthase subunit alpha"  
"JS1\_F07\_00093" 6724 "s59E5H2" 0.9173777 "ATP synthase subunit alpha"  
"JS1\_F07\_00093" 6724 "s63E6H2" 1.987319 "ATP synthase subunit alpha"  
"JS1\_F07\_00094" 6725 "s59E13H2" 0.315046 "ATP synthase gamma chain, sodium ion specific"  
"JS1\_F07\_00094" 6725 "s59E25H2" 0 "ATP synthase gamma chain, sodium ion specific"  
"JS1\_F07\_00094" 6725 "s59E5H2" 1.154611 "ATP synthase gamma chain, sodium ion specific"  
"JS1\_F07\_00094" 6725 "s63E6H2" 2.055457 "ATP synthase gamma chain, sodium ion specific"  
"JS1\_F07\_00095" 6726 "s59E13H2" 0.2883742 "ubiquinone/menaquinone biosynthesis methyltransferase"  
"JS1\_F07\_00095" 6726 "s59E25H2" 0 "ubiquinone/menaquinone biosynthesis methyltransferase"  
"JS1\_F07\_00095" 6726 "s59E5H2" 2.476336 "ubiquinone/menaquinone biosynthesis methyltransferase"  
"JS1\_F07\_00095" 6726 "s63E6H2" 2.413129 "ubiquinone/menaquinone biosynthesis methyltransferase"  
"JS1\_F07\_00096" 6727 "s59E13H2" 0.4408597 "Dihydrolipoyl dehydrogenase"  
"JS1\_F07\_00096" 6727 "s59E25H2" 0 "Dihydrolipoyl dehydrogenase"  
"JS1\_F07\_00096" 6727 "s59E5H2" 2.179065 "Dihydrolipoyl dehydrogenase"  
"JS1\_F07\_00096" 6727 "s63E6H2" 3.41681 "Dihydrolipoyl dehydrogenase"  
"JS1\_F07\_00097" 6728 "s59E13H2" 0.07948727 "Demethylrebeccamycin-D-glucose O-methyltransferase"  
"JS1\_F07\_00097" 6728 "s59E25H2" 0 "Demethylrebeccamycin-D-glucose O-methyltransferase"  
"JS1\_F07\_00097" 6728 "s59E5H2" 2.720848 "Demethylrebeccamycin-D-glucose O-methyltransferase"  
"JS1\_F07\_00097" 6728 "s63E6H2" 2.799744 "Demethylrebeccamycin-D-glucose O-methyltransferase"  
"JS1\_F07\_00098" 6729 "s59E13H2" 0.07056455 "flavodoxin"  
"JS1\_F07\_00098" 6729 "s59E25H2" 0 "flavodoxin"  
"JS1\_F07\_00098" 6729 "s59E5H2" 1.07605 "flavodoxin"  
"JS1\_F07\_00098" 6729 "s63E6H2" 3.000925 "flavodoxin"  
"JS1\_F07\_00099" 6730 "s59E13H2" 0.05699143 "DNA alkylation repair enzyme"  
"JS1\_F07\_00099" 6730 "s59E25H2" 0.4311377 "DNA alkylation repair enzyme"  
"JS1\_F07\_00099" 6730 "s59E5H2" 1.529307 "DNA alkylation repair enzyme"  
"JS1\_F07\_00099" 6730 "s63E6H2" 3.570569 "DNA alkylation repair enzyme"  
"JS1\_F07\_00100" 6731 "s59E13H2" 0.03227237 "L-2,4-diaminobutyrate decarboxylase"  
"JS1\_F07\_00100" 6731 "s59E25H2" 0 "L-2,4-diaminobutyrate decarboxylase"  
"JS1\_F07\_00100" 6731 "s59E5H2" 0.2825293 "L-2,4-diaminobutyrate decarboxylase"  
"JS1\_F07\_00100" 6731 "s63E6H2" 1.31856 "L-2,4-diaminobutyrate decarboxylase"  
"JS1\_F07\_00101" 6732 "s59E13H2" 0.3441882 "hypothetical protein"  
"JS1\_F07\_00101" 6732 "s59E25H2" 0 "hypothetical protein"  
"JS1\_F07\_00101" 6732 "s59E5H2" 2.686909 "hypothetical protein"  
"JS1\_F07\_00101" 6732 "s63E6H2" 0.003436984 "hypothetical protein"  
"JS1\_F07\_00102" 6733 "s59E13H2" 0.05855211 "hypothetical protein"  
"JS1\_F07\_00102" 6733 "s59E25H2" 0 "hypothetical protein"  
"JS1\_F07\_00102" 6733 "s59E5H2" 1.971913 "hypothetical protein"  
"JS1\_F07\_00102" 6733 "s63E6H2" 0.2966307 "hypothetical protein"

"JS1\_F07\_00103" 6734 "s59E13H2" 0.00771423 "Zinc transporter ZupT"  
"JS1\_F07\_00103" 6734 "s59E25H2" 0 "Zinc transporter ZupT"  
"JS1\_F07\_00103" 6734 "s59E5H2" 1.071683 "Zinc transporter ZupT"  
"JS1\_F07\_00103" 6734 "s63E6H2" 0.03682589 "Zinc transporter ZupT"  
"JS1\_F07\_00104" 6735 "s59E13H2" 3.264063 "Alpha/beta hydrolase family protein"  
"JS1\_F07\_00104" 6735 "s59E25H2" 0 "Alpha/beta hydrolase family protein"  
"JS1\_F07\_00104" 6735 "s59E5H2" 0.1372837 "Alpha/beta hydrolase family protein"  
"JS1\_F07\_00104" 6735 "s63E6H2" 0.0949759 "Alpha/beta hydrolase family protein"  
"JS1\_F07\_00105" 6736 "s59E13H2" 5.173683 "1-acyl-sn-glycerol-3-phosphate acyltransferase"  
"JS1\_F07\_00105" 6736 "s59E25H2" 0 "1-acyl-sn-glycerol-3-phosphate acyltransferase"  
"JS1\_F07\_00105" 6736 "s59E5H2" 0.9922518 "1-acyl-sn-glycerol-3-phosphate acyltransferase"  
"JS1\_F07\_00105" 6736 "s63E6H2" 0.1178121 "1-acyl-sn-glycerol-3-phosphate acyltransferase"  
"JS1\_F07\_00106" 6737 "s59E13H2" 0.558064 "YhhN-like protein"  
"JS1\_F07\_00106" 6737 "s59E25H2" 0 "YhhN-like protein"  
"JS1\_F07\_00106" 6737 "s59E5H2" 0.8177505 "YhhN-like protein"  
"JS1\_F07\_00106" 6737 "s63E6H2" 0.002398252 "YhhN-like protein"  
"JS1\_F07\_00107" 6738 "s59E13H2" 10.29114 "Aspartate racemase"  
"JS1\_F07\_00107" 6738 "s59E25H2" 0.6869565 "Aspartate racemase"  
"JS1\_F07\_00107" 6738 "s59E5H2" 1.304716 "Aspartate racemase"  
"JS1\_F07\_00107" 6738 "s63E6H2" 0.3058587 "Aspartate racemase"  
"JS1\_F07\_00108" 6739 "s59E13H2" 10.45141 "hypothetical protein"  
"JS1\_F07\_00108" 6739 "s59E25H2" 0 "hypothetical protein"  
"JS1\_F07\_00108" 6739 "s59E5H2" 0.5278932 "hypothetical protein"  
"JS1\_F07\_00108" 6739 "s63E6H2" 0.3042063 "hypothetical protein"  
"JS1\_F07\_00109" 6740 "s59E13H2" 11.88934 "hypothetical protein"  
"JS1\_F07\_00109" 6740 "s59E25H2" 0 "hypothetical protein"  
"JS1\_F07\_00109" 6740 "s59E5H2" 0.7644434 "hypothetical protein"  
"JS1\_F07\_00109" 6740 "s63E6H2" 0.362017 "hypothetical protein"  
"JS1\_F07\_00110" 6741 "s59E13H2" 15.30977 "D-inositol 3-phosphate glycosyltransferase"  
"JS1\_F07\_00110" 6741 "s59E25H2" 0 "D-inositol 3-phosphate glycosyltransferase"  
"JS1\_F07\_00110" 6741 "s59E5H2" 1.217265 "D-inositol 3-phosphate glycosyltransferase"  
"JS1\_F07\_00110" 6741 "s63E6H2" 1.333808 "D-inositol 3-phosphate glycosyltransferase"  
"JS1\_F07\_00111" 6742 "s59E13H2" 18.9352 "DNA-binding transcriptional dual regulator Crp"  
"JS1\_F07\_00111" 6742 "s59E25H2" 0.7038308 "DNA-binding transcriptional dual regulator Crp"  
"JS1\_F07\_00111" 6742 "s59E5H2" 1.308136 "DNA-binding transcriptional dual regulator Crp"  
"JS1\_F07\_00111" 6742 "s63E6H2" 0.7912287 "DNA-binding transcriptional dual regulator Crp"  
"JS1\_F07\_00112" 6743 "s59E13H2" 12.30794 "putative transporter"  
"JS1\_F07\_00112" 6743 "s59E25H2" 0.1370641 "putative transporter"  
"JS1\_F07\_00112" 6743 "s59E5H2" 0.6696774 "putative transporter"  
"JS1\_F07\_00112" 6743 "s63E6H2" 5.597458 "putative transporter"  
"JS1\_F07\_00113" 6744 "s59E13H2" 0.4828722 "Ribosomal protein S6 modification protein"  
"JS1\_F07\_00113" 6744 "s59E25H2" 0 "Ribosomal protein S6 modification protein"  
"JS1\_F07\_00113" 6744 "s59E5H2" 0.9721529 "Ribosomal protein S6 modification protein"  
"JS1\_F07\_00113" 6744 "s63E6H2" 8.473463 "Ribosomal protein S6 modification protein"  
"JS1\_F07\_00114" 6745 "s59E13H2" 0.7906729 "hypothetical protein"  
"JS1\_F07\_00114" 6745 "s59E25H2" 0 "hypothetical protein"  
"JS1\_F07\_00114" 6745 "s59E5H2" 0.4762563 "hypothetical protein"



"JS1\_F07\_00114" 6745 "s63E6H2" 9.579421 "hypothetical protein"  
"JS1\_F07\_00115" 6746 "s59E13H2" 0.5999171 "Heterodisulfide reductase subunit A-like protein"  
"JS1\_F07\_00115" 6746 "s59E25H2" 0 "Heterodisulfide reductase subunit A-like protein"  
"JS1\_F07\_00115" 6746 "s59E5H2" 1.37508 "Heterodisulfide reductase subunit A-like protein"  
"JS1\_F07\_00115" 6746 "s63E6H2" 16.39325 "Heterodisulfide reductase subunit A-like protein"  
"JS1\_F07\_00117" 6748 "s59E13H2" 0.06307544 "hypothetical protein"  
"JS1\_F07\_00117" 6748 "s59E25H2" 0 "hypothetical protein"  
"JS1\_F07\_00117" 6748 "s59E5H2" 1.435004 "hypothetical protein"  
"JS1\_F07\_00117" 6748 "s63E6H2" 3.012637 "hypothetical protein"  
"JS1\_F07\_00118" 6749 "s59E13H2" 0.1792254 "Aromatic amino acid exporter YddG"  
"JS1\_F07\_00118" 6749 "s59E25H2" 0 "Aromatic amino acid exporter YddG"  
"JS1\_F07\_00118" 6749 "s59E5H2" 0.6096374 "Aromatic amino acid exporter YddG"  
"JS1\_F07\_00118" 6749 "s63E6H2" 0.6952083 "Aromatic amino acid exporter YddG"  
"JS1\_F07\_00119" 6750 "s59E13H2" 0.5216205 "L-fucose phosphate aldolase"  
"JS1\_F07\_00119" 6750 "s59E25H2" 0 "L-fucose phosphate aldolase"  
"JS1\_F07\_00119" 6750 "s59E5H2" 1.20343 "L-fucose phosphate aldolase"  
"JS1\_F07\_00119" 6750 "s63E6H2" 1.529211 "L-fucose phosphate aldolase"  
"JS1\_F07\_00120" 6751 "s59E13H2" 0.3270273 "putative diguanylate cyclase YeaP"  
"JS1\_F07\_00120" 6751 "s59E25H2" 0 "putative diguanylate cyclase YeaP"  
"JS1\_F07\_00120" 6751 "s59E5H2" 0.1842355 "putative diguanylate cyclase YeaP"  
"JS1\_F07\_00120" 6751 "s63E6H2" 4.129161 "putative diguanylate cyclase YeaP"  
"JS1\_F07\_00121" 6752 "s59E13H2" 0.9554119 "Diacylglycerol kinase"  
"JS1\_F07\_00121" 6752 "s59E25H2" 0 "Diacylglycerol kinase"  
"JS1\_F07\_00121" 6752 "s59E5H2" 2.470287 "Diacylglycerol kinase"  
"JS1\_F07\_00121" 6752 "s63E6H2" 4.525206 "Diacylglycerol kinase"  
"JS1\_F07\_00122" 6753 "s59E13H2" 0.3937875 "N-carbamoyl-D-amino acid hydrolase"  
"JS1\_F07\_00122" 6753 "s59E25H2" 0 "N-carbamoyl-D-amino acid hydrolase"  
"JS1\_F07\_00122" 6753 "s59E5H2" 2.014823 "N-carbamoyl-D-amino acid hydrolase"  
"JS1\_F07\_00122" 6753 "s63E6H2" 3.894908 "N-carbamoyl-D-amino acid hydrolase"  
"JS1\_F07\_00123" 6754 "s59E13H2" 0.5017353 "Spermidine N(1)-acetyltransferase"  
"JS1\_F07\_00123" 6754 "s59E25H2" 0 "Spermidine N(1)-acetyltransferase"  
"JS1\_F07\_00123" 6754 "s59E5H2" 2.174395 "Spermidine N(1)-acetyltransferase"  
"JS1\_F07\_00123" 6754 "s63E6H2" 3.658057 "Spermidine N(1)-acetyltransferase"  
"JS1\_F07\_00124" 6755 "s59E13H2" 0.5462094 "Replication-associated recombination protein A"  
"JS1\_F07\_00124" 6755 "s59E25H2" 0.1610487 "Replication-associated recombination protein A"  
"JS1\_F07\_00124" 6755 "s59E5H2" 2.874043 "Replication-associated recombination protein A"  
"JS1\_F07\_00124" 6755 "s63E6H2" 5.475004 "Replication-associated recombination protein A"  
"JS1\_F07\_00125" 6756 "s59E13H2" 0.310422 "putative adenylyltransferase"  
"JS1\_F07\_00125" 6756 "s59E25H2" 0 "putative adenylyltransferase"  
"JS1\_F07\_00125" 6756 "s59E5H2" 2.429897 "putative adenylyltransferase"  
"JS1\_F07\_00125" 6756 "s63E6H2" 6.012148 "putative adenylyltransferase"  
"JS1\_F07\_00126" 6757 "s59E13H2" 0.9638604 "D-alanine--D-alanine ligase"  
"JS1\_F07\_00126" 6757 "s59E25H2" 0 "D-alanine--D-alanine ligase"  
"JS1\_F07\_00126" 6757 "s59E5H2" 4.984003 "D-alanine--D-alanine ligase"  
"JS1\_F07\_00126" 6757 "s63E6H2" 8.580904 "D-alanine--D-alanine ligase"  
"JS1\_F07\_00127" 6758 "s59E13H2" 25.21443 "Methionine aminopeptidase"  
"JS1\_F07\_00127" 6758 "s59E25H2" 0.3359788 "Methionine aminopeptidase"

"JS1\_F07\_00127" 6758 "s59E5H2" 9.524178 "Methionine aminopeptidase"  
"JS1\_F07\_00127" 6758 "s63E6H2" 11.34813 "Methionine aminopeptidase"  
"JS1\_F07\_00128" 6759 "s59E13H2" 21.19684 "Adenosylcobalamin-dependent ribonucleoside-triphosphate reductase"  
"JS1\_F07\_00128" 6759 "s59E25H2" 0.1769231 "Adenosylcobalamin-dependent ribonucleoside-triphosphate reductase"  
"JS1\_F07\_00128" 6759 "s59E5H2" 5.985275 "Adenosylcobalamin-dependent ribonucleoside-triphosphate reductase"  
"JS1\_F07\_00128" 6759 "s63E6H2" 6.571702 "Adenosylcobalamin-dependent ribonucleoside-triphosphate reductase"  
"JS1\_F07\_00129" 6760 "s59E13H2" 0.01285644 "putative type I restriction enzymeP M protein"  
"JS1\_F07\_00129" 6760 "s59E25H2" 0 "putative type I restriction enzymeP M protein"  
"JS1\_F07\_00129" 6760 "s59E5H2" 0.006400534 "putative type I restriction enzymeP M protein"  
"JS1\_F07\_00129" 6760 "s63E6H2" 0 "putative type I restriction enzymeP M protein"  
"JS1\_F07\_00130" 6761 "s59E13H2" 0.01863657 "Type-1 restriction enzyme EcoKI specificity protein"  
"JS1\_F07\_00130" 6761 "s59E25H2" 0 "Type-1 restriction enzyme EcoKI specificity protein"  
"JS1\_F07\_00130" 6761 "s59E5H2" 0 "Type-1 restriction enzyme EcoKI specificity protein"  
"JS1\_F07\_00130" 6761 "s63E6H2" 0 "Type-1 restriction enzyme EcoKI specificity protein"  
"JS1\_F07\_00131" 6762 "s59E13H2" 0.5309815 "Type-1 restriction enzyme R protein"  
"JS1\_F07\_00131" 6762 "s59E25H2" 0 "Type-1 restriction enzyme R protein"  
"JS1\_F07\_00131" 6762 "s59E5H2" 0.01013488 "Type-1 restriction enzyme R protein"  
"JS1\_F07\_00131" 6762 "s63E6H2" 0.04701062 "Type-1 restriction enzyme R protein"  
"JS1\_F07\_00134" 6765 "s59E13H2" 0.05426176 "hypothetical protein"  
"JS1\_F07\_00134" 6765 "s59E25H2" 0 "hypothetical protein"  
"JS1\_F07\_00134" 6765 "s59E5H2" 0 "hypothetical protein"  
"JS1\_F07\_00134" 6765 "s63E6H2" 0 "hypothetical protein"  
"JS1\_F07\_00136" 6767 "s59E13H2" 0.03677585 "hypothetical protein"  
"JS1\_F07\_00136" 6767 "s59E25H2" 0 "hypothetical protein"  
"JS1\_F07\_00136" 6767 "s59E5H2" 0 "hypothetical protein"  
"JS1\_F07\_00136" 6767 "s63E6H2" 0 "hypothetical protein"  
"JS1\_F07\_00137" 6768 "s59E13H2" 0.03888809 "hypothetical protein"  
"JS1\_F07\_00137" 6768 "s59E25H2" 0 "hypothetical protein"  
"JS1\_F07\_00137" 6768 "s59E5H2" 0.08752698 "hypothetical protein"  
"JS1\_F07\_00137" 6768 "s63E6H2" 0 "hypothetical protein"  
"JS1\_F07\_00139" 6770 "s59E13H2" 0 "Transposase, Mutator family"  
"JS1\_F07\_00139" 6770 "s59E25H2" 0 "Transposase, Mutator family"  
"JS1\_F07\_00139" 6770 "s59E5H2" 0 "Transposase, Mutator family"  
"JS1\_F07\_00139" 6770 "s63E6H2" 0 "Transposase, Mutator family"  
"JS1\_F07\_00140" 6771 "s59E13H2" 0.05283259 "Transposase IS200 like protein"  
"JS1\_F07\_00140" 6771 "s59E25H2" 0 "Transposase IS200 like protein"  
"JS1\_F07\_00140" 6771 "s59E5H2" 0.8679727 "Transposase IS200 like protein"  
"JS1\_F07\_00140" 6771 "s63E6H2" 0.6910126 "Transposase IS200 like protein"  
"JS1\_F07\_00141" 6772 "s59E13H2" 0 "putative zinc-type alcohol dehydrogenase-like protein YjmD"  
"JS1\_F07\_00141" 6772 "s59E25H2" 0 "putative zinc-type alcohol dehydrogenase-like protein YjmD"  
"JS1\_F07\_00141" 6772 "s59E5H2" 0.0002231704 "putative zinc-type alcohol dehydrogenase-like protein YjmD"  
"JS1\_F07\_00141" 6772 "s63E6H2" 0.0002211738 "putative zinc-type alcohol dehydrogenase-like protein YjmD"  
"JS1\_F07\_00142" 6773 "s59E13H2" 0 "Sorbitol dehydrogenase"  
"JS1\_F07\_00142" 6773 "s59E25H2" 0 "Sorbitol dehydrogenase"  
"JS1\_F07\_00142" 6773 "s59E5H2" 0 "Sorbitol dehydrogenase"  
"JS1\_F07\_00142" 6773 "s63E6H2" 0 "Sorbitol dehydrogenase"  
"JS1\_F07\_00143" 6774 "s59E13H2" 0 "L-ribulose-5-phosphate 3-epimerase UlaE"

"JS1\_F07\_00143" 6774 "s59E25H2" 0 "L-ribulose-5-phosphate 3-epimerase UlaE"  
"JS1\_F07\_00143" 6774 "s59E5H2" 0 "L-ribulose-5-phosphate 3-epimerase UlaE"  
"JS1\_F07\_00143" 6774 "s63E6H2" 0 "L-ribulose-5-phosphate 3-epimerase UlaE"  
"JS1\_F07\_00145" 6776 "s59E13H2" 0 "Ribose transport system permease protein RbsC"  
"JS1\_F07\_00145" 6776 "s59E25H2" 0 "Ribose transport system permease protein RbsC"  
"JS1\_F07\_00145" 6776 "s59E5H2" 0 "Ribose transport system permease protein RbsC"  
"JS1\_F07\_00145" 6776 "s63E6H2" 0 "Ribose transport system permease protein RbsC"  
"JS1\_F07\_00146" 6777 "s59E13H2" 0.159308 "hypothetical protein"  
"JS1\_F07\_00146" 6777 "s59E25H2" 0.6556474 "hypothetical protein"  
"JS1\_F07\_00146" 6777 "s59E5H2" 5.936531 "hypothetical protein"  
"JS1\_F07\_00146" 6777 "s63E6H2" 0.5117154 "hypothetical protein"  
"JS1\_F07\_00147" 6778 "s59E13H2" 0.04705853 "hypothetical protein"  
"JS1\_F07\_00147" 6778 "s59E25H2" 0 "hypothetical protein"  
"JS1\_F07\_00147" 6778 "s59E5H2" 1.888875 "hypothetical protein"  
"JS1\_F07\_00147" 6778 "s63E6H2" 0.1008539 "hypothetical protein"  
"JS1\_F07\_00148" 6779 "s59E13H2" 0.09231414 "hypothetical protein"  
"JS1\_F07\_00148" 6779 "s59E25H2" 0 "hypothetical protein"  
"JS1\_F07\_00148" 6779 "s59E5H2" 1.565925 "hypothetical protein"  
"JS1\_F07\_00148" 6779 "s63E6H2" 0.2129085 "hypothetical protein"  
"JS1\_F07\_00149" 6780 "s59E13H2" 0.03497799 "hypothetical protein"  
"JS1\_F07\_00149" 6780 "s59E25H2" 0 "hypothetical protein"  
"JS1\_F07\_00149" 6780 "s59E5H2" 0 "hypothetical protein"  
"JS1\_F07\_00149" 6780 "s63E6H2" 0.001454261 "hypothetical protein"  
"JS1\_F07\_00150" 6781 "s59E13H2" 0 "SOUL heme-binding protein"  
"JS1\_F07\_00150" 6781 "s59E25H2" 0 "SOUL heme-binding protein"  
"JS1\_F07\_00150" 6781 "s59E5H2" 0 "SOUL heme-binding protein"  
"JS1\_F07\_00150" 6781 "s63E6H2" 0 "SOUL heme-binding protein"  
"JS1\_F07\_00152" 6783 "s59E13H2" 0 "Aminodeoxyfutasine deaminase"  
"JS1\_F07\_00152" 6783 "s59E25H2" 0 "Aminodeoxyfutasine deaminase"  
"JS1\_F07\_00152" 6783 "s59E5H2" 0 "Aminodeoxyfutasine deaminase"  
"JS1\_F07\_00152" 6783 "s63E6H2" 0.002965362 "Aminodeoxyfutasine deaminase"  
"JS1\_F07\_00153" 6784 "s59E13H2" 4.54687 "General stress protein 69"  
"JS1\_F07\_00153" 6784 "s59E25H2" 0 "General stress protein 69"  
"JS1\_F07\_00153" 6784 "s59E5H2" 0.5638637 "General stress protein 69"  
"JS1\_F07\_00153" 6784 "s63E6H2" 1.074551 "General stress protein 69"  
"JS1\_F07\_00154" 6785 "s59E13H2" 4.925788 "Adenosine monophosphate-protein transferase SoFic"  
"JS1\_F07\_00154" 6785 "s59E25H2" 0 "Adenosine monophosphate-protein transferase SoFic"  
"JS1\_F07\_00154" 6785 "s59E5H2" 0.1578835 "Adenosine monophosphate-protein transferase SoFic"  
"JS1\_F07\_00154" 6785 "s63E6H2" 0.009156461 "Adenosine monophosphate-protein transferase SoFic"  
"JS1\_F07\_00155" 6786 "s59E13H2" 0.3955351 "Cyclic di-GMP phosphodiesterase Gmr"  
"JS1\_F07\_00155" 6786 "s59E25H2" 0 "Cyclic di-GMP phosphodiesterase Gmr"  
"JS1\_F07\_00155" 6786 "s59E5H2" 1.129617 "Cyclic di-GMP phosphodiesterase Gmr"  
"JS1\_F07\_00155" 6786 "s63E6H2" 2.207965 "Cyclic di-GMP phosphodiesterase Gmr"  
"JS1\_F07\_00156" 6787 "s59E13H2" 1.519234 "L-asparaginase 1"  
"JS1\_F07\_00156" 6787 "s59E25H2" 0 "L-asparaginase 1"  
"JS1\_F07\_00156" 6787 "s59E5H2" 1.821411 "L-asparaginase 1"  
"JS1\_F07\_00156" 6787 "s63E6H2" 3.28988 "L-asparaginase 1"

"JS1\_F07\_00157" 6788 "s59E13H2" 1.876375 "Multidrug export protein MepA"  
"JS1\_F07\_00157" 6788 "s59E25H2" 0.3399852 "Multidrug export protein MepA"  
"JS1\_F07\_00157" 6788 "s59E5H2" 1.13463 "Multidrug export protein MepA"  
"JS1\_F07\_00157" 6788 "s63E6H2" 1.430021 "Multidrug export protein MepA"  
"JS1\_F07\_00158" 6789 "s59E13H2" 0.8552716 "putative HTH-type transcriptional regulator YusO"  
"JS1\_F07\_00158" 6789 "s59E25H2" 0 "putative HTH-type transcriptional regulator YusO"  
"JS1\_F07\_00158" 6789 "s59E5H2" 0.08715632 "putative HTH-type transcriptional regulator YusO"  
"JS1\_F07\_00158" 6789 "s63E6H2" 0.2042313 "putative HTH-type transcriptional regulator YusO"  
"JS1\_F07\_00159" 6790 "s59E13H2" 1.252312 "Na(+)/H(+) antiporter subunit F"  
"JS1\_F07\_00159" 6790 "s59E25H2" 0 "Na(+)/H(+) antiporter subunit F"  
"JS1\_F07\_00159" 6790 "s59E5H2" 0.7311907 "Na(+)/H(+) antiporter subunit F"  
"JS1\_F07\_00159" 6790 "s63E6H2" 2.935183 "Na(+)/H(+) antiporter subunit F"  
"JS1\_F07\_00160" 6791 "s59E13H2" 1.53454 "Na(+)/H(+) antiporter subunit E"  
"JS1\_F07\_00160" 6791 "s59E25H2" 0 "Na(+)/H(+) antiporter subunit E"  
"JS1\_F07\_00160" 6791 "s59E5H2" 1.13142 "Na(+)/H(+) antiporter subunit E"  
"JS1\_F07\_00160" 6791 "s63E6H2" 3.867751 "Na(+)/H(+) antiporter subunit E"  
"JS1\_F07\_00161" 6792 "s59E13H2" 1.142893 "putative hydrogenase nickel incorporation protein HypA"  
"JS1\_F07\_00161" 6792 "s59E25H2" 0 "putative hydrogenase nickel incorporation protein HypA"  
"JS1\_F07\_00161" 6792 "s59E5H2" 0.5802568 "putative hydrogenase nickel incorporation protein HypA"  
"JS1\_F07\_00161" 6792 "s63E6H2" 3.548723 "putative hydrogenase nickel incorporation protein HypA"  
"JS1\_F07\_00163" 6794 "s59E13H2" 2.292991 "Oligopeptide transport ATP-binding protein OppF"  
"JS1\_F07\_00163" 6794 "s59E25H2" 0.2317949 "Oligopeptide transport ATP-binding protein OppF"  
"JS1\_F07\_00163" 6794 "s59E5H2" 1.427663 "Oligopeptide transport ATP-binding protein OppF"  
"JS1\_F07\_00163" 6794 "s63E6H2" 5.725163 "Oligopeptide transport ATP-binding protein OppF"  
"JS1\_F07\_00164" 6795 "s59E13H2" 1.976909 "Oligopeptide transport ATP-binding protein OppD"  
"JS1\_F07\_00164" 6795 "s59E25H2" 0.2429543 "Oligopeptide transport ATP-binding protein OppD"  
"JS1\_F07\_00164" 6795 "s59E5H2" 1.213028 "Oligopeptide transport ATP-binding protein OppD"  
"JS1\_F07\_00164" 6795 "s63E6H2" 3.200052 "Oligopeptide transport ATP-binding protein OppD"  
"JS1\_F07\_00165" 6796 "s59E13H2" 0.9219109 "Putative nicotinate phosphoribosyltransferase"  
"JS1\_F07\_00165" 6796 "s59E25H2" 0.2418112 "Putative nicotinate phosphoribosyltransferase"  
"JS1\_F07\_00165" 6796 "s59E5H2" 0.429689 "Putative nicotinate phosphoribosyltransferase"  
"JS1\_F07\_00165" 6796 "s63E6H2" 0.5414375 "Putative nicotinate phosphoribosyltransferase"  
"JS1\_F07\_00166" 6797 "s59E13H2" 1.030077 "preprotein translocase subunit SecG"  
"JS1\_F07\_00166" 6797 "s59E25H2" 0 "preprotein translocase subunit SecG"  
"JS1\_F07\_00166" 6797 "s59E5H2" 0.4545049 "preprotein translocase subunit SecG"  
"JS1\_F07\_00166" 6797 "s63E6H2" 0.6265181 "preprotein translocase subunit SecG"  
"JS1\_F07\_00167" 6798 "s59E13H2" 1.111325 "Triosephosphate isomerase"  
"JS1\_F07\_00167" 6798 "s59E25H2" 0 "Triosephosphate isomerase"  
"JS1\_F07\_00167" 6798 "s59E5H2" 0.4069741 "Triosephosphate isomerase"  
"JS1\_F07\_00167" 6798 "s63E6H2" 0.8847201 "Triosephosphate isomerase"  
"JS1\_F07\_00168" 6799 "s59E13H2" 0.7528032 "Glyceraldehyde-3-phosphate dehydrogenase"  
"JS1\_F07\_00168" 6799 "s59E25H2" 0 "Glyceraldehyde-3-phosphate dehydrogenase"  
"JS1\_F07\_00168" 6799 "s59E5H2" 0.5937303 "Glyceraldehyde-3-phosphate dehydrogenase"  
"JS1\_F07\_00168" 6799 "s63E6H2" 0.8899628 "Glyceraldehyde-3-phosphate dehydrogenase"  
"JS1\_F07\_00169" 6800 "s59E13H2" 0.6416511 "RNA polymerase sigma-54 factor"  
"JS1\_F07\_00169" 6800 "s59E25H2" 0 "RNA polymerase sigma-54 factor"  
"JS1\_F07\_00169" 6800 "s59E5H2" 0.3294541 "RNA polymerase sigma-54 factor"

"JS1\_F07\_00169" 6800 "s63E6H2" 0.6102768 "RNA polymerase sigma-54 factor"  
"JS1\_F07\_00170" 6801 "s59E13H2" 0.8038516 "Trehalose/maltose import ATP-binding protein Malk"  
"JS1\_F07\_00170" 6801 "s59E25H2" 0 "Trehalose/maltose import ATP-binding protein Malk"  
"JS1\_F07\_00170" 6801 "s59E5H2" 0.2606911 "Trehalose/maltose import ATP-binding protein Malk"  
"JS1\_F07\_00170" 6801 "s63E6H2" 0.705615 "Trehalose/maltose import ATP-binding protein Malk"  
"JS1\_F07\_00171" 6802 "s59E13H2" 0.6464452 "Putative sporulation transcription regulator WhiA"  
"JS1\_F07\_00171" 6802 "s59E25H2" 0 "Putative sporulation transcription regulator WhiA"  
"JS1\_F07\_00171" 6802 "s59E5H2" 0.2070862 "Putative sporulation transcription regulator WhiA"  
"JS1\_F07\_00171" 6802 "s63E6H2" 0.3859274 "Putative sporulation transcription regulator WhiA"  
"JS1\_F07\_00172" 6803 "s59E13H2" 0.485881 "glmZ(sRNA)-inactivating NTPase"  
"JS1\_F07\_00172" 6803 "s59E25H2" 0 "glmZ(sRNA)-inactivating NTPase"  
"JS1\_F07\_00172" 6803 "s59E5H2" 0.3479315 "glmZ(sRNA)-inactivating NTPase"  
"JS1\_F07\_00172" 6803 "s63E6H2" 0.8783889 "glmZ(sRNA)-inactivating NTPase"  
"JS1\_F07\_00173" 6804 "s59E13H2" 0.1479671 "Arginine--tRNA ligase"  
"JS1\_F07\_00173" 6804 "s59E25H2" 0 "Arginine--tRNA ligase"  
"JS1\_F07\_00173" 6804 "s59E5H2" 0.4413419 "Arginine--tRNA ligase"  
"JS1\_F07\_00173" 6804 "s63E6H2" 0.5373592 "Arginine--tRNA ligase"  
"JS1\_F07\_00175" 6806 "s59E13H2" 0.05700858 "Oligopeptide transport system permease protein OppC"  
"JS1\_F07\_00175" 6806 "s59E25H2" 0 "Oligopeptide transport system permease protein OppC"  
"JS1\_F07\_00175" 6806 "s59E5H2" 0.04244496 "Oligopeptide transport system permease protein OppC"  
"JS1\_F07\_00175" 6806 "s63E6H2" 0.6350066 "Oligopeptide transport system permease protein OppC"  
"JS1\_F07\_00176" 6807 "s59E13H2" 0.0804212 "Dipeptide transport system permease protein DppB"  
"JS1\_F07\_00176" 6807 "s59E25H2" 0 "Dipeptide transport system permease protein DppB"  
"JS1\_F07\_00176" 6807 "s59E5H2" 0.06860848 "Dipeptide transport system permease protein DppB"  
"JS1\_F07\_00176" 6807 "s63E6H2" 0.4415034 "Dipeptide transport system permease protein DppB"  
"JS1\_F07\_00177" 6808 "s59E13H2" 0.1726518 "Oligopeptide-binding protein OppA precursor"  
"JS1\_F07\_00177" 6808 "s59E25H2" 0 "Oligopeptide-binding protein OppA precursor"  
"JS1\_F07\_00177" 6808 "s59E5H2" 0.1011959 "Oligopeptide-binding protein OppA precursor"  
"JS1\_F07\_00177" 6808 "s63E6H2" 0.4016843 "Oligopeptide-binding protein OppA precursor"  
"JS1\_F07\_00179" 6810 "s59E13H2" 0.2117029 "ATP-dependent zinc metalloprotease FtsH 3"  
"JS1\_F07\_00179" 6810 "s59E25H2" 0 "ATP-dependent zinc metalloprotease FtsH 3"  
"JS1\_F07\_00179" 6810 "s59E5H2" 0.02259817 "ATP-dependent zinc metalloprotease FtsH 3"  
"JS1\_F07\_00179" 6810 "s63E6H2" 0.1381472 "ATP-dependent zinc metalloprotease FtsH 3"  
"JS1\_F07\_00180" 6811 "s59E13H2" 0.2008113 "ATP-dependent zinc metalloprotease FtsH"  
"JS1\_F07\_00180" 6811 "s59E25H2" 0 "ATP-dependent zinc metalloprotease FtsH"  
"JS1\_F07\_00180" 6811 "s59E5H2" 0.07900319 "ATP-dependent zinc metalloprotease FtsH"  
"JS1\_F07\_00180" 6811 "s63E6H2" 0.1737177 "ATP-dependent zinc metalloprotease FtsH"  
"JS1\_F07\_00181" 6812 "s59E13H2" 0.03388815 "Hypoxanthine-guanine phosphoribosyltransferase"  
"JS1\_F07\_00181" 6812 "s59E25H2" 0 "Hypoxanthine-guanine phosphoribosyltransferase"  
"JS1\_F07\_00181" 6812 "s59E5H2" 0.1547563 "Hypoxanthine-guanine phosphoribosyltransferase"  
"JS1\_F07\_00181" 6812 "s63E6H2" 0.1059878 "Hypoxanthine-guanine phosphoribosyltransferase"  
"JS1\_F07\_00182" 6813 "s59E13H2" 0.07221387 "tRNA(Ile)-lysine synthase"  
"JS1\_F07\_00182" 6813 "s59E25H2" 0 "tRNA(Ile)-lysine synthase"  
"JS1\_F07\_00182" 6813 "s59E5H2" 0.1925686 "tRNA(Ile)-lysine synthase"  
"JS1\_F07\_00182" 6813 "s63E6H2" 0.2975468 "tRNA(Ile)-lysine synthase"  
"JS1\_F07\_00186" 6817 "s59E13H2" 0.05516171 "cell division protein FtsB"  
"JS1\_F07\_00186" 6817 "s59E25H2" 0 "cell division protein FtsB"

"JS1\_F07\_00186" 6817 "s59E5H2" 0.4086708 "cell division protein FtsB"  
"JS1\_F07\_00186" 6817 "s63E6H2" 0.5106392 "cell division protein FtsB"  
"JS1\_F07\_00187" 6818 "s59E13H2" 0.07881499 "Enolase"  
"JS1\_F07\_00187" 6818 "s59E25H2" 0 "Enolase"  
"JS1\_F07\_00187" 6818 "s59E5H2" 0.3982577 "Enolase"  
"JS1\_F07\_00187" 6818 "s63E6H2" 0.4017989 "Enolase"  
"JS1\_F07\_00188" 6819 "s59E13H2" 0.09088641 "Enolase"  
"JS1\_F07\_00188" 6819 "s59E25H2" 0 "Enolase"  
"JS1\_F07\_00188" 6819 "s59E5H2" 0.2960185 "Enolase"  
"JS1\_F07\_00188" 6819 "s63E6H2" 0.3666535 "Enolase"  
"JS1\_F07\_00189" 6820 "s59E13H2" 0.06576289 "Magnesium transporter MgtE"  
"JS1\_F07\_00189" 6820 "s59E25H2" 0 "Magnesium transporter MgtE"  
"JS1\_F07\_00189" 6820 "s59E5H2" 0.3716848 "Magnesium transporter MgtE"  
"JS1\_F07\_00189" 6820 "s63E6H2" 0.2923792 "Magnesium transporter MgtE"  
"JS1\_F07\_00190" 6821 "s59E13H2" 0.08479571 "S4 domain protein"  
"JS1\_F07\_00190" 6821 "s59E25H2" 0 "S4 domain protein"  
"JS1\_F07\_00190" 6821 "s59E5H2" 0.03272706 "S4 domain protein"  
"JS1\_F07\_00190" 6821 "s63E6H2" 0.06618912 "S4 domain protein"  
"JS1\_F07\_00191" 6822 "s59E13H2" 0.1709283 "Lysine--tRNA ligase"  
"JS1\_F07\_00191" 6822 "s59E25H2" 0 "Lysine--tRNA ligase"  
"JS1\_F07\_00191" 6822 "s59E5H2" 0.2575718 "Lysine--tRNA ligase"  
"JS1\_F07\_00191" 6822 "s63E6H2" 0.2428844 "Lysine--tRNA ligase"  
"JS1\_F07\_00192" 6823 "s59E13H2" 4.935163 "Dipeptide transport system permease protein DppB"  
"JS1\_F07\_00192" 6823 "s59E25H2" 0 "Dipeptide transport system permease protein DppB"  
"JS1\_F07\_00192" 6823 "s59E5H2" 0.6296927 "Dipeptide transport system permease protein DppB"  
"JS1\_F07\_00192" 6823 "s63E6H2" 0.139122 "Dipeptide transport system permease protein DppB"  
"JS1\_F07\_00193" 6824 "s59E13H2" 5.344474 "Glutathione transport system permease protein GsiD"  
"JS1\_F07\_00193" 6824 "s59E25H2" 0 "Glutathione transport system permease protein GsiD"  
"JS1\_F07\_00193" 6824 "s59E5H2" 0.7528346 "Glutathione transport system permease protein GsiD"  
"JS1\_F07\_00193" 6824 "s63E6H2" 0.155015 "Glutathione transport system permease protein GsiD"  
"JS1\_F07\_00194" 6825 "s59E13H2" 7.073399 "Oligopeptide transport ATP-binding protein OppD"  
"JS1\_F07\_00194" 6825 "s59E25H2" 0.175813 "Oligopeptide transport ATP-binding protein OppD"  
"JS1\_F07\_00194" 6825 "s59E5H2" 2.085547 "Oligopeptide transport ATP-binding protein OppD"  
"JS1\_F07\_00194" 6825 "s63E6H2" 0.3656285 "Oligopeptide transport ATP-binding protein OppD"  
"JS1\_F07\_00195" 6826 "s59E13H2" 8.08307 "Oligopeptide transport ATP-binding protein OppF"  
"JS1\_F07\_00195" 6826 "s59E25H2" 0 "Oligopeptide transport ATP-binding protein OppF"  
"JS1\_F07\_00195" 6826 "s59E5H2" 2.586925 "Oligopeptide transport ATP-binding protein OppF"  
"JS1\_F07\_00195" 6826 "s63E6H2" 0.4043075 "Oligopeptide transport ATP-binding protein OppF"  
"JS1\_F07\_00196" 6827 "s59E13H2" 4.79178 "RNA polymerase-binding transcription factor CarD"  
"JS1\_F07\_00196" 6827 "s59E25H2" 0 "RNA polymerase-binding transcription factor CarD"  
"JS1\_F07\_00196" 6827 "s59E5H2" 1.99556 "RNA polymerase-binding transcription factor CarD"  
"JS1\_F07\_00196" 6827 "s63E6H2" 0.2567759 "RNA polymerase-binding transcription factor CarD"  
"JS1\_F07\_00197" 6828 "s59E13H2" 4.368435 "Bifunctional protein FOLD protein"  
"JS1\_F07\_00197" 6828 "s59E25H2" 0 "Bifunctional protein FOLD protein"  
"JS1\_F07\_00197" 6828 "s59E5H2" 2.433812 "Bifunctional protein FOLD protein"  
"JS1\_F07\_00197" 6828 "s63E6H2" 0.3911857 "Bifunctional protein FOLD protein"  
"JS1\_F07\_00198" 6829 "s59E13H2" 4.15323 "OsmC-like protein"

"JS1\_F07\_00198" 6829 "s59E25H2" 0 "OsmC-like protein"  
"JS1\_F07\_00198" 6829 "s59E5H2" 0.5078206 "OsmC-like protein"  
"JS1\_F07\_00198" 6829 "s63E6H2" 0.2549717 "OsmC-like protein"  
"JS1\_F07\_00199" 6830 "s59E13H2" 0.01742578 "hypothetical protein"  
"JS1\_F07\_00199" 6830 "s59E25H2" 0 "hypothetical protein"  
"JS1\_F07\_00199" 6830 "s59E5H2" 0.5038718 "hypothetical protein"  
"JS1\_F07\_00199" 6830 "s63E6H2" 0.09007159 "hypothetical protein"  
"JS1\_F07\_00200" 6831 "s59E13H2" 0.03141857 "Lipoprotein-releasing system transmembrane protein LolE"  
"JS1\_F07\_00200" 6831 "s59E25H2" 0 "Lipoprotein-releasing system transmembrane protein LolE"  
"JS1\_F07\_00200" 6831 "s59E5H2" 0.2132555 "Lipoprotein-releasing system transmembrane protein LolE"  
"JS1\_F07\_00200" 6831 "s63E6H2" 0.1736183 "Lipoprotein-releasing system transmembrane protein LolE"  
"JS1\_F07\_00201" 6832 "s59E13H2" 0.02287655 "ABC transporter permease YtrF precursor"  
"JS1\_F07\_00201" 6832 "s59E25H2" 0 "ABC transporter permease YtrF precursor"  
"JS1\_F07\_00201" 6832 "s59E5H2" 0.1773215 "ABC transporter permease YtrF precursor"  
"JS1\_F07\_00201" 6832 "s63E6H2" 0.1891792 "ABC transporter permease YtrF precursor"  
"JS1\_F07\_00202" 6833 "s59E13H2" 0.003881019 "putative ABC transporter ATP-binding protein"  
"JS1\_F07\_00202" 6833 "s59E25H2" 0 "putative ABC transporter ATP-binding protein"  
"JS1\_F07\_00202" 6833 "s59E5H2" 0.07572524 "putative ABC transporter ATP-binding protein"  
"JS1\_F07\_00202" 6833 "s63E6H2" 0.09138318 "putative ABC transporter ATP-binding protein"  
"JS1\_F07\_00203" 6834 "s59E13H2" 0.01393359 "ABC transporter permease YtrF precursor"  
"JS1\_F07\_00203" 6834 "s59E25H2" 0 "ABC transporter permease YtrF precursor"  
"JS1\_F07\_00203" 6834 "s59E5H2" 0.05598399 "ABC transporter permease YtrF precursor"  
"JS1\_F07\_00203" 6834 "s63E6H2" 0.08832591 "ABC transporter permease YtrF precursor"  
"JS1\_F07\_00204" 6835 "s59E13H2" 0.008870901 "putative HTH-type transcriptional regulator YfiR"  
"JS1\_F07\_00204" 6835 "s59E25H2" 0 "putative HTH-type transcriptional regulator YfiR"  
"JS1\_F07\_00204" 6835 "s59E5H2" 0.02297837 "putative HTH-type transcriptional regulator YfiR"  
"JS1\_F07\_00204" 6835 "s63E6H2" 0.06686337 "putative HTH-type transcriptional regulator YfiR"  
"JS1\_F07\_00205" 6836 "s59E13H2" 0.04213102 "hypothetical protein"  
"JS1\_F07\_00205" 6836 "s59E25H2" 0 "hypothetical protein"  
"JS1\_F07\_00205" 6836 "s59E5H2" 0.2495372 "hypothetical protein"  
"JS1\_F07\_00205" 6836 "s63E6H2" 0.3888545 "hypothetical protein"  
"JS1\_F07\_00206" 6837 "s59E13H2" 0.04601085 "Intracellular protease 1"  
"JS1\_F07\_00206" 6837 "s59E25H2" 0 "Intracellular protease 1"  
"JS1\_F07\_00206" 6837 "s59E5H2" 0.106867 "Intracellular protease 1"  
"JS1\_F07\_00206" 6837 "s63E6H2" 0.1595406 "Intracellular protease 1"  
"JS1\_F07\_00207" 6838 "s59E13H2" 0.01015001 "hypothetical protein"  
"JS1\_F07\_00207" 6838 "s59E25H2" 0 "hypothetical protein"  
"JS1\_F07\_00207" 6838 "s59E5H2" 0.004271663 "hypothetical protein"  
"JS1\_F07\_00207" 6838 "s63E6H2" 0 "hypothetical protein"  
"JS1\_F07\_00209" 6840 "s59E13H2" 0 "hypothetical protein"  
"JS1\_F07\_00209" 6840 "s59E25H2" 0 "hypothetical protein"  
"JS1\_F07\_00209" 6840 "s59E5H2" 0 "hypothetical protein"  
"JS1\_F07\_00209" 6840 "s63E6H2" 0 "hypothetical protein"  
"JS1\_F07\_00210" 6841 "s59E13H2" 0.02423417 "hypothetical protein"  
"JS1\_F07\_00210" 6841 "s59E25H2" 0 "hypothetical protein"  
"JS1\_F07\_00210" 6841 "s59E5H2" 0 "hypothetical protein"  
"JS1\_F07\_00210" 6841 "s63E6H2" 0 "hypothetical protein"

"JS1\_F07\_00211" 6842 "s59E13H2" 0.006168697 "hypothetical protein"  
"JS1\_F07\_00211" 6842 "s59E25H2" 0 "hypothetical protein"  
"JS1\_F07\_00211" 6842 "s59E5H2" 0 "hypothetical protein"  
"JS1\_F07\_00211" 6842 "s63E6H2" 0 "hypothetical protein"  
"JS1\_F07\_00212" 6843 "s59E13H2" 0.003477796 "voltage-gated potassium channel"  
"JS1\_F07\_00212" 6843 "s59E25H2" 0 "voltage-gated potassium channel"  
"JS1\_F07\_00212" 6843 "s59E5H2" 0 "voltage-gated potassium channel"  
"JS1\_F07\_00212" 6843 "s63E6H2" 0 "voltage-gated potassium channel"  
"JS1\_F07\_00214" 6845 "s59E13H2" 0.4959519 "Sulfhydrogenase 1 subunit beta"  
"JS1\_F07\_00214" 6845 "s59E25H2" 0 "Sulfhydrogenase 1 subunit beta"  
"JS1\_F07\_00214" 6845 "s59E5H2" 0.1852273 "Sulfhydrogenase 1 subunit beta"  
"JS1\_F07\_00214" 6845 "s63E6H2" 0.07976096 "Sulfhydrogenase 1 subunit beta"  
"JS1\_F07\_00215" 6846 "s59E13H2" 1.3123 "hypothetical protein"  
"JS1\_F07\_00215" 6846 "s59E25H2" 0 "hypothetical protein"  
"JS1\_F07\_00215" 6846 "s59E5H2" 0.2355734 "hypothetical protein"  
"JS1\_F07\_00215" 6846 "s63E6H2" 0.06403121 "hypothetical protein"  
"JS1\_F07\_00216" 6847 "s59E13H2" 0.2305455 "N-substituted formamide deformylase precursor"  
"JS1\_F07\_00216" 6847 "s59E25H2" 0 "N-substituted formamide deformylase precursor"  
"JS1\_F07\_00216" 6847 "s59E5H2" 0.08032017 "N-substituted formamide deformylase precursor"  
"JS1\_F07\_00216" 6847 "s63E6H2" 0.1532526 "N-substituted formamide deformylase precursor"  
"JS1\_F07\_00218" 6849 "s59E13H2" 8.499589 "Glucose-6-phosphate 3-dehydrogenase"  
"JS1\_F07\_00218" 6849 "s59E25H2" 0 "Glucose-6-phosphate 3-dehydrogenase"  
"JS1\_F07\_00218" 6849 "s59E5H2" 0.2937971 "Glucose-6-phosphate 3-dehydrogenase"  
"JS1\_F07\_00218" 6849 "s63E6H2" 0.4800308 "Glucose-6-phosphate 3-dehydrogenase"  
"JS1\_F07\_00219" 6850 "s59E13H2" 10.64054 "ferredoxin"  
"JS1\_F07\_00219" 6850 "s59E25H2" 0 "ferredoxin"  
"JS1\_F07\_00219" 6850 "s59E5H2" 0.4075947 "ferredoxin"  
"JS1\_F07\_00219" 6850 "s63E6H2" 0.6086554 "ferredoxin"  
"JS1\_F07\_00220" 6851 "s59E13H2" 11.22343 "putative hydrolase"  
"JS1\_F07\_00220" 6851 "s59E25H2" 0.03347889 "putative hydrolase"  
"JS1\_F07\_00220" 6851 "s59E5H2" 0.5703604 "putative hydrolase"  
"JS1\_F07\_00220" 6851 "s63E6H2" 0.3920744 "putative hydrolase"  
"JS1\_F07\_00221" 6852 "s59E13H2" 12.48861 "Phosphoserine phosphatase 1"  
"JS1\_F07\_00221" 6852 "s59E25H2" 0.2716049 "Phosphoserine phosphatase 1"  
"JS1\_F07\_00221" 6852 "s59E5H2" 0.5557522 "Phosphoserine phosphatase 1"  
"JS1\_F07\_00221" 6852 "s63E6H2" 0.3714652 "Phosphoserine phosphatase 1"  
"JS1\_F07\_00222" 6853 "s59E13H2" 13.1035 "3-chloro-4-hydroxyphenylacetate reductive dehalogenase precursor"  
"JS1\_F07\_00222" 6853 "s59E25H2" 0 "3-chloro-4-hydroxyphenylacetate reductive dehalogenase precursor"  
"JS1\_F07\_00222" 6853 "s59E5H2" 1.062578 "3-chloro-4-hydroxyphenylacetate reductive dehalogenase precursor"  
"JS1\_F07\_00222" 6853 "s63E6H2" 0.3828996 "3-chloro-4-hydroxyphenylacetate reductive dehalogenase precursor"  
"JS1\_F07\_00223" 6854 "s59E13H2" 15.96888 "D-alanyl-D-alanine carboxypeptidase DacC precursor"  
"JS1\_F07\_00223" 6854 "s59E25H2" 0 "D-alanyl-D-alanine carboxypeptidase DacC precursor"  
"JS1\_F07\_00223" 6854 "s59E5H2" 0.7532813 "D-alanyl-D-alanine carboxypeptidase DacC precursor"  
"JS1\_F07\_00223" 6854 "s63E6H2" 0.7012045 "D-alanyl-D-alanine carboxypeptidase DacC precursor"  
"JS1\_F07\_00224" 6855 "s59E13H2" 0.04959895 "Cyclic di-GMP phosphodiesterase response regulator RpfG"  
"JS1\_F07\_00224" 6855 "s59E25H2" 0 "Cyclic di-GMP phosphodiesterase response regulator RpfG"  
"JS1\_F07\_00224" 6855 "s59E5H2" 1.936743 "Cyclic di-GMP phosphodiesterase response regulator RpfG"



"JS1\_F07\_00224" 6855 "s63E6H2" 0.03267084 "Cyclic di-GMP phosphodiesterase response regulator RpfG"  
"JS1\_F07\_00225" 6856 "s59E13H2" 0.09276239 "Cyclic di-GMP phosphodiesterase response regulator RpfG"  
"JS1\_F07\_00225" 6856 "s59E25H2" 0 "Cyclic di-GMP phosphodiesterase response regulator RpfG"  
"JS1\_F07\_00225" 6856 "s59E5H2" 0.01400283 "Cyclic di-GMP phosphodiesterase response regulator RpfG"  
"JS1\_F07\_00225" 6856 "s63E6H2" 0.00185263 "Cyclic di-GMP phosphodiesterase response regulator RpfG"  
"JS1\_F07\_00226" 6857 "s59E13H2" 0.1467509 "Cyclic di-GMP phosphodiesterase response regulator RpfG"  
"JS1\_F07\_00226" 6857 "s59E25H2" 0 "Cyclic di-GMP phosphodiesterase response regulator RpfG"  
"JS1\_F07\_00226" 6857 "s59E5H2" 0.109595 "Cyclic di-GMP phosphodiesterase response regulator RpfG"  
"JS1\_F07\_00226" 6857 "s63E6H2" 0.01636292 "Cyclic di-GMP phosphodiesterase response regulator RpfG"  
"JS1\_F07\_00227" 6858 "s59E13H2" 3.564484 "hypothetical protein"  
"JS1\_F07\_00227" 6858 "s59E25H2" 0.7518519 "hypothetical protein"  
"JS1\_F07\_00227" 6858 "s59E5H2" 2.213142 "hypothetical protein"  
"JS1\_F07\_00227" 6858 "s63E6H2" 0.6046867 "hypothetical protein"  
"JS1\_F07\_00228" 6859 "s59E13H2" 9.41716 "Peptidase M15"  
"JS1\_F07\_00228" 6859 "s59E25H2" 0.5748031 "Peptidase M15"  
"JS1\_F07\_00228" 6859 "s59E5H2" 2.952237 "Peptidase M15"  
"JS1\_F07\_00228" 6859 "s63E6H2" 4.555925 "Peptidase M15"  
"JS1\_F07\_00229" 6860 "s59E13H2" 1.239545 "hypothetical protein"  
"JS1\_F07\_00229" 6860 "s59E25H2" 0 "hypothetical protein"  
"JS1\_F07\_00229" 6860 "s59E5H2" 1.815503 "hypothetical protein"  
"JS1\_F07\_00229" 6860 "s63E6H2" 2.295217 "hypothetical protein"  
"JS1\_F07\_00230" 6861 "s59E13H2" 1.647456 "hypothetical protein"  
"JS1\_F07\_00230" 6861 "s59E25H2" 0 "hypothetical protein"  
"JS1\_F07\_00230" 6861 "s59E5H2" 3.245078 "hypothetical protein"  
"JS1\_F07\_00230" 6861 "s63E6H2" 11.66415 "hypothetical protein"  
"JS1\_F07\_00231" 6862 "s59E13H2" 0.6127938 "hypothetical protein"  
"JS1\_F07\_00231" 6862 "s59E25H2" 0 "hypothetical protein"  
"JS1\_F07\_00231" 6862 "s59E5H2" 0.4423385 "hypothetical protein"  
"JS1\_F07\_00231" 6862 "s63E6H2" 5.252879 "hypothetical protein"  
"JS1\_F07\_00232" 6863 "s59E13H2" 0.1869705 "Sigma-70, region 4"  
"JS1\_F07\_00232" 6863 "s59E25H2" 0 "Sigma-70, region 4"  
"JS1\_F07\_00232" 6863 "s59E5H2" 1.360334 "Sigma-70, region 4"  
"JS1\_F07\_00232" 6863 "s63E6H2" 1.642497 "Sigma-70, region 4"  
"JS1\_F07\_00233" 6864 "s59E13H2" 0.2410007 "RNA polymerase factor sigma-70"  
"JS1\_F07\_00233" 6864 "s59E25H2" 0 "RNA polymerase factor sigma-70"  
"JS1\_F07\_00233" 6864 "s59E5H2" 0.2337437 "RNA polymerase factor sigma-70"  
"JS1\_F07\_00233" 6864 "s63E6H2" 4.898857 "RNA polymerase factor sigma-70"  
"JS1\_F07\_00235" 6866 "s59E13H2" 1.909873 "Putative ski2-type helicase"  
"JS1\_F07\_00235" 6866 "s59E25H2" 0.1802198 "Putative ski2-type helicase"  
"JS1\_F07\_00235" 6866 "s59E5H2" 0.2748334 "Putative ski2-type helicase"  
"JS1\_F07\_00235" 6866 "s63E6H2" 2.218725 "Putative ski2-type helicase"  
"JS1\_F07\_00236" 6867 "s59E13H2" 0.01828021 "Adenine phosphoribosyltransferase"  
"JS1\_F07\_00236" 6867 "s59E25H2" 0 "Adenine phosphoribosyltransferase"  
"JS1\_F07\_00236" 6867 "s59E5H2" 0.0738118 "Adenine phosphoribosyltransferase"  
"JS1\_F07\_00236" 6867 "s63E6H2" 0.1792863 "Adenine phosphoribosyltransferase"  
"JS1\_F07\_00237" 6868 "s59E13H2" 0.05793982 "GTP pyrophosphokinase"  
"JS1\_F07\_00237" 6868 "s59E25H2" 0 "GTP pyrophosphokinase"

"JS1\_F07\_00237" 6868 "s59E5H2" 0.1247195 "GTP pyrophosphokinase"  
"JS1\_F07\_00237" 6868 "s63E6H2" 0.3566634 "GTP pyrophosphokinase"  
"JS1\_F07\_00238" 6869 "s59E13H2" 0.01775995 "D-tyrosyl-tRNA(Tyr) deacylase"  
"JS1\_F07\_00238" 6869 "s59E25H2" 0 "D-tyrosyl-tRNA(Tyr) deacylase"  
"JS1\_F07\_00238" 6869 "s59E5H2" 0.06808928 "D-tyrosyl-tRNA(Tyr) deacylase"  
"JS1\_F07\_00238" 6869 "s63E6H2" 0.2570999 "D-tyrosyl-tRNA(Tyr) deacylase"  
"JS1\_F07\_00239" 6870 "s59E13H2" 0.03150434 "putative glycerophosphoryl diester phosphodiesterase 1"  
"JS1\_F07\_00239" 6870 "s59E25H2" 0 "putative glycerophosphoryl diester phosphodiesterase 1"  
"JS1\_F07\_00239" 6870 "s59E5H2" 0.05800735 "putative glycerophosphoryl diester phosphodiesterase 1"  
"JS1\_F07\_00239" 6870 "s63E6H2" 0.2860775 "putative glycerophosphoryl diester phosphodiesterase 1"  
"JS1\_F07\_00240" 6871 "s59E13H2" 0.01723441 "Beta-lactamase hydrolase-like protein"  
"JS1\_F07\_00240" 6871 "s59E25H2" 0 "Beta-lactamase hydrolase-like protein"  
"JS1\_F07\_00240" 6871 "s59E5H2" 0.1692968 "Beta-lactamase hydrolase-like protein"  
"JS1\_F07\_00240" 6871 "s63E6H2" 0.413054 "Beta-lactamase hydrolase-like protein"  
"JS1\_F07\_00241" 6872 "s59E13H2" 0.0107903 "Adenosylhomocysteinase"  
"JS1\_F07\_00241" 6872 "s59E25H2" 0 "Adenosylhomocysteinase"  
"JS1\_F07\_00241" 6872 "s59E5H2" 0.2158598 "Adenosylhomocysteinase"  
"JS1\_F07\_00241" 6872 "s63E6H2" 0.4009526 "Adenosylhomocysteinase"  
"JS1\_F07\_00242" 6873 "s59E13H2" 0.1180059 "DNA utilization protein GntX"  
"JS1\_F07\_00242" 6873 "s59E25H2" 0 "DNA utilization protein GntX"  
"JS1\_F07\_00242" 6873 "s59E5H2" 0.1975859 "DNA utilization protein GntX"  
"JS1\_F07\_00242" 6873 "s63E6H2" 0.2685663 "DNA utilization protein GntX"  
"JS1\_F07\_00243" 6874 "s59E13H2" 0.003967264 "Putative sigma-54 modulation protein"  
"JS1\_F07\_00243" 6874 "s59E25H2" 0 "Putative sigma-54 modulation protein"  
"JS1\_F07\_00243" 6874 "s59E5H2" 0.09979222 "Putative sigma-54 modulation protein"  
"JS1\_F07\_00243" 6874 "s63E6H2" 0.1787086 "Putative sigma-54 modulation protein"  
"JS1\_F07\_00245" 6876 "s59E13H2" 0.01290649 "hypothetical protein"  
"JS1\_F07\_00245" 6876 "s59E25H2" 0 "hypothetical protein"  
"JS1\_F07\_00245" 6876 "s59E5H2" 0.2687545 "hypothetical protein"  
"JS1\_F07\_00245" 6876 "s63E6H2" 0.1755564 "hypothetical protein"  
"JS1\_F07\_00246" 6877 "s59E13H2" 0.01872789 "Cyclic di-GMP phosphodiesterase response regulator RpfG"  
"JS1\_F07\_00246" 6877 "s59E25H2" 0 "Cyclic di-GMP phosphodiesterase response regulator RpfG"  
"JS1\_F07\_00246" 6877 "s59E5H2" 0.1760785 "Cyclic di-GMP phosphodiesterase response regulator RpfG"  
"JS1\_F07\_00246" 6877 "s63E6H2" 0.05068528 "Cyclic di-GMP phosphodiesterase response regulator RpfG"  
"JS1\_F07\_00247" 6878 "s59E13H2" 0.02231299 "hypothetical protein"  
"JS1\_F07\_00247" 6878 "s59E25H2" 0 "hypothetical protein"  
"JS1\_F07\_00247" 6878 "s59E5H2" 0.2880927 "hypothetical protein"  
"JS1\_F07\_00247" 6878 "s63E6H2" 0.07550959 "hypothetical protein"  
"JS1\_F07\_00248" 6879 "s59E13H2" 0.6728729 "Oligo-1,6-glucosidase"  
"JS1\_F07\_00248" 6879 "s59E25H2" 0 "Oligo-1,6-glucosidase"  
"JS1\_F07\_00248" 6879 "s59E5H2" 0.6799009 "Oligo-1,6-glucosidase"  
"JS1\_F07\_00248" 6879 "s63E6H2" 0.8786305 "Oligo-1,6-glucosidase"  
"JS1\_F07\_00249" 6880 "s59E13H2" 0.0898406 "Oligo-1,6-glucosidase"  
"JS1\_F07\_00249" 6880 "s59E25H2" 0 "Oligo-1,6-glucosidase"  
"JS1\_F07\_00249" 6880 "s59E5H2" 1.187021 "Oligo-1,6-glucosidase"  
"JS1\_F07\_00249" 6880 "s63E6H2" 2.942661 "Oligo-1,6-glucosidase"  
"JS1\_F07\_00250" 6881 "s59E13H2" 0.06705042 "Ferredoxin"

"JS1\_F07\_00250" 6881 "s59E25H2" 0 "Ferredoxin"  
"JS1\_F07\_00250" 6881 "s59E5H2" 0.7962924 "Ferredoxin"  
"JS1\_F07\_00250" 6881 "s63E6H2" 0.130574 "Ferredoxin"  
"JS1\_F07\_00251" 6882 "s59E13H2" 0.2216325 "Ribonuclease Z"  
"JS1\_F07\_00251" 6882 "s59E25H2" 0 "Ribonuclease Z"  
"JS1\_F07\_00251" 6882 "s59E5H2" 0.5366289 "Ribonuclease Z"  
"JS1\_F07\_00251" 6882 "s63E6H2" 0.2510785 "Ribonuclease Z"  
"JS1\_F07\_00252" 6883 "s59E13H2" 0.1141788 "Molybdopterin adenyltransferase"  
"JS1\_F07\_00252" 6883 "s59E25H2" 0 "Molybdopterin adenyltransferase"  
"JS1\_F07\_00252" 6883 "s59E5H2" 0.4958294 "Molybdopterin adenyltransferase"  
"JS1\_F07\_00252" 6883 "s63E6H2" 0.1424475 "Molybdopterin adenyltransferase"  
"JS1\_F07\_00253" 6884 "s59E13H2" 0 "Cyclic pyranopterin monophosphate synthase accessory protein"  
"JS1\_F07\_00253" 6884 "s59E25H2" 0 "Cyclic pyranopterin monophosphate synthase accessory protein"  
"JS1\_F07\_00253" 6884 "s59E5H2" 0.4207563 "Cyclic pyranopterin monophosphate synthase accessory protein"  
"JS1\_F07\_00253" 6884 "s63E6H2" 0.2067447 "Cyclic pyranopterin monophosphate synthase accessory protein"  
"JS1\_F07\_00254" 6885 "s59E13H2" 0.1585407 "Cyclic pyranopterin monophosphate synthase"  
"JS1\_F07\_00254" 6885 "s59E25H2" 0 "Cyclic pyranopterin monophosphate synthase"  
"JS1\_F07\_00254" 6885 "s59E5H2" 0.4018297 "Cyclic pyranopterin monophosphate synthase"  
"JS1\_F07\_00254" 6885 "s63E6H2" 0.3231524 "Cyclic pyranopterin monophosphate synthase"  
"JS1\_F07\_00255" 6886 "s59E13H2" 0.2371521 "Molybdopterin molybdenumtransferase"  
"JS1\_F07\_00255" 6886 "s59E25H2" 0 "Molybdopterin molybdenumtransferase"  
"JS1\_F07\_00255" 6886 "s59E5H2" 0.4287538 "Molybdopterin molybdenumtransferase"  
"JS1\_F07\_00255" 6886 "s63E6H2" 0.5712726 "Molybdopterin molybdenumtransferase"  
"JS1\_F07\_00256" 6887 "s59E13H2" 0.1571178 "Molybdopterin molybdenumtransferase"  
"JS1\_F07\_00256" 6887 "s59E25H2" 0 "Molybdopterin molybdenumtransferase"  
"JS1\_F07\_00256" 6887 "s59E5H2" 0.2784755 "Molybdopterin molybdenumtransferase"  
"JS1\_F07\_00256" 6887 "s63E6H2" 0.6329764 "Molybdopterin molybdenumtransferase"  
"JS1\_F07\_00257" 6888 "s59E13H2" 0.01159265 "Sulfate/thiosulfate import ATP-binding protein CysA"  
"JS1\_F07\_00257" 6888 "s59E25H2" 0 "Sulfate/thiosulfate import ATP-binding protein CysA"  
"JS1\_F07\_00257" 6888 "s59E5H2" 0.4122435 "Sulfate/thiosulfate import ATP-binding protein CysA"  
"JS1\_F07\_00257" 6888 "s63E6H2" 0.4919203 "Sulfate/thiosulfate import ATP-binding protein CysA"  
"JS1\_F07\_00258" 6889 "s59E13H2" 0.02352656 "Sulfate transport system permease protein CysT"  
"JS1\_F07\_00258" 6889 "s59E25H2" 0 "Sulfate transport system permease protein CysT"  
"JS1\_F07\_00258" 6889 "s59E5H2" 0.8370681 "Sulfate transport system permease protein CysT"  
"JS1\_F07\_00258" 6889 "s63E6H2" 0.7333395 "Sulfate transport system permease protein CysT"  
"JS1\_F07\_00259" 6890 "s59E13H2" 0.1661869 "PBP superfamily domain protein"  
"JS1\_F07\_00259" 6890 "s59E25H2" 0 "PBP superfamily domain protein"  
"JS1\_F07\_00259" 6890 "s59E5H2" 0.1356322 "PBP superfamily domain protein"  
"JS1\_F07\_00259" 6890 "s63E6H2" 0.2534373 "PBP superfamily domain protein"  
"JS1\_F07\_00261" 6892 "s59E13H2" 0.9780539 "Formamidopyrimidine-DNA glycosylase"  
"JS1\_F07\_00261" 6892 "s59E25H2" 0.2935673 "Formamidopyrimidine-DNA glycosylase"  
"JS1\_F07\_00261" 6892 "s59E5H2" 0.2041351 "Formamidopyrimidine-DNA glycosylase"  
"JS1\_F07\_00261" 6892 "s63E6H2" 0.4121901 "Formamidopyrimidine-DNA glycosylase"  
"JS1\_F07\_00262" 6893 "s59E13H2" 1.402129 "GMP/IMP nucleotidase YrfG"  
"JS1\_F07\_00262" 6893 "s59E25H2" 0 "GMP/IMP nucleotidase YrfG"  
"JS1\_F07\_00262" 6893 "s59E5H2" 0.2679007 "GMP/IMP nucleotidase YrfG"  
"JS1\_F07\_00262" 6893 "s63E6H2" 0.4254207 "GMP/IMP nucleotidase YrfG"

"JS1\_F07\_00264" 6895 "s59E13H2" 0.5953699 "hypothetical protein"  
"JS1\_F07\_00264" 6895 "s59E25H2" 0 "hypothetical protein"  
"JS1\_F07\_00264" 6895 "s59E5H2" 0.5009743 "hypothetical protein"  
"JS1\_F07\_00264" 6895 "s63E6H2" 0.6801983 "hypothetical protein"  
"JS1\_F07\_00265" 6896 "s59E13H2" 0.2241841 "hypothetical protein"  
"JS1\_F07\_00265" 6896 "s59E25H2" 0 "hypothetical protein"  
"JS1\_F07\_00265" 6896 "s59E5H2" 0.6001185 "hypothetical protein"  
"JS1\_F07\_00265" 6896 "s63E6H2" 0.5818315 "hypothetical protein"  
"JS1\_F07\_00266" 6897 "s59E13H2" 0.2275215 "ADP-ribose pyrophosphatase"  
"JS1\_F07\_00266" 6897 "s59E25H2" 0 "ADP-ribose pyrophosphatase"  
"JS1\_F07\_00266" 6897 "s59E5H2" 0.5083559 "ADP-ribose pyrophosphatase"  
"JS1\_F07\_00266" 6897 "s63E6H2" 0.3719409 "ADP-ribose pyrophosphatase"  
"JS1\_F07\_00267" 6898 "s59E13H2" 0.2366558 "Cupin domain protein"  
"JS1\_F07\_00267" 6898 "s59E25H2" 0 "Cupin domain protein"  
"JS1\_F07\_00267" 6898 "s59E5H2" 0.4006614 "Cupin domain protein"  
"JS1\_F07\_00267" 6898 "s63E6H2" 0.0439482 "Cupin domain protein"  
"JS1\_F07\_00268" 6899 "s59E13H2" 3.309502 "hypothetical protein"  
"JS1\_F07\_00268" 6899 "s59E25H2" 0 "hypothetical protein"  
"JS1\_F07\_00268" 6899 "s59E5H2" 0.8835295 "hypothetical protein"  
"JS1\_F07\_00268" 6899 "s63E6H2" 0.6223607 "hypothetical protein"  
"JS1\_F07\_00269" 6900 "s59E13H2" 7.90737 "hypothetical protein"  
"JS1\_F07\_00269" 6900 "s59E25H2" 0 "hypothetical protein"  
"JS1\_F07\_00269" 6900 "s59E5H2" 0.4046297 "hypothetical protein"  
"JS1\_F07\_00269" 6900 "s63E6H2" 0.5764837 "hypothetical protein"  
"JS1\_F07\_00270" 6901 "s59E13H2" 3.960352 "hypothetical protein"  
"JS1\_F07\_00270" 6901 "s59E25H2" 0 "hypothetical protein"  
"JS1\_F07\_00270" 6901 "s59E5H2" 0.09214721 "hypothetical protein"  
"JS1\_F07\_00270" 6901 "s63E6H2" 0.1474557 "hypothetical protein"  
"JS1\_F07\_00271" 6902 "s59E13H2" 0.006795694 "4-hydroxy-2-oxo-heptane-1,7-dioate aldolase"  
"JS1\_F07\_00271" 6902 "s59E25H2" 0 "4-hydroxy-2-oxo-heptane-1,7-dioate aldolase"  
"JS1\_F07\_00271" 6902 "s59E5H2" 0 "4-hydroxy-2-oxo-heptane-1,7-dioate aldolase"  
"JS1\_F07\_00271" 6902 "s63E6H2" 0.06648786 "4-hydroxy-2-oxo-heptane-1,7-dioate aldolase"  
"JS1\_F07\_00272" 6903 "s59E13H2" 0.03800145 "Transaldolase"  
"JS1\_F07\_00272" 6903 "s59E25H2" 0 "Transaldolase"  
"JS1\_F07\_00272" 6903 "s59E5H2" 0.01942945 "Transaldolase"  
"JS1\_F07\_00272" 6903 "s63E6H2" 0.2030933 "Transaldolase"  
"JS1\_F07\_00273" 6904 "s59E13H2" 0.005630718 "putative L-threonine 3-dehydrogenase"  
"JS1\_F07\_00273" 6904 "s59E25H2" 0 "putative L-threonine 3-dehydrogenase"  
"JS1\_F07\_00273" 6904 "s59E5H2" 0.02288391 "putative L-threonine 3-dehydrogenase"  
"JS1\_F07\_00273" 6904 "s63E6H2" 0.06008985 "putative L-threonine 3-dehydrogenase"  
"JS1\_F07\_00274" 6905 "s59E13H2" 0.003846305 "Xylose isomerase-like TIM barrel"  
"JS1\_F07\_00274" 6905 "s59E25H2" 0 "Xylose isomerase-like TIM barrel"  
"JS1\_F07\_00274" 6905 "s59E5H2" 0.008803722 "Xylose isomerase-like TIM barrel"  
"JS1\_F07\_00274" 6905 "s63E6H2" 0.07625952 "Xylose isomerase-like TIM barrel"  
"JS1\_F07\_00275" 6906 "s59E13H2" 0.00538272 "hypothetical protein"  
"JS1\_F07\_00275" 6906 "s59E25H2" 0 "hypothetical protein"  
"JS1\_F07\_00275" 6906 "s59E5H2" 0 "hypothetical protein"

"JS1\_F07\_00275" 6906 "s63E6H2" 0.07519175 "hypothetical protein"  
"JS1\_F07\_00277" 6908 "s59E13H2" 13.28319 "Signal peptidase I S"  
"JS1\_F07\_00277" 6908 "s59E25H2" 0 "Signal peptidase I S"  
"JS1\_F07\_00277" 6908 "s59E5H2" 1.217631 "Signal peptidase I S"  
"JS1\_F07\_00277" 6908 "s63E6H2" 0.6143139 "Signal peptidase I S"  
"JS1\_F07\_00278" 6909 "s59E13H2" 10.17059 "Putative HAD-hydrolase YfnB"  
"JS1\_F07\_00278" 6909 "s59E25H2" 0 "Putative HAD-hydrolase YfnB"  
"JS1\_F07\_00278" 6909 "s59E5H2" 0.3221793 "Putative HAD-hydrolase YfnB"  
"JS1\_F07\_00278" 6909 "s63E6H2" 0.3184959 "Putative HAD-hydrolase YfnB"  
"JS1\_F07\_00279" 6910 "s59E13H2" 11.29921 "Radical SAM superfamily protein"  
"JS1\_F07\_00279" 6910 "s59E25H2" 0 "Radical SAM superfamily protein"  
"JS1\_F07\_00279" 6910 "s59E5H2" 0.3025316 "Radical SAM superfamily protein"  
"JS1\_F07\_00279" 6910 "s63E6H2" 0.5108177 "Radical SAM superfamily protein"  
"JS1\_F07\_00280" 6911 "s59E13H2" 12.11182 "putative inner membrane transporter yjIE"  
"JS1\_F07\_00280" 6911 "s59E25H2" 0 "putative inner membrane transporter yjIE"  
"JS1\_F07\_00280" 6911 "s59E5H2" 0.4093935 "putative inner membrane transporter yjIE"  
"JS1\_F07\_00280" 6911 "s63E6H2" 0.6954055 "putative inner membrane transporter yjIE"  
"JS1\_F07\_00281" 6912 "s59E13H2" 8.595965 "pyrroloquinoline quinone biosynthesis protein PqqE"  
"JS1\_F07\_00281" 6912 "s59E25H2" 0.3128964 "pyrroloquinoline quinone biosynthesis protein PqqE"  
"JS1\_F07\_00281" 6912 "s59E5H2" 0.6047582 "pyrroloquinoline quinone biosynthesis protein PqqE"  
"JS1\_F07\_00281" 6912 "s63E6H2" 0.5760545 "pyrroloquinoline quinone biosynthesis protein PqqE"  
"JS1\_F07\_00282" 6913 "s59E13H2" 5.230716 "Winged helix-turn-helix transcription repressor, HrcA DNA-binding"  
"JS1\_F07\_00282" 6913 "s59E25H2" 0 "Winged helix-turn-helix transcription repressor, HrcA DNA-binding"  
"JS1\_F07\_00282" 6913 "s59E5H2" 0.4793183 "Winged helix-turn-helix transcription repressor, HrcA DNA-binding"  
"JS1\_F07\_00282" 6913 "s63E6H2" 0.2144799 "Winged helix-turn-helix transcription repressor, HrcA DNA-binding"  
"JS1\_F07\_00283" 6914 "s59E13H2" 3.435123 "hypothetical protein"  
"JS1\_F07\_00283" 6914 "s59E25H2" 0 "hypothetical protein"  
"JS1\_F07\_00283" 6914 "s59E5H2" 0.09712434 "hypothetical protein"  
"JS1\_F07\_00283" 6914 "s63E6H2" 0.09266809 "hypothetical protein"  
"JS1\_F07\_00284" 6915 "s59E13H2" 5.133797 "FMN reductase [NAD(P)H]"  
"JS1\_F07\_00284" 6915 "s59E25H2" 0 "FMN reductase [NAD(P)H]"  
"JS1\_F07\_00284" 6915 "s59E5H2" 0.1641398 "FMN reductase [NAD(P)H]"  
"JS1\_F07\_00284" 6915 "s63E6H2" 0.08847559 "FMN reductase [NAD(P)H]"  
"JS1\_F07\_00285" 6916 "s59E13H2" 7.226021 "hypothetical protein"  
"JS1\_F07\_00285" 6916 "s59E25H2" 0 "hypothetical protein"  
"JS1\_F07\_00285" 6916 "s59E5H2" 0.5194905 "hypothetical protein"  
"JS1\_F07\_00285" 6916 "s63E6H2" 3.54623 "hypothetical protein"  
"JS1\_F07\_00286" 6917 "s59E13H2" 9.005274 "Lactate-binding periplasmic protein precursor"  
"JS1\_F07\_00286" 6917 "s59E25H2" 0 "Lactate-binding periplasmic protein precursor"  
"JS1\_F07\_00286" 6917 "s59E5H2" 0.5494547 "Lactate-binding periplasmic protein precursor"  
"JS1\_F07\_00286" 6917 "s63E6H2" 0.1186191 "Lactate-binding periplasmic protein precursor"  
"JS1\_F07\_00287" 6918 "s59E13H2" 11.14601 "Transposase IS116/IS110/IS902 family protein"  
"JS1\_F07\_00287" 6918 "s59E25H2" 0 "Transposase IS116/IS110/IS902 family protein"  
"JS1\_F07\_00287" 6918 "s59E5H2" 0.5084247 "Transposase IS116/IS110/IS902 family protein"  
"JS1\_F07\_00287" 6918 "s63E6H2" 2.756378 "Transposase IS116/IS110/IS902 family protein"  
"JS1\_F07\_00288" 6919 "s59E13H2" 0.1300953 "Transposase IS116/IS110/IS902 family protein"  
"JS1\_F07\_00288" 6919 "s59E25H2" 0 "Transposase IS116/IS110/IS902 family protein"

"JS1\_F07\_00288" 6919 "s59E5H2" 0.5107639 "Transposase IS116/IS110/IS902 family protein"  
"JS1\_F07\_00288" 6919 "s63E6H2" 2.382663 "Transposase IS116/IS110/IS902 family protein"  
"JS1\_F07\_00289" 6920 "s59E13H2" 0.006660507 "hypothetical protein"  
"JS1\_F07\_00289" 6920 "s59E25H2" 0 "hypothetical protein"  
"JS1\_F07\_00289" 6920 "s59E5H2" 0 "hypothetical protein"  
"JS1\_F07\_00289" 6920 "s63E6H2" 0 "hypothetical protein"  
"JS1\_F07\_00290" 6921 "s59E13H2" 0.02070921 "hypothetical protein"  
"JS1\_F07\_00290" 6921 "s59E25H2" 0 "hypothetical protein"  
"JS1\_F07\_00290" 6921 "s59E5H2" 0.05361939 "hypothetical protein"  
"JS1\_F07\_00290" 6921 "s63E6H2" 1.475595 "hypothetical protein"  
"JS1\_F07\_00291" 6922 "s59E13H2" 0.2613781 "hypothetical protein"  
"JS1\_F07\_00291" 6922 "s59E25H2" 0 "hypothetical protein"  
"JS1\_F07\_00291" 6922 "s59E5H2" 0.1732629 "hypothetical protein"  
"JS1\_F07\_00291" 6922 "s63E6H2" 1.657018 "hypothetical protein"  
"JS1\_F07\_00292" 6923 "s59E13H2" 0.5490405 "hypothetical protein"  
"JS1\_F07\_00292" 6923 "s59E25H2" 0 "hypothetical protein"  
"JS1\_F07\_00292" 6923 "s59E5H2" 0.08493628 "hypothetical protein"  
"JS1\_F07\_00292" 6923 "s63E6H2" 0.04530076 "hypothetical protein"  
"JS1\_F07\_00293" 6924 "s59E13H2" 0.04805931 "Transposase IS200 like protein"  
"JS1\_F07\_00293" 6924 "s59E25H2" 0 "Transposase IS200 like protein"  
"JS1\_F07\_00293" 6924 "s59E5H2" 0.3909751 "Transposase IS200 like protein"  
"JS1\_F07\_00293" 6924 "s63E6H2" 1.524402 "Transposase IS200 like protein"  
"JS1\_F07\_00294" 6925 "s59E13H2" 0.0431583 "Glyoxylate reductase"  
"JS1\_F07\_00294" 6925 "s59E25H2" 0 "Glyoxylate reductase"  
"JS1\_F07\_00294" 6925 "s59E5H2" 0.0150567 "Glyoxylate reductase"  
"JS1\_F07\_00294" 6925 "s63E6H2" 0.418334 "Glyoxylate reductase"  
"JS1\_F07\_00295" 6926 "s59E13H2" 5.139286 "5-aminovalerate aminotransferase DavT"  
"JS1\_F07\_00295" 6926 "s59E25H2" 0 "5-aminovalerate aminotransferase DavT"  
"JS1\_F07\_00295" 6926 "s59E5H2" 0.7389668 "5-aminovalerate aminotransferase DavT"  
"JS1\_F07\_00295" 6926 "s63E6H2" 0.4881624 "5-aminovalerate aminotransferase DavT"  
"JS1\_F07\_00296" 6927 "s59E13H2" 3.963491 "GYD domain protein"  
"JS1\_F07\_00296" 6927 "s59E25H2" 0 "GYD domain protein"  
"JS1\_F07\_00296" 6927 "s59E5H2" 0.3029676 "GYD domain protein"  
"JS1\_F07\_00296" 6927 "s63E6H2" 2.596772 "GYD domain protein"  
"JS1\_F07\_00297" 6928 "s59E13H2" 3.576469 "Rubrerythrin"  
"JS1\_F07\_00297" 6928 "s59E25H2" 0 "Rubrerythrin"  
"JS1\_F07\_00297" 6928 "s59E5H2" 0.7660624 "Rubrerythrin"  
"JS1\_F07\_00297" 6928 "s63E6H2" 2.607195 "Rubrerythrin"  
"JS1\_F07\_00298" 6929 "s59E13H2" 0.4645571 "hypothetical protein"  
"JS1\_F07\_00298" 6929 "s59E25H2" 0.1402918 "hypothetical protein"  
"JS1\_F07\_00298" 6929 "s59E5H2" 2.301629 "hypothetical protein"  
"JS1\_F07\_00298" 6929 "s63E6H2" 0.4687535 "hypothetical protein"  
"JS1\_F07\_00299" 6930 "s59E13H2" 0.3805836 "Nitroreductase family protein"  
"JS1\_F07\_00299" 6930 "s59E25H2" 0 "Nitroreductase family protein"  
"JS1\_F07\_00299" 6930 "s59E5H2" 1.34043 "Nitroreductase family protein"  
"JS1\_F07\_00299" 6930 "s63E6H2" 2.808038 "Nitroreductase family protein"  
"JS1\_F07\_00300" 6931 "s59E13H2" 0.7556759 "Peptide methionine sulfoxide reductase MsrA/MsrB"

"JS1\_F07\_00300" 6931 "s59E25H2" 0 "Peptide methionine sulfoxide reductase MsrA/MsrB"  
"JS1\_F07\_00300" 6931 "s59E5H2" 0.8238817 "Peptide methionine sulfoxide reductase MsrA/MsrB"  
"JS1\_F07\_00300" 6931 "s63E6H2" 2.809909 "Peptide methionine sulfoxide reductase MsrA/MsrB"  
"JS1\_F07\_00301" 6932 "s59E13H2" 0.2333303 "hypothetical protein"  
"JS1\_F07\_00301" 6932 "s59E25H2" 0 "hypothetical protein"  
"JS1\_F07\_00301" 6932 "s59E5H2" 0.02029835 "hypothetical protein"  
"JS1\_F07\_00301" 6932 "s63E6H2" 0.1760187 "hypothetical protein"  
"JS1\_F07\_00302" 6933 "s59E13H2" 0.01651075 "hypothetical protein"  
"JS1\_F07\_00302" 6933 "s59E25H2" 0 "hypothetical protein"  
"JS1\_F07\_00302" 6933 "s59E5H2" 0.009661538 "hypothetical protein"  
"JS1\_F07\_00302" 6933 "s63E6H2" 0.1001752 "hypothetical protein"  
"JS1\_F07\_00303" 6934 "s59E13H2" 0.04071183 "Translation initiation factor IF-2"  
"JS1\_F07\_00303" 6934 "s59E25H2" 0 "Translation initiation factor IF-2"  
"JS1\_F07\_00303" 6934 "s59E5H2" 0.1247313 "Translation initiation factor IF-2"  
"JS1\_F07\_00303" 6934 "s63E6H2" 0.07775995 "Translation initiation factor IF-2"  
"JS1\_F07\_00304" 6935 "s59E13H2" 0.02081201 "Ribosome-binding factor A"  
"JS1\_F07\_00304" 6935 "s59E25H2" 0 "Ribosome-binding factor A"  
"JS1\_F07\_00304" 6935 "s59E5H2" 0.05195414 "Ribosome-binding factor A"  
"JS1\_F07\_00304" 6935 "s63E6H2" 0.04301775 "Ribosome-binding factor A"  
"JS1\_F07\_00305" 6936 "s59E13H2" 0.03945705 "Bifunctional oligoribonuclease and PAP phosphatase NrnA"  
"JS1\_F07\_00305" 6936 "s59E25H2" 0 "Bifunctional oligoribonuclease and PAP phosphatase NrnA"  
"JS1\_F07\_00305" 6936 "s59E5H2" 0.05172081 "Bifunctional oligoribonuclease and PAP phosphatase NrnA"  
"JS1\_F07\_00305" 6936 "s63E6H2" 0.05561968 "Bifunctional oligoribonuclease and PAP phosphatase NrnA"  
"JS1\_F07\_00306" 6937 "s59E13H2" 0.04846405 "tRNA pseudouridine synthase B"  
"JS1\_F07\_00306" 6937 "s59E25H2" 0 "tRNA pseudouridine synthase B"  
"JS1\_F07\_00306" 6937 "s59E5H2" 0.07220954 "tRNA pseudouridine synthase B"  
"JS1\_F07\_00306" 6937 "s63E6H2" 0.05104111 "tRNA pseudouridine synthase B"  
"JS1\_F07\_00307" 6938 "s59E13H2" 0.0862761 "Riboflavin biosynthesis protein RibF"  
"JS1\_F07\_00307" 6938 "s59E25H2" 0 "Riboflavin biosynthesis protein RibF"  
"JS1\_F07\_00307" 6938 "s59E5H2" 0.03050092 "Riboflavin biosynthesis protein RibF"  
"JS1\_F07\_00307" 6938 "s63E6H2" 0.02931179 "Riboflavin biosynthesis protein RibF"  
"JS1\_F07\_00308" 6939 "s59E13H2" 0.03956959 "30S ribosomal protein S15"  
"JS1\_F07\_00308" 6939 "s59E25H2" 0 "30S ribosomal protein S15"  
"JS1\_F07\_00308" 6939 "s59E5H2" 0 "30S ribosomal protein S15"  
"JS1\_F07\_00308" 6939 "s63E6H2" 0.02861769 "30S ribosomal protein S15"  
"JS1\_F07\_00309" 6940 "s59E13H2" 2.299622 "Polyribonucleotide nucleotidyltransferase"  
"JS1\_F07\_00309" 6940 "s59E25H2" 0 "Polyribonucleotide nucleotidyltransferase"  
"JS1\_F07\_00309" 6940 "s59E5H2" 0.1273325 "Polyribonucleotide nucleotidyltransferase"  
"JS1\_F07\_00309" 6940 "s63E6H2" 0.02814297 "Polyribonucleotide nucleotidyltransferase"  
"JS1\_F07\_00310" 6941 "s59E13H2" 3.54434 "Deoxyuridine 5'-triphosphate nucleotidohydrolase"  
"JS1\_F07\_00310" 6941 "s59E25H2" 0 "Deoxyuridine 5'-triphosphate nucleotidohydrolase"  
"JS1\_F07\_00310" 6941 "s59E5H2" 0.1109006 "Deoxyuridine 5'-triphosphate nucleotidohydrolase"  
"JS1\_F07\_00310" 6941 "s63E6H2" 0.086091 "Deoxyuridine 5'-triphosphate nucleotidohydrolase"  
"JS1\_F07\_00311" 6942 "s59E13H2" 1.401888 "hypothetical protein"  
"JS1\_F07\_00311" 6942 "s59E25H2" 0 "hypothetical protein"  
"JS1\_F07\_00311" 6942 "s59E5H2" 0.2019737 "hypothetical protein"  
"JS1\_F07\_00311" 6942 "s63E6H2" 0.1263694 "hypothetical protein"

"JS1\_F07\_00312" 6943 "s59E13H2" 4.296918 "Undecaprenyl-diphosphatase"  
"JS1\_F07\_00312" 6943 "s59E25H2" 0 "Undecaprenyl-diphosphatase"  
"JS1\_F07\_00312" 6943 "s59E5H2" 0.1784661 "Undecaprenyl-diphosphatase"  
"JS1\_F07\_00312" 6943 "s63E6H2" 0.1416298 "Undecaprenyl-diphosphatase"  
"JS1\_F07\_00313" 6944 "s59E13H2" 3.756078 "DNA translocase SpoIIIE"  
"JS1\_F07\_00313" 6944 "s59E25H2" 0 "DNA translocase SpoIIIE"  
"JS1\_F07\_00313" 6944 "s59E5H2" 0.1927144 "DNA translocase SpoIIIE"  
"JS1\_F07\_00313" 6944 "s63E6H2" 0.1050925 "DNA translocase SpoIIIE"  
"JS1\_F07\_00314" 6945 "s59E13H2" 0.1501622 "Integrase core domain protein"  
"JS1\_F07\_00314" 6945 "s59E25H2" 0 "Integrase core domain protein"  
"JS1\_F07\_00314" 6945 "s59E5H2" 1.018657 "Integrase core domain protein"  
"JS1\_F07\_00314" 6945 "s63E6H2" 1.474665 "Integrase core domain protein"  
"JS1\_F07\_00315" 6946 "s59E13H2" 0.01765108 "2-dehydro-3-deoxy-D-gluconate 5-dehydrogenase"  
"JS1\_F07\_00315" 6946 "s59E25H2" 0 "2-dehydro-3-deoxy-D-gluconate 5-dehydrogenase"  
"JS1\_F07\_00315" 6946 "s59E5H2" 0 "2-dehydro-3-deoxy-D-gluconate 5-dehydrogenase"  
"JS1\_F07\_00315" 6946 "s63E6H2" 0 "2-dehydro-3-deoxy-D-gluconate 5-dehydrogenase"  
"JS1\_F07\_00317" 6948 "s59E13H2" 0.03315135 "Pyruvate synthase subunit PorC"  
"JS1\_F07\_00317" 6948 "s59E25H2" 0 "Pyruvate synthase subunit PorC"  
"JS1\_F07\_00317" 6948 "s59E5H2" 0.004328787 "Pyruvate synthase subunit PorC"  
"JS1\_F07\_00317" 6948 "s63E6H2" 0.001983992 "Pyruvate synthase subunit PorC"  
"JS1\_F07\_00318" 6949 "s59E13H2" 0.04414483 "Pyruvate synthase subunit PorD"  
"JS1\_F07\_00318" 6949 "s59E25H2" 0 "Pyruvate synthase subunit PorD"  
"JS1\_F07\_00318" 6949 "s59E5H2" 0.04668979 "Pyruvate synthase subunit PorD"  
"JS1\_F07\_00318" 6949 "s63E6H2" 0.006444047 "Pyruvate synthase subunit PorD"  
"JS1\_F07\_00319" 6950 "s59E13H2" 0.03538254 "Pyruvate synthase subunit PorA"  
"JS1\_F07\_00319" 6950 "s59E25H2" 0 "Pyruvate synthase subunit PorA"  
"JS1\_F07\_00319" 6950 "s59E5H2" 0.008044303 "Pyruvate synthase subunit PorA"  
"JS1\_F07\_00319" 6950 "s63E6H2" 0.007546527 "Pyruvate synthase subunit PorA"  
"JS1\_F07\_00320" 6951 "s59E13H2" 0.04734169 "Pyruvate synthase subunit PorB"  
"JS1\_F07\_00320" 6951 "s59E25H2" 0 "Pyruvate synthase subunit PorB"  
"JS1\_F07\_00320" 6951 "s59E5H2" 0.02165073 "Pyruvate synthase subunit PorB"  
"JS1\_F07\_00320" 6951 "s63E6H2" 0.002631727 "Pyruvate synthase subunit PorB"  
"JS1\_F07\_00321" 6952 "s59E13H2" 0.1053462 "Transposase IS200 like protein"  
"JS1\_F07\_00321" 6952 "s59E25H2" 0 "Transposase IS200 like protein"  
"JS1\_F07\_00321" 6952 "s59E5H2" 0.4875317 "Transposase IS200 like protein"  
"JS1\_F07\_00321" 6952 "s63E6H2" 0.3076035 "Transposase IS200 like protein"  
"JS1\_F07\_00322" 6953 "s59E13H2" 0.04740996 "EamA-like transporter family protein"  
"JS1\_F07\_00322" 6953 "s59E25H2" 0 "EamA-like transporter family protein"  
"JS1\_F07\_00322" 6953 "s59E5H2" 0.3452354 "EamA-like transporter family protein"  
"JS1\_F07\_00322" 6953 "s63E6H2" 0.02094909 "EamA-like transporter family protein"  
"JS1\_F07\_00323" 6954 "s59E13H2" 2.607535 "putative membrane protein"  
"JS1\_F07\_00323" 6954 "s59E25H2" 0 "putative membrane protein"  
"JS1\_F07\_00323" 6954 "s59E5H2" 1.917903 "putative membrane protein"  
"JS1\_F07\_00323" 6954 "s63E6H2" 2.141688 "putative membrane protein"  
"JS1\_F07\_00324" 6955 "s59E13H2" 2.079828 "UvrB/uvrC motif protein"  
"JS1\_F07\_00324" 6955 "s59E25H2" 0 "UvrB/uvrC motif protein"  
"JS1\_F07\_00324" 6955 "s59E5H2" 0.7263962 "UvrB/uvrC motif protein"



"JS1\_F07\_00324" 6955 "s63E6H2" 2.070194 "UvrB/uvrC motif protein"  
"JS1\_F07\_00325" 6956 "s59E13H2" 3.033142 "B3/4 domain protein"  
"JS1\_F07\_00325" 6956 "s59E25H2" 0 "B3/4 domain protein"  
"JS1\_F07\_00325" 6956 "s59E5H2" 0.7223304 "B3/4 domain protein"  
"JS1\_F07\_00325" 6956 "s63E6H2" 1.379637 "B3/4 domain protein"  
"JS1\_F07\_00326" 6957 "s59E13H2" 4.581624 "Histidinol-phosphate aminotransferase 2"  
"JS1\_F07\_00326" 6957 "s59E25H2" 0 "Histidinol-phosphate aminotransferase 2"  
"JS1\_F07\_00326" 6957 "s59E5H2" 0.9931605 "Histidinol-phosphate aminotransferase 2"  
"JS1\_F07\_00326" 6957 "s63E6H2" 2.438484 "Histidinol-phosphate aminotransferase 2"  
"JS1\_F07\_00327" 6958 "s59E13H2" 7.878419 "Chaperone protein ClpB 1"  
"JS1\_F07\_00327" 6958 "s59E25H2" 0.09199384 "Chaperone protein ClpB 1"  
"JS1\_F07\_00327" 6958 "s59E5H2" 0.2328986 "Chaperone protein ClpB 1"  
"JS1\_F07\_00327" 6958 "s63E6H2" 3.890004 "Chaperone protein ClpB 1"  
"JS1\_F07\_00328" 6959 "s59E13H2" 1.208824 "putative MscS family protein YkuT"  
"JS1\_F07\_00328" 6959 "s59E25H2" 1.413889 "putative MscS family protein YkuT"  
"JS1\_F07\_00328" 6959 "s59E5H2" 0.7968517 "putative MscS family protein YkuT"  
"JS1\_F07\_00328" 6959 "s63E6H2" 2.965309 "putative MscS family protein YkuT"  
"JS1\_F07\_00329" 6960 "s59E13H2" 7.482223 "putative MscS family protein YkuT"  
"JS1\_F07\_00329" 6960 "s59E25H2" 0.1492248 "putative MscS family protein YkuT"  
"JS1\_F07\_00329" 6960 "s59E5H2" 0.9794274 "putative MscS family protein YkuT"  
"JS1\_F07\_00329" 6960 "s63E6H2" 4.110566 "putative MscS family protein YkuT"  
"JS1\_F07\_00330" 6961 "s59E13H2" 10.98464 "hypothetical protein"  
"JS1\_F07\_00330" 6961 "s59E25H2" 0 "hypothetical protein"  
"JS1\_F07\_00330" 6961 "s59E5H2" 0.330326 "hypothetical protein"  
"JS1\_F07\_00330" 6961 "s63E6H2" 1.552707 "hypothetical protein"  
"JS1\_F07\_00331" 6962 "s59E13H2" 6.816027 "Tetratricopeptide repeat protein"  
"JS1\_F07\_00331" 6962 "s59E25H2" 0 "Tetratricopeptide repeat protein"  
"JS1\_F07\_00331" 6962 "s59E5H2" 0.8020928 "Tetratricopeptide repeat protein"  
"JS1\_F07\_00331" 6962 "s63E6H2" 4.408538 "Tetratricopeptide repeat protein"  
"JS1\_F07\_00334" 6965 "s59E13H2" 0.5346812 "hypothetical protein"  
"JS1\_F07\_00334" 6965 "s59E25H2" 0 "hypothetical protein"  
"JS1\_F07\_00334" 6965 "s59E5H2" 0.1508592 "hypothetical protein"  
"JS1\_F07\_00334" 6965 "s63E6H2" 1.299699 "hypothetical protein"  
"JS1\_F07\_00335" 6966 "s59E13H2" 0.310423 "D-inositol-3-phosphate glycosyltransferase"  
"JS1\_F07\_00335" 6966 "s59E25H2" 0 "D-inositol-3-phosphate glycosyltransferase"  
"JS1\_F07\_00335" 6966 "s59E5H2" 0.8507049 "D-inositol-3-phosphate glycosyltransferase"  
"JS1\_F07\_00335" 6966 "s63E6H2" 2.606292 "D-inositol-3-phosphate glycosyltransferase"  
"JS1\_F07\_00336" 6967 "s59E13H2" 0.1470721 "hypothetical protein"  
"JS1\_F07\_00336" 6967 "s59E25H2" 0 "hypothetical protein"  
"JS1\_F07\_00336" 6967 "s59E5H2" 1.052223 "hypothetical protein"  
"JS1\_F07\_00336" 6967 "s63E6H2" 3.461879 "hypothetical protein"  
"JS1\_F07\_00337" 6968 "s59E13H2" 0.2277143 "Beta-1,4-mannooligosaccharide phosphorylase"  
"JS1\_F07\_00337" 6968 "s59E25H2" 0 "Beta-1,4-mannooligosaccharide phosphorylase"  
"JS1\_F07\_00337" 6968 "s59E5H2" 1.687538 "Beta-1,4-mannooligosaccharide phosphorylase"  
"JS1\_F07\_00337" 6968 "s63E6H2" 2.84077 "Beta-1,4-mannooligosaccharide phosphorylase"  
"JS1\_F07\_00338" 6969 "s59E13H2" 0.7821496 "Carbohydrate diacid regulator"  
"JS1\_F07\_00338" 6969 "s59E25H2" 0 "Carbohydrate diacid regulator"

"JS1\_F07\_00338" 6969 "s59E5H2" 0.5362463 "Carbohydrate diacid regulator"  
"JS1\_F07\_00338" 6969 "s63E6H2" 3.499403 "Carbohydrate diacid regulator"  
"JS1\_F07\_00339" 6970 "s59E13H2" 0.09641395 "hypothetical protein"  
"JS1\_F07\_00339" 6970 "s59E25H2" 0 "hypothetical protein"  
"JS1\_F07\_00339" 6970 "s59E5H2" 0.1267767 "hypothetical protein"  
"JS1\_F07\_00339" 6970 "s63E6H2" 1.508668 "hypothetical protein"  
"JS1\_F07\_00340" 6971 "s59E13H2" 0.07503609 "putative oxidoreductase"  
"JS1\_F07\_00340" 6971 "s59E25H2" 0 "putative oxidoreductase"  
"JS1\_F07\_00340" 6971 "s59E5H2" 0.7505344 "putative oxidoreductase"  
"JS1\_F07\_00340" 6971 "s63E6H2" 0.8017441 "putative oxidoreductase"  
"JS1\_F07\_00341" 6972 "s59E13H2" 0.06649249 "6-phosphogluconate dehydrogenase, NADP(+)-dependent, decarboxylating"  
"JS1\_F07\_00341" 6972 "s59E25H2" 0 "6-phosphogluconate dehydrogenase, NADP(+)-dependent, decarboxylating"  
"JS1\_F07\_00341" 6972 "s59E5H2" 0.4102306 "6-phosphogluconate dehydrogenase, NADP(+)-dependent, decarboxylating"  
"JS1\_F07\_00341" 6972 "s63E6H2" 0.6253652 "6-phosphogluconate dehydrogenase, NADP(+)-dependent, decarboxylating"  
"JS1\_F07\_00342" 6973 "s59E13H2" 0.8955026 "hypothetical protein"  
"JS1\_F07\_00342" 6973 "s59E25H2" 0 "hypothetical protein"  
"JS1\_F07\_00342" 6973 "s59E5H2" 0.2671511 "hypothetical protein"  
"JS1\_F07\_00342" 6973 "s63E6H2" 0.6135992 "hypothetical protein"  
"JS1\_F07\_00343" 6974 "s59E13H2" 1.020111 "6-phosphofructokinase 1"  
"JS1\_F07\_00343" 6974 "s59E25H2" 0 "6-phosphofructokinase 1"  
"JS1\_F07\_00343" 6974 "s59E5H2" 0.4621948 "6-phosphofructokinase 1"  
"JS1\_F07\_00343" 6974 "s63E6H2" 0.7651299 "6-phosphofructokinase 1"  
"JS1\_F07\_00344" 6975 "s59E13H2" 0.05125419 "hypothetical protein"  
"JS1\_F07\_00344" 6975 "s59E25H2" 0 "hypothetical protein"  
"JS1\_F07\_00344" 6975 "s59E5H2" 0.3343282 "hypothetical protein"  
"JS1\_F07\_00344" 6975 "s63E6H2" 0.1375235 "hypothetical protein"  
"JS1\_F07\_00345" 6976 "s59E13H2" 0.07206824 "putative binding protein component of ABC iron transporter precursor"  
"JS1\_F07\_00345" 6976 "s59E25H2" 0 "putative binding protein component of ABC iron transporter precursor"  
"JS1\_F07\_00345" 6976 "s59E5H2" 0.03350425 "putative binding protein component of ABC iron transporter precursor"  
"JS1\_F07\_00345" 6976 "s63E6H2" 0.7855107 "putative binding protein component of ABC iron transporter precursor"  
"JS1\_F07\_00346" 6977 "s59E13H2" 0.1761696 "Putative 2-aminoethylphosphonate transport system permease protein PhnV"  
"JS1\_F07\_00346" 6977 "s59E25H2" 0 "Putative 2-aminoethylphosphonate transport system permease protein PhnV"  
"JS1\_F07\_00346" 6977 "s59E5H2" 0.8471781 "Putative 2-aminoethylphosphonate transport system permease protein PhnV"  
"JS1\_F07\_00346" 6977 "s63E6H2" 0.5300924 "Putative 2-aminoethylphosphonate transport system permease protein PhnV"  
"JS1\_F07\_00347" 6978 "s59E13H2" 1.05445 "Trehalose/maltose import ATP-binding protein Malk"  
"JS1\_F07\_00347" 6978 "s59E25H2" 0 "Trehalose/maltose import ATP-binding protein Malk"  
"JS1\_F07\_00347" 6978 "s59E5H2" 1.641327 "Trehalose/maltose import ATP-binding protein Malk"  
"JS1\_F07\_00347" 6978 "s63E6H2" 0.6070985 "Trehalose/maltose import ATP-binding protein Malk"  
"JS1\_F07\_00348" 6979 "s59E13H2" 0.1130737 "2-dehydro-3-deoxygluconokinase"  
"JS1\_F07\_00348" 6979 "s59E25H2" 0 "2-dehydro-3-deoxygluconokinase"  
"JS1\_F07\_00348" 6979 "s59E5H2" 0.7418345 "2-dehydro-3-deoxygluconokinase"  
"JS1\_F07\_00348" 6979 "s63E6H2" 0.2516335 "2-dehydro-3-deoxygluconokinase"  
"JS1\_F07\_00349" 6980 "s59E13H2" 0.1911577 "Butyrate kinase 2"  
"JS1\_F07\_00349" 6980 "s59E25H2" 0 "Butyrate kinase 2"  
"JS1\_F07\_00349" 6980 "s59E5H2" 0.1535679 "Butyrate kinase 2"  
"JS1\_F07\_00349" 6980 "s63E6H2" 0.08145038 "Butyrate kinase 2"  
"JS1\_F07\_00350" 6981 "s59E13H2" 0.7232915 "Aspartate aminotransferase"

"JS1\_F07\_00350" 6981 "s59E25H2" 0 "Aspartate aminotransferase"  
"JS1\_F07\_00350" 6981 "s59E5H2" 1.165005 "Aspartate aminotransferase"  
"JS1\_F07\_00350" 6981 "s63E6H2" 0.3932376 "Aspartate aminotransferase"  
"JS1\_F07\_00351" 6982 "s59E13H2" 0.7503492 "Indolepyruvate oxidoreductase subunit lorB"  
"JS1\_F07\_00351" 6982 "s59E25H2" 0 "Indolepyruvate oxidoreductase subunit lorB"  
"JS1\_F07\_00351" 6982 "s59E5H2" 1.040091 "Indolepyruvate oxidoreductase subunit lorB"  
"JS1\_F07\_00351" 6982 "s63E6H2" 0.6683296 "Indolepyruvate oxidoreductase subunit lorB"  
"JS1\_F07\_00352" 6983 "s59E13H2" 1.199814 "Indolepyruvate oxidoreductase subunit lorA"  
"JS1\_F07\_00352" 6983 "s59E25H2" 0 "Indolepyruvate oxidoreductase subunit lorA"  
"JS1\_F07\_00352" 6983 "s59E5H2" 0.9829402 "Indolepyruvate oxidoreductase subunit lorA"  
"JS1\_F07\_00352" 6983 "s63E6H2" 1.08554 "Indolepyruvate oxidoreductase subunit lorA"  
"JS1\_F07\_00353" 6984 "s59E13H2" 1.00482 "Transcriptional regulator KdgR"  
"JS1\_F07\_00353" 6984 "s59E25H2" 0 "Transcriptional regulator KdgR"  
"JS1\_F07\_00353" 6984 "s59E5H2" 1.061766 "Transcriptional regulator KdgR"  
"JS1\_F07\_00353" 6984 "s63E6H2" 1.545989 "Transcriptional regulator KdgR"  
"JS1\_F07\_00354" 6985 "s59E13H2" 0.825023 "Phospholipase YtpA"  
"JS1\_F07\_00354" 6985 "s59E25H2" 0 "Phospholipase YtpA"  
"JS1\_F07\_00354" 6985 "s59E5H2" 0.2405031 "Phospholipase YtpA"  
"JS1\_F07\_00354" 6985 "s63E6H2" 1.371167 "Phospholipase YtpA"  
"JS1\_F07\_00355" 6986 "s59E13H2" 0.3957329 "pfkB family carbohydrate kinase"  
"JS1\_F07\_00355" 6986 "s59E25H2" 0 "pfkB family carbohydrate kinase"  
"JS1\_F07\_00355" 6986 "s59E5H2" 0.2911288 "pfkB family carbohydrate kinase"  
"JS1\_F07\_00355" 6986 "s63E6H2" 0.6897469 "pfkB family carbohydrate kinase"  
"JS1\_F07\_00356" 6987 "s59E13H2" 0.2102046 "alpha-glucosidase"  
"JS1\_F07\_00356" 6987 "s59E25H2" 0 "alpha-glucosidase"  
"JS1\_F07\_00356" 6987 "s59E5H2" 0.06711859 "alpha-glucosidase"  
"JS1\_F07\_00356" 6987 "s63E6H2" 0.005945551 "alpha-glucosidase"  
"JS1\_F07\_00357" 6988 "s59E13H2" 0.08296399 "Sialic acid TRAP transporter permease protein SiaT"  
"JS1\_F07\_00357" 6988 "s59E25H2" 0 "Sialic acid TRAP transporter permease protein SiaT"  
"JS1\_F07\_00357" 6988 "s59E5H2" 0.2695911 "Sialic acid TRAP transporter permease protein SiaT"  
"JS1\_F07\_00357" 6988 "s63E6H2" 0.04028379 "Sialic acid TRAP transporter permease protein SiaT"  
"JS1\_F07\_00358" 6989 "s59E13H2" 0.1397954 "Tripartite ATP-independent periplasmic transporters, DctQ component"  
"JS1\_F07\_00358" 6989 "s59E25H2" 0 "Tripartite ATP-independent periplasmic transporters, DctQ component"  
"JS1\_F07\_00358" 6989 "s59E5H2" 0.548169 "Tripartite ATP-independent periplasmic transporters, DctQ component"  
"JS1\_F07\_00358" 6989 "s63E6H2" 0.0556624 "Tripartite ATP-independent periplasmic transporters, DctQ component"  
"JS1\_F07\_00359" 6990 "s59E13H2" 0.1397981 "Monocarboxylate 2-oxoacid-binding periplasmic protein precursor"  
"JS1\_F07\_00359" 6990 "s59E25H2" 0 "Monocarboxylate 2-oxoacid-binding periplasmic protein precursor"  
"JS1\_F07\_00359" 6990 "s59E5H2" 0.4459003 "Monocarboxylate 2-oxoacid-binding periplasmic protein precursor"  
"JS1\_F07\_00359" 6990 "s63E6H2" 0.02541772 "Monocarboxylate 2-oxoacid-binding periplasmic protein precursor"  
"JS1\_F07\_00360" 6991 "s59E13H2" 0.159863 "Glycerate 2-kinase"  
"JS1\_F07\_00360" 6991 "s59E25H2" 0 "Glycerate 2-kinase"  
"JS1\_F07\_00360" 6991 "s59E5H2" 1.075733 "Glycerate 2-kinase"  
"JS1\_F07\_00360" 6991 "s63E6H2" 0.165045 "Glycerate 2-kinase"  
"JS1\_F07\_00361" 6992 "s59E13H2" 0.008457534 "Acetyltransferase (GNAT) family protein"  
"JS1\_F07\_00361" 6992 "s59E25H2" 1.020964 "Acetyltransferase (GNAT) family protein"  
"JS1\_F07\_00361" 6992 "s59E5H2" 0.04727572 "Acetyltransferase (GNAT) family protein"  
"JS1\_F07\_00361" 6992 "s63E6H2" 0.3960077 "Acetyltransferase (GNAT) family protein"

"JS1\_F07\_00363" 6994 "s59E13H2" 0.03580011 "Elongation factor P"  
"JS1\_F07\_00363" 6994 "s59E25H2" 0 "Elongation factor P"  
"JS1\_F07\_00363" 6994 "s59E5H2" 0.1506122 "Elongation factor P"  
"JS1\_F07\_00363" 6994 "s63E6H2" 0.1382548 "Elongation factor P"  
"JS1\_F07\_00364" 6995 "s59E13H2" 0.04511782 "Serine hydroxymethyltransferase"  
"JS1\_F07\_00364" 6995 "s59E25H2" 0 "Serine hydroxymethyltransferase"  
"JS1\_F07\_00364" 6995 "s59E5H2" 0.179505 "Serine hydroxymethyltransferase"  
"JS1\_F07\_00364" 6995 "s63E6H2" 0.09496475 "Serine hydroxymethyltransferase"  
"JS1\_F07\_00365" 6996 "s59E13H2" 0.07327778 "Xaa-Pro dipeptidase"  
"JS1\_F07\_00365" 6996 "s59E25H2" 0 "Xaa-Pro dipeptidase"  
"JS1\_F07\_00365" 6996 "s59E5H2" 0.09712819 "Xaa-Pro dipeptidase"  
"JS1\_F07\_00365" 6996 "s63E6H2" 0.01887779 "Xaa-Pro dipeptidase"  
"JS1\_F07\_00366" 6997 "s59E13H2" 0.5619393 "Beta-galactosidase"  
"JS1\_F07\_00366" 6997 "s59E25H2" 0 "Beta-galactosidase"  
"JS1\_F07\_00366" 6997 "s59E5H2" 0.6758174 "Beta-galactosidase"  
"JS1\_F07\_00366" 6997 "s63E6H2" 0.09112381 "Beta-galactosidase"  
"JS1\_F07\_00367" 6998 "s59E13H2" 0.9781069 "Lactose transport system permease protein LacG"  
"JS1\_F07\_00367" 6998 "s59E25H2" 0 "Lactose transport system permease protein LacG"  
"JS1\_F07\_00367" 6998 "s59E5H2" 0.6176828 "Lactose transport system permease protein LacG"  
"JS1\_F07\_00367" 6998 "s63E6H2" 0.4128814 "Lactose transport system permease protein LacG"  
"JS1\_F07\_00368" 6999 "s59E13H2" 6.29957 "Lactose transport system permease protein LacF"  
"JS1\_F07\_00368" 6999 "s59E25H2" 0 "Lactose transport system permease protein LacF"  
"JS1\_F07\_00368" 6999 "s59E5H2" 0.722937 "Lactose transport system permease protein LacF"  
"JS1\_F07\_00368" 6999 "s63E6H2" 0.5581186 "Lactose transport system permease protein LacF"  
"JS1\_F07\_00369" 7000 "s59E13H2" 5.491975 "Lactose-binding protein precursor"  
"JS1\_F07\_00369" 7000 "s59E25H2" 0 "Lactose-binding protein precursor"  
"JS1\_F07\_00369" 7000 "s59E5H2" 0.5753836 "Lactose-binding protein precursor"  
"JS1\_F07\_00369" 7000 "s63E6H2" 0.4522166 "Lactose-binding protein precursor"  
"JS1\_F07\_00370" 7001 "s59E13H2" 3.978767 "Ribose operon repressor"  
"JS1\_F07\_00370" 7001 "s59E25H2" 0 "Ribose operon repressor"  
"JS1\_F07\_00370" 7001 "s59E5H2" 0.6486326 "Ribose operon repressor"  
"JS1\_F07\_00370" 7001 "s63E6H2" 0.2524589 "Ribose operon repressor"  
"JS1\_F07\_00371" 7002 "s59E13H2" 2.952116 "hypothetical protein"  
"JS1\_F07\_00371" 7002 "s59E25H2" 0 "hypothetical protein"  
"JS1\_F07\_00371" 7002 "s59E5H2" 1.030139 "hypothetical protein"  
"JS1\_F07\_00371" 7002 "s63E6H2" 0.4332658 "hypothetical protein"  
"JS1\_F07\_00372" 7003 "s59E13H2" 0.5377866 "4-amino-4-deoxy-L-arabinose-phosphoundecaprenol flippase subunit ArnF"  
"JS1\_F07\_00372" 7003 "s59E25H2" 0.7669903 "4-amino-4-deoxy-L-arabinose-phosphoundecaprenol flippase subunit ArnF"  
"JS1\_F07\_00372" 7003 "s59E5H2" 0.7537669 "4-amino-4-deoxy-L-arabinose-phosphoundecaprenol flippase subunit ArnF"  
"JS1\_F07\_00372" 7003 "s63E6H2" 0.4621047 "4-amino-4-deoxy-L-arabinose-phosphoundecaprenol flippase subunit ArnF"  
"JS1\_F07\_00373" 7004 "s59E13H2" 0.8315751 "Phosphodiesterase"  
"JS1\_F07\_00373" 7004 "s59E25H2" 0 "Phosphodiesterase"  
"JS1\_F07\_00373" 7004 "s59E5H2" 0.9183736 "Phosphodiesterase"  
"JS1\_F07\_00373" 7004 "s63E6H2" 0.6219926 "Phosphodiesterase"  
"JS1\_F07\_00374" 7005 "s59E13H2" 0.06170705 "3'-5' exoribonuclease YhaM"  
"JS1\_F07\_00374" 7005 "s59E25H2" 0 "3'-5' exoribonuclease YhaM"  
"JS1\_F07\_00374" 7005 "s59E5H2" 0.03820167 "3'-5' exoribonuclease YhaM"

"JS1\_F07\_00374" 7005 "s63E6H2" 0.5212135 "3'-5' exoribonuclease YhaM"  
"JS1\_F07\_00375" 7006 "s59E13H2" 0.8575064 "protease TldD"  
"JS1\_F07\_00375" 7006 "s59E25H2" 0.1298322 "protease TldD"  
"JS1\_F07\_00375" 7006 "s59E5H2" 11.52989 "protease TldD"  
"JS1\_F07\_00375" 7006 "s63E6H2" 0.8107138 "protease TldD"  
"JS1\_F07\_00376" 7007 "s59E13H2" 1.168238 "protease TldD"  
"JS1\_F07\_00376" 7007 "s59E25H2" 0 "protease TldD"  
"JS1\_F07\_00376" 7007 "s59E5H2" 0.1453257 "protease TldD"  
"JS1\_F07\_00376" 7007 "s63E6H2" 0.8770879 "protease TldD"  
"JS1\_F07\_00377" 7008 "s59E13H2" 1.074958 "hypothetical protein"  
"JS1\_F07\_00377" 7008 "s59E25H2" 0 "hypothetical protein"  
"JS1\_F07\_00377" 7008 "s59E5H2" 0.134786 "hypothetical protein"  
"JS1\_F07\_00377" 7008 "s63E6H2" 0.2440623 "hypothetical protein"  
"JS1\_F07\_00378" 7009 "s59E13H2" 1.151555 "Ankyrin repeats (3 copies)"  
"JS1\_F07\_00378" 7009 "s59E25H2" 0 "Ankyrin repeats (3 copies)"  
"JS1\_F07\_00378" 7009 "s59E5H2" 0.1780959 "Ankyrin repeats (3 copies)"  
"JS1\_F07\_00378" 7009 "s63E6H2" 0.2822857 "Ankyrin repeats (3 copies)"  
"JS1\_F07\_00379" 7010 "s59E13H2" 0.04505584 "Ornithine carbamoyltransferase"  
"JS1\_F07\_00379" 7010 "s59E25H2" 0 "Ornithine carbamoyltransferase"  
"JS1\_F07\_00379" 7010 "s59E5H2" 0.2450048 "Ornithine carbamoyltransferase"  
"JS1\_F07\_00379" 7010 "s63E6H2" 0.3666046 "Ornithine carbamoyltransferase"  
"JS1\_F07\_00380" 7011 "s59E13H2" 0.06682781 "Carbamate kinase"  
"JS1\_F07\_00380" 7011 "s59E25H2" 0 "Carbamate kinase"  
"JS1\_F07\_00380" 7011 "s59E5H2" 0.0624092 "Carbamate kinase"  
"JS1\_F07\_00380" 7011 "s63E6H2" 0.2976934 "Carbamate kinase"  
"JS1\_F07\_00381" 7012 "s59E13H2" 0.07339951 "Threonine synthase"  
"JS1\_F07\_00381" 7012 "s59E25H2" 0 "Threonine synthase"  
"JS1\_F07\_00381" 7012 "s59E5H2" 0.2068963 "Threonine synthase"  
"JS1\_F07\_00381" 7012 "s63E6H2" 0.4515742 "Threonine synthase"  
"JS1\_F07\_00382" 7013 "s59E13H2" 0.0754419 "putative succinyl-diaminopimelate desuccinylase"  
"JS1\_F07\_00382" 7013 "s59E25H2" 0 "putative succinyl-diaminopimelate desuccinylase"  
"JS1\_F07\_00382" 7013 "s59E5H2" 0.2468074 "putative succinyl-diaminopimelate desuccinylase"  
"JS1\_F07\_00382" 7013 "s63E6H2" 0.9233063 "putative succinyl-diaminopimelate desuccinylase"  
"JS1\_F07\_00383" 7014 "s59E13H2" 0.06539495 "Cysteine synthase"  
"JS1\_F07\_00383" 7014 "s59E25H2" 0 "Cysteine synthase"  
"JS1\_F07\_00383" 7014 "s59E5H2" 0.4826347 "Cysteine synthase"  
"JS1\_F07\_00383" 7014 "s63E6H2" 1.342483 "Cysteine synthase"  
"JS1\_F07\_00384" 7015 "s59E13H2" 0.1303773 "Aspartate carbamoyltransferase"  
"JS1\_F07\_00384" 7015 "s59E25H2" 0 "Aspartate carbamoyltransferase"  
"JS1\_F07\_00384" 7015 "s59E5H2" 0.8211735 "Aspartate carbamoyltransferase"  
"JS1\_F07\_00384" 7015 "s63E6H2" 1.504624 "Aspartate carbamoyltransferase"  
"JS1\_F07\_00385" 7016 "s59E13H2" 3.719531 "putative xanthine dehydrogenase subunit D"  
"JS1\_F07\_00385" 7016 "s59E25H2" 0 "putative xanthine dehydrogenase subunit D"  
"JS1\_F07\_00385" 7016 "s59E5H2" 0.5970793 "putative xanthine dehydrogenase subunit D"  
"JS1\_F07\_00385" 7016 "s63E6H2" 1.190854 "putative xanthine dehydrogenase subunit D"  
"JS1\_F07\_00386" 7017 "s59E13H2" 3.336073 "Glyceraldehyde dehydrogenase medium chain"  
"JS1\_F07\_00386" 7017 "s59E25H2" 0 "Glyceraldehyde dehydrogenase medium chain"

"JS1\_F07\_00386" 7017 "s59E5H2" 0.4644597 "Glyceraldehyde dehydrogenase medium chain"  
"JS1\_F07\_00386" 7017 "s63E6H2" 0.6094574 "Glyceraldehyde dehydrogenase medium chain"  
"JS1\_F07\_00387" 7018 "s59E13H2" 3.138779 "Nicotinate dehydrogenase small FeS subunit"  
"JS1\_F07\_00387" 7018 "s59E25H2" 0 "Nicotinate dehydrogenase small FeS subunit"  
"JS1\_F07\_00387" 7018 "s59E5H2" 0.2322629 "Nicotinate dehydrogenase small FeS subunit"  
"JS1\_F07\_00387" 7018 "s63E6H2" 0.5303325 "Nicotinate dehydrogenase small FeS subunit"  
"JS1\_F07\_00388" 7019 "s59E13H2" 1.946307 "8-oxoguanine deaminase"  
"JS1\_F07\_00388" 7019 "s59E25H2" 0 "8-oxoguanine deaminase"  
"JS1\_F07\_00388" 7019 "s59E5H2" 0.2185661 "8-oxoguanine deaminase"  
"JS1\_F07\_00388" 7019 "s63E6H2" 0.1151755 "8-oxoguanine deaminase"  
"JS1\_F07\_00389" 7020 "s59E13H2" 0.161822 "5-methylthioadenosine/S-adenosylhomocysteine deaminase"  
"JS1\_F07\_00389" 7020 "s59E25H2" 0.1816817 "5-methylthioadenosine/S-adenosylhomocysteine deaminase"  
"JS1\_F07\_00389" 7020 "s59E5H2" 0.3088749 "5-methylthioadenosine/S-adenosylhomocysteine deaminase"  
"JS1\_F07\_00389" 7020 "s63E6H2" 1.092269 "5-methylthioadenosine/S-adenosylhomocysteine deaminase"  
"JS1\_F07\_00390" 7021 "s59E13H2" 0.1040471 "Cell wall-binding protein YocH precursor"  
"JS1\_F07\_00390" 7021 "s59E25H2" 0 "Cell wall-binding protein YocH precursor"  
"JS1\_F07\_00390" 7021 "s59E5H2" 0.2103626 "Cell wall-binding protein YocH precursor"  
"JS1\_F07\_00390" 7021 "s63E6H2" 0.2447384 "Cell wall-binding protein YocH precursor"  
"JS1\_F07\_00391" 7022 "s59E13H2" 0.2574611 "Galactose/methyl galactoside import ATP-binding protein MglA"  
"JS1\_F07\_00391" 7022 "s59E25H2" 0.1588542 "Galactose/methyl galactoside import ATP-binding protein MglA"  
"JS1\_F07\_00391" 7022 "s59E5H2" 1.317298 "Galactose/methyl galactoside import ATP-binding protein MglA"  
"JS1\_F07\_00391" 7022 "s63E6H2" 1.400603 "Galactose/methyl galactoside import ATP-binding protein MglA"  
"JS1\_F07\_00392" 7023 "s59E13H2" 0.2762465 "D-allose transporter subunit"  
"JS1\_F07\_00392" 7023 "s59E25H2" 0 "D-allose transporter subunit"  
"JS1\_F07\_00392" 7023 "s59E5H2" 2.627892 "D-allose transporter subunit"  
"JS1\_F07\_00392" 7023 "s63E6H2" 0.8116471 "D-allose transporter subunit"  
"JS1\_F07\_00393" 7024 "s59E13H2" 0.2056013 "Branched-chain amino acid transport system / permease component"  
"JS1\_F07\_00393" 7024 "s59E25H2" 0 "Branched-chain amino acid transport system / permease component"  
"JS1\_F07\_00393" 7024 "s59E5H2" 2.810069 "Branched-chain amino acid transport system / permease component"  
"JS1\_F07\_00393" 7024 "s63E6H2" 0.7608394 "Branched-chain amino acid transport system / permease component"  
"JS1\_F07\_00394" 7025 "s59E13H2" 0.1650464 "Purine-binding protein precursor"  
"JS1\_F07\_00394" 7025 "s59E25H2" 0 "Purine-binding protein precursor"  
"JS1\_F07\_00394" 7025 "s59E5H2" 0.6641998 "Purine-binding protein precursor"  
"JS1\_F07\_00394" 7025 "s63E6H2" 2.101862 "Purine-binding protein precursor"  
"JS1\_F07\_00395" 7026 "s59E13H2" 0.2872905 "Uridine phosphorylase"  
"JS1\_F07\_00395" 7026 "s59E25H2" 0 "Uridine phosphorylase"  
"JS1\_F07\_00395" 7026 "s59E5H2" 2.688072 "Uridine phosphorylase"  
"JS1\_F07\_00395" 7026 "s63E6H2" 3.540346 "Uridine phosphorylase"  
"JS1\_F07\_00396" 7027 "s59E13H2" 0.1014725 "Uridine phosphorylase"  
"JS1\_F07\_00396" 7027 "s59E25H2" 0 "Uridine phosphorylase"  
"JS1\_F07\_00396" 7027 "s59E5H2" 0.6528653 "Uridine phosphorylase"  
"JS1\_F07\_00396" 7027 "s63E6H2" 4.272261 "Uridine phosphorylase"  
"JS1\_F07\_00397" 7028 "s59E13H2" 0.1276051 "lineage-specific thermal regulator protein"  
"JS1\_F07\_00397" 7028 "s59E25H2" 0 "lineage-specific thermal regulator protein"  
"JS1\_F07\_00397" 7028 "s59E5H2" 0.8486642 "lineage-specific thermal regulator protein"  
"JS1\_F07\_00397" 7028 "s63E6H2" 3.15881 "lineage-specific thermal regulator protein"  
"JS1\_F07\_00398" 7029 "s59E13H2" 0.02802431 "Putative glycosyltransferase EpsF"

"JS1\_F07\_00398" 7029 "s59E25H2" 0 "Putative glycosyltransferase EpsF"  
"JS1\_F07\_00398" 7029 "s59E5H2" 0 "Putative glycosyltransferase EpsF"  
"JS1\_F07\_00398" 7029 "s63E6H2" 0.1062634 "Putative glycosyltransferase EpsF"  
"JS1\_F07\_00399" 7030 "s59E13H2" 0.02415435 "UDP-glucose 4-epimerase"  
"JS1\_F07\_00399" 7030 "s59E25H2" 0 "UDP-glucose 4-epimerase"  
"JS1\_F07\_00399" 7030 "s59E5H2" 0.006876184 "UDP-glucose 4-epimerase"  
"JS1\_F07\_00399" 7030 "s63E6H2" 0.01045839 "UDP-glucose 4-epimerase"  
"JS1\_F07\_00400" 7031 "s59E13H2" 0.04112684 "putative undecaprenyl-phosphate N-acetylglucosaminyl 1-phosphate transferase"  
"JS1\_F07\_00400" 7031 "s59E25H2" 0 "putative undecaprenyl-phosphate N-acetylglucosaminyl 1-phosphate transferase"  
"JS1\_F07\_00400" 7031 "s59E5H2" 0.0009932422 "putative undecaprenyl-phosphate N-acetylglucosaminyl 1-phosphate transferase"  
"JS1\_F07\_00400" 7031 "s63E6H2" 0.01571904 "putative undecaprenyl-phosphate N-acetylglucosaminyl 1-phosphate transferase"  
"JS1\_F07\_00401" 7032 "s59E13H2" 0.01345496 "UDP-N-acetyl-alpha-D-glucosamine C6 dehydratase"  
"JS1\_F07\_00401" 7032 "s59E25H2" 0 "UDP-N-acetyl-alpha-D-glucosamine C6 dehydratase"  
"JS1\_F07\_00401" 7032 "s59E5H2" 0.003930909 "UDP-N-acetyl-alpha-D-glucosamine C6 dehydratase"  
"JS1\_F07\_00401" 7032 "s63E6H2" 0.006491112 "UDP-N-acetyl-alpha-D-glucosamine C6 dehydratase"  
"JS1\_F07\_00402" 7033 "s59E13H2" 0.0141527 "Pseudouridine kinase"  
"JS1\_F07\_00402" 7033 "s59E25H2" 0 "Pseudouridine kinase"  
"JS1\_F07\_00402" 7033 "s59E5H2" 0.01393196 "Pseudouridine kinase"  
"JS1\_F07\_00402" 7033 "s63E6H2" 0.3349889 "Pseudouridine kinase"  
"JS1\_F07\_00403" 7034 "s59E13H2" 0.06493397 "Pseudouridine-5'-phosphate glycosidase"  
"JS1\_F07\_00403" 7034 "s59E25H2" 0 "Pseudouridine-5'-phosphate glycosidase"  
"JS1\_F07\_00403" 7034 "s59E5H2" 0.04615327 "Pseudouridine-5'-phosphate glycosidase"  
"JS1\_F07\_00403" 7034 "s63E6H2" 0.3063605 "Pseudouridine-5'-phosphate glycosidase"  
"JS1\_F07\_00404" 7035 "s59E13H2" 0.04747798 "Nucleotidyltransferase domain protein"  
"JS1\_F07\_00404" 7035 "s59E25H2" 0 "Nucleotidyltransferase domain protein"  
"JS1\_F07\_00404" 7035 "s59E5H2" 0.1075943 "Nucleotidyltransferase domain protein"  
"JS1\_F07\_00404" 7035 "s63E6H2" 0.05468336 "Nucleotidyltransferase domain protein"  
"JS1\_F07\_00405" 7036 "s59E13H2" 0.05904525 "hypothetical protein"  
"JS1\_F07\_00405" 7036 "s59E25H2" 0 "hypothetical protein"  
"JS1\_F07\_00405" 7036 "s59E5H2" 0.03298387 "hypothetical protein"  
"JS1\_F07\_00405" 7036 "s63E6H2" 0.0286252 "hypothetical protein"  
"JS1\_F07\_00406" 7037 "s59E13H2" 0.05010394 "Digeranylgeranyllycerophospholipid reductase"  
"JS1\_F07\_00406" 7037 "s59E25H2" 0 "Digeranylgeranyllycerophospholipid reductase"  
"JS1\_F07\_00406" 7037 "s59E5H2" 0.007710917 "Digeranylgeranyllycerophospholipid reductase"  
"JS1\_F07\_00406" 7037 "s63E6H2" 0.3976692 "Digeranylgeranyllycerophospholipid reductase"  
"JS1\_F07\_00407" 7038 "s59E13H2" 0.0488194 "Glucose-1-phosphate thymidyltransferase"  
"JS1\_F07\_00407" 7038 "s59E25H2" 0 "Glucose-1-phosphate thymidyltransferase"  
"JS1\_F07\_00407" 7038 "s59E5H2" 0.1376024 "Glucose-1-phosphate thymidyltransferase"  
"JS1\_F07\_00407" 7038 "s63E6H2" 0.780221 "Glucose-1-phosphate thymidyltransferase"  
"JS1\_F07\_00408" 7039 "s59E13H2" 0.1092454 "translocation protein TolB"  
"JS1\_F07\_00408" 7039 "s59E25H2" 0.1255048 "translocation protein TolB"  
"JS1\_F07\_00408" 7039 "s59E5H2" 0.0855359 "translocation protein TolB"  
"JS1\_F07\_00408" 7039 "s63E6H2" 1.915503 "translocation protein TolB"  
"JS1\_F07\_00409" 7040 "s59E13H2" 0.1146367 "Transposase IS200 like protein"  
"JS1\_F07\_00409" 7040 "s59E25H2" 0 "Transposase IS200 like protein"  
"JS1\_F07\_00409" 7040 "s59E5H2" 0.03613058 "Transposase IS200 like protein"  
"JS1\_F07\_00409" 7040 "s63E6H2" 8.512845 "Transposase IS200 like protein"

"JS1\_F07\_00410" 7041 "s59E13H2" 0.001073394 "hypothetical protein"  
"JS1\_F07\_00410" 7041 "s59E25H2" 0 "hypothetical protein"  
"JS1\_F07\_00410" 7041 "s59E5H2" 0.03027191 "hypothetical protein"  
"JS1\_F07\_00410" 7041 "s63E6H2" 5.572138 "hypothetical protein"  
"JS1\_F07\_00411" 7042 "s59E13H2" 0.02394505 "N-acetylgalactosamine-N,N'-diacetylbaucillosaminy-diphospho-undecaprenol 4-alpha-N-acetylgalactosaminytransferase"  
"JS1\_F07\_00411" 7042 "s59E25H2" 0 "N-acetylgalactosamine-N,N'-diacetylbaucillosaminy-diphospho-undecaprenol 4-alpha-N-acetylgalactosaminytransferase"  
"JS1\_F07\_00411" 7042 "s59E5H2" 0 "N-acetylgalactosamine-N,N'-diacetylbaucillosaminy-diphospho-undecaprenol 4-alpha-N-acetylgalactosaminytransferase"  
"JS1\_F07\_00411" 7042 "s63E6H2" 0 "N-acetylgalactosamine-N,N'-diacetylbaucillosaminy-diphospho-undecaprenol 4-alpha-N-acetylgalactosaminytransferase"  
"JS1\_F07\_00412" 7043 "s59E13H2" 0.04728928 "UDP-Glc:alpha-D-GlcNAc-diphosphoundecaprenol beta-1,3-glucosyltransferase WfgD"  
"JS1\_F07\_00412" 7043 "s59E25H2" 0 "UDP-Glc:alpha-D-GlcNAc-diphosphoundecaprenol beta-1,3-glucosyltransferase WfgD"  
"JS1\_F07\_00412" 7043 "s59E5H2" 0.004265351 "UDP-Glc:alpha-D-GlcNAc-diphosphoundecaprenol beta-1,3-glucosyltransferase WfgD"  
"JS1\_F07\_00412" 7043 "s63E6H2" 0.005964586 "UDP-Glc:alpha-D-GlcNAc-diphosphoundecaprenol beta-1,3-glucosyltransferase WfgD"  
"JS1\_F07\_00413" 7044 "s59E13H2" 0.03523712 "Lipopolysaccharide biosynthesis protein WzxC"  
"JS1\_F07\_00413" 7044 "s59E25H2" 0 "Lipopolysaccharide biosynthesis protein WzxC"  
"JS1\_F07\_00413" 7044 "s59E5H2" 0 "Lipopolysaccharide biosynthesis protein WzxC"  
"JS1\_F07\_00413" 7044 "s63E6H2" 0.0164419 "Lipopolysaccharide biosynthesis protein WzxC"  
"JS1\_F07\_00414" 7045 "s59E13H2" 0.004712461 "D-inositol 3-phosphate glycosyltransferase"  
"JS1\_F07\_00414" 7045 "s59E25H2" 0 "D-inositol 3-phosphate glycosyltransferase"  
"JS1\_F07\_00414" 7045 "s59E5H2" 0 "D-inositol 3-phosphate glycosyltransferase"  
"JS1\_F07\_00414" 7045 "s63E6H2" 0.1403591 "D-inositol 3-phosphate glycosyltransferase"  
"JS1\_F07\_00415" 7046 "s59E13H2" 1.219974 "Tyrosine--tRNA ligase"  
"JS1\_F07\_00415" 7046 "s59E25H2" 0 "Tyrosine--tRNA ligase"  
"JS1\_F07\_00415" 7046 "s59E5H2" 0.8331582 "Tyrosine--tRNA ligase"  
"JS1\_F07\_00415" 7046 "s63E6H2" 1.180408 "Tyrosine--tRNA ligase"  
"JS1\_F07\_00416" 7047 "s59E13H2" 0.9548483 "Queuosine precursor transporter QueT"  
"JS1\_F07\_00416" 7047 "s59E25H2" 0 "Queuosine precursor transporter QueT"  
"JS1\_F07\_00416" 7047 "s59E5H2" 0.4166207 "Queuosine precursor transporter QueT"  
"JS1\_F07\_00416" 7047 "s63E6H2" 0.7496102 "Queuosine precursor transporter QueT"  
"JS1\_F07\_00417" 7048 "s59E13H2" 1.280563 "Penicillin-binding protein 2D"  
"JS1\_F07\_00417" 7048 "s59E25H2" 0 "Penicillin-binding protein 2D"  
"JS1\_F07\_00417" 7048 "s59E5H2" 0.4052857 "Penicillin-binding protein 2D"  
"JS1\_F07\_00417" 7048 "s63E6H2" 1.343543 "Penicillin-binding protein 2D"  
"JS1\_F07\_00418" 7049 "s59E13H2" 1.543324 "Endonuclease MutS2"  
"JS1\_F07\_00418" 7049 "s59E25H2" 0 "Endonuclease MutS2"  
"JS1\_F07\_00418" 7049 "s59E5H2" 0.4644583 "Endonuclease MutS2"  
"JS1\_F07\_00418" 7049 "s63E6H2" 1.102561 "Endonuclease MutS2"  
"JS1\_F07\_00419" 7050 "s59E13H2" 1.102151 "colicin V production protein"  
"JS1\_F07\_00419" 7050 "s59E25H2" 0 "colicin V production protein"  
"JS1\_F07\_00419" 7050 "s59E5H2" 0.4230649 "colicin V production protein"  
"JS1\_F07\_00419" 7050 "s63E6H2" 0.518296 "colicin V production protein"  
"JS1\_F07\_00420" 7051 "s59E13H2" 0.4666916 "Phenylalanine--tRNA ligase beta subunit"  
"JS1\_F07\_00420" 7051 "s59E25H2" 0 "Phenylalanine--tRNA ligase beta subunit"  
"JS1\_F07\_00420" 7051 "s59E5H2" 0.310885 "Phenylalanine--tRNA ligase beta subunit"  
"JS1\_F07\_00420" 7051 "s63E6H2" 0.3286544 "Phenylalanine--tRNA ligase beta subunit"  
"JS1\_F07\_00421" 7052 "s59E13H2" 0.03341412 "Phenylalanine--tRNA ligase alpha subunit"  
"JS1\_F07\_00421" 7052 "s59E25H2" 0 "Phenylalanine--tRNA ligase alpha subunit"  
"JS1\_F07\_00421" 7052 "s59E5H2" 0.09687305 "Phenylalanine--tRNA ligase alpha subunit"



"JS1\_F07\_00421" 7052 "s63E6H2" 0.4705549 "Phenylalanine--tRNA ligase alpha subunit"  
"JS1\_F07\_00423" 7054 "s59E13H2" 0.2877121 "50S ribosomal protein L20"  
"JS1\_F07\_00423" 7054 "s59E25H2" 0 "50S ribosomal protein L20"  
"JS1\_F07\_00423" 7054 "s59E5H2" 0.2940363 "50S ribosomal protein L20"  
"JS1\_F07\_00423" 7054 "s63E6H2" 0.3830293 "50S ribosomal protein L20"  
"JS1\_F07\_00424" 7055 "s59E13H2" 0.02950857 "50S ribosomal protein L35"  
"JS1\_F07\_00424" 7055 "s59E25H2" 0 "50S ribosomal protein L35"  
"JS1\_F07\_00424" 7055 "s59E5H2" 0.3054028 "50S ribosomal protein L35"  
"JS1\_F07\_00424" 7055 "s63E6H2" 0.3106578 "50S ribosomal protein L35"  
"JS1\_F07\_00425" 7056 "s59E13H2" 0.09884821 "Translation initiation factor IF-3"  
"JS1\_F07\_00425" 7056 "s59E25H2" 0 "Translation initiation factor IF-3"  
"JS1\_F07\_00425" 7056 "s59E5H2" 0.2640852 "Translation initiation factor IF-3"  
"JS1\_F07\_00425" 7056 "s63E6H2" 0.2920973 "Translation initiation factor IF-3"  
"JS1\_F07\_00426" 7057 "s59E13H2" 0.09384236 "Threonine--tRNA ligase 2"  
"JS1\_F07\_00426" 7057 "s59E25H2" 0 "Threonine--tRNA ligase 2"  
"JS1\_F07\_00426" 7057 "s59E5H2" 0.1606266 "Threonine--tRNA ligase 2"  
"JS1\_F07\_00426" 7057 "s63E6H2" 0.2556033 "Threonine--tRNA ligase 2"  
"JS1\_F07\_00434" 7065 "s59E13H2" 0.0422315 "Single-stranded DNA-binding protein ssb"  
"JS1\_F07\_00434" 7065 "s59E25H2" 0 "Single-stranded DNA-binding protein ssb"  
"JS1\_F07\_00434" 7065 "s59E5H2" 0.3120849 "Single-stranded DNA-binding protein ssb"  
"JS1\_F07\_00434" 7065 "s63E6H2" 0.2789401 "Single-stranded DNA-binding protein ssb"  
"JS1\_F07\_00435" 7066 "s59E13H2" 0.06625457 "Leucine--tRNA ligase"  
"JS1\_F07\_00435" 7066 "s59E25H2" 0.1849057 "Leucine--tRNA ligase"  
"JS1\_F07\_00435" 7066 "s59E5H2" 0.9581032 "Leucine--tRNA ligase"  
"JS1\_F07\_00435" 7066 "s63E6H2" 0.5850341 "Leucine--tRNA ligase"  
"JS1\_F07\_00438" 7069 "s59E13H2" 0.1119211 "hypothetical protein"  
"JS1\_F07\_00438" 7069 "s59E25H2" 0 "hypothetical protein"  
"JS1\_F07\_00438" 7069 "s59E5H2" 0.7597899 "hypothetical protein"  
"JS1\_F07\_00438" 7069 "s63E6H2" 1.169788 "hypothetical protein"  
"JS1\_F07\_00439" 7070 "s59E13H2" 0.1471887 "Elongation factor G"  
"JS1\_F07\_00439" 7070 "s59E25H2" 0.2363291 "Elongation factor G"  
"JS1\_F07\_00439" 7070 "s59E5H2" 1.106692 "Elongation factor G"  
"JS1\_F07\_00439" 7070 "s63E6H2" 1.208142 "Elongation factor G"  
"JS1\_F07\_00440" 7071 "s59E13H2" 0.1666203 "Lipoyl synthase"  
"JS1\_F07\_00440" 7071 "s59E25H2" 0 "Lipoyl synthase"  
"JS1\_F07\_00440" 7071 "s59E5H2" 1.076166 "Lipoyl synthase"  
"JS1\_F07\_00440" 7071 "s63E6H2" 0.9813901 "Lipoyl synthase"  
"JS1\_F07\_00441" 7072 "s59E13H2" 0.5120593 "endonuclease IV"  
"JS1\_F07\_00441" 7072 "s59E25H2" 0 "endonuclease IV"  
"JS1\_F07\_00441" 7072 "s59E5H2" 1.522924 "endonuclease IV"  
"JS1\_F07\_00441" 7072 "s63E6H2" 1.124654 "endonuclease IV"  
"JS1\_F07\_00442" 7073 "s59E13H2" 0.6245838 "Thioredoxin reductase"  
"JS1\_F07\_00442" 7073 "s59E25H2" 0 "Thioredoxin reductase"  
"JS1\_F07\_00442" 7073 "s59E5H2" 1.097325 "Thioredoxin reductase"  
"JS1\_F07\_00442" 7073 "s63E6H2" 0.5495347 "Thioredoxin reductase"  
"JS1\_F07\_00443" 7074 "s59E13H2" 0.261076 "Sporulation-specific N-acetylmuramoyl-L-alanine amidase"  
"JS1\_F07\_00443" 7074 "s59E25H2" 0 "Sporulation-specific N-acetylmuramoyl-L-alanine amidase"

"JS1\_F07\_00443" 7074 "s59E5H2" 0.8034546 "Sporulation-specific N-acetylmuramoyl-L-alanine amidase"  
"JS1\_F07\_00443" 7074 "s63E6H2" 0.4540129 "Sporulation-specific N-acetylmuramoyl-L-alanine amidase"  
"JS1\_F07\_00444" 7075 "s59E13H2" 0.3926191 "Redox-sensing transcriptional repressor Rex"  
"JS1\_F07\_00444" 7075 "s59E25H2" 0 "Redox-sensing transcriptional repressor Rex"  
"JS1\_F07\_00444" 7075 "s59E5H2" 1.096127 "Redox-sensing transcriptional repressor Rex"  
"JS1\_F07\_00444" 7075 "s63E6H2" 0.6250867 "Redox-sensing transcriptional repressor Rex"  
"JS1\_F07\_00445" 7076 "s59E13H2" 0.4526684 "DRTGG domain protein"  
"JS1\_F07\_00445" 7076 "s59E25H2" 0 "DRTGG domain protein"  
"JS1\_F07\_00445" 7076 "s59E5H2" 0.03514851 "DRTGG domain protein"  
"JS1\_F07\_00445" 7076 "s63E6H2" 0.1401527 "DRTGG domain protein"  
"JS1\_F07\_00446" 7077 "s59E13H2" 0.3727569 "Serine/threonine-protein kinase RsbT"  
"JS1\_F07\_00446" 7077 "s59E25H2" 0 "Serine/threonine-protein kinase RsbT"  
"JS1\_F07\_00446" 7077 "s59E5H2" 0.01938248 "Serine/threonine-protein kinase RsbT"  
"JS1\_F07\_00446" 7077 "s63E6H2" 0.1939875 "Serine/threonine-protein kinase RsbT"  
"JS1\_F07\_00447" 7078 "s59E13H2" 0.4215896 "DRTGG domain protein"  
"JS1\_F07\_00447" 7078 "s59E25H2" 0 "DRTGG domain protein"  
"JS1\_F07\_00447" 7078 "s59E5H2" 0.1069974 "DRTGG domain protein"  
"JS1\_F07\_00447" 7078 "s63E6H2" 0.2781143 "DRTGG domain protein"  
"JS1\_F07\_00448" 7079 "s59E13H2" 0.2467399 "PHP domain protein"  
"JS1\_F07\_00448" 7079 "s59E25H2" 0 "PHP domain protein"  
"JS1\_F07\_00448" 7079 "s59E5H2" 0.210019 "PHP domain protein"  
"JS1\_F07\_00448" 7079 "s63E6H2" 0.2849656 "PHP domain protein"  
"JS1\_F07\_00449" 7080 "s59E13H2" 0.06416691 "osmolarity sensor protein"  
"JS1\_F07\_00449" 7080 "s59E25H2" 0 "osmolarity sensor protein"  
"JS1\_F07\_00449" 7080 "s59E5H2" 0.009113623 "osmolarity sensor protein"  
"JS1\_F07\_00449" 7080 "s63E6H2" 0.3940694 "osmolarity sensor protein"  
"JS1\_F07\_00450" 7081 "s59E13H2" 0.05606284 "NADP-reducing hydrogenase subunit HndB"  
"JS1\_F07\_00450" 7081 "s59E25H2" 0 "NADP-reducing hydrogenase subunit HndB"  
"JS1\_F07\_00450" 7081 "s59E5H2" 0.04318699 "NADP-reducing hydrogenase subunit HndB"  
"JS1\_F07\_00450" 7081 "s63E6H2" 0.06901489 "NADP-reducing hydrogenase subunit HndB"  
"JS1\_F07\_00451" 7082 "s59E13H2" 0.06047973 "NADP-reducing hydrogenase subunit HndA"  
"JS1\_F07\_00451" 7082 "s59E25H2" 0 "NADP-reducing hydrogenase subunit HndA"  
"JS1\_F07\_00451" 7082 "s59E5H2" 0.09812711 "NADP-reducing hydrogenase subunit HndA"  
"JS1\_F07\_00451" 7082 "s63E6H2" 0.0809707 "NADP-reducing hydrogenase subunit HndA"  
"JS1\_F07\_00452" 7083 "s59E13H2" 0.06050728 "NADP-reducing hydrogenase subunit HndC"  
"JS1\_F07\_00452" 7083 "s59E25H2" 0 "NADP-reducing hydrogenase subunit HndC"  
"JS1\_F07\_00452" 7083 "s59E5H2" 0.0699058 "NADP-reducing hydrogenase subunit HndC"  
"JS1\_F07\_00452" 7083 "s63E6H2" 0.1792853 "NADP-reducing hydrogenase subunit HndC"  
"JS1\_F07\_00453" 7084 "s59E13H2" 0.5968666 "NADH-quinone oxidoreductase subunit E"  
"JS1\_F07\_00453" 7084 "s59E25H2" 0 "NADH-quinone oxidoreductase subunit E"  
"JS1\_F07\_00453" 7084 "s59E5H2" 0.0672219 "NADH-quinone oxidoreductase subunit E"  
"JS1\_F07\_00453" 7084 "s63E6H2" 0.2182091 "NADH-quinone oxidoreductase subunit E"  
"JS1\_F07\_00454" 7085 "s59E13H2" 0.6965717 "NADP-reducing hydrogenase subunit HndC"  
"JS1\_F07\_00454" 7085 "s59E25H2" 0 "NADP-reducing hydrogenase subunit HndC"  
"JS1\_F07\_00454" 7085 "s59E5H2" 0.3889488 "NADP-reducing hydrogenase subunit HndC"  
"JS1\_F07\_00454" 7085 "s63E6H2" 0.1845813 "NADP-reducing hydrogenase subunit HndC"  
"JS1\_F07\_00455" 7086 "s59E13H2" 0.9922189 "Formate dehydrogenase subunit alpha"

"JS1\_F07\_00455" 7086 "s59E25H2" 0 "Formate dehydrogenase subunit alpha"  
"JS1\_F07\_00455" 7086 "s59E5H2" 0.5756567 "Formate dehydrogenase subunit alpha"  
"JS1\_F07\_00455" 7086 "s63E6H2" 0.3664122 "Formate dehydrogenase subunit alpha"  
"JS1\_F07\_00456" 7087 "s59E13H2" 0.03067595 "Formate dehydrogenase subunit alpha"  
"JS1\_F07\_00456" 7087 "s59E25H2" 0 "Formate dehydrogenase subunit alpha"  
"JS1\_F07\_00456" 7087 "s59E5H2" 0.2347237 "Formate dehydrogenase subunit alpha"  
"JS1\_F07\_00456" 7087 "s63E6H2" 0.2079948 "Formate dehydrogenase subunit alpha"  
"JS1\_F07\_00457" 7088 "s59E13H2" 0.0622657 "putative formate transporter 1"  
"JS1\_F07\_00457" 7088 "s59E25H2" 0 "putative formate transporter 1"  
"JS1\_F07\_00457" 7088 "s59E5H2" 0.09394634 "putative formate transporter 1"  
"JS1\_F07\_00457" 7088 "s63E6H2" 0.4003627 "putative formate transporter 1"  
"JS1\_F07\_00458" 7089 "s59E13H2" 0.7796489 "putative molybdenum cofactor guanylyltransferase"  
"JS1\_F07\_00458" 7089 "s59E25H2" 0 "putative molybdenum cofactor guanylyltransferase"  
"JS1\_F07\_00458" 7089 "s59E5H2" 0.2443018 "putative molybdenum cofactor guanylyltransferase"  
"JS1\_F07\_00458" 7089 "s63E6H2" 0.4391255 "putative molybdenum cofactor guanylyltransferase"  
"JS1\_F07\_00459" 7090 "s59E13H2" 0.9551277 "formate dehydrogenase accessory protein"  
"JS1\_F07\_00459" 7090 "s59E25H2" 0 "formate dehydrogenase accessory protein"  
"JS1\_F07\_00459" 7090 "s59E5H2" 0.405709 "formate dehydrogenase accessory protein"  
"JS1\_F07\_00459" 7090 "s63E6H2" 0.8031131 "formate dehydrogenase accessory protein"  
"JS1\_F07\_00460" 7091 "s59E13H2" 1.172618 "Holliday junction resolvase-like protein"  
"JS1\_F07\_00460" 7091 "s59E25H2" 0 "Holliday junction resolvase-like protein"  
"JS1\_F07\_00460" 7091 "s59E5H2" 0.1416061 "Holliday junction resolvase-like protein"  
"JS1\_F07\_00460" 7091 "s63E6H2" 0.8264875 "Holliday junction resolvase-like protein"  
"JS1\_F07\_00461" 7092 "s59E13H2" 1.018921 "Hydrogenase isoenzymes nickel incorporation protein HypB"  
"JS1\_F07\_00461" 7092 "s59E25H2" 0 "Hydrogenase isoenzymes nickel incorporation protein HypB"  
"JS1\_F07\_00461" 7092 "s59E5H2" 0.3802211 "Hydrogenase isoenzymes nickel incorporation protein HypB"  
"JS1\_F07\_00461" 7092 "s63E6H2" 1.224101 "Hydrogenase isoenzymes nickel incorporation protein HypB"  
"JS1\_F07\_00462" 7093 "s59E13H2" 1.009249 "Carbamoyltransferase HypF"  
"JS1\_F07\_00462" 7093 "s59E25H2" 0 "Carbamoyltransferase HypF"  
"JS1\_F07\_00462" 7093 "s59E5H2" 0.3886895 "Carbamoyltransferase HypF"  
"JS1\_F07\_00462" 7093 "s63E6H2" 1.024088 "Carbamoyltransferase HypF"  
"JS1\_F07\_00463" 7094 "s59E13H2" 0.9261887 "Hydrogenase isoenzymes formation protein HypC"  
"JS1\_F07\_00463" 7094 "s59E25H2" 0 "Hydrogenase isoenzymes formation protein HypC"  
"JS1\_F07\_00463" 7094 "s59E5H2" 0.4301363 "Hydrogenase isoenzymes formation protein HypC"  
"JS1\_F07\_00463" 7094 "s63E6H2" 0.8278247 "Hydrogenase isoenzymes formation protein HypC"  
"JS1\_F07\_00464" 7095 "s59E13H2" 1.466726 "Hydrogenase expression/formation protein HypD"  
"JS1\_F07\_00464" 7095 "s59E25H2" 0 "Hydrogenase expression/formation protein HypD"  
"JS1\_F07\_00464" 7095 "s59E5H2" 0.8163669 "Hydrogenase expression/formation protein HypD"  
"JS1\_F07\_00464" 7095 "s63E6H2" 1.061765 "Hydrogenase expression/formation protein HypD"  
"JS1\_F07\_00465" 7096 "s59E13H2" 1.376836 "Hydrogenase expression/formation protein HypE"  
"JS1\_F07\_00465" 7096 "s59E25H2" 0 "Hydrogenase expression/formation protein HypE"  
"JS1\_F07\_00465" 7096 "s59E5H2" 0.09744678 "Hydrogenase expression/formation protein HypE"  
"JS1\_F07\_00465" 7096 "s63E6H2" 0.6115188 "Hydrogenase expression/formation protein HypE"  
"JS1\_F07\_00466" 7097 "s59E13H2" 1.534655 "hypothetical protein"  
"JS1\_F07\_00466" 7097 "s59E25H2" 0 "hypothetical protein"  
"JS1\_F07\_00466" 7097 "s59E5H2" 6.850769 "hypothetical protein"  
"JS1\_F07\_00466" 7097 "s63E6H2" 0.3023318 "hypothetical protein"

"JS1\_F07\_00467" 7098 "s59E13H2" 1.812769 "Pyruvate formate-lyase 1-activating enzyme"  
"JS1\_F07\_00467" 7098 "s59E25H2" 0 "Pyruvate formate-lyase 1-activating enzyme"  
"JS1\_F07\_00467" 7098 "s59E5H2" 0.4762951 "Pyruvate formate-lyase 1-activating enzyme"  
"JS1\_F07\_00467" 7098 "s63E6H2" 0.7538374 "Pyruvate formate-lyase 1-activating enzyme"  
"JS1\_F07\_00468" 7099 "s59E13H2" 1.541879 "Na(+)/H(+) antiporter subunit E1"  
"JS1\_F07\_00468" 7099 "s59E25H2" 0 "Na(+)/H(+) antiporter subunit E1"  
"JS1\_F07\_00468" 7099 "s59E5H2" 1.140518 "Na(+)/H(+) antiporter subunit E1"  
"JS1\_F07\_00468" 7099 "s63E6H2" 0.9356735 "Na(+)/H(+) antiporter subunit E1"  
"JS1\_F07\_00469" 7100 "s59E13H2" 1.422197 "putative monovalent cation/H+ antiporter subunit F"  
"JS1\_F07\_00469" 7100 "s59E25H2" 0 "putative monovalent cation/H+ antiporter subunit F"  
"JS1\_F07\_00469" 7100 "s59E5H2" 1.512184 "putative monovalent cation/H+ antiporter subunit F"  
"JS1\_F07\_00469" 7100 "s63E6H2" 1.129883 "putative monovalent cation/H+ antiporter subunit F"  
"JS1\_F07\_00470" 7101 "s59E13H2" 0.5253518 "Na(+)/H(+) antiporter subunit G"  
"JS1\_F07\_00470" 7101 "s59E25H2" 0 "Na(+)/H(+) antiporter subunit G"  
"JS1\_F07\_00470" 7101 "s59E5H2" 1.715901 "Na(+)/H(+) antiporter subunit G"  
"JS1\_F07\_00470" 7101 "s63E6H2" 0.7729837 "Na(+)/H(+) antiporter subunit G"  
"JS1\_F07\_00471" 7102 "s59E13H2" 1.137212 "Glutamine-binding periplasmic protein precursor"  
"JS1\_F07\_00471" 7102 "s59E25H2" 0 "Glutamine-binding periplasmic protein precursor"  
"JS1\_F07\_00471" 7102 "s59E5H2" 1.579873 "Glutamine-binding periplasmic protein precursor"  
"JS1\_F07\_00471" 7102 "s63E6H2" 0.870759 "Glutamine-binding periplasmic protein precursor"  
"JS1\_F07\_00472" 7103 "s59E13H2" 0.6649031 "putative monovalent cation/H+ antiporter subunit B"  
"JS1\_F07\_00472" 7103 "s59E25H2" 0 "putative monovalent cation/H+ antiporter subunit B"  
"JS1\_F07\_00472" 7103 "s59E5H2" 2.130942 "putative monovalent cation/H+ antiporter subunit B"  
"JS1\_F07\_00472" 7103 "s63E6H2" 1.026071 "putative monovalent cation/H+ antiporter subunit B"  
"JS1\_F07\_00473" 7104 "s59E13H2" 0.2317388 "Na(+)/H(+) antiporter subunit B"  
"JS1\_F07\_00473" 7104 "s59E25H2" 0 "Na(+)/H(+) antiporter subunit B"  
"JS1\_F07\_00473" 7104 "s59E5H2" 2.537593 "Na(+)/H(+) antiporter subunit B"  
"JS1\_F07\_00473" 7104 "s63E6H2" 1.108757 "Na(+)/H(+) antiporter subunit B"  
"JS1\_F07\_00474" 7105 "s59E13H2" 0.09523965 "Na(+)/H(+) antiporter subunit C"  
"JS1\_F07\_00474" 7105 "s59E25H2" 0 "Na(+)/H(+) antiporter subunit C"  
"JS1\_F07\_00474" 7105 "s59E5H2" 5.32765 "Na(+)/H(+) antiporter subunit C"  
"JS1\_F07\_00474" 7105 "s63E6H2" 0.9651396 "Na(+)/H(+) antiporter subunit C"  
"JS1\_F07\_00475" 7106 "s59E13H2" 0.1350521 "Na(+)/H(+) antiporter subunit D"  
"JS1\_F07\_00475" 7106 "s59E25H2" 0 "Na(+)/H(+) antiporter subunit D"  
"JS1\_F07\_00475" 7106 "s59E5H2" 5.274939 "Na(+)/H(+) antiporter subunit D"  
"JS1\_F07\_00475" 7106 "s63E6H2" 0.7378051 "Na(+)/H(+) antiporter subunit D"  
"JS1\_F07\_00476" 7107 "s59E13H2" 0.740047 "Hydrogenase-4 component B"  
"JS1\_F07\_00476" 7107 "s59E25H2" 0 "Hydrogenase-4 component B"  
"JS1\_F07\_00476" 7107 "s59E5H2" 2.080823 "Hydrogenase-4 component B"  
"JS1\_F07\_00476" 7107 "s63E6H2" 0.5723134 "Hydrogenase-4 component B"  
"JS1\_F07\_00477" 7108 "s59E13H2" 0.3404611 "Arsenical pump membrane protein"  
"JS1\_F07\_00477" 7108 "s59E25H2" 0 "Arsenical pump membrane protein"  
"JS1\_F07\_00477" 7108 "s59E5H2" 0.6693148 "Arsenical pump membrane protein"  
"JS1\_F07\_00477" 7108 "s63E6H2" 0.1533079 "Arsenical pump membrane protein"  
"JS1\_F07\_00478" 7109 "s59E13H2" 0.4427058 "Rod shape-determining protein MreB"  
"JS1\_F07\_00478" 7109 "s59E25H2" 0 "Rod shape-determining protein MreB"  
"JS1\_F07\_00478" 7109 "s59E5H2" 1.188424 "Rod shape-determining protein MreB"

"JS1\_F07\_00478" 7109 "s63E6H2" 1.113228 "Rod shape-determining protein MreB"  
"JS1\_F07\_00479" 7110 "s59E13H2" 0.04817958 "Cell shape-determining protein MreC precursor"  
"JS1\_F07\_00479" 7110 "s59E25H2" 0 "Cell shape-determining protein MreC precursor"  
"JS1\_F07\_00479" 7110 "s59E5H2" 1.013738 "Cell shape-determining protein MreC precursor"  
"JS1\_F07\_00479" 7110 "s63E6H2" 1.247947 "Cell shape-determining protein MreC precursor"  
"JS1\_F07\_00480" 7111 "s59E13H2" 0.08931458 "Protease 3 precursor"  
"JS1\_F07\_00480" 7111 "s59E25H2" 0 "Protease 3 precursor"  
"JS1\_F07\_00480" 7111 "s59E5H2" 1.254926 "Protease 3 precursor"  
"JS1\_F07\_00480" 7111 "s63E6H2" 1.464011 "Protease 3 precursor"  
"JS1\_F07\_00481" 7112 "s59E13H2" 0.06933511 "hypothetical protein"  
"JS1\_F07\_00481" 7112 "s59E25H2" 0 "hypothetical protein"  
"JS1\_F07\_00481" 7112 "s59E5H2" 0.3228622 "hypothetical protein"  
"JS1\_F07\_00481" 7112 "s63E6H2" 0.2281824 "hypothetical protein"  
"JS1\_F07\_00482" 7113 "s59E13H2" 0.130083 "30S ribosomal protein S6"  
"JS1\_F07\_00482" 7113 "s59E25H2" 0 "30S ribosomal protein S6"  
"JS1\_F07\_00482" 7113 "s59E5H2" 0.3035543 "30S ribosomal protein S6"  
"JS1\_F07\_00482" 7113 "s63E6H2" 0.725345 "30S ribosomal protein S6"  
"JS1\_F07\_00483" 7114 "s59E13H2" 0.06417575 "30S ribosomal protein S18"  
"JS1\_F07\_00483" 7114 "s59E25H2" 0 "30S ribosomal protein S18"  
"JS1\_F07\_00483" 7114 "s59E5H2" 0.6209648 "30S ribosomal protein S18"  
"JS1\_F07\_00483" 7114 "s63E6H2" 0.5492144 "30S ribosomal protein S18"  
"JS1\_F07\_00484" 7115 "s59E13H2" 0.2195375 "ABC-2 family transporter protein"  
"JS1\_F07\_00484" 7115 "s59E25H2" 0 "ABC-2 family transporter protein"  
"JS1\_F07\_00484" 7115 "s59E5H2" 0.04382716 "ABC-2 family transporter protein"  
"JS1\_F07\_00484" 7115 "s63E6H2" 2.109999 "ABC-2 family transporter protein"  
"JS1\_F07\_00485" 7116 "s59E13H2" 4.161839 "putative ABC transporter ATP-binding protein YbhF"  
"JS1\_F07\_00485" 7116 "s59E25H2" 0 "putative ABC transporter ATP-binding protein YbhF"  
"JS1\_F07\_00485" 7116 "s59E5H2" 0.01055977 "putative ABC transporter ATP-binding protein YbhF"  
"JS1\_F07\_00485" 7116 "s63E6H2" 1.526699 "putative ABC transporter ATP-binding protein YbhF"  
"JS1\_F07\_00486" 7117 "s59E13H2" 3.361614 "hypothetical protein"  
"JS1\_F07\_00486" 7117 "s59E25H2" 0 "hypothetical protein"  
"JS1\_F07\_00486" 7117 "s59E5H2" 0.03215005 "hypothetical protein"  
"JS1\_F07\_00486" 7117 "s63E6H2" 1.12801 "hypothetical protein"  
"JS1\_F07\_00487" 7118 "s59E13H2" 3.303033 "Phosphinothricin N-acetyltransferase"  
"JS1\_F07\_00487" 7118 "s59E25H2" 0 "Phosphinothricin N-acetyltransferase"  
"JS1\_F07\_00487" 7118 "s59E5H2" 0.008372726 "Phosphinothricin N-acetyltransferase"  
"JS1\_F07\_00487" 7118 "s63E6H2" 1.196081 "Phosphinothricin N-acetyltransferase"  
"JS1\_F07\_00488" 7119 "s59E13H2" 0.03281504 "flavodoxin"  
"JS1\_F07\_00488" 7119 "s59E25H2" 0 "flavodoxin"  
"JS1\_F07\_00488" 7119 "s59E5H2" 0.2064095 "flavodoxin"  
"JS1\_F07\_00488" 7119 "s63E6H2" 0.3265909 "flavodoxin"  
"JS1\_F07\_00490" 7121 "s59E13H2" 0.04401966 "Polyketide cyclase / dehydrase and lipid transport"  
"JS1\_F07\_00490" 7121 "s59E25H2" 0 "Polyketide cyclase / dehydrase and lipid transport"  
"JS1\_F07\_00490" 7121 "s59E5H2" 0.02441207 "Polyketide cyclase / dehydrase and lipid transport"  
"JS1\_F07\_00490" 7121 "s63E6H2" 0.03670247 "Polyketide cyclase / dehydrase and lipid transport"  
"JS1\_F07\_00491" 7122 "s59E13H2" 0.0649902 "hypothetical protein"  
"JS1\_F07\_00491" 7122 "s59E25H2" 0 "hypothetical protein"

"JS1\_F07\_00491" 7122 "s59E5H2" 0.03691287 "hypothetical protein"  
"JS1\_F07\_00491" 7122 "s63E6H2" 0.0167726 "hypothetical protein"  
"JS1\_F07\_00492" 7123 "s59E13H2" 0.08852685 "Adenosine monophosphate-protein transferase SoFic"  
"JS1\_F07\_00492" 7123 "s59E25H2" 0 "Adenosine monophosphate-protein transferase SoFic"  
"JS1\_F07\_00492" 7123 "s59E5H2" 1.224051 "Adenosine monophosphate-protein transferase SoFic"  
"JS1\_F07\_00492" 7123 "s63E6H2" 0.369109 "Adenosine monophosphate-protein transferase SoFic"  
"JS1\_F07\_00493" 7124 "s59E13H2" 2.714449 "Lactoylglutathione lyase"  
"JS1\_F07\_00493" 7124 "s59E25H2" 0 "Lactoylglutathione lyase"  
"JS1\_F07\_00493" 7124 "s59E5H2" 1.161708 "Lactoylglutathione lyase"  
"JS1\_F07\_00493" 7124 "s63E6H2" 1.05391 "Lactoylglutathione lyase"  
"JS1\_F07\_00497" 7128 "s59E13H2" 0.074354 "cell division protein MraZ"  
"JS1\_F07\_00497" 7128 "s59E25H2" 0 "cell division protein MraZ"  
"JS1\_F07\_00497" 7128 "s59E5H2" 0.9471104 "cell division protein MraZ"  
"JS1\_F07\_00497" 7128 "s63E6H2" 0.7094615 "cell division protein MraZ"  
"JS1\_F07\_00498" 7129 "s59E13H2" 0.05638786 "Ribosomal RNA small subunit methyltransferase H"  
"JS1\_F07\_00498" 7129 "s59E25H2" 0 "Ribosomal RNA small subunit methyltransferase H"  
"JS1\_F07\_00498" 7129 "s59E5H2" 0.6359121 "Ribosomal RNA small subunit methyltransferase H"  
"JS1\_F07\_00498" 7129 "s63E6H2" 0.9858451 "Ribosomal RNA small subunit methyltransferase H"  
"JS1\_F07\_00499" 7130 "s59E13H2" 0.09280432 "Cell division protein FtsL"  
"JS1\_F07\_00499" 7130 "s59E25H2" 0 "Cell division protein FtsL"  
"JS1\_F07\_00499" 7130 "s59E5H2" 0.3886404 "Cell division protein FtsL"  
"JS1\_F07\_00499" 7130 "s63E6H2" 0.319721 "Cell division protein FtsL"  
"JS1\_F07\_00500" 7131 "s59E13H2" 0.06102228 "Acetolactate synthase isozyme 2 large subunit"  
"JS1\_F07\_00500" 7131 "s59E25H2" 0 "Acetolactate synthase isozyme 2 large subunit"  
"JS1\_F07\_00500" 7131 "s59E5H2" 1.120647 "Acetolactate synthase isozyme 2 large subunit"  
"JS1\_F07\_00500" 7131 "s63E6H2" 0.5439638 "Acetolactate synthase isozyme 2 large subunit"  
"JS1\_F07\_00501" 7132 "s59E13H2" 0.009369034 "Acetolactate synthase small subunit"  
"JS1\_F07\_00501" 7132 "s59E25H2" 0 "Acetolactate synthase small subunit"  
"JS1\_F07\_00501" 7132 "s59E5H2" 0.7533873 "Acetolactate synthase small subunit"  
"JS1\_F07\_00501" 7132 "s63E6H2" 0.4332531 "Acetolactate synthase small subunit"  
"JS1\_F07\_00502" 7133 "s59E13H2" 0.06581276 "Ketol-acid reductoisomerase"  
"JS1\_F07\_00502" 7133 "s59E25H2" 0 "Ketol-acid reductoisomerase"  
"JS1\_F07\_00502" 7133 "s59E5H2" 0.1073946 "Ketol-acid reductoisomerase"  
"JS1\_F07\_00502" 7133 "s63E6H2" 0.1015901 "Ketol-acid reductoisomerase"  
"JS1\_F07\_00503" 7134 "s59E13H2" 0.01884441 "P-protein"  
"JS1\_F07\_00503" 7134 "s59E25H2" 0 "P-protein"  
"JS1\_F07\_00503" 7134 "s59E5H2" 1.84867 "P-protein"  
"JS1\_F07\_00503" 7134 "s63E6H2" 0.4892127 "P-protein"  
"JS1\_F07\_00504" 7135 "s59E13H2" 0.1491573 "2-isopropylmalate synthase"  
"JS1\_F07\_00504" 7135 "s59E25H2" 0 "2-isopropylmalate synthase"  
"JS1\_F07\_00504" 7135 "s59E5H2" 1.066062 "2-isopropylmalate synthase"  
"JS1\_F07\_00504" 7135 "s63E6H2" 0.8891942 "2-isopropylmalate synthase"  
"JS1\_F07\_00505" 7136 "s59E13H2" 0.1337464 "(R)-citramalate synthase CimA"  
"JS1\_F07\_00505" 7136 "s59E25H2" 0 "(R)-citramalate synthase CimA"  
"JS1\_F07\_00505" 7136 "s59E5H2" 1.584278 "(R)-citramalate synthase CimA"  
"JS1\_F07\_00505" 7136 "s63E6H2" 0.6029705 "(R)-citramalate synthase CimA"  
"JS1\_F07\_00506" 7137 "s59E13H2" 0.03287132 "Acetolactate synthase large subunit llvB1"

"JS1\_F07\_00506" 7137 "s59E25H2" 0 "Acetolactate synthase large subunit llvB1"  
"JS1\_F07\_00506" 7137 "s59E5H2" 0.3956932 "Acetolactate synthase large subunit llvB1"  
"JS1\_F07\_00506" 7137 "s63E6H2" 0.3777172 "Acetolactate synthase large subunit llvB1"  
"JS1\_F07\_00509" 7140 "s59E13H2" 0.02763404 "Dihydroxy-acid dehydratase"  
"JS1\_F07\_00509" 7140 "s59E25H2" 0 "Dihydroxy-acid dehydratase"  
"JS1\_F07\_00509" 7140 "s59E5H2" 0.5041634 "Dihydroxy-acid dehydratase"  
"JS1\_F07\_00509" 7140 "s63E6H2" 0.05898959 "Dihydroxy-acid dehydratase"  
"JS1\_F07\_00510" 7141 "s59E13H2" 0.04366566 "Bifunctional homocysteine S-methyltransferase/5,10-methylenetetrahydrofolate reductase"  
"JS1\_F07\_00510" 7141 "s59E25H2" 0 "Bifunctional homocysteine S-methyltransferase/5,10-methylenetetrahydrofolate reductase"  
"JS1\_F07\_00510" 7141 "s59E5H2" 0.3405004 "Bifunctional homocysteine S-methyltransferase/5,10-methylenetetrahydrofolate reductase"  
"JS1\_F07\_00510" 7141 "s63E6H2" 0.03911685 "Bifunctional homocysteine S-methyltransferase/5,10-methylenetetrahydrofolate reductase"  
"JS1\_F07\_00511" 7142 "s59E13H2" 0.04101286 "hypothetical protein"  
"JS1\_F07\_00511" 7142 "s59E25H2" 0 "hypothetical protein"  
"JS1\_F07\_00511" 7142 "s59E5H2" 0.1232222 "hypothetical protein"  
"JS1\_F07\_00511" 7142 "s63E6H2" 0.2334203 "hypothetical protein"  
"JS1\_F07\_00512" 7143 "s59E13H2" 0.02796776 "D-3-phosphoglycerate dehydrogenase"  
"JS1\_F07\_00512" 7143 "s59E25H2" 0 "D-3-phosphoglycerate dehydrogenase"  
"JS1\_F07\_00512" 7143 "s59E5H2" 0.8368571 "D-3-phosphoglycerate dehydrogenase"  
"JS1\_F07\_00512" 7143 "s63E6H2" 0.1447192 "D-3-phosphoglycerate dehydrogenase"  
"JS1\_F07\_00513" 7144 "s59E13H2" 0.155157 "Soluble hydrogenase 42 kDa subunit"  
"JS1\_F07\_00513" 7144 "s59E25H2" 0 "Soluble hydrogenase 42 kDa subunit"  
"JS1\_F07\_00513" 7144 "s59E5H2" 0.1914759 "Soluble hydrogenase 42 kDa subunit"  
"JS1\_F07\_00513" 7144 "s63E6H2" 0.01190654 "Soluble hydrogenase 42 kDa subunit"  
"JS1\_F07\_00514" 7145 "s59E13H2" 0.1307491 "UDP-N-acetylmuramoyl-L-alanyl-D-glutamate--L-lysine ligase"  
"JS1\_F07\_00514" 7145 "s59E25H2" 0 "UDP-N-acetylmuramoyl-L-alanyl-D-glutamate--L-lysine ligase"  
"JS1\_F07\_00514" 7145 "s59E5H2" 0.7256209 "UDP-N-acetylmuramoyl-L-alanyl-D-glutamate--L-lysine ligase"  
"JS1\_F07\_00514" 7145 "s63E6H2" 0.4760707 "UDP-N-acetylmuramoyl-L-alanyl-D-glutamate--L-lysine ligase"  
"JS1\_F07\_00515" 7146 "s59E13H2" 0.4432856 "UDP-N-acetylmuramoyl-tripeptide--D-alanyl-D-alanine ligase"  
"JS1\_F07\_00515" 7146 "s59E25H2" 0 "UDP-N-acetylmuramoyl-tripeptide--D-alanyl-D-alanine ligase"  
"JS1\_F07\_00515" 7146 "s59E5H2" 1.298544 "UDP-N-acetylmuramoyl-tripeptide--D-alanyl-D-alanine ligase"  
"JS1\_F07\_00515" 7146 "s63E6H2" 0.8717125 "UDP-N-acetylmuramoyl-tripeptide--D-alanyl-D-alanine ligase"  
"JS1\_F07\_00516" 7147 "s59E13H2" 0.8772604 "Phospho-N-acetylmuramoyl-pentapeptide-transferase"  
"JS1\_F07\_00516" 7147 "s59E25H2" 0 "Phospho-N-acetylmuramoyl-pentapeptide-transferase"  
"JS1\_F07\_00516" 7147 "s59E5H2" 1.10816 "Phospho-N-acetylmuramoyl-pentapeptide-transferase"  
"JS1\_F07\_00516" 7147 "s63E6H2" 1.745952 "Phospho-N-acetylmuramoyl-pentapeptide-transferase"  
"JS1\_F07\_00517" 7148 "s59E13H2" 0.757075 "Lipid II flippase FtsW"  
"JS1\_F07\_00517" 7148 "s59E25H2" 0 "Lipid II flippase FtsW"  
"JS1\_F07\_00517" 7148 "s59E5H2" 1.293211 "Lipid II flippase FtsW"  
"JS1\_F07\_00517" 7148 "s63E6H2" 1.343944 "Lipid II flippase FtsW"  
"JS1\_F07\_00518" 7149 "s59E13H2" 0.8121347 "UDP-N-acetylglucosamine--N-acetylmuramyl-(pentapeptide) pyrophosphoryl-undecaprenol N-acetylglucosamine transferase"  
"JS1\_F07\_00518" 7149 "s59E25H2" 0 "UDP-N-acetylglucosamine--N-acetylmuramyl-(pentapeptide) pyrophosphoryl-undecaprenol N-acetylglucosamine transferase"  
"JS1\_F07\_00518" 7149 "s59E5H2" 1.490349 "UDP-N-acetylglucosamine--N-acetylmuramyl-(pentapeptide) pyrophosphoryl-undecaprenol N-acetylglucosamine transferase"  
"JS1\_F07\_00518" 7149 "s63E6H2" 1.188677 "UDP-N-acetylglucosamine--N-acetylmuramyl-(pentapeptide) pyrophosphoryl-undecaprenol N-acetylglucosamine transferase"  
"JS1\_F07\_00519" 7150 "s59E13H2" 0.6992098 "UDP-N-acetylmuramate--L-alanine ligase"  
"JS1\_F07\_00519" 7150 "s59E25H2" 0 "UDP-N-acetylmuramate--L-alanine ligase"  
"JS1\_F07\_00519" 7150 "s59E5H2" 1.388187 "UDP-N-acetylmuramate--L-alanine ligase"  
"JS1\_F07\_00519" 7150 "s63E6H2" 1.079645 "UDP-N-acetylmuramate--L-alanine ligase"

"JS1\_F07\_00520" 7151 "s59E13H2" 0.654031 "UDP-N-acetylenolpyruvoylglucosamine reductase"  
"JS1\_F07\_00520" 7151 "s59E25H2" 0 "UDP-N-acetylenolpyruvoylglucosamine reductase"  
"JS1\_F07\_00520" 7151 "s59E5H2" 0.294398 "UDP-N-acetylenolpyruvoylglucosamine reductase"  
"JS1\_F07\_00520" 7151 "s63E6H2" 0.6566231 "UDP-N-acetylenolpyruvoylglucosamine reductase"  
"JS1\_F07\_00521" 7152 "s59E13H2" 1.89483 "Anaerobic regulatory protein"  
"JS1\_F07\_00521" 7152 "s59E25H2" 0 "Anaerobic regulatory protein"  
"JS1\_F07\_00521" 7152 "s59E5H2" 0.335718 "Anaerobic regulatory protein"  
"JS1\_F07\_00521" 7152 "s63E6H2" 0.1000731 "Anaerobic regulatory protein"  
"JS1\_F07\_00522" 7153 "s59E13H2" 3.184944 "ferredoxin"  
"JS1\_F07\_00522" 7153 "s59E25H2" 0 "ferredoxin"  
"JS1\_F07\_00522" 7153 "s59E5H2" 0.3476299 "ferredoxin"  
"JS1\_F07\_00522" 7153 "s63E6H2" 0.4544411 "ferredoxin"  
"JS1\_F07\_00523" 7154 "s59E13H2" 3.529967 "Hydroxylamine reductase"  
"JS1\_F07\_00523" 7154 "s59E25H2" 0 "Hydroxylamine reductase"  
"JS1\_F07\_00523" 7154 "s59E5H2" 0.5437979 "Hydroxylamine reductase"  
"JS1\_F07\_00523" 7154 "s63E6H2" 0.4251281 "Hydroxylamine reductase"  
"JS1\_F07\_00524" 7155 "s59E13H2" 0.09768103 "Nitronate monooxygenase"  
"JS1\_F07\_00524" 7155 "s59E25H2" 0 "Nitronate monooxygenase"  
"JS1\_F07\_00524" 7155 "s59E5H2" 0.4917731 "Nitronate monooxygenase"  
"JS1\_F07\_00524" 7155 "s63E6H2" 0.08370317 "Nitronate monooxygenase"  
"JS1\_F07\_00525" 7156 "s59E13H2" 0.6849028 "inosine 5-monophosphate dehydrogenase"  
"JS1\_F07\_00525" 7156 "s59E25H2" 0 "inosine 5-monophosphate dehydrogenase"  
"JS1\_F07\_00525" 7156 "s59E5H2" 0.5660194 "inosine 5-monophosphate dehydrogenase"  
"JS1\_F07\_00525" 7156 "s63E6H2" 0.06646031 "inosine 5-monophosphate dehydrogenase"  
"JS1\_F07\_00526" 7157 "s59E13H2" 1.32369 "Iron-sulfur flavoprotein"  
"JS1\_F07\_00526" 7157 "s59E25H2" 0 "Iron-sulfur flavoprotein"  
"JS1\_F07\_00526" 7157 "s59E5H2" 0.2657666 "Iron-sulfur flavoprotein"  
"JS1\_F07\_00526" 7157 "s63E6H2" 0.5796425 "Iron-sulfur flavoprotein"  
"JS1\_F07\_00527" 7158 "s59E13H2" 1.241194 "hypothetical protein"  
"JS1\_F07\_00527" 7158 "s59E25H2" 0 "hypothetical protein"  
"JS1\_F07\_00527" 7158 "s59E5H2" 1.0488 "hypothetical protein"  
"JS1\_F07\_00527" 7158 "s63E6H2" 0.06174766 "hypothetical protein"  
"JS1\_F07\_00528" 7159 "s59E13H2" 0.1936216 "hypothetical protein"  
"JS1\_F07\_00528" 7159 "s59E25H2" 0 "hypothetical protein"  
"JS1\_F07\_00528" 7159 "s59E5H2" 0.2320659 "hypothetical protein"  
"JS1\_F07\_00528" 7159 "s63E6H2" 2.034451 "hypothetical protein"  
"JS1\_F07\_00529" 7160 "s59E13H2" 0.1640538 "putative diguanylate cyclase YdaM"  
"JS1\_F07\_00529" 7160 "s59E25H2" 0 "putative diguanylate cyclase YdaM"  
"JS1\_F07\_00529" 7160 "s59E5H2" 0.1624595 "putative diguanylate cyclase YdaM"  
"JS1\_F07\_00529" 7160 "s63E6H2" 2.843979 "putative diguanylate cyclase YdaM"  
"JS1\_F07\_00530" 7161 "s59E13H2" 0.7190976 "Molybdopterin-guanine dinucleotide biosynthesis adapter protein"  
"JS1\_F07\_00530" 7161 "s59E25H2" 0 "Molybdopterin-guanine dinucleotide biosynthesis adapter protein"  
"JS1\_F07\_00530" 7161 "s59E5H2" 0.642843 "Molybdopterin-guanine dinucleotide biosynthesis adapter protein"  
"JS1\_F07\_00530" 7161 "s63E6H2" 0.4814647 "Molybdopterin-guanine dinucleotide biosynthesis adapter protein"  
"JS1\_F07\_00531" 7162 "s59E13H2" 1.498681 "hypothetical protein"  
"JS1\_F07\_00531" 7162 "s59E25H2" 0.281761 "hypothetical protein"  
"JS1\_F07\_00531" 7162 "s59E5H2" 0.3764385 "hypothetical protein"



"JS1\_F07\_00531" 7162 "s63E6H2" 1.346077 "hypothetical protein"  
"JS1\_F07\_00532" 7163 "s59E13H2" 2.848462 "hypothetical protein"  
"JS1\_F07\_00532" 7163 "s59E25H2" 0 "hypothetical protein"  
"JS1\_F07\_00532" 7163 "s59E5H2" 0.1121502 "hypothetical protein"  
"JS1\_F07\_00532" 7163 "s63E6H2" 1.641208 "hypothetical protein"  
"JS1\_F07\_00533" 7164 "s59E13H2" 4.659684 "Zinc ribbon domain protein"  
"JS1\_F07\_00533" 7164 "s59E25H2" 0.6542056 "Zinc ribbon domain protein"  
"JS1\_F07\_00533" 7164 "s59E5H2" 0.3104471 "Zinc ribbon domain protein"  
"JS1\_F07\_00533" 7164 "s63E6H2" 2.28284 "Zinc ribbon domain protein"  
"JS1\_F07\_00534" 7165 "s59E13H2" 5.959054 "NTE family protein RssA"  
"JS1\_F07\_00534" 7165 "s59E25H2" 0 "NTE family protein RssA"  
"JS1\_F07\_00534" 7165 "s59E5H2" 0.4393451 "NTE family protein RssA"  
"JS1\_F07\_00534" 7165 "s63E6H2" 2.535782 "NTE family protein RssA"  
"JS1\_F07\_00535" 7166 "s59E13H2" 4.477549 "Isochorismatase"  
"JS1\_F07\_00535" 7166 "s59E25H2" 0 "Isochorismatase"  
"JS1\_F07\_00535" 7166 "s59E5H2" 0.3248247 "Isochorismatase"  
"JS1\_F07\_00535" 7166 "s63E6H2" 2.26195 "Isochorismatase"  
"JS1\_F07\_00536" 7167 "s59E13H2" 16.25529 "Fluoroacetyl-CoA thioesterase"  
"JS1\_F07\_00536" 7167 "s59E25H2" 0 "Fluoroacetyl-CoA thioesterase"  
"JS1\_F07\_00536" 7167 "s59E5H2" 0.603333 "Fluoroacetyl-CoA thioesterase"  
"JS1\_F07\_00536" 7167 "s63E6H2" 1.704942 "Fluoroacetyl-CoA thioesterase"  
"JS1\_F07\_00537" 7168 "s59E13H2" 1.698046 "hypothetical protein"  
"JS1\_F07\_00537" 7168 "s59E25H2" 0 "hypothetical protein"  
"JS1\_F07\_00537" 7168 "s59E5H2" 3.548161 "hypothetical protein"  
"JS1\_F07\_00537" 7168 "s63E6H2" 1.798198 "hypothetical protein"  
"JS1\_F07\_00538" 7169 "s59E13H2" 0.4794144 "Peptidase family S58"  
"JS1\_F07\_00538" 7169 "s59E25H2" 0 "Peptidase family S58"  
"JS1\_F07\_00538" 7169 "s59E5H2" 1.586943 "Peptidase family S58"  
"JS1\_F07\_00538" 7169 "s63E6H2" 2.198658 "Peptidase family S58"  
"JS1\_F07\_00539" 7170 "s59E13H2" 0.05878975 "Ferredoxin"  
"JS1\_F07\_00539" 7170 "s59E25H2" 0 "Ferredoxin"  
"JS1\_F07\_00539" 7170 "s59E5H2" 0.3557205 "Ferredoxin"  
"JS1\_F07\_00539" 7170 "s63E6H2" 0.9814313 "Ferredoxin"  
"JS1\_F07\_00541" 7172 "s59E13H2" 0.3170591 "hypothetical protein"  
"JS1\_F07\_00541" 7172 "s59E25H2" 0 "hypothetical protein"  
"JS1\_F07\_00541" 7172 "s59E5H2" 2.234217 "hypothetical protein"  
"JS1\_F07\_00541" 7172 "s63E6H2" 5.88858 "hypothetical protein"  
"JS1\_F07\_00542" 7173 "s59E13H2" 0.05316408 "hypothetical protein"  
"JS1\_F07\_00542" 7173 "s59E25H2" 0 "hypothetical protein"  
"JS1\_F07\_00542" 7173 "s59E5H2" 0.1495334 "hypothetical protein"  
"JS1\_F07\_00542" 7173 "s63E6H2" 1.379007 "hypothetical protein"  
"JS1\_F07\_00543" 7174 "s59E13H2" 3.709939 "Periplasmic dipeptide transport protein precursor"  
"JS1\_F07\_00543" 7174 "s59E25H2" 0 "Periplasmic dipeptide transport protein precursor"  
"JS1\_F07\_00543" 7174 "s59E5H2" 0.2548068 "Periplasmic dipeptide transport protein precursor"  
"JS1\_F07\_00543" 7174 "s63E6H2" 0.1628283 "Periplasmic dipeptide transport protein precursor"  
"JS1\_F07\_00544" 7175 "s59E13H2" 5.164627 "Murein hydrolase activator NlpD precursor"  
"JS1\_F07\_00544" 7175 "s59E25H2" 0 "Murein hydrolase activator NlpD precursor"

"JS1\_F07\_00544" 7175 "s59E5H2" 0.6984279 "Murein hydrolase activator NlpD precursor"  
"JS1\_F07\_00544" 7175 "s63E6H2" 0.2285896 "Murein hydrolase activator NlpD precursor"  
"JS1\_F07\_00545" 7176 "s59E13H2" 3.362997 "hypothetical protein"  
"JS1\_F07\_00545" 7176 "s59E25H2" 0 "hypothetical protein"  
"JS1\_F07\_00545" 7176 "s59E5H2" 0.3513038 "hypothetical protein"  
"JS1\_F07\_00545" 7176 "s63E6H2" 0.08315799 "hypothetical protein"  
"JS1\_F07\_00546" 7177 "s59E13H2" 3.716615 "Soluble lytic murein transglycosylase precursor"  
"JS1\_F07\_00546" 7177 "s59E25H2" 0 "Soluble lytic murein transglycosylase precursor"  
"JS1\_F07\_00546" 7177 "s59E5H2" 0.5379706 "Soluble lytic murein transglycosylase precursor"  
"JS1\_F07\_00546" 7177 "s63E6H2" 0.1743544 "Soluble lytic murein transglycosylase precursor"  
"JS1\_F07\_00547" 7178 "s59E13H2" 1.093739 "putative diguanylate cyclase YedQ"  
"JS1\_F07\_00547" 7178 "s59E25H2" 0 "putative diguanylate cyclase YedQ"  
"JS1\_F07\_00547" 7178 "s59E5H2" 0.1928236 "putative diguanylate cyclase YedQ"  
"JS1\_F07\_00547" 7178 "s63E6H2" 0.03436691 "putative diguanylate cyclase YedQ"  
"JS1\_F07\_00548" 7179 "s59E13H2" 2.302398 "hypothetical protein"  
"JS1\_F07\_00548" 7179 "s59E25H2" 0 "hypothetical protein"  
"JS1\_F07\_00548" 7179 "s59E5H2" 0.2218627 "hypothetical protein"  
"JS1\_F07\_00548" 7179 "s63E6H2" 0.02267334 "hypothetical protein"  
"JS1\_F07\_00549" 7180 "s59E13H2" 0.726822 "Glucose 1-dehydrogenase 2"  
"JS1\_F07\_00549" 7180 "s59E25H2" 0 "Glucose 1-dehydrogenase 2"  
"JS1\_F07\_00549" 7180 "s59E5H2" 0.2249378 "Glucose 1-dehydrogenase 2"  
"JS1\_F07\_00549" 7180 "s63E6H2" 0.1973154 "Glucose 1-dehydrogenase 2"  
"JS1\_F07\_00550" 7181 "s59E13H2" 0.6439795 "Cation efflux family protein"  
"JS1\_F07\_00550" 7181 "s59E25H2" 0 "Cation efflux family protein"  
"JS1\_F07\_00550" 7181 "s59E5H2" 0.4084514 "Cation efflux family protein"  
"JS1\_F07\_00550" 7181 "s63E6H2" 0.5485309 "Cation efflux family protein"  
"JS1\_F07\_00551" 7182 "s59E13H2" 0.3526383 "Lon protease 1"  
"JS1\_F07\_00551" 7182 "s59E25H2" 0 "Lon protease 1"  
"JS1\_F07\_00551" 7182 "s59E5H2" 0.2593625 "Lon protease 1"  
"JS1\_F07\_00551" 7182 "s63E6H2" 0.1476885 "Lon protease 1"  
"JS1\_F07\_00553" 7184 "s59E13H2" 0.688635 "Valine--tRNA ligase"  
"JS1\_F07\_00553" 7184 "s59E25H2" 0 "Valine--tRNA ligase"  
"JS1\_F07\_00553" 7184 "s59E5H2" 0.3426335 "Valine--tRNA ligase"  
"JS1\_F07\_00553" 7184 "s63E6H2" 0.1841195 "Valine--tRNA ligase"  
"JS1\_F07\_00554" 7185 "s59E13H2" 0.8697061 "Folylpolyglutamate synthase"  
"JS1\_F07\_00554" 7185 "s59E25H2" 0.3695492 "Folylpolyglutamate synthase"  
"JS1\_F07\_00554" 7185 "s59E5H2" 0.303961 "Folylpolyglutamate synthase"  
"JS1\_F07\_00554" 7185 "s63E6H2" 0.09111296 "Folylpolyglutamate synthase"  
"JS1\_F07\_00555" 7186 "s59E13H2" 0.5116371 "ComE operon protein 1"  
"JS1\_F07\_00555" 7186 "s59E25H2" 0 "ComE operon protein 1"  
"JS1\_F07\_00555" 7186 "s59E5H2" 0.9395378 "ComE operon protein 1"  
"JS1\_F07\_00555" 7186 "s63E6H2" 0.07832007 "ComE operon protein 1"  
"JS1\_F07\_00556" 7187 "s59E13H2" 0.4719251 "ComEC family competence protein"  
"JS1\_F07\_00556" 7187 "s59E25H2" 0 "ComEC family competence protein"  
"JS1\_F07\_00556" 7187 "s59E5H2" 0.8300731 "ComEC family competence protein"  
"JS1\_F07\_00556" 7187 "s63E6H2" 0.07192815 "ComEC family competence protein"  
"JS1\_F07\_00557" 7188 "s59E13H2" 0.5553288 "DNA polymerase III subunit delta"

"JS1\_F07\_00557" 7188 "s59E25H2" 0 "DNA polymerase III subunit delta"  
"JS1\_F07\_00557" 7188 "s59E5H2" 0.6302667 "DNA polymerase III subunit delta"  
"JS1\_F07\_00557" 7188 "s63E6H2" 0.05178654 "DNA polymerase III subunit delta"  
"JS1\_F07\_00558" 7189 "s59E13H2" 0.2857516 "30S ribosomal protein S20"  
"JS1\_F07\_00558" 7189 "s59E25H2" 0 "30S ribosomal protein S20"  
"JS1\_F07\_00558" 7189 "s59E5H2" 0.2373275 "30S ribosomal protein S20"  
"JS1\_F07\_00558" 7189 "s63E6H2" 0.04728764 "30S ribosomal protein S20"  
"JS1\_F07\_00559" 7190 "s59E13H2" 0.5905914 "putative peptidoglycan biosynthesis protein MurJ"  
"JS1\_F07\_00559" 7190 "s59E25H2" 0.126195 "putative peptidoglycan biosynthesis protein MurJ"  
"JS1\_F07\_00559" 7190 "s59E5H2" 0.4227346 "putative peptidoglycan biosynthesis protein MurJ"  
"JS1\_F07\_00559" 7190 "s63E6H2" 0.1307997 "putative peptidoglycan biosynthesis protein MurJ"  
"JS1\_F07\_00560" 7191 "s59E13H2" 1.373126 "Elongation factor 4"  
"JS1\_F07\_00560" 7191 "s59E25H2" 0 "Elongation factor 4"  
"JS1\_F07\_00560" 7191 "s59E5H2" 0.2596468 "Elongation factor 4"  
"JS1\_F07\_00560" 7191 "s63E6H2" 0.1153926 "Elongation factor 4"  
"JS1\_F07\_00561" 7192 "s59E13H2" 0.1605476 "Oxygen-independent coproporphyrinogen-III oxidase 1"  
"JS1\_F07\_00561" 7192 "s59E25H2" 0 "Oxygen-independent coproporphyrinogen-III oxidase 1"  
"JS1\_F07\_00561" 7192 "s59E5H2" 0.134613 "Oxygen-independent coproporphyrinogen-III oxidase 1"  
"JS1\_F07\_00561" 7192 "s63E6H2" 0.1159984 "Oxygen-independent coproporphyrinogen-III oxidase 1"  
"JS1\_F07\_00562" 7193 "s59E13H2" 0.08248982 "Heat-inducible transcription repressor HrcA"  
"JS1\_F07\_00562" 7193 "s59E25H2" 0 "Heat-inducible transcription repressor HrcA"  
"JS1\_F07\_00562" 7193 "s59E5H2" 0.1660603 "Heat-inducible transcription repressor HrcA"  
"JS1\_F07\_00562" 7193 "s63E6H2" 0.1342804 "Heat-inducible transcription repressor HrcA"  
"JS1\_F07\_00563" 7194 "s59E13H2" 0.1705684 "heat shock protein GrpE"  
"JS1\_F07\_00563" 7194 "s59E25H2" 0 "heat shock protein GrpE"  
"JS1\_F07\_00563" 7194 "s59E5H2" 0.04928869 "heat shock protein GrpE"  
"JS1\_F07\_00563" 7194 "s63E6H2" 0.1147619 "heat shock protein GrpE"  
"JS1\_F07\_00564" 7195 "s59E13H2" 0.1962249 "Chaperone protein DnaK"  
"JS1\_F07\_00564" 7195 "s59E25H2" 0 "Chaperone protein DnaK"  
"JS1\_F07\_00564" 7195 "s59E5H2" 0.08780314 "Chaperone protein DnaK"  
"JS1\_F07\_00564" 7195 "s63E6H2" 0.3001021 "Chaperone protein DnaK"  
"JS1\_F07\_00565" 7196 "s59E13H2" 0.08333217 "Chaperone protein DnaJ"  
"JS1\_F07\_00565" 7196 "s59E25H2" 0.1128748 "Chaperone protein DnaJ"  
"JS1\_F07\_00565" 7196 "s59E5H2" 0.03725553 "Chaperone protein DnaJ"  
"JS1\_F07\_00565" 7196 "s63E6H2" 0.4459111 "Chaperone protein DnaJ"  
"JS1\_F07\_00566" 7197 "s59E13H2" 0.8826422 "Threonylcarbamoyladenine tRNA methylthiotransferase MtaB"  
"JS1\_F07\_00566" 7197 "s59E25H2" 0 "Threonylcarbamoyladenine tRNA methylthiotransferase MtaB"  
"JS1\_F07\_00566" 7197 "s59E5H2" 0.1901014 "Threonylcarbamoyladenine tRNA methylthiotransferase MtaB"  
"JS1\_F07\_00566" 7197 "s63E6H2" 0.4187689 "Threonylcarbamoyladenine tRNA methylthiotransferase MtaB"  
"JS1\_F07\_00567" 7198 "s59E13H2" 1.528407 "Phosphate acetyltransferase"  
"JS1\_F07\_00567" 7198 "s59E25H2" 0.2813559 "Phosphate acetyltransferase"  
"JS1\_F07\_00567" 7198 "s59E5H2" 1.757645 "Phosphate acetyltransferase"  
"JS1\_F07\_00567" 7198 "s63E6H2" 1.255542 "Phosphate acetyltransferase"  
"JS1\_F07\_00568" 7199 "s59E13H2" 0.8215687 "Butyrate kinase 2"  
"JS1\_F07\_00568" 7199 "s59E25H2" 0 "Butyrate kinase 2"  
"JS1\_F07\_00568" 7199 "s59E5H2" 2.089644 "Butyrate kinase 2"  
"JS1\_F07\_00568" 7199 "s63E6H2" 1.184142 "Butyrate kinase 2"

"JS1\_F07\_00570" 7201 "s59E13H2" 0.2091998 "Membrane-bound lytic murein transglycosylase C precursor"  
"JS1\_F07\_00570" 7201 "s59E25H2" 0 "Membrane-bound lytic murein transglycosylase C precursor"  
"JS1\_F07\_00570" 7201 "s59E5H2" 0.1754605 "Membrane-bound lytic murein transglycosylase C precursor"  
"JS1\_F07\_00570" 7201 "s63E6H2" 0.09507565 "Membrane-bound lytic murein transglycosylase C precursor"  
"JS1\_F07\_00571" 7202 "s59E13H2" 0.1258564 "Methionine--tRNA ligase"  
"JS1\_F07\_00571" 7202 "s59E25H2" 0 "Methionine--tRNA ligase"  
"JS1\_F07\_00571" 7202 "s59E5H2" 0.1373944 "Methionine--tRNA ligase"  
"JS1\_F07\_00571" 7202 "s63E6H2" 0.1383608 "Methionine--tRNA ligase"  
"JS1\_F07\_00572" 7203 "s59E13H2" 0.04943784 "Ribosomal RNA small subunit methyltransferase I"  
"JS1\_F07\_00572" 7203 "s59E25H2" 0 "Ribosomal RNA small subunit methyltransferase I"  
"JS1\_F07\_00572" 7203 "s59E5H2" 0.05675983 "Ribosomal RNA small subunit methyltransferase I"  
"JS1\_F07\_00572" 7203 "s63E6H2" 0.04213989 "Ribosomal RNA small subunit methyltransferase I"  
"JS1\_F07\_00573" 7204 "s59E13H2" 0.08053922 "N5-glutamine S-adenosyl-L-methionine-dependent methyltransferase"  
"JS1\_F07\_00573" 7204 "s59E25H2" 0 "N5-glutamine S-adenosyl-L-methionine-dependent methyltransferase"  
"JS1\_F07\_00573" 7204 "s59E5H2" 0.08677434 "N5-glutamine S-adenosyl-L-methionine-dependent methyltransferase"  
"JS1\_F07\_00573" 7204 "s63E6H2" 0.1000485 "N5-glutamine S-adenosyl-L-methionine-dependent methyltransferase"  
"JS1\_F07\_00574" 7205 "s59E13H2" 0.04138578 "tRNA1(Val) (adenine(37)-N6)-methyltransferase"  
"JS1\_F07\_00574" 7205 "s59E25H2" 0 "tRNA1(Val) (adenine(37)-N6)-methyltransferase"  
"JS1\_F07\_00574" 7205 "s59E5H2" 0.1810986 "tRNA1(Val) (adenine(37)-N6)-methyltransferase"  
"JS1\_F07\_00574" 7205 "s63E6H2" 0.08232371 "tRNA1(Val) (adenine(37)-N6)-methyltransferase"  
"JS1\_F07\_00575" 7206 "s59E13H2" 0.05391784 "hypothetical protein"  
"JS1\_F07\_00575" 7206 "s59E25H2" 0 "hypothetical protein"  
"JS1\_F07\_00575" 7206 "s59E5H2" 0.2561454 "hypothetical protein"  
"JS1\_F07\_00575" 7206 "s63E6H2" 0.0928594 "hypothetical protein"  
"JS1\_F07\_00576" 7207 "s59E13H2" 0.04534246 "DNA polymerase III subunit tau"  
"JS1\_F07\_00576" 7207 "s59E25H2" 0 "DNA polymerase III subunit tau"  
"JS1\_F07\_00576" 7207 "s59E5H2" 0.3805576 "DNA polymerase III subunit tau"  
"JS1\_F07\_00576" 7207 "s63E6H2" 0.07381391 "DNA polymerase III subunit tau"  
"JS1\_F07\_00577" 7208 "s59E13H2" 0.03579232 "Thymidylate kinase"  
"JS1\_F07\_00577" 7208 "s59E25H2" 0 "Thymidylate kinase"  
"JS1\_F07\_00577" 7208 "s59E5H2" 0.744051 "Thymidylate kinase"  
"JS1\_F07\_00577" 7208 "s63E6H2" 0.09767573 "Thymidylate kinase"  
"JS1\_F07\_00578" 7209 "s59E13H2" 0.0228168 "Inosine-5'-monophosphate dehydrogenase"  
"JS1\_F07\_00578" 7209 "s59E25H2" 0 "Inosine-5'-monophosphate dehydrogenase"  
"JS1\_F07\_00578" 7209 "s59E5H2" 0.7916908 "Inosine-5'-monophosphate dehydrogenase"  
"JS1\_F07\_00578" 7209 "s63E6H2" 0.1136814 "Inosine-5'-monophosphate dehydrogenase"  
"JS1\_F07\_00579" 7210 "s59E13H2" 0.02314803 "Tagatose-6-phosphate kinase"  
"JS1\_F07\_00579" 7210 "s59E25H2" 0 "Tagatose-6-phosphate kinase"  
"JS1\_F07\_00579" 7210 "s59E5H2" 0.7370517 "Tagatose-6-phosphate kinase"  
"JS1\_F07\_00579" 7210 "s63E6H2" 0.08620472 "Tagatose-6-phosphate kinase"  
"JS1\_F07\_00580" 7211 "s59E13H2" 0.01634307 "Rhomboid protease GluP"  
"JS1\_F07\_00580" 7211 "s59E25H2" 0 "Rhomboid protease GluP"  
"JS1\_F07\_00580" 7211 "s59E5H2" 0.6156616 "Rhomboid protease GluP"  
"JS1\_F07\_00580" 7211 "s63E6H2" 0.1495145 "Rhomboid protease GluP"  
"JS1\_F07\_00581" 7212 "s59E13H2" 0.03085066 "UDP-N-acetylglucosamine 2-epimerase"  
"JS1\_F07\_00581" 7212 "s59E25H2" 0 "UDP-N-acetylglucosamine 2-epimerase"  
"JS1\_F07\_00581" 7212 "s59E5H2" 1.318848 "UDP-N-acetylglucosamine 2-epimerase"

"JS1\_F07\_00581" 7212 "s63E6H2" 0.07721111 "UDP-N-acetylglucosamine 2-epimerase"  
"JS1\_F07\_00582" 7213 "s59E13H2" 0.3025056 "DNA primase"  
"JS1\_F07\_00582" 7213 "s59E25H2" 0 "DNA primase"  
"JS1\_F07\_00582" 7213 "s59E5H2" 0.9108602 "DNA primase"  
"JS1\_F07\_00582" 7213 "s63E6H2" 0.1038135 "DNA primase"  
"JS1\_F07\_00583" 7214 "s59E13H2" 0.4772097 "RNA polymerase sigma factor SigA"  
"JS1\_F07\_00583" 7214 "s59E25H2" 0 "RNA polymerase sigma factor SigA"  
"JS1\_F07\_00583" 7214 "s59E5H2" 1.241549 "RNA polymerase sigma factor SigA"  
"JS1\_F07\_00583" 7214 "s63E6H2" 0.1701756 "RNA polymerase sigma factor SigA"  
"JS1\_F07\_00585" 7216 "s59E13H2" 4.510361 "Helix-turn-helix"  
"JS1\_F07\_00585" 7216 "s59E25H2" 0 "Helix-turn-helix"  
"JS1\_F07\_00585" 7216 "s59E5H2" 1.308806 "Helix-turn-helix"  
"JS1\_F07\_00585" 7216 "s63E6H2" 0.01823787 "Helix-turn-helix"  
"JS1\_F07\_00587" 7218 "s59E13H2" 0.4244514 "hypothetical protein"  
"JS1\_F07\_00587" 7218 "s59E25H2" 0 "hypothetical protein"  
"JS1\_F07\_00587" 7218 "s59E5H2" 3.115585 "hypothetical protein"  
"JS1\_F07\_00587" 7218 "s63E6H2" 0.158595 "hypothetical protein"  
"JS1\_F07\_00589" 7220 "s59E13H2" 0.3598553 "hypothetical protein"  
"JS1\_F07\_00589" 7220 "s59E25H2" 0 "hypothetical protein"  
"JS1\_F07\_00589" 7220 "s59E5H2" 2.162983 "hypothetical protein"  
"JS1\_F07\_00589" 7220 "s63E6H2" 0.3100944 "hypothetical protein"  
"JS1\_F07\_00590" 7221 "s59E13H2" 0.4608934 "Holliday junction ATP-dependent DNA helicase RuvB"  
"JS1\_F07\_00590" 7221 "s59E25H2" 0 "Holliday junction ATP-dependent DNA helicase RuvB"  
"JS1\_F07\_00590" 7221 "s59E5H2" 0.1675212 "Holliday junction ATP-dependent DNA helicase RuvB"  
"JS1\_F07\_00590" 7221 "s63E6H2" 0.09389125 "Holliday junction ATP-dependent DNA helicase RuvB"  
"JS1\_F07\_00591" 7222 "s59E13H2" 0.8314252 "Amidase enhancer precursor"  
"JS1\_F07\_00591" 7222 "s59E25H2" 0 "Amidase enhancer precursor"  
"JS1\_F07\_00591" 7222 "s59E5H2" 0.1501322 "Amidase enhancer precursor"  
"JS1\_F07\_00591" 7222 "s63E6H2" 0.03303804 "Amidase enhancer precursor"  
"JS1\_F07\_00592" 7223 "s59E13H2" 0.8554744 "Amidase enhancer precursor"  
"JS1\_F07\_00592" 7223 "s59E25H2" 0 "Amidase enhancer precursor"  
"JS1\_F07\_00592" 7223 "s59E5H2" 0.2397338 "Amidase enhancer precursor"  
"JS1\_F07\_00592" 7223 "s63E6H2" 0.02301247 "Amidase enhancer precursor"  
"JS1\_F07\_00593" 7224 "s59E13H2" 1.303501 "S-adenosylmethionine:tRNA ribosyltransferase-isomerase"  
"JS1\_F07\_00593" 7224 "s59E25H2" 0 "S-adenosylmethionine:tRNA ribosyltransferase-isomerase"  
"JS1\_F07\_00593" 7224 "s59E5H2" 0.2383865 "S-adenosylmethionine:tRNA ribosyltransferase-isomerase"  
"JS1\_F07\_00593" 7224 "s63E6H2" 0.0767562 "S-adenosylmethionine:tRNA ribosyltransferase-isomerase"  
"JS1\_F07\_00594" 7225 "s59E13H2" 0.2133287 "Sodium Bile acid symporter family protein"  
"JS1\_F07\_00594" 7225 "s59E25H2" 0 "Sodium Bile acid symporter family protein"  
"JS1\_F07\_00594" 7225 "s59E5H2" 5.433591 "Sodium Bile acid symporter family protein"  
"JS1\_F07\_00594" 7225 "s63E6H2" 33.95497 "Sodium Bile acid symporter family protein"  
"JS1\_F07\_00595" 7226 "s59E13H2" 0.008000477 "hypothetical protein"  
"JS1\_F07\_00595" 7226 "s59E25H2" 0 "hypothetical protein"  
"JS1\_F07\_00595" 7226 "s59E5H2" 0 "hypothetical protein"  
"JS1\_F07\_00595" 7226 "s63E6H2" 0 "hypothetical protein"  
"JS1\_F07\_00596" 7227 "s59E13H2" 0.005876832 "DGC domain protein"  
"JS1\_F07\_00596" 7227 "s59E25H2" 0 "DGC domain protein"

"JS1\_F07\_00596" 7227 "s59E5H2" 0 "DGC domain protein"  
"JS1\_F07\_00596" 7227 "s63E6H2" 2.135379 "DGC domain protein"  
"JS1\_F07\_00597" 7228 "s59E13H2" 0.1098818 "feruloyl-CoA synthase"  
"JS1\_F07\_00597" 7228 "s59E25H2" 0 "feruloyl-CoA synthase"  
"JS1\_F07\_00597" 7228 "s59E5H2" 0.4471736 "feruloyl-CoA synthase"  
"JS1\_F07\_00597" 7228 "s63E6H2" 0.3341438 "feruloyl-CoA synthase"  
"JS1\_F07\_00598" 7229 "s59E13H2" 0.07104154 "LysM domain/BON superfamily protein"  
"JS1\_F07\_00598" 7229 "s59E25H2" 0 "LysM domain/BON superfamily protein"  
"JS1\_F07\_00598" 7229 "s59E5H2" 0.4391813 "LysM domain/BON superfamily protein"  
"JS1\_F07\_00598" 7229 "s63E6H2" 0.3654343 "LysM domain/BON superfamily protein"  
"JS1\_F07\_00599" 7230 "s59E13H2" 0.01837963 "Glucokinase"  
"JS1\_F07\_00599" 7230 "s59E25H2" 0 "Glucokinase"  
"JS1\_F07\_00599" 7230 "s59E5H2" 0.1397157 "Glucokinase"  
"JS1\_F07\_00599" 7230 "s63E6H2" 0.0669643 "Glucokinase"  
"JS1\_F07\_00600" 7231 "s59E13H2" 0.02191638 "tRNA-specific adenosine deaminase"  
"JS1\_F07\_00600" 7231 "s59E25H2" 0 "tRNA-specific adenosine deaminase"  
"JS1\_F07\_00600" 7231 "s59E5H2" 1.39169 "tRNA-specific adenosine deaminase"  
"JS1\_F07\_00600" 7231 "s63E6H2" 0.0810435 "tRNA-specific adenosine deaminase"  
"JS1\_F07\_00601" 7232 "s59E13H2" 0.03063773 "Uracil phosphoribosyltransferase"  
"JS1\_F07\_00601" 7232 "s59E25H2" 0 "Uracil phosphoribosyltransferase"  
"JS1\_F07\_00601" 7232 "s59E5H2" 0.4891569 "Uracil phosphoribosyltransferase"  
"JS1\_F07\_00601" 7232 "s63E6H2" 0.1851385 "Uracil phosphoribosyltransferase"  
"JS1\_F07\_00602" 7233 "s59E13H2" 0.04546979 "Putative sugar phosphate isomerase YwIF"  
"JS1\_F07\_00602" 7233 "s59E25H2" 0 "Putative sugar phosphate isomerase YwIF"  
"JS1\_F07\_00602" 7233 "s59E5H2" 0.07675619 "Putative sugar phosphate isomerase YwIF"  
"JS1\_F07\_00602" 7233 "s63E6H2" 0.09582303 "Putative sugar phosphate isomerase YwIF"  
"JS1\_F07\_00603" 7234 "s59E13H2" 0.0637458 "Low molecular weight protein-tyrosine-phosphatase YwIE"  
"JS1\_F07\_00603" 7234 "s59E25H2" 0 "Low molecular weight protein-tyrosine-phosphatase YwIE"  
"JS1\_F07\_00603" 7234 "s59E5H2" 0.4415446 "Low molecular weight protein-tyrosine-phosphatase YwIE"  
"JS1\_F07\_00603" 7234 "s63E6H2" 0.1166645 "Low molecular weight protein-tyrosine-phosphatase YwIE"  
"JS1\_F07\_00604" 7235 "s59E13H2" 0.02806643 "Release factor glutamine methyltransferase"  
"JS1\_F07\_00604" 7235 "s59E25H2" 0 "Release factor glutamine methyltransferase"  
"JS1\_F07\_00604" 7235 "s59E5H2" 0.1819376 "Release factor glutamine methyltransferase"  
"JS1\_F07\_00604" 7235 "s63E6H2" 0.07941739 "Release factor glutamine methyltransferase"  
"JS1\_F07\_00605" 7236 "s59E13H2" 0.319931 "Peptide chain release factor 1"  
"JS1\_F07\_00605" 7236 "s59E25H2" 0 "Peptide chain release factor 1"  
"JS1\_F07\_00605" 7236 "s59E5H2" 0.06723506 "Peptide chain release factor 1"  
"JS1\_F07\_00605" 7236 "s63E6H2" 0.1165398 "Peptide chain release factor 1"  
"JS1\_F07\_00606" 7237 "s59E13H2" 0.0326443 "hypothetical protein"  
"JS1\_F07\_00606" 7237 "s59E25H2" 0 "hypothetical protein"  
"JS1\_F07\_00606" 7237 "s59E5H2" 0.1067317 "hypothetical protein"  
"JS1\_F07\_00606" 7237 "s63E6H2" 0.2610796 "hypothetical protein"  
"JS1\_F07\_00607" 7238 "s59E13H2" 0.08139842 "Thymidylate synthase ThyX"  
"JS1\_F07\_00607" 7238 "s59E25H2" 0 "Thymidylate synthase ThyX"  
"JS1\_F07\_00607" 7238 "s59E5H2" 0.1804254 "Thymidylate synthase ThyX"  
"JS1\_F07\_00607" 7238 "s63E6H2" 0.2650081 "Thymidylate synthase ThyX"  
"JS1\_F07\_00608" 7239 "s59E13H2" 0.07591086 "Thymidine kinase"

"JS1\_F07\_00608" 7239 "s59E25H2" 0 "Thymidine kinase"  
"JS1\_F07\_00608" 7239 "s59E5H2" 0.1913208 "Thymidine kinase"  
"JS1\_F07\_00608" 7239 "s63E6H2" 0.202496 "Thymidine kinase"  
"JS1\_F07\_00609" 7240 "s59E13H2" 0.141963 "50S ribosomal protein L31"  
"JS1\_F07\_00609" 7240 "s59E25H2" 0 "50S ribosomal protein L31"  
"JS1\_F07\_00609" 7240 "s59E5H2" 0.06360549 "50S ribosomal protein L31"  
"JS1\_F07\_00609" 7240 "s63E6H2" 0.04981184 "50S ribosomal protein L31"  
"JS1\_F07\_00610" 7241 "s59E13H2" 0.1697532 "hypothetical protein"  
"JS1\_F07\_00610" 7241 "s59E25H2" 0 "hypothetical protein"  
"JS1\_F07\_00610" 7241 "s59E5H2" 0.1560395 "hypothetical protein"  
"JS1\_F07\_00610" 7241 "s63E6H2" 0.252983 "hypothetical protein"  
"JS1\_F07\_00611" 7242 "s59E13H2" 0.1034379 "2-C-methyl-D-erythritol 4-phosphate cytidyltransferase"  
"JS1\_F07\_00611" 7242 "s59E25H2" 0 "2-C-methyl-D-erythritol 4-phosphate cytidyltransferase"  
"JS1\_F07\_00611" 7242 "s59E5H2" 0.1263353 "2-C-methyl-D-erythritol 4-phosphate cytidyltransferase"  
"JS1\_F07\_00611" 7242 "s63E6H2" 0.1262119 "2-C-methyl-D-erythritol 4-phosphate cytidyltransferase"  
"JS1\_F07\_00612" 7243 "s59E13H2" 0.06554175 "CTP synthase"  
"JS1\_F07\_00612" 7243 "s59E25H2" 0 "CTP synthase"  
"JS1\_F07\_00612" 7243 "s59E5H2" 0.480575 "CTP synthase"  
"JS1\_F07\_00612" 7243 "s63E6H2" 0.4090931 "CTP synthase"  
"JS1\_F07\_00613" 7244 "s59E13H2" 0.04383438 "metal-dependent hydrolase"  
"JS1\_F07\_00613" 7244 "s59E25H2" 0 "metal-dependent hydrolase"  
"JS1\_F07\_00613" 7244 "s59E5H2" 0.6050858 "metal-dependent hydrolase"  
"JS1\_F07\_00613" 7244 "s63E6H2" 0.5160261 "metal-dependent hydrolase"  
"JS1\_F07\_00614" 7245 "s59E13H2" 0.4640695 "hypothetical protein"  
"JS1\_F07\_00614" 7245 "s59E25H2" 0.6218905 "hypothetical protein"  
"JS1\_F07\_00614" 7245 "s59E5H2" 0.7347504 "hypothetical protein"  
"JS1\_F07\_00614" 7245 "s63E6H2" 1.704197 "hypothetical protein"  
"JS1\_F07\_00615" 7246 "s59E13H2" 0.1211607 "ATP synthase subunit beta"  
"JS1\_F07\_00615" 7246 "s59E25H2" 0 "ATP synthase subunit beta"  
"JS1\_F07\_00615" 7246 "s59E5H2" 1.568375 "ATP synthase subunit beta"  
"JS1\_F07\_00615" 7246 "s63E6H2" 0.4887044 "ATP synthase subunit beta"  
"JS1\_F07\_00616" 7247 "s59E13H2" 0.1610936 "F0F1 ATP synthase subunit epsilon"  
"JS1\_F07\_00616" 7247 "s59E25H2" 0 "F0F1 ATP synthase subunit epsilon"  
"JS1\_F07\_00616" 7247 "s59E5H2" 1.20961 "F0F1 ATP synthase subunit epsilon"  
"JS1\_F07\_00616" 7247 "s63E6H2" 0.5424799 "F0F1 ATP synthase subunit epsilon"  
"JS1\_F07\_00617" 7248 "s59E13H2" 0.1893467 "Putative F0F1-ATPase subunit (ATPase\_gene1)"  
"JS1\_F07\_00617" 7248 "s59E25H2" 0 "Putative F0F1-ATPase subunit (ATPase\_gene1)"  
"JS1\_F07\_00617" 7248 "s59E5H2" 1.535211 "Putative F0F1-ATPase subunit (ATPase\_gene1)"  
"JS1\_F07\_00617" 7248 "s63E6H2" 0.6888736 "Putative F0F1-ATPase subunit (ATPase\_gene1)"  
"JS1\_F07\_00618" 7249 "s59E13H2" 0.2603034 "N-ATPase, AtpR subunit"  
"JS1\_F07\_00618" 7249 "s59E25H2" 0 "N-ATPase, AtpR subunit"  
"JS1\_F07\_00618" 7249 "s59E5H2" 2.055006 "N-ATPase, AtpR subunit"  
"JS1\_F07\_00618" 7249 "s63E6H2" 0.8617604 "N-ATPase, AtpR subunit"  
"JS1\_F07\_00619" 7250 "s59E13H2" 0.2143569 "ATP synthase subunit a"  
"JS1\_F07\_00619" 7250 "s59E25H2" 0 "ATP synthase subunit a"  
"JS1\_F07\_00619" 7250 "s59E5H2" 2.361645 "ATP synthase subunit a"  
"JS1\_F07\_00619" 7250 "s63E6H2" 0.918441 "ATP synthase subunit a"

"JS1\_F07\_00620" 7251 "s59E13H2" 0.2869311 "ATP synthase subunit c, sodium ion specific"  
"JS1\_F07\_00620" 7251 "s59E25H2" 0 "ATP synthase subunit c, sodium ion specific"  
"JS1\_F07\_00620" 7251 "s59E5H2" 2.263998 "ATP synthase subunit c, sodium ion specific"  
"JS1\_F07\_00620" 7251 "s63E6H2" 1.008442 "ATP synthase subunit c, sodium ion specific"  
"JS1\_F07\_00621" 7252 "s59E13H2" 0.3042681 "ATP synthase subunit b, sodium ion specific"  
"JS1\_F07\_00621" 7252 "s59E25H2" 0 "ATP synthase subunit b, sodium ion specific"  
"JS1\_F07\_00621" 7252 "s59E5H2" 0.5482483 "ATP synthase subunit b, sodium ion specific"  
"JS1\_F07\_00621" 7252 "s63E6H2" 0.8276785 "ATP synthase subunit b, sodium ion specific"  
"JS1\_F07\_00622" 7253 "s59E13H2" 5.354261 "Proline--tRNA ligase"  
"JS1\_F07\_00622" 7253 "s59E25H2" 0 "Proline--tRNA ligase"  
"JS1\_F07\_00622" 7253 "s59E5H2" 3.517017 "Proline--tRNA ligase"  
"JS1\_F07\_00622" 7253 "s63E6H2" 3.01816 "Proline--tRNA ligase"  
"JS1\_F07\_00623" 7254 "s59E13H2" 6.090053 "Elongation factor Tu"  
"JS1\_F07\_00623" 7254 "s59E25H2" 0 "Elongation factor Tu"  
"JS1\_F07\_00623" 7254 "s59E5H2" 4.185832 "Elongation factor Tu"  
"JS1\_F07\_00623" 7254 "s63E6H2" 2.443662 "Elongation factor Tu"  
"JS1\_F07\_00624" 7255 "s59E13H2" 5.506076 "Modulator of FtsH protease HflK"  
"JS1\_F07\_00624" 7255 "s59E25H2" 0 "Modulator of FtsH protease HflK"  
"JS1\_F07\_00624" 7255 "s59E5H2" 1.968079 "Modulator of FtsH protease HflK"  
"JS1\_F07\_00624" 7255 "s63E6H2" 2.009248 "Modulator of FtsH protease HflK"  
"JS1\_F07\_00625" 7256 "s59E13H2" 4.195084 "hypothetical protein"  
"JS1\_F07\_00625" 7256 "s59E25H2" 0 "hypothetical protein"  
"JS1\_F07\_00625" 7256 "s59E5H2" 1.344508 "hypothetical protein"  
"JS1\_F07\_00625" 7256 "s63E6H2" 1.760563 "hypothetical protein"  
"JS1\_F07\_00626" 7257 "s59E13H2" 3.229548 "hypothetical protein"  
"JS1\_F07\_00626" 7257 "s59E25H2" 0 "hypothetical protein"  
"JS1\_F07\_00626" 7257 "s59E5H2" 0.8088497 "hypothetical protein"  
"JS1\_F07\_00626" 7257 "s63E6H2" 1.069328 "hypothetical protein"  
"JS1\_I07\_00001" 14955 "s59E13H2" 0.07103069 "putative NH(3)-dependent NAD(+) synthetase"  
"JS1\_I07\_00001" 14955 "s59E25H2" 0 "putative NH(3)-dependent NAD(+) synthetase"  
"JS1\_I07\_00001" 14955 "s59E5H2" 0.138689 "putative NH(3)-dependent NAD(+) synthetase"  
"JS1\_I07\_00001" 14955 "s63E6H2" 0.3625129 "putative NH(3)-dependent NAD(+) synthetase"  
"JS1\_I07\_00002" 14956 "s59E13H2" 0 "hypothetical protein"  
"JS1\_I07\_00002" 14956 "s59E25H2" 0 "hypothetical protein"  
"JS1\_I07\_00002" 14956 "s59E5H2" 0.1531108 "hypothetical protein"  
"JS1\_I07\_00002" 14956 "s63E6H2" 0 "hypothetical protein"  
"JS1\_I07\_00003" 14957 "s59E13H2" 0.4173741 "Hydroxyacylglutathione hydrolase"  
"JS1\_I07\_00003" 14957 "s59E25H2" 0 "Hydroxyacylglutathione hydrolase"  
"JS1\_I07\_00003" 14957 "s59E5H2" 0.5223302 "Hydroxyacylglutathione hydrolase"  
"JS1\_I07\_00003" 14957 "s63E6H2" 1.172805 "Hydroxyacylglutathione hydrolase"  
"JS1\_I07\_00004" 14958 "s59E13H2" 0.4349055 "RDD family protein"  
"JS1\_I07\_00004" 14958 "s59E25H2" 0 "RDD family protein"  
"JS1\_I07\_00004" 14958 "s59E5H2" 1.748649 "RDD family protein"  
"JS1\_I07\_00004" 14958 "s63E6H2" 1.209439 "RDD family protein"  
"JS1\_I07\_00005" 14959 "s59E13H2" 0 "HTH domain protein"  
"JS1\_I07\_00005" 14959 "s59E25H2" 0 "HTH domain protein"  
"JS1\_I07\_00005" 14959 "s59E5H2" 0.0170005 "HTH domain protein"



"JS1\_I07\_00005" 14959 "s63E6H2" 0.02497166 "HTH domain protein"  
"JS1\_I07\_00007" 14961 "s59E13H2" 0.336958 "Serine--tRNA ligase"  
"JS1\_I07\_00007" 14961 "s59E25H2" 0.1878931 "Serine--tRNA ligase"  
"JS1\_I07\_00007" 14961 "s59E5H2" 1.793856 "Serine--tRNA ligase"  
"JS1\_I07\_00007" 14961 "s63E6H2" 0.9041892 "Serine--tRNA ligase"  
"JS1\_I07\_00008" 14962 "s59E13H2" 0.2361133 "tRNA-splicing ligase RtcB"  
"JS1\_I07\_00008" 14962 "s59E25H2" 0 "tRNA-splicing ligase RtcB"  
"JS1\_I07\_00008" 14962 "s59E5H2" 0.7595719 "tRNA-splicing ligase RtcB"  
"JS1\_I07\_00008" 14962 "s63E6H2" 0.1817574 "tRNA-splicing ligase RtcB"  
"JS1\_I07\_00009" 14963 "s59E13H2" 0.09917434 "hypothetical protein"  
"JS1\_I07\_00009" 14963 "s59E25H2" 0 "hypothetical protein"  
"JS1\_I07\_00009" 14963 "s59E5H2" 0.4642416 "hypothetical protein"  
"JS1\_I07\_00009" 14963 "s63E6H2" 0.05161688 "hypothetical protein"  
"JS1\_I07\_00011" 14965 "s59E13H2" 0.2332572 "MMPL family protein"  
"JS1\_I07\_00011" 14965 "s59E25H2" 0 "MMPL family protein"  
"JS1\_I07\_00011" 14965 "s59E5H2" 0.4202007 "MMPL family protein"  
"JS1\_I07\_00011" 14965 "s63E6H2" 0.6097872 "MMPL family protein"  
"JS1\_I07\_00012" 14966 "s59E13H2" 0.07583897 "hypothetical protein"  
"JS1\_I07\_00012" 14966 "s59E25H2" 0 "hypothetical protein"  
"JS1\_I07\_00012" 14966 "s59E5H2" 0.4016838 "hypothetical protein"  
"JS1\_I07\_00012" 14966 "s63E6H2" 1.285692 "hypothetical protein"  
"JS1\_I07\_00013" 14967 "s59E13H2" 0.1861871 "hypothetical protein"  
"JS1\_I07\_00013" 14967 "s59E25H2" 0 "hypothetical protein"  
"JS1\_I07\_00013" 14967 "s59E5H2" 0.6920714 "hypothetical protein"  
"JS1\_I07\_00013" 14967 "s63E6H2" 0.716785 "hypothetical protein"  
"JS1\_I07\_00014" 14968 "s59E13H2" 0.1426961 "HTH-type transcriptional regulator EthR"  
"JS1\_I07\_00014" 14968 "s59E25H2" 0 "HTH-type transcriptional regulator EthR"  
"JS1\_I07\_00014" 14968 "s59E5H2" 0.5321749 "HTH-type transcriptional regulator EthR"  
"JS1\_I07\_00014" 14968 "s63E6H2" 0.7165911 "HTH-type transcriptional regulator EthR"  
"JS1\_I07\_00015" 14969 "s59E13H2" 1.511557 "Glycerol kinase"  
"JS1\_I07\_00015" 14969 "s59E25H2" 0.2573333 "Glycerol kinase"  
"JS1\_I07\_00015" 14969 "s59E5H2" 1.254983 "Glycerol kinase"  
"JS1\_I07\_00015" 14969 "s63E6H2" 2.910302 "Glycerol kinase"  
"JS1\_I07\_00016" 14970 "s59E13H2" 0.1810288 "Galactokinase"  
"JS1\_I07\_00016" 14970 "s59E25H2" 0 "Galactokinase"  
"JS1\_I07\_00016" 14970 "s59E5H2" 0.6645983 "Galactokinase"  
"JS1\_I07\_00016" 14970 "s63E6H2" 0.8677617 "Galactokinase"  
"JS1\_I07\_00017" 14971 "s59E13H2" 0.314168 "Galactose-1-phosphate uridylyltransferase"  
"JS1\_I07\_00017" 14971 "s59E25H2" 0 "Galactose-1-phosphate uridylyltransferase"  
"JS1\_I07\_00017" 14971 "s59E5H2" 0.4394362 "Galactose-1-phosphate uridylyltransferase"  
"JS1\_I07\_00017" 14971 "s63E6H2" 0.6207937 "Galactose-1-phosphate uridylyltransferase"  
"JS1\_I07\_00018" 14972 "s59E13H2" 0.1472981 "Alpha-galactosidase"  
"JS1\_I07\_00018" 14972 "s59E25H2" 0 "Alpha-galactosidase"  
"JS1\_I07\_00018" 14972 "s59E5H2" 0.5764928 "Alpha-galactosidase"  
"JS1\_I07\_00018" 14972 "s63E6H2" 0.113446 "Alpha-galactosidase"  
"JS1\_I07\_00019" 14973 "s59E13H2" 0.1783789 "Beta-galactosidase"  
"JS1\_I07\_00019" 14973 "s59E25H2" 0 "Beta-galactosidase"

"JS1\_I07\_00019" 14973 "s59E5H2" 0.5038931 "Beta-galactosidase"  
"JS1\_I07\_00019" 14973 "s63E6H2" 0.2308971 "Beta-galactosidase"  
"JS1\_I07\_00020" 14974 "s59E13H2" 0.9693998 "Lactose transport system permease protein LacG"  
"JS1\_I07\_00020" 14974 "s59E25H2" 0 "Lactose transport system permease protein LacG"  
"JS1\_I07\_00020" 14974 "s59E5H2" 0.6216667 "Lactose transport system permease protein LacG"  
"JS1\_I07\_00020" 14974 "s63E6H2" 0.4176516 "Lactose transport system permease protein LacG"  
"JS1\_I07\_00021" 14975 "s59E13H2" 6.096231 "Lactose transport system permease protein LacF"  
"JS1\_I07\_00021" 14975 "s59E25H2" 0 "Lactose transport system permease protein LacF"  
"JS1\_I07\_00021" 14975 "s59E5H2" 0.717852 "Lactose transport system permease protein LacF"  
"JS1\_I07\_00021" 14975 "s63E6H2" 0.5506375 "Lactose transport system permease protein LacF"  
"JS1\_I07\_00022" 14976 "s59E13H2" 5.600271 "Lactose-binding protein precursor"  
"JS1\_I07\_00022" 14976 "s59E25H2" 0 "Lactose-binding protein precursor"  
"JS1\_I07\_00022" 14976 "s59E5H2" 0.6072051 "Lactose-binding protein precursor"  
"JS1\_I07\_00022" 14976 "s63E6H2" 0.4257877 "Lactose-binding protein precursor"  
"JS1\_I07\_00023" 14977 "s59E13H2" 0.8848954 "Ribose transport system permease protein RbsC"  
"JS1\_I07\_00023" 14977 "s59E25H2" 0 "Ribose transport system permease protein RbsC"  
"JS1\_I07\_00023" 14977 "s59E5H2" 0.5806627 "Ribose transport system permease protein RbsC"  
"JS1\_I07\_00023" 14977 "s63E6H2" 0.6846517 "Ribose transport system permease protein RbsC"  
"JS1\_I07\_00024" 14978 "s59E13H2" 0.7940904 "Ribose transport system permease protein RbsC"  
"JS1\_I07\_00024" 14978 "s59E25H2" 0 "Ribose transport system permease protein RbsC"  
"JS1\_I07\_00024" 14978 "s59E5H2" 1.405362 "Ribose transport system permease protein RbsC"  
"JS1\_I07\_00024" 14978 "s63E6H2" 0.8005467 "Ribose transport system permease protein RbsC"  
"JS1\_I07\_00025" 14979 "s59E13H2" 0.7083873 "Galactose/methyl galactoside import ATP-binding protein MglA"  
"JS1\_I07\_00025" 14979 "s59E25H2" 0 "Galactose/methyl galactoside import ATP-binding protein MglA"  
"JS1\_I07\_00025" 14979 "s59E5H2" 0.2840496 "Galactose/methyl galactoside import ATP-binding protein MglA"  
"JS1\_I07\_00025" 14979 "s63E6H2" 0.7944544 "Galactose/methyl galactoside import ATP-binding protein MglA"  
"JS1\_I07\_00026" 14980 "s59E13H2" 0.8166691 "Mannitol-1-phosphate 5-dehydrogenase"  
"JS1\_I07\_00026" 14980 "s59E25H2" 0 "Mannitol-1-phosphate 5-dehydrogenase"  
"JS1\_I07\_00026" 14980 "s59E5H2" 0.5215925 "Mannitol-1-phosphate 5-dehydrogenase"  
"JS1\_I07\_00026" 14980 "s63E6H2" 1.100692 "Mannitol-1-phosphate 5-dehydrogenase"  
"JS1\_I07\_00027" 14981 "s59E13H2" 0.5112119 "putative sugar kinase YdjH"  
"JS1\_I07\_00027" 14981 "s59E25H2" 0 "putative sugar kinase YdjH"  
"JS1\_I07\_00027" 14981 "s59E5H2" 0.521984 "putative sugar kinase YdjH"  
"JS1\_I07\_00027" 14981 "s63E6H2" 0.5633211 "putative sugar kinase YdjH"  
"JS1\_I07\_00028" 14982 "s59E13H2" 0.02909173 "putative D-lyxose ketol-isomerase"  
"JS1\_I07\_00028" 14982 "s59E25H2" 0 "putative D-lyxose ketol-isomerase"  
"JS1\_I07\_00028" 14982 "s59E5H2" 0.4095802 "putative D-lyxose ketol-isomerase"  
"JS1\_I07\_00028" 14982 "s63E6H2" 0.6623822 "putative D-lyxose ketol-isomerase"  
"JS1\_I07\_00029" 14983 "s59E13H2" 0.0554073 "ureidoglycolate hydrolase"  
"JS1\_I07\_00029" 14983 "s59E25H2" 0 "ureidoglycolate hydrolase"  
"JS1\_I07\_00029" 14983 "s59E5H2" 0.4399304 "ureidoglycolate hydrolase"  
"JS1\_I07\_00029" 14983 "s63E6H2" 0.7028782 "ureidoglycolate hydrolase"  
"JS1\_I07\_00030" 14984 "s59E13H2" 0.0959 "Trehalose/maltose import ATP-binding protein MalK"  
"JS1\_I07\_00030" 14984 "s59E25H2" 0 "Trehalose/maltose import ATP-binding protein MalK"  
"JS1\_I07\_00030" 14984 "s59E5H2" 0.402157 "Trehalose/maltose import ATP-binding protein MalK"  
"JS1\_I07\_00030" 14984 "s63E6H2" 0.9602406 "Trehalose/maltose import ATP-binding protein MalK"  
"JS1\_I07\_00031" 14985 "s59E13H2" 0.2119236 "Trehalose/maltose import ATP-binding protein MalK"

"JS1\_I07\_00031" 14985 "s59E25H2" 0 "Trehalose/maltose import ATP-binding protein MalK"  
"JS1\_I07\_00031" 14985 "s59E5H2" 0.4681425 "Trehalose/maltose import ATP-binding protein MalK"  
"JS1\_I07\_00031" 14985 "s63E6H2" 0.728674 "Trehalose/maltose import ATP-binding protein MalK"  
"JS1\_I07\_00032" 14986 "s59E13H2" 0.2139689 "Trehalose/maltose-binding protein MalE precursor"  
"JS1\_I07\_00032" 14986 "s59E25H2" 0 "Trehalose/maltose-binding protein MalE precursor"  
"JS1\_I07\_00032" 14986 "s59E5H2" 0.3717287 "Trehalose/maltose-binding protein MalE precursor"  
"JS1\_I07\_00032" 14986 "s63E6H2" 0.4907059 "Trehalose/maltose-binding protein MalE precursor"  
"JS1\_I07\_00033" 14987 "s59E13H2" 0.1454842 "Aldehyde-alcohol dehydrogenase"  
"JS1\_I07\_00033" 14987 "s59E25H2" 0 "Aldehyde-alcohol dehydrogenase"  
"JS1\_I07\_00033" 14987 "s59E5H2" 0.8738382 "Aldehyde-alcohol dehydrogenase"  
"JS1\_I07\_00033" 14987 "s63E6H2" 3.934189 "Aldehyde-alcohol dehydrogenase"  
"JS1\_I07\_00034" 14988 "s59E13H2" 0.1488747 "BMC domain protein"  
"JS1\_I07\_00034" 14988 "s59E25H2" 0 "BMC domain protein"  
"JS1\_I07\_00034" 14988 "s59E5H2" 0.8383072 "BMC domain protein"  
"JS1\_I07\_00034" 14988 "s63E6H2" 3.368277 "BMC domain protein"  
"JS1\_I07\_00035" 14989 "s59E13H2" 0.1188076 "Electron transport complex protein RnfC"  
"JS1\_I07\_00035" 14989 "s59E25H2" 0 "Electron transport complex protein RnfC"  
"JS1\_I07\_00035" 14989 "s59E5H2" 0.7714726 "Electron transport complex protein RnfC"  
"JS1\_I07\_00035" 14989 "s63E6H2" 2.620794 "Electron transport complex protein RnfC"  
"JS1\_I07\_00036" 14990 "s59E13H2" 0.1124246 "Carbon dioxide concentrating mechanism protein CcmL"  
"JS1\_I07\_00036" 14990 "s59E25H2" 0 "Carbon dioxide concentrating mechanism protein CcmL"  
"JS1\_I07\_00036" 14990 "s59E5H2" 0.4673257 "Carbon dioxide concentrating mechanism protein CcmL"  
"JS1\_I07\_00036" 14990 "s63E6H2" 1.738508 "Carbon dioxide concentrating mechanism protein CcmL"  
"JS1\_I07\_00037" 14991 "s59E13H2" 0.07409738 "Carbon dioxide concentrating mechanism protein CcmL"  
"JS1\_I07\_00037" 14991 "s59E25H2" 0 "Carbon dioxide concentrating mechanism protein CcmL"  
"JS1\_I07\_00037" 14991 "s59E5H2" 0.3214491 "Carbon dioxide concentrating mechanism protein CcmL"  
"JS1\_I07\_00037" 14991 "s63E6H2" 1.4138 "Carbon dioxide concentrating mechanism protein CcmL"  
"JS1\_I07\_00038" 14992 "s59E13H2" 0.08417555 "Ethanolamine utilization protein EutM precursor"  
"JS1\_I07\_00038" 14992 "s59E25H2" 0 "Ethanolamine utilization protein EutM precursor"  
"JS1\_I07\_00038" 14992 "s59E5H2" 0.4392679 "Ethanolamine utilization protein EutM precursor"  
"JS1\_I07\_00038" 14992 "s63E6H2" 1.41957 "Ethanolamine utilization protein EutM precursor"  
"JS1\_I07\_00039" 14993 "s59E13H2" 0.1593829 "Xylose isomerase"  
"JS1\_I07\_00039" 14993 "s59E25H2" 0 "Xylose isomerase"  
"JS1\_I07\_00039" 14993 "s59E5H2" 0.4155567 "Xylose isomerase"  
"JS1\_I07\_00039" 14993 "s63E6H2" 1.757058 "Xylose isomerase"  
"JS1\_I07\_00040" 14994 "s59E13H2" 0.1748083 "Ribokinase"  
"JS1\_I07\_00040" 14994 "s59E25H2" 0 "Ribokinase"  
"JS1\_I07\_00040" 14994 "s59E5H2" 0.1566962 "Ribokinase"  
"JS1\_I07\_00040" 14994 "s63E6H2" 0.3012 "Ribokinase"  
"JS1\_I07\_00041" 14995 "s59E13H2" 0.0922099 "Trehalose/maltose transport system permease protein MalG"  
"JS1\_I07\_00041" 14995 "s59E25H2" 0 "Trehalose/maltose transport system permease protein MalG"  
"JS1\_I07\_00041" 14995 "s59E5H2" 0.291267 "Trehalose/maltose transport system permease protein MalG"  
"JS1\_I07\_00041" 14995 "s63E6H2" 0.2252855 "Trehalose/maltose transport system permease protein MalG"  
"JS1\_I07\_00042" 14996 "s59E13H2" 0.0699605 "Inner membrane ABC transporter permease protein YcjO"  
"JS1\_I07\_00042" 14996 "s59E25H2" 0 "Inner membrane ABC transporter permease protein YcjO"  
"JS1\_I07\_00042" 14996 "s59E5H2" 0.1963905 "Inner membrane ABC transporter permease protein YcjO"  
"JS1\_I07\_00042" 14996 "s63E6H2" 0.3486275 "Inner membrane ABC transporter permease protein YcjO"

"JS1\_I07\_00044" 14998 "s59E13H2" 1.071824 "hypothetical protein"  
"JS1\_I07\_00044" 14998 "s59E25H2" 0 "hypothetical protein"  
"JS1\_I07\_00044" 14998 "s59E5H2" 0.2178452 "hypothetical protein"  
"JS1\_I07\_00044" 14998 "s63E6H2" 0.1417234 "hypothetical protein"  
"JS1\_I07\_00045" 14999 "s59E13H2" 0.9266901 "Transcriptional regulatory protein ZraR"  
"JS1\_I07\_00045" 14999 "s59E25H2" 0 "Transcriptional regulatory protein ZraR"  
"JS1\_I07\_00045" 14999 "s59E5H2" 0.9897086 "Transcriptional regulatory protein ZraR"  
"JS1\_I07\_00045" 14999 "s63E6H2" 0.2943675 "Transcriptional regulatory protein ZraR"  
"JS1\_I07\_00046" 15000 "s59E13H2" 0.8347244 "Sensor protein ZraS"  
"JS1\_I07\_00046" 15000 "s59E25H2" 0 "Sensor protein ZraS"  
"JS1\_I07\_00046" 15000 "s59E5H2" 0.6190629 "Sensor protein ZraS"  
"JS1\_I07\_00046" 15000 "s63E6H2" 0.1854864 "Sensor protein ZraS"  
"JS1\_I07\_00047" 15001 "s59E13H2" 1.247671 "Putative serine protease HtrA"  
"JS1\_I07\_00047" 15001 "s59E25H2" 0 "Putative serine protease HtrA"  
"JS1\_I07\_00047" 15001 "s59E5H2" 0.3332932 "Putative serine protease HtrA"  
"JS1\_I07\_00047" 15001 "s63E6H2" 0.06932479 "Putative serine protease HtrA"  
"JS1\_I07\_00048" 15002 "s59E13H2" 0.1307216 "hypothetical protein"  
"JS1\_I07\_00048" 15002 "s59E25H2" 0 "hypothetical protein"  
"JS1\_I07\_00048" 15002 "s59E5H2" 0.04123094 "hypothetical protein"  
"JS1\_I07\_00048" 15002 "s63E6H2" 0.1407865 "hypothetical protein"  
"JS1\_I07\_00049" 15003 "s59E13H2" 0.1172896 "hypothetical protein"  
"JS1\_I07\_00049" 15003 "s59E25H2" 0 "hypothetical protein"  
"JS1\_I07\_00049" 15003 "s59E5H2" 0.07544691 "hypothetical protein"  
"JS1\_I07\_00049" 15003 "s63E6H2" 0.0832061 "hypothetical protein"  
"JS1\_I07\_00050" 15004 "s59E13H2" 0.3036342 "hypothetical protein"  
"JS1\_I07\_00050" 15004 "s59E25H2" 0 "hypothetical protein"  
"JS1\_I07\_00050" 15004 "s59E5H2" 0.05383834 "hypothetical protein"  
"JS1\_I07\_00050" 15004 "s63E6H2" 0.08289541 "hypothetical protein"  
"JS1\_I07\_00051" 15005 "s59E13H2" 0.3668319 "Thiol:disulfide interchange protein DsbD precursor"  
"JS1\_I07\_00051" 15005 "s59E25H2" 0 "Thiol:disulfide interchange protein DsbD precursor"  
"JS1\_I07\_00051" 15005 "s59E5H2" 0.02367148 "Thiol:disulfide interchange protein DsbD precursor"  
"JS1\_I07\_00051" 15005 "s63E6H2" 0.05873343 "Thiol:disulfide interchange protein DsbD precursor"  
"JS1\_I07\_00052" 15006 "s59E13H2" 0.5219786 "Thiol:disulfide interchange protein DsbD precursor"  
"JS1\_I07\_00052" 15006 "s59E25H2" 0 "Thiol:disulfide interchange protein DsbD precursor"  
"JS1\_I07\_00052" 15006 "s59E5H2" 0.1061868 "Thiol:disulfide interchange protein DsbD precursor"  
"JS1\_I07\_00052" 15006 "s63E6H2" 0.08658766 "Thiol:disulfide interchange protein DsbD precursor"  
"JS1\_I07\_00053" 15007 "s59E13H2" 0.6435191 "NifU-like protein"  
"JS1\_I07\_00053" 15007 "s59E25H2" 0 "NifU-like protein"  
"JS1\_I07\_00053" 15007 "s59E5H2" 0.1542225 "NifU-like protein"  
"JS1\_I07\_00053" 15007 "s63E6H2" 0.1000233 "NifU-like protein"  
"JS1\_I07\_00054" 15008 "s59E13H2" 0.3681508 "Cysteine desulfurase"  
"JS1\_I07\_00054" 15008 "s59E25H2" 0 "Cysteine desulfurase"  
"JS1\_I07\_00054" 15008 "s59E5H2" 0.07617727 "Cysteine desulfurase"  
"JS1\_I07\_00054" 15008 "s63E6H2" 0.1655227 "Cysteine desulfurase"  
"JS1\_I07\_00055" 15009 "s59E13H2" 0.1989767 "hypothetical protein"  
"JS1\_I07\_00055" 15009 "s59E25H2" 0 "hypothetical protein"  
"JS1\_I07\_00055" 15009 "s59E5H2" 0.0198273 "hypothetical protein"

"JS1\_I07\_00055" 15009 "s63E6H2" 0.06398562 "hypothetical protein"  
"JS1\_I07\_00056" 15010 "s59E13H2" 0.1823391 "Acylphosphatase"  
"JS1\_I07\_00056" 15010 "s59E25H2" 0 "Acylphosphatase"  
"JS1\_I07\_00056" 15010 "s59E5H2" 0.03741169 "Acylphosphatase"  
"JS1\_I07\_00056" 15010 "s63E6H2" 0.01492544 "Acylphosphatase"  
"JS1\_I07\_00057" 15011 "s59E13H2" 0.8163819 "Peptidase family M50"  
"JS1\_I07\_00057" 15011 "s59E25H2" 0 "Peptidase family M50"  
"JS1\_I07\_00057" 15011 "s59E5H2" 0.4899737 "Peptidase family M50"  
"JS1\_I07\_00057" 15011 "s63E6H2" 0.3028111 "Peptidase family M50"  
"JS1\_I07\_00058" 15012 "s59E13H2" 14.20089 "Sodium:neurotransmitter symporter family protein"  
"JS1\_I07\_00058" 15012 "s59E25H2" 0 "Sodium:neurotransmitter symporter family protein"  
"JS1\_I07\_00058" 15012 "s59E5H2" 0.4314022 "Sodium:neurotransmitter symporter family protein"  
"JS1\_I07\_00058" 15012 "s63E6H2" 1.565469 "Sodium:neurotransmitter symporter family protein"  
"JS1\_I07\_00059" 15013 "s59E13H2" 5.069023 "TPR repeat-containing protein YfgC precursor"  
"JS1\_I07\_00059" 15013 "s59E25H2" 0.1157528 "TPR repeat-containing protein YfgC precursor"  
"JS1\_I07\_00059" 15013 "s59E5H2" 0.3841856 "TPR repeat-containing protein YfgC precursor"  
"JS1\_I07\_00059" 15013 "s63E6H2" 1.215466 "TPR repeat-containing protein YfgC precursor"  
"JS1\_I07\_00060" 15014 "s59E13H2" 10.88167 "alanyl-tRNA synthetase"  
"JS1\_I07\_00060" 15014 "s59E25H2" 0.8283828 "alanyl-tRNA synthetase"  
"JS1\_I07\_00060" 15014 "s59E5H2" 0 "alanyl-tRNA synthetase"  
"JS1\_I07\_00060" 15014 "s63E6H2" 0.99592 "alanyl-tRNA synthetase"  
"JS1\_I07\_00061" 15015 "s59E13H2" 0 "GYD domain protein"  
"JS1\_I07\_00061" 15015 "s59E25H2" 0 "GYD domain protein"  
"JS1\_I07\_00061" 15015 "s59E5H2" 0 "GYD domain protein"  
"JS1\_I07\_00061" 15015 "s63E6H2" 0.01487584 "GYD domain protein"  
"JS1\_I07\_00062" 15016 "s59E13H2" 0.01950704 "hypothetical protein"  
"JS1\_I07\_00062" 15016 "s59E25H2" 0 "hypothetical protein"  
"JS1\_I07\_00062" 15016 "s59E5H2" 0.1374137 "hypothetical protein"  
"JS1\_I07\_00062" 15016 "s63E6H2" 0.04217412 "hypothetical protein"  
"JS1\_I07\_00063" 15017 "s59E13H2" 0 "hypothetical protein"  
"JS1\_I07\_00063" 15017 "s59E25H2" 0 "hypothetical protein"  
"JS1\_I07\_00063" 15017 "s59E5H2" 0.004508406 "hypothetical protein"  
"JS1\_I07\_00063" 15017 "s63E6H2" 0.01745625 "hypothetical protein"  
"JS1\_I07\_00064" 15018 "s59E13H2" 0.04437618 "Phage shock protein C"  
"JS1\_I07\_00064" 15018 "s59E25H2" 0 "Phage shock protein C"  
"JS1\_I07\_00064" 15018 "s59E5H2" 0.1976785 "Phage shock protein C"  
"JS1\_I07\_00064" 15018 "s63E6H2" 0.08432563 "Phage shock protein C"  
"JS1\_I07\_00065" 15019 "s59E13H2" 0.3364999 "hypothetical protein"  
"JS1\_I07\_00065" 15019 "s59E25H2" 0 "hypothetical protein"  
"JS1\_I07\_00065" 15019 "s59E5H2" 1.158161 "hypothetical protein"  
"JS1\_I07\_00065" 15019 "s63E6H2" 0.1264592 "hypothetical protein"  
"JS1\_I07\_00068" 15022 "s59E13H2" 0 "hypothetical protein"  
"JS1\_I07\_00068" 15022 "s59E25H2" 0 "hypothetical protein"  
"JS1\_I07\_00068" 15022 "s59E5H2" 0 "hypothetical protein"  
"JS1\_I07\_00068" 15022 "s63E6H2" 0 "hypothetical protein"  
"JS1\_I07\_00069" 15023 "s59E13H2" 0 "hypothetical protein"  
"JS1\_I07\_00069" 15023 "s59E25H2" 0.312381 "hypothetical protein"

"JS1\_I07\_00069" 15023 "s59E5H2" 0 "hypothetical protein"  
"JS1\_I07\_00069" 15023 "s63E6H2" 5.685572 "hypothetical protein"  
"JS1\_I07\_00070" 15024 "s59E13H2" 0 "hypothetical protein"  
"JS1\_I07\_00070" 15024 "s59E25H2" 0 "hypothetical protein"  
"JS1\_I07\_00070" 15024 "s59E5H2" 0 "hypothetical protein"  
"JS1\_I07\_00070" 15024 "s63E6H2" 4.31908 "hypothetical protein"  
"JS1\_I07\_00071" 15025 "s59E13H2" 0.06008412 "Copper-exporting P-type ATPase B"  
"JS1\_I07\_00071" 15025 "s59E25H2" 0 "Copper-exporting P-type ATPase B"  
"JS1\_I07\_00071" 15025 "s59E5H2" 1.924401 "Copper-exporting P-type ATPase B"  
"JS1\_I07\_00071" 15025 "s63E6H2" 6.425425 "Copper-exporting P-type ATPase B"  
"JS1\_I07\_00072" 15026 "s59E13H2" 0 "hypothetical protein"  
"JS1\_I07\_00072" 15026 "s59E25H2" 0 "hypothetical protein"  
"JS1\_I07\_00072" 15026 "s59E5H2" 0 "hypothetical protein"  
"JS1\_I07\_00072" 15026 "s63E6H2" 0 "hypothetical protein"  
"JS1\_I07\_00073" 15027 "s59E13H2" 0 "hypothetical protein"  
"JS1\_I07\_00073" 15027 "s59E25H2" 0 "hypothetical protein"  
"JS1\_I07\_00073" 15027 "s59E5H2" 0 "hypothetical protein"  
"JS1\_I07\_00073" 15027 "s63E6H2" 0 "hypothetical protein"  
"JS1\_I07\_00074" 15028 "s59E13H2" 0 "Stress response protein NhaX"  
"JS1\_I07\_00074" 15028 "s59E25H2" 0 "Stress response protein NhaX"  
"JS1\_I07\_00074" 15028 "s59E5H2" 0.04247017 "Stress response protein NhaX"  
"JS1\_I07\_00074" 15028 "s63E6H2" 0 "Stress response protein NhaX"  
"JS1\_I07\_00076" 15030 "s59E13H2" 0.2942136 "hypothetical protein"  
"JS1\_I07\_00076" 15030 "s59E25H2" 0 "hypothetical protein"  
"JS1\_I07\_00076" 15030 "s59E5H2" 0.05869765 "hypothetical protein"  
"JS1\_I07\_00076" 15030 "s63E6H2" 0.032353 "hypothetical protein"  
"JS1\_I07\_00077" 15031 "s59E13H2" 0.1994788 "ATP-dependent zinc metalloprotease FtsH"  
"JS1\_I07\_00077" 15031 "s59E25H2" 0 "ATP-dependent zinc metalloprotease FtsH"  
"JS1\_I07\_00077" 15031 "s59E5H2" 0.06718632 "ATP-dependent zinc metalloprotease FtsH"  
"JS1\_I07\_00077" 15031 "s63E6H2" 0.172512 "ATP-dependent zinc metalloprotease FtsH"  
"JS1\_I07\_00079" 15033 "s59E13H2" 0 "Oligopeptide-binding protein OppA precursor"  
"JS1\_I07\_00079" 15033 "s59E25H2" 0 "Oligopeptide-binding protein OppA precursor"  
"JS1\_I07\_00079" 15033 "s59E5H2" 0 "Oligopeptide-binding protein OppA precursor"  
"JS1\_I07\_00079" 15033 "s63E6H2" 0 "Oligopeptide-binding protein OppA precursor"  
"JS1\_I07\_00080" 15034 "s59E13H2" 0.002636761 "Dipeptide transport system permease protein DppB"  
"JS1\_I07\_00080" 15034 "s59E25H2" 0 "Dipeptide transport system permease protein DppB"  
"JS1\_I07\_00080" 15034 "s59E5H2" 0.04201276 "Dipeptide transport system permease protein DppB"  
"JS1\_I07\_00080" 15034 "s63E6H2" 0.007575934 "Dipeptide transport system permease protein DppB"  
"JS1\_I07\_00081" 15035 "s59E13H2" 0 "Oligopeptide transport system permease protein OppC"  
"JS1\_I07\_00081" 15035 "s59E25H2" 0 "Oligopeptide transport system permease protein OppC"  
"JS1\_I07\_00081" 15035 "s59E5H2" 0.06749033 "Oligopeptide transport system permease protein OppC"  
"JS1\_I07\_00081" 15035 "s63E6H2" 0.006600013 "Oligopeptide transport system permease protein OppC"  
"JS1\_I07\_00083" 15037 "s59E13H2" 0.05163397 "Arginine--tRNA ligase"  
"JS1\_I07\_00083" 15037 "s59E25H2" 0 "Arginine--tRNA ligase"  
"JS1\_I07\_00083" 15037 "s59E5H2" 0.228366 "Arginine--tRNA ligase"  
"JS1\_I07\_00083" 15037 "s63E6H2" 0.2451618 "Arginine--tRNA ligase"  
"JS1\_I07\_00084" 15038 "s59E13H2" 0.4577421 "glmZ(sRNA)-inactivating NTPase"

"JS1\_I07\_00084" 15038 "s59E25H2" 0 "glmZ(sRNA)-inactivating NTPase"  
"JS1\_I07\_00084" 15038 "s59E5H2" 0.3995872 "glmZ(sRNA)-inactivating NTPase"  
"JS1\_I07\_00084" 15038 "s63E6H2" 0.9020079 "glmZ(sRNA)-inactivating NTPase"  
"JS1\_I07\_00085" 15039 "s59E13H2" 0.6449989 "Putative sporulation transcription regulator WhiA"  
"JS1\_I07\_00085" 15039 "s59E25H2" 0 "Putative sporulation transcription regulator WhiA"  
"JS1\_I07\_00085" 15039 "s59E5H2" 0.2508735 "Putative sporulation transcription regulator WhiA"  
"JS1\_I07\_00085" 15039 "s63E6H2" 0.4482189 "Putative sporulation transcription regulator WhiA"  
"JS1\_I07\_00086" 15040 "s59E13H2" 0.8980694 "Trehalose/maltose import ATP-binding protein Malk"  
"JS1\_I07\_00086" 15040 "s59E25H2" 0 "Trehalose/maltose import ATP-binding protein Malk"  
"JS1\_I07\_00086" 15040 "s59E5H2" 0.1351856 "Trehalose/maltose import ATP-binding protein Malk"  
"JS1\_I07\_00086" 15040 "s63E6H2" 0.7171969 "Trehalose/maltose import ATP-binding protein Malk"  
"JS1\_I07\_00087" 15041 "s59E13H2" 0.6246497 "RNA polymerase sigma-54 factor"  
"JS1\_I07\_00087" 15041 "s59E25H2" 0 "RNA polymerase sigma-54 factor"  
"JS1\_I07\_00087" 15041 "s59E5H2" 0.3553699 "RNA polymerase sigma-54 factor"  
"JS1\_I07\_00087" 15041 "s63E6H2" 0.6639853 "RNA polymerase sigma-54 factor"  
"JS1\_I07\_00088" 15042 "s59E13H2" 0.1330321 "Carbon dioxide concentrating mechanism protein CcmL"  
"JS1\_I07\_00088" 15042 "s59E25H2" 0 "Carbon dioxide concentrating mechanism protein CcmL"  
"JS1\_I07\_00088" 15042 "s59E5H2" 0.7865692 "Carbon dioxide concentrating mechanism protein CcmL"  
"JS1\_I07\_00088" 15042 "s63E6H2" 3.176001 "Carbon dioxide concentrating mechanism protein CcmL"  
"JS1\_I07\_00089" 15043 "s59E13H2" 0.2392039 "Carbon dioxide concentrating mechanism protein CcmL"  
"JS1\_I07\_00089" 15043 "s59E25H2" 0 "Carbon dioxide concentrating mechanism protein CcmL"  
"JS1\_I07\_00089" 15043 "s59E5H2" 0.8198592 "Carbon dioxide concentrating mechanism protein CcmL"  
"JS1\_I07\_00089" 15043 "s63E6H2" 4.511316 "Carbon dioxide concentrating mechanism protein CcmL"  
"JS1\_I07\_00090" 15044 "s59E13H2" 0.2246856 "Putative sugar phosphate isomerase YwIF"  
"JS1\_I07\_00090" 15044 "s59E25H2" 0 "Putative sugar phosphate isomerase YwIF"  
"JS1\_I07\_00090" 15044 "s59E5H2" 0.6244422 "Putative sugar phosphate isomerase YwIF"  
"JS1\_I07\_00090" 15044 "s63E6H2" 6.102179 "Putative sugar phosphate isomerase YwIF"  
"JS1\_I07\_00091" 15045 "s59E13H2" 0.2122393 "Deoxyribose-phosphate aldolase 1"  
"JS1\_I07\_00091" 15045 "s59E25H2" 0 "Deoxyribose-phosphate aldolase 1"  
"JS1\_I07\_00091" 15045 "s59E5H2" 0.5193317 "Deoxyribose-phosphate aldolase 1"  
"JS1\_I07\_00091" 15045 "s63E6H2" 7.984968 "Deoxyribose-phosphate aldolase 1"  
"JS1\_I07\_00092" 15046 "s59E13H2" 0.1631018 "Phosphate propanoyltransferase"  
"JS1\_I07\_00092" 15046 "s59E25H2" 0 "Phosphate propanoyltransferase"  
"JS1\_I07\_00092" 15046 "s59E5H2" 0.5519392 "Phosphate propanoyltransferase"  
"JS1\_I07\_00092" 15046 "s63E6H2" 3.367936 "Phosphate propanoyltransferase"  
"JS1\_I07\_00093" 15047 "s59E13H2" 0.04635278 "Deoxyribose operon repressor"  
"JS1\_I07\_00093" 15047 "s59E25H2" 0 "Deoxyribose operon repressor"  
"JS1\_I07\_00093" 15047 "s59E5H2" 0.7273456 "Deoxyribose operon repressor"  
"JS1\_I07\_00093" 15047 "s63E6H2" 0.5444471 "Deoxyribose operon repressor"  
"JS1\_I07\_00094" 15048 "s59E13H2" 0.02422809 "hypothetical protein"  
"JS1\_I07\_00094" 15048 "s59E25H2" 0 "hypothetical protein"  
"JS1\_I07\_00094" 15048 "s59E5H2" 0.5663247 "hypothetical protein"  
"JS1\_I07\_00094" 15048 "s63E6H2" 0.5476984 "hypothetical protein"  
"JS1\_I07\_00095" 15049 "s59E13H2" 0.04527525 "Sporulation protein YtfJ (Spore\_Ytfj)"  
"JS1\_I07\_00095" 15049 "s59E25H2" 0 "Sporulation protein YtfJ (Spore\_Ytfj)"  
"JS1\_I07\_00095" 15049 "s59E5H2" 0.7590154 "Sporulation protein YtfJ (Spore\_Ytfj)"  
"JS1\_I07\_00095" 15049 "s63E6H2" 0.6516647 "Sporulation protein YtfJ (Spore\_Ytfj)"

"JS1\_I07\_00096" 15050 "s59E13H2" 4.925962 "General stress protein 69"  
"JS1\_I07\_00096" 15050 "s59E25H2" 0 "General stress protein 69"  
"JS1\_I07\_00096" 15050 "s59E5H2" 0.5912176 "General stress protein 69"  
"JS1\_I07\_00096" 15050 "s63E6H2" 1.159271 "General stress protein 69"  
"JS1\_I07\_00097" 15051 "s59E13H2" 4.996401 "Adenosine monophosphate-protein transferase SoFic"  
"JS1\_I07\_00097" 15051 "s59E25H2" 0 "Adenosine monophosphate-protein transferase SoFic"  
"JS1\_I07\_00097" 15051 "s59E5H2" 0.1657199 "Adenosine monophosphate-protein transferase SoFic"  
"JS1\_I07\_00097" 15051 "s63E6H2" 0.009156461 "Adenosine monophosphate-protein transferase SoFic"  
"JS1\_I07\_00100" 15054 "s59E13H2" 0.03751512 "Polyketide cyclase / dehydrase and lipid transport"  
"JS1\_I07\_00100" 15054 "s59E25H2" 0 "Polyketide cyclase / dehydrase and lipid transport"  
"JS1\_I07\_00100" 15054 "s59E5H2" 0.2782264 "Polyketide cyclase / dehydrase and lipid transport"  
"JS1\_I07\_00100" 15054 "s63E6H2" 0.0192933 "Polyketide cyclase / dehydrase and lipid transport"  
"JS1\_I07\_00101" 15055 "s59E13H2" 0 "hypothetical protein"  
"JS1\_I07\_00101" 15055 "s59E25H2" 0 "hypothetical protein"  
"JS1\_I07\_00101" 15055 "s59E5H2" 0 "hypothetical protein"  
"JS1\_I07\_00101" 15055 "s63E6H2" 0.01044127 "hypothetical protein"  
"JS1\_I07\_00103" 15057 "s59E13H2" 0 "hypothetical protein"  
"JS1\_I07\_00103" 15057 "s59E25H2" 0 "hypothetical protein"  
"JS1\_I07\_00103" 15057 "s59E5H2" 0 "hypothetical protein"  
"JS1\_I07\_00103" 15057 "s63E6H2" 0 "hypothetical protein"  
"JS1\_I07\_00104" 15058 "s59E13H2" 0 "hypothetical protein"  
"JS1\_I07\_00104" 15058 "s59E25H2" 0 "hypothetical protein"  
"JS1\_I07\_00104" 15058 "s59E5H2" 0 "hypothetical protein"  
"JS1\_I07\_00104" 15058 "s63E6H2" 0.00879313 "hypothetical protein"  
"JS1\_I07\_00105" 15059 "s59E13H2" 0.6361055 "4Fe-4S dicluster domain protein"  
"JS1\_I07\_00105" 15059 "s59E25H2" 0 "4Fe-4S dicluster domain protein"  
"JS1\_I07\_00105" 15059 "s59E5H2" 0 "4Fe-4S dicluster domain protein"  
"JS1\_I07\_00105" 15059 "s63E6H2" 0 "4Fe-4S dicluster domain protein"  
"JS1\_I07\_00106" 15060 "s59E13H2" 1.369942 "hypothetical protein"  
"JS1\_I07\_00106" 15060 "s59E25H2" 0 "hypothetical protein"  
"JS1\_I07\_00106" 15060 "s59E5H2" 0 "hypothetical protein"  
"JS1\_I07\_00106" 15060 "s63E6H2" 0.01170237 "hypothetical protein"  
"JS1\_I07\_00107" 15061 "s59E13H2" 1.305302 "High-affinity branched-chain amino acid transport system permease protein LivH"  
"JS1\_I07\_00107" 15061 "s59E25H2" 0 "High-affinity branched-chain amino acid transport system permease protein LivH"  
"JS1\_I07\_00107" 15061 "s59E5H2" 0 "High-affinity branched-chain amino acid transport system permease protein LivH"  
"JS1\_I07\_00107" 15061 "s63E6H2" 0.005773664 "High-affinity branched-chain amino acid transport system permease protein LivH"  
"JS1\_I07\_00108" 15062 "s59E13H2" 1.115827 "leucine/isoleucine/valine transporter permease subunit"  
"JS1\_I07\_00108" 15062 "s59E25H2" 0 "leucine/isoleucine/valine transporter permease subunit"  
"JS1\_I07\_00108" 15062 "s59E5H2" 0 "leucine/isoleucine/valine transporter permease subunit"  
"JS1\_I07\_00108" 15062 "s63E6H2" 0.002512974 "leucine/isoleucine/valine transporter permease subunit"  
"JS1\_I07\_00109" 15063 "s59E13H2" 0 "High-affinity branched-chain amino acid transport ATP-binding protein LivF"  
"JS1\_I07\_00109" 15063 "s59E25H2" 0 "High-affinity branched-chain amino acid transport ATP-binding protein LivF"  
"JS1\_I07\_00109" 15063 "s59E5H2" 0 "High-affinity branched-chain amino acid transport ATP-binding protein LivF"  
"JS1\_I07\_00109" 15063 "s63E6H2" 0 "High-affinity branched-chain amino acid transport ATP-binding protein LivF"  
"JS1\_I07\_00110" 15064 "s59E13H2" 0.006047951 "Lipopolysaccharide export system ATP-binding protein LptB"  
"JS1\_I07\_00110" 15064 "s59E25H2" 0 "Lipopolysaccharide export system ATP-binding protein LptB"  
"JS1\_I07\_00110" 15064 "s59E5H2" 0 "Lipopolysaccharide export system ATP-binding protein LptB"



"JS1\_I07\_00110" 15064 "s63E6H2" 0 "Lipopolysaccharide export system ATP-binding protein LptB"  
"JS1\_I07\_00111" 15065 "s59E13H2" 0 "succinyl-CoA synthetase subunit beta"  
"JS1\_I07\_00111" 15065 "s59E25H2" 0 "succinyl-CoA synthetase subunit beta"  
"JS1\_I07\_00111" 15065 "s59E5H2" 0.01780672 "succinyl-CoA synthetase subunit beta"  
"JS1\_I07\_00111" 15065 "s63E6H2" 0.231629 "succinyl-CoA synthetase subunit beta"  
"JS1\_I07\_00112" 15066 "s59E13H2" 0 "High-affinity branched-chain amino acid transport ATP-binding protein LivF"  
"JS1\_I07\_00112" 15066 "s59E25H2" 0 "High-affinity branched-chain amino acid transport ATP-binding protein LivF"  
"JS1\_I07\_00112" 15066 "s59E5H2" 0 "High-affinity branched-chain amino acid transport ATP-binding protein LivF"  
"JS1\_I07\_00112" 15066 "s63E6H2" 0.03901083 "High-affinity branched-chain amino acid transport ATP-binding protein LivF"  
"JS1\_I07\_00113" 15067 "s59E13H2" 0 "putative branched-chain amino acid transport ATP-binding protein LivG"  
"JS1\_I07\_00113" 15067 "s59E25H2" 0 "putative branched-chain amino acid transport ATP-binding protein LivG"  
"JS1\_I07\_00113" 15067 "s59E5H2" 0 "putative branched-chain amino acid transport ATP-binding protein LivG"  
"JS1\_I07\_00113" 15067 "s63E6H2" 0.03111786 "putative branched-chain amino acid transport ATP-binding protein LivG"  
"JS1\_I07\_00114" 15068 "s59E13H2" 0 "leucine/isoleucine/valine transporter permease subunit"  
"JS1\_I07\_00114" 15068 "s59E25H2" 0 "leucine/isoleucine/valine transporter permease subunit"  
"JS1\_I07\_00114" 15068 "s59E5H2" 0.001596977 "leucine/isoleucine/valine transporter permease subunit"  
"JS1\_I07\_00114" 15068 "s63E6H2" 0.02223024 "leucine/isoleucine/valine transporter permease subunit"  
"JS1\_I07\_00115" 15069 "s59E13H2" 0 "High-affinity branched-chain amino acid transport system permease protein LivH"  
"JS1\_I07\_00115" 15069 "s59E25H2" 0 "High-affinity branched-chain amino acid transport system permease protein LivH"  
"JS1\_I07\_00115" 15069 "s59E5H2" 0.007550412 "High-affinity branched-chain amino acid transport system permease protein LivH"  
"JS1\_I07\_00115" 15069 "s63E6H2" 0.02150699 "High-affinity branched-chain amino acid transport system permease protein LivH"  
"JS1\_I07\_00116" 15070 "s59E13H2" 0.004112632 "hypothetical protein"  
"JS1\_I07\_00116" 15070 "s59E25H2" 0 "hypothetical protein"  
"JS1\_I07\_00116" 15070 "s59E5H2" 0 "hypothetical protein"  
"JS1\_I07\_00116" 15070 "s63E6H2" 0.01493768 "hypothetical protein"  
"JS1\_I07\_00117" 15071 "s59E13H2" 0.03538849 "Inner membrane ABC transporter permease protein YcjP"  
"JS1\_I07\_00117" 15071 "s59E25H2" 0 "Inner membrane ABC transporter permease protein YcjP"  
"JS1\_I07\_00117" 15071 "s59E5H2" 0.2861871 "Inner membrane ABC transporter permease protein YcjP"  
"JS1\_I07\_00117" 15071 "s63E6H2" 0.6018433 "Inner membrane ABC transporter permease protein YcjP"  
"JS1\_I07\_00118" 15072 "s59E13H2" 0.1142889 "Bacterial extracellular solute-binding protein"  
"JS1\_I07\_00118" 15072 "s59E25H2" 0 "Bacterial extracellular solute-binding protein"  
"JS1\_I07\_00118" 15072 "s59E5H2" 0.3771982 "Bacterial extracellular solute-binding protein"  
"JS1\_I07\_00118" 15072 "s63E6H2" 0.5650641 "Bacterial extracellular solute-binding protein"  
"JS1\_I07\_00119" 15073 "s59E13H2" 0.05951725 "Glucose-6-phosphate 3-dehydrogenase"  
"JS1\_I07\_00119" 15073 "s59E25H2" 0 "Glucose-6-phosphate 3-dehydrogenase"  
"JS1\_I07\_00119" 15073 "s59E5H2" 0.1787347 "Glucose-6-phosphate 3-dehydrogenase"  
"JS1\_I07\_00119" 15073 "s63E6H2" 0.6498701 "Glucose-6-phosphate 3-dehydrogenase"  
"JS1\_I07\_00120" 15074 "s59E13H2" 0.08160062 "putative L-threonine 3-dehydrogenase"  
"JS1\_I07\_00120" 15074 "s59E25H2" 0 "putative L-threonine 3-dehydrogenase"  
"JS1\_I07\_00120" 15074 "s59E5H2" 0.1023854 "putative L-threonine 3-dehydrogenase"  
"JS1\_I07\_00120" 15074 "s63E6H2" 0.2200206 "putative L-threonine 3-dehydrogenase"  
"JS1\_I07\_00121" 15075 "s59E13H2" 0 "hypothetical protein"  
"JS1\_I07\_00121" 15075 "s59E25H2" 0 "hypothetical protein"  
"JS1\_I07\_00121" 15075 "s59E5H2" 0 "hypothetical protein"  
"JS1\_I07\_00121" 15075 "s63E6H2" 0 "hypothetical protein"  
"JS1\_I07\_00122" 15076 "s59E13H2" 0.03573205 "NADH dehydrogenase"  
"JS1\_I07\_00122" 15076 "s59E25H2" 0 "NADH dehydrogenase"

"JS1\_I07\_00122" 15076 "s59E5H2" 1.26167 "NADH dehydrogenase"  
"JS1\_I07\_00122" 15076 "s63E6H2" 0.02840588 "NADH dehydrogenase"  
"JS1\_I07\_00123" 15077 "s59E13H2" 0.335151 "Transposase IS200 like protein"  
"JS1\_I07\_00123" 15077 "s59E25H2" 0 "Transposase IS200 like protein"  
"JS1\_I07\_00123" 15077 "s59E5H2" 0.02245881 "Transposase IS200 like protein"  
"JS1\_I07\_00123" 15077 "s63E6H2" 0.3237042 "Transposase IS200 like protein"  
"JS1\_I07\_00125" 15079 "s59E13H2" 0.06957681 "hypothetical protein"  
"JS1\_I07\_00125" 15079 "s59E25H2" 0 "hypothetical protein"  
"JS1\_I07\_00125" 15079 "s59E5H2" 0.1799356 "hypothetical protein"  
"JS1\_I07\_00125" 15079 "s63E6H2" 0.002701906 "hypothetical protein"  
"JS1\_I07\_00126" 15080 "s59E13H2" 0.04766254 "hypothetical protein"  
"JS1\_I07\_00126" 15080 "s59E25H2" 0 "hypothetical protein"  
"JS1\_I07\_00126" 15080 "s59E5H2" 0.01521698 "hypothetical protein"  
"JS1\_I07\_00126" 15080 "s63E6H2" 0.01099918 "hypothetical protein"  
"JS1\_I07\_00127" 15081 "s59E13H2" 0.004934309 "RNA-metabolising metallo-beta-lactamase"  
"JS1\_I07\_00127" 15081 "s59E25H2" 0 "RNA-metabolising metallo-beta-lactamase"  
"JS1\_I07\_00127" 15081 "s59E5H2" 0.1164612 "RNA-metabolising metallo-beta-lactamase"  
"JS1\_I07\_00127" 15081 "s63E6H2" 0.07877097 "RNA-metabolising metallo-beta-lactamase"  
"JS1\_I07\_00129" 15083 "s59E13H2" 0.0195684 "Transposase"  
"JS1\_I07\_00129" 15083 "s59E25H2" 0 "Transposase"  
"JS1\_I07\_00129" 15083 "s59E5H2" 0.05906475 "Transposase"  
"JS1\_I07\_00129" 15083 "s63E6H2" 3.787134 "Transposase"  
"JS1\_I07\_00130" 15084 "s59E13H2" 0.02709516 "Integrase core domain protein"  
"JS1\_I07\_00130" 15084 "s59E25H2" 0 "Integrase core domain protein"  
"JS1\_I07\_00130" 15084 "s59E5H2" 0.04127711 "Integrase core domain protein"  
"JS1\_I07\_00130" 15084 "s63E6H2" 0.4685689 "Integrase core domain protein"  
"JS1\_I07\_00131" 15085 "s59E13H2" 0 "2,5-dihydroxypyridine 5,6-dioxygenase"  
"JS1\_I07\_00131" 15085 "s59E25H2" 0 "2,5-dihydroxypyridine 5,6-dioxygenase"  
"JS1\_I07\_00131" 15085 "s59E5H2" 0 "2,5-dihydroxypyridine 5,6-dioxygenase"  
"JS1\_I07\_00131" 15085 "s63E6H2" 0.1354746 "2,5-dihydroxypyridine 5,6-dioxygenase"  
"JS1\_I07\_00132" 15086 "s59E13H2" 0.03002641 "Ferredoxin"  
"JS1\_I07\_00132" 15086 "s59E25H2" 0 "Ferredoxin"  
"JS1\_I07\_00132" 15086 "s59E5H2" 0.09053219 "Ferredoxin"  
"JS1\_I07\_00132" 15086 "s63E6H2" 0.2297121 "Ferredoxin"  
"JS1\_I07\_00133" 15087 "s59E13H2" 0.04684407 "HTH-type transcriptional repressor YtrA"  
"JS1\_I07\_00133" 15087 "s59E25H2" 0 "HTH-type transcriptional repressor YtrA"  
"JS1\_I07\_00133" 15087 "s59E5H2" 0.3058484 "HTH-type transcriptional repressor YtrA"  
"JS1\_I07\_00133" 15087 "s63E6H2" 0.219323 "HTH-type transcriptional repressor YtrA"  
"JS1\_I07\_00134" 15088 "s59E13H2" 0.050454 "Sialic acid TRAP transporter permease protein SiaT"  
"JS1\_I07\_00134" 15088 "s59E25H2" 0 "Sialic acid TRAP transporter permease protein SiaT"  
"JS1\_I07\_00134" 15088 "s59E5H2" 0.5002892 "Sialic acid TRAP transporter permease protein SiaT"  
"JS1\_I07\_00134" 15088 "s63E6H2" 0.04927249 "Sialic acid TRAP transporter permease protein SiaT"  
"JS1\_I07\_00135" 15089 "s59E13H2" 0.06646001 "hypothetical protein"  
"JS1\_I07\_00135" 15089 "s59E25H2" 0 "hypothetical protein"  
"JS1\_I07\_00135" 15089 "s59E5H2" 0.3120917 "hypothetical protein"  
"JS1\_I07\_00135" 15089 "s63E6H2" 0.04337752 "hypothetical protein"  
"JS1\_I07\_00136" 15090 "s59E13H2" 0.0159399 "alkanesulfonate transporter substrate-binding subunit"

"JS1\_I07\_00136" 15090 "s59E25H2" 0 "alkanesulfonate transporter substrate-binding subunit"  
"JS1\_I07\_00136" 15090 "s59E5H2" 0.1370078 "alkanesulfonate transporter substrate-binding subunit"  
"JS1\_I07\_00136" 15090 "s63E6H2" 0.006385001 "alkanesulfonate transporter substrate-binding subunit"  
"JS1\_I07\_00137" 15091 "s59E13H2" 0 "hypothetical protein"  
"JS1\_I07\_00137" 15091 "s59E25H2" 0 "hypothetical protein"  
"JS1\_I07\_00137" 15091 "s59E5H2" 0.02294113 "hypothetical protein"  
"JS1\_I07\_00137" 15091 "s63E6H2" 0 "hypothetical protein"  
"JS1\_I07\_00138" 15092 "s59E13H2" 0.0397609 "Glutamate 2,3-aminomutase"  
"JS1\_I07\_00138" 15092 "s59E25H2" 0 "Glutamate 2,3-aminomutase"  
"JS1\_I07\_00138" 15092 "s59E5H2" 0.05570458 "Glutamate 2,3-aminomutase"  
"JS1\_I07\_00138" 15092 "s63E6H2" 0.04504654 "Glutamate 2,3-aminomutase"  
"JS1\_I07\_00139" 15093 "s59E13H2" 0 "putative HTH-type transcriptional regulator YbbH"  
"JS1\_I07\_00139" 15093 "s59E25H2" 0 "putative HTH-type transcriptional regulator YbbH"  
"JS1\_I07\_00139" 15093 "s59E5H2" 0.06739104 "putative HTH-type transcriptional regulator YbbH"  
"JS1\_I07\_00139" 15093 "s63E6H2" 0.0235233 "putative HTH-type transcriptional regulator YbbH"  
"JS1\_I07\_00140" 15094 "s59E13H2" 0 "Methenyltetrahydrofolate cyclohydrolase"  
"JS1\_I07\_00140" 15094 "s59E25H2" 0 "Methenyltetrahydrofolate cyclohydrolase"  
"JS1\_I07\_00140" 15094 "s59E5H2" 0.01763381 "Methenyltetrahydrofolate cyclohydrolase"  
"JS1\_I07\_00140" 15094 "s63E6H2" 0.04048981 "Methenyltetrahydrofolate cyclohydrolase"  
"JS1\_I07\_00141" 15095 "s59E13H2" 0.01848153 "hypothetical protein"  
"JS1\_I07\_00141" 15095 "s59E25H2" 0 "hypothetical protein"  
"JS1\_I07\_00141" 15095 "s59E5H2" 0.1131711 "hypothetical protein"  
"JS1\_I07\_00141" 15095 "s63E6H2" 0.07360751 "hypothetical protein"  
"JS1\_I07\_00142" 15096 "s59E13H2" 0.02849422 "Peptide chain release factor 2"  
"JS1\_I07\_00142" 15096 "s59E25H2" 0 "Peptide chain release factor 2"  
"JS1\_I07\_00142" 15096 "s59E5H2" 0.187571 "Peptide chain release factor 2"  
"JS1\_I07\_00142" 15096 "s63E6H2" 0.1945948 "Peptide chain release factor 2"  
"JS1\_I07\_00143" 15097 "s59E13H2" 0.0301409 "preprotein translocase subunit SecA"  
"JS1\_I07\_00143" 15097 "s59E25H2" 0 "preprotein translocase subunit SecA"  
"JS1\_I07\_00143" 15097 "s59E5H2" 0.1401322 "preprotein translocase subunit SecA"  
"JS1\_I07\_00143" 15097 "s63E6H2" 0.1091501 "preprotein translocase subunit SecA"  
"JS1\_I07\_00144" 15098 "s59E13H2" 1.109414 "Trehalose/maltose-binding protein MalE precursor"  
"JS1\_I07\_00144" 15098 "s59E25H2" 0 "Trehalose/maltose-binding protein MalE precursor"  
"JS1\_I07\_00144" 15098 "s59E5H2" 0.5266206 "Trehalose/maltose-binding protein MalE precursor"  
"JS1\_I07\_00144" 15098 "s63E6H2" 0.3121274 "Trehalose/maltose-binding protein MalE precursor"  
"JS1\_I07\_00146" 15100 "s59E13H2" 2.473299 "Xylulose kinase"  
"JS1\_I07\_00146" 15100 "s59E25H2" 0 "Xylulose kinase"  
"JS1\_I07\_00146" 15100 "s59E5H2" 0.7235355 "Xylulose kinase"  
"JS1\_I07\_00146" 15100 "s63E6H2" 1.105825 "Xylulose kinase"  
"JS1\_I07\_00147" 15101 "s59E13H2" 2.45293 "D-tagatose-1,6-bisphosphate aldolase subunit GatY"  
"JS1\_I07\_00147" 15101 "s59E25H2" 0 "D-tagatose-1,6-bisphosphate aldolase subunit GatY"  
"JS1\_I07\_00147" 15101 "s59E5H2" 0.4630531 "D-tagatose-1,6-bisphosphate aldolase subunit GatY"  
"JS1\_I07\_00147" 15101 "s63E6H2" 2.003827 "D-tagatose-1,6-bisphosphate aldolase subunit GatY"  
"JS1\_I07\_00148" 15102 "s59E13H2" 0.8957243 "Xylulose kinase"  
"JS1\_I07\_00148" 15102 "s59E25H2" 0 "Xylulose kinase"  
"JS1\_I07\_00148" 15102 "s59E5H2" 0.9081829 "Xylulose kinase"  
"JS1\_I07\_00148" 15102 "s63E6H2" 1.286736 "Xylulose kinase"

"JS1\_I07\_00149" 15103 "s59E13H2" 0.6958735 "L-ribulose-5-phosphate 4-epimerase UlaF"  
"JS1\_I07\_00149" 15103 "s59E25H2" 0 "L-ribulose-5-phosphate 4-epimerase UlaF"  
"JS1\_I07\_00149" 15103 "s59E5H2" 0.5110736 "L-ribulose-5-phosphate 4-epimerase UlaF"  
"JS1\_I07\_00149" 15103 "s63E6H2" 0.5782901 "L-ribulose-5-phosphate 4-epimerase UlaF"  
"JS1\_I07\_00150" 15104 "s59E13H2" 0.5823035 "Arabinose metabolism transcriptional repressor"  
"JS1\_I07\_00150" 15104 "s59E25H2" 0 "Arabinose metabolism transcriptional repressor"  
"JS1\_I07\_00150" 15104 "s59E5H2" 1.149421 "Arabinose metabolism transcriptional repressor"  
"JS1\_I07\_00150" 15104 "s63E6H2" 0.4149703 "Arabinose metabolism transcriptional repressor"  
"JS1\_I07\_00151" 15105 "s59E13H2" 0.2918064 "hypothetical protein"  
"JS1\_I07\_00151" 15105 "s59E25H2" 0 "hypothetical protein"  
"JS1\_I07\_00151" 15105 "s59E5H2" 1.105931 "hypothetical protein"  
"JS1\_I07\_00151" 15105 "s63E6H2" 1.101541 "hypothetical protein"  
"JS1\_I07\_00152" 15106 "s59E13H2" 0.283899 "Methylcobamide:CoM methyltransferase MtaA"  
"JS1\_I07\_00152" 15106 "s59E25H2" 0 "Methylcobamide:CoM methyltransferase MtaA"  
"JS1\_I07\_00152" 15106 "s59E5H2" 0.5038998 "Methylcobamide:CoM methyltransferase MtaA"  
"JS1\_I07\_00152" 15106 "s63E6H2" 1.095497 "Methylcobamide:CoM methyltransferase MtaA"  
"JS1\_I07\_00153" 15107 "s59E13H2" 0.1590512 "Ribose transport system permease protein RbsC"  
"JS1\_I07\_00153" 15107 "s59E25H2" 0 "Ribose transport system permease protein RbsC"  
"JS1\_I07\_00153" 15107 "s59E5H2" 0.04957501 "Ribose transport system permease protein RbsC"  
"JS1\_I07\_00153" 15107 "s63E6H2" 0.2497795 "Ribose transport system permease protein RbsC"  
"JS1\_I07\_00154" 15108 "s59E13H2" 0 "Succinylglutamate desuccinylase / Aspartoacylase family protein"  
"JS1\_I07\_00154" 15108 "s59E25H2" 0 "Succinylglutamate desuccinylase / Aspartoacylase family protein"  
"JS1\_I07\_00154" 15108 "s59E5H2" 0.04994733 "Succinylglutamate desuccinylase / Aspartoacylase family protein"  
"JS1\_I07\_00154" 15108 "s63E6H2" 0 "Succinylglutamate desuccinylase / Aspartoacylase family protein"  
"JS1\_I07\_00155" 15109 "s59E13H2" 0 "Dipeptidase A"  
"JS1\_I07\_00155" 15109 "s59E25H2" 0 "Dipeptidase A"  
"JS1\_I07\_00155" 15109 "s59E5H2" 0.3376209 "Dipeptidase A"  
"JS1\_I07\_00155" 15109 "s63E6H2" 0.00607188 "Dipeptidase A"  
"JS1\_I07\_00156" 15110 "s59E13H2" 0 "Peptidase family C69"  
"JS1\_I07\_00156" 15110 "s59E25H2" 0 "Peptidase family C69"  
"JS1\_I07\_00156" 15110 "s59E5H2" 0 "Peptidase family C69"  
"JS1\_I07\_00156" 15110 "s63E6H2" 0.006114634 "Peptidase family C69"  
"JS1\_I07\_00157" 15111 "s59E13H2" 0 "Peptidase family C69"  
"JS1\_I07\_00157" 15111 "s59E25H2" 0 "Peptidase family C69"  
"JS1\_I07\_00157" 15111 "s59E5H2" 0 "Peptidase family C69"  
"JS1\_I07\_00157" 15111 "s63E6H2" 0.006139481 "Peptidase family C69"  
"JS1\_I07\_00158" 15112 "s59E13H2" 0 "Dipeptidase A"  
"JS1\_I07\_00158" 15112 "s59E25H2" 0 "Dipeptidase A"  
"JS1\_I07\_00158" 15112 "s59E5H2" 0 "Dipeptidase A"  
"JS1\_I07\_00158" 15112 "s63E6H2" 0.006695056 "Dipeptidase A"  
"JS1\_I07\_00159" 15113 "s59E13H2" 0.007819046 "Capsule biosynthesis protein CapC"  
"JS1\_I07\_00159" 15113 "s59E25H2" 0 "Capsule biosynthesis protein CapC"  
"JS1\_I07\_00159" 15113 "s59E5H2" 0.1160536 "Capsule biosynthesis protein CapC"  
"JS1\_I07\_00159" 15113 "s63E6H2" 0.01144583 "Capsule biosynthesis protein CapC"  
"JS1\_I07\_00160" 15114 "s59E13H2" 0.003429494 "Capsule biosynthesis protein CapB"  
"JS1\_I07\_00160" 15114 "s59E25H2" 0 "Capsule biosynthesis protein CapB"  
"JS1\_I07\_00160" 15114 "s59E5H2" 0.08318163 "Capsule biosynthesis protein CapB"

"JS1\_I07\_00160" 15114 "s63E6H2" 0.01034324 "Capsule biosynthesis protein CapB"  
"JS1\_I07\_00161" 15115 "s59E13H2" 0.06669568 "Poly(A) polymerase I precursor"  
"JS1\_I07\_00161" 15115 "s59E25H2" 0 "Poly(A) polymerase I precursor"  
"JS1\_I07\_00161" 15115 "s59E5H2" 0.04214545 "Poly(A) polymerase I precursor"  
"JS1\_I07\_00161" 15115 "s63E6H2" 0.200465 "Poly(A) polymerase I precursor"  
"JS1\_I07\_00162" 15116 "s59E13H2" 0.01073801 "Putative oxidoreductase YdbC"  
"JS1\_I07\_00162" 15116 "s59E25H2" 0 "Putative oxidoreductase YdbC"  
"JS1\_I07\_00162" 15116 "s59E5H2" 0.2941779 "Putative oxidoreductase YdbC"  
"JS1\_I07\_00162" 15116 "s63E6H2" 0.335914 "Putative oxidoreductase YdbC"  
"JS1\_I07\_00163" 15117 "s59E13H2" 0.007676913 "hypothetical protein"  
"JS1\_I07\_00163" 15117 "s59E25H2" 0 "hypothetical protein"  
"JS1\_I07\_00163" 15117 "s59E5H2" 0.2337492 "hypothetical protein"  
"JS1\_I07\_00163" 15117 "s63E6H2" 0.09515214 "hypothetical protein"  
"JS1\_I07\_00164" 15118 "s59E13H2" 0.002574722 "hypothetical protein"  
"JS1\_I07\_00164" 15118 "s59E25H2" 0 "hypothetical protein"  
"JS1\_I07\_00164" 15118 "s59E5H2" 0.04352985 "hypothetical protein"  
"JS1\_I07\_00164" 15118 "s63E6H2" 0.01697835 "hypothetical protein"  
"JS1\_I07\_00165" 15119 "s59E13H2" 0.6356429 "Membrane-bound hydrogenase subunit alpha"  
"JS1\_I07\_00165" 15119 "s59E25H2" 0.5172414 "Membrane-bound hydrogenase subunit alpha"  
"JS1\_I07\_00165" 15119 "s59E5H2" 0.7035998 "Membrane-bound hydrogenase subunit alpha"  
"JS1\_I07\_00165" 15119 "s63E6H2" 4.470743 "Membrane-bound hydrogenase subunit alpha"  
"JS1\_I07\_00166" 15120 "s59E13H2" 0.5838269 "Membrane-bound hydrogenase subunit beta"  
"JS1\_I07\_00166" 15120 "s59E25H2" 0.3782772 "Membrane-bound hydrogenase subunit beta"  
"JS1\_I07\_00166" 15120 "s59E5H2" 0.2091739 "Membrane-bound hydrogenase subunit beta"  
"JS1\_I07\_00166" 15120 "s63E6H2" 3.553356 "Membrane-bound hydrogenase subunit beta"  
"JS1\_I07\_00167" 15121 "s59E13H2" 0.6243495 "putative membrane-bound hydrogenase subunit mbhJ"  
"JS1\_I07\_00167" 15121 "s59E25H2" 0 "putative membrane-bound hydrogenase subunit mbhJ"  
"JS1\_I07\_00167" 15121 "s59E5H2" 0.5634838 "putative membrane-bound hydrogenase subunit mbhJ"  
"JS1\_I07\_00167" 15121 "s63E6H2" 2.848633 "putative membrane-bound hydrogenase subunit mbhJ"  
"JS1\_I07\_00168" 15122 "s59E13H2" 0.4855492 "hypothetical protein"  
"JS1\_I07\_00168" 15122 "s59E25H2" 0 "hypothetical protein"  
"JS1\_I07\_00168" 15122 "s59E5H2" 1.229248 "hypothetical protein"  
"JS1\_I07\_00168" 15122 "s63E6H2" 5.609762 "hypothetical protein"  
"JS1\_I07\_00169" 15123 "s59E13H2" 0.4711104 "Na(+)/H(+) antiporter subunit A"  
"JS1\_I07\_00169" 15123 "s59E25H2" 0 "Na(+)/H(+) antiporter subunit A"  
"JS1\_I07\_00169" 15123 "s59E5H2" 1.171748 "Na(+)/H(+) antiporter subunit A"  
"JS1\_I07\_00169" 15123 "s63E6H2" 4.007642 "Na(+)/H(+) antiporter subunit A"  
"JS1\_I07\_00170" 15124 "s59E13H2" 0.5884072 "Na(+)/H(+) antiporter subunit C1"  
"JS1\_I07\_00170" 15124 "s59E25H2" 0 "Na(+)/H(+) antiporter subunit C1"  
"JS1\_I07\_00170" 15124 "s59E5H2" 1.543795 "Na(+)/H(+) antiporter subunit C1"  
"JS1\_I07\_00170" 15124 "s63E6H2" 3.818021 "Na(+)/H(+) antiporter subunit C1"  
"JS1\_I07\_00171" 15125 "s59E13H2" 0.5351286 "Na(+)/H(+) antiporter subunit B"  
"JS1\_I07\_00171" 15125 "s59E25H2" 0 "Na(+)/H(+) antiporter subunit B"  
"JS1\_I07\_00171" 15125 "s59E5H2" 0.7771096 "Na(+)/H(+) antiporter subunit B"  
"JS1\_I07\_00171" 15125 "s63E6H2" 3.013977 "Na(+)/H(+) antiporter subunit B"  
"JS1\_I07\_00172" 15126 "s59E13H2" 0.6521584 "Na(+)/H(+) antiporter subunit A"  
"JS1\_I07\_00172" 15126 "s59E25H2" 0 "Na(+)/H(+) antiporter subunit A"

"JS1\_I07\_00172" 15126 "s59E5H2" 0.2048629 "Na(+)/H(+) antiporter subunit A"  
"JS1\_I07\_00172" 15126 "s63E6H2" 0.4151904 "Na(+)/H(+) antiporter subunit A"  
"JS1\_I07\_00173" 15127 "s59E13H2" 1.156976 "hypothetical protein"  
"JS1\_I07\_00173" 15127 "s59E25H2" 0 "hypothetical protein"  
"JS1\_I07\_00173" 15127 "s59E5H2" 0.4886203 "hypothetical protein"  
"JS1\_I07\_00173" 15127 "s63E6H2" 3.223499 "hypothetical protein"  
"JS1\_I07\_00174" 15128 "s59E13H2" 1.749648 "Na(+)/H(+) antiporter subunit G"  
"JS1\_I07\_00174" 15128 "s59E25H2" 0 "Na(+)/H(+) antiporter subunit G"  
"JS1\_I07\_00174" 15128 "s59E5H2" 0.9129037 "Na(+)/H(+) antiporter subunit G"  
"JS1\_I07\_00174" 15128 "s63E6H2" 4.489714 "Na(+)/H(+) antiporter subunit G"  
"JS1\_I07\_00175" 15129 "s59E13H2" 1.411017 "Na(+)/H(+) antiporter subunit F"  
"JS1\_I07\_00175" 15129 "s59E25H2" 0 "Na(+)/H(+) antiporter subunit F"  
"JS1\_I07\_00175" 15129 "s59E5H2" 1.339873 "Na(+)/H(+) antiporter subunit F"  
"JS1\_I07\_00175" 15129 "s63E6H2" 3.669753 "Na(+)/H(+) antiporter subunit F"  
"JS1\_I07\_00176" 15130 "s59E13H2" 1.385922 "Na(+)/H(+) antiporter subunit E"  
"JS1\_I07\_00176" 15130 "s59E25H2" 0 "Na(+)/H(+) antiporter subunit E"  
"JS1\_I07\_00176" 15130 "s59E5H2" 1.12697 "Na(+)/H(+) antiporter subunit E"  
"JS1\_I07\_00176" 15130 "s63E6H2" 3.518526 "Na(+)/H(+) antiporter subunit E"  
"JS1\_I07\_00177" 15131 "s59E13H2" 0.6090618 "putative hydrogenase nickel incorporation protein HypA"  
"JS1\_I07\_00177" 15131 "s59E25H2" 0 "putative hydrogenase nickel incorporation protein HypA"  
"JS1\_I07\_00177" 15131 "s59E5H2" 0.7425637 "putative hydrogenase nickel incorporation protein HypA"  
"JS1\_I07\_00177" 15131 "s63E6H2" 1.90687 "putative hydrogenase nickel incorporation protein HypA"  
"JS1\_I07\_00179" 15133 "s59E13H2" 2.333448 "Oligopeptide transport ATP-binding protein OppF"  
"JS1\_I07\_00179" 15133 "s59E25H2" 0.2317949 "Oligopeptide transport ATP-binding protein OppF"  
"JS1\_I07\_00179" 15133 "s59E5H2" 1.519796 "Oligopeptide transport ATP-binding protein OppF"  
"JS1\_I07\_00179" 15133 "s63E6H2" 5.169541 "Oligopeptide transport ATP-binding protein OppF"  
"JS1\_I07\_00180" 15134 "s59E13H2" 1.706989 "Oligopeptide transport ATP-binding protein OppD"  
"JS1\_I07\_00180" 15134 "s59E25H2" 0.1285311 "Oligopeptide transport ATP-binding protein OppD"  
"JS1\_I07\_00180" 15134 "s59E5H2" 1.091567 "Oligopeptide transport ATP-binding protein OppD"  
"JS1\_I07\_00180" 15134 "s63E6H2" 2.505861 "Oligopeptide transport ATP-binding protein OppD"  
"JS1\_I07\_00181" 15135 "s59E13H2" 0.823425 "Membrane-bound hydrogenase subunit alpha"  
"JS1\_I07\_00181" 15135 "s59E25H2" 0 "Membrane-bound hydrogenase subunit alpha"  
"JS1\_I07\_00181" 15135 "s59E5H2" 0.2593599 "Membrane-bound hydrogenase subunit alpha"  
"JS1\_I07\_00181" 15135 "s63E6H2" 6.491574 "Membrane-bound hydrogenase subunit alpha"  
"JS1\_I07\_00182" 15136 "s59E13H2" 6.507461 "putative undecaprenyl-phosphate N-acetylglucosaminyl 1-phosphate transferase"  
"JS1\_I07\_00182" 15136 "s59E25H2" 0 "putative undecaprenyl-phosphate N-acetylglucosaminyl 1-phosphate transferase"  
"JS1\_I07\_00182" 15136 "s59E5H2" 0.6250816 "putative undecaprenyl-phosphate N-acetylglucosaminyl 1-phosphate transferase"  
"JS1\_I07\_00182" 15136 "s63E6H2" 0.6367398 "putative undecaprenyl-phosphate N-acetylglucosaminyl 1-phosphate transferase"  
"JS1\_I07\_00183" 15137 "s59E13H2" 3.288541 "UDP-glucose 4-epimerase"  
"JS1\_I07\_00183" 15137 "s59E25H2" 0 "UDP-glucose 4-epimerase"  
"JS1\_I07\_00183" 15137 "s59E5H2" 0.640226 "UDP-glucose 4-epimerase"  
"JS1\_I07\_00183" 15137 "s63E6H2" 0.3657992 "UDP-glucose 4-epimerase"  
"JS1\_I07\_00184" 15138 "s59E13H2" 0.09087 "Putative N-acetylmannosaminyltransferase"  
"JS1\_I07\_00184" 15138 "s59E25H2" 0 "Putative N-acetylmannosaminyltransferase"  
"JS1\_I07\_00184" 15138 "s59E5H2" 0.3727455 "Putative N-acetylmannosaminyltransferase"  
"JS1\_I07\_00184" 15138 "s63E6H2" 0.6817735 "Putative N-acetylmannosaminyltransferase"  
"JS1\_I07\_00185" 15139 "s59E13H2" 0.1935618 "rod shape-determining protein MreD"

"JS1\_I07\_00185" 15139 "s59E25H2" 0 "rod shape-determining protein MreD"  
"JS1\_I07\_00185" 15139 "s59E5H2" 0.3826499 "rod shape-determining protein MreD"  
"JS1\_I07\_00185" 15139 "s63E6H2" 0.6556682 "rod shape-determining protein MreD"  
"JS1\_I07\_00186" 15140 "s59E13H2" 0.267538 "Stage V sporulation protein D"  
"JS1\_I07\_00186" 15140 "s59E25H2" 0 "Stage V sporulation protein D"  
"JS1\_I07\_00186" 15140 "s59E5H2" 0.3723 "Stage V sporulation protein D"  
"JS1\_I07\_00186" 15140 "s63E6H2" 0.3903945 "Stage V sporulation protein D"  
"JS1\_I07\_00187" 15141 "s59E13H2" 0.1263434 "Rod shape-determining protein RodA"  
"JS1\_I07\_00187" 15141 "s59E25H2" 0 "Rod shape-determining protein RodA"  
"JS1\_I07\_00187" 15141 "s59E5H2" 0.3662497 "Rod shape-determining protein RodA"  
"JS1\_I07\_00187" 15141 "s63E6H2" 0.9561631 "Rod shape-determining protein RodA"  
"JS1\_I07\_00188" 15142 "s59E13H2" 0.1310623 "Radical SAM superfamily protein"  
"JS1\_I07\_00188" 15142 "s59E25H2" 0 "Radical SAM superfamily protein"  
"JS1\_I07\_00188" 15142 "s59E5H2" 0.3335931 "Radical SAM superfamily protein"  
"JS1\_I07\_00188" 15142 "s63E6H2" 0.2676498 "Radical SAM superfamily protein"  
"JS1\_I07\_00189" 15143 "s59E13H2" 0 "SpoIVD-associated factor A"  
"JS1\_I07\_00189" 15143 "s59E25H2" 0 "SpoIVD-associated factor A"  
"JS1\_I07\_00189" 15143 "s59E5H2" 0.04316695 "SpoIVD-associated factor A"  
"JS1\_I07\_00189" 15143 "s63E6H2" 2.775702 "SpoIVD-associated factor A"  
"JS1\_I07\_00190" 15144 "s59E13H2" 0.04273064 "hypothetical protein"  
"JS1\_I07\_00190" 15144 "s59E25H2" 0 "hypothetical protein"  
"JS1\_I07\_00190" 15144 "s59E5H2" 0.2315282 "hypothetical protein"  
"JS1\_I07\_00190" 15144 "s63E6H2" 3.737829 "hypothetical protein"  
"JS1\_I07\_00191" 15145 "s59E13H2" 0.03081784 "hypothetical protein"  
"JS1\_I07\_00191" 15145 "s59E25H2" 0 "hypothetical protein"  
"JS1\_I07\_00191" 15145 "s59E5H2" 0.09695484 "hypothetical protein"  
"JS1\_I07\_00191" 15145 "s63E6H2" 6.725425 "hypothetical protein"  
"JS1\_I07\_00192" 15146 "s59E13H2" 0.7609294 "High-affinity branched-chain amino acid transport system permease protein LivH"  
"JS1\_I07\_00192" 15146 "s59E25H2" 0.5357942 "High-affinity branched-chain amino acid transport system permease protein LivH"  
"JS1\_I07\_00192" 15146 "s59E5H2" 0.2083226 "High-affinity branched-chain amino acid transport system permease protein LivH"  
"JS1\_I07\_00192" 15146 "s63E6H2" 7.901247 "High-affinity branched-chain amino acid transport system permease protein LivH"  
"JS1\_I07\_00193" 15147 "s59E13H2" 0.8542223 "leucine/isoleucine/valine transporter permease subunit"  
"JS1\_I07\_00193" 15147 "s59E25H2" 0 "leucine/isoleucine/valine transporter permease subunit"  
"JS1\_I07\_00193" 15147 "s59E5H2" 0.3242347 "leucine/isoleucine/valine transporter permease subunit"  
"JS1\_I07\_00193" 15147 "s63E6H2" 8.09146 "leucine/isoleucine/valine transporter permease subunit"  
"JS1\_I07\_00194" 15148 "s59E13H2" 0.7341116 "putative branched-chain amino acid transport ATP-binding protein LivG"  
"JS1\_I07\_00194" 15148 "s59E25H2" 0 "putative branched-chain amino acid transport ATP-binding protein LivG"  
"JS1\_I07\_00194" 15148 "s59E5H2" 0.6257645 "putative branched-chain amino acid transport ATP-binding protein LivG"  
"JS1\_I07\_00194" 15148 "s63E6H2" 5.169721 "putative branched-chain amino acid transport ATP-binding protein LivG"  
"JS1\_I07\_00195" 15149 "s59E13H2" 0.7809163 "High-affinity branched-chain amino acid transport ATP-binding protein LivF"  
"JS1\_I07\_00195" 15149 "s59E25H2" 0 "High-affinity branched-chain amino acid transport ATP-binding protein LivF"  
"JS1\_I07\_00195" 15149 "s59E5H2" 0.4376941 "High-affinity branched-chain amino acid transport ATP-binding protein LivF"  
"JS1\_I07\_00195" 15149 "s63E6H2" 0.763632 "High-affinity branched-chain amino acid transport ATP-binding protein LivF"  
"JS1\_I07\_00196" 15150 "s59E13H2" 0.8049977 "Poly-beta-1,6-N-acetyl-D-glucosamine N-deacetylase precursor"  
"JS1\_I07\_00196" 15150 "s59E25H2" 0 "Poly-beta-1,6-N-acetyl-D-glucosamine N-deacetylase precursor"  
"JS1\_I07\_00196" 15150 "s59E5H2" 0.4919447 "Poly-beta-1,6-N-acetyl-D-glucosamine N-deacetylase precursor"  
"JS1\_I07\_00196" 15150 "s63E6H2" 0.7685562 "Poly-beta-1,6-N-acetyl-D-glucosamine N-deacetylase precursor"

"JS1\_I07\_00197" 15151 "s59E13H2" 0.5349964 "Pyrimidine 5'-nucleotidase YjjG"  
"JS1\_I07\_00197" 15151 "s59E25H2" 0 "Pyrimidine 5'-nucleotidase YjjG"  
"JS1\_I07\_00197" 15151 "s59E5H2" 1.019446 "Pyrimidine 5'-nucleotidase YjjG"  
"JS1\_I07\_00197" 15151 "s63E6H2" 1.00266 "Pyrimidine 5'-nucleotidase YjjG"  
"JS1\_I07\_00198" 15152 "s59E13H2" 0.4647708 "putative sulfoacetate transporter SauU"  
"JS1\_I07\_00198" 15152 "s59E25H2" 0 "putative sulfoacetate transporter SauU"  
"JS1\_I07\_00198" 15152 "s59E5H2" 0.5897431 "putative sulfoacetate transporter SauU"  
"JS1\_I07\_00198" 15152 "s63E6H2" 0.7487607 "putative sulfoacetate transporter SauU"  
"JS1\_I07\_00199" 15153 "s59E13H2" 0.6281059 "Adenosine specific kinase"  
"JS1\_I07\_00199" 15153 "s59E25H2" 0 "Adenosine specific kinase"  
"JS1\_I07\_00199" 15153 "s59E5H2" 1.070411 "Adenosine specific kinase"  
"JS1\_I07\_00199" 15153 "s63E6H2" 0.661472 "Adenosine specific kinase"  
"JS1\_I07\_00200" 15154 "s59E13H2" 0.4549289 "Phage shock protein C"  
"JS1\_I07\_00200" 15154 "s59E25H2" 0 "Phage shock protein C"  
"JS1\_I07\_00200" 15154 "s59E5H2" 0.3173511 "Phage shock protein C"  
"JS1\_I07\_00200" 15154 "s63E6H2" 0.264811 "Phage shock protein C"  
"JS1\_I07\_00201" 15155 "s59E13H2" 0.9421612 "putative N-acetyltransferase"  
"JS1\_I07\_00201" 15155 "s59E25H2" 0 "putative N-acetyltransferase"  
"JS1\_I07\_00201" 15155 "s59E5H2" 0.2561454 "putative N-acetyltransferase"  
"JS1\_I07\_00201" 15155 "s63E6H2" 0.4634249 "putative N-acetyltransferase"  
"JS1\_I07\_00202" 15156 "s59E13H2" 16.46829 "tRNA N6-adenosine threonylcarbamoyltransferase"  
"JS1\_I07\_00202" 15156 "s59E25H2" 0 "tRNA N6-adenosine threonylcarbamoyltransferase"  
"JS1\_I07\_00202" 15156 "s59E5H2" 0.9596141 "tRNA N6-adenosine threonylcarbamoyltransferase"  
"JS1\_I07\_00202" 15156 "s63E6H2" 0.540825 "tRNA N6-adenosine threonylcarbamoyltransferase"  
"JS1\_I07\_00203" 15157 "s59E13H2" 14.62858 "hypothetical protein"  
"JS1\_I07\_00203" 15157 "s59E25H2" 0 "hypothetical protein"  
"JS1\_I07\_00203" 15157 "s59E5H2" 0.4662374 "hypothetical protein"  
"JS1\_I07\_00203" 15157 "s63E6H2" 0.4055111 "hypothetical protein"  
"JS1\_I07\_00204" 15158 "s59E13H2" 6.734722 "10 kDa chaperonin"  
"JS1\_I07\_00204" 15158 "s59E25H2" 0 "10 kDa chaperonin"  
"JS1\_I07\_00204" 15158 "s59E5H2" 0.171029 "10 kDa chaperonin"  
"JS1\_I07\_00204" 15158 "s63E6H2" 0.2434915 "10 kDa chaperonin"  
"JS1\_I07\_00205" 15159 "s59E13H2" 5.724389 "60 kDa chaperonin"  
"JS1\_I07\_00205" 15159 "s59E25H2" 0 "60 kDa chaperonin"  
"JS1\_I07\_00205" 15159 "s59E5H2" 0.765749 "60 kDa chaperonin"  
"JS1\_I07\_00205" 15159 "s63E6H2" 0.3542794 "60 kDa chaperonin"  
"JS1\_I07\_00206" 15160 "s59E13H2" 6.696336 "Amino-acid carrier protein AlST"  
"JS1\_I07\_00206" 15160 "s59E25H2" 0.3164464 "Amino-acid carrier protein AlST"  
"JS1\_I07\_00206" 15160 "s59E5H2" 2.291187 "Amino-acid carrier protein AlST"  
"JS1\_I07\_00206" 15160 "s63E6H2" 0.456527 "Amino-acid carrier protein AlST"  
"JS1\_I07\_00207" 15161 "s59E13H2" 1.076602 "Aminomethyltransferase"  
"JS1\_I07\_00207" 15161 "s59E25H2" 0 "Aminomethyltransferase"  
"JS1\_I07\_00207" 15161 "s59E5H2" 0.231907 "Aminomethyltransferase"  
"JS1\_I07\_00207" 15161 "s63E6H2" 0.08355376 "Aminomethyltransferase"  
"JS1\_I07\_00208" 15162 "s59E13H2" 14.77096 "putative glycine dehydrogenase (decarboxylating) subunit 2"  
"JS1\_I07\_00208" 15162 "s59E25H2" 0.1474104 "putative glycine dehydrogenase (decarboxylating) subunit 2"  
"JS1\_I07\_00208" 15162 "s59E5H2" 1.949079 "putative glycine dehydrogenase (decarboxylating) subunit 2"



"JS1\_I07\_00208" 15162 "s63E6H2" 0.42178 "putative glycine dehydrogenase (decarboxylating) subunit 2"  
"JS1\_I07\_00209" 15163 "s59E13H2" 6.434217 "putative glycine dehydrogenase (decarboxylating) subunit 1"  
"JS1\_I07\_00209" 15163 "s59E25H2" 0 "putative glycine dehydrogenase (decarboxylating) subunit 1"  
"JS1\_I07\_00209" 15163 "s59E5H2" 0.8801134 "putative glycine dehydrogenase (decarboxylating) subunit 1"  
"JS1\_I07\_00209" 15163 "s63E6H2" 0.2065902 "putative glycine dehydrogenase (decarboxylating) subunit 1"  
"JS1\_I07\_00210" 15164 "s59E13H2" 1.678934 "5-methyltetrahydrofolate:corrinoid/iron-sulfur protein co-methyltransferase"  
"JS1\_I07\_00210" 15164 "s59E25H2" 0 "5-methyltetrahydrofolate:corrinoid/iron-sulfur protein co-methyltransferase"  
"JS1\_I07\_00210" 15164 "s59E5H2" 0.09930612 "5-methyltetrahydrofolate:corrinoid/iron-sulfur protein co-methyltransferase"  
"JS1\_I07\_00210" 15164 "s63E6H2" 0.1842524 "5-methyltetrahydrofolate:corrinoid/iron-sulfur protein co-methyltransferase"  
"JS1\_I07\_00211" 15165 "s59E13H2" 2.2031 "Formate--tetrahydrofolate ligase"  
"JS1\_I07\_00211" 15165 "s59E25H2" 0 "Formate--tetrahydrofolate ligase"  
"JS1\_I07\_00211" 15165 "s59E5H2" 0.3397876 "Formate--tetrahydrofolate ligase"  
"JS1\_I07\_00211" 15165 "s63E6H2" 0.5370469 "Formate--tetrahydrofolate ligase"  
"JS1\_I07\_00213" 15167 "s59E13H2" 0.5431484 "Folate transporter FolT"  
"JS1\_I07\_00213" 15167 "s59E25H2" 0 "Folate transporter FolT"  
"JS1\_I07\_00213" 15167 "s59E5H2" 0.1718322 "Folate transporter FolT"  
"JS1\_I07\_00213" 15167 "s63E6H2" 0.371053 "Folate transporter FolT"  
"JS1\_I07\_00214" 15168 "s59E13H2" 0.2432528 "Chlorosome protein I"  
"JS1\_I07\_00214" 15168 "s59E25H2" 0 "Chlorosome protein I"  
"JS1\_I07\_00214" 15168 "s59E5H2" 0.1579325 "Chlorosome protein I"  
"JS1\_I07\_00214" 15168 "s63E6H2" 0.04947731 "Chlorosome protein I"  
"JS1\_I07\_00215" 15169 "s59E13H2" 0.00539658 "Vitamin B12 dependent methionine synthase, activation domain"  
"JS1\_I07\_00215" 15169 "s59E25H2" 0 "Vitamin B12 dependent methionine synthase, activation domain"  
"JS1\_I07\_00215" 15169 "s59E5H2" 0.05096447 "Vitamin B12 dependent methionine synthase, activation domain"  
"JS1\_I07\_00215" 15169 "s63E6H2" 0.03395143 "Vitamin B12 dependent methionine synthase, activation domain"  
"JS1\_I07\_00216" 15170 "s59E13H2" 1.373719 "Glyoxylate reductase"  
"JS1\_I07\_00216" 15170 "s59E25H2" 0 "Glyoxylate reductase"  
"JS1\_I07\_00216" 15170 "s59E5H2" 0.2863574 "Glyoxylate reductase"  
"JS1\_I07\_00216" 15170 "s63E6H2" 0.8580839 "Glyoxylate reductase"  
"JS1\_I07\_00217" 15171 "s59E13H2" 1.098079 "Sorbitol dehydrogenase"  
"JS1\_I07\_00217" 15171 "s59E25H2" 0 "Sorbitol dehydrogenase"  
"JS1\_I07\_00217" 15171 "s59E5H2" 0.1228954 "Sorbitol dehydrogenase"  
"JS1\_I07\_00217" 15171 "s63E6H2" 0.1951196 "Sorbitol dehydrogenase"  
"JS1\_I07\_00218" 15172 "s59E13H2" 0.5089237 "Xylulose kinase"  
"JS1\_I07\_00218" 15172 "s59E25H2" 0 "Xylulose kinase"  
"JS1\_I07\_00218" 15172 "s59E5H2" 0.1933113 "Xylulose kinase"  
"JS1\_I07\_00218" 15172 "s63E6H2" 0.1675933 "Xylulose kinase"  
"JS1\_I07\_00220" 15174 "s59E13H2" 0.5052593 "hypothetical protein"  
"JS1\_I07\_00220" 15174 "s59E25H2" 0 "hypothetical protein"  
"JS1\_I07\_00220" 15174 "s59E5H2" 0.4693833 "hypothetical protein"  
"JS1\_I07\_00220" 15174 "s63E6H2" 0.04544092 "hypothetical protein"  
"JS1\_I07\_00221" 15175 "s59E13H2" 1.113535 "hypothetical protein"  
"JS1\_I07\_00221" 15175 "s59E25H2" 0 "hypothetical protein"  
"JS1\_I07\_00221" 15175 "s59E5H2" 0.1208417 "hypothetical protein"  
"JS1\_I07\_00221" 15175 "s63E6H2" 7.579735 "hypothetical protein"  
"JS1\_I07\_00222" 15176 "s59E13H2" 0.8754009 "hypothetical protein"  
"JS1\_I07\_00222" 15176 "s59E25H2" 0.2886335 "hypothetical protein"

"JS1\_I07\_00222" 15176 "s59E5H2" 0.09975495 "hypothetical protein"  
"JS1\_I07\_00222" 15176 "s63E6H2" 4.392058 "hypothetical protein"  
"JS1\_I07\_00223" 15177 "s59E13H2" 0.8393257 "hypothetical protein"  
"JS1\_I07\_00223" 15177 "s59E25H2" 0 "hypothetical protein"  
"JS1\_I07\_00223" 15177 "s59E5H2" 0.06676379 "hypothetical protein"  
"JS1\_I07\_00223" 15177 "s63E6H2" 0.02530361 "hypothetical protein"  
"JS1\_I07\_00224" 15178 "s59E13H2" 0.8159055 "hypothetical protein"  
"JS1\_I07\_00224" 15178 "s59E25H2" 0 "hypothetical protein"  
"JS1\_I07\_00224" 15178 "s59E5H2" 0.2146366 "hypothetical protein"  
"JS1\_I07\_00224" 15178 "s63E6H2" 0.5506506 "hypothetical protein"  
"JS1\_I07\_00225" 15179 "s59E13H2" 0.02391111 "Acyl-coenzyme A:6-aminopenicillanic acid acyl-transferase"  
"JS1\_I07\_00225" 15179 "s59E25H2" 0 "Acyl-coenzyme A:6-aminopenicillanic acid acyl-transferase"  
"JS1\_I07\_00225" 15179 "s59E5H2" 0.0158828 "Acyl-coenzyme A:6-aminopenicillanic acid acyl-transferase"  
"JS1\_I07\_00225" 15179 "s63E6H2" 1.00182 "Acyl-coenzyme A:6-aminopenicillanic acid acyl-transferase"  
"JS1\_I07\_00226" 15180 "s59E13H2" 0.7663657 "Glycine/sarcosine N-methyltransferase"  
"JS1\_I07\_00226" 15180 "s59E25H2" 0 "Glycine/sarcosine N-methyltransferase"  
"JS1\_I07\_00226" 15180 "s59E5H2" 0.02659405 "Glycine/sarcosine N-methyltransferase"  
"JS1\_I07\_00226" 15180 "s63E6H2" 0.4213219 "Glycine/sarcosine N-methyltransferase"  
"JS1\_I07\_00227" 15181 "s59E13H2" 0.6427269 "NADPH-dependent oxidoreductase"  
"JS1\_I07\_00227" 15181 "s59E25H2" 0 "NADPH-dependent oxidoreductase"  
"JS1\_I07\_00227" 15181 "s59E5H2" 0.02263887 "NADPH-dependent oxidoreductase"  
"JS1\_I07\_00227" 15181 "s63E6H2" 0.9168576 "NADPH-dependent oxidoreductase"  
"JS1\_I07\_00228" 15182 "s59E13H2" 0.01773816 "30S ribosomal protein S16"  
"JS1\_I07\_00228" 15182 "s59E25H2" 0 "30S ribosomal protein S16"  
"JS1\_I07\_00228" 15182 "s59E5H2" 0.008268635 "30S ribosomal protein S16"  
"JS1\_I07\_00228" 15182 "s63E6H2" 0.01784723 "30S ribosomal protein S16"  
"JS1\_I07\_00229" 15183 "s59E13H2" 0.03077323 "hypothetical protein"  
"JS1\_I07\_00229" 15183 "s59E25H2" 0 "hypothetical protein"  
"JS1\_I07\_00229" 15183 "s59E5H2" 0.02308944 "hypothetical protein"  
"JS1\_I07\_00229" 15183 "s63E6H2" 0.0240803 "hypothetical protein"  
"JS1\_I07\_00230" 15184 "s59E13H2" 0.9851076 "Ribosome maturation factor RimM"  
"JS1\_I07\_00230" 15184 "s59E25H2" 0 "Ribosome maturation factor RimM"  
"JS1\_I07\_00230" 15184 "s59E5H2" 0.03860829 "Ribosome maturation factor RimM"  
"JS1\_I07\_00230" 15184 "s63E6H2" 0.007379484 "Ribosome maturation factor RimM"  
"JS1\_I07\_00231" 15185 "s59E13H2" 0.01608367 "tRNA (guanine-N(1)-)-methyltransferase"  
"JS1\_I07\_00231" 15185 "s59E25H2" 0 "tRNA (guanine-N(1)-)-methyltransferase"  
"JS1\_I07\_00231" 15185 "s59E5H2" 0.0732081 "tRNA (guanine-N(1)-)-methyltransferase"  
"JS1\_I07\_00231" 15185 "s63E6H2" 0.01362654 "tRNA (guanine-N(1)-)-methyltransferase"  
"JS1\_I07\_00232" 15186 "s59E13H2" 0.01749987 "50S ribosomal protein L19"  
"JS1\_I07\_00232" 15186 "s59E25H2" 0 "50S ribosomal protein L19"  
"JS1\_I07\_00232" 15186 "s59E5H2" 0.06616267 "50S ribosomal protein L19"  
"JS1\_I07\_00232" 15186 "s63E6H2" 0.04343608 "50S ribosomal protein L19"  
"JS1\_I07\_00233" 15187 "s59E13H2" 0.0308642 "Ribonuclease HII"  
"JS1\_I07\_00233" 15187 "s59E25H2" 0 "Ribonuclease HII"  
"JS1\_I07\_00233" 15187 "s59E5H2" 0.1123505 "Ribonuclease HII"  
"JS1\_I07\_00233" 15187 "s63E6H2" 0.04112613 "Ribonuclease HII"  
"JS1\_I07\_00234" 15188 "s59E13H2" 0.03417551 "hypothetical protein"

"JS1\_I07\_00234" 15188 "s59E25H2" 0 "hypothetical protein"  
"JS1\_I07\_00234" 15188 "s59E5H2" 0.0710593 "hypothetical protein"  
"JS1\_I07\_00234" 15188 "s63E6H2" 0.01929097 "hypothetical protein"  
"JS1\_I07\_00235" 15189 "s59E13H2" 0.233121 "Competence protein ComM"  
"JS1\_I07\_00235" 15189 "s59E25H2" 0 "Competence protein ComM"  
"JS1\_I07\_00235" 15189 "s59E5H2" 0.1985726 "Competence protein ComM"  
"JS1\_I07\_00235" 15189 "s63E6H2" 0.0498098 "Competence protein ComM"  
"JS1\_I07\_00236" 15190 "s59E13H2" 0.01457816 "Ribulose-phosphate 3-epimerase"  
"JS1\_I07\_00236" 15190 "s59E25H2" 0 "Ribulose-phosphate 3-epimerase"  
"JS1\_I07\_00236" 15190 "s59E5H2" 0.154616 "Ribulose-phosphate 3-epimerase"  
"JS1\_I07\_00236" 15190 "s63E6H2" 0.0359298 "Ribulose-phosphate 3-epimerase"  
"JS1\_I07\_00237" 15191 "s59E13H2" 0.03249441 "GTPase Der"  
"JS1\_I07\_00237" 15191 "s59E25H2" 0 "GTPase Der"  
"JS1\_I07\_00237" 15191 "s59E5H2" 0.159462 "GTPase Der"  
"JS1\_I07\_00237" 15191 "s63E6H2" 0.08644208 "GTPase Der"  
"JS1\_I07\_00238" 15192 "s59E13H2" 0.007965646 "Glycerol-3-phosphate acyltransferase"  
"JS1\_I07\_00238" 15192 "s59E25H2" 0 "Glycerol-3-phosphate acyltransferase"  
"JS1\_I07\_00238" 15192 "s59E5H2" 0.08622181 "Glycerol-3-phosphate acyltransferase"  
"JS1\_I07\_00238" 15192 "s63E6H2" 0.04675836 "Glycerol-3-phosphate acyltransferase"  
"JS1\_I07\_00239" 15193 "s59E13H2" 2.707127 "Ribosomal RNA small subunit methyltransferase B"  
"JS1\_I07\_00239" 15193 "s59E25H2" 0.04796163 "Ribosomal RNA small subunit methyltransferase B"  
"JS1\_I07\_00239" 15193 "s59E5H2" 0.322699 "Ribosomal RNA small subunit methyltransferase B"  
"JS1\_I07\_00239" 15193 "s63E6H2" 0.07147903 "Ribosomal RNA small subunit methyltransferase B"  
"JS1\_I07\_00240" 15194 "s59E13H2" 2.612933 "Serine/threonine-protein kinase PK-1"  
"JS1\_I07\_00240" 15194 "s59E25H2" 1.681319 "Serine/threonine-protein kinase PK-1"  
"JS1\_I07\_00240" 15194 "s59E5H2" 0.6364144 "Serine/threonine-protein kinase PK-1"  
"JS1\_I07\_00240" 15194 "s63E6H2" 0.1264292 "Serine/threonine-protein kinase PK-1"  
"JS1\_I07\_00241" 15195 "s59E13H2" 2.069423 "hypothetical protein"  
"JS1\_I07\_00241" 15195 "s59E25H2" 0.2506887 "hypothetical protein"  
"JS1\_I07\_00241" 15195 "s59E5H2" 1.107221 "hypothetical protein"  
"JS1\_I07\_00241" 15195 "s63E6H2" 0.09237003 "hypothetical protein"  
"JS1\_I07\_00242" 15196 "s59E13H2" 0.04874214 "Putative neutral zinc metalloproteinase"  
"JS1\_I07\_00242" 15196 "s59E25H2" 0 "Putative neutral zinc metalloproteinase"  
"JS1\_I07\_00242" 15196 "s59E5H2" 0.2244939 "Putative neutral zinc metalloproteinase"  
"JS1\_I07\_00242" 15196 "s63E6H2" 0.8935977 "Putative neutral zinc metalloproteinase"  
"JS1\_I07\_00243" 15197 "s59E13H2" 0.1938385 "Ribosomal RNA small subunit methyltransferase B"  
"JS1\_I07\_00243" 15197 "s59E25H2" 0.04933333 "Ribosomal RNA small subunit methyltransferase B"  
"JS1\_I07\_00243" 15197 "s59E5H2" 0.4693189 "Ribosomal RNA small subunit methyltransferase B"  
"JS1\_I07\_00243" 15197 "s63E6H2" 0.6627398 "Ribosomal RNA small subunit methyltransferase B"  
"JS1\_I07\_00244" 15198 "s59E13H2" 0.1472267 "Methionyl-tRNA formyltransferase"  
"JS1\_I07\_00244" 15198 "s59E25H2" 0 "Methionyl-tRNA formyltransferase"  
"JS1\_I07\_00244" 15198 "s59E5H2" 0.3221913 "Methionyl-tRNA formyltransferase"  
"JS1\_I07\_00244" 15198 "s63E6H2" 0.5440901 "Methionyl-tRNA formyltransferase"  
"JS1\_I07\_00245" 15199 "s59E13H2" 0.1091132 "Peptide deformylase 1"  
"JS1\_I07\_00245" 15199 "s59E25H2" 0.5112474 "Peptide deformylase 1"  
"JS1\_I07\_00245" 15199 "s59E5H2" 0.6237373 "Peptide deformylase 1"  
"JS1\_I07\_00245" 15199 "s63E6H2" 1.391735 "Peptide deformylase 1"

"JS1\_I07\_00246" 15200 "s59E13H2" 0.1195569 "Primosomal protein N"  
"JS1\_I07\_00246" 15200 "s59E25H2" 0 "Primosomal protein N"  
"JS1\_I07\_00246" 15200 "s59E5H2" 0.8377484 "Primosomal protein N"  
"JS1\_I07\_00246" 15200 "s63E6H2" 3.126595 "Primosomal protein N"  
"JS1\_I07\_00247" 15201 "s59E13H2" 0.1761007 "Primosomal protein N"  
"JS1\_I07\_00247" 15201 "s59E25H2" 0.3206751 "Primosomal protein N"  
"JS1\_I07\_00247" 15201 "s59E5H2" 0.6070165 "Primosomal protein N"  
"JS1\_I07\_00247" 15201 "s63E6H2" 1.584095 "Primosomal protein N"  
"JS1\_I07\_00248" 15202 "s59E13H2" 0.04554165 "primosome assembly protein PriA"  
"JS1\_I07\_00248" 15202 "s59E25H2" 0 "primosome assembly protein PriA"  
"JS1\_I07\_00248" 15202 "s59E5H2" 0.1093764 "primosome assembly protein PriA"  
"JS1\_I07\_00248" 15202 "s63E6H2" 0.02887946 "primosome assembly protein PriA"  
"JS1\_I07\_00249" 15203 "s59E13H2" 0.1799479 "50S ribosomal protein L15"  
"JS1\_I07\_00249" 15203 "s59E25H2" 0 "50S ribosomal protein L15"  
"JS1\_I07\_00249" 15203 "s59E5H2" 0.1162712 "50S ribosomal protein L15"  
"JS1\_I07\_00249" 15203 "s63E6H2" 0.2960113 "50S ribosomal protein L15"  
"JS1\_I07\_00250" 15204 "s59E13H2" 0.5842204 "preprotein translocase subunit SecY"  
"JS1\_I07\_00250" 15204 "s59E25H2" 0 "preprotein translocase subunit SecY"  
"JS1\_I07\_00250" 15204 "s59E5H2" 0.1404378 "preprotein translocase subunit SecY"  
"JS1\_I07\_00250" 15204 "s63E6H2" 0.812081 "preprotein translocase subunit SecY"  
"JS1\_I07\_00251" 15205 "s59E13H2" 0.14642 "Adenylate kinase"  
"JS1\_I07\_00251" 15205 "s59E25H2" 0 "Adenylate kinase"  
"JS1\_I07\_00251" 15205 "s59E5H2" 0.02779154 "Adenylate kinase"  
"JS1\_I07\_00251" 15205 "s63E6H2" 0.9632826 "Adenylate kinase"  
"JS1\_I07\_00252" 15206 "s59E13H2" 0.136308 "methionine aminopeptidase"  
"JS1\_I07\_00252" 15206 "s59E25H2" 0 "methionine aminopeptidase"  
"JS1\_I07\_00252" 15206 "s59E5H2" 0.01621173 "methionine aminopeptidase"  
"JS1\_I07\_00252" 15206 "s63E6H2" 0.8755591 "methionine aminopeptidase"  
"JS1\_I07\_00253" 15207 "s59E13H2" 0.2654718 "Translation initiation factor IF-1"  
"JS1\_I07\_00253" 15207 "s59E25H2" 0 "Translation initiation factor IF-1"  
"JS1\_I07\_00253" 15207 "s59E5H2" 0.07805649 "Translation initiation factor IF-1"  
"JS1\_I07\_00253" 15207 "s63E6H2" 1.139219 "Translation initiation factor IF-1"  
"JS1\_I07\_00254" 15208 "s59E13H2" 0.02562587 "30S ribosomal protein S17"  
"JS1\_I07\_00254" 15208 "s59E25H2" 0 "30S ribosomal protein S17"  
"JS1\_I07\_00254" 15208 "s59E5H2" 0.04444006 "30S ribosomal protein S17"  
"JS1\_I07\_00254" 15208 "s63E6H2" 0.02215741 "30S ribosomal protein S17"  
"JS1\_I07\_00255" 15209 "s59E13H2" 0.0308572 "50S ribosomal protein L14"  
"JS1\_I07\_00255" 15209 "s59E25H2" 0 "50S ribosomal protein L14"  
"JS1\_I07\_00255" 15209 "s59E5H2" 0.1109339 "50S ribosomal protein L14"  
"JS1\_I07\_00255" 15209 "s63E6H2" 0.1495439 "50S ribosomal protein L14"  
"JS1\_I07\_00256" 15210 "s59E13H2" 0.1192895 "50S ribosomal protein L24"  
"JS1\_I07\_00256" 15210 "s59E25H2" 0 "50S ribosomal protein L24"  
"JS1\_I07\_00256" 15210 "s59E5H2" 0.1517963 "50S ribosomal protein L24"  
"JS1\_I07\_00256" 15210 "s63E6H2" 0.2544721 "50S ribosomal protein L24"  
"JS1\_I07\_00257" 15211 "s59E13H2" 0.1153856 "50S ribosomal protein L5"  
"JS1\_I07\_00257" 15211 "s59E25H2" 0 "50S ribosomal protein L5"  
"JS1\_I07\_00257" 15211 "s59E5H2" 0.1151934 "50S ribosomal protein L5"

"JS1\_I07\_00257" 15211 "s63E6H2" 0.1294889 "50S ribosomal protein L5"  
"JS1\_I07\_00258" 15212 "s59E13H2" 0.1250089 "30S ribosomal protein S8"  
"JS1\_I07\_00258" 15212 "s59E25H2" 0 "30S ribosomal protein S8"  
"JS1\_I07\_00258" 15212 "s59E5H2" 0.07935216 "30S ribosomal protein S8"  
"JS1\_I07\_00258" 15212 "s63E6H2" 0.1521803 "30S ribosomal protein S8"  
"JS1\_I07\_00259" 15213 "s59E13H2" 0.3940214 "50S ribosomal protein L6"  
"JS1\_I07\_00259" 15213 "s59E25H2" 0 "50S ribosomal protein L6"  
"JS1\_I07\_00259" 15213 "s59E5H2" 0.03677662 "50S ribosomal protein L6"  
"JS1\_I07\_00259" 15213 "s63E6H2" 0.1934565 "50S ribosomal protein L6"  
"JS1\_I07\_00260" 15214 "s59E13H2" 0.1546194 "50S ribosomal protein L18"  
"JS1\_I07\_00260" 15214 "s59E25H2" 0 "50S ribosomal protein L18"  
"JS1\_I07\_00260" 15214 "s59E5H2" 0.00753004 "50S ribosomal protein L18"  
"JS1\_I07\_00260" 15214 "s63E6H2" 0.07041013 "50S ribosomal protein L18"  
"JS1\_I07\_00261" 15215 "s59E13H2" 0.0794321 "30S ribosomal protein S5"  
"JS1\_I07\_00261" 15215 "s59E25H2" 0 "30S ribosomal protein S5"  
"JS1\_I07\_00261" 15215 "s59E5H2" 0.06481707 "30S ribosomal protein S5"  
"JS1\_I07\_00261" 15215 "s63E6H2" 0.1318859 "30S ribosomal protein S5"  
"JS1\_I07\_00262" 15216 "s59E13H2" 0.009798755 "Aspartokinase"  
"JS1\_I07\_00262" 15216 "s59E25H2" 0 "Aspartokinase"  
"JS1\_I07\_00262" 15216 "s59E5H2" 0.1820631 "Aspartokinase"  
"JS1\_I07\_00262" 15216 "s63E6H2" 0.1841044 "Aspartokinase"  
"JS1\_I07\_00264" 15218 "s59E13H2" 0 "hypothetical protein"  
"JS1\_I07\_00264" 15218 "s59E25H2" 0 "hypothetical protein"  
"JS1\_I07\_00264" 15218 "s59E5H2" 1.433614 "hypothetical protein"  
"JS1\_I07\_00264" 15218 "s63E6H2" 0.02581915 "hypothetical protein"  
"JS1\_I07\_00265" 15219 "s59E13H2" 0.1909165 "hypothetical protein"  
"JS1\_I07\_00265" 15219 "s59E25H2" 0 "hypothetical protein"  
"JS1\_I07\_00265" 15219 "s59E5H2" 0 "hypothetical protein"  
"JS1\_I07\_00265" 15219 "s63E6H2" 0 "hypothetical protein"  
"JS1\_I07\_00266" 15220 "s59E13H2" 0.001947566 "L-glutamine:scyllo-inosose aminotransferase"  
"JS1\_I07\_00266" 15220 "s59E25H2" 0 "L-glutamine:scyllo-inosose aminotransferase"  
"JS1\_I07\_00266" 15220 "s59E5H2" 0.9548265 "L-glutamine:scyllo-inosose aminotransferase"  
"JS1\_I07\_00266" 15220 "s63E6H2" 0.569546 "L-glutamine:scyllo-inosose aminotransferase"  
"JS1\_I07\_00267" 15221 "s59E13H2" 0 "hypothetical protein"  
"JS1\_I07\_00267" 15221 "s59E25H2" 0.5721393 "hypothetical protein"  
"JS1\_I07\_00267" 15221 "s59E5H2" 0.441064 "hypothetical protein"  
"JS1\_I07\_00267" 15221 "s63E6H2" 0.3895585 "hypothetical protein"  
"JS1\_I07\_00268" 15222 "s59E13H2" 0 "Modification methylase DpnIIB"  
"JS1\_I07\_00268" 15222 "s59E25H2" 0 "Modification methylase DpnIIB"  
"JS1\_I07\_00268" 15222 "s59E5H2" 2.886104 "Modification methylase DpnIIB"  
"JS1\_I07\_00268" 15222 "s63E6H2" 0 "Modification methylase DpnIIB"  
"JS1\_I07\_00269" 15223 "s59E13H2" 0 "DNA mismatch repair protein"  
"JS1\_I07\_00269" 15223 "s59E25H2" 0 "DNA mismatch repair protein"  
"JS1\_I07\_00269" 15223 "s59E5H2" 1.605201 "DNA mismatch repair protein"  
"JS1\_I07\_00269" 15223 "s63E6H2" 0.00252555 "DNA mismatch repair protein"  
"JS1\_I07\_00271" 15225 "s59E13H2" 0.4326569 "haloacid dehalogenase-like hydrolase"  
"JS1\_I07\_00271" 15225 "s59E25H2" 0.6218905 "haloacid dehalogenase-like hydrolase"

"JS1\_I07\_00271" 15225 "s59E5H2" 0.6566357 "haloacid dehalogenase-like hydrolase"  
"JS1\_I07\_00271" 15225 "s63E6H2" 1.361111 "haloacid dehalogenase-like hydrolase"  
"JS1\_I07\_00272" 15226 "s59E13H2" 0.1065425 "ATP synthase subunit beta"  
"JS1\_I07\_00272" 15226 "s59E25H2" 0 "ATP synthase subunit beta"  
"JS1\_I07\_00272" 15226 "s59E5H2" 1.511621 "ATP synthase subunit beta"  
"JS1\_I07\_00272" 15226 "s63E6H2" 0.4299956 "ATP synthase subunit beta"  
"JS1\_I07\_00273" 15227 "s59E13H2" 0.1553947 "FOF1 ATP synthase subunit epsilon"  
"JS1\_I07\_00273" 15227 "s59E25H2" 0 "FOF1 ATP synthase subunit epsilon"  
"JS1\_I07\_00273" 15227 "s59E5H2" 1.36917 "FOF1 ATP synthase subunit epsilon"  
"JS1\_I07\_00273" 15227 "s63E6H2" 0.5391232 "FOF1 ATP synthase subunit epsilon"  
"JS1\_I07\_00274" 15228 "s59E13H2" 0.1846023 "Putative FOF1-ATPase subunit (ATPase\_gene1)"  
"JS1\_I07\_00274" 15228 "s59E25H2" 0 "Putative FOF1-ATPase subunit (ATPase\_gene1)"  
"JS1\_I07\_00274" 15228 "s59E5H2" 1.628579 "Putative FOF1-ATPase subunit (ATPase\_gene1)"  
"JS1\_I07\_00274" 15228 "s63E6H2" 0.6854024 "Putative FOF1-ATPase subunit (ATPase\_gene1)"  
"JS1\_I07\_00275" 15229 "s59E13H2" 0.2550867 "N-ATPase, AtpR subunit"  
"JS1\_I07\_00275" 15229 "s59E25H2" 0 "N-ATPase, AtpR subunit"  
"JS1\_I07\_00275" 15229 "s59E5H2" 2.064913 "N-ATPase, AtpR subunit"  
"JS1\_I07\_00275" 15229 "s63E6H2" 0.8638079 "N-ATPase, AtpR subunit"  
"JS1\_I07\_00276" 15230 "s59E13H2" 0.2097978 "ATP synthase subunit a"  
"JS1\_I07\_00276" 15230 "s59E25H2" 0 "ATP synthase subunit a"  
"JS1\_I07\_00276" 15230 "s59E5H2" 2.364279 "ATP synthase subunit a"  
"JS1\_I07\_00276" 15230 "s63E6H2" 0.90836 "ATP synthase subunit a"  
"JS1\_I07\_00277" 15231 "s59E13H2" 0.2635139 "ATP synthase subunit c, sodium ion specific"  
"JS1\_I07\_00277" 15231 "s59E25H2" 0 "ATP synthase subunit c, sodium ion specific"  
"JS1\_I07\_00277" 15231 "s59E5H2" 2.247426 "ATP synthase subunit c, sodium ion specific"  
"JS1\_I07\_00277" 15231 "s63E6H2" 1.024743 "ATP synthase subunit c, sodium ion specific"  
"JS1\_I07\_00278" 15232 "s59E13H2" 0.0991816 "Translation initiation factor IF-3"  
"JS1\_I07\_00278" 15232 "s59E25H2" 0 "Translation initiation factor IF-3"  
"JS1\_I07\_00278" 15232 "s59E5H2" 0.2745045 "Translation initiation factor IF-3"  
"JS1\_I07\_00278" 15232 "s63E6H2" 0.2728263 "Translation initiation factor IF-3"  
"JS1\_I07\_00279" 15233 "s59E13H2" 0.0917128 "Threonine--tRNA ligase 2"  
"JS1\_I07\_00279" 15233 "s59E25H2" 0 "Threonine--tRNA ligase 2"  
"JS1\_I07\_00279" 15233 "s59E5H2" 0.1907801 "Threonine--tRNA ligase 2"  
"JS1\_I07\_00279" 15233 "s63E6H2" 0.2619558 "Threonine--tRNA ligase 2"  
"JS1\_I07\_00287" 15241 "s59E13H2" 0.04178024 "Single-stranded DNA-binding protein ssb"  
"JS1\_I07\_00287" 15241 "s59E25H2" 0 "Single-stranded DNA-binding protein ssb"  
"JS1\_I07\_00287" 15241 "s59E5H2" 0.3330477 "Single-stranded DNA-binding protein ssb"  
"JS1\_I07\_00287" 15241 "s63E6H2" 0.2970012 "Single-stranded DNA-binding protein ssb"  
"JS1\_I07\_00288" 15242 "s59E13H2" 0.06769527 "Leucine--tRNA ligase"  
"JS1\_I07\_00288" 15242 "s59E25H2" 0.1849057 "Leucine--tRNA ligase"  
"JS1\_I07\_00288" 15242 "s59E5H2" 0.9630245 "Leucine--tRNA ligase"  
"JS1\_I07\_00288" 15242 "s63E6H2" 0.5496646 "Leucine--tRNA ligase"  
"JS1\_I07\_00289" 15243 "s59E13H2" 0.03368896 "hypothetical protein"  
"JS1\_I07\_00289" 15243 "s59E25H2" 0 "hypothetical protein"  
"JS1\_I07\_00289" 15243 "s59E5H2" 0.07192933 "hypothetical protein"  
"JS1\_I07\_00289" 15243 "s63E6H2" 0.2291247 "hypothetical protein"  
"JS1\_I07\_00290" 15244 "s59E13H2" 0.03990486 "hypothetical protein"

"JS1\_I07\_00290" 15244 "s59E25H2" 0 "hypothetical protein"  
"JS1\_I07\_00290" 15244 "s59E5H2" 0.08067811 "hypothetical protein"  
"JS1\_I07\_00290" 15244 "s63E6H2" 0.1776266 "hypothetical protein"  
"JS1\_I07\_00291" 15245 "s59E13H2" 0.01642845 "GIY-YIG nuclease superfamily protein"  
"JS1\_I07\_00291" 15245 "s59E25H2" 0 "GIY-YIG nuclease superfamily protein"  
"JS1\_I07\_00291" 15245 "s59E5H2" 0.01904235 "GIY-YIG nuclease superfamily protein"  
"JS1\_I07\_00291" 15245 "s63E6H2" 0 "GIY-YIG nuclease superfamily protein"  
"JS1\_I07\_00292" 15246 "s59E13H2" 0.03396772 "Elongation factor P"  
"JS1\_I07\_00292" 15246 "s59E25H2" 0 "Elongation factor P"  
"JS1\_I07\_00292" 15246 "s59E5H2" 0.1609552 "Elongation factor P"  
"JS1\_I07\_00292" 15246 "s63E6H2" 0.1301055 "Elongation factor P"  
"JS1\_I07\_00293" 15247 "s59E13H2" 0.02818484 "Serine hydroxymethyltransferase"  
"JS1\_I07\_00293" 15247 "s59E25H2" 0 "Serine hydroxymethyltransferase"  
"JS1\_I07\_00293" 15247 "s59E5H2" 0.1376031 "Serine hydroxymethyltransferase"  
"JS1\_I07\_00293" 15247 "s63E6H2" 0.03839839 "Serine hydroxymethyltransferase"  
"JS1\_I07\_00294" 15248 "s59E13H2" 0.07140691 "Xaa-Pro dipeptidase"  
"JS1\_I07\_00294" 15248 "s59E25H2" 0 "Xaa-Pro dipeptidase"  
"JS1\_I07\_00294" 15248 "s59E5H2" 0.1453234 "Xaa-Pro dipeptidase"  
"JS1\_I07\_00294" 15248 "s63E6H2" 0.0163122 "Xaa-Pro dipeptidase"  
"JS1\_I07\_00295" 15249 "s59E13H2" 0.06611184 "Ribosomal protein S12 methylthiotransferase RimO"  
"JS1\_I07\_00295" 15249 "s59E25H2" 0.3713647 "Ribosomal protein S12 methylthiotransferase RimO"  
"JS1\_I07\_00295" 15249 "s59E5H2" 0.1094443 "Ribosomal protein S12 methylthiotransferase RimO"  
"JS1\_I07\_00295" 15249 "s63E6H2" 0.09156562 "Ribosomal protein S12 methylthiotransferase RimO"  
"JS1\_I07\_00296" 15250 "s59E13H2" 0.01729698 "hypothetical protein"  
"JS1\_I07\_00296" 15250 "s59E25H2" 0 "hypothetical protein"  
"JS1\_I07\_00296" 15250 "s59E5H2" 0.02062922 "hypothetical protein"  
"JS1\_I07\_00296" 15250 "s63E6H2" 0 "hypothetical protein"  
"JS1\_I07\_00297" 15251 "s59E13H2" 0.05224782 "hypothetical protein"  
"JS1\_I07\_00297" 15251 "s59E25H2" 0 "hypothetical protein"  
"JS1\_I07\_00297" 15251 "s59E5H2" 0.04159755 "hypothetical protein"  
"JS1\_I07\_00297" 15251 "s63E6H2" 0.01771948 "hypothetical protein"  
"JS1\_I07\_00298" 15252 "s59E13H2" 0.01502005 "hypothetical protein"  
"JS1\_I07\_00298" 15252 "s59E25H2" 0 "hypothetical protein"  
"JS1\_I07\_00298" 15252 "s59E5H2" 0.02161564 "hypothetical protein"  
"JS1\_I07\_00298" 15252 "s63E6H2" 0.01524228 "hypothetical protein"  
"JS1\_I07\_00299" 15253 "s59E13H2" 0.000123655 "YcfA-like protein"  
"JS1\_I07\_00299" 15253 "s59E25H2" 0 "YcfA-like protein"  
"JS1\_I07\_00299" 15253 "s59E5H2" 0 "YcfA-like protein"  
"JS1\_I07\_00299" 15253 "s63E6H2" 0.005106603 "YcfA-like protein"  
"JS1\_I07\_00300" 15254 "s59E13H2" 0 "YvrJ protein family protein"  
"JS1\_I07\_00300" 15254 "s59E25H2" 0 "YvrJ protein family protein"  
"JS1\_I07\_00300" 15254 "s59E5H2" 0 "YvrJ protein family protein"  
"JS1\_I07\_00300" 15254 "s63E6H2" 0 "YvrJ protein family protein"  
"JS1\_I07\_00301" 15255 "s59E13H2" 0 "hypothetical protein"  
"JS1\_I07\_00301" 15255 "s59E25H2" 0 "hypothetical protein"  
"JS1\_I07\_00301" 15255 "s59E5H2" 0 "hypothetical protein"  
"JS1\_I07\_00301" 15255 "s63E6H2" 0 "hypothetical protein"

"JS1\_I07\_00302" 15256 "s59E13H2" 0.03131291 "hypothetical protein"  
"JS1\_I07\_00302" 15256 "s59E25H2" 0 "hypothetical protein"  
"JS1\_I07\_00302" 15256 "s59E5H2" 0.03758984 "hypothetical protein"  
"JS1\_I07\_00302" 15256 "s63E6H2" 0.08657977 "hypothetical protein"  
"JS1\_I07\_00303" 15257 "s59E13H2" 0 "hypothetical protein"  
"JS1\_I07\_00303" 15257 "s59E25H2" 0 "hypothetical protein"  
"JS1\_I07\_00303" 15257 "s59E5H2" 0.0120877 "hypothetical protein"  
"JS1\_I07\_00303" 15257 "s63E6H2" 0.06012631 "hypothetical protein"  
"JS1\_I07\_00304" 15258 "s59E13H2" 0 "sporulation sigma factor SigG"  
"JS1\_I07\_00304" 15258 "s59E25H2" 0 "sporulation sigma factor SigG"  
"JS1\_I07\_00304" 15258 "s59E5H2" 0 "sporulation sigma factor SigG"  
"JS1\_I07\_00304" 15258 "s63E6H2" 0.3205389 "sporulation sigma factor SigG"  
"JS1\_I07\_00305" 15259 "s59E13H2" 0 "RNA polymerase factor sigma-70"  
"JS1\_I07\_00305" 15259 "s59E25H2" 0 "RNA polymerase factor sigma-70"  
"JS1\_I07\_00305" 15259 "s59E5H2" 0 "RNA polymerase factor sigma-70"  
"JS1\_I07\_00305" 15259 "s63E6H2" 0.08531838 "RNA polymerase factor sigma-70"  
"JS1\_I07\_00306" 15260 "s59E13H2" 0 "hypothetical protein"  
"JS1\_I07\_00306" 15260 "s59E25H2" 0 "hypothetical protein"  
"JS1\_I07\_00306" 15260 "s59E5H2" 0.03866561 "hypothetical protein"  
"JS1\_I07\_00306" 15260 "s63E6H2" 0.005878653 "hypothetical protein"  
"JS1\_I07\_00307" 15261 "s59E13H2" 0 "DNA-binding transcriptional regulator CpxR"  
"JS1\_I07\_00307" 15261 "s59E25H2" 0 "DNA-binding transcriptional regulator CpxR"  
"JS1\_I07\_00307" 15261 "s59E5H2" 0 "DNA-binding transcriptional regulator CpxR"  
"JS1\_I07\_00307" 15261 "s63E6H2" 0 "DNA-binding transcriptional regulator CpxR"  
"JS1\_I07\_00308" 15262 "s59E13H2" 0.4877651 "hypothetical protein"  
"JS1\_I07\_00308" 15262 "s59E25H2" 0 "hypothetical protein"  
"JS1\_I07\_00308" 15262 "s59E5H2" 1.743701 "hypothetical protein"  
"JS1\_I07\_00308" 15262 "s63E6H2" 1.961325 "hypothetical protein"  
"JS1\_I07\_00309" 15263 "s59E13H2" 1.243509 "Protein-L-isoaspartate O-methyltransferase"  
"JS1\_I07\_00309" 15263 "s59E25H2" 0 "Protein-L-isoaspartate O-methyltransferase"  
"JS1\_I07\_00309" 15263 "s59E5H2" 1.305804 "Protein-L-isoaspartate O-methyltransferase"  
"JS1\_I07\_00309" 15263 "s63E6H2" 0.8572552 "Protein-L-isoaspartate O-methyltransferase"  
"JS1\_I07\_00310" 15264 "s59E13H2" 0 "PEGA domain protein"  
"JS1\_I07\_00310" 15264 "s59E25H2" 0 "PEGA domain protein"  
"JS1\_I07\_00310" 15264 "s59E5H2" 0.2840163 "PEGA domain protein"  
"JS1\_I07\_00310" 15264 "s63E6H2" 0.07359293 "PEGA domain protein"  
"JS1\_I07\_00311" 15265 "s59E13H2" 1.686411 "Inner membrane transport permease YbhS"  
"JS1\_I07\_00311" 15265 "s59E25H2" 0 "Inner membrane transport permease YbhS"  
"JS1\_I07\_00311" 15265 "s59E5H2" 2.208937 "Inner membrane transport permease YbhS"  
"JS1\_I07\_00311" 15265 "s63E6H2" 1.65542 "Inner membrane transport permease YbhS"  
"JS1\_I07\_00312" 15266 "s59E13H2" 1.861631 "putative ABC transporter ATP-binding protein YbhF"  
"JS1\_I07\_00312" 15266 "s59E25H2" 0 "putative ABC transporter ATP-binding protein YbhF"  
"JS1\_I07\_00312" 15266 "s59E5H2" 3.245558 "putative ABC transporter ATP-binding protein YbhF"  
"JS1\_I07\_00312" 15266 "s63E6H2" 1.678608 "putative ABC transporter ATP-binding protein YbhF"  
"JS1\_I07\_00313" 15267 "s59E13H2" 0.7782617 "Epoxyqueuosine reductase"  
"JS1\_I07\_00313" 15267 "s59E25H2" 0 "Epoxyqueuosine reductase"  
"JS1\_I07\_00313" 15267 "s59E5H2" 0.739274 "Epoxyqueuosine reductase"



"JS1\_I07\_00313" 15267 "s63E6H2" 0.6189214 "Epoxyqueuosine reductase"  
"JS1\_I07\_00314" 15268 "s59E13H2" 0.5836603 "colicin V production protein"  
"JS1\_I07\_00314" 15268 "s59E25H2" 0 "colicin V production protein"  
"JS1\_I07\_00314" 15268 "s59E5H2" 0.1636494 "colicin V production protein"  
"JS1\_I07\_00314" 15268 "s63E6H2" 0.366366 "colicin V production protein"  
"JS1\_I07\_00315" 15269 "s59E13H2" 0.2780348 "Phenylalanine--tRNA ligase beta subunit"  
"JS1\_I07\_00315" 15269 "s59E25H2" 0 "Phenylalanine--tRNA ligase beta subunit"  
"JS1\_I07\_00315" 15269 "s59E5H2" 0.2398202 "Phenylalanine--tRNA ligase beta subunit"  
"JS1\_I07\_00315" 15269 "s63E6H2" 0.2823017 "Phenylalanine--tRNA ligase beta subunit"  
"JS1\_I07\_00316" 15270 "s59E13H2" 0.03582812 "Phenylalanine--tRNA ligase alpha subunit"  
"JS1\_I07\_00316" 15270 "s59E25H2" 0 "Phenylalanine--tRNA ligase alpha subunit"  
"JS1\_I07\_00316" 15270 "s59E5H2" 0.09661875 "Phenylalanine--tRNA ligase alpha subunit"  
"JS1\_I07\_00316" 15270 "s63E6H2" 0.4691185 "Phenylalanine--tRNA ligase alpha subunit"  
"JS1\_I07\_00318" 15272 "s59E13H2" 0.2861535 "50S ribosomal protein L20"  
"JS1\_I07\_00318" 15272 "s59E25H2" 0 "50S ribosomal protein L20"  
"JS1\_I07\_00318" 15272 "s59E5H2" 0.2940363 "50S ribosomal protein L20"  
"JS1\_I07\_00318" 15272 "s63E6H2" 0.3834039 "50S ribosomal protein L20"  
"JS1\_I07\_00319" 15273 "s59E13H2" 0.02051549 "50S ribosomal protein L35"  
"JS1\_I07\_00319" 15273 "s59E25H2" 0 "50S ribosomal protein L35"  
"JS1\_I07\_00319" 15273 "s59E5H2" 0.2380177 "50S ribosomal protein L35"  
"JS1\_I07\_00319" 15273 "s63E6H2" 0.2595365 "50S ribosomal protein L35"  
"JS1\_I07\_00320" 15274 "s59E13H2" 0 "Colicin V production protein"  
"JS1\_I07\_00320" 15274 "s59E25H2" 0 "Colicin V production protein"  
"JS1\_I07\_00320" 15274 "s59E5H2" 0.0030397 "Colicin V production protein"  
"JS1\_I07\_00320" 15274 "s63E6H2" 0.03786891 "Colicin V production protein"  
"JS1\_I07\_00321" 15275 "s59E13H2" 0.02516288 "Phenylalanine--tRNA ligase beta subunit"  
"JS1\_I07\_00321" 15275 "s59E25H2" 0 "Phenylalanine--tRNA ligase beta subunit"  
"JS1\_I07\_00321" 15275 "s59E5H2" 0 "Phenylalanine--tRNA ligase beta subunit"  
"JS1\_I07\_00321" 15275 "s63E6H2" 0.0539984 "Phenylalanine--tRNA ligase beta subunit"  
"JS1\_I07\_00322" 15276 "s59E13H2" 0 "hypothetical protein"  
"JS1\_I07\_00322" 15276 "s59E25H2" 0 "hypothetical protein"  
"JS1\_I07\_00322" 15276 "s59E5H2" 0 "hypothetical protein"  
"JS1\_I07\_00322" 15276 "s63E6H2" 0 "hypothetical protein"  
"JS1\_I07\_00323" 15277 "s59E13H2" 0 "Dihydrofolate reductase"  
"JS1\_I07\_00323" 15277 "s59E25H2" 0 "Dihydrofolate reductase"  
"JS1\_I07\_00323" 15277 "s59E5H2" 0 "Dihydrofolate reductase"  
"JS1\_I07\_00323" 15277 "s63E6H2" 0 "Dihydrofolate reductase"  
"JS1\_I07\_00324" 15278 "s59E13H2" 0 "Acetyltransferase (GNAT) family protein"  
"JS1\_I07\_00324" 15278 "s59E25H2" 0 "Acetyltransferase (GNAT) family protein"  
"JS1\_I07\_00324" 15278 "s59E5H2" 0 "Acetyltransferase (GNAT) family protein"  
"JS1\_I07\_00324" 15278 "s63E6H2" 0 "Acetyltransferase (GNAT) family protein"  
"JS1\_I07\_00327" 15281 "s59E13H2" 0 "Kappa-carrageenase precursor"  
"JS1\_I07\_00327" 15281 "s59E25H2" 0 "Kappa-carrageenase precursor"  
"JS1\_I07\_00327" 15281 "s59E5H2" 0.01121457 "Kappa-carrageenase precursor"  
"JS1\_I07\_00327" 15281 "s63E6H2" 0.06232543 "Kappa-carrageenase precursor"  
"JS1\_I07\_00330" 15284 "s59E13H2" 0.0007765414 "Microbial collagenase precursor"  
"JS1\_I07\_00330" 15284 "s59E25H2" 0 "Microbial collagenase precursor"

"JS1\_I07\_00330" 15284 "s59E5H2" 0.01482843 "Microbial collagenase precursor"  
"JS1\_I07\_00330" 15284 "s63E6H2" 0.9258651 "Microbial collagenase precursor"  
"JS1\_I07\_00332" 15286 "s59E13H2" 0.04694753 "metal-dependent hydrolase"  
"JS1\_I07\_00332" 15286 "s59E25H2" 0 "metal-dependent hydrolase"  
"JS1\_I07\_00332" 15286 "s59E5H2" 0.6206125 "metal-dependent hydrolase"  
"JS1\_I07\_00332" 15286 "s63E6H2" 0.4892734 "metal-dependent hydrolase"  
"JS1\_I07\_00333" 15287 "s59E13H2" 0.0664112 "CTP synthase"  
"JS1\_I07\_00333" 15287 "s59E25H2" 0 "CTP synthase"  
"JS1\_I07\_00333" 15287 "s59E5H2" 0.4453185 "CTP synthase"  
"JS1\_I07\_00333" 15287 "s63E6H2" 0.4126431 "CTP synthase"  
"JS1\_I07\_00334" 15288 "s59E13H2" 0.08992784 "2-phospho-L-lactate guanylyltransferase"  
"JS1\_I07\_00334" 15288 "s59E25H2" 0 "2-phospho-L-lactate guanylyltransferase"  
"JS1\_I07\_00334" 15288 "s59E5H2" 0.121556 "2-phospho-L-lactate guanylyltransferase"  
"JS1\_I07\_00334" 15288 "s63E6H2" 0.120961 "2-phospho-L-lactate guanylyltransferase"  
"JS1\_I07\_00335" 15289 "s59E13H2" 1.06315 "High-affinity branched-chain amino acid transport ATP-binding protein LivF"  
"JS1\_I07\_00335" 15289 "s59E25H2" 0 "High-affinity branched-chain amino acid transport ATP-binding protein LivF"  
"JS1\_I07\_00335" 15289 "s59E5H2" 2.364804 "High-affinity branched-chain amino acid transport ATP-binding protein LivF"  
"JS1\_I07\_00335" 15289 "s63E6H2" 2.088994 "High-affinity branched-chain amino acid transport ATP-binding protein LivF"  
"JS1\_I07\_00336" 15290 "s59E13H2" 0.5247044 "hypothetical protein"  
"JS1\_I07\_00336" 15290 "s59E25H2" 0 "hypothetical protein"  
"JS1\_I07\_00336" 15290 "s59E5H2" 1.623469 "hypothetical protein"  
"JS1\_I07\_00336" 15290 "s63E6H2" 0.6390386 "hypothetical protein"  
"JS1\_I07\_00337" 15291 "s59E13H2" 0.6166077 "hypothetical protein"  
"JS1\_I07\_00337" 15291 "s59E25H2" 0 "hypothetical protein"  
"JS1\_I07\_00337" 15291 "s59E5H2" 2.00655 "hypothetical protein"  
"JS1\_I07\_00337" 15291 "s63E6H2" 0.7041092 "hypothetical protein"  
"JS1\_I07\_00338" 15292 "s59E13H2" 0.7222224 "YGGT family protein"  
"JS1\_I07\_00338" 15292 "s59E25H2" 0 "YGGT family protein"  
"JS1\_I07\_00338" 15292 "s59E5H2" 2.03139 "YGGT family protein"  
"JS1\_I07\_00338" 15292 "s63E6H2" 1.605788 "YGGT family protein"  
"JS1\_I07\_00339" 15293 "s59E13H2" 0.76462 "Septum site-determining protein DivIVA"  
"JS1\_I07\_00339" 15293 "s59E25H2" 0 "Septum site-determining protein DivIVA"  
"JS1\_I07\_00339" 15293 "s59E5H2" 2.036907 "Septum site-determining protein DivIVA"  
"JS1\_I07\_00339" 15293 "s63E6H2" 1.742858 "Septum site-determining protein DivIVA"  
"JS1\_I07\_00340" 15294 "s59E13H2" 0.5424012 "hypothetical protein"  
"JS1\_I07\_00340" 15294 "s59E25H2" 0 "hypothetical protein"  
"JS1\_I07\_00340" 15294 "s59E5H2" 1.114412 "hypothetical protein"  
"JS1\_I07\_00340" 15294 "s63E6H2" 1.003417 "hypothetical protein"  
"JS1\_I07\_00342" 15296 "s59E13H2" 0.7728298 "Isoleucine--tRNA ligase"  
"JS1\_I07\_00342" 15296 "s59E25H2" 0 "Isoleucine--tRNA ligase"  
"JS1\_I07\_00342" 15296 "s59E5H2" 1.821922 "Isoleucine--tRNA ligase"  
"JS1\_I07\_00342" 15296 "s63E6H2" 1.240211 "Isoleucine--tRNA ligase"  
"JS1\_I07\_00343" 15297 "s59E13H2" 0.07368783 "primosome assembly protein PriA"  
"JS1\_I07\_00343" 15297 "s59E25H2" 0 "primosome assembly protein PriA"  
"JS1\_I07\_00343" 15297 "s59E5H2" 0.3181666 "primosome assembly protein PriA"  
"JS1\_I07\_00343" 15297 "s63E6H2" 0.3434289 "primosome assembly protein PriA"  
"JS1\_I07\_00344" 15298 "s59E13H2" 1.175507 "Coenzyme A biosynthesis bifunctional protein CoaBC"

"JS1\_I07\_00344" 15298 "s59E25H2" 1.076214 "Coenzyme A biosynthesis bifunctional protein CoaBC"  
"JS1\_I07\_00344" 15298 "s59E5H2" 0.7770498 "Coenzyme A biosynthesis bifunctional protein CoaBC"  
"JS1\_I07\_00344" 15298 "s63E6H2" 1.672176 "Coenzyme A biosynthesis bifunctional protein CoaBC"  
"JS1\_I07\_00345" 15299 "s59E13H2" 0.6567607 "DNA-directed RNA polymerase subunit omega"  
"JS1\_I07\_00345" 15299 "s59E25H2" 0 "DNA-directed RNA polymerase subunit omega"  
"JS1\_I07\_00345" 15299 "s59E5H2" 0.07118794 "DNA-directed RNA polymerase subunit omega"  
"JS1\_I07\_00345" 15299 "s63E6H2" 0.01325965 "DNA-directed RNA polymerase subunit omega"  
"JS1\_I07\_00346" 15300 "s59E13H2" 1.004957 "Guanylate kinase"  
"JS1\_I07\_00346" 15300 "s59E25H2" 0 "Guanylate kinase"  
"JS1\_I07\_00346" 15300 "s59E5H2" 0.2759324 "Guanylate kinase"  
"JS1\_I07\_00346" 15300 "s63E6H2" 0.4865929 "Guanylate kinase"  
"JS1\_I07\_00347" 15301 "s59E13H2" 0.9133778 "hypothetical protein"  
"JS1\_I07\_00347" 15301 "s59E25H2" 0 "hypothetical protein"  
"JS1\_I07\_00347" 15301 "s59E5H2" 0.1918963 "hypothetical protein"  
"JS1\_I07\_00347" 15301 "s63E6H2" 0.9866126 "hypothetical protein"  
"JS1\_I07\_00348" 15302 "s59E13H2" 0.7189378 "hypothetical protein"  
"JS1\_I07\_00348" 15302 "s59E25H2" 0 "hypothetical protein"  
"JS1\_I07\_00348" 15302 "s59E5H2" 0.5663974 "hypothetical protein"  
"JS1\_I07\_00348" 15302 "s63E6H2" 0.8325953 "hypothetical protein"  
"JS1\_I07\_00350" 15304 "s59E13H2" 0.2807579 "prolipoprotein diacylglycerol transferase"  
"JS1\_I07\_00350" 15304 "s59E25H2" 0 "prolipoprotein diacylglycerol transferase"  
"JS1\_I07\_00350" 15304 "s59E5H2" 1.613759 "prolipoprotein diacylglycerol transferase"  
"JS1\_I07\_00350" 15304 "s63E6H2" 0.3518448 "prolipoprotein diacylglycerol transferase"  
"JS1\_I07\_00351" 15305 "s59E13H2" 0.6772557 "Lipoprotein signal peptidase"  
"JS1\_I07\_00351" 15305 "s59E25H2" 0.1333333 "Lipoprotein signal peptidase"  
"JS1\_I07\_00351" 15305 "s59E5H2" 3.017814 "Lipoprotein signal peptidase"  
"JS1\_I07\_00351" 15305 "s63E6H2" 0.7557908 "Lipoprotein signal peptidase"  
"JS1\_I07\_00352" 15306 "s59E13H2" 0.2296746 "4-hydroxy-tetrahydrodipicolinate synthase"  
"JS1\_I07\_00352" 15306 "s59E25H2" 0 "4-hydroxy-tetrahydrodipicolinate synthase"  
"JS1\_I07\_00352" 15306 "s59E5H2" 0.02649367 "4-hydroxy-tetrahydrodipicolinate synthase"  
"JS1\_I07\_00352" 15306 "s63E6H2" 0.02669039 "4-hydroxy-tetrahydrodipicolinate synthase"  
"JS1\_I07\_00353" 15307 "s59E13H2" 0.106069 "4-hydroxy-tetrahydrodipicolinate synthase"  
"JS1\_I07\_00353" 15307 "s59E25H2" 0 "4-hydroxy-tetrahydrodipicolinate synthase"  
"JS1\_I07\_00353" 15307 "s59E5H2" 0.1971368 "4-hydroxy-tetrahydrodipicolinate synthase"  
"JS1\_I07\_00353" 15307 "s63E6H2" 0.7871223 "4-hydroxy-tetrahydrodipicolinate synthase"  
"JS1\_I07\_00354" 15308 "s59E13H2" 0.401079 "Transcriptional regulator KdgR"  
"JS1\_I07\_00354" 15308 "s59E25H2" 0 "Transcriptional regulator KdgR"  
"JS1\_I07\_00354" 15308 "s59E5H2" 0.06367852 "Transcriptional regulator KdgR"  
"JS1\_I07\_00354" 15308 "s63E6H2" 0.8223784 "Transcriptional regulator KdgR"  
"JS1\_I07\_00355" 15309 "s59E13H2" 1.37591 "Integrase core domain protein"  
"JS1\_I07\_00355" 15309 "s59E25H2" 0 "Integrase core domain protein"  
"JS1\_I07\_00355" 15309 "s59E5H2" 1.50046 "Integrase core domain protein"  
"JS1\_I07\_00355" 15309 "s63E6H2" 2.8624 "Integrase core domain protein"  
"JS1\_I07\_00357" 15311 "s59E13H2" 6.564634 "hypothetical protein"  
"JS1\_I07\_00357" 15311 "s59E25H2" 0 "hypothetical protein"  
"JS1\_I07\_00357" 15311 "s59E5H2" 0.1401298 "hypothetical protein"  
"JS1\_I07\_00357" 15311 "s63E6H2" 0.05032438 "hypothetical protein"

"JS1\_I07\_00358" 15312 "s59E13H2" 0.415504 "Transposase IS200 like protein"  
"JS1\_I07\_00358" 15312 "s59E25H2" 0.3683409 "Transposase IS200 like protein"  
"JS1\_I07\_00358" 15312 "s59E5H2" 1.34856 "Transposase IS200 like protein"  
"JS1\_I07\_00358" 15312 "s63E6H2" 1.780908 "Transposase IS200 like protein"  
"JS1\_I07\_00359" 15313 "s59E13H2" 0.002771577 "D-alanyl-D-alanine carboxypeptidase precursor"  
"JS1\_I07\_00359" 15313 "s59E25H2" 0 "D-alanyl-D-alanine carboxypeptidase precursor"  
"JS1\_I07\_00359" 15313 "s59E5H2" 0.003695778 "D-alanyl-D-alanine carboxypeptidase precursor"  
"JS1\_I07\_00359" 15313 "s63E6H2" 0.006737297 "D-alanyl-D-alanine carboxypeptidase precursor"  
"JS1\_I07\_00360" 15314 "s59E13H2" 0 "Cysteine desulfurase"  
"JS1\_I07\_00360" 15314 "s59E25H2" 0 "Cysteine desulfurase"  
"JS1\_I07\_00360" 15314 "s59E5H2" 0 "Cysteine desulfurase"  
"JS1\_I07\_00360" 15314 "s63E6H2" 0 "Cysteine desulfurase"  
"JS1\_I07\_00361" 15315 "s59E13H2" 0 "hypothetical protein"  
"JS1\_I07\_00361" 15315 "s59E25H2" 0 "hypothetical protein"  
"JS1\_I07\_00361" 15315 "s59E5H2" 0 "hypothetical protein"  
"JS1\_I07\_00361" 15315 "s63E6H2" 0 "hypothetical protein"  
"JS1\_I07\_00362" 15316 "s59E13H2" 0.01935352 "Transposase DDE domain protein"  
"JS1\_I07\_00362" 15316 "s59E25H2" 0 "Transposase DDE domain protein"  
"JS1\_I07\_00362" 15316 "s59E5H2" 0.5868597 "Transposase DDE domain protein"  
"JS1\_I07\_00362" 15316 "s63E6H2" 2.001097 "Transposase DDE domain protein"  
"JS1\_I07\_00363" 15317 "s59E13H2" 0.003417073 "methylcobalamin:coenzyme M methyltransferase"  
"JS1\_I07\_00363" 15317 "s59E25H2" 0 "methylcobalamin:coenzyme M methyltransferase"  
"JS1\_I07\_00363" 15317 "s59E5H2" 0.01524675 "methylcobalamin:coenzyme M methyltransferase"  
"JS1\_I07\_00363" 15317 "s63E6H2" 0.01498593 "methylcobalamin:coenzyme M methyltransferase"  
"JS1\_I07\_00364" 15318 "s59E13H2" 0 "hypothetical protein"  
"JS1\_I07\_00364" 15318 "s59E25H2" 0 "hypothetical protein"  
"JS1\_I07\_00364" 15318 "s59E5H2" 0 "hypothetical protein"  
"JS1\_I07\_00364" 15318 "s63E6H2" 0 "hypothetical protein"  
"JS1\_I07\_00366" 15320 "s59E13H2" 0 "hypothetical protein"  
"JS1\_I07\_00366" 15320 "s59E25H2" 0 "hypothetical protein"  
"JS1\_I07\_00366" 15320 "s59E5H2" 0 "hypothetical protein"  
"JS1\_I07\_00366" 15320 "s63E6H2" 0 "hypothetical protein"  
"JS1\_I07\_00367" 15321 "s59E13H2" 0.1904732 "hypothetical protein"  
"JS1\_I07\_00367" 15321 "s59E25H2" 0 "hypothetical protein"  
"JS1\_I07\_00367" 15321 "s59E5H2" 0.1930753 "hypothetical protein"  
"JS1\_I07\_00367" 15321 "s63E6H2" 2.164639 "hypothetical protein"  
"JS1\_I07\_00368" 15322 "s59E13H2" 0.3882332 "Phage shock protein C"  
"JS1\_I07\_00368" 15322 "s59E25H2" 0 "Phage shock protein C"  
"JS1\_I07\_00368" 15322 "s59E5H2" 0.4527464 "Phage shock protein C"  
"JS1\_I07\_00368" 15322 "s63E6H2" 4.806586 "Phage shock protein C"  
"JS1\_I07\_00369" 15323 "s59E13H2" 0 "hypothetical protein"  
"JS1\_I07\_00369" 15323 "s59E25H2" 0 "hypothetical protein"  
"JS1\_I07\_00369" 15323 "s59E5H2" 0.0452291 "hypothetical protein"  
"JS1\_I07\_00369" 15323 "s63E6H2" 0.009229467 "hypothetical protein"  
"JS1\_I07\_00371" 15325 "s59E13H2" 1.094318 "Integrase core domain protein"  
"JS1\_I07\_00371" 15325 "s59E25H2" 0 "Integrase core domain protein"  
"JS1\_I07\_00371" 15325 "s59E5H2" 8.892554 "Integrase core domain protein"

"JS1\_I07\_00371" 15325 "s63E6H2" 6.094614 "Integrase core domain protein"  
"JS1\_I07\_00372" 15326 "s59E13H2" 0.04749337 "Transposase IS200 like protein"  
"JS1\_I07\_00372" 15326 "s59E25H2" 0 "Transposase IS200 like protein"  
"JS1\_I07\_00372" 15326 "s59E5H2" 0.4155905 "Transposase IS200 like protein"  
"JS1\_I07\_00372" 15326 "s63E6H2" 1.678634 "Transposase IS200 like protein"  
"JS1\_I07\_00374" 15328 "s59E13H2" 0 "succinyl-diaminopimelate desuccinylase"  
"JS1\_I07\_00374" 15328 "s59E25H2" 0 "succinyl-diaminopimelate desuccinylase"  
"JS1\_I07\_00374" 15328 "s59E5H2" 0 "succinyl-diaminopimelate desuccinylase"  
"JS1\_I07\_00374" 15328 "s63E6H2" 0 "succinyl-diaminopimelate desuccinylase"  
"JS1\_I07\_00376" 15330 "s59E13H2" 0 "hypothetical protein"  
"JS1\_I07\_00376" 15330 "s59E25H2" 0 "hypothetical protein"  
"JS1\_I07\_00376" 15330 "s59E5H2" 0 "hypothetical protein"  
"JS1\_I07\_00376" 15330 "s63E6H2" 0 "hypothetical protein"  
"JS1\_I07\_00377" 15331 "s59E13H2" 0 "putative oxidoreductase"  
"JS1\_I07\_00377" 15331 "s59E25H2" 0 "putative oxidoreductase"  
"JS1\_I07\_00377" 15331 "s59E5H2" 0 "putative oxidoreductase"  
"JS1\_I07\_00377" 15331 "s63E6H2" 0 "putative oxidoreductase"  
"JS1\_I07\_00380" 15334 "s59E13H2" 0.1491374 "Ribose transport system permease protein RbsC"  
"JS1\_I07\_00380" 15334 "s59E25H2" 0 "Ribose transport system permease protein RbsC"  
"JS1\_I07\_00380" 15334 "s59E5H2" 0.3387952 "Ribose transport system permease protein RbsC"  
"JS1\_I07\_00380" 15334 "s63E6H2" 0.1689817 "Ribose transport system permease protein RbsC"  
"JS1\_I07\_00381" 15335 "s59E13H2" 0.1154337 "PHP domain protein"  
"JS1\_I07\_00381" 15335 "s59E25H2" 0 "PHP domain protein"  
"JS1\_I07\_00381" 15335 "s59E5H2" 0.7649406 "PHP domain protein"  
"JS1\_I07\_00381" 15335 "s63E6H2" 0.2890648 "PHP domain protein"  
"JS1\_I07\_00382" 15336 "s59E13H2" 0.534852 "Sorbitol-6-phosphate 2-dehydrogenase"  
"JS1\_I07\_00382" 15336 "s59E25H2" 0 "Sorbitol-6-phosphate 2-dehydrogenase"  
"JS1\_I07\_00382" 15336 "s59E5H2" 0.6058081 "Sorbitol-6-phosphate 2-dehydrogenase"  
"JS1\_I07\_00382" 15336 "s63E6H2" 0.2440579 "Sorbitol-6-phosphate 2-dehydrogenase"  
"JS1\_I07\_00383" 15337 "s59E13H2" 0.4888631 "L-threonine 3-dehydrogenase"  
"JS1\_I07\_00383" 15337 "s59E25H2" 0 "L-threonine 3-dehydrogenase"  
"JS1\_I07\_00383" 15337 "s59E5H2" 0.3844992 "L-threonine 3-dehydrogenase"  
"JS1\_I07\_00383" 15337 "s63E6H2" 0.6794124 "L-threonine 3-dehydrogenase"  
"JS1\_I07\_00384" 15338 "s59E13H2" 0.8632703 "D-ribose-binding periplasmic protein precursor"  
"JS1\_I07\_00384" 15338 "s59E25H2" 0 "D-ribose-binding periplasmic protein precursor"  
"JS1\_I07\_00384" 15338 "s59E5H2" 1.162746 "D-ribose-binding periplasmic protein precursor"  
"JS1\_I07\_00384" 15338 "s63E6H2" 0.6655433 "D-ribose-binding periplasmic protein precursor"  
"JS1\_I07\_00385" 15339 "s59E13H2" 0.1283651 "50S ribosomal protein L31"  
"JS1\_I07\_00385" 15339 "s59E25H2" 0 "50S ribosomal protein L31"  
"JS1\_I07\_00385" 15339 "s59E5H2" 0.0576904 "50S ribosomal protein L31"  
"JS1\_I07\_00385" 15339 "s63E6H2" 0.06290148 "50S ribosomal protein L31"  
"JS1\_I07\_00386" 15340 "s59E13H2" 0.07591086 "Thymidine kinase"  
"JS1\_I07\_00386" 15340 "s59E25H2" 0 "Thymidine kinase"  
"JS1\_I07\_00386" 15340 "s59E5H2" 0.1719172 "Thymidine kinase"  
"JS1\_I07\_00386" 15340 "s63E6H2" 0.2044279 "Thymidine kinase"  
"JS1\_I07\_00387" 15341 "s59E13H2" 0.08167824 "Thymidylate synthase ThyX"  
"JS1\_I07\_00387" 15341 "s59E25H2" 0 "Thymidylate synthase ThyX"

"JS1\_I07\_00387" 15341 "s59E5H2" 0.1886011 "Thymidylate synthase ThyX"  
"JS1\_I07\_00387" 15341 "s63E6H2" 0.268633 "Thymidylate synthase ThyX"  
"JS1\_I07\_00388" 15342 "s59E13H2" 0.03772812 "hypothetical protein"  
"JS1\_I07\_00388" 15342 "s59E25H2" 0 "hypothetical protein"  
"JS1\_I07\_00388" 15342 "s59E5H2" 0.1164624 "hypothetical protein"  
"JS1\_I07\_00388" 15342 "s63E6H2" 0.257673 "hypothetical protein"  
"JS1\_I07\_00389" 15343 "s59E13H2" 0.3303677 "Peptide chain release factor 1"  
"JS1\_I07\_00389" 15343 "s59E25H2" 0 "Peptide chain release factor 1"  
"JS1\_I07\_00389" 15343 "s59E5H2" 0.06679111 "Peptide chain release factor 1"  
"JS1\_I07\_00389" 15343 "s63E6H2" 0.1179118 "Peptide chain release factor 1"  
"JS1\_I07\_00390" 15344 "s59E13H2" 1.486287 "hypothetical protein"  
"JS1\_I07\_00390" 15344 "s59E25H2" 0 "hypothetical protein"  
"JS1\_I07\_00390" 15344 "s59E5H2" 0.08667366 "hypothetical protein"  
"JS1\_I07\_00390" 15344 "s63E6H2" 0.7161371 "hypothetical protein"  
"JS1\_I07\_00391" 15345 "s59E13H2" 3.910389 "GYD domain protein"  
"JS1\_I07\_00391" 15345 "s59E25H2" 0 "GYD domain protein"  
"JS1\_I07\_00391" 15345 "s59E5H2" 0.2898356 "GYD domain protein"  
"JS1\_I07\_00391" 15345 "s63E6H2" 2.615315 "GYD domain protein"  
"JS1\_I07\_00392" 15346 "s59E13H2" 1.463057 "Rubrerythrin"  
"JS1\_I07\_00392" 15346 "s59E25H2" 0 "Rubrerythrin"  
"JS1\_I07\_00392" 15346 "s59E5H2" 0.2548094 "Rubrerythrin"  
"JS1\_I07\_00392" 15346 "s63E6H2" 0.5611522 "Rubrerythrin"  
"JS1\_I07\_00393" 15347 "s59E13H2" 0.1451549 "Nitroreductase family protein"  
"JS1\_I07\_00393" 15347 "s59E25H2" 0 "Nitroreductase family protein"  
"JS1\_I07\_00393" 15347 "s59E5H2" 1.315755 "Nitroreductase family protein"  
"JS1\_I07\_00393" 15347 "s63E6H2" 1.684533 "Nitroreductase family protein"  
"JS1\_I07\_00394" 15348 "s59E13H2" 0.7355015 "Peptide methionine sulfoxide reductase MsrA/MsrB"  
"JS1\_I07\_00394" 15348 "s59E25H2" 0 "Peptide methionine sulfoxide reductase MsrA/MsrB"  
"JS1\_I07\_00394" 15348 "s59E5H2" 0.9488527 "Peptide methionine sulfoxide reductase MsrA/MsrB"  
"JS1\_I07\_00394" 15348 "s63E6H2" 2.289344 "Peptide methionine sulfoxide reductase MsrA/MsrB"  
"JS1\_I07\_00395" 15349 "s59E13H2" 0.15279 "Carnitine transport permease protein OpuCB"  
"JS1\_I07\_00395" 15349 "s59E25H2" 0 "Carnitine transport permease protein OpuCB"  
"JS1\_I07\_00395" 15349 "s59E5H2" 0.2851853 "Carnitine transport permease protein OpuCB"  
"JS1\_I07\_00395" 15349 "s63E6H2" 0.6059534 "Carnitine transport permease protein OpuCB"  
"JS1\_I07\_00396" 15350 "s59E13H2" 0.2957019 "hypothetical protein"  
"JS1\_I07\_00396" 15350 "s59E25H2" 0 "hypothetical protein"  
"JS1\_I07\_00396" 15350 "s59E5H2" 0.5377584 "hypothetical protein"  
"JS1\_I07\_00396" 15350 "s63E6H2" 0.2328056 "hypothetical protein"  
"JS1\_I07\_00397" 15351 "s59E13H2" 0.07329303 "hypothetical protein"  
"JS1\_I07\_00397" 15351 "s59E25H2" 0 "hypothetical protein"  
"JS1\_I07\_00397" 15351 "s59E5H2" 0.4394055 "hypothetical protein"  
"JS1\_I07\_00397" 15351 "s63E6H2" 0.6119085 "hypothetical protein"  
"JS1\_I07\_00398" 15352 "s59E13H2" 0.009838894 "Elongation factor G"  
"JS1\_I07\_00398" 15352 "s59E25H2" 0 "Elongation factor G"  
"JS1\_I07\_00398" 15352 "s59E5H2" 0.001870585 "Elongation factor G"  
"JS1\_I07\_00398" 15352 "s63E6H2" 0.08874724 "Elongation factor G"  
"JS1\_I07\_00407" 15361 "s59E13H2" 0.2478812 "Tyrosine--tRNA ligase"

"JS1\_I07\_00407" 15361 "s59E25H2" 0 "Tyrosine--tRNA ligase"  
"JS1\_I07\_00407" 15361 "s59E5H2" 0.06360504 "Tyrosine--tRNA ligase"  
"JS1\_I07\_00407" 15361 "s63E6H2" 0.3075516 "Tyrosine--tRNA ligase"  
"JS1\_I07\_00408" 15362 "s59E13H2" 0.6176132 "NTE family protein RssA"  
"JS1\_I07\_00408" 15362 "s59E25H2" 0 "NTE family protein RssA"  
"JS1\_I07\_00408" 15362 "s59E5H2" 0.06710982 "NTE family protein RssA"  
"JS1\_I07\_00408" 15362 "s63E6H2" 0.4350238 "NTE family protein RssA"  
"JS1\_I07\_00409" 15363 "s59E13H2" 0.8279149 "NTE family protein RssA"  
"JS1\_I07\_00409" 15363 "s59E25H2" 0 "NTE family protein RssA"  
"JS1\_I07\_00409" 15363 "s59E5H2" 0.1772005 "NTE family protein RssA"  
"JS1\_I07\_00409" 15363 "s63E6H2" 0.7401697 "NTE family protein RssA"  
"JS1\_I07\_00410" 15364 "s59E13H2" 0.4194779 "hypothetical protein"  
"JS1\_I07\_00410" 15364 "s59E25H2" 0 "hypothetical protein"  
"JS1\_I07\_00410" 15364 "s59E5H2" 0.5949693 "hypothetical protein"  
"JS1\_I07\_00410" 15364 "s63E6H2" 0.4672293 "hypothetical protein"  
"JS1\_I07\_00411" 15365 "s59E13H2" 0.04629485 "Transaldolase"  
"JS1\_I07\_00411" 15365 "s59E25H2" 0 "Transaldolase"  
"JS1\_I07\_00411" 15365 "s59E5H2" 0.01787176 "Transaldolase"  
"JS1\_I07\_00411" 15365 "s63E6H2" 0.17969 "Transaldolase"  
"JS1\_I07\_00412" 15366 "s59E13H2" 0.003846305 "Xylose isomerase-like TIM barrel"  
"JS1\_I07\_00412" 15366 "s59E25H2" 0 "Xylose isomerase-like TIM barrel"  
"JS1\_I07\_00412" 15366 "s59E5H2" 0.008803722 "Xylose isomerase-like TIM barrel"  
"JS1\_I07\_00412" 15366 "s63E6H2" 0.07625952 "Xylose isomerase-like TIM barrel"  
"JS1\_I07\_00413" 15367 "s59E13H2" 0.00538272 "hypothetical protein"  
"JS1\_I07\_00413" 15367 "s59E25H2" 0 "hypothetical protein"  
"JS1\_I07\_00413" 15367 "s59E5H2" 0 "hypothetical protein"  
"JS1\_I07\_00413" 15367 "s63E6H2" 0.07519175 "hypothetical protein"  
"JS1\_I07\_00415" 15369 "s59E13H2" 13.29123 "Signal peptidase I S"  
"JS1\_I07\_00415" 15369 "s59E25H2" 0 "Signal peptidase I S"  
"JS1\_I07\_00415" 15369 "s59E5H2" 1.202295 "Signal peptidase I S"  
"JS1\_I07\_00415" 15369 "s63E6H2" 0.5926685 "Signal peptidase I S"  
"JS1\_I07\_00416" 15370 "s59E13H2" 0.03512574 "Enolase"  
"JS1\_I07\_00416" 15370 "s59E25H2" 0 "Enolase"  
"JS1\_I07\_00416" 15370 "s59E5H2" 0.3603733 "Enolase"  
"JS1\_I07\_00416" 15370 "s63E6H2" 0.2782921 "Enolase"  
"JS1\_I07\_00417" 15371 "s59E13H2" 0.0558138 "cell division protein FtsB"  
"JS1\_I07\_00417" 15371 "s59E25H2" 0 "cell division protein FtsB"  
"JS1\_I07\_00417" 15371 "s59E5H2" 0.3854227 "cell division protein FtsB"  
"JS1\_I07\_00417" 15371 "s63E6H2" 0.5078107 "cell division protein FtsB"  
"JS1\_I07\_00421" 15375 "s59E13H2" 0.07409738 "tRNA(Ile)-lysine synthase"  
"JS1\_I07\_00421" 15375 "s59E25H2" 0 "tRNA(Ile)-lysine synthase"  
"JS1\_I07\_00421" 15375 "s59E5H2" 0.2071313 "tRNA(Ile)-lysine synthase"  
"JS1\_I07\_00421" 15375 "s63E6H2" 0.3163236 "tRNA(Ile)-lysine synthase"  
"JS1\_I07\_00422" 15376 "s59E13H2" 0.03039155 "Hypoxanthine-guanine phosphoribosyltransferase"  
"JS1\_I07\_00422" 15376 "s59E25H2" 0 "Hypoxanthine-guanine phosphoribosyltransferase"  
"JS1\_I07\_00422" 15376 "s59E5H2" 0.1372009 "Hypoxanthine-guanine phosphoribosyltransferase"  
"JS1\_I07\_00422" 15376 "s63E6H2" 0.1212134 "Hypoxanthine-guanine phosphoribosyltransferase"

"JS1\_I07\_00423" 15377 "s59E13H2" 0.07627967 "Lysine--tRNA ligase"  
"JS1\_I07\_00423" 15377 "s59E25H2" 0 "Lysine--tRNA ligase"  
"JS1\_I07\_00423" 15377 "s59E5H2" 0.01661703 "Lysine--tRNA ligase"  
"JS1\_I07\_00423" 15377 "s63E6H2" 0.05676537 "Lysine--tRNA ligase"  
"JS1\_I07\_00424" 15378 "s59E13H2" 0.03318874 "ferredoxin"  
"JS1\_I07\_00424" 15378 "s59E25H2" 0 "ferredoxin"  
"JS1\_I07\_00424" 15378 "s59E5H2" 0.2162072 "ferredoxin"  
"JS1\_I07\_00424" 15378 "s63E6H2" 0.04411528 "ferredoxin"  
"JS1\_I07\_00425" 15379 "s59E13H2" 0.03493011 "DNA topoisomerase 1"  
"JS1\_I07\_00425" 15379 "s59E25H2" 0 "DNA topoisomerase 1"  
"JS1\_I07\_00425" 15379 "s59E5H2" 0.1472701 "DNA topoisomerase 1"  
"JS1\_I07\_00425" 15379 "s63E6H2" 0.06696758 "DNA topoisomerase 1"  
"JS1\_I07\_00427" 15381 "s59E13H2" 0.02173256 "Tyrosine recombinase XerD"  
"JS1\_I07\_00427" 15381 "s59E25H2" 0 "Tyrosine recombinase XerD"  
"JS1\_I07\_00427" 15381 "s59E5H2" 0.08574433 "Tyrosine recombinase XerD"  
"JS1\_I07\_00427" 15381 "s63E6H2" 0.03725809 "Tyrosine recombinase XerD"  
"JS1\_I07\_00428" 15382 "s59E13H2" 0.01527056 "hypothetical protein"  
"JS1\_I07\_00428" 15382 "s59E25H2" 0 "hypothetical protein"  
"JS1\_I07\_00428" 15382 "s59E5H2" 0.1264129 "hypothetical protein"  
"JS1\_I07\_00428" 15382 "s63E6H2" 0.0306196 "hypothetical protein"  
"JS1\_I07\_00429" 15383 "s59E13H2" 0 "Carboxymuconolactone decarboxylase family protein"  
"JS1\_I07\_00429" 15383 "s59E25H2" 0 "Carboxymuconolactone decarboxylase family protein"  
"JS1\_I07\_00429" 15383 "s59E5H2" 0.1687398 "Carboxymuconolactone decarboxylase family protein"  
"JS1\_I07\_00429" 15383 "s63E6H2" 0.09689116 "Carboxymuconolactone decarboxylase family protein"  
"JS1\_I07\_00430" 15384 "s59E13H2" 0.09431555 "Fe/S biogenesis protein NfuA"  
"JS1\_I07\_00430" 15384 "s59E25H2" 0 "Fe/S biogenesis protein NfuA"  
"JS1\_I07\_00430" 15384 "s59E5H2" 0.06431321 "Fe/S biogenesis protein NfuA"  
"JS1\_I07\_00430" 15384 "s63E6H2" 0.1425506 "Fe/S biogenesis protein NfuA"  
"JS1\_I07\_00431" 15385 "s59E13H2" 0.06752235 "Rubrerythrin-1"  
"JS1\_I07\_00431" 15385 "s59E25H2" 0 "Rubrerythrin-1"  
"JS1\_I07\_00431" 15385 "s59E5H2" 0.196805 "Rubrerythrin-1"  
"JS1\_I07\_00431" 15385 "s63E6H2" 0.1632012 "Rubrerythrin-1"  
"JS1\_I07\_00432" 15386 "s59E13H2" 0.1111534 "Nitric oxide reductase"  
"JS1\_I07\_00432" 15386 "s59E25H2" 0 "Nitric oxide reductase"  
"JS1\_I07\_00432" 15386 "s59E5H2" 0.3043008 "Nitric oxide reductase"  
"JS1\_I07\_00432" 15386 "s63E6H2" 0.2102162 "Nitric oxide reductase"  
"JS1\_I07\_00433" 15387 "s59E13H2" 0.1003759 "High molecular weight rubredoxin"  
"JS1\_I07\_00433" 15387 "s59E25H2" 0 "High molecular weight rubredoxin"  
"JS1\_I07\_00433" 15387 "s59E5H2" 2.151842 "High molecular weight rubredoxin"  
"JS1\_I07\_00433" 15387 "s63E6H2" 0.4608305 "High molecular weight rubredoxin"  
"JS1\_I07\_00434" 15388 "s59E13H2" 0.1136979 "Desulfoferredoxin"  
"JS1\_I07\_00434" 15388 "s59E25H2" 0 "Desulfoferredoxin"  
"JS1\_I07\_00434" 15388 "s59E5H2" 0.1221954 "Desulfoferredoxin"  
"JS1\_I07\_00434" 15388 "s63E6H2" 0.3200188 "Desulfoferredoxin"  
"JS1\_I07\_00435" 15389 "s59E13H2" 0.06102818 "HTH-type transcriptional repressor NsrR"  
"JS1\_I07\_00435" 15389 "s59E25H2" 0 "HTH-type transcriptional repressor NsrR"  
"JS1\_I07\_00435" 15389 "s59E5H2" 0.05577872 "HTH-type transcriptional repressor NsrR"



"JS1\_I07\_00435" 15389 "s63E6H2" 0.1418223 "HTH-type transcriptional repressor NsrR"  
"JS1\_I07\_00436" 15390 "s59E13H2" 0.01369037 "GIY-YIG nuclease superfamily protein"  
"JS1\_I07\_00436" 15390 "s59E25H2" 0 "GIY-YIG nuclease superfamily protein"  
"JS1\_I07\_00436" 15390 "s59E5H2" 0 "GIY-YIG nuclease superfamily protein"  
"JS1\_I07\_00436" 15390 "s63E6H2" 0 "GIY-YIG nuclease superfamily protein"  
"JS1\_I07\_00437" 15391 "s59E13H2" 0.02193141 "Non-canonical purine NTP pyrophosphatase"  
"JS1\_I07\_00437" 15391 "s59E25H2" 0 "Non-canonical purine NTP pyrophosphatase"  
"JS1\_I07\_00437" 15391 "s59E5H2" 0.03711053 "Non-canonical purine NTP pyrophosphatase"  
"JS1\_I07\_00437" 15391 "s63E6H2" 0.1048677 "Non-canonical purine NTP pyrophosphatase"  
"JS1\_I07\_00438" 15392 "s59E13H2" 0.02193982 "Ribonuclease PH"  
"JS1\_I07\_00438" 15392 "s59E25H2" 0 "Ribonuclease PH"  
"JS1\_I07\_00438" 15392 "s59E5H2" 0.1429357 "Ribonuclease PH"  
"JS1\_I07\_00438" 15392 "s63E6H2" 0.2727809 "Ribonuclease PH"  
"JS1\_I07\_00439" 15393 "s59E13H2" 0.03107801 "Farnesyl diphosphate synthase"  
"JS1\_I07\_00439" 15393 "s59E25H2" 0 "Farnesyl diphosphate synthase"  
"JS1\_I07\_00439" 15393 "s59E5H2" 0.04810799 "Farnesyl diphosphate synthase"  
"JS1\_I07\_00439" 15393 "s63E6H2" 0.1806559 "Farnesyl diphosphate synthase"  
"JS1\_I07\_00440" 15394 "s59E13H2" 0.01702832 "Exodeoxyribonuclease 7 small subunit"  
"JS1\_I07\_00440" 15394 "s59E25H2" 0 "Exodeoxyribonuclease 7 small subunit"  
"JS1\_I07\_00440" 15394 "s59E5H2" 0.04839502 "Exodeoxyribonuclease 7 small subunit"  
"JS1\_I07\_00440" 15394 "s63E6H2" 0.2296395 "Exodeoxyribonuclease 7 small subunit"  
"JS1\_I07\_00441" 15395 "s59E13H2" 0.04041536 "Exodeoxyribonuclease 7 large subunit"  
"JS1\_I07\_00441" 15395 "s59E25H2" 0 "Exodeoxyribonuclease 7 large subunit"  
"JS1\_I07\_00441" 15395 "s59E5H2" 0.06940103 "Exodeoxyribonuclease 7 large subunit"  
"JS1\_I07\_00441" 15395 "s63E6H2" 0.1543028 "Exodeoxyribonuclease 7 large subunit"  
"JS1\_I07\_00442" 15396 "s59E13H2" 0 "Sialic acid TRAP transporter permease protein SiaT"  
"JS1\_I07\_00442" 15396 "s59E25H2" 0 "Sialic acid TRAP transporter permease protein SiaT"  
"JS1\_I07\_00442" 15396 "s59E5H2" 0.0949484 "Sialic acid TRAP transporter permease protein SiaT"  
"JS1\_I07\_00442" 15396 "s63E6H2" 0.09779107 "Sialic acid TRAP transporter permease protein SiaT"  
"JS1\_I07\_00443" 15397 "s59E13H2" 0 "hypothetical protein"  
"JS1\_I07\_00443" 15397 "s59E25H2" 0 "hypothetical protein"  
"JS1\_I07\_00443" 15397 "s59E5H2" 0.07209608 "hypothetical protein"  
"JS1\_I07\_00443" 15397 "s63E6H2" 0.0954399 "hypothetical protein"  
"JS1\_I07\_00444" 15398 "s59E13H2" 0.14034 "Sialic acid TRAP transporter permease protein SiaT"  
"JS1\_I07\_00444" 15398 "s59E25H2" 0 "Sialic acid TRAP transporter permease protein SiaT"  
"JS1\_I07\_00444" 15398 "s59E5H2" 0.09867249 "Sialic acid TRAP transporter permease protein SiaT"  
"JS1\_I07\_00444" 15398 "s63E6H2" 0.2343648 "Sialic acid TRAP transporter permease protein SiaT"  
"JS1\_I07\_00445" 15399 "s59E13H2" 0.1176737 "2,3-diketo-L-gulonate-binding periplasmic protein YiaO precursor"  
"JS1\_I07\_00445" 15399 "s59E25H2" 0 "2,3-diketo-L-gulonate-binding periplasmic protein YiaO precursor"  
"JS1\_I07\_00445" 15399 "s59E5H2" 0.6153181 "2,3-diketo-L-gulonate-binding periplasmic protein YiaO precursor"  
"JS1\_I07\_00445" 15399 "s63E6H2" 0.5216983 "2,3-diketo-L-gulonate-binding periplasmic protein YiaO precursor"  
"JS1\_I07\_00446" 15400 "s59E13H2" 1.060818 "Alpha-D-glucose-1-phosphate phosphatase YihX"  
"JS1\_I07\_00446" 15400 "s59E25H2" 0 "Alpha-D-glucose-1-phosphate phosphatase YihX"  
"JS1\_I07\_00446" 15400 "s59E5H2" 0.363406 "Alpha-D-glucose-1-phosphate phosphatase YihX"  
"JS1\_I07\_00446" 15400 "s63E6H2" 0.476631 "Alpha-D-glucose-1-phosphate phosphatase YihX"  
"JS1\_I07\_00447" 15401 "s59E13H2" 1.789048 "L-arabinose transport system permease protein AraQ"  
"JS1\_I07\_00447" 15401 "s59E25H2" 0 "L-arabinose transport system permease protein AraQ"

"JS1\_I07\_00447" 15401 "s59E5H2" 0.2281117 "L-arabinose transport system permease protein AraQ"  
"JS1\_I07\_00447" 15401 "s63E6H2" 0.539766 "L-arabinose transport system permease protein AraQ"  
"JS1\_I07\_00448" 15402 "s59E13H2" 1.458654 "hypothetical protein"  
"JS1\_I07\_00448" 15402 "s59E25H2" 0 "hypothetical protein"  
"JS1\_I07\_00448" 15402 "s59E5H2" 0.06762608 "hypothetical protein"  
"JS1\_I07\_00448" 15402 "s63E6H2" 0.5238032 "hypothetical protein"  
"JS1\_I07\_00449" 15403 "s59E13H2" 0.2447777 "Quinone oxidoreductase 1"  
"JS1\_I07\_00449" 15403 "s59E25H2" 0 "Quinone oxidoreductase 1"  
"JS1\_I07\_00449" 15403 "s59E5H2" 0.3392473 "Quinone oxidoreductase 1"  
"JS1\_I07\_00449" 15403 "s63E6H2" 0.487846 "Quinone oxidoreductase 1"  
"JS1\_I07\_00450" 15404 "s59E13H2" 0 "hypothetical protein"  
"JS1\_I07\_00450" 15404 "s59E25H2" 0 "hypothetical protein"  
"JS1\_I07\_00450" 15404 "s59E5H2" 0.2973067 "hypothetical protein"  
"JS1\_I07\_00450" 15404 "s63E6H2" 1.822705 "hypothetical protein"  
"JS1\_I07\_00451" 15405 "s59E13H2" 0.3802722 "translocation protein TolB"  
"JS1\_I07\_00451" 15405 "s59E25H2" 0 "translocation protein TolB"  
"JS1\_I07\_00451" 15405 "s59E5H2" 0.03921695 "translocation protein TolB"  
"JS1\_I07\_00451" 15405 "s63E6H2" 0.07816229 "translocation protein TolB"  
"JS1\_I07\_00452" 15406 "s59E13H2" 0.6681201 "hypothetical protein"  
"JS1\_I07\_00452" 15406 "s59E25H2" 0 "hypothetical protein"  
"JS1\_I07\_00452" 15406 "s59E5H2" 0.7462824 "hypothetical protein"  
"JS1\_I07\_00452" 15406 "s63E6H2" 1.184151 "hypothetical protein"  
"JS1\_I07\_00453" 15407 "s59E13H2" 0.808726 "Ribosomal large subunit pseudouridine synthase D"  
"JS1\_I07\_00453" 15407 "s59E25H2" 0 "Ribosomal large subunit pseudouridine synthase D"  
"JS1\_I07\_00453" 15407 "s59E5H2" 2.824066 "Ribosomal large subunit pseudouridine synthase D"  
"JS1\_I07\_00453" 15407 "s63E6H2" 1.318219 "Ribosomal large subunit pseudouridine synthase D"  
"JS1\_I07\_00454" 15408 "s59E13H2" 0.7278562 "Prolipoprotein diacylglyceryl transferase"  
"JS1\_I07\_00454" 15408 "s59E25H2" 0 "Prolipoprotein diacylglyceryl transferase"  
"JS1\_I07\_00454" 15408 "s59E5H2" 2.968893 "Prolipoprotein diacylglyceryl transferase"  
"JS1\_I07\_00454" 15408 "s63E6H2" 1.305059 "Prolipoprotein diacylglyceryl transferase"  
"JS1\_I07\_00455" 15409 "s59E13H2" 0.0644509 "Sialic acid-binding periplasmic protein SiaP precursor"  
"JS1\_I07\_00455" 15409 "s59E25H2" 0 "Sialic acid-binding periplasmic protein SiaP precursor"  
"JS1\_I07\_00455" 15409 "s59E5H2" 0 "Sialic acid-binding periplasmic protein SiaP precursor"  
"JS1\_I07\_00455" 15409 "s63E6H2" 0.004173702 "Sialic acid-binding periplasmic protein SiaP precursor"  
"JS1\_I07\_00456" 15410 "s59E13H2" 0.08581214 "2,3-diketo-L-gulonate TRAP transporter small permease protein YiaM"  
"JS1\_I07\_00456" 15410 "s59E25H2" 0 "2,3-diketo-L-gulonate TRAP transporter small permease protein YiaM"  
"JS1\_I07\_00456" 15410 "s59E5H2" 0 "2,3-diketo-L-gulonate TRAP transporter small permease protein YiaM"  
"JS1\_I07\_00456" 15410 "s63E6H2" 0.005465571 "2,3-diketo-L-gulonate TRAP transporter small permease protein YiaM"  
"JS1\_I07\_00457" 15411 "s59E13H2" 0.09265743 "Sialic acid TRAP transporter permease protein SiaT"  
"JS1\_I07\_00457" 15411 "s59E25H2" 0 "Sialic acid TRAP transporter permease protein SiaT"  
"JS1\_I07\_00457" 15411 "s59E5H2" 0 "Sialic acid TRAP transporter permease protein SiaT"  
"JS1\_I07\_00457" 15411 "s63E6H2" 0.01558479 "Sialic acid TRAP transporter permease protein SiaT"  
"JS1\_I07\_00458" 15412 "s59E13H2" 0.08392379 "Sialic acid TRAP transporter permease protein SiaT"  
"JS1\_I07\_00458" 15412 "s59E25H2" 0 "Sialic acid TRAP transporter permease protein SiaT"  
"JS1\_I07\_00458" 15412 "s59E5H2" 0 "Sialic acid TRAP transporter permease protein SiaT"  
"JS1\_I07\_00458" 15412 "s63E6H2" 0.005925772 "Sialic acid TRAP transporter permease protein SiaT"  
"JS1\_I07\_00460" 15414 "s59E13H2" 0.008495512 "hypothetical protein"

"JS1\_I07\_00460" 15414 "s59E25H2" 0 "hypothetical protein"  
"JS1\_I07\_00460" 15414 "s59E5H2" 0.03819033 "hypothetical protein"  
"JS1\_I07\_00460" 15414 "s63E6H2" 0.02585966 "hypothetical protein"  
"JS1\_I07\_00461" 15415 "s59E13H2" 0.0003134748 "hypothetical protein"  
"JS1\_I07\_00461" 15415 "s59E25H2" 0 "hypothetical protein"  
"JS1\_I07\_00461" 15415 "s59E5H2" 0.001226908 "hypothetical protein"  
"JS1\_I07\_00461" 15415 "s63E6H2" 0.0004962685 "hypothetical protein"  
"JS1\_I07\_00462" 15416 "s59E13H2" 0.007596239 "Arabinose operon regulatory protein"  
"JS1\_I07\_00462" 15416 "s59E25H2" 0 "Arabinose operon regulatory protein"  
"JS1\_I07\_00462" 15416 "s59E5H2" 0.9584476 "Arabinose operon regulatory protein"  
"JS1\_I07\_00462" 15416 "s63E6H2" 0.1760061 "Arabinose operon regulatory protein"  
"JS1\_I07\_00463" 15417 "s59E13H2" 5.551959 "hypothetical protein"  
"JS1\_I07\_00463" 15417 "s59E25H2" 0.4448463 "hypothetical protein"  
"JS1\_I07\_00463" 15417 "s59E5H2" 0.4787005 "hypothetical protein"  
"JS1\_I07\_00463" 15417 "s63E6H2" 0.352181 "hypothetical protein"  
"JS1\_I07\_00464" 15418 "s59E13H2" 2.803179 "hypothetical protein"  
"JS1\_I07\_00464" 15418 "s59E25H2" 0 "hypothetical protein"  
"JS1\_I07\_00464" 15418 "s59E5H2" 0.001917517 "hypothetical protein"  
"JS1\_I07\_00464" 15418 "s63E6H2" 0.1106038 "hypothetical protein"  
"JS1\_I07\_00465" 15419 "s59E13H2" 0.2041199 "hypothetical protein"  
"JS1\_I07\_00465" 15419 "s59E25H2" 0 "hypothetical protein"  
"JS1\_I07\_00465" 15419 "s59E5H2" 0.343564 "hypothetical protein"  
"JS1\_I07\_00465" 15419 "s63E6H2" 0.2294834 "hypothetical protein"  
"JS1\_I07\_00466" 15420 "s59E13H2" 0.6720386 "Glyceraldehyde-3-phosphate dehydrogenase"  
"JS1\_I07\_00466" 15420 "s59E25H2" 0 "Glyceraldehyde-3-phosphate dehydrogenase"  
"JS1\_I07\_00466" 15420 "s59E5H2" 0.7492064 "Glyceraldehyde-3-phosphate dehydrogenase"  
"JS1\_I07\_00466" 15420 "s63E6H2" 1.209638 "Glyceraldehyde-3-phosphate dehydrogenase"  
"JS1\_I07\_00467" 15421 "s59E13H2" 1.054215 "Triosephosphate isomerase"  
"JS1\_I07\_00467" 15421 "s59E25H2" 0 "Triosephosphate isomerase"  
"JS1\_I07\_00467" 15421 "s59E5H2" 0.3863275 "Triosephosphate isomerase"  
"JS1\_I07\_00467" 15421 "s63E6H2" 0.9545032 "Triosephosphate isomerase"  
"JS1\_I07\_00468" 15422 "s59E13H2" 1.024296 "preprotein translocase subunit SecG"  
"JS1\_I07\_00468" 15422 "s59E25H2" 0 "preprotein translocase subunit SecG"  
"JS1\_I07\_00468" 15422 "s59E5H2" 0.5223781 "preprotein translocase subunit SecG"  
"JS1\_I07\_00468" 15422 "s63E6H2" 0.615062 "preprotein translocase subunit SecG"  
"JS1\_I07\_00469" 15423 "s59E13H2" 0.7911417 "Putative nicotinate phosphoribosyltransferase"  
"JS1\_I07\_00469" 15423 "s59E25H2" 0.2909441 "Putative nicotinate phosphoribosyltransferase"  
"JS1\_I07\_00469" 15423 "s59E5H2" 0.4700465 "Putative nicotinate phosphoribosyltransferase"  
"JS1\_I07\_00469" 15423 "s63E6H2" 0.4808495 "Putative nicotinate phosphoribosyltransferase"  
"JS1\_I07\_00471" 15425 "s59E13H2" 0.6521564 "Colicin V production protein"  
"JS1\_I07\_00471" 15425 "s59E25H2" 0 "Colicin V production protein"  
"JS1\_I07\_00471" 15425 "s59E5H2" 0.273546 "Colicin V production protein"  
"JS1\_I07\_00471" 15425 "s63E6H2" 0.2595249 "Colicin V production protein"  
"JS1\_I07\_00472" 15426 "s59E13H2" 0.2280888 "Endonuclease MutS2"  
"JS1\_I07\_00472" 15426 "s59E25H2" 0 "Endonuclease MutS2"  
"JS1\_I07\_00472" 15426 "s59E5H2" 0.06501131 "Endonuclease MutS2"  
"JS1\_I07\_00472" 15426 "s63E6H2" 0.0745079 "Endonuclease MutS2"

"JS1\_I07\_00474" 15428 "s59E13H2" 0.03915271 "Penicillin-binding protein 1F"  
"JS1\_I07\_00474" 15428 "s59E25H2" 0 "Penicillin-binding protein 1F"  
"JS1\_I07\_00474" 15428 "s59E5H2" 0.02733511 "Penicillin-binding protein 1F"  
"JS1\_I07\_00474" 15428 "s63E6H2" 0.08350518 "Penicillin-binding protein 1F"  
"JS1\_I07\_00475" 15429 "s59E13H2" 0.2439956 "Queuosine precursor transporter QueT"  
"JS1\_I07\_00475" 15429 "s59E25H2" 0 "Queuosine precursor transporter QueT"  
"JS1\_I07\_00475" 15429 "s59E5H2" 0.1446585 "Queuosine precursor transporter QueT"  
"JS1\_I07\_00475" 15429 "s63E6H2" 0.2898574 "Queuosine precursor transporter QueT"  
"JS1\_I07\_00476" 15430 "s59E13H2" 0.215183 "Tyrosine--tRNA ligase"  
"JS1\_I07\_00476" 15430 "s59E25H2" 0 "Tyrosine--tRNA ligase"  
"JS1\_I07\_00476" 15430 "s59E5H2" 0.176729 "Tyrosine--tRNA ligase"  
"JS1\_I07\_00476" 15430 "s63E6H2" 0.2058128 "Tyrosine--tRNA ligase"  
"JS1\_I07\_00477" 15431 "s59E13H2" 0.04439416 "Tyrosine--tRNA ligase"  
"JS1\_I07\_00477" 15431 "s59E25H2" 0 "Tyrosine--tRNA ligase"  
"JS1\_I07\_00477" 15431 "s59E5H2" 0.01058635 "Tyrosine--tRNA ligase"  
"JS1\_I07\_00477" 15431 "s63E6H2" 0.04647501 "Tyrosine--tRNA ligase"  
"JS1\_I07\_00478" 15432 "s59E13H2" 9.97758 "Putative HAD-hydrolase YfnB"  
"JS1\_I07\_00478" 15432 "s59E25H2" 0 "Putative HAD-hydrolase YfnB"  
"JS1\_I07\_00478" 15432 "s59E5H2" 0.2747912 "Putative HAD-hydrolase YfnB"  
"JS1\_I07\_00478" 15432 "s63E6H2" 0.294274 "Putative HAD-hydrolase YfnB"  
"JS1\_I07\_00479" 15433 "s59E13H2" 9.94183 "Radical SAM superfamily protein"  
"JS1\_I07\_00479" 15433 "s59E25H2" 0 "Radical SAM superfamily protein"  
"JS1\_I07\_00479" 15433 "s59E5H2" 0.1831034 "Radical SAM superfamily protein"  
"JS1\_I07\_00479" 15433 "s63E6H2" 0.4096602 "Radical SAM superfamily protein"  
"JS1\_I07\_00480" 15434 "s59E13H2" 10.6053 "putative inner membrane transporter yjIE"  
"JS1\_I07\_00480" 15434 "s59E25H2" 0 "putative inner membrane transporter yjIE"  
"JS1\_I07\_00480" 15434 "s59E5H2" 0.3562613 "putative inner membrane transporter yjIE"  
"JS1\_I07\_00480" 15434 "s63E6H2" 0.6090343 "putative inner membrane transporter yjIE"  
"JS1\_I07\_00481" 15435 "s59E13H2" 9.188943 "hypothetical protein"  
"JS1\_I07\_00481" 15435 "s59E25H2" 0 "hypothetical protein"  
"JS1\_I07\_00481" 15435 "s59E5H2" 0.3505637 "hypothetical protein"  
"JS1\_I07\_00481" 15435 "s63E6H2" 0.5250367 "hypothetical protein"  
"JS1\_I07\_00482" 15436 "s59E13H2" 0.04656383 "putative propionyl-CoA carboxylase beta chain 5"  
"JS1\_I07\_00482" 15436 "s59E25H2" 0 "putative propionyl-CoA carboxylase beta chain 5"  
"JS1\_I07\_00482" 15436 "s59E5H2" 0.06962038 "putative propionyl-CoA carboxylase beta chain 5"  
"JS1\_I07\_00482" 15436 "s63E6H2" 0.08171578 "putative propionyl-CoA carboxylase beta chain 5"  
"JS1\_I07\_00483" 15437 "s59E13H2" 0.1515632 "glyoxalase I"  
"JS1\_I07\_00483" 15437 "s59E25H2" 0 "glyoxalase I"  
"JS1\_I07\_00483" 15437 "s59E5H2" 0.2166768 "glyoxalase I"  
"JS1\_I07\_00483" 15437 "s63E6H2" 0.3171288 "glyoxalase I"  
"JS1\_I07\_00484" 15438 "s59E13H2" 0.2100329 "putative GTPase ArgK"  
"JS1\_I07\_00484" 15438 "s59E25H2" 0 "putative GTPase ArgK"  
"JS1\_I07\_00484" 15438 "s59E5H2" 0.164491 "putative GTPase ArgK"  
"JS1\_I07\_00484" 15438 "s63E6H2" 0.1542359 "putative GTPase ArgK"  
"JS1\_I07\_00485" 15439 "s59E13H2" 0.09779985 "Methylmalonyl-CoA mutase"  
"JS1\_I07\_00485" 15439 "s59E25H2" 0 "Methylmalonyl-CoA mutase"  
"JS1\_I07\_00485" 15439 "s59E5H2" 0.04802112 "Methylmalonyl-CoA mutase"

"JS1\_I07\_00485" 15439 "s63E6H2" 0.274397 "Methylmalonyl-CoA mutase"  
"JS1\_I07\_00486" 15440 "s59E13H2" 0.1004506 "Methylmalonyl-CoA mutase large subunit"  
"JS1\_I07\_00486" 15440 "s59E25H2" 0 "Methylmalonyl-CoA mutase large subunit"  
"JS1\_I07\_00486" 15440 "s59E5H2" 0.03660284 "Methylmalonyl-CoA mutase large subunit"  
"JS1\_I07\_00486" 15440 "s63E6H2" 0.2977155 "Methylmalonyl-CoA mutase large subunit"  
"JS1\_I07\_00487" 15441 "s59E13H2" 0 "Glycosyltransferase Gtf1"  
"JS1\_I07\_00487" 15441 "s59E25H2" 0 "Glycosyltransferase Gtf1"  
"JS1\_I07\_00487" 15441 "s59E5H2" 0 "Glycosyltransferase Gtf1"  
"JS1\_I07\_00487" 15441 "s63E6H2" 0 "Glycosyltransferase Gtf1"  
"JS1\_I07\_00488" 15442 "s59E13H2" 0 "Polysaccharide deacetylase"  
"JS1\_I07\_00488" 15442 "s59E25H2" 0 "Polysaccharide deacetylase"  
"JS1\_I07\_00488" 15442 "s59E5H2" 0 "Polysaccharide deacetylase"  
"JS1\_I07\_00488" 15442 "s63E6H2" 0 "Polysaccharide deacetylase"  
"JS1\_I07\_00489" 15443 "s59E13H2" 0 "GDP-mannose-dependent alpha-(1-6)-phosphatidylinositol monomannoside mannosyltransferase"  
"JS1\_I07\_00489" 15443 "s59E25H2" 0 "GDP-mannose-dependent alpha-(1-6)-phosphatidylinositol monomannoside mannosyltransferase"  
"JS1\_I07\_00489" 15443 "s59E5H2" 0 "GDP-mannose-dependent alpha-(1-6)-phosphatidylinositol monomannoside mannosyltransferase"  
"JS1\_I07\_00489" 15443 "s63E6H2" 0 "GDP-mannose-dependent alpha-(1-6)-phosphatidylinositol monomannoside mannosyltransferase"  
"JS1\_I07\_00490" 15444 "s59E13H2" 0.4201581 "D-tagatose 3-epimerase"  
"JS1\_I07\_00490" 15444 "s59E25H2" 0 "D-tagatose 3-epimerase"  
"JS1\_I07\_00490" 15444 "s59E5H2" 1.316753 "D-tagatose 3-epimerase"  
"JS1\_I07\_00490" 15444 "s63E6H2" 1.120006 "D-tagatose 3-epimerase"  
"JS1\_I07\_00491" 15445 "s59E13H2" 0.1629492 "Lipoyl synthase"  
"JS1\_I07\_00491" 15445 "s59E25H2" 0 "Lipoyl synthase"  
"JS1\_I07\_00491" 15445 "s59E5H2" 1.139287 "Lipoyl synthase"  
"JS1\_I07\_00491" 15445 "s63E6H2" 0.9891651 "Lipoyl synthase"  
"JS1\_I07\_00492" 15446 "s59E13H2" 0.1490345 "Elongation factor G"  
"JS1\_I07\_00492" 15446 "s59E25H2" 0 "Elongation factor G"  
"JS1\_I07\_00492" 15446 "s59E5H2" 0.7473647 "Elongation factor G"  
"JS1\_I07\_00492" 15446 "s63E6H2" 0.9141679 "Elongation factor G"  
"JS1\_I07\_00493" 15447 "s59E13H2" 0 "Malonyl CoA-acyl carrier protein transacylase"  
"JS1\_I07\_00493" 15447 "s59E25H2" 0 "Malonyl CoA-acyl carrier protein transacylase"  
"JS1\_I07\_00493" 15447 "s59E5H2" 0 "Malonyl CoA-acyl carrier protein transacylase"  
"JS1\_I07\_00493" 15447 "s63E6H2" 0.00158036 "Malonyl CoA-acyl carrier protein transacylase"  
"JS1\_I07\_00494" 15448 "s59E13H2" 0 "putative acyl transferase"  
"JS1\_I07\_00494" 15448 "s59E25H2" 0 "putative acyl transferase"  
"JS1\_I07\_00494" 15448 "s59E5H2" 0 "putative acyl transferase"  
"JS1\_I07\_00494" 15448 "s63E6H2" 0 "putative acyl transferase"  
"JS1\_I07\_00495" 15449 "s59E13H2" 0 "Putative pyridoxal phosphate-dependent aminotransferase EpsN"  
"JS1\_I07\_00495" 15449 "s59E25H2" 0 "Putative pyridoxal phosphate-dependent aminotransferase EpsN"  
"JS1\_I07\_00495" 15449 "s59E5H2" 0 "Putative pyridoxal phosphate-dependent aminotransferase EpsN"  
"JS1\_I07\_00495" 15449 "s63E6H2" 0.001203193 "Putative pyridoxal phosphate-dependent aminotransferase EpsN"  
"JS1\_I07\_00496" 15450 "s59E13H2" 0 "mRNA interferase MazF9"  
"JS1\_I07\_00496" 15450 "s59E25H2" 0 "mRNA interferase MazF9"  
"JS1\_I07\_00496" 15450 "s59E5H2" 0 "mRNA interferase MazF9"  
"JS1\_I07\_00496" 15450 "s63E6H2" 0 "mRNA interferase MazF9"  
"JS1\_I07\_00499" 15453 "s59E13H2" 0 "putative DapA-like lyase"  
"JS1\_I07\_00499" 15453 "s59E25H2" 0 "putative DapA-like lyase"

"JS1\_I07\_00499" 15453 "s59E5H2" 0 "putative DapA-like lyase"  
"JS1\_I07\_00499" 15453 "s63E6H2" 0 "putative DapA-like lyase"  
"JS1\_I07\_00500" 15454 "s59E13H2" 0 "Sialic acid-binding periplasmic protein SiaP precursor"  
"JS1\_I07\_00500" 15454 "s59E25H2" 0 "Sialic acid-binding periplasmic protein SiaP precursor"  
"JS1\_I07\_00500" 15454 "s59E5H2" 0 "Sialic acid-binding periplasmic protein SiaP precursor"  
"JS1\_I07\_00500" 15454 "s63E6H2" 0 "Sialic acid-binding periplasmic protein SiaP precursor"  
"JS1\_I07\_00501" 15455 "s59E13H2" 0 "Tripartite ATP-independent periplasmic transporters, DctQ component"  
"JS1\_I07\_00501" 15455 "s59E25H2" 0 "Tripartite ATP-independent periplasmic transporters, DctQ component"  
"JS1\_I07\_00501" 15455 "s59E5H2" 0 "Tripartite ATP-independent periplasmic transporters, DctQ component"  
"JS1\_I07\_00501" 15455 "s63E6H2" 0 "Tripartite ATP-independent periplasmic transporters, DctQ component"  
"JS1\_I07\_00502" 15456 "s59E13H2" 0 "hypothetical protein"  
"JS1\_I07\_00502" 15456 "s59E25H2" 0 "hypothetical protein"  
"JS1\_I07\_00502" 15456 "s59E5H2" 0 "hypothetical protein"  
"JS1\_I07\_00502" 15456 "s63E6H2" 0 "hypothetical protein"  
"JS1\_I07\_00505" 15459 "s59E13H2" 0.02511174 "Tyrosine--tRNA ligase"  
"JS1\_I07\_00505" 15459 "s59E25H2" 0 "Tyrosine--tRNA ligase"  
"JS1\_I07\_00505" 15459 "s59E5H2" 0.02896655 "Tyrosine--tRNA ligase"  
"JS1\_I07\_00505" 15459 "s63E6H2" 0.01852097 "Tyrosine--tRNA ligase"  
"JS1\_I07\_00506" 15460 "s59E13H2" 0.08119159 "Tungsten-containing aldehyde ferredoxin oxidoreductase"  
"JS1\_I07\_00506" 15460 "s59E25H2" 0 "Tungsten-containing aldehyde ferredoxin oxidoreductase"  
"JS1\_I07\_00506" 15460 "s59E5H2" 0.2634429 "Tungsten-containing aldehyde ferredoxin oxidoreductase"  
"JS1\_I07\_00506" 15460 "s63E6H2" 0.1081218 "Tungsten-containing aldehyde ferredoxin oxidoreductase"  
"JS1\_I07\_00507" 15461 "s59E13H2" 0.004576048 "hypothetical protein"  
"JS1\_I07\_00507" 15461 "s59E25H2" 0 "hypothetical protein"  
"JS1\_I07\_00507" 15461 "s59E5H2" 7.110409e-05 "hypothetical protein"  
"JS1\_I07\_00507" 15461 "s63E6H2" 0.003839551 "hypothetical protein"  
"JS1\_I07\_00508" 15462 "s59E13H2" 1.009257 "V-type ATP synthase subunit I"  
"JS1\_I07\_00508" 15462 "s59E25H2" 0 "V-type ATP synthase subunit I"  
"JS1\_I07\_00508" 15462 "s59E5H2" 1.577387 "V-type ATP synthase subunit I"  
"JS1\_I07\_00508" 15462 "s63E6H2" 0.1577492 "V-type ATP synthase subunit I"  
"JS1\_I07\_00509" 15463 "s59E13H2" 0.002224853 "Beta-1,4-mannooligosaccharide phosphorylase"  
"JS1\_I07\_00509" 15463 "s59E25H2" 0 "Beta-1,4-mannooligosaccharide phosphorylase"  
"JS1\_I07\_00509" 15463 "s59E5H2" 1.567707 "Beta-1,4-mannooligosaccharide phosphorylase"  
"JS1\_I07\_00509" 15463 "s63E6H2" 0.002333465 "Beta-1,4-mannooligosaccharide phosphorylase"  
"JS1\_I07\_00511" 15465 "s59E13H2" 0 "hypothetical protein"  
"JS1\_I07\_00511" 15465 "s59E25H2" 0 "hypothetical protein"  
"JS1\_I07\_00511" 15465 "s59E5H2" 0 "hypothetical protein"  
"JS1\_I07\_00511" 15465 "s63E6H2" 0 "hypothetical protein"  
"JS1\_I07\_00512" 15466 "s59E13H2" 0 "hypothetical protein"  
"JS1\_I07\_00512" 15466 "s59E25H2" 0 "hypothetical protein"  
"JS1\_I07\_00512" 15466 "s59E5H2" 0 "hypothetical protein"  
"JS1\_I07\_00512" 15466 "s63E6H2" 0 "hypothetical protein"  
"JS1\_I07\_00513" 15467 "s59E13H2" 0 "hypothetical protein"  
"JS1\_I07\_00513" 15467 "s59E25H2" 0 "hypothetical protein"  
"JS1\_I07\_00513" 15467 "s59E5H2" 0 "hypothetical protein"  
"JS1\_I07\_00513" 15467 "s63E6H2" 0 "hypothetical protein"  
"JS1\_I07\_00514" 15468 "s59E13H2" 0.204863 "hypothetical protein"

"JS1\_I07\_00514" 15468 "s59E25H2" 0.5242165 "hypothetical protein"  
"JS1\_I07\_00514" 15468 "s59E5H2" 1.481642 "hypothetical protein"  
"JS1\_I07\_00514" 15468 "s63E6H2" 0 "hypothetical protein"  
"JS1\_I07\_00515" 15469 "s59E13H2" 0.4012168 "putative oxidoreductase YdgJ"  
"JS1\_I07\_00515" 15469 "s59E25H2" 0 "putative oxidoreductase YdgJ"  
"JS1\_I07\_00515" 15469 "s59E5H2" 1.111082 "putative oxidoreductase YdgJ"  
"JS1\_I07\_00515" 15469 "s63E6H2" 0.007049117 "putative oxidoreductase YdgJ"  
"JS1\_I07\_00518" 15472 "s59E13H2" 0 "putative oxidoreductase"  
"JS1\_I07\_00518" 15472 "s59E25H2" 0 "putative oxidoreductase"  
"JS1\_I07\_00518" 15472 "s59E5H2" 0 "putative oxidoreductase"  
"JS1\_I07\_00518" 15472 "s63E6H2" 0 "putative oxidoreductase"  
"JS1\_I07\_00523" 15477 "s59E13H2" 0.1977187 "Endonuclease MutS2"  
"JS1\_I07\_00523" 15477 "s59E25H2" 0 "Endonuclease MutS2"  
"JS1\_I07\_00523" 15477 "s59E5H2" 0.02052664 "Endonuclease MutS2"  
"JS1\_I07\_00523" 15477 "s63E6H2" 0.07254311 "Endonuclease MutS2"  
"JS1\_I07\_00524" 15478 "s59E13H2" 0 "Colicin V production protein"  
"JS1\_I07\_00524" 15478 "s59E25H2" 0 "Colicin V production protein"  
"JS1\_I07\_00524" 15478 "s59E5H2" 0 "Colicin V production protein"  
"JS1\_I07\_00524" 15478 "s63E6H2" 0 "Colicin V production protein"  
"JS1\_I07\_00527" 15481 "s59E13H2" 0.02033352 "Colicin V production protein"  
"JS1\_I07\_00527" 15481 "s59E25H2" 0 "Colicin V production protein"  
"JS1\_I07\_00527" 15481 "s59E5H2" 0.01918388 "Colicin V production protein"  
"JS1\_I07\_00527" 15481 "s63E6H2" 0.006869597 "Colicin V production protein"  
"JS1\_I07\_00528" 15482 "s59E13H2" 0 "hypothetical protein"  
"JS1\_I07\_00528" 15482 "s59E25H2" 0 "hypothetical protein"  
"JS1\_I07\_00528" 15482 "s59E5H2" 0 "hypothetical protein"  
"JS1\_I07\_00528" 15482 "s63E6H2" 0 "hypothetical protein"  
"JS1\_I07\_00529" 15483 "s59E13H2" 0 "hypothetical protein"  
"JS1\_I07\_00529" 15483 "s59E25H2" 0 "hypothetical protein"  
"JS1\_I07\_00529" 15483 "s59E5H2" 0 "hypothetical protein"  
"JS1\_I07\_00529" 15483 "s63E6H2" 0 "hypothetical protein"  
"JS1\_I07\_00530" 15484 "s59E13H2" 0 "hypothetical protein"  
"JS1\_I07\_00530" 15484 "s59E25H2" 0 "hypothetical protein"  
"JS1\_I07\_00530" 15484 "s59E5H2" 0 "hypothetical protein"  
"JS1\_I07\_00530" 15484 "s63E6H2" 0 "hypothetical protein"  
"JS1\_I07\_00531" 15485 "s59E13H2" 1.212677 "V-type ATP synthase subunit I"  
"JS1\_I07\_00531" 15485 "s59E25H2" 0 "V-type ATP synthase subunit I"  
"JS1\_I07\_00531" 15485 "s59E5H2" 1.728805 "V-type ATP synthase subunit I"  
"JS1\_I07\_00531" 15485 "s63E6H2" 0.1079213 "V-type ATP synthase subunit I"  
"JS1\_I07\_00532" 15486 "s59E13H2" 1.093751 "V-type ATP synthase subunit K"  
"JS1\_I07\_00532" 15486 "s59E25H2" 0 "V-type ATP synthase subunit K"  
"JS1\_I07\_00532" 15486 "s59E5H2" 1.917877 "V-type ATP synthase subunit K"  
"JS1\_I07\_00532" 15486 "s63E6H2" 0.8310416 "V-type ATP synthase subunit K"  
"JS1\_I07\_00533" 15487 "s59E13H2" 1.600169 "V-type ATP synthase subunit F"  
"JS1\_I07\_00533" 15487 "s59E25H2" 0 "V-type ATP synthase subunit F"  
"JS1\_I07\_00533" 15487 "s59E5H2" 2.906884 "V-type ATP synthase subunit F"  
"JS1\_I07\_00533" 15487 "s63E6H2" 1.408762 "V-type ATP synthase subunit F"

"JS1\_I07\_00534" 15488 "s59E13H2" 3.499436 "V-type ATP synthase subunit E"  
"JS1\_I07\_00534" 15488 "s59E25H2" 0 "V-type ATP synthase subunit E"  
"JS1\_I07\_00534" 15488 "s59E5H2" 3.143789 "V-type ATP synthase subunit E"  
"JS1\_I07\_00534" 15488 "s63E6H2" 1.488675 "V-type ATP synthase subunit E"  
"JS1\_I07\_00535" 15489 "s59E13H2" 0.05366778 "Endonuclease MutS2"  
"JS1\_I07\_00535" 15489 "s59E25H2" 0 "Endonuclease MutS2"  
"JS1\_I07\_00535" 15489 "s59E5H2" 0.0227495 "Endonuclease MutS2"  
"JS1\_I07\_00535" 15489 "s63E6H2" 0.02464283 "Endonuclease MutS2"  
"JS1\_I07\_00537" 15491 "s59E13H2" 0.09423062 "Queuosine precursor transporter QueT"  
"JS1\_I07\_00537" 15491 "s59E25H2" 0 "Queuosine precursor transporter QueT"  
"JS1\_I07\_00537" 15491 "s59E5H2" 0 "Queuosine precursor transporter QueT"  
"JS1\_I07\_00537" 15491 "s63E6H2" 0.03114797 "Queuosine precursor transporter QueT"  
"JS1\_I07\_00544" 15498 "s59E13H2" 8.058157 "hypothetical protein"  
"JS1\_I07\_00544" 15498 "s59E25H2" 0 "hypothetical protein"  
"JS1\_I07\_00544" 15498 "s59E5H2" 2.593757 "hypothetical protein"  
"JS1\_I07\_00544" 15498 "s63E6H2" 2.206985 "hypothetical protein"  
"JS1\_I07\_00545" 15499 "s59E13H2" 6.52376 "Transposase IS116/IS110/IS902 family protein"  
"JS1\_I07\_00545" 15499 "s59E25H2" 0 "Transposase IS116/IS110/IS902 family protein"  
"JS1\_I07\_00545" 15499 "s59E5H2" 1.293047 "Transposase IS116/IS110/IS902 family protein"  
"JS1\_I07\_00545" 15499 "s63E6H2" 2.61119 "Transposase IS116/IS110/IS902 family protein"  
"JS1\_I07\_00546" 15500 "s59E13H2" 1.490738 "hypothetical protein"  
"JS1\_I07\_00546" 15500 "s59E25H2" 0 "hypothetical protein"  
"JS1\_I07\_00546" 15500 "s59E5H2" 0.1442394 "hypothetical protein"  
"JS1\_I07\_00546" 15500 "s63E6H2" 0.07585602 "hypothetical protein"  
"JS1\_I07\_00547" 15501 "s59E13H2" 0 "hypothetical protein"  
"JS1\_I07\_00547" 15501 "s59E25H2" 0 "hypothetical protein"  
"JS1\_I07\_00547" 15501 "s59E5H2" 0 "hypothetical protein"  
"JS1\_I07\_00547" 15501 "s63E6H2" 0.8868624 "hypothetical protein"  
"JS1\_I07\_00548" 15502 "s59E13H2" 0 "Opine dehydrogenase"  
"JS1\_I07\_00548" 15502 "s59E25H2" 0 "Opine dehydrogenase"  
"JS1\_I07\_00548" 15502 "s59E5H2" 0 "Opine dehydrogenase"  
"JS1\_I07\_00548" 15502 "s63E6H2" 0.00314199 "Opine dehydrogenase"  
"JS1\_I07\_00549" 15503 "s59E13H2" 0 "putative oxidoreductase"  
"JS1\_I07\_00549" 15503 "s59E25H2" 0 "putative oxidoreductase"  
"JS1\_I07\_00549" 15503 "s59E5H2" 0 "putative oxidoreductase"  
"JS1\_I07\_00549" 15503 "s63E6H2" 0 "putative oxidoreductase"  
"JS1\_I07\_00552" 15506 "s59E13H2" 1.910876 "Tungsten-containing formaldehyde ferredoxin oxidoreductase"  
"JS1\_I07\_00552" 15506 "s59E25H2" 0 "Tungsten-containing formaldehyde ferredoxin oxidoreductase"  
"JS1\_I07\_00552" 15506 "s59E5H2" 0.1500282 "Tungsten-containing formaldehyde ferredoxin oxidoreductase"  
"JS1\_I07\_00552" 15506 "s63E6H2" 0.0230637 "Tungsten-containing formaldehyde ferredoxin oxidoreductase"  
"JS1\_I07\_00553" 15507 "s59E13H2" 1.637796 "putative xanthine dehydrogenase subunit D"  
"JS1\_I07\_00553" 15507 "s59E25H2" 0 "putative xanthine dehydrogenase subunit D"  
"JS1\_I07\_00553" 15507 "s59E5H2" 0.1135729 "putative xanthine dehydrogenase subunit D"  
"JS1\_I07\_00553" 15507 "s63E6H2" 0.06918594 "putative xanthine dehydrogenase subunit D"  
"JS1\_I07\_00554" 15508 "s59E13H2" 2.998774 "Acryloyl-CoA reductase electron transfer subunit beta"  
"JS1\_I07\_00554" 15508 "s59E25H2" 0 "Acryloyl-CoA reductase electron transfer subunit beta"  
"JS1\_I07\_00554" 15508 "s59E5H2" 0.1370209 "Acryloyl-CoA reductase electron transfer subunit beta"



"JS1\_I07\_00554" 15508 "s63E6H2" 0.9042645 "Acryloyl-CoA reductase electron transfer subunit beta"  
"JS1\_I07\_00555" 15509 "s59E13H2" 3.176158 "Acryloyl-CoA reductase electron transfer subunit gamma"  
"JS1\_I07\_00555" 15509 "s59E25H2" 0 "Acryloyl-CoA reductase electron transfer subunit gamma"  
"JS1\_I07\_00555" 15509 "s59E5H2" 0.2504702 "Acryloyl-CoA reductase electron transfer subunit gamma"  
"JS1\_I07\_00555" 15509 "s63E6H2" 1.099488 "Acryloyl-CoA reductase electron transfer subunit gamma"  
"JS1\_I07\_00557" 15511 "s59E13H2" 0.04380901 "Queuosine precursor transporter QueT"  
"JS1\_I07\_00557" 15511 "s59E25H2" 0 "Queuosine precursor transporter QueT"  
"JS1\_I07\_00557" 15511 "s59E5H2" 0 "Queuosine precursor transporter QueT"  
"JS1\_I07\_00557" 15511 "s63E6H2" 0.01663634 "Queuosine precursor transporter QueT"  
"JS1\_I07\_00565" 15519 "s59E13H2" 0.05279667 "Endonuclease MutS2"  
"JS1\_I07\_00565" 15519 "s59E25H2" 0 "Endonuclease MutS2"  
"JS1\_I07\_00565" 15519 "s59E5H2" 0.01087454 "Endonuclease MutS2"  
"JS1\_I07\_00565" 15519 "s63E6H2" 0.02534288 "Endonuclease MutS2"  
"JS1\_I07\_00568" 15522 "s59E13H2" 0.04468441 "Endonuclease MutS2"  
"JS1\_I07\_00568" 15522 "s59E25H2" 0 "Endonuclease MutS2"  
"JS1\_I07\_00568" 15522 "s59E5H2" 0.01137665 "Endonuclease MutS2"  
"JS1\_I07\_00568" 15522 "s63E6H2" 0.009443745 "Endonuclease MutS2"  
"JS1\_I07\_00570" 15524 "s59E13H2" 0 "hypothetical protein"  
"JS1\_I07\_00570" 15524 "s59E25H2" 0 "hypothetical protein"  
"JS1\_I07\_00570" 15524 "s59E5H2" 0 "hypothetical protein"  
"JS1\_I07\_00570" 15524 "s63E6H2" 0 "hypothetical protein"  
"JS1\_I07\_00573" 15527 "s59E13H2" 0 "hypothetical protein"  
"JS1\_I07\_00573" 15527 "s59E25H2" 0 "hypothetical protein"  
"JS1\_I07\_00573" 15527 "s59E5H2" 0 "hypothetical protein"  
"JS1\_I07\_00573" 15527 "s63E6H2" 0 "hypothetical protein"  
"JS1\_I07\_00574" 15528 "s59E13H2" 0 "hypothetical protein"  
"JS1\_I07\_00574" 15528 "s59E25H2" 0 "hypothetical protein"  
"JS1\_I07\_00574" 15528 "s59E5H2" 0 "hypothetical protein"  
"JS1\_I07\_00574" 15528 "s63E6H2" 0.2454073 "hypothetical protein"  
"JS1\_I07\_00576" 15530 "s59E13H2" 0.1014241 "ATP-dependent Clp protease ATP-binding subunit ClpX"  
"JS1\_I07\_00576" 15530 "s59E25H2" 0 "ATP-dependent Clp protease ATP-binding subunit ClpX"  
"JS1\_I07\_00576" 15530 "s59E5H2" 0.1137904 "ATP-dependent Clp protease ATP-binding subunit ClpX"  
"JS1\_I07\_00576" 15530 "s63E6H2" 0.08452524 "ATP-dependent Clp protease ATP-binding subunit ClpX"  
"JS1\_I07\_00577" 15531 "s59E13H2" 0.04779594 "Lon protease"  
"JS1\_I07\_00577" 15531 "s59E25H2" 0 "Lon protease"  
"JS1\_I07\_00577" 15531 "s59E5H2" 0.02440619 "Lon protease"  
"JS1\_I07\_00577" 15531 "s63E6H2" 0.07888127 "Lon protease"  
"JS1\_I07\_00584" 15538 "s59E13H2" 0 "Putative pyridoxal phosphate-dependent aminotransferase EpsN"  
"JS1\_I07\_00584" 15538 "s59E25H2" 0 "Putative pyridoxal phosphate-dependent aminotransferase EpsN"  
"JS1\_I07\_00584" 15538 "s59E5H2" 0 "Putative pyridoxal phosphate-dependent aminotransferase EpsN"  
"JS1\_I07\_00584" 15538 "s63E6H2" 0.002671688 "Putative pyridoxal phosphate-dependent aminotransferase EpsN"  
"JS1\_I07\_00586" 15540 "s59E13H2" 0.01796195 "Redox-sensing transcriptional repressor Rex"  
"JS1\_I07\_00586" 15540 "s59E25H2" 0 "Redox-sensing transcriptional repressor Rex"  
"JS1\_I07\_00586" 15540 "s59E5H2" 0.7875424 "Redox-sensing transcriptional repressor Rex"  
"JS1\_I07\_00586" 15540 "s63E6H2" 0.7855094 "Redox-sensing transcriptional repressor Rex"  
"JS1\_I07\_00587" 15541 "s59E13H2" 0.1318731 "Redox-sensing transcriptional repressor Rex"  
"JS1\_I07\_00587" 15541 "s59E25H2" 0 "Redox-sensing transcriptional repressor Rex"

"JS1\_I07\_00587" 15541 "s59E5H2" 1.080287 "Redox-sensing transcriptional repressor Rex"  
"JS1\_I07\_00587" 15541 "s63E6H2" 0.2949616 "Redox-sensing transcriptional repressor Rex"  
"JS1\_I07\_00588" 15542 "s59E13H2" 0.1837995 "Sporulation-specific N-acetylmuramoyl-L-alanine amidase"  
"JS1\_I07\_00588" 15542 "s59E25H2" 0 "Sporulation-specific N-acetylmuramoyl-L-alanine amidase"  
"JS1\_I07\_00588" 15542 "s59E5H2" 0.5968167 "Sporulation-specific N-acetylmuramoyl-L-alanine amidase"  
"JS1\_I07\_00588" 15542 "s63E6H2" 0.2856237 "Sporulation-specific N-acetylmuramoyl-L-alanine amidase"  
"JS1\_I07\_00589" 15543 "s59E13H2" 0.04094084 "Glutamate dehydrogenase"  
"JS1\_I07\_00589" 15543 "s59E25H2" 0 "Glutamate dehydrogenase"  
"JS1\_I07\_00589" 15543 "s59E5H2" 0 "Glutamate dehydrogenase"  
"JS1\_I07\_00589" 15543 "s63E6H2" 0.4533629 "Glutamate dehydrogenase"  
"JS1\_I07\_00590" 15544 "s59E13H2" 0.06024113 "QueT transporter"  
"JS1\_I07\_00590" 15544 "s59E25H2" 0 "QueT transporter"  
"JS1\_I07\_00590" 15544 "s59E5H2" 0 "QueT transporter"  
"JS1\_I07\_00590" 15544 "s63E6H2" 0.04948755 "QueT transporter"  
"JS1\_I07\_00591" 15545 "s59E13H2" 0.006128986 "Penicillin-binding protein 1A"  
"JS1\_I07\_00591" 15545 "s59E25H2" 0 "Penicillin-binding protein 1A"  
"JS1\_I07\_00591" 15545 "s59E5H2" 0.003336328 "Penicillin-binding protein 1A"  
"JS1\_I07\_00591" 15545 "s63E6H2" 0 "Penicillin-binding protein 1A"  
"JS1\_I07\_00592" 15546 "s59E13H2" 0 "putative oxidoreductase"  
"JS1\_I07\_00592" 15546 "s59E25H2" 0 "putative oxidoreductase"  
"JS1\_I07\_00592" 15546 "s59E5H2" 0 "putative oxidoreductase"  
"JS1\_I07\_00592" 15546 "s63E6H2" 0 "putative oxidoreductase"  
"JS1\_I07\_00595" 15549 "s59E13H2" 0.003923668 "Queuosine precursor transporter QueT"  
"JS1\_I07\_00595" 15549 "s59E25H2" 0 "Queuosine precursor transporter QueT"  
"JS1\_I07\_00595" 15549 "s59E5H2" 0 "Queuosine precursor transporter QueT"  
"JS1\_I07\_00595" 15549 "s63E6H2" 0.001714671 "Queuosine precursor transporter QueT"  
"JS1\_I07\_00597" 15551 "s59E13H2" 0.09209253 "hypothetical protein"  
"JS1\_I07\_00597" 15551 "s59E25H2" 0 "hypothetical protein"  
"JS1\_I07\_00597" 15551 "s59E5H2" 0.3749138 "hypothetical protein"  
"JS1\_I07\_00597" 15551 "s63E6H2" 0.3610405 "hypothetical protein"  
"JS1\_I07\_00598" 15552 "s59E13H2" 0 "Tripartite ATP-independent periplasmic transporters, DctQ component"  
"JS1\_I07\_00598" 15552 "s59E25H2" 0 "Tripartite ATP-independent periplasmic transporters, DctQ component"  
"JS1\_I07\_00598" 15552 "s59E5H2" 0 "Tripartite ATP-independent periplasmic transporters, DctQ component"  
"JS1\_I07\_00598" 15552 "s63E6H2" 0 "Tripartite ATP-independent periplasmic transporters, DctQ component"  
"JS1\_I07\_00599" 15553 "s59E13H2" 0 "hypothetical protein"  
"JS1\_I07\_00599" 15553 "s59E25H2" 0 "hypothetical protein"  
"JS1\_I07\_00599" 15553 "s59E5H2" 0 "hypothetical protein"  
"JS1\_I07\_00599" 15553 "s63E6H2" 0 "hypothetical protein"  
"JS1\_I07\_00600" 15554 "s59E13H2" 0.2379798 "Endonuclease MutS2"  
"JS1\_I07\_00600" 15554 "s59E25H2" 0 "Endonuclease MutS2"  
"JS1\_I07\_00600" 15554 "s59E5H2" 0.05296877 "Endonuclease MutS2"  
"JS1\_I07\_00600" 15554 "s63E6H2" 0.08923144 "Endonuclease MutS2"  
"JS1\_I07\_00604" 15558 "s59E13H2" 0 "RNA polymerase factor sigma-70"  
"JS1\_I07\_00604" 15558 "s59E25H2" 0 "RNA polymerase factor sigma-70"  
"JS1\_I07\_00604" 15558 "s59E5H2" 0 "RNA polymerase factor sigma-70"  
"JS1\_I07\_00604" 15558 "s63E6H2" 0 "RNA polymerase factor sigma-70"  
"JS1\_I07\_00608" 15562 "s59E13H2" 0.1542694 "Methylmalonyl-CoA carboxyltransferase 12S subunit"

"JS1\_I07\_00608" 15562 "s59E25H2" 0 "Methylmalonyl-CoA carboxyltransferase 12S subunit"  
"JS1\_I07\_00608" 15562 "s59E5H2" 0.2474137 "Methylmalonyl-CoA carboxyltransferase 12S subunit"  
"JS1\_I07\_00608" 15562 "s63E6H2" 0.4145006 "Methylmalonyl-CoA carboxyltransferase 12S subunit"  
"JS1\_I07\_00609" 15563 "s59E13H2" 0.3286397 "Phenylalanine--tRNA ligase beta subunit"  
"JS1\_I07\_00609" 15563 "s59E25H2" 0 "Phenylalanine--tRNA ligase beta subunit"  
"JS1\_I07\_00609" 15563 "s59E5H2" 0.1825303 "Phenylalanine--tRNA ligase beta subunit"  
"JS1\_I07\_00609" 15563 "s63E6H2" 0.1246645 "Phenylalanine--tRNA ligase beta subunit"  
"JS1\_I07\_00610" 15564 "s59E13H2" 0 "hypothetical protein"  
"JS1\_I07\_00610" 15564 "s59E25H2" 0 "hypothetical protein"  
"JS1\_I07\_00610" 15564 "s59E5H2" 0 "hypothetical protein"  
"JS1\_I07\_00610" 15564 "s63E6H2" 0 "hypothetical protein"  
"JS1\_I07\_00611" 15565 "s59E13H2" 0 "hypothetical protein"  
"JS1\_I07\_00611" 15565 "s59E25H2" 0 "hypothetical protein"  
"JS1\_I07\_00611" 15565 "s59E5H2" 0 "hypothetical protein"  
"JS1\_I07\_00611" 15565 "s63E6H2" 0.03718714 "hypothetical protein"  
"JS1\_I07\_00615" 15569 "s59E13H2" 0 "hypothetical protein"  
"JS1\_I07\_00615" 15569 "s59E25H2" 0 "hypothetical protein"  
"JS1\_I07\_00615" 15569 "s59E5H2" 0 "hypothetical protein"  
"JS1\_I07\_00615" 15569 "s63E6H2" 0 "hypothetical protein"  
"JS1\_I07\_00618" 15572 "s59E13H2" 0.04519136 "Endonuclease MutS2"  
"JS1\_I07\_00618" 15572 "s59E25H2" 0 "Endonuclease MutS2"  
"JS1\_I07\_00618" 15572 "s59E5H2" 0.003897648 "Endonuclease MutS2"  
"JS1\_I07\_00618" 15572 "s63E6H2" 0.02591268 "Endonuclease MutS2"  
"JS1\_I07\_00619" 15573 "s59E13H2" 0 "hypothetical protein"  
"JS1\_I07\_00619" 15573 "s59E25H2" 0 "hypothetical protein"  
"JS1\_I07\_00619" 15573 "s59E5H2" 0 "hypothetical protein"  
"JS1\_I07\_00619" 15573 "s63E6H2" 0 "hypothetical protein"  
"JS1\_I07\_00632" 15586 "s59E13H2" 0 "hypothetical protein"  
"JS1\_I07\_00632" 15586 "s59E25H2" 0 "hypothetical protein"  
"JS1\_I07\_00632" 15586 "s59E5H2" 0 "hypothetical protein"  
"JS1\_I07\_00632" 15586 "s63E6H2" 0 "hypothetical protein"  
"JS1\_I07\_00634" 15588 "s59E13H2" 0 "hypothetical protein"  
"JS1\_I07\_00634" 15588 "s59E25H2" 0 "hypothetical protein"  
"JS1\_I07\_00634" 15588 "s59E5H2" 0 "hypothetical protein"  
"JS1\_I07\_00634" 15588 "s63E6H2" 0 "hypothetical protein"  
"JS1\_I07\_00635" 15589 "s59E13H2" 0 "hypothetical protein"  
"JS1\_I07\_00635" 15589 "s59E25H2" 0 "hypothetical protein"  
"JS1\_I07\_00635" 15589 "s59E5H2" 0 "hypothetical protein"  
"JS1\_I07\_00635" 15589 "s63E6H2" 0 "hypothetical protein"  
"JS1\_I07\_00637" 15591 "s59E13H2" 0.05556303 "Penicillin-binding protein 1F"  
"JS1\_I07\_00637" 15591 "s59E25H2" 0 "Penicillin-binding protein 1F"  
"JS1\_I07\_00637" 15591 "s59E5H2" 0.05715767 "Penicillin-binding protein 1F"  
"JS1\_I07\_00637" 15591 "s63E6H2" 0.05226761 "Penicillin-binding protein 1F"  
"JS1\_I07\_00638" 15592 "s59E13H2" 0 "hypothetical protein"  
"JS1\_I07\_00638" 15592 "s59E25H2" 0 "hypothetical protein"  
"JS1\_I07\_00638" 15592 "s59E5H2" 0 "hypothetical protein"  
"JS1\_I07\_00638" 15592 "s63E6H2" 0.001457404 "hypothetical protein"

"JS1\_I07\_00641" 15595 "s59E13H2" 0.449362 "ATP synthase subunit alpha"  
"JS1\_I07\_00641" 15595 "s59E25H2" 0 "ATP synthase subunit alpha"  
"JS1\_I07\_00641" 15595 "s59E5H2" 1.020062 "ATP synthase subunit alpha"  
"JS1\_I07\_00641" 15595 "s63E6H2" 1.917865 "ATP synthase subunit alpha"  
"JS1\_I07\_00642" 15596 "s59E13H2" 0.1102614 "Penicillin-binding protein 1A"  
"JS1\_I07\_00642" 15596 "s59E25H2" 0 "Penicillin-binding protein 1A"  
"JS1\_I07\_00642" 15596 "s59E5H2" 0.04318238 "Penicillin-binding protein 1A"  
"JS1\_I07\_00642" 15596 "s63E6H2" 0.09580153 "Penicillin-binding protein 1A"  
"JS1\_I07\_00644" 15598 "s59E13H2" 0 "hypothetical protein"  
"JS1\_I07\_00644" 15598 "s59E25H2" 0 "hypothetical protein"  
"JS1\_I07\_00644" 15598 "s59E5H2" 0 "hypothetical protein"  
"JS1\_I07\_00644" 15598 "s63E6H2" 0 "hypothetical protein"  
"JS1\_I07\_00645" 15599 "s59E13H2" 0 "hypothetical protein"  
"JS1\_I07\_00645" 15599 "s59E25H2" 0 "hypothetical protein"  
"JS1\_I07\_00645" 15599 "s59E5H2" 0 "hypothetical protein"  
"JS1\_I07\_00645" 15599 "s63E6H2" 0 "hypothetical protein"  
"JS1\_I07\_00646" 15600 "s59E13H2" 0 "Sialic acid TRAP transporter permease protein SiaT"  
"JS1\_I07\_00646" 15600 "s59E25H2" 0 "Sialic acid TRAP transporter permease protein SiaT"  
"JS1\_I07\_00646" 15600 "s59E5H2" 0 "Sialic acid TRAP transporter permease protein SiaT"  
"JS1\_I07\_00646" 15600 "s63E6H2" 0 "Sialic acid TRAP transporter permease protein SiaT"  
"JS1\_I07\_00648" 15602 "s59E13H2" 0.007624074 "Penicillin-binding protein 1F"  
"JS1\_I07\_00648" 15602 "s59E25H2" 0 "Penicillin-binding protein 1F"  
"JS1\_I07\_00648" 15602 "s59E5H2" 0 "Penicillin-binding protein 1F"  
"JS1\_I07\_00648" 15602 "s63E6H2" 0.01383741 "Penicillin-binding protein 1F"  
"JS1\_I07\_00649" 15603 "s59E13H2" 0.02179757 "Penicillin-binding protein 1F"  
"JS1\_I07\_00649" 15603 "s59E25H2" 0 "Penicillin-binding protein 1F"  
"JS1\_I07\_00649" 15603 "s59E5H2" 0 "Penicillin-binding protein 1F"  
"JS1\_I07\_00649" 15603 "s63E6H2" 0.01278722 "Penicillin-binding protein 1F"  
"JS1\_I07\_00652" 15606 "s59E13H2" 0.05557925 "1-deoxy-D-xylulose 5-phosphate reductoisomerase"  
"JS1\_I07\_00652" 15606 "s59E25H2" 0 "1-deoxy-D-xylulose 5-phosphate reductoisomerase"  
"JS1\_I07\_00652" 15606 "s59E5H2" 0.06893803 "1-deoxy-D-xylulose 5-phosphate reductoisomerase"  
"JS1\_I07\_00652" 15606 "s63E6H2" 0.05486244 "1-deoxy-D-xylulose 5-phosphate reductoisomerase"  
"JS1\_I07\_00654" 15608 "s59E13H2" 0 "hypothetical protein"  
"JS1\_I07\_00654" 15608 "s59E25H2" 0 "hypothetical protein"  
"JS1\_I07\_00654" 15608 "s59E5H2" 0.03544501 "hypothetical protein"  
"JS1\_I07\_00654" 15608 "s63E6H2" 0 "hypothetical protein"  
"JS1\_I07\_00657" 15611 "s59E13H2" 0 "DctM-like transporters"  
"JS1\_I07\_00657" 15611 "s59E25H2" 0 "DctM-like transporters"  
"JS1\_I07\_00657" 15611 "s59E5H2" 0 "DctM-like transporters"  
"JS1\_I07\_00657" 15611 "s63E6H2" 0 "DctM-like transporters"  
"JS1\_I07\_00658" 15612 "s59E13H2" 0 "hypothetical protein"  
"JS1\_I07\_00658" 15612 "s59E25H2" 0 "hypothetical protein"  
"JS1\_I07\_00658" 15612 "s59E5H2" 0 "hypothetical protein"  
"JS1\_I07\_00658" 15612 "s63E6H2" 0 "hypothetical protein"  
"JS1\_I07\_00660" 15614 "s59E13H2" 0.02572967 "Penicillin-binding protein 1A"  
"JS1\_I07\_00660" 15614 "s59E25H2" 0 "Penicillin-binding protein 1A"  
"JS1\_I07\_00660" 15614 "s59E5H2" 0 "Penicillin-binding protein 1A"

"JS1\_I07\_00660" 15614 "s63E6H2" 0.01436923 "Penicillin-binding protein 1A"  
"JS1\_I07\_00661" 15615 "s59E13H2" 0 "hypothetical protein"  
"JS1\_I07\_00661" 15615 "s59E25H2" 0 "hypothetical protein"  
"JS1\_I07\_00661" 15615 "s59E5H2" 0.04031532 "hypothetical protein"  
"JS1\_I07\_00661" 15615 "s63E6H2" 0 "hypothetical protein"  
"JS1\_I07\_00663" 15617 "s59E13H2" 0.07437684 "Penicillin-binding protein 1F"  
"JS1\_I07\_00663" 15617 "s59E25H2" 0 "Penicillin-binding protein 1F"  
"JS1\_I07\_00663" 15617 "s59E5H2" 0.03466121 "Penicillin-binding protein 1F"  
"JS1\_I07\_00663" 15617 "s63E6H2" 0.06792557 "Penicillin-binding protein 1F"  
"JS1\_I07\_00664" 15618 "s59E13H2" 0 "hypothetical protein"  
"JS1\_I07\_00664" 15618 "s59E25H2" 0 "hypothetical protein"  
"JS1\_I07\_00664" 15618 "s59E5H2" 0 "hypothetical protein"  
"JS1\_I07\_00664" 15618 "s63E6H2" 0 "hypothetical protein"  
"JS1\_I07\_00665" 15619 "s59E13H2" 0 "hypothetical protein"  
"JS1\_I07\_00665" 15619 "s59E25H2" 0 "hypothetical protein"  
"JS1\_I07\_00665" 15619 "s59E5H2" 0 "hypothetical protein"  
"JS1\_I07\_00665" 15619 "s63E6H2" 0 "hypothetical protein"  
"JS1\_I07\_00666" 15620 "s59E13H2" 0 "hypothetical protein"  
"JS1\_I07\_00666" 15620 "s59E25H2" 0 "hypothetical protein"  
"JS1\_I07\_00666" 15620 "s59E5H2" 0 "hypothetical protein"  
"JS1\_I07\_00666" 15620 "s63E6H2" 0 "hypothetical protein"  
"JS1\_I07\_00667" 15621 "s59E13H2" 0.02089118 "Penicillin-binding protein 1A"  
"JS1\_I07\_00667" 15621 "s59E25H2" 0 "Penicillin-binding protein 1A"  
"JS1\_I07\_00667" 15621 "s59E5H2" 0.008845349 "Penicillin-binding protein 1A"  
"JS1\_I07\_00667" 15621 "s63E6H2" 0.01756595 "Penicillin-binding protein 1A"  
"JS1\_I07\_00668" 15622 "s59E13H2" 0.06046926 "Penicillin-binding protein 1F"  
"JS1\_I07\_00668" 15622 "s59E25H2" 0 "Penicillin-binding protein 1F"  
"JS1\_I07\_00668" 15622 "s59E5H2" 0.01920113 "Penicillin-binding protein 1F"  
"JS1\_I07\_00668" 15622 "s63E6H2" 0.05818009 "Penicillin-binding protein 1F"  
"JS1\_I07\_00669" 15623 "s59E13H2" 0 "hypothetical protein"  
"JS1\_I07\_00669" 15623 "s59E25H2" 0 "hypothetical protein"  
"JS1\_I07\_00669" 15623 "s59E5H2" 0 "hypothetical protein"  
"JS1\_I07\_00669" 15623 "s63E6H2" 0 "hypothetical protein"  
"JS1\_I07\_00670" 15624 "s59E13H2" 0 "hypothetical protein"  
"JS1\_I07\_00670" 15624 "s59E25H2" 0 "hypothetical protein"  
"JS1\_I07\_00670" 15624 "s59E5H2" 0 "hypothetical protein"  
"JS1\_I07\_00670" 15624 "s63E6H2" 0 "hypothetical protein"  
"JS1\_I07\_00673" 15627 "s59E13H2" 0 "hypothetical protein"  
"JS1\_I07\_00673" 15627 "s59E25H2" 0 "hypothetical protein"  
"JS1\_I07\_00673" 15627 "s59E5H2" 0 "hypothetical protein"  
"JS1\_I07\_00673" 15627 "s63E6H2" 0.3205693 "hypothetical protein"  
"JS1\_I07\_00674" 15628 "s59E13H2" 0 "DctM-like transporters"  
"JS1\_I07\_00674" 15628 "s59E25H2" 0 "DctM-like transporters"  
"JS1\_I07\_00674" 15628 "s59E5H2" 0 "DctM-like transporters"  
"JS1\_I07\_00674" 15628 "s63E6H2" 0 "DctM-like transporters"  
"JS1\_I07\_00676" 15630 "s59E13H2" 0 "NAD/NADP octopine/nopaline dehydrogenase, alpha-helical domain"  
"JS1\_I07\_00676" 15630 "s59E25H2" 0 "NAD/NADP octopine/nopaline dehydrogenase, alpha-helical domain"

"JS1\_I07\_00676" 15630 "s59E5H2" 0 "NAD/NADP octopine/nopaline dehydrogenase, alpha-helical domain"  
"JS1\_I07\_00676" 15630 "s63E6H2" 0.003576956 "NAD/NADP octopine/nopaline dehydrogenase, alpha-helical domain"  
"JS1\_I07\_00677" 15631 "s59E13H2" 0.1074967 "Tyrosine--tRNA ligase"  
"JS1\_I07\_00677" 15631 "s59E25H2" 0 "Tyrosine--tRNA ligase"  
"JS1\_I07\_00677" 15631 "s59E5H2" 0.05838098 "Tyrosine--tRNA ligase"  
"JS1\_I07\_00677" 15631 "s63E6H2" 0.1239871 "Tyrosine--tRNA ligase"  
"JS1\_I07\_00678" 15632 "s59E13H2" 0 "hypothetical protein"  
"JS1\_I07\_00678" 15632 "s59E25H2" 0 "hypothetical protein"  
"JS1\_I07\_00678" 15632 "s59E5H2" 0 "hypothetical protein"  
"JS1\_I07\_00678" 15632 "s63E6H2" 0 "hypothetical protein"  
"JS1\_I07\_00679" 15633 "s59E13H2" 0.009463391 "Endonuclease Muts2"  
"JS1\_I07\_00679" 15633 "s59E25H2" 0 "Endonuclease MutS2"  
"JS1\_I07\_00679" 15633 "s59E5H2" 0 "Endonuclease MutS2"  
"JS1\_I07\_00679" 15633 "s63E6H2" 0.01282027 "Endonuclease MutS2"  
"JS1\_I07\_00680" 15634 "s59E13H2" 0.001904508 "recombination and DNA strand exchange inhibitor protein"  
"JS1\_I07\_00680" 15634 "s59E25H2" 0 "recombination and DNA strand exchange inhibitor protein"  
"JS1\_I07\_00680" 15634 "s59E5H2" 0 "recombination and DNA strand exchange inhibitor protein"  
"JS1\_I07\_00680" 15634 "s63E6H2" 0 "recombination and DNA strand exchange inhibitor protein"  
"JS1\_I07\_00685" 15639 "s59E13H2" 1.232913 "hypothetical protein"  
"JS1\_I07\_00685" 15639 "s59E25H2" 0 "hypothetical protein"  
"JS1\_I07\_00685" 15639 "s59E5H2" 2.030705 "hypothetical protein"  
"JS1\_I07\_00685" 15639 "s63E6H2" 0.1438765 "hypothetical protein"  
"JS1\_I07\_00686" 15640 "s59E13H2" 1.102741 "hypothetical protein"  
"JS1\_I07\_00686" 15640 "s59E25H2" 0.7203065 "hypothetical protein"  
"JS1\_I07\_00686" 15640 "s59E5H2" 1.761178 "hypothetical protein"  
"JS1\_I07\_00686" 15640 "s63E6H2" 0.1548239 "hypothetical protein"  
"JS1\_I07\_00688" 15642 "s59E13H2" 0 "dTDP-4-dehydrorhamnose reductase"  
"JS1\_I07\_00688" 15642 "s59E25H2" 0 "dTDP-4-dehydrorhamnose reductase"  
"JS1\_I07\_00688" 15642 "s59E5H2" 0 "dTDP-4-dehydrorhamnose reductase"  
"JS1\_I07\_00688" 15642 "s63E6H2" 0 "dTDP-4-dehydrorhamnose reductase"  
"JS1\_I07\_00689" 15643 "s59E13H2" 0.08538623 "Penicillin-binding protein 1F"  
"JS1\_I07\_00689" 15643 "s59E25H2" 0 "Penicillin-binding protein 1F"  
"JS1\_I07\_00689" 15643 "s59E5H2" 0.02113883 "Penicillin-binding protein 1F"  
"JS1\_I07\_00689" 15643 "s63E6H2" 0.04565427 "Penicillin-binding protein 1F"  
"JS1\_I07\_00691" 15645 "s59E13H2" 0 "YcfA-like protein"  
"JS1\_I07\_00691" 15645 "s59E25H2" 0 "YcfA-like protein"  
"JS1\_I07\_00691" 15645 "s59E5H2" 0 "YcfA-like protein"  
"JS1\_I07\_00691" 15645 "s63E6H2" 0 "YcfA-like protein"  
"JS1\_I07\_00693" 15647 "s59E13H2" 0.030984 "Penicillin-binding protein 1A"  
"JS1\_I07\_00693" 15647 "s59E25H2" 0 "Penicillin-binding protein 1A"  
"JS1\_I07\_00693" 15647 "s59E5H2" 0 "Penicillin-binding protein 1A"  
"JS1\_I07\_00693" 15647 "s63E6H2" 0.007895181 "Penicillin-binding protein 1A"  
"JS1\_I07\_00694" 15648 "s59E13H2" 0 "dTDP-4-dehydrorhamnose reductase"  
"JS1\_I07\_00694" 15648 "s59E25H2" 0 "dTDP-4-dehydrorhamnose reductase"  
"JS1\_I07\_00694" 15648 "s59E5H2" 0 "dTDP-4-dehydrorhamnose reductase"  
"JS1\_I07\_00694" 15648 "s63E6H2" 0 "dTDP-4-dehydrorhamnose reductase"  
"JS1\_I07\_00695" 15649 "s59E13H2" 0 "Opine dehydrogenase"

"JS1\_I07\_00695" 15649 "s59E25H2" 0 "Opine dehydrogenase"  
"JS1\_I07\_00695" 15649 "s59E5H2" 0 "Opine dehydrogenase"  
"JS1\_I07\_00695" 15649 "s63E6H2" 0.001495982 "Opine dehydrogenase"  
"JS1\_I07\_00696" 15650 "s59E13H2" 3.438682 "hypothetical protein"  
"JS1\_I07\_00696" 15650 "s59E25H2" 0 "hypothetical protein"  
"JS1\_I07\_00696" 15650 "s59E5H2" 0.08337462 "hypothetical protein"  
"JS1\_I07\_00696" 15650 "s63E6H2" 0.1471004 "hypothetical protein"  
"JS1\_I07\_00697" 15651 "s59E13H2" 0.006795694 "alpha-dehydro-beta-deoxy-D-glucarate aldolase"  
"JS1\_I07\_00697" 15651 "s59E25H2" 0 "alpha-dehydro-beta-deoxy-D-glucarate aldolase"  
"JS1\_I07\_00697" 15651 "s59E5H2" 0 "alpha-dehydro-beta-deoxy-D-glucarate aldolase"  
"JS1\_I07\_00697" 15651 "s63E6H2" 0.06648786 "alpha-dehydro-beta-deoxy-D-glucarate aldolase"  
"JS1\_I07\_00698" 15652 "s59E13H2" 0 "DNA-binding transcriptional regulator CpxR"  
"JS1\_I07\_00698" 15652 "s59E25H2" 0 "DNA-binding transcriptional regulator CpxR"  
"JS1\_I07\_00698" 15652 "s59E5H2" 0 "DNA-binding transcriptional regulator CpxR"  
"JS1\_I07\_00698" 15652 "s63E6H2" 0 "DNA-binding transcriptional regulator CpxR"  
"JS1\_I07\_00699" 15653 "s59E13H2" 0.002525133 "hypothetical protein"  
"JS1\_I07\_00699" 15653 "s59E25H2" 0 "hypothetical protein"  
"JS1\_I07\_00699" 15653 "s59E5H2" 0.003531268 "hypothetical protein"  
"JS1\_I07\_00699" 15653 "s63E6H2" 0.002086621 "hypothetical protein"  
"JS1\_I07\_00700" 15654 "s59E13H2" 0 "hypothetical protein"  
"JS1\_I07\_00700" 15654 "s59E25H2" 0 "hypothetical protein"  
"JS1\_I07\_00700" 15654 "s59E5H2" 0 "hypothetical protein"  
"JS1\_I07\_00700" 15654 "s63E6H2" 0 "hypothetical protein"  
"JS1\_I07\_00701" 15655 "s59E13H2" 0 "hypothetical protein"  
"JS1\_I07\_00701" 15655 "s59E25H2" 0 "hypothetical protein"  
"JS1\_I07\_00701" 15655 "s59E5H2" 0 "hypothetical protein"  
"JS1\_I07\_00701" 15655 "s63E6H2" 0.1863574 "hypothetical protein"  
"JS1\_I07\_00705" 15659 "s59E13H2" 1.38788 "hypothetical protein"  
"JS1\_I07\_00705" 15659 "s59E25H2" 0 "hypothetical protein"  
"JS1\_I07\_00705" 15659 "s59E5H2" 0.07591208 "hypothetical protein"  
"JS1\_I07\_00705" 15659 "s63E6H2" 0.04598066 "hypothetical protein"  
"JS1\_I07\_00706" 15660 "s59E13H2" 0.05814162 "hypothetical protein"  
"JS1\_I07\_00706" 15660 "s59E25H2" 0 "hypothetical protein"  
"JS1\_I07\_00706" 15660 "s59E5H2" 0.004115286 "hypothetical protein"  
"JS1\_I07\_00706" 15660 "s63E6H2" 0.001356149 "hypothetical protein"  
"JS1\_I07\_00707" 15661 "s59E13H2" 0.6991172 "hypothetical protein"  
"JS1\_I07\_00707" 15661 "s59E25H2" 0 "hypothetical protein"  
"JS1\_I07\_00707" 15661 "s59E5H2" 0.01466776 "hypothetical protein"  
"JS1\_I07\_00707" 15661 "s63E6H2" 0.006630254 "hypothetical protein"  
"JS1\_I07\_00708" 15662 "s59E13H2" 0.3956781 "hypothetical protein"  
"JS1\_I07\_00708" 15662 "s59E25H2" 0 "hypothetical protein"  
"JS1\_I07\_00708" 15662 "s59E5H2" 0.01397048 "hypothetical protein"  
"JS1\_I07\_00708" 15662 "s63E6H2" 0.01052436 "hypothetical protein"  
"JS1\_I07\_00709" 15663 "s59E13H2" 0.06578062 "Tyrosine--tRNA ligase"  
"JS1\_I07\_00709" 15663 "s59E25H2" 0 "Tyrosine--tRNA ligase"  
"JS1\_I07\_00709" 15663 "s59E5H2" 0.0499264 "Tyrosine--tRNA ligase"  
"JS1\_I07\_00709" 15663 "s63E6H2" 0.1041011 "Tyrosine--tRNA ligase"

"JS1\_I07\_00712" 15666 "s59E13H2" 0 "hypothetical protein"  
"JS1\_I07\_00712" 15666 "s59E25H2" 0 "hypothetical protein"  
"JS1\_I07\_00712" 15666 "s59E5H2" 0 "hypothetical protein"  
"JS1\_I07\_00712" 15666 "s63E6H2" 0.4926537 "hypothetical protein"  
"JS1\_I07\_00720" 15674 "s59E13H2" 0 "hypothetical protein"  
"JS1\_I07\_00720" 15674 "s59E25H2" 0 "hypothetical protein"  
"JS1\_I07\_00720" 15674 "s59E5H2" 0 "hypothetical protein"  
"JS1\_I07\_00720" 15674 "s63E6H2" 0 "hypothetical protein"  
"JS1\_I07\_00722" 15676 "s59E13H2" 0 "hypothetical protein"  
"JS1\_I07\_00722" 15676 "s59E25H2" 0 "hypothetical protein"  
"JS1\_I07\_00722" 15676 "s59E5H2" 0 "hypothetical protein"  
"JS1\_I07\_00722" 15676 "s63E6H2" 0.1687876 "hypothetical protein"  
"JS1\_I07\_00723" 15677 "s59E13H2" 0.2566922 "Tyrosine--tRNA ligase"  
"JS1\_I07\_00723" 15677 "s59E25H2" 0 "Tyrosine--tRNA ligase"  
"JS1\_I07\_00723" 15677 "s59E5H2" 0.08105866 "Tyrosine--tRNA ligase"  
"JS1\_I07\_00723" 15677 "s63E6H2" 0.2595672 "Tyrosine--tRNA ligase"  
"JS1\_I07\_00724" 15678 "s59E13H2" 0.1031922 "Tyrosine--tRNA ligase"  
"JS1\_I07\_00724" 15678 "s59E25H2" 0 "Tyrosine--tRNA ligase"  
"JS1\_I07\_00724" 15678 "s59E5H2" 0.0357395 "Tyrosine--tRNA ligase"  
"JS1\_I07\_00724" 15678 "s63E6H2" 0.1343431 "Tyrosine--tRNA ligase"  
"JS1\_I07\_00725" 15679 "s59E13H2" 0 "hypothetical protein"  
"JS1\_I07\_00725" 15679 "s59E25H2" 0 "hypothetical protein"  
"JS1\_I07\_00725" 15679 "s59E5H2" 0 "hypothetical protein"  
"JS1\_I07\_00725" 15679 "s63E6H2" 0 "hypothetical protein"  
"JS1\_I07\_00726" 15680 "s59E13H2" 0.2917218 "Uracil DNA glycosylase superfamily protein"  
"JS1\_I07\_00726" 15680 "s59E25H2" 0 "Uracil DNA glycosylase superfamily protein"  
"JS1\_I07\_00726" 15680 "s59E5H2" 0.214821 "Uracil DNA glycosylase superfamily protein"  
"JS1\_I07\_00726" 15680 "s63E6H2" 0.1003316 "Uracil DNA glycosylase superfamily protein"  
"JS1\_I07\_00729" 15683 "s59E13H2" 0.720432 "hypothetical protein"  
"JS1\_I07\_00729" 15683 "s59E25H2" 0 "hypothetical protein"  
"JS1\_I07\_00729" 15683 "s59E5H2" 0.008025927 "hypothetical protein"  
"JS1\_I07\_00729" 15683 "s63E6H2" 0.01422098 "hypothetical protein"  
"JS1\_I07\_00730" 15684 "s59E13H2" 0.1011723 "hypothetical protein"  
"JS1\_I07\_00730" 15684 "s59E25H2" 0 "hypothetical protein"  
"JS1\_I07\_00730" 15684 "s59E5H2" 0 "hypothetical protein"  
"JS1\_I07\_00730" 15684 "s63E6H2" 0.9042837 "hypothetical protein"  
"JS1\_I07\_00731" 15685 "s59E13H2" 0 "dTDP-4-dehydrorhamnose reductase"  
"JS1\_I07\_00731" 15685 "s59E25H2" 0 "dTDP-4-dehydrorhamnose reductase"  
"JS1\_I07\_00731" 15685 "s59E5H2" 0.003960821 "dTDP-4-dehydrorhamnose reductase"  
"JS1\_I07\_00731" 15685 "s63E6H2" 0 "dTDP-4-dehydrorhamnose reductase"  
"JS1\_I07\_00732" 15686 "s59E13H2" 0 "dTDP-4-dehydrorhamnose reductase"  
"JS1\_I07\_00732" 15686 "s59E25H2" 0 "dTDP-4-dehydrorhamnose reductase"  
"JS1\_I07\_00732" 15686 "s59E5H2" 0 "dTDP-4-dehydrorhamnose reductase"  
"JS1\_I07\_00732" 15686 "s63E6H2" 0 "dTDP-4-dehydrorhamnose reductase"  
"JS1\_I07\_00735" 15689 "s59E13H2" 0 "hypothetical protein"  
"JS1\_I07\_00735" 15689 "s59E25H2" 0 "hypothetical protein"  
"JS1\_I07\_00735" 15689 "s59E5H2" 0.0384707 "hypothetical protein"



"JS1\_I07\_00735" 15689 "s63E6H2" 0.0119294 "hypothetical protein"  
"JS1\_I07\_00736" 15690 "s59E13H2" 0 "hypothetical protein"  
"JS1\_I07\_00736" 15690 "s59E25H2" 0 "hypothetical protein"  
"JS1\_I07\_00736" 15690 "s59E5H2" 0 "hypothetical protein"  
"JS1\_I07\_00736" 15690 "s63E6H2" 0.2213608 "hypothetical protein"  
"JS1\_K04\_00001" 7258 "s59E13H2" 1.382994 "Tetratricopeptide repeat protein"  
"JS1\_K04\_00001" 7258 "s59E25H2" 0 "Tetratricopeptide repeat protein"  
"JS1\_K04\_00001" 7258 "s59E5H2" 0.02395885 "Tetratricopeptide repeat protein"  
"JS1\_K04\_00001" 7258 "s63E6H2" 0.004168656 "Tetratricopeptide repeat protein"  
"JS1\_K04\_00002" 7259 "s59E13H2" 3.124868 "Leu/Ile/Val/Thr-binding protein precursor"  
"JS1\_K04\_00002" 7259 "s59E25H2" 0.2213675 "Leu/Ile/Val/Thr-binding protein precursor"  
"JS1\_K04\_00002" 7259 "s59E5H2" 0.04665376 "Leu/Ile/Val/Thr-binding protein precursor"  
"JS1\_K04\_00002" 7259 "s63E6H2" 0.005190778 "Leu/Ile/Val/Thr-binding protein precursor"  
"JS1\_K04\_00003" 7260 "s59E13H2" 3.81886 "High-affinity branched-chain amino acid transport system permease protein LivH"  
"JS1\_K04\_00003" 7260 "s59E25H2" 0 "High-affinity branched-chain amino acid transport system permease protein LivH"  
"JS1\_K04\_00003" 7260 "s59E5H2" 0.08657438 "High-affinity branched-chain amino acid transport system permease protein LivH"  
"JS1\_K04\_00003" 7260 "s63E6H2" 0.004094786 "High-affinity branched-chain amino acid transport system permease protein LivH"  
"JS1\_K04\_00004" 7261 "s59E13H2" 2.180857 "leucine/isoleucine/valine transporter permease subunit"  
"JS1\_K04\_00004" 7261 "s59E25H2" 0 "leucine/isoleucine/valine transporter permease subunit"  
"JS1\_K04\_00004" 7261 "s59E5H2" 0.07970769 "leucine/isoleucine/valine transporter permease subunit"  
"JS1\_K04\_00004" 7261 "s63E6H2" 0.00809221 "leucine/isoleucine/valine transporter permease subunit"  
"JS1\_K04\_00005" 7262 "s59E13H2" 2.837633 "putative branched-chain amino acid transport ATP-binding protein LivG"  
"JS1\_K04\_00005" 7262 "s59E25H2" 0 "putative branched-chain amino acid transport ATP-binding protein LivG"  
"JS1\_K04\_00005" 7262 "s59E5H2" 0.06843196 "putative branched-chain amino acid transport ATP-binding protein LivG"  
"JS1\_K04\_00005" 7262 "s63E6H2" 0.004962282 "putative branched-chain amino acid transport ATP-binding protein LivG"  
"JS1\_K04\_00006" 7263 "s59E13H2" 3.067717 "leucine/isoleucine/valine transporter ATP-binding subunit"  
"JS1\_K04\_00006" 7263 "s59E25H2" 0 "leucine/isoleucine/valine transporter ATP-binding subunit"  
"JS1\_K04\_00006" 7263 "s59E5H2" 0.04493252 "leucine/isoleucine/valine transporter ATP-binding subunit"  
"JS1\_K04\_00006" 7263 "s63E6H2" 0 "leucine/isoleucine/valine transporter ATP-binding subunit"  
"JS1\_K04\_00007" 7264 "s59E13H2" 3.226971 "High-affinity branched-chain amino acid transport ATP-binding protein LivF"  
"JS1\_K04\_00007" 7264 "s59E25H2" 0 "High-affinity branched-chain amino acid transport ATP-binding protein LivF"  
"JS1\_K04\_00007" 7264 "s59E5H2" 0.0903028 "High-affinity branched-chain amino acid transport ATP-binding protein LivF"  
"JS1\_K04\_00007" 7264 "s63E6H2" 0.004121845 "High-affinity branched-chain amino acid transport ATP-binding protein LivF"  
"JS1\_K04\_00008" 7265 "s59E13H2" 3.182069 "Urocanate hydratase"  
"JS1\_K04\_00008" 7265 "s59E25H2" 0.2449681 "Urocanate hydratase"  
"JS1\_K04\_00008" 7265 "s59E5H2" 0.009025088 "Urocanate hydratase"  
"JS1\_K04\_00008" 7265 "s63E6H2" 0.005360041 "Urocanate hydratase"  
"JS1\_K04\_00009" 7266 "s59E13H2" 3.607918 "hypothetical protein"  
"JS1\_K04\_00009" 7266 "s59E25H2" 0.2770419 "hypothetical protein"  
"JS1\_K04\_00009" 7266 "s59E5H2" 0.03372971 "hypothetical protein"  
"JS1\_K04\_00009" 7266 "s63E6H2" 0.07305213 "hypothetical protein"  
"JS1\_K04\_00010" 7267 "s59E13H2" 4.726893 "Imidazolonepropionase"  
"JS1\_K04\_00010" 7267 "s59E25H2" 0 "Imidazolonepropionase"  
"JS1\_K04\_00010" 7267 "s59E5H2" 0.02637412 "Imidazolonepropionase"  
"JS1\_K04\_00010" 7267 "s63E6H2" 0.01802431 "Imidazolonepropionase"  
"JS1\_K04\_00011" 7268 "s59E13H2" 5.274232 "Methenyltetrahydrofolate cyclohydrolase"  
"JS1\_K04\_00011" 7268 "s59E25H2" 0 "Methenyltetrahydrofolate cyclohydrolase"

"JS1\_K04\_00011" 7268 "s59E5H2" 0.07129508 "Methenyltetrahydrofolate cyclohydrolase"  
"JS1\_K04\_00011" 7268 "s63E6H2" 0.1915808 "Methenyltetrahydrofolate cyclohydrolase"  
"JS1\_K04\_00012" 7269 "s59E13H2" 5.881169 "Arsenical pump membrane protein"  
"JS1\_K04\_00012" 7269 "s59E25H2" 0.1960784 "Arsenical pump membrane protein"  
"JS1\_K04\_00012" 7269 "s59E5H2" 0.2874753 "Arsenical pump membrane protein"  
"JS1\_K04\_00012" 7269 "s63E6H2" 0.9691532 "Arsenical pump membrane protein"  
"JS1\_K04\_00013" 7270 "s59E13H2" 4.383837 "inosine 5'-monophosphate dehydrogenase"  
"JS1\_K04\_00013" 7270 "s59E25H2" 0 "inosine 5'-monophosphate dehydrogenase"  
"JS1\_K04\_00013" 7270 "s59E5H2" 0.2694236 "inosine 5'-monophosphate dehydrogenase"  
"JS1\_K04\_00013" 7270 "s63E6H2" 0.8164169 "inosine 5'-monophosphate dehydrogenase"  
"JS1\_K04\_00014" 7271 "s59E13H2" 3.827956 "putative sugar kinase"  
"JS1\_K04\_00014" 7271 "s59E25H2" 0.1441144 "putative sugar kinase"  
"JS1\_K04\_00014" 7271 "s59E5H2" 0.6221096 "putative sugar kinase"  
"JS1\_K04\_00014" 7271 "s63E6H2" 1.051851 "putative sugar kinase"  
"JS1\_K04\_00015" 7272 "s59E13H2" 3.413204 "putative kinase inhibitor protein"  
"JS1\_K04\_00015" 7272 "s59E25H2" 0.7360179 "putative kinase inhibitor protein"  
"JS1\_K04\_00015" 7272 "s59E5H2" 0.5906946 "putative kinase inhibitor protein"  
"JS1\_K04\_00015" 7272 "s63E6H2" 0.1454405 "putative kinase inhibitor protein"  
"JS1\_K04\_00016" 7273 "s59E13H2" 5.815165 "hypothetical protein"  
"JS1\_K04\_00016" 7273 "s59E25H2" 0.4448463 "hypothetical protein"  
"JS1\_K04\_00016" 7273 "s59E5H2" 0.5188536 "hypothetical protein"  
"JS1\_K04\_00016" 7273 "s63E6H2" 0.3529432 "hypothetical protein"  
"JS1\_K04\_00017" 7274 "s59E13H2" 2.889204 "hypothetical protein"  
"JS1\_K04\_00017" 7274 "s59E25H2" 0 "hypothetical protein"  
"JS1\_K04\_00017" 7274 "s59E5H2" 0.001917517 "hypothetical protein"  
"JS1\_K04\_00017" 7274 "s63E6H2" 0.107976 "hypothetical protein"  
"JS1\_K04\_00018" 7275 "s59E13H2" 0.04211255 "hypothetical protein"  
"JS1\_K04\_00018" 7275 "s59E25H2" 0 "hypothetical protein"  
"JS1\_K04\_00018" 7275 "s59E5H2" 0.01530242 "hypothetical protein"  
"JS1\_K04\_00018" 7275 "s63E6H2" 0.4143464 "hypothetical protein"  
"JS1\_K04\_00019" 7276 "s59E13H2" 0.1647022 "HTH-type transcriptional repressor NsrR"  
"JS1\_K04\_00019" 7276 "s59E25H2" 0 "HTH-type transcriptional repressor NsrR"  
"JS1\_K04\_00019" 7276 "s59E5H2" 0.1698199 "HTH-type transcriptional repressor NsrR"  
"JS1\_K04\_00019" 7276 "s63E6H2" 0.06080802 "HTH-type transcriptional repressor NsrR"  
"JS1\_K04\_00020" 7277 "s59E13H2" 0.1554764 "Ferritin"  
"JS1\_K04\_00020" 7277 "s59E25H2" 0 "Ferritin"  
"JS1\_K04\_00020" 7277 "s59E5H2" 0.3367705 "Ferritin"  
"JS1\_K04\_00020" 7277 "s63E6H2" 0.0100379 "Ferritin"  
"JS1\_K04\_00021" 7278 "s59E13H2" 0.2376807 "putative peroxiredoxin"  
"JS1\_K04\_00021" 7278 "s59E25H2" 0 "putative peroxiredoxin"  
"JS1\_K04\_00021" 7278 "s59E5H2" 0.3358701 "putative peroxiredoxin"  
"JS1\_K04\_00021" 7278 "s63E6H2" 0.008187872 "putative peroxiredoxin"  
"JS1\_K04\_00022" 7279 "s59E13H2" 0.1950442 "Desulfoferrodoxin"  
"JS1\_K04\_00022" 7279 "s59E25H2" 0 "Desulfoferrodoxin"  
"JS1\_K04\_00022" 7279 "s59E5H2" 0.14268 "Desulfoferrodoxin"  
"JS1\_K04\_00022" 7279 "s63E6H2" 0.1741944 "Desulfoferrodoxin"  
"JS1\_K04\_00023" 7280 "s59E13H2" 0.1024131 "High molecular weight rubredoxin"

"JS1\_K04\_00023" 7280 "s59E25H2" 0 "High molecular weight rubredoxin"  
"JS1\_K04\_00023" 7280 "s59E5H2" 2.311065 "High molecular weight rubredoxin"  
"JS1\_K04\_00023" 7280 "s63E6H2" 0.4758803 "High molecular weight rubredoxin"  
"JS1\_K04\_00024" 7281 "s59E13H2" 0.1146963 "Nitric oxide reductase"  
"JS1\_K04\_00024" 7281 "s59E25H2" 0 "Nitric oxide reductase"  
"JS1\_K04\_00024" 7281 "s59E5H2" 0.2850839 "Nitric oxide reductase"  
"JS1\_K04\_00024" 7281 "s63E6H2" 0.2169314 "Nitric oxide reductase"  
"JS1\_K04\_00025" 7282 "s59E13H2" 0.06752235 "Rubrerythrin-1"  
"JS1\_K04\_00025" 7282 "s59E25H2" 0 "Rubrerythrin-1"  
"JS1\_K04\_00025" 7282 "s59E5H2" 0.1968352 "Rubrerythrin-1"  
"JS1\_K04\_00025" 7282 "s63E6H2" 0.1610163 "Rubrerythrin-1"  
"JS1\_K04\_00026" 7283 "s59E13H2" 0.1255155 "Fe/S biogenesis protein NfuA"  
"JS1\_K04\_00026" 7283 "s59E25H2" 0 "Fe/S biogenesis protein NfuA"  
"JS1\_K04\_00026" 7283 "s59E5H2" 0.07859021 "Fe/S biogenesis protein NfuA"  
"JS1\_K04\_00026" 7283 "s63E6H2" 0.5709779 "Fe/S biogenesis protein NfuA"  
"JS1\_K04\_00027" 7284 "s59E13H2" 0.1011853 "hypothetical protein"  
"JS1\_K04\_00027" 7284 "s59E25H2" 0 "hypothetical protein"  
"JS1\_K04\_00027" 7284 "s59E5H2" 0.1839554 "hypothetical protein"  
"JS1\_K04\_00027" 7284 "s63E6H2" 0.3338689 "hypothetical protein"  
"JS1\_K04\_00028" 7285 "s59E13H2" 0.2204774 "putative multidrug resistance ABC transporter ATP-binding/permease protein YheI"  
"JS1\_K04\_00028" 7285 "s59E25H2" 0 "putative multidrug resistance ABC transporter ATP-binding/permease protein YheI"  
"JS1\_K04\_00028" 7285 "s59E5H2" 2.810221 "putative multidrug resistance ABC transporter ATP-binding/permease protein YheI"  
"JS1\_K04\_00028" 7285 "s63E6H2" 1.381548 "putative multidrug resistance ABC transporter ATP-binding/permease protein YheI"  
"JS1\_K04\_00029" 7286 "s59E13H2" 0.3006553 "putative multidrug resistance ABC transporter ATP-binding/permease protein YheH"  
"JS1\_K04\_00029" 7286 "s59E25H2" 0 "putative multidrug resistance ABC transporter ATP-binding/permease protein YheH"  
"JS1\_K04\_00029" 7286 "s59E5H2" 1.892007 "putative multidrug resistance ABC transporter ATP-binding/permease protein YheH"  
"JS1\_K04\_00029" 7286 "s63E6H2" 0.8723958 "putative multidrug resistance ABC transporter ATP-binding/permease protein YheH"  
"JS1\_K04\_00030" 7287 "s59E13H2" 0.2921152 "hypothetical protein"  
"JS1\_K04\_00030" 7287 "s59E25H2" 0 "hypothetical protein"  
"JS1\_K04\_00030" 7287 "s59E5H2" 0.08505986 "hypothetical protein"  
"JS1\_K04\_00030" 7287 "s63E6H2" 1.401168 "hypothetical protein"  
"JS1\_K04\_00031" 7288 "s59E13H2" 0.3472345 "Dimethyl sulfoxide reductase DmsA precursor"  
"JS1\_K04\_00031" 7288 "s59E25H2" 0 "Dimethyl sulfoxide reductase DmsA precursor"  
"JS1\_K04\_00031" 7288 "s59E5H2" 0.9505656 "Dimethyl sulfoxide reductase DmsA precursor"  
"JS1\_K04\_00031" 7288 "s63E6H2" 0.6986479 "Dimethyl sulfoxide reductase DmsA precursor"  
"JS1\_K04\_00032" 7289 "s59E13H2" 0.4425987 "Putative NAD(P)H nitroreductase"  
"JS1\_K04\_00032" 7289 "s59E25H2" 0 "Putative NAD(P)H nitroreductase"  
"JS1\_K04\_00032" 7289 "s59E5H2" 0.1713601 "Putative NAD(P)H nitroreductase"  
"JS1\_K04\_00032" 7289 "s63E6H2" 1.109974 "Putative NAD(P)H nitroreductase"  
"JS1\_K04\_00033" 7290 "s59E13H2" 0.3401343 "Cys-tRNA(Pro)/Cys-tRNA(Cys) deacylase YbaK"  
"JS1\_K04\_00033" 7290 "s59E25H2" 0 "Cys-tRNA(Pro)/Cys-tRNA(Cys) deacylase YbaK"  
"JS1\_K04\_00033" 7290 "s59E5H2" 0.7601045 "Cys-tRNA(Pro)/Cys-tRNA(Cys) deacylase YbaK"  
"JS1\_K04\_00033" 7290 "s63E6H2" 1.590414 "Cys-tRNA(Pro)/Cys-tRNA(Cys) deacylase YbaK"  
"JS1\_K04\_00034" 7291 "s59E13H2" 0.1584109 "ATP-dependent helicase/deoxyribonuclease subunit B"  
"JS1\_K04\_00034" 7291 "s59E25H2" 0 "ATP-dependent helicase/deoxyribonuclease subunit B"  
"JS1\_K04\_00034" 7291 "s59E5H2" 2.39327 "ATP-dependent helicase/deoxyribonuclease subunit B"  
"JS1\_K04\_00034" 7291 "s63E6H2" 1.753354 "ATP-dependent helicase/deoxyribonuclease subunit B"

"JS1\_K04\_00035" 7292 "s59E13H2" 0.2790036 "ATP-dependent helicase/nuclease subunit A"  
"JS1\_K04\_00035" 7292 "s59E25H2" 0 "ATP-dependent helicase/nuclease subunit A"  
"JS1\_K04\_00035" 7292 "s59E5H2" 2.751462 "ATP-dependent helicase/nuclease subunit A"  
"JS1\_K04\_00035" 7292 "s63E6H2" 0.4065806 "ATP-dependent helicase/nuclease subunit A"  
"JS1\_K04\_00036" 7293 "s59E13H2" 0.2246853 "DegV domain-containing protein"  
"JS1\_K04\_00036" 7293 "s59E25H2" 0 "DegV domain-containing protein"  
"JS1\_K04\_00036" 7293 "s59E5H2" 0.7468996 "DegV domain-containing protein"  
"JS1\_K04\_00036" 7293 "s63E6H2" 0.5370275 "DegV domain-containing protein"  
"JS1\_K04\_00037" 7294 "s59E13H2" 0.002517736 "Bacterial extracellular solute-binding proteins, family 5 Middle"  
"JS1\_K04\_00037" 7294 "s59E25H2" 0 "Bacterial extracellular solute-binding proteins, family 5 Middle"  
"JS1\_K04\_00037" 7294 "s59E5H2" 0.1937476 "Bacterial extracellular solute-binding proteins, family 5 Middle"  
"JS1\_K04\_00037" 7294 "s63E6H2" 0.001325159 "Bacterial extracellular solute-binding proteins, family 5 Middle"  
"JS1\_K04\_00038" 7295 "s59E13H2" 0.004090741 "Dipeptide transport system permease protein DppB"  
"JS1\_K04\_00038" 7295 "s59E25H2" 0 "Dipeptide transport system permease protein DppB"  
"JS1\_K04\_00038" 7295 "s59E5H2" 0.9761979 "Dipeptide transport system permease protein DppB"  
"JS1\_K04\_00038" 7295 "s63E6H2" 0.03961437 "Dipeptide transport system permease protein DppB"  
"JS1\_K04\_00039" 7296 "s59E13H2" 0.002452579 "Dipeptide transport system permease protein DppC"  
"JS1\_K04\_00039" 7296 "s59E25H2" 0.1548894 "Dipeptide transport system permease protein DppC"  
"JS1\_K04\_00039" 7296 "s59E5H2" 0.2893233 "Dipeptide transport system permease protein DppC"  
"JS1\_K04\_00039" 7296 "s63E6H2" 0.05444023 "Dipeptide transport system permease protein DppC"  
"JS1\_K04\_00040" 7297 "s59E13H2" 0.003594786 "Oligopeptide transport ATP-binding protein OppD"  
"JS1\_K04\_00040" 7297 "s59E25H2" 0 "Oligopeptide transport ATP-binding protein OppD"  
"JS1\_K04\_00040" 7297 "s59E5H2" 0.4616791 "Oligopeptide transport ATP-binding protein OppD"  
"JS1\_K04\_00040" 7297 "s63E6H2" 0.0263188 "Oligopeptide transport ATP-binding protein OppD"  
"JS1\_K04\_00041" 7298 "s59E13H2" 0.05959043 "Oligopeptide transport ATP-binding protein OppF"  
"JS1\_K04\_00041" 7298 "s59E25H2" 0 "Oligopeptide transport ATP-binding protein OppF"  
"JS1\_K04\_00041" 7298 "s59E5H2" 0.8323162 "Oligopeptide transport ATP-binding protein OppF"  
"JS1\_K04\_00041" 7298 "s63E6H2" 0.02098454 "Oligopeptide transport ATP-binding protein OppF"  
"JS1\_K04\_00042" 7299 "s59E13H2" 0.07846702 "protease TldD"  
"JS1\_K04\_00042" 7299 "s59E25H2" 0.1078636 "protease TldD"  
"JS1\_K04\_00042" 7299 "s59E5H2" 1.43383 "protease TldD"  
"JS1\_K04\_00042" 7299 "s63E6H2" 1.122092 "protease TldD"  
"JS1\_K04\_00043" 7300 "s59E13H2" 0.07505401 "protease TldD"  
"JS1\_K04\_00043" 7300 "s59E25H2" 0 "protease TldD"  
"JS1\_K04\_00043" 7300 "s59E5H2" 1.583213 "protease TldD"  
"JS1\_K04\_00043" 7300 "s63E6H2" 0.6863658 "protease TldD"  
"JS1\_K04\_00044" 7301 "s59E13H2" 0.0650269 "Xylose isomerase-like TIM barrel"  
"JS1\_K04\_00044" 7301 "s59E25H2" 0 "Xylose isomerase-like TIM barrel"  
"JS1\_K04\_00044" 7301 "s59E5H2" 0.6716926 "Xylose isomerase-like TIM barrel"  
"JS1\_K04\_00044" 7301 "s63E6H2" 0.4161154 "Xylose isomerase-like TIM barrel"  
"JS1\_K04\_00045" 7302 "s59E13H2" 0.03047679 "Anthranilate synthase component 1"  
"JS1\_K04\_00045" 7302 "s59E25H2" 0 "Anthranilate synthase component 1"  
"JS1\_K04\_00045" 7302 "s59E5H2" 0.1553217 "Anthranilate synthase component 1"  
"JS1\_K04\_00045" 7302 "s63E6H2" 0.1654619 "Anthranilate synthase component 1"  
"JS1\_K04\_00046" 7303 "s59E13H2" 0.02968401 "Anthranilate phosphoribosyltransferase"  
"JS1\_K04\_00046" 7303 "s59E25H2" 0 "Anthranilate phosphoribosyltransferase"  
"JS1\_K04\_00046" 7303 "s59E5H2" 0.179235 "Anthranilate phosphoribosyltransferase"

"JS1\_K04\_00046" 7303 "s63E6H2" 0.01149105 "Anthranilate phosphoribosyltransferase"  
"JS1\_K04\_00047" 7304 "s59E13H2" 0.01430474 "Indole-3-glycerol phosphate synthase"  
"JS1\_K04\_00047" 7304 "s59E25H2" 0 "Indole-3-glycerol phosphate synthase"  
"JS1\_K04\_00047" 7304 "s59E5H2" 0.1904928 "Indole-3-glycerol phosphate synthase"  
"JS1\_K04\_00047" 7304 "s63E6H2" 0.006169021 "Indole-3-glycerol phosphate synthase"  
"JS1\_K04\_00048" 7305 "s59E13H2" 0.005396105 "GDP-mannose 4,6-dehydratase"  
"JS1\_K04\_00048" 7305 "s59E25H2" 0 "GDP-mannose 4,6-dehydratase"  
"JS1\_K04\_00048" 7305 "s59E5H2" 0.06637482 "GDP-mannose 4,6-dehydratase"  
"JS1\_K04\_00048" 7305 "s63E6H2" 0.1244324 "GDP-mannose 4,6-dehydratase"  
"JS1\_K04\_00049" 7306 "s59E13H2" 0.004387757 "D-glycero-alpha-D-manno-heptose 1-phosphate guanylyltransferase"  
"JS1\_K04\_00049" 7306 "s59E25H2" 0 "D-glycero-alpha-D-manno-heptose 1-phosphate guanylyltransferase"  
"JS1\_K04\_00049" 7306 "s59E5H2" 0.06595096 "D-glycero-alpha-D-manno-heptose 1-phosphate guanylyltransferase"  
"JS1\_K04\_00049" 7306 "s63E6H2" 0.140254 "D-glycero-alpha-D-manno-heptose 1-phosphate guanylyltransferase"  
"JS1\_K04\_00050" 7307 "s59E13H2" 0.01578775 "GDP-6-deoxy-D-mannose reductase"  
"JS1\_K04\_00050" 7307 "s59E25H2" 0 "GDP-6-deoxy-D-mannose reductase"  
"JS1\_K04\_00050" 7307 "s59E5H2" 0.06030427 "GDP-6-deoxy-D-mannose reductase"  
"JS1\_K04\_00050" 7307 "s63E6H2" 0.1238085 "GDP-6-deoxy-D-mannose reductase"  
"JS1\_K04\_00051" 7308 "s59E13H2" 0.003708088 "N-acetylglucosaminyl-diphospho-decaprenol L-rhamnosyltransferase"  
"JS1\_K04\_00051" 7308 "s59E25H2" 0 "N-acetylglucosaminyl-diphospho-decaprenol L-rhamnosyltransferase"  
"JS1\_K04\_00051" 7308 "s59E5H2" 0.08859139 "N-acetylglucosaminyl-diphospho-decaprenol L-rhamnosyltransferase"  
"JS1\_K04\_00051" 7308 "s63E6H2" 0.02454232 "N-acetylglucosaminyl-diphospho-decaprenol L-rhamnosyltransferase"  
"JS1\_K04\_00052" 7309 "s59E13H2" 0.004230896 "Tryptophan synthase alpha chain"  
"JS1\_K04\_00052" 7309 "s59E25H2" 0 "Tryptophan synthase alpha chain"  
"JS1\_K04\_00052" 7309 "s59E5H2" 0.07344585 "Tryptophan synthase alpha chain"  
"JS1\_K04\_00052" 7309 "s63E6H2" 0.0403585 "Tryptophan synthase alpha chain"  
"JS1\_K04\_00053" 7310 "s59E13H2" 0.001426351 "Tryptophan synthase beta chain 1"  
"JS1\_K04\_00053" 7310 "s59E25H2" 0 "Tryptophan synthase beta chain 1"  
"JS1\_K04\_00053" 7310 "s59E5H2" 0.1074027 "Tryptophan synthase beta chain 1"  
"JS1\_K04\_00053" 7310 "s63E6H2" 0.03936141 "Tryptophan synthase beta chain 1"  
"JS1\_K04\_00054" 7311 "s59E13H2" 0.01524062 "N-(5'-phosphoribosyl)anthranilate isomerase"  
"JS1\_K04\_00054" 7311 "s59E25H2" 0 "N-(5'-phosphoribosyl)anthranilate isomerase"  
"JS1\_K04\_00054" 7311 "s59E5H2" 0.05304757 "N-(5'-phosphoribosyl)anthranilate isomerase"  
"JS1\_K04\_00054" 7311 "s63E6H2" 0.02137047 "N-(5'-phosphoribosyl)anthranilate isomerase"  
"JS1\_K04\_00055" 7312 "s59E13H2" 0.02470566 "Transketolase"  
"JS1\_K04\_00055" 7312 "s59E25H2" 0 "Transketolase"  
"JS1\_K04\_00055" 7312 "s59E5H2" 0.008646257 "Transketolase"  
"JS1\_K04\_00055" 7312 "s63E6H2" 0.03151929 "Transketolase"  
"JS1\_K04\_00056" 7313 "s59E13H2" 0 "Ribosomal protein S12 methylthiotransferase RimO"  
"JS1\_K04\_00056" 7313 "s59E25H2" 0 "Ribosomal protein S12 methylthiotransferase RimO"  
"JS1\_K04\_00056" 7313 "s59E5H2" 0.03767932 "Ribosomal protein S12 methylthiotransferase RimO"  
"JS1\_K04\_00056" 7313 "s63E6H2" 0.2177487 "Ribosomal protein S12 methylthiotransferase RimO"  
"JS1\_K04\_00057" 7314 "s59E13H2" 0.05268062 "Carbamoyltransferase HypF"  
"JS1\_K04\_00057" 7314 "s59E25H2" 0 "Carbamoyltransferase HypF"  
"JS1\_K04\_00057" 7314 "s59E5H2" 0.004781774 "Carbamoyltransferase HypF"  
"JS1\_K04\_00057" 7314 "s63E6H2" 0.01692489 "Carbamoyltransferase HypF"  
"JS1\_K04\_00061" 7318 "s59E13H2" 0.02434912 "Xylulose kinase"  
"JS1\_K04\_00061" 7318 "s59E25H2" 0.02614379 "Xylulose kinase"

"JS1\_K04\_00061" 7318 "s59E5H2" 0.8852772 "Xylulose kinase"  
"JS1\_K04\_00061" 7318 "s63E6H2" 0.27029 "Xylulose kinase"  
"JS1\_K04\_00062" 7319 "s59E13H2" 0.03109338 "Xylose isomerase"  
"JS1\_K04\_00062" 7319 "s59E25H2" 5.733333 "Xylose isomerase"  
"JS1\_K04\_00062" 7319 "s59E5H2" 0.2915337 "Xylose isomerase"  
"JS1\_K04\_00062" 7319 "s63E6H2" 0.3010508 "Xylose isomerase"  
"JS1\_K04\_00065" 7322 "s59E13H2" 0.1133797 "tRNA dimethylallyltransferase"  
"JS1\_K04\_00065" 7322 "s59E25H2" 0 "tRNA dimethylallyltransferase"  
"JS1\_K04\_00065" 7322 "s59E5H2" 0.3639409 "tRNA dimethylallyltransferase"  
"JS1\_K04\_00065" 7322 "s63E6H2" 0.02601312 "tRNA dimethylallyltransferase"  
"JS1\_K04\_00066" 7323 "s59E13H2" 0.1237868 "(Dimethylallyl)adenosine tRNA methylthiotransferase MiaB"  
"JS1\_K04\_00066" 7323 "s59E25H2" 0 "(Dimethylallyl)adenosine tRNA methylthiotransferase MiaB"  
"JS1\_K04\_00066" 7323 "s59E5H2" 0.9505201 "(Dimethylallyl)adenosine tRNA methylthiotransferase MiaB"  
"JS1\_K04\_00066" 7323 "s63E6H2" 0.1042144 "(Dimethylallyl)adenosine tRNA methylthiotransferase MiaB"  
"JS1\_K04\_00067" 7324 "s59E13H2" 0.1137077 "Ribonuclease Y"  
"JS1\_K04\_00067" 7324 "s59E25H2" 0 "Ribonuclease Y"  
"JS1\_K04\_00067" 7324 "s59E5H2" 0.8026551 "Ribonuclease Y"  
"JS1\_K04\_00067" 7324 "s63E6H2" 0.1357926 "Ribonuclease Y"  
"JS1\_K04\_00068" 7325 "s59E13H2" 0.07299929 "recombination regulator RecX"  
"JS1\_K04\_00068" 7325 "s59E25H2" 0 "recombination regulator RecX"  
"JS1\_K04\_00068" 7325 "s59E5H2" 0.2313516 "recombination regulator RecX"  
"JS1\_K04\_00068" 7325 "s63E6H2" 0.1668293 "recombination regulator RecX"  
"JS1\_K04\_00069" 7326 "s59E13H2" 0.07308036 "DNA repair and recombination protein RadA"  
"JS1\_K04\_00069" 7326 "s59E25H2" 0 "DNA repair and recombination protein RadA"  
"JS1\_K04\_00069" 7326 "s59E5H2" 0.3162996 "DNA repair and recombination protein RadA"  
"JS1\_K04\_00069" 7326 "s63E6H2" 0.3802235 "DNA repair and recombination protein RadA"  
"JS1\_K04\_00070" 7327 "s59E13H2" 0.06941026 "2'-5'-RNA ligase"  
"JS1\_K04\_00070" 7327 "s59E25H2" 0 "2'-5'-RNA ligase"  
"JS1\_K04\_00070" 7327 "s59E5H2" 0.1302597 "2'-5'-RNA ligase"  
"JS1\_K04\_00070" 7327 "s63E6H2" 0.1752278 "2'-5'-RNA ligase"  
"JS1\_K04\_00071" 7328 "s59E13H2" 0.1058546 "hypothetical protein"  
"JS1\_K04\_00071" 7328 "s59E25H2" 0 "hypothetical protein"  
"JS1\_K04\_00071" 7328 "s59E5H2" 0.171763 "hypothetical protein"  
"JS1\_K04\_00071" 7328 "s63E6H2" 0.1859195 "hypothetical protein"  
"JS1\_K04\_00072" 7329 "s59E13H2" 0.4184093 "hypothetical protein"  
"JS1\_K04\_00072" 7329 "s59E25H2" 0 "hypothetical protein"  
"JS1\_K04\_00072" 7329 "s59E5H2" 0.1586402 "hypothetical protein"  
"JS1\_K04\_00072" 7329 "s63E6H2" 0.2086641 "hypothetical protein"  
"JS1\_K04\_00073" 7330 "s59E13H2" 1.039695 "L-arabinose transporter permease protein"  
"JS1\_K04\_00073" 7330 "s59E25H2" 0 "L-arabinose transporter permease protein"  
"JS1\_K04\_00073" 7330 "s59E5H2" 0.07186344 "L-arabinose transporter permease protein"  
"JS1\_K04\_00073" 7330 "s63E6H2" 0.7156771 "L-arabinose transporter permease protein"  
"JS1\_K04\_00074" 7331 "s59E13H2" 1.971574 "D-allose transporter subunit"  
"JS1\_K04\_00074" 7331 "s59E25H2" 0 "D-allose transporter subunit"  
"JS1\_K04\_00074" 7331 "s59E5H2" 0.2288232 "D-allose transporter subunit"  
"JS1\_K04\_00074" 7331 "s63E6H2" 0.2859698 "D-allose transporter subunit"  
"JS1\_K04\_00075" 7332 "s59E13H2" 2.191221 "Galactose/methyl galactoside import ATP-binding protein MglA"

"JS1\_K04\_00075" 7332 "s59E25H2" 0 "Galactose/methyl galactoside import ATP-binding protein MglA"  
"JS1\_K04\_00075" 7332 "s59E5H2" 0.2550199 "Galactose/methyl galactoside import ATP-binding protein MglA"  
"JS1\_K04\_00075" 7332 "s63E6H2" 0.2400215 "Galactose/methyl galactoside import ATP-binding protein MglA"  
"JS1\_K04\_00076" 7333 "s59E13H2" 1.474013 "Membrane lipoprotein TmpC precursor"  
"JS1\_K04\_00076" 7333 "s59E25H2" 0 "Membrane lipoprotein TmpC precursor"  
"JS1\_K04\_00076" 7333 "s59E5H2" 0.2680681 "Membrane lipoprotein TmpC precursor"  
"JS1\_K04\_00076" 7333 "s63E6H2" 0.1406389 "Membrane lipoprotein TmpC precursor"  
"JS1\_K04\_00077" 7334 "s59E13H2" 3.749316 "DNA translocase SpoIIIE"  
"JS1\_K04\_00077" 7334 "s59E25H2" 0 "DNA translocase SpoIIIE"  
"JS1\_K04\_00077" 7334 "s59E5H2" 0.192722 "DNA translocase SpoIIIE"  
"JS1\_K04\_00077" 7334 "s63E6H2" 0.1042188 "DNA translocase SpoIIIE"  
"JS1\_K04\_00078" 7335 "s59E13H2" 4.090905 "Undecaprenyl-diphosphatase"  
"JS1\_K04\_00078" 7335 "s59E25H2" 0 "Undecaprenyl-diphosphatase"  
"JS1\_K04\_00078" 7335 "s59E5H2" 0.1779766 "Undecaprenyl-diphosphatase"  
"JS1\_K04\_00078" 7335 "s63E6H2" 0.1309911 "Undecaprenyl-diphosphatase"  
"JS1\_K04\_00079" 7336 "s59E13H2" 0.008164119 "Ribose operon repressor"  
"JS1\_K04\_00079" 7336 "s59E25H2" 0 "Ribose operon repressor"  
"JS1\_K04\_00079" 7336 "s59E5H2" 0 "Ribose operon repressor"  
"JS1\_K04\_00079" 7336 "s63E6H2" 0.01021252 "Ribose operon repressor"  
"JS1\_K04\_00080" 7337 "s59E13H2" 0.09105916 "Modulator of FtsH protease HflK"  
"JS1\_K04\_00080" 7337 "s59E25H2" 0 "Modulator of FtsH protease HflK"  
"JS1\_K04\_00080" 7337 "s59E5H2" 0.2335125 "Modulator of FtsH protease HflK"  
"JS1\_K04\_00080" 7337 "s63E6H2" 1.862988 "Modulator of FtsH protease HflK"  
"JS1\_K04\_00081" 7338 "s59E13H2" 0.1268048 "Bifunctional AAC/APH"  
"JS1\_K04\_00081" 7338 "s59E25H2" 0 "Bifunctional AAC/APH"  
"JS1\_K04\_00081" 7338 "s59E5H2" 0.3693062 "Bifunctional AAC/APH"  
"JS1\_K04\_00081" 7338 "s63E6H2" 2.182969 "Bifunctional AAC/APH"  
"JS1\_K04\_00082" 7339 "s59E13H2" 0.05990932 "Phosphate acetyltransferase"  
"JS1\_K04\_00082" 7339 "s59E25H2" 0 "Phosphate acetyltransferase"  
"JS1\_K04\_00082" 7339 "s59E5H2" 0.1078656 "Phosphate acetyltransferase"  
"JS1\_K04\_00082" 7339 "s63E6H2" 0.06610148 "Phosphate acetyltransferase"  
"JS1\_K04\_00083" 7340 "s59E13H2" 0.062555 "Butyrate kinase 2"  
"JS1\_K04\_00083" 7340 "s59E25H2" 0 "Butyrate kinase 2"  
"JS1\_K04\_00083" 7340 "s59E5H2" 0.1096179 "Butyrate kinase 2"  
"JS1\_K04\_00083" 7340 "s63E6H2" 0.04929659 "Butyrate kinase 2"  
"JS1\_K04\_00084" 7341 "s59E13H2" 0.06115515 "hypothetical protein"  
"JS1\_K04\_00084" 7341 "s59E25H2" 0 "hypothetical protein"  
"JS1\_K04\_00084" 7341 "s59E5H2" 0.1786926 "hypothetical protein"  
"JS1\_K04\_00084" 7341 "s63E6H2" 0.02537127 "hypothetical protein"  
"JS1\_K04\_00085" 7342 "s59E13H2" 0.05448548 "Ketoisovalerate oxidoreductase subunit VorC"  
"JS1\_K04\_00085" 7342 "s59E25H2" 0 "Ketoisovalerate oxidoreductase subunit VorC"  
"JS1\_K04\_00085" 7342 "s59E5H2" 0.1618789 "Ketoisovalerate oxidoreductase subunit VorC"  
"JS1\_K04\_00085" 7342 "s63E6H2" 0 "Ketoisovalerate oxidoreductase subunit VorC"  
"JS1\_K04\_00086" 7343 "s59E13H2" 0.02197335 "Ketoisovalerate oxidoreductase subunit VorB"  
"JS1\_K04\_00086" 7343 "s59E25H2" 0 "Ketoisovalerate oxidoreductase subunit VorB"  
"JS1\_K04\_00086" 7343 "s59E5H2" 0.2051797 "Ketoisovalerate oxidoreductase subunit VorB"  
"JS1\_K04\_00086" 7343 "s63E6H2" 0 "Ketoisovalerate oxidoreductase subunit VorB"

"JS1\_K04\_00087" 7344 "s59E13H2" 0.01997289 "Ketoisovalerate oxidoreductase subunit VorA"  
"JS1\_K04\_00087" 7344 "s59E25H2" 0 "Ketoisovalerate oxidoreductase subunit VorA"  
"JS1\_K04\_00087" 7344 "s59E5H2" 0.3640804 "Ketoisovalerate oxidoreductase subunit VorA"  
"JS1\_K04\_00087" 7344 "s63E6H2" 0.007894124 "Ketoisovalerate oxidoreductase subunit VorA"  
"JS1\_K04\_00088" 7345 "s59E13H2" 0.08689338 "Ketoisovalerate oxidoreductase subunit VorA"  
"JS1\_K04\_00088" 7345 "s59E25H2" 0 "Ketoisovalerate oxidoreductase subunit VorA"  
"JS1\_K04\_00088" 7345 "s59E5H2" 0.2585171 "Ketoisovalerate oxidoreductase subunit VorA"  
"JS1\_K04\_00088" 7345 "s63E6H2" 0.009895732 "Ketoisovalerate oxidoreductase subunit VorA"  
"JS1\_K04\_00089" 7346 "s59E13H2" 0.3881 "Peptidase T"  
"JS1\_K04\_00089" 7346 "s59E25H2" 0 "Peptidase T"  
"JS1\_K04\_00089" 7346 "s59E5H2" 0.2654475 "Peptidase T"  
"JS1\_K04\_00089" 7346 "s63E6H2" 0.04643144 "Peptidase T"  
"JS1\_K04\_00090" 7347 "s59E13H2" 0.325222 "ADP-ribose pyrophosphatase"  
"JS1\_K04\_00090" 7347 "s59E25H2" 0 "ADP-ribose pyrophosphatase"  
"JS1\_K04\_00090" 7347 "s59E5H2" 0.3700933 "ADP-ribose pyrophosphatase"  
"JS1\_K04\_00090" 7347 "s63E6H2" 0.08151622 "ADP-ribose pyrophosphatase"  
"JS1\_K04\_00091" 7348 "s59E13H2" 0.4026174 "hypothetical protein"  
"JS1\_K04\_00091" 7348 "s59E25H2" 0 "hypothetical protein"  
"JS1\_K04\_00091" 7348 "s59E5H2" 0.3200625 "hypothetical protein"  
"JS1\_K04\_00091" 7348 "s63E6H2" 0.08439484 "hypothetical protein"  
"JS1\_K04\_00092" 7349 "s59E13H2" 0.3076361 "DNA primase"  
"JS1\_K04\_00092" 7349 "s59E25H2" 0 "DNA primase"  
"JS1\_K04\_00092" 7349 "s59E5H2" 0.9201254 "DNA primase"  
"JS1\_K04\_00092" 7349 "s63E6H2" 0.1049362 "DNA primase"  
"JS1\_K04\_00093" 7350 "s59E13H2" 0.4605978 "RNA polymerase sigma factor SigA"  
"JS1\_K04\_00093" 7350 "s59E25H2" 0 "RNA polymerase sigma factor SigA"  
"JS1\_K04\_00093" 7350 "s59E5H2" 1.182358 "RNA polymerase sigma factor SigA"  
"JS1\_K04\_00093" 7350 "s63E6H2" 0.1618861 "RNA polymerase sigma factor SigA"  
"JS1\_K04\_00094" 7351 "s59E13H2" 0.9073439 "hypothetical protein"  
"JS1\_K04\_00094" 7351 "s59E25H2" 0 "hypothetical protein"  
"JS1\_K04\_00094" 7351 "s59E5H2" 0.0921873 "hypothetical protein"  
"JS1\_K04\_00094" 7351 "s63E6H2" 0.1409411 "hypothetical protein"  
"JS1\_K04\_00095" 7352 "s59E13H2" 0.007410911 "hypothetical protein"  
"JS1\_K04\_00095" 7352 "s59E25H2" 0 "hypothetical protein"  
"JS1\_K04\_00095" 7352 "s59E5H2" 0.08767741 "hypothetical protein"  
"JS1\_K04\_00095" 7352 "s63E6H2" 0.07116591 "hypothetical protein"  
"JS1\_K04\_00096" 7353 "s59E13H2" 0.004348373 "PLAT/LH2 domain protein"  
"JS1\_K04\_00096" 7353 "s59E25H2" 0 "PLAT/LH2 domain protein"  
"JS1\_K04\_00096" 7353 "s59E5H2" 0.09244683 "PLAT/LH2 domain protein"  
"JS1\_K04\_00096" 7353 "s63E6H2" 0.02198637 "PLAT/LH2 domain protein"  
"JS1\_K04\_00097" 7354 "s59E13H2" 0 "hypothetical protein"  
"JS1\_K04\_00097" 7354 "s59E25H2" 0 "hypothetical protein"  
"JS1\_K04\_00097" 7354 "s59E5H2" 0.01504089 "hypothetical protein"  
"JS1\_K04\_00097" 7354 "s63E6H2" 0.03980809 "hypothetical protein"  
"JS1\_K04\_00098" 7355 "s59E13H2" 0.0001220279 "YHS domain protein"  
"JS1\_K04\_00098" 7355 "s59E25H2" 0 "YHS domain protein"  
"JS1\_K04\_00098" 7355 "s59E5H2" 0 "YHS domain protein"



"JS1\_K04\_00098" 7355 "s63E6H2" 0.02616583 "YHS domain protein"  
"JS1\_K04\_00099" 7356 "s59E13H2" 0.5364141 "hypothetical protein"  
"JS1\_K04\_00099" 7356 "s59E25H2" 0 "hypothetical protein"  
"JS1\_K04\_00099" 7356 "s59E5H2" 1.049637 "hypothetical protein"  
"JS1\_K04\_00099" 7356 "s63E6H2" 1.579038 "hypothetical protein"  
"JS1\_K04\_00100" 7357 "s59E13H2" 0.5589974 "Capsule biosynthesis protein CapA"  
"JS1\_K04\_00100" 7357 "s59E25H2" 0 "Capsule biosynthesis protein CapA"  
"JS1\_K04\_00100" 7357 "s59E5H2" 0.2525208 "Capsule biosynthesis protein CapA"  
"JS1\_K04\_00100" 7357 "s63E6H2" 0.6189286 "Capsule biosynthesis protein CapA"  
"JS1\_K04\_00101" 7358 "s59E13H2" 0.9592753 "spermidine synthase"  
"JS1\_K04\_00101" 7358 "s59E25H2" 0 "spermidine synthase"  
"JS1\_K04\_00101" 7358 "s59E5H2" 0.9306083 "spermidine synthase"  
"JS1\_K04\_00101" 7358 "s63E6H2" 0.8371284 "spermidine synthase"  
"JS1\_K04\_00102" 7359 "s59E13H2" 0.8162653 "NTE family protein RssA"  
"JS1\_K04\_00102" 7359 "s59E25H2" 0 "NTE family protein RssA"  
"JS1\_K04\_00102" 7359 "s59E5H2" 0.1770943 "NTE family protein RssA"  
"JS1\_K04\_00102" 7359 "s63E6H2" 0.742938 "NTE family protein RssA"  
"JS1\_K04\_00103" 7360 "s59E13H2" 0.6582036 "NTE family protein RssA"  
"JS1\_K04\_00103" 7360 "s59E25H2" 0 "NTE family protein RssA"  
"JS1\_K04\_00103" 7360 "s59E5H2" 0.1439348 "NTE family protein RssA"  
"JS1\_K04\_00103" 7360 "s63E6H2" 0.432464 "NTE family protein RssA"  
"JS1\_K04\_00104" 7361 "s59E13H2" 0.0424531 "hypothetical protein"  
"JS1\_K04\_00104" 7361 "s59E25H2" 0 "hypothetical protein"  
"JS1\_K04\_00104" 7361 "s59E5H2" 0.05431241 "hypothetical protein"  
"JS1\_K04\_00104" 7361 "s63E6H2" 0.2351264 "hypothetical protein"  
"JS1\_K04\_00105" 7362 "s59E13H2" 0.001750147 "hypothetical protein"  
"JS1\_K04\_00105" 7362 "s59E25H2" 0 "hypothetical protein"  
"JS1\_K04\_00105" 7362 "s59E5H2" 0 "hypothetical protein"  
"JS1\_K04\_00105" 7362 "s63E6H2" 0.001281267 "hypothetical protein"  
"JS1\_K04\_00106" 7363 "s59E13H2" 0.007614627 "hypothetical protein"  
"JS1\_K04\_00106" 7363 "s59E25H2" 0 "hypothetical protein"  
"JS1\_K04\_00106" 7363 "s59E5H2" 0 "hypothetical protein"  
"JS1\_K04\_00106" 7363 "s63E6H2" 0 "hypothetical protein"  
"JS1\_K04\_00107" 7364 "s59E13H2" 0.02433017 "hypothetical protein"  
"JS1\_K04\_00107" 7364 "s59E25H2" 0 "hypothetical protein"  
"JS1\_K04\_00107" 7364 "s59E5H2" 0 "hypothetical protein"  
"JS1\_K04\_00107" 7364 "s63E6H2" 0.002901193 "hypothetical protein"  
"JS1\_K04\_00108" 7365 "s59E13H2" 0.04379447 "hypothetical protein"  
"JS1\_K04\_00108" 7365 "s59E25H2" 0 "hypothetical protein"  
"JS1\_K04\_00108" 7365 "s59E5H2" 0.02227326 "hypothetical protein"  
"JS1\_K04\_00108" 7365 "s63E6H2" 0.1387193 "hypothetical protein"  
"JS1\_K04\_00109" 7366 "s59E13H2" 0.8384823 "putative ABC transporter ATP-binding protein YbhF"  
"JS1\_K04\_00109" 7366 "s59E25H2" 0 "putative ABC transporter ATP-binding protein YbhF"  
"JS1\_K04\_00109" 7366 "s59E5H2" 1.234617 "putative ABC transporter ATP-binding protein YbhF"  
"JS1\_K04\_00109" 7366 "s63E6H2" 1.883765 "putative ABC transporter ATP-binding protein YbhF"  
"JS1\_K04\_00110" 7367 "s59E13H2" 1.531437 "ABC-2 type transporter"  
"JS1\_K04\_00110" 7367 "s59E25H2" 0 "ABC-2 type transporter"

"JS1\_K04\_00110" 7367 "s59E5H2" 1.318514 "ABC-2 type transporter"  
"JS1\_K04\_00110" 7367 "s63E6H2" 1.34715 "ABC-2 type transporter"  
"JS1\_K04\_00111" 7368 "s59E13H2" 7.981196 "hypothetical protein"  
"JS1\_K04\_00111" 7368 "s59E25H2" 0 "hypothetical protein"  
"JS1\_K04\_00111" 7368 "s59E5H2" 0.9200454 "hypothetical protein"  
"JS1\_K04\_00111" 7368 "s63E6H2" 1.231078 "hypothetical protein"  
"JS1\_K04\_00112" 7369 "s59E13H2" 7.590208 "hypothetical protein"  
"JS1\_K04\_00112" 7369 "s59E25H2" 0 "hypothetical protein"  
"JS1\_K04\_00112" 7369 "s59E5H2" 0.7538885 "hypothetical protein"  
"JS1\_K04\_00112" 7369 "s63E6H2" 1.728738 "hypothetical protein"  
"JS1\_K04\_00113" 7370 "s59E13H2" 6.693878 "Fosmidomycin resistance protein"  
"JS1\_K04\_00113" 7370 "s59E25H2" 0 "Fosmidomycin resistance protein"  
"JS1\_K04\_00113" 7370 "s59E5H2" 0.4767661 "Fosmidomycin resistance protein"  
"JS1\_K04\_00113" 7370 "s63E6H2" 1.051269 "Fosmidomycin resistance protein"  
"JS1\_K04\_00114" 7371 "s59E13H2" 4.076071 "Alanine--tRNA ligase"  
"JS1\_K04\_00114" 7371 "s59E25H2" 0.1306471 "Alanine--tRNA ligase"  
"JS1\_K04\_00114" 7371 "s59E5H2" 0.2873574 "Alanine--tRNA ligase"  
"JS1\_K04\_00114" 7371 "s63E6H2" 0.8028745 "Alanine--tRNA ligase"  
"JS1\_K04\_00115" 7372 "s59E13H2" 18.43848 "Bicarbonate transport ATP-binding protein CmpD"  
"JS1\_K04\_00115" 7372 "s59E25H2" 0 "Bicarbonate transport ATP-binding protein CmpD"  
"JS1\_K04\_00115" 7372 "s59E5H2" 0.4292883 "Bicarbonate transport ATP-binding protein CmpD"  
"JS1\_K04\_00115" 7372 "s63E6H2" 1.21523 "Bicarbonate transport ATP-binding protein CmpD"  
"JS1\_K04\_00116" 7373 "s59E13H2" 14.34936 "ribose ABC transporter permease protein"  
"JS1\_K04\_00116" 7373 "s59E25H2" 0 "ribose ABC transporter permease protein"  
"JS1\_K04\_00116" 7373 "s59E5H2" 0.2537265 "ribose ABC transporter permease protein"  
"JS1\_K04\_00116" 7373 "s63E6H2" 1.342037 "ribose ABC transporter permease protein"  
"JS1\_K04\_00117" 7374 "s59E13H2" 6.753867 "ABC transporter substrate binding protein"  
"JS1\_K04\_00117" 7374 "s59E25H2" 0 "ABC transporter substrate binding protein"  
"JS1\_K04\_00117" 7374 "s59E5H2" 0.3448836 "ABC transporter substrate binding protein"  
"JS1\_K04\_00117" 7374 "s63E6H2" 1.897618 "ABC transporter substrate binding protein"  
"JS1\_K04\_00118" 7375 "s59E13H2" 0.1538586 "Integrase core domain protein"  
"JS1\_K04\_00118" 7375 "s59E25H2" 0 "Integrase core domain protein"  
"JS1\_K04\_00118" 7375 "s59E5H2" 1.027323 "Integrase core domain protein"  
"JS1\_K04\_00118" 7375 "s63E6H2" 1.545136 "Integrase core domain protein"  
"JS1\_K04\_00119" 7376 "s59E13H2" 0.4394729 "putative deoxyribonuclease YcfH"  
"JS1\_K04\_00119" 7376 "s59E25H2" 0 "putative deoxyribonuclease YcfH"  
"JS1\_K04\_00119" 7376 "s59E5H2" 0.1267541 "putative deoxyribonuclease YcfH"  
"JS1\_K04\_00119" 7376 "s63E6H2" 1.657798 "putative deoxyribonuclease YcfH"  
"JS1\_K04\_00120" 7377 "s59E13H2" 5.306896 "hypothetical protein"  
"JS1\_K04\_00120" 7377 "s59E25H2" 0 "hypothetical protein"  
"JS1\_K04\_00120" 7377 "s59E5H2" 0.3938851 "hypothetical protein"  
"JS1\_K04\_00120" 7377 "s63E6H2" 1.683341 "hypothetical protein"  
"JS1\_K04\_00121" 7378 "s59E13H2" 0 "hypothetical protein"  
"JS1\_K04\_00121" 7378 "s59E25H2" 0 "hypothetical protein"  
"JS1\_K04\_00121" 7378 "s59E5H2" 0.1515096 "hypothetical protein"  
"JS1\_K04\_00121" 7378 "s63E6H2" 0.006054272 "hypothetical protein"  
"JS1\_K04\_00122" 7379 "s59E13H2" 0.005269388 "chaperone protein DnaJ"

"JS1\_K04\_00122" 7379 "s59E25H2" 0 "chaperone protein DnaJ"  
"JS1\_K04\_00122" 7379 "s59E5H2" 0.07127431 "chaperone protein DnaJ"  
"JS1\_K04\_00122" 7379 "s63E6H2" 0.02872311 "chaperone protein DnaJ"  
"JS1\_K04\_00123" 7380 "s59E13H2" 0.003684808 "hypothetical protein"  
"JS1\_K04\_00123" 7380 "s59E25H2" 0 "hypothetical protein"  
"JS1\_K04\_00123" 7380 "s59E5H2" 0.04023984 "hypothetical protein"  
"JS1\_K04\_00123" 7380 "s63E6H2" 0.02950988 "hypothetical protein"  
"JS1\_K04\_00125" 7382 "s59E13H2" 0.01473487 "Denitrification regulatory protein NirQ"  
"JS1\_K04\_00125" 7382 "s59E25H2" 0 "Denitrification regulatory protein NirQ"  
"JS1\_K04\_00125" 7382 "s59E5H2" 0.6588149 "Denitrification regulatory protein NirQ"  
"JS1\_K04\_00125" 7382 "s63E6H2" 0.03561584 "Denitrification regulatory protein NirQ"  
"JS1\_K04\_00126" 7383 "s59E13H2" 0.0111633 "Chaperone protein DnaJ"  
"JS1\_K04\_00126" 7383 "s59E25H2" 0 "Chaperone protein DnaJ"  
"JS1\_K04\_00126" 7383 "s59E5H2" 0.1611666 "Chaperone protein DnaJ"  
"JS1\_K04\_00126" 7383 "s63E6H2" 0.02048946 "Chaperone protein DnaJ"  
"JS1\_K04\_00127" 7384 "s59E13H2" 0.008808027 "hypothetical protein"  
"JS1\_K04\_00127" 7384 "s59E25H2" 0 "hypothetical protein"  
"JS1\_K04\_00127" 7384 "s59E5H2" 0.1533986 "hypothetical protein"  
"JS1\_K04\_00127" 7384 "s63E6H2" 0.01418501 "hypothetical protein"  
"JS1\_K04\_00128" 7385 "s59E13H2" 0.09173834 "Cyclic di-GMP phosphodiesterase response regulator RpfG"  
"JS1\_K04\_00128" 7385 "s59E25H2" 0 "Cyclic di-GMP phosphodiesterase response regulator RpfG"  
"JS1\_K04\_00128" 7385 "s59E5H2" 0.02985975 "Cyclic di-GMP phosphodiesterase response regulator RpfG"  
"JS1\_K04\_00128" 7385 "s63E6H2" 0 "Cyclic di-GMP phosphodiesterase response regulator RpfG"  
"JS1\_K04\_00129" 7386 "s59E13H2" 0.1467509 "Cyclic di-GMP phosphodiesterase response regulator RpfG"  
"JS1\_K04\_00129" 7386 "s59E25H2" 0 "Cyclic di-GMP phosphodiesterase response regulator RpfG"  
"JS1\_K04\_00129" 7386 "s59E5H2" 0.1127657 "Cyclic di-GMP phosphodiesterase response regulator RpfG"  
"JS1\_K04\_00129" 7386 "s63E6H2" 0.01900671 "Cyclic di-GMP phosphodiesterase response regulator RpfG"  
"JS1\_K04\_00130" 7387 "s59E13H2" 0.4727742 "hypothetical protein"  
"JS1\_K04\_00130" 7387 "s59E25H2" 0 "hypothetical protein"  
"JS1\_K04\_00130" 7387 "s59E5H2" 1.112965 "hypothetical protein"  
"JS1\_K04\_00130" 7387 "s63E6H2" 0.2245059 "hypothetical protein"  
"JS1\_K04\_00131" 7388 "s59E13H2" 0 "hypothetical protein"  
"JS1\_K04\_00131" 7388 "s59E25H2" 0 "hypothetical protein"  
"JS1\_K04\_00131" 7388 "s59E5H2" 0 "hypothetical protein"  
"JS1\_K04\_00131" 7388 "s63E6H2" 0.01040734 "hypothetical protein"  
"JS1\_K04\_00132" 7389 "s59E13H2" 0.007536805 "hypothetical protein"  
"JS1\_K04\_00132" 7389 "s59E25H2" 0 "hypothetical protein"  
"JS1\_K04\_00132" 7389 "s59E5H2" 0 "hypothetical protein"  
"JS1\_K04\_00132" 7389 "s63E6H2" 0 "hypothetical protein"  
"JS1\_K04\_00133" 7390 "s59E13H2" 0.03894443 "putative peptidase"  
"JS1\_K04\_00133" 7390 "s59E25H2" 0 "putative peptidase"  
"JS1\_K04\_00133" 7390 "s59E5H2" 0.008132618 "putative peptidase"  
"JS1\_K04\_00133" 7390 "s63E6H2" 0 "putative peptidase"  
"JS1\_K04\_00134" 7391 "s59E13H2" 0.08181973 "hypothetical protein"  
"JS1\_K04\_00134" 7391 "s59E25H2" 0 "hypothetical protein"  
"JS1\_K04\_00134" 7391 "s59E5H2" 0.4957377 "hypothetical protein"  
"JS1\_K04\_00134" 7391 "s63E6H2" 0.7809221 "hypothetical protein"

"JS1\_K04\_00135" 7392 "s59E13H2" 0.02003019 "SpoVT / AbrB like domain protein"  
"JS1\_K04\_00135" 7392 "s59E25H2" 0 "SpoVT / AbrB like domain protein"  
"JS1\_K04\_00135" 7392 "s59E5H2" 0.2367693 "SpoVT / AbrB like domain protein"  
"JS1\_K04\_00135" 7392 "s63E6H2" 0.6673848 "SpoVT / AbrB like domain protein"  
"JS1\_K04\_00136" 7393 "s59E13H2" 0.03859864 "1-acyl-sn-glycerol-3-phosphate acyltransferase"  
"JS1\_K04\_00136" 7393 "s59E25H2" 0 "1-acyl-sn-glycerol-3-phosphate acyltransferase"  
"JS1\_K04\_00136" 7393 "s59E5H2" 0.1223111 "1-acyl-sn-glycerol-3-phosphate acyltransferase"  
"JS1\_K04\_00136" 7393 "s63E6H2" 0.6157635 "1-acyl-sn-glycerol-3-phosphate acyltransferase"  
"JS1\_K04\_00137" 7394 "s59E13H2" 0.009321765 "hypothetical protein"  
"JS1\_K04\_00137" 7394 "s59E25H2" 0 "hypothetical protein"  
"JS1\_K04\_00137" 7394 "s59E5H2" 0.02598319 "hypothetical protein"  
"JS1\_K04\_00137" 7394 "s63E6H2" 0.553146 "hypothetical protein"  
"JS1\_K04\_00138" 7395 "s59E13H2" 0.00653766 "putative Mg(2+) transport ATPase"  
"JS1\_K04\_00138" 7395 "s59E25H2" 0 "putative Mg(2+) transport ATPase"  
"JS1\_K04\_00138" 7395 "s59E5H2" 0.4713231 "putative Mg(2+) transport ATPase"  
"JS1\_K04\_00138" 7395 "s63E6H2" 0.6409954 "putative Mg(2+) transport ATPase"  
"JS1\_K04\_00139" 7396 "s59E13H2" 0.757082 "ski2-like helicase"  
"JS1\_K04\_00139" 7396 "s59E25H2" 0 "ski2-like helicase"  
"JS1\_K04\_00139" 7396 "s59E5H2" 0.310713 "ski2-like helicase"  
"JS1\_K04\_00139" 7396 "s63E6H2" 1.554941 "ski2-like helicase"  
"JS1\_K04\_00141" 7398 "s59E13H2" 0.1738206 "Sigma-70, region 4"  
"JS1\_K04\_00141" 7398 "s59E25H2" 0 "Sigma-70, region 4"  
"JS1\_K04\_00141" 7398 "s59E5H2" 1.33154 "Sigma-70, region 4"  
"JS1\_K04\_00141" 7398 "s63E6H2" 1.669597 "Sigma-70, region 4"  
"JS1\_K04\_00142" 7399 "s59E13H2" 0 "hypothetical protein"  
"JS1\_K04\_00142" 7399 "s59E25H2" 0 "hypothetical protein"  
"JS1\_K04\_00142" 7399 "s59E5H2" 0 "hypothetical protein"  
"JS1\_K04\_00142" 7399 "s63E6H2" 0.01274518 "hypothetical protein"  
"JS1\_K04\_00143" 7400 "s59E13H2" 0.001278442 "Cyclic di-GMP phosphodiesterase response regulator RpfG"  
"JS1\_K04\_00143" 7400 "s59E25H2" 0 "Cyclic di-GMP phosphodiesterase response regulator RpfG"  
"JS1\_K04\_00143" 7400 "s59E5H2" 0.03962026 "Cyclic di-GMP phosphodiesterase response regulator RpfG"  
"JS1\_K04\_00143" 7400 "s63E6H2" 0.04380497 "Cyclic di-GMP phosphodiesterase response regulator RpfG"  
"JS1\_K04\_00144" 7401 "s59E13H2" 0.01017355 "hypothetical protein"  
"JS1\_K04\_00144" 7401 "s59E25H2" 0 "hypothetical protein"  
"JS1\_K04\_00144" 7401 "s59E5H2" 0.06480034 "hypothetical protein"  
"JS1\_K04\_00144" 7401 "s63E6H2" 0.02388043 "hypothetical protein"  
"JS1\_K04\_00145" 7402 "s59E13H2" 0.01635047 "Glutaredoxin"  
"JS1\_K04\_00145" 7402 "s59E25H2" 0 "Glutaredoxin"  
"JS1\_K04\_00145" 7402 "s59E5H2" 0.1613855 "Glutaredoxin"  
"JS1\_K04\_00145" 7402 "s63E6H2" 0.01982102 "Glutaredoxin"  
"JS1\_K04\_00146" 7403 "s59E13H2" 0.004397214 "Ferredoxin thioredoxin reductase catalytic beta chain"  
"JS1\_K04\_00146" 7403 "s59E25H2" 0 "Ferredoxin thioredoxin reductase catalytic beta chain"  
"JS1\_K04\_00146" 7403 "s59E5H2" 0.05379065 "Ferredoxin thioredoxin reductase catalytic beta chain"  
"JS1\_K04\_00146" 7403 "s63E6H2" 0.06316871 "Ferredoxin thioredoxin reductase catalytic beta chain"  
"JS1\_K04\_00147" 7404 "s59E13H2" 0.005280115 "DNA polymerase IV"  
"JS1\_K04\_00147" 7404 "s59E25H2" 0 "DNA polymerase IV"  
"JS1\_K04\_00147" 7404 "s59E5H2" 0.6945469 "DNA polymerase IV"

"JS1\_K04\_00147" 7404 "s63E6H2" 0.07086317 "DNA polymerase IV"  
"JS1\_K04\_00148" 7405 "s59E13H2" 0 "RNA recognition motif. (a.k.a. RRM, RBD, or RNP domain)"  
"JS1\_K04\_00148" 7405 "s59E25H2" 0 "RNA recognition motif. (a.k.a. RRM, RBD, or RNP domain)"  
"JS1\_K04\_00148" 7405 "s59E5H2" 0.645227 "RNA recognition motif. (a.k.a. RRM, RBD, or RNP domain)"  
"JS1\_K04\_00148" 7405 "s63E6H2" 0.004883696 "RNA recognition motif. (a.k.a. RRM, RBD, or RNP domain)"  
"JS1\_K04\_00149" 7406 "s59E13H2" 0.007309091 "hypothetical protein"  
"JS1\_K04\_00149" 7406 "s59E25H2" 0 "hypothetical protein"  
"JS1\_K04\_00149" 7406 "s59E5H2" 0 "hypothetical protein"  
"JS1\_K04\_00149" 7406 "s63E6H2" 0 "hypothetical protein"  
"JS1\_K04\_00150" 7407 "s59E13H2" 0.005835477 "Type I restriction enzyme EcoR124II R protein"  
"JS1\_K04\_00150" 7407 "s59E25H2" 0 "Type I restriction enzyme EcoR124II R protein"  
"JS1\_K04\_00150" 7407 "s59E5H2" 0.1507417 "Type I restriction enzyme EcoR124II R protein"  
"JS1\_K04\_00150" 7407 "s63E6H2" 0 "Type I restriction enzyme EcoR124II R protein"  
"JS1\_K04\_00151" 7408 "s59E13H2" 0.003855534 "Type-1 restriction enzyme MjaXIP specificity protein"  
"JS1\_K04\_00151" 7408 "s59E25H2" 0 "Type-1 restriction enzyme MjaXIP specificity protein"  
"JS1\_K04\_00151" 7408 "s59E5H2" 0.00241658 "Type-1 restriction enzyme MjaXIP specificity protein"  
"JS1\_K04\_00151" 7408 "s63E6H2" 0 "Type-1 restriction enzyme MjaXIP specificity protein"  
"JS1\_K04\_00152" 7409 "s59E13H2" 0.002422183 "putative type I restriction enzymeP M protein"  
"JS1\_K04\_00152" 7409 "s59E25H2" 0 "putative type I restriction enzymeP M protein"  
"JS1\_K04\_00152" 7409 "s59E5H2" 0.02656817 "putative type I restriction enzymeP M protein"  
"JS1\_K04\_00152" 7409 "s63E6H2" 0 "putative type I restriction enzymeP M protein"  
"JS1\_K04\_00153" 7410 "s59E13H2" 0 "recombination protein F"  
"JS1\_K04\_00153" 7410 "s59E25H2" 0 "recombination protein F"  
"JS1\_K04\_00153" 7410 "s59E5H2" 0 "recombination protein F"  
"JS1\_K04\_00153" 7410 "s63E6H2" 0 "recombination protein F"  
"JS1\_K04\_00154" 7411 "s59E13H2" 0.0400878 "Chaperone protein ClpB 1"  
"JS1\_K04\_00154" 7411 "s59E25H2" 0 "Chaperone protein ClpB 1"  
"JS1\_K04\_00154" 7411 "s59E5H2" 0.2051487 "Chaperone protein ClpB 1"  
"JS1\_K04\_00154" 7411 "s63E6H2" 0.2810459 "Chaperone protein ClpB 1"  
"JS1\_K04\_00155" 7412 "s59E13H2" 0.03949985 "Curved DNA-binding protein"  
"JS1\_K04\_00155" 7412 "s59E25H2" 0 "Curved DNA-binding protein"  
"JS1\_K04\_00155" 7412 "s59E5H2" 0.1140258 "Curved DNA-binding protein"  
"JS1\_K04\_00155" 7412 "s63E6H2" 0.8277225 "Curved DNA-binding protein"  
"JS1\_K04\_00156" 7413 "s59E13H2" 0.05831552 "Chaperone protein DnaK"  
"JS1\_K04\_00156" 7413 "s59E25H2" 0 "Chaperone protein DnaK"  
"JS1\_K04\_00156" 7413 "s59E5H2" 0.1001868 "Chaperone protein DnaK"  
"JS1\_K04\_00156" 7413 "s63E6H2" 0.6505989 "Chaperone protein DnaK"  
"JS1\_K04\_00157" 7414 "s59E13H2" 0 "Coenzyme A disulfide reductase"  
"JS1\_K04\_00157" 7414 "s59E25H2" 0 "Coenzyme A disulfide reductase"  
"JS1\_K04\_00157" 7414 "s59E5H2" 0 "Coenzyme A disulfide reductase"  
"JS1\_K04\_00157" 7414 "s63E6H2" 0 "Coenzyme A disulfide reductase"  
"JS1\_K04\_00158" 7415 "s59E13H2" 7.678117 "Oligopeptide transport ATP-binding protein OppF"  
"JS1\_K04\_00158" 7415 "s59E25H2" 0 "Oligopeptide transport ATP-binding protein OppF"  
"JS1\_K04\_00158" 7415 "s59E5H2" 2.313559 "Oligopeptide transport ATP-binding protein OppF"  
"JS1\_K04\_00158" 7415 "s63E6H2" 0.3878631 "Oligopeptide transport ATP-binding protein OppF"  
"JS1\_K04\_00159" 7416 "s59E13H2" 4.930234 "RNA polymerase-binding transcription factor CarD"  
"JS1\_K04\_00159" 7416 "s59E25H2" 0 "RNA polymerase-binding transcription factor CarD"

"JS1\_K04\_00159" 7416 "s59E5H2" 2.013897 "RNA polymerase-binding transcription factor CarD"  
"JS1\_K04\_00159" 7416 "s63E6H2" 0.2613311 "RNA polymerase-binding transcription factor CarD"  
"JS1\_K04\_00160" 7417 "s59E13H2" 4.36686 "Bifunctional protein FOLD protein"  
"JS1\_K04\_00160" 7417 "s59E25H2" 0 "Bifunctional protein FOLD protein"  
"JS1\_K04\_00160" 7417 "s59E5H2" 2.65219 "Bifunctional protein FOLD protein"  
"JS1\_K04\_00160" 7417 "s63E6H2" 0.4008024 "Bifunctional protein FOLD protein"  
"JS1\_K04\_00161" 7418 "s59E13H2" 4.191304 "OsmC-like protein"  
"JS1\_K04\_00161" 7418 "s59E25H2" 0 "OsmC-like protein"  
"JS1\_K04\_00161" 7418 "s59E5H2" 0.5114967 "OsmC-like protein"  
"JS1\_K04\_00161" 7418 "s63E6H2" 0.2572187 "OsmC-like protein"  
"JS1\_K04\_00162" 7419 "s59E13H2" 3.195815 "tRNA uridine 5-carboxymethylaminomethyl modification enzyme MnmG"  
"JS1\_K04\_00162" 7419 "s59E25H2" 0.1333333 "tRNA uridine 5-carboxymethylaminomethyl modification enzyme MnmG"  
"JS1\_K04\_00162" 7419 "s59E5H2" 4.274537 "tRNA uridine 5-carboxymethylaminomethyl modification enzyme MnmG"  
"JS1\_K04\_00162" 7419 "s63E6H2" 0.4516734 "tRNA uridine 5-carboxymethylaminomethyl modification enzyme MnmG"  
"JS1\_K04\_00165" 7422 "s59E13H2" 0.4855398 "Purine nucleoside phosphorylase DeoD-type"  
"JS1\_K04\_00165" 7422 "s59E25H2" 0 "Purine nucleoside phosphorylase DeoD-type"  
"JS1\_K04\_00165" 7422 "s59E5H2" 1.019155 "Purine nucleoside phosphorylase DeoD-type"  
"JS1\_K04\_00165" 7422 "s63E6H2" 0.09702719 "Purine nucleoside phosphorylase DeoD-type"  
"JS1\_K04\_00166" 7423 "s59E13H2" 0.1830366 "Acyltransferase family protein"  
"JS1\_K04\_00166" 7423 "s59E25H2" 0 "Acyltransferase family protein"  
"JS1\_K04\_00166" 7423 "s59E5H2" 2.511526 "Acyltransferase family protein"  
"JS1\_K04\_00166" 7423 "s63E6H2" 0.1006142 "Acyltransferase family protein"  
"JS1\_K04\_00167" 7424 "s59E13H2" 0.07554958 "UDP-N-acetylmuramoylalanine--D-glutamate ligase"  
"JS1\_K04\_00167" 7424 "s59E25H2" 0 "UDP-N-acetylmuramoylalanine--D-glutamate ligase"  
"JS1\_K04\_00167" 7424 "s59E5H2" 1.622679 "UDP-N-acetylmuramoylalanine--D-glutamate ligase"  
"JS1\_K04\_00167" 7424 "s63E6H2" 0.2384892 "UDP-N-acetylmuramoylalanine--D-glutamate ligase"  
"JS1\_K04\_00169" 7426 "s59E13H2" 0.09623409 "tRNA-specific adenosine deaminase"  
"JS1\_K04\_00169" 7426 "s59E25H2" 0 "tRNA-specific adenosine deaminase"  
"JS1\_K04\_00169" 7426 "s59E5H2" 2.466324 "tRNA-specific adenosine deaminase"  
"JS1\_K04\_00169" 7426 "s63E6H2" 0.3182811 "tRNA-specific adenosine deaminase"  
"JS1\_K04\_00175" 7432 "s59E13H2" 0.03247988 "DNA polymerase III subunit tau"  
"JS1\_K04\_00175" 7432 "s59E25H2" 0 "DNA polymerase III subunit tau"  
"JS1\_K04\_00175" 7432 "s59E5H2" 1.619181 "DNA polymerase III subunit tau"  
"JS1\_K04\_00175" 7432 "s63E6H2" 0.21864 "DNA polymerase III subunit tau"  
"JS1\_K04\_00176" 7433 "s59E13H2" 0.03885227 "Nucleoid-associated protein"  
"JS1\_K04\_00176" 7433 "s59E25H2" 0 "Nucleoid-associated protein"  
"JS1\_K04\_00176" 7433 "s59E5H2" 1.372908 "Nucleoid-associated protein"  
"JS1\_K04\_00176" 7433 "s63E6H2" 0.4005248 "Nucleoid-associated protein"  
"JS1\_K04\_00177" 7434 "s59E13H2" 0.04361593 "Recombination protein RecR"  
"JS1\_K04\_00177" 7434 "s59E25H2" 0 "Recombination protein RecR"  
"JS1\_K04\_00177" 7434 "s59E5H2" 0.9254064 "Recombination protein RecR"  
"JS1\_K04\_00177" 7434 "s63E6H2" 0.4797222 "Recombination protein RecR"  
"JS1\_K04\_00178" 7435 "s59E13H2" 0.5767101 "Pyruvate-flavodoxin oxidoreductase"  
"JS1\_K04\_00178" 7435 "s59E25H2" 0 "Pyruvate-flavodoxin oxidoreductase"  
"JS1\_K04\_00178" 7435 "s59E5H2" 0.4687642 "Pyruvate-flavodoxin oxidoreductase"  
"JS1\_K04\_00178" 7435 "s63E6H2" 0.4278706 "Pyruvate-flavodoxin oxidoreductase"  
"JS1\_K04\_00179" 7436 "s59E13H2" 0.06910794 "Pyridoxal biosynthesis lyase PdxS"

"JS1\_K04\_00179" 7436 "s59E25H2" 0 "Pyridoxal biosynthesis lyase PdxS"  
"JS1\_K04\_00179" 7436 "s59E5H2" 0.9457943 "Pyridoxal biosynthesis lyase PdxS"  
"JS1\_K04\_00179" 7436 "s63E6H2" 0.3015946 "Pyridoxal biosynthesis lyase PdxS"  
"JS1\_K04\_00180" 7437 "s59E13H2" 0.03713369 "Glutamine amidotransferase subunit PdxT"  
"JS1\_K04\_00180" 7437 "s59E25H2" 0 "Glutamine amidotransferase subunit PdxT"  
"JS1\_K04\_00180" 7437 "s59E5H2" 0.6782342 "Glutamine amidotransferase subunit PdxT"  
"JS1\_K04\_00180" 7437 "s63E6H2" 0.1528708 "Glutamine amidotransferase subunit PdxT"  
"JS1\_K04\_00184" 7441 "s59E13H2" 0.117502 "tRNA(Ile)-lysidine synthase"  
"JS1\_K04\_00184" 7441 "s59E25H2" 0 "tRNA(Ile)-lysidine synthase"  
"JS1\_K04\_00184" 7441 "s59E5H2" 0.2301974 "tRNA(Ile)-lysidine synthase"  
"JS1\_K04\_00184" 7441 "s63E6H2" 0.3152484 "tRNA(Ile)-lysidine synthase"  
"JS1\_K04\_00188" 7445 "s59E13H2" 0.0549685 "cell division protein FtsB"  
"JS1\_K04\_00188" 7445 "s59E25H2" 0 "cell division protein FtsB"  
"JS1\_K04\_00188" 7445 "s59E5H2" 0.4191408 "cell division protein FtsB"  
"JS1\_K04\_00188" 7445 "s63E6H2" 0.5146076 "cell division protein FtsB"  
"JS1\_K04\_00189" 7446 "s59E13H2" 0.08207708 "Enolase"  
"JS1\_K04\_00189" 7446 "s59E25H2" 0 "Enolase"  
"JS1\_K04\_00189" 7446 "s59E5H2" 0.3858797 "Enolase"  
"JS1\_K04\_00189" 7446 "s63E6H2" 0.3938867 "Enolase"  
"JS1\_K04\_00190" 7447 "s59E13H2" 0.06576289 "Magnesium transporter MgtE"  
"JS1\_K04\_00190" 7447 "s59E25H2" 0 "Magnesium transporter MgtE"  
"JS1\_K04\_00190" 7447 "s59E5H2" 0.376591 "Magnesium transporter MgtE"  
"JS1\_K04\_00190" 7447 "s63E6H2" 0.2977919 "Magnesium transporter MgtE"  
"JS1\_K04\_00191" 7448 "s59E13H2" 0.09576314 "S4 domain protein"  
"JS1\_K04\_00191" 7448 "s59E25H2" 0 "S4 domain protein"  
"JS1\_K04\_00191" 7448 "s59E5H2" 0.05094249 "S4 domain protein"  
"JS1\_K04\_00191" 7448 "s63E6H2" 0.05922184 "S4 domain protein"  
"JS1\_K04\_00192" 7449 "s59E13H2" 0.175739 "Lysine--tRNA ligase"  
"JS1\_K04\_00192" 7449 "s59E25H2" 0 "Lysine--tRNA ligase"  
"JS1\_K04\_00192" 7449 "s59E5H2" 0.2658637 "Lysine--tRNA ligase"  
"JS1\_K04\_00192" 7449 "s63E6H2" 0.251224 "Lysine--tRNA ligase"  
"JS1\_K04\_00193" 7450 "s59E13H2" 0.07184511 "Transcription elongation factor GreA"  
"JS1\_K04\_00193" 7450 "s59E25H2" 0 "Transcription elongation factor GreA"  
"JS1\_K04\_00193" 7450 "s59E5H2" 0.2402688 "Transcription elongation factor GreA"  
"JS1\_K04\_00193" 7450 "s63E6H2" 0.1874832 "Transcription elongation factor GreA"  
"JS1\_K04\_00194" 7451 "s59E13H2" 0.01681373 "Putative pyridoxal phosphate-dependent acyltransferase"  
"JS1\_K04\_00194" 7451 "s59E25H2" 0 "Putative pyridoxal phosphate-dependent acyltransferase"  
"JS1\_K04\_00194" 7451 "s59E5H2" 0.1664459 "Putative pyridoxal phosphate-dependent acyltransferase"  
"JS1\_K04\_00194" 7451 "s63E6H2" 0.1970486 "Putative pyridoxal phosphate-dependent acyltransferase"  
"JS1\_K04\_00195" 7452 "s59E13H2" 0.045307 "hypothetical protein"  
"JS1\_K04\_00195" 7452 "s59E25H2" 0 "hypothetical protein"  
"JS1\_K04\_00195" 7452 "s59E5H2" 0.1570523 "hypothetical protein"  
"JS1\_K04\_00195" 7452 "s63E6H2" 0.1658864 "hypothetical protein"  
"JS1\_K04\_00196" 7453 "s59E13H2" 0.01767383 "hypothetical protein"  
"JS1\_K04\_00196" 7453 "s59E25H2" 0 "hypothetical protein"  
"JS1\_K04\_00196" 7453 "s59E5H2" 0.3057378 "hypothetical protein"  
"JS1\_K04\_00196" 7453 "s63E6H2" 0.09145567 "hypothetical protein"

"JS1\_K04\_00197" 7454 "s59E13H2" 0.07051646 "tRNA-specific 2-thiouridylase MnmA"  
"JS1\_K04\_00197" 7454 "s59E25H2" 0 "tRNA-specific 2-thiouridylase MnmA"  
"JS1\_K04\_00197" 7454 "s59E5H2" 0.36322 "tRNA-specific 2-thiouridylase MnmA"  
"JS1\_K04\_00197" 7454 "s63E6H2" 0.103099 "tRNA-specific 2-thiouridylase MnmA"  
"JS1\_K04\_00198" 7455 "s59E13H2" 0.03544238 "hypothetical protein"  
"JS1\_K04\_00198" 7455 "s59E25H2" 0 "hypothetical protein"  
"JS1\_K04\_00198" 7455 "s59E5H2" 0.161585 "hypothetical protein"  
"JS1\_K04\_00198" 7455 "s63E6H2" 0.0785045 "hypothetical protein"  
"JS1\_K04\_00199" 7456 "s59E13H2" 0.03636824 "HTH-type transcriptional regulator CymR"  
"JS1\_K04\_00199" 7456 "s59E25H2" 0 "HTH-type transcriptional regulator CymR"  
"JS1\_K04\_00199" 7456 "s59E5H2" 0.1778095 "HTH-type transcriptional regulator CymR"  
"JS1\_K04\_00199" 7456 "s63E6H2" 0.09528117 "HTH-type transcriptional regulator CymR"  
"JS1\_K04\_00200" 7457 "s59E13H2" 0.2560759 "hypothetical protein"  
"JS1\_K04\_00200" 7457 "s59E25H2" 0 "hypothetical protein"  
"JS1\_K04\_00200" 7457 "s59E5H2" 0 "hypothetical protein"  
"JS1\_K04\_00200" 7457 "s63E6H2" 0.0688616 "hypothetical protein"  
"JS1\_K04\_00201" 7458 "s59E13H2" 0.3417809 "Sorbitol operon regulator"  
"JS1\_K04\_00201" 7458 "s59E25H2" 0 "Sorbitol operon regulator"  
"JS1\_K04\_00201" 7458 "s59E5H2" 0.02511532 "Sorbitol operon regulator"  
"JS1\_K04\_00201" 7458 "s63E6H2" 0.1429437 "Sorbitol operon regulator"  
"JS1\_K04\_00202" 7459 "s59E13H2" 0.396097 "Acetoin:2,6-dichlorophenolindophenol oxidoreductase subunit alpha"  
"JS1\_K04\_00202" 7459 "s59E25H2" 0 "Acetoin:2,6-dichlorophenolindophenol oxidoreductase subunit alpha"  
"JS1\_K04\_00202" 7459 "s59E5H2" 0.02714559 "Acetoin:2,6-dichlorophenolindophenol oxidoreductase subunit alpha"  
"JS1\_K04\_00202" 7459 "s63E6H2" 0.2582251 "Acetoin:2,6-dichlorophenolindophenol oxidoreductase subunit alpha"  
"JS1\_K04\_00203" 7460 "s59E13H2" 0.1736509 "2-oxoisovalerate dehydrogenase subunit beta"  
"JS1\_K04\_00203" 7460 "s59E25H2" 0 "2-oxoisovalerate dehydrogenase subunit beta"  
"JS1\_K04\_00203" 7460 "s59E5H2" 0.01490169 "2-oxoisovalerate dehydrogenase subunit beta"  
"JS1\_K04\_00203" 7460 "s63E6H2" 0.3644749 "2-oxoisovalerate dehydrogenase subunit beta"  
"JS1\_K04\_00204" 7461 "s59E13H2" 0.5043059 "Dihydrolipoyllysine-residue acetyltransferase component of pyruvate dehydrogenase complex"  
"JS1\_K04\_00204" 7461 "s59E25H2" 0 "Dihydrolipoyllysine-residue acetyltransferase component of pyruvate dehydrogenase complex"  
"JS1\_K04\_00204" 7461 "s59E5H2" 0.07132899 "Dihydrolipoyllysine-residue acetyltransferase component of pyruvate dehydrogenase complex"  
"JS1\_K04\_00204" 7461 "s63E6H2" 0.3167591 "Dihydrolipoyllysine-residue acetyltransferase component of pyruvate dehydrogenase complex"  
"JS1\_K04\_00206" 7463 "s59E13H2" 0.5723801 "Octanoyltransferase"  
"JS1\_K04\_00206" 7463 "s59E25H2" 0 "Octanoyltransferase"  
"JS1\_K04\_00206" 7463 "s59E5H2" 0.2177865 "Octanoyltransferase"  
"JS1\_K04\_00206" 7463 "s63E6H2" 1.071111 "Octanoyltransferase"  
"JS1\_K04\_00207" 7464 "s59E13H2" 0.07617428 "Dihydrolipoyl dehydrogenase"  
"JS1\_K04\_00207" 7464 "s59E25H2" 0 "Dihydrolipoyl dehydrogenase"  
"JS1\_K04\_00207" 7464 "s59E5H2" 0.004323129 "Dihydrolipoyl dehydrogenase"  
"JS1\_K04\_00207" 7464 "s63E6H2" 0.1573246 "Dihydrolipoyl dehydrogenase"  
"JS1\_K04\_00209" 7466 "s59E13H2" 0.0109883 "Murein hydrolase activator NlpD precursor"  
"JS1\_K04\_00209" 7466 "s59E25H2" 0 "Murein hydrolase activator NlpD precursor"  
"JS1\_K04\_00209" 7466 "s59E5H2" 0.04369228 "Murein hydrolase activator NlpD precursor"  
"JS1\_K04\_00209" 7466 "s63E6H2" 0.06948445 "Murein hydrolase activator NlpD precursor"  
"JS1\_K04\_00210" 7467 "s59E13H2" 0.02479919 "Fructose-bisphosphate aldolase class 1"  
"JS1\_K04\_00210" 7467 "s59E25H2" 0 "Fructose-bisphosphate aldolase class 1"  
"JS1\_K04\_00210" 7467 "s59E5H2" 0.01762452 "Fructose-bisphosphate aldolase class 1"



"JS1\_K04\_00210" 7467 "s63E6H2" 0.07830893 "Fructose-bisphosphate aldolase class 1"  
"JS1\_K04\_00211" 7468 "s59E13H2" 0.002012791 "DNA-binding protein HU"  
"JS1\_K04\_00211" 7468 "s59E25H2" 0 "DNA-binding protein HU"  
"JS1\_K04\_00211" 7468 "s59E5H2" 0 "DNA-binding protein HU"  
"JS1\_K04\_00211" 7468 "s63E6H2" 0.04482641 "DNA-binding protein HU"  
"JS1\_K04\_00212" 7469 "s59E13H2" 9.796609e-05 "putative dual-specificity RNA methyltransferase RlmN"  
"JS1\_K04\_00212" 7469 "s59E25H2" 0 "putative dual-specificity RNA methyltransferase RlmN"  
"JS1\_K04\_00212" 7469 "s59E5H2" 0.02105242 "putative dual-specificity RNA methyltransferase RlmN"  
"JS1\_K04\_00212" 7469 "s63E6H2" 0.09817624 "putative dual-specificity RNA methyltransferase RlmN"  
"JS1\_K04\_00213" 7470 "s59E13H2" 0.02359933 "putative transporter"  
"JS1\_K04\_00213" 7470 "s59E25H2" 0 "putative transporter"  
"JS1\_K04\_00213" 7470 "s59E5H2" 0.3228699 "putative transporter"  
"JS1\_K04\_00213" 7470 "s63E6H2" 0.1034461 "putative transporter"  
"JS1\_K04\_00214" 7471 "s59E13H2" 0.030568 "hypothetical protein"  
"JS1\_K04\_00214" 7471 "s59E25H2" 0 "hypothetical protein"  
"JS1\_K04\_00214" 7471 "s59E5H2" 0.0004266245 "hypothetical protein"  
"JS1\_K04\_00214" 7471 "s63E6H2" 0.2038695 "hypothetical protein"  
"JS1\_K04\_00215" 7472 "s59E13H2" 0.02921943 "hypothetical protein"  
"JS1\_K04\_00215" 7472 "s59E25H2" 0 "hypothetical protein"  
"JS1\_K04\_00215" 7472 "s59E5H2" 0 "hypothetical protein"  
"JS1\_K04\_00215" 7472 "s63E6H2" 0.1982784 "hypothetical protein"  
"JS1\_K04\_00216" 7473 "s59E13H2" 0.00273007 "putative lipoprotein YbbD precursor"  
"JS1\_K04\_00216" 7473 "s59E25H2" 0 "putative lipoprotein YbbD precursor"  
"JS1\_K04\_00216" 7473 "s59E5H2" 0.4437557 "putative lipoprotein YbbD precursor"  
"JS1\_K04\_00216" 7473 "s63E6H2" 0.07857988 "putative lipoprotein YbbD precursor"  
"JS1\_K04\_00217" 7474 "s59E13H2" 0 "hypothetical protein"  
"JS1\_K04\_00217" 7474 "s59E25H2" 0 "hypothetical protein"  
"JS1\_K04\_00217" 7474 "s59E5H2" 0 "hypothetical protein"  
"JS1\_K04\_00217" 7474 "s63E6H2" 0 "hypothetical protein"  
"JS1\_K04\_00218" 7475 "s59E13H2" 0.1320181 "Radical SAM superfamily protein"  
"JS1\_K04\_00218" 7475 "s59E25H2" 0 "Radical SAM superfamily protein"  
"JS1\_K04\_00218" 7475 "s59E5H2" 0.3203607 "Radical SAM superfamily protein"  
"JS1\_K04\_00218" 7475 "s63E6H2" 0.263409 "Radical SAM superfamily protein"  
"JS1\_K04\_00219" 7476 "s59E13H2" 0.2210939 "Rod shape-determining protein RodA"  
"JS1\_K04\_00219" 7476 "s59E25H2" 0 "Rod shape-determining protein RodA"  
"JS1\_K04\_00219" 7476 "s59E5H2" 0.2829897 "Rod shape-determining protein RodA"  
"JS1\_K04\_00219" 7476 "s63E6H2" 0.3116649 "Rod shape-determining protein RodA"  
"JS1\_K04\_00220" 7477 "s59E13H2" 0.2770723 "Stage V sporulation protein D"  
"JS1\_K04\_00220" 7477 "s59E25H2" 0 "Stage V sporulation protein D"  
"JS1\_K04\_00220" 7477 "s59E5H2" 0.3510428 "Stage V sporulation protein D"  
"JS1\_K04\_00220" 7477 "s63E6H2" 0.5395473 "Stage V sporulation protein D"  
"JS1\_K04\_00221" 7478 "s59E13H2" 0.2327634 "rod shape-determining protein MreD"  
"JS1\_K04\_00221" 7478 "s59E25H2" 0 "rod shape-determining protein MreD"  
"JS1\_K04\_00221" 7478 "s59E5H2" 0.3907061 "rod shape-determining protein MreD"  
"JS1\_K04\_00221" 7478 "s63E6H2" 1.555689 "rod shape-determining protein MreD"  
"JS1\_K04\_00222" 7479 "s59E13H2" 0.1515185 "Putative N-acetylmannosaminyltransferase"  
"JS1\_K04\_00222" 7479 "s59E25H2" 0 "Putative N-acetylmannosaminyltransferase"

"JS1\_K04\_00222" 7479 "s59E5H2" 0.8358145 "Putative N-acetylmannosaminyltransferase"  
"JS1\_K04\_00222" 7479 "s63E6H2" 1.418095 "Putative N-acetylmannosaminyltransferase"  
"JS1\_K04\_00223" 7480 "s59E13H2" 4.732508 "UDP-glucose 4-epimerase"  
"JS1\_K04\_00223" 7480 "s59E25H2" 0 "UDP-glucose 4-epimerase"  
"JS1\_K04\_00223" 7480 "s59E5H2" 0.8270986 "UDP-glucose 4-epimerase"  
"JS1\_K04\_00223" 7480 "s63E6H2" 0.6770978 "UDP-glucose 4-epimerase"  
"JS1\_K04\_00224" 7481 "s59E13H2" 6.265506 "putative undecaprenyl-phosphate N-acetylglucosaminyl 1-phosphate transferase"  
"JS1\_K04\_00224" 7481 "s59E25H2" 0 "putative undecaprenyl-phosphate N-acetylglucosaminyl 1-phosphate transferase"  
"JS1\_K04\_00224" 7481 "s59E5H2" 0.6768223 "putative undecaprenyl-phosphate N-acetylglucosaminyl 1-phosphate transferase"  
"JS1\_K04\_00224" 7481 "s63E6H2" 0.2234468 "putative undecaprenyl-phosphate N-acetylglucosaminyl 1-phosphate transferase"  
"JS1\_K04\_00225" 7482 "s59E13H2" 6.650053 "Bifunctional phosphoglucose/phosphomannose isomerase"  
"JS1\_K04\_00225" 7482 "s59E25H2" 0 "Bifunctional phosphoglucose/phosphomannose isomerase"  
"JS1\_K04\_00225" 7482 "s59E5H2" 0.8118102 "Bifunctional phosphoglucose/phosphomannose isomerase"  
"JS1\_K04\_00225" 7482 "s63E6H2" 0.7103265 "Bifunctional phosphoglucose/phosphomannose isomerase"  
"JS1\_K04\_00226" 7483 "s59E13H2" 0.350997 "hypothetical protein"  
"JS1\_K04\_00226" 7483 "s59E25H2" 0 "hypothetical protein"  
"JS1\_K04\_00226" 7483 "s59E5H2" 0.1048941 "hypothetical protein"  
"JS1\_K04\_00226" 7483 "s63E6H2" 1.497004 "hypothetical protein"  
"JS1\_K04\_00227" 7484 "s59E13H2" 0.009286828 "Amidohydrolase"  
"JS1\_K04\_00227" 7484 "s59E25H2" 0 "Amidohydrolase"  
"JS1\_K04\_00227" 7484 "s59E5H2" 0.1777665 "Amidohydrolase"  
"JS1\_K04\_00227" 7484 "s63E6H2" 12.52055 "Amidohydrolase"  
"JS1\_K04\_00228" 7485 "s59E13H2" 0.108235 "Transposase IS200 like protein"  
"JS1\_K04\_00228" 7485 "s59E25H2" 0 "Transposase IS200 like protein"  
"JS1\_K04\_00228" 7485 "s59E5H2" 0.03613058 "Transposase IS200 like protein"  
"JS1\_K04\_00228" 7485 "s63E6H2" 8.85675 "Transposase IS200 like protein"  
"JS1\_K04\_00229" 7486 "s59E13H2" 0.1159287 "translocation protein TolB"  
"JS1\_K04\_00229" 7486 "s59E25H2" 0.1273687 "translocation protein TolB"  
"JS1\_K04\_00229" 7486 "s59E5H2" 0.0948127 "translocation protein TolB"  
"JS1\_K04\_00229" 7486 "s63E6H2" 2.063325 "translocation protein TolB"  
"JS1\_K04\_00230" 7487 "s59E13H2" 0.04802485 "Glucose-1-phosphate thymidyltransferase"  
"JS1\_K04\_00230" 7487 "s59E25H2" 0 "Glucose-1-phosphate thymidyltransferase"  
"JS1\_K04\_00230" 7487 "s59E5H2" 0.1462547 "Glucose-1-phosphate thymidyltransferase"  
"JS1\_K04\_00230" 7487 "s63E6H2" 2.132533 "Glucose-1-phosphate thymidyltransferase"  
"JS1\_K04\_00231" 7488 "s59E13H2" 0.05010394 "Digeranylgeranyllycerophospholipid reductase"  
"JS1\_K04\_00231" 7488 "s59E25H2" 0 "Digeranylgeranyllycerophospholipid reductase"  
"JS1\_K04\_00231" 7488 "s59E5H2" 0.007710917 "Digeranylgeranyllycerophospholipid reductase"  
"JS1\_K04\_00231" 7488 "s63E6H2" 0.3979513 "Digeranylgeranyllycerophospholipid reductase"  
"JS1\_K04\_00232" 7489 "s59E13H2" 0.05904525 "hypothetical protein"  
"JS1\_K04\_00232" 7489 "s59E25H2" 0 "hypothetical protein"  
"JS1\_K04\_00232" 7489 "s59E5H2" 0.03298387 "hypothetical protein"  
"JS1\_K04\_00232" 7489 "s63E6H2" 0.0286252 "hypothetical protein"  
"JS1\_K04\_00233" 7490 "s59E13H2" 0.04747798 "Nucleotidyltransferase domain protein"  
"JS1\_K04\_00233" 7490 "s59E25H2" 0 "Nucleotidyltransferase domain protein"  
"JS1\_K04\_00233" 7490 "s59E5H2" 0.1075943 "Nucleotidyltransferase domain protein"  
"JS1\_K04\_00233" 7490 "s63E6H2" 0.05315598 "Nucleotidyltransferase domain protein"  
"JS1\_K04\_00234" 7491 "s59E13H2" 0.06681447 "Pseudouridine-5'-phosphate glycosidase"

"JS1\_K04\_00234" 7491 "s59E25H2" 0 "Pseudouridine-5'-phosphate glycosidase"  
"JS1\_K04\_00234" 7491 "s59E5H2" 0.06725845 "Pseudouridine-5'-phosphate glycosidase"  
"JS1\_K04\_00234" 7491 "s63E6H2" 0.3031394 "Pseudouridine-5'-phosphate glycosidase"  
"JS1\_K04\_00235" 7492 "s59E13H2" 0.0141527 "Pseudouridine kinase"  
"JS1\_K04\_00235" 7492 "s59E25H2" 0 "Pseudouridine kinase"  
"JS1\_K04\_00235" 7492 "s59E5H2" 0.01393196 "Pseudouridine kinase"  
"JS1\_K04\_00235" 7492 "s63E6H2" 0.3348939 "Pseudouridine kinase"  
"JS1\_K04\_00236" 7493 "s59E13H2" 0.01345496 "UDP-N-acetyl-alpha-D-glucosamine C6 dehydratase"  
"JS1\_K04\_00236" 7493 "s59E25H2" 0 "UDP-N-acetyl-alpha-D-glucosamine C6 dehydratase"  
"JS1\_K04\_00236" 7493 "s59E5H2" 0.003930909 "UDP-N-acetyl-alpha-D-glucosamine C6 dehydratase"  
"JS1\_K04\_00236" 7493 "s63E6H2" 0.009749742 "UDP-N-acetyl-alpha-D-glucosamine C6 dehydratase"  
"JS1\_K04\_00237" 7494 "s59E13H2" 0.04655119 "putative undecaprenyl-phosphate N-acetylglucosaminyl 1-phosphate transferase"  
"JS1\_K04\_00237" 7494 "s59E25H2" 0 "putative undecaprenyl-phosphate N-acetylglucosaminyl 1-phosphate transferase"  
"JS1\_K04\_00237" 7494 "s59E5H2" 0.0009932422 "putative undecaprenyl-phosphate N-acetylglucosaminyl 1-phosphate transferase"  
"JS1\_K04\_00237" 7494 "s63E6H2" 0.01917217 "putative undecaprenyl-phosphate N-acetylglucosaminyl 1-phosphate transferase"  
"JS1\_K04\_00238" 7495 "s59E13H2" 0.02280487 "UDP-glucose 4-epimerase"  
"JS1\_K04\_00238" 7495 "s59E25H2" 0 "UDP-glucose 4-epimerase"  
"JS1\_K04\_00238" 7495 "s59E5H2" 0.006876184 "UDP-glucose 4-epimerase"  
"JS1\_K04\_00238" 7495 "s63E6H2" 0.00725876 "UDP-glucose 4-epimerase"  
"JS1\_K04\_00239" 7496 "s59E13H2" 0.04835485 "Putative glycosyltransferase EpsF"  
"JS1\_K04\_00239" 7496 "s59E25H2" 0 "Putative glycosyltransferase EpsF"  
"JS1\_K04\_00239" 7496 "s59E5H2" 0 "Putative glycosyltransferase EpsF"  
"JS1\_K04\_00239" 7496 "s63E6H2" 0.05006696 "Putative glycosyltransferase EpsF"  
"JS1\_K04\_00240" 7497 "s59E13H2" 0.01402311 "hypothetical protein"  
"JS1\_K04\_00240" 7497 "s59E25H2" 0 "hypothetical protein"  
"JS1\_K04\_00240" 7497 "s59E5H2" 0 "hypothetical protein"  
"JS1\_K04\_00240" 7497 "s63E6H2" 0 "hypothetical protein"  
"JS1\_K04\_00241" 7498 "s59E13H2" 0.02097217 "hypothetical protein"  
"JS1\_K04\_00241" 7498 "s59E25H2" 0 "hypothetical protein"  
"JS1\_K04\_00241" 7498 "s59E5H2" 0 "hypothetical protein"  
"JS1\_K04\_00241" 7498 "s63E6H2" 0 "hypothetical protein"  
"JS1\_K04\_00242" 7499 "s59E13H2" 0.01036191 "GalNAc-alpha-(1-"  
"JS1\_K04\_00242" 7499 "s59E25H2" 0 "GalNAc-alpha-(1-"  
"JS1\_K04\_00242" 7499 "s59E5H2" 0.005795079 "GalNAc-alpha-(1-"  
"JS1\_K04\_00242" 7499 "s63E6H2" 0.001352764 "GalNAc-alpha-(1-"  
"JS1\_K04\_00243" 7500 "s59E13H2" 0.009289212 "Phenylacetate-coenzyme A ligase"  
"JS1\_K04\_00243" 7500 "s59E25H2" 0 "Phenylacetate-coenzyme A ligase"  
"JS1\_K04\_00243" 7500 "s59E5H2" 0 "Phenylacetate-coenzyme A ligase"  
"JS1\_K04\_00243" 7500 "s63E6H2" 0.000611006 "Phenylacetate-coenzyme A ligase"  
"JS1\_K04\_00244" 7501 "s59E13H2" 0.007939402 "Cyclic pyranopterin monophosphate synthase 1"  
"JS1\_K04\_00244" 7501 "s59E25H2" 0 "Cyclic pyranopterin monophosphate synthase 1"  
"JS1\_K04\_00244" 7501 "s59E5H2" 0 "Cyclic pyranopterin monophosphate synthase 1"  
"JS1\_K04\_00244" 7501 "s63E6H2" 0.006807709 "Cyclic pyranopterin monophosphate synthase 1"  
"JS1\_K04\_00245" 7502 "s59E13H2" 0.02586092 "Phenylacetate-coenzyme A ligase"  
"JS1\_K04\_00245" 7502 "s59E25H2" 0 "Phenylacetate-coenzyme A ligase"  
"JS1\_K04\_00245" 7502 "s59E5H2" 0.03227108 "Phenylacetate-coenzyme A ligase"  
"JS1\_K04\_00245" 7502 "s63E6H2" 0 "Phenylacetate-coenzyme A ligase"

"JS1\_K04\_00246" 7503 "s59E13H2" 0.01987703 "hypothetical protein"  
"JS1\_K04\_00246" 7503 "s59E25H2" 0 "hypothetical protein"  
"JS1\_K04\_00246" 7503 "s59E5H2" 0.00954606 "hypothetical protein"  
"JS1\_K04\_00246" 7503 "s63E6H2" 0.003546252 "hypothetical protein"  
"JS1\_K04\_00247" 7504 "s59E13H2" 0.02394505 "N-acetylgalactosamine-N,N'-diacetylbaucillosaminy-diphospho-undecaprenol 4-alpha-N-acetylgalactosaminytransferase"  
"JS1\_K04\_00247" 7504 "s59E25H2" 0 "N-acetylgalactosamine-N,N'-diacetylbaucillosaminy-diphospho-undecaprenol 4-alpha-N-acetylgalactosaminytransferase"  
"JS1\_K04\_00247" 7504 "s59E5H2" 0 "N-acetylgalactosamine-N,N'-diacetylbaucillosaminy-diphospho-undecaprenol 4-alpha-N-acetylgalactosaminytransferase"  
"JS1\_K04\_00247" 7504 "s63E6H2" 0 "N-acetylgalactosamine-N,N'-diacetylbaucillosaminy-diphospho-undecaprenol 4-alpha-N-acetylgalactosaminytransferase"  
"JS1\_K04\_00248" 7505 "s59E13H2" 0.04728928 "UDP-Glc:alpha-D-GlcNAc-diphosphoundecaprenol beta-1,3-glucosyltransferase WfgD"  
"JS1\_K04\_00248" 7505 "s59E25H2" 0 "UDP-Glc:alpha-D-GlcNAc-diphosphoundecaprenol beta-1,3-glucosyltransferase WfgD"  
"JS1\_K04\_00248" 7505 "s59E5H2" 0.004265351 "UDP-Glc:alpha-D-GlcNAc-diphosphoundecaprenol beta-1,3-glucosyltransferase WfgD"  
"JS1\_K04\_00248" 7505 "s63E6H2" 0.005964586 "UDP-Glc:alpha-D-GlcNAc-diphosphoundecaprenol beta-1,3-glucosyltransferase WfgD"  
"JS1\_K04\_00249" 7506 "s59E13H2" 0.03523712 "Lipopolysaccharide biosynthesis protein WzxC"  
"JS1\_K04\_00249" 7506 "s59E25H2" 0 "Lipopolysaccharide biosynthesis protein WzxC"  
"JS1\_K04\_00249" 7506 "s59E5H2" 0 "Lipopolysaccharide biosynthesis protein WzxC"  
"JS1\_K04\_00249" 7506 "s63E6H2" 0.01544855 "Lipopolysaccharide biosynthesis protein WzxC"  
"JS1\_K04\_00250" 7507 "s59E13H2" 0.006217053 "D-inositol 3-phosphate glycosyltransferase"  
"JS1\_K04\_00250" 7507 "s59E25H2" 0 "D-inositol 3-phosphate glycosyltransferase"  
"JS1\_K04\_00250" 7507 "s59E5H2" 0 "D-inositol 3-phosphate glycosyltransferase"  
"JS1\_K04\_00250" 7507 "s63E6H2" 0.1026019 "D-inositol 3-phosphate glycosyltransferase"  
"JS1\_K04\_00251" 7508 "s59E13H2" 0.02409256 "putative undecaprenyl-phosphate N-acetylglucosaminy 1-phosphate transferase"  
"JS1\_K04\_00251" 7508 "s59E25H2" 0 "putative undecaprenyl-phosphate N-acetylglucosaminy 1-phosphate transferase"  
"JS1\_K04\_00251" 7508 "s59E5H2" 0 "putative undecaprenyl-phosphate N-acetylglucosaminy 1-phosphate transferase"  
"JS1\_K04\_00251" 7508 "s63E6H2" 0.00314663 "putative undecaprenyl-phosphate N-acetylglucosaminy 1-phosphate transferase"  
"JS1\_K04\_00252" 7509 "s59E13H2" 0.05011063 "putative glycosyl transferase"  
"JS1\_K04\_00252" 7509 "s59E25H2" 0 "putative glycosyl transferase"  
"JS1\_K04\_00252" 7509 "s59E5H2" 0 "putative glycosyl transferase"  
"JS1\_K04\_00252" 7509 "s63E6H2" 0 "putative glycosyl transferase"  
"JS1\_K04\_00253" 7510 "s59E13H2" 0 "tRNA(fMet)-specific endonuclease VapC"  
"JS1\_K04\_00253" 7510 "s59E25H2" 0 "tRNA(fMet)-specific endonuclease VapC"  
"JS1\_K04\_00253" 7510 "s59E5H2" 0.04981854 "tRNA(fMet)-specific endonuclease VapC"  
"JS1\_K04\_00253" 7510 "s63E6H2" 0.01084214 "tRNA(fMet)-specific endonuclease VapC"  
"JS1\_K04\_00254" 7511 "s59E13H2" 0 "putative regulator PrIF"  
"JS1\_K04\_00254" 7511 "s59E25H2" 0 "putative regulator PrIF"  
"JS1\_K04\_00254" 7511 "s59E5H2" 0.0362648 "putative regulator PrIF"  
"JS1\_K04\_00254" 7511 "s63E6H2" 0.02580646 "putative regulator PrIF"  
"JS1\_K04\_00255" 7512 "s59E13H2" 0.00678461 "Methylcobamide:CoM methyltransferase MtaA"  
"JS1\_K04\_00255" 7512 "s59E25H2" 0 "Methylcobamide:CoM methyltransferase MtaA"  
"JS1\_K04\_00255" 7512 "s59E5H2" 0 "Methylcobamide:CoM methyltransferase MtaA"  
"JS1\_K04\_00255" 7512 "s63E6H2" 0.01151897 "Methylcobamide:CoM methyltransferase MtaA"  
"JS1\_K04\_00256" 7513 "s59E13H2" 0 "Sugar phosphatase YidA"  
"JS1\_K04\_00256" 7513 "s59E25H2" 0 "Sugar phosphatase YidA"  
"JS1\_K04\_00256" 7513 "s59E5H2" 0 "Sugar phosphatase YidA"  
"JS1\_K04\_00256" 7513 "s63E6H2" 0.01140721 "Sugar phosphatase YidA"  
"JS1\_K04\_00257" 7514 "s59E13H2" 0 "Putative phosphatase YwpJ"  
"JS1\_K04\_00257" 7514 "s59E25H2" 0 "Putative phosphatase YwpJ"  
"JS1\_K04\_00257" 7514 "s59E5H2" 0 "Putative phosphatase YwpJ"

"JS1\_K04\_00257" 7514 "s63E6H2" 0.02433849 "Putative phosphatase YwpJ"  
"JS1\_K04\_00259" 7516 "s59E13H2" 0 "hypothetical protein"  
"JS1\_K04\_00259" 7516 "s59E25H2" 0 "hypothetical protein"  
"JS1\_K04\_00259" 7516 "s59E5H2" 0 "hypothetical protein"  
"JS1\_K04\_00259" 7516 "s63E6H2" 0.03584475 "hypothetical protein"  
"JS1\_K04\_00260" 7517 "s59E13H2" 0.007249735 "putative 2-phosphosulfolactate phosphatase"  
"JS1\_K04\_00260" 7517 "s59E25H2" 0 "putative 2-phosphosulfolactate phosphatase"  
"JS1\_K04\_00260" 7517 "s59E5H2" 0 "putative 2-phosphosulfolactate phosphatase"  
"JS1\_K04\_00260" 7517 "s63E6H2" 0.02512622 "putative 2-phosphosulfolactate phosphatase"  
"JS1\_K04\_00261" 7518 "s59E13H2" 0 "Phosphoribosylaminoimidazole-succinocarboxamide synthase"  
"JS1\_K04\_00261" 7518 "s59E25H2" 0 "Phosphoribosylaminoimidazole-succinocarboxamide synthase"  
"JS1\_K04\_00261" 7518 "s59E5H2" 0 "Phosphoribosylaminoimidazole-succinocarboxamide synthase"  
"JS1\_K04\_00261" 7518 "s63E6H2" 0.04394225 "Phosphoribosylaminoimidazole-succinocarboxamide synthase"  
"JS1\_K04\_00262" 7519 "s59E13H2" 0 "Glycerate 2-kinase"  
"JS1\_K04\_00262" 7519 "s59E25H2" 0 "Glycerate 2-kinase"  
"JS1\_K04\_00262" 7519 "s59E5H2" 0 "Glycerate 2-kinase"  
"JS1\_K04\_00262" 7519 "s63E6H2" 0.03508092 "Glycerate 2-kinase"  
"JS1\_K04\_00263" 7520 "s59E13H2" 0 "S-methyl-5'-thioadenosine phosphorylase"  
"JS1\_K04\_00263" 7520 "s59E25H2" 0 "S-methyl-5'-thioadenosine phosphorylase"  
"JS1\_K04\_00263" 7520 "s59E5H2" 0 "S-methyl-5'-thioadenosine phosphorylase"  
"JS1\_K04\_00263" 7520 "s63E6H2" 0.0417742 "S-methyl-5'-thioadenosine phosphorylase"  
"JS1\_K04\_00265" 7522 "s59E13H2" 0 "HTH-type transcriptional repressor GlcR"  
"JS1\_K04\_00265" 7522 "s59E25H2" 0 "HTH-type transcriptional repressor GlcR"  
"JS1\_K04\_00265" 7522 "s59E5H2" 0 "HTH-type transcriptional repressor GlcR"  
"JS1\_K04\_00265" 7522 "s63E6H2" 0.07383758 "HTH-type transcriptional repressor GlcR"  
"JS1\_K04\_00266" 7523 "s59E13H2" 0 "Arabinose 5-phosphate isomerase KpsF"  
"JS1\_K04\_00266" 7523 "s59E25H2" 0 "Arabinose 5-phosphate isomerase KpsF"  
"JS1\_K04\_00266" 7523 "s59E5H2" 0 "Arabinose 5-phosphate isomerase KpsF"  
"JS1\_K04\_00266" 7523 "s63E6H2" 0.08640983 "Arabinose 5-phosphate isomerase KpsF"  
"JS1\_K04\_00267" 7524 "s59E13H2" 0 "Ribulose-phosphate 3-epimerase"  
"JS1\_K04\_00267" 7524 "s59E25H2" 0 "Ribulose-phosphate 3-epimerase"  
"JS1\_K04\_00267" 7524 "s59E5H2" 0 "Ribulose-phosphate 3-epimerase"  
"JS1\_K04\_00267" 7524 "s63E6H2" 0.01692393 "Ribulose-phosphate 3-epimerase"  
"JS1\_K04\_00268" 7525 "s59E13H2" 0.05256327 "Triosephosphate isomerase"  
"JS1\_K04\_00268" 7525 "s59E25H2" 0 "Triosephosphate isomerase"  
"JS1\_K04\_00268" 7525 "s59E5H2" 0.02023003 "Triosephosphate isomerase"  
"JS1\_K04\_00268" 7525 "s63E6H2" 0.02762526 "Triosephosphate isomerase"  
"JS1\_K04\_00269" 7526 "s59E13H2" 0.01103732 "hypothetical protein"  
"JS1\_K04\_00269" 7526 "s59E25H2" 0 "hypothetical protein"  
"JS1\_K04\_00269" 7526 "s59E5H2" 0.04015721 "hypothetical protein"  
"JS1\_K04\_00269" 7526 "s63E6H2" 0.03526231 "hypothetical protein"  
"JS1\_K04\_00270" 7527 "s59E13H2" 0 "HTH-type transcriptional regulator KdgR"  
"JS1\_K04\_00270" 7527 "s59E25H2" 0 "HTH-type transcriptional regulator KdgR"  
"JS1\_K04\_00270" 7527 "s59E5H2" 0 "HTH-type transcriptional regulator KdgR"  
"JS1\_K04\_00270" 7527 "s63E6H2" 0.01653894 "HTH-type transcriptional regulator KdgR"  
"JS1\_K04\_00272" 7529 "s59E13H2" 0 "Xaa-Pro dipeptidase"  
"JS1\_K04\_00272" 7529 "s59E25H2" 0 "Xaa-Pro dipeptidase"

"JS1\_K04\_00272" 7529 "s59E5H2" 0 "Xaa-Pro dipeptidase"  
"JS1\_K04\_00272" 7529 "s63E6H2" 0.03913613 "Xaa-Pro dipeptidase"  
"JS1\_K04\_00273" 7530 "s59E13H2" 0.003709649 "hypothetical protein"  
"JS1\_K04\_00273" 7530 "s59E25H2" 0 "hypothetical protein"  
"JS1\_K04\_00273" 7530 "s59E5H2" 0 "hypothetical protein"  
"JS1\_K04\_00273" 7530 "s63E6H2" 0.03530664 "hypothetical protein"  
"JS1\_K04\_00275" 7532 "s59E13H2" 0.007827398 "Xylulose kinase"  
"JS1\_K04\_00275" 7532 "s59E25H2" 0 "Xylulose kinase"  
"JS1\_K04\_00275" 7532 "s59E5H2" 0.003657525 "Xylulose kinase"  
"JS1\_K04\_00275" 7532 "s63E6H2" 0.01966296 "Xylulose kinase"  
"JS1\_K04\_00276" 7533 "s59E13H2" 0.01553909 "glucosamine-6-phosphate deaminase"  
"JS1\_K04\_00276" 7533 "s59E25H2" 0 "glucosamine-6-phosphate deaminase"  
"JS1\_K04\_00276" 7533 "s59E5H2" 0.02296662 "glucosamine-6-phosphate deaminase"  
"JS1\_K04\_00276" 7533 "s63E6H2" 0.01013215 "glucosamine-6-phosphate deaminase"  
"JS1\_K04\_00279" 7536 "s59E13H2" 0 "Cadherin-like beta sandwich domain protein"  
"JS1\_K04\_00279" 7536 "s59E25H2" 0 "Cadherin-like beta sandwich domain protein"  
"JS1\_K04\_00279" 7536 "s59E5H2" 0.0005584235 "Cadherin-like beta sandwich domain protein"  
"JS1\_K04\_00279" 7536 "s63E6H2" 0.000540963 "Cadherin-like beta sandwich domain protein"  
"JS1\_K04\_00281" 7538 "s59E13H2" 0.01443041 "Formate dehydrogenase subunit alpha"  
"JS1\_K04\_00281" 7538 "s59E25H2" 0 "Formate dehydrogenase subunit alpha"  
"JS1\_K04\_00281" 7538 "s59E5H2" 0.04957898 "Formate dehydrogenase subunit alpha"  
"JS1\_K04\_00281" 7538 "s63E6H2" 0.05878359 "Formate dehydrogenase subunit alpha"  
"JS1\_K04\_00282" 7539 "s59E13H2" 0.01287896 "NADH-quinone oxidoreductase subunit E"  
"JS1\_K04\_00282" 7539 "s59E25H2" 0 "NADH-quinone oxidoreductase subunit E"  
"JS1\_K04\_00282" 7539 "s59E5H2" 0.05137417 "NADH-quinone oxidoreductase subunit E"  
"JS1\_K04\_00282" 7539 "s63E6H2" 0.314971 "NADH-quinone oxidoreductase subunit E"  
"JS1\_K04\_00283" 7540 "s59E13H2" 0.02798413 "NADP-reducing hydrogenase subunit HndC"  
"JS1\_K04\_00283" 7540 "s59E25H2" 0 "NADP-reducing hydrogenase subunit HndC"  
"JS1\_K04\_00283" 7540 "s59E5H2" 0.2348062 "NADP-reducing hydrogenase subunit HndC"  
"JS1\_K04\_00283" 7540 "s63E6H2" 0.3920859 "NADP-reducing hydrogenase subunit HndC"  
"JS1\_K04\_00284" 7541 "s59E13H2" 0.01128758 "hypothetical protein"  
"JS1\_K04\_00284" 7541 "s59E25H2" 0 "hypothetical protein"  
"JS1\_K04\_00284" 7541 "s59E5H2" 0.007394825 "hypothetical protein"  
"JS1\_K04\_00284" 7541 "s63E6H2" 0.4190977 "hypothetical protein"  
"JS1\_K04\_00285" 7542 "s59E13H2" 0.0888604 "formate dehydrogenase accessory protein"  
"JS1\_K04\_00285" 7542 "s59E25H2" 0 "formate dehydrogenase accessory protein"  
"JS1\_K04\_00285" 7542 "s59E5H2" 0.03683956 "formate dehydrogenase accessory protein"  
"JS1\_K04\_00285" 7542 "s63E6H2" 0.4096729 "formate dehydrogenase accessory protein"  
"JS1\_K04\_00286" 7543 "s59E13H2" 0.02134916 "molybdopterin-guanine dinucleotide biosynthesis protein MobA"  
"JS1\_K04\_00286" 7543 "s59E25H2" 0 "molybdopterin-guanine dinucleotide biosynthesis protein MobA"  
"JS1\_K04\_00286" 7543 "s59E5H2" 0.02058201 "molybdopterin-guanine dinucleotide biosynthesis protein MobA"  
"JS1\_K04\_00286" 7543 "s63E6H2" 0.1537979 "molybdopterin-guanine dinucleotide biosynthesis protein MobA"  
"JS1\_K04\_00287" 7544 "s59E13H2" 0.01612842 "NADP-reducing hydrogenase subunit HndC"  
"JS1\_K04\_00287" 7544 "s59E25H2" 0 "NADP-reducing hydrogenase subunit HndC"  
"JS1\_K04\_00287" 7544 "s59E5H2" 0 "NADP-reducing hydrogenase subunit HndC"  
"JS1\_K04\_00287" 7544 "s63E6H2" 0.04981476 "NADP-reducing hydrogenase subunit HndC"  
"JS1\_K04\_00288" 7545 "s59E13H2" 0.0116286 "NADP-reducing hydrogenase subunit HndC"

"JS1\_K04\_00288" 7545 "s59E25H2" 0 "NADP-reducing hydrogenase subunit HndC"  
"JS1\_K04\_00288" 7545 "s59E5H2" 0.01051459 "NADP-reducing hydrogenase subunit HndC"  
"JS1\_K04\_00288" 7545 "s63E6H2" 0.04373318 "NADP-reducing hydrogenase subunit HndC"  
"JS1\_K04\_00289" 7546 "s59E13H2" 0.004399264 "NADP-reducing hydrogenase subunit HndA"  
"JS1\_K04\_00289" 7546 "s59E25H2" 0 "NADP-reducing hydrogenase subunit HndA"  
"JS1\_K04\_00289" 7546 "s59E5H2" 0 "NADP-reducing hydrogenase subunit HndA"  
"JS1\_K04\_00289" 7546 "s63E6H2" 0.03857361 "NADP-reducing hydrogenase subunit HndA"  
"JS1\_K04\_00290" 7547 "s59E13H2" 0.001977313 "Putative L,D-transpeptidase YciB precursor"  
"JS1\_K04\_00290" 7547 "s59E25H2" 0 "Putative L,D-transpeptidase YciB precursor"  
"JS1\_K04\_00290" 7547 "s59E5H2" 0 "Putative L,D-transpeptidase YciB precursor"  
"JS1\_K04\_00290" 7547 "s63E6H2" 0.02956294 "Putative L,D-transpeptidase YciB precursor"  
"JS1\_K04\_00291" 7548 "s59E13H2" 0.009843344 "Molybdopterin adenyltransferase"  
"JS1\_K04\_00291" 7548 "s59E25H2" 0 "Molybdopterin adenyltransferase"  
"JS1\_K04\_00291" 7548 "s59E5H2" 0.002718135 "Molybdopterin adenyltransferase"  
"JS1\_K04\_00291" 7548 "s63E6H2" 0.1638011 "Molybdopterin adenyltransferase"  
"JS1\_K04\_00292" 7549 "s59E13H2" 0.01115696 "MOSC domain protein"  
"JS1\_K04\_00292" 7549 "s59E25H2" 0 "MOSC domain protein"  
"JS1\_K04\_00292" 7549 "s59E5H2" 0.0130927 "MOSC domain protein"  
"JS1\_K04\_00292" 7549 "s63E6H2" 0.7359884 "MOSC domain protein"  
"JS1\_K04\_00293" 7550 "s59E13H2" 0.003484738 "Cyclic pyranopterin monophosphate synthase accessory protein"  
"JS1\_K04\_00293" 7550 "s59E25H2" 0 "Cyclic pyranopterin monophosphate synthase accessory protein"  
"JS1\_K04\_00293" 7550 "s59E5H2" 0.0210979 "Cyclic pyranopterin monophosphate synthase accessory protein"  
"JS1\_K04\_00293" 7550 "s63E6H2" 0.7705894 "Cyclic pyranopterin monophosphate synthase accessory protein"  
"JS1\_K04\_00294" 7551 "s59E13H2" 0.003389665 "Cyclic pyranopterin monophosphate synthase"  
"JS1\_K04\_00294" 7551 "s59E25H2" 0 "Cyclic pyranopterin monophosphate synthase"  
"JS1\_K04\_00294" 7551 "s59E5H2" 0.00486668 "Cyclic pyranopterin monophosphate synthase"  
"JS1\_K04\_00294" 7551 "s63E6H2" 0.8032128 "Cyclic pyranopterin monophosphate synthase"  
"JS1\_K04\_00295" 7552 "s59E13H2" 7.560427e-05 "Fe(3+) ions import ATP-binding protein FbpC"  
"JS1\_K04\_00295" 7552 "s59E25H2" 0 "Fe(3+) ions import ATP-binding protein FbpC"  
"JS1\_K04\_00295" 7552 "s59E5H2" 0.03718126 "Fe(3+) ions import ATP-binding protein FbpC"  
"JS1\_K04\_00295" 7552 "s63E6H2" 0.8687382 "Fe(3+) ions import ATP-binding protein FbpC"  
"JS1\_K04\_00296" 7553 "s59E13H2" 0.02114929 "Sulfate transport system permease protein CysW"  
"JS1\_K04\_00296" 7553 "s59E25H2" 0 "Sulfate transport system permease protein CysW"  
"JS1\_K04\_00296" 7553 "s59E5H2" 0.02749637 "Sulfate transport system permease protein CysW"  
"JS1\_K04\_00296" 7553 "s63E6H2" 0.832156 "Sulfate transport system permease protein CysW"  
"JS1\_K04\_00297" 7554 "s59E13H2" 0.01322242 "PBP superfamily domain protein"  
"JS1\_K04\_00297" 7554 "s59E25H2" 0 "PBP superfamily domain protein"  
"JS1\_K04\_00297" 7554 "s59E5H2" 0.00847894 "PBP superfamily domain protein"  
"JS1\_K04\_00297" 7554 "s63E6H2" 0.5454403 "PBP superfamily domain protein"  
"JS1\_K04\_00299" 7556 "s59E13H2" 0.02315104 "Molybdopterin molybdenumtransferase"  
"JS1\_K04\_00299" 7556 "s59E25H2" 0 "Molybdopterin molybdenumtransferase"  
"JS1\_K04\_00299" 7556 "s59E5H2" 0.0101157 "Molybdopterin molybdenumtransferase"  
"JS1\_K04\_00299" 7556 "s63E6H2" 0.5215262 "Molybdopterin molybdenumtransferase"  
"JS1\_K04\_00300" 7557 "s59E13H2" 0 "YcfA-like protein"  
"JS1\_K04\_00300" 7557 "s59E25H2" 0 "YcfA-like protein"  
"JS1\_K04\_00300" 7557 "s59E5H2" 0.008298863 "YcfA-like protein"  
"JS1\_K04\_00300" 7557 "s63E6H2" 0.4206651 "YcfA-like protein"

"JS1\_K04\_00301" 7558 "s59E13H2" 0 "hypothetical protein"  
"JS1\_K04\_00301" 7558 "s59E25H2" 0 "hypothetical protein"  
"JS1\_K04\_00301" 7558 "s59E5H2" 0 "hypothetical protein"  
"JS1\_K04\_00301" 7558 "s63E6H2" 0 "hypothetical protein"  
"JS1\_K04\_00303" 7560 "s59E13H2" 0 "hypothetical protein"  
"JS1\_K04\_00303" 7560 "s59E25H2" 0 "hypothetical protein"  
"JS1\_K04\_00303" 7560 "s59E5H2" 0 "hypothetical protein"  
"JS1\_K04\_00303" 7560 "s63E6H2" 0.006687218 "hypothetical protein"  
"JS1\_K04\_00304" 7561 "s59E13H2" 0 "chromosome segregation protein"  
"JS1\_K04\_00304" 7561 "s59E25H2" 0 "chromosome segregation protein"  
"JS1\_K04\_00304" 7561 "s59E5H2" 0 "chromosome segregation protein"  
"JS1\_K04\_00304" 7561 "s63E6H2" 0 "chromosome segregation protein"  
"JS1\_K04\_00305" 7562 "s59E13H2" 0.0001586553 "DNA-dependent helicase II"  
"JS1\_K04\_00305" 7562 "s59E25H2" 0 "DNA-dependent helicase II"  
"JS1\_K04\_00305" 7562 "s59E5H2" 0 "DNA-dependent helicase II"  
"JS1\_K04\_00305" 7562 "s63E6H2" 0 "DNA-dependent helicase II"  
"JS1\_K04\_00307" 7564 "s59E13H2" 0.001410016 "Deoxycytidine triphosphate deaminase"  
"JS1\_K04\_00307" 7564 "s59E25H2" 0 "Deoxycytidine triphosphate deaminase"  
"JS1\_K04\_00307" 7564 "s59E5H2" 0 "Deoxycytidine triphosphate deaminase"  
"JS1\_K04\_00307" 7564 "s63E6H2" 0 "Deoxycytidine triphosphate deaminase"  
"JS1\_K04\_00308" 7565 "s59E13H2" 0 "putative methyltransferase YcgJ"  
"JS1\_K04\_00308" 7565 "s59E25H2" 0 "putative methyltransferase YcgJ"  
"JS1\_K04\_00308" 7565 "s59E5H2" 0 "putative methyltransferase YcgJ"  
"JS1\_K04\_00308" 7565 "s63E6H2" 0 "putative methyltransferase YcgJ"  
"JS1\_K04\_00310" 7567 "s59E13H2" 0 "hypothetical protein"  
"JS1\_K04\_00310" 7567 "s59E25H2" 0 "hypothetical protein"  
"JS1\_K04\_00310" 7567 "s59E5H2" 0.006221608 "hypothetical protein"  
"JS1\_K04\_00310" 7567 "s63E6H2" 0.004172846 "hypothetical protein"  
"JS1\_K04\_00311" 7568 "s59E13H2" 0.008536409 "hypothetical protein"  
"JS1\_K04\_00311" 7568 "s59E25H2" 0 "hypothetical protein"  
"JS1\_K04\_00311" 7568 "s59E5H2" 0 "hypothetical protein"  
"JS1\_K04\_00311" 7568 "s63E6H2" 0 "hypothetical protein"  
"JS1\_K04\_00312" 7569 "s59E13H2" 0.1577679 "hypothetical protein"  
"JS1\_K04\_00312" 7569 "s59E25H2" 0 "hypothetical protein"  
"JS1\_K04\_00312" 7569 "s59E5H2" 0 "hypothetical protein"  
"JS1\_K04\_00312" 7569 "s63E6H2" 0 "hypothetical protein"  
"JS1\_K04\_00313" 7570 "s59E13H2" 0.008020224 "hypothetical protein"  
"JS1\_K04\_00313" 7570 "s59E25H2" 0 "hypothetical protein"  
"JS1\_K04\_00313" 7570 "s59E5H2" 0 "hypothetical protein"  
"JS1\_K04\_00313" 7570 "s63E6H2" 0 "hypothetical protein"  
"JS1\_K04\_00314" 7571 "s59E13H2" 0.004717941 "hypothetical protein"  
"JS1\_K04\_00314" 7571 "s59E25H2" 0 "hypothetical protein"  
"JS1\_K04\_00314" 7571 "s59E5H2" 0 "hypothetical protein"  
"JS1\_K04\_00314" 7571 "s63E6H2" 0 "hypothetical protein"  
"JS1\_K04\_00315" 7572 "s59E13H2" 0 "NYN domain protein"  
"JS1\_K04\_00315" 7572 "s59E25H2" 0 "NYN domain protein"  
"JS1\_K04\_00315" 7572 "s59E5H2" 0.01357261 "NYN domain protein"



"JS1\_K04\_00315" 7572 "s63E6H2" 0 "NYN domain protein"  
"JS1\_K04\_00317" 7574 "s59E13H2" 0.06036767 "hypothetical protein"  
"JS1\_K04\_00317" 7574 "s59E25H2" 0 "hypothetical protein"  
"JS1\_K04\_00317" 7574 "s59E5H2" 0.6919007 "hypothetical protein"  
"JS1\_K04\_00317" 7574 "s63E6H2" 2.501765e-05 "hypothetical protein"  
"JS1\_K04\_00319" 7576 "s59E13H2" 0.1093574 "Plasmid stabilisation system protein"  
"JS1\_K04\_00319" 7576 "s59E25H2" 0 "Plasmid stabilisation system protein"  
"JS1\_K04\_00319" 7576 "s59E5H2" 0.6631612 "Plasmid stabilisation system protein"  
"JS1\_K04\_00319" 7576 "s63E6H2" 0.001118758 "Plasmid stabilisation system protein"  
"JS1\_K04\_00320" 7577 "s59E13H2" 0.1063719 "hypothetical protein"  
"JS1\_K04\_00320" 7577 "s59E25H2" 0 "hypothetical protein"  
"JS1\_K04\_00320" 7577 "s59E5H2" 1.940042 "hypothetical protein"  
"JS1\_K04\_00320" 7577 "s63E6H2" 0.302277 "hypothetical protein"  
"JS1\_K04\_00321" 7578 "s59E13H2" 0.0474076 "Cyclic di-GMP phosphodiesterase response regulator RpfG"  
"JS1\_K04\_00321" 7578 "s59E25H2" 0 "Cyclic di-GMP phosphodiesterase response regulator RpfG"  
"JS1\_K04\_00321" 7578 "s59E5H2" 0.3144073 "Cyclic di-GMP phosphodiesterase response regulator RpfG"  
"JS1\_K04\_00321" 7578 "s63E6H2" 0.1234669 "Cyclic di-GMP phosphodiesterase response regulator RpfG"  
"JS1\_K04\_00322" 7579 "s59E13H2" 0.01489787 "Cyclic di-GMP phosphodiesterase response regulator RpfG"  
"JS1\_K04\_00322" 7579 "s59E25H2" 0 "Cyclic di-GMP phosphodiesterase response regulator RpfG"  
"JS1\_K04\_00322" 7579 "s59E5H2" 0.4322316 "Cyclic di-GMP phosphodiesterase response regulator RpfG"  
"JS1\_K04\_00322" 7579 "s63E6H2" 0.01194222 "Cyclic di-GMP phosphodiesterase response regulator RpfG"  
"JS1\_K04\_00323" 7580 "s59E13H2" 0.01389569 "Cyclic di-GMP phosphodiesterase response regulator RpfG"  
"JS1\_K04\_00323" 7580 "s59E25H2" 0 "Cyclic di-GMP phosphodiesterase response regulator RpfG"  
"JS1\_K04\_00323" 7580 "s59E5H2" 0.5038274 "Cyclic di-GMP phosphodiesterase response regulator RpfG"  
"JS1\_K04\_00323" 7580 "s63E6H2" 0.009716934 "Cyclic di-GMP phosphodiesterase response regulator RpfG"  
"JS1\_K04\_00324" 7581 "s59E13H2" 0.01790491 "putative diguanylate cyclase YcdT"  
"JS1\_K04\_00324" 7581 "s59E25H2" 0 "putative diguanylate cyclase YcdT"  
"JS1\_K04\_00324" 7581 "s59E5H2" 1.881642 "putative diguanylate cyclase YcdT"  
"JS1\_K04\_00324" 7581 "s63E6H2" 0.03235716 "putative diguanylate cyclase YcdT"  
"JS1\_K04\_00325" 7582 "s59E13H2" 0.009204602 "Cyclic di-GMP phosphodiesterase response regulator RpfG"  
"JS1\_K04\_00325" 7582 "s59E25H2" 0 "Cyclic di-GMP phosphodiesterase response regulator RpfG"  
"JS1\_K04\_00325" 7582 "s59E5H2" 1.865905 "Cyclic di-GMP phosphodiesterase response regulator RpfG"  
"JS1\_K04\_00325" 7582 "s63E6H2" 0.005301529 "Cyclic di-GMP phosphodiesterase response regulator RpfG"  
"JS1\_K04\_00326" 7583 "s59E13H2" 0 "hypothetical protein"  
"JS1\_K04\_00326" 7583 "s59E25H2" 0 "hypothetical protein"  
"JS1\_K04\_00326" 7583 "s59E5H2" 0.1304238 "hypothetical protein"  
"JS1\_K04\_00326" 7583 "s63E6H2" 0.03707598 "hypothetical protein"  
"JS1\_K04\_00327" 7584 "s59E13H2" 0 "hypothetical protein"  
"JS1\_K04\_00327" 7584 "s59E25H2" 0 "hypothetical protein"  
"JS1\_K04\_00327" 7584 "s59E5H2" 0.1113676 "hypothetical protein"  
"JS1\_K04\_00327" 7584 "s63E6H2" 0.1264022 "hypothetical protein"  
"JS1\_K04\_00329" 7586 "s59E13H2" 0.003472302 "Transcriptional regulatory protein ZraR"  
"JS1\_K04\_00329" 7586 "s59E25H2" 0 "Transcriptional regulatory protein ZraR"  
"JS1\_K04\_00329" 7586 "s59E5H2" 0.1496448 "Transcriptional regulatory protein ZraR"  
"JS1\_K04\_00329" 7586 "s63E6H2" 0.1414659 "Transcriptional regulatory protein ZraR"  
"JS1\_K04\_00330" 7587 "s59E13H2" 0 "Sporulation kinase A"  
"JS1\_K04\_00330" 7587 "s59E25H2" 0 "Sporulation kinase A"

"JS1\_K04\_00330" 7587 "s59E5H2" 0.1924641 "Sporulation kinase A"  
"JS1\_K04\_00330" 7587 "s63E6H2" 0.09121446 "Sporulation kinase A"  
"JS1\_K04\_00331" 7588 "s59E13H2" 0.003939618 "Gas vesicle structural protein"  
"JS1\_K04\_00331" 7588 "s59E25H2" 0 "Gas vesicle structural protein"  
"JS1\_K04\_00331" 7588 "s59E5H2" 0.3283791 "Gas vesicle structural protein"  
"JS1\_K04\_00331" 7588 "s63E6H2" 0.1090538 "Gas vesicle structural protein"  
"JS1\_K04\_00332" 7589 "s59E13H2" 0.0009910583 "Gas vesicle synthesis protein GvpL/GvpF"  
"JS1\_K04\_00332" 7589 "s59E25H2" 0 "Gas vesicle synthesis protein GvpL/GvpF"  
"JS1\_K04\_00332" 7589 "s59E5H2" 0.1874415 "Gas vesicle synthesis protein GvpL/GvpF"  
"JS1\_K04\_00332" 7589 "s63E6H2" 0.002129738 "Gas vesicle synthesis protein GvpL/GvpF"  
"JS1\_K04\_00333" 7590 "s59E13H2" 0 "Gas vesicle protein K"  
"JS1\_K04\_00333" 7590 "s59E25H2" 0 "Gas vesicle protein K"  
"JS1\_K04\_00333" 7590 "s59E5H2" 0.09408347 "Gas vesicle protein K"  
"JS1\_K04\_00333" 7590 "s63E6H2" 0.03088141 "Gas vesicle protein K"  
"JS1\_K04\_00334" 7591 "s59E13H2" 0 "Gas vesicle structural protein"  
"JS1\_K04\_00334" 7591 "s59E25H2" 0 "Gas vesicle structural protein"  
"JS1\_K04\_00334" 7591 "s59E5H2" 0.2147154 "Gas vesicle structural protein"  
"JS1\_K04\_00334" 7591 "s63E6H2" 0.7690808 "Gas vesicle structural protein"  
"JS1\_K04\_00335" 7592 "s59E13H2" 0 "Gas vesicle synthesis protein GvpO"  
"JS1\_K04\_00335" 7592 "s59E25H2" 0 "Gas vesicle synthesis protein GvpO"  
"JS1\_K04\_00335" 7592 "s59E5H2" 0.2833369 "Gas vesicle synthesis protein GvpO"  
"JS1\_K04\_00335" 7592 "s63E6H2" 0.09167292 "Gas vesicle synthesis protein GvpO"  
"JS1\_K04\_00336" 7593 "s59E13H2" 0 "Putative arsenical pump-driving ATPase"  
"JS1\_K04\_00336" 7593 "s59E25H2" 0 "Putative arsenical pump-driving ATPase"  
"JS1\_K04\_00336" 7593 "s59E5H2" 0.8232939 "Putative arsenical pump-driving ATPase"  
"JS1\_K04\_00336" 7593 "s63E6H2" 0.15397 "Putative arsenical pump-driving ATPase"  
"JS1\_K04\_00337" 7594 "s59E13H2" 0 "Cadherin-like beta sandwich domain protein"  
"JS1\_K04\_00337" 7594 "s59E25H2" 0 "Cadherin-like beta sandwich domain protein"  
"JS1\_K04\_00337" 7594 "s59E5H2" 0 "Cadherin-like beta sandwich domain protein"  
"JS1\_K04\_00337" 7594 "s63E6H2" 0 "Cadherin-like beta sandwich domain protein"  
"JS1\_K04\_00338" 7595 "s59E13H2" 0.002290653 "Putative glycoside hydrolase"  
"JS1\_K04\_00338" 7595 "s59E25H2" 0 "Putative glycoside hydrolase"  
"JS1\_K04\_00338" 7595 "s59E5H2" 0 "Putative glycoside hydrolase"  
"JS1\_K04\_00338" 7595 "s63E6H2" 0 "Putative glycoside hydrolase"  
"JS1\_K04\_00340" 7597 "s59E13H2" 0.0007613086 "hypothetical protein"  
"JS1\_K04\_00340" 7597 "s59E25H2" 0 "hypothetical protein"  
"JS1\_K04\_00340" 7597 "s59E5H2" 0.06976691 "hypothetical protein"  
"JS1\_K04\_00340" 7597 "s63E6H2" 0.01975013 "hypothetical protein"  
"JS1\_K04\_00342" 7599 "s59E13H2" 0.07484653 "Ubiquinone biosynthesis O-methyltransferase"  
"JS1\_K04\_00342" 7599 "s59E25H2" 0 "Ubiquinone biosynthesis O-methyltransferase"  
"JS1\_K04\_00342" 7599 "s59E5H2" 0.02705582 "Ubiquinone biosynthesis O-methyltransferase"  
"JS1\_K04\_00342" 7599 "s63E6H2" 0.1300043 "Ubiquinone biosynthesis O-methyltransferase"  
"JS1\_K04\_00343" 7600 "s59E13H2" 0.006550255 "Trehalose/maltose transport system permease protein MalG"  
"JS1\_K04\_00343" 7600 "s59E25H2" 0 "Trehalose/maltose transport system permease protein MalG"  
"JS1\_K04\_00343" 7600 "s59E5H2" 0.007180021 "Trehalose/maltose transport system permease protein MalG"  
"JS1\_K04\_00343" 7600 "s63E6H2" 0 "Trehalose/maltose transport system permease protein MalG"  
"JS1\_K04\_00344" 7601 "s59E13H2" 0.005974968 "Trehalose/maltose transport system permease protein MalF"

"JS1\_K04\_00344" 7601 "s59E25H2" 0 "Trehalose/maltose transport system permease protein MalF"  
"JS1\_K04\_00344" 7601 "s59E5H2" 0.5701923 "Trehalose/maltose transport system permease protein MalF"  
"JS1\_K04\_00344" 7601 "s63E6H2" 0 "Trehalose/maltose transport system permease protein MalF"  
"JS1\_K04\_00345" 7602 "s59E13H2" 0.007010665 "Trehalose/maltose-binding protein MalE precursor"  
"JS1\_K04\_00345" 7602 "s59E25H2" 0 "Trehalose/maltose-binding protein MalE precursor"  
"JS1\_K04\_00345" 7602 "s59E5H2" 0 "Trehalose/maltose-binding protein MalE precursor"  
"JS1\_K04\_00345" 7602 "s63E6H2" 0 "Trehalose/maltose-binding protein MalE precursor"  
"JS1\_K04\_00347" 7604 "s59E13H2" 0.004429432 "Glutamine--fructose-6-phosphate aminotransferase [isomerizing]"  
"JS1\_K04\_00347" 7604 "s59E25H2" 0 "Glutamine--fructose-6-phosphate aminotransferase [isomerizing]"  
"JS1\_K04\_00347" 7604 "s59E5H2" 0.1994769 "Glutamine--fructose-6-phosphate aminotransferase [isomerizing]"  
"JS1\_K04\_00347" 7604 "s63E6H2" 0.6002225 "Glutamine--fructose-6-phosphate aminotransferase [isomerizing]"  
"JS1\_K04\_00348" 7605 "s59E13H2" 0.2735635 "Pyrophosphate--fructose 6-phosphate 1-phosphotransferase"  
"JS1\_K04\_00348" 7605 "s59E25H2" 0 "Pyrophosphate--fructose 6-phosphate 1-phosphotransferase"  
"JS1\_K04\_00348" 7605 "s59E5H2" 0.9277839 "Pyrophosphate--fructose 6-phosphate 1-phosphotransferase"  
"JS1\_K04\_00348" 7605 "s63E6H2" 0.4063296 "Pyrophosphate--fructose 6-phosphate 1-phosphotransferase"  
"JS1\_K04\_00349" 7606 "s59E13H2" 0.1844165 "PAS fold protein"  
"JS1\_K04\_00349" 7606 "s59E25H2" 0 "PAS fold protein"  
"JS1\_K04\_00349" 7606 "s59E5H2" 0.5013835 "PAS fold protein"  
"JS1\_K04\_00349" 7606 "s63E6H2" 0.006824643 "PAS fold protein"  
"JS1\_K04\_00350" 7607 "s59E13H2" 0.09262814 "Nitrogen fixation regulatory protein"  
"JS1\_K04\_00350" 7607 "s59E25H2" 0 "Nitrogen fixation regulatory protein"  
"JS1\_K04\_00350" 7607 "s59E5H2" 0.3619961 "Nitrogen fixation regulatory protein"  
"JS1\_K04\_00350" 7607 "s63E6H2" 0 "Nitrogen fixation regulatory protein"  
"JS1\_K04\_00352" 7609 "s59E13H2" 0.2253398 "Cob(II)yrinic acid a,c-diamide adenosyltransferase"  
"JS1\_K04\_00352" 7609 "s59E25H2" 0.3699422 "Cob(II)yrinic acid a,c-diamide adenosyltransferase"  
"JS1\_K04\_00352" 7609 "s59E5H2" 0.6267912 "Cob(II)yrinic acid a,c-diamide adenosyltransferase"  
"JS1\_K04\_00352" 7609 "s63E6H2" 3.613558 "Cob(II)yrinic acid a,c-diamide adenosyltransferase"  
"JS1\_K04\_00353" 7610 "s59E13H2" 0.3018137 "GMP synthase [glutamine-hydrolyzing]"  
"JS1\_K04\_00353" 7610 "s59E25H2" 0 "GMP synthase [glutamine-hydrolyzing]"  
"JS1\_K04\_00353" 7610 "s59E5H2" 0.8493179 "GMP synthase [glutamine-hydrolyzing]"  
"JS1\_K04\_00353" 7610 "s63E6H2" 2.671299 "GMP synthase [glutamine-hydrolyzing]"  
"JS1\_K04\_00354" 7611 "s59E13H2" 0.8595335 "N5-carboxyaminoimidazole ribonucleotide mutase"  
"JS1\_K04\_00354" 7611 "s59E25H2" 0 "N5-carboxyaminoimidazole ribonucleotide mutase"  
"JS1\_K04\_00354" 7611 "s59E5H2" 0.7267513 "N5-carboxyaminoimidazole ribonucleotide mutase"  
"JS1\_K04\_00354" 7611 "s63E6H2" 0.1228994 "N5-carboxyaminoimidazole ribonucleotide mutase"  
"JS1\_K04\_00355" 7612 "s59E13H2" 0.2441858 "hypothetical protein"  
"JS1\_K04\_00355" 7612 "s59E25H2" 0 "hypothetical protein"  
"JS1\_K04\_00355" 7612 "s59E5H2" 1.025045 "hypothetical protein"  
"JS1\_K04\_00355" 7612 "s63E6H2" 0.1158805 "hypothetical protein"  
"JS1\_K04\_00356" 7613 "s59E13H2" 0.06648317 "hypothetical protein"  
"JS1\_K04\_00356" 7613 "s59E25H2" 0 "hypothetical protein"  
"JS1\_K04\_00356" 7613 "s59E5H2" 0.3877794 "hypothetical protein"  
"JS1\_K04\_00356" 7613 "s63E6H2" 0.03215431 "hypothetical protein"  
"JS1\_K04\_00357" 7614 "s59E13H2" 0.0256433 "hypothetical protein"  
"JS1\_K04\_00357" 7614 "s59E25H2" 0 "hypothetical protein"  
"JS1\_K04\_00357" 7614 "s59E5H2" 0.4085844 "hypothetical protein"  
"JS1\_K04\_00357" 7614 "s63E6H2" 0.04040671 "hypothetical protein"

"JS1\_K04\_00358" 7615 "s59E13H2" 0.6070063 "ATP-dependent RecD-like DNA helicase"  
"JS1\_K04\_00358" 7615 "s59E25H2" 0 "ATP-dependent RecD-like DNA helicase"  
"JS1\_K04\_00358" 7615 "s59E5H2" 0.7249578 "ATP-dependent RecD-like DNA helicase"  
"JS1\_K04\_00358" 7615 "s63E6H2" 0.1363335 "ATP-dependent RecD-like DNA helicase"  
"JS1\_K04\_00359" 7616 "s59E13H2" 0.2675285 "2,3-bisphosphoglycerate-independent phosphoglycerate mutase"  
"JS1\_K04\_00359" 7616 "s59E25H2" 0 "2,3-bisphosphoglycerate-independent phosphoglycerate mutase"  
"JS1\_K04\_00359" 7616 "s59E5H2" 0.4440459 "2,3-bisphosphoglycerate-independent phosphoglycerate mutase"  
"JS1\_K04\_00359" 7616 "s63E6H2" 0.07466615 "2,3-bisphosphoglycerate-independent phosphoglycerate mutase"  
"JS1\_K04\_00360" 7617 "s59E13H2" 6.119333 "Murein hydrolase activator NlpD precursor"  
"JS1\_K04\_00360" 7617 "s59E25H2" 0 "Murein hydrolase activator NlpD precursor"  
"JS1\_K04\_00360" 7617 "s59E5H2" 0.8955907 "Murein hydrolase activator NlpD precursor"  
"JS1\_K04\_00360" 7617 "s63E6H2" 0.2158393 "Murein hydrolase activator NlpD precursor"  
"JS1\_K04\_00361" 7618 "s59E13H2" 4.578605 "Periplasmic dipeptide transport protein precursor"  
"JS1\_K04\_00361" 7618 "s59E25H2" 0 "Periplasmic dipeptide transport protein precursor"  
"JS1\_K04\_00361" 7618 "s59E5H2" 0.2492046 "Periplasmic dipeptide transport protein precursor"  
"JS1\_K04\_00361" 7618 "s63E6H2" 0.05659503 "Periplasmic dipeptide transport protein precursor"  
"JS1\_K04\_00362" 7619 "s59E13H2" 4.480246 "Dipeptide transport system permease protein DppB"  
"JS1\_K04\_00362" 7619 "s59E25H2" 0 "Dipeptide transport system permease protein DppB"  
"JS1\_K04\_00362" 7619 "s59E5H2" 0.6803766 "Dipeptide transport system permease protein DppB"  
"JS1\_K04\_00362" 7619 "s63E6H2" 0.2592378 "Dipeptide transport system permease protein DppB"  
"JS1\_K04\_00363" 7620 "s59E13H2" 4.603191 "Glutathione transport system permease protein GsiD"  
"JS1\_K04\_00363" 7620 "s59E25H2" 0.2278912 "Glutathione transport system permease protein GsiD"  
"JS1\_K04\_00363" 7620 "s59E5H2" 0.8653426 "Glutathione transport system permease protein GsiD"  
"JS1\_K04\_00363" 7620 "s63E6H2" 0.2083708 "Glutathione transport system permease protein GsiD"  
"JS1\_K04\_00364" 7621 "s59E13H2" 6.969087 "Oligopeptide transport ATP-binding protein OppD"  
"JS1\_K04\_00364" 7621 "s59E25H2" 0.175813 "Oligopeptide transport ATP-binding protein OppD"  
"JS1\_K04\_00364" 7621 "s59E5H2" 2.052201 "Oligopeptide transport ATP-binding protein OppD"  
"JS1\_K04\_00364" 7621 "s63E6H2" 0.3868319 "Oligopeptide transport ATP-binding protein OppD"  
"JS1\_K04\_00365" 7622 "s59E13H2" 0 "hypothetical protein"  
"JS1\_K04\_00365" 7622 "s59E25H2" 0 "hypothetical protein"  
"JS1\_K04\_00365" 7622 "s59E5H2" 0 "hypothetical protein"  
"JS1\_K04\_00365" 7622 "s63E6H2" 0 "hypothetical protein"  
"JS1\_K04\_00366" 7623 "s59E13H2" 0 "hypothetical protein"  
"JS1\_K04\_00366" 7623 "s59E25H2" 0 "hypothetical protein"  
"JS1\_K04\_00366" 7623 "s59E5H2" 0 "hypothetical protein"  
"JS1\_K04\_00366" 7623 "s63E6H2" 0 "hypothetical protein"  
"JS1\_K04\_00367" 7624 "s59E13H2" 0 "hypothetical protein"  
"JS1\_K04\_00367" 7624 "s59E25H2" 0 "hypothetical protein"  
"JS1\_K04\_00367" 7624 "s59E5H2" 0 "hypothetical protein"  
"JS1\_K04\_00367" 7624 "s63E6H2" 0 "hypothetical protein"  
"JS1\_K04\_00368" 7625 "s59E13H2" 8.943473 "Acryloyl-CoA reductase electron transfer subunit beta"  
"JS1\_K04\_00368" 7625 "s59E25H2" 0 "Acryloyl-CoA reductase electron transfer subunit beta"  
"JS1\_K04\_00368" 7625 "s59E5H2" 0.01697796 "Acryloyl-CoA reductase electron transfer subunit beta"  
"JS1\_K04\_00368" 7625 "s63E6H2" 0.7526019 "Acryloyl-CoA reductase electron transfer subunit beta"  
"JS1\_K04\_00369" 7626 "s59E13H2" 7.081347 "Acryloyl-CoA reductase electron transfer subunit gamma"  
"JS1\_K04\_00369" 7626 "s59E25H2" 0 "Acryloyl-CoA reductase electron transfer subunit gamma"  
"JS1\_K04\_00369" 7626 "s59E5H2" 0.03266543 "Acryloyl-CoA reductase electron transfer subunit gamma"

"JS1\_K04\_00369" 7626 "s63E6H2" 0.6343708 "Acryloyl-CoA reductase electron transfer subunit gamma"  
"JS1\_K04\_00370" 7627 "s59E13H2" 5.76743 "Acyl-CoA dehydrogenase"  
"JS1\_K04\_00370" 7627 "s59E25H2" 0 "Acyl-CoA dehydrogenase"  
"JS1\_K04\_00370" 7627 "s59E5H2" 0.08163564 "Acyl-CoA dehydrogenase"  
"JS1\_K04\_00370" 7627 "s63E6H2" 0.5862768 "Acyl-CoA dehydrogenase"  
"JS1\_K04\_00371" 7628 "s59E13H2" 4.209189 "Biotin transporter BioY"  
"JS1\_K04\_00371" 7628 "s59E25H2" 0 "Biotin transporter BioY"  
"JS1\_K04\_00371" 7628 "s59E5H2" 0.08970999 "Biotin transporter BioY"  
"JS1\_K04\_00371" 7628 "s63E6H2" 0.4505334 "Biotin transporter BioY"  
"JS1\_K04\_00372" 7629 "s59E13H2" 6.533027 "Pyruvate carboxylase subunit B"  
"JS1\_K04\_00372" 7629 "s59E25H2" 0 "Pyruvate carboxylase subunit B"  
"JS1\_K04\_00372" 7629 "s59E5H2" 0.4104349 "Pyruvate carboxylase subunit B"  
"JS1\_K04\_00372" 7629 "s63E6H2" 0.641047 "Pyruvate carboxylase subunit B"  
"JS1\_K04\_00373" 7630 "s59E13H2" 12.2179 "Pyruvate carboxylase subunit A"  
"JS1\_K04\_00373" 7630 "s59E25H2" 0 "Pyruvate carboxylase subunit A"  
"JS1\_K04\_00373" 7630 "s59E5H2" 0.8160268 "Pyruvate carboxylase subunit A"  
"JS1\_K04\_00373" 7630 "s63E6H2" 1.438017 "Pyruvate carboxylase subunit A"  
"JS1\_K04\_00374" 7631 "s59E13H2" 7.956654 "Thermonuclease precursor"  
"JS1\_K04\_00374" 7631 "s59E25H2" 0 "Thermonuclease precursor"  
"JS1\_K04\_00374" 7631 "s59E5H2" 0.3950793 "Thermonuclease precursor"  
"JS1\_K04\_00374" 7631 "s63E6H2" 1.365888 "Thermonuclease precursor"  
"JS1\_K04\_00375" 7632 "s59E13H2" 6.066015 "YacP-like NYN domain protein"  
"JS1\_K04\_00375" 7632 "s59E25H2" 0 "YacP-like NYN domain protein"  
"JS1\_K04\_00375" 7632 "s59E5H2" 0.2059826 "YacP-like NYN domain protein"  
"JS1\_K04\_00375" 7632 "s63E6H2" 1.004883 "YacP-like NYN domain protein"  
"JS1\_K04\_00376" 7633 "s59E13H2" 4.479438 "Putative TrmH family tRNA/rRNA methyltransferase"  
"JS1\_K04\_00376" 7633 "s59E25H2" 0 "Putative TrmH family tRNA/rRNA methyltransferase"  
"JS1\_K04\_00376" 7633 "s59E5H2" 0.06547529 "Putative TrmH family tRNA/rRNA methyltransferase"  
"JS1\_K04\_00376" 7633 "s63E6H2" 0.8595361 "Putative TrmH family tRNA/rRNA methyltransferase"  
"JS1\_K04\_00377" 7634 "s59E13H2" 5.209906 "Cysteine--tRNA ligase"  
"JS1\_K04\_00377" 7634 "s59E25H2" 0 "Cysteine--tRNA ligase"  
"JS1\_K04\_00377" 7634 "s59E5H2" 0.05033543 "Cysteine--tRNA ligase"  
"JS1\_K04\_00377" 7634 "s63E6H2" 0.8103689 "Cysteine--tRNA ligase"  
"JS1\_K04\_00378" 7635 "s59E13H2" 6.960304 "Serine acetyltransferase"  
"JS1\_K04\_00378" 7635 "s59E25H2" 0 "Serine acetyltransferase"  
"JS1\_K04\_00378" 7635 "s59E5H2" 0.02954799 "Serine acetyltransferase"  
"JS1\_K04\_00378" 7635 "s63E6H2" 0.8301112 "Serine acetyltransferase"  
"JS1\_K04\_00379" 7636 "s59E13H2" 3.942332 "Glutamate--tRNA ligase"  
"JS1\_K04\_00379" 7636 "s59E25H2" 0 "Glutamate--tRNA ligase"  
"JS1\_K04\_00379" 7636 "s59E5H2" 0.02545842 "Glutamate--tRNA ligase"  
"JS1\_K04\_00379" 7636 "s63E6H2" 0.6907014 "Glutamate--tRNA ligase"  
"JS1\_K04\_00380" 7637 "s59E13H2" 3.345833 "2-C-methyl-D-erythritol 2,4-cyclodiphosphate synthase"  
"JS1\_K04\_00380" 7637 "s59E25H2" 0 "2-C-methyl-D-erythritol 2,4-cyclodiphosphate synthase"  
"JS1\_K04\_00380" 7637 "s59E5H2" 0.01350978 "2-C-methyl-D-erythritol 2,4-cyclodiphosphate synthase"  
"JS1\_K04\_00380" 7637 "s63E6H2" 0.6211007 "2-C-methyl-D-erythritol 2,4-cyclodiphosphate synthase"  
"JS1\_K04\_00381" 7638 "s59E13H2" 2.743507 "2-C-methyl-D-erythritol 4-phosphate cytidylyltransferase"  
"JS1\_K04\_00381" 7638 "s59E25H2" 0 "2-C-methyl-D-erythritol 4-phosphate cytidylyltransferase"

"JS1\_K04\_00381" 7638 "s59E5H2" 0.05305865 "2-C-methyl-D-erythritol 4-phosphate cytidyltransferase"  
"JS1\_K04\_00381" 7638 "s63E6H2" 0.4730474 "2-C-methyl-D-erythritol 4-phosphate cytidyltransferase"  
"JS1\_K04\_00382" 7639 "s59E13H2" 2.784844 "DNA integrity scanning protein DisA"  
"JS1\_K04\_00382" 7639 "s59E25H2" 0 "DNA integrity scanning protein DisA"  
"JS1\_K04\_00382" 7639 "s59E5H2" 0.04019341 "DNA integrity scanning protein DisA"  
"JS1\_K04\_00382" 7639 "s63E6H2" 0.440984 "DNA integrity scanning protein DisA"  
"JS1\_K04\_00383" 7640 "s59E13H2" 2.416854 "ATP-dependent Clp protease ATP-binding subunit ClpC1"  
"JS1\_K04\_00383" 7640 "s59E25H2" 0 "ATP-dependent Clp protease ATP-binding subunit ClpC1"  
"JS1\_K04\_00383" 7640 "s59E5H2" 0.01869017 "ATP-dependent Clp protease ATP-binding subunit ClpC1"  
"JS1\_K04\_00383" 7640 "s63E6H2" 0.1719039 "ATP-dependent Clp protease ATP-binding subunit ClpC1"  
"JS1\_K04\_00384" 7641 "s59E13H2" 1.73622 "Putative ATP:guanido phosphotransferase"  
"JS1\_K04\_00384" 7641 "s59E25H2" 0 "Putative ATP:guanido phosphotransferase"  
"JS1\_K04\_00384" 7641 "s59E5H2" 0 "Putative ATP:guanido phosphotransferase"  
"JS1\_K04\_00384" 7641 "s63E6H2" 0.03272039 "Putative ATP:guanido phosphotransferase"  
"JS1\_K04\_00385" 7642 "s59E13H2" 1.50559 "hypothetical protein"  
"JS1\_K04\_00385" 7642 "s59E25H2" 0 "hypothetical protein"  
"JS1\_K04\_00385" 7642 "s59E5H2" 0 "hypothetical protein"  
"JS1\_K04\_00385" 7642 "s63E6H2" 0.02503767 "hypothetical protein"  
"JS1\_K04\_00386" 7643 "s59E13H2" 0.9608312 "Lysine--tRNA ligase"  
"JS1\_K04\_00386" 7643 "s59E25H2" 0 "Lysine--tRNA ligase"  
"JS1\_K04\_00386" 7643 "s59E5H2" 0.02239207 "Lysine--tRNA ligase"  
"JS1\_K04\_00386" 7643 "s63E6H2" 0.01842421 "Lysine--tRNA ligase"  
"JS1\_K04\_00387" 7644 "s59E13H2" 0.01996017 "Transcription elongation factor GreA"  
"JS1\_K04\_00387" 7644 "s59E25H2" 0 "Transcription elongation factor GreA"  
"JS1\_K04\_00387" 7644 "s59E5H2" 0.02833589 "Transcription elongation factor GreA"  
"JS1\_K04\_00387" 7644 "s63E6H2" 0.01036597 "Transcription elongation factor GreA"  
"JS1\_K04\_00388" 7645 "s59E13H2" 0.006443709 "N5-carboxyaminoimidazole ribonucleotide mutase"  
"JS1\_K04\_00388" 7645 "s59E25H2" 0 "N5-carboxyaminoimidazole ribonucleotide mutase"  
"JS1\_K04\_00388" 7645 "s59E5H2" 0 "N5-carboxyaminoimidazole ribonucleotide mutase"  
"JS1\_K04\_00388" 7645 "s63E6H2" 0.01725097 "N5-carboxyaminoimidazole ribonucleotide mutase"  
"JS1\_K04\_00389" 7646 "s59E13H2" 0.002690574 "Phosphoribosylamine--glycine ligase"  
"JS1\_K04\_00389" 7646 "s59E25H2" 0 "Phosphoribosylamine--glycine ligase"  
"JS1\_K04\_00389" 7646 "s59E5H2" 0.003066405 "Phosphoribosylamine--glycine ligase"  
"JS1\_K04\_00389" 7646 "s63E6H2" 0.02223889 "Phosphoribosylamine--glycine ligase"  
"JS1\_K04\_00390" 7647 "s59E13H2" 0.002611618 "Adenylosuccinate synthetase"  
"JS1\_K04\_00390" 7647 "s59E25H2" 115.9029 "Adenylosuccinate synthetase"  
"JS1\_K04\_00390" 7647 "s59E5H2" 0.01776094 "Adenylosuccinate synthetase"  
"JS1\_K04\_00390" 7647 "s63E6H2" 0.01863126 "Adenylosuccinate synthetase"  
"JS1\_K04\_00391" 7648 "s59E13H2" 0.0008565273 "Replicative DNA helicase"  
"JS1\_K04\_00391" 7648 "s59E25H2" 0 "Replicative DNA helicase"  
"JS1\_K04\_00391" 7648 "s59E5H2" 0.01443338 "Replicative DNA helicase"  
"JS1\_K04\_00391" 7648 "s63E6H2" 0.01190904 "Replicative DNA helicase"  
"JS1\_K04\_00392" 7649 "s59E13H2" 0 "50S ribosomal protein L9"  
"JS1\_K04\_00392" 7649 "s59E25H2" 0 "50S ribosomal protein L9"  
"JS1\_K04\_00392" 7649 "s59E5H2" 0.03102891 "50S ribosomal protein L9"  
"JS1\_K04\_00392" 7649 "s63E6H2" 0.02996688 "50S ribosomal protein L9"  
"JS1\_K04\_00393" 7650 "s59E13H2" 0.08393223 "hypothetical protein"

"JS1\_K04\_00393" 7650 "s59E25H2" 0 "hypothetical protein"  
"JS1\_K04\_00393" 7650 "s59E5H2" 0 "hypothetical protein"  
"JS1\_K04\_00393" 7650 "s63E6H2" 0.008265863 "hypothetical protein"  
"JS1\_K04\_00394" 7651 "s59E13H2" 0.1222653 "30S ribosomal protein S18"  
"JS1\_K04\_00394" 7651 "s59E25H2" 0 "30S ribosomal protein S18"  
"JS1\_K04\_00394" 7651 "s59E5H2" 0.03470401 "30S ribosomal protein S18"  
"JS1\_K04\_00394" 7651 "s63E6H2" 0.01269772 "30S ribosomal protein S18"  
"JS1\_K04\_00395" 7652 "s59E13H2" 0.1372986 "Single-stranded DNA-binding protein"  
"JS1\_K04\_00395" 7652 "s59E25H2" 0 "Single-stranded DNA-binding protein"  
"JS1\_K04\_00395" 7652 "s59E5H2" 0.02826661 "Single-stranded DNA-binding protein"  
"JS1\_K04\_00395" 7652 "s63E6H2" 0.006858686 "Single-stranded DNA-binding protein"  
"JS1\_K04\_00396" 7653 "s59E13H2" 0.1513021 "30S ribosomal protein S6"  
"JS1\_K04\_00396" 7653 "s59E25H2" 0 "30S ribosomal protein S6"  
"JS1\_K04\_00396" 7653 "s59E5H2" 0.03994437 "30S ribosomal protein S6"  
"JS1\_K04\_00396" 7653 "s63E6H2" 0.01314046 "30S ribosomal protein S6"  
"JS1\_K04\_00397" 7654 "s59E13H2" 0.1033334 "putative MscS family protein YkuT"  
"JS1\_K04\_00397" 7654 "s59E25H2" 0 "putative MscS family protein YkuT"  
"JS1\_K04\_00397" 7654 "s59E5H2" 0.01654485 "putative MscS family protein YkuT"  
"JS1\_K04\_00397" 7654 "s63E6H2" 0.009500625 "putative MscS family protein YkuT"  
"JS1\_K04\_00398" 7655 "s59E13H2" 0.3113117 "Phosphoserine phosphatase 1"  
"JS1\_K04\_00398" 7655 "s59E25H2" 0 "Phosphoserine phosphatase 1"  
"JS1\_K04\_00398" 7655 "s59E5H2" 0.009390796 "Phosphoserine phosphatase 1"  
"JS1\_K04\_00398" 7655 "s63E6H2" 0.002260595 "Phosphoserine phosphatase 1"  
"JS1\_K04\_00399" 7656 "s59E13H2" 0.4152132 "Putative nicotinate phosphoribosyltransferase"  
"JS1\_K04\_00399" 7656 "s59E25H2" 0 "Putative nicotinate phosphoribosyltransferase"  
"JS1\_K04\_00399" 7656 "s59E5H2" 0.0162533 "Putative nicotinate phosphoribosyltransferase"  
"JS1\_K04\_00399" 7656 "s63E6H2" 0.001298993 "Putative nicotinate phosphoribosyltransferase"  
"JS1\_K04\_00400" 7657 "s59E13H2" 0.2763982 "Peroxyureidoacrylate/ureidoacrylate amidohydrolase RutB"  
"JS1\_K04\_00400" 7657 "s59E25H2" 0 "Peroxyureidoacrylate/ureidoacrylate amidohydrolase RutB"  
"JS1\_K04\_00400" 7657 "s59E5H2" 0 "Peroxyureidoacrylate/ureidoacrylate amidohydrolase RutB"  
"JS1\_K04\_00400" 7657 "s63E6H2" 0 "Peroxyureidoacrylate/ureidoacrylate amidohydrolase RutB"  
"JS1\_K04\_00401" 7658 "s59E13H2" 0.1949498 "Sporulation and spore germination"  
"JS1\_K04\_00401" 7658 "s59E25H2" 0 "Sporulation and spore germination"  
"JS1\_K04\_00401" 7658 "s59E5H2" 0.01110804 "Sporulation and spore germination"  
"JS1\_K04\_00401" 7658 "s63E6H2" 0 "Sporulation and spore germination"  
"JS1\_K04\_00402" 7659 "s59E13H2" 0.001087187 "R-phenyllactate dehydratase beta subunit"  
"JS1\_K04\_00402" 7659 "s59E25H2" 0 "R-phenyllactate dehydratase beta subunit"  
"JS1\_K04\_00402" 7659 "s59E5H2" 0.007657874 "R-phenyllactate dehydratase beta subunit"  
"JS1\_K04\_00402" 7659 "s63E6H2" 0 "R-phenyllactate dehydratase beta subunit"  
"JS1\_K04\_00403" 7660 "s59E13H2" 0.03588847 "R-phenyllactate dehydratase subunit alpha precursor"  
"JS1\_K04\_00403" 7660 "s59E25H2" 0 "R-phenyllactate dehydratase subunit alpha precursor"  
"JS1\_K04\_00403" 7660 "s59E5H2" 0.04414036 "R-phenyllactate dehydratase subunit alpha precursor"  
"JS1\_K04\_00403" 7660 "s63E6H2" 0.02942584 "R-phenyllactate dehydratase subunit alpha precursor"  
"JS1\_K04\_00404" 7661 "s59E13H2" 0.2112469 "R-phenyllactate dehydratase activator"  
"JS1\_K04\_00404" 7661 "s59E25H2" 0 "R-phenyllactate dehydratase activator"  
"JS1\_K04\_00404" 7661 "s59E5H2" 0.03041271 "R-phenyllactate dehydratase activator"  
"JS1\_K04\_00404" 7661 "s63E6H2" 0.01621929 "R-phenyllactate dehydratase activator"

"JS1\_K04\_00405" 7662 "s59E13H2" 0 "Cycloisomaltooligosaccharide glucanotransferase precursor"  
"JS1\_K04\_00405" 7662 "s59E25H2" 0 "Cycloisomaltooligosaccharide glucanotransferase precursor"  
"JS1\_K04\_00405" 7662 "s59E5H2" 0 "Cycloisomaltooligosaccharide glucanotransferase precursor"  
"JS1\_K04\_00405" 7662 "s63E6H2" 0.04256977 "Cycloisomaltooligosaccharide glucanotransferase precursor"  
"JS1\_K04\_00406" 7663 "s59E13H2" 0 "Trehalose/maltose transport system permease protein MalG"  
"JS1\_K04\_00406" 7663 "s59E25H2" 0 "Trehalose/maltose transport system permease protein MalG"  
"JS1\_K04\_00406" 7663 "s59E5H2" 0 "Trehalose/maltose transport system permease protein MalG"  
"JS1\_K04\_00406" 7663 "s63E6H2" 0.004757389 "Trehalose/maltose transport system permease protein MalG"  
"JS1\_K04\_00407" 7664 "s59E13H2" 0 "Lactose transport system permease protein LacF"  
"JS1\_K04\_00407" 7664 "s59E25H2" 0 "Lactose transport system permease protein LacF"  
"JS1\_K04\_00407" 7664 "s59E5H2" 0 "Lactose transport system permease protein LacF"  
"JS1\_K04\_00407" 7664 "s63E6H2" 0.03952196 "Lactose transport system permease protein LacF"  
"JS1\_K04\_00408" 7665 "s59E13H2" 0 "Maltotriose-binding protein precursor"  
"JS1\_K04\_00408" 7665 "s59E25H2" 0 "Maltotriose-binding protein precursor"  
"JS1\_K04\_00408" 7665 "s59E5H2" 0 "Maltotriose-binding protein precursor"  
"JS1\_K04\_00408" 7665 "s63E6H2" 0.02102479 "Maltotriose-binding protein precursor"  
"JS1\_K04\_00409" 7666 "s59E13H2" 0 "N-acetylglucosamine repressor"  
"JS1\_K04\_00409" 7666 "s59E25H2" 0 "N-acetylglucosamine repressor"  
"JS1\_K04\_00409" 7666 "s59E5H2" 0 "N-acetylglucosamine repressor"  
"JS1\_K04\_00409" 7666 "s63E6H2" 0.0009598878 "N-acetylglucosamine repressor"  
"JS1\_K04\_00410" 7667 "s59E13H2" 0.3441817 "D-allose transporter subunit"  
"JS1\_K04\_00410" 7667 "s59E25H2" 0 "D-allose transporter subunit"  
"JS1\_K04\_00410" 7667 "s59E5H2" 0.06838913 "D-allose transporter subunit"  
"JS1\_K04\_00410" 7667 "s63E6H2" 0.08378175 "D-allose transporter subunit"  
"JS1\_K04\_00411" 7668 "s59E13H2" 0.3671264 "Ribose transport system permease protein RbsC"  
"JS1\_K04\_00411" 7668 "s59E25H2" 0 "Ribose transport system permease protein RbsC"  
"JS1\_K04\_00411" 7668 "s59E5H2" 0.1166494 "Ribose transport system permease protein RbsC"  
"JS1\_K04\_00411" 7668 "s63E6H2" 0.03862461 "Ribose transport system permease protein RbsC"  
"JS1\_K04\_00412" 7669 "s59E13H2" 0.3990318 "Xylose import ATP-binding protein XylG"  
"JS1\_K04\_00412" 7669 "s59E25H2" 0 "Xylose import ATP-binding protein XylG"  
"JS1\_K04\_00412" 7669 "s59E5H2" 0.1421904 "Xylose import ATP-binding protein XylG"  
"JS1\_K04\_00412" 7669 "s63E6H2" 0.1212375 "Xylose import ATP-binding protein XylG"  
"JS1\_K04\_00413" 7670 "s59E13H2" 0.5659479 "methylcobalamin:coenzyme M methyltransferase"  
"JS1\_K04\_00413" 7670 "s59E25H2" 0 "methylcobalamin:coenzyme M methyltransferase"  
"JS1\_K04\_00413" 7670 "s59E5H2" 0.1539857 "methylcobalamin:coenzyme M methyltransferase"  
"JS1\_K04\_00413" 7670 "s63E6H2" 0.1264878 "methylcobalamin:coenzyme M methyltransferase"  
"JS1\_K04\_00414" 7671 "s59E13H2" 0.7346856 "Hydroxypyruvate isomerase"  
"JS1\_K04\_00414" 7671 "s59E25H2" 0 "Hydroxypyruvate isomerase"  
"JS1\_K04\_00414" 7671 "s59E5H2" 0.2333564 "Hydroxypyruvate isomerase"  
"JS1\_K04\_00414" 7671 "s63E6H2" 0.04294927 "Hydroxypyruvate isomerase"  
"JS1\_K04\_00415" 7672 "s59E13H2" 0.6355397 "Inositol 2-dehydrogenase"  
"JS1\_K04\_00415" 7672 "s59E25H2" 0 "Inositol 2-dehydrogenase"  
"JS1\_K04\_00415" 7672 "s59E5H2" 0.3031176 "Inositol 2-dehydrogenase"  
"JS1\_K04\_00415" 7672 "s63E6H2" 0.0999826 "Inositol 2-dehydrogenase"  
"JS1\_K04\_00416" 7673 "s59E13H2" 0.1828767 "Ribose operon repressor"  
"JS1\_K04\_00416" 7673 "s59E25H2" 0 "Ribose operon repressor"  
"JS1\_K04\_00416" 7673 "s59E5H2" 0.1997215 "Ribose operon repressor"



"JS1\_K04\_00416" 7673 "s63E6H2" 0.1266907 "Ribose operon repressor"  
"JS1\_K04\_00417" 7674 "s59E13H2" 1.06292 "putative L-threonine 3-dehydrogenase"  
"JS1\_K04\_00417" 7674 "s59E25H2" 0 "putative L-threonine 3-dehydrogenase"  
"JS1\_K04\_00417" 7674 "s59E5H2" 0.3998757 "putative L-threonine 3-dehydrogenase"  
"JS1\_K04\_00417" 7674 "s63E6H2" 0.2304179 "putative L-threonine 3-dehydrogenase"  
"JS1\_K04\_00418" 7675 "s59E13H2" 0.6969417 "Creatinine amidohydrolase"  
"JS1\_K04\_00418" 7675 "s59E25H2" 0 "Creatinine amidohydrolase"  
"JS1\_K04\_00418" 7675 "s59E5H2" 0.6232848 "Creatinine amidohydrolase"  
"JS1\_K04\_00418" 7675 "s63E6H2" 0.2630187 "Creatinine amidohydrolase"  
"JS1\_K04\_00419" 7676 "s59E13H2" 0.3685004 "D-tagatose 3-epimerase"  
"JS1\_K04\_00419" 7676 "s59E25H2" 0 "D-tagatose 3-epimerase"  
"JS1\_K04\_00419" 7676 "s59E5H2" 0.380035 "D-tagatose 3-epimerase"  
"JS1\_K04\_00419" 7676 "s63E6H2" 0.08679875 "D-tagatose 3-epimerase"  
"JS1\_K04\_00420" 7677 "s59E13H2" 0.1271521 "hypothetical protein"  
"JS1\_K04\_00420" 7677 "s59E25H2" 0 "hypothetical protein"  
"JS1\_K04\_00420" 7677 "s59E5H2" 0.1067137 "hypothetical protein"  
"JS1\_K04\_00420" 7677 "s63E6H2" 0.57497 "hypothetical protein"  
"JS1\_K04\_00421" 7678 "s59E13H2" 0.07503609 "putative oxidoreductase"  
"JS1\_K04\_00421" 7678 "s59E25H2" 0 "putative oxidoreductase"  
"JS1\_K04\_00421" 7678 "s59E5H2" 0.7505344 "putative oxidoreductase"  
"JS1\_K04\_00421" 7678 "s63E6H2" 0.8028715 "putative oxidoreductase"  
"JS1\_K04\_00422" 7679 "s59E13H2" 0.06821043 "6-phosphogluconate dehydrogenase, NADP(+)-dependent, decarboxylating"  
"JS1\_K04\_00422" 7679 "s59E25H2" 0 "6-phosphogluconate dehydrogenase, NADP(+)-dependent, decarboxylating"  
"JS1\_K04\_00422" 7679 "s59E5H2" 0.4102306 "6-phosphogluconate dehydrogenase, NADP(+)-dependent, decarboxylating"  
"JS1\_K04\_00422" 7679 "s63E6H2" 0.6253652 "6-phosphogluconate dehydrogenase, NADP(+)-dependent, decarboxylating"  
"JS1\_K04\_00423" 7680 "s59E13H2" 0.8955026 "hypothetical protein"  
"JS1\_K04\_00423" 7680 "s59E25H2" 0 "hypothetical protein"  
"JS1\_K04\_00423" 7680 "s59E5H2" 0.2703224 "hypothetical protein"  
"JS1\_K04\_00423" 7680 "s63E6H2" 0.6142937 "hypothetical protein"  
"JS1\_K04\_00424" 7681 "s59E13H2" 1.020111 "6-phosphofructokinase 1"  
"JS1\_K04\_00424" 7681 "s59E25H2" 0 "6-phosphofructokinase 1"  
"JS1\_K04\_00424" 7681 "s59E5H2" 0.4621948 "6-phosphofructokinase 1"  
"JS1\_K04\_00424" 7681 "s63E6H2" 0.7651299 "6-phosphofructokinase 1"  
"JS1\_K04\_00425" 7682 "s59E13H2" 0.05125419 "hypothetical protein"  
"JS1\_K04\_00425" 7682 "s59E25H2" 0 "hypothetical protein"  
"JS1\_K04\_00425" 7682 "s59E5H2" 0.3343282 "hypothetical protein"  
"JS1\_K04\_00425" 7682 "s63E6H2" 0.1375235 "hypothetical protein"  
"JS1\_K04\_00426" 7683 "s59E13H2" 0.07206824 "putative binding protein component of ABC iron transporter precursor"  
"JS1\_K04\_00426" 7683 "s59E25H2" 0 "putative binding protein component of ABC iron transporter precursor"  
"JS1\_K04\_00426" 7683 "s59E5H2" 0.03350425 "putative binding protein component of ABC iron transporter precursor"  
"JS1\_K04\_00426" 7683 "s63E6H2" 0.7855107 "putative binding protein component of ABC iron transporter precursor"  
"JS1\_K04\_00427" 7684 "s59E13H2" 0.1761696 "Putative 2-aminoethylphosphonate transport system permease protein PhnV"  
"JS1\_K04\_00427" 7684 "s59E25H2" 0 "Putative 2-aminoethylphosphonate transport system permease protein PhnV"  
"JS1\_K04\_00427" 7684 "s59E5H2" 0.8471781 "Putative 2-aminoethylphosphonate transport system permease protein PhnV"  
"JS1\_K04\_00427" 7684 "s63E6H2" 0.5316181 "Putative 2-aminoethylphosphonate transport system permease protein PhnV"  
"JS1\_K04\_00428" 7685 "s59E13H2" 1.05445 "Trehalose/maltose import ATP-binding protein Malk"  
"JS1\_K04\_00428" 7685 "s59E25H2" 0 "Trehalose/maltose import ATP-binding protein Malk"

"JS1\_K04\_00428" 7685 "s59E5H2" 1.641327 "Trehalose/maltose import ATP-binding protein Malk"  
"JS1\_K04\_00428" 7685 "s63E6H2" 0.6058029 "Trehalose/maltose import ATP-binding protein Malk"  
"JS1\_K04\_00429" 7686 "s59E13H2" 0.1143345 "2-dehydro-3-deoxygluconokinase"  
"JS1\_K04\_00429" 7686 "s59E25H2" 0 "2-dehydro-3-deoxygluconokinase"  
"JS1\_K04\_00429" 7686 "s59E5H2" 0.7221967 "2-dehydro-3-deoxygluconokinase"  
"JS1\_K04\_00429" 7686 "s63E6H2" 0.2280071 "2-dehydro-3-deoxygluconokinase"  
"JS1\_K04\_00430" 7687 "s59E13H2" 0.2106004 "alpha-glucosidase"  
"JS1\_K04\_00430" 7687 "s59E25H2" 0 "alpha-glucosidase"  
"JS1\_K04\_00430" 7687 "s59E5H2" 0.06711859 "alpha-glucosidase"  
"JS1\_K04\_00430" 7687 "s63E6H2" 0.005945551 "alpha-glucosidase"  
"JS1\_K04\_00431" 7688 "s59E13H2" 0.3959544 "pfkB family carbohydrate kinase"  
"JS1\_K04\_00431" 7688 "s59E25H2" 0 "pfkB family carbohydrate kinase"  
"JS1\_K04\_00431" 7688 "s59E5H2" 0.2911103 "pfkB family carbohydrate kinase"  
"JS1\_K04\_00431" 7688 "s63E6H2" 0.690812 "pfkB family carbohydrate kinase"  
"JS1\_K04\_00432" 7689 "s59E13H2" 0.8247072 "Phospholipase YtpA"  
"JS1\_K04\_00432" 7689 "s59E25H2" 0 "Phospholipase YtpA"  
"JS1\_K04\_00432" 7689 "s59E5H2" 0.2405031 "Phospholipase YtpA"  
"JS1\_K04\_00432" 7689 "s63E6H2" 1.370636 "Phospholipase YtpA"  
"JS1\_K04\_00433" 7690 "s59E13H2" 1.0046 "Transcriptional regulator KdgR"  
"JS1\_K04\_00433" 7690 "s59E25H2" 0 "Transcriptional regulator KdgR"  
"JS1\_K04\_00433" 7690 "s59E5H2" 1.067252 "Transcriptional regulator KdgR"  
"JS1\_K04\_00433" 7690 "s63E6H2" 1.544738 "Transcriptional regulator KdgR"  
"JS1\_K04\_00434" 7691 "s59E13H2" 1.199502 "Indolepyruvate oxidoreductase subunit IorA"  
"JS1\_K04\_00434" 7691 "s59E25H2" 0 "Indolepyruvate oxidoreductase subunit IorA"  
"JS1\_K04\_00434" 7691 "s59E5H2" 0.9820049 "Indolepyruvate oxidoreductase subunit IorA"  
"JS1\_K04\_00434" 7691 "s63E6H2" 1.087235 "Indolepyruvate oxidoreductase subunit IorA"  
"JS1\_K04\_00435" 7692 "s59E13H2" 0.7509155 "Indolepyruvate oxidoreductase subunit IorB"  
"JS1\_K04\_00435" 7692 "s59E25H2" 0 "Indolepyruvate oxidoreductase subunit IorB"  
"JS1\_K04\_00435" 7692 "s59E5H2" 1.039394 "Indolepyruvate oxidoreductase subunit IorB"  
"JS1\_K04\_00435" 7692 "s63E6H2" 0.6743436 "Indolepyruvate oxidoreductase subunit IorB"  
"JS1\_K04\_00436" 7693 "s59E13H2" 0.7247031 "Aspartate aminotransferase"  
"JS1\_K04\_00436" 7693 "s59E25H2" 0 "Aspartate aminotransferase"  
"JS1\_K04\_00436" 7693 "s59E5H2" 1.168631 "Aspartate aminotransferase"  
"JS1\_K04\_00436" 7693 "s63E6H2" 0.3939201 "Aspartate aminotransferase"  
"JS1\_K04\_00437" 7694 "s59E13H2" 0.7604456 "Butyrate kinase 2"  
"JS1\_K04\_00437" 7694 "s59E25H2" 0 "Butyrate kinase 2"  
"JS1\_K04\_00437" 7694 "s59E5H2" 1.858156 "Butyrate kinase 2"  
"JS1\_K04\_00437" 7694 "s63E6H2" 1.031504 "Butyrate kinase 2"  
"JS1\_K04\_00438" 7695 "s59E13H2" 1.731919 "Phosphate acetyltransferase"  
"JS1\_K04\_00438" 7695 "s59E25H2" 0.2766667 "Phosphate acetyltransferase"  
"JS1\_K04\_00438" 7695 "s59E5H2" 1.870348 "Phosphate acetyltransferase"  
"JS1\_K04\_00438" 7695 "s63E6H2" 1.296726 "Phosphate acetyltransferase"  
"JS1\_K04\_00439" 7696 "s59E13H2" 2.779491 "GTP-binding protein TypA/BipA"  
"JS1\_K04\_00439" 7696 "s59E25H2" 0.1376096 "GTP-binding protein TypA/BipA"  
"JS1\_K04\_00439" 7696 "s59E5H2" 1.206228 "GTP-binding protein TypA/BipA"  
"JS1\_K04\_00439" 7696 "s63E6H2" 8.469187 "GTP-binding protein TypA/BipA"  
"JS1\_K04\_00440" 7697 "s59E13H2" 2.97926 "Transcriptional repressor PagR"

"JS1\_K04\_00440" 7697 "s59E25H2" 0 "Transcriptional repressor PagR"  
"JS1\_K04\_00440" 7697 "s59E5H2" 0.3280599 "Transcriptional repressor PagR"  
"JS1\_K04\_00440" 7697 "s63E6H2" 0.3273253 "Transcriptional repressor PagR"  
"JS1\_K04\_00441" 7698 "s59E13H2" 1.509245 "Coenzyme A disulfide reductase"  
"JS1\_K04\_00441" 7698 "s59E25H2" 0 "Coenzyme A disulfide reductase"  
"JS1\_K04\_00441" 7698 "s59E5H2" 0.5401601 "Coenzyme A disulfide reductase"  
"JS1\_K04\_00441" 7698 "s63E6H2" 0.1377557 "Coenzyme A disulfide reductase"  
"JS1\_K04\_00442" 7699 "s59E13H2" 1.645451 "hypothetical protein"  
"JS1\_K04\_00442" 7699 "s59E25H2" 0 "hypothetical protein"  
"JS1\_K04\_00442" 7699 "s59E5H2" 1.529248 "hypothetical protein"  
"JS1\_K04\_00442" 7699 "s63E6H2" 4.146538 "hypothetical protein"  
"JS1\_K04\_00445" 7702 "s59E13H2" 0.01708183 "Transcriptional regulator PadR-like family protein"  
"JS1\_K04\_00445" 7702 "s59E25H2" 0 "Transcriptional regulator PadR-like family protein"  
"JS1\_K04\_00445" 7702 "s59E5H2" 0 "Transcriptional regulator PadR-like family protein"  
"JS1\_K04\_00445" 7702 "s63E6H2" 4.057831 "Transcriptional regulator PadR-like family protein"  
"JS1\_K04\_00447" 7704 "s59E13H2" 0.02076864 "putative permease"  
"JS1\_K04\_00447" 7704 "s59E25H2" 0 "putative permease"  
"JS1\_K04\_00447" 7704 "s59E5H2" 0 "putative permease"  
"JS1\_K04\_00447" 7704 "s63E6H2" 5.143154 "putative permease"  
"JS1\_K04\_00448" 7705 "s59E13H2" 0.1634916 "hypothetical protein"  
"JS1\_K04\_00448" 7705 "s59E25H2" 1.194444 "hypothetical protein"  
"JS1\_K04\_00448" 7705 "s59E5H2" 2.74838 "hypothetical protein"  
"JS1\_K04\_00448" 7705 "s63E6H2" 4.900782 "hypothetical protein"  
"JS1\_K04\_00449" 7706 "s59E13H2" 0.2218021 "Sodium Bile acid symporter family protein"  
"JS1\_K04\_00449" 7706 "s59E25H2" 0 "Sodium Bile acid symporter family protein"  
"JS1\_K04\_00449" 7706 "s59E5H2" 5.639789 "Sodium Bile acid symporter family protein"  
"JS1\_K04\_00449" 7706 "s63E6H2" 35.50547 "Sodium Bile acid symporter family protein"  
"JS1\_K04\_00450" 7707 "s59E13H2" 0.1715416 "thiol:disulfide interchange protein precursor"  
"JS1\_K04\_00450" 7707 "s59E25H2" 0.6438746 "thiol:disulfide interchange protein precursor"  
"JS1\_K04\_00450" 7707 "s59E5H2" 4.516769 "thiol:disulfide interchange protein precursor"  
"JS1\_K04\_00450" 7707 "s63E6H2" 25.36235 "thiol:disulfide interchange protein precursor"  
"JS1\_K04\_00451" 7708 "s59E13H2" 0.1416504 "Thioredoxin"  
"JS1\_K04\_00451" 7708 "s59E25H2" 0.5742092 "Thioredoxin"  
"JS1\_K04\_00451" 7708 "s59E5H2" 3.66113 "Thioredoxin"  
"JS1\_K04\_00451" 7708 "s63E6H2" 14.78624 "Thioredoxin"  
"JS1\_K04\_00452" 7709 "s59E13H2" 0.04859164 "Sporulation thiol-disulfide oxidoreductase A precursor"  
"JS1\_K04\_00452" 7709 "s59E25H2" 0 "Sporulation thiol-disulfide oxidoreductase A precursor"  
"JS1\_K04\_00452" 7709 "s59E5H2" 1.171487 "Sporulation thiol-disulfide oxidoreductase A precursor"  
"JS1\_K04\_00452" 7709 "s63E6H2" 14.31601 "Sporulation thiol-disulfide oxidoreductase A precursor"  
"JS1\_K04\_00453" 7710 "s59E13H2" 0.01501344 "Cadmium, cobalt and zinc/H(+)-K(+) antiporter"  
"JS1\_K04\_00453" 7710 "s59E25H2" 0 "Cadmium, cobalt and zinc/H(+)-K(+) antiporter"  
"JS1\_K04\_00453" 7710 "s59E5H2" 0.4230288 "Cadmium, cobalt and zinc/H(+)-K(+) antiporter"  
"JS1\_K04\_00453" 7710 "s63E6H2" 2.635216 "Cadmium, cobalt and zinc/H(+)-K(+) antiporter"  
"JS1\_K04\_00454" 7711 "s59E13H2" 0.007486923 "DGC domain protein"  
"JS1\_K04\_00454" 7711 "s59E25H2" 0 "DGC domain protein"  
"JS1\_K04\_00454" 7711 "s59E5H2" 0 "DGC domain protein"  
"JS1\_K04\_00454" 7711 "s63E6H2" 2.322486 "DGC domain protein"

"JS1\_K04\_00455" 7712 "s59E13H2" 0.0028402 "Thioredoxin"  
"JS1\_K04\_00455" 7712 "s59E25H2" 0 "Thioredoxin"  
"JS1\_K04\_00455" 7712 "s59E5H2" 0.1273972 "Thioredoxin"  
"JS1\_K04\_00455" 7712 "s63E6H2" 1.495024 "Thioredoxin"  
"JS1\_K04\_00456" 7713 "s59E13H2" 2.150178 "putative permease"  
"JS1\_K04\_00456" 7713 "s59E25H2" 0 "putative permease"  
"JS1\_K04\_00456" 7713 "s59E5H2" 0.4369865 "putative permease"  
"JS1\_K04\_00456" 7713 "s63E6H2" 1.812783 "putative permease"  
"JS1\_K04\_00457" 7714 "s59E13H2" 0.05038835 "hypothetical protein"  
"JS1\_K04\_00457" 7714 "s59E25H2" 0 "hypothetical protein"  
"JS1\_K04\_00457" 7714 "s59E5H2" 0.8837615 "hypothetical protein"  
"JS1\_K04\_00457" 7714 "s63E6H2" 1.188001 "hypothetical protein"  
"JS1\_K04\_00459" 7716 "s59E13H2" 0 "hypothetical protein"  
"JS1\_K04\_00459" 7716 "s59E25H2" 0 "hypothetical protein"  
"JS1\_K04\_00459" 7716 "s59E5H2" 0 "hypothetical protein"  
"JS1\_K04\_00459" 7716 "s63E6H2" 1.979155 "hypothetical protein"  
"JS1\_K04\_00460" 7717 "s59E13H2" 0 "hypothetical protein"  
"JS1\_K04\_00460" 7717 "s59E25H2" 0 "hypothetical protein"  
"JS1\_K04\_00460" 7717 "s59E5H2" 0 "hypothetical protein"  
"JS1\_K04\_00460" 7717 "s63E6H2" 2.116471 "hypothetical protein"  
"JS1\_K04\_00461" 7718 "s59E13H2" 0.07123549 "Demethylrebeccamycin-D-glucose O-methyltransferase"  
"JS1\_K04\_00461" 7718 "s59E25H2" 0 "Demethylrebeccamycin-D-glucose O-methyltransferase"  
"JS1\_K04\_00461" 7718 "s59E5H2" 2.627556 "Demethylrebeccamycin-D-glucose O-methyltransferase"  
"JS1\_K04\_00461" 7718 "s63E6H2" 2.751094 "Demethylrebeccamycin-D-glucose O-methyltransferase"  
"JS1\_K04\_00462" 7719 "s59E13H2" 0 "Transposase IS116/IS110/IS902 family protein"  
"JS1\_K04\_00462" 7719 "s59E25H2" 0 "Transposase IS116/IS110/IS902 family protein"  
"JS1\_K04\_00462" 7719 "s59E5H2" 0 "Transposase IS116/IS110/IS902 family protein"  
"JS1\_K04\_00462" 7719 "s63E6H2" 0.1346624 "Transposase IS116/IS110/IS902 family protein"  
"JS1\_K04\_00463" 7720 "s59E13H2" 0 "Integrase core domain protein"  
"JS1\_K04\_00463" 7720 "s59E25H2" 0 "Integrase core domain protein"  
"JS1\_K04\_00463" 7720 "s59E5H2" 0 "Integrase core domain protein"  
"JS1\_K04\_00463" 7720 "s63E6H2" 0.003683672 "Integrase core domain protein"  
"JS1\_K04\_00464" 7721 "s59E13H2" 0.01496146 "Transposase"  
"JS1\_K04\_00464" 7721 "s59E25H2" 0 "Transposase"  
"JS1\_K04\_00464" 7721 "s59E5H2" 0.01847491 "Transposase"  
"JS1\_K04\_00464" 7721 "s63E6H2" 0.0123491 "Transposase"  
"JS1\_K04\_00465" 7722 "s59E13H2" 0 "hypothetical protein"  
"JS1\_K04\_00465" 7722 "s59E25H2" 0 "hypothetical protein"  
"JS1\_K04\_00465" 7722 "s59E5H2" 0.06028519 "hypothetical protein"  
"JS1\_K04\_00465" 7722 "s63E6H2" 0.01281651 "hypothetical protein"  
"JS1\_K04\_00466" 7723 "s59E13H2" 0.006405721 "hypothetical protein"  
"JS1\_K04\_00466" 7723 "s59E25H2" 0 "hypothetical protein"  
"JS1\_K04\_00466" 7723 "s59E5H2" 0.04117014 "hypothetical protein"  
"JS1\_K04\_00466" 7723 "s63E6H2" 0.1382778 "hypothetical protein"  
"JS1\_K04\_00467" 7724 "s59E13H2" 0 "putative transporter"  
"JS1\_K04\_00467" 7724 "s59E25H2" 0 "putative transporter"  
"JS1\_K04\_00467" 7724 "s59E5H2" 0.01756271 "putative transporter"

"JS1\_K04\_00467" 7724 "s63E6H2" 0.01111952 "putative transporter"  
"JS1\_K04\_00468" 7725 "s59E13H2" 0.03531837 "hypothetical protein"  
"JS1\_K04\_00468" 7725 "s59E25H2" 0 "hypothetical protein"  
"JS1\_K04\_00468" 7725 "s59E5H2" 0.2020575 "hypothetical protein"  
"JS1\_K04\_00468" 7725 "s63E6H2" 0.04525185 "hypothetical protein"  
"JS1\_K04\_00470" 7727 "s59E13H2" 0 "zinc transporter ZupT"  
"JS1\_K04\_00470" 7727 "s59E25H2" 3.453552 "zinc transporter ZupT"  
"JS1\_K04\_00470" 7727 "s59E5H2" 0.02772826 "zinc transporter ZupT"  
"JS1\_K04\_00470" 7727 "s63E6H2" 0.02628545 "zinc transporter ZupT"  
"JS1\_K04\_00471" 7728 "s59E13H2" 0.003144748 "Beta-lactamase superfamily domain protein"  
"JS1\_K04\_00471" 7728 "s59E25H2" 0 "Beta-lactamase superfamily domain protein"  
"JS1\_K04\_00471" 7728 "s59E5H2" 0 "Beta-lactamase superfamily domain protein"  
"JS1\_K04\_00471" 7728 "s63E6H2" 0 "Beta-lactamase superfamily domain protein"  
"JS1\_K04\_00473" 7730 "s59E13H2" 0 "Transposase"  
"JS1\_K04\_00473" 7730 "s59E25H2" 0 "Transposase"  
"JS1\_K04\_00473" 7730 "s59E5H2" 0 "Transposase"  
"JS1\_K04\_00473" 7730 "s63E6H2" 0.04684757 "Transposase"  
"JS1\_K04\_00474" 7731 "s59E13H2" 0 "IS2 transposase TnpB"  
"JS1\_K04\_00474" 7731 "s59E25H2" 0 "IS2 transposase TnpB"  
"JS1\_K04\_00474" 7731 "s59E5H2" 0.011048 "IS2 transposase TnpB"  
"JS1\_K04\_00474" 7731 "s63E6H2" 0.09730241 "IS2 transposase TnpB"  
"JS1\_K04\_00476" 7733 "s59E13H2" 0 "Acetyl-CoA decarboxylase/synthase complex subunit gamma"  
"JS1\_K04\_00476" 7733 "s59E25H2" 0 "Acetyl-CoA decarboxylase/synthase complex subunit gamma"  
"JS1\_K04\_00476" 7733 "s59E5H2" 0 "Acetyl-CoA decarboxylase/synthase complex subunit gamma"  
"JS1\_K04\_00476" 7733 "s63E6H2" 0.009092954 "Acetyl-CoA decarboxylase/synthase complex subunit gamma"  
"JS1\_K04\_00477" 7734 "s59E13H2" 0 "Demethylmenaquinone methyltransferase"  
"JS1\_K04\_00477" 7734 "s59E25H2" 0 "Demethylmenaquinone methyltransferase"  
"JS1\_K04\_00477" 7734 "s59E5H2" 0 "Demethylmenaquinone methyltransferase"  
"JS1\_K04\_00477" 7734 "s63E6H2" 0.009950535 "Demethylmenaquinone methyltransferase"  
"JS1\_K04\_00478" 7735 "s59E13H2" 0.02328745 "hypothetical protein"  
"JS1\_K04\_00478" 7735 "s59E25H2" 0 "hypothetical protein"  
"JS1\_K04\_00478" 7735 "s59E5H2" 0.0009998425 "hypothetical protein"  
"JS1\_K04\_00478" 7735 "s63E6H2" 0.01575616 "hypothetical protein"  
"JS1\_K04\_00479" 7736 "s59E13H2" 0 "hypothetical protein"  
"JS1\_K04\_00479" 7736 "s59E25H2" 0 "hypothetical protein"  
"JS1\_K04\_00479" 7736 "s59E5H2" 0.2558191 "hypothetical protein"  
"JS1\_K04\_00479" 7736 "s63E6H2" 0.006538104 "hypothetical protein"  
"JS1\_K04\_00480" 7737 "s59E13H2" 0 "hypothetical protein"  
"JS1\_K04\_00480" 7737 "s59E25H2" 0 "hypothetical protein"  
"JS1\_K04\_00480" 7737 "s59E5H2" 0.3314071 "hypothetical protein"  
"JS1\_K04\_00480" 7737 "s63E6H2" 0.00246856 "hypothetical protein"  
"JS1\_K04\_00481" 7738 "s59E13H2" 0 "hypothetical protein"  
"JS1\_K04\_00481" 7738 "s59E25H2" 0 "hypothetical protein"  
"JS1\_K04\_00481" 7738 "s59E5H2" 0.4625748 "hypothetical protein"  
"JS1\_K04\_00481" 7738 "s63E6H2" 0.004789743 "hypothetical protein"  
"JS1\_K04\_00482" 7739 "s59E13H2" 0.03045087 "Peptide methionine sulfoxide reductase MsrA"  
"JS1\_K04\_00482" 7739 "s59E25H2" 0 "Peptide methionine sulfoxide reductase MsrA"

"JS1\_K04\_00482" 7739 "s59E5H2" 0.04213317 "Peptide methionine sulfoxide reductase MsrA"  
"JS1\_K04\_00482" 7739 "s63E6H2" 0.02131544 "Peptide methionine sulfoxide reductase MsrA"  
"JS1\_K04\_00483" 7740 "s59E13H2" 0.05466382 "Peptide methionine sulfoxide reductase MsrB"  
"JS1\_K04\_00483" 7740 "s59E25H2" 0 "Peptide methionine sulfoxide reductase MsrB"  
"JS1\_K04\_00483" 7740 "s59E5H2" 0.03142582 "Peptide methionine sulfoxide reductase MsrB"  
"JS1\_K04\_00483" 7740 "s63E6H2" 0.007622494 "Peptide methionine sulfoxide reductase MsrB"  
"JS1\_K04\_00484" 7741 "s59E13H2" 0.113194 "hypothetical protein"  
"JS1\_K04\_00484" 7741 "s59E25H2" 0 "hypothetical protein"  
"JS1\_K04\_00484" 7741 "s59E5H2" 0.2730905 "hypothetical protein"  
"JS1\_K04\_00484" 7741 "s63E6H2" 0.01717641 "hypothetical protein"  
"JS1\_K04\_00485" 7742 "s59E13H2" 0.1029943 "SpoVT / AbrB like domain protein"  
"JS1\_K04\_00485" 7742 "s59E25H2" 0 "SpoVT / AbrB like domain protein"  
"JS1\_K04\_00485" 7742 "s59E5H2" 0.6585566 "SpoVT / AbrB like domain protein"  
"JS1\_K04\_00485" 7742 "s63E6H2" 0.0229662 "SpoVT / AbrB like domain protein"  
"JS1\_K04\_00486" 7743 "s59E13H2" 0.1852426 "hypothetical protein"  
"JS1\_K04\_00486" 7743 "s59E25H2" 0 "hypothetical protein"  
"JS1\_K04\_00486" 7743 "s59E5H2" 0.6715136 "hypothetical protein"  
"JS1\_K04\_00486" 7743 "s63E6H2" 0.03880497 "hypothetical protein"  
"JS1\_K04\_00487" 7744 "s59E13H2" 0.05477273 "Vitamin B12 dependent methionine synthase, activation domain"  
"JS1\_K04\_00487" 7744 "s59E25H2" 0 "Vitamin B12 dependent methionine synthase, activation domain"  
"JS1\_K04\_00487" 7744 "s59E5H2" 0.1718731 "Vitamin B12 dependent methionine synthase, activation domain"  
"JS1\_K04\_00487" 7744 "s63E6H2" 0.02340257 "Vitamin B12 dependent methionine synthase, activation domain"  
"JS1\_K04\_00488" 7745 "s59E13H2" 0.3619143 "hypothetical protein"  
"JS1\_K04\_00488" 7745 "s59E25H2" 0 "hypothetical protein"  
"JS1\_K04\_00488" 7745 "s59E5H2" 0.9850092 "hypothetical protein"  
"JS1\_K04\_00488" 7745 "s63E6H2" 0.01386762 "hypothetical protein"  
"JS1\_K04\_00489" 7746 "s59E13H2" 0.3664985 "CCA-adding enzyme"  
"JS1\_K04\_00489" 7746 "s59E25H2" 0 "CCA-adding enzyme"  
"JS1\_K04\_00489" 7746 "s59E5H2" 0.08713175 "CCA-adding enzyme"  
"JS1\_K04\_00489" 7746 "s63E6H2" 0.03094803 "CCA-adding enzyme"  
"JS1\_K04\_00490" 7747 "s59E13H2" 0.2712681 "NADH dehydrogenase"  
"JS1\_K04\_00490" 7747 "s59E25H2" 0 "NADH dehydrogenase"  
"JS1\_K04\_00490" 7747 "s59E5H2" 0.1391052 "NADH dehydrogenase"  
"JS1\_K04\_00490" 7747 "s63E6H2" 0.01296687 "NADH dehydrogenase"  
"JS1\_K04\_00491" 7748 "s59E13H2" 0.001484425 "General stress protein 69"  
"JS1\_K04\_00491" 7748 "s59E25H2" 0 "General stress protein 69"  
"JS1\_K04\_00491" 7748 "s59E5H2" 0.0157669 "General stress protein 69"  
"JS1\_K04\_00491" 7748 "s63E6H2" 0.004503864 "General stress protein 69"  
"JS1\_K04\_00492" 7749 "s59E13H2" 2.089284 "D-alanine aminotransferase"  
"JS1\_K04\_00492" 7749 "s59E25H2" 0 "D-alanine aminotransferase"  
"JS1\_K04\_00492" 7749 "s59E5H2" 0.2250393 "D-alanine aminotransferase"  
"JS1\_K04\_00492" 7749 "s63E6H2" 0.01273472 "D-alanine aminotransferase"  
"JS1\_K04\_00493" 7750 "s59E13H2" 0.08423706 "Aminodeoxychorismate synthase component 1"  
"JS1\_K04\_00493" 7750 "s59E25H2" 0 "Aminodeoxychorismate synthase component 1"  
"JS1\_K04\_00493" 7750 "s59E5H2" 0.3426668 "Aminodeoxychorismate synthase component 1"  
"JS1\_K04\_00493" 7750 "s63E6H2" 0.01487316 "Aminodeoxychorismate synthase component 1"  
"JS1\_K04\_00494" 7751 "s59E13H2" 0.07027022 "Aminodeoxychorismate/anthranilate synthase component 2"

"JS1\_K04\_00494" 7751 "s59E25H2" 0 "Aminodeoxychorismate/anthranilate synthase component 2"  
"JS1\_K04\_00494" 7751 "s59E5H2" 0.3879899 "Aminodeoxychorismate/anthranilate synthase component 2"  
"JS1\_K04\_00494" 7751 "s63E6H2" 0.0035309 "Aminodeoxychorismate/anthranilate synthase component 2"  
"JS1\_K04\_00495" 7752 "s59E13H2" 3.895862 "hypothetical protein"  
"JS1\_K04\_00495" 7752 "s59E25H2" 0 "hypothetical protein"  
"JS1\_K04\_00495" 7752 "s59E5H2" 1.323549 "hypothetical protein"  
"JS1\_K04\_00495" 7752 "s63E6H2" 0.8252091 "hypothetical protein"  
"JS1\_K04\_00496" 7753 "s59E13H2" 0.0006819208 "Lipase 3 precursor"  
"JS1\_K04\_00496" 7753 "s59E25H2" 0 "Lipase 3 precursor"  
"JS1\_K04\_00496" 7753 "s59E5H2" 1.123913 "Lipase 3 precursor"  
"JS1\_K04\_00496" 7753 "s63E6H2" 0.6327857 "Lipase 3 precursor"  
"JS1\_K04\_00497" 7754 "s59E13H2" 0.1810518 "Nucleotidyltransferase domain protein"  
"JS1\_K04\_00497" 7754 "s59E25H2" 0 "Nucleotidyltransferase domain protein"  
"JS1\_K04\_00497" 7754 "s59E5H2" 0.1820637 "Nucleotidyltransferase domain protein"  
"JS1\_K04\_00497" 7754 "s63E6H2" 0.5737343 "Nucleotidyltransferase domain protein"  
"JS1\_K04\_00498" 7755 "s59E13H2" 0.01172556 "HEPN domain protein"  
"JS1\_K04\_00498" 7755 "s59E25H2" 0 "HEPN domain protein"  
"JS1\_K04\_00498" 7755 "s59E5H2" 0.03676036 "HEPN domain protein"  
"JS1\_K04\_00498" 7755 "s63E6H2" 0.06839523 "HEPN domain protein"  
"JS1\_K04\_00499" 7756 "s59E13H2" 0.03219544 "PD-(D/E)XK nuclease superfamily protein"  
"JS1\_K04\_00499" 7756 "s59E25H2" 0 "PD-(D/E)XK nuclease superfamily protein"  
"JS1\_K04\_00499" 7756 "s59E5H2" 0.01273397 "PD-(D/E)XK nuclease superfamily protein"  
"JS1\_K04\_00499" 7756 "s63E6H2" 0.1825241 "PD-(D/E)XK nuclease superfamily protein"  
"JS1\_K04\_00500" 7757 "s59E13H2" 0.01707119 "3-hydroxypropionyl-coenzyme A dehydratase"  
"JS1\_K04\_00500" 7757 "s59E25H2" 0 "3-hydroxypropionyl-coenzyme A dehydratase"  
"JS1\_K04\_00500" 7757 "s59E5H2" 0.1338459 "3-hydroxypropionyl-coenzyme A dehydratase"  
"JS1\_K04\_00500" 7757 "s63E6H2" 0.1984884 "3-hydroxypropionyl-coenzyme A dehydratase"  
"JS1\_K04\_00501" 7758 "s59E13H2" 0.2212859 "S-adenosyl-L-methionine-binding protein"  
"JS1\_K04\_00501" 7758 "s59E25H2" 0 "S-adenosyl-L-methionine-binding protein"  
"JS1\_K04\_00501" 7758 "s59E5H2" 0.1463213 "S-adenosyl-L-methionine-binding protein"  
"JS1\_K04\_00501" 7758 "s63E6H2" 0.03360496 "S-adenosyl-L-methionine-binding protein"  
"JS1\_K04\_00503" 7760 "s59E13H2" 0.009908252 "hypothetical protein"  
"JS1\_K04\_00503" 7760 "s59E25H2" 0 "hypothetical protein"  
"JS1\_K04\_00503" 7760 "s59E5H2" 0.655305 "hypothetical protein"  
"JS1\_K04\_00503" 7760 "s63E6H2" 0 "hypothetical protein"  
"JS1\_K04\_00504" 7761 "s59E13H2" 0.02468114 "hypothetical protein"  
"JS1\_K04\_00504" 7761 "s59E25H2" 0 "hypothetical protein"  
"JS1\_K04\_00504" 7761 "s59E5H2" 0.01429422 "hypothetical protein"  
"JS1\_K04\_00504" 7761 "s63E6H2" 0 "hypothetical protein"  
"JS1\_K04\_00505" 7762 "s59E13H2" 0.1188938 "hypothetical protein"  
"JS1\_K04\_00505" 7762 "s59E25H2" 0 "hypothetical protein"  
"JS1\_K04\_00505" 7762 "s59E5H2" 0.03485275 "hypothetical protein"  
"JS1\_K04\_00505" 7762 "s63E6H2" 0.02201186 "hypothetical protein"  
"JS1\_K04\_00506" 7763 "s59E13H2" 0.05604683 "Two component regulator propeller"  
"JS1\_K04\_00506" 7763 "s59E25H2" 0 "Two component regulator propeller"  
"JS1\_K04\_00506" 7763 "s59E5H2" 0.1199571 "Two component regulator propeller"  
"JS1\_K04\_00506" 7763 "s63E6H2" 0.1025538 "Two component regulator propeller"

"JS1\_K04\_00507" 7764 "s59E13H2" 0.02721565 "hypothetical protein"  
"JS1\_K04\_00507" 7764 "s59E25H2" 0 "hypothetical protein"  
"JS1\_K04\_00507" 7764 "s59E5H2" 0.2534283 "hypothetical protein"  
"JS1\_K04\_00507" 7764 "s63E6H2" 0 "hypothetical protein"  
"JS1\_K04\_00508" 7765 "s59E13H2" 0.2274092 "Aminopeptidase YwaD precursor"  
"JS1\_K04\_00508" 7765 "s59E25H2" 0 "Aminopeptidase YwaD precursor"  
"JS1\_K04\_00508" 7765 "s59E5H2" 0.5724967 "Aminopeptidase YwaD precursor"  
"JS1\_K04\_00508" 7765 "s63E6H2" 0.05332789 "Aminopeptidase YwaD precursor"  
"JS1\_K04\_00511" 7768 "s59E13H2" 0.06648587 "hypothetical protein"  
"JS1\_K04\_00511" 7768 "s59E25H2" 0 "hypothetical protein"  
"JS1\_K04\_00511" 7768 "s59E5H2" 1.01396 "hypothetical protein"  
"JS1\_K04\_00511" 7768 "s63E6H2" 0.0626656 "hypothetical protein"  
"JS1\_K04\_00512" 7769 "s59E13H2" 0.04091612 "hypothetical protein"  
"JS1\_K04\_00512" 7769 "s59E25H2" 0 "hypothetical protein"  
"JS1\_K04\_00512" 7769 "s59E5H2" 1.209333 "hypothetical protein"  
"JS1\_K04\_00512" 7769 "s63E6H2" 0.02417427 "hypothetical protein"  
"JS1\_K04\_00513" 7770 "s59E13H2" 0.05014296 "Sialic acid TRAP transporter permease protein SiaT"  
"JS1\_K04\_00513" 7770 "s59E25H2" 0 "Sialic acid TRAP transporter permease protein SiaT"  
"JS1\_K04\_00513" 7770 "s59E5H2" 0.1051306 "Sialic acid TRAP transporter permease protein SiaT"  
"JS1\_K04\_00513" 7770 "s63E6H2" 0.005725019 "Sialic acid TRAP transporter permease protein SiaT"  
"JS1\_K04\_00514" 7771 "s59E13H2" 0.02281046 "Sialic acid TRAP transporter permease protein SiaT"  
"JS1\_K04\_00514" 7771 "s59E25H2" 0 "Sialic acid TRAP transporter permease protein SiaT"  
"JS1\_K04\_00514" 7771 "s59E5H2" 0 "Sialic acid TRAP transporter permease protein SiaT"  
"JS1\_K04\_00514" 7771 "s63E6H2" 0 "Sialic acid TRAP transporter permease protein SiaT"  
"JS1\_K04\_00515" 7772 "s59E13H2" 0.0280255 "C4-dicarboxylate-binding periplasmic protein precursor"  
"JS1\_K04\_00515" 7772 "s59E25H2" 0 "C4-dicarboxylate-binding periplasmic protein precursor"  
"JS1\_K04\_00515" 7772 "s59E5H2" 0.007216098 "C4-dicarboxylate-binding periplasmic protein precursor"  
"JS1\_K04\_00515" 7772 "s63E6H2" 0.001518292 "C4-dicarboxylate-binding periplasmic protein precursor"  
"JS1\_K04\_00516" 7773 "s59E13H2" 0.01521506 "Uronate isomerase"  
"JS1\_K04\_00516" 7773 "s59E25H2" 0 "Uronate isomerase"  
"JS1\_K04\_00516" 7773 "s59E5H2" 0.06809591 "Uronate isomerase"  
"JS1\_K04\_00516" 7773 "s63E6H2" 0.001715628 "Uronate isomerase"  
"JS1\_K04\_00517" 7774 "s59E13H2" 0.3752516 "putative oxidoreductase YdgJ"  
"JS1\_K04\_00517" 7774 "s59E25H2" 0 "putative oxidoreductase YdgJ"  
"JS1\_K04\_00517" 7774 "s59E5H2" 1.018467 "putative oxidoreductase YdgJ"  
"JS1\_K04\_00517" 7774 "s63E6H2" 0.007049117 "putative oxidoreductase YdgJ"  
"JS1\_K04\_00528" 7785 "s59E13H2" 1.005597 "Integrase core domain protein"  
"JS1\_K04\_00528" 7785 "s59E25H2" 0 "Integrase core domain protein"  
"JS1\_K04\_00528" 7785 "s59E5H2" 1.445636 "Integrase core domain protein"  
"JS1\_K04\_00528" 7785 "s63E6H2" 0.794814 "Integrase core domain protein"  
"JS1\_K04\_00529" 7786 "s59E13H2" 0.9897442 "Formamidopyrimidine-DNA glycosylase"  
"JS1\_K04\_00529" 7786 "s59E25H2" 0.2935673 "Formamidopyrimidine-DNA glycosylase"  
"JS1\_K04\_00529" 7786 "s59E5H2" 0.2041351 "Formamidopyrimidine-DNA glycosylase"  
"JS1\_K04\_00529" 7786 "s63E6H2" 0.4205589 "Formamidopyrimidine-DNA glycosylase"  
"JS1\_K04\_00530" 7787 "s59E13H2" 1.431285 "GMP/IMP nucleotidase YrfG"  
"JS1\_K04\_00530" 7787 "s59E25H2" 0 "GMP/IMP nucleotidase YrfG"  
"JS1\_K04\_00530" 7787 "s59E5H2" 0.262028 "GMP/IMP nucleotidase YrfG"



"JS1\_K04\_00530" 7787 "s63E6H2" 0.426198 "GMP/IMP nucleotidase YrfG"  
"JS1\_K04\_00533" 7790 "s59E13H2" 1.376804 "hypothetical protein"  
"JS1\_K04\_00533" 7790 "s59E25H2" 0 "hypothetical protein"  
"JS1\_K04\_00533" 7790 "s59E5H2" 0.04193905 "hypothetical protein"  
"JS1\_K04\_00533" 7790 "s63E6H2" 0 "hypothetical protein"  
"JS1\_K04\_00534" 7791 "s59E13H2" 2.602897 "hypothetical protein"  
"JS1\_K04\_00534" 7791 "s59E25H2" 0 "hypothetical protein"  
"JS1\_K04\_00534" 7791 "s59E5H2" 0.04645467 "hypothetical protein"  
"JS1\_K04\_00534" 7791 "s63E6H2" 0.004337271 "hypothetical protein"  
"JS1\_K04\_00535" 7792 "s59E13H2" 3.121526 "TadE-like protein"  
"JS1\_K04\_00535" 7792 "s59E25H2" 0 "TadE-like protein"  
"JS1\_K04\_00535" 7792 "s59E5H2" 0.08916453 "TadE-like protein"  
"JS1\_K04\_00535" 7792 "s63E6H2" 0.01242972 "TadE-like protein"  
"JS1\_K04\_00537" 7794 "s59E13H2" 0 "hypothetical protein"  
"JS1\_K04\_00537" 7794 "s59E25H2" 0 "hypothetical protein"  
"JS1\_K04\_00537" 7794 "s59E5H2" 0 "hypothetical protein"  
"JS1\_K04\_00537" 7794 "s63E6H2" 0.0492133 "hypothetical protein"  
"JS1\_K04\_00538" 7795 "s59E13H2" 2.351143 "hypothetical protein"  
"JS1\_K04\_00538" 7795 "s59E25H2" 0 "hypothetical protein"  
"JS1\_K04\_00538" 7795 "s59E5H2" 0.02565455 "hypothetical protein"  
"JS1\_K04\_00538" 7795 "s63E6H2" 0.07323896 "hypothetical protein"  
"JS1\_K04\_00539" 7796 "s59E13H2" 5.506803 "hypothetical protein"  
"JS1\_K04\_00539" 7796 "s59E25H2" 0 "hypothetical protein"  
"JS1\_K04\_00539" 7796 "s59E5H2" 0.07547581 "hypothetical protein"  
"JS1\_K04\_00539" 7796 "s63E6H2" 0.07386404 "hypothetical protein"  
"JS1\_K04\_00540" 7797 "s59E13H2" 0.002683654 "hypothetical protein"  
"JS1\_K04\_00540" 7797 "s59E25H2" 0 "hypothetical protein"  
"JS1\_K04\_00540" 7797 "s59E5H2" 0.01591388 "hypothetical protein"  
"JS1\_K04\_00540" 7797 "s63E6H2" 0.04159766 "hypothetical protein"  
"JS1\_K04\_00541" 7798 "s59E13H2" 0.01556376 "Antitoxin HigA"  
"JS1\_K04\_00541" 7798 "s59E25H2" 0 "Antitoxin HigA"  
"JS1\_K04\_00541" 7798 "s59E5H2" 0.1065835 "Antitoxin HigA"  
"JS1\_K04\_00541" 7798 "s63E6H2" 0.007286524 "Antitoxin HigA"  
"JS1\_K04\_00542" 7799 "s59E13H2" 0.005339459 "Antilisterial bacteriocin subtilisin biosynthesis protein Alba"  
"JS1\_K04\_00542" 7799 "s59E25H2" 0 "Antilisterial bacteriocin subtilisin biosynthesis protein Alba"  
"JS1\_K04\_00542" 7799 "s59E5H2" 0 "Antilisterial bacteriocin subtilisin biosynthesis protein Alba"  
"JS1\_K04\_00542" 7799 "s63E6H2" 0.155682 "Antilisterial bacteriocin subtilisin biosynthesis protein Alba"  
"JS1\_K04\_00543" 7800 "s59E13H2" 0 "hypothetical protein"  
"JS1\_K04\_00543" 7800 "s59E25H2" 0 "hypothetical protein"  
"JS1\_K04\_00543" 7800 "s59E5H2" 0.002524195 "hypothetical protein"  
"JS1\_K04\_00543" 7800 "s63E6H2" 0.1246921 "hypothetical protein"  
"JS1\_K04\_00544" 7801 "s59E13H2" 0.0003032678 "Uracil DNA glycosylase superfamily protein"  
"JS1\_K04\_00544" 7801 "s59E25H2" 0 "Uracil DNA glycosylase superfamily protein"  
"JS1\_K04\_00544" 7801 "s59E5H2" 0.005700328 "Uracil DNA glycosylase superfamily protein"  
"JS1\_K04\_00544" 7801 "s63E6H2" 0.1487759 "Uracil DNA glycosylase superfamily protein"  
"JS1\_K04\_00545" 7802 "s59E13H2" 0.006431163 "tRNA threonylcarbamoyladenosine biosynthesis protein TsaE"  
"JS1\_K04\_00545" 7802 "s59E25H2" 0 "tRNA threonylcarbamoyladenosine biosynthesis protein TsaE"

"JS1\_K04\_00545" 7802 "s59E5H2" 0.02734122 "tRNA threonylcarbamoyladenosine biosynthesis protein TsaE"  
"JS1\_K04\_00545" 7802 "s63E6H2" 0.2093978 "tRNA threonylcarbamoyladenosine biosynthesis protein TsaE"  
"JS1\_K04\_00546" 7803 "s59E13H2" 8.461792e-06 "tRNA threonylcarbamoyladenosine biosynthesis protein TsaB"  
"JS1\_K04\_00546" 7803 "s59E25H2" 0 "tRNA threonylcarbamoyladenosine biosynthesis protein TsaB"  
"JS1\_K04\_00546" 7803 "s59E5H2" 0.04918742 "tRNA threonylcarbamoyladenosine biosynthesis protein TsaB"  
"JS1\_K04\_00546" 7803 "s63E6H2" 0.2040852 "tRNA threonylcarbamoyladenosine biosynthesis protein TsaB"  
"JS1\_K04\_00547" 7804 "s59E13H2" 0.0173453 "tRNA N6-adenosine threonylcarbamoyltransferase"  
"JS1\_K04\_00547" 7804 "s59E25H2" 0 "tRNA N6-adenosine threonylcarbamoyltransferase"  
"JS1\_K04\_00547" 7804 "s59E5H2" 0.09302558 "tRNA N6-adenosine threonylcarbamoyltransferase"  
"JS1\_K04\_00547" 7804 "s63E6H2" 0.2778793 "tRNA N6-adenosine threonylcarbamoyltransferase"  
"JS1\_K04\_00548" 7805 "s59E13H2" 0.04564608 "10 kDa chaperonin 5"  
"JS1\_K04\_00548" 7805 "s59E25H2" 0 "10 kDa chaperonin 5"  
"JS1\_K04\_00548" 7805 "s59E5H2" 0.01047008 "10 kDa chaperonin 5"  
"JS1\_K04\_00548" 7805 "s63E6H2" 0.2916159 "10 kDa chaperonin 5"  
"JS1\_K04\_00549" 7806 "s59E13H2" 0.02925014 "60 kDa chaperonin"  
"JS1\_K04\_00549" 7806 "s59E25H2" 0 "60 kDa chaperonin"  
"JS1\_K04\_00549" 7806 "s59E5H2" 0.06531381 "60 kDa chaperonin"  
"JS1\_K04\_00549" 7806 "s63E6H2" 0.4014343 "60 kDa chaperonin"  
"JS1\_K04\_00550" 7807 "s59E13H2" 0.007640613 "hypothetical protein"  
"JS1\_K04\_00550" 7807 "s59E25H2" 0 "hypothetical protein"  
"JS1\_K04\_00550" 7807 "s59E5H2" 0 "hypothetical protein"  
"JS1\_K04\_00550" 7807 "s63E6H2" 0.0478698 "hypothetical protein"  
"JS1\_K04\_00551" 7808 "s59E13H2" 0.008580634 "Glycerol-3-phosphate acyltransferase"  
"JS1\_K04\_00551" 7808 "s59E25H2" 0 "Glycerol-3-phosphate acyltransferase"  
"JS1\_K04\_00551" 7808 "s59E5H2" 0.009673965 "Glycerol-3-phosphate acyltransferase"  
"JS1\_K04\_00551" 7808 "s63E6H2" 0.4156714 "Glycerol-3-phosphate acyltransferase"  
"JS1\_K04\_00552" 7809 "s59E13H2" 0.01846437 "putative oxidoreductase/MSMEI\_1564"  
"JS1\_K04\_00552" 7809 "s59E25H2" 0 "putative oxidoreductase/MSMEI\_1564"  
"JS1\_K04\_00552" 7809 "s59E5H2" 0.04190475 "putative oxidoreductase/MSMEI\_1564"  
"JS1\_K04\_00552" 7809 "s63E6H2" 0.5508119 "putative oxidoreductase/MSMEI\_1564"  
"JS1\_K04\_00553" 7810 "s59E13H2" 0.01492753 "GMP synthase [glutamine-hydrolyzing]"  
"JS1\_K04\_00553" 7810 "s59E25H2" 0 "GMP synthase [glutamine-hydrolyzing]"  
"JS1\_K04\_00553" 7810 "s59E5H2" 0.04200457 "GMP synthase [glutamine-hydrolyzing]"  
"JS1\_K04\_00553" 7810 "s63E6H2" 0.6665011 "GMP synthase [glutamine-hydrolyzing]"  
"JS1\_K04\_00554" 7811 "s59E13H2" 0.01100692 "bifunctional 3-deoxy-7-phosphoheptulonate synthase/chorismate mutase"  
"JS1\_K04\_00554" 7811 "s59E25H2" 0 "bifunctional 3-deoxy-7-phosphoheptulonate synthase/chorismate mutase"  
"JS1\_K04\_00554" 7811 "s59E5H2" 0.03048943 "bifunctional 3-deoxy-7-phosphoheptulonate synthase/chorismate mutase"  
"JS1\_K04\_00554" 7811 "s63E6H2" 0.4230332 "bifunctional 3-deoxy-7-phosphoheptulonate synthase/chorismate mutase"  
"JS1\_K04\_00555" 7812 "s59E13H2" 0.01897289 "Phospho-2-dehydro-3-deoxyheptonate aldolase"  
"JS1\_K04\_00555" 7812 "s59E25H2" 0 "Phospho-2-dehydro-3-deoxyheptonate aldolase"  
"JS1\_K04\_00555" 7812 "s59E5H2" 0.05039691 "Phospho-2-dehydro-3-deoxyheptonate aldolase"  
"JS1\_K04\_00555" 7812 "s63E6H2" 0.5576616 "Phospho-2-dehydro-3-deoxyheptonate aldolase"  
"JS1\_K04\_00556" 7813 "s59E13H2" 0.02222732 "ATP-dependent DNA helicase PcrA"  
"JS1\_K04\_00556" 7813 "s59E25H2" 0 "ATP-dependent DNA helicase PcrA"  
"JS1\_K04\_00556" 7813 "s59E5H2" 0.3281985 "ATP-dependent DNA helicase PcrA"  
"JS1\_K04\_00556" 7813 "s63E6H2" 0.5719769 "ATP-dependent DNA helicase PcrA"  
"JS1\_K04\_00557" 7814 "s59E13H2" 2.133986 "Aminopeptidase PepS"

"JS1\_K04\_00557" 7814 "s59E25H2" 0 "Aminopeptidase PepS"  
"JS1\_K04\_00557" 7814 "s59E5H2" 1.219667 "Aminopeptidase PepS"  
"JS1\_K04\_00557" 7814 "s63E6H2" 0.2225522 "Aminopeptidase PepS"  
"JS1\_K04\_00558" 7815 "s59E13H2" 0 "hypothetical protein"  
"JS1\_K04\_00558" 7815 "s59E25H2" 0 "hypothetical protein"  
"JS1\_K04\_00558" 7815 "s59E5H2" 0 "hypothetical protein"  
"JS1\_K04\_00558" 7815 "s63E6H2" 0.04387841 "hypothetical protein"  
"JS1\_K04\_00559" 7816 "s59E13H2" 0 "hypothetical protein"  
"JS1\_K04\_00559" 7816 "s59E25H2" 0 "hypothetical protein"  
"JS1\_K04\_00559" 7816 "s59E5H2" 0 "hypothetical protein"  
"JS1\_K04\_00559" 7816 "s63E6H2" 0.03370993 "hypothetical protein"  
"JS1\_K04\_00560" 7817 "s59E13H2" 0 "putative transporter"  
"JS1\_K04\_00560" 7817 "s59E25H2" 0 "putative transporter"  
"JS1\_K04\_00560" 7817 "s59E5H2" 0 "putative transporter"  
"JS1\_K04\_00560" 7817 "s63E6H2" 0.1167653 "putative transporter"  
"JS1\_K04\_00561" 7818 "s59E13H2" 0.006933788 "Thiamine-monophosphate kinase"  
"JS1\_K04\_00561" 7818 "s59E25H2" 0 "Thiamine-monophosphate kinase"  
"JS1\_K04\_00561" 7818 "s59E5H2" 0.2091771 "Thiamine-monophosphate kinase"  
"JS1\_K04\_00561" 7818 "s63E6H2" 0.6417113 "Thiamine-monophosphate kinase"  
"JS1\_K04\_00562" 7819 "s59E13H2" 0.01766468 "Phosphomethylpyrimidine synthase"  
"JS1\_K04\_00562" 7819 "s59E25H2" 0 "Phosphomethylpyrimidine synthase"  
"JS1\_K04\_00562" 7819 "s59E5H2" 0.1241506 "Phosphomethylpyrimidine synthase"  
"JS1\_K04\_00562" 7819 "s63E6H2" 0.5211176 "Phosphomethylpyrimidine synthase"  
"JS1\_K04\_00563" 7820 "s59E13H2" 2.904552 "YvrJ protein family protein"  
"JS1\_K04\_00563" 7820 "s59E25H2" 0.7518519 "YvrJ protein family protein"  
"JS1\_K04\_00563" 7820 "s59E5H2" 1.159859 "YvrJ protein family protein"  
"JS1\_K04\_00563" 7820 "s63E6H2" 4.849472 "YvrJ protein family protein"  
"JS1\_K04\_00564" 7821 "s59E13H2" 0.1884423 "Arsenate-mycothioli transferase ArsC2"  
"JS1\_K04\_00564" 7821 "s59E25H2" 0 "Arsenate-mycothioli transferase ArsC2"  
"JS1\_K04\_00564" 7821 "s59E5H2" 0.1951157 "Arsenate-mycothioli transferase ArsC2"  
"JS1\_K04\_00564" 7821 "s63E6H2" 0.08347166 "Arsenate-mycothioli transferase ArsC2"  
"JS1\_K04\_00565" 7822 "s59E13H2" 0.4132461 "Inner membrane symporter YicJ"  
"JS1\_K04\_00565" 7822 "s59E25H2" 0 "Inner membrane symporter YicJ"  
"JS1\_K04\_00565" 7822 "s59E5H2" 3.997164 "Inner membrane symporter YicJ"  
"JS1\_K04\_00565" 7822 "s63E6H2" 1.91724 "Inner membrane symporter YicJ"  
"JS1\_K04\_00566" 7823 "s59E13H2" 0.243433 "Carbon-nitrogen hydrolase"  
"JS1\_K04\_00566" 7823 "s59E25H2" 0 "Carbon-nitrogen hydrolase"  
"JS1\_K04\_00566" 7823 "s59E5H2" 2.265571 "Carbon-nitrogen hydrolase"  
"JS1\_K04\_00566" 7823 "s63E6H2" 1.032846 "Carbon-nitrogen hydrolase"  
"JS1\_K04\_00567" 7824 "s59E13H2" 0.08297555 "Formamidase"  
"JS1\_K04\_00567" 7824 "s59E25H2" 0 "Formamidase"  
"JS1\_K04\_00567" 7824 "s59E5H2" 0.4780647 "Formamidase"  
"JS1\_K04\_00567" 7824 "s63E6H2" 0.5031489 "Formamidase"  
"JS1\_K04\_00568" 7825 "s59E13H2" 0.1589202 "hypothetical protein"  
"JS1\_K04\_00568" 7825 "s59E25H2" 0 "hypothetical protein"  
"JS1\_K04\_00568" 7825 "s59E5H2" 1.056826 "hypothetical protein"  
"JS1\_K04\_00568" 7825 "s63E6H2" 1.428996 "hypothetical protein"

"JS1\_K04\_00569" 7826 "s59E13H2" 0.5346427 "von Willebrand factor type A domain protein"  
"JS1\_K04\_00569" 7826 "s59E25H2" 0 "von Willebrand factor type A domain protein"  
"JS1\_K04\_00569" 7826 "s59E5H2" 0.05715748 "von Willebrand factor type A domain protein"  
"JS1\_K04\_00569" 7826 "s63E6H2" 0.001217277 "von Willebrand factor type A domain protein"  
"JS1\_K04\_00570" 7827 "s59E13H2" 1.336818 "hypothetical protein"  
"JS1\_K04\_00570" 7827 "s59E25H2" 0 "hypothetical protein"  
"JS1\_K04\_00570" 7827 "s59E5H2" 0.3478768 "hypothetical protein"  
"JS1\_K04\_00570" 7827 "s63E6H2" 0.007420052 "hypothetical protein"  
"JS1\_K04\_00571" 7828 "s59E13H2" 1.368223 "hypothetical protein"  
"JS1\_K04\_00571" 7828 "s59E25H2" 0 "hypothetical protein"  
"JS1\_K04\_00571" 7828 "s59E5H2" 0.4818939 "hypothetical protein"  
"JS1\_K04\_00571" 7828 "s63E6H2" 0.000670894 "hypothetical protein"  
"JS1\_K04\_00572" 7829 "s59E13H2" 1.250733 "Ankyrin repeats (3 copies)"  
"JS1\_K04\_00572" 7829 "s59E25H2" 0 "Ankyrin repeats (3 copies)"  
"JS1\_K04\_00572" 7829 "s59E5H2" 0.1697929 "Ankyrin repeats (3 copies)"  
"JS1\_K04\_00572" 7829 "s63E6H2" 0.3040968 "Ankyrin repeats (3 copies)"  
"JS1\_K04\_00573" 7830 "s59E13H2" 1.175294 "protease TldD"  
"JS1\_K04\_00573" 7830 "s59E25H2" 0 "protease TldD"  
"JS1\_K04\_00573" 7830 "s59E5H2" 0.1454861 "protease TldD"  
"JS1\_K04\_00573" 7830 "s63E6H2" 0.8963621 "protease TldD"  
"JS1\_K04\_00574" 7831 "s59E13H2" 0.9061042 "protease TldD"  
"JS1\_K04\_00574" 7831 "s59E25H2" 0.1298322 "protease TldD"  
"JS1\_K04\_00574" 7831 "s59E5H2" 11.29876 "protease TldD"  
"JS1\_K04\_00574" 7831 "s63E6H2" 0.8353547 "protease TldD"  
"JS1\_K04\_00575" 7832 "s59E13H2" 0.8703862 "3'-5' exoribonuclease YhaM"  
"JS1\_K04\_00575" 7832 "s59E25H2" 0 "3'-5' exoribonuclease YhaM"  
"JS1\_K04\_00575" 7832 "s59E5H2" 0.1073178 "3'-5' exoribonuclease YhaM"  
"JS1\_K04\_00575" 7832 "s63E6H2" 0.1476018 "3'-5' exoribonuclease YhaM"  
"JS1\_K04\_00576" 7833 "s59E13H2" 1.253364 "Glucosamine-6-phosphate deaminase 1"  
"JS1\_K04\_00576" 7833 "s59E25H2" 0 "Glucosamine-6-phosphate deaminase 1"  
"JS1\_K04\_00576" 7833 "s59E5H2" 0.3534509 "Glucosamine-6-phosphate deaminase 1"  
"JS1\_K04\_00576" 7833 "s63E6H2" 0.9297524 "Glucosamine-6-phosphate deaminase 1"  
"JS1\_K04\_00577" 7834 "s59E13H2" 1.578198 "N-acetylglucosamine-6-phosphate deacetylase"  
"JS1\_K04\_00577" 7834 "s59E25H2" 0 "N-acetylglucosamine-6-phosphate deacetylase"  
"JS1\_K04\_00577" 7834 "s59E5H2" 0.2674867 "N-acetylglucosamine-6-phosphate deacetylase"  
"JS1\_K04\_00577" 7834 "s63E6H2" 1.189925 "N-acetylglucosamine-6-phosphate deacetylase"  
"JS1\_K04\_00578" 7835 "s59E13H2" 1.290364 "hypothetical protein"  
"JS1\_K04\_00578" 7835 "s59E25H2" 0 "hypothetical protein"  
"JS1\_K04\_00578" 7835 "s59E5H2" 0.1377477 "hypothetical protein"  
"JS1\_K04\_00578" 7835 "s63E6H2" 1.939202 "hypothetical protein"  
"JS1\_K04\_00579" 7836 "s59E13H2" 0.9965695 "hypothetical protein"  
"JS1\_K04\_00579" 7836 "s59E25H2" 0 "hypothetical protein"  
"JS1\_K04\_00579" 7836 "s59E5H2" 0.3114814 "hypothetical protein"  
"JS1\_K04\_00579" 7836 "s63E6H2" 1.759282 "hypothetical protein"  
"JS1\_K04\_00580" 7837 "s59E13H2" 0.04556805 "50S ribosomal protein L3"  
"JS1\_K04\_00580" 7837 "s59E25H2" 0 "50S ribosomal protein L3"  
"JS1\_K04\_00580" 7837 "s59E5H2" 0.1367865 "50S ribosomal protein L3"

"JS1\_K04\_00580" 7837 "s63E6H2" 0.05877621 "50S ribosomal protein L3"  
"JS1\_K04\_00581" 7838 "s59E13H2" 0.03024122 "50S ribosomal protein L4"  
"JS1\_K04\_00581" 7838 "s59E25H2" 0 "50S ribosomal protein L4"  
"JS1\_K04\_00581" 7838 "s59E5H2" 0.1103645 "50S ribosomal protein L4"  
"JS1\_K04\_00581" 7838 "s63E6H2" 0.07588395 "50S ribosomal protein L4"  
"JS1\_K04\_00582" 7839 "s59E13H2" 0.02359588 "50S ribosomal protein L23"  
"JS1\_K04\_00582" 7839 "s59E25H2" 0 "50S ribosomal protein L23"  
"JS1\_K04\_00582" 7839 "s59E5H2" 0.06985681 "50S ribosomal protein L23"  
"JS1\_K04\_00582" 7839 "s63E6H2" 0.149217 "50S ribosomal protein L23"  
"JS1\_K04\_00583" 7840 "s59E13H2" 0.02584578 "50S ribosomal protein L2"  
"JS1\_K04\_00583" 7840 "s59E25H2" 0 "50S ribosomal protein L2"  
"JS1\_K04\_00583" 7840 "s59E5H2" 0.06486637 "50S ribosomal protein L2"  
"JS1\_K04\_00583" 7840 "s63E6H2" 0.3007426 "50S ribosomal protein L2"  
"JS1\_K04\_00584" 7841 "s59E13H2" 0.03302076 "30S ribosomal protein S19"  
"JS1\_K04\_00584" 7841 "s59E25H2" 0 "30S ribosomal protein S19"  
"JS1\_K04\_00584" 7841 "s59E5H2" 0.03646218 "30S ribosomal protein S19"  
"JS1\_K04\_00584" 7841 "s63E6H2" 0.2781115 "30S ribosomal protein S19"  
"JS1\_K04\_00585" 7842 "s59E13H2" 2.912014 "50S ribosomal protein L22"  
"JS1\_K04\_00585" 7842 "s59E25H2" 0 "50S ribosomal protein L22"  
"JS1\_K04\_00585" 7842 "s59E5H2" 0.09412203 "50S ribosomal protein L22"  
"JS1\_K04\_00585" 7842 "s63E6H2" 0.2571628 "50S ribosomal protein L22"  
"JS1\_K04\_00586" 7843 "s59E13H2" 0.04471452 "30S ribosomal protein S3"  
"JS1\_K04\_00586" 7843 "s59E25H2" 0 "30S ribosomal protein S3"  
"JS1\_K04\_00586" 7843 "s59E5H2" 0.04263575 "30S ribosomal protein S3"  
"JS1\_K04\_00586" 7843 "s63E6H2" 0.1739504 "30S ribosomal protein S3"  
"JS1\_K04\_00587" 7844 "s59E13H2" 0.02731262 "50S ribosomal protein L16"  
"JS1\_K04\_00587" 7844 "s59E25H2" 0 "50S ribosomal protein L16"  
"JS1\_K04\_00587" 7844 "s59E5H2" 0.1955756 "50S ribosomal protein L16"  
"JS1\_K04\_00587" 7844 "s63E6H2" 0.2293315 "50S ribosomal protein L16"  
"JS1\_K04\_00588" 7845 "s59E13H2" 0.02694745 "50S ribosomal protein L29"  
"JS1\_K04\_00588" 7845 "s59E25H2" 0 "50S ribosomal protein L29"  
"JS1\_K04\_00588" 7845 "s59E5H2" 0.02008623 "50S ribosomal protein L29"  
"JS1\_K04\_00588" 7845 "s63E6H2" 0.09183933 "50S ribosomal protein L29"  
"JS1\_K04\_00589" 7846 "s59E13H2" 0.008565273 "30S ribosomal protein S7"  
"JS1\_K04\_00589" 7846 "s59E25H2" 0 "30S ribosomal protein S7"  
"JS1\_K04\_00589" 7846 "s59E5H2" 0.07259139 "30S ribosomal protein S7"  
"JS1\_K04\_00589" 7846 "s63E6H2" 0.180249 "30S ribosomal protein S7"  
"JS1\_K04\_00590" 7847 "s59E13H2" 0.01290469 "30S ribosomal protein S12"  
"JS1\_K04\_00590" 7847 "s59E25H2" 0 "30S ribosomal protein S12"  
"JS1\_K04\_00590" 7847 "s59E5H2" 0.1806749 "30S ribosomal protein S12"  
"JS1\_K04\_00590" 7847 "s63E6H2" 0.249565 "30S ribosomal protein S12"  
"JS1\_K04\_00592" 7849 "s59E13H2" 0.01807005 "RNA polymerase-associated protein RapA"  
"JS1\_K04\_00592" 7849 "s59E25H2" 0 "RNA polymerase-associated protein RapA"  
"JS1\_K04\_00592" 7849 "s59E5H2" 0.4273529 "RNA polymerase-associated protein RapA"  
"JS1\_K04\_00592" 7849 "s63E6H2" 0.001565055 "RNA polymerase-associated protein RapA"  
"JS1\_K04\_00593" 7850 "s59E13H2" 0.02306421 "hypothetical protein"  
"JS1\_K04\_00593" 7850 "s59E25H2" 0 "hypothetical protein"

"JS1\_K04\_00593" 7850 "s59E5H2" 0.1500335 "hypothetical protein"  
"JS1\_K04\_00593" 7850 "s63E6H2" 0.002231498 "hypothetical protein"  
"JS1\_K04\_00594" 7851 "s59E13H2" 0.01734486 "hypothetical protein"  
"JS1\_K04\_00594" 7851 "s59E25H2" 0 "hypothetical protein"  
"JS1\_K04\_00594" 7851 "s59E5H2" 0.3561283 "hypothetical protein"  
"JS1\_K04\_00594" 7851 "s63E6H2" 0.00235365 "hypothetical protein"  
"JS1\_K04\_00596" 7853 "s59E13H2" 0 "Modification methylase HaeIII"  
"JS1\_K04\_00596" 7853 "s59E25H2" 0 "Modification methylase HaeIII"  
"JS1\_K04\_00596" 7853 "s59E5H2" 0 "Modification methylase HaeIII"  
"JS1\_K04\_00596" 7853 "s63E6H2" 0.01403701 "Modification methylase HaeIII"  
"JS1\_K04\_00597" 7854 "s59E13H2" 0 "heat shock protein 90"  
"JS1\_K04\_00597" 7854 "s59E25H2" 0 "heat shock protein 90"  
"JS1\_K04\_00597" 7854 "s59E5H2" 0.009685698 "heat shock protein 90"  
"JS1\_K04\_00597" 7854 "s63E6H2" 0.009024811 "heat shock protein 90"  
"JS1\_K04\_00598" 7855 "s59E13H2" 0 "Very short patch repair protein"  
"JS1\_K04\_00598" 7855 "s59E25H2" 0 "Very short patch repair protein"  
"JS1\_K04\_00598" 7855 "s59E5H2" 0 "Very short patch repair protein"  
"JS1\_K04\_00598" 7855 "s63E6H2" 0 "Very short patch repair protein"  
"JS1\_K04\_00599" 7856 "s59E13H2" 0 "hypothetical protein"  
"JS1\_K04\_00599" 7856 "s59E25H2" 0 "hypothetical protein"  
"JS1\_K04\_00599" 7856 "s59E5H2" 0 "hypothetical protein"  
"JS1\_K04\_00599" 7856 "s63E6H2" 0 "hypothetical protein"  
"JS1\_K04\_00600" 7857 "s59E13H2" 0 "Serine/threonine-protein kinase PknD"  
"JS1\_K04\_00600" 7857 "s59E25H2" 0 "Serine/threonine-protein kinase PknD"  
"JS1\_K04\_00600" 7857 "s59E5H2" 0 "Serine/threonine-protein kinase PknD"  
"JS1\_K04\_00600" 7857 "s63E6H2" 0 "Serine/threonine-protein kinase PknD"  
"JS1\_K04\_00602" 7859 "s59E13H2" 0.01516626 "5'-methylthioadenosine/S-adenosylhomocysteine nucleosidase"  
"JS1\_K04\_00602" 7859 "s59E25H2" 0 "5'-methylthioadenosine/S-adenosylhomocysteine nucleosidase"  
"JS1\_K04\_00602" 7859 "s59E5H2" 0 "5'-methylthioadenosine/S-adenosylhomocysteine nucleosidase"  
"JS1\_K04\_00602" 7859 "s63E6H2" 0 "5'-methylthioadenosine/S-adenosylhomocysteine nucleosidase"  
"JS1\_K04\_00604" 7861 "s59E13H2" 0.08068487 "hypothetical protein"  
"JS1\_K04\_00604" 7861 "s59E25H2" 0 "hypothetical protein"  
"JS1\_K04\_00604" 7861 "s59E5H2" 0 "hypothetical protein"  
"JS1\_K04\_00604" 7861 "s63E6H2" 0.03039876 "hypothetical protein"  
"JS1\_K04\_00606" 7863 "s59E13H2" 0.6153195 "Endonuclease III"  
"JS1\_K04\_00606" 7863 "s59E25H2" 0 "Endonuclease III"  
"JS1\_K04\_00606" 7863 "s59E5H2" 0.02931081 "Endonuclease III"  
"JS1\_K04\_00606" 7863 "s63E6H2" 0 "Endonuclease III"  
"JS1\_K04\_00607" 7864 "s59E13H2" 0.1348139 "hypothetical protein"  
"JS1\_K04\_00607" 7864 "s59E25H2" 0 "hypothetical protein"  
"JS1\_K04\_00607" 7864 "s59E5H2" 0 "hypothetical protein"  
"JS1\_K04\_00607" 7864 "s63E6H2" 0 "hypothetical protein"  
"JS1\_K04\_00608" 7865 "s59E13H2" 0.2173748 "hypothetical protein"  
"JS1\_K04\_00608" 7865 "s59E25H2" 0 "hypothetical protein"  
"JS1\_K04\_00608" 7865 "s59E5H2" 1.02719 "hypothetical protein"  
"JS1\_K04\_00608" 7865 "s63E6H2" 0.1037853 "hypothetical protein"  
"JS1\_K04\_00609" 7866 "s59E13H2" 0.1964044 "hypothetical protein"

"JS1\_K04\_00609" 7866 "s59E25H2" 0 "hypothetical protein"  
"JS1\_K04\_00609" 7866 "s59E5H2" 1.27567 "hypothetical protein"  
"JS1\_K04\_00609" 7866 "s63E6H2" 0.07876299 "hypothetical protein"  
"JS1\_K04\_00610" 7867 "s59E13H2" 0.2400114 "hypothetical protein"  
"JS1\_K04\_00610" 7867 "s59E25H2" 0 "hypothetical protein"  
"JS1\_K04\_00610" 7867 "s59E5H2" 0 "hypothetical protein"  
"JS1\_K04\_00610" 7867 "s63E6H2" 0 "hypothetical protein"  
"JS1\_K04\_00611" 7868 "s59E13H2" 0.2521234 "RNA-metabolising metallo-beta-lactamase"  
"JS1\_K04\_00611" 7868 "s59E25H2" 0 "RNA-metabolising metallo-beta-lactamase"  
"JS1\_K04\_00611" 7868 "s59E5H2" 0.1083143 "RNA-metabolising metallo-beta-lactamase"  
"JS1\_K04\_00611" 7868 "s63E6H2" 0.2216285 "RNA-metabolising metallo-beta-lactamase"  
"JS1\_K04\_00612" 7869 "s59E13H2" 0.4127183 "hypothetical protein"  
"JS1\_K04\_00612" 7869 "s59E25H2" 0.5242165 "hypothetical protein"  
"JS1\_K04\_00612" 7869 "s59E5H2" 0.06563211 "hypothetical protein"  
"JS1\_K04\_00612" 7869 "s63E6H2" 0 "hypothetical protein"  
"JS1\_K04\_00613" 7870 "s59E13H2" 0.3181902 "hypothetical protein"  
"JS1\_K04\_00613" 7870 "s59E25H2" 0.1343042 "hypothetical protein"  
"JS1\_K04\_00613" 7870 "s59E5H2" 0.8132886 "hypothetical protein"  
"JS1\_K04\_00613" 7870 "s63E6H2" 0 "hypothetical protein"  
"JS1\_K04\_00615" 7872 "s59E13H2" 0.0724922 "Fructose-bisphosphate aldolase"  
"JS1\_K04\_00615" 7872 "s59E25H2" 0 "Fructose-bisphosphate aldolase"  
"JS1\_K04\_00615" 7872 "s59E5H2" 0.7072579 "Fructose-bisphosphate aldolase"  
"JS1\_K04\_00615" 7872 "s63E6H2" 0.2143809 "Fructose-bisphosphate aldolase"  
"JS1\_K04\_00616" 7873 "s59E13H2" 0.08537185 "6-phosphofructokinase 1"  
"JS1\_K04\_00616" 7873 "s59E25H2" 0 "6-phosphofructokinase 1"  
"JS1\_K04\_00616" 7873 "s59E5H2" 0.07954312 "6-phosphofructokinase 1"  
"JS1\_K04\_00616" 7873 "s63E6H2" 0.3886038 "6-phosphofructokinase 1"  
"JS1\_K04\_00617" 7874 "s59E13H2" 0.175612 "DNA polymerase III subunit alpha"  
"JS1\_K04\_00617" 7874 "s59E25H2" 0 "DNA polymerase III subunit alpha"  
"JS1\_K04\_00617" 7874 "s59E5H2" 0.7869596 "DNA polymerase III subunit alpha"  
"JS1\_K04\_00617" 7874 "s63E6H2" 0.854247 "DNA polymerase III subunit alpha"  
"JS1\_K04\_00618" 7875 "s59E13H2" 0.05749541 "DNA polymerase III subunit alpha"  
"JS1\_K04\_00618" 7875 "s59E25H2" 0 "DNA polymerase III subunit alpha"  
"JS1\_K04\_00618" 7875 "s59E5H2" 0.3057572 "DNA polymerase III subunit alpha"  
"JS1\_K04\_00618" 7875 "s63E6H2" 0.681362 "DNA polymerase III subunit alpha"  
"JS1\_K04\_00620" 7877 "s59E13H2" 0.03486601 "hypothetical protein"  
"JS1\_K04\_00620" 7877 "s59E25H2" 0 "hypothetical protein"  
"JS1\_K04\_00620" 7877 "s59E5H2" 0.2071271 "hypothetical protein"  
"JS1\_K04\_00620" 7877 "s63E6H2" 0.1824813 "hypothetical protein"  
"JS1\_K04\_00622" 7879 "s59E13H2" 0.02474491 "DNA polymerase I"  
"JS1\_K04\_00622" 7879 "s59E25H2" 0 "DNA polymerase I"  
"JS1\_K04\_00622" 7879 "s59E5H2" 0.1701168 "DNA polymerase I"  
"JS1\_K04\_00622" 7879 "s63E6H2" 1.503353 "DNA polymerase I"  
"JS1\_K04\_00623" 7880 "s59E13H2" 0.05088565 "UvrABC system protein C"  
"JS1\_K04\_00623" 7880 "s59E25H2" 0 "UvrABC system protein C"  
"JS1\_K04\_00623" 7880 "s59E5H2" 0.1513095 "UvrABC system protein C"  
"JS1\_K04\_00623" 7880 "s63E6H2" 0.1335977 "UvrABC system protein C"

"JS1\_K04\_00624" 7881 "s59E13H2" 0.04509924 "UvrABC system protein A"  
"JS1\_K04\_00624" 7881 "s59E25H2" 0 "UvrABC system protein A"  
"JS1\_K04\_00624" 7881 "s59E5H2" 0.9448747 "UvrABC system protein A"  
"JS1\_K04\_00624" 7881 "s63E6H2" 0.2047512 "UvrABC system protein A"  
"JS1\_K04\_00625" 7882 "s59E13H2" 0.05997499 "UvrABC system protein B"  
"JS1\_K04\_00625" 7882 "s59E25H2" 0 "UvrABC system protein B"  
"JS1\_K04\_00625" 7882 "s59E5H2" 0.7800159 "UvrABC system protein B"  
"JS1\_K04\_00625" 7882 "s63E6H2" 0.8845991 "UvrABC system protein B"  
"JS1\_K04\_00626" 7883 "s59E13H2" 0.07463152 "Adenine deaminase"  
"JS1\_K04\_00626" 7883 "s59E25H2" 0 "Adenine deaminase"  
"JS1\_K04\_00626" 7883 "s59E5H2" 1.112297 "Adenine deaminase"  
"JS1\_K04\_00626" 7883 "s63E6H2" 2.427915 "Adenine deaminase"  
"JS1\_K04\_00627" 7884 "s59E13H2" 0.03951583 "Dephospho-CoA kinase"  
"JS1\_K04\_00627" 7884 "s59E25H2" 0 "Dephospho-CoA kinase"  
"JS1\_K04\_00627" 7884 "s59E5H2" 0.4473498 "Dephospho-CoA kinase"  
"JS1\_K04\_00627" 7884 "s63E6H2" 0.4837489 "Dephospho-CoA kinase"  
"JS1\_K04\_00628" 7885 "s59E13H2" 0.008848271 "putative NH(3)-dependent NAD(+) synthetase"  
"JS1\_K04\_00628" 7885 "s59E25H2" 0 "putative NH(3)-dependent NAD(+) synthetase"  
"JS1\_K04\_00628" 7885 "s59E5H2" 0 "putative NH(3)-dependent NAD(+) synthetase"  
"JS1\_K04\_00628" 7885 "s63E6H2" 0.004363028 "putative NH(3)-dependent NAD(+) synthetase"  
"JS1\_K04\_00629" 7886 "s59E13H2" 0.01253494 "T-protein"  
"JS1\_K04\_00629" 7886 "s59E25H2" 0 "T-protein"  
"JS1\_K04\_00629" 7886 "s59E5H2" 0.1387389 "T-protein"  
"JS1\_K04\_00629" 7886 "s63E6H2" 0.02334187 "T-protein"  
"JS1\_K04\_00630" 7887 "s59E13H2" 0.0254607 "3-phosphoshikimate 1-carboxyvinyltransferase 1"  
"JS1\_K04\_00630" 7887 "s59E25H2" 0 "3-phosphoshikimate 1-carboxyvinyltransferase 1"  
"JS1\_K04\_00630" 7887 "s59E5H2" 0.09037098 "3-phosphoshikimate 1-carboxyvinyltransferase 1"  
"JS1\_K04\_00630" 7887 "s63E6H2" 0.03561333 "3-phosphoshikimate 1-carboxyvinyltransferase 1"  
"JS1\_K04\_00631" 7888 "s59E13H2" 0.008736782 "Cytidylate kinase"  
"JS1\_K04\_00631" 7888 "s59E25H2" 0 "Cytidylate kinase"  
"JS1\_K04\_00631" 7888 "s59E5H2" 0.08474631 "Cytidylate kinase"  
"JS1\_K04\_00631" 7888 "s63E6H2" 0.06037543 "Cytidylate kinase"  
"JS1\_K04\_00632" 7889 "s59E13H2" 0.02519256 "1-acyl-sn-glycerol-3-phosphate acyltransferase"  
"JS1\_K04\_00632" 7889 "s59E25H2" 0 "1-acyl-sn-glycerol-3-phosphate acyltransferase"  
"JS1\_K04\_00632" 7889 "s59E5H2" 0.05989335 "1-acyl-sn-glycerol-3-phosphate acyltransferase"  
"JS1\_K04\_00632" 7889 "s63E6H2" 0.05064198 "1-acyl-sn-glycerol-3-phosphate acyltransferase"  
"JS1\_K04\_00633" 7890 "s59E13H2" 0.03185743 "4-hydroxy-3-methylbut-2-enyl diphosphate reductase"  
"JS1\_K04\_00633" 7890 "s59E25H2" 0 "4-hydroxy-3-methylbut-2-enyl diphosphate reductase"  
"JS1\_K04\_00633" 7890 "s59E5H2" 0.04874896 "4-hydroxy-3-methylbut-2-enyl diphosphate reductase"  
"JS1\_K04\_00633" 7890 "s63E6H2" 0.03471239 "4-hydroxy-3-methylbut-2-enyl diphosphate reductase"  
"JS1\_K04\_00634" 7891 "s59E13H2" 0.01878572 "Radical SAM superfamily protein"  
"JS1\_K04\_00634" 7891 "s59E25H2" 0 "Radical SAM superfamily protein"  
"JS1\_K04\_00634" 7891 "s59E5H2" 0.0007137241 "Radical SAM superfamily protein"  
"JS1\_K04\_00634" 7891 "s63E6H2" 0.02692803 "Radical SAM superfamily protein"  
"JS1\_K04\_00635" 7892 "s59E13H2" 0.01390062 "GTPase Der"  
"JS1\_K04\_00635" 7892 "s59E25H2" 0 "GTPase Der"  
"JS1\_K04\_00635" 7892 "s59E5H2" 0.1463118 "GTPase Der"



"JS1\_K04\_00635" 7892 "s63E6H2" 0.04734183 "GTPase Der"  
"JS1\_K04\_00636" 7893 "s59E13H2" 0.02084144 "Glycerol-3-phosphate dehydrogenase [NAD(P)+]"  
"JS1\_K04\_00636" 7893 "s59E25H2" 0 "Glycerol-3-phosphate dehydrogenase [NAD(P)+]"  
"JS1\_K04\_00636" 7893 "s59E5H2" 0.1600946 "Glycerol-3-phosphate dehydrogenase [NAD(P)+]"  
"JS1\_K04\_00636" 7893 "s63E6H2" 0.04033481 "Glycerol-3-phosphate dehydrogenase [NAD(P)+]"  
"JS1\_K04\_00638" 7895 "s59E13H2" 0.01496964 "Glycogen accumulation regulator GarA"  
"JS1\_K04\_00638" 7895 "s59E25H2" 0 "Glycogen accumulation regulator GarA"  
"JS1\_K04\_00638" 7895 "s59E5H2" 0.1822449 "Glycogen accumulation regulator GarA"  
"JS1\_K04\_00638" 7895 "s63E6H2" 0.06627013 "Glycogen accumulation regulator GarA"  
"JS1\_K04\_00639" 7896 "s59E13H2" 0.03566305 "MerR family regulatory protein"  
"JS1\_K04\_00639" 7896 "s59E25H2" 0 "MerR family regulatory protein"  
"JS1\_K04\_00639" 7896 "s59E5H2" 0.2000344 "MerR family regulatory protein"  
"JS1\_K04\_00639" 7896 "s63E6H2" 0.09652869 "MerR family regulatory protein"  
"JS1\_K04\_00640" 7897 "s59E13H2" 0.02569125 "D-alanyl-D-alanine carboxypeptidase DacF precursor"  
"JS1\_K04\_00640" 7897 "s59E25H2" 0 "D-alanyl-D-alanine carboxypeptidase DacF precursor"  
"JS1\_K04\_00640" 7897 "s59E5H2" 0.06538358 "D-alanyl-D-alanine carboxypeptidase DacF precursor"  
"JS1\_K04\_00640" 7897 "s63E6H2" 0.07910096 "D-alanyl-D-alanine carboxypeptidase DacF precursor"  
"JS1\_K04\_00641" 7898 "s59E13H2" 0.01004296 "Putative lipoprotein YerB precursor"  
"JS1\_K04\_00641" 7898 "s59E25H2" 0 "Putative lipoprotein YerB precursor"  
"JS1\_K04\_00641" 7898 "s59E5H2" 0.05342312 "Putative lipoprotein YerB precursor"  
"JS1\_K04\_00641" 7898 "s63E6H2" 0.06188486 "Putative lipoprotein YerB precursor"  
"JS1\_K04\_00642" 7899 "s59E13H2" 0.02259702 "Hypoxanthine-guanine phosphoribosyltransferase"  
"JS1\_K04\_00642" 7899 "s59E25H2" 0 "Hypoxanthine-guanine phosphoribosyltransferase"  
"JS1\_K04\_00642" 7899 "s59E5H2" 0.1750491 "Hypoxanthine-guanine phosphoribosyltransferase"  
"JS1\_K04\_00642" 7899 "s63E6H2" 0.140116 "Hypoxanthine-guanine phosphoribosyltransferase"  
"JS1\_K04\_00643" 7900 "s59E13H2" 0.001619999 "hypothetical protein"  
"JS1\_K04\_00643" 7900 "s59E25H2" 0 "hypothetical protein"  
"JS1\_K04\_00643" 7900 "s59E5H2" 0.1638493 "hypothetical protein"  
"JS1\_K04\_00643" 7900 "s63E6H2" 0.04936175 "hypothetical protein"  
"JS1\_K04\_00644" 7901 "s59E13H2" 0.02003267 "hypothetical protein"  
"JS1\_K04\_00644" 7901 "s59E25H2" 0 "hypothetical protein"  
"JS1\_K04\_00644" 7901 "s59E5H2" 0.1969132 "hypothetical protein"  
"JS1\_K04\_00644" 7901 "s63E6H2" 0.04330876 "hypothetical protein"  
"JS1\_K04\_00645" 7902 "s59E13H2" 0.005221119 "hypothetical protein"  
"JS1\_K04\_00645" 7902 "s59E25H2" 0 "hypothetical protein"  
"JS1\_K04\_00645" 7902 "s59E5H2" 0.1521758 "hypothetical protein"  
"JS1\_K04\_00645" 7902 "s63E6H2" 0.05488376 "hypothetical protein"  
"JS1\_K04\_00646" 7903 "s59E13H2" 0.02360113 "Serine acetyltransferase"  
"JS1\_K04\_00646" 7903 "s59E25H2" 0 "Serine acetyltransferase"  
"JS1\_K04\_00646" 7903 "s59E5H2" 0.5647381 "Serine acetyltransferase"  
"JS1\_K04\_00646" 7903 "s63E6H2" 0.0815638 "Serine acetyltransferase"  
"JS1\_K04\_00647" 7904 "s59E13H2" 0.07160263 "Deoxyuridine 5'-triphosphate nucleotidohydrolase"  
"JS1\_K04\_00647" 7904 "s59E25H2" 0 "Deoxyuridine 5'-triphosphate nucleotidohydrolase"  
"JS1\_K04\_00647" 7904 "s59E5H2" 0.03130541 "Deoxyuridine 5'-triphosphate nucleotidohydrolase"  
"JS1\_K04\_00647" 7904 "s63E6H2" 0.1106151 "Deoxyuridine 5'-triphosphate nucleotidohydrolase"  
"JS1\_K04\_00648" 7905 "s59E13H2" 0.06269058 "Ketol-acid reductoisomerase"  
"JS1\_K04\_00648" 7905 "s59E25H2" 0 "Ketol-acid reductoisomerase"

"JS1\_K04\_00648" 7905 "s59E5H2" 0.4671632 "Ketol-acid reductoisomerase"  
"JS1\_K04\_00648" 7905 "s63E6H2" 0.1214523 "Ketol-acid reductoisomerase"  
"JS1\_K04\_00649" 7906 "s59E13H2" 0.02510638 "LexA repressor"  
"JS1\_K04\_00649" 7906 "s59E25H2" 0 "LexA repressor"  
"JS1\_K04\_00649" 7906 "s59E5H2" 0.7376596 "LexA repressor"  
"JS1\_K04\_00649" 7906 "s63E6H2" 0.1661672 "LexA repressor"  
"JS1\_K04\_00650" 7907 "s59E13H2" 0.01037742 "GTPase HflX"  
"JS1\_K04\_00650" 7907 "s59E25H2" 0 "GTPase HflX"  
"JS1\_K04\_00650" 7907 "s59E5H2" 0.9507529 "GTPase HflX"  
"JS1\_K04\_00650" 7907 "s63E6H2" 0.1962749 "GTPase HflX"  
"JS1\_K04\_00651" 7908 "s59E13H2" 0.01435338 "LL-diaminopimelate aminotransferase"  
"JS1\_K04\_00651" 7908 "s59E25H2" 0 "LL-diaminopimelate aminotransferase"  
"JS1\_K04\_00651" 7908 "s59E5H2" 0.7493887 "LL-diaminopimelate aminotransferase"  
"JS1\_K04\_00651" 7908 "s63E6H2" 0.1725025 "LL-diaminopimelate aminotransferase"  
"JS1\_K04\_00652" 7909 "s59E13H2" 0.0003485903 "Diaminopimelate epimerase"  
"JS1\_K04\_00652" 7909 "s59E25H2" 0 "Diaminopimelate epimerase"  
"JS1\_K04\_00652" 7909 "s59E5H2" 0.3092322 "Diaminopimelate epimerase"  
"JS1\_K04\_00652" 7909 "s63E6H2" 0.1332413 "Diaminopimelate epimerase"  
"JS1\_K04\_00653" 7910 "s59E13H2" 0.003369958 "tRNA dimethylallyltransferase"  
"JS1\_K04\_00653" 7910 "s59E25H2" 0 "tRNA dimethylallyltransferase"  
"JS1\_K04\_00653" 7910 "s59E5H2" 0.06500402 "tRNA dimethylallyltransferase"  
"JS1\_K04\_00653" 7910 "s63E6H2" 0.04663734 "tRNA dimethylallyltransferase"  
"JS1\_K04\_00654" 7911 "s59E13H2" 0.009063348 "(Dimethylallyl)adenosine tRNA methylthiotransferase MiaB"  
"JS1\_K04\_00654" 7911 "s59E25H2" 0 "(Dimethylallyl)adenosine tRNA methylthiotransferase MiaB"  
"JS1\_K04\_00654" 7911 "s59E5H2" 0.0623292 "(Dimethylallyl)adenosine tRNA methylthiotransferase MiaB"  
"JS1\_K04\_00654" 7911 "s63E6H2" 0.04833496 "(Dimethylallyl)adenosine tRNA methylthiotransferase MiaB"  
"JS1\_K04\_00655" 7912 "s59E13H2" 0 "Stage V sporulation protein S"  
"JS1\_K04\_00655" 7912 "s59E25H2" 0 "Stage V sporulation protein S"  
"JS1\_K04\_00655" 7912 "s59E5H2" 0.08675949 "Stage V sporulation protein S"  
"JS1\_K04\_00655" 7912 "s63E6H2" 0.04943598 "Stage V sporulation protein S"  
"JS1\_K04\_00656" 7913 "s59E13H2" 0.01012768 "DNA mismatch repair protein MutL"  
"JS1\_K04\_00656" 7913 "s59E25H2" 0 "DNA mismatch repair protein MutL"  
"JS1\_K04\_00656" 7913 "s59E5H2" 0.07229671 "DNA mismatch repair protein MutL"  
"JS1\_K04\_00656" 7913 "s63E6H2" 0.06185108 "DNA mismatch repair protein MutL"  
"JS1\_K04\_00657" 7914 "s59E13H2" 0.008547891 "Ribonuclease Y"  
"JS1\_K04\_00657" 7914 "s59E25H2" 0 "Ribonuclease Y"  
"JS1\_K04\_00657" 7914 "s59E5H2" 0.05211515 "Ribonuclease Y"  
"JS1\_K04\_00657" 7914 "s63E6H2" 0.02907966 "Ribonuclease Y"  
"JS1\_K04\_00658" 7915 "s59E13H2" 1.19446 "Tyrosine--tRNA ligase"  
"JS1\_K04\_00658" 7915 "s59E25H2" 0 "Tyrosine--tRNA ligase"  
"JS1\_K04\_00658" 7915 "s59E5H2" 0.2857383 "Tyrosine--tRNA ligase"  
"JS1\_K04\_00658" 7915 "s63E6H2" 0.08067355 "Tyrosine--tRNA ligase"  
"JS1\_K04\_00659" 7916 "s59E13H2" 1.267334 "Penicillin-binding protein 2D"  
"JS1\_K04\_00659" 7916 "s59E25H2" 0 "Penicillin-binding protein 2D"  
"JS1\_K04\_00659" 7916 "s59E5H2" 0.2289649 "Penicillin-binding protein 2D"  
"JS1\_K04\_00659" 7916 "s63E6H2" 0.05163947 "Penicillin-binding protein 2D"  
"JS1\_K04\_00660" 7917 "s59E13H2" 0.06405915 "putative protease YhbU precursor"

"JS1\_K04\_00660" 7917 "s59E25H2" 0 "putative protease YhbU precursor"  
"JS1\_K04\_00660" 7917 "s59E5H2" 0.3002033 "putative protease YhbU precursor"  
"JS1\_K04\_00660" 7917 "s63E6H2" 0.02614985 "putative protease YhbU precursor"  
"JS1\_K04\_00661" 7918 "s59E13H2" 0.05023484 "Argininosuccinate lyase"  
"JS1\_K04\_00661" 7918 "s59E25H2" 0 "Argininosuccinate lyase"  
"JS1\_K04\_00661" 7918 "s59E5H2" 0.5837678 "Argininosuccinate lyase"  
"JS1\_K04\_00661" 7918 "s63E6H2" 0.03263685 "Argininosuccinate lyase"  
"JS1\_K04\_00662" 7919 "s59E13H2" 0.03281301 "Argininosuccinate synthase"  
"JS1\_K04\_00662" 7919 "s59E25H2" 0 "Argininosuccinate synthase"  
"JS1\_K04\_00662" 7919 "s59E5H2" 0.375126 "Argininosuccinate synthase"  
"JS1\_K04\_00662" 7919 "s63E6H2" 0.03931274 "Argininosuccinate synthase"  
"JS1\_K04\_00663" 7920 "s59E13H2" 0.01741171 "Arginine repressor"  
"JS1\_K04\_00663" 7920 "s59E25H2" 0 "Arginine repressor"  
"JS1\_K04\_00663" 7920 "s59E5H2" 0.2705134 "Arginine repressor"  
"JS1\_K04\_00663" 7920 "s63E6H2" 0.03006533 "Arginine repressor"  
"JS1\_K04\_00664" 7921 "s59E13H2" 0.02131059 "Ornithine carbamoyltransferase"  
"JS1\_K04\_00664" 7921 "s59E25H2" 0 "Ornithine carbamoyltransferase"  
"JS1\_K04\_00664" 7921 "s59E5H2" 0.2489901 "Ornithine carbamoyltransferase"  
"JS1\_K04\_00664" 7921 "s63E6H2" 0.02168882 "Ornithine carbamoyltransferase"  
"JS1\_K04\_00665" 7922 "s59E13H2" 0.0111947 "Acetylornithine aminotransferase"  
"JS1\_K04\_00665" 7922 "s59E25H2" 0 "Acetylornithine aminotransferase"  
"JS1\_K04\_00665" 7922 "s59E5H2" 0.2018535 "Acetylornithine aminotransferase"  
"JS1\_K04\_00665" 7922 "s63E6H2" 0.05320639 "Acetylornithine aminotransferase"  
"JS1\_K04\_00666" 7923 "s59E13H2" 0.01470793 "Acetylglutamate kinase"  
"JS1\_K04\_00666" 7923 "s59E25H2" 0 "Acetylglutamate kinase"  
"JS1\_K04\_00666" 7923 "s59E5H2" 0.3016162 "Acetylglutamate kinase"  
"JS1\_K04\_00666" 7923 "s63E6H2" 0.07162141 "Acetylglutamate kinase"  
"JS1\_K04\_00667" 7924 "s59E13H2" 0.002871626 "Arginine biosynthesis bifunctional protein ArgJ"  
"JS1\_K04\_00667" 7924 "s59E25H2" 0 "Arginine biosynthesis bifunctional protein ArgJ"  
"JS1\_K04\_00667" 7924 "s59E5H2" 0.04660385 "Arginine biosynthesis bifunctional protein ArgJ"  
"JS1\_K04\_00667" 7924 "s63E6H2" 0.2770301 "Arginine biosynthesis bifunctional protein ArgJ"  
"JS1\_K04\_00668" 7925 "s59E13H2" 0.002068944 "N-acetyl-gamma-glutamyl-phosphate reductase"  
"JS1\_K04\_00668" 7925 "s59E25H2" 0 "N-acetyl-gamma-glutamyl-phosphate reductase"  
"JS1\_K04\_00668" 7925 "s59E5H2" 0.119085 "N-acetyl-gamma-glutamyl-phosphate reductase"  
"JS1\_K04\_00668" 7925 "s63E6H2" 2.540454 "N-acetyl-gamma-glutamyl-phosphate reductase"  
"JS1\_K04\_00669" 7926 "s59E13H2" 0.0230082 "hypothetical protein"  
"JS1\_K04\_00669" 7926 "s59E25H2" 0 "hypothetical protein"  
"JS1\_K04\_00669" 7926 "s59E5H2" 0.09818981 "hypothetical protein"  
"JS1\_K04\_00669" 7926 "s63E6H2" 1.97909 "hypothetical protein"  
"JS1\_K04\_00670" 7927 "s59E13H2" 0.009405671 "Serpin (serine protease inhibitor)"  
"JS1\_K04\_00670" 7927 "s59E25H2" 0 "Serpin (serine protease inhibitor)"  
"JS1\_K04\_00670" 7927 "s59E5H2" 0.0800111 "Serpin (serine protease inhibitor)"  
"JS1\_K04\_00670" 7927 "s63E6H2" 1.589387 "Serpin (serine protease inhibitor)"  
"JS1\_K04\_00671" 7928 "s59E13H2" 0.1034085 "hypothetical protein"  
"JS1\_K04\_00671" 7928 "s59E25H2" 0 "hypothetical protein"  
"JS1\_K04\_00671" 7928 "s59E5H2" 0.03680822 "hypothetical protein"  
"JS1\_K04\_00671" 7928 "s63E6H2" 1.650892 "hypothetical protein"

"JS1\_K04\_00672" 7929 "s59E13H2" 0.1297124 "RNA polymerase sigma factor SigI"  
"JS1\_K04\_00672" 7929 "s59E25H2" 0 "RNA polymerase sigma factor SigI"  
"JS1\_K04\_00672" 7929 "s59E5H2" 0.3078477 "RNA polymerase sigma factor SigI"  
"JS1\_K04\_00672" 7929 "s63E6H2" 1.550405 "RNA polymerase sigma factor SigI"  
"JS1\_K04\_00673" 7930 "s59E13H2" 0.5083041 "hypothetical protein"  
"JS1\_K04\_00673" 7930 "s59E25H2" 0 "hypothetical protein"  
"JS1\_K04\_00673" 7930 "s59E5H2" 0.9253409 "hypothetical protein"  
"JS1\_K04\_00673" 7930 "s63E6H2" 3.831637 "hypothetical protein"  
"JS1\_K04\_00674" 7931 "s59E13H2" 0.7153733 "D-lyxose ketol-isomerase"  
"JS1\_K04\_00674" 7931 "s59E25H2" 0 "D-lyxose ketol-isomerase"  
"JS1\_K04\_00674" 7931 "s59E5H2" 0.9670956 "D-lyxose ketol-isomerase"  
"JS1\_K04\_00674" 7931 "s63E6H2" 2.646649 "D-lyxose ketol-isomerase"  
"JS1\_K04\_00675" 7932 "s59E13H2" 0.4694274 "HTH-type transcriptional repressor CsiR"  
"JS1\_K04\_00675" 7932 "s59E25H2" 0 "HTH-type transcriptional repressor CsiR"  
"JS1\_K04\_00675" 7932 "s59E5H2" 0.3277372 "HTH-type transcriptional repressor CsiR"  
"JS1\_K04\_00675" 7932 "s63E6H2" 1.773867 "HTH-type transcriptional repressor CsiR"  
"JS1\_K04\_00676" 7933 "s59E13H2" 0.5235474 "putative HTH-type transcriptional regulator YdfH"  
"JS1\_K04\_00676" 7933 "s59E25H2" 0 "putative HTH-type transcriptional regulator YdfH"  
"JS1\_K04\_00676" 7933 "s59E5H2" 0.3221073 "putative HTH-type transcriptional regulator YdfH"  
"JS1\_K04\_00676" 7933 "s63E6H2" 1.85874 "putative HTH-type transcriptional regulator YdfH"  
"JS1\_K04\_00677" 7934 "s59E13H2" 0.6572432 "Membrane transport protein"  
"JS1\_K04\_00677" 7934 "s59E25H2" 0 "Membrane transport protein"  
"JS1\_K04\_00677" 7934 "s59E5H2" 0.2461837 "Membrane transport protein"  
"JS1\_K04\_00677" 7934 "s63E6H2" 1.96446 "Membrane transport protein"  
"JS1\_K04\_00678" 7935 "s59E13H2" 0.4704186 "Transketolase 2"  
"JS1\_K04\_00678" 7935 "s59E25H2" 0 "Transketolase 2"  
"JS1\_K04\_00678" 7935 "s59E5H2" 0.7258624 "Transketolase 2"  
"JS1\_K04\_00678" 7935 "s63E6H2" 5.533478 "Transketolase 2"  
"JS1\_K04\_00679" 7936 "s59E13H2" 9.267117 "1-deoxy-D-xylulose-5-phosphate synthase"  
"JS1\_K04\_00679" 7936 "s59E25H2" 0 "1-deoxy-D-xylulose-5-phosphate synthase"  
"JS1\_K04\_00679" 7936 "s59E5H2" 0.3997881 "1-deoxy-D-xylulose-5-phosphate synthase"  
"JS1\_K04\_00679" 7936 "s63E6H2" 10.70298 "1-deoxy-D-xylulose-5-phosphate synthase"  
"JS1\_K04\_00680" 7937 "s59E13H2" 14.50489 "Xylose isomerase"  
"JS1\_K04\_00680" 7937 "s59E25H2" 0 "Xylose isomerase"  
"JS1\_K04\_00680" 7937 "s59E5H2" 1.300414 "Xylose isomerase"  
"JS1\_K04\_00680" 7937 "s63E6H2" 13.07737 "Xylose isomerase"  
"JS1\_K04\_00681" 7938 "s59E13H2" 7.692748 "3-keto-5-aminohexanoate cleavage enzyme"  
"JS1\_K04\_00681" 7938 "s59E25H2" 0.7283951 "3-keto-5-aminohexanoate cleavage enzyme"  
"JS1\_K04\_00681" 7938 "s59E5H2" 0.6669827 "3-keto-5-aminohexanoate cleavage enzyme"  
"JS1\_K04\_00681" 7938 "s63E6H2" 12.47629 "3-keto-5-aminohexanoate cleavage enzyme"  
"JS1\_K04\_00682" 7939 "s59E13H2" 8.96847 "Tripartite tricarboxylate transporter TctA family protein"  
"JS1\_K04\_00682" 7939 "s59E25H2" 0.5142672 "Tripartite tricarboxylate transporter TctA family protein"  
"JS1\_K04\_00682" 7939 "s59E5H2" 1.071909 "Tripartite tricarboxylate transporter TctA family protein"  
"JS1\_K04\_00682" 7939 "s63E6H2" 12.50604 "Tripartite tricarboxylate transporter TctA family protein"  
"JS1\_K04\_00683" 7940 "s59E13H2" 4.443698 "Tripartite tricarboxylate transporter TctB family protein"  
"JS1\_K04\_00683" 7940 "s59E25H2" 0.2889785 "Tripartite tricarboxylate transporter TctB family protein"  
"JS1\_K04\_00683" 7940 "s59E5H2" 0.861379 "Tripartite tricarboxylate transporter TctB family protein"

"JS1\_K04\_00683" 7940 "s63E6H2" 6.980961 "Tripartite tricarboxylate transporter TctB family protein"  
"JS1\_K04\_00684" 7941 "s59E13H2" 3.819845 "Tripartite tricarboxylate transporter family receptor"  
"JS1\_K04\_00684" 7941 "s59E25H2" 0.3810945 "Tripartite tricarboxylate transporter family receptor"  
"JS1\_K04\_00684" 7941 "s59E5H2" 2.295888 "Tripartite tricarboxylate transporter family receptor"  
"JS1\_K04\_00684" 7941 "s63E6H2" 11.67184 "Tripartite tricarboxylate transporter family receptor"  
"JS1\_K04\_00685" 7942 "s59E13H2" 1.066458 "L-arabinose transport system permease protein AraQ"  
"JS1\_K04\_00685" 7942 "s59E25H2" 0.5833333 "L-arabinose transport system permease protein AraQ"  
"JS1\_K04\_00685" 7942 "s59E5H2" 0.6542399 "L-arabinose transport system permease protein AraQ"  
"JS1\_K04\_00685" 7942 "s63E6H2" 2.938294 "L-arabinose transport system permease protein AraQ"  
"JS1\_K04\_00686" 7943 "s59E13H2" 1.19763 "sn-glycerol-3-phosphate transport system permease protein UgpA"  
"JS1\_K04\_00686" 7943 "s59E25H2" 0.3287197 "sn-glycerol-3-phosphate transport system permease protein UgpA"  
"JS1\_K04\_00686" 7943 "s59E5H2" 0.1861825 "sn-glycerol-3-phosphate transport system permease protein UgpA"  
"JS1\_K04\_00686" 7943 "s63E6H2" 3.894819 "sn-glycerol-3-phosphate transport system permease protein UgpA"  
"JS1\_K04\_00687" 7944 "s59E13H2" 1.380104 "sn-glycerol-3-phosphate-binding periplasmic protein UgpB precursor"  
"JS1\_K04\_00687" 7944 "s59E25H2" 0.3786848 "sn-glycerol-3-phosphate-binding periplasmic protein UgpB precursor"  
"JS1\_K04\_00687" 7944 "s59E5H2" 0.09135183 "sn-glycerol-3-phosphate-binding periplasmic protein UgpB precursor"  
"JS1\_K04\_00687" 7944 "s63E6H2" 3.443355 "sn-glycerol-3-phosphate-binding periplasmic protein UgpB precursor"  
"JS1\_K04\_00688" 7945 "s59E13H2" 0.3540326 "hypothetical protein"  
"JS1\_K04\_00688" 7945 "s59E25H2" 0 "hypothetical protein"  
"JS1\_K04\_00688" 7945 "s59E5H2" 0.05254712 "hypothetical protein"  
"JS1\_K04\_00688" 7945 "s63E6H2" 2.107405 "hypothetical protein"  
"JS1\_K04\_00689" 7946 "s59E13H2" 0.874355 "Lactose transport system permease protein LacG"  
"JS1\_K04\_00689" 7946 "s59E25H2" 0 "Lactose transport system permease protein LacG"  
"JS1\_K04\_00689" 7946 "s59E5H2" 1.186256 "Lactose transport system permease protein LacG"  
"JS1\_K04\_00689" 7946 "s63E6H2" 1.093171 "Lactose transport system permease protein LacG"  
"JS1\_K04\_00690" 7947 "s59E13H2" 2.802279 "sn-glycerol-3-phosphate transport system permease protein UgpA"  
"JS1\_K04\_00690" 7947 "s59E25H2" 0 "sn-glycerol-3-phosphate transport system permease protein UgpA"  
"JS1\_K04\_00690" 7947 "s59E5H2" 1.354405 "sn-glycerol-3-phosphate transport system permease protein UgpA"  
"JS1\_K04\_00690" 7947 "s63E6H2" 0.95385 "sn-glycerol-3-phosphate transport system permease protein UgpA"  
"JS1\_K04\_00691" 7948 "s59E13H2" 2.877966 "sn-glycerol-3-phosphate-binding periplasmic protein UgpB precursor"  
"JS1\_K04\_00691" 7948 "s59E25H2" 0.3795455 "sn-glycerol-3-phosphate-binding periplasmic protein UgpB precursor"  
"JS1\_K04\_00691" 7948 "s59E5H2" 1.822604 "sn-glycerol-3-phosphate-binding periplasmic protein UgpB precursor"  
"JS1\_K04\_00691" 7948 "s63E6H2" 4.993906 "sn-glycerol-3-phosphate-binding periplasmic protein UgpB precursor"  
"JS1\_K04\_00692" 7949 "s59E13H2" 0.3202052 "Glycerol-3-phosphate responsive antiterminator"  
"JS1\_K04\_00692" 7949 "s59E25H2" 0 "Glycerol-3-phosphate responsive antiterminator"  
"JS1\_K04\_00692" 7949 "s59E5H2" 1.972485 "Glycerol-3-phosphate responsive antiterminator"  
"JS1\_K04\_00692" 7949 "s63E6H2" 2.157042 "Glycerol-3-phosphate responsive antiterminator"  
"JS1\_K04\_00693" 7950 "s59E13H2" 0.3746782 "hypothetical protein"  
"JS1\_K04\_00693" 7950 "s59E25H2" 0 "hypothetical protein"  
"JS1\_K04\_00693" 7950 "s59E5H2" 3.389603 "hypothetical protein"  
"JS1\_K04\_00693" 7950 "s63E6H2" 4.977023 "hypothetical protein"  
"JS1\_K04\_00694" 7951 "s59E13H2" 2.694726 "Thioredoxin reductase"  
"JS1\_K04\_00694" 7951 "s59E25H2" 0 "Thioredoxin reductase"  
"JS1\_K04\_00694" 7951 "s59E5H2" 1.684548 "Thioredoxin reductase"  
"JS1\_K04\_00694" 7951 "s63E6H2" 4.448839 "Thioredoxin reductase"  
"JS1\_K04\_00695" 7952 "s59E13H2" 7.794986 "L-2-hydroxyglutarate oxidase LhgO"  
"JS1\_K04\_00695" 7952 "s59E25H2" 0.3204301 "L-2-hydroxyglutarate oxidase LhgO"

"JS1\_K04\_00695" 7952 "s59E5H2" 0.9122964 "L-2-hydroxyglutarate oxidase LhgO"  
"JS1\_K04\_00695" 7952 "s63E6H2" 2.569735 "L-2-hydroxyglutarate oxidase LhgO"  
"JS1\_K04\_00697" 7954 "s59E13H2" 0.01008943 "hypothetical protein"  
"JS1\_K04\_00697" 7954 "s59E25H2" 0 "hypothetical protein"  
"JS1\_K04\_00697" 7954 "s59E5H2" 0 "hypothetical protein"  
"JS1\_K04\_00697" 7954 "s63E6H2" 0.03262329 "hypothetical protein"  
"JS1\_K04\_00698" 7955 "s59E13H2" 0.01837216 "hypothetical protein"  
"JS1\_K04\_00698" 7955 "s59E25H2" 0 "hypothetical protein"  
"JS1\_K04\_00698" 7955 "s59E5H2" 0 "hypothetical protein"  
"JS1\_K04\_00698" 7955 "s63E6H2" 0.02608708 "hypothetical protein"  
"JS1\_K04\_00699" 7956 "s59E13H2" 0.01092796 "Diacylglycerol kinase"  
"JS1\_K04\_00699" 7956 "s59E25H2" 0 "Diacylglycerol kinase"  
"JS1\_K04\_00699" 7956 "s59E5H2" 0.1212837 "Diacylglycerol kinase"  
"JS1\_K04\_00699" 7956 "s63E6H2" 0.04684995 "Diacylglycerol kinase"  
"JS1\_K04\_00700" 7957 "s59E13H2" 0.03929009 "Activator of (R)-2-hydroxyglutaryl-CoA dehydratase"  
"JS1\_K04\_00700" 7957 "s59E25H2" 0 "Activator of (R)-2-hydroxyglutaryl-CoA dehydratase"  
"JS1\_K04\_00700" 7957 "s59E5H2" 0.1840658 "Activator of (R)-2-hydroxyglutaryl-CoA dehydratase"  
"JS1\_K04\_00700" 7957 "s63E6H2" 0.05733279 "Activator of (R)-2-hydroxyglutaryl-CoA dehydratase"  
"JS1\_K04\_00701" 7958 "s59E13H2" 0.001631252 "hypothetical protein"  
"JS1\_K04\_00701" 7958 "s59E25H2" 0 "hypothetical protein"  
"JS1\_K04\_00701" 7958 "s59E5H2" 0.1455775 "hypothetical protein"  
"JS1\_K04\_00701" 7958 "s63E6H2" 0.05850592 "hypothetical protein"  
"JS1\_K04\_00702" 7959 "s59E13H2" 0 "Fumarate hydratase class I, anaerobic"  
"JS1\_K04\_00702" 7959 "s59E25H2" 0 "Fumarate hydratase class I, anaerobic"  
"JS1\_K04\_00702" 7959 "s59E5H2" 0.3199468 "Fumarate hydratase class I, anaerobic"  
"JS1\_K04\_00702" 7959 "s63E6H2" 0.3337001 "Fumarate hydratase class I, anaerobic"  
"JS1\_K04\_00703" 7960 "s59E13H2" 0.005512591 "L(+)-tartrate dehydratase subunit alpha"  
"JS1\_K04\_00703" 7960 "s59E25H2" 0 "L(+)-tartrate dehydratase subunit alpha"  
"JS1\_K04\_00703" 7960 "s59E5H2" 0.290413 "L(+)-tartrate dehydratase subunit alpha"  
"JS1\_K04\_00703" 7960 "s63E6H2" 0.3158184 "L(+)-tartrate dehydratase subunit alpha"  
"JS1\_K04\_00704" 7961 "s59E13H2" 0.0117168 "DNA topoisomerase 1"  
"JS1\_K04\_00704" 7961 "s59E25H2" 0 "DNA topoisomerase 1"  
"JS1\_K04\_00704" 7961 "s59E5H2" 0.5701009 "DNA topoisomerase 1"  
"JS1\_K04\_00704" 7961 "s63E6H2" 0.2554475 "DNA topoisomerase 1"  
"JS1\_K04\_00705" 7962 "s59E13H2" 0.004594907 "putative transposase"  
"JS1\_K04\_00705" 7962 "s59E25H2" 0 "putative transposase"  
"JS1\_K04\_00705" 7962 "s59E5H2" 0.0008842763 "putative transposase"  
"JS1\_K04\_00705" 7962 "s63E6H2" 1.218242 "putative transposase"  
"JS1\_K04\_00706" 7963 "s59E13H2" 0.01079447 "Quinolinate synthase A"  
"JS1\_K04\_00706" 7963 "s59E25H2" 0 "Quinolinate synthase A"  
"JS1\_K04\_00706" 7963 "s59E5H2" 0.9379949 "Quinolinate synthase A"  
"JS1\_K04\_00706" 7963 "s63E6H2" 0.03638272 "Quinolinate synthase A"  
"JS1\_K04\_00707" 7964 "s59E13H2" 0.02443891 "L-aspartate oxidase"  
"JS1\_K04\_00707" 7964 "s59E25H2" 0 "L-aspartate oxidase"  
"JS1\_K04\_00707" 7964 "s59E5H2" 1.173655 "L-aspartate oxidase"  
"JS1\_K04\_00707" 7964 "s63E6H2" 0.08246434 "L-aspartate oxidase"  
"JS1\_K04\_00708" 7965 "s59E13H2" 0.04964524 "Nicotinate-nucleotide pyrophosphorylase [carboxylating]"

"JS1\_K04\_00708" 7965 "s59E25H2" 0 "Nicotinate-nucleotide pyrophosphorylase [carboxylating]"  
"JS1\_K04\_00708" 7965 "s59E5H2" 1.307988 "Nicotinate-nucleotide pyrophosphorylase [carboxylating]"  
"JS1\_K04\_00708" 7965 "s63E6H2" 0.1690015 "Nicotinate-nucleotide pyrophosphorylase [carboxylating]"  
"JS1\_K04\_00710" 7967 "s59E13H2" 0.07573571 "Soluble lytic murein transglycosylase precursor"  
"JS1\_K04\_00710" 7967 "s59E25H2" 0 "Soluble lytic murein transglycosylase precursor"  
"JS1\_K04\_00710" 7967 "s59E5H2" 1.381248 "Soluble lytic murein transglycosylase precursor"  
"JS1\_K04\_00710" 7967 "s63E6H2" 0.1022532 "Soluble lytic murein transglycosylase precursor"  
"JS1\_K04\_00711" 7968 "s59E13H2" 0.1144685 "hypothetical protein"  
"JS1\_K04\_00711" 7968 "s59E25H2" 0 "hypothetical protein"  
"JS1\_K04\_00711" 7968 "s59E5H2" 0.05905305 "hypothetical protein"  
"JS1\_K04\_00711" 7968 "s63E6H2" 0.07930931 "hypothetical protein"  
"JS1\_K04\_00712" 7969 "s59E13H2" 0.1147229 "Inner membrane protein YhhQ"  
"JS1\_K04\_00712" 7969 "s59E25H2" 0 "Inner membrane protein YhhQ"  
"JS1\_K04\_00712" 7969 "s59E5H2" 0.000252949 "Inner membrane protein YhhQ"  
"JS1\_K04\_00712" 7969 "s63E6H2" 0.06231056 "Inner membrane protein YhhQ"  
"JS1\_K04\_00713" 7970 "s59E13H2" 0.07069789 "hypothetical protein"  
"JS1\_K04\_00713" 7970 "s59E25H2" 0 "hypothetical protein"  
"JS1\_K04\_00713" 7970 "s59E5H2" 0.1822005 "hypothetical protein"  
"JS1\_K04\_00713" 7970 "s63E6H2" 0.03989345 "hypothetical protein"  
"JS1\_K04\_00714" 7971 "s59E13H2" 0.1214168 "hypothetical protein"  
"JS1\_K04\_00714" 7971 "s59E25H2" 0 "hypothetical protein"  
"JS1\_K04\_00714" 7971 "s59E5H2" 0.05101292 "hypothetical protein"  
"JS1\_K04\_00714" 7971 "s63E6H2" 0.04179309 "hypothetical protein"  
"JS1\_K04\_00716" 7973 "s59E13H2" 0.1116258 "Alanine racemase"  
"JS1\_K04\_00716" 7973 "s59E25H2" 0 "Alanine racemase"  
"JS1\_K04\_00716" 7973 "s59E5H2" 0.02466823 "Alanine racemase"  
"JS1\_K04\_00716" 7973 "s63E6H2" 0.06445388 "Alanine racemase"  
"JS1\_K04\_00717" 7974 "s59E13H2" 0.08926344 "Inosine-5'-monophosphate dehydrogenase"  
"JS1\_K04\_00717" 7974 "s59E25H2" 0 "Inosine-5'-monophosphate dehydrogenase"  
"JS1\_K04\_00717" 7974 "s59E5H2" 0.02509974 "Inosine-5'-monophosphate dehydrogenase"  
"JS1\_K04\_00717" 7974 "s63E6H2" 0.0450614 "Inosine-5'-monophosphate dehydrogenase"  
"JS1\_K04\_00718" 7975 "s59E13H2" 0.08738911 "Bifunctional NAD(P)H-hydrate repair enzyme Nnr"  
"JS1\_K04\_00718" 7975 "s59E25H2" 0 "Bifunctional NAD(P)H-hydrate repair enzyme Nnr"  
"JS1\_K04\_00718" 7975 "s59E5H2" 0.03561531 "Bifunctional NAD(P)H-hydrate repair enzyme Nnr"  
"JS1\_K04\_00718" 7975 "s63E6H2" 0.03085097 "Bifunctional NAD(P)H-hydrate repair enzyme Nnr"  
"JS1\_K04\_00719" 7976 "s59E13H2" 0.04262811 "Holo-[acyl-carrier-protein] synthase"  
"JS1\_K04\_00719" 7976 "s59E25H2" 0 "Holo-[acyl-carrier-protein] synthase"  
"JS1\_K04\_00719" 7976 "s59E5H2" 0 "Holo-[acyl-carrier-protein] synthase"  
"JS1\_K04\_00719" 7976 "s63E6H2" 0.01432861 "Holo-[acyl-carrier-protein] synthase"  
"JS1\_K04\_00720" 7977 "s59E13H2" 0.02986695 "alanine racemase"  
"JS1\_K04\_00720" 7977 "s59E25H2" 0 "alanine racemase"  
"JS1\_K04\_00720" 7977 "s59E5H2" 0 "alanine racemase"  
"JS1\_K04\_00720" 7977 "s63E6H2" 0.03028549 "alanine racemase"  
"JS1\_K04\_00721" 7978 "s59E13H2" 0.03753561 "30S ribosomal protein S9"  
"JS1\_K04\_00721" 7978 "s59E25H2" 0 "30S ribosomal protein S9"  
"JS1\_K04\_00721" 7978 "s59E5H2" 0.0248498 "30S ribosomal protein S9"  
"JS1\_K04\_00721" 7978 "s63E6H2" 0.03753501 "30S ribosomal protein S9"

"JS1\_K04\_00722" 7979 "s59E13H2" 0.03692417 "50S ribosomal protein L13"  
"JS1\_K04\_00722" 7979 "s59E25H2" 0 "50S ribosomal protein L13"  
"JS1\_K04\_00722" 7979 "s59E5H2" 0.03556358 "50S ribosomal protein L13"  
"JS1\_K04\_00722" 7979 "s63E6H2" 0.01716989 "50S ribosomal protein L13"  
"JS1\_K04\_00723" 7980 "s59E13H2" 0.1383885 "tRNA pseudouridine synthase A"  
"JS1\_K04\_00723" 7980 "s59E25H2" 0 "tRNA pseudouridine synthase A"  
"JS1\_K04\_00723" 7980 "s59E5H2" 0.0154768 "tRNA pseudouridine synthase A"  
"JS1\_K04\_00723" 7980 "s63E6H2" 0.0177191 "tRNA pseudouridine synthase A"  
"JS1\_K04\_00724" 7981 "s59E13H2" 0.05449522 "50S ribosomal protein L17"  
"JS1\_K04\_00724" 7981 "s59E25H2" 0 "50S ribosomal protein L17"  
"JS1\_K04\_00724" 7981 "s59E5H2" 0.04146026 "50S ribosomal protein L17"  
"JS1\_K04\_00724" 7981 "s63E6H2" 0.0104557 "50S ribosomal protein L17"  
"JS1\_K04\_00725" 7982 "s59E13H2" 0.03245943 "DNA-directed RNA polymerase subunit alpha"  
"JS1\_K04\_00725" 7982 "s59E25H2" 0 "DNA-directed RNA polymerase subunit alpha"  
"JS1\_K04\_00725" 7982 "s59E5H2" 0.009526125 "DNA-directed RNA polymerase subunit alpha"  
"JS1\_K04\_00725" 7982 "s63E6H2" 0.01791962 "DNA-directed RNA polymerase subunit alpha"  
"JS1\_K04\_00726" 7983 "s59E13H2" 0.02750066 "30S ribosomal protein S4"  
"JS1\_K04\_00726" 7983 "s59E25H2" 0 "30S ribosomal protein S4"  
"JS1\_K04\_00726" 7983 "s59E5H2" 0.03826693 "30S ribosomal protein S4"  
"JS1\_K04\_00726" 7983 "s63E6H2" 0.100924 "30S ribosomal protein S4"  
"JS1\_K04\_00727" 7984 "s59E13H2" 0.02308071 "30S ribosomal protein S11"  
"JS1\_K04\_00727" 7984 "s59E25H2" 0 "30S ribosomal protein S11"  
"JS1\_K04\_00727" 7984 "s59E5H2" 0.03445501 "30S ribosomal protein S11"  
"JS1\_K04\_00727" 7984 "s63E6H2" 0.01089396 "30S ribosomal protein S11"  
"JS1\_K04\_00728" 7985 "s59E13H2" 0.01845551 "30S ribosomal protein S13"  
"JS1\_K04\_00728" 7985 "s59E25H2" 0 "30S ribosomal protein S13"  
"JS1\_K04\_00728" 7985 "s59E5H2" 0 "30S ribosomal protein S13"  
"JS1\_K04\_00728" 7985 "s63E6H2" 0.004717529 "30S ribosomal protein S13"  
"JS1\_K04\_00729" 7986 "s59E13H2" 0.01641276 "50S ribosomal protein L36"  
"JS1\_K04\_00729" 7986 "s59E25H2" 0 "50S ribosomal protein L36"  
"JS1\_K04\_00729" 7986 "s59E5H2" 0 "50S ribosomal protein L36"  
"JS1\_K04\_00729" 7986 "s63E6H2" 0.003572916 "50S ribosomal protein L36"  
"JS1\_K04\_00730" 7987 "s59E13H2" 0.03040338 "Translation initiation factor IF-1"  
"JS1\_K04\_00730" 7987 "s59E25H2" 0 "Translation initiation factor IF-1"  
"JS1\_K04\_00730" 7987 "s59E5H2" 0.2100388 "Translation initiation factor IF-1"  
"JS1\_K04\_00730" 7987 "s63E6H2" 0.01345855 "Translation initiation factor IF-1"  
"JS1\_K04\_00731" 7988 "s59E13H2" 0.03525985 "Methionine aminopeptidase 1"  
"JS1\_K04\_00731" 7988 "s59E25H2" 0 "Methionine aminopeptidase 1"  
"JS1\_K04\_00731" 7988 "s59E5H2" 0.1046875 "Methionine aminopeptidase 1"  
"JS1\_K04\_00731" 7988 "s63E6H2" 0.0005642216 "Methionine aminopeptidase 1"  
"JS1\_K04\_00732" 7989 "s59E13H2" 0.03097207 "Adenylate kinase"  
"JS1\_K04\_00732" 7989 "s59E25H2" 0 "Adenylate kinase"  
"JS1\_K04\_00732" 7989 "s59E5H2" 0.05669008 "Adenylate kinase"  
"JS1\_K04\_00732" 7989 "s63E6H2" 0.004769757 "Adenylate kinase"  
"JS1\_K04\_00733" 7990 "s59E13H2" 0.02479892 "preprotein translocase subunit SecY"  
"JS1\_K04\_00733" 7990 "s59E25H2" 0 "preprotein translocase subunit SecY"  
"JS1\_K04\_00733" 7990 "s59E5H2" 0.03080614 "preprotein translocase subunit SecY"



"JS1\_K04\_00733" 7990 "s63E6H2" 0.01459896 "preprotein translocase subunit SecY"  
"JS1\_K04\_00734" 7991 "s59E13H2" 0.0008674775 "50S ribosomal protein L15"  
"JS1\_K04\_00734" 7991 "s59E25H2" 0 "50S ribosomal protein L15"  
"JS1\_K04\_00734" 7991 "s59E5H2" 0.04297396 "50S ribosomal protein L15"  
"JS1\_K04\_00734" 7991 "s63E6H2" 0.02569568 "50S ribosomal protein L15"  
"JS1\_K04\_00735" 7992 "s59E13H2" 0.005423957 "30S ribosomal protein S5"  
"JS1\_K04\_00735" 7992 "s59E25H2" 0 "30S ribosomal protein S5"  
"JS1\_K04\_00735" 7992 "s59E5H2" 0.005141903 "30S ribosomal protein S5"  
"JS1\_K04\_00735" 7992 "s63E6H2" 0.01876597 "30S ribosomal protein S5"  
"JS1\_K04\_00736" 7993 "s59E13H2" 0.002701759 "50S ribosomal protein L18"  
"JS1\_K04\_00736" 7993 "s59E25H2" 0 "50S ribosomal protein L18"  
"JS1\_K04\_00736" 7993 "s59E5H2" 0.01808747 "50S ribosomal protein L18"  
"JS1\_K04\_00736" 7993 "s63E6H2" 0.0117064 "50S ribosomal protein L18"  
"JS1\_K04\_00737" 7994 "s59E13H2" 0.01360877 "50S ribosomal protein L6"  
"JS1\_K04\_00737" 7994 "s59E25H2" 0 "50S ribosomal protein L6"  
"JS1\_K04\_00737" 7994 "s59E5H2" 0.02907539 "50S ribosomal protein L6"  
"JS1\_K04\_00737" 7994 "s63E6H2" 0.0138436 "50S ribosomal protein L6"  
"JS1\_K04\_00738" 7995 "s59E13H2" 0.009016509 "30S ribosomal protein S8"  
"JS1\_K04\_00738" 7995 "s59E25H2" 0 "30S ribosomal protein S8"  
"JS1\_K04\_00738" 7995 "s59E5H2" 0.02838054 "30S ribosomal protein S8"  
"JS1\_K04\_00738" 7995 "s63E6H2" 0.01834294 "30S ribosomal protein S8"  
"JS1\_K04\_00739" 7996 "s59E13H2" 0.008900167 "30S ribosomal protein S14 type Z"  
"JS1\_K04\_00739" 7996 "s59E25H2" 0 "30S ribosomal protein S14 type Z"  
"JS1\_K04\_00739" 7996 "s59E5H2" 0.01856505 "30S ribosomal protein S14 type Z"  
"JS1\_K04\_00739" 7996 "s63E6H2" 0.008105719 "30S ribosomal protein S14 type Z"  
"JS1\_K04\_00740" 7997 "s59E13H2" 0.00175491 "50S ribosomal protein L5"  
"JS1\_K04\_00740" 7997 "s59E25H2" 0 "50S ribosomal protein L5"  
"JS1\_K04\_00740" 7997 "s59E5H2" 0.01594303 "50S ribosomal protein L5"  
"JS1\_K04\_00740" 7997 "s63E6H2" 0.0126176 "50S ribosomal protein L5"  
"JS1\_K04\_00741" 7998 "s59E13H2" 0 "50S ribosomal protein L24"  
"JS1\_K04\_00741" 7998 "s59E25H2" 0 "50S ribosomal protein L24"  
"JS1\_K04\_00741" 7998 "s59E5H2" 0.004520579 "50S ribosomal protein L24"  
"JS1\_K04\_00741" 7998 "s63E6H2" 0.008748721 "50S ribosomal protein L24"  
"JS1\_K04\_00742" 7999 "s59E13H2" 0.005372206 "50S ribosomal protein L14"  
"JS1\_K04\_00742" 7999 "s59E25H2" 0 "50S ribosomal protein L14"  
"JS1\_K04\_00742" 7999 "s59E5H2" 0.029392 "50S ribosomal protein L14"  
"JS1\_K04\_00742" 7999 "s63E6H2" 0.007001892 "50S ribosomal protein L14"  
"JS1\_K04\_00743" 8000 "s59E13H2" 0.001738898 "30S ribosomal protein S17"  
"JS1\_K04\_00743" 8000 "s59E25H2" 0 "30S ribosomal protein S17"  
"JS1\_K04\_00743" 8000 "s59E5H2" 0.01869753 "30S ribosomal protein S17"  
"JS1\_K04\_00743" 8000 "s63E6H2" 0.01661672 "30S ribosomal protein S17"  
"JS1\_K04\_00744" 8001 "s59E13H2" 0 "50S ribosomal protein L29"  
"JS1\_K04\_00744" 8001 "s59E25H2" 0 "50S ribosomal protein L29"  
"JS1\_K04\_00744" 8001 "s59E5H2" 0 "50S ribosomal protein L29"  
"JS1\_K04\_00744" 8001 "s63E6H2" 0.02876321 "50S ribosomal protein L29"  
"JS1\_K04\_00745" 8002 "s59E13H2" 0 "50S ribosomal protein L16"  
"JS1\_K04\_00745" 8002 "s59E25H2" 0 "50S ribosomal protein L16"

"JS1\_K04\_00745" 8002 "s59E5H2" 0 "50S ribosomal protein L16"  
"JS1\_K04\_00745" 8002 "s63E6H2" 0.01703649 "50S ribosomal protein L16"  
"JS1\_K04\_00746" 8003 "s59E13H2" 0 "30S ribosomal protein S3"  
"JS1\_K04\_00746" 8003 "s59E25H2" 0 "30S ribosomal protein S3"  
"JS1\_K04\_00746" 8003 "s59E5H2" 0 "30S ribosomal protein S3"  
"JS1\_K04\_00746" 8003 "s63E6H2" 0.0183241 "30S ribosomal protein S3"  
"JS1\_K04\_00747" 8004 "s59E13H2" 0 "50S ribosomal protein L22"  
"JS1\_K04\_00747" 8004 "s59E25H2" 0 "50S ribosomal protein L22"  
"JS1\_K04\_00747" 8004 "s59E5H2" 0 "50S ribosomal protein L22"  
"JS1\_K04\_00747" 8004 "s63E6H2" 0.01566989 "50S ribosomal protein L22"  
"JS1\_K04\_00748" 8005 "s59E13H2" 0 "30S ribosomal protein S19"  
"JS1\_K04\_00748" 8005 "s59E25H2" 0 "30S ribosomal protein S19"  
"JS1\_K04\_00748" 8005 "s59E5H2" 0.02029224 "30S ribosomal protein S19"  
"JS1\_K04\_00748" 8005 "s63E6H2" 0.007444028 "30S ribosomal protein S19"  
"JS1\_K04\_00749" 8006 "s59E13H2" 0 "50S ribosomal protein L2"  
"JS1\_K04\_00749" 8006 "s59E25H2" 0 "50S ribosomal protein L2"  
"JS1\_K04\_00749" 8006 "s59E5H2" 0.02422981 "50S ribosomal protein L2"  
"JS1\_K04\_00749" 8006 "s63E6H2" 0.02600707 "50S ribosomal protein L2"  
"JS1\_K04\_00750" 8007 "s59E13H2" 0 "50S ribosomal protein L23"  
"JS1\_K04\_00750" 8007 "s59E25H2" 0 "50S ribosomal protein L23"  
"JS1\_K04\_00750" 8007 "s59E5H2" 0 "50S ribosomal protein L23"  
"JS1\_K04\_00750" 8007 "s63E6H2" 0.00529827 "50S ribosomal protein L23"  
"JS1\_K04\_00751" 8008 "s59E13H2" 0 "50S ribosomal protein L4"  
"JS1\_K04\_00751" 8008 "s59E25H2" 0 "50S ribosomal protein L4"  
"JS1\_K04\_00751" 8008 "s59E5H2" 0.001826674 "50S ribosomal protein L4"  
"JS1\_K04\_00751" 8008 "s63E6H2" 0.01081714 "50S ribosomal protein L4"  
"JS1\_K04\_00752" 8009 "s59E13H2" 0 "50S ribosomal protein L3"  
"JS1\_K04\_00752" 8009 "s59E25H2" 0 "50S ribosomal protein L3"  
"JS1\_K04\_00752" 8009 "s59E5H2" 0.01831614 "50S ribosomal protein L3"  
"JS1\_K04\_00752" 8009 "s63E6H2" 0.03275412 "50S ribosomal protein L3"  
"JS1\_K04\_00753" 8010 "s59E13H2" 0 "30S ribosomal protein S10"  
"JS1\_K04\_00753" 8010 "s59E25H2" 0 "30S ribosomal protein S10"  
"JS1\_K04\_00753" 8010 "s59E5H2" 0.01388856 "30S ribosomal protein S10"  
"JS1\_K04\_00753" 8010 "s63E6H2" 0.01939312 "30S ribosomal protein S10"  
"JS1\_K04\_00754" 8011 "s59E13H2" 0.05311334 "Elongation factor Tu"  
"JS1\_K04\_00754" 8011 "s59E25H2" 0 "Elongation factor Tu"  
"JS1\_K04\_00754" 8011 "s59E5H2" 0.06806514 "Elongation factor Tu"  
"JS1\_K04\_00754" 8011 "s63E6H2" 0.009297441 "Elongation factor Tu"  
"JS1\_K04\_00755" 8012 "s59E13H2" 0.007028774 "Elongation factor G"  
"JS1\_K04\_00755" 8012 "s59E25H2" 0 "Elongation factor G"  
"JS1\_K04\_00755" 8012 "s59E5H2" 0.009551819 "Elongation factor G"  
"JS1\_K04\_00755" 8012 "s63E6H2" 0.0243724 "Elongation factor G"  
"JS1\_K04\_00756" 8013 "s59E13H2" 0.02219587 "30S ribosomal protein S7"  
"JS1\_K04\_00756" 8013 "s59E25H2" 0 "30S ribosomal protein S7"  
"JS1\_K04\_00756" 8013 "s59E5H2" 0.01431864 "30S ribosomal protein S7"  
"JS1\_K04\_00756" 8013 "s63E6H2" 0.02817641 "30S ribosomal protein S7"  
"JS1\_K04\_00757" 8014 "s59E13H2" 0 "30S ribosomal protein S12"

"JS1\_K04\_00757" 8014 "s59E25H2" 0 "30S ribosomal protein S12"  
"JS1\_K04\_00757" 8014 "s59E5H2" 0 "30S ribosomal protein S12"  
"JS1\_K04\_00757" 8014 "s63E6H2" 0.01532896 "30S ribosomal protein S12"  
"JS1\_K04\_00758" 8015 "s59E13H2" 0.005170967 "DNA-directed RNA polymerase subunit beta"  
"JS1\_K04\_00758" 8015 "s59E25H2" 0 "DNA-directed RNA polymerase subunit beta"  
"JS1\_K04\_00758" 8015 "s59E5H2" 0.03105232 "DNA-directed RNA polymerase subunit beta"  
"JS1\_K04\_00758" 8015 "s63E6H2" 0.01837901 "DNA-directed RNA polymerase subunit beta"  
"JS1\_K04\_00760" 8017 "s59E13H2" 0.008138597 "D-alanine--D-alanine ligase"  
"JS1\_K04\_00760" 8017 "s59E25H2" 0 "D-alanine--D-alanine ligase"  
"JS1\_K04\_00760" 8017 "s59E5H2" 0.7208872 "D-alanine--D-alanine ligase"  
"JS1\_K04\_00760" 8017 "s63E6H2" 0.005733482 "D-alanine--D-alanine ligase"  
"JS1\_K04\_00761" 8018 "s59E13H2" 0.008367677 "Queuine tRNA-ribosyltransferase"  
"JS1\_K04\_00761" 8018 "s59E25H2" 0.1906028 "Queuine tRNA-ribosyltransferase"  
"JS1\_K04\_00761" 8018 "s59E5H2" 1.100989 "Queuine tRNA-ribosyltransferase"  
"JS1\_K04\_00761" 8018 "s63E6H2" 0.01986548 "Queuine tRNA-ribosyltransferase"  
"JS1\_K04\_00762" 8019 "s59E13H2" 0.00904227 "preprotein translocase subunit YajC"  
"JS1\_K04\_00762" 8019 "s59E25H2" 0 "preprotein translocase subunit YajC"  
"JS1\_K04\_00762" 8019 "s59E5H2" 0.263981 "preprotein translocase subunit YajC"  
"JS1\_K04\_00762" 8019 "s63E6H2" 0.003633099 "preprotein translocase subunit YajC"  
"JS1\_K04\_00763" 8020 "s59E13H2" 0.002403615 "preprotein translocase subunit SecD"  
"JS1\_K04\_00763" 8020 "s59E25H2" 0 "preprotein translocase subunit SecD"  
"JS1\_K04\_00763" 8020 "s59E5H2" 0.1193025 "preprotein translocase subunit SecD"  
"JS1\_K04\_00763" 8020 "s63E6H2" 0.005900815 "preprotein translocase subunit SecD"  
"JS1\_K04\_00764" 8021 "s59E13H2" 0.004306966 "preprotein translocase subunit SecF"  
"JS1\_K04\_00764" 8021 "s59E25H2" 0 "preprotein translocase subunit SecF"  
"JS1\_K04\_00764" 8021 "s59E5H2" 0.1084079 "preprotein translocase subunit SecF"  
"JS1\_K04\_00764" 8021 "s63E6H2" 0.01232344 "preprotein translocase subunit SecF"  
"JS1\_K04\_00765" 8022 "s59E13H2" 0.005195599 "Single-stranded-DNA-specific exonuclease RecJ"  
"JS1\_K04\_00765" 8022 "s59E25H2" 0 "Single-stranded-DNA-specific exonuclease RecJ"  
"JS1\_K04\_00765" 8022 "s59E5H2" 0.09930272 "Single-stranded-DNA-specific exonuclease RecJ"  
"JS1\_K04\_00765" 8022 "s63E6H2" 0.007533262 "Single-stranded-DNA-specific exonuclease RecJ"  
"JS1\_K04\_00766" 8023 "s59E13H2" 0.003145 "Bifunctional (p)ppGpp synthase/hydrolase relA"  
"JS1\_K04\_00766" 8023 "s59E25H2" 0 "Bifunctional (p)ppGpp synthase/hydrolase relA"  
"JS1\_K04\_00766" 8023 "s59E5H2" 0.133245 "Bifunctional (p)ppGpp synthase/hydrolase relA"  
"JS1\_K04\_00766" 8023 "s63E6H2" 0.01712126 "Bifunctional (p)ppGpp synthase/hydrolase relA"  
"JS1\_K04\_00767" 8024 "s59E13H2" 0.01313132 "putative metallo-hydrolase"  
"JS1\_K04\_00767" 8024 "s59E25H2" 0 "putative metallo-hydrolase"  
"JS1\_K04\_00767" 8024 "s59E5H2" 0.07069298 "putative metallo-hydrolase"  
"JS1\_K04\_00767" 8024 "s63E6H2" 0.01878132 "putative metallo-hydrolase"  
"JS1\_K04\_00768" 8025 "s59E13H2" 0.01398161 "Histidine--tRNA ligase"  
"JS1\_K04\_00768" 8025 "s59E25H2" 0 "Histidine--tRNA ligase"  
"JS1\_K04\_00768" 8025 "s59E5H2" 0.135325 "Histidine--tRNA ligase"  
"JS1\_K04\_00768" 8025 "s63E6H2" 0.02412304 "Histidine--tRNA ligase"  
"JS1\_K04\_00769" 8026 "s59E13H2" 0.005465385 "Aspartate--tRNA ligase"  
"JS1\_K04\_00769" 8026 "s59E25H2" 0 "Aspartate--tRNA ligase"  
"JS1\_K04\_00769" 8026 "s59E5H2" 0.07662908 "Aspartate--tRNA ligase"  
"JS1\_K04\_00769" 8026 "s63E6H2" 0.05049836 "Aspartate--tRNA ligase"

"JS1\_K04\_00771" 8028 "s59E13H2" 0.009556871 "Alanine--tRNA ligase"  
"JS1\_K04\_00771" 8028 "s59E25H2" 0 "Alanine--tRNA ligase"  
"JS1\_K04\_00771" 8028 "s59E5H2" 0.04472904 "Alanine--tRNA ligase"  
"JS1\_K04\_00771" 8028 "s63E6H2" 0.115347 "Alanine--tRNA ligase"  
"JS1\_K04\_00772" 8029 "s59E13H2" 0.0122696 "Putative Holliday junction resolvase"  
"JS1\_K04\_00772" 8029 "s59E25H2" 0 "Putative Holliday junction resolvase"  
"JS1\_K04\_00772" 8029 "s59E5H2" 0.06413693 "Putative Holliday junction resolvase"  
"JS1\_K04\_00772" 8029 "s63E6H2" 0.1116755 "Putative Holliday junction resolvase"  
"JS1\_K04\_00773" 8030 "s59E13H2" 0.01213342 "putative aminodeoxychorismate lyase"  
"JS1\_K04\_00773" 8030 "s59E25H2" 0 "putative aminodeoxychorismate lyase"  
"JS1\_K04\_00773" 8030 "s59E5H2" 0.03436131 "putative aminodeoxychorismate lyase"  
"JS1\_K04\_00773" 8030 "s63E6H2" 0.07062965 "putative aminodeoxychorismate lyase"  
"JS1\_K04\_00774" 8031 "s59E13H2" 0.03157083 "Putative O-methyltransferase/MSMEI\_4947"  
"JS1\_K04\_00774" 8031 "s59E25H2" 0 "Putative O-methyltransferase/MSMEI\_4947"  
"JS1\_K04\_00774" 8031 "s59E5H2" 0.02704336 "Putative O-methyltransferase/MSMEI\_4947"  
"JS1\_K04\_00774" 8031 "s63E6H2" 0.1161403 "Putative O-methyltransferase/MSMEI\_4947"  
"JS1\_K04\_00775" 8032 "s59E13H2" 0.02964892 "putative protease YhbU precursor"  
"JS1\_K04\_00775" 8032 "s59E25H2" 0 "putative protease YhbU precursor"  
"JS1\_K04\_00775" 8032 "s59E5H2" 0.09551742 "putative protease YhbU precursor"  
"JS1\_K04\_00775" 8032 "s63E6H2" 0.1880823 "putative protease YhbU precursor"  
"JS1\_K04\_00776" 8033 "s59E13H2" 0.004295384 "Acylphosphatase"  
"JS1\_K04\_00776" 8033 "s59E25H2" 0 "Acylphosphatase"  
"JS1\_K04\_00776" 8033 "s59E5H2" 0.07053526 "Acylphosphatase"  
"JS1\_K04\_00776" 8033 "s63E6H2" 0.1223964 "Acylphosphatase"  
"JS1\_K04\_00777" 8034 "s59E13H2" 0.03639463 "Shikimate dehydrogenase"  
"JS1\_K04\_00777" 8034 "s59E25H2" 0 "Shikimate dehydrogenase"  
"JS1\_K04\_00777" 8034 "s59E5H2" 0.04876386 "Shikimate dehydrogenase"  
"JS1\_K04\_00777" 8034 "s63E6H2" 0.1475158 "Shikimate dehydrogenase"  
"JS1\_K04\_00778" 8035 "s59E13H2" 0.02376038 "Type 4 prepilin-like proteins leader peptide-processing enzyme"  
"JS1\_K04\_00778" 8035 "s59E25H2" 0 "Type 4 prepilin-like proteins leader peptide-processing enzyme"  
"JS1\_K04\_00778" 8035 "s59E5H2" 0.02206242 "Type 4 prepilin-like proteins leader peptide-processing enzyme"  
"JS1\_K04\_00778" 8035 "s63E6H2" 0.1485676 "Type 4 prepilin-like proteins leader peptide-processing enzyme"  
"JS1\_K04\_00779" 8036 "s59E13H2" 0 "Competence protein A"  
"JS1\_K04\_00779" 8036 "s59E25H2" 0 "Competence protein A"  
"JS1\_K04\_00779" 8036 "s59E5H2" 0 "Competence protein A"  
"JS1\_K04\_00779" 8036 "s63E6H2" 0.1501117 "Competence protein A"  
"JS1\_K04\_00781" 8038 "s59E13H2" 0.02412557 "Chorismate synthase"  
"JS1\_K04\_00781" 8038 "s59E25H2" 0 "Chorismate synthase"  
"JS1\_K04\_00781" 8038 "s59E5H2" 0.07603588 "Chorismate synthase"  
"JS1\_K04\_00781" 8038 "s63E6H2" 0.2295378 "Chorismate synthase"  
"JS1\_K04\_00782" 8039 "s59E13H2" 0.05457259 "Shikimate kinase 1"  
"JS1\_K04\_00782" 8039 "s59E25H2" 0 "Shikimate kinase 1"  
"JS1\_K04\_00782" 8039 "s59E5H2" 0.06637752 "Shikimate kinase 1"  
"JS1\_K04\_00782" 8039 "s63E6H2" 0.1104346 "Shikimate kinase 1"  
"JS1\_K04\_00783" 8040 "s59E13H2" 0.04957418 "3-dehydroquinate synthase"  
"JS1\_K04\_00783" 8040 "s59E25H2" 0 "3-dehydroquinate synthase"  
"JS1\_K04\_00783" 8040 "s59E5H2" 0.0882784 "3-dehydroquinate synthase"

"JS1\_K04\_00783" 8040 "s63E6H2" 0.168733 "3-dehydroquinatase synthase"  
"JS1\_K04\_00784" 8041 "s59E13H2" 0.03703118 "3-dehydroquinatase dehydratase"  
"JS1\_K04\_00784" 8041 "s59E25H2" 13.7277 "3-dehydroquinatase dehydratase"  
"JS1\_K04\_00784" 8041 "s59E5H2" 0.03786543 "3-dehydroquinatase dehydratase"  
"JS1\_K04\_00784" 8041 "s63E6H2" 0.06494565 "3-dehydroquinatase dehydratase"  
"JS1\_K04\_00785" 8042 "s59E13H2" 0.001913708 "hypothetical protein"  
"JS1\_K04\_00785" 8042 "s59E25H2" 0 "hypothetical protein"  
"JS1\_K04\_00785" 8042 "s59E5H2" 0 "hypothetical protein"  
"JS1\_K04\_00785" 8042 "s63E6H2" 0.005821965 "hypothetical protein"  
"JS1\_K04\_00786" 8043 "s59E13H2" 0 "hypothetical protein"  
"JS1\_K04\_00786" 8043 "s59E25H2" 0 "hypothetical protein"  
"JS1\_K04\_00786" 8043 "s59E5H2" 0 "hypothetical protein"  
"JS1\_K04\_00786" 8043 "s63E6H2" 0 "hypothetical protein"  
"JS1\_K04\_00787" 8044 "s59E13H2" 0.00187266 "hypothetical protein"  
"JS1\_K04\_00787" 8044 "s59E25H2" 0 "hypothetical protein"  
"JS1\_K04\_00787" 8044 "s59E5H2" 0 "hypothetical protein"  
"JS1\_K04\_00787" 8044 "s63E6H2" 0 "hypothetical protein"  
"JS1\_K04\_00789" 8046 "s59E13H2" 0.01438599 "Xaa-Pro dipeptidase"  
"JS1\_K04\_00789" 8046 "s59E25H2" 0 "Xaa-Pro dipeptidase"  
"JS1\_K04\_00789" 8046 "s59E5H2" 0.09994361 "Xaa-Pro dipeptidase"  
"JS1\_K04\_00789" 8046 "s63E6H2" 0.1106183 "Xaa-Pro dipeptidase"  
"JS1\_K04\_00790" 8047 "s59E13H2" 0.02137512 "Elongation factor P"  
"JS1\_K04\_00790" 8047 "s59E25H2" 0 "Elongation factor P"  
"JS1\_K04\_00790" 8047 "s59E5H2" 0.08793637 "Elongation factor P"  
"JS1\_K04\_00790" 8047 "s63E6H2" 0.2239368 "Elongation factor P"  
"JS1\_K04\_00791" 8048 "s59E13H2" 0.02483897 "hypothetical protein"  
"JS1\_K04\_00791" 8048 "s59E25H2" 0 "hypothetical protein"  
"JS1\_K04\_00791" 8048 "s59E5H2" 0.1041048 "hypothetical protein"  
"JS1\_K04\_00791" 8048 "s63E6H2" 0.276712 "hypothetical protein"  
"JS1\_K04\_00792" 8049 "s59E13H2" 0.112121 "Farnesyl diphosphate synthase"  
"JS1\_K04\_00792" 8049 "s59E25H2" 0 "Farnesyl diphosphate synthase"  
"JS1\_K04\_00792" 8049 "s59E5H2" 0.08152452 "Farnesyl diphosphate synthase"  
"JS1\_K04\_00792" 8049 "s63E6H2" 0.2329137 "Farnesyl diphosphate synthase"  
"JS1\_K04\_00793" 8050 "s59E13H2" 0.01726906 "putative inorganic polyphosphate/ATP-NAD kinase"  
"JS1\_K04\_00793" 8050 "s59E25H2" 0 "putative inorganic polyphosphate/ATP-NAD kinase"  
"JS1\_K04\_00793" 8050 "s59E5H2" 0.03693294 "putative inorganic polyphosphate/ATP-NAD kinase"  
"JS1\_K04\_00793" 8050 "s63E6H2" 0.2211184 "putative inorganic polyphosphate/ATP-NAD kinase"  
"JS1\_K04\_00794" 8051 "s59E13H2" 0.01983109 "DNA repair protein RecN"  
"JS1\_K04\_00794" 8051 "s59E25H2" 71.32657 "DNA repair protein RecN"  
"JS1\_K04\_00794" 8051 "s59E5H2" 0.03049415 "DNA repair protein RecN"  
"JS1\_K04\_00794" 8051 "s63E6H2" 0.239345 "DNA repair protein RecN"  
"JS1\_K04\_00795" 8052 "s59E13H2" 0.02319587 "CTP synthase"  
"JS1\_K04\_00795" 8052 "s59E25H2" 0 "CTP synthase"  
"JS1\_K04\_00795" 8052 "s59E5H2" 0.0346515 "CTP synthase"  
"JS1\_K04\_00795" 8052 "s63E6H2" 0.232744 "CTP synthase"  
"JS1\_K04\_00796" 8053 "s59E13H2" 0.009146498 "CTP synthase"  
"JS1\_K04\_00796" 8053 "s59E25H2" 0 "CTP synthase"

"JS1\_K04\_00796" 8053 "s59E5H2" 0.04878393 "CTP synthase"  
"JS1\_K04\_00796" 8053 "s63E6H2" 0.1821184 "CTP synthase"  
"JS1\_K04\_00797" 8054 "s59E13H2" 0.01019188 "hypothetical protein"  
"JS1\_K04\_00797" 8054 "s59E25H2" 0 "hypothetical protein"  
"JS1\_K04\_00797" 8054 "s59E5H2" 0.005989335 "hypothetical protein"  
"JS1\_K04\_00797" 8054 "s63E6H2" 0.0787859 "hypothetical protein"  
"JS1\_K04\_00798" 8055 "s59E13H2" 0.006306404 "Peptidase T"  
"JS1\_K04\_00798" 8055 "s59E25H2" 0 "Peptidase T"  
"JS1\_K04\_00798" 8055 "s59E5H2" 0.04233784 "Peptidase T"  
"JS1\_K04\_00798" 8055 "s63E6H2" 0.1394022 "Peptidase T"  
"JS1\_K04\_00799" 8056 "s59E13H2" 0.02648709 "ADP-ribose pyrophosphatase"  
"JS1\_K04\_00799" 8056 "s59E25H2" 0.3019197 "ADP-ribose pyrophosphatase"  
"JS1\_K04\_00799" 8056 "s59E5H2" 0.01086441 "ADP-ribose pyrophosphatase"  
"JS1\_K04\_00799" 8056 "s63E6H2" 0.1303599 "ADP-ribose pyrophosphatase"  
"JS1\_K04\_00800" 8057 "s59E13H2" 0.01621451 "Tyrosine recombinase XerD"  
"JS1\_K04\_00800" 8057 "s59E25H2" 0.1071038 "Tyrosine recombinase XerD"  
"JS1\_K04\_00800" 8057 "s59E5H2" 0.03580755 "Tyrosine recombinase XerD"  
"JS1\_K04\_00800" 8057 "s63E6H2" 0.09956082 "Tyrosine recombinase XerD"  
"JS1\_K04\_00801" 8058 "s59E13H2" 0.01171877 "Peptidase family M50"  
"JS1\_K04\_00801" 8058 "s59E25H2" 0 "Peptidase family M50"  
"JS1\_K04\_00801" 8058 "s59E5H2" 0.02894145 "Peptidase family M50"  
"JS1\_K04\_00801" 8058 "s63E6H2" 0.1116995 "Peptidase family M50"  
"JS1\_K04\_00802" 8059 "s59E13H2" 0.004289637 "Tryptophan--tRNA ligase"  
"JS1\_K04\_00802" 8059 "s59E25H2" 0 "Tryptophan--tRNA ligase"  
"JS1\_K04\_00802" 8059 "s59E5H2" 3.305144e-05 "Tryptophan--tRNA ligase"  
"JS1\_K04\_00802" 8059 "s63E6H2" 0.1070909 "Tryptophan--tRNA ligase"  
"JS1\_K04\_00803" 8060 "s59E13H2" 0.004916403 "Segregation and condensation protein A"  
"JS1\_K04\_00803" 8060 "s59E25H2" 0 "Segregation and condensation protein A"  
"JS1\_K04\_00803" 8060 "s59E5H2" 0.02163735 "Segregation and condensation protein A"  
"JS1\_K04\_00803" 8060 "s63E6H2" 0.08143155 "Segregation and condensation protein A"  
"JS1\_K04\_00804" 8061 "s59E13H2" 0 "Segregation and condensation protein B"  
"JS1\_K04\_00804" 8061 "s59E25H2" 0 "Segregation and condensation protein B"  
"JS1\_K04\_00804" 8061 "s59E5H2" 0.03456363 "Segregation and condensation protein B"  
"JS1\_K04\_00804" 8061 "s63E6H2" 0.1591851 "Segregation and condensation protein B"  
"JS1\_K04\_00805" 8062 "s59E13H2" 0.3202824 "putative outer membrane protein PmpB precursor"  
"JS1\_K04\_00805" 8062 "s59E25H2" 0 "putative outer membrane protein PmpB precursor"  
"JS1\_K04\_00805" 8062 "s59E5H2" 0.0175037 "putative outer membrane protein PmpB precursor"  
"JS1\_K04\_00805" 8062 "s63E6H2" 0 "putative outer membrane protein PmpB precursor"  
"JS1\_K04\_00806" 8063 "s59E13H2" 0.3317893 "hypothetical protein"  
"JS1\_K04\_00806" 8063 "s59E25H2" 0 "hypothetical protein"  
"JS1\_K04\_00806" 8063 "s59E5H2" 0.01263465 "hypothetical protein"  
"JS1\_K04\_00806" 8063 "s63E6H2" 0 "hypothetical protein"  
"JS1\_K04\_00807" 8064 "s59E13H2" 0.1829514 "hypothetical protein"  
"JS1\_K04\_00807" 8064 "s59E25H2" 0 "hypothetical protein"  
"JS1\_K04\_00807" 8064 "s59E5H2" 0.007970769 "hypothetical protein"  
"JS1\_K04\_00807" 8064 "s63E6H2" 0 "hypothetical protein"  
"JS1\_K04\_00808" 8065 "s59E13H2" 0.08995348 "hypothetical protein"

"JS1\_K04\_00808" 8065 "s59E25H2" 0 "hypothetical protein"  
"JS1\_K04\_00808" 8065 "s59E5H2" 0.02457493 "hypothetical protein"  
"JS1\_K04\_00808" 8065 "s63E6H2" 0 "hypothetical protein"  
"JS1\_K04\_00809" 8066 "s59E13H2" 0.1318724 "hypothetical protein"  
"JS1\_K04\_00809" 8066 "s59E25H2" 0 "hypothetical protein"  
"JS1\_K04\_00809" 8066 "s59E5H2" 0.03804794 "hypothetical protein"  
"JS1\_K04\_00809" 8066 "s63E6H2" 0 "hypothetical protein"  
"JS1\_K04\_00810" 8067 "s59E13H2" 0.09190242 "hypothetical protein"  
"JS1\_K04\_00810" 8067 "s59E25H2" 0 "hypothetical protein"  
"JS1\_K04\_00810" 8067 "s59E5H2" 0.0009665532 "hypothetical protein"  
"JS1\_K04\_00810" 8067 "s63E6H2" 0 "hypothetical protein"  
"JS1\_K04\_00812" 8069 "s59E13H2" 0.05630517 "Restriction endonuclease BgIII"  
"JS1\_K04\_00812" 8069 "s59E25H2" 0 "Restriction endonuclease BgIII"  
"JS1\_K04\_00812" 8069 "s59E5H2" 0.01388641 "Restriction endonuclease BgIII"  
"JS1\_K04\_00812" 8069 "s63E6H2" 0 "Restriction endonuclease BgIII"  
"JS1\_K04\_00813" 8070 "s59E13H2" 0.04733127 "DNA replication and repair protein RecF"  
"JS1\_K04\_00813" 8070 "s59E25H2" 0 "DNA replication and repair protein RecF"  
"JS1\_K04\_00813" 8070 "s59E5H2" 0.003514432 "DNA replication and repair protein RecF"  
"JS1\_K04\_00813" 8070 "s63E6H2" 0 "DNA replication and repair protein RecF"  
"JS1\_K04\_00814" 8071 "s59E13H2" 0.112468 "hypothetical protein"  
"JS1\_K04\_00814" 8071 "s59E25H2" 0 "hypothetical protein"  
"JS1\_K04\_00814" 8071 "s59E5H2" 0.009087812 "hypothetical protein"  
"JS1\_K04\_00814" 8071 "s63E6H2" 0.001164836 "hypothetical protein"  
"JS1\_K04\_00815" 8072 "s59E13H2" 0.1307552 "Inner membrane protein YhaI"  
"JS1\_K04\_00815" 8072 "s59E25H2" 0 "Inner membrane protein YhaI"  
"JS1\_K04\_00815" 8072 "s59E5H2" 0 "Inner membrane protein YhaI"  
"JS1\_K04\_00815" 8072 "s63E6H2" 0.006675298 "Inner membrane protein YhaI"  
"JS1\_K04\_00816" 8073 "s59E13H2" 0.05332621 "hypothetical protein"  
"JS1\_K04\_00816" 8073 "s59E25H2" 0 "hypothetical protein"  
"JS1\_K04\_00816" 8073 "s59E5H2" 0.005270481 "hypothetical protein"  
"JS1\_K04\_00816" 8073 "s63E6H2" 0.1398904 "hypothetical protein"  
"JS1\_K04\_00817" 8074 "s59E13H2" 0.02009393 "hypothetical protein"  
"JS1\_K04\_00817" 8074 "s59E25H2" 0 "hypothetical protein"  
"JS1\_K04\_00817" 8074 "s59E5H2" 0 "hypothetical protein"  
"JS1\_K04\_00817" 8074 "s63E6H2" 0 "hypothetical protein"  
"JS1\_K04\_00818" 8075 "s59E13H2" 0.02562849 "Cyclic di-GMP phosphodiesterase response regulator RpfG"  
"JS1\_K04\_00818" 8075 "s59E25H2" 0 "Cyclic di-GMP phosphodiesterase response regulator RpfG"  
"JS1\_K04\_00818" 8075 "s59E5H2" 0 "Cyclic di-GMP phosphodiesterase response regulator RpfG"  
"JS1\_K04\_00818" 8075 "s63E6H2" 0 "Cyclic di-GMP phosphodiesterase response regulator RpfG"  
"JS1\_K04\_00819" 8076 "s59E13H2" 0.02448694 "hypothetical protein"  
"JS1\_K04\_00819" 8076 "s59E25H2" 0 "hypothetical protein"  
"JS1\_K04\_00819" 8076 "s59E5H2" 0 "hypothetical protein"  
"JS1\_K04\_00819" 8076 "s63E6H2" 0 "hypothetical protein"  
"JS1\_K04\_00821" 8078 "s59E13H2" 0.04018787 "hypothetical protein"  
"JS1\_K04\_00821" 8078 "s59E25H2" 0 "hypothetical protein"  
"JS1\_K04\_00821" 8078 "s59E5H2" 0 "hypothetical protein"  
"JS1\_K04\_00821" 8078 "s63E6H2" 0.01043236 "hypothetical protein"

"JS1\_K04\_00822" 8079 "s59E13H2" 0.01096033 "hypothetical protein"  
"JS1\_K04\_00822" 8079 "s59E25H2" 0 "hypothetical protein"  
"JS1\_K04\_00822" 8079 "s59E5H2" 0 "hypothetical protein"  
"JS1\_K04\_00822" 8079 "s63E6H2" 0 "hypothetical protein"  
"JS1\_K04\_00824" 8081 "s59E13H2" 1.514529 "Asp/Glu/Hydantoin racemase"  
"JS1\_K04\_00824" 8081 "s59E25H2" 0 "Asp/Glu/Hydantoin racemase"  
"JS1\_K04\_00824" 8081 "s59E5H2" 0.04882819 "Asp/Glu/Hydantoin racemase"  
"JS1\_K04\_00824" 8081 "s63E6H2" 0.02824337 "Asp/Glu/Hydantoin racemase"  
"JS1\_K04\_00825" 8082 "s59E13H2" 1.186371 "Tungsten-containing aldehyde ferredoxin oxidoreductase"  
"JS1\_K04\_00825" 8082 "s59E25H2" 0 "Tungsten-containing aldehyde ferredoxin oxidoreductase"  
"JS1\_K04\_00825" 8082 "s59E5H2" 0.05794939 "Tungsten-containing aldehyde ferredoxin oxidoreductase"  
"JS1\_K04\_00825" 8082 "s63E6H2" 0.08644422 "Tungsten-containing aldehyde ferredoxin oxidoreductase"  
"JS1\_K04\_00826" 8083 "s59E13H2" 0.02789408 "hypothetical protein"  
"JS1\_K04\_00826" 8083 "s59E25H2" 0 "hypothetical protein"  
"JS1\_K04\_00826" 8083 "s59E5H2" 0 "hypothetical protein"  
"JS1\_K04\_00826" 8083 "s63E6H2" 0.05047273 "hypothetical protein"  
"JS1\_K04\_00827" 8084 "s59E13H2" 1.017846 "Leucine-, isoleucine-, valine-, threonine-, and alanine-binding protein precursor"  
"JS1\_K04\_00827" 8084 "s59E25H2" 0 "Leucine-, isoleucine-, valine-, threonine-, and alanine-binding protein precursor"  
"JS1\_K04\_00827" 8084 "s59E5H2" 0.134487 "Leucine-, isoleucine-, valine-, threonine-, and alanine-binding protein precursor"  
"JS1\_K04\_00827" 8084 "s63E6H2" 0.207602 "Leucine-, isoleucine-, valine-, threonine-, and alanine-binding protein precursor"  
"JS1\_K04\_00828" 8085 "s59E13H2" 0.7842191 "High-affinity branched-chain amino acid transport ATP-binding protein LivF"  
"JS1\_K04\_00828" 8085 "s59E25H2" 0 "High-affinity branched-chain amino acid transport ATP-binding protein LivF"  
"JS1\_K04\_00828" 8085 "s59E5H2" 0.1848941 "High-affinity branched-chain amino acid transport ATP-binding protein LivF"  
"JS1\_K04\_00828" 8085 "s63E6H2" 0.1931556 "High-affinity branched-chain amino acid transport ATP-binding protein LivF"  
"JS1\_K04\_00829" 8086 "s59E13H2" 0.9181203 "putative branched-chain amino acid transport ATP-binding protein LivG"  
"JS1\_K04\_00829" 8086 "s59E25H2" 0 "putative branched-chain amino acid transport ATP-binding protein LivG"  
"JS1\_K04\_00829" 8086 "s59E5H2" 0.171569 "putative branched-chain amino acid transport ATP-binding protein LivG"  
"JS1\_K04\_00829" 8086 "s63E6H2" 0.1849997 "putative branched-chain amino acid transport ATP-binding protein LivG"  
"JS1\_K04\_00830" 8087 "s59E13H2" 0.7688711 "leucine/isoleucine/valine transporter permease subunit"  
"JS1\_K04\_00830" 8087 "s59E25H2" 0 "leucine/isoleucine/valine transporter permease subunit"  
"JS1\_K04\_00830" 8087 "s59E5H2" 0.1549458 "leucine/isoleucine/valine transporter permease subunit"  
"JS1\_K04\_00830" 8087 "s63E6H2" 0.2044737 "leucine/isoleucine/valine transporter permease subunit"  
"JS1\_K04\_00832" 8089 "s59E13H2" 0.001547751 "hypothetical protein"  
"JS1\_K04\_00832" 8089 "s59E25H2" 0 "hypothetical protein"  
"JS1\_K04\_00832" 8089 "s59E5H2" 0 "hypothetical protein"  
"JS1\_K04\_00832" 8089 "s63E6H2" 0 "hypothetical protein"  
"JS1\_K04\_00833" 8090 "s59E13H2" 0.002332872 "SEFIR domain protein"  
"JS1\_K04\_00833" 8090 "s59E25H2" 0 "SEFIR domain protein"  
"JS1\_K04\_00833" 8090 "s59E5H2" 0.00053482 "SEFIR domain protein"  
"JS1\_K04\_00833" 8090 "s63E6H2" 0 "SEFIR domain protein"  
"JS1\_K04\_00834" 8091 "s59E13H2" 0.1359129 "D-alanyl-D-alanine carboxypeptidase precursor"  
"JS1\_K04\_00834" 8091 "s59E25H2" 0 "D-alanyl-D-alanine carboxypeptidase precursor"  
"JS1\_K04\_00834" 8091 "s59E5H2" 0.2532587 "D-alanyl-D-alanine carboxypeptidase precursor"  
"JS1\_K04\_00834" 8091 "s63E6H2" 3.8267 "D-alanyl-D-alanine carboxypeptidase precursor"  
"JS1\_K04\_00835" 8092 "s59E13H2" 0.0923597 "hypothetical protein"  
"JS1\_K04\_00835" 8092 "s59E25H2" 0 "hypothetical protein"  
"JS1\_K04\_00835" 8092 "s59E5H2" 0.4635735 "hypothetical protein"



"JS1\_K04\_00835" 8092 "s63E6H2" 4.447005 "hypothetical protein"  
"JS1\_K04\_00836" 8093 "s59E13H2" 0.024731 "thiosulfate sulfurtransferase"  
"JS1\_K04\_00836" 8093 "s59E25H2" 0.350211 "thiosulfate sulfurtransferase"  
"JS1\_K04\_00836" 8093 "s59E5H2" 0 "thiosulfate sulfurtransferase"  
"JS1\_K04\_00836" 8093 "s63E6H2" 12.27741 "thiosulfate sulfurtransferase"  
"JS1\_K04\_00837" 8094 "s59E13H2" 0.1250223 "hypothetical protein"  
"JS1\_K04\_00837" 8094 "s59E25H2" 0 "hypothetical protein"  
"JS1\_K04\_00837" 8094 "s59E5H2" 1.152234 "hypothetical protein"  
"JS1\_K04\_00837" 8094 "s63E6H2" 0.4473214 "hypothetical protein"  
"JS1\_K04\_00838" 8095 "s59E13H2" 0.01851202 "hypothetical protein"  
"JS1\_K04\_00838" 8095 "s59E25H2" 0 "hypothetical protein"  
"JS1\_K04\_00838" 8095 "s59E5H2" 0.8512004 "hypothetical protein"  
"JS1\_K04\_00838" 8095 "s63E6H2" 0.2828453 "hypothetical protein"  
"JS1\_K04\_00839" 8096 "s59E13H2" 0.0710327 "ASCH domain protein"  
"JS1\_K04\_00839" 8096 "s59E25H2" 0 "ASCH domain protein"  
"JS1\_K04\_00839" 8096 "s59E5H2" 0.4583687 "ASCH domain protein"  
"JS1\_K04\_00839" 8096 "s63E6H2" 0.5563131 "ASCH domain protein"  
"JS1\_K04\_00840" 8097 "s59E13H2" 0.04176489 "hypothetical protein"  
"JS1\_K04\_00840" 8097 "s59E25H2" 0 "hypothetical protein"  
"JS1\_K04\_00840" 8097 "s59E5H2" 0.3557818 "hypothetical protein"  
"JS1\_K04\_00840" 8097 "s63E6H2" 0.6257561 "hypothetical protein"  
"JS1\_K04\_00841" 8098 "s59E13H2" 0.05491606 "DsrE/DsrF-like family protein"  
"JS1\_K04\_00841" 8098 "s59E25H2" 0 "DsrE/DsrF-like family protein"  
"JS1\_K04\_00841" 8098 "s59E5H2" 0.4567077 "DsrE/DsrF-like family protein"  
"JS1\_K04\_00841" 8098 "s63E6H2" 0.7915235 "DsrE/DsrF-like family protein"  
"JS1\_K04\_00842" 8099 "s59E13H2" 0.1292432 "putative cysteine desulfurase 2"  
"JS1\_K04\_00842" 8099 "s59E25H2" 0 "putative cysteine desulfurase 2"  
"JS1\_K04\_00842" 8099 "s59E5H2" 0.7385206 "putative cysteine desulfurase 2"  
"JS1\_K04\_00842" 8099 "s63E6H2" 1.142782 "putative cysteine desulfurase 2"  
"JS1\_K04\_00843" 8100 "s59E13H2" 0.1561399 "NifU-like protein"  
"JS1\_K04\_00843" 8100 "s59E25H2" 0 "NifU-like protein"  
"JS1\_K04\_00843" 8100 "s59E5H2" 0.3849522 "NifU-like protein"  
"JS1\_K04\_00843" 8100 "s63E6H2" 0.6891773 "NifU-like protein"  
"JS1\_K04\_00844" 8101 "s59E13H2" 0.3204502 "Glycine betaine/carnitine/choline-binding protein OpuCC precursor"  
"JS1\_K04\_00844" 8101 "s59E25H2" 0 "Glycine betaine/carnitine/choline-binding protein OpuCC precursor"  
"JS1\_K04\_00844" 8101 "s59E5H2" 4.14866 "Glycine betaine/carnitine/choline-binding protein OpuCC precursor"  
"JS1\_K04\_00844" 8101 "s63E6H2" 0.4563709 "Glycine betaine/carnitine/choline-binding protein OpuCC precursor"  
"JS1\_K04\_00845" 8102 "s59E13H2" 0.417193 "Choline transport ATP-binding protein OpuBA"  
"JS1\_K04\_00845" 8102 "s59E25H2" 0 "Choline transport ATP-binding protein OpuBA"  
"JS1\_K04\_00845" 8102 "s59E5H2" 2.298165 "Choline transport ATP-binding protein OpuBA"  
"JS1\_K04\_00845" 8102 "s63E6H2" 0.528546 "Choline transport ATP-binding protein OpuBA"  
"JS1\_K04\_00846" 8103 "s59E13H2" 0.4603398 "Glycine betaine/carnitine/choline transport system permease protein OpuCB"  
"JS1\_K04\_00846" 8103 "s59E25H2" 0 "Glycine betaine/carnitine/choline transport system permease protein OpuCB"  
"JS1\_K04\_00846" 8103 "s59E5H2" 0.7410113 "Glycine betaine/carnitine/choline transport system permease protein OpuCB"  
"JS1\_K04\_00846" 8103 "s63E6H2" 0.4719438 "Glycine betaine/carnitine/choline transport system permease protein OpuCB"  
"JS1\_K04\_00847" 8104 "s59E13H2" 0.2301637 "Carnitine transport permease protein OpuCB"  
"JS1\_K04\_00847" 8104 "s59E25H2" 0 "Carnitine transport permease protein OpuCB"

"JS1\_K04\_00847" 8104 "s59E5H2" 0.5037042 "Carnitine transport permease protein OpuCB"  
"JS1\_K04\_00847" 8104 "s63E6H2" 0.5881331 "Carnitine transport permease protein OpuCB"  
"JS1\_K04\_00848" 8105 "s59E13H2" 0.7651406 "Peptide methionine sulfoxide reductase MsrA/MsrB"  
"JS1\_K04\_00848" 8105 "s59E25H2" 0 "Peptide methionine sulfoxide reductase MsrA/MsrB"  
"JS1\_K04\_00848" 8105 "s59E5H2" 0.8560091 "Peptide methionine sulfoxide reductase MsrA/MsrB"  
"JS1\_K04\_00848" 8105 "s63E6H2" 2.87783 "Peptide methionine sulfoxide reductase MsrA/MsrB"  
"JS1\_K04\_00849" 8106 "s59E13H2" 0.3802298 "Nitroreductase family protein"  
"JS1\_K04\_00849" 8106 "s59E25H2" 0 "Nitroreductase family protein"  
"JS1\_K04\_00849" 8106 "s59E5H2" 1.339779 "Nitroreductase family protein"  
"JS1\_K04\_00849" 8106 "s63E6H2" 2.809031 "Nitroreductase family protein"  
"JS1\_K04\_00850" 8107 "s59E13H2" 0.4645181 "hypothetical protein"  
"JS1\_K04\_00850" 8107 "s59E25H2" 0.1402918 "hypothetical protein"  
"JS1\_K04\_00850" 8107 "s59E5H2" 2.308935 "hypothetical protein"  
"JS1\_K04\_00850" 8107 "s63E6H2" 0.4685113 "hypothetical protein"  
"JS1\_K04\_00851" 8108 "s59E13H2" 3.579072 "Rubrerythrin"  
"JS1\_K04\_00851" 8108 "s59E25H2" 0 "Rubrerythrin"  
"JS1\_K04\_00851" 8108 "s59E5H2" 0.765333 "Rubrerythrin"  
"JS1\_K04\_00851" 8108 "s63E6H2" 2.608351 "Rubrerythrin"  
"JS1\_K04\_00852" 8109 "s59E13H2" 3.961247 "GYD domain protein"  
"JS1\_K04\_00852" 8109 "s59E25H2" 0 "GYD domain protein"  
"JS1\_K04\_00852" 8109 "s59E5H2" 0.3029676 "GYD domain protein"  
"JS1\_K04\_00852" 8109 "s63E6H2" 2.648413 "GYD domain protein"  
"JS1\_K04\_00853" 8110 "s59E13H2" 4.798975 "5-aminovalerate aminotransferase DavT"  
"JS1\_K04\_00853" 8110 "s59E25H2" 0 "5-aminovalerate aminotransferase DavT"  
"JS1\_K04\_00853" 8110 "s59E5H2" 0.7038922 "5-aminovalerate aminotransferase DavT"  
"JS1\_K04\_00853" 8110 "s63E6H2" 0.6661452 "5-aminovalerate aminotransferase DavT"  
"JS1\_K04\_00854" 8111 "s59E13H2" 0.7488071 "Sialic acid TRAP transporter permease protein SiaT"  
"JS1\_K04\_00854" 8111 "s59E25H2" 0 "Sialic acid TRAP transporter permease protein SiaT"  
"JS1\_K04\_00854" 8111 "s59E5H2" 1.120642 "Sialic acid TRAP transporter permease protein SiaT"  
"JS1\_K04\_00854" 8111 "s63E6H2" 0.5189806 "Sialic acid TRAP transporter permease protein SiaT"  
"JS1\_K04\_00855" 8112 "s59E13H2" 0.2828084 "Tripartite ATP-independent periplasmic transporters, DctQ component"  
"JS1\_K04\_00855" 8112 "s59E25H2" 0 "Tripartite ATP-independent periplasmic transporters, DctQ component"  
"JS1\_K04\_00855" 8112 "s59E5H2" 0.7146596 "Tripartite ATP-independent periplasmic transporters, DctQ component"  
"JS1\_K04\_00855" 8112 "s63E6H2" 0.2028605 "Tripartite ATP-independent periplasmic transporters, DctQ component"  
"JS1\_K04\_00856" 8113 "s59E13H2" 0.3396477 "Sialic acid-binding periplasmic protein SiaP precursor"  
"JS1\_K04\_00856" 8113 "s59E25H2" 0 "Sialic acid-binding periplasmic protein SiaP precursor"  
"JS1\_K04\_00856" 8113 "s59E5H2" 0.5567144 "Sialic acid-binding periplasmic protein SiaP precursor"  
"JS1\_K04\_00856" 8113 "s63E6H2" 0.1231878 "Sialic acid-binding periplasmic protein SiaP precursor"  
"JS1\_K04\_00858" 8115 "s59E13H2" 0.1726448 "Type I restriction enzyme EcoKI M protein"  
"JS1\_K04\_00858" 8115 "s59E25H2" 0 "Type I restriction enzyme EcoKI M protein"  
"JS1\_K04\_00858" 8115 "s59E5H2" 0.3267306 "Type I restriction enzyme EcoKI M protein"  
"JS1\_K04\_00858" 8115 "s63E6H2" 0.09365196 "Type I restriction enzyme EcoKI M protein"  
"JS1\_K04\_00859" 8116 "s59E13H2" 0.1650182 "EcoKI restriction-modification system protein HsdS"  
"JS1\_K04\_00859" 8116 "s59E25H2" 0 "EcoKI restriction-modification system protein HsdS"  
"JS1\_K04\_00859" 8116 "s59E5H2" 1.264928 "EcoKI restriction-modification system protein HsdS"  
"JS1\_K04\_00859" 8116 "s63E6H2" 0.1411934 "EcoKI restriction-modification system protein HsdS"  
"JS1\_K04\_00860" 8117 "s59E13H2" 0.3171986 "Phosphoglycolate phosphatase"

"JS1\_K04\_00860" 8117 "s59E25H2" 0 "Phosphoglycolate phosphatase"  
"JS1\_K04\_00860" 8117 "s59E5H2" 1.088688 "Phosphoglycolate phosphatase"  
"JS1\_K04\_00860" 8117 "s63E6H2" 0.5368726 "Phosphoglycolate phosphatase"  
"JS1\_K04\_00861" 8118 "s59E13H2" 0 "HTH-type transcriptional regulator MtrR"  
"JS1\_K04\_00861" 8118 "s59E25H2" 0 "HTH-type transcriptional regulator MtrR"  
"JS1\_K04\_00861" 8118 "s59E5H2" 0.2056964 "HTH-type transcriptional regulator MtrR"  
"JS1\_K04\_00861" 8118 "s63E6H2" 0.3324549 "HTH-type transcriptional regulator MtrR"  
"JS1\_K04\_00862" 8119 "s59E13H2" 0 "hypothetical protein"  
"JS1\_K04\_00862" 8119 "s59E25H2" 0 "hypothetical protein"  
"JS1\_K04\_00862" 8119 "s59E5H2" 0.1478598 "hypothetical protein"  
"JS1\_K04\_00862" 8119 "s63E6H2" 0.2797744 "hypothetical protein"  
"JS1\_K04\_00863" 8120 "s59E13H2" 0 "3 beta-hydroxysteroid dehydrogenase/Delta 5--"  
"JS1\_K04\_00863" 8120 "s59E25H2" 0 "3 beta-hydroxysteroid dehydrogenase/Delta 5--"  
"JS1\_K04\_00863" 8120 "s59E5H2" 0.2215273 "3 beta-hydroxysteroid dehydrogenase/Delta 5--"  
"JS1\_K04\_00863" 8120 "s63E6H2" 0.1663222 "3 beta-hydroxysteroid dehydrogenase/Delta 5--"  
"JS1\_K04\_00864" 8121 "s59E13H2" 0.1596688 "TPR repeat-containing protein YrrB"  
"JS1\_K04\_00864" 8121 "s59E25H2" 0 "TPR repeat-containing protein YrrB"  
"JS1\_K04\_00864" 8121 "s59E5H2" 0.3713222 "TPR repeat-containing protein YrrB"  
"JS1\_K04\_00864" 8121 "s63E6H2" 0.2804115 "TPR repeat-containing protein YrrB"  
"JS1\_K04\_00865" 8122 "s59E13H2" 0.001022622 "hypothetical protein"  
"JS1\_K04\_00865" 8122 "s59E25H2" 0 "hypothetical protein"  
"JS1\_K04\_00865" 8122 "s59E5H2" 0.2877017 "hypothetical protein"  
"JS1\_K04\_00865" 8122 "s63E6H2" 2.311517e-05 "hypothetical protein"  
"JS1\_K04\_00866" 8123 "s59E13H2" 0.004311954 "hypothetical protein"  
"JS1\_K04\_00866" 8123 "s59E25H2" 0 "hypothetical protein"  
"JS1\_K04\_00866" 8123 "s59E5H2" 0.3065074 "hypothetical protein"  
"JS1\_K04\_00866" 8123 "s63E6H2" 0.0007328049 "hypothetical protein"  
"JS1\_K04\_00867" 8124 "s59E13H2" 0.01223395 "dTDP-4-dehydrorhamnose reductase"  
"JS1\_K04\_00867" 8124 "s59E25H2" 0 "dTDP-4-dehydrorhamnose reductase"  
"JS1\_K04\_00867" 8124 "s59E5H2" 0.3553167 "dTDP-4-dehydrorhamnose reductase"  
"JS1\_K04\_00867" 8124 "s63E6H2" 0.004519945 "dTDP-4-dehydrorhamnose reductase"  
"JS1\_K04\_00868" 8125 "s59E13H2" 0.001780172 "hypothetical protein"  
"JS1\_K04\_00868" 8125 "s59E25H2" 0 "hypothetical protein"  
"JS1\_K04\_00868" 8125 "s59E5H2" 0.2684556 "hypothetical protein"  
"JS1\_K04\_00868" 8125 "s63E6H2" 0.01659414 "hypothetical protein"  
"JS1\_K04\_00869" 8126 "s59E13H2" 0.006550644 "Arylesterase precursor"  
"JS1\_K04\_00869" 8126 "s59E25H2" 0 "Arylesterase precursor"  
"JS1\_K04\_00869" 8126 "s59E5H2" 0.09860287 "Arylesterase precursor"  
"JS1\_K04\_00869" 8126 "s63E6H2" 0.01283868 "Arylesterase precursor"  
"JS1\_K04\_00870" 8127 "s59E13H2" 0.01059751 "hypothetical protein"  
"JS1\_K04\_00870" 8127 "s59E25H2" 0 "hypothetical protein"  
"JS1\_K04\_00870" 8127 "s59E5H2" 0.1148179 "hypothetical protein"  
"JS1\_K04\_00870" 8127 "s63E6H2" 0.0008879861 "hypothetical protein"  
"JS1\_K04\_00871" 8128 "s59E13H2" 0.003467972 "hypothetical protein"  
"JS1\_K04\_00871" 8128 "s59E25H2" 0 "hypothetical protein"  
"JS1\_K04\_00871" 8128 "s59E5H2" 0.09848399 "hypothetical protein"  
"JS1\_K04\_00871" 8128 "s63E6H2" 0.05916145 "hypothetical protein"

"JS1\_K04\_00872" 8129 "s59E13H2" 0.004517823 "hypothetical protein"  
"JS1\_K04\_00872" 8129 "s59E25H2" 0 "hypothetical protein"  
"JS1\_K04\_00872" 8129 "s59E5H2" 0.1246296 "hypothetical protein"  
"JS1\_K04\_00872" 8129 "s63E6H2" 0.3266258 "hypothetical protein"  
"JS1\_K04\_00873" 8130 "s59E13H2" 0.001254205 "hypothetical protein"  
"JS1\_K04\_00873" 8130 "s59E25H2" 0 "hypothetical protein"  
"JS1\_K04\_00873" 8130 "s59E5H2" 0.651113 "hypothetical protein"  
"JS1\_K04\_00873" 8130 "s63E6H2" 1.317935 "hypothetical protein"  
"JS1\_K04\_00874" 8131 "s59E13H2" 0 "hypothetical protein"  
"JS1\_K04\_00874" 8131 "s59E25H2" 0 "hypothetical protein"  
"JS1\_K04\_00874" 8131 "s59E5H2" 0.4474301 "hypothetical protein"  
"JS1\_K04\_00874" 8131 "s63E6H2" 0.8826 "hypothetical protein"  
"JS1\_K04\_00875" 8132 "s59E13H2" 0.001585862 "hypothetical protein"  
"JS1\_K04\_00875" 8132 "s59E25H2" 0 "hypothetical protein"  
"JS1\_K04\_00875" 8132 "s59E5H2" 0.01823728 "hypothetical protein"  
"JS1\_K04\_00875" 8132 "s63E6H2" 0.05887181 "hypothetical protein"  
"JS1\_K04\_00876" 8133 "s59E13H2" 0 "hypothetical protein"  
"JS1\_K04\_00876" 8133 "s59E25H2" 0 "hypothetical protein"  
"JS1\_K04\_00876" 8133 "s59E5H2" 0.01722689 "hypothetical protein"  
"JS1\_K04\_00876" 8133 "s63E6H2" 0.02872762 "hypothetical protein"  
"JS1\_K04\_00878" 8135 "s59E13H2" 0.03769545 "hypothetical protein"  
"JS1\_K04\_00878" 8135 "s59E25H2" 0 "hypothetical protein"  
"JS1\_K04\_00878" 8135 "s59E5H2" 0.4078602 "hypothetical protein"  
"JS1\_K04\_00878" 8135 "s63E6H2" 0.1373075 "hypothetical protein"  
"JS1\_K04\_00879" 8136 "s59E13H2" 0.03636168 "Ribonuclease G"  
"JS1\_K04\_00879" 8136 "s59E25H2" 0 "Ribonuclease G"  
"JS1\_K04\_00879" 8136 "s59E5H2" 0.4183244 "Ribonuclease G"  
"JS1\_K04\_00879" 8136 "s63E6H2" 0.1420376 "Ribonuclease G"  
"JS1\_K04\_00880" 8137 "s59E13H2" 0.03633851 "50S ribosomal protein L21"  
"JS1\_K04\_00880" 8137 "s59E25H2" 0 "50S ribosomal protein L21"  
"JS1\_K04\_00880" 8137 "s59E5H2" 0.192878 "50S ribosomal protein L21"  
"JS1\_K04\_00880" 8137 "s63E6H2" 0.04331494 "50S ribosomal protein L21"  
"JS1\_K04\_00881" 8138 "s59E13H2" 0.02766247 "50S ribosomal protein L27"  
"JS1\_K04\_00881" 8138 "s59E25H2" 0 "50S ribosomal protein L27"  
"JS1\_K04\_00881" 8138 "s59E5H2" 0.177211 "50S ribosomal protein L27"  
"JS1\_K04\_00881" 8138 "s63E6H2" 0.06328517 "50S ribosomal protein L27"  
"JS1\_K04\_00882" 8139 "s59E13H2" 0.2570969 "GTPase ObgE"  
"JS1\_K04\_00882" 8139 "s59E25H2" 0 "GTPase ObgE"  
"JS1\_K04\_00882" 8139 "s59E5H2" 0.2575822 "GTPase ObgE"  
"JS1\_K04\_00882" 8139 "s63E6H2" 0.09560677 "GTPase ObgE"  
"JS1\_K04\_00883" 8140 "s59E13H2" 0.4172361 "Outer membrane protein assembly factor BamD precursor"  
"JS1\_K04\_00883" 8140 "s59E25H2" 0 "Outer membrane protein assembly factor BamD precursor"  
"JS1\_K04\_00883" 8140 "s59E5H2" 0.1980587 "Outer membrane protein assembly factor BamD precursor"  
"JS1\_K04\_00883" 8140 "s63E6H2" 0.03923282 "Outer membrane protein assembly factor BamD precursor"  
"JS1\_K04\_00884" 8141 "s59E13H2" 0.1926117 "Biopolymer transport protein ExbB"  
"JS1\_K04\_00884" 8141 "s59E25H2" 0 "Biopolymer transport protein ExbB"  
"JS1\_K04\_00884" 8141 "s59E5H2" 0.9659907 "Biopolymer transport protein ExbB"

"JS1\_K04\_00884" 8141 "s63E6H2" 0.2237553 "Biopolymer transport protein ExbB"  
"JS1\_K04\_00885" 8142 "s59E13H2" 0.2651587 "Biopolymer transport protein ExbD"  
"JS1\_K04\_00885" 8142 "s59E25H2" 0 "Biopolymer transport protein ExbD"  
"JS1\_K04\_00885" 8142 "s59E5H2" 0.483512 "Biopolymer transport protein ExbD"  
"JS1\_K04\_00885" 8142 "s63E6H2" 0.1002121 "Biopolymer transport protein ExbD"  
"JS1\_K04\_00886" 8143 "s59E13H2" 0.8474813 "Putative lipoprotein YerB precursor"  
"JS1\_K04\_00886" 8143 "s59E25H2" 0 "Putative lipoprotein YerB precursor"  
"JS1\_K04\_00886" 8143 "s59E5H2" 0.3193853 "Putative lipoprotein YerB precursor"  
"JS1\_K04\_00886" 8143 "s63E6H2" 0.1062917 "Putative lipoprotein YerB precursor"  
"JS1\_K04\_00887" 8144 "s59E13H2" 0.2729498 "Tyrosine recombinase XerD"  
"JS1\_K04\_00887" 8144 "s59E25H2" 0 "Tyrosine recombinase XerD"  
"JS1\_K04\_00887" 8144 "s59E5H2" 0.224329 "Tyrosine recombinase XerD"  
"JS1\_K04\_00887" 8144 "s63E6H2" 0.1072819 "Tyrosine recombinase XerD"  
"JS1\_K04\_00888" 8145 "s59E13H2" 0.3728198 "Purine nucleoside phosphorylase 1"  
"JS1\_K04\_00888" 8145 "s59E25H2" 0 "Purine nucleoside phosphorylase 1"  
"JS1\_K04\_00888" 8145 "s59E5H2" 0.2745383 "Purine nucleoside phosphorylase 1"  
"JS1\_K04\_00888" 8145 "s63E6H2" 0.1775447 "Purine nucleoside phosphorylase 1"  
"JS1\_K04\_00889" 8146 "s59E13H2" 0.3734199 "Putative small multi-drug export protein"  
"JS1\_K04\_00889" 8146 "s59E25H2" 0 "Putative small multi-drug export protein"  
"JS1\_K04\_00889" 8146 "s59E5H2" 0.2575158 "Putative small multi-drug export protein"  
"JS1\_K04\_00889" 8146 "s63E6H2" 0.2359135 "Putative small multi-drug export protein"  
"JS1\_K04\_00890" 8147 "s59E13H2" 0.4345061 "Methylthioribose-1-phosphate isomerase"  
"JS1\_K04\_00890" 8147 "s59E25H2" 0 "Methylthioribose-1-phosphate isomerase"  
"JS1\_K04\_00890" 8147 "s59E5H2" 0.2855145 "Methylthioribose-1-phosphate isomerase"  
"JS1\_K04\_00890" 8147 "s63E6H2" 0.1546137 "Methylthioribose-1-phosphate isomerase"  
"JS1\_K04\_00891" 8148 "s59E13H2" 0.6843796 "UDP-N-acetylglucosamine 1-carboxyvinyltransferase 1"  
"JS1\_K04\_00891" 8148 "s59E25H2" 0 "UDP-N-acetylglucosamine 1-carboxyvinyltransferase 1"  
"JS1\_K04\_00891" 8148 "s59E5H2" 0.3055584 "UDP-N-acetylglucosamine 1-carboxyvinyltransferase 1"  
"JS1\_K04\_00891" 8148 "s63E6H2" 0.1575946 "UDP-N-acetylglucosamine 1-carboxyvinyltransferase 1"  
"JS1\_K04\_00892" 8149 "s59E13H2" 1.657148 "Rod shape-determining protein MreB"  
"JS1\_K04\_00892" 8149 "s59E25H2" 0 "Rod shape-determining protein MreB"  
"JS1\_K04\_00892" 8149 "s59E5H2" 0.2226921 "Rod shape-determining protein MreB"  
"JS1\_K04\_00892" 8149 "s63E6H2" 0.4022254 "Rod shape-determining protein MreB"  
"JS1\_K04\_00893" 8150 "s59E13H2" 0.955907 "hypothetical protein"  
"JS1\_K04\_00893" 8150 "s59E25H2" 0 "hypothetical protein"  
"JS1\_K04\_00893" 8150 "s59E5H2" 0.1676993 "hypothetical protein"  
"JS1\_K04\_00893" 8150 "s63E6H2" 0.1136737 "hypothetical protein"  
"JS1\_K04\_00894" 8151 "s59E13H2" 0.932688 "Putative 2-C-methyl-D-erythritol 4-phosphate cytidyltransferase 2"  
"JS1\_K04\_00894" 8151 "s59E25H2" 0 "Putative 2-C-methyl-D-erythritol 4-phosphate cytidyltransferase 2"  
"JS1\_K04\_00894" 8151 "s59E5H2" 0.2088062 "Putative 2-C-methyl-D-erythritol 4-phosphate cytidyltransferase 2"  
"JS1\_K04\_00894" 8151 "s63E6H2" 0.298409 "Putative 2-C-methyl-D-erythritol 4-phosphate cytidyltransferase 2"  
"JS1\_K04\_00895" 8152 "s59E13H2" 0.6848827 "4-diphosphocytidyl-2-C-methyl-D-erythritol kinase"  
"JS1\_K04\_00895" 8152 "s59E25H2" 0 "4-diphosphocytidyl-2-C-methyl-D-erythritol kinase"  
"JS1\_K04\_00895" 8152 "s59E5H2" 0.3312446 "4-diphosphocytidyl-2-C-methyl-D-erythritol kinase"  
"JS1\_K04\_00895" 8152 "s63E6H2" 0.3883235 "4-diphosphocytidyl-2-C-methyl-D-erythritol kinase"  
"JS1\_K04\_00896" 8153 "s59E13H2" 0.6976604 "2-C-methyl-D-erythritol 2,4-cyclodiphosphate synthase"  
"JS1\_K04\_00896" 8153 "s59E25H2" 0 "2-C-methyl-D-erythritol 2,4-cyclodiphosphate synthase"

"JS1\_K04\_00896" 8153 "s59E5H2" 0.0910559 "2-C-methyl-D-erythritol 2,4-cyclodiphosphate synthase"  
"JS1\_K04\_00896" 8153 "s63E6H2" 0.2571919 "2-C-methyl-D-erythritol 2,4-cyclodiphosphate synthase"  
"JS1\_K04\_00897" 8154 "s59E13H2" 0.7420528 "hypothetical protein"  
"JS1\_K04\_00897" 8154 "s59E25H2" 0 "hypothetical protein"  
"JS1\_K04\_00897" 8154 "s59E5H2" 0.124945 "hypothetical protein"  
"JS1\_K04\_00897" 8154 "s63E6H2" 0.1302749 "hypothetical protein"  
"JS1\_K04\_00898" 8155 "s59E13H2" 0.757686 "lipoprotein Nlpl"  
"JS1\_K04\_00898" 8155 "s59E25H2" 0 "lipoprotein Nlpl"  
"JS1\_K04\_00898" 8155 "s59E5H2" 0.3376456 "lipoprotein Nlpl"  
"JS1\_K04\_00898" 8155 "s63E6H2" 0.259797 "lipoprotein Nlpl"  
"JS1\_K04\_00899" 8156 "s59E13H2" 0.1923288 "putative nicotinate-nucleotide adenyllyltransferase"  
"JS1\_K04\_00899" 8156 "s59E25H2" 0 "putative nicotinate-nucleotide adenyllyltransferase"  
"JS1\_K04\_00899" 8156 "s59E5H2" 0.3312795 "putative nicotinate-nucleotide adenyllyltransferase"  
"JS1\_K04\_00899" 8156 "s63E6H2" 0.226175 "putative nicotinate-nucleotide adenyllyltransferase"  
"JS1\_K04\_00900" 8157 "s59E13H2" 0.03662308 "putative nicotinate-nucleotide adenyllyltransferase"  
"JS1\_K04\_00900" 8157 "s59E25H2" 0 "putative nicotinate-nucleotide adenyllyltransferase"  
"JS1\_K04\_00900" 8157 "s59E5H2" 0.3394278 "putative nicotinate-nucleotide adenyllyltransferase"  
"JS1\_K04\_00900" 8157 "s63E6H2" 0.3103302 "putative nicotinate-nucleotide adenyllyltransferase"  
"JS1\_K04\_00901" 8158 "s59E13H2" 0.0349834 "Putative transcriptional regulator YvhJ"  
"JS1\_K04\_00901" 8158 "s59E25H2" 0 "Putative transcriptional regulator YvhJ"  
"JS1\_K04\_00901" 8158 "s59E5H2" 0.2089467 "Putative transcriptional regulator YvhJ"  
"JS1\_K04\_00901" 8158 "s63E6H2" 0.38929 "Putative transcriptional regulator YvhJ"  
"JS1\_K04\_00902" 8159 "s59E13H2" 0.03700593 "Ribosomal silencing factor RsfS"  
"JS1\_K04\_00902" 8159 "s59E25H2" 0 "Ribosomal silencing factor RsfS"  
"JS1\_K04\_00902" 8159 "s59E5H2" 0.213159 "Ribosomal silencing factor RsfS"  
"JS1\_K04\_00902" 8159 "s63E6H2" 0.3428783 "Ribosomal silencing factor RsfS"  
"JS1\_K04\_00903" 8160 "s59E13H2" 0.06549667 "Ferredoxin"  
"JS1\_K04\_00903" 8160 "s59E25H2" 0 "Ferredoxin"  
"JS1\_K04\_00903" 8160 "s59E5H2" 0.3663238 "Ferredoxin"  
"JS1\_K04\_00903" 8160 "s63E6H2" 1.003818 "Ferredoxin"  
"JS1\_K04\_00904" 8161 "s59E13H2" 0.4793862 "Peptidase family S58"  
"JS1\_K04\_00904" 8161 "s59E25H2" 0 "Peptidase family S58"  
"JS1\_K04\_00904" 8161 "s59E5H2" 1.590902 "Peptidase family S58"  
"JS1\_K04\_00904" 8161 "s63E6H2" 2.203863 "Peptidase family S58"  
"JS1\_K04\_00905" 8162 "s59E13H2" 1.698993 "hypothetical protein"  
"JS1\_K04\_00905" 8162 "s59E25H2" 0 "hypothetical protein"  
"JS1\_K04\_00905" 8162 "s59E5H2" 3.53977 "hypothetical protein"  
"JS1\_K04\_00905" 8162 "s63E6H2" 1.799704 "hypothetical protein"  
"JS1\_K04\_00906" 8163 "s59E13H2" 0.857079 "Phosphodiesterase"  
"JS1\_K04\_00906" 8163 "s59E25H2" 0 "Phosphodiesterase"  
"JS1\_K04\_00906" 8163 "s59E5H2" 0.948176 "Phosphodiesterase"  
"JS1\_K04\_00906" 8163 "s63E6H2" 0.6735998 "Phosphodiesterase"  
"JS1\_K04\_00907" 8164 "s59E13H2" 0.6430226 "Aspartate racemase"  
"JS1\_K04\_00907" 8164 "s59E25H2" 0 "Aspartate racemase"  
"JS1\_K04\_00907" 8164 "s59E5H2" 0.6445561 "Aspartate racemase"  
"JS1\_K04\_00907" 8164 "s63E6H2" 1.142706 "Aspartate racemase"  
"JS1\_K04\_00908" 8165 "s59E13H2" 5.454908 "Proline--tRNA ligase"

"JS1\_K04\_00908" 8165 "s59E25H2" 0 "Proline--tRNA ligase"  
"JS1\_K04\_00908" 8165 "s59E5H2" 3.572321 "Proline--tRNA ligase"  
"JS1\_K04\_00908" 8165 "s63E6H2" 3.093054 "Proline--tRNA ligase"  
"JS1\_K04\_00909" 8166 "s59E13H2" 6.071316 "Elongation factor Tu"  
"JS1\_K04\_00909" 8166 "s59E25H2" 0 "Elongation factor Tu"  
"JS1\_K04\_00909" 8166 "s59E5H2" 4.21926 "Elongation factor Tu"  
"JS1\_K04\_00909" 8166 "s63E6H2" 2.444157 "Elongation factor Tu"  
"JS1\_K04\_00910" 8167 "s59E13H2" 5.501003 "Modulator of FtsH protease HflK"  
"JS1\_K04\_00910" 8167 "s59E25H2" 0 "Modulator of FtsH protease HflK"  
"JS1\_K04\_00910" 8167 "s59E5H2" 1.971082 "Modulator of FtsH protease HflK"  
"JS1\_K04\_00910" 8167 "s63E6H2" 2.009139 "Modulator of FtsH protease HflK"  
"JS1\_K04\_00911" 8168 "s59E13H2" 4.179338 "hypothetical protein"  
"JS1\_K04\_00911" 8168 "s59E25H2" 0 "hypothetical protein"  
"JS1\_K04\_00911" 8168 "s59E5H2" 1.343925 "hypothetical protein"  
"JS1\_K04\_00911" 8168 "s63E6H2" 1.757682 "hypothetical protein"  
"JS1\_K04\_00912" 8169 "s59E13H2" 0.03278971 "4-hydroxy-3-methylbut-2-en-1-yl diphosphate synthase"  
"JS1\_K04\_00912" 8169 "s59E25H2" 0 "4-hydroxy-3-methylbut-2-en-1-yl diphosphate synthase"  
"JS1\_K04\_00912" 8169 "s59E5H2" 0.1186551 "4-hydroxy-3-methylbut-2-en-1-yl diphosphate synthase"  
"JS1\_K04\_00912" 8169 "s63E6H2" 0.03093914 "4-hydroxy-3-methylbut-2-en-1-yl diphosphate synthase"  
"JS1\_K04\_00913" 8170 "s59E13H2" 0.02434457 "V-type ATP synthase subunit H"  
"JS1\_K04\_00913" 8170 "s59E25H2" 0 "V-type ATP synthase subunit H"  
"JS1\_K04\_00913" 8170 "s59E5H2" 0.1618624 "V-type ATP synthase subunit H"  
"JS1\_K04\_00913" 8170 "s63E6H2" 0.01399384 "V-type ATP synthase subunit H"  
"JS1\_K04\_00914" 8171 "s59E13H2" 0.02959701 "V-type ATP synthase subunit I"  
"JS1\_K04\_00914" 8171 "s59E25H2" 0 "V-type ATP synthase subunit I"  
"JS1\_K04\_00914" 8171 "s59E5H2" 0.2166115 "V-type ATP synthase subunit I"  
"JS1\_K04\_00914" 8171 "s63E6H2" 0.04987151 "V-type ATP synthase subunit I"  
"JS1\_K04\_00915" 8172 "s59E13H2" 0.06405853 "V-type sodium ATPase subunit K"  
"JS1\_K04\_00915" 8172 "s59E25H2" 0 "V-type sodium ATPase subunit K"  
"JS1\_K04\_00915" 8172 "s59E5H2" 1.017125 "V-type sodium ATPase subunit K"  
"JS1\_K04\_00915" 8172 "s63E6H2" 0.1069037 "V-type sodium ATPase subunit K"  
"JS1\_K04\_00916" 8173 "s59E13H2" 0.9232064 "V-type ATP synthase subunit E"  
"JS1\_K04\_00916" 8173 "s59E25H2" 0 "V-type ATP synthase subunit E"  
"JS1\_K04\_00916" 8173 "s59E5H2" 0.2500734 "V-type ATP synthase subunit E"  
"JS1\_K04\_00916" 8173 "s63E6H2" 0.08215696 "V-type ATP synthase subunit E"  
"JS1\_K04\_00917" 8174 "s59E13H2" 0.02442362 "V-type sodium ATPase subunit C"  
"JS1\_K04\_00917" 8174 "s59E25H2" 0 "V-type sodium ATPase subunit C"  
"JS1\_K04\_00917" 8174 "s59E5H2" 0.3518529 "V-type sodium ATPase subunit C"  
"JS1\_K04\_00917" 8174 "s63E6H2" 0.04436845 "V-type sodium ATPase subunit C"  
"JS1\_K04\_00918" 8175 "s59E13H2" 0.105759 "V-type sodium ATPase subunit G"  
"JS1\_K04\_00918" 8175 "s59E25H2" 0 "V-type sodium ATPase subunit G"  
"JS1\_K04\_00918" 8175 "s59E5H2" 0.5159991 "V-type sodium ATPase subunit G"  
"JS1\_K04\_00918" 8175 "s63E6H2" 0.06610995 "V-type sodium ATPase subunit G"  
"JS1\_K04\_00919" 8176 "s59E13H2" 0.1125498 "V-type sodium ATPase catalytic subunit A"  
"JS1\_K04\_00919" 8176 "s59E25H2" 0 "V-type sodium ATPase catalytic subunit A"  
"JS1\_K04\_00919" 8176 "s59E5H2" 0.5621176 "V-type sodium ATPase catalytic subunit A"  
"JS1\_K04\_00919" 8176 "s63E6H2" 0.4415989 "V-type sodium ATPase catalytic subunit A"

"JS1\_K04\_00920" 8177 "s59E13H2" 0.2243068 "V-type sodium ATPase subunit B"  
"JS1\_K04\_00920" 8177 "s59E25H2" 0 "V-type sodium ATPase subunit B"  
"JS1\_K04\_00920" 8177 "s59E5H2" 0.7773256 "V-type sodium ATPase subunit B"  
"JS1\_K04\_00920" 8177 "s63E6H2" 0.6972252 "V-type sodium ATPase subunit B"  
"JS1\_K04\_00921" 8178 "s59E13H2" 0.1056507 "V-type sodium ATPase subunit D"  
"JS1\_K04\_00921" 8178 "s59E25H2" 0 "V-type sodium ATPase subunit D"  
"JS1\_K04\_00921" 8178 "s59E5H2" 0.3737093 "V-type sodium ATPase subunit D"  
"JS1\_K04\_00921" 8178 "s63E6H2" 0.5445981 "V-type sodium ATPase subunit D"  
"JS1\_K04\_00922" 8179 "s59E13H2" 0.7888516 "Transposase IS116/IS110/IS902 family protein"  
"JS1\_K04\_00922" 8179 "s59E25H2" 0 "Transposase IS116/IS110/IS902 family protein"  
"JS1\_K04\_00922" 8179 "s59E5H2" 0.3271324 "Transposase IS116/IS110/IS902 family protein"  
"JS1\_K04\_00922" 8179 "s63E6H2" 1.072674 "Transposase IS116/IS110/IS902 family protein"  
"JS1\_K04\_00923" 8180 "s59E13H2" 0.2559185 "phosphodiesterase"  
"JS1\_K04\_00923" 8180 "s59E25H2" 0 "phosphodiesterase"  
"JS1\_K04\_00923" 8180 "s59E5H2" 0.5579483 "phosphodiesterase"  
"JS1\_K04\_00923" 8180 "s63E6H2" 0.4771953 "phosphodiesterase"  
"JS1\_K04\_00925" 8182 "s59E13H2" 0.1616638 "1-acyl-sn-glycerol-3-phosphate acyltransferase"  
"JS1\_K04\_00925" 8182 "s59E25H2" 0 "1-acyl-sn-glycerol-3-phosphate acyltransferase"  
"JS1\_K04\_00925" 8182 "s59E5H2" 0.2576743 "1-acyl-sn-glycerol-3-phosphate acyltransferase"  
"JS1\_K04\_00925" 8182 "s63E6H2" 0.5450602 "1-acyl-sn-glycerol-3-phosphate acyltransferase"  
"JS1\_K04\_00926" 8183 "s59E13H2" 0.1112063 "Serine/threonine-protein kinase PknD"  
"JS1\_K04\_00926" 8183 "s59E25H2" 0 "Serine/threonine-protein kinase PknD"  
"JS1\_K04\_00926" 8183 "s59E5H2" 0.691655 "Serine/threonine-protein kinase PknD"  
"JS1\_K04\_00926" 8183 "s63E6H2" 0.7169757 "Serine/threonine-protein kinase PknD"  
"JS1\_K04\_00927" 8184 "s59E13H2" 0.08968499 "hypothetical protein"  
"JS1\_K04\_00927" 8184 "s59E25H2" 0 "hypothetical protein"  
"JS1\_K04\_00927" 8184 "s59E5H2" 0.2131144 "hypothetical protein"  
"JS1\_K04\_00927" 8184 "s63E6H2" 1.126922 "hypothetical protein"  
"JS1\_K04\_00928" 8185 "s59E13H2" 0.0123655 "Acetyltransferase (GNAT) family protein"  
"JS1\_K04\_00928" 8185 "s59E25H2" 0.8367003 "Acetyltransferase (GNAT) family protein"  
"JS1\_K04\_00928" 8185 "s59E5H2" 0.06962311 "Acetyltransferase (GNAT) family protein"  
"JS1\_K04\_00928" 8185 "s63E6H2" 0.510732 "Acetyltransferase (GNAT) family protein"  
"JS1\_K04\_00929" 8186 "s59E13H2" 0.06325303 "hypothetical protein"  
"JS1\_K04\_00929" 8186 "s59E25H2" 0 "hypothetical protein"  
"JS1\_K04\_00929" 8186 "s59E5H2" 0.5788996 "hypothetical protein"  
"JS1\_K04\_00929" 8186 "s63E6H2" 0.787004 "hypothetical protein"  
"JS1\_K04\_00930" 8187 "s59E13H2" 0.05340828 "hypothetical protein"  
"JS1\_K04\_00930" 8187 "s59E25H2" 0 "hypothetical protein"  
"JS1\_K04\_00930" 8187 "s59E5H2" 0.4805177 "hypothetical protein"  
"JS1\_K04\_00930" 8187 "s63E6H2" 1.054676 "hypothetical protein"  
"JS1\_K04\_00932" 8189 "s59E13H2" 0.008000477 "hypothetical protein"  
"JS1\_K04\_00932" 8189 "s59E25H2" 0 "hypothetical protein"  
"JS1\_K04\_00932" 8189 "s59E5H2" 0 "hypothetical protein"  
"JS1\_K04\_00932" 8189 "s63E6H2" 0 "hypothetical protein"  
"JS1\_K04\_00933" 8190 "s59E13H2" 0.006161281 "hypothetical protein"  
"JS1\_K04\_00933" 8190 "s59E25H2" 0 "hypothetical protein"  
"JS1\_K04\_00933" 8190 "s59E5H2" 0 "hypothetical protein"



"JS1\_K04\_00933" 8190 "s63E6H2" 0 "hypothetical protein"  
"JS1\_K04\_00934" 8191 "s59E13H2" 0.001917632 "Secreted effector protein pipB2"  
"JS1\_K04\_00934" 8191 "s59E25H2" 0 "Secreted effector protein pipB2"  
"JS1\_K04\_00934" 8191 "s59E5H2" 0.01484129 "Secreted effector protein pipB2"  
"JS1\_K04\_00934" 8191 "s63E6H2" 0 "Secreted effector protein pipB2"  
"JS1\_K04\_00935" 8192 "s59E13H2" 0.5928844 "Thioredoxin reductase"  
"JS1\_K04\_00935" 8192 "s59E25H2" 0 "Thioredoxin reductase"  
"JS1\_K04\_00935" 8192 "s59E5H2" 0.7343009 "Thioredoxin reductase"  
"JS1\_K04\_00935" 8192 "s63E6H2" 0.655368 "Thioredoxin reductase"  
"JS1\_K04\_00936" 8193 "s59E13H2" 0.4926626 "endonuclease IV"  
"JS1\_K04\_00936" 8193 "s59E25H2" 0 "endonuclease IV"  
"JS1\_K04\_00936" 8193 "s59E5H2" 1.518127 "endonuclease IV"  
"JS1\_K04\_00936" 8193 "s63E6H2" 1.121232 "endonuclease IV"  
"JS1\_K04\_00937" 8194 "s59E13H2" 0.1666203 "Lipoyl synthase"  
"JS1\_K04\_00937" 8194 "s59E25H2" 0 "Lipoyl synthase"  
"JS1\_K04\_00937" 8194 "s59E5H2" 1.068417 "Lipoyl synthase"  
"JS1\_K04\_00937" 8194 "s63E6H2" 0.9788078 "Lipoyl synthase"  
"JS1\_K04\_00938" 8195 "s59E13H2" 0.1472019 "Elongation factor G"  
"JS1\_K04\_00938" 8195 "s59E25H2" 0.2363291 "Elongation factor G"  
"JS1\_K04\_00938" 8195 "s59E5H2" 1.109968 "Elongation factor G"  
"JS1\_K04\_00938" 8195 "s63E6H2" 1.20533 "Elongation factor G"  
"JS1\_K04\_00939" 8196 "s59E13H2" 0.1119211 "hypothetical protein"  
"JS1\_K04\_00939" 8196 "s59E25H2" 0 "hypothetical protein"  
"JS1\_K04\_00939" 8196 "s59E5H2" 0.7597899 "hypothetical protein"  
"JS1\_K04\_00939" 8196 "s63E6H2" 1.171311 "hypothetical protein"  
"JS1\_K04\_00942" 8199 "s59E13H2" 0.06586685 "Leucine--tRNA ligase"  
"JS1\_K04\_00942" 8199 "s59E25H2" 0.1830536 "Leucine--tRNA ligase"  
"JS1\_K04\_00942" 8199 "s59E5H2" 0.9509976 "Leucine--tRNA ligase"  
"JS1\_K04\_00942" 8199 "s63E6H2" 0.6458042 "Leucine--tRNA ligase"  
"JS1\_K04\_00943" 8200 "s59E13H2" 0.0422315 "Single-stranded DNA-binding protein ssb"  
"JS1\_K04\_00943" 8200 "s59E25H2" 0 "Single-stranded DNA-binding protein ssb"  
"JS1\_K04\_00943" 8200 "s59E5H2" 0.3120849 "Single-stranded DNA-binding protein ssb"  
"JS1\_K04\_00943" 8200 "s63E6H2" 0.272004 "Single-stranded DNA-binding protein ssb"  
"JS1\_K04\_00951" 8208 "s59E13H2" 0.09426158 "Threonine--tRNA ligase 2"  
"JS1\_K04\_00951" 8208 "s59E25H2" 0 "Threonine--tRNA ligase 2"  
"JS1\_K04\_00951" 8208 "s59E5H2" 0.1921666 "Threonine--tRNA ligase 2"  
"JS1\_K04\_00951" 8208 "s63E6H2" 0.2109347 "Threonine--tRNA ligase 2"  
"JS1\_K04\_00952" 8209 "s59E13H2" 0.08984654 "Threonine--tRNA ligase 2"  
"JS1\_K04\_00952" 8209 "s59E25H2" 0 "Threonine--tRNA ligase 2"  
"JS1\_K04\_00952" 8209 "s59E5H2" 0.135664 "Threonine--tRNA ligase 2"  
"JS1\_K04\_00952" 8209 "s63E6H2" 0.2979641 "Threonine--tRNA ligase 2"  
"JS1\_K04\_00953" 8210 "s59E13H2" 0.09884821 "Translation initiation factor IF-3"  
"JS1\_K04\_00953" 8210 "s59E25H2" 0 "Translation initiation factor IF-3"  
"JS1\_K04\_00953" 8210 "s59E5H2" 0.2658159 "Translation initiation factor IF-3"  
"JS1\_K04\_00953" 8210 "s63E6H2" 0.2920973 "Translation initiation factor IF-3"  
"JS1\_K04\_00954" 8211 "s59E13H2" 0.02950857 "50S ribosomal protein L35"  
"JS1\_K04\_00954" 8211 "s59E25H2" 0 "50S ribosomal protein L35"

"JS1\_K04\_00954" 8211 "s59E5H2" 0.3188307 "50S ribosomal protein L35"  
"JS1\_K04\_00954" 8211 "s63E6H2" 0.3106578 "50S ribosomal protein L35"  
"JS1\_K04\_00955" 8212 "s59E13H2" 0.2877316 "50S ribosomal protein L20"  
"JS1\_K04\_00955" 8212 "s59E25H2" 0 "50S ribosomal protein L20"  
"JS1\_K04\_00955" 8212 "s59E5H2" 0.2940363 "50S ribosomal protein L20"  
"JS1\_K04\_00955" 8212 "s63E6H2" 0.384017 "50S ribosomal protein L20"  
"JS1\_K04\_00957" 8214 "s59E13H2" 0.03330501 "Phenylalanine--tRNA ligase alpha subunit"  
"JS1\_K04\_00957" 8214 "s59E25H2" 0 "Phenylalanine--tRNA ligase alpha subunit"  
"JS1\_K04\_00957" 8214 "s59E5H2" 0.09687305 "Phenylalanine--tRNA ligase alpha subunit"  
"JS1\_K04\_00957" 8214 "s63E6H2" 0.4706324 "Phenylalanine--tRNA ligase alpha subunit"  
"JS1\_K04\_00958" 8215 "s59E13H2" 0.4687869 "Phenylalanine--tRNA ligase beta subunit"  
"JS1\_K04\_00958" 8215 "s59E25H2" 0 "Phenylalanine--tRNA ligase beta subunit"  
"JS1\_K04\_00958" 8215 "s59E5H2" 0.3105314 "Phenylalanine--tRNA ligase beta subunit"  
"JS1\_K04\_00958" 8215 "s63E6H2" 0.3286494 "Phenylalanine--tRNA ligase beta subunit"  
"JS1\_K04\_00959" 8216 "s59E13H2" 1.101637 "colicin V production protein"  
"JS1\_K04\_00959" 8216 "s59E25H2" 0 "colicin V production protein"  
"JS1\_K04\_00959" 8216 "s59E5H2" 0.4160733 "colicin V production protein"  
"JS1\_K04\_00959" 8216 "s63E6H2" 0.5257436 "colicin V production protein"  
"JS1\_K04\_00960" 8217 "s59E13H2" 1.54184 "Endonuclease MutS2"  
"JS1\_K04\_00960" 8217 "s59E25H2" 0 "Endonuclease MutS2"  
"JS1\_K04\_00960" 8217 "s59E5H2" 0.4671637 "Endonuclease MutS2"  
"JS1\_K04\_00960" 8217 "s63E6H2" 1.101953 "Endonuclease MutS2"  
"JS1\_K04\_00961" 8218 "s59E13H2" 1.27802 "Penicillin-binding protein 2D"  
"JS1\_K04\_00961" 8218 "s59E25H2" 0 "Penicillin-binding protein 2D"  
"JS1\_K04\_00961" 8218 "s59E5H2" 0.4108712 "Penicillin-binding protein 2D"  
"JS1\_K04\_00961" 8218 "s63E6H2" 1.424891 "Penicillin-binding protein 2D"  
"JS1\_K04\_00962" 8219 "s59E13H2" 0.02974589 "hypothetical protein"  
"JS1\_K04\_00962" 8219 "s59E25H2" 0 "hypothetical protein"  
"JS1\_K04\_00962" 8219 "s59E5H2" 0.008566199 "hypothetical protein"  
"JS1\_K04\_00962" 8219 "s63E6H2" 0 "hypothetical protein"  
"JS1\_K04\_00963" 8220 "s59E13H2" 0.05985578 "hypothetical protein"  
"JS1\_K04\_00963" 8220 "s59E25H2" 0 "hypothetical protein"  
"JS1\_K04\_00963" 8220 "s59E5H2" 0.1515768 "hypothetical protein"  
"JS1\_K04\_00963" 8220 "s63E6H2" 0.3128006 "hypothetical protein"  
"JS1\_K04\_00964" 8221 "s59E13H2" 0.05141484 "Nicotine blue oxidoreductase"  
"JS1\_K04\_00964" 8221 "s59E25H2" 0 "Nicotine blue oxidoreductase"  
"JS1\_K04\_00964" 8221 "s59E5H2" 0.05024319 "Nicotine blue oxidoreductase"  
"JS1\_K04\_00964" 8221 "s63E6H2" 0.1211014 "Nicotine blue oxidoreductase"  
"JS1\_K04\_00965" 8222 "s59E13H2" 0.1496324 "hypothetical protein"  
"JS1\_K04\_00965" 8222 "s59E25H2" 0 "hypothetical protein"  
"JS1\_K04\_00965" 8222 "s59E5H2" 0.0003656782 "hypothetical protein"  
"JS1\_K04\_00965" 8222 "s63E6H2" 0.5620296 "hypothetical protein"  
"JS1\_K04\_00966" 8223 "s59E13H2" 0.07468157 "putative xanthine dehydrogenase subunit A"  
"JS1\_K04\_00966" 8223 "s59E25H2" 0 "putative xanthine dehydrogenase subunit A"  
"JS1\_K04\_00966" 8223 "s59E5H2" 0.05811792 "putative xanthine dehydrogenase subunit A"  
"JS1\_K04\_00966" 8223 "s63E6H2" 0.2262769 "putative xanthine dehydrogenase subunit A"  
"JS1\_K04\_00967" 8224 "s59E13H2" 0.06304777 "DNA-binding transcriptional regulator ModE"

"JS1\_K04\_00967" 8224 "s59E25H2" 0 "DNA-binding transcriptional regulator ModE"  
"JS1\_K04\_00967" 8224 "s59E5H2" 0.2542682 "DNA-binding transcriptional regulator ModE"  
"JS1\_K04\_00967" 8224 "s63E6H2" 0.1760505 "DNA-binding transcriptional regulator ModE"  
"JS1\_K04\_00968" 8225 "s59E13H2" 0.002161689 "bifunctional molybdenum cofactor biosynthesis protein MoaC/MogA"  
"JS1\_K04\_00968" 8225 "s59E25H2" 0 "bifunctional molybdenum cofactor biosynthesis protein MoaC/MogA"  
"JS1\_K04\_00968" 8225 "s59E5H2" 0.01134821 "bifunctional molybdenum cofactor biosynthesis protein MoaC/MogA"  
"JS1\_K04\_00968" 8225 "s63E6H2" 0.629719 "bifunctional molybdenum cofactor biosynthesis protein MoaC/MogA"  
"JS1\_K04\_00969" 8226 "s59E13H2" 0.01317347 "hypothetical protein"  
"JS1\_K04\_00969" 8226 "s59E25H2" 0 "hypothetical protein"  
"JS1\_K04\_00969" 8226 "s59E5H2" 0 "hypothetical protein"  
"JS1\_K04\_00969" 8226 "s63E6H2" 0.6137403 "hypothetical protein"  
"JS1\_K04\_00970" 8227 "s59E13H2" 0.1063143 "Taurine-binding periplasmic protein precursor"  
"JS1\_K04\_00970" 8227 "s59E25H2" 0 "Taurine-binding periplasmic protein precursor"  
"JS1\_K04\_00970" 8227 "s59E5H2" 0.4904532 "Taurine-binding periplasmic protein precursor"  
"JS1\_K04\_00970" 8227 "s63E6H2" 1.621825 "Taurine-binding periplasmic protein precursor"  
"JS1\_K04\_00971" 8228 "s59E13H2" 0.2720896 "Putative aliphatic sulfonates transport permease protein SsuC"  
"JS1\_K04\_00971" 8228 "s59E25H2" 0 "Putative aliphatic sulfonates transport permease protein SsuC"  
"JS1\_K04\_00971" 8228 "s59E5H2" 1.817629 "Putative aliphatic sulfonates transport permease protein SsuC"  
"JS1\_K04\_00971" 8228 "s63E6H2" 2.319975 "Putative aliphatic sulfonates transport permease protein SsuC"  
"JS1\_K04\_00972" 8229 "s59E13H2" 0.2856879 "Spermidine/putrescine import ATP-binding protein PotA"  
"JS1\_K04\_00972" 8229 "s59E25H2" 0 "Spermidine/putrescine import ATP-binding protein PotA"  
"JS1\_K04\_00972" 8229 "s59E5H2" 1.32385 "Spermidine/putrescine import ATP-binding protein PotA"  
"JS1\_K04\_00972" 8229 "s63E6H2" 1.105178 "Spermidine/putrescine import ATP-binding protein PotA"  
"JS1\_K04\_00973" 8230 "s59E13H2" 0.03223096 "Pectin degradation repressor protein KdgR"  
"JS1\_K04\_00973" 8230 "s59E25H2" 0 "Pectin degradation repressor protein KdgR"  
"JS1\_K04\_00973" 8230 "s59E5H2" 0.6643852 "Pectin degradation repressor protein KdgR"  
"JS1\_K04\_00973" 8230 "s63E6H2" 0.157529 "Pectin degradation repressor protein KdgR"  
"JS1\_K04\_00974" 8231 "s59E13H2" 0.1317341 "Carbamate kinase"  
"JS1\_K04\_00974" 8231 "s59E25H2" 0 "Carbamate kinase"  
"JS1\_K04\_00974" 8231 "s59E5H2" 0.0205482 "Carbamate kinase"  
"JS1\_K04\_00974" 8231 "s63E6H2" 0.02614345 "Carbamate kinase"  
"JS1\_K04\_00975" 8232 "s59E13H2" 0.007279284 "Aspartate carbamoyltransferase"  
"JS1\_K04\_00975" 8232 "s59E25H2" 0 "Aspartate carbamoyltransferase"  
"JS1\_K04\_00975" 8232 "s59E5H2" 0.0306514 "Aspartate carbamoyltransferase"  
"JS1\_K04\_00975" 8232 "s63E6H2" 0.02363291 "Aspartate carbamoyltransferase"  
"JS1\_K04\_00976" 8233 "s59E13H2" 0.4858408 "Dihydroorotate dehydrogenase B (NAD(+) , electron transfer subunit"  
"JS1\_K04\_00976" 8233 "s59E25H2" 0 "Dihydroorotate dehydrogenase B (NAD(+) , electron transfer subunit"  
"JS1\_K04\_00976" 8233 "s59E5H2" 0.1452175 "Dihydroorotate dehydrogenase B (NAD(+) , electron transfer subunit"  
"JS1\_K04\_00976" 8233 "s63E6H2" 0.04093085 "Dihydroorotate dehydrogenase B (NAD(+) , electron transfer subunit"  
"JS1\_K04\_00977" 8234 "s59E13H2" 0.3977947 "Dihydroorotate dehydrogenase B (NAD(+) , catalytic subunit"  
"JS1\_K04\_00977" 8234 "s59E25H2" 0 "Dihydroorotate dehydrogenase B (NAD(+) , catalytic subunit"  
"JS1\_K04\_00977" 8234 "s59E5H2" 0.187106 "Dihydroorotate dehydrogenase B (NAD(+) , catalytic subunit"  
"JS1\_K04\_00977" 8234 "s63E6H2" 0.2123381 "Dihydroorotate dehydrogenase B (NAD(+) , catalytic subunit"  
"JS1\_K04\_00978" 8235 "s59E13H2" 0.8410954 "High-affinity branched-chain amino acid transport system permease protein LivH"  
"JS1\_K04\_00978" 8235 "s59E25H2" 0 "High-affinity branched-chain amino acid transport system permease protein LivH"  
"JS1\_K04\_00978" 8235 "s59E5H2" 0.2702518 "High-affinity branched-chain amino acid transport system permease protein LivH"  
"JS1\_K04\_00978" 8235 "s63E6H2" 0.1981187 "High-affinity branched-chain amino acid transport system permease protein LivH"

"JS1\_K04\_00979" 8236 "s59E13H2" 0.00953605 "Tyrosine-protein phosphatase YwqE"  
"JS1\_K04\_00979" 8236 "s59E25H2" 0 "Tyrosine-protein phosphatase YwqE"  
"JS1\_K04\_00979" 8236 "s59E5H2" 1.569101 "Tyrosine-protein phosphatase YwqE"  
"JS1\_K04\_00979" 8236 "s63E6H2" 0.02132415 "Tyrosine-protein phosphatase YwqE"  
"JS1\_K04\_00980" 8237 "s59E13H2" 0 "hypothetical protein"  
"JS1\_K04\_00980" 8237 "s59E25H2" 0 "hypothetical protein"  
"JS1\_K04\_00980" 8237 "s59E5H2" 0 "hypothetical protein"  
"JS1\_K04\_00980" 8237 "s63E6H2" 0.03176388 "hypothetical protein"  
"JS1\_K04\_00981" 8238 "s59E13H2" 0.000976704 "Tyrosine-protein kinase YwqD"  
"JS1\_K04\_00981" 8238 "s59E25H2" 0 "Tyrosine-protein kinase YwqD"  
"JS1\_K04\_00981" 8238 "s59E5H2" 0.02367934 "Tyrosine-protein kinase YwqD"  
"JS1\_K04\_00981" 8238 "s63E6H2" 0.05112347 "Tyrosine-protein kinase YwqD"  
"JS1\_K04\_00983" 8240 "s59E13H2" 0.01130614 "Tyrosine-protein kinase ptk"  
"JS1\_K04\_00983" 8240 "s59E25H2" 0 "Tyrosine-protein kinase ptk"  
"JS1\_K04\_00983" 8240 "s59E5H2" 0.09511294 "Tyrosine-protein kinase ptk"  
"JS1\_K04\_00983" 8240 "s63E6H2" 0.02108103 "Tyrosine-protein kinase ptk"  
"JS1\_K04\_00984" 8241 "s59E13H2" 0.03464061 "SLBB domain protein"  
"JS1\_K04\_00984" 8241 "s59E25H2" 0 "SLBB domain protein"  
"JS1\_K04\_00984" 8241 "s59E5H2" 0.7100893 "SLBB domain protein"  
"JS1\_K04\_00984" 8241 "s63E6H2" 0 "SLBB domain protein"  
"JS1\_K04\_00985" 8242 "s59E13H2" 0.00618623 "hypothetical protein"  
"JS1\_K04\_00985" 8242 "s59E25H2" 0 "hypothetical protein"  
"JS1\_K04\_00985" 8242 "s59E5H2" 0.2722484 "hypothetical protein"  
"JS1\_K04\_00985" 8242 "s63E6H2" 0 "hypothetical protein"  
"JS1\_K04\_00986" 8243 "s59E13H2" 0.002554549 "Squalene--hopene cyclase"  
"JS1\_K04\_00986" 8243 "s59E25H2" 0 "Squalene--hopene cyclase"  
"JS1\_K04\_00986" 8243 "s59E5H2" 0.1681846 "Squalene--hopene cyclase"  
"JS1\_K04\_00986" 8243 "s63E6H2" 0 "Squalene--hopene cyclase"  
"JS1\_K04\_00987" 8244 "s59E13H2" 0.005835758 "PIN domain protein"  
"JS1\_K04\_00987" 8244 "s59E25H2" 0 "PIN domain protein"  
"JS1\_K04\_00987" 8244 "s59E5H2" 0.009153563 "PIN domain protein"  
"JS1\_K04\_00987" 8244 "s63E6H2" 0.02347626 "PIN domain protein"  
"JS1\_K04\_00988" 8245 "s59E13H2" 0.004202337 "hypothetical protein"  
"JS1\_K04\_00988" 8245 "s59E25H2" 0 "hypothetical protein"  
"JS1\_K04\_00988" 8245 "s59E5H2" 0 "hypothetical protein"  
"JS1\_K04\_00988" 8245 "s63E6H2" 0.03893278 "hypothetical protein"  
"JS1\_K04\_00989" 8246 "s59E13H2" 0.8640002 "Soluble hydrogenase 42 kDa subunit"  
"JS1\_K04\_00989" 8246 "s59E25H2" 0 "Soluble hydrogenase 42 kDa subunit"  
"JS1\_K04\_00989" 8246 "s59E5H2" 0.3868413 "Soluble hydrogenase 42 kDa subunit"  
"JS1\_K04\_00989" 8246 "s63E6H2" 0.01661445 "Soluble hydrogenase 42 kDa subunit"  
"JS1\_K04\_00990" 8247 "s59E13H2" 0.02988839 "D-3-phosphoglycerate dehydrogenase"  
"JS1\_K04\_00990" 8247 "s59E25H2" 0 "D-3-phosphoglycerate dehydrogenase"  
"JS1\_K04\_00990" 8247 "s59E5H2" 0.8404597 "D-3-phosphoglycerate dehydrogenase"  
"JS1\_K04\_00990" 8247 "s63E6H2" 0.1463243 "D-3-phosphoglycerate dehydrogenase"  
"JS1\_K04\_00991" 8248 "s59E13H2" 0.04101286 "hypothetical protein"  
"JS1\_K04\_00991" 8248 "s59E25H2" 0 "hypothetical protein"  
"JS1\_K04\_00991" 8248 "s59E5H2" 0.1232222 "hypothetical protein"

"JS1\_K04\_00991" 8248 "s63E6H2" 0.2334252 "hypothetical protein"  
"JS1\_K04\_00992" 8249 "s59E13H2" 0.04367339 "Bifunctional homocysteine S-methyltransferase/5,10-methylenetetrahydrofolate reductase"  
"JS1\_K04\_00992" 8249 "s59E25H2" 0 "Bifunctional homocysteine S-methyltransferase/5,10-methylenetetrahydrofolate reductase"  
"JS1\_K04\_00992" 8249 "s59E5H2" 0.3427701 "Bifunctional homocysteine S-methyltransferase/5,10-methylenetetrahydrofolate reductase"  
"JS1\_K04\_00992" 8249 "s63E6H2" 0.03911685 "Bifunctional homocysteine S-methyltransferase/5,10-methylenetetrahydrofolate reductase"  
"JS1\_K04\_00993" 8250 "s59E13H2" 0.02763404 "Dihydroxy-acid dehydratase"  
"JS1\_K04\_00993" 8250 "s59E25H2" 0 "Dihydroxy-acid dehydratase"  
"JS1\_K04\_00993" 8250 "s59E5H2" 0.5040464 "Dihydroxy-acid dehydratase"  
"JS1\_K04\_00993" 8250 "s63E6H2" 0.05808977 "Dihydroxy-acid dehydratase"  
"JS1\_K04\_00996" 8253 "s59E13H2" 0.04076785 "Acetolactate synthase large subunit"  
"JS1\_K04\_00996" 8253 "s59E25H2" 0 "Acetolactate synthase large subunit"  
"JS1\_K04\_00996" 8253 "s59E5H2" 0.7345826 "Acetolactate synthase large subunit"  
"JS1\_K04\_00996" 8253 "s63E6H2" 0.475367 "Acetolactate synthase large subunit"  
"JS1\_K04\_00997" 8254 "s59E13H2" 0.009369034 "Acetolactate synthase small subunit"  
"JS1\_K04\_00997" 8254 "s59E25H2" 0 "Acetolactate synthase small subunit"  
"JS1\_K04\_00997" 8254 "s59E5H2" 0.7533873 "Acetolactate synthase small subunit"  
"JS1\_K04\_00997" 8254 "s63E6H2" 0.4332531 "Acetolactate synthase small subunit"  
"JS1\_K04\_00998" 8255 "s59E13H2" 0.06581276 "Ketol-acid reductoisomerase"  
"JS1\_K04\_00998" 8255 "s59E25H2" 0 "Ketol-acid reductoisomerase"  
"JS1\_K04\_00998" 8255 "s59E5H2" 0.1073946 "Ketol-acid reductoisomerase"  
"JS1\_K04\_00998" 8255 "s63E6H2" 0.1015901 "Ketol-acid reductoisomerase"  
"JS1\_K04\_00999" 8256 "s59E13H2" 0.01884441 "P-protein"  
"JS1\_K04\_00999" 8256 "s59E25H2" 0 "P-protein"  
"JS1\_K04\_00999" 8256 "s59E5H2" 1.852062 "P-protein"  
"JS1\_K04\_00999" 8256 "s63E6H2" 0.4855074 "P-protein"  
"JS1\_K04\_01000" 8257 "s59E13H2" 0.1491573 "2-isopropylmalate synthase"  
"JS1\_K04\_01000" 8257 "s59E25H2" 0 "2-isopropylmalate synthase"  
"JS1\_K04\_01000" 8257 "s59E5H2" 1.082115 "2-isopropylmalate synthase"  
"JS1\_K04\_01000" 8257 "s63E6H2" 0.894647 "2-isopropylmalate synthase"  
"JS1\_K04\_01001" 8258 "s59E13H2" 0.1448613 "2-isopropylmalate synthase"  
"JS1\_K04\_01001" 8258 "s59E25H2" 0 "2-isopropylmalate synthase"  
"JS1\_K04\_01001" 8258 "s59E5H2" 1.644278 "2-isopropylmalate synthase"  
"JS1\_K04\_01001" 8258 "s63E6H2" 0.6037316 "2-isopropylmalate synthase"  
"JS1\_K04\_01002" 8259 "s59E13H2" 0.1634414 "hypothetical protein"  
"JS1\_K04\_01002" 8259 "s59E25H2" 0 "hypothetical protein"  
"JS1\_K04\_01002" 8259 "s59E5H2" 0.6849701 "hypothetical protein"  
"JS1\_K04\_01002" 8259 "s63E6H2" 0.4667125 "hypothetical protein"  
"JS1\_K04\_01003" 8260 "s59E13H2" 0.1793111 "Ferredoxin"  
"JS1\_K04\_01003" 8260 "s59E25H2" 0 "Ferredoxin"  
"JS1\_K04\_01003" 8260 "s59E5H2" 2.388211 "Ferredoxin"  
"JS1\_K04\_01003" 8260 "s63E6H2" 0.7686576 "Ferredoxin"  
"JS1\_K04\_01004" 8261 "s59E13H2" 0.2547428 "hypothetical protein"  
"JS1\_K04\_01004" 8261 "s59E25H2" 0 "hypothetical protein"  
"JS1\_K04\_01004" 8261 "s59E5H2" 1.601538 "hypothetical protein"  
"JS1\_K04\_01004" 8261 "s63E6H2" 1.006934 "hypothetical protein"  
"JS1\_K04\_01005" 8262 "s59E13H2" 0.05010413 "Pyrroline-5-carboxylate reductase"  
"JS1\_K04\_01005" 8262 "s59E25H2" 0 "Pyrroline-5-carboxylate reductase"

"JS1\_K04\_01005" 8262 "s59E5H2" 1.980474 "Pyrroline-5-carboxylate reductase"  
"JS1\_K04\_01005" 8262 "s63E6H2" 0.5415485 "Pyrroline-5-carboxylate reductase"  
"JS1\_K04\_01006" 8263 "s59E13H2" 0.04582379 "Dimethylamine corrinoid protein"  
"JS1\_K04\_01006" 8263 "s59E25H2" 0 "Dimethylamine corrinoid protein"  
"JS1\_K04\_01006" 8263 "s59E5H2" 0.120237 "Dimethylamine corrinoid protein"  
"JS1\_K04\_01006" 8263 "s63E6H2" 0.2801157 "Dimethylamine corrinoid protein"  
"JS1\_K04\_01007" 8264 "s59E13H2" 0.0855946 "5-methyltetrahydrofolate:corrinoid/iron-sulfur protein co-methyltransferase"  
"JS1\_K04\_01007" 8264 "s59E25H2" 0 "5-methyltetrahydrofolate:corrinoid/iron-sulfur protein co-methyltransferase"  
"JS1\_K04\_01007" 8264 "s59E5H2" 0.1640603 "5-methyltetrahydrofolate:corrinoid/iron-sulfur protein co-methyltransferase"  
"JS1\_K04\_01007" 8264 "s63E6H2" 0.2963065 "5-methyltetrahydrofolate:corrinoid/iron-sulfur protein co-methyltransferase"  
"JS1\_K04\_01008" 8265 "s59E13H2" 0.1342958 "Bifunctional homocysteine S-methyltransferase/5,10-methylenetetrahydrofolate reductase"  
"JS1\_K04\_01008" 8265 "s59E25H2" 0 "Bifunctional homocysteine S-methyltransferase/5,10-methylenetetrahydrofolate reductase"  
"JS1\_K04\_01008" 8265 "s59E5H2" 0.1236223 "Bifunctional homocysteine S-methyltransferase/5,10-methylenetetrahydrofolate reductase"  
"JS1\_K04\_01008" 8265 "s63E6H2" 0.3929866 "Bifunctional homocysteine S-methyltransferase/5,10-methylenetetrahydrofolate reductase"  
"JS1\_K04\_01009" 8266 "s59E13H2" 0.5055094 "Vitamin B12 dependent methionine synthase, activation domain"  
"JS1\_K04\_01009" 8266 "s59E25H2" 0 "Vitamin B12 dependent methionine synthase, activation domain"  
"JS1\_K04\_01009" 8266 "s59E5H2" 0.1658282 "Vitamin B12 dependent methionine synthase, activation domain"  
"JS1\_K04\_01009" 8266 "s63E6H2" 0.6492838 "Vitamin B12 dependent methionine synthase, activation domain"  
"JS1\_K04\_01010" 8267 "s59E13H2" 0.2833564 "2,3-dimethylmalate dehydratase large subunit"  
"JS1\_K04\_01010" 8267 "s59E25H2" 0.46635 "2,3-dimethylmalate dehydratase large subunit"  
"JS1\_K04\_01010" 8267 "s59E5H2" 0.3438864 "2,3-dimethylmalate dehydratase large subunit"  
"JS1\_K04\_01010" 8267 "s63E6H2" 0.8512016 "2,3-dimethylmalate dehydratase large subunit"  
"JS1\_K04\_01011" 8268 "s59E13H2" 0.02122138 "2,3-dimethylmalate dehydratase small subunit"  
"JS1\_K04\_01011" 8268 "s59E25H2" 0.1019608 "2,3-dimethylmalate dehydratase small subunit"  
"JS1\_K04\_01011" 8268 "s59E5H2" 0.2803676 "2,3-dimethylmalate dehydratase small subunit"  
"JS1\_K04\_01011" 8268 "s63E6H2" 0.2817095 "2,3-dimethylmalate dehydratase small subunit"  
"JS1\_K04\_01012" 8269 "s59E13H2" 0.03740237 "D-malate dehydrogenase [decarboxylating]"  
"JS1\_K04\_01012" 8269 "s59E25H2" 0 "D-malate dehydrogenase [decarboxylating]"  
"JS1\_K04\_01012" 8269 "s59E5H2" 0.2755282 "D-malate dehydrogenase [decarboxylating]"  
"JS1\_K04\_01012" 8269 "s63E6H2" 0.06380313 "D-malate dehydrogenase [decarboxylating]"  
"JS1\_K04\_01013" 8270 "s59E13H2" 6.899214 "hypothetical protein"  
"JS1\_K04\_01013" 8270 "s59E25H2" 0 "hypothetical protein"  
"JS1\_K04\_01013" 8270 "s59E5H2" 0.08157922 "hypothetical protein"  
"JS1\_K04\_01013" 8270 "s63E6H2" 0.0123166 "hypothetical protein"  
"JS1\_K04\_01014" 8271 "s59E13H2" 10.2281 "tRNA(fMet)-specific endonuclease VapC"  
"JS1\_K04\_01014" 8271 "s59E25H2" 0 "tRNA(fMet)-specific endonuclease VapC"  
"JS1\_K04\_01014" 8271 "s59E5H2" 0 "tRNA(fMet)-specific endonuclease VapC"  
"JS1\_K04\_01014" 8271 "s63E6H2" 0.0325741 "tRNA(fMet)-specific endonuclease VapC"  
"JS1\_K04\_01015" 8272 "s59E13H2" 10.67958 "SpoVT / AbrB like domain protein"  
"JS1\_K04\_01015" 8272 "s59E25H2" 0 "SpoVT / AbrB like domain protein"  
"JS1\_K04\_01015" 8272 "s59E5H2" 0.01134154 "SpoVT / AbrB like domain protein"  
"JS1\_K04\_01015" 8272 "s63E6H2" 0.05669 "SpoVT / AbrB like domain protein"  
"JS1\_K04\_01016" 8273 "s59E13H2" 8.676685 "Enolase"  
"JS1\_K04\_01016" 8273 "s59E25H2" 0 "Enolase"  
"JS1\_K04\_01016" 8273 "s59E5H2" 0.06638911 "Enolase"  
"JS1\_K04\_01016" 8273 "s63E6H2" 0.03820596 "Enolase"  
"JS1\_K04\_01017" 8274 "s59E13H2" 8.129196 "Macrolide export protein MacA"

"JS1\_K04\_01017" 8274 "s59E25H2" 0.1965409 "Macrolide export protein MacA"  
"JS1\_K04\_01017" 8274 "s59E5H2" 0 "Macrolide export protein MacA"  
"JS1\_K04\_01017" 8274 "s63E6H2" 0.004769757 "Macrolide export protein MacA"  
"JS1\_K04\_01018" 8275 "s59E13H2" 13.8675 "putative ABC transporter ATP-binding protein"  
"JS1\_K04\_01018" 8275 "s59E25H2" 0 "putative ABC transporter ATP-binding protein"  
"JS1\_K04\_01018" 8275 "s59E5H2" 0.01337416 "putative ABC transporter ATP-binding protein"  
"JS1\_K04\_01018" 8275 "s63E6H2" 0.006900815 "putative ABC transporter ATP-binding protein"  
"JS1\_K04\_01019" 8276 "s59E13H2" 1.293588 "Macrolide export ATP-binding/permease protein MacB"  
"JS1\_K04\_01019" 8276 "s59E25H2" 0 "Macrolide export ATP-binding/permease protein MacB"  
"JS1\_K04\_01019" 8276 "s59E5H2" 0 "Macrolide export ATP-binding/permease protein MacB"  
"JS1\_K04\_01019" 8276 "s63E6H2" 0.01639387 "Macrolide export ATP-binding/permease protein MacB"  
"JS1\_K04\_01020" 8277 "s59E13H2" 0 "hypothetical protein"  
"JS1\_K04\_01020" 8277 "s59E25H2" 0 "hypothetical protein"  
"JS1\_K04\_01020" 8277 "s59E5H2" 0 "hypothetical protein"  
"JS1\_K04\_01020" 8277 "s63E6H2" 0 "hypothetical protein"  
"JS1\_K04\_01021" 8278 "s59E13H2" 0 "hypothetical protein"  
"JS1\_K04\_01021" 8278 "s59E25H2" 0 "hypothetical protein"  
"JS1\_K04\_01021" 8278 "s59E5H2" 0 "hypothetical protein"  
"JS1\_K04\_01021" 8278 "s63E6H2" 0 "hypothetical protein"  
"JS1\_K04\_01022" 8279 "s59E13H2" 0 "pyrroloquinoline quinone biosynthesis protein PqqE"  
"JS1\_K04\_01022" 8279 "s59E25H2" 0 "pyrroloquinoline quinone biosynthesis protein PqqE"  
"JS1\_K04\_01022" 8279 "s59E5H2" 0 "pyrroloquinoline quinone biosynthesis protein PqqE"  
"JS1\_K04\_01022" 8279 "s63E6H2" 0 "pyrroloquinoline quinone biosynthesis protein PqqE"  
"JS1\_K04\_01024" 8281 "s59E13H2" 0.09653859 "Oligopeptide-binding protein AppA precursor"  
"JS1\_K04\_01024" 8281 "s59E25H2" 0 "Oligopeptide-binding protein AppA precursor"  
"JS1\_K04\_01024" 8281 "s59E5H2" 0.7405098 "Oligopeptide-binding protein AppA precursor"  
"JS1\_K04\_01024" 8281 "s63E6H2" 0.4466463 "Oligopeptide-binding protein AppA precursor"  
"JS1\_K04\_01025" 8282 "s59E13H2" 0.1403272 "Glutathione transport system permease protein GsiC"  
"JS1\_K04\_01025" 8282 "s59E25H2" 0 "Glutathione transport system permease protein GsiC"  
"JS1\_K04\_01025" 8282 "s59E5H2" 1.168509 "Glutathione transport system permease protein GsiC"  
"JS1\_K04\_01025" 8282 "s63E6H2" 0.197054 "Glutathione transport system permease protein GsiC"  
"JS1\_K04\_01026" 8283 "s59E13H2" 0.1556218 "Glutathione transport system permease protein GsiC"  
"JS1\_K04\_01026" 8283 "s59E25H2" 0 "Glutathione transport system permease protein GsiC"  
"JS1\_K04\_01026" 8283 "s59E5H2" 1.166057 "Glutathione transport system permease protein GsiC"  
"JS1\_K04\_01026" 8283 "s63E6H2" 0.4618145 "Glutathione transport system permease protein GsiC"  
"JS1\_K04\_01027" 8284 "s59E13H2" 0.2882707 "Glutathione transport system permease protein GsiD"  
"JS1\_K04\_01027" 8284 "s59E25H2" 0 "Glutathione transport system permease protein GsiD"  
"JS1\_K04\_01027" 8284 "s59E5H2" 0.939542 "Glutathione transport system permease protein GsiD"  
"JS1\_K04\_01027" 8284 "s63E6H2" 0.2707783 "Glutathione transport system permease protein GsiD"  
"JS1\_K04\_01028" 8285 "s59E13H2" 0.1536093 "hypothetical protein"  
"JS1\_K04\_01028" 8285 "s59E25H2" 0 "hypothetical protein"  
"JS1\_K04\_01028" 8285 "s59E5H2" 0.04223746 "hypothetical protein"  
"JS1\_K04\_01028" 8285 "s63E6H2" 0.03465894 "hypothetical protein"  
"JS1\_K04\_01029" 8286 "s59E13H2" 0.04872654 "hypothetical protein"  
"JS1\_K04\_01029" 8286 "s59E25H2" 0 "hypothetical protein"  
"JS1\_K04\_01029" 8286 "s59E5H2" 0.1910544 "hypothetical protein"  
"JS1\_K04\_01029" 8286 "s63E6H2" 0.1153104 "hypothetical protein"

"JS1\_K04\_01031" 8288 "s59E13H2" 1.002126 "Cyclic di-GMP phosphodiesterase response regulator RpfG"  
"JS1\_K04\_01031" 8288 "s59E25H2" 0 "Cyclic di-GMP phosphodiesterase response regulator RpfG"  
"JS1\_K04\_01031" 8288 "s59E5H2" 0.1493635 "Cyclic di-GMP phosphodiesterase response regulator RpfG"  
"JS1\_K04\_01031" 8288 "s63E6H2" 0.4721974 "Cyclic di-GMP phosphodiesterase response regulator RpfG"  
"JS1\_K04\_01033" 8290 "s59E13H2" 3.805938 "HTH-type transcriptional repressor YtrA"  
"JS1\_K04\_01033" 8290 "s59E25H2" 0 "HTH-type transcriptional repressor YtrA"  
"JS1\_K04\_01033" 8290 "s59E5H2" 1.964899 "HTH-type transcriptional repressor YtrA"  
"JS1\_K04\_01033" 8290 "s63E6H2" 2.954743 "HTH-type transcriptional repressor YtrA"  
"JS1\_K04\_01034" 8291 "s59E13H2" 5.851601 "ABC transporter ATP-binding protein YtrB"  
"JS1\_K04\_01034" 8291 "s59E25H2" 0 "ABC transporter ATP-binding protein YtrB"  
"JS1\_K04\_01034" 8291 "s59E5H2" 4.951409 "ABC transporter ATP-binding protein YtrB"  
"JS1\_K04\_01034" 8291 "s63E6H2" 3.606475 "ABC transporter ATP-binding protein YtrB"  
"JS1\_K04\_01035" 8292 "s59E13H2" 5.375888 "hypothetical protein"  
"JS1\_K04\_01035" 8292 "s59E25H2" 0 "hypothetical protein"  
"JS1\_K04\_01035" 8292 "s59E5H2" 4.723868 "hypothetical protein"  
"JS1\_K04\_01035" 8292 "s63E6H2" 1.709686 "hypothetical protein"  
"JS1\_K04\_01036" 8293 "s59E13H2" 7.531211 "hypothetical protein"  
"JS1\_K04\_01036" 8293 "s59E25H2" 0.07407407 "hypothetical protein"  
"JS1\_K04\_01036" 8293 "s59E5H2" 5.948355 "hypothetical protein"  
"JS1\_K04\_01036" 8293 "s63E6H2" 2.520297 "hypothetical protein"  
"JS1\_K04\_01037" 8294 "s59E13H2" 5.01488 "hypothetical protein"  
"JS1\_K04\_01037" 8294 "s59E25H2" 1 "hypothetical protein"  
"JS1\_K04\_01037" 8294 "s59E5H2" 3.473761 "hypothetical protein"  
"JS1\_K04\_01037" 8294 "s63E6H2" 1.898467 "hypothetical protein"  
"JS1\_K04\_01038" 8295 "s59E13H2" 5.413105 "CGGC domain protein"  
"JS1\_K04\_01038" 8295 "s59E25H2" 0 "CGGC domain protein"  
"JS1\_K04\_01038" 8295 "s59E5H2" 2.586204 "CGGC domain protein"  
"JS1\_K04\_01038" 8295 "s63E6H2" 1.218776 "CGGC domain protein"  
"JS1\_K04\_01039" 8296 "s59E13H2" 5.501981 "Pyruvate kinase"  
"JS1\_K04\_01039" 8296 "s59E25H2" 0 "Pyruvate kinase"  
"JS1\_K04\_01039" 8296 "s59E5H2" 2.904437 "Pyruvate kinase"  
"JS1\_K04\_01039" 8296 "s63E6H2" 2.808039 "Pyruvate kinase"  
"JS1\_K04\_01040" 8297 "s59E13H2" 0.3327253 "Trifunctional nucleotide phosphoesterase protein YfkN precursor"  
"JS1\_K04\_01040" 8297 "s59E25H2" 0 "Trifunctional nucleotide phosphoesterase protein YfkN precursor"  
"JS1\_K04\_01040" 8297 "s59E5H2" 2.419641 "Trifunctional nucleotide phosphoesterase protein YfkN precursor"  
"JS1\_K04\_01040" 8297 "s63E6H2" 0.002743536 "Trifunctional nucleotide phosphoesterase protein YfkN precursor"  
"JS1\_K04\_01041" 8298 "s59E13H2" 0.2434553 "Anti-sigma-V factor RsiV"  
"JS1\_K04\_01041" 8298 "s59E25H2" 0 "Anti-sigma-V factor RsiV"  
"JS1\_K04\_01041" 8298 "s59E5H2" 1.580344 "Anti-sigma-V factor RsiV"  
"JS1\_K04\_01041" 8298 "s63E6H2" 0.02511772 "Anti-sigma-V factor RsiV"  
"JS1\_K04\_01042" 8299 "s59E13H2" 0.6198206 "putative lipoprotein YiaD precursor"  
"JS1\_K04\_01042" 8299 "s59E25H2" 0 "putative lipoprotein YiaD precursor"  
"JS1\_K04\_01042" 8299 "s59E5H2" 0.5980715 "putative lipoprotein YiaD precursor"  
"JS1\_K04\_01042" 8299 "s63E6H2" 0 "putative lipoprotein YiaD precursor"  
"JS1\_K04\_01043" 8300 "s59E13H2" 0 "hypothetical protein"  
"JS1\_K04\_01043" 8300 "s59E25H2" 0 "hypothetical protein"  
"JS1\_K04\_01043" 8300 "s59E5H2" 0.01810269 "hypothetical protein"



"JS1\_K04\_01043" 8300 "s63E6H2" 0 "hypothetical protein"  
"JS1\_K04\_01044" 8301 "s59E13H2" 0.02810121 "hypothetical protein"  
"JS1\_K04\_01044" 8301 "s59E25H2" 0 "hypothetical protein"  
"JS1\_K04\_01044" 8301 "s59E5H2" 0.06632729 "hypothetical protein"  
"JS1\_K04\_01044" 8301 "s63E6H2" 0 "hypothetical protein"  
"JS1\_K04\_01046" 8303 "s59E13H2" 5.172097 "Regulator of nucleoside diphosphate kinase"  
"JS1\_K04\_01046" 8303 "s59E25H2" 0 "Regulator of nucleoside diphosphate kinase"  
"JS1\_K04\_01046" 8303 "s59E5H2" 0.6297146 "Regulator of nucleoside diphosphate kinase"  
"JS1\_K04\_01046" 8303 "s63E6H2" 0.02668629 "Regulator of nucleoside diphosphate kinase"  
"JS1\_K04\_01049" 8306 "s59E13H2" 0.08883383 "DNA primase"  
"JS1\_K04\_01049" 8306 "s59E25H2" 0 "DNA primase"  
"JS1\_K04\_01049" 8306 "s59E5H2" 0.2087817 "DNA primase"  
"JS1\_K04\_01049" 8306 "s63E6H2" 1.166181 "DNA primase"  
"JS1\_K04\_01050" 8307 "s59E13H2" 0.08028656 "Helix-turn-helix"  
"JS1\_K04\_01050" 8307 "s59E25H2" 0 "Helix-turn-helix"  
"JS1\_K04\_01050" 8307 "s59E5H2" 0.04510187 "Helix-turn-helix"  
"JS1\_K04\_01050" 8307 "s63E6H2" 0.0080018 "Helix-turn-helix"  
"JS1\_K04\_01052" 8309 "s59E13H2" 2.567919 "hypothetical protein"  
"JS1\_K04\_01052" 8309 "s59E25H2" 0.1657559 "hypothetical protein"  
"JS1\_K04\_01052" 8309 "s59E5H2" 1.185907 "hypothetical protein"  
"JS1\_K04\_01052" 8309 "s63E6H2" 0.3184706 "hypothetical protein"  
"JS1\_K04\_01053" 8310 "s59E13H2" 2.814098 "Serine/threonine-protein kinase PK-1"  
"JS1\_K04\_01053" 8310 "s59E25H2" 1.681319 "Serine/threonine-protein kinase PK-1"  
"JS1\_K04\_01053" 8310 "s59E5H2" 0.3835292 "Serine/threonine-protein kinase PK-1"  
"JS1\_K04\_01053" 8310 "s63E6H2" 0.09190193 "Serine/threonine-protein kinase PK-1"  
"JS1\_K04\_01054" 8311 "s59E13H2" 1.889073 "Ribosomal RNA small subunit methyltransferase B"  
"JS1\_K04\_01054" 8311 "s59E25H2" 0.02873563 "Ribosomal RNA small subunit methyltransferase B"  
"JS1\_K04\_01054" 8311 "s59E5H2" 0.3832118 "Ribosomal RNA small subunit methyltransferase B"  
"JS1\_K04\_01054" 8311 "s63E6H2" 0.1533405 "Ribosomal RNA small subunit methyltransferase B"  
"JS1\_K04\_01055" 8312 "s59E13H2" 0.1806922 "Putative neutral zinc metallopeptidase"  
"JS1\_K04\_01055" 8312 "s59E25H2" 0.6182085 "Putative neutral zinc metallopeptidase"  
"JS1\_K04\_01055" 8312 "s59E5H2" 1.130322 "Putative neutral zinc metallopeptidase"  
"JS1\_K04\_01055" 8312 "s63E6H2" 3.493083 "Putative neutral zinc metallopeptidase"  
"JS1\_K04\_01056" 8313 "s59E13H2" 0.1481903 "Methionyl-tRNA formyltransferase"  
"JS1\_K04\_01056" 8313 "s59E25H2" 0 "Methionyl-tRNA formyltransferase"  
"JS1\_K04\_01056" 8313 "s59E5H2" 0.2971475 "Methionyl-tRNA formyltransferase"  
"JS1\_K04\_01056" 8313 "s63E6H2" 0.4855959 "Methionyl-tRNA formyltransferase"  
"JS1\_K04\_01057" 8314 "s59E13H2" 0.09299727 "Peptide deformylase 1"  
"JS1\_K04\_01057" 8314 "s59E25H2" 0.5112474 "Peptide deformylase 1"  
"JS1\_K04\_01057" 8314 "s59E5H2" 0.6713448 "Peptide deformylase 1"  
"JS1\_K04\_01057" 8314 "s63E6H2" 1.574449 "Peptide deformylase 1"  
"JS1\_K04\_01058" 8315 "s59E13H2" 0.17309 "Primosomal protein N"  
"JS1\_K04\_01058" 8315 "s59E25H2" 0.1106259 "Primosomal protein N"  
"JS1\_K04\_01058" 8315 "s59E5H2" 0.8084314 "Primosomal protein N"  
"JS1\_K04\_01058" 8315 "s63E6H2" 2.402473 "Primosomal protein N"  
"JS1\_K04\_01059" 8316 "s59E13H2" 1.164835 "Coenzyme A biosynthesis bifunctional protein CoaBC"  
"JS1\_K04\_01059" 8316 "s59E25H2" 1.076214 "Coenzyme A biosynthesis bifunctional protein CoaBC"

"JS1\_K04\_01059" 8316 "s59E5H2" 0.7367377 "Coenzyme A biosynthesis bifunctional protein CoaBC"  
"JS1\_K04\_01059" 8316 "s63E6H2" 1.674636 "Coenzyme A biosynthesis bifunctional protein CoaBC"  
"JS1\_K04\_01060" 8317 "s59E13H2" 0.7528823 "DNA-directed RNA polymerase subunit omega"  
"JS1\_K04\_01060" 8317 "s59E25H2" 0 "DNA-directed RNA polymerase subunit omega"  
"JS1\_K04\_01060" 8317 "s59E5H2" 0.08484947 "DNA-directed RNA polymerase subunit omega"  
"JS1\_K04\_01060" 8317 "s63E6H2" 0.02339468 "DNA-directed RNA polymerase subunit omega"  
"JS1\_K04\_01061" 8318 "s59E13H2" 0.8747637 "Guanylate kinase"  
"JS1\_K04\_01061" 8318 "s59E25H2" 0 "Guanylate kinase"  
"JS1\_K04\_01061" 8318 "s59E5H2" 0.2682709 "Guanylate kinase"  
"JS1\_K04\_01061" 8318 "s63E6H2" 0.4764331 "Guanylate kinase"  
"JS1\_K04\_01062" 8319 "s59E13H2" 0.7062886 "hypothetical protein"  
"JS1\_K04\_01062" 8319 "s59E25H2" 0 "hypothetical protein"  
"JS1\_K04\_01062" 8319 "s59E5H2" 0.1899992 "hypothetical protein"  
"JS1\_K04\_01062" 8319 "s63E6H2" 0.9723414 "hypothetical protein"  
"JS1\_K04\_01063" 8320 "s59E13H2" 0.7131093 "hypothetical protein"  
"JS1\_K04\_01063" 8320 "s59E25H2" 0 "hypothetical protein"  
"JS1\_K04\_01063" 8320 "s59E5H2" 0.6643058 "hypothetical protein"  
"JS1\_K04\_01063" 8320 "s63E6H2" 0.9996772 "hypothetical protein"  
"JS1\_K04\_01064" 8321 "s59E13H2" 0 "Sulfite exporter TauE/Safe"  
"JS1\_K04\_01064" 8321 "s59E25H2" 0 "Sulfite exporter TauE/Safe"  
"JS1\_K04\_01064" 8321 "s59E5H2" 0 "Sulfite exporter TauE/Safe"  
"JS1\_K04\_01064" 8321 "s63E6H2" 0 "Sulfite exporter TauE/Safe"  
"JS1\_K04\_01065" 8322 "s59E13H2" 0 "Anaerobic sulfatase-maturing enzyme"  
"JS1\_K04\_01065" 8322 "s59E25H2" 0 "Anaerobic sulfatase-maturing enzyme"  
"JS1\_K04\_01065" 8322 "s59E5H2" 0 "Anaerobic sulfatase-maturing enzyme"  
"JS1\_K04\_01065" 8322 "s63E6H2" 0 "Anaerobic sulfatase-maturing enzyme"  
"JS1\_K04\_01066" 8323 "s59E13H2" 0 "hypothetical protein"  
"JS1\_K04\_01066" 8323 "s59E25H2" 0 "hypothetical protein"  
"JS1\_K04\_01066" 8323 "s59E5H2" 0 "hypothetical protein"  
"JS1\_K04\_01066" 8323 "s63E6H2" 0 "hypothetical protein"  
"JS1\_K04\_01067" 8324 "s59E13H2" 0 "Arylsulfatase"  
"JS1\_K04\_01067" 8324 "s59E25H2" 0 "Arylsulfatase"  
"JS1\_K04\_01067" 8324 "s59E5H2" 0 "Arylsulfatase"  
"JS1\_K04\_01067" 8324 "s63E6H2" 0.002106978 "Arylsulfatase"  
"JS1\_K04\_01068" 8325 "s59E13H2" 0 "Bicarbonate transport ATP-binding protein CmpD"  
"JS1\_K04\_01068" 8325 "s59E25H2" 0 "Bicarbonate transport ATP-binding protein CmpD"  
"JS1\_K04\_01068" 8325 "s59E5H2" 0 "Bicarbonate transport ATP-binding protein CmpD"  
"JS1\_K04\_01068" 8325 "s63E6H2" 0 "Bicarbonate transport ATP-binding protein CmpD"  
"JS1\_K04\_01069" 8326 "s59E13H2" 0 "Aliphatic sulfonates import ATP-binding protein SsuB"  
"JS1\_K04\_01069" 8326 "s59E25H2" 0 "Aliphatic sulfonates import ATP-binding protein SsuB"  
"JS1\_K04\_01069" 8326 "s59E5H2" 0 "Aliphatic sulfonates import ATP-binding protein SsuB"  
"JS1\_K04\_01069" 8326 "s63E6H2" 0 "Aliphatic sulfonates import ATP-binding protein SsuB"  
"JS1\_K04\_01070" 8327 "s59E13H2" 0 "Bicarbonate transport system permease protein CmpB"  
"JS1\_K04\_01070" 8327 "s59E25H2" 0 "Bicarbonate transport system permease protein CmpB"  
"JS1\_K04\_01070" 8327 "s59E5H2" 0 "Bicarbonate transport system permease protein CmpB"  
"JS1\_K04\_01070" 8327 "s63E6H2" 0 "Bicarbonate transport system permease protein CmpB"  
"JS1\_K04\_01071" 8328 "s59E13H2" 0 "Bicarbonate transport system permease protein CmpB"

"JS1\_K04\_01071" 8328 "s59E25H2" 0 "Bicarbonate transport system permease protein CmpB"  
"JS1\_K04\_01071" 8328 "s59E5H2" 0 "Bicarbonate transport system permease protein CmpB"  
"JS1\_K04\_01071" 8328 "s63E6H2" 0 "Bicarbonate transport system permease protein CmpB"  
"JS1\_K04\_01072" 8329 "s59E13H2" 0.01765413 "Putative ABC transporter periplasmic binding protein precursor"  
"JS1\_K04\_01072" 8329 "s59E25H2" 0 "Putative ABC transporter periplasmic binding protein precursor"  
"JS1\_K04\_01072" 8329 "s59E5H2" 0.001681536 "Putative ABC transporter periplasmic binding protein precursor"  
"JS1\_K04\_01072" 8329 "s63E6H2" 0 "Putative ABC transporter periplasmic binding protein precursor"  
"JS1\_K04\_01073" 8330 "s59E13H2" 1.417622 "L-fucose isomerase"  
"JS1\_K04\_01073" 8330 "s59E25H2" 0 "L-fucose isomerase"  
"JS1\_K04\_01073" 8330 "s59E5H2" 0.2645306 "L-fucose isomerase"  
"JS1\_K04\_01073" 8330 "s63E6H2" 0.03744364 "L-fucose isomerase"  
"JS1\_K04\_01074" 8331 "s59E13H2" 0 "putative ABC transporter ATP-binding protein"  
"JS1\_K04\_01074" 8331 "s59E25H2" 0 "putative ABC transporter ATP-binding protein"  
"JS1\_K04\_01074" 8331 "s59E5H2" 0 "putative ABC transporter ATP-binding protein"  
"JS1\_K04\_01074" 8331 "s63E6H2" 0.1697784 "putative ABC transporter ATP-binding protein"  
"JS1\_K04\_01075" 8332 "s59E13H2" 0 "putative ABC transporter ATP-binding protein"  
"JS1\_K04\_01075" 8332 "s59E25H2" 0 "putative ABC transporter ATP-binding protein"  
"JS1\_K04\_01075" 8332 "s59E5H2" 0 "putative ABC transporter ATP-binding protein"  
"JS1\_K04\_01075" 8332 "s63E6H2" 0.08466145 "putative ABC transporter ATP-binding protein"  
"JS1\_K04\_01076" 8333 "s59E13H2" 0.03067812 "hypothetical protein"  
"JS1\_K04\_01076" 8333 "s59E25H2" 0 "hypothetical protein"  
"JS1\_K04\_01076" 8333 "s59E5H2" 0 "hypothetical protein"  
"JS1\_K04\_01076" 8333 "s63E6H2" 0.1185659 "hypothetical protein"  
"JS1\_K04\_01077" 8334 "s59E13H2" 0.1015853 "FtsX-like permease family protein"  
"JS1\_K04\_01077" 8334 "s59E25H2" 0 "FtsX-like permease family protein"  
"JS1\_K04\_01077" 8334 "s59E5H2" 0 "FtsX-like permease family protein"  
"JS1\_K04\_01077" 8334 "s63E6H2" 0.05822608 "FtsX-like permease family protein"  
"JS1\_K04\_01078" 8335 "s59E13H2" 0.02833417 "hypothetical protein"  
"JS1\_K04\_01078" 8335 "s59E25H2" 0 "hypothetical protein"  
"JS1\_K04\_01078" 8335 "s59E5H2" 0.03212165 "hypothetical protein"  
"JS1\_K04\_01078" 8335 "s63E6H2" 0.01514972 "hypothetical protein"  
"JS1\_K04\_01079" 8336 "s59E13H2" 0.05790904 "RNA polymerase sigma factor SigM"  
"JS1\_K04\_01079" 8336 "s59E25H2" 0 "RNA polymerase sigma factor SigM"  
"JS1\_K04\_01079" 8336 "s59E5H2" 0 "RNA polymerase sigma factor SigM"  
"JS1\_K04\_01079" 8336 "s63E6H2" 0.1637142 "RNA polymerase sigma factor SigM"  
"JS1\_K04\_01080" 8337 "s59E13H2" 0.1126088 "hypothetical protein"  
"JS1\_K04\_01080" 8337 "s59E25H2" 0 "hypothetical protein"  
"JS1\_K04\_01080" 8337 "s59E5H2" 0 "hypothetical protein"  
"JS1\_K04\_01080" 8337 "s63E6H2" 0.5946972 "hypothetical protein"  
"JS1\_K04\_01081" 8338 "s59E13H2" 0.2550327 "2,3-bisphosphoglycerate-independent phosphoglycerate mutase 1"  
"JS1\_K04\_01081" 8338 "s59E25H2" 0 "2,3-bisphosphoglycerate-independent phosphoglycerate mutase 1"  
"JS1\_K04\_01081" 8338 "s59E5H2" 0.05866721 "2,3-bisphosphoglycerate-independent phosphoglycerate mutase 1"  
"JS1\_K04\_01081" 8338 "s63E6H2" 0.9537212 "2,3-bisphosphoglycerate-independent phosphoglycerate mutase 1"  
"JS1\_K04\_01082" 8339 "s59E13H2" 0.1888133 "Threonine synthase"  
"JS1\_K04\_01082" 8339 "s59E25H2" 0 "Threonine synthase"  
"JS1\_K04\_01082" 8339 "s59E5H2" 0.1341301 "Threonine synthase"  
"JS1\_K04\_01082" 8339 "s63E6H2" 0.721829 "Threonine synthase"

"JS1\_K04\_01083" 8340 "s59E13H2" 0.1262631 "Homoserine dehydrogenase"  
"JS1\_K04\_01083" 8340 "s59E25H2" 0 "Homoserine dehydrogenase"  
"JS1\_K04\_01083" 8340 "s59E5H2" 0.1162146 "Homoserine dehydrogenase"  
"JS1\_K04\_01083" 8340 "s63E6H2" 0.45661 "Homoserine dehydrogenase"  
"JS1\_K04\_01084" 8341 "s59E13H2" 0.5345339 "Diaminopimelate decarboxylase"  
"JS1\_K04\_01084" 8341 "s59E25H2" 0 "Diaminopimelate decarboxylase"  
"JS1\_K04\_01084" 8341 "s59E5H2" 0.1342805 "Diaminopimelate decarboxylase"  
"JS1\_K04\_01084" 8341 "s63E6H2" 0.0789896 "Diaminopimelate decarboxylase"  
"JS1\_K04\_01086" 8343 "s59E13H2" 0.03718324 "hypothetical protein"  
"JS1\_K04\_01086" 8343 "s59E25H2" 0 "hypothetical protein"  
"JS1\_K04\_01086" 8343 "s59E5H2" 0.1246024 "hypothetical protein"  
"JS1\_K04\_01086" 8343 "s63E6H2" 0.04761421 "hypothetical protein"  
"JS1\_K04\_01087" 8344 "s59E13H2" 0.03833391 "DNA polymerase III subunit tau"  
"JS1\_K04\_01087" 8344 "s59E25H2" 0 "DNA polymerase III subunit tau"  
"JS1\_K04\_01087" 8344 "s59E5H2" 0.1245784 "DNA polymerase III subunit tau"  
"JS1\_K04\_01087" 8344 "s63E6H2" 0.01983169 "DNA polymerase III subunit tau"  
"JS1\_K04\_01088" 8345 "s59E13H2" 0.01973473 "Thymidylate kinase"  
"JS1\_K04\_01088" 8345 "s59E25H2" 0 "Thymidylate kinase"  
"JS1\_K04\_01088" 8345 "s59E5H2" 0.1769337 "Thymidylate kinase"  
"JS1\_K04\_01088" 8345 "s63E6H2" 0.01095985 "Thymidylate kinase"  
"JS1\_K04\_01089" 8346 "s59E13H2" 0.01232666 "N-acetylglucosamine-6-phosphate deacetylase"  
"JS1\_K04\_01089" 8346 "s59E25H2" 0 "N-acetylglucosamine-6-phosphate deacetylase"  
"JS1\_K04\_01089" 8346 "s59E5H2" 0.04286469 "N-acetylglucosamine-6-phosphate deacetylase"  
"JS1\_K04\_01089" 8346 "s63E6H2" 0.03428129 "N-acetylglucosamine-6-phosphate deacetylase"  
"JS1\_K04\_01090" 8347 "s59E13H2" 0.003236077 "hypothetical protein"  
"JS1\_K04\_01090" 8347 "s59E25H2" 0 "hypothetical protein"  
"JS1\_K04\_01090" 8347 "s59E5H2" 0.04285186 "hypothetical protein"  
"JS1\_K04\_01090" 8347 "s63E6H2" 0.01703495 "hypothetical protein"  
"JS1\_K04\_01091" 8348 "s59E13H2" 0.001264256 "putative lipoprotein YbbD precursor"  
"JS1\_K04\_01091" 8348 "s59E25H2" 0 "putative lipoprotein YbbD precursor"  
"JS1\_K04\_01091" 8348 "s59E5H2" 0.05207127 "putative lipoprotein YbbD precursor"  
"JS1\_K04\_01091" 8348 "s63E6H2" 0.01082037 "putative lipoprotein YbbD precursor"  
"JS1\_K04\_01092" 8349 "s59E13H2" 3.986381 "L-arabinose transport system permease protein AraQ"  
"JS1\_K04\_01092" 8349 "s59E25H2" 0 "L-arabinose transport system permease protein AraQ"  
"JS1\_K04\_01092" 8349 "s59E5H2" 0.3748916 "L-arabinose transport system permease protein AraQ"  
"JS1\_K04\_01092" 8349 "s63E6H2" 1.027102 "L-arabinose transport system permease protein AraQ"  
"JS1\_K04\_01093" 8350 "s59E13H2" 8.98819 "Lactose transport system permease protein LacF"  
"JS1\_K04\_01093" 8350 "s59E25H2" 0 "Lactose transport system permease protein LacF"  
"JS1\_K04\_01093" 8350 "s59E5H2" 0.6345627 "Lactose transport system permease protein LacF"  
"JS1\_K04\_01093" 8350 "s63E6H2" 2.245072 "Lactose transport system permease protein LacF"  
"JS1\_K04\_01094" 8351 "s59E13H2" 1.688682 "Bacterial extracellular solute-binding protein"  
"JS1\_K04\_01094" 8351 "s59E25H2" 0 "Bacterial extracellular solute-binding protein"  
"JS1\_K04\_01094" 8351 "s59E5H2" 0.1628643 "Bacterial extracellular solute-binding protein"  
"JS1\_K04\_01094" 8351 "s63E6H2" 0.4603453 "Bacterial extracellular solute-binding protein"  
"JS1\_K04\_01095" 8352 "s59E13H2" 0.02758689 "hypothetical protein"  
"JS1\_K04\_01095" 8352 "s59E25H2" 0 "hypothetical protein"  
"JS1\_K04\_01095" 8352 "s59E5H2" 0.1434147 "hypothetical protein"

"JS1\_K04\_01095" 8352 "s63E6H2" 0.430458 "hypothetical protein"  
"JS1\_K04\_01096" 8353 "s59E13H2" 1.220404 "hypothetical protein"  
"JS1\_K04\_01096" 8353 "s59E25H2" 0.3109453 "hypothetical protein"  
"JS1\_K04\_01096" 8353 "s59E5H2" 0.2261779 "hypothetical protein"  
"JS1\_K04\_01096" 8353 "s63E6H2" 0.8484768 "hypothetical protein"  
"JS1\_K04\_01097" 8354 "s59E13H2" 1.015088 "Threonine synthase"  
"JS1\_K04\_01097" 8354 "s59E25H2" 0 "Threonine synthase"  
"JS1\_K04\_01097" 8354 "s59E5H2" 0.5672925 "Threonine synthase"  
"JS1\_K04\_01097" 8354 "s63E6H2" 0.7651928 "Threonine synthase"  
"JS1\_K04\_01098" 8355 "s59E13H2" 0.8947947 "Ribonuclease"  
"JS1\_K04\_01098" 8355 "s59E25H2" 0 "Ribonuclease"  
"JS1\_K04\_01098" 8355 "s59E5H2" 0.3358574 "Ribonuclease"  
"JS1\_K04\_01098" 8355 "s63E6H2" 0.8092004 "Ribonuclease"  
"JS1\_K04\_01099" 8356 "s59E13H2" 0.1177482 "Thioredoxin-1"  
"JS1\_K04\_01099" 8356 "s59E25H2" 0 "Thioredoxin-1"  
"JS1\_K04\_01099" 8356 "s59E5H2" 0.5403911 "Thioredoxin-1"  
"JS1\_K04\_01099" 8356 "s63E6H2" 0.1085949 "Thioredoxin-1"  
"JS1\_K04\_01100" 8357 "s59E13H2" 0.01765075 "Transcriptional repressor MprA"  
"JS1\_K04\_01100" 8357 "s59E25H2" 0 "Transcriptional repressor MprA"  
"JS1\_K04\_01100" 8357 "s59E5H2" 0.2427228 "Transcriptional repressor MprA"  
"JS1\_K04\_01100" 8357 "s63E6H2" 0.4973382 "Transcriptional repressor MprA"  
"JS1\_K04\_01101" 8358 "s59E13H2" 3.080894 "Integrase core domain protein"  
"JS1\_K04\_01101" 8358 "s59E25H2" 0 "Integrase core domain protein"  
"JS1\_K04\_01101" 8358 "s59E5H2" 1.195336 "Integrase core domain protein"  
"JS1\_K04\_01101" 8358 "s63E6H2" 1.473312 "Integrase core domain protein"  
"JS1\_K04\_01102" 8359 "s59E13H2" 0.2643644 "23S rRNA (uracil-C(5))-methyltransferase RlmCD"  
"JS1\_K04\_01102" 8359 "s59E25H2" 0 "23S rRNA (uracil-C(5))-methyltransferase RlmCD"  
"JS1\_K04\_01102" 8359 "s59E5H2" 0.2284967 "23S rRNA (uracil-C(5))-methyltransferase RlmCD"  
"JS1\_K04\_01102" 8359 "s63E6H2" 0.285409 "23S rRNA (uracil-C(5))-methyltransferase RlmCD"  
"JS1\_K04\_01103" 8360 "s59E13H2" 0.0002365848 "N-acyl homoserine lactonase"  
"JS1\_K04\_01103" 8360 "s59E25H2" 0 "N-acyl homoserine lactonase"  
"JS1\_K04\_01103" 8360 "s59E5H2" 0.0002205678 "N-acyl homoserine lactonase"  
"JS1\_K04\_01103" 8360 "s63E6H2" 1.654228e-05 "N-acyl homoserine lactonase"  
"JS1\_K04\_01104" 8361 "s59E13H2" 0.2630014 "transcriptional regulator NanR"  
"JS1\_K04\_01104" 8361 "s59E25H2" 0 "transcriptional regulator NanR"  
"JS1\_K04\_01104" 8361 "s59E5H2" 0 "transcriptional regulator NanR"  
"JS1\_K04\_01104" 8361 "s63E6H2" 0 "transcriptional regulator NanR"  
"JS1\_K04\_01105" 8362 "s59E13H2" 0 "Undecaprenyl-phosphate 4-deoxy-4-formamido-L-arabinose transferase"  
"JS1\_K04\_01105" 8362 "s59E25H2" 0 "Undecaprenyl-phosphate 4-deoxy-4-formamido-L-arabinose transferase"  
"JS1\_K04\_01105" 8362 "s59E5H2" 0.1662951 "Undecaprenyl-phosphate 4-deoxy-4-formamido-L-arabinose transferase"  
"JS1\_K04\_01105" 8362 "s63E6H2" 0 "Undecaprenyl-phosphate 4-deoxy-4-formamido-L-arabinose transferase"  
"JS1\_K04\_01106" 8363 "s59E13H2" 0.006889032 "Undecaprenyl-phosphate 4-deoxy-4-formamido-L-arabinose transferase"  
"JS1\_K04\_01106" 8363 "s59E25H2" 0 "Undecaprenyl-phosphate 4-deoxy-4-formamido-L-arabinose transferase"  
"JS1\_K04\_01106" 8363 "s59E5H2" 0.3055149 "Undecaprenyl-phosphate 4-deoxy-4-formamido-L-arabinose transferase"  
"JS1\_K04\_01106" 8363 "s63E6H2" 0.01731676 "Undecaprenyl-phosphate 4-deoxy-4-formamido-L-arabinose transferase"  
"JS1\_K04\_01107" 8364 "s59E13H2" 0.005110516 "Antilisterial bacteriocin subtilisin biosynthesis protein Alba"  
"JS1\_K04\_01107" 8364 "s59E25H2" 0 "Antilisterial bacteriocin subtilisin biosynthesis protein Alba"

"JS1\_K04\_01107" 8364 "s59E5H2" 0.2686377 "Antilisterial bacteriocin subtilisin biosynthesis protein Alba"  
"JS1\_K04\_01107" 8364 "s63E6H2" 0.02097629 "Antilisterial bacteriocin subtilisin biosynthesis protein Alba"  
"JS1\_K04\_01108" 8365 "s59E13H2" 0.01551359 "3 beta-hydroxysteroid dehydrogenase/Delta 5--"  
"JS1\_K04\_01108" 8365 "s59E25H2" 0 "3 beta-hydroxysteroid dehydrogenase/Delta 5--"  
"JS1\_K04\_01108" 8365 "s59E5H2" 0.6248375 "3 beta-hydroxysteroid dehydrogenase/Delta 5--"  
"JS1\_K04\_01108" 8365 "s63E6H2" 0.02858072 "3 beta-hydroxysteroid dehydrogenase/Delta 5--"  
"JS1\_K04\_01109" 8366 "s59E13H2" 0.01038664 "Galactoside O-acetyltransferase"  
"JS1\_K04\_01109" 8366 "s59E25H2" 0 "Galactoside O-acetyltransferase"  
"JS1\_K04\_01109" 8366 "s59E5H2" 1.307529 "Galactoside O-acetyltransferase"  
"JS1\_K04\_01109" 8366 "s63E6H2" 0.0354135 "Galactoside O-acetyltransferase"  
"JS1\_K04\_01110" 8367 "s59E13H2" 0.005113007 "hypothetical protein"  
"JS1\_K04\_01110" 8367 "s59E25H2" 0 "hypothetical protein"  
"JS1\_K04\_01110" 8367 "s59E5H2" 1.366983 "hypothetical protein"  
"JS1\_K04\_01110" 8367 "s63E6H2" 0.04471814 "hypothetical protein"  
"JS1\_K04\_01111" 8368 "s59E13H2" 0.002275595 "hypothetical protein"  
"JS1\_K04\_01111" 8368 "s59E25H2" 0 "hypothetical protein"  
"JS1\_K04\_01111" 8368 "s59E5H2" 0.2186582 "hypothetical protein"  
"JS1\_K04\_01111" 8368 "s63E6H2" 0.06724745 "hypothetical protein"  
"JS1\_K04\_01112" 8369 "s59E13H2" 0.01391119 "GDSL-like Lipase/Acylhydrolase"  
"JS1\_K04\_01112" 8369 "s59E25H2" 0 "GDSL-like Lipase/Acylhydrolase"  
"JS1\_K04\_01112" 8369 "s59E5H2" 0.3328126 "GDSL-like Lipase/Acylhydrolase"  
"JS1\_K04\_01112" 8369 "s63E6H2" 0.03967536 "GDSL-like Lipase/Acylhydrolase"  
"JS1\_K04\_01113" 8370 "s59E13H2" 0.414603 "Uracil DNA glycosylase superfamily protein"  
"JS1\_K04\_01113" 8370 "s59E25H2" 0.2142857 "Uracil DNA glycosylase superfamily protein"  
"JS1\_K04\_01113" 8370 "s59E5H2" 0.2966361 "Uracil DNA glycosylase superfamily protein"  
"JS1\_K04\_01113" 8370 "s63E6H2" 0.1953437 "Uracil DNA glycosylase superfamily protein"  
"JS1\_K04\_01114" 8371 "s59E13H2" 0.5962085 "hypothetical protein"  
"JS1\_K04\_01114" 8371 "s59E25H2" 0.5373134 "hypothetical protein"  
"JS1\_K04\_01114" 8371 "s59E5H2" 0.1108205 "hypothetical protein"  
"JS1\_K04\_01114" 8371 "s63E6H2" 0.1530408 "hypothetical protein"  
"JS1\_K04\_01115" 8372 "s59E13H2" 0.5294959 "putative protease YhbU precursor"  
"JS1\_K04\_01115" 8372 "s59E25H2" 0 "putative protease YhbU precursor"  
"JS1\_K04\_01115" 8372 "s59E5H2" 0.6717588 "putative protease YhbU precursor"  
"JS1\_K04\_01115" 8372 "s63E6H2" 1.261715 "putative protease YhbU precursor"  
"JS1\_K04\_01116" 8373 "s59E13H2" 0.3815767 "Putative GTP cyclohydrolase 1 type 2"  
"JS1\_K04\_01116" 8373 "s59E25H2" 0 "Putative GTP cyclohydrolase 1 type 2"  
"JS1\_K04\_01116" 8373 "s59E5H2" 0.3350573 "Putative GTP cyclohydrolase 1 type 2"  
"JS1\_K04\_01116" 8373 "s63E6H2" 0.1329761 "Putative GTP cyclohydrolase 1 type 2"  
"JS1\_K04\_01117" 8374 "s59E13H2" 0.4970121 "hypothetical protein"  
"JS1\_K04\_01117" 8374 "s59E25H2" 0 "hypothetical protein"  
"JS1\_K04\_01117" 8374 "s59E5H2" 0.3722265 "hypothetical protein"  
"JS1\_K04\_01117" 8374 "s63E6H2" 1.168542 "hypothetical protein"  
"JS1\_K04\_01118" 8375 "s59E13H2" 0.4438905 "Transketolase 2"  
"JS1\_K04\_01118" 8375 "s59E25H2" 0 "Transketolase 2"  
"JS1\_K04\_01118" 8375 "s59E5H2" 0.8058392 "Transketolase 2"  
"JS1\_K04\_01118" 8375 "s63E6H2" 2.197809 "Transketolase 2"  
"JS1\_K04\_01119" 8376 "s59E13H2" 0.249994 "2-hydroxy-3-oxopropionate reductase"

"JS1\_K04\_01119" 8376 "s59E25H2" 0 "2-hydroxy-3-oxopropionate reductase"  
"JS1\_K04\_01119" 8376 "s59E5H2" 0.8192037 "2-hydroxy-3-oxopropionate reductase"  
"JS1\_K04\_01119" 8376 "s63E6H2" 0.1698915 "2-hydroxy-3-oxopropionate reductase"  
"JS1\_K04\_01120" 8377 "s59E13H2" 0.206889 "Xylose isomerase-like TIM barrel"  
"JS1\_K04\_01120" 8377 "s59E25H2" 0 "Xylose isomerase-like TIM barrel"  
"JS1\_K04\_01120" 8377 "s59E5H2" 0.4035393 "Xylose isomerase-like TIM barrel"  
"JS1\_K04\_01120" 8377 "s63E6H2" 1.60173 "Xylose isomerase-like TIM barrel"  
"JS1\_K04\_01121" 8378 "s59E13H2" 0.1752707 "HTH-type transcriptional regulator LutR"  
"JS1\_K04\_01121" 8378 "s59E25H2" 0 "HTH-type transcriptional regulator LutR"  
"JS1\_K04\_01121" 8378 "s59E5H2" 0.2539838 "HTH-type transcriptional regulator LutR"  
"JS1\_K04\_01121" 8378 "s63E6H2" 0.302847 "HTH-type transcriptional regulator LutR"  
"JS1\_K04\_01122" 8379 "s59E13H2" 0 "Formate dehydrogenase subunit beta"  
"JS1\_K04\_01122" 8379 "s59E25H2" 0 "Formate dehydrogenase subunit beta"  
"JS1\_K04\_01122" 8379 "s59E5H2" 0 "Formate dehydrogenase subunit beta"  
"JS1\_K04\_01122" 8379 "s63E6H2" 0.1407668 "Formate dehydrogenase subunit beta"  
"JS1\_K04\_01123" 8380 "s59E13H2" 0.05447301 "Sulfhydrogenase 2 subunit beta"  
"JS1\_K04\_01123" 8380 "s59E25H2" 0 "Sulfhydrogenase 2 subunit beta"  
"JS1\_K04\_01123" 8380 "s59E5H2" 0 "Sulfhydrogenase 2 subunit beta"  
"JS1\_K04\_01123" 8380 "s63E6H2" 0.1420026 "Sulfhydrogenase 2 subunit beta"  
"JS1\_K04\_01124" 8381 "s59E13H2" 0 "Sulfhydrogenase 1 subunit gamma"  
"JS1\_K04\_01124" 8381 "s59E25H2" 0 "Sulfhydrogenase 1 subunit gamma"  
"JS1\_K04\_01124" 8381 "s59E5H2" 0.004752376 "Sulfhydrogenase 1 subunit gamma"  
"JS1\_K04\_01124" 8381 "s63E6H2" 0.1699902 "Sulfhydrogenase 1 subunit gamma"  
"JS1\_K04\_01125" 8382 "s59E13H2" 0.004306847 "CoB--CoM heterodisulfide reductase iron-sulfur subunit A"  
"JS1\_K04\_01125" 8382 "s59E25H2" 0 "CoB--CoM heterodisulfide reductase iron-sulfur subunit A"  
"JS1\_K04\_01125" 8382 "s59E5H2" 0 "CoB--CoM heterodisulfide reductase iron-sulfur subunit A"  
"JS1\_K04\_01125" 8382 "s63E6H2" 0.4582925 "CoB--CoM heterodisulfide reductase iron-sulfur subunit A"  
"JS1\_K04\_01126" 8383 "s59E13H2" 0.003459683 "NADP-reducing hydrogenase subunit HndB"  
"JS1\_K04\_01126" 8383 "s59E25H2" 0 "NADP-reducing hydrogenase subunit HndB"  
"JS1\_K04\_01126" 8383 "s59E5H2" 0 "NADP-reducing hydrogenase subunit HndB"  
"JS1\_K04\_01126" 8383 "s63E6H2" 0.4886387 "NADP-reducing hydrogenase subunit HndB"  
"JS1\_K04\_01127" 8384 "s59E13H2" 0.001783485 "NADP-reducing hydrogenase subunit HndC"  
"JS1\_K04\_01127" 8384 "s59E25H2" 148.7447 "NADP-reducing hydrogenase subunit HndC"  
"JS1\_K04\_01127" 8384 "s59E5H2" 0.0173865 "NADP-reducing hydrogenase subunit HndC"  
"JS1\_K04\_01127" 8384 "s63E6H2" 0.2169466 "NADP-reducing hydrogenase subunit HndC"  
"JS1\_K04\_01128" 8385 "s59E13H2" 0 "DRTGG domain protein"  
"JS1\_K04\_01128" 8385 "s59E25H2" 0 "DRTGG domain protein"  
"JS1\_K04\_01128" 8385 "s59E5H2" 0.01067159 "DRTGG domain protein"  
"JS1\_K04\_01128" 8385 "s63E6H2" 0.01709694 "DRTGG domain protein"  
"JS1\_K04\_01129" 8386 "s59E13H2" 0.003689949 "Serine/threonine-protein kinase RsbT"  
"JS1\_K04\_01129" 8386 "s59E25H2" 0 "Serine/threonine-protein kinase RsbT"  
"JS1\_K04\_01129" 8386 "s59E5H2" 0.0575181 "Serine/threonine-protein kinase RsbT"  
"JS1\_K04\_01129" 8386 "s63E6H2" 0.02838988 "Serine/threonine-protein kinase RsbT"  
"JS1\_K04\_01130" 8387 "s59E13H2" 0 "DRTGG domain protein"  
"JS1\_K04\_01130" 8387 "s59E25H2" 0 "DRTGG domain protein"  
"JS1\_K04\_01130" 8387 "s59E5H2" 0.01227329 "DRTGG domain protein"  
"JS1\_K04\_01130" 8387 "s63E6H2" 0.02957214 "DRTGG domain protein"

"JS1\_K04\_01131" 8388 "s59E13H2" 0.01017371 "hypothetical protein"  
"JS1\_K04\_01131" 8388 "s59E25H2" 0 "hypothetical protein"  
"JS1\_K04\_01131" 8388 "s59E5H2" 0.01104559 "hypothetical protein"  
"JS1\_K04\_01131" 8388 "s63E6H2" 0.02779451 "hypothetical protein"  
"JS1\_K04\_01132" 8389 "s59E13H2" 0.02757001 "Globin-coupled histidine kinase"  
"JS1\_K04\_01132" 8389 "s59E25H2" 0 "Globin-coupled histidine kinase"  
"JS1\_K04\_01132" 8389 "s59E5H2" 0.06767755 "Globin-coupled histidine kinase"  
"JS1\_K04\_01132" 8389 "s63E6H2" 0.04419547 "Globin-coupled histidine kinase"  
"JS1\_K04\_01133" 8390 "s59E13H2" 0.0429486 "CoB--CoM heterodisulfide reductase iron-sulfur subunit A"  
"JS1\_K04\_01133" 8390 "s59E25H2" 0 "CoB--CoM heterodisulfide reductase iron-sulfur subunit A"  
"JS1\_K04\_01133" 8390 "s59E5H2" 0.0294733 "CoB--CoM heterodisulfide reductase iron-sulfur subunit A"  
"JS1\_K04\_01133" 8390 "s63E6H2" 0.04990372 "CoB--CoM heterodisulfide reductase iron-sulfur subunit A"  
"JS1\_K04\_01134" 8391 "s59E13H2" 0.01838724 "F420-non-reducing hydrogenase vhc iron-sulfur subunit D"  
"JS1\_K04\_01134" 8391 "s59E25H2" 0 "F420-non-reducing hydrogenase vhc iron-sulfur subunit D"  
"JS1\_K04\_01134" 8391 "s59E5H2" 0.002739483 "F420-non-reducing hydrogenase vhc iron-sulfur subunit D"  
"JS1\_K04\_01134" 8391 "s63E6H2" 0.0135236 "F420-non-reducing hydrogenase vhc iron-sulfur subunit D"  
"JS1\_K04\_01136" 8393 "s59E13H2" 0.0321518 "F420-non-reducing hydrogenase subunit G"  
"JS1\_K04\_01136" 8393 "s59E25H2" 0 "F420-non-reducing hydrogenase subunit G"  
"JS1\_K04\_01136" 8393 "s59E5H2" 0.03280821 "F420-non-reducing hydrogenase subunit G"  
"JS1\_K04\_01136" 8393 "s63E6H2" 0.3974491 "F420-non-reducing hydrogenase subunit G"  
"JS1\_K04\_01137" 8394 "s59E13H2" 0.04582593 "F420-non-reducing hydrogenase subunit A"  
"JS1\_K04\_01137" 8394 "s59E25H2" 0 "F420-non-reducing hydrogenase subunit A"  
"JS1\_K04\_01137" 8394 "s59E5H2" 0.04930928 "F420-non-reducing hydrogenase subunit A"  
"JS1\_K04\_01137" 8394 "s63E6H2" 0.473679 "F420-non-reducing hydrogenase subunit A"  
"JS1\_K04\_01138" 8395 "s59E13H2" 0.04299059 "Hydrogenase 2 maturation protease"  
"JS1\_K04\_01138" 8395 "s59E25H2" 0 "Hydrogenase 2 maturation protease"  
"JS1\_K04\_01138" 8395 "s59E5H2" 0.02210395 "Hydrogenase 2 maturation protease"  
"JS1\_K04\_01138" 8395 "s63E6H2" 0.351024 "Hydrogenase 2 maturation protease"  
"JS1\_K04\_01139" 8396 "s59E13H2" 0.08909207 "Hydrogenase/urease nickel incorporation protein HypA"  
"JS1\_K04\_01139" 8396 "s59E25H2" 0 "Hydrogenase/urease nickel incorporation protein HypA"  
"JS1\_K04\_01139" 8396 "s59E5H2" 0.02476401 "Hydrogenase/urease nickel incorporation protein HypA"  
"JS1\_K04\_01139" 8396 "s63E6H2" 0.2102377 "Hydrogenase/urease nickel incorporation protein HypA"  
"JS1\_K04\_01140" 8397 "s59E13H2" 0.09414283 "Hydrogenase isoenzymes formation protein HypE"  
"JS1\_K04\_01140" 8397 "s59E25H2" 0 "Hydrogenase isoenzymes formation protein HypE"  
"JS1\_K04\_01140" 8397 "s59E5H2" 0.04110941 "Hydrogenase isoenzymes formation protein HypE"  
"JS1\_K04\_01140" 8397 "s63E6H2" 0.02477511 "Hydrogenase isoenzymes formation protein HypE"  
"JS1\_K04\_01141" 8398 "s59E13H2" 0.05760608 "Hydrogenase expression/formation protein HypD"  
"JS1\_K04\_01141" 8398 "s59E25H2" 0 "Hydrogenase expression/formation protein HypD"  
"JS1\_K04\_01141" 8398 "s59E5H2" 0.01622687 "Hydrogenase expression/formation protein HypD"  
"JS1\_K04\_01141" 8398 "s63E6H2" 0.006346074 "Hydrogenase expression/formation protein HypD"  
"JS1\_K04\_01142" 8399 "s59E13H2" 0.02217968 "Ureidoglycolate lyase"  
"JS1\_K04\_01142" 8399 "s59E25H2" 0 "Ureidoglycolate lyase"  
"JS1\_K04\_01142" 8399 "s59E5H2" 0.02920065 "Ureidoglycolate lyase"  
"JS1\_K04\_01142" 8399 "s63E6H2" 0.006103704 "Ureidoglycolate lyase"  
"JS1\_K04\_01143" 8400 "s59E13H2" 0.03556861 "leucine export protein LeuE"  
"JS1\_K04\_01143" 8400 "s59E25H2" 0 "leucine export protein LeuE"  
"JS1\_K04\_01143" 8400 "s59E5H2" 0.02823979 "leucine export protein LeuE"



"JS1\_K04\_01143" 8400 "s63E6H2" 0.006069951 "leucine export protein LeuE"  
"JS1\_K04\_01144" 8401 "s59E13H2" 0.1231483 "Na+/Pi-cotransporter"  
"JS1\_K04\_01144" 8401 "s59E25H2" 0 "Na+/Pi-cotransporter"  
"JS1\_K04\_01144" 8401 "s59E5H2" 0.05107696 "Na+/Pi-cotransporter"  
"JS1\_K04\_01144" 8401 "s63E6H2" 0.9617361 "Na+/Pi-cotransporter"  
"JS1\_K04\_01145" 8402 "s59E13H2" 0.2671912 "Cadmium, cobalt and zinc/H(+)-K(+) antiporter"  
"JS1\_K04\_01145" 8402 "s59E25H2" 0 "Cadmium, cobalt and zinc/H(+)-K(+) antiporter"  
"JS1\_K04\_01145" 8402 "s59E5H2" 0.0001994732 "Cadmium, cobalt and zinc/H(+)-K(+) antiporter"  
"JS1\_K04\_01145" 8402 "s63E6H2" 0.2445248 "Cadmium, cobalt and zinc/H(+)-K(+) antiporter"  
"JS1\_K04\_01146" 8403 "s59E13H2" 0.1862714 "hypothetical protein"  
"JS1\_K04\_01146" 8403 "s59E25H2" 0 "hypothetical protein"  
"JS1\_K04\_01146" 8403 "s59E5H2" 0 "hypothetical protein"  
"JS1\_K04\_01146" 8403 "s63E6H2" 0.6664421 "hypothetical protein"  
"JS1\_K04\_01148" 8405 "s59E13H2" 0.1993857 "DegV domain-containing protein"  
"JS1\_K04\_01148" 8405 "s59E25H2" 0 "DegV domain-containing protein"  
"JS1\_K04\_01148" 8405 "s59E5H2" 0.1634128 "DegV domain-containing protein"  
"JS1\_K04\_01148" 8405 "s63E6H2" 0.6898883 "DegV domain-containing protein"  
"JS1\_K04\_01149" 8406 "s59E13H2" 0.02248019 "hypothetical protein"  
"JS1\_K04\_01149" 8406 "s59E25H2" 0 "hypothetical protein"  
"JS1\_K04\_01149" 8406 "s59E5H2" 0.5041793 "hypothetical protein"  
"JS1\_K04\_01149" 8406 "s63E6H2" 0.574754 "hypothetical protein"  
"JS1\_K04\_01150" 8407 "s59E13H2" 0 "hypothetical protein"  
"JS1\_K04\_01150" 8407 "s59E25H2" 0 "hypothetical protein"  
"JS1\_K04\_01150" 8407 "s59E5H2" 0.03969796 "hypothetical protein"  
"JS1\_K04\_01150" 8407 "s63E6H2" 0.005663612 "hypothetical protein"  
"JS1\_K04\_01151" 8408 "s59E13H2" 0 "putative oxidoreductase YvaA"  
"JS1\_K04\_01151" 8408 "s59E25H2" 0 "putative oxidoreductase YvaA"  
"JS1\_K04\_01151" 8408 "s59E5H2" 0.05716173 "putative oxidoreductase YvaA"  
"JS1\_K04\_01151" 8408 "s63E6H2" 0.5585969 "putative oxidoreductase YvaA"  
"JS1\_K04\_01152" 8409 "s59E13H2" 0.03538747 "hypothetical protein"  
"JS1\_K04\_01152" 8409 "s59E25H2" 0 "hypothetical protein"  
"JS1\_K04\_01152" 8409 "s59E5H2" 0 "hypothetical protein"  
"JS1\_K04\_01152" 8409 "s63E6H2" 0 "hypothetical protein"  
"JS1\_K04\_01153" 8410 "s59E13H2" 0 "Anabaena sensory rhodopsin transducer"  
"JS1\_K04\_01153" 8410 "s59E25H2" 0 "Anabaena sensory rhodopsin transducer"  
"JS1\_K04\_01153" 8410 "s59E5H2" 0 "Anabaena sensory rhodopsin transducer"  
"JS1\_K04\_01153" 8410 "s63E6H2" 0 "Anabaena sensory rhodopsin transducer"  
"JS1\_K04\_01154" 8411 "s59E13H2" 0.01059983 "Xaa-Pro dipeptidase"  
"JS1\_K04\_01154" 8411 "s59E25H2" 0 "Xaa-Pro dipeptidase"  
"JS1\_K04\_01154" 8411 "s59E5H2" 0 "Xaa-Pro dipeptidase"  
"JS1\_K04\_01154" 8411 "s63E6H2" 0 "Xaa-Pro dipeptidase"  
"JS1\_K04\_01155" 8412 "s59E13H2" 0.0285684 "D-tagatose 3-epimerase"  
"JS1\_K04\_01155" 8412 "s59E25H2" 0 "D-tagatose 3-epimerase"  
"JS1\_K04\_01155" 8412 "s59E5H2" 0 "D-tagatose 3-epimerase"  
"JS1\_K04\_01155" 8412 "s63E6H2" 0.003797159 "D-tagatose 3-epimerase"  
"JS1\_K04\_01156" 8413 "s59E13H2" 0.007360637 "Ribulokinase"  
"JS1\_K04\_01156" 8413 "s59E25H2" 0 "Ribulokinase"

"JS1\_K04\_01156" 8413 "s59E5H2" 0 "Ribulokinase"  
"JS1\_K04\_01156" 8413 "s63E6H2" 0.001892148 "Ribulokinase"  
"JS1\_K04\_01157" 8414 "s59E13H2" 0 "Ribulokinase"  
"JS1\_K04\_01157" 8414 "s59E25H2" 0 "Ribulokinase"  
"JS1\_K04\_01157" 8414 "s59E5H2" 0 "Ribulokinase"  
"JS1\_K04\_01157" 8414 "s63E6H2" 0.0052062 "Ribulokinase"  
"JS1\_K04\_01158" 8415 "s59E13H2" 0.007527137 "Ribulokinase"  
"JS1\_K04\_01158" 8415 "s59E25H2" 0 "Ribulokinase"  
"JS1\_K04\_01158" 8415 "s59E5H2" 0 "Ribulokinase"  
"JS1\_K04\_01158" 8415 "s63E6H2" 0.002365739 "Ribulokinase"  
"JS1\_K04\_01159" 8416 "s59E13H2" 0.01043339 "L-ribulose-5-phosphate 4-epimerase"  
"JS1\_K04\_01159" 8416 "s59E25H2" 0 "L-ribulose-5-phosphate 4-epimerase"  
"JS1\_K04\_01159" 8416 "s59E5H2" 0 "L-ribulose-5-phosphate 4-epimerase"  
"JS1\_K04\_01159" 8416 "s63E6H2" 0.004584798 "L-ribulose-5-phosphate 4-epimerase"  
"JS1\_K04\_01160" 8417 "s59E13H2" 0 "methylcobalamin:coenzyme M methyltransferase"  
"JS1\_K04\_01160" 8417 "s59E25H2" 0 "methylcobalamin:coenzyme M methyltransferase"  
"JS1\_K04\_01160" 8417 "s59E5H2" 0 "methylcobalamin:coenzyme M methyltransferase"  
"JS1\_K04\_01160" 8417 "s63E6H2" 0.01286952 "methylcobalamin:coenzyme M methyltransferase"  
"JS1\_K04\_01161" 8418 "s59E13H2" 0.03316109 "Cyclic di-GMP phosphodiesterase response regulator RpfG"  
"JS1\_K04\_01161" 8418 "s59E25H2" 0 "Cyclic di-GMP phosphodiesterase response regulator RpfG"  
"JS1\_K04\_01161" 8418 "s59E5H2" 1.91686 "Cyclic di-GMP phosphodiesterase response regulator RpfG"  
"JS1\_K04\_01161" 8418 "s63E6H2" 0.03639575 "Cyclic di-GMP phosphodiesterase response regulator RpfG"  
"JS1\_K04\_01162" 8419 "s59E13H2" 0 "Catabolite control protein A"  
"JS1\_K04\_01162" 8419 "s59E25H2" 0 "Catabolite control protein A"  
"JS1\_K04\_01162" 8419 "s59E5H2" 0 "Catabolite control protein A"  
"JS1\_K04\_01162" 8419 "s63E6H2" 0 "Catabolite control protein A"  
"JS1\_K04\_01163" 8420 "s59E13H2" 0 "Xaa-Pro dipeptidase"  
"JS1\_K04\_01163" 8420 "s59E25H2" 0 "Xaa-Pro dipeptidase"  
"JS1\_K04\_01163" 8420 "s59E5H2" 0 "Xaa-Pro dipeptidase"  
"JS1\_K04\_01163" 8420 "s63E6H2" 0.0007216067 "Xaa-Pro dipeptidase"  
"JS1\_K04\_01164" 8421 "s59E13H2" 0 "Diacetyl reductase [(S)-acetoin forming]"  
"JS1\_K04\_01164" 8421 "s59E25H2" 0 "Diacetyl reductase [(S)-acetoin forming]"  
"JS1\_K04\_01164" 8421 "s59E5H2" 0 "Diacetyl reductase [(S)-acetoin forming]"  
"JS1\_K04\_01164" 8421 "s63E6H2" 0 "Diacetyl reductase [(S)-acetoin forming]"  
"JS1\_K04\_01165" 8422 "s59E13H2" 0 "Putative redox-active protein (C\_GCAxxG\_C\_C)"  
"JS1\_K04\_01165" 8422 "s59E25H2" 0 "Putative redox-active protein (C\_GCAxxG\_C\_C)"  
"JS1\_K04\_01165" 8422 "s59E5H2" 0 "Putative redox-active protein (C\_GCAxxG\_C\_C)"  
"JS1\_K04\_01165" 8422 "s63E6H2" 0 "Putative redox-active protein (C\_GCAxxG\_C\_C)"  
"JS1\_K04\_01166" 8423 "s59E13H2" 0 "Galactose/methyl galactoside import ATP-binding protein MglA"  
"JS1\_K04\_01166" 8423 "s59E25H2" 0 "Galactose/methyl galactoside import ATP-binding protein MglA"  
"JS1\_K04\_01166" 8423 "s59E5H2" 0 "Galactose/methyl galactoside import ATP-binding protein MglA"  
"JS1\_K04\_01166" 8423 "s63E6H2" 0 "Galactose/methyl galactoside import ATP-binding protein MglA"  
"JS1\_K04\_01172" 8429 "s59E13H2" 0 "hypothetical protein"  
"JS1\_K04\_01172" 8429 "s59E25H2" 0 "hypothetical protein"  
"JS1\_K04\_01172" 8429 "s59E5H2" 0.3330564 "hypothetical protein"  
"JS1\_K04\_01172" 8429 "s63E6H2" 0 "hypothetical protein"  
"JS1\_K04\_01175" 8432 "s59E13H2" 0.001481665 "hypothetical protein"

"JS1\_K04\_01175" 8432 "s59E25H2" 0 "hypothetical protein"  
"JS1\_K04\_01175" 8432 "s59E5H2" 0 "hypothetical protein"  
"JS1\_K04\_01175" 8432 "s63E6H2" 0 "hypothetical protein"  
"JS1\_K04\_01176" 8433 "s59E13H2" 0.01328391 "Tyrosine recombinase XerD"  
"JS1\_K04\_01176" 8433 "s59E25H2" 0 "Tyrosine recombinase XerD"  
"JS1\_K04\_01176" 8433 "s59E5H2" 0.004811701 "Tyrosine recombinase XerD"  
"JS1\_K04\_01176" 8433 "s63E6H2" 0.001741897 "Tyrosine recombinase XerD"  
"JS1\_K04\_01177" 8434 "s59E13H2" 0.1127934 "hypothetical protein"  
"JS1\_K04\_01177" 8434 "s59E25H2" 0 "hypothetical protein"  
"JS1\_K04\_01177" 8434 "s59E5H2" 0 "hypothetical protein"  
"JS1\_K04\_01177" 8434 "s63E6H2" 0 "hypothetical protein"  
"JS1\_K04\_01179" 8436 "s59E13H2" 0.1554912 "Tyrosine recombinase XerD"  
"JS1\_K04\_01179" 8436 "s59E25H2" 0 "Tyrosine recombinase XerD"  
"JS1\_K04\_01179" 8436 "s59E5H2" 0.5182089 "Tyrosine recombinase XerD"  
"JS1\_K04\_01179" 8436 "s63E6H2" 0.1344798 "Tyrosine recombinase XerD"  
"JS1\_K04\_01180" 8437 "s59E13H2" 0.00585334 "hypothetical protein"  
"JS1\_K04\_01180" 8437 "s59E25H2" 0 "hypothetical protein"  
"JS1\_K04\_01180" 8437 "s59E5H2" 0.06723883 "hypothetical protein"  
"JS1\_K04\_01180" 8437 "s63E6H2" 0.1901522 "hypothetical protein"  
"JS1\_K04\_01181" 8438 "s59E13H2" 0.02868296 "Sulfoxide reductase catalytic subunit YedY precursor"  
"JS1\_K04\_01181" 8438 "s59E25H2" 0 "Sulfoxide reductase catalytic subunit YedY precursor"  
"JS1\_K04\_01181" 8438 "s59E5H2" 0.05328398 "Sulfoxide reductase catalytic subunit YedY precursor"  
"JS1\_K04\_01181" 8438 "s63E6H2" 0.2032182 "Sulfoxide reductase catalytic subunit YedY precursor"  
"JS1\_K04\_01182" 8439 "s59E13H2" 0.01973511 "YtxH-like protein"  
"JS1\_K04\_01182" 8439 "s59E25H2" 0 "YtxH-like protein"  
"JS1\_K04\_01182" 8439 "s59E5H2" 0.004310262 "YtxH-like protein"  
"JS1\_K04\_01182" 8439 "s63E6H2" 0.1015386 "YtxH-like protein"  
"JS1\_K04\_01183" 8440 "s59E13H2" 0.01764003 "hypothetical protein"  
"JS1\_K04\_01183" 8440 "s59E25H2" 0 "hypothetical protein"  
"JS1\_K04\_01183" 8440 "s59E5H2" 0.01917184 "hypothetical protein"  
"JS1\_K04\_01183" 8440 "s63E6H2" 0.1386168 "hypothetical protein"  
"JS1\_K04\_01184" 8441 "s59E13H2" 0.0008049785 "Sulfide dehydrogenase subunit alpha precursor"  
"JS1\_K04\_01184" 8441 "s59E25H2" 0 "Sulfide dehydrogenase subunit alpha precursor"  
"JS1\_K04\_01184" 8441 "s59E5H2" 0.07687934 "Sulfide dehydrogenase subunit alpha precursor"  
"JS1\_K04\_01184" 8441 "s63E6H2" 0.06387678 "Sulfide dehydrogenase subunit alpha precursor"  
"JS1\_K04\_01185" 8442 "s59E13H2" 0.005932241 "Sulfide dehydrogenase subunit beta precursor"  
"JS1\_K04\_01185" 8442 "s59E25H2" 0 "Sulfide dehydrogenase subunit beta precursor"  
"JS1\_K04\_01185" 8442 "s59E5H2" 0.09859342 "Sulfide dehydrogenase subunit beta precursor"  
"JS1\_K04\_01185" 8442 "s63E6H2" 0.01332552 "Sulfide dehydrogenase subunit beta precursor"  
"JS1\_K04\_01186" 8443 "s59E13H2" 0.002007617 "protochlorophyllide reductase iron-sulfur ATP-binding protein"  
"JS1\_K04\_01186" 8443 "s59E25H2" 0 "protochlorophyllide reductase iron-sulfur ATP-binding protein"  
"JS1\_K04\_01186" 8443 "s59E5H2" 0.005196864 "protochlorophyllide reductase iron-sulfur ATP-binding protein"  
"JS1\_K04\_01186" 8443 "s63E6H2" 0.01115701 "protochlorophyllide reductase iron-sulfur ATP-binding protein"  
"JS1\_K04\_01187" 8444 "s59E13H2" 0.002558739 "heat shock protein GrpE"  
"JS1\_K04\_01187" 8444 "s59E25H2" 0 "heat shock protein GrpE"  
"JS1\_K04\_01187" 8444 "s59E5H2" 0.07214951 "heat shock protein GrpE"  
"JS1\_K04\_01187" 8444 "s63E6H2" 0.007767981 "heat shock protein GrpE"

"JS1\_K04\_01188" 8445 "s59E13H2" 0.004941369 "hypothetical protein"  
"JS1\_K04\_01188" 8445 "s59E25H2" 0 "hypothetical protein"  
"JS1\_K04\_01188" 8445 "s59E5H2" 0.1033498 "hypothetical protein"  
"JS1\_K04\_01188" 8445 "s63E6H2" 0.002406385 "hypothetical protein"  
"JS1\_K04\_01189" 8446 "s59E13H2" 0.01290171 "Histone deacetylase-like amidohydrolase"  
"JS1\_K04\_01189" 8446 "s59E25H2" 0 "Histone deacetylase-like amidohydrolase"  
"JS1\_K04\_01189" 8446 "s59E5H2" 0.06407277 "Histone deacetylase-like amidohydrolase"  
"JS1\_K04\_01189" 8446 "s63E6H2" 0 "Histone deacetylase-like amidohydrolase"  
"JS1\_K04\_01190" 8447 "s59E13H2" 0.006454113 "N-acetylmuramoyl-L-alanine amidase LytC precursor"  
"JS1\_K04\_01190" 8447 "s59E25H2" 0 "N-acetylmuramoyl-L-alanine amidase LytC precursor"  
"JS1\_K04\_01190" 8447 "s59E5H2" 0.07597352 "N-acetylmuramoyl-L-alanine amidase LytC precursor"  
"JS1\_K04\_01190" 8447 "s63E6H2" 0.003267334 "N-acetylmuramoyl-L-alanine amidase LytC precursor"  
"JS1\_K04\_01191" 8448 "s59E13H2" 0 "Thioredoxin reductase"  
"JS1\_K04\_01191" 8448 "s59E25H2" 0 "Thioredoxin reductase"  
"JS1\_K04\_01191" 8448 "s59E5H2" 0.02691662 "Thioredoxin reductase"  
"JS1\_K04\_01191" 8448 "s63E6H2" 0.00636878 "Thioredoxin reductase"  
"JS1\_K04\_01192" 8449 "s59E13H2" 0.004073095 "putative transposase"  
"JS1\_K04\_01192" 8449 "s59E25H2" 0 "putative transposase"  
"JS1\_K04\_01192" 8449 "s59E5H2" 0.003385743 "putative transposase"  
"JS1\_K04\_01192" 8449 "s63E6H2" 0 "putative transposase"  
"JS1\_K04\_01193" 8450 "s59E13H2" 0 "Transposase IS200 like protein"  
"JS1\_K04\_01193" 8450 "s59E25H2" 0 "Transposase IS200 like protein"  
"JS1\_K04\_01193" 8450 "s59E5H2" 0 "Transposase IS200 like protein"  
"JS1\_K04\_01193" 8450 "s63E6H2" 0 "Transposase IS200 like protein"  
"JS1\_K04\_01194" 8451 "s59E13H2" 0.005987092 "hypothetical protein"  
"JS1\_K04\_01194" 8451 "s59E25H2" 0 "hypothetical protein"  
"JS1\_K04\_01194" 8451 "s59E5H2" 0.004583064 "hypothetical protein"  
"JS1\_K04\_01194" 8451 "s63E6H2" 0 "hypothetical protein"  
"JS1\_K04\_01195" 8452 "s59E13H2" 0.003749396 "putative lysine decarboxylase"  
"JS1\_K04\_01195" 8452 "s59E25H2" 0 "putative lysine decarboxylase"  
"JS1\_K04\_01195" 8452 "s59E5H2" 0.007750752 "putative lysine decarboxylase"  
"JS1\_K04\_01195" 8452 "s63E6H2" 0.01087324 "putative lysine decarboxylase"  
"JS1\_K04\_01196" 8453 "s59E13H2" 0.01138656 "hypothetical protein"  
"JS1\_K04\_01196" 8453 "s59E25H2" 0 "hypothetical protein"  
"JS1\_K04\_01196" 8453 "s59E5H2" 0.007845678 "hypothetical protein"  
"JS1\_K04\_01196" 8453 "s63E6H2" 0.02413703 "hypothetical protein"  
"JS1\_K04\_01197" 8454 "s59E13H2" 0.006462572 "Adenine phosphoribosyltransferase"  
"JS1\_K04\_01197" 8454 "s59E25H2" 0 "Adenine phosphoribosyltransferase"  
"JS1\_K04\_01197" 8454 "s59E5H2" 0.03969079 "Adenine phosphoribosyltransferase"  
"JS1\_K04\_01197" 8454 "s63E6H2" 0.009107288 "Adenine phosphoribosyltransferase"  
"JS1\_K04\_01198" 8455 "s59E13H2" 0.008391316 "hypothetical protein"  
"JS1\_K04\_01198" 8455 "s59E25H2" 0 "hypothetical protein"  
"JS1\_K04\_01198" 8455 "s59E5H2" 0.09050197 "hypothetical protein"  
"JS1\_K04\_01198" 8455 "s63E6H2" 0.01615459 "hypothetical protein"  
"JS1\_K04\_01199" 8456 "s59E13H2" 0.006702308 "3'-5' exoribonuclease YhaM"  
"JS1\_K04\_01199" 8456 "s59E25H2" 0 "3'-5' exoribonuclease YhaM"  
"JS1\_K04\_01199" 8456 "s59E5H2" 0.6107782 "3'-5' exoribonuclease YhaM"

"JS1\_K04\_01199" 8456 "s63E6H2" 0.008383857 "3'-5' exoribonuclease YhaM"  
"JS1\_K04\_01200" 8457 "s59E13H2" 0.01317713 "5'-nucleotidase SurE"  
"JS1\_K04\_01200" 8457 "s59E25H2" 0 "5'-nucleotidase SurE"  
"JS1\_K04\_01200" 8457 "s59E5H2" 0.02426544 "5'-nucleotidase SurE"  
"JS1\_K04\_01200" 8457 "s63E6H2" 0.005336004 "5'-nucleotidase SurE"  
"JS1\_K04\_01202" 8459 "s59E13H2" 0.0008378327 "hypothetical protein"  
"JS1\_K04\_01202" 8459 "s59E25H2" 0 "hypothetical protein"  
"JS1\_K04\_01202" 8459 "s59E5H2" 0 "hypothetical protein"  
"JS1\_K04\_01202" 8459 "s63E6H2" 0.007433313 "hypothetical protein"  
"JS1\_K04\_01203" 8460 "s59E13H2" 0.001743852 "methylcobalamin:coenzyme M methyltransferase"  
"JS1\_K04\_01203" 8460 "s59E25H2" 0 "methylcobalamin:coenzyme M methyltransferase"  
"JS1\_K04\_01203" 8460 "s59E5H2" 0 "methylcobalamin:coenzyme M methyltransferase"  
"JS1\_K04\_01203" 8460 "s63E6H2" 0.01199115 "methylcobalamin:coenzyme M methyltransferase"  
"JS1\_K04\_01204" 8461 "s59E13H2" 0 "UDP-glucose 4-epimerase"  
"JS1\_K04\_01204" 8461 "s59E25H2" 0 "UDP-glucose 4-epimerase"  
"JS1\_K04\_01204" 8461 "s59E5H2" 0 "UDP-glucose 4-epimerase"  
"JS1\_K04\_01204" 8461 "s63E6H2" 0 "UDP-glucose 4-epimerase"  
"JS1\_K04\_01205" 8462 "s59E13H2" 0 "hypothetical protein"  
"JS1\_K04\_01205" 8462 "s59E25H2" 0 "hypothetical protein"  
"JS1\_K04\_01205" 8462 "s59E5H2" 0 "hypothetical protein"  
"JS1\_K04\_01205" 8462 "s63E6H2" 0 "hypothetical protein"  
"JS1\_K04\_01206" 8463 "s59E13H2" 0 "CDP-glycerol:poly(glycerophosphate) glycerophosphotransferase"  
"JS1\_K04\_01206" 8463 "s59E25H2" 0 "CDP-glycerol:poly(glycerophosphate) glycerophosphotransferase"  
"JS1\_K04\_01206" 8463 "s59E5H2" 0 "CDP-glycerol:poly(glycerophosphate) glycerophosphotransferase"  
"JS1\_K04\_01206" 8463 "s63E6H2" 0 "CDP-glycerol:poly(glycerophosphate) glycerophosphotransferase"  
"JS1\_K04\_01207" 8464 "s59E13H2" 0 "Glycerol-3-phosphate cytidyltransferase"  
"JS1\_K04\_01207" 8464 "s59E25H2" 0 "Glycerol-3-phosphate cytidyltransferase"  
"JS1\_K04\_01207" 8464 "s59E5H2" 0 "Glycerol-3-phosphate cytidyltransferase"  
"JS1\_K04\_01207" 8464 "s63E6H2" 0 "Glycerol-3-phosphate cytidyltransferase"  
"JS1\_K04\_01208" 8465 "s59E13H2" 0 "hypothetical protein"  
"JS1\_K04\_01208" 8465 "s59E25H2" 0 "hypothetical protein"  
"JS1\_K04\_01208" 8465 "s59E5H2" 0 "hypothetical protein"  
"JS1\_K04\_01208" 8465 "s63E6H2" 0 "hypothetical protein"  
"JS1\_K04\_01209" 8466 "s59E13H2" 0 "putative glycosyl transferase"  
"JS1\_K04\_01209" 8466 "s59E25H2" 0 "putative glycosyl transferase"  
"JS1\_K04\_01209" 8466 "s59E5H2" 0 "putative glycosyl transferase"  
"JS1\_K04\_01209" 8466 "s63E6H2" 0 "putative glycosyl transferase"  
"JS1\_K04\_01210" 8467 "s59E13H2" 0 "UDP-glucose 4-epimerase"  
"JS1\_K04\_01210" 8467 "s59E25H2" 0 "UDP-glucose 4-epimerase"  
"JS1\_K04\_01210" 8467 "s59E5H2" 0 "UDP-glucose 4-epimerase"  
"JS1\_K04\_01210" 8467 "s63E6H2" 0 "UDP-glucose 4-epimerase"  
"JS1\_K04\_01211" 8468 "s59E13H2" 6.2663e-05 "NAD dependent epimerase/dehydratase family protein"  
"JS1\_K04\_01211" 8468 "s59E25H2" 0 "NAD dependent epimerase/dehydratase family protein"  
"JS1\_K04\_01211" 8468 "s59E5H2" 0 "NAD dependent epimerase/dehydratase family protein"  
"JS1\_K04\_01211" 8468 "s63E6H2" 0 "NAD dependent epimerase/dehydratase family protein"  
"JS1\_K04\_01213" 8470 "s59E13H2" 9.104179e-05 "Glycosyl transferases group 1"  
"JS1\_K04\_01213" 8470 "s59E25H2" 0 "Glycosyl transferases group 1"

"JS1\_K04\_01213" 8470 "s59E5H2" 0 "Glycosyl transferases group 1"  
"JS1\_K04\_01213" 8470 "s63E6H2" 0 "Glycosyl transferases group 1"  
"JS1\_K04\_01214" 8471 "s59E13H2" 0 "hypothetical protein"  
"JS1\_K04\_01214" 8471 "s59E25H2" 0 "hypothetical protein"  
"JS1\_K04\_01214" 8471 "s59E5H2" 0 "hypothetical protein"  
"JS1\_K04\_01214" 8471 "s63E6H2" 0 "hypothetical protein"  
"JS1\_K04\_01215" 8472 "s59E13H2" 0.004496545 "hypothetical protein"  
"JS1\_K04\_01215" 8472 "s59E25H2" 0 "hypothetical protein"  
"JS1\_K04\_01215" 8472 "s59E5H2" 0.05354784 "hypothetical protein"  
"JS1\_K04\_01215" 8472 "s63E6H2" 0.01000934 "hypothetical protein"  
"JS1\_K04\_01217" 8474 "s59E13H2" 0 "UDP-glucose 6-dehydrogenase"  
"JS1\_K04\_01217" 8474 "s59E25H2" 0 "UDP-glucose 6-dehydrogenase"  
"JS1\_K04\_01217" 8474 "s59E5H2" 0 "UDP-glucose 6-dehydrogenase"  
"JS1\_K04\_01217" 8474 "s63E6H2" 0 "UDP-glucose 6-dehydrogenase"  
"JS1\_K04\_01218" 8475 "s59E13H2" 0 "UDP-N-acetylglactosamine-undecaprenyl-phosphate N-acetylglactosaminephosphotransferase"  
"JS1\_K04\_01218" 8475 "s59E25H2" 0 "UDP-N-acetylglactosamine-undecaprenyl-phosphate N-acetylglactosaminephosphotransferase"  
"JS1\_K04\_01218" 8475 "s59E5H2" 0 "UDP-N-acetylglactosamine-undecaprenyl-phosphate N-acetylglactosaminephosphotransferase"  
"JS1\_K04\_01218" 8475 "s63E6H2" 0.004619388 "UDP-N-acetylglactosamine-undecaprenyl-phosphate N-acetylglactosaminephosphotransferase"  
"JS1\_K04\_01219" 8476 "s59E13H2" 0 "Alginate biosynthesis protein AlgA"  
"JS1\_K04\_01219" 8476 "s59E25H2" 0 "Alginate biosynthesis protein AlgA"  
"JS1\_K04\_01219" 8476 "s59E5H2" 0 "Alginate biosynthesis protein AlgA"  
"JS1\_K04\_01219" 8476 "s63E6H2" 0 "Alginate biosynthesis protein AlgA"  
"JS1\_K04\_01220" 8477 "s59E13H2" 0.1951563 "mRNA interferase MazF9"  
"JS1\_K04\_01220" 8477 "s59E25H2" 0 "mRNA interferase MazF9"  
"JS1\_K04\_01220" 8477 "s59E5H2" 0.0007919525 "mRNA interferase MazF9"  
"JS1\_K04\_01220" 8477 "s63E6H2" 0.000157223 "mRNA interferase MazF9"  
"JS1\_K04\_01221" 8478 "s59E13H2" 0.2503098 "hypothetical protein"  
"JS1\_K04\_01221" 8478 "s59E25H2" 0 "hypothetical protein"  
"JS1\_K04\_01221" 8478 "s59E5H2" 0.04621766 "hypothetical protein"  
"JS1\_K04\_01221" 8478 "s63E6H2" 0.0345293 "hypothetical protein"  
"JS1\_K04\_01222" 8479 "s59E13H2" 0.09784872 "hypothetical protein"  
"JS1\_K04\_01222" 8479 "s59E25H2" 0 "hypothetical protein"  
"JS1\_K04\_01222" 8479 "s59E5H2" 0 "hypothetical protein"  
"JS1\_K04\_01222" 8479 "s63E6H2" 0.01524228 "hypothetical protein"  
"JS1\_K04\_01223" 8480 "s59E13H2" 0.0107467 "YcfA-like protein"  
"JS1\_K04\_01223" 8480 "s59E25H2" 0 "YcfA-like protein"  
"JS1\_K04\_01223" 8480 "s59E5H2" 0 "YcfA-like protein"  
"JS1\_K04\_01223" 8480 "s63E6H2" 0.005011306 "YcfA-like protein"  
"JS1\_K04\_01224" 8481 "s59E13H2" 0.001453587 "Putative O-antigen transporter"  
"JS1\_K04\_01224" 8481 "s59E25H2" 0 "Putative O-antigen transporter"  
"JS1\_K04\_01224" 8481 "s59E5H2" 0 "Putative O-antigen transporter"  
"JS1\_K04\_01224" 8481 "s63E6H2" 0 "Putative O-antigen transporter"  
"JS1\_K04\_01225" 8482 "s59E13H2" 0 "O-Antigen ligase"  
"JS1\_K04\_01225" 8482 "s59E25H2" 0 "O-Antigen ligase"  
"JS1\_K04\_01225" 8482 "s59E5H2" 0 "O-Antigen ligase"  
"JS1\_K04\_01225" 8482 "s63E6H2" 0 "O-Antigen ligase"  
"JS1\_K04\_01226" 8483 "s59E13H2" 0 "UDP-N-acetyl-D-glucosamine 6-dehydrogenase"

"JS1\_K04\_01226" 8483 "s59E25H2" 0 "UDP-N-acetyl-D-glucosamine 6-dehydrogenase"  
"JS1\_K04\_01226" 8483 "s59E5H2" 0 "UDP-N-acetyl-D-glucosamine 6-dehydrogenase"  
"JS1\_K04\_01226" 8483 "s63E6H2" 0 "UDP-N-acetyl-D-glucosamine 6-dehydrogenase"  
"JS1\_K04\_01227" 8484 "s59E13H2" 0.3031101 "Soluble hydrogenase 42 kDa subunit"  
"JS1\_K04\_01227" 8484 "s59E25H2" 0 "Soluble hydrogenase 42 kDa subunit"  
"JS1\_K04\_01227" 8484 "s59E5H2" 0.2092569 "Soluble hydrogenase 42 kDa subunit"  
"JS1\_K04\_01227" 8484 "s63E6H2" 0.07493558 "Soluble hydrogenase 42 kDa subunit"  
"JS1\_K04\_01228" 8485 "s59E13H2" 0.02881336 "VanZ like family protein"  
"JS1\_K04\_01228" 8485 "s59E25H2" 0 "VanZ like family protein"  
"JS1\_K04\_01228" 8485 "s59E5H2" 0.1333982 "VanZ like family protein"  
"JS1\_K04\_01228" 8485 "s63E6H2" 0.0564949 "VanZ like family protein"  
"JS1\_K04\_01229" 8486 "s59E13H2" 0.4847528 "Tetrahedral aminopeptidase"  
"JS1\_K04\_01229" 8486 "s59E25H2" 0 "Tetrahedral aminopeptidase"  
"JS1\_K04\_01229" 8486 "s59E5H2" 0.3767364 "Tetrahedral aminopeptidase"  
"JS1\_K04\_01229" 8486 "s63E6H2" 0.1343325 "Tetrahedral aminopeptidase"  
"JS1\_K04\_01230" 8487 "s59E13H2" 0.1603187 "putative A/G-specific adenine glycosylase YfhQ"  
"JS1\_K04\_01230" 8487 "s59E25H2" 0 "putative A/G-specific adenine glycosylase YfhQ"  
"JS1\_K04\_01230" 8487 "s59E5H2" 0.2276367 "putative A/G-specific adenine glycosylase YfhQ"  
"JS1\_K04\_01230" 8487 "s63E6H2" 0.120487 "putative A/G-specific adenine glycosylase YfhQ"  
"JS1\_K04\_01231" 8488 "s59E13H2" 0.06349728 "Trehalose synthase"  
"JS1\_K04\_01231" 8488 "s59E25H2" 0 "Trehalose synthase"  
"JS1\_K04\_01231" 8488 "s59E5H2" 0.2878799 "Trehalose synthase"  
"JS1\_K04\_01231" 8488 "s63E6H2" 0.1583968 "Trehalose synthase"  
"JS1\_K04\_01232" 8489 "s59E13H2" 0.07814429 "4-alpha-glucanotransferase"  
"JS1\_K04\_01232" 8489 "s59E25H2" 0 "4-alpha-glucanotransferase"  
"JS1\_K04\_01232" 8489 "s59E5H2" 0.3323405 "4-alpha-glucanotransferase"  
"JS1\_K04\_01232" 8489 "s63E6H2" 0.1663242 "4-alpha-glucanotransferase"  
"JS1\_K04\_01233" 8490 "s59E13H2" 0.02352656 "Sulfate transport system permease protein CysT"  
"JS1\_K04\_01233" 8490 "s59E25H2" 0 "Sulfate transport system permease protein CysT"  
"JS1\_K04\_01233" 8490 "s59E5H2" 0.8152419 "Sulfate transport system permease protein CysT"  
"JS1\_K04\_01233" 8490 "s63E6H2" 0.7210143 "Sulfate transport system permease protein CysT"  
"JS1\_K04\_01234" 8491 "s59E13H2" 0.01159265 "Sulfate/thiosulfate import ATP-binding protein CysA"  
"JS1\_K04\_01234" 8491 "s59E25H2" 0 "Sulfate/thiosulfate import ATP-binding protein CysA"  
"JS1\_K04\_01234" 8491 "s59E5H2" 0.4154157 "Sulfate/thiosulfate import ATP-binding protein CysA"  
"JS1\_K04\_01234" 8491 "s63E6H2" 0.4916812 "Sulfate/thiosulfate import ATP-binding protein CysA"  
"JS1\_K04\_01237" 8494 "s59E13H2" 0.1399156 "hypothetical protein"  
"JS1\_K04\_01237" 8494 "s59E25H2" 0 "hypothetical protein"  
"JS1\_K04\_01237" 8494 "s59E5H2" 3.367789 "hypothetical protein"  
"JS1\_K04\_01237" 8494 "s63E6H2" 14.02452 "hypothetical protein"  
"JS1\_K04\_01238" 8495 "s59E13H2" 3.911828 "Group II intron, maturase-specific domain"  
"JS1\_K04\_01238" 8495 "s59E25H2" 0 "Group II intron, maturase-specific domain"  
"JS1\_K04\_01238" 8495 "s59E5H2" 5.112441 "Group II intron, maturase-specific domain"  
"JS1\_K04\_01238" 8495 "s63E6H2" 16.63572 "Group II intron, maturase-specific domain"  
"JS1\_K04\_01240" 8497 "s59E13H2" 0.08569177 "transposase/IS protein"  
"JS1\_K04\_01240" 8497 "s59E25H2" 0 "transposase/IS protein"  
"JS1\_K04\_01240" 8497 "s59E5H2" 0.1147292 "transposase/IS protein"  
"JS1\_K04\_01240" 8497 "s63E6H2" 2.36034 "transposase/IS protein"

"JS1\_K04\_01243" 8500 "s59E13H2" 0.02068843 "Transposase DDE domain protein"  
"JS1\_K04\_01243" 8500 "s59E25H2" 0 "Transposase DDE domain protein"  
"JS1\_K04\_01243" 8500 "s59E5H2" 0.647512 "Transposase DDE domain protein"  
"JS1\_K04\_01243" 8500 "s63E6H2" 1.922586 "Transposase DDE domain protein"  
"JS1\_K04\_01244" 8501 "s59E13H2" 0 "Ribose transport system permease protein RbsC"  
"JS1\_K04\_01244" 8501 "s59E25H2" 0 "Ribose transport system permease protein RbsC"  
"JS1\_K04\_01244" 8501 "s59E5H2" 0 "Ribose transport system permease protein RbsC"  
"JS1\_K04\_01244" 8501 "s63E6H2" 0.01556702 "Ribose transport system permease protein RbsC"  
"JS1\_K04\_01246" 8503 "s59E13H2" 0 "D-ribose-binding periplasmic protein precursor"  
"JS1\_K04\_01246" 8503 "s59E25H2" 0 "D-ribose-binding periplasmic protein precursor"  
"JS1\_K04\_01246" 8503 "s59E5H2" 0 "D-ribose-binding periplasmic protein precursor"  
"JS1\_K04\_01246" 8503 "s63E6H2" 0.01476159 "D-ribose-binding periplasmic protein precursor"  
"JS1\_K04\_01247" 8504 "s59E13H2" 0 "hypothetical protein"  
"JS1\_K04\_01247" 8504 "s59E25H2" 0 "hypothetical protein"  
"JS1\_K04\_01247" 8504 "s59E5H2" 0 "hypothetical protein"  
"JS1\_K04\_01247" 8504 "s63E6H2" 0.009209315 "hypothetical protein"  
"JS1\_K04\_01248" 8505 "s59E13H2" 0.002971554 "putative cysteine desulfurase"  
"JS1\_K04\_01248" 8505 "s59E25H2" 0 "putative cysteine desulfurase"  
"JS1\_K04\_01248" 8505 "s59E5H2" 0 "putative cysteine desulfurase"  
"JS1\_K04\_01248" 8505 "s63E6H2" 0.01615384 "putative cysteine desulfurase"  
"JS1\_K04\_01249" 8506 "s59E13H2" 0 "hypothetical protein"  
"JS1\_K04\_01249" 8506 "s59E25H2" 0 "hypothetical protein"  
"JS1\_K04\_01249" 8506 "s59E5H2" 0 "hypothetical protein"  
"JS1\_K04\_01249" 8506 "s63E6H2" 0.02260812 "hypothetical protein"  
"JS1\_K04\_01250" 8507 "s59E13H2" 0 "hypothetical protein"  
"JS1\_K04\_01250" 8507 "s59E25H2" 0 "hypothetical protein"  
"JS1\_K04\_01250" 8507 "s59E5H2" 0 "hypothetical protein"  
"JS1\_K04\_01250" 8507 "s63E6H2" 0.02380134 "hypothetical protein"  
"JS1\_K04\_01251" 8508 "s59E13H2" 0 "hypothetical protein"  
"JS1\_K04\_01251" 8508 "s59E25H2" 0 "hypothetical protein"  
"JS1\_K04\_01251" 8508 "s59E5H2" 0 "hypothetical protein"  
"JS1\_K04\_01251" 8508 "s63E6H2" 0.03133682 "hypothetical protein"  
"JS1\_K04\_01252" 8509 "s59E13H2" 0 "hypothetical protein"  
"JS1\_K04\_01252" 8509 "s59E25H2" 0 "hypothetical protein"  
"JS1\_K04\_01252" 8509 "s59E5H2" 0 "hypothetical protein"  
"JS1\_K04\_01252" 8509 "s63E6H2" 0.04546532 "hypothetical protein"  
"JS1\_K04\_01255" 8512 "s59E13H2" 0.1366242 "hypothetical protein"  
"JS1\_K04\_01255" 8512 "s59E25H2" 0 "hypothetical protein"  
"JS1\_K04\_01255" 8512 "s59E5H2" 0 "hypothetical protein"  
"JS1\_K04\_01255" 8512 "s63E6H2" 0.06279323 "hypothetical protein"  
"JS1\_K04\_01257" 8514 "s59E13H2" 0.01999501 "hypothetical protein"  
"JS1\_K04\_01257" 8514 "s59E25H2" 0 "hypothetical protein"  
"JS1\_K04\_01257" 8514 "s59E5H2" 0.1427929 "hypothetical protein"  
"JS1\_K04\_01257" 8514 "s63E6H2" 0.1205969 "hypothetical protein"  
"JS1\_K04\_01258" 8515 "s59E13H2" 0.000631674 "hypothetical protein"  
"JS1\_K04\_01258" 8515 "s59E25H2" 0 "hypothetical protein"  
"JS1\_K04\_01258" 8515 "s59E5H2" 0 "hypothetical protein"



"JS1\_K04\_01258" 8515 "s63E6H2" 0.01083481 "hypothetical protein"  
"JS1\_K04\_01260" 8517 "s59E13H2" 0 "DNA repair and recombination protein RadA"  
"JS1\_K04\_01260" 8517 "s59E25H2" 0 "DNA repair and recombination protein RadA"  
"JS1\_K04\_01260" 8517 "s59E5H2" 0.5613293 "DNA repair and recombination protein RadA"  
"JS1\_K04\_01260" 8517 "s63E6H2" 0.1544695 "DNA repair and recombination protein RadA"  
"JS1\_K04\_01261" 8518 "s59E13H2" 0 "2'-5'-RNA ligase"  
"JS1\_K04\_01261" 8518 "s59E25H2" 0 "2'-5'-RNA ligase"  
"JS1\_K04\_01261" 8518 "s59E5H2" 0.3294256 "2'-5'-RNA ligase"  
"JS1\_K04\_01261" 8518 "s63E6H2" 0.09786758 "2'-5'-RNA ligase"  
"JS1\_K04\_01262" 8519 "s59E13H2" 0 "Nicotinamide-nucleotide amidohydrolase PncC"  
"JS1\_K04\_01262" 8519 "s59E25H2" 0 "Nicotinamide-nucleotide amidohydrolase PncC"  
"JS1\_K04\_01262" 8519 "s59E5H2" 0.3518739 "Nicotinamide-nucleotide amidohydrolase PncC"  
"JS1\_K04\_01262" 8519 "s63E6H2" 0.1304816 "Nicotinamide-nucleotide amidohydrolase PncC"  
"JS1\_K04\_01263" 8520 "s59E13H2" 0.001472131 "DNA translocase SpoIIIE"  
"JS1\_K04\_01263" 8520 "s59E25H2" 0 "DNA translocase SpoIIIE"  
"JS1\_K04\_01263" 8520 "s59E5H2" 0.3266442 "DNA translocase SpoIIIE"  
"JS1\_K04\_01263" 8520 "s63E6H2" 0.1119503 "DNA translocase SpoIIIE"  
"JS1\_K04\_01264" 8521 "s59E13H2" 0 "Ribonuclease J 1"  
"JS1\_K04\_01264" 8521 "s59E25H2" 0 "Ribonuclease J 1"  
"JS1\_K04\_01264" 8521 "s59E5H2" 0.1366763 "Ribonuclease J 1"  
"JS1\_K04\_01264" 8521 "s63E6H2" 0.141476 "Ribonuclease J 1"  
"JS1\_K04\_01265" 8522 "s59E13H2" 0.005375848 "4-hydroxy-tetrahydrodipicolinate synthase"  
"JS1\_K04\_01265" 8522 "s59E25H2" 0 "4-hydroxy-tetrahydrodipicolinate synthase"  
"JS1\_K04\_01265" 8522 "s59E5H2" 0.0764974 "4-hydroxy-tetrahydrodipicolinate synthase"  
"JS1\_K04\_01265" 8522 "s63E6H2" 0.1171414 "4-hydroxy-tetrahydrodipicolinate synthase"  
"JS1\_K04\_01266" 8523 "s59E13H2" 0.0818023 "4-hydroxy-tetrahydrodipicolinate reductase"  
"JS1\_K04\_01266" 8523 "s59E25H2" 0 "4-hydroxy-tetrahydrodipicolinate reductase"  
"JS1\_K04\_01266" 8523 "s59E5H2" 0.01082814 "4-hydroxy-tetrahydrodipicolinate reductase"  
"JS1\_K04\_01266" 8523 "s63E6H2" 0.1001864 "4-hydroxy-tetrahydrodipicolinate reductase"  
"JS1\_K04\_01267" 8524 "s59E13H2" 0.005119531 "Peptidase M16 inactive domain protein"  
"JS1\_K04\_01267" 8524 "s59E25H2" 0 "Peptidase M16 inactive domain protein"  
"JS1\_K04\_01267" 8524 "s59E5H2" 0.02249026 "Peptidase M16 inactive domain protein"  
"JS1\_K04\_01267" 8524 "s63E6H2" 0.09261839 "Peptidase M16 inactive domain protein"  
"JS1\_K04\_01268" 8525 "s59E13H2" 0 "Polyribonucleotide nucleotidyltransferase"  
"JS1\_K04\_01268" 8525 "s59E25H2" 0 "Polyribonucleotide nucleotidyltransferase"  
"JS1\_K04\_01268" 8525 "s59E5H2" 0.0225163 "Polyribonucleotide nucleotidyltransferase"  
"JS1\_K04\_01268" 8525 "s63E6H2" 0.06118692 "Polyribonucleotide nucleotidyltransferase"  
"JS1\_K04\_01269" 8526 "s59E13H2" 0.799283 "hypothetical protein"  
"JS1\_K04\_01269" 8526 "s59E25H2" 0 "hypothetical protein"  
"JS1\_K04\_01269" 8526 "s59E5H2" 2.438728 "hypothetical protein"  
"JS1\_K04\_01269" 8526 "s63E6H2" 2.096288 "hypothetical protein"  
"JS1\_K04\_01270" 8527 "s59E13H2" 0.7140713 "hypothetical protein"  
"JS1\_K04\_01270" 8527 "s59E25H2" 0 "hypothetical protein"  
"JS1\_K04\_01270" 8527 "s59E5H2" 0.7538878 "hypothetical protein"  
"JS1\_K04\_01270" 8527 "s63E6H2" 1.131935 "hypothetical protein"  
"JS1\_K04\_01272" 8529 "s59E13H2" 0 "hypothetical protein"  
"JS1\_K04\_01272" 8529 "s59E25H2" 0 "hypothetical protein"

"JS1\_K04\_01272" 8529 "s59E5H2" 0 "hypothetical protein"  
"JS1\_K04\_01272" 8529 "s63E6H2" 0.004165439 "hypothetical protein"  
"JS1\_K04\_01273" 8530 "s59E13H2" 1.765695 "Adenosine monophosphate-protein transferase SoFic"  
"JS1\_K04\_01273" 8530 "s59E25H2" 0 "Adenosine monophosphate-protein transferase SoFic"  
"JS1\_K04\_01273" 8530 "s59E5H2" 0.0122447 "Adenosine monophosphate-protein transferase SoFic"  
"JS1\_K04\_01273" 8530 "s63E6H2" 0.006588825 "Adenosine monophosphate-protein transferase SoFic"  
"JS1\_K04\_01274" 8531 "s59E13H2" 0.016773 "hypothetical protein"  
"JS1\_K04\_01274" 8531 "s59E25H2" 0 "hypothetical protein"  
"JS1\_K04\_01274" 8531 "s59E5H2" 0 "hypothetical protein"  
"JS1\_K04\_01274" 8531 "s63E6H2" 0 "hypothetical protein"  
"JS1\_K04\_01275" 8532 "s59E13H2" 0.003000452 "hypothetical protein"  
"JS1\_K04\_01275" 8532 "s59E25H2" 0 "hypothetical protein"  
"JS1\_K04\_01275" 8532 "s59E5H2" 0 "hypothetical protein"  
"JS1\_K04\_01275" 8532 "s63E6H2" 0 "hypothetical protein"  
"JS1\_K04\_01277" 8534 "s59E13H2" 0 "hypothetical protein"  
"JS1\_K04\_01277" 8534 "s59E25H2" 0 "hypothetical protein"  
"JS1\_K04\_01277" 8534 "s59E5H2" 0.01426632 "hypothetical protein"  
"JS1\_K04\_01277" 8534 "s63E6H2" 0.06700728 "hypothetical protein"  
"JS1\_K04\_01278" 8535 "s59E13H2" 0 "Cation efflux family protein"  
"JS1\_K04\_01278" 8535 "s59E25H2" 0 "Cation efflux family protein"  
"JS1\_K04\_01278" 8535 "s59E5H2" 0 "Cation efflux family protein"  
"JS1\_K04\_01278" 8535 "s63E6H2" 0 "Cation efflux family protein"  
"JS1\_K04\_01279" 8536 "s59E13H2" 0.02086678 "hypothetical protein"  
"JS1\_K04\_01279" 8536 "s59E25H2" 0 "hypothetical protein"  
"JS1\_K04\_01279" 8536 "s59E5H2" 0 "hypothetical protein"  
"JS1\_K04\_01279" 8536 "s63E6H2" 0.6174745 "hypothetical protein"  
"JS1\_K04\_01280" 8537 "s59E13H2" 0.005251612 "putative permease"  
"JS1\_K04\_01280" 8537 "s59E25H2" 0 "putative permease"  
"JS1\_K04\_01280" 8537 "s59E5H2" 0.1907646 "putative permease"  
"JS1\_K04\_01280" 8537 "s63E6H2" 1.044734 "putative permease"  
"JS1\_K04\_01282" 8539 "s59E13H2" 0.007156854 "hypothetical protein"  
"JS1\_K04\_01282" 8539 "s59E25H2" 0 "hypothetical protein"  
"JS1\_K04\_01282" 8539 "s59E5H2" 0 "hypothetical protein"  
"JS1\_K04\_01282" 8539 "s63E6H2" 0.03815036 "hypothetical protein"  
"JS1\_K04\_01283" 8540 "s59E13H2" 0.01318128 "hypothetical protein"  
"JS1\_K04\_01283" 8540 "s59E25H2" 0 "hypothetical protein"  
"JS1\_K04\_01283" 8540 "s59E5H2" 0 "hypothetical protein"  
"JS1\_K04\_01283" 8540 "s63E6H2" 0.01410057 "hypothetical protein"  
"JS1\_K04\_01284" 8541 "s59E13H2" 0.005978889 "Glucitol operon repressor"  
"JS1\_K04\_01284" 8541 "s59E25H2" 0 "Glucitol operon repressor"  
"JS1\_K04\_01284" 8541 "s59E5H2" 0 "Glucitol operon repressor"  
"JS1\_K04\_01284" 8541 "s63E6H2" 0.009765158 "Glucitol operon repressor"  
"JS1\_K04\_01285" 8542 "s59E13H2" 0.006289423 "Glutamine--fructose-6-phosphate aminotransferase [isomerizing]"  
"JS1\_K04\_01285" 8542 "s59E25H2" 0 "Glutamine--fructose-6-phosphate aminotransferase [isomerizing]"  
"JS1\_K04\_01285" 8542 "s59E5H2" 0 "Glutamine--fructose-6-phosphate aminotransferase [isomerizing]"  
"JS1\_K04\_01285" 8542 "s63E6H2" 0.01555499 "Glutamine--fructose-6-phosphate aminotransferase [isomerizing]"  
"JS1\_K04\_01286" 8543 "s59E13H2" 0 "2-dehydro-3-deoxygluconokinase"

"JS1\_K04\_01286" 8543 "s59E25H2" 0 "2-dehydro-3-deoxygluconokinase"  
"JS1\_K04\_01286" 8543 "s59E5H2" 0 "2-dehydro-3-deoxygluconokinase"  
"JS1\_K04\_01286" 8543 "s63E6H2" 0 "2-dehydro-3-deoxygluconokinase"  
"JS1\_K04\_01287" 8544 "s59E13H2" 0 "ribokinase"  
"JS1\_K04\_01287" 8544 "s59E25H2" 0 "ribokinase"  
"JS1\_K04\_01287" 8544 "s59E5H2" 0 "ribokinase"  
"JS1\_K04\_01287" 8544 "s63E6H2" 0 "ribokinase"  
"JS1\_K04\_01288" 8545 "s59E13H2" 0.005489463 "hypothetical protein"  
"JS1\_K04\_01288" 8545 "s59E25H2" 0 "hypothetical protein"  
"JS1\_K04\_01288" 8545 "s59E5H2" 0 "hypothetical protein"  
"JS1\_K04\_01288" 8545 "s63E6H2" 0.01403601 "hypothetical protein"  
"JS1\_K04\_01289" 8546 "s59E13H2" 0.003455923 "hypothetical protein"  
"JS1\_K04\_01289" 8546 "s59E25H2" 0 "hypothetical protein"  
"JS1\_K04\_01289" 8546 "s59E5H2" 0.001274507 "hypothetical protein"  
"JS1\_K04\_01289" 8546 "s63E6H2" 0.02269219 "hypothetical protein"  
"JS1\_K04\_01290" 8547 "s59E13H2" 0.1086 "Transposase, Mutator family"  
"JS1\_K04\_01290" 8547 "s59E25H2" 0 "Transposase, Mutator family"  
"JS1\_K04\_01290" 8547 "s59E5H2" 0.01621173 "Transposase, Mutator family"  
"JS1\_K04\_01290" 8547 "s63E6H2" 0.1482806 "Transposase, Mutator family"  
"JS1\_K04\_01291" 8548 "s59E13H2" 0.8617113 "Glyoxalase-like domain protein"  
"JS1\_K04\_01291" 8548 "s59E25H2" 0.3975904 "Glyoxalase-like domain protein"  
"JS1\_K04\_01291" 8548 "s59E5H2" 0 "Glyoxalase-like domain protein"  
"JS1\_K04\_01291" 8548 "s63E6H2" 0.4679588 "Glyoxalase-like domain protein"  
"JS1\_K04\_01292" 8549 "s59E13H2" 1.291757 "Galactose/methyl galactoside import ATP-binding protein MglA"  
"JS1\_K04\_01292" 8549 "s59E25H2" 0 "Galactose/methyl galactoside import ATP-binding protein MglA"  
"JS1\_K04\_01292" 8549 "s59E5H2" 0 "Galactose/methyl galactoside import ATP-binding protein MglA"  
"JS1\_K04\_01292" 8549 "s63E6H2" 0.2650798 "Galactose/methyl galactoside import ATP-binding protein MglA"  
"JS1\_K04\_01293" 8550 "s59E13H2" 1.775945 "Ribose transport system permease protein RbsC"  
"JS1\_K04\_01293" 8550 "s59E25H2" 0 "Ribose transport system permease protein RbsC"  
"JS1\_K04\_01293" 8550 "s59E5H2" 0 "Ribose transport system permease protein RbsC"  
"JS1\_K04\_01293" 8550 "s63E6H2" 0.04206377 "Ribose transport system permease protein RbsC"  
"JS1\_K04\_01294" 8551 "s59E13H2" 3.166662 "D-ribose-binding periplasmic protein precursor"  
"JS1\_K04\_01294" 8551 "s59E25H2" 0 "D-ribose-binding periplasmic protein precursor"  
"JS1\_K04\_01294" 8551 "s59E5H2" 0 "D-ribose-binding periplasmic protein precursor"  
"JS1\_K04\_01294" 8551 "s63E6H2" 0.7978931 "D-ribose-binding periplasmic protein precursor"  
"JS1\_K04\_01295" 8552 "s59E13H2" 0.07059927 "hypothetical protein"  
"JS1\_K04\_01295" 8552 "s59E25H2" 0 "hypothetical protein"  
"JS1\_K04\_01295" 8552 "s59E5H2" 0 "hypothetical protein"  
"JS1\_K04\_01295" 8552 "s63E6H2" 0.2672692 "hypothetical protein"  
"JS1\_K04\_01296" 8553 "s59E13H2" 0.006990936 "Glycerate dehydrogenase"  
"JS1\_K04\_01296" 8553 "s59E25H2" 0 "Glycerate dehydrogenase"  
"JS1\_K04\_01296" 8553 "s59E5H2" 0 "Glycerate dehydrogenase"  
"JS1\_K04\_01296" 8553 "s63E6H2" 0.434107 "Glycerate dehydrogenase"  
"JS1\_K04\_01297" 8554 "s59E13H2" 0.004276704 "2-dehydro-3-deoxygluconokinase"  
"JS1\_K04\_01297" 8554 "s59E25H2" 0 "2-dehydro-3-deoxygluconokinase"  
"JS1\_K04\_01297" 8554 "s59E5H2" 0 "2-dehydro-3-deoxygluconokinase"  
"JS1\_K04\_01297" 8554 "s63E6H2" 0.2043663 "2-dehydro-3-deoxygluconokinase"

"JS1\_K04\_01298" 8555 "s59E13H2" 0.006200722 "2-dehydro-3-deoxy-6-phosphogalactonate aldolase"  
"JS1\_K04\_01298" 8555 "s59E25H2" 0 "2-dehydro-3-deoxy-6-phosphogalactonate aldolase"  
"JS1\_K04\_01298" 8555 "s59E5H2" 0 "2-dehydro-3-deoxy-6-phosphogalactonate aldolase"  
"JS1\_K04\_01298" 8555 "s63E6H2" 0.1173916 "2-dehydro-3-deoxy-6-phosphogalactonate aldolase"  
"JS1\_K04\_01299" 8556 "s59E13H2" 0.2122003 "Kynurenine formamidase"  
"JS1\_K04\_01299" 8556 "s59E25H2" 0 "Kynurenine formamidase"  
"JS1\_K04\_01299" 8556 "s59E5H2" 0 "Kynurenine formamidase"  
"JS1\_K04\_01299" 8556 "s63E6H2" 0.4404044 "Kynurenine formamidase"  
"JS1\_K04\_01300" 8557 "s59E13H2" 0.001877394 "4-hydroxy-4-methyl-2-oxoglutarate aldolase"  
"JS1\_K04\_01300" 8557 "s59E25H2" 0 "4-hydroxy-4-methyl-2-oxoglutarate aldolase"  
"JS1\_K04\_01300" 8557 "s59E5H2" 0 "4-hydroxy-4-methyl-2-oxoglutarate aldolase"  
"JS1\_K04\_01300" 8557 "s63E6H2" 0.3160244 "4-hydroxy-4-methyl-2-oxoglutarate aldolase"  
"JS1\_K04\_01301" 8558 "s59E13H2" 10.90169 "Transposase IS116/IS110/IS902 family protein"  
"JS1\_K04\_01301" 8558 "s59E25H2" 0 "Transposase IS116/IS110/IS902 family protein"  
"JS1\_K04\_01301" 8558 "s59E5H2" 0.5098093 "Transposase IS116/IS110/IS902 family protein"  
"JS1\_K04\_01301" 8558 "s63E6H2" 2.729006 "Transposase IS116/IS110/IS902 family protein"  
"JS1\_K04\_01302" 8559 "s59E13H2" 0.7102605 "Glucose 1-dehydrogenase 2"  
"JS1\_K04\_01302" 8559 "s59E25H2" 0 "Glucose 1-dehydrogenase 2"  
"JS1\_K04\_01302" 8559 "s59E5H2" 0.2343696 "Glucose 1-dehydrogenase 2"  
"JS1\_K04\_01302" 8559 "s63E6H2" 0.1962635 "Glucose 1-dehydrogenase 2"  
"JS1\_K04\_01304" 8561 "s59E13H2" 2.311638 "membrane-bound lytic murein transglycosylase D"  
"JS1\_K04\_01304" 8561 "s59E25H2" 0 "membrane-bound lytic murein transglycosylase D"  
"JS1\_K04\_01304" 8561 "s59E5H2" 0.2622114 "membrane-bound lytic murein transglycosylase D"  
"JS1\_K04\_01304" 8561 "s63E6H2" 0.04043732 "membrane-bound lytic murein transglycosylase D"  
"JS1\_K04\_01305" 8562 "s59E13H2" 3.363529 "hypothetical protein"  
"JS1\_K04\_01305" 8562 "s59E25H2" 0 "hypothetical protein"  
"JS1\_K04\_01305" 8562 "s59E5H2" 0.3561623 "hypothetical protein"  
"JS1\_K04\_01305" 8562 "s63E6H2" 0.08269321 "hypothetical protein"  
"JS1\_K04\_01306" 8563 "s59E13H2" 3.812011 "Soluble lytic murein transglycosylase precursor"  
"JS1\_K04\_01306" 8563 "s59E25H2" 0 "Soluble lytic murein transglycosylase precursor"  
"JS1\_K04\_01306" 8563 "s59E5H2" 0.5335083 "Soluble lytic murein transglycosylase precursor"  
"JS1\_K04\_01306" 8563 "s63E6H2" 0.1707878 "Soluble lytic murein transglycosylase precursor"  
"JS1\_K04\_01307" 8564 "s59E13H2" 1.065327 "putative diguanylate cyclase YedQ"  
"JS1\_K04\_01307" 8564 "s59E25H2" 0 "putative diguanylate cyclase YedQ"  
"JS1\_K04\_01307" 8564 "s59E5H2" 0.174911 "putative diguanylate cyclase YedQ"  
"JS1\_K04\_01307" 8564 "s63E6H2" 0.03117435 "putative diguanylate cyclase YedQ"  
"JS1\_K04\_01308" 8565 "s59E13H2" 0.151535 "putative DNA-binding protein"  
"JS1\_K04\_01308" 8565 "s59E25H2" 0 "putative DNA-binding protein"  
"JS1\_K04\_01308" 8565 "s59E5H2" 0.008710782 "putative DNA-binding protein"  
"JS1\_K04\_01308" 8565 "s63E6H2" 0.1100624 "putative DNA-binding protein"  
"JS1\_K04\_01309" 8566 "s59E13H2" 0.2203248 "RNA polymerase factor sigma-70"  
"JS1\_K04\_01309" 8566 "s59E25H2" 0 "RNA polymerase factor sigma-70"  
"JS1\_K04\_01309" 8566 "s59E5H2" 0.03077227 "RNA polymerase factor sigma-70"  
"JS1\_K04\_01309" 8566 "s63E6H2" 1.869419 "RNA polymerase factor sigma-70"  
"JS1\_K04\_01311" 8568 "s59E13H2" 0.3014502 "Putative ski2-type helicase"  
"JS1\_K04\_01311" 8568 "s59E25H2" 0 "Putative ski2-type helicase"  
"JS1\_K04\_01311" 8568 "s59E5H2" 0.6376276 "Putative ski2-type helicase"

"JS1\_K04\_01311" 8568 "s63E6H2" 0.0110121 "Putative ski2-type helicase"  
"JS1\_K04\_01312" 8569 "s59E13H2" 0.4692652 "Transposase IS116/IS110/IS902 family protein"  
"JS1\_K04\_01312" 8569 "s59E25H2" 0 "Transposase IS116/IS110/IS902 family protein"  
"JS1\_K04\_01312" 8569 "s59E5H2" 1.007671 "Transposase IS116/IS110/IS902 family protein"  
"JS1\_K04\_01312" 8569 "s63E6H2" 0.816592 "Transposase IS116/IS110/IS902 family protein"  
"JS1\_K04\_01313" 8570 "s59E13H2" 0.002873833 "Glucokinase"  
"JS1\_K04\_01313" 8570 "s59E25H2" 0 "Glucokinase"  
"JS1\_K04\_01313" 8570 "s59E5H2" 0.007845678 "Glucokinase"  
"JS1\_K04\_01313" 8570 "s63E6H2" 0.2150017 "Glucokinase"  
"JS1\_K04\_01314" 8571 "s59E13H2" 0.05202173 "hypothetical protein"  
"JS1\_K04\_01314" 8571 "s59E25H2" 0 "hypothetical protein"  
"JS1\_K04\_01314" 8571 "s59E5H2" 0 "hypothetical protein"  
"JS1\_K04\_01314" 8571 "s63E6H2" 0.09377939 "hypothetical protein"  
"JS1\_K04\_01317" 8574 "s59E13H2" 0.1598032 "Glycosyl hydrolase family 109 protein 1 precursor"  
"JS1\_K04\_01317" 8574 "s59E25H2" 0 "Glycosyl hydrolase family 109 protein 1 precursor"  
"JS1\_K04\_01317" 8574 "s59E5H2" 0.002833402 "Glycosyl hydrolase family 109 protein 1 precursor"  
"JS1\_K04\_01317" 8574 "s63E6H2" 0.1419213 "Glycosyl hydrolase family 109 protein 1 precursor"  
"JS1\_K04\_01318" 8575 "s59E13H2" 0.2248326 "glucose-6-phosphate isomerase"  
"JS1\_K04\_01318" 8575 "s59E25H2" 0 "glucose-6-phosphate isomerase"  
"JS1\_K04\_01318" 8575 "s59E5H2" 0 "glucose-6-phosphate isomerase"  
"JS1\_K04\_01318" 8575 "s63E6H2" 0.06332948 "glucose-6-phosphate isomerase"  
"JS1\_K04\_01319" 8576 "s59E13H2" 0.1255505 "High-affinity branched-chain amino acid transport system permease protein LivH"  
"JS1\_K04\_01319" 8576 "s59E25H2" 0 "High-affinity branched-chain amino acid transport system permease protein LivH"  
"JS1\_K04\_01319" 8576 "s59E5H2" 0.004759234 "High-affinity branched-chain amino acid transport system permease protein LivH"  
"JS1\_K04\_01319" 8576 "s63E6H2" 0.04449613 "High-affinity branched-chain amino acid transport system permease protein LivH"  
"JS1\_K04\_01320" 8577 "s59E13H2" 0.08629422 "leucine/isoleucine/valine transporter permease subunit"  
"JS1\_K04\_01320" 8577 "s59E25H2" 0 "leucine/isoleucine/valine transporter permease subunit"  
"JS1\_K04\_01320" 8577 "s59E5H2" 0 "leucine/isoleucine/valine transporter permease subunit"  
"JS1\_K04\_01320" 8577 "s63E6H2" 0.02443482 "leucine/isoleucine/valine transporter permease subunit"  
"JS1\_K04\_01321" 8578 "s59E13H2" 0.08992263 "Lipopolysaccharide export system ATP-binding protein LptB"  
"JS1\_K04\_01321" 8578 "s59E25H2" 0 "Lipopolysaccharide export system ATP-binding protein LptB"  
"JS1\_K04\_01321" 8578 "s59E5H2" 0.005001267 "Lipopolysaccharide export system ATP-binding protein LptB"  
"JS1\_K04\_01321" 8578 "s63E6H2" 0.01831734 "Lipopolysaccharide export system ATP-binding protein LptB"  
"JS1\_K04\_01322" 8579 "s59E13H2" 0.06349657 "High-affinity branched-chain amino acid transport ATP-binding protein LivF"  
"JS1\_K04\_01322" 8579 "s59E25H2" 0 "High-affinity branched-chain amino acid transport ATP-binding protein LivF"  
"JS1\_K04\_01322" 8579 "s59E5H2" 0.01042183 "High-affinity branched-chain amino acid transport ATP-binding protein LivF"  
"JS1\_K04\_01322" 8579 "s63E6H2" 0.007049932 "High-affinity branched-chain amino acid transport ATP-binding protein LivF"  
"JS1\_K04\_01324" 8581 "s59E13H2" 0.7985778 "Phosphoenolpyruvate carboxykinase [GTP]"  
"JS1\_K04\_01324" 8581 "s59E25H2" 0 "Phosphoenolpyruvate carboxykinase [GTP]"  
"JS1\_K04\_01324" 8581 "s59E5H2" 0.186816 "Phosphoenolpyruvate carboxykinase [GTP]"  
"JS1\_K04\_01324" 8581 "s63E6H2" 0.0171662 "Phosphoenolpyruvate carboxykinase [GTP]"  
"JS1\_K04\_01325" 8582 "s59E13H2" 0.1243225 "hypothetical protein"  
"JS1\_K04\_01325" 8582 "s59E25H2" 0 "hypothetical protein"  
"JS1\_K04\_01325" 8582 "s59E5H2" 0.05846957 "hypothetical protein"  
"JS1\_K04\_01325" 8582 "s63E6H2" 0.005648732 "hypothetical protein"  
"JS1\_K04\_01326" 8583 "s59E13H2" 0.4346718 "Hydrogenase isoenzymes nickel incorporation protein HypB"  
"JS1\_K04\_01326" 8583 "s59E25H2" 0 "Hydrogenase isoenzymes nickel incorporation protein HypB"

"JS1\_K04\_01326" 8583 "s59E5H2" 0.1537167 "Hydrogenase isoenzymes nickel incorporation protein HypB"  
"JS1\_K04\_01326" 8583 "s63E6H2" 0.02002481 "Hydrogenase isoenzymes nickel incorporation protein HypB"  
"JS1\_K04\_01327" 8584 "s59E13H2" 0.006005265 "Sulfhydrogenase 2 subunit beta"  
"JS1\_K04\_01327" 8584 "s59E25H2" 0 "Sulfhydrogenase 2 subunit beta"  
"JS1\_K04\_01327" 8584 "s59E5H2" 0.06698336 "Sulfhydrogenase 2 subunit beta"  
"JS1\_K04\_01327" 8584 "s63E6H2" 0.01110413 "Sulfhydrogenase 2 subunit beta"  
"JS1\_K04\_01328" 8585 "s59E13H2" 0.004061482 "Sulfhydrogenase 2 subunit gamma"  
"JS1\_K04\_01328" 8585 "s59E25H2" 0 "Sulfhydrogenase 2 subunit gamma"  
"JS1\_K04\_01328" 8585 "s59E5H2" 0.5487048 "Sulfhydrogenase 2 subunit gamma"  
"JS1\_K04\_01328" 8585 "s63E6H2" 0.01023843 "Sulfhydrogenase 2 subunit gamma"  
"JS1\_K04\_01329" 8586 "s59E13H2" 0.0007757822 "Sulfhydrogenase 1 subunit delta"  
"JS1\_K04\_01329" 8586 "s59E25H2" 0 "Sulfhydrogenase 1 subunit delta"  
"JS1\_K04\_01329" 8586 "s59E5H2" 0.2966398 "Sulfhydrogenase 1 subunit delta"  
"JS1\_K04\_01329" 8586 "s63E6H2" 0.01680473 "Sulfhydrogenase 1 subunit delta"  
"JS1\_K04\_01330" 8587 "s59E13H2" 0.008718531 "Sulfhydrogenase 1 subunit alpha"  
"JS1\_K04\_01330" 8587 "s59E25H2" 0 "Sulfhydrogenase 1 subunit alpha"  
"JS1\_K04\_01330" 8587 "s59E5H2" 0.5619694 "Sulfhydrogenase 1 subunit alpha"  
"JS1\_K04\_01330" 8587 "s63E6H2" 0.01929311 "Sulfhydrogenase 1 subunit alpha"  
"JS1\_K04\_01331" 8588 "s59E13H2" 0.003560601 "Hydrogenase 2 maturation protease"  
"JS1\_K04\_01331" 8588 "s59E25H2" 0 "Hydrogenase 2 maturation protease"  
"JS1\_K04\_01331" 8588 "s59E5H2" 1.044756 "Hydrogenase 2 maturation protease"  
"JS1\_K04\_01331" 8588 "s63E6H2" 0.02691051 "Hydrogenase 2 maturation protease"  
"JS1\_K04\_01332" 8589 "s59E13H2" 0.005987415 "hypothetical protein"  
"JS1\_K04\_01332" 8589 "s59E25H2" 0 "hypothetical protein"  
"JS1\_K04\_01332" 8589 "s59E5H2" 1.136543 "hypothetical protein"  
"JS1\_K04\_01332" 8589 "s63E6H2" 0.03801226 "hypothetical protein"  
"JS1\_K04\_01333" 8590 "s59E13H2" 0.6500816 "Sulfhydrogenase 1 subunit alpha"  
"JS1\_K04\_01333" 8590 "s59E25H2" 0 "Sulfhydrogenase 1 subunit alpha"  
"JS1\_K04\_01333" 8590 "s59E5H2" 1.554408 "Sulfhydrogenase 1 subunit alpha"  
"JS1\_K04\_01333" 8590 "s63E6H2" 0.08927105 "Sulfhydrogenase 1 subunit alpha"  
"JS1\_K04\_01334" 8591 "s59E13H2" 0.3294759 "Sulfhydrogenase 1 subunit delta"  
"JS1\_K04\_01334" 8591 "s59E25H2" 0 "Sulfhydrogenase 1 subunit delta"  
"JS1\_K04\_01334" 8591 "s59E5H2" 0.9794377 "Sulfhydrogenase 1 subunit delta"  
"JS1\_K04\_01334" 8591 "s63E6H2" 0.1704417 "Sulfhydrogenase 1 subunit delta"  
"JS1\_K04\_01335" 8592 "s59E13H2" 0.6203761 "Sulfhydrogenase 2 subunit gamma"  
"JS1\_K04\_01335" 8592 "s59E25H2" 0 "Sulfhydrogenase 2 subunit gamma"  
"JS1\_K04\_01335" 8592 "s59E5H2" 0.8677968 "Sulfhydrogenase 2 subunit gamma"  
"JS1\_K04\_01335" 8592 "s63E6H2" 0.2228158 "Sulfhydrogenase 2 subunit gamma"  
"JS1\_K04\_01336" 8593 "s59E13H2" 0.664995 "Sulfhydrogenase 1 subunit beta"  
"JS1\_K04\_01336" 8593 "s59E25H2" 0 "Sulfhydrogenase 1 subunit beta"  
"JS1\_K04\_01336" 8593 "s59E5H2" 0.7015066 "Sulfhydrogenase 1 subunit beta"  
"JS1\_K04\_01336" 8593 "s63E6H2" 0.1705275 "Sulfhydrogenase 1 subunit beta"  
"JS1\_K04\_01337" 8594 "s59E13H2" 0.2004234 "Alkaline phosphatase synthesis sensor protein PhoR"  
"JS1\_K04\_01337" 8594 "s59E25H2" 0 "Alkaline phosphatase synthesis sensor protein PhoR"  
"JS1\_K04\_01337" 8594 "s59E5H2" 0.2205738 "Alkaline phosphatase synthesis sensor protein PhoR"  
"JS1\_K04\_01337" 8594 "s63E6H2" 0.1611536 "Alkaline phosphatase synthesis sensor protein PhoR"  
"JS1\_K04\_01338" 8595 "s59E13H2" 0.4636354 "Response regulator MprA"

"JS1\_K04\_01338" 8595 "s59E25H2" 0 "Response regulator MprA"  
"JS1\_K04\_01338" 8595 "s59E5H2" 0.1201648 "Response regulator MprA"  
"JS1\_K04\_01338" 8595 "s63E6H2" 0.1308671 "Response regulator MprA"  
"JS1\_K04\_01339" 8596 "s59E13H2" 0.3479538 "Sensor protein ZraS"  
"JS1\_K04\_01339" 8596 "s59E25H2" 0 "Sensor protein ZraS"  
"JS1\_K04\_01339" 8596 "s59E5H2" 0.04270696 "Sensor protein ZraS"  
"JS1\_K04\_01339" 8596 "s63E6H2" 0.09703079 "Sensor protein ZraS"  
"JS1\_K04\_01340" 8597 "s59E13H2" 0 "Acetoin:2,6-dichlorophenolindophenol oxidoreductase subunit alpha"  
"JS1\_K04\_01340" 8597 "s59E25H2" 0 "Acetoin:2,6-dichlorophenolindophenol oxidoreductase subunit alpha"  
"JS1\_K04\_01340" 8597 "s59E5H2" 0 "Acetoin:2,6-dichlorophenolindophenol oxidoreductase subunit alpha"  
"JS1\_K04\_01340" 8597 "s63E6H2" 0 "Acetoin:2,6-dichlorophenolindophenol oxidoreductase subunit alpha"  
"JS1\_K04\_01341" 8598 "s59E13H2" 0 "2-oxoisovalerate dehydrogenase subunit beta"  
"JS1\_K04\_01341" 8598 "s59E25H2" 0 "2-oxoisovalerate dehydrogenase subunit beta"  
"JS1\_K04\_01341" 8598 "s59E5H2" 0 "2-oxoisovalerate dehydrogenase subunit beta"  
"JS1\_K04\_01341" 8598 "s63E6H2" 0 "2-oxoisovalerate dehydrogenase subunit beta"  
"JS1\_K04\_01342" 8599 "s59E13H2" 0 "pyruvate dehydrogenase subunit beta"  
"JS1\_K04\_01342" 8599 "s59E25H2" 0 "pyruvate dehydrogenase subunit beta"  
"JS1\_K04\_01342" 8599 "s59E5H2" 0 "pyruvate dehydrogenase subunit beta"  
"JS1\_K04\_01342" 8599 "s63E6H2" 0 "pyruvate dehydrogenase subunit beta"  
"JS1\_K04\_01343" 8600 "s59E13H2" 0 "SMP-30/Gluconolactonase/LRE-like region"  
"JS1\_K04\_01343" 8600 "s59E25H2" 0 "SMP-30/Gluconolactonase/LRE-like region"  
"JS1\_K04\_01343" 8600 "s59E5H2" 0 "SMP-30/Gluconolactonase/LRE-like region"  
"JS1\_K04\_01343" 8600 "s63E6H2" 0 "SMP-30/Gluconolactonase/LRE-like region"  
"JS1\_K04\_01344" 8601 "s59E13H2" 0 "Glyceraldehyde-3-phosphate dehydrogenase"  
"JS1\_K04\_01344" 8601 "s59E25H2" 0 "Glyceraldehyde-3-phosphate dehydrogenase"  
"JS1\_K04\_01344" 8601 "s59E5H2" 0 "Glyceraldehyde-3-phosphate dehydrogenase"  
"JS1\_K04\_01344" 8601 "s63E6H2" 0 "Glyceraldehyde-3-phosphate dehydrogenase"  
"JS1\_K04\_01345" 8602 "s59E13H2" 0 "Phosphoglycerate kinase"  
"JS1\_K04\_01345" 8602 "s59E25H2" 0 "Phosphoglycerate kinase"  
"JS1\_K04\_01345" 8602 "s59E5H2" 0 "Phosphoglycerate kinase"  
"JS1\_K04\_01345" 8602 "s63E6H2" 0 "Phosphoglycerate kinase"  
"JS1\_K04\_01346" 8603 "s59E13H2" 0 "NAD-dependent malic enzyme"  
"JS1\_K04\_01346" 8603 "s59E25H2" 0 "NAD-dependent malic enzyme"  
"JS1\_K04\_01346" 8603 "s59E5H2" 0 "NAD-dependent malic enzyme"  
"JS1\_K04\_01346" 8603 "s63E6H2" 0 "NAD-dependent malic enzyme"  
"JS1\_K04\_01347" 8604 "s59E13H2" 0.01962306 "Corrinoid/iron-sulfur protein large subunit"  
"JS1\_K04\_01347" 8604 "s59E25H2" 0 "Corrinoid/iron-sulfur protein large subunit"  
"JS1\_K04\_01347" 8604 "s59E5H2" 0 "Corrinoid/iron-sulfur protein large subunit"  
"JS1\_K04\_01347" 8604 "s63E6H2" 0.01307562 "Corrinoid/iron-sulfur protein large subunit"  
"JS1\_K04\_01348" 8605 "s59E13H2" 0.03094138 "Carbon monoxide dehydrogenase/acetyl-CoA synthase subunit alpha"  
"JS1\_K04\_01348" 8605 "s59E25H2" 0 "Carbon monoxide dehydrogenase/acetyl-CoA synthase subunit alpha"  
"JS1\_K04\_01348" 8605 "s59E5H2" 0.01642729 "Carbon monoxide dehydrogenase/acetyl-CoA synthase subunit alpha"  
"JS1\_K04\_01348" 8605 "s63E6H2" 0.01060322 "Carbon monoxide dehydrogenase/acetyl-CoA synthase subunit alpha"  
"JS1\_K04\_01349" 8606 "s59E13H2" 0.07683205 "Carbon monoxide dehydrogenase 2"  
"JS1\_K04\_01349" 8606 "s59E25H2" 0 "Carbon monoxide dehydrogenase 2"  
"JS1\_K04\_01349" 8606 "s59E5H2" 0.006026481 "Carbon monoxide dehydrogenase 2"  
"JS1\_K04\_01349" 8606 "s63E6H2" 0.03535513 "Carbon monoxide dehydrogenase 2"

"JS1\_K04\_01350" 8607 "s59E13H2" 0.04856362 "Corrinoid/iron-sulfur protein small subunit"  
"JS1\_K04\_01350" 8607 "s59E25H2" 0 "Corrinoid/iron-sulfur protein small subunit"  
"JS1\_K04\_01350" 8607 "s59E5H2" 0 "Corrinoid/iron-sulfur protein small subunit"  
"JS1\_K04\_01350" 8607 "s63E6H2" 0.03966381 "Corrinoid/iron-sulfur protein small subunit"  
"JS1\_K04\_01351" 8608 "s59E13H2" 0.02955207 "Septum site-determining protein MinD"  
"JS1\_K04\_01351" 8608 "s59E25H2" 0 "Septum site-determining protein MinD"  
"JS1\_K04\_01351" 8608 "s59E5H2" 0 "Septum site-determining protein MinD"  
"JS1\_K04\_01351" 8608 "s63E6H2" 0.04166243 "Septum site-determining protein MinD"  
"JS1\_K04\_01352" 8609 "s59E13H2" 0.04991997 "CDP-6-deoxy-L-threo-D-glycero-4-hexulose-3-dehydrase reductase"  
"JS1\_K04\_01352" 8609 "s59E25H2" 0 "CDP-6-deoxy-L-threo-D-glycero-4-hexulose-3-dehydrase reductase"  
"JS1\_K04\_01352" 8609 "s59E5H2" 0.1062185 "CDP-6-deoxy-L-threo-D-glycero-4-hexulose-3-dehydrase reductase"  
"JS1\_K04\_01352" 8609 "s63E6H2" 0.03215707 "CDP-6-deoxy-L-threo-D-glycero-4-hexulose-3-dehydrase reductase"  
"JS1\_K04\_01353" 8610 "s59E13H2" 0.1856249 "hypothetical protein"  
"JS1\_K04\_01353" 8610 "s59E25H2" 0 "hypothetical protein"  
"JS1\_K04\_01353" 8610 "s59E5H2" 0.007517172 "hypothetical protein"  
"JS1\_K04\_01353" 8610 "s63E6H2" 0.006430235 "hypothetical protein"  
"JS1\_K04\_01354" 8611 "s59E13H2" 0.173314 "Elongation factor 4"  
"JS1\_K04\_01354" 8611 "s59E25H2" 0 "Elongation factor 4"  
"JS1\_K04\_01354" 8611 "s59E5H2" 0.2114235 "Elongation factor 4"  
"JS1\_K04\_01354" 8611 "s63E6H2" 0.05862891 "Elongation factor 4"  
"JS1\_K04\_01355" 8612 "s59E13H2" 0.1394696 "putative peptidoglycan biosynthesis protein MurJ"  
"JS1\_K04\_01355" 8612 "s59E25H2" 0 "putative peptidoglycan biosynthesis protein MurJ"  
"JS1\_K04\_01355" 8612 "s59E5H2" 0.2180607 "putative peptidoglycan biosynthesis protein MurJ"  
"JS1\_K04\_01355" 8612 "s63E6H2" 0.03810846 "putative peptidoglycan biosynthesis protein MurJ"  
"JS1\_K04\_01356" 8613 "s59E13H2" 0.1633019 "30S ribosomal protein S20"  
"JS1\_K04\_01356" 8613 "s59E25H2" 0 "30S ribosomal protein S20"  
"JS1\_K04\_01356" 8613 "s59E5H2" 0.3429682 "30S ribosomal protein S20"  
"JS1\_K04\_01356" 8613 "s63E6H2" 0.04266761 "30S ribosomal protein S20"  
"JS1\_K04\_01357" 8614 "s59E13H2" 0.1637799 "DNA polymerase III subunit delta"  
"JS1\_K04\_01357" 8614 "s59E25H2" 0 "DNA polymerase III subunit delta"  
"JS1\_K04\_01357" 8614 "s59E5H2" 0.2941047 "DNA polymerase III subunit delta"  
"JS1\_K04\_01357" 8614 "s63E6H2" 0.2080331 "DNA polymerase III subunit delta"  
"JS1\_K04\_01359" 8616 "s59E13H2" 0.01108014 "hypothetical protein"  
"JS1\_K04\_01359" 8616 "s59E25H2" 1.017544 "hypothetical protein"  
"JS1\_K04\_01359" 8616 "s59E5H2" 0.0267067 "hypothetical protein"  
"JS1\_K04\_01359" 8616 "s63E6H2" 0.04579731 "hypothetical protein"  
"JS1\_K04\_01360" 8617 "s59E13H2" 1.040063 "ComEC family competence protein"  
"JS1\_K04\_01360" 8617 "s59E25H2" 0.1428571 "ComEC family competence protein"  
"JS1\_K04\_01360" 8617 "s59E5H2" 0.07955235 "ComEC family competence protein"  
"JS1\_K04\_01360" 8617 "s63E6H2" 0.1544853 "ComEC family competence protein"  
"JS1\_K04\_01361" 8618 "s59E13H2" 1.670289 "ComE operon protein 1"  
"JS1\_K04\_01361" 8618 "s59E25H2" 0 "ComE operon protein 1"  
"JS1\_K04\_01361" 8618 "s59E5H2" 0.05896863 "ComE operon protein 1"  
"JS1\_K04\_01361" 8618 "s63E6H2" 0.2012817 "ComE operon protein 1"  
"JS1\_K04\_01363" 8620 "s59E13H2" 2.237117 "Putative cysteine protease YraA"  
"JS1\_K04\_01363" 8620 "s59E25H2" 0 "Putative cysteine protease YraA"  
"JS1\_K04\_01363" 8620 "s59E5H2" 0.1488083 "Putative cysteine protease YraA"



"JS1\_K04\_01363" 8620 "s63E6H2" 0.221703 "Putative cysteine protease YraA"  
"JS1\_K04\_01364" 8621 "s59E13H2" 2.803104 "Leucine--tRNA ligase"  
"JS1\_K04\_01364" 8621 "s59E25H2" 0 "Leucine--tRNA ligase"  
"JS1\_K04\_01364" 8621 "s59E5H2" 0.2292148 "Leucine--tRNA ligase"  
"JS1\_K04\_01364" 8621 "s63E6H2" 0.3272327 "Leucine--tRNA ligase"  
"JS1\_K04\_01365" 8622 "s59E13H2" 2.333575 "Ribosomal silencing factor RsfS"  
"JS1\_K04\_01365" 8622 "s59E25H2" 0 "Ribosomal silencing factor RsfS"  
"JS1\_K04\_01365" 8622 "s59E5H2" 0.1841455 "Ribosomal silencing factor RsfS"  
"JS1\_K04\_01365" 8622 "s63E6H2" 0.1405816 "Ribosomal silencing factor RsfS"  
"JS1\_K04\_01366" 8623 "s59E13H2" 1.906392 "Cell envelope-related transcriptional attenuator domain protein"  
"JS1\_K04\_01366" 8623 "s59E25H2" 0 "Cell envelope-related transcriptional attenuator domain protein"  
"JS1\_K04\_01366" 8623 "s59E5H2" 0.03863979 "Cell envelope-related transcriptional attenuator domain protein"  
"JS1\_K04\_01366" 8623 "s63E6H2" 0.1705521 "Cell envelope-related transcriptional attenuator domain protein"  
"JS1\_K04\_01367" 8624 "s59E13H2" 1.286069 "putative nicotinate-nucleotide adenyllyltransferase"  
"JS1\_K04\_01367" 8624 "s59E25H2" 0 "putative nicotinate-nucleotide adenyllyltransferase"  
"JS1\_K04\_01367" 8624 "s59E5H2" 0.04278096 "putative nicotinate-nucleotide adenyllyltransferase"  
"JS1\_K04\_01367" 8624 "s63E6H2" 0.1545053 "putative nicotinate-nucleotide adenyllyltransferase"  
"JS1\_K04\_01368" 8625 "s59E13H2" 1.585383 "Nicotinate-nucleotide adenyllyltransferase"  
"JS1\_K04\_01368" 8625 "s59E25H2" 0 "Nicotinate-nucleotide adenyllyltransferase"  
"JS1\_K04\_01368" 8625 "s59E5H2" 0.1177645 "Nicotinate-nucleotide adenyllyltransferase"  
"JS1\_K04\_01368" 8625 "s63E6H2" 0.1847683 "Nicotinate-nucleotide adenyllyltransferase"  
"JS1\_K04\_01369" 8626 "s59E13H2" 0.09109779 "Gamma-glutamyl phosphate reductase"  
"JS1\_K04\_01369" 8626 "s59E25H2" 0 "Gamma-glutamyl phosphate reductase"  
"JS1\_K04\_01369" 8626 "s59E5H2" 0.07092149 "Gamma-glutamyl phosphate reductase"  
"JS1\_K04\_01369" 8626 "s63E6H2" 0.2068409 "Gamma-glutamyl phosphate reductase"  
"JS1\_K04\_01370" 8627 "s59E13H2" 0 "Glutamate 5-kinase 1"  
"JS1\_K04\_01370" 8627 "s59E25H2" 0 "Glutamate 5-kinase 1"  
"JS1\_K04\_01370" 8627 "s59E5H2" 0.0523994 "Glutamate 5-kinase 1"  
"JS1\_K04\_01370" 8627 "s63E6H2" 0.1384602 "Glutamate 5-kinase 1"  
"JS1\_K04\_01371" 8628 "s59E13H2" 0.04155275 "GTPase Obg"  
"JS1\_K04\_01371" 8628 "s59E25H2" 0 "GTPase Obg"  
"JS1\_K04\_01371" 8628 "s59E5H2" 0.03828596 "GTPase Obg"  
"JS1\_K04\_01371" 8628 "s63E6H2" 0.08760591 "GTPase Obg"  
"JS1\_K04\_01372" 8629 "s59E13H2" 0.04242433 "Sorbitol dehydrogenase"  
"JS1\_K04\_01372" 8629 "s59E25H2" 0 "Sorbitol dehydrogenase"  
"JS1\_K04\_01372" 8629 "s59E5H2" 0.03677529 "Sorbitol dehydrogenase"  
"JS1\_K04\_01372" 8629 "s63E6H2" 0.1843991 "Sorbitol dehydrogenase"  
"JS1\_K04\_01373" 8630 "s59E13H2" 0.04281911 "Sorbitol dehydrogenase"  
"JS1\_K04\_01373" 8630 "s59E25H2" 0 "Sorbitol dehydrogenase"  
"JS1\_K04\_01373" 8630 "s59E5H2" 0.03225166 "Sorbitol dehydrogenase"  
"JS1\_K04\_01373" 8630 "s63E6H2" 0.1402688 "Sorbitol dehydrogenase"  
"JS1\_K04\_01374" 8631 "s59E13H2" 0 "putative transporter"  
"JS1\_K04\_01374" 8631 "s59E25H2" 0 "putative transporter"  
"JS1\_K04\_01374" 8631 "s59E5H2" 0 "putative transporter"  
"JS1\_K04\_01374" 8631 "s63E6H2" 0.03826538 "putative transporter"  
"JS1\_K04\_01375" 8632 "s59E13H2" 0.02476737 "50S ribosomal protein L27"  
"JS1\_K04\_01375" 8632 "s59E25H2" 0 "50S ribosomal protein L27"

"JS1\_K04\_01375" 8632 "s59E5H2" 0.0486352 "50S ribosomal protein L27"  
"JS1\_K04\_01375" 8632 "s63E6H2" 0.06117434 "50S ribosomal protein L27"  
"JS1\_K04\_01376" 8633 "s59E13H2" 0.01368499 "50S ribosomal protein L21"  
"JS1\_K04\_01376" 8633 "s59E25H2" 0 "50S ribosomal protein L21"  
"JS1\_K04\_01376" 8633 "s59E5H2" 0.2199348 "50S ribosomal protein L21"  
"JS1\_K04\_01376" 8633 "s63E6H2" 0.1051931 "50S ribosomal protein L21"  
"JS1\_K04\_01377" 8634 "s59E13H2" 0.03891642 "Ribonuclease G"  
"JS1\_K04\_01377" 8634 "s59E25H2" 0 "Ribonuclease G"  
"JS1\_K04\_01377" 8634 "s59E5H2" 0.1222369 "Ribonuclease G"  
"JS1\_K04\_01377" 8634 "s63E6H2" 0.07579501 "Ribonuclease G"  
"JS1\_K04\_01378" 8635 "s59E13H2" 0.0610088 "hypothetical protein"  
"JS1\_K04\_01378" 8635 "s59E25H2" 0 "hypothetical protein"  
"JS1\_K04\_01378" 8635 "s59E5H2" 0.1331057 "hypothetical protein"  
"JS1\_K04\_01378" 8635 "s63E6H2" 0.02434292 "hypothetical protein"  
"JS1\_K04\_01379" 8636 "s59E13H2" 0.05196282 "Radical SAM superfamily protein"  
"JS1\_K04\_01379" 8636 "s59E25H2" 0 "Radical SAM superfamily protein"  
"JS1\_K04\_01379" 8636 "s59E5H2" 0.1458517 "Radical SAM superfamily protein"  
"JS1\_K04\_01379" 8636 "s63E6H2" 0.04270987 "Radical SAM superfamily protein"  
"JS1\_K04\_01380" 8637 "s59E13H2" 0.07157007 "Rod shape-determining protein RodA"  
"JS1\_K04\_01380" 8637 "s59E25H2" 0 "Rod shape-determining protein RodA"  
"JS1\_K04\_01380" 8637 "s59E5H2" 0.1707364 "Rod shape-determining protein RodA"  
"JS1\_K04\_01380" 8637 "s63E6H2" 0.05259095 "Rod shape-determining protein RodA"  
"JS1\_K04\_01381" 8638 "s59E13H2" 0.0208811 "Phosphoribosylformylglycinamide synthase"  
"JS1\_K04\_01381" 8638 "s59E25H2" 0 "Phosphoribosylformylglycinamide synthase"  
"JS1\_K04\_01381" 8638 "s59E5H2" 0.1311438 "Phosphoribosylformylglycinamide synthase"  
"JS1\_K04\_01381" 8638 "s63E6H2" 0.06694194 "Phosphoribosylformylglycinamide synthase"  
"JS1\_K04\_01382" 8639 "s59E13H2" 0.01971471 "Amidophosphoribosyltransferase precursor"  
"JS1\_K04\_01382" 8639 "s59E25H2" 0 "Amidophosphoribosyltransferase precursor"  
"JS1\_K04\_01382" 8639 "s59E5H2" 0.1748271 "Amidophosphoribosyltransferase precursor"  
"JS1\_K04\_01382" 8639 "s63E6H2" 0.1386321 "Amidophosphoribosyltransferase precursor"  
"JS1\_K04\_01383" 8640 "s59E13H2" 0.0365364 "Phosphoribosylformylglycinamide cyclo-ligase"  
"JS1\_K04\_01383" 8640 "s59E25H2" 0 "Phosphoribosylformylglycinamide cyclo-ligase"  
"JS1\_K04\_01383" 8640 "s59E5H2" 0.1375872 "Phosphoribosylformylglycinamide cyclo-ligase"  
"JS1\_K04\_01383" 8640 "s63E6H2" 0.1361294 "Phosphoribosylformylglycinamide cyclo-ligase"  
"JS1\_K04\_01384" 8641 "s59E13H2" 0.06038359 "Phosphoribosylglycinamide formyltransferase"  
"JS1\_K04\_01384" 8641 "s59E25H2" 0 "Phosphoribosylglycinamide formyltransferase"  
"JS1\_K04\_01384" 8641 "s59E5H2" 0.4155476 "Phosphoribosylglycinamide formyltransferase"  
"JS1\_K04\_01384" 8641 "s63E6H2" 0.2254873 "Phosphoribosylglycinamide formyltransferase"  
"JS1\_K04\_01385" 8642 "s59E13H2" 0.05187039 "Bifunctional purine biosynthesis protein PurH"  
"JS1\_K04\_01385" 8642 "s59E25H2" 0 "Bifunctional purine biosynthesis protein PurH"  
"JS1\_K04\_01385" 8642 "s59E5H2" 0.6054024 "Bifunctional purine biosynthesis protein PurH"  
"JS1\_K04\_01385" 8642 "s63E6H2" 0.5033159 "Bifunctional purine biosynthesis protein PurH"  
"JS1\_K04\_01386" 8643 "s59E13H2" 0.03851652 "Lon protease 2"  
"JS1\_K04\_01386" 8643 "s59E25H2" 0 "Lon protease 2"  
"JS1\_K04\_01386" 8643 "s59E5H2" 0.7576706 "Lon protease 2"  
"JS1\_K04\_01386" 8643 "s63E6H2" 1.115701 "Lon protease 2"  
"JS1\_K04\_01387" 8644 "s59E13H2" 0.09421012 "SsrA-binding protein"

"JS1\_K04\_01387" 8644 "s59E25H2" 0 "SsrA-binding protein"  
"JS1\_K04\_01387" 8644 "s59E5H2" 0.6029221 "SsrA-binding protein"  
"JS1\_K04\_01387" 8644 "s63E6H2" 0.01827563 "SsrA-binding protein"  
"JS1\_K04\_01388" 8645 "s59E13H2" 0.08457064 "putative CtpA-like serine protease"  
"JS1\_K04\_01388" 8645 "s59E25H2" 0 "putative CtpA-like serine protease"  
"JS1\_K04\_01388" 8645 "s59E5H2" 0.03203376 "putative CtpA-like serine protease"  
"JS1\_K04\_01388" 8645 "s63E6H2" 0.1582028 "putative CtpA-like serine protease"  
"JS1\_K04\_01389" 8646 "s59E13H2" 0.04422274 "Murein DD-endopeptidase MepM"  
"JS1\_K04\_01389" 8646 "s59E25H2" 0 "Murein DD-endopeptidase MepM"  
"JS1\_K04\_01389" 8646 "s59E5H2" 0.1264296 "Murein DD-endopeptidase MepM"  
"JS1\_K04\_01389" 8646 "s63E6H2" 0.6822948 "Murein DD-endopeptidase MepM"  
"JS1\_K04\_01390" 8647 "s59E13H2" 0.04952321 "Cell division protein FtsX"  
"JS1\_K04\_01390" 8647 "s59E25H2" 0 "Cell division protein FtsX"  
"JS1\_K04\_01390" 8647 "s59E5H2" 0.09637866 "Cell division protein FtsX"  
"JS1\_K04\_01390" 8647 "s63E6H2" 0.5083931 "Cell division protein FtsX"  
"JS1\_K04\_01391" 8648 "s59E13H2" 0.03869618 "Cell division ATP-binding protein FtsE"  
"JS1\_K04\_01391" 8648 "s59E25H2" 0.4672489 "Cell division ATP-binding protein FtsE"  
"JS1\_K04\_01391" 8648 "s59E5H2" 0.176984 "Cell division ATP-binding protein FtsE"  
"JS1\_K04\_01391" 8648 "s63E6H2" 0.515952 "Cell division ATP-binding protein FtsE"  
"JS1\_K04\_01392" 8649 "s59E13H2" 0.1300901 "Peptide chain release factor 2"  
"JS1\_K04\_01392" 8649 "s59E25H2" 0.08956916 "Peptide chain release factor 2"  
"JS1\_K04\_01392" 8649 "s59E5H2" 0.1178567 "Peptide chain release factor 2"  
"JS1\_K04\_01392" 8649 "s63E6H2" 0.3245527 "Peptide chain release factor 2"  
"JS1\_K04\_01393" 8650 "s59E13H2" 0.1248843 "preprotein translocase subunit SecA"  
"JS1\_K04\_01393" 8650 "s59E25H2" 0 "preprotein translocase subunit SecA"  
"JS1\_K04\_01393" 8650 "s59E5H2" 0.0534415 "preprotein translocase subunit SecA"  
"JS1\_K04\_01393" 8650 "s63E6H2" 0.3993187 "preprotein translocase subunit SecA"  
"JS1\_K04\_01394" 8651 "s59E13H2" 0 "2,3-diketo-L-gulonate-binding periplasmic protein YiaO precursor"  
"JS1\_K04\_01394" 8651 "s59E25H2" 0 "2,3-diketo-L-gulonate-binding periplasmic protein YiaO precursor"  
"JS1\_K04\_01394" 8651 "s59E5H2" 0 "2,3-diketo-L-gulonate-binding periplasmic protein YiaO precursor"  
"JS1\_K04\_01394" 8651 "s63E6H2" 0.04518661 "2,3-diketo-L-gulonate-binding periplasmic protein YiaO precursor"  
"JS1\_K04\_01395" 8652 "s59E13H2" 0 "Sialic acid TRAP transporter permease protein SiaT"  
"JS1\_K04\_01395" 8652 "s59E25H2" 0 "Sialic acid TRAP transporter permease protein SiaT"  
"JS1\_K04\_01395" 8652 "s59E5H2" 0 "Sialic acid TRAP transporter permease protein SiaT"  
"JS1\_K04\_01395" 8652 "s63E6H2" 0.04362035 "Sialic acid TRAP transporter permease protein SiaT"  
"JS1\_K04\_01396" 8653 "s59E13H2" 0 "Sialic acid TRAP transporter permease protein SiaT"  
"JS1\_K04\_01396" 8653 "s59E25H2" 0 "Sialic acid TRAP transporter permease protein SiaT"  
"JS1\_K04\_01396" 8653 "s59E5H2" 0 "Sialic acid TRAP transporter permease protein SiaT"  
"JS1\_K04\_01396" 8653 "s63E6H2" 0.07613858 "Sialic acid TRAP transporter permease protein SiaT"  
"JS1\_K04\_01397" 8654 "s59E13H2" 0 "2-(R)-hydroxypropyl-CoM dehydrogenase"  
"JS1\_K04\_01397" 8654 "s59E25H2" 0 "2-(R)-hydroxypropyl-CoM dehydrogenase"  
"JS1\_K04\_01397" 8654 "s59E5H2" 0 "2-(R)-hydroxypropyl-CoM dehydrogenase"  
"JS1\_K04\_01397" 8654 "s63E6H2" 0.09521827 "2-(R)-hydroxypropyl-CoM dehydrogenase"  
"JS1\_K04\_01398" 8655 "s59E13H2" 0 "hypothetical protein"  
"JS1\_K04\_01398" 8655 "s59E25H2" 0.1960784 "hypothetical protein"  
"JS1\_K04\_01398" 8655 "s59E5H2" 0 "hypothetical protein"  
"JS1\_K04\_01398" 8655 "s63E6H2" 0.1891541 "hypothetical protein"

"JS1\_K04\_01399" 8656 "s59E13H2" 0.005587414 "putative oxidoreductase"  
"JS1\_K04\_01399" 8656 "s59E25H2" 0 "putative oxidoreductase"  
"JS1\_K04\_01399" 8656 "s59E5H2" 0 "putative oxidoreductase"  
"JS1\_K04\_01399" 8656 "s63E6H2" 0.2209739 "putative oxidoreductase"  
"JS1\_K04\_01400" 8657 "s59E13H2" 0.00567715 "Glyoxylate reductase"  
"JS1\_K04\_01400" 8657 "s59E25H2" 0 "Glyoxylate reductase"  
"JS1\_K04\_01400" 8657 "s59E5H2" 0 "Glyoxylate reductase"  
"JS1\_K04\_01400" 8657 "s63E6H2" 0.3008522 "Glyoxylate reductase"  
"JS1\_K04\_01401" 8658 "s59E13H2" 0.004905142 "Putative KHG/KDPG aldolase"  
"JS1\_K04\_01401" 8658 "s59E25H2" 0 "Putative KHG/KDPG aldolase"  
"JS1\_K04\_01401" 8658 "s59E5H2" 0 "Putative KHG/KDPG aldolase"  
"JS1\_K04\_01401" 8658 "s63E6H2" 0.4258859 "Putative KHG/KDPG aldolase"  
"JS1\_K04\_01402" 8659 "s59E13H2" 0.01940846 "2-dehydro-3-deoxygluconokinase"  
"JS1\_K04\_01402" 8659 "s59E25H2" 0 "2-dehydro-3-deoxygluconokinase"  
"JS1\_K04\_01402" 8659 "s59E5H2" 0.01351761 "2-dehydro-3-deoxygluconokinase"  
"JS1\_K04\_01402" 8659 "s63E6H2" 0.5939437 "2-dehydro-3-deoxygluconokinase"  
"JS1\_K04\_01403" 8660 "s59E13H2" 0.01881072 "Ferredoxin"  
"JS1\_K04\_01403" 8660 "s59E25H2" 0 "Ferredoxin"  
"JS1\_K04\_01403" 8660 "s59E5H2" 0.1399919 "Ferredoxin"  
"JS1\_K04\_01403" 8660 "s63E6H2" 0.7987957 "Ferredoxin"  
"JS1\_K04\_01404" 8661 "s59E13H2" 0.1265 "hypothetical protein"  
"JS1\_K04\_01404" 8661 "s59E25H2" 0 "hypothetical protein"  
"JS1\_K04\_01404" 8661 "s59E5H2" 0.1815168 "hypothetical protein"  
"JS1\_K04\_01404" 8661 "s63E6H2" 0.4485098 "hypothetical protein"  
"JS1\_K04\_01405" 8662 "s59E13H2" 0.08777015 "exonuclease subunit SbcD"  
"JS1\_K04\_01405" 8662 "s59E25H2" 0 "exonuclease subunit SbcD"  
"JS1\_K04\_01405" 8662 "s59E5H2" 0.1239083 "exonuclease subunit SbcD"  
"JS1\_K04\_01405" 8662 "s63E6H2" 0.1492059 "exonuclease subunit SbcD"  
"JS1\_K04\_01406" 8663 "s59E13H2" 0.06123487 "Glycine/sarcosine N-methyltransferase"  
"JS1\_K04\_01406" 8663 "s59E25H2" 0 "Glycine/sarcosine N-methyltransferase"  
"JS1\_K04\_01406" 8663 "s59E5H2" 0.09148202 "Glycine/sarcosine N-methyltransferase"  
"JS1\_K04\_01406" 8663 "s63E6H2" 0.1966999 "Glycine/sarcosine N-methyltransferase"  
"JS1\_K04\_01407" 8664 "s59E13H2" 0.1298544 "Putative nickel-responsive regulator"  
"JS1\_K04\_01407" 8664 "s59E25H2" 0 "Putative nickel-responsive regulator"  
"JS1\_K04\_01407" 8664 "s59E5H2" 0.2491242 "Putative nickel-responsive regulator"  
"JS1\_K04\_01407" 8664 "s63E6H2" 0.2764254 "Putative nickel-responsive regulator"  
"JS1\_K04\_01408" 8665 "s59E13H2" 0.1354785 "Ultraviolet N-glycosylase/AP lyase"  
"JS1\_K04\_01408" 8665 "s59E25H2" 0 "Ultraviolet N-glycosylase/AP lyase"  
"JS1\_K04\_01408" 8665 "s59E5H2" 0.1419287 "Ultraviolet N-glycosylase/AP lyase"  
"JS1\_K04\_01408" 8665 "s63E6H2" 0.2778051 "Ultraviolet N-glycosylase/AP lyase"  
"JS1\_K04\_01409" 8666 "s59E13H2" 0.09107366 "DNA polymerase/3'-5' exonuclease PolX"  
"JS1\_K04\_01409" 8666 "s59E25H2" 0 "DNA polymerase/3'-5' exonuclease PolX"  
"JS1\_K04\_01409" 8666 "s59E5H2" 0.04179836 "DNA polymerase/3'-5' exonuclease PolX"  
"JS1\_K04\_01409" 8666 "s63E6H2" 0.7606979 "DNA polymerase/3'-5' exonuclease PolX"  
"JS1\_K04\_01410" 8667 "s59E13H2" 0.01691621 "hypothetical protein"  
"JS1\_K04\_01410" 8667 "s59E25H2" 0 "hypothetical protein"  
"JS1\_K04\_01410" 8667 "s59E5H2" 0.006113363 "hypothetical protein"

"JS1\_K04\_01410" 8667 "s63E6H2" 0.5330473 "hypothetical protein"  
"JS1\_K04\_01411" 8668 "s59E13H2" 0.006787988 "Protein-L-isoaspartate O-methyltransferase"  
"JS1\_K04\_01411" 8668 "s59E25H2" 0 "Protein-L-isoaspartate O-methyltransferase"  
"JS1\_K04\_01411" 8668 "s59E5H2" 0.03424647 "Protein-L-isoaspartate O-methyltransferase"  
"JS1\_K04\_01411" 8668 "s63E6H2" 0.1653371 "Protein-L-isoaspartate O-methyltransferase"  
"JS1\_K04\_01413" 8670 "s59E13H2" 2.310902 "hypothetical protein"  
"JS1\_K04\_01413" 8670 "s59E25H2" 0 "hypothetical protein"  
"JS1\_K04\_01413" 8670 "s59E5H2" 1.478536 "hypothetical protein"  
"JS1\_K04\_01413" 8670 "s63E6H2" 2.278867 "hypothetical protein"  
"JS1\_K04\_01414" 8671 "s59E13H2" 0 "hypothetical protein"  
"JS1\_K04\_01414" 8671 "s59E25H2" 0 "hypothetical protein"  
"JS1\_K04\_01414" 8671 "s59E5H2" 0 "hypothetical protein"  
"JS1\_K04\_01414" 8671 "s63E6H2" 0 "hypothetical protein"  
"JS1\_K04\_01415" 8672 "s59E13H2" 0 "ABC transporter periplasmic-binding protein YtfQ precursor"  
"JS1\_K04\_01415" 8672 "s59E25H2" 0 "ABC transporter periplasmic-binding protein YtfQ precursor"  
"JS1\_K04\_01415" 8672 "s59E5H2" 0 "ABC transporter periplasmic-binding protein YtfQ precursor"  
"JS1\_K04\_01415" 8672 "s63E6H2" 0 "ABC transporter periplasmic-binding protein YtfQ precursor"  
"JS1\_K04\_01416" 8673 "s59E13H2" 0.3335257 "ATP-dependent zinc metalloprotease FtsH"  
"JS1\_K04\_01416" 8673 "s59E25H2" 0 "ATP-dependent zinc metalloprotease FtsH"  
"JS1\_K04\_01416" 8673 "s59E5H2" 0.03534332 "ATP-dependent zinc metalloprotease FtsH"  
"JS1\_K04\_01416" 8673 "s63E6H2" 0.229662 "ATP-dependent zinc metalloprotease FtsH"  
"JS1\_K04\_01417" 8674 "s59E13H2" 0.2576319 "ATP-dependent zinc metalloprotease FtsH"  
"JS1\_K04\_01417" 8674 "s59E25H2" 0 "ATP-dependent zinc metalloprotease FtsH"  
"JS1\_K04\_01417" 8674 "s59E5H2" 0.03883126 "ATP-dependent zinc metalloprotease FtsH"  
"JS1\_K04\_01417" 8674 "s63E6H2" 0.0356107 "ATP-dependent zinc metalloprotease FtsH"  
"JS1\_K04\_01418" 8675 "s59E13H2" 0.2722004 "GTP cyclohydrolase 1"  
"JS1\_K04\_01418" 8675 "s59E25H2" 0 "GTP cyclohydrolase 1"  
"JS1\_K04\_01418" 8675 "s59E5H2" 0.01555411 "GTP cyclohydrolase 1"  
"JS1\_K04\_01418" 8675 "s63E6H2" 0.0615327 "GTP cyclohydrolase 1"  
"JS1\_K04\_01419" 8676 "s59E13H2" 0.3723652 "Dihydropteroate synthase"  
"JS1\_K04\_01419" 8676 "s59E25H2" 0 "Dihydropteroate synthase"  
"JS1\_K04\_01419" 8676 "s59E5H2" 0.01116897 "Dihydropteroate synthase"  
"JS1\_K04\_01419" 8676 "s63E6H2" 0.03201659 "Dihydropteroate synthase"  
"JS1\_K04\_01420" 8677 "s59E13H2" 0.2761619 "Bifunctional folate synthesis protein"  
"JS1\_K04\_01420" 8677 "s59E25H2" 0 "Bifunctional folate synthesis protein"  
"JS1\_K04\_01420" 8677 "s59E5H2" 0.01151504 "Bifunctional folate synthesis protein"  
"JS1\_K04\_01420" 8677 "s63E6H2" 0.03330689 "Bifunctional folate synthesis protein"  
"JS1\_K04\_01421" 8678 "s59E13H2" 0.2034544 "Fused nickel transport protein NikMN"  
"JS1\_K04\_01421" 8678 "s59E25H2" 0 "Fused nickel transport protein NikMN"  
"JS1\_K04\_01421" 8678 "s59E5H2" 0.1908861 "Fused nickel transport protein NikMN"  
"JS1\_K04\_01421" 8678 "s63E6H2" 0.08149059 "Fused nickel transport protein NikMN"  
"JS1\_K04\_01422" 8679 "s59E13H2" 0.1314584 "cobalt transport protein CbiN"  
"JS1\_K04\_01422" 8679 "s59E25H2" 0 "cobalt transport protein CbiN"  
"JS1\_K04\_01422" 8679 "s59E5H2" 0.08730202 "cobalt transport protein CbiN"  
"JS1\_K04\_01422" 8679 "s63E6H2" 0.04676528 "cobalt transport protein CbiN"  
"JS1\_K04\_01423" 8680 "s59E13H2" 0.003010351 "Cobalt transport protein CbiQ"  
"JS1\_K04\_01423" 8680 "s59E25H2" 0 "Cobalt transport protein CbiQ"

"JS1\_K04\_01423" 8680 "s59E5H2" 0.2016007 "Cobalt transport protein CbiQ"  
"JS1\_K04\_01423" 8680 "s63E6H2" 0.08736527 "Cobalt transport protein CbiQ"  
"JS1\_K04\_01424" 8681 "s59E13H2" 0.00560761 "Energy-coupling factor transporter ATP-binding protein EcfA1"  
"JS1\_K04\_01424" 8681 "s59E25H2" 0 "Energy-coupling factor transporter ATP-binding protein EcfA1"  
"JS1\_K04\_01424" 8681 "s59E5H2" 0.1069053 "Energy-coupling factor transporter ATP-binding protein EcfA1"  
"JS1\_K04\_01424" 8681 "s63E6H2" 0.01332103 "Energy-coupling factor transporter ATP-binding protein EcfA1"  
"JS1\_K04\_01425" 8682 "s59E13H2" 0 "Galactose/methyl galactoside import ATP-binding protein MglA"  
"JS1\_K04\_01425" 8682 "s59E25H2" 0 "Galactose/methyl galactoside import ATP-binding protein MglA"  
"JS1\_K04\_01425" 8682 "s59E5H2" 0.006880101 "Galactose/methyl galactoside import ATP-binding protein MglA"  
"JS1\_K04\_01425" 8682 "s63E6H2" 0.003192863 "Galactose/methyl galactoside import ATP-binding protein MglA"  
"JS1\_K04\_01426" 8683 "s59E13H2" 0 "methylcobalamin:coenzyme M methyltransferase"  
"JS1\_K04\_01426" 8683 "s59E25H2" 0 "methylcobalamin:coenzyme M methyltransferase"  
"JS1\_K04\_01426" 8683 "s59E5H2" 0 "methylcobalamin:coenzyme M methyltransferase"  
"JS1\_K04\_01426" 8683 "s63E6H2" 0.002394872 "methylcobalamin:coenzyme M methyltransferase"  
"JS1\_K04\_01427" 8684 "s59E13H2" 0 "putative sugar isomerase YihS"  
"JS1\_K04\_01427" 8684 "s59E25H2" 0 "putative sugar isomerase YihS"  
"JS1\_K04\_01427" 8684 "s59E5H2" 0 "putative sugar isomerase YihS"  
"JS1\_K04\_01427" 8684 "s63E6H2" 0.00376337 "putative sugar isomerase YihS"  
"JS1\_K04\_01428" 8685 "s59E13H2" 0 "putative HTH-type transcriptional repressor ExuR"  
"JS1\_K04\_01428" 8685 "s59E25H2" 0 "putative HTH-type transcriptional repressor ExuR"  
"JS1\_K04\_01428" 8685 "s59E5H2" 0 "putative HTH-type transcriptional repressor ExuR"  
"JS1\_K04\_01428" 8685 "s63E6H2" 0 "putative HTH-type transcriptional repressor ExuR"  
"JS1\_K04\_01429" 8686 "s59E13H2" 0.0005862195 "Calcineurin-like phosphoesterase superfamily domain protein"  
"JS1\_K04\_01429" 8686 "s59E25H2" 0 "Calcineurin-like phosphoesterase superfamily domain protein"  
"JS1\_K04\_01429" 8686 "s59E5H2" 0.007691362 "Calcineurin-like phosphoesterase superfamily domain protein"  
"JS1\_K04\_01429" 8686 "s63E6H2" 0 "Calcineurin-like phosphoesterase superfamily domain protein"  
"JS1\_K04\_01430" 8687 "s59E13H2" 0.006536515 "hypothetical protein"  
"JS1\_K04\_01430" 8687 "s59E25H2" 0 "hypothetical protein"  
"JS1\_K04\_01430" 8687 "s59E5H2" 0.02032175 "hypothetical protein"  
"JS1\_K04\_01430" 8687 "s63E6H2" 0 "hypothetical protein"  
"JS1\_K04\_01431" 8688 "s59E13H2" 0.003399113 "CAAX amino terminal protease self- immunity"  
"JS1\_K04\_01431" 8688 "s59E25H2" 0 "CAAX amino terminal protease self- immunity"  
"JS1\_K04\_01431" 8688 "s59E5H2" 0.2836442 "CAAX amino terminal protease self- immunity"  
"JS1\_K04\_01431" 8688 "s63E6H2" 0.01411165 "CAAX amino terminal protease self- immunity"  
"JS1\_K04\_01432" 8689 "s59E13H2" 0.9103468 "Epoxyqueuosine reductase"  
"JS1\_K04\_01432" 8689 "s59E25H2" 0 "Epoxyqueuosine reductase"  
"JS1\_K04\_01432" 8689 "s59E5H2" 0.1105135 "Epoxyqueuosine reductase"  
"JS1\_K04\_01432" 8689 "s63E6H2" 5.483841 "Epoxyqueuosine reductase"  
"JS1\_K04\_01433" 8690 "s59E13H2" 0.2058956 "Peptide methionine sulfoxide reductase MsrA 3"  
"JS1\_K04\_01433" 8690 "s59E25H2" 0 "Peptide methionine sulfoxide reductase MsrA 3"  
"JS1\_K04\_01433" 8690 "s59E5H2" 0.9023356 "Peptide methionine sulfoxide reductase MsrA 3"  
"JS1\_K04\_01433" 8690 "s63E6H2" 5.763651 "Peptide methionine sulfoxide reductase MsrA 3"  
"JS1\_K04\_01434" 8691 "s59E13H2" 0.03963375 "hypothetical protein"  
"JS1\_K04\_01434" 8691 "s59E25H2" 0 "hypothetical protein"  
"JS1\_K04\_01434" 8691 "s59E5H2" 0.7075045 "hypothetical protein"  
"JS1\_K04\_01434" 8691 "s63E6H2" 2.211638 "hypothetical protein"  
"JS1\_K04\_01435" 8692 "s59E13H2" 0.09781454 "2-oxoglutarate oxidoreductase subunit KorB"

"JS1\_K04\_01435" 8692 "s59E25H2" 0 "2-oxoglutarate oxidoreductase subunit KorB"  
"JS1\_K04\_01435" 8692 "s59E5H2" 0.9492242 "2-oxoglutarate oxidoreductase subunit KorB"  
"JS1\_K04\_01435" 8692 "s63E6H2" 5.550074 "2-oxoglutarate oxidoreductase subunit KorB"  
"JS1\_K04\_01436" 8693 "s59E13H2" 0.1651593 "2-oxoglutarate synthase subunit KorA"  
"JS1\_K04\_01436" 8693 "s59E25H2" 0 "2-oxoglutarate synthase subunit KorA"  
"JS1\_K04\_01436" 8693 "s59E5H2" 0.8998443 "2-oxoglutarate synthase subunit KorA"  
"JS1\_K04\_01436" 8693 "s63E6H2" 4.180899 "2-oxoglutarate synthase subunit KorA"  
"JS1\_K04\_01437" 8694 "s59E13H2" 0.02462561 "hypothetical protein"  
"JS1\_K04\_01437" 8694 "s59E25H2" 0 "hypothetical protein"  
"JS1\_K04\_01437" 8694 "s59E5H2" 2.576028 "hypothetical protein"  
"JS1\_K04\_01437" 8694 "s63E6H2" 5.789065 "hypothetical protein"  
"JS1\_K04\_01438" 8695 "s59E13H2" 0.1800184 "Ribose-5-phosphate isomerase B"  
"JS1\_K04\_01438" 8695 "s59E25H2" 0 "Ribose-5-phosphate isomerase B"  
"JS1\_K04\_01438" 8695 "s59E5H2" 1.500601 "Ribose-5-phosphate isomerase B"  
"JS1\_K04\_01438" 8695 "s63E6H2" 0.8064416 "Ribose-5-phosphate isomerase B"  
"JS1\_K04\_01439" 8696 "s59E13H2" 0.4723142 "Glutathione amide reductase"  
"JS1\_K04\_01439" 8696 "s59E25H2" 0 "Glutathione amide reductase"  
"JS1\_K04\_01439" 8696 "s59E5H2" 2.100364 "Glutathione amide reductase"  
"JS1\_K04\_01439" 8696 "s63E6H2" 2.951953 "Glutathione amide reductase"  
"JS1\_K04\_01440" 8697 "s59E13H2" 0.2903045 "Demethylmenaquinone methyltransferase"  
"JS1\_K04\_01440" 8697 "s59E25H2" 0 "Demethylmenaquinone methyltransferase"  
"JS1\_K04\_01440" 8697 "s59E5H2" 2.50969 "Demethylmenaquinone methyltransferase"  
"JS1\_K04\_01440" 8697 "s63E6H2" 2.418888 "Demethylmenaquinone methyltransferase"  
"JS1\_K04\_01441" 8698 "s59E13H2" 0.3207484 "ATP synthase gamma chain, sodium ion specific"  
"JS1\_K04\_01441" 8698 "s59E25H2" 0 "ATP synthase gamma chain, sodium ion specific"  
"JS1\_K04\_01441" 8698 "s59E5H2" 1.202498 "ATP synthase gamma chain, sodium ion specific"  
"JS1\_K04\_01441" 8698 "s63E6H2" 2.073325 "ATP synthase gamma chain, sodium ion specific"  
"JS1\_K04\_01442" 8699 "s59E13H2" 0.4938734 "ATP synthase subunit alpha"  
"JS1\_K04\_01442" 8699 "s59E25H2" 0 "ATP synthase subunit alpha"  
"JS1\_K04\_01442" 8699 "s59E5H2" 0.8304759 "ATP synthase subunit alpha"  
"JS1\_K04\_01442" 8699 "s63E6H2" 2.043561 "ATP synthase subunit alpha"  
"JS1\_K04\_01443" 8700 "s59E13H2" 0.3923479 "ATP synthase subunit b, sodium ion specific"  
"JS1\_K04\_01443" 8700 "s59E25H2" 0 "ATP synthase subunit b, sodium ion specific"  
"JS1\_K04\_01443" 8700 "s59E5H2" 0.5079676 "ATP synthase subunit b, sodium ion specific"  
"JS1\_K04\_01443" 8700 "s63E6H2" 1.094264 "ATP synthase subunit b, sodium ion specific"  
"JS1\_K04\_01444" 8701 "s59E13H2" 0.2842004 "ATP synthase subunit c, sodium ion specific"  
"JS1\_K04\_01444" 8701 "s59E25H2" 0 "ATP synthase subunit c, sodium ion specific"  
"JS1\_K04\_01444" 8701 "s59E5H2" 2.426296 "ATP synthase subunit c, sodium ion specific"  
"JS1\_K04\_01444" 8701 "s63E6H2" 1.047664 "ATP synthase subunit c, sodium ion specific"  
"JS1\_K04\_01445" 8702 "s59E13H2" 0.2178153 "ATP synthase subunit a"  
"JS1\_K04\_01445" 8702 "s59E25H2" 0 "ATP synthase subunit a"  
"JS1\_K04\_01445" 8702 "s59E5H2" 2.441251 "ATP synthase subunit a"  
"JS1\_K04\_01445" 8702 "s63E6H2" 0.9301568 "ATP synthase subunit a"  
"JS1\_K04\_01446" 8703 "s59E13H2" 0.2565599 "N-ATPase, AtpR subunit"  
"JS1\_K04\_01446" 8703 "s59E25H2" 0 "N-ATPase, AtpR subunit"  
"JS1\_K04\_01446" 8703 "s59E5H2" 2.031195 "N-ATPase, AtpR subunit"  
"JS1\_K04\_01446" 8703 "s63E6H2" 0.8735601 "N-ATPase, AtpR subunit"

"JS1\_K04\_01447" 8704 "s59E13H2" 0.1785054 "Putative FOF1-ATPase subunit (ATPase\_gene1)"  
"JS1\_K04\_01447" 8704 "s59E25H2" 0 "Putative FOF1-ATPase subunit (ATPase\_gene1)"  
"JS1\_K04\_01447" 8704 "s59E5H2" 1.481722 "Putative FOF1-ATPase subunit (ATPase\_gene1)"  
"JS1\_K04\_01447" 8704 "s63E6H2" 0.6872224 "Putative FOF1-ATPase subunit (ATPase\_gene1)"  
"JS1\_K04\_01448" 8705 "s59E13H2" 0.1554478 "FOF1 ATP synthase subunit epsilon"  
"JS1\_K04\_01448" 8705 "s59E25H2" 0 "FOF1 ATP synthase subunit epsilon"  
"JS1\_K04\_01448" 8705 "s59E5H2" 1.274044 "FOF1 ATP synthase subunit epsilon"  
"JS1\_K04\_01448" 8705 "s63E6H2" 0.5536949 "FOF1 ATP synthase subunit epsilon"  
"JS1\_K04\_01449" 8706 "s59E13H2" 0.1210755 "ATP synthase subunit beta"  
"JS1\_K04\_01449" 8706 "s59E25H2" 0 "ATP synthase subunit beta"  
"JS1\_K04\_01449" 8706 "s59E5H2" 1.674955 "ATP synthase subunit beta"  
"JS1\_K04\_01449" 8706 "s63E6H2" 0.4613681 "ATP synthase subunit beta"  
"JS1\_K04\_01450" 8707 "s59E13H2" 0.4657671 "Xylulose kinase"  
"JS1\_K04\_01450" 8707 "s59E25H2" 0 "Xylulose kinase"  
"JS1\_K04\_01450" 8707 "s59E5H2" 1.723601 "Xylulose kinase"  
"JS1\_K04\_01450" 8707 "s63E6H2" 2.307094 "Xylulose kinase"  
"JS1\_K04\_01451" 8708 "s59E13H2" 0.2649158 "N-acetylglucosamine repressor"  
"JS1\_K04\_01451" 8708 "s59E25H2" 0 "N-acetylglucosamine repressor"  
"JS1\_K04\_01451" 8708 "s59E5H2" 1.481678 "N-acetylglucosamine repressor"  
"JS1\_K04\_01451" 8708 "s63E6H2" 2.199886 "N-acetylglucosamine repressor"  
"JS1\_K04\_01452" 8709 "s59E13H2" 0 "1-deoxy-D-xylulose-5-phosphate synthase"  
"JS1\_K04\_01452" 8709 "s59E25H2" 0 "1-deoxy-D-xylulose-5-phosphate synthase"  
"JS1\_K04\_01452" 8709 "s59E5H2" 0 "1-deoxy-D-xylulose-5-phosphate synthase"  
"JS1\_K04\_01452" 8709 "s63E6H2" 0 "1-deoxy-D-xylulose-5-phosphate synthase"  
"JS1\_K04\_01453" 8710 "s59E13H2" 0.0001071268 "Transketolase 1"  
"JS1\_K04\_01453" 8710 "s59E25H2" 0 "Transketolase 1"  
"JS1\_K04\_01453" 8710 "s59E5H2" 0 "Transketolase 1"  
"JS1\_K04\_01453" 8710 "s63E6H2" 8.694253e-05 "Transketolase 1"  
"JS1\_K04\_01454" 8711 "s59E13H2" 0.06500603 "IS2 transposase TnpB"  
"JS1\_K04\_01454" 8711 "s59E25H2" 0 "IS2 transposase TnpB"  
"JS1\_K04\_01454" 8711 "s59E5H2" 0.8781761 "IS2 transposase TnpB"  
"JS1\_K04\_01454" 8711 "s63E6H2" 1.038926 "IS2 transposase TnpB"  
"JS1\_K04\_01455" 8712 "s59E13H2" 0.08812416 "Transposase"  
"JS1\_K04\_01455" 8712 "s59E25H2" 0 "Transposase"  
"JS1\_K04\_01455" 8712 "s59E5H2" 0.5380152 "Transposase"  
"JS1\_K04\_01455" 8712 "s63E6H2" 0.7968586 "Transposase"  
"JS1\_K04\_01456" 8713 "s59E13H2" 0.006157819 "Transposase"  
"JS1\_K04\_01456" 8713 "s59E25H2" 0 "Transposase"  
"JS1\_K04\_01456" 8713 "s59E5H2" 0.008541666 "Transposase"  
"JS1\_K04\_01456" 8713 "s63E6H2" 1.679649 "Transposase"  
"JS1\_K04\_01457" 8714 "s59E13H2" 0 "Inosose dehydratase"  
"JS1\_K04\_01457" 8714 "s59E25H2" 0 "Inosose dehydratase"  
"JS1\_K04\_01457" 8714 "s59E5H2" 0 "Inosose dehydratase"  
"JS1\_K04\_01457" 8714 "s63E6H2" 0 "Inosose dehydratase"  
"JS1\_K04\_01458" 8715 "s59E13H2" 0 "Glucose--fructose oxidoreductase precursor"  
"JS1\_K04\_01458" 8715 "s59E25H2" 0 "Glucose--fructose oxidoreductase precursor"  
"JS1\_K04\_01458" 8715 "s59E5H2" 0 "Glucose--fructose oxidoreductase precursor"



"JS1\_K04\_01458" 8715 "s63E6H2" 0 "Glucose--fructose oxidoreductase precursor"  
"JS1\_K04\_01459" 8716 "s59E13H2" 0 "hypothetical protein"  
"JS1\_K04\_01459" 8716 "s59E25H2" 0 "hypothetical protein"  
"JS1\_K04\_01459" 8716 "s59E5H2" 0 "hypothetical protein"  
"JS1\_K04\_01459" 8716 "s63E6H2" 0 "hypothetical protein"  
"JS1\_K04\_01460" 8717 "s59E13H2" 0 "hypothetical protein"  
"JS1\_K04\_01460" 8717 "s59E25H2" 0 "hypothetical protein"  
"JS1\_K04\_01460" 8717 "s59E5H2" 0 "hypothetical protein"  
"JS1\_K04\_01460" 8717 "s63E6H2" 0 "hypothetical protein"  
"JS1\_K04\_01461" 8718 "s59E13H2" 0 "hypothetical protein"  
"JS1\_K04\_01461" 8718 "s59E25H2" 0 "hypothetical protein"  
"JS1\_K04\_01461" 8718 "s59E5H2" 0 "hypothetical protein"  
"JS1\_K04\_01461" 8718 "s63E6H2" 0 "hypothetical protein"  
"JS1\_K04\_01462" 8719 "s59E13H2" 0 "L-glutamine:scyllo-inosose aminotransferase"  
"JS1\_K04\_01462" 8719 "s59E25H2" 0 "L-glutamine:scyllo-inosose aminotransferase"  
"JS1\_K04\_01462" 8719 "s59E5H2" 0 "L-glutamine:scyllo-inosose aminotransferase"  
"JS1\_K04\_01462" 8719 "s63E6H2" 0 "L-glutamine:scyllo-inosose aminotransferase"  
"JS1\_K04\_01463" 8720 "s59E13H2" 0.1213244 "Integrase core domain protein"  
"JS1\_K04\_01463" 8720 "s59E25H2" 0 "Integrase core domain protein"  
"JS1\_K04\_01463" 8720 "s59E5H2" 0.1287228 "Integrase core domain protein"  
"JS1\_K04\_01463" 8720 "s63E6H2" 0.2011707 "Integrase core domain protein"  
"JS1\_K04\_01465" 8722 "s59E13H2" 0.01369512 "Inner membrane ABC transporter permease protein YcjP"  
"JS1\_K04\_01465" 8722 "s59E25H2" 0 "Inner membrane ABC transporter permease protein YcjP"  
"JS1\_K04\_01465" 8722 "s59E5H2" 0.1874905 "Inner membrane ABC transporter permease protein YcjP"  
"JS1\_K04\_01465" 8722 "s63E6H2" 0.04511893 "Inner membrane ABC transporter permease protein YcjP"  
"JS1\_K04\_01466" 8723 "s59E13H2" 0.01921735 "Inner membrane ABC transporter permease protein YcjO"  
"JS1\_K04\_01466" 8723 "s59E25H2" 0 "Inner membrane ABC transporter permease protein YcjO"  
"JS1\_K04\_01466" 8723 "s59E5H2" 0.1093113 "Inner membrane ABC transporter permease protein YcjO"  
"JS1\_K04\_01466" 8723 "s63E6H2" 0.1449577 "Inner membrane ABC transporter permease protein YcjO"  
"JS1\_K04\_01467" 8724 "s59E13H2" 0 "Bacterial extracellular solute-binding protein"  
"JS1\_K04\_01467" 8724 "s59E25H2" 0 "Bacterial extracellular solute-binding protein"  
"JS1\_K04\_01467" 8724 "s59E5H2" 0.0047396 "Bacterial extracellular solute-binding protein"  
"JS1\_K04\_01467" 8724 "s63E6H2" 0.004560665 "Bacterial extracellular solute-binding protein"  
"JS1\_K04\_01469" 8726 "s59E13H2" 0.009023472 "Putative transposase"  
"JS1\_K04\_01469" 8726 "s59E25H2" 0 "Putative transposase"  
"JS1\_K04\_01469" 8726 "s59E5H2" 0 "Putative transposase"  
"JS1\_K04\_01469" 8726 "s63E6H2" 1.398319 "Putative transposase"  
"JS1\_K04\_01470" 8727 "s59E13H2" 0.008221264 "tRNA-dihydrouridine synthase C"  
"JS1\_K04\_01470" 8727 "s59E25H2" 0 "tRNA-dihydrouridine synthase C"  
"JS1\_K04\_01470" 8727 "s59E5H2" 0.03312832 "tRNA-dihydrouridine synthase C"  
"JS1\_K04\_01470" 8727 "s63E6H2" 0.9603956 "tRNA-dihydrouridine synthase C"  
"JS1\_K04\_01471" 8728 "s59E13H2" 0 "Type III pantothenate kinase"  
"JS1\_K04\_01471" 8728 "s59E25H2" 0 "Type III pantothenate kinase"  
"JS1\_K04\_01471" 8728 "s59E5H2" 0.1116531 "Type III pantothenate kinase"  
"JS1\_K04\_01471" 8728 "s63E6H2" 0.02214264 "Type III pantothenate kinase"  
"JS1\_K04\_01472" 8729 "s59E13H2" 0 "Energy-coupling factor transporter ATP-binding protein EcfA3"  
"JS1\_K04\_01472" 8729 "s59E25H2" 0 "Energy-coupling factor transporter ATP-binding protein EcfA3"

"JS1\_K04\_01472" 8729 "s59E5H2" 0.1149802 "Energy-coupling factor transporter ATP-binding protein EcfA3"  
"JS1\_K04\_01472" 8729 "s63E6H2" 0.02518993 "Energy-coupling factor transporter ATP-binding protein EcfA3"  
"JS1\_K04\_01474" 8731 "s59E13H2" 10.27417 "hypothetical protein"  
"JS1\_K04\_01474" 8731 "s59E25H2" 0 "hypothetical protein"  
"JS1\_K04\_01474" 8731 "s59E5H2" 0 "hypothetical protein"  
"JS1\_K04\_01474" 8731 "s63E6H2" 0.1420263 "hypothetical protein"  
"JS1\_K04\_01475" 8732 "s59E13H2" 17.27312 "Modulator of FtsH protease HflK"  
"JS1\_K04\_01475" 8732 "s59E25H2" 0 "Modulator of FtsH protease HflK"  
"JS1\_K04\_01475" 8732 "s59E5H2" 0 "Modulator of FtsH protease HflK"  
"JS1\_K04\_01475" 8732 "s63E6H2" 0.09331227 "Modulator of FtsH protease HflK"  
"JS1\_K04\_01476" 8733 "s59E13H2" 24.05736 "Methylated-DNA--protein-cysteine methyltransferase, inducible"  
"JS1\_K04\_01476" 8733 "s59E25H2" 0 "Methylated-DNA--protein-cysteine methyltransferase, inducible"  
"JS1\_K04\_01476" 8733 "s59E5H2" 0.1122591 "Methylated-DNA--protein-cysteine methyltransferase, inducible"  
"JS1\_K04\_01476" 8733 "s63E6H2" 0.1287743 "Methylated-DNA--protein-cysteine methyltransferase, inducible"  
"JS1\_K04\_01478" 8735 "s59E13H2" 23.08252 "Cob(I)yrinic acid a,c-diamide adenosyltransferase"  
"JS1\_K04\_01478" 8735 "s59E25H2" 0 "Cob(I)yrinic acid a,c-diamide adenosyltransferase"  
"JS1\_K04\_01478" 8735 "s59E5H2" 0.4241519 "Cob(I)yrinic acid a,c-diamide adenosyltransferase"  
"JS1\_K04\_01478" 8735 "s63E6H2" 0.1480845 "Cob(I)yrinic acid a,c-diamide adenosyltransferase"  
"JS1\_K04\_01479" 8736 "s59E13H2" 16.8527 "Cobalamin import ATP-binding protein BtuD"  
"JS1\_K04\_01479" 8736 "s59E25H2" 0 "Cobalamin import ATP-binding protein BtuD"  
"JS1\_K04\_01479" 8736 "s59E5H2" 0.4238394 "Cobalamin import ATP-binding protein BtuD"  
"JS1\_K04\_01479" 8736 "s63E6H2" 0.06580335 "Cobalamin import ATP-binding protein BtuD"  
"JS1\_K04\_01480" 8737 "s59E13H2" 13.26038 "Hemin transport system permease protein HmuU"  
"JS1\_K04\_01480" 8737 "s59E25H2" 0 "Hemin transport system permease protein HmuU"  
"JS1\_K04\_01480" 8737 "s59E5H2" 0.5010264 "Hemin transport system permease protein HmuU"  
"JS1\_K04\_01480" 8737 "s63E6H2" 0.0406567 "Hemin transport system permease protein HmuU"  
"JS1\_K04\_01481" 8738 "s59E13H2" 10.74518 "Cobalamin synthase"  
"JS1\_K04\_01481" 8738 "s59E25H2" 0 "Cobalamin synthase"  
"JS1\_K04\_01481" 8738 "s59E5H2" 0.2193385 "Cobalamin synthase"  
"JS1\_K04\_01481" 8738 "s63E6H2" 0.07180058 "Cobalamin synthase"  
"JS1\_K04\_01482" 8739 "s59E13H2" 12.26423 "Bifunctional adenosylcobalamin biosynthesis protein CobU"  
"JS1\_K04\_01482" 8739 "s59E25H2" 0 "Bifunctional adenosylcobalamin biosynthesis protein CobU"  
"JS1\_K04\_01482" 8739 "s59E5H2" 0.1552928 "Bifunctional adenosylcobalamin biosynthesis protein CobU"  
"JS1\_K04\_01482" 8739 "s63E6H2" 0.1397192 "Bifunctional adenosylcobalamin biosynthesis protein CobU"  
"JS1\_K04\_01483" 8740 "s59E13H2" 12.79208 "Cobalamin-binding protein precursor"  
"JS1\_K04\_01483" 8740 "s59E25H2" 0 "Cobalamin-binding protein precursor"  
"JS1\_K04\_01483" 8740 "s59E5H2" 0.174939 "Cobalamin-binding protein precursor"  
"JS1\_K04\_01483" 8740 "s63E6H2" 0.07721831 "Cobalamin-binding protein precursor"  
"JS1\_K04\_01485" 8742 "s59E13H2" 9.402651 "Inosine-5'-monophosphate dehydrogenase"  
"JS1\_K04\_01485" 8742 "s59E25H2" 0 "Inosine-5'-monophosphate dehydrogenase"  
"JS1\_K04\_01485" 8742 "s59E5H2" 0.09600714 "Inosine-5'-monophosphate dehydrogenase"  
"JS1\_K04\_01485" 8742 "s63E6H2" 0.06188506 "Inosine-5'-monophosphate dehydrogenase"  
"JS1\_K04\_01486" 8743 "s59E13H2" 9.543325 "Sodium/hydrogen exchanger family protein"  
"JS1\_K04\_01486" 8743 "s59E25H2" 0 "Sodium/hydrogen exchanger family protein"  
"JS1\_K04\_01486" 8743 "s59E5H2" 0.05753729 "Sodium/hydrogen exchanger family protein"  
"JS1\_K04\_01486" 8743 "s63E6H2" 0.06526181 "Sodium/hydrogen exchanger family protein"  
"JS1\_K04\_01487" 8744 "s59E13H2" 6.26991 "Nicotinate-nucleotide--dimethylbenzimidazole phosphoribosyltransferase"

"JS1\_K04\_01487" 8744 "s59E25H2" 0 "Nicotinate-nucleotide--dimethylbenzimidazole phosphoribosyltransferase"  
"JS1\_K04\_01487" 8744 "s59E5H2" 0.0293263 "Nicotinate-nucleotide--dimethylbenzimidazole phosphoribosyltransferase"  
"JS1\_K04\_01487" 8744 "s63E6H2" 0.02067563 "Nicotinate-nucleotide--dimethylbenzimidazole phosphoribosyltransferase"  
"JS1\_K04\_01488" 8745 "s59E13H2" 0.03455856 "putative diguanylate cyclase YdaM"  
"JS1\_K04\_01488" 8745 "s59E25H2" 0 "putative diguanylate cyclase YdaM"  
"JS1\_K04\_01488" 8745 "s59E5H2" 1.481155 "putative diguanylate cyclase YdaM"  
"JS1\_K04\_01488" 8745 "s63E6H2" 0.002596525 "putative diguanylate cyclase YdaM"  
"JS1\_K04\_01489" 8746 "s59E13H2" 0.01865772 "hypothetical protein"  
"JS1\_K04\_01489" 8746 "s59E25H2" 0 "hypothetical protein"  
"JS1\_K04\_01489" 8746 "s59E5H2" 0.7162141 "hypothetical protein"  
"JS1\_K04\_01489" 8746 "s63E6H2" 0.0003656459 "hypothetical protein"  
"JS1\_K04\_01490" 8747 "s59E13H2" 0.07532175 "hypothetical protein"  
"JS1\_K04\_01490" 8747 "s59E25H2" 0 "hypothetical protein"  
"JS1\_K04\_01490" 8747 "s59E5H2" 2.493123 "hypothetical protein"  
"JS1\_K04\_01490" 8747 "s63E6H2" 0.5115136 "hypothetical protein"  
"JS1\_K04\_01491" 8748 "s59E13H2" 0.23728 "hypothetical protein"  
"JS1\_K04\_01491" 8748 "s59E25H2" 0 "hypothetical protein"  
"JS1\_K04\_01491" 8748 "s59E5H2" 4.709894 "hypothetical protein"  
"JS1\_K04\_01491" 8748 "s63E6H2" 1.917403 "hypothetical protein"  
"JS1\_K04\_01492" 8749 "s59E13H2" 0.2265262 "hypothetical protein"  
"JS1\_K04\_01492" 8749 "s59E25H2" 0.6969697 "hypothetical protein"  
"JS1\_K04\_01492" 8749 "s59E5H2" 7.275316 "hypothetical protein"  
"JS1\_K04\_01492" 8749 "s63E6H2" 0.5859732 "hypothetical protein"  
"JS1\_K04\_01493" 8750 "s59E13H2" 0.1198859 "Peptidase M15"  
"JS1\_K04\_01493" 8750 "s59E25H2" 0.3897436 "Peptidase M15"  
"JS1\_K04\_01493" 8750 "s59E5H2" 3.387961 "Peptidase M15"  
"JS1\_K04\_01493" 8750 "s63E6H2" 0.744105 "Peptidase M15"  
"JS1\_K04\_01494" 8751 "s59E13H2" 0.1019418 "hypothetical protein"  
"JS1\_K04\_01494" 8751 "s59E25H2" 0 "hypothetical protein"  
"JS1\_K04\_01494" 8751 "s59E5H2" 4.602845 "hypothetical protein"  
"JS1\_K04\_01494" 8751 "s63E6H2" 0.6061277 "hypothetical protein"  
"JS1\_K04\_01495" 8752 "s59E13H2" 0.02357768 "hypothetical protein"  
"JS1\_K04\_01495" 8752 "s59E25H2" 0 "hypothetical protein"  
"JS1\_K04\_01495" 8752 "s59E5H2" 0.7642793 "hypothetical protein"  
"JS1\_K04\_01495" 8752 "s63E6H2" 0.01490205 "hypothetical protein"  
"JS1\_K04\_01496" 8753 "s59E13H2" 0.03557169 "PemK-like protein"  
"JS1\_K04\_01496" 8753 "s59E25H2" 0 "PemK-like protein"  
"JS1\_K04\_01496" 8753 "s59E5H2" 0.9284016 "PemK-like protein"  
"JS1\_K04\_01496" 8753 "s63E6H2" 0.006207082 "PemK-like protein"  
"JS1\_K04\_01497" 8754 "s59E13H2" 0.01283096 "putative tyrosine recombinase XerC-like protein"  
"JS1\_K04\_01497" 8754 "s59E25H2" 0 "putative tyrosine recombinase XerC-like protein"  
"JS1\_K04\_01497" 8754 "s59E5H2" 1.173539 "putative tyrosine recombinase XerC-like protein"  
"JS1\_K04\_01497" 8754 "s63E6H2" 0 "putative tyrosine recombinase XerC-like protein"  
"JS1\_K04\_01499" 8756 "s59E13H2" 0 "hypothetical protein"  
"JS1\_K04\_01499" 8756 "s59E25H2" 0 "hypothetical protein"  
"JS1\_K04\_01499" 8756 "s59E5H2" 0.863409 "hypothetical protein"  
"JS1\_K04\_01499" 8756 "s63E6H2" 0 "hypothetical protein"

"JS1\_K04\_01500" 8757 "s59E13H2" 0.01379074 "hypothetical protein"  
"JS1\_K04\_01500" 8757 "s59E25H2" 0 "hypothetical protein"  
"JS1\_K04\_01500" 8757 "s59E5H2" 0.930385 "hypothetical protein"  
"JS1\_K04\_01500" 8757 "s63E6H2" 0.1912476 "hypothetical protein"  
"JS1\_K04\_01501" 8758 "s59E13H2" 0.01302752 "Sporulation initiation inhibitor protein Soj"  
"JS1\_K04\_01501" 8758 "s59E25H2" 0 "Sporulation initiation inhibitor protein Soj"  
"JS1\_K04\_01501" 8758 "s59E5H2" 1.51022 "Sporulation initiation inhibitor protein Soj"  
"JS1\_K04\_01501" 8758 "s63E6H2" 0.1523263 "Sporulation initiation inhibitor protein Soj"  
"JS1\_K04\_01502" 8759 "s59E13H2" 0.005647503 "Chromosome-partitioning protein Spo0J"  
"JS1\_K04\_01502" 8759 "s59E25H2" 0 "Chromosome-partitioning protein Spo0J"  
"JS1\_K04\_01502" 8759 "s59E5H2" 0.9503763 "Chromosome-partitioning protein Spo0J"  
"JS1\_K04\_01502" 8759 "s63E6H2" 0.1182655 "Chromosome-partitioning protein Spo0J"  
"JS1\_K04\_01503" 8760 "s59E13H2" 0.003729452 "Phospholipase D precursor"  
"JS1\_K04\_01503" 8760 "s59E25H2" 0 "Phospholipase D precursor"  
"JS1\_K04\_01503" 8760 "s59E5H2" 0.3281001 "Phospholipase D precursor"  
"JS1\_K04\_01503" 8760 "s63E6H2" 0.03279788 "Phospholipase D precursor"  
"JS1\_K04\_01504" 8761 "s59E13H2" 0.008444768 "Replication initiator protein A"  
"JS1\_K04\_01504" 8761 "s59E25H2" 0 "Replication initiator protein A"  
"JS1\_K04\_01504" 8761 "s59E5H2" 0.1410891 "Replication initiator protein A"  
"JS1\_K04\_01504" 8761 "s63E6H2" 0.1121184 "Replication initiator protein A"  
"JS1\_K04\_01505" 8762 "s59E13H2" 0.01250094 "Histidine protein kinase DivJ"  
"JS1\_K04\_01505" 8762 "s59E25H2" 0 "Histidine protein kinase DivJ"  
"JS1\_K04\_01505" 8762 "s59E5H2" 0.1703625 "Histidine protein kinase DivJ"  
"JS1\_K04\_01505" 8762 "s63E6H2" 0.008084828 "Histidine protein kinase DivJ"  
"JS1\_K04\_01506" 8763 "s59E13H2" 0.001123546 "Cyclic di-GMP phosphodiesterase response regulator RpfG"  
"JS1\_K04\_01506" 8763 "s59E25H2" 0 "Cyclic di-GMP phosphodiesterase response regulator RpfG"  
"JS1\_K04\_01506" 8763 "s59E5H2" 0.3157277 "Cyclic di-GMP phosphodiesterase response regulator RpfG"  
"JS1\_K04\_01506" 8763 "s63E6H2" 0.02966421 "Cyclic di-GMP phosphodiesterase response regulator RpfG"  
"JS1\_K04\_01507" 8764 "s59E13H2" 0.0104305 "Sporulation kinase E"  
"JS1\_K04\_01507" 8764 "s59E25H2" 0 "Sporulation kinase E"  
"JS1\_K04\_01507" 8764 "s59E5H2" 0.1083208 "Sporulation kinase E"  
"JS1\_K04\_01507" 8764 "s63E6H2" 0.02532279 "Sporulation kinase E"  
"JS1\_K04\_01508" 8765 "s59E13H2" 0.03135443 "Transcriptional regulatory protein ZraR"  
"JS1\_K04\_01508" 8765 "s59E25H2" 0 "Transcriptional regulatory protein ZraR"  
"JS1\_K04\_01508" 8765 "s59E5H2" 0.5982474 "Transcriptional regulatory protein ZraR"  
"JS1\_K04\_01508" 8765 "s63E6H2" 0.09195249 "Transcriptional regulatory protein ZraR"  
"JS1\_K04\_01509" 8766 "s59E13H2" 0.01598003 "Transcriptional regulatory protein ZraR"  
"JS1\_K04\_01509" 8766 "s59E25H2" 0 "Transcriptional regulatory protein ZraR"  
"JS1\_K04\_01509" 8766 "s59E5H2" 0.03928228 "Transcriptional regulatory protein ZraR"  
"JS1\_K04\_01509" 8766 "s63E6H2" 0.02520567 "Transcriptional regulatory protein ZraR"  
"JS1\_K04\_01510" 8767 "s59E13H2" 0 "Gas vesicle structural protein"  
"JS1\_K04\_01510" 8767 "s59E25H2" 0 "Gas vesicle structural protein"  
"JS1\_K04\_01510" 8767 "s59E5H2" 0.09868011 "Gas vesicle structural protein"  
"JS1\_K04\_01510" 8767 "s63E6H2" 0.06848746 "Gas vesicle structural protein"  
"JS1\_K04\_01511" 8768 "s59E13H2" 0.01102546 "hypothetical protein"  
"JS1\_K04\_01511" 8768 "s59E25H2" 0 "hypothetical protein"  
"JS1\_K04\_01511" 8768 "s59E5H2" 0.1718583 "hypothetical protein"

"JS1\_K04\_01511" 8768 "s63E6H2" 0.1091576 "hypothetical protein"  
"JS1\_K04\_01512" 8769 "s59E13H2" 0.2542048 "cobalt-precorrin-6Y C(15)-methyltransferase"  
"JS1\_K04\_01512" 8769 "s59E25H2" 0 "cobalt-precorrin-6Y C(15)-methyltransferase"  
"JS1\_K04\_01512" 8769 "s59E5H2" 0 "cobalt-precorrin-6Y C(15)-methyltransferase"  
"JS1\_K04\_01512" 8769 "s63E6H2" 0 "cobalt-precorrin-6Y C(15)-methyltransferase"  
"JS1\_K04\_01513" 8770 "s59E13H2" 0.5578083 "hypothetical protein"  
"JS1\_K04\_01513" 8770 "s59E25H2" 0 "hypothetical protein"  
"JS1\_K04\_01513" 8770 "s59E5H2" 0 "hypothetical protein"  
"JS1\_K04\_01513" 8770 "s63E6H2" 0 "hypothetical protein"  
"JS1\_K04\_01514" 8771 "s59E13H2" 0.5046195 "hypothetical protein"  
"JS1\_K04\_01514" 8771 "s59E25H2" 0 "hypothetical protein"  
"JS1\_K04\_01514" 8771 "s59E5H2" 0 "hypothetical protein"  
"JS1\_K04\_01514" 8771 "s63E6H2" 0 "hypothetical protein"  
"JS1\_K04\_01515" 8772 "s59E13H2" 1.891746 "short chain dehydrogenase"  
"JS1\_K04\_01515" 8772 "s59E25H2" 0 "short chain dehydrogenase"  
"JS1\_K04\_01515" 8772 "s59E5H2" 1.141731 "short chain dehydrogenase"  
"JS1\_K04\_01515" 8772 "s63E6H2" 0.6589551 "short chain dehydrogenase"  
"JS1\_K04\_01517" 8774 "s59E13H2" 0.4165946 "hypothetical protein"  
"JS1\_K04\_01517" 8774 "s59E25H2" 0 "hypothetical protein"  
"JS1\_K04\_01517" 8774 "s59E5H2" 0.01409474 "hypothetical protein"  
"JS1\_K04\_01517" 8774 "s63E6H2" 0.169092 "hypothetical protein"  
"JS1\_K04\_01520" 8777 "s59E13H2" 0.4420871 "hypothetical protein"  
"JS1\_K04\_01520" 8777 "s59E25H2" 0 "hypothetical protein"  
"JS1\_K04\_01520" 8777 "s59E5H2" 0.08991188 "hypothetical protein"  
"JS1\_K04\_01520" 8777 "s63E6H2" 0.6337983 "hypothetical protein"  
"JS1\_K04\_01521" 8778 "s59E13H2" 1.388467 "ribosomal-protein-alanine N-acetyltransferase"  
"JS1\_K04\_01521" 8778 "s59E25H2" 0 "ribosomal-protein-alanine N-acetyltransferase"  
"JS1\_K04\_01521" 8778 "s59E5H2" 0.3988216 "ribosomal-protein-alanine N-acetyltransferase"  
"JS1\_K04\_01521" 8778 "s63E6H2" 0.728277 "ribosomal-protein-alanine N-acetyltransferase"  
"JS1\_K04\_01522" 8779 "s59E13H2" 0.5815076 "hypothetical protein"  
"JS1\_K04\_01522" 8779 "s59E25H2" 0 "hypothetical protein"  
"JS1\_K04\_01522" 8779 "s59E5H2" 0.1251572 "hypothetical protein"  
"JS1\_K04\_01522" 8779 "s63E6H2" 0.8238438 "hypothetical protein"  
"JS1\_K04\_01523" 8780 "s59E13H2" 1.953002 "RNA recognition motif. (a.k.a. RRM, RBD, or RNP domain)"  
"JS1\_K04\_01523" 8780 "s59E25H2" 0 "RNA recognition motif. (a.k.a. RRM, RBD, or RNP domain)"  
"JS1\_K04\_01523" 8780 "s59E5H2" 15.09709 "RNA recognition motif. (a.k.a. RRM, RBD, or RNP domain)"  
"JS1\_K04\_01523" 8780 "s63E6H2" 2.422507 "RNA recognition motif. (a.k.a. RRM, RBD, or RNP domain)"  
"JS1\_K04\_01524" 8781 "s59E13H2" 7.740897 "Sodium-dependent dicarboxylate transporter SdcS"  
"JS1\_K04\_01524" 8781 "s59E25H2" 0 "Sodium-dependent dicarboxylate transporter SdcS"  
"JS1\_K04\_01524" 8781 "s59E5H2" 0.5598838 "Sodium-dependent dicarboxylate transporter SdcS"  
"JS1\_K04\_01524" 8781 "s63E6H2" 2.440808 "Sodium-dependent dicarboxylate transporter SdcS"  
"JS1\_L14\_00001" 8783 "s59E13H2" 3.81606 "Tripartite tricarboxylate transporter family receptor"  
"JS1\_L14\_00001" 8783 "s59E25H2" 0.3810945 "Tripartite tricarboxylate transporter family receptor"  
"JS1\_L14\_00001" 8783 "s59E5H2" 2.270949 "Tripartite tricarboxylate transporter family receptor"  
"JS1\_L14\_00001" 8783 "s63E6H2" 11.60952 "Tripartite tricarboxylate transporter family receptor"  
"JS1\_L14\_00002" 8784 "s59E13H2" 4.422373 "Tripartite tricarboxylate transporter TctB family protein"  
"JS1\_L14\_00002" 8784 "s59E25H2" 0.2889785 "Tripartite tricarboxylate transporter TctB family protein"

"JS1\_L14\_00002" 8784 "s59E5H2" 0.8461696 "Tripartite tricarboxylate transporter TctB family protein"  
"JS1\_L14\_00002" 8784 "s63E6H2" 6.964055 "Tripartite tricarboxylate transporter TctB family protein"  
"JS1\_L14\_00003" 8785 "s59E13H2" 8.967721 "Tripartite tricarboxylate transporter TctA family protein"  
"JS1\_L14\_00003" 8785 "s59E25H2" 0.5142672 "Tripartite tricarboxylate transporter TctA family protein"  
"JS1\_L14\_00003" 8785 "s59E5H2" 1.070521 "Tripartite tricarboxylate transporter TctA family protein"  
"JS1\_L14\_00003" 8785 "s63E6H2" 12.50347 "Tripartite tricarboxylate transporter TctA family protein"  
"JS1\_L14\_00004" 8786 "s59E13H2" 7.690292 "3-keto-5-aminohexanoate cleavage enzyme"  
"JS1\_L14\_00004" 8786 "s59E25H2" 0.7283951 "3-keto-5-aminohexanoate cleavage enzyme"  
"JS1\_L14\_00004" 8786 "s59E5H2" 0.6698448 "3-keto-5-aminohexanoate cleavage enzyme"  
"JS1\_L14\_00004" 8786 "s63E6H2" 12.47084 "3-keto-5-aminohexanoate cleavage enzyme"  
"JS1\_L14\_00005" 8787 "s59E13H2" 14.51323 "Xylose isomerase"  
"JS1\_L14\_00005" 8787 "s59E25H2" 0 "Xylose isomerase"  
"JS1\_L14\_00005" 8787 "s59E5H2" 1.300464 "Xylose isomerase"  
"JS1\_L14\_00005" 8787 "s63E6H2" 13.07249 "Xylose isomerase"  
"JS1\_L14\_00006" 8788 "s59E13H2" 9.260654 "1-deoxy-D-xylulose-5-phosphate synthase"  
"JS1\_L14\_00006" 8788 "s59E25H2" 0 "1-deoxy-D-xylulose-5-phosphate synthase"  
"JS1\_L14\_00006" 8788 "s59E5H2" 0.3997881 "1-deoxy-D-xylulose-5-phosphate synthase"  
"JS1\_L14\_00006" 8788 "s63E6H2" 10.70027 "1-deoxy-D-xylulose-5-phosphate synthase"  
"JS1\_L14\_00007" 8789 "s59E13H2" 0.4686027 "Transketolase 2"  
"JS1\_L14\_00007" 8789 "s59E25H2" 0 "Transketolase 2"  
"JS1\_L14\_00007" 8789 "s59E5H2" 0.7148467 "Transketolase 2"  
"JS1\_L14\_00007" 8789 "s63E6H2" 5.528554 "Transketolase 2"  
"JS1\_L14\_00008" 8790 "s59E13H2" 0.2897762 "Carbon-nitrogen hydrolase"  
"JS1\_L14\_00008" 8790 "s59E25H2" 0 "Carbon-nitrogen hydrolase"  
"JS1\_L14\_00008" 8790 "s59E5H2" 2.819648 "Carbon-nitrogen hydrolase"  
"JS1\_L14\_00008" 8790 "s63E6H2" 1.314127 "Carbon-nitrogen hydrolase"  
"JS1\_L14\_00009" 8791 "s59E13H2" 0.4028054 "Inner membrane symporter YicJ"  
"JS1\_L14\_00009" 8791 "s59E25H2" 0 "Inner membrane symporter YicJ"  
"JS1\_L14\_00009" 8791 "s59E5H2" 3.855091 "Inner membrane symporter YicJ"  
"JS1\_L14\_00009" 8791 "s63E6H2" 1.685522 "Inner membrane symporter YicJ"  
"JS1\_L14\_00010" 8792 "s59E13H2" 0.1884423 "Arsenate-mycothioli transferase ArsC2"  
"JS1\_L14\_00010" 8792 "s59E25H2" 0 "Arsenate-mycothioli transferase ArsC2"  
"JS1\_L14\_00010" 8792 "s59E5H2" 0.1951157 "Arsenate-mycothioli transferase ArsC2"  
"JS1\_L14\_00010" 8792 "s63E6H2" 0.08355789 "Arsenate-mycothioli transferase ArsC2"  
"JS1\_L14\_00011" 8793 "s59E13H2" 4.673205 "YvrJ protein family protein"  
"JS1\_L14\_00011" 8793 "s59E25H2" 0.7518519 "YvrJ protein family protein"  
"JS1\_L14\_00011" 8793 "s59E5H2" 2.951616 "YvrJ protein family protein"  
"JS1\_L14\_00011" 8793 "s63E6H2" 5.687738 "YvrJ protein family protein"  
"JS1\_L14\_00012" 8794 "s59E13H2" 7.778744 "Peptidase M15"  
"JS1\_L14\_00012" 8794 "s59E25H2" 0.5748031 "Peptidase M15"  
"JS1\_L14\_00012" 8794 "s59E5H2" 2.379806 "Peptidase M15"  
"JS1\_L14\_00012" 8794 "s63E6H2" 5.865669 "Peptidase M15"  
"JS1\_L14\_00013" 8795 "s59E13H2" 2.733903 "hypothetical protein"  
"JS1\_L14\_00013" 8795 "s59E25H2" 0 "hypothetical protein"  
"JS1\_L14\_00013" 8795 "s59E5H2" 1.846438 "hypothetical protein"  
"JS1\_L14\_00013" 8795 "s63E6H2" 3.057948 "hypothetical protein"  
"JS1\_L14\_00014" 8796 "s59E13H2" 1.347347 "hypothetical protein"

"JS1\_L14\_00014" 8796 "s59E25H2" 0 "hypothetical protein"  
"JS1\_L14\_00014" 8796 "s59E5H2" 2.198263 "hypothetical protein"  
"JS1\_L14\_00014" 8796 "s63E6H2" 13.10762 "hypothetical protein"  
"JS1\_L14\_00015" 8797 "s59E13H2" 0.9928193 "hypothetical protein"  
"JS1\_L14\_00015" 8797 "s59E25H2" 0 "hypothetical protein"  
"JS1\_L14\_00015" 8797 "s59E5H2" 1.060589 "hypothetical protein"  
"JS1\_L14\_00015" 8797 "s63E6H2" 7.015367 "hypothetical protein"  
"JS1\_L14\_00016" 8798 "s59E13H2" 0.1548571 "putative DNA-binding protein"  
"JS1\_L14\_00016" 8798 "s59E25H2" 0 "putative DNA-binding protein"  
"JS1\_L14\_00016" 8798 "s59E5H2" 0.008710782 "putative DNA-binding protein"  
"JS1\_L14\_00016" 8798 "s63E6H2" 0.1009888 "putative DNA-binding protein"  
"JS1\_L14\_00017" 8799 "s59E13H2" 0.2116947 "RNA polymerase factor sigma-70"  
"JS1\_L14\_00017" 8799 "s59E25H2" 0 "RNA polymerase factor sigma-70"  
"JS1\_L14\_00017" 8799 "s59E5H2" 0.03077227 "RNA polymerase factor sigma-70"  
"JS1\_L14\_00017" 8799 "s63E6H2" 1.897508 "RNA polymerase factor sigma-70"  
"JS1\_L14\_00019" 8801 "s59E13H2" 0.4455076 "ski2-like helicase"  
"JS1\_L14\_00019" 8801 "s59E25H2" 0 "ski2-like helicase"  
"JS1\_L14\_00019" 8801 "s59E5H2" 0.8975628 "ski2-like helicase"  
"JS1\_L14\_00019" 8801 "s63E6H2" 0.04115662 "ski2-like helicase"  
"JS1\_L14\_00020" 8802 "s59E13H2" 6.404958 "Putative peptidyl-prolyl cis-trans isomerase Cbf2 precursor"  
"JS1\_L14\_00020" 8802 "s59E25H2" 0 "Putative peptidyl-prolyl cis-trans isomerase Cbf2 precursor"  
"JS1\_L14\_00020" 8802 "s59E5H2" 0.35115 "Putative peptidyl-prolyl cis-trans isomerase Cbf2 precursor"  
"JS1\_L14\_00020" 8802 "s63E6H2" 0.3327197 "Putative peptidyl-prolyl cis-trans isomerase Cbf2 precursor"  
"JS1\_L14\_00021" 8803 "s59E13H2" 0.2312289 "aspartoacylase"  
"JS1\_L14\_00021" 8803 "s59E25H2" 0 "aspartoacylase"  
"JS1\_L14\_00021" 8803 "s59E5H2" 0.5049539 "aspartoacylase"  
"JS1\_L14\_00021" 8803 "s63E6H2" 0.255525 "aspartoacylase"  
"JS1\_L14\_00022" 8804 "s59E13H2" 0.08834473 "Vancomycin B-type resistance protein VanW"  
"JS1\_L14\_00022" 8804 "s59E25H2" 0.3377483 "Vancomycin B-type resistance protein VanW"  
"JS1\_L14\_00022" 8804 "s59E5H2" 0.381268 "Vancomycin B-type resistance protein VanW"  
"JS1\_L14\_00022" 8804 "s63E6H2" 0.5987317 "Vancomycin B-type resistance protein VanW"  
"JS1\_L14\_00024" 8806 "s59E13H2" 0.05371992 "Protein-L-isoaspartate O-methyltransferase"  
"JS1\_L14\_00024" 8806 "s59E25H2" 0 "Protein-L-isoaspartate O-methyltransferase"  
"JS1\_L14\_00024" 8806 "s59E5H2" 0.4088874 "Protein-L-isoaspartate O-methyltransferase"  
"JS1\_L14\_00024" 8806 "s63E6H2" 0.4613951 "Protein-L-isoaspartate O-methyltransferase"  
"JS1\_L14\_00025" 8807 "s59E13H2" 0.04798071 "hypothetical protein"  
"JS1\_L14\_00025" 8807 "s59E25H2" 0 "hypothetical protein"  
"JS1\_L14\_00025" 8807 "s59E5H2" 0.7023583 "hypothetical protein"  
"JS1\_L14\_00025" 8807 "s63E6H2" 0.2249337 "hypothetical protein"  
"JS1\_L14\_00026" 8808 "s59E13H2" 0.06419714 "5'-nucleotidase SurE"  
"JS1\_L14\_00026" 8808 "s59E25H2" 0 "5'-nucleotidase SurE"  
"JS1\_L14\_00026" 8808 "s59E5H2" 0.5970796 "5'-nucleotidase SurE"  
"JS1\_L14\_00026" 8808 "s63E6H2" 0.2694757 "5'-nucleotidase SurE"  
"JS1\_L14\_00027" 8809 "s59E13H2" 0.03031043 "dihydrolipoamide dehydrogenase"  
"JS1\_L14\_00027" 8809 "s59E25H2" 0 "dihydrolipoamide dehydrogenase"  
"JS1\_L14\_00027" 8809 "s59E5H2" 0.3876986 "dihydrolipoamide dehydrogenase"  
"JS1\_L14\_00027" 8809 "s63E6H2" 0.2148451 "dihydrolipoamide dehydrogenase"

"JS1\_L14\_00028" 8810 "s59E13H2" 2.11842 "23S rRNA (uridine(2479)-2'-O)-methyltransferase"  
"JS1\_L14\_00028" 8810 "s59E25H2" 0 "23S rRNA (uridine(2479)-2'-O)-methyltransferase"  
"JS1\_L14\_00028" 8810 "s59E5H2" 0.508937 "23S rRNA (uridine(2479)-2'-O)-methyltransferase"  
"JS1\_L14\_00028" 8810 "s63E6H2" 0.3227438 "23S rRNA (uridine(2479)-2'-O)-methyltransferase"  
"JS1\_L14\_00029" 8811 "s59E13H2" 0 "hypothetical protein"  
"JS1\_L14\_00029" 8811 "s59E25H2" 0 "hypothetical protein"  
"JS1\_L14\_00029" 8811 "s59E5H2" 0.5079676 "hypothetical protein"  
"JS1\_L14\_00029" 8811 "s63E6H2" 0 "hypothetical protein"  
"JS1\_L14\_00030" 8812 "s59E13H2" 0.4455275 "Cyclic di-GMP phosphodiesterase response regulator RpfG"  
"JS1\_L14\_00030" 8812 "s59E25H2" 0 "Cyclic di-GMP phosphodiesterase response regulator RpfG"  
"JS1\_L14\_00030" 8812 "s59E5H2" 0.9656554 "Cyclic di-GMP phosphodiesterase response regulator RpfG"  
"JS1\_L14\_00030" 8812 "s63E6H2" 0.03613963 "Cyclic di-GMP phosphodiesterase response regulator RpfG"  
"JS1\_L14\_00032" 8814 "s59E13H2" 0.187086 "Putative phosphoserine phosphatase 2"  
"JS1\_L14\_00032" 8814 "s59E25H2" 0 "Putative phosphoserine phosphatase 2"  
"JS1\_L14\_00032" 8814 "s59E5H2" 0.268672 "Putative phosphoserine phosphatase 2"  
"JS1\_L14\_00032" 8814 "s63E6H2" 0.4494032 "Putative phosphoserine phosphatase 2"  
"JS1\_L14\_00033" 8815 "s59E13H2" 0.07818347 "Nicotinate-nucleotide--dimethylbenzimidazole phosphoribosyltransferase"  
"JS1\_L14\_00033" 8815 "s59E25H2" 0 "Nicotinate-nucleotide--dimethylbenzimidazole phosphoribosyltransferase"  
"JS1\_L14\_00033" 8815 "s59E5H2" 0.6853833 "Nicotinate-nucleotide--dimethylbenzimidazole phosphoribosyltransferase"  
"JS1\_L14\_00033" 8815 "s63E6H2" 3.087577 "Nicotinate-nucleotide--dimethylbenzimidazole phosphoribosyltransferase"  
"JS1\_L14\_00034" 8816 "s59E13H2" 0.0722569 "Bifunctional adenosylcobalamin biosynthesis protein CobU"  
"JS1\_L14\_00034" 8816 "s59E25H2" 0 "Bifunctional adenosylcobalamin biosynthesis protein CobU"  
"JS1\_L14\_00034" 8816 "s59E5H2" 1.146743 "Bifunctional adenosylcobalamin biosynthesis protein CobU"  
"JS1\_L14\_00034" 8816 "s63E6H2" 1.264398 "Bifunctional adenosylcobalamin biosynthesis protein CobU"  
"JS1\_L14\_00035" 8817 "s59E13H2" 0.06814349 "Cobalamin synthase"  
"JS1\_L14\_00035" 8817 "s59E25H2" 0 "Cobalamin synthase"  
"JS1\_L14\_00035" 8817 "s59E5H2" 1.272921 "Cobalamin synthase"  
"JS1\_L14\_00035" 8817 "s63E6H2" 2.360146 "Cobalamin synthase"  
"JS1\_L14\_00036" 8818 "s59E13H2" 1.279083 "Hemin import ATP-binding protein HmuV"  
"JS1\_L14\_00036" 8818 "s59E25H2" 0 "Hemin import ATP-binding protein HmuV"  
"JS1\_L14\_00036" 8818 "s59E5H2" 1.810986 "Hemin import ATP-binding protein HmuV"  
"JS1\_L14\_00036" 8818 "s63E6H2" 3.133329 "Hemin import ATP-binding protein HmuV"  
"JS1\_L14\_00037" 8819 "s59E13H2" 1.722312 "Hemin transport system permease protein HmuU"  
"JS1\_L14\_00037" 8819 "s59E25H2" 0 "Hemin transport system permease protein HmuU"  
"JS1\_L14\_00037" 8819 "s59E5H2" 2.201412 "Hemin transport system permease protein HmuU"  
"JS1\_L14\_00037" 8819 "s63E6H2" 4.611461 "Hemin transport system permease protein HmuU"  
"JS1\_L14\_00038" 8820 "s59E13H2" 1.992071 "Vitamin B12-binding protein precursor"  
"JS1\_L14\_00038" 8820 "s59E25H2" 0 "Vitamin B12-binding protein precursor"  
"JS1\_L14\_00038" 8820 "s59E5H2" 1.820819 "Vitamin B12-binding protein precursor"  
"JS1\_L14\_00038" 8820 "s63E6H2" 3.808315 "Vitamin B12-binding protein precursor"  
"JS1\_L14\_00040" 8822 "s59E13H2" 0.2252057 "Cob(I)yrinic acid a,c-diamide adenosyltransferase"  
"JS1\_L14\_00040" 8822 "s59E25H2" 0.3699422 "Cob(I)yrinic acid a,c-diamide adenosyltransferase"  
"JS1\_L14\_00040" 8822 "s59E5H2" 0.6346315 "Cob(I)yrinic acid a,c-diamide adenosyltransferase"  
"JS1\_L14\_00040" 8822 "s63E6H2" 3.657729 "Cob(I)yrinic acid a,c-diamide adenosyltransferase"  
"JS1\_L14\_00041" 8823 "s59E13H2" 0.3045875 "GMP synthase [glutamine-hydrolyzing]"  
"JS1\_L14\_00041" 8823 "s59E25H2" 0 "GMP synthase [glutamine-hydrolyzing]"  
"JS1\_L14\_00041" 8823 "s59E5H2" 0.8493179 "GMP synthase [glutamine-hydrolyzing]"



"JS1\_L14\_00041" 8823 "s63E6H2" 2.7177 "GMP synthase [glutamine-hydrolyzing]"  
"JS1\_L14\_00042" 8824 "s59E13H2" 0.8600192 "N5-carboxyaminoimidazole ribonucleotide mutase"  
"JS1\_L14\_00042" 8824 "s59E25H2" 0 "N5-carboxyaminoimidazole ribonucleotide mutase"  
"JS1\_L14\_00042" 8824 "s59E5H2" 0.7267513 "N5-carboxyaminoimidazole ribonucleotide mutase"  
"JS1\_L14\_00042" 8824 "s63E6H2" 0.1241088 "N5-carboxyaminoimidazole ribonucleotide mutase"  
"JS1\_L14\_00043" 8825 "s59E13H2" 0.2430063 "hypothetical protein"  
"JS1\_L14\_00043" 8825 "s59E25H2" 0 "hypothetical protein"  
"JS1\_L14\_00043" 8825 "s59E5H2" 1.027956 "hypothetical protein"  
"JS1\_L14\_00043" 8825 "s63E6H2" 0.1164919 "hypothetical protein"  
"JS1\_L14\_00044" 8826 "s59E13H2" 0.06648317 "hypothetical protein"  
"JS1\_L14\_00044" 8826 "s59E25H2" 0 "hypothetical protein"  
"JS1\_L14\_00044" 8826 "s59E5H2" 0.3927927 "hypothetical protein"  
"JS1\_L14\_00044" 8826 "s63E6H2" 0.03215431 "hypothetical protein"  
"JS1\_L14\_00045" 8827 "s59E13H2" 0.0256433 "hypothetical protein"  
"JS1\_L14\_00045" 8827 "s59E25H2" 0 "hypothetical protein"  
"JS1\_L14\_00045" 8827 "s59E5H2" 0.4143134 "hypothetical protein"  
"JS1\_L14\_00045" 8827 "s63E6H2" 0.04040671 "hypothetical protein"  
"JS1\_L14\_00046" 8828 "s59E13H2" 0.6061934 "ATP-dependent RecD-like DNA helicase"  
"JS1\_L14\_00046" 8828 "s59E25H2" 0 "ATP-dependent RecD-like DNA helicase"  
"JS1\_L14\_00046" 8828 "s59E5H2" 0.7229341 "ATP-dependent RecD-like DNA helicase"  
"JS1\_L14\_00046" 8828 "s63E6H2" 0.1363335 "ATP-dependent RecD-like DNA helicase"  
"JS1\_L14\_00047" 8829 "s59E13H2" 0.2675285 "2,3-bisphosphoglycerate-independent phosphoglycerate mutase"  
"JS1\_L14\_00047" 8829 "s59E25H2" 0 "2,3-bisphosphoglycerate-independent phosphoglycerate mutase"  
"JS1\_L14\_00047" 8829 "s59E5H2" 0.4405729 "2,3-bisphosphoglycerate-independent phosphoglycerate mutase"  
"JS1\_L14\_00047" 8829 "s63E6H2" 0.07456055 "2,3-bisphosphoglycerate-independent phosphoglycerate mutase"  
"JS1\_L14\_00048" 8830 "s59E13H2" 0.05490397 "putative 2-phosphosulfolactate phosphatase"  
"JS1\_L14\_00048" 8830 "s59E25H2" 0 "putative 2-phosphosulfolactate phosphatase"  
"JS1\_L14\_00048" 8830 "s59E5H2" 0.3239207 "putative 2-phosphosulfolactate phosphatase"  
"JS1\_L14\_00048" 8830 "s63E6H2" 0.08372266 "putative 2-phosphosulfolactate phosphatase"  
"JS1\_L14\_00049" 8831 "s59E13H2" 0.3030435 "Soluble hydrogenase 42 kDa subunit"  
"JS1\_L14\_00049" 8831 "s59E25H2" 0 "Soluble hydrogenase 42 kDa subunit"  
"JS1\_L14\_00049" 8831 "s59E5H2" 0.2092569 "Soluble hydrogenase 42 kDa subunit"  
"JS1\_L14\_00049" 8831 "s63E6H2" 0.07493558 "Soluble hydrogenase 42 kDa subunit"  
"JS1\_L14\_00050" 8832 "s59E13H2" 0.02881336 "VanZ like family protein"  
"JS1\_L14\_00050" 8832 "s59E25H2" 0 "VanZ like family protein"  
"JS1\_L14\_00050" 8832 "s59E5H2" 0.1333982 "VanZ like family protein"  
"JS1\_L14\_00050" 8832 "s63E6H2" 0.0564949 "VanZ like family protein"  
"JS1\_L14\_00051" 8833 "s59E13H2" 0.4864118 "Tetrahedral aminopeptidase"  
"JS1\_L14\_00051" 8833 "s59E25H2" 0 "Tetrahedral aminopeptidase"  
"JS1\_L14\_00051" 8833 "s59E5H2" 0.3767364 "Tetrahedral aminopeptidase"  
"JS1\_L14\_00051" 8833 "s63E6H2" 0.1343325 "Tetrahedral aminopeptidase"  
"JS1\_L14\_00052" 8834 "s59E13H2" 0.1653061 "putative A/G-specific adenine glycosylase YfhQ"  
"JS1\_L14\_00052" 8834 "s59E25H2" 0 "putative A/G-specific adenine glycosylase YfhQ"  
"JS1\_L14\_00052" 8834 "s59E5H2" 0.2276367 "putative A/G-specific adenine glycosylase YfhQ"  
"JS1\_L14\_00052" 8834 "s63E6H2" 0.1159748 "putative A/G-specific adenine glycosylase YfhQ"  
"JS1\_L14\_00053" 8835 "s59E13H2" 0.06349728 "Trehalose synthase"  
"JS1\_L14\_00053" 8835 "s59E25H2" 0 "Trehalose synthase"

"JS1\_L14\_00053" 8835 "s59E5H2" 0.2878799 "Trehalose synthase"  
"JS1\_L14\_00053" 8835 "s63E6H2" 0.1583968 "Trehalose synthase"  
"JS1\_L14\_00054" 8836 "s59E13H2" 0.05151986 "4-alpha-glucanotransferase"  
"JS1\_L14\_00054" 8836 "s59E25H2" 0 "4-alpha-glucanotransferase"  
"JS1\_L14\_00054" 8836 "s59E5H2" 0.1824753 "4-alpha-glucanotransferase"  
"JS1\_L14\_00054" 8836 "s63E6H2" 0.1347836 "4-alpha-glucanotransferase"  
"JS1\_L14\_00055" 8837 "s59E13H2" 0.06787464 "Glycosyl hydrolase family 57"  
"JS1\_L14\_00055" 8837 "s59E25H2" 0 "Glycosyl hydrolase family 57"  
"JS1\_L14\_00055" 8837 "s59E5H2" 0.1006122 "Glycosyl hydrolase family 57"  
"JS1\_L14\_00055" 8837 "s63E6H2" 0.3549311 "Glycosyl hydrolase family 57"  
"JS1\_L14\_00056" 8838 "s59E13H2" 0.9923601 "1,4-alpha-glucan branching enzyme GlgB"  
"JS1\_L14\_00056" 8838 "s59E25H2" 0 "1,4-alpha-glucan branching enzyme GlgB"  
"JS1\_L14\_00056" 8838 "s59E5H2" 0.6266856 "1,4-alpha-glucan branching enzyme GlgB"  
"JS1\_L14\_00056" 8838 "s63E6H2" 0.629186 "1,4-alpha-glucan branching enzyme GlgB"  
"JS1\_L14\_00057" 8839 "s59E13H2" 0.0392919 "Trehalose synthase/amylose TreS"  
"JS1\_L14\_00057" 8839 "s59E25H2" 0 "Trehalose synthase/amylose TreS"  
"JS1\_L14\_00057" 8839 "s59E5H2" 0.7397667 "Trehalose synthase/amylose TreS"  
"JS1\_L14\_00057" 8839 "s63E6H2" 0.5706963 "Trehalose synthase/amylose TreS"  
"JS1\_L14\_00058" 8840 "s59E13H2" 0.02588613 "Alpha-1,4-glucan:maltose-1-phosphate maltosyltransferase 1"  
"JS1\_L14\_00058" 8840 "s59E25H2" 0 "Alpha-1,4-glucan:maltose-1-phosphate maltosyltransferase 1"  
"JS1\_L14\_00058" 8840 "s59E5H2" 0.1332745 "Alpha-1,4-glucan:maltose-1-phosphate maltosyltransferase 1"  
"JS1\_L14\_00058" 8840 "s63E6H2" 0.9469367 "Alpha-1,4-glucan:maltose-1-phosphate maltosyltransferase 1"  
"JS1\_L14\_00060" 8842 "s59E13H2" 0.1918434 "Maltodextrin phosphorylase"  
"JS1\_L14\_00060" 8842 "s59E25H2" 0 "Maltodextrin phosphorylase"  
"JS1\_L14\_00060" 8842 "s59E5H2" 0.2345035 "Maltodextrin phosphorylase"  
"JS1\_L14\_00060" 8842 "s63E6H2" 0.05481897 "Maltodextrin phosphorylase"  
"JS1\_L14\_00061" 8843 "s59E13H2" 0.5993656 "Bifunctional trehalose-6-phosphate synthase/phosphatase"  
"JS1\_L14\_00061" 8843 "s59E25H2" 0.1038251 "Bifunctional trehalose-6-phosphate synthase/phosphatase"  
"JS1\_L14\_00061" 8843 "s59E5H2" 0.5665912 "Bifunctional trehalose-6-phosphate synthase/phosphatase"  
"JS1\_L14\_00061" 8843 "s63E6H2" 0.09196171 "Bifunctional trehalose-6-phosphate synthase/phosphatase"  
"JS1\_L14\_00062" 8844 "s59E13H2" 1.830979 "Trehalose-phosphate phosphatase"  
"JS1\_L14\_00062" 8844 "s59E25H2" 0 "Trehalose-phosphate phosphatase"  
"JS1\_L14\_00062" 8844 "s59E5H2" 0.1835752 "Trehalose-phosphate phosphatase"  
"JS1\_L14\_00062" 8844 "s63E6H2" 0.05714927 "Trehalose-phosphate phosphatase"  
"JS1\_L14\_00063" 8845 "s59E13H2" 1.61429 "Trehalose synthase"  
"JS1\_L14\_00063" 8845 "s59E25H2" 0 "Trehalose synthase"  
"JS1\_L14\_00063" 8845 "s59E5H2" 0.1312225 "Trehalose synthase"  
"JS1\_L14\_00063" 8845 "s63E6H2" 0.02338691 "Trehalose synthase"  
"JS1\_L14\_00064" 8846 "s59E13H2" 0.05579713 "Multiple sugar-binding protein precursor"  
"JS1\_L14\_00064" 8846 "s59E25H2" 0 "Multiple sugar-binding protein precursor"  
"JS1\_L14\_00064" 8846 "s59E5H2" 0.2619882 "Multiple sugar-binding protein precursor"  
"JS1\_L14\_00064" 8846 "s63E6H2" 0.1849379 "Multiple sugar-binding protein precursor"  
"JS1\_L14\_00065" 8847 "s59E13H2" 0.04433095 "Lactose transport system permease protein LacF"  
"JS1\_L14\_00065" 8847 "s59E25H2" 0 "Lactose transport system permease protein LacF"  
"JS1\_L14\_00065" 8847 "s59E5H2" 1.334766 "Lactose transport system permease protein LacF"  
"JS1\_L14\_00065" 8847 "s63E6H2" 0.04451182 "Lactose transport system permease protein LacF"  
"JS1\_L14\_00066" 8848 "s59E13H2" 0.09966451 "L-arabinose transport system permease protein AraQ"

"JS1\_L14\_00066" 8848 "s59E25H2" 0 "L-arabinose transport system permease protein AraQ"  
"JS1\_L14\_00066" 8848 "s59E5H2" 1.347381 "L-arabinose transport system permease protein AraQ"  
"JS1\_L14\_00066" 8848 "s63E6H2" 0.02663308 "L-arabinose transport system permease protein AraQ"  
"JS1\_L14\_00067" 8849 "s59E13H2" 0.1722589 "Deoxyguanosinetriphosphate triphosphohydrolase"  
"JS1\_L14\_00067" 8849 "s59E25H2" 0 "Deoxyguanosinetriphosphate triphosphohydrolase"  
"JS1\_L14\_00067" 8849 "s59E5H2" 1.051195 "Deoxyguanosinetriphosphate triphosphohydrolase"  
"JS1\_L14\_00067" 8849 "s63E6H2" 0.05333606 "Deoxyguanosinetriphosphate triphosphohydrolase"  
"JS1\_L14\_00068" 8850 "s59E13H2" 0.2219454 "O-acetyl-ADP-ribose deacetylase"  
"JS1\_L14\_00068" 8850 "s59E25H2" 0 "O-acetyl-ADP-ribose deacetylase"  
"JS1\_L14\_00068" 8850 "s59E5H2" 0.4218821 "O-acetyl-ADP-ribose deacetylase"  
"JS1\_L14\_00068" 8850 "s63E6H2" 0.0851454 "O-acetyl-ADP-ribose deacetylase"  
"JS1\_L14\_00069" 8851 "s59E13H2" 0.1323828 "Murein DD-endopeptidase MepM"  
"JS1\_L14\_00069" 8851 "s59E25H2" 0 "Murein DD-endopeptidase MepM"  
"JS1\_L14\_00069" 8851 "s59E5H2" 0.3994473 "Murein DD-endopeptidase MepM"  
"JS1\_L14\_00069" 8851 "s63E6H2" 0.1757928 "Murein DD-endopeptidase MepM"  
"JS1\_L14\_00070" 8852 "s59E13H2" 0.1708795 "hypothetical protein"  
"JS1\_L14\_00070" 8852 "s59E25H2" 0 "hypothetical protein"  
"JS1\_L14\_00070" 8852 "s59E5H2" 1.010684 "hypothetical protein"  
"JS1\_L14\_00070" 8852 "s63E6H2" 0.09932775 "hypothetical protein"  
"JS1\_L14\_00071" 8853 "s59E13H2" 0.5706813 "ECF RNA polymerase sigma factor SigW"  
"JS1\_L14\_00071" 8853 "s59E25H2" 0 "ECF RNA polymerase sigma factor SigW"  
"JS1\_L14\_00071" 8853 "s59E5H2" 1.480282 "ECF RNA polymerase sigma factor SigW"  
"JS1\_L14\_00071" 8853 "s63E6H2" 0.1595761 "ECF RNA polymerase sigma factor SigW"  
"JS1\_L14\_00072" 8854 "s59E13H2" 0.7700765 "hypothetical protein"  
"JS1\_L14\_00072" 8854 "s59E25H2" 0 "hypothetical protein"  
"JS1\_L14\_00072" 8854 "s59E5H2" 0.5302931 "hypothetical protein"  
"JS1\_L14\_00072" 8854 "s63E6H2" 0.07554462 "hypothetical protein"  
"JS1\_L14\_00073" 8855 "s59E13H2" 0.9227449 "tetratricopeptide repeat protein"  
"JS1\_L14\_00073" 8855 "s59E25H2" 0 "tetratricopeptide repeat protein"  
"JS1\_L14\_00073" 8855 "s59E5H2" 0.4269621 "tetratricopeptide repeat protein"  
"JS1\_L14\_00073" 8855 "s63E6H2" 0.1286617 "tetratricopeptide repeat protein"  
"JS1\_L14\_00074" 8856 "s59E13H2" 1.355891 "Alpha-monoglucosyldiacylglycerol synthase"  
"JS1\_L14\_00074" 8856 "s59E25H2" 0 "Alpha-monoglucosyldiacylglycerol synthase"  
"JS1\_L14\_00074" 8856 "s59E5H2" 1.13698 "Alpha-monoglucosyldiacylglycerol synthase"  
"JS1\_L14\_00074" 8856 "s63E6H2" 0.622845 "Alpha-monoglucosyldiacylglycerol synthase"  
"JS1\_L14\_00075" 8857 "s59E13H2" 1.320553 "hypothetical protein"  
"JS1\_L14\_00075" 8857 "s59E25H2" 0 "hypothetical protein"  
"JS1\_L14\_00075" 8857 "s59E5H2" 1.013885 "hypothetical protein"  
"JS1\_L14\_00075" 8857 "s63E6H2" 0.2052022 "hypothetical protein"  
"JS1\_L14\_00078" 8860 "s59E13H2" 3.047686 "Fibronectin type III domain protein"  
"JS1\_L14\_00078" 8860 "s59E25H2" 0 "Fibronectin type III domain protein"  
"JS1\_L14\_00078" 8860 "s59E5H2" 0.02107228 "Fibronectin type III domain protein"  
"JS1\_L14\_00078" 8860 "s63E6H2" 0.03066161 "Fibronectin type III domain protein"  
"JS1\_L14\_00082" 8864 "s59E13H2" 2.833811 "PKD domain protein"  
"JS1\_L14\_00082" 8864 "s59E25H2" 0 "PKD domain protein"  
"JS1\_L14\_00082" 8864 "s59E5H2" 0.009827875 "PKD domain protein"  
"JS1\_L14\_00082" 8864 "s63E6H2" 0.05798092 "PKD domain protein"

"JS1\_L14\_00083" 8865 "s59E13H2" 0.01316751 "Ribonuclease PH"  
"JS1\_L14\_00083" 8865 "s59E25H2" 0 "Ribonuclease PH"  
"JS1\_L14\_00083" 8865 "s59E5H2" 0.04924696 "Ribonuclease PH"  
"JS1\_L14\_00083" 8865 "s63E6H2" 0.09554808 "Ribonuclease PH"  
"JS1\_L14\_00084" 8866 "s59E13H2" 0.02570494 "Non-canonical purine NTP pyrophosphatase"  
"JS1\_L14\_00084" 8866 "s59E25H2" 0 "Non-canonical purine NTP pyrophosphatase"  
"JS1\_L14\_00084" 8866 "s59E5H2" 0.03909564 "Non-canonical purine NTP pyrophosphatase"  
"JS1\_L14\_00084" 8866 "s63E6H2" 0.1069252 "Non-canonical purine NTP pyrophosphatase"  
"JS1\_L14\_00092" 8874 "s59E13H2" 0.2239838 "Trigger factor"  
"JS1\_L14\_00092" 8874 "s59E25H2" 0 "Trigger factor"  
"JS1\_L14\_00092" 8874 "s59E5H2" 0.04047394 "Trigger factor"  
"JS1\_L14\_00092" 8874 "s63E6H2" 0.09099085 "Trigger factor"  
"JS1\_L14\_00093" 8875 "s59E13H2" 0 "hypothetical protein"  
"JS1\_L14\_00093" 8875 "s59E25H2" 0 "hypothetical protein"  
"JS1\_L14\_00093" 8875 "s59E5H2" 0 "hypothetical protein"  
"JS1\_L14\_00093" 8875 "s63E6H2" 0 "hypothetical protein"  
"JS1\_L14\_00094" 8876 "s59E13H2" 0 "hypothetical protein"  
"JS1\_L14\_00094" 8876 "s59E25H2" 0 "hypothetical protein"  
"JS1\_L14\_00094" 8876 "s59E5H2" 0 "hypothetical protein"  
"JS1\_L14\_00094" 8876 "s63E6H2" 0 "hypothetical protein"  
"JS1\_L14\_00095" 8877 "s59E13H2" 0.0001796045 "hypothetical protein"  
"JS1\_L14\_00095" 8877 "s59E25H2" 0 "hypothetical protein"  
"JS1\_L14\_00095" 8877 "s59E5H2" 8.879666e-05 "hypothetical protein"  
"JS1\_L14\_00095" 8877 "s63E6H2" 0 "hypothetical protein"  
"JS1\_L14\_00096" 8878 "s59E13H2" 0.05979116 "Xaa-Pro dipeptidase"  
"JS1\_L14\_00096" 8878 "s59E25H2" 0 "Xaa-Pro dipeptidase"  
"JS1\_L14\_00096" 8878 "s59E5H2" 0.07235859 "Xaa-Pro dipeptidase"  
"JS1\_L14\_00096" 8878 "s63E6H2" 0.006751963 "Xaa-Pro dipeptidase"  
"JS1\_L14\_00097" 8879 "s59E13H2" 0.06420826 "Ribosomal protein S12 methylthiotransferase RimO"  
"JS1\_L14\_00097" 8879 "s59E25H2" 0.3713647 "Ribosomal protein S12 methylthiotransferase RimO"  
"JS1\_L14\_00097" 8879 "s59E5H2" 0.1032183 "Ribosomal protein S12 methylthiotransferase RimO"  
"JS1\_L14\_00097" 8879 "s63E6H2" 0.094943 "Ribosomal protein S12 methylthiotransferase RimO"  
"JS1\_L14\_00098" 8880 "s59E13H2" 0.05508167 "hypothetical protein"  
"JS1\_L14\_00098" 8880 "s59E25H2" 0 "hypothetical protein"  
"JS1\_L14\_00098" 8880 "s59E5H2" 0.0542707 "hypothetical protein"  
"JS1\_L14\_00098" 8880 "s63E6H2" 0.03084516 "hypothetical protein"  
"JS1\_L14\_00099" 8881 "s59E13H2" 0.7083213 "Transposase IS116/IS110/IS902 family protein"  
"JS1\_L14\_00099" 8881 "s59E25H2" 0 "Transposase IS116/IS110/IS902 family protein"  
"JS1\_L14\_00099" 8881 "s59E5H2" 0.6507875 "Transposase IS116/IS110/IS902 family protein"  
"JS1\_L14\_00099" 8881 "s63E6H2" 1.552533 "Transposase IS116/IS110/IS902 family protein"  
"JS1\_L14\_00100" 8882 "s59E13H2" 0.02048894 "hypothetical protein"  
"JS1\_L14\_00100" 8882 "s59E25H2" 0 "hypothetical protein"  
"JS1\_L14\_00100" 8882 "s59E5H2" 0 "hypothetical protein"  
"JS1\_L14\_00100" 8882 "s63E6H2" 0.01362962 "hypothetical protein"  
"JS1\_L14\_00102" 8884 "s59E13H2" 0.009251504 "Adenylate cyclase 2"  
"JS1\_L14\_00102" 8884 "s59E25H2" 0 "Adenylate cyclase 2"  
"JS1\_L14\_00102" 8884 "s59E5H2" 0.0113403 "Adenylate cyclase 2"

"JS1\_L14\_00102" 8884 "s63E6H2" 0.04289309 "Adenylate cyclase 2"  
"JS1\_L14\_00103" 8885 "s59E13H2" 0.05780653 "Microbial collagenase precursor"  
"JS1\_L14\_00103" 8885 "s59E25H2" 0 "Microbial collagenase precursor"  
"JS1\_L14\_00103" 8885 "s59E5H2" 0 "Microbial collagenase precursor"  
"JS1\_L14\_00103" 8885 "s63E6H2" 0 "Microbial collagenase precursor"  
"JS1\_L14\_00104" 8886 "s59E13H2" 0.08366159 "Type IV pilus biogenesis and competence protein PilQ precursor"  
"JS1\_L14\_00104" 8886 "s59E25H2" 0 "Type IV pilus biogenesis and competence protein PilQ precursor"  
"JS1\_L14\_00104" 8886 "s59E5H2" 0.09384851 "Type IV pilus biogenesis and competence protein PilQ precursor"  
"JS1\_L14\_00104" 8886 "s63E6H2" 0.04786107 "Type IV pilus biogenesis and competence protein PilQ precursor"  
"JS1\_L14\_00105" 8887 "s59E13H2" 0.02743595 "hypothetical protein"  
"JS1\_L14\_00105" 8887 "s59E25H2" 0 "hypothetical protein"  
"JS1\_L14\_00105" 8887 "s59E5H2" 0.05213773 "hypothetical protein"  
"JS1\_L14\_00105" 8887 "s63E6H2" 0.1053556 "hypothetical protein"  
"JS1\_L14\_00106" 8888 "s59E13H2" 0.06760084 "Pilus assembly protein, PilO"  
"JS1\_L14\_00106" 8888 "s59E25H2" 0 "Pilus assembly protein, PilO"  
"JS1\_L14\_00106" 8888 "s59E5H2" 0.1424004 "Pilus assembly protein, PilO"  
"JS1\_L14\_00106" 8888 "s63E6H2" 0.07882264 "Pilus assembly protein, PilO"  
"JS1\_L14\_00107" 8889 "s59E13H2" 0.1091683 "hypothetical protein"  
"JS1\_L14\_00107" 8889 "s59E25H2" 0 "hypothetical protein"  
"JS1\_L14\_00107" 8889 "s59E5H2" 0.1430312 "hypothetical protein"  
"JS1\_L14\_00107" 8889 "s63E6H2" 0.05928385 "hypothetical protein"  
"JS1\_L14\_00108" 8890 "s59E13H2" 0.06863112 "Competence protein A"  
"JS1\_L14\_00108" 8890 "s59E25H2" 0 "Competence protein A"  
"JS1\_L14\_00108" 8890 "s59E5H2" 0.2940578 "Competence protein A"  
"JS1\_L14\_00108" 8890 "s63E6H2" 0.05342716 "Competence protein A"  
"JS1\_L14\_00109" 8891 "s59E13H2" 0.006955593 "hypothetical protein"  
"JS1\_L14\_00109" 8891 "s59E25H2" 0 "hypothetical protein"  
"JS1\_L14\_00109" 8891 "s59E5H2" 0 "hypothetical protein"  
"JS1\_L14\_00109" 8891 "s63E6H2" 0 "hypothetical protein"  
"JS1\_L14\_00110" 8892 "s59E13H2" 6.649359 "Cysteine desulfurase"  
"JS1\_L14\_00110" 8892 "s59E25H2" 0.4296875 "Cysteine desulfurase"  
"JS1\_L14\_00110" 8892 "s59E5H2" 0.2765001 "Cysteine desulfurase"  
"JS1\_L14\_00110" 8892 "s63E6H2" 4.359584 "Cysteine desulfurase"  
"JS1\_L14\_00111" 8893 "s59E13H2" 3.793689 "Endoribonuclease L-PSP"  
"JS1\_L14\_00111" 8893 "s59E25H2" 0 "Endoribonuclease L-PSP"  
"JS1\_L14\_00111" 8893 "s59E5H2" 0.1486426 "Endoribonuclease L-PSP"  
"JS1\_L14\_00111" 8893 "s63E6H2" 1.625723 "Endoribonuclease L-PSP"  
"JS1\_L14\_00112" 8894 "s59E13H2" 2.460288 "4'-demethylrebeccamycin synthase"  
"JS1\_L14\_00112" 8894 "s59E25H2" 0 "4'-demethylrebeccamycin synthase"  
"JS1\_L14\_00112" 8894 "s59E5H2" 0.9991818 "4'-demethylrebeccamycin synthase"  
"JS1\_L14\_00112" 8894 "s63E6H2" 2.510471 "4'-demethylrebeccamycin synthase"  
"JS1\_L14\_00113" 8895 "s59E13H2" 0.8667472 "Threonylcarbamoyladenine tRNA methylthiotransferase MtaB"  
"JS1\_L14\_00113" 8895 "s59E25H2" 0 "Threonylcarbamoyladenine tRNA methylthiotransferase MtaB"  
"JS1\_L14\_00113" 8895 "s59E5H2" 0.1901014 "Threonylcarbamoyladenine tRNA methylthiotransferase MtaB"  
"JS1\_L14\_00113" 8895 "s63E6H2" 0.4189551 "Threonylcarbamoyladenine tRNA methylthiotransferase MtaB"  
"JS1\_L14\_00114" 8896 "s59E13H2" 0.1505385 "Integrase core domain protein"  
"JS1\_L14\_00114" 8896 "s59E25H2" 0 "Integrase core domain protein"

"JS1\_L14\_00114" 8896 "s59E5H2" 1.021262 "Integrase core domain protein"  
"JS1\_L14\_00114" 8896 "s63E6H2" 1.490519 "Integrase core domain protein"  
"JS1\_L14\_00115" 8897 "s59E13H2" 0.2333303 "hypothetical protein"  
"JS1\_L14\_00115" 8897 "s59E25H2" 0 "hypothetical protein"  
"JS1\_L14\_00115" 8897 "s59E5H2" 0.02029835 "hypothetical protein"  
"JS1\_L14\_00115" 8897 "s63E6H2" 0.174694 "hypothetical protein"  
"JS1\_L14\_00116" 8898 "s59E13H2" 0.01651075 "hypothetical protein"  
"JS1\_L14\_00116" 8898 "s59E25H2" 0 "hypothetical protein"  
"JS1\_L14\_00116" 8898 "s59E5H2" 0.009661538 "hypothetical protein"  
"JS1\_L14\_00116" 8898 "s63E6H2" 0.09380937 "hypothetical protein"  
"JS1\_L14\_00117" 8899 "s59E13H2" 0.04071183 "Translation initiation factor IF-2"  
"JS1\_L14\_00117" 8899 "s59E25H2" 0 "Translation initiation factor IF-2"  
"JS1\_L14\_00117" 8899 "s59E5H2" 0.1247313 "Translation initiation factor IF-2"  
"JS1\_L14\_00117" 8899 "s63E6H2" 0.07775995 "Translation initiation factor IF-2"  
"JS1\_L14\_00118" 8900 "s59E13H2" 0.02081201 "Ribosome-binding factor A"  
"JS1\_L14\_00118" 8900 "s59E25H2" 0 "Ribosome-binding factor A"  
"JS1\_L14\_00118" 8900 "s59E5H2" 0.05195414 "Ribosome-binding factor A"  
"JS1\_L14\_00118" 8900 "s63E6H2" 0.04301775 "Ribosome-binding factor A"  
"JS1\_L14\_00119" 8901 "s59E13H2" 0.03945705 "Bifunctional oligoribonuclease and PAP phosphatase NrnA"  
"JS1\_L14\_00119" 8901 "s59E25H2" 0 "Bifunctional oligoribonuclease and PAP phosphatase NrnA"  
"JS1\_L14\_00119" 8901 "s59E5H2" 0.05172081 "Bifunctional oligoribonuclease and PAP phosphatase NrnA"  
"JS1\_L14\_00119" 8901 "s63E6H2" 0.05561968 "Bifunctional oligoribonuclease and PAP phosphatase NrnA"  
"JS1\_L14\_00120" 8902 "s59E13H2" 0.04846405 "tRNA pseudouridine synthase B"  
"JS1\_L14\_00120" 8902 "s59E25H2" 0 "tRNA pseudouridine synthase B"  
"JS1\_L14\_00120" 8902 "s59E5H2" 0.07220954 "tRNA pseudouridine synthase B"  
"JS1\_L14\_00120" 8902 "s63E6H2" 0.05104111 "tRNA pseudouridine synthase B"  
"JS1\_L14\_00121" 8903 "s59E13H2" 0.08451491 "Riboflavin biosynthesis protein RibF"  
"JS1\_L14\_00121" 8903 "s59E25H2" 0 "Riboflavin biosynthesis protein RibF"  
"JS1\_L14\_00121" 8903 "s59E5H2" 0.03050092 "Riboflavin biosynthesis protein RibF"  
"JS1\_L14\_00121" 8903 "s63E6H2" 0.02931179 "Riboflavin biosynthesis protein RibF"  
"JS1\_L14\_00122" 8904 "s59E13H2" 0.03956959 "30S ribosomal protein S15"  
"JS1\_L14\_00122" 8904 "s59E25H2" 0 "30S ribosomal protein S15"  
"JS1\_L14\_00122" 8904 "s59E5H2" 0 "30S ribosomal protein S15"  
"JS1\_L14\_00122" 8904 "s63E6H2" 0.02861769 "30S ribosomal protein S15"  
"JS1\_L14\_00123" 8905 "s59E13H2" 2.298833 "Polyribonucleotide nucleotidyltransferase"  
"JS1\_L14\_00123" 8905 "s59E25H2" 0 "Polyribonucleotide nucleotidyltransferase"  
"JS1\_L14\_00123" 8905 "s59E5H2" 0.1273325 "Polyribonucleotide nucleotidyltransferase"  
"JS1\_L14\_00123" 8905 "s63E6H2" 0.02814297 "Polyribonucleotide nucleotidyltransferase"  
"JS1\_L14\_00124" 8906 "s59E13H2" 3.541253 "Deoxyuridine 5'-triphosphate nucleotidohydrolase"  
"JS1\_L14\_00124" 8906 "s59E25H2" 0 "Deoxyuridine 5'-triphosphate nucleotidohydrolase"  
"JS1\_L14\_00124" 8906 "s59E5H2" 0.1109006 "Deoxyuridine 5'-triphosphate nucleotidohydrolase"  
"JS1\_L14\_00124" 8906 "s63E6H2" 0.086091 "Deoxyuridine 5'-triphosphate nucleotidohydrolase"  
"JS1\_L14\_00125" 8907 "s59E13H2" 1.401888 "hypothetical protein"  
"JS1\_L14\_00125" 8907 "s59E25H2" 0 "hypothetical protein"  
"JS1\_L14\_00125" 8907 "s59E5H2" 0.2019737 "hypothetical protein"  
"JS1\_L14\_00125" 8907 "s63E6H2" 0.1263694 "hypothetical protein"  
"JS1\_L14\_00126" 8908 "s59E13H2" 4.296918 "Undecaprenyl-diphosphatase"

"JS1\_L14\_00126" 8908 "s59E25H2" 0 "Undecaprenyl-diphosphatase"  
"JS1\_L14\_00126" 8908 "s59E5H2" 0.1784661 "Undecaprenyl-diphosphatase"  
"JS1\_L14\_00126" 8908 "s63E6H2" 0.1416298 "Undecaprenyl-diphosphatase"  
"JS1\_L14\_00127" 8909 "s59E13H2" 3.755153 "DNA translocase SpoIIIE"  
"JS1\_L14\_00127" 8909 "s59E25H2" 0 "DNA translocase SpoIIIE"  
"JS1\_L14\_00127" 8909 "s59E5H2" 0.1945934 "DNA translocase SpoIIIE"  
"JS1\_L14\_00127" 8909 "s63E6H2" 0.1044443 "DNA translocase SpoIIIE"  
"JS1\_L14\_00128" 8910 "s59E13H2" 1.473613 "Membrane lipoprotein TmpC precursor"  
"JS1\_L14\_00128" 8910 "s59E25H2" 0 "Membrane lipoprotein TmpC precursor"  
"JS1\_L14\_00128" 8910 "s59E5H2" 0.2680681 "Membrane lipoprotein TmpC precursor"  
"JS1\_L14\_00128" 8910 "s63E6H2" 0.1371742 "Membrane lipoprotein TmpC precursor"  
"JS1\_L14\_00129" 8911 "s59E13H2" 0.03107801 "Farnesyl diphosphate synthase"  
"JS1\_L14\_00129" 8911 "s59E25H2" 0 "Farnesyl diphosphate synthase"  
"JS1\_L14\_00129" 8911 "s59E5H2" 0.05744715 "Farnesyl diphosphate synthase"  
"JS1\_L14\_00129" 8911 "s63E6H2" 0.149857 "Farnesyl diphosphate synthase"  
"JS1\_L14\_00130" 8912 "s59E13H2" 0.01702832 "Exodeoxyribonuclease 7 small subunit"  
"JS1\_L14\_00130" 8912 "s59E25H2" 0 "Exodeoxyribonuclease 7 small subunit"  
"JS1\_L14\_00130" 8912 "s59E5H2" 0.04839502 "Exodeoxyribonuclease 7 small subunit"  
"JS1\_L14\_00130" 8912 "s63E6H2" 0.1901467 "Exodeoxyribonuclease 7 small subunit"  
"JS1\_L14\_00131" 8913 "s59E13H2" 0.03497784 "Exodeoxyribonuclease 7 large subunit"  
"JS1\_L14\_00131" 8913 "s59E25H2" 0 "Exodeoxyribonuclease 7 large subunit"  
"JS1\_L14\_00131" 8913 "s59E5H2" 0.06752227 "Exodeoxyribonuclease 7 large subunit"  
"JS1\_L14\_00131" 8913 "s63E6H2" 0.1959148 "Exodeoxyribonuclease 7 large subunit"  
"JS1\_L14\_00132" 8914 "s59E13H2" 0.02665488 "hypothetical protein"  
"JS1\_L14\_00132" 8914 "s59E25H2" 0 "hypothetical protein"  
"JS1\_L14\_00132" 8914 "s59E5H2" 0.06258572 "hypothetical protein"  
"JS1\_L14\_00132" 8914 "s63E6H2" 0.2149597 "hypothetical protein"  
"JS1\_L14\_00133" 8915 "s59E13H2" 0.03387994 "hypothetical protein"  
"JS1\_L14\_00133" 8915 "s59E25H2" 0 "hypothetical protein"  
"JS1\_L14\_00133" 8915 "s59E5H2" 0.07641587 "hypothetical protein"  
"JS1\_L14\_00133" 8915 "s63E6H2" 0.1628565 "hypothetical protein"  
"JS1\_L14\_00134" 8916 "s59E13H2" 0.00761251 "hypothetical protein"  
"JS1\_L14\_00134" 8916 "s59E25H2" 0 "hypothetical protein"  
"JS1\_L14\_00134" 8916 "s59E5H2" 0 "hypothetical protein"  
"JS1\_L14\_00134" 8916 "s63E6H2" 0.05733108 "hypothetical protein"  
"JS1\_L14\_00135" 8917 "s59E13H2" 0.03580011 "Elongation factor P"  
"JS1\_L14\_00135" 8917 "s59E25H2" 0 "Elongation factor P"  
"JS1\_L14\_00135" 8917 "s59E5H2" 0.1506703 "Elongation factor P"  
"JS1\_L14\_00135" 8917 "s63E6H2" 0.1434625 "Elongation factor P"  
"JS1\_L14\_00136" 8918 "s59E13H2" 0.04511782 "Serine hydroxymethyltransferase"  
"JS1\_L14\_00136" 8918 "s59E25H2" 0 "Serine hydroxymethyltransferase"  
"JS1\_L14\_00136" 8918 "s59E5H2" 0.177021 "Serine hydroxymethyltransferase"  
"JS1\_L14\_00136" 8918 "s63E6H2" 0.09529175 "Serine hydroxymethyltransferase"  
"JS1\_L14\_00137" 8919 "s59E13H2" 0.01629692 "Xaa-Pro dipeptidase"  
"JS1\_L14\_00137" 8919 "s59E25H2" 0 "Xaa-Pro dipeptidase"  
"JS1\_L14\_00137" 8919 "s59E5H2" 0.05850321 "Xaa-Pro dipeptidase"  
"JS1\_L14\_00137" 8919 "s63E6H2" 0.01127752 "Xaa-Pro dipeptidase"

"JS1\_L14\_00138" 8920 "s59E13H2" 0.6497346 "Membrane transport protein"  
"JS1\_L14\_00138" 8920 "s59E25H2" 0 "Membrane transport protein"  
"JS1\_L14\_00138" 8920 "s59E5H2" 0.2276253 "Membrane transport protein"  
"JS1\_L14\_00138" 8920 "s63E6H2" 1.870655 "Membrane transport protein"  
"JS1\_L14\_00139" 8921 "s59E13H2" 0.5230228 "putative HTH-type transcriptional regulator YdfH"  
"JS1\_L14\_00139" 8921 "s59E25H2" 0 "putative HTH-type transcriptional regulator YdfH"  
"JS1\_L14\_00139" 8921 "s59E5H2" 0.3221073 "putative HTH-type transcriptional regulator YdfH"  
"JS1\_L14\_00139" 8921 "s63E6H2" 1.858603 "putative HTH-type transcriptional regulator YdfH"  
"JS1\_L14\_00140" 8922 "s59E13H2" 0.4747407 "HTH-type transcriptional repressor CsiR"  
"JS1\_L14\_00140" 8922 "s59E25H2" 0 "HTH-type transcriptional repressor CsiR"  
"JS1\_L14\_00140" 8922 "s59E5H2" 0.3277372 "HTH-type transcriptional repressor CsiR"  
"JS1\_L14\_00140" 8922 "s63E6H2" 1.772535 "HTH-type transcriptional repressor CsiR"  
"JS1\_L14\_00141" 8923 "s59E13H2" 0.7156616 "D-lyxose ketol-isomerase"  
"JS1\_L14\_00141" 8923 "s59E25H2" 0 "D-lyxose ketol-isomerase"  
"JS1\_L14\_00141" 8923 "s59E5H2" 0.967709 "D-lyxose ketol-isomerase"  
"JS1\_L14\_00141" 8923 "s63E6H2" 2.645981 "D-lyxose ketol-isomerase"  
"JS1\_L14\_00142" 8924 "s59E13H2" 0.5220027 "hypothetical protein"  
"JS1\_L14\_00142" 8924 "s59E25H2" 0 "hypothetical protein"  
"JS1\_L14\_00142" 8924 "s59E5H2" 0.9555015 "hypothetical protein"  
"JS1\_L14\_00142" 8924 "s63E6H2" 3.866112 "hypothetical protein"  
"JS1\_L14\_00143" 8925 "s59E13H2" 0.06652063 "Ferredoxin"  
"JS1\_L14\_00143" 8925 "s59E25H2" 0 "Ferredoxin"  
"JS1\_L14\_00143" 8925 "s59E5H2" 0.3694434 "Ferredoxin"  
"JS1\_L14\_00143" 8925 "s63E6H2" 1.05919 "Ferredoxin"  
"JS1\_L14\_00144" 8926 "s59E13H2" 0.4793862 "Peptidase family S58"  
"JS1\_L14\_00144" 8926 "s59E25H2" 0 "Peptidase family S58"  
"JS1\_L14\_00144" 8926 "s59E5H2" 1.586598 "Peptidase family S58"  
"JS1\_L14\_00144" 8926 "s63E6H2" 2.203863 "Peptidase family S58"  
"JS1\_L14\_00145" 8927 "s59E13H2" 1.698993 "hypothetical protein"  
"JS1\_L14\_00145" 8927 "s59E25H2" 0 "hypothetical protein"  
"JS1\_L14\_00145" 8927 "s59E5H2" 3.544364 "hypothetical protein"  
"JS1\_L14\_00145" 8927 "s63E6H2" 1.798584 "hypothetical protein"  
"JS1\_L14\_00146" 8928 "s59E13H2" 0.857079 "Phosphodiesterase"  
"JS1\_L14\_00146" 8928 "s59E25H2" 0 "Phosphodiesterase"  
"JS1\_L14\_00146" 8928 "s59E5H2" 0.948176 "Phosphodiesterase"  
"JS1\_L14\_00146" 8928 "s63E6H2" 0.6750317 "Phosphodiesterase"  
"JS1\_L14\_00147" 8929 "s59E13H2" 0.6718043 "Aspartate racemase"  
"JS1\_L14\_00147" 8929 "s59E25H2" 0 "Aspartate racemase"  
"JS1\_L14\_00147" 8929 "s59E5H2" 0.6445561 "Aspartate racemase"  
"JS1\_L14\_00147" 8929 "s63E6H2" 1.144872 "Aspartate racemase"  
"JS1\_L14\_00148" 8930 "s59E13H2" 5.485711 "Proline--tRNA ligase"  
"JS1\_L14\_00148" 8930 "s59E25H2" 0 "Proline--tRNA ligase"  
"JS1\_L14\_00148" 8930 "s59E5H2" 3.572321 "Proline--tRNA ligase"  
"JS1\_L14\_00148" 8930 "s63E6H2" 3.091161 "Proline--tRNA ligase"  
"JS1\_L14\_00149" 8931 "s59E13H2" 6.090053 "Elongation factor Tu"  
"JS1\_L14\_00149" 8931 "s59E25H2" 0 "Elongation factor Tu"  
"JS1\_L14\_00149" 8931 "s59E5H2" 4.21926 "Elongation factor Tu"



"JS1\_L14\_00149" 8931 "s63E6H2" 2.444157 "Elongation factor Tu"  
"JS1\_L14\_00150" 8932 "s59E13H2" 5.506076 "Modulator of FtsH protease HflK"  
"JS1\_L14\_00150" 8932 "s59E25H2" 0 "Modulator of FtsH protease HflK"  
"JS1\_L14\_00150" 8932 "s59E5H2" 1.971082 "Modulator of FtsH protease HflK"  
"JS1\_L14\_00150" 8932 "s63E6H2" 2.012773 "Modulator of FtsH protease HflK"  
"JS1\_L14\_00151" 8933 "s59E13H2" 4.195084 "hypothetical protein"  
"JS1\_L14\_00151" 8933 "s59E25H2" 0 "hypothetical protein"  
"JS1\_L14\_00151" 8933 "s59E5H2" 1.344508 "hypothetical protein"  
"JS1\_L14\_00151" 8933 "s63E6H2" 1.759401 "hypothetical protein"  
"JS1\_L14\_00152" 8934 "s59E13H2" 2.58242 "putative inner membrane transporter yjE"  
"JS1\_L14\_00152" 8934 "s59E25H2" 0.257329 "putative inner membrane transporter yjE"  
"JS1\_L14\_00152" 8934 "s59E5H2" 1.106429 "putative inner membrane transporter yjE"  
"JS1\_L14\_00152" 8934 "s63E6H2" 0.9842244 "putative inner membrane transporter yjE"  
"JS1\_L14\_00153" 8935 "s59E13H2" 2.954357 "hypothetical protein"  
"JS1\_L14\_00153" 8935 "s59E25H2" 0 "hypothetical protein"  
"JS1\_L14\_00153" 8935 "s59E5H2" 1.041093 "hypothetical protein"  
"JS1\_L14\_00153" 8935 "s63E6H2" 0.4346624 "hypothetical protein"  
"JS1\_L14\_00154" 8936 "s59E13H2" 3.978865 "Ribose operon repressor"  
"JS1\_L14\_00154" 8936 "s59E25H2" 0 "Ribose operon repressor"  
"JS1\_L14\_00154" 8936 "s59E5H2" 0.6486162 "Ribose operon repressor"  
"JS1\_L14\_00154" 8936 "s63E6H2" 0.2553546 "Ribose operon repressor"  
"JS1\_L14\_00155" 8937 "s59E13H2" 5.492947 "Lactose-binding protein precursor"  
"JS1\_L14\_00155" 8937 "s59E25H2" 0 "Lactose-binding protein precursor"  
"JS1\_L14\_00155" 8937 "s59E5H2" 0.5752697 "Lactose-binding protein precursor"  
"JS1\_L14\_00155" 8937 "s63E6H2" 0.4528288 "Lactose-binding protein precursor"  
"JS1\_L14\_00156" 8938 "s59E13H2" 6.297153 "Lactose transport system permease protein LacF"  
"JS1\_L14\_00156" 8938 "s59E25H2" 0 "Lactose transport system permease protein LacF"  
"JS1\_L14\_00156" 8938 "s59E5H2" 0.7202616 "Lactose transport system permease protein LacF"  
"JS1\_L14\_00156" 8938 "s63E6H2" 0.5577864 "Lactose transport system permease protein LacF"  
"JS1\_L14\_00157" 8939 "s59E13H2" 0.9778616 "Lactose transport system permease protein LacG"  
"JS1\_L14\_00157" 8939 "s59E25H2" 0 "Lactose transport system permease protein LacG"  
"JS1\_L14\_00157" 8939 "s59E5H2" 0.6181956 "Lactose transport system permease protein LacG"  
"JS1\_L14\_00157" 8939 "s63E6H2" 0.4129479 "Lactose transport system permease protein LacG"  
"JS1\_L14\_00158" 8940 "s59E13H2" 0.5616634 "Beta-galactosidase"  
"JS1\_L14\_00158" 8940 "s59E25H2" 0 "Beta-galactosidase"  
"JS1\_L14\_00158" 8940 "s59E5H2" 0.6740627 "Beta-galactosidase"  
"JS1\_L14\_00158" 8940 "s63E6H2" 0.09105565 "Beta-galactosidase"  
"JS1\_L14\_00159" 8941 "s59E13H2" 0.08333217 "Chaperone protein DnaJ"  
"JS1\_L14\_00159" 8941 "s59E25H2" 0.1128748 "Chaperone protein DnaJ"  
"JS1\_L14\_00159" 8941 "s59E5H2" 0.03436773 "Chaperone protein DnaJ"  
"JS1\_L14\_00159" 8941 "s63E6H2" 0.4367921 "Chaperone protein DnaJ"  
"JS1\_L14\_00160" 8942 "s59E13H2" 0.06779016 "Pyridoxal biosynthesis lyase PdxS"  
"JS1\_L14\_00160" 8942 "s59E25H2" 0 "Pyridoxal biosynthesis lyase PdxS"  
"JS1\_L14\_00160" 8942 "s59E5H2" 1.026922 "Pyridoxal biosynthesis lyase PdxS"  
"JS1\_L14\_00160" 8942 "s63E6H2" 0.2386088 "Pyridoxal biosynthesis lyase PdxS"  
"JS1\_L14\_00161" 8943 "s59E13H2" 0.03462918 "Glutamine amidotransferase subunit PdxT"  
"JS1\_L14\_00161" 8943 "s59E25H2" 0 "Glutamine amidotransferase subunit PdxT"

"JS1\_L14\_00161" 8943 "s59E5H2" 0.6700849 "Glutamine amidotransferase subunit PdxT"  
"JS1\_L14\_00161" 8943 "s63E6H2" 0.1570321 "Glutamine amidotransferase subunit PdxT"  
"JS1\_L14\_00167" 8949 "s59E13H2" 1.401864 "GMP/IMP nucleotidase YrfG"  
"JS1\_L14\_00167" 8949 "s59E25H2" 0 "GMP/IMP nucleotidase YrfG"  
"JS1\_L14\_00167" 8949 "s59E5H2" 0.2679007 "GMP/IMP nucleotidase YrfG"  
"JS1\_L14\_00167" 8949 "s63E6H2" 0.4312594 "GMP/IMP nucleotidase YrfG"  
"JS1\_L14\_00168" 8950 "s59E13H2" 0.9766791 "Formamidopyrimidine-DNA glycosylase"  
"JS1\_L14\_00168" 8950 "s59E25H2" 0.2935673 "Formamidopyrimidine-DNA glycosylase"  
"JS1\_L14\_00168" 8950 "s59E5H2" 0.2041351 "Formamidopyrimidine-DNA glycosylase"  
"JS1\_L14\_00168" 8950 "s63E6H2" 0.4115643 "Formamidopyrimidine-DNA glycosylase"  
"JS1\_L14\_00170" 8952 "s59E13H2" 0.166034 "PBP superfamily domain protein"  
"JS1\_L14\_00170" 8952 "s59E25H2" 0 "PBP superfamily domain protein"  
"JS1\_L14\_00170" 8952 "s59E5H2" 0.1356322 "PBP superfamily domain protein"  
"JS1\_L14\_00170" 8952 "s63E6H2" 0.2517895 "PBP superfamily domain protein"  
"JS1\_L14\_00171" 8953 "s59E13H2" 0.02352656 "Sulfate transport system permease protein CysT"  
"JS1\_L14\_00171" 8953 "s59E25H2" 0 "Sulfate transport system permease protein CysT"  
"JS1\_L14\_00171" 8953 "s59E5H2" 0.8098848 "Sulfate transport system permease protein CysT"  
"JS1\_L14\_00171" 8953 "s63E6H2" 0.7310148 "Sulfate transport system permease protein CysT"  
"JS1\_L14\_00172" 8954 "s59E13H2" 0.01159265 "Sulfate/thiosulfate import ATP-binding protein CysA"  
"JS1\_L14\_00172" 8954 "s59E25H2" 0 "Sulfate/thiosulfate import ATP-binding protein CysA"  
"JS1\_L14\_00172" 8954 "s59E5H2" 0.4122116 "Sulfate/thiosulfate import ATP-binding protein CysA"  
"JS1\_L14\_00172" 8954 "s63E6H2" 0.4916752 "Sulfate/thiosulfate import ATP-binding protein CysA"  
"JS1\_L14\_00173" 8955 "s59E13H2" 0.1571178 "Molybdopterin molybdenumtransferase"  
"JS1\_L14\_00173" 8955 "s59E25H2" 0 "Molybdopterin molybdenumtransferase"  
"JS1\_L14\_00173" 8955 "s59E5H2" 0.278411 "Molybdopterin molybdenumtransferase"  
"JS1\_L14\_00173" 8955 "s63E6H2" 0.6257412 "Molybdopterin molybdenumtransferase"  
"JS1\_L14\_00174" 8956 "s59E13H2" 0.2372081 "Molybdopterin molybdenumtransferase"  
"JS1\_L14\_00174" 8956 "s59E25H2" 0 "Molybdopterin molybdenumtransferase"  
"JS1\_L14\_00174" 8956 "s59E5H2" 0.4270396 "Molybdopterin molybdenumtransferase"  
"JS1\_L14\_00174" 8956 "s63E6H2" 0.5709237 "Molybdopterin molybdenumtransferase"  
"JS1\_L14\_00175" 8957 "s59E13H2" 0.1585407 "Cyclic pyranopterin monophosphate synthase"  
"JS1\_L14\_00175" 8957 "s59E25H2" 0 "Cyclic pyranopterin monophosphate synthase"  
"JS1\_L14\_00175" 8957 "s59E5H2" 0.4018297 "Cyclic pyranopterin monophosphate synthase"  
"JS1\_L14\_00175" 8957 "s63E6H2" 0.3263394 "Cyclic pyranopterin monophosphate synthase"  
"JS1\_L14\_00176" 8958 "s59E13H2" 0 "Cyclic pyranopterin monophosphate synthase accessory protein"  
"JS1\_L14\_00176" 8958 "s59E25H2" 0 "Cyclic pyranopterin monophosphate synthase accessory protein"  
"JS1\_L14\_00176" 8958 "s59E5H2" 0.4210818 "Cyclic pyranopterin monophosphate synthase accessory protein"  
"JS1\_L14\_00176" 8958 "s63E6H2" 0.2109684 "Cyclic pyranopterin monophosphate synthase accessory protein"  
"JS1\_L14\_00177" 8959 "s59E13H2" 0.1142845 "Molybdopterin adenyllyltransferase"  
"JS1\_L14\_00177" 8959 "s59E25H2" 0 "Molybdopterin adenyllyltransferase"  
"JS1\_L14\_00177" 8959 "s59E5H2" 0.4958622 "Molybdopterin adenyllyltransferase"  
"JS1\_L14\_00177" 8959 "s63E6H2" 0.1470424 "Molybdopterin adenyllyltransferase"  
"JS1\_L14\_00178" 8960 "s59E13H2" 0.2215664 "Ribonuclease Z"  
"JS1\_L14\_00178" 8960 "s59E25H2" 0 "Ribonuclease Z"  
"JS1\_L14\_00178" 8960 "s59E5H2" 0.5367315 "Ribonuclease Z"  
"JS1\_L14\_00178" 8960 "s63E6H2" 0.2512003 "Ribonuclease Z"  
"JS1\_L14\_00179" 8961 "s59E13H2" 0.06592855 "Ferrodoxin"

"JS1\_L14\_00179" 8961 "s59E25H2" 0 "Ferredoxin"  
"JS1\_L14\_00179" 8961 "s59E5H2" 0.7962924 "Ferredoxin"  
"JS1\_L14\_00179" 8961 "s63E6H2" 0.1355093 "Ferredoxin"  
"JS1\_L14\_00180" 8962 "s59E13H2" 0.08982087 "Oligo-1,6-glucosidase"  
"JS1\_L14\_00180" 8962 "s59E25H2" 0 "Oligo-1,6-glucosidase"  
"JS1\_L14\_00180" 8962 "s59E5H2" 1.187182 "Oligo-1,6-glucosidase"  
"JS1\_L14\_00180" 8962 "s63E6H2" 2.933589 "Oligo-1,6-glucosidase"  
"JS1\_L14\_00181" 8963 "s59E13H2" 0.6710239 "Oligo-1,6-glucosidase"  
"JS1\_L14\_00181" 8963 "s59E25H2" 0 "Oligo-1,6-glucosidase"  
"JS1\_L14\_00181" 8963 "s59E5H2" 0.6798154 "Oligo-1,6-glucosidase"  
"JS1\_L14\_00181" 8963 "s63E6H2" 0.8809776 "Oligo-1,6-glucosidase"  
"JS1\_L14\_00182" 8964 "s59E13H2" 0.03708163 "HTH-type transcriptional regulator CymR"  
"JS1\_L14\_00182" 8964 "s59E25H2" 0 "HTH-type transcriptional regulator CymR"  
"JS1\_L14\_00182" 8964 "s59E5H2" 0.1809964 "HTH-type transcriptional regulator CymR"  
"JS1\_L14\_00182" 8964 "s63E6H2" 0.09711275 "HTH-type transcriptional regulator CymR"  
"JS1\_L14\_00183" 8965 "s59E13H2" 0.03537317 "hypothetical protein"  
"JS1\_L14\_00183" 8965 "s59E25H2" 0 "hypothetical protein"  
"JS1\_L14\_00183" 8965 "s59E5H2" 0.166634 "hypothetical protein"  
"JS1\_L14\_00183" 8965 "s63E6H2" 0.07998651 "hypothetical protein"  
"JS1\_L14\_00184" 8966 "s59E13H2" 0.06720427 "tRNA-specific 2-thiouridylase MnmA"  
"JS1\_L14\_00184" 8966 "s59E25H2" 0 "tRNA-specific 2-thiouridylase MnmA"  
"JS1\_L14\_00184" 8966 "s59E5H2" 0.371681 "tRNA-specific 2-thiouridylase MnmA"  
"JS1\_L14\_00184" 8966 "s63E6H2" 0.1048301 "tRNA-specific 2-thiouridylase MnmA"  
"JS1\_L14\_00185" 8967 "s59E13H2" 0.01569977 "hypothetical protein"  
"JS1\_L14\_00185" 8967 "s59E25H2" 0 "hypothetical protein"  
"JS1\_L14\_00185" 8967 "s59E5H2" 0.2942507 "hypothetical protein"  
"JS1\_L14\_00185" 8967 "s63E6H2" 0.09304208 "hypothetical protein"  
"JS1\_L14\_00186" 8968 "s59E13H2" 0.04146574 "hypothetical protein"  
"JS1\_L14\_00186" 8968 "s59E25H2" 0 "hypothetical protein"  
"JS1\_L14\_00186" 8968 "s59E5H2" 0.1570523 "hypothetical protein"  
"JS1\_L14\_00186" 8968 "s63E6H2" 0.1636058 "hypothetical protein"  
"JS1\_L14\_00187" 8969 "s59E13H2" 0.01681373 "Putative pyridoxal phosphate-dependent acyltransferase"  
"JS1\_L14\_00187" 8969 "s59E25H2" 0 "Putative pyridoxal phosphate-dependent acyltransferase"  
"JS1\_L14\_00187" 8969 "s59E5H2" 0.1664459 "Putative pyridoxal phosphate-dependent acyltransferase"  
"JS1\_L14\_00187" 8969 "s63E6H2" 0.198243 "Putative pyridoxal phosphate-dependent acyltransferase"  
"JS1\_L14\_00188" 8970 "s59E13H2" 0.0711114 "Transcription elongation factor GreA"  
"JS1\_L14\_00188" 8970 "s59E25H2" 0 "Transcription elongation factor GreA"  
"JS1\_L14\_00188" 8970 "s59E5H2" 0.2280245 "Transcription elongation factor GreA"  
"JS1\_L14\_00188" 8970 "s63E6H2" 0.182725 "Transcription elongation factor GreA"  
"JS1\_L14\_00189" 8971 "s59E13H2" 0.1719561 "Lysine--tRNA ligase"  
"JS1\_L14\_00189" 8971 "s59E25H2" 0 "Lysine--tRNA ligase"  
"JS1\_L14\_00189" 8971 "s59E5H2" 0.2594752 "Lysine--tRNA ligase"  
"JS1\_L14\_00189" 8971 "s63E6H2" 0.2502313 "Lysine--tRNA ligase"  
"JS1\_L14\_00190" 8972 "s59E13H2" 0.08479571 "S4 domain protein"  
"JS1\_L14\_00190" 8972 "s59E25H2" 0 "S4 domain protein"  
"JS1\_L14\_00190" 8972 "s59E5H2" 0.03272706 "S4 domain protein"  
"JS1\_L14\_00190" 8972 "s63E6H2" 0.06202241 "S4 domain protein"

"JS1\_L14\_00191" 8973 "s59E13H2" 0.06576289 "Magnesium transporter MgtE"  
"JS1\_L14\_00191" 8973 "s59E25H2" 0 "Magnesium transporter MgtE"  
"JS1\_L14\_00191" 8973 "s59E5H2" 0.3727039 "Magnesium transporter MgtE"  
"JS1\_L14\_00191" 8973 "s63E6H2" 0.2925569 "Magnesium transporter MgtE"  
"JS1\_L14\_00192" 8974 "s59E13H2" 0.09155194 "Enolase"  
"JS1\_L14\_00192" 8974 "s59E25H2" 0 "Enolase"  
"JS1\_L14\_00192" 8974 "s59E5H2" 0.3147988 "Enolase"  
"JS1\_L14\_00192" 8974 "s63E6H2" 0.3693562 "Enolase"  
"JS1\_L14\_00193" 8975 "s59E13H2" 0.05103666 "Enolase"  
"JS1\_L14\_00193" 8975 "s59E25H2" 0 "Enolase"  
"JS1\_L14\_00193" 8975 "s59E5H2" 0.413872 "Enolase"  
"JS1\_L14\_00193" 8975 "s63E6H2" 0.3750922 "Enolase"  
"JS1\_L14\_00194" 8976 "s59E13H2" 0.0558138 "cell division protein FtsB"  
"JS1\_L14\_00194" 8976 "s59E25H2" 0 "cell division protein FtsB"  
"JS1\_L14\_00194" 8976 "s59E5H2" 0.4070946 "cell division protein FtsB"  
"JS1\_L14\_00194" 8976 "s63E6H2" 0.5003593 "cell division protein FtsB"  
"JS1\_L14\_00198" 8980 "s59E13H2" 0.07233816 "tRNA(Ile)-lysidine synthase"  
"JS1\_L14\_00198" 8980 "s59E25H2" 0 "tRNA(Ile)-lysidine synthase"  
"JS1\_L14\_00198" 8980 "s59E5H2" 0.1925686 "tRNA(Ile)-lysidine synthase"  
"JS1\_L14\_00198" 8980 "s63E6H2" 0.2971456 "tRNA(Ile)-lysidine synthase"  
"JS1\_L14\_00199" 8981 "s59E13H2" 0.01737373 "SH3 domain of the SH3b1 type"  
"JS1\_L14\_00199" 8981 "s59E25H2" 0 "SH3 domain of the SH3b1 type"  
"JS1\_L14\_00199" 8981 "s59E5H2" 0.05249852 "SH3 domain of the SH3b1 type"  
"JS1\_L14\_00199" 8981 "s63E6H2" 0.2621338 "SH3 domain of the SH3b1 type"  
"JS1\_L14\_00200" 8982 "s59E13H2" 0.1961699 "Isoaspartyl dipeptidase"  
"JS1\_L14\_00200" 8982 "s59E25H2" 0 "Isoaspartyl dipeptidase"  
"JS1\_L14\_00200" 8982 "s59E5H2" 0.1453203 "Isoaspartyl dipeptidase"  
"JS1\_L14\_00200" 8982 "s63E6H2" 0.3503937 "Isoaspartyl dipeptidase"  
"JS1\_L14\_00201" 8983 "s59E13H2" 0.02562857 "hypothetical protein"  
"JS1\_L14\_00201" 8983 "s59E25H2" 0 "hypothetical protein"  
"JS1\_L14\_00201" 8983 "s59E5H2" 0.4752021 "hypothetical protein"  
"JS1\_L14\_00201" 8983 "s63E6H2" 1.445184 "hypothetical protein"  
"JS1\_L14\_00202" 8984 "s59E13H2" 0.5448939 "Xylose import ATP-binding protein XylG"  
"JS1\_L14\_00202" 8984 "s59E25H2" 0.2008032 "Xylose import ATP-binding protein XylG"  
"JS1\_L14\_00202" 8984 "s59E5H2" 1.008812 "Xylose import ATP-binding protein XylG"  
"JS1\_L14\_00202" 8984 "s63E6H2" 0.3540002 "Xylose import ATP-binding protein XylG"  
"JS1\_L14\_00203" 8985 "s59E13H2" 0.05600411 "Xylose transport system permease protein XylH"  
"JS1\_L14\_00203" 8985 "s59E25H2" 0 "Xylose transport system permease protein XylH"  
"JS1\_L14\_00203" 8985 "s59E5H2" 1.27558 "Xylose transport system permease protein XylH"  
"JS1\_L14\_00203" 8985 "s63E6H2" 0.1747998 "Xylose transport system permease protein XylH"  
"JS1\_L14\_00204" 8986 "s59E13H2" 0.2951809 "N-acetylglucosamine repressor"  
"JS1\_L14\_00204" 8986 "s59E25H2" 0 "N-acetylglucosamine repressor"  
"JS1\_L14\_00204" 8986 "s59E5H2" 1.557732 "N-acetylglucosamine repressor"  
"JS1\_L14\_00204" 8986 "s63E6H2" 2.281755 "N-acetylglucosamine repressor"  
"JS1\_L14\_00205" 8987 "s59E13H2" 0.446354 "Xylulose kinase"  
"JS1\_L14\_00205" 8987 "s59E25H2" 0 "Xylulose kinase"  
"JS1\_L14\_00205" 8987 "s59E5H2" 1.695895 "Xylulose kinase"

"JS1\_L14\_00205" 8987 "s63E6H2" 2.700214 "Xylulose kinase"  
"JS1\_L14\_00208" 8990 "s59E13H2" 0.5555887 "Antitoxin MazE"  
"JS1\_L14\_00208" 8990 "s59E25H2" 0 "Antitoxin MazE"  
"JS1\_L14\_00208" 8990 "s59E5H2" 0.5787522 "Antitoxin MazE"  
"JS1\_L14\_00208" 8990 "s63E6H2" 2.946829 "Antitoxin MazE"  
"JS1\_L14\_00209" 8991 "s59E13H2" 0.4209533 "mRNA interferase MazF"  
"JS1\_L14\_00209" 8991 "s59E25H2" 0 "mRNA interferase MazF"  
"JS1\_L14\_00209" 8991 "s59E5H2" 0.499722 "mRNA interferase MazF"  
"JS1\_L14\_00209" 8991 "s63E6H2" 2.827219 "mRNA interferase MazF"  
"JS1\_L14\_00210" 8992 "s59E13H2" 0.4184025 "B3/4 domain protein"  
"JS1\_L14\_00210" 8992 "s59E25H2" 0 "B3/4 domain protein"  
"JS1\_L14\_00210" 8992 "s59E5H2" 1.02923 "B3/4 domain protein"  
"JS1\_L14\_00210" 8992 "s63E6H2" 2.381082 "B3/4 domain protein"  
"JS1\_L14\_00212" 8994 "s59E13H2" 0.1478965 "UvrABC system protein C"  
"JS1\_L14\_00212" 8994 "s59E25H2" 0 "UvrABC system protein C"  
"JS1\_L14\_00212" 8994 "s59E5H2" 0.1739459 "UvrABC system protein C"  
"JS1\_L14\_00212" 8994 "s63E6H2" 1.67293 "UvrABC system protein C"  
"JS1\_L14\_00214" 8996 "s59E13H2" 0.09664805 "hypothetical protein"  
"JS1\_L14\_00214" 8996 "s59E25H2" 0 "hypothetical protein"  
"JS1\_L14\_00214" 8996 "s59E5H2" 0.8060763 "hypothetical protein"  
"JS1\_L14\_00214" 8996 "s63E6H2" 0.05801653 "hypothetical protein"  
"JS1\_L14\_00217" 8999 "s59E13H2" 0.03013467 "PEGA domain protein"  
"JS1\_L14\_00217" 8999 "s59E25H2" 0 "PEGA domain protein"  
"JS1\_L14\_00217" 8999 "s59E5H2" 0 "PEGA domain protein"  
"JS1\_L14\_00217" 8999 "s63E6H2" 0 "PEGA domain protein"  
"JS1\_L14\_00218" 9000 "s59E13H2" 0.2772915 "Xylose import ATP-binding protein XylG"  
"JS1\_L14\_00218" 9000 "s59E25H2" 0 "Xylose import ATP-binding protein XylG"  
"JS1\_L14\_00218" 9000 "s59E5H2" 0.4221736 "Xylose import ATP-binding protein XylG"  
"JS1\_L14\_00218" 9000 "s63E6H2" 0.09279795 "Xylose import ATP-binding protein XylG"  
"JS1\_L14\_00219" 9001 "s59E13H2" 0.5370477 "D-xylose-binding periplasmic protein precursor"  
"JS1\_L14\_00219" 9001 "s59E25H2" 0 "D-xylose-binding periplasmic protein precursor"  
"JS1\_L14\_00219" 9001 "s59E5H2" 1.130089 "D-xylose-binding periplasmic protein precursor"  
"JS1\_L14\_00219" 9001 "s63E6H2" 0.3803506 "D-xylose-binding periplasmic protein precursor"  
"JS1\_L14\_00220" 9002 "s59E13H2" 0.419831 "Xylose isomerase"  
"JS1\_L14\_00220" 9002 "s59E25H2" 0 "Xylose isomerase"  
"JS1\_L14\_00220" 9002 "s59E5H2" 0.8383741 "Xylose isomerase"  
"JS1\_L14\_00220" 9002 "s63E6H2" 1.385155 "Xylose isomerase"  
"JS1\_L14\_00221" 9003 "s59E13H2" 0.5808913 "Beta-xylosidase"  
"JS1\_L14\_00221" 9003 "s59E25H2" 0 "Beta-xylosidase"  
"JS1\_L14\_00221" 9003 "s59E5H2" 0.9176613 "Beta-xylosidase"  
"JS1\_L14\_00221" 9003 "s63E6H2" 0.3270658 "Beta-xylosidase"  
"JS1\_L14\_00222" 9004 "s59E13H2" 2.391027 "Beta-xylosidase"  
"JS1\_L14\_00222" 9004 "s59E25H2" 0 "Beta-xylosidase"  
"JS1\_L14\_00222" 9004 "s59E5H2" 0.9075934 "Beta-xylosidase"  
"JS1\_L14\_00222" 9004 "s63E6H2" 0.6822026 "Beta-xylosidase"  
"JS1\_L14\_00223" 9005 "s59E13H2" 0.4247259 "EamA-like transporter family protein"  
"JS1\_L14\_00223" 9005 "s59E25H2" 0 "EamA-like transporter family protein"

"JS1\_L14\_00223" 9005 "s59E5H2" 1.13955 "EamA-like transporter family protein"  
"JS1\_L14\_00223" 9005 "s63E6H2" 0.5743381 "EamA-like transporter family protein"  
"JS1\_L14\_00224" 9006 "s59E13H2" 0.8164715 "Cyclic di-GMP phosphodiesterase response regulator RpfG"  
"JS1\_L14\_00224" 9006 "s59E25H2" 0 "Cyclic di-GMP phosphodiesterase response regulator RpfG"  
"JS1\_L14\_00224" 9006 "s59E5H2" 0.1309636 "Cyclic di-GMP phosphodiesterase response regulator RpfG"  
"JS1\_L14\_00224" 9006 "s63E6H2" 2.421386 "Cyclic di-GMP phosphodiesterase response regulator RpfG"  
"JS1\_L14\_00226" 9008 "s59E13H2" 0.4276884 "Oligopeptide transport ATP-binding protein OppF"  
"JS1\_L14\_00226" 9008 "s59E25H2" 0 "Oligopeptide transport ATP-binding protein OppF"  
"JS1\_L14\_00226" 9008 "s59E5H2" 0.1446158 "Oligopeptide transport ATP-binding protein OppF"  
"JS1\_L14\_00226" 9008 "s63E6H2" 2.689299 "Oligopeptide transport ATP-binding protein OppF"  
"JS1\_L14\_00227" 9009 "s59E13H2" 0.6774427 "Oligopeptide transport ATP-binding protein OppD"  
"JS1\_L14\_00227" 9009 "s59E25H2" 0 "Oligopeptide transport ATP-binding protein OppD"  
"JS1\_L14\_00227" 9009 "s59E5H2" 0.1751971 "Oligopeptide transport ATP-binding protein OppD"  
"JS1\_L14\_00227" 9009 "s63E6H2" 2.128372 "Oligopeptide transport ATP-binding protein OppD"  
"JS1\_L14\_00228" 9010 "s59E13H2" 0.1726772 "putative D,D-dipeptide transport system permease protein DdpC"  
"JS1\_L14\_00228" 9010 "s59E25H2" 0.2741228 "putative D,D-dipeptide transport system permease protein DdpC"  
"JS1\_L14\_00228" 9010 "s59E5H2" 0.1145131 "putative D,D-dipeptide transport system permease protein DdpC"  
"JS1\_L14\_00228" 9010 "s63E6H2" 0.8415683 "putative D,D-dipeptide transport system permease protein DdpC"  
"JS1\_L14\_00229" 9011 "s59E13H2" 0.02275058 "Dipeptide transport system permease protein DppB"  
"JS1\_L14\_00229" 9011 "s59E25H2" 0 "Dipeptide transport system permease protein DppB"  
"JS1\_L14\_00229" 9011 "s59E5H2" 0.1207678 "Dipeptide transport system permease protein DppB"  
"JS1\_L14\_00229" 9011 "s63E6H2" 0.5584624 "Dipeptide transport system permease protein DppB"  
"JS1\_L14\_00230" 9012 "s59E13H2" 0.03254967 "Periplasmic dipeptide transport protein precursor"  
"JS1\_L14\_00230" 9012 "s59E25H2" 0 "Periplasmic dipeptide transport protein precursor"  
"JS1\_L14\_00230" 9012 "s59E5H2" 0.07473253 "Periplasmic dipeptide transport protein precursor"  
"JS1\_L14\_00230" 9012 "s63E6H2" 0.04779098 "Periplasmic dipeptide transport protein precursor"  
"JS1\_L14\_00231" 9013 "s59E13H2" 1.96903 "Hydrogen cyanide synthase subunit HcnB"  
"JS1\_L14\_00231" 9013 "s59E25H2" 0 "Hydrogen cyanide synthase subunit HcnB"  
"JS1\_L14\_00231" 9013 "s59E5H2" 1.56217 "Hydrogen cyanide synthase subunit HcnB"  
"JS1\_L14\_00231" 9013 "s63E6H2" 4.015456 "Hydrogen cyanide synthase subunit HcnB"  
"JS1\_L14\_00232" 9014 "s59E13H2" 0.3743159 "hypothetical protein"  
"JS1\_L14\_00232" 9014 "s59E25H2" 0 "hypothetical protein"  
"JS1\_L14\_00232" 9014 "s59E5H2" 3.386437 "hypothetical protein"  
"JS1\_L14\_00232" 9014 "s63E6H2" 4.963613 "hypothetical protein"  
"JS1\_L14\_00233" 9015 "s59E13H2" 0.3201556 "Glycerol-3-phosphate responsive antiterminator"  
"JS1\_L14\_00233" 9015 "s59E25H2" 0 "Glycerol-3-phosphate responsive antiterminator"  
"JS1\_L14\_00233" 9015 "s59E5H2" 2.029299 "Glycerol-3-phosphate responsive antiterminator"  
"JS1\_L14\_00233" 9015 "s63E6H2" 2.307952 "Glycerol-3-phosphate responsive antiterminator"  
"JS1\_L14\_00234" 9016 "s59E13H2" 2.878941 "sn-glycerol-3-phosphate-binding periplasmic protein UgpB precursor"  
"JS1\_L14\_00234" 9016 "s59E25H2" 0.3795455 "sn-glycerol-3-phosphate-binding periplasmic protein UgpB precursor"  
"JS1\_L14\_00234" 9016 "s59E5H2" 1.822592 "sn-glycerol-3-phosphate-binding periplasmic protein UgpB precursor"  
"JS1\_L14\_00234" 9016 "s63E6H2" 4.994302 "sn-glycerol-3-phosphate-binding periplasmic protein UgpB precursor"  
"JS1\_L14\_00235" 9017 "s59E13H2" 2.800723 "sn-glycerol-3-phosphate transport system permease protein UgpA"  
"JS1\_L14\_00235" 9017 "s59E25H2" 0 "sn-glycerol-3-phosphate transport system permease protein UgpA"  
"JS1\_L14\_00235" 9017 "s59E5H2" 1.353915 "sn-glycerol-3-phosphate transport system permease protein UgpA"  
"JS1\_L14\_00235" 9017 "s63E6H2" 0.950688 "sn-glycerol-3-phosphate transport system permease protein UgpA"  
"JS1\_L14\_00236" 9018 "s59E13H2" 0.8727925 "Lactose transport system permease protein LacG"

"JS1\_L14\_00236" 9018 "s59E25H2" 0 "Lactose transport system permease protein LacG"  
"JS1\_L14\_00236" 9018 "s59E5H2" 1.186256 "Lactose transport system permease protein LacG"  
"JS1\_L14\_00236" 9018 "s63E6H2" 1.099331 "Lactose transport system permease protein LacG"  
"JS1\_L14\_00237" 9019 "s59E13H2" 0.354017 "hypothetical protein"  
"JS1\_L14\_00237" 9019 "s59E25H2" 0 "hypothetical protein"  
"JS1\_L14\_00237" 9019 "s59E5H2" 0.04901729 "hypothetical protein"  
"JS1\_L14\_00237" 9019 "s63E6H2" 2.106593 "hypothetical protein"  
"JS1\_L14\_00238" 9020 "s59E13H2" 1.379621 "sn-glycerol-3-phosphate-binding periplasmic protein UgpB precursor"  
"JS1\_L14\_00238" 9020 "s59E25H2" 0.3786848 "sn-glycerol-3-phosphate-binding periplasmic protein UgpB precursor"  
"JS1\_L14\_00238" 9020 "s59E5H2" 0.09147436 "sn-glycerol-3-phosphate-binding periplasmic protein UgpB precursor"  
"JS1\_L14\_00238" 9020 "s63E6H2" 3.44312 "sn-glycerol-3-phosphate-binding periplasmic protein UgpB precursor"  
"JS1\_L14\_00239" 9021 "s59E13H2" 1.197108 "sn-glycerol-3-phosphate transport system permease protein UgpA"  
"JS1\_L14\_00239" 9021 "s59E25H2" 0.3287197 "sn-glycerol-3-phosphate transport system permease protein UgpA"  
"JS1\_L14\_00239" 9021 "s59E5H2" 0.1861825 "sn-glycerol-3-phosphate transport system permease protein UgpA"  
"JS1\_L14\_00239" 9021 "s63E6H2" 3.891418 "sn-glycerol-3-phosphate transport system permease protein UgpA"  
"JS1\_L14\_00240" 9022 "s59E13H2" 1.059246 "L-arabinose transport system permease protein AraQ"  
"JS1\_L14\_00240" 9022 "s59E25H2" 0.5833333 "L-arabinose transport system permease protein AraQ"  
"JS1\_L14\_00240" 9022 "s59E5H2" 0.6468481 "L-arabinose transport system permease protein AraQ"  
"JS1\_L14\_00240" 9022 "s63E6H2" 2.913304 "L-arabinose transport system permease protein AraQ"  
"JS1\_L14\_00241" 9023 "s59E13H2" 0 "hypothetical protein"  
"JS1\_L14\_00241" 9023 "s59E25H2" 0 "hypothetical protein"  
"JS1\_L14\_00241" 9023 "s59E5H2" 0 "hypothetical protein"  
"JS1\_L14\_00241" 9023 "s63E6H2" 0 "hypothetical protein"  
"JS1\_L14\_00242" 9024 "s59E13H2" 0.2431909 "MMPL family protein"  
"JS1\_L14\_00242" 9024 "s59E25H2" 0 "MMPL family protein"  
"JS1\_L14\_00242" 9024 "s59E5H2" 0.4792477 "MMPL family protein"  
"JS1\_L14\_00242" 9024 "s63E6H2" 0.6578713 "MMPL family protein"  
"JS1\_L14\_00243" 9025 "s59E13H2" 0.361371 "hypothetical protein"  
"JS1\_L14\_00243" 9025 "s59E25H2" 0 "hypothetical protein"  
"JS1\_L14\_00243" 9025 "s59E5H2" 0.8610645 "hypothetical protein"  
"JS1\_L14\_00243" 9025 "s63E6H2" 0.2944224 "hypothetical protein"  
"JS1\_L14\_00244" 9026 "s59E13H2" 0.1323029 "hypothetical protein"  
"JS1\_L14\_00244" 9026 "s59E25H2" 0.2035685 "hypothetical protein"  
"JS1\_L14\_00244" 9026 "s59E5H2" 0.8035129 "hypothetical protein"  
"JS1\_L14\_00244" 9026 "s63E6H2" 1.116504 "hypothetical protein"  
"JS1\_L14\_00245" 9027 "s59E13H2" 0.1954309 "HTH-type transcriptional regulator EthR"  
"JS1\_L14\_00245" 9027 "s59E25H2" 0 "HTH-type transcriptional regulator EthR"  
"JS1\_L14\_00245" 9027 "s59E5H2" 1.499089 "HTH-type transcriptional regulator EthR"  
"JS1\_L14\_00245" 9027 "s63E6H2" 1.71072 "HTH-type transcriptional regulator EthR"  
"JS1\_L14\_00246" 9028 "s59E13H2" 1.462256 "Glycerol kinase"  
"JS1\_L14\_00246" 9028 "s59E25H2" 0 "Glycerol kinase"  
"JS1\_L14\_00246" 9028 "s59E5H2" 1.191379 "Glycerol kinase"  
"JS1\_L14\_00246" 9028 "s63E6H2" 2.755689 "Glycerol kinase"  
"JS1\_L14\_00247" 9029 "s59E13H2" 0.4293896 "Galactokinase"  
"JS1\_L14\_00247" 9029 "s59E25H2" 0 "Galactokinase"  
"JS1\_L14\_00247" 9029 "s59E5H2" 0.4724838 "Galactokinase"  
"JS1\_L14\_00247" 9029 "s63E6H2" 0.6064246 "Galactokinase"

"JS1\_L14\_00248" 9030 "s59E13H2" 0.4111528 "Galactose-1-phosphate uridylyltransferase"  
"JS1\_L14\_00248" 9030 "s59E25H2" 0 "Galactose-1-phosphate uridylyltransferase"  
"JS1\_L14\_00248" 9030 "s59E5H2" 0.3673841 "Galactose-1-phosphate uridylyltransferase"  
"JS1\_L14\_00248" 9030 "s63E6H2" 0.2393214 "Galactose-1-phosphate uridylyltransferase"  
"JS1\_L14\_00249" 9031 "s59E13H2" 0.2676835 "Melibiase"  
"JS1\_L14\_00249" 9031 "s59E25H2" 0 "Melibiase"  
"JS1\_L14\_00249" 9031 "s59E5H2" 0.2412562 "Melibiase"  
"JS1\_L14\_00249" 9031 "s63E6H2" 0.06731213 "Melibiase"  
"JS1\_L14\_00250" 9032 "s59E13H2" 0.03914453 "Hypoxanthine phosphoribosyltransferase"  
"JS1\_L14\_00250" 9032 "s59E25H2" 0 "Hypoxanthine phosphoribosyltransferase"  
"JS1\_L14\_00250" 9032 "s59E5H2" 0.1593703 "Hypoxanthine phosphoribosyltransferase"  
"JS1\_L14\_00250" 9032 "s63E6H2" 0.05999921 "Hypoxanthine phosphoribosyltransferase"  
"JS1\_L23\_00001" 9033 "s59E13H2" 0.1501622 "Integrase core domain protein"  
"JS1\_L23\_00001" 9033 "s59E25H2" 0 "Integrase core domain protein"  
"JS1\_L23\_00001" 9033 "s59E5H2" 1.023183 "Integrase core domain protein"  
"JS1\_L23\_00001" 9033 "s63E6H2" 1.514855 "Integrase core domain protein"  
"JS1\_L23\_00002" 9034 "s59E13H2" 0.8591339 "Cyclic di-GMP phosphodiesterase response regulator RpfG"  
"JS1\_L23\_00002" 9034 "s59E25H2" 0 "Cyclic di-GMP phosphodiesterase response regulator RpfG"  
"JS1\_L23\_00002" 9034 "s59E5H2" 0.1637584 "Cyclic di-GMP phosphodiesterase response regulator RpfG"  
"JS1\_L23\_00002" 9034 "s63E6H2" 0.4313702 "Cyclic di-GMP phosphodiesterase response regulator RpfG"  
"JS1\_L23\_00004" 9036 "s59E13H2" 0.4684743 "Poly(A) polymerase I precursor"  
"JS1\_L23\_00004" 9036 "s59E25H2" 0 "Poly(A) polymerase I precursor"  
"JS1\_L23\_00004" 9036 "s59E5H2" 0.2890042 "Poly(A) polymerase I precursor"  
"JS1\_L23\_00004" 9036 "s63E6H2" 1.256523 "Poly(A) polymerase I precursor"  
"JS1\_L23\_00005" 9037 "s59E13H2" 0.3603559 "23S rRNA (uracil-C(5))-methyltransferase RlmCD"  
"JS1\_L23\_00005" 9037 "s59E25H2" 0 "23S rRNA (uracil-C(5))-methyltransferase RlmCD"  
"JS1\_L23\_00005" 9037 "s59E5H2" 0.368121 "23S rRNA (uracil-C(5))-methyltransferase RlmCD"  
"JS1\_L23\_00005" 9037 "s63E6H2" 1.253439 "23S rRNA (uracil-C(5))-methyltransferase RlmCD"  
"JS1\_L23\_00006" 9038 "s59E13H2" 0.7724674 "hypothetical protein"  
"JS1\_L23\_00006" 9038 "s59E25H2" 0 "hypothetical protein"  
"JS1\_L23\_00006" 9038 "s59E5H2" 2.484875 "hypothetical protein"  
"JS1\_L23\_00006" 9038 "s63E6H2" 2.419024 "hypothetical protein"  
"JS1\_L23\_00007" 9039 "s59E13H2" 0.7184185 "hypothetical protein"  
"JS1\_L23\_00007" 9039 "s59E25H2" 0 "hypothetical protein"  
"JS1\_L23\_00007" 9039 "s59E5H2" 0.7538878 "hypothetical protein"  
"JS1\_L23\_00007" 9039 "s63E6H2" 1.173319 "hypothetical protein"  
"JS1\_L23\_00008" 9040 "s59E13H2" 0.02086678 "UvrB/uvrC motif protein"  
"JS1\_L23\_00008" 9040 "s59E25H2" 0 "UvrB/uvrC motif protein"  
"JS1\_L23\_00008" 9040 "s59E5H2" 0.4701402 "UvrB/uvrC motif protein"  
"JS1\_L23\_00008" 9040 "s63E6H2" 0.08965417 "UvrB/uvrC motif protein"  
"JS1\_L23\_00009" 9041 "s59E13H2" 0.1117483 "Oligopeptide-binding protein AppA precursor"  
"JS1\_L23\_00009" 9041 "s59E25H2" 0 "Oligopeptide-binding protein AppA precursor"  
"JS1\_L23\_00009" 9041 "s59E5H2" 0.7402075 "Oligopeptide-binding protein AppA precursor"  
"JS1\_L23\_00009" 9041 "s63E6H2" 0.4060345 "Oligopeptide-binding protein AppA precursor"  
"JS1\_L23\_00010" 9042 "s59E13H2" 0.4869617 "Sulfur carrier protein ThiS"  
"JS1\_L23\_00010" 9042 "s59E25H2" 0 "Sulfur carrier protein ThiS"  
"JS1\_L23\_00010" 9042 "s59E5H2" 0.1542571 "Sulfur carrier protein ThiS"



"JS1\_L23\_00010" 9042 "s63E6H2" 1.694709 "Sulfur carrier protein ThiS"  
"JS1\_L23\_00011" 9043 "s59E13H2" 1.229451 "Tungsten-containing formaldehyde ferredoxin oxidoreductase"  
"JS1\_L23\_00011" 9043 "s59E25H2" 0 "Tungsten-containing formaldehyde ferredoxin oxidoreductase"  
"JS1\_L23\_00011" 9043 "s59E5H2" 0.5538934 "Tungsten-containing formaldehyde ferredoxin oxidoreductase"  
"JS1\_L23\_00011" 9043 "s63E6H2" 1.835162 "Tungsten-containing formaldehyde ferredoxin oxidoreductase"  
"JS1\_L23\_00012" 9044 "s59E13H2" 3.118595 "Malate-2H(+)/Na(+)-lactate antiporter"  
"JS1\_L23\_00012" 9044 "s59E25H2" 0 "Malate-2H(+)/Na(+)-lactate antiporter"  
"JS1\_L23\_00012" 9044 "s59E5H2" 0.4821132 "Malate-2H(+)/Na(+)-lactate antiporter"  
"JS1\_L23\_00012" 9044 "s63E6H2" 0.8138092 "Malate-2H(+)/Na(+)-lactate antiporter"  
"JS1\_L23\_00013" 9045 "s59E13H2" 0.5710662 "Transcriptional regulator MntR"  
"JS1\_L23\_00013" 9045 "s59E25H2" 0 "Transcriptional regulator MntR"  
"JS1\_L23\_00013" 9045 "s59E5H2" 0.3027594 "Transcriptional regulator MntR"  
"JS1\_L23\_00013" 9045 "s63E6H2" 3.489999 "Transcriptional regulator MntR"  
"JS1\_L23\_00014" 9046 "s59E13H2" 0.6207942 "FeoA domain protein"  
"JS1\_L23\_00014" 9046 "s59E25H2" 0 "FeoA domain protein"  
"JS1\_L23\_00014" 9046 "s59E5H2" 0.4568059 "FeoA domain protein"  
"JS1\_L23\_00014" 9046 "s63E6H2" 2.984984 "FeoA domain protein"  
"JS1\_L23\_00015" 9047 "s59E13H2" 0.1756547 "Pyruvate, phosphate dikinase"  
"JS1\_L23\_00015" 9047 "s59E25H2" 0 "Pyruvate, phosphate dikinase"  
"JS1\_L23\_00015" 9047 "s59E5H2" 0.1241286 "Pyruvate, phosphate dikinase"  
"JS1\_L23\_00015" 9047 "s63E6H2" 0.08444191 "Pyruvate, phosphate dikinase"  
"JS1\_L23\_00018" 9050 "s59E13H2" 0.004715466 "Transposase DDE domain protein"  
"JS1\_L23\_00018" 9050 "s59E25H2" 0 "Transposase DDE domain protein"  
"JS1\_L23\_00018" 9050 "s59E5H2" 0 "Transposase DDE domain protein"  
"JS1\_L23\_00018" 9050 "s63E6H2" 0.01719039 "Transposase DDE domain protein"  
"JS1\_L23\_00019" 9051 "s59E13H2" 0.01235895 "hypothetical protein"  
"JS1\_L23\_00019" 9051 "s59E25H2" 0 "hypothetical protein"  
"JS1\_L23\_00019" 9051 "s59E5H2" 0 "hypothetical protein"  
"JS1\_L23\_00019" 9051 "s63E6H2" 0 "hypothetical protein"  
"JS1\_L23\_00020" 9052 "s59E13H2" 0.1007093 "hypothetical protein"  
"JS1\_L23\_00020" 9052 "s59E25H2" 0 "hypothetical protein"  
"JS1\_L23\_00020" 9052 "s59E5H2" 0.5326746 "hypothetical protein"  
"JS1\_L23\_00020" 9052 "s63E6H2" 0.0460681 "hypothetical protein"  
"JS1\_L23\_00022" 9054 "s59E13H2" 0.1902724 "RNA polymerase factor sigma-70"  
"JS1\_L23\_00022" 9054 "s59E25H2" 0 "RNA polymerase factor sigma-70"  
"JS1\_L23\_00022" 9054 "s59E5H2" 0.03046381 "RNA polymerase factor sigma-70"  
"JS1\_L23\_00022" 9054 "s63E6H2" 2.128998 "RNA polymerase factor sigma-70"  
"JS1\_L23\_00023" 9055 "s59E13H2" 0.1285994 "putative DNA-binding protein"  
"JS1\_L23\_00023" 9055 "s59E25H2" 0 "putative DNA-binding protein"  
"JS1\_L23\_00023" 9055 "s59E5H2" 0.006632072 "putative DNA-binding protein"  
"JS1\_L23\_00023" 9055 "s63E6H2" 0.07877746 "putative DNA-binding protein"  
"JS1\_L23\_00024" 9056 "s59E13H2" 0.2824255 "Energy-coupling factor transporter ATP-binding protein EcfA1"  
"JS1\_L23\_00024" 9056 "s59E25H2" 0 "Energy-coupling factor transporter ATP-binding protein EcfA1"  
"JS1\_L23\_00024" 9056 "s59E5H2" 0.21959 "Energy-coupling factor transporter ATP-binding protein EcfA1"  
"JS1\_L23\_00024" 9056 "s63E6H2" 3.085967 "Energy-coupling factor transporter ATP-binding protein EcfA1"  
"JS1\_L23\_00025" 9057 "s59E13H2" 0.2829484 "Energy-coupling factor transporter ATP-binding protein EcfA2"  
"JS1\_L23\_00025" 9057 "s59E25H2" 0 "Energy-coupling factor transporter ATP-binding protein EcfA2"

"JS1\_L23\_00025" 9057 "s59E5H2" 0.5764172 "Energy-coupling factor transporter ATP-binding protein EcfA2"  
"JS1\_L23\_00025" 9057 "s63E6H2" 1.747319 "Energy-coupling factor transporter ATP-binding protein EcfA2"  
"JS1\_L23\_00026" 9058 "s59E13H2" 0.2728196 "Energy-coupling factor transporter transmembrane protein EcfT"  
"JS1\_L23\_00026" 9058 "s59E25H2" 0 "Energy-coupling factor transporter transmembrane protein EcfT"  
"JS1\_L23\_00026" 9058 "s59E5H2" 0.5534336 "Energy-coupling factor transporter transmembrane protein EcfT"  
"JS1\_L23\_00026" 9058 "s63E6H2" 0.9822624 "Energy-coupling factor transporter transmembrane protein EcfT"  
"JS1\_L23\_00027" 9059 "s59E13H2" 3.045991 "Integrase core domain protein"  
"JS1\_L23\_00027" 9059 "s59E25H2" 0 "Integrase core domain protein"  
"JS1\_L23\_00027" 9059 "s59E5H2" 1.149977 "Integrase core domain protein"  
"JS1\_L23\_00027" 9059 "s63E6H2" 1.487038 "Integrase core domain protein"  
"JS1\_L23\_00028" 9060 "s59E13H2" 0.01921068 "Transcriptional repressor MprA"  
"JS1\_L23\_00028" 9060 "s59E25H2" 0 "Transcriptional repressor MprA"  
"JS1\_L23\_00028" 9060 "s59E5H2" 0.2587315 "Transcriptional repressor MprA"  
"JS1\_L23\_00028" 9060 "s63E6H2" 0.5243821 "Transcriptional repressor MprA"  
"JS1\_L23\_00029" 9061 "s59E13H2" 0.1177482 "Thioredoxin-1"  
"JS1\_L23\_00029" 9061 "s59E25H2" 0 "Thioredoxin-1"  
"JS1\_L23\_00029" 9061 "s59E5H2" 0.5403911 "Thioredoxin-1"  
"JS1\_L23\_00029" 9061 "s63E6H2" 0.1085949 "Thioredoxin-1"  
"JS1\_L23\_00030" 9062 "s59E13H2" 0.8903575 "Ribonuclease"  
"JS1\_L23\_00030" 9062 "s59E25H2" 0 "Ribonuclease"  
"JS1\_L23\_00030" 9062 "s59E5H2" 0.3341111 "Ribonuclease"  
"JS1\_L23\_00030" 9062 "s63E6H2" 0.8087929 "Ribonuclease"  
"JS1\_L23\_00031" 9063 "s59E13H2" 1.008178 "Threonine synthase"  
"JS1\_L23\_00031" 9063 "s59E25H2" 0 "Threonine synthase"  
"JS1\_L23\_00031" 9063 "s59E5H2" 0.5690544 "Threonine synthase"  
"JS1\_L23\_00031" 9063 "s63E6H2" 0.763682 "Threonine synthase"  
"JS1\_L23\_00032" 9064 "s59E13H2" 0.05544618 "Methylmalonate-semialdehyde dehydrogenase [acylating]"  
"JS1\_L23\_00032" 9064 "s59E25H2" 0 "Methylmalonate-semialdehyde dehydrogenase [acylating]"  
"JS1\_L23\_00032" 9064 "s59E5H2" 0.2046952 "Methylmalonate-semialdehyde dehydrogenase [acylating]"  
"JS1\_L23\_00032" 9064 "s63E6H2" 0.03014123 "Methylmalonate-semialdehyde dehydrogenase [acylating]"  
"JS1\_L23\_00033" 9065 "s59E13H2" 0.06416442 "Transposase IS200 like protein"  
"JS1\_L23\_00033" 9065 "s59E25H2" 0 "Transposase IS200 like protein"  
"JS1\_L23\_00033" 9065 "s59E5H2" 0.1971141 "Transposase IS200 like protein"  
"JS1\_L23\_00033" 9065 "s63E6H2" 0.05392555 "Transposase IS200 like protein"  
"JS1\_L23\_00034" 9066 "s59E13H2" 0.09006601 "hypothetical protein"  
"JS1\_L23\_00034" 9066 "s59E25H2" 0 "hypothetical protein"  
"JS1\_L23\_00034" 9066 "s59E5H2" 0.1203706 "hypothetical protein"  
"JS1\_L23\_00034" 9066 "s63E6H2" 0.01402913 "hypothetical protein"  
"JS1\_L23\_00036" 9068 "s59E13H2" 0.5366453 "Homoserine dehydrogenase"  
"JS1\_L23\_00036" 9068 "s59E25H2" 0 "Homoserine dehydrogenase"  
"JS1\_L23\_00036" 9068 "s59E5H2" 0.1261164 "Homoserine dehydrogenase"  
"JS1\_L23\_00036" 9068 "s63E6H2" 0.2209092 "Homoserine dehydrogenase"  
"JS1\_L23\_00037" 9069 "s59E13H2" 0.2874296 "Homoserine kinase"  
"JS1\_L23\_00037" 9069 "s59E25H2" 0 "Homoserine kinase"  
"JS1\_L23\_00037" 9069 "s59E5H2" 0.1950176 "Homoserine kinase"  
"JS1\_L23\_00037" 9069 "s63E6H2" 0.5645263 "Homoserine kinase"  
"JS1\_L23\_00038" 9070 "s59E13H2" 1.307332 "Aspartokinase"

"JS1\_L23\_00038" 9070 "s59E25H2" 0 "Aspartokinase"  
"JS1\_L23\_00038" 9070 "s59E5H2" 0.5268291 "Aspartokinase"  
"JS1\_L23\_00038" 9070 "s63E6H2" 0.91275 "Aspartokinase"  
"JS1\_L23\_00039" 9071 "s59E13H2" 1.942377 "Aspartate-semialdehyde dehydrogenase"  
"JS1\_L23\_00039" 9071 "s59E25H2" 0 "Aspartate-semialdehyde dehydrogenase"  
"JS1\_L23\_00039" 9071 "s59E5H2" 0.5266588 "Aspartate-semialdehyde dehydrogenase"  
"JS1\_L23\_00039" 9071 "s63E6H2" 1.975012 "Aspartate-semialdehyde dehydrogenase"  
"JS1\_L23\_00040" 9072 "s59E13H2" 0.3323347 "Vancomycin/teicoplanin A-type resistance protein VanA"  
"JS1\_L23\_00040" 9072 "s59E25H2" 0 "Vancomycin/teicoplanin A-type resistance protein VanA"  
"JS1\_L23\_00040" 9072 "s59E5H2" 0.230681 "Vancomycin/teicoplanin A-type resistance protein VanA"  
"JS1\_L23\_00040" 9072 "s63E6H2" 1.994774 "Vancomycin/teicoplanin A-type resistance protein VanA"  
"JS1\_L23\_00041" 9073 "s59E13H2" 0.8419609 "TraB family protein"  
"JS1\_L23\_00041" 9073 "s59E25H2" 0 "TraB family protein"  
"JS1\_L23\_00041" 9073 "s59E5H2" 0.5539982 "TraB family protein"  
"JS1\_L23\_00041" 9073 "s63E6H2" 0.7881808 "TraB family protein"  
"JS1\_L23\_00042" 9074 "s59E13H2" 0.3608921 "hypothetical protein"  
"JS1\_L23\_00042" 9074 "s59E25H2" 0 "hypothetical protein"  
"JS1\_L23\_00042" 9074 "s59E5H2" 0.1343997 "hypothetical protein"  
"JS1\_L23\_00042" 9074 "s63E6H2" 0.1415301 "hypothetical protein"  
"JS1\_L23\_00043" 9075 "s59E13H2" 0.1530887 "flavodoxin"  
"JS1\_L23\_00043" 9075 "s59E25H2" 0 "flavodoxin"  
"JS1\_L23\_00043" 9075 "s59E5H2" 0.03865875 "flavodoxin"  
"JS1\_L23\_00043" 9075 "s63E6H2" 0.1714425 "flavodoxin"  
"JS1\_L23\_00044" 9076 "s59E13H2" 0.1250719 "CDP-alcohol phosphatidyltransferase"  
"JS1\_L23\_00044" 9076 "s59E25H2" 0 "CDP-alcohol phosphatidyltransferase"  
"JS1\_L23\_00044" 9076 "s59E5H2" 0.009473523 "CDP-alcohol phosphatidyltransferase"  
"JS1\_L23\_00044" 9076 "s63E6H2" 0.2477373 "CDP-alcohol phosphatidyltransferase"  
"JS1\_L23\_00045" 9077 "s59E13H2" 0.2100477 "Diacylglycerol kinase"  
"JS1\_L23\_00045" 9077 "s59E25H2" 0 "Diacylglycerol kinase"  
"JS1\_L23\_00045" 9077 "s59E5H2" 0.1789086 "Diacylglycerol kinase"  
"JS1\_L23\_00045" 9077 "s63E6H2" 8.270268 "Diacylglycerol kinase"  
"JS1\_L23\_00046" 9078 "s59E13H2" 0.1740906 "1-acyl-sn-glycerol-3-phosphate acyltransferase"  
"JS1\_L23\_00046" 9078 "s59E25H2" 0 "1-acyl-sn-glycerol-3-phosphate acyltransferase"  
"JS1\_L23\_00046" 9078 "s59E5H2" 0.1408634 "1-acyl-sn-glycerol-3-phosphate acyltransferase"  
"JS1\_L23\_00046" 9078 "s63E6H2" 8.073488 "1-acyl-sn-glycerol-3-phosphate acyltransferase"  
"JS1\_L23\_00047" 9079 "s59E13H2" 2.805985 "putative tRNA-dihydrouridine synthase"  
"JS1\_L23\_00047" 9079 "s59E25H2" 0 "putative tRNA-dihydrouridine synthase"  
"JS1\_L23\_00047" 9079 "s59E5H2" 0.2820565 "putative tRNA-dihydrouridine synthase"  
"JS1\_L23\_00047" 9079 "s63E6H2" 0.3381742 "putative tRNA-dihydrouridine synthase"  
"JS1\_L23\_00048" 9080 "s59E13H2" 0.1968332 "hypothetical protein"  
"JS1\_L23\_00048" 9080 "s59E25H2" 0 "hypothetical protein"  
"JS1\_L23\_00048" 9080 "s59E5H2" 0.3113592 "hypothetical protein"  
"JS1\_L23\_00048" 9080 "s63E6H2" 0.02976209 "hypothetical protein"  
"JS1\_L23\_00049" 9081 "s59E13H2" 0.3007937 "Dihydrolipoyl dehydrogenase"  
"JS1\_L23\_00049" 9081 "s59E25H2" 0 "Dihydrolipoyl dehydrogenase"  
"JS1\_L23\_00049" 9081 "s59E5H2" 0.5953481 "Dihydrolipoyl dehydrogenase"  
"JS1\_L23\_00049" 9081 "s63E6H2" 0.0688771 "Dihydrolipoyl dehydrogenase"

"JS1\_L23\_00050" 9082 "s59E13H2" 0.32875 "DNA alkylation repair enzyme"  
"JS1\_L23\_00050" 9082 "s59E25H2" 0 "DNA alkylation repair enzyme"  
"JS1\_L23\_00050" 9082 "s59E5H2" 0.5061129 "DNA alkylation repair enzyme"  
"JS1\_L23\_00050" 9082 "s63E6H2" 0.2779987 "DNA alkylation repair enzyme"  
"JS1\_L23\_00053" 9085 "s59E13H2" 0.2493176 "FMN reductase [NAD(P)H]"  
"JS1\_L23\_00053" 9085 "s59E25H2" 0 "FMN reductase [NAD(P)H]"  
"JS1\_L23\_00053" 9085 "s59E5H2" 0.06348042 "FMN reductase [NAD(P)H]"  
"JS1\_L23\_00053" 9085 "s63E6H2" 9.263704 "FMN reductase [NAD(P)H]"  
"JS1\_L23\_00054" 9086 "s59E13H2" 0.4538078 "Glyoxalase-like domain protein"  
"JS1\_L23\_00054" 9086 "s59E25H2" 0 "Glyoxalase-like domain protein"  
"JS1\_L23\_00054" 9086 "s59E5H2" 0.1153943 "Glyoxalase-like domain protein"  
"JS1\_L23\_00054" 9086 "s63E6H2" 10.90422 "Glyoxalase-like domain protein"  
"JS1\_L23\_00055" 9087 "s59E13H2" 0.2230942 "Rubrerythrin"  
"JS1\_L23\_00055" 9087 "s59E25H2" 0 "Rubrerythrin"  
"JS1\_L23\_00055" 9087 "s59E5H2" 0.5680111 "Rubrerythrin"  
"JS1\_L23\_00055" 9087 "s63E6H2" 1.055893 "Rubrerythrin"  
"JS1\_L23\_00056" 9088 "s59E13H2" 0.114197 "hypothetical protein"  
"JS1\_L23\_00056" 9088 "s59E25H2" 0 "hypothetical protein"  
"JS1\_L23\_00056" 9088 "s59E5H2" 0.4602258 "hypothetical protein"  
"JS1\_L23\_00056" 9088 "s63E6H2" 3.539936 "hypothetical protein"  
"JS1\_L23\_00057" 9089 "s59E13H2" 0.3300614 "Exodeoxyribonuclease"  
"JS1\_L23\_00057" 9089 "s59E25H2" 0 "Exodeoxyribonuclease"  
"JS1\_L23\_00057" 9089 "s59E5H2" 1.633831 "Exodeoxyribonuclease"  
"JS1\_L23\_00057" 9089 "s63E6H2" 0.2237194 "Exodeoxyribonuclease"  
"JS1\_L23\_00058" 9090 "s59E13H2" 4.358289 "Isoprenylcysteine carboxyl methyltransferase (ICMT) family protein"  
"JS1\_L23\_00058" 9090 "s59E25H2" 0 "Isoprenylcysteine carboxyl methyltransferase (ICMT) family protein"  
"JS1\_L23\_00058" 9090 "s59E5H2" 0.7350525 "Isoprenylcysteine carboxyl methyltransferase (ICMT) family protein"  
"JS1\_L23\_00058" 9090 "s63E6H2" 4.184695 "Isoprenylcysteine carboxyl methyltransferase (ICMT) family protein"  
"JS1\_L23\_00060" 9092 "s59E13H2" 1.790364 "hypothetical protein"  
"JS1\_L23\_00060" 9092 "s59E25H2" 0 "hypothetical protein"  
"JS1\_L23\_00060" 9092 "s59E5H2" 2.695565 "hypothetical protein"  
"JS1\_L23\_00060" 9092 "s63E6H2" 0.2023117 "hypothetical protein"  
"JS1\_L23\_00061" 9093 "s59E13H2" 0.2277059 "Sialic acid TRAP transporter permease protein SiaT"  
"JS1\_L23\_00061" 9093 "s59E25H2" 0 "Sialic acid TRAP transporter permease protein SiaT"  
"JS1\_L23\_00061" 9093 "s59E5H2" 4.610703 "Sialic acid TRAP transporter permease protein SiaT"  
"JS1\_L23\_00061" 9093 "s63E6H2" 0 "Sialic acid TRAP transporter permease protein SiaT"  
"JS1\_L23\_00062" 9094 "s59E13H2" 0.2170891 "2,3-diketo-L-gulonate TRAP transporter small permease protein YiaM"  
"JS1\_L23\_00062" 9094 "s59E25H2" 0 "2,3-diketo-L-gulonate TRAP transporter small permease protein YiaM"  
"JS1\_L23\_00062" 9094 "s59E5H2" 3.493007 "2,3-diketo-L-gulonate TRAP transporter small permease protein YiaM"  
"JS1\_L23\_00062" 9094 "s63E6H2" 0 "2,3-diketo-L-gulonate TRAP transporter small permease protein YiaM"  
"JS1\_L23\_00063" 9095 "s59E13H2" 0.2584851 "2,3-diketo-L-gulonate-binding periplasmic protein YiaO precursor"  
"JS1\_L23\_00063" 9095 "s59E25H2" 0 "2,3-diketo-L-gulonate-binding periplasmic protein YiaO precursor"  
"JS1\_L23\_00063" 9095 "s59E5H2" 1.726622 "2,3-diketo-L-gulonate-binding periplasmic protein YiaO precursor"  
"JS1\_L23\_00063" 9095 "s63E6H2" 0 "2,3-diketo-L-gulonate-binding periplasmic protein YiaO precursor"  
"JS1\_L23\_00064" 9096 "s59E13H2" 0.3119781 "Lon protease 1"  
"JS1\_L23\_00064" 9096 "s59E25H2" 0 "Lon protease 1"  
"JS1\_L23\_00064" 9096 "s59E5H2" 0.2180812 "Lon protease 1"

"JS1\_L23\_00064" 9096 "s63E6H2" 0.1240189 "Lon protease 1"  
"JS1\_L23\_00066" 9098 "s59E13H2" 0.6753185 "Valine--tRNA ligase"  
"JS1\_L23\_00066" 9098 "s59E25H2" 0 "Valine--tRNA ligase"  
"JS1\_L23\_00066" 9098 "s59E5H2" 0.3339514 "Valine--tRNA ligase"  
"JS1\_L23\_00066" 9098 "s63E6H2" 0.1920121 "Valine--tRNA ligase"  
"JS1\_L23\_00067" 9099 "s59E13H2" 0.05800786 "Serine hydroxymethyltransferase"  
"JS1\_L23\_00067" 9099 "s59E25H2" 0 "Serine hydroxymethyltransferase"  
"JS1\_L23\_00067" 9099 "s59E5H2" 0.1794202 "Serine hydroxymethyltransferase"  
"JS1\_L23\_00067" 9099 "s63E6H2" 0.1090245 "Serine hydroxymethyltransferase"  
"JS1\_L23\_00068" 9100 "s59E13H2" 0.06794833 "Xaa-Pro dipeptidase"  
"JS1\_L23\_00068" 9100 "s59E25H2" 0 "Xaa-Pro dipeptidase"  
"JS1\_L23\_00068" 9100 "s59E5H2" 0.09830042 "Xaa-Pro dipeptidase"  
"JS1\_L23\_00068" 9100 "s63E6H2" 0.01612747 "Xaa-Pro dipeptidase"  
"JS1\_L23\_00069" 9101 "s59E13H2" 0.06395411 "Ribosomal protein S12 methylthiotransferase RimO"  
"JS1\_L23\_00069" 9101 "s59E25H2" 0.3713647 "Ribosomal protein S12 methylthiotransferase RimO"  
"JS1\_L23\_00069" 9101 "s59E5H2" 0.1032183 "Ribosomal protein S12 methylthiotransferase RimO"  
"JS1\_L23\_00069" 9101 "s63E6H2" 0.094943 "Ribosomal protein S12 methylthiotransferase RimO"  
"JS1\_L23\_00070" 9102 "s59E13H2" 0.06363968 "hypothetical protein"  
"JS1\_L23\_00070" 9102 "s59E25H2" 0 "hypothetical protein"  
"JS1\_L23\_00070" 9102 "s59E5H2" 0.06549913 "hypothetical protein"  
"JS1\_L23\_00070" 9102 "s63E6H2" 0.03404752 "hypothetical protein"  
"JS1\_L23\_00071" 9103 "s59E13H2" 0.1954958 "Transposase IS116/IS110/IS902 family protein"  
"JS1\_L23\_00071" 9103 "s59E25H2" 0 "Transposase IS116/IS110/IS902 family protein"  
"JS1\_L23\_00071" 9103 "s59E5H2" 0.3824403 "Transposase IS116/IS110/IS902 family protein"  
"JS1\_L23\_00071" 9103 "s63E6H2" 1.035529 "Transposase IS116/IS110/IS902 family protein"  
"JS1\_L23\_00072" 9104 "s59E13H2" 0.02048894 "hypothetical protein"  
"JS1\_L23\_00072" 9104 "s59E25H2" 0 "hypothetical protein"  
"JS1\_L23\_00072" 9104 "s59E5H2" 0 "hypothetical protein"  
"JS1\_L23\_00072" 9104 "s63E6H2" 0.01362962 "hypothetical protein"  
"JS1\_L23\_00074" 9106 "s59E13H2" 0.01807005 "RNA polymerase-associated protein RapA"  
"JS1\_L23\_00074" 9106 "s59E25H2" 0 "RNA polymerase-associated protein RapA"  
"JS1\_L23\_00074" 9106 "s59E5H2" 0.4285157 "RNA polymerase-associated protein RapA"  
"JS1\_L23\_00074" 9106 "s63E6H2" 0.001565055 "RNA polymerase-associated protein RapA"  
"JS1\_L23\_00075" 9107 "s59E13H2" 0.02306421 "hypothetical protein"  
"JS1\_L23\_00075" 9107 "s59E25H2" 0 "hypothetical protein"  
"JS1\_L23\_00075" 9107 "s59E5H2" 0.1500335 "hypothetical protein"  
"JS1\_L23\_00075" 9107 "s63E6H2" 0.002231498 "hypothetical protein"  
"JS1\_L23\_00076" 9108 "s59E13H2" 0.01734486 "hypothetical protein"  
"JS1\_L23\_00076" 9108 "s59E25H2" 0 "hypothetical protein"  
"JS1\_L23\_00076" 9108 "s59E5H2" 0.3576491 "hypothetical protein"  
"JS1\_L23\_00076" 9108 "s63E6H2" 0.00235365 "hypothetical protein"  
"JS1\_L23\_00078" 9110 "s59E13H2" 0 "Modification methylase HaeIII"  
"JS1\_L23\_00078" 9110 "s59E25H2" 0 "Modification methylase HaeIII"  
"JS1\_L23\_00078" 9110 "s59E5H2" 0 "Modification methylase HaeIII"  
"JS1\_L23\_00078" 9110 "s63E6H2" 0.01403701 "Modification methylase HaeIII"  
"JS1\_L23\_00079" 9111 "s59E13H2" 0 "heat shock protein 90"  
"JS1\_L23\_00079" 9111 "s59E25H2" 0 "heat shock protein 90"

"JS1\_L23\_00079" 9111 "s59E5H2" 0.009685698 "heat shock protein 90"  
"JS1\_L23\_00079" 9111 "s63E6H2" 0.009024811 "heat shock protein 90"  
"JS1\_L23\_00080" 9112 "s59E13H2" 0 "Very short patch repair protein"  
"JS1\_L23\_00080" 9112 "s59E25H2" 0 "Very short patch repair protein"  
"JS1\_L23\_00080" 9112 "s59E5H2" 0 "Very short patch repair protein"  
"JS1\_L23\_00080" 9112 "s63E6H2" 0 "Very short patch repair protein"  
"JS1\_L23\_00081" 9113 "s59E13H2" 0 "hypothetical protein"  
"JS1\_L23\_00081" 9113 "s59E25H2" 0 "hypothetical protein"  
"JS1\_L23\_00081" 9113 "s59E5H2" 0 "hypothetical protein"  
"JS1\_L23\_00081" 9113 "s63E6H2" 0 "hypothetical protein"  
"JS1\_L23\_00082" 9114 "s59E13H2" 0 "Serine/threonine-protein kinase PknD"  
"JS1\_L23\_00082" 9114 "s59E25H2" 0 "Serine/threonine-protein kinase PknD"  
"JS1\_L23\_00082" 9114 "s59E5H2" 0 "Serine/threonine-protein kinase PknD"  
"JS1\_L23\_00082" 9114 "s63E6H2" 0 "Serine/threonine-protein kinase PknD"  
"JS1\_L23\_00084" 9116 "s59E13H2" 0.01516626 "5'-methylthioadenosine/S-adenosylhomocysteine nucleosidase"  
"JS1\_L23\_00084" 9116 "s59E25H2" 0 "5'-methylthioadenosine/S-adenosylhomocysteine nucleosidase"  
"JS1\_L23\_00084" 9116 "s59E5H2" 0 "5'-methylthioadenosine/S-adenosylhomocysteine nucleosidase"  
"JS1\_L23\_00084" 9116 "s63E6H2" 0 "5'-methylthioadenosine/S-adenosylhomocysteine nucleosidase"  
"JS1\_L23\_00086" 9118 "s59E13H2" 0.08068487 "hypothetical protein"  
"JS1\_L23\_00086" 9118 "s59E25H2" 0 "hypothetical protein"  
"JS1\_L23\_00086" 9118 "s59E5H2" 0 "hypothetical protein"  
"JS1\_L23\_00086" 9118 "s63E6H2" 0.03039876 "hypothetical protein"  
"JS1\_L23\_00088" 9120 "s59E13H2" 0.6153195 "Endonuclease III"  
"JS1\_L23\_00088" 9120 "s59E25H2" 0 "Endonuclease III"  
"JS1\_L23\_00088" 9120 "s59E5H2" 0.02931081 "Endonuclease III"  
"JS1\_L23\_00088" 9120 "s63E6H2" 0 "Endonuclease III"  
"JS1\_L23\_00089" 9121 "s59E13H2" 0.1348139 "hypothetical protein"  
"JS1\_L23\_00089" 9121 "s59E25H2" 0 "hypothetical protein"  
"JS1\_L23\_00089" 9121 "s59E5H2" 0 "hypothetical protein"  
"JS1\_L23\_00089" 9121 "s63E6H2" 0 "hypothetical protein"  
"JS1\_L23\_00090" 9122 "s59E13H2" 0.2173748 "hypothetical protein"  
"JS1\_L23\_00090" 9122 "s59E25H2" 0 "hypothetical protein"  
"JS1\_L23\_00090" 9122 "s59E5H2" 1.023108 "hypothetical protein"  
"JS1\_L23\_00090" 9122 "s63E6H2" 0.1037853 "hypothetical protein"  
"JS1\_L23\_00091" 9123 "s59E13H2" 0.1964044 "hypothetical protein"  
"JS1\_L23\_00091" 9123 "s59E25H2" 0 "hypothetical protein"  
"JS1\_L23\_00091" 9123 "s59E5H2" 1.261389 "hypothetical protein"  
"JS1\_L23\_00091" 9123 "s63E6H2" 0.07752542 "hypothetical protein"  
"JS1\_L23\_00092" 9124 "s59E13H2" 0.2400114 "hypothetical protein"  
"JS1\_L23\_00092" 9124 "s59E25H2" 0 "hypothetical protein"  
"JS1\_L23\_00092" 9124 "s59E5H2" 0 "hypothetical protein"  
"JS1\_L23\_00092" 9124 "s63E6H2" 0 "hypothetical protein"  
"JS1\_L23\_00093" 9125 "s59E13H2" 0.2521234 "RNA-metabolising metallo-beta-lactamase"  
"JS1\_L23\_00093" 9125 "s59E25H2" 0 "RNA-metabolising metallo-beta-lactamase"  
"JS1\_L23\_00093" 9125 "s59E5H2" 0.1025956 "RNA-metabolising metallo-beta-lactamase"  
"JS1\_L23\_00093" 9125 "s63E6H2" 0.2191692 "RNA-metabolising metallo-beta-lactamase"  
"JS1\_L23\_00094" 9126 "s59E13H2" 0.4127183 "hypothetical protein"

"JS1\_L23\_00094" 9126 "s59E25H2" 0.5242165 "hypothetical protein"  
"JS1\_L23\_00094" 9126 "s59E5H2" 0.06563211 "hypothetical protein"  
"JS1\_L23\_00094" 9126 "s63E6H2" 0 "hypothetical protein"  
"JS1\_L23\_00095" 9127 "s59E13H2" 0.3242342 "hypothetical protein"  
"JS1\_L23\_00095" 9127 "s59E25H2" 0.1343042 "hypothetical protein"  
"JS1\_L23\_00095" 9127 "s59E5H2" 0.8132886 "hypothetical protein"  
"JS1\_L23\_00095" 9127 "s63E6H2" 0.001987082 "hypothetical protein"  
"JS1\_L23\_00096" 9128 "s59E13H2" 11.09879 "Transposase IS116/IS110/IS902 family protein"  
"JS1\_L23\_00096" 9128 "s59E25H2" 0 "Transposase IS116/IS110/IS902 family protein"  
"JS1\_L23\_00096" 9128 "s59E5H2" 0.5068116 "Transposase IS116/IS110/IS902 family protein"  
"JS1\_L23\_00096" 9128 "s63E6H2" 2.743151 "Transposase IS116/IS110/IS902 family protein"  
"JS1\_L23\_00097" 9129 "s59E13H2" 0.4022521 "cobalt-precorrin-6Y C(15)-methyltransferase"  
"JS1\_L23\_00097" 9129 "s59E25H2" 0 "cobalt-precorrin-6Y C(15)-methyltransferase"  
"JS1\_L23\_00097" 9129 "s59E5H2" 0 "cobalt-precorrin-6Y C(15)-methyltransferase"  
"JS1\_L23\_00097" 9129 "s63E6H2" 0 "cobalt-precorrin-6Y C(15)-methyltransferase"  
"JS1\_L23\_00098" 9130 "s59E13H2" 0.5578083 "hypothetical protein"  
"JS1\_L23\_00098" 9130 "s59E25H2" 0 "hypothetical protein"  
"JS1\_L23\_00098" 9130 "s59E5H2" 0 "hypothetical protein"  
"JS1\_L23\_00098" 9130 "s63E6H2" 0 "hypothetical protein"  
"JS1\_L23\_00099" 9131 "s59E13H2" 0.5046195 "hypothetical protein"  
"JS1\_L23\_00099" 9131 "s59E25H2" 0 "hypothetical protein"  
"JS1\_L23\_00099" 9131 "s59E5H2" 0 "hypothetical protein"  
"JS1\_L23\_00099" 9131 "s63E6H2" 0 "hypothetical protein"  
"JS1\_L23\_00100" 9132 "s59E13H2" 1.870788 "short chain dehydrogenase"  
"JS1\_L23\_00100" 9132 "s59E25H2" 0 "short chain dehydrogenase"  
"JS1\_L23\_00100" 9132 "s59E5H2" 1.147667 "short chain dehydrogenase"  
"JS1\_L23\_00100" 9132 "s63E6H2" 0.6562111 "short chain dehydrogenase"  
"JS1\_L23\_00102" 9134 "s59E13H2" 0.4165946 "hypothetical protein"  
"JS1\_L23\_00102" 9134 "s59E25H2" 0 "hypothetical protein"  
"JS1\_L23\_00102" 9134 "s59E5H2" 0.01409474 "hypothetical protein"  
"JS1\_L23\_00102" 9134 "s63E6H2" 0.169092 "hypothetical protein"  
"JS1\_L23\_00105" 9137 "s59E13H2" 0.4420871 "hypothetical protein"  
"JS1\_L23\_00105" 9137 "s59E25H2" 0 "hypothetical protein"  
"JS1\_L23\_00105" 9137 "s59E5H2" 0.08393308 "hypothetical protein"  
"JS1\_L23\_00105" 9137 "s63E6H2" 0.6337983 "hypothetical protein"  
"JS1\_L23\_00106" 9138 "s59E13H2" 1.390994 "ribosomal-protein-alanine N-acetyltransferase"  
"JS1\_L23\_00106" 9138 "s59E25H2" 0 "ribosomal-protein-alanine N-acetyltransferase"  
"JS1\_L23\_00106" 9138 "s59E5H2" 0.3988216 "ribosomal-protein-alanine N-acetyltransferase"  
"JS1\_L23\_00106" 9138 "s63E6H2" 0.7293085 "ribosomal-protein-alanine N-acetyltransferase"  
"JS1\_L23\_00107" 9139 "s59E13H2" 0.5090463 "hypothetical protein"  
"JS1\_L23\_00107" 9139 "s59E25H2" 0 "hypothetical protein"  
"JS1\_L23\_00107" 9139 "s59E5H2" 0.07575482 "hypothetical protein"  
"JS1\_L23\_00107" 9139 "s63E6H2" 0.7414857 "hypothetical protein"  
"JS1\_L23\_00108" 9140 "s59E13H2" 1.955655 "RNA recognition motif. (a.k.a. RRM, RBD, or RNP domain)"  
"JS1\_L23\_00108" 9140 "s59E25H2" 0 "RNA recognition motif. (a.k.a. RRM, RBD, or RNP domain)"  
"JS1\_L23\_00108" 9140 "s59E5H2" 15.08748 "RNA recognition motif. (a.k.a. RRM, RBD, or RNP domain)"  
"JS1\_L23\_00108" 9140 "s63E6H2" 2.401657 "RNA recognition motif. (a.k.a. RRM, RBD, or RNP domain)"

"JS1\_L23\_00109" 9141 "s59E13H2" 0.004861631 "methylcobalamin:coenzyme M methyltransferase"  
"JS1\_L23\_00109" 9141 "s59E25H2" 0 "methylcobalamin:coenzyme M methyltransferase"  
"JS1\_L23\_00109" 9141 "s59E5H2" 0 "methylcobalamin:coenzyme M methyltransferase"  
"JS1\_L23\_00109" 9141 "s63E6H2" 0 "methylcobalamin:coenzyme M methyltransferase"  
"JS1\_L23\_00110" 9142 "s59E13H2" 0.0009088069 "1-deoxy-D-xylulose-5-phosphate synthase"  
"JS1\_L23\_00110" 9142 "s59E25H2" 0 "1-deoxy-D-xylulose-5-phosphate synthase"  
"JS1\_L23\_00110" 9142 "s59E5H2" 0 "1-deoxy-D-xylulose-5-phosphate synthase"  
"JS1\_L23\_00110" 9142 "s63E6H2" 0 "1-deoxy-D-xylulose-5-phosphate synthase"  
"JS1\_L23\_00111" 9143 "s59E13H2" 0 "Transketolase 1"  
"JS1\_L23\_00111" 9143 "s59E25H2" 0 "Transketolase 1"  
"JS1\_L23\_00111" 9143 "s59E5H2" 0 "Transketolase 1"  
"JS1\_L23\_00111" 9143 "s63E6H2" 0 "Transketolase 1"  
"JS1\_L23\_00112" 9144 "s59E13H2" 0.00264975 "5-deoxy-glucuronate isomerase"  
"JS1\_L23\_00112" 9144 "s59E25H2" 0 "5-deoxy-glucuronate isomerase"  
"JS1\_L23\_00112" 9144 "s59E5H2" 0 "5-deoxy-glucuronate isomerase"  
"JS1\_L23\_00112" 9144 "s63E6H2" 0 "5-deoxy-glucuronate isomerase"  
"JS1\_L23\_00113" 9145 "s59E13H2" 0 "Sialic acid TRAP transporter permease protein SiaT"  
"JS1\_L23\_00113" 9145 "s59E25H2" 0 "Sialic acid TRAP transporter permease protein SiaT"  
"JS1\_L23\_00113" 9145 "s59E5H2" 0 "Sialic acid TRAP transporter permease protein SiaT"  
"JS1\_L23\_00113" 9145 "s63E6H2" 0 "Sialic acid TRAP transporter permease protein SiaT"  
"JS1\_L23\_00114" 9146 "s59E13H2" 0.008720063 "Sialic acid TRAP transporter permease protein SiaT"  
"JS1\_L23\_00114" 9146 "s59E25H2" 0 "Sialic acid TRAP transporter permease protein SiaT"  
"JS1\_L23\_00114" 9146 "s59E5H2" 0 "Sialic acid TRAP transporter permease protein SiaT"  
"JS1\_L23\_00114" 9146 "s63E6H2" 0 "Sialic acid TRAP transporter permease protein SiaT"  
"JS1\_L23\_00115" 9147 "s59E13H2" 0.00784085 "2,3-diketo-L-gulonate TRAP transporter small permease protein YiaM"  
"JS1\_L23\_00115" 9147 "s59E25H2" 0 "2,3-diketo-L-gulonate TRAP transporter small permease protein YiaM"  
"JS1\_L23\_00115" 9147 "s59E5H2" 0 "2,3-diketo-L-gulonate TRAP transporter small permease protein YiaM"  
"JS1\_L23\_00115" 9147 "s63E6H2" 0 "2,3-diketo-L-gulonate TRAP transporter small permease protein YiaM"  
"JS1\_L23\_00116" 9148 "s59E13H2" 0.004497811 "2,3-diketo-L-gulonate-binding periplasmic protein YiaO precursor"  
"JS1\_L23\_00116" 9148 "s59E25H2" 0 "2,3-diketo-L-gulonate-binding periplasmic protein YiaO precursor"  
"JS1\_L23\_00116" 9148 "s59E5H2" 0 "2,3-diketo-L-gulonate-binding periplasmic protein YiaO precursor"  
"JS1\_L23\_00116" 9148 "s63E6H2" 0 "2,3-diketo-L-gulonate-binding periplasmic protein YiaO precursor"  
"JS1\_L23\_00117" 9149 "s59E13H2" 0.0326015 "putative homocitrate synthase AksA"  
"JS1\_L23\_00117" 9149 "s59E25H2" 0 "putative homocitrate synthase AksA"  
"JS1\_L23\_00117" 9149 "s59E5H2" 0.008741621 "putative homocitrate synthase AksA"  
"JS1\_L23\_00117" 9149 "s63E6H2" 0 "putative homocitrate synthase AksA"  
"JS1\_L23\_00118" 9150 "s59E13H2" 0.03697522 "Glyoxylate reductase"  
"JS1\_L23\_00118" 9150 "s59E25H2" 0 "Glyoxylate reductase"  
"JS1\_L23\_00118" 9150 "s59E5H2" 0 "Glyoxylate reductase"  
"JS1\_L23\_00118" 9150 "s63E6H2" 0 "Glyoxylate reductase"  
"JS1\_L23\_00119" 9151 "s59E13H2" 0.02246442 "HTH-type transcriptional regulator LutR"  
"JS1\_L23\_00119" 9151 "s59E25H2" 0 "HTH-type transcriptional regulator LutR"  
"JS1\_L23\_00119" 9151 "s59E5H2" 0.01128464 "HTH-type transcriptional regulator LutR"  
"JS1\_L23\_00119" 9151 "s63E6H2" 0 "HTH-type transcriptional regulator LutR"  
"JS1\_L23\_00121" 9153 "s59E13H2" 0.2754771 "Peptidase M15"  
"JS1\_L23\_00121" 9153 "s59E25H2" 0.3897436 "Peptidase M15"  
"JS1\_L23\_00121" 9153 "s59E5H2" 5.510617 "Peptidase M15"



"JS1\_L23\_00121" 9153 "s63E6H2" 0.808717 "Peptidase M15"  
"JS1\_L23\_00122" 9154 "s59E13H2" 0.2366051 "hypothetical protein"  
"JS1\_L23\_00122" 9154 "s59E25H2" 0.6969697 "hypothetical protein"  
"JS1\_L23\_00122" 9154 "s59E5H2" 7.037768 "hypothetical protein"  
"JS1\_L23\_00122" 9154 "s63E6H2" 0.6547211 "hypothetical protein"  
"JS1\_L23\_00123" 9155 "s59E13H2" 0.04777193 "hypothetical protein"  
"JS1\_L23\_00123" 9155 "s59E25H2" 0 "hypothetical protein"  
"JS1\_L23\_00123" 9155 "s59E5H2" 1.89416 "hypothetical protein"  
"JS1\_L23\_00123" 9155 "s63E6H2" 0.1061983 "hypothetical protein"  
"JS1\_L23\_00124" 9156 "s59E13H2" 0.09719525 "hypothetical protein"  
"JS1\_L23\_00124" 9156 "s59E25H2" 0 "hypothetical protein"  
"JS1\_L23\_00124" 9156 "s59E5H2" 1.563295 "hypothetical protein"  
"JS1\_L23\_00124" 9156 "s63E6H2" 0.2223473 "hypothetical protein"  
"JS1\_L23\_00125" 9157 "s59E13H2" 0.03497799 "hypothetical protein"  
"JS1\_L23\_00125" 9157 "s59E25H2" 0 "hypothetical protein"  
"JS1\_L23\_00125" 9157 "s59E5H2" 0 "hypothetical protein"  
"JS1\_L23\_00125" 9157 "s63E6H2" 0.001454261 "hypothetical protein"  
"JS1\_L23\_00126" 9158 "s59E13H2" 0.05504244 "GTP pyrophosphokinase YwaC"  
"JS1\_L23\_00126" 9158 "s59E25H2" 0 "GTP pyrophosphokinase YwaC"  
"JS1\_L23\_00126" 9158 "s59E5H2" 0 "GTP pyrophosphokinase YwaC"  
"JS1\_L23\_00126" 9158 "s63E6H2" 0.06338537 "GTP pyrophosphokinase YwaC"  
"JS1\_L23\_00127" 9159 "s59E13H2" 0.08053922 "N5-glutamine S-adenosyl-L-methionine-dependent methyltransferase"  
"JS1\_L23\_00127" 9159 "s59E25H2" 0 "N5-glutamine S-adenosyl-L-methionine-dependent methyltransferase"  
"JS1\_L23\_00127" 9159 "s59E5H2" 0.08628937 "N5-glutamine S-adenosyl-L-methionine-dependent methyltransferase"  
"JS1\_L23\_00127" 9159 "s63E6H2" 0.0998926 "N5-glutamine S-adenosyl-L-methionine-dependent methyltransferase"  
"JS1\_L23\_00128" 9160 "s59E13H2" 0.04882601 "Ribosomal RNA small subunit methyltransferase I"  
"JS1\_L23\_00128" 9160 "s59E25H2" 0 "Ribosomal RNA small subunit methyltransferase I"  
"JS1\_L23\_00128" 9160 "s59E5H2" 0.05668477 "Ribosomal RNA small subunit methyltransferase I"  
"JS1\_L23\_00128" 9160 "s63E6H2" 0.04213989 "Ribosomal RNA small subunit methyltransferase I"  
"JS1\_L23\_00129" 9161 "s59E13H2" 0.2052456 "Membrane-bound lytic murein transglycosylase C precursor"  
"JS1\_L23\_00129" 9161 "s59E25H2" 0 "Membrane-bound lytic murein transglycosylase C precursor"  
"JS1\_L23\_00129" 9161 "s59E5H2" 0.1754605 "Membrane-bound lytic murein transglycosylase C precursor"  
"JS1\_L23\_00129" 9161 "s63E6H2" 0.09088399 "Membrane-bound lytic murein transglycosylase C precursor"  
"JS1\_L23\_00130" 9162 "s59E13H2" 0.1265157 "Methionine--tRNA ligase"  
"JS1\_L23\_00130" 9162 "s59E25H2" 0 "Methionine--tRNA ligase"  
"JS1\_L23\_00130" 9162 "s59E5H2" 0.1373944 "Methionine--tRNA ligase"  
"JS1\_L23\_00130" 9162 "s63E6H2" 0.135204 "Methionine--tRNA ligase"  
"JS1\_L23\_00131" 9163 "s59E13H2" 5.266918 "Methenyltetrahydrofolate cyclohydrolase"  
"JS1\_L23\_00131" 9163 "s59E25H2" 0 "Methenyltetrahydrofolate cyclohydrolase"  
"JS1\_L23\_00131" 9163 "s59E5H2" 0.07129508 "Methenyltetrahydrofolate cyclohydrolase"  
"JS1\_L23\_00131" 9163 "s63E6H2" 0.1902005 "Methenyltetrahydrofolate cyclohydrolase"  
"JS1\_L23\_00132" 9164 "s59E13H2" 4.723575 "Imidazolonepropionase"  
"JS1\_L23\_00132" 9164 "s59E25H2" 0 "Imidazolonepropionase"  
"JS1\_L23\_00132" 9164 "s59E5H2" 0.02637412 "Imidazolonepropionase"  
"JS1\_L23\_00132" 9164 "s63E6H2" 0.01802431 "Imidazolonepropionase"  
"JS1\_L23\_00133" 9165 "s59E13H2" 3.602836 "hypothetical protein"  
"JS1\_L23\_00133" 9165 "s59E25H2" 0.2770419 "hypothetical protein"

"JS1\_L23\_00133" 9165 "s59E5H2" 0.03372971 "hypothetical protein"  
"JS1\_L23\_00133" 9165 "s63E6H2" 0.07305213 "hypothetical protein"  
"JS1\_L23\_00134" 9166 "s59E13H2" 3.181294 "Urocanate hydratase"  
"JS1\_L23\_00134" 9166 "s59E25H2" 0.2449681 "Urocanate hydratase"  
"JS1\_L23\_00134" 9166 "s59E5H2" 0.009025088 "Urocanate hydratase"  
"JS1\_L23\_00134" 9166 "s63E6H2" 0.005360041 "Urocanate hydratase"  
"JS1\_L23\_00135" 9167 "s59E13H2" 3.225363 "High-affinity branched-chain amino acid transport ATP-binding protein LivF"  
"JS1\_L23\_00135" 9167 "s59E25H2" 0 "High-affinity branched-chain amino acid transport ATP-binding protein LivF"  
"JS1\_L23\_00135" 9167 "s59E5H2" 0.08464594 "High-affinity branched-chain amino acid transport ATP-binding protein LivF"  
"JS1\_L23\_00135" 9167 "s63E6H2" 0.004121845 "High-affinity branched-chain amino acid transport ATP-binding protein LivF"  
"JS1\_L23\_00136" 9168 "s59E13H2" 2.886598 "putative branched-chain amino acid transport ATP-binding protein LivG"  
"JS1\_L23\_00136" 9168 "s59E25H2" 0 "putative branched-chain amino acid transport ATP-binding protein LivG"  
"JS1\_L23\_00136" 9168 "s59E5H2" 0.06424887 "putative branched-chain amino acid transport ATP-binding protein LivG"  
"JS1\_L23\_00136" 9168 "s63E6H2" 0.004020821 "putative branched-chain amino acid transport ATP-binding protein LivG"  
"JS1\_L23\_00137" 9169 "s59E13H2" 2.180053 "leucine/isoleucine/valine transporter permease subunit"  
"JS1\_L23\_00137" 9169 "s59E25H2" 0 "leucine/isoleucine/valine transporter permease subunit"  
"JS1\_L23\_00137" 9169 "s59E5H2" 0.07970769 "leucine/isoleucine/valine transporter permease subunit"  
"JS1\_L23\_00137" 9169 "s63E6H2" 0.00809221 "leucine/isoleucine/valine transporter permease subunit"  
"JS1\_L23\_00138" 9170 "s59E13H2" 3.781844 "High-affinity branched-chain amino acid transport system permease protein LivH"  
"JS1\_L23\_00138" 9170 "s59E25H2" 0 "High-affinity branched-chain amino acid transport system permease protein LivH"  
"JS1\_L23\_00138" 9170 "s59E5H2" 0.08191584 "High-affinity branched-chain amino acid transport system permease protein LivH"  
"JS1\_L23\_00138" 9170 "s63E6H2" 0.004094786 "High-affinity branched-chain amino acid transport system permease protein LivH"  
"JS1\_L23\_00139" 9171 "s59E13H2" 3.121177 "Leu/Ile/Val/Thr-binding protein precursor"  
"JS1\_L23\_00139" 9171 "s59E25H2" 0.2213675 "Leu/Ile/Val/Thr-binding protein precursor"  
"JS1\_L23\_00139" 9171 "s59E5H2" 0.04665376 "Leu/Ile/Val/Thr-binding protein precursor"  
"JS1\_L23\_00139" 9171 "s63E6H2" 0.005190778 "Leu/Ile/Val/Thr-binding protein precursor"  
"JS1\_L23\_00140" 9172 "s59E13H2" 1.614453 "Tetratricopeptide repeat protein"  
"JS1\_L23\_00140" 9172 "s59E25H2" 0 "Tetratricopeptide repeat protein"  
"JS1\_L23\_00140" 9172 "s59E5H2" 0.02115245 "Tetratricopeptide repeat protein"  
"JS1\_L23\_00140" 9172 "s63E6H2" 0.003201759 "Tetratricopeptide repeat protein"  
"JS1\_L23\_00141" 9173 "s59E13H2" 0.06762908 "Ribose transport system permease protein RbsC"  
"JS1\_L23\_00141" 9173 "s59E25H2" 0 "Ribose transport system permease protein RbsC"  
"JS1\_L23\_00141" 9173 "s59E5H2" 0.3403433 "Ribose transport system permease protein RbsC"  
"JS1\_L23\_00141" 9173 "s63E6H2" 0.004406243 "Ribose transport system permease protein RbsC"  
"JS1\_L23\_00142" 9174 "s59E13H2" 0.5011257 "D-ribose-binding periplasmic protein precursor"  
"JS1\_L23\_00142" 9174 "s59E25H2" 0 "D-ribose-binding periplasmic protein precursor"  
"JS1\_L23\_00142" 9174 "s59E5H2" 0.5551975 "D-ribose-binding periplasmic protein precursor"  
"JS1\_L23\_00142" 9174 "s63E6H2" 0.3080299 "D-ribose-binding periplasmic protein precursor"  
"JS1\_L23\_00143" 9175 "s59E13H2" 0.1062346 "Glucokinase"  
"JS1\_L23\_00143" 9175 "s59E25H2" 0 "Glucokinase"  
"JS1\_L23\_00143" 9175 "s59E5H2" 0 "Glucokinase"  
"JS1\_L23\_00143" 9175 "s63E6H2" 0.01458104 "Glucokinase"  
"JS1\_L23\_00144" 9176 "s59E13H2" 0.8415 "L-threonine 3-dehydrogenase"  
"JS1\_L23\_00144" 9176 "s59E25H2" 0 "L-threonine 3-dehydrogenase"  
"JS1\_L23\_00144" 9176 "s59E5H2" 0.7109416 "L-threonine 3-dehydrogenase"  
"JS1\_L23\_00144" 9176 "s63E6H2" 0.4860351 "L-threonine 3-dehydrogenase"  
"JS1\_L23\_00145" 9177 "s59E13H2" 0.5814665 "Sorbitol-6-phosphate 2-dehydrogenase"

"JS1\_L23\_00145" 9177 "s59E25H2" 0 "Sorbitol-6-phosphate 2-dehydrogenase"  
"JS1\_L23\_00145" 9177 "s59E5H2" 0.6275414 "Sorbitol-6-phosphate 2-dehydrogenase"  
"JS1\_L23\_00145" 9177 "s63E6H2" 0.2350659 "Sorbitol-6-phosphate 2-dehydrogenase"  
"JS1\_L23\_00146" 9178 "s59E13H2" 0.1324034 "hypothetical protein"  
"JS1\_L23\_00146" 9178 "s59E25H2" 0 "hypothetical protein"  
"JS1\_L23\_00146" 9178 "s59E5H2" 0.5747752 "hypothetical protein"  
"JS1\_L23\_00146" 9178 "s63E6H2" 0.298818 "hypothetical protein"  
"JS1\_L23\_00147" 9179 "s59E13H2" 0.1266614 "2-oxoisovalerate dehydrogenase subunit beta"  
"JS1\_L23\_00147" 9179 "s59E25H2" 0 "2-oxoisovalerate dehydrogenase subunit beta"  
"JS1\_L23\_00147" 9179 "s59E5H2" 0.7503188 "2-oxoisovalerate dehydrogenase subunit beta"  
"JS1\_L23\_00147" 9179 "s63E6H2" 0.2536155 "2-oxoisovalerate dehydrogenase subunit beta"  
"JS1\_L23\_00148" 9180 "s59E13H2" 0.07173377 "Dihydrolipoyllysine-residue acetyltransferase component of pyruvate dehydrogenase complex"  
"JS1\_L23\_00148" 9180 "s59E25H2" 0 "Dihydrolipoyllysine-residue acetyltransferase component of pyruvate dehydrogenase complex"  
"JS1\_L23\_00148" 9180 "s59E5H2" 0.137826 "Dihydrolipoyllysine-residue acetyltransferase component of pyruvate dehydrogenase complex"  
"JS1\_L23\_00148" 9180 "s63E6H2" 0.0906729 "Dihydrolipoyllysine-residue acetyltransferase component of pyruvate dehydrogenase complex"  
"JS1\_L23\_00149" 9181 "s59E13H2" 0.1517323 "Rhamnulokinase"  
"JS1\_L23\_00149" 9181 "s59E25H2" 0 "Rhamnulokinase"  
"JS1\_L23\_00149" 9181 "s59E5H2" 0.2633725 "Rhamnulokinase"  
"JS1\_L23\_00149" 9181 "s63E6H2" 0.1898288 "Rhamnulokinase"  
"JS1\_L23\_00150" 9182 "s59E13H2" 0.04493483 "short chain dehydrogenase"  
"JS1\_L23\_00150" 9182 "s59E25H2" 0 "short chain dehydrogenase"  
"JS1\_L23\_00150" 9182 "s59E5H2" 0.2190071 "short chain dehydrogenase"  
"JS1\_L23\_00150" 9182 "s63E6H2" 0.9818053 "short chain dehydrogenase"  
"JS1\_L23\_00154" 9186 "s59E13H2" 0.5862769 "hypothetical protein"  
"JS1\_L23\_00154" 9186 "s59E25H2" 0 "hypothetical protein"  
"JS1\_L23\_00154" 9186 "s59E5H2" 0.2157532 "hypothetical protein"  
"JS1\_L23\_00154" 9186 "s63E6H2" 0.04185939 "hypothetical protein"  
"JS1\_L23\_00155" 9187 "s59E13H2" 0.4350211 "S-adenosyl-L-methionine-binding protein"  
"JS1\_L23\_00155" 9187 "s59E25H2" 0 "S-adenosyl-L-methionine-binding protein"  
"JS1\_L23\_00155" 9187 "s59E5H2" 0.375509 "S-adenosyl-L-methionine-binding protein"  
"JS1\_L23\_00155" 9187 "s63E6H2" 0 "S-adenosyl-L-methionine-binding protein"  
"JS1\_L23\_00156" 9188 "s59E13H2" 0.3353368 "hypothetical protein"  
"JS1\_L23\_00156" 9188 "s59E25H2" 0 "hypothetical protein"  
"JS1\_L23\_00156" 9188 "s59E5H2" 0.4820739 "hypothetical protein"  
"JS1\_L23\_00156" 9188 "s63E6H2" 0.01036857 "hypothetical protein"  
"JS1\_L23\_00157" 9189 "s59E13H2" 0.02927973 "protoporphyrinogen oxidase"  
"JS1\_L23\_00157" 9189 "s59E25H2" 0 "protoporphyrinogen oxidase"  
"JS1\_L23\_00157" 9189 "s59E5H2" 0.2673238 "protoporphyrinogen oxidase"  
"JS1\_L23\_00157" 9189 "s63E6H2" 0.3753411 "protoporphyrinogen oxidase"  
"JS1\_L23\_00158" 9190 "s59E13H2" 2.439427 "Lon protease 2"  
"JS1\_L23\_00158" 9190 "s59E25H2" 0 "Lon protease 2"  
"JS1\_L23\_00158" 9190 "s59E5H2" 0.2117857 "Lon protease 2"  
"JS1\_L23\_00158" 9190 "s63E6H2" 1.136152 "Lon protease 2"  
"JS1\_L23\_00159" 9191 "s59E13H2" 1.798735 "MarR family protein"  
"JS1\_L23\_00159" 9191 "s59E25H2" 0 "MarR family protein"  
"JS1\_L23\_00159" 9191 "s59E5H2" 0.08356608 "MarR family protein"  
"JS1\_L23\_00159" 9191 "s63E6H2" 0.6568389 "MarR family protein"

"JS1\_L23\_00160" 9192 "s59E13H2" 0.05981968 "7TM receptor with intracellular HD hydrolase"  
"JS1\_L23\_00160" 9192 "s59E25H2" 0 "7TM receptor with intracellular HD hydrolase"  
"JS1\_L23\_00160" 9192 "s59E5H2" 0.3513923 "7TM receptor with intracellular HD hydrolase"  
"JS1\_L23\_00160" 9192 "s63E6H2" 0.5238097 "7TM receptor with intracellular HD hydrolase"  
"JS1\_L23\_00161" 9193 "s59E13H2" 0.058398 "PhoH-like protein"  
"JS1\_L23\_00161" 9193 "s59E25H2" 0 "PhoH-like protein"  
"JS1\_L23\_00161" 9193 "s59E5H2" 0.3158554 "PhoH-like protein"  
"JS1\_L23\_00161" 9193 "s63E6H2" 0.5583719 "PhoH-like protein"  
"JS1\_L23\_00162" 9194 "s59E13H2" 0.02072767 "hypothetical protein"  
"JS1\_L23\_00162" 9194 "s59E25H2" 0 "hypothetical protein"  
"JS1\_L23\_00162" 9194 "s59E5H2" 0.1421229 "hypothetical protein"  
"JS1\_L23\_00162" 9194 "s63E6H2" 0.257181 "hypothetical protein"  
"JS1\_L23\_00163" 9195 "s59E13H2" 0.0318213 "SigmaW regulon antibacterial"  
"JS1\_L23\_00163" 9195 "s59E25H2" 0 "SigmaW regulon antibacterial"  
"JS1\_L23\_00163" 9195 "s59E5H2" 0.2272121 "SigmaW regulon antibacterial"  
"JS1\_L23\_00163" 9195 "s63E6H2" 0.9108647 "SigmaW regulon antibacterial"  
"JS1\_L23\_00164" 9196 "s59E13H2" 0.08700456 "hypothetical protein"  
"JS1\_L23\_00164" 9196 "s59E25H2" 0 "hypothetical protein"  
"JS1\_L23\_00164" 9196 "s59E5H2" 0.295438 "hypothetical protein"  
"JS1\_L23\_00164" 9196 "s63E6H2" 0.9185666 "hypothetical protein"  
"JS1\_L23\_00165" 9197 "s59E13H2" 0.04983355 "glutamyl-tRNA(Gln) amidotransferase subunit E"  
"JS1\_L23\_00165" 9197 "s59E25H2" 0 "glutamyl-tRNA(Gln) amidotransferase subunit E"  
"JS1\_L23\_00165" 9197 "s59E5H2" 0.2864073 "glutamyl-tRNA(Gln) amidotransferase subunit E"  
"JS1\_L23\_00165" 9197 "s63E6H2" 0.1323285 "glutamyl-tRNA(Gln) amidotransferase subunit E"  
"JS1\_L23\_00166" 9198 "s59E13H2" 0.03775893 "30S ribosomal protein S21"  
"JS1\_L23\_00166" 9198 "s59E25H2" 0 "30S ribosomal protein S21"  
"JS1\_L23\_00166" 9198 "s59E5H2" 0.3241489 "30S ribosomal protein S21"  
"JS1\_L23\_00166" 9198 "s63E6H2" 0.1866245 "30S ribosomal protein S21"  
"JS1\_L23\_00167" 9199 "s59E13H2" 0.6572432 "Membrane transport protein"  
"JS1\_L23\_00167" 9199 "s59E25H2" 0 "Membrane transport protein"  
"JS1\_L23\_00167" 9199 "s59E5H2" 0.2461837 "Membrane transport protein"  
"JS1\_L23\_00167" 9199 "s63E6H2" 1.96446 "Membrane transport protein"  
"JS1\_L23\_00168" 9200 "s59E13H2" 0.4704186 "Transketolase 2"  
"JS1\_L23\_00168" 9200 "s59E25H2" 0 "Transketolase 2"  
"JS1\_L23\_00168" 9200 "s59E5H2" 0.7258624 "Transketolase 2"  
"JS1\_L23\_00168" 9200 "s63E6H2" 5.531743 "Transketolase 2"  
"JS1\_L23\_00169" 9201 "s59E13H2" 9.270472 "1-deoxy-D-xylulose-5-phosphate synthase"  
"JS1\_L23\_00169" 9201 "s59E25H2" 0 "1-deoxy-D-xylulose-5-phosphate synthase"  
"JS1\_L23\_00169" 9201 "s59E5H2" 0.3997881 "1-deoxy-D-xylulose-5-phosphate synthase"  
"JS1\_L23\_00169" 9201 "s63E6H2" 10.70144 "1-deoxy-D-xylulose-5-phosphate synthase"  
"JS1\_L23\_00170" 9202 "s59E13H2" 14.50489 "Xylose isomerase"  
"JS1\_L23\_00170" 9202 "s59E25H2" 0 "Xylose isomerase"  
"JS1\_L23\_00170" 9202 "s59E5H2" 1.300414 "Xylose isomerase"  
"JS1\_L23\_00170" 9202 "s63E6H2" 13.07885 "Xylose isomerase"  
"JS1\_L23\_00171" 9203 "s59E13H2" 7.692748 "3-keto-5-aminohexanoate cleavage enzyme"  
"JS1\_L23\_00171" 9203 "s59E25H2" 0.7283951 "3-keto-5-aminohexanoate cleavage enzyme"  
"JS1\_L23\_00171" 9203 "s59E5H2" 0.6669827 "3-keto-5-aminohexanoate cleavage enzyme"

"JS1\_L23\_00171" 9203 "s63E6H2" 12.47629 "3-keto-5-aminohexanoate cleavage enzyme"  
"JS1\_L23\_00172" 9204 "s59E13H2" 8.96847 "Tripartite tricarboxylate transporter TctA family protein"  
"JS1\_L23\_00172" 9204 "s59E25H2" 0.5142672 "Tripartite tricarboxylate transporter TctA family protein"  
"JS1\_L23\_00172" 9204 "s59E5H2" 1.071909 "Tripartite tricarboxylate transporter TctA family protein"  
"JS1\_L23\_00172" 9204 "s63E6H2" 12.50461 "Tripartite tricarboxylate transporter TctA family protein"  
"JS1\_L23\_00173" 9205 "s59E13H2" 4.443698 "Tripartite tricarboxylate transporter TctB family protein"  
"JS1\_L23\_00173" 9205 "s59E25H2" 0.2889785 "Tripartite tricarboxylate transporter TctB family protein"  
"JS1\_L23\_00173" 9205 "s59E5H2" 0.861379 "Tripartite tricarboxylate transporter TctB family protein"  
"JS1\_L23\_00173" 9205 "s63E6H2" 6.977096 "Tripartite tricarboxylate transporter TctB family protein"  
"JS1\_L23\_00174" 9206 "s59E13H2" 3.819845 "Tripartite tricarboxylate transporter family receptor"  
"JS1\_L23\_00174" 9206 "s59E25H2" 0.3810945 "Tripartite tricarboxylate transporter family receptor"  
"JS1\_L23\_00174" 9206 "s59E5H2" 2.295888 "Tripartite tricarboxylate transporter family receptor"  
"JS1\_L23\_00174" 9206 "s63E6H2" 11.54529 "Tripartite tricarboxylate transporter family receptor"  
"JS1\_L23\_00175" 9207 "s59E13H2" 1.290677 "Penicillin-binding protein 2D"  
"JS1\_L23\_00175" 9207 "s59E25H2" 0 "Penicillin-binding protein 2D"  
"JS1\_L23\_00175" 9207 "s59E5H2" 0.4060231 "Penicillin-binding protein 2D"  
"JS1\_L23\_00175" 9207 "s63E6H2" 1.426517 "Penicillin-binding protein 2D"  
"JS1\_L23\_00176" 9208 "s59E13H2" 1.541957 "Endonuclease MutS2"  
"JS1\_L23\_00176" 9208 "s59E25H2" 0 "Endonuclease MutS2"  
"JS1\_L23\_00176" 9208 "s59E5H2" 0.4657263 "Endonuclease MutS2"  
"JS1\_L23\_00176" 9208 "s63E6H2" 1.100532 "Endonuclease MutS2"  
"JS1\_L23\_00177" 9209 "s59E13H2" 1.102151 "colicin V production protein"  
"JS1\_L23\_00177" 9209 "s59E25H2" 0 "colicin V production protein"  
"JS1\_L23\_00177" 9209 "s59E5H2" 0.4230649 "colicin V production protein"  
"JS1\_L23\_00177" 9209 "s63E6H2" 0.5211581 "colicin V production protein"  
"JS1\_L23\_00178" 9210 "s59E13H2" 0.4687468 "Phenylalanine--tRNA ligase beta subunit"  
"JS1\_L23\_00178" 9210 "s59E25H2" 0 "Phenylalanine--tRNA ligase beta subunit"  
"JS1\_L23\_00178" 9210 "s59E5H2" 0.310885 "Phenylalanine--tRNA ligase beta subunit"  
"JS1\_L23\_00178" 9210 "s63E6H2" 0.3286544 "Phenylalanine--tRNA ligase beta subunit"  
"JS1\_L23\_00179" 9211 "s59E13H2" 0.03341412 "Phenylalanine--tRNA ligase alpha subunit"  
"JS1\_L23\_00179" 9211 "s59E25H2" 0 "Phenylalanine--tRNA ligase alpha subunit"  
"JS1\_L23\_00179" 9211 "s59E5H2" 0.09687305 "Phenylalanine--tRNA ligase alpha subunit"  
"JS1\_L23\_00179" 9211 "s63E6H2" 0.4705549 "Phenylalanine--tRNA ligase alpha subunit"  
"JS1\_L23\_00181" 9213 "s59E13H2" 0.2877121 "50S ribosomal protein L20"  
"JS1\_L23\_00181" 9213 "s59E25H2" 0 "50S ribosomal protein L20"  
"JS1\_L23\_00181" 9213 "s59E5H2" 0.2940363 "50S ribosomal protein L20"  
"JS1\_L23\_00181" 9213 "s63E6H2" 0.3830293 "50S ribosomal protein L20"  
"JS1\_L23\_00182" 9214 "s59E13H2" 0.02950857 "50S ribosomal protein L35"  
"JS1\_L23\_00182" 9214 "s59E25H2" 0 "50S ribosomal protein L35"  
"JS1\_L23\_00182" 9214 "s59E5H2" 0.3054028 "50S ribosomal protein L35"  
"JS1\_L23\_00182" 9214 "s63E6H2" 0.3106578 "50S ribosomal protein L35"  
"JS1\_L23\_00183" 9215 "s59E13H2" 0.09884821 "Translation initiation factor IF-3"  
"JS1\_L23\_00183" 9215 "s59E25H2" 0 "Translation initiation factor IF-3"  
"JS1\_L23\_00183" 9215 "s59E5H2" 0.2640852 "Translation initiation factor IF-3"  
"JS1\_L23\_00183" 9215 "s63E6H2" 0.2920973 "Translation initiation factor IF-3"  
"JS1\_L23\_00184" 9216 "s59E13H2" 0.09384236 "Threonine--tRNA ligase 2"  
"JS1\_L23\_00184" 9216 "s59E25H2" 0 "Threonine--tRNA ligase 2"

"JS1\_L23\_00184" 9216 "s59E5H2" 0.1606266 "Threonine--tRNA ligase 2"  
"JS1\_L23\_00184" 9216 "s63E6H2" 0.2556033 "Threonine--tRNA ligase 2"  
"JS1\_L23\_00192" 9224 "s59E13H2" 0.0393061 "Single-stranded DNA-binding protein ssb"  
"JS1\_L23\_00192" 9224 "s59E25H2" 0 "Single-stranded DNA-binding protein ssb"  
"JS1\_L23\_00192" 9224 "s59E5H2" 0.2995 "Single-stranded DNA-binding protein ssb"  
"JS1\_L23\_00192" 9224 "s63E6H2" 0.2721128 "Single-stranded DNA-binding protein ssb"  
"JS1\_L23\_00193" 9225 "s59E13H2" 0.002318531 "Leucine--tRNA ligase"  
"JS1\_L23\_00193" 9225 "s59E25H2" 0 "Leucine--tRNA ligase"  
"JS1\_L23\_00193" 9225 "s59E5H2" 0.9834098 "Leucine--tRNA ligase"  
"JS1\_L23\_00193" 9225 "s63E6H2" 0.1634526 "Leucine--tRNA ligase"  
"JS1\_L23\_00194" 9226 "s59E13H2" 0.07332509 "Leucine--tRNA ligase"  
"JS1\_L23\_00194" 9226 "s59E25H2" 0.2040998 "Leucine--tRNA ligase"  
"JS1\_L23\_00194" 9226 "s59E5H2" 0.9514857 "Leucine--tRNA ligase"  
"JS1\_L23\_00194" 9226 "s63E6H2" 0.7048102 "Leucine--tRNA ligase"  
"JS1\_L23\_00197" 9229 "s59E13H2" 0.1119211 "hypothetical protein"  
"JS1\_L23\_00197" 9229 "s59E25H2" 0 "hypothetical protein"  
"JS1\_L23\_00197" 9229 "s59E5H2" 0.7597899 "hypothetical protein"  
"JS1\_L23\_00197" 9229 "s63E6H2" 1.165826 "hypothetical protein"  
"JS1\_L23\_00198" 9230 "s59E13H2" 0.1471887 "Elongation factor G"  
"JS1\_L23\_00198" 9230 "s59E25H2" 0.2363291 "Elongation factor G"  
"JS1\_L23\_00198" 9230 "s59E5H2" 1.110708 "Elongation factor G"  
"JS1\_L23\_00198" 9230 "s63E6H2" 1.208142 "Elongation factor G"  
"JS1\_L23\_00199" 9231 "s59E13H2" 0.1666203 "Lipoyl synthase"  
"JS1\_L23\_00199" 9231 "s59E25H2" 0 "Lipoyl synthase"  
"JS1\_L23\_00199" 9231 "s59E5H2" 1.085511 "Lipoyl synthase"  
"JS1\_L23\_00199" 9231 "s63E6H2" 0.9813901 "Lipoyl synthase"  
"JS1\_L23\_00200" 9232 "s59E13H2" 0.5147559 "endonuclease IV"  
"JS1\_L23\_00200" 9232 "s59E25H2" 0 "endonuclease IV"  
"JS1\_L23\_00200" 9232 "s59E5H2" 1.518127 "endonuclease IV"  
"JS1\_L23\_00200" 9232 "s63E6H2" 1.124654 "endonuclease IV"  
"JS1\_L23\_00201" 9233 "s59E13H2" 0.594252 "Thioredoxin reductase"  
"JS1\_L23\_00201" 9233 "s59E25H2" 0 "Thioredoxin reductase"  
"JS1\_L23\_00201" 9233 "s59E5H2" 0.7302722 "Thioredoxin reductase"  
"JS1\_L23\_00201" 9233 "s63E6H2" 0.6666529 "Thioredoxin reductase"  
"JS1\_L23\_00202" 9234 "s59E13H2" 0.7223703 "Molybdopterin-guanine dinucleotide biosynthesis adapter protein"  
"JS1\_L23\_00202" 9234 "s59E25H2" 0 "Molybdopterin-guanine dinucleotide biosynthesis adapter protein"  
"JS1\_L23\_00202" 9234 "s59E5H2" 0.6428208 "Molybdopterin-guanine dinucleotide biosynthesis adapter protein"  
"JS1\_L23\_00202" 9234 "s63E6H2" 0.5070578 "Molybdopterin-guanine dinucleotide biosynthesis adapter protein"  
"JS1\_L23\_00203" 9235 "s59E13H2" 1.788119 "hypothetical protein"  
"JS1\_L23\_00203" 9235 "s59E25H2" 0.3425076 "hypothetical protein"  
"JS1\_L23\_00203" 9235 "s59E5H2" 0.3304814 "hypothetical protein"  
"JS1\_L23\_00203" 9235 "s63E6H2" 1.416316 "hypothetical protein"  
"JS1\_L23\_00204" 9236 "s59E13H2" 2.853328 "hypothetical protein"  
"JS1\_L23\_00204" 9236 "s59E25H2" 0 "hypothetical protein"  
"JS1\_L23\_00204" 9236 "s59E5H2" 0.1121502 "hypothetical protein"  
"JS1\_L23\_00204" 9236 "s63E6H2" 1.651897 "hypothetical protein"  
"JS1\_L23\_00205" 9237 "s59E13H2" 4.699467 "Zinc ribbon domain protein"

"JS1\_L23\_00205" 9237 "s59E25H2" 0.6542056 "Zinc ribbon domain protein"  
"JS1\_L23\_00205" 9237 "s59E5H2" 0.3104471 "Zinc ribbon domain protein"  
"JS1\_L23\_00205" 9237 "s63E6H2" 2.289203 "Zinc ribbon domain protein"  
"JS1\_L23\_00206" 9238 "s59E13H2" 5.965948 "NTE family protein RssA"  
"JS1\_L23\_00206" 9238 "s59E25H2" 0 "NTE family protein RssA"  
"JS1\_L23\_00206" 9238 "s59E5H2" 0.4393451 "NTE family protein RssA"  
"JS1\_L23\_00206" 9238 "s63E6H2" 2.546162 "NTE family protein RssA"  
"JS1\_L23\_00207" 9239 "s59E13H2" 4.485211 "Isochorismatase"  
"JS1\_L23\_00207" 9239 "s59E25H2" 0 "Isochorismatase"  
"JS1\_L23\_00207" 9239 "s59E5H2" 0.3256322 "Isochorismatase"  
"JS1\_L23\_00207" 9239 "s63E6H2" 2.268483 "Isochorismatase"  
"JS1\_L23\_00208" 9240 "s59E13H2" 16.31055 "Fluoroacetyl-CoA thioesterase"  
"JS1\_L23\_00208" 9240 "s59E25H2" 0 "Fluoroacetyl-CoA thioesterase"  
"JS1\_L23\_00208" 9240 "s59E5H2" 0.6613765 "Fluoroacetyl-CoA thioesterase"  
"JS1\_L23\_00208" 9240 "s63E6H2" 1.792793 "Fluoroacetyl-CoA thioesterase"  
"JS1\_L23\_00209" 9241 "s59E13H2" 3.337579 "D-arabitol-phosphate dehydrogenase"  
"JS1\_L23\_00209" 9241 "s59E25H2" 0 "D-arabitol-phosphate dehydrogenase"  
"JS1\_L23\_00209" 9241 "s59E5H2" 0.5781869 "D-arabitol-phosphate dehydrogenase"  
"JS1\_L23\_00209" 9241 "s63E6H2" 1.638558 "D-arabitol-phosphate dehydrogenase"  
"JS1\_L23\_00210" 9242 "s59E13H2" 2.742395 "Sorbitol dehydrogenase"  
"JS1\_L23\_00210" 9242 "s59E25H2" 0.7261209 "Sorbitol dehydrogenase"  
"JS1\_L23\_00210" 9242 "s59E5H2" 0.6278333 "Sorbitol dehydrogenase"  
"JS1\_L23\_00210" 9242 "s63E6H2" 1.500891 "Sorbitol dehydrogenase"  
"JS1\_L23\_00211" 9243 "s59E13H2" 1.311833 "Folate transporter FolT"  
"JS1\_L23\_00211" 9243 "s59E25H2" 0 "Folate transporter FolT"  
"JS1\_L23\_00211" 9243 "s59E5H2" 0.3591779 "Folate transporter FolT"  
"JS1\_L23\_00211" 9243 "s63E6H2" 1.054347 "Folate transporter FolT"  
"JS1\_L23\_00212" 9244 "s59E13H2" 0.06425772 "Ureidoglycolate lyase"  
"JS1\_L23\_00212" 9244 "s59E25H2" 0.3255208 "Ureidoglycolate lyase"  
"JS1\_L23\_00212" 9244 "s59E5H2" 0.401367 "Ureidoglycolate lyase"  
"JS1\_L23\_00212" 9244 "s63E6H2" 0.9555171 "Ureidoglycolate lyase"  
"JS1\_L23\_00213" 9245 "s59E13H2" 0.4791073 "Membrane dipeptidase (Peptidase family M19)"  
"JS1\_L23\_00213" 9245 "s59E25H2" 0 "Membrane dipeptidase (Peptidase family M19)"  
"JS1\_L23\_00213" 9245 "s59E5H2" 0.5263052 "Membrane dipeptidase (Peptidase family M19)"  
"JS1\_L23\_00213" 9245 "s63E6H2" 1.642631 "Membrane dipeptidase (Peptidase family M19)"  
"JS1\_L23\_00214" 9246 "s59E13H2" 1.119837 "lipoprotein Nlpl"  
"JS1\_L23\_00214" 9246 "s59E25H2" 0 "lipoprotein Nlpl"  
"JS1\_L23\_00214" 9246 "s59E5H2" 0.4694459 "lipoprotein Nlpl"  
"JS1\_L23\_00214" 9246 "s63E6H2" 1.091861 "lipoprotein Nlpl"  
"JS1\_L23\_00215" 9247 "s59E13H2" 1.175693 "Inosine-5'-monophosphate dehydrogenase"  
"JS1\_L23\_00215" 9247 "s59E25H2" 0 "Inosine-5'-monophosphate dehydrogenase"  
"JS1\_L23\_00215" 9247 "s59E5H2" 1.026347 "Inosine-5'-monophosphate dehydrogenase"  
"JS1\_L23\_00215" 9247 "s63E6H2" 1.026537 "Inosine-5'-monophosphate dehydrogenase"  
"JS1\_L23\_00216" 9248 "s59E13H2" 0.6448682 "Quinolate synthase A"  
"JS1\_L23\_00216" 9248 "s59E25H2" 0 "Quinolate synthase A"  
"JS1\_L23\_00216" 9248 "s59E5H2" 0.4931665 "Quinolate synthase A"  
"JS1\_L23\_00216" 9248 "s63E6H2" 0.8797879 "Quinolate synthase A"

"JS1\_L23\_00217" 9249 "s59E13H2" 2.423636 "L-aspartate oxidase"  
"JS1\_L23\_00217" 9249 "s59E25H2" 0 "L-aspartate oxidase"  
"JS1\_L23\_00217" 9249 "s59E5H2" 1.947522 "L-aspartate oxidase"  
"JS1\_L23\_00217" 9249 "s63E6H2" 1.926415 "L-aspartate oxidase"  
"JS1\_L23\_00218" 9250 "s59E13H2" 6.355294 "putative nicotinate-nucleotide pyrophosphorylase [carboxylating]"  
"JS1\_L23\_00218" 9250 "s59E25H2" 0.4548611 "putative nicotinate-nucleotide pyrophosphorylase [carboxylating]"  
"JS1\_L23\_00218" 9250 "s59E5H2" 3.821691 "putative nicotinate-nucleotide pyrophosphorylase [carboxylating]"  
"JS1\_L23\_00218" 9250 "s63E6H2" 3.381703 "putative nicotinate-nucleotide pyrophosphorylase [carboxylating]"  
"JS1\_L23\_00219" 9251 "s59E13H2" 7.594308 "Type III pantothenate kinase"  
"JS1\_L23\_00219" 9251 "s59E25H2" 0 "Type III pantothenate kinase"  
"JS1\_L23\_00219" 9251 "s59E5H2" 0.994116 "Type III pantothenate kinase"  
"JS1\_L23\_00219" 9251 "s63E6H2" 3.317286 "Type III pantothenate kinase"  
"JS1\_L23\_00220" 9252 "s59E13H2" 6.410514 "Pantothenic acid transporter PanT"  
"JS1\_L23\_00220" 9252 "s59E25H2" 0 "Pantothenic acid transporter PanT"  
"JS1\_L23\_00220" 9252 "s59E5H2" 4.271239 "Pantothenic acid transporter PanT"  
"JS1\_L23\_00220" 9252 "s63E6H2" 4.42 "Pantothenic acid transporter PanT"  
"JS1\_L23\_00221" 9253 "s59E13H2" 8.027272 "V-type ATP synthase subunit D"  
"JS1\_L23\_00221" 9253 "s59E25H2" 0 "V-type ATP synthase subunit D"  
"JS1\_L23\_00221" 9253 "s59E5H2" 6.360665 "V-type ATP synthase subunit D"  
"JS1\_L23\_00221" 9253 "s63E6H2" 4.234786 "V-type ATP synthase subunit D"  
"JS1\_L23\_00222" 9254 "s59E13H2" 7.52192 "V-type sodium ATPase subunit B"  
"JS1\_L23\_00222" 9254 "s59E25H2" 0.1224345 "V-type sodium ATPase subunit B"  
"JS1\_L23\_00222" 9254 "s59E5H2" 5.352086 "V-type sodium ATPase subunit B"  
"JS1\_L23\_00222" 9254 "s63E6H2" 3.518812 "V-type sodium ATPase subunit B"  
"JS1\_L23\_00223" 9255 "s59E13H2" 5.325852 "V-type ATP synthase alpha chain"  
"JS1\_L23\_00223" 9255 "s59E25H2" 0 "V-type ATP synthase alpha chain"  
"JS1\_L23\_00223" 9255 "s59E5H2" 4.101196 "V-type ATP synthase alpha chain"  
"JS1\_L23\_00223" 9255 "s63E6H2" 2.994627 "V-type ATP synthase alpha chain"  
"JS1\_L23\_00224" 9256 "s59E13H2" 3.512983 "V-type ATP synthase subunit E"  
"JS1\_L23\_00224" 9256 "s59E25H2" 0 "V-type ATP synthase subunit E"  
"JS1\_L23\_00224" 9256 "s59E5H2" 3.14716 "V-type ATP synthase subunit E"  
"JS1\_L23\_00224" 9256 "s63E6H2" 1.498555 "V-type ATP synthase subunit E"  
"JS1\_L23\_00225" 9257 "s59E13H2" 1.621621 "V-type ATP synthase subunit F"  
"JS1\_L23\_00225" 9257 "s59E25H2" 0 "V-type ATP synthase subunit F"  
"JS1\_L23\_00225" 9257 "s59E5H2" 2.843559 "V-type ATP synthase subunit F"  
"JS1\_L23\_00225" 9257 "s63E6H2" 1.422967 "V-type ATP synthase subunit F"  
"JS1\_L23\_00226" 9258 "s59E13H2" 0.9237615 "V-type ATP synthase subunit K"  
"JS1\_L23\_00226" 9258 "s59E25H2" 0 "V-type ATP synthase subunit K"  
"JS1\_L23\_00226" 9258 "s59E5H2" 1.500029 "V-type ATP synthase subunit K"  
"JS1\_L23\_00226" 9258 "s63E6H2" 0.9405205 "V-type ATP synthase subunit K"  
"JS1\_L23\_00227" 9259 "s59E13H2" 0.05391784 "hypothetical protein"  
"JS1\_L23\_00227" 9259 "s59E25H2" 0 "hypothetical protein"  
"JS1\_L23\_00227" 9259 "s59E5H2" 0.2561454 "hypothetical protein"  
"JS1\_L23\_00227" 9259 "s63E6H2" 0.0928594 "hypothetical protein"  
"JS1\_L23\_00228" 9260 "s59E13H2" 0.04534246 "DNA polymerase III subunit tau"  
"JS1\_L23\_00228" 9260 "s59E25H2" 0 "DNA polymerase III subunit tau"  
"JS1\_L23\_00228" 9260 "s59E5H2" 0.3766494 "DNA polymerase III subunit tau"



"JS1\_L23\_00228" 9260 "s63E6H2" 0.07381391 "DNA polymerase III subunit tau"  
"JS1\_L23\_00229" 9261 "s59E13H2" 0.03579232 "Thymidylate kinase"  
"JS1\_L23\_00229" 9261 "s59E25H2" 0 "Thymidylate kinase"  
"JS1\_L23\_00229" 9261 "s59E5H2" 0.7380198 "Thymidylate kinase"  
"JS1\_L23\_00229" 9261 "s63E6H2" 0.09767573 "Thymidylate kinase"  
"JS1\_L23\_00230" 9262 "s59E13H2" 0.0228168 "Inosine-5'-monophosphate dehydrogenase"  
"JS1\_L23\_00230" 9262 "s59E25H2" 0 "Inosine-5'-monophosphate dehydrogenase"  
"JS1\_L23\_00230" 9262 "s59E5H2" 0.7828871 "Inosine-5'-monophosphate dehydrogenase"  
"JS1\_L23\_00230" 9262 "s63E6H2" 0.1136814 "Inosine-5'-monophosphate dehydrogenase"  
"JS1\_L23\_00231" 9263 "s59E13H2" 0.02115015 "Tagatose-6-phosphate kinase"  
"JS1\_L23\_00231" 9263 "s59E25H2" 0 "Tagatose-6-phosphate kinase"  
"JS1\_L23\_00231" 9263 "s59E5H2" 0.6865369 "Tagatose-6-phosphate kinase"  
"JS1\_L23\_00231" 9263 "s63E6H2" 0.07155549 "Tagatose-6-phosphate kinase"  
"JS1\_L23\_00232" 9264 "s59E13H2" 0.01326415 "UDP-N-acetylglucosamine 2-epimerase"  
"JS1\_L23\_00232" 9264 "s59E25H2" 0 "UDP-N-acetylglucosamine 2-epimerase"  
"JS1\_L23\_00232" 9264 "s59E5H2" 0.3484056 "UDP-N-acetylglucosamine 2-epimerase"  
"JS1\_L23\_00232" 9264 "s63E6H2" 0.04400023 "UDP-N-acetylglucosamine 2-epimerase"  
"JS1\_L23\_00233" 9265 "s59E13H2" 3.813149 "putative sugar kinase"  
"JS1\_L23\_00233" 9265 "s59E25H2" 0 "putative sugar kinase"  
"JS1\_L23\_00233" 9265 "s59E5H2" 0.614405 "putative sugar kinase"  
"JS1\_L23\_00233" 9265 "s63E6H2" 1.048313 "putative sugar kinase"  
"JS1\_L23\_00234" 9266 "s59E13H2" 4.371062 "inosine 5'-monophosphate dehydrogenase"  
"JS1\_L23\_00234" 9266 "s59E25H2" 0 "inosine 5'-monophosphate dehydrogenase"  
"JS1\_L23\_00234" 9266 "s59E5H2" 0.2531383 "inosine 5'-monophosphate dehydrogenase"  
"JS1\_L23\_00234" 9266 "s63E6H2" 0.8147489 "inosine 5'-monophosphate dehydrogenase"  
"JS1\_L23\_00236" 9268 "s59E13H2" 0.008000477 "hypothetical protein"  
"JS1\_L23\_00236" 9268 "s59E25H2" 0 "hypothetical protein"  
"JS1\_L23\_00236" 9268 "s59E5H2" 0 "hypothetical protein"  
"JS1\_L23\_00236" 9268 "s63E6H2" 0 "hypothetical protein"  
"JS1\_L23\_00237" 9269 "s59E13H2" 0 "hypothetical protein"  
"JS1\_L23\_00237" 9269 "s59E25H2" 0 "hypothetical protein"  
"JS1\_L23\_00237" 9269 "s59E5H2" 0 "hypothetical protein"  
"JS1\_L23\_00237" 9269 "s63E6H2" 0.00279596 "hypothetical protein"  
"JS1\_L23\_00238" 9270 "s59E13H2" 0.04779013 "Putative teichuronic acid biosynthesis glycosyltransferase TuaG"  
"JS1\_L23\_00238" 9270 "s59E25H2" 0 "Putative teichuronic acid biosynthesis glycosyltransferase TuaG"  
"JS1\_L23\_00238" 9270 "s59E5H2" 0 "Putative teichuronic acid biosynthesis glycosyltransferase TuaG"  
"JS1\_L23\_00238" 9270 "s63E6H2" 0.002067786 "Putative teichuronic acid biosynthesis glycosyltransferase TuaG"  
"JS1\_L23\_00239" 9271 "s59E13H2" 0.05863801 "GDP-mannose 4,6-dehydratase"  
"JS1\_L23\_00239" 9271 "s59E25H2" 0 "GDP-mannose 4,6-dehydratase"  
"JS1\_L23\_00239" 9271 "s59E5H2" 0 "GDP-mannose 4,6-dehydratase"  
"JS1\_L23\_00239" 9271 "s63E6H2" 0 "GDP-mannose 4,6-dehydratase"  
"JS1\_L23\_00240" 9272 "s59E13H2" 0.02441857 "D-inositol 3-phosphate glycosyltransferase"  
"JS1\_L23\_00240" 9272 "s59E25H2" 0 "D-inositol 3-phosphate glycosyltransferase"  
"JS1\_L23\_00240" 9272 "s59E5H2" 0 "D-inositol 3-phosphate glycosyltransferase"  
"JS1\_L23\_00240" 9272 "s63E6H2" 0 "D-inositol 3-phosphate glycosyltransferase"  
"JS1\_L23\_00242" 9274 "s59E13H2" 0.6410486 "Lysine 6-dehydrogenase"  
"JS1\_L23\_00242" 9274 "s59E25H2" 0 "Lysine 6-dehydrogenase"

"JS1\_L23\_00242" 9274 "s59E5H2" 0.5376045 "Lysine 6-dehydrogenase"  
"JS1\_L23\_00242" 9274 "s63E6H2" 1.312648 "Lysine 6-dehydrogenase"  
"JS1\_L23\_00243" 9275 "s59E13H2" 0.3522408 "5-aminovaleate aminotransferase DavT"  
"JS1\_L23\_00243" 9275 "s59E25H2" 0 "5-aminovaleate aminotransferase DavT"  
"JS1\_L23\_00243" 9275 "s59E5H2" 0.2294737 "5-aminovaleate aminotransferase DavT"  
"JS1\_L23\_00243" 9275 "s63E6H2" 1.130594 "5-aminovaleate aminotransferase DavT"  
"JS1\_L23\_00244" 9276 "s59E13H2" 0.6503427 "Cyclic 2,3-diphosphoglycerate synthetase"  
"JS1\_L23\_00244" 9276 "s59E25H2" 0 "Cyclic 2,3-diphosphoglycerate synthetase"  
"JS1\_L23\_00244" 9276 "s59E5H2" 0.266919 "Cyclic 2,3-diphosphoglycerate synthetase"  
"JS1\_L23\_00244" 9276 "s63E6H2" 1.05902 "Cyclic 2,3-diphosphoglycerate synthetase"  
"JS1\_L23\_00245" 9277 "s59E13H2" 0.1152068 "Glycine betaine transport ATP-binding protein OpuAA"  
"JS1\_L23\_00245" 9277 "s59E25H2" 0 "Glycine betaine transport ATP-binding protein OpuAA"  
"JS1\_L23\_00245" 9277 "s59E5H2" 1.287272 "Glycine betaine transport ATP-binding protein OpuAA"  
"JS1\_L23\_00245" 9277 "s63E6H2" 0.02347668 "Glycine betaine transport ATP-binding protein OpuAA"  
"JS1\_L23\_00246" 9278 "s59E13H2" 0.3651565 "Glycine betaine transport system permease protein OpuAB"  
"JS1\_L23\_00246" 9278 "s59E25H2" 0 "Glycine betaine transport system permease protein OpuAB"  
"JS1\_L23\_00246" 9278 "s59E5H2" 1.263046 "Glycine betaine transport system permease protein OpuAB"  
"JS1\_L23\_00246" 9278 "s63E6H2" 0.6986735 "Glycine betaine transport system permease protein OpuAB"  
"JS1\_L23\_00247" 9279 "s59E13H2" 0.2405233 "glycine betaine transporter periplasmic subunit"  
"JS1\_L23\_00247" 9279 "s59E25H2" 0 "glycine betaine transporter periplasmic subunit"  
"JS1\_L23\_00247" 9279 "s59E5H2" 0.9477877 "glycine betaine transporter periplasmic subunit"  
"JS1\_L23\_00247" 9279 "s63E6H2" 0.428414 "glycine betaine transporter periplasmic subunit"  
"JS1\_L23\_00248" 9280 "s59E13H2" 0.2400183 "Choline/Carnitine o-acyltransferase"  
"JS1\_L23\_00248" 9280 "s59E25H2" 0.2307246 "Choline/Carnitine o-acyltransferase"  
"JS1\_L23\_00248" 9280 "s59E5H2" 1.409312 "Choline/Carnitine o-acyltransferase"  
"JS1\_L23\_00248" 9280 "s63E6H2" 0.9513295 "Choline/Carnitine o-acyltransferase"  
"JS1\_L23\_00249" 9281 "s59E13H2" 0.03861422 "hypothetical protein"  
"JS1\_L23\_00249" 9281 "s59E25H2" 0 "hypothetical protein"  
"JS1\_L23\_00249" 9281 "s59E5H2" 0.3990539 "hypothetical protein"  
"JS1\_L23\_00249" 9281 "s63E6H2" 0.1962237 "hypothetical protein"  
"JS1\_L23\_00250" 9282 "s59E13H2" 0.06386274 "hypothetical protein"  
"JS1\_L23\_00250" 9282 "s59E25H2" 0 "hypothetical protein"  
"JS1\_L23\_00250" 9282 "s59E5H2" 0.8792221 "hypothetical protein"  
"JS1\_L23\_00250" 9282 "s63E6H2" 0.5695133 "hypothetical protein"  
"JS1\_L23\_00251" 9283 "s59E13H2" 0.03256803 "putative MFS family transporter protein"  
"JS1\_L23\_00251" 9283 "s59E25H2" 0 "putative MFS family transporter protein"  
"JS1\_L23\_00251" 9283 "s59E5H2" 0.4760757 "putative MFS family transporter protein"  
"JS1\_L23\_00251" 9283 "s63E6H2" 0.1247702 "putative MFS family transporter protein"  
"JS1\_L23\_00252" 9284 "s59E13H2" 0.03126766 "hypothetical protein"  
"JS1\_L23\_00252" 9284 "s59E25H2" 0 "hypothetical protein"  
"JS1\_L23\_00252" 9284 "s59E5H2" 0.2534283 "hypothetical protein"  
"JS1\_L23\_00252" 9284 "s63E6H2" 0 "hypothetical protein"  
"JS1\_L23\_00253" 9285 "s59E13H2" 0.2290629 "Aminopeptidase YwaD precursor"  
"JS1\_L23\_00253" 9285 "s59E25H2" 0 "Aminopeptidase YwaD precursor"  
"JS1\_L23\_00253" 9285 "s59E5H2" 0.5724967 "Aminopeptidase YwaD precursor"  
"JS1\_L23\_00253" 9285 "s63E6H2" 0.05332789 "Aminopeptidase YwaD precursor"  
"JS1\_L23\_00256" 9288 "s59E13H2" 0.06632597 "hypothetical protein"

"JS1\_L23\_00256" 9288 "s59E25H2" 0 "hypothetical protein"  
"JS1\_L23\_00256" 9288 "s59E5H2" 1.01396 "hypothetical protein"  
"JS1\_L23\_00256" 9288 "s63E6H2" 0.0626656 "hypothetical protein"  
"JS1\_L23\_00257" 9289 "s59E13H2" 0.04091612 "hypothetical protein"  
"JS1\_L23\_00257" 9289 "s59E25H2" 0 "hypothetical protein"  
"JS1\_L23\_00257" 9289 "s59E5H2" 1.209333 "hypothetical protein"  
"JS1\_L23\_00257" 9289 "s63E6H2" 0.02417427 "hypothetical protein"  
"JS1\_L23\_00258" 9290 "s59E13H2" 0.05014296 "Sialic acid TRAP transporter permease protein SiaT"  
"JS1\_L23\_00258" 9290 "s59E25H2" 0 "Sialic acid TRAP transporter permease protein SiaT"  
"JS1\_L23\_00258" 9290 "s59E5H2" 0.1051306 "Sialic acid TRAP transporter permease protein SiaT"  
"JS1\_L23\_00258" 9290 "s63E6H2" 0.005725019 "Sialic acid TRAP transporter permease protein SiaT"  
"JS1\_L23\_00259" 9291 "s59E13H2" 0.02281046 "Sialic acid TRAP transporter permease protein SiaT"  
"JS1\_L23\_00259" 9291 "s59E25H2" 0 "Sialic acid TRAP transporter permease protein SiaT"  
"JS1\_L23\_00259" 9291 "s59E5H2" 0 "Sialic acid TRAP transporter permease protein SiaT"  
"JS1\_L23\_00259" 9291 "s63E6H2" 0 "Sialic acid TRAP transporter permease protein SiaT"  
"JS1\_L23\_00260" 9292 "s59E13H2" 0.0280255 "C4-dicarboxylate-binding periplasmic protein precursor"  
"JS1\_L23\_00260" 9292 "s59E25H2" 0 "C4-dicarboxylate-binding periplasmic protein precursor"  
"JS1\_L23\_00260" 9292 "s59E5H2" 0.007216098 "C4-dicarboxylate-binding periplasmic protein precursor"  
"JS1\_L23\_00260" 9292 "s63E6H2" 0.001518292 "C4-dicarboxylate-binding periplasmic protein precursor"  
"JS1\_L23\_00261" 9293 "s59E13H2" 0.01521506 "Uronate isomerase"  
"JS1\_L23\_00261" 9293 "s59E25H2" 0 "Uronate isomerase"  
"JS1\_L23\_00261" 9293 "s59E5H2" 0.07113492 "Uronate isomerase"  
"JS1\_L23\_00261" 9293 "s63E6H2" 0.001715628 "Uronate isomerase"  
"JS1\_L23\_00262" 9294 "s59E13H2" 0.3931311 "Inositol 2-dehydrogenase/D-chiro-inositol 3-dehydrogenase"  
"JS1\_L23\_00262" 9294 "s59E25H2" 0 "Inositol 2-dehydrogenase/D-chiro-inositol 3-dehydrogenase"  
"JS1\_L23\_00262" 9294 "s59E5H2" 1.014213 "Inositol 2-dehydrogenase/D-chiro-inositol 3-dehydrogenase"  
"JS1\_L23\_00262" 9294 "s63E6H2" 0.007688186 "Inositol 2-dehydrogenase/D-chiro-inositol 3-dehydrogenase"  
"JS1\_L23\_00263" 9295 "s59E13H2" 0.4840062 "hypothetical protein"  
"JS1\_L23\_00263" 9295 "s59E25H2" 0 "hypothetical protein"  
"JS1\_L23\_00263" 9295 "s59E5H2" 1.109903 "hypothetical protein"  
"JS1\_L23\_00263" 9295 "s63E6H2" 0.2165803 "hypothetical protein"  
"JS1\_L23\_00264" 9296 "s59E13H2" 0.146813 "Cyclic di-GMP phosphodiesterase response regulator RpfG"  
"JS1\_L23\_00264" 9296 "s59E25H2" 0 "Cyclic di-GMP phosphodiesterase response regulator RpfG"  
"JS1\_L23\_00264" 9296 "s59E5H2" 0.109595 "Cyclic di-GMP phosphodiesterase response regulator RpfG"  
"JS1\_L23\_00264" 9296 "s63E6H2" 0.01636292 "Cyclic di-GMP phosphodiesterase response regulator RpfG"  
"JS1\_L23\_00265" 9297 "s59E13H2" 0.09276239 "Cyclic di-GMP phosphodiesterase response regulator RpfG"  
"JS1\_L23\_00265" 9297 "s59E25H2" 0 "Cyclic di-GMP phosphodiesterase response regulator RpfG"  
"JS1\_L23\_00265" 9297 "s59E5H2" 0.01399297 "Cyclic di-GMP phosphodiesterase response regulator RpfG"  
"JS1\_L23\_00265" 9297 "s63E6H2" 0.00185263 "Cyclic di-GMP phosphodiesterase response regulator RpfG"  
"JS1\_L23\_00266" 9298 "s59E13H2" 0.04959895 "Cyclic di-GMP phosphodiesterase response regulator RpfG"  
"JS1\_L23\_00266" 9298 "s59E25H2" 0 "Cyclic di-GMP phosphodiesterase response regulator RpfG"  
"JS1\_L23\_00266" 9298 "s59E5H2" 1.942444 "Cyclic di-GMP phosphodiesterase response regulator RpfG"  
"JS1\_L23\_00266" 9298 "s63E6H2" 0.03267084 "Cyclic di-GMP phosphodiesterase response regulator RpfG"  
"JS1\_L23\_00267" 9299 "s59E13H2" 16.04333 "D-alanyl-D-alanine carboxypeptidase DacC precursor"  
"JS1\_L23\_00267" 9299 "s59E25H2" 0 "D-alanyl-D-alanine carboxypeptidase DacC precursor"  
"JS1\_L23\_00267" 9299 "s59E5H2" 0.7565741 "D-alanyl-D-alanine carboxypeptidase DacC precursor"  
"JS1\_L23\_00267" 9299 "s63E6H2" 0.7064921 "D-alanyl-D-alanine carboxypeptidase DacC precursor"

"JS1\_L23\_00268" 9300 "s59E13H2" 12.87051 "3-chloro-4-hydroxyphenylacetate reductive dehalogenase precursor"  
"JS1\_L23\_00268" 9300 "s59E25H2" 0 "3-chloro-4-hydroxyphenylacetate reductive dehalogenase precursor"  
"JS1\_L23\_00268" 9300 "s59E5H2" 1.046374 "3-chloro-4-hydroxyphenylacetate reductive dehalogenase precursor"  
"JS1\_L23\_00268" 9300 "s63E6H2" 0.3827319 "3-chloro-4-hydroxyphenylacetate reductive dehalogenase precursor"  
"JS1\_L23\_00269" 9301 "s59E13H2" 12.4877 "Phosphoserine phosphatase 1"  
"JS1\_L23\_00269" 9301 "s59E25H2" 0.2716049 "Phosphoserine phosphatase 1"  
"JS1\_L23\_00269" 9301 "s59E5H2" 0.5623069 "Phosphoserine phosphatase 1"  
"JS1\_L23\_00269" 9301 "s63E6H2" 0.3699642 "Phosphoserine phosphatase 1"  
"JS1\_L23\_00270" 9302 "s59E13H2" 11.22411 "putative hydrolase"  
"JS1\_L23\_00270" 9302 "s59E25H2" 0.03347889 "putative hydrolase"  
"JS1\_L23\_00270" 9302 "s59E5H2" 0.5696996 "putative hydrolase"  
"JS1\_L23\_00270" 9302 "s63E6H2" 0.3921894 "putative hydrolase"  
"JS1\_L23\_00271" 9303 "s59E13H2" 10.63698 "ferredoxin"  
"JS1\_L23\_00271" 9303 "s59E25H2" 0 "ferredoxin"  
"JS1\_L23\_00271" 9303 "s59E5H2" 0.4075947 "ferredoxin"  
"JS1\_L23\_00271" 9303 "s63E6H2" 0.6121839 "ferredoxin"  
"JS1\_L23\_00272" 9304 "s59E13H2" 8.770591 "Glucose-6-phosphate 3-dehydrogenase"  
"JS1\_L23\_00272" 9304 "s59E25H2" 0 "Glucose-6-phosphate 3-dehydrogenase"  
"JS1\_L23\_00272" 9304 "s59E5H2" 0.3017679 "Glucose-6-phosphate 3-dehydrogenase"  
"JS1\_L23\_00272" 9304 "s63E6H2" 0.5019365 "Glucose-6-phosphate 3-dehydrogenase"  
"JS1\_L23\_00274" 9306 "s59E13H2" 0.1260963 "hypothetical protein"  
"JS1\_L23\_00274" 9306 "s59E25H2" 0 "hypothetical protein"  
"JS1\_L23\_00274" 9306 "s59E5H2" 0.445528 "hypothetical protein"  
"JS1\_L23\_00274" 9306 "s63E6H2" 0.3461218 "hypothetical protein"  
"JS1\_L23\_00275" 9307 "s59E13H2" 1.822688 "Alpha-D-glucose-1-phosphate phosphatase YihX"  
"JS1\_L23\_00275" 9307 "s59E25H2" 0 "Alpha-D-glucose-1-phosphate phosphatase YihX"  
"JS1\_L23\_00275" 9307 "s59E5H2" 0.6275222 "Alpha-D-glucose-1-phosphate phosphatase YihX"  
"JS1\_L23\_00275" 9307 "s63E6H2" 0.7710252 "Alpha-D-glucose-1-phosphate phosphatase YihX"  
"JS1\_L23\_00276" 9308 "s59E13H2" 0.1296716 "2,3-diketo-L-gulonate-binding periplasmic protein YiaO precursor"  
"JS1\_L23\_00276" 9308 "s59E25H2" 0 "2,3-diketo-L-gulonate-binding periplasmic protein YiaO precursor"  
"JS1\_L23\_00276" 9308 "s59E5H2" 0.4975314 "2,3-diketo-L-gulonate-binding periplasmic protein YiaO precursor"  
"JS1\_L23\_00276" 9308 "s63E6H2" 0.4033292 "2,3-diketo-L-gulonate-binding periplasmic protein YiaO precursor"  
"JS1\_L23\_00277" 9309 "s59E13H2" 0.1506168 "Sialic acid TRAP transporter permease protein SiaT"  
"JS1\_L23\_00277" 9309 "s59E25H2" 0 "Sialic acid TRAP transporter permease protein SiaT"  
"JS1\_L23\_00277" 9309 "s59E5H2" 0.1570055 "Sialic acid TRAP transporter permease protein SiaT"  
"JS1\_L23\_00277" 9309 "s63E6H2" 0.1811628 "Sialic acid TRAP transporter permease protein SiaT"  
"JS1\_L23\_00278" 9310 "s59E13H2" 0 "Sialic acid TRAP transporter permease protein SiaT"  
"JS1\_L23\_00278" 9310 "s59E25H2" 0 "Sialic acid TRAP transporter permease protein SiaT"  
"JS1\_L23\_00278" 9310 "s59E5H2" 0.1670288 "Sialic acid TRAP transporter permease protein SiaT"  
"JS1\_L23\_00278" 9310 "s63E6H2" 0.1539755 "Sialic acid TRAP transporter permease protein SiaT"  
"JS1\_L23\_00279" 9311 "s59E13H2" 0.04362598 "HTH-type transcriptional regulator PuuR"  
"JS1\_L23\_00279" 9311 "s59E25H2" 0 "HTH-type transcriptional regulator PuuR"  
"JS1\_L23\_00279" 9311 "s59E5H2" 0.2211514 "HTH-type transcriptional regulator PuuR"  
"JS1\_L23\_00279" 9311 "s63E6H2" 0.4297346 "HTH-type transcriptional regulator PuuR"  
"JS1\_L23\_00280" 9312 "s59E13H2" 0.005393561 "Purine-binding protein precursor"  
"JS1\_L23\_00280" 9312 "s59E25H2" 0 "Purine-binding protein precursor"  
"JS1\_L23\_00280" 9312 "s59E5H2" 0.08456876 "Purine-binding protein precursor"

"JS1\_L23\_00280" 9312 "s63E6H2" 0.01675019 "Purine-binding protein precursor"  
"JS1\_L23\_00281" 9313 "s59E13H2" 0.005446062 "Ribose import ATP-binding protein RbsA"  
"JS1\_L23\_00281" 9313 "s59E25H2" 0 "Ribose import ATP-binding protein RbsA"  
"JS1\_L23\_00281" 9313 "s59E5H2" 0.03983936 "Ribose import ATP-binding protein RbsA"  
"JS1\_L23\_00281" 9313 "s63E6H2" 0.0203749 "Ribose import ATP-binding protein RbsA"  
"JS1\_L23\_00282" 9314 "s59E13H2" 0.009459113 "Branched-chain amino acid transport system / permease component"  
"JS1\_L23\_00282" 9314 "s59E25H2" 0 "Branched-chain amino acid transport system / permease component"  
"JS1\_L23\_00282" 9314 "s59E5H2" 0.07990889 "Branched-chain amino acid transport system / permease component"  
"JS1\_L23\_00282" 9314 "s63E6H2" 0.009625542 "Branched-chain amino acid transport system / permease component"  
"JS1\_L23\_00283" 9315 "s59E13H2" 0.0005327369 "Branched-chain amino acid transport system / permease component"  
"JS1\_L23\_00283" 9315 "s59E25H2" 0 "Branched-chain amino acid transport system / permease component"  
"JS1\_L23\_00283" 9315 "s59E5H2" 0.09188397 "Branched-chain amino acid transport system / permease component"  
"JS1\_L23\_00283" 9315 "s63E6H2" 0.004288949 "Branched-chain amino acid transport system / permease component"  
"JS1\_L23\_00284" 9316 "s59E13H2" 0.01461836 "Allantoinase"  
"JS1\_L23\_00284" 9316 "s59E25H2" 0 "Allantoinase"  
"JS1\_L23\_00284" 9316 "s59E5H2" 0.1109156 "Allantoinase"  
"JS1\_L23\_00284" 9316 "s63E6H2" 0.0678258 "Allantoinase"  
"JS1\_L23\_00285" 9317 "s59E13H2" 0.04665337 "Ornithine carbamoyltransferase"  
"JS1\_L23\_00285" 9317 "s59E25H2" 0 "Ornithine carbamoyltransferase"  
"JS1\_L23\_00285" 9317 "s59E5H2" 0.2583333 "Ornithine carbamoyltransferase"  
"JS1\_L23\_00285" 9317 "s63E6H2" 0.382501 "Ornithine carbamoyltransferase"  
"JS1\_L23\_00286" 9318 "s59E13H2" 0.06700335 "Carbamate kinase"  
"JS1\_L23\_00286" 9318 "s59E25H2" 0 "Carbamate kinase"  
"JS1\_L23\_00286" 9318 "s59E5H2" 0.06482988 "Carbamate kinase"  
"JS1\_L23\_00286" 9318 "s63E6H2" 0.2960505 "Carbamate kinase"  
"JS1\_L23\_00287" 9319 "s59E13H2" 0.07339951 "Threonine synthase"  
"JS1\_L23\_00287" 9319 "s59E25H2" 0 "Threonine synthase"  
"JS1\_L23\_00287" 9319 "s59E5H2" 0.2068963 "Threonine synthase"  
"JS1\_L23\_00287" 9319 "s63E6H2" 0.449351 "Threonine synthase"  
"JS1\_L23\_00288" 9320 "s59E13H2" 0.0754419 "putative succinyl-diaminopimelate desuccinylase"  
"JS1\_L23\_00288" 9320 "s59E25H2" 0 "putative succinyl-diaminopimelate desuccinylase"  
"JS1\_L23\_00288" 9320 "s59E5H2" 0.2499201 "putative succinyl-diaminopimelate desuccinylase"  
"JS1\_L23\_00288" 9320 "s63E6H2" 0.9172702 "putative succinyl-diaminopimelate desuccinylase"  
"JS1\_L23\_00289" 9321 "s59E13H2" 0.04057229 "Putative multidrug export ATP-binding/permease protein"  
"JS1\_L23\_00289" 9321 "s59E25H2" 0 "Putative multidrug export ATP-binding/permease protein"  
"JS1\_L23\_00289" 9321 "s59E5H2" 0.1276499 "Putative multidrug export ATP-binding/permease protein"  
"JS1\_L23\_00289" 9321 "s63E6H2" 0.1856091 "Putative multidrug export ATP-binding/permease protein"  
"JS1\_L23\_00290" 9322 "s59E13H2" 0.02963635 "DNA ligase"  
"JS1\_L23\_00290" 9322 "s59E25H2" 0 "DNA ligase"  
"JS1\_L23\_00290" 9322 "s59E5H2" 0.12177 "DNA ligase"  
"JS1\_L23\_00290" 9322 "s63E6H2" 0.1667132 "DNA ligase"  
"JS1\_L23\_00291" 9323 "s59E13H2" 0.0065017 "1-deoxy-D-xylulose-5-phosphate synthase"  
"JS1\_L23\_00291" 9323 "s59E25H2" 0 "1-deoxy-D-xylulose-5-phosphate synthase"  
"JS1\_L23\_00291" 9323 "s59E5H2" 0.01240898 "1-deoxy-D-xylulose-5-phosphate synthase"  
"JS1\_L23\_00291" 9323 "s63E6H2" 0.5028548 "1-deoxy-D-xylulose-5-phosphate synthase"  
"JS1\_L23\_00292" 9324 "s59E13H2" 0.003734942 "Transketolase"  
"JS1\_L23\_00292" 9324 "s59E25H2" 0 "Transketolase"

"JS1\_L23\_00292" 9324 "s59E5H2" 0.001827504 "Transketolase"  
"JS1\_L23\_00292" 9324 "s63E6H2" 0.6244794 "Transketolase"  
"JS1\_L23\_00293" 9325 "s59E13H2" 0.1263872 "Modulator of FtsH protease HflK"  
"JS1\_L23\_00293" 9325 "s59E25H2" 0 "Modulator of FtsH protease HflK"  
"JS1\_L23\_00293" 9325 "s59E5H2" 0.3525893 "Modulator of FtsH protease HflK"  
"JS1\_L23\_00293" 9325 "s63E6H2" 1.490433 "Modulator of FtsH protease HflK"  
"JS1\_L23\_00294" 9326 "s59E13H2" 0.2653983 "Modulator of FtsH protease HflC"  
"JS1\_L23\_00294" 9326 "s59E25H2" 0 "Modulator of FtsH protease HflC"  
"JS1\_L23\_00294" 9326 "s59E5H2" 0.7390038 "Modulator of FtsH protease HflC"  
"JS1\_L23\_00294" 9326 "s63E6H2" 2.517176 "Modulator of FtsH protease HflC"  
"JS1\_L23\_00295" 9327 "s59E13H2" 0.1779494 "Glycerate dehydrogenase"  
"JS1\_L23\_00295" 9327 "s59E25H2" 0 "Glycerate dehydrogenase"  
"JS1\_L23\_00295" 9327 "s59E5H2" 0.8464293 "Glycerate dehydrogenase"  
"JS1\_L23\_00295" 9327 "s63E6H2" 1.1265 "Glycerate dehydrogenase"  
"JS1\_L23\_00296" 9328 "s59E13H2" 0.09885373 "hypothetical protein"  
"JS1\_L23\_00296" 9328 "s59E25H2" 0 "hypothetical protein"  
"JS1\_L23\_00296" 9328 "s59E5H2" 0.6602924 "hypothetical protein"  
"JS1\_L23\_00296" 9328 "s63E6H2" 0.5467185 "hypothetical protein"  
"JS1\_L23\_00298" 9330 "s59E13H2" 0.07667432 "putative transporter"  
"JS1\_L23\_00298" 9330 "s59E25H2" 0 "putative transporter"  
"JS1\_L23\_00298" 9330 "s59E5H2" 0.4513509 "putative transporter"  
"JS1\_L23\_00298" 9330 "s63E6H2" 0.8274409 "putative transporter"  
"JS1\_L23\_00299" 9331 "s59E13H2" 0.07781719 "Aspartyl/glutamyl-tRNA(Asn/Gln) amidotransferase subunit B"  
"JS1\_L23\_00299" 9331 "s59E25H2" 0 "Aspartyl/glutamyl-tRNA(Asn/Gln) amidotransferase subunit B"  
"JS1\_L23\_00299" 9331 "s59E5H2" 0.7203648 "Aspartyl/glutamyl-tRNA(Asn/Gln) amidotransferase subunit B"  
"JS1\_L23\_00299" 9331 "s63E6H2" 0.7320069 "Aspartyl/glutamyl-tRNA(Asn/Gln) amidotransferase subunit B"  
"JS1\_L23\_00300" 9332 "s59E13H2" 0.1662671 "Glutamyl-tRNA(Gln) amidotransferase subunit A"  
"JS1\_L23\_00300" 9332 "s59E25H2" 0 "Glutamyl-tRNA(Gln) amidotransferase subunit A"  
"JS1\_L23\_00300" 9332 "s59E5H2" 0.7930049 "Glutamyl-tRNA(Gln) amidotransferase subunit A"  
"JS1\_L23\_00300" 9332 "s63E6H2" 0.9525647 "Glutamyl-tRNA(Gln) amidotransferase subunit A"  
"JS1\_L23\_00301" 9333 "s59E13H2" 0.08457906 "Aspartyl/glutamyl-tRNA(Asn/Gln) amidotransferase subunit C"  
"JS1\_L23\_00301" 9333 "s59E25H2" 0 "Aspartyl/glutamyl-tRNA(Asn/Gln) amidotransferase subunit C"  
"JS1\_L23\_00301" 9333 "s59E5H2" 0.1348221 "Aspartyl/glutamyl-tRNA(Asn/Gln) amidotransferase subunit C"  
"JS1\_L23\_00301" 9333 "s63E6H2" 0.5247213 "Aspartyl/glutamyl-tRNA(Asn/Gln) amidotransferase subunit C"  
"JS1\_L23\_00302" 9334 "s59E13H2" 0.08662004 "DNA ligase"  
"JS1\_L23\_00302" 9334 "s59E25H2" 0 "DNA ligase"  
"JS1\_L23\_00302" 9334 "s59E5H2" 0.1812303 "DNA ligase"  
"JS1\_L23\_00302" 9334 "s63E6H2" 0.614074 "DNA ligase"  
"JS1\_L23\_00303" 9335 "s59E13H2" 0.05425923 "Putative multidrug export ATP-binding/permease protein"  
"JS1\_L23\_00303" 9335 "s59E25H2" 0 "Putative multidrug export ATP-binding/permease protein"  
"JS1\_L23\_00303" 9335 "s59E5H2" 0.2702609 "Putative multidrug export ATP-binding/permease protein"  
"JS1\_L23\_00303" 9335 "s63E6H2" 0.261336 "Putative multidrug export ATP-binding/permease protein"  
"JS1\_L23\_00304" 9336 "s59E13H2" 1.519594 "Multidrug resistance protein MdtN"  
"JS1\_L23\_00304" 9336 "s59E25H2" 0 "Multidrug resistance protein MdtN"  
"JS1\_L23\_00304" 9336 "s59E5H2" 1.380296 "Multidrug resistance protein MdtN"  
"JS1\_L23\_00304" 9336 "s63E6H2" 0.4603279 "Multidrug resistance protein MdtN"  
"JS1\_L23\_00305" 9337 "s59E13H2" 0.7844207 "Lipoprotein-releasing system transmembrane protein LolE"

"JS1\_L23\_00305" 9337 "s59E25H2" 0 "Lipoprotein-releasing system transmembrane protein LoLE"  
"JS1\_L23\_00305" 9337 "s59E5H2" 2.158156 "Lipoprotein-releasing system transmembrane protein LoLE"  
"JS1\_L23\_00305" 9337 "s63E6H2" 0.7438169 "Lipoprotein-releasing system transmembrane protein LoLE"  
"JS1\_L23\_00306" 9338 "s59E13H2" 0.8031232 "Lipoprotein-releasing system ATP-binding protein LoLD"  
"JS1\_L23\_00306" 9338 "s59E25H2" 0 "Lipoprotein-releasing system ATP-binding protein LoLD"  
"JS1\_L23\_00306" 9338 "s59E5H2" 2.121509 "Lipoprotein-releasing system ATP-binding protein LoLD"  
"JS1\_L23\_00306" 9338 "s63E6H2" 1.583322 "Lipoprotein-releasing system ATP-binding protein LoLD"  
"JS1\_L23\_00307" 9339 "s59E13H2" 0.04371733 "Outer membrane lipoprotein Blc precursor"  
"JS1\_L23\_00307" 9339 "s59E25H2" 0 "Outer membrane lipoprotein Blc precursor"  
"JS1\_L23\_00307" 9339 "s59E5H2" 0.3622643 "Outer membrane lipoprotein Blc precursor"  
"JS1\_L23\_00307" 9339 "s63E6H2" 1.924176 "Outer membrane lipoprotein Blc precursor"  
"JS1\_L23\_00308" 9340 "s59E13H2" 5.697602 "Pyridoxamine 5'-phosphate oxidase"  
"JS1\_L23\_00308" 9340 "s59E25H2" 0 "Pyridoxamine 5'-phosphate oxidase"  
"JS1\_L23\_00308" 9340 "s59E5H2" 0.1585391 "Pyridoxamine 5'-phosphate oxidase"  
"JS1\_L23\_00308" 9340 "s63E6H2" 0.4438155 "Pyridoxamine 5'-phosphate oxidase"  
"JS1\_L23\_00309" 9341 "s59E13H2" 8.943878 "hypothetical protein"  
"JS1\_L23\_00309" 9341 "s59E25H2" 0 "hypothetical protein"  
"JS1\_L23\_00309" 9341 "s59E5H2" 0.09330957 "hypothetical protein"  
"JS1\_L23\_00309" 9341 "s63E6H2" 0.2033684 "hypothetical protein"  
"JS1\_L23\_00310" 9342 "s59E13H2" 0.02185339 "hypothetical protein"  
"JS1\_L23\_00310" 9342 "s59E25H2" 0 "hypothetical protein"  
"JS1\_L23\_00310" 9342 "s59E5H2" 0.07398759 "hypothetical protein"  
"JS1\_L23\_00310" 9342 "s63E6H2" 1.085024 "hypothetical protein"  
"JS1\_L23\_00312" 9344 "s59E13H2" 0.5984158 "Iron-sulfur flavoprotein"  
"JS1\_L23\_00312" 9344 "s59E25H2" 0 "Iron-sulfur flavoprotein"  
"JS1\_L23\_00312" 9344 "s59E5H2" 1.890685 "Iron-sulfur flavoprotein"  
"JS1\_L23\_00312" 9344 "s63E6H2" 0.01772485 "Iron-sulfur flavoprotein"  
"JS1\_L23\_00313" 9345 "s59E13H2" 0.6240208 "hypothetical protein"  
"JS1\_L23\_00313" 9345 "s59E25H2" 0 "hypothetical protein"  
"JS1\_L23\_00313" 9345 "s59E5H2" 1.184214 "hypothetical protein"  
"JS1\_L23\_00313" 9345 "s63E6H2" 0.0220362 "hypothetical protein"  
"JS1\_L23\_00314" 9346 "s59E13H2" 0.6372755 "hypothetical protein"  
"JS1\_L23\_00314" 9346 "s59E25H2" 0 "hypothetical protein"  
"JS1\_L23\_00314" 9346 "s59E5H2" 1.539069 "hypothetical protein"  
"JS1\_L23\_00314" 9346 "s63E6H2" 0.007246588 "hypothetical protein"  
"JS1\_L23\_00315" 9347 "s59E13H2" 0.7862923 "chromosomal replication initiation protein"  
"JS1\_L23\_00315" 9347 "s59E25H2" 0.3011152 "chromosomal replication initiation protein"  
"JS1\_L23\_00315" 9347 "s59E5H2" 2.512136 "chromosomal replication initiation protein"  
"JS1\_L23\_00315" 9347 "s63E6H2" 3.35069 "chromosomal replication initiation protein"  
"JS1\_L23\_00318" 9350 "s59E13H2" 0.2660464 "Sugar fermentation stimulation protein A"  
"JS1\_L23\_00318" 9350 "s59E25H2" 0 "Sugar fermentation stimulation protein A"  
"JS1\_L23\_00318" 9350 "s59E5H2" 0.09365212 "Sugar fermentation stimulation protein A"  
"JS1\_L23\_00318" 9350 "s63E6H2" 0.1025638 "Sugar fermentation stimulation protein A"  
"JS1\_L23\_00319" 9351 "s59E13H2" 0.02703308 "Putative peroxiredoxin/MT2597"  
"JS1\_L23\_00319" 9351 "s59E25H2" 0 "Putative peroxiredoxin/MT2597"  
"JS1\_L23\_00319" 9351 "s59E5H2" 0.06496191 "Putative peroxiredoxin/MT2597"  
"JS1\_L23\_00319" 9351 "s63E6H2" 0.02354108 "Putative peroxiredoxin/MT2597"

"JS1\_L23\_00320" 9352 "s59E13H2" 0.08599372 "Nitroreductase family protein"  
"JS1\_L23\_00320" 9352 "s59E25H2" 0 "Nitroreductase family protein"  
"JS1\_L23\_00320" 9352 "s59E5H2" 0.2074963 "Nitroreductase family protein"  
"JS1\_L23\_00320" 9352 "s63E6H2" 0.06843098 "Nitroreductase family protein"  
"JS1\_L23\_00321" 9353 "s59E13H2" 0.1187442 "hypothetical protein"  
"JS1\_L23\_00321" 9353 "s59E25H2" 0 "hypothetical protein"  
"JS1\_L23\_00321" 9353 "s59E5H2" 0.05193759 "hypothetical protein"  
"JS1\_L23\_00321" 9353 "s63E6H2" 0.2400053 "hypothetical protein"  
"JS1\_L23\_00322" 9354 "s59E13H2" 0.08951185 "Enamine/imine deaminase"  
"JS1\_L23\_00322" 9354 "s59E25H2" 0.3690476 "Enamine/imine deaminase"  
"JS1\_L23\_00322" 9354 "s59E5H2" 0.5793764 "Enamine/imine deaminase"  
"JS1\_L23\_00322" 9354 "s63E6H2" 0.9542313 "Enamine/imine deaminase"  
"JS1\_L23\_00323" 9355 "s59E13H2" 0.04167648 "L-threonine dehydratase catabolic TdcB"  
"JS1\_L23\_00323" 9355 "s59E25H2" 0.6379487 "L-threonine dehydratase catabolic TdcB"  
"JS1\_L23\_00323" 9355 "s59E5H2" 0.2753833 "L-threonine dehydratase catabolic TdcB"  
"JS1\_L23\_00323" 9355 "s63E6H2" 0.7634777 "L-threonine dehydratase catabolic TdcB"  
"JS1\_L23\_00324" 9356 "s59E13H2" 2.336 "hypothetical protein"  
"JS1\_L23\_00324" 9356 "s59E25H2" 0 "hypothetical protein"  
"JS1\_L23\_00324" 9356 "s59E5H2" 0.3187311 "hypothetical protein"  
"JS1\_L23\_00324" 9356 "s63E6H2" 0.08391474 "hypothetical protein"  
"JS1\_L23\_00325" 9357 "s59E13H2" 2.052301 "Flavodoxin domain protein"  
"JS1\_L23\_00325" 9357 "s59E25H2" 0 "Flavodoxin domain protein"  
"JS1\_L23\_00325" 9357 "s59E5H2" 0.5175977 "Flavodoxin domain protein"  
"JS1\_L23\_00325" 9357 "s63E6H2" 0.1130254 "Flavodoxin domain protein"  
"JS1\_L23\_00326" 9358 "s59E13H2" 2.055769 "VIT family protein"  
"JS1\_L23\_00326" 9358 "s59E25H2" 0 "VIT family protein"  
"JS1\_L23\_00326" 9358 "s59E5H2" 0.6723141 "VIT family protein"  
"JS1\_L23\_00326" 9358 "s63E6H2" 0.09316511 "VIT family protein"  
"JS1\_L23\_00327" 9359 "s59E13H2" 3.676433 "Calcium/calmodulin dependent protein kinase II Association"  
"JS1\_L23\_00327" 9359 "s59E25H2" 0 "Calcium/calmodulin dependent protein kinase II Association"  
"JS1\_L23\_00327" 9359 "s59E5H2" 0.6454671 "Calcium/calmodulin dependent protein kinase II Association"  
"JS1\_L23\_00327" 9359 "s63E6H2" 0.2858392 "Calcium/calmodulin dependent protein kinase II Association"  
"JS1\_L23\_00328" 9360 "s59E13H2" 2.273193 "ferredoxin"  
"JS1\_L23\_00328" 9360 "s59E25H2" 0 "ferredoxin"  
"JS1\_L23\_00328" 9360 "s59E5H2" 0.8849811 "ferredoxin"  
"JS1\_L23\_00328" 9360 "s63E6H2" 0.7430983 "ferredoxin"  
"JS1\_L23\_00329" 9361 "s59E13H2" 2.372966 "DinB superfamily protein"  
"JS1\_L23\_00329" 9361 "s59E25H2" 0 "DinB superfamily protein"  
"JS1\_L23\_00329" 9361 "s59E5H2" 1.143749 "DinB superfamily protein"  
"JS1\_L23\_00329" 9361 "s63E6H2" 0.20185 "DinB superfamily protein"  
"JS1\_L23\_00330" 9362 "s59E13H2" 2.13659 "OsmC-like protein"  
"JS1\_L23\_00330" 9362 "s59E25H2" 0 "OsmC-like protein"  
"JS1\_L23\_00330" 9362 "s59E5H2" 0.4148797 "OsmC-like protein"  
"JS1\_L23\_00330" 9362 "s63E6H2" 0.3752782 "OsmC-like protein"  
"JS1\_L23\_00331" 9363 "s59E13H2" 2.916815 "YvrJ protein family protein"  
"JS1\_L23\_00331" 9363 "s59E25H2" 0.7518519 "YvrJ protein family protein"  
"JS1\_L23\_00331" 9363 "s59E5H2" 1.141666 "YvrJ protein family protein"



"JS1\_L23\_00331" 9363 "s63E6H2" 4.858118 "YvrJ protein family protein"  
"JS1\_L23\_00332" 9364 "s59E13H2" 0.1884423 "Arsenate-mycothioli transferase ArsC2"  
"JS1\_L23\_00332" 9364 "s59E25H2" 0 "Arsenate-mycothioli transferase ArsC2"  
"JS1\_L23\_00332" 9364 "s59E5H2" 0.1951157 "Arsenate-mycothioli transferase ArsC2"  
"JS1\_L23\_00332" 9364 "s63E6H2" 0.08347166 "Arsenate-mycothioli transferase ArsC2"  
"JS1\_L23\_00333" 9365 "s59E13H2" 0.4132461 "Inner membrane symporter YicJ"  
"JS1\_L23\_00333" 9365 "s59E25H2" 0 "Inner membrane symporter YicJ"  
"JS1\_L23\_00333" 9365 "s59E5H2" 3.991772 "Inner membrane symporter YicJ"  
"JS1\_L23\_00333" 9365 "s63E6H2" 1.916971 "Inner membrane symporter YicJ"  
"JS1\_L23\_00334" 9366 "s59E13H2" 0.3361594 "hypothetical protein"  
"JS1\_L23\_00334" 9366 "s59E25H2" 0 "hypothetical protein"  
"JS1\_L23\_00334" 9366 "s59E5H2" 3.15003 "hypothetical protein"  
"JS1\_L23\_00334" 9366 "s63E6H2" 1.700717 "hypothetical protein"  
"JS1\_L23\_00335" 9367 "s59E13H2" 0.1201993 "hypothetical protein"  
"JS1\_L23\_00335" 9367 "s59E25H2" 0 "hypothetical protein"  
"JS1\_L23\_00335" 9367 "s59E5H2" 0.9629769 "hypothetical protein"  
"JS1\_L23\_00335" 9367 "s63E6H2" 0.2398135 "hypothetical protein"  
"JS1\_L23\_00336" 9368 "s59E13H2" 0.08297555 "Formamidase"  
"JS1\_L23\_00336" 9368 "s59E25H2" 0 "Formamidase"  
"JS1\_L23\_00336" 9368 "s59E5H2" 0.4780647 "Formamidase"  
"JS1\_L23\_00336" 9368 "s63E6H2" 0.4989815 "Formamidase"  
"JS1\_L23\_00337" 9369 "s59E13H2" 0.1580401 "hypothetical protein"  
"JS1\_L23\_00337" 9369 "s59E25H2" 0 "hypothetical protein"  
"JS1\_L23\_00337" 9369 "s59E5H2" 1.056826 "hypothetical protein"  
"JS1\_L23\_00337" 9369 "s63E6H2" 1.398264 "hypothetical protein"  
"JS1\_L23\_00338" 9370 "s59E13H2" 0.5331951 "hypothetical protein"  
"JS1\_L23\_00338" 9370 "s59E25H2" 0 "hypothetical protein"  
"JS1\_L23\_00338" 9370 "s59E5H2" 0.05948561 "hypothetical protein"  
"JS1\_L23\_00338" 9370 "s63E6H2" 0.0009262665 "hypothetical protein"  
"JS1\_L23\_00339" 9371 "s59E13H2" 1.334669 "hypothetical protein"  
"JS1\_L23\_00339" 9371 "s59E25H2" 0 "hypothetical protein"  
"JS1\_L23\_00339" 9371 "s59E5H2" 0.3477137 "hypothetical protein"  
"JS1\_L23\_00339" 9371 "s63E6H2" 0.007420052 "hypothetical protein"  
"JS1\_L23\_00340" 9372 "s59E13H2" 1.298015 "hypothetical protein"  
"JS1\_L23\_00340" 9372 "s59E25H2" 0 "hypothetical protein"  
"JS1\_L23\_00340" 9372 "s59E5H2" 0.4890501 "hypothetical protein"  
"JS1\_L23\_00340" 9372 "s63E6H2" 0 "hypothetical protein"  
"JS1\_L23\_00342" 9374 "s59E13H2" 2.396108 "hypothetical protein"  
"JS1\_L23\_00342" 9374 "s59E25H2" 0 "hypothetical protein"  
"JS1\_L23\_00342" 9374 "s59E5H2" 1.497537 "hypothetical protein"  
"JS1\_L23\_00342" 9374 "s63E6H2" 2.386889 "hypothetical protein"  
"JS1\_L23\_00343" 9375 "s59E13H2" 0.03951583 "Dephospho-CoA kinase"  
"JS1\_L23\_00343" 9375 "s59E25H2" 0 "Dephospho-CoA kinase"  
"JS1\_L23\_00343" 9375 "s59E5H2" 0.4646841 "Dephospho-CoA kinase"  
"JS1\_L23\_00343" 9375 "s63E6H2" 0.4915218 "Dephospho-CoA kinase"  
"JS1\_L23\_00344" 9376 "s59E13H2" 0.02557768 "Adenine deaminase"  
"JS1\_L23\_00344" 9376 "s59E25H2" 0 "Adenine deaminase"

"JS1\_L23\_00344" 9376 "s59E5H2" 0.9127791 "Adenine deaminase"  
"JS1\_L23\_00344" 9376 "s63E6H2" 1.496706 "Adenine deaminase"  
"JS1\_L23\_00345" 9377 "s59E13H2" 0.04465267 "Carbonic anhydrase precursor"  
"JS1\_L23\_00345" 9377 "s59E25H2" 0 "Carbonic anhydrase precursor"  
"JS1\_L23\_00345" 9377 "s59E5H2" 0.1520257 "Carbonic anhydrase precursor"  
"JS1\_L23\_00345" 9377 "s63E6H2" 0.2166937 "Carbonic anhydrase precursor"  
"JS1\_L23\_00346" 9378 "s59E13H2" 0.05098449 "UvrABC system protein C"  
"JS1\_L23\_00346" 9378 "s59E25H2" 0 "UvrABC system protein C"  
"JS1\_L23\_00346" 9378 "s59E5H2" 0.2501146 "UvrABC system protein C"  
"JS1\_L23\_00346" 9378 "s63E6H2" 0.1699972 "UvrABC system protein C"  
"JS1\_L23\_00347" 9379 "s59E13H2" 0.06618246 "UvrABC system protein A"  
"JS1\_L23\_00347" 9379 "s59E25H2" 0 "UvrABC system protein A"  
"JS1\_L23\_00347" 9379 "s59E5H2" 1.017705 "UvrABC system protein A"  
"JS1\_L23\_00347" 9379 "s63E6H2" 0.2244676 "UvrABC system protein A"  
"JS1\_L23\_00348" 9380 "s59E13H2" 0.1253602 "putative metallo-hydrolase YfIN"  
"JS1\_L23\_00348" 9380 "s59E25H2" 0 "putative metallo-hydrolase YfIN"  
"JS1\_L23\_00348" 9380 "s59E5H2" 0.06102949 "putative metallo-hydrolase YfIN"  
"JS1\_L23\_00348" 9380 "s63E6H2" 0.0753962 "putative metallo-hydrolase YfIN"  
"JS1\_L23\_00349" 9381 "s59E13H2" 0.5861777 "putative oxidoreductase YciK"  
"JS1\_L23\_00349" 9381 "s59E25H2" 0 "putative oxidoreductase YciK"  
"JS1\_L23\_00349" 9381 "s59E5H2" 0.1493018 "putative oxidoreductase YciK"  
"JS1\_L23\_00349" 9381 "s63E6H2" 0.09156226 "putative oxidoreductase YciK"  
"JS1\_L23\_00350" 9382 "s59E13H2" 1.159636 "Toluene 1,2-dioxygenase system ferredoxin subunit"  
"JS1\_L23\_00350" 9382 "s59E25H2" 0 "Toluene 1,2-dioxygenase system ferredoxin subunit"  
"JS1\_L23\_00350" 9382 "s59E5H2" 0.118886 "Toluene 1,2-dioxygenase system ferredoxin subunit"  
"JS1\_L23\_00350" 9382 "s63E6H2" 0.04517747 "Toluene 1,2-dioxygenase system ferredoxin subunit"  
"JS1\_L23\_00351" 9383 "s59E13H2" 1.080605 "putative acetyltransferase"  
"JS1\_L23\_00351" 9383 "s59E25H2" 0 "putative acetyltransferase"  
"JS1\_L23\_00351" 9383 "s59E5H2" 0.09573206 "putative acetyltransferase"  
"JS1\_L23\_00351" 9383 "s63E6H2" 0.0190514 "putative acetyltransferase"  
"JS1\_L23\_00352" 9384 "s59E13H2" 0.4294204 "Serine--tRNA ligase"  
"JS1\_L23\_00352" 9384 "s59E25H2" 0.1878931 "Serine--tRNA ligase"  
"JS1\_L23\_00352" 9384 "s59E5H2" 1.785699 "Serine--tRNA ligase"  
"JS1\_L23\_00352" 9384 "s63E6H2" 1.129692 "Serine--tRNA ligase"  
"JS1\_L23\_00353" 9385 "s59E13H2" 0.2679144 "tRNA-splicing ligase RtcB"  
"JS1\_L23\_00353" 9385 "s59E25H2" 0 "tRNA-splicing ligase RtcB"  
"JS1\_L23\_00353" 9385 "s59E5H2" 0.6850069 "tRNA-splicing ligase RtcB"  
"JS1\_L23\_00353" 9385 "s63E6H2" 0.2260053 "tRNA-splicing ligase RtcB"  
"JS1\_L23\_00354" 9386 "s59E13H2" 0.1423447 "hypothetical protein"  
"JS1\_L23\_00354" 9386 "s59E25H2" 0 "hypothetical protein"  
"JS1\_L23\_00354" 9386 "s59E5H2" 0.2521191 "hypothetical protein"  
"JS1\_L23\_00354" 9386 "s63E6H2" 0.07332251 "hypothetical protein"  
"JS1\_L23\_00356" 9388 "s59E13H2" 0.07076655 "Glyoxylate reductase"  
"JS1\_L23\_00356" 9388 "s59E25H2" 0 "Glyoxylate reductase"  
"JS1\_L23\_00356" 9388 "s59E5H2" 0.0191189 "Glyoxylate reductase"  
"JS1\_L23\_00356" 9388 "s63E6H2" 0.00151341 "Glyoxylate reductase"  
"JS1\_L23\_00357" 9389 "s59E13H2" 0.04613616 "ThiS family protein"

"JS1\_L23\_00357" 9389 "s59E25H2" 0 "ThiS family protein"  
"JS1\_L23\_00357" 9389 "s59E5H2" 0 "ThiS family protein"  
"JS1\_L23\_00357" 9389 "s63E6H2" 0.0006375285 "ThiS family protein"  
"JS1\_L23\_00358" 9390 "s59E13H2" 0.0682687 "Tungsten-containing aldehyde ferredoxin oxidoreductase"  
"JS1\_L23\_00358" 9390 "s59E25H2" 0 "Tungsten-containing aldehyde ferredoxin oxidoreductase"  
"JS1\_L23\_00358" 9390 "s59E5H2" 0.002225663 "Tungsten-containing aldehyde ferredoxin oxidoreductase"  
"JS1\_L23\_00358" 9390 "s63E6H2" 0.01559383 "Tungsten-containing aldehyde ferredoxin oxidoreductase"  
"JS1\_L23\_00359" 9391 "s59E13H2" 0.01140033 "KHG/KDPG aldolase"  
"JS1\_L23\_00359" 9391 "s59E25H2" 0 "KHG/KDPG aldolase"  
"JS1\_L23\_00359" 9391 "s59E5H2" 0 "KHG/KDPG aldolase"  
"JS1\_L23\_00359" 9391 "s63E6H2" 0 "KHG/KDPG aldolase"  
"JS1\_L23\_00360" 9392 "s59E13H2" 0.007277611 "Transposase IS200 like protein"  
"JS1\_L23\_00360" 9392 "s59E25H2" 0 "Transposase IS200 like protein"  
"JS1\_L23\_00360" 9392 "s59E5H2" 0.2108276 "Transposase IS200 like protein"  
"JS1\_L23\_00360" 9392 "s63E6H2" 0.0908516 "Transposase IS200 like protein"  
"JS1\_L23\_00361" 9393 "s59E13H2" 0 "Acetoin:2,6-dichlorophenolindophenol oxidoreductase subunit alpha"  
"JS1\_L23\_00361" 9393 "s59E25H2" 0 "Acetoin:2,6-dichlorophenolindophenol oxidoreductase subunit alpha"  
"JS1\_L23\_00361" 9393 "s59E5H2" 0 "Acetoin:2,6-dichlorophenolindophenol oxidoreductase subunit alpha"  
"JS1\_L23\_00361" 9393 "s63E6H2" 0 "Acetoin:2,6-dichlorophenolindophenol oxidoreductase subunit alpha"  
"JS1\_L23\_00362" 9394 "s59E13H2" 0 "Epoxyqueuosine reductase"  
"JS1\_L23\_00362" 9394 "s59E25H2" 0 "Epoxyqueuosine reductase"  
"JS1\_L23\_00362" 9394 "s59E5H2" 0 "Epoxyqueuosine reductase"  
"JS1\_L23\_00362" 9394 "s63E6H2" 0 "Epoxyqueuosine reductase"  
"JS1\_L23\_00363" 9395 "s59E13H2" 0 "Dihydrolipoyllysine-residue acetyltransferase component of pyruvate dehydrogenase complex"  
"JS1\_L23\_00363" 9395 "s59E25H2" 0 "Dihydrolipoyllysine-residue acetyltransferase component of pyruvate dehydrogenase complex"  
"JS1\_L23\_00363" 9395 "s59E5H2" 0 "Dihydrolipoyllysine-residue acetyltransferase component of pyruvate dehydrogenase complex"  
"JS1\_L23\_00363" 9395 "s63E6H2" 0 "Dihydrolipoyllysine-residue acetyltransferase component of pyruvate dehydrogenase complex"  
"JS1\_L23\_00364" 9396 "s59E13H2" 0.003417895 "Acetoin:2,6-dichlorophenolindophenol oxidoreductase subunit beta"  
"JS1\_L23\_00364" 9396 "s59E25H2" 0 "Acetoin:2,6-dichlorophenolindophenol oxidoreductase subunit beta"  
"JS1\_L23\_00364" 9396 "s59E5H2" 0 "Acetoin:2,6-dichlorophenolindophenol oxidoreductase subunit beta"  
"JS1\_L23\_00364" 9396 "s63E6H2" 0 "Acetoin:2,6-dichlorophenolindophenol oxidoreductase subunit beta"  
"JS1\_L23\_00365" 9397 "s59E13H2" 0 "Acetoin:2,6-dichlorophenolindophenol oxidoreductase subunit alpha"  
"JS1\_L23\_00365" 9397 "s59E25H2" 0 "Acetoin:2,6-dichlorophenolindophenol oxidoreductase subunit alpha"  
"JS1\_L23\_00365" 9397 "s59E5H2" 0 "Acetoin:2,6-dichlorophenolindophenol oxidoreductase subunit alpha"  
"JS1\_L23\_00365" 9397 "s63E6H2" 0 "Acetoin:2,6-dichlorophenolindophenol oxidoreductase subunit alpha"  
"JS1\_L23\_00367" 9399 "s59E13H2" 0.501304 "NADH-quinone oxidoreductase subunit E"  
"JS1\_L23\_00367" 9399 "s59E25H2" 0 "NADH-quinone oxidoreductase subunit E"  
"JS1\_L23\_00367" 9399 "s59E5H2" 0.04040762 "NADH-quinone oxidoreductase subunit E"  
"JS1\_L23\_00367" 9399 "s63E6H2" 0.1946285 "NADH-quinone oxidoreductase subunit E"  
"JS1\_L23\_00368" 9400 "s59E13H2" 0.6925965 "NADP-reducing hydrogenase subunit HndC"  
"JS1\_L23\_00368" 9400 "s59E25H2" 0 "NADP-reducing hydrogenase subunit HndC"  
"JS1\_L23\_00368" 9400 "s59E5H2" 0.3889488 "NADP-reducing hydrogenase subunit HndC"  
"JS1\_L23\_00368" 9400 "s63E6H2" 0.1841906 "NADP-reducing hydrogenase subunit HndC"  
"JS1\_L23\_00369" 9401 "s59E13H2" 0.9513456 "Formate dehydrogenase subunit alpha"  
"JS1\_L23\_00369" 9401 "s59E25H2" 0 "Formate dehydrogenase subunit alpha"  
"JS1\_L23\_00369" 9401 "s59E5H2" 0.5656073 "Formate dehydrogenase subunit alpha"  
"JS1\_L23\_00369" 9401 "s63E6H2" 0.3588178 "Formate dehydrogenase subunit alpha"

"JS1\_L23\_00370" 9402 "s59E13H2" 0.06199481 "putative formate transporter 1"  
"JS1\_L23\_00370" 9402 "s59E25H2" 0 "putative formate transporter 1"  
"JS1\_L23\_00370" 9402 "s59E5H2" 0.09394634 "putative formate transporter 1"  
"JS1\_L23\_00370" 9402 "s63E6H2" 0.402215 "putative formate transporter 1"  
"JS1\_L23\_00371" 9403 "s59E13H2" 0.7733405 "putative molybdenum cofactor guanylyltransferase"  
"JS1\_L23\_00371" 9403 "s59E25H2" 0 "putative molybdenum cofactor guanylyltransferase"  
"JS1\_L23\_00371" 9403 "s59E5H2" 0.2346841 "putative molybdenum cofactor guanylyltransferase"  
"JS1\_L23\_00371" 9403 "s63E6H2" 0.4391177 "putative molybdenum cofactor guanylyltransferase"  
"JS1\_L23\_00372" 9404 "s59E13H2" 0.6410364 "formate dehydrogenase accessory protein"  
"JS1\_L23\_00372" 9404 "s59E25H2" 0 "formate dehydrogenase accessory protein"  
"JS1\_L23\_00372" 9404 "s59E5H2" 0.2996992 "formate dehydrogenase accessory protein"  
"JS1\_L23\_00372" 9404 "s63E6H2" 0.4532829 "formate dehydrogenase accessory protein"  
"JS1\_L23\_00373" 9405 "s59E13H2" 0.07879994 "Sensor histidine kinase LiaS"  
"JS1\_L23\_00373" 9405 "s59E25H2" 0 "Sensor histidine kinase LiaS"  
"JS1\_L23\_00373" 9405 "s59E5H2" 0.02115947 "Sensor histidine kinase LiaS"  
"JS1\_L23\_00373" 9405 "s63E6H2" 0.2795684 "Sensor histidine kinase LiaS"  
"JS1\_L23\_00374" 9406 "s59E13H2" 0.2468868 "PHP domain protein"  
"JS1\_L23\_00374" 9406 "s59E25H2" 0 "PHP domain protein"  
"JS1\_L23\_00374" 9406 "s59E5H2" 0.2041505 "PHP domain protein"  
"JS1\_L23\_00374" 9406 "s63E6H2" 0.2844154 "PHP domain protein"  
"JS1\_L23\_00375" 9407 "s59E13H2" 0.4269121 "DRTGG domain protein"  
"JS1\_L23\_00375" 9407 "s59E25H2" 0 "DRTGG domain protein"  
"JS1\_L23\_00375" 9407 "s59E5H2" 0.1069974 "DRTGG domain protein"  
"JS1\_L23\_00375" 9407 "s63E6H2" 0.277339 "DRTGG domain protein"  
"JS1\_L23\_00376" 9408 "s59E13H2" 0.3721352 "Serine/threonine-protein kinase RsbT"  
"JS1\_L23\_00376" 9408 "s59E25H2" 0 "Serine/threonine-protein kinase RsbT"  
"JS1\_L23\_00376" 9408 "s59E5H2" 0.01938248 "Serine/threonine-protein kinase RsbT"  
"JS1\_L23\_00376" 9408 "s63E6H2" 0.1939875 "Serine/threonine-protein kinase RsbT"  
"JS1\_L23\_00377" 9409 "s59E13H2" 0.4526684 "DRTGG domain protein"  
"JS1\_L23\_00377" 9409 "s59E25H2" 0 "DRTGG domain protein"  
"JS1\_L23\_00377" 9409 "s59E5H2" 0.03514851 "DRTGG domain protein"  
"JS1\_L23\_00377" 9409 "s63E6H2" 0.1401527 "DRTGG domain protein"  
"JS1\_L23\_00378" 9410 "s59E13H2" 0.3926629 "Redox-sensing transcriptional repressor Rex"  
"JS1\_L23\_00378" 9410 "s59E25H2" 0 "Redox-sensing transcriptional repressor Rex"  
"JS1\_L23\_00378" 9410 "s59E5H2" 1.094598 "Redox-sensing transcriptional repressor Rex"  
"JS1\_L23\_00378" 9410 "s63E6H2" 0.6230985 "Redox-sensing transcriptional repressor Rex"  
"JS1\_L23\_00379" 9411 "s59E13H2" 0.2848132 "Sporulation-specific N-acetylmuramoyl-L-alanine amidase"  
"JS1\_L23\_00379" 9411 "s59E25H2" 0 "Sporulation-specific N-acetylmuramoyl-L-alanine amidase"  
"JS1\_L23\_00379" 9411 "s59E5H2" 0.9864697 "Sporulation-specific N-acetylmuramoyl-L-alanine amidase"  
"JS1\_L23\_00379" 9411 "s63E6H2" 0.7081199 "Sporulation-specific N-acetylmuramoyl-L-alanine amidase"  
"JS1\_L23\_00380" 9412 "s59E13H2" 0.8072636 "Membrane-bound hydrogenase subunit alpha"  
"JS1\_L23\_00380" 9412 "s59E25H2" 0.2573529 "Membrane-bound hydrogenase subunit alpha"  
"JS1\_L23\_00380" 9412 "s59E5H2" 0.6677406 "Membrane-bound hydrogenase subunit alpha"  
"JS1\_L23\_00380" 9412 "s63E6H2" 5.940991 "Membrane-bound hydrogenase subunit alpha"  
"JS1\_L23\_00381" 9413 "s59E13H2" 1.050488 "F(420)H(2) dehydrogenase subunit H"  
"JS1\_L23\_00381" 9413 "s59E25H2" 0 "F(420)H(2) dehydrogenase subunit H"  
"JS1\_L23\_00381" 9413 "s59E5H2" 1.444635 "F(420)H(2) dehydrogenase subunit H"

"JS1\_L23\_00381" 9413 "s63E6H2" 6.916114 "F(420)H(2) dehydrogenase subunit H"  
"JS1\_L23\_00382" 9414 "s59E13H2" 0.4322676 "NAD(P)H-quinone oxidoreductase subunit I"  
"JS1\_L23\_00382" 9414 "s59E25H2" 0 "NAD(P)H-quinone oxidoreductase subunit I"  
"JS1\_L23\_00382" 9414 "s59E5H2" 0.767073 "NAD(P)H-quinone oxidoreductase subunit I"  
"JS1\_L23\_00382" 9414 "s63E6H2" 6.361961 "NAD(P)H-quinone oxidoreductase subunit I"  
"JS1\_L23\_00383" 9415 "s59E13H2" 0.1556728 "Ribose import ATP-binding protein RbsA"  
"JS1\_L23\_00383" 9415 "s59E25H2" 0 "Ribose import ATP-binding protein RbsA"  
"JS1\_L23\_00383" 9415 "s59E5H2" 0.06831044 "Ribose import ATP-binding protein RbsA"  
"JS1\_L23\_00383" 9415 "s63E6H2" 0.01442755 "Ribose import ATP-binding protein RbsA"  
"JS1\_L23\_00384" 9416 "s59E13H2" 0.132303 "Ribose transport system permease protein RbsC"  
"JS1\_L23\_00384" 9416 "s59E25H2" 0 "Ribose transport system permease protein RbsC"  
"JS1\_L23\_00384" 9416 "s59E5H2" 0.04856679 "Ribose transport system permease protein RbsC"  
"JS1\_L23\_00384" 9416 "s63E6H2" 0.02044386 "Ribose transport system permease protein RbsC"  
"JS1\_L23\_00385" 9417 "s59E13H2" 0.4737327 "RNA polymerase sigma factor SigA"  
"JS1\_L23\_00385" 9417 "s59E25H2" 0 "RNA polymerase sigma factor SigA"  
"JS1\_L23\_00385" 9417 "s59E5H2" 1.481155 "RNA polymerase sigma factor SigA"  
"JS1\_L23\_00385" 9417 "s63E6H2" 0.1978789 "RNA polymerase sigma factor SigA"  
"JS1\_L23\_00386" 9418 "s59E13H2" 13.55819 "hypothetical protein"  
"JS1\_L23\_00386" 9418 "s59E25H2" 0.3326586 "hypothetical protein"  
"JS1\_L23\_00386" 9418 "s59E5H2" 0.1419675 "hypothetical protein"  
"JS1\_L23\_00386" 9418 "s63E6H2" 1.594296 "hypothetical protein"  
"JS1\_L23\_00387" 9419 "s59E13H2" 4.510361 "Helix-turn-helix"  
"JS1\_L23\_00387" 9419 "s59E25H2" 0 "Helix-turn-helix"  
"JS1\_L23\_00387" 9419 "s59E5H2" 1.308806 "Helix-turn-helix"  
"JS1\_L23\_00387" 9419 "s63E6H2" 0.01823787 "Helix-turn-helix"  
"JS1\_L23\_00389" 9421 "s59E13H2" 0.4391942 "hypothetical protein"  
"JS1\_L23\_00389" 9421 "s59E25H2" 0 "hypothetical protein"  
"JS1\_L23\_00389" 9421 "s59E5H2" 3.039801 "hypothetical protein"  
"JS1\_L23\_00389" 9421 "s63E6H2" 0.1635304 "hypothetical protein"  
"JS1\_L23\_00390" 9422 "s59E13H2" 0.06945199 "Glycine--tRNA ligase alpha subunit"  
"JS1\_L23\_00390" 9422 "s59E25H2" 0 "Glycine--tRNA ligase alpha subunit"  
"JS1\_L23\_00390" 9422 "s59E5H2" 0.226163 "Glycine--tRNA ligase alpha subunit"  
"JS1\_L23\_00390" 9422 "s63E6H2" 0.3461981 "Glycine--tRNA ligase alpha subunit"  
"JS1\_L23\_00391" 9423 "s59E13H2" 0.1036783 "Pyrimidine-nucleoside phosphorylase"  
"JS1\_L23\_00391" 9423 "s59E25H2" 0 "Pyrimidine-nucleoside phosphorylase"  
"JS1\_L23\_00391" 9423 "s59E5H2" 0.1986217 "Pyrimidine-nucleoside phosphorylase"  
"JS1\_L23\_00391" 9423 "s63E6H2" 0.08478862 "Pyrimidine-nucleoside phosphorylase"  
"JS1\_L23\_00392" 9424 "s59E13H2" 0.06378815 "Putative K(+)-stimulated pyrophosphate-energized sodium pump"  
"JS1\_L23\_00392" 9424 "s59E25H2" 0 "Putative K(+)-stimulated pyrophosphate-energized sodium pump"  
"JS1\_L23\_00392" 9424 "s59E5H2" 0.3404996 "Putative K(+)-stimulated pyrophosphate-energized sodium pump"  
"JS1\_L23\_00392" 9424 "s63E6H2" 0.08363598 "Putative K(+)-stimulated pyrophosphate-energized sodium pump"  
"JS1\_L23\_00393" 9425 "s59E13H2" 0.545032 "Ankyrin repeats (3 copies)"  
"JS1\_L23\_00393" 9425 "s59E25H2" 0 "Ankyrin repeats (3 copies)"  
"JS1\_L23\_00393" 9425 "s59E5H2" 0.1272501 "Ankyrin repeats (3 copies)"  
"JS1\_L23\_00393" 9425 "s63E6H2" 0.2012845 "Ankyrin repeats (3 copies)"  
"JS1\_L23\_00396" 9428 "s59E13H2" 0.5567336 "Antitoxin MazE"  
"JS1\_L23\_00396" 9428 "s59E25H2" 0 "Antitoxin MazE"

"JS1\_L23\_00396" 9428 "s59E5H2" 0.5787522 "Antitoxin MazE"  
"JS1\_L23\_00396" 9428 "s63E6H2" 2.946829 "Antitoxin MazE"  
"JS1\_L23\_00397" 9429 "s59E13H2" 0.4209533 "mRNA interferase MazF"  
"JS1\_L23\_00397" 9429 "s59E25H2" 0 "mRNA interferase MazF"  
"JS1\_L23\_00397" 9429 "s59E5H2" 0.499722 "mRNA interferase MazF"  
"JS1\_L23\_00397" 9429 "s63E6H2" 2.824179 "mRNA interferase MazF"  
"JS1\_L23\_00398" 9430 "s59E13H2" 0.00654424 "hypothetical protein"  
"JS1\_L23\_00398" 9430 "s59E25H2" 0 "hypothetical protein"  
"JS1\_L23\_00398" 9430 "s59E5H2" 0.06022746 "hypothetical protein"  
"JS1\_L23\_00398" 9430 "s63E6H2" 0.001078584 "hypothetical protein"  
"JS1\_L23\_00399" 9431 "s59E13H2" 0.05604683 "Two component regulator propeller"  
"JS1\_L23\_00399" 9431 "s59E25H2" 0 "Two component regulator propeller"  
"JS1\_L23\_00399" 9431 "s59E5H2" 0.1199571 "Two component regulator propeller"  
"JS1\_L23\_00399" 9431 "s63E6H2" 0.1025538 "Two component regulator propeller"  
"JS1\_L23\_00400" 9432 "s59E13H2" 0.1188938 "hypothetical protein"  
"JS1\_L23\_00400" 9432 "s59E25H2" 0 "hypothetical protein"  
"JS1\_L23\_00400" 9432 "s59E5H2" 0.03485275 "hypothetical protein"  
"JS1\_L23\_00400" 9432 "s63E6H2" 0.02201186 "hypothetical protein"  
"JS1\_L23\_00401" 9433 "s59E13H2" 2.008449 "putative A/G-specific adenine glycosylase YfhQ"  
"JS1\_L23\_00401" 9433 "s59E25H2" 0 "putative A/G-specific adenine glycosylase YfhQ"  
"JS1\_L23\_00401" 9433 "s59E5H2" 0.7278192 "putative A/G-specific adenine glycosylase YfhQ"  
"JS1\_L23\_00401" 9433 "s63E6H2" 0.09497931 "putative A/G-specific adenine glycosylase YfhQ"  
"JS1\_L23\_00402" 9434 "s59E13H2" 1.876974 "Putative ski2-type helicase"  
"JS1\_L23\_00402" 9434 "s59E25H2" 0.1673469 "Putative ski2-type helicase"  
"JS1\_L23\_00402" 9434 "s59E5H2" 0.268817 "Putative ski2-type helicase"  
"JS1\_L23\_00402" 9434 "s63E6H2" 2.254025 "Putative ski2-type helicase"  
"JS1\_L23\_00404" 9436 "s59E13H2" 0.2386611 "RNA polymerase factor sigma-70"  
"JS1\_L23\_00404" 9436 "s59E25H2" 0 "RNA polymerase factor sigma-70"  
"JS1\_L23\_00404" 9436 "s59E5H2" 0.2391476 "RNA polymerase factor sigma-70"  
"JS1\_L23\_00404" 9436 "s63E6H2" 4.951581 "RNA polymerase factor sigma-70"  
"JS1\_L23\_00405" 9437 "s59E13H2" 0.1713291 "Sigma-70, region 4"  
"JS1\_L23\_00405" 9437 "s59E25H2" 0 "Sigma-70, region 4"  
"JS1\_L23\_00405" 9437 "s59E5H2" 1.317586 "Sigma-70, region 4"  
"JS1\_L23\_00405" 9437 "s63E6H2" 1.63542 "Sigma-70, region 4"  
"JS1\_L23\_00407" 9439 "s59E13H2" 2.308801 "hypothetical protein"  
"JS1\_L23\_00407" 9439 "s59E25H2" 0 "hypothetical protein"  
"JS1\_L23\_00407" 9439 "s59E5H2" 1.491479 "hypothetical protein"  
"JS1\_L23\_00407" 9439 "s63E6H2" 3.541614 "hypothetical protein"  
"JS1\_L23\_00408" 9440 "s59E13H2" 0.8096249 "hypothetical protein"  
"JS1\_L23\_00408" 9440 "s59E25H2" 0 "hypothetical protein"  
"JS1\_L23\_00408" 9440 "s59E5H2" 0.001350978 "hypothetical protein"  
"JS1\_L23\_00408" 9440 "s63E6H2" 0.4244037 "hypothetical protein"  
"JS1\_L23\_00409" 9441 "s59E13H2" 0.7261602 "Tungsten-containing aldehyde ferredoxin oxidoreductase"  
"JS1\_L23\_00409" 9441 "s59E25H2" 0 "Tungsten-containing aldehyde ferredoxin oxidoreductase"  
"JS1\_L23\_00409" 9441 "s59E5H2" 0.2109312 "Tungsten-containing aldehyde ferredoxin oxidoreductase"  
"JS1\_L23\_00409" 9441 "s63E6H2" 0.1829659 "Tungsten-containing aldehyde ferredoxin oxidoreductase"  
"JS1\_L23\_00410" 9442 "s59E13H2" 0.3098474 "hypothetical protein"

"JS1\_L23\_00410" 9442 "s59E25H2" 0 "hypothetical protein"  
"JS1\_L23\_00410" 9442 "s59E5H2" 0 "hypothetical protein"  
"JS1\_L23\_00410" 9442 "s63E6H2" 0.01149881 "hypothetical protein"  
"JS1\_L23\_00411" 9443 "s59E13H2" 0.7101221 "D-lyxose ketol-isomerase"  
"JS1\_L23\_00411" 9443 "s59E25H2" 0 "D-lyxose ketol-isomerase"  
"JS1\_L23\_00411" 9443 "s59E5H2" 0.9597054 "D-lyxose ketol-isomerase"  
"JS1\_L23\_00411" 9443 "s63E6H2" 2.640591 "D-lyxose ketol-isomerase"  
"JS1\_L23\_00412" 9444 "s59E13H2" 0.4694274 "HTH-type transcriptional repressor CsiR"  
"JS1\_L23\_00412" 9444 "s59E25H2" 0 "HTH-type transcriptional repressor CsiR"  
"JS1\_L23\_00412" 9444 "s59E5H2" 0.3220581 "HTH-type transcriptional repressor CsiR"  
"JS1\_L23\_00412" 9444 "s63E6H2" 1.773867 "HTH-type transcriptional repressor CsiR"  
"JS1\_L23\_00413" 9445 "s59E13H2" 0.3126058 "FCD domain protein"  
"JS1\_L23\_00413" 9445 "s59E25H2" 0 "FCD domain protein"  
"JS1\_L23\_00413" 9445 "s59E5H2" 0.1692347 "FCD domain protein"  
"JS1\_L23\_00413" 9445 "s63E6H2" 1.261255 "FCD domain protein"  
"JS1\_L23\_00414" 9446 "s59E13H2" 0.00659259 "Acetyltransferase (GNAT) family protein"  
"JS1\_L23\_00414" 9446 "s59E25H2" 0.8367003 "Acetyltransferase (GNAT) family protein"  
"JS1\_L23\_00414" 9446 "s59E5H2" 0.05466684 "Acetyltransferase (GNAT) family protein"  
"JS1\_L23\_00414" 9446 "s63E6H2" 0.4508499 "Acetyltransferase (GNAT) family protein"  
"JS1\_L23\_00415" 9447 "s59E13H2" 0.100324 "hypothetical protein"  
"JS1\_L23\_00415" 9447 "s59E25H2" 0 "hypothetical protein"  
"JS1\_L23\_00415" 9447 "s59E5H2" 0.2852113 "hypothetical protein"  
"JS1\_L23\_00415" 9447 "s63E6H2" 1.073692 "hypothetical protein"  
"JS1\_L23\_00416" 9448 "s59E13H2" 0.05376331 "NADP-reducing hydrogenase subunit HndB"  
"JS1\_L23\_00416" 9448 "s59E25H2" 0 "NADP-reducing hydrogenase subunit HndB"  
"JS1\_L23\_00416" 9448 "s59E5H2" 0.04318699 "NADP-reducing hydrogenase subunit HndB"  
"JS1\_L23\_00416" 9448 "s63E6H2" 0.05968002 "NADP-reducing hydrogenase subunit HndB"  
"JS1\_L23\_00417" 9449 "s59E13H2" 0.06047973 "NADP-reducing hydrogenase subunit HndA"  
"JS1\_L23\_00417" 9449 "s59E25H2" 0 "NADP-reducing hydrogenase subunit HndA"  
"JS1\_L23\_00417" 9449 "s59E5H2" 0.09812711 "NADP-reducing hydrogenase subunit HndA"  
"JS1\_L23\_00417" 9449 "s63E6H2" 0.0809707 "NADP-reducing hydrogenase subunit HndA"  
"JS1\_L23\_00418" 9450 "s59E13H2" 0.05657625 "NADP-reducing hydrogenase subunit HndC"  
"JS1\_L23\_00418" 9450 "s59E25H2" 0 "NADP-reducing hydrogenase subunit HndC"  
"JS1\_L23\_00418" 9450 "s59E5H2" 0.06964038 "NADP-reducing hydrogenase subunit HndC"  
"JS1\_L23\_00418" 9450 "s63E6H2" 0.1779914 "NADP-reducing hydrogenase subunit HndC"  
"JS1\_L23\_00419" 9451 "s59E13H2" 0.1728568 "Branched-chain-amino-acid aminotransferase"  
"JS1\_L23\_00419" 9451 "s59E25H2" 0 "Branched-chain-amino-acid aminotransferase"  
"JS1\_L23\_00419" 9451 "s59E5H2" 0.3754737 "Branched-chain-amino-acid aminotransferase"  
"JS1\_L23\_00419" 9451 "s63E6H2" 0.09323584 "Branched-chain-amino-acid aminotransferase"  
"JS1\_L23\_00420" 9452 "s59E13H2" 0.172917 "Aspartate aminotransferase"  
"JS1\_L23\_00420" 9452 "s59E25H2" 0 "Aspartate aminotransferase"  
"JS1\_L23\_00420" 9452 "s59E5H2" 0.6667313 "Aspartate aminotransferase"  
"JS1\_L23\_00420" 9452 "s63E6H2" 0.182119 "Aspartate aminotransferase"  
"JS1\_L23\_00421" 9453 "s59E13H2" 0.1584913 "hypothetical protein"  
"JS1\_L23\_00421" 9453 "s59E25H2" 0 "hypothetical protein"  
"JS1\_L23\_00421" 9453 "s59E5H2" 1.008288 "hypothetical protein"  
"JS1\_L23\_00421" 9453 "s63E6H2" 0.1616046 "hypothetical protein"

"JS1\_L23\_00422" 9454 "s59E13H2" 0.2516739 "ATP-dependent DNA helicase PcrA"  
"JS1\_L23\_00422" 9454 "s59E25H2" 0 "ATP-dependent DNA helicase PcrA"  
"JS1\_L23\_00422" 9454 "s59E5H2" 0.5805204 "ATP-dependent DNA helicase PcrA"  
"JS1\_L23\_00422" 9454 "s63E6H2" 0.2372989 "ATP-dependent DNA helicase PcrA"  
"JS1\_L23\_00423" 9455 "s59E13H2" 0.1005249 "Peptidyl-prolyl cis-trans isomerase D"  
"JS1\_L23\_00423" 9455 "s59E25H2" 0 "Peptidyl-prolyl cis-trans isomerase D"  
"JS1\_L23\_00423" 9455 "s59E5H2" 0.47586 "Peptidyl-prolyl cis-trans isomerase D"  
"JS1\_L23\_00423" 9455 "s63E6H2" 0.2408557 "Peptidyl-prolyl cis-trans isomerase D"  
"JS1\_L23\_00424" 9456 "s59E13H2" 0.06339164 "UvrABC system protein B"  
"JS1\_L23\_00424" 9456 "s59E25H2" 0 "UvrABC system protein B"  
"JS1\_L23\_00424" 9456 "s59E5H2" 0.7045741 "UvrABC system protein B"  
"JS1\_L23\_00424" 9456 "s63E6H2" 1.023648 "UvrABC system protein B"  
"JS1\_L23\_00425" 9457 "s59E13H2" 0.07688847 "Adenine deaminase"  
"JS1\_L23\_00425" 9457 "s59E25H2" 0 "Adenine deaminase"  
"JS1\_L23\_00425" 9457 "s59E5H2" 0.9192666 "Adenine deaminase"  
"JS1\_L23\_00425" 9457 "s63E6H2" 2.208768 "Adenine deaminase"  
"JS1\_L23\_00426" 9458 "s59E13H2" 0.01510018 "hypothetical protein"  
"JS1\_L23\_00426" 9458 "s59E25H2" 0 "hypothetical protein"  
"JS1\_L23\_00426" 9458 "s59E5H2" 1.201377 "hypothetical protein"  
"JS1\_L23\_00426" 9458 "s63E6H2" 0 "hypothetical protein"  
"JS1\_L23\_00428" 9460 "s59E13H2" 0.289742 "S-adenosyl-L-methionine-binding protein"  
"JS1\_L23\_00428" 9460 "s59E25H2" 0 "S-adenosyl-L-methionine-binding protein"  
"JS1\_L23\_00428" 9460 "s59E5H2" 0.2008454 "S-adenosyl-L-methionine-binding protein"  
"JS1\_L23\_00428" 9460 "s63E6H2" 0.05181685 "S-adenosyl-L-methionine-binding protein"  
"JS1\_L23\_00429" 9461 "s59E13H2" 0.0238567 "3-hydroxypropionyl-coenzyme A dehydratase"  
"JS1\_L23\_00429" 9461 "s59E25H2" 0 "3-hydroxypropionyl-coenzyme A dehydratase"  
"JS1\_L23\_00429" 9461 "s59E5H2" 0.2917486 "3-hydroxypropionyl-coenzyme A dehydratase"  
"JS1\_L23\_00429" 9461 "s63E6H2" 0.4150269 "3-hydroxypropionyl-coenzyme A dehydratase"  
"JS1\_L23\_00430" 9462 "s59E13H2" 0.05721147 "PD-(D/E)XK nuclease superfamily protein"  
"JS1\_L23\_00430" 9462 "s59E25H2" 0 "PD-(D/E)XK nuclease superfamily protein"  
"JS1\_L23\_00430" 9462 "s59E5H2" 0.04654854 "PD-(D/E)XK nuclease superfamily protein"  
"JS1\_L23\_00430" 9462 "s63E6H2" 0.3756018 "PD-(D/E)XK nuclease superfamily protein"  
"JS1\_L23\_00431" 9463 "s59E13H2" 0.3110935 "putative outer membrane protein PmpB precursor"  
"JS1\_L23\_00431" 9463 "s59E25H2" 0 "putative outer membrane protein PmpB precursor"  
"JS1\_L23\_00431" 9463 "s59E5H2" 0.0175037 "putative outer membrane protein PmpB precursor"  
"JS1\_L23\_00431" 9463 "s63E6H2" 0 "putative outer membrane protein PmpB precursor"  
"JS1\_L23\_00432" 9464 "s59E13H2" 0.331104 "hypothetical protein"  
"JS1\_L23\_00432" 9464 "s59E25H2" 0 "hypothetical protein"  
"JS1\_L23\_00432" 9464 "s59E5H2" 0.01263465 "hypothetical protein"  
"JS1\_L23\_00432" 9464 "s63E6H2" 0 "hypothetical protein"  
"JS1\_L23\_00433" 9465 "s59E13H2" 3.491364 "Lactose transport system permease protein LacF"  
"JS1\_L23\_00433" 9465 "s59E25H2" 0 "Lactose transport system permease protein LacF"  
"JS1\_L23\_00433" 9465 "s59E5H2" 0.8561466 "Lactose transport system permease protein LacF"  
"JS1\_L23\_00433" 9465 "s63E6H2" 0.9213923 "Lactose transport system permease protein LacF"  
"JS1\_L23\_00434" 9466 "s59E13H2" 4.336766 "Trehalose/maltose-binding protein MalE precursor"  
"JS1\_L23\_00434" 9466 "s59E25H2" 0 "Trehalose/maltose-binding protein MalE precursor"  
"JS1\_L23\_00434" 9466 "s59E5H2" 0.4203353 "Trehalose/maltose-binding protein MalE precursor"



"JS1\_L23\_00434" 9466 "s63E6H2" 1.209631 "Trehalose/maltose-binding protein MalE precursor"  
"JS1\_L23\_00435" 9467 "s59E13H2" 0.7878178 "Xylulose kinase"  
"JS1\_L23\_00435" 9467 "s59E25H2" 0 "Xylulose kinase"  
"JS1\_L23\_00435" 9467 "s59E5H2" 0.8207006 "Xylulose kinase"  
"JS1\_L23\_00435" 9467 "s63E6H2" 1.191024 "Xylulose kinase"  
"JS1\_L23\_00436" 9468 "s59E13H2" 0.6966319 "L-ribulose-5-phosphate 4-epimerase UlaF"  
"JS1\_L23\_00436" 9468 "s59E25H2" 0 "L-ribulose-5-phosphate 4-epimerase UlaF"  
"JS1\_L23\_00436" 9468 "s59E5H2" 0.4884226 "L-ribulose-5-phosphate 4-epimerase UlaF"  
"JS1\_L23\_00436" 9468 "s63E6H2" 0.5151866 "L-ribulose-5-phosphate 4-epimerase UlaF"  
"JS1\_L23\_00437" 9469 "s59E13H2" 0.5825469 "Arabinose metabolism transcriptional repressor"  
"JS1\_L23\_00437" 9469 "s59E25H2" 0 "Arabinose metabolism transcriptional repressor"  
"JS1\_L23\_00437" 9469 "s59E5H2" 1.133478 "Arabinose metabolism transcriptional repressor"  
"JS1\_L23\_00437" 9469 "s63E6H2" 0.3825474 "Arabinose metabolism transcriptional repressor"  
"JS1\_L23\_00438" 9470 "s59E13H2" 0.2875776 "hypothetical protein"  
"JS1\_L23\_00438" 9470 "s59E25H2" 0 "hypothetical protein"  
"JS1\_L23\_00438" 9470 "s59E5H2" 0.8928705 "hypothetical protein"  
"JS1\_L23\_00438" 9470 "s63E6H2" 0.9089851 "hypothetical protein"  
"JS1\_L23\_00439" 9471 "s59E13H2" 0.2833576 "Methylcobamide:CoM methyltransferase MtaA"  
"JS1\_L23\_00439" 9471 "s59E25H2" 0 "Methylcobamide:CoM methyltransferase MtaA"  
"JS1\_L23\_00439" 9471 "s59E5H2" 0.4810371 "Methylcobamide:CoM methyltransferase MtaA"  
"JS1\_L23\_00439" 9471 "s63E6H2" 1.087525 "Methylcobamide:CoM methyltransferase MtaA"  
"JS1\_L23\_00440" 9472 "s59E13H2" 0.2654145 "Ribose transport system permease protein RbsC"  
"JS1\_L23\_00440" 9472 "s59E25H2" 0 "Ribose transport system permease protein RbsC"  
"JS1\_L23\_00440" 9472 "s59E5H2" 0.1241398 "Ribose transport system permease protein RbsC"  
"JS1\_L23\_00440" 9472 "s63E6H2" 0.5790336 "Ribose transport system permease protein RbsC"  
"JS1\_L23\_00441" 9473 "s59E13H2" 0.3592923 "Xylose import ATP-binding protein XylG"  
"JS1\_L23\_00441" 9473 "s59E25H2" 0 "Xylose import ATP-binding protein XylG"  
"JS1\_L23\_00441" 9473 "s59E5H2" 0.2276061 "Xylose import ATP-binding protein XylG"  
"JS1\_L23\_00441" 9473 "s63E6H2" 0.5732079 "Xylose import ATP-binding protein XylG"  
"JS1\_L23\_00442" 9474 "s59E13H2" 0.3290847 "hypothetical protein"  
"JS1\_L23\_00442" 9474 "s59E25H2" 0 "hypothetical protein"  
"JS1\_L23\_00442" 9474 "s59E5H2" 0.3396651 "hypothetical protein"  
"JS1\_L23\_00442" 9474 "s63E6H2" 0.4695763 "hypothetical protein"  
"JS1\_L23\_00443" 9475 "s59E13H2" 2.124763 "Aldose 1-epimerase precursor"  
"JS1\_L23\_00443" 9475 "s59E25H2" 0 "Aldose 1-epimerase precursor"  
"JS1\_L23\_00443" 9475 "s59E5H2" 0.1132018 "Aldose 1-epimerase precursor"  
"JS1\_L23\_00443" 9475 "s63E6H2" 0.137476 "Aldose 1-epimerase precursor"  
"JS1\_L23\_00444" 9476 "s59E13H2" 0.08640668 "Nuclease SbcCD subunit C"  
"JS1\_L23\_00444" 9476 "s59E25H2" 0 "Nuclease SbcCD subunit C"  
"JS1\_L23\_00444" 9476 "s59E5H2" 0.05813493 "Nuclease SbcCD subunit C"  
"JS1\_L23\_00444" 9476 "s63E6H2" 0.04466187 "Nuclease SbcCD subunit C"  
"JS1\_L23\_00445" 9477 "s59E13H2" 6.404958 "Putative peptidyl-prolyl cis-trans isomerase Cbf2 precursor"  
"JS1\_L23\_00445" 9477 "s59E25H2" 0 "Putative peptidyl-prolyl cis-trans isomerase Cbf2 precursor"  
"JS1\_L23\_00445" 9477 "s59E5H2" 0.3548717 "Putative peptidyl-prolyl cis-trans isomerase Cbf2 precursor"  
"JS1\_L23\_00445" 9477 "s63E6H2" 0.3312515 "Putative peptidyl-prolyl cis-trans isomerase Cbf2 precursor"  
"JS1\_L23\_00446" 9478 "s59E13H2" 0.2312289 "aspartoacylase"  
"JS1\_L23\_00446" 9478 "s59E25H2" 0 "aspartoacylase"

"JS1\_L23\_00446" 9478 "s59E5H2" 0.5049539 "aspartoacylase"  
"JS1\_L23\_00446" 9478 "s63E6H2" 0.255525 "aspartoacylase"  
"JS1\_L23\_00447" 9479 "s59E13H2" 0.08834473 "Vancomycin B-type resistance protein VanW"  
"JS1\_L23\_00447" 9479 "s59E25H2" 0.3377483 "Vancomycin B-type resistance protein VanW"  
"JS1\_L23\_00447" 9479 "s59E5H2" 0.3842622 "Vancomycin B-type resistance protein VanW"  
"JS1\_L23\_00447" 9479 "s63E6H2" 0.5988123 "Vancomycin B-type resistance protein VanW"  
"JS1\_L23\_00449" 9481 "s59E13H2" 0.05371992 "Protein-L-isoaspartate O-methyltransferase"  
"JS1\_L23\_00449" 9481 "s59E25H2" 0 "Protein-L-isoaspartate O-methyltransferase"  
"JS1\_L23\_00449" 9481 "s59E5H2" 0.4088874 "Protein-L-isoaspartate O-methyltransferase"  
"JS1\_L23\_00449" 9481 "s63E6H2" 0.4732956 "Protein-L-isoaspartate O-methyltransferase"  
"JS1\_L23\_00450" 9482 "s59E13H2" 0.04798071 "hypothetical protein"  
"JS1\_L23\_00450" 9482 "s59E25H2" 0 "hypothetical protein"  
"JS1\_L23\_00450" 9482 "s59E5H2" 0.7023583 "hypothetical protein"  
"JS1\_L23\_00450" 9482 "s63E6H2" 0.2249337 "hypothetical protein"  
"JS1\_L23\_00451" 9483 "s59E13H2" 0.06419714 "5'-nucleotidase SurE"  
"JS1\_L23\_00451" 9483 "s59E25H2" 0 "5'-nucleotidase SurE"  
"JS1\_L23\_00451" 9483 "s59E5H2" 0.5970796 "5'-nucleotidase SurE"  
"JS1\_L23\_00451" 9483 "s63E6H2" 0.2694757 "5'-nucleotidase SurE"  
"JS1\_L23\_00452" 9484 "s59E13H2" 0.03031043 "dihydrolipoamide dehydrogenase"  
"JS1\_L23\_00452" 9484 "s59E25H2" 0 "dihydrolipoamide dehydrogenase"  
"JS1\_L23\_00452" 9484 "s59E5H2" 0.3876986 "dihydrolipoamide dehydrogenase"  
"JS1\_L23\_00452" 9484 "s63E6H2" 0.2148451 "dihydrolipoamide dehydrogenase"  
"JS1\_L23\_00453" 9485 "s59E13H2" 2.11842 "23S rRNA (uridine(2479)-2'-O)-methyltransferase"  
"JS1\_L23\_00453" 9485 "s59E25H2" 0 "23S rRNA (uridine(2479)-2'-O)-methyltransferase"  
"JS1\_L23\_00453" 9485 "s59E5H2" 0.508937 "23S rRNA (uridine(2479)-2'-O)-methyltransferase"  
"JS1\_L23\_00453" 9485 "s63E6H2" 0.3193715 "23S rRNA (uridine(2479)-2'-O)-methyltransferase"  
"JS1\_L23\_00454" 9486 "s59E13H2" 0 "hypothetical protein"  
"JS1\_L23\_00454" 9486 "s59E25H2" 0 "hypothetical protein"  
"JS1\_L23\_00454" 9486 "s59E5H2" 0.5814549 "hypothetical protein"  
"JS1\_L23\_00454" 9486 "s63E6H2" 0 "hypothetical protein"  
"JS1\_L23\_00455" 9487 "s59E13H2" 0 "PLAT/LH2 domain protein"  
"JS1\_L23\_00455" 9487 "s59E25H2" 0 "PLAT/LH2 domain protein"  
"JS1\_L23\_00455" 9487 "s59E5H2" 0.09638114 "PLAT/LH2 domain protein"  
"JS1\_L23\_00455" 9487 "s63E6H2" 0 "PLAT/LH2 domain protein"  
"JS1\_L23\_00456" 9488 "s59E13H2" 0.3893926 "RDD family protein"  
"JS1\_L23\_00456" 9488 "s59E25H2" 0 "RDD family protein"  
"JS1\_L23\_00456" 9488 "s59E5H2" 1.743964 "RDD family protein"  
"JS1\_L23\_00456" 9488 "s63E6H2" 1.248796 "RDD family protein"  
"JS1\_L23\_00457" 9489 "s59E13H2" 0.3963224 "Hydroxyacylglutathione hydrolase"  
"JS1\_L23\_00457" 9489 "s59E25H2" 0 "Hydroxyacylglutathione hydrolase"  
"JS1\_L23\_00457" 9489 "s59E5H2" 0.5162081 "Hydroxyacylglutathione hydrolase"  
"JS1\_L23\_00457" 9489 "s63E6H2" 1.12615 "Hydroxyacylglutathione hydrolase"  
"JS1\_L23\_00458" 9490 "s59E13H2" 0.1625466 "putative NH(3)-dependent NAD(+) synthetase"  
"JS1\_L23\_00458" 9490 "s59E25H2" 0 "putative NH(3)-dependent NAD(+) synthetase"  
"JS1\_L23\_00458" 9490 "s59E5H2" 0.2458608 "putative NH(3)-dependent NAD(+) synthetase"  
"JS1\_L23\_00458" 9490 "s63E6H2" 0.4905692 "putative NH(3)-dependent NAD(+) synthetase"  
"JS1\_L23\_00459" 9491 "s59E13H2" 0.1200999 "hypothetical protein"

"JS1\_L23\_00459" 9491 "s59E25H2" 0 "hypothetical protein"  
"JS1\_L23\_00459" 9491 "s59E5H2" 0.1736682 "hypothetical protein"  
"JS1\_L23\_00459" 9491 "s63E6H2" 0.3702794 "hypothetical protein"  
"JS1\_L23\_00460" 9492 "s59E13H2" 0.147179 "D-aminopeptidase"  
"JS1\_L23\_00460" 9492 "s59E25H2" 0 "D-aminopeptidase"  
"JS1\_L23\_00460" 9492 "s59E5H2" 0.3216238 "D-aminopeptidase"  
"JS1\_L23\_00460" 9492 "s63E6H2" 0.403768 "D-aminopeptidase"  
"JS1\_L23\_00461" 9493 "s59E13H2" 0.4749666 "D-xylose-binding periplasmic protein precursor"  
"JS1\_L23\_00461" 9493 "s59E25H2" 0 "D-xylose-binding periplasmic protein precursor"  
"JS1\_L23\_00461" 9493 "s59E5H2" 1.005396 "D-xylose-binding periplasmic protein precursor"  
"JS1\_L23\_00461" 9493 "s63E6H2" 0.3414475 "D-xylose-binding periplasmic protein precursor"  
"JS1\_L23\_00462" 9494 "s59E13H2" 0.6453715 "Transposase IS116/IS110/IS902 family protein"  
"JS1\_L23\_00462" 9494 "s59E25H2" 0 "Transposase IS116/IS110/IS902 family protein"  
"JS1\_L23\_00462" 9494 "s59E5H2" 0.112652 "Transposase IS116/IS110/IS902 family protein"  
"JS1\_L23\_00462" 9494 "s63E6H2" 0.2678764 "Transposase IS116/IS110/IS902 family protein"  
"JS1\_L23\_00464" 9496 "s59E13H2" 1.259684 "Macrolide export ATP-binding/permease protein MacB"  
"JS1\_L23\_00464" 9496 "s59E25H2" 0 "Macrolide export ATP-binding/permease protein MacB"  
"JS1\_L23\_00464" 9496 "s59E5H2" 0.1185303 "Macrolide export ATP-binding/permease protein MacB"  
"JS1\_L23\_00464" 9496 "s63E6H2" 0.4596045 "Macrolide export ATP-binding/permease protein MacB"  
"JS1\_L23\_00465" 9497 "s59E13H2" 0.2359155 "putative ABC transporter ATP-binding protein"  
"JS1\_L23\_00465" 9497 "s59E25H2" 0 "putative ABC transporter ATP-binding protein"  
"JS1\_L23\_00465" 9497 "s59E5H2" 0.1847953 "putative ABC transporter ATP-binding protein"  
"JS1\_L23\_00465" 9497 "s63E6H2" 0.1309559 "putative ABC transporter ATP-binding protein"  
"JS1\_L23\_00466" 9498 "s59E13H2" 0.2699989 "putative ABC transporter ATP-binding protein"  
"JS1\_L23\_00466" 9498 "s59E25H2" 0 "putative ABC transporter ATP-binding protein"  
"JS1\_L23\_00466" 9498 "s59E5H2" 0.1255245 "putative ABC transporter ATP-binding protein"  
"JS1\_L23\_00466" 9498 "s63E6H2" 0.03817899 "putative ABC transporter ATP-binding protein"  
"JS1\_L23\_00467" 9499 "s59E13H2" 0.01345045 "hypothetical protein"  
"JS1\_L23\_00467" 9499 "s59E25H2" 0 "hypothetical protein"  
"JS1\_L23\_00467" 9499 "s59E5H2" 0.1502357 "hypothetical protein"  
"JS1\_L23\_00467" 9499 "s63E6H2" 0.01378232 "hypothetical protein"  
"JS1\_L23\_00468" 9500 "s59E13H2" 0.1165933 "Thiosulfate sulfurtransferase PspE precursor"  
"JS1\_L23\_00468" 9500 "s59E25H2" 0 "Thiosulfate sulfurtransferase PspE precursor"  
"JS1\_L23\_00468" 9500 "s59E5H2" 0.07996375 "Thiosulfate sulfurtransferase PspE precursor"  
"JS1\_L23\_00468" 9500 "s63E6H2" 0.07789173 "Thiosulfate sulfurtransferase PspE precursor"  
"JS1\_L23\_00469" 9501 "s59E13H2" 0.001859493 "Quinolate synthase A"  
"JS1\_L23\_00469" 9501 "s59E25H2" 0 "Quinolate synthase A"  
"JS1\_L23\_00469" 9501 "s59E5H2" 0.05273347 "Quinolate synthase A"  
"JS1\_L23\_00469" 9501 "s63E6H2" 0.07873156 "Quinolate synthase A"  
"JS1\_L23\_00470" 9502 "s59E13H2" 0.7893965 "Methionine--tRNA ligase"  
"JS1\_L23\_00470" 9502 "s59E25H2" 0 "Methionine--tRNA ligase"  
"JS1\_L23\_00470" 9502 "s59E5H2" 1.429089 "Methionine--tRNA ligase"  
"JS1\_L23\_00470" 9502 "s63E6H2" 0.1447792 "Methionine--tRNA ligase"  
"JS1\_L23\_00471" 9503 "s59E13H2" 1.102784 "NAD-dependent protein deacetylase"  
"JS1\_L23\_00471" 9503 "s59E25H2" 0 "NAD-dependent protein deacetylase"  
"JS1\_L23\_00471" 9503 "s59E5H2" 1.145205 "NAD-dependent protein deacetylase"  
"JS1\_L23\_00471" 9503 "s63E6H2" 0.1350238 "NAD-dependent protein deacetylase"

"JS1\_L23\_00472" 9504 "s59E13H2" 1.050748 "RNA recognition motif. (a.k.a. RRM, RBD, or RNP domain)"  
"JS1\_L23\_00472" 9504 "s59E25H2" 0 "RNA recognition motif. (a.k.a. RRM, RBD, or RNP domain)"  
"JS1\_L23\_00472" 9504 "s59E5H2" 1.95311 "RNA recognition motif. (a.k.a. RRM, RBD, or RNP domain)"  
"JS1\_L23\_00472" 9504 "s63E6H2" 1.099955 "RNA recognition motif. (a.k.a. RRM, RBD, or RNP domain)"  
"JS1\_L23\_00474" 9506 "s59E13H2" 0.04923014 "hypothetical protein"  
"JS1\_L23\_00474" 9506 "s59E25H2" 0 "hypothetical protein"  
"JS1\_L23\_00474" 9506 "s59E5H2" 0 "hypothetical protein"  
"JS1\_L23\_00474" 9506 "s63E6H2" 0 "hypothetical protein"  
"JS1\_L23\_00476" 9508 "s59E13H2" 0 "Cadherin-like beta sandwich domain protein"  
"JS1\_L23\_00476" 9508 "s59E25H2" 0 "Cadherin-like beta sandwich domain protein"  
"JS1\_L23\_00476" 9508 "s59E5H2" 0.0005584235 "Cadherin-like beta sandwich domain protein"  
"JS1\_L23\_00476" 9508 "s63E6H2" 0.000540963 "Cadherin-like beta sandwich domain protein"  
"JS1\_L23\_00477" 9509 "s59E13H2" 0.6977699 "Putative ankyrin repeat protein"  
"JS1\_L23\_00477" 9509 "s59E25H2" 0 "Putative ankyrin repeat protein"  
"JS1\_L23\_00477" 9509 "s59E5H2" 0.08658401 "Putative ankyrin repeat protein"  
"JS1\_L23\_00477" 9509 "s63E6H2" 0.1169442 "Putative ankyrin repeat protein"  
"JS1\_L23\_00478" 9510 "s59E13H2" 0.02224803 "hypothetical protein"  
"JS1\_L23\_00478" 9510 "s59E25H2" 0 "hypothetical protein"  
"JS1\_L23\_00478" 9510 "s59E5H2" 0 "hypothetical protein"  
"JS1\_L23\_00478" 9510 "s63E6H2" 0 "hypothetical protein"  
"JS1\_L23\_00480" 9512 "s59E13H2" 0.002063657 "Spore germination lipase LipC"  
"JS1\_L23\_00480" 9512 "s59E25H2" 0 "Spore germination lipase LipC"  
"JS1\_L23\_00480" 9512 "s59E5H2" 0.0094281 "Spore germination lipase LipC"  
"JS1\_L23\_00480" 9512 "s63E6H2" 0.04967627 "Spore germination lipase LipC"  
"JS1\_L23\_00481" 9513 "s59E13H2" 0.9741556 "hypothetical protein"  
"JS1\_L23\_00481" 9513 "s59E25H2" 0 "hypothetical protein"  
"JS1\_L23\_00481" 9513 "s59E5H2" 0.2063136 "hypothetical protein"  
"JS1\_L23\_00481" 9513 "s63E6H2" 0.1407645 "hypothetical protein"  
"JS1\_L23\_00482" 9514 "s59E13H2" 1.184663 "V-type ATP synthase subunit C"  
"JS1\_L23\_00482" 9514 "s59E25H2" 0.4737345 "V-type ATP synthase subunit C"  
"JS1\_L23\_00482" 9514 "s59E5H2" 1.159952 "V-type ATP synthase subunit C"  
"JS1\_L23\_00482" 9514 "s63E6H2" 0.2461328 "V-type ATP synthase subunit C"  
"JS1\_L23\_00483" 9515 "s59E13H2" 0.9672224 "Isopropylmalate/citramalate isomerase small subunit"  
"JS1\_L23\_00483" 9515 "s59E25H2" 0 "Isopropylmalate/citramalate isomerase small subunit"  
"JS1\_L23\_00483" 9515 "s59E5H2" 0.1200869 "Isopropylmalate/citramalate isomerase small subunit"  
"JS1\_L23\_00483" 9515 "s63E6H2" 0.4009329 "Isopropylmalate/citramalate isomerase small subunit"  
"JS1\_L23\_00484" 9516 "s59E13H2" 0.1834161 "3-isopropylmalate/3-methylmalate dehydrogenase"  
"JS1\_L23\_00484" 9516 "s59E25H2" 0 "3-isopropylmalate/3-methylmalate dehydrogenase"  
"JS1\_L23\_00484" 9516 "s59E5H2" 0.1894952 "3-isopropylmalate/3-methylmalate dehydrogenase"  
"JS1\_L23\_00484" 9516 "s63E6H2" 0.8478271 "3-isopropylmalate/3-methylmalate dehydrogenase"  
"JS1\_L23\_00485" 9517 "s59E13H2" 0.3690295 "2-methylcitrate dehydratase"  
"JS1\_L23\_00485" 9517 "s59E25H2" 0 "2-methylcitrate dehydratase"  
"JS1\_L23\_00485" 9517 "s59E5H2" 0.06061778 "2-methylcitrate dehydratase"  
"JS1\_L23\_00485" 9517 "s63E6H2" 0.5350964 "2-methylcitrate dehydratase"  
"JS1\_L23\_00486" 9518 "s59E13H2" 0.05116445 "(3S)-malyl-CoA thioesterase"  
"JS1\_L23\_00486" 9518 "s59E25H2" 0 "(3S)-malyl-CoA thioesterase"  
"JS1\_L23\_00486" 9518 "s59E5H2" 0 "(3S)-malyl-CoA thioesterase"

"JS1\_L23\_00486" 9518 "s63E6H2" 0 "(3S)-maly-CoA thioesterase"  
"JS1\_L23\_00487" 9519 "s59E13H2" 0.0524776 "Bifunctional protein PaaZ"  
"JS1\_L23\_00487" 9519 "s59E25H2" 0 "Bifunctional protein PaaZ"  
"JS1\_L23\_00487" 9519 "s59E5H2" 0 "Bifunctional protein PaaZ"  
"JS1\_L23\_00487" 9519 "s63E6H2" 0 "Bifunctional protein PaaZ"  
"JS1\_L23\_00488" 9520 "s59E13H2" 0.05966619 "Citrate lyase subunit beta"  
"JS1\_L23\_00488" 9520 "s59E25H2" 0 "Citrate lyase subunit beta"  
"JS1\_L23\_00488" 9520 "s59E5H2" 0 "Citrate lyase subunit beta"  
"JS1\_L23\_00488" 9520 "s63E6H2" 0 "Citrate lyase subunit beta"  
"JS1\_L23\_00489" 9521 "s59E13H2" 0.0530086 "Putative acetyltransferase EpsM"  
"JS1\_L23\_00489" 9521 "s59E25H2" 0 "Putative acetyltransferase EpsM"  
"JS1\_L23\_00489" 9521 "s59E5H2" 0 "Putative acetyltransferase EpsM"  
"JS1\_L23\_00489" 9521 "s63E6H2" 0 "Putative acetyltransferase EpsM"  
"JS1\_L23\_00490" 9522 "s59E13H2" 0.0477875 "Putative pyridoxal phosphate-dependent aminotransferase EpsN"  
"JS1\_L23\_00490" 9522 "s59E25H2" 0 "Putative pyridoxal phosphate-dependent aminotransferase EpsN"  
"JS1\_L23\_00490" 9522 "s59E5H2" 0.003588311 "Putative pyridoxal phosphate-dependent aminotransferase EpsN"  
"JS1\_L23\_00490" 9522 "s63E6H2" 0.01022328 "Putative pyridoxal phosphate-dependent aminotransferase EpsN"  
"JS1\_L23\_00491" 9523 "s59E13H2" 0.1128098 "Integrase core domain protein"  
"JS1\_L23\_00491" 9523 "s59E25H2" 0 "Integrase core domain protein"  
"JS1\_L23\_00491" 9523 "s59E5H2" 0.08952514 "Integrase core domain protein"  
"JS1\_L23\_00491" 9523 "s63E6H2" 1.356352 "Integrase core domain protein"  
"JS1\_L23\_00492" 9524 "s59E13H2" 0.09597028 "transposase/IS protein"  
"JS1\_L23\_00492" 9524 "s59E25H2" 0 "transposase/IS protein"  
"JS1\_L23\_00492" 9524 "s59E5H2" 0.1404798 "transposase/IS protein"  
"JS1\_L23\_00492" 9524 "s63E6H2" 2.470563 "transposase/IS protein"  
"JS1\_L23\_00493" 9525 "s59E13H2" 0.4753237 "Transposase IS116/IS110/IS902 family protein"  
"JS1\_L23\_00493" 9525 "s59E25H2" 0 "Transposase IS116/IS110/IS902 family protein"  
"JS1\_L23\_00493" 9525 "s59E5H2" 1.03205 "Transposase IS116/IS110/IS902 family protein"  
"JS1\_L23\_00493" 9525 "s63E6H2" 0.799043 "Transposase IS116/IS110/IS902 family protein"  
"JS1\_L23\_00494" 9526 "s59E13H2" 0.09679606 "hypothetical protein"  
"JS1\_L23\_00494" 9526 "s59E25H2" 0 "hypothetical protein"  
"JS1\_L23\_00494" 9526 "s59E5H2" 0.001381269 "hypothetical protein"  
"JS1\_L23\_00494" 9526 "s63E6H2" 0 "hypothetical protein"  
"JS1\_L23\_00495" 9527 "s59E13H2" 0.1842632 "mRNA interferase MazF9"  
"JS1\_L23\_00495" 9527 "s59E25H2" 0 "mRNA interferase MazF9"  
"JS1\_L23\_00495" 9527 "s59E5H2" 0.0002795126 "mRNA interferase MazF9"  
"JS1\_L23\_00495" 9527 "s63E6H2" 0.004873913 "mRNA interferase MazF9"  
"JS1\_L23\_00496" 9528 "s59E13H2" 0.2514691 "hypothetical protein"  
"JS1\_L23\_00496" 9528 "s59E25H2" 0 "hypothetical protein"  
"JS1\_L23\_00496" 9528 "s59E5H2" 0.03043255 "hypothetical protein"  
"JS1\_L23\_00496" 9528 "s63E6H2" 0.0345293 "hypothetical protein"  
"JS1\_L23\_00497" 9529 "s59E13H2" 0.1136752 "hypothetical protein"  
"JS1\_L23\_00497" 9529 "s59E25H2" 0 "hypothetical protein"  
"JS1\_L23\_00497" 9529 "s59E5H2" 0 "hypothetical protein"  
"JS1\_L23\_00497" 9529 "s63E6H2" 0.006020552 "hypothetical protein"  
"JS1\_L23\_00498" 9530 "s59E13H2" 0.09291679 "UDP-glucose 6-dehydrogenase Tuad"  
"JS1\_L23\_00498" 9530 "s59E25H2" 0 "UDP-glucose 6-dehydrogenase Tuad"

"JS1\_L23\_00498" 9530 "s59E5H2" 0.1563042 "UDP-glucose 6-dehydrogenase TuaD"  
"JS1\_L23\_00498" 9530 "s63E6H2" 0.05196761 "UDP-glucose 6-dehydrogenase TuaD"  
"JS1\_L23\_00499" 9531 "s59E13H2" 0.03112392 "Polysaccharide biosynthesis protein"  
"JS1\_L23\_00499" 9531 "s59E25H2" 0 "Polysaccharide biosynthesis protein"  
"JS1\_L23\_00499" 9531 "s59E5H2" 0 "Polysaccharide biosynthesis protein"  
"JS1\_L23\_00499" 9531 "s63E6H2" 0 "Polysaccharide biosynthesis protein"  
"JS1\_L23\_00500" 9532 "s59E13H2" 0.03274047 "hypothetical protein"  
"JS1\_L23\_00500" 9532 "s59E25H2" 0 "hypothetical protein"  
"JS1\_L23\_00500" 9532 "s59E5H2" 0 "hypothetical protein"  
"JS1\_L23\_00500" 9532 "s63E6H2" 0 "hypothetical protein"  
"JS1\_L23\_00501" 9533 "s59E13H2" 0.02066149 "hypothetical protein"  
"JS1\_L23\_00501" 9533 "s59E25H2" 0 "hypothetical protein"  
"JS1\_L23\_00501" 9533 "s59E5H2" 0 "hypothetical protein"  
"JS1\_L23\_00501" 9533 "s63E6H2" 0 "hypothetical protein"  
"JS1\_L23\_00502" 9534 "s59E13H2" 0.02671831 "putative glycosyl transferase"  
"JS1\_L23\_00502" 9534 "s59E25H2" 0 "putative glycosyl transferase"  
"JS1\_L23\_00502" 9534 "s59E5H2" 0 "putative glycosyl transferase"  
"JS1\_L23\_00502" 9534 "s63E6H2" 0 "putative glycosyl transferase"  
"JS1\_L23\_00503" 9535 "s59E13H2" 0.01563522 "GDP-L-fucose synthase"  
"JS1\_L23\_00503" 9535 "s59E25H2" 0 "GDP-L-fucose synthase"  
"JS1\_L23\_00503" 9535 "s59E5H2" 0 "GDP-L-fucose synthase"  
"JS1\_L23\_00503" 9535 "s63E6H2" 0.003104594 "GDP-L-fucose synthase"  
"JS1\_L23\_00504" 9536 "s59E13H2" 0.00290642 "GDP-mannose 4,6-dehydratase"  
"JS1\_L23\_00504" 9536 "s59E25H2" 0 "GDP-mannose 4,6-dehydratase"  
"JS1\_L23\_00504" 9536 "s59E5H2" 0 "GDP-mannose 4,6-dehydratase"  
"JS1\_L23\_00504" 9536 "s63E6H2" 0 "GDP-mannose 4,6-dehydratase"  
"JS1\_L23\_00505" 9537 "s59E13H2" 0.02994722 "N,N'-diacetylbaucillosaminyl-diphospho-undecaprenol alpha-1,3-N-acetylgalactosaminyltransferase"  
"JS1\_L23\_00505" 9537 "s59E25H2" 0 "N,N'-diacetylbaucillosaminyl-diphospho-undecaprenol alpha-1,3-N-acetylgalactosaminyltransferase"  
"JS1\_L23\_00505" 9537 "s59E5H2" 0 "N,N'-diacetylbaucillosaminyl-diphospho-undecaprenol alpha-1,3-N-acetylgalactosaminyltransferase"  
"JS1\_L23\_00505" 9537 "s63E6H2" 0 "N,N'-diacetylbaucillosaminyl-diphospho-undecaprenol alpha-1,3-N-acetylgalactosaminyltransferase"  
"JS1\_L23\_00506" 9538 "s59E13H2" 0.06676041 "Alpha-D-kanosaminyltransferase"  
"JS1\_L23\_00506" 9538 "s59E25H2" 0 "Alpha-D-kanosaminyltransferase"  
"JS1\_L23\_00506" 9538 "s59E5H2" 0 "Alpha-D-kanosaminyltransferase"  
"JS1\_L23\_00506" 9538 "s63E6H2" 0 "Alpha-D-kanosaminyltransferase"  
"JS1\_L23\_00507" 9539 "s59E13H2" 0.04883981 "O-Antigen ligase"  
"JS1\_L23\_00507" 9539 "s59E25H2" 0 "O-Antigen ligase"  
"JS1\_L23\_00507" 9539 "s59E5H2" 0 "O-Antigen ligase"  
"JS1\_L23\_00507" 9539 "s63E6H2" 0 "O-Antigen ligase"  
"JS1\_L23\_00508" 9540 "s59E13H2" 0.2849828 "50S ribosomal protein L17"  
"JS1\_L23\_00508" 9540 "s59E25H2" 0 "50S ribosomal protein L17"  
"JS1\_L23\_00508" 9540 "s59E5H2" 0.1987998 "50S ribosomal protein L17"  
"JS1\_L23\_00508" 9540 "s63E6H2" 2.55428 "50S ribosomal protein L17"  
"JS1\_L23\_00509" 9541 "s59E13H2" 0.2017122 "DNA-directed RNA polymerase subunit alpha"  
"JS1\_L23\_00509" 9541 "s59E25H2" 0 "DNA-directed RNA polymerase subunit alpha"  
"JS1\_L23\_00509" 9541 "s59E5H2" 0.142707 "DNA-directed RNA polymerase subunit alpha"  
"JS1\_L23\_00509" 9541 "s63E6H2" 1.306277 "DNA-directed RNA polymerase subunit alpha"  
"JS1\_L23\_00510" 9542 "s59E13H2" 0.2793665 "30S ribosomal protein S4"

"JS1\_L23\_00510" 9542 "s59E25H2" 0 "30S ribosomal protein S4"  
"JS1\_L23\_00510" 9542 "s59E5H2" 0.1449836 "30S ribosomal protein S4"  
"JS1\_L23\_00510" 9542 "s63E6H2" 1.148765 "30S ribosomal protein S4"  
"JS1\_L23\_00511" 9543 "s59E13H2" 0.2083165 "30S ribosomal protein S11"  
"JS1\_L23\_00511" 9543 "s59E25H2" 0 "30S ribosomal protein S11"  
"JS1\_L23\_00511" 9543 "s59E5H2" 0.1413205 "30S ribosomal protein S11"  
"JS1\_L23\_00511" 9543 "s63E6H2" 0.9572885 "30S ribosomal protein S11"  
"JS1\_L23\_00512" 9544 "s59E13H2" 0.2417344 "30S ribosomal protein S13"  
"JS1\_L23\_00512" 9544 "s59E25H2" 0 "30S ribosomal protein S13"  
"JS1\_L23\_00512" 9544 "s59E5H2" 0.1293079 "30S ribosomal protein S13"  
"JS1\_L23\_00512" 9544 "s63E6H2" 1.262739 "30S ribosomal protein S13"  
"JS1\_L23\_00513" 9545 "s59E13H2" 0.3360086 "50S ribosomal protein L36"  
"JS1\_L23\_00513" 9545 "s59E25H2" 0 "50S ribosomal protein L36"  
"JS1\_L23\_00513" 9545 "s59E5H2" 0.0714979 "50S ribosomal protein L36"  
"JS1\_L23\_00513" 9545 "s63E6H2" 0.8841469 "50S ribosomal protein L36"  
"JS1\_L23\_00514" 9546 "s59E13H2" 0.1576279 "Translation initiation factor IF-1"  
"JS1\_L23\_00514" 9546 "s59E25H2" 0 "Translation initiation factor IF-1"  
"JS1\_L23\_00514" 9546 "s59E5H2" 0.07715584 "Translation initiation factor IF-1"  
"JS1\_L23\_00514" 9546 "s63E6H2" 0.6786851 "Translation initiation factor IF-1"  
"JS1\_L23\_00515" 9547 "s59E13H2" 1.065779 "L-arabinose transport system permease protein AraQ"  
"JS1\_L23\_00515" 9547 "s59E25H2" 0.5833333 "L-arabinose transport system permease protein AraQ"  
"JS1\_L23\_00515" 9547 "s59E5H2" 0.6535258 "L-arabinose transport system permease protein AraQ"  
"JS1\_L23\_00515" 9547 "s63E6H2" 2.901102 "L-arabinose transport system permease protein AraQ"  
"JS1\_L23\_00516" 9548 "s59E13H2" 1.19763 "sn-glycerol-3-phosphate transport system permease protein UgpA"  
"JS1\_L23\_00516" 9548 "s59E25H2" 0.3287197 "sn-glycerol-3-phosphate transport system permease protein UgpA"  
"JS1\_L23\_00516" 9548 "s59E5H2" 0.1861825 "sn-glycerol-3-phosphate transport system permease protein UgpA"  
"JS1\_L23\_00516" 9548 "s63E6H2" 3.894819 "sn-glycerol-3-phosphate transport system permease protein UgpA"  
"JS1\_L23\_00517" 9549 "s59E13H2" 1.380104 "sn-glycerol-3-phosphate-binding periplasmic protein UgpB precursor"  
"JS1\_L23\_00517" 9549 "s59E25H2" 0.3786848 "sn-glycerol-3-phosphate-binding periplasmic protein UgpB precursor"  
"JS1\_L23\_00517" 9549 "s59E5H2" 0.09135183 "sn-glycerol-3-phosphate-binding periplasmic protein UgpB precursor"  
"JS1\_L23\_00517" 9549 "s63E6H2" 3.443355 "sn-glycerol-3-phosphate-binding periplasmic protein UgpB precursor"  
"JS1\_L23\_00518" 9550 "s59E13H2" 0.3540326 "hypothetical protein"  
"JS1\_L23\_00518" 9550 "s59E25H2" 0 "hypothetical protein"  
"JS1\_L23\_00518" 9550 "s59E5H2" 0.04901729 "hypothetical protein"  
"JS1\_L23\_00518" 9550 "s63E6H2" 2.107405 "hypothetical protein"  
"JS1\_L23\_00519" 9551 "s59E13H2" 0.874355 "Lactose transport system permease protein LacG"  
"JS1\_L23\_00519" 9551 "s59E25H2" 0 "Lactose transport system permease protein LacG"  
"JS1\_L23\_00519" 9551 "s59E5H2" 1.186256 "Lactose transport system permease protein LacG"  
"JS1\_L23\_00519" 9551 "s63E6H2" 1.094118 "Lactose transport system permease protein LacG"  
"JS1\_L23\_00520" 9552 "s59E13H2" 2.802279 "sn-glycerol-3-phosphate transport system permease protein UgpA"  
"JS1\_L23\_00520" 9552 "s59E25H2" 0 "sn-glycerol-3-phosphate transport system permease protein UgpA"  
"JS1\_L23\_00520" 9552 "s59E5H2" 1.357542 "sn-glycerol-3-phosphate transport system permease protein UgpA"  
"JS1\_L23\_00520" 9552 "s63E6H2" 0.9546049 "sn-glycerol-3-phosphate transport system permease protein UgpA"  
"JS1\_L23\_00521" 9553 "s59E13H2" 2.877966 "sn-glycerol-3-phosphate-binding periplasmic protein UgpB precursor"  
"JS1\_L23\_00521" 9553 "s59E25H2" 0.3795455 "sn-glycerol-3-phosphate-binding periplasmic protein UgpB precursor"  
"JS1\_L23\_00521" 9553 "s59E5H2" 1.82016 "sn-glycerol-3-phosphate-binding periplasmic protein UgpB precursor"  
"JS1\_L23\_00521" 9553 "s63E6H2" 4.995974 "sn-glycerol-3-phosphate-binding periplasmic protein UgpB precursor"

"JS1\_L23\_00522" 9554 "s59E13H2" 0.3202052 "Glycerol-3-phosphate responsive antiterminator"  
"JS1\_L23\_00522" 9554 "s59E25H2" 0 "Glycerol-3-phosphate responsive antiterminator"  
"JS1\_L23\_00522" 9554 "s59E5H2" 2.029992 "Glycerol-3-phosphate responsive antiterminator"  
"JS1\_L23\_00522" 9554 "s63E6H2" 2.307844 "Glycerol-3-phosphate responsive antiterminator"  
"JS1\_L23\_00523" 9555 "s59E13H2" 0.3746782 "hypothetical protein"  
"JS1\_L23\_00523" 9555 "s59E25H2" 0 "hypothetical protein"  
"JS1\_L23\_00523" 9555 "s59E5H2" 3.385255 "hypothetical protein"  
"JS1\_L23\_00523" 9555 "s63E6H2" 4.99553 "hypothetical protein"  
"JS1\_L23\_00524" 9556 "s59E13H2" 2.762584 "Thioredoxin reductase"  
"JS1\_L23\_00524" 9556 "s59E25H2" 0 "Thioredoxin reductase"  
"JS1\_L23\_00524" 9556 "s59E5H2" 1.684548 "Thioredoxin reductase"  
"JS1\_L23\_00524" 9556 "s63E6H2" 4.453776 "Thioredoxin reductase"  
"JS1\_L23\_00525" 9557 "s59E13H2" 7.876335 "L-2-hydroxyglutarate oxidase LhgO"  
"JS1\_L23\_00525" 9557 "s59E25H2" 0.3306826 "L-2-hydroxyglutarate oxidase LhgO"  
"JS1\_L23\_00525" 9557 "s59E5H2" 0.9050638 "L-2-hydroxyglutarate oxidase LhgO"  
"JS1\_L23\_00525" 9557 "s63E6H2" 2.539822 "L-2-hydroxyglutarate oxidase LhgO"  
"JS1\_L23\_00526" 9558 "s59E13H2" 7.851543 "Na+/Pi-cotransporter"  
"JS1\_L23\_00526" 9558 "s59E25H2" 0.3103662 "Na+/Pi-cotransporter"  
"JS1\_L23\_00526" 9558 "s59E5H2" 2.975744 "Na+/Pi-cotransporter"  
"JS1\_L23\_00526" 9558 "s63E6H2" 1.418482 "Na+/Pi-cotransporter"  
"JS1\_L23\_00527" 9559 "s59E13H2" 6.862246 "Undecaprenyl-phosphate mannosyltransferase"  
"JS1\_L23\_00527" 9559 "s59E25H2" 0 "Undecaprenyl-phosphate mannosyltransferase"  
"JS1\_L23\_00527" 9559 "s59E5H2" 7.448347 "Undecaprenyl-phosphate mannosyltransferase"  
"JS1\_L23\_00527" 9559 "s63E6H2" 1.874049 "Undecaprenyl-phosphate mannosyltransferase"  
"JS1\_L23\_00528" 9560 "s59E13H2" 5.203932 "Diacetylchitobiose deacetylase"  
"JS1\_L23\_00528" 9560 "s59E25H2" 0 "Diacetylchitobiose deacetylase"  
"JS1\_L23\_00528" 9560 "s59E5H2" 5.112431 "Diacetylchitobiose deacetylase"  
"JS1\_L23\_00528" 9560 "s63E6H2" 2.666719 "Diacetylchitobiose deacetylase"  
"JS1\_L23\_00530" 9562 "s59E13H2" 0.05643792 "hypothetical protein"  
"JS1\_L23\_00530" 9562 "s59E25H2" 0 "hypothetical protein"  
"JS1\_L23\_00530" 9562 "s59E5H2" 0.003232004 "hypothetical protein"  
"JS1\_L23\_00530" 9562 "s63E6H2" 0.02749739 "hypothetical protein"  
"JS1\_L23\_00531" 9563 "s59E13H2" 0.01745523 "Phosphoglycerate kinase"  
"JS1\_L23\_00531" 9563 "s59E25H2" 0 "Phosphoglycerate kinase"  
"JS1\_L23\_00531" 9563 "s59E5H2" 0.005944302 "Phosphoglycerate kinase"  
"JS1\_L23\_00531" 9563 "s63E6H2" 0.002393117 "Phosphoglycerate kinase"  
"JS1\_L23\_00532" 9564 "s59E13H2" 0.03447792 "Glyceraldehyde-3-phosphate dehydrogenase"  
"JS1\_L23\_00532" 9564 "s59E25H2" 0 "Glyceraldehyde-3-phosphate dehydrogenase"  
"JS1\_L23\_00532" 9564 "s59E5H2" 0 "Glyceraldehyde-3-phosphate dehydrogenase"  
"JS1\_L23\_00532" 9564 "s63E6H2" 0.01628296 "Glyceraldehyde-3-phosphate dehydrogenase"  
"JS1\_L23\_00533" 9565 "s59E13H2" 0.1256867 "Dihydrolipoyllysine-residue acetyltransferase component of pyruvate dehydrogenase complex"  
"JS1\_L23\_00533" 9565 "s59E25H2" 0 "Dihydrolipoyllysine-residue acetyltransferase component of pyruvate dehydrogenase complex"  
"JS1\_L23\_00533" 9565 "s59E5H2" 0.01293032 "Dihydrolipoyllysine-residue acetyltransferase component of pyruvate dehydrogenase complex"  
"JS1\_L23\_00533" 9565 "s63E6H2" 0 "Dihydrolipoyllysine-residue acetyltransferase component of pyruvate dehydrogenase complex"  
"JS1\_L23\_00534" 9566 "s59E13H2" 0.08477789 "Acetoin:2,6-dichlorophenolindophenol oxidoreductase subunit beta"  
"JS1\_L23\_00534" 9566 "s59E25H2" 0 "Acetoin:2,6-dichlorophenolindophenol oxidoreductase subunit beta"  
"JS1\_L23\_00534" 9566 "s59E5H2" 0.004122741 "Acetoin:2,6-dichlorophenolindophenol oxidoreductase subunit beta"



"JS1\_L23\_00534" 9566 "s63E6H2" 0 "Acetoin:2,6-dichlorophenolindophenol oxidoreductase subunit beta"  
"JS1\_L23\_00535" 9567 "s59E13H2" 0 "Acetoin:2,6-dichlorophenolindophenol oxidoreductase subunit alpha"  
"JS1\_L23\_00535" 9567 "s59E25H2" 0 "Acetoin:2,6-dichlorophenolindophenol oxidoreductase subunit alpha"  
"JS1\_L23\_00535" 9567 "s59E5H2" 0 "Acetoin:2,6-dichlorophenolindophenol oxidoreductase subunit alpha"  
"JS1\_L23\_00535" 9567 "s63E6H2" 0 "Acetoin:2,6-dichlorophenolindophenol oxidoreductase subunit alpha"  
"JS1\_L23\_00536" 9568 "s59E13H2" 0 "1-deoxy-D-xylulose-5-phosphate synthase"  
"JS1\_L23\_00536" 9568 "s59E25H2" 0 "1-deoxy-D-xylulose-5-phosphate synthase"  
"JS1\_L23\_00536" 9568 "s59E5H2" 0 "1-deoxy-D-xylulose-5-phosphate synthase"  
"JS1\_L23\_00536" 9568 "s63E6H2" 0 "1-deoxy-D-xylulose-5-phosphate synthase"  
"JS1\_L23\_00537" 9569 "s59E13H2" 0 "Transketolase"  
"JS1\_L23\_00537" 9569 "s59E25H2" 0 "Transketolase"  
"JS1\_L23\_00537" 9569 "s59E5H2" 0 "Transketolase"  
"JS1\_L23\_00537" 9569 "s63E6H2" 0 "Transketolase"  
"JS1\_L23\_00538" 9570 "s59E13H2" 0.09656054 "hypothetical protein"  
"JS1\_L23\_00538" 9570 "s59E25H2" 0 "hypothetical protein"  
"JS1\_L23\_00538" 9570 "s59E5H2" 0.1007575 "hypothetical protein"  
"JS1\_L23\_00538" 9570 "s63E6H2" 0.2149031 "hypothetical protein"  
"JS1\_L23\_00539" 9571 "s59E13H2" 0.1159748 "Transposase IS200 like protein"  
"JS1\_L23\_00539" 9571 "s59E25H2" 0 "Transposase IS200 like protein"  
"JS1\_L23\_00539" 9571 "s59E5H2" 1.258473 "Transposase IS200 like protein"  
"JS1\_L23\_00539" 9571 "s63E6H2" 1.040698 "Transposase IS200 like protein"  
"JS1\_L23\_00540" 9572 "s59E13H2" 0 "putative zinc-type alcohol dehydrogenase-like protein YjmD"  
"JS1\_L23\_00540" 9572 "s59E25H2" 0 "putative zinc-type alcohol dehydrogenase-like protein YjmD"  
"JS1\_L23\_00540" 9572 "s59E5H2" 0.0002231704 "putative zinc-type alcohol dehydrogenase-like protein YjmD"  
"JS1\_L23\_00540" 9572 "s63E6H2" 0.0008249183 "putative zinc-type alcohol dehydrogenase-like protein YjmD"  
"JS1\_L23\_00541" 9573 "s59E13H2" 0 "Sorbitol dehydrogenase"  
"JS1\_L23\_00541" 9573 "s59E25H2" 0 "Sorbitol dehydrogenase"  
"JS1\_L23\_00541" 9573 "s59E5H2" 0 "Sorbitol dehydrogenase"  
"JS1\_L23\_00541" 9573 "s63E6H2" 0 "Sorbitol dehydrogenase"  
"JS1\_L23\_00542" 9574 "s59E13H2" 0 "L-ribulose-5-phosphate 3-epimerase UlaE"  
"JS1\_L23\_00542" 9574 "s59E25H2" 0 "L-ribulose-5-phosphate 3-epimerase UlaE"  
"JS1\_L23\_00542" 9574 "s59E5H2" 0 "L-ribulose-5-phosphate 3-epimerase UlaE"  
"JS1\_L23\_00542" 9574 "s63E6H2" 0 "L-ribulose-5-phosphate 3-epimerase UlaE"  
"JS1\_L23\_00544" 9576 "s59E13H2" 0 "Ribose transport system permease protein RbsC"  
"JS1\_L23\_00544" 9576 "s59E25H2" 0 "Ribose transport system permease protein RbsC"  
"JS1\_L23\_00544" 9576 "s59E5H2" 0 "Ribose transport system permease protein RbsC"  
"JS1\_L23\_00544" 9576 "s63E6H2" 0 "Ribose transport system permease protein RbsC"  
"JS1\_L23\_00545" 9577 "s59E13H2" 0 "Ribose transport system permease protein RbsC"  
"JS1\_L23\_00545" 9577 "s59E25H2" 0 "Ribose transport system permease protein RbsC"  
"JS1\_L23\_00545" 9577 "s59E5H2" 0 "Ribose transport system permease protein RbsC"  
"JS1\_L23\_00545" 9577 "s63E6H2" 0 "Ribose transport system permease protein RbsC"  
"JS1\_L23\_00546" 9578 "s59E13H2" 0 "Ribose import ATP-binding protein RbsA"  
"JS1\_L23\_00546" 9578 "s59E25H2" 0 "Ribose import ATP-binding protein RbsA"  
"JS1\_L23\_00546" 9578 "s59E5H2" 0 "Ribose import ATP-binding protein RbsA"  
"JS1\_L23\_00546" 9578 "s63E6H2" 0 "Ribose import ATP-binding protein RbsA"  
"JS1\_L23\_00547" 9579 "s59E13H2" 0 "D-ribose-binding periplasmic protein precursor"  
"JS1\_L23\_00547" 9579 "s59E25H2" 0 "D-ribose-binding periplasmic protein precursor"

"JS1\_L23\_00547" 9579 "s59E5H2" 0 "D-ribose-binding periplasmic protein precursor"  
"JS1\_L23\_00547" 9579 "s63E6H2" 0 "D-ribose-binding periplasmic protein precursor"  
"JS1\_L23\_00548" 9580 "s59E13H2" 0 "Kynurenine formamidase"  
"JS1\_L23\_00548" 9580 "s59E25H2" 0 "Kynurenine formamidase"  
"JS1\_L23\_00548" 9580 "s59E5H2" 0 "Kynurenine formamidase"  
"JS1\_L23\_00548" 9580 "s63E6H2" 0 "Kynurenine formamidase"  
"JS1\_L23\_00549" 9581 "s59E13H2" 0 "N-acyl homoserine lactonase"  
"JS1\_L23\_00549" 9581 "s59E25H2" 0 "N-acyl homoserine lactonase"  
"JS1\_L23\_00549" 9581 "s59E5H2" 0 "N-acyl homoserine lactonase"  
"JS1\_L23\_00549" 9581 "s63E6H2" 0 "N-acyl homoserine lactonase"  
"JS1\_L23\_00550" 9582 "s59E13H2" 0.3707129 "putative HTH-type transcriptional regulator YdfH"  
"JS1\_L23\_00550" 9582 "s59E25H2" 0 "putative HTH-type transcriptional regulator YdfH"  
"JS1\_L23\_00550" 9582 "s59E5H2" 0 "putative HTH-type transcriptional regulator YdfH"  
"JS1\_L23\_00550" 9582 "s63E6H2" 0 "putative HTH-type transcriptional regulator YdfH"  
"JS1\_L23\_00551" 9583 "s59E13H2" 0.0007921647 "hypothetical protein"  
"JS1\_L23\_00551" 9583 "s59E25H2" 0 "hypothetical protein"  
"JS1\_L23\_00551" 9583 "s59E5H2" 0.2831649 "hypothetical protein"  
"JS1\_L23\_00551" 9583 "s63E6H2" 2.533037e-05 "hypothetical protein"  
"JS1\_L23\_00552" 9584 "s59E13H2" 0.1571621 "TPR repeat-containing protein YrrB"  
"JS1\_L23\_00552" 9584 "s59E25H2" 0 "TPR repeat-containing protein YrrB"  
"JS1\_L23\_00552" 9584 "s59E5H2" 0.3616751 "TPR repeat-containing protein YrrB"  
"JS1\_L23\_00552" 9584 "s63E6H2" 0.2768713 "TPR repeat-containing protein YrrB"  
"JS1\_L23\_00553" 9585 "s59E13H2" 0 "3 beta-hydroxysteroid dehydrogenase/Delta 5--"  
"JS1\_L23\_00553" 9585 "s59E25H2" 0 "3 beta-hydroxysteroid dehydrogenase/Delta 5--"  
"JS1\_L23\_00553" 9585 "s59E5H2" 0.2174124 "3 beta-hydroxysteroid dehydrogenase/Delta 5--"  
"JS1\_L23\_00553" 9585 "s63E6H2" 0.1661425 "3 beta-hydroxysteroid dehydrogenase/Delta 5--"  
"JS1\_L23\_00554" 9586 "s59E13H2" 0 "hypothetical protein"  
"JS1\_L23\_00554" 9586 "s59E25H2" 0 "hypothetical protein"  
"JS1\_L23\_00554" 9586 "s59E5H2" 0.1483436 "hypothetical protein"  
"JS1\_L23\_00554" 9586 "s63E6H2" 0.199674 "hypothetical protein"  
"JS1\_L23\_00555" 9587 "s59E13H2" 0.4367993 "Xylulose kinase"  
"JS1\_L23\_00555" 9587 "s59E25H2" 0 "Xylulose kinase"  
"JS1\_L23\_00555" 9587 "s59E5H2" 1.623714 "Xylulose kinase"  
"JS1\_L23\_00555" 9587 "s63E6H2" 2.600143 "Xylulose kinase"  
"JS1\_L23\_00556" 9588 "s59E13H2" 0.003377613 "Transposase, Mutator family"  
"JS1\_L23\_00556" 9588 "s59E25H2" 0 "Transposase, Mutator family"  
"JS1\_L23\_00556" 9588 "s59E5H2" 0.05980328 "Transposase, Mutator family"  
"JS1\_L23\_00556" 9588 "s63E6H2" 0 "Transposase, Mutator family"  
"JS1\_L23\_00557" 9589 "s59E13H2" 0 "hypothetical protein"  
"JS1\_L23\_00557" 9589 "s59E25H2" 0 "hypothetical protein"  
"JS1\_L23\_00557" 9589 "s59E5H2" 0 "hypothetical protein"  
"JS1\_L23\_00557" 9589 "s63E6H2" 0 "hypothetical protein"  
"JS1\_L23\_00558" 9590 "s59E13H2" 0 "hypothetical protein"  
"JS1\_L23\_00558" 9590 "s59E25H2" 0 "hypothetical protein"  
"JS1\_L23\_00558" 9590 "s59E5H2" 0 "hypothetical protein"  
"JS1\_L23\_00558" 9590 "s63E6H2" 0 "hypothetical protein"  
"JS1\_M10\_00002" 15692 "s59E13H2" 0.1540499 "Alpha-galactosidase"

"JS1\_M10\_00002" 15692 "s59E25H2" 0 "Alpha-galactosidase"  
"JS1\_M10\_00002" 15692 "s59E5H2" 0.3474509 "Alpha-galactosidase"  
"JS1\_M10\_00002" 15692 "s63E6H2" 0.0697875 "Alpha-galactosidase"  
"JS1\_M10\_00003" 15693 "s59E13H2" 0.0464662 "Beta-galactosidase"  
"JS1\_M10\_00003" 15693 "s59E25H2" 0 "Beta-galactosidase"  
"JS1\_M10\_00003" 15693 "s59E5H2" 0.3561982 "Beta-galactosidase"  
"JS1\_M10\_00003" 15693 "s63E6H2" 0.1681048 "Beta-galactosidase"  
"JS1\_M10\_00004" 15694 "s59E13H2" 0.1561085 "Energy-coupling factor transporter ATP-binding protein EcfA1"  
"JS1\_M10\_00004" 15694 "s59E25H2" 0 "Energy-coupling factor transporter ATP-binding protein EcfA1"  
"JS1\_M10\_00004" 15694 "s59E5H2" 0.1603914 "Energy-coupling factor transporter ATP-binding protein EcfA1"  
"JS1\_M10\_00004" 15694 "s63E6H2" 1.804925 "Energy-coupling factor transporter ATP-binding protein EcfA1"  
"JS1\_M10\_00005" 15695 "s59E13H2" 0.1667898 "Energy-coupling factor transporter ATP-binding protein EcfA2"  
"JS1\_M10\_00005" 15695 "s59E25H2" 0 "Energy-coupling factor transporter ATP-binding protein EcfA2"  
"JS1\_M10\_00005" 15695 "s59E5H2" 0.3406895 "Energy-coupling factor transporter ATP-binding protein EcfA2"  
"JS1\_M10\_00005" 15695 "s63E6H2" 1.001316 "Energy-coupling factor transporter ATP-binding protein EcfA2"  
"JS1\_M10\_00006" 15696 "s59E13H2" 0.2441692 "Energy-coupling factor transporter transmembrane protein EcfT"  
"JS1\_M10\_00006" 15696 "s59E25H2" 0 "Energy-coupling factor transporter transmembrane protein EcfT"  
"JS1\_M10\_00006" 15696 "s59E5H2" 0.5285269 "Energy-coupling factor transporter transmembrane protein EcfT"  
"JS1\_M10\_00006" 15696 "s63E6H2" 0.85977 "Energy-coupling factor transporter transmembrane protein EcfT"  
"JS1\_M10\_00007" 15697 "s59E13H2" 0.1586285 "tRNA pseudouridine synthase A"  
"JS1\_M10\_00007" 15697 "s59E25H2" 0 "tRNA pseudouridine synthase A"  
"JS1\_M10\_00007" 15697 "s59E5H2" 0.2066508 "tRNA pseudouridine synthase A"  
"JS1\_M10\_00007" 15697 "s63E6H2" 0.5417567 "tRNA pseudouridine synthase A"  
"JS1\_M10\_00008" 15698 "s59E13H2" 0.0195313 "Chorismate mutase AroH"  
"JS1\_M10\_00008" 15698 "s59E25H2" 0 "Chorismate mutase AroH"  
"JS1\_M10\_00008" 15698 "s59E5H2" 0.02944051 "Chorismate mutase AroH"  
"JS1\_M10\_00008" 15698 "s63E6H2" 0.05045 "Chorismate mutase AroH"  
"JS1\_M10\_00009" 15699 "s59E13H2" 0.02843668 "Phospho-2-dehydro-3-deoxyheptonate aldolase"  
"JS1\_M10\_00009" 15699 "s59E25H2" 0 "Phospho-2-dehydro-3-deoxyheptonate aldolase"  
"JS1\_M10\_00009" 15699 "s59E5H2" 0.2017768 "Phospho-2-dehydro-3-deoxyheptonate aldolase"  
"JS1\_M10\_00009" 15699 "s63E6H2" 0.2960839 "Phospho-2-dehydro-3-deoxyheptonate aldolase"  
"JS1\_M10\_00010" 15700 "s59E13H2" 0.0006685996 "3-phosphoshikimate 1-carboxyvinyltransferase 1"  
"JS1\_M10\_00010" 15700 "s59E25H2" 0 "3-phosphoshikimate 1-carboxyvinyltransferase 1"  
"JS1\_M10\_00010" 15700 "s59E5H2" 0.006283617 "3-phosphoshikimate 1-carboxyvinyltransferase 1"  
"JS1\_M10\_00010" 15700 "s63E6H2" 0.1331364 "3-phosphoshikimate 1-carboxyvinyltransferase 1"  
"JS1\_M10\_00011" 15701 "s59E13H2" 0 "Shikimate dehydrogenase"  
"JS1\_M10\_00011" 15701 "s59E25H2" 0 "Shikimate dehydrogenase"  
"JS1\_M10\_00011" 15701 "s59E5H2" 0.008339599 "Shikimate dehydrogenase"  
"JS1\_M10\_00011" 15701 "s63E6H2" 0.1567643 "Shikimate dehydrogenase"  
"JS1\_M10\_00012" 15702 "s59E13H2" 0.01084806 "Chorismate synthase"  
"JS1\_M10\_00012" 15702 "s59E25H2" 0 "Chorismate synthase"  
"JS1\_M10\_00012" 15702 "s59E5H2" 0.01639516 "Chorismate synthase"  
"JS1\_M10\_00012" 15702 "s63E6H2" 0.06222674 "Chorismate synthase"  
"JS1\_M10\_00013" 15703 "s59E13H2" 0.01231126 "Shikimate kinase 1"  
"JS1\_M10\_00013" 15703 "s59E25H2" 0 "Shikimate kinase 1"  
"JS1\_M10\_00013" 15703 "s59E5H2" 0.09012838 "Shikimate kinase 1"  
"JS1\_M10\_00013" 15703 "s63E6H2" 0.2265098 "Shikimate kinase 1"

"JS1\_M10\_00014" 15704 "s59E13H2" 0.02774818 "3-dehydroquinase synthase"  
"JS1\_M10\_00014" 15704 "s59E25H2" 0 "3-dehydroquinase synthase"  
"JS1\_M10\_00014" 15704 "s59E5H2" 0.2592436 "3-dehydroquinase synthase"  
"JS1\_M10\_00014" 15704 "s63E6H2" 0.3378464 "3-dehydroquinase synthase"  
"JS1\_M10\_00015" 15705 "s59E13H2" 0.007867548 "3-dehydroquinase dehydratase"  
"JS1\_M10\_00015" 15705 "s59E25H2" 0 "3-dehydroquinase dehydratase"  
"JS1\_M10\_00015" 15705 "s59E5H2" 0.01368991 "3-dehydroquinase dehydratase"  
"JS1\_M10\_00015" 15705 "s63E6H2" 0.06446749 "3-dehydroquinase dehydratase"  
"JS1\_M10\_00016" 15706 "s59E13H2" 0.004653107 "prephenate dehydrogenase"  
"JS1\_M10\_00016" 15706 "s59E25H2" 0 "prephenate dehydrogenase"  
"JS1\_M10\_00016" 15706 "s59E5H2" 0.01866126 "prephenate dehydrogenase"  
"JS1\_M10\_00016" 15706 "s63E6H2" 0.01243905 "prephenate dehydrogenase"  
"JS1\_M10\_00017" 15707 "s59E13H2" 0.5110416 "SsrA-binding protein"  
"JS1\_M10\_00017" 15707 "s59E25H2" 0 "SsrA-binding protein"  
"JS1\_M10\_00017" 15707 "s59E5H2" 0.2746261 "SsrA-binding protein"  
"JS1\_M10\_00017" 15707 "s63E6H2" 0.2338701 "SsrA-binding protein"  
"JS1\_M10\_00020" 15710 "s59E13H2" 0.008204032 "Periplasmic dipeptide transport protein precursor"  
"JS1\_M10\_00020" 15710 "s59E25H2" 0 "Periplasmic dipeptide transport protein precursor"  
"JS1\_M10\_00020" 15710 "s59E5H2" 0.02388593 "Periplasmic dipeptide transport protein precursor"  
"JS1\_M10\_00020" 15710 "s63E6H2" 0 "Periplasmic dipeptide transport protein precursor"  
"JS1\_M10\_00021" 15711 "s59E13H2" 0.001479913 "hypothetical protein"  
"JS1\_M10\_00021" 15711 "s59E25H2" 0 "hypothetical protein"  
"JS1\_M10\_00021" 15711 "s59E5H2" 0.0003832561 "hypothetical protein"  
"JS1\_M10\_00021" 15711 "s63E6H2" 0 "hypothetical protein"  
"JS1\_M10\_00022" 15712 "s59E13H2" 0.001912788 "hypothetical protein"  
"JS1\_M10\_00022" 15712 "s59E25H2" 0 "hypothetical protein"  
"JS1\_M10\_00022" 15712 "s59E5H2" 0 "hypothetical protein"  
"JS1\_M10\_00022" 15712 "s63E6H2" 0 "hypothetical protein"  
"JS1\_M10\_00024" 15714 "s59E13H2" 0 "hypothetical protein"  
"JS1\_M10\_00024" 15714 "s59E25H2" 0 "hypothetical protein"  
"JS1\_M10\_00024" 15714 "s59E5H2" 0 "hypothetical protein"  
"JS1\_M10\_00024" 15714 "s63E6H2" 0 "hypothetical protein"  
"JS1\_M10\_00025" 15715 "s59E13H2" 0.003729158 "Papain family cysteine protease"  
"JS1\_M10\_00025" 15715 "s59E25H2" 0 "Papain family cysteine protease"  
"JS1\_M10\_00025" 15715 "s59E5H2" 0.008376936 "Papain family cysteine protease"  
"JS1\_M10\_00025" 15715 "s63E6H2" 0.004911961 "Papain family cysteine protease"  
"JS1\_M10\_00026" 15716 "s59E13H2" 0.01676762 "Transcriptional regulatory protein ZraR"  
"JS1\_M10\_00026" 15716 "s59E25H2" 0 "Transcriptional regulatory protein ZraR"  
"JS1\_M10\_00026" 15716 "s59E5H2" 0.00639823 "Transcriptional regulatory protein ZraR"  
"JS1\_M10\_00026" 15716 "s63E6H2" 0.01003488 "Transcriptional regulatory protein ZraR"  
"JS1\_M10\_00027" 15717 "s59E13H2" 0 "hypothetical protein"  
"JS1\_M10\_00027" 15717 "s59E25H2" 0 "hypothetical protein"  
"JS1\_M10\_00027" 15717 "s59E5H2" 0 "hypothetical protein"  
"JS1\_M10\_00027" 15717 "s63E6H2" 0 "hypothetical protein"  
"JS1\_M10\_00028" 15718 "s59E13H2" 0 "hypothetical protein"  
"JS1\_M10\_00028" 15718 "s59E25H2" 0 "hypothetical protein"  
"JS1\_M10\_00028" 15718 "s59E5H2" 0 "hypothetical protein"

"JS1\_M10\_00028" 15718 "s63E6H2" 0 "hypothetical protein"  
"JS1\_M10\_00032" 15722 "s59E13H2" 0.007047114 "hypothetical protein"  
"JS1\_M10\_00032" 15722 "s59E25H2" 0 "hypothetical protein"  
"JS1\_M10\_00032" 15722 "s59E5H2" 0 "hypothetical protein"  
"JS1\_M10\_00032" 15722 "s63E6H2" 0 "hypothetical protein"  
"JS1\_M10\_00034" 15724 "s59E13H2" 0.06679287 "Elongation factor G"  
"JS1\_M10\_00034" 15724 "s59E25H2" 0 "Elongation factor G"  
"JS1\_M10\_00034" 15724 "s59E5H2" 0.1372309 "Elongation factor G"  
"JS1\_M10\_00034" 15724 "s63E6H2" 0.1651159 "Elongation factor G"  
"JS1\_M10\_00035" 15725 "s59E13H2" 0 "Inner membrane ABC transporter permease protein YcjO"  
"JS1\_M10\_00035" 15725 "s59E25H2" 0 "Inner membrane ABC transporter permease protein YcjO"  
"JS1\_M10\_00035" 15725 "s59E5H2" 0 "Inner membrane ABC transporter permease protein YcjO"  
"JS1\_M10\_00035" 15725 "s63E6H2" 0 "Inner membrane ABC transporter permease protein YcjO"  
"JS1\_M10\_00036" 15726 "s59E13H2" 0 "hypothetical protein"  
"JS1\_M10\_00036" 15726 "s59E25H2" 0 "hypothetical protein"  
"JS1\_M10\_00036" 15726 "s59E5H2" 0 "hypothetical protein"  
"JS1\_M10\_00036" 15726 "s63E6H2" 0.01491797 "hypothetical protein"  
"JS1\_M10\_00038" 15728 "s59E13H2" 0 "hypothetical protein"  
"JS1\_M10\_00038" 15728 "s59E25H2" 0 "hypothetical protein"  
"JS1\_M10\_00038" 15728 "s59E5H2" 0 "hypothetical protein"  
"JS1\_M10\_00038" 15728 "s63E6H2" 0 "hypothetical protein"  
"JS1\_M10\_00039" 15729 "s59E13H2" 0 "DNA replication and repair protein RecF"  
"JS1\_M10\_00039" 15729 "s59E25H2" 0 "DNA replication and repair protein RecF"  
"JS1\_M10\_00039" 15729 "s59E5H2" 0 "DNA replication and repair protein RecF"  
"JS1\_M10\_00039" 15729 "s63E6H2" 0 "DNA replication and repair protein RecF"  
"JS1\_M10\_00040" 15730 "s59E13H2" 0.01152159 "glucosamine--fructose-6-phosphate aminotransferase"  
"JS1\_M10\_00040" 15730 "s59E25H2" 0 "glucosamine--fructose-6-phosphate aminotransferase"  
"JS1\_M10\_00040" 15730 "s59E5H2" 0 "glucosamine--fructose-6-phosphate aminotransferase"  
"JS1\_M10\_00040" 15730 "s63E6H2" 0 "glucosamine--fructose-6-phosphate aminotransferase"  
"JS1\_M10\_00041" 15731 "s59E13H2" 0 "Divergent AAA domain protein"  
"JS1\_M10\_00041" 15731 "s59E25H2" 0 "Divergent AAA domain protein"  
"JS1\_M10\_00041" 15731 "s59E5H2" 0 "Divergent AAA domain protein"  
"JS1\_M10\_00041" 15731 "s63E6H2" 0.002771783 "Divergent AAA domain protein"  
"JS1\_M10\_00042" 15732 "s59E13H2" 0 "hypothetical protein"  
"JS1\_M10\_00042" 15732 "s59E25H2" 0 "hypothetical protein"  
"JS1\_M10\_00042" 15732 "s59E5H2" 0 "hypothetical protein"  
"JS1\_M10\_00042" 15732 "s63E6H2" 0 "hypothetical protein"  
"JS1\_M10\_00044" 15734 "s59E13H2" 0.8852372 "hypothetical protein"  
"JS1\_M10\_00044" 15734 "s59E25H2" 0 "hypothetical protein"  
"JS1\_M10\_00044" 15734 "s59E5H2" 0.2149556 "hypothetical protein"  
"JS1\_M10\_00044" 15734 "s63E6H2" 0.3420163 "hypothetical protein"  
"JS1\_M10\_00045" 15735 "s59E13H2" 0.04623523 "hypothetical protein"  
"JS1\_M10\_00045" 15735 "s59E25H2" 0 "hypothetical protein"  
"JS1\_M10\_00045" 15735 "s59E5H2" 0.05317133 "hypothetical protein"  
"JS1\_M10\_00045" 15735 "s63E6H2" 0.07484478 "hypothetical protein"  
"JS1\_M10\_00046" 15736 "s59E13H2" 1.543842 "ABC-2 type transporter"  
"JS1\_M10\_00046" 15736 "s59E25H2" 0 "ABC-2 type transporter"

"JS1\_M10\_00046" 15736 "s59E5H2" 1.373989 "ABC-2 type transporter"  
"JS1\_M10\_00046" 15736 "s63E6H2" 1.415846 "ABC-2 type transporter"  
"JS1\_M10\_00047" 15737 "s59E13H2" 0.8363986 "putative ABC transporter ATP-binding protein YbhF"  
"JS1\_M10\_00047" 15737 "s59E25H2" 0 "putative ABC transporter ATP-binding protein YbhF"  
"JS1\_M10\_00047" 15737 "s59E5H2" 1.2275 "putative ABC transporter ATP-binding protein YbhF"  
"JS1\_M10\_00047" 15737 "s63E6H2" 1.882302 "putative ABC transporter ATP-binding protein YbhF"  
"JS1\_M10\_00050" 15740 "s59E13H2" 0 "N-formylglutamate amidohydrolase"  
"JS1\_M10\_00050" 15740 "s59E25H2" 0 "N-formylglutamate amidohydrolase"  
"JS1\_M10\_00050" 15740 "s59E5H2" 0 "N-formylglutamate amidohydrolase"  
"JS1\_M10\_00050" 15740 "s63E6H2" 0.01208621 "N-formylglutamate amidohydrolase"  
"JS1\_M10\_00052" 15742 "s59E13H2" 0 "hypothetical protein"  
"JS1\_M10\_00052" 15742 "s59E25H2" 0 "hypothetical protein"  
"JS1\_M10\_00052" 15742 "s59E5H2" 0 "hypothetical protein"  
"JS1\_M10\_00052" 15742 "s63E6H2" 0.01342815 "hypothetical protein"  
"JS1\_M10\_00053" 15743 "s59E13H2" 0.01370736 "hypothetical protein"  
"JS1\_M10\_00053" 15743 "s59E25H2" 0 "hypothetical protein"  
"JS1\_M10\_00053" 15743 "s59E5H2" 0.02416914 "hypothetical protein"  
"JS1\_M10\_00053" 15743 "s63E6H2" 0.01062206 "hypothetical protein"  
"JS1\_M10\_00056" 15746 "s59E13H2" 0 "Glycosyl hydrolases family 15"  
"JS1\_M10\_00056" 15746 "s59E25H2" 0 "Glycosyl hydrolases family 15"  
"JS1\_M10\_00056" 15746 "s59E5H2" 0 "Glycosyl hydrolases family 15"  
"JS1\_M10\_00056" 15746 "s63E6H2" 0 "Glycosyl hydrolases family 15"  
"JS1\_M10\_00057" 15747 "s59E13H2" 0 "hypothetical protein"  
"JS1\_M10\_00057" 15747 "s59E25H2" 0 "hypothetical protein"  
"JS1\_M10\_00057" 15747 "s59E5H2" 0 "hypothetical protein"  
"JS1\_M10\_00057" 15747 "s63E6H2" 0.005186695 "hypothetical protein"  
"JS1\_M10\_00058" 15748 "s59E13H2" 0 "Cycloisomaltooligosaccharide glucanotransferase precursor"  
"JS1\_M10\_00058" 15748 "s59E25H2" 0 "Cycloisomaltooligosaccharide glucanotransferase precursor"  
"JS1\_M10\_00058" 15748 "s59E5H2" 0 "Cycloisomaltooligosaccharide glucanotransferase precursor"  
"JS1\_M10\_00058" 15748 "s63E6H2" 0 "Cycloisomaltooligosaccharide glucanotransferase precursor"  
"JS1\_M10\_00059" 15749 "s59E13H2" 0.2615452 "hypothetical protein"  
"JS1\_M10\_00059" 15749 "s59E25H2" 0 "hypothetical protein"  
"JS1\_M10\_00059" 15749 "s59E5H2" 0.09493451 "hypothetical protein"  
"JS1\_M10\_00059" 15749 "s63E6H2" 0.1619837 "hypothetical protein"  
"JS1\_M10\_00060" 15750 "s59E13H2" 0 "Peptidase M15"  
"JS1\_M10\_00060" 15750 "s59E25H2" 0 "Peptidase M15"  
"JS1\_M10\_00060" 15750 "s59E5H2" 0.1156265 "Peptidase M15"  
"JS1\_M10\_00060" 15750 "s63E6H2" 0.009472755 "Peptidase M15"  
"JS1\_M10\_00062" 15752 "s59E13H2" 0.1301018 "Glycerol kinase"  
"JS1\_M10\_00062" 15752 "s59E25H2" 0 "Glycerol kinase"  
"JS1\_M10\_00062" 15752 "s59E5H2" 0.4035433 "Glycerol kinase"  
"JS1\_M10\_00062" 15752 "s63E6H2" 0.885521 "Glycerol kinase"  
"JS1\_M10\_00063" 15753 "s59E13H2" 0 "Tyrosine recombinase XerD"  
"JS1\_M10\_00063" 15753 "s59E25H2" 0 "Tyrosine recombinase XerD"  
"JS1\_M10\_00063" 15753 "s59E5H2" 0 "Tyrosine recombinase XerD"  
"JS1\_M10\_00063" 15753 "s63E6H2" 0 "Tyrosine recombinase XerD"  
"JS1\_M10\_00064" 15754 "s59E13H2" 0 "hypothetical protein"

"JS1\_M10\_00064" 15754 "s59E25H2" 0 "hypothetical protein"  
"JS1\_M10\_00064" 15754 "s59E5H2" 0 "hypothetical protein"  
"JS1\_M10\_00064" 15754 "s63E6H2" 0 "hypothetical protein"  
"JS1\_M10\_00065" 15755 "s59E13H2" 0 "hypothetical protein"  
"JS1\_M10\_00065" 15755 "s59E25H2" 0 "hypothetical protein"  
"JS1\_M10\_00065" 15755 "s59E5H2" 0 "hypothetical protein"  
"JS1\_M10\_00065" 15755 "s63E6H2" 0 "hypothetical protein"  
"JS1\_M10\_00066" 15756 "s59E13H2" 0 "hypothetical protein"  
"JS1\_M10\_00066" 15756 "s59E25H2" 0 "hypothetical protein"  
"JS1\_M10\_00066" 15756 "s59E5H2" 0 "hypothetical protein"  
"JS1\_M10\_00066" 15756 "s63E6H2" 0.007691718 "hypothetical protein"  
"JS1\_M10\_00067" 15757 "s59E13H2" 0 "Hut operon positive regulatory protein"  
"JS1\_M10\_00067" 15757 "s59E25H2" 0 "Hut operon positive regulatory protein"  
"JS1\_M10\_00067" 15757 "s59E5H2" 0 "Hut operon positive regulatory protein"  
"JS1\_M10\_00067" 15757 "s63E6H2" 0 "Hut operon positive regulatory protein"  
"JS1\_M10\_00068" 15758 "s59E13H2" 0.02570084 "Dipeptide transport system permease protein DppB"  
"JS1\_M10\_00068" 15758 "s59E25H2" 0 "Dipeptide transport system permease protein DppB"  
"JS1\_M10\_00068" 15758 "s59E5H2" 0.1376584 "Dipeptide transport system permease protein DppB"  
"JS1\_M10\_00068" 15758 "s63E6H2" 0.01891335 "Dipeptide transport system permease protein DppB"  
"JS1\_M10\_00069" 15759 "s59E13H2" 0 "Oligopeptide transport ATP-binding protein OppD"  
"JS1\_M10\_00069" 15759 "s59E25H2" 0 "Oligopeptide transport ATP-binding protein OppD"  
"JS1\_M10\_00069" 15759 "s59E5H2" 0 "Oligopeptide transport ATP-binding protein OppD"  
"JS1\_M10\_00069" 15759 "s63E6H2" 0 "Oligopeptide transport ATP-binding protein OppD"  
"JS1\_M10\_00070" 15760 "s59E13H2" 0.2519122 "Elongation factor Tu"  
"JS1\_M10\_00070" 15760 "s59E25H2" 0 "Elongation factor Tu"  
"JS1\_M10\_00070" 15760 "s59E5H2" 0.3081177 "Elongation factor Tu"  
"JS1\_M10\_00070" 15760 "s63E6H2" 0.9802943 "Elongation factor Tu"  
"JS1\_M10\_00072" 15762 "s59E13H2" 0 "hypothetical protein"  
"JS1\_M10\_00072" 15762 "s59E25H2" 0 "hypothetical protein"  
"JS1\_M10\_00072" 15762 "s59E5H2" 0 "hypothetical protein"  
"JS1\_M10\_00072" 15762 "s63E6H2" 0 "hypothetical protein"  
"JS1\_M10\_00073" 15763 "s59E13H2" 0.03574851 "hypothetical protein"  
"JS1\_M10\_00073" 15763 "s59E25H2" 0 "hypothetical protein"  
"JS1\_M10\_00073" 15763 "s59E5H2" 0 "hypothetical protein"  
"JS1\_M10\_00073" 15763 "s63E6H2" 0 "hypothetical protein"  
"JS1\_M10\_00074" 15764 "s59E13H2" 0.006955593 "hypothetical protein"  
"JS1\_M10\_00074" 15764 "s59E25H2" 0 "hypothetical protein"  
"JS1\_M10\_00074" 15764 "s59E5H2" 0 "hypothetical protein"  
"JS1\_M10\_00074" 15764 "s63E6H2" 0 "hypothetical protein"  
"JS1\_M10\_00076" 15766 "s59E13H2" 0 "Thermonuclease precursor"  
"JS1\_M10\_00076" 15766 "s59E25H2" 0 "Thermonuclease precursor"  
"JS1\_M10\_00076" 15766 "s59E5H2" 0 "Thermonuclease precursor"  
"JS1\_M10\_00076" 15766 "s63E6H2" 0.009931733 "Thermonuclease precursor"  
"JS1\_M10\_00077" 15767 "s59E13H2" 0.006260033 "hypothetical protein"  
"JS1\_M10\_00077" 15767 "s59E25H2" 0 "hypothetical protein"  
"JS1\_M10\_00077" 15767 "s59E5H2" 0 "hypothetical protein"  
"JS1\_M10\_00077" 15767 "s63E6H2" 0 "hypothetical protein"

"JS1\_M10\_00078" 15768 "s59E13H2" 0 "hypothetical protein"  
"JS1\_M10\_00078" 15768 "s59E25H2" 0 "hypothetical protein"  
"JS1\_M10\_00078" 15768 "s59E5H2" 0 "hypothetical protein"  
"JS1\_M10\_00078" 15768 "s63E6H2" 0 "hypothetical protein"  
"JS1\_M10\_00079" 15769 "s59E13H2" 0 "hypothetical protein"  
"JS1\_M10\_00079" 15769 "s59E25H2" 0 "hypothetical protein"  
"JS1\_M10\_00079" 15769 "s59E5H2" 0 "hypothetical protein"  
"JS1\_M10\_00079" 15769 "s63E6H2" 0 "hypothetical protein"  
"JS1\_M10\_00080" 15770 "s59E13H2" 0.02528995 "IS2 transposase TnpB"  
"JS1\_M10\_00080" 15770 "s59E25H2" 0 "IS2 transposase TnpB"  
"JS1\_M10\_00080" 15770 "s59E5H2" 0.05697038 "IS2 transposase TnpB"  
"JS1\_M10\_00080" 15770 "s63E6H2" 0.3523072 "IS2 transposase TnpB"  
"JS1\_M10\_00081" 15771 "s59E13H2" 0 "Transposase"  
"JS1\_M10\_00081" 15771 "s59E25H2" 0 "Transposase"  
"JS1\_M10\_00081" 15771 "s59E5H2" 0.3347723 "Transposase"  
"JS1\_M10\_00081" 15771 "s63E6H2" 0.160169 "Transposase"  
"JS1\_M10\_00084" 15774 "s59E13H2" 0 "hypothetical protein"  
"JS1\_M10\_00084" 15774 "s59E25H2" 0 "hypothetical protein"  
"JS1\_M10\_00084" 15774 "s59E5H2" 0 "hypothetical protein"  
"JS1\_M10\_00084" 15774 "s63E6H2" 0 "hypothetical protein"  
"JS1\_M10\_00087" 15777 "s59E13H2" 0 "hypothetical protein"  
"JS1\_M10\_00087" 15777 "s59E25H2" 0 "hypothetical protein"  
"JS1\_M10\_00087" 15777 "s59E5H2" 0 "hypothetical protein"  
"JS1\_M10\_00087" 15777 "s63E6H2" 0 "hypothetical protein"  
"JS1\_M10\_00089" 15779 "s59E13H2" 0.01787315 "Modulator of FtsH protease HflK"  
"JS1\_M10\_00089" 15779 "s59E25H2" 0 "Modulator of FtsH protease HflK"  
"JS1\_M10\_00089" 15779 "s59E5H2" 0.7561184 "Modulator of FtsH protease HflK"  
"JS1\_M10\_00089" 15779 "s63E6H2" 0.8290065 "Modulator of FtsH protease HflK"  
"JS1\_M10\_00090" 15780 "s59E13H2" 0 "Bacterial Ig-like domain (group 1)"  
"JS1\_M10\_00090" 15780 "s59E25H2" 0 "Bacterial Ig-like domain (group 1)"  
"JS1\_M10\_00090" 15780 "s59E5H2" 0 "Bacterial Ig-like domain (group 1)"  
"JS1\_M10\_00090" 15780 "s63E6H2" 0.169192 "Bacterial Ig-like domain (group 1)"  
"JS1\_M10\_00091" 15781 "s59E13H2" 0 "hypothetical protein"  
"JS1\_M10\_00091" 15781 "s59E25H2" 0 "hypothetical protein"  
"JS1\_M10\_00091" 15781 "s59E5H2" 0 "hypothetical protein"  
"JS1\_M10\_00091" 15781 "s63E6H2" 0.136611 "hypothetical protein"  
"JS1\_M10\_00092" 15782 "s59E13H2" 0 "hypothetical protein"  
"JS1\_M10\_00092" 15782 "s59E25H2" 0 "hypothetical protein"  
"JS1\_M10\_00092" 15782 "s59E5H2" 0 "hypothetical protein"  
"JS1\_M10\_00092" 15782 "s63E6H2" 0.1387542 "hypothetical protein"  
"JS1\_M10\_00093" 15783 "s59E13H2" 0.03098137 "hypothetical protein"  
"JS1\_M10\_00093" 15783 "s59E25H2" 0 "hypothetical protein"  
"JS1\_M10\_00093" 15783 "s59E5H2" 1.838005 "hypothetical protein"  
"JS1\_M10\_00093" 15783 "s63E6H2" 3.060732 "hypothetical protein"  
"JS1\_M10\_00095" 15785 "s59E13H2" 0.2663276 "hypothetical protein"  
"JS1\_M10\_00095" 15785 "s59E25H2" 0 "hypothetical protein"  
"JS1\_M10\_00095" 15785 "s59E5H2" 0.353461 "hypothetical protein"



"JS1\_M10\_00095" 15785 "s63E6H2" 0.4720096 "hypothetical protein"  
"JS1\_M10\_00099" 15789 "s59E13H2" 0.01142091 "hypothetical protein"  
"JS1\_M10\_00099" 15789 "s59E25H2" 0 "hypothetical protein"  
"JS1\_M10\_00099" 15789 "s59E5H2" 0.01064103 "hypothetical protein"  
"JS1\_M10\_00099" 15789 "s63E6H2" 0.6138832 "hypothetical protein"  
"JS1\_M10\_00100" 15790 "s59E13H2" 0.006791932 "Galactokinase"  
"JS1\_M10\_00100" 15790 "s59E25H2" 0 "Galactokinase"  
"JS1\_M10\_00100" 15790 "s59E5H2" 0.00791514 "Galactokinase"  
"JS1\_M10\_00100" 15790 "s63E6H2" 0.03642806 "Galactokinase"  
"JS1\_M10\_00101" 15791 "s59E13H2" 0.04005739 "Galactose-1-phosphate uridylyltransferase"  
"JS1\_M10\_00101" 15791 "s59E25H2" 0 "Galactose-1-phosphate uridylyltransferase"  
"JS1\_M10\_00101" 15791 "s59E5H2" 0.04068139 "Galactose-1-phosphate uridylyltransferase"  
"JS1\_M10\_00101" 15791 "s63E6H2" 0.1439642 "Galactose-1-phosphate uridylyltransferase"  
"JS1\_M10\_00102" 15792 "s59E13H2" 0.04961763 "Asparagine--tRNA ligase"  
"JS1\_M10\_00102" 15792 "s59E25H2" 0 "Asparagine--tRNA ligase"  
"JS1\_M10\_00102" 15792 "s59E5H2" 0.1486451 "Asparagine--tRNA ligase"  
"JS1\_M10\_00102" 15792 "s63E6H2" 0.2731459 "Asparagine--tRNA ligase"  
"JS1\_M10\_00103" 15793 "s59E13H2" 6.177183 "Transposase IS116/IS110/IS902 family protein"  
"JS1\_M10\_00103" 15793 "s59E25H2" 0 "Transposase IS116/IS110/IS902 family protein"  
"JS1\_M10\_00103" 15793 "s59E5H2" 1.269785 "Transposase IS116/IS110/IS902 family protein"  
"JS1\_M10\_00103" 15793 "s63E6H2" 2.208365 "Transposase IS116/IS110/IS902 family protein"  
"JS1\_M10\_00104" 15794 "s59E13H2" 0.01482303 "Histidine--tRNA ligase"  
"JS1\_M10\_00104" 15794 "s59E25H2" 0 "Histidine--tRNA ligase"  
"JS1\_M10\_00104" 15794 "s59E5H2" 0.01939965 "Histidine--tRNA ligase"  
"JS1\_M10\_00104" 15794 "s63E6H2" 0.131475 "Histidine--tRNA ligase"  
"JS1\_M10\_00105" 15795 "s59E13H2" 0.06564792 "Twitching mobility protein"  
"JS1\_M10\_00105" 15795 "s59E25H2" 0 "Twitching mobility protein"  
"JS1\_M10\_00105" 15795 "s59E5H2" 0.1037459 "Twitching mobility protein"  
"JS1\_M10\_00105" 15795 "s63E6H2" 0.2521499 "Twitching mobility protein"  
"JS1\_M10\_00106" 15796 "s59E13H2" 0.09461102 "bacteriophage N4 adsorption protein B"  
"JS1\_M10\_00106" 15796 "s59E25H2" 0 "bacteriophage N4 adsorption protein B"  
"JS1\_M10\_00106" 15796 "s59E5H2" 0.2048257 "bacteriophage N4 adsorption protein B"  
"JS1\_M10\_00106" 15796 "s63E6H2" 0.2774771 "bacteriophage N4 adsorption protein B"  
"JS1\_M10\_00108" 15798 "s59E13H2" 0.1149807 "Twitching mobility protein"  
"JS1\_M10\_00108" 15798 "s59E25H2" 0 "Twitching mobility protein"  
"JS1\_M10\_00108" 15798 "s59E5H2" 0.09760718 "Twitching mobility protein"  
"JS1\_M10\_00108" 15798 "s63E6H2" 0.2770698 "Twitching mobility protein"  
"JS1\_M10\_00109" 15799 "s59E13H2" 0.1251193 "S-adenosylmethionine synthase"  
"JS1\_M10\_00109" 15799 "s59E25H2" 0 "S-adenosylmethionine synthase"  
"JS1\_M10\_00109" 15799 "s59E5H2" 0.1322942 "S-adenosylmethionine synthase"  
"JS1\_M10\_00109" 15799 "s63E6H2" 0.2555384 "S-adenosylmethionine synthase"  
"JS1\_M10\_00111" 15801 "s59E13H2" 0.142927 "Mannose-1-phosphate guanylyltransferase 1"  
"JS1\_M10\_00111" 15801 "s59E25H2" 0 "Mannose-1-phosphate guanylyltransferase 1"  
"JS1\_M10\_00111" 15801 "s59E5H2" 0.1286931 "Mannose-1-phosphate guanylyltransferase 1"  
"JS1\_M10\_00111" 15801 "s63E6H2" 0.1099204 "Mannose-1-phosphate guanylyltransferase 1"  
"JS1\_M10\_00112" 15802 "s59E13H2" 0.01291453 "Galactokinase"  
"JS1\_M10\_00112" 15802 "s59E25H2" 0 "Galactokinase"

"JS1\_M10\_00112" 15802 "s59E5H2" 0.006039665 "Galactokinase"  
"JS1\_M10\_00112" 15802 "s63E6H2" 0.03171684 "Galactokinase"  
"JS1\_M10\_00113" 15803 "s59E13H2" 0.4584952 "Glycerol kinase"  
"JS1\_M10\_00113" 15803 "s59E25H2" 0.1263916 "Glycerol kinase"  
"JS1\_M10\_00113" 15803 "s59E5H2" 0.7945129 "Glycerol kinase"  
"JS1\_M10\_00113" 15803 "s63E6H2" 1.759025 "Glycerol kinase"  
"JS1\_M10\_00114" 15804 "s59E13H2" 2.212796 "SpoVT / AbrB like domain protein"  
"JS1\_M10\_00114" 15804 "s59E25H2" 0 "SpoVT / AbrB like domain protein"  
"JS1\_M10\_00114" 15804 "s59E5H2" 1.125795 "SpoVT / AbrB like domain protein"  
"JS1\_M10\_00114" 15804 "s63E6H2" 0.01129011 "SpoVT / AbrB like domain protein"  
"JS1\_M10\_00115" 15805 "s59E13H2" 2.818458 "hypothetical protein"  
"JS1\_M10\_00115" 15805 "s59E25H2" 0 "hypothetical protein"  
"JS1\_M10\_00115" 15805 "s59E5H2" 1.222185 "hypothetical protein"  
"JS1\_M10\_00115" 15805 "s63E6H2" 0.01193342 "hypothetical protein"  
"JS1\_M10\_00116" 15806 "s59E13H2" 0.2539917 "putative 6-phospho-beta-glucosidase"  
"JS1\_M10\_00116" 15806 "s59E25H2" 0 "putative 6-phospho-beta-glucosidase"  
"JS1\_M10\_00116" 15806 "s59E5H2" 0.2153432 "putative 6-phospho-beta-glucosidase"  
"JS1\_M10\_00116" 15806 "s63E6H2" 0.05528415 "putative 6-phospho-beta-glucosidase"  
"JS1\_M10\_00117" 15807 "s59E13H2" 0.4247734 "Beta-glucosidase A"  
"JS1\_M10\_00117" 15807 "s59E25H2" 0 "Beta-glucosidase A"  
"JS1\_M10\_00117" 15807 "s59E5H2" 1.891931 "Beta-glucosidase A"  
"JS1\_M10\_00117" 15807 "s63E6H2" 2.66007 "Beta-glucosidase A"  
"JS1\_M10\_00118" 15808 "s59E13H2" 0.4511068 "Beta-glucosidase B"  
"JS1\_M10\_00118" 15808 "s59E25H2" 0 "Beta-glucosidase B"  
"JS1\_M10\_00118" 15808 "s59E5H2" 1.581071 "Beta-glucosidase B"  
"JS1\_M10\_00118" 15808 "s63E6H2" 1.119336 "Beta-glucosidase B"  
"JS1\_M10\_00119" 15809 "s59E13H2" 0.1926403 "Beta-glucosidase A"  
"JS1\_M10\_00119" 15809 "s59E25H2" 0 "Beta-glucosidase A"  
"JS1\_M10\_00119" 15809 "s59E5H2" 0.7026341 "Beta-glucosidase A"  
"JS1\_M10\_00119" 15809 "s63E6H2" 0.3783297 "Beta-glucosidase A"  
"JS1\_M10\_00120" 15810 "s59E13H2" 0 "Thermostable beta-glucosidase B"  
"JS1\_M10\_00120" 15810 "s59E25H2" 0 "Thermostable beta-glucosidase B"  
"JS1\_M10\_00120" 15810 "s59E5H2" 0 "Thermostable beta-glucosidase B"  
"JS1\_M10\_00120" 15810 "s63E6H2" 0.001408877 "Thermostable beta-glucosidase B"  
"JS1\_M10\_00121" 15811 "s59E13H2" 0.002127928 "Exo-beta-D-glucosaminidase precursor"  
"JS1\_M10\_00121" 15811 "s59E25H2" 0 "Exo-beta-D-glucosaminidase precursor"  
"JS1\_M10\_00121" 15811 "s59E5H2" 0.9701644 "Exo-beta-D-glucosaminidase precursor"  
"JS1\_M10\_00121" 15811 "s63E6H2" 0.004908187 "Exo-beta-D-glucosaminidase precursor"  
"JS1\_M10\_00122" 15812 "s59E13H2" 0 "Oligopeptide transport ATP-binding protein OppF"  
"JS1\_M10\_00122" 15812 "s59E25H2" 0 "Oligopeptide transport ATP-binding protein OppF"  
"JS1\_M10\_00122" 15812 "s59E5H2" 0 "Oligopeptide transport ATP-binding protein OppF"  
"JS1\_M10\_00122" 15812 "s63E6H2" 0 "Oligopeptide transport ATP-binding protein OppF"  
"JS1\_M10\_00123" 15813 "s59E13H2" 0 "Oligopeptide transport ATP-binding protein OppD"  
"JS1\_M10\_00123" 15813 "s59E25H2" 0 "Oligopeptide transport ATP-binding protein OppD"  
"JS1\_M10\_00123" 15813 "s59E5H2" 0 "Oligopeptide transport ATP-binding protein OppD"  
"JS1\_M10\_00123" 15813 "s63E6H2" 0 "Oligopeptide transport ATP-binding protein OppD"  
"JS1\_M10\_00124" 15814 "s59E13H2" 0 "Dipeptide transport system permease protein DppC"

"JS1\_M10\_00124" 15814 "s59E25H2" 0 "Dipeptide transport system permease protein DppC"  
"JS1\_M10\_00124" 15814 "s59E5H2" 0 "Dipeptide transport system permease protein DppC"  
"JS1\_M10\_00124" 15814 "s63E6H2" 0.001990114 "Dipeptide transport system permease protein DppC"  
"JS1\_M10\_00125" 15815 "s59E13H2" 0 "Oligopeptide transport system permease protein OppB"  
"JS1\_M10\_00125" 15815 "s59E25H2" 0 "Oligopeptide transport system permease protein OppB"  
"JS1\_M10\_00125" 15815 "s59E5H2" 0 "Oligopeptide transport system permease protein OppB"  
"JS1\_M10\_00125" 15815 "s63E6H2" 0.009602992 "Oligopeptide transport system permease protein OppB"  
"JS1\_M10\_00126" 15816 "s59E13H2" 0 "putative ABC transporter-binding protein precursor"  
"JS1\_M10\_00126" 15816 "s59E25H2" 0 "putative ABC transporter-binding protein precursor"  
"JS1\_M10\_00126" 15816 "s59E5H2" 0 "putative ABC transporter-binding protein precursor"  
"JS1\_M10\_00126" 15816 "s63E6H2" 0.004873824 "putative ABC transporter-binding protein precursor"  
"JS1\_M10\_00127" 15817 "s59E13H2" 0.0004920138 "HTH-type transcriptional regulator DegA"  
"JS1\_M10\_00127" 15817 "s59E25H2" 0 "HTH-type transcriptional regulator DegA"  
"JS1\_M10\_00127" 15817 "s59E5H2" 0.05366209 "HTH-type transcriptional regulator DegA"  
"JS1\_M10\_00127" 15817 "s63E6H2" 0 "HTH-type transcriptional regulator DegA"  
"JS1\_M10\_00128" 15818 "s59E13H2" 0 "putative aldo-keto reductase"  
"JS1\_M10\_00128" 15818 "s59E25H2" 0 "putative aldo-keto reductase"  
"JS1\_M10\_00128" 15818 "s59E5H2" 0.1441862 "putative aldo-keto reductase"  
"JS1\_M10\_00128" 15818 "s63E6H2" 0 "putative aldo-keto reductase"  
"JS1\_M10\_00129" 15819 "s59E13H2" 0.03670497 "putative ABC transporter-binding protein precursor"  
"JS1\_M10\_00129" 15819 "s59E25H2" 0 "putative ABC transporter-binding protein precursor"  
"JS1\_M10\_00129" 15819 "s59E5H2" 0 "putative ABC transporter-binding protein precursor"  
"JS1\_M10\_00129" 15819 "s63E6H2" 0.7513296 "putative ABC transporter-binding protein precursor"  
"JS1\_M10\_00130" 15820 "s59E13H2" 0.0390828 "Dipeptide transport system permease protein DppB"  
"JS1\_M10\_00130" 15820 "s59E25H2" 0 "Dipeptide transport system permease protein DppB"  
"JS1\_M10\_00130" 15820 "s59E5H2" 0 "Dipeptide transport system permease protein DppB"  
"JS1\_M10\_00130" 15820 "s63E6H2" 0.8866372 "Dipeptide transport system permease protein DppB"  
"JS1\_M10\_00131" 15821 "s59E13H2" 0.06141438 "Glutathione transport system permease protein GsiD"  
"JS1\_M10\_00131" 15821 "s59E25H2" 0 "Glutathione transport system permease protein GsiD"  
"JS1\_M10\_00131" 15821 "s59E5H2" 0 "Glutathione transport system permease protein GsiD"  
"JS1\_M10\_00131" 15821 "s63E6H2" 0.9348735 "Glutathione transport system permease protein GsiD"  
"JS1\_M10\_00132" 15822 "s59E13H2" 0.02422765 "Oligopeptide transport ATP-binding protein OppD"  
"JS1\_M10\_00132" 15822 "s59E25H2" 0 "Oligopeptide transport ATP-binding protein OppD"  
"JS1\_M10\_00132" 15822 "s59E5H2" 0 "Oligopeptide transport ATP-binding protein OppD"  
"JS1\_M10\_00132" 15822 "s63E6H2" 0.7091687 "Oligopeptide transport ATP-binding protein OppD"  
"JS1\_M10\_00133" 15823 "s59E13H2" 0.211136 "Maltodextrin phosphorylase"  
"JS1\_M10\_00133" 15823 "s59E25H2" 0 "Maltodextrin phosphorylase"  
"JS1\_M10\_00133" 15823 "s59E5H2" 0.1985772 "Maltodextrin phosphorylase"  
"JS1\_M10\_00133" 15823 "s63E6H2" 0.04234637 "Maltodextrin phosphorylase"  
"JS1\_M10\_00135" 15825 "s59E13H2" 0.02364548 "Alpha-1,4-glucan:maltose-1-phosphate maltosyltransferase 1"  
"JS1\_M10\_00135" 15825 "s59E25H2" 0 "Alpha-1,4-glucan:maltose-1-phosphate maltosyltransferase 1"  
"JS1\_M10\_00135" 15825 "s59E5H2" 0.133093 "Alpha-1,4-glucan:maltose-1-phosphate maltosyltransferase 1"  
"JS1\_M10\_00135" 15825 "s63E6H2" 1.039568 "Alpha-1,4-glucan:maltose-1-phosphate maltosyltransferase 1"  
"JS1\_M10\_00138" 15828 "s59E13H2" 0 "hypothetical protein"  
"JS1\_M10\_00138" 15828 "s59E25H2" 0 "hypothetical protein"  
"JS1\_M10\_00138" 15828 "s59E5H2" 0 "hypothetical protein"  
"JS1\_M10\_00138" 15828 "s63E6H2" 0 "hypothetical protein"

"JS1\_M10\_00140" 15830 "s59E13H2" 0 "cryptic autophosphorylating protein tyrosine kinase Etk"  
"JS1\_M10\_00140" 15830 "s59E25H2" 0 "cryptic autophosphorylating protein tyrosine kinase Etk"  
"JS1\_M10\_00140" 15830 "s59E5H2" 0.04837095 "cryptic autophosphorylating protein tyrosine kinase Etk"  
"JS1\_M10\_00140" 15830 "s63E6H2" 0.0229596 "cryptic autophosphorylating protein tyrosine kinase Etk"  
"JS1\_M10\_00141" 15831 "s59E13H2" 0 "UDP-glucose 6-dehydrogenase TuaD"  
"JS1\_M10\_00141" 15831 "s59E25H2" 0 "UDP-glucose 6-dehydrogenase TuaD"  
"JS1\_M10\_00141" 15831 "s59E5H2" 0.08965941 "UDP-glucose 6-dehydrogenase TuaD"  
"JS1\_M10\_00141" 15831 "s63E6H2" 0.04859165 "UDP-glucose 6-dehydrogenase TuaD"  
"JS1\_M10\_00142" 15832 "s59E13H2" 0 "GDP-mannose 4,6-dehydratase"  
"JS1\_M10\_00142" 15832 "s59E25H2" 0 "GDP-mannose 4,6-dehydratase"  
"JS1\_M10\_00142" 15832 "s59E5H2" 0.001808538 "GDP-mannose 4,6-dehydratase"  
"JS1\_M10\_00142" 15832 "s63E6H2" 8.680824e-05 "GDP-mannose 4,6-dehydratase"  
"JS1\_M10\_00143" 15833 "s59E13H2" 0.001850366 "GDP-L-fucose synthase"  
"JS1\_M10\_00143" 15833 "s59E25H2" 0 "GDP-L-fucose synthase"  
"JS1\_M10\_00143" 15833 "s59E5H2" 0.003533326 "GDP-L-fucose synthase"  
"JS1\_M10\_00143" 15833 "s63E6H2" 0.000798881 "GDP-L-fucose synthase"  
"JS1\_M10\_00144" 15834 "s59E13H2" 0 "Glucose-1-phosphate cytidyltransferase"  
"JS1\_M10\_00144" 15834 "s59E25H2" 0 "Glucose-1-phosphate cytidyltransferase"  
"JS1\_M10\_00144" 15834 "s59E5H2" 0 "Glucose-1-phosphate cytidyltransferase"  
"JS1\_M10\_00144" 15834 "s63E6H2" 0.000389698 "Glucose-1-phosphate cytidyltransferase"  
"JS1\_M10\_00145" 15835 "s59E13H2" 0 "GDP-6-deoxy-D-mannose reductase"  
"JS1\_M10\_00145" 15835 "s59E25H2" 0 "GDP-6-deoxy-D-mannose reductase"  
"JS1\_M10\_00145" 15835 "s59E5H2" 0 "GDP-6-deoxy-D-mannose reductase"  
"JS1\_M10\_00145" 15835 "s63E6H2" 0 "GDP-6-deoxy-D-mannose reductase"  
"JS1\_M10\_00146" 15836 "s59E13H2" 0 "Hexuronic acid methyltransferase AgIP"  
"JS1\_M10\_00146" 15836 "s59E25H2" 0 "Hexuronic acid methyltransferase AgIP"  
"JS1\_M10\_00146" 15836 "s59E5H2" 0 "Hexuronic acid methyltransferase AgIP"  
"JS1\_M10\_00146" 15836 "s63E6H2" 0 "Hexuronic acid methyltransferase AgIP"  
"JS1\_M10\_00147" 15837 "s59E13H2" 0 "Transketolase 2"  
"JS1\_M10\_00147" 15837 "s59E25H2" 0 "Transketolase 2"  
"JS1\_M10\_00147" 15837 "s59E5H2" 0 "Transketolase 2"  
"JS1\_M10\_00147" 15837 "s63E6H2" 0 "Transketolase 2"  
"JS1\_M10\_00148" 15838 "s59E13H2" 0 "1-deoxy-D-xylulose-5-phosphate synthase"  
"JS1\_M10\_00148" 15838 "s59E25H2" 0 "1-deoxy-D-xylulose-5-phosphate synthase"  
"JS1\_M10\_00148" 15838 "s59E5H2" 0 "1-deoxy-D-xylulose-5-phosphate synthase"  
"JS1\_M10\_00148" 15838 "s63E6H2" 0 "1-deoxy-D-xylulose-5-phosphate synthase"  
"JS1\_M10\_00149" 15839 "s59E13H2" 0 "CDP-glucose 4,6-dehydratase"  
"JS1\_M10\_00149" 15839 "s59E25H2" 0 "CDP-glucose 4,6-dehydratase"  
"JS1\_M10\_00149" 15839 "s59E5H2" 0 "CDP-glucose 4,6-dehydratase"  
"JS1\_M10\_00149" 15839 "s63E6H2" 0 "CDP-glucose 4,6-dehydratase"  
"JS1\_M10\_00150" 15840 "s59E13H2" 0 "UDP-4-amino-4-deoxy-L-arabinose--oxoglutarate aminotransferase"  
"JS1\_M10\_00150" 15840 "s59E25H2" 0 "UDP-4-amino-4-deoxy-L-arabinose--oxoglutarate aminotransferase"  
"JS1\_M10\_00150" 15840 "s59E5H2" 0.001251 "UDP-4-amino-4-deoxy-L-arabinose--oxoglutarate aminotransferase"  
"JS1\_M10\_00150" 15840 "s63E6H2" 0.001972597 "UDP-4-amino-4-deoxy-L-arabinose--oxoglutarate aminotransferase"  
"JS1\_M10\_00151" 15841 "s59E13H2" 0.01940222 "Transposase DDE domain protein"  
"JS1\_M10\_00151" 15841 "s59E25H2" 0 "Transposase DDE domain protein"  
"JS1\_M10\_00151" 15841 "s59E5H2" 1.289514 "Transposase DDE domain protein"

"JS1\_M10\_00151" 15841 "s63E6H2" 0.395986 "Transposase DDE domain protein"  
"JS1\_M10\_00152" 15842 "s59E13H2" 0 "Glycosyltransferase family 10 (fucosyltransferase)"  
"JS1\_M10\_00152" 15842 "s59E25H2" 0 "Glycosyltransferase family 10 (fucosyltransferase)"  
"JS1\_M10\_00152" 15842 "s59E5H2" 0 "Glycosyltransferase family 10 (fucosyltransferase)"  
"JS1\_M10\_00152" 15842 "s63E6H2" 0 "Glycosyltransferase family 10 (fucosyltransferase)"  
"JS1\_M10\_00153" 15843 "s59E13H2" 0 "Abequosyltransferase RfbV"  
"JS1\_M10\_00153" 15843 "s59E25H2" 0 "Abequosyltransferase RfbV"  
"JS1\_M10\_00153" 15843 "s59E5H2" 0 "Abequosyltransferase RfbV"  
"JS1\_M10\_00153" 15843 "s63E6H2" 0 "Abequosyltransferase RfbV"  
"JS1\_M10\_00154" 15844 "s59E13H2" 0 "Polysaccharide biosynthesis protein"  
"JS1\_M10\_00154" 15844 "s59E25H2" 0 "Polysaccharide biosynthesis protein"  
"JS1\_M10\_00154" 15844 "s59E5H2" 0 "Polysaccharide biosynthesis protein"  
"JS1\_M10\_00154" 15844 "s63E6H2" 0 "Polysaccharide biosynthesis protein"  
"JS1\_M10\_00155" 15845 "s59E13H2" 0 "Chondroitin synthase"  
"JS1\_M10\_00155" 15845 "s59E25H2" 0 "Chondroitin synthase"  
"JS1\_M10\_00155" 15845 "s59E5H2" 0 "Chondroitin synthase"  
"JS1\_M10\_00155" 15845 "s63E6H2" 0 "Chondroitin synthase"  
"JS1\_M10\_00156" 15846 "s59E13H2" 0 "hypothetical protein"  
"JS1\_M10\_00156" 15846 "s59E25H2" 0 "hypothetical protein"  
"JS1\_M10\_00156" 15846 "s59E5H2" 0 "hypothetical protein"  
"JS1\_M10\_00156" 15846 "s63E6H2" 0 "hypothetical protein"  
"JS1\_M10\_00157" 15847 "s59E13H2" 0 "bifunctional 3-demethylubiquinone-9 3-methyltransferase/ 2-octaprenyl-6-hydroxy phenol methylase"  
"JS1\_M10\_00157" 15847 "s59E25H2" 0 "bifunctional 3-demethylubiquinone-9 3-methyltransferase/ 2-octaprenyl-6-hydroxy phenol methylase"  
"JS1\_M10\_00157" 15847 "s59E5H2" 0 "bifunctional 3-demethylubiquinone-9 3-methyltransferase/ 2-octaprenyl-6-hydroxy phenol methylase"  
"JS1\_M10\_00157" 15847 "s63E6H2" 0 "bifunctional 3-demethylubiquinone-9 3-methyltransferase/ 2-octaprenyl-6-hydroxy phenol methylase"  
"JS1\_M10\_00158" 15848 "s59E13H2" 0 "N-acetylgalactosamine-N,N'-diacetylbaucillosaminyl-diphospho-undecaprenol 4-alpha-N-acetylgalactosaminyltransferase"  
"JS1\_M10\_00158" 15848 "s59E25H2" 0 "N-acetylgalactosamine-N,N'-diacetylbaucillosaminyl-diphospho-undecaprenol 4-alpha-N-acetylgalactosaminyltransferase"  
"JS1\_M10\_00158" 15848 "s59E5H2" 0 "N-acetylgalactosamine-N,N'-diacetylbaucillosaminyl-diphospho-undecaprenol 4-alpha-N-acetylgalactosaminyltransferase"  
"JS1\_M10\_00158" 15848 "s63E6H2" 0 "N-acetylgalactosamine-N,N'-diacetylbaucillosaminyl-diphospho-undecaprenol 4-alpha-N-acetylgalactosaminyltransferase"  
"JS1\_M10\_00159" 15849 "s59E13H2" 0 "UDP-glucose 4-epimerase"  
"JS1\_M10\_00159" 15849 "s59E25H2" 0 "UDP-glucose 4-epimerase"  
"JS1\_M10\_00159" 15849 "s59E5H2" 0 "UDP-glucose 4-epimerase"  
"JS1\_M10\_00159" 15849 "s63E6H2" 0 "UDP-glucose 4-epimerase"  
"JS1\_M10\_00160" 15850 "s59E13H2" 0 "Putative glycosyltransferase EpsD"  
"JS1\_M10\_00160" 15850 "s59E25H2" 0 "Putative glycosyltransferase EpsD"  
"JS1\_M10\_00160" 15850 "s59E5H2" 0 "Putative glycosyltransferase EpsD"  
"JS1\_M10\_00160" 15850 "s63E6H2" 0 "Putative glycosyltransferase EpsD"  
"JS1\_M10\_00161" 15851 "s59E13H2" 0.002936321 "putative undecaprenyl-phosphate N-acetylglucosaminyl 1-phosphate transferase"  
"JS1\_M10\_00161" 15851 "s59E25H2" 0 "putative undecaprenyl-phosphate N-acetylglucosaminyl 1-phosphate transferase"  
"JS1\_M10\_00161" 15851 "s59E5H2" 0.01145155 "putative undecaprenyl-phosphate N-acetylglucosaminyl 1-phosphate transferase"  
"JS1\_M10\_00161" 15851 "s63E6H2" 0 "putative undecaprenyl-phosphate N-acetylglucosaminyl 1-phosphate transferase"  
"JS1\_M10\_00162" 15852 "s59E13H2" 0 "Nucleotidyltransferase domain protein"  
"JS1\_M10\_00162" 15852 "s59E25H2" 0 "Nucleotidyltransferase domain protein"  
"JS1\_M10\_00162" 15852 "s59E5H2" 0 "Nucleotidyltransferase domain protein"  
"JS1\_M10\_00162" 15852 "s63E6H2" 0.02474059 "Nucleotidyltransferase domain protein"  
"JS1\_M10\_00163" 15853 "s59E13H2" 0 "hypothetical protein"  
"JS1\_M10\_00163" 15853 "s59E25H2" 0 "hypothetical protein"

"JS1\_M10\_00163" 15853 "s59E5H2" 0 "hypothetical protein"  
"JS1\_M10\_00163" 15853 "s63E6H2" 0.03839709 "hypothetical protein"  
"JS1\_M10\_00164" 15854 "s59E13H2" 0.04490392 "Pseudouridine kinase"  
"JS1\_M10\_00164" 15854 "s59E25H2" 0 "Pseudouridine kinase"  
"JS1\_M10\_00164" 15854 "s59E5H2" 0.0296618 "Pseudouridine kinase"  
"JS1\_M10\_00164" 15854 "s63E6H2" 0.1101941 "Pseudouridine kinase"  
"JS1\_M10\_00165" 15855 "s59E13H2" 0.0411854 "Pseudouridine-5'-phosphate glycosidase"  
"JS1\_M10\_00165" 15855 "s59E25H2" 0 "Pseudouridine-5'-phosphate glycosidase"  
"JS1\_M10\_00165" 15855 "s59E5H2" 0.06980195 "Pseudouridine-5'-phosphate glycosidase"  
"JS1\_M10\_00165" 15855 "s63E6H2" 0.1042608 "Pseudouridine-5'-phosphate glycosidase"  
"JS1\_M10\_00166" 15856 "s59E13H2" 0 "Digeranylgeranyllycerophospholipid reductase"  
"JS1\_M10\_00166" 15856 "s59E25H2" 0 "Digeranylgeranyllycerophospholipid reductase"  
"JS1\_M10\_00166" 15856 "s59E5H2" 0.002328056 "Digeranylgeranyllycerophospholipid reductase"  
"JS1\_M10\_00166" 15856 "s63E6H2" 0.8200216 "Digeranylgeranyllycerophospholipid reductase"  
"JS1\_M10\_00167" 15857 "s59E13H2" 0.003217287 "Bifunctional protein GlmU"  
"JS1\_M10\_00167" 15857 "s59E25H2" 0 "Bifunctional protein GlmU"  
"JS1\_M10\_00167" 15857 "s59E5H2" 0.04008913 "Bifunctional protein GlmU"  
"JS1\_M10\_00167" 15857 "s63E6H2" 0.1761571 "Bifunctional protein GlmU"  
"JS1\_M10\_00168" 15858 "s59E13H2" 0.02659608 "translocation protein TolB"  
"JS1\_M10\_00168" 15858 "s59E25H2" 0 "translocation protein TolB"  
"JS1\_M10\_00168" 15858 "s59E5H2" 0.08262093 "translocation protein TolB"  
"JS1\_M10\_00168" 15858 "s63E6H2" 0.4802082 "translocation protein TolB"  
"JS1\_M10\_00169" 15859 "s59E13H2" 0.03478528 "Transposase IS200 like protein"  
"JS1\_M10\_00169" 15859 "s59E25H2" 0 "Transposase IS200 like protein"  
"JS1\_M10\_00169" 15859 "s59E5H2" 0.6072325 "Transposase IS200 like protein"  
"JS1\_M10\_00169" 15859 "s63E6H2" 0.5942745 "Transposase IS200 like protein"  
"JS1\_M10\_00170" 15860 "s59E13H2" 0.004539182 "Amidohydrolase"  
"JS1\_M10\_00170" 15860 "s59E25H2" 0 "Amidohydrolase"  
"JS1\_M10\_00170" 15860 "s59E5H2" 0.2331666 "Amidohydrolase"  
"JS1\_M10\_00170" 15860 "s63E6H2" 4.217803 "Amidohydrolase"  
"JS1\_M10\_00171" 15861 "s59E13H2" 0.005378992 "hypothetical protein"  
"JS1\_M10\_00171" 15861 "s59E25H2" 0 "hypothetical protein"  
"JS1\_M10\_00171" 15861 "s59E5H2" 0 "hypothetical protein"  
"JS1\_M10\_00171" 15861 "s63E6H2" 0.002616346 "hypothetical protein"  
"JS1\_M10\_00172" 15862 "s59E13H2" 0.002580808 "VCP-like ATPase"  
"JS1\_M10\_00172" 15862 "s59E25H2" 0 "VCP-like ATPase"  
"JS1\_M10\_00172" 15862 "s59E5H2" 0.07668174 "VCP-like ATPase"  
"JS1\_M10\_00172" 15862 "s63E6H2" 0.002246495 "VCP-like ATPase"  
"JS1\_M10\_00174" 15864 "s59E13H2" 0 "chaperone protein DnaJ"  
"JS1\_M10\_00174" 15864 "s59E25H2" 0 "chaperone protein DnaJ"  
"JS1\_M10\_00174" 15864 "s59E5H2" 0.03709488 "chaperone protein DnaJ"  
"JS1\_M10\_00174" 15864 "s63E6H2" 0.01277014 "chaperone protein DnaJ"  
"JS1\_M10\_00176" 15866 "s59E13H2" 0 "hypothetical protein"  
"JS1\_M10\_00176" 15866 "s59E25H2" 0 "hypothetical protein"  
"JS1\_M10\_00176" 15866 "s59E5H2" 0 "hypothetical protein"  
"JS1\_M10\_00176" 15866 "s63E6H2" 0 "hypothetical protein"  
"JS1\_M10\_00179" 15869 "s59E13H2" 0.0795007 "hypothetical protein"

"JS1\_M10\_00179" 15869 "s59E25H2" 0 "hypothetical protein"  
"JS1\_M10\_00179" 15869 "s59E5H2" 1.768999 "hypothetical protein"  
"JS1\_M10\_00179" 15869 "s63E6H2" 0.1401586 "hypothetical protein"  
"JS1\_M10\_00182" 15872 "s59E13H2" 0 "N-acetylglucosamine repressor"  
"JS1\_M10\_00182" 15872 "s59E25H2" 0 "N-acetylglucosamine repressor"  
"JS1\_M10\_00182" 15872 "s59E5H2" 0 "N-acetylglucosamine repressor"  
"JS1\_M10\_00182" 15872 "s63E6H2" 0.002286705 "N-acetylglucosamine repressor"  
"JS1\_M10\_00186" 15876 "s59E13H2" 0 "Glycosyl hydrolases family 15"  
"JS1\_M10\_00186" 15876 "s59E25H2" 0 "Glycosyl hydrolases family 15"  
"JS1\_M10\_00186" 15876 "s59E5H2" 0 "Glycosyl hydrolases family 15"  
"JS1\_M10\_00186" 15876 "s63E6H2" 0.005101835 "Glycosyl hydrolases family 15"  
"JS1\_M10\_00187" 15877 "s59E13H2" 0.0722703 "6-phosphogluconate dehydrogenase, decarboxylating"  
"JS1\_M10\_00187" 15877 "s59E25H2" 0 "6-phosphogluconate dehydrogenase, decarboxylating"  
"JS1\_M10\_00187" 15877 "s59E5H2" 0.6070833 "6-phosphogluconate dehydrogenase, decarboxylating"  
"JS1\_M10\_00187" 15877 "s63E6H2" 0.6107462 "6-phosphogluconate dehydrogenase, decarboxylating"  
"JS1\_M10\_00188" 15878 "s59E13H2" 0.06464064 "hypothetical protein"  
"JS1\_M10\_00188" 15878 "s59E25H2" 0 "hypothetical protein"  
"JS1\_M10\_00188" 15878 "s59E5H2" 0.1273034 "hypothetical protein"  
"JS1\_M10\_00188" 15878 "s63E6H2" 0.1801425 "hypothetical protein"  
"JS1\_M10\_00189" 15879 "s59E13H2" 0.3888939 "6-phosphofructokinase 1"  
"JS1\_M10\_00189" 15879 "s59E25H2" 0 "6-phosphofructokinase 1"  
"JS1\_M10\_00189" 15879 "s59E5H2" 0.5890756 "6-phosphofructokinase 1"  
"JS1\_M10\_00189" 15879 "s63E6H2" 0.2384155 "6-phosphofructokinase 1"  
"JS1\_M10\_00190" 15880 "s59E13H2" 0.003177986 "hypothetical protein"  
"JS1\_M10\_00190" 15880 "s59E25H2" 0 "hypothetical protein"  
"JS1\_M10\_00190" 15880 "s59E5H2" 0.07212979 "hypothetical protein"  
"JS1\_M10\_00190" 15880 "s63E6H2" 0.144191 "hypothetical protein"  
"JS1\_M10\_00191" 15881 "s59E13H2" 0.05446615 "hypothetical protein"  
"JS1\_M10\_00191" 15881 "s59E25H2" 0 "hypothetical protein"  
"JS1\_M10\_00191" 15881 "s59E5H2" 0.08443611 "hypothetical protein"  
"JS1\_M10\_00191" 15881 "s63E6H2" 0.7058731 "hypothetical protein"  
"JS1\_M10\_00192" 15882 "s59E13H2" 0.06812119 "Bacterial extracellular solute-binding protein"  
"JS1\_M10\_00192" 15882 "s59E25H2" 0 "Bacterial extracellular solute-binding protein"  
"JS1\_M10\_00192" 15882 "s59E5H2" 0.01144987 "Bacterial extracellular solute-binding protein"  
"JS1\_M10\_00192" 15882 "s63E6H2" 0.930994 "Bacterial extracellular solute-binding protein"  
"JS1\_M10\_00194" 15884 "s59E13H2" 0.003021116 "(R)-stereoselective amidase"  
"JS1\_M10\_00194" 15884 "s59E25H2" 0 "(R)-stereoselective amidase"  
"JS1\_M10\_00194" 15884 "s59E5H2" 0 "(R)-stereoselective amidase"  
"JS1\_M10\_00194" 15884 "s63E6H2" 0.06043128 "(R)-stereoselective amidase"  
"JS1\_M10\_00195" 15885 "s59E13H2" 0.04534904 "Kynurenine formamidase"  
"JS1\_M10\_00195" 15885 "s59E25H2" 0 "Kynurenine formamidase"  
"JS1\_M10\_00195" 15885 "s59E5H2" 0 "Kynurenine formamidase"  
"JS1\_M10\_00195" 15885 "s63E6H2" 0.08288176 "Kynurenine formamidase"  
"JS1\_M10\_00196" 15886 "s59E13H2" 0.01080435 "Succinyl-CoA:(R)-benzylsuccinate CoA-transferase subunit BbsF"  
"JS1\_M10\_00196" 15886 "s59E25H2" 0 "Succinyl-CoA:(R)-benzylsuccinate CoA-transferase subunit BbsF"  
"JS1\_M10\_00196" 15886 "s59E5H2" 0.006160458 "Succinyl-CoA:(R)-benzylsuccinate CoA-transferase subunit BbsF"  
"JS1\_M10\_00196" 15886 "s63E6H2" 0.5039812 "Succinyl-CoA:(R)-benzylsuccinate CoA-transferase subunit BbsF"

"JS1\_M10\_00198" 15888 "s59E13H2" 0 "hypothetical protein"  
"JS1\_M10\_00198" 15888 "s59E25H2" 0 "hypothetical protein"  
"JS1\_M10\_00198" 15888 "s59E5H2" 0 "hypothetical protein"  
"JS1\_M10\_00198" 15888 "s63E6H2" 0 "hypothetical protein"  
"JS1\_M10\_00199" 15889 "s59E13H2" 0 "hypothetical protein"  
"JS1\_M10\_00199" 15889 "s59E25H2" 0 "hypothetical protein"  
"JS1\_M10\_00199" 15889 "s59E5H2" 0 "hypothetical protein"  
"JS1\_M10\_00199" 15889 "s63E6H2" 0 "hypothetical protein"  
"JS1\_M10\_00206" 15896 "s59E13H2" 0 "Histidinol-phosphate aminotransferase 2"  
"JS1\_M10\_00206" 15896 "s59E25H2" 0 "Histidinol-phosphate aminotransferase 2"  
"JS1\_M10\_00206" 15896 "s59E5H2" 0 "Histidinol-phosphate aminotransferase 2"  
"JS1\_M10\_00206" 15896 "s63E6H2" 0 "Histidinol-phosphate aminotransferase 2"  
"JS1\_M10\_00207" 15897 "s59E13H2" 0.03356701 "Indolepyruvate oxidoreductase subunit IorA"  
"JS1\_M10\_00207" 15897 "s59E25H2" 0 "Indolepyruvate oxidoreductase subunit IorA"  
"JS1\_M10\_00207" 15897 "s59E5H2" 0.1982151 "Indolepyruvate oxidoreductase subunit IorA"  
"JS1\_M10\_00207" 15897 "s63E6H2" 0.1786162 "Indolepyruvate oxidoreductase subunit IorA"  
"JS1\_M10\_00208" 15898 "s59E13H2" 0.05618889 "Indolepyruvate oxidoreductase subunit IorB"  
"JS1\_M10\_00208" 15898 "s59E25H2" 0 "Indolepyruvate oxidoreductase subunit IorB"  
"JS1\_M10\_00208" 15898 "s59E5H2" 0.3086571 "Indolepyruvate oxidoreductase subunit IorB"  
"JS1\_M10\_00208" 15898 "s63E6H2" 0.4431781 "Indolepyruvate oxidoreductase subunit IorB"  
"JS1\_M10\_00209" 15899 "s59E13H2" 0.01491154 "succinyl-CoA synthetase subunit alpha"  
"JS1\_M10\_00209" 15899 "s59E25H2" 0 "succinyl-CoA synthetase subunit alpha"  
"JS1\_M10\_00209" 15899 "s59E5H2" 0.1386073 "succinyl-CoA synthetase subunit alpha"  
"JS1\_M10\_00209" 15899 "s63E6H2" 0.2659177 "succinyl-CoA synthetase subunit alpha"  
"JS1\_M10\_00210" 15900 "s59E13H2" 0.03683094 "succinyl-CoA synthetase subunit beta"  
"JS1\_M10\_00210" 15900 "s59E25H2" 0 "succinyl-CoA synthetase subunit beta"  
"JS1\_M10\_00210" 15900 "s59E5H2" 0.1067451 "succinyl-CoA synthetase subunit beta"  
"JS1\_M10\_00210" 15900 "s63E6H2" 0.1230498 "succinyl-CoA synthetase subunit beta"  
"JS1\_M10\_00212" 15902 "s59E13H2" 0 "Cycloisomaltooligosaccharide glucanotransferase precursor"  
"JS1\_M10\_00212" 15902 "s59E25H2" 0 "Cycloisomaltooligosaccharide glucanotransferase precursor"  
"JS1\_M10\_00212" 15902 "s59E5H2" 0 "Cycloisomaltooligosaccharide glucanotransferase precursor"  
"JS1\_M10\_00212" 15902 "s63E6H2" 0 "Cycloisomaltooligosaccharide glucanotransferase precursor"  
"JS1\_M10\_00214" 15904 "s59E13H2" 0 "ATP-dependent Clp protease proteolytic subunit"  
"JS1\_M10\_00214" 15904 "s59E25H2" 0 "ATP-dependent Clp protease proteolytic subunit"  
"JS1\_M10\_00214" 15904 "s59E5H2" 0 "ATP-dependent Clp protease proteolytic subunit"  
"JS1\_M10\_00214" 15904 "s63E6H2" 0 "ATP-dependent Clp protease proteolytic subunit"  
"JS1\_M10\_00217" 15907 "s59E13H2" 0 "hypothetical protein"  
"JS1\_M10\_00217" 15907 "s59E25H2" 0 "hypothetical protein"  
"JS1\_M10\_00217" 15907 "s59E5H2" 0 "hypothetical protein"  
"JS1\_M10\_00217" 15907 "s63E6H2" 0 "hypothetical protein"  
"JS1\_M10\_00218" 15908 "s59E13H2" 0 "hypothetical protein"  
"JS1\_M10\_00218" 15908 "s59E25H2" 0 "hypothetical protein"  
"JS1\_M10\_00218" 15908 "s59E5H2" 0 "hypothetical protein"  
"JS1\_M10\_00218" 15908 "s63E6H2" 0 "hypothetical protein"  
"JS1\_M10\_00221" 15911 "s59E13H2" 0.0333685 "hypothetical protein"  
"JS1\_M10\_00221" 15911 "s59E25H2" 0 "hypothetical protein"  
"JS1\_M10\_00221" 15911 "s59E5H2" 0 "hypothetical protein"



"JS1\_M10\_00221" 15911 "s63E6H2" 0 "hypothetical protein"  
"JS1\_M10\_00222" 15912 "s59E13H2" 0 "hypothetical protein"  
"JS1\_M10\_00222" 15912 "s59E25H2" 0 "hypothetical protein"  
"JS1\_M10\_00222" 15912 "s59E5H2" 0.01129909 "hypothetical protein"  
"JS1\_M10\_00222" 15912 "s63E6H2" 0 "hypothetical protein"  
"JS1\_M10\_00223" 15913 "s59E13H2" 0 "anaerobic benzoate catabolism transcriptional regulator"  
"JS1\_M10\_00223" 15913 "s59E25H2" 0 "anaerobic benzoate catabolism transcriptional regulator"  
"JS1\_M10\_00223" 15913 "s59E5H2" 0 "anaerobic benzoate catabolism transcriptional regulator"  
"JS1\_M10\_00223" 15913 "s63E6H2" 0 "anaerobic benzoate catabolism transcriptional regulator"  
"JS1\_M10\_00225" 15915 "s59E13H2" 0 "hypothetical protein"  
"JS1\_M10\_00225" 15915 "s59E25H2" 0 "hypothetical protein"  
"JS1\_M10\_00225" 15915 "s59E5H2" 0 "hypothetical protein"  
"JS1\_M10\_00225" 15915 "s63E6H2" 0.0004638815 "hypothetical protein"  
"JS1\_M10\_00226" 15916 "s59E13H2" 0 "Modification methylase DpnIIB"  
"JS1\_M10\_00226" 15916 "s59E25H2" 0 "Modification methylase DpnIIB"  
"JS1\_M10\_00226" 15916 "s59E5H2" 0 "Modification methylase DpnIIB"  
"JS1\_M10\_00226" 15916 "s63E6H2" 0.003510994 "Modification methylase DpnIIB"  
"JS1\_M10\_00227" 15917 "s59E13H2" 0 "Modification methylase DpnIIB"  
"JS1\_M10\_00227" 15917 "s59E25H2" 0 "Modification methylase DpnIIB"  
"JS1\_M10\_00227" 15917 "s59E5H2" 0 "Modification methylase DpnIIB"  
"JS1\_M10\_00227" 15917 "s63E6H2" 0 "Modification methylase DpnIIB"  
"JS1\_M10\_00228" 15918 "s59E13H2" 0 "hypothetical protein"  
"JS1\_M10\_00228" 15918 "s59E25H2" 0 "hypothetical protein"  
"JS1\_M10\_00228" 15918 "s59E5H2" 0.01365539 "hypothetical protein"  
"JS1\_M10\_00228" 15918 "s63E6H2" 0.03049352 "hypothetical protein"  
"JS1\_M10\_00229" 15919 "s59E13H2" 0 "hypothetical protein"  
"JS1\_M10\_00229" 15919 "s59E25H2" 0 "hypothetical protein"  
"JS1\_M10\_00229" 15919 "s59E5H2" 0 "hypothetical protein"  
"JS1\_M10\_00229" 15919 "s63E6H2" 0 "hypothetical protein"  
"JS1\_M10\_00231" 15921 "s59E13H2" 0.1388482 "Glycerol-3-phosphate regulon repressor"  
"JS1\_M10\_00231" 15921 "s59E25H2" 0 "Glycerol-3-phosphate regulon repressor"  
"JS1\_M10\_00231" 15921 "s59E5H2" 0.9135788 "Glycerol-3-phosphate regulon repressor"  
"JS1\_M10\_00231" 15921 "s63E6H2" 3.061538 "Glycerol-3-phosphate regulon repressor"  
"JS1\_M10\_00233" 15923 "s59E13H2" 0 "hypothetical protein"  
"JS1\_M10\_00233" 15923 "s59E25H2" 0 "hypothetical protein"  
"JS1\_M10\_00233" 15923 "s59E5H2" 0 "hypothetical protein"  
"JS1\_M10\_00233" 15923 "s63E6H2" 0 "hypothetical protein"  
"JS1\_M10\_00235" 15925 "s59E13H2" 0 "3-oxoacyl-[acyl-carrier-protein] reductase FabG"  
"JS1\_M10\_00235" 15925 "s59E25H2" 0 "3-oxoacyl-[acyl-carrier-protein] reductase FabG"  
"JS1\_M10\_00235" 15925 "s59E5H2" 0 "3-oxoacyl-[acyl-carrier-protein] reductase FabG"  
"JS1\_M10\_00235" 15925 "s63E6H2" 0.002638581 "3-oxoacyl-[acyl-carrier-protein] reductase FabG"  
"JS1\_M10\_00236" 15926 "s59E13H2" 0 "flagellin modification protein A"  
"JS1\_M10\_00236" 15926 "s59E25H2" 0 "flagellin modification protein A"  
"JS1\_M10\_00236" 15926 "s59E5H2" 0 "flagellin modification protein A"  
"JS1\_M10\_00236" 15926 "s63E6H2" 0 "flagellin modification protein A"  
"JS1\_M10\_00237" 15927 "s59E13H2" 0 "hypothetical protein"  
"JS1\_M10\_00237" 15927 "s59E25H2" 0 "hypothetical protein"

"JS1\_M10\_00237" 15927 "s59E5H2" 0.002040638 "hypothetical protein"  
"JS1\_M10\_00237" 15927 "s63E6H2" 0 "hypothetical protein"  
"JS1\_M10\_00238" 15928 "s59E13H2" 0 "hypothetical protein"  
"JS1\_M10\_00238" 15928 "s59E25H2" 0 "hypothetical protein"  
"JS1\_M10\_00238" 15928 "s59E5H2" 0.003332633 "hypothetical protein"  
"JS1\_M10\_00238" 15928 "s63E6H2" 0.008548845 "hypothetical protein"  
"JS1\_M10\_00239" 15929 "s59E13H2" 0 "Arabinose import ATP-binding protein AraG"  
"JS1\_M10\_00239" 15929 "s59E25H2" 0 "Arabinose import ATP-binding protein AraG"  
"JS1\_M10\_00239" 15929 "s59E5H2" 0.009709816 "Arabinose import ATP-binding protein AraG"  
"JS1\_M10\_00239" 15929 "s63E6H2" 0.1936492 "Arabinose import ATP-binding protein AraG"  
"JS1\_M10\_00240" 15930 "s59E13H2" 0 "Autoinducer 2 import ATP-binding protein LsrA"  
"JS1\_M10\_00240" 15930 "s59E25H2" 0 "Autoinducer 2 import ATP-binding protein LsrA"  
"JS1\_M10\_00240" 15930 "s59E5H2" 0.02170609 "Autoinducer 2 import ATP-binding protein LsrA"  
"JS1\_M10\_00240" 15930 "s63E6H2" 0.3955354 "Autoinducer 2 import ATP-binding protein LsrA"  
"JS1\_M10\_00241" 15931 "s59E13H2" 0 "Ribose transport system permease protein RbsC"  
"JS1\_M10\_00241" 15931 "s59E25H2" 0 "Ribose transport system permease protein RbsC"  
"JS1\_M10\_00241" 15931 "s59E5H2" 0.01016811 "Ribose transport system permease protein RbsC"  
"JS1\_M10\_00241" 15931 "s63E6H2" 0.3386537 "Ribose transport system permease protein RbsC"  
"JS1\_M10\_00242" 15932 "s59E13H2" 0 "dihydroorotase"  
"JS1\_M10\_00242" 15932 "s59E25H2" 0 "dihydroorotase"  
"JS1\_M10\_00242" 15932 "s59E5H2" 0.04022262 "dihydroorotase"  
"JS1\_M10\_00242" 15932 "s63E6H2" 0.3763792 "dihydroorotase"  
"JS1\_M10\_00243" 15933 "s59E13H2" 0 "imidazolonepropionase"  
"JS1\_M10\_00243" 15933 "s59E25H2" 0 "imidazolonepropionase"  
"JS1\_M10\_00243" 15933 "s59E5H2" 0.02064571 "imidazolonepropionase"  
"JS1\_M10\_00243" 15933 "s63E6H2" 0.5161784 "imidazolonepropionase"  
"JS1\_M10\_00244" 15934 "s59E13H2" 0 "D-tagatose 3-epimerase"  
"JS1\_M10\_00244" 15934 "s59E25H2" 0 "D-tagatose 3-epimerase"  
"JS1\_M10\_00244" 15934 "s59E5H2" 0.01073224 "D-tagatose 3-epimerase"  
"JS1\_M10\_00244" 15934 "s63E6H2" 0.4968579 "D-tagatose 3-epimerase"  
"JS1\_M10\_00245" 15935 "s59E13H2" 0 "putative lyase"  
"JS1\_M10\_00245" 15935 "s59E25H2" 0 "putative lyase"  
"JS1\_M10\_00245" 15935 "s59E5H2" 0 "putative lyase"  
"JS1\_M10\_00245" 15935 "s63E6H2" 0.06871197 "putative lyase"  
"JS1\_M10\_00246" 15936 "s59E13H2" 0.1901287 "HTH-type transcriptional repressor YvoA"  
"JS1\_M10\_00246" 15936 "s59E25H2" 0 "HTH-type transcriptional repressor YvoA"  
"JS1\_M10\_00246" 15936 "s59E5H2" 0.03497531 "HTH-type transcriptional repressor YvoA"  
"JS1\_M10\_00246" 15936 "s63E6H2" 0.008379127 "HTH-type transcriptional repressor YvoA"  
"JS1\_M10\_00247" 15937 "s59E13H2" 0.2225035 "Inositol 2-dehydrogenase/D-chiro-inositol 3-dehydrogenase"  
"JS1\_M10\_00247" 15937 "s59E25H2" 0 "Inositol 2-dehydrogenase/D-chiro-inositol 3-dehydrogenase"  
"JS1\_M10\_00247" 15937 "s59E5H2" 0.02366209 "Inositol 2-dehydrogenase/D-chiro-inositol 3-dehydrogenase"  
"JS1\_M10\_00247" 15937 "s63E6H2" 0.003867004 "Inositol 2-dehydrogenase/D-chiro-inositol 3-dehydrogenase"  
"JS1\_M10\_00248" 15938 "s59E13H2" 0.07109339 "D-tagatose 3-epimerase"  
"JS1\_M10\_00248" 15938 "s59E25H2" 0 "D-tagatose 3-epimerase"  
"JS1\_M10\_00248" 15938 "s59E5H2" 0.01889453 "D-tagatose 3-epimerase"  
"JS1\_M10\_00248" 15938 "s63E6H2" 0.01416345 "D-tagatose 3-epimerase"  
"JS1\_M10\_00249" 15939 "s59E13H2" 0 "imidazolonepropionase"

"JS1\_M10\_00249" 15939 "s59E25H2" 0 "imidazolonepropionase"  
"JS1\_M10\_00249" 15939 "s59E5H2" 0 "imidazolonepropionase"  
"JS1\_M10\_00249" 15939 "s63E6H2" 0.006152008 "imidazolonepropionase"  
"JS1\_M10\_00250" 15940 "s59E13H2" 0 "Xaa-Pro dipeptidase"  
"JS1\_M10\_00250" 15940 "s59E25H2" 0 "Xaa-Pro dipeptidase"  
"JS1\_M10\_00250" 15940 "s59E5H2" 0 "Xaa-Pro dipeptidase"  
"JS1\_M10\_00250" 15940 "s63E6H2" 0.001883258 "Xaa-Pro dipeptidase"  
"JS1\_M10\_00251" 15941 "s59E13H2" 0.01247666 "hypothetical protein"  
"JS1\_M10\_00251" 15941 "s59E25H2" 0 "hypothetical protein"  
"JS1\_M10\_00251" 15941 "s59E5H2" 0.0009623403 "hypothetical protein"  
"JS1\_M10\_00251" 15941 "s63E6H2" 0.002151347 "hypothetical protein"  
"JS1\_M10\_00252" 15942 "s59E13H2" 0 "Glucose--fructose oxidoreductase precursor"  
"JS1\_M10\_00252" 15942 "s59E25H2" 0 "Glucose--fructose oxidoreductase precursor"  
"JS1\_M10\_00252" 15942 "s59E5H2" 0.01290184 "Glucose--fructose oxidoreductase precursor"  
"JS1\_M10\_00252" 15942 "s63E6H2" 0 "Glucose--fructose oxidoreductase precursor"  
"JS1\_M10\_00253" 15943 "s59E13H2" 0.006528616 "Ribose import ATP-binding protein RbsA"  
"JS1\_M10\_00253" 15943 "s59E25H2" 0 "Ribose import ATP-binding protein RbsA"  
"JS1\_M10\_00253" 15943 "s59E5H2" 0 "Ribose import ATP-binding protein RbsA"  
"JS1\_M10\_00253" 15943 "s63E6H2" 0 "Ribose import ATP-binding protein RbsA"  
"JS1\_M10\_00254" 15944 "s59E13H2" 1.676706 "Ribose transport system permease protein RbsC"  
"JS1\_M10\_00254" 15944 "s59E25H2" 0 "Ribose transport system permease protein RbsC"  
"JS1\_M10\_00254" 15944 "s59E5H2" 0 "Ribose transport system permease protein RbsC"  
"JS1\_M10\_00254" 15944 "s63E6H2" 0.003045899 "Ribose transport system permease protein RbsC"  
"JS1\_M10\_00255" 15945 "s59E13H2" 0.0007847335 "D-ribose-binding periplasmic protein precursor"  
"JS1\_M10\_00255" 15945 "s59E25H2" 0 "D-ribose-binding periplasmic protein precursor"  
"JS1\_M10\_00255" 15945 "s59E5H2" 0.006667595 "D-ribose-binding periplasmic protein precursor"  
"JS1\_M10\_00255" 15945 "s63E6H2" 0 "D-ribose-binding periplasmic protein precursor"  
"JS1\_M10\_00256" 15946 "s59E13H2" 0.1350105 "Levodione reductase"  
"JS1\_M10\_00256" 15946 "s59E25H2" 0 "Levodione reductase"  
"JS1\_M10\_00256" 15946 "s59E5H2" 0.0107217 "Levodione reductase"  
"JS1\_M10\_00256" 15946 "s63E6H2" 0.004755248 "Levodione reductase"  
"JS1\_M10\_00257" 15947 "s59E13H2" 0.3957897 "Xylulose kinase"  
"JS1\_M10\_00257" 15947 "s59E25H2" 0 "Xylulose kinase"  
"JS1\_M10\_00257" 15947 "s59E5H2" 0.3749627 "Xylulose kinase"  
"JS1\_M10\_00257" 15947 "s63E6H2" 0.05861029 "Xylulose kinase"  
"JS1\_M10\_00258" 15948 "s59E13H2" 0.854576 "D-ribose-binding periplasmic protein precursor"  
"JS1\_M10\_00258" 15948 "s59E25H2" 0 "D-ribose-binding periplasmic protein precursor"  
"JS1\_M10\_00258" 15948 "s59E5H2" 1.10899 "D-ribose-binding periplasmic protein precursor"  
"JS1\_M10\_00258" 15948 "s63E6H2" 0.7370245 "D-ribose-binding periplasmic protein precursor"  
"JS1\_M10\_00259" 15949 "s59E13H2" 0.01446063 "Glucokinase"  
"JS1\_M10\_00259" 15949 "s59E25H2" 0 "Glucokinase"  
"JS1\_M10\_00259" 15949 "s59E5H2" 0 "Glucokinase"  
"JS1\_M10\_00259" 15949 "s63E6H2" 0.02349392 "Glucokinase"  
"JS1\_M10\_00260" 15950 "s59E13H2" 0.005621466 "putative D-lyxose ketol-isomerase"  
"JS1\_M10\_00260" 15950 "s59E25H2" 0 "putative D-lyxose ketol-isomerase"  
"JS1\_M10\_00260" 15950 "s59E5H2" 0.05461271 "putative D-lyxose ketol-isomerase"  
"JS1\_M10\_00260" 15950 "s63E6H2" 0.749247 "putative D-lyxose ketol-isomerase"

"JS1\_M10\_00261" 15951 "s59E13H2" 0.07107746 "putative sugar kinase YdjH"  
"JS1\_M10\_00261" 15951 "s59E25H2" 0 "putative sugar kinase YdjH"  
"JS1\_M10\_00261" 15951 "s59E5H2" 0.2502405 "putative sugar kinase YdjH"  
"JS1\_M10\_00261" 15951 "s63E6H2" 1.174575 "putative sugar kinase YdjH"  
"JS1\_M10\_00262" 15952 "s59E13H2" 0.348985 "Mannitol-1-phosphate 5-dehydrogenase"  
"JS1\_M10\_00262" 15952 "s59E25H2" 0 "Mannitol-1-phosphate 5-dehydrogenase"  
"JS1\_M10\_00262" 15952 "s59E5H2" 0.3057915 "Mannitol-1-phosphate 5-dehydrogenase"  
"JS1\_M10\_00262" 15952 "s63E6H2" 0.9598523 "Mannitol-1-phosphate 5-dehydrogenase"  
"JS1\_M10\_00263" 15953 "s59E13H2" 1.091338 "Glyoxylate reductase"  
"JS1\_M10\_00263" 15953 "s59E25H2" 0 "Glyoxylate reductase"  
"JS1\_M10\_00263" 15953 "s59E5H2" 1.097062 "Glyoxylate reductase"  
"JS1\_M10\_00263" 15953 "s63E6H2" 0.0305247 "Glyoxylate reductase"  
"JS1\_M10\_00264" 15954 "s59E13H2" 0.7567896 "ThiS family protein"  
"JS1\_M10\_00264" 15954 "s59E25H2" 0 "ThiS family protein"  
"JS1\_M10\_00264" 15954 "s59E5H2" 0.8093585 "ThiS family protein"  
"JS1\_M10\_00264" 15954 "s63E6H2" 0.05535838 "ThiS family protein"  
"JS1\_M10\_00265" 15955 "s59E13H2" 1.273143 "Tungsten-containing aldehyde ferredoxin oxidoreductase"  
"JS1\_M10\_00265" 15955 "s59E25H2" 0 "Tungsten-containing aldehyde ferredoxin oxidoreductase"  
"JS1\_M10\_00265" 15955 "s59E5H2" 1.938119 "Tungsten-containing aldehyde ferredoxin oxidoreductase"  
"JS1\_M10\_00265" 15955 "s63E6H2" 0.06223025 "Tungsten-containing aldehyde ferredoxin oxidoreductase"  
"JS1\_M10\_00266" 15956 "s59E13H2" 0 "hypothetical protein"  
"JS1\_M10\_00266" 15956 "s59E25H2" 0 "hypothetical protein"  
"JS1\_M10\_00266" 15956 "s59E5H2" 0 "hypothetical protein"  
"JS1\_M10\_00266" 15956 "s63E6H2" 0 "hypothetical protein"  
"JS1\_M10\_00267" 15957 "s59E13H2" 0 "Glycosyl hydrolases family 15"  
"JS1\_M10\_00267" 15957 "s59E25H2" 0 "Glycosyl hydrolases family 15"  
"JS1\_M10\_00267" 15957 "s59E5H2" 0 "Glycosyl hydrolases family 15"  
"JS1\_M10\_00267" 15957 "s63E6H2" 0.004704794 "Glycosyl hydrolases family 15"  
"JS1\_M10\_00269" 15959 "s59E13H2" 0.4117372 "Trehalose/maltose import ATP-binding protein Malk"  
"JS1\_M10\_00269" 15959 "s59E25H2" 0 "Trehalose/maltose import ATP-binding protein Malk"  
"JS1\_M10\_00269" 15959 "s59E5H2" 0.2475694 "Trehalose/maltose import ATP-binding protein Malk"  
"JS1\_M10\_00269" 15959 "s63E6H2" 0.4187186 "Trehalose/maltose import ATP-binding protein Malk"  
"JS1\_M10\_00271" 15961 "s59E13H2" 0 "hypothetical protein"  
"JS1\_M10\_00271" 15961 "s59E25H2" 0 "hypothetical protein"  
"JS1\_M10\_00271" 15961 "s59E5H2" 0 "hypothetical protein"  
"JS1\_M10\_00271" 15961 "s63E6H2" 0 "hypothetical protein"  
"JS1\_M10\_00272" 15962 "s59E13H2" 0.2317669 "hypothetical protein"  
"JS1\_M10\_00272" 15962 "s59E25H2" 0 "hypothetical protein"  
"JS1\_M10\_00272" 15962 "s59E5H2" 0.3121211 "hypothetical protein"  
"JS1\_M10\_00272" 15962 "s63E6H2" 2.379398 "hypothetical protein"  
"JS1\_M10\_00273" 15963 "s59E13H2" 0.04531154 "Chaperone protein ClpB"  
"JS1\_M10\_00273" 15963 "s59E25H2" 0 "Chaperone protein ClpB"  
"JS1\_M10\_00273" 15963 "s59E5H2" 0.006938355 "Chaperone protein ClpB"  
"JS1\_M10\_00273" 15963 "s63E6H2" 2.039889 "Chaperone protein ClpB"  
"JS1\_M10\_00274" 15964 "s59E13H2" 0.02666946 "Hydrogenase-4 component B"  
"JS1\_M10\_00274" 15964 "s59E25H2" 0 "Hydrogenase-4 component B"  
"JS1\_M10\_00274" 15964 "s59E5H2" 1.883752 "Hydrogenase-4 component B"

"JS1\_M10\_00274" 15964 "s63E6H2" 0.4581621 "Hydrogenase-4 component B"  
"JS1\_M10\_00275" 15965 "s59E13H2" 0.2977141 "Rod shape-determining protein MreB"  
"JS1\_M10\_00275" 15965 "s59E25H2" 0 "Rod shape-determining protein MreB"  
"JS1\_M10\_00275" 15965 "s59E5H2" 1.041351 "Rod shape-determining protein MreB"  
"JS1\_M10\_00275" 15965 "s63E6H2" 1.000017 "Rod shape-determining protein MreB"  
"JS1\_M10\_00276" 15966 "s59E13H2" 0.04589502 "Cell shape-determining protein MreC precursor"  
"JS1\_M10\_00276" 15966 "s59E25H2" 0 "Cell shape-determining protein MreC precursor"  
"JS1\_M10\_00276" 15966 "s59E5H2" 0.9302447 "Cell shape-determining protein MreC precursor"  
"JS1\_M10\_00276" 15966 "s63E6H2" 1.180637 "Cell shape-determining protein MreC precursor"  
"JS1\_M10\_00277" 15967 "s59E13H2" 0.05250121 "Protease 3 precursor"  
"JS1\_M10\_00277" 15967 "s59E25H2" 0 "Protease 3 precursor"  
"JS1\_M10\_00277" 15967 "s59E5H2" 0.7777488 "Protease 3 precursor"  
"JS1\_M10\_00277" 15967 "s63E6H2" 0.949774 "Protease 3 precursor"  
"JS1\_M10\_00278" 15968 "s59E13H2" 0.2405077 "Na(+)/H(+) antiporter subunit D"  
"JS1\_M10\_00278" 15968 "s59E25H2" 0 "Na(+)/H(+) antiporter subunit D"  
"JS1\_M10\_00278" 15968 "s59E5H2" 5.461888 "Na(+)/H(+) antiporter subunit D"  
"JS1\_M10\_00278" 15968 "s63E6H2" 0.7964649 "Na(+)/H(+) antiporter subunit D"  
"JS1\_M10\_00279" 15969 "s59E13H2" 0.2962723 "Na(+)/H(+) antiporter subunit C"  
"JS1\_M10\_00279" 15969 "s59E25H2" 0 "Na(+)/H(+) antiporter subunit C"  
"JS1\_M10\_00279" 15969 "s59E5H2" 5.307991 "Na(+)/H(+) antiporter subunit C"  
"JS1\_M10\_00279" 15969 "s63E6H2" 1.153807 "Na(+)/H(+) antiporter subunit C"  
"JS1\_M10\_00280" 15970 "s59E13H2" 0.2438703 "Na(+)/H(+) antiporter subunit B"  
"JS1\_M10\_00280" 15970 "s59E25H2" 0 "Na(+)/H(+) antiporter subunit B"  
"JS1\_M10\_00280" 15970 "s59E5H2" 2.573822 "Na(+)/H(+) antiporter subunit B"  
"JS1\_M10\_00280" 15970 "s63E6H2" 1.157719 "Na(+)/H(+) antiporter subunit B"  
"JS1\_M10\_00281" 15971 "s59E13H2" 0.7054259 "putative monovalent cation/H+ antiporter subunit B"  
"JS1\_M10\_00281" 15971 "s59E25H2" 0 "putative monovalent cation/H+ antiporter subunit B"  
"JS1\_M10\_00281" 15971 "s59E5H2" 3.16471 "putative monovalent cation/H+ antiporter subunit B"  
"JS1\_M10\_00281" 15971 "s63E6H2" 1.257512 "putative monovalent cation/H+ antiporter subunit B"  
"JS1\_M10\_00282" 15972 "s59E13H2" 1.35834 "Glutamine-binding periplasmic protein precursor"  
"JS1\_M10\_00282" 15972 "s59E25H2" 0 "Glutamine-binding periplasmic protein precursor"  
"JS1\_M10\_00282" 15972 "s59E5H2" 2.712429 "Glutamine-binding periplasmic protein precursor"  
"JS1\_M10\_00282" 15972 "s63E6H2" 1.832596 "Glutamine-binding periplasmic protein precursor"  
"JS1\_M10\_00283" 15973 "s59E13H2" 1.386786 "Na(+)/H(+) antiporter subunit G"  
"JS1\_M10\_00283" 15973 "s59E25H2" 0 "Na(+)/H(+) antiporter subunit G"  
"JS1\_M10\_00283" 15973 "s59E5H2" 2.494915 "Na(+)/H(+) antiporter subunit G"  
"JS1\_M10\_00283" 15973 "s63E6H2" 1.761827 "Na(+)/H(+) antiporter subunit G"  
"JS1\_M10\_00284" 15974 "s59E13H2" 1.699926 "putative monovalent cation/H+ antiporter subunit F"  
"JS1\_M10\_00284" 15974 "s59E25H2" 0 "putative monovalent cation/H+ antiporter subunit F"  
"JS1\_M10\_00284" 15974 "s59E5H2" 2.811127 "putative monovalent cation/H+ antiporter subunit F"  
"JS1\_M10\_00284" 15974 "s63E6H2" 1.450628 "putative monovalent cation/H+ antiporter subunit F"  
"JS1\_M10\_00285" 15975 "s59E13H2" 0.8341435 "Na(+)/H(+) antiporter subunit E1"  
"JS1\_M10\_00285" 15975 "s59E25H2" 0 "Na(+)/H(+) antiporter subunit E1"  
"JS1\_M10\_00285" 15975 "s59E5H2" 1.638971 "Na(+)/H(+) antiporter subunit E1"  
"JS1\_M10\_00285" 15975 "s63E6H2" 1.212205 "Na(+)/H(+) antiporter subunit E1"  
"JS1\_M10\_00286" 15976 "s59E13H2" 1.025348 "Pyruvate formate-lyase 1-activating enzyme"  
"JS1\_M10\_00286" 15976 "s59E25H2" 0 "Pyruvate formate-lyase 1-activating enzyme"

"JS1\_M10\_00286" 15976 "s59E5H2" 0.5474827 "Pyruvate formate-lyase 1-activating enzyme"  
"JS1\_M10\_00286" 15976 "s63E6H2" 0.6177447 "Pyruvate formate-lyase 1-activating enzyme"  
"JS1\_M10\_00287" 15977 "s59E13H2" 0.1274927 "hypothetical protein"  
"JS1\_M10\_00287" 15977 "s59E25H2" 0 "hypothetical protein"  
"JS1\_M10\_00287" 15977 "s59E5H2" 0.2014269 "hypothetical protein"  
"JS1\_M10\_00287" 15977 "s63E6H2" 0.2071938 "hypothetical protein"  
"JS1\_M10\_00288" 15978 "s59E13H2" 0.1986025 "Hydrogenase expression/formation protein HypE"  
"JS1\_M10\_00288" 15978 "s59E25H2" 0 "Hydrogenase expression/formation protein HypE"  
"JS1\_M10\_00288" 15978 "s59E5H2" 0.2078341 "Hydrogenase expression/formation protein HypE"  
"JS1\_M10\_00288" 15978 "s63E6H2" 0.360019 "Hydrogenase expression/formation protein HypE"  
"JS1\_M10\_00289" 15979 "s59E13H2" 0 "Transposase IS200 like protein"  
"JS1\_M10\_00289" 15979 "s59E25H2" 0 "Transposase IS200 like protein"  
"JS1\_M10\_00289" 15979 "s59E5H2" 0 "Transposase IS200 like protein"  
"JS1\_M10\_00289" 15979 "s63E6H2" 0.2339241 "Transposase IS200 like protein"  
"JS1\_M10\_00290" 15980 "s59E13H2" 0.5642016 "Hydrogenase expression/formation protein HypD"  
"JS1\_M10\_00290" 15980 "s59E25H2" 0 "Hydrogenase expression/formation protein HypD"  
"JS1\_M10\_00290" 15980 "s59E5H2" 0.496034 "Hydrogenase expression/formation protein HypD"  
"JS1\_M10\_00290" 15980 "s63E6H2" 0.5756468 "Hydrogenase expression/formation protein HypD"  
"JS1\_M10\_00291" 15981 "s59E13H2" 0.1075219 "Hydrogenase isoenzymes formation protein HypC"  
"JS1\_M10\_00291" 15981 "s59E25H2" 0 "Hydrogenase isoenzymes formation protein HypC"  
"JS1\_M10\_00291" 15981 "s59E5H2" 0.05201264 "Hydrogenase isoenzymes formation protein HypC"  
"JS1\_M10\_00291" 15981 "s63E6H2" 0.4021619 "Hydrogenase isoenzymes formation protein HypC"  
"JS1\_M10\_00292" 15982 "s59E13H2" 0.1531393 "Carbamoyltransferase HypF"  
"JS1\_M10\_00292" 15982 "s59E25H2" 0 "Carbamoyltransferase HypF"  
"JS1\_M10\_00292" 15982 "s59E5H2" 0.256094 "Carbamoyltransferase HypF"  
"JS1\_M10\_00292" 15982 "s63E6H2" 0.2224475 "Carbamoyltransferase HypF"  
"JS1\_M10\_00293" 15983 "s59E13H2" 0.6042593 "Hydrogenase isoenzymes nickel incorporation protein HypB"  
"JS1\_M10\_00293" 15983 "s59E25H2" 0 "Hydrogenase isoenzymes nickel incorporation protein HypB"  
"JS1\_M10\_00293" 15983 "s59E5H2" 0.3424424 "Hydrogenase isoenzymes nickel incorporation protein HypB"  
"JS1\_M10\_00293" 15983 "s63E6H2" 0.9722391 "Hydrogenase isoenzymes nickel incorporation protein HypB"  
"JS1\_M10\_00294" 15984 "s59E13H2" 0.0009138735 "Holliday junction resolvase-like protein"  
"JS1\_M10\_00294" 15984 "s59E25H2" 0 "Holliday junction resolvase-like protein"  
"JS1\_M10\_00294" 15984 "s59E5H2" 0.1193199 "Holliday junction resolvase-like protein"  
"JS1\_M10\_00294" 15984 "s63E6H2" 0.188103 "Holliday junction resolvase-like protein"  
"JS1\_M10\_00295" 15985 "s59E13H2" 0.001463407 "formate dehydrogenase accessory protein"  
"JS1\_M10\_00295" 15985 "s59E25H2" 0 "formate dehydrogenase accessory protein"  
"JS1\_M10\_00295" 15985 "s59E5H2" 0.009348971 "formate dehydrogenase accessory protein"  
"JS1\_M10\_00295" 15985 "s63E6H2" 0.4725434 "formate dehydrogenase accessory protein"  
"JS1\_M10\_00296" 15986 "s59E13H2" 0 "putative molybdenum cofactor guanylyltransferase"  
"JS1\_M10\_00296" 15986 "s59E25H2" 0 "putative molybdenum cofactor guanylyltransferase"  
"JS1\_M10\_00296" 15986 "s59E5H2" 0 "putative molybdenum cofactor guanylyltransferase"  
"JS1\_M10\_00296" 15986 "s63E6H2" 0.387324 "putative molybdenum cofactor guanylyltransferase"  
"JS1\_M10\_00297" 15987 "s59E13H2" 0.008963952 "Formate dehydrogenase subunit alpha"  
"JS1\_M10\_00297" 15987 "s59E25H2" 0 "Formate dehydrogenase subunit alpha"  
"JS1\_M10\_00297" 15987 "s59E5H2" 0.03800811 "Formate dehydrogenase subunit alpha"  
"JS1\_M10\_00297" 15987 "s63E6H2" 0.08838126 "Formate dehydrogenase subunit alpha"  
"JS1\_M10\_00298" 15988 "s59E13H2" 0 "NADP-reducing hydrogenase subunit HndC"

"JS1\_M10\_00298" 15988 "s59E25H2" 0 "NADP-reducing hydrogenase subunit HndC"  
"JS1\_M10\_00298" 15988 "s59E5H2" 0 "NADP-reducing hydrogenase subunit HndC"  
"JS1\_M10\_00298" 15988 "s63E6H2" 0.07288785 "NADP-reducing hydrogenase subunit HndC"  
"JS1\_M10\_00299" 15989 "s59E13H2" 0 "NADP-reducing hydrogenase subunit HndA"  
"JS1\_M10\_00299" 15989 "s59E25H2" 0 "NADP-reducing hydrogenase subunit HndA"  
"JS1\_M10\_00299" 15989 "s59E5H2" 0 "NADP-reducing hydrogenase subunit HndA"  
"JS1\_M10\_00299" 15989 "s63E6H2" 0.128711 "NADP-reducing hydrogenase subunit HndA"  
"JS1\_M10\_00300" 15990 "s59E13H2" 0 "NADH-quinone oxidoreductase subunit 9"  
"JS1\_M10\_00300" 15990 "s59E25H2" 0 "NADH-quinone oxidoreductase subunit 9"  
"JS1\_M10\_00300" 15990 "s59E5H2" 0.2142321 "NADH-quinone oxidoreductase subunit 9"  
"JS1\_M10\_00300" 15990 "s63E6H2" 0.3587077 "NADH-quinone oxidoreductase subunit 9"  
"JS1\_M10\_00301" 15991 "s59E13H2" 0 "Na(+)/H(+) antiporter subunit G"  
"JS1\_M10\_00301" 15991 "s59E25H2" 0 "Na(+)/H(+) antiporter subunit G"  
"JS1\_M10\_00301" 15991 "s59E5H2" 0.2929561 "Na(+)/H(+) antiporter subunit G"  
"JS1\_M10\_00301" 15991 "s63E6H2" 0.3110742 "Na(+)/H(+) antiporter subunit G"  
"JS1\_M10\_00302" 15992 "s59E13H2" 0 "Na(+)/H(+) antiporter subunit F"  
"JS1\_M10\_00302" 15992 "s59E25H2" 0 "Na(+)/H(+) antiporter subunit F"  
"JS1\_M10\_00302" 15992 "s59E5H2" 0.2726559 "Na(+)/H(+) antiporter subunit F"  
"JS1\_M10\_00302" 15992 "s63E6H2" 0.2943431 "Na(+)/H(+) antiporter subunit F"  
"JS1\_M10\_00303" 15993 "s59E13H2" 0 "Na(+)/H(+) antiporter subunit E"  
"JS1\_M10\_00303" 15993 "s59E25H2" 0 "Na(+)/H(+) antiporter subunit E"  
"JS1\_M10\_00303" 15993 "s59E5H2" 0.05170867 "Na(+)/H(+) antiporter subunit E"  
"JS1\_M10\_00303" 15993 "s63E6H2" 0.7658892 "Na(+)/H(+) antiporter subunit E"  
"JS1\_M10\_00304" 15994 "s59E13H2" 0.001159265 "Na(+)/H(+) antiporter subunit D"  
"JS1\_M10\_00304" 15994 "s59E25H2" 0.3306773 "Na(+)/H(+) antiporter subunit D"  
"JS1\_M10\_00304" 15994 "s59E5H2" 0.134538 "Na(+)/H(+) antiporter subunit D"  
"JS1\_M10\_00304" 15994 "s63E6H2" 3.013103 "Na(+)/H(+) antiporter subunit D"  
"JS1\_M10\_00305" 15995 "s59E13H2" 0.003405983 "Na(+)/H(+) antiporter subunit C1"  
"JS1\_M10\_00305" 15995 "s59E25H2" 0 "Na(+)/H(+) antiporter subunit C1"  
"JS1\_M10\_00305" 15995 "s59E5H2" 0.2868855 "Na(+)/H(+) antiporter subunit C1"  
"JS1\_M10\_00305" 15995 "s63E6H2" 4.586492 "Na(+)/H(+) antiporter subunit C1"  
"JS1\_M10\_00306" 15996 "s59E13H2" 0.001305133 "Na(+)/H(+) antiporter subunit B"  
"JS1\_M10\_00306" 15996 "s59E25H2" 0 "Na(+)/H(+) antiporter subunit B"  
"JS1\_M10\_00306" 15996 "s59E5H2" 0.2888408 "Na(+)/H(+) antiporter subunit B"  
"JS1\_M10\_00306" 15996 "s63E6H2" 3.954048 "Na(+)/H(+) antiporter subunit B"  
"JS1\_M10\_00307" 15997 "s59E13H2" 0.006588175 "Na(+)/H(+) antiporter subunit A"  
"JS1\_M10\_00307" 15997 "s59E25H2" 0 "Na(+)/H(+) antiporter subunit A"  
"JS1\_M10\_00307" 15997 "s59E5H2" 0.1017589 "Na(+)/H(+) antiporter subunit A"  
"JS1\_M10\_00307" 15997 "s63E6H2" 3.429162 "Na(+)/H(+) antiporter subunit A"  
"JS1\_M10\_00308" 15998 "s59E13H2" 0.000635327 "Na(+)/H(+) antiporter subunit A"  
"JS1\_M10\_00308" 15998 "s59E25H2" 0 "Na(+)/H(+) antiporter subunit A"  
"JS1\_M10\_00308" 15998 "s59E5H2" 0.2921093 "Na(+)/H(+) antiporter subunit A"  
"JS1\_M10\_00308" 15998 "s63E6H2" 5.704829 "Na(+)/H(+) antiporter subunit A"  
"JS1\_M10\_00309" 15999 "s59E13H2" 0 "Membrane-bound hydrogenase subunit alpha"  
"JS1\_M10\_00309" 15999 "s59E25H2" 0 "Membrane-bound hydrogenase subunit alpha"  
"JS1\_M10\_00309" 15999 "s59E5H2" 1.096433 "Membrane-bound hydrogenase subunit alpha"  
"JS1\_M10\_00309" 15999 "s63E6H2" 8.22591 "Membrane-bound hydrogenase subunit alpha"

"JS1\_M10\_00310" 16000 "s59E13H2" 0 "F(420)H(2) dehydrogenase subunit C"  
"JS1\_M10\_00310" 16000 "s59E25H2" 0.5 "F(420)H(2) dehydrogenase subunit C"  
"JS1\_M10\_00310" 16000 "s59E5H2" 0.917673 "F(420)H(2) dehydrogenase subunit C"  
"JS1\_M10\_00310" 16000 "s63E6H2" 6.489462 "F(420)H(2) dehydrogenase subunit C"  
"JS1\_M10\_00311" 16001 "s59E13H2" 0.00732336 "putative membrane-bound hydrogenase subunit mbhJ"  
"JS1\_M10\_00311" 16001 "s59E25H2" 0 "putative membrane-bound hydrogenase subunit mbhJ"  
"JS1\_M10\_00311" 16001 "s59E5H2" 0.5182537 "putative membrane-bound hydrogenase subunit mbhJ"  
"JS1\_M10\_00311" 16001 "s63E6H2" 6.195886 "putative membrane-bound hydrogenase subunit mbhJ"  
"JS1\_M10\_00312" 16002 "s59E13H2" 0.000284207 "F(420)H(2) dehydrogenase subunit H"  
"JS1\_M10\_00312" 16002 "s59E25H2" 0 "F(420)H(2) dehydrogenase subunit H"  
"JS1\_M10\_00312" 16002 "s59E5H2" 0.4243813 "F(420)H(2) dehydrogenase subunit H"  
"JS1\_M10\_00312" 16002 "s63E6H2" 5.943551 "F(420)H(2) dehydrogenase subunit H"  
"JS1\_M10\_00313" 16003 "s59E13H2" 0 "Anaerobic dimethyl sulfoxide reductase chain B"  
"JS1\_M10\_00313" 16003 "s59E25H2" 0 "Anaerobic dimethyl sulfoxide reductase chain B"  
"JS1\_M10\_00313" 16003 "s59E5H2" 0.7444181 "Anaerobic dimethyl sulfoxide reductase chain B"  
"JS1\_M10\_00313" 16003 "s63E6H2" 4.63885 "Anaerobic dimethyl sulfoxide reductase chain B"  
"JS1\_M10\_00314" 16004 "s59E13H2" 0 "Sulfhydrogenase 1 subunit gamma"  
"JS1\_M10\_00314" 16004 "s59E25H2" 0 "Sulfhydrogenase 1 subunit gamma"  
"JS1\_M10\_00314" 16004 "s59E5H2" 0.3749483 "Sulfhydrogenase 1 subunit gamma"  
"JS1\_M10\_00314" 16004 "s63E6H2" 1.696122 "Sulfhydrogenase 1 subunit gamma"  
"JS1\_M10\_00315" 16005 "s59E13H2" 0.003028712 "Anaerobic sulfite reductase subunit B"  
"JS1\_M10\_00315" 16005 "s59E25H2" 0 "Anaerobic sulfite reductase subunit B"  
"JS1\_M10\_00315" 16005 "s59E5H2" 0.4980848 "Anaerobic sulfite reductase subunit B"  
"JS1\_M10\_00315" 16005 "s63E6H2" 4.026078 "Anaerobic sulfite reductase subunit B"  
"JS1\_M10\_00316" 16006 "s59E13H2" 0.001310474 "Anaerobic dimethyl sulfoxide reductase chain B"  
"JS1\_M10\_00316" 16006 "s59E25H2" 0 "Anaerobic dimethyl sulfoxide reductase chain B"  
"JS1\_M10\_00316" 16006 "s59E5H2" 0.3607698 "Anaerobic dimethyl sulfoxide reductase chain B"  
"JS1\_M10\_00316" 16006 "s63E6H2" 2.385361 "Anaerobic dimethyl sulfoxide reductase chain B"  
"JS1\_M10\_00317" 16007 "s59E13H2" 0.003576829 "Sulfhydrogenase 1 subunit gamma"  
"JS1\_M10\_00317" 16007 "s59E25H2" 0 "Sulfhydrogenase 1 subunit gamma"  
"JS1\_M10\_00317" 16007 "s59E5H2" 0.665903 "Sulfhydrogenase 1 subunit gamma"  
"JS1\_M10\_00317" 16007 "s63E6H2" 1.444682 "Sulfhydrogenase 1 subunit gamma"  
"JS1\_M10\_00318" 16008 "s59E13H2" 0.001464335 "Sulfhydrogenase 2 subunit beta"  
"JS1\_M10\_00318" 16008 "s59E25H2" 0 "Sulfhydrogenase 2 subunit beta"  
"JS1\_M10\_00318" 16008 "s59E5H2" 0.222935 "Sulfhydrogenase 2 subunit beta"  
"JS1\_M10\_00318" 16008 "s63E6H2" 1.517749 "Sulfhydrogenase 2 subunit beta"  
"JS1\_M10\_00319" 16009 "s59E13H2" 0.1727524 "Redox-sensing transcriptional repressor Rex"  
"JS1\_M10\_00319" 16009 "s59E25H2" 0 "Redox-sensing transcriptional repressor Rex"  
"JS1\_M10\_00319" 16009 "s59E5H2" 0.5915753 "Redox-sensing transcriptional repressor Rex"  
"JS1\_M10\_00319" 16009 "s63E6H2" 1.432686 "Redox-sensing transcriptional repressor Rex"  
"JS1\_M10\_00320" 16010 "s59E13H2" 0.08503241 "Sporulation-specific N-acetylmuramoyl-L-alanine amidase"  
"JS1\_M10\_00320" 16010 "s59E25H2" 0 "Sporulation-specific N-acetylmuramoyl-L-alanine amidase"  
"JS1\_M10\_00320" 16010 "s59E5H2" 0.2569189 "Sporulation-specific N-acetylmuramoyl-L-alanine amidase"  
"JS1\_M10\_00320" 16010 "s63E6H2" 1.378343 "Sporulation-specific N-acetylmuramoyl-L-alanine amidase"  
"JS1\_M10\_00321" 16011 "s59E13H2" 0.1428524 "Hydrogenase 3 maturation protease"  
"JS1\_M10\_00321" 16011 "s59E25H2" 0 "Hydrogenase 3 maturation protease"  
"JS1\_M10\_00321" 16011 "s59E5H2" 1.567242 "Hydrogenase 3 maturation protease"



"JS1\_M10\_00321" 16011 "s63E6H2" 1.404046 "Hydrogenase 3 maturation protease"  
"JS1\_M10\_00322" 16012 "s59E13H2" 0.05035019 "NAD(P)H-quinone oxidoreductase subunit I"  
"JS1\_M10\_00322" 16012 "s59E25H2" 0 "NAD(P)H-quinone oxidoreductase subunit I"  
"JS1\_M10\_00322" 16012 "s59E5H2" 0.4547351 "NAD(P)H-quinone oxidoreductase subunit I"  
"JS1\_M10\_00322" 16012 "s63E6H2" 1.791515 "NAD(P)H-quinone oxidoreductase subunit I"  
"JS1\_M10\_00323" 16013 "s59E13H2" 0.0005710328 "F(420)H(2) dehydrogenase subunit H"  
"JS1\_M10\_00323" 16013 "s59E25H2" 0 "F(420)H(2) dehydrogenase subunit H"  
"JS1\_M10\_00323" 16013 "s59E5H2" 0.007841283 "F(420)H(2) dehydrogenase subunit H"  
"JS1\_M10\_00323" 16013 "s63E6H2" 1.575576 "F(420)H(2) dehydrogenase subunit H"  
"JS1\_M10\_00324" 16014 "s59E13H2" 0.004011968 "Membrane-bound hydrogenase subunit alpha"  
"JS1\_M10\_00324" 16014 "s59E25H2" 0 "Membrane-bound hydrogenase subunit alpha"  
"JS1\_M10\_00324" 16014 "s59E5H2" 0.006635685 "Membrane-bound hydrogenase subunit alpha"  
"JS1\_M10\_00324" 16014 "s63E6H2" 2.079152 "Membrane-bound hydrogenase subunit alpha"  
"JS1\_M10\_00325" 16015 "s59E13H2" 0 "Membrane-bound hydrogenase subunit beta"  
"JS1\_M10\_00325" 16015 "s59E25H2" 0 "Membrane-bound hydrogenase subunit beta"  
"JS1\_M10\_00325" 16015 "s59E5H2" 0 "Membrane-bound hydrogenase subunit beta"  
"JS1\_M10\_00325" 16015 "s63E6H2" 1.563408 "Membrane-bound hydrogenase subunit beta"  
"JS1\_M10\_00326" 16016 "s59E13H2" 0 "putative membrane-bound hydrogenase subunit mbhJ"  
"JS1\_M10\_00326" 16016 "s59E25H2" 0 "putative membrane-bound hydrogenase subunit mbhJ"  
"JS1\_M10\_00326" 16016 "s59E5H2" 0 "putative membrane-bound hydrogenase subunit mbhJ"  
"JS1\_M10\_00326" 16016 "s63E6H2" 0.2151724 "putative membrane-bound hydrogenase subunit mbhJ"  
"JS1\_M10\_00327" 16017 "s59E13H2" 0 "hypothetical protein"  
"JS1\_M10\_00327" 16017 "s59E25H2" 0 "hypothetical protein"  
"JS1\_M10\_00327" 16017 "s59E5H2" 0 "hypothetical protein"  
"JS1\_M10\_00327" 16017 "s63E6H2" 0 "hypothetical protein"  
"JS1\_M10\_00328" 16018 "s59E13H2" 0.00885661 "Na(+)/H(+) antiporter subunit A"  
"JS1\_M10\_00328" 16018 "s59E25H2" 0 "Na(+)/H(+) antiporter subunit A"  
"JS1\_M10\_00328" 16018 "s59E5H2" 0.2482486 "Na(+)/H(+) antiporter subunit A"  
"JS1\_M10\_00328" 16018 "s63E6H2" 0.2141727 "Na(+)/H(+) antiporter subunit A"  
"JS1\_M10\_00329" 16019 "s59E13H2" 0.4060827 "Na(+)/H(+) antiporter subunit C1"  
"JS1\_M10\_00329" 16019 "s59E25H2" 0 "Na(+)/H(+) antiporter subunit C1"  
"JS1\_M10\_00329" 16019 "s59E5H2" 1.504663 "Na(+)/H(+) antiporter subunit C1"  
"JS1\_M10\_00329" 16019 "s63E6H2" 3.348361 "Na(+)/H(+) antiporter subunit C1"  
"JS1\_M10\_00330" 16020 "s59E13H2" 0.3059779 "hypothetical protein"  
"JS1\_M10\_00330" 16020 "s59E25H2" 0 "hypothetical protein"  
"JS1\_M10\_00330" 16020 "s59E5H2" 0.7357266 "hypothetical protein"  
"JS1\_M10\_00330" 16020 "s63E6H2" 1.792973 "hypothetical protein"  
"JS1\_M10\_00332" 16022 "s59E13H2" 0.316476 "Cyclic di-GMP phosphodiesterase response regulator RpfG"  
"JS1\_M10\_00332" 16022 "s59E25H2" 0 "Cyclic di-GMP phosphodiesterase response regulator RpfG"  
"JS1\_M10\_00332" 16022 "s59E5H2" 0.01387711 "Cyclic di-GMP phosphodiesterase response regulator RpfG"  
"JS1\_M10\_00332" 16022 "s63E6H2" 0 "Cyclic di-GMP phosphodiesterase response regulator RpfG"  
"JS1\_M10\_00333" 16023 "s59E13H2" 0.005213094 "NAD-dependent alcohol dehydrogenase"  
"JS1\_M10\_00333" 16023 "s59E25H2" 0 "NAD-dependent alcohol dehydrogenase"  
"JS1\_M10\_00333" 16023 "s59E5H2" 0.008391166 "NAD-dependent alcohol dehydrogenase"  
"JS1\_M10\_00333" 16023 "s63E6H2" 0.07126488 "NAD-dependent alcohol dehydrogenase"  
"JS1\_M10\_00334" 16024 "s59E13H2" 0.02916262 "Isoprenylcysteine carboxyl methyltransferase (ICMT) family protein"  
"JS1\_M10\_00334" 16024 "s59E25H2" 0 "Isoprenylcysteine carboxyl methyltransferase (ICMT) family protein"

"JS1\_M10\_00334" 16024 "s59E5H2" 0 "Isoprenylcysteine carboxyl methyltransferase (ICMT) family protein"  
"JS1\_M10\_00334" 16024 "s63E6H2" 0.003719397 "Isoprenylcysteine carboxyl methyltransferase (ICMT) family protein"  
"JS1\_M10\_00335" 16025 "s59E13H2" 0 "hypothetical protein"  
"JS1\_M10\_00335" 16025 "s59E25H2" 0 "hypothetical protein"  
"JS1\_M10\_00335" 16025 "s59E5H2" 0 "hypothetical protein"  
"JS1\_M10\_00335" 16025 "s63E6H2" 0.006254119 "hypothetical protein"  
"JS1\_M10\_00336" 16026 "s59E13H2" 0.2324525 "Phosphorylated carbohydrates phosphatase"  
"JS1\_M10\_00336" 16026 "s59E25H2" 0 "Phosphorylated carbohydrates phosphatase"  
"JS1\_M10\_00336" 16026 "s59E5H2" 0.03653571 "Phosphorylated carbohydrates phosphatase"  
"JS1\_M10\_00336" 16026 "s63E6H2" 0.03452839 "Phosphorylated carbohydrates phosphatase"  
"JS1\_M10\_00337" 16027 "s59E13H2" 0 "Divergent AAA domain protein"  
"JS1\_M10\_00337" 16027 "s59E25H2" 0 "Divergent AAA domain protein"  
"JS1\_M10\_00337" 16027 "s59E5H2" 0.3232344 "Divergent AAA domain protein"  
"JS1\_M10\_00337" 16027 "s63E6H2" 0.002589073 "Divergent AAA domain protein"  
"JS1\_M10\_00338" 16028 "s59E13H2" 0.01608034 "Soluble hydrogenase 42 kDa subunit"  
"JS1\_M10\_00338" 16028 "s59E25H2" 0 "Soluble hydrogenase 42 kDa subunit"  
"JS1\_M10\_00338" 16028 "s59E5H2" 0.1775722 "Soluble hydrogenase 42 kDa subunit"  
"JS1\_M10\_00338" 16028 "s63E6H2" 0.2511638 "Soluble hydrogenase 42 kDa subunit"  
"JS1\_M10\_00339" 16029 "s59E13H2" 0.007606006 "D-3-phosphoglycerate dehydrogenase"  
"JS1\_M10\_00339" 16029 "s59E25H2" 0 "D-3-phosphoglycerate dehydrogenase"  
"JS1\_M10\_00339" 16029 "s59E5H2" 0.2190457 "D-3-phosphoglycerate dehydrogenase"  
"JS1\_M10\_00339" 16029 "s63E6H2" 0.3639883 "D-3-phosphoglycerate dehydrogenase"  
"JS1\_M10\_00340" 16030 "s59E13H2" 0.02326352 "hypothetical protein"  
"JS1\_M10\_00340" 16030 "s59E25H2" 0 "hypothetical protein"  
"JS1\_M10\_00340" 16030 "s59E5H2" 0.1010466 "hypothetical protein"  
"JS1\_M10\_00340" 16030 "s63E6H2" 1.125587 "hypothetical protein"  
"JS1\_M10\_00341" 16031 "s59E13H2" 0.03986628 "Bifunctional homocysteine S-methyltransferase/5,10-methylenetetrahydrofolate reductase"  
"JS1\_M10\_00341" 16031 "s59E25H2" 0 "Bifunctional homocysteine S-methyltransferase/5,10-methylenetetrahydrofolate reductase"  
"JS1\_M10\_00341" 16031 "s59E5H2" 0.2428677 "Bifunctional homocysteine S-methyltransferase/5,10-methylenetetrahydrofolate reductase"  
"JS1\_M10\_00341" 16031 "s63E6H2" 0.04842351 "Bifunctional homocysteine S-methyltransferase/5,10-methylenetetrahydrofolate reductase"  
"JS1\_M10\_00343" 16033 "s59E13H2" 0.004370677 "putative transcriptional regulatory protein pdtaR"  
"JS1\_M10\_00343" 16033 "s59E25H2" 0 "putative transcriptional regulatory protein pdtaR"  
"JS1\_M10\_00343" 16033 "s59E5H2" 0.005518888 "putative transcriptional regulatory protein pdtaR"  
"JS1\_M10\_00343" 16033 "s63E6H2" 0.1251989 "putative transcriptional regulatory protein pdtaR"  
"JS1\_M10\_00344" 16034 "s59E13H2" 0.0390622 "Methylcobamide:CoM methyltransferase MtbA"  
"JS1\_M10\_00344" 16034 "s59E25H2" 0 "Methylcobamide:CoM methyltransferase MtbA"  
"JS1\_M10\_00344" 16034 "s59E5H2" 0.07346969 "Methylcobamide:CoM methyltransferase MtbA"  
"JS1\_M10\_00344" 16034 "s63E6H2" 0.6203607 "Methylcobamide:CoM methyltransferase MtbA"  
"JS1\_M10\_00345" 16035 "s59E13H2" 0.05088064 "methylcobalamin:coenzyme M methyltransferase"  
"JS1\_M10\_00345" 16035 "s59E25H2" 0 "methylcobalamin:coenzyme M methyltransferase"  
"JS1\_M10\_00345" 16035 "s59E5H2" 0.08418257 "methylcobalamin:coenzyme M methyltransferase"  
"JS1\_M10\_00345" 16035 "s63E6H2" 0.6997068 "methylcobalamin:coenzyme M methyltransferase"  
"JS1\_M10\_00346" 16036 "s59E13H2" 0.2930413 "DNA polymerase/3'-5' exonuclease PolX"  
"JS1\_M10\_00346" 16036 "s59E25H2" 0 "DNA polymerase/3'-5' exonuclease PolX"  
"JS1\_M10\_00346" 16036 "s59E5H2" 0.03230086 "DNA polymerase/3'-5' exonuclease PolX"  
"JS1\_M10\_00346" 16036 "s63E6H2" 0.01541218 "DNA polymerase/3'-5' exonuclease PolX"  
"JS1\_M10\_00347" 16037 "s59E13H2" 0.3320623 "HTH-type transcriptional activator Btr"

"JS1\_M10\_00347" 16037 "s59E25H2" 0 "HTH-type transcriptional activator Btr"  
"JS1\_M10\_00347" 16037 "s59E5H2" 0.0240281 "HTH-type transcriptional activator Btr"  
"JS1\_M10\_00347" 16037 "s63E6H2" 0.09120744 "HTH-type transcriptional activator Btr"  
"JS1\_M10\_00348" 16038 "s59E13H2" 0.1134322 "Trimethylamine corrinoid protein"  
"JS1\_M10\_00348" 16038 "s59E25H2" 0 "Trimethylamine corrinoid protein"  
"JS1\_M10\_00348" 16038 "s59E5H2" 0.03111731 "Trimethylamine corrinoid protein"  
"JS1\_M10\_00348" 16038 "s63E6H2" 0.01339749 "Trimethylamine corrinoid protein"  
"JS1\_M10\_00349" 16039 "s59E13H2" 0.06725162 "Methylcobamide:CoM methyltransferase MtbA"  
"JS1\_M10\_00349" 16039 "s59E25H2" 0 "Methylcobamide:CoM methyltransferase MtbA"  
"JS1\_M10\_00349" 16039 "s59E5H2" 0.01541606 "Methylcobamide:CoM methyltransferase MtbA"  
"JS1\_M10\_00349" 16039 "s63E6H2" 0.004761489 "Methylcobamide:CoM methyltransferase MtbA"  
"JS1\_M10\_00351" 16041 "s59E13H2" 0.4996015 "hypothetical protein"  
"JS1\_M10\_00351" 16041 "s59E25H2" 0 "hypothetical protein"  
"JS1\_M10\_00351" 16041 "s59E5H2" 0.9664319 "hypothetical protein"  
"JS1\_M10\_00351" 16041 "s63E6H2" 3.535461 "hypothetical protein"  
"JS1\_M10\_00353" 16043 "s59E13H2" 0 "Ribose operon repressor"  
"JS1\_M10\_00353" 16043 "s59E25H2" 0 "Ribose operon repressor"  
"JS1\_M10\_00353" 16043 "s59E5H2" 0 "Ribose operon repressor"  
"JS1\_M10\_00353" 16043 "s63E6H2" 0 "Ribose operon repressor"  
"JS1\_M10\_00354" 16044 "s59E13H2" 0.01366277 "Bacterial extracellular solute-binding protein"  
"JS1\_M10\_00354" 16044 "s59E25H2" 0 "Bacterial extracellular solute-binding protein"  
"JS1\_M10\_00354" 16044 "s59E5H2" 0 "Bacterial extracellular solute-binding protein"  
"JS1\_M10\_00354" 16044 "s63E6H2" 0 "Bacterial extracellular solute-binding protein"  
"JS1\_M10\_00355" 16045 "s59E13H2" 0.0006593987 "Bacterial extracellular solute-binding protein"  
"JS1\_M10\_00355" 16045 "s59E25H2" 0 "Bacterial extracellular solute-binding protein"  
"JS1\_M10\_00355" 16045 "s59E5H2" 0 "Bacterial extracellular solute-binding protein"  
"JS1\_M10\_00355" 16045 "s63E6H2" 0 "Bacterial extracellular solute-binding protein"  
"JS1\_M10\_00356" 16046 "s59E13H2" 0 "hypothetical protein"  
"JS1\_M10\_00356" 16046 "s59E25H2" 0 "hypothetical protein"  
"JS1\_M10\_00356" 16046 "s59E5H2" 0 "hypothetical protein"  
"JS1\_M10\_00356" 16046 "s63E6H2" 0 "hypothetical protein"  
"JS1\_M10\_00358" 16048 "s59E13H2" 0.1055329 "Membrane-bound lytic murein transglycosylase C precursor"  
"JS1\_M10\_00358" 16048 "s59E25H2" 0 "Membrane-bound lytic murein transglycosylase C precursor"  
"JS1\_M10\_00358" 16048 "s59E5H2" 0.063644 "Membrane-bound lytic murein transglycosylase C precursor"  
"JS1\_M10\_00358" 16048 "s63E6H2" 0.03752365 "Membrane-bound lytic murein transglycosylase C precursor"  
"JS1\_M10\_00360" 16050 "s59E13H2" 0.1514512 "Riboflavin transporter RibU"  
"JS1\_M10\_00360" 16050 "s59E25H2" 0 "Riboflavin transporter RibU"  
"JS1\_M10\_00360" 16050 "s59E5H2" 0.1221528 "Riboflavin transporter RibU"  
"JS1\_M10\_00360" 16050 "s63E6H2" 0.1177161 "Riboflavin transporter RibU"  
"JS1\_M10\_00365" 16055 "s59E13H2" 0 "UDP-glucose 6-dehydrogenase YwqF"  
"JS1\_M10\_00365" 16055 "s59E25H2" 0 "UDP-glucose 6-dehydrogenase YwqF"  
"JS1\_M10\_00365" 16055 "s59E5H2" 0 "UDP-glucose 6-dehydrogenase YwqF"  
"JS1\_M10\_00365" 16055 "s63E6H2" 0 "UDP-glucose 6-dehydrogenase YwqF"  
"JS1\_M10\_00366" 16056 "s59E13H2" 0 "UDP-3-O-[3-hydroxymyristoyl] glucosamine N-acyltransferase"  
"JS1\_M10\_00366" 16056 "s59E25H2" 0 "UDP-3-O-[3-hydroxymyristoyl] glucosamine N-acyltransferase"  
"JS1\_M10\_00366" 16056 "s59E5H2" 0 "UDP-3-O-[3-hydroxymyristoyl] glucosamine N-acyltransferase"  
"JS1\_M10\_00366" 16056 "s63E6H2" 0 "UDP-3-O-[3-hydroxymyristoyl] glucosamine N-acyltransferase"

"JS1\_M10\_00367" 16057 "s59E13H2" 0 "Capsule biosynthesis protein CapA"  
"JS1\_M10\_00367" 16057 "s59E25H2" 0 "Capsule biosynthesis protein CapA"  
"JS1\_M10\_00367" 16057 "s59E5H2" 0 "Capsule biosynthesis protein CapA"  
"JS1\_M10\_00367" 16057 "s63E6H2" 0 "Capsule biosynthesis protein CapA"  
"JS1\_M10\_00368" 16058 "s59E13H2" 0 "Phenylacetate-coenzyme A ligase"  
"JS1\_M10\_00368" 16058 "s59E25H2" 0 "Phenylacetate-coenzyme A ligase"  
"JS1\_M10\_00368" 16058 "s59E5H2" 0 "Phenylacetate-coenzyme A ligase"  
"JS1\_M10\_00368" 16058 "s63E6H2" 0 "Phenylacetate-coenzyme A ligase"  
"JS1\_M10\_00369" 16059 "s59E13H2" 0 "Putative pyridoxal phosphate-dependent aminotransferase EpsN"  
"JS1\_M10\_00369" 16059 "s59E25H2" 0 "Putative pyridoxal phosphate-dependent aminotransferase EpsN"  
"JS1\_M10\_00369" 16059 "s59E5H2" 0 "Putative pyridoxal phosphate-dependent aminotransferase EpsN"  
"JS1\_M10\_00369" 16059 "s63E6H2" 0.00555884 "Putative pyridoxal phosphate-dependent aminotransferase EpsN"  
"JS1\_M10\_00370" 16060 "s59E13H2" 0 "putative undecaprenyl-phosphate N-acetylglucosaminyl 1-phosphate transferase"  
"JS1\_M10\_00370" 16060 "s59E25H2" 0 "putative undecaprenyl-phosphate N-acetylglucosaminyl 1-phosphate transferase"  
"JS1\_M10\_00370" 16060 "s59E5H2" 0 "putative undecaprenyl-phosphate N-acetylglucosaminyl 1-phosphate transferase"  
"JS1\_M10\_00370" 16060 "s63E6H2" 0 "putative undecaprenyl-phosphate N-acetylglucosaminyl 1-phosphate transferase"  
"JS1\_M10\_00372" 16062 "s59E13H2" 0 "hypothetical protein"  
"JS1\_M10\_00372" 16062 "s59E25H2" 0 "hypothetical protein"  
"JS1\_M10\_00372" 16062 "s59E5H2" 0 "hypothetical protein"  
"JS1\_M10\_00372" 16062 "s63E6H2" 0 "hypothetical protein"  
"JS1\_M10\_00374" 16064 "s59E13H2" 0 "Glycosyltransferase AgIE"  
"JS1\_M10\_00374" 16064 "s59E25H2" 0 "Glycosyltransferase AgIE"  
"JS1\_M10\_00374" 16064 "s59E5H2" 0.02108308 "Glycosyltransferase AgIE"  
"JS1\_M10\_00374" 16064 "s63E6H2" 0 "Glycosyltransferase AgIE"  
"JS1\_M10\_00376" 16066 "s59E13H2" 0 "dTDP-3-amino-3,6-dideoxy-alpha-D-galactopyranose transaminase"  
"JS1\_M10\_00376" 16066 "s59E25H2" 0 "dTDP-3-amino-3,6-dideoxy-alpha-D-galactopyranose transaminase"  
"JS1\_M10\_00376" 16066 "s59E5H2" 0.001208961 "dTDP-3-amino-3,6-dideoxy-alpha-D-galactopyranose transaminase"  
"JS1\_M10\_00376" 16066 "s63E6H2" 0 "dTDP-3-amino-3,6-dideoxy-alpha-D-galactopyranose transaminase"  
"JS1\_M10\_00377" 16067 "s59E13H2" 0 "UDP-2-acetamido-3-amino-2,3-dideoxy-D-glucuronate N-acetyltransferase"  
"JS1\_M10\_00377" 16067 "s59E25H2" 0 "UDP-2-acetamido-3-amino-2,3-dideoxy-D-glucuronate N-acetyltransferase"  
"JS1\_M10\_00377" 16067 "s59E5H2" 0.02425476 "UDP-2-acetamido-3-amino-2,3-dideoxy-D-glucuronate N-acetyltransferase"  
"JS1\_M10\_00377" 16067 "s63E6H2" 0 "UDP-2-acetamido-3-amino-2,3-dideoxy-D-glucuronate N-acetyltransferase"  
"JS1\_M10\_00378" 16068 "s59E13H2" 0 "Glucose--fructose oxidoreductase precursor"  
"JS1\_M10\_00378" 16068 "s59E25H2" 0 "Glucose--fructose oxidoreductase precursor"  
"JS1\_M10\_00378" 16068 "s59E5H2" 0.04848383 "Glucose--fructose oxidoreductase precursor"  
"JS1\_M10\_00378" 16068 "s63E6H2" 0 "Glucose--fructose oxidoreductase precursor"  
"JS1\_M10\_00381" 16071 "s59E13H2" 0.1115198 "Transposase IS116/IS110/IS902 family protein"  
"JS1\_M10\_00381" 16071 "s59E25H2" 0 "Transposase IS116/IS110/IS902 family protein"  
"JS1\_M10\_00381" 16071 "s59E5H2" 0.2601498 "Transposase IS116/IS110/IS902 family protein"  
"JS1\_M10\_00381" 16071 "s63E6H2" 0.4751393 "Transposase IS116/IS110/IS902 family protein"  
"JS1\_M10\_00382" 16072 "s59E13H2" 0.09625926 "hypothetical protein"  
"JS1\_M10\_00382" 16072 "s59E25H2" 0 "hypothetical protein"  
"JS1\_M10\_00382" 16072 "s59E5H2" 1.302155 "hypothetical protein"  
"JS1\_M10\_00382" 16072 "s63E6H2" 0.1445605 "hypothetical protein"  
"JS1\_M10\_00383" 16073 "s59E13H2" 0.07246441 "Response regulator aspartate phosphatase G"  
"JS1\_M10\_00383" 16073 "s59E25H2" 0 "Response regulator aspartate phosphatase G"  
"JS1\_M10\_00383" 16073 "s59E5H2" 0.8494865 "Response regulator aspartate phosphatase G"

"JS1\_M10\_00383" 16073 "s63E6H2" 0.1164759 "Response regulator aspartate phosphatase G"  
"JS1\_M10\_00384" 16074 "s59E13H2" 0.0679277 "putative inner membrane transporter YicL"  
"JS1\_M10\_00384" 16074 "s59E25H2" 0 "putative inner membrane transporter YicL"  
"JS1\_M10\_00384" 16074 "s59E5H2" 0.2557152 "putative inner membrane transporter YicL"  
"JS1\_M10\_00384" 16074 "s63E6H2" 0.0909467 "putative inner membrane transporter YicL"  
"JS1\_M10\_00385" 16075 "s59E13H2" 0.1641239 "Acetyltransferase (GNAT) family protein"  
"JS1\_M10\_00385" 16075 "s59E25H2" 0 "Acetyltransferase (GNAT) family protein"  
"JS1\_M10\_00385" 16075 "s59E5H2" 1.618651 "Acetyltransferase (GNAT) family protein"  
"JS1\_M10\_00385" 16075 "s63E6H2" 0.7839459 "Acetyltransferase (GNAT) family protein"  
"JS1\_M10\_00387" 16077 "s59E13H2" 0.07426544 "hypothetical protein"  
"JS1\_M10\_00387" 16077 "s59E25H2" 0 "hypothetical protein"  
"JS1\_M10\_00387" 16077 "s59E5H2" 0.84726 "hypothetical protein"  
"JS1\_M10\_00387" 16077 "s63E6H2" 0.791152 "hypothetical protein"  
"JS1\_M10\_00388" 16078 "s59E13H2" 0.08084115 "LemA family protein"  
"JS1\_M10\_00388" 16078 "s59E25H2" 0 "LemA family protein"  
"JS1\_M10\_00388" 16078 "s59E5H2" 0.8049439 "LemA family protein"  
"JS1\_M10\_00388" 16078 "s63E6H2" 0.8823479 "LemA family protein"  
"JS1\_M10\_00389" 16079 "s59E13H2" 0.1164905 "hypothetical protein"  
"JS1\_M10\_00389" 16079 "s59E25H2" 0 "hypothetical protein"  
"JS1\_M10\_00389" 16079 "s59E5H2" 0.8356984 "hypothetical protein"  
"JS1\_M10\_00389" 16079 "s63E6H2" 0.2669308 "hypothetical protein"  
"JS1\_M10\_00390" 16080 "s59E13H2" 0.007570057 "Trifunctional nucleotide phosphoesterase protein YfkN precursor"  
"JS1\_M10\_00390" 16080 "s59E25H2" 0 "Trifunctional nucleotide phosphoesterase protein YfkN precursor"  
"JS1\_M10\_00390" 16080 "s59E5H2" 0.2454824 "Trifunctional nucleotide phosphoesterase protein YfkN precursor"  
"JS1\_M10\_00390" 16080 "s63E6H2" 0.6684065 "Trifunctional nucleotide phosphoesterase protein YfkN precursor"  
"JS1\_M10\_00391" 16081 "s59E13H2" 0.2062293 "Macrolide export ATP-binding/permease protein MacB"  
"JS1\_M10\_00391" 16081 "s59E25H2" 0.1978654 "Macrolide export ATP-binding/permease protein MacB"  
"JS1\_M10\_00391" 16081 "s59E5H2" 0.7963714 "Macrolide export ATP-binding/permease protein MacB"  
"JS1\_M10\_00391" 16081 "s63E6H2" 0.9519678 "Macrolide export ATP-binding/permease protein MacB"  
"JS1\_M10\_00392" 16082 "s59E13H2" 0.1211176 "putative ABC transporter ATP-binding protein"  
"JS1\_M10\_00392" 16082 "s59E25H2" 0 "putative ABC transporter ATP-binding protein"  
"JS1\_M10\_00392" 16082 "s59E5H2" 0.5164082 "putative ABC transporter ATP-binding protein"  
"JS1\_M10\_00392" 16082 "s63E6H2" 1.417389 "putative ABC transporter ATP-binding protein"  
"JS1\_M10\_00393" 16083 "s59E13H2" 0.1423139 "Putative efflux system component YknX"  
"JS1\_M10\_00393" 16083 "s59E25H2" 0 "Putative efflux system component YknX"  
"JS1\_M10\_00393" 16083 "s59E5H2" 0.4695519 "Putative efflux system component YknX"  
"JS1\_M10\_00393" 16083 "s63E6H2" 0.5402787 "Putative efflux system component YknX"  
"JS1\_M10\_00394" 16084 "s59E13H2" 0.03598594 "Outer membrane efflux protein"  
"JS1\_M10\_00394" 16084 "s59E25H2" 0 "Outer membrane efflux protein"  
"JS1\_M10\_00394" 16084 "s59E5H2" 0.1633888 "Outer membrane efflux protein"  
"JS1\_M10\_00394" 16084 "s63E6H2" 0.03311254 "Outer membrane efflux protein"  
"JS1\_M10\_00395" 16085 "s59E13H2" 0.09339933 "Outer membrane efflux protein"  
"JS1\_M10\_00395" 16085 "s59E25H2" 0 "Outer membrane efflux protein"  
"JS1\_M10\_00395" 16085 "s59E5H2" 1.296844 "Outer membrane efflux protein"  
"JS1\_M10\_00395" 16085 "s63E6H2" 0.06780133 "Outer membrane efflux protein"  
"JS1\_M10\_00396" 16086 "s59E13H2" 0 "GTPase Der"  
"JS1\_M10\_00396" 16086 "s59E25H2" 0 "GTPase Der"

"JS1\_M10\_00396" 16086 "s59E5H2" 0.05650814 "GTPase Der"  
"JS1\_M10\_00396" 16086 "s63E6H2" 0.007109974 "GTPase Der"  
"JS1\_M10\_00397" 16087 "s59E13H2" 0.005199478 "Glycerol-3-phosphate acyltransferase"  
"JS1\_M10\_00397" 16087 "s59E25H2" 0 "Glycerol-3-phosphate acyltransferase"  
"JS1\_M10\_00397" 16087 "s59E5H2" 0.1001864 "Glycerol-3-phosphate acyltransferase"  
"JS1\_M10\_00397" 16087 "s63E6H2" 0.05572682 "Glycerol-3-phosphate acyltransferase"  
"JS1\_M10\_00398" 16088 "s59E13H2" 0.004611929 "hypothetical protein"  
"JS1\_M10\_00398" 16088 "s59E25H2" 0 "hypothetical protein"  
"JS1\_M10\_00398" 16088 "s59E5H2" 0.09073884 "hypothetical protein"  
"JS1\_M10\_00398" 16088 "s63E6H2" 0.03532248 "hypothetical protein"  
"JS1\_M10\_00399" 16089 "s59E13H2" 0.01766185 "DNA topoisomerase 1"  
"JS1\_M10\_00399" 16089 "s59E25H2" 0 "DNA topoisomerase 1"  
"JS1\_M10\_00399" 16089 "s59E5H2" 0.08593066 "DNA topoisomerase 1"  
"JS1\_M10\_00399" 16089 "s63E6H2" 0.06898823 "DNA topoisomerase 1"  
"JS1\_M10\_00400" 16090 "s59E13H2" 0.005700678 "Tyrosine recombinase XerD"  
"JS1\_M10\_00400" 16090 "s59E25H2" 0 "Tyrosine recombinase XerD"  
"JS1\_M10\_00400" 16090 "s59E5H2" 0.1121445 "Tyrosine recombinase XerD"  
"JS1\_M10\_00400" 16090 "s63E6H2" 0.04575184 "Tyrosine recombinase XerD"  
"JS1\_M10\_00401" 16091 "s59E13H2" 0.03128052 "ATP-dependent protease subunit ClpQ"  
"JS1\_M10\_00401" 16091 "s59E25H2" 0 "ATP-dependent protease subunit ClpQ"  
"JS1\_M10\_00401" 16091 "s59E5H2" 0.268608 "ATP-dependent protease subunit ClpQ"  
"JS1\_M10\_00401" 16091 "s63E6H2" 0.05955643 "ATP-dependent protease subunit ClpQ"  
"JS1\_M10\_00402" 16092 "s59E13H2" 0.02666553 "ATP-dependent protease ATPase subunit ClpY"  
"JS1\_M10\_00402" 16092 "s59E25H2" 0 "ATP-dependent protease ATPase subunit ClpY"  
"JS1\_M10\_00402" 16092 "s59E5H2" 0.9553302 "ATP-dependent protease ATPase subunit ClpY"  
"JS1\_M10\_00402" 16092 "s63E6H2" 0.06490075 "ATP-dependent protease ATPase subunit ClpY"  
"JS1\_M10\_00403" 16093 "s59E13H2" 0.01125287 "30S ribosomal protein S2"  
"JS1\_M10\_00403" 16093 "s59E25H2" 0 "30S ribosomal protein S2"  
"JS1\_M10\_00403" 16093 "s59E5H2" 0.06286705 "30S ribosomal protein S2"  
"JS1\_M10\_00403" 16093 "s63E6H2" 0.03782087 "30S ribosomal protein S2"  
"JS1\_M10\_00404" 16094 "s59E13H2" 0.00375602 "Elongation factor Ts"  
"JS1\_M10\_00404" 16094 "s59E25H2" 0 "Elongation factor Ts"  
"JS1\_M10\_00404" 16094 "s59E5H2" 0.04169117 "Elongation factor Ts"  
"JS1\_M10\_00404" 16094 "s63E6H2" 0.01990967 "Elongation factor Ts"  
"JS1\_M10\_00405" 16095 "s59E13H2" 0.0243639 "Uridylate kinase"  
"JS1\_M10\_00405" 16095 "s59E25H2" 0 "Uridylate kinase"  
"JS1\_M10\_00405" 16095 "s59E5H2" 0.1349852 "Uridylate kinase"  
"JS1\_M10\_00405" 16095 "s63E6H2" 0.2571202 "Uridylate kinase"  
"JS1\_M10\_00406" 16096 "s59E13H2" 0.04494958 "Ribosome-recycling factor"  
"JS1\_M10\_00406" 16096 "s59E25H2" 0 "Ribosome-recycling factor"  
"JS1\_M10\_00406" 16096 "s59E5H2" 0.1020351 "Ribosome-recycling factor"  
"JS1\_M10\_00406" 16096 "s63E6H2" 0.3491451 "Ribosome-recycling factor"  
"JS1\_M10\_00407" 16097 "s59E13H2" 0.001911771 "Ferredoxin"  
"JS1\_M10\_00407" 16097 "s59E25H2" 0 "Ferredoxin"  
"JS1\_M10\_00407" 16097 "s59E5H2" 0.1058977 "Ferredoxin"  
"JS1\_M10\_00407" 16097 "s63E6H2" 0.2504241 "Ferredoxin"  
"JS1\_M10\_00408" 16098 "s59E13H2" 0.01272883 "Ditrans,polycis-undecaprenyl-diphosphate synthase ((2E,6E)-farnesyl-diphosphate specific)"

"JS1\_M10\_00408" 16098 "s59E25H2" 0 "Ditrans, polycis-undecaprenyl-diphosphate synthase ((2E,6E)-farnesyl-diphosphate specific)"  
"JS1\_M10\_00408" 16098 "s59E5H2" 0.1528381 "Ditrans, polycis-undecaprenyl-diphosphate synthase ((2E,6E)-farnesyl-diphosphate specific)"  
"JS1\_M10\_00408" 16098 "s63E6H2" 0.2026672 "Ditrans, polycis-undecaprenyl-diphosphate synthase ((2E,6E)-farnesyl-diphosphate specific)"  
"JS1\_M10\_00409" 16099 "s59E13H2" 0.01357517 "Phosphatidate cytidyltransferase"  
"JS1\_M10\_00409" 16099 "s59E25H2" 0 "Phosphatidate cytidyltransferase"  
"JS1\_M10\_00409" 16099 "s59E5H2" 0.09572362 "Phosphatidate cytidyltransferase"  
"JS1\_M10\_00409" 16099 "s63E6H2" 0.2539792 "Phosphatidate cytidyltransferase"  
"JS1\_M10\_00410" 16100 "s59E13H2" 0.07343409 "1-deoxy-D-xylulose 5-phosphate reductoisomerase"  
"JS1\_M10\_00410" 16100 "s59E25H2" 0 "1-deoxy-D-xylulose 5-phosphate reductoisomerase"  
"JS1\_M10\_00410" 16100 "s59E5H2" 0.1412956 "1-deoxy-D-xylulose 5-phosphate reductoisomerase"  
"JS1\_M10\_00410" 16100 "s63E6H2" 0.3514393 "1-deoxy-D-xylulose 5-phosphate reductoisomerase"  
"JS1\_M10\_00411" 16101 "s59E13H2" 0.002713174 "Regulator of sigma-W protease RasP"  
"JS1\_M10\_00411" 16101 "s59E25H2" 0 "Regulator of sigma-W protease RasP"  
"JS1\_M10\_00411" 16101 "s59E5H2" 0.06489803 "Regulator of sigma-W protease RasP"  
"JS1\_M10\_00411" 16101 "s63E6H2" 0.149333 "Regulator of sigma-W protease RasP"  
"JS1\_M10\_00412" 16102 "s59E13H2" 0.001662718 "4-hydroxy-3-methylbut-2-en-1-yl diphosphate synthase"  
"JS1\_M10\_00412" 16102 "s59E25H2" 0 "4-hydroxy-3-methylbut-2-en-1-yl diphosphate synthase"  
"JS1\_M10\_00412" 16102 "s59E5H2" 0.08516564 "4-hydroxy-3-methylbut-2-en-1-yl diphosphate synthase"  
"JS1\_M10\_00412" 16102 "s63E6H2" 0.04519518 "4-hydroxy-3-methylbut-2-en-1-yl diphosphate synthase"  
"JS1\_M10\_00413" 16103 "s59E13H2" 0 "hypothetical protein"  
"JS1\_M10\_00413" 16103 "s59E25H2" 0 "hypothetical protein"  
"JS1\_M10\_00413" 16103 "s59E5H2" 0 "hypothetical protein"  
"JS1\_M10\_00413" 16103 "s63E6H2" 0.009089985 "hypothetical protein"  
"JS1\_M10\_00414" 16104 "s59E13H2" 0 "V-type ATP synthase subunit I"  
"JS1\_M10\_00414" 16104 "s59E25H2" 0 "V-type ATP synthase subunit I"  
"JS1\_M10\_00414" 16104 "s59E5H2" 0 "V-type ATP synthase subunit I"  
"JS1\_M10\_00414" 16104 "s63E6H2" 0.002245503 "V-type ATP synthase subunit I"  
"JS1\_M10\_00415" 16105 "s59E13H2" 0 "V-type sodium ATPase subunit K"  
"JS1\_M10\_00415" 16105 "s59E25H2" 0 "V-type sodium ATPase subunit K"  
"JS1\_M10\_00415" 16105 "s59E5H2" 0 "V-type sodium ATPase subunit K"  
"JS1\_M10\_00415" 16105 "s63E6H2" 0 "V-type sodium ATPase subunit K"  
"JS1\_M10\_00416" 16106 "s59E13H2" 0 "V-type ATP synthase subunit E"  
"JS1\_M10\_00416" 16106 "s59E25H2" 0 "V-type ATP synthase subunit E"  
"JS1\_M10\_00416" 16106 "s59E5H2" 0 "V-type ATP synthase subunit E"  
"JS1\_M10\_00416" 16106 "s63E6H2" 0 "V-type ATP synthase subunit E"  
"JS1\_M10\_00417" 16107 "s59E13H2" 0 "V-type sodium ATPase subunit C"  
"JS1\_M10\_00417" 16107 "s59E25H2" 0 "V-type sodium ATPase subunit C"  
"JS1\_M10\_00417" 16107 "s59E5H2" 0 "V-type sodium ATPase subunit C"  
"JS1\_M10\_00417" 16107 "s63E6H2" 0 "V-type sodium ATPase subunit C"  
"JS1\_M10\_00418" 16108 "s59E13H2" 0.21178 "V-type sodium ATPase subunit G"  
"JS1\_M10\_00418" 16108 "s59E25H2" 0 "V-type sodium ATPase subunit G"  
"JS1\_M10\_00418" 16108 "s59E5H2" 0.02390379 "V-type sodium ATPase subunit G"  
"JS1\_M10\_00418" 16108 "s63E6H2" 0.009109806 "V-type sodium ATPase subunit G"  
"JS1\_M10\_00419" 16109 "s59E13H2" 0.218152 "V-type sodium ATPase catalytic subunit A"  
"JS1\_M10\_00419" 16109 "s59E25H2" 0 "V-type sodium ATPase catalytic subunit A"  
"JS1\_M10\_00419" 16109 "s59E5H2" 0.2971597 "V-type sodium ATPase catalytic subunit A"  
"JS1\_M10\_00419" 16109 "s63E6H2" 0.1372707 "V-type sodium ATPase catalytic subunit A"

"JS1\_M10\_00420" 16110 "s59E13H2" 0.06385954 "V-type sodium ATPase subunit B"  
"JS1\_M10\_00420" 16110 "s59E25H2" 0 "V-type sodium ATPase subunit B"  
"JS1\_M10\_00420" 16110 "s59E5H2" 0.3826994 "V-type sodium ATPase subunit B"  
"JS1\_M10\_00420" 16110 "s63E6H2" 0.2320874 "V-type sodium ATPase subunit B"  
"JS1\_M10\_00421" 16111 "s59E13H2" 0 "V-type sodium ATPase subunit D"  
"JS1\_M10\_00421" 16111 "s59E25H2" 0 "V-type sodium ATPase subunit D"  
"JS1\_M10\_00421" 16111 "s59E5H2" 0 "V-type sodium ATPase subunit D"  
"JS1\_M10\_00421" 16111 "s63E6H2" 0 "V-type sodium ATPase subunit D"  
"JS1\_M10\_00422" 16112 "s59E13H2" 0.002375311 "phosphodiesterase"  
"JS1\_M10\_00422" 16112 "s59E25H2" 0 "phosphodiesterase"  
"JS1\_M10\_00422" 16112 "s59E5H2" 0.1677859 "phosphodiesterase"  
"JS1\_M10\_00422" 16112 "s63E6H2" 0.06346447 "phosphodiesterase"  
"JS1\_M10\_00424" 16114 "s59E13H2" 0 "1-acyl-sn-glycerol-3-phosphate acyltransferase"  
"JS1\_M10\_00424" 16114 "s59E25H2" 0 "1-acyl-sn-glycerol-3-phosphate acyltransferase"  
"JS1\_M10\_00424" 16114 "s59E5H2" 0 "1-acyl-sn-glycerol-3-phosphate acyltransferase"  
"JS1\_M10\_00424" 16114 "s63E6H2" 0.005950784 "1-acyl-sn-glycerol-3-phosphate acyltransferase"  
"JS1\_M10\_00425" 16115 "s59E13H2" 0.06288893 "Serine/threonine-protein kinase PknD"  
"JS1\_M10\_00425" 16115 "s59E25H2" 0 "Serine/threonine-protein kinase PknD"  
"JS1\_M10\_00425" 16115 "s59E5H2" 0.660041 "Serine/threonine-protein kinase PknD"  
"JS1\_M10\_00425" 16115 "s63E6H2" 0.4859114 "Serine/threonine-protein kinase PknD"  
"JS1\_M10\_00426" 16116 "s59E13H2" 0.001961834 "hypothetical protein"  
"JS1\_M10\_00426" 16116 "s59E25H2" 0 "hypothetical protein"  
"JS1\_M10\_00426" 16116 "s59E5H2" 0.2639225 "hypothetical protein"  
"JS1\_M10\_00426" 16116 "s63E6H2" 0.03399584 "hypothetical protein"  
"JS1\_M10\_00427" 16117 "s59E13H2" 0.01844566 "hypothetical protein"  
"JS1\_M10\_00427" 16117 "s59E25H2" 0 "hypothetical protein"  
"JS1\_M10\_00427" 16117 "s59E5H2" 0.4980684 "hypothetical protein"  
"JS1\_M10\_00427" 16117 "s63E6H2" 0.7974988 "hypothetical protein"  
"JS1\_M10\_00428" 16118 "s59E13H2" 0 "L-lactate permease"  
"JS1\_M10\_00428" 16118 "s59E25H2" 0 "L-lactate permease"  
"JS1\_M10\_00428" 16118 "s59E5H2" 0.00822377 "L-lactate permease"  
"JS1\_M10\_00428" 16118 "s63E6H2" 0.6270769 "L-lactate permease"  
"JS1\_M10\_00431" 16121 "s59E13H2" 0.02098708 "Dimethylamine corrinoid protein"  
"JS1\_M10\_00431" 16121 "s59E25H2" 0 "Dimethylamine corrinoid protein"  
"JS1\_M10\_00431" 16121 "s59E5H2" 0.06701359 "Dimethylamine corrinoid protein"  
"JS1\_M10\_00431" 16121 "s63E6H2" 0.1498602 "Dimethylamine corrinoid protein"  
"JS1\_M10\_00432" 16122 "s59E13H2" 0.003947023 "hypothetical protein"  
"JS1\_M10\_00432" 16122 "s59E25H2" 0 "hypothetical protein"  
"JS1\_M10\_00432" 16122 "s59E5H2" 0 "hypothetical protein"  
"JS1\_M10\_00432" 16122 "s63E6H2" 0.1515342 "hypothetical protein"  
"JS1\_M10\_00433" 16123 "s59E13H2" 0.02481843 "Pyrroline-5-carboxylate reductase"  
"JS1\_M10\_00433" 16123 "s59E25H2" 0 "Pyrroline-5-carboxylate reductase"  
"JS1\_M10\_00433" 16123 "s59E5H2" 1.804571 "Pyrroline-5-carboxylate reductase"  
"JS1\_M10\_00433" 16123 "s63E6H2" 0.4984278 "Pyrroline-5-carboxylate reductase"  
"JS1\_M10\_00434" 16124 "s59E13H2" 0.2349198 "hypothetical protein"  
"JS1\_M10\_00434" 16124 "s59E25H2" 0 "hypothetical protein"  
"JS1\_M10\_00434" 16124 "s59E5H2" 2.340755 "hypothetical protein"



"JS1\_M10\_00434" 16124 "s63E6H2" 1.052872 "hypothetical protein"  
"JS1\_M10\_00435" 16125 "s59E13H2" 0.1478916 "Ferredoxin"  
"JS1\_M10\_00435" 16125 "s59E25H2" 0 "Ferredoxin"  
"JS1\_M10\_00435" 16125 "s59E5H2" 2.508726 "Ferredoxin"  
"JS1\_M10\_00435" 16125 "s63E6H2" 0.8086796 "Ferredoxin"  
"JS1\_M10\_00436" 16126 "s59E13H2" 0.1388183 "hypothetical protein"  
"JS1\_M10\_00436" 16126 "s59E25H2" 0 "hypothetical protein"  
"JS1\_M10\_00436" 16126 "s59E5H2" 1.173514 "hypothetical protein"  
"JS1\_M10\_00436" 16126 "s63E6H2" 0.5851513 "hypothetical protein"  
"JS1\_M10\_00437" 16127 "s59E13H2" 0.1468618 "(R)-citramalate synthase CimA"  
"JS1\_M10\_00437" 16127 "s59E25H2" 0 "(R)-citramalate synthase CimA"  
"JS1\_M10\_00437" 16127 "s59E5H2" 1.588987 "(R)-citramalate synthase CimA"  
"JS1\_M10\_00437" 16127 "s63E6H2" 0.6253231 "(R)-citramalate synthase CimA"  
"JS1\_M10\_00438" 16128 "s59E13H2" 0 "Divergent AAA domain protein"  
"JS1\_M10\_00438" 16128 "s59E25H2" 0 "Divergent AAA domain protein"  
"JS1\_M10\_00438" 16128 "s59E5H2" 0 "Divergent AAA domain protein"  
"JS1\_M10\_00438" 16128 "s63E6H2" 0 "Divergent AAA domain protein"  
"JS1\_M10\_00439" 16129 "s59E13H2" 0.001285217 "Divergent AAA domain protein"  
"JS1\_M10\_00439" 16129 "s59E25H2" 0 "Divergent AAA domain protein"  
"JS1\_M10\_00439" 16129 "s59E5H2" 0.02186727 "Divergent AAA domain protein"  
"JS1\_M10\_00439" 16129 "s63E6H2" 0.03609382 "Divergent AAA domain protein"  
"JS1\_M10\_00440" 16130 "s59E13H2" 0 "Calcineurin-like phosphoesterase superfamily domain protein"  
"JS1\_M10\_00440" 16130 "s59E25H2" 0 "Calcineurin-like phosphoesterase superfamily domain protein"  
"JS1\_M10\_00440" 16130 "s59E5H2" 0 "Calcineurin-like phosphoesterase superfamily domain protein"  
"JS1\_M10\_00440" 16130 "s63E6H2" 0.0324114 "Calcineurin-like phosphoesterase superfamily domain protein"  
"JS1\_M10\_00441" 16131 "s59E13H2" 0 "hypothetical protein"  
"JS1\_M10\_00441" 16131 "s59E25H2" 0 "hypothetical protein"  
"JS1\_M10\_00441" 16131 "s59E5H2" 0.1625725 "hypothetical protein"  
"JS1\_M10\_00441" 16131 "s63E6H2" 0 "hypothetical protein"  
"JS1\_M10\_00442" 16132 "s59E13H2" 0 "Ribonuclease HIII"  
"JS1\_M10\_00442" 16132 "s59E25H2" 0 "Ribonuclease HIII"  
"JS1\_M10\_00442" 16132 "s59E5H2" 0.6845413 "Ribonuclease HIII"  
"JS1\_M10\_00442" 16132 "s63E6H2" 0 "Ribonuclease HIII"  
"JS1\_M10\_00443" 16133 "s59E13H2" 0 "hypothetical protein"  
"JS1\_M10\_00443" 16133 "s59E25H2" 0 "hypothetical protein"  
"JS1\_M10\_00443" 16133 "s59E5H2" 0.2230759 "hypothetical protein"  
"JS1\_M10\_00443" 16133 "s63E6H2" 0 "hypothetical protein"  
"JS1\_M10\_00444" 16134 "s59E13H2" 0 "Modification methylase MbolI"  
"JS1\_M10\_00444" 16134 "s59E25H2" 0 "Modification methylase MbolI"  
"JS1\_M10\_00444" 16134 "s59E5H2" 0.00434398 "Modification methylase MbolI"  
"JS1\_M10\_00444" 16134 "s63E6H2" 0 "Modification methylase MbolI"  
"JS1\_M10\_00445" 16135 "s59E13H2" 0 "Putative ski2-type helicase"  
"JS1\_M10\_00445" 16135 "s59E25H2" 0 "Putative ski2-type helicase"  
"JS1\_M10\_00445" 16135 "s59E5H2" 0 "Putative ski2-type helicase"  
"JS1\_M10\_00445" 16135 "s63E6H2" 0 "Putative ski2-type helicase"  
"JS1\_M10\_00446" 16136 "s59E13H2" 0 "hypothetical protein"  
"JS1\_M10\_00446" 16136 "s59E25H2" 0 "hypothetical protein"

"JS1\_M10\_00446" 16136 "s59E5H2" 0.01627824 "hypothetical protein"  
"JS1\_M10\_00446" 16136 "s63E6H2" 0.001720907 "hypothetical protein"  
"JS1\_M10\_00447" 16137 "s59E13H2" 0 "RNA polymerase factor sigma-70"  
"JS1\_M10\_00447" 16137 "s59E25H2" 0 "RNA polymerase factor sigma-70"  
"JS1\_M10\_00447" 16137 "s59E5H2" 0 "RNA polymerase factor sigma-70"  
"JS1\_M10\_00447" 16137 "s63E6H2" 0.0326668 "RNA polymerase factor sigma-70"  
"JS1\_M10\_00448" 16138 "s59E13H2" 0 "putative DNA-binding protein"  
"JS1\_M10\_00448" 16138 "s59E25H2" 0 "putative DNA-binding protein"  
"JS1\_M10\_00448" 16138 "s59E5H2" 0 "putative DNA-binding protein"  
"JS1\_M10\_00448" 16138 "s63E6H2" 0.005847698 "putative DNA-binding protein"  
"JS1\_M10\_00449" 16139 "s59E13H2" 0.3651686 "hypothetical protein"  
"JS1\_M10\_00449" 16139 "s59E25H2" 0 "hypothetical protein"  
"JS1\_M10\_00449" 16139 "s59E5H2" 0.05631444 "hypothetical protein"  
"JS1\_M10\_00449" 16139 "s63E6H2" 0.1081207 "hypothetical protein"  
"JS1\_M10\_00450" 16140 "s59E13H2" 0.2727459 "hypothetical protein"  
"JS1\_M10\_00450" 16140 "s59E25H2" 0 "hypothetical protein"  
"JS1\_M10\_00450" 16140 "s59E5H2" 0.2886639 "hypothetical protein"  
"JS1\_M10\_00450" 16140 "s63E6H2" 0.8615222 "hypothetical protein"  
"JS1\_M10\_00451" 16141 "s59E13H2" 0.01609988 "hypothetical protein"  
"JS1\_M10\_00451" 16141 "s59E25H2" 0 "hypothetical protein"  
"JS1\_M10\_00451" 16141 "s59E5H2" 0.05935656 "hypothetical protein"  
"JS1\_M10\_00451" 16141 "s63E6H2" 0.2084143 "hypothetical protein"  
"JS1\_M10\_00452" 16142 "s59E13H2" 0.2988166 "Peptidase M15"  
"JS1\_M10\_00452" 16142 "s59E25H2" 0 "Peptidase M15"  
"JS1\_M10\_00452" 16142 "s59E5H2" 0.01957322 "Peptidase M15"  
"JS1\_M10\_00452" 16142 "s63E6H2" 0.5065915 "Peptidase M15"  
"JS1\_M10\_00453" 16143 "s59E13H2" 0.002395815 "hypothetical protein"  
"JS1\_M10\_00453" 16143 "s59E25H2" 0 "hypothetical protein"  
"JS1\_M10\_00453" 16143 "s59E5H2" 0 "hypothetical protein"  
"JS1\_M10\_00453" 16143 "s63E6H2" 0.02510521 "hypothetical protein"  
"JS1\_M10\_00454" 16144 "s59E13H2" 0 "HEPN domain protein"  
"JS1\_M10\_00454" 16144 "s59E25H2" 0 "HEPN domain protein"  
"JS1\_M10\_00454" 16144 "s59E5H2" 0 "HEPN domain protein"  
"JS1\_M10\_00454" 16144 "s63E6H2" 0.2119308 "HEPN domain protein"  
"JS1\_M10\_00455" 16145 "s59E13H2" 0 "Nucleotidyltransferase domain protein"  
"JS1\_M10\_00455" 16145 "s59E25H2" 0 "Nucleotidyltransferase domain protein"  
"JS1\_M10\_00455" 16145 "s59E5H2" 0 "Nucleotidyltransferase domain protein"  
"JS1\_M10\_00455" 16145 "s63E6H2" 0.5846724 "Nucleotidyltransferase domain protein"  
"JS1\_M10\_00456" 16146 "s59E13H2" 0.02202151 "putative xanthine dehydrogenase subunit D"  
"JS1\_M10\_00456" 16146 "s59E25H2" 0 "putative xanthine dehydrogenase subunit D"  
"JS1\_M10\_00456" 16146 "s59E5H2" 0.04094854 "putative xanthine dehydrogenase subunit D"  
"JS1\_M10\_00456" 16146 "s63E6H2" 0.3908024 "putative xanthine dehydrogenase subunit D"  
"JS1\_M10\_00457" 16147 "s59E13H2" 0.006291136 "Nicotinate dehydrogenase small FeS subunit"  
"JS1\_M10\_00457" 16147 "s59E25H2" 0 "Nicotinate dehydrogenase small FeS subunit"  
"JS1\_M10\_00457" 16147 "s59E5H2" 0.02879889 "Nicotinate dehydrogenase small FeS subunit"  
"JS1\_M10\_00457" 16147 "s63E6H2" 0.1491156 "Nicotinate dehydrogenase small FeS subunit"  
"JS1\_M10\_00458" 16148 "s59E13H2" 1.336176 "Glyceraldehyde dehydrogenase medium chain"

"JS1\_M10\_00458" 16148 "s59E25H2" 0 "Glyceraldehyde dehydrogenase medium chain"  
"JS1\_M10\_00458" 16148 "s59E5H2" 0.1057378 "Glyceraldehyde dehydrogenase medium chain"  
"JS1\_M10\_00458" 16148 "s63E6H2" 0.0464081 "Glyceraldehyde dehydrogenase medium chain"  
"JS1\_M10\_00459" 16149 "s59E13H2" 2.156321 "Glyceraldehyde dehydrogenase small chain"  
"JS1\_M10\_00459" 16149 "s59E25H2" 0 "Glyceraldehyde dehydrogenase small chain"  
"JS1\_M10\_00459" 16149 "s59E5H2" 0.1895447 "Glyceraldehyde dehydrogenase small chain"  
"JS1\_M10\_00459" 16149 "s63E6H2" 0.05217738 "Glyceraldehyde dehydrogenase small chain"  
"JS1\_M10\_00460" 16150 "s59E13H2" 2.132924 "Glyceraldehyde dehydrogenase medium chain"  
"JS1\_M10\_00460" 16150 "s59E25H2" 0 "Glyceraldehyde dehydrogenase medium chain"  
"JS1\_M10\_00460" 16150 "s59E5H2" 0.3594419 "Glyceraldehyde dehydrogenase medium chain"  
"JS1\_M10\_00460" 16150 "s63E6H2" 0.07658813 "Glyceraldehyde dehydrogenase medium chain"  
"JS1\_M10\_00461" 16151 "s59E13H2" 1.639556 "Xanthine dehydrogenase molybdenum-binding subunit"  
"JS1\_M10\_00461" 16151 "s59E25H2" 0 "Xanthine dehydrogenase molybdenum-binding subunit"  
"JS1\_M10\_00461" 16151 "s59E5H2" 0.1617821 "Xanthine dehydrogenase molybdenum-binding subunit"  
"JS1\_M10\_00461" 16151 "s63E6H2" 0.09156385 "Xanthine dehydrogenase molybdenum-binding subunit"  
"JS1\_M10\_00462" 16152 "s59E13H2" 0 "hypothetical protein"  
"JS1\_M10\_00462" 16152 "s59E25H2" 0 "hypothetical protein"  
"JS1\_M10\_00462" 16152 "s59E5H2" 0 "hypothetical protein"  
"JS1\_M10\_00462" 16152 "s63E6H2" 0 "hypothetical protein"  
"JS1\_M10\_00463" 16153 "s59E13H2" 0 "Maltotriose-binding protein precursor"  
"JS1\_M10\_00463" 16153 "s59E25H2" 0 "Maltotriose-binding protein precursor"  
"JS1\_M10\_00463" 16153 "s59E5H2" 0 "Maltotriose-binding protein precursor"  
"JS1\_M10\_00463" 16153 "s63E6H2" 0 "Maltotriose-binding protein precursor"  
"JS1\_M10\_00464" 16154 "s59E13H2" 0 "Histidinol-phosphate aminotransferase 2"  
"JS1\_M10\_00464" 16154 "s59E25H2" 0 "Histidinol-phosphate aminotransferase 2"  
"JS1\_M10\_00464" 16154 "s59E5H2" 0.0397022 "Histidinol-phosphate aminotransferase 2"  
"JS1\_M10\_00464" 16154 "s63E6H2" 0.009801304 "Histidinol-phosphate aminotransferase 2"  
"JS1\_M10\_00465" 16155 "s59E13H2" 0.1065985 "Putative ABC transporter arginine-binding protein 2 precursor"  
"JS1\_M10\_00465" 16155 "s59E25H2" 0 "Putative ABC transporter arginine-binding protein 2 precursor"  
"JS1\_M10\_00465" 16155 "s59E5H2" 0.09023274 "Putative ABC transporter arginine-binding protein 2 precursor"  
"JS1\_M10\_00465" 16155 "s63E6H2" 0.236731 "Putative ABC transporter arginine-binding protein 2 precursor"  
"JS1\_M10\_00466" 16156 "s59E13H2" 0.02757831 "putative amino-acid permease protein YxeN"  
"JS1\_M10\_00466" 16156 "s59E25H2" 0 "putative amino-acid permease protein YxeN"  
"JS1\_M10\_00466" 16156 "s59E5H2" 0.1811732 "putative amino-acid permease protein YxeN"  
"JS1\_M10\_00466" 16156 "s63E6H2" 0.1571816 "putative amino-acid permease protein YxeN"  
"JS1\_M10\_00467" 16157 "s59E13H2" 0.01034768 "Glutamine transport ATP-binding protein GlnQ"  
"JS1\_M10\_00467" 16157 "s59E25H2" 0 "Glutamine transport ATP-binding protein GlnQ"  
"JS1\_M10\_00467" 16157 "s59E5H2" 0.08524301 "Glutamine transport ATP-binding protein GlnQ"  
"JS1\_M10\_00467" 16157 "s63E6H2" 0.04494416 "Glutamine transport ATP-binding protein GlnQ"  
"JS1\_M10\_00468" 16158 "s59E13H2" 0 "Inner membrane amino-acid ABC transporter permease protein YecS"  
"JS1\_M10\_00468" 16158 "s59E25H2" 0 "Inner membrane amino-acid ABC transporter permease protein YecS"  
"JS1\_M10\_00468" 16158 "s59E5H2" 0.003276579 "Inner membrane amino-acid ABC transporter permease protein YecS"  
"JS1\_M10\_00468" 16158 "s63E6H2" 0 "Inner membrane amino-acid ABC transporter permease protein YecS"  
"JS1\_M10\_00471" 16161 "s59E13H2" 0.02595317 "hypothetical protein"  
"JS1\_M10\_00471" 16161 "s59E25H2" 0 "hypothetical protein"  
"JS1\_M10\_00471" 16161 "s59E5H2" 0.4266576 "hypothetical protein"  
"JS1\_M10\_00471" 16161 "s63E6H2" 0.05978753 "hypothetical protein"

"JS1\_M10\_00472" 16162 "s59E13H2" 0.0004558909 "Group II intron-encoded protein LtrA"  
"JS1\_M10\_00472" 16162 "s59E25H2" 0 "Group II intron-encoded protein LtrA"  
"JS1\_M10\_00472" 16162 "s59E5H2" 0.1107195 "Group II intron-encoded protein LtrA"  
"JS1\_M10\_00472" 16162 "s63E6H2" 0.1592341 "Group II intron-encoded protein LtrA"  
"JS1\_M10\_00474" 16164 "s59E13H2" 0 "D-aminoacylase"  
"JS1\_M10\_00474" 16164 "s59E25H2" 0 "D-aminoacylase"  
"JS1\_M10\_00474" 16164 "s59E5H2" 0 "D-aminoacylase"  
"JS1\_M10\_00474" 16164 "s63E6H2" 0 "D-aminoacylase"  
"JS1\_M10\_00475" 16165 "s59E13H2" 0 "Histidinol-phosphate aminotransferase"  
"JS1\_M10\_00475" 16165 "s59E25H2" 0 "Histidinol-phosphate aminotransferase"  
"JS1\_M10\_00475" 16165 "s59E5H2" 0 "Histidinol-phosphate aminotransferase"  
"JS1\_M10\_00475" 16165 "s63E6H2" 0 "Histidinol-phosphate aminotransferase"  
"JS1\_M10\_00480" 16170 "s59E13H2" 0 "hypothetical protein"  
"JS1\_M10\_00480" 16170 "s59E25H2" 0 "hypothetical protein"  
"JS1\_M10\_00480" 16170 "s59E5H2" 0 "hypothetical protein"  
"JS1\_M10\_00480" 16170 "s63E6H2" 0 "hypothetical protein"  
"JS1\_M10\_00482" 16172 "s59E13H2" 0 "lipoprotein Nlpl"  
"JS1\_M10\_00482" 16172 "s59E25H2" 0 "lipoprotein Nlpl"  
"JS1\_M10\_00482" 16172 "s59E5H2" 0 "lipoprotein Nlpl"  
"JS1\_M10\_00482" 16172 "s63E6H2" 0.015434 "lipoprotein Nlpl"  
"JS1\_M10\_00483" 16173 "s59E13H2" 0 "Acetylornithine deacetylase"  
"JS1\_M10\_00483" 16173 "s59E25H2" 0 "Acetylornithine deacetylase"  
"JS1\_M10\_00483" 16173 "s59E5H2" 0 "Acetylornithine deacetylase"  
"JS1\_M10\_00483" 16173 "s63E6H2" 0 "Acetylornithine deacetylase"  
"JS1\_M10\_00484" 16174 "s59E13H2" 0 "Sialic acid TRAP transporter permease protein SiaT"  
"JS1\_M10\_00484" 16174 "s59E25H2" 0 "Sialic acid TRAP transporter permease protein SiaT"  
"JS1\_M10\_00484" 16174 "s59E5H2" 0 "Sialic acid TRAP transporter permease protein SiaT"  
"JS1\_M10\_00484" 16174 "s63E6H2" 0 "Sialic acid TRAP transporter permease protein SiaT"  
"JS1\_M10\_00485" 16175 "s59E13H2" 0 "Tripartite ATP-independent periplasmic transporters, DctQ component"  
"JS1\_M10\_00485" 16175 "s59E25H2" 0 "Tripartite ATP-independent periplasmic transporters, DctQ component"  
"JS1\_M10\_00485" 16175 "s59E5H2" 0 "Tripartite ATP-independent periplasmic transporters, DctQ component"  
"JS1\_M10\_00485" 16175 "s63E6H2" 0 "Tripartite ATP-independent periplasmic transporters, DctQ component"  
"JS1\_M10\_00486" 16176 "s59E13H2" 0 "C4-dicarboxylate-binding periplasmic protein precursor"  
"JS1\_M10\_00486" 16176 "s59E25H2" 0 "C4-dicarboxylate-binding periplasmic protein precursor"  
"JS1\_M10\_00486" 16176 "s59E5H2" 0 "C4-dicarboxylate-binding periplasmic protein precursor"  
"JS1\_M10\_00486" 16176 "s63E6H2" 0 "C4-dicarboxylate-binding periplasmic protein precursor"  
"JS1\_M10\_00487" 16177 "s59E13H2" 0 "DNA-invertase hin"  
"JS1\_M10\_00487" 16177 "s59E25H2" 0 "DNA-invertase hin"  
"JS1\_M10\_00487" 16177 "s59E5H2" 0.009027962 "DNA-invertase hin"  
"JS1\_M10\_00487" 16177 "s63E6H2" 0.002195299 "DNA-invertase hin"  
"JS1\_M10\_00488" 16178 "s59E13H2" 0 "Restriction enzyme Bgcl subunit alpha"  
"JS1\_M10\_00488" 16178 "s59E25H2" 0 "Restriction enzyme Bgcl subunit alpha"  
"JS1\_M10\_00488" 16178 "s59E5H2" 0 "Restriction enzyme Bgcl subunit alpha"  
"JS1\_M10\_00488" 16178 "s63E6H2" 0 "Restriction enzyme Bgcl subunit alpha"  
"JS1\_M10\_00489" 16179 "s59E13H2" 0 "Restriction enzyme Bgcl subunit beta"  
"JS1\_M10\_00489" 16179 "s59E25H2" 0 "Restriction enzyme Bgcl subunit beta"  
"JS1\_M10\_00489" 16179 "s59E5H2" 0 "Restriction enzyme Bgcl subunit beta"

"JS1\_M10\_00489" 16179 "s63E6H2" 0.001570483 "Restriction enzyme Bgcl subunit beta"  
"JS1\_M10\_00490" 16180 "s59E13H2" 0.01728697 "Sporulation initiation inhibitor protein Soj"  
"JS1\_M10\_00490" 16180 "s59E25H2" 0 "Sporulation initiation inhibitor protein Soj"  
"JS1\_M10\_00490" 16180 "s59E5H2" 1.506243 "Sporulation initiation inhibitor protein Soj"  
"JS1\_M10\_00490" 16180 "s63E6H2" 0.01917813 "Sporulation initiation inhibitor protein Soj"  
"JS1\_M10\_00491" 16181 "s59E13H2" 0 "hypothetical protein"  
"JS1\_M10\_00491" 16181 "s59E25H2" 0 "hypothetical protein"  
"JS1\_M10\_00491" 16181 "s59E5H2" 0.4466354 "hypothetical protein"  
"JS1\_M10\_00491" 16181 "s63E6H2" 0.005469713 "hypothetical protein"  
"JS1\_M10\_00492" 16182 "s59E13H2" 0 "Helix-turn-helix domain protein"  
"JS1\_M10\_00492" 16182 "s59E25H2" 0 "Helix-turn-helix domain protein"  
"JS1\_M10\_00492" 16182 "s59E5H2" 0 "Helix-turn-helix domain protein"  
"JS1\_M10\_00492" 16182 "s63E6H2" 0 "Helix-turn-helix domain protein"  
"JS1\_M10\_00496" 16186 "s59E13H2" 0 "hypothetical protein"  
"JS1\_M10\_00496" 16186 "s59E25H2" 0 "hypothetical protein"  
"JS1\_M10\_00496" 16186 "s59E5H2" 0 "hypothetical protein"  
"JS1\_M10\_00496" 16186 "s63E6H2" 0 "hypothetical protein"  
"JS1\_M10\_00497" 16187 "s59E13H2" 0 "hypothetical protein"  
"JS1\_M10\_00497" 16187 "s59E25H2" 0 "hypothetical protein"  
"JS1\_M10\_00497" 16187 "s59E5H2" 0 "hypothetical protein"  
"JS1\_M10\_00497" 16187 "s63E6H2" 0 "hypothetical protein"  
"JS1\_M10\_00498" 16188 "s59E13H2" 0 "UDP-glucose 6-dehydrogenase YwqF"  
"JS1\_M10\_00498" 16188 "s59E25H2" 0 "UDP-glucose 6-dehydrogenase YwqF"  
"JS1\_M10\_00498" 16188 "s59E5H2" 0.01671442 "UDP-glucose 6-dehydrogenase YwqF"  
"JS1\_M10\_00498" 16188 "s63E6H2" 0.00607929 "UDP-glucose 6-dehydrogenase YwqF"  
"JS1\_M10\_00499" 16189 "s59E13H2" 0 "UDP-glucose 6-dehydrogenase TuaD"  
"JS1\_M10\_00499" 16189 "s59E25H2" 0 "UDP-glucose 6-dehydrogenase TuaD"  
"JS1\_M10\_00499" 16189 "s59E5H2" 0.062789 "UDP-glucose 6-dehydrogenase TuaD"  
"JS1\_M10\_00499" 16189 "s63E6H2" 0.006045978 "UDP-glucose 6-dehydrogenase TuaD"  
"JS1\_M10\_00500" 16190 "s59E13H2" 0 "hypothetical protein"  
"JS1\_M10\_00500" 16190 "s59E25H2" 0 "hypothetical protein"  
"JS1\_M10\_00500" 16190 "s59E5H2" 0.07811108 "hypothetical protein"  
"JS1\_M10\_00500" 16190 "s63E6H2" 0 "hypothetical protein"  
"JS1\_M10\_00501" 16191 "s59E13H2" 0 "hypothetical protein"  
"JS1\_M10\_00501" 16191 "s59E25H2" 0 "hypothetical protein"  
"JS1\_M10\_00501" 16191 "s59E5H2" 0 "hypothetical protein"  
"JS1\_M10\_00501" 16191 "s63E6H2" 0 "hypothetical protein"  
"JS1\_M10\_00502" 16192 "s59E13H2" 0 "hypothetical protein"  
"JS1\_M10\_00502" 16192 "s59E25H2" 0 "hypothetical protein"  
"JS1\_M10\_00502" 16192 "s59E5H2" 0.3665694 "hypothetical protein"  
"JS1\_M10\_00502" 16192 "s63E6H2" 0.1057385 "hypothetical protein"  
"JS1\_M10\_00503" 16193 "s59E13H2" 0.003472302 "putative transcriptional regulatory protein TcrX"  
"JS1\_M10\_00503" 16193 "s59E25H2" 0 "putative transcriptional regulatory protein TcrX"  
"JS1\_M10\_00503" 16193 "s59E5H2" 0.1211654 "putative transcriptional regulatory protein TcrX"  
"JS1\_M10\_00503" 16193 "s63E6H2" 0.1501095 "putative transcriptional regulatory protein TcrX"  
"JS1\_M10\_00504" 16194 "s59E13H2" 0 "Sensor protein ZraS"  
"JS1\_M10\_00504" 16194 "s59E25H2" 0 "Sensor protein ZraS"

"JS1\_M10\_00504" 16194 "s59E5H2" 0.1352757 "Sensor protein ZraS"  
"JS1\_M10\_00504" 16194 "s63E6H2" 0.1189339 "Sensor protein ZraS"  
"JS1\_M10\_00505" 16195 "s59E13H2" 0.003939618 "Gas vesicle structural protein"  
"JS1\_M10\_00505" 16195 "s59E25H2" 0 "Gas vesicle structural protein"  
"JS1\_M10\_00505" 16195 "s59E5H2" 0.3576393 "Gas vesicle structural protein"  
"JS1\_M10\_00505" 16195 "s63E6H2" 0.1155559 "Gas vesicle structural protein"  
"JS1\_M10\_00506" 16196 "s59E13H2" 0.002764052 "Gas vesicle synthesis protein GvpL/GvpF"  
"JS1\_M10\_00506" 16196 "s59E25H2" 0 "Gas vesicle synthesis protein GvpL/GvpF"  
"JS1\_M10\_00506" 16196 "s59E5H2" 0.2685214 "Gas vesicle synthesis protein GvpL/GvpF"  
"JS1\_M10\_00506" 16196 "s63E6H2" 0.07632091 "Gas vesicle synthesis protein GvpL/GvpF"  
"JS1\_M10\_00507" 16197 "s59E13H2" 0 "Gas vesicle protein K"  
"JS1\_M10\_00507" 16197 "s59E25H2" 0 "Gas vesicle protein K"  
"JS1\_M10\_00507" 16197 "s59E5H2" 0.1291935 "Gas vesicle protein K"  
"JS1\_M10\_00507" 16197 "s63E6H2" 0.05285605 "Gas vesicle protein K"  
"JS1\_M10\_00508" 16198 "s59E13H2" 0 "Gas vesicle structural protein"  
"JS1\_M10\_00508" 16198 "s59E25H2" 0 "Gas vesicle structural protein"  
"JS1\_M10\_00508" 16198 "s59E5H2" 0.2179275 "Gas vesicle structural protein"  
"JS1\_M10\_00508" 16198 "s63E6H2" 0.5836288 "Gas vesicle structural protein"  
"JS1\_M10\_00509" 16199 "s59E13H2" 0 "Gas vesicle synthesis protein GvpO"  
"JS1\_M10\_00509" 16199 "s59E25H2" 0 "Gas vesicle synthesis protein GvpO"  
"JS1\_M10\_00509" 16199 "s59E5H2" 0.3324633 "Gas vesicle synthesis protein GvpO"  
"JS1\_M10\_00509" 16199 "s63E6H2" 0.1039927 "Gas vesicle synthesis protein GvpO"  
"JS1\_M10\_00510" 16200 "s59E13H2" 0.001666548 "Putative arsenical pump-driving ATPase"  
"JS1\_M10\_00510" 16200 "s59E25H2" 0 "Putative arsenical pump-driving ATPase"  
"JS1\_M10\_00510" 16200 "s59E5H2" 1.194497 "Putative arsenical pump-driving ATPase"  
"JS1\_M10\_00510" 16200 "s63E6H2" 0.147691 "Putative arsenical pump-driving ATPase"  
"JS1\_M10\_00511" 16201 "s59E13H2" 0 "Gas vesicle protein G"  
"JS1\_M10\_00511" 16201 "s59E25H2" 0 "Gas vesicle protein G"  
"JS1\_M10\_00511" 16201 "s59E5H2" 0.368703 "Gas vesicle protein G"  
"JS1\_M10\_00511" 16201 "s63E6H2" 0.04116338 "Gas vesicle protein G"  
"JS1\_M10\_00512" 16202 "s59E13H2" 0 "Gas vesicle synthesis protein GvpL/GvpF"  
"JS1\_M10\_00512" 16202 "s59E25H2" 0 "Gas vesicle synthesis protein GvpL/GvpF"  
"JS1\_M10\_00512" 16202 "s59E5H2" 0.1929719 "Gas vesicle synthesis protein GvpL/GvpF"  
"JS1\_M10\_00512" 16202 "s63E6H2" 0.0486779 "Gas vesicle synthesis protein GvpL/GvpF"  
"JS1\_M10\_00514" 16204 "s59E13H2" 0 "hypothetical protein"  
"JS1\_M10\_00514" 16204 "s59E25H2" 0 "hypothetical protein"  
"JS1\_M10\_00514" 16204 "s59E5H2" 0 "hypothetical protein"  
"JS1\_M10\_00514" 16204 "s63E6H2" 0 "hypothetical protein"  
"JS1\_M10\_00515" 16205 "s59E13H2" 0.0007548705 "hypothetical protein"  
"JS1\_M10\_00515" 16205 "s59E25H2" 0 "hypothetical protein"  
"JS1\_M10\_00515" 16205 "s59E5H2" 0.1044337 "hypothetical protein"  
"JS1\_M10\_00515" 16205 "s63E6H2" 0.04159679 "hypothetical protein"  
"JS1\_M10\_00517" 16207 "s59E13H2" 0 "Reverse transcriptase (RNA-dependent DNA polymerase)"  
"JS1\_M10\_00517" 16207 "s59E25H2" 0 "Reverse transcriptase (RNA-dependent DNA polymerase)"  
"JS1\_M10\_00517" 16207 "s59E5H2" 0 "Reverse transcriptase (RNA-dependent DNA polymerase)"  
"JS1\_M10\_00517" 16207 "s63E6H2" 0 "Reverse transcriptase (RNA-dependent DNA polymerase)"  
"JS1\_M10\_00518" 16208 "s59E13H2" 0.003663576 "Caspase domain protein"

"JS1\_M10\_00518" 16208 "s59E25H2" 0 "Caspase domain protein"  
"JS1\_M10\_00518" 16208 "s59E5H2" 0.2760844 "Caspase domain protein"  
"JS1\_M10\_00518" 16208 "s63E6H2" 0.009281309 "Caspase domain protein"  
"JS1\_M10\_00519" 16209 "s59E13H2" 0.09433126 "hypothetical protein"  
"JS1\_M10\_00519" 16209 "s59E25H2" 0 "hypothetical protein"  
"JS1\_M10\_00519" 16209 "s59E5H2" 0.1451306 "hypothetical protein"  
"JS1\_M10\_00519" 16209 "s63E6H2" 0.05110725 "hypothetical protein"  
"JS1\_M10\_00520" 16210 "s59E13H2" 0 "hypothetical protein"  
"JS1\_M10\_00520" 16210 "s59E25H2" 0 "hypothetical protein"  
"JS1\_M10\_00520" 16210 "s59E5H2" 0 "hypothetical protein"  
"JS1\_M10\_00520" 16210 "s63E6H2" 0.0008934876 "hypothetical protein"  
"JS1\_M10\_00521" 16211 "s59E13H2" 0 "hypothetical protein"  
"JS1\_M10\_00521" 16211 "s59E25H2" 0 "hypothetical protein"  
"JS1\_M10\_00521" 16211 "s59E5H2" 0 "hypothetical protein"  
"JS1\_M10\_00521" 16211 "s63E6H2" 0.001745454 "hypothetical protein"  
"JS1\_M10\_00523" 16213 "s59E13H2" 0 "hypothetical protein"  
"JS1\_M10\_00523" 16213 "s59E25H2" 0 "hypothetical protein"  
"JS1\_M10\_00523" 16213 "s59E5H2" 0 "hypothetical protein"  
"JS1\_M10\_00523" 16213 "s63E6H2" 0 "hypothetical protein"  
"JS1\_M10\_00528" 16218 "s59E13H2" 0.1793713 "ATP-dependent zinc metalloprotease FtsH"  
"JS1\_M10\_00528" 16218 "s59E25H2" 0 "ATP-dependent zinc metalloprotease FtsH"  
"JS1\_M10\_00528" 16218 "s59E5H2" 0.0761727 "ATP-dependent zinc metalloprotease FtsH"  
"JS1\_M10\_00528" 16218 "s63E6H2" 0.14948 "ATP-dependent zinc metalloprotease FtsH"  
"JS1\_M10\_00529" 16219 "s59E13H2" 0.005363953 "Hypoxanthine-guanine phosphoribosyltransferase"  
"JS1\_M10\_00529" 16219 "s59E25H2" 0 "Hypoxanthine-guanine phosphoribosyltransferase"  
"JS1\_M10\_00529" 16219 "s59E5H2" 0.2347634 "Hypoxanthine-guanine phosphoribosyltransferase"  
"JS1\_M10\_00529" 16219 "s63E6H2" 0.2369061 "Hypoxanthine-guanine phosphoribosyltransferase"  
"JS1\_M10\_00530" 16220 "s59E13H2" 0.04587823 "tRNA(Ile)-lysidine synthase"  
"JS1\_M10\_00530" 16220 "s59E25H2" 0 "tRNA(Ile)-lysidine synthase"  
"JS1\_M10\_00530" 16220 "s59E5H2" 0.1716215 "tRNA(Ile)-lysidine synthase"  
"JS1\_M10\_00530" 16220 "s63E6H2" 0.3901483 "tRNA(Ile)-lysidine synthase"  
"JS1\_M10\_00534" 16224 "s59E13H2" 0.02864352 "cell division protein FtsB"  
"JS1\_M10\_00534" 16224 "s59E25H2" 0 "cell division protein FtsB"  
"JS1\_M10\_00534" 16224 "s59E5H2" 0.3741645 "cell division protein FtsB"  
"JS1\_M10\_00534" 16224 "s63E6H2" 0.4844434 "cell division protein FtsB"  
"JS1\_M10\_00535" 16225 "s59E13H2" 0.01380259 "Enolase"  
"JS1\_M10\_00535" 16225 "s59E25H2" 0 "Enolase"  
"JS1\_M10\_00535" 16225 "s59E5H2" 0.2610962 "Enolase"  
"JS1\_M10\_00535" 16225 "s63E6H2" 0.465329 "Enolase"  
"JS1\_M10\_00536" 16226 "s59E13H2" 0.02973325 "Magnesium transporter MgtE"  
"JS1\_M10\_00536" 16226 "s59E25H2" 0 "Magnesium transporter MgtE"  
"JS1\_M10\_00536" 16226 "s59E5H2" 0.2766684 "Magnesium transporter MgtE"  
"JS1\_M10\_00536" 16226 "s63E6H2" 0.3119099 "Magnesium transporter MgtE"  
"JS1\_M10\_00537" 16227 "s59E13H2" 0.0002060916 "S4 domain protein"  
"JS1\_M10\_00537" 16227 "s59E25H2" 0 "S4 domain protein"  
"JS1\_M10\_00537" 16227 "s59E5H2" 0.09210666 "S4 domain protein"  
"JS1\_M10\_00537" 16227 "s63E6H2" 0.04320799 "S4 domain protein"

"JS1\_M10\_00538" 16228 "s59E13H2" 0.02075883 "Lysine--tRNA ligase"  
"JS1\_M10\_00538" 16228 "s59E25H2" 0 "Lysine--tRNA ligase"  
"JS1\_M10\_00538" 16228 "s59E5H2" 0.1561118 "Lysine--tRNA ligase"  
"JS1\_M10\_00538" 16228 "s63E6H2" 0.1786704 "Lysine--tRNA ligase"  
"JS1\_M10\_00539" 16229 "s59E13H2" 0.03674431 "Transcription elongation factor GreA"  
"JS1\_M10\_00539" 16229 "s59E25H2" 0 "Transcription elongation factor GreA"  
"JS1\_M10\_00539" 16229 "s59E5H2" 0.1581499 "Transcription elongation factor GreA"  
"JS1\_M10\_00539" 16229 "s63E6H2" 0.1767355 "Transcription elongation factor GreA"  
"JS1\_M10\_00540" 16230 "s59E13H2" 0.131641 "Transposase IS200 like protein"  
"JS1\_M10\_00540" 16230 "s59E25H2" 0 "Transposase IS200 like protein"  
"JS1\_M10\_00540" 16230 "s59E5H2" 1.248454 "Transposase IS200 like protein"  
"JS1\_M10\_00540" 16230 "s63E6H2" 1.156388 "Transposase IS200 like protein"  
"JS1\_M10\_00541" 16231 "s59E13H2" 0.01769714 "isoaspartyl dipeptidase"  
"JS1\_M10\_00541" 16231 "s59E25H2" 0 "isoaspartyl dipeptidase"  
"JS1\_M10\_00541" 16231 "s59E5H2" 0.1577395 "isoaspartyl dipeptidase"  
"JS1\_M10\_00541" 16231 "s63E6H2" 0.1636021 "isoaspartyl dipeptidase"  
"JS1\_M10\_00542" 16232 "s59E13H2" 0.05916547 "Dipeptide transport system permease protein DppC"  
"JS1\_M10\_00542" 16232 "s59E25H2" 0 "Dipeptide transport system permease protein DppC"  
"JS1\_M10\_00542" 16232 "s59E5H2" 0.1044392 "Dipeptide transport system permease protein DppC"  
"JS1\_M10\_00542" 16232 "s63E6H2" 0.2899023 "Dipeptide transport system permease protein DppC"  
"JS1\_M10\_00543" 16233 "s59E13H2" 0.07065418 "Glutathione transport system permease protein GsiC"  
"JS1\_M10\_00543" 16233 "s59E25H2" 0 "Glutathione transport system permease protein GsiC"  
"JS1\_M10\_00543" 16233 "s59E5H2" 0.07525322 "Glutathione transport system permease protein GsiC"  
"JS1\_M10\_00543" 16233 "s63E6H2" 0.3397313 "Glutathione transport system permease protein GsiC"  
"JS1\_M10\_00544" 16234 "s59E13H2" 0.03590142 "Glutathione-binding protein GsiB precursor"  
"JS1\_M10\_00544" 16234 "s59E25H2" 0 "Glutathione-binding protein GsiB precursor"  
"JS1\_M10\_00544" 16234 "s59E5H2" 0 "Glutathione-binding protein GsiB precursor"  
"JS1\_M10\_00544" 16234 "s63E6H2" 0.05354391 "Glutathione-binding protein GsiB precursor"  
"JS1\_M10\_00546" 16236 "s59E13H2" 0.002807869 "Putative pyridoxal phosphate-dependent acyltransferase"  
"JS1\_M10\_00546" 16236 "s59E25H2" 0 "Putative pyridoxal phosphate-dependent acyltransferase"  
"JS1\_M10\_00546" 16236 "s59E5H2" 0.04750825 "Putative pyridoxal phosphate-dependent acyltransferase"  
"JS1\_M10\_00546" 16236 "s63E6H2" 0.2448671 "Putative pyridoxal phosphate-dependent acyltransferase"  
"JS1\_M10\_00547" 16237 "s59E13H2" 0.0163751 "hypothetical protein"  
"JS1\_M10\_00547" 16237 "s59E25H2" 0 "hypothetical protein"  
"JS1\_M10\_00547" 16237 "s59E5H2" 0.06745079 "hypothetical protein"  
"JS1\_M10\_00547" 16237 "s63E6H2" 0.1328415 "hypothetical protein"  
"JS1\_M10\_00548" 16238 "s59E13H2" 0.004186604 "hypothetical protein"  
"JS1\_M10\_00548" 16238 "s59E25H2" 0 "hypothetical protein"  
"JS1\_M10\_00548" 16238 "s59E5H2" 0.08176889 "hypothetical protein"  
"JS1\_M10\_00548" 16238 "s63E6H2" 0.08934819 "hypothetical protein"  
"JS1\_M10\_00549" 16239 "s59E13H2" 0.04752988 "tRNA-specific 2-thiouridylase MnmA"  
"JS1\_M10\_00549" 16239 "s59E25H2" 0 "tRNA-specific 2-thiouridylase MnmA"  
"JS1\_M10\_00549" 16239 "s59E5H2" 0.1631518 "tRNA-specific 2-thiouridylase MnmA"  
"JS1\_M10\_00549" 16239 "s63E6H2" 0.07378521 "tRNA-specific 2-thiouridylase MnmA"  
"JS1\_M10\_00550" 16240 "s59E13H2" 0.009768465 "hypothetical protein"  
"JS1\_M10\_00550" 16240 "s59E25H2" 0 "hypothetical protein"  
"JS1\_M10\_00550" 16240 "s59E5H2" 0.04373435 "hypothetical protein"



"JS1\_M10\_00550" 16240 "s63E6H2" 0.04330961 "hypothetical protein"  
"JS1\_M10\_00551" 16241 "s59E13H2" 0 "HTH-type transcriptional regulator CymR"  
"JS1\_M10\_00551" 16241 "s59E25H2" 0 "HTH-type transcriptional regulator CymR"  
"JS1\_M10\_00551" 16241 "s59E5H2" 0.08843708 "HTH-type transcriptional regulator CymR"  
"JS1\_M10\_00551" 16241 "s63E6H2" 0.06805427 "HTH-type transcriptional regulator CymR"  
"JS1\_M10\_00552" 16242 "s59E13H2" 0 "General stress protein 69"  
"JS1\_M10\_00552" 16242 "s59E25H2" 0 "General stress protein 69"  
"JS1\_M10\_00552" 16242 "s59E5H2" 0.01068017 "General stress protein 69"  
"JS1\_M10\_00552" 16242 "s63E6H2" 0 "General stress protein 69"  
"JS1\_M10\_00553" 16243 "s59E13H2" 0 "Cocaine esterase"  
"JS1\_M10\_00553" 16243 "s59E25H2" 0 "Cocaine esterase"  
"JS1\_M10\_00553" 16243 "s59E5H2" 0 "Cocaine esterase"  
"JS1\_M10\_00553" 16243 "s63E6H2" 0 "Cocaine esterase"  
"JS1\_M10\_00554" 16244 "s59E13H2" 0 "N-acyl-D-glutamate deacylase"  
"JS1\_M10\_00554" 16244 "s59E25H2" 0 "N-acyl-D-glutamate deacylase"  
"JS1\_M10\_00554" 16244 "s59E5H2" 0 "N-acyl-D-glutamate deacylase"  
"JS1\_M10\_00554" 16244 "s63E6H2" 0 "N-acyl-D-glutamate deacylase"  
"JS1\_M10\_00555" 16245 "s59E13H2" 0 "D-aminoacylase"  
"JS1\_M10\_00555" 16245 "s59E25H2" 0 "D-aminoacylase"  
"JS1\_M10\_00555" 16245 "s59E5H2" 0 "D-aminoacylase"  
"JS1\_M10\_00555" 16245 "s63E6H2" 0 "D-aminoacylase"  
"JS1\_M10\_00556" 16246 "s59E13H2" 0 "D-aminoacylase"  
"JS1\_M10\_00556" 16246 "s59E25H2" 0 "D-aminoacylase"  
"JS1\_M10\_00556" 16246 "s59E5H2" 0 "D-aminoacylase"  
"JS1\_M10\_00556" 16246 "s63E6H2" 0 "D-aminoacylase"  
"JS1\_M10\_00557" 16247 "s59E13H2" 0 "Membrane dipeptidase (Peptidase family M19)"  
"JS1\_M10\_00557" 16247 "s59E25H2" 0 "Membrane dipeptidase (Peptidase family M19)"  
"JS1\_M10\_00557" 16247 "s59E5H2" 0 "Membrane dipeptidase (Peptidase family M19)"  
"JS1\_M10\_00557" 16247 "s63E6H2" 0 "Membrane dipeptidase (Peptidase family M19)"  
"JS1\_M10\_00559" 16249 "s59E13H2" 0 "D-aminopeptidase"  
"JS1\_M10\_00559" 16249 "s59E25H2" 0 "D-aminopeptidase"  
"JS1\_M10\_00559" 16249 "s59E5H2" 0 "D-aminopeptidase"  
"JS1\_M10\_00559" 16249 "s63E6H2" 0 "D-aminopeptidase"  
"JS1\_M10\_00560" 16250 "s59E13H2" 0.0002191888 "5-aminovalerate aminotransferase DavT"  
"JS1\_M10\_00560" 16250 "s59E25H2" 0 "5-aminovalerate aminotransferase DavT"  
"JS1\_M10\_00560" 16250 "s59E5H2" 0 "5-aminovalerate aminotransferase DavT"  
"JS1\_M10\_00560" 16250 "s63E6H2" 0.005393879 "5-aminovalerate aminotransferase DavT"  
"JS1\_M10\_00561" 16251 "s59E13H2" 0 "hypothetical protein"  
"JS1\_M10\_00561" 16251 "s59E25H2" 0 "hypothetical protein"  
"JS1\_M10\_00561" 16251 "s59E5H2" 0 "hypothetical protein"  
"JS1\_M10\_00561" 16251 "s63E6H2" 0 "hypothetical protein"  
"JS1\_M10\_00562" 16252 "s59E13H2" 0.001704802 "Oligopeptide transport ATP-binding protein OppF"  
"JS1\_M10\_00562" 16252 "s59E25H2" 0 "Oligopeptide transport ATP-binding protein OppF"  
"JS1\_M10\_00562" 16252 "s59E5H2" 0 "Oligopeptide transport ATP-binding protein OppF"  
"JS1\_M10\_00562" 16252 "s63E6H2" 0 "Oligopeptide transport ATP-binding protein OppF"  
"JS1\_M10\_00563" 16253 "s59E13H2" 0 "Oligopeptide transport ATP-binding protein OppD"  
"JS1\_M10\_00563" 16253 "s59E25H2" 0 "Oligopeptide transport ATP-binding protein OppD"

"JS1\_M10\_00563" 16253 "s59E5H2" 0 "Oligopeptide transport ATP-binding protein OppD"  
"JS1\_M10\_00563" 16253 "s63E6H2" 0 "Oligopeptide transport ATP-binding protein OppD"  
"JS1\_M10\_00565" 16255 "s59E13H2" 1.454211 "hypothetical protein"  
"JS1\_M10\_00565" 16255 "s59E25H2" 0 "hypothetical protein"  
"JS1\_M10\_00565" 16255 "s59E5H2" 0.6916096 "hypothetical protein"  
"JS1\_M10\_00565" 16255 "s63E6H2" 0.7982155 "hypothetical protein"  
"JS1\_M10\_00566" 16256 "s59E13H2" 0 "putative inner membrane transporter yiJE"  
"JS1\_M10\_00566" 16256 "s59E25H2" 0 "putative inner membrane transporter yiJE"  
"JS1\_M10\_00566" 16256 "s59E5H2" 0.1918651 "putative inner membrane transporter yiJE"  
"JS1\_M10\_00566" 16256 "s63E6H2" 0.0006230124 "putative inner membrane transporter yiJE"  
"JS1\_M10\_00567" 16257 "s59E13H2" 0.3221641 "hypothetical protein"  
"JS1\_M10\_00567" 16257 "s59E25H2" 0 "hypothetical protein"  
"JS1\_M10\_00567" 16257 "s59E5H2" 0.6365584 "hypothetical protein"  
"JS1\_M10\_00567" 16257 "s63E6H2" 0.9336822 "hypothetical protein"  
"JS1\_M10\_00568" 16258 "s59E13H2" 0.7390606 "Modulator of FtsH protease HflK"  
"JS1\_M10\_00568" 16258 "s59E25H2" 0 "Modulator of FtsH protease HflK"  
"JS1\_M10\_00568" 16258 "s59E5H2" 0.8425132 "Modulator of FtsH protease HflK"  
"JS1\_M10\_00568" 16258 "s63E6H2" 1.126167 "Modulator of FtsH protease HflK"  
"JS1\_M10\_00569" 16259 "s59E13H2" 2.677094 "Elongation factor Tu domain 2"  
"JS1\_M10\_00569" 16259 "s59E25H2" 0 "Elongation factor Tu domain 2"  
"JS1\_M10\_00569" 16259 "s59E5H2" 2.03363 "Elongation factor Tu domain 2"  
"JS1\_M10\_00569" 16259 "s63E6H2" 2.284211 "Elongation factor Tu domain 2"  
"JS1\_M10\_00570" 16260 "s59E13H2" 4.891486 "Proline--tRNA ligase"  
"JS1\_M10\_00570" 16260 "s59E25H2" 0 "Proline--tRNA ligase"  
"JS1\_M10\_00570" 16260 "s59E5H2" 3.715944 "Proline--tRNA ligase"  
"JS1\_M10\_00570" 16260 "s63E6H2" 3.135906 "Proline--tRNA ligase"  
"JS1\_M10\_00571" 16261 "s59E13H2" 0 "Proton/sodium-glutamate symport protein"  
"JS1\_M10\_00571" 16261 "s59E25H2" 0 "Proton/sodium-glutamate symport protein"  
"JS1\_M10\_00571" 16261 "s59E5H2" 0.01252786 "Proton/sodium-glutamate symport protein"  
"JS1\_M10\_00571" 16261 "s63E6H2" 1.915758 "Proton/sodium-glutamate symport protein"  
"JS1\_M10\_00572" 16262 "s59E13H2" 0.1708988 "Aspartate racemase"  
"JS1\_M10\_00572" 16262 "s59E25H2" 0 "Aspartate racemase"  
"JS1\_M10\_00572" 16262 "s59E5H2" 0.1657901 "Aspartate racemase"  
"JS1\_M10\_00572" 16262 "s63E6H2" 0.5995864 "Aspartate racemase"  
"JS1\_M10\_00573" 16263 "s59E13H2" 0.007947253 "Phosphodiesterase"  
"JS1\_M10\_00573" 16263 "s59E25H2" 0 "Phosphodiesterase"  
"JS1\_M10\_00573" 16263 "s59E5H2" 0.3558443 "Phosphodiesterase"  
"JS1\_M10\_00573" 16263 "s63E6H2" 0.06405227 "Phosphodiesterase"  
"JS1\_M10\_00574" 16264 "s59E13H2" 0.9801615 "hypothetical protein"  
"JS1\_M10\_00574" 16264 "s59E25H2" 0 "hypothetical protein"  
"JS1\_M10\_00574" 16264 "s59E5H2" 1.817285 "hypothetical protein"  
"JS1\_M10\_00574" 16264 "s63E6H2" 1.970696 "hypothetical protein"  
"JS1\_M10\_00575" 16265 "s59E13H2" 0.7890616 "Peptidase family S58"  
"JS1\_M10\_00575" 16265 "s59E25H2" 0 "Peptidase family S58"  
"JS1\_M10\_00575" 16265 "s59E5H2" 1.509564 "Peptidase family S58"  
"JS1\_M10\_00575" 16265 "s63E6H2" 1.699423 "Peptidase family S58"  
"JS1\_M10\_00576" 16266 "s59E13H2" 0.007669887 "1,3-propanediol dehydrogenase"

"JS1\_M10\_00576" 16266 "s59E25H2" 0 "1,3-propanediol dehydrogenase"  
"JS1\_M10\_00576" 16266 "s59E5H2" 1.164843 "1,3-propanediol dehydrogenase"  
"JS1\_M10\_00576" 16266 "s63E6H2" 0.192997 "1,3-propanediol dehydrogenase"  
"JS1\_M10\_00577" 16267 "s59E13H2" 0 "Tetrahedral aminopeptidase"  
"JS1\_M10\_00577" 16267 "s59E25H2" 0 "Tetrahedral aminopeptidase"  
"JS1\_M10\_00577" 16267 "s59E5H2" 0.195966 "Tetrahedral aminopeptidase"  
"JS1\_M10\_00577" 16267 "s63E6H2" 0.01718568 "Tetrahedral aminopeptidase"  
"JS1\_M10\_00578" 16268 "s59E13H2" 0 "Xylulose kinase"  
"JS1\_M10\_00578" 16268 "s59E25H2" 0 "Xylulose kinase"  
"JS1\_M10\_00578" 16268 "s59E5H2" 0.1009775 "Xylulose kinase"  
"JS1\_M10\_00578" 16268 "s63E6H2" 0.0200495 "Xylulose kinase"  
"JS1\_M10\_00579" 16269 "s59E13H2" 0 "Putative sgc region protein SgcQ"  
"JS1\_M10\_00579" 16269 "s59E25H2" 0 "Putative sgc region protein SgcQ"  
"JS1\_M10\_00579" 16269 "s59E5H2" 0.08233374 "Putative sgc region protein SgcQ"  
"JS1\_M10\_00579" 16269 "s63E6H2" 0.009164472 "Putative sgc region protein SgcQ"  
"JS1\_M10\_00580" 16270 "s59E13H2" 0.02149516 "PTS-dependent dihydroxyacetone kinase, ADP-binding subunit DhaL"  
"JS1\_M10\_00580" 16270 "s59E25H2" 0 "PTS-dependent dihydroxyacetone kinase, ADP-binding subunit DhaL"  
"JS1\_M10\_00580" 16270 "s59E5H2" 0.03800414 "PTS-dependent dihydroxyacetone kinase, ADP-binding subunit DhaL"  
"JS1\_M10\_00580" 16270 "s63E6H2" 0.01055827 "PTS-dependent dihydroxyacetone kinase, ADP-binding subunit DhaL"  
"JS1\_M10\_00581" 16271 "s59E13H2" 0.06582701 "PTS-dependent dihydroxyacetone kinase, dihydroxyacetone-binding subunit DhaK"  
"JS1\_M10\_00581" 16271 "s59E25H2" 0 "PTS-dependent dihydroxyacetone kinase, dihydroxyacetone-binding subunit DhaK"  
"JS1\_M10\_00581" 16271 "s59E5H2" 0.06502332 "PTS-dependent dihydroxyacetone kinase, dihydroxyacetone-binding subunit DhaK"  
"JS1\_M10\_00581" 16271 "s63E6H2" 0.01834611 "PTS-dependent dihydroxyacetone kinase, dihydroxyacetone-binding subunit DhaK"  
"JS1\_M10\_00582" 16272 "s59E13H2" 0.081287 "Autoinducer 2 import system permease protein LsrD"  
"JS1\_M10\_00582" 16272 "s59E25H2" 0 "Autoinducer 2 import system permease protein LsrD"  
"JS1\_M10\_00582" 16272 "s59E5H2" 0.05379714 "Autoinducer 2 import system permease protein LsrD"  
"JS1\_M10\_00582" 16272 "s63E6H2" 0.003000326 "Autoinducer 2 import system permease protein LsrD"  
"JS1\_M10\_00583" 16273 "s59E13H2" 0.06969829 "Ribose transport system permease protein RbsC"  
"JS1\_M10\_00583" 16273 "s59E25H2" 0 "Ribose transport system permease protein RbsC"  
"JS1\_M10\_00583" 16273 "s59E5H2" 0.03943907 "Ribose transport system permease protein RbsC"  
"JS1\_M10\_00583" 16273 "s63E6H2" 0 "Ribose transport system permease protein RbsC"  
"JS1\_M10\_00584" 16274 "s59E13H2" 0.06809764 "Ribose import ATP-binding protein RbsA"  
"JS1\_M10\_00584" 16274 "s59E25H2" 0 "Ribose import ATP-binding protein RbsA"  
"JS1\_M10\_00584" 16274 "s59E5H2" 0.4192749 "Ribose import ATP-binding protein RbsA"  
"JS1\_M10\_00584" 16274 "s63E6H2" 0 "Ribose import ATP-binding protein RbsA"  
"JS1\_M10\_00585" 16275 "s59E13H2" 0.06471185 "Autoinducer 2-binding protein LsrB precursor"  
"JS1\_M10\_00585" 16275 "s59E25H2" 0 "Autoinducer 2-binding protein LsrB precursor"  
"JS1\_M10\_00585" 16275 "s59E5H2" 0.1944443 "Autoinducer 2-binding protein LsrB precursor"  
"JS1\_M10\_00585" 16275 "s63E6H2" 0 "Autoinducer 2-binding protein LsrB precursor"  
"JS1\_M10\_00586" 16276 "s59E13H2" 0.05631748 "Dihydrolipoyllysine-residue acetyltransferase component of pyruvate dehydrogenase complex"  
"JS1\_M10\_00586" 16276 "s59E25H2" 0 "Dihydrolipoyllysine-residue acetyltransferase component of pyruvate dehydrogenase complex"  
"JS1\_M10\_00586" 16276 "s59E5H2" 0.2179904 "Dihydrolipoyllysine-residue acetyltransferase component of pyruvate dehydrogenase complex"  
"JS1\_M10\_00586" 16276 "s63E6H2" 0.002399167 "Dihydrolipoyllysine-residue acetyltransferase component of pyruvate dehydrogenase complex"  
"JS1\_M10\_00587" 16277 "s59E13H2" 0.03703925 "2-oxoisovalerate dehydrogenase subunit beta"  
"JS1\_M10\_00587" 16277 "s59E25H2" 0 "2-oxoisovalerate dehydrogenase subunit beta"  
"JS1\_M10\_00587" 16277 "s59E5H2" 0.2239454 "2-oxoisovalerate dehydrogenase subunit beta"  
"JS1\_M10\_00587" 16277 "s63E6H2" 0 "2-oxoisovalerate dehydrogenase subunit beta"

"JS1\_M10\_00588" 16278 "s59E13H2" 0 "Acetoin:2,6-dichlorophenolindophenol oxidoreductase subunit alpha"  
"JS1\_M10\_00588" 16278 "s59E25H2" 0 "Acetoin:2,6-dichlorophenolindophenol oxidoreductase subunit alpha"  
"JS1\_M10\_00588" 16278 "s59E5H2" 0.01752127 "Acetoin:2,6-dichlorophenolindophenol oxidoreductase subunit alpha"  
"JS1\_M10\_00588" 16278 "s63E6H2" 0 "Acetoin:2,6-dichlorophenolindophenol oxidoreductase subunit alpha"  
"JS1\_M10\_00589" 16279 "s59E13H2" 0.01957544 "Sorbitol operon regulator"  
"JS1\_M10\_00589" 16279 "s59E25H2" 0 "Sorbitol operon regulator"  
"JS1\_M10\_00589" 16279 "s59E5H2" 0.21879 "Sorbitol operon regulator"  
"JS1\_M10\_00589" 16279 "s63E6H2" 0 "Sorbitol operon regulator"  
"JS1\_M10\_00590" 16280 "s59E13H2" 0.03245943 "2,5-diketo-D-gluconic acid reductase A"  
"JS1\_M10\_00590" 16280 "s59E25H2" 0 "2,5-diketo-D-gluconic acid reductase A"  
"JS1\_M10\_00590" 16280 "s59E5H2" 0.071035 "2,5-diketo-D-gluconic acid reductase A"  
"JS1\_M10\_00590" 16280 "s63E6H2" 0 "2,5-diketo-D-gluconic acid reductase A"  
"JS1\_M10\_00591" 16281 "s59E13H2" 0.07514538 "hypothetical protein"  
"JS1\_M10\_00591" 16281 "s59E25H2" 0 "hypothetical protein"  
"JS1\_M10\_00591" 16281 "s59E5H2" 0.1380272 "hypothetical protein"  
"JS1\_M10\_00591" 16281 "s63E6H2" 2.313671 "hypothetical protein"  
"JS1\_M10\_00592" 16282 "s59E13H2" 1.645013 "Na+/Pi-cotransporter"  
"JS1\_M10\_00592" 16282 "s59E25H2" 0.3103662 "Na+/Pi-cotransporter"  
"JS1\_M10\_00592" 16282 "s59E5H2" 1.942329 "Na+/Pi-cotransporter"  
"JS1\_M10\_00592" 16282 "s63E6H2" 0.4307579 "Na+/Pi-cotransporter"  
"JS1\_M10\_00593" 16283 "s59E13H2" 5.14789 "Undecaprenyl-phosphate mannosyltransferase"  
"JS1\_M10\_00593" 16283 "s59E25H2" 0 "Undecaprenyl-phosphate mannosyltransferase"  
"JS1\_M10\_00593" 16283 "s59E5H2" 5.542682 "Undecaprenyl-phosphate mannosyltransferase"  
"JS1\_M10\_00593" 16283 "s63E6H2" 1.614776 "Undecaprenyl-phosphate mannosyltransferase"  
"JS1\_M10\_00594" 16284 "s59E13H2" 4.742352 "Diacetylchitobiose deacetylase"  
"JS1\_M10\_00594" 16284 "s59E25H2" 0 "Diacetylchitobiose deacetylase"  
"JS1\_M10\_00594" 16284 "s59E5H2" 5.082947 "Diacetylchitobiose deacetylase"  
"JS1\_M10\_00594" 16284 "s63E6H2" 2.545418 "Diacetylchitobiose deacetylase"  
"JS1\_M10\_00595" 16285 "s59E13H2" 0.5073275 "hypothetical protein"  
"JS1\_M10\_00595" 16285 "s59E25H2" 0 "hypothetical protein"  
"JS1\_M10\_00595" 16285 "s59E5H2" 0.8496542 "hypothetical protein"  
"JS1\_M10\_00595" 16285 "s63E6H2" 0.8424005 "hypothetical protein"  
"JS1\_M10\_00596" 16286 "s59E13H2" 0.3938452 "hypothetical protein"  
"JS1\_M10\_00596" 16286 "s59E25H2" 0 "hypothetical protein"  
"JS1\_M10\_00596" 16286 "s59E5H2" 0.02069129 "hypothetical protein"  
"JS1\_M10\_00596" 16286 "s63E6H2" 0.7483125 "hypothetical protein"  
"JS1\_M10\_00597" 16287 "s59E13H2" 0.3642613 "Tungsten-containing aldehyde ferredoxin oxidoreductase"  
"JS1\_M10\_00597" 16287 "s59E25H2" 0 "Tungsten-containing aldehyde ferredoxin oxidoreductase"  
"JS1\_M10\_00597" 16287 "s59E5H2" 0.7481906 "Tungsten-containing aldehyde ferredoxin oxidoreductase"  
"JS1\_M10\_00597" 16287 "s63E6H2" 0.4356952 "Tungsten-containing aldehyde ferredoxin oxidoreductase"  
"JS1\_M10\_00598" 16288 "s59E13H2" 0.08473225 "Poly(A) polymerase I precursor"  
"JS1\_M10\_00598" 16288 "s59E25H2" 0 "Poly(A) polymerase I precursor"  
"JS1\_M10\_00598" 16288 "s59E5H2" 0.02299747 "Poly(A) polymerase I precursor"  
"JS1\_M10\_00598" 16288 "s63E6H2" 0.6569658 "Poly(A) polymerase I precursor"  
"JS1\_M10\_00599" 16289 "s59E13H2" 0.02973026 "Putative oxidoreductase YdbC"  
"JS1\_M10\_00599" 16289 "s59E25H2" 0 "Putative oxidoreductase YdbC"  
"JS1\_M10\_00599" 16289 "s59E5H2" 0.2845667 "Putative oxidoreductase YdbC"

"JS1\_M10\_00599" 16289 "s63E6H2" 0.4692869 "Putative oxidoreductase Ydbc"  
"JS1\_M10\_00600" 16290 "s59E13H2" 0.05284212 "23S rRNA (uracil-C(5))-methyltransferase RlmCD"  
"JS1\_M10\_00600" 16290 "s59E25H2" 0 "23S rRNA (uracil-C(5))-methyltransferase RlmCD"  
"JS1\_M10\_00600" 16290 "s59E5H2" 0.05990621 "23S rRNA (uracil-C(5))-methyltransferase RlmCD"  
"JS1\_M10\_00600" 16290 "s63E6H2" 0.5930135 "23S rRNA (uracil-C(5))-methyltransferase RlmCD"  
"JS1\_M10\_00601" 16291 "s59E13H2" 0 "Inner membrane ABC transporter permease protein Yjff"  
"JS1\_M10\_00601" 16291 "s59E25H2" 0 "Inner membrane ABC transporter permease protein Yjff"  
"JS1\_M10\_00601" 16291 "s59E5H2" 0.1239331 "Inner membrane ABC transporter permease protein Yjff"  
"JS1\_M10\_00601" 16291 "s63E6H2" 0.105814 "Inner membrane ABC transporter permease protein Yjff"  
"JS1\_M10\_00602" 16292 "s59E13H2" 0 "Ribose transport system permease protein RbsC"  
"JS1\_M10\_00602" 16292 "s59E25H2" 0 "Ribose transport system permease protein RbsC"  
"JS1\_M10\_00602" 16292 "s59E5H2" 0.04341532 "Ribose transport system permease protein RbsC"  
"JS1\_M10\_00602" 16292 "s63E6H2" 0.1461163 "Ribose transport system permease protein RbsC"  
"JS1\_M10\_00603" 16293 "s59E13H2" 0 "Ribose import ATP-binding protein RbsA"  
"JS1\_M10\_00603" 16293 "s59E25H2" 0 "Ribose import ATP-binding protein RbsA"  
"JS1\_M10\_00603" 16293 "s59E5H2" 0.2675569 "Ribose import ATP-binding protein RbsA"  
"JS1\_M10\_00603" 16293 "s63E6H2" 0.3234253 "Ribose import ATP-binding protein RbsA"  
"JS1\_M10\_00604" 16294 "s59E13H2" 0 "hypothetical protein"  
"JS1\_M10\_00604" 16294 "s59E25H2" 0.1763441 "hypothetical protein"  
"JS1\_M10\_00604" 16294 "s59E5H2" 0.09188973 "hypothetical protein"  
"JS1\_M10\_00604" 16294 "s63E6H2" 0.3684703 "hypothetical protein"  
"JS1\_M10\_00605" 16295 "s59E13H2" 0 "Cyclopentanol dehydrogenase"  
"JS1\_M10\_00605" 16295 "s59E25H2" 0 "Cyclopentanol dehydrogenase"  
"JS1\_M10\_00605" 16295 "s59E5H2" 0.1045549 "Cyclopentanol dehydrogenase"  
"JS1\_M10\_00605" 16295 "s63E6H2" 0.07360804 "Cyclopentanol dehydrogenase"  
"JS1\_M10\_00606" 16296 "s59E13H2" 0.005987415 "3-oxoacyl-[acyl-carrier-protein] reductase FabG"  
"JS1\_M10\_00606" 16296 "s59E25H2" 0 "3-oxoacyl-[acyl-carrier-protein] reductase FabG"  
"JS1\_M10\_00606" 16296 "s59E5H2" 0.01258933 "3-oxoacyl-[acyl-carrier-protein] reductase FabG"  
"JS1\_M10\_00606" 16296 "s63E6H2" 0.1703834 "3-oxoacyl-[acyl-carrier-protein] reductase FabG"  
"JS1\_M10\_00607" 16297 "s59E13H2" 0.007378893 "3-oxoacyl-[acyl-carrier-protein] reductase FabG"  
"JS1\_M10\_00607" 16297 "s59E25H2" 0 "3-oxoacyl-[acyl-carrier-protein] reductase FabG"  
"JS1\_M10\_00607" 16297 "s59E5H2" 0.02661594 "3-oxoacyl-[acyl-carrier-protein] reductase FabG"  
"JS1\_M10\_00607" 16297 "s63E6H2" 0.1471138 "3-oxoacyl-[acyl-carrier-protein] reductase FabG"  
"JS1\_M10\_00608" 16298 "s59E13H2" 0.007091406 "Deoxyribose-phosphate aldolase"  
"JS1\_M10\_00608" 16298 "s59E25H2" 0 "Deoxyribose-phosphate aldolase"  
"JS1\_M10\_00608" 16298 "s59E5H2" 0.02688389 "Deoxyribose-phosphate aldolase"  
"JS1\_M10\_00608" 16298 "s63E6H2" 0.1571797 "Deoxyribose-phosphate aldolase"  
"JS1\_M10\_00609" 16299 "s59E13H2" 0.004046975 "Glycerol kinase"  
"JS1\_M10\_00609" 16299 "s59E25H2" 0 "Glycerol kinase"  
"JS1\_M10\_00609" 16299 "s59E5H2" 0.03057162 "Glycerol kinase"  
"JS1\_M10\_00609" 16299 "s63E6H2" 0.1651317 "Glycerol kinase"  
"JS1\_M10\_00610" 16300 "s59E13H2" 0 "putative L-threonine 3-dehydrogenase"  
"JS1\_M10\_00610" 16300 "s59E25H2" 0 "putative L-threonine 3-dehydrogenase"  
"JS1\_M10\_00610" 16300 "s59E5H2" 0.0008885625 "putative L-threonine 3-dehydrogenase"  
"JS1\_M10\_00610" 16300 "s63E6H2" 0.1388104 "putative L-threonine 3-dehydrogenase"  
"JS1\_M10\_00612" 16302 "s59E13H2" 0 "Glycerol kinase"  
"JS1\_M10\_00612" 16302 "s59E25H2" 0 "Glycerol kinase"

"JS1\_M10\_00612" 16302 "s59E5H2" 0.005275501 "Glycerol kinase"  
"JS1\_M10\_00612" 16302 "s63E6H2" 0.1050012 "Glycerol kinase"  
"JS1\_M10\_00613" 16303 "s59E13H2" 1.987312e-05 "Galactitol-1-phosphate 5-dehydrogenase"  
"JS1\_M10\_00613" 16303 "s59E25H2" 0 "Galactitol-1-phosphate 5-dehydrogenase"  
"JS1\_M10\_00613" 16303 "s59E5H2" 0.003751858 "Galactitol-1-phosphate 5-dehydrogenase"  
"JS1\_M10\_00613" 16303 "s63E6H2" 2.505698 "Galactitol-1-phosphate 5-dehydrogenase"  
"JS1\_M10\_00614" 16304 "s59E13H2" 0.07283706 "Phosphate propanoyltransferase"  
"JS1\_M10\_00614" 16304 "s59E25H2" 0 "Phosphate propanoyltransferase"  
"JS1\_M10\_00614" 16304 "s59E5H2" 0.2189308 "Phosphate propanoyltransferase"  
"JS1\_M10\_00614" 16304 "s63E6H2" 3.998381 "Phosphate propanoyltransferase"  
"JS1\_M10\_00615" 16305 "s59E13H2" 0.1252262 "Deoxyribose-phosphate aldolase 1"  
"JS1\_M10\_00615" 16305 "s59E25H2" 0 "Deoxyribose-phosphate aldolase 1"  
"JS1\_M10\_00615" 16305 "s59E5H2" 0.2577387 "Deoxyribose-phosphate aldolase 1"  
"JS1\_M10\_00615" 16305 "s63E6H2" 3.429926 "Deoxyribose-phosphate aldolase 1"  
"JS1\_M10\_00616" 16306 "s59E13H2" 0.1868786 "Putative sugar phosphate isomerase YwIF"  
"JS1\_M10\_00616" 16306 "s59E25H2" 0 "Putative sugar phosphate isomerase YwIF"  
"JS1\_M10\_00616" 16306 "s59E5H2" 0.5291184 "Putative sugar phosphate isomerase YwIF"  
"JS1\_M10\_00616" 16306 "s63E6H2" 6.038303 "Putative sugar phosphate isomerase YwIF"  
"JS1\_M10\_00617" 16307 "s59E13H2" 0.1949369 "Carbon dioxide concentrating mechanism protein Ccml"  
"JS1\_M10\_00617" 16307 "s59E25H2" 0 "Carbon dioxide concentrating mechanism protein Ccml"  
"JS1\_M10\_00617" 16307 "s59E5H2" 0.7527047 "Carbon dioxide concentrating mechanism protein Ccml"  
"JS1\_M10\_00617" 16307 "s63E6H2" 5.257054 "Carbon dioxide concentrating mechanism protein Ccml"  
"JS1\_M10\_00618" 16308 "s59E13H2" 0.1284208 "Carbon dioxide concentrating mechanism protein Ccml"  
"JS1\_M10\_00618" 16308 "s59E25H2" 0 "Carbon dioxide concentrating mechanism protein Ccml"  
"JS1\_M10\_00618" 16308 "s59E5H2" 0.8153901 "Carbon dioxide concentrating mechanism protein Ccml"  
"JS1\_M10\_00618" 16308 "s63E6H2" 3.367724 "Carbon dioxide concentrating mechanism protein Ccml"  
"JS1\_M10\_00619" 16309 "s59E13H2" 0.1100916 "Aldehyde-alcohol dehydrogenase"  
"JS1\_M10\_00619" 16309 "s59E25H2" 0 "Aldehyde-alcohol dehydrogenase"  
"JS1\_M10\_00619" 16309 "s59E5H2" 0.5721503 "Aldehyde-alcohol dehydrogenase"  
"JS1\_M10\_00619" 16309 "s63E6H2" 2.913166 "Aldehyde-alcohol dehydrogenase"  
"JS1\_M10\_00620" 16310 "s59E13H2" 0.1506293 "BMC domain protein"  
"JS1\_M10\_00620" 16310 "s59E25H2" 0 "BMC domain protein"  
"JS1\_M10\_00620" 16310 "s59E5H2" 0.6912332 "BMC domain protein"  
"JS1\_M10\_00620" 16310 "s63E6H2" 3.392616 "BMC domain protein"  
"JS1\_M10\_00621" 16311 "s59E13H2" 0.1198381 "Electron transport complex protein RnfC"  
"JS1\_M10\_00621" 16311 "s59E25H2" 0 "Electron transport complex protein RnfC"  
"JS1\_M10\_00621" 16311 "s59E5H2" 0.5764662 "Electron transport complex protein RnfC"  
"JS1\_M10\_00621" 16311 "s63E6H2" 2.942776 "Electron transport complex protein RnfC"  
"JS1\_M10\_00622" 16312 "s59E13H2" 0.06960423 "Carbon dioxide concentrating mechanism protein Ccml"  
"JS1\_M10\_00622" 16312 "s59E25H2" 0 "Carbon dioxide concentrating mechanism protein Ccml"  
"JS1\_M10\_00622" 16312 "s59E5H2" 0.391671 "Carbon dioxide concentrating mechanism protein Ccml"  
"JS1\_M10\_00622" 16312 "s63E6H2" 2.572574 "Carbon dioxide concentrating mechanism protein Ccml"  
"JS1\_M10\_00623" 16313 "s59E13H2" 0.07296417 "Carbon dioxide concentrating mechanism protein Ccml"  
"JS1\_M10\_00623" 16313 "s59E25H2" 0 "Carbon dioxide concentrating mechanism protein Ccml"  
"JS1\_M10\_00623" 16313 "s59E5H2" 0.4423101 "Carbon dioxide concentrating mechanism protein Ccml"  
"JS1\_M10\_00623" 16313 "s63E6H2" 1.949811 "Carbon dioxide concentrating mechanism protein Ccml"  
"JS1\_M10\_00624" 16314 "s59E13H2" 0.06118345 "Ethanamine utilization protein EutM precursor"

"JS1\_M10\_00624" 16314 "s59E25H2" 0 "Ethanolamine utilization protein EutM precursor"  
"JS1\_M10\_00624" 16314 "s59E5H2" 0.4043927 "Ethanolamine utilization protein EutM precursor"  
"JS1\_M10\_00624" 16314 "s63E6H2" 1.144145 "Ethanolamine utilization protein EutM precursor"  
"JS1\_M10\_00625" 16315 "s59E13H2" 0.1449461 "Xylose isomerase"  
"JS1\_M10\_00625" 16315 "s59E25H2" 0 "Xylose isomerase"  
"JS1\_M10\_00625" 16315 "s59E5H2" 0.3498658 "Xylose isomerase"  
"JS1\_M10\_00625" 16315 "s63E6H2" 1.446463 "Xylose isomerase"  
"JS1\_M10\_00626" 16316 "s59E13H2" 0.1794771 "putative sugar kinase YdjH"  
"JS1\_M10\_00626" 16316 "s59E25H2" 0 "putative sugar kinase YdjH"  
"JS1\_M10\_00626" 16316 "s59E5H2" 0.1382427 "putative sugar kinase YdjH"  
"JS1\_M10\_00626" 16316 "s63E6H2" 0.3144787 "putative sugar kinase YdjH"  
"JS1\_M10\_00627" 16317 "s59E13H2" 0.1434671 "Ribokinase"  
"JS1\_M10\_00627" 16317 "s59E25H2" 0 "Ribokinase"  
"JS1\_M10\_00627" 16317 "s59E5H2" 0.166536 "Ribokinase"  
"JS1\_M10\_00627" 16317 "s63E6H2" 0.1595506 "Ribokinase"  
"JS1\_M10\_00628" 16318 "s59E13H2" 0.0508276 "Trehalose/maltose transport system permease protein MalG"  
"JS1\_M10\_00628" 16318 "s59E25H2" 0 "Trehalose/maltose transport system permease protein MalG"  
"JS1\_M10\_00628" 16318 "s59E5H2" 0.1982134 "Trehalose/maltose transport system permease protein MalG"  
"JS1\_M10\_00628" 16318 "s63E6H2" 0.1785422 "Trehalose/maltose transport system permease protein MalG"  
"JS1\_M10\_00629" 16319 "s59E13H2" 0.01907044 "ureidoglycolate hydrolase"  
"JS1\_M10\_00629" 16319 "s59E25H2" 0 "ureidoglycolate hydrolase"  
"JS1\_M10\_00629" 16319 "s59E5H2" 0.2347537 "ureidoglycolate hydrolase"  
"JS1\_M10\_00629" 16319 "s63E6H2" 0.268931 "ureidoglycolate hydrolase"  
"JS1\_M10\_00630" 16320 "s59E13H2" 0.1132586 "Methylthioribose-1-phosphate isomerase"  
"JS1\_M10\_00630" 16320 "s59E25H2" 0 "Methylthioribose-1-phosphate isomerase"  
"JS1\_M10\_00630" 16320 "s59E5H2" 0.1541759 "Methylthioribose-1-phosphate isomerase"  
"JS1\_M10\_00630" 16320 "s63E6H2" 0.1066959 "Methylthioribose-1-phosphate isomerase"  
"JS1\_M10\_00631" 16321 "s59E13H2" 0.3793689 "UDP-N-acetylglucosamine 1-carboxyvinyltransferase 1"  
"JS1\_M10\_00631" 16321 "s59E25H2" 0 "UDP-N-acetylglucosamine 1-carboxyvinyltransferase 1"  
"JS1\_M10\_00631" 16321 "s59E5H2" 0.4184758 "UDP-N-acetylglucosamine 1-carboxyvinyltransferase 1"  
"JS1\_M10\_00631" 16321 "s63E6H2" 0.3524014 "UDP-N-acetylglucosamine 1-carboxyvinyltransferase 1"  
"JS1\_M10\_00632" 16322 "s59E13H2" 1.315058 "Rod shape-determining protein MreB"  
"JS1\_M10\_00632" 16322 "s59E25H2" 0 "Rod shape-determining protein MreB"  
"JS1\_M10\_00632" 16322 "s59E5H2" 0.2086962 "Rod shape-determining protein MreB"  
"JS1\_M10\_00632" 16322 "s63E6H2" 0.587844 "Rod shape-determining protein MreB"  
"JS1\_M10\_00633" 16323 "s59E13H2" 0.2289001 "SpoIVB peptidase S55"  
"JS1\_M10\_00633" 16323 "s59E25H2" 0 "SpoIVB peptidase S55"  
"JS1\_M10\_00633" 16323 "s59E5H2" 0.3079681 "SpoIVB peptidase S55"  
"JS1\_M10\_00633" 16323 "s63E6H2" 0.1289556 "SpoIVB peptidase S55"  
"JS1\_M10\_00635" 16325 "s59E13H2" 0.3620543 "Putative 2-C-methyl-D-erythritol 4-phosphate cytidyltransferase 2"  
"JS1\_M10\_00635" 16325 "s59E25H2" 0 "Putative 2-C-methyl-D-erythritol 4-phosphate cytidyltransferase 2"  
"JS1\_M10\_00635" 16325 "s59E5H2" 0.2266666 "Putative 2-C-methyl-D-erythritol 4-phosphate cytidyltransferase 2"  
"JS1\_M10\_00635" 16325 "s63E6H2" 0.24148 "Putative 2-C-methyl-D-erythritol 4-phosphate cytidyltransferase 2"  
"JS1\_M10\_00636" 16326 "s59E13H2" 0.2481882 "4-diphosphocytidyl-2-C-methyl-D-erythritol kinase"  
"JS1\_M10\_00636" 16326 "s59E25H2" 0 "4-diphosphocytidyl-2-C-methyl-D-erythritol kinase"  
"JS1\_M10\_00636" 16326 "s59E5H2" 0.6003065 "4-diphosphocytidyl-2-C-methyl-D-erythritol kinase"  
"JS1\_M10\_00636" 16326 "s63E6H2" 0.181904 "4-diphosphocytidyl-2-C-methyl-D-erythritol kinase"

"JS1\_M10\_00637" 16327 "s59E13H2" 0.4746638 "2-C-methyl-D-erythritol 2,4-cyclodiphosphate synthase"  
"JS1\_M10\_00637" 16327 "s59E25H2" 0 "2-C-methyl-D-erythritol 2,4-cyclodiphosphate synthase"  
"JS1\_M10\_00637" 16327 "s59E5H2" 0.1519979 "2-C-methyl-D-erythritol 2,4-cyclodiphosphate synthase"  
"JS1\_M10\_00637" 16327 "s63E6H2" 0.4105521 "2-C-methyl-D-erythritol 2,4-cyclodiphosphate synthase"  
"JS1\_M10\_00638" 16328 "s59E13H2" 0.08165795 "hypothetical protein"  
"JS1\_M10\_00638" 16328 "s59E25H2" 0 "hypothetical protein"  
"JS1\_M10\_00638" 16328 "s59E5H2" 0.05690482 "hypothetical protein"  
"JS1\_M10\_00638" 16328 "s63E6H2" 0.1851113 "hypothetical protein"  
"JS1\_M10\_00639" 16329 "s59E13H2" 0.144973 "hypothetical protein"  
"JS1\_M10\_00639" 16329 "s59E25H2" 0 "hypothetical protein"  
"JS1\_M10\_00639" 16329 "s59E5H2" 0.2595388 "hypothetical protein"  
"JS1\_M10\_00639" 16329 "s63E6H2" 0.1266393 "hypothetical protein"  
"JS1\_M10\_00640" 16330 "s59E13H2" 0.02992819 "RNA polymerase factor sigma-70"  
"JS1\_M10\_00640" 16330 "s59E25H2" 0 "RNA polymerase factor sigma-70"  
"JS1\_M10\_00640" 16330 "s59E5H2" 0.06028583 "RNA polymerase factor sigma-70"  
"JS1\_M10\_00640" 16330 "s63E6H2" 2.624004 "RNA polymerase factor sigma-70"  
"JS1\_M10\_00642" 16332 "s59E13H2" 0 "hypothetical protein"  
"JS1\_M10\_00642" 16332 "s59E25H2" 0 "hypothetical protein"  
"JS1\_M10\_00642" 16332 "s59E5H2" 0.02054908 "hypothetical protein"  
"JS1\_M10\_00642" 16332 "s63E6H2" 0.5233788 "hypothetical protein"  
"JS1\_M10\_00643" 16333 "s59E13H2" 1.40582 "hypothetical protein"  
"JS1\_M10\_00643" 16333 "s59E25H2" 0 "hypothetical protein"  
"JS1\_M10\_00643" 16333 "s59E5H2" 1.566778 "hypothetical protein"  
"JS1\_M10\_00643" 16333 "s63E6H2" 5.631025 "hypothetical protein"  
"JS1\_M10\_00644" 16334 "s59E13H2" 0.0003441569 "hypothetical protein"  
"JS1\_M10\_00644" 16334 "s59E25H2" 0 "hypothetical protein"  
"JS1\_M10\_00644" 16334 "s59E5H2" 0.3003815 "hypothetical protein"  
"JS1\_M10\_00644" 16334 "s63E6H2" 0.03468678 "hypothetical protein"  
"JS1\_M10\_00645" 16335 "s59E13H2" 0.002574117 "Peptidase M15"  
"JS1\_M10\_00645" 16335 "s59E25H2" 0 "Peptidase M15"  
"JS1\_M10\_00645" 16335 "s59E5H2" 0.02025403 "Peptidase M15"  
"JS1\_M10\_00645" 16335 "s63E6H2" 0.07499386 "Peptidase M15"  
"JS1\_M10\_00646" 16336 "s59E13H2" 0.006878308 "YvrJ protein family protein"  
"JS1\_M10\_00646" 16336 "s59E25H2" 0 "YvrJ protein family protein"  
"JS1\_M10\_00646" 16336 "s59E5H2" 0.05409915 "YvrJ protein family protein"  
"JS1\_M10\_00646" 16336 "s63E6H2" 0.08222802 "YvrJ protein family protein"  
"JS1\_M10\_00647" 16337 "s59E13H2" 0.0103586 "Ferredoxin"  
"JS1\_M10\_00647" 16337 "s59E25H2" 0 "Ferredoxin"  
"JS1\_M10\_00647" 16337 "s59E5H2" 0.1464286 "Ferredoxin"  
"JS1\_M10\_00647" 16337 "s63E6H2" 0.08344315 "Ferredoxin"  
"JS1\_M10\_00648" 16338 "s59E13H2" 0.1502629 "Ribonuclease Z"  
"JS1\_M10\_00648" 16338 "s59E25H2" 0 "Ribonuclease Z"  
"JS1\_M10\_00648" 16338 "s59E5H2" 0.5566371 "Ribonuclease Z"  
"JS1\_M10\_00648" 16338 "s63E6H2" 0.2440465 "Ribonuclease Z"  
"JS1\_M10\_00649" 16339 "s59E13H2" 0.1236916 "Molybdopterin adenyltransferase"  
"JS1\_M10\_00649" 16339 "s59E25H2" 0 "Molybdopterin adenyltransferase"  
"JS1\_M10\_00649" 16339 "s59E5H2" 0.594622 "Molybdopterin adenyltransferase"



"JS1\_M10\_00649" 16339 "s63E6H2" 0.1713352 "Molybdopterin adenyltransferase"  
"JS1\_M10\_00650" 16340 "s59E13H2" 0.006970947 "MOSC domain protein"  
"JS1\_M10\_00650" 16340 "s59E25H2" 0 "MOSC domain protein"  
"JS1\_M10\_00650" 16340 "s59E5H2" 0.609783 "MOSC domain protein"  
"JS1\_M10\_00650" 16340 "s63E6H2" 0.1306175 "MOSC domain protein"  
"JS1\_M10\_00651" 16341 "s59E13H2" 0 "Cyclic pyranopterin monophosphate synthase accessory protein"  
"JS1\_M10\_00651" 16341 "s59E25H2" 0 "Cyclic pyranopterin monophosphate synthase accessory protein"  
"JS1\_M10\_00651" 16341 "s59E5H2" 0.4409086 "Cyclic pyranopterin monophosphate synthase accessory protein"  
"JS1\_M10\_00651" 16341 "s63E6H2" 0.2297332 "Cyclic pyranopterin monophosphate synthase accessory protein"  
"JS1\_M10\_00652" 16342 "s59E13H2" 0.05821095 "Cyclic pyranopterin monophosphate synthase"  
"JS1\_M10\_00652" 16342 "s59E25H2" 0 "Cyclic pyranopterin monophosphate synthase"  
"JS1\_M10\_00652" 16342 "s59E5H2" 0.2600933 "Cyclic pyranopterin monophosphate synthase"  
"JS1\_M10\_00652" 16342 "s63E6H2" 0.2909039 "Cyclic pyranopterin monophosphate synthase"  
"JS1\_M10\_00653" 16343 "s59E13H2" 0.1434722 "Molybdopterin molybdenumtransferase"  
"JS1\_M10\_00653" 16343 "s59E25H2" 0 "Molybdopterin molybdenumtransferase"  
"JS1\_M10\_00653" 16343 "s59E5H2" 0.4275702 "Molybdopterin molybdenumtransferase"  
"JS1\_M10\_00653" 16343 "s63E6H2" 0.6167663 "Molybdopterin molybdenumtransferase"  
"JS1\_M10\_00654" 16344 "s59E13H2" 0.1101164 "Molybdopterin molybdenumtransferase"  
"JS1\_M10\_00654" 16344 "s59E25H2" 0 "Molybdopterin molybdenumtransferase"  
"JS1\_M10\_00654" 16344 "s59E5H2" 0.3144715 "Molybdopterin molybdenumtransferase"  
"JS1\_M10\_00654" 16344 "s63E6H2" 0.675691 "Molybdopterin molybdenumtransferase"  
"JS1\_M10\_00655" 16345 "s59E13H2" 0.01871873 "Sulfate/thiosulfate import ATP-binding protein CysA"  
"JS1\_M10\_00655" 16345 "s59E25H2" 0 "Sulfate/thiosulfate import ATP-binding protein CysA"  
"JS1\_M10\_00655" 16345 "s59E5H2" 0.6440508 "Sulfate/thiosulfate import ATP-binding protein CysA"  
"JS1\_M10\_00655" 16345 "s63E6H2" 0.7805808 "Sulfate/thiosulfate import ATP-binding protein CysA"  
"JS1\_M10\_00656" 16346 "s59E13H2" 0.02169984 "Molybdenum transport system permease protein ModB"  
"JS1\_M10\_00656" 16346 "s59E25H2" 0 "Molybdenum transport system permease protein ModB"  
"JS1\_M10\_00656" 16346 "s59E5H2" 0.8391736 "Molybdenum transport system permease protein ModB"  
"JS1\_M10\_00656" 16346 "s63E6H2" 0.7599287 "Molybdenum transport system permease protein ModB"  
"JS1\_M10\_00657" 16347 "s59E13H2" 0 "PBP superfamily domain protein"  
"JS1\_M10\_00657" 16347 "s59E25H2" 0 "PBP superfamily domain protein"  
"JS1\_M10\_00657" 16347 "s59E5H2" 0.002364211 "PBP superfamily domain protein"  
"JS1\_M10\_00657" 16347 "s63E6H2" 0.2338366 "PBP superfamily domain protein"  
"JS1\_M10\_00659" 16349 "s59E13H2" 0.5183972 "Formamidopyrimidine-DNA glycosylase"  
"JS1\_M10\_00659" 16349 "s59E25H2" 0.5933806 "Formamidopyrimidine-DNA glycosylase"  
"JS1\_M10\_00659" 16349 "s59E5H2" 0.3740963 "Formamidopyrimidine-DNA glycosylase"  
"JS1\_M10\_00659" 16349 "s63E6H2" 0.4446361 "Formamidopyrimidine-DNA glycosylase"  
"JS1\_M10\_00660" 16350 "s59E13H2" 1.254742 "GMP/IMP nucleotidase YrfG"  
"JS1\_M10\_00660" 16350 "s59E25H2" 0 "GMP/IMP nucleotidase YrfG"  
"JS1\_M10\_00660" 16350 "s59E5H2" 0.4110708 "GMP/IMP nucleotidase YrfG"  
"JS1\_M10\_00660" 16350 "s63E6H2" 0.5280017 "GMP/IMP nucleotidase YrfG"  
"JS1\_M10\_00663" 16353 "s59E13H2" 0.2587363 "hypothetical protein"  
"JS1\_M10\_00663" 16353 "s59E25H2" 0 "hypothetical protein"  
"JS1\_M10\_00663" 16353 "s59E5H2" 0.07387625 "hypothetical protein"  
"JS1\_M10\_00663" 16353 "s63E6H2" 0.006387102 "hypothetical protein"  
"JS1\_M10\_00664" 16354 "s59E13H2" 0.3498841 "Glyoxalase-like domain protein"  
"JS1\_M10\_00664" 16354 "s59E25H2" 0 "Glyoxalase-like domain protein"

"JS1\_M10\_00664" 16354 "s59E5H2" 0.09232374 "Glyoxalase-like domain protein"  
"JS1\_M10\_00664" 16354 "s63E6H2" 6.282447 "Glyoxalase-like domain protein"  
"JS1\_M10\_00666" 16356 "s59E13H2" 0 "pyrroloquinoline quinone biosynthesis protein PqqE"  
"JS1\_M10\_00666" 16356 "s59E25H2" 0 "pyrroloquinoline quinone biosynthesis protein PqqE"  
"JS1\_M10\_00666" 16356 "s59E5H2" 0.005468862 "pyrroloquinoline quinone biosynthesis protein PqqE"  
"JS1\_M10\_00666" 16356 "s63E6H2" 0.4624498 "pyrroloquinoline quinone biosynthesis protein PqqE"  
"JS1\_M10\_00667" 16357 "s59E13H2" 0.6359459 "Metallo-beta-lactamase L1 precursor"  
"JS1\_M10\_00667" 16357 "s59E25H2" 0 "Metallo-beta-lactamase L1 precursor"  
"JS1\_M10\_00667" 16357 "s59E5H2" 0.1494352 "Metallo-beta-lactamase L1 precursor"  
"JS1\_M10\_00667" 16357 "s63E6H2" 3.057362 "Metallo-beta-lactamase L1 precursor"  
"JS1\_M10\_00668" 16358 "s59E13H2" 0.05269148 "hypothetical protein"  
"JS1\_M10\_00668" 16358 "s59E25H2" 0.6324461 "hypothetical protein"  
"JS1\_M10\_00668" 16358 "s59E5H2" 0.3938691 "hypothetical protein"  
"JS1\_M10\_00668" 16358 "s63E6H2" 1.767925 "hypothetical protein"  
"JS1\_M10\_00669" 16359 "s59E13H2" 0.06077051 "dTDP-3-amino-3,6-dideoxy-alpha-D-galactopyranose transaminase"  
"JS1\_M10\_00669" 16359 "s59E25H2" 0 "dTDP-3-amino-3,6-dideoxy-alpha-D-galactopyranose transaminase"  
"JS1\_M10\_00669" 16359 "s59E5H2" 0 "dTDP-3-amino-3,6-dideoxy-alpha-D-galactopyranose transaminase"  
"JS1\_M10\_00669" 16359 "s63E6H2" 3.91536 "dTDP-3-amino-3,6-dideoxy-alpha-D-galactopyranose transaminase"  
"JS1\_M10\_00670" 16360 "s59E13H2" 0.08114858 "Transposase IS200 like protein"  
"JS1\_M10\_00670" 16360 "s59E25H2" 0 "Transposase IS200 like protein"  
"JS1\_M10\_00670" 16360 "s59E5H2" 0.4982364 "Transposase IS200 like protein"  
"JS1\_M10\_00670" 16360 "s63E6H2" 1.048392 "Transposase IS200 like protein"  
"JS1\_M10\_00671" 16361 "s59E13H2" 0.09159891 "nicotinic acid mononucleotide adenyltransferase"  
"JS1\_M10\_00671" 16361 "s59E25H2" 0 "nicotinic acid mononucleotide adenyltransferase"  
"JS1\_M10\_00671" 16361 "s59E5H2" 1.258387 "nicotinic acid mononucleotide adenyltransferase"  
"JS1\_M10\_00671" 16361 "s63E6H2" 0.2355793 "nicotinic acid mononucleotide adenyltransferase"  
"JS1\_M10\_00673" 16363 "s59E13H2" 0.03306582 "L-lactate dehydrogenase 2"  
"JS1\_M10\_00673" 16363 "s59E25H2" 0 "L-lactate dehydrogenase 2"  
"JS1\_M10\_00673" 16363 "s59E5H2" 0.3402967 "L-lactate dehydrogenase 2"  
"JS1\_M10\_00673" 16363 "s63E6H2" 0.2692907 "L-lactate dehydrogenase 2"  
"JS1\_M10\_00674" 16364 "s59E13H2" 0.05057507 "putative dual-specificity RNA methyltransferase RlmN"  
"JS1\_M10\_00674" 16364 "s59E25H2" 0 "putative dual-specificity RNA methyltransferase RlmN"  
"JS1\_M10\_00674" 16364 "s59E5H2" 0.3437707 "putative dual-specificity RNA methyltransferase RlmN"  
"JS1\_M10\_00674" 16364 "s63E6H2" 0.4974088 "putative dual-specificity RNA methyltransferase RlmN"  
"JS1\_M10\_00676" 16366 "s59E13H2" 0.01719011 "Putative zinc ribbon domain protein"  
"JS1\_M10\_00676" 16366 "s59E25H2" 0 "Putative zinc ribbon domain protein"  
"JS1\_M10\_00676" 16366 "s59E5H2" 0.2268738 "Putative zinc ribbon domain protein"  
"JS1\_M10\_00676" 16366 "s63E6H2" 0.4116027 "Putative zinc ribbon domain protein"  
"JS1\_M10\_00680" 16370 "s59E13H2" 0.001224884 "hypothetical protein"  
"JS1\_M10\_00680" 16370 "s59E25H2" 0 "hypothetical protein"  
"JS1\_M10\_00680" 16370 "s59E5H2" 0.0100941 "hypothetical protein"  
"JS1\_M10\_00680" 16370 "s63E6H2" 0.007723374 "hypothetical protein"  
"JS1\_M10\_00681" 16371 "s59E13H2" 0.06103855 "cell division protein MraZ"  
"JS1\_M10\_00681" 16371 "s59E25H2" 0 "cell division protein MraZ"  
"JS1\_M10\_00681" 16371 "s59E5H2" 0.9313115 "cell division protein MraZ"  
"JS1\_M10\_00681" 16371 "s63E6H2" 0.8731098 "cell division protein MraZ"  
"JS1\_M10\_00682" 16372 "s59E13H2" 0.02909719 "Ribosomal RNA small subunit methyltransferase H"

"JS1\_M10\_00682" 16372 "s59E25H2" 0 "Ribosomal RNA small subunit methyltransferase H"  
"JS1\_M10\_00682" 16372 "s59E5H2" 0.4459703 "Ribosomal RNA small subunit methyltransferase H"  
"JS1\_M10\_00682" 16372 "s63E6H2" 0.9226055 "Ribosomal RNA small subunit methyltransferase H"  
"JS1\_M10\_00683" 16373 "s59E13H2" 0.008138517 "Cell division protein FtsL"  
"JS1\_M10\_00683" 16373 "s59E25H2" 0 "Cell division protein FtsL"  
"JS1\_M10\_00683" 16373 "s59E5H2" 0.2147227 "Cell division protein FtsL"  
"JS1\_M10\_00683" 16373 "s63E6H2" 0.3788321 "Cell division protein FtsL"  
"JS1\_M10\_00684" 16374 "s59E13H2" 0.06747452 "Stage V sporulation protein D"  
"JS1\_M10\_00684" 16374 "s59E25H2" 0 "Stage V sporulation protein D"  
"JS1\_M10\_00684" 16374 "s59E5H2" 0.467776 "Stage V sporulation protein D"  
"JS1\_M10\_00684" 16374 "s63E6H2" 0.6574729 "Stage V sporulation protein D"  
"JS1\_M10\_00685" 16375 "s59E13H2" 0.01405762 "Stage V sporulation protein D"  
"JS1\_M10\_00685" 16375 "s59E25H2" 0 "Stage V sporulation protein D"  
"JS1\_M10\_00685" 16375 "s59E5H2" 0.2769647 "Stage V sporulation protein D"  
"JS1\_M10\_00685" 16375 "s63E6H2" 0.58158 "Stage V sporulation protein D"  
"JS1\_M10\_00686" 16376 "s59E13H2" 0.03610014 "UDP-N-acetylmuramoyl-L-alanyl-D-glutamate--L-lysine ligase"  
"JS1\_M10\_00686" 16376 "s59E25H2" 0 "UDP-N-acetylmuramoyl-L-alanyl-D-glutamate--L-lysine ligase"  
"JS1\_M10\_00686" 16376 "s59E5H2" 0.2409308 "UDP-N-acetylmuramoyl-L-alanyl-D-glutamate--L-lysine ligase"  
"JS1\_M10\_00686" 16376 "s63E6H2" 0.9851957 "UDP-N-acetylmuramoyl-L-alanyl-D-glutamate--L-lysine ligase"  
"JS1\_M10\_00687" 16377 "s59E13H2" 0.3574563 "UDP-N-acetylmuramoyl-tripeptide--D-alanyl-D-alanine ligase"  
"JS1\_M10\_00687" 16377 "s59E25H2" 0 "UDP-N-acetylmuramoyl-tripeptide--D-alanyl-D-alanine ligase"  
"JS1\_M10\_00687" 16377 "s59E5H2" 1.239384 "UDP-N-acetylmuramoyl-tripeptide--D-alanyl-D-alanine ligase"  
"JS1\_M10\_00687" 16377 "s63E6H2" 0.843618 "UDP-N-acetylmuramoyl-tripeptide--D-alanyl-D-alanine ligase"  
"JS1\_M10\_00688" 16378 "s59E13H2" 0.2779897 "Phospho-N-acetylmuramoyl-pentapeptide-transferase"  
"JS1\_M10\_00688" 16378 "s59E25H2" 0 "Phospho-N-acetylmuramoyl-pentapeptide-transferase"  
"JS1\_M10\_00688" 16378 "s59E5H2" 0.7380003 "Phospho-N-acetylmuramoyl-pentapeptide-transferase"  
"JS1\_M10\_00688" 16378 "s63E6H2" 0.6878675 "Phospho-N-acetylmuramoyl-pentapeptide-transferase"  
"JS1\_M10\_00689" 16379 "s59E13H2" 0.5425111 "Lipid II flippase FtsW"  
"JS1\_M10\_00689" 16379 "s59E25H2" 0 "Lipid II flippase FtsW"  
"JS1\_M10\_00689" 16379 "s59E5H2" 1.236514 "Lipid II flippase FtsW"  
"JS1\_M10\_00689" 16379 "s63E6H2" 1.238319 "Lipid II flippase FtsW"  
"JS1\_M10\_00690" 16380 "s59E13H2" 0.1878699 "UDP-N-acetylglucosamine--N-acetylmuramyl-(pentapeptide) pyrophosphoryl-undecaprenol N-acetylglucosamine transferase"  
"JS1\_M10\_00690" 16380 "s59E25H2" 0 "UDP-N-acetylglucosamine--N-acetylmuramyl-(pentapeptide) pyrophosphoryl-undecaprenol N-acetylglucosamine transferase"  
"JS1\_M10\_00690" 16380 "s59E5H2" 0.6597591 "UDP-N-acetylglucosamine--N-acetylmuramyl-(pentapeptide) pyrophosphoryl-undecaprenol N-acetylglucosamine transferase"  
"JS1\_M10\_00690" 16380 "s63E6H2" 0.7445925 "UDP-N-acetylglucosamine--N-acetylmuramyl-(pentapeptide) pyrophosphoryl-undecaprenol N-acetylglucosamine transferase"  
"JS1\_M10\_00691" 16381 "s59E13H2" 0.2228844 "UDP-N-acetylmuramate--L-alanine ligase"  
"JS1\_M10\_00691" 16381 "s59E25H2" 0 "UDP-N-acetylmuramate--L-alanine ligase"  
"JS1\_M10\_00691" 16381 "s59E5H2" 0.6091713 "UDP-N-acetylmuramate--L-alanine ligase"  
"JS1\_M10\_00691" 16381 "s63E6H2" 0.5967814 "UDP-N-acetylmuramate--L-alanine ligase"  
"JS1\_M10\_00692" 16382 "s59E13H2" 0.04253409 "UDP-N-acetylenolpyruvoylglucosamine reductase"  
"JS1\_M10\_00692" 16382 "s59E25H2" 0 "UDP-N-acetylenolpyruvoylglucosamine reductase"  
"JS1\_M10\_00692" 16382 "s59E5H2" 0.5724449 "UDP-N-acetylenolpyruvoylglucosamine reductase"  
"JS1\_M10\_00692" 16382 "s63E6H2" 0.5996054 "UDP-N-acetylenolpyruvoylglucosamine reductase"  
"JS1\_M10\_00693" 16383 "s59E13H2" 0.01247387 "Cell division protein DivIB"  
"JS1\_M10\_00693" 16383 "s59E25H2" 0 "Cell division protein DivIB"  
"JS1\_M10\_00693" 16383 "s59E5H2" 0.06735945 "Cell division protein DivIB"  
"JS1\_M10\_00693" 16383 "s63E6H2" 0.9017015 "Cell division protein DivIB"

"JS1\_M10\_00694" 16384 "s59E13H2" 0.1516252 "Cell division protein FtsA"  
"JS1\_M10\_00694" 16384 "s59E25H2" 0 "Cell division protein FtsA"  
"JS1\_M10\_00694" 16384 "s59E5H2" 0.3173653 "Cell division protein FtsA"  
"JS1\_M10\_00694" 16384 "s63E6H2" 1.063532 "Cell division protein FtsA"  
"JS1\_M10\_00695" 16385 "s59E13H2" 0.2697509 "Cell division protein FtsZ"  
"JS1\_M10\_00695" 16385 "s59E25H2" 0 "Cell division protein FtsZ"  
"JS1\_M10\_00695" 16385 "s59E5H2" 0.576657 "Cell division protein FtsZ"  
"JS1\_M10\_00695" 16385 "s63E6H2" 1.63251 "Cell division protein FtsZ"  
"JS1\_M10\_00696" 16386 "s59E13H2" 0.07270913 "Transcriptional repressor NrdR"  
"JS1\_M10\_00696" 16386 "s59E25H2" 0 "Transcriptional repressor NrdR"  
"JS1\_M10\_00696" 16386 "s59E5H2" 0.3834975 "Transcriptional repressor NrdR"  
"JS1\_M10\_00696" 16386 "s63E6H2" 1.433929 "Transcriptional repressor NrdR"  
"JS1\_M10\_00697" 16387 "s59E13H2" 0.132404 "Anaerobic ribonucleoside-triphosphate reductase"  
"JS1\_M10\_00697" 16387 "s59E25H2" 0 "Anaerobic ribonucleoside-triphosphate reductase"  
"JS1\_M10\_00697" 16387 "s59E5H2" 0.4837004 "Anaerobic ribonucleoside-triphosphate reductase"  
"JS1\_M10\_00697" 16387 "s63E6H2" 0.7651044 "Anaerobic ribonucleoside-triphosphate reductase"  
"JS1\_M10\_00698" 16388 "s59E13H2" 0.2704771 "Thioredoxin"  
"JS1\_M10\_00698" 16388 "s59E25H2" 0 "Thioredoxin"  
"JS1\_M10\_00698" 16388 "s59E5H2" 0.3969014 "Thioredoxin"  
"JS1\_M10\_00698" 16388 "s63E6H2" 0.5851614 "Thioredoxin"  
"JS1\_M10\_00699" 16389 "s59E13H2" 0.04401296 "7-carboxy-7-deazaguanine synthase"  
"JS1\_M10\_00699" 16389 "s59E25H2" 0 "7-carboxy-7-deazaguanine synthase"  
"JS1\_M10\_00699" 16389 "s59E5H2" 0.5934041 "7-carboxy-7-deazaguanine synthase"  
"JS1\_M10\_00699" 16389 "s63E6H2" 0.207662 "7-carboxy-7-deazaguanine synthase"  
"JS1\_M10\_00700" 16390 "s59E13H2" 0.1798246 "Laccase domain protein"  
"JS1\_M10\_00700" 16390 "s59E25H2" 0 "Laccase domain protein"  
"JS1\_M10\_00700" 16390 "s59E5H2" 0.2588898 "Laccase domain protein"  
"JS1\_M10\_00700" 16390 "s63E6H2" 0.2519758 "Laccase domain protein"  
"JS1\_M10\_00701" 16391 "s59E13H2" 2.108669 "Transposase IS116/IS110/IS902 family protein"  
"JS1\_M10\_00701" 16391 "s59E25H2" 0 "Transposase IS116/IS110/IS902 family protein"  
"JS1\_M10\_00701" 16391 "s59E5H2" 0.2382963 "Transposase IS116/IS110/IS902 family protein"  
"JS1\_M10\_00701" 16391 "s63E6H2" 0.9851272 "Transposase IS116/IS110/IS902 family protein"  
"JS1\_M10\_00702" 16392 "s59E13H2" 0.130156 "Hydrogen cyanide synthase subunit HcnA"  
"JS1\_M10\_00702" 16392 "s59E25H2" 0 "Hydrogen cyanide synthase subunit HcnA"  
"JS1\_M10\_00702" 16392 "s59E5H2" 0.2525534 "Hydrogen cyanide synthase subunit HcnA"  
"JS1\_M10\_00702" 16392 "s63E6H2" 0.175306 "Hydrogen cyanide synthase subunit HcnA"  
"JS1\_M10\_00703" 16393 "s59E13H2" 0.07467944 "Hydrogen cyanide synthase subunit HcnB"  
"JS1\_M10\_00703" 16393 "s59E25H2" 0 "Hydrogen cyanide synthase subunit HcnB"  
"JS1\_M10\_00703" 16393 "s59E5H2" 0.7072203 "Hydrogen cyanide synthase subunit HcnB"  
"JS1\_M10\_00703" 16393 "s63E6H2" 1.527304 "Hydrogen cyanide synthase subunit HcnB"  
"JS1\_M10\_00704" 16394 "s59E13H2" 0.07314546 "ferredoxin"  
"JS1\_M10\_00704" 16394 "s59E25H2" 0 "ferredoxin"  
"JS1\_M10\_00704" 16394 "s59E5H2" 0.6235657 "ferredoxin"  
"JS1\_M10\_00704" 16394 "s63E6H2" 1.97135 "ferredoxin"  
"JS1\_M10\_00705" 16395 "s59E13H2" 0.01284109 "Hydrogen cyanide synthase subunit HcnB"  
"JS1\_M10\_00705" 16395 "s59E25H2" 0 "Hydrogen cyanide synthase subunit HcnB"  
"JS1\_M10\_00705" 16395 "s59E5H2" 0.6621869 "Hydrogen cyanide synthase subunit HcnB"

"JS1\_M10\_00705" 16395 "s63E6H2" 1.432998 "Hydrogen cyanide synthase subunit HcnB"  
"JS1\_M10\_00706" 16396 "s59E13H2" 0.02645067 "4-methylaminobutanoate oxidase (formaldehyde-forming)"  
"JS1\_M10\_00706" 16396 "s59E25H2" 0 "4-methylaminobutanoate oxidase (formaldehyde-forming)"  
"JS1\_M10\_00706" 16396 "s59E5H2" 0.5415935 "4-methylaminobutanoate oxidase (formaldehyde-forming)"  
"JS1\_M10\_00706" 16396 "s63E6H2" 1.446102 "4-methylaminobutanoate oxidase (formaldehyde-forming)"  
"JS1\_M10\_00707" 16397 "s59E13H2" 0.01812942 "Leucine-specific-binding protein precursor"  
"JS1\_M10\_00707" 16397 "s59E25H2" 0 "Leucine-specific-binding protein precursor"  
"JS1\_M10\_00707" 16397 "s59E5H2" 0.009866495 "Leucine-specific-binding protein precursor"  
"JS1\_M10\_00707" 16397 "s63E6H2" 0.3538277 "Leucine-specific-binding protein precursor"  
"JS1\_M10\_00708" 16398 "s59E13H2" 0.05928969 "Leucine-specific-binding protein precursor"  
"JS1\_M10\_00708" 16398 "s59E25H2" 0 "Leucine-specific-binding protein precursor"  
"JS1\_M10\_00708" 16398 "s59E5H2" 0.1799125 "Leucine-specific-binding protein precursor"  
"JS1\_M10\_00708" 16398 "s63E6H2" 2.039531 "Leucine-specific-binding protein precursor"  
"JS1\_M10\_00709" 16399 "s59E13H2" 0.1093447 "High-affinity branched-chain amino acid transport system permease protein LivH"  
"JS1\_M10\_00709" 16399 "s59E25H2" 0 "High-affinity branched-chain amino acid transport system permease protein LivH"  
"JS1\_M10\_00709" 16399 "s59E5H2" 0.6885542 "High-affinity branched-chain amino acid transport system permease protein LivH"  
"JS1\_M10\_00709" 16399 "s63E6H2" 2.073124 "High-affinity branched-chain amino acid transport system permease protein LivH"  
"JS1\_M10\_00710" 16400 "s59E13H2" 0.1532598 "leucine/isoleucine/valine transporter permease subunit"  
"JS1\_M10\_00710" 16400 "s59E25H2" 0 "leucine/isoleucine/valine transporter permease subunit"  
"JS1\_M10\_00710" 16400 "s59E5H2" 0.8120147 "leucine/isoleucine/valine transporter permease subunit"  
"JS1\_M10\_00710" 16400 "s63E6H2" 1.59079 "leucine/isoleucine/valine transporter permease subunit"  
"JS1\_M10\_00711" 16401 "s59E13H2" 0.3457069 "putative branched-chain amino acid transport ATP-binding protein LivG"  
"JS1\_M10\_00711" 16401 "s59E25H2" 0 "putative branched-chain amino acid transport ATP-binding protein LivG"  
"JS1\_M10\_00711" 16401 "s59E5H2" 1.357184 "putative branched-chain amino acid transport ATP-binding protein LivG"  
"JS1\_M10\_00711" 16401 "s63E6H2" 1.005517 "putative branched-chain amino acid transport ATP-binding protein LivG"  
"JS1\_M10\_00712" 16402 "s59E13H2" 0.8012032 "High-affinity branched-chain amino acid transport ATP-binding protein LivF"  
"JS1\_M10\_00712" 16402 "s59E25H2" 0 "High-affinity branched-chain amino acid transport ATP-binding protein LivF"  
"JS1\_M10\_00712" 16402 "s59E5H2" 1.871049 "High-affinity branched-chain amino acid transport ATP-binding protein LivF"  
"JS1\_M10\_00712" 16402 "s63E6H2" 1.952094 "High-affinity branched-chain amino acid transport ATP-binding protein LivF"  
"JS1\_M10\_00713" 16403 "s59E13H2" 0.257772 "hypothetical protein"  
"JS1\_M10\_00713" 16403 "s59E25H2" 0 "hypothetical protein"  
"JS1\_M10\_00713" 16403 "s59E5H2" 0.775591 "hypothetical protein"  
"JS1\_M10\_00713" 16403 "s63E6H2" 0.6203884 "hypothetical protein"  
"JS1\_M10\_00714" 16404 "s59E13H2" 0.1830424 "hypothetical protein"  
"JS1\_M10\_00714" 16404 "s59E25H2" 0 "hypothetical protein"  
"JS1\_M10\_00714" 16404 "s59E5H2" 0.3853059 "hypothetical protein"  
"JS1\_M10\_00714" 16404 "s63E6H2" 1.045487 "hypothetical protein"  
"JS1\_M10\_00715" 16405 "s59E13H2" 0.1154113 "YGGT family protein"  
"JS1\_M10\_00715" 16405 "s59E25H2" 0 "YGGT family protein"  
"JS1\_M10\_00715" 16405 "s59E5H2" 0.1817515 "YGGT family protein"  
"JS1\_M10\_00715" 16405 "s63E6H2" 0.4352096 "YGGT family protein"  
"JS1\_M10\_00716" 16406 "s59E13H2" 0.3276664 "Septum site-determining protein DivIVA"  
"JS1\_M10\_00716" 16406 "s59E25H2" 0 "Septum site-determining protein DivIVA"  
"JS1\_M10\_00716" 16406 "s59E5H2" 0.8285006 "Septum site-determining protein DivIVA"  
"JS1\_M10\_00716" 16406 "s63E6H2" 0.8090116 "Septum site-determining protein DivIVA"  
"JS1\_M10\_00717" 16407 "s59E13H2" 0.006935431 "hypothetical protein"  
"JS1\_M10\_00717" 16407 "s59E25H2" 0 "hypothetical protein"

"JS1\_M10\_00717" 16407 "s59E5H2" 0 "hypothetical protein"  
"JS1\_M10\_00717" 16407 "s63E6H2" 0.1023435 "hypothetical protein"  
"JS1\_M10\_00719" 16409 "s59E13H2" 0.431269 "Isoleucine--tRNA ligase"  
"JS1\_M10\_00719" 16409 "s59E25H2" 0 "Isoleucine--tRNA ligase"  
"JS1\_M10\_00719" 16409 "s59E5H2" 1.551713 "Isoleucine--tRNA ligase"  
"JS1\_M10\_00719" 16409 "s63E6H2" 1.260312 "Isoleucine--tRNA ligase"  
"JS1\_M10\_00720" 16410 "s59E13H2" 2.016611 "Lipoprotein signal peptidase"  
"JS1\_M10\_00720" 16410 "s59E25H2" 0.4543651 "Lipoprotein signal peptidase"  
"JS1\_M10\_00720" 16410 "s59E5H2" 0.4515804 "Lipoprotein signal peptidase"  
"JS1\_M10\_00720" 16410 "s63E6H2" 0.3833933 "Lipoprotein signal peptidase"  
"JS1\_M10\_00721" 16411 "s59E13H2" 0.05050962 "Prolipoprotein diacylglycerol transferase"  
"JS1\_M10\_00721" 16411 "s59E25H2" 0.04444444 "Prolipoprotein diacylglycerol transferase"  
"JS1\_M10\_00721" 16411 "s59E5H2" 0.2253631 "Prolipoprotein diacylglycerol transferase"  
"JS1\_M10\_00721" 16411 "s63E6H2" 1.064424 "Prolipoprotein diacylglycerol transferase"  
"JS1\_M10\_00724" 16414 "s59E13H2" 0.008996455 "(Dimethylallyl)adenosine tRNA methylthiotransferase MiaB"  
"JS1\_M10\_00724" 16414 "s59E25H2" 0 "(Dimethylallyl)adenosine tRNA methylthiotransferase MiaB"  
"JS1\_M10\_00724" 16414 "s59E5H2" 0.07918186 "(Dimethylallyl)adenosine tRNA methylthiotransferase MiaB"  
"JS1\_M10\_00724" 16414 "s63E6H2" 0.05353658 "(Dimethylallyl)adenosine tRNA methylthiotransferase MiaB"  
"JS1\_M10\_00725" 16415 "s59E13H2" 0.02876152 "tRNA dimethylallyltransferase"  
"JS1\_M10\_00725" 16415 "s59E25H2" 0 "tRNA dimethylallyltransferase"  
"JS1\_M10\_00725" 16415 "s59E5H2" 0.2047843 "tRNA dimethylallyltransferase"  
"JS1\_M10\_00725" 16415 "s63E6H2" 0.0738172 "tRNA dimethylallyltransferase"  
"JS1\_M10\_00726" 16416 "s59E13H2" 0.03949698 "R-phenyllactate dehydratase activator"  
"JS1\_M10\_00726" 16416 "s59E25H2" 0 "R-phenyllactate dehydratase activator"  
"JS1\_M10\_00726" 16416 "s59E5H2" 0.469416 "R-phenyllactate dehydratase activator"  
"JS1\_M10\_00726" 16416 "s63E6H2" 0.7843328 "R-phenyllactate dehydratase activator"  
"JS1\_M10\_00727" 16417 "s59E13H2" 0.04060983 "2-hydroxyglutaryl-CoA dehydratase, D-component"  
"JS1\_M10\_00727" 16417 "s59E25H2" 0 "2-hydroxyglutaryl-CoA dehydratase, D-component"  
"JS1\_M10\_00727" 16417 "s59E5H2" 0.5355946 "2-hydroxyglutaryl-CoA dehydratase, D-component"  
"JS1\_M10\_00727" 16417 "s63E6H2" 1.686916 "2-hydroxyglutaryl-CoA dehydratase, D-component"  
"JS1\_M10\_00728" 16418 "s59E13H2" 0.01963932 "(Dimethylallyl)adenosine tRNA methylthiotransferase MiaB"  
"JS1\_M10\_00728" 16418 "s59E25H2" 0 "(Dimethylallyl)adenosine tRNA methylthiotransferase MiaB"  
"JS1\_M10\_00728" 16418 "s59E5H2" 0.02070742 "(Dimethylallyl)adenosine tRNA methylthiotransferase MiaB"  
"JS1\_M10\_00728" 16418 "s63E6H2" 0.05960939 "(Dimethylallyl)adenosine tRNA methylthiotransferase MiaB"  
"JS1\_M10\_00729" 16419 "s59E13H2" 0.0690395 "Ribonuclease Y"  
"JS1\_M10\_00729" 16419 "s59E25H2" 0 "Ribonuclease Y"  
"JS1\_M10\_00729" 16419 "s59E5H2" 0.682134 "Ribonuclease Y"  
"JS1\_M10\_00729" 16419 "s63E6H2" 0.237003 "Ribonuclease Y"  
"JS1\_M10\_00730" 16420 "s59E13H2" 0.005593157 "recombination regulator RecX"  
"JS1\_M10\_00730" 16420 "s59E25H2" 0 "recombination regulator RecX"  
"JS1\_M10\_00730" 16420 "s59E5H2" 0.1681898 "recombination regulator RecX"  
"JS1\_M10\_00730" 16420 "s63E6H2" 0.1457985 "recombination regulator RecX"  
"JS1\_M10\_00731" 16421 "s59E13H2" 0.05243344 "DNA repair and recombination protein RadA"  
"JS1\_M10\_00731" 16421 "s59E25H2" 0 "DNA repair and recombination protein RadA"  
"JS1\_M10\_00731" 16421 "s59E5H2" 0.2803046 "DNA repair and recombination protein RadA"  
"JS1\_M10\_00731" 16421 "s63E6H2" 0.363191 "DNA repair and recombination protein RadA"  
"JS1\_M10\_00732" 16422 "s59E13H2" 0.01002674 "2'-5'-RNA ligase"

"JS1\_M10\_00732" 16422 "s59E25H2" 0 "2'-5'-RNA ligase"  
"JS1\_M10\_00732" 16422 "s59E5H2" 0.1172734 "2'-5'-RNA ligase"  
"JS1\_M10\_00732" 16422 "s63E6H2" 0.2282757 "2'-5'-RNA ligase"  
"JS1\_M10\_00733" 16423 "s59E13H2" 1.224172 "hypothetical protein"  
"JS1\_M10\_00733" 16423 "s59E25H2" 0 "hypothetical protein"  
"JS1\_M10\_00733" 16423 "s59E5H2" 0.2672061 "hypothetical protein"  
"JS1\_M10\_00733" 16423 "s63E6H2" 0.1997327 "hypothetical protein"  
"JS1\_M10\_00734" 16424 "s59E13H2" 1.951665 "Helix-turn-helix domain protein"  
"JS1\_M10\_00734" 16424 "s59E25H2" 0 "Helix-turn-helix domain protein"  
"JS1\_M10\_00734" 16424 "s59E5H2" 0.09163153 "Helix-turn-helix domain protein"  
"JS1\_M10\_00734" 16424 "s63E6H2" 0.2160864 "Helix-turn-helix domain protein"  
"JS1\_M10\_00735" 16425 "s59E13H2" 1.965498 "L-arabinose transporter permease protein"  
"JS1\_M10\_00735" 16425 "s59E25H2" 0 "L-arabinose transporter permease protein"  
"JS1\_M10\_00735" 16425 "s59E5H2" 0.2019113 "L-arabinose transporter permease protein"  
"JS1\_M10\_00735" 16425 "s63E6H2" 0.612963 "L-arabinose transporter permease protein"  
"JS1\_M10\_00736" 16426 "s59E13H2" 2.28724 "Branched-chain amino acid transport system / permease component"  
"JS1\_M10\_00736" 16426 "s59E25H2" 0 "Branched-chain amino acid transport system / permease component"  
"JS1\_M10\_00736" 16426 "s59E5H2" 0.2640999 "Branched-chain amino acid transport system / permease component"  
"JS1\_M10\_00736" 16426 "s63E6H2" 0.2410803 "Branched-chain amino acid transport system / permease component"  
"JS1\_M10\_00737" 16427 "s59E13H2" 1.988766 "Galactose/methyl galactoside import ATP-binding protein MglA"  
"JS1\_M10\_00737" 16427 "s59E25H2" 0 "Galactose/methyl galactoside import ATP-binding protein MglA"  
"JS1\_M10\_00737" 16427 "s59E5H2" 0.3372967 "Galactose/methyl galactoside import ATP-binding protein MglA"  
"JS1\_M10\_00737" 16427 "s63E6H2" 0.1891137 "Galactose/methyl galactoside import ATP-binding protein MglA"  
"JS1\_M10\_00738" 16428 "s59E13H2" 1.566695 "Membrane lipoprotein TmpC precursor"  
"JS1\_M10\_00738" 16428 "s59E25H2" 0 "Membrane lipoprotein TmpC precursor"  
"JS1\_M10\_00738" 16428 "s59E5H2" 0.2326906 "Membrane lipoprotein TmpC precursor"  
"JS1\_M10\_00738" 16428 "s63E6H2" 0.07690071 "Membrane lipoprotein TmpC precursor"  
"JS1\_M10\_00739" 16429 "s59E13H2" 0.9764857 "Methylated-DNA--protein-cysteine methyltransferase"  
"JS1\_M10\_00739" 16429 "s59E25H2" 0 "Methylated-DNA--protein-cysteine methyltransferase"  
"JS1\_M10\_00739" 16429 "s59E5H2" 6.076497 "Methylated-DNA--protein-cysteine methyltransferase"  
"JS1\_M10\_00739" 16429 "s63E6H2" 4.314559 "Methylated-DNA--protein-cysteine methyltransferase"  
"JS1\_M10\_00740" 16430 "s59E13H2" 3.951386 "D-alanine--D-alanine ligase"  
"JS1\_M10\_00740" 16430 "s59E25H2" 0.2231256 "D-alanine--D-alanine ligase"  
"JS1\_M10\_00740" 16430 "s59E5H2" 6.136338 "D-alanine--D-alanine ligase"  
"JS1\_M10\_00740" 16430 "s63E6H2" 8.844048 "D-alanine--D-alanine ligase"  
"JS1\_M10\_00741" 16431 "s59E13H2" 4.507076 "Ktr system potassium uptake protein A"  
"JS1\_M10\_00741" 16431 "s59E25H2" 0 "Ktr system potassium uptake protein A"  
"JS1\_M10\_00741" 16431 "s59E5H2" 3.120006 "Ktr system potassium uptake protein A"  
"JS1\_M10\_00741" 16431 "s63E6H2" 8.784287 "Ktr system potassium uptake protein A"  
"JS1\_M10\_00742" 16432 "s59E13H2" 10.25165 "Ktr system potassium uptake protein B"  
"JS1\_M10\_00742" 16432 "s59E25H2" 0.3938679 "Ktr system potassium uptake protein B"  
"JS1\_M10\_00742" 16432 "s59E5H2" 1.88571 "Ktr system potassium uptake protein B"  
"JS1\_M10\_00742" 16432 "s63E6H2" 4.743992 "Ktr system potassium uptake protein B"  
"JS1\_M10\_00743" 16433 "s59E13H2" 9.81517 "Trk system potassium uptake protein TrkH"  
"JS1\_M10\_00743" 16433 "s59E25H2" 0.2383922 "Trk system potassium uptake protein TrkH"  
"JS1\_M10\_00743" 16433 "s59E5H2" 0.8868593 "Trk system potassium uptake protein TrkH"  
"JS1\_M10\_00743" 16433 "s63E6H2" 10.35272 "Trk system potassium uptake protein TrkH"

"JS1\_M10\_00744" 16434 "s59E13H2" 0 "Putative pyridoxal phosphate-dependent aminotransferase EpsN"  
"JS1\_M10\_00744" 16434 "s59E25H2" 0 "Putative pyridoxal phosphate-dependent aminotransferase EpsN"  
"JS1\_M10\_00744" 16434 "s59E5H2" 0.3640448 "Putative pyridoxal phosphate-dependent aminotransferase EpsN"  
"JS1\_M10\_00744" 16434 "s63E6H2" 0.04533955 "Putative pyridoxal phosphate-dependent aminotransferase EpsN"  
"JS1\_M10\_00745" 16435 "s59E13H2" 0 "hypothetical protein"  
"JS1\_M10\_00745" 16435 "s59E25H2" 0 "hypothetical protein"  
"JS1\_M10\_00745" 16435 "s59E5H2" 0 "hypothetical protein"  
"JS1\_M10\_00745" 16435 "s63E6H2" 0 "hypothetical protein"  
"JS1\_M10\_00746" 16436 "s59E13H2" 0 "hypothetical protein"  
"JS1\_M10\_00746" 16436 "s59E25H2" 0 "hypothetical protein"  
"JS1\_M10\_00746" 16436 "s59E5H2" 0 "hypothetical protein"  
"JS1\_M10\_00746" 16436 "s63E6H2" 0.002837002 "hypothetical protein"  
"JS1\_M10\_00747" 16437 "s59E13H2" 0 "Putative acetyltransferase EpsM"  
"JS1\_M10\_00747" 16437 "s59E25H2" 0 "Putative acetyltransferase EpsM"  
"JS1\_M10\_00747" 16437 "s59E5H2" 0 "Putative acetyltransferase EpsM"  
"JS1\_M10\_00747" 16437 "s63E6H2" 0 "Putative acetyltransferase EpsM"  
"JS1\_M10\_00748" 16438 "s59E13H2" 0 "GDP/UDP-N,N'-diacetylbaicillosamine 2-epimerase (hydrolyzing)"  
"JS1\_M10\_00748" 16438 "s59E25H2" 0 "GDP/UDP-N,N'-diacetylbaicillosamine 2-epimerase (hydrolyzing)"  
"JS1\_M10\_00748" 16438 "s59E5H2" 0.1288988 "GDP/UDP-N,N'-diacetylbaicillosamine 2-epimerase (hydrolyzing)"  
"JS1\_M10\_00748" 16438 "s63E6H2" 0.01361397 "GDP/UDP-N,N'-diacetylbaicillosamine 2-epimerase (hydrolyzing)"  
"JS1\_M10\_00749" 16439 "s59E13H2" 0 "N,N'-diacetyllegionaminic acid synthase"  
"JS1\_M10\_00749" 16439 "s59E25H2" 0 "N,N'-diacetyllegionaminic acid synthase"  
"JS1\_M10\_00749" 16439 "s59E5H2" 0.1984007 "N,N'-diacetyllegionaminic acid synthase"  
"JS1\_M10\_00749" 16439 "s63E6H2" 0.06974936 "N,N'-diacetyllegionaminic acid synthase"  
"JS1\_M10\_00750" 16440 "s59E13H2" 0 "Bifunctional protein GImU"  
"JS1\_M10\_00750" 16440 "s59E25H2" 0 "Bifunctional protein GImU"  
"JS1\_M10\_00750" 16440 "s59E5H2" 0.001472414 "Bifunctional protein GImU"  
"JS1\_M10\_00750" 16440 "s63E6H2" 0.003944708 "Bifunctional protein GImU"  
"JS1\_M10\_00751" 16441 "s59E13H2" 0 "hypothetical protein"  
"JS1\_M10\_00751" 16441 "s59E25H2" 0 "hypothetical protein"  
"JS1\_M10\_00751" 16441 "s59E5H2" 0 "hypothetical protein"  
"JS1\_M10\_00751" 16441 "s63E6H2" 0 "hypothetical protein"  
"JS1\_M10\_00752" 16442 "s59E13H2" 0 "putative oxidoreductase"  
"JS1\_M10\_00752" 16442 "s59E25H2" 0 "putative oxidoreductase"  
"JS1\_M10\_00752" 16442 "s59E5H2" 0 "putative oxidoreductase"  
"JS1\_M10\_00752" 16442 "s63E6H2" 0.001656788 "putative oxidoreductase"  
"JS1\_M10\_00753" 16443 "s59E13H2" 0 "Putative pyridoxal phosphate-dependent aminotransferase EpsN"  
"JS1\_M10\_00753" 16443 "s59E25H2" 0 "Putative pyridoxal phosphate-dependent aminotransferase EpsN"  
"JS1\_M10\_00753" 16443 "s59E5H2" 0.06918643 "Putative pyridoxal phosphate-dependent aminotransferase EpsN"  
"JS1\_M10\_00753" 16443 "s63E6H2" 0.02691672 "Putative pyridoxal phosphate-dependent aminotransferase EpsN"  
"JS1\_M10\_00754" 16444 "s59E13H2" 0.02466009 "GDP-6-deoxy-D-mannose reductase"  
"JS1\_M10\_00754" 16444 "s59E25H2" 0 "GDP-6-deoxy-D-mannose reductase"  
"JS1\_M10\_00754" 16444 "s59E5H2" 0.08456212 "GDP-6-deoxy-D-mannose reductase"  
"JS1\_M10\_00754" 16444 "s63E6H2" 0.01271012 "GDP-6-deoxy-D-mannose reductase"  
"JS1\_M10\_00755" 16445 "s59E13H2" 0 "UDP-glucose 6-dehydrogenase YwqF"  
"JS1\_M10\_00755" 16445 "s59E25H2" 0 "UDP-glucose 6-dehydrogenase YwqF"  
"JS1\_M10\_00755" 16445 "s59E5H2" 0 "UDP-glucose 6-dehydrogenase YwqF"



"JS1\_M10\_00755" 16445 "s63E6H2" 0.01283406 "UDP-glucose 6-dehydrogenase YwqF"  
"JS1\_M10\_00757" 16447 "s59E13H2" 0 "hypothetical protein"  
"JS1\_M10\_00757" 16447 "s59E25H2" 0 "hypothetical protein"  
"JS1\_M10\_00757" 16447 "s59E5H2" 0.002916207 "hypothetical protein"  
"JS1\_M10\_00757" 16447 "s63E6H2" 0.0006025728 "hypothetical protein"  
"JS1\_M10\_00758" 16448 "s59E13H2" 0 "hypothetical protein"  
"JS1\_M10\_00758" 16448 "s59E25H2" 0 "hypothetical protein"  
"JS1\_M10\_00758" 16448 "s59E5H2" 0 "hypothetical protein"  
"JS1\_M10\_00758" 16448 "s63E6H2" 0.002266402 "hypothetical protein"  
"JS1\_M10\_00760" 16450 "s59E13H2" 0 "hypothetical protein"  
"JS1\_M10\_00760" 16450 "s59E25H2" 0 "hypothetical protein"  
"JS1\_M10\_00760" 16450 "s59E5H2" 0 "hypothetical protein"  
"JS1\_M10\_00760" 16450 "s63E6H2" 0 "hypothetical protein"  
"JS1\_M10\_00761" 16451 "s59E13H2" 0 "hypothetical protein"  
"JS1\_M10\_00761" 16451 "s59E25H2" 0 "hypothetical protein"  
"JS1\_M10\_00761" 16451 "s59E5H2" 0 "hypothetical protein"  
"JS1\_M10\_00761" 16451 "s63E6H2" 0.001276892 "hypothetical protein"  
"JS1\_M10\_00762" 16452 "s59E13H2" 0 "Glycosyl transferases group 1"  
"JS1\_M10\_00762" 16452 "s59E25H2" 0 "Glycosyl transferases group 1"  
"JS1\_M10\_00762" 16452 "s59E5H2" 0 "Glycosyl transferases group 1"  
"JS1\_M10\_00762" 16452 "s63E6H2" 0 "Glycosyl transferases group 1"  
"JS1\_M10\_00763" 16453 "s59E13H2" 0.02117206 "Maltokinase"  
"JS1\_M10\_00763" 16453 "s59E25H2" 0 "Maltokinase"  
"JS1\_M10\_00763" 16453 "s59E5H2" 0.8349715 "Maltokinase"  
"JS1\_M10\_00763" 16453 "s63E6H2" 0.9681864 "Maltokinase"  
"JS1\_M10\_00764" 16454 "s59E13H2" 0.5714656 "1,4-alpha-glucan branching enzyme GlgB"  
"JS1\_M10\_00764" 16454 "s59E25H2" 0 "1,4-alpha-glucan branching enzyme GlgB"  
"JS1\_M10\_00764" 16454 "s59E5H2" 0.5709488 "1,4-alpha-glucan branching enzyme GlgB"  
"JS1\_M10\_00764" 16454 "s63E6H2" 0.6422081 "1,4-alpha-glucan branching enzyme GlgB"  
"JS1\_M10\_00765" 16455 "s59E13H2" 0.06522042 "Alpha-amylase 1"  
"JS1\_M10\_00765" 16455 "s59E25H2" 0 "Alpha-amylase 1"  
"JS1\_M10\_00765" 16455 "s59E5H2" 0.08927393 "Alpha-amylase 1"  
"JS1\_M10\_00765" 16455 "s63E6H2" 0.4196624 "Alpha-amylase 1"  
"JS1\_M10\_00766" 16456 "s59E13H2" 0.05503871 "4-alpha-glucanotransferase"  
"JS1\_M10\_00766" 16456 "s59E25H2" 0 "4-alpha-glucanotransferase"  
"JS1\_M10\_00766" 16456 "s59E5H2" 0.2476703 "4-alpha-glucanotransferase"  
"JS1\_M10\_00766" 16456 "s63E6H2" 0.2113346 "4-alpha-glucanotransferase"  
"JS1\_M10\_00767" 16457 "s59E13H2" 0.08967807 "Trehalose synthase"  
"JS1\_M10\_00767" 16457 "s59E25H2" 0 "Trehalose synthase"  
"JS1\_M10\_00767" 16457 "s59E5H2" 0.5628482 "Trehalose synthase"  
"JS1\_M10\_00767" 16457 "s63E6H2" 0.2219705 "Trehalose synthase"  
"JS1\_M10\_00768" 16458 "s59E13H2" 0.1869445 "Endonuclease III"  
"JS1\_M10\_00768" 16458 "s59E25H2" 0 "Endonuclease III"  
"JS1\_M10\_00768" 16458 "s59E5H2" 0.1709289 "Endonuclease III"  
"JS1\_M10\_00768" 16458 "s63E6H2" 0.05807083 "Endonuclease III"  
"JS1\_M10\_00769" 16459 "s59E13H2" 0.8051831 "Tetrahedral aminopeptidase"  
"JS1\_M10\_00769" 16459 "s59E25H2" 0 "Tetrahedral aminopeptidase"

"JS1\_M10\_00769" 16459 "s59E5H2" 0.4753578 "Tetrahedral aminopeptidase"  
"JS1\_M10\_00769" 16459 "s63E6H2" 0.1562622 "Tetrahedral aminopeptidase"  
"JS1\_M10\_00770" 16460 "s59E13H2" 0.00691419 "VanZ like family protein"  
"JS1\_M10\_00770" 16460 "s59E25H2" 0 "VanZ like family protein"  
"JS1\_M10\_00770" 16460 "s59E5H2" 0.1691135 "VanZ like family protein"  
"JS1\_M10\_00770" 16460 "s63E6H2" 0.08089436 "VanZ like family protein"  
"JS1\_M10\_00771" 16461 "s59E13H2" 0.04649137 "Soluble hydrogenase 42 kDa subunit"  
"JS1\_M10\_00771" 16461 "s59E25H2" 0 "Soluble hydrogenase 42 kDa subunit"  
"JS1\_M10\_00771" 16461 "s59E5H2" 0.1883066 "Soluble hydrogenase 42 kDa subunit"  
"JS1\_M10\_00771" 16461 "s63E6H2" 0.1242877 "Soluble hydrogenase 42 kDa subunit"  
"JS1\_M10\_00772" 16462 "s59E13H2" 0.4340383 "putative 2-phosphosulfolactate phosphatase"  
"JS1\_M10\_00772" 16462 "s59E25H2" 0 "putative 2-phosphosulfolactate phosphatase"  
"JS1\_M10\_00772" 16462 "s59E5H2" 0.3407274 "putative 2-phosphosulfolactate phosphatase"  
"JS1\_M10\_00772" 16462 "s63E6H2" 0.08917912 "putative 2-phosphosulfolactate phosphatase"  
"JS1\_M10\_00773" 16463 "s59E13H2" 0.3635203 "2,3-bisphosphoglycerate-independent phosphoglycerate mutase 1"  
"JS1\_M10\_00773" 16463 "s59E25H2" 0 "2,3-bisphosphoglycerate-independent phosphoglycerate mutase 1"  
"JS1\_M10\_00773" 16463 "s59E5H2" 0.1543936 "2,3-bisphosphoglycerate-independent phosphoglycerate mutase 1"  
"JS1\_M10\_00773" 16463 "s63E6H2" 0.1006477 "2,3-bisphosphoglycerate-independent phosphoglycerate mutase 1"  
"JS1\_M10\_00774" 16464 "s59E13H2" 1.308676 "ATP-dependent RecD-like DNA helicase"  
"JS1\_M10\_00774" 16464 "s59E25H2" 0 "ATP-dependent RecD-like DNA helicase"  
"JS1\_M10\_00774" 16464 "s59E5H2" 0.7488017 "ATP-dependent RecD-like DNA helicase"  
"JS1\_M10\_00774" 16464 "s63E6H2" 0.1449281 "ATP-dependent RecD-like DNA helicase"  
"JS1\_M10\_00775" 16465 "s59E13H2" 0.3488062 "hypothetical protein"  
"JS1\_M10\_00775" 16465 "s59E25H2" 0 "hypothetical protein"  
"JS1\_M10\_00775" 16465 "s59E5H2" 0.2506012 "hypothetical protein"  
"JS1\_M10\_00775" 16465 "s63E6H2" 0.04614382 "hypothetical protein"  
"JS1\_M10\_00776" 16466 "s59E13H2" 0.2305123 "hypothetical protein"  
"JS1\_M10\_00776" 16466 "s59E25H2" 0 "hypothetical protein"  
"JS1\_M10\_00776" 16466 "s59E5H2" 0.1528721 "hypothetical protein"  
"JS1\_M10\_00776" 16466 "s63E6H2" 0.01643117 "hypothetical protein"  
"JS1\_M10\_00777" 16467 "s59E13H2" 0.9471402 "hypothetical protein"  
"JS1\_M10\_00777" 16467 "s59E25H2" 0 "hypothetical protein"  
"JS1\_M10\_00777" 16467 "s59E5H2" 1.035113 "hypothetical protein"  
"JS1\_M10\_00777" 16467 "s63E6H2" 0.1389298 "hypothetical protein"  
"JS1\_M10\_00778" 16468 "s59E13H2" 1.179344 "N5-carboxyaminoimidazole ribonucleotide mutase"  
"JS1\_M10\_00778" 16468 "s59E25H2" 0 "N5-carboxyaminoimidazole ribonucleotide mutase"  
"JS1\_M10\_00778" 16468 "s59E5H2" 0.5207832 "N5-carboxyaminoimidazole ribonucleotide mutase"  
"JS1\_M10\_00778" 16468 "s63E6H2" 0.1048217 "N5-carboxyaminoimidazole ribonucleotide mutase"  
"JS1\_M10\_00779" 16469 "s59E13H2" 0.4879911 "GMP synthase [glutamine-hydrolyzing]"  
"JS1\_M10\_00779" 16469 "s59E25H2" 0 "GMP synthase [glutamine-hydrolyzing]"  
"JS1\_M10\_00779" 16469 "s59E5H2" 0.1008068 "GMP synthase [glutamine-hydrolyzing]"  
"JS1\_M10\_00779" 16469 "s63E6H2" 0.2210448 "GMP synthase [glutamine-hydrolyzing]"  
"JS1\_M10\_00780" 16470 "s59E13H2" 0.5983954 "Cob(I)yrinic acid a,c-diamide adenosyltransferase"  
"JS1\_M10\_00780" 16470 "s59E25H2" 0 "Cob(I)yrinic acid a,c-diamide adenosyltransferase"  
"JS1\_M10\_00780" 16470 "s59E5H2" 0.2587942 "Cob(I)yrinic acid a,c-diamide adenosyltransferase"  
"JS1\_M10\_00780" 16470 "s63E6H2" 0.43382 "Cob(I)yrinic acid a,c-diamide adenosyltransferase"  
"JS1\_M10\_00782" 16472 "s59E13H2" 0.4869897 "Vitamin B12-binding protein precursor"

"JS1\_M10\_00782" 16472 "s59E25H2" 0 "Vitamin B12-binding protein precursor"  
"JS1\_M10\_00782" 16472 "s59E5H2" 0.4140065 "Vitamin B12-binding protein precursor"  
"JS1\_M10\_00782" 16472 "s63E6H2" 1.184214 "Vitamin B12-binding protein precursor"  
"JS1\_M10\_00783" 16473 "s59E13H2" 1.712421 "Hemin transport system permease protein HmuU"  
"JS1\_M10\_00783" 16473 "s59E25H2" 0 "Hemin transport system permease protein HmuU"  
"JS1\_M10\_00783" 16473 "s59E5H2" 1.893302 "Hemin transport system permease protein HmuU"  
"JS1\_M10\_00783" 16473 "s63E6H2" 4.761105 "Hemin transport system permease protein HmuU"  
"JS1\_M10\_00784" 16474 "s59E13H2" 1.478267 "Hemin import ATP-binding protein HmuV"  
"JS1\_M10\_00784" 16474 "s59E25H2" 0 "Hemin import ATP-binding protein HmuV"  
"JS1\_M10\_00784" 16474 "s59E5H2" 1.892318 "Hemin import ATP-binding protein HmuV"  
"JS1\_M10\_00784" 16474 "s63E6H2" 3.290419 "Hemin import ATP-binding protein HmuV"  
"JS1\_M10\_00785" 16475 "s59E13H2" 1.228956 "hypothetical protein"  
"JS1\_M10\_00785" 16475 "s59E25H2" 0 "hypothetical protein"  
"JS1\_M10\_00785" 16475 "s59E5H2" 0.07999045 "hypothetical protein"  
"JS1\_M10\_00785" 16475 "s63E6H2" 0.6275806 "hypothetical protein"  
"JS1\_M10\_00786" 16476 "s59E13H2" 0.2076207 "hypothetical protein"  
"JS1\_M10\_00786" 16476 "s59E25H2" 0 "hypothetical protein"  
"JS1\_M10\_00786" 16476 "s59E5H2" 0.07269132 "hypothetical protein"  
"JS1\_M10\_00786" 16476 "s63E6H2" 0.05883183 "hypothetical protein"  
"JS1\_M10\_00788" 16478 "s59E13H2" 0.08975497 "hypothetical protein"  
"JS1\_M10\_00788" 16478 "s59E25H2" 0 "hypothetical protein"  
"JS1\_M10\_00788" 16478 "s59E5H2" 0.04063741 "hypothetical protein"  
"JS1\_M10\_00788" 16478 "s63E6H2" 0.199271 "hypothetical protein"  
"JS1\_M10\_00789" 16479 "s59E13H2" 0 "Mannosylfructose-phosphate phosphatase"  
"JS1\_M10\_00789" 16479 "s59E25H2" 0 "Mannosylfructose-phosphate phosphatase"  
"JS1\_M10\_00789" 16479 "s59E5H2" 0.03732663 "Mannosylfructose-phosphate phosphatase"  
"JS1\_M10\_00789" 16479 "s63E6H2" 0.1067279 "Mannosylfructose-phosphate phosphatase"  
"JS1\_M10\_00790" 16480 "s59E13H2" 0.000182477 "D-inositol 3-phosphate glycosyltransferase"  
"JS1\_M10\_00790" 16480 "s59E25H2" 0 "D-inositol 3-phosphate glycosyltransferase"  
"JS1\_M10\_00790" 16480 "s59E5H2" 0.01200869 "D-inositol 3-phosphate glycosyltransferase"  
"JS1\_M10\_00790" 16480 "s63E6H2" 0.125845 "D-inositol 3-phosphate glycosyltransferase"  
"JS1\_M10\_00792" 16482 "s59E13H2" 0 "hypothetical protein"  
"JS1\_M10\_00792" 16482 "s59E25H2" 0 "hypothetical protein"  
"JS1\_M10\_00792" 16482 "s59E5H2" 0.05605381 "hypothetical protein"  
"JS1\_M10\_00792" 16482 "s63E6H2" 0.002075855 "hypothetical protein"  
"JS1\_M10\_00802" 16492 "s59E13H2" 0.099724 "Competence protein ComM"  
"JS1\_M10\_00802" 16492 "s59E25H2" 0 "Competence protein ComM"  
"JS1\_M10\_00802" 16492 "s59E5H2" 0.1790045 "Competence protein ComM"  
"JS1\_M10\_00802" 16492 "s63E6H2" 0.0420128 "Competence protein ComM"  
"JS1\_M10\_00803" 16493 "s59E13H2" 0.004731311 "hypothetical protein"  
"JS1\_M10\_00803" 16493 "s59E25H2" 0 "hypothetical protein"  
"JS1\_M10\_00803" 16493 "s59E5H2" 0.04318735 "hypothetical protein"  
"JS1\_M10\_00803" 16493 "s63E6H2" 0.0423738 "hypothetical protein"  
"JS1\_M10\_00804" 16494 "s59E13H2" 0.0207332 "Ribonuclease HII"  
"JS1\_M10\_00804" 16494 "s59E25H2" 0 "Ribonuclease HII"  
"JS1\_M10\_00804" 16494 "s59E5H2" 0.04298667 "Ribonuclease HII"  
"JS1\_M10\_00804" 16494 "s63E6H2" 0.02661878 "Ribonuclease HII"

"JS1\_M10\_00805" 16495 "s59E13H2" 0.001028218 "50S ribosomal protein L19"  
"JS1\_M10\_00805" 16495 "s59E25H2" 0 "50S ribosomal protein L19"  
"JS1\_M10\_00805" 16495 "s59E5H2" 0.04482896 "50S ribosomal protein L19"  
"JS1\_M10\_00805" 16495 "s63E6H2" 0.01723346 "50S ribosomal protein L19"  
"JS1\_M10\_00806" 16496 "s59E13H2" 0.003490262 "tRNA (guanine-N(1)-)-methyltransferase"  
"JS1\_M10\_00806" 16496 "s59E25H2" 0 "tRNA (guanine-N(1)-)-methyltransferase"  
"JS1\_M10\_00806" 16496 "s59E5H2" 0.04824782 "tRNA (guanine-N(1)-)-methyltransferase"  
"JS1\_M10\_00806" 16496 "s63E6H2" 0.008033087 "tRNA (guanine-N(1)-)-methyltransferase"  
"JS1\_M10\_00807" 16497 "s59E13H2" 0.004405209 "Ribosome maturation factor RimM"  
"JS1\_M10\_00807" 16497 "s59E25H2" 0 "Ribosome maturation factor RimM"  
"JS1\_M10\_00807" 16497 "s59E5H2" 0.04593324 "Ribosome maturation factor RimM"  
"JS1\_M10\_00807" 16497 "s63E6H2" 0 "Ribosome maturation factor RimM"  
"JS1\_M10\_00808" 16498 "s59E13H2" 0.143439 "Glucose-6-phosphate isomerase"  
"JS1\_M10\_00808" 16498 "s59E25H2" 0 "Glucose-6-phosphate isomerase"  
"JS1\_M10\_00808" 16498 "s59E5H2" 0.4049754 "Glucose-6-phosphate isomerase"  
"JS1\_M10\_00808" 16498 "s63E6H2" 0.08311613 "Glucose-6-phosphate isomerase"  
"JS1\_M10\_00809" 16499 "s59E13H2" 0.02960114 "D-allose-binding periplasmic protein precursor"  
"JS1\_M10\_00809" 16499 "s59E25H2" 0 "D-allose-binding periplasmic protein precursor"  
"JS1\_M10\_00809" 16499 "s59E5H2" 0.6189622 "D-allose-binding periplasmic protein precursor"  
"JS1\_M10\_00809" 16499 "s63E6H2" 0.4907874 "D-allose-binding periplasmic protein precursor"  
"JS1\_M10\_00810" 16500 "s59E13H2" 0.09844839 "Ribose import ATP-binding protein RbsA"  
"JS1\_M10\_00810" 16500 "s59E25H2" 0 "Ribose import ATP-binding protein RbsA"  
"JS1\_M10\_00810" 16500 "s59E5H2" 1.013004 "Ribose import ATP-binding protein RbsA"  
"JS1\_M10\_00810" 16500 "s63E6H2" 0.6147589 "Ribose import ATP-binding protein RbsA"  
"JS1\_M10\_00811" 16501 "s59E13H2" 0.02497865 "Ribose transport system permease protein RbsC"  
"JS1\_M10\_00811" 16501 "s59E25H2" 0 "Ribose transport system permease protein RbsC"  
"JS1\_M10\_00811" 16501 "s59E5H2" 1.284981 "Ribose transport system permease protein RbsC"  
"JS1\_M10\_00811" 16501 "s63E6H2" 0.1165309 "Ribose transport system permease protein RbsC"  
"JS1\_M10\_00812" 16502 "s59E13H2" 0 "Cycloisomaltooligosaccharide glucanotransferase precursor"  
"JS1\_M10\_00812" 16502 "s59E25H2" 0 "Cycloisomaltooligosaccharide glucanotransferase precursor"  
"JS1\_M10\_00812" 16502 "s59E5H2" 0 "Cycloisomaltooligosaccharide glucanotransferase precursor"  
"JS1\_M10\_00812" 16502 "s63E6H2" 0.001734957 "Cycloisomaltooligosaccharide glucanotransferase precursor"  
"JS1\_M10\_00813" 16503 "s59E13H2" 0.06016994 "Release factor glutamine methyltransferase"  
"JS1\_M10\_00813" 16503 "s59E25H2" 0 "Release factor glutamine methyltransferase"  
"JS1\_M10\_00813" 16503 "s59E5H2" 0.1841122 "Release factor glutamine methyltransferase"  
"JS1\_M10\_00813" 16503 "s63E6H2" 0.07157386 "Release factor glutamine methyltransferase"  
"JS1\_M10\_00814" 16504 "s59E13H2" 0.05388169 "hypothetical protein"  
"JS1\_M10\_00814" 16504 "s59E25H2" 0 "hypothetical protein"  
"JS1\_M10\_00814" 16504 "s59E5H2" 0.2589562 "hypothetical protein"  
"JS1\_M10\_00814" 16504 "s63E6H2" 0.096368 "hypothetical protein"  
"JS1\_M10\_00815" 16505 "s59E13H2" 0.05650729 "DNA polymerase III subunit tau"  
"JS1\_M10\_00815" 16505 "s59E25H2" 0 "DNA polymerase III subunit tau"  
"JS1\_M10\_00815" 16505 "s59E5H2" 0.3918961 "DNA polymerase III subunit tau"  
"JS1\_M10\_00815" 16505 "s63E6H2" 0.0509623 "DNA polymerase III subunit tau"  
"JS1\_M10\_00816" 16506 "s59E13H2" 0.02806367 "Thymidylate kinase"  
"JS1\_M10\_00816" 16506 "s59E25H2" 0 "Thymidylate kinase"  
"JS1\_M10\_00816" 16506 "s59E5H2" 0.7203829 "Thymidylate kinase"

"JS1\_M10\_00816" 16506 "s63E6H2" 0.07798546 "Thymidylate kinase"  
"JS1\_M10\_00817" 16507 "s59E13H2" 0.01926991 "Inosine-5'-monophosphate dehydrogenase"  
"JS1\_M10\_00817" 16507 "s59E25H2" 0 "Inosine-5'-monophosphate dehydrogenase"  
"JS1\_M10\_00817" 16507 "s59E5H2" 0.7447734 "Inosine-5'-monophosphate dehydrogenase"  
"JS1\_M10\_00817" 16507 "s63E6H2" 0.08545898 "Inosine-5'-monophosphate dehydrogenase"  
"JS1\_M10\_00818" 16508 "s59E13H2" 0.03334659 "Tagatose-6-phosphate kinase"  
"JS1\_M10\_00818" 16508 "s59E25H2" 0 "Tagatose-6-phosphate kinase"  
"JS1\_M10\_00818" 16508 "s59E5H2" 0.8951205 "Tagatose-6-phosphate kinase"  
"JS1\_M10\_00818" 16508 "s63E6H2" 0.08476471 "Tagatose-6-phosphate kinase"  
"JS1\_M10\_00819" 16509 "s59E13H2" 0.01455007 "Rhomboid protease GluP"  
"JS1\_M10\_00819" 16509 "s59E25H2" 0 "Rhomboid protease GluP"  
"JS1\_M10\_00819" 16509 "s59E5H2" 0.5646967 "Rhomboid protease GluP"  
"JS1\_M10\_00819" 16509 "s63E6H2" 0.1298086 "Rhomboid protease GluP"  
"JS1\_M10\_00820" 16510 "s59E13H2" 0.01958137 "UDP-N-acetylglucosamine 2-epimerase"  
"JS1\_M10\_00820" 16510 "s59E25H2" 0 "UDP-N-acetylglucosamine 2-epimerase"  
"JS1\_M10\_00820" 16510 "s59E5H2" 0.5680966 "UDP-N-acetylglucosamine 2-epimerase"  
"JS1\_M10\_00820" 16510 "s63E6H2" 0.05835698 "UDP-N-acetylglucosamine 2-epimerase"  
"JS1\_M10\_00821" 16511 "s59E13H2" 0.03217745 "tRNA-specific adenosine deaminase"  
"JS1\_M10\_00821" 16511 "s59E25H2" 0 "tRNA-specific adenosine deaminase"  
"JS1\_M10\_00821" 16511 "s59E5H2" 1.358828 "tRNA-specific adenosine deaminase"  
"JS1\_M10\_00821" 16511 "s63E6H2" 0.08316578 "tRNA-specific adenosine deaminase"  
"JS1\_M10\_00822" 16512 "s59E13H2" 0.01340332 "Uracil phosphoribosyltransferase"  
"JS1\_M10\_00822" 16512 "s59E25H2" 0 "Uracil phosphoribosyltransferase"  
"JS1\_M10\_00822" 16512 "s59E5H2" 0.5543126 "Uracil phosphoribosyltransferase"  
"JS1\_M10\_00822" 16512 "s63E6H2" 0.09794411 "Uracil phosphoribosyltransferase"  
"JS1\_M10\_00823" 16513 "s59E13H2" 0 "Putative sugar phosphate isomerase YwLF"  
"JS1\_M10\_00823" 16513 "s59E25H2" 0 "Putative sugar phosphate isomerase YwLF"  
"JS1\_M10\_00823" 16513 "s59E5H2" 0.02737743 "Putative sugar phosphate isomerase YwLF"  
"JS1\_M10\_00823" 16513 "s63E6H2" 0.02266649 "Putative sugar phosphate isomerase YwLF"  
"JS1\_M10\_00824" 16514 "s59E13H2" 0 "Low molecular weight protein-tyrosine-phosphatase YwLE"  
"JS1\_M10\_00824" 16514 "s59E25H2" 0 "Low molecular weight protein-tyrosine-phosphatase YwLE"  
"JS1\_M10\_00824" 16514 "s59E5H2" 0.01431393 "Low molecular weight protein-tyrosine-phosphatase YwLE"  
"JS1\_M10\_00824" 16514 "s63E6H2" 0.009709976 "Low molecular weight protein-tyrosine-phosphatase YwLE"  
"JS1\_M10\_00825" 16515 "s59E13H2" 0.003812866 "Release factor glutamine methyltransferase"  
"JS1\_M10\_00825" 16515 "s59E25H2" 0 "Release factor glutamine methyltransferase"  
"JS1\_M10\_00825" 16515 "s59E5H2" 0.1573238 "Release factor glutamine methyltransferase"  
"JS1\_M10\_00825" 16515 "s63E6H2" 0.01848023 "Release factor glutamine methyltransferase"  
"JS1\_M10\_00826" 16516 "s59E13H2" 0.006706006 "Peptide chain release factor 1"  
"JS1\_M10\_00826" 16516 "s59E25H2" 0 "Peptide chain release factor 1"  
"JS1\_M10\_00826" 16516 "s59E5H2" 0.03847033 "Peptide chain release factor 1"  
"JS1\_M10\_00826" 16516 "s63E6H2" 0.02605082 "Peptide chain release factor 1"  
"JS1\_M10\_00827" 16517 "s59E13H2" 0.05131579 "hypothetical protein"  
"JS1\_M10\_00827" 16517 "s59E25H2" 0 "hypothetical protein"  
"JS1\_M10\_00827" 16517 "s59E5H2" 0.3089744 "hypothetical protein"  
"JS1\_M10\_00827" 16517 "s63E6H2" 0.1949614 "hypothetical protein"  
"JS1\_M10\_00828" 16518 "s59E13H2" 0.05783335 "Thymidylate synthase ThyX"  
"JS1\_M10\_00828" 16518 "s59E25H2" 0 "Thymidylate synthase ThyX"

"JS1\_M10\_00828" 16518 "s59E5H2" 0.3645543 "Thymidylate synthase ThyX"  
"JS1\_M10\_00828" 16518 "s63E6H2" 0.108973 "Thymidylate synthase ThyX"  
"JS1\_M10\_00829" 16519 "s59E13H2" 0.06931566 "Thymidine kinase"  
"JS1\_M10\_00829" 16519 "s59E25H2" 0 "Thymidine kinase"  
"JS1\_M10\_00829" 16519 "s59E5H2" 0.2359521 "Thymidine kinase"  
"JS1\_M10\_00829" 16519 "s63E6H2" 0.1700521 "Thymidine kinase"  
"JS1\_M10\_00830" 16520 "s59E13H2" 0.1077804 "50S ribosomal protein L31"  
"JS1\_M10\_00830" 16520 "s59E25H2" 0 "50S ribosomal protein L31"  
"JS1\_M10\_00830" 16520 "s59E5H2" 0.09792763 "50S ribosomal protein L31"  
"JS1\_M10\_00830" 16520 "s63E6H2" 0.0486617 "50S ribosomal protein L31"  
"JS1\_M10\_00831" 16521 "s59E13H2" 0.1538515 "hypothetical protein"  
"JS1\_M10\_00831" 16521 "s59E25H2" 0 "hypothetical protein"  
"JS1\_M10\_00831" 16521 "s59E5H2" 0.2046747 "hypothetical protein"  
"JS1\_M10\_00831" 16521 "s63E6H2" 0.1722757 "hypothetical protein"  
"JS1\_M10\_00832" 16522 "s59E13H2" 0.08108443 "MobA-like NTP transferase domain protein"  
"JS1\_M10\_00832" 16522 "s59E25H2" 0 "MobA-like NTP transferase domain protein"  
"JS1\_M10\_00832" 16522 "s59E5H2" 0.1946689 "MobA-like NTP transferase domain protein"  
"JS1\_M10\_00832" 16522 "s63E6H2" 0.080064 "MobA-like NTP transferase domain protein"  
"JS1\_M10\_00833" 16523 "s59E13H2" 0.05270794 "CTP synthase"  
"JS1\_M10\_00833" 16523 "s59E25H2" 0 "CTP synthase"  
"JS1\_M10\_00833" 16523 "s59E5H2" 0.2712763 "CTP synthase"  
"JS1\_M10\_00833" 16523 "s63E6H2" 0.2880039 "CTP synthase"  
"JS1\_M10\_00834" 16524 "s59E13H2" 0.002227862 "DegV domain-containing protein"  
"JS1\_M10\_00834" 16524 "s59E25H2" 0 "DegV domain-containing protein"  
"JS1\_M10\_00834" 16524 "s59E5H2" 0.7188409 "DegV domain-containing protein"  
"JS1\_M10\_00834" 16524 "s63E6H2" 1.384301 "DegV domain-containing protein"  
"JS1\_M10\_00835" 16525 "s59E13H2" 0.04843745 "protease TldD"  
"JS1\_M10\_00835" 16525 "s59E25H2" 0.1078636 "protease TldD"  
"JS1\_M10\_00835" 16525 "s59E5H2" 1.164345 "protease TldD"  
"JS1\_M10\_00835" 16525 "s63E6H2" 2.043179 "protease TldD"  
"JS1\_M10\_00836" 16526 "s59E13H2" 0.01058121 "protease TldD"  
"JS1\_M10\_00836" 16526 "s59E25H2" 0.3348248 "protease TldD"  
"JS1\_M10\_00836" 16526 "s59E5H2" 1.448454 "protease TldD"  
"JS1\_M10\_00836" 16526 "s63E6H2" 2.882363 "protease TldD"  
"JS1\_M10\_00837" 16527 "s59E13H2" 0.09064746 "HTH-type transcriptional regulator TtgR"  
"JS1\_M10\_00837" 16527 "s59E25H2" 0 "HTH-type transcriptional regulator TtgR"  
"JS1\_M10\_00837" 16527 "s59E5H2" 1.168844 "HTH-type transcriptional regulator TtgR"  
"JS1\_M10\_00837" 16527 "s63E6H2" 0.7907005 "HTH-type transcriptional regulator TtgR"  
"JS1\_M10\_00838" 16528 "s59E13H2" 0.006239161 "hypothetical protein"  
"JS1\_M10\_00838" 16528 "s59E25H2" 0 "hypothetical protein"  
"JS1\_M10\_00838" 16528 "s59E5H2" 0.629102 "hypothetical protein"  
"JS1\_M10\_00838" 16528 "s63E6H2" 0.03281732 "hypothetical protein"  
"JS1\_M10\_00839" 16529 "s59E13H2" 0.2767935 "hypothetical protein"  
"JS1\_M10\_00839" 16529 "s59E25H2" 0 "hypothetical protein"  
"JS1\_M10\_00839" 16529 "s59E5H2" 0.2687876 "hypothetical protein"  
"JS1\_M10\_00839" 16529 "s63E6H2" 0.1020668 "hypothetical protein"  
"JS1\_M10\_00840" 16530 "s59E13H2" 0 "hypothetical protein"

"JS1\_M10\_00840" 16530 "s59E25H2" 0 "hypothetical protein"  
"JS1\_M10\_00840" 16530 "s59E5H2" 0 "hypothetical protein"  
"JS1\_M10\_00840" 16530 "s63E6H2" 0 "hypothetical protein"  
"JS1\_M10\_00844" 16534 "s59E13H2" 0 "hypothetical protein"  
"JS1\_M10\_00844" 16534 "s59E25H2" 0 "hypothetical protein"  
"JS1\_M10\_00844" 16534 "s59E5H2" 0 "hypothetical protein"  
"JS1\_M10\_00844" 16534 "s63E6H2" 0 "hypothetical protein"  
"JS1\_M10\_00846" 16536 "s59E13H2" 0.02058142 "NTE family protein RssA"  
"JS1\_M10\_00846" 16536 "s59E25H2" 0 "NTE family protein RssA"  
"JS1\_M10\_00846" 16536 "s59E5H2" 0.2445062 "NTE family protein RssA"  
"JS1\_M10\_00846" 16536 "s63E6H2" 0.2326653 "NTE family protein RssA"  
"JS1\_M10\_00847" 16537 "s59E13H2" 0.1452904 "hypothetical protein"  
"JS1\_M10\_00847" 16537 "s59E25H2" 0 "hypothetical protein"  
"JS1\_M10\_00847" 16537 "s59E5H2" 0.2286877 "hypothetical protein"  
"JS1\_M10\_00847" 16537 "s63E6H2" 0.2916964 "hypothetical protein"  
"JS1\_M10\_00848" 16538 "s59E13H2" 0.5674362 "Galactose/methyl galactoside import ATP-binding protein MglA"  
"JS1\_M10\_00848" 16538 "s59E25H2" 0 "Galactose/methyl galactoside import ATP-binding protein MglA"  
"JS1\_M10\_00848" 16538 "s59E5H2" 2.084153 "Galactose/methyl galactoside import ATP-binding protein MglA"  
"JS1\_M10\_00848" 16538 "s63E6H2" 1.103757 "Galactose/methyl galactoside import ATP-binding protein MglA"  
"JS1\_M10\_00849" 16539 "s59E13H2" 0.1032677 "Purine-binding protein precursor"  
"JS1\_M10\_00849" 16539 "s59E25H2" 0 "Purine-binding protein precursor"  
"JS1\_M10\_00849" 16539 "s59E5H2" 0.0593763 "Purine-binding protein precursor"  
"JS1\_M10\_00849" 16539 "s63E6H2" 0.2288427 "Purine-binding protein precursor"  
"JS1\_M10\_00850" 16540 "s59E13H2" 0.6727225 "beta-methylgalactoside transporter inner membrane component"  
"JS1\_M10\_00850" 16540 "s59E25H2" 0 "beta-methylgalactoside transporter inner membrane component"  
"JS1\_M10\_00850" 16540 "s59E5H2" 0.4608158 "beta-methylgalactoside transporter inner membrane component"  
"JS1\_M10\_00850" 16540 "s63E6H2" 2.415869 "beta-methylgalactoside transporter inner membrane component"  
"JS1\_M10\_00851" 16541 "s59E13H2" 0.3919557 "beta-methylgalactoside transporter inner membrane component"  
"JS1\_M10\_00851" 16541 "s59E25H2" 0 "beta-methylgalactoside transporter inner membrane component"  
"JS1\_M10\_00851" 16541 "s59E5H2" 0.5772504 "beta-methylgalactoside transporter inner membrane component"  
"JS1\_M10\_00851" 16541 "s63E6H2" 2.363955 "beta-methylgalactoside transporter inner membrane component"  
"JS1\_M10\_00853" 16543 "s59E13H2" 0.2158511 "Glucose--fructose oxidoreductase precursor"  
"JS1\_M10\_00853" 16543 "s59E25H2" 0 "Glucose--fructose oxidoreductase precursor"  
"JS1\_M10\_00853" 16543 "s59E5H2" 0.5640654 "Glucose--fructose oxidoreductase precursor"  
"JS1\_M10\_00853" 16543 "s63E6H2" 0.4912766 "Glucose--fructose oxidoreductase precursor"  
"JS1\_M10\_00854" 16544 "s59E13H2" 0.1263018 "Cysteine synthase"  
"JS1\_M10\_00854" 16544 "s59E25H2" 0 "Cysteine synthase"  
"JS1\_M10\_00854" 16544 "s59E5H2" 0.07052194 "Cysteine synthase"  
"JS1\_M10\_00854" 16544 "s63E6H2" 8.61108 "Cysteine synthase"  
"JS1\_M10\_00855" 16545 "s59E13H2" 0.01625159 "hypothetical protein"  
"JS1\_M10\_00855" 16545 "s59E25H2" 0 "hypothetical protein"  
"JS1\_M10\_00855" 16545 "s59E5H2" 0.0349215 "hypothetical protein"  
"JS1\_M10\_00855" 16545 "s63E6H2" 0.2710637 "hypothetical protein"  
"JS1\_M10\_00856" 16546 "s59E13H2" 0.07948733 "Small-conductance mechanosensitive channel"  
"JS1\_M10\_00856" 16546 "s59E25H2" 0 "Small-conductance mechanosensitive channel"  
"JS1\_M10\_00856" 16546 "s59E5H2" 0.171309 "Small-conductance mechanosensitive channel"  
"JS1\_M10\_00856" 16546 "s63E6H2" 7.580647 "Small-conductance mechanosensitive channel"

"JS1\_M10\_00858" 16548 "s59E13H2" 0.03278566 "hypothetical protein"  
"JS1\_M10\_00858" 16548 "s59E25H2" 0 "hypothetical protein"  
"JS1\_M10\_00858" 16548 "s59E5H2" 0.02587903 "hypothetical protein"  
"JS1\_M10\_00858" 16548 "s63E6H2" 0.1770326 "hypothetical protein"  
"JS1\_M10\_00860" 16550 "s59E13H2" 0.031661 "Tryptophan synthase beta chain 1"  
"JS1\_M10\_00860" 16550 "s59E25H2" 0.183223 "Tryptophan synthase beta chain 1"  
"JS1\_M10\_00860" 16550 "s59E5H2" 0.5738762 "Tryptophan synthase beta chain 1"  
"JS1\_M10\_00860" 16550 "s63E6H2" 4.931471 "Tryptophan synthase beta chain 1"  
"JS1\_M10\_00862" 16552 "s59E13H2" 3.788188 "Ribosomal protein S12 methylthiotransferase RimO"  
"JS1\_M10\_00862" 16552 "s59E25H2" 0.3279352 "Ribosomal protein S12 methylthiotransferase RimO"  
"JS1\_M10\_00862" 16552 "s59E5H2" 0.5266625 "Ribosomal protein S12 methylthiotransferase RimO"  
"JS1\_M10\_00862" 16552 "s63E6H2" 3.252375 "Ribosomal protein S12 methylthiotransferase RimO"  
"JS1\_M10\_00863" 16553 "s59E13H2" 0.3595578 "50S ribosomal protein L33"  
"JS1\_M10\_00863" 16553 "s59E25H2" 0 "50S ribosomal protein L33"  
"JS1\_M10\_00863" 16553 "s59E5H2" 0.2422033 "50S ribosomal protein L33"  
"JS1\_M10\_00863" 16553 "s63E6H2" 0.3636226 "50S ribosomal protein L33"  
"JS1\_M10\_00864" 16554 "s59E13H2" 0.09651317 "preprotein translocase subunit SecE"  
"JS1\_M10\_00864" 16554 "s59E25H2" 0 "preprotein translocase subunit SecE"  
"JS1\_M10\_00864" 16554 "s59E5H2" 0.2275288 "preprotein translocase subunit SecE"  
"JS1\_M10\_00864" 16554 "s63E6H2" 0.2601694 "preprotein translocase subunit SecE"  
"JS1\_M10\_00865" 16555 "s59E13H2" 0.009248218 "hypothetical protein"  
"JS1\_M10\_00865" 16555 "s59E25H2" 0 "hypothetical protein"  
"JS1\_M10\_00865" 16555 "s59E5H2" 0.1141161 "hypothetical protein"  
"JS1\_M10\_00865" 16555 "s63E6H2" 0.08907235 "hypothetical protein"  
"JS1\_M10\_00866" 16556 "s59E13H2" 0.1686087 "50S ribosomal protein L11"  
"JS1\_M10\_00866" 16556 "s59E25H2" 0 "50S ribosomal protein L11"  
"JS1\_M10\_00866" 16556 "s59E5H2" 0.1066897 "50S ribosomal protein L11"  
"JS1\_M10\_00866" 16556 "s63E6H2" 0.1156613 "50S ribosomal protein L11"  
"JS1\_M10\_00867" 16557 "s59E13H2" 0.02239314 "50S ribosomal protein L1"  
"JS1\_M10\_00867" 16557 "s59E25H2" 0 "50S ribosomal protein L1"  
"JS1\_M10\_00867" 16557 "s59E5H2" 0.1082133 "50S ribosomal protein L1"  
"JS1\_M10\_00867" 16557 "s63E6H2" 0.08791328 "50S ribosomal protein L1"  
"JS1\_M10\_00869" 16559 "s59E13H2" 0.009943921 "50S ribosomal protein L10"  
"JS1\_M10\_00869" 16559 "s59E25H2" 0 "50S ribosomal protein L10"  
"JS1\_M10\_00869" 16559 "s59E5H2" 0.08400079 "50S ribosomal protein L10"  
"JS1\_M10\_00869" 16559 "s63E6H2" 0.0850988 "50S ribosomal protein L10"  
"JS1\_M10\_00870" 16560 "s59E13H2" 0.01295022 "50S ribosomal protein L7/L12"  
"JS1\_M10\_00870" 16560 "s59E25H2" 0 "50S ribosomal protein L7/L12"  
"JS1\_M10\_00870" 16560 "s59E5H2" 0.1019633 "50S ribosomal protein L7/L12"  
"JS1\_M10\_00870" 16560 "s63E6H2" 0.06724547 "50S ribosomal protein L7/L12"  
"JS1\_M10\_00871" 16561 "s59E13H2" 0.1403174 "DNA-directed RNA polymerase subunit beta"  
"JS1\_M10\_00871" 16561 "s59E25H2" 0.1320022 "DNA-directed RNA polymerase subunit beta"  
"JS1\_M10\_00871" 16561 "s59E5H2" 0.1138193 "DNA-directed RNA polymerase subunit beta"  
"JS1\_M10\_00871" 16561 "s63E6H2" 0.120672 "DNA-directed RNA polymerase subunit beta"  
"JS1\_M10\_00872" 16562 "s59E13H2" 0.04443188 "DNA-directed RNA polymerase subunit beta"  
"JS1\_M10\_00872" 16562 "s59E25H2" 0 "DNA-directed RNA polymerase subunit beta"  
"JS1\_M10\_00872" 16562 "s59E5H2" 0.123197 "DNA-directed RNA polymerase subunit beta"



"JS1\_M10\_00872" 16562 "s63E6H2" 0.09056979 "DNA-directed RNA polymerase subunit beta"  
"JS1\_M10\_00873" 16563 "s59E13H2" 0.007154841 "30S ribosomal protein S12"  
"JS1\_M10\_00873" 16563 "s59E25H2" 0 "30S ribosomal protein S12"  
"JS1\_M10\_00873" 16563 "s59E5H2" 0.1300316 "30S ribosomal protein S12"  
"JS1\_M10\_00873" 16563 "s63E6H2" 0.2703701 "30S ribosomal protein S12"  
"JS1\_M10\_00874" 16564 "s59E13H2" 0.002518213 "Methenyltetrahydrofolate cyclohydrolase"  
"JS1\_M10\_00874" 16564 "s59E25H2" 0 "Methenyltetrahydrofolate cyclohydrolase"  
"JS1\_M10\_00874" 16564 "s59E5H2" 0.006464008 "Methenyltetrahydrofolate cyclohydrolase"  
"JS1\_M10\_00874" 16564 "s63E6H2" 0.06606743 "Methenyltetrahydrofolate cyclohydrolase"  
"JS1\_M10\_00875" 16565 "s59E13H2" 0 "hypothetical protein"  
"JS1\_M10\_00875" 16565 "s59E25H2" 0 "hypothetical protein"  
"JS1\_M10\_00875" 16565 "s59E5H2" 0 "hypothetical protein"  
"JS1\_M10\_00875" 16565 "s63E6H2" 0.0424523 "hypothetical protein"  
"JS1\_M10\_00876" 16566 "s59E13H2" 0.01846108 "hypothetical protein"  
"JS1\_M10\_00876" 16566 "s59E25H2" 0 "hypothetical protein"  
"JS1\_M10\_00876" 16566 "s59E5H2" 0.05793968 "hypothetical protein"  
"JS1\_M10\_00876" 16566 "s63E6H2" 0.06912716 "hypothetical protein"  
"JS1\_M10\_00877" 16567 "s59E13H2" 0.02097875 "Peptide chain release factor 2"  
"JS1\_M10\_00877" 16567 "s59E25H2" 0 "Peptide chain release factor 2"  
"JS1\_M10\_00877" 16567 "s59E5H2" 0.182428 "Peptide chain release factor 2"  
"JS1\_M10\_00877" 16567 "s63E6H2" 0.1731043 "Peptide chain release factor 2"  
"JS1\_M10\_00878" 16568 "s59E13H2" 0.01499135 "preprotein translocase subunit SecA"  
"JS1\_M10\_00878" 16568 "s59E25H2" 0 "preprotein translocase subunit SecA"  
"JS1\_M10\_00878" 16568 "s59E5H2" 0.1004301 "preprotein translocase subunit SecA"  
"JS1\_M10\_00878" 16568 "s63E6H2" 0.1713549 "preprotein translocase subunit SecA"  
"JS1\_M10\_00879" 16569 "s59E13H2" 0.0138538 "hypothetical protein"  
"JS1\_M10\_00879" 16569 "s59E25H2" 0 "hypothetical protein"  
"JS1\_M10\_00879" 16569 "s59E5H2" 0.2914367 "hypothetical protein"  
"JS1\_M10\_00879" 16569 "s63E6H2" 0.1841042 "hypothetical protein"  
"JS1\_M10\_00880" 16570 "s59E13H2" 0.01246842 "Cyclic di-GMP phosphodiesterase response regulator RpfG"  
"JS1\_M10\_00880" 16570 "s59E25H2" 0 "Cyclic di-GMP phosphodiesterase response regulator RpfG"  
"JS1\_M10\_00880" 16570 "s59E5H2" 0.1533114 "Cyclic di-GMP phosphodiesterase response regulator RpfG"  
"JS1\_M10\_00880" 16570 "s63E6H2" 0.1268751 "Cyclic di-GMP phosphodiesterase response regulator RpfG"  
"JS1\_M10\_00881" 16571 "s59E13H2" 0 "hypothetical protein"  
"JS1\_M10\_00881" 16571 "s59E25H2" 0 "hypothetical protein"  
"JS1\_M10\_00881" 16571 "s59E5H2" 0.01891369 "hypothetical protein"  
"JS1\_M10\_00881" 16571 "s63E6H2" 0.09443163 "hypothetical protein"  
"JS1\_M10\_00883" 16573 "s59E13H2" 0.003967264 "Putative sigma-54 modulation protein"  
"JS1\_M10\_00883" 16573 "s59E25H2" 0 "Putative sigma-54 modulation protein"  
"JS1\_M10\_00883" 16573 "s59E5H2" 0.1706435 "Putative sigma-54 modulation protein"  
"JS1\_M10\_00883" 16573 "s63E6H2" 0.2425974 "Putative sigma-54 modulation protein"  
"JS1\_M10\_00884" 16574 "s59E13H2" 0.06326679 "DNA utilization protein GntX"  
"JS1\_M10\_00884" 16574 "s59E25H2" 0 "DNA utilization protein GntX"  
"JS1\_M10\_00884" 16574 "s59E5H2" 0.2062456 "DNA utilization protein GntX"  
"JS1\_M10\_00884" 16574 "s63E6H2" 0.2183786 "DNA utilization protein GntX"  
"JS1\_M10\_00885" 16575 "s59E13H2" 0.008040156 "Adenosylhomocysteinase"  
"JS1\_M10\_00885" 16575 "s59E25H2" 0 "Adenosylhomocysteinase"

"JS1\_M10\_00885" 16575 "s59E5H2" 0.1159713 "Adenosylhomocysteinase"  
"JS1\_M10\_00885" 16575 "s63E6H2" 0.2638034 "Adenosylhomocysteinase"  
"JS1\_M10\_00886" 16576 "s59E13H2" 0.01738898 "Beta-lactamase hydrolase-like protein"  
"JS1\_M10\_00886" 16576 "s59E25H2" 0 "Beta-lactamase hydrolase-like protein"  
"JS1\_M10\_00886" 16576 "s59E5H2" 0.1620394 "Beta-lactamase hydrolase-like protein"  
"JS1\_M10\_00886" 16576 "s63E6H2" 0.341317 "Beta-lactamase hydrolase-like protein"  
"JS1\_M10\_00887" 16577 "s59E13H2" 0.02486711 "putative glycerophosphoryl diester phosphodiesterase 1"  
"JS1\_M10\_00887" 16577 "s59E25H2" 0 "putative glycerophosphoryl diester phosphodiesterase 1"  
"JS1\_M10\_00887" 16577 "s59E5H2" 0.1123691 "putative glycerophosphoryl diester phosphodiesterase 1"  
"JS1\_M10\_00887" 16577 "s63E6H2" 0.1897948 "putative glycerophosphoryl diester phosphodiesterase 1"  
"JS1\_M10\_00888" 16578 "s59E13H2" 0.01775995 "D-tyrosyl-tRNA(Tyr) deacylase"  
"JS1\_M10\_00888" 16578 "s59E25H2" 0 "D-tyrosyl-tRNA(Tyr) deacylase"  
"JS1\_M10\_00888" 16578 "s59E5H2" 0.06808928 "D-tyrosyl-tRNA(Tyr) deacylase"  
"JS1\_M10\_00888" 16578 "s63E6H2" 0.2362007 "D-tyrosyl-tRNA(Tyr) deacylase"  
"JS1\_M10\_00889" 16579 "s59E13H2" 0.07576986 "GTP pyrophosphokinase"  
"JS1\_M10\_00889" 16579 "s59E25H2" 0 "GTP pyrophosphokinase"  
"JS1\_M10\_00889" 16579 "s59E5H2" 0.1529836 "GTP pyrophosphokinase"  
"JS1\_M10\_00889" 16579 "s63E6H2" 0.4330983 "GTP pyrophosphokinase"  
"JS1\_M10\_00890" 16580 "s59E13H2" 0.002251521 "Adenine phosphoribosyltransferase"  
"JS1\_M10\_00890" 16580 "s59E25H2" 0 "Adenine phosphoribosyltransferase"  
"JS1\_M10\_00890" 16580 "s59E5H2" 0.05357056 "Adenine phosphoribosyltransferase"  
"JS1\_M10\_00890" 16580 "s63E6H2" 0.3873995 "Adenine phosphoribosyltransferase"  
"JS1\_M10\_00891" 16581 "s59E13H2" 0.01155758 "Single-stranded-DNA-specific exonuclease RecJ"  
"JS1\_M10\_00891" 16581 "s59E25H2" 0 "Single-stranded-DNA-specific exonuclease RecJ"  
"JS1\_M10\_00891" 16581 "s59E5H2" 0.3962747 "Single-stranded-DNA-specific exonuclease RecJ"  
"JS1\_M10\_00891" 16581 "s63E6H2" 0.4294533 "Single-stranded-DNA-specific exonuclease RecJ"  
"JS1\_M10\_00892" 16582 "s59E13H2" 0 "hypothetical protein"  
"JS1\_M10\_00892" 16582 "s59E25H2" 0 "hypothetical protein"  
"JS1\_M10\_00892" 16582 "s59E5H2" 0.1643081 "hypothetical protein"  
"JS1\_M10\_00892" 16582 "s63E6H2" 0.003559944 "hypothetical protein"  
"JS1\_M10\_00893" 16583 "s59E13H2" 0 "Protein-export membrane protein SecF"  
"JS1\_M10\_00893" 16583 "s59E25H2" 0 "Protein-export membrane protein SecF"  
"JS1\_M10\_00893" 16583 "s59E5H2" 0.4439003 "Protein-export membrane protein SecF"  
"JS1\_M10\_00893" 16583 "s63E6H2" 0.1601145 "Protein-export membrane protein SecF"  
"JS1\_M10\_00894" 16584 "s59E13H2" 0.03770971 "preprotein translocase subunit SecD"  
"JS1\_M10\_00894" 16584 "s59E25H2" 0 "preprotein translocase subunit SecD"  
"JS1\_M10\_00894" 16584 "s59E5H2" 0.459278 "preprotein translocase subunit SecD"  
"JS1\_M10\_00894" 16584 "s63E6H2" 0.1952161 "preprotein translocase subunit SecD"  
"JS1\_M10\_00895" 16585 "s59E13H2" 0 "preprotein translocase subunit YajC"  
"JS1\_M10\_00895" 16585 "s59E25H2" 0 "preprotein translocase subunit YajC"  
"JS1\_M10\_00895" 16585 "s59E5H2" 0.01894474 "preprotein translocase subunit YajC"  
"JS1\_M10\_00895" 16585 "s63E6H2" 0.064706 "preprotein translocase subunit YajC"  
"JS1\_M10\_00896" 16586 "s59E13H2" 3.011834 "Bifunctional purine biosynthesis protein PurH"  
"JS1\_M10\_00896" 16586 "s59E25H2" 0 "Bifunctional purine biosynthesis protein PurH"  
"JS1\_M10\_00896" 16586 "s59E5H2" 0.3560762 "Bifunctional purine biosynthesis protein PurH"  
"JS1\_M10\_00896" 16586 "s63E6H2" 0.6906618 "Bifunctional purine biosynthesis protein PurH"  
"JS1\_M10\_00897" 16587 "s59E13H2" 1.504097 "Phosphoribosylamine--glycine ligase"

"JS1\_M10\_00897" 16587 "s59E25H2" 0 "Phosphoribosylamine--glycine ligase"  
"JS1\_M10\_00897" 16587 "s59E5H2" 0.1441844 "Phosphoribosylamine--glycine ligase"  
"JS1\_M10\_00897" 16587 "s63E6H2" 0.3858806 "Phosphoribosylamine--glycine ligase"  
"JS1\_M10\_00898" 16588 "s59E13H2" 1.308747 "Phosphoribosylglycinamide formyltransferase"  
"JS1\_M10\_00898" 16588 "s59E25H2" 0 "Phosphoribosylglycinamide formyltransferase"  
"JS1\_M10\_00898" 16588 "s59E5H2" 0.06221219 "Phosphoribosylglycinamide formyltransferase"  
"JS1\_M10\_00898" 16588 "s63E6H2" 0.1987212 "Phosphoribosylglycinamide formyltransferase"  
"JS1\_M10\_00899" 16589 "s59E13H2" 0.9930815 "Phosphoribosylformylglycinamide cyclo-ligase"  
"JS1\_M10\_00899" 16589 "s59E25H2" 0 "Phosphoribosylformylglycinamide cyclo-ligase"  
"JS1\_M10\_00899" 16589 "s59E5H2" 0.0561345 "Phosphoribosylformylglycinamide cyclo-ligase"  
"JS1\_M10\_00899" 16589 "s63E6H2" 0.2124147 "Phosphoribosylformylglycinamide cyclo-ligase"  
"JS1\_M10\_00900" 16590 "s59E13H2" 0.03083851 "Amidophosphoribosyltransferase precursor"  
"JS1\_M10\_00900" 16590 "s59E25H2" 0 "Amidophosphoribosyltransferase precursor"  
"JS1\_M10\_00900" 16590 "s59E5H2" 0.05052418 "Amidophosphoribosyltransferase precursor"  
"JS1\_M10\_00900" 16590 "s63E6H2" 0.02110715 "Amidophosphoribosyltransferase precursor"  
"JS1\_M10\_00901" 16591 "s59E13H2" 0.004713497 "Phosphoribosylformylglycinamide synthase 2"  
"JS1\_M10\_00901" 16591 "s59E25H2" 0 "Phosphoribosylformylglycinamide synthase 2"  
"JS1\_M10\_00901" 16591 "s59E5H2" 0.01580347 "Phosphoribosylformylglycinamide synthase 2"  
"JS1\_M10\_00901" 16591 "s63E6H2" 0.02938045 "Phosphoribosylformylglycinamide synthase 2"  
"JS1\_M10\_00902" 16592 "s59E13H2" 0 "Phosphoribosylformylglycinamide synthase 1"  
"JS1\_M10\_00902" 16592 "s59E25H2" 0 "Phosphoribosylformylglycinamide synthase 1"  
"JS1\_M10\_00902" 16592 "s59E5H2" 0 "Phosphoribosylformylglycinamide synthase 1"  
"JS1\_M10\_00902" 16592 "s63E6H2" 0.03116924 "Phosphoribosylformylglycinamide synthase 1"  
"JS1\_M10\_00903" 16593 "s59E13H2" 0 "phosphoribosylformylglycinamide synthase subunit PurS"  
"JS1\_M10\_00903" 16593 "s59E25H2" 0 "phosphoribosylformylglycinamide synthase subunit PurS"  
"JS1\_M10\_00903" 16593 "s59E5H2" 0 "phosphoribosylformylglycinamide synthase subunit PurS"  
"JS1\_M10\_00903" 16593 "s63E6H2" 0.01548771 "phosphoribosylformylglycinamide synthase subunit PurS"  
"JS1\_M10\_00904" 16594 "s59E13H2" 0.009727014 "phosphoribosylaminoimidazole-succinocarboxamide synthase"  
"JS1\_M10\_00904" 16594 "s59E25H2" 0 "phosphoribosylaminoimidazole-succinocarboxamide synthase"  
"JS1\_M10\_00904" 16594 "s59E5H2" 0.009894041 "phosphoribosylaminoimidazole-succinocarboxamide synthase"  
"JS1\_M10\_00904" 16594 "s63E6H2" 0.03126492 "phosphoribosylaminoimidazole-succinocarboxamide synthase"  
"JS1\_M10\_00906" 16596 "s59E13H2" 0.4280679 "N5-carboxyaminoimidazole ribonucleotide mutase"  
"JS1\_M10\_00906" 16596 "s59E25H2" 0 "N5-carboxyaminoimidazole ribonucleotide mutase"  
"JS1\_M10\_00906" 16596 "s59E5H2" 0.1150115 "N5-carboxyaminoimidazole ribonucleotide mutase"  
"JS1\_M10\_00906" 16596 "s63E6H2" 0.09758725 "N5-carboxyaminoimidazole ribonucleotide mutase"  
"JS1\_M10\_00908" 16598 "s59E13H2" 1.632102 "4-hydroxy-tetrahydrodipicolinate synthase"  
"JS1\_M10\_00908" 16598 "s59E25H2" 0 "4-hydroxy-tetrahydrodipicolinate synthase"  
"JS1\_M10\_00908" 16598 "s59E5H2" 0.08119994 "4-hydroxy-tetrahydrodipicolinate synthase"  
"JS1\_M10\_00908" 16598 "s63E6H2" 1.0115 "4-hydroxy-tetrahydrodipicolinate synthase"  
"JS1\_M10\_00909" 16599 "s59E13H2" 0.2655448 "methylcobalamin:coenzyme M methyltransferase"  
"JS1\_M10\_00909" 16599 "s59E25H2" 0 "methylcobalamin:coenzyme M methyltransferase"  
"JS1\_M10\_00909" 16599 "s59E5H2" 0.03338581 "methylcobalamin:coenzyme M methyltransferase"  
"JS1\_M10\_00909" 16599 "s63E6H2" 0.6881645 "methylcobalamin:coenzyme M methyltransferase"  
"JS1\_M10\_00910" 16600 "s59E13H2" 1.215207 "Methylated-thiol--coenzyme M methyltransferase"  
"JS1\_M10\_00910" 16600 "s59E25H2" 0 "Methylated-thiol--coenzyme M methyltransferase"  
"JS1\_M10\_00910" 16600 "s59E5H2" 0.2789441 "Methylated-thiol--coenzyme M methyltransferase"  
"JS1\_M10\_00910" 16600 "s63E6H2" 0.3491264 "Methylated-thiol--coenzyme M methyltransferase"

"JS1\_M10\_00911" 16601 "s59E13H2" 0 "Sialic acid TRAP transporter permease protein SiaT"  
"JS1\_M10\_00911" 16601 "s59E25H2" 0 "Sialic acid TRAP transporter permease protein SiaT"  
"JS1\_M10\_00911" 16601 "s59E5H2" 0.003027191 "Sialic acid TRAP transporter permease protein SiaT"  
"JS1\_M10\_00911" 16601 "s63E6H2" 0.005727479 "Sialic acid TRAP transporter permease protein SiaT"  
"JS1\_M10\_00912" 16602 "s59E13H2" 0 "2,3-diketo-L-gulonate TRAP transporter small permease protein YiaM"  
"JS1\_M10\_00912" 16602 "s59E25H2" 0 "2,3-diketo-L-gulonate TRAP transporter small permease protein YiaM"  
"JS1\_M10\_00912" 16602 "s59E5H2" 0 "2,3-diketo-L-gulonate TRAP transporter small permease protein YiaM"  
"JS1\_M10\_00912" 16602 "s63E6H2" 0.0132639 "2,3-diketo-L-gulonate TRAP transporter small permease protein YiaM"  
"JS1\_M10\_00913" 16603 "s59E13H2" 0 "Sialic acid-binding periplasmic protein SiaP precursor"  
"JS1\_M10\_00913" 16603 "s59E25H2" 0 "Sialic acid-binding periplasmic protein SiaP precursor"  
"JS1\_M10\_00913" 16603 "s59E5H2" 0 "Sialic acid-binding periplasmic protein SiaP precursor"  
"JS1\_M10\_00913" 16603 "s63E6H2" 0.2519528 "Sialic acid-binding periplasmic protein SiaP precursor"  
"JS1\_M10\_00914" 16604 "s59E13H2" 0.2212806 "methylcobalamin:coenzyme M methyltransferase"  
"JS1\_M10\_00914" 16604 "s59E25H2" 0 "methylcobalamin:coenzyme M methyltransferase"  
"JS1\_M10\_00914" 16604 "s59E5H2" 0.8078775 "methylcobalamin:coenzyme M methyltransferase"  
"JS1\_M10\_00914" 16604 "s63E6H2" 0.8283073 "methylcobalamin:coenzyme M methyltransferase"  
"JS1\_M10\_00915" 16605 "s59E13H2" 0.1355857 "L-fucose isomerase"  
"JS1\_M10\_00915" 16605 "s59E25H2" 0 "L-fucose isomerase"  
"JS1\_M10\_00915" 16605 "s59E5H2" 0.03149425 "L-fucose isomerase"  
"JS1\_M10\_00915" 16605 "s63E6H2" 0.6808973 "L-fucose isomerase"  
"JS1\_M10\_00916" 16606 "s59E13H2" 0 "putative sugar kinase"  
"JS1\_M10\_00916" 16606 "s59E25H2" 0 "putative sugar kinase"  
"JS1\_M10\_00916" 16606 "s59E5H2" 0 "putative sugar kinase"  
"JS1\_M10\_00916" 16606 "s63E6H2" 0.05795838 "putative sugar kinase"  
"JS1\_M10\_00917" 16607 "s59E13H2" 0.004292299 "L-threonine 3-dehydrogenase"  
"JS1\_M10\_00917" 16607 "s59E25H2" 0 "L-threonine 3-dehydrogenase"  
"JS1\_M10\_00917" 16607 "s59E5H2" 0 "L-threonine 3-dehydrogenase"  
"JS1\_M10\_00917" 16607 "s63E6H2" 0.08394994 "L-threonine 3-dehydrogenase"  
"JS1\_M10\_00918" 16608 "s59E13H2" 1.931179 "Vegetative catalase"  
"JS1\_M10\_00918" 16608 "s59E25H2" 0 "Vegetative catalase"  
"JS1\_M10\_00918" 16608 "s59E5H2" 0.2983142 "Vegetative catalase"  
"JS1\_M10\_00918" 16608 "s63E6H2" 1.513056 "Vegetative catalase"  
"JS1\_M10\_00919" 16609 "s59E13H2" 1.212932 "Catalase"  
"JS1\_M10\_00919" 16609 "s59E25H2" 0 "Catalase"  
"JS1\_M10\_00919" 16609 "s59E5H2" 0.1861127 "Catalase"  
"JS1\_M10\_00919" 16609 "s63E6H2" 1.193307 "Catalase"  
"JS1\_M10\_00920" 16610 "s59E13H2" 0.0002866547 "Glutamine cyclotransferase"  
"JS1\_M10\_00920" 16610 "s59E25H2" 0 "Glutamine cyclotransferase"  
"JS1\_M10\_00920" 16610 "s59E5H2" 0.01212441 "Glutamine cyclotransferase"  
"JS1\_M10\_00920" 16610 "s63E6H2" 0.1956794 "Glutamine cyclotransferase"  
"JS1\_M10\_00921" 16611 "s59E13H2" 0 "hypothetical protein"  
"JS1\_M10\_00921" 16611 "s59E25H2" 0 "hypothetical protein"  
"JS1\_M10\_00921" 16611 "s59E5H2" 0 "hypothetical protein"  
"JS1\_M10\_00921" 16611 "s63E6H2" 0.06793873 "hypothetical protein"  
"JS1\_M10\_00922" 16612 "s59E13H2" 2.696804 "Multidrug resistance protein stp"  
"JS1\_M10\_00922" 16612 "s59E25H2" 0 "Multidrug resistance protein stp"  
"JS1\_M10\_00922" 16612 "s59E5H2" 0.01009122 "Multidrug resistance protein stp"

"JS1\_M10\_00922" 16612 "s63E6H2" 0.4082683 "Multidrug resistance protein stp"  
"JS1\_M10\_00923" 16613 "s59E13H2" 0 "hypothetical protein"  
"JS1\_M10\_00923" 16613 "s59E25H2" 0 "hypothetical protein"  
"JS1\_M10\_00923" 16613 "s59E5H2" 0 "hypothetical protein"  
"JS1\_M10\_00923" 16613 "s63E6H2" 0.1412759 "hypothetical protein"  
"JS1\_M10\_00924" 16614 "s59E13H2" 0.4747149 "hypothetical protein"  
"JS1\_M10\_00924" 16614 "s59E25H2" 0 "hypothetical protein"  
"JS1\_M10\_00924" 16614 "s59E5H2" 0.1554979 "hypothetical protein"  
"JS1\_M10\_00924" 16614 "s63E6H2" 1.390631 "hypothetical protein"  
"JS1\_M10\_00925" 16615 "s59E13H2" 0.162529 "GDP-mannose-dependent alpha-(1-2)-phosphatidylinositol mannosyltransferase"  
"JS1\_M10\_00925" 16615 "s59E25H2" 0 "GDP-mannose-dependent alpha-(1-2)-phosphatidylinositol mannosyltransferase"  
"JS1\_M10\_00925" 16615 "s59E5H2" 0.6372697 "GDP-mannose-dependent alpha-(1-2)-phosphatidylinositol mannosyltransferase"  
"JS1\_M10\_00925" 16615 "s63E6H2" 1.784545 "GDP-mannose-dependent alpha-(1-2)-phosphatidylinositol mannosyltransferase"  
"JS1\_M10\_00926" 16616 "s59E13H2" 0.1101091 "hypothetical protein"  
"JS1\_M10\_00926" 16616 "s59E25H2" 0 "hypothetical protein"  
"JS1\_M10\_00926" 16616 "s59E5H2" 0.8771857 "hypothetical protein"  
"JS1\_M10\_00926" 16616 "s63E6H2" 3.227894 "hypothetical protein"  
"JS1\_M10\_00927" 16617 "s59E13H2" 0.155966 "Beta-1,4-mannooligosaccharide phosphorylase"  
"JS1\_M10\_00927" 16617 "s59E25H2" 0 "Beta-1,4-mannooligosaccharide phosphorylase"  
"JS1\_M10\_00927" 16617 "s59E5H2" 1.070919 "Beta-1,4-mannooligosaccharide phosphorylase"  
"JS1\_M10\_00927" 16617 "s63E6H2" 2.706248 "Beta-1,4-mannooligosaccharide phosphorylase"  
"JS1\_M10\_00928" 16618 "s59E13H2" 0 "Amidohydrolase"  
"JS1\_M10\_00928" 16618 "s59E25H2" 0 "Amidohydrolase"  
"JS1\_M10\_00928" 16618 "s59E5H2" 0 "Amidohydrolase"  
"JS1\_M10\_00928" 16618 "s63E6H2" 0 "Amidohydrolase"  
"JS1\_M10\_00929" 16619 "s59E13H2" 0 "Bacterial extracellular solute-binding protein"  
"JS1\_M10\_00929" 16619 "s59E25H2" 0 "Bacterial extracellular solute-binding protein"  
"JS1\_M10\_00929" 16619 "s59E5H2" 0 "Bacterial extracellular solute-binding protein"  
"JS1\_M10\_00929" 16619 "s63E6H2" 0 "Bacterial extracellular solute-binding protein"  
"JS1\_M10\_00930" 16620 "s59E13H2" 0 "Lactose transport system permease protein LacF"  
"JS1\_M10\_00930" 16620 "s59E25H2" 0 "Lactose transport system permease protein LacF"  
"JS1\_M10\_00930" 16620 "s59E5H2" 0 "Lactose transport system permease protein LacF"  
"JS1\_M10\_00930" 16620 "s63E6H2" 0 "Lactose transport system permease protein LacF"  
"JS1\_M10\_00931" 16621 "s59E13H2" 0 "Trehalose transport system permease protein SugB"  
"JS1\_M10\_00931" 16621 "s59E25H2" 0 "Trehalose transport system permease protein SugB"  
"JS1\_M10\_00931" 16621 "s59E5H2" 0.003073964 "Trehalose transport system permease protein SugB"  
"JS1\_M10\_00931" 16621 "s63E6H2" 0 "Trehalose transport system permease protein SugB"  
"JS1\_M10\_00932" 16622 "s59E13H2" 0 "Trehalose/maltose import ATP-binding protein Malk"  
"JS1\_M10\_00932" 16622 "s59E25H2" 0 "Trehalose/maltose import ATP-binding protein Malk"  
"JS1\_M10\_00932" 16622 "s59E5H2" 0.000559533 "Trehalose/maltose import ATP-binding protein Malk"  
"JS1\_M10\_00932" 16622 "s63E6H2" 0 "Trehalose/maltose import ATP-binding protein Malk"  
"JS1\_M10\_00933" 16623 "s59E13H2" 0 "Glycosyl transferases group 1"  
"JS1\_M10\_00933" 16623 "s59E25H2" 0 "Glycosyl transferases group 1"  
"JS1\_M10\_00933" 16623 "s59E5H2" 0.01993815 "Glycosyl transferases group 1"  
"JS1\_M10\_00933" 16623 "s63E6H2" 0 "Glycosyl transferases group 1"  
"JS1\_M10\_00934" 16624 "s59E13H2" 0 "Mannosylglycerate hydrolase"  
"JS1\_M10\_00934" 16624 "s59E25H2" 0 "Mannosylglycerate hydrolase"

"JS1\_M10\_00934" 16624 "s59E5H2" 1.030298e-05 "Mannosylglycerate hydrolase"  
"JS1\_M10\_00934" 16624 "s63E6H2" 0 "Mannosylglycerate hydrolase"  
"JS1\_M10\_00935" 16625 "s59E13H2" 0.00318611 "Sucrose phosphorylase"  
"JS1\_M10\_00935" 16625 "s59E25H2" 0 "Sucrose phosphorylase"  
"JS1\_M10\_00935" 16625 "s59E5H2" 0.02081377 "Sucrose phosphorylase"  
"JS1\_M10\_00935" 16625 "s63E6H2" 0.02351966 "Sucrose phosphorylase"  
"JS1\_M10\_00936" 16626 "s59E13H2" 0.1860919 "Pyridoxal 4-dehydrogenase"  
"JS1\_M10\_00936" 16626 "s59E25H2" 0 "Pyridoxal 4-dehydrogenase"  
"JS1\_M10\_00936" 16626 "s59E5H2" 0.4174907 "Pyridoxal 4-dehydrogenase"  
"JS1\_M10\_00936" 16626 "s63E6H2" 0.6102333 "Pyridoxal 4-dehydrogenase"  
"JS1\_M10\_00937" 16627 "s59E13H2" 0.008284507 "DNA-bindng transcriptional repressor SrlR"  
"JS1\_M10\_00937" 16627 "s59E25H2" 0 "DNA-bindng transcriptional repressor SrlR"  
"JS1\_M10\_00937" 16627 "s59E5H2" 0.04903061 "DNA-bindng transcriptional repressor SrlR"  
"JS1\_M10\_00937" 16627 "s63E6H2" 0.2699847 "DNA-bindng transcriptional repressor SrlR"  
"JS1\_M10\_00938" 16628 "s59E13H2" 0.1883716 "hypothetical protein"  
"JS1\_M10\_00938" 16628 "s59E25H2" 0 "hypothetical protein"  
"JS1\_M10\_00938" 16628 "s59E5H2" 0.4582136 "hypothetical protein"  
"JS1\_M10\_00938" 16628 "s63E6H2" 1.146761 "hypothetical protein"  
"JS1\_M10\_00939" 16629 "s59E13H2" 0.2336386 "Cell division protein FtsZ"  
"JS1\_M10\_00939" 16629 "s59E25H2" 0 "Cell division protein FtsZ"  
"JS1\_M10\_00939" 16629 "s59E5H2" 0.8520911 "Cell division protein FtsZ"  
"JS1\_M10\_00939" 16629 "s63E6H2" 1.035422 "Cell division protein FtsZ"  
"JS1\_M10\_00940" 16630 "s59E13H2" 0.05763452 "Sporulation initiation inhibitor protein Soj"  
"JS1\_M10\_00940" 16630 "s59E25H2" 0.5646766 "Sporulation initiation inhibitor protein Soj"  
"JS1\_M10\_00940" 16630 "s59E5H2" 0.7010969 "Sporulation initiation inhibitor protein Soj"  
"JS1\_M10\_00940" 16630 "s63E6H2" 1.349564 "Sporulation initiation inhibitor protein Soj"  
"JS1\_M10\_00941" 16631 "s59E13H2" 1.748562 "MobA-like NTP transferase domain protein"  
"JS1\_M10\_00941" 16631 "s59E25H2" 0 "MobA-like NTP transferase domain protein"  
"JS1\_M10\_00941" 16631 "s59E5H2" 2.182061 "MobA-like NTP transferase domain protein"  
"JS1\_M10\_00941" 16631 "s63E6H2" 11.13446 "MobA-like NTP transferase domain protein"  
"JS1\_M10\_00942" 16632 "s59E13H2" 0.06613979 "hypothetical protein"  
"JS1\_M10\_00942" 16632 "s59E25H2" 0 "hypothetical protein"  
"JS1\_M10\_00942" 16632 "s59E5H2" 0.8024808 "hypothetical protein"  
"JS1\_M10\_00942" 16632 "s63E6H2" 8.560534 "hypothetical protein"  
"JS1\_M10\_00943" 16633 "s59E13H2" 0.05055965 "Putative competence-damage inducible protein"  
"JS1\_M10\_00943" 16633 "s59E25H2" 0.1457327 "Putative competence-damage inducible protein"  
"JS1\_M10\_00943" 16633 "s59E5H2" 3.631232 "Putative competence-damage inducible protein"  
"JS1\_M10\_00943" 16633 "s63E6H2" 1.266847 "Putative competence-damage inducible protein"  
"JS1\_M10\_00944" 16634 "s59E13H2" 0.08411938 "1,3-propanediol dehydrogenase"  
"JS1\_M10\_00944" 16634 "s59E25H2" 0 "1,3-propanediol dehydrogenase"  
"JS1\_M10\_00944" 16634 "s59E5H2" 4.696068 "1,3-propanediol dehydrogenase"  
"JS1\_M10\_00944" 16634 "s63E6H2" 2.466103 "1,3-propanediol dehydrogenase"  
"JS1\_M10\_00945" 16635 "s59E13H2" 1.215889 "RNA recognition motif. (a.k.a. RRM, RBD, or RNP domain)"  
"JS1\_M10\_00945" 16635 "s59E25H2" 0 "RNA recognition motif. (a.k.a. RRM, RBD, or RNP domain)"  
"JS1\_M10\_00945" 16635 "s59E5H2" 13.24655 "RNA recognition motif. (a.k.a. RRM, RBD, or RNP domain)"  
"JS1\_M10\_00945" 16635 "s63E6H2" 2.567329 "RNA recognition motif. (a.k.a. RRM, RBD, or RNP domain)"  
"JS1\_M10\_00946" 16636 "s59E13H2" 0.3448807 "Benzylsuccinate synthase alpha subunit"

"JS1\_M10\_00946" 16636 "s59E25H2" 0 "Benzy succinate synthase alpha subunit"  
"JS1\_M10\_00946" 16636 "s59E5H2" 0.6193486 "Benzy succinate synthase alpha subunit"  
"JS1\_M10\_00946" 16636 "s63E6H2" 0.2647903 "Benzy succinate synthase alpha subunit"  
"JS1\_M10\_00947" 16637 "s59E13H2" 0.4732807 "Benzy succinate synthase activating enzyme"  
"JS1\_M10\_00947" 16637 "s59E25H2" 0 "Benzy succinate synthase activating enzyme"  
"JS1\_M10\_00947" 16637 "s59E5H2" 0.4434079 "Benzy succinate synthase activating enzyme"  
"JS1\_M10\_00947" 16637 "s63E6H2" 0.5044262 "Benzy succinate synthase activating enzyme"  
"JS1\_M10\_00948" 16638 "s59E13H2" 0.0120412 "Xaa-Pro dipeptidase"  
"JS1\_M10\_00948" 16638 "s59E25H2" 0 "Xaa-Pro dipeptidase"  
"JS1\_M10\_00948" 16638 "s59E5H2" 0 "Xaa-Pro dipeptidase"  
"JS1\_M10\_00948" 16638 "s63E6H2" 0.009314951 "Xaa-Pro dipeptidase"  
"JS1\_M10\_00949" 16639 "s59E13H2" 0 "Oligopeptide transport ATP-binding protein OppF"  
"JS1\_M10\_00949" 16639 "s59E25H2" 0 "Oligopeptide transport ATP-binding protein OppF"  
"JS1\_M10\_00949" 16639 "s59E5H2" 0 "Oligopeptide transport ATP-binding protein OppF"  
"JS1\_M10\_00949" 16639 "s63E6H2" 0.0008295697 "Oligopeptide transport ATP-binding protein OppF"  
"JS1\_M10\_00950" 16640 "s59E13H2" 0 "Oligopeptide transport ATP-binding protein OppD"  
"JS1\_M10\_00950" 16640 "s59E25H2" 0 "Oligopeptide transport ATP-binding protein OppD"  
"JS1\_M10\_00950" 16640 "s59E5H2" 0 "Oligopeptide transport ATP-binding protein OppD"  
"JS1\_M10\_00950" 16640 "s63E6H2" 0.002242665 "Oligopeptide transport ATP-binding protein OppD"  
"JS1\_M10\_00951" 16641 "s59E13H2" 0 "Glutathione transport system permease protein GsiD"  
"JS1\_M10\_00951" 16641 "s59E25H2" 0 "Glutathione transport system permease protein GsiD"  
"JS1\_M10\_00951" 16641 "s59E5H2" 0 "Glutathione transport system permease protein GsiD"  
"JS1\_M10\_00951" 16641 "s63E6H2" 0.01013897 "Glutathione transport system permease protein GsiD"  
"JS1\_M10\_00952" 16642 "s59E13H2" 0 "putative D,D-dipeptide transport system permease protein DdpB"  
"JS1\_M10\_00952" 16642 "s59E25H2" 0 "putative D,D-dipeptide transport system permease protein DdpB"  
"JS1\_M10\_00952" 16642 "s59E5H2" 0 "putative D,D-dipeptide transport system permease protein DdpB"  
"JS1\_M10\_00952" 16642 "s63E6H2" 0.0123127 "putative D,D-dipeptide transport system permease protein DdpB"  
"JS1\_M10\_00953" 16643 "s59E13H2" 0 "putative D,D-dipeptide-binding periplasmic protein DdpA precursor"  
"JS1\_M10\_00953" 16643 "s59E25H2" 0 "putative D,D-dipeptide-binding periplasmic protein DdpA precursor"  
"JS1\_M10\_00953" 16643 "s59E5H2" 0 "putative D,D-dipeptide-binding periplasmic protein DdpA precursor"  
"JS1\_M10\_00953" 16643 "s63E6H2" 0.01504003 "putative D,D-dipeptide-binding periplasmic protein DdpA precursor"  
"JS1\_M10\_00954" 16644 "s59E13H2" 0 "Acetophenone carboxylase delta subunit"  
"JS1\_M10\_00954" 16644 "s59E25H2" 0 "Acetophenone carboxylase delta subunit"  
"JS1\_M10\_00954" 16644 "s59E5H2" 0 "Acetophenone carboxylase delta subunit"  
"JS1\_M10\_00954" 16644 "s63E6H2" 0.00998765 "Acetophenone carboxylase delta subunit"  
"JS1\_M10\_00955" 16645 "s59E13H2" 0 "Cupin domain protein"  
"JS1\_M10\_00955" 16645 "s59E25H2" 0 "Cupin domain protein"  
"JS1\_M10\_00955" 16645 "s59E5H2" 0 "Cupin domain protein"  
"JS1\_M10\_00955" 16645 "s63E6H2" 0.002077516 "Cupin domain protein"  
"JS1\_M10\_00956" 16646 "s59E13H2" 0 "Acetophenone carboxylase gamma subunit"  
"JS1\_M10\_00956" 16646 "s59E25H2" 0 "Acetophenone carboxylase gamma subunit"  
"JS1\_M10\_00956" 16646 "s59E5H2" 0 "Acetophenone carboxylase gamma subunit"  
"JS1\_M10\_00956" 16646 "s63E6H2" 0.0007310353 "Acetophenone carboxylase gamma subunit"  
"JS1\_M10\_00957" 16647 "s59E13H2" 0 "putative HTH-type transcriptional regulator YdfH"  
"JS1\_M10\_00957" 16647 "s59E25H2" 0 "putative HTH-type transcriptional regulator YdfH"  
"JS1\_M10\_00957" 16647 "s59E5H2" 0 "putative HTH-type transcriptional regulator YdfH"  
"JS1\_M10\_00957" 16647 "s63E6H2" 0 "putative HTH-type transcriptional regulator YdfH"

"JS1\_M10\_00958" 16648 "s59E13H2" 0.2532273 "Transketolase"  
"JS1\_M10\_00958" 16648 "s59E25H2" 0 "Transketolase"  
"JS1\_M10\_00958" 16648 "s59E5H2" 1.553173 "Transketolase"  
"JS1\_M10\_00958" 16648 "s63E6H2" 0.7602068 "Transketolase"  
"JS1\_M10\_00959" 16649 "s59E13H2" 0.006067267 "Hydroxymethylpyrimidine/phosphomethylpyrimidine kinase"  
"JS1\_M10\_00959" 16649 "s59E25H2" 0 "Hydroxymethylpyrimidine/phosphomethylpyrimidine kinase"  
"JS1\_M10\_00959" 16649 "s59E5H2" 0 "Hydroxymethylpyrimidine/phosphomethylpyrimidine kinase"  
"JS1\_M10\_00959" 16649 "s63E6H2" 0.2604156 "Hydroxymethylpyrimidine/phosphomethylpyrimidine kinase"  
"JS1\_M10\_00960" 16650 "s59E13H2" 0.00318546 "Thiamine-monophosphate kinase"  
"JS1\_M10\_00960" 16650 "s59E25H2" 0 "Thiamine-monophosphate kinase"  
"JS1\_M10\_00960" 16650 "s59E5H2" 0 "Thiamine-monophosphate kinase"  
"JS1\_M10\_00960" 16650 "s63E6H2" 0.2071364 "Thiamine-monophosphate kinase"  
"JS1\_M10\_00961" 16651 "s59E13H2" 0 "Thiamine-phosphate synthase"  
"JS1\_M10\_00961" 16651 "s59E25H2" 0 "Thiamine-phosphate synthase"  
"JS1\_M10\_00961" 16651 "s59E5H2" 0 "Thiamine-phosphate synthase"  
"JS1\_M10\_00961" 16651 "s63E6H2" 0.1599843 "Thiamine-phosphate synthase"  
"JS1\_M10\_00962" 16652 "s59E13H2" 0.004096902 "Hydroxyethylthiazole kinase"  
"JS1\_M10\_00962" 16652 "s59E25H2" 0 "Hydroxyethylthiazole kinase"  
"JS1\_M10\_00962" 16652 "s59E5H2" 0 "Hydroxyethylthiazole kinase"  
"JS1\_M10\_00962" 16652 "s63E6H2" 0.06871704 "Hydroxyethylthiazole kinase"  
"JS1\_M10\_00963" 16653 "s59E13H2" 0.00390286 "Cytosine permease"  
"JS1\_M10\_00963" 16653 "s59E25H2" 0 "Cytosine permease"  
"JS1\_M10\_00963" 16653 "s59E5H2" 0 "Cytosine permease"  
"JS1\_M10\_00963" 16653 "s63E6H2" 0.05151957 "Cytosine permease"  
"JS1\_M10\_00965" 16655 "s59E13H2" 0.8742345 "RNA recognition motif. (a.k.a. RRM, RBD, or RNP domain)"  
"JS1\_M10\_00965" 16655 "s59E25H2" 0 "RNA recognition motif. (a.k.a. RRM, RBD, or RNP domain)"  
"JS1\_M10\_00965" 16655 "s59E5H2" 1.662546 "RNA recognition motif. (a.k.a. RRM, RBD, or RNP domain)"  
"JS1\_M10\_00965" 16655 "s63E6H2" 1.033333 "RNA recognition motif. (a.k.a. RRM, RBD, or RNP domain)"  
"JS1\_M10\_00966" 16656 "s59E13H2" 0.00954359 "Sensor protein ZraS"  
"JS1\_M10\_00966" 16656 "s59E25H2" 0 "Sensor protein ZraS"  
"JS1\_M10\_00966" 16656 "s59E5H2" 0.01142279 "Sensor protein ZraS"  
"JS1\_M10\_00966" 16656 "s63E6H2" 0.04243727 "Sensor protein ZraS"  
"JS1\_M10\_00967" 16657 "s59E13H2" 0.06209246 "hypothetical protein"  
"JS1\_M10\_00967" 16657 "s59E25H2" 0 "hypothetical protein"  
"JS1\_M10\_00967" 16657 "s59E5H2" 0.4331535 "hypothetical protein"  
"JS1\_M10\_00967" 16657 "s63E6H2" 0.06963199 "hypothetical protein"  
"JS1\_M10\_00968" 16658 "s59E13H2" 0.3127414 "Uracil DNA glycosylase superfamily protein"  
"JS1\_M10\_00968" 16658 "s59E25H2" 0 "Uracil DNA glycosylase superfamily protein"  
"JS1\_M10\_00968" 16658 "s59E5H2" 0.1625309 "Uracil DNA glycosylase superfamily protein"  
"JS1\_M10\_00968" 16658 "s63E6H2" 0.101704 "Uracil DNA glycosylase superfamily protein"  
"JS1\_M10\_00969" 16659 "s59E13H2" 0.2041325 "putative protease YhbU precursor"  
"JS1\_M10\_00969" 16659 "s59E25H2" 0 "putative protease YhbU precursor"  
"JS1\_M10\_00969" 16659 "s59E5H2" 0.4510684 "putative protease YhbU precursor"  
"JS1\_M10\_00969" 16659 "s63E6H2" 3.902681 "putative protease YhbU precursor"  
"JS1\_M10\_00970" 16660 "s59E13H2" 0.05985504 "Putative GTP cyclohydrolase 1 type 2"  
"JS1\_M10\_00970" 16660 "s59E25H2" 0 "Putative GTP cyclohydrolase 1 type 2"  
"JS1\_M10\_00970" 16660 "s59E5H2" 0.1663187 "Putative GTP cyclohydrolase 1 type 2"



"JS1\_M10\_00970" 16660 "s63E6H2" 3.430974 "Putative GTP cyclohydrolase 1 type 2"  
"JS1\_M10\_00971" 16661 "s59E13H2" 0 "hypothetical protein"  
"JS1\_M10\_00971" 16661 "s59E25H2" 0 "hypothetical protein"  
"JS1\_M10\_00971" 16661 "s59E5H2" 0 "hypothetical protein"  
"JS1\_M10\_00971" 16661 "s63E6H2" 0.4260649 "hypothetical protein"  
"JS1\_M10\_00972" 16662 "s59E13H2" 0 "Transketolase 2"  
"JS1\_M10\_00972" 16662 "s59E25H2" 0 "Transketolase 2"  
"JS1\_M10\_00972" 16662 "s59E5H2" 0 "Transketolase 2"  
"JS1\_M10\_00972" 16662 "s63E6H2" 0.1640968 "Transketolase 2"  
"JS1\_M10\_00973" 16663 "s59E13H2" 0.1027451 "Xylose isomerase-like TIM barrel"  
"JS1\_M10\_00973" 16663 "s59E25H2" 0 "Xylose isomerase-like TIM barrel"  
"JS1\_M10\_00973" 16663 "s59E5H2" 0.2967367 "Xylose isomerase-like TIM barrel"  
"JS1\_M10\_00973" 16663 "s63E6H2" 1.752676 "Xylose isomerase-like TIM barrel"  
"JS1\_M10\_00974" 16664 "s59E13H2" 0.002227806 "HTH-type transcriptional regulator LutR"  
"JS1\_M10\_00974" 16664 "s59E25H2" 0 "HTH-type transcriptional regulator LutR"  
"JS1\_M10\_00974" 16664 "s59E5H2" 0.0007518485 "HTH-type transcriptional regulator LutR"  
"JS1\_M10\_00974" 16664 "s63E6H2" 0.002740086 "HTH-type transcriptional regulator LutR"  
"JS1\_M10\_00975" 16665 "s59E13H2" 0 "NADH dehydrogenase"  
"JS1\_M10\_00975" 16665 "s59E25H2" 0 "NADH dehydrogenase"  
"JS1\_M10\_00975" 16665 "s59E5H2" 0 "NADH dehydrogenase"  
"JS1\_M10\_00975" 16665 "s63E6H2" 0.4119933 "NADH dehydrogenase"  
"JS1\_M10\_00976" 16666 "s59E13H2" 0 "hypothetical protein"  
"JS1\_M10\_00976" 16666 "s59E25H2" 0 "hypothetical protein"  
"JS1\_M10\_00976" 16666 "s59E5H2" 0 "hypothetical protein"  
"JS1\_M10\_00976" 16666 "s63E6H2" 0.4968253 "hypothetical protein"  
"JS1\_M10\_00977" 16667 "s59E13H2" 4.148652 "NADH dehydrogenase"  
"JS1\_M10\_00977" 16667 "s59E25H2" 0 "NADH dehydrogenase"  
"JS1\_M10\_00977" 16667 "s59E5H2" 0.4019119 "NADH dehydrogenase"  
"JS1\_M10\_00977" 16667 "s63E6H2" 0.2359902 "NADH dehydrogenase"  
"JS1\_M10\_00978" 16668 "s59E13H2" 0 "hypothetical protein"  
"JS1\_M10\_00978" 16668 "s59E25H2" 0 "hypothetical protein"  
"JS1\_M10\_00978" 16668 "s59E5H2" 0.001606568 "hypothetical protein"  
"JS1\_M10\_00978" 16668 "s63E6H2" 5.476837e-05 "hypothetical protein"  
"JS1\_M10\_00979" 16669 "s59E13H2" 0.5213106 "Winged helix-turn-helix transcription repressor, HrcA DNA-binding"  
"JS1\_M10\_00979" 16669 "s59E25H2" 0 "Winged helix-turn-helix transcription repressor, HrcA DNA-binding"  
"JS1\_M10\_00979" 16669 "s59E5H2" 0.5181965 "Winged helix-turn-helix transcription repressor, HrcA DNA-binding"  
"JS1\_M10\_00979" 16669 "s63E6H2" 0.110931 "Winged helix-turn-helix transcription repressor, HrcA DNA-binding"  
"JS1\_M10\_00980" 16670 "s59E13H2" 2.947429 "Cyclic pyranopterin monophosphate synthase"  
"JS1\_M10\_00980" 16670 "s59E25H2" 0 "Cyclic pyranopterin monophosphate synthase"  
"JS1\_M10\_00980" 16670 "s59E5H2" 0.3059865 "Cyclic pyranopterin monophosphate synthase"  
"JS1\_M10\_00980" 16670 "s63E6H2" 0.4653877 "Cyclic pyranopterin monophosphate synthase"  
"JS1\_M10\_00981" 16671 "s59E13H2" 5.628096 "putative inner membrane transporter yjE"  
"JS1\_M10\_00981" 16671 "s59E25H2" 0 "putative inner membrane transporter yjE"  
"JS1\_M10\_00981" 16671 "s59E5H2" 0.381637 "putative inner membrane transporter yjE"  
"JS1\_M10\_00981" 16671 "s63E6H2" 0.3086196 "putative inner membrane transporter yjE"  
"JS1\_M10\_00982" 16672 "s59E13H2" 2.727253 "Radical SAM superfamily protein"  
"JS1\_M10\_00982" 16672 "s59E25H2" 0 "Radical SAM superfamily protein"

"JS1\_M10\_00982" 16672 "s59E5H2" 0.4055556 "Radical SAM superfamily protein"  
"JS1\_M10\_00982" 16672 "s63E6H2" 0.3273373 "Radical SAM superfamily protein"  
"JS1\_M10\_00983" 16673 "s59E13H2" 1.027534 "Pyrophosphatase PpaX"  
"JS1\_M10\_00983" 16673 "s59E25H2" 0 "Pyrophosphatase PpaX"  
"JS1\_M10\_00983" 16673 "s59E5H2" 0.5796107 "Pyrophosphatase PpaX"  
"JS1\_M10\_00983" 16673 "s63E6H2" 0.2572769 "Pyrophosphatase PpaX"  
"JS1\_M10\_00984" 16674 "s59E13H2" 0.2427762 "Signal peptidase I S"  
"JS1\_M10\_00984" 16674 "s59E25H2" 0 "Signal peptidase I S"  
"JS1\_M10\_00984" 16674 "s59E5H2" 0.2250859 "Signal peptidase I S"  
"JS1\_M10\_00984" 16674 "s63E6H2" 0.1180531 "Signal peptidase I S"  
"JS1\_M10\_00986" 16676 "s59E13H2" 0.01282765 "hypothetical protein"  
"JS1\_M10\_00986" 16676 "s59E25H2" 0 "hypothetical protein"  
"JS1\_M10\_00986" 16676 "s59E5H2" 0 "hypothetical protein"  
"JS1\_M10\_00986" 16676 "s63E6H2" 0.06743225 "hypothetical protein"  
"JS1\_M10\_00987" 16677 "s59E13H2" 0.3743614 "hypothetical protein"  
"JS1\_M10\_00987" 16677 "s59E25H2" 0 "hypothetical protein"  
"JS1\_M10\_00987" 16677 "s59E5H2" 0.1751531 "hypothetical protein"  
"JS1\_M10\_00987" 16677 "s63E6H2" 0.2183923 "hypothetical protein"  
"JS1\_M10\_00988" 16678 "s59E13H2" 0.4470818 "Phosphoglycolate phosphatase"  
"JS1\_M10\_00988" 16678 "s59E25H2" 0 "Phosphoglycolate phosphatase"  
"JS1\_M10\_00988" 16678 "s59E5H2" 0.4289019 "Phosphoglycolate phosphatase"  
"JS1\_M10\_00988" 16678 "s63E6H2" 0.5535746 "Phosphoglycolate phosphatase"  
"JS1\_M10\_00989" 16679 "s59E13H2" 0.2269469 "Cupin domain protein"  
"JS1\_M10\_00989" 16679 "s59E25H2" 0 "Cupin domain protein"  
"JS1\_M10\_00989" 16679 "s59E5H2" 0.09143224 "Cupin domain protein"  
"JS1\_M10\_00989" 16679 "s63E6H2" 0.2194334 "Cupin domain protein"  
"JS1\_M10\_00990" 16680 "s59E13H2" 0.2152069 "ADP-ribose pyrophosphatase"  
"JS1\_M10\_00990" 16680 "s59E25H2" 0 "ADP-ribose pyrophosphatase"  
"JS1\_M10\_00990" 16680 "s59E5H2" 0.4441238 "ADP-ribose pyrophosphatase"  
"JS1\_M10\_00990" 16680 "s63E6H2" 0.1524069 "ADP-ribose pyrophosphatase"  
"JS1\_M10\_00991" 16681 "s59E13H2" 0.2255912 "hypothetical protein"  
"JS1\_M10\_00991" 16681 "s59E25H2" 0 "hypothetical protein"  
"JS1\_M10\_00991" 16681 "s59E5H2" 0.5730582 "hypothetical protein"  
"JS1\_M10\_00991" 16681 "s63E6H2" 0.3829371 "hypothetical protein"  
"JS1\_M10\_00992" 16682 "s59E13H2" 0.2076051 "Tetratricopeptide repeat protein"  
"JS1\_M10\_00992" 16682 "s59E25H2" 0 "Tetratricopeptide repeat protein"  
"JS1\_M10\_00992" 16682 "s59E5H2" 0.4293063 "Tetratricopeptide repeat protein"  
"JS1\_M10\_00992" 16682 "s63E6H2" 0.5709267 "Tetratricopeptide repeat protein"  
"JS1\_M10\_00993" 16683 "s59E13H2" 0.4836681 "putative ATP-dependent RNA helicase"  
"JS1\_M10\_00993" 16683 "s59E25H2" 0 "putative ATP-dependent RNA helicase"  
"JS1\_M10\_00993" 16683 "s59E5H2" 0.6122752 "putative ATP-dependent RNA helicase"  
"JS1\_M10\_00993" 16683 "s63E6H2" 0.5616273 "putative ATP-dependent RNA helicase"  
"JS1\_M10\_00994" 16684 "s59E13H2" 1.969352 "putative endonuclease 4"  
"JS1\_M10\_00994" 16684 "s59E25H2" 0 "putative endonuclease 4"  
"JS1\_M10\_00994" 16684 "s59E5H2" 0.1079834 "putative endonuclease 4"  
"JS1\_M10\_00994" 16684 "s63E6H2" 0.1492661 "putative endonuclease 4"  
"JS1\_M10\_00995" 16685 "s59E13H2" 2.949635 "hypothetical protein"

"JS1\_M10\_00995" 16685 "s59E25H2" 0 "hypothetical protein"  
"JS1\_M10\_00995" 16685 "s59E5H2" 0.0974022 "hypothetical protein"  
"JS1\_M10\_00995" 16685 "s63E6H2" 0.08403259 "hypothetical protein"  
"JS1\_M10\_00996" 16686 "s59E13H2" 0 "Bacterial extracellular solute-binding protein"  
"JS1\_M10\_00996" 16686 "s59E25H2" 0 "Bacterial extracellular solute-binding protein"  
"JS1\_M10\_00996" 16686 "s59E5H2" 0 "Bacterial extracellular solute-binding protein"  
"JS1\_M10\_00996" 16686 "s63E6H2" 0 "Bacterial extracellular solute-binding protein"  
"JS1\_M10\_00997" 16687 "s59E13H2" 0 "L-arabinose transport system permease protein AraP"  
"JS1\_M10\_00997" 16687 "s59E25H2" 0 "L-arabinose transport system permease protein AraP"  
"JS1\_M10\_00997" 16687 "s59E5H2" 0 "L-arabinose transport system permease protein AraP"  
"JS1\_M10\_00997" 16687 "s63E6H2" 0 "L-arabinose transport system permease protein AraP"  
"JS1\_M10\_00998" 16688 "s59E13H2" 0 "L-arabinose transport system permease protein AraQ"  
"JS1\_M10\_00998" 16688 "s59E25H2" 0 "L-arabinose transport system permease protein AraQ"  
"JS1\_M10\_00998" 16688 "s59E5H2" 0 "L-arabinose transport system permease protein AraQ"  
"JS1\_M10\_00998" 16688 "s63E6H2" 0 "L-arabinose transport system permease protein AraQ"  
"JS1\_M10\_00999" 16689 "s59E13H2" 0 "Non-reducing end beta-L-arabinofuranosidase"  
"JS1\_M10\_00999" 16689 "s59E25H2" 0 "Non-reducing end beta-L-arabinofuranosidase"  
"JS1\_M10\_00999" 16689 "s59E5H2" 0 "Non-reducing end beta-L-arabinofuranosidase"  
"JS1\_M10\_00999" 16689 "s63E6H2" 0 "Non-reducing end beta-L-arabinofuranosidase"  
"JS1\_M10\_01000" 16690 "s59E13H2" 0.1237967 "Intracellular exo-alpha-(1-"  
"JS1\_M10\_01000" 16690 "s59E25H2" 0 "Intracellular exo-alpha-(1-"  
"JS1\_M10\_01000" 16690 "s59E5H2" 0.04352973 "Intracellular exo-alpha-(1-"  
"JS1\_M10\_01000" 16690 "s63E6H2" 0.07434639 "Intracellular exo-alpha-(1-"  
"JS1\_M10\_01001" 16691 "s59E13H2" 0 "Galactose-1-phosphate uridylyltransferase"  
"JS1\_M10\_01001" 16691 "s59E25H2" 0 "Galactose-1-phosphate uridylyltransferase"  
"JS1\_M10\_01001" 16691 "s59E5H2" 0 "Galactose-1-phosphate uridylyltransferase"  
"JS1\_M10\_01001" 16691 "s63E6H2" 0.02002809 "Galactose-1-phosphate uridylyltransferase"  
"JS1\_M10\_01002" 16692 "s59E13H2" 0 "Galactokinase"  
"JS1\_M10\_01002" 16692 "s59E25H2" 0 "Galactokinase"  
"JS1\_M10\_01002" 16692 "s59E5H2" 0 "Galactokinase"  
"JS1\_M10\_01002" 16692 "s63E6H2" 0.007641651 "Galactokinase"  
"JS1\_M10\_01003" 16693 "s59E13H2" 0 "hypothetical protein"  
"JS1\_M10\_01003" 16693 "s59E25H2" 0 "hypothetical protein"  
"JS1\_M10\_01003" 16693 "s59E5H2" 0 "hypothetical protein"  
"JS1\_M10\_01003" 16693 "s63E6H2" 0 "hypothetical protein"  
"JS1\_M10\_01004" 16694 "s59E13H2" 0.1188876 "hypothetical protein"  
"JS1\_M10\_01004" 16694 "s59E25H2" 0 "hypothetical protein"  
"JS1\_M10\_01004" 16694 "s59E5H2" 0.1187558 "hypothetical protein"  
"JS1\_M10\_01004" 16694 "s63E6H2" 0.951421 "hypothetical protein"  
"JS1\_M10\_01005" 16695 "s59E13H2" 0.1799482 "putative amino-acid import ATP-binding protein YxeO"  
"JS1\_M10\_01005" 16695 "s59E25H2" 0 "putative amino-acid import ATP-binding protein YxeO"  
"JS1\_M10\_01005" 16695 "s59E5H2" 0.1854307 "putative amino-acid import ATP-binding protein YxeO"  
"JS1\_M10\_01005" 16695 "s63E6H2" 0.9286872 "putative amino-acid import ATP-binding protein YxeO"  
"JS1\_M10\_01006" 16696 "s59E13H2" 0.1345106 "Ribose transport system permease protein RbsC"  
"JS1\_M10\_01006" 16696 "s59E25H2" 0 "Ribose transport system permease protein RbsC"  
"JS1\_M10\_01006" 16696 "s59E5H2" 0.107311 "Ribose transport system permease protein RbsC"  
"JS1\_M10\_01006" 16696 "s63E6H2" 0.9593894 "Ribose transport system permease protein RbsC"

"JS1\_M10\_01007" 16697 "s59E13H2" 0.003543415 "hypothetical protein"  
"JS1\_M10\_01007" 16697 "s59E25H2" 0 "hypothetical protein"  
"JS1\_M10\_01007" 16697 "s59E5H2" 0 "hypothetical protein"  
"JS1\_M10\_01007" 16697 "s63E6H2" 0.1694745 "hypothetical protein"  
"JS1\_M10\_01008" 16698 "s59E13H2" 0 "Maltotriose-binding protein precursor"  
"JS1\_M10\_01008" 16698 "s59E25H2" 0 "Maltotriose-binding protein precursor"  
"JS1\_M10\_01008" 16698 "s59E5H2" 0 "Maltotriose-binding protein precursor"  
"JS1\_M10\_01008" 16698 "s63E6H2" 0.003628723 "Maltotriose-binding protein precursor"  
"JS1\_M10\_01009" 16699 "s59E13H2" 0 "Xaa-Pro dipeptidase"  
"JS1\_M10\_01009" 16699 "s59E25H2" 0 "Xaa-Pro dipeptidase"  
"JS1\_M10\_01009" 16699 "s59E5H2" 0 "Xaa-Pro dipeptidase"  
"JS1\_M10\_01009" 16699 "s63E6H2" 0 "Xaa-Pro dipeptidase"  
"JS1\_M10\_01011" 16701 "s59E13H2" 0 "L-arabinose transport system permease protein AraQ"  
"JS1\_M10\_01011" 16701 "s59E25H2" 0 "L-arabinose transport system permease protein AraQ"  
"JS1\_M10\_01011" 16701 "s59E5H2" 0.1487417 "L-arabinose transport system permease protein AraQ"  
"JS1\_M10\_01011" 16701 "s63E6H2" 0 "L-arabinose transport system permease protein AraQ"  
"JS1\_M10\_01012" 16702 "s59E13H2" 0 "L-arabinose transport system permease protein AraP"  
"JS1\_M10\_01012" 16702 "s59E25H2" 0 "L-arabinose transport system permease protein AraP"  
"JS1\_M10\_01012" 16702 "s59E5H2" 0.003827086 "L-arabinose transport system permease protein AraP"  
"JS1\_M10\_01012" 16702 "s63E6H2" 0 "L-arabinose transport system permease protein AraP"  
"JS1\_M10\_01013" 16703 "s59E13H2" 0 "putative arabinose-binding protein precursor"  
"JS1\_M10\_01013" 16703 "s59E25H2" 0 "putative arabinose-binding protein precursor"  
"JS1\_M10\_01013" 16703 "s59E5H2" 0 "putative arabinose-binding protein precursor"  
"JS1\_M10\_01013" 16703 "s63E6H2" 0.00236025 "putative arabinose-binding protein precursor"  
"JS1\_M10\_01014" 16704 "s59E13H2" 1.302465 "Inner membrane ABC transporter permease protein YcjP"  
"JS1\_M10\_01014" 16704 "s59E25H2" 0 "Inner membrane ABC transporter permease protein YcjP"  
"JS1\_M10\_01014" 16704 "s59E5H2" 0.01495082 "Inner membrane ABC transporter permease protein YcjP"  
"JS1\_M10\_01014" 16704 "s63E6H2" 0.02574316 "Inner membrane ABC transporter permease protein YcjP"  
"JS1\_M10\_01015" 16705 "s59E13H2" 0.7945206 "Inner membrane ABC transporter permease protein YcjO"  
"JS1\_M10\_01015" 16705 "s59E25H2" 0.5735632 "Inner membrane ABC transporter permease protein YcjO"  
"JS1\_M10\_01015" 16705 "s59E5H2" 0.03218122 "Inner membrane ABC transporter permease protein YcjO"  
"JS1\_M10\_01015" 16705 "s63E6H2" 0.02350659 "Inner membrane ABC transporter permease protein YcjO"  
"JS1\_M10\_01016" 16706 "s59E13H2" 0.5545753 "Trehalose/maltose-binding protein MalE precursor"  
"JS1\_M10\_01016" 16706 "s59E25H2" 0 "Trehalose/maltose-binding protein MalE precursor"  
"JS1\_M10\_01016" 16706 "s59E5H2" 0.007065458 "Trehalose/maltose-binding protein MalE precursor"  
"JS1\_M10\_01016" 16706 "s63E6H2" 0.05741551 "Trehalose/maltose-binding protein MalE precursor"  
"JS1\_M10\_01017" 16707 "s59E13H2" 0 "hypothetical protein"  
"JS1\_M10\_01017" 16707 "s59E25H2" 0 "hypothetical protein"  
"JS1\_M10\_01017" 16707 "s59E5H2" 0.05573041 "hypothetical protein"  
"JS1\_M10\_01017" 16707 "s63E6H2" 0.9981482 "hypothetical protein"  
"JS1\_M10\_01018" 16708 "s59E13H2" 0.02725166 "hypothetical protein"  
"JS1\_M10\_01018" 16708 "s59E25H2" 0 "hypothetical protein"  
"JS1\_M10\_01018" 16708 "s59E5H2" 0.01974506 "hypothetical protein"  
"JS1\_M10\_01018" 16708 "s63E6H2" 0.07723815 "hypothetical protein"  
"JS1\_M10\_01019" 16709 "s59E13H2" 0.08429148 "hypothetical protein"  
"JS1\_M10\_01019" 16709 "s59E25H2" 0 "hypothetical protein"  
"JS1\_M10\_01019" 16709 "s59E5H2" 0.2949034 "hypothetical protein"

"JS1\_M10\_01019" 16709 "s63E6H2" 0.2384658 "hypothetical protein"  
"JS1\_M10\_01020" 16710 "s59E13H2" 0.1447221 "hypothetical protein"  
"JS1\_M10\_01020" 16710 "s59E25H2" 0 "hypothetical protein"  
"JS1\_M10\_01020" 16710 "s59E5H2" 0.4808146 "hypothetical protein"  
"JS1\_M10\_01020" 16710 "s63E6H2" 0.4635521 "hypothetical protein"  
"JS1\_M10\_01023" 16713 "s59E13H2" 0.04187938 "hypothetical protein"  
"JS1\_M10\_01023" 16713 "s59E25H2" 0 "hypothetical protein"  
"JS1\_M10\_01023" 16713 "s59E5H2" 0 "hypothetical protein"  
"JS1\_M10\_01023" 16713 "s63E6H2" 0.01622418 "hypothetical protein"  
"JS1\_M10\_01024" 16714 "s59E13H2" 5.305011 "Xylulose kinase"  
"JS1\_M10\_01024" 16714 "s59E25H2" 0 "Xylulose kinase"  
"JS1\_M10\_01024" 16714 "s59E5H2" 0.2119343 "Xylulose kinase"  
"JS1\_M10\_01024" 16714 "s63E6H2" 0.7210988 "Xylulose kinase"  
"JS1\_M10\_01025" 16715 "s59E13H2" 0.2720548 "Benzylsuccinate synthase activating enzyme"  
"JS1\_M10\_01025" 16715 "s59E25H2" 0 "Benzylsuccinate synthase activating enzyme"  
"JS1\_M10\_01025" 16715 "s59E5H2" 0.06407494 "Benzylsuccinate synthase activating enzyme"  
"JS1\_M10\_01025" 16715 "s63E6H2" 0.3049053 "Benzylsuccinate synthase activating enzyme"  
"JS1\_M10\_01026" 16716 "s59E13H2" 6.336479 "Glucose-6-phosphate 3-dehydrogenase"  
"JS1\_M10\_01026" 16716 "s59E25H2" 0 "Glucose-6-phosphate 3-dehydrogenase"  
"JS1\_M10\_01026" 16716 "s59E5H2" 0.2458148 "Glucose-6-phosphate 3-dehydrogenase"  
"JS1\_M10\_01026" 16716 "s63E6H2" 0.528135 "Glucose-6-phosphate 3-dehydrogenase"  
"JS1\_M10\_01027" 16717 "s59E13H2" 0.02510581 "putative hydrolase"  
"JS1\_M10\_01027" 16717 "s59E25H2" 0 "putative hydrolase"  
"JS1\_M10\_01027" 16717 "s59E5H2" 0.06786199 "putative hydrolase"  
"JS1\_M10\_01027" 16717 "s63E6H2" 0.23377 "putative hydrolase"  
"JS1\_M10\_01028" 16718 "s59E13H2" 0.07542739 "Phosphoserine phosphatase 1"  
"JS1\_M10\_01028" 16718 "s59E25H2" 0 "Phosphoserine phosphatase 1"  
"JS1\_M10\_01028" 16718 "s59E5H2" 0.06299559 "Phosphoserine phosphatase 1"  
"JS1\_M10\_01028" 16718 "s63E6H2" 0.347467 "Phosphoserine phosphatase 1"  
"JS1\_M10\_01029" 16719 "s59E13H2" 0.004249397 "Ferrous-iron efflux pump FieF"  
"JS1\_M10\_01029" 16719 "s59E25H2" 0 "Ferrous-iron efflux pump FieF"  
"JS1\_M10\_01029" 16719 "s59E5H2" 1.827147 "Ferrous-iron efflux pump FieF"  
"JS1\_M10\_01029" 16719 "s63E6H2" 0.1041168 "Ferrous-iron efflux pump FieF"  
"JS1\_M10\_01030" 16720 "s59E13H2" 6.13386 "D-alanyl-D-alanine carboxypeptidase DacC precursor"  
"JS1\_M10\_01030" 16720 "s59E25H2" 0 "D-alanyl-D-alanine carboxypeptidase DacC precursor"  
"JS1\_M10\_01030" 16720 "s59E5H2" 0.2930314 "D-alanyl-D-alanine carboxypeptidase DacC precursor"  
"JS1\_M10\_01030" 16720 "s63E6H2" 0.3417124 "D-alanyl-D-alanine carboxypeptidase DacC precursor"  
"JS1\_M10\_01031" 16721 "s59E13H2" 0 "Cyclic di-GMP phosphodiesterase response regulator RpfG"  
"JS1\_M10\_01031" 16721 "s59E25H2" 0.3500697 "Cyclic di-GMP phosphodiesterase response regulator RpfG"  
"JS1\_M10\_01031" 16721 "s59E5H2" 1.431584 "Cyclic di-GMP phosphodiesterase response regulator RpfG"  
"JS1\_M10\_01031" 16721 "s63E6H2" 0.02474958 "Cyclic di-GMP phosphodiesterase response regulator RpfG"  
"JS1\_M10\_01032" 16722 "s59E13H2" 1.321155 "Soluble lytic murein transglycosylase precursor"  
"JS1\_M10\_01032" 16722 "s59E25H2" 0 "Soluble lytic murein transglycosylase precursor"  
"JS1\_M10\_01032" 16722 "s59E5H2" 0.5141526 "Soluble lytic murein transglycosylase precursor"  
"JS1\_M10\_01032" 16722 "s63E6H2" 0.2380158 "Soluble lytic murein transglycosylase precursor"  
"JS1\_M10\_01033" 16723 "s59E13H2" 0.535706 "hypothetical protein"  
"JS1\_M10\_01033" 16723 "s59E25H2" 0 "hypothetical protein"

"JS1\_M10\_01033" 16723 "s59E5H2" 0.6110801 "hypothetical protein"  
"JS1\_M10\_01033" 16723 "s63E6H2" 0.318971 "hypothetical protein"  
"JS1\_M10\_01034" 16724 "s59E13H2" 0.002598354 "Helix-turn-helix domain protein"  
"JS1\_M10\_01034" 16724 "s59E25H2" 0 "Helix-turn-helix domain protein"  
"JS1\_M10\_01034" 16724 "s59E5H2" 0.1748817 "Helix-turn-helix domain protein"  
"JS1\_M10\_01034" 16724 "s63E6H2" 0.2255626 "Helix-turn-helix domain protein"  
"JS1\_M10\_01035" 16725 "s59E13H2" 0.06442204 "Murein hydrolase activator NlpD precursor"  
"JS1\_M10\_01035" 16725 "s59E25H2" 0 "Murein hydrolase activator NlpD precursor"  
"JS1\_M10\_01035" 16725 "s59E5H2" 0.06458638 "Murein hydrolase activator NlpD precursor"  
"JS1\_M10\_01035" 16725 "s63E6H2" 0.2821731 "Murein hydrolase activator NlpD precursor"  
"JS1\_M10\_01036" 16726 "s59E13H2" 0.857197 "Periplasmic dipeptide transport protein precursor"  
"JS1\_M10\_01036" 16726 "s59E25H2" 0.04892966 "Periplasmic dipeptide transport protein precursor"  
"JS1\_M10\_01036" 16726 "s59E5H2" 0.1900194 "Periplasmic dipeptide transport protein precursor"  
"JS1\_M10\_01036" 16726 "s63E6H2" 0.2279715 "Periplasmic dipeptide transport protein precursor"  
"JS1\_M10\_01037" 16727 "s59E13H2" 0.0750875 "5-aminovalerate aminotransferase DavT"  
"JS1\_M10\_01037" 16727 "s59E25H2" 0 "5-aminovalerate aminotransferase DavT"  
"JS1\_M10\_01037" 16727 "s59E5H2" 0 "5-aminovalerate aminotransferase DavT"  
"JS1\_M10\_01037" 16727 "s63E6H2" 0 "5-aminovalerate aminotransferase DavT"  
"JS1\_M10\_01038" 16728 "s59E13H2" 0.146412 "Periplasmic dipeptide transport protein precursor"  
"JS1\_M10\_01038" 16728 "s59E25H2" 0 "Periplasmic dipeptide transport protein precursor"  
"JS1\_M10\_01038" 16728 "s59E5H2" 0.002449112 "Periplasmic dipeptide transport protein precursor"  
"JS1\_M10\_01038" 16728 "s63E6H2" 0.002223496 "Periplasmic dipeptide transport protein precursor"  
"JS1\_M10\_01039" 16729 "s59E13H2" 1.704432 "Dipeptide transport system permease protein DppB"  
"JS1\_M10\_01039" 16729 "s59E25H2" 0 "Dipeptide transport system permease protein DppB"  
"JS1\_M10\_01039" 16729 "s59E5H2" 1.421842 "Dipeptide transport system permease protein DppB"  
"JS1\_M10\_01039" 16729 "s63E6H2" 0.3072068 "Dipeptide transport system permease protein DppB"  
"JS1\_M10\_01040" 16730 "s59E13H2" 1.716154 "Glutathione transport system permease protein GsiD"  
"JS1\_M10\_01040" 16730 "s59E25H2" 0.4512472 "Glutathione transport system permease protein GsiD"  
"JS1\_M10\_01040" 16730 "s59E5H2" 1.22768 "Glutathione transport system permease protein GsiD"  
"JS1\_M10\_01040" 16730 "s63E6H2" 0.2416138 "Glutathione transport system permease protein GsiD"  
"JS1\_M10\_01041" 16731 "s59E13H2" 4.841283 "Oligopeptide transport ATP-binding protein OppD"  
"JS1\_M10\_01041" 16731 "s59E25H2" 0 "Oligopeptide transport ATP-binding protein OppD"  
"JS1\_M10\_01041" 16731 "s59E5H2" 2.129487 "Oligopeptide transport ATP-binding protein OppD"  
"JS1\_M10\_01041" 16731 "s63E6H2" 0.3429794 "Oligopeptide transport ATP-binding protein OppD"  
"JS1\_M10\_01042" 16732 "s59E13H2" 6.794661 "Oligopeptide transport ATP-binding protein OppF"  
"JS1\_M10\_01042" 16732 "s59E25H2" 0 "Oligopeptide transport ATP-binding protein OppF"  
"JS1\_M10\_01042" 16732 "s59E5H2" 2.281208 "Oligopeptide transport ATP-binding protein OppF"  
"JS1\_M10\_01042" 16732 "s63E6H2" 0.3790434 "Oligopeptide transport ATP-binding protein OppF"  
"JS1\_M10\_01043" 16733 "s59E13H2" 0.03131043 "30S ribosomal protein S3"  
"JS1\_M10\_01043" 16733 "s59E25H2" 0 "30S ribosomal protein S3"  
"JS1\_M10\_01043" 16733 "s59E5H2" 0.03031929 "30S ribosomal protein S3"  
"JS1\_M10\_01043" 16733 "s63E6H2" 0.08148759 "30S ribosomal protein S3"  
"JS1\_M10\_01044" 16734 "s59E13H2" 0.02986136 "50S ribosomal protein L16"  
"JS1\_M10\_01044" 16734 "s59E25H2" 0 "50S ribosomal protein L16"  
"JS1\_M10\_01044" 16734 "s59E5H2" 0.2117107 "50S ribosomal protein L16"  
"JS1\_M10\_01044" 16734 "s63E6H2" 0.2515216 "50S ribosomal protein L16"  
"JS1\_M10\_01045" 16735 "s59E13H2" 0.04616901 "50S ribosomal protein L29"

"JS1\_M10\_01045" 16735 "s59E25H2" 0 "50S ribosomal protein L29"  
"JS1\_M10\_01045" 16735 "s59E5H2" 0.05701518 "50S ribosomal protein L29"  
"JS1\_M10\_01045" 16735 "s63E6H2" 0.1834066 "50S ribosomal protein L29"  
"JS1\_M10\_01046" 16736 "s59E13H2" 0.01213185 "30S ribosomal protein S17"  
"JS1\_M10\_01046" 16736 "s59E25H2" 0 "30S ribosomal protein S17"  
"JS1\_M10\_01046" 16736 "s59E5H2" 0.06151661 "30S ribosomal protein S17"  
"JS1\_M10\_01046" 16736 "s63E6H2" 0.1165904 "30S ribosomal protein S17"  
"JS1\_M10\_01047" 16737 "s59E13H2" 0.03722844 "50S ribosomal protein L14"  
"JS1\_M10\_01047" 16737 "s59E25H2" 0 "50S ribosomal protein L14"  
"JS1\_M10\_01047" 16737 "s59E5H2" 0.1109339 "50S ribosomal protein L14"  
"JS1\_M10\_01047" 16737 "s63E6H2" 0.1850147 "50S ribosomal protein L14"  
"JS1\_M10\_01048" 16738 "s59E13H2" 0.0888979 "50S ribosomal protein L24"  
"JS1\_M10\_01048" 16738 "s59E25H2" 0 "50S ribosomal protein L24"  
"JS1\_M10\_01048" 16738 "s59E5H2" 0.1395767 "50S ribosomal protein L24"  
"JS1\_M10\_01048" 16738 "s63E6H2" 0.2673062 "50S ribosomal protein L24"  
"JS1\_M10\_01049" 16739 "s59E13H2" 0.1109417 "50S ribosomal protein L5"  
"JS1\_M10\_01049" 16739 "s59E25H2" 0 "50S ribosomal protein L5"  
"JS1\_M10\_01049" 16739 "s59E5H2" 0.1148931 "50S ribosomal protein L5"  
"JS1\_M10\_01049" 16739 "s63E6H2" 0.149224 "50S ribosomal protein L5"  
"JS1\_M10\_01050" 16740 "s59E13H2" 0.1097189 "30S ribosomal protein S14 type Z"  
"JS1\_M10\_01050" 16740 "s59E25H2" 0 "30S ribosomal protein S14 type Z"  
"JS1\_M10\_01050" 16740 "s59E5H2" 0.03268494 "30S ribosomal protein S14 type Z"  
"JS1\_M10\_01050" 16740 "s63E6H2" 0.1039036 "30S ribosomal protein S14 type Z"  
"JS1\_M10\_01051" 16741 "s59E13H2" 0.09837195 "30S ribosomal protein S8"  
"JS1\_M10\_01051" 16741 "s59E25H2" 0 "30S ribosomal protein S8"  
"JS1\_M10\_01051" 16741 "s59E5H2" 0.063628 "30S ribosomal protein S8"  
"JS1\_M10\_01051" 16741 "s63E6H2" 0.1795447 "30S ribosomal protein S8"  
"JS1\_M10\_01052" 16742 "s59E13H2" 0.02738443 "50S ribosomal protein L6"  
"JS1\_M10\_01052" 16742 "s59E25H2" 0 "50S ribosomal protein L6"  
"JS1\_M10\_01052" 16742 "s59E5H2" 0.02734979 "50S ribosomal protein L6"  
"JS1\_M10\_01052" 16742 "s63E6H2" 0.05264214 "50S ribosomal protein L6"  
"JS1\_M10\_01053" 16743 "s59E13H2" 0.005036153 "50S ribosomal protein L18"  
"JS1\_M10\_01053" 16743 "s59E25H2" 0 "50S ribosomal protein L18"  
"JS1\_M10\_01053" 16743 "s59E5H2" 0 "50S ribosomal protein L18"  
"JS1\_M10\_01053" 16743 "s63E6H2" 0.0154806 "50S ribosomal protein L18"  
"JS1\_M10\_01054" 16744 "s59E13H2" 0.05563193 "30S ribosomal protein S5"  
"JS1\_M10\_01054" 16744 "s59E25H2" 0 "30S ribosomal protein S5"  
"JS1\_M10\_01054" 16744 "s59E5H2" 0.07965544 "30S ribosomal protein S5"  
"JS1\_M10\_01054" 16744 "s63E6H2" 0.1177457 "30S ribosomal protein S5"  
"JS1\_M10\_01055" 16745 "s59E13H2" 0.1184343 "50S ribosomal protein L15"  
"JS1\_M10\_01055" 16745 "s59E25H2" 0 "50S ribosomal protein L15"  
"JS1\_M10\_01055" 16745 "s59E5H2" 0.05856075 "50S ribosomal protein L15"  
"JS1\_M10\_01055" 16745 "s63E6H2" 0.2124581 "50S ribosomal protein L15"  
"JS1\_M10\_01056" 16746 "s59E13H2" 0.7791305 "preprotein translocase subunit SecY"  
"JS1\_M10\_01056" 16746 "s59E25H2" 0 "preprotein translocase subunit SecY"  
"JS1\_M10\_01056" 16746 "s59E5H2" 0.1138782 "preprotein translocase subunit SecY"  
"JS1\_M10\_01056" 16746 "s63E6H2" 0.4290905 "preprotein translocase subunit SecY"

"JS1\_M10\_01057" 16747 "s59E13H2" 0.1050523 "Adenylate kinase"  
"JS1\_M10\_01057" 16747 "s59E25H2" 0 "Adenylate kinase"  
"JS1\_M10\_01057" 16747 "s59E5H2" 0.02308713 "Adenylate kinase"  
"JS1\_M10\_01057" 16747 "s63E6H2" 0.7013731 "Adenylate kinase"  
"JS1\_M10\_01058" 16748 "s59E13H2" 0.02840888 "Methionine aminopeptidase 1"  
"JS1\_M10\_01058" 16748 "s59E25H2" 0 "Methionine aminopeptidase 1"  
"JS1\_M10\_01058" 16748 "s59E5H2" 0.005318474 "Methionine aminopeptidase 1"  
"JS1\_M10\_01058" 16748 "s63E6H2" 0.1793671 "Methionine aminopeptidase 1"  
"JS1\_M10\_01059" 16749 "s59E13H2" 0.1358595 "Translation initiation factor IF-1"  
"JS1\_M10\_01059" 16749 "s59E25H2" 0 "Translation initiation factor IF-1"  
"JS1\_M10\_01059" 16749 "s59E5H2" 0.06214497 "Translation initiation factor IF-1"  
"JS1\_M10\_01059" 16749 "s63E6H2" 0.5511608 "Translation initiation factor IF-1"  
"JS1\_M10\_01060" 16750 "s59E13H2" 0.2542656 "50S ribosomal protein L36"  
"JS1\_M10\_01060" 16750 "s59E25H2" 0 "50S ribosomal protein L36"  
"JS1\_M10\_01060" 16750 "s59E5H2" 0.0972704 "50S ribosomal protein L36"  
"JS1\_M10\_01060" 16750 "s63E6H2" 0.6540172 "50S ribosomal protein L36"  
"JS1\_M10\_01061" 16751 "s59E13H2" 0.2185675 "30S ribosomal protein S13"  
"JS1\_M10\_01061" 16751 "s59E25H2" 0 "30S ribosomal protein S13"  
"JS1\_M10\_01061" 16751 "s59E5H2" 0.1378855 "30S ribosomal protein S13"  
"JS1\_M10\_01061" 16751 "s63E6H2" 1.172836 "30S ribosomal protein S13"  
"JS1\_M10\_01062" 16752 "s59E13H2" 0.1540594 "30S ribosomal protein S11"  
"JS1\_M10\_01062" 16752 "s59E25H2" 0 "30S ribosomal protein S11"  
"JS1\_M10\_01062" 16752 "s59E5H2" 0.136285 "30S ribosomal protein S11"  
"JS1\_M10\_01062" 16752 "s63E6H2" 0.7079916 "30S ribosomal protein S11"  
"JS1\_M10\_01063" 16753 "s59E13H2" 0.2483905 "30S ribosomal protein S4"  
"JS1\_M10\_01063" 16753 "s59E25H2" 0 "30S ribosomal protein S4"  
"JS1\_M10\_01063" 16753 "s59E5H2" 0.1502851 "30S ribosomal protein S4"  
"JS1\_M10\_01063" 16753 "s63E6H2" 1.053801 "30S ribosomal protein S4"  
"JS1\_M10\_01064" 16754 "s59E13H2" 0.1690939 "DNA-directed RNA polymerase subunit alpha"  
"JS1\_M10\_01064" 16754 "s59E25H2" 0 "DNA-directed RNA polymerase subunit alpha"  
"JS1\_M10\_01064" 16754 "s59E5H2" 0.1251653 "DNA-directed RNA polymerase subunit alpha"  
"JS1\_M10\_01064" 16754 "s63E6H2" 1.10532 "DNA-directed RNA polymerase subunit alpha"  
"JS1\_M10\_01065" 16755 "s59E13H2" 0 "HEPN domain protein"  
"JS1\_M10\_01065" 16755 "s59E25H2" 0 "HEPN domain protein"  
"JS1\_M10\_01065" 16755 "s59E5H2" 0 "HEPN domain protein"  
"JS1\_M10\_01065" 16755 "s63E6H2" 0.02029621 "HEPN domain protein"  
"JS1\_M10\_01066" 16756 "s59E13H2" 0 "Nucleotidyltransferase domain protein"  
"JS1\_M10\_01066" 16756 "s59E25H2" 0 "Nucleotidyltransferase domain protein"  
"JS1\_M10\_01066" 16756 "s59E5H2" 0 "Nucleotidyltransferase domain protein"  
"JS1\_M10\_01066" 16756 "s63E6H2" 0.009411208 "Nucleotidyltransferase domain protein"  
"JS1\_M10\_01068" 16758 "s59E13H2" 0 "mRNA interferase MazF4"  
"JS1\_M10\_01068" 16758 "s59E25H2" 0 "mRNA interferase MazF4"  
"JS1\_M10\_01068" 16758 "s59E5H2" 1.050347 "mRNA interferase MazF4"  
"JS1\_M10\_01068" 16758 "s63E6H2" 0.7851842 "mRNA interferase MazF4"  
"JS1\_M10\_01070" 16760 "s59E13H2" 0 "hypothetical protein"  
"JS1\_M10\_01070" 16760 "s59E25H2" 0 "hypothetical protein"  
"JS1\_M10\_01070" 16760 "s59E5H2" 0 "hypothetical protein"



"JS1\_M10\_01070" 16760 "s63E6H2" 0 "hypothetical protein"  
"JS1\_M10\_01071" 16761 "s59E13H2" 0 "hypothetical protein"  
"JS1\_M10\_01071" 16761 "s59E25H2" 0 "hypothetical protein"  
"JS1\_M10\_01071" 16761 "s59E5H2" 0 "hypothetical protein"  
"JS1\_M10\_01071" 16761 "s63E6H2" 0 "hypothetical protein"  
"JS1\_M10\_01072" 16762 "s59E13H2" 0 "hypothetical protein"  
"JS1\_M10\_01072" 16762 "s59E25H2" 0 "hypothetical protein"  
"JS1\_M10\_01072" 16762 "s59E5H2" 0 "hypothetical protein"  
"JS1\_M10\_01072" 16762 "s63E6H2" 0.004531006 "hypothetical protein"  
"JS1\_M10\_01074" 16764 "s59E13H2" 0 "hypothetical protein"  
"JS1\_M10\_01074" 16764 "s59E25H2" 0 "hypothetical protein"  
"JS1\_M10\_01074" 16764 "s59E5H2" 0.002372655 "hypothetical protein"  
"JS1\_M10\_01074" 16764 "s63E6H2" 0.001579982 "hypothetical protein"  
"JS1\_M10\_01075" 16765 "s59E13H2" 0.0017665 "Phosphoglucomutase"  
"JS1\_M10\_01075" 16765 "s59E25H2" 0 "Phosphoglucomutase"  
"JS1\_M10\_01075" 16765 "s59E5H2" 0.2771612 "Phosphoglucomutase"  
"JS1\_M10\_01075" 16765 "s63E6H2" 3.270105 "Phosphoglucomutase"  
"JS1\_M10\_01076" 16766 "s59E13H2" 0.06507062 "hypothetical protein"  
"JS1\_M10\_01076" 16766 "s59E25H2" 0 "hypothetical protein"  
"JS1\_M10\_01076" 16766 "s59E5H2" 0.2652043 "hypothetical protein"  
"JS1\_M10\_01076" 16766 "s63E6H2" 0.265116 "hypothetical protein"  
"JS1\_M10\_01077" 16767 "s59E13H2" 0 "O-Antigen ligase"  
"JS1\_M10\_01077" 16767 "s59E25H2" 0 "O-Antigen ligase"  
"JS1\_M10\_01077" 16767 "s59E5H2" 0 "O-Antigen ligase"  
"JS1\_M10\_01077" 16767 "s63E6H2" 0 "O-Antigen ligase"  
"JS1\_M10\_01078" 16768 "s59E13H2" 0.003151536 "hypothetical protein"  
"JS1\_M10\_01078" 16768 "s59E25H2" 0 "hypothetical protein"  
"JS1\_M10\_01078" 16768 "s59E5H2" 0 "hypothetical protein"  
"JS1\_M10\_01078" 16768 "s63E6H2" 0.01942703 "hypothetical protein"  
"JS1\_M10\_01079" 16769 "s59E13H2" 0 "hypothetical protein"  
"JS1\_M10\_01079" 16769 "s59E25H2" 0 "hypothetical protein"  
"JS1\_M10\_01079" 16769 "s59E5H2" 0.009873428 "hypothetical protein"  
"JS1\_M10\_01079" 16769 "s63E6H2" 0.1204178 "hypothetical protein"  
"JS1\_M10\_01080" 16770 "s59E13H2" 0 "hypothetical protein"  
"JS1\_M10\_01080" 16770 "s59E25H2" 0 "hypothetical protein"  
"JS1\_M10\_01080" 16770 "s59E5H2" 0.008476723 "hypothetical protein"  
"JS1\_M10\_01080" 16770 "s63E6H2" 0.009059333 "hypothetical protein"  
"JS1\_M10\_01081" 16771 "s59E13H2" 0 "hypothetical protein"  
"JS1\_M10\_01081" 16771 "s59E25H2" 0 "hypothetical protein"  
"JS1\_M10\_01081" 16771 "s59E5H2" 0 "hypothetical protein"  
"JS1\_M10\_01081" 16771 "s63E6H2" 0.01207012 "hypothetical protein"  
"JS1\_M10\_01082" 16772 "s59E13H2" 0.3812341 "hypothetical protein"  
"JS1\_M10\_01082" 16772 "s59E25H2" 0 "hypothetical protein"  
"JS1\_M10\_01082" 16772 "s59E5H2" 0 "hypothetical protein"  
"JS1\_M10\_01082" 16772 "s63E6H2" 0.0582496 "hypothetical protein"  
"JS1\_M10\_01083" 16773 "s59E13H2" 0 "Cycloisomaltooligosaccharide glucanotransferase precursor"  
"JS1\_M10\_01083" 16773 "s59E25H2" 0 "Cycloisomaltooligosaccharide glucanotransferase precursor"

"JS1\_M10\_01083" 16773 "s59E5H2" 0 "Cycloisomaltooligosaccharide glucanotransferase precursor"  
"JS1\_M10\_01083" 16773 "s63E6H2" 0 "Cycloisomaltooligosaccharide glucanotransferase precursor"  
"JS1\_M10\_01084" 16774 "s59E13H2" 0.03289079 "Methylmalonyl-CoA carboxyltransferase 12S subunit"  
"JS1\_M10\_01084" 16774 "s59E25H2" 0 "Methylmalonyl-CoA carboxyltransferase 12S subunit"  
"JS1\_M10\_01084" 16774 "s59E5H2" 0.05992776 "Methylmalonyl-CoA carboxyltransferase 12S subunit"  
"JS1\_M10\_01084" 16774 "s63E6H2" 0.2744096 "Methylmalonyl-CoA carboxyltransferase 12S subunit"  
"JS1\_M10\_01085" 16775 "s59E13H2" 0.006530529 "Oxaloacetate decarboxylase, gamma chain"  
"JS1\_M10\_01085" 16775 "s59E25H2" 0 "Oxaloacetate decarboxylase, gamma chain"  
"JS1\_M10\_01085" 16775 "s59E5H2" 0.006484693 "Oxaloacetate decarboxylase, gamma chain"  
"JS1\_M10\_01085" 16775 "s63E6H2" 0.05218057 "Oxaloacetate decarboxylase, gamma chain"  
"JS1\_M10\_01086" 16776 "s59E13H2" 0.005628318 "Glutaconyl-CoA decarboxylase subunit gamma"  
"JS1\_M10\_01086" 16776 "s59E25H2" 0 "Glutaconyl-CoA decarboxylase subunit gamma"  
"JS1\_M10\_01086" 16776 "s59E5H2" 0.04334876 "Glutaconyl-CoA decarboxylase subunit gamma"  
"JS1\_M10\_01086" 16776 "s63E6H2" 0.05204107 "Glutaconyl-CoA decarboxylase subunit gamma"  
"JS1\_M10\_01087" 16777 "s59E13H2" 0.05335729 "Glutaconyl-CoA decarboxylase subunit beta"  
"JS1\_M10\_01087" 16777 "s59E25H2" 0 "Glutaconyl-CoA decarboxylase subunit beta"  
"JS1\_M10\_01087" 16777 "s59E5H2" 0.1302299 "Glutaconyl-CoA decarboxylase subunit beta"  
"JS1\_M10\_01087" 16777 "s63E6H2" 0.0912491 "Glutaconyl-CoA decarboxylase subunit beta"  
"JS1\_M10\_01088" 16778 "s59E13H2" 0.006641063 "Pyruvate carboxylase subunit B"  
"JS1\_M10\_01088" 16778 "s59E25H2" 0 "Pyruvate carboxylase subunit B"  
"JS1\_M10\_01088" 16778 "s59E5H2" 0.005288711 "Pyruvate carboxylase subunit B"  
"JS1\_M10\_01088" 16778 "s63E6H2" 0 "Pyruvate carboxylase subunit B"  
"JS1\_M10\_01089" 16779 "s59E13H2" 0.05139891 "hypothetical protein"  
"JS1\_M10\_01089" 16779 "s59E25H2" 0 "hypothetical protein"  
"JS1\_M10\_01089" 16779 "s59E5H2" 0.2188173 "hypothetical protein"  
"JS1\_M10\_01089" 16779 "s63E6H2" 0.03959806 "hypothetical protein"  
"JS1\_M10\_01090" 16780 "s59E13H2" 0.06130613 "colanic acid biosynthesis protein"  
"JS1\_M10\_01090" 16780 "s59E25H2" 0 "colanic acid biosynthesis protein"  
"JS1\_M10\_01090" 16780 "s59E5H2" 0.2417321 "colanic acid biosynthesis protein"  
"JS1\_M10\_01090" 16780 "s63E6H2" 0.09110357 "colanic acid biosynthesis protein"  
"JS1\_M10\_01091" 16781 "s59E13H2" 0.1383905 "Cell division ATP-binding protein FtsE"  
"JS1\_M10\_01091" 16781 "s59E25H2" 0 "Cell division ATP-binding protein FtsE"  
"JS1\_M10\_01091" 16781 "s59E5H2" 0.8214665 "Cell division ATP-binding protein FtsE"  
"JS1\_M10\_01091" 16781 "s63E6H2" 0.2302745 "Cell division ATP-binding protein FtsE"  
"JS1\_M10\_01092" 16782 "s59E13H2" 0.0674496 "Cell division protein FtsX"  
"JS1\_M10\_01092" 16782 "s59E25H2" 0 "Cell division protein FtsX"  
"JS1\_M10\_01092" 16782 "s59E5H2" 0.3146908 "Cell division protein FtsX"  
"JS1\_M10\_01092" 16782 "s63E6H2" 0.166971 "Cell division protein FtsX"  
"JS1\_M10\_01093" 16783 "s59E13H2" 0.04910706 "Murein hydrolase activator EnvC precursor"  
"JS1\_M10\_01093" 16783 "s59E25H2" 0 "Murein hydrolase activator EnvC precursor"  
"JS1\_M10\_01093" 16783 "s59E5H2" 0.2267908 "Murein hydrolase activator EnvC precursor"  
"JS1\_M10\_01093" 16783 "s63E6H2" 0.07955613 "Murein hydrolase activator EnvC precursor"  
"JS1\_M10\_01094" 16784 "s59E13H2" 0.03853457 "Carboxy-terminal processing protease CtpB precursor"  
"JS1\_M10\_01094" 16784 "s59E25H2" 0 "Carboxy-terminal processing protease CtpB precursor"  
"JS1\_M10\_01094" 16784 "s59E5H2" 0.1721453 "Carboxy-terminal processing protease CtpB precursor"  
"JS1\_M10\_01094" 16784 "s63E6H2" 0.08354021 "Carboxy-terminal processing protease CtpB precursor"  
"JS1\_M10\_01095" 16785 "s59E13H2" 0.008698279 "Divergent polysaccharide deacetylase"

"JS1\_M10\_01095" 16785 "s59E25H2" 0 "Divergent polysaccharide deacetylase"  
"JS1\_M10\_01095" 16785 "s59E5H2" 0.1886777 "Divergent polysaccharide deacetylase"  
"JS1\_M10\_01095" 16785 "s63E6H2" 0.08336176 "Divergent polysaccharide deacetylase"  
"JS1\_M10\_01096" 16786 "s59E13H2" 0.008798288 "Glutamate--tRNA ligase 1"  
"JS1\_M10\_01096" 16786 "s59E25H2" 0 "Glutamate--tRNA ligase 1"  
"JS1\_M10\_01096" 16786 "s59E5H2" 0.1839396 "Glutamate--tRNA ligase 1"  
"JS1\_M10\_01096" 16786 "s63E6H2" 0.1252309 "Glutamate--tRNA ligase 1"  
"JS1\_M10\_01099" 16789 "s59E13H2" 0.002274508 "Transcription elongation factor GreA"  
"JS1\_M10\_01099" 16789 "s59E25H2" 0 "Transcription elongation factor GreA"  
"JS1\_M10\_01099" 16789 "s59E5H2" 0.0139544 "Transcription elongation factor GreA"  
"JS1\_M10\_01099" 16789 "s63E6H2" 0.01269725 "Transcription elongation factor GreA"  
"JS1\_M10\_01100" 16790 "s59E13H2" 0.04228429 "Threonylcarbamoyl-AMP synthase"  
"JS1\_M10\_01100" 16790 "s59E25H2" 0 "Threonylcarbamoyl-AMP synthase"  
"JS1\_M10\_01100" 16790 "s59E5H2" 0.06411796 "Threonylcarbamoyl-AMP synthase"  
"JS1\_M10\_01100" 16790 "s63E6H2" 0.08837255 "Threonylcarbamoyl-AMP synthase"  
"JS1\_M10\_01101" 16791 "s59E13H2" 0.15317 "50S ribosomal protein L13"  
"JS1\_M10\_01101" 16791 "s59E25H2" 0 "50S ribosomal protein L13"  
"JS1\_M10\_01101" 16791 "s59E5H2" 0.4018302 "50S ribosomal protein L13"  
"JS1\_M10\_01101" 16791 "s63E6H2" 1.448598 "50S ribosomal protein L13"  
"JS1\_M10\_01102" 16792 "s59E13H2" 0.1216963 "30S ribosomal protein S9"  
"JS1\_M10\_01102" 16792 "s59E25H2" 0 "30S ribosomal protein S9"  
"JS1\_M10\_01102" 16792 "s59E5H2" 0.454176 "30S ribosomal protein S9"  
"JS1\_M10\_01102" 16792 "s63E6H2" 1.355063 "30S ribosomal protein S9"  
"JS1\_M10\_01103" 16793 "s59E13H2" 0.04553545 "Pyruvate, phosphate dikinase"  
"JS1\_M10\_01103" 16793 "s59E25H2" 0 "Pyruvate, phosphate dikinase"  
"JS1\_M10\_01103" 16793 "s59E5H2" 0.08637541 "Pyruvate, phosphate dikinase"  
"JS1\_M10\_01103" 16793 "s63E6H2" 0.07065268 "Pyruvate, phosphate dikinase"  
"JS1\_M10\_01104" 16794 "s59E13H2" 0.02365255 "Putative K(+)-stimulated pyrophosphate-energized sodium pump"  
"JS1\_M10\_01104" 16794 "s59E25H2" 0 "Putative K(+)-stimulated pyrophosphate-energized sodium pump"  
"JS1\_M10\_01104" 16794 "s59E5H2" 0.285145 "Putative K(+)-stimulated pyrophosphate-energized sodium pump"  
"JS1\_M10\_01104" 16794 "s63E6H2" 0.1117723 "Putative K(+)-stimulated pyrophosphate-energized sodium pump"  
"JS1\_M10\_01106" 16796 "s59E13H2" 0.005826244 "Integrase core domain protein"  
"JS1\_M10\_01106" 16796 "s59E25H2" 0 "Integrase core domain protein"  
"JS1\_M10\_01106" 16796 "s59E5H2" 0.1174043 "Integrase core domain protein"  
"JS1\_M10\_01106" 16796 "s63E6H2" 2.097571 "Integrase core domain protein"  
"JS1\_M10\_01107" 16797 "s59E13H2" 1.420107 "RNA polymerase-binding transcription factor CarD"  
"JS1\_M10\_01107" 16797 "s59E25H2" 0 "RNA polymerase-binding transcription factor CarD"  
"JS1\_M10\_01107" 16797 "s59E5H2" 1.402957 "RNA polymerase-binding transcription factor CarD"  
"JS1\_M10\_01107" 16797 "s63E6H2" 0.09215218 "RNA polymerase-binding transcription factor CarD"  
"JS1\_M10\_01108" 16798 "s59E13H2" 0.8939216 "Bifunctional protein FOLD protein"  
"JS1\_M10\_01108" 16798 "s59E25H2" 0 "Bifunctional protein FOLD protein"  
"JS1\_M10\_01108" 16798 "s59E5H2" 3.089938 "Bifunctional protein FOLD protein"  
"JS1\_M10\_01108" 16798 "s63E6H2" 0.1820153 "Bifunctional protein FOLD protein"  
"JS1\_M10\_01109" 16799 "s59E13H2" 2.202751 "tRNA uridine 5-carboxymethylaminomethyl modification enzyme MnmG"  
"JS1\_M10\_01109" 16799 "s59E25H2" 0.1282051 "tRNA uridine 5-carboxymethylaminomethyl modification enzyme MnmG"  
"JS1\_M10\_01109" 16799 "s59E5H2" 4.528544 "tRNA uridine 5-carboxymethylaminomethyl modification enzyme MnmG"  
"JS1\_M10\_01109" 16799 "s63E6H2" 0.3821566 "tRNA uridine 5-carboxymethylaminomethyl modification enzyme MnmG"

"JS1\_M10\_01112" 16802 "s59E13H2" 0.02837723 "Purine nucleoside phosphorylase DeoD-type"  
"JS1\_M10\_01112" 16802 "s59E25H2" 0 "Purine nucleoside phosphorylase DeoD-type"  
"JS1\_M10\_01112" 16802 "s59E5H2" 1.145375 "Purine nucleoside phosphorylase DeoD-type"  
"JS1\_M10\_01112" 16802 "s63E6H2" 0.0923238 "Purine nucleoside phosphorylase DeoD-type"  
"JS1\_M10\_01113" 16803 "s59E13H2" 0.0277318 "hypothetical protein"  
"JS1\_M10\_01113" 16803 "s59E25H2" 0 "hypothetical protein"  
"JS1\_M10\_01113" 16803 "s59E5H2" 0.05224484 "hypothetical protein"  
"JS1\_M10\_01113" 16803 "s63E6H2" 0.02703226 "hypothetical protein"  
"JS1\_M10\_01114" 16804 "s59E13H2" 0.03391468 "UDP-N-acetylmuramoylalanine--D-glutamate ligase"  
"JS1\_M10\_01114" 16804 "s59E25H2" 0 "UDP-N-acetylmuramoylalanine--D-glutamate ligase"  
"JS1\_M10\_01114" 16804 "s59E5H2" 1.023236 "UDP-N-acetylmuramoylalanine--D-glutamate ligase"  
"JS1\_M10\_01114" 16804 "s63E6H2" 0.06686787 "UDP-N-acetylmuramoylalanine--D-glutamate ligase"  
"JS1\_M10\_01117" 16807 "s59E13H2" 0.03169249 "putative 3-hydroxyphenylpropionic transporter MhpT"  
"JS1\_M10\_01117" 16807 "s59E25H2" 0 "putative 3-hydroxyphenylpropionic transporter MhpT"  
"JS1\_M10\_01117" 16807 "s59E5H2" 0.9590498 "putative 3-hydroxyphenylpropionic transporter MhpT"  
"JS1\_M10\_01117" 16807 "s63E6H2" 0.002583311 "putative 3-hydroxyphenylpropionic transporter MhpT"  
"JS1\_M10\_01118" 16808 "s59E13H2" 0.163622 "Trehalose/maltose-binding protein MalE precursor"  
"JS1\_M10\_01118" 16808 "s59E25H2" 0 "Trehalose/maltose-binding protein MalE precursor"  
"JS1\_M10\_01118" 16808 "s59E5H2" 1.263221 "Trehalose/maltose-binding protein MalE precursor"  
"JS1\_M10\_01118" 16808 "s63E6H2" 0.1438097 "Trehalose/maltose-binding protein MalE precursor"  
"JS1\_M10\_01119" 16809 "s59E13H2" 0.1708987 "Trehalose/maltose transport system permease protein MalF"  
"JS1\_M10\_01119" 16809 "s59E25H2" 0 "Trehalose/maltose transport system permease protein MalF"  
"JS1\_M10\_01119" 16809 "s59E5H2" 1.605386 "Trehalose/maltose transport system permease protein MalF"  
"JS1\_M10\_01119" 16809 "s63E6H2" 0.02702829 "Trehalose/maltose transport system permease protein MalF"  
"JS1\_M10\_01120" 16810 "s59E13H2" 0.1009105 "Trehalose transport system permease protein SugB"  
"JS1\_M10\_01120" 16810 "s59E25H2" 0 "Trehalose transport system permease protein SugB"  
"JS1\_M10\_01120" 16810 "s59E5H2" 1.13408 "Trehalose transport system permease protein SugB"  
"JS1\_M10\_01120" 16810 "s63E6H2" 0.06334605 "Trehalose transport system permease protein SugB"  
"JS1\_M10\_01121" 16811 "s59E13H2" 0.1035081 "Trehalose/maltose import ATP-binding protein MalK"  
"JS1\_M10\_01121" 16811 "s59E25H2" 0 "Trehalose/maltose import ATP-binding protein MalK"  
"JS1\_M10\_01121" 16811 "s59E5H2" 1.172293 "Trehalose/maltose import ATP-binding protein MalK"  
"JS1\_M10\_01121" 16811 "s63E6H2" 0.1265603 "Trehalose/maltose import ATP-binding protein MalK"  
"JS1\_M10\_01122" 16812 "s59E13H2" 0.6658881 "Ribosomal RNA small subunit methyltransferase D"  
"JS1\_M10\_01122" 16812 "s59E25H2" 0 "Ribosomal RNA small subunit methyltransferase D"  
"JS1\_M10\_01122" 16812 "s59E5H2" 0.01430173 "Ribosomal RNA small subunit methyltransferase D"  
"JS1\_M10\_01122" 16812 "s63E6H2" 0.2614182 "Ribosomal RNA small subunit methyltransferase D"  
"JS1\_M10\_01123" 16813 "s59E13H2" 1.822593 "Phosphopantetheine adenyltransferase"  
"JS1\_M10\_01123" 16813 "s59E25H2" 0 "Phosphopantetheine adenyltransferase"  
"JS1\_M10\_01123" 16813 "s59E5H2" 0.003613658 "Phosphopantetheine adenyltransferase"  
"JS1\_M10\_01123" 16813 "s63E6H2" 0.4232006 "Phosphopantetheine adenyltransferase"  
"JS1\_M10\_01124" 16814 "s59E13H2" 4.488248 "Lon protease"  
"JS1\_M10\_01124" 16814 "s59E25H2" 0 "Lon protease"  
"JS1\_M10\_01124" 16814 "s59E5H2" 0.2204992 "Lon protease"  
"JS1\_M10\_01124" 16814 "s63E6H2" 0.5934378 "Lon protease"  
"JS1\_M10\_01125" 16815 "s59E13H2" 2.091157 "hypothetical protein"  
"JS1\_M10\_01125" 16815 "s59E25H2" 0 "hypothetical protein"  
"JS1\_M10\_01125" 16815 "s59E5H2" 0.189382 "hypothetical protein"

"JS1\_M10\_01125" 16815 "s63E6H2" 0.5017367 "hypothetical protein"  
"JS1\_M10\_01126" 16816 "s59E13H2" 1.55563 "Phosphate acetyltransferase"  
"JS1\_M10\_01126" 16816 "s59E25H2" 0 "Phosphate acetyltransferase"  
"JS1\_M10\_01126" 16816 "s59E5H2" 0.2308797 "Phosphate acetyltransferase"  
"JS1\_M10\_01126" 16816 "s63E6H2" 0.3798767 "Phosphate acetyltransferase"  
"JS1\_M10\_01127" 16817 "s59E13H2" 0.07929376 "Acetate kinase"  
"JS1\_M10\_01127" 16817 "s59E25H2" 0 "Acetate kinase"  
"JS1\_M10\_01127" 16817 "s59E5H2" 0 "Acetate kinase"  
"JS1\_M10\_01127" 16817 "s63E6H2" 0.09272042 "Acetate kinase"  
"JS1\_M10\_01128" 16818 "s59E13H2" 0.1830234 "50S ribosomal protein L32"  
"JS1\_M10\_01128" 16818 "s59E25H2" 0 "50S ribosomal protein L32"  
"JS1\_M10\_01128" 16818 "s59E5H2" 0.03242347 "50S ribosomal protein L32"  
"JS1\_M10\_01128" 16818 "s63E6H2" 0.1482364 "50S ribosomal protein L32"  
"JS1\_M10\_01129" 16819 "s59E13H2" 0.01337887 "Transcription factor FapR"  
"JS1\_M10\_01129" 16819 "s59E25H2" 0 "Transcription factor FapR"  
"JS1\_M10\_01129" 16819 "s59E5H2" 0.06308239 "Transcription factor FapR"  
"JS1\_M10\_01129" 16819 "s63E6H2" 0.109117 "Transcription factor FapR"  
"JS1\_M10\_01130" 16820 "s59E13H2" 0.1552064 "Phosphate acyltransferase"  
"JS1\_M10\_01130" 16820 "s59E25H2" 0 "Phosphate acyltransferase"  
"JS1\_M10\_01130" 16820 "s59E5H2" 0.08231847 "Phosphate acyltransferase"  
"JS1\_M10\_01130" 16820 "s63E6H2" 0.1390777 "Phosphate acyltransferase"  
"JS1\_M10\_01131" 16821 "s59E13H2" 0.01391819 "3-oxoacyl-[acyl-carrier-protein] synthase 3"  
"JS1\_M10\_01131" 16821 "s59E25H2" 0 "3-oxoacyl-[acyl-carrier-protein] synthase 3"  
"JS1\_M10\_01131" 16821 "s59E5H2" 0.08613605 "3-oxoacyl-[acyl-carrier-protein] synthase 3"  
"JS1\_M10\_01131" 16821 "s63E6H2" 0.1309833 "3-oxoacyl-[acyl-carrier-protein] synthase 3"  
"JS1\_M10\_01132" 16822 "s59E13H2" 0.4491587 "Malonyl CoA-acyl carrier protein transacylase"  
"JS1\_M10\_01132" 16822 "s59E25H2" 0 "Malonyl CoA-acyl carrier protein transacylase"  
"JS1\_M10\_01132" 16822 "s59E5H2" 0.1458204 "Malonyl CoA-acyl carrier protein transacylase"  
"JS1\_M10\_01132" 16822 "s63E6H2" 0.09527417 "Malonyl CoA-acyl carrier protein transacylase"  
"JS1\_M10\_01133" 16823 "s59E13H2" 0.09906365 "3-oxoacyl-[acyl-carrier-protein] reductase FabG"  
"JS1\_M10\_01133" 16823 "s59E25H2" 0 "3-oxoacyl-[acyl-carrier-protein] reductase FabG"  
"JS1\_M10\_01133" 16823 "s59E5H2" 0.2278324 "3-oxoacyl-[acyl-carrier-protein] reductase FabG"  
"JS1\_M10\_01133" 16823 "s63E6H2" 0.1335246 "3-oxoacyl-[acyl-carrier-protein] reductase FabG"  
"JS1\_M10\_01134" 16824 "s59E13H2" 0.0726473 "Acyl carrier protein"  
"JS1\_M10\_01134" 16824 "s59E25H2" 0 "Acyl carrier protein"  
"JS1\_M10\_01134" 16824 "s59E5H2" 0.2273966 "Acyl carrier protein"  
"JS1\_M10\_01134" 16824 "s63E6H2" 0.1337984 "Acyl carrier protein"  
"JS1\_M10\_01135" 16825 "s59E13H2" 0.08467118 "3-oxoacyl-[acyl-carrier-protein] synthase 2"  
"JS1\_M10\_01135" 16825 "s59E25H2" 0 "3-oxoacyl-[acyl-carrier-protein] synthase 2"  
"JS1\_M10\_01135" 16825 "s59E5H2" 0.2070847 "3-oxoacyl-[acyl-carrier-protein] synthase 2"  
"JS1\_M10\_01135" 16825 "s63E6H2" 0.1457561 "3-oxoacyl-[acyl-carrier-protein] synthase 2"  
"JS1\_M10\_01136" 16826 "s59E13H2" 0.03807431 "Ribonuclease 3"  
"JS1\_M10\_01136" 16826 "s59E25H2" 0 "Ribonuclease 3"  
"JS1\_M10\_01136" 16826 "s59E5H2" 0.1096759 "Ribonuclease 3"  
"JS1\_M10\_01136" 16826 "s63E6H2" 0.1363963 "Ribonuclease 3"  
"JS1\_M10\_01137" 16827 "s59E13H2" 0.009170948 "Chromosome partition protein Smc"  
"JS1\_M10\_01137" 16827 "s59E25H2" 0 "Chromosome partition protein Smc"

"JS1\_M10\_01137" 16827 "s59E5H2" 0.04097625 "Chromosome partition protein Smc"  
"JS1\_M10\_01137" 16827 "s63E6H2" 0.04057283 "Chromosome partition protein Smc"  
"JS1\_M10\_01138" 16828 "s59E13H2" 0.0154896 "Signal recognition particle receptor FtsY"  
"JS1\_M10\_01138" 16828 "s59E25H2" 0 "Signal recognition particle receptor FtsY"  
"JS1\_M10\_01138" 16828 "s59E5H2" 0.03552147 "Signal recognition particle receptor FtsY"  
"JS1\_M10\_01138" 16828 "s63E6H2" 0.08915631 "Signal recognition particle receptor FtsY"  
"JS1\_M10\_01139" 16829 "s59E13H2" 0.03796373 "Signal recognition particle protein"  
"JS1\_M10\_01139" 16829 "s59E25H2" 0 "Signal recognition particle protein"  
"JS1\_M10\_01139" 16829 "s59E5H2" 0.1304983 "Signal recognition particle protein"  
"JS1\_M10\_01139" 16829 "s63E6H2" 0.03205936 "Signal recognition particle protein"  
"JS1\_M10\_01140" 16830 "s59E13H2" 0.02032878 "Signal recognition particle protein"  
"JS1\_M10\_01140" 16830 "s59E25H2" 0 "Signal recognition particle protein"  
"JS1\_M10\_01140" 16830 "s59E5H2" 0.06072682 "Signal recognition particle protein"  
"JS1\_M10\_01140" 16830 "s63E6H2" 0.007478758 "Signal recognition particle protein"  
"JS1\_M10\_01141" 16831 "s59E13H2" 0.01024018 "30S ribosomal protein S16"  
"JS1\_M10\_01141" 16831 "s59E25H2" 0 "30S ribosomal protein S16"  
"JS1\_M10\_01141" 16831 "s59E5H2" 0 "30S ribosomal protein S16"  
"JS1\_M10\_01141" 16831 "s63E6H2" 0.01445037 "30S ribosomal protein S16"  
"JS1\_M10\_01142" 16832 "s59E13H2" 0.009846229 "hypothetical protein"  
"JS1\_M10\_01142" 16832 "s59E25H2" 0 "hypothetical protein"  
"JS1\_M10\_01142" 16832 "s59E5H2" 0 "hypothetical protein"  
"JS1\_M10\_01142" 16832 "s63E6H2" 0.007184615 "hypothetical protein"  
"JS1\_M10\_01145" 16835 "s59E13H2" 0 "N-acetylglucosamine repressor"  
"JS1\_M10\_01145" 16835 "s59E25H2" 0 "N-acetylglucosamine repressor"  
"JS1\_M10\_01145" 16835 "s59E5H2" 0 "N-acetylglucosamine repressor"  
"JS1\_M10\_01145" 16835 "s63E6H2" 0.01536253 "N-acetylglucosamine repressor"  
"JS1\_M10\_01146" 16836 "s59E13H2" 0 "N-acetylglucosamine repressor"  
"JS1\_M10\_01146" 16836 "s59E25H2" 0 "N-acetylglucosamine repressor"  
"JS1\_M10\_01146" 16836 "s59E5H2" 0 "N-acetylglucosamine repressor"  
"JS1\_M10\_01146" 16836 "s63E6H2" 0 "N-acetylglucosamine repressor"  
"JS1\_M10\_01147" 16837 "s59E13H2" 0 "Type IIS restriction enzyme Eco57I"  
"JS1\_M10\_01147" 16837 "s59E25H2" 0 "Type IIS restriction enzyme Eco57I"  
"JS1\_M10\_01147" 16837 "s59E5H2" 0 "Type IIS restriction enzyme Eco57I"  
"JS1\_M10\_01147" 16837 "s63E6H2" 0 "Type IIS restriction enzyme Eco57I"  
"JS1\_M10\_01148" 16838 "s59E13H2" 0 "hypothetical protein"  
"JS1\_M10\_01148" 16838 "s59E25H2" 0 "hypothetical protein"  
"JS1\_M10\_01148" 16838 "s59E5H2" 0.001385248 "hypothetical protein"  
"JS1\_M10\_01148" 16838 "s63E6H2" 0 "hypothetical protein"  
"JS1\_M10\_01149" 16839 "s59E13H2" 0.3923258 "Multiple sugar-binding periplasmic protein SbpA precursor"  
"JS1\_M10\_01149" 16839 "s59E25H2" 0.4335155 "Multiple sugar-binding periplasmic protein SbpA precursor"  
"JS1\_M10\_01149" 16839 "s59E5H2" 0.2907186 "Multiple sugar-binding periplasmic protein SbpA precursor"  
"JS1\_M10\_01149" 16839 "s63E6H2" 1.881584 "Multiple sugar-binding periplasmic protein SbpA precursor"  
"JS1\_M10\_01150" 16840 "s59E13H2" 0.01285966 "Galactose/methyl galactoside import ATP-binding protein MglA"  
"JS1\_M10\_01150" 16840 "s59E25H2" 0 "Galactose/methyl galactoside import ATP-binding protein MglA"  
"JS1\_M10\_01150" 16840 "s59E5H2" 0.006368177 "Galactose/methyl galactoside import ATP-binding protein MglA"  
"JS1\_M10\_01150" 16840 "s63E6H2" 0.3193699 "Galactose/methyl galactoside import ATP-binding protein MglA"  
"JS1\_M10\_01151" 16841 "s59E13H2" 0.2006615 "Xylose transport system permease protein XylH"

"JS1\_M10\_01151" 16841 "s59E25H2" 0 "Xylose transport system permease protein XylH"  
"JS1\_M10\_01151" 16841 "s59E5H2" 0.1072026 "Xylose transport system permease protein XylH"  
"JS1\_M10\_01151" 16841 "s63E6H2" 0.8833541 "Xylose transport system permease protein XylH"  
"JS1\_M10\_01153" 16843 "s59E13H2" 3.086301 "hypothetical protein"  
"JS1\_M10\_01153" 16843 "s59E25H2" 0 "hypothetical protein"  
"JS1\_M10\_01153" 16843 "s59E5H2" 3.316186 "hypothetical protein"  
"JS1\_M10\_01153" 16843 "s63E6H2" 0.2354681 "hypothetical protein"  
"JS1\_M10\_01154" 16844 "s59E13H2" 0.04634366 "hypothetical protein"  
"JS1\_M10\_01154" 16844 "s59E25H2" 0 "hypothetical protein"  
"JS1\_M10\_01154" 16844 "s59E5H2" 0.03166943 "hypothetical protein"  
"JS1\_M10\_01154" 16844 "s63E6H2" 0.0006126416 "hypothetical protein"  
"JS1\_M10\_01155" 16845 "s59E13H2" 0 "hypothetical protein"  
"JS1\_M10\_01155" 16845 "s59E25H2" 0 "hypothetical protein"  
"JS1\_M10\_01155" 16845 "s59E5H2" 0 "hypothetical protein"  
"JS1\_M10\_01155" 16845 "s63E6H2" 0 "hypothetical protein"  
"JS1\_M10\_01157" 16847 "s59E13H2" 0.389642 "Nucleotidyltransferase domain protein"  
"JS1\_M10\_01157" 16847 "s59E25H2" 0 "Nucleotidyltransferase domain protein"  
"JS1\_M10\_01157" 16847 "s59E5H2" 0.08006795 "Nucleotidyltransferase domain protein"  
"JS1\_M10\_01157" 16847 "s63E6H2" 0.00284826 "Nucleotidyltransferase domain protein"  
"JS1\_M10\_01158" 16848 "s59E13H2" 0.09221718 "HEPN domain protein"  
"JS1\_M10\_01158" 16848 "s59E25H2" 0 "HEPN domain protein"  
"JS1\_M10\_01158" 16848 "s59E5H2" 0.1062276 "HEPN domain protein"  
"JS1\_M10\_01158" 16848 "s63E6H2" 0.003442155 "HEPN domain protein"  
"JS1\_M10\_01159" 16849 "s59E13H2" 0.03313314 "N-acetylglucosamine repressor"  
"JS1\_M10\_01159" 16849 "s59E25H2" 0 "N-acetylglucosamine repressor"  
"JS1\_M10\_01159" 16849 "s59E5H2" 0.03385225 "N-acetylglucosamine repressor"  
"JS1\_M10\_01159" 16849 "s63E6H2" 0.8146354 "N-acetylglucosamine repressor"  
"JS1\_M10\_01160" 16850 "s59E13H2" 0 "D-ribose-binding periplasmic protein precursor"  
"JS1\_M10\_01160" 16850 "s59E25H2" 0 "D-ribose-binding periplasmic protein precursor"  
"JS1\_M10\_01160" 16850 "s59E5H2" 0.1640266 "D-ribose-binding periplasmic protein precursor"  
"JS1\_M10\_01160" 16850 "s63E6H2" 3.741128 "D-ribose-binding periplasmic protein precursor"  
"JS1\_M10\_01162" 16852 "s59E13H2" 0.002183616 "Ribose import ATP-binding protein RbsA"  
"JS1\_M10\_01162" 16852 "s59E25H2" 0 "Ribose import ATP-binding protein RbsA"  
"JS1\_M10\_01162" 16852 "s59E5H2" 0.1359014 "Ribose import ATP-binding protein RbsA"  
"JS1\_M10\_01162" 16852 "s63E6H2" 1.578536 "Ribose import ATP-binding protein RbsA"  
"JS1\_M10\_01163" 16853 "s59E13H2" 0 "Ribose transport system permease protein RbsC"  
"JS1\_M10\_01163" 16853 "s59E25H2" 0 "Ribose transport system permease protein RbsC"  
"JS1\_M10\_01163" 16853 "s59E5H2" 0.1189372 "Ribose transport system permease protein RbsC"  
"JS1\_M10\_01163" 16853 "s63E6H2" 0.04806538 "Ribose transport system permease protein RbsC"  
"JS1\_M10\_01164" 16854 "s59E13H2" 0.2439558 "Pyrophosphate--fructose 6-phosphate 1-phosphotransferase"  
"JS1\_M10\_01164" 16854 "s59E25H2" 0 "Pyrophosphate--fructose 6-phosphate 1-phosphotransferase"  
"JS1\_M10\_01164" 16854 "s59E5H2" 1.010937 "Pyrophosphate--fructose 6-phosphate 1-phosphotransferase"  
"JS1\_M10\_01164" 16854 "s63E6H2" 0.494687 "Pyrophosphate--fructose 6-phosphate 1-phosphotransferase"  
"JS1\_M10\_01165" 16855 "s59E13H2" 0.00946099 "Glutamine--fructose-6-phosphate aminotransferase [isomerizing]"  
"JS1\_M10\_01165" 16855 "s59E25H2" 0 "Glutamine--fructose-6-phosphate aminotransferase [isomerizing]"  
"JS1\_M10\_01165" 16855 "s59E5H2" 0.2548549 "Glutamine--fructose-6-phosphate aminotransferase [isomerizing]"  
"JS1\_M10\_01165" 16855 "s63E6H2" 1.44773 "Glutamine--fructose-6-phosphate aminotransferase [isomerizing]"

"JS1\_M10\_01169" 16859 "s59E13H2" 0 "hypothetical protein"  
"JS1\_M10\_01169" 16859 "s59E25H2" 0 "hypothetical protein"  
"JS1\_M10\_01169" 16859 "s59E5H2" 0 "hypothetical protein"  
"JS1\_M10\_01169" 16859 "s63E6H2" 0 "hypothetical protein"  
"JS1\_M10\_01173" 16863 "s59E13H2" 0.5792265 "Ribose operon repressor"  
"JS1\_M10\_01173" 16863 "s59E25H2" 0 "Ribose operon repressor"  
"JS1\_M10\_01173" 16863 "s59E5H2" 0.08375246 "Ribose operon repressor"  
"JS1\_M10\_01173" 16863 "s63E6H2" 0.0515607 "Ribose operon repressor"  
"JS1\_M10\_01175" 16865 "s59E13H2" 0 "putative ABC transporter-binding protein precursor"  
"JS1\_M10\_01175" 16865 "s59E25H2" 0 "putative ABC transporter-binding protein precursor"  
"JS1\_M10\_01175" 16865 "s59E5H2" 0 "putative ABC transporter-binding protein precursor"  
"JS1\_M10\_01175" 16865 "s63E6H2" 0 "putative ABC transporter-binding protein precursor"  
"JS1\_M10\_01176" 16866 "s59E13H2" 0 "Oligopeptide transport system permease protein OppB"  
"JS1\_M10\_01176" 16866 "s59E25H2" 0 "Oligopeptide transport system permease protein OppB"  
"JS1\_M10\_01176" 16866 "s59E5H2" 0 "Oligopeptide transport system permease protein OppB"  
"JS1\_M10\_01176" 16866 "s63E6H2" 0 "Oligopeptide transport system permease protein OppB"  
"JS1\_M10\_01177" 16867 "s59E13H2" 0 "Glutathione transport system permease protein GsiD"  
"JS1\_M10\_01177" 16867 "s59E25H2" 0 "Glutathione transport system permease protein GsiD"  
"JS1\_M10\_01177" 16867 "s59E5H2" 0 "Glutathione transport system permease protein GsiD"  
"JS1\_M10\_01177" 16867 "s63E6H2" 0 "Glutathione transport system permease protein GsiD"  
"JS1\_M10\_01178" 16868 "s59E13H2" 0 "Oligopeptide transport ATP-binding protein OppF"  
"JS1\_M10\_01178" 16868 "s59E25H2" 0 "Oligopeptide transport ATP-binding protein OppF"  
"JS1\_M10\_01178" 16868 "s59E5H2" 0 "Oligopeptide transport ATP-binding protein OppF"  
"JS1\_M10\_01178" 16868 "s63E6H2" 0 "Oligopeptide transport ATP-binding protein OppF"  
"JS1\_M10\_01179" 16869 "s59E13H2" 0 "Oligopeptide transport ATP-binding protein OppD"  
"JS1\_M10\_01179" 16869 "s59E25H2" 0 "Oligopeptide transport ATP-binding protein OppD"  
"JS1\_M10\_01179" 16869 "s59E5H2" 0 "Oligopeptide transport ATP-binding protein OppD"  
"JS1\_M10\_01179" 16869 "s63E6H2" 0 "Oligopeptide transport ATP-binding protein OppD"  
"JS1\_M10\_01182" 16872 "s59E13H2" 0 "hypothetical protein"  
"JS1\_M10\_01182" 16872 "s59E25H2" 0 "hypothetical protein"  
"JS1\_M10\_01182" 16872 "s59E5H2" 0 "hypothetical protein"  
"JS1\_M10\_01182" 16872 "s63E6H2" 0 "hypothetical protein"  
"JS1\_M10\_01184" 16874 "s59E13H2" 0.05210203 "Phosphoglucosamine mutase"  
"JS1\_M10\_01184" 16874 "s59E25H2" 0 "Phosphoglucosamine mutase"  
"JS1\_M10\_01184" 16874 "s59E5H2" 0.06484693 "Phosphoglucosamine mutase"  
"JS1\_M10\_01184" 16874 "s63E6H2" 0.04271714 "Phosphoglucosamine mutase"  
"JS1\_M10\_01185" 16875 "s59E13H2" 0.102419 "DNA integrity scanning protein DisA"  
"JS1\_M10\_01185" 16875 "s59E25H2" 0.5950617 "DNA integrity scanning protein DisA"  
"JS1\_M10\_01185" 16875 "s59E5H2" 0.1716242 "DNA integrity scanning protein DisA"  
"JS1\_M10\_01185" 16875 "s63E6H2" 1.358338 "DNA integrity scanning protein DisA"  
"JS1\_M10\_01186" 16876 "s59E13H2" 0.007414708 "YbbR-like protein"  
"JS1\_M10\_01186" 16876 "s59E25H2" 0 "YbbR-like protein"  
"JS1\_M10\_01186" 16876 "s59E5H2" 0.04497017 "YbbR-like protein"  
"JS1\_M10\_01186" 16876 "s63E6H2" 0.2359286 "YbbR-like protein"  
"JS1\_M10\_01187" 16877 "s59E13H2" 0.1021806 "Phosphoglucosamine mutase"  
"JS1\_M10\_01187" 16877 "s59E25H2" 1.043801 "Phosphoglucosamine mutase"  
"JS1\_M10\_01187" 16877 "s59E5H2" 0.1320769 "Phosphoglucosamine mutase"



"JS1\_M10\_01187" 16877 "s63E6H2" 0.1517882 "Phosphoglucosamine mutase"  
"JS1\_M10\_01189" 16879 "s59E13H2" 0.1246685 "Glutamine--fructose-6-phosphate aminotransferase [isomerizing]"  
"JS1\_M10\_01189" 16879 "s59E25H2" 0.3497268 "Glutamine--fructose-6-phosphate aminotransferase [isomerizing]"  
"JS1\_M10\_01189" 16879 "s59E5H2" 0.2593877 "Glutamine--fructose-6-phosphate aminotransferase [isomerizing]"  
"JS1\_M10\_01189" 16879 "s63E6H2" 0.2177705 "Glutamine--fructose-6-phosphate aminotransferase [isomerizing]"  
"JS1\_M10\_01190" 16880 "s59E13H2" 0.07719713 "Glutamine synthetase"  
"JS1\_M10\_01190" 16880 "s59E25H2" 0.6869827 "Glutamine synthetase"  
"JS1\_M10\_01190" 16880 "s59E5H2" 0.1236922 "Glutamine synthetase"  
"JS1\_M10\_01190" 16880 "s63E6H2" 0.4782786 "Glutamine synthetase"  
"JS1\_M10\_01191" 16881 "s59E13H2" 0.1309319 "L-allo-threonine aldolase"  
"JS1\_M10\_01191" 16881 "s59E25H2" 0 "L-allo-threonine aldolase"  
"JS1\_M10\_01191" 16881 "s59E5H2" 0.1406079 "L-allo-threonine aldolase"  
"JS1\_M10\_01191" 16881 "s63E6H2" 0.02634359 "L-allo-threonine aldolase"  
"JS1\_M10\_01192" 16882 "s59E13H2" 1.64341 "Thioesterase superfamily protein"  
"JS1\_M10\_01192" 16882 "s59E25H2" 2.134703 "Thioesterase superfamily protein"  
"JS1\_M10\_01192" 16882 "s59E5H2" 0.3181275 "Thioesterase superfamily protein"  
"JS1\_M10\_01192" 16882 "s63E6H2" 0.08605387 "Thioesterase superfamily protein"  
"JS1\_M10\_01193" 16883 "s59E13H2" 0.03316202 "phage T7 F exclusion suppressor FxsA"  
"JS1\_M10\_01193" 16883 "s59E25H2" 0 "phage T7 F exclusion suppressor FxsA"  
"JS1\_M10\_01193" 16883 "s59E5H2" 0.0210425 "phage T7 F exclusion suppressor FxsA"  
"JS1\_M10\_01193" 16883 "s63E6H2" 0.03535506 "phage T7 F exclusion suppressor FxsA"  
"JS1\_M10\_01194" 16884 "s59E13H2" 0.3676477 "Holo-[acyl-carrier-protein] synthase"  
"JS1\_M10\_01194" 16884 "s59E25H2" 0.6282051 "Holo-[acyl-carrier-protein] synthase"  
"JS1\_M10\_01194" 16884 "s59E5H2" 0.07947906 "Holo-[acyl-carrier-protein] synthase"  
"JS1\_M10\_01194" 16884 "s63E6H2" 0.01907962 "Holo-[acyl-carrier-protein] synthase"  
"JS1\_M10\_01195" 16885 "s59E13H2" 4.856228 "Bifunctional NAD(P)H-hydrate repair enzyme Nnr"  
"JS1\_M10\_01195" 16885 "s59E25H2" 0.2168285 "Bifunctional NAD(P)H-hydrate repair enzyme Nnr"  
"JS1\_M10\_01195" 16885 "s59E5H2" 0.5350082 "Bifunctional NAD(P)H-hydrate repair enzyme Nnr"  
"JS1\_M10\_01195" 16885 "s63E6H2" 0.1615674 "Bifunctional NAD(P)H-hydrate repair enzyme Nnr"  
"JS1\_M10\_01196" 16886 "s59E13H2" 2.944517 "Alanine racemase"  
"JS1\_M10\_01196" 16886 "s59E25H2" 1.577608 "Alanine racemase"  
"JS1\_M10\_01196" 16886 "s59E5H2" 0.2853485 "Alanine racemase"  
"JS1\_M10\_01196" 16886 "s63E6H2" 0.08270206 "Alanine racemase"  
"JS1\_M10\_01197" 16887 "s59E13H2" 1.306529 "tRNA threonylcarbamoyladenosine biosynthesis protein TsaE"  
"JS1\_M10\_01197" 16887 "s59E25H2" 0.9266247 "tRNA threonylcarbamoyladenosine biosynthesis protein TsaE"  
"JS1\_M10\_01197" 16887 "s59E5H2" 0.2522845 "tRNA threonylcarbamoyladenosine biosynthesis protein TsaE"  
"JS1\_M10\_01197" 16887 "s63E6H2" 0.0644889 "tRNA threonylcarbamoyladenosine biosynthesis protein TsaE"  
"JS1\_M10\_01198" 16888 "s59E13H2" 0.7503519 "tRNA threonylcarbamoyladenosine biosynthesis protein TsaB"  
"JS1\_M10\_01198" 16888 "s59E25H2" 0.1082621 "tRNA threonylcarbamoyladenosine biosynthesis protein TsaB"  
"JS1\_M10\_01198" 16888 "s59E5H2" 0.6340127 "tRNA threonylcarbamoyladenosine biosynthesis protein TsaB"  
"JS1\_M10\_01198" 16888 "s63E6H2" 0.1321683 "tRNA threonylcarbamoyladenosine biosynthesis protein TsaB"  
"JS1\_M10\_01199" 16889 "s59E13H2" 0.1087837 "putative N-acetyltransferase"  
"JS1\_M10\_01199" 16889 "s59E25H2" 0.5093168 "putative N-acetyltransferase"  
"JS1\_M10\_01199" 16889 "s59E5H2" 0.1126766 "putative N-acetyltransferase"  
"JS1\_M10\_01199" 16889 "s63E6H2" 0.05553173 "putative N-acetyltransferase"  
"JS1\_M10\_01200" 16890 "s59E13H2" 5.672337 "tRNA N6-adenosine threonylcarbamoyltransferase"  
"JS1\_M10\_01200" 16890 "s59E25H2" 0 "tRNA N6-adenosine threonylcarbamoyltransferase"

"JS1\_M10\_01200" 16890 "s59E5H2" 0.6523043 "tRNA N6-adenosine threonylcarbamoyltransferase"  
"JS1\_M10\_01200" 16890 "s63E6H2" 0.2072129 "tRNA N6-adenosine threonylcarbamoyltransferase"  
"JS1\_M10\_01201" 16891 "s59E13H2" 0 "10 kDa chaperonin"  
"JS1\_M10\_01201" 16891 "s59E25H2" 0 "10 kDa chaperonin"  
"JS1\_M10\_01201" 16891 "s59E5H2" 0 "10 kDa chaperonin"  
"JS1\_M10\_01201" 16891 "s63E6H2" 0.01939015 "10 kDa chaperonin"  
"JS1\_M10\_01202" 16892 "s59E13H2" 8.5602 "60 kDa chaperonin"  
"JS1\_M10\_01202" 16892 "s59E25H2" 0 "60 kDa chaperonin"  
"JS1\_M10\_01202" 16892 "s59E5H2" 0.99397 "60 kDa chaperonin"  
"JS1\_M10\_01202" 16892 "s63E6H2" 0.4504518 "60 kDa chaperonin"  
"JS1\_M10\_01203" 16893 "s59E13H2" 0.003203233 "hypothetical protein"  
"JS1\_M10\_01203" 16893 "s59E25H2" 0 "hypothetical protein"  
"JS1\_M10\_01203" 16893 "s59E5H2" 0 "hypothetical protein"  
"JS1\_M10\_01203" 16893 "s63E6H2" 0.02954321 "hypothetical protein"  
"JS1\_M10\_01204" 16894 "s59E13H2" 0.5997102 "Aminomethyltransferase"  
"JS1\_M10\_01204" 16894 "s59E25H2" 0 "Aminomethyltransferase"  
"JS1\_M10\_01204" 16894 "s59E5H2" 0.259862 "Aminomethyltransferase"  
"JS1\_M10\_01204" 16894 "s63E6H2" 0.1791666 "Aminomethyltransferase"  
"JS1\_M10\_01205" 16895 "s59E13H2" 3.928621 "putative glycine dehydrogenase (decarboxylating) subunit 2"  
"JS1\_M10\_01205" 16895 "s59E25H2" 0.1474104 "putative glycine dehydrogenase (decarboxylating) subunit 2"  
"JS1\_M10\_01205" 16895 "s59E5H2" 0.5942149 "putative glycine dehydrogenase (decarboxylating) subunit 2"  
"JS1\_M10\_01205" 16895 "s63E6H2" 0.1962408 "putative glycine dehydrogenase (decarboxylating) subunit 2"  
"JS1\_M10\_01206" 16896 "s59E13H2" 0.3531464 "putative glycine dehydrogenase (decarboxylating) subunit 1"  
"JS1\_M10\_01206" 16896 "s59E25H2" 0 "putative glycine dehydrogenase (decarboxylating) subunit 1"  
"JS1\_M10\_01206" 16896 "s59E5H2" 0.1468223 "putative glycine dehydrogenase (decarboxylating) subunit 1"  
"JS1\_M10\_01206" 16896 "s63E6H2" 0.2736268 "putative glycine dehydrogenase (decarboxylating) subunit 1"  
"JS1\_M10\_01207" 16897 "s59E13H2" 0.006066822 "Glycine cleavage system H protein"  
"JS1\_M10\_01207" 16897 "s59E25H2" 0 "Glycine cleavage system H protein"  
"JS1\_M10\_01207" 16897 "s59E5H2" 0.02098519 "Glycine cleavage system H protein"  
"JS1\_M10\_01207" 16897 "s63E6H2" 1.254124 "Glycine cleavage system H protein"  
"JS1\_M10\_01209" 16899 "s59E13H2" 0.1030758 "Arginine--tRNA ligase"  
"JS1\_M10\_01209" 16899 "s59E25H2" 0 "Arginine--tRNA ligase"  
"JS1\_M10\_01209" 16899 "s59E5H2" 1.125396 "Arginine--tRNA ligase"  
"JS1\_M10\_01209" 16899 "s63E6H2" 0.5362813 "Arginine--tRNA ligase"  
"JS1\_M10\_01210" 16900 "s59E13H2" 0.2973751 "glmZ(sRNA)-inactivating NTPase"  
"JS1\_M10\_01210" 16900 "s59E25H2" 0 "glmZ(sRNA)-inactivating NTPase"  
"JS1\_M10\_01210" 16900 "s59E5H2" 0.3889538 "glmZ(sRNA)-inactivating NTPase"  
"JS1\_M10\_01210" 16900 "s63E6H2" 0.7585488 "glmZ(sRNA)-inactivating NTPase"  
"JS1\_M10\_01211" 16901 "s59E13H2" 0.2886053 "Putative sporulation transcription regulator WhiA"  
"JS1\_M10\_01211" 16901 "s59E25H2" 0 "Putative sporulation transcription regulator WhiA"  
"JS1\_M10\_01211" 16901 "s59E5H2" 0.1298796 "Putative sporulation transcription regulator WhiA"  
"JS1\_M10\_01211" 16901 "s63E6H2" 0.2558455 "Putative sporulation transcription regulator WhiA"  
"JS1\_M10\_01212" 16902 "s59E13H2" 0 "hypothetical protein"  
"JS1\_M10\_01212" 16902 "s59E25H2" 0 "hypothetical protein"  
"JS1\_M10\_01212" 16902 "s59E5H2" 0.02901249 "hypothetical protein"  
"JS1\_M10\_01212" 16902 "s63E6H2" 5.847558 "hypothetical protein"  
"JS1\_M10\_01213" 16903 "s59E13H2" 0.04214271 "hypothetical protein"

"JS1\_M10\_01213" 16903 "s59E25H2" 0 "hypothetical protein"  
"JS1\_M10\_01213" 16903 "s59E5H2" 0.4406571 "hypothetical protein"  
"JS1\_M10\_01213" 16903 "s63E6H2" 0.2342016 "hypothetical protein"  
"JS1\_M10\_01214" 16904 "s59E13H2" 0.03432079 "YcfA-like protein"  
"JS1\_M10\_01214" 16904 "s59E25H2" 0 "YcfA-like protein"  
"JS1\_M10\_01214" 16904 "s59E5H2" 0.06537971 "YcfA-like protein"  
"JS1\_M10\_01214" 16904 "s63E6H2" 0.1906557 "YcfA-like protein"  
"JS1\_M10\_01215" 16905 "s59E13H2" 0 "hypothetical protein"  
"JS1\_M10\_01215" 16905 "s59E25H2" 0 "hypothetical protein"  
"JS1\_M10\_01215" 16905 "s59E5H2" 0 "hypothetical protein"  
"JS1\_M10\_01215" 16905 "s63E6H2" 0.01643828 "hypothetical protein"  
"JS1\_M10\_01216" 16906 "s59E13H2" 0.009791653 "hypothetical protein"  
"JS1\_M10\_01216" 16906 "s59E25H2" 0 "hypothetical protein"  
"JS1\_M10\_01216" 16906 "s59E5H2" 0.08583533 "hypothetical protein"  
"JS1\_M10\_01216" 16906 "s63E6H2" 0.6600552 "hypothetical protein"  
"JS1\_M10\_01217" 16907 "s59E13H2" 0 "Tyrosine-protein kinase ptk"  
"JS1\_M10\_01217" 16907 "s59E25H2" 0 "Tyrosine-protein kinase ptk"  
"JS1\_M10\_01217" 16907 "s59E5H2" 0.01744894 "Tyrosine-protein kinase ptk"  
"JS1\_M10\_01217" 16907 "s63E6H2" 0.00133851 "Tyrosine-protein kinase ptk"  
"JS1\_M10\_01218" 16908 "s59E13H2" 0 "Tyrosine-protein kinase YwqD"  
"JS1\_M10\_01218" 16908 "s59E25H2" 0 "Tyrosine-protein kinase YwqD"  
"JS1\_M10\_01218" 16908 "s59E5H2" 0 "Tyrosine-protein kinase YwqD"  
"JS1\_M10\_01218" 16908 "s63E6H2" 0 "Tyrosine-protein kinase YwqD"  
"JS1\_M10\_01220" 16910 "s59E13H2" 0.007182143 "Putative ski2-type helicase"  
"JS1\_M10\_01220" 16910 "s59E25H2" 0 "Putative ski2-type helicase"  
"JS1\_M10\_01220" 16910 "s59E5H2" 0.259545 "Putative ski2-type helicase"  
"JS1\_M10\_01220" 16910 "s63E6H2" 0.4503224 "Putative ski2-type helicase"  
"JS1\_M10\_01221" 16911 "s59E13H2" 0 "putative type I restriction enzymeP M protein"  
"JS1\_M10\_01221" 16911 "s59E25H2" 0 "putative type I restriction enzymeP M protein"  
"JS1\_M10\_01221" 16911 "s59E5H2" 0 "putative type I restriction enzymeP M protein"  
"JS1\_M10\_01221" 16911 "s63E6H2" 0 "putative type I restriction enzymeP M protein"  
"JS1\_M10\_01223" 16913 "s59E13H2" 0 "Type-1 restriction enzyme EcoKI specificity protein"  
"JS1\_M10\_01223" 16913 "s59E25H2" 0 "Type-1 restriction enzyme EcoKI specificity protein"  
"JS1\_M10\_01223" 16913 "s59E5H2" 0 "Type-1 restriction enzyme EcoKI specificity protein"  
"JS1\_M10\_01223" 16913 "s63E6H2" 0 "Type-1 restriction enzyme EcoKI specificity protein"  
"JS1\_M10\_01224" 16914 "s59E13H2" 0.002527199 "hypothetical protein"  
"JS1\_M10\_01224" 16914 "s59E25H2" 0 "hypothetical protein"  
"JS1\_M10\_01224" 16914 "s59E5H2" 0 "hypothetical protein"  
"JS1\_M10\_01224" 16914 "s63E6H2" 0 "hypothetical protein"  
"JS1\_M10\_01225" 16915 "s59E13H2" 0.012638 "ComEC family competence protein"  
"JS1\_M10\_01225" 16915 "s59E25H2" 0 "ComEC family competence protein"  
"JS1\_M10\_01225" 16915 "s59E5H2" 0 "ComEC family competence protein"  
"JS1\_M10\_01225" 16915 "s63E6H2" 0 "ComEC family competence protein"  
"JS1\_M10\_01226" 16916 "s59E13H2" 0 "hypothetical protein"  
"JS1\_M10\_01226" 16916 "s59E25H2" 0 "hypothetical protein"  
"JS1\_M10\_01226" 16916 "s59E5H2" 0 "hypothetical protein"  
"JS1\_M10\_01226" 16916 "s63E6H2" 0 "hypothetical protein"

"JS1\_M10\_01227" 16917 "s59E13H2" 0 "Microbial collagenase precursor"  
"JS1\_M10\_01227" 16917 "s59E25H2" 0 "Microbial collagenase precursor"  
"JS1\_M10\_01227" 16917 "s59E5H2" 0 "Microbial collagenase precursor"  
"JS1\_M10\_01227" 16917 "s63E6H2" 0 "Microbial collagenase precursor"  
"JS1\_M10\_01228" 16918 "s59E13H2" 0.04835178 "hypothetical protein"  
"JS1\_M10\_01228" 16918 "s59E25H2" 0 "hypothetical protein"  
"JS1\_M10\_01228" 16918 "s59E5H2" 0.005303529 "hypothetical protein"  
"JS1\_M10\_01228" 16918 "s63E6H2" 0 "hypothetical protein"  
"JS1\_M10\_01229" 16919 "s59E13H2" 0 "Glutathione transport system permease protein GsiD"  
"JS1\_M10\_01229" 16919 "s59E25H2" 0 "Glutathione transport system permease protein GsiD"  
"JS1\_M10\_01229" 16919 "s59E5H2" 0 "Glutathione transport system permease protein GsiD"  
"JS1\_M10\_01229" 16919 "s63E6H2" 0 "Glutathione transport system permease protein GsiD"  
"JS1\_M10\_01230" 16920 "s59E13H2" 0 "Type-1 restriction enzyme R protein"  
"JS1\_M10\_01230" 16920 "s59E25H2" 0.05844156 "Type-1 restriction enzyme R protein"  
"JS1\_M10\_01230" 16920 "s59E5H2" 0 "Type-1 restriction enzyme R protein"  
"JS1\_M10\_01230" 16920 "s63E6H2" 1.262883 "Type-1 restriction enzyme R protein"  
"JS1\_M10\_01231" 16921 "s59E13H2" 0 "hypothetical protein"  
"JS1\_M10\_01231" 16921 "s59E25H2" 0 "hypothetical protein"  
"JS1\_M10\_01231" 16921 "s59E5H2" 0 "hypothetical protein"  
"JS1\_M10\_01231" 16921 "s63E6H2" 0 "hypothetical protein"  
"JS1\_M10\_01232" 16922 "s59E13H2" 0 "EcoKI restriction-modification system protein HsdS"  
"JS1\_M10\_01232" 16922 "s59E25H2" 0 "EcoKI restriction-modification system protein HsdS"  
"JS1\_M10\_01232" 16922 "s59E5H2" 0 "EcoKI restriction-modification system protein HsdS"  
"JS1\_M10\_01232" 16922 "s63E6H2" 0 "EcoKI restriction-modification system protein HsdS"  
"JS1\_M10\_01233" 16923 "s59E13H2" 0 "putative type I restriction enzymeP M protein"  
"JS1\_M10\_01233" 16923 "s59E25H2" 0 "putative type I restriction enzymeP M protein"  
"JS1\_M10\_01233" 16923 "s59E5H2" 0 "putative type I restriction enzymeP M protein"  
"JS1\_M10\_01233" 16923 "s63E6H2" 0.3533685 "putative type I restriction enzymeP M protein"  
"JS1\_M10\_01234" 16924 "s59E13H2" 0 "hypothetical protein"  
"JS1\_M10\_01234" 16924 "s59E25H2" 0 "hypothetical protein"  
"JS1\_M10\_01234" 16924 "s59E5H2" 0 "hypothetical protein"  
"JS1\_M10\_01234" 16924 "s63E6H2" 0.9340855 "hypothetical protein"  
"JS1\_M10\_01235" 16925 "s59E13H2" 0.5194729 "Transposase IS116/IS110/IS902 family protein"  
"JS1\_M10\_01235" 16925 "s59E25H2" 0 "Transposase IS116/IS110/IS902 family protein"  
"JS1\_M10\_01235" 16925 "s59E5H2" 1.399597 "Transposase IS116/IS110/IS902 family protein"  
"JS1\_M10\_01235" 16925 "s63E6H2" 1.211645 "Transposase IS116/IS110/IS902 family protein"  
"JS1\_M10\_01236" 16926 "s59E13H2" 0.01244685 "Methylated-thiol--coenzyme M methyltransferase"  
"JS1\_M10\_01236" 16926 "s59E25H2" 0 "Methylated-thiol--coenzyme M methyltransferase"  
"JS1\_M10\_01236" 16926 "s59E5H2" 0 "Methylated-thiol--coenzyme M methyltransferase"  
"JS1\_M10\_01236" 16926 "s63E6H2" 0.8727276 "Methylated-thiol--coenzyme M methyltransferase"  
"JS1\_M10\_01237" 16927 "s59E13H2" 0 "hypothetical protein"  
"JS1\_M10\_01237" 16927 "s59E25H2" 0 "hypothetical protein"  
"JS1\_M10\_01237" 16927 "s59E5H2" 0 "hypothetical protein"  
"JS1\_M10\_01237" 16927 "s63E6H2" 0.07487125 "hypothetical protein"  
"JS1\_M10\_01238" 16928 "s59E13H2" 0.07521755 "Glutamine--tRNA ligase"  
"JS1\_M10\_01238" 16928 "s59E25H2" 0 "Glutamine--tRNA ligase"  
"JS1\_M10\_01238" 16928 "s59E5H2" 0.2200857 "Glutamine--tRNA ligase"

"JS1\_M10\_01238" 16928 "s63E6H2" 0.1731277 "Glutamine--tRNA ligase"  
"JS1\_M10\_01239" 16929 "s59E13H2" 0.007741877 "Al-2 transport protein TqsA"  
"JS1\_M10\_01239" 16929 "s59E25H2" 0 "Al-2 transport protein TqsA"  
"JS1\_M10\_01239" 16929 "s59E5H2" 0.2775574 "Al-2 transport protein TqsA"  
"JS1\_M10\_01239" 16929 "s63E6H2" 0.4629012 "Al-2 transport protein TqsA"  
"JS1\_M10\_01240" 16930 "s59E13H2" 0.05660811 "N-acetylmuramoyl-L-alanine amidase AmiC precursor"  
"JS1\_M10\_01240" 16930 "s59E25H2" 0 "N-acetylmuramoyl-L-alanine amidase AmiC precursor"  
"JS1\_M10\_01240" 16930 "s59E5H2" 0.144799 "N-acetylmuramoyl-L-alanine amidase AmiC precursor"  
"JS1\_M10\_01240" 16930 "s63E6H2" 0.2533843 "N-acetylmuramoyl-L-alanine amidase AmiC precursor"  
"JS1\_M10\_01241" 16931 "s59E13H2" 0.04672561 "Sporulation and spore germination"  
"JS1\_M10\_01241" 16931 "s59E25H2" 0 "Sporulation and spore germination"  
"JS1\_M10\_01241" 16931 "s59E5H2" 0.07588746 "Sporulation and spore germination"  
"JS1\_M10\_01241" 16931 "s63E6H2" 0.05493661 "Sporulation and spore germination"  
"JS1\_M10\_01242" 16932 "s59E13H2" 0 "Divergent PAP2 family protein"  
"JS1\_M10\_01242" 16932 "s59E25H2" 0 "Divergent PAP2 family protein"  
"JS1\_M10\_01242" 16932 "s59E5H2" 0.01631058 "Divergent PAP2 family protein"  
"JS1\_M10\_01242" 16932 "s63E6H2" 0.02686255 "Divergent PAP2 family protein"  
"JS1\_M10\_01243" 16933 "s59E13H2" 0.01038299 "16S/23S rRNA (cytidine-2'-O)-methyltransferase TlyA"  
"JS1\_M10\_01243" 16933 "s59E25H2" 0 "16S/23S rRNA (cytidine-2'-O)-methyltransferase TlyA"  
"JS1\_M10\_01243" 16933 "s59E5H2" 0.04052933 "16S/23S rRNA (cytidine-2'-O)-methyltransferase TlyA"  
"JS1\_M10\_01243" 16933 "s63E6H2" 0.04327456 "16S/23S rRNA (cytidine-2'-O)-methyltransferase TlyA"  
"JS1\_M10\_01244" 16934 "s59E13H2" 0.008624425 "hypothetical protein"  
"JS1\_M10\_01244" 16934 "s59E25H2" 0 "hypothetical protein"  
"JS1\_M10\_01244" 16934 "s59E5H2" 0.08723456 "hypothetical protein"  
"JS1\_M10\_01244" 16934 "s63E6H2" 0.03945971 "hypothetical protein"  
"JS1\_M10\_01245" 16935 "s59E13H2" 0.005958545 "putative inorganic polyphosphate/ATP-NAD kinase"  
"JS1\_M10\_01245" 16935 "s59E25H2" 0 "putative inorganic polyphosphate/ATP-NAD kinase"  
"JS1\_M10\_01245" 16935 "s59E5H2" 0.1636297 "putative inorganic polyphosphate/ATP-NAD kinase"  
"JS1\_M10\_01245" 16935 "s63E6H2" 0.02946968 "putative inorganic polyphosphate/ATP-NAD kinase"  
"JS1\_M10\_01246" 16936 "s59E13H2" 0.004012842 "DNA repair protein RecN"  
"JS1\_M10\_01246" 16936 "s59E25H2" 0 "DNA repair protein RecN"  
"JS1\_M10\_01246" 16936 "s59E5H2" 0.08584849 "DNA repair protein RecN"  
"JS1\_M10\_01246" 16936 "s63E6H2" 0.04673188 "DNA repair protein RecN"  
"JS1\_M10\_01247" 16937 "s59E13H2" 0.007854615 "Arginine utilization regulatory protein RocR"  
"JS1\_M10\_01247" 16937 "s59E25H2" 0 "Arginine utilization regulatory protein RocR"  
"JS1\_M10\_01247" 16937 "s59E5H2" 0.1483429 "Arginine utilization regulatory protein RocR"  
"JS1\_M10\_01247" 16937 "s63E6H2" 0.05325375 "Arginine utilization regulatory protein RocR"  
"JS1\_M10\_01248" 16938 "s59E13H2" 0.02813801 "2-aminoadipate transaminase"  
"JS1\_M10\_01248" 16938 "s59E25H2" 0 "2-aminoadipate transaminase"  
"JS1\_M10\_01248" 16938 "s59E5H2" 0.06927439 "2-aminoadipate transaminase"  
"JS1\_M10\_01248" 16938 "s63E6H2" 0.06873811 "2-aminoadipate transaminase"  
"JS1\_M10\_01249" 16939 "s59E13H2" 0.009975784 "Phosphate acetyltransferase"  
"JS1\_M10\_01249" 16939 "s59E25H2" 0 "Phosphate acetyltransferase"  
"JS1\_M10\_01249" 16939 "s59E5H2" 0.05530121 "Phosphate acetyltransferase"  
"JS1\_M10\_01249" 16939 "s63E6H2" 0.08136382 "Phosphate acetyltransferase"  
"JS1\_M10\_01250" 16940 "s59E13H2" 0.0119359 "Butyrate kinase 2"  
"JS1\_M10\_01250" 16940 "s59E25H2" 0 "Butyrate kinase 2"

"JS1\_M10\_01250" 16940 "s59E5H2" 0.01073235 "Butyrate kinase 2"  
"JS1\_M10\_01250" 16940 "s63E6H2" 0.06130233 "Butyrate kinase 2"  
"JS1\_M10\_01251" 16941 "s59E13H2" 0.01914088 "hypothetical protein"  
"JS1\_M10\_01251" 16941 "s59E25H2" 0 "hypothetical protein"  
"JS1\_M10\_01251" 16941 "s59E5H2" 0.008457242 "hypothetical protein"  
"JS1\_M10\_01251" 16941 "s63E6H2" 0.104711 "hypothetical protein"  
"JS1\_M10\_01252" 16942 "s59E13H2" 0.008967259 "Ketoisovalerate oxidoreductase subunit VorC"  
"JS1\_M10\_01252" 16942 "s59E25H2" 0 "Ketoisovalerate oxidoreductase subunit VorC"  
"JS1\_M10\_01252" 16942 "s59E5H2" 0 "Ketoisovalerate oxidoreductase subunit VorC"  
"JS1\_M10\_01252" 16942 "s63E6H2" 0.04178022 "Ketoisovalerate oxidoreductase subunit VorC"  
"JS1\_M10\_01253" 16943 "s59E13H2" 0.02257448 "Ketoisovalerate oxidoreductase subunit VorB"  
"JS1\_M10\_01253" 16943 "s59E25H2" 0 "Ketoisovalerate oxidoreductase subunit VorB"  
"JS1\_M10\_01253" 16943 "s59E5H2" 0.02464673 "Ketoisovalerate oxidoreductase subunit VorB"  
"JS1\_M10\_01253" 16943 "s63E6H2" 0.1288247 "Ketoisovalerate oxidoreductase subunit VorB"  
"JS1\_M10\_01254" 16944 "s59E13H2" 0.1360019 "Ketoisovalerate oxidoreductase subunit VorA"  
"JS1\_M10\_01254" 16944 "s59E25H2" 0 "Ketoisovalerate oxidoreductase subunit VorA"  
"JS1\_M10\_01254" 16944 "s59E5H2" 0.006380521 "Ketoisovalerate oxidoreductase subunit VorA"  
"JS1\_M10\_01254" 16944 "s63E6H2" 0.2580483 "Ketoisovalerate oxidoreductase subunit VorA"  
"JS1\_M10\_01255" 16945 "s59E13H2" 0.1439432 "Ketoisovalerate oxidoreductase subunit VorA"  
"JS1\_M10\_01255" 16945 "s59E25H2" 0 "Ketoisovalerate oxidoreductase subunit VorA"  
"JS1\_M10\_01255" 16945 "s59E5H2" 0.006671868 "Ketoisovalerate oxidoreductase subunit VorA"  
"JS1\_M10\_01255" 16945 "s63E6H2" 0.1532275 "Ketoisovalerate oxidoreductase subunit VorA"  
"JS1\_M10\_01258" 16948 "s59E13H2" 0.3085043 "Lysine 6-dehydrogenase"  
"JS1\_M10\_01258" 16948 "s59E25H2" 0 "Lysine 6-dehydrogenase"  
"JS1\_M10\_01258" 16948 "s59E5H2" 0.2821883 "Lysine 6-dehydrogenase"  
"JS1\_M10\_01258" 16948 "s63E6H2" 0.701633 "Lysine 6-dehydrogenase"  
"JS1\_M10\_01259" 16949 "s59E13H2" 0.1693753 "4-aminobutyrate aminotransferase PuuE"  
"JS1\_M10\_01259" 16949 "s59E25H2" 0 "4-aminobutyrate aminotransferase PuuE"  
"JS1\_M10\_01259" 16949 "s59E5H2" 0.1393215 "4-aminobutyrate aminotransferase PuuE"  
"JS1\_M10\_01259" 16949 "s63E6H2" 1.17655 "4-aminobutyrate aminotransferase PuuE"  
"JS1\_M10\_01260" 16950 "s59E13H2" 0.008754815 "Cyclic 2,3-diphosphoglycerate synthetase"  
"JS1\_M10\_01260" 16950 "s59E25H2" 0 "Cyclic 2,3-diphosphoglycerate synthetase"  
"JS1\_M10\_01260" 16950 "s59E5H2" 0.09778389 "Cyclic 2,3-diphosphoglycerate synthetase"  
"JS1\_M10\_01260" 16950 "s63E6H2" 0.3630794 "Cyclic 2,3-diphosphoglycerate synthetase"  
"JS1\_M10\_01261" 16951 "s59E13H2" 0.1187336 "Malate-2H(+)/Na(+)-lactate antiporter"  
"JS1\_M10\_01261" 16951 "s59E25H2" 0 "Malate-2H(+)/Na(+)-lactate antiporter"  
"JS1\_M10\_01261" 16951 "s59E5H2" 0.05599803 "Malate-2H(+)/Na(+)-lactate antiporter"  
"JS1\_M10\_01261" 16951 "s63E6H2" 0.1770883 "Malate-2H(+)/Na(+)-lactate antiporter"  
"JS1\_M10\_01262" 16952 "s59E13H2" 0.7700637 "Tungsten-containing aldehyde ferredoxin oxidoreductase"  
"JS1\_M10\_01262" 16952 "s59E25H2" 0 "Tungsten-containing aldehyde ferredoxin oxidoreductase"  
"JS1\_M10\_01262" 16952 "s59E5H2" 0.299438 "Tungsten-containing aldehyde ferredoxin oxidoreductase"  
"JS1\_M10\_01262" 16952 "s63E6H2" 0.7327284 "Tungsten-containing aldehyde ferredoxin oxidoreductase"  
"JS1\_M10\_01263" 16953 "s59E13H2" 0.01517584 "Sulfur carrier protein ThiS"  
"JS1\_M10\_01263" 16953 "s59E25H2" 0 "Sulfur carrier protein ThiS"  
"JS1\_M10\_01263" 16953 "s59E5H2" 0.001801304 "Sulfur carrier protein ThiS"  
"JS1\_M10\_01263" 16953 "s63E6H2" 0.1549298 "Sulfur carrier protein ThiS"  
"JS1\_M10\_01264" 16954 "s59E13H2" 0.2904707 "Transcriptional regulator MntR"

"JS1\_M10\_01264" 16954 "s59E25H2" 0 "Transcriptional regulator MntR"  
"JS1\_M10\_01264" 16954 "s59E5H2" 0.3661067 "Transcriptional regulator MntR"  
"JS1\_M10\_01264" 16954 "s63E6H2" 1.702624 "Transcriptional regulator MntR"  
"JS1\_M10\_01265" 16955 "s59E13H2" 0.4072484 "FeoA domain protein"  
"JS1\_M10\_01265" 16955 "s59E25H2" 0 "FeoA domain protein"  
"JS1\_M10\_01265" 16955 "s59E5H2" 0.5041779 "FeoA domain protein"  
"JS1\_M10\_01265" 16955 "s63E6H2" 2.315841 "FeoA domain protein"  
"JS1\_M10\_01266" 16956 "s59E13H2" 0.03167582 "hypothetical protein"  
"JS1\_M10\_01266" 16956 "s59E25H2" 0 "hypothetical protein"  
"JS1\_M10\_01266" 16956 "s59E5H2" 0.08154822 "hypothetical protein"  
"JS1\_M10\_01266" 16956 "s63E6H2" 0.4074042 "hypothetical protein"  
"JS1\_M10\_01268" 16958 "s59E13H2" 0.1410144 "Lysine 6-dehydrogenase"  
"JS1\_M10\_01268" 16958 "s59E25H2" 0 "Lysine 6-dehydrogenase"  
"JS1\_M10\_01268" 16958 "s59E5H2" 0.09494629 "Lysine 6-dehydrogenase"  
"JS1\_M10\_01268" 16958 "s63E6H2" 0.3070282 "Lysine 6-dehydrogenase"  
"JS1\_M10\_01269" 16959 "s59E13H2" 0.04863853 "2-methylcitrate dehydratase"  
"JS1\_M10\_01269" 16959 "s59E25H2" 0.1804949 "2-methylcitrate dehydratase"  
"JS1\_M10\_01269" 16959 "s59E5H2" 0.1175056 "2-methylcitrate dehydratase"  
"JS1\_M10\_01269" 16959 "s63E6H2" 0.07022597 "2-methylcitrate dehydratase"  
"JS1\_M10\_01270" 16960 "s59E13H2" 0.07352789 "Homoisocitrate dehydrogenase"  
"JS1\_M10\_01270" 16960 "s59E25H2" 0 "Homoisocitrate dehydrogenase"  
"JS1\_M10\_01270" 16960 "s59E5H2" 0.1220878 "Homoisocitrate dehydrogenase"  
"JS1\_M10\_01270" 16960 "s63E6H2" 0.1906474 "Homoisocitrate dehydrogenase"  
"JS1\_M10\_01271" 16961 "s59E13H2" 0.3251464 "Isopropylmalate/citramalate isomerase small subunit"  
"JS1\_M10\_01271" 16961 "s59E25H2" 0 "Isopropylmalate/citramalate isomerase small subunit"  
"JS1\_M10\_01271" 16961 "s59E5H2" 0.09453627 "Isopropylmalate/citramalate isomerase small subunit"  
"JS1\_M10\_01271" 16961 "s63E6H2" 0.243063 "Isopropylmalate/citramalate isomerase small subunit"  
"JS1\_M10\_01272" 16962 "s59E13H2" 0.1092083 "Isopropylmalate/citramalate isomerase large subunit"  
"JS1\_M10\_01272" 16962 "s59E25H2" 0 "Isopropylmalate/citramalate isomerase large subunit"  
"JS1\_M10\_01272" 16962 "s59E5H2" 0.09670427 "Isopropylmalate/citramalate isomerase large subunit"  
"JS1\_M10\_01272" 16962 "s63E6H2" 0.2043703 "Isopropylmalate/citramalate isomerase large subunit"  
"JS1\_M10\_01273" 16963 "s59E13H2" 0.5595126 "Dihydroneopterin 2',3'-cyclic phosphate phosphodiesterase"  
"JS1\_M10\_01273" 16963 "s59E25H2" 0 "Dihydroneopterin 2',3'-cyclic phosphate phosphodiesterase"  
"JS1\_M10\_01273" 16963 "s59E5H2" 0.1700858 "Dihydroneopterin 2',3'-cyclic phosphate phosphodiesterase"  
"JS1\_M10\_01273" 16963 "s63E6H2" 0.285864 "Dihydroneopterin 2',3'-cyclic phosphate phosphodiesterase"  
"JS1\_M10\_01274" 16964 "s59E13H2" 1.229854 "hypothetical protein"  
"JS1\_M10\_01274" 16964 "s59E25H2" 0 "hypothetical protein"  
"JS1\_M10\_01274" 16964 "s59E5H2" 0.2081979 "hypothetical protein"  
"JS1\_M10\_01274" 16964 "s63E6H2" 0.4650657 "hypothetical protein"  
"JS1\_M10\_01275" 16965 "s59E13H2" 3.112272 "hypothetical protein"  
"JS1\_M10\_01275" 16965 "s59E25H2" 0.3679176 "hypothetical protein"  
"JS1\_M10\_01275" 16965 "s59E5H2" 0.2173136 "hypothetical protein"  
"JS1\_M10\_01275" 16965 "s63E6H2" 0.3901705 "hypothetical protein"  
"JS1\_M10\_01277" 16967 "s59E13H2" 0.3389973 "HTH-type transcriptional regulator LutR"  
"JS1\_M10\_01277" 16967 "s59E25H2" 0 "HTH-type transcriptional regulator LutR"  
"JS1\_M10\_01277" 16967 "s59E5H2" 0.01164999 "HTH-type transcriptional regulator LutR"  
"JS1\_M10\_01277" 16967 "s63E6H2" 0.006377552 "HTH-type transcriptional regulator LutR"

"JS1\_M10\_01278" 16968 "s59E13H2" 0.07126929 "Phosphoenolpyruvate carboxykinase [GTP]"  
"JS1\_M10\_01278" 16968 "s59E25H2" 0 "Phosphoenolpyruvate carboxykinase [GTP]"  
"JS1\_M10\_01278" 16968 "s59E5H2" 0.01018192 "Phosphoenolpyruvate carboxykinase [GTP]"  
"JS1\_M10\_01278" 16968 "s63E6H2" 0.3695739 "Phosphoenolpyruvate carboxykinase [GTP]"  
"JS1\_M10\_01279" 16969 "s59E13H2" 0.003753812 "L-hydantoinase"  
"JS1\_M10\_01279" 16969 "s59E25H2" 0 "L-hydantoinase"  
"JS1\_M10\_01279" 16969 "s59E5H2" 0.01445722 "L-hydantoinase"  
"JS1\_M10\_01279" 16969 "s63E6H2" 0.06829332 "L-hydantoinase"  
"JS1\_M10\_01280" 16970 "s59E13H2" 0.4746674 "Asp/Glu/Hydantoin racemase"  
"JS1\_M10\_01280" 16970 "s59E25H2" 0 "Asp/Glu/Hydantoin racemase"  
"JS1\_M10\_01280" 16970 "s59E5H2" 0.04564375 "Asp/Glu/Hydantoin racemase"  
"JS1\_M10\_01280" 16970 "s63E6H2" 0.01349747 "Asp/Glu/Hydantoin racemase"  
"JS1\_M10\_01281" 16971 "s59E13H2" 0.991095 "Leucine-, isoleucine-, valine-, threonine-, and alanine-binding protein precursor"  
"JS1\_M10\_01281" 16971 "s59E25H2" 0 "Leucine-, isoleucine-, valine-, threonine-, and alanine-binding protein precursor"  
"JS1\_M10\_01281" 16971 "s59E5H2" 0.1301055 "Leucine-, isoleucine-, valine-, threonine-, and alanine-binding protein precursor"  
"JS1\_M10\_01281" 16971 "s63E6H2" 0.1957671 "Leucine-, isoleucine-, valine-, threonine-, and alanine-binding protein precursor"  
"JS1\_M10\_01282" 16972 "s59E13H2" 0.8252533 "High-affinity branched-chain amino acid transport ATP-binding protein LivF"  
"JS1\_M10\_01282" 16972 "s59E25H2" 0 "High-affinity branched-chain amino acid transport ATP-binding protein LivF"  
"JS1\_M10\_01282" 16972 "s59E5H2" 0.2239943 "High-affinity branched-chain amino acid transport ATP-binding protein LivF"  
"JS1\_M10\_01282" 16972 "s63E6H2" 0.1914809 "High-affinity branched-chain amino acid transport ATP-binding protein LivF"  
"JS1\_M10\_01283" 16973 "s59E13H2" 0.9185096 "putative branched-chain amino acid transport ATP-binding protein LivG"  
"JS1\_M10\_01283" 16973 "s59E25H2" 0 "putative branched-chain amino acid transport ATP-binding protein LivG"  
"JS1\_M10\_01283" 16973 "s59E5H2" 0.1965673 "putative branched-chain amino acid transport ATP-binding protein LivG"  
"JS1\_M10\_01283" 16973 "s63E6H2" 0.1836215 "putative branched-chain amino acid transport ATP-binding protein LivG"  
"JS1\_M10\_01284" 16974 "s59E13H2" 0.8187294 "leucine/isoleucine/valine transporter permease subunit"  
"JS1\_M10\_01284" 16974 "s59E25H2" 0 "leucine/isoleucine/valine transporter permease subunit"  
"JS1\_M10\_01284" 16974 "s59E5H2" 0.1816184 "leucine/isoleucine/valine transporter permease subunit"  
"JS1\_M10\_01284" 16974 "s63E6H2" 0.2295278 "leucine/isoleucine/valine transporter permease subunit"  
"JS1\_M10\_01285" 16975 "s59E13H2" 0.7931952 "High-affinity branched-chain amino acid transport system permease protein LivH"  
"JS1\_M10\_01285" 16975 "s59E25H2" 0 "High-affinity branched-chain amino acid transport system permease protein LivH"  
"JS1\_M10\_01285" 16975 "s59E5H2" 0.2039789 "High-affinity branched-chain amino acid transport system permease protein LivH"  
"JS1\_M10\_01285" 16975 "s63E6H2" 0.1774885 "High-affinity branched-chain amino acid transport system permease protein LivH"  
"JS1\_M10\_01286" 16976 "s59E13H2" 0.001053878 "Aspartate carbamoyltransferase"  
"JS1\_M10\_01286" 16976 "s59E25H2" 0 "Aspartate carbamoyltransferase"  
"JS1\_M10\_01286" 16976 "s59E5H2" 0.05323203 "Aspartate carbamoyltransferase"  
"JS1\_M10\_01286" 16976 "s63E6H2" 0.05854935 "Aspartate carbamoyltransferase"  
"JS1\_M10\_01287" 16977 "s59E13H2" 0.2076968 "Spermidine/putrescine import ATP-binding protein PotA"  
"JS1\_M10\_01287" 16977 "s59E25H2" 0 "Spermidine/putrescine import ATP-binding protein PotA"  
"JS1\_M10\_01287" 16977 "s59E5H2" 1.157268 "Spermidine/putrescine import ATP-binding protein PotA"  
"JS1\_M10\_01287" 16977 "s63E6H2" 1.646021 "Spermidine/putrescine import ATP-binding protein PotA"  
"JS1\_M10\_01288" 16978 "s59E13H2" 0.1723928 "Putative aliphatic sulfonates transport permease protein SsuC"  
"JS1\_M10\_01288" 16978 "s59E25H2" 0 "Putative aliphatic sulfonates transport permease protein SsuC"  
"JS1\_M10\_01288" 16978 "s59E5H2" 1.150225 "Putative aliphatic sulfonates transport permease protein SsuC"  
"JS1\_M10\_01288" 16978 "s63E6H2" 1.46842 "Putative aliphatic sulfonates transport permease protein SsuC"  
"JS1\_M10\_01289" 16979 "s59E13H2" 0.06999664 "Putative aliphatic sulfonates-binding protein precursor"  
"JS1\_M10\_01289" 16979 "s59E25H2" 0 "Putative aliphatic sulfonates-binding protein precursor"  
"JS1\_M10\_01289" 16979 "s59E5H2" 0.3544995 "Putative aliphatic sulfonates-binding protein precursor"



"JS1\_M10\_01289" 16979 "s63E6H2" 0.3164524 "Putative aliphatic sulfonates-binding protein precursor"  
"JS1\_M10\_01290" 16980 "s59E13H2" 0.008651378 "hypothetical protein"  
"JS1\_M10\_01290" 16980 "s59E25H2" 0 "hypothetical protein"  
"JS1\_M10\_01290" 16980 "s59E5H2" 0.01105345 "hypothetical protein"  
"JS1\_M10\_01290" 16980 "s63E6H2" 0.6594187 "hypothetical protein"  
"JS1\_M10\_01291" 16981 "s59E13H2" 0.008403825 "bifunctional molybdenum cofactor biosynthesis protein MoaC/MogA"  
"JS1\_M10\_01291" 16981 "s59E25H2" 0 "bifunctional molybdenum cofactor biosynthesis protein MoaC/MogA"  
"JS1\_M10\_01291" 16981 "s59E5H2" 0 "bifunctional molybdenum cofactor biosynthesis protein MoaC/MogA"  
"JS1\_M10\_01291" 16981 "s63E6H2" 0.3043448 "bifunctional molybdenum cofactor biosynthesis protein MoaC/MogA"  
"JS1\_M10\_01292" 16982 "s59E13H2" 0.02702142 "Multifunctional CCA protein"  
"JS1\_M10\_01292" 16982 "s59E25H2" 0 "Multifunctional CCA protein"  
"JS1\_M10\_01292" 16982 "s59E5H2" 0.2340446 "Multifunctional CCA protein"  
"JS1\_M10\_01292" 16982 "s63E6H2" 0.1016485 "Multifunctional CCA protein"  
"JS1\_M10\_01293" 16983 "s59E13H2" 0.02736063 "Pyrimidine-nucleoside phosphorylase"  
"JS1\_M10\_01293" 16983 "s59E25H2" 0 "Pyrimidine-nucleoside phosphorylase"  
"JS1\_M10\_01293" 16983 "s59E5H2" 0.1417382 "Pyrimidine-nucleoside phosphorylase"  
"JS1\_M10\_01293" 16983 "s63E6H2" 0.09250309 "Pyrimidine-nucleoside phosphorylase"  
"JS1\_M10\_01294" 16984 "s59E13H2" 0.06593576 "5-methyltetrahydrofolate:corrinoid/iron-sulfur protein co-methyltransferase"  
"JS1\_M10\_01294" 16984 "s59E25H2" 0 "5-methyltetrahydrofolate:corrinoid/iron-sulfur protein co-methyltransferase"  
"JS1\_M10\_01294" 16984 "s59E5H2" 0.1616433 "5-methyltetrahydrofolate:corrinoid/iron-sulfur protein co-methyltransferase"  
"JS1\_M10\_01294" 16984 "s63E6H2" 0.26596 "5-methyltetrahydrofolate:corrinoid/iron-sulfur protein co-methyltransferase"  
"JS1\_M10\_01300" 16990 "s59E13H2" 0.7004871 "TIR domain protein"  
"JS1\_M10\_01300" 16990 "s59E25H2" 0 "TIR domain protein"  
"JS1\_M10\_01300" 16990 "s59E5H2" 0.008705336 "TIR domain protein"  
"JS1\_M10\_01300" 16990 "s63E6H2" 0.2038354 "TIR domain protein"  
"JS1\_M10\_01302" 16992 "s59E13H2" 0 "hypothetical protein"  
"JS1\_M10\_01302" 16992 "s59E25H2" 0 "hypothetical protein"  
"JS1\_M10\_01302" 16992 "s59E5H2" 0.0764369 "hypothetical protein"  
"JS1\_M10\_01302" 16992 "s63E6H2" 0 "hypothetical protein"  
"JS1\_M10\_01304" 16994 "s59E13H2" 0.162587 "hypothetical protein"  
"JS1\_M10\_01304" 16994 "s59E25H2" 0 "hypothetical protein"  
"JS1\_M10\_01304" 16994 "s59E5H2" 0.09147427 "hypothetical protein"  
"JS1\_M10\_01304" 16994 "s63E6H2" 0.00209997 "hypothetical protein"  
"JS1\_M10\_01305" 16995 "s59E13H2" 0 "hypothetical protein"  
"JS1\_M10\_01305" 16995 "s59E25H2" 0 "hypothetical protein"  
"JS1\_M10\_01305" 16995 "s59E5H2" 0.007733741 "hypothetical protein"  
"JS1\_M10\_01305" 16995 "s63E6H2" 0.002596742 "hypothetical protein"  
"JS1\_M10\_01306" 16996 "s59E13H2" 0 "hypothetical protein"  
"JS1\_M10\_01306" 16996 "s59E25H2" 0 "hypothetical protein"  
"JS1\_M10\_01306" 16996 "s59E5H2" 0 "hypothetical protein"  
"JS1\_M10\_01306" 16996 "s63E6H2" 0 "hypothetical protein"  
"JS1\_M10\_01307" 16997 "s59E13H2" 0 "hypothetical protein"  
"JS1\_M10\_01307" 16997 "s59E25H2" 0 "hypothetical protein"  
"JS1\_M10\_01307" 16997 "s59E5H2" 0 "hypothetical protein"  
"JS1\_M10\_01307" 16997 "s63E6H2" 0 "hypothetical protein"  
"JS1\_M10\_01310" 17000 "s59E13H2" 0.030724 "putative oxidoreductase YvaA"  
"JS1\_M10\_01310" 17000 "s59E25H2" 0 "putative oxidoreductase YvaA"

"JS1\_M10\_01310" 17000 "s59E5H2" 0.1085798 "putative oxidoreductase YvaA"  
"JS1\_M10\_01310" 17000 "s63E6H2" 0.004046793 "putative oxidoreductase YvaA"  
"JS1\_M10\_01311" 17001 "s59E13H2" 0.02142771 "hypothetical protein"  
"JS1\_M10\_01311" 17001 "s59E25H2" 0 "hypothetical protein"  
"JS1\_M10\_01311" 17001 "s59E5H2" 0 "hypothetical protein"  
"JS1\_M10\_01311" 17001 "s63E6H2" 0 "hypothetical protein"  
"JS1\_M10\_01312" 17002 "s59E13H2" 0.01027327 "Oligopeptide-binding protein AppA precursor"  
"JS1\_M10\_01312" 17002 "s59E25H2" 0 "Oligopeptide-binding protein AppA precursor"  
"JS1\_M10\_01312" 17002 "s59E5H2" 0 "Oligopeptide-binding protein AppA precursor"  
"JS1\_M10\_01312" 17002 "s63E6H2" 0 "Oligopeptide-binding protein AppA precursor"  
"JS1\_M10\_01313" 17003 "s59E13H2" 0.03790133 "Glutathione transport system permease protein GsiC"  
"JS1\_M10\_01313" 17003 "s59E25H2" 0 "Glutathione transport system permease protein GsiC"  
"JS1\_M10\_01313" 17003 "s59E5H2" 0 "Glutathione transport system permease protein GsiC"  
"JS1\_M10\_01313" 17003 "s63E6H2" 0 "Glutathione transport system permease protein GsiC"  
"JS1\_M10\_01314" 17004 "s59E13H2" 0 "Cycloisomaltooligosaccharide glucanotransferase precursor"  
"JS1\_M10\_01314" 17004 "s59E25H2" 0 "Cycloisomaltooligosaccharide glucanotransferase precursor"  
"JS1\_M10\_01314" 17004 "s59E5H2" 0 "Cycloisomaltooligosaccharide glucanotransferase precursor"  
"JS1\_M10\_01314" 17004 "s63E6H2" 0.0003014524 "Cycloisomaltooligosaccharide glucanotransferase precursor"  
"JS1\_M10\_01315" 17005 "s59E13H2" 1.970129 "Oligopeptide transport ATP-binding protein OppD"  
"JS1\_M10\_01315" 17005 "s59E25H2" 0.4761905 "Oligopeptide transport ATP-binding protein OppD"  
"JS1\_M10\_01315" 17005 "s59E5H2" 1.290423 "Oligopeptide transport ATP-binding protein OppD"  
"JS1\_M10\_01315" 17005 "s63E6H2" 3.717376 "Oligopeptide transport ATP-binding protein OppD"  
"JS1\_M10\_01316" 17006 "s59E13H2" 2.102636 "Oligopeptide transport ATP-binding protein OppF"  
"JS1\_M10\_01316" 17006 "s59E25H2" 0.2317949 "Oligopeptide transport ATP-binding protein OppF"  
"JS1\_M10\_01316" 17006 "s59E5H2" 1.53235 "Oligopeptide transport ATP-binding protein OppF"  
"JS1\_M10\_01316" 17006 "s63E6H2" 4.891583 "Oligopeptide transport ATP-binding protein OppF"  
"JS1\_M10\_01318" 17008 "s59E13H2" 0.004799766 "putative hydrogenase nickel incorporation protein HypA"  
"JS1\_M10\_01318" 17008 "s59E25H2" 0 "putative hydrogenase nickel incorporation protein HypA"  
"JS1\_M10\_01318" 17008 "s59E5H2" 0.02588189 "putative hydrogenase nickel incorporation protein HypA"  
"JS1\_M10\_01318" 17008 "s63E6H2" 0.02945434 "putative hydrogenase nickel incorporation protein HypA"  
"JS1\_M10\_01319" 17009 "s59E13H2" 0.3871128 "Na(+)/H(+) antiporter subunit E"  
"JS1\_M10\_01319" 17009 "s59E25H2" 0 "Na(+)/H(+) antiporter subunit E"  
"JS1\_M10\_01319" 17009 "s59E5H2" 0.5609577 "Na(+)/H(+) antiporter subunit E"  
"JS1\_M10\_01319" 17009 "s63E6H2" 1.162813 "Na(+)/H(+) antiporter subunit E"  
"JS1\_M10\_01320" 17010 "s59E13H2" 0.3728249 "Na(+)/H(+) antiporter subunit F"  
"JS1\_M10\_01320" 17010 "s59E25H2" 0 "Na(+)/H(+) antiporter subunit F"  
"JS1\_M10\_01320" 17010 "s59E5H2" 0.9822053 "Na(+)/H(+) antiporter subunit F"  
"JS1\_M10\_01320" 17010 "s63E6H2" 0.5939889 "Na(+)/H(+) antiporter subunit F"  
"JS1\_M10\_01321" 17011 "s59E13H2" 0.08809634 "DNA primase"  
"JS1\_M10\_01321" 17011 "s59E25H2" 0 "DNA primase"  
"JS1\_M10\_01321" 17011 "s59E5H2" 0.4734447 "DNA primase"  
"JS1\_M10\_01321" 17011 "s63E6H2" 0.03864251 "DNA primase"  
"JS1\_M10\_01322" 17012 "s59E13H2" 0.1985894 "RNA polymerase sigma factor SigA"  
"JS1\_M10\_01322" 17012 "s59E25H2" 0 "RNA polymerase sigma factor SigA"  
"JS1\_M10\_01322" 17012 "s59E5H2" 1.174186 "RNA polymerase sigma factor SigA"  
"JS1\_M10\_01322" 17012 "s63E6H2" 0.1542887 "RNA polymerase sigma factor SigA"  
"JS1\_M10\_01324" 17014 "s59E13H2" 0 "hypothetical protein"

"JS1\_M10\_01324" 17014 "s59E25H2" 0 "hypothetical protein"  
"JS1\_M10\_01324" 17014 "s59E5H2" 0 "hypothetical protein"  
"JS1\_M10\_01324" 17014 "s63E6H2" 0 "hypothetical protein"  
"JS1\_M10\_01326" 17016 "s59E13H2" 0 "Modification methylase Mjal"  
"JS1\_M10\_01326" 17016 "s59E25H2" 0 "Modification methylase Mjal"  
"JS1\_M10\_01326" 17016 "s59E5H2" 0 "Modification methylase Mjal"  
"JS1\_M10\_01326" 17016 "s63E6H2" 0 "Modification methylase Mjal"  
"JS1\_M10\_01328" 17018 "s59E13H2" 0 "Thermonuclease precursor"  
"JS1\_M10\_01328" 17018 "s59E25H2" 0 "Thermonuclease precursor"  
"JS1\_M10\_01328" 17018 "s59E5H2" 0 "Thermonuclease precursor"  
"JS1\_M10\_01328" 17018 "s63E6H2" 0 "Thermonuclease precursor"  
"JS1\_M10\_01329" 17019 "s59E13H2" 0 "Mjal restriction endonuclease"  
"JS1\_M10\_01329" 17019 "s59E25H2" 0 "Mjal restriction endonuclease"  
"JS1\_M10\_01329" 17019 "s59E5H2" 0 "Mjal restriction endonuclease"  
"JS1\_M10\_01329" 17019 "s63E6H2" 0 "Mjal restriction endonuclease"  
"JS1\_M10\_01330" 17020 "s59E13H2" 0.8241599 "Transposase IS116/IS110/IS902 family protein"  
"JS1\_M10\_01330" 17020 "s59E25H2" 0 "Transposase IS116/IS110/IS902 family protein"  
"JS1\_M10\_01330" 17020 "s59E5H2" 0.2314013 "Transposase IS116/IS110/IS902 family protein"  
"JS1\_M10\_01330" 17020 "s63E6H2" 0.8012037 "Transposase IS116/IS110/IS902 family protein"  
"JS1\_M10\_01334" 17024 "s59E13H2" 0 "Small heat shock protein HSP16.5"  
"JS1\_M10\_01334" 17024 "s59E25H2" 0 "Small heat shock protein HSP16.5"  
"JS1\_M10\_01334" 17024 "s59E5H2" 0.146749 "Small heat shock protein HSP16.5"  
"JS1\_M10\_01334" 17024 "s63E6H2" 0.05563897 "Small heat shock protein HSP16.5"  
"JS1\_M10\_01335" 17025 "s59E13H2" 0 "hypothetical protein"  
"JS1\_M10\_01335" 17025 "s59E25H2" 0 "hypothetical protein"  
"JS1\_M10\_01335" 17025 "s59E5H2" 0.1327627 "hypothetical protein"  
"JS1\_M10\_01335" 17025 "s63E6H2" 0.01878826 "hypothetical protein"  
"JS1\_M10\_01336" 17026 "s59E13H2" 0.005269388 "chaperone protein DnaJ"  
"JS1\_M10\_01336" 17026 "s59E25H2" 0 "chaperone protein DnaJ"  
"JS1\_M10\_01336" 17026 "s59E5H2" 0.0511734 "chaperone protein DnaJ"  
"JS1\_M10\_01336" 17026 "s63E6H2" 0.02798622 "chaperone protein DnaJ"  
"JS1\_M10\_01337" 17027 "s59E13H2" 0.01554658 "hypothetical protein"  
"JS1\_M10\_01337" 17027 "s59E25H2" 0 "hypothetical protein"  
"JS1\_M10\_01337" 17027 "s59E5H2" 0.05934652 "hypothetical protein"  
"JS1\_M10\_01337" 17027 "s63E6H2" 0.04031148 "hypothetical protein"  
"JS1\_M10\_01339" 17029 "s59E13H2" 0.01443743 "Denitrification regulatory protein NirQ"  
"JS1\_M10\_01339" 17029 "s59E25H2" 0 "Denitrification regulatory protein NirQ"  
"JS1\_M10\_01339" 17029 "s59E5H2" 0.4601146 "Denitrification regulatory protein NirQ"  
"JS1\_M10\_01339" 17029 "s63E6H2" 0.03889545 "Denitrification regulatory protein NirQ"  
"JS1\_M10\_01340" 17030 "s59E13H2" 0.006019672 "Chaperone protein DnaJ"  
"JS1\_M10\_01340" 17030 "s59E25H2" 0 "Chaperone protein DnaJ"  
"JS1\_M10\_01340" 17030 "s59E5H2" 0.1179937 "Chaperone protein DnaJ"  
"JS1\_M10\_01340" 17030 "s63E6H2" 0.02651091 "Chaperone protein DnaJ"  
"JS1\_M10\_01341" 17031 "s59E13H2" 0.007267264 "hypothetical protein"  
"JS1\_M10\_01341" 17031 "s59E25H2" 0 "hypothetical protein"  
"JS1\_M10\_01341" 17031 "s59E5H2" 0.0910869 "hypothetical protein"  
"JS1\_M10\_01341" 17031 "s63E6H2" 0.02680867 "hypothetical protein"

"JS1\_M10\_01342" 17032 "s59E13H2" 0.01265739 "hypothetical protein"  
"JS1\_M10\_01342" 17032 "s59E25H2" 0 "hypothetical protein"  
"JS1\_M10\_01342" 17032 "s59E5H2" 0.1891137 "hypothetical protein"  
"JS1\_M10\_01342" 17032 "s63E6H2" 0.1112797 "hypothetical protein"  
"JS1\_M10\_01343" 17033 "s59E13H2" 0.01219749 "Gas vesicle structural protein"  
"JS1\_M10\_01343" 17033 "s59E25H2" 0 "Gas vesicle structural protein"  
"JS1\_M10\_01343" 17033 "s59E5H2" 0.09554741 "Gas vesicle structural protein"  
"JS1\_M10\_01343" 17033 "s63E6H2" 0.07010273 "Gas vesicle structural protein"  
"JS1\_M10\_01348" 17038 "s59E13H2" 0.6547126 "Glyceraldehyde-3-phosphate dehydrogenase"  
"JS1\_M10\_01348" 17038 "s59E25H2" 0 "Glyceraldehyde-3-phosphate dehydrogenase"  
"JS1\_M10\_01348" 17038 "s59E5H2" 0.6269188 "Glyceraldehyde-3-phosphate dehydrogenase"  
"JS1\_M10\_01348" 17038 "s63E6H2" 1.019636 "Glyceraldehyde-3-phosphate dehydrogenase"  
"JS1\_M10\_01349" 17039 "s59E13H2" 0.7510214 "Triosephosphate isomerase"  
"JS1\_M10\_01349" 17039 "s59E25H2" 0 "Triosephosphate isomerase"  
"JS1\_M10\_01349" 17039 "s59E5H2" 0.3785929 "Triosephosphate isomerase"  
"JS1\_M10\_01349" 17039 "s63E6H2" 0.6680357 "Triosephosphate isomerase"  
"JS1\_M10\_01350" 17040 "s59E13H2" 0.06875217 "preprotein translocase subunit SecG"  
"JS1\_M10\_01350" 17040 "s59E25H2" 0 "preprotein translocase subunit SecG"  
"JS1\_M10\_01350" 17040 "s59E5H2" 0.3526232 "preprotein translocase subunit SecG"  
"JS1\_M10\_01350" 17040 "s63E6H2" 0.6449991 "preprotein translocase subunit SecG"  
"JS1\_M10\_01351" 17041 "s59E13H2" 0.4164041 "Putative nicotinate phosphoribosyltransferase"  
"JS1\_M10\_01351" 17041 "s59E25H2" 0.2909441 "Putative nicotinate phosphoribosyltransferase"  
"JS1\_M10\_01351" 17041 "s59E5H2" 0.4966132 "Putative nicotinate phosphoribosyltransferase"  
"JS1\_M10\_01351" 17041 "s63E6H2" 0.2843034 "Putative nicotinate phosphoribosyltransferase"  
"JS1\_M10\_01352" 17042 "s59E13H2" 0 "Putative redox-active protein (C\_GCAxxG\_C\_C)"  
"JS1\_M10\_01352" 17042 "s59E25H2" 0 "Putative redox-active protein (C\_GCAxxG\_C\_C)"  
"JS1\_M10\_01352" 17042 "s59E5H2" 0 "Putative redox-active protein (C\_GCAxxG\_C\_C)"  
"JS1\_M10\_01352" 17042 "s63E6H2" 0 "Putative redox-active protein (C\_GCAxxG\_C\_C)"  
"JS1\_M10\_01353" 17043 "s59E13H2" 0.6454108 "Histidinol-phosphate aminotransferase 2"  
"JS1\_M10\_01353" 17043 "s59E25H2" 0 "Histidinol-phosphate aminotransferase 2"  
"JS1\_M10\_01353" 17043 "s59E5H2" 0.3627099 "Histidinol-phosphate aminotransferase 2"  
"JS1\_M10\_01353" 17043 "s63E6H2" 1.032325 "Histidinol-phosphate aminotransferase 2"  
"JS1\_M10\_01354" 17044 "s59E13H2" 1.993816 "B3/4 domain protein"  
"JS1\_M10\_01354" 17044 "s59E25H2" 0 "B3/4 domain protein"  
"JS1\_M10\_01354" 17044 "s59E5H2" 0.5582872 "B3/4 domain protein"  
"JS1\_M10\_01354" 17044 "s63E6H2" 1.21098 "B3/4 domain protein"  
"JS1\_M10\_01355" 17045 "s59E13H2" 1.826989 "UvrB/uvrC motif protein"  
"JS1\_M10\_01355" 17045 "s59E25H2" 0 "UvrB/uvrC motif protein"  
"JS1\_M10\_01355" 17045 "s59E5H2" 0.7051797 "UvrB/uvrC motif protein"  
"JS1\_M10\_01355" 17045 "s63E6H2" 1.826539 "UvrB/uvrC motif protein"  
"JS1\_M10\_01356" 17046 "s59E13H2" 2.025959 "Inner membrane protein YrbG"  
"JS1\_M10\_01356" 17046 "s59E25H2" 0 "Inner membrane protein YrbG"  
"JS1\_M10\_01356" 17046 "s59E5H2" 1.9191 "Inner membrane protein YrbG"  
"JS1\_M10\_01356" 17046 "s63E6H2" 1.96918 "Inner membrane protein YrbG"  
"JS1\_M10\_01357" 17047 "s59E13H2" 5.266403 "DNA-binding protein HU"  
"JS1\_M10\_01357" 17047 "s59E25H2" 0 "DNA-binding protein HU"  
"JS1\_M10\_01357" 17047 "s59E5H2" 0.3745326 "DNA-binding protein HU"

"JS1\_M10\_01357" 17047 "s63E6H2" 0.5240214 "DNA-binding protein HU"  
"JS1\_M10\_01358" 17048 "s59E13H2" 8.394587 "hypothetical protein"  
"JS1\_M10\_01358" 17048 "s59E25H2" 0 "hypothetical protein"  
"JS1\_M10\_01358" 17048 "s59E5H2" 0.3457801 "hypothetical protein"  
"JS1\_M10\_01358" 17048 "s63E6H2" 0.9939507 "hypothetical protein"  
"JS1\_M10\_01359" 17049 "s59E13H2" 4.438761 "Stage V sporulation protein S"  
"JS1\_M10\_01359" 17049 "s59E25H2" 0 "Stage V sporulation protein S"  
"JS1\_M10\_01359" 17049 "s59E5H2" 0.3807583 "Stage V sporulation protein S"  
"JS1\_M10\_01359" 17049 "s63E6H2" 0.7558816 "Stage V sporulation protein S"  
"JS1\_M10\_01360" 17050 "s59E13H2" 0.01628768 "Radical SAM superfamily protein"  
"JS1\_M10\_01360" 17050 "s59E25H2" 0 "Radical SAM superfamily protein"  
"JS1\_M10\_01360" 17050 "s59E5H2" 0.06531977 "Radical SAM superfamily protein"  
"JS1\_M10\_01360" 17050 "s63E6H2" 0.04245371 "Radical SAM superfamily protein"  
"JS1\_M10\_01364" 17054 "s59E13H2" 0 "Cycloisomaltooligosaccharide glucanotransferase precursor"  
"JS1\_M10\_01364" 17054 "s59E25H2" 0 "Cycloisomaltooligosaccharide glucanotransferase precursor"  
"JS1\_M10\_01364" 17054 "s59E5H2" 0 "Cycloisomaltooligosaccharide glucanotransferase precursor"  
"JS1\_M10\_01364" 17054 "s63E6H2" 0.001675182 "Cycloisomaltooligosaccharide glucanotransferase precursor"  
"JS1\_M10\_01370" 17060 "s59E13H2" 0 "hypothetical protein"  
"JS1\_M10\_01370" 17060 "s59E25H2" 0 "hypothetical protein"  
"JS1\_M10\_01370" 17060 "s59E5H2" 0 "hypothetical protein"  
"JS1\_M10\_01370" 17060 "s63E6H2" 0 "hypothetical protein"  
"JS1\_M10\_01371" 17061 "s59E13H2" 0 "hypothetical protein"  
"JS1\_M10\_01371" 17061 "s59E25H2" 0 "hypothetical protein"  
"JS1\_M10\_01371" 17061 "s59E5H2" 0 "hypothetical protein"  
"JS1\_M10\_01371" 17061 "s63E6H2" 0 "hypothetical protein"  
"JS1\_M10\_01375" 17065 "s59E13H2" 0 "hypothetical protein"  
"JS1\_M10\_01375" 17065 "s59E25H2" 0 "hypothetical protein"  
"JS1\_M10\_01375" 17065 "s59E5H2" 0 "hypothetical protein"  
"JS1\_M10\_01375" 17065 "s63E6H2" 0 "hypothetical protein"  
"JS1\_M10\_01377" 17067 "s59E13H2" 0 "hypothetical protein"  
"JS1\_M10\_01377" 17067 "s59E25H2" 0 "hypothetical protein"  
"JS1\_M10\_01377" 17067 "s59E5H2" 0 "hypothetical protein"  
"JS1\_M10\_01377" 17067 "s63E6H2" 0.009287803 "hypothetical protein"  
"JS1\_M10\_01380" 17070 "s59E13H2" 0.5217953 "Integrase core domain protein"  
"JS1\_M10\_01380" 17070 "s59E25H2" 0 "Integrase core domain protein"  
"JS1\_M10\_01380" 17070 "s59E5H2" 0.5132326 "Integrase core domain protein"  
"JS1\_M10\_01380" 17070 "s63E6H2" 1.273715 "Integrase core domain protein"  
"JS1\_M10\_01381" 17071 "s59E13H2" 0.04291131 "Type I phosphodiesterase / nucleotide pyrophosphatase"  
"JS1\_M10\_01381" 17071 "s59E25H2" 0 "Type I phosphodiesterase / nucleotide pyrophosphatase"  
"JS1\_M10\_01381" 17071 "s59E5H2" 0.02902602 "Type I phosphodiesterase / nucleotide pyrophosphatase"  
"JS1\_M10\_01381" 17071 "s63E6H2" 0.111846 "Type I phosphodiesterase / nucleotide pyrophosphatase"  
"JS1\_M10\_01382" 17072 "s59E13H2" 0.1550794 "Transcription-repair-coupling factor"  
"JS1\_M10\_01382" 17072 "s59E25H2" 0 "Transcription-repair-coupling factor"  
"JS1\_M10\_01382" 17072 "s59E5H2" 0.3254471 "Transcription-repair-coupling factor"  
"JS1\_M10\_01382" 17072 "s63E6H2" 0.4187641 "Transcription-repair-coupling factor"  
"JS1\_M10\_01383" 17073 "s59E13H2" 0.05349182 "6-phosphofructokinase"  
"JS1\_M10\_01383" 17073 "s59E25H2" 0 "6-phosphofructokinase"

"JS1\_M10\_01383" 17073 "s59E5H2" 0.1689142 "6-phosphofructokinase"  
"JS1\_M10\_01383" 17073 "s63E6H2" 0.410094 "6-phosphofructokinase"  
"JS1\_M10\_01384" 17074 "s59E13H2" 0.08373306 "Galactose-1-phosphate uridylyltransferase"  
"JS1\_M10\_01384" 17074 "s59E25H2" 0 "Galactose-1-phosphate uridylyltransferase"  
"JS1\_M10\_01384" 17074 "s59E5H2" 0.1646921 "Galactose-1-phosphate uridylyltransferase"  
"JS1\_M10\_01384" 17074 "s63E6H2" 0.3870541 "Galactose-1-phosphate uridylyltransferase"  
"JS1\_M10\_01385" 17075 "s59E13H2" 0.01969676 "Transposase DDE domain protein"  
"JS1\_M10\_01385" 17075 "s59E25H2" 0 "Transposase DDE domain protein"  
"JS1\_M10\_01385" 17075 "s59E5H2" 0.2025213 "Transposase DDE domain protein"  
"JS1\_M10\_01385" 17075 "s63E6H2" 0.1036637 "Transposase DDE domain protein"  
"JS1\_M10\_01386" 17076 "s59E13H2" 2.502302 "putative peptidoglycan biosynthesis protein MurJ"  
"JS1\_M10\_01386" 17076 "s59E25H2" 0.126195 "putative peptidoglycan biosynthesis protein MurJ"  
"JS1\_M10\_01386" 17076 "s59E5H2" 0.1992834 "putative peptidoglycan biosynthesis protein MurJ"  
"JS1\_M10\_01386" 17076 "s63E6H2" 0.06114549 "putative peptidoglycan biosynthesis protein MurJ"  
"JS1\_M10\_01387" 17077 "s59E13H2" 4.892737 "Elongation factor 4"  
"JS1\_M10\_01387" 17077 "s59E25H2" 0 "Elongation factor 4"  
"JS1\_M10\_01387" 17077 "s59E5H2" 0.1971891 "Elongation factor 4"  
"JS1\_M10\_01387" 17077 "s63E6H2" 0.0484196 "Elongation factor 4"  
"JS1\_M10\_01388" 17078 "s59E13H2" 1.230608 "Oxygen-independent coproporphyrinogen-III oxidase 1"  
"JS1\_M10\_01388" 17078 "s59E25H2" 0 "Oxygen-independent coproporphyrinogen-III oxidase 1"  
"JS1\_M10\_01388" 17078 "s59E5H2" 0.06866817 "Oxygen-independent coproporphyrinogen-III oxidase 1"  
"JS1\_M10\_01388" 17078 "s63E6H2" 0.02419418 "Oxygen-independent coproporphyrinogen-III oxidase 1"  
"JS1\_M10\_01389" 17079 "s59E13H2" 2.846846 "Heat-inducible transcription repressor HrcA"  
"JS1\_M10\_01389" 17079 "s59E25H2" 0 "Heat-inducible transcription repressor HrcA"  
"JS1\_M10\_01389" 17079 "s59E5H2" 0.08658825 "Heat-inducible transcription repressor HrcA"  
"JS1\_M10\_01389" 17079 "s63E6H2" 0.008677125 "Heat-inducible transcription repressor HrcA"  
"JS1\_M10\_01390" 17080 "s59E13H2" 0.4698197 "heat shock protein GrpE"  
"JS1\_M10\_01390" 17080 "s59E25H2" 0 "heat shock protein GrpE"  
"JS1\_M10\_01390" 17080 "s59E5H2" 0.03599209 "heat shock protein GrpE"  
"JS1\_M10\_01390" 17080 "s63E6H2" 0.03480298 "heat shock protein GrpE"  
"JS1\_M10\_01391" 17081 "s59E13H2" 0.8614897 "Chaperone protein DnaK"  
"JS1\_M10\_01391" 17081 "s59E25H2" 0 "Chaperone protein DnaK"  
"JS1\_M10\_01391" 17081 "s59E5H2" 0.05563722 "Chaperone protein DnaK"  
"JS1\_M10\_01391" 17081 "s63E6H2" 0.06683512 "Chaperone protein DnaK"  
"JS1\_M10\_01392" 17082 "s59E13H2" 1.026833 "Chaperone protein DnaJ"  
"JS1\_M10\_01392" 17082 "s59E25H2" 0.1128748 "Chaperone protein DnaJ"  
"JS1\_M10\_01392" 17082 "s59E5H2" 0.02253059 "Chaperone protein DnaJ"  
"JS1\_M10\_01392" 17082 "s63E6H2" 0.01213177 "Chaperone protein DnaJ"  
"JS1\_M10\_01393" 17083 "s59E13H2" 1.254483 "Threonylcarbamoyladenosine tRNA methylthiotransferase MtaB"  
"JS1\_M10\_01393" 17083 "s59E25H2" 0 "Threonylcarbamoyladenosine tRNA methylthiotransferase MtaB"  
"JS1\_M10\_01393" 17083 "s59E5H2" 0.1248715 "Threonylcarbamoyladenosine tRNA methylthiotransferase MtaB"  
"JS1\_M10\_01393" 17083 "s63E6H2" 0.1876123 "Threonylcarbamoyladenosine tRNA methylthiotransferase MtaB"  
"JS1\_M10\_01394" 17084 "s59E13H2" 0.1144 "hypothetical protein"  
"JS1\_M10\_01394" 17084 "s59E25H2" 0 "hypothetical protein"  
"JS1\_M10\_01394" 17084 "s59E5H2" 0.04357368 "hypothetical protein"  
"JS1\_M10\_01394" 17084 "s63E6H2" 0.1031414 "hypothetical protein"  
"JS1\_M10\_01395" 17085 "s59E13H2" 0.01958676 "hypothetical protein"

"JS1\_M10\_01395" 17085 "s59E25H2" 0 "hypothetical protein"  
"JS1\_M10\_01395" 17085 "s59E5H2" 0.03906577 "hypothetical protein"  
"JS1\_M10\_01395" 17085 "s63E6H2" 0.03841773 "hypothetical protein"  
"JS1\_M10\_01396" 17086 "s59E13H2" 0.0339813 "Translation initiation factor IF-2"  
"JS1\_M10\_01396" 17086 "s59E25H2" 0 "Translation initiation factor IF-2"  
"JS1\_M10\_01396" 17086 "s59E5H2" 0.09138355 "Translation initiation factor IF-2"  
"JS1\_M10\_01396" 17086 "s63E6H2" 0.0556753 "Translation initiation factor IF-2"  
"JS1\_M10\_01397" 17087 "s59E13H2" 0.001843871 "Ribosome-binding factor A"  
"JS1\_M10\_01397" 17087 "s59E25H2" 0 "Ribosome-binding factor A"  
"JS1\_M10\_01397" 17087 "s59E5H2" 0.02582814 "Ribosome-binding factor A"  
"JS1\_M10\_01397" 17087 "s63E6H2" 0.0448208 "Ribosome-binding factor A"  
"JS1\_M10\_01398" 17088 "s59E13H2" 0.01634844 "Bifunctional oligoribonuclease and PAP phosphatase NrnA"  
"JS1\_M10\_01398" 17088 "s59E25H2" 0 "Bifunctional oligoribonuclease and PAP phosphatase NrnA"  
"JS1\_M10\_01398" 17088 "s59E5H2" 0.02627082 "Bifunctional oligoribonuclease and PAP phosphatase NrnA"  
"JS1\_M10\_01398" 17088 "s63E6H2" 0.05056919 "Bifunctional oligoribonuclease and PAP phosphatase NrnA"  
"JS1\_M10\_01399" 17089 "s59E13H2" 0.01212712 "tRNA pseudouridine synthase B"  
"JS1\_M10\_01399" 17089 "s59E25H2" 0 "tRNA pseudouridine synthase B"  
"JS1\_M10\_01399" 17089 "s59E5H2" 0 "tRNA pseudouridine synthase B"  
"JS1\_M10\_01399" 17089 "s63E6H2" 0.03117939 "tRNA pseudouridine synthase B"  
"JS1\_M10\_01400" 17090 "s59E13H2" 0.03301705 "Riboflavin biosynthesis protein RibF"  
"JS1\_M10\_01400" 17090 "s59E25H2" 0 "Riboflavin biosynthesis protein RibF"  
"JS1\_M10\_01400" 17090 "s59E5H2" 0.004275246 "Riboflavin biosynthesis protein RibF"  
"JS1\_M10\_01400" 17090 "s63E6H2" 0.01680782 "Riboflavin biosynthesis protein RibF"  
"JS1\_M10\_01401" 17091 "s59E13H2" 0 "30S ribosomal protein S15"  
"JS1\_M10\_01401" 17091 "s59E25H2" 0 "30S ribosomal protein S15"  
"JS1\_M10\_01401" 17091 "s59E5H2" 0 "30S ribosomal protein S15"  
"JS1\_M10\_01401" 17091 "s63E6H2" 0.01787761 "30S ribosomal protein S15"  
"JS1\_M10\_01402" 17092 "s59E13H2" 0.03415449 "Polyribonucleotide nucleotidyltransferase"  
"JS1\_M10\_01402" 17092 "s59E25H2" 0 "Polyribonucleotide nucleotidyltransferase"  
"JS1\_M10\_01402" 17092 "s59E5H2" 0.02437058 "Polyribonucleotide nucleotidyltransferase"  
"JS1\_M10\_01402" 17092 "s63E6H2" 0.01880266 "Polyribonucleotide nucleotidyltransferase"  
"JS1\_M10\_01403" 17093 "s59E13H2" 0.4473278 "Deoxyuridine 5'-triphosphate nucleotidohydrolase"  
"JS1\_M10\_01403" 17093 "s59E25H2" 0 "Deoxyuridine 5'-triphosphate nucleotidohydrolase"  
"JS1\_M10\_01403" 17093 "s59E5H2" 0.1358252 "Deoxyuridine 5'-triphosphate nucleotidohydrolase"  
"JS1\_M10\_01403" 17093 "s63E6H2" 0.07286054 "Deoxyuridine 5'-triphosphate nucleotidohydrolase"  
"JS1\_M10\_01404" 17094 "s59E13H2" 3.126082 "hypothetical protein"  
"JS1\_M10\_01404" 17094 "s59E25H2" 0 "hypothetical protein"  
"JS1\_M10\_01404" 17094 "s59E5H2" 0.05093538 "hypothetical protein"  
"JS1\_M10\_01404" 17094 "s63E6H2" 0.06137295 "hypothetical protein"  
"JS1\_M10\_01405" 17095 "s59E13H2" 2.568546 "Undecaprenyl-diphosphatase"  
"JS1\_M10\_01405" 17095 "s59E25H2" 0 "Undecaprenyl-diphosphatase"  
"JS1\_M10\_01405" 17095 "s59E5H2" 0.3845783 "Undecaprenyl-diphosphatase"  
"JS1\_M10\_01405" 17095 "s63E6H2" 0.05482374 "Undecaprenyl-diphosphatase"  
"JS1\_M10\_01406" 17096 "s59E13H2" 2.987454 "DNA translocase SpoIIIE"  
"JS1\_M10\_01406" 17096 "s59E25H2" 0 "DNA translocase SpoIIIE"  
"JS1\_M10\_01406" 17096 "s59E5H2" 0.1836052 "DNA translocase SpoIIIE"  
"JS1\_M10\_01406" 17096 "s63E6H2" 0.06079008 "DNA translocase SpoIIIE"

"JS1\_M10\_01407" 17097 "s59E13H2" 0.125223 "Ornithine carbamoyltransferase"  
"JS1\_M10\_01407" 17097 "s59E25H2" 0 "Ornithine carbamoyltransferase"  
"JS1\_M10\_01407" 17097 "s59E5H2" 0.2837488 "Ornithine carbamoyltransferase"  
"JS1\_M10\_01407" 17097 "s63E6H2" 1.607474 "Ornithine carbamoyltransferase"  
"JS1\_M10\_01408" 17098 "s59E13H2" 0.175923 "hypothetical protein"  
"JS1\_M10\_01408" 17098 "s59E25H2" 0 "hypothetical protein"  
"JS1\_M10\_01408" 17098 "s59E5H2" 0.3676738 "hypothetical protein"  
"JS1\_M10\_01408" 17098 "s63E6H2" 1.477439 "hypothetical protein"  
"JS1\_M10\_01412" 17102 "s59E13H2" 0.3210883 "putative 6-phospho-beta-glucosidase"  
"JS1\_M10\_01412" 17102 "s59E25H2" 0 "putative 6-phospho-beta-glucosidase"  
"JS1\_M10\_01412" 17102 "s59E5H2" 0.04723809 "putative 6-phospho-beta-glucosidase"  
"JS1\_M10\_01412" 17102 "s63E6H2" 0.09364083 "putative 6-phospho-beta-glucosidase"  
"JS1\_M10\_01413" 17103 "s59E13H2" 0.1262539 "Glucosamine kinase GspK"  
"JS1\_M10\_01413" 17103 "s59E25H2" 0 "Glucosamine kinase GspK"  
"JS1\_M10\_01413" 17103 "s59E5H2" 0.1686849 "Glucosamine kinase GspK"  
"JS1\_M10\_01413" 17103 "s63E6H2" 0.01672552 "Glucosamine kinase GspK"  
"JS1\_M10\_01414" 17104 "s59E13H2" 0.212077 "Ribose operon repressor"  
"JS1\_M10\_01414" 17104 "s59E25H2" 0 "Ribose operon repressor"  
"JS1\_M10\_01414" 17104 "s59E5H2" 0.01927141 "Ribose operon repressor"  
"JS1\_M10\_01414" 17104 "s63E6H2" 0.06006224 "Ribose operon repressor"  
"JS1\_M10\_01415" 17105 "s59E13H2" 8.917426e-05 "putative arabinose-binding protein precursor"  
"JS1\_M10\_01415" 17105 "s59E25H2" 0 "putative arabinose-binding protein precursor"  
"JS1\_M10\_01415" 17105 "s59E5H2" 0 "putative arabinose-binding protein precursor"  
"JS1\_M10\_01415" 17105 "s63E6H2" 0.008985979 "putative arabinose-binding protein precursor"  
"JS1\_M10\_01416" 17106 "s59E13H2" 0.01251856 "Lactose transport system permease protein LacF"  
"JS1\_M10\_01416" 17106 "s59E25H2" 0 "Lactose transport system permease protein LacF"  
"JS1\_M10\_01416" 17106 "s59E5H2" 0.007965505 "Lactose transport system permease protein LacF"  
"JS1\_M10\_01416" 17106 "s63E6H2" 0.09906479 "Lactose transport system permease protein LacF"  
"JS1\_M10\_01417" 17107 "s59E13H2" 0.001110625 "L-arabinose transport system permease protein AraQ"  
"JS1\_M10\_01417" 17107 "s59E25H2" 0 "L-arabinose transport system permease protein AraQ"  
"JS1\_M10\_01417" 17107 "s59E5H2" 0 "L-arabinose transport system permease protein AraQ"  
"JS1\_M10\_01417" 17107 "s63E6H2" 0.05300602 "L-arabinose transport system permease protein AraQ"  
"JS1\_M10\_01418" 17108 "s59E13H2" 0.02329996 "Oligopeptide transport system permease protein OppC"  
"JS1\_M10\_01418" 17108 "s59E25H2" 0 "Oligopeptide transport system permease protein OppC"  
"JS1\_M10\_01418" 17108 "s59E5H2" 0.05421726 "Oligopeptide transport system permease protein OppC"  
"JS1\_M10\_01418" 17108 "s63E6H2" 0.1275315 "Oligopeptide transport system permease protein OppC"  
"JS1\_M10\_01419" 17109 "s59E13H2" 0.0002369769 "hypothetical protein"  
"JS1\_M10\_01419" 17109 "s59E25H2" 0 "hypothetical protein"  
"JS1\_M10\_01419" 17109 "s59E5H2" 0.0005224776 "hypothetical protein"  
"JS1\_M10\_01419" 17109 "s63E6H2" 0.0001343489 "hypothetical protein"  
"JS1\_M10\_01420" 17110 "s59E13H2" 0.09688053 "DNA primase"  
"JS1\_M10\_01420" 17110 "s59E25H2" 0 "DNA primase"  
"JS1\_M10\_01420" 17110 "s59E5H2" 0.1713681 "DNA primase"  
"JS1\_M10\_01420" 17110 "s63E6H2" 0.05030583 "DNA primase"  
"JS1\_M10\_01432" 17122 "s59E13H2" 0 "hypothetical protein"  
"JS1\_M10\_01432" 17122 "s59E25H2" 0 "hypothetical protein"  
"JS1\_M10\_01432" 17122 "s59E5H2" 0 "hypothetical protein"



"JS1\_M10\_01432" 17122 "s63E6H2" 0 "hypothetical protein"  
"JS1\_M10\_01433" 17123 "s59E13H2" 0.1715493 "RNA polymerase sigma-H factor"  
"JS1\_M10\_01433" 17123 "s59E25H2" 0 "RNA polymerase sigma-H factor"  
"JS1\_M10\_01433" 17123 "s59E5H2" 0.1170421 "RNA polymerase sigma-H factor"  
"JS1\_M10\_01433" 17123 "s63E6H2" 0.4047097 "RNA polymerase sigma-H factor"  
"JS1\_M10\_01434" 17124 "s59E13H2" 0.05615345 "Cysteine--tRNA ligase"  
"JS1\_M10\_01434" 17124 "s59E25H2" 0 "Cysteine--tRNA ligase"  
"JS1\_M10\_01434" 17124 "s59E5H2" 0.1813274 "Cysteine--tRNA ligase"  
"JS1\_M10\_01434" 17124 "s63E6H2" 0.1074948 "Cysteine--tRNA ligase"  
"JS1\_M10\_01435" 17125 "s59E13H2" 0.03226158 "putative PIN and TRAM-domain containing protein precursor"  
"JS1\_M10\_01435" 17125 "s59E25H2" 0 "putative PIN and TRAM-domain containing protein precursor"  
"JS1\_M10\_01435" 17125 "s59E5H2" 0.1924801 "putative PIN and TRAM-domain containing protein precursor"  
"JS1\_M10\_01435" 17125 "s63E6H2" 0.4215623 "putative PIN and TRAM-domain containing protein precursor"  
"JS1\_M10\_01437" 17127 "s59E13H2" 0.1285468 "hypothetical protein"  
"JS1\_M10\_01437" 17127 "s59E25H2" 0 "hypothetical protein"  
"JS1\_M10\_01437" 17127 "s59E5H2" 0.5050533 "hypothetical protein"  
"JS1\_M10\_01437" 17127 "s63E6H2" 0.4673841 "hypothetical protein"  
"JS1\_M10\_01438" 17128 "s59E13H2" 0.1100261 "Negative regulator of genetic competence ClpC/MecB"  
"JS1\_M10\_01438" 17128 "s59E25H2" 0 "Negative regulator of genetic competence ClpC/MecB"  
"JS1\_M10\_01438" 17128 "s59E5H2" 0.3761999 "Negative regulator of genetic competence ClpC/MecB"  
"JS1\_M10\_01438" 17128 "s63E6H2" 0.1013938 "Negative regulator of genetic competence ClpC/MecB"  
"JS1\_M10\_01439" 17129 "s59E13H2" 0.09410127 "Putative ATP:guanido phosphotransferase"  
"JS1\_M10\_01439" 17129 "s59E25H2" 0 "Putative ATP:guanido phosphotransferase"  
"JS1\_M10\_01439" 17129 "s59E5H2" 0.4455208 "Putative ATP:guanido phosphotransferase"  
"JS1\_M10\_01439" 17129 "s63E6H2" 0.2708171 "Putative ATP:guanido phosphotransferase"  
"JS1\_M10\_01440" 17130 "s59E13H2" 0.5922023 "UvrB/uvrC motif protein"  
"JS1\_M10\_01440" 17130 "s59E25H2" 0 "UvrB/uvrC motif protein"  
"JS1\_M10\_01440" 17130 "s59E5H2" 0.2194049 "UvrB/uvrC motif protein"  
"JS1\_M10\_01440" 17130 "s63E6H2" 0.1022778 "UvrB/uvrC motif protein"  
"JS1\_M10\_01441" 17131 "s59E13H2" 0.03648635 "Copper-sensing transcriptional repressor CsoR"  
"JS1\_M10\_01441" 17131 "s59E25H2" 0 "Copper-sensing transcriptional repressor CsoR"  
"JS1\_M10\_01441" 17131 "s59E5H2" 0 "Copper-sensing transcriptional repressor CsoR"  
"JS1\_M10\_01441" 17131 "s63E6H2" 0.01068675 "Copper-sensing transcriptional repressor CsoR"  
"JS1\_M10\_01442" 17132 "s59E13H2" 0.04543788 "hypothetical protein"  
"JS1\_M10\_01442" 17132 "s59E25H2" 0 "hypothetical protein"  
"JS1\_M10\_01442" 17132 "s59E5H2" 0.2549155 "hypothetical protein"  
"JS1\_M10\_01442" 17132 "s63E6H2" 0.1022415 "hypothetical protein"  
"JS1\_M10\_01443" 17133 "s59E13H2" 0.0235215 "Phosphoglycerate kinase"  
"JS1\_M10\_01443" 17133 "s59E25H2" 0 "Phosphoglycerate kinase"  
"JS1\_M10\_01443" 17133 "s59E5H2" 0.09406858 "Phosphoglycerate kinase"  
"JS1\_M10\_01443" 17133 "s63E6H2" 0.06097527 "Phosphoglycerate kinase"  
"JS1\_M10\_01444" 17134 "s59E13H2" 0.03129048 "hypothetical protein"  
"JS1\_M10\_01444" 17134 "s59E25H2" 0 "hypothetical protein"  
"JS1\_M10\_01444" 17134 "s59E5H2" 0.4402908 "hypothetical protein"  
"JS1\_M10\_01444" 17134 "s63E6H2" 0.2919583 "hypothetical protein"  
"JS1\_M10\_01445" 17135 "s59E13H2" 0.08950651 "hypothetical protein"  
"JS1\_M10\_01445" 17135 "s59E25H2" 0 "hypothetical protein"

"JS1\_M10\_01445" 17135 "s59E5H2" 0.4183673 "hypothetical protein"  
"JS1\_M10\_01445" 17135 "s63E6H2" 0.4436411 "hypothetical protein"  
"JS1\_M10\_01446" 17136 "s59E13H2" 0.0337107 "Ribosomal silencing factor RsfS"  
"JS1\_M10\_01446" 17136 "s59E25H2" 0 "Ribosomal silencing factor RsfS"  
"JS1\_M10\_01446" 17136 "s59E5H2" 0.2188584 "Ribosomal silencing factor RsfS"  
"JS1\_M10\_01446" 17136 "s63E6H2" 0.432112 "Ribosomal silencing factor RsfS"  
"JS1\_M10\_01447" 17137 "s59E13H2" 0.03148506 "Regulatory protein MsrR"  
"JS1\_M10\_01447" 17137 "s59E25H2" 0 "Regulatory protein MsrR"  
"JS1\_M10\_01447" 17137 "s59E5H2" 0.1536489 "Regulatory protein MsrR"  
"JS1\_M10\_01447" 17137 "s63E6H2" 0.4409717 "Regulatory protein MsrR"  
"JS1\_M10\_01448" 17138 "s59E13H2" 0.04259542 "putative nicotinate-nucleotide adenyllyltransferase"  
"JS1\_M10\_01448" 17138 "s59E25H2" 0 "putative nicotinate-nucleotide adenyllyltransferase"  
"JS1\_M10\_01448" 17138 "s59E5H2" 0.457748 "putative nicotinate-nucleotide adenyllyltransferase"  
"JS1\_M10\_01448" 17138 "s63E6H2" 0.3569381 "putative nicotinate-nucleotide adenyllyltransferase"  
"JS1\_M10\_01449" 17139 "s59E13H2" 0.02495759 "putative nicotinate-nucleotide adenyllyltransferase"  
"JS1\_M10\_01449" 17139 "s59E25H2" 0 "putative nicotinate-nucleotide adenyllyltransferase"  
"JS1\_M10\_01449" 17139 "s59E5H2" 0.4051519 "putative nicotinate-nucleotide adenyllyltransferase"  
"JS1\_M10\_01449" 17139 "s63E6H2" 0.2907449 "putative nicotinate-nucleotide adenyllyltransferase"  
"JS1\_M10\_01451" 17141 "s59E13H2" 0.04830849 "High molecular weight rubredoxin"  
"JS1\_M10\_01451" 17141 "s59E25H2" 0 "High molecular weight rubredoxin"  
"JS1\_M10\_01451" 17141 "s59E5H2" 0.5263167 "High molecular weight rubredoxin"  
"JS1\_M10\_01451" 17141 "s63E6H2" 0.3956529 "High molecular weight rubredoxin"  
"JS1\_M10\_01452" 17142 "s59E13H2" 0.09124484 "Type A flavoprotein FprA"  
"JS1\_M10\_01452" 17142 "s59E25H2" 0 "Type A flavoprotein FprA"  
"JS1\_M10\_01452" 17142 "s59E5H2" 0.2221256 "Type A flavoprotein FprA"  
"JS1\_M10\_01452" 17142 "s63E6H2" 0.1755447 "Type A flavoprotein FprA"  
"JS1\_M10\_01453" 17143 "s59E13H2" 0.04065848 "Rubrerythrin-1"  
"JS1\_M10\_01453" 17143 "s59E25H2" 0 "Rubrerythrin-1"  
"JS1\_M10\_01453" 17143 "s59E5H2" 0.2946188 "Rubrerythrin-1"  
"JS1\_M10\_01453" 17143 "s63E6H2" 0.2912059 "Rubrerythrin-1"  
"JS1\_M10\_01454" 17144 "s59E13H2" 0.007528069 "Fe/S biogenesis protein NfuA"  
"JS1\_M10\_01454" 17144 "s59E25H2" 0 "Fe/S biogenesis protein NfuA"  
"JS1\_M10\_01454" 17144 "s59E5H2" 0.2116198 "Fe/S biogenesis protein NfuA"  
"JS1\_M10\_01454" 17144 "s63E6H2" 1.143807 "Fe/S biogenesis protein NfuA"  
"JS1\_M10\_01455" 17145 "s59E13H2" 0.02379595 "hypothetical protein"  
"JS1\_M10\_01455" 17145 "s59E25H2" 0 "hypothetical protein"  
"JS1\_M10\_01455" 17145 "s59E5H2" 0.4453223 "hypothetical protein"  
"JS1\_M10\_01455" 17145 "s63E6H2" 1.025382 "hypothetical protein"  
"JS1\_M10\_01456" 17146 "s59E13H2" 0.1722222 "putative multidrug resistance ABC transporter ATP-binding/permease protein YheI"  
"JS1\_M10\_01456" 17146 "s59E25H2" 0 "putative multidrug resistance ABC transporter ATP-binding/permease protein YheI"  
"JS1\_M10\_01456" 17146 "s59E5H2" 2.312733 "putative multidrug resistance ABC transporter ATP-binding/permease protein YheI"  
"JS1\_M10\_01456" 17146 "s63E6H2" 1.381793 "putative multidrug resistance ABC transporter ATP-binding/permease protein YheI"  
"JS1\_M10\_01457" 17147 "s59E13H2" 0.1428141 "putative multidrug resistance ABC transporter ATP-binding/permease protein YheH"  
"JS1\_M10\_01457" 17147 "s59E25H2" 0 "putative multidrug resistance ABC transporter ATP-binding/permease protein YheH"  
"JS1\_M10\_01457" 17147 "s59E5H2" 0.9240609 "putative multidrug resistance ABC transporter ATP-binding/permease protein YheH"  
"JS1\_M10\_01457" 17147 "s63E6H2" 1.083795 "putative multidrug resistance ABC transporter ATP-binding/permease protein YheH"  
"JS1\_M10\_01458" 17148 "s59E13H2" 0.2810696 "hypothetical protein"

"JS1\_M10\_01458" 17148 "s59E25H2" 0 "hypothetical protein"  
"JS1\_M10\_01458" 17148 "s59E5H2" 0.08110505 "hypothetical protein"  
"JS1\_M10\_01458" 17148 "s63E6H2" 1.393462 "hypothetical protein"  
"JS1\_M10\_01459" 17149 "s59E13H2" 0.04127813 "Dimethyl sulfoxide reductase DmsA precursor"  
"JS1\_M10\_01459" 17149 "s59E25H2" 0 "Dimethyl sulfoxide reductase DmsA precursor"  
"JS1\_M10\_01459" 17149 "s59E5H2" 0.6293626 "Dimethyl sulfoxide reductase DmsA precursor"  
"JS1\_M10\_01459" 17149 "s63E6H2" 0.9452511 "Dimethyl sulfoxide reductase DmsA precursor"  
"JS1\_M10\_01460" 17150 "s59E13H2" 0.007945668 "Putative NAD(P)H nitroreductase"  
"JS1\_M10\_01460" 17150 "s59E25H2" 0 "Putative NAD(P)H nitroreductase"  
"JS1\_M10\_01460" 17150 "s59E5H2" 0.9314882 "Putative NAD(P)H nitroreductase"  
"JS1\_M10\_01460" 17150 "s63E6H2" 0.9332093 "Putative NAD(P)H nitroreductase"  
"JS1\_M10\_01461" 17151 "s59E13H2" 0.08385948 "ATP-dependent helicase/deoxyribonuclease subunit B"  
"JS1\_M10\_01461" 17151 "s59E25H2" 0 "ATP-dependent helicase/deoxyribonuclease subunit B"  
"JS1\_M10\_01461" 17151 "s59E5H2" 1.582592 "ATP-dependent helicase/deoxyribonuclease subunit B"  
"JS1\_M10\_01461" 17151 "s63E6H2" 1.596823 "ATP-dependent helicase/deoxyribonuclease subunit B"  
"JS1\_M10\_01462" 17152 "s59E13H2" 0.1024577 "ATP-dependent helicase/nuclease subunit A"  
"JS1\_M10\_01462" 17152 "s59E25H2" 0 "ATP-dependent helicase/nuclease subunit A"  
"JS1\_M10\_01462" 17152 "s59E5H2" 2.090332 "ATP-dependent helicase/nuclease subunit A"  
"JS1\_M10\_01462" 17152 "s63E6H2" 0.3097188 "ATP-dependent helicase/nuclease subunit A"  
"JS1\_M10\_01463" 17153 "s59E13H2" 0.02777623 "DegV domain-containing protein"  
"JS1\_M10\_01463" 17153 "s59E25H2" 0 "DegV domain-containing protein"  
"JS1\_M10\_01463" 17153 "s59E5H2" 0.4431207 "DegV domain-containing protein"  
"JS1\_M10\_01463" 17153 "s63E6H2" 1.248024 "DegV domain-containing protein"  
"JS1\_M10\_01466" 17156 "s59E13H2" 0.04460121 "hypothetical protein"  
"JS1\_M10\_01466" 17156 "s59E25H2" 0 "hypothetical protein"  
"JS1\_M10\_01466" 17156 "s59E5H2" 0.01429192 "hypothetical protein"  
"JS1\_M10\_01466" 17156 "s63E6H2" 0.4125385 "hypothetical protein"  
"JS1\_M10\_01467" 17157 "s59E13H2" 0 "hypothetical protein"  
"JS1\_M10\_01467" 17157 "s59E25H2" 0 "hypothetical protein"  
"JS1\_M10\_01467" 17157 "s59E5H2" 0 "hypothetical protein"  
"JS1\_M10\_01467" 17157 "s63E6H2" 0 "hypothetical protein"  
"JS1\_M10\_01471" 17161 "s59E13H2" 0 "putative cysteine desulfurase"  
"JS1\_M10\_01471" 17161 "s59E25H2" 0 "putative cysteine desulfurase"  
"JS1\_M10\_01471" 17161 "s59E5H2" 0 "putative cysteine desulfurase"  
"JS1\_M10\_01471" 17161 "s63E6H2" 0.01003898 "putative cysteine desulfurase"  
"JS1\_M10\_01472" 17162 "s59E13H2" 0 "hypothetical protein"  
"JS1\_M10\_01472" 17162 "s59E25H2" 0 "hypothetical protein"  
"JS1\_M10\_01472" 17162 "s59E5H2" 0 "hypothetical protein"  
"JS1\_M10\_01472" 17162 "s63E6H2" 0.02591128 "hypothetical protein"  
"JS1\_M10\_01473" 17163 "s59E13H2" 0 "hypothetical protein"  
"JS1\_M10\_01473" 17163 "s59E25H2" 0 "hypothetical protein"  
"JS1\_M10\_01473" 17163 "s59E5H2" 0 "hypothetical protein"  
"JS1\_M10\_01473" 17163 "s63E6H2" 0 "hypothetical protein"  
"JS1\_M10\_01474" 17164 "s59E13H2" 0.2432662 "Peptidase family M50"  
"JS1\_M10\_01474" 17164 "s59E25H2" 0 "Peptidase family M50"  
"JS1\_M10\_01474" 17164 "s59E5H2" 0.458147 "Peptidase family M50"  
"JS1\_M10\_01474" 17164 "s63E6H2" 0.2567683 "Peptidase family M50"

"JS1\_M10\_01475" 17165 "s59E13H2" 0.02825261 "Acylphosphatase"  
"JS1\_M10\_01475" 17165 "s59E25H2" 0 "Acylphosphatase"  
"JS1\_M10\_01475" 17165 "s59E5H2" 0.006908092 "Acylphosphatase"  
"JS1\_M10\_01475" 17165 "s63E6H2" 0 "Acylphosphatase"  
"JS1\_M10\_01476" 17166 "s59E13H2" 0.03913304 "hypothetical protein"  
"JS1\_M10\_01476" 17166 "s59E25H2" 0 "hypothetical protein"  
"JS1\_M10\_01476" 17166 "s59E5H2" 0.005988117 "hypothetical protein"  
"JS1\_M10\_01476" 17166 "s63E6H2" 0.09532436 "hypothetical protein"  
"JS1\_M10\_01477" 17167 "s59E13H2" 0.00632175 "hypothetical protein"  
"JS1\_M10\_01477" 17167 "s59E25H2" 0 "hypothetical protein"  
"JS1\_M10\_01477" 17167 "s59E5H2" 0 "hypothetical protein"  
"JS1\_M10\_01477" 17167 "s63E6H2" 0.07401571 "hypothetical protein"  
"JS1\_M10\_01478" 17168 "s59E13H2" 0.0420984 "putative cysteine desulfurase 2"  
"JS1\_M10\_01478" 17168 "s59E25H2" 0 "putative cysteine desulfurase 2"  
"JS1\_M10\_01478" 17168 "s59E5H2" 0.02311063 "putative cysteine desulfurase 2"  
"JS1\_M10\_01478" 17168 "s63E6H2" 0.1583958 "putative cysteine desulfurase 2"  
"JS1\_M10\_01479" 17169 "s59E13H2" 0.3042166 "NifU-like protein"  
"JS1\_M10\_01479" 17169 "s59E25H2" 0 "NifU-like protein"  
"JS1\_M10\_01479" 17169 "s59E5H2" 0.1205325 "NifU-like protein"  
"JS1\_M10\_01479" 17169 "s63E6H2" 0.1464571 "NifU-like protein"  
"JS1\_M10\_01480" 17170 "s59E13H2" 0.3514506 "Thiol:disulfide interchange protein DsbD precursor"  
"JS1\_M10\_01480" 17170 "s59E25H2" 0 "Thiol:disulfide interchange protein DsbD precursor"  
"JS1\_M10\_01480" 17170 "s59E5H2" 0.05768675 "Thiol:disulfide interchange protein DsbD precursor"  
"JS1\_M10\_01480" 17170 "s63E6H2" 0.09364639 "Thiol:disulfide interchange protein DsbD precursor"  
"JS1\_M10\_01481" 17171 "s59E13H2" 0.2279973 "Thiol:disulfide interchange protein DsbD precursor"  
"JS1\_M10\_01481" 17171 "s59E25H2" 0 "Thiol:disulfide interchange protein DsbD precursor"  
"JS1\_M10\_01481" 17171 "s59E5H2" 0.004610946 "Thiol:disulfide interchange protein DsbD precursor"  
"JS1\_M10\_01481" 17171 "s63E6H2" 0.06289642 "Thiol:disulfide interchange protein DsbD precursor"  
"JS1\_M10\_01482" 17172 "s59E13H2" 0.1117561 "GMP synthase subunit B"  
"JS1\_M10\_01482" 17172 "s59E25H2" 0 "GMP synthase subunit B"  
"JS1\_M10\_01482" 17172 "s59E5H2" 0.03006448 "GMP synthase subunit B"  
"JS1\_M10\_01482" 17172 "s63E6H2" 0.04597424 "GMP synthase subunit B"  
"JS1\_M10\_01483" 17173 "s59E13H2" 0.003184795 "hypothetical protein"  
"JS1\_M10\_01483" 17173 "s59E25H2" 0 "hypothetical protein"  
"JS1\_M10\_01483" 17173 "s59E5H2" 0.03417528 "hypothetical protein"  
"JS1\_M10\_01483" 17173 "s63E6H2" 0.08028893 "hypothetical protein"  
"JS1\_M10\_01484" 17174 "s59E13H2" 0 "hypothetical protein"  
"JS1\_M10\_01484" 17174 "s59E25H2" 0 "hypothetical protein"  
"JS1\_M10\_01484" 17174 "s59E5H2" 0 "hypothetical protein"  
"JS1\_M10\_01484" 17174 "s63E6H2" 0.001723155 "hypothetical protein"  
"JS1\_M10\_01485" 17175 "s59E13H2" 0 "Kappa-carrageenase precursor"  
"JS1\_M10\_01485" 17175 "s59E25H2" 0 "Kappa-carrageenase precursor"  
"JS1\_M10\_01485" 17175 "s59E5H2" 0 "Kappa-carrageenase precursor"  
"JS1\_M10\_01485" 17175 "s63E6H2" 0.02152637 "Kappa-carrageenase precursor"  
"JS1\_M10\_01487" 17177 "s59E13H2" 0 "hypothetical protein"  
"JS1\_M10\_01487" 17177 "s59E25H2" 0 "hypothetical protein"  
"JS1\_M10\_01487" 17177 "s59E5H2" 0 "hypothetical protein"

"JS1\_M10\_01487" 17177 "s63E6H2" 0.0623788 "hypothetical protein"  
"JS1\_M10\_01488" 17178 "s59E13H2" 0 "Putative serine protease HtrA"  
"JS1\_M10\_01488" 17178 "s59E25H2" 0 "Putative serine protease HtrA"  
"JS1\_M10\_01488" 17178 "s59E5H2" 0 "Putative serine protease HtrA"  
"JS1\_M10\_01488" 17178 "s63E6H2" 0.101708 "Putative serine protease HtrA"  
"JS1\_M10\_01489" 17179 "s59E13H2" 0.0430798 "High-affinity branched-chain amino acid transport system permease protein LivH"  
"JS1\_M10\_01489" 17179 "s59E25H2" 0 "High-affinity branched-chain amino acid transport system permease protein LivH"  
"JS1\_M10\_01489" 17179 "s59E5H2" 0.01570462 "High-affinity branched-chain amino acid transport system permease protein LivH"  
"JS1\_M10\_01489" 17179 "s63E6H2" 0.007755105 "High-affinity branched-chain amino acid transport system permease protein LivH"  
"JS1\_M10\_01490" 17180 "s59E13H2" 0.03256393 "High-affinity branched-chain amino acid transport system permease protein LivH"  
"JS1\_M10\_01490" 17180 "s59E25H2" 0 "High-affinity branched-chain amino acid transport system permease protein LivH"  
"JS1\_M10\_01490" 17180 "s59E5H2" 0 "High-affinity branched-chain amino acid transport system permease protein LivH"  
"JS1\_M10\_01490" 17180 "s63E6H2" 0.08807264 "High-affinity branched-chain amino acid transport system permease protein LivH"  
"JS1\_M10\_01491" 17181 "s59E13H2" 0.1413238 "Lipopolysaccharide export system ATP-binding protein LptB"  
"JS1\_M10\_01491" 17181 "s59E25H2" 0 "Lipopolysaccharide export system ATP-binding protein LptB"  
"JS1\_M10\_01491" 17181 "s59E5H2" 0.02060112 "Lipopolysaccharide export system ATP-binding protein LptB"  
"JS1\_M10\_01491" 17181 "s63E6H2" 0.153768 "Lipopolysaccharide export system ATP-binding protein LptB"  
"JS1\_M10\_01492" 17182 "s59E13H2" 0.2029408 "High-affinity branched-chain amino acid transport ATP-binding protein LivF"  
"JS1\_M10\_01492" 17182 "s59E25H2" 0 "High-affinity branched-chain amino acid transport ATP-binding protein LivF"  
"JS1\_M10\_01492" 17182 "s59E5H2" 0.02207752 "High-affinity branched-chain amino acid transport ATP-binding protein LivF"  
"JS1\_M10\_01492" 17182 "s63E6H2" 0.2339401 "High-affinity branched-chain amino acid transport ATP-binding protein LivF"  
"JS1\_M10\_01493" 17183 "s59E13H2" 3.333174 "TPR repeat-containing protein YfgC precursor"  
"JS1\_M10\_01493" 17183 "s59E25H2" 0 "TPR repeat-containing protein YfgC precursor"  
"JS1\_M10\_01493" 17183 "s59E5H2" 0.01893474 "TPR repeat-containing protein YfgC precursor"  
"JS1\_M10\_01493" 17183 "s63E6H2" 0.6075974 "TPR repeat-containing protein YfgC precursor"  
"JS1\_M10\_01494" 17184 "s59E13H2" 0.2735584 "Alanine--tRNA ligase"  
"JS1\_M10\_01494" 17184 "s59E25H2" 0 "Alanine--tRNA ligase"  
"JS1\_M10\_01494" 17184 "s59E5H2" 0.1209422 "Alanine--tRNA ligase"  
"JS1\_M10\_01494" 17184 "s63E6H2" 0.3851749 "Alanine--tRNA ligase"  
"JS1\_M10\_01495" 17185 "s59E13H2" 0.9007956 "putative deoxyribonuclease YcfH"  
"JS1\_M10\_01495" 17185 "s59E25H2" 0 "putative deoxyribonuclease YcfH"  
"JS1\_M10\_01495" 17185 "s59E5H2" 0.02391476 "putative deoxyribonuclease YcfH"  
"JS1\_M10\_01495" 17185 "s63E6H2" 0.1691222 "putative deoxyribonuclease YcfH"  
"JS1\_M10\_01496" 17186 "s59E13H2" 4.28489 "hypothetical protein"  
"JS1\_M10\_01496" 17186 "s59E25H2" 0 "hypothetical protein"  
"JS1\_M10\_01496" 17186 "s59E5H2" 0.1444474 "hypothetical protein"  
"JS1\_M10\_01496" 17186 "s63E6H2" 0.4715256 "hypothetical protein"  
"JS1\_M10\_01497" 17187 "s59E13H2" 0.07456395 "hypothetical protein"  
"JS1\_M10\_01497" 17187 "s59E25H2" 0 "hypothetical protein"  
"JS1\_M10\_01497" 17187 "s59E5H2" 0.009962847 "hypothetical protein"  
"JS1\_M10\_01497" 17187 "s63E6H2" 0.0723546 "hypothetical protein"  
"JS1\_M10\_01498" 17188 "s59E13H2" 0 "YcfA-like protein"  
"JS1\_M10\_01498" 17188 "s59E25H2" 0 "YcfA-like protein"  
"JS1\_M10\_01498" 17188 "s59E5H2" 1.189358 "YcfA-like protein"  
"JS1\_M10\_01498" 17188 "s63E6H2" 0.08239037 "YcfA-like protein"  
"JS1\_M10\_01499" 17189 "s59E13H2" 0.005696962 "hypothetical protein"  
"JS1\_M10\_01499" 17189 "s59E25H2" 0 "hypothetical protein"

"JS1\_M10\_01499" 17189 "s59E5H2" 1.172571 "hypothetical protein"  
"JS1\_M10\_01499" 17189 "s63E6H2" 0.0837784 "hypothetical protein"  
"JS1\_M10\_01500" 17190 "s59E13H2" 0 "hypothetical protein"  
"JS1\_M10\_01500" 17190 "s59E25H2" 0 "hypothetical protein"  
"JS1\_M10\_01500" 17190 "s59E5H2" 0 "hypothetical protein"  
"JS1\_M10\_01500" 17190 "s63E6H2" 0.02300777 "hypothetical protein"  
"JS1\_M10\_01501" 17191 "s59E13H2" 0 "Toxin MazF5"  
"JS1\_M10\_01501" 17191 "s59E25H2" 0 "Toxin MazF5"  
"JS1\_M10\_01501" 17191 "s59E5H2" 0.1271206 "Toxin MazF5"  
"JS1\_M10\_01501" 17191 "s63E6H2" 0.02806123 "Toxin MazF5"  
"JS1\_M10\_01502" 17192 "s59E13H2" 0 "Ribbon-helix-helix protein, copG family"  
"JS1\_M10\_01502" 17192 "s59E25H2" 0 "Ribbon-helix-helix protein, copG family"  
"JS1\_M10\_01502" 17192 "s59E5H2" 0.07708711 "Ribbon-helix-helix protein, copG family"  
"JS1\_M10\_01502" 17192 "s63E6H2" 0.04067509 "Ribbon-helix-helix protein, copG family"  
"JS1\_M10\_01503" 17193 "s59E13H2" 0.07568071 "DNA primase"  
"JS1\_M10\_01503" 17193 "s59E25H2" 0 "DNA primase"  
"JS1\_M10\_01503" 17193 "s59E5H2" 0.4202291 "DNA primase"  
"JS1\_M10\_01503" 17193 "s63E6H2" 0.05195541 "DNA primase"  
"JS1\_M10\_01504" 17194 "s59E13H2" 0.0004361593 "DNA primase"  
"JS1\_M10\_01504" 17194 "s59E25H2" 0 "DNA primase"  
"JS1\_M10\_01504" 17194 "s59E5H2" 0.04542495 "DNA primase"  
"JS1\_M10\_01504" 17194 "s63E6H2" 0 "DNA primase"  
"JS1\_M10\_01506" 17196 "s59E13H2" 0.0308702 "metal-dependent hydrolase"  
"JS1\_M10\_01506" 17196 "s59E25H2" 0 "metal-dependent hydrolase"  
"JS1\_M10\_01506" 17196 "s59E5H2" 0.4863266 "metal-dependent hydrolase"  
"JS1\_M10\_01506" 17196 "s63E6H2" 0.399454 "metal-dependent hydrolase"  
"JS1\_M10\_01507" 17197 "s59E13H2" 0.04434248 "DNA-directed RNA polymerase subunit delta"  
"JS1\_M10\_01507" 17197 "s59E25H2" 0 "DNA-directed RNA polymerase subunit delta"  
"JS1\_M10\_01507" 17197 "s59E5H2" 0.3362135 "DNA-directed RNA polymerase subunit delta"  
"JS1\_M10\_01507" 17197 "s63E6H2" 0.1307954 "DNA-directed RNA polymerase subunit delta"  
"JS1\_M10\_01508" 17198 "s59E13H2" 0.01934209 "Carbonic anhydrase precursor"  
"JS1\_M10\_01508" 17198 "s59E25H2" 0 "Carbonic anhydrase precursor"  
"JS1\_M10\_01508" 17198 "s59E5H2" 0.147051 "Carbonic anhydrase precursor"  
"JS1\_M10\_01508" 17198 "s63E6H2" 0.1325549 "Carbonic anhydrase precursor"  
"JS1\_M10\_01509" 17199 "s59E13H2" 0.03035421 "UvrABC system protein C"  
"JS1\_M10\_01509" 17199 "s59E25H2" 0 "UvrABC system protein C"  
"JS1\_M10\_01509" 17199 "s59E5H2" 0.1736493 "UvrABC system protein C"  
"JS1\_M10\_01509" 17199 "s63E6H2" 0.1196161 "UvrABC system protein C"  
"JS1\_M10\_01510" 17200 "s59E13H2" 0.02987726 "UvrABC system protein A"  
"JS1\_M10\_01510" 17200 "s59E25H2" 0 "UvrABC system protein A"  
"JS1\_M10\_01510" 17200 "s59E5H2" 0.7000563 "UvrABC system protein A"  
"JS1\_M10\_01510" 17200 "s63E6H2" 0.1324566 "UvrABC system protein A"  
"JS1\_M10\_01511" 17201 "s59E13H2" 0.07713721 "UvrABC system protein B"  
"JS1\_M10\_01511" 17201 "s59E25H2" 0 "UvrABC system protein B"  
"JS1\_M10\_01511" 17201 "s59E5H2" 0.5453737 "UvrABC system protein B"  
"JS1\_M10\_01511" 17201 "s63E6H2" 0.2141818 "UvrABC system protein B"  
"JS1\_M10\_01512" 17202 "s59E13H2" 0.04838461 "Adenine deaminase"

"JS1\_M10\_01512" 17202 "s59E25H2" 0 "Adenine deaminase"  
"JS1\_M10\_01512" 17202 "s59E5H2" 0.5502052 "Adenine deaminase"  
"JS1\_M10\_01512" 17202 "s63E6H2" 2.374156 "Adenine deaminase"  
"JS1\_M10\_01513" 17203 "s59E13H2" 0.002811359 "Dephospho-CoA kinase"  
"JS1\_M10\_01513" 17203 "s59E25H2" 0 "Dephospho-CoA kinase"  
"JS1\_M10\_01513" 17203 "s59E5H2" 0.0530993 "Dephospho-CoA kinase"  
"JS1\_M10\_01513" 17203 "s63E6H2" 0.02704843 "Dephospho-CoA kinase"  
"JS1\_M10\_01514" 17204 "s59E13H2" 0.01468838 "DNA polymerase I"  
"JS1\_M10\_01514" 17204 "s59E25H2" 0 "DNA polymerase I"  
"JS1\_M10\_01514" 17204 "s59E5H2" 0.1309825 "DNA polymerase I"  
"JS1\_M10\_01514" 17204 "s63E6H2" 0.5917699 "DNA polymerase I"  
"JS1\_M10\_01517" 17207 "s59E13H2" 0.07716286 "DNA polymerase III subunit alpha"  
"JS1\_M10\_01517" 17207 "s59E25H2" 0 "DNA polymerase III subunit alpha"  
"JS1\_M10\_01517" 17207 "s59E5H2" 0.3678931 "DNA polymerase III subunit alpha"  
"JS1\_M10\_01517" 17207 "s63E6H2" 0.4305641 "DNA polymerase III subunit alpha"  
"JS1\_M10\_01518" 17208 "s59E13H2" 0.005159736 "6-phosphofructokinase 1"  
"JS1\_M10\_01518" 17208 "s59E25H2" 0 "6-phosphofructokinase 1"  
"JS1\_M10\_01518" 17208 "s59E5H2" 0.4446981 "6-phosphofructokinase 1"  
"JS1\_M10\_01518" 17208 "s63E6H2" 1.614701 "6-phosphofructokinase 1"  
"JS1\_M10\_01519" 17209 "s59E13H2" 0.01666294 "Fructose-bisphosphate aldolase"  
"JS1\_M10\_01519" 17209 "s59E25H2" 0 "Fructose-bisphosphate aldolase"  
"JS1\_M10\_01519" 17209 "s59E5H2" 0.4534984 "Fructose-bisphosphate aldolase"  
"JS1\_M10\_01519" 17209 "s63E6H2" 0.6074171 "Fructose-bisphosphate aldolase"  
"JS1\_M10\_01520" 17210 "s59E13H2" 0.1060591 "Modulator of FtsH protease HflK"  
"JS1\_M10\_01520" 17210 "s59E25H2" 0 "Modulator of FtsH protease HflK"  
"JS1\_M10\_01520" 17210 "s59E5H2" 0.3071964 "Modulator of FtsH protease HflK"  
"JS1\_M10\_01520" 17210 "s63E6H2" 1.170442 "Modulator of FtsH protease HflK"  
"JS1\_M10\_01521" 17211 "s59E13H2" 0.169114 "Modulator of FtsH protease HflC"  
"JS1\_M10\_01521" 17211 "s59E25H2" 0 "Modulator of FtsH protease HflC"  
"JS1\_M10\_01521" 17211 "s59E5H2" 0.57721 "Modulator of FtsH protease HflC"  
"JS1\_M10\_01521" 17211 "s63E6H2" 1.75563 "Modulator of FtsH protease HflC"  
"JS1\_M10\_01522" 17212 "s59E13H2" 0.06088041 "Glycerate dehydrogenase"  
"JS1\_M10\_01522" 17212 "s59E25H2" 0 "Glycerate dehydrogenase"  
"JS1\_M10\_01522" 17212 "s59E5H2" 0.2174435 "Glycerate dehydrogenase"  
"JS1\_M10\_01522" 17212 "s63E6H2" 0.8267465 "Glycerate dehydrogenase"  
"JS1\_M10\_01523" 17213 "s59E13H2" 0.02446401 "hypothetical protein"  
"JS1\_M10\_01523" 17213 "s59E25H2" 0 "hypothetical protein"  
"JS1\_M10\_01523" 17213 "s59E5H2" 0.07624427 "hypothetical protein"  
"JS1\_M10\_01523" 17213 "s63E6H2" 0.5008721 "hypothetical protein"  
"JS1\_M10\_01525" 17215 "s59E13H2" 0.0406341 "putative transporter"  
"JS1\_M10\_01525" 17215 "s59E25H2" 0 "putative transporter"  
"JS1\_M10\_01525" 17215 "s59E5H2" 0.293285 "putative transporter"  
"JS1\_M10\_01525" 17215 "s63E6H2" 0.7744846 "putative transporter"  
"JS1\_M10\_01526" 17216 "s59E13H2" 0.02935366 "Aspartyl/glutamyl-tRNA(Asn/Gln) amidotransferase subunit B"  
"JS1\_M10\_01526" 17216 "s59E25H2" 0 "Aspartyl/glutamyl-tRNA(Asn/Gln) amidotransferase subunit B"  
"JS1\_M10\_01526" 17216 "s59E5H2" 0.2175438 "Aspartyl/glutamyl-tRNA(Asn/Gln) amidotransferase subunit B"  
"JS1\_M10\_01526" 17216 "s63E6H2" 0.2056008 "Aspartyl/glutamyl-tRNA(Asn/Gln) amidotransferase subunit B"

"JS1\_M10\_01527" 17217 "s59E13H2" 0.06143407 "Glutamyl-tRNA(Gln) amidotransferase subunit A"  
"JS1\_M10\_01527" 17217 "s59E25H2" 0 "Glutamyl-tRNA(Gln) amidotransferase subunit A"  
"JS1\_M10\_01527" 17217 "s59E5H2" 0.3502974 "Glutamyl-tRNA(Gln) amidotransferase subunit A"  
"JS1\_M10\_01527" 17217 "s63E6H2" 0.6244462 "Glutamyl-tRNA(Gln) amidotransferase subunit A"  
"JS1\_M10\_01528" 17218 "s59E13H2" 0.02467579 "Aspartyl/glutamyl-tRNA(Asn/Gln) amidotransferase subunit C"  
"JS1\_M10\_01528" 17218 "s59E25H2" 0 "Aspartyl/glutamyl-tRNA(Asn/Gln) amidotransferase subunit C"  
"JS1\_M10\_01528" 17218 "s59E5H2" 0.2899915 "Aspartyl/glutamyl-tRNA(Asn/Gln) amidotransferase subunit C"  
"JS1\_M10\_01528" 17218 "s63E6H2" 0.1319247 "Aspartyl/glutamyl-tRNA(Asn/Gln) amidotransferase subunit C"  
"JS1\_M10\_01529" 17219 "s59E13H2" 0.07686953 "DNA ligase"  
"JS1\_M10\_01529" 17219 "s59E25H2" 0 "DNA ligase"  
"JS1\_M10\_01529" 17219 "s59E5H2" 0.138054 "DNA ligase"  
"JS1\_M10\_01529" 17219 "s63E6H2" 0.4370085 "DNA ligase"  
"JS1\_M10\_01530" 17220 "s59E13H2" 0.06286863 "Putative multidrug export ATP-binding/permease protein"  
"JS1\_M10\_01530" 17220 "s59E25H2" 0 "Putative multidrug export ATP-binding/permease protein"  
"JS1\_M10\_01530" 17220 "s59E5H2" 0.262309 "Putative multidrug export ATP-binding/permease protein"  
"JS1\_M10\_01530" 17220 "s63E6H2" 0.3642149 "Putative multidrug export ATP-binding/permease protein"  
"JS1\_M10\_01531" 17221 "s59E13H2" 0.07799259 "Putative peptidyl-prolyl cis-trans isomerase Cbf2 precursor"  
"JS1\_M10\_01531" 17221 "s59E25H2" 0 "Putative peptidyl-prolyl cis-trans isomerase Cbf2 precursor"  
"JS1\_M10\_01531" 17221 "s59E5H2" 0.1540747 "Putative peptidyl-prolyl cis-trans isomerase Cbf2 precursor"  
"JS1\_M10\_01531" 17221 "s63E6H2" 0.09342587 "Putative peptidyl-prolyl cis-trans isomerase Cbf2 precursor"  
"JS1\_M10\_01532" 17222 "s59E13H2" 0.1514234 "ATP-dependent DNA helicase PcrA"  
"JS1\_M10\_01532" 17222 "s59E25H2" 0 "ATP-dependent DNA helicase PcrA"  
"JS1\_M10\_01532" 17222 "s59E5H2" 0.1474603 "ATP-dependent DNA helicase PcrA"  
"JS1\_M10\_01532" 17222 "s63E6H2" 0.2235384 "ATP-dependent DNA helicase PcrA"  
"JS1\_M10\_01533" 17223 "s59E13H2" 0.09545348 "hypothetical protein"  
"JS1\_M10\_01533" 17223 "s59E25H2" 0 "hypothetical protein"  
"JS1\_M10\_01533" 17223 "s59E5H2" 0.4004332 "hypothetical protein"  
"JS1\_M10\_01533" 17223 "s63E6H2" 0.1226436 "hypothetical protein"  
"JS1\_M10\_01534" 17224 "s59E13H2" 0.1123908 "Aspartate aminotransferase"  
"JS1\_M10\_01534" 17224 "s59E25H2" 0 "Aspartate aminotransferase"  
"JS1\_M10\_01534" 17224 "s59E5H2" 0.7859795 "Aspartate aminotransferase"  
"JS1\_M10\_01534" 17224 "s63E6H2" 0.1822629 "Aspartate aminotransferase"  
"JS1\_M10\_01535" 17225 "s59E13H2" 0.02210333 "Peptidyl-tRNA hydrolase"  
"JS1\_M10\_01535" 17225 "s59E25H2" 0 "Peptidyl-tRNA hydrolase"  
"JS1\_M10\_01535" 17225 "s59E5H2" 0.04461691 "Peptidyl-tRNA hydrolase"  
"JS1\_M10\_01535" 17225 "s63E6H2" 0.3844501 "Peptidyl-tRNA hydrolase"  
"JS1\_M10\_01536" 17226 "s59E13H2" 0 "peptidyl-tRNA hydrolase"  
"JS1\_M10\_01536" 17226 "s59E25H2" 0 "peptidyl-tRNA hydrolase"  
"JS1\_M10\_01536" 17226 "s59E5H2" 0 "peptidyl-tRNA hydrolase"  
"JS1\_M10\_01536" 17226 "s63E6H2" 0.005854131 "peptidyl-tRNA hydrolase"  
"JS1\_M10\_01538" 17228 "s59E13H2" 0.0729719 "RNA polymerase sigma factor SigA"  
"JS1\_M10\_01538" 17228 "s59E25H2" 0 "RNA polymerase sigma factor SigA"  
"JS1\_M10\_01538" 17228 "s59E5H2" 1.02469 "RNA polymerase sigma factor SigA"  
"JS1\_M10\_01538" 17228 "s63E6H2" 0.09837641 "RNA polymerase sigma factor SigA"  
"JS1\_M10\_01539" 17229 "s59E13H2" 0 "GYD domain protein"  
"JS1\_M10\_01539" 17229 "s59E25H2" 0 "GYD domain protein"  
"JS1\_M10\_01539" 17229 "s59E5H2" 0 "GYD domain protein"



"JS1\_M10\_01539" 17229 "s63E6H2" 0.008130134 "GYD domain protein"  
"JS1\_M10\_01540" 17230 "s59E13H2" 0.06228752 "Xylulose kinase"  
"JS1\_M10\_01540" 17230 "s59E25H2" 0 "Xylulose kinase"  
"JS1\_M10\_01540" 17230 "s59E5H2" 0.3116899 "Xylulose kinase"  
"JS1\_M10\_01540" 17230 "s63E6H2" 0.5913918 "Xylulose kinase"  
"JS1\_M10\_01541" 17231 "s59E13H2" 0.002562587 "Xylose isomerase"  
"JS1\_M10\_01541" 17231 "s59E25H2" 0 "Xylose isomerase"  
"JS1\_M10\_01541" 17231 "s59E5H2" 0.00938574 "Xylose isomerase"  
"JS1\_M10\_01541" 17231 "s63E6H2" 0.02742613 "Xylose isomerase"  
"JS1\_M10\_01542" 17232 "s59E13H2" 0.04899671 "N-acetylglucosamine repressor"  
"JS1\_M10\_01542" 17232 "s59E25H2" 0 "N-acetylglucosamine repressor"  
"JS1\_M10\_01542" 17232 "s59E5H2" 0.4526602 "N-acetylglucosamine repressor"  
"JS1\_M10\_01542" 17232 "s63E6H2" 0.773967 "N-acetylglucosamine repressor"  
"JS1\_M10\_01543" 17233 "s59E13H2" 0.06172802 "Xylose transport system permease protein XylH"  
"JS1\_M10\_01543" 17233 "s59E25H2" 0 "Xylose transport system permease protein XylH"  
"JS1\_M10\_01543" 17233 "s59E5H2" 0.1494369 "Xylose transport system permease protein XylH"  
"JS1\_M10\_01543" 17233 "s63E6H2" 0.7294295 "Xylose transport system permease protein XylH"  
"JS1\_M10\_01544" 17234 "s59E13H2" 0.01513607 "Ribose import ATP-binding protein RbsA"  
"JS1\_M10\_01544" 17234 "s59E25H2" 0 "Ribose import ATP-binding protein RbsA"  
"JS1\_M10\_01544" 17234 "s59E5H2" 0.09380374 "Ribose import ATP-binding protein RbsA"  
"JS1\_M10\_01544" 17234 "s63E6H2" 0.5122662 "Ribose import ATP-binding protein RbsA"  
"JS1\_M10\_01545" 17235 "s59E13H2" 0.241875 "Beta-galactosidase"  
"JS1\_M10\_01545" 17235 "s59E25H2" 0 "Beta-galactosidase"  
"JS1\_M10\_01545" 17235 "s59E5H2" 0.3969203 "Beta-galactosidase"  
"JS1\_M10\_01545" 17235 "s63E6H2" 0.3508384 "Beta-galactosidase"  
"JS1\_M10\_01546" 17236 "s59E13H2" 0 "putative ABC transporter ATP-binding protein YbhF"  
"JS1\_M10\_01546" 17236 "s59E25H2" 0 "putative ABC transporter ATP-binding protein YbhF"  
"JS1\_M10\_01546" 17236 "s59E5H2" 0.07985779 "putative ABC transporter ATP-binding protein YbhF"  
"JS1\_M10\_01546" 17236 "s63E6H2" 0.00476807 "putative ABC transporter ATP-binding protein YbhF"  
"JS1\_M10\_01547" 17237 "s59E13H2" 0 "ABC-2 type transporter"  
"JS1\_M10\_01547" 17237 "s59E25H2" 0 "ABC-2 type transporter"  
"JS1\_M10\_01547" 17237 "s59E5H2" 0.0676785 "ABC-2 type transporter"  
"JS1\_M10\_01547" 17237 "s63E6H2" 0.01245021 "ABC-2 type transporter"  
"JS1\_M10\_01548" 17238 "s59E13H2" 0.08950835 "Glycosyl hydrolases family 2, sugar binding domain"  
"JS1\_M10\_01548" 17238 "s59E25H2" 0 "Glycosyl hydrolases family 2, sugar binding domain"  
"JS1\_M10\_01548" 17238 "s59E5H2" 0.06439026 "Glycosyl hydrolases family 2, sugar binding domain"  
"JS1\_M10\_01548" 17238 "s63E6H2" 0.3068757 "Glycosyl hydrolases family 2, sugar binding domain"  
"JS1\_M10\_01549" 17239 "s59E13H2" 0.3399011 "N,N'-diacetylchitobiose phosphorylase"  
"JS1\_M10\_01549" 17239 "s59E25H2" 0 "N,N'-diacetylchitobiose phosphorylase"  
"JS1\_M10\_01549" 17239 "s59E5H2" 0.2894449 "N,N'-diacetylchitobiose phosphorylase"  
"JS1\_M10\_01549" 17239 "s63E6H2" 0.4142301 "N,N'-diacetylchitobiose phosphorylase"  
"JS1\_M10\_01550" 17240 "s59E13H2" 1.12494 "Beta-1,4-mannooligosaccharide phosphorylase"  
"JS1\_M10\_01550" 17240 "s59E25H2" 0 "Beta-1,4-mannooligosaccharide phosphorylase"  
"JS1\_M10\_01550" 17240 "s59E5H2" 2.0092 "Beta-1,4-mannooligosaccharide phosphorylase"  
"JS1\_M10\_01550" 17240 "s63E6H2" 1.166593 "Beta-1,4-mannooligosaccharide phosphorylase"  
"JS1\_M10\_01551" 17241 "s59E13H2" 1.33367 "Oligopeptide transport ATP-binding protein OppF"  
"JS1\_M10\_01551" 17241 "s59E25H2" 0 "Oligopeptide transport ATP-binding protein OppF"

"JS1\_M10\_01551" 17241 "s59E5H2" 1.45833 "Oligopeptide transport ATP-binding protein OppF"  
"JS1\_M10\_01551" 17241 "s63E6H2" 0.946729 "Oligopeptide transport ATP-binding protein OppF"  
"JS1\_M10\_01552" 17242 "s59E13H2" 0.1538871 "Oligopeptide transport ATP-binding protein OppD"  
"JS1\_M10\_01552" 17242 "s59E25H2" 0 "Oligopeptide transport ATP-binding protein OppD"  
"JS1\_M10\_01552" 17242 "s59E5H2" 0.397607 "Oligopeptide transport ATP-binding protein OppD"  
"JS1\_M10\_01552" 17242 "s63E6H2" 0.318225 "Oligopeptide transport ATP-binding protein OppD"  
"JS1\_M10\_01553" 17243 "s59E13H2" 0.02038207 "Oligopeptide transport system permease protein OppC"  
"JS1\_M10\_01553" 17243 "s59E25H2" 0 "Oligopeptide transport system permease protein OppC"  
"JS1\_M10\_01553" 17243 "s59E5H2" 0.1977794 "Oligopeptide transport system permease protein OppC"  
"JS1\_M10\_01553" 17243 "s63E6H2" 0.04753284 "Oligopeptide transport system permease protein OppC"  
"JS1\_M10\_01554" 17244 "s59E13H2" 0.01330178 "Dipeptide transport system permease protein DppB"  
"JS1\_M10\_01554" 17244 "s59E25H2" 0 "Dipeptide transport system permease protein DppB"  
"JS1\_M10\_01554" 17244 "s59E5H2" 0.06773663 "Dipeptide transport system permease protein DppB"  
"JS1\_M10\_01554" 17244 "s63E6H2" 0.01932149 "Dipeptide transport system permease protein DppB"  
"JS1\_M10\_01555" 17245 "s59E13H2" 0.0004380825 "Periplasmic dipeptide transport protein precursor"  
"JS1\_M10\_01555" 17245 "s59E25H2" 0 "Periplasmic dipeptide transport protein precursor"  
"JS1\_M10\_01555" 17245 "s59E5H2" 0.004806687 "Periplasmic dipeptide transport protein precursor"  
"JS1\_M10\_01555" 17245 "s63E6H2" 0.0003214835 "Periplasmic dipeptide transport protein precursor"  
"JS1\_M10\_01556" 17246 "s59E13H2" 0.3981875 "HTH-type transcriptional regulator DegA"  
"JS1\_M10\_01556" 17246 "s59E25H2" 0 "HTH-type transcriptional regulator DegA"  
"JS1\_M10\_01556" 17246 "s59E5H2" 0.268766 "HTH-type transcriptional regulator DegA"  
"JS1\_M10\_01556" 17246 "s63E6H2" 0.1376735 "HTH-type transcriptional regulator DegA"  
"JS1\_M10\_01557" 17247 "s59E13H2" 0.006503196 "arsenite S-adenosylmethyltransferase"  
"JS1\_M10\_01557" 17247 "s59E25H2" 0 "arsenite S-adenosylmethyltransferase"  
"JS1\_M10\_01557" 17247 "s59E5H2" 0.002306547 "arsenite S-adenosylmethyltransferase"  
"JS1\_M10\_01557" 17247 "s63E6H2" 0.02793755 "arsenite S-adenosylmethyltransferase"  
"JS1\_M10\_01558" 17248 "s59E13H2" 0 "Capreomycin synthase"  
"JS1\_M10\_01558" 17248 "s59E25H2" 0 "Capreomycin synthase"  
"JS1\_M10\_01558" 17248 "s59E5H2" 0.02721917 "Capreomycin synthase"  
"JS1\_M10\_01558" 17248 "s63E6H2" 0.01081654 "Capreomycin synthase"  
"JS1\_M10\_01559" 17249 "s59E13H2" 0 "Alanine dehydrogenase"  
"JS1\_M10\_01559" 17249 "s59E25H2" 0 "Alanine dehydrogenase"  
"JS1\_M10\_01559" 17249 "s59E5H2" 0 "Alanine dehydrogenase"  
"JS1\_M10\_01559" 17249 "s63E6H2" 0.01331405 "Alanine dehydrogenase"  
"JS1\_M10\_01560" 17250 "s59E13H2" 0 "L-threonine dehydratase catabolic TdcB"  
"JS1\_M10\_01560" 17250 "s59E25H2" 0 "L-threonine dehydratase catabolic TdcB"  
"JS1\_M10\_01560" 17250 "s59E5H2" 0 "L-threonine dehydratase catabolic TdcB"  
"JS1\_M10\_01560" 17250 "s63E6H2" 0.002454025 "L-threonine dehydratase catabolic TdcB"  
"JS1\_M10\_01561" 17251 "s59E13H2" 0.003489585 "Formamidase"  
"JS1\_M10\_01561" 17251 "s59E25H2" 0 "Formamidase"  
"JS1\_M10\_01561" 17251 "s59E5H2" 0.008426437 "Formamidase"  
"JS1\_M10\_01561" 17251 "s63E6H2" 0.06191945 "Formamidase"  
"JS1\_M10\_01562" 17252 "s59E13H2" 0 "leucine/isoleucine/valine transporter permease subunit"  
"JS1\_M10\_01562" 17252 "s59E25H2" 0 "leucine/isoleucine/valine transporter permease subunit"  
"JS1\_M10\_01562" 17252 "s59E5H2" 0 "leucine/isoleucine/valine transporter permease subunit"  
"JS1\_M10\_01562" 17252 "s63E6H2" 0.000186834 "leucine/isoleucine/valine transporter permease subunit"  
"JS1\_M10\_01563" 17253 "s59E13H2" 0 "hypothetical protein"

"JS1\_M10\_01563" 17253 "s59E25H2" 0 "hypothetical protein"  
"JS1\_M10\_01563" 17253 "s59E5H2" 0 "hypothetical protein"  
"JS1\_M10\_01563" 17253 "s63E6H2" 0 "hypothetical protein"  
"JS1\_M10\_01565" 17255 "s59E13H2" 0.02044523 "hypothetical protein"  
"JS1\_M10\_01565" 17255 "s59E25H2" 0 "hypothetical protein"  
"JS1\_M10\_01565" 17255 "s59E5H2" 0 "hypothetical protein"  
"JS1\_M10\_01565" 17255 "s63E6H2" 0.1240175 "hypothetical protein"  
"JS1\_M10\_01567" 17257 "s59E13H2" 0.3923322 "hypothetical protein"  
"JS1\_M10\_01567" 17257 "s59E25H2" 0 "hypothetical protein"  
"JS1\_M10\_01567" 17257 "s59E5H2" 1.103033 "hypothetical protein"  
"JS1\_M10\_01567" 17257 "s63E6H2" 1.089356 "hypothetical protein"  
"JS1\_M10\_01568" 17258 "s59E13H2" 0.006917375 "Serine/threonine-protein kinase PK-1"  
"JS1\_M10\_01568" 17258 "s59E25H2" 0 "Serine/threonine-protein kinase PK-1"  
"JS1\_M10\_01568" 17258 "s59E5H2" 0.3091215 "Serine/threonine-protein kinase PK-1"  
"JS1\_M10\_01568" 17258 "s63E6H2" 1.178926 "Serine/threonine-protein kinase PK-1"  
"JS1\_M10\_01569" 17259 "s59E13H2" 0.07363334 "Ribosomal RNA small subunit methyltransferase B"  
"JS1\_M10\_01569" 17259 "s59E25H2" 0.3548851 "Ribosomal RNA small subunit methyltransferase B"  
"JS1\_M10\_01569" 17259 "s59E5H2" 1.240454 "Ribosomal RNA small subunit methyltransferase B"  
"JS1\_M10\_01569" 17259 "s63E6H2" 3.095542 "Ribosomal RNA small subunit methyltransferase B"  
"JS1\_M10\_01570" 17260 "s59E13H2" 0.09682675 "Putative neutral zinc metallopeptidase"  
"JS1\_M10\_01570" 17260 "s59E25H2" 0.3127753 "Putative neutral zinc metallopeptidase"  
"JS1\_M10\_01570" 17260 "s59E5H2" 1.179219 "Putative neutral zinc metallopeptidase"  
"JS1\_M10\_01570" 17260 "s63E6H2" 3.912331 "Putative neutral zinc metallopeptidase"  
"JS1\_M10\_01571" 17261 "s59E13H2" 0.01219051 "Methionyl-tRNA formyltransferase"  
"JS1\_M10\_01571" 17261 "s59E25H2" 0 "Methionyl-tRNA formyltransferase"  
"JS1\_M10\_01571" 17261 "s59E5H2" 0.9554726 "Methionyl-tRNA formyltransferase"  
"JS1\_M10\_01571" 17261 "s63E6H2" 2.359459 "Methionyl-tRNA formyltransferase"  
"JS1\_M10\_01572" 17262 "s59E13H2" 0.07937953 "Peptide deformylase 1"  
"JS1\_M10\_01572" 17262 "s59E25H2" 0.4816956 "Peptide deformylase 1"  
"JS1\_M10\_01572" 17262 "s59E5H2" 0.4744509 "Peptide deformylase 1"  
"JS1\_M10\_01572" 17262 "s63E6H2" 2.28087 "Peptide deformylase 1"  
"JS1\_M10\_01573" 17263 "s59E13H2" 0.1101319 "Primosomal protein N"  
"JS1\_M10\_01573" 17263 "s59E25H2" 0.2247728 "Primosomal protein N"  
"JS1\_M10\_01573" 17263 "s59E5H2" 0.8974679 "Primosomal protein N"  
"JS1\_M10\_01573" 17263 "s63E6H2" 3.050687 "Primosomal protein N"  
"JS1\_M10\_01574" 17264 "s59E13H2" 0.7263526 "Coenzyme A biosynthesis bifunctional protein CoaBC"  
"JS1\_M10\_01574" 17264 "s59E25H2" 1.017588 "Coenzyme A biosynthesis bifunctional protein CoaBC"  
"JS1\_M10\_01574" 17264 "s59E5H2" 0.8142798 "Coenzyme A biosynthesis bifunctional protein CoaBC"  
"JS1\_M10\_01574" 17264 "s63E6H2" 2.109783 "Coenzyme A biosynthesis bifunctional protein CoaBC"  
"JS1\_M10\_01575" 17265 "s59E13H2" 0.03177986 "DNA-directed RNA polymerase subunit omega"  
"JS1\_M10\_01575" 17265 "s59E25H2" 0 "DNA-directed RNA polymerase subunit omega"  
"JS1\_M10\_01575" 17265 "s59E5H2" 0.1096621 "DNA-directed RNA polymerase subunit omega"  
"JS1\_M10\_01575" 17265 "s63E6H2" 0.1938385 "DNA-directed RNA polymerase subunit omega"  
"JS1\_M10\_01576" 17266 "s59E13H2" 0.5522464 "Guanylate kinase"  
"JS1\_M10\_01576" 17266 "s59E25H2" 0 "Guanylate kinase"  
"JS1\_M10\_01576" 17266 "s59E5H2" 0.6106419 "Guanylate kinase"  
"JS1\_M10\_01576" 17266 "s63E6H2" 1.143278 "Guanylate kinase"

"JS1\_M10\_01577" 17267 "s59E13H2" 0.5529203 "hypothetical protein"  
"JS1\_M10\_01577" 17267 "s59E25H2" 0 "hypothetical protein"  
"JS1\_M10\_01577" 17267 "s59E5H2" 1.540862 "hypothetical protein"  
"JS1\_M10\_01577" 17267 "s63E6H2" 1.265355 "hypothetical protein"  
"JS1\_M10\_01578" 17268 "s59E13H2" 0.4073288 "hypothetical protein"  
"JS1\_M10\_01578" 17268 "s59E25H2" 0 "hypothetical protein"  
"JS1\_M10\_01578" 17268 "s59E5H2" 0.8404207 "hypothetical protein"  
"JS1\_M10\_01578" 17268 "s63E6H2" 1.12305 "hypothetical protein"  
"JS1\_M10\_01580" 17270 "s59E13H2" 0.006192174 "ThiS family protein"  
"JS1\_M10\_01580" 17270 "s59E25H2" 0 "ThiS family protein"  
"JS1\_M10\_01580" 17270 "s59E5H2" 0.01126913 "ThiS family protein"  
"JS1\_M10\_01580" 17270 "s63E6H2" 0.01109594 "ThiS family protein"  
"JS1\_M10\_01581" 17271 "s59E13H2" 0.03180076 "hypothetical protein"  
"JS1\_M10\_01581" 17271 "s59E25H2" 0 "hypothetical protein"  
"JS1\_M10\_01581" 17271 "s59E5H2" 0.008781355 "hypothetical protein"  
"JS1\_M10\_01581" 17271 "s63E6H2" 0.01116839 "hypothetical protein"  
"JS1\_M10\_01582" 17272 "s59E13H2" 3.96142 "Putative KHG/KDPG aldolase"  
"JS1\_M10\_01582" 17272 "s59E25H2" 0.2979167 "Putative KHG/KDPG aldolase"  
"JS1\_M10\_01582" 17272 "s59E5H2" 0.06731246 "Putative KHG/KDPG aldolase"  
"JS1\_M10\_01582" 17272 "s63E6H2" 8.91916 "Putative KHG/KDPG aldolase"  
"JS1\_M10\_01583" 17273 "s59E13H2" 0.002834803 "Tripartite tricarboxylate transporter TctA family protein"  
"JS1\_M10\_01583" 17273 "s59E25H2" 0 "Tripartite tricarboxylate transporter TctA family protein"  
"JS1\_M10\_01583" 17273 "s59E5H2" 0.002515991 "Tripartite tricarboxylate transporter TctA family protein"  
"JS1\_M10\_01583" 17273 "s63E6H2" 0.01720825 "Tripartite tricarboxylate transporter TctA family protein"  
"JS1\_M10\_01584" 17274 "s59E13H2" 0 "Tripartite tricarboxylate transporter TctB family protein"  
"JS1\_M10\_01584" 17274 "s59E25H2" 0 "Tripartite tricarboxylate transporter TctB family protein"  
"JS1\_M10\_01584" 17274 "s59E5H2" 0 "Tripartite tricarboxylate transporter TctB family protein"  
"JS1\_M10\_01584" 17274 "s63E6H2" 0.003630169 "Tripartite tricarboxylate transporter TctB family protein"  
"JS1\_M10\_01585" 17275 "s59E13H2" 0 "Transposase for transposon Tn5"  
"JS1\_M10\_01585" 17275 "s59E25H2" 0 "Transposase for transposon Tn5"  
"JS1\_M10\_01585" 17275 "s59E5H2" 0 "Transposase for transposon Tn5"  
"JS1\_M10\_01585" 17275 "s63E6H2" 0.001327936 "Transposase for transposon Tn5"  
"JS1\_M10\_01586" 17276 "s59E13H2" 0 "Tripartite tricarboxylate transporter family receptor"  
"JS1\_M10\_01586" 17276 "s59E25H2" 0 "Tripartite tricarboxylate transporter family receptor"  
"JS1\_M10\_01586" 17276 "s59E5H2" 0 "Tripartite tricarboxylate transporter family receptor"  
"JS1\_M10\_01586" 17276 "s63E6H2" 0.006122669 "Tripartite tricarboxylate transporter family receptor"  
"JS1\_M10\_01587" 17277 "s59E13H2" 0.001374807 "4-hydroxy-2-oxo-heptane-1,7-dioate aldolase"  
"JS1\_M10\_01587" 17277 "s59E25H2" 0 "4-hydroxy-2-oxo-heptane-1,7-dioate aldolase"  
"JS1\_M10\_01587" 17277 "s59E5H2" 0 "4-hydroxy-2-oxo-heptane-1,7-dioate aldolase"  
"JS1\_M10\_01587" 17277 "s63E6H2" 0.002535583 "4-hydroxy-2-oxo-heptane-1,7-dioate aldolase"  
"JS1\_M10\_01588" 17278 "s59E13H2" 0 "4-hydroxy-2-oxovalerate aldolase"  
"JS1\_M10\_01588" 17278 "s59E25H2" 0 "4-hydroxy-2-oxovalerate aldolase"  
"JS1\_M10\_01588" 17278 "s59E5H2" 0 "4-hydroxy-2-oxovalerate aldolase"  
"JS1\_M10\_01588" 17278 "s63E6H2" 0 "4-hydroxy-2-oxovalerate aldolase"  
"JS1\_M10\_01589" 17279 "s59E13H2" 0 "D-tagatose 3-epimerase"  
"JS1\_M10\_01589" 17279 "s59E25H2" 0 "D-tagatose 3-epimerase"  
"JS1\_M10\_01589" 17279 "s59E5H2" 0 "D-tagatose 3-epimerase"

"JS1\_M10\_01589" 17279 "s63E6H2" 0.0008156699 "D-tagatose 3-epimerase"  
"JS1\_M10\_01590" 17280 "s59E13H2" 0 "2-amino-3,7-dideoxy-D-threo-hept-6-ulosonate synthase"  
"JS1\_M10\_01590" 17280 "s59E25H2" 0 "2-amino-3,7-dideoxy-D-threo-hept-6-ulosonate synthase"  
"JS1\_M10\_01590" 17280 "s59E5H2" 0 "2-amino-3,7-dideoxy-D-threo-hept-6-ulosonate synthase"  
"JS1\_M10\_01590" 17280 "s63E6H2" 0.007003258 "2-amino-3,7-dideoxy-D-threo-hept-6-ulosonate synthase"  
"JS1\_M10\_01591" 17281 "s59E13H2" 0 "autoinducer 2 aldolase"  
"JS1\_M10\_01591" 17281 "s59E25H2" 0 "autoinducer 2 aldolase"  
"JS1\_M10\_01591" 17281 "s59E5H2" 0 "autoinducer 2 aldolase"  
"JS1\_M10\_01591" 17281 "s63E6H2" 0.004001558 "autoinducer 2 aldolase"  
"JS1\_M10\_01592" 17282 "s59E13H2" 0.006797767 "Tungsten-containing aldehyde ferredoxin oxidoreductase"  
"JS1\_M10\_01592" 17282 "s59E25H2" 0 "Tungsten-containing aldehyde ferredoxin oxidoreductase"  
"JS1\_M10\_01592" 17282 "s59E5H2" 0 "Tungsten-containing aldehyde ferredoxin oxidoreductase"  
"JS1\_M10\_01592" 17282 "s63E6H2" 0.03907364 "Tungsten-containing aldehyde ferredoxin oxidoreductase"  
"JS1\_M10\_01594" 17284 "s59E13H2" 0.004171632 "hypothetical protein"  
"JS1\_M10\_01594" 17284 "s59E25H2" 0 "hypothetical protein"  
"JS1\_M10\_01594" 17284 "s59E5H2" 0 "hypothetical protein"  
"JS1\_M10\_01594" 17284 "s63E6H2" 0.008553945 "hypothetical protein"  
"JS1\_M10\_01595" 17285 "s59E13H2" 0 "Putative serine protease HtrA"  
"JS1\_M10\_01595" 17285 "s59E25H2" 0 "Putative serine protease HtrA"  
"JS1\_M10\_01595" 17285 "s59E5H2" 0.09240037 "Putative serine protease HtrA"  
"JS1\_M10\_01595" 17285 "s63E6H2" 0.09975894 "Putative serine protease HtrA"  
"JS1\_M10\_01596" 17286 "s59E13H2" 0 "hypothetical protein"  
"JS1\_M10\_01596" 17286 "s59E25H2" 0 "hypothetical protein"  
"JS1\_M10\_01596" 17286 "s59E5H2" 0 "hypothetical protein"  
"JS1\_M10\_01596" 17286 "s63E6H2" 0.03375054 "hypothetical protein"  
"JS1\_M10\_01597" 17287 "s59E13H2" 0.003111712 "hypothetical protein"  
"JS1\_M10\_01597" 17287 "s59E25H2" 0 "hypothetical protein"  
"JS1\_M10\_01597" 17287 "s59E5H2" 0 "hypothetical protein"  
"JS1\_M10\_01597" 17287 "s63E6H2" 0.004466145 "hypothetical protein"  
"JS1\_M10\_01598" 17288 "s59E13H2" 0 "hypothetical protein"  
"JS1\_M10\_01598" 17288 "s59E25H2" 0 "hypothetical protein"  
"JS1\_M10\_01598" 17288 "s59E5H2" 0 "hypothetical protein"  
"JS1\_M10\_01598" 17288 "s63E6H2" 0 "hypothetical protein"  
"JS1\_M10\_01599" 17289 "s59E13H2" 0 "hypothetical protein"  
"JS1\_M10\_01599" 17289 "s59E25H2" 0 "hypothetical protein"  
"JS1\_M10\_01599" 17289 "s59E5H2" 0 "hypothetical protein"  
"JS1\_M10\_01599" 17289 "s63E6H2" 0 "hypothetical protein"  
"JS1\_M10\_01600" 17290 "s59E13H2" 0 "hypothetical protein"  
"JS1\_M10\_01600" 17290 "s59E25H2" 0 "hypothetical protein"  
"JS1\_M10\_01600" 17290 "s59E5H2" 0 "hypothetical protein"  
"JS1\_M10\_01600" 17290 "s63E6H2" 0 "hypothetical protein"  
"JS1\_M10\_01604" 17294 "s59E13H2" 3.145996 "Group II intron-encoded protein LtrA"  
"JS1\_M10\_01604" 17294 "s59E25H2" 0 "Group II intron-encoded protein LtrA"  
"JS1\_M10\_01604" 17294 "s59E5H2" 4.601814 "Group II intron-encoded protein LtrA"  
"JS1\_M10\_01604" 17294 "s63E6H2" 18.2916 "Group II intron-encoded protein LtrA"  
"JS1\_M10\_01605" 17295 "s59E13H2" 0 "hypothetical protein"  
"JS1\_M10\_01605" 17295 "s59E25H2" 0 "hypothetical protein"

"JS1\_M10\_01605" 17295 "s59E5H2" 0 "hypothetical protein"  
"JS1\_M10\_01605" 17295 "s63E6H2" 0 "hypothetical protein"  
"JS1\_M10\_01606" 17296 "s59E13H2" 0 "hypothetical protein"  
"JS1\_M10\_01606" 17296 "s59E25H2" 0 "hypothetical protein"  
"JS1\_M10\_01606" 17296 "s59E5H2" 0 "hypothetical protein"  
"JS1\_M10\_01606" 17296 "s63E6H2" 0 "hypothetical protein"  
"JS1\_M10\_01607" 17297 "s59E13H2" 0 "hypothetical protein"  
"JS1\_M10\_01607" 17297 "s59E25H2" 0 "hypothetical protein"  
"JS1\_M10\_01607" 17297 "s59E5H2" 0.1028368 "hypothetical protein"  
"JS1\_M10\_01607" 17297 "s63E6H2" 0.01685136 "hypothetical protein"  
"JS1\_M10\_01609" 17299 "s59E13H2" 0.7294002 "Cyclic di-GMP phosphodiesterase response regulator RpfG"  
"JS1\_M10\_01609" 17299 "s59E25H2" 0 "Cyclic di-GMP phosphodiesterase response regulator RpfG"  
"JS1\_M10\_01609" 17299 "s59E5H2" 0.1240055 "Cyclic di-GMP phosphodiesterase response regulator RpfG"  
"JS1\_M10\_01609" 17299 "s63E6H2" 2.573421 "Cyclic di-GMP phosphodiesterase response regulator RpfG"  
"JS1\_M10\_01610" 17300 "s59E13H2" 0 "hypothetical protein"  
"JS1\_M10\_01610" 17300 "s59E25H2" 0 "hypothetical protein"  
"JS1\_M10\_01610" 17300 "s59E5H2" 0.0611889 "hypothetical protein"  
"JS1\_M10\_01610" 17300 "s63E6H2" 1.060322 "hypothetical protein"  
"JS1\_M10\_01611" 17301 "s59E13H2" 0.1341672 "Rubrerythrin"  
"JS1\_M10\_01611" 17301 "s59E25H2" 0 "Rubrerythrin"  
"JS1\_M10\_01611" 17301 "s59E5H2" 0.6869032 "Rubrerythrin"  
"JS1\_M10\_01611" 17301 "s63E6H2" 1.15064 "Rubrerythrin"  
"JS1\_M10\_01612" 17302 "s59E13H2" 0.1165436 "hypothetical protein"  
"JS1\_M10\_01612" 17302 "s59E25H2" 0 "hypothetical protein"  
"JS1\_M10\_01612" 17302 "s59E5H2" 0.5792426 "hypothetical protein"  
"JS1\_M10\_01612" 17302 "s63E6H2" 4.158087 "hypothetical protein"  
"JS1\_M10\_01613" 17303 "s59E13H2" 0.01859371 "Cupin domain protein"  
"JS1\_M10\_01613" 17303 "s59E25H2" 0 "Cupin domain protein"  
"JS1\_M10\_01613" 17303 "s59E5H2" 0.07586667 "Cupin domain protein"  
"JS1\_M10\_01613" 17303 "s63E6H2" 0 "Cupin domain protein"  
"JS1\_M10\_01614" 17304 "s59E13H2" 0.0158671 "CAAX amino terminal protease self- immunity"  
"JS1\_M10\_01614" 17304 "s59E25H2" 0 "CAAX amino terminal protease self- immunity"  
"JS1\_M10\_01614" 17304 "s59E5H2" 0.08610402 "CAAX amino terminal protease self- immunity"  
"JS1\_M10\_01614" 17304 "s63E6H2" 0.8690407 "CAAX amino terminal protease self- immunity"  
"JS1\_M10\_01616" 17306 "s59E13H2" 0.04304456 "hypothetical protein"  
"JS1\_M10\_01616" 17306 "s59E25H2" 0 "hypothetical protein"  
"JS1\_M10\_01616" 17306 "s59E5H2" 0.3097771 "hypothetical protein"  
"JS1\_M10\_01616" 17306 "s63E6H2" 3.54065 "hypothetical protein"  
"JS1\_M10\_01617" 17307 "s59E13H2" 0.9129121 "Integrase core domain protein"  
"JS1\_M10\_01617" 17307 "s59E25H2" 0 "Integrase core domain protein"  
"JS1\_M10\_01617" 17307 "s59E5H2" 0.4963419 "Integrase core domain protein"  
"JS1\_M10\_01617" 17307 "s63E6H2" 0.4174226 "Integrase core domain protein"  
"JS1\_M10\_01618" 17308 "s59E13H2" 0.008068487 "Transposase"  
"JS1\_M10\_01618" 17308 "s59E25H2" 0 "Transposase"  
"JS1\_M10\_01618" 17308 "s59E5H2" 0.4709508 "Transposase"  
"JS1\_M10\_01618" 17308 "s63E6H2" 0.70998 "Transposase"  
"JS1\_M10\_01619" 17309 "s59E13H2" 0.1186301 "IS2 transposase TnpB"

"JS1\_M10\_01619" 17309 "s59E25H2" 0 "IS2 transposase TnpB"  
"JS1\_M10\_01619" 17309 "s59E5H2" 0.9600018 "IS2 transposase TnpB"  
"JS1\_M10\_01619" 17309 "s63E6H2" 0.1591009 "IS2 transposase TnpB"  
"JS1\_M10\_01629" 17319 "s59E13H2" 0 "Sucrose phosphorylase"  
"JS1\_M10\_01629" 17319 "s59E25H2" 0 "Sucrose phosphorylase"  
"JS1\_M10\_01629" 17319 "s59E5H2" 0.03665088 "Sucrose phosphorylase"  
"JS1\_M10\_01629" 17319 "s63E6H2" 0.01734056 "Sucrose phosphorylase"  
"JS1\_M10\_01630" 17320 "s59E13H2" 0 "Glycerate 2-kinase"  
"JS1\_M10\_01630" 17320 "s59E25H2" 0 "Glycerate 2-kinase"  
"JS1\_M10\_01630" 17320 "s59E5H2" 0 "Glycerate 2-kinase"  
"JS1\_M10\_01630" 17320 "s63E6H2" 0.0176333 "Glycerate 2-kinase"  
"JS1\_M10\_01632" 17322 "s59E13H2" 0.004038731 "Bifunctional protein GlmU"  
"JS1\_M10\_01632" 17322 "s59E25H2" 0 "Bifunctional protein GlmU"  
"JS1\_M10\_01632" 17322 "s59E5H2" 0.1841397 "Bifunctional protein GlmU"  
"JS1\_M10\_01632" 17322 "s63E6H2" 0.01298658 "Bifunctional protein GlmU"  
"JS1\_M10\_01633" 17323 "s59E13H2" 0.002560045 "Glucose-1-phosphate adenyllyltransferase"  
"JS1\_M10\_01633" 17323 "s59E25H2" 0 "Glucose-1-phosphate adenyllyltransferase"  
"JS1\_M10\_01633" 17323 "s59E5H2" 0.1224511 "Glucose-1-phosphate adenyllyltransferase"  
"JS1\_M10\_01633" 17323 "s63E6H2" 0.01635216 "Glucose-1-phosphate adenyllyltransferase"  
"JS1\_M10\_01634" 17324 "s59E13H2" 0.005213265 "Glycosyl transferase family 2"  
"JS1\_M10\_01634" 17324 "s59E25H2" 0 "Glycosyl transferase family 2"  
"JS1\_M10\_01634" 17324 "s59E5H2" 0.2301938 "Glycosyl transferase family 2"  
"JS1\_M10\_01634" 17324 "s63E6H2" 0.03217107 "Glycosyl transferase family 2"  
"JS1\_M10\_01636" 17326 "s59E13H2" 0.1019182 "Glucokinase"  
"JS1\_M10\_01636" 17326 "s59E25H2" 0 "Glucokinase"  
"JS1\_M10\_01636" 17326 "s59E5H2" 0.3548137 "Glucokinase"  
"JS1\_M10\_01636" 17326 "s63E6H2" 0.1376031 "Glucokinase"  
"JS1\_M10\_01637" 17327 "s59E13H2" 0.04774763 "LysM domain/BON superfamily protein"  
"JS1\_M10\_01637" 17327 "s59E25H2" 0 "LysM domain/BON superfamily protein"  
"JS1\_M10\_01637" 17327 "s59E5H2" 0.2041886 "LysM domain/BON superfamily protein"  
"JS1\_M10\_01637" 17327 "s63E6H2" 0.1908215 "LysM domain/BON superfamily protein"  
"JS1\_M10\_01638" 17328 "s59E13H2" 0.04549757 "Long-chain-fatty-acid--CoA ligase FadD15"  
"JS1\_M10\_01638" 17328 "s59E25H2" 0 "Long-chain-fatty-acid--CoA ligase FadD15"  
"JS1\_M10\_01638" 17328 "s59E5H2" 0.102965 "Long-chain-fatty-acid--CoA ligase FadD15"  
"JS1\_M10\_01638" 17328 "s63E6H2" 1.578675 "Long-chain-fatty-acid--CoA ligase FadD15"  
"JS1\_M10\_01639" 17329 "s59E13H2" 0.469479 "Transcriptional regulatory protein ZraR"  
"JS1\_M10\_01639" 17329 "s59E25H2" 0 "Transcriptional regulatory protein ZraR"  
"JS1\_M10\_01639" 17329 "s59E5H2" 0.4813872 "Transcriptional regulatory protein ZraR"  
"JS1\_M10\_01639" 17329 "s63E6H2" 0.4697155 "Transcriptional regulatory protein ZraR"  
"JS1\_M10\_01640" 17330 "s59E13H2" 5.055175 "Pantothenic acid transporter PanT"  
"JS1\_M10\_01640" 17330 "s59E25H2" 0 "Pantothenic acid transporter PanT"  
"JS1\_M10\_01640" 17330 "s59E5H2" 4.018115 "Pantothenic acid transporter PanT"  
"JS1\_M10\_01640" 17330 "s63E6H2" 3.55407 "Pantothenic acid transporter PanT"  
"JS1\_M10\_01641" 17331 "s59E13H2" 6.73936 "Type III pantothenate kinase"  
"JS1\_M10\_01641" 17331 "s59E25H2" 0 "Type III pantothenate kinase"  
"JS1\_M10\_01641" 17331 "s59E5H2" 1.502753 "Type III pantothenate kinase"  
"JS1\_M10\_01641" 17331 "s63E6H2" 3.049173 "Type III pantothenate kinase"

"JS1\_M10\_01642" 17332 "s59E13H2" 2.019368 "putative nicotinate-nucleotide pyrophosphorylase [carboxylating]"  
"JS1\_M10\_01642" 17332 "s59E25H2" 0.2893519 "putative nicotinate-nucleotide pyrophosphorylase [carboxylating]"  
"JS1\_M10\_01642" 17332 "s59E5H2" 3.035816 "putative nicotinate-nucleotide pyrophosphorylase [carboxylating]"  
"JS1\_M10\_01642" 17332 "s63E6H2" 1.867538 "putative nicotinate-nucleotide pyrophosphorylase [carboxylating]"  
"JS1\_M10\_01643" 17333 "s59E13H2" 0.8622568 "L-aspartate oxidase"  
"JS1\_M10\_01643" 17333 "s59E25H2" 0 "L-aspartate oxidase"  
"JS1\_M10\_01643" 17333 "s59E5H2" 2.291973 "L-aspartate oxidase"  
"JS1\_M10\_01643" 17333 "s63E6H2" 0.9952682 "L-aspartate oxidase"  
"JS1\_M10\_01644" 17334 "s59E13H2" 0.04728014 "Quinolate synthase A"  
"JS1\_M10\_01644" 17334 "s59E25H2" 0 "Quinolate synthase A"  
"JS1\_M10\_01644" 17334 "s59E5H2" 0.1016839 "Quinolate synthase A"  
"JS1\_M10\_01644" 17334 "s63E6H2" 0.1016668 "Quinolate synthase A"  
"JS1\_M10\_01645" 17335 "s59E13H2" 1.064413 "Inosine-5'-monophosphate dehydrogenase"  
"JS1\_M10\_01645" 17335 "s59E25H2" 0 "Inosine-5'-monophosphate dehydrogenase"  
"JS1\_M10\_01645" 17335 "s59E5H2" 1.281332 "Inosine-5'-monophosphate dehydrogenase"  
"JS1\_M10\_01645" 17335 "s63E6H2" 0.9840979 "Inosine-5'-monophosphate dehydrogenase"  
"JS1\_M10\_01646" 17336 "s59E13H2" 0.6598617 "lipoprotein Nlpl"  
"JS1\_M10\_01646" 17336 "s59E25H2" 0 "lipoprotein Nlpl"  
"JS1\_M10\_01646" 17336 "s59E5H2" 0.2151602 "lipoprotein Nlpl"  
"JS1\_M10\_01646" 17336 "s63E6H2" 0.5537021 "lipoprotein Nlpl"  
"JS1\_M10\_01647" 17337 "s59E13H2" 0.3235848 "Membrane dipeptidase (Peptidase family M19)"  
"JS1\_M10\_01647" 17337 "s59E25H2" 0 "Membrane dipeptidase (Peptidase family M19)"  
"JS1\_M10\_01647" 17337 "s59E5H2" 0.4081494 "Membrane dipeptidase (Peptidase family M19)"  
"JS1\_M10\_01647" 17337 "s63E6H2" 1.075955 "Membrane dipeptidase (Peptidase family M19)"  
"JS1\_M10\_01648" 17338 "s59E13H2" 0.06020029 "Ureidoglycolate lyase"  
"JS1\_M10\_01648" 17338 "s59E25H2" 0.3255208 "Ureidoglycolate lyase"  
"JS1\_M10\_01648" 17338 "s59E5H2" 0.4205974 "Ureidoglycolate lyase"  
"JS1\_M10\_01648" 17338 "s63E6H2" 0.5187819 "Ureidoglycolate lyase"  
"JS1\_M10\_01650" 17340 "s59E13H2" 1.101341 "Folate transporter FolT"  
"JS1\_M10\_01650" 17340 "s59E25H2" 0 "Folate transporter FolT"  
"JS1\_M10\_01650" 17340 "s59E5H2" 0.5008845 "Folate transporter FolT"  
"JS1\_M10\_01650" 17340 "s63E6H2" 0.6937374 "Folate transporter FolT"  
"JS1\_M10\_01651" 17341 "s59E13H2" 1.802922 "Sorbitol dehydrogenase"  
"JS1\_M10\_01651" 17341 "s59E25H2" 0.7261209 "Sorbitol dehydrogenase"  
"JS1\_M10\_01651" 17341 "s59E5H2" 0.5418606 "Sorbitol dehydrogenase"  
"JS1\_M10\_01651" 17341 "s63E6H2" 0.8324361 "Sorbitol dehydrogenase"  
"JS1\_M10\_01652" 17342 "s59E13H2" 2.903221 "D-arabitol-phosphate dehydrogenase"  
"JS1\_M10\_01652" 17342 "s59E25H2" 0 "D-arabitol-phosphate dehydrogenase"  
"JS1\_M10\_01652" 17342 "s59E5H2" 0.6709224 "D-arabitol-phosphate dehydrogenase"  
"JS1\_M10\_01652" 17342 "s63E6H2" 1.244548 "D-arabitol-phosphate dehydrogenase"  
"JS1\_M10\_01653" 17343 "s59E13H2" 1.519088 "Fluoroacetyl-CoA thioesterase"  
"JS1\_M10\_01653" 17343 "s59E25H2" 0 "Fluoroacetyl-CoA thioesterase"  
"JS1\_M10\_01653" 17343 "s59E5H2" 0.5859939 "Fluoroacetyl-CoA thioesterase"  
"JS1\_M10\_01653" 17343 "s63E6H2" 0.5001783 "Fluoroacetyl-CoA thioesterase"  
"JS1\_M10\_01654" 17344 "s59E13H2" 1.5473 "Isochorismatase"  
"JS1\_M10\_01654" 17344 "s59E25H2" 0 "Isochorismatase"  
"JS1\_M10\_01654" 17344 "s59E5H2" 0.4313501 "Isochorismatase"



"JS1\_M10\_01654" 17344 "s63E6H2" 0.7236451 "Isochorismatase"  
"JS1\_M10\_01655" 17345 "s59E13H2" 0.9782435 "NTE family protein RssA"  
"JS1\_M10\_01655" 17345 "s59E25H2" 0 "NTE family protein RssA"  
"JS1\_M10\_01655" 17345 "s59E5H2" 0.2436412 "NTE family protein RssA"  
"JS1\_M10\_01655" 17345 "s63E6H2" 0.3933891 "NTE family protein RssA"  
"JS1\_M10\_01656" 17346 "s59E13H2" 1.257252 "Zinc ribbon domain protein"  
"JS1\_M10\_01656" 17346 "s59E25H2" 0.6796117 "Zinc ribbon domain protein"  
"JS1\_M10\_01656" 17346 "s59E5H2" 0.1733973 "Zinc ribbon domain protein"  
"JS1\_M10\_01656" 17346 "s63E6H2" 0.752199 "Zinc ribbon domain protein"  
"JS1\_M10\_01657" 17347 "s59E13H2" 0.1371036 "hypothetical protein"  
"JS1\_M10\_01657" 17347 "s59E25H2" 0 "hypothetical protein"  
"JS1\_M10\_01657" 17347 "s59E5H2" 0.3155474 "hypothetical protein"  
"JS1\_M10\_01657" 17347 "s63E6H2" 0.1692747 "hypothetical protein"  
"JS1\_M10\_01658" 17348 "s59E13H2" 0.1517369 "Sulfite exporter TauE/SafE"  
"JS1\_M10\_01658" 17348 "s59E25H2" 0 "Sulfite exporter TauE/SafE"  
"JS1\_M10\_01658" 17348 "s59E5H2" 0.4833543 "Sulfite exporter TauE/SafE"  
"JS1\_M10\_01658" 17348 "s63E6H2" 0.1015356 "Sulfite exporter TauE/SafE"  
"JS1\_M10\_01659" 17349 "s59E13H2" 0.1424036 "Molybdopterin-guanine dinucleotide biosynthesis adapter protein"  
"JS1\_M10\_01659" 17349 "s59E25H2" 0 "Molybdopterin-guanine dinucleotide biosynthesis adapter protein"  
"JS1\_M10\_01659" 17349 "s59E5H2" 0.491489 "Molybdopterin-guanine dinucleotide biosynthesis adapter protein"  
"JS1\_M10\_01659" 17349 "s63E6H2" 0.1566105 "Molybdopterin-guanine dinucleotide biosynthesis adapter protein"  
"JS1\_M10\_01660" 17350 "s59E13H2" 0.3411434 "Thioredoxin reductase"  
"JS1\_M10\_01660" 17350 "s59E25H2" 0 "Thioredoxin reductase"  
"JS1\_M10\_01660" 17350 "s59E5H2" 0.4879699 "Thioredoxin reductase"  
"JS1\_M10\_01660" 17350 "s63E6H2" 0.2524422 "Thioredoxin reductase"  
"JS1\_M10\_01661" 17351 "s59E13H2" 0.3505174 "Inosose isomerase"  
"JS1\_M10\_01661" 17351 "s59E25H2" 0 "Inosose isomerase"  
"JS1\_M10\_01661" 17351 "s59E5H2" 0.6795567 "Inosose isomerase"  
"JS1\_M10\_01661" 17351 "s63E6H2" 0.6433503 "Inosose isomerase"  
"JS1\_M10\_01662" 17352 "s59E13H2" 0.07685769 "Lipoyl synthase"  
"JS1\_M10\_01662" 17352 "s59E25H2" 0 "Lipoyl synthase"  
"JS1\_M10\_01662" 17352 "s59E5H2" 0.3674284 "Lipoyl synthase"  
"JS1\_M10\_01662" 17352 "s63E6H2" 0.4524216 "Lipoyl synthase"  
"JS1\_M10\_01663" 17353 "s59E13H2" 0.09398331 "Elongation factor G"  
"JS1\_M10\_01663" 17353 "s59E25H2" 0 "Elongation factor G"  
"JS1\_M10\_01663" 17353 "s59E5H2" 0.5463508 "Elongation factor G"  
"JS1\_M10\_01663" 17353 "s63E6H2" 0.5989606 "Elongation factor G"  
"JS1\_M10\_01664" 17354 "s59E13H2" 0 "Beta-glucuronidase"  
"JS1\_M10\_01664" 17354 "s59E25H2" 0 "Beta-glucuronidase"  
"JS1\_M10\_01664" 17354 "s59E5H2" 0 "Beta-glucuronidase"  
"JS1\_M10\_01664" 17354 "s63E6H2" 0.001694339 "Beta-glucuronidase"  
"JS1\_M10\_01665" 17355 "s59E13H2" 1.633865 "transposase/IS protein"  
"JS1\_M10\_01665" 17355 "s59E25H2" 0 "transposase/IS protein"  
"JS1\_M10\_01665" 17355 "s59E5H2" 2.404655 "transposase/IS protein"  
"JS1\_M10\_01665" 17355 "s63E6H2" 0.8925137 "transposase/IS protein"  
"JS1\_M10\_01666" 17356 "s59E13H2" 0.05281658 "Tyrosine recombinase XerD"  
"JS1\_M10\_01666" 17356 "s59E25H2" 0 "Tyrosine recombinase XerD"

"JS1\_M10\_01666" 17356 "s59E5H2" 0.3282158 "Tyrosine recombinase XerD"  
"JS1\_M10\_01666" 17356 "s63E6H2" 0.3060154 "Tyrosine recombinase XerD"  
"JS1\_M10\_01667" 17357 "s59E13H2" 0.2144994 "putative tyrosine recombinase XerC-like protein"  
"JS1\_M10\_01667" 17357 "s59E25H2" 0 "putative tyrosine recombinase XerC-like protein"  
"JS1\_M10\_01667" 17357 "s59E5H2" 0.1473554 "putative tyrosine recombinase XerC-like protein"  
"JS1\_M10\_01667" 17357 "s63E6H2" 0.8864889 "putative tyrosine recombinase XerC-like protein"  
"JS1\_M10\_01668" 17358 "s59E13H2" 1.583366 "Tyrosine recombinase XerC"  
"JS1\_M10\_01668" 17358 "s59E25H2" 0 "Tyrosine recombinase XerC"  
"JS1\_M10\_01668" 17358 "s59E5H2" 0.185286 "Tyrosine recombinase XerC"  
"JS1\_M10\_01668" 17358 "s63E6H2" 0.1249612 "Tyrosine recombinase XerC"  
"JS1\_M10\_01669" 17359 "s59E13H2" 1.490587 "transposase"  
"JS1\_M10\_01669" 17359 "s59E25H2" 0 "transposase"  
"JS1\_M10\_01669" 17359 "s59E5H2" 1.280904 "transposase"  
"JS1\_M10\_01669" 17359 "s63E6H2" 0.4191388 "transposase"  
"JS1\_M10\_01670" 17360 "s59E13H2" 2.908302 "Integrase core domain protein"  
"JS1\_M10\_01670" 17360 "s59E25H2" 0 "Integrase core domain protein"  
"JS1\_M10\_01670" 17360 "s59E5H2" 1.893069 "Integrase core domain protein"  
"JS1\_M10\_01670" 17360 "s63E6H2" 0.4291271 "Integrase core domain protein"  
"JS1\_M10\_01673" 17363 "s59E13H2" 0.05488227 "Homoserine dehydrogenase"  
"JS1\_M10\_01673" 17363 "s59E25H2" 0 "Homoserine dehydrogenase"  
"JS1\_M10\_01673" 17363 "s59E5H2" 0.03626786 "Homoserine dehydrogenase"  
"JS1\_M10\_01673" 17363 "s63E6H2" 0.2063694 "Homoserine dehydrogenase"  
"JS1\_M10\_01674" 17364 "s59E13H2" 0.003648835 "Methylmalonate-semialdehyde dehydrogenase [acylating]"  
"JS1\_M10\_01674" 17364 "s59E25H2" 0 "Methylmalonate-semialdehyde dehydrogenase [acylating]"  
"JS1\_M10\_01674" 17364 "s59E5H2" 0.07701311 "Methylmalonate-semialdehyde dehydrogenase [acylating]"  
"JS1\_M10\_01674" 17364 "s63E6H2" 0.03220141 "Methylmalonate-semialdehyde dehydrogenase [acylating]"  
"JS1\_M10\_01675" 17365 "s59E13H2" 0.000761803 "Methylmalonate semialdehyde dehydrogenase [acylating]"  
"JS1\_M10\_01675" 17365 "s59E25H2" 0 "Methylmalonate semialdehyde dehydrogenase [acylating]"  
"JS1\_M10\_01675" 17365 "s59E5H2" 0 "Methylmalonate semialdehyde dehydrogenase [acylating]"  
"JS1\_M10\_01675" 17365 "s63E6H2" 0.003517303 "Methylmalonate semialdehyde dehydrogenase [acylating]"  
"JS1\_M10\_01676" 17366 "s59E13H2" 0 "1-deoxy-D-xylulose-5-phosphate synthase"  
"JS1\_M10\_01676" 17366 "s59E25H2" 0 "1-deoxy-D-xylulose-5-phosphate synthase"  
"JS1\_M10\_01676" 17366 "s59E5H2" 0 "1-deoxy-D-xylulose-5-phosphate synthase"  
"JS1\_M10\_01676" 17366 "s63E6H2" 0 "1-deoxy-D-xylulose-5-phosphate synthase"  
"JS1\_M10\_01677" 17367 "s59E13H2" 0 "Transketolase 2"  
"JS1\_M10\_01677" 17367 "s59E25H2" 0 "Transketolase 2"  
"JS1\_M10\_01677" 17367 "s59E5H2" 0 "Transketolase 2"  
"JS1\_M10\_01677" 17367 "s63E6H2" 0 "Transketolase 2"  
"JS1\_M10\_01678" 17368 "s59E13H2" 0.1158729 "Xylulose kinase"  
"JS1\_M10\_01678" 17368 "s59E25H2" 0 "Xylulose kinase"  
"JS1\_M10\_01678" 17368 "s59E5H2" 0 "Xylulose kinase"  
"JS1\_M10\_01678" 17368 "s63E6H2" 0.001526655 "Xylulose kinase"  
"JS1\_M10\_01679" 17369 "s59E13H2" 0.2818947 "putative fructose-bisphosphate aldolase"  
"JS1\_M10\_01679" 17369 "s59E25H2" 0 "putative fructose-bisphosphate aldolase"  
"JS1\_M10\_01679" 17369 "s59E5H2" 0 "putative fructose-bisphosphate aldolase"  
"JS1\_M10\_01679" 17369 "s63E6H2" 0 "putative fructose-bisphosphate aldolase"  
"JS1\_M10\_01680" 17370 "s59E13H2" 0.2815418 "hypothetical protein"

"JS1\_M10\_01680" 17370 "s59E25H2" 0 "hypothetical protein"  
"JS1\_M10\_01680" 17370 "s59E5H2" 0.003458503 "hypothetical protein"  
"JS1\_M10\_01680" 17370 "s63E6H2" 0.001495055 "hypothetical protein"  
"JS1\_M10\_01681" 17371 "s59E13H2" 0.1092632 "L-arabinose transport system permease protein AraQ"  
"JS1\_M10\_01681" 17371 "s59E25H2" 0 "L-arabinose transport system permease protein AraQ"  
"JS1\_M10\_01681" 17371 "s59E5H2" 0.007401996 "L-arabinose transport system permease protein AraQ"  
"JS1\_M10\_01681" 17371 "s63E6H2" 0.001174989 "L-arabinose transport system permease protein AraQ"  
"JS1\_M10\_01682" 17372 "s59E13H2" 0.0009827518 "Methylmalonate semialdehyde dehydrogenase [acylating]"  
"JS1\_M10\_01682" 17372 "s59E25H2" 0 "Methylmalonate semialdehyde dehydrogenase [acylating]"  
"JS1\_M10\_01682" 17372 "s59E5H2" 0 "Methylmalonate semialdehyde dehydrogenase [acylating]"  
"JS1\_M10\_01682" 17372 "s63E6H2" 0 "Methylmalonate semialdehyde dehydrogenase [acylating]"  
"JS1\_M10\_01683" 17373 "s59E13H2" 0 "O-Glycosyl hydrolase family 30"  
"JS1\_M10\_01683" 17373 "s59E25H2" 0 "O-Glycosyl hydrolase family 30"  
"JS1\_M10\_01683" 17373 "s59E5H2" 0 "O-Glycosyl hydrolase family 30"  
"JS1\_M10\_01683" 17373 "s63E6H2" 0 "O-Glycosyl hydrolase family 30"  
"JS1\_M10\_01684" 17374 "s59E13H2" 0 "putative fructose-bisphosphate aldolase"  
"JS1\_M10\_01684" 17374 "s59E25H2" 0 "putative fructose-bisphosphate aldolase"  
"JS1\_M10\_01684" 17374 "s59E5H2" 0 "putative fructose-bisphosphate aldolase"  
"JS1\_M10\_01684" 17374 "s63E6H2" 0 "putative fructose-bisphosphate aldolase"  
"JS1\_M10\_01685" 17375 "s59E13H2" 0 "Bacterial extracellular solute-binding protein"  
"JS1\_M10\_01685" 17375 "s59E25H2" 0 "Bacterial extracellular solute-binding protein"  
"JS1\_M10\_01685" 17375 "s59E5H2" 0 "Bacterial extracellular solute-binding protein"  
"JS1\_M10\_01685" 17375 "s63E6H2" 0 "Bacterial extracellular solute-binding protein"  
"JS1\_M10\_01686" 17376 "s59E13H2" 0.03039036 "Ribose-5-phosphate isomerase B"  
"JS1\_M10\_01686" 17376 "s59E25H2" 0 "Ribose-5-phosphate isomerase B"  
"JS1\_M10\_01686" 17376 "s59E5H2" 0 "Ribose-5-phosphate isomerase B"  
"JS1\_M10\_01686" 17376 "s63E6H2" 0 "Ribose-5-phosphate isomerase B"  
"JS1\_M10\_01687" 17377 "s59E13H2" 0.068821 "Xylose isomerase-like TIM barrel"  
"JS1\_M10\_01687" 17377 "s59E25H2" 0 "Xylose isomerase-like TIM barrel"  
"JS1\_M10\_01687" 17377 "s59E5H2" 0.007463515 "Xylose isomerase-like TIM barrel"  
"JS1\_M10\_01687" 17377 "s63E6H2" 0 "Xylose isomerase-like TIM barrel"  
"JS1\_M10\_01688" 17378 "s59E13H2" 0.04142349 "Methylmalonate semialdehyde dehydrogenase [acylating]"  
"JS1\_M10\_01688" 17378 "s59E25H2" 0 "Methylmalonate semialdehyde dehydrogenase [acylating]"  
"JS1\_M10\_01688" 17378 "s59E5H2" 0.1457438 "Methylmalonate semialdehyde dehydrogenase [acylating]"  
"JS1\_M10\_01688" 17378 "s63E6H2" 0.02693412 "Methylmalonate semialdehyde dehydrogenase [acylating]"  
"JS1\_M10\_01689" 17379 "s59E13H2" 0.007048334 "1-deoxy-D-xylulose-5-phosphate synthase"  
"JS1\_M10\_01689" 17379 "s59E25H2" 0 "1-deoxy-D-xylulose-5-phosphate synthase"  
"JS1\_M10\_01689" 17379 "s59E5H2" 0.01710961 "1-deoxy-D-xylulose-5-phosphate synthase"  
"JS1\_M10\_01689" 17379 "s63E6H2" 0.00757573 "1-deoxy-D-xylulose-5-phosphate synthase"  
"JS1\_M10\_01690" 17380 "s59E13H2" 0.02318531 "Transketolase 2"  
"JS1\_M10\_01690" 17380 "s59E25H2" 0 "Transketolase 2"  
"JS1\_M10\_01690" 17380 "s59E5H2" 0.05177701 "Transketolase 2"  
"JS1\_M10\_01690" 17380 "s63E6H2" 0.003738685 "Transketolase 2"  
"JS1\_M10\_01691" 17381 "s59E13H2" 0.04046615 "Transposase DDE domain protein"  
"JS1\_M10\_01691" 17381 "s59E25H2" 0 "Transposase DDE domain protein"  
"JS1\_M10\_01691" 17381 "s59E5H2" 0.1428508 "Transposase DDE domain protein"  
"JS1\_M10\_01691" 17381 "s63E6H2" 0.006128438 "Transposase DDE domain protein"

"JS1\_M10\_01692" 17382 "s59E13H2" 0.2658992 "Limonene hydroxylase"  
"JS1\_M10\_01692" 17382 "s59E25H2" 0 "Limonene hydroxylase"  
"JS1\_M10\_01692" 17382 "s59E5H2" 0.02225327 "Limonene hydroxylase"  
"JS1\_M10\_01692" 17382 "s63E6H2" 0.1072812 "Limonene hydroxylase"  
"JS1\_M10\_01694" 17384 "s59E13H2" 0.004089377 "Glyoxylate/hydroxypyruvate reductase B"  
"JS1\_M10\_01694" 17384 "s59E25H2" 0 "Glyoxylate/hydroxypyruvate reductase B"  
"JS1\_M10\_01694" 17384 "s59E5H2" 0 "Glyoxylate/hydroxypyruvate reductase B"  
"JS1\_M10\_01694" 17384 "s63E6H2" 0.005026184 "Glyoxylate/hydroxypyruvate reductase B"  
"JS1\_M10\_01695" 17385 "s59E13H2" 0.01775722 "Tungsten-containing aldehyde ferredoxin oxidoreductase"  
"JS1\_M10\_01695" 17385 "s59E25H2" 0 "Tungsten-containing aldehyde ferredoxin oxidoreductase"  
"JS1\_M10\_01695" 17385 "s59E5H2" 0 "Tungsten-containing aldehyde ferredoxin oxidoreductase"  
"JS1\_M10\_01695" 17385 "s63E6H2" 0 "Tungsten-containing aldehyde ferredoxin oxidoreductase"  
"JS1\_M10\_01696" 17386 "s59E13H2" 0.01548604 "50S ribosomal protein L2"  
"JS1\_M10\_01696" 17386 "s59E25H2" 0 "50S ribosomal protein L2"  
"JS1\_M10\_01696" 17386 "s59E5H2" 0.03211758 "50S ribosomal protein L2"  
"JS1\_M10\_01696" 17386 "s63E6H2" 0.331761 "50S ribosomal protein L2"  
"JS1\_M10\_01697" 17387 "s59E13H2" 0.025333 "30S ribosomal protein S19"  
"JS1\_M10\_01697" 17387 "s59E25H2" 0 "30S ribosomal protein S19"  
"JS1\_M10\_01697" 17387 "s59E5H2" 0.02047798 "30S ribosomal protein S19"  
"JS1\_M10\_01697" 17387 "s63E6H2" 0.2387134 "30S ribosomal protein S19"  
"JS1\_M10\_01698" 17388 "s59E13H2" 2.055993 "50S ribosomal protein L22"  
"JS1\_M10\_01698" 17388 "s59E25H2" 0 "50S ribosomal protein L22"  
"JS1\_M10\_01698" 17388 "s59E5H2" 0.09520281 "50S ribosomal protein L22"  
"JS1\_M10\_01698" 17388 "s63E6H2" 0.2905019 "50S ribosomal protein L22"  
"JS1\_M10\_01699" 17389 "s59E13H2" 0.0243808 "30S ribosomal protein S3"  
"JS1\_M10\_01699" 17389 "s59E25H2" 0 "30S ribosomal protein S3"  
"JS1\_M10\_01699" 17389 "s59E5H2" 0.0465243 "30S ribosomal protein S3"  
"JS1\_M10\_01699" 17389 "s63E6H2" 0.1377022 "30S ribosomal protein S3"  
"JS1\_M10\_01700" 17390 "s59E13H2" 0.0164002 "30S ribosomal protein S17"  
"JS1\_M10\_01700" 17390 "s59E25H2" 0 "30S ribosomal protein S17"  
"JS1\_M10\_01700" 17390 "s59E5H2" 0 "30S ribosomal protein S17"  
"JS1\_M10\_01700" 17390 "s63E6H2" 0.01051955 "30S ribosomal protein S17"  
"JS1\_M10\_01701" 17391 "s59E13H2" 0 "hypothetical protein"  
"JS1\_M10\_01701" 17391 "s59E25H2" 0 "hypothetical protein"  
"JS1\_M10\_01701" 17391 "s59E5H2" 0 "hypothetical protein"  
"JS1\_M10\_01701" 17391 "s63E6H2" 0 "hypothetical protein"  
"JS1\_M10\_01703" 17393 "s59E13H2" 0 "Radical SAM superfamily protein"  
"JS1\_M10\_01703" 17393 "s59E25H2" 0 "Radical SAM superfamily protein"  
"JS1\_M10\_01703" 17393 "s59E5H2" 0 "Radical SAM superfamily protein"  
"JS1\_M10\_01703" 17393 "s63E6H2" 0.001490227 "Radical SAM superfamily protein"  
"JS1\_M10\_01705" 17395 "s59E13H2" 0 "hypothetical protein"  
"JS1\_M10\_01705" 17395 "s59E25H2" 0 "hypothetical protein"  
"JS1\_M10\_01705" 17395 "s59E5H2" 0 "hypothetical protein"  
"JS1\_M10\_01705" 17395 "s63E6H2" 0 "hypothetical protein"  
"JS1\_M10\_01706" 17396 "s59E13H2" 0.008060939 "hypothetical protein"  
"JS1\_M10\_01706" 17396 "s59E25H2" 0 "hypothetical protein"  
"JS1\_M10\_01706" 17396 "s59E5H2" 0 "hypothetical protein"

"JS1\_M10\_01706" 17396 "s63E6H2" 0.0004241365 "hypothetical protein"  
"JS1\_M10\_01707" 17397 "s59E13H2" 0 "hypothetical protein"  
"JS1\_M10\_01707" 17397 "s59E25H2" 0 "hypothetical protein"  
"JS1\_M10\_01707" 17397 "s59E5H2" 0 "hypothetical protein"  
"JS1\_M10\_01707" 17397 "s63E6H2" 0.01823019 "hypothetical protein"  
"JS1\_M10\_01708" 17398 "s59E13H2" 0 "hypothetical protein"  
"JS1\_M10\_01708" 17398 "s59E25H2" 0 "hypothetical protein"  
"JS1\_M10\_01708" 17398 "s59E5H2" 0 "hypothetical protein"  
"JS1\_M10\_01708" 17398 "s63E6H2" 0.0007381036 "hypothetical protein"  
"JS1\_M10\_01709" 17399 "s59E13H2" 0 "hypothetical protein"  
"JS1\_M10\_01709" 17399 "s59E25H2" 0 "hypothetical protein"  
"JS1\_M10\_01709" 17399 "s59E5H2" 0.0007327337 "hypothetical protein"  
"JS1\_M10\_01709" 17399 "s63E6H2" 0.003984167 "hypothetical protein"  
"JS1\_M10\_01710" 17400 "s59E13H2" 0 "Nitroreductase family protein"  
"JS1\_M10\_01710" 17400 "s59E25H2" 0 "Nitroreductase family protein"  
"JS1\_M10\_01710" 17400 "s59E5H2" 2.018892 "Nitroreductase family protein"  
"JS1\_M10\_01710" 17400 "s63E6H2" 0.0944121 "Nitroreductase family protein"  
"JS1\_M10\_01711" 17401 "s59E13H2" 0.02586118 "Xylose isomerase-like TIM barrel"  
"JS1\_M10\_01711" 17401 "s59E25H2" 0 "Xylose isomerase-like TIM barrel"  
"JS1\_M10\_01711" 17401 "s59E5H2" 0.4617729 "Xylose isomerase-like TIM barrel"  
"JS1\_M10\_01711" 17401 "s63E6H2" 1.520476 "Xylose isomerase-like TIM barrel"  
"JS1\_M10\_01712" 17402 "s59E13H2" 0.04320953 "hypothetical protein"  
"JS1\_M10\_01712" 17402 "s59E25H2" 0 "hypothetical protein"  
"JS1\_M10\_01712" 17402 "s59E5H2" 0.02296662 "hypothetical protein"  
"JS1\_M10\_01712" 17402 "s63E6H2" 0.4656088 "hypothetical protein"  
"JS1\_M10\_01713" 17403 "s59E13H2" 0.09473793 "Trehalose/maltose import ATP-binding protein Malk"  
"JS1\_M10\_01713" 17403 "s59E25H2" 0 "Trehalose/maltose import ATP-binding protein Malk"  
"JS1\_M10\_01713" 17403 "s59E5H2" 0.05857043 "Trehalose/maltose import ATP-binding protein Malk"  
"JS1\_M10\_01713" 17403 "s63E6H2" 0.2745152 "Trehalose/maltose import ATP-binding protein Malk"  
"JS1\_M10\_01714" 17404 "s59E13H2" 0.08620054 "Spermidine/putrescine transport system permease protein PotB"  
"JS1\_M10\_01714" 17404 "s59E25H2" 0 "Spermidine/putrescine transport system permease protein PotB"  
"JS1\_M10\_01714" 17404 "s59E5H2" 0 "Spermidine/putrescine transport system permease protein PotB"  
"JS1\_M10\_01714" 17404 "s63E6H2" 0.123342 "Spermidine/putrescine transport system permease protein PotB"  
"JS1\_M10\_01715" 17405 "s59E13H2" 0.04423471 "Inner membrane ABC transporter permease protein YdcV"  
"JS1\_M10\_01715" 17405 "s59E25H2" 0 "Inner membrane ABC transporter permease protein YdcV"  
"JS1\_M10\_01715" 17405 "s59E5H2" 0 "Inner membrane ABC transporter permease protein YdcV"  
"JS1\_M10\_01715" 17405 "s63E6H2" 0.1032438 "Inner membrane ABC transporter permease protein YdcV"  
"JS1\_M10\_01716" 17406 "s59E13H2" 0.2085402 "D-allose transporter subunit"  
"JS1\_M10\_01716" 17406 "s59E25H2" 0 "D-allose transporter subunit"  
"JS1\_M10\_01716" 17406 "s59E5H2" 0.1568621 "D-allose transporter subunit"  
"JS1\_M10\_01716" 17406 "s63E6H2" 0.2329341 "D-allose transporter subunit"  
"JS1\_M10\_01717" 17407 "s59E13H2" 0.1307763 "Ribose transport system permease protein RbsC"  
"JS1\_M10\_01717" 17407 "s59E25H2" 0 "Ribose transport system permease protein RbsC"  
"JS1\_M10\_01717" 17407 "s59E5H2" 0.04892907 "Ribose transport system permease protein RbsC"  
"JS1\_M10\_01717" 17407 "s63E6H2" 0.1424194 "Ribose transport system permease protein RbsC"  
"JS1\_M10\_01718" 17408 "s59E13H2" 0.1361593 "Ribose import ATP-binding protein RbsA"  
"JS1\_M10\_01718" 17408 "s59E25H2" 0 "Ribose import ATP-binding protein RbsA"

"JS1\_M10\_01718" 17408 "s59E5H2" 0.2265632 "Ribose import ATP-binding protein RbsA"  
"JS1\_M10\_01718" 17408 "s63E6H2" 0.2233426 "Ribose import ATP-binding protein RbsA"  
"JS1\_M10\_01719" 17409 "s59E13H2" 0.1337185 "methylcobalamin:coenzyme M methyltransferase"  
"JS1\_M10\_01719" 17409 "s59E25H2" 0 "methylcobalamin:coenzyme M methyltransferase"  
"JS1\_M10\_01719" 17409 "s59E5H2" 0.2926218 "methylcobalamin:coenzyme M methyltransferase"  
"JS1\_M10\_01719" 17409 "s63E6H2" 0.1948798 "methylcobalamin:coenzyme M methyltransferase"  
"JS1\_M10\_01720" 17410 "s59E13H2" 0.001641917 "Hydroxypyruvate isomerase"  
"JS1\_M10\_01720" 17410 "s59E25H2" 0 "Hydroxypyruvate isomerase"  
"JS1\_M10\_01720" 17410 "s59E5H2" 0.1483447 "Hydroxypyruvate isomerase"  
"JS1\_M10\_01720" 17410 "s63E6H2" 0.04413202 "Hydroxypyruvate isomerase"  
"JS1\_M10\_01721" 17411 "s59E13H2" 0.007057969 "hypothetical protein"  
"JS1\_M10\_01721" 17411 "s59E25H2" 0 "hypothetical protein"  
"JS1\_M10\_01721" 17411 "s59E5H2" 0 "hypothetical protein"  
"JS1\_M10\_01721" 17411 "s63E6H2" 0.0500344 "hypothetical protein"  
"JS1\_M10\_01722" 17412 "s59E13H2" 0.01713864 "Putrescine transport system permease protein PotH"  
"JS1\_M10\_01722" 17412 "s59E25H2" 0 "Putrescine transport system permease protein PotH"  
"JS1\_M10\_01722" 17412 "s59E5H2" 0.02770178 "Putrescine transport system permease protein PotH"  
"JS1\_M10\_01722" 17412 "s63E6H2" 0.05927139 "Putrescine transport system permease protein PotH"  
"JS1\_M10\_01723" 17413 "s59E13H2" 0.02042476 "Trehalose/maltose transport system permease protein MalG"  
"JS1\_M10\_01723" 17413 "s59E25H2" 0 "Trehalose/maltose transport system permease protein MalG"  
"JS1\_M10\_01723" 17413 "s59E5H2" 0.05258122 "Trehalose/maltose transport system permease protein MalG"  
"JS1\_M10\_01723" 17413 "s63E6H2" 0.03483564 "Trehalose/maltose transport system permease protein MalG"  
"JS1\_M10\_01724" 17414 "s59E13H2" 0.001610091 "Trehalose/maltose import ATP-binding protein MalK"  
"JS1\_M10\_01724" 17414 "s59E25H2" 0 "Trehalose/maltose import ATP-binding protein MalK"  
"JS1\_M10\_01724" 17414 "s59E5H2" 0.03170294 "Trehalose/maltose import ATP-binding protein MalK"  
"JS1\_M10\_01724" 17414 "s63E6H2" 0.01457904 "Trehalose/maltose import ATP-binding protein MalK"  
"JS1\_M10\_01726" 17416 "s59E13H2" 0.1857654 "Inositol 2-dehydrogenase"  
"JS1\_M10\_01726" 17416 "s59E25H2" 0 "Inositol 2-dehydrogenase"  
"JS1\_M10\_01726" 17416 "s59E5H2" 0.4610051 "Inositol 2-dehydrogenase"  
"JS1\_M10\_01726" 17416 "s63E6H2" 0.07769187 "Inositol 2-dehydrogenase"  
"JS1\_M10\_01727" 17417 "s59E13H2" 0.176788 "Ribose operon repressor"  
"JS1\_M10\_01727" 17417 "s59E25H2" 0 "Ribose operon repressor"  
"JS1\_M10\_01727" 17417 "s59E5H2" 0.3885187 "Ribose operon repressor"  
"JS1\_M10\_01727" 17417 "s63E6H2" 0.09568247 "Ribose operon repressor"  
"JS1\_M10\_01728" 17418 "s59E13H2" 0.2349053 "putative L-threonine 3-dehydrogenase"  
"JS1\_M10\_01728" 17418 "s59E25H2" 0 "putative L-threonine 3-dehydrogenase"  
"JS1\_M10\_01728" 17418 "s59E5H2" 0.1641558 "putative L-threonine 3-dehydrogenase"  
"JS1\_M10\_01728" 17418 "s63E6H2" 0.09745845 "putative L-threonine 3-dehydrogenase"  
"JS1\_M10\_01729" 17419 "s59E13H2" 0.1242398 "Creatinine amidohydrolase"  
"JS1\_M10\_01729" 17419 "s59E25H2" 0 "Creatinine amidohydrolase"  
"JS1\_M10\_01729" 17419 "s59E5H2" 0.3366608 "Creatinine amidohydrolase"  
"JS1\_M10\_01729" 17419 "s63E6H2" 0.1391464 "Creatinine amidohydrolase"  
"JS1\_M10\_01730" 17420 "s59E13H2" 0.08288534 "D-tagatose 3-epimerase"  
"JS1\_M10\_01730" 17420 "s59E25H2" 0 "D-tagatose 3-epimerase"  
"JS1\_M10\_01730" 17420 "s59E5H2" 0.2023974 "D-tagatose 3-epimerase"  
"JS1\_M10\_01730" 17420 "s63E6H2" 0.04296629 "D-tagatose 3-epimerase"  
"JS1\_M10\_01731" 17421 "s59E13H2" 0.964778 "Pectin degradation repressor protein KdGR"

"JS1\_M10\_01731" 17421 "s59E25H2" 0 "Pectin degradation repressor protein KdgR"  
"JS1\_M10\_01731" 17421 "s59E5H2" 0.02465155 "Pectin degradation repressor protein KdgR"  
"JS1\_M10\_01731" 17421 "s63E6H2" 0.233047 "Pectin degradation repressor protein KdgR"  
"JS1\_M10\_01732" 17422 "s59E13H2" 0.1987053 "Putative KHG/KDPG aldolase"  
"JS1\_M10\_01732" 17422 "s59E25H2" 0.6916667 "Putative KHG/KDPG aldolase"  
"JS1\_M10\_01732" 17422 "s59E5H2" 0.02617519 "Putative KHG/KDPG aldolase"  
"JS1\_M10\_01732" 17422 "s63E6H2" 12.80522 "Putative KHG/KDPG aldolase"  
"JS1\_M10\_01733" 17423 "s59E13H2" 0.1356915 "2-dehydro-3-deoxygluconokinase"  
"JS1\_M10\_01733" 17423 "s59E25H2" 0 "2-dehydro-3-deoxygluconokinase"  
"JS1\_M10\_01733" 17423 "s59E5H2" 0.01139075 "2-dehydro-3-deoxygluconokinase"  
"JS1\_M10\_01733" 17423 "s63E6H2" 0.07102548 "2-dehydro-3-deoxygluconokinase"  
"JS1\_M10\_01734" 17424 "s59E13H2" 0 "Sialic acid-binding periplasmic protein SiaP precursor"  
"JS1\_M10\_01734" 17424 "s59E25H2" 0 "Sialic acid-binding periplasmic protein SiaP precursor"  
"JS1\_M10\_01734" 17424 "s59E5H2" 0.01453015 "Sialic acid-binding periplasmic protein SiaP precursor"  
"JS1\_M10\_01734" 17424 "s63E6H2" 0.6222793 "Sialic acid-binding periplasmic protein SiaP precursor"  
"JS1\_M10\_01735" 17425 "s59E13H2" 0 "Sialic acid TRAP transporter permease protein SiaT"  
"JS1\_M10\_01735" 17425 "s59E25H2" 0 "Sialic acid TRAP transporter permease protein SiaT"  
"JS1\_M10\_01735" 17425 "s59E5H2" 0.05394145 "Sialic acid TRAP transporter permease protein SiaT"  
"JS1\_M10\_01735" 17425 "s63E6H2" 0.5951112 "Sialic acid TRAP transporter permease protein SiaT"  
"JS1\_M10\_01736" 17426 "s59E13H2" 0.1104712 "Cell wall-binding protein Yoch precursor"  
"JS1\_M10\_01736" 17426 "s59E25H2" 0 "Cell wall-binding protein Yoch precursor"  
"JS1\_M10\_01736" 17426 "s59E5H2" 0.1602736 "Cell wall-binding protein Yoch precursor"  
"JS1\_M10\_01736" 17426 "s63E6H2" 0.3455301 "Cell wall-binding protein Yoch precursor"  
"JS1\_M10\_01737" 17427 "s59E13H2" 0.109937 "hypothetical protein"  
"JS1\_M10\_01737" 17427 "s59E25H2" 0 "hypothetical protein"  
"JS1\_M10\_01737" 17427 "s59E5H2" 0.1511406 "hypothetical protein"  
"JS1\_M10\_01737" 17427 "s63E6H2" 0.05534687 "hypothetical protein"  
"JS1\_M10\_01738" 17428 "s59E13H2" 0.1123659 "Cupin domain protein"  
"JS1\_M10\_01738" 17428 "s59E25H2" 0 "Cupin domain protein"  
"JS1\_M10\_01738" 17428 "s59E5H2" 0 "Cupin domain protein"  
"JS1\_M10\_01738" 17428 "s63E6H2" 0.00028949 "Cupin domain protein"  
"JS1\_M10\_01739" 17429 "s59E13H2" 0.05878311 "5-methylthioadenosine/S-adenosylhomocysteine deaminase"  
"JS1\_M10\_01739" 17429 "s59E25H2" 0.3033033 "5-methylthioadenosine/S-adenosylhomocysteine deaminase"  
"JS1\_M10\_01739" 17429 "s59E5H2" 0.3559522 "5-methylthioadenosine/S-adenosylhomocysteine deaminase"  
"JS1\_M10\_01739" 17429 "s63E6H2" 0.9710341 "5-methylthioadenosine/S-adenosylhomocysteine deaminase"  
"JS1\_M10\_01740" 17430 "s59E13H2" 0.5954927 "8-oxoguanine deaminase"  
"JS1\_M10\_01740" 17430 "s59E25H2" 0 "8-oxoguanine deaminase"  
"JS1\_M10\_01740" 17430 "s59E5H2" 0.3141654 "8-oxoguanine deaminase"  
"JS1\_M10\_01740" 17430 "s63E6H2" 0.2155309 "8-oxoguanine deaminase"  
"JS1\_M10\_01741" 17431 "s59E13H2" 0.1370741 "Xylose import ATP-binding protein XylG"  
"JS1\_M10\_01741" 17431 "s59E25H2" 0.1627604 "Xylose import ATP-binding protein XylG"  
"JS1\_M10\_01741" 17431 "s59E5H2" 0.2469967 "Xylose import ATP-binding protein XylG"  
"JS1\_M10\_01741" 17431 "s63E6H2" 1.414211 "Xylose import ATP-binding protein XylG"  
"JS1\_M10\_01748" 17438 "s59E13H2" 0 "hypothetical protein"  
"JS1\_M10\_01748" 17438 "s59E25H2" 0 "hypothetical protein"  
"JS1\_M10\_01748" 17438 "s59E5H2" 0 "hypothetical protein"  
"JS1\_M10\_01748" 17438 "s63E6H2" 0 "hypothetical protein"

"JS1\_M10\_01749" 17439 "s59E13H2" 0 "hypothetical protein"  
"JS1\_M10\_01749" 17439 "s59E25H2" 0 "hypothetical protein"  
"JS1\_M10\_01749" 17439 "s59E5H2" 0 "hypothetical protein"  
"JS1\_M10\_01749" 17439 "s63E6H2" 0 "hypothetical protein"  
"JS1\_M10\_01752" 17442 "s59E13H2" 0 "Oligopeptide transport ATP-binding protein OppD"  
"JS1\_M10\_01752" 17442 "s59E25H2" 0 "Oligopeptide transport ATP-binding protein OppD"  
"JS1\_M10\_01752" 17442 "s59E5H2" 0 "Oligopeptide transport ATP-binding protein OppD"  
"JS1\_M10\_01752" 17442 "s63E6H2" 0 "Oligopeptide transport ATP-binding protein OppD"  
"JS1\_M10\_01755" 17445 "s59E13H2" 0 "hypothetical protein"  
"JS1\_M10\_01755" 17445 "s59E25H2" 0 "hypothetical protein"  
"JS1\_M10\_01755" 17445 "s59E5H2" 0 "hypothetical protein"  
"JS1\_M10\_01755" 17445 "s63E6H2" 0 "hypothetical protein"  
"JS1\_M10\_01758" 17448 "s59E13H2" 0 "hypothetical protein"  
"JS1\_M10\_01758" 17448 "s59E25H2" 0 "hypothetical protein"  
"JS1\_M10\_01758" 17448 "s59E5H2" 0 "hypothetical protein"  
"JS1\_M10\_01758" 17448 "s63E6H2" 0 "hypothetical protein"  
"JS1\_M10\_01759" 17449 "s59E13H2" 0 "hypothetical protein"  
"JS1\_M10\_01759" 17449 "s59E25H2" 0 "hypothetical protein"  
"JS1\_M10\_01759" 17449 "s59E5H2" 0 "hypothetical protein"  
"JS1\_M10\_01759" 17449 "s63E6H2" 0 "hypothetical protein"  
"JS1\_M10\_01760" 17450 "s59E13H2" 0.002566945 "Oligopeptide transport ATP-binding protein OppD"  
"JS1\_M10\_01760" 17450 "s59E25H2" 0 "Oligopeptide transport ATP-binding protein OppD"  
"JS1\_M10\_01760" 17450 "s59E5H2" 0 "Oligopeptide transport ATP-binding protein OppD"  
"JS1\_M10\_01760" 17450 "s63E6H2" 0 "Oligopeptide transport ATP-binding protein OppD"  
"JS1\_M10\_01761" 17451 "s59E13H2" 0 "Cycloisomaltooligosaccharide glucanotransferase precursor"  
"JS1\_M10\_01761" 17451 "s59E25H2" 0 "Cycloisomaltooligosaccharide glucanotransferase precursor"  
"JS1\_M10\_01761" 17451 "s59E5H2" 0 "Cycloisomaltooligosaccharide glucanotransferase precursor"  
"JS1\_M10\_01761" 17451 "s63E6H2" 0.0069246 "Cycloisomaltooligosaccharide glucanotransferase precursor"  
"JS1\_M10\_01762" 17452 "s59E13H2" 0.02905773 "Threonine synthase"  
"JS1\_M10\_01762" 17452 "s59E25H2" 0 "Threonine synthase"  
"JS1\_M10\_01762" 17452 "s59E5H2" 0.2147168 "Threonine synthase"  
"JS1\_M10\_01762" 17452 "s63E6H2" 0.2746243 "Threonine synthase"  
"JS1\_M10\_01763" 17453 "s59E13H2" 0 "Acetylornithine deacetylase"  
"JS1\_M10\_01763" 17453 "s59E25H2" 0 "Acetylornithine deacetylase"  
"JS1\_M10\_01763" 17453 "s59E5H2" 0 "Acetylornithine deacetylase"  
"JS1\_M10\_01763" 17453 "s63E6H2" 0.05784884 "Acetylornithine deacetylase"  
"JS1\_M10\_01764" 17454 "s59E13H2" 0.01585515 "Cysteine synthase"  
"JS1\_M10\_01764" 17454 "s59E25H2" 0 "Cysteine synthase"  
"JS1\_M10\_01764" 17454 "s59E5H2" 0.1669908 "Cysteine synthase"  
"JS1\_M10\_01764" 17454 "s63E6H2" 0.4426983 "Cysteine synthase"  
"JS1\_M10\_01765" 17455 "s59E13H2" 2.024939 "putative xanthine dehydrogenase subunit D"  
"JS1\_M10\_01765" 17455 "s59E25H2" 0 "putative xanthine dehydrogenase subunit D"  
"JS1\_M10\_01765" 17455 "s59E5H2" 0.6168138 "putative xanthine dehydrogenase subunit D"  
"JS1\_M10\_01765" 17455 "s63E6H2" 1.029117 "putative xanthine dehydrogenase subunit D"  
"JS1\_M10\_01766" 17456 "s59E13H2" 2.307239 "Glyceraldehyde dehydrogenase medium chain"  
"JS1\_M10\_01766" 17456 "s59E25H2" 0 "Glyceraldehyde dehydrogenase medium chain"  
"JS1\_M10\_01766" 17456 "s59E5H2" 0.4805423 "Glyceraldehyde dehydrogenase medium chain"



"JS1\_M10\_01766" 17456 "s63E6H2" 0.6520263 "Glyceraldehyde dehydrogenase medium chain"  
"JS1\_M10\_01767" 17457 "s59E13H2" 2.412761 "Nicotinate dehydrogenase small FeS subunit"  
"JS1\_M10\_01767" 17457 "s59E25H2" 0 "Nicotinate dehydrogenase small FeS subunit"  
"JS1\_M10\_01767" 17457 "s59E5H2" 0.2649584 "Nicotinate dehydrogenase small FeS subunit"  
"JS1\_M10\_01767" 17457 "s63E6H2" 0.3930023 "Nicotinate dehydrogenase small FeS subunit"  
"JS1\_M10\_01768" 17458 "s59E13H2" 0 "Serine hydroxymethyltransferase"  
"JS1\_M10\_01768" 17458 "s59E25H2" 0 "Serine hydroxymethyltransferase"  
"JS1\_M10\_01768" 17458 "s59E5H2" 0.04720475 "Serine hydroxymethyltransferase"  
"JS1\_M10\_01768" 17458 "s63E6H2" 0.003874057 "Serine hydroxymethyltransferase"  
"JS1\_M10\_01769" 17459 "s59E13H2" 0.005310184 "Elongation factor P"  
"JS1\_M10\_01769" 17459 "s59E25H2" 0 "Elongation factor P"  
"JS1\_M10\_01769" 17459 "s59E5H2" 0.1443658 "Elongation factor P"  
"JS1\_M10\_01769" 17459 "s63E6H2" 0.09405467 "Elongation factor P"  
"JS1\_M10\_01770" 17460 "s59E13H2" 0.003820678 "hypothetical protein"  
"JS1\_M10\_01770" 17460 "s59E25H2" 0 "hypothetical protein"  
"JS1\_M10\_01770" 17460 "s59E5H2" 0.06568416 "hypothetical protein"  
"JS1\_M10\_01770" 17460 "s63E6H2" 0.1039758 "hypothetical protein"  
"JS1\_M10\_01771" 17461 "s59E13H2" 0.009356341 "hypothetical protein"  
"JS1\_M10\_01771" 17461 "s59E25H2" 0 "hypothetical protein"  
"JS1\_M10\_01771" 17461 "s59E5H2" 0.05729679 "hypothetical protein"  
"JS1\_M10\_01771" 17461 "s63E6H2" 0.1578172 "hypothetical protein"  
"JS1\_M10\_01772" 17462 "s59E13H2" 0.01907981 "Exodeoxyribonuclease 7 large subunit"  
"JS1\_M10\_01772" 17462 "s59E25H2" 0 "Exodeoxyribonuclease 7 large subunit"  
"JS1\_M10\_01772" 17462 "s59E5H2" 0.03852593 "Exodeoxyribonuclease 7 large subunit"  
"JS1\_M10\_01772" 17462 "s63E6H2" 0.1745745 "Exodeoxyribonuclease 7 large subunit"  
"JS1\_M10\_01773" 17463 "s59E13H2" 0.01285497 "Exodeoxyribonuclease 7 small subunit"  
"JS1\_M10\_01773" 17463 "s59E25H2" 0 "Exodeoxyribonuclease 7 small subunit"  
"JS1\_M10\_01773" 17463 "s59E5H2" 0 "Exodeoxyribonuclease 7 small subunit"  
"JS1\_M10\_01773" 17463 "s63E6H2" 0.2359665 "Exodeoxyribonuclease 7 small subunit"  
"JS1\_M10\_01774" 17464 "s59E13H2" 0.02607741 "Farnesyl diphosphate synthase"  
"JS1\_M10\_01774" 17464 "s59E25H2" 0 "Farnesyl diphosphate synthase"  
"JS1\_M10\_01774" 17464 "s59E5H2" 0.02801749 "Farnesyl diphosphate synthase"  
"JS1\_M10\_01774" 17464 "s63E6H2" 0.2064558 "Farnesyl diphosphate synthase"  
"JS1\_M10\_01775" 17465 "s59E13H2" 0.02344399 "Ribonuclease PH"  
"JS1\_M10\_01775" 17465 "s59E25H2" 0 "Ribonuclease PH"  
"JS1\_M10\_01775" 17465 "s59E5H2" 0.09057133 "Ribonuclease PH"  
"JS1\_M10\_01775" 17465 "s63E6H2" 0.2038404 "Ribonuclease PH"  
"JS1\_M10\_01776" 17466 "s59E13H2" 0.01353265 "Non-canonical purine NTP pyrophosphatase"  
"JS1\_M10\_01776" 17466 "s59E25H2" 0 "Non-canonical purine NTP pyrophosphatase"  
"JS1\_M10\_01776" 17466 "s59E5H2" 0.017094 "Non-canonical purine NTP pyrophosphatase"  
"JS1\_M10\_01776" 17466 "s63E6H2" 0.0771801 "Non-canonical purine NTP pyrophosphatase"  
"JS1\_M10\_01784" 17474 "s59E13H2" 0.07393242 "Trigger factor"  
"JS1\_M10\_01784" 17474 "s59E25H2" 0 "Trigger factor"  
"JS1\_M10\_01784" 17474 "s59E5H2" 0.03008094 "Trigger factor"  
"JS1\_M10\_01784" 17474 "s63E6H2" 0.07177559 "Trigger factor"  
"JS1\_M10\_01785" 17475 "s59E13H2" 0.05503889 "ATP-dependent Clp protease proteolytic subunit"  
"JS1\_M10\_01785" 17475 "s59E25H2" 0 "ATP-dependent Clp protease proteolytic subunit"

"JS1\_M10\_01785" 17475 "s59E5H2" 0.03255924 "ATP-dependent Clp protease proteolytic subunit"  
"JS1\_M10\_01785" 17475 "s63E6H2" 0.04652642 "ATP-dependent Clp protease proteolytic subunit"  
"JS1\_M10\_01786" 17476 "s59E13H2" 0.04347792 "ATP-dependent Clp protease ATP-binding subunit ClpX"  
"JS1\_M10\_01786" 17476 "s59E25H2" 0 "ATP-dependent Clp protease ATP-binding subunit ClpX"  
"JS1\_M10\_01786" 17476 "s59E5H2" 0.04171462 "ATP-dependent Clp protease ATP-binding subunit ClpX"  
"JS1\_M10\_01786" 17476 "s63E6H2" 0.0864626 "ATP-dependent Clp protease ATP-binding subunit ClpX"  
"JS1\_M10\_01787" 17477 "s59E13H2" 0.2102431 "Lon protease 1"  
"JS1\_M10\_01787" 17477 "s59E25H2" 0 "Lon protease 1"  
"JS1\_M10\_01787" 17477 "s59E5H2" 0.1570585 "Lon protease 1"  
"JS1\_M10\_01787" 17477 "s63E6H2" 0.1058687 "Lon protease 1"  
"JS1\_M10\_01789" 17479 "s59E13H2" 0.4203068 "Valine--tRNA ligase"  
"JS1\_M10\_01789" 17479 "s59E25H2" 0 "Valine--tRNA ligase"  
"JS1\_M10\_01789" 17479 "s59E5H2" 0.3200478 "Valine--tRNA ligase"  
"JS1\_M10\_01789" 17479 "s63E6H2" 0.1543099 "Valine--tRNA ligase"  
"JS1\_M10\_01790" 17480 "s59E13H2" 2.176374 "Folypolyglutamate synthase"  
"JS1\_M10\_01790" 17480 "s59E25H2" 0.1844444 "Folypolyglutamate synthase"  
"JS1\_M10\_01790" 17480 "s59E5H2" 0.1721326 "Folypolyglutamate synthase"  
"JS1\_M10\_01790" 17480 "s63E6H2" 0.06855637 "Folypolyglutamate synthase"  
"JS1\_M10\_01791" 17481 "s59E13H2" 3.641104 "ComE operon protein 1"  
"JS1\_M10\_01791" 17481 "s59E25H2" 0 "ComE operon protein 1"  
"JS1\_M10\_01791" 17481 "s59E5H2" 0.465812 "ComE operon protein 1"  
"JS1\_M10\_01791" 17481 "s63E6H2" 0.03624524 "ComE operon protein 1"  
"JS1\_M10\_01792" 17482 "s59E13H2" 3.95503 "ComEC family competence protein"  
"JS1\_M10\_01792" 17482 "s59E25H2" 0 "ComEC family competence protein"  
"JS1\_M10\_01792" 17482 "s59E5H2" 0.6482405 "ComEC family competence protein"  
"JS1\_M10\_01792" 17482 "s63E6H2" 0.05013332 "ComEC family competence protein"  
"JS1\_M10\_01793" 17483 "s59E13H2" 2.604421 "DNA polymerase III subunit delta"  
"JS1\_M10\_01793" 17483 "s59E25H2" 0 "DNA polymerase III subunit delta"  
"JS1\_M10\_01793" 17483 "s59E5H2" 0.5538365 "DNA polymerase III subunit delta"  
"JS1\_M10\_01793" 17483 "s63E6H2" 0.04109551 "DNA polymerase III subunit delta"  
"JS1\_M10\_01794" 17484 "s59E13H2" 1.354387 "30S ribosomal protein S20"  
"JS1\_M10\_01794" 17484 "s59E25H2" 0 "30S ribosomal protein S20"  
"JS1\_M10\_01794" 17484 "s59E5H2" 0.1339187 "30S ribosomal protein S20"  
"JS1\_M10\_01794" 17484 "s63E6H2" 0.01185154 "30S ribosomal protein S20"  
"JS1\_M10\_01795" 17485 "s59E13H2" 0.01310154 "Glutamine amidotransferase subunit PdxT"  
"JS1\_M10\_01795" 17485 "s59E25H2" 0 "Glutamine amidotransferase subunit PdxT"  
"JS1\_M10\_01795" 17485 "s59E5H2" 0.3500247 "Glutamine amidotransferase subunit PdxT"  
"JS1\_M10\_01795" 17485 "s63E6H2" 0.3235426 "Glutamine amidotransferase subunit PdxT"  
"JS1\_M10\_01799" 17489 "s59E13H2" 0.001231564 "hypothetical protein"  
"JS1\_M10\_01799" 17489 "s59E25H2" 0 "hypothetical protein"  
"JS1\_M10\_01799" 17489 "s59E5H2" 0.005775793 "hypothetical protein"  
"JS1\_M10\_01799" 17489 "s63E6H2" 0.005290507 "hypothetical protein"  
"JS1\_M10\_01800" 17490 "s59E13H2" 0.3857348 "Bifunctional phosphoglucose/phosphomannose isomerase"  
"JS1\_M10\_01800" 17490 "s59E25H2" 0 "Bifunctional phosphoglucose/phosphomannose isomerase"  
"JS1\_M10\_01800" 17490 "s59E5H2" 0.4185029 "Bifunctional phosphoglucose/phosphomannose isomerase"  
"JS1\_M10\_01800" 17490 "s63E6H2" 0.8356182 "Bifunctional phosphoglucose/phosphomannose isomerase"  
"JS1\_M10\_01801" 17491 "s59E13H2" 1.403637 "putative undecaprenyl-phosphate N-acetylglucosaminyl 1-phosphate transferase"

"JS1\_M10\_01801" 17491 "s59E25H2" 0 "putative undecaprenyl-phosphate N-acetylglucosaminyl 1-phosphate transferase"  
"JS1\_M10\_01801" 17491 "s59E5H2" 0.5220213 "putative undecaprenyl-phosphate N-acetylglucosaminyl 1-phosphate transferase"  
"JS1\_M10\_01801" 17491 "s63E6H2" 0.2028667 "putative undecaprenyl-phosphate N-acetylglucosaminyl 1-phosphate transferase"  
"JS1\_M10\_01802" 17492 "s59E13H2" 1.641704 "UDP-glucose 4-epimerase"  
"JS1\_M10\_01802" 17492 "s59E25H2" 0 "UDP-glucose 4-epimerase"  
"JS1\_M10\_01802" 17492 "s59E5H2" 0.3121715 "UDP-glucose 4-epimerase"  
"JS1\_M10\_01802" 17492 "s63E6H2" 0.09316985 "UDP-glucose 4-epimerase"  
"JS1\_M10\_01803" 17493 "s59E13H2" 0.08526675 "Putative N-acetylmannosaminyltransferase"  
"JS1\_M10\_01803" 17493 "s59E25H2" 0 "Putative N-acetylmannosaminyltransferase"  
"JS1\_M10\_01803" 17493 "s59E5H2" 0.7785663 "Putative N-acetylmannosaminyltransferase"  
"JS1\_M10\_01803" 17493 "s63E6H2" 1.311993 "Putative N-acetylmannosaminyltransferase"  
"JS1\_M10\_01804" 17494 "s59E13H2" 0.150164 "rod shape-determining protein MreD"  
"JS1\_M10\_01804" 17494 "s59E25H2" 0 "rod shape-determining protein MreD"  
"JS1\_M10\_01804" 17494 "s59E5H2" 0.5154933 "rod shape-determining protein MreD"  
"JS1\_M10\_01804" 17494 "s63E6H2" 0.2186431 "rod shape-determining protein MreD"  
"JS1\_M10\_01805" 17495 "s59E13H2" 0.1051935 "Stage V sporulation protein D"  
"JS1\_M10\_01805" 17495 "s59E25H2" 0 "Stage V sporulation protein D"  
"JS1\_M10\_01805" 17495 "s59E5H2" 0.5065431 "Stage V sporulation protein D"  
"JS1\_M10\_01805" 17495 "s63E6H2" 0.6200221 "Stage V sporulation protein D"  
"JS1\_M10\_01806" 17496 "s59E13H2" 0.01356654 "Rod shape-determining protein RodA"  
"JS1\_M10\_01806" 17496 "s59E25H2" 0 "Rod shape-determining protein RodA"  
"JS1\_M10\_01806" 17496 "s59E5H2" 0.3414249 "Rod shape-determining protein RodA"  
"JS1\_M10\_01806" 17496 "s63E6H2" 0.171666 "Rod shape-determining protein RodA"  
"JS1\_M10\_01807" 17497 "s59E13H2" 0.06917974 "Radical SAM superfamily protein"  
"JS1\_M10\_01807" 17497 "s59E25H2" 0 "Radical SAM superfamily protein"  
"JS1\_M10\_01807" 17497 "s59E5H2" 0.2578846 "Radical SAM superfamily protein"  
"JS1\_M10\_01807" 17497 "s63E6H2" 1.076722 "Radical SAM superfamily protein"  
"JS1\_M10\_01808" 17498 "s59E13H2" 0.004501814 "hypothetical protein"  
"JS1\_M10\_01808" 17498 "s59E25H2" 0 "hypothetical protein"  
"JS1\_M10\_01808" 17498 "s59E5H2" 0.04192534 "hypothetical protein"  
"JS1\_M10\_01808" 17498 "s63E6H2" 0.009456673 "hypothetical protein"  
"JS1\_M21\_00001" 17499 "s59E13H2" 0.120632 "hypothetical protein"  
"JS1\_M21\_00001" 17499 "s59E25H2" 0 "hypothetical protein"  
"JS1\_M21\_00001" 17499 "s59E5H2" 0.7416592 "hypothetical protein"  
"JS1\_M21\_00001" 17499 "s63E6H2" 0.297899 "hypothetical protein"  
"JS1\_M21\_00002" 17500 "s59E13H2" 0.534852 "Sorbitol-6-phosphate 2-dehydrogenase"  
"JS1\_M21\_00002" 17500 "s59E25H2" 0 "Sorbitol-6-phosphate 2-dehydrogenase"  
"JS1\_M21\_00002" 17500 "s59E5H2" 0.6058081 "Sorbitol-6-phosphate 2-dehydrogenase"  
"JS1\_M21\_00002" 17500 "s63E6H2" 0.2452025 "Sorbitol-6-phosphate 2-dehydrogenase"  
"JS1\_M21\_00003" 17501 "s59E13H2" 0.4876074 "L-threonine 3-dehydrogenase"  
"JS1\_M21\_00003" 17501 "s59E25H2" 0 "L-threonine 3-dehydrogenase"  
"JS1\_M21\_00003" 17501 "s59E5H2" 0.3844992 "L-threonine 3-dehydrogenase"  
"JS1\_M21\_00003" 17501 "s63E6H2" 0.6794124 "L-threonine 3-dehydrogenase"  
"JS1\_M21\_00004" 17502 "s59E13H2" 1.014447 "D-ribose-binding periplasmic protein precursor"  
"JS1\_M21\_00004" 17502 "s59E25H2" 0 "D-ribose-binding periplasmic protein precursor"  
"JS1\_M21\_00004" 17502 "s59E5H2" 1.237111 "D-ribose-binding periplasmic protein precursor"  
"JS1\_M21\_00004" 17502 "s63E6H2" 0.8797842 "D-ribose-binding periplasmic protein precursor"

"JS1\_M21\_00006" 17504 "s59E13H2" 0 "hypothetical protein"  
"JS1\_M21\_00006" 17504 "s59E25H2" 0 "hypothetical protein"  
"JS1\_M21\_00006" 17504 "s59E5H2" 0 "hypothetical protein"  
"JS1\_M21\_00006" 17504 "s63E6H2" 0.002799767 "hypothetical protein"  
"JS1\_M21\_00007" 17505 "s59E13H2" 0 "hypothetical protein"  
"JS1\_M21\_00007" 17505 "s59E25H2" 0 "hypothetical protein"  
"JS1\_M21\_00007" 17505 "s59E5H2" 0 "hypothetical protein"  
"JS1\_M21\_00007" 17505 "s63E6H2" 0 "hypothetical protein"  
"JS1\_M21\_00009" 17507 "s59E13H2" 0.07184334 "hypothetical protein"  
"JS1\_M21\_00009" 17507 "s59E25H2" 0 "hypothetical protein"  
"JS1\_M21\_00009" 17507 "s59E5H2" 0.2769776 "hypothetical protein"  
"JS1\_M21\_00009" 17507 "s63E6H2" 1.247941 "hypothetical protein"  
"JS1\_M21\_00010" 17508 "s59E13H2" 0.03098465 "SigmaW regulon antibacterial"  
"JS1\_M21\_00010" 17508 "s59E25H2" 0 "SigmaW regulon antibacterial"  
"JS1\_M21\_00010" 17508 "s59E5H2" 0.2004901 "SigmaW regulon antibacterial"  
"JS1\_M21\_00010" 17508 "s63E6H2" 1.010779 "SigmaW regulon antibacterial"  
"JS1\_M21\_00011" 17509 "s59E13H2" 0.0235099 "hypothetical protein"  
"JS1\_M21\_00011" 17509 "s59E25H2" 0 "hypothetical protein"  
"JS1\_M21\_00011" 17509 "s59E5H2" 0.0907857 "hypothetical protein"  
"JS1\_M21\_00011" 17509 "s63E6H2" 0.3043022 "hypothetical protein"  
"JS1\_M21\_00012" 17510 "s59E13H2" 0.05073873 "PhoH-like protein"  
"JS1\_M21\_00012" 17510 "s59E25H2" 0 "PhoH-like protein"  
"JS1\_M21\_00012" 17510 "s59E5H2" 0.3469095 "PhoH-like protein"  
"JS1\_M21\_00012" 17510 "s63E6H2" 0.6018416 "PhoH-like protein"  
"JS1\_M21\_00013" 17511 "s59E13H2" 0.107798 "hypothetical protein"  
"JS1\_M21\_00013" 17511 "s59E25H2" 0 "hypothetical protein"  
"JS1\_M21\_00013" 17511 "s59E5H2" 0.416002 "hypothetical protein"  
"JS1\_M21\_00013" 17511 "s63E6H2" 0.6088559 "hypothetical protein"  
"JS1\_M21\_00014" 17512 "s59E13H2" 0.1173909 "NMT1/THI5 like protein"  
"JS1\_M21\_00014" 17512 "s59E25H2" 0 "NMT1/THI5 like protein"  
"JS1\_M21\_00014" 17512 "s59E5H2" 0.09151515 "NMT1/THI5 like protein"  
"JS1\_M21\_00014" 17512 "s63E6H2" 0.1595986 "NMT1/THI5 like protein"  
"JS1\_M21\_00015" 17513 "s59E13H2" 0.01122442 "hypothetical protein"  
"JS1\_M21\_00015" 17513 "s59E25H2" 0 "hypothetical protein"  
"JS1\_M21\_00015" 17513 "s59E5H2" 0.02196531 "hypothetical protein"  
"JS1\_M21\_00015" 17513 "s63E6H2" 0.1522683 "hypothetical protein"  
"JS1\_M21\_00016" 17514 "s59E13H2" 0.01122794 "hypothetical protein"  
"JS1\_M21\_00016" 17514 "s59E25H2" 0 "hypothetical protein"  
"JS1\_M21\_00016" 17514 "s59E5H2" 0.003400214 "hypothetical protein"  
"JS1\_M21\_00016" 17514 "s63E6H2" 0.05173088 "hypothetical protein"  
"JS1\_M21\_00017" 17515 "s59E13H2" 0.03018053 "Hemolysin C"  
"JS1\_M21\_00017" 17515 "s59E25H2" 0 "Hemolysin C"  
"JS1\_M21\_00017" 17515 "s59E5H2" 0.2029007 "Hemolysin C"  
"JS1\_M21\_00017" 17515 "s63E6H2" 0.05814295 "Hemolysin C"  
"JS1\_M21\_00021" 17519 "s59E13H2" 0.1382292 "Putative 2-C-methyl-D-erythritol 4-phosphate cytidyltransferase 2"  
"JS1\_M21\_00021" 17519 "s59E25H2" 0 "Putative 2-C-methyl-D-erythritol 4-phosphate cytidyltransferase 2"  
"JS1\_M21\_00021" 17519 "s59E5H2" 0.05910528 "Putative 2-C-methyl-D-erythritol 4-phosphate cytidyltransferase 2"

"JS1\_M21\_00021" 17519 "s63E6H2" 0.02618239 "Putative 2-C-methyl-D-erythritol 4-phosphate cytidyltransferase 2"  
"JS1\_M21\_00022" 17520 "s59E13H2" 0.09136116 "lipoprotein Nlpl"  
"JS1\_M21\_00022" 17520 "s59E25H2" 0 "lipoprotein Nlpl"  
"JS1\_M21\_00022" 17520 "s59E5H2" 0.05506842 "lipoprotein Nlpl"  
"JS1\_M21\_00022" 17520 "s63E6H2" 0.03096337 "lipoprotein Nlpl"  
"JS1\_M21\_00023" 17521 "s59E13H2" 0.08508691 "hypothetical protein"  
"JS1\_M21\_00023" 17521 "s59E25H2" 0 "hypothetical protein"  
"JS1\_M21\_00023" 17521 "s59E5H2" 0.03190528 "hypothetical protein"  
"JS1\_M21\_00023" 17521 "s63E6H2" 0.01854322 "hypothetical protein"  
"JS1\_M21\_00024" 17522 "s59E13H2" 3.197834 "Phosphate acetyltransferase"  
"JS1\_M21\_00024" 17522 "s59E25H2" 0 "Phosphate acetyltransferase"  
"JS1\_M21\_00024" 17522 "s59E5H2" 0.1459699 "Phosphate acetyltransferase"  
"JS1\_M21\_00024" 17522 "s63E6H2" 0.1091618 "Phosphate acetyltransferase"  
"JS1\_M21\_00025" 17523 "s59E13H2" 4.887927 "Phosphate acetyltransferase"  
"JS1\_M21\_00025" 17523 "s59E25H2" 0 "Phosphate acetyltransferase"  
"JS1\_M21\_00025" 17523 "s59E5H2" 0.2638459 "Phosphate acetyltransferase"  
"JS1\_M21\_00025" 17523 "s63E6H2" 0.02988984 "Phosphate acetyltransferase"  
"JS1\_M21\_00026" 17524 "s59E13H2" 0 "Trehalose synthase"  
"JS1\_M21\_00026" 17524 "s59E25H2" 0 "Trehalose synthase"  
"JS1\_M21\_00026" 17524 "s59E5H2" 0.005588435 "Trehalose synthase"  
"JS1\_M21\_00026" 17524 "s63E6H2" 0 "Trehalose synthase"  
"JS1\_M21\_00027" 17525 "s59E13H2" 0.1913827 "Glutamine--fructose-6-phosphate aminotransferase [isomerizing]"  
"JS1\_M21\_00027" 17525 "s59E25H2" 0 "Glutamine--fructose-6-phosphate aminotransferase [isomerizing]"  
"JS1\_M21\_00027" 17525 "s59E5H2" 0.1907682 "Glutamine--fructose-6-phosphate aminotransferase [isomerizing]"  
"JS1\_M21\_00027" 17525 "s63E6H2" 0.2151266 "Glutamine--fructose-6-phosphate aminotransferase [isomerizing]"  
"JS1\_M21\_00028" 17526 "s59E13H2" 0.0889311 "Glutamine synthetase"  
"JS1\_M21\_00028" 17526 "s59E25H2" 0.5018811 "Glutamine synthetase"  
"JS1\_M21\_00028" 17526 "s59E5H2" 0.1416727 "Glutamine synthetase"  
"JS1\_M21\_00028" 17526 "s63E6H2" 0.1733169 "Glutamine synthetase"  
"JS1\_M21\_00029" 17527 "s59E13H2" 0.92512 "L-allo-threonine aldolase"  
"JS1\_M21\_00029" 17527 "s59E25H2" 0 "L-allo-threonine aldolase"  
"JS1\_M21\_00029" 17527 "s59E5H2" 0.357803 "L-allo-threonine aldolase"  
"JS1\_M21\_00029" 17527 "s63E6H2" 0.1552852 "L-allo-threonine aldolase"  
"JS1\_M21\_00030" 17528 "s59E13H2" 2.359153 "Thioesterase superfamily protein"  
"JS1\_M21\_00030" 17528 "s59E25H2" 1.50463 "Thioesterase superfamily protein"  
"JS1\_M21\_00030" 17528 "s59E5H2" 0.3223583 "Thioesterase superfamily protein"  
"JS1\_M21\_00030" 17528 "s63E6H2" 0.07683547 "Thioesterase superfamily protein"  
"JS1\_M21\_00031" 17529 "s59E13H2" 0.4944891 "phage T7 F exclusion suppressor FxsA"  
"JS1\_M21\_00031" 17529 "s59E25H2" 0 "phage T7 F exclusion suppressor FxsA"  
"JS1\_M21\_00031" 17529 "s59E5H2" 0.05869479 "phage T7 F exclusion suppressor FxsA"  
"JS1\_M21\_00031" 17529 "s63E6H2" 0.0229766 "phage T7 F exclusion suppressor FxsA"  
"JS1\_M21\_00032" 17530 "s59E13H2" 0.02872402 "deoxyguanosinetriphosphate triphosphohydrolase-like protein"  
"JS1\_M21\_00032" 17530 "s59E25H2" 0 "deoxyguanosinetriphosphate triphosphohydrolase-like protein"  
"JS1\_M21\_00032" 17530 "s59E5H2" 0.2693699 "deoxyguanosinetriphosphate triphosphohydrolase-like protein"  
"JS1\_M21\_00032" 17530 "s63E6H2" 0.009780339 "deoxyguanosinetriphosphate triphosphohydrolase-like protein"  
"JS1\_M21\_00033" 17531 "s59E13H2" 0.006944283 "Trehalose synthase"  
"JS1\_M21\_00033" 17531 "s59E25H2" 0 "Trehalose synthase"

"JS1\_M21\_00033" 17531 "s59E5H2" 0.03882908 "Trehalose synthase"  
"JS1\_M21\_00033" 17531 "s63E6H2" 0.009598358 "Trehalose synthase"  
"JS1\_M21\_00034" 17532 "s59E13H2" 0.0004498642 "hypothetical protein"  
"JS1\_M21\_00034" 17532 "s59E25H2" 0 "hypothetical protein"  
"JS1\_M21\_00034" 17532 "s59E5H2" 0.002742283 "hypothetical protein"  
"JS1\_M21\_00034" 17532 "s63E6H2" 0.005625611 "hypothetical protein"  
"JS1\_M21\_00035" 17533 "s59E13H2" 0.08153709 "BMC domain protein"  
"JS1\_M21\_00035" 17533 "s59E25H2" 0 "BMC domain protein"  
"JS1\_M21\_00035" 17533 "s59E5H2" 0.3197363 "BMC domain protein"  
"JS1\_M21\_00035" 17533 "s63E6H2" 1.381521 "BMC domain protein"  
"JS1\_M21\_00037" 17535 "s59E13H2" 0.03531219 "Aldehyde-alcohol dehydrogenase"  
"JS1\_M21\_00037" 17535 "s59E25H2" 0 "Aldehyde-alcohol dehydrogenase"  
"JS1\_M21\_00037" 17535 "s59E5H2" 0.24086 "Aldehyde-alcohol dehydrogenase"  
"JS1\_M21\_00037" 17535 "s63E6H2" 0.7056645 "Aldehyde-alcohol dehydrogenase"  
"JS1\_M21\_00038" 17536 "s59E13H2" 0.002563662 "Ribokinase"  
"JS1\_M21\_00038" 17536 "s59E25H2" 0 "Ribokinase"  
"JS1\_M21\_00038" 17536 "s59E5H2" 0.005903832 "Ribokinase"  
"JS1\_M21\_00038" 17536 "s63E6H2" 0.01231927 "Ribokinase"  
"JS1\_M21\_00039" 17537 "s59E13H2" 0.4530457 "General stress protein 69"  
"JS1\_M21\_00039" 17537 "s59E25H2" 0 "General stress protein 69"  
"JS1\_M21\_00039" 17537 "s59E5H2" 0.03381623 "General stress protein 69"  
"JS1\_M21\_00039" 17537 "s63E6H2" 0.1336469 "General stress protein 69"  
"JS1\_M21\_00040" 17538 "s59E13H2" 0.05717009 "LysM domain/BON superfamily protein"  
"JS1\_M21\_00040" 17538 "s59E25H2" 0 "LysM domain/BON superfamily protein"  
"JS1\_M21\_00040" 17538 "s59E5H2" 0.216109 "LysM domain/BON superfamily protein"  
"JS1\_M21\_00040" 17538 "s63E6H2" 0.2212364 "LysM domain/BON superfamily protein"  
"JS1\_M21\_00041" 17539 "s59E13H2" 0.8176221 "Mannitol-1-phosphate 5-dehydrogenase"  
"JS1\_M21\_00041" 17539 "s59E25H2" 0 "Mannitol-1-phosphate 5-dehydrogenase"  
"JS1\_M21\_00041" 17539 "s59E5H2" 0.5186265 "Mannitol-1-phosphate 5-dehydrogenase"  
"JS1\_M21\_00041" 17539 "s63E6H2" 1.101992 "Mannitol-1-phosphate 5-dehydrogenase"  
"JS1\_M21\_00042" 17540 "s59E13H2" 0.6939636 "Galactose/methyl galactoside import ATP-binding protein MglA"  
"JS1\_M21\_00042" 17540 "s59E25H2" 0 "Galactose/methyl galactoside import ATP-binding protein MglA"  
"JS1\_M21\_00042" 17540 "s59E5H2" 0.0540709 "Galactose/methyl galactoside import ATP-binding protein MglA"  
"JS1\_M21\_00042" 17540 "s63E6H2" 0.6556812 "Galactose/methyl galactoside import ATP-binding protein MglA"  
"JS1\_M21\_00050" 17548 "s59E13H2" 0.1328869 "Adenylate kinase"  
"JS1\_M21\_00050" 17548 "s59E25H2" 0 "Adenylate kinase"  
"JS1\_M21\_00050" 17548 "s59E5H2" 0.02204141 "Adenylate kinase"  
"JS1\_M21\_00050" 17548 "s63E6H2" 0.9488113 "Adenylate kinase"  
"JS1\_M21\_00051" 17549 "s59E13H2" 0.1365725 "methionine aminopeptidase"  
"JS1\_M21\_00051" 17549 "s59E25H2" 0 "methionine aminopeptidase"  
"JS1\_M21\_00051" 17549 "s59E5H2" 0.01621173 "methionine aminopeptidase"  
"JS1\_M21\_00051" 17549 "s63E6H2" 0.8691454 "methionine aminopeptidase"  
"JS1\_M21\_00052" 17550 "s59E13H2" 0.2654718 "Translation initiation factor IF-1"  
"JS1\_M21\_00052" 17550 "s59E25H2" 0 "Translation initiation factor IF-1"  
"JS1\_M21\_00052" 17550 "s59E5H2" 0.07805649 "Translation initiation factor IF-1"  
"JS1\_M21\_00052" 17550 "s63E6H2" 1.134604 "Translation initiation factor IF-1"  
"JS1\_M21\_00053" 17551 "s59E13H2" 0.2425073 "30S ribosomal protein S13"

"JS1\_M21\_00053" 17551 "s59E25H2" 0 "30S ribosomal protein S13"  
"JS1\_M21\_00053" 17551 "s59E5H2" 0.1329963 "30S ribosomal protein S13"  
"JS1\_M21\_00053" 17551 "s63E6H2" 1.258863 "30S ribosomal protein S13"  
"JS1\_M21\_00054" 17552 "s59E13H2" 0.2085448 "30S ribosomal protein S11"  
"JS1\_M21\_00054" 17552 "s59E25H2" 0 "30S ribosomal protein S11"  
"JS1\_M21\_00054" 17552 "s59E5H2" 0.1413205 "30S ribosomal protein S11"  
"JS1\_M21\_00054" 17552 "s63E6H2" 0.9587162 "30S ribosomal protein S11"  
"JS1\_M21\_00055" 17553 "s59E13H2" 0.2749272 "30S ribosomal protein S4"  
"JS1\_M21\_00055" 17553 "s59E25H2" 0 "30S ribosomal protein S4"  
"JS1\_M21\_00055" 17553 "s59E5H2" 0.1307695 "30S ribosomal protein S4"  
"JS1\_M21\_00055" 17553 "s63E6H2" 1.13578 "30S ribosomal protein S4"  
"JS1\_M21\_00056" 17554 "s59E13H2" 0.2021874 "DNA-directed RNA polymerase subunit alpha"  
"JS1\_M21\_00056" 17554 "s59E25H2" 0 "DNA-directed RNA polymerase subunit alpha"  
"JS1\_M21\_00056" 17554 "s59E5H2" 0.1394612 "DNA-directed RNA polymerase subunit alpha"  
"JS1\_M21\_00056" 17554 "s63E6H2" 1.309162 "DNA-directed RNA polymerase subunit alpha"  
"JS1\_M21\_00057" 17555 "s59E13H2" 0.2549205 "50S ribosomal protein L17"  
"JS1\_M21\_00057" 17555 "s59E25H2" 0 "50S ribosomal protein L17"  
"JS1\_M21\_00057" 17555 "s59E5H2" 0.1839162 "50S ribosomal protein L17"  
"JS1\_M21\_00057" 17555 "s63E6H2" 2.282121 "50S ribosomal protein L17"  
"JS1\_M21\_00058" 17556 "s59E13H2" 0.2576716 "Energy-coupling factor transporter ATP-binding protein EcfA1"  
"JS1\_M21\_00058" 17556 "s59E25H2" 0 "Energy-coupling factor transporter ATP-binding protein EcfA1"  
"JS1\_M21\_00058" 17556 "s59E5H2" 0.2201322 "Energy-coupling factor transporter ATP-binding protein EcfA1"  
"JS1\_M21\_00058" 17556 "s63E6H2" 2.904938 "Energy-coupling factor transporter ATP-binding protein EcfA1"  
"JS1\_M21\_00059" 17557 "s59E13H2" 0.2828209 "Energy-coupling factor transporter ATP-binding protein EcfA2"  
"JS1\_M21\_00059" 17557 "s59E25H2" 0 "Energy-coupling factor transporter ATP-binding protein EcfA2"  
"JS1\_M21\_00059" 17557 "s59E5H2" 0.5810783 "Energy-coupling factor transporter ATP-binding protein EcfA2"  
"JS1\_M21\_00059" 17557 "s63E6H2" 1.740968 "Energy-coupling factor transporter ATP-binding protein EcfA2"  
"JS1\_M21\_00060" 17558 "s59E13H2" 0.2768378 "Energy-coupling factor transporter transmembrane protein EcfT"  
"JS1\_M21\_00060" 17558 "s59E25H2" 0 "Energy-coupling factor transporter transmembrane protein EcfT"  
"JS1\_M21\_00060" 17558 "s59E5H2" 0.5534336 "Energy-coupling factor transporter transmembrane protein EcfT"  
"JS1\_M21\_00060" 17558 "s63E6H2" 0.9904214 "Energy-coupling factor transporter transmembrane protein EcfT"  
"JS1\_M21\_00061" 17559 "s59E13H2" 0.2446097 "tRNA pseudouridine synthase A"  
"JS1\_M21\_00061" 17559 "s59E25H2" 0 "tRNA pseudouridine synthase A"  
"JS1\_M21\_00061" 17559 "s59E5H2" 0.2966508 "tRNA pseudouridine synthase A"  
"JS1\_M21\_00061" 17559 "s63E6H2" 0.9193888 "tRNA pseudouridine synthase A"  
"JS1\_M21\_00062" 17560 "s59E13H2" 0.1741021 "50S ribosomal protein L13"  
"JS1\_M21\_00062" 17560 "s59E25H2" 0 "50S ribosomal protein L13"  
"JS1\_M21\_00062" 17560 "s59E5H2" 0.4549941 "50S ribosomal protein L13"  
"JS1\_M21\_00062" 17560 "s63E6H2" 1.664227 "50S ribosomal protein L13"  
"JS1\_M21\_00063" 17561 "s59E13H2" 0.1335722 "30S ribosomal protein S9"  
"JS1\_M21\_00063" 17561 "s59E25H2" 0 "30S ribosomal protein S9"  
"JS1\_M21\_00063" 17561 "s59E5H2" 0.4606525 "30S ribosomal protein S9"  
"JS1\_M21\_00063" 17561 "s63E6H2" 1.419847 "30S ribosomal protein S9"  
"JS1\_M21\_00064" 17562 "s59E13H2" 0.1559356 "alanine racemase"  
"JS1\_M21\_00064" 17562 "s59E25H2" 0 "alanine racemase"  
"JS1\_M21\_00064" 17562 "s59E5H2" 0.2945355 "alanine racemase"  
"JS1\_M21\_00064" 17562 "s63E6H2" 1.456936 "alanine racemase"

"JS1\_M21\_00065" 17563 "s59E13H2" 0.1780498 "Ornithine carbamoyltransferase"  
"JS1\_M21\_00065" 17563 "s59E25H2" 0 "Ornithine carbamoyltransferase"  
"JS1\_M21\_00065" 17563 "s59E5H2" 0.3621489 "Ornithine carbamoyltransferase"  
"JS1\_M21\_00065" 17563 "s63E6H2" 2.308436 "Ornithine carbamoyltransferase"  
"JS1\_M21\_00066" 17564 "s59E13H2" 0.1873716 "DNA integrity scanning protein DisA"  
"JS1\_M21\_00066" 17564 "s59E25H2" 0.5950617 "DNA integrity scanning protein DisA"  
"JS1\_M21\_00066" 17564 "s59E5H2" 0.113322 "DNA integrity scanning protein DisA"  
"JS1\_M21\_00066" 17564 "s63E6H2" 2.897907 "DNA integrity scanning protein DisA"  
"JS1\_M21\_00067" 17565 "s59E13H2" 0.1936031 "YbbR-like protein"  
"JS1\_M21\_00067" 17565 "s59E25H2" 0 "YbbR-like protein"  
"JS1\_M21\_00067" 17565 "s59E5H2" 0.1382278 "YbbR-like protein"  
"JS1\_M21\_00067" 17565 "s63E6H2" 1.063158 "YbbR-like protein"  
"JS1\_M21\_00068" 17566 "s59E13H2" 0.2062563 "Phosphoglucosamine mutase"  
"JS1\_M21\_00068" 17566 "s59E25H2" 0.8151448 "Phosphoglucosamine mutase"  
"JS1\_M21\_00068" 17566 "s59E5H2" 0.123279 "Phosphoglucosamine mutase"  
"JS1\_M21\_00068" 17566 "s63E6H2" 0.1953857 "Phosphoglucosamine mutase"  
"JS1\_M21\_00069" 17567 "s59E13H2" 0.01629878 "Purine catabolism protein PucG"  
"JS1\_M21\_00069" 17567 "s59E25H2" 0 "Purine catabolism protein PucG"  
"JS1\_M21\_00069" 17567 "s59E5H2" 0.02908914 "Purine catabolism protein PucG"  
"JS1\_M21\_00069" 17567 "s63E6H2" 0.01290879 "Purine catabolism protein PucG"  
"JS1\_M21\_00070" 17568 "s59E13H2" 0.009200788 "Trehalose synthase"  
"JS1\_M21\_00070" 17568 "s59E25H2" 0 "Trehalose synthase"  
"JS1\_M21\_00070" 17568 "s59E5H2" 0.1272877 "Trehalose synthase"  
"JS1\_M21\_00070" 17568 "s63E6H2" 0.01277982 "Trehalose synthase"  
"JS1\_M21\_00071" 17569 "s59E13H2" 0.0366451 "Ultraviolet N-glycosylase/AP lyase"  
"JS1\_M21\_00071" 17569 "s59E25H2" 0 "Ultraviolet N-glycosylase/AP lyase"  
"JS1\_M21\_00071" 17569 "s59E5H2" 0.0512176 "Ultraviolet N-glycosylase/AP lyase"  
"JS1\_M21\_00071" 17569 "s63E6H2" 0.03533699 "Ultraviolet N-glycosylase/AP lyase"  
"JS1\_M21\_00072" 17570 "s59E13H2" 0.1234476 "Tetrahedral aminopeptidase"  
"JS1\_M21\_00072" 17570 "s59E25H2" 0 "Tetrahedral aminopeptidase"  
"JS1\_M21\_00072" 17570 "s59E5H2" 0.196725 "Tetrahedral aminopeptidase"  
"JS1\_M21\_00072" 17570 "s63E6H2" 0.03836095 "Tetrahedral aminopeptidase"  
"JS1\_M21\_00073" 17571 "s59E13H2" 2.732303 "hypothetical protein"  
"JS1\_M21\_00073" 17571 "s59E25H2" 0 "hypothetical protein"  
"JS1\_M21\_00073" 17571 "s59E5H2" 0.3683666 "hypothetical protein"  
"JS1\_M21\_00073" 17571 "s63E6H2" 0.3779917 "hypothetical protein"  
"JS1\_M21\_00074" 17572 "s59E13H2" 0.2315885 "MMPL family protein"  
"JS1\_M21\_00074" 17572 "s59E25H2" 0 "MMPL family protein"  
"JS1\_M21\_00074" 17572 "s59E5H2" 0.4289179 "MMPL family protein"  
"JS1\_M21\_00074" 17572 "s63E6H2" 0.6245892 "MMPL family protein"  
"JS1\_M21\_00075" 17573 "s59E13H2" 0.07800706 "hypothetical protein"  
"JS1\_M21\_00075" 17573 "s59E25H2" 0 "hypothetical protein"  
"JS1\_M21\_00075" 17573 "s59E5H2" 0.4016838 "hypothetical protein"  
"JS1\_M21\_00075" 17573 "s63E6H2" 1.31554 "hypothetical protein"  
"JS1\_M21\_00076" 17574 "s59E13H2" 0.1861871 "hypothetical protein"  
"JS1\_M21\_00076" 17574 "s59E25H2" 0 "hypothetical protein"  
"JS1\_M21\_00076" 17574 "s59E5H2" 0.6920714 "hypothetical protein"



"JS1\_M21\_00076" 17574 "s63E6H2" 0.7207832 "hypothetical protein"  
"JS1\_M21\_00077" 17575 "s59E13H2" 0.1426961 "HTH-type transcriptional regulator EthR"  
"JS1\_M21\_00077" 17575 "s59E25H2" 0 "HTH-type transcriptional regulator EthR"  
"JS1\_M21\_00077" 17575 "s59E5H2" 0.5429276 "HTH-type transcriptional regulator EthR"  
"JS1\_M21\_00077" 17575 "s63E6H2" 0.7341673 "HTH-type transcriptional regulator EthR"  
"JS1\_M21\_00078" 17576 "s59E13H2" 1.511557 "Glycerol kinase"  
"JS1\_M21\_00078" 17576 "s59E25H2" 0.2573333 "Glycerol kinase"  
"JS1\_M21\_00078" 17576 "s59E5H2" 1.257101 "Glycerol kinase"  
"JS1\_M21\_00078" 17576 "s63E6H2" 2.912993 "Glycerol kinase"  
"JS1\_M21\_00079" 17577 "s59E13H2" 0.1810288 "Galactokinase"  
"JS1\_M21\_00079" 17577 "s59E25H2" 0 "Galactokinase"  
"JS1\_M21\_00079" 17577 "s59E5H2" 0.6645983 "Galactokinase"  
"JS1\_M21\_00079" 17577 "s63E6H2" 0.8677617 "Galactokinase"  
"JS1\_M21\_00080" 17578 "s59E13H2" 0.3169502 "Galactose-1-phosphate uridylyltransferase"  
"JS1\_M21\_00080" 17578 "s59E25H2" 0 "Galactose-1-phosphate uridylyltransferase"  
"JS1\_M21\_00080" 17578 "s59E5H2" 0.4416796 "Galactose-1-phosphate uridylyltransferase"  
"JS1\_M21\_00080" 17578 "s63E6H2" 0.62648 "Galactose-1-phosphate uridylyltransferase"  
"JS1\_M21\_00081" 17579 "s59E13H2" 0.1481067 "Alpha-galactosidase"  
"JS1\_M21\_00081" 17579 "s59E25H2" 0 "Alpha-galactosidase"  
"JS1\_M21\_00081" 17579 "s59E5H2" 0.5764928 "Alpha-galactosidase"  
"JS1\_M21\_00081" 17579 "s63E6H2" 0.113446 "Alpha-galactosidase"  
"JS1\_M21\_00082" 17580 "s59E13H2" 0.1783789 "Beta-galactosidase"  
"JS1\_M21\_00082" 17580 "s59E25H2" 0 "Beta-galactosidase"  
"JS1\_M21\_00082" 17580 "s59E5H2" 0.5038931 "Beta-galactosidase"  
"JS1\_M21\_00082" 17580 "s63E6H2" 0.2308971 "Beta-galactosidase"  
"JS1\_M21\_00083" 17581 "s59E13H2" 0.9707536 "Lactose transport system permease protein LacG"  
"JS1\_M21\_00083" 17581 "s59E25H2" 0 "Lactose transport system permease protein LacG"  
"JS1\_M21\_00083" 17581 "s59E5H2" 0.6216667 "Lactose transport system permease protein LacG"  
"JS1\_M21\_00083" 17581 "s63E6H2" 0.4176516 "Lactose transport system permease protein LacG"  
"JS1\_M21\_00084" 17582 "s59E13H2" 6.102708 "Lactose transport system permease protein LacF"  
"JS1\_M21\_00084" 17582 "s59E25H2" 0 "Lactose transport system permease protein LacF"  
"JS1\_M21\_00084" 17582 "s59E5H2" 0.717852 "Lactose transport system permease protein LacF"  
"JS1\_M21\_00084" 17582 "s63E6H2" 0.5506375 "Lactose transport system permease protein LacF"  
"JS1\_M21\_00085" 17583 "s59E13H2" 5.081128 "Lactose-binding protein precursor"  
"JS1\_M21\_00085" 17583 "s59E25H2" 0 "Lactose-binding protein precursor"  
"JS1\_M21\_00085" 17583 "s59E5H2" 0.6228419 "Lactose-binding protein precursor"  
"JS1\_M21\_00085" 17583 "s63E6H2" 0.4575223 "Lactose-binding protein precursor"  
"JS1\_M21\_00086" 17584 "s59E13H2" 0.01993244 "Periplasmic binding proteins and sugar binding domain of LacI family protein"  
"JS1\_M21\_00086" 17584 "s59E25H2" 0 "Periplasmic binding proteins and sugar binding domain of LacI family protein"  
"JS1\_M21\_00086" 17584 "s59E5H2" 0.3647559 "Periplasmic binding proteins and sugar binding domain of LacI family protein"  
"JS1\_M21\_00086" 17584 "s63E6H2" 0.2135736 "Periplasmic binding proteins and sugar binding domain of LacI family protein"  
"JS1\_M21\_00087" 17585 "s59E13H2" 0.01116877 "Inner membrane ABC transporter permease protein Yjff"  
"JS1\_M21\_00087" 17585 "s59E25H2" 0 "Inner membrane ABC transporter permease protein Yjff"  
"JS1\_M21\_00087" 17585 "s59E5H2" 0.4021947 "Inner membrane ABC transporter permease protein Yjff"  
"JS1\_M21\_00087" 17585 "s63E6H2" 0.1586397 "Inner membrane ABC transporter permease protein Yjff"  
"JS1\_M21\_00088" 17586 "s59E13H2" 0.03292855 "Galactose/methyl galactoside import ATP-binding protein MglA"  
"JS1\_M21\_00088" 17586 "s59E25H2" 0 "Galactose/methyl galactoside import ATP-binding protein MglA"

"JS1\_M21\_00088" 17586 "s59E5H2" 0.4784248 "Galactose/methyl galactoside import ATP-binding protein MglA"  
"JS1\_M21\_00088" 17586 "s63E6H2" 0.1536775 "Galactose/methyl galactoside import ATP-binding protein MglA"  
"JS1\_M21\_00089" 17587 "s59E13H2" 3.816043 "Ribose operon repressor"  
"JS1\_M21\_00089" 17587 "s59E25H2" 0 "Ribose operon repressor"  
"JS1\_M21\_00089" 17587 "s59E5H2" 0.588968 "Ribose operon repressor"  
"JS1\_M21\_00089" 17587 "s63E6H2" 0.282687 "Ribose operon repressor"  
"JS1\_M21\_00090" 17588 "s59E13H2" 0 "D-allose-binding periplasmic protein precursor"  
"JS1\_M21\_00090" 17588 "s59E25H2" 0 "D-allose-binding periplasmic protein precursor"  
"JS1\_M21\_00090" 17588 "s59E5H2" 0 "D-allose-binding periplasmic protein precursor"  
"JS1\_M21\_00090" 17588 "s63E6H2" 0 "D-allose-binding periplasmic protein precursor"  
"JS1\_M21\_00091" 17589 "s59E13H2" 0.2202299 "hypothetical protein"  
"JS1\_M21\_00091" 17589 "s59E25H2" 0 "hypothetical protein"  
"JS1\_M21\_00091" 17589 "s59E5H2" 0 "hypothetical protein"  
"JS1\_M21\_00091" 17589 "s63E6H2" 0.116733 "hypothetical protein"  
"JS1\_M21\_00093" 17591 "s59E13H2" 0.2111909 "Tungsten-containing aldehyde ferredoxin oxidoreductase"  
"JS1\_M21\_00093" 17591 "s59E25H2" 0 "Tungsten-containing aldehyde ferredoxin oxidoreductase"  
"JS1\_M21\_00093" 17591 "s59E5H2" 0.1987262 "Tungsten-containing aldehyde ferredoxin oxidoreductase"  
"JS1\_M21\_00093" 17591 "s63E6H2" 0.1392575 "Tungsten-containing aldehyde ferredoxin oxidoreductase"  
"JS1\_M21\_00096" 17594 "s59E13H2" 0.02694733 "DNA polymerase I"  
"JS1\_M21\_00096" 17594 "s59E25H2" 0 "DNA polymerase I"  
"JS1\_M21\_00096" 17594 "s59E5H2" 0.1534532 "DNA polymerase I"  
"JS1\_M21\_00096" 17594 "s63E6H2" 2.722952 "DNA polymerase I"  
"JS1\_M21\_00097" 17595 "s59E13H2" 0.02345028 "hypothetical protein"  
"JS1\_M21\_00097" 17595 "s59E25H2" 0 "hypothetical protein"  
"JS1\_M21\_00097" 17595 "s59E5H2" 0 "hypothetical protein"  
"JS1\_M21\_00097" 17595 "s63E6H2" 0.006571423 "hypothetical protein"  
"JS1\_M21\_00098" 17596 "s59E13H2" 0.03973325 "Dephospho-CoA kinase"  
"JS1\_M21\_00098" 17596 "s59E25H2" 0 "Dephospho-CoA kinase"  
"JS1\_M21\_00098" 17596 "s59E5H2" 0.2333218 "Dephospho-CoA kinase"  
"JS1\_M21\_00098" 17596 "s63E6H2" 0.6583811 "Dephospho-CoA kinase"  
"JS1\_M21\_00099" 17597 "s59E13H2" 0.07226426 "Adenine deaminase"  
"JS1\_M21\_00099" 17597 "s59E25H2" 0 "Adenine deaminase"  
"JS1\_M21\_00099" 17597 "s59E5H2" 1.058523 "Adenine deaminase"  
"JS1\_M21\_00099" 17597 "s63E6H2" 2.344058 "Adenine deaminase"  
"JS1\_M21\_00100" 17598 "s59E13H2" 0.06089892 "UvrABC system protein B"  
"JS1\_M21\_00100" 17598 "s59E25H2" 0 "UvrABC system protein B"  
"JS1\_M21\_00100" 17598 "s59E5H2" 0.7624309 "UvrABC system protein B"  
"JS1\_M21\_00100" 17598 "s63E6H2" 0.6551036 "UvrABC system protein B"  
"JS1\_M21\_00101" 17599 "s59E13H2" 0.04565855 "UvrABC system protein A"  
"JS1\_M21\_00101" 17599 "s59E25H2" 0 "UvrABC system protein A"  
"JS1\_M21\_00101" 17599 "s59E5H2" 0.9522598 "UvrABC system protein A"  
"JS1\_M21\_00101" 17599 "s63E6H2" 0.1957497 "UvrABC system protein A"  
"JS1\_M21\_00102" 17600 "s59E13H2" 0.05106332 "UvrABC system protein C"  
"JS1\_M21\_00102" 17600 "s59E25H2" 0 "UvrABC system protein C"  
"JS1\_M21\_00102" 17600 "s59E5H2" 0.2190421 "UvrABC system protein C"  
"JS1\_M21\_00102" 17600 "s63E6H2" 0.1629452 "UvrABC system protein C"  
"JS1\_M21\_00103" 17601 "s59E13H2" 0.0433718 "Carbonic anhydrase precursor"

"JS1\_M21\_00103" 17601 "s59E25H2" 0 "Carbonic anhydrase precursor"  
"JS1\_M21\_00103" 17601 "s59E5H2" 0.1534775 "Carbonic anhydrase precursor"  
"JS1\_M21\_00103" 17601 "s63E6H2" 0.2264505 "Carbonic anhydrase precursor"  
"JS1\_M21\_00105" 17603 "s59E13H2" 0.04694753 "metal-dependent hydrolase"  
"JS1\_M21\_00105" 17603 "s59E25H2" 0 "metal-dependent hydrolase"  
"JS1\_M21\_00105" 17603 "s59E5H2" 0.6315472 "metal-dependent hydrolase"  
"JS1\_M21\_00105" 17603 "s63E6H2" 0.4939066 "metal-dependent hydrolase"  
"JS1\_M21\_00106" 17604 "s59E13H2" 0.0664112 "CTP synthase"  
"JS1\_M21\_00106" 17604 "s59E25H2" 0 "CTP synthase"  
"JS1\_M21\_00106" 17604 "s59E5H2" 0.4453185 "CTP synthase"  
"JS1\_M21\_00106" 17604 "s63E6H2" 0.4143179 "CTP synthase"  
"JS1\_M21\_00107" 17605 "s59E13H2" 0.08992784 "2-phospho-L-lactate guanylyltransferase"  
"JS1\_M21\_00107" 17605 "s59E25H2" 0 "2-phospho-L-lactate guanylyltransferase"  
"JS1\_M21\_00107" 17605 "s59E5H2" 0.121556 "2-phospho-L-lactate guanylyltransferase"  
"JS1\_M21\_00107" 17605 "s63E6H2" 0.1251981 "2-phospho-L-lactate guanylyltransferase"  
"JS1\_M21\_00108" 17606 "s59E13H2" 0.171588 "hypothetical protein"  
"JS1\_M21\_00108" 17606 "s59E25H2" 0 "hypothetical protein"  
"JS1\_M21\_00108" 17606 "s59E5H2" 0.1558322 "hypothetical protein"  
"JS1\_M21\_00108" 17606 "s63E6H2" 0.2591546 "hypothetical protein"  
"JS1\_M21\_00109" 17607 "s59E13H2" 0.1283651 "50S ribosomal protein L31"  
"JS1\_M21\_00109" 17607 "s59E25H2" 0 "50S ribosomal protein L31"  
"JS1\_M21\_00109" 17607 "s59E5H2" 0.0576904 "50S ribosomal protein L31"  
"JS1\_M21\_00109" 17607 "s63E6H2" 0.06290148 "50S ribosomal protein L31"  
"JS1\_M21\_00110" 17608 "s59E13H2" 0.07591086 "Thymidine kinase"  
"JS1\_M21\_00110" 17608 "s59E25H2" 0 "Thymidine kinase"  
"JS1\_M21\_00110" 17608 "s59E5H2" 0.1719172 "Thymidine kinase"  
"JS1\_M21\_00110" 17608 "s63E6H2" 0.2044279 "Thymidine kinase"  
"JS1\_M21\_00111" 17609 "s59E13H2" 0.08167824 "Thymidylate synthase ThyX"  
"JS1\_M21\_00111" 17609 "s59E25H2" 0 "Thymidylate synthase ThyX"  
"JS1\_M21\_00111" 17609 "s59E5H2" 0.1886011 "Thymidylate synthase ThyX"  
"JS1\_M21\_00111" 17609 "s63E6H2" 0.268633 "Thymidylate synthase ThyX"  
"JS1\_M21\_00112" 17610 "s59E13H2" 0.03772812 "hypothetical protein"  
"JS1\_M21\_00112" 17610 "s59E25H2" 0 "hypothetical protein"  
"JS1\_M21\_00112" 17610 "s59E5H2" 0.1164624 "hypothetical protein"  
"JS1\_M21\_00112" 17610 "s63E6H2" 0.2593561 "hypothetical protein"  
"JS1\_M21\_00113" 17611 "s59E13H2" 0.02303791 "DNA polymerase I"  
"JS1\_M21\_00113" 17611 "s59E25H2" 0 "DNA polymerase I"  
"JS1\_M21\_00113" 17611 "s59E5H2" 0.1427115 "DNA polymerase I"  
"JS1\_M21\_00113" 17611 "s63E6H2" 0.3795134 "DNA polymerase I"  
"JS1\_M21\_00116" 17614 "s59E13H2" 0.123542 "DNA polymerase III subunit alpha"  
"JS1\_M21\_00116" 17614 "s59E25H2" 0 "DNA polymerase III subunit alpha"  
"JS1\_M21\_00116" 17614 "s59E5H2" 0.5815733 "DNA polymerase III subunit alpha"  
"JS1\_M21\_00116" 17614 "s63E6H2" 0.7988524 "DNA polymerase III subunit alpha"  
"JS1\_M21\_00117" 17615 "s59E13H2" 0.001313387 "6-phosphofructokinase 1"  
"JS1\_M21\_00117" 17615 "s59E25H2" 0 "6-phosphofructokinase 1"  
"JS1\_M21\_00117" 17615 "s59E5H2" 0.5785464 "6-phosphofructokinase 1"  
"JS1\_M21\_00117" 17615 "s63E6H2" 1.343242 "6-phosphofructokinase 1"

"JS1\_M21\_00118" 17616 "s59E13H2" 0.0718183 "Fructose-bisphosphate aldolase"  
"JS1\_M21\_00118" 17616 "s59E25H2" 0 "Fructose-bisphosphate aldolase"  
"JS1\_M21\_00118" 17616 "s59E5H2" 0.7470112 "Fructose-bisphosphate aldolase"  
"JS1\_M21\_00118" 17616 "s63E6H2" 0.2556737 "Fructose-bisphosphate aldolase"  
"JS1\_M21\_00119" 17617 "s59E13H2" 0.05174415 "Modulator of FtsH protease HflK"  
"JS1\_M21\_00119" 17617 "s59E25H2" 0 "Modulator of FtsH protease HflK"  
"JS1\_M21\_00119" 17617 "s59E5H2" 0.3191645 "Modulator of FtsH protease HflK"  
"JS1\_M21\_00119" 17617 "s63E6H2" 0.4966601 "Modulator of FtsH protease HflK"  
"JS1\_M21\_00120" 17618 "s59E13H2" 0.2357554 "Modulator of FtsH protease HflC"  
"JS1\_M21\_00120" 17618 "s59E25H2" 0 "Modulator of FtsH protease HflC"  
"JS1\_M21\_00120" 17618 "s59E5H2" 0.7221832 "Modulator of FtsH protease HflC"  
"JS1\_M21\_00120" 17618 "s63E6H2" 1.892286 "Modulator of FtsH protease HflC"  
"JS1\_M21\_00121" 17619 "s59E13H2" 0.1709094 "Glyoxylate reductase"  
"JS1\_M21\_00121" 17619 "s59E25H2" 0 "Glyoxylate reductase"  
"JS1\_M21\_00121" 17619 "s59E5H2" 0.934965 "Glyoxylate reductase"  
"JS1\_M21\_00121" 17619 "s63E6H2" 1.0402 "Glyoxylate reductase"  
"JS1\_M21\_00122" 17620 "s59E13H2" 0.09895209 "hypothetical protein"  
"JS1\_M21\_00122" 17620 "s59E25H2" 0 "hypothetical protein"  
"JS1\_M21\_00122" 17620 "s59E5H2" 0.706897 "hypothetical protein"  
"JS1\_M21\_00122" 17620 "s63E6H2" 0.5493958 "hypothetical protein"  
"JS1\_M21\_00124" 17622 "s59E13H2" 0.140468 "hypothetical protein"  
"JS1\_M21\_00124" 17622 "s59E25H2" 0 "hypothetical protein"  
"JS1\_M21\_00124" 17622 "s59E5H2" 0.4019286 "hypothetical protein"  
"JS1\_M21\_00124" 17622 "s63E6H2" 1.041738 "hypothetical protein"  
"JS1\_M21\_00125" 17623 "s59E13H2" 0.08419795 "hypothetical protein"  
"JS1\_M21\_00125" 17623 "s59E25H2" 0 "hypothetical protein"  
"JS1\_M21\_00125" 17623 "s59E5H2" 0.4867631 "hypothetical protein"  
"JS1\_M21\_00125" 17623 "s63E6H2" 0.9619374 "hypothetical protein"  
"JS1\_M21\_00126" 17624 "s59E13H2" 0.06186351 "galactoside permease"  
"JS1\_M21\_00126" 17624 "s59E25H2" 0 "galactoside permease"  
"JS1\_M21\_00126" 17624 "s59E5H2" 0.4134221 "galactoside permease"  
"JS1\_M21\_00126" 17624 "s63E6H2" 0.762075 "galactoside permease"  
"JS1\_M21\_00127" 17625 "s59E13H2" 0.07566667 "Aspartyl/glutamyl-tRNA(Asn/Gln) amidotransferase subunit B"  
"JS1\_M21\_00127" 17625 "s59E25H2" 0 "Aspartyl/glutamyl-tRNA(Asn/Gln) amidotransferase subunit B"  
"JS1\_M21\_00127" 17625 "s59E5H2" 0.652967 "Aspartyl/glutamyl-tRNA(Asn/Gln) amidotransferase subunit B"  
"JS1\_M21\_00127" 17625 "s63E6H2" 0.7290658 "Aspartyl/glutamyl-tRNA(Asn/Gln) amidotransferase subunit B"  
"JS1\_M21\_00128" 17626 "s59E13H2" 0.1343488 "Glutamyl-tRNA(Gln) amidotransferase subunit A"  
"JS1\_M21\_00128" 17626 "s59E25H2" 0 "Glutamyl-tRNA(Gln) amidotransferase subunit A"  
"JS1\_M21\_00128" 17626 "s59E5H2" 0.8132505 "Glutamyl-tRNA(Gln) amidotransferase subunit A"  
"JS1\_M21\_00128" 17626 "s63E6H2" 0.7721799 "Glutamyl-tRNA(Gln) amidotransferase subunit A"  
"JS1\_M21\_00129" 17627 "s59E13H2" 0.005725352 "Aspartyl/glutamyl-tRNA(Asn/Gln) amidotransferase subunit C"  
"JS1\_M21\_00129" 17627 "s59E25H2" 0 "Aspartyl/glutamyl-tRNA(Asn/Gln) amidotransferase subunit C"  
"JS1\_M21\_00129" 17627 "s59E5H2" 0.01714915 "Aspartyl/glutamyl-tRNA(Asn/Gln) amidotransferase subunit C"  
"JS1\_M21\_00129" 17627 "s63E6H2" 0.02553715 "Aspartyl/glutamyl-tRNA(Asn/Gln) amidotransferase subunit C"  
"JS1\_M21\_00130" 17628 "s59E13H2" 0 "hypothetical protein"  
"JS1\_M21\_00130" 17628 "s59E25H2" 0 "hypothetical protein"  
"JS1\_M21\_00130" 17628 "s59E5H2" 0.09205123 "hypothetical protein"

"JS1\_M21\_00130" 17628 "s63E6H2" 0.004329978 "hypothetical protein"  
"JS1\_M21\_00131" 17629 "s59E13H2" 0.08578564 "DNA ligase"  
"JS1\_M21\_00131" 17629 "s59E25H2" 0 "DNA ligase"  
"JS1\_M21\_00131" 17629 "s59E5H2" 0.2165629 "DNA ligase"  
"JS1\_M21\_00131" 17629 "s63E6H2" 0.5986277 "DNA ligase"  
"JS1\_M21\_00132" 17630 "s59E13H2" 0.09489959 "Putative multidrug export ATP-binding/permease protein"  
"JS1\_M21\_00132" 17630 "s59E25H2" 0 "Putative multidrug export ATP-binding/permease protein"  
"JS1\_M21\_00132" 17630 "s59E5H2" 0.3787591 "Putative multidrug export ATP-binding/permease protein"  
"JS1\_M21\_00132" 17630 "s63E6H2" 0.4576407 "Putative multidrug export ATP-binding/permease protein"  
"JS1\_M21\_00133" 17631 "s59E13H2" 0.1038144 "Putative peptidyl-prolyl cis-trans isomerase Cbf2 precursor"  
"JS1\_M21\_00133" 17631 "s59E25H2" 0 "Putative peptidyl-prolyl cis-trans isomerase Cbf2 precursor"  
"JS1\_M21\_00133" 17631 "s59E5H2" 0.4035764 "Putative peptidyl-prolyl cis-trans isomerase Cbf2 precursor"  
"JS1\_M21\_00133" 17631 "s63E6H2" 0.301999 "Putative peptidyl-prolyl cis-trans isomerase Cbf2 precursor"  
"JS1\_M21\_00134" 17632 "s59E13H2" 0.2403684 "ATP-dependent DNA helicase PcrA"  
"JS1\_M21\_00134" 17632 "s59E25H2" 0 "ATP-dependent DNA helicase PcrA"  
"JS1\_M21\_00134" 17632 "s59E5H2" 0.595958 "ATP-dependent DNA helicase PcrA"  
"JS1\_M21\_00134" 17632 "s63E6H2" 0.2451783 "ATP-dependent DNA helicase PcrA"  
"JS1\_M21\_00135" 17633 "s59E13H2" 0.1579372 "hypothetical protein"  
"JS1\_M21\_00135" 17633 "s59E25H2" 0 "hypothetical protein"  
"JS1\_M21\_00135" 17633 "s59E5H2" 1.016785 "hypothetical protein"  
"JS1\_M21\_00135" 17633 "s63E6H2" 0.1583801 "hypothetical protein"  
"JS1\_M21\_00136" 17634 "s59E13H2" 0.1785269 "Aspartate aminotransferase"  
"JS1\_M21\_00136" 17634 "s59E25H2" 0 "Aspartate aminotransferase"  
"JS1\_M21\_00136" 17634 "s59E5H2" 1.042837 "Aspartate aminotransferase"  
"JS1\_M21\_00136" 17634 "s63E6H2" 0.2451931 "Aspartate aminotransferase"  
"JS1\_M21\_00137" 17635 "s59E13H2" 0.1666205 "Branched-chain-amino-acid aminotransferase"  
"JS1\_M21\_00137" 17635 "s59E25H2" 0 "Branched-chain-amino-acid aminotransferase"  
"JS1\_M21\_00137" 17635 "s59E5H2" 0.4287459 "Branched-chain-amino-acid aminotransferase"  
"JS1\_M21\_00137" 17635 "s63E6H2" 0.1013884 "Branched-chain-amino-acid aminotransferase"  
"JS1\_M21\_00138" 17636 "s59E13H2" 0.1514546 "Glutamate racemase"  
"JS1\_M21\_00138" 17636 "s59E25H2" 0 "Glutamate racemase"  
"JS1\_M21\_00138" 17636 "s59E5H2" 1.090775 "Glutamate racemase"  
"JS1\_M21\_00138" 17636 "s63E6H2" 0.1570111 "Glutamate racemase"  
"JS1\_M21\_00139" 17637 "s59E13H2" 0.3481893 "Spermidine synthase"  
"JS1\_M21\_00139" 17637 "s59E25H2" 0 "Spermidine synthase"  
"JS1\_M21\_00139" 17637 "s59E5H2" 0.1341239 "Spermidine synthase"  
"JS1\_M21\_00139" 17637 "s63E6H2" 0.1976879 "Spermidine synthase"  
"JS1\_M21\_00140" 17638 "s59E13H2" 0.1893588 "S-adenosylmethionine decarboxylase proenzyme"  
"JS1\_M21\_00140" 17638 "s59E25H2" 0 "S-adenosylmethionine decarboxylase proenzyme"  
"JS1\_M21\_00140" 17638 "s59E5H2" 0.2648761 "S-adenosylmethionine decarboxylase proenzyme"  
"JS1\_M21\_00140" 17638 "s63E6H2" 0.1415968 "S-adenosylmethionine decarboxylase proenzyme"  
"JS1\_M21\_00141" 17639 "s59E13H2" 0.09966222 "S-adenosylmethionine decarboxylase proenzyme precursor"  
"JS1\_M21\_00141" 17639 "s59E25H2" 0 "S-adenosylmethionine decarboxylase proenzyme precursor"  
"JS1\_M21\_00141" 17639 "s59E5H2" 0.367103 "S-adenosylmethionine decarboxylase proenzyme precursor"  
"JS1\_M21\_00141" 17639 "s63E6H2" 0.08718185 "S-adenosylmethionine decarboxylase proenzyme precursor"  
"JS1\_M21\_00142" 17640 "s59E13H2" 0.1613633 "Adenylosuccinate lyase"  
"JS1\_M21\_00142" 17640 "s59E25H2" 0 "Adenylosuccinate lyase"

"JS1\_M21\_00142" 17640 "s59E5H2" 1.155699 "Adenylosuccinate lyase"  
"JS1\_M21\_00142" 17640 "s63E6H2" 0.2413891 "Adenylosuccinate lyase"  
"JS1\_M21\_00143" 17641 "s59E13H2" 0.07105868 "Adenylosuccinate synthetase"  
"JS1\_M21\_00143" 17641 "s59E25H2" 0 "Adenylosuccinate synthetase"  
"JS1\_M21\_00143" 17641 "s59E5H2" 0.8487643 "Adenylosuccinate synthetase"  
"JS1\_M21\_00143" 17641 "s63E6H2" 0.2283768 "Adenylosuccinate synthetase"  
"JS1\_M21\_00144" 17642 "s59E13H2" 0.6973038 "GMP synthase [glutamine-hydrolyzing]"  
"JS1\_M21\_00144" 17642 "s59E25H2" 0 "GMP synthase [glutamine-hydrolyzing]"  
"JS1\_M21\_00144" 17642 "s59E5H2" 1.092917 "GMP synthase [glutamine-hydrolyzing]"  
"JS1\_M21\_00144" 17642 "s63E6H2" 0.1361118 "GMP synthase [glutamine-hydrolyzing]"  
"JS1\_M21\_00146" 17644 "s59E13H2" 0.2289037 "Formate--tetrahydrofolate ligase"  
"JS1\_M21\_00146" 17644 "s59E25H2" 0 "Formate--tetrahydrofolate ligase"  
"JS1\_M21\_00146" 17644 "s59E5H2" 0.2904363 "Formate--tetrahydrofolate ligase"  
"JS1\_M21\_00146" 17644 "s63E6H2" 0.1930658 "Formate--tetrahydrofolate ligase"  
"JS1\_M21\_00147" 17645 "s59E13H2" 0.0306082 "Glycine cleavage system H protein"  
"JS1\_M21\_00147" 17645 "s59E25H2" 0 "Glycine cleavage system H protein"  
"JS1\_M21\_00147" 17645 "s59E5H2" 0.6062853 "Glycine cleavage system H protein"  
"JS1\_M21\_00147" 17645 "s63E6H2" 0.2450723 "Glycine cleavage system H protein"  
"JS1\_M21\_00148" 17646 "s59E13H2" 5.803464 "putative glycine dehydrogenase (decarboxylating) subunit 1"  
"JS1\_M21\_00148" 17646 "s59E25H2" 0 "putative glycine dehydrogenase (decarboxylating) subunit 1"  
"JS1\_M21\_00148" 17646 "s59E5H2" 0.9340684 "putative glycine dehydrogenase (decarboxylating) subunit 1"  
"JS1\_M21\_00148" 17646 "s63E6H2" 0.2137974 "putative glycine dehydrogenase (decarboxylating) subunit 1"  
"JS1\_M21\_00149" 17647 "s59E13H2" 14.79067 "putative glycine dehydrogenase (decarboxylating) subunit 2"  
"JS1\_M21\_00149" 17647 "s59E25H2" 0.1474104 "putative glycine dehydrogenase (decarboxylating) subunit 2"  
"JS1\_M21\_00149" 17647 "s59E5H2" 1.959811 "putative glycine dehydrogenase (decarboxylating) subunit 2"  
"JS1\_M21\_00149" 17647 "s63E6H2" 0.426289 "putative glycine dehydrogenase (decarboxylating) subunit 2"  
"JS1\_M21\_00150" 17648 "s59E13H2" 1.076602 "Aminomethyltransferase"  
"JS1\_M21\_00150" 17648 "s59E25H2" 0 "Aminomethyltransferase"  
"JS1\_M21\_00150" 17648 "s59E5H2" 0.2336075 "Aminomethyltransferase"  
"JS1\_M21\_00150" 17648 "s63E6H2" 0.08378072 "Aminomethyltransferase"  
"JS1\_M21\_00151" 17649 "s59E13H2" 6.714328 "Amino-acid carrier protein AlsT"  
"JS1\_M21\_00151" 17649 "s59E25H2" 0.3164464 "Amino-acid carrier protein AlsT"  
"JS1\_M21\_00151" 17649 "s59E5H2" 2.285295 "Amino-acid carrier protein AlsT"  
"JS1\_M21\_00151" 17649 "s63E6H2" 0.4575893 "Amino-acid carrier protein AlsT"  
"JS1\_M21\_00152" 17650 "s59E13H2" 5.740495 "60 kDa chaperonin"  
"JS1\_M21\_00152" 17650 "s59E25H2" 0 "60 kDa chaperonin"  
"JS1\_M21\_00152" 17650 "s59E5H2" 0.7724122 "60 kDa chaperonin"  
"JS1\_M21\_00152" 17650 "s63E6H2" 0.354246 "60 kDa chaperonin"  
"JS1\_M21\_00153" 17651 "s59E13H2" 10.56981 "10 kDa chaperonin"  
"JS1\_M21\_00153" 17651 "s59E25H2" 0 "10 kDa chaperonin"  
"JS1\_M21\_00153" 17651 "s59E5H2" 0.3472414 "10 kDa chaperonin"  
"JS1\_M21\_00153" 17651 "s63E6H2" 0.3174071 "10 kDa chaperonin"  
"JS1\_M21\_00154" 17652 "s59E13H2" 16.50919 "tRNA N6-adenosine threonylcarbamoyltransferase"  
"JS1\_M21\_00154" 17652 "s59E25H2" 0 "tRNA N6-adenosine threonylcarbamoyltransferase"  
"JS1\_M21\_00154" 17652 "s59E5H2" 0.9621972 "tRNA N6-adenosine threonylcarbamoyltransferase"  
"JS1\_M21\_00154" 17652 "s63E6H2" 0.5416035 "tRNA N6-adenosine threonylcarbamoyltransferase"  
"JS1\_M21\_00155" 17653 "s59E13H2" 0.9641498 "putative N-acetyltransferase"

"JS1\_M21\_00155" 17653 "s59E25H2" 0 "putative N-acetyltransferase"  
"JS1\_M21\_00155" 17653 "s59E5H2" 0.2911488 "putative N-acetyltransferase"  
"JS1\_M21\_00155" 17653 "s63E6H2" 0.4749952 "putative N-acetyltransferase"  
"JS1\_M21\_00156" 17654 "s59E13H2" 10.08986 "tRNA threonylcarbamoyladenosine biosynthesis protein TsaB"  
"JS1\_M21\_00156" 17654 "s59E25H2" 0.1082621 "tRNA threonylcarbamoyladenosine biosynthesis protein TsaB"  
"JS1\_M21\_00156" 17654 "s59E5H2" 0.8761495 "tRNA threonylcarbamoyladenosine biosynthesis protein TsaB"  
"JS1\_M21\_00156" 17654 "s63E6H2" 0.2920397 "tRNA threonylcarbamoyladenosine biosynthesis protein TsaB"  
"JS1\_M21\_00157" 17655 "s59E13H2" 16.38434 "tRNA threonylcarbamoyladenosine biosynthesis protein TsaE"  
"JS1\_M21\_00157" 17655 "s59E25H2" 0.9266247 "tRNA threonylcarbamoyladenosine biosynthesis protein TsaE"  
"JS1\_M21\_00157" 17655 "s59E5H2" 0.8084115 "tRNA threonylcarbamoyladenosine biosynthesis protein TsaE"  
"JS1\_M21\_00157" 17655 "s63E6H2" 0.313727 "tRNA threonylcarbamoyladenosine biosynthesis protein TsaE"  
"JS1\_M21\_00158" 17656 "s59E13H2" 6.891801 "Alanine racemase"  
"JS1\_M21\_00158" 17656 "s59E25H2" 0.3731976 "Alanine racemase"  
"JS1\_M21\_00158" 17656 "s59E5H2" 0.3646196 "Alanine racemase"  
"JS1\_M21\_00158" 17656 "s63E6H2" 0.04051313 "Alanine racemase"  
"JS1\_M21\_00159" 17657 "s59E13H2" 2.814058 "Bifunctional NAD(P)H-hydrate repair enzyme Nnr"  
"JS1\_M21\_00159" 17657 "s59E25H2" 0 "Bifunctional NAD(P)H-hydrate repair enzyme Nnr"  
"JS1\_M21\_00159" 17657 "s59E5H2" 0.1543731 "Bifunctional NAD(P)H-hydrate repair enzyme Nnr"  
"JS1\_M21\_00159" 17657 "s63E6H2" 0.01211071 "Bifunctional NAD(P)H-hydrate repair enzyme Nnr"  
"JS1\_M21\_00164" 17662 "s59E13H2" 0.09776472 "hypothetical protein"  
"JS1\_M21\_00164" 17662 "s59E25H2" 0 "hypothetical protein"  
"JS1\_M21\_00164" 17662 "s59E5H2" 0 "hypothetical protein"  
"JS1\_M21\_00164" 17662 "s63E6H2" 0.0308877 "hypothetical protein"  
"JS1\_M21\_00168" 17666 "s59E13H2" 0.07700257 "Aldehyde-alcohol dehydrogenase"  
"JS1\_M21\_00168" 17666 "s59E25H2" 0 "Aldehyde-alcohol dehydrogenase"  
"JS1\_M21\_00168" 17666 "s59E5H2" 0.5785082 "Aldehyde-alcohol dehydrogenase"  
"JS1\_M21\_00168" 17666 "s63E6H2" 2.627399 "Aldehyde-alcohol dehydrogenase"  
"JS1\_M21\_00169" 17667 "s59E13H2" 0.1330321 "Carbon dioxide concentrating mechanism protein Ccml"  
"JS1\_M21\_00169" 17667 "s59E25H2" 0 "Carbon dioxide concentrating mechanism protein Ccml"  
"JS1\_M21\_00169" 17667 "s59E5H2" 0.7975572 "Carbon dioxide concentrating mechanism protein Ccml"  
"JS1\_M21\_00169" 17667 "s63E6H2" 3.176001 "Carbon dioxide concentrating mechanism protein Ccml"  
"JS1\_M21\_00170" 17668 "s59E13H2" 0.2392039 "Carbon dioxide concentrating mechanism protein Ccml"  
"JS1\_M21\_00170" 17668 "s59E25H2" 0 "Carbon dioxide concentrating mechanism protein Ccml"  
"JS1\_M21\_00170" 17668 "s59E5H2" 0.822684 "Carbon dioxide concentrating mechanism protein Ccml"  
"JS1\_M21\_00170" 17668 "s63E6H2" 4.511316 "Carbon dioxide concentrating mechanism protein Ccml"  
"JS1\_M21\_00171" 17669 "s59E13H2" 0.2246856 "Putative sugar phosphate isomerase Ywlf"  
"JS1\_M21\_00171" 17669 "s59E25H2" 0 "Putative sugar phosphate isomerase Ywlf"  
"JS1\_M21\_00171" 17669 "s59E5H2" 0.6244422 "Putative sugar phosphate isomerase Ywlf"  
"JS1\_M21\_00171" 17669 "s63E6H2" 6.102179 "Putative sugar phosphate isomerase Ywlf"  
"JS1\_M21\_00172" 17670 "s59E13H2" 0.2122393 "Deoxyribose-phosphate aldolase 1"  
"JS1\_M21\_00172" 17670 "s59E25H2" 0 "Deoxyribose-phosphate aldolase 1"  
"JS1\_M21\_00172" 17670 "s59E5H2" 0.5193317 "Deoxyribose-phosphate aldolase 1"  
"JS1\_M21\_00172" 17670 "s63E6H2" 7.984968 "Deoxyribose-phosphate aldolase 1"  
"JS1\_M21\_00173" 17671 "s59E13H2" 0.1631018 "Phosphate propanoyltransferase"  
"JS1\_M21\_00173" 17671 "s59E25H2" 0 "Phosphate propanoyltransferase"  
"JS1\_M21\_00173" 17671 "s59E5H2" 0.5519392 "Phosphate propanoyltransferase"  
"JS1\_M21\_00173" 17671 "s63E6H2" 3.369981 "Phosphate propanoyltransferase"

"JS1\_M21\_00174" 17672 "s59E13H2" 0.04635278 "Deoxyribose operon repressor"  
"JS1\_M21\_00174" 17672 "s59E25H2" 0 "Deoxyribose operon repressor"  
"JS1\_M21\_00174" 17672 "s59E5H2" 0.7471115 "Deoxyribose operon repressor"  
"JS1\_M21\_00174" 17672 "s63E6H2" 0.5444471 "Deoxyribose operon repressor"  
"JS1\_M21\_00175" 17673 "s59E13H2" 0.00369903 "1-deoxy-D-xylulose-5-phosphate synthase"  
"JS1\_M21\_00175" 17673 "s59E25H2" 0 "1-deoxy-D-xylulose-5-phosphate synthase"  
"JS1\_M21\_00175" 17673 "s59E5H2" 0 "1-deoxy-D-xylulose-5-phosphate synthase"  
"JS1\_M21\_00175" 17673 "s63E6H2" 0 "1-deoxy-D-xylulose-5-phosphate synthase"  
"JS1\_M21\_00176" 17674 "s59E13H2" 0.004917218 "Succinyl-CoA:coenzyme A transferase"  
"JS1\_M21\_00176" 17674 "s59E25H2" 0 "Succinyl-CoA:coenzyme A transferase"  
"JS1\_M21\_00176" 17674 "s59E5H2" 0.00838732 "Succinyl-CoA:coenzyme A transferase"  
"JS1\_M21\_00176" 17674 "s63E6H2" 0.006176389 "Succinyl-CoA:coenzyme A transferase"  
"JS1\_M21\_00177" 17675 "s59E13H2" 0.1379142 "Tungsten-containing aldehyde ferredoxin oxidoreductase"  
"JS1\_M21\_00177" 17675 "s59E25H2" 0 "Tungsten-containing aldehyde ferredoxin oxidoreductase"  
"JS1\_M21\_00177" 17675 "s59E5H2" 1.527086 "Tungsten-containing aldehyde ferredoxin oxidoreductase"  
"JS1\_M21\_00177" 17675 "s63E6H2" 0.4812723 "Tungsten-containing aldehyde ferredoxin oxidoreductase"  
"JS1\_M21\_00180" 17678 "s59E13H2" 0.007911478 "LysM domain/BON superfamily protein"  
"JS1\_M21\_00180" 17678 "s59E25H2" 0 "LysM domain/BON superfamily protein"  
"JS1\_M21\_00180" 17678 "s59E5H2" 0.08802686 "LysM domain/BON superfamily protein"  
"JS1\_M21\_00180" 17678 "s63E6H2" 0.06530792 "LysM domain/BON superfamily protein"  
"JS1\_M21\_00181" 17679 "s59E13H2" 0.005422371 "VanZ like family protein"  
"JS1\_M21\_00181" 17679 "s59E25H2" 0 "VanZ like family protein"  
"JS1\_M21\_00181" 17679 "s59E5H2" 0.04218537 "VanZ like family protein"  
"JS1\_M21\_00181" 17679 "s63E6H2" 0.004020175 "VanZ like family protein"  
"JS1\_M21\_00182" 17680 "s59E13H2" 0.1219627 "Tetrahedral aminopeptidase"  
"JS1\_M21\_00182" 17680 "s59E25H2" 0 "Tetrahedral aminopeptidase"  
"JS1\_M21\_00182" 17680 "s59E5H2" 0.1087304 "Tetrahedral aminopeptidase"  
"JS1\_M21\_00182" 17680 "s63E6H2" 0.02251783 "Tetrahedral aminopeptidase"  
"JS1\_M21\_00184" 17682 "s59E13H2" 0.04877502 "2-C-methyl-D-erythritol 2,4-cyclodiphosphate synthase"  
"JS1\_M21\_00184" 17682 "s59E25H2" 0 "2-C-methyl-D-erythritol 2,4-cyclodiphosphate synthase"  
"JS1\_M21\_00184" 17682 "s59E5H2" 0.01180855 "2-C-methyl-D-erythritol 2,4-cyclodiphosphate synthase"  
"JS1\_M21\_00184" 17682 "s63E6H2" 0.008030666 "2-C-methyl-D-erythritol 2,4-cyclodiphosphate synthase"  
"JS1\_M21\_00189" 17687 "s59E13H2" 0 "hypothetical protein"  
"JS1\_M21\_00189" 17687 "s59E25H2" 0 "hypothetical protein"  
"JS1\_M21\_00189" 17687 "s59E5H2" 0 "hypothetical protein"  
"JS1\_M21\_00189" 17687 "s63E6H2" 0.1748138 "hypothetical protein"  
"JS1\_M21\_00191" 17689 "s59E13H2" 0.05384975 "Glutamate--tRNA ligase 1"  
"JS1\_M21\_00191" 17689 "s59E25H2" 0 "Glutamate--tRNA ligase 1"  
"JS1\_M21\_00191" 17689 "s59E5H2" 0.4229977 "Glutamate--tRNA ligase 1"  
"JS1\_M21\_00191" 17689 "s63E6H2" 0.1192489 "Glutamate--tRNA ligase 1"  
"JS1\_M21\_00192" 17690 "s59E13H2" 0.04577204 "Divergent polysaccharide deacetylase"  
"JS1\_M21\_00192" 17690 "s59E25H2" 0 "Divergent polysaccharide deacetylase"  
"JS1\_M21\_00192" 17690 "s59E5H2" 0.3619914 "Divergent polysaccharide deacetylase"  
"JS1\_M21\_00192" 17690 "s63E6H2" 0.1231884 "Divergent polysaccharide deacetylase"  
"JS1\_M21\_00193" 17691 "s59E13H2" 0.09810681 "putative CtpA-like serine protease"  
"JS1\_M21\_00193" 17691 "s59E25H2" 0 "putative CtpA-like serine protease"  
"JS1\_M21\_00193" 17691 "s59E5H2" 0.2920403 "putative CtpA-like serine protease"



"JS1\_M21\_00193" 17691 "s63E6H2" 0.1450691 "putative CtpA-like serine protease"  
"JS1\_M21\_00194" 17692 "s59E13H2" 0.06315564 "Murein hydrolase activator EnvC precursor"  
"JS1\_M21\_00194" 17692 "s59E25H2" 0 "Murein hydrolase activator EnvC precursor"  
"JS1\_M21\_00194" 17692 "s59E5H2" 0.2984026 "Murein hydrolase activator EnvC precursor"  
"JS1\_M21\_00194" 17692 "s63E6H2" 0.08493993 "Murein hydrolase activator EnvC precursor"  
"JS1\_M21\_00195" 17693 "s59E13H2" 0.115007 "Cell division protein FtsX"  
"JS1\_M21\_00195" 17693 "s59E25H2" 0 "Cell division protein FtsX"  
"JS1\_M21\_00195" 17693 "s59E5H2" 0.3562185 "Cell division protein FtsX"  
"JS1\_M21\_00195" 17693 "s63E6H2" 0.1288947 "Cell division protein FtsX"  
"JS1\_M21\_00196" 17694 "s59E13H2" 0.1424505 "Cell division ATP-binding protein FtsE"  
"JS1\_M21\_00196" 17694 "s59E25H2" 0 "Cell division ATP-binding protein FtsE"  
"JS1\_M21\_00196" 17694 "s59E5H2" 0.6598055 "Cell division ATP-binding protein FtsE"  
"JS1\_M21\_00196" 17694 "s63E6H2" 0.2063266 "Cell division ATP-binding protein FtsE"  
"JS1\_M21\_00197" 17695 "s59E13H2" 0.08883759 "hypothetical protein"  
"JS1\_M21\_00197" 17695 "s59E25H2" 0 "hypothetical protein"  
"JS1\_M21\_00197" 17695 "s59E5H2" 0.08331948 "hypothetical protein"  
"JS1\_M21\_00197" 17695 "s63E6H2" 0.6427194 "hypothetical protein"  
"JS1\_M21\_00198" 17696 "s59E13H2" 0 "hypothetical protein"  
"JS1\_M21\_00198" 17696 "s59E25H2" 0 "hypothetical protein"  
"JS1\_M21\_00198" 17696 "s59E5H2" 0 "hypothetical protein"  
"JS1\_M21\_00198" 17696 "s63E6H2" 0 "hypothetical protein"  
"JS1\_M21\_00199" 17697 "s59E13H2" 0 "hypothetical protein"  
"JS1\_M21\_00199" 17697 "s59E25H2" 0 "hypothetical protein"  
"JS1\_M21\_00199" 17697 "s59E5H2" 0 "hypothetical protein"  
"JS1\_M21\_00199" 17697 "s63E6H2" 0 "hypothetical protein"  
"JS1\_M21\_00200" 17698 "s59E13H2" 0 "hypothetical protein"  
"JS1\_M21\_00200" 17698 "s59E25H2" 0 "hypothetical protein"  
"JS1\_M21\_00200" 17698 "s59E5H2" 0 "hypothetical protein"  
"JS1\_M21\_00200" 17698 "s63E6H2" 0 "hypothetical protein"  
"JS1\_M21\_00201" 17699 "s59E13H2" 0 "hypothetical protein"  
"JS1\_M21\_00201" 17699 "s59E25H2" 0 "hypothetical protein"  
"JS1\_M21\_00201" 17699 "s59E5H2" 0 "hypothetical protein"  
"JS1\_M21\_00201" 17699 "s63E6H2" 0 "hypothetical protein"  
"JS1\_M21\_00203" 17701 "s59E13H2" 0 "hypothetical protein"  
"JS1\_M21\_00203" 17701 "s59E25H2" 0 "hypothetical protein"  
"JS1\_M21\_00203" 17701 "s59E5H2" 0 "hypothetical protein"  
"JS1\_M21\_00203" 17701 "s63E6H2" 0 "hypothetical protein"  
"JS1\_M21\_00205" 17703 "s59E13H2" 0 "Helix-turn-helix domain protein"  
"JS1\_M21\_00205" 17703 "s59E25H2" 0 "Helix-turn-helix domain protein"  
"JS1\_M21\_00205" 17703 "s59E5H2" 0 "Helix-turn-helix domain protein"  
"JS1\_M21\_00205" 17703 "s63E6H2" 0 "Helix-turn-helix domain protein"  
"JS1\_M21\_00206" 17704 "s59E13H2" 0 "hypothetical protein"  
"JS1\_M21\_00206" 17704 "s59E25H2" 0 "hypothetical protein"  
"JS1\_M21\_00206" 17704 "s59E5H2" 0 "hypothetical protein"  
"JS1\_M21\_00206" 17704 "s63E6H2" 0 "hypothetical protein"  
"JS1\_M21\_00209" 17707 "s59E13H2" 0 "hypothetical protein"  
"JS1\_M21\_00209" 17707 "s59E25H2" 0 "hypothetical protein"

"JS1\_M21\_00209" 17707 "s59E5H2" 0 "hypothetical protein"  
"JS1\_M21\_00209" 17707 "s63E6H2" 0 "hypothetical protein"  
"JS1\_M21\_00211" 17709 "s59E13H2" 0.01425215 "hypothetical protein"  
"JS1\_M21\_00211" 17709 "s59E25H2" 0 "hypothetical protein"  
"JS1\_M21\_00211" 17709 "s59E5H2" 0.004847626 "hypothetical protein"  
"JS1\_M21\_00211" 17709 "s63E6H2" 0 "hypothetical protein"  
"JS1\_M21\_00217" 17715 "s59E13H2" 0 "Helix-turn-helix"  
"JS1\_M21\_00217" 17715 "s59E25H2" 0 "Helix-turn-helix"  
"JS1\_M21\_00217" 17715 "s59E5H2" 0 "Helix-turn-helix"  
"JS1\_M21\_00217" 17715 "s63E6H2" 0 "Helix-turn-helix"  
"JS1\_M21\_00218" 17716 "s59E13H2" 0 "anaerobic benzoate catabolism transcriptional regulator"  
"JS1\_M21\_00218" 17716 "s59E25H2" 0 "anaerobic benzoate catabolism transcriptional regulator"  
"JS1\_M21\_00218" 17716 "s59E5H2" 0 "anaerobic benzoate catabolism transcriptional regulator"  
"JS1\_M21\_00218" 17716 "s63E6H2" 0 "anaerobic benzoate catabolism transcriptional regulator"  
"JS1\_M21\_00219" 17717 "s59E13H2" 0 "hypothetical protein"  
"JS1\_M21\_00219" 17717 "s59E25H2" 0 "hypothetical protein"  
"JS1\_M21\_00219" 17717 "s59E5H2" 0 "hypothetical protein"  
"JS1\_M21\_00219" 17717 "s63E6H2" 0 "hypothetical protein"  
"JS1\_M21\_00220" 17718 "s59E13H2" 0 "hypothetical protein"  
"JS1\_M21\_00220" 17718 "s59E25H2" 0 "hypothetical protein"  
"JS1\_M21\_00220" 17718 "s59E5H2" 0 "hypothetical protein"  
"JS1\_M21\_00220" 17718 "s63E6H2" 0.00138971 "hypothetical protein"  
"JS1\_M21\_00224" 17722 "s59E13H2" 2.114611 "Lactose transport system permease protein LacF"  
"JS1\_M21\_00224" 17722 "s59E25H2" 0 "Lactose transport system permease protein LacF"  
"JS1\_M21\_00224" 17722 "s59E5H2" 0.07152779 "Lactose transport system permease protein LacF"  
"JS1\_M21\_00224" 17722 "s63E6H2" 0.03431745 "Lactose transport system permease protein LacF"  
"JS1\_M21\_00225" 17723 "s59E13H2" 2.87449 "Multiple sugar-binding protein precursor"  
"JS1\_M21\_00225" 17723 "s59E25H2" 0.4238579 "Multiple sugar-binding protein precursor"  
"JS1\_M21\_00225" 17723 "s59E5H2" 0.0760525 "Multiple sugar-binding protein precursor"  
"JS1\_M21\_00225" 17723 "s63E6H2" 0.04145438 "Multiple sugar-binding protein precursor"  
"JS1\_M21\_00226" 17724 "s59E13H2" 0 "N-acetylglucosamine repressor"  
"JS1\_M21\_00226" 17724 "s59E25H2" 0 "N-acetylglucosamine repressor"  
"JS1\_M21\_00226" 17724 "s59E5H2" 0.1569125 "N-acetylglucosamine repressor"  
"JS1\_M21\_00226" 17724 "s63E6H2" 0.1122642 "N-acetylglucosamine repressor"  
"JS1\_M21\_00227" 17725 "s59E13H2" 0 "Trehalose synthase"  
"JS1\_M21\_00227" 17725 "s59E25H2" 0 "Trehalose synthase"  
"JS1\_M21\_00227" 17725 "s59E5H2" 0 "Trehalose synthase"  
"JS1\_M21\_00227" 17725 "s63E6H2" 0.001692665 "Trehalose synthase"  
"JS1\_M21\_00228" 17726 "s59E13H2" 0 "hypothetical protein"  
"JS1\_M21\_00228" 17726 "s59E25H2" 0 "hypothetical protein"  
"JS1\_M21\_00228" 17726 "s59E5H2" 0 "hypothetical protein"  
"JS1\_M21\_00228" 17726 "s63E6H2" 0 "hypothetical protein"  
"JS1\_M21\_00232" 17730 "s59E13H2" 0 "Enolase"  
"JS1\_M21\_00232" 17730 "s59E25H2" 0 "Enolase"  
"JS1\_M21\_00232" 17730 "s59E5H2" 0.04301621 "Enolase"  
"JS1\_M21\_00232" 17730 "s63E6H2" 0.03863323 "Enolase"  
"JS1\_M21\_00233" 17731 "s59E13H2" 0.02555536 "Enolase"

"JS1\_M21\_00233" 17731 "s59E25H2" 0 "Enolase"  
"JS1\_M21\_00233" 17731 "s59E5H2" 0.2497808 "Enolase"  
"JS1\_M21\_00233" 17731 "s63E6H2" 0.279197 "Enolase"  
"JS1\_M21\_00234" 17732 "s59E13H2" 0.0558138 "cell division protein FtsB"  
"JS1\_M21\_00234" 17732 "s59E25H2" 0 "cell division protein FtsB"  
"JS1\_M21\_00234" 17732 "s59E5H2" 0.3854227 "cell division protein FtsB"  
"JS1\_M21\_00234" 17732 "s63E6H2" 0.5078107 "cell division protein FtsB"  
"JS1\_M21\_00238" 17736 "s59E13H2" 0.08079343 "tRNA(Ile)-lysidine synthase"  
"JS1\_M21\_00238" 17736 "s59E25H2" 0 "tRNA(Ile)-lysidine synthase"  
"JS1\_M21\_00238" 17736 "s59E5H2" 0.2168749 "tRNA(Ile)-lysidine synthase"  
"JS1\_M21\_00238" 17736 "s63E6H2" 0.3231511 "tRNA(Ile)-lysidine synthase"  
"JS1\_M21\_00239" 17737 "s59E13H2" 0.04971961 "tRNA(Ile)-lysidine synthase"  
"JS1\_M21\_00239" 17737 "s59E25H2" 0 "tRNA(Ile)-lysidine synthase"  
"JS1\_M21\_00239" 17737 "s59E5H2" 0.1406518 "tRNA(Ile)-lysidine synthase"  
"JS1\_M21\_00239" 17737 "s63E6H2" 0.1904281 "tRNA(Ile)-lysidine synthase"  
"JS1\_M21\_00240" 17738 "s59E13H2" 0.03039155 "Hypoxanthine-guanine phosphoribosyltransferase"  
"JS1\_M21\_00240" 17738 "s59E25H2" 0 "Hypoxanthine-guanine phosphoribosyltransferase"  
"JS1\_M21\_00240" 17738 "s59E5H2" 0.1298691 "Hypoxanthine-guanine phosphoribosyltransferase"  
"JS1\_M21\_00240" 17738 "s63E6H2" 0.1212134 "Hypoxanthine-guanine phosphoribosyltransferase"  
"JS1\_M21\_00241" 17739 "s59E13H2" 0 "hypothetical protein"  
"JS1\_M21\_00241" 17739 "s59E25H2" 0 "hypothetical protein"  
"JS1\_M21\_00241" 17739 "s59E5H2" 0 "hypothetical protein"  
"JS1\_M21\_00241" 17739 "s63E6H2" 0 "hypothetical protein"  
"JS1\_M21\_00243" 17741 "s59E13H2" 0 "hypothetical protein"  
"JS1\_M21\_00243" 17741 "s59E25H2" 0 "hypothetical protein"  
"JS1\_M21\_00243" 17741 "s59E5H2" 0 "hypothetical protein"  
"JS1\_M21\_00243" 17741 "s63E6H2" 0 "hypothetical protein"  
"JS1\_M21\_00246" 17744 "s59E13H2" 0.1192895 "50S ribosomal protein L24"  
"JS1\_M21\_00246" 17744 "s59E25H2" 0 "50S ribosomal protein L24"  
"JS1\_M21\_00246" 17744 "s59E5H2" 0.1517963 "50S ribosomal protein L24"  
"JS1\_M21\_00246" 17744 "s63E6H2" 0.2565533 "50S ribosomal protein L24"  
"JS1\_M21\_00247" 17745 "s59E13H2" 0.0308572 "50S ribosomal protein L14"  
"JS1\_M21\_00247" 17745 "s59E25H2" 0 "50S ribosomal protein L14"  
"JS1\_M21\_00247" 17745 "s59E5H2" 0.1109339 "50S ribosomal protein L14"  
"JS1\_M21\_00247" 17745 "s63E6H2" 0.1495439 "50S ribosomal protein L14"  
"JS1\_M21\_00248" 17746 "s59E13H2" 0.01582532 "30S ribosomal protein S17"  
"JS1\_M21\_00248" 17746 "s59E25H2" 0 "30S ribosomal protein S17"  
"JS1\_M21\_00248" 17746 "s59E5H2" 0.07320414 "30S ribosomal protein S17"  
"JS1\_M21\_00248" 17746 "s63E6H2" 0.1167553 "30S ribosomal protein S17"  
"JS1\_M21\_00249" 17747 "s59E13H2" 0.04616901 "50S ribosomal protein L29"  
"JS1\_M21\_00249" 17747 "s59E25H2" 0 "50S ribosomal protein L29"  
"JS1\_M21\_00249" 17747 "s59E5H2" 0.05701518 "50S ribosomal protein L29"  
"JS1\_M21\_00249" 17747 "s63E6H2" 0.1657267 "50S ribosomal protein L29"  
"JS1\_M21\_00250" 17748 "s59E13H2" 0.02986136 "50S ribosomal protein L16"  
"JS1\_M21\_00250" 17748 "s59E25H2" 0 "50S ribosomal protein L16"  
"JS1\_M21\_00250" 17748 "s59E5H2" 0.1978368 "50S ribosomal protein L16"  
"JS1\_M21\_00250" 17748 "s63E6H2" 0.2330107 "50S ribosomal protein L16"

"JS1\_M21\_00251" 17749 "s59E13H2" 0.04471452 "30S ribosomal protein S3"  
"JS1\_M21\_00251" 17749 "s59E25H2" 0 "30S ribosomal protein S3"  
"JS1\_M21\_00251" 17749 "s59E5H2" 0.05701677 "30S ribosomal protein S3"  
"JS1\_M21\_00251" 17749 "s63E6H2" 0.1823456 "30S ribosomal protein S3"  
"JS1\_M21\_00252" 17750 "s59E13H2" 2.839495 "50S ribosomal protein L22"  
"JS1\_M21\_00252" 17750 "s59E25H2" 0 "50S ribosomal protein L22"  
"JS1\_M21\_00252" 17750 "s59E5H2" 0.09661253 "50S ribosomal protein L22"  
"JS1\_M21\_00252" 17750 "s63E6H2" 0.2569865 "50S ribosomal protein L22"  
"JS1\_M21\_00253" 17751 "s59E13H2" 0.03215451 "DNA repair protein RecN"  
"JS1\_M21\_00253" 17751 "s59E25H2" 0 "DNA repair protein RecN"  
"JS1\_M21\_00253" 17751 "s59E5H2" 0.1775111 "DNA repair protein RecN"  
"JS1\_M21\_00253" 17751 "s63E6H2" 0.02249186 "DNA repair protein RecN"  
"JS1\_M21\_00254" 17752 "s59E13H2" 0.03030901 "Bifunctional oligoribonuclease and PAP phosphatase NrnA"  
"JS1\_M21\_00254" 17752 "s59E25H2" 0 "Bifunctional oligoribonuclease and PAP phosphatase NrnA"  
"JS1\_M21\_00254" 17752 "s59E5H2" 0.0458108 "Bifunctional oligoribonuclease and PAP phosphatase NrnA"  
"JS1\_M21\_00254" 17752 "s63E6H2" 0.05565642 "Bifunctional oligoribonuclease and PAP phosphatase NrnA"  
"JS1\_M21\_00255" 17753 "s59E13H2" 0.02081201 "Ribosome-binding factor A"  
"JS1\_M21\_00255" 17753 "s59E25H2" 0 "Ribosome-binding factor A"  
"JS1\_M21\_00255" 17753 "s59E5H2" 0.06974024 "Ribosome-binding factor A"  
"JS1\_M21\_00255" 17753 "s63E6H2" 0.04301775 "Ribosome-binding factor A"  
"JS1\_M21\_00256" 17754 "s59E13H2" 0.03988659 "Translation initiation factor IF-2"  
"JS1\_M21\_00256" 17754 "s59E25H2" 0 "Translation initiation factor IF-2"  
"JS1\_M21\_00256" 17754 "s59E5H2" 0.1241567 "Translation initiation factor IF-2"  
"JS1\_M21\_00256" 17754 "s63E6H2" 0.07359469 "Translation initiation factor IF-2"  
"JS1\_M21\_00257" 17755 "s59E13H2" 0.01421564 "hypothetical protein"  
"JS1\_M21\_00257" 17755 "s59E25H2" 0 "hypothetical protein"  
"JS1\_M21\_00257" 17755 "s59E5H2" 0 "hypothetical protein"  
"JS1\_M21\_00257" 17755 "s63E6H2" 0.1005027 "hypothetical protein"  
"JS1\_M21\_00258" 17756 "s59E13H2" 0.2327779 "hypothetical protein"  
"JS1\_M21\_00258" 17756 "s59E25H2" 0 "hypothetical protein"  
"JS1\_M21\_00258" 17756 "s59E5H2" 0.01279874 "hypothetical protein"  
"JS1\_M21\_00258" 17756 "s63E6H2" 0.1694904 "hypothetical protein"  
"JS1\_M21\_00259" 17757 "s59E13H2" 0.804871 "Threonylcarbamoyladenosine tRNA methylthiotransferase MtaB"  
"JS1\_M21\_00259" 17757 "s59E25H2" 0 "Threonylcarbamoyladenosine tRNA methylthiotransferase MtaB"  
"JS1\_M21\_00259" 17757 "s59E5H2" 0.1874774 "Threonylcarbamoyladenosine tRNA methylthiotransferase MtaB"  
"JS1\_M21\_00259" 17757 "s63E6H2" 0.4185987 "Threonylcarbamoyladenosine tRNA methylthiotransferase MtaB"  
"JS1\_M21\_00260" 17758 "s59E13H2" 0.07548106 "Chaperone protein DnaJ"  
"JS1\_M21\_00260" 17758 "s59E25H2" 0 "Chaperone protein DnaJ"  
"JS1\_M21\_00260" 17758 "s59E5H2" 0.03725553 "Chaperone protein DnaJ"  
"JS1\_M21\_00260" 17758 "s63E6H2" 0.4605035 "Chaperone protein DnaJ"  
"JS1\_M21\_00261" 17759 "s59E13H2" 0.190834 "Chaperone protein DnaK"  
"JS1\_M21\_00261" 17759 "s59E25H2" 0 "Chaperone protein DnaK"  
"JS1\_M21\_00261" 17759 "s59E5H2" 0.08778649 "Chaperone protein DnaK"  
"JS1\_M21\_00261" 17759 "s63E6H2" 0.294844 "Chaperone protein DnaK"  
"JS1\_M21\_00262" 17760 "s59E13H2" 0.1564631 "heat shock protein GrpE"  
"JS1\_M21\_00262" 17760 "s59E25H2" 0 "heat shock protein GrpE"  
"JS1\_M21\_00262" 17760 "s59E5H2" 0.04928869 "heat shock protein GrpE"

"JS1\_M21\_00262" 17760 "s63E6H2" 0.1122454 "heat shock protein GrpE"  
"JS1\_M21\_00263" 17761 "s59E13H2" 0.08844791 "Heat-inducible transcription repressor HrcA"  
"JS1\_M21\_00263" 17761 "s59E25H2" 0 "Heat-inducible transcription repressor HrcA"  
"JS1\_M21\_00263" 17761 "s59E5H2" 0.1434236 "Heat-inducible transcription repressor HrcA"  
"JS1\_M21\_00263" 17761 "s63E6H2" 0.1325603 "Heat-inducible transcription repressor HrcA"  
"JS1\_M21\_00264" 17762 "s59E13H2" 0.1593363 "Oxygen-independent coproporphyrinogen-III oxidase 1"  
"JS1\_M21\_00264" 17762 "s59E25H2" 0 "Oxygen-independent coproporphyrinogen-III oxidase 1"  
"JS1\_M21\_00264" 17762 "s59E5H2" 0.1485434 "Oxygen-independent coproporphyrinogen-III oxidase 1"  
"JS1\_M21\_00264" 17762 "s63E6H2" 0.1192332 "Oxygen-independent coproporphyrinogen-III oxidase 1"  
"JS1\_M21\_00265" 17763 "s59E13H2" 1.345852 "Elongation factor 4"  
"JS1\_M21\_00265" 17763 "s59E25H2" 0 "Elongation factor 4"  
"JS1\_M21\_00265" 17763 "s59E5H2" 0.2717855 "Elongation factor 4"  
"JS1\_M21\_00265" 17763 "s63E6H2" 0.1160491 "Elongation factor 4"  
"JS1\_M21\_00266" 17764 "s59E13H2" 0.5278093 "putative peptidoglycan biosynthesis protein MurJ"  
"JS1\_M21\_00266" 17764 "s59E25H2" 0.126195 "putative peptidoglycan biosynthesis protein MurJ"  
"JS1\_M21\_00266" 17764 "s59E5H2" 0.481165 "putative peptidoglycan biosynthesis protein MurJ"  
"JS1\_M21\_00266" 17764 "s63E6H2" 0.1240036 "putative peptidoglycan biosynthesis protein MurJ"  
"JS1\_M21\_00267" 17765 "s59E13H2" 0.08260115 "30S ribosomal protein S20"  
"JS1\_M21\_00267" 17765 "s59E25H2" 0 "30S ribosomal protein S20"  
"JS1\_M21\_00267" 17765 "s59E5H2" 0.2713349 "30S ribosomal protein S20"  
"JS1\_M21\_00267" 17765 "s63E6H2" 0.03879514 "30S ribosomal protein S20"  
"JS1\_M21\_00268" 17766 "s59E13H2" 0.02635397 "GIY-YIG catalytic domain protein"  
"JS1\_M21\_00268" 17766 "s59E25H2" 0 "GIY-YIG catalytic domain protein"  
"JS1\_M21\_00268" 17766 "s59E5H2" 0.01468062 "GIY-YIG catalytic domain protein"  
"JS1\_M21\_00268" 17766 "s63E6H2" 0.004356824 "GIY-YIG catalytic domain protein"  
"JS1\_M21\_00269" 17767 "s59E13H2" 0.3681365 "DNA polymerase III subunit delta"  
"JS1\_M21\_00269" 17767 "s59E25H2" 0 "DNA polymerase III subunit delta"  
"JS1\_M21\_00269" 17767 "s59E5H2" 0.6432873 "DNA polymerase III subunit delta"  
"JS1\_M21\_00269" 17767 "s63E6H2" 0.04982284 "DNA polymerase III subunit delta"  
"JS1\_M21\_00270" 17768 "s59E13H2" 0.5349938 "ComEC family competence protein"  
"JS1\_M21\_00270" 17768 "s59E25H2" 0 "ComEC family competence protein"  
"JS1\_M21\_00270" 17768 "s59E5H2" 0.9005597 "ComEC family competence protein"  
"JS1\_M21\_00270" 17768 "s63E6H2" 0.07379035 "ComEC family competence protein"  
"JS1\_M21\_00271" 17769 "s59E13H2" 0.4695629 "ComE operon protein 1"  
"JS1\_M21\_00271" 17769 "s59E25H2" 0 "ComE operon protein 1"  
"JS1\_M21\_00271" 17769 "s59E5H2" 0.8975358 "ComE operon protein 1"  
"JS1\_M21\_00271" 17769 "s63E6H2" 0.07762859 "ComE operon protein 1"  
"JS1\_M21\_00272" 17770 "s59E13H2" 0.8020694 "Folypolyglutamate synthase"  
"JS1\_M21\_00272" 17770 "s59E25H2" 0.3787879 "Folypolyglutamate synthase"  
"JS1\_M21\_00272" 17770 "s59E5H2" 0.3079369 "Folypolyglutamate synthase"  
"JS1\_M21\_00272" 17770 "s63E6H2" 0.08492583 "Folypolyglutamate synthase"  
"JS1\_M21\_00273" 17771 "s59E13H2" 0.7070421 "Valine--tRNA ligase"  
"JS1\_M21\_00273" 17771 "s59E25H2" 0 "Valine--tRNA ligase"  
"JS1\_M21\_00273" 17771 "s59E5H2" 0.3582056 "Valine--tRNA ligase"  
"JS1\_M21\_00273" 17771 "s63E6H2" 0.1850128 "Valine--tRNA ligase"  
"JS1\_M21\_00275" 17773 "s59E13H2" 0.2953477 "Lon protease 1"  
"JS1\_M21\_00275" 17773 "s59E25H2" 0 "Lon protease 1"

"JS1\_M21\_00275" 17773 "s59E5H2" 0.1896545 "Lon protease 1"  
"JS1\_M21\_00275" 17773 "s63E6H2" 0.1154961 "Lon protease 1"  
"JS1\_M21\_00276" 17774 "s59E13H2" 0.114401 "ATP-dependent Clp protease ATP-binding subunit ClpX"  
"JS1\_M21\_00276" 17774 "s59E25H2" 0 "ATP-dependent Clp protease ATP-binding subunit ClpX"  
"JS1\_M21\_00276" 17774 "s59E5H2" 0.1291482 "ATP-dependent Clp protease ATP-binding subunit ClpX"  
"JS1\_M21\_00276" 17774 "s63E6H2" 0.09012002 "ATP-dependent Clp protease ATP-binding subunit ClpX"  
"JS1\_M21\_00277" 17775 "s59E13H2" 0.2494775 "hypothetical protein"  
"JS1\_M21\_00277" 17775 "s59E25H2" 0 "hypothetical protein"  
"JS1\_M21\_00277" 17775 "s59E5H2" 0.01921391 "hypothetical protein"  
"JS1\_M21\_00277" 17775 "s63E6H2" 1.416653 "hypothetical protein"  
"JS1\_M21\_00278" 17776 "s59E13H2" 0.9860528 "hypothetical protein"  
"JS1\_M21\_00278" 17776 "s59E25H2" 0 "hypothetical protein"  
"JS1\_M21\_00278" 17776 "s59E5H2" 0.09418245 "hypothetical protein"  
"JS1\_M21\_00278" 17776 "s63E6H2" 6.637896 "hypothetical protein"  
"JS1\_M21\_00279" 17777 "s59E13H2" 0.5069012 "hypothetical protein"  
"JS1\_M21\_00279" 17777 "s59E25H2" 0 "hypothetical protein"  
"JS1\_M21\_00279" 17777 "s59E5H2" 0.5506312 "hypothetical protein"  
"JS1\_M21\_00279" 17777 "s63E6H2" 0.043722 "hypothetical protein"  
"JS1\_M21\_00280" 17778 "s59E13H2" 0 "Dehydrosqualene desaturase"  
"JS1\_M21\_00280" 17778 "s59E25H2" 0 "Dehydrosqualene desaturase"  
"JS1\_M21\_00280" 17778 "s59E5H2" 0 "Dehydrosqualene desaturase"  
"JS1\_M21\_00280" 17778 "s63E6H2" 0 "Dehydrosqualene desaturase"  
"JS1\_M21\_00281" 17779 "s59E13H2" 0.01289849 "Intracellular protease 1"  
"JS1\_M21\_00281" 17779 "s59E25H2" 0 "Intracellular protease 1"  
"JS1\_M21\_00281" 17779 "s59E5H2" 0.08155557 "Intracellular protease 1"  
"JS1\_M21\_00281" 17779 "s63E6H2" 0.4034575 "Intracellular protease 1"  
"JS1\_M21\_00282" 17780 "s59E13H2" 0.0406869 "hypothetical protein"  
"JS1\_M21\_00282" 17780 "s59E25H2" 0 "hypothetical protein"  
"JS1\_M21\_00282" 17780 "s59E5H2" 0.41536 "hypothetical protein"  
"JS1\_M21\_00282" 17780 "s63E6H2" 0.5056 "hypothetical protein"  
"JS1\_M21\_00283" 17781 "s59E13H2" 0 "HTH-type transcriptional regulator MtrR"  
"JS1\_M21\_00283" 17781 "s59E25H2" 0 "HTH-type transcriptional regulator MtrR"  
"JS1\_M21\_00283" 17781 "s59E5H2" 0.3567045 "HTH-type transcriptional regulator MtrR"  
"JS1\_M21\_00283" 17781 "s63E6H2" 0.001695939 "HTH-type transcriptional regulator MtrR"  
"JS1\_M21\_00284" 17782 "s59E13H2" 0 "Lipoprotein-releasing system transmembrane protein LolE"  
"JS1\_M21\_00284" 17782 "s59E25H2" 0 "Lipoprotein-releasing system transmembrane protein LolE"  
"JS1\_M21\_00284" 17782 "s59E5H2" 0.2343914 "Lipoprotein-releasing system transmembrane protein LolE"  
"JS1\_M21\_00284" 17782 "s63E6H2" 0.04097402 "Lipoprotein-releasing system transmembrane protein LolE"  
"JS1\_M21\_00285" 17783 "s59E13H2" 0.002610867 "putative ABC transporter ATP-binding protein"  
"JS1\_M21\_00285" 17783 "s59E25H2" 0 "putative ABC transporter ATP-binding protein"  
"JS1\_M21\_00285" 17783 "s59E5H2" 0.1728547 "putative ABC transporter ATP-binding protein"  
"JS1\_M21\_00285" 17783 "s63E6H2" 0.08311887 "putative ABC transporter ATP-binding protein"  
"JS1\_M21\_00286" 17784 "s59E13H2" 0.02825464 "ABC transporter permease YtrF precursor"  
"JS1\_M21\_00286" 17784 "s59E25H2" 0 "ABC transporter permease YtrF precursor"  
"JS1\_M21\_00286" 17784 "s59E5H2" 0.8407203 "ABC transporter permease YtrF precursor"  
"JS1\_M21\_00286" 17784 "s63E6H2" 0.3795851 "ABC transporter permease YtrF precursor"  
"JS1\_M21\_00287" 17785 "s59E13H2" 0.01771115 "Lipoprotein-releasing system transmembrane protein LolE"

"JS1\_M21\_00287" 17785 "s59E25H2" 0 "Lipoprotein-releasing system transmembrane protein LolE"  
"JS1\_M21\_00287" 17785 "s59E5H2" 0.4890218 "Lipoprotein-releasing system transmembrane protein LolE"  
"JS1\_M21\_00287" 17785 "s63E6H2" 0.09795213 "Lipoprotein-releasing system transmembrane protein LolE"  
"JS1\_M21\_00288" 17786 "s59E13H2" 0.04558602 "hypothetical protein"  
"JS1\_M21\_00288" 17786 "s59E25H2" 0 "hypothetical protein"  
"JS1\_M21\_00288" 17786 "s59E5H2" 1.513547 "hypothetical protein"  
"JS1\_M21\_00288" 17786 "s63E6H2" 0.228062 "hypothetical protein"  
"JS1\_M21\_00289" 17787 "s59E13H2" 0.03722703 "hypothetical protein"  
"JS1\_M21\_00289" 17787 "s59E25H2" 0 "hypothetical protein"  
"JS1\_M21\_00289" 17787 "s59E5H2" 0.1016602 "hypothetical protein"  
"JS1\_M21\_00289" 17787 "s63E6H2" 0.02663696 "hypothetical protein"  
"JS1\_M21\_00290" 17788 "s59E13H2" 2.290294 "Anaerobic regulatory protein"  
"JS1\_M21\_00290" 17788 "s59E25H2" 0 "Anaerobic regulatory protein"  
"JS1\_M21\_00290" 17788 "s59E5H2" 0.4051003 "Anaerobic regulatory protein"  
"JS1\_M21\_00290" 17788 "s63E6H2" 0.09359573 "Anaerobic regulatory protein"  
"JS1\_M21\_00291" 17789 "s59E13H2" 2.800141 "4Fe-4S binding domain protein"  
"JS1\_M21\_00291" 17789 "s59E25H2" 0 "4Fe-4S binding domain protein"  
"JS1\_M21\_00291" 17789 "s59E5H2" 0.2942129 "4Fe-4S binding domain protein"  
"JS1\_M21\_00291" 17789 "s63E6H2" 0.2808294 "4Fe-4S binding domain protein"  
"JS1\_M21\_00293" 17791 "s59E13H2" 3.260455 "Hydroxylamine reductase"  
"JS1\_M21\_00293" 17791 "s59E25H2" 0 "Hydroxylamine reductase"  
"JS1\_M21\_00293" 17791 "s59E5H2" 0.5285651 "Hydroxylamine reductase"  
"JS1\_M21\_00293" 17791 "s63E6H2" 0.4274923 "Hydroxylamine reductase"  
"JS1\_M21\_00294" 17792 "s59E13H2" 0.1220766 "Lysine--tRNA ligase"  
"JS1\_M21\_00294" 17792 "s59E25H2" 0 "Lysine--tRNA ligase"  
"JS1\_M21\_00294" 17792 "s59E5H2" 0.1419732 "Lysine--tRNA ligase"  
"JS1\_M21\_00294" 17792 "s63E6H2" 0.1630943 "Lysine--tRNA ligase"  
"JS1\_M21\_00295" 17793 "s59E13H2" 0.08393603 "S4 domain protein"  
"JS1\_M21\_00295" 17793 "s59E25H2" 0 "S4 domain protein"  
"JS1\_M21\_00295" 17793 "s59E5H2" 0.1006706 "S4 domain protein"  
"JS1\_M21\_00295" 17793 "s63E6H2" 0.06999152 "S4 domain protein"  
"JS1\_M21\_00297" 17795 "s59E13H2" 0.06571205 "Magnesium transporter MgtE"  
"JS1\_M21\_00297" 17795 "s59E25H2" 0 "Magnesium transporter MgtE"  
"JS1\_M21\_00297" 17795 "s59E5H2" 0.4179261 "Magnesium transporter MgtE"  
"JS1\_M21\_00297" 17795 "s63E6H2" 0.3119324 "Magnesium transporter MgtE"  
"JS1\_M21\_00298" 17796 "s59E13H2" 0.08598836 "Enolase"  
"JS1\_M21\_00298" 17796 "s59E25H2" 0 "Enolase"  
"JS1\_M21\_00298" 17796 "s59E5H2" 0.3159073 "Enolase"  
"JS1\_M21\_00298" 17796 "s63E6H2" 0.306611 "Enolase"  
"JS1\_M21\_00299" 17797 "s59E13H2" 0.008191257 "Trehalose synthase"  
"JS1\_M21\_00299" 17797 "s59E25H2" 0 "Trehalose synthase"  
"JS1\_M21\_00299" 17797 "s59E5H2" 0.09228455 "Trehalose synthase"  
"JS1\_M21\_00299" 17797 "s63E6H2" 0.02548424 "Trehalose synthase"  
"JS1\_M21\_00300" 17798 "s59E13H2" 5.833335 "Diaminopimelate epimerase"  
"JS1\_M21\_00300" 17798 "s59E25H2" 0 "Diaminopimelate epimerase"  
"JS1\_M21\_00300" 17798 "s59E5H2" 2.505118 "Diaminopimelate epimerase"  
"JS1\_M21\_00300" 17798 "s63E6H2" 2.057095 "Diaminopimelate epimerase"

"JS1\_M21\_00301" 17799 "s59E13H2" 0.1173646 "4-hydroxy-tetrahydrodipicolinate reductase"  
"JS1\_M21\_00301" 17799 "s59E25H2" 0 "4-hydroxy-tetrahydrodipicolinate reductase"  
"JS1\_M21\_00301" 17799 "s59E5H2" 0.3502281 "4-hydroxy-tetrahydrodipicolinate reductase"  
"JS1\_M21\_00301" 17799 "s63E6H2" 0.2690021 "4-hydroxy-tetrahydrodipicolinate reductase"  
"JS1\_M21\_00302" 17800 "s59E13H2" 0.1087823 "Glycerate 2-kinase"  
"JS1\_M21\_00302" 17800 "s59E25H2" 0 "Glycerate 2-kinase"  
"JS1\_M21\_00302" 17800 "s59E5H2" 0.9457695 "Glycerate 2-kinase"  
"JS1\_M21\_00302" 17800 "s63E6H2" 0.08866827 "Glycerate 2-kinase"  
"JS1\_M21\_00303" 17801 "s59E13H2" 0.004148542 "Beta-1,4-mannooligosaccharide phosphorylase"  
"JS1\_M21\_00303" 17801 "s59E25H2" 0 "Beta-1,4-mannooligosaccharide phosphorylase"  
"JS1\_M21\_00303" 17801 "s59E5H2" 0.09752342 "Beta-1,4-mannooligosaccharide phosphorylase"  
"JS1\_M21\_00303" 17801 "s63E6H2" 0.02788883 "Beta-1,4-mannooligosaccharide phosphorylase"  
"JS1\_M21\_00304" 17802 "s59E13H2" 4.821901e-05 "Sucrose phosphorylase"  
"JS1\_M21\_00304" 17802 "s59E25H2" 0 "Sucrose phosphorylase"  
"JS1\_M21\_00304" 17802 "s59E5H2" 0.2920828 "Sucrose phosphorylase"  
"JS1\_M21\_00304" 17802 "s63E6H2" 0.02766762 "Sucrose phosphorylase"  
"JS1\_M21\_00305" 17803 "s59E13H2" 0.1202082 "HTH-type transcriptional regulator DegA"  
"JS1\_M21\_00305" 17803 "s59E25H2" 0 "HTH-type transcriptional regulator DegA"  
"JS1\_M21\_00305" 17803 "s59E5H2" 1.450437 "HTH-type transcriptional regulator DegA"  
"JS1\_M21\_00305" 17803 "s63E6H2" 0.1105514 "HTH-type transcriptional regulator DegA"  
"JS1\_M21\_00306" 17804 "s59E13H2" 0.5650384 "Glycosyl transferases group 1"  
"JS1\_M21\_00306" 17804 "s59E25H2" 0 "Glycosyl transferases group 1"  
"JS1\_M21\_00306" 17804 "s59E5H2" 0.8538903 "Glycosyl transferases group 1"  
"JS1\_M21\_00306" 17804 "s63E6H2" 2.166611 "Glycosyl transferases group 1"  
"JS1\_M21\_00307" 17805 "s59E13H2" 0.02534372 "Trehalose/maltose import ATP-binding protein Malk"  
"JS1\_M21\_00307" 17805 "s59E25H2" 0 "Trehalose/maltose import ATP-binding protein Malk"  
"JS1\_M21\_00307" 17805 "s59E5H2" 0.05347185 "Trehalose/maltose import ATP-binding protein Malk"  
"JS1\_M21\_00307" 17805 "s63E6H2" 0.03654851 "Trehalose/maltose import ATP-binding protein Malk"  
"JS1\_M21\_00308" 17806 "s59E13H2" 0 "Trehalose transport system permease protein SugB"  
"JS1\_M21\_00308" 17806 "s59E25H2" 0 "Trehalose transport system permease protein SugB"  
"JS1\_M21\_00308" 17806 "s59E5H2" 0.228042 "Trehalose transport system permease protein SugB"  
"JS1\_M21\_00308" 17806 "s63E6H2" 0.03341011 "Trehalose transport system permease protein SugB"  
"JS1\_M21\_00309" 17807 "s59E13H2" 0 "Trehalose/maltose transport system permease protein MalF"  
"JS1\_M21\_00309" 17807 "s59E25H2" 0 "Trehalose/maltose transport system permease protein MalF"  
"JS1\_M21\_00309" 17807 "s59E5H2" 0.3503409 "Trehalose/maltose transport system permease protein MalF"  
"JS1\_M21\_00309" 17807 "s63E6H2" 1.513258 "Trehalose/maltose transport system permease protein MalF"  
"JS1\_M21\_00310" 17808 "s59E13H2" 0 "Bacterial extracellular solute-binding protein"  
"JS1\_M21\_00310" 17808 "s59E25H2" 0.4017713 "Bacterial extracellular solute-binding protein"  
"JS1\_M21\_00310" 17808 "s59E5H2" 0.306561 "Bacterial extracellular solute-binding protein"  
"JS1\_M21\_00310" 17808 "s63E6H2" 0.500631 "Bacterial extracellular solute-binding protein"  
"JS1\_M21\_00311" 17809 "s59E13H2" 0.007276296 "Mannosylglycerate hydrolase"  
"JS1\_M21\_00311" 17809 "s59E25H2" 0 "Mannosylglycerate hydrolase"  
"JS1\_M21\_00311" 17809 "s59E5H2" 0.4165055 "Mannosylglycerate hydrolase"  
"JS1\_M21\_00311" 17809 "s63E6H2" 0.1436261 "Mannosylglycerate hydrolase"  
"JS1\_M21\_00312" 17810 "s59E13H2" 0.01256327 "Exo-beta-D-glucosaminidase precursor"  
"JS1\_M21\_00312" 17810 "s59E25H2" 0 "Exo-beta-D-glucosaminidase precursor"  
"JS1\_M21\_00312" 17810 "s59E5H2" 4.300338 "Exo-beta-D-glucosaminidase precursor"



"JS1\_M21\_00312" 17810 "s63E6H2" 0.02015354 "Exo-beta-D-glucosaminidase precursor"  
"JS1\_M21\_00313" 17811 "s59E13H2" 0 "Beta-1,4-mannooligosaccharide phosphorylase"  
"JS1\_M21\_00313" 17811 "s59E25H2" 0 "Beta-1,4-mannooligosaccharide phosphorylase"  
"JS1\_M21\_00313" 17811 "s59E5H2" 2.560622 "Beta-1,4-mannooligosaccharide phosphorylase"  
"JS1\_M21\_00313" 17811 "s63E6H2" 0.01179844 "Beta-1,4-mannooligosaccharide phosphorylase"  
"JS1\_M21\_00314" 17812 "s59E13H2" 0.01735926 "alpha-mannosidase"  
"JS1\_M21\_00314" 17812 "s59E25H2" 0 "alpha-mannosidase"  
"JS1\_M21\_00314" 17812 "s59E5H2" 0.02009146 "alpha-mannosidase"  
"JS1\_M21\_00314" 17812 "s63E6H2" 0.09194276 "alpha-mannosidase"  
"JS1\_M21\_00315" 17813 "s59E13H2" 0.8345696 "Carbohydrate diacid regulator"  
"JS1\_M21\_00315" 17813 "s59E25H2" 0 "Carbohydrate diacid regulator"  
"JS1\_M21\_00315" 17813 "s59E5H2" 0.515278 "Carbohydrate diacid regulator"  
"JS1\_M21\_00315" 17813 "s63E6H2" 3.212098 "Carbohydrate diacid regulator"  
"JS1\_M21\_00316" 17814 "s59E13H2" 6.814795 "Tetratricopeptide repeat protein"  
"JS1\_M21\_00316" 17814 "s59E25H2" 0 "Tetratricopeptide repeat protein"  
"JS1\_M21\_00316" 17814 "s59E5H2" 0.8587253 "Tetratricopeptide repeat protein"  
"JS1\_M21\_00316" 17814 "s63E6H2" 4.970378 "Tetratricopeptide repeat protein"  
"JS1\_M21\_00317" 17815 "s59E13H2" 10.70533 "hypothetical protein"  
"JS1\_M21\_00317" 17815 "s59E25H2" 0 "hypothetical protein"  
"JS1\_M21\_00317" 17815 "s59E5H2" 0.3236271 "hypothetical protein"  
"JS1\_M21\_00317" 17815 "s63E6H2" 1.643231 "hypothetical protein"  
"JS1\_M21\_00318" 17816 "s59E13H2" 4.573694 "putative MscS family protein YkuT"  
"JS1\_M21\_00318" 17816 "s59E25H2" 0.5574516 "putative MscS family protein YkuT"  
"JS1\_M21\_00318" 17816 "s59E5H2" 1.066193 "putative MscS family protein YkuT"  
"JS1\_M21\_00318" 17816 "s63E6H2" 3.296739 "putative MscS family protein YkuT"  
"JS1\_M21\_00319" 17817 "s59E13H2" 7.440955 "Chaperone protein ClpB 1"  
"JS1\_M21\_00319" 17817 "s59E25H2" 0 "Chaperone protein ClpB 1"  
"JS1\_M21\_00319" 17817 "s59E5H2" 0.2210799 "Chaperone protein ClpB 1"  
"JS1\_M21\_00319" 17817 "s63E6H2" 3.866026 "Chaperone protein ClpB 1"  
"JS1\_M21\_00320" 17818 "s59E13H2" 4.579751 "Histidinol-phosphate aminotransferase 2"  
"JS1\_M21\_00320" 17818 "s59E25H2" 0 "Histidinol-phosphate aminotransferase 2"  
"JS1\_M21\_00320" 17818 "s59E5H2" 0.8937978 "Histidinol-phosphate aminotransferase 2"  
"JS1\_M21\_00320" 17818 "s63E6H2" 2.445054 "Histidinol-phosphate aminotransferase 2"  
"JS1\_M21\_00321" 17819 "s59E13H2" 3.032076 "B3/4 domain protein"  
"JS1\_M21\_00321" 17819 "s59E25H2" 0 "B3/4 domain protein"  
"JS1\_M21\_00321" 17819 "s59E5H2" 0.7116606 "B3/4 domain protein"  
"JS1\_M21\_00321" 17819 "s63E6H2" 1.376825 "B3/4 domain protein"  
"JS1\_M21\_00322" 17820 "s59E13H2" 2.092527 "UvrB/uvrC motif protein"  
"JS1\_M21\_00322" 17820 "s59E25H2" 0 "UvrB/uvrC motif protein"  
"JS1\_M21\_00322" 17820 "s59E5H2" 0.8040774 "UvrB/uvrC motif protein"  
"JS1\_M21\_00322" 17820 "s63E6H2" 2.072416 "UvrB/uvrC motif protein"  
"JS1\_M21\_00323" 17821 "s59E13H2" 2.976667 "putative membrane protein"  
"JS1\_M21\_00323" 17821 "s59E25H2" 0 "putative membrane protein"  
"JS1\_M21\_00323" 17821 "s59E5H2" 1.167827 "putative membrane protein"  
"JS1\_M21\_00323" 17821 "s63E6H2" 1.812502 "putative membrane protein"  
"JS1\_M21\_00324" 17822 "s59E13H2" 2.154384 "EamA-like transporter family protein"  
"JS1\_M21\_00324" 17822 "s59E25H2" 0 "EamA-like transporter family protein"

"JS1\_M21\_00324" 17822 "s59E5H2" 0.3111248 "EamA-like transporter family protein"  
"JS1\_M21\_00324" 17822 "s63E6H2" 0.4083073 "EamA-like transporter family protein"  
"JS1\_M21\_00326" 17824 "s59E13H2" 5.698188 "Diaminopimelate decarboxylase"  
"JS1\_M21\_00326" 17824 "s59E25H2" 0 "Diaminopimelate decarboxylase"  
"JS1\_M21\_00326" 17824 "s59E5H2" 2.20029 "Diaminopimelate decarboxylase"  
"JS1\_M21\_00326" 17824 "s63E6H2" 1.997026 "Diaminopimelate decarboxylase"  
"JS1\_M21\_00327" 17825 "s59E13H2" 4.66211 "Aspartokinase"  
"JS1\_M21\_00327" 17825 "s59E25H2" 0 "Aspartokinase"  
"JS1\_M21\_00327" 17825 "s59E5H2" 3.634419 "Aspartokinase"  
"JS1\_M21\_00327" 17825 "s63E6H2" 2.708023 "Aspartokinase"  
"JS1\_M21\_00328" 17826 "s59E13H2" 1.111983 "4-hydroxy-tetrahydrodipicolinate synthase"  
"JS1\_M21\_00328" 17826 "s59E25H2" 0 "4-hydroxy-tetrahydrodipicolinate synthase"  
"JS1\_M21\_00328" 17826 "s59E5H2" 3.130128 "4-hydroxy-tetrahydrodipicolinate synthase"  
"JS1\_M21\_00328" 17826 "s63E6H2" 1.37675 "4-hydroxy-tetrahydrodipicolinate synthase"  
"JS1\_M21\_00329" 17827 "s59E13H2" 0.0005989538 "Xanthine dehydrogenase molybdenum-binding subunit"  
"JS1\_M21\_00329" 17827 "s59E25H2" 0 "Xanthine dehydrogenase molybdenum-binding subunit"  
"JS1\_M21\_00329" 17827 "s59E5H2" 0.05509737 "Xanthine dehydrogenase molybdenum-binding subunit"  
"JS1\_M21\_00329" 17827 "s63E6H2" 1.239643 "Xanthine dehydrogenase molybdenum-binding subunit"  
"JS1\_M21\_00330" 17828 "s59E13H2" 0 "hypothetical protein"  
"JS1\_M21\_00330" 17828 "s59E25H2" 0 "hypothetical protein"  
"JS1\_M21\_00330" 17828 "s59E5H2" 0 "hypothetical protein"  
"JS1\_M21\_00330" 17828 "s63E6H2" 0.3238989 "hypothetical protein"  
"JS1\_M21\_00331" 17829 "s59E13H2" 0.04444968 "Succinyl-CoA ligase [ADP-forming] subunit alpha"  
"JS1\_M21\_00331" 17829 "s59E25H2" 0 "Succinyl-CoA ligase [ADP-forming] subunit alpha"  
"JS1\_M21\_00331" 17829 "s59E5H2" 0 "Succinyl-CoA ligase [ADP-forming] subunit alpha"  
"JS1\_M21\_00331" 17829 "s63E6H2" 0.5336109 "Succinyl-CoA ligase [ADP-forming] subunit alpha"  
"JS1\_M21\_00333" 17831 "s59E13H2" 0.1023183 "hypothetical protein"  
"JS1\_M21\_00333" 17831 "s59E25H2" 0 "hypothetical protein"  
"JS1\_M21\_00333" 17831 "s59E5H2" 0.1661606 "hypothetical protein"  
"JS1\_M21\_00333" 17831 "s63E6H2" 0.1136822 "hypothetical protein"  
"JS1\_M21\_00334" 17832 "s59E13H2" 0.07093545 "Formyl-coenzyme A transferase"  
"JS1\_M21\_00334" 17832 "s59E25H2" 0 "Formyl-coenzyme A transferase"  
"JS1\_M21\_00334" 17832 "s59E5H2" 0.01688722 "Formyl-coenzyme A transferase"  
"JS1\_M21\_00334" 17832 "s63E6H2" 0.279166 "Formyl-coenzyme A transferase"  
"JS1\_M21\_00335" 17833 "s59E13H2" 0.04056097 "Kynurenine formamidase"  
"JS1\_M21\_00335" 17833 "s59E25H2" 0 "Kynurenine formamidase"  
"JS1\_M21\_00335" 17833 "s59E5H2" 0 "Kynurenine formamidase"  
"JS1\_M21\_00335" 17833 "s63E6H2" 0.07710527 "Kynurenine formamidase"  
"JS1\_M21\_00336" 17834 "s59E13H2" 0.003021116 "(R)-stereoselective amidase"  
"JS1\_M21\_00336" 17834 "s59E25H2" 0 "(R)-stereoselective amidase"  
"JS1\_M21\_00336" 17834 "s59E5H2" 0 "(R)-stereoselective amidase"  
"JS1\_M21\_00336" 17834 "s63E6H2" 0.05386755 "(R)-stereoselective amidase"  
"JS1\_M21\_00337" 17835 "s59E13H2" 0 "Inner membrane amino-acid ABC transporter permease protein YecS"  
"JS1\_M21\_00337" 17835 "s59E25H2" 0 "Inner membrane amino-acid ABC transporter permease protein YecS"  
"JS1\_M21\_00337" 17835 "s59E5H2" 0 "Inner membrane amino-acid ABC transporter permease protein YecS"  
"JS1\_M21\_00337" 17835 "s63E6H2" 0.02705151 "Inner membrane amino-acid ABC transporter permease protein YecS"  
"JS1\_M21\_00338" 17836 "s59E13H2" 0 "Glutamine transport ATP-binding protein GlnQ"

"JS1\_M21\_00338" 17836 "s59E25H2" 0 "Glutamine transport ATP-binding protein GlnQ"  
"JS1\_M21\_00338" 17836 "s59E5H2" 0 "Glutamine transport ATP-binding protein GlnQ"  
"JS1\_M21\_00338" 17836 "s63E6H2" 0.01552025 "Glutamine transport ATP-binding protein GlnQ"  
"JS1\_M21\_00339" 17837 "s59E13H2" 0 "Inner membrane amino-acid ABC transporter permease protein YecS"  
"JS1\_M21\_00339" 17837 "s59E25H2" 0 "Inner membrane amino-acid ABC transporter permease protein YecS"  
"JS1\_M21\_00339" 17837 "s59E5H2" 0 "Inner membrane amino-acid ABC transporter permease protein YecS"  
"JS1\_M21\_00339" 17837 "s63E6H2" 0.03246872 "Inner membrane amino-acid ABC transporter permease protein YecS"  
"JS1\_M21\_00340" 17838 "s59E13H2" 0 "Putative ABC transporter arginine-binding protein 2 precursor"  
"JS1\_M21\_00340" 17838 "s59E25H2" 0 "Putative ABC transporter arginine-binding protein 2 precursor"  
"JS1\_M21\_00340" 17838 "s59E5H2" 0 "Putative ABC transporter arginine-binding protein 2 precursor"  
"JS1\_M21\_00340" 17838 "s63E6H2" 0.06849648 "Putative ABC transporter arginine-binding protein 2 precursor"  
"JS1\_M21\_00341" 17839 "s59E13H2" 0 "hypothetical protein"  
"JS1\_M21\_00341" 17839 "s59E25H2" 0 "hypothetical protein"  
"JS1\_M21\_00341" 17839 "s59E5H2" 0 "hypothetical protein"  
"JS1\_M21\_00341" 17839 "s63E6H2" 0.016558 "hypothetical protein"  
"JS1\_M21\_00342" 17840 "s59E13H2" 0.0431748 "Indolepyruvate oxidoreductase subunit IorA"  
"JS1\_M21\_00342" 17840 "s59E25H2" 0 "Indolepyruvate oxidoreductase subunit IorA"  
"JS1\_M21\_00342" 17840 "s59E5H2" 0.2649549 "Indolepyruvate oxidoreductase subunit IorA"  
"JS1\_M21\_00342" 17840 "s63E6H2" 0.3404402 "Indolepyruvate oxidoreductase subunit IorA"  
"JS1\_M21\_00343" 17841 "s59E13H2" 0.04981293 "Indolepyruvate oxidoreductase subunit IorB"  
"JS1\_M21\_00343" 17841 "s59E25H2" 0 "Indolepyruvate oxidoreductase subunit IorB"  
"JS1\_M21\_00343" 17841 "s59E5H2" 0.3055691 "Indolepyruvate oxidoreductase subunit IorB"  
"JS1\_M21\_00343" 17841 "s63E6H2" 0.4835 "Indolepyruvate oxidoreductase subunit IorB"  
"JS1\_M21\_00344" 17842 "s59E13H2" 0.0223093 "Succinyl-CoA ligase [ADP-forming] subunit alpha"  
"JS1\_M21\_00344" 17842 "s59E25H2" 0 "Succinyl-CoA ligase [ADP-forming] subunit alpha"  
"JS1\_M21\_00344" 17842 "s59E5H2" 0.2893415 "Succinyl-CoA ligase [ADP-forming] subunit alpha"  
"JS1\_M21\_00344" 17842 "s63E6H2" 0.4934815 "Succinyl-CoA ligase [ADP-forming] subunit alpha"  
"JS1\_M21\_00345" 17843 "s59E13H2" 0.004112632 "hypothetical protein"  
"JS1\_M21\_00345" 17843 "s59E25H2" 0 "hypothetical protein"  
"JS1\_M21\_00345" 17843 "s59E5H2" 0 "hypothetical protein"  
"JS1\_M21\_00345" 17843 "s63E6H2" 0.01520787 "hypothetical protein"  
"JS1\_M21\_00346" 17844 "s59E13H2" 0 "High-affinity branched-chain amino acid transport system permease protein LivH"  
"JS1\_M21\_00346" 17844 "s59E25H2" 0 "High-affinity branched-chain amino acid transport system permease protein LivH"  
"JS1\_M21\_00346" 17844 "s59E5H2" 0.007550412 "High-affinity branched-chain amino acid transport system permease protein LivH"  
"JS1\_M21\_00346" 17844 "s63E6H2" 0.02150699 "High-affinity branched-chain amino acid transport system permease protein LivH"  
"JS1\_M21\_00347" 17845 "s59E13H2" 0 "leucine/isoleucine/valine transporter permease subunit"  
"JS1\_M21\_00347" 17845 "s59E25H2" 0 "leucine/isoleucine/valine transporter permease subunit"  
"JS1\_M21\_00347" 17845 "s59E5H2" 0.001596977 "leucine/isoleucine/valine transporter permease subunit"  
"JS1\_M21\_00347" 17845 "s63E6H2" 0.02227258 "leucine/isoleucine/valine transporter permease subunit"  
"JS1\_M21\_00348" 17846 "s59E13H2" 0 "putative branched-chain amino acid transport ATP-binding protein LivG"  
"JS1\_M21\_00348" 17846 "s59E25H2" 0 "putative branched-chain amino acid transport ATP-binding protein LivG"  
"JS1\_M21\_00348" 17846 "s59E5H2" 0 "putative branched-chain amino acid transport ATP-binding protein LivG"  
"JS1\_M21\_00348" 17846 "s63E6H2" 0.03111786 "putative branched-chain amino acid transport ATP-binding protein LivG"  
"JS1\_M21\_00349" 17847 "s59E13H2" 0 "High-affinity branched-chain amino acid transport ATP-binding protein LivF"  
"JS1\_M21\_00349" 17847 "s59E25H2" 0 "High-affinity branched-chain amino acid transport ATP-binding protein LivF"  
"JS1\_M21\_00349" 17847 "s59E5H2" 0 "High-affinity branched-chain amino acid transport ATP-binding protein LivF"  
"JS1\_M21\_00349" 17847 "s63E6H2" 0.03988732 "High-affinity branched-chain amino acid transport ATP-binding protein LivF"

"JS1\_M21\_00350" 17848 "s59E13H2" 0 "succinyl-CoA synthetase subunit beta"  
"JS1\_M21\_00350" 17848 "s59E25H2" 0 "succinyl-CoA synthetase subunit beta"  
"JS1\_M21\_00350" 17848 "s59E5H2" 0.01780672 "succinyl-CoA synthetase subunit beta"  
"JS1\_M21\_00350" 17848 "s63E6H2" 0.2481082 "succinyl-CoA synthetase subunit beta"  
"JS1\_M21\_00351" 17849 "s59E13H2" 0.006047951 "Lipopolysaccharide export system ATP-binding protein LptB"  
"JS1\_M21\_00351" 17849 "s59E25H2" 0 "Lipopolysaccharide export system ATP-binding protein LptB"  
"JS1\_M21\_00351" 17849 "s59E5H2" 0 "Lipopolysaccharide export system ATP-binding protein LptB"  
"JS1\_M21\_00351" 17849 "s63E6H2" 0 "Lipopolysaccharide export system ATP-binding protein LptB"  
"JS1\_M21\_00352" 17850 "s59E13H2" 0 "High-affinity branched-chain amino acid transport ATP-binding protein LivF"  
"JS1\_M21\_00352" 17850 "s59E25H2" 0 "High-affinity branched-chain amino acid transport ATP-binding protein LivF"  
"JS1\_M21\_00352" 17850 "s59E5H2" 0 "High-affinity branched-chain amino acid transport ATP-binding protein LivF"  
"JS1\_M21\_00352" 17850 "s63E6H2" 0 "High-affinity branched-chain amino acid transport ATP-binding protein LivF"  
"JS1\_M21\_00353" 17851 "s59E13H2" 1.115426 "leucine/isoleucine/valine transporter permease subunit"  
"JS1\_M21\_00353" 17851 "s59E25H2" 0 "leucine/isoleucine/valine transporter permease subunit"  
"JS1\_M21\_00353" 17851 "s59E5H2" 0 "leucine/isoleucine/valine transporter permease subunit"  
"JS1\_M21\_00353" 17851 "s63E6H2" 0.002512974 "leucine/isoleucine/valine transporter permease subunit"  
"JS1\_M21\_00354" 17852 "s59E13H2" 1.30436 "High-affinity branched-chain amino acid transport system permease protein LivH"  
"JS1\_M21\_00354" 17852 "s59E25H2" 0 "High-affinity branched-chain amino acid transport system permease protein LivH"  
"JS1\_M21\_00354" 17852 "s59E5H2" 0 "High-affinity branched-chain amino acid transport system permease protein LivH"  
"JS1\_M21\_00354" 17852 "s63E6H2" 0.00570058 "High-affinity branched-chain amino acid transport system permease protein LivH"  
"JS1\_M21\_00355" 17853 "s59E13H2" 1.370592 "hypothetical protein"  
"JS1\_M21\_00355" 17853 "s59E25H2" 0 "hypothetical protein"  
"JS1\_M21\_00355" 17853 "s59E5H2" 0 "hypothetical protein"  
"JS1\_M21\_00355" 17853 "s63E6H2" 0.01170237 "hypothetical protein"  
"JS1\_M21\_00356" 17854 "s59E13H2" 0.6344494 "4Fe-4S dicluster domain protein"  
"JS1\_M21\_00356" 17854 "s59E25H2" 0 "4Fe-4S dicluster domain protein"  
"JS1\_M21\_00356" 17854 "s59E5H2" 0 "4Fe-4S dicluster domain protein"  
"JS1\_M21\_00356" 17854 "s63E6H2" 0 "4Fe-4S dicluster domain protein"  
"JS1\_M21\_00357" 17855 "s59E13H2" 1.690998 "Tungsten-containing aldehyde ferredoxin oxidoreductase"  
"JS1\_M21\_00357" 17855 "s59E25H2" 0 "Tungsten-containing aldehyde ferredoxin oxidoreductase"  
"JS1\_M21\_00357" 17855 "s59E5H2" 0.09755391 "Tungsten-containing aldehyde ferredoxin oxidoreductase"  
"JS1\_M21\_00357" 17855 "s63E6H2" 0.01412058 "Tungsten-containing aldehyde ferredoxin oxidoreductase"  
"JS1\_M21\_00358" 17856 "s59E13H2" 1.30008 "putative xanthine dehydrogenase subunit D"  
"JS1\_M21\_00358" 17856 "s59E25H2" 0 "putative xanthine dehydrogenase subunit D"  
"JS1\_M21\_00358" 17856 "s59E5H2" 0.07924476 "putative xanthine dehydrogenase subunit D"  
"JS1\_M21\_00358" 17856 "s63E6H2" 0.06361998 "putative xanthine dehydrogenase subunit D"  
"JS1\_M21\_00359" 17857 "s59E13H2" 0.6057927 "hypothetical protein"  
"JS1\_M21\_00359" 17857 "s59E25H2" 0 "hypothetical protein"  
"JS1\_M21\_00359" 17857 "s59E5H2" 0.04930814 "hypothetical protein"  
"JS1\_M21\_00359" 17857 "s63E6H2" 0.01943843 "hypothetical protein"  
"JS1\_M21\_00360" 17858 "s59E13H2" 0.4067238 "hypothetical protein"  
"JS1\_M21\_00360" 17858 "s59E25H2" 0 "hypothetical protein"  
"JS1\_M21\_00360" 17858 "s59E5H2" 0.02317446 "hypothetical protein"  
"JS1\_M21\_00360" 17858 "s63E6H2" 0.05903925 "hypothetical protein"  
"JS1\_M21\_00362" 17860 "s59E13H2" 8.27475 "hypothetical protein"  
"JS1\_M21\_00362" 17860 "s59E25H2" 0 "hypothetical protein"  
"JS1\_M21\_00362" 17860 "s59E5H2" 0.04666555 "hypothetical protein"

"JS1\_M21\_00362" 17860 "s63E6H2" 0.08819704 "hypothetical protein"  
"JS1\_M21\_00363" 17861 "s59E13H2" 8.082665 "Demethylmenaquinone methyltransferase"  
"JS1\_M21\_00363" 17861 "s59E25H2" 0.1106195 "Demethylmenaquinone methyltransferase"  
"JS1\_M21\_00363" 17861 "s59E5H2" 0.0120512 "Demethylmenaquinone methyltransferase"  
"JS1\_M21\_00363" 17861 "s63E6H2" 0.06396704 "Demethylmenaquinone methyltransferase"  
"JS1\_M21\_00364" 17862 "s59E13H2" 9.936193 "Acetyl-CoA decarboxylase/synthase complex subunit gamma"  
"JS1\_M21\_00364" 17862 "s59E25H2" 0.292851 "Acetyl-CoA decarboxylase/synthase complex subunit gamma"  
"JS1\_M21\_00364" 17862 "s59E5H2" 0.2017879 "Acetyl-CoA decarboxylase/synthase complex subunit gamma"  
"JS1\_M21\_00364" 17862 "s63E6H2" 0.1392948 "Acetyl-CoA decarboxylase/synthase complex subunit gamma"  
"JS1\_M21\_00365" 17863 "s59E13H2" 0.5626681 "hypothetical protein"  
"JS1\_M21\_00365" 17863 "s59E25H2" 0 "hypothetical protein"  
"JS1\_M21\_00365" 17863 "s59E5H2" 0.1387276 "hypothetical protein"  
"JS1\_M21\_00365" 17863 "s63E6H2" 0.07019859 "hypothetical protein"  
"JS1\_M21\_00366" 17864 "s59E13H2" 1.00957 "bifunctional preprotein translocase subunit SecD/SecF"  
"JS1\_M21\_00366" 17864 "s59E25H2" 0 "bifunctional preprotein translocase subunit SecD/SecF"  
"JS1\_M21\_00366" 17864 "s59E5H2" 0.2278153 "bifunctional preprotein translocase subunit SecD/SecF"  
"JS1\_M21\_00366" 17864 "s63E6H2" 0.1420599 "bifunctional preprotein translocase subunit SecD/SecF"  
"JS1\_M21\_00367" 17865 "s59E13H2" 0.6504915 "Coenzyme A disulfide reductase"  
"JS1\_M21\_00367" 17865 "s59E25H2" 0 "Coenzyme A disulfide reductase"  
"JS1\_M21\_00367" 17865 "s59E5H2" 1.033476 "Coenzyme A disulfide reductase"  
"JS1\_M21\_00367" 17865 "s63E6H2" 0.2810953 "Coenzyme A disulfide reductase"  
"JS1\_M21\_00368" 17866 "s59E13H2" 1.233331 "Transcriptional repressor PagR"  
"JS1\_M21\_00368" 17866 "s59E25H2" 0 "Transcriptional repressor PagR"  
"JS1\_M21\_00368" 17866 "s59E5H2" 0.5150343 "Transcriptional repressor PagR"  
"JS1\_M21\_00368" 17866 "s63E6H2" 0.4323867 "Transcriptional repressor PagR"  
"JS1\_M21\_00369" 17867 "s59E13H2" 2.752981 "GTP-binding protein TypA/BipA"  
"JS1\_M21\_00369" 17867 "s59E25H2" 0.1376096 "GTP-binding protein TypA/BipA"  
"JS1\_M21\_00369" 17867 "s59E5H2" 1.203863 "GTP-binding protein TypA/BipA"  
"JS1\_M21\_00369" 17867 "s63E6H2" 8.482349 "GTP-binding protein TypA/BipA"  
"JS1\_M21\_00370" 17868 "s59E13H2" 1.602661 "Phosphate acetyltransferase"  
"JS1\_M21\_00370" 17868 "s59E25H2" 0.2766667 "Phosphate acetyltransferase"  
"JS1\_M21\_00370" 17868 "s59E5H2" 2.99791 "Phosphate acetyltransferase"  
"JS1\_M21\_00370" 17868 "s63E6H2" 1.165231 "Phosphate acetyltransferase"  
"JS1\_M21\_00371" 17869 "s59E13H2" 0.6980927 "Butyrate kinase 2"  
"JS1\_M21\_00371" 17869 "s59E25H2" 0 "Butyrate kinase 2"  
"JS1\_M21\_00371" 17869 "s59E5H2" 2.056628 "Butyrate kinase 2"  
"JS1\_M21\_00371" 17869 "s63E6H2" 1.07871 "Butyrate kinase 2"  
"JS1\_M21\_00372" 17870 "s59E13H2" 0.7443445 "Putative N-acetyl-LL-diaminopimelate aminotransferase"  
"JS1\_M21\_00372" 17870 "s59E25H2" 0 "Putative N-acetyl-LL-diaminopimelate aminotransferase"  
"JS1\_M21\_00372" 17870 "s59E5H2" 1.159181 "Putative N-acetyl-LL-diaminopimelate aminotransferase"  
"JS1\_M21\_00372" 17870 "s63E6H2" 0.4075591 "Putative N-acetyl-LL-diaminopimelate aminotransferase"  
"JS1\_M21\_00373" 17871 "s59E13H2" 0.7066031 "Indolepyruvate oxidoreductase subunit lorB"  
"JS1\_M21\_00373" 17871 "s59E25H2" 0 "Indolepyruvate oxidoreductase subunit lorB"  
"JS1\_M21\_00373" 17871 "s59E5H2" 1.04828 "Indolepyruvate oxidoreductase subunit lorB"  
"JS1\_M21\_00373" 17871 "s63E6H2" 0.6496421 "Indolepyruvate oxidoreductase subunit lorB"  
"JS1\_M21\_00374" 17872 "s59E13H2" 1.3507 "Indolepyruvate oxidoreductase subunit lorA"  
"JS1\_M21\_00374" 17872 "s59E25H2" 0 "Indolepyruvate oxidoreductase subunit lorA"

"JS1\_M21\_00374" 17872 "s59E5H2" 0.9837543 "Indolepyruvate oxidoreductase subunit IorA"  
"JS1\_M21\_00374" 17872 "s63E6H2" 1.099497 "Indolepyruvate oxidoreductase subunit IorA"  
"JS1\_M21\_00375" 17873 "s59E13H2" 0.9284162 "Transcriptional regulator KdGR"  
"JS1\_M21\_00375" 17873 "s59E25H2" 0 "Transcriptional regulator KdGR"  
"JS1\_M21\_00375" 17873 "s59E5H2" 0.9180023 "Transcriptional regulator KdGR"  
"JS1\_M21\_00375" 17873 "s63E6H2" 1.729306 "Transcriptional regulator KdGR"  
"JS1\_M21\_00376" 17874 "s59E13H2" 0.7277998 "Phospholipase YtpA"  
"JS1\_M21\_00376" 17874 "s59E25H2" 0 "Phospholipase YtpA"  
"JS1\_M21\_00376" 17874 "s59E5H2" 0.1760806 "Phospholipase YtpA"  
"JS1\_M21\_00376" 17874 "s63E6H2" 1.23535 "Phospholipase YtpA"  
"JS1\_M21\_00377" 17875 "s59E13H2" 0.1271077 "pfkB family carbohydrate kinase"  
"JS1\_M21\_00377" 17875 "s59E25H2" 0 "pfkB family carbohydrate kinase"  
"JS1\_M21\_00377" 17875 "s59E5H2" 0.3894136 "pfkB family carbohydrate kinase"  
"JS1\_M21\_00377" 17875 "s63E6H2" 0.2587052 "pfkB family carbohydrate kinase"  
"JS1\_M21\_00378" 17876 "s59E13H2" 0.0136768 "endonuclease 4"  
"JS1\_M21\_00378" 17876 "s59E25H2" 0 "endonuclease 4"  
"JS1\_M21\_00378" 17876 "s59E5H2" 3.825762 "endonuclease 4"  
"JS1\_M21\_00378" 17876 "s63E6H2" 0.06708812 "endonuclease 4"  
"JS1\_M21\_00379" 17877 "s59E13H2" 0.1138862 "Trehalose transport system permease protein SugB"  
"JS1\_M21\_00379" 17877 "s59E25H2" 0 "Trehalose transport system permease protein SugB"  
"JS1\_M21\_00379" 17877 "s59E5H2" 1.700485 "Trehalose transport system permease protein SugB"  
"JS1\_M21\_00379" 17877 "s63E6H2" 0.06190743 "Trehalose transport system permease protein SugB"  
"JS1\_M21\_00380" 17878 "s59E13H2" 0.1352614 "Lactose transport system permease protein LacF"  
"JS1\_M21\_00380" 17878 "s59E25H2" 0 "Lactose transport system permease protein LacF"  
"JS1\_M21\_00380" 17878 "s59E5H2" 1.772981 "Lactose transport system permease protein LacF"  
"JS1\_M21\_00380" 17878 "s63E6H2" 0.06265046 "Lactose transport system permease protein LacF"  
"JS1\_M21\_00381" 17879 "s59E13H2" 0.002531612 "maltose ABC transporter periplasmic protein"  
"JS1\_M21\_00381" 17879 "s59E25H2" 0 "maltose ABC transporter periplasmic protein"  
"JS1\_M21\_00381" 17879 "s59E5H2" 0.2039533 "maltose ABC transporter periplasmic protein"  
"JS1\_M21\_00381" 17879 "s63E6H2" 0.01860591 "maltose ABC transporter periplasmic protein"  
"JS1\_M21\_00382" 17880 "s59E13H2" 0.01947694 "Trehalose/maltose import ATP-binding protein Malk"  
"JS1\_M21\_00382" 17880 "s59E25H2" 0 "Trehalose/maltose import ATP-binding protein Malk"  
"JS1\_M21\_00382" 17880 "s59E5H2" 2.514267 "Trehalose/maltose import ATP-binding protein Malk"  
"JS1\_M21\_00382" 17880 "s63E6H2" 0.002810132 "Trehalose/maltose import ATP-binding protein Malk"  
"JS1\_M21\_00383" 17881 "s59E13H2" 0.003841033 "pfkB family carbohydrate kinase"  
"JS1\_M21\_00383" 17881 "s59E25H2" 0 "pfkB family carbohydrate kinase"  
"JS1\_M21\_00383" 17881 "s59E5H2" 0.2838855 "pfkB family carbohydrate kinase"  
"JS1\_M21\_00383" 17881 "s63E6H2" 0.004363579 "pfkB family carbohydrate kinase"  
"JS1\_M21\_00384" 17882 "s59E13H2" 0.8010144 "Trehalose/maltose import ATP-binding protein Malk"  
"JS1\_M21\_00384" 17882 "s59E25H2" 0 "Trehalose/maltose import ATP-binding protein Malk"  
"JS1\_M21\_00384" 17882 "s59E5H2" 0.9088167 "Trehalose/maltose import ATP-binding protein Malk"  
"JS1\_M21\_00384" 17882 "s63E6H2" 0.4465952 "Trehalose/maltose import ATP-binding protein Malk"  
"JS1\_M21\_00385" 17883 "s59E13H2" 0.02153793 "Sulfate transport system permease protein CysW"  
"JS1\_M21\_00385" 17883 "s59E25H2" 0 "Sulfate transport system permease protein CysW"  
"JS1\_M21\_00385" 17883 "s59E5H2" 0.3666032 "Sulfate transport system permease protein CysW"  
"JS1\_M21\_00385" 17883 "s63E6H2" 0.03322634 "Sulfate transport system permease protein CysW"  
"JS1\_M21\_00386" 17884 "s59E13H2" 0.0006505728 "putative binding protein component of ABC iron transporter precursor"

"JS1\_M21\_00386" 17884 "s59E25H2" 0 "putative binding protein component of ABC iron transporter precursor"  
"JS1\_M21\_00386" 17884 "s59E5H2" 0.387904 "putative binding protein component of ABC iron transporter precursor"  
"JS1\_M21\_00386" 17884 "s63E6H2" 0.0005141688 "putative binding protein component of ABC iron transporter precursor"  
"JS1\_M21\_00387" 17885 "s59E13H2" 0.03628368 "hypothetical protein"  
"JS1\_M21\_00387" 17885 "s59E25H2" 0 "hypothetical protein"  
"JS1\_M21\_00387" 17885 "s59E5H2" 0.5244433 "hypothetical protein"  
"JS1\_M21\_00387" 17885 "s63E6H2" 0.3357585 "hypothetical protein"  
"JS1\_M21\_00390" 17888 "s59E13H2" 0.2287797 "hypothetical protein"  
"JS1\_M21\_00390" 17888 "s59E25H2" 0 "hypothetical protein"  
"JS1\_M21\_00390" 17888 "s59E5H2" 0.6588247 "hypothetical protein"  
"JS1\_M21\_00390" 17888 "s63E6H2" 1.443487 "hypothetical protein"  
"JS1\_M21\_00391" 17889 "s59E13H2" 0.07273563 "L-rhamnose mutarotase"  
"JS1\_M21\_00391" 17889 "s59E25H2" 0 "L-rhamnose mutarotase"  
"JS1\_M21\_00391" 17889 "s59E5H2" 0.07323586 "L-rhamnose mutarotase"  
"JS1\_M21\_00391" 17889 "s63E6H2" 1.126965 "L-rhamnose mutarotase"  
"JS1\_M21\_00392" 17890 "s59E13H2" 0.05367002 "short chain dehydrogenase"  
"JS1\_M21\_00392" 17890 "s59E25H2" 0 "short chain dehydrogenase"  
"JS1\_M21\_00392" 17890 "s59E5H2" 0.2325325 "short chain dehydrogenase"  
"JS1\_M21\_00392" 17890 "s63E6H2" 0.8887089 "short chain dehydrogenase"  
"JS1\_M21\_00393" 17891 "s59E13H2" 0.2020664 "ATP-dependent zinc metalloprotease FtsH"  
"JS1\_M21\_00393" 17891 "s59E25H2" 0 "ATP-dependent zinc metalloprotease FtsH"  
"JS1\_M21\_00393" 17891 "s59E5H2" 0.02161564 "ATP-dependent zinc metalloprotease FtsH"  
"JS1\_M21\_00393" 17891 "s63E6H2" 0.1867177 "ATP-dependent zinc metalloprotease FtsH"  
"JS1\_M21\_00395" 17893 "s59E13H2" 0 "Oligopeptide-binding protein OppA precursor"  
"JS1\_M21\_00395" 17893 "s59E25H2" 0 "Oligopeptide-binding protein OppA precursor"  
"JS1\_M21\_00395" 17893 "s59E5H2" 0 "Oligopeptide-binding protein OppA precursor"  
"JS1\_M21\_00395" 17893 "s63E6H2" 0 "Oligopeptide-binding protein OppA precursor"  
"JS1\_M21\_00396" 17894 "s59E13H2" 0.001356265 "Dipeptide transport system permease protein DppB"  
"JS1\_M21\_00396" 17894 "s59E25H2" 0 "Dipeptide transport system permease protein DppB"  
"JS1\_M21\_00396" 17894 "s59E5H2" 0.04201276 "Dipeptide transport system permease protein DppB"  
"JS1\_M21\_00396" 17894 "s63E6H2" 0.006158757 "Dipeptide transport system permease protein DppB"  
"JS1\_M21\_00397" 17895 "s59E13H2" 0 "Oligopeptide transport system permease protein OppC"  
"JS1\_M21\_00397" 17895 "s59E25H2" 0 "Oligopeptide transport system permease protein OppC"  
"JS1\_M21\_00397" 17895 "s59E5H2" 0.06749033 "Oligopeptide transport system permease protein OppC"  
"JS1\_M21\_00397" 17895 "s63E6H2" 0.006600013 "Oligopeptide transport system permease protein OppC"  
"JS1\_M21\_00399" 17897 "s59E13H2" 0.05163397 "Arginine--tRNA ligase"  
"JS1\_M21\_00399" 17897 "s59E25H2" 0 "Arginine--tRNA ligase"  
"JS1\_M21\_00399" 17897 "s59E5H2" 0.2294004 "Arginine--tRNA ligase"  
"JS1\_M21\_00399" 17897 "s63E6H2" 0.2474999 "Arginine--tRNA ligase"  
"JS1\_M21\_00400" 17898 "s59E13H2" 0.459603 "glmZ(sRNA)-inactivating NTPase"  
"JS1\_M21\_00400" 17898 "s59E25H2" 0 "glmZ(sRNA)-inactivating NTPase"  
"JS1\_M21\_00400" 17898 "s59E5H2" 0.3995872 "glmZ(sRNA)-inactivating NTPase"  
"JS1\_M21\_00400" 17898 "s63E6H2" 0.9020079 "glmZ(sRNA)-inactivating NTPase"  
"JS1\_M21\_00401" 17899 "s59E13H2" 0.6449989 "Putative sporulation transcription regulator WhiA"  
"JS1\_M21\_00401" 17899 "s59E25H2" 0 "Putative sporulation transcription regulator WhiA"  
"JS1\_M21\_00401" 17899 "s59E5H2" 0.2508735 "Putative sporulation transcription regulator WhiA"  
"JS1\_M21\_00401" 17899 "s63E6H2" 0.4482189 "Putative sporulation transcription regulator WhiA"

"JS1\_M21\_00402" 17900 "s59E13H2" 0.8980694 "Trehalose/maltose import ATP-binding protein Malk"  
"JS1\_M21\_00402" 17900 "s59E25H2" 0 "Trehalose/maltose import ATP-binding protein Malk"  
"JS1\_M21\_00402" 17900 "s59E5H2" 0.1351856 "Trehalose/maltose import ATP-binding protein Malk"  
"JS1\_M21\_00402" 17900 "s63E6H2" 0.7171969 "Trehalose/maltose import ATP-binding protein Malk"  
"JS1\_M21\_00403" 17901 "s59E13H2" 0.6470284 "RNA polymerase sigma-54 factor"  
"JS1\_M21\_00403" 17901 "s59E25H2" 0 "RNA polymerase sigma-54 factor"  
"JS1\_M21\_00403" 17901 "s59E5H2" 0.3611831 "RNA polymerase sigma-54 factor"  
"JS1\_M21\_00403" 17901 "s63E6H2" 0.6786058 "RNA polymerase sigma-54 factor"  
"JS1\_M21\_00404" 17902 "s59E13H2" 0.7345623 "Glyceraldehyde-3-phosphate dehydrogenase"  
"JS1\_M21\_00404" 17902 "s59E25H2" 0 "Glyceraldehyde-3-phosphate dehydrogenase"  
"JS1\_M21\_00404" 17902 "s59E5H2" 0.6239727 "Glyceraldehyde-3-phosphate dehydrogenase"  
"JS1\_M21\_00404" 17902 "s63E6H2" 0.9608207 "Glyceraldehyde-3-phosphate dehydrogenase"  
"JS1\_M21\_00405" 17903 "s59E13H2" 1.052067 "Triosephosphate isomerase"  
"JS1\_M21\_00405" 17903 "s59E25H2" 0 "Triosephosphate isomerase"  
"JS1\_M21\_00405" 17903 "s59E5H2" 0.3863275 "Triosephosphate isomerase"  
"JS1\_M21\_00405" 17903 "s63E6H2" 0.9564592 "Triosephosphate isomerase"  
"JS1\_M21\_00406" 17904 "s59E13H2" 1.024296 "preprotein translocase subunit SecG"  
"JS1\_M21\_00406" 17904 "s59E25H2" 0 "preprotein translocase subunit SecG"  
"JS1\_M21\_00406" 17904 "s59E5H2" 0.529223 "preprotein translocase subunit SecG"  
"JS1\_M21\_00406" 17904 "s63E6H2" 0.615062 "preprotein translocase subunit SecG"  
"JS1\_M21\_00407" 17905 "s59E13H2" 0.7911551 "Putative nicotinate phosphoribosyltransferase"  
"JS1\_M21\_00407" 17905 "s59E25H2" 0.2909441 "Putative nicotinate phosphoribosyltransferase"  
"JS1\_M21\_00407" 17905 "s59E5H2" 0.4718739 "Putative nicotinate phosphoribosyltransferase"  
"JS1\_M21\_00407" 17905 "s63E6H2" 0.4808495 "Putative nicotinate phosphoribosyltransferase"  
"JS1\_M21\_00408" 17906 "s59E13H2" 1.853716 "Oligopeptide transport ATP-binding protein OppD"  
"JS1\_M21\_00408" 17906 "s59E25H2" 0.3867833 "Oligopeptide transport ATP-binding protein OppD"  
"JS1\_M21\_00408" 17906 "s59E5H2" 1.164629 "Oligopeptide transport ATP-binding protein OppD"  
"JS1\_M21\_00408" 17906 "s63E6H2" 2.636492 "Oligopeptide transport ATP-binding protein OppD"  
"JS1\_M21\_00409" 17907 "s59E13H2" 2.340083 "Oligopeptide transport ATP-binding protein OppF"  
"JS1\_M21\_00409" 17907 "s59E25H2" 0.2317949 "Oligopeptide transport ATP-binding protein OppF"  
"JS1\_M21\_00409" 17907 "s59E5H2" 1.515573 "Oligopeptide transport ATP-binding protein OppF"  
"JS1\_M21\_00409" 17907 "s63E6H2" 5.173931 "Oligopeptide transport ATP-binding protein OppF"  
"JS1\_M21\_00410" 17908 "s59E13H2" 0.604323 "putative hydrogenase nickel incorporation protein HypA"  
"JS1\_M21\_00410" 17908 "s59E25H2" 0 "putative hydrogenase nickel incorporation protein HypA"  
"JS1\_M21\_00410" 17908 "s59E5H2" 0.7428007 "putative hydrogenase nickel incorporation protein HypA"  
"JS1\_M21\_00410" 17908 "s63E6H2" 1.912772 "putative hydrogenase nickel incorporation protein HypA"  
"JS1\_M21\_00411" 17909 "s59E13H2" 1.386659 "Na(+)/H(+) antiporter subunit E"  
"JS1\_M21\_00411" 17909 "s59E25H2" 0 "Na(+)/H(+) antiporter subunit E"  
"JS1\_M21\_00411" 17909 "s59E5H2" 1.11915 "Na(+)/H(+) antiporter subunit E"  
"JS1\_M21\_00411" 17909 "s63E6H2" 3.538075 "Na(+)/H(+) antiporter subunit E"  
"JS1\_M21\_00412" 17910 "s59E13H2" 1.409973 "Na(+)/H(+) antiporter subunit F"  
"JS1\_M21\_00412" 17910 "s59E25H2" 0 "Na(+)/H(+) antiporter subunit F"  
"JS1\_M21\_00412" 17910 "s59E5H2" 1.339873 "Na(+)/H(+) antiporter subunit F"  
"JS1\_M21\_00412" 17910 "s63E6H2" 3.67915 "Na(+)/H(+) antiporter subunit F"  
"JS1\_M21\_00413" 17911 "s59E13H2" 1.749648 "Na(+)/H(+) antiporter subunit G"  
"JS1\_M21\_00413" 17911 "s59E25H2" 0 "Na(+)/H(+) antiporter subunit G"  
"JS1\_M21\_00413" 17911 "s59E5H2" 0.9127697 "Na(+)/H(+) antiporter subunit G"



"JS1\_M21\_00413" 17911 "s63E6H2" 4.491021 "Na(+)/H(+) antiporter subunit G"  
"JS1\_M21\_00414" 17912 "s59E13H2" 1.155916 "hypothetical protein"  
"JS1\_M21\_00414" 17912 "s59E25H2" 0 "hypothetical protein"  
"JS1\_M21\_00414" 17912 "s59E5H2" 0.4886203 "hypothetical protein"  
"JS1\_M21\_00414" 17912 "s63E6H2" 3.222574 "hypothetical protein"  
"JS1\_M21\_00415" 17913 "s59E13H2" 0.6521584 "Na(+)/H(+) antiporter subunit A"  
"JS1\_M21\_00415" 17913 "s59E25H2" 0 "Na(+)/H(+) antiporter subunit A"  
"JS1\_M21\_00415" 17913 "s59E5H2" 0.2048629 "Na(+)/H(+) antiporter subunit A"  
"JS1\_M21\_00415" 17913 "s63E6H2" 0.4014153 "Na(+)/H(+) antiporter subunit A"  
"JS1\_M21\_00416" 17914 "s59E13H2" 0.5351286 "Na(+)/H(+) antiporter subunit B"  
"JS1\_M21\_00416" 17914 "s59E25H2" 0 "Na(+)/H(+) antiporter subunit B"  
"JS1\_M21\_00416" 17914 "s59E5H2" 0.7692246 "Na(+)/H(+) antiporter subunit B"  
"JS1\_M21\_00416" 17914 "s63E6H2" 2.985938 "Na(+)/H(+) antiporter subunit B"  
"JS1\_M21\_00417" 17915 "s59E13H2" 0.5879874 "Na(+)/H(+) antiporter subunit C1"  
"JS1\_M21\_00417" 17915 "s59E25H2" 0 "Na(+)/H(+) antiporter subunit C1"  
"JS1\_M21\_00417" 17915 "s59E5H2" 1.566482 "Na(+)/H(+) antiporter subunit C1"  
"JS1\_M21\_00417" 17915 "s63E6H2" 3.822738 "Na(+)/H(+) antiporter subunit C1"  
"JS1\_M21\_00418" 17916 "s59E13H2" 0.4711992 "Na(+)/H(+) antiporter subunit A"  
"JS1\_M21\_00418" 17916 "s59E25H2" 0 "Na(+)/H(+) antiporter subunit A"  
"JS1\_M21\_00418" 17916 "s59E5H2" 1.178736 "Na(+)/H(+) antiporter subunit A"  
"JS1\_M21\_00418" 17916 "s63E6H2" 4.012529 "Na(+)/H(+) antiporter subunit A"  
"JS1\_M21\_00419" 17917 "s59E13H2" 0.4902066 "hypothetical protein"  
"JS1\_M21\_00419" 17917 "s59E25H2" 0 "hypothetical protein"  
"JS1\_M21\_00419" 17917 "s59E5H2" 1.229248 "hypothetical protein"  
"JS1\_M21\_00419" 17917 "s63E6H2" 5.606971 "hypothetical protein"  
"JS1\_M21\_00420" 17918 "s59E13H2" 0.6244113 "putative membrane-bound hydrogenase subunit mbhJ"  
"JS1\_M21\_00420" 17918 "s59E25H2" 0 "putative membrane-bound hydrogenase subunit mbhJ"  
"JS1\_M21\_00420" 17918 "s59E5H2" 0.5626912 "putative membrane-bound hydrogenase subunit mbhJ"  
"JS1\_M21\_00420" 17918 "s63E6H2" 2.875599 "putative membrane-bound hydrogenase subunit mbhJ"  
"JS1\_M21\_00421" 17919 "s59E13H2" 0.5837748 "Membrane-bound hydrogenase subunit beta"  
"JS1\_M21\_00421" 17919 "s59E25H2" 0.3782772 "Membrane-bound hydrogenase subunit beta"  
"JS1\_M21\_00421" 17919 "s59E5H2" 0.2022823 "Membrane-bound hydrogenase subunit beta"  
"JS1\_M21\_00421" 17919 "s63E6H2" 3.562168 "Membrane-bound hydrogenase subunit beta"  
"JS1\_M21\_00422" 17920 "s59E13H2" 0.8407743 "Membrane-bound hydrogenase subunit alpha"  
"JS1\_M21\_00422" 17920 "s59E25H2" 0.2573529 "Membrane-bound hydrogenase subunit alpha"  
"JS1\_M21\_00422" 17920 "s59E5H2" 0.7273426 "Membrane-bound hydrogenase subunit alpha"  
"JS1\_M21\_00422" 17920 "s63E6H2" 6.180214 "Membrane-bound hydrogenase subunit alpha"  
"JS1\_M21\_00423" 17921 "s59E13H2" 1.044079 "F(420)H(2) dehydrogenase subunit H"  
"JS1\_M21\_00423" 17921 "s59E25H2" 0 "F(420)H(2) dehydrogenase subunit H"  
"JS1\_M21\_00423" 17921 "s59E5H2" 1.408195 "F(420)H(2) dehydrogenase subunit H"  
"JS1\_M21\_00423" 17921 "s63E6H2" 6.685113 "F(420)H(2) dehydrogenase subunit H"  
"JS1\_M21\_00424" 17922 "s59E13H2" 0.4873933 "NAD(P)H-quinone oxidoreductase subunit I"  
"JS1\_M21\_00424" 17922 "s59E25H2" 0 "NAD(P)H-quinone oxidoreductase subunit I"  
"JS1\_M21\_00424" 17922 "s59E5H2" 0.8708362 "NAD(P)H-quinone oxidoreductase subunit I"  
"JS1\_M21\_00424" 17922 "s63E6H2" 7.192314 "NAD(P)H-quinone oxidoreductase subunit I"  
"JS1\_M21\_00425" 17923 "s59E13H2" 0.3786779 "Hydrogenase 3 maturation protease"  
"JS1\_M21\_00425" 17923 "s59E25H2" 0 "Hydrogenase 3 maturation protease"

"JS1\_M21\_00425" 17923 "s59E5H2" 1.098363 "Hydrogenase 3 maturation protease"  
"JS1\_M21\_00425" 17923 "s63E6H2" 0.3472895 "Hydrogenase 3 maturation protease"  
"JS1\_M21\_00426" 17924 "s59E13H2" 0.1854942 "Sporulation-specific N-acetylmuramoyl-L-alanine amidase"  
"JS1\_M21\_00426" 17924 "s59E25H2" 0 "Sporulation-specific N-acetylmuramoyl-L-alanine amidase"  
"JS1\_M21\_00426" 17924 "s59E5H2" 0.6066644 "Sporulation-specific N-acetylmuramoyl-L-alanine amidase"  
"JS1\_M21\_00426" 17924 "s63E6H2" 0.2861175 "Sporulation-specific N-acetylmuramoyl-L-alanine amidase"  
"JS1\_M21\_00427" 17925 "s59E13H2" 0.09118826 "Redox-sensing transcriptional repressor Rex"  
"JS1\_M21\_00427" 17925 "s59E25H2" 0 "Redox-sensing transcriptional repressor Rex"  
"JS1\_M21\_00427" 17925 "s59E5H2" 0.9649295 "Redox-sensing transcriptional repressor Rex"  
"JS1\_M21\_00427" 17925 "s63E6H2" 0.4978709 "Redox-sensing transcriptional repressor Rex"  
"JS1\_M21\_00428" 17926 "s59E13H2" 0 "Sulfhydrogenase 1 subunit beta"  
"JS1\_M21\_00428" 17926 "s59E25H2" 0 "Sulfhydrogenase 1 subunit beta"  
"JS1\_M21\_00428" 17926 "s59E5H2" 0.8066522 "Sulfhydrogenase 1 subunit beta"  
"JS1\_M21\_00428" 17926 "s63E6H2" 0.4933705 "Sulfhydrogenase 1 subunit beta"  
"JS1\_M21\_00429" 17927 "s59E13H2" 0 "Sulfhydrogenase 1 subunit gamma"  
"JS1\_M21\_00429" 17927 "s59E25H2" 0 "Sulfhydrogenase 1 subunit gamma"  
"JS1\_M21\_00429" 17927 "s59E5H2" 1.036745 "Sulfhydrogenase 1 subunit gamma"  
"JS1\_M21\_00429" 17927 "s63E6H2" 1.576806 "Sulfhydrogenase 1 subunit gamma"  
"JS1\_M21\_00430" 17928 "s59E13H2" 0 "Anaerobic dimethyl sulfoxide reductase chain B"  
"JS1\_M21\_00430" 17928 "s59E25H2" 0 "Anaerobic dimethyl sulfoxide reductase chain B"  
"JS1\_M21\_00430" 17928 "s59E5H2" 1.198435 "Anaerobic dimethyl sulfoxide reductase chain B"  
"JS1\_M21\_00430" 17928 "s63E6H2" 4.57645 "Anaerobic dimethyl sulfoxide reductase chain B"  
"JS1\_M21\_00431" 17929 "s59E13H2" 0.0002860525 "F(420)H(2) dehydrogenase subunit H"  
"JS1\_M21\_00431" 17929 "s59E25H2" 0 "F(420)H(2) dehydrogenase subunit H"  
"JS1\_M21\_00431" 17929 "s59E5H2" 0.5200036 "F(420)H(2) dehydrogenase subunit H"  
"JS1\_M21\_00431" 17929 "s63E6H2" 5.680458 "F(420)H(2) dehydrogenase subunit H"  
"JS1\_M21\_00432" 17930 "s59E13H2" 0.00732336 "putative membrane-bound hydrogenase subunit mbhJ"  
"JS1\_M21\_00432" 17930 "s59E25H2" 0 "putative membrane-bound hydrogenase subunit mbhJ"  
"JS1\_M21\_00432" 17930 "s59E5H2" 0.5042035 "putative membrane-bound hydrogenase subunit mbhJ"  
"JS1\_M21\_00432" 17930 "s63E6H2" 6.144163 "putative membrane-bound hydrogenase subunit mbhJ"  
"JS1\_M21\_00433" 17931 "s59E13H2" 0 "F(420)H(2) dehydrogenase subunit C"  
"JS1\_M21\_00433" 17931 "s59E25H2" 0 "F(420)H(2) dehydrogenase subunit C"  
"JS1\_M21\_00433" 17931 "s59E5H2" 0.8553228 "F(420)H(2) dehydrogenase subunit C"  
"JS1\_M21\_00433" 17931 "s63E6H2" 6.25673 "F(420)H(2) dehydrogenase subunit C"  
"JS1\_M21\_00434" 17932 "s59E13H2" 0 "Membrane-bound hydrogenase subunit alpha"  
"JS1\_M21\_00434" 17932 "s59E25H2" 0 "Membrane-bound hydrogenase subunit alpha"  
"JS1\_M21\_00434" 17932 "s59E5H2" 1.007221 "Membrane-bound hydrogenase subunit alpha"  
"JS1\_M21\_00434" 17932 "s63E6H2" 8.073933 "Membrane-bound hydrogenase subunit alpha"  
"JS1\_M21\_00435" 17933 "s59E13H2" 0 "Na(+)/H(+) antiporter subunit A"  
"JS1\_M21\_00435" 17933 "s59E25H2" 0 "Na(+)/H(+) antiporter subunit A"  
"JS1\_M21\_00435" 17933 "s59E5H2" 0.4165627 "Na(+)/H(+) antiporter subunit A"  
"JS1\_M21\_00435" 17933 "s63E6H2" 5.915488 "Na(+)/H(+) antiporter subunit A"  
"JS1\_M21\_00436" 17934 "s59E13H2" 0 "Na(+)/H(+) antiporter subunit A"  
"JS1\_M21\_00436" 17934 "s59E25H2" 0 "Na(+)/H(+) antiporter subunit A"  
"JS1\_M21\_00436" 17934 "s59E5H2" 0.3284574 "Na(+)/H(+) antiporter subunit A"  
"JS1\_M21\_00436" 17934 "s63E6H2" 5.393581 "Na(+)/H(+) antiporter subunit A"  
"JS1\_M21\_00437" 17935 "s59E13H2" 0.001305133 "Na(+)/H(+) antiporter subunit B"

"JS1\_M21\_00437" 17935 "s59E25H2" 0 "Na(+)/H(+) antiporter subunit B"  
"JS1\_M21\_00437" 17935 "s59E5H2" 0.4142402 "Na(+)/H(+) antiporter subunit B"  
"JS1\_M21\_00437" 17935 "s63E6H2" 5.766481 "Na(+)/H(+) antiporter subunit B"  
"JS1\_M21\_00438" 17936 "s59E13H2" 0.003405983 "Na(+)/H(+) antiporter subunit C"  
"JS1\_M21\_00438" 17936 "s59E25H2" 0.5870206 "Na(+)/H(+) antiporter subunit C"  
"JS1\_M21\_00438" 17936 "s59E5H2" 0.3998416 "Na(+)/H(+) antiporter subunit C"  
"JS1\_M21\_00438" 17936 "s63E6H2" 5.770752 "Na(+)/H(+) antiporter subunit C"  
"JS1\_M21\_00439" 17937 "s59E13H2" 0.001161579 "Na(+)/H(+) antiporter subunit D"  
"JS1\_M21\_00439" 17937 "s59E25H2" 0.5296075 "Na(+)/H(+) antiporter subunit D"  
"JS1\_M21\_00439" 17937 "s59E5H2" 0.3326695 "Na(+)/H(+) antiporter subunit D"  
"JS1\_M21\_00439" 17937 "s63E6H2" 5.219982 "Na(+)/H(+) antiporter subunit D"  
"JS1\_M21\_00440" 17938 "s59E13H2" 0 "Na(+)/H(+) antiporter subunit E"  
"JS1\_M21\_00440" 17938 "s59E25H2" 0 "Na(+)/H(+) antiporter subunit E"  
"JS1\_M21\_00440" 17938 "s59E5H2" 0.09115722 "Na(+)/H(+) antiporter subunit E"  
"JS1\_M21\_00440" 17938 "s63E6H2" 0.544679 "Na(+)/H(+) antiporter subunit E"  
"JS1\_M21\_00441" 17939 "s59E13H2" 0 "Na(+)/H(+) antiporter subunit F"  
"JS1\_M21\_00441" 17939 "s59E25H2" 0 "Na(+)/H(+) antiporter subunit F"  
"JS1\_M21\_00441" 17939 "s59E5H2" 0.2089952 "Na(+)/H(+) antiporter subunit F"  
"JS1\_M21\_00441" 17939 "s63E6H2" 0.2492344 "Na(+)/H(+) antiporter subunit F"  
"JS1\_M21\_00442" 17940 "s59E13H2" 0 "Na(+)/H(+) antiporter subunit G"  
"JS1\_M21\_00442" 17940 "s59E25H2" 0 "Na(+)/H(+) antiporter subunit G"  
"JS1\_M21\_00442" 17940 "s59E5H2" 0.2816789 "Na(+)/H(+) antiporter subunit G"  
"JS1\_M21\_00442" 17940 "s63E6H2" 0.2778199 "Na(+)/H(+) antiporter subunit G"  
"JS1\_M21\_00443" 17941 "s59E13H2" 0 "NAD(P)H-quinone oxidoreductase subunit I"  
"JS1\_M21\_00443" 17941 "s59E25H2" 0 "NAD(P)H-quinone oxidoreductase subunit I"  
"JS1\_M21\_00443" 17941 "s59E5H2" 0.1251071 "NAD(P)H-quinone oxidoreductase subunit I"  
"JS1\_M21\_00443" 17941 "s63E6H2" 0.04509548 "NAD(P)H-quinone oxidoreductase subunit I"  
"JS1\_M21\_00444" 17942 "s59E13H2" 0 "NADP-reducing hydrogenase subunit HndB"  
"JS1\_M21\_00444" 17942 "s59E25H2" 0 "NADP-reducing hydrogenase subunit HndB"  
"JS1\_M21\_00444" 17942 "s59E5H2" 0 "NADP-reducing hydrogenase subunit HndB"  
"JS1\_M21\_00444" 17942 "s63E6H2" 0.08416439 "NADP-reducing hydrogenase subunit HndB"  
"JS1\_M21\_00445" 17943 "s59E13H2" 0 "NADH-quinone oxidoreductase subunit E"  
"JS1\_M21\_00445" 17943 "s59E25H2" 0 "NADH-quinone oxidoreductase subunit E"  
"JS1\_M21\_00445" 17943 "s59E5H2" 0 "NADH-quinone oxidoreductase subunit E"  
"JS1\_M21\_00445" 17943 "s63E6H2" 0.05453267 "NADH-quinone oxidoreductase subunit E"  
"JS1\_M21\_00446" 17944 "s59E13H2" 0 "NADP-reducing hydrogenase subunit HndC"  
"JS1\_M21\_00446" 17944 "s59E25H2" 0 "NADP-reducing hydrogenase subunit HndC"  
"JS1\_M21\_00446" 17944 "s59E5H2" 0 "NADP-reducing hydrogenase subunit HndC"  
"JS1\_M21\_00446" 17944 "s63E6H2" 0.03383796 "NADP-reducing hydrogenase subunit HndC"  
"JS1\_M21\_00447" 17945 "s59E13H2" 0 "NADP-reducing hydrogenase subunit HndC"  
"JS1\_M21\_00447" 17945 "s59E25H2" 0 "NADP-reducing hydrogenase subunit HndC"  
"JS1\_M21\_00447" 17945 "s59E5H2" 0 "NADP-reducing hydrogenase subunit HndC"  
"JS1\_M21\_00447" 17945 "s63E6H2" 0.04818059 "NADP-reducing hydrogenase subunit HndC"  
"JS1\_M21\_00448" 17946 "s59E13H2" 0 "hypothetical protein"  
"JS1\_M21\_00448" 17946 "s59E25H2" 0 "hypothetical protein"  
"JS1\_M21\_00448" 17946 "s59E5H2" 0 "hypothetical protein"  
"JS1\_M21\_00448" 17946 "s63E6H2" 0.04043094 "hypothetical protein"

"JS1\_M21\_00449" 17947 "s59E13H2" 0 "hypothetical protein"  
"JS1\_M21\_00449" 17947 "s59E25H2" 0 "hypothetical protein"  
"JS1\_M21\_00449" 17947 "s59E5H2" 0 "hypothetical protein"  
"JS1\_M21\_00449" 17947 "s63E6H2" 0.05359966 "hypothetical protein"  
"JS1\_M21\_00450" 17948 "s59E13H2" 0 "NADP-reducing hydrogenase subunit HndA"  
"JS1\_M21\_00450" 17948 "s59E25H2" 0 "NADP-reducing hydrogenase subunit HndA"  
"JS1\_M21\_00450" 17948 "s59E5H2" 0 "NADP-reducing hydrogenase subunit HndA"  
"JS1\_M21\_00450" 17948 "s63E6H2" 0.08254324 "NADP-reducing hydrogenase subunit HndA"  
"JS1\_M21\_00451" 17949 "s59E13H2" 0 "NADP-reducing hydrogenase subunit HndC"  
"JS1\_M21\_00451" 17949 "s59E25H2" 0 "NADP-reducing hydrogenase subunit HndC"  
"JS1\_M21\_00451" 17949 "s59E5H2" 0 "NADP-reducing hydrogenase subunit HndC"  
"JS1\_M21\_00451" 17949 "s63E6H2" 0.05839434 "NADP-reducing hydrogenase subunit HndC"  
"JS1\_M21\_00452" 17950 "s59E13H2" 0.00108043 "Formate dehydrogenase subunit alpha"  
"JS1\_M21\_00452" 17950 "s59E25H2" 0 "Formate dehydrogenase subunit alpha"  
"JS1\_M21\_00452" 17950 "s59E5H2" 0.01098855 "Formate dehydrogenase subunit alpha"  
"JS1\_M21\_00452" 17950 "s63E6H2" 0.02177565 "Formate dehydrogenase subunit alpha"  
"JS1\_M21\_00453" 17951 "s59E13H2" 7.18129e-05 "putative molybdenum cofactor guanylyltransferase"  
"JS1\_M21\_00453" 17951 "s59E25H2" 0 "putative molybdenum cofactor guanylyltransferase"  
"JS1\_M21\_00453" 17951 "s59E5H2" 0 "putative molybdenum cofactor guanylyltransferase"  
"JS1\_M21\_00453" 17951 "s63E6H2" 0.2405713 "putative molybdenum cofactor guanylyltransferase"  
"JS1\_M21\_00454" 17952 "s59E13H2" 0.2883426 "formate dehydrogenase accessory protein"  
"JS1\_M21\_00454" 17952 "s59E25H2" 0 "formate dehydrogenase accessory protein"  
"JS1\_M21\_00454" 17952 "s59E5H2" 0.1687989 "formate dehydrogenase accessory protein"  
"JS1\_M21\_00454" 17952 "s63E6H2" 0.2823414 "formate dehydrogenase accessory protein"  
"JS1\_M21\_00455" 17953 "s59E13H2" 0.801924 "Holliday junction resolvase-like protein"  
"JS1\_M21\_00455" 17953 "s59E25H2" 0 "Holliday junction resolvase-like protein"  
"JS1\_M21\_00455" 17953 "s59E5H2" 0.166259 "Holliday junction resolvase-like protein"  
"JS1\_M21\_00455" 17953 "s63E6H2" 0.5812895 "Holliday junction resolvase-like protein"  
"JS1\_M21\_00456" 17954 "s59E13H2" 0.949971 "Hydrogenase isoenzymes nickel incorporation protein HypB"  
"JS1\_M21\_00456" 17954 "s59E25H2" 0 "Hydrogenase isoenzymes nickel incorporation protein HypB"  
"JS1\_M21\_00456" 17954 "s59E5H2" 0.3407628 "Hydrogenase isoenzymes nickel incorporation protein HypB"  
"JS1\_M21\_00456" 17954 "s63E6H2" 1.196808 "Hydrogenase isoenzymes nickel incorporation protein HypB"  
"JS1\_M21\_00457" 17955 "s59E13H2" 0.8948888 "Carbamoyltransferase HypF"  
"JS1\_M21\_00457" 17955 "s59E25H2" 0 "Carbamoyltransferase HypF"  
"JS1\_M21\_00457" 17955 "s59E5H2" 0.366875 "Carbamoyltransferase HypF"  
"JS1\_M21\_00457" 17955 "s63E6H2" 0.9044418 "Carbamoyltransferase HypF"  
"JS1\_M21\_00458" 17956 "s59E13H2" 1.120108 "Hydrogenase isoenzymes formation protein HypC"  
"JS1\_M21\_00458" 17956 "s59E25H2" 0 "Hydrogenase isoenzymes formation protein HypC"  
"JS1\_M21\_00458" 17956 "s59E5H2" 0.3727948 "Hydrogenase isoenzymes formation protein HypC"  
"JS1\_M21\_00458" 17956 "s63E6H2" 0.8380132 "Hydrogenase isoenzymes formation protein HypC"  
"JS1\_M21\_00459" 17957 "s59E13H2" 1.52819 "Hydrogenase expression/formation protein HypD"  
"JS1\_M21\_00459" 17957 "s59E25H2" 0 "Hydrogenase expression/formation protein HypD"  
"JS1\_M21\_00459" 17957 "s59E5H2" 0.7668436 "Hydrogenase expression/formation protein HypD"  
"JS1\_M21\_00459" 17957 "s63E6H2" 0.9923918 "Hydrogenase expression/formation protein HypD"  
"JS1\_M21\_00460" 17958 "s59E13H2" 1.379031 "Hydrogenase expression/formation protein HypE"  
"JS1\_M21\_00460" 17958 "s59E25H2" 0 "Hydrogenase expression/formation protein HypE"  
"JS1\_M21\_00460" 17958 "s59E5H2" 0.1017122 "Hydrogenase expression/formation protein HypE"

"JS1\_M21\_00460" 17958 "s63E6H2" 0.582331 "Hydrogenase expression/formation protein HypE"  
"JS1\_M21\_00461" 17959 "s59E13H2" 1.450128 "hypothetical protein"  
"JS1\_M21\_00461" 17959 "s59E25H2" 0 "hypothetical protein"  
"JS1\_M21\_00461" 17959 "s59E5H2" 7.343513 "hypothetical protein"  
"JS1\_M21\_00461" 17959 "s63E6H2" 0.4996018 "hypothetical protein"  
"JS1\_M21\_00462" 17960 "s59E13H2" 2.030741 "Pyruvate formate-lyase 1-activating enzyme"  
"JS1\_M21\_00462" 17960 "s59E25H2" 0 "Pyruvate formate-lyase 1-activating enzyme"  
"JS1\_M21\_00462" 17960 "s59E5H2" 0.6223747 "Pyruvate formate-lyase 1-activating enzyme"  
"JS1\_M21\_00462" 17960 "s63E6H2" 0.8430252 "Pyruvate formate-lyase 1-activating enzyme"  
"JS1\_M21\_00463" 17961 "s59E13H2" 0.8920929 "Na(+)/H(+) antiporter subunit E1"  
"JS1\_M21\_00463" 17961 "s59E25H2" 0 "Na(+)/H(+) antiporter subunit E1"  
"JS1\_M21\_00463" 17961 "s59E5H2" 1.524194 "Na(+)/H(+) antiporter subunit E1"  
"JS1\_M21\_00463" 17961 "s63E6H2" 1.292887 "Na(+)/H(+) antiporter subunit E1"  
"JS1\_M21\_00464" 17962 "s59E13H2" 1.627999 "putative monovalent cation/H+ antiporter subunit F"  
"JS1\_M21\_00464" 17962 "s59E25H2" 0 "putative monovalent cation/H+ antiporter subunit F"  
"JS1\_M21\_00464" 17962 "s59E5H2" 2.774635 "putative monovalent cation/H+ antiporter subunit F"  
"JS1\_M21\_00464" 17962 "s63E6H2" 1.440564 "putative monovalent cation/H+ antiporter subunit F"  
"JS1\_M21\_00465" 17963 "s59E13H2" 1.612409 "Na(+)/H(+) antiporter subunit G"  
"JS1\_M21\_00465" 17963 "s59E25H2" 0 "Na(+)/H(+) antiporter subunit G"  
"JS1\_M21\_00465" 17963 "s59E5H2" 2.821715 "Na(+)/H(+) antiporter subunit G"  
"JS1\_M21\_00465" 17963 "s63E6H2" 1.76412 "Na(+)/H(+) antiporter subunit G"  
"JS1\_M21\_00466" 17964 "s59E13H2" 1.352381 "Glutamine-binding periplasmic protein precursor"  
"JS1\_M21\_00466" 17964 "s59E25H2" 0 "Glutamine-binding periplasmic protein precursor"  
"JS1\_M21\_00466" 17964 "s59E5H2" 2.851389 "Glutamine-binding periplasmic protein precursor"  
"JS1\_M21\_00466" 17964 "s63E6H2" 1.790431 "Glutamine-binding periplasmic protein precursor"  
"JS1\_M21\_00467" 17965 "s59E13H2" 0.3327865 "putative monovalent cation/H+ antiporter subunit B"  
"JS1\_M21\_00467" 17965 "s59E25H2" 0 "putative monovalent cation/H+ antiporter subunit B"  
"JS1\_M21\_00467" 17965 "s59E5H2" 2.864433 "putative monovalent cation/H+ antiporter subunit B"  
"JS1\_M21\_00467" 17965 "s63E6H2" 1.239882 "putative monovalent cation/H+ antiporter subunit B"  
"JS1\_M21\_00468" 17966 "s59E13H2" 0.2113618 "Na(+)/H(+) antiporter subunit B"  
"JS1\_M21\_00468" 17966 "s59E25H2" 0 "Na(+)/H(+) antiporter subunit B"  
"JS1\_M21\_00468" 17966 "s59E5H2" 1.652798 "Na(+)/H(+) antiporter subunit B"  
"JS1\_M21\_00468" 17966 "s63E6H2" 0.7593118 "Na(+)/H(+) antiporter subunit B"  
"JS1\_M21\_00469" 17967 "s59E13H2" 0.7185447 "Na(+)/H(+) antiporter subunit C"  
"JS1\_M21\_00469" 17967 "s59E25H2" 0 "Na(+)/H(+) antiporter subunit C"  
"JS1\_M21\_00469" 17967 "s59E5H2" 1.332716 "Na(+)/H(+) antiporter subunit C"  
"JS1\_M21\_00469" 17967 "s63E6H2" 0.8295435 "Na(+)/H(+) antiporter subunit C"  
"JS1\_M21\_00470" 17968 "s59E13H2" 0.8571492 "Na(+)/H(+) antiporter subunit D"  
"JS1\_M21\_00470" 17968 "s59E25H2" 0 "Na(+)/H(+) antiporter subunit D"  
"JS1\_M21\_00470" 17968 "s59E5H2" 1.497789 "Na(+)/H(+) antiporter subunit D"  
"JS1\_M21\_00470" 17968 "s63E6H2" 0.6231047 "Na(+)/H(+) antiporter subunit D"  
"JS1\_M21\_00471" 17969 "s59E13H2" 0.8854998 "Hydrogenase-4 component B"  
"JS1\_M21\_00471" 17969 "s59E25H2" 0 "Hydrogenase-4 component B"  
"JS1\_M21\_00471" 17969 "s59E5H2" 0.7027351 "Hydrogenase-4 component B"  
"JS1\_M21\_00471" 17969 "s63E6H2" 0.5535826 "Hydrogenase-4 component B"  
"JS1\_M21\_00472" 17970 "s59E13H2" 0.4025558 "Rod shape-determining protein MreB"  
"JS1\_M21\_00472" 17970 "s59E25H2" 0 "Rod shape-determining protein MreB"

"JS1\_M21\_00472" 17970 "s59E5H2" 1.162869 "Rod shape-determining protein MreB"  
"JS1\_M21\_00472" 17970 "s63E6H2" 1.109246 "Rod shape-determining protein MreB"  
"JS1\_M21\_00473" 17971 "s59E13H2" 0.06360248 "Cell shape-determining protein MreC precursor"  
"JS1\_M21\_00473" 17971 "s59E25H2" 0 "Cell shape-determining protein MreC precursor"  
"JS1\_M21\_00473" 17971 "s59E5H2" 1.05687 "Cell shape-determining protein MreC precursor"  
"JS1\_M21\_00473" 17971 "s63E6H2" 1.317513 "Cell shape-determining protein MreC precursor"  
"JS1\_M21\_00474" 17972 "s59E13H2" 0.08939665 "Protease 3 precursor"  
"JS1\_M21\_00474" 17972 "s59E25H2" 0 "Protease 3 precursor"  
"JS1\_M21\_00474" 17972 "s59E5H2" 1.252637 "Protease 3 precursor"  
"JS1\_M21\_00474" 17972 "s63E6H2" 1.527215 "Protease 3 precursor"  
"JS1\_M21\_00475" 17973 "s59E13H2" 0.09781992 "hypothetical protein"  
"JS1\_M21\_00475" 17973 "s59E25H2" 0 "hypothetical protein"  
"JS1\_M21\_00475" 17973 "s59E5H2" 0.2658209 "hypothetical protein"  
"JS1\_M21\_00475" 17973 "s63E6H2" 0.4625085 "hypothetical protein"  
"JS1\_M21\_00476" 17974 "s59E13H2" 0.1307518 "30S ribosomal protein S6"  
"JS1\_M21\_00476" 17974 "s59E25H2" 0 "30S ribosomal protein S6"  
"JS1\_M21\_00476" 17974 "s59E5H2" 0.3341072 "30S ribosomal protein S6"  
"JS1\_M21\_00476" 17974 "s63E6H2" 0.7475967 "30S ribosomal protein S6"  
"JS1\_M21\_00477" 17975 "s59E13H2" 0.07386602 "30S ribosomal protein S18"  
"JS1\_M21\_00477" 17975 "s59E25H2" 0 "30S ribosomal protein S18"  
"JS1\_M21\_00477" 17975 "s59E5H2" 0.6889294 "30S ribosomal protein S18"  
"JS1\_M21\_00477" 17975 "s63E6H2" 0.766588 "30S ribosomal protein S18"  
"JS1\_M21\_00480" 17978 "s59E13H2" 0.01835253 "Cadmium, cobalt and zinc/H(+)-K(+) antiporter"  
"JS1\_M21\_00480" 17978 "s59E25H2" 0 "Cadmium, cobalt and zinc/H(+)-K(+) antiporter"  
"JS1\_M21\_00480" 17978 "s59E5H2" 0.4127676 "Cadmium, cobalt and zinc/H(+)-K(+) antiporter"  
"JS1\_M21\_00480" 17978 "s63E6H2" 2.171359 "Cadmium, cobalt and zinc/H(+)-K(+) antiporter"  
"JS1\_M21\_00481" 17979 "s59E13H2" 0.007486923 "DGC domain protein"  
"JS1\_M21\_00481" 17979 "s59E25H2" 0 "DGC domain protein"  
"JS1\_M21\_00481" 17979 "s59E5H2" 0 "DGC domain protein"  
"JS1\_M21\_00481" 17979 "s63E6H2" 2.314577 "DGC domain protein"  
"JS1\_M21\_00482" 17980 "s59E13H2" 0.0028402 "putative Thioredoxin"  
"JS1\_M21\_00482" 17980 "s59E25H2" 0 "putative Thioredoxin"  
"JS1\_M21\_00482" 17980 "s59E5H2" 0.1523227 "putative Thioredoxin"  
"JS1\_M21\_00482" 17980 "s63E6H2" 1.49092 "putative Thioredoxin"  
"JS1\_M21\_00483" 17981 "s59E13H2" 2.187087 "putative permease"  
"JS1\_M21\_00483" 17981 "s59E25H2" 0 "putative permease"  
"JS1\_M21\_00483" 17981 "s59E5H2" 0.4855022 "putative permease"  
"JS1\_M21\_00483" 17981 "s63E6H2" 1.842831 "putative permease"  
"JS1\_M21\_00484" 17982 "s59E13H2" 0.06173688 "hypothetical protein"  
"JS1\_M21\_00484" 17982 "s59E25H2" 0 "hypothetical protein"  
"JS1\_M21\_00484" 17982 "s59E5H2" 1.048135 "hypothetical protein"  
"JS1\_M21\_00484" 17982 "s63E6H2" 0.9244713 "hypothetical protein"  
"JS1\_M21\_00485" 17983 "s59E13H2" 0.08123986 "Ubiquinone biosynthesis O-methyltransferase"  
"JS1\_M21\_00485" 17983 "s59E25H2" 0 "Ubiquinone biosynthesis O-methyltransferase"  
"JS1\_M21\_00485" 17983 "s59E5H2" 2.809885 "Ubiquinone biosynthesis O-methyltransferase"  
"JS1\_M21\_00485" 17983 "s63E6H2" 2.594221 "Ubiquinone biosynthesis O-methyltransferase"  
"JS1\_M21\_00486" 17984 "s59E13H2" 0.0631112 "flavodoxin"

"JS1\_M21\_00486" 17984 "s59E25H2" 0 "flavodoxin"  
"JS1\_M21\_00486" 17984 "s59E5H2" 1.169687 "flavodoxin"  
"JS1\_M21\_00486" 17984 "s63E6H2" 2.804991 "flavodoxin"  
"JS1\_M21\_00487" 17985 "s59E13H2" 0.0818573 "DNA alkylation repair enzyme"  
"JS1\_M21\_00487" 17985 "s59E25H2" 0.3144105 "DNA alkylation repair enzyme"  
"JS1\_M21\_00487" 17985 "s59E5H2" 1.571689 "DNA alkylation repair enzyme"  
"JS1\_M21\_00487" 17985 "s63E6H2" 3.09965 "DNA alkylation repair enzyme"  
"JS1\_M21\_00488" 17986 "s59E13H2" 4.347883 "Alpha/beta hydrolase family protein"  
"JS1\_M21\_00488" 17986 "s59E25H2" 0 "Alpha/beta hydrolase family protein"  
"JS1\_M21\_00488" 17986 "s59E5H2" 0.1399136 "Alpha/beta hydrolase family protein"  
"JS1\_M21\_00488" 17986 "s63E6H2" 0.1366197 "Alpha/beta hydrolase family protein"  
"JS1\_M21\_00489" 17987 "s59E13H2" 4.131669 "1-acyl-sn-glycerol-3-phosphate acyltransferase"  
"JS1\_M21\_00489" 17987 "s59E25H2" 0 "1-acyl-sn-glycerol-3-phosphate acyltransferase"  
"JS1\_M21\_00489" 17987 "s59E5H2" 0.877606 "1-acyl-sn-glycerol-3-phosphate acyltransferase"  
"JS1\_M21\_00489" 17987 "s63E6H2" 0.1572978 "1-acyl-sn-glycerol-3-phosphate acyltransferase"  
"JS1\_M21\_00490" 17988 "s59E13H2" 11.41773 "Aspartate racemase"  
"JS1\_M21\_00490" 17988 "s59E25H2" 0.6869565 "Aspartate racemase"  
"JS1\_M21\_00490" 17988 "s59E5H2" 1.352881 "Aspartate racemase"  
"JS1\_M21\_00490" 17988 "s63E6H2" 0.3333741 "Aspartate racemase"  
"JS1\_M21\_00491" 17989 "s59E13H2" 10.3606 "hypothetical protein"  
"JS1\_M21\_00491" 17989 "s59E25H2" 0 "hypothetical protein"  
"JS1\_M21\_00491" 17989 "s59E5H2" 0.5984225 "hypothetical protein"  
"JS1\_M21\_00491" 17989 "s63E6H2" 0.3304983 "hypothetical protein"  
"JS1\_M21\_00492" 17990 "s59E13H2" 10.67458 "hypothetical protein"  
"JS1\_M21\_00492" 17990 "s59E25H2" 0 "hypothetical protein"  
"JS1\_M21\_00492" 17990 "s59E5H2" 0.6486633 "hypothetical protein"  
"JS1\_M21\_00492" 17990 "s63E6H2" 0.3625491 "hypothetical protein"  
"JS1\_M21\_00493" 17991 "s59E13H2" 13.2408 "D-inositol 3-phosphate glycosyltransferase"  
"JS1\_M21\_00493" 17991 "s59E25H2" 0 "D-inositol 3-phosphate glycosyltransferase"  
"JS1\_M21\_00493" 17991 "s59E5H2" 1.034347 "D-inositol 3-phosphate glycosyltransferase"  
"JS1\_M21\_00493" 17991 "s63E6H2" 1.669687 "D-inositol 3-phosphate glycosyltransferase"  
"JS1\_M21\_00494" 17992 "s59E13H2" 9.153429 "DNA-binding transcriptional dual regulator Crp"  
"JS1\_M21\_00494" 17992 "s59E25H2" 0.7072613 "DNA-binding transcriptional dual regulator Crp"  
"JS1\_M21\_00494" 17992 "s59E5H2" 1.897051 "DNA-binding transcriptional dual regulator Crp"  
"JS1\_M21\_00494" 17992 "s63E6H2" 2.098863 "DNA-binding transcriptional dual regulator Crp"  
"JS1\_M21\_00495" 17993 "s59E13H2" 5.290499 "Adenosine monophosphate-protein transferase SoFic"  
"JS1\_M21\_00495" 17993 "s59E25H2" 0 "Adenosine monophosphate-protein transferase SoFic"  
"JS1\_M21\_00495" 17993 "s59E5H2" 0.8116487 "Adenosine monophosphate-protein transferase SoFic"  
"JS1\_M21\_00495" 17993 "s63E6H2" 0.8686297 "Adenosine monophosphate-protein transferase SoFic"  
"JS1\_M21\_00496" 17994 "s59E13H2" 0 "hypothetical protein"  
"JS1\_M21\_00496" 17994 "s59E25H2" 0 "hypothetical protein"  
"JS1\_M21\_00496" 17994 "s59E5H2" 0 "hypothetical protein"  
"JS1\_M21\_00496" 17994 "s63E6H2" 3.973392e-05 "hypothetical protein"  
"JS1\_M21\_00499" 17997 "s59E13H2" 0.06042714 "Glucokinase"  
"JS1\_M21\_00499" 17997 "s59E25H2" 0 "Glucokinase"  
"JS1\_M21\_00499" 17997 "s59E5H2" 0.3575615 "Glucokinase"  
"JS1\_M21\_00499" 17997 "s63E6H2" 0.1391764 "Glucokinase"

"JS1\_M21\_00500" 17998 "s59E13H2" 0.01490484 "hypothetical protein"  
"JS1\_M21\_00500" 17998 "s59E25H2" 0 "hypothetical protein"  
"JS1\_M21\_00500" 17998 "s59E5H2" 0.1342251 "hypothetical protein"  
"JS1\_M21\_00500" 17998 "s63E6H2" 0.07755814 "hypothetical protein"  
"JS1\_M21\_00502" 18000 "s59E13H2" 0.02766247 "50S ribosomal protein L27"  
"JS1\_M21\_00502" 18000 "s59E25H2" 0 "50S ribosomal protein L27"  
"JS1\_M21\_00502" 18000 "s59E5H2" 0.1509989 "50S ribosomal protein L27"  
"JS1\_M21\_00502" 18000 "s63E6H2" 0.05562201 "50S ribosomal protein L27"  
"JS1\_M21\_00503" 18001 "s59E13H2" 0.03633851 "50S ribosomal protein L21"  
"JS1\_M21\_00503" 18001 "s59E25H2" 0 "50S ribosomal protein L21"  
"JS1\_M21\_00503" 18001 "s59E5H2" 0.1988535 "50S ribosomal protein L21"  
"JS1\_M21\_00503" 18001 "s63E6H2" 0.03452725 "50S ribosomal protein L21"  
"JS1\_M21\_00504" 18002 "s59E13H2" 0.03769438 "Ribonuclease G"  
"JS1\_M21\_00504" 18002 "s59E25H2" 0 "Ribonuclease G"  
"JS1\_M21\_00504" 18002 "s59E5H2" 0.3792737 "Ribonuclease G"  
"JS1\_M21\_00504" 18002 "s63E6H2" 0.1347935 "Ribonuclease G"  
"JS1\_M21\_00505" 18003 "s59E13H2" 0.03769545 "hypothetical protein"  
"JS1\_M21\_00505" 18003 "s59E25H2" 0 "hypothetical protein"  
"JS1\_M21\_00505" 18003 "s59E5H2" 0.3722394 "hypothetical protein"  
"JS1\_M21\_00505" 18003 "s63E6H2" 0.146114 "hypothetical protein"  
"JS1\_M21\_00506" 18004 "s59E13H2" 0.1312799 "Radical SAM superfamily protein"  
"JS1\_M21\_00506" 18004 "s59E25H2" 0 "Radical SAM superfamily protein"  
"JS1\_M21\_00506" 18004 "s59E5H2" 0.3446871 "Radical SAM superfamily protein"  
"JS1\_M21\_00506" 18004 "s63E6H2" 0.2690275 "Radical SAM superfamily protein"  
"JS1\_M21\_00507" 18005 "s59E13H2" 0.1211401 "Rod shape-determining protein RodA"  
"JS1\_M21\_00507" 18005 "s59E25H2" 0 "Rod shape-determining protein RodA"  
"JS1\_M21\_00507" 18005 "s59E5H2" 0.3609959 "Rod shape-determining protein RodA"  
"JS1\_M21\_00507" 18005 "s63E6H2" 0.9045161 "Rod shape-determining protein RodA"  
"JS1\_M21\_00508" 18006 "s59E13H2" 0.2677627 "Stage V sporulation protein D"  
"JS1\_M21\_00508" 18006 "s59E25H2" 0 "Stage V sporulation protein D"  
"JS1\_M21\_00508" 18006 "s59E5H2" 0.3677968 "Stage V sporulation protein D"  
"JS1\_M21\_00508" 18006 "s63E6H2" 0.3903324 "Stage V sporulation protein D"  
"JS1\_M21\_00509" 18007 "s59E13H2" 0.1935902 "rod shape-determining protein MreD"  
"JS1\_M21\_00509" 18007 "s59E25H2" 0 "rod shape-determining protein MreD"  
"JS1\_M21\_00509" 18007 "s59E5H2" 0.3826499 "rod shape-determining protein MreD"  
"JS1\_M21\_00509" 18007 "s63E6H2" 0.6556682 "rod shape-determining protein MreD"  
"JS1\_M21\_00510" 18008 "s59E13H2" 0.09081255 "Putative N-acetylmannosaminyltransferase"  
"JS1\_M21\_00510" 18008 "s59E25H2" 0 "Putative N-acetylmannosaminyltransferase"  
"JS1\_M21\_00510" 18008 "s59E5H2" 0.3768678 "Putative N-acetylmannosaminyltransferase"  
"JS1\_M21\_00510" 18008 "s63E6H2" 0.6835381 "Putative N-acetylmannosaminyltransferase"  
"JS1\_M21\_00511" 18009 "s59E13H2" 3.388173 "UDP-glucose 4-epimerase"  
"JS1\_M21\_00511" 18009 "s59E25H2" 0 "UDP-glucose 4-epimerase"  
"JS1\_M21\_00511" 18009 "s59E5H2" 0.640226 "UDP-glucose 4-epimerase"  
"JS1\_M21\_00511" 18009 "s63E6H2" 0.3672017 "UDP-glucose 4-epimerase"  
"JS1\_M21\_00512" 18010 "s59E13H2" 6.738614 "putative undecaprenyl-phosphate N-acetylglucosaminyl 1-phosphate transferase"  
"JS1\_M21\_00512" 18010 "s59E25H2" 0 "putative undecaprenyl-phosphate N-acetylglucosaminyl 1-phosphate transferase"  
"JS1\_M21\_00512" 18010 "s59E5H2" 0.6808752 "putative undecaprenyl-phosphate N-acetylglucosaminyl 1-phosphate transferase"



"JS1\_M21\_00512" 18010 "s63E6H2" 0.7742475 "putative undecaprenyl-phosphate N-acetylglucosaminyl 1-phosphate transferase"  
"JS1\_M21\_00513" 18011 "s59E13H2" 1.243307 "Bifunctional phosphoglucose/phosphomannose isomerase"  
"JS1\_M21\_00513" 18011 "s59E25H2" 0 "Bifunctional phosphoglucose/phosphomannose isomerase"  
"JS1\_M21\_00513" 18011 "s59E5H2" 0.3631516 "Bifunctional phosphoglucose/phosphomannose isomerase"  
"JS1\_M21\_00513" 18011 "s63E6H2" 1.001686 "Bifunctional phosphoglucose/phosphomannose isomerase"  
"JS1\_M21\_00514" 18012 "s59E13H2" 0.009424103 "hypothetical protein"  
"JS1\_M21\_00514" 18012 "s59E25H2" 0 "hypothetical protein"  
"JS1\_M21\_00514" 18012 "s59E5H2" 0.01542092 "hypothetical protein"  
"JS1\_M21\_00514" 18012 "s63E6H2" 0.06467814 "hypothetical protein"  
"JS1\_M21\_00515" 18013 "s59E13H2" 0.007493932 "Amidohydrolase"  
"JS1\_M21\_00515" 18013 "s59E25H2" 0 "Amidohydrolase"  
"JS1\_M21\_00515" 18013 "s59E5H2" 0.118829 "Amidohydrolase"  
"JS1\_M21\_00515" 18013 "s63E6H2" 7.24484 "Amidohydrolase"  
"JS1\_M21\_00516" 18014 "s59E13H2" 0.03772954 "Transposase IS200 like protein"  
"JS1\_M21\_00516" 18014 "s59E25H2" 0 "Transposase IS200 like protein"  
"JS1\_M21\_00516" 18014 "s59E5H2" 0 "Transposase IS200 like protein"  
"JS1\_M21\_00516" 18014 "s63E6H2" 5.318507 "Transposase IS200 like protein"  
"JS1\_M21\_00517" 18015 "s59E13H2" 0.001234165 "translocation protein TolB"  
"JS1\_M21\_00517" 18015 "s59E25H2" 0 "translocation protein TolB"  
"JS1\_M21\_00517" 18015 "s59E5H2" 0.01411166 "translocation protein TolB"  
"JS1\_M21\_00517" 18015 "s63E6H2" 0.3650095 "translocation protein TolB"  
"JS1\_M21\_00518" 18016 "s59E13H2" 0.03243338 "Bifunctional protein GlmU"  
"JS1\_M21\_00518" 18016 "s59E25H2" 0 "Bifunctional protein GlmU"  
"JS1\_M21\_00518" 18016 "s59E5H2" 0.06118866 "Bifunctional protein GlmU"  
"JS1\_M21\_00518" 18016 "s63E6H2" 0.7207089 "Bifunctional protein GlmU"  
"JS1\_M21\_00519" 18017 "s59E13H2" 0.05198881 "Digeranylgeranylglycerophospholipid reductase"  
"JS1\_M21\_00519" 18017 "s59E25H2" 0 "Digeranylgeranylglycerophospholipid reductase"  
"JS1\_M21\_00519" 18017 "s59E5H2" 0.00785675 "Digeranylgeranylglycerophospholipid reductase"  
"JS1\_M21\_00519" 18017 "s63E6H2" 0.3935154 "Digeranylgeranylglycerophospholipid reductase"  
"JS1\_M21\_00520" 18018 "s59E13H2" 0 "PemK-like protein"  
"JS1\_M21\_00520" 18018 "s59E25H2" 0 "PemK-like protein"  
"JS1\_M21\_00520" 18018 "s59E5H2" 0 "PemK-like protein"  
"JS1\_M21\_00520" 18018 "s63E6H2" 0.03378102 "PemK-like protein"  
"JS1\_M21\_00521" 18019 "s59E13H2" 3.654911 "Soluble lytic murein transglycosylase precursor"  
"JS1\_M21\_00521" 18019 "s59E25H2" 0 "Soluble lytic murein transglycosylase precursor"  
"JS1\_M21\_00521" 18019 "s59E5H2" 0.5040402 "Soluble lytic murein transglycosylase precursor"  
"JS1\_M21\_00521" 18019 "s63E6H2" 0.137919 "Soluble lytic murein transglycosylase precursor"  
"JS1\_M21\_00522" 18020 "s59E13H2" 3.131229 "hypothetical protein"  
"JS1\_M21\_00522" 18020 "s59E25H2" 0 "hypothetical protein"  
"JS1\_M21\_00522" 18020 "s59E5H2" 0.3625578 "hypothetical protein"  
"JS1\_M21\_00522" 18020 "s63E6H2" 0.09037133 "hypothetical protein"  
"JS1\_M21\_00523" 18021 "s59E13H2" 3.819805 "Murein hydrolase activator NlpD precursor"  
"JS1\_M21\_00523" 18021 "s59E25H2" 0 "Murein hydrolase activator NlpD precursor"  
"JS1\_M21\_00523" 18021 "s59E5H2" 0.7876885 "Murein hydrolase activator NlpD precursor"  
"JS1\_M21\_00523" 18021 "s63E6H2" 0.1401402 "Murein hydrolase activator NlpD precursor"  
"JS1\_M21\_00524" 18022 "s59E13H2" 0.2766922 "Periplasmic dipeptide transport protein precursor"  
"JS1\_M21\_00524" 18022 "s59E25H2" 0 "Periplasmic dipeptide transport protein precursor"

"JS1\_M21\_00524" 18022 "s59E5H2" 0.2827287 "Periplasmic dipeptide transport protein precursor"  
"JS1\_M21\_00524" 18022 "s63E6H2" 0.1903952 "Periplasmic dipeptide transport protein precursor"  
"JS1\_M21\_00525" 18023 "s59E13H2" 1.08935 "Dipeptide transport system permease protein DppB"  
"JS1\_M21\_00525" 18023 "s59E25H2" 0 "Dipeptide transport system permease protein DppB"  
"JS1\_M21\_00525" 18023 "s59E5H2" 1.212218 "Dipeptide transport system permease protein DppB"  
"JS1\_M21\_00525" 18023 "s63E6H2" 0.2933484 "Dipeptide transport system permease protein DppB"  
"JS1\_M21\_00526" 18024 "s59E13H2" 1.394273 "Glutathione transport system permease protein GsiD"  
"JS1\_M21\_00526" 18024 "s59E25H2" 0 "Glutathione transport system permease protein GsiD"  
"JS1\_M21\_00526" 18024 "s59E5H2" 1.026192 "Glutathione transport system permease protein GsiD"  
"JS1\_M21\_00526" 18024 "s63E6H2" 0.250526 "Glutathione transport system permease protein GsiD"  
"JS1\_M21\_00527" 18025 "s59E13H2" 6.914552 "Oligopeptide transport ATP-binding protein OppD"  
"JS1\_M21\_00527" 18025 "s59E25H2" 0.175813 "Oligopeptide transport ATP-binding protein OppD"  
"JS1\_M21\_00527" 18025 "s59E5H2" 2.017043 "Oligopeptide transport ATP-binding protein OppD"  
"JS1\_M21\_00527" 18025 "s63E6H2" 0.3792328 "Oligopeptide transport ATP-binding protein OppD"  
"JS1\_M21\_00528" 18026 "s59E13H2" 8.081254 "Oligopeptide transport ATP-binding protein OppF"  
"JS1\_M21\_00528" 18026 "s59E25H2" 0 "Oligopeptide transport ATP-binding protein OppF"  
"JS1\_M21\_00528" 18026 "s59E5H2" 2.63981 "Oligopeptide transport ATP-binding protein OppF"  
"JS1\_M21\_00528" 18026 "s63E6H2" 0.4131131 "Oligopeptide transport ATP-binding protein OppF"  
"JS1\_M21\_00533" 18031 "s59E13H2" 0.03535453 "Glutamine amidotransferase subunit PdxT"  
"JS1\_M21\_00533" 18031 "s59E25H2" 0 "Glutamine amidotransferase subunit PdxT"  
"JS1\_M21\_00533" 18031 "s59E5H2" 0.6372612 "Glutamine amidotransferase subunit PdxT"  
"JS1\_M21\_00533" 18031 "s63E6H2" 0.1207817 "Glutamine amidotransferase subunit PdxT"  
"JS1\_M21\_00534" 18032 "s59E13H2" 0.0724482 "Pyridoxal biosynthesis lyase PdxS"  
"JS1\_M21\_00534" 18032 "s59E25H2" 0 "Pyridoxal biosynthesis lyase PdxS"  
"JS1\_M21\_00534" 18032 "s59E5H2" 0.8683077 "Pyridoxal biosynthesis lyase PdxS"  
"JS1\_M21\_00534" 18032 "s63E6H2" 0.3587056 "Pyridoxal biosynthesis lyase PdxS"  
"JS1\_M21\_00535" 18033 "s59E13H2" 0.3046651 "Pyruvate-flavodoxin oxidoreductase"  
"JS1\_M21\_00535" 18033 "s59E25H2" 0 "Pyruvate-flavodoxin oxidoreductase"  
"JS1\_M21\_00535" 18033 "s59E5H2" 0.194518 "Pyruvate-flavodoxin oxidoreductase"  
"JS1\_M21\_00535" 18033 "s63E6H2" 0.2174631 "Pyruvate-flavodoxin oxidoreductase"  
"JS1\_M21\_00536" 18034 "s59E13H2" 0.04497032 "Recombination protein RecR"  
"JS1\_M21\_00536" 18034 "s59E25H2" 0 "Recombination protein RecR"  
"JS1\_M21\_00536" 18034 "s59E5H2" 0.9174343 "Recombination protein RecR"  
"JS1\_M21\_00536" 18034 "s63E6H2" 0.4825913 "Recombination protein RecR"  
"JS1\_M21\_00537" 18035 "s59E13H2" 0.04533516 "Nucleoid-associated protein"  
"JS1\_M21\_00537" 18035 "s59E25H2" 0 "Nucleoid-associated protein"  
"JS1\_M21\_00537" 18035 "s59E5H2" 1.235712 "Nucleoid-associated protein"  
"JS1\_M21\_00537" 18035 "s63E6H2" 0.3636556 "Nucleoid-associated protein"  
"JS1\_M21\_00538" 18036 "s59E13H2" 0.03315867 "DNA polymerase III subunit tau"  
"JS1\_M21\_00538" 18036 "s59E25H2" 0 "DNA polymerase III subunit tau"  
"JS1\_M21\_00538" 18036 "s59E5H2" 1.632677 "DNA polymerase III subunit tau"  
"JS1\_M21\_00538" 18036 "s63E6H2" 0.2224069 "DNA polymerase III subunit tau"  
"JS1\_M21\_00545" 18043 "s59E13H2" 0.0933284 "tRNA-specific adenosine deaminase"  
"JS1\_M21\_00545" 18043 "s59E25H2" 0 "tRNA-specific adenosine deaminase"  
"JS1\_M21\_00545" 18043 "s59E5H2" 2.555769 "tRNA-specific adenosine deaminase"  
"JS1\_M21\_00545" 18043 "s63E6H2" 0.3183337 "tRNA-specific adenosine deaminase"  
"JS1\_M21\_00547" 18045 "s59E13H2" 0.0756581 "UDP-N-acetylmuramoylalanine--D-glutamate ligase"

"JS1\_M21\_00547" 18045 "s59E25H2" 0 "UDP-N-acetylmuramoylalanine--D-glutamate ligase"  
"JS1\_M21\_00547" 18045 "s59E5H2" 1.544001 "UDP-N-acetylmuramoylalanine--D-glutamate ligase"  
"JS1\_M21\_00547" 18045 "s63E6H2" 0.2247957 "UDP-N-acetylmuramoylalanine--D-glutamate ligase"  
"JS1\_M21\_00548" 18046 "s59E13H2" 0.292444 "Acyltransferase family protein"  
"JS1\_M21\_00548" 18046 "s59E25H2" 0 "Acyltransferase family protein"  
"JS1\_M21\_00548" 18046 "s59E5H2" 1.638487 "Acyltransferase family protein"  
"JS1\_M21\_00548" 18046 "s63E6H2" 0.0654815 "Acyltransferase family protein"  
"JS1\_M21\_00549" 18047 "s59E13H2" 0.4852438 "Purine nucleoside phosphorylase DeoD-type"  
"JS1\_M21\_00549" 18047 "s59E25H2" 0 "Purine nucleoside phosphorylase DeoD-type"  
"JS1\_M21\_00549" 18047 "s59E5H2" 1.121553 "Purine nucleoside phosphorylase DeoD-type"  
"JS1\_M21\_00549" 18047 "s63E6H2" 0.09484554 "Purine nucleoside phosphorylase DeoD-type"  
"JS1\_M21\_00552" 18050 "s59E13H2" 3.072508 "tRNA uridine 5-carboxymethylaminomethyl modification enzyme MnmG"  
"JS1\_M21\_00552" 18050 "s59E25H2" 0.1308216 "tRNA uridine 5-carboxymethylaminomethyl modification enzyme MnmG"  
"JS1\_M21\_00552" 18050 "s59E5H2" 4.091151 "tRNA uridine 5-carboxymethylaminomethyl modification enzyme MnmG"  
"JS1\_M21\_00552" 18050 "s63E6H2" 0.4306943 "tRNA uridine 5-carboxymethylaminomethyl modification enzyme MnmG"  
"JS1\_M21\_00553" 18051 "s59E13H2" 3.996768 "Bifunctional protein FOLD protein"  
"JS1\_M21\_00553" 18051 "s59E25H2" 0 "Bifunctional protein FOLD protein"  
"JS1\_M21\_00553" 18051 "s59E5H2" 2.61843 "Bifunctional protein FOLD protein"  
"JS1\_M21\_00553" 18051 "s63E6H2" 0.3990302 "Bifunctional protein FOLD protein"  
"JS1\_M21\_00554" 18052 "s59E13H2" 4.456216 "RNA polymerase-binding transcription factor CarD"  
"JS1\_M21\_00554" 18052 "s59E25H2" 0 "RNA polymerase-binding transcription factor CarD"  
"JS1\_M21\_00554" 18052 "s59E5H2" 2.031691 "RNA polymerase-binding transcription factor CarD"  
"JS1\_M21\_00554" 18052 "s63E6H2" 0.2696047 "RNA polymerase-binding transcription factor CarD"  
"JS1\_M21\_00556" 18054 "s59E13H2" 0.04567852 "Phosphoserine phosphatase 1"  
"JS1\_M21\_00556" 18054 "s59E25H2" 0 "Phosphoserine phosphatase 1"  
"JS1\_M21\_00556" 18054 "s59E5H2" 0.09501204 "Phosphoserine phosphatase 1"  
"JS1\_M21\_00556" 18054 "s63E6H2" 0.2360337 "Phosphoserine phosphatase 1"  
"JS1\_M21\_00557" 18055 "s59E13H2" 0.05067381 "Nicotinate-nucleotide--dimethylbenzimidazole phosphoribosyltransferase"  
"JS1\_M21\_00557" 18055 "s59E25H2" 0 "Nicotinate-nucleotide--dimethylbenzimidazole phosphoribosyltransferase"  
"JS1\_M21\_00557" 18055 "s59E5H2" 0.5960946 "Nicotinate-nucleotide--dimethylbenzimidazole phosphoribosyltransferase"  
"JS1\_M21\_00557" 18055 "s63E6H2" 1.42762 "Nicotinate-nucleotide--dimethylbenzimidazole phosphoribosyltransferase"  
"JS1\_M21\_00558" 18056 "s59E13H2" 0.1330885 "Bifunctional adenosylcobalamin biosynthesis protein CobP"  
"JS1\_M21\_00558" 18056 "s59E25H2" 0 "Bifunctional adenosylcobalamin biosynthesis protein CobP"  
"JS1\_M21\_00558" 18056 "s59E5H2" 1.426855 "Bifunctional adenosylcobalamin biosynthesis protein CobP"  
"JS1\_M21\_00558" 18056 "s63E6H2" 2.035455 "Bifunctional adenosylcobalamin biosynthesis protein CobP"  
"JS1\_M21\_00559" 18057 "s59E13H2" 0.09957246 "Cobalamin synthase"  
"JS1\_M21\_00559" 18057 "s59E25H2" 0 "Cobalamin synthase"  
"JS1\_M21\_00559" 18057 "s59E5H2" 1.135546 "Cobalamin synthase"  
"JS1\_M21\_00559" 18057 "s63E6H2" 1.939123 "Cobalamin synthase"  
"JS1\_M21\_00560" 18058 "s59E13H2" 1.30413 "Hemin import ATP-binding protein HmuV"  
"JS1\_M21\_00560" 18058 "s59E25H2" 0 "Hemin import ATP-binding protein HmuV"  
"JS1\_M21\_00560" 18058 "s59E5H2" 1.901112 "Hemin import ATP-binding protein HmuV"  
"JS1\_M21\_00560" 18058 "s63E6H2" 3.152472 "Hemin import ATP-binding protein HmuV"  
"JS1\_M21\_00561" 18059 "s59E13H2" 1.742205 "Hemin transport system permease protein HmuU"  
"JS1\_M21\_00561" 18059 "s59E25H2" 0 "Hemin transport system permease protein HmuU"  
"JS1\_M21\_00561" 18059 "s59E5H2" 2.212596 "Hemin transport system permease protein HmuU"  
"JS1\_M21\_00561" 18059 "s63E6H2" 4.700847 "Hemin transport system permease protein HmuU"

"JS1\_M21\_00562" 18060 "s59E13H2" 2.244323 "Cobalamin-binding protein precursor"  
"JS1\_M21\_00562" 18060 "s59E25H2" 0 "Cobalamin-binding protein precursor"  
"JS1\_M21\_00562" 18060 "s59E5H2" 1.860547 "Cobalamin-binding protein precursor"  
"JS1\_M21\_00562" 18060 "s63E6H2" 3.621758 "Cobalamin-binding protein precursor"  
"JS1\_M21\_00564" 18062 "s59E13H2" 0.2263449 "Cob(II)yrinic acid a,c-diamide adenosyltransferase"  
"JS1\_M21\_00564" 18062 "s59E25H2" 0.3699422 "Cob(II)yrinic acid a,c-diamide adenosyltransferase"  
"JS1\_M21\_00564" 18062 "s59E5H2" 0.6438463 "Cob(II)yrinic acid a,c-diamide adenosyltransferase"  
"JS1\_M21\_00564" 18062 "s63E6H2" 3.589604 "Cob(II)yrinic acid a,c-diamide adenosyltransferase"  
"JS1\_M21\_00565" 18063 "s59E13H2" 0.2982052 "GMP synthase [glutamine-hydrolyzing]"  
"JS1\_M21\_00565" 18063 "s59E25H2" 0 "GMP synthase [glutamine-hydrolyzing]"  
"JS1\_M21\_00565" 18063 "s59E5H2" 0.8633091 "GMP synthase [glutamine-hydrolyzing]"  
"JS1\_M21\_00565" 18063 "s63E6H2" 2.667099 "GMP synthase [glutamine-hydrolyzing]"  
"JS1\_M21\_00566" 18064 "s59E13H2" 0.8539708 "N5-carboxyaminoimidazole ribonucleotide mutase"  
"JS1\_M21\_00566" 18064 "s59E25H2" 0 "N5-carboxyaminoimidazole ribonucleotide mutase"  
"JS1\_M21\_00566" 18064 "s59E5H2" 0.8562315 "N5-carboxyaminoimidazole ribonucleotide mutase"  
"JS1\_M21\_00566" 18064 "s63E6H2" 0.1236763 "N5-carboxyaminoimidazole ribonucleotide mutase"  
"JS1\_M21\_00567" 18065 "s59E13H2" 0.3273461 "hypothetical protein"  
"JS1\_M21\_00567" 18065 "s59E25H2" 0 "hypothetical protein"  
"JS1\_M21\_00567" 18065 "s59E5H2" 1.064543 "hypothetical protein"  
"JS1\_M21\_00567" 18065 "s63E6H2" 0.1200864 "hypothetical protein"  
"JS1\_M21\_00568" 18066 "s59E13H2" 0.06064495 "hypothetical protein"  
"JS1\_M21\_00568" 18066 "s59E25H2" 0 "hypothetical protein"  
"JS1\_M21\_00568" 18066 "s59E5H2" 0.3993685 "hypothetical protein"  
"JS1\_M21\_00568" 18066 "s63E6H2" 0.03466904 "hypothetical protein"  
"JS1\_M21\_00569" 18067 "s59E13H2" 0.0256433 "hypothetical protein"  
"JS1\_M21\_00569" 18067 "s59E25H2" 0 "hypothetical protein"  
"JS1\_M21\_00569" 18067 "s59E5H2" 0.4872052 "hypothetical protein"  
"JS1\_M21\_00569" 18067 "s63E6H2" 0.04055907 "hypothetical protein"  
"JS1\_M21\_00570" 18068 "s59E13H2" 0.6529644 "ATP-dependent RecD-like DNA helicase"  
"JS1\_M21\_00570" 18068 "s59E25H2" 0 "ATP-dependent RecD-like DNA helicase"  
"JS1\_M21\_00570" 18068 "s59E5H2" 0.7322299 "ATP-dependent RecD-like DNA helicase"  
"JS1\_M21\_00570" 18068 "s63E6H2" 0.1379699 "ATP-dependent RecD-like DNA helicase"  
"JS1\_M21\_00571" 18069 "s59E13H2" 0.2491874 "2,3-bisphosphoglycerate-independent phosphoglycerate mutase"  
"JS1\_M21\_00571" 18069 "s59E25H2" 0 "2,3-bisphosphoglycerate-independent phosphoglycerate mutase"  
"JS1\_M21\_00571" 18069 "s59E5H2" 0.4611024 "2,3-bisphosphoglycerate-independent phosphoglycerate mutase"  
"JS1\_M21\_00571" 18069 "s63E6H2" 0.07613443 "2,3-bisphosphoglycerate-independent phosphoglycerate mutase"  
"JS1\_M21\_00572" 18070 "s59E13H2" 0.0502669 "putative 2-phosphosulfolactate phosphatase"  
"JS1\_M21\_00572" 18070 "s59E25H2" 0 "putative 2-phosphosulfolactate phosphatase"  
"JS1\_M21\_00572" 18070 "s59E5H2" 0.3075072 "putative 2-phosphosulfolactate phosphatase"  
"JS1\_M21\_00572" 18070 "s63E6H2" 0.08421035 "putative 2-phosphosulfolactate phosphatase"  
"JS1\_M21\_00573" 18071 "s59E13H2" 0.02624696 "Purine catabolism protein PucG"  
"JS1\_M21\_00573" 18071 "s59E25H2" 0 "Purine catabolism protein PucG"  
"JS1\_M21\_00573" 18071 "s59E5H2" 0.0867397 "Purine catabolism protein PucG"  
"JS1\_M21\_00573" 18071 "s63E6H2" 0.01483451 "Purine catabolism protein PucG"  
"JS1\_M21\_00574" 18072 "s59E13H2" 0.128129 "Monocarboxylate 2-oxoacid-binding periplasmic protein precursor"  
"JS1\_M21\_00574" 18072 "s59E25H2" 0 "Monocarboxylate 2-oxoacid-binding periplasmic protein precursor"  
"JS1\_M21\_00574" 18072 "s59E5H2" 0.3369595 "Monocarboxylate 2-oxoacid-binding periplasmic protein precursor"

"JS1\_M21\_00574" 18072 "s63E6H2" 0.01976234 "Monocarboxylate 2-oxoacid-binding periplasmic protein precursor"  
"JS1\_M21\_00575" 18073 "s59E13H2" 0 "Helix-turn-helix domain protein"  
"JS1\_M21\_00575" 18073 "s59E25H2" 0 "Helix-turn-helix domain protein"  
"JS1\_M21\_00575" 18073 "s59E5H2" 0.0610208 "Helix-turn-helix domain protein"  
"JS1\_M21\_00575" 18073 "s63E6H2" 0.1107732 "Helix-turn-helix domain protein"  
"JS1\_M21\_00576" 18074 "s59E13H2" 0 "Helix-turn-helix"  
"JS1\_M21\_00576" 18074 "s59E25H2" 0 "Helix-turn-helix"  
"JS1\_M21\_00576" 18074 "s59E5H2" 0 "Helix-turn-helix"  
"JS1\_M21\_00576" 18074 "s63E6H2" 0.07822574 "Helix-turn-helix"  
"JS1\_M21\_00578" 18076 "s59E13H2" 0 "hypothetical protein"  
"JS1\_M21\_00578" 18076 "s59E25H2" 0 "hypothetical protein"  
"JS1\_M21\_00578" 18076 "s59E5H2" 0.05340335 "hypothetical protein"  
"JS1\_M21\_00578" 18076 "s63E6H2" 0.04508806 "hypothetical protein"  
"JS1\_M21\_00580" 18078 "s59E13H2" 0 "hypothetical protein"  
"JS1\_M21\_00580" 18078 "s59E25H2" 0 "hypothetical protein"  
"JS1\_M21\_00580" 18078 "s59E5H2" 0 "hypothetical protein"  
"JS1\_M21\_00580" 18078 "s63E6H2" 0 "hypothetical protein"  
"JS1\_M21\_00581" 18079 "s59E13H2" 0.02182617 "hypothetical protein"  
"JS1\_M21\_00581" 18079 "s59E25H2" 0 "hypothetical protein"  
"JS1\_M21\_00581" 18079 "s59E5H2" 0 "hypothetical protein"  
"JS1\_M21\_00581" 18079 "s63E6H2" 0.02791582 "hypothetical protein"  
"JS1\_M21\_00587" 18085 "s59E13H2" 0 "hypothetical protein"  
"JS1\_M21\_00587" 18085 "s59E25H2" 0 "hypothetical protein"  
"JS1\_M21\_00587" 18085 "s59E5H2" 0.05016101 "hypothetical protein"  
"JS1\_M21\_00587" 18085 "s63E6H2" 0.009440779 "hypothetical protein"  
"JS1\_M21\_00588" 18086 "s59E13H2" 0.006012461 "hypothetical protein"  
"JS1\_M21\_00588" 18086 "s59E25H2" 0 "hypothetical protein"  
"JS1\_M21\_00588" 18086 "s59E5H2" 0.115314 "hypothetical protein"  
"JS1\_M21\_00588" 18086 "s63E6H2" 0.05790781 "hypothetical protein"  
"JS1\_M21\_00591" 18089 "s59E13H2" 0.0201944 "hypothetical protein"  
"JS1\_M21\_00591" 18089 "s59E25H2" 0 "hypothetical protein"  
"JS1\_M21\_00591" 18089 "s59E5H2" 0.03636832 "hypothetical protein"  
"JS1\_M21\_00591" 18089 "s63E6H2" 0.006342725 "hypothetical protein"  
"JS1\_M21\_00593" 18091 "s59E13H2" 0 "HTH-type transcriptional regulator PuuR"  
"JS1\_M21\_00593" 18091 "s59E25H2" 0 "HTH-type transcriptional regulator PuuR"  
"JS1\_M21\_00593" 18091 "s59E5H2" 0 "HTH-type transcriptional regulator PuuR"  
"JS1\_M21\_00593" 18091 "s63E6H2" 0 "HTH-type transcriptional regulator PuuR"  
"JS1\_M21\_00594" 18092 "s59E13H2" 0.05306154 "Poly(A) polymerase I precursor"  
"JS1\_M21\_00594" 18092 "s59E25H2" 0 "Poly(A) polymerase I precursor"  
"JS1\_M21\_00594" 18092 "s59E5H2" 0.01528641 "Poly(A) polymerase I precursor"  
"JS1\_M21\_00594" 18092 "s63E6H2" 0.5859019 "Poly(A) polymerase I precursor"  
"JS1\_M21\_00595" 18093 "s59E13H2" 0.01299327 "Succinyl-CoA ligase [ADP-forming] subunit alpha"  
"JS1\_M21\_00595" 18093 "s59E25H2" 0 "Succinyl-CoA ligase [ADP-forming] subunit alpha"  
"JS1\_M21\_00595" 18093 "s59E5H2" 0.7750647 "Succinyl-CoA ligase [ADP-forming] subunit alpha"  
"JS1\_M21\_00595" 18093 "s63E6H2" 0.07461826 "Succinyl-CoA ligase [ADP-forming] subunit alpha"  
"JS1\_M21\_00596" 18094 "s59E13H2" 0.003009808 "Succinyl-CoA ligase [ADP-forming] subunit beta"  
"JS1\_M21\_00596" 18094 "s59E25H2" 0 "Succinyl-CoA ligase [ADP-forming] subunit beta"

"JS1\_M21\_00596" 18094 "s59E5H2" 0.7325222 "Succinyl-CoA ligase [ADP-forming] subunit beta"  
"JS1\_M21\_00596" 18094 "s63E6H2" 0.05722125 "Succinyl-CoA ligase [ADP-forming] subunit beta"  
"JS1\_M21\_00597" 18095 "s59E13H2" 0 "hydrogenase 2 maturation endopeptidase"  
"JS1\_M21\_00597" 18095 "s59E25H2" 0 "hydrogenase 2 maturation endopeptidase"  
"JS1\_M21\_00597" 18095 "s59E5H2" 0 "hydrogenase 2 maturation endopeptidase"  
"JS1\_M21\_00597" 18095 "s63E6H2" 0.004771915 "hydrogenase 2 maturation endopeptidase"  
"JS1\_M21\_00598" 18096 "s59E13H2" 0 "F420-non-reducing hydrogenase iron-sulfur subunit A"  
"JS1\_M21\_00598" 18096 "s59E25H2" 0 "F420-non-reducing hydrogenase iron-sulfur subunit A"  
"JS1\_M21\_00598" 18096 "s59E5H2" 0 "F420-non-reducing hydrogenase iron-sulfur subunit A"  
"JS1\_M21\_00598" 18096 "s63E6H2" 0.01167111 "F420-non-reducing hydrogenase iron-sulfur subunit A"  
"JS1\_M21\_00599" 18097 "s59E13H2" 0 "F420-non-reducing hydrogenase iron-sulfur subunit G"  
"JS1\_M21\_00599" 18097 "s59E25H2" 0 "F420-non-reducing hydrogenase iron-sulfur subunit G"  
"JS1\_M21\_00599" 18097 "s59E5H2" 0 "F420-non-reducing hydrogenase iron-sulfur subunit G"  
"JS1\_M21\_00599" 18097 "s63E6H2" 0.005909916 "F420-non-reducing hydrogenase iron-sulfur subunit G"  
"JS1\_M21\_00600" 18098 "s59E13H2" 0 "F420-non-reducing hydrogenase vhc iron-sulfur subunit D"  
"JS1\_M21\_00600" 18098 "s59E25H2" 0 "F420-non-reducing hydrogenase vhc iron-sulfur subunit D"  
"JS1\_M21\_00600" 18098 "s59E5H2" 0 "F420-non-reducing hydrogenase vhc iron-sulfur subunit D"  
"JS1\_M21\_00600" 18098 "s63E6H2" 0.1474442 "F420-non-reducing hydrogenase vhc iron-sulfur subunit D"  
"JS1\_M21\_00601" 18099 "s59E13H2" 0.003086633 "CoB--CoM heterodisulfide reductase iron-sulfur subunit A"  
"JS1\_M21\_00601" 18099 "s59E25H2" 0 "CoB--CoM heterodisulfide reductase iron-sulfur subunit A"  
"JS1\_M21\_00601" 18099 "s59E5H2" 0.04430047 "CoB--CoM heterodisulfide reductase iron-sulfur subunit A"  
"JS1\_M21\_00601" 18099 "s63E6H2" 0.5610973 "CoB--CoM heterodisulfide reductase iron-sulfur subunit A"  
"JS1\_M21\_00602" 18100 "s59E13H2" 0.0008781147 "CoB--CoM heterodisulfide reductase subunit B"  
"JS1\_M21\_00602" 18100 "s59E25H2" 0 "CoB--CoM heterodisulfide reductase subunit B"  
"JS1\_M21\_00602" 18100 "s59E5H2" 0.04531386 "CoB--CoM heterodisulfide reductase subunit B"  
"JS1\_M21\_00602" 18100 "s63E6H2" 0.72732 "CoB--CoM heterodisulfide reductase subunit B"  
"JS1\_M21\_00603" 18101 "s59E13H2" 0.0005284887 "CoB--CoM heterodisulfide reductase iron-sulfur subunit C"  
"JS1\_M21\_00603" 18101 "s59E25H2" 0 "CoB--CoM heterodisulfide reductase iron-sulfur subunit C"  
"JS1\_M21\_00603" 18101 "s59E5H2" 0.01251641 "CoB--CoM heterodisulfide reductase iron-sulfur subunit C"  
"JS1\_M21\_00603" 18101 "s63E6H2" 0.5391197 "CoB--CoM heterodisulfide reductase iron-sulfur subunit C"  
"JS1\_M21\_00604" 18102 "s59E13H2" 0.1017519 "Lipoate-protein ligase A subunit 2"  
"JS1\_M21\_00604" 18102 "s59E25H2" 0 "Lipoate-protein ligase A subunit 2"  
"JS1\_M21\_00604" 18102 "s59E5H2" 0 "Lipoate-protein ligase A subunit 2"  
"JS1\_M21\_00604" 18102 "s63E6H2" 0.3977559 "Lipoate-protein ligase A subunit 2"  
"JS1\_M21\_00605" 18103 "s59E13H2" 0 "L-aspartate oxidase"  
"JS1\_M21\_00605" 18103 "s59E25H2" 0 "L-aspartate oxidase"  
"JS1\_M21\_00605" 18103 "s59E5H2" 0.003255953 "L-aspartate oxidase"  
"JS1\_M21\_00605" 18103 "s63E6H2" 0.5172863 "L-aspartate oxidase"  
"JS1\_M21\_00606" 18104 "s59E13H2" 0 "acetyl-CoA decarboxylase/synthase complex subunit alpha"  
"JS1\_M21\_00606" 18104 "s59E25H2" 0 "acetyl-CoA decarboxylase/synthase complex subunit alpha"  
"JS1\_M21\_00606" 18104 "s59E5H2" 0.01069663 "acetyl-CoA decarboxylase/synthase complex subunit alpha"  
"JS1\_M21\_00606" 18104 "s63E6H2" 0.5330344 "acetyl-CoA decarboxylase/synthase complex subunit alpha"  
"JS1\_M21\_00607" 18105 "s59E13H2" 0.0007033745 "Indolepyruvate oxidoreductase subunit lorA"  
"JS1\_M21\_00607" 18105 "s59E25H2" 0 "Indolepyruvate oxidoreductase subunit lorA"  
"JS1\_M21\_00607" 18105 "s59E5H2" 0 "Indolepyruvate oxidoreductase subunit lorA"  
"JS1\_M21\_00607" 18105 "s63E6H2" 0.2685816 "Indolepyruvate oxidoreductase subunit lorA"  
"JS1\_M21\_00609" 18107 "s59E13H2" 0.003145682 "Fumarate hydratase class I, aerobic"

"JS1\_M21\_00609" 18107 "s59E25H2" 0 "Fumarate hydratase class I, aerobic"  
"JS1\_M21\_00609" 18107 "s59E5H2" 0 "Fumarate hydratase class I, aerobic"  
"JS1\_M21\_00609" 18107 "s63E6H2" 0.5272332 "Fumarate hydratase class I, aerobic"  
"JS1\_M21\_00610" 18108 "s59E13H2" 0.009948306 "L(+)-tartrate dehydratase subunit alpha"  
"JS1\_M21\_00610" 18108 "s59E25H2" 0 "L(+)-tartrate dehydratase subunit alpha"  
"JS1\_M21\_00610" 18108 "s59E5H2" 0.02014011 "L(+)-tartrate dehydratase subunit alpha"  
"JS1\_M21\_00610" 18108 "s63E6H2" 0.5102292 "L(+)-tartrate dehydratase subunit alpha"  
"JS1\_M21\_00611" 18109 "s59E13H2" 0.01230844 "NAD-dependent malic enzyme"  
"JS1\_M21\_00611" 18109 "s59E25H2" 0 "NAD-dependent malic enzyme"  
"JS1\_M21\_00611" 18109 "s59E5H2" 0.0781935 "NAD-dependent malic enzyme"  
"JS1\_M21\_00611" 18109 "s63E6H2" 0.4 "NAD-dependent malic enzyme"  
"JS1\_M21\_00612" 18110 "s59E13H2" 0 "Gamma-glutamyltranspeptidase precursor"  
"JS1\_M21\_00612" 18110 "s59E25H2" 0 "Gamma-glutamyltranspeptidase precursor"  
"JS1\_M21\_00612" 18110 "s59E5H2" 0.007950581 "Gamma-glutamyltranspeptidase precursor"  
"JS1\_M21\_00612" 18110 "s63E6H2" 0 "Gamma-glutamyltranspeptidase precursor"  
"JS1\_M21\_00614" 18112 "s59E13H2" 0.005857341 "hypothetical protein"  
"JS1\_M21\_00614" 18112 "s59E25H2" 0 "hypothetical protein"  
"JS1\_M21\_00614" 18112 "s59E5H2" 0.5092475 "hypothetical protein"  
"JS1\_M21\_00614" 18112 "s63E6H2" 0.008372355 "hypothetical protein"  
"JS1\_M21\_00615" 18113 "s59E13H2" 0.08926892 "Tungsten-containing aldehyde ferredoxin oxidoreductase"  
"JS1\_M21\_00615" 18113 "s59E25H2" 0 "Tungsten-containing aldehyde ferredoxin oxidoreductase"  
"JS1\_M21\_00615" 18113 "s59E5H2" 0.1992639 "Tungsten-containing aldehyde ferredoxin oxidoreductase"  
"JS1\_M21\_00615" 18113 "s63E6H2" 0.1107484 "Tungsten-containing aldehyde ferredoxin oxidoreductase"  
"JS1\_M21\_00616" 18114 "s59E13H2" 0.2822865 "Poly(A) polymerase I precursor"  
"JS1\_M21\_00616" 18114 "s59E25H2" 0 "Poly(A) polymerase I precursor"  
"JS1\_M21\_00616" 18114 "s59E5H2" 0.1864099 "Poly(A) polymerase I precursor"  
"JS1\_M21\_00616" 18114 "s63E6H2" 0.6034023 "Poly(A) polymerase I precursor"  
"JS1\_M21\_00617" 18115 "s59E13H2" 0.003577162 "Aldo/keto reductase family protein"  
"JS1\_M21\_00617" 18115 "s59E25H2" 0 "Aldo/keto reductase family protein"  
"JS1\_M21\_00617" 18115 "s59E5H2" 0.2829076 "Aldo/keto reductase family protein"  
"JS1\_M21\_00617" 18115 "s63E6H2" 0.2754401 "Aldo/keto reductase family protein"  
"JS1\_M21\_00618" 18116 "s59E13H2" 0 "Dihydrolipoyl dehydrogenase"  
"JS1\_M21\_00618" 18116 "s59E25H2" 0 "Dihydrolipoyl dehydrogenase"  
"JS1\_M21\_00618" 18116 "s59E5H2" 0.02793033 "Dihydrolipoyl dehydrogenase"  
"JS1\_M21\_00618" 18116 "s63E6H2" 0 "Dihydrolipoyl dehydrogenase"  
"JS1\_M21\_00619" 18117 "s59E13H2" 0.001390007 "hypothetical protein"  
"JS1\_M21\_00619" 18117 "s59E25H2" 0 "hypothetical protein"  
"JS1\_M21\_00619" 18117 "s59E5H2" 0.2544503 "hypothetical protein"  
"JS1\_M21\_00619" 18117 "s63E6H2" 0.05747383 "hypothetical protein"  
"JS1\_M21\_00620" 18118 "s59E13H2" 0.03884566 "Bacillibactin exporter"  
"JS1\_M21\_00620" 18118 "s59E25H2" 0 "Bacillibactin exporter"  
"JS1\_M21\_00620" 18118 "s59E5H2" 0.4301787 "Bacillibactin exporter"  
"JS1\_M21\_00620" 18118 "s63E6H2" 0.1125053 "Bacillibactin exporter"  
"JS1\_M21\_00621" 18119 "s59E13H2" 0.07571561 "Tetrathionate reductase subunit B precursor"  
"JS1\_M21\_00621" 18119 "s59E25H2" 0 "Tetrathionate reductase subunit B precursor"  
"JS1\_M21\_00621" 18119 "s59E5H2" 0.2563631 "Tetrathionate reductase subunit B precursor"  
"JS1\_M21\_00621" 18119 "s63E6H2" 0.6044659 "Tetrathionate reductase subunit B precursor"

"JS1\_M21\_00622" 18120 "s59E13H2" 0.1498736 "Tungsten-containing aldehyde ferredoxin oxidoreductase"  
"JS1\_M21\_00622" 18120 "s59E25H2" 0 "Tungsten-containing aldehyde ferredoxin oxidoreductase"  
"JS1\_M21\_00622" 18120 "s59E5H2" 0.432608 "Tungsten-containing aldehyde ferredoxin oxidoreductase"  
"JS1\_M21\_00622" 18120 "s63E6H2" 0.7757007 "Tungsten-containing aldehyde ferredoxin oxidoreductase"  
"JS1\_M21\_00623" 18121 "s59E13H2" 0.0715507 "Haemolysin-III related"  
"JS1\_M21\_00623" 18121 "s59E25H2" 0 "Haemolysin-III related"  
"JS1\_M21\_00623" 18121 "s59E5H2" 0.4253267 "Haemolysin-III related"  
"JS1\_M21\_00623" 18121 "s63E6H2" 0.6887762 "Haemolysin-III related"  
"JS1\_M21\_00624" 18122 "s59E13H2" 0.00337983 "hypothetical protein"  
"JS1\_M21\_00624" 18122 "s59E25H2" 0 "hypothetical protein"  
"JS1\_M21\_00624" 18122 "s59E5H2" 0.2214081 "hypothetical protein"  
"JS1\_M21\_00624" 18122 "s63E6H2" 0.7714704 "hypothetical protein"  
"JS1\_M21\_00625" 18123 "s59E13H2" 0.1178966 "Microcin C7 self-immunity protein MccF"  
"JS1\_M21\_00625" 18123 "s59E25H2" 0 "Microcin C7 self-immunity protein MccF"  
"JS1\_M21\_00625" 18123 "s59E5H2" 0.8044955 "Microcin C7 self-immunity protein MccF"  
"JS1\_M21\_00625" 18123 "s63E6H2" 0.7233593 "Microcin C7 self-immunity protein MccF"  
"JS1\_M21\_00626" 18124 "s59E13H2" 0.006247153 "hypothetical protein"  
"JS1\_M21\_00626" 18124 "s59E25H2" 0 "hypothetical protein"  
"JS1\_M21\_00626" 18124 "s59E5H2" 0.1253407 "hypothetical protein"  
"JS1\_M21\_00626" 18124 "s63E6H2" 0.06407646 "hypothetical protein"  
"JS1\_M21\_00627" 18125 "s59E13H2" 0.6628429 "D-aminopeptidase"  
"JS1\_M21\_00627" 18125 "s59E25H2" 0 "D-aminopeptidase"  
"JS1\_M21\_00627" 18125 "s59E5H2" 0.6628388 "D-aminopeptidase"  
"JS1\_M21\_00627" 18125 "s63E6H2" 0.0592961 "D-aminopeptidase"  
"JS1\_M21\_00628" 18126 "s59E13H2" 0.7187531 "hypothetical protein"  
"JS1\_M21\_00628" 18126 "s59E25H2" 0 "hypothetical protein"  
"JS1\_M21\_00628" 18126 "s59E5H2" 0.9509886 "hypothetical protein"  
"JS1\_M21\_00628" 18126 "s63E6H2" 0.3056544 "hypothetical protein"  
"JS1\_M21\_00629" 18127 "s59E13H2" 0.05637465 "hypothetical protein"  
"JS1\_M21\_00629" 18127 "s59E25H2" 0 "hypothetical protein"  
"JS1\_M21\_00629" 18127 "s59E5H2" 1.219349 "hypothetical protein"  
"JS1\_M21\_00629" 18127 "s63E6H2" 0.112717 "hypothetical protein"  
"JS1\_M21\_00630" 18128 "s59E13H2" 0.07636531 "hypothetical protein"  
"JS1\_M21\_00630" 18128 "s59E25H2" 0 "hypothetical protein"  
"JS1\_M21\_00630" 18128 "s59E5H2" 1.261302 "hypothetical protein"  
"JS1\_M21\_00630" 18128 "s63E6H2" 0.147546 "hypothetical protein"  
"JS1\_M21\_00631" 18129 "s59E13H2" 0.07775444 "Pyruvate kinase, alpha/beta domain"  
"JS1\_M21\_00631" 18129 "s59E25H2" 0 "Pyruvate kinase, alpha/beta domain"  
"JS1\_M21\_00631" 18129 "s59E5H2" 1.198972 "Pyruvate kinase, alpha/beta domain"  
"JS1\_M21\_00631" 18129 "s63E6H2" 0.04011078 "Pyruvate kinase, alpha/beta domain"  
"JS1\_M21\_00632" 18130 "s59E13H2" 0.358147 "metal-dependent hydrolase"  
"JS1\_M21\_00632" 18130 "s59E25H2" 0.2493225 "metal-dependent hydrolase"  
"JS1\_M21\_00632" 18130 "s59E5H2" 1.919091 "metal-dependent hydrolase"  
"JS1\_M21\_00632" 18130 "s63E6H2" 0.01368252 "metal-dependent hydrolase"  
"JS1\_M21\_00633" 18131 "s59E13H2" 0.527342 "Putative ribosome biogenesis GTPase RsgA"  
"JS1\_M21\_00633" 18131 "s59E25H2" 0 "Putative ribosome biogenesis GTPase RsgA"  
"JS1\_M21\_00633" 18131 "s59E5H2" 3.030865 "Putative ribosome biogenesis GTPase RsgA"



"JS1\_M21\_00633" 18131 "s63E6H2" 0.3236994 "Putative ribosome biogenesis GTPase RsgA"  
"JS1\_M21\_00634" 18132 "s59E13H2" 0.01569897 "hypothetical protein"  
"JS1\_M21\_00634" 18132 "s59E25H2" 0 "hypothetical protein"  
"JS1\_M21\_00634" 18132 "s59E5H2" 0.2179143 "hypothetical protein"  
"JS1\_M21\_00634" 18132 "s63E6H2" 0.1153356 "hypothetical protein"  
"JS1\_M21\_00635" 18133 "s59E13H2" 0.1382051 "N-acetylglucosamine repressor"  
"JS1\_M21\_00635" 18133 "s59E25H2" 0 "N-acetylglucosamine repressor"  
"JS1\_M21\_00635" 18133 "s59E5H2" 0.05932955 "N-acetylglucosamine repressor"  
"JS1\_M21\_00635" 18133 "s63E6H2" 0.4226941 "N-acetylglucosamine repressor"  
"JS1\_M21\_00636" 18134 "s59E13H2" 0.01252763 "sn-glycerol-3-phosphate-binding periplasmic protein UgpB precursor"  
"JS1\_M21\_00636" 18134 "s59E25H2" 0 "sn-glycerol-3-phosphate-binding periplasmic protein UgpB precursor"  
"JS1\_M21\_00636" 18134 "s59E5H2" 0.6347391 "sn-glycerol-3-phosphate-binding periplasmic protein UgpB precursor"  
"JS1\_M21\_00636" 18134 "s63E6H2" 0.2008149 "sn-glycerol-3-phosphate-binding periplasmic protein UgpB precursor"  
"JS1\_M21\_00637" 18135 "s59E13H2" 0 "Lactose transport system permease protein LacF"  
"JS1\_M21\_00637" 18135 "s59E25H2" 0 "Lactose transport system permease protein LacF"  
"JS1\_M21\_00637" 18135 "s59E5H2" 0.06962038 "Lactose transport system permease protein LacF"  
"JS1\_M21\_00637" 18135 "s63E6H2" 0.06277204 "Lactose transport system permease protein LacF"  
"JS1\_M21\_00638" 18136 "s59E13H2" 0 "hypothetical protein"  
"JS1\_M21\_00638" 18136 "s59E25H2" 0 "hypothetical protein"  
"JS1\_M21\_00638" 18136 "s59E5H2" 0.01173753 "hypothetical protein"  
"JS1\_M21\_00638" 18136 "s63E6H2" 0.006515081 "hypothetical protein"  
"JS1\_M21\_00639" 18137 "s59E13H2" 1.784145 "General stress protein 69"  
"JS1\_M21\_00639" 18137 "s59E25H2" 0 "General stress protein 69"  
"JS1\_M21\_00639" 18137 "s59E5H2" 0.2075213 "General stress protein 69"  
"JS1\_M21\_00639" 18137 "s63E6H2" 0.3960104 "General stress protein 69"  
"JS1\_M21\_00644" 18142 "s59E13H2" 0.04351704 "Long-chain-fatty-acid--CoA ligase FadD15"  
"JS1\_M21\_00644" 18142 "s59E25H2" 0 "Long-chain-fatty-acid--CoA ligase FadD15"  
"JS1\_M21\_00644" 18142 "s59E5H2" 0.04962453 "Long-chain-fatty-acid--CoA ligase FadD15"  
"JS1\_M21\_00644" 18142 "s63E6H2" 1.394823 "Long-chain-fatty-acid--CoA ligase FadD15"  
"JS1\_M21\_00645" 18143 "s59E13H2" 0.002769356 "Sporulation initiation inhibitor protein Soj"  
"JS1\_M21\_00645" 18143 "s59E25H2" 0 "Sporulation initiation inhibitor protein Soj"  
"JS1\_M21\_00645" 18143 "s59E5H2" 0.01320956 "Sporulation initiation inhibitor protein Soj"  
"JS1\_M21\_00645" 18143 "s63E6H2" 0.01415686 "Sporulation initiation inhibitor protein Soj"  
"JS1\_M21\_00646" 18144 "s59E13H2" 0.009067762 "Sporulation initiation inhibitor protein Soj"  
"JS1\_M21\_00646" 18144 "s59E25H2" 0 "Sporulation initiation inhibitor protein Soj"  
"JS1\_M21\_00646" 18144 "s59E5H2" 0.4797032 "Sporulation initiation inhibitor protein Soj"  
"JS1\_M21\_00646" 18144 "s63E6H2" 0.6522346 "Sporulation initiation inhibitor protein Soj"  
"JS1\_M21\_00647" 18145 "s59E13H2" 0.2639497 "Cell division protein FtsZ"  
"JS1\_M21\_00647" 18145 "s59E25H2" 0 "Cell division protein FtsZ"  
"JS1\_M21\_00647" 18145 "s59E5H2" 0.9666263 "Cell division protein FtsZ"  
"JS1\_M21\_00647" 18145 "s63E6H2" 1.129538 "Cell division protein FtsZ"  
"JS1\_M21\_00648" 18146 "s59E13H2" 0 "hypothetical protein"  
"JS1\_M21\_00648" 18146 "s59E25H2" 0 "hypothetical protein"  
"JS1\_M21\_00648" 18146 "s59E5H2" 0 "hypothetical protein"  
"JS1\_M21\_00648" 18146 "s63E6H2" 0 "hypothetical protein"  
"JS1\_M21\_00649" 18147 "s59E13H2" 0.06882458 "Sialic acid TRAP transporter permease protein SiaT"  
"JS1\_M21\_00649" 18147 "s59E25H2" 0 "Sialic acid TRAP transporter permease protein SiaT"

"JS1\_M21\_00649" 18147 "s59E5H2" 0.2267104 "Sialic acid TRAP transporter permease protein SiaT"  
"JS1\_M21\_00649" 18147 "s63E6H2" 0.03574586 "Sialic acid TRAP transporter permease protein SiaT"  
"JS1\_M21\_00650" 18148 "s59E13H2" 0.1860549 "Tripartite ATP-independent periplasmic transporters, DctQ component"  
"JS1\_M21\_00650" 18148 "s59E25H2" 0 "Tripartite ATP-independent periplasmic transporters, DctQ component"  
"JS1\_M21\_00650" 18148 "s59E5H2" 0.4883534 "Tripartite ATP-independent periplasmic transporters, DctQ component"  
"JS1\_M21\_00650" 18148 "s63E6H2" 0.02957087 "Tripartite ATP-independent periplasmic transporters, DctQ component"  
"JS1\_M21\_00651" 18149 "s59E13H2" 0.1871446 "pfkB family carbohydrate kinase"  
"JS1\_M21\_00651" 18149 "s59E25H2" 0 "pfkB family carbohydrate kinase"  
"JS1\_M21\_00651" 18149 "s59E5H2" 0.2900839 "pfkB family carbohydrate kinase"  
"JS1\_M21\_00651" 18149 "s63E6H2" 0.1947778 "pfkB family carbohydrate kinase"  
"JS1\_M21\_00652" 18150 "s59E13H2" 0.1729059 "ATP synthase subunit a"  
"JS1\_M21\_00652" 18150 "s59E25H2" 0 "ATP synthase subunit a"  
"JS1\_M21\_00652" 18150 "s59E5H2" 2.05562 "ATP synthase subunit a"  
"JS1\_M21\_00652" 18150 "s63E6H2" 0.7973576 "ATP synthase subunit a"  
"JS1\_M21\_00653" 18151 "s59E13H2" 0.2822425 "ATP synthase subunit c, sodium ion specific"  
"JS1\_M21\_00653" 18151 "s59E25H2" 0 "ATP synthase subunit c, sodium ion specific"  
"JS1\_M21\_00653" 18151 "s59E5H2" 2.317077 "ATP synthase subunit c, sodium ion specific"  
"JS1\_M21\_00653" 18151 "s63E6H2" 1.053338 "ATP synthase subunit c, sodium ion specific"  
"JS1\_M21\_00654" 18152 "s59E13H2" 0.3465985 "ATP synthase subunit b, sodium ion specific"  
"JS1\_M21\_00654" 18152 "s59E25H2" 0 "ATP synthase subunit b, sodium ion specific"  
"JS1\_M21\_00654" 18152 "s59E5H2" 0.6164129 "ATP synthase subunit b, sodium ion specific"  
"JS1\_M21\_00654" 18152 "s63E6H2" 1.037349 "ATP synthase subunit b, sodium ion specific"  
"JS1\_M21\_00655" 18153 "s59E13H2" 0.4755224 "ATP synthase subunit alpha"  
"JS1\_M21\_00655" 18153 "s59E25H2" 0 "ATP synthase subunit alpha"  
"JS1\_M21\_00655" 18153 "s59E5H2" 0.9527636 "ATP synthase subunit alpha"  
"JS1\_M21\_00655" 18153 "s63E6H2" 1.913984 "ATP synthase subunit alpha"  
"JS1\_M21\_00656" 18154 "s59E13H2" 0.0006762382 "Autoinducer 2 import system permease protein LsrD"  
"JS1\_M21\_00656" 18154 "s59E25H2" 0 "Autoinducer 2 import system permease protein LsrD"  
"JS1\_M21\_00656" 18154 "s59E5H2" 0.01526283 "Autoinducer 2 import system permease protein LsrD"  
"JS1\_M21\_00656" 18154 "s63E6H2" 0.08347564 "Autoinducer 2 import system permease protein LsrD"  
"JS1\_M21\_00657" 18155 "s59E13H2" 0 "Ribose transport system permease protein RbsC"  
"JS1\_M21\_00657" 18155 "s59E25H2" 0 "Ribose transport system permease protein RbsC"  
"JS1\_M21\_00657" 18155 "s59E5H2" 0 "Ribose transport system permease protein RbsC"  
"JS1\_M21\_00657" 18155 "s63E6H2" 0.04497367 "Ribose transport system permease protein RbsC"  
"JS1\_M21\_00658" 18156 "s59E13H2" 0 "Phenylalanine--tRNA ligase alpha subunit"  
"JS1\_M21\_00658" 18156 "s59E25H2" 0 "Phenylalanine--tRNA ligase alpha subunit"  
"JS1\_M21\_00658" 18156 "s59E5H2" 0.04779666 "Phenylalanine--tRNA ligase alpha subunit"  
"JS1\_M21\_00658" 18156 "s63E6H2" 0.3974248 "Phenylalanine--tRNA ligase alpha subunit"  
"JS1\_M21\_00659" 18157 "s59E13H2" 0.4177563 "Phenylalanine--tRNA ligase beta subunit"  
"JS1\_M21\_00659" 18157 "s59E25H2" 0 "Phenylalanine--tRNA ligase beta subunit"  
"JS1\_M21\_00659" 18157 "s59E5H2" 0.3158019 "Phenylalanine--tRNA ligase beta subunit"  
"JS1\_M21\_00659" 18157 "s63E6H2" 0.3402101 "Phenylalanine--tRNA ligase beta subunit"  
"JS1\_M21\_00660" 18158 "s59E13H2" 1.016186 "colicin V production protein"  
"JS1\_M21\_00660" 18158 "s59E25H2" 0 "colicin V production protein"  
"JS1\_M21\_00660" 18158 "s59E5H2" 0.3725356 "colicin V production protein"  
"JS1\_M21\_00660" 18158 "s63E6H2" 0.5874035 "colicin V production protein"  
"JS1\_M21\_00661" 18159 "s59E13H2" 1.366381 "hypothetical protein"

"JS1\_M21\_00661" 18159 "s59E25H2" 0 "hypothetical protein"  
"JS1\_M21\_00661" 18159 "s59E5H2" 0.4254272 "hypothetical protein"  
"JS1\_M21\_00661" 18159 "s63E6H2" 0.6501571 "hypothetical protein"  
"JS1\_M21\_00663" 18161 "s59E13H2" 0.1328804 "deoxyguanosinetriphosphate triphosphohydrolase-like protein"  
"JS1\_M21\_00663" 18161 "s59E25H2" 0 "deoxyguanosinetriphosphate triphosphohydrolase-like protein"  
"JS1\_M21\_00663" 18161 "s59E5H2" 1.042841 "deoxyguanosinetriphosphate triphosphohydrolase-like protein"  
"JS1\_M21\_00663" 18161 "s63E6H2" 0.04688446 "deoxyguanosinetriphosphate triphosphohydrolase-like protein"  
"JS1\_M21\_00664" 18162 "s59E13H2" 0.2365845 "O-acetyl-ADP-ribose deacetylase"  
"JS1\_M21\_00664" 18162 "s59E25H2" 0 "O-acetyl-ADP-ribose deacetylase"  
"JS1\_M21\_00664" 18162 "s59E5H2" 0.6008709 "O-acetyl-ADP-ribose deacetylase"  
"JS1\_M21\_00664" 18162 "s63E6H2" 0.1036071 "O-acetyl-ADP-ribose deacetylase"  
"JS1\_M21\_00665" 18163 "s59E13H2" 0.1408258 "Murein DD-endopeptidase MepM"  
"JS1\_M21\_00665" 18163 "s59E25H2" 0 "Murein DD-endopeptidase MepM"  
"JS1\_M21\_00665" 18163 "s59E5H2" 0.3688506 "Murein DD-endopeptidase MepM"  
"JS1\_M21\_00665" 18163 "s63E6H2" 0.1516008 "Murein DD-endopeptidase MepM"  
"JS1\_M21\_00666" 18164 "s59E13H2" 0.1383733 "hypothetical protein"  
"JS1\_M21\_00666" 18164 "s59E25H2" 0 "hypothetical protein"  
"JS1\_M21\_00666" 18164 "s59E5H2" 0.9618961 "hypothetical protein"  
"JS1\_M21\_00666" 18164 "s63E6H2" 0.09440058 "hypothetical protein"  
"JS1\_M21\_00667" 18165 "s59E13H2" 0.5594113 "ECF RNA polymerase sigma factor SigW"  
"JS1\_M21\_00667" 18165 "s59E25H2" 0 "ECF RNA polymerase sigma factor SigW"  
"JS1\_M21\_00667" 18165 "s59E5H2" 1.538137 "ECF RNA polymerase sigma factor SigW"  
"JS1\_M21\_00667" 18165 "s63E6H2" 0.1647467 "ECF RNA polymerase sigma factor SigW"  
"JS1\_M21\_00668" 18166 "s59E13H2" 0.5924821 "hypothetical protein"  
"JS1\_M21\_00668" 18166 "s59E25H2" 0 "hypothetical protein"  
"JS1\_M21\_00668" 18166 "s59E5H2" 0.6638636 "hypothetical protein"  
"JS1\_M21\_00668" 18166 "s63E6H2" 0.09762624 "hypothetical protein"  
"JS1\_M21\_00669" 18167 "s59E13H2" 0.9112587 "tetratricopeptide repeat protein"  
"JS1\_M21\_00669" 18167 "s59E25H2" 0 "tetratricopeptide repeat protein"  
"JS1\_M21\_00669" 18167 "s59E5H2" 0.4285921 "tetratricopeptide repeat protein"  
"JS1\_M21\_00669" 18167 "s63E6H2" 0.1456305 "tetratricopeptide repeat protein"  
"JS1\_M21\_00670" 18168 "s59E13H2" 1.307921 "Alpha-monoglucosyldiacylglycerol synthase"  
"JS1\_M21\_00670" 18168 "s59E25H2" 0 "Alpha-monoglucosyldiacylglycerol synthase"  
"JS1\_M21\_00670" 18168 "s59E5H2" 0.8580966 "Alpha-monoglucosyldiacylglycerol synthase"  
"JS1\_M21\_00670" 18168 "s63E6H2" 0.6006672 "Alpha-monoglucosyldiacylglycerol synthase"  
"JS1\_M21\_00671" 18169 "s59E13H2" 1.12057 "hypothetical protein"  
"JS1\_M21\_00671" 18169 "s59E25H2" 0 "hypothetical protein"  
"JS1\_M21\_00671" 18169 "s59E5H2" 1.079781 "hypothetical protein"  
"JS1\_M21\_00671" 18169 "s63E6H2" 0.1059334 "hypothetical protein"  
"JS1\_M21\_00674" 18172 "s59E13H2" 0.1252832 "Cna protein B-type domain protein"  
"JS1\_M21\_00674" 18172 "s59E25H2" 0 "Cna protein B-type domain protein"  
"JS1\_M21\_00674" 18172 "s59E5H2" 0.01579041 "Cna protein B-type domain protein"  
"JS1\_M21\_00674" 18172 "s63E6H2" 0.005869777 "Cna protein B-type domain protein"  
"JS1\_M21\_00676" 18174 "s59E13H2" 0.1648452 "hypothetical protein"  
"JS1\_M21\_00676" 18174 "s59E25H2" 0 "hypothetical protein"  
"JS1\_M21\_00676" 18174 "s59E5H2" 0.04685173 "hypothetical protein"  
"JS1\_M21\_00676" 18174 "s63E6H2" 1.058204 "hypothetical protein"

"JS1\_M21\_00678" 18176 "s59E13H2" 1.423962 "2-amino-3-ketobutyrate coenzyme A ligase"  
"JS1\_M21\_00678" 18176 "s59E25H2" 0.3860503 "2-amino-3-ketobutyrate coenzyme A ligase"  
"JS1\_M21\_00678" 18176 "s59E5H2" 1.12968 "2-amino-3-ketobutyrate coenzyme A ligase"  
"JS1\_M21\_00678" 18176 "s63E6H2" 1.354597 "2-amino-3-ketobutyrate coenzyme A ligase"  
"JS1\_M21\_00679" 18177 "s59E13H2" 0.7453616 "putative epimerase/dehydratase"  
"JS1\_M21\_00679" 18177 "s59E25H2" 0 "putative epimerase/dehydratase"  
"JS1\_M21\_00679" 18177 "s59E5H2" 1.61924 "putative epimerase/dehydratase"  
"JS1\_M21\_00679" 18177 "s63E6H2" 2.04592 "putative epimerase/dehydratase"  
"JS1\_M21\_00680" 18178 "s59E13H2" 0.4210894 "putative HTH-type transcriptional regulator YdfH"  
"JS1\_M21\_00680" 18178 "s59E25H2" 0 "putative HTH-type transcriptional regulator YdfH"  
"JS1\_M21\_00680" 18178 "s59E5H2" 0.3889529 "putative HTH-type transcriptional regulator YdfH"  
"JS1\_M21\_00680" 18178 "s63E6H2" 1.54715 "putative HTH-type transcriptional regulator YdfH"  
"JS1\_M21\_00681" 18179 "s59E13H2" 0.8810417 "Malate dehydrogenase"  
"JS1\_M21\_00681" 18179 "s59E25H2" 0 "Malate dehydrogenase"  
"JS1\_M21\_00681" 18179 "s59E5H2" 1.825496 "Malate dehydrogenase"  
"JS1\_M21\_00681" 18179 "s63E6H2" 0.8862488 "Malate dehydrogenase"  
"JS1\_M21\_00682" 18180 "s59E13H2" 0.3449049 "hypothetical protein"  
"JS1\_M21\_00682" 18180 "s59E25H2" 0 "hypothetical protein"  
"JS1\_M21\_00682" 18180 "s59E5H2" 0.6336212 "hypothetical protein"  
"JS1\_M21\_00682" 18180 "s63E6H2" 0.1042633 "hypothetical protein"  
"JS1\_M21\_00684" 18182 "s59E13H2" 0.01348667 "hypothetical protein"  
"JS1\_M21\_00684" 18182 "s59E25H2" 0 "hypothetical protein"  
"JS1\_M21\_00684" 18182 "s59E5H2" 0.3954749 "hypothetical protein"  
"JS1\_M21\_00684" 18182 "s63E6H2" 0.8243288 "hypothetical protein"  
"JS1\_M21\_00685" 18183 "s59E13H2" 0.0008505853 "Flavoredoxin"  
"JS1\_M21\_00685" 18183 "s59E25H2" 0 "Flavoredoxin"  
"JS1\_M21\_00685" 18183 "s59E5H2" 0.05234439 "Flavoredoxin"  
"JS1\_M21\_00685" 18183 "s63E6H2" 0.3753452 "Flavoredoxin"  
"JS1\_M21\_00686" 18184 "s59E13H2" 0 "Endonuclease YhcR precursor"  
"JS1\_M21\_00686" 18184 "s59E25H2" 0.1443053 "Endonuclease YhcR precursor"  
"JS1\_M21\_00686" 18184 "s59E5H2" 0.1677822 "Endonuclease YhcR precursor"  
"JS1\_M21\_00686" 18184 "s63E6H2" 0.8412801 "Endonuclease YhcR precursor"  
"JS1\_M21\_00687" 18185 "s59E13H2" 0.04025813 "Leucine-, isoleucine-, valine-, threonine-, and alanine-binding protein precursor"  
"JS1\_M21\_00687" 18185 "s59E25H2" 0 "Leucine-, isoleucine-, valine-, threonine-, and alanine-binding protein precursor"  
"JS1\_M21\_00687" 18185 "s59E5H2" 0.1696308 "Leucine-, isoleucine-, valine-, threonine-, and alanine-binding protein precursor"  
"JS1\_M21\_00687" 18185 "s63E6H2" 5.295879 "Leucine-, isoleucine-, valine-, threonine-, and alanine-binding protein precursor"  
"JS1\_M21\_00688" 18186 "s59E13H2" 0.7609294 "High-affinity branched-chain amino acid transport system permease protein LivH"  
"JS1\_M21\_00688" 18186 "s59E25H2" 0.5357942 "High-affinity branched-chain amino acid transport system permease protein LivH"  
"JS1\_M21\_00688" 18186 "s59E5H2" 0.2083226 "High-affinity branched-chain amino acid transport system permease protein LivH"  
"JS1\_M21\_00688" 18186 "s63E6H2" 7.911298 "High-affinity branched-chain amino acid transport system permease protein LivH"  
"JS1\_M21\_00689" 18187 "s59E13H2" 0.8542223 "leucine/isoleucine/valine transporter permease subunit"  
"JS1\_M21\_00689" 18187 "s59E25H2" 0 "leucine/isoleucine/valine transporter permease subunit"  
"JS1\_M21\_00689" 18187 "s59E5H2" 0.3242347 "leucine/isoleucine/valine transporter permease subunit"  
"JS1\_M21\_00689" 18187 "s63E6H2" 8.094204 "leucine/isoleucine/valine transporter permease subunit"  
"JS1\_M21\_00690" 18188 "s59E13H2" 0.7341116 "putative branched-chain amino acid transport ATP-binding protein LivG"  
"JS1\_M21\_00690" 18188 "s59E25H2" 0 "putative branched-chain amino acid transport ATP-binding protein LivG"  
"JS1\_M21\_00690" 18188 "s59E5H2" 0.6257645 "putative branched-chain amino acid transport ATP-binding protein LivG"

"JS1\_M21\_00690" 18188 "s63E6H2" 5.227333 "putative branched-chain amino acid transport ATP-binding protein LivG"  
"JS1\_M21\_00691" 18189 "s59E13H2" 0.7815817 "High-affinity branched-chain amino acid transport ATP-binding protein LivF"  
"JS1\_M21\_00691" 18189 "s59E25H2" 0 "High-affinity branched-chain amino acid transport ATP-binding protein LivF"  
"JS1\_M21\_00691" 18189 "s59E5H2" 0.4352333 "High-affinity branched-chain amino acid transport ATP-binding protein LivF"  
"JS1\_M21\_00691" 18189 "s63E6H2" 0.7478388 "High-affinity branched-chain amino acid transport ATP-binding protein LivF"  
"JS1\_M21\_00692" 18190 "s59E13H2" 0.8049977 "Poly-beta-1,6-N-acetyl-D-glucosamine N-deacetylase precursor"  
"JS1\_M21\_00692" 18190 "s59E25H2" 0 "Poly-beta-1,6-N-acetyl-D-glucosamine N-deacetylase precursor"  
"JS1\_M21\_00692" 18190 "s59E5H2" 0.4919447 "Poly-beta-1,6-N-acetyl-D-glucosamine N-deacetylase precursor"  
"JS1\_M21\_00692" 18190 "s63E6H2" 0.7685562 "Poly-beta-1,6-N-acetyl-D-glucosamine N-deacetylase precursor"  
"JS1\_M21\_00693" 18191 "s59E13H2" 0.5349964 "Pyrimidine 5'-nucleotidase YjjG"  
"JS1\_M21\_00693" 18191 "s59E25H2" 0 "Pyrimidine 5'-nucleotidase YjjG"  
"JS1\_M21\_00693" 18191 "s59E5H2" 1.019446 "Pyrimidine 5'-nucleotidase YjjG"  
"JS1\_M21\_00693" 18191 "s63E6H2" 1.00266 "Pyrimidine 5'-nucleotidase YjjG"  
"JS1\_M21\_00694" 18192 "s59E13H2" 0.4647708 "putative sulfoacetate transporter SauU"  
"JS1\_M21\_00694" 18192 "s59E25H2" 0 "putative sulfoacetate transporter SauU"  
"JS1\_M21\_00694" 18192 "s59E5H2" 0.5897431 "putative sulfoacetate transporter SauU"  
"JS1\_M21\_00694" 18192 "s63E6H2" 0.7487607 "putative sulfoacetate transporter SauU"  
"JS1\_M21\_00695" 18193 "s59E13H2" 0.6411674 "Adenosine specific kinase"  
"JS1\_M21\_00695" 18193 "s59E25H2" 0 "Adenosine specific kinase"  
"JS1\_M21\_00695" 18193 "s59E5H2" 1.094443 "Adenosine specific kinase"  
"JS1\_M21\_00695" 18193 "s63E6H2" 0.6675513 "Adenosine specific kinase"  
"JS1\_M21\_00696" 18194 "s59E13H2" 1.106071 "Phage shock protein C"  
"JS1\_M21\_00696" 18194 "s59E25H2" 0 "Phage shock protein C"  
"JS1\_M21\_00696" 18194 "s59E5H2" 1.18096 "Phage shock protein C"  
"JS1\_M21\_00696" 18194 "s63E6H2" 0.771172 "Phage shock protein C"  
"JS1\_M21\_00697" 18195 "s59E13H2" 0.9240727 "Epoxyqueuosine reductase"  
"JS1\_M21\_00697" 18195 "s59E25H2" 0 "Epoxyqueuosine reductase"  
"JS1\_M21\_00697" 18195 "s59E5H2" 0.6454874 "Epoxyqueuosine reductase"  
"JS1\_M21\_00697" 18195 "s63E6H2" 0.7166107 "Epoxyqueuosine reductase"  
"JS1\_M21\_00698" 18196 "s59E13H2" 1.868559 "putative ABC transporter ATP-binding protein YbhF"  
"JS1\_M21\_00698" 18196 "s59E25H2" 0 "putative ABC transporter ATP-binding protein YbhF"  
"JS1\_M21\_00698" 18196 "s59E5H2" 3.239569 "putative ABC transporter ATP-binding protein YbhF"  
"JS1\_M21\_00698" 18196 "s63E6H2" 1.678258 "putative ABC transporter ATP-binding protein YbhF"  
"JS1\_M21\_00699" 18197 "s59E13H2" 1.686574 "Inner membrane transport permease YbhS"  
"JS1\_M21\_00699" 18197 "s59E25H2" 0 "Inner membrane transport permease YbhS"  
"JS1\_M21\_00699" 18197 "s59E5H2" 2.205719 "Inner membrane transport permease YbhS"  
"JS1\_M21\_00699" 18197 "s63E6H2" 1.653872 "Inner membrane transport permease YbhS"  
"JS1\_M21\_00700" 18198 "s59E13H2" 0 "PEGA domain protein"  
"JS1\_M21\_00700" 18198 "s59E25H2" 0 "PEGA domain protein"  
"JS1\_M21\_00700" 18198 "s59E5H2" 0.2840358 "PEGA domain protein"  
"JS1\_M21\_00700" 18198 "s63E6H2" 0.07355649 "PEGA domain protein"  
"JS1\_M21\_00701" 18199 "s59E13H2" 1.243509 "Protein-L-isoaspartate O-methyltransferase"  
"JS1\_M21\_00701" 18199 "s59E25H2" 0 "Protein-L-isoaspartate O-methyltransferase"  
"JS1\_M21\_00701" 18199 "s59E5H2" 1.294706 "Protein-L-isoaspartate O-methyltransferase"  
"JS1\_M21\_00701" 18199 "s63E6H2" 0.8516699 "Protein-L-isoaspartate O-methyltransferase"  
"JS1\_M21\_00702" 18200 "s59E13H2" 0.5914177 "hypothetical protein"  
"JS1\_M21\_00702" 18200 "s59E25H2" 0 "hypothetical protein"

"JS1\_M21\_00702" 18200 "s59E5H2" 1.249624 "hypothetical protein"  
"JS1\_M21\_00702" 18200 "s63E6H2" 1.756555 "hypothetical protein"  
"JS1\_M21\_00703" 18201 "s59E13H2" 0.246142 "Capsule biosynthesis protein CapA"  
"JS1\_M21\_00703" 18201 "s59E25H2" 0 "Capsule biosynthesis protein CapA"  
"JS1\_M21\_00703" 18201 "s59E5H2" 0.1689448 "Capsule biosynthesis protein CapA"  
"JS1\_M21\_00703" 18201 "s63E6H2" 0.5419523 "Capsule biosynthesis protein CapA"  
"JS1\_M21\_00704" 18202 "s59E13H2" 0.4202984 "hypothetical protein"  
"JS1\_M21\_00704" 18202 "s59E25H2" 0 "hypothetical protein"  
"JS1\_M21\_00704" 18202 "s59E5H2" 0.5966893 "hypothetical protein"  
"JS1\_M21\_00704" 18202 "s63E6H2" 0.4702545 "hypothetical protein"  
"JS1\_M21\_00705" 18203 "s59E13H2" 0.8278693 "NTE family protein RssA"  
"JS1\_M21\_00705" 18203 "s59E25H2" 0 "NTE family protein RssA"  
"JS1\_M21\_00705" 18203 "s59E5H2" 0.18048 "NTE family protein RssA"  
"JS1\_M21\_00705" 18203 "s63E6H2" 0.7412601 "NTE family protein RssA"  
"JS1\_M21\_00706" 18204 "s59E13H2" 0.6374869 "NTE family protein RssA"  
"JS1\_M21\_00706" 18204 "s59E25H2" 0 "NTE family protein RssA"  
"JS1\_M21\_00706" 18204 "s59E5H2" 0.1018955 "NTE family protein RssA"  
"JS1\_M21\_00706" 18204 "s63E6H2" 0.4512144 "NTE family protein RssA"  
"JS1\_M21\_00707" 18205 "s59E13H2" 1.48966 "General stress protein 69"  
"JS1\_M21\_00707" 18205 "s59E25H2" 0 "General stress protein 69"  
"JS1\_M21\_00707" 18205 "s59E5H2" 0.2339015 "General stress protein 69"  
"JS1\_M21\_00707" 18205 "s63E6H2" 0.3609219 "General stress protein 69"  
"JS1\_M21\_00708" 18206 "s59E13H2" 0 "putative HTH-type transcriptional regulator YbbH"  
"JS1\_M21\_00708" 18206 "s59E25H2" 0 "putative HTH-type transcriptional regulator YbbH"  
"JS1\_M21\_00708" 18206 "s59E5H2" 0.06739104 "putative HTH-type transcriptional regulator YbbH"  
"JS1\_M21\_00708" 18206 "s63E6H2" 0.0235233 "putative HTH-type transcriptional regulator YbbH"  
"JS1\_M21\_00709" 18207 "s59E13H2" 0 "Methenyltetrahydrofolate cyclohydrolase"  
"JS1\_M21\_00709" 18207 "s59E25H2" 0 "Methenyltetrahydrofolate cyclohydrolase"  
"JS1\_M21\_00709" 18207 "s59E5H2" 0.01763381 "Methenyltetrahydrofolate cyclohydrolase"  
"JS1\_M21\_00709" 18207 "s63E6H2" 0.04048981 "Methenyltetrahydrofolate cyclohydrolase"  
"JS1\_M21\_00710" 18208 "s59E13H2" 0.7932274 "Thioesterase superfamily protein"  
"JS1\_M21\_00710" 18208 "s59E25H2" 0 "Thioesterase superfamily protein"  
"JS1\_M21\_00710" 18208 "s59E5H2" 0.138175 "Thioesterase superfamily protein"  
"JS1\_M21\_00710" 18208 "s63E6H2" 0.02870776 "Thioesterase superfamily protein"  
"JS1\_M21\_00711" 18209 "s59E13H2" 0.1161973 "Thioredoxin"  
"JS1\_M21\_00711" 18209 "s59E25H2" 0 "Thioredoxin"  
"JS1\_M21\_00711" 18209 "s59E5H2" 3.649415 "Thioredoxin"  
"JS1\_M21\_00711" 18209 "s63E6H2" 12.68418 "Thioredoxin"  
"JS1\_M21\_00712" 18210 "s59E13H2" 0.1695203 "thiol:disulfide interchange protein precursor"  
"JS1\_M21\_00712" 18210 "s59E25H2" 0.6438746 "thiol:disulfide interchange protein precursor"  
"JS1\_M21\_00712" 18210 "s59E5H2" 5.683344 "thiol:disulfide interchange protein precursor"  
"JS1\_M21\_00712" 18210 "s63E6H2" 25.85698 "thiol:disulfide interchange protein precursor"  
"JS1\_M21\_00713" 18211 "s59E13H2" 0.1820405 "Sodium Bile acid symporter family protein"  
"JS1\_M21\_00713" 18211 "s59E25H2" 0 "Sodium Bile acid symporter family protein"  
"JS1\_M21\_00713" 18211 "s59E5H2" 5.434858 "Sodium Bile acid symporter family protein"  
"JS1\_M21\_00713" 18211 "s63E6H2" 37.30869 "Sodium Bile acid symporter family protein"  
"JS1\_M21\_00714" 18212 "s59E13H2" 0.01315487 "hypothetical protein"

"JS1\_M21\_00714" 18212 "s59E25H2" 0 "hypothetical protein"  
"JS1\_M21\_00714" 18212 "s59E5H2" 0.03080518 "hypothetical protein"  
"JS1\_M21\_00714" 18212 "s63E6H2" 0.0004117879 "hypothetical protein"  
"JS1\_M21\_00716" 18214 "s59E13H2" 0 "hypothetical protein"  
"JS1\_M21\_00716" 18214 "s59E25H2" 0 "hypothetical protein"  
"JS1\_M21\_00716" 18214 "s59E5H2" 0.02344403 "hypothetical protein"  
"JS1\_M21\_00716" 18214 "s63E6H2" 0 "hypothetical protein"  
"JS1\_M21\_00717" 18215 "s59E13H2" 0 "Outer membrane porin F precursor"  
"JS1\_M21\_00717" 18215 "s59E25H2" 0 "Outer membrane porin F precursor"  
"JS1\_M21\_00717" 18215 "s59E5H2" 0.07685351 "Outer membrane porin F precursor"  
"JS1\_M21\_00717" 18215 "s63E6H2" 0 "Outer membrane porin F precursor"  
"JS1\_M21\_00718" 18216 "s59E13H2" 0 "Caspase domain protein"  
"JS1\_M21\_00718" 18216 "s59E25H2" 0 "Caspase domain protein"  
"JS1\_M21\_00718" 18216 "s59E5H2" 0.2722611 "Caspase domain protein"  
"JS1\_M21\_00718" 18216 "s63E6H2" 0.02386079 "Caspase domain protein"  
"JS1\_M21\_00721" 18219 "s59E13H2" 0.9675195 "Cysteine/O-acetylserine efflux protein"  
"JS1\_M21\_00721" 18219 "s59E25H2" 0 "Cysteine/O-acetylserine efflux protein"  
"JS1\_M21\_00721" 18219 "s59E5H2" 3.098968 "Cysteine/O-acetylserine efflux protein"  
"JS1\_M21\_00721" 18219 "s63E6H2" 0.287007 "Cysteine/O-acetylserine efflux protein"  
"JS1\_M21\_00722" 18220 "s59E13H2" 0.5368321 "Biotin transporter BioY"  
"JS1\_M21\_00722" 18220 "s59E25H2" 0 "Biotin transporter BioY"  
"JS1\_M21\_00722" 18220 "s59E5H2" 1.962664 "Biotin transporter BioY"  
"JS1\_M21\_00722" 18220 "s63E6H2" 0.8645026 "Biotin transporter BioY"  
"JS1\_M21\_00723" 18221 "s59E13H2" 0.0715711 "Bifunctional ligase/repressor BirA"  
"JS1\_M21\_00723" 18221 "s59E25H2" 0 "Bifunctional ligase/repressor BirA"  
"JS1\_M21\_00723" 18221 "s59E5H2" 1.219685 "Bifunctional ligase/repressor BirA"  
"JS1\_M21\_00723" 18221 "s63E6H2" 4.044798 "Bifunctional ligase/repressor BirA"  
"JS1\_M21\_00724" 18222 "s59E13H2" 0.1846471 "hypothetical protein"  
"JS1\_M21\_00724" 18222 "s59E25H2" 0 "hypothetical protein"  
"JS1\_M21\_00724" 18222 "s59E5H2" 2.516275 "hypothetical protein"  
"JS1\_M21\_00724" 18222 "s63E6H2" 0.6398303 "hypothetical protein"  
"JS1\_M21\_00725" 18223 "s59E13H2" 0.1887525 "Deoxyadenosine/deoxycytidine kinase"  
"JS1\_M21\_00725" 18223 "s59E25H2" 0 "Deoxyadenosine/deoxycytidine kinase"  
"JS1\_M21\_00725" 18223 "s59E5H2" 1.750587 "Deoxyadenosine/deoxycytidine kinase"  
"JS1\_M21\_00725" 18223 "s63E6H2" 12.91153 "Deoxyadenosine/deoxycytidine kinase"  
"JS1\_M21\_00726" 18224 "s59E13H2" 0.214718 "Deoxyguanosine kinase"  
"JS1\_M21\_00726" 18224 "s59E25H2" 0 "Deoxyguanosine kinase"  
"JS1\_M21\_00726" 18224 "s59E5H2" 1.700585 "Deoxyguanosine kinase"  
"JS1\_M21\_00726" 18224 "s63E6H2" 11.58306 "Deoxyguanosine kinase"  
"JS1\_M21\_00727" 18225 "s59E13H2" 0.1786526 "Octanoyltransferase LipM"  
"JS1\_M21\_00727" 18225 "s59E25H2" 0 "Octanoyltransferase LipM"  
"JS1\_M21\_00727" 18225 "s59E5H2" 0.9417276 "Octanoyltransferase LipM"  
"JS1\_M21\_00727" 18225 "s63E6H2" 5.432151 "Octanoyltransferase LipM"  
"JS1\_M21\_00729" 18227 "s59E13H2" 0.7599686 "hypothetical protein"  
"JS1\_M21\_00729" 18227 "s59E25H2" 0 "hypothetical protein"  
"JS1\_M21\_00729" 18227 "s59E5H2" 0.5969073 "hypothetical protein"  
"JS1\_M21\_00729" 18227 "s63E6H2" 0.8606123 "hypothetical protein"

"JS1\_M21\_00730" 18228 "s59E13H2" 0.6258227 "FeoA domain protein"  
"JS1\_M21\_00730" 18228 "s59E25H2" 0 "FeoA domain protein"  
"JS1\_M21\_00730" 18228 "s59E5H2" 0.446349 "FeoA domain protein"  
"JS1\_M21\_00730" 18228 "s63E6H2" 2.990774 "FeoA domain protein"  
"JS1\_M21\_00731" 18229 "s59E13H2" 0.5710511 "Transcriptional regulator MntR"  
"JS1\_M21\_00731" 18229 "s59E25H2" 0 "Transcriptional regulator MntR"  
"JS1\_M21\_00731" 18229 "s59E5H2" 0.3161639 "Transcriptional regulator MntR"  
"JS1\_M21\_00731" 18229 "s63E6H2" 3.523554 "Transcriptional regulator MntR"  
"JS1\_M21\_00732" 18230 "s59E13H2" 0.556869 "Sulfur carrier protein ThiS"  
"JS1\_M21\_00732" 18230 "s59E25H2" 0 "Sulfur carrier protein ThiS"  
"JS1\_M21\_00732" 18230 "s59E5H2" 0.1696501 "Sulfur carrier protein ThiS"  
"JS1\_M21\_00732" 18230 "s63E6H2" 3.22098 "Sulfur carrier protein ThiS"  
"JS1\_M21\_00733" 18231 "s59E13H2" 0.9277784 "Tungsten-containing formaldehyde ferredoxin oxidoreductase"  
"JS1\_M21\_00733" 18231 "s59E25H2" 0 "Tungsten-containing formaldehyde ferredoxin oxidoreductase"  
"JS1\_M21\_00733" 18231 "s59E5H2" 0.5161558 "Tungsten-containing formaldehyde ferredoxin oxidoreductase"  
"JS1\_M21\_00733" 18231 "s63E6H2" 1.568836 "Tungsten-containing formaldehyde ferredoxin oxidoreductase"  
"JS1\_M21\_00734" 18232 "s59E13H2" 1.315033 "Malate-2H(+)/Na(+)-lactate antiporter"  
"JS1\_M21\_00734" 18232 "s59E25H2" 0 "Malate-2H(+)/Na(+)-lactate antiporter"  
"JS1\_M21\_00734" 18232 "s59E5H2" 0.4113052 "Malate-2H(+)/Na(+)-lactate antiporter"  
"JS1\_M21\_00734" 18232 "s63E6H2" 0.6717941 "Malate-2H(+)/Na(+)-lactate antiporter"  
"JS1\_M21\_00735" 18233 "s59E13H2" 0.7305995 "Cyclic 2,3-diphosphoglycerate synthetase"  
"JS1\_M21\_00735" 18233 "s59E25H2" 0 "Cyclic 2,3-diphosphoglycerate synthetase"  
"JS1\_M21\_00735" 18233 "s59E5H2" 0.2637157 "Cyclic 2,3-diphosphoglycerate synthetase"  
"JS1\_M21\_00735" 18233 "s63E6H2" 1.068882 "Cyclic 2,3-diphosphoglycerate synthetase"  
"JS1\_M21\_00736" 18234 "s59E13H2" 0.09010291 "5-aminovalerate aminotransferase DavT"  
"JS1\_M21\_00736" 18234 "s59E25H2" 0 "5-aminovalerate aminotransferase DavT"  
"JS1\_M21\_00736" 18234 "s59E5H2" 0.1504772 "5-aminovalerate aminotransferase DavT"  
"JS1\_M21\_00736" 18234 "s63E6H2" 1.282506 "5-aminovalerate aminotransferase DavT"  
"JS1\_M21\_00738" 18236 "s59E13H2" 0.1868401 "Lysine 6-dehydrogenase"  
"JS1\_M21\_00738" 18236 "s59E25H2" 0 "Lysine 6-dehydrogenase"  
"JS1\_M21\_00738" 18236 "s59E5H2" 0.2833993 "Lysine 6-dehydrogenase"  
"JS1\_M21\_00738" 18236 "s63E6H2" 0.3990016 "Lysine 6-dehydrogenase"  
"JS1\_M21\_00740" 18238 "s59E13H2" 0.1364997 "Lysine 6-dehydrogenase"  
"JS1\_M21\_00740" 18238 "s59E25H2" 0 "Lysine 6-dehydrogenase"  
"JS1\_M21\_00740" 18238 "s59E5H2" 0.1566421 "Lysine 6-dehydrogenase"  
"JS1\_M21\_00740" 18238 "s63E6H2" 0.5862798 "Lysine 6-dehydrogenase"  
"JS1\_M21\_00741" 18239 "s59E13H2" 0.1318221 "2-methylcitrate dehydratase"  
"JS1\_M21\_00741" 18239 "s59E25H2" 0 "2-methylcitrate dehydratase"  
"JS1\_M21\_00741" 18239 "s59E5H2" 0.0386533 "2-methylcitrate dehydratase"  
"JS1\_M21\_00741" 18239 "s63E6H2" 0.2075365 "2-methylcitrate dehydratase"  
"JS1\_M21\_00742" 18240 "s59E13H2" 0.2077268 "3-isopropylmalate/3-methylmalate dehydrogenase"  
"JS1\_M21\_00742" 18240 "s59E25H2" 0 "3-isopropylmalate/3-methylmalate dehydrogenase"  
"JS1\_M21\_00742" 18240 "s59E5H2" 0.34026 "3-isopropylmalate/3-methylmalate dehydrogenase"  
"JS1\_M21\_00742" 18240 "s63E6H2" 0.2531479 "3-isopropylmalate/3-methylmalate dehydrogenase"  
"JS1\_M21\_00743" 18241 "s59E13H2" 0.9762809 "Isopropylmalate/citramalate isomerase small subunit"  
"JS1\_M21\_00743" 18241 "s59E25H2" 0 "Isopropylmalate/citramalate isomerase small subunit"  
"JS1\_M21\_00743" 18241 "s59E5H2" 0.1821568 "Isopropylmalate/citramalate isomerase small subunit"



"JS1\_M21\_00743" 18241 "s63E6H2" 0.2095907 "Isopropylmalate/citramalate isomerase small subunit"  
"JS1\_M21\_00744" 18242 "s59E13H2" 1.118216 "Isopropylmalate/citramalate isomerase large subunit"  
"JS1\_M21\_00744" 18242 "s59E25H2" 0 "Isopropylmalate/citramalate isomerase large subunit"  
"JS1\_M21\_00744" 18242 "s59E5H2" 0.1958532 "Isopropylmalate/citramalate isomerase large subunit"  
"JS1\_M21\_00744" 18242 "s63E6H2" 0.1244131 "Isopropylmalate/citramalate isomerase large subunit"  
"JS1\_M21\_00745" 18243 "s59E13H2" 1.52913 "Dihydroneopterin 2',3'-cyclic phosphate phosphodiesterase"  
"JS1\_M21\_00745" 18243 "s59E25H2" 0 "Dihydroneopterin 2',3'-cyclic phosphate phosphodiesterase"  
"JS1\_M21\_00745" 18243 "s59E5H2" 0.2769428 "Dihydroneopterin 2',3'-cyclic phosphate phosphodiesterase"  
"JS1\_M21\_00745" 18243 "s63E6H2" 0.1436475 "Dihydroneopterin 2',3'-cyclic phosphate phosphodiesterase"  
"JS1\_M21\_00746" 18244 "s59E13H2" 2.158763 "hypothetical protein"  
"JS1\_M21\_00746" 18244 "s59E25H2" 0 "hypothetical protein"  
"JS1\_M21\_00746" 18244 "s59E5H2" 0.2042433 "hypothetical protein"  
"JS1\_M21\_00746" 18244 "s63E6H2" 0.2860951 "hypothetical protein"  
"JS1\_M21\_00747" 18245 "s59E13H2" 4.05684 "hypothetical protein"  
"JS1\_M21\_00747" 18245 "s59E25H2" 0.3679176 "hypothetical protein"  
"JS1\_M21\_00747" 18245 "s59E5H2" 0.1863335 "hypothetical protein"  
"JS1\_M21\_00747" 18245 "s63E6H2" 0.2929958 "hypothetical protein"  
"JS1\_M21\_00748" 18246 "s59E13H2" 0.4696269 "HTH-type transcriptional regulator LutR"  
"JS1\_M21\_00748" 18246 "s59E25H2" 0 "HTH-type transcriptional regulator LutR"  
"JS1\_M21\_00748" 18246 "s59E5H2" 0.05362164 "HTH-type transcriptional regulator LutR"  
"JS1\_M21\_00748" 18246 "s63E6H2" 0.099182 "HTH-type transcriptional regulator LutR"  
"JS1\_M21\_00749" 18247 "s59E13H2" 1.511455 "N(G),N(G)-dimethylarginine dimethylaminohydrolase"  
"JS1\_M21\_00749" 18247 "s59E25H2" 0 "N(G),N(G)-dimethylarginine dimethylaminohydrolase"  
"JS1\_M21\_00749" 18247 "s59E5H2" 0.07957524 "N(G),N(G)-dimethylarginine dimethylaminohydrolase"  
"JS1\_M21\_00749" 18247 "s63E6H2" 0.0921509 "N(G),N(G)-dimethylarginine dimethylaminohydrolase"  
"JS1\_M21\_00750" 18248 "s59E13H2" 1.869209 "Phosphoenolpyruvate carboxykinase [GTP]"  
"JS1\_M21\_00750" 18248 "s59E25H2" 0 "Phosphoenolpyruvate carboxykinase [GTP]"  
"JS1\_M21\_00750" 18248 "s59E5H2" 0.08519314 "Phosphoenolpyruvate carboxykinase [GTP]"  
"JS1\_M21\_00750" 18248 "s63E6H2" 1.151776 "Phosphoenolpyruvate carboxykinase [GTP]"  
"JS1\_M21\_00751" 18249 "s59E13H2" 1.775844 "L-hydantoinase"  
"JS1\_M21\_00751" 18249 "s59E25H2" 0 "L-hydantoinase"  
"JS1\_M21\_00751" 18249 "s59E5H2" 0.09671945 "L-hydantoinase"  
"JS1\_M21\_00751" 18249 "s63E6H2" 0.03684937 "L-hydantoinase"  
"JS1\_M21\_00752" 18250 "s59E13H2" 0.2946708 "Asp/Glu/Hydantoin racemase"  
"JS1\_M21\_00752" 18250 "s59E25H2" 0 "Asp/Glu/Hydantoin racemase"  
"JS1\_M21\_00752" 18250 "s59E5H2" 0 "Asp/Glu/Hydantoin racemase"  
"JS1\_M21\_00752" 18250 "s63E6H2" 0.02309587 "Asp/Glu/Hydantoin racemase"  
"JS1\_M21\_00753" 18251 "s59E13H2" 0.04789533 "D-phenylhydantoinase"  
"JS1\_M21\_00753" 18251 "s59E25H2" 0 "D-phenylhydantoinase"  
"JS1\_M21\_00753" 18251 "s59E5H2" 0.01032271 "D-phenylhydantoinase"  
"JS1\_M21\_00753" 18251 "s63E6H2" 0.05931221 "D-phenylhydantoinase"  
"JS1\_M21\_00754" 18252 "s59E13H2" 0.04337644 "Sialic acid TRAP transporter permease protein SiaT"  
"JS1\_M21\_00754" 18252 "s59E25H2" 0 "Sialic acid TRAP transporter permease protein SiaT"  
"JS1\_M21\_00754" 18252 "s59E5H2" 0.3188888 "Sialic acid TRAP transporter permease protein SiaT"  
"JS1\_M21\_00754" 18252 "s63E6H2" 0.07085978 "Sialic acid TRAP transporter permease protein SiaT"  
"JS1\_M21\_00755" 18253 "s59E13H2" 0 "hypothetical protein"  
"JS1\_M21\_00755" 18253 "s59E25H2" 0 "hypothetical protein"

"JS1\_M21\_00755" 18253 "s59E5H2" 0.676193 "hypothetical protein"  
"JS1\_M21\_00755" 18253 "s63E6H2" 0.08719789 "hypothetical protein"  
"JS1\_M21\_00756" 18254 "s59E13H2" 0.08281371 "Tungsten-containing formaldehyde ferredoxin oxidoreductase"  
"JS1\_M21\_00756" 18254 "s59E25H2" 0 "Tungsten-containing formaldehyde ferredoxin oxidoreductase"  
"JS1\_M21\_00756" 18254 "s59E5H2" 0 "Tungsten-containing formaldehyde ferredoxin oxidoreductase"  
"JS1\_M21\_00756" 18254 "s63E6H2" 0.02079854 "Tungsten-containing formaldehyde ferredoxin oxidoreductase"  
"JS1\_M21\_00757" 18255 "s59E13H2" 0.944018 "Leucine-, isoleucine-, valine-, threonine-, and alanine-binding protein precursor"  
"JS1\_M21\_00757" 18255 "s59E25H2" 0 "Leucine-, isoleucine-, valine-, threonine-, and alanine-binding protein precursor"  
"JS1\_M21\_00757" 18255 "s59E5H2" 0.1430642 "Leucine-, isoleucine-, valine-, threonine-, and alanine-binding protein precursor"  
"JS1\_M21\_00757" 18255 "s63E6H2" 0.1947613 "Leucine-, isoleucine-, valine-, threonine-, and alanine-binding protein precursor"  
"JS1\_M21\_00758" 18256 "s59E13H2" 0.9238962 "High-affinity branched-chain amino acid transport ATP-binding protein LivF"  
"JS1\_M21\_00758" 18256 "s59E25H2" 0 "High-affinity branched-chain amino acid transport ATP-binding protein LivF"  
"JS1\_M21\_00758" 18256 "s59E5H2" 0.316687 "High-affinity branched-chain amino acid transport ATP-binding protein LivF"  
"JS1\_M21\_00758" 18256 "s63E6H2" 0.2149188 "High-affinity branched-chain amino acid transport ATP-binding protein LivF"  
"JS1\_M21\_00759" 18257 "s59E13H2" 0.9002602 "putative branched-chain amino acid transport ATP-binding protein LivG"  
"JS1\_M21\_00759" 18257 "s59E25H2" 0 "putative branched-chain amino acid transport ATP-binding protein LivG"  
"JS1\_M21\_00759" 18257 "s59E5H2" 0.1499796 "putative branched-chain amino acid transport ATP-binding protein LivG"  
"JS1\_M21\_00759" 18257 "s63E6H2" 0.1778905 "putative branched-chain amino acid transport ATP-binding protein LivG"  
"JS1\_M21\_00760" 18258 "s59E13H2" 0.8083511 "leucine/isoleucine/valine transporter permease subunit"  
"JS1\_M21\_00760" 18258 "s59E25H2" 0 "leucine/isoleucine/valine transporter permease subunit"  
"JS1\_M21\_00760" 18258 "s59E5H2" 0.1427407 "leucine/isoleucine/valine transporter permease subunit"  
"JS1\_M21\_00760" 18258 "s63E6H2" 0.1936156 "leucine/isoleucine/valine transporter permease subunit"  
"JS1\_M21\_00761" 18259 "s59E13H2" 0.6779519 "High-affinity branched-chain amino acid transport system permease protein LivH"  
"JS1\_M21\_00761" 18259 "s59E25H2" 0 "High-affinity branched-chain amino acid transport system permease protein LivH"  
"JS1\_M21\_00761" 18259 "s59E5H2" 0.05302098 "High-affinity branched-chain amino acid transport system permease protein LivH"  
"JS1\_M21\_00761" 18259 "s63E6H2" 0.2189425 "High-affinity branched-chain amino acid transport system permease protein LivH"  
"JS1\_M21\_00762" 18260 "s59E13H2" 0 "dTDP-4-dehydrorhamnose reductase"  
"JS1\_M21\_00762" 18260 "s59E25H2" 0 "dTDP-4-dehydrorhamnose reductase"  
"JS1\_M21\_00762" 18260 "s59E5H2" 0.008856409 "dTDP-4-dehydrorhamnose reductase"  
"JS1\_M21\_00762" 18260 "s63E6H2" 0.00695178 "dTDP-4-dehydrorhamnose reductase"  
"JS1\_M21\_00763" 18261 "s59E13H2" 0.09198986 "mRNA interferase EndoA"  
"JS1\_M21\_00763" 18261 "s59E25H2" 0 "mRNA interferase EndoA"  
"JS1\_M21\_00763" 18261 "s59E5H2" 0 "mRNA interferase EndoA"  
"JS1\_M21\_00763" 18261 "s63E6H2" 0.004709573 "mRNA interferase EndoA"  
"JS1\_M21\_00764" 18262 "s59E13H2" 0.1528834 "hypothetical protein"  
"JS1\_M21\_00764" 18262 "s59E25H2" 0 "hypothetical protein"  
"JS1\_M21\_00764" 18262 "s59E5H2" 0.01803474 "hypothetical protein"  
"JS1\_M21\_00764" 18262 "s63E6H2" 9.765927e-05 "hypothetical protein"  
"JS1\_M21\_00767" 18265 "s59E13H2" 0.0005146396 "Putative ski2-type helicase"  
"JS1\_M21\_00767" 18265 "s59E25H2" 0 "Putative ski2-type helicase"  
"JS1\_M21\_00767" 18265 "s59E5H2" 0.0103441 "Putative ski2-type helicase"  
"JS1\_M21\_00767" 18265 "s63E6H2" 0.003463943 "Putative ski2-type helicase"  
"JS1\_M21\_00768" 18266 "s59E13H2" 0 "hypothetical protein"  
"JS1\_M21\_00768" 18266 "s59E25H2" 0 "hypothetical protein"  
"JS1\_M21\_00768" 18266 "s59E5H2" 0.210057 "hypothetical protein"  
"JS1\_M21\_00768" 18266 "s63E6H2" 0.02189614 "hypothetical protein"  
"JS1\_M21\_00769" 18267 "s59E13H2" 0 "RNA polymerase factor sigma-70"

"JS1\_M21\_00769" 18267 "s59E25H2" 0 "RNA polymerase factor sigma-70"  
"JS1\_M21\_00769" 18267 "s59E5H2" 0 "RNA polymerase factor sigma-70"  
"JS1\_M21\_00769" 18267 "s63E6H2" 0.08840537 "RNA polymerase factor sigma-70"  
"JS1\_M21\_00770" 18268 "s59E13H2" 0 "sporulation sigma factor SigG"  
"JS1\_M21\_00770" 18268 "s59E25H2" 0 "sporulation sigma factor SigG"  
"JS1\_M21\_00770" 18268 "s59E5H2" 0 "sporulation sigma factor SigG"  
"JS1\_M21\_00770" 18268 "s63E6H2" 0.3251361 "sporulation sigma factor SigG"  
"JS1\_M21\_00771" 18269 "s59E13H2" 0 "hypothetical protein"  
"JS1\_M21\_00771" 18269 "s59E25H2" 0 "hypothetical protein"  
"JS1\_M21\_00771" 18269 "s59E5H2" 0.0120877 "hypothetical protein"  
"JS1\_M21\_00771" 18269 "s63E6H2" 0.07289815 "hypothetical protein"  
"JS1\_M21\_00772" 18270 "s59E13H2" 0.02698158 "hypothetical protein"  
"JS1\_M21\_00772" 18270 "s59E25H2" 0 "hypothetical protein"  
"JS1\_M21\_00772" 18270 "s59E5H2" 0.03758984 "hypothetical protein"  
"JS1\_M21\_00772" 18270 "s63E6H2" 0.09775854 "hypothetical protein"  
"JS1\_M21\_00773" 18271 "s59E13H2" 0 "hypothetical protein"  
"JS1\_M21\_00773" 18271 "s59E25H2" 0 "hypothetical protein"  
"JS1\_M21\_00773" 18271 "s59E5H2" 0 "hypothetical protein"  
"JS1\_M21\_00773" 18271 "s63E6H2" 0 "hypothetical protein"  
"JS1\_M21\_00774" 18272 "s59E13H2" 0 "Zinc D-Ala-D-Ala carboxypeptidase precursor"  
"JS1\_M21\_00774" 18272 "s59E25H2" 0 "Zinc D-Ala-D-Ala carboxypeptidase precursor"  
"JS1\_M21\_00774" 18272 "s59E5H2" 0 "Zinc D-Ala-D-Ala carboxypeptidase precursor"  
"JS1\_M21\_00774" 18272 "s63E6H2" 0.007579167 "Zinc D-Ala-D-Ala carboxypeptidase precursor"  
"JS1\_M21\_00775" 18273 "s59E13H2" 0 "YvrJ protein family protein"  
"JS1\_M21\_00775" 18273 "s59E25H2" 0 "YvrJ protein family protein"  
"JS1\_M21\_00775" 18273 "s59E5H2" 0 "YvrJ protein family protein"  
"JS1\_M21\_00775" 18273 "s63E6H2" 0.003512478 "YvrJ protein family protein"  
"JS1\_M21\_00776" 18274 "s59E13H2" 0.0008655849 "YcfA-like protein"  
"JS1\_M21\_00776" 18274 "s59E25H2" 0 "YcfA-like protein"  
"JS1\_M21\_00776" 18274 "s59E5H2" 0 "YcfA-like protein"  
"JS1\_M21\_00776" 18274 "s63E6H2" 0.005106603 "YcfA-like protein"  
"JS1\_M21\_00777" 18275 "s59E13H2" 0.02197564 "hypothetical protein"  
"JS1\_M21\_00777" 18275 "s59E25H2" 0 "hypothetical protein"  
"JS1\_M21\_00777" 18275 "s59E5H2" 0.02161564 "hypothetical protein"  
"JS1\_M21\_00777" 18275 "s63E6H2" 0.01524228 "hypothetical protein"  
"JS1\_M21\_00778" 18276 "s59E13H2" 0 "hypothetical protein"  
"JS1\_M21\_00778" 18276 "s59E25H2" 0 "hypothetical protein"  
"JS1\_M21\_00778" 18276 "s59E5H2" 0.05970988 "hypothetical protein"  
"JS1\_M21\_00778" 18276 "s63E6H2" 0.03157228 "hypothetical protein"  
"JS1\_M21\_00780" 18278 "s59E13H2" 0.06851999 "mRNA interferase MazF9"  
"JS1\_M21\_00780" 18278 "s59E25H2" 0 "mRNA interferase MazF9"  
"JS1\_M21\_00780" 18278 "s59E5H2" 0 "mRNA interferase MazF9"  
"JS1\_M21\_00780" 18278 "s63E6H2" 0 "mRNA interferase MazF9"  
"JS1\_M21\_00781" 18279 "s59E13H2" 0 "Putative pyridoxal phosphate-dependent aminotransferase EpsN"  
"JS1\_M21\_00781" 18279 "s59E25H2" 0 "Putative pyridoxal phosphate-dependent aminotransferase EpsN"  
"JS1\_M21\_00781" 18279 "s59E5H2" 0 "Putative pyridoxal phosphate-dependent aminotransferase EpsN"  
"JS1\_M21\_00781" 18279 "s63E6H2" 0.003380938 "Putative pyridoxal phosphate-dependent aminotransferase EpsN"

"JS1\_M21\_00782" 18280 "s59E13H2" 0 "Malonyl CoA-acyl carrier protein transacylase"  
"JS1\_M21\_00782" 18280 "s59E25H2" 0 "Malonyl CoA-acyl carrier protein transacylase"  
"JS1\_M21\_00782" 18280 "s59E5H2" 0 "Malonyl CoA-acyl carrier protein transacylase"  
"JS1\_M21\_00782" 18280 "s63E6H2" 0.00158036 "Malonyl CoA-acyl carrier protein transacylase"  
"JS1\_M21\_00783" 18281 "s59E13H2" 0 "Putative acetyltransferase EpsM"  
"JS1\_M21\_00783" 18281 "s59E25H2" 0 "Putative acetyltransferase EpsM"  
"JS1\_M21\_00783" 18281 "s59E5H2" 0 "Putative acetyltransferase EpsM"  
"JS1\_M21\_00783" 18281 "s63E6H2" 0 "Putative acetyltransferase EpsM"  
"JS1\_M21\_00784" 18282 "s59E13H2" 0 "3-oxoacyl-[acyl-carrier-protein] reductase FabG"  
"JS1\_M21\_00784" 18282 "s59E25H2" 0 "3-oxoacyl-[acyl-carrier-protein] reductase FabG"  
"JS1\_M21\_00784" 18282 "s59E5H2" 0 "3-oxoacyl-[acyl-carrier-protein] reductase FabG"  
"JS1\_M21\_00784" 18282 "s63E6H2" 0 "3-oxoacyl-[acyl-carrier-protein] reductase FabG"  
"JS1\_M21\_00785" 18283 "s59E13H2" 0 "3-oxoacyl-[acyl-carrier-protein] synthase 3"  
"JS1\_M21\_00785" 18283 "s59E25H2" 0 "3-oxoacyl-[acyl-carrier-protein] synthase 3"  
"JS1\_M21\_00785" 18283 "s59E5H2" 0 "3-oxoacyl-[acyl-carrier-protein] synthase 3"  
"JS1\_M21\_00785" 18283 "s63E6H2" 0.006598887 "3-oxoacyl-[acyl-carrier-protein] synthase 3"  
"JS1\_M21\_00786" 18284 "s59E13H2" 0 "acyl carrier protein"  
"JS1\_M21\_00786" 18284 "s59E25H2" 0 "acyl carrier protein"  
"JS1\_M21\_00786" 18284 "s59E5H2" 0 "acyl carrier protein"  
"JS1\_M21\_00786" 18284 "s63E6H2" 0.00434235 "acyl carrier protein"  
"JS1\_M21\_00787" 18285 "s59E13H2" 0 "3-oxoacyl-[acyl-carrier-protein] synthase 3"  
"JS1\_M21\_00787" 18285 "s59E25H2" 0 "3-oxoacyl-[acyl-carrier-protein] synthase 3"  
"JS1\_M21\_00787" 18285 "s59E5H2" 0.0186297 "3-oxoacyl-[acyl-carrier-protein] synthase 3"  
"JS1\_M21\_00787" 18285 "s63E6H2" 0.003036602 "3-oxoacyl-[acyl-carrier-protein] synthase 3"  
"JS1\_M21\_00788" 18286 "s59E13H2" 0.002668498 "MarR family protein"  
"JS1\_M21\_00788" 18286 "s59E25H2" 0 "MarR family protein"  
"JS1\_M21\_00788" 18286 "s59E5H2" 0.05849988 "MarR family protein"  
"JS1\_M21\_00788" 18286 "s63E6H2" 0.06031496 "MarR family protein"  
"JS1\_M21\_00789" 18287 "s59E13H2" 0.001237293 "putative sugar transferase EpsL"  
"JS1\_M21\_00789" 18287 "s59E25H2" 0 "putative sugar transferase EpsL"  
"JS1\_M21\_00789" 18287 "s59E5H2" 0.01860192 "putative sugar transferase EpsL"  
"JS1\_M21\_00789" 18287 "s63E6H2" 0.006050062 "putative sugar transferase EpsL"  
"JS1\_M21\_00790" 18288 "s59E13H2" 0.002499981 "putative glycosyl transferase"  
"JS1\_M21\_00790" 18288 "s59E25H2" 0 "putative glycosyl transferase"  
"JS1\_M21\_00790" 18288 "s59E5H2" 0 "putative glycosyl transferase"  
"JS1\_M21\_00790" 18288 "s63E6H2" 0 "putative glycosyl transferase"  
"JS1\_M21\_00791" 18289 "s59E13H2" 0.0554073 "ureidoglycolate hydrolase"  
"JS1\_M21\_00791" 18289 "s59E25H2" 0 "ureidoglycolate hydrolase"  
"JS1\_M21\_00791" 18289 "s59E5H2" 0.4399304 "ureidoglycolate hydrolase"  
"JS1\_M21\_00791" 18289 "s63E6H2" 0.7028782 "ureidoglycolate hydrolase"  
"JS1\_M21\_00792" 18290 "s59E13H2" 0.0959 "Trehalose/maltose import ATP-binding protein Malk"  
"JS1\_M21\_00792" 18290 "s59E25H2" 0 "Trehalose/maltose import ATP-binding protein Malk"  
"JS1\_M21\_00792" 18290 "s59E5H2" 0.3984906 "Trehalose/maltose import ATP-binding protein Malk"  
"JS1\_M21\_00792" 18290 "s63E6H2" 0.9602406 "Trehalose/maltose import ATP-binding protein Malk"  
"JS1\_M21\_00793" 18291 "s59E13H2" 1.958013 "Rod shape-determining protein MreB"  
"JS1\_M21\_00793" 18291 "s59E25H2" 0 "Rod shape-determining protein MreB"  
"JS1\_M21\_00793" 18291 "s59E5H2" 0.1958274 "Rod shape-determining protein MreB"

"JS1\_M21\_00793" 18291 "s63E6H2" 0.1617646 "Rod shape-determining protein MreB"  
"JS1\_M21\_00794" 18292 "s59E13H2" 0.5407741 "hypothetical protein"  
"JS1\_M21\_00794" 18292 "s59E25H2" 0 "hypothetical protein"  
"JS1\_M21\_00794" 18292 "s59E5H2" 0.01203271 "hypothetical protein"  
"JS1\_M21\_00794" 18292 "s63E6H2" 0.04779673 "hypothetical protein"  
"JS1\_M21\_00795" 18293 "s59E13H2" 0.8167651 "Rod shape-determining protein MreB"  
"JS1\_M21\_00795" 18293 "s59E25H2" 0 "Rod shape-determining protein MreB"  
"JS1\_M21\_00795" 18293 "s59E5H2" 0.1415165 "Rod shape-determining protein MreB"  
"JS1\_M21\_00795" 18293 "s63E6H2" 0.4020228 "Rod shape-determining protein MreB"  
"JS1\_M21\_00796" 18294 "s59E13H2" 0.3696212 "UDP-N-acetylglucosamine 1-carboxyvinyltransferase 1"  
"JS1\_M21\_00796" 18294 "s59E25H2" 0 "UDP-N-acetylglucosamine 1-carboxyvinyltransferase 1"  
"JS1\_M21\_00796" 18294 "s59E5H2" 0.4410028 "UDP-N-acetylglucosamine 1-carboxyvinyltransferase 1"  
"JS1\_M21\_00796" 18294 "s63E6H2" 0.2298578 "UDP-N-acetylglucosamine 1-carboxyvinyltransferase 1"  
"JS1\_M21\_00797" 18295 "s59E13H2" 0.4047512 "Methylthioribose-1-phosphate isomerase"  
"JS1\_M21\_00797" 18295 "s59E25H2" 0 "Methylthioribose-1-phosphate isomerase"  
"JS1\_M21\_00797" 18295 "s59E5H2" 0.2773331 "Methylthioribose-1-phosphate isomerase"  
"JS1\_M21\_00797" 18295 "s63E6H2" 0.1509046 "Methylthioribose-1-phosphate isomerase"  
"JS1\_M21\_00798" 18296 "s59E13H2" 0.3293829 "Putative small multi-drug export protein"  
"JS1\_M21\_00798" 18296 "s59E25H2" 0 "Putative small multi-drug export protein"  
"JS1\_M21\_00798" 18296 "s59E5H2" 0.2710079 "Putative small multi-drug export protein"  
"JS1\_M21\_00798" 18296 "s63E6H2" 0.2835545 "Putative small multi-drug export protein"  
"JS1\_M21\_00799" 18297 "s59E13H2" 0.3493562 "Purine nucleoside phosphorylase 1"  
"JS1\_M21\_00799" 18297 "s59E25H2" 0 "Purine nucleoside phosphorylase 1"  
"JS1\_M21\_00799" 18297 "s59E5H2" 0.2753047 "Purine nucleoside phosphorylase 1"  
"JS1\_M21\_00799" 18297 "s63E6H2" 0.2484329 "Purine nucleoside phosphorylase 1"  
"JS1\_M21\_00800" 18298 "s59E13H2" 0.2593248 "Tyrosine recombinase XerD"  
"JS1\_M21\_00800" 18298 "s59E25H2" 0 "Tyrosine recombinase XerD"  
"JS1\_M21\_00800" 18298 "s59E5H2" 0.2186582 "Tyrosine recombinase XerD"  
"JS1\_M21\_00800" 18298 "s63E6H2" 0.1297353 "Tyrosine recombinase XerD"  
"JS1\_M21\_00801" 18299 "s59E13H2" 0.2125351 "Putative lipoprotein YerB precursor"  
"JS1\_M21\_00801" 18299 "s59E25H2" 0 "Putative lipoprotein YerB precursor"  
"JS1\_M21\_00801" 18299 "s59E5H2" 0.2328575 "Putative lipoprotein YerB precursor"  
"JS1\_M21\_00801" 18299 "s63E6H2" 0.04700746 "Putative lipoprotein YerB precursor"  
"JS1\_M21\_00802" 18300 "s59E13H2" 0.09962913 "Biopolymer transport protein ExbD"  
"JS1\_M21\_00802" 18300 "s59E25H2" 0 "Biopolymer transport protein ExbD"  
"JS1\_M21\_00802" 18300 "s59E5H2" 0.4282106 "Biopolymer transport protein ExbD"  
"JS1\_M21\_00802" 18300 "s63E6H2" 0.05694712 "Biopolymer transport protein ExbD"  
"JS1\_M21\_00803" 18301 "s59E13H2" 0.1686297 "Biopolymer transport protein ExbB"  
"JS1\_M21\_00803" 18301 "s59E25H2" 0 "Biopolymer transport protein ExbB"  
"JS1\_M21\_00803" 18301 "s59E5H2" 0.9873445 "Biopolymer transport protein ExbB"  
"JS1\_M21\_00803" 18301 "s63E6H2" 0.1621947 "Biopolymer transport protein ExbB"  
"JS1\_M21\_00804" 18302 "s59E13H2" 0.118384 "tol-pal system protein YbgF"  
"JS1\_M21\_00804" 18302 "s59E25H2" 0 "tol-pal system protein YbgF"  
"JS1\_M21\_00804" 18302 "s59E5H2" 0.02742434 "tol-pal system protein YbgF"  
"JS1\_M21\_00804" 18302 "s63E6H2" 0.04049824 "tol-pal system protein YbgF"  
"JS1\_M21\_00805" 18303 "s59E13H2" 0.1091865 "Electron transport complex protein RnfC"  
"JS1\_M21\_00805" 18303 "s59E25H2" 0 "Electron transport complex protein RnfC"

"JS1\_M21\_00805" 18303 "s59E5H2" 0.6507608 "Electron transport complex protein RnfC"  
"JS1\_M21\_00805" 18303 "s63E6H2" 2.241208 "Electron transport complex protein RnfC"  
"JS1\_M21\_00806" 18304 "s59E13H2" 0.1124246 "Carbon dioxide concentrating mechanism protein CcmL"  
"JS1\_M21\_00806" 18304 "s59E25H2" 0 "Carbon dioxide concentrating mechanism protein CcmL"  
"JS1\_M21\_00806" 18304 "s59E5H2" 0.4673257 "Carbon dioxide concentrating mechanism protein CcmL"  
"JS1\_M21\_00806" 18304 "s63E6H2" 1.7433 "Carbon dioxide concentrating mechanism protein CcmL"  
"JS1\_M21\_00807" 18305 "s59E13H2" 0.07409738 "Carbon dioxide concentrating mechanism protein CcmL"  
"JS1\_M21\_00807" 18305 "s59E25H2" 0 "Carbon dioxide concentrating mechanism protein CcmL"  
"JS1\_M21\_00807" 18305 "s59E5H2" 0.3084129 "Carbon dioxide concentrating mechanism protein CcmL"  
"JS1\_M21\_00807" 18305 "s63E6H2" 1.4138 "Carbon dioxide concentrating mechanism protein CcmL"  
"JS1\_M21\_00808" 18306 "s59E13H2" 0.08417555 "Ethanolamine utilization protein EutM precursor"  
"JS1\_M21\_00808" 18306 "s59E25H2" 0 "Ethanolamine utilization protein EutM precursor"  
"JS1\_M21\_00808" 18306 "s59E5H2" 0.4392679 "Ethanolamine utilization protein EutM precursor"  
"JS1\_M21\_00808" 18306 "s63E6H2" 1.41957 "Ethanolamine utilization protein EutM precursor"  
"JS1\_M21\_00809" 18307 "s59E13H2" 0.09781631 "Xylose isomerase"  
"JS1\_M21\_00809" 18307 "s59E25H2" 0 "Xylose isomerase"  
"JS1\_M21\_00809" 18307 "s59E5H2" 0.3043749 "Xylose isomerase"  
"JS1\_M21\_00809" 18307 "s63E6H2" 1.194905 "Xylose isomerase"  
"JS1\_M21\_00810" 18308 "s59E13H2" 0.08940788 "Ribokinase"  
"JS1\_M21\_00810" 18308 "s59E25H2" 0 "Ribokinase"  
"JS1\_M21\_00810" 18308 "s59E5H2" 0.05417723 "Ribokinase"  
"JS1\_M21\_00810" 18308 "s63E6H2" 0.1036198 "Ribokinase"  
"JS1\_M21\_00811" 18309 "s59E13H2" 0.09133241 "Trehalose/maltose transport system permease protein MalG"  
"JS1\_M21\_00811" 18309 "s59E25H2" 0 "Trehalose/maltose transport system permease protein MalG"  
"JS1\_M21\_00811" 18309 "s59E5H2" 0.2912483 "Trehalose/maltose transport system permease protein MalG"  
"JS1\_M21\_00811" 18309 "s63E6H2" 0.2240612 "Trehalose/maltose transport system permease protein MalG"  
"JS1\_M21\_00812" 18310 "s59E13H2" 0.03914271 "Inner membrane ABC transporter permease protein YcjO"  
"JS1\_M21\_00812" 18310 "s59E25H2" 0 "Inner membrane ABC transporter permease protein YcjO"  
"JS1\_M21\_00812" 18310 "s59E5H2" 0.09761494 "Inner membrane ABC transporter permease protein YcjO"  
"JS1\_M21\_00812" 18310 "s63E6H2" 0.1770338 "Inner membrane ABC transporter permease protein YcjO"  
"JS1\_M21\_00813" 18311 "s59E13H2" 0.04478111 "hypothetical protein"  
"JS1\_M21\_00813" 18311 "s59E25H2" 0 "hypothetical protein"  
"JS1\_M21\_00813" 18311 "s59E5H2" 0.08949879 "hypothetical protein"  
"JS1\_M21\_00813" 18311 "s63E6H2" 0.06351917 "hypothetical protein"  
"JS1\_M21\_00815" 18313 "s59E13H2" 0 "Sialic acid TRAP transporter permease protein SiaT"  
"JS1\_M21\_00815" 18313 "s59E25H2" 0 "Sialic acid TRAP transporter permease protein SiaT"  
"JS1\_M21\_00815" 18313 "s59E5H2" 0 "Sialic acid TRAP transporter permease protein SiaT"  
"JS1\_M21\_00815" 18313 "s63E6H2" 0 "Sialic acid TRAP transporter permease protein SiaT"  
"JS1\_M21\_00816" 18314 "s59E13H2" 0 "Tripartite ATP-independent periplasmic transporters, DctQ component"  
"JS1\_M21\_00816" 18314 "s59E25H2" 0 "Tripartite ATP-independent periplasmic transporters, DctQ component"  
"JS1\_M21\_00816" 18314 "s59E5H2" 0 "Tripartite ATP-independent periplasmic transporters, DctQ component"  
"JS1\_M21\_00816" 18314 "s63E6H2" 0 "Tripartite ATP-independent periplasmic transporters, DctQ component"  
"JS1\_M21\_00817" 18315 "s59E13H2" 0.001348463 "Sialic acid-binding periplasmic protein SiaP precursor"  
"JS1\_M21\_00817" 18315 "s59E25H2" 0 "Sialic acid-binding periplasmic protein SiaP precursor"  
"JS1\_M21\_00817" 18315 "s59E5H2" 0 "Sialic acid-binding periplasmic protein SiaP precursor"  
"JS1\_M21\_00817" 18315 "s63E6H2" 0.001509299 "Sialic acid-binding periplasmic protein SiaP precursor"  
"JS1\_M21\_00818" 18316 "s59E13H2" 0.01536413 "Uroporphyrinogen decarboxylase (URO-D)"

"JS1\_M21\_00818" 18316 "s59E25H2" 0 "Uroporphyrinogen decarboxylase (URO-D)"  
"JS1\_M21\_00818" 18316 "s59E5H2" 0.001224886 "Uroporphyrinogen decarboxylase (URO-D)"  
"JS1\_M21\_00818" 18316 "s63E6H2" 0.4224971 "Uroporphyrinogen decarboxylase (URO-D)"  
"JS1\_M21\_00819" 18317 "s59E13H2" 0.1993433 "L-fucose isomerase"  
"JS1\_M21\_00819" 18317 "s59E25H2" 0 "L-fucose isomerase"  
"JS1\_M21\_00819" 18317 "s59E5H2" 0.04315911 "L-fucose isomerase"  
"JS1\_M21\_00819" 18317 "s63E6H2" 0.9274249 "L-fucose isomerase"  
"JS1\_M21\_00820" 18318 "s59E13H2" 0.1166312 "4-hydroxy-tetrahydrodipicolinate synthase"  
"JS1\_M21\_00820" 18318 "s59E25H2" 0 "4-hydroxy-tetrahydrodipicolinate synthase"  
"JS1\_M21\_00820" 18318 "s59E5H2" 0.1971368 "4-hydroxy-tetrahydrodipicolinate synthase"  
"JS1\_M21\_00820" 18318 "s63E6H2" 0.7604807 "4-hydroxy-tetrahydrodipicolinate synthase"  
"JS1\_M21\_00821" 18319 "s59E13H2" 0 "4-hydroxy-tetrahydrodipicolinate synthase"  
"JS1\_M21\_00821" 18319 "s59E25H2" 0 "4-hydroxy-tetrahydrodipicolinate synthase"  
"JS1\_M21\_00821" 18319 "s59E5H2" 0 "4-hydroxy-tetrahydrodipicolinate synthase"  
"JS1\_M21\_00821" 18319 "s63E6H2" 0 "4-hydroxy-tetrahydrodipicolinate synthase"  
"JS1\_M21\_00822" 18320 "s59E13H2" 0 "hypothetical protein"  
"JS1\_M21\_00822" 18320 "s59E25H2" 0 "hypothetical protein"  
"JS1\_M21\_00822" 18320 "s59E5H2" 0 "hypothetical protein"  
"JS1\_M21\_00822" 18320 "s63E6H2" 0 "hypothetical protein"  
"JS1\_M21\_00823" 18321 "s59E13H2" 0 "transport protein TonB"  
"JS1\_M21\_00823" 18321 "s59E25H2" 0 "transport protein TonB"  
"JS1\_M21\_00823" 18321 "s59E5H2" 0 "transport protein TonB"  
"JS1\_M21\_00823" 18321 "s63E6H2" 0.01669856 "transport protein TonB"  
"JS1\_M21\_00824" 18322 "s59E13H2" 0 "Colicin I receptor precursor"  
"JS1\_M21\_00824" 18322 "s59E25H2" 0 "Colicin I receptor precursor"  
"JS1\_M21\_00824" 18322 "s59E5H2" 0.004707239 "Colicin I receptor precursor"  
"JS1\_M21\_00824" 18322 "s63E6H2" 0 "Colicin I receptor precursor"  
"JS1\_M21\_00825" 18323 "s59E13H2" 0.06359951 "hypothetical protein"  
"JS1\_M21\_00825" 18323 "s59E25H2" 0 "hypothetical protein"  
"JS1\_M21\_00825" 18323 "s59E5H2" 0.04576598 "hypothetical protein"  
"JS1\_M21\_00825" 18323 "s63E6H2" 0.01673735 "hypothetical protein"  
"JS1\_M21\_00826" 18324 "s59E13H2" 0 "Putative redox-active protein (C\_GCAxxG\_C\_C)"  
"JS1\_M21\_00826" 18324 "s59E25H2" 0 "Putative redox-active protein (C\_GCAxxG\_C\_C)"  
"JS1\_M21\_00826" 18324 "s59E5H2" 0 "Putative redox-active protein (C\_GCAxxG\_C\_C)"  
"JS1\_M21\_00826" 18324 "s63E6H2" 0.000718364 "Putative redox-active protein (C\_GCAxxG\_C\_C)"  
"JS1\_M21\_00827" 18325 "s59E13H2" 0 "putative aldolase LsrF"  
"JS1\_M21\_00827" 18325 "s59E25H2" 0 "putative aldolase LsrF"  
"JS1\_M21\_00827" 18325 "s59E5H2" 0 "putative aldolase LsrF"  
"JS1\_M21\_00827" 18325 "s63E6H2" 0.0260541 "putative aldolase LsrF"  
"JS1\_M21\_00828" 18326 "s59E13H2" 0 "L-fuculose phosphate aldolase"  
"JS1\_M21\_00828" 18326 "s59E25H2" 0 "L-fuculose phosphate aldolase"  
"JS1\_M21\_00828" 18326 "s59E5H2" 0 "L-fuculose phosphate aldolase"  
"JS1\_M21\_00828" 18326 "s63E6H2" 0.01209947 "L-fuculose phosphate aldolase"  
"JS1\_M21\_00829" 18327 "s59E13H2" 0 "3-oxoacyl-[acyl-carrier-protein] reductase FabG"  
"JS1\_M21\_00829" 18327 "s59E25H2" 0 "3-oxoacyl-[acyl-carrier-protein] reductase FabG"  
"JS1\_M21\_00829" 18327 "s59E5H2" 0 "3-oxoacyl-[acyl-carrier-protein] reductase FabG"  
"JS1\_M21\_00829" 18327 "s63E6H2" 0 "3-oxoacyl-[acyl-carrier-protein] reductase FabG"

"JS1\_M21\_00830" 18328 "s59E13H2" 0 "Xylulose kinase"  
"JS1\_M21\_00830" 18328 "s59E25H2" 0 "Xylulose kinase"  
"JS1\_M21\_00830" 18328 "s59E5H2" 0.005371808 "Xylulose kinase"  
"JS1\_M21\_00830" 18328 "s63E6H2" 0.005926806 "Xylulose kinase"  
"JS1\_M21\_00831" 18329 "s59E13H2" 0.3215317 "ATP synthase gamma chain"  
"JS1\_M21\_00831" 18329 "s59E25H2" 0 "ATP synthase gamma chain"  
"JS1\_M21\_00831" 18329 "s59E5H2" 1.052704 "ATP synthase gamma chain"  
"JS1\_M21\_00831" 18329 "s63E6H2" 1.901852 "ATP synthase gamma chain"  
"JS1\_M21\_00832" 18330 "s59E13H2" 0.2937102 "Demethylmenaquinone methyltransferase"  
"JS1\_M21\_00832" 18330 "s59E25H2" 0 "Demethylmenaquinone methyltransferase"  
"JS1\_M21\_00832" 18330 "s59E5H2" 2.388813 "Demethylmenaquinone methyltransferase"  
"JS1\_M21\_00832" 18330 "s63E6H2" 2.401407 "Demethylmenaquinone methyltransferase"  
"JS1\_M21\_00833" 18331 "s59E13H2" 0.4718236 "Glutathione amide reductase"  
"JS1\_M21\_00833" 18331 "s59E25H2" 0 "Glutathione amide reductase"  
"JS1\_M21\_00833" 18331 "s59E5H2" 2.003611 "Glutathione amide reductase"  
"JS1\_M21\_00833" 18331 "s63E6H2" 2.937913 "Glutathione amide reductase"  
"JS1\_M21\_00834" 18332 "s59E13H2" 0 "Mercuric reductase"  
"JS1\_M21\_00834" 18332 "s59E25H2" 0 "Mercuric reductase"  
"JS1\_M21\_00834" 18332 "s59E5H2" 1.362509 "Mercuric reductase"  
"JS1\_M21\_00834" 18332 "s63E6H2" 0.1286444 "Mercuric reductase"  
"JS1\_M21\_00835" 18333 "s59E13H2" 0 "Antilisterial bacteriocin subtilisin biosynthesis protein AlbA"  
"JS1\_M21\_00835" 18333 "s59E25H2" 0 "Antilisterial bacteriocin subtilisin biosynthesis protein AlbA"  
"JS1\_M21\_00835" 18333 "s59E5H2" 1.095814 "Antilisterial bacteriocin subtilisin biosynthesis protein AlbA"  
"JS1\_M21\_00835" 18333 "s63E6H2" 0.003126548 "Antilisterial bacteriocin subtilisin biosynthesis protein AlbA"  
"JS1\_M21\_00836" 18334 "s59E13H2" 0 "6-phosphogluconolactonase"  
"JS1\_M21\_00836" 18334 "s59E25H2" 0 "6-phosphogluconolactonase"  
"JS1\_M21\_00836" 18334 "s59E5H2" 2.679758 "6-phosphogluconolactonase"  
"JS1\_M21\_00836" 18334 "s63E6H2" 0.3822767 "6-phosphogluconolactonase"  
"JS1\_M21\_00837" 18335 "s59E13H2" 0.001106371 "Glucose-6-phosphate 1-dehydrogenase"  
"JS1\_M21\_00837" 18335 "s59E25H2" 0 "Glucose-6-phosphate 1-dehydrogenase"  
"JS1\_M21\_00837" 18335 "s59E5H2" 2.685045 "Glucose-6-phosphate 1-dehydrogenase"  
"JS1\_M21\_00837" 18335 "s63E6H2" 0.2548756 "Glucose-6-phosphate 1-dehydrogenase"  
"JS1\_M21\_00838" 18336 "s59E13H2" 0.1477067 "Putative sugar phosphate isomerase YwIF"  
"JS1\_M21\_00838" 18336 "s59E25H2" 0 "Putative sugar phosphate isomerase YwIF"  
"JS1\_M21\_00838" 18336 "s59E5H2" 2.141463 "Putative sugar phosphate isomerase YwIF"  
"JS1\_M21\_00838" 18336 "s63E6H2" 0.6816161 "Putative sugar phosphate isomerase YwIF"  
"JS1\_M21\_00839" 18337 "s59E13H2" 0.005375365 "Guanylyl transferase CofC like protein"  
"JS1\_M21\_00839" 18337 "s59E25H2" 0 "Guanylyl transferase CofC like protein"  
"JS1\_M21\_00839" 18337 "s59E5H2" 5.077533 "Guanylyl transferase CofC like protein"  
"JS1\_M21\_00839" 18337 "s63E6H2" 0 "Guanylyl transferase CofC like protein"  
"JS1\_M21\_00841" 18339 "s59E13H2" 0.005390089 "Undecaprenyl-phosphate 4-deoxy-4-formamido-L-arabinose transferase"  
"JS1\_M21\_00841" 18339 "s59E25H2" 0 "Undecaprenyl-phosphate 4-deoxy-4-formamido-L-arabinose transferase"  
"JS1\_M21\_00841" 18339 "s59E5H2" 8.779716 "Undecaprenyl-phosphate 4-deoxy-4-formamido-L-arabinose transferase"  
"JS1\_M21\_00841" 18339 "s63E6H2" 0.009829051 "Undecaprenyl-phosphate 4-deoxy-4-formamido-L-arabinose transferase"  
"JS1\_M21\_00842" 18340 "s59E13H2" 0.01591355 "hypothetical protein"  
"JS1\_M21\_00842" 18340 "s59E25H2" 0 "hypothetical protein"  
"JS1\_M21\_00842" 18340 "s59E5H2" 2.608124 "hypothetical protein"



"JS1\_M21\_00842" 18340 "s63E6H2" 5.727144 "hypothetical protein"  
"JS1\_M21\_00843" 18341 "s59E13H2" 0.1607461 "2-oxoglutarate synthase subunit KorA"  
"JS1\_M21\_00843" 18341 "s59E25H2" 0 "2-oxoglutarate synthase subunit KorA"  
"JS1\_M21\_00843" 18341 "s59E5H2" 0.9581972 "2-oxoglutarate synthase subunit KorA"  
"JS1\_M21\_00843" 18341 "s63E6H2" 4.05592 "2-oxoglutarate synthase subunit KorA"  
"JS1\_M21\_00844" 18342 "s59E13H2" 0.1468107 "2-oxoglutarate oxidoreductase subunit KorB"  
"JS1\_M21\_00844" 18342 "s59E25H2" 0 "2-oxoglutarate oxidoreductase subunit KorB"  
"JS1\_M21\_00844" 18342 "s59E5H2" 0.9832482 "2-oxoglutarate oxidoreductase subunit KorB"  
"JS1\_M21\_00844" 18342 "s63E6H2" 5.511084 "2-oxoglutarate oxidoreductase subunit KorB"  
"JS1\_M21\_00845" 18343 "s59E13H2" 0.04409583 "hypothetical protein"  
"JS1\_M21\_00845" 18343 "s59E25H2" 0 "hypothetical protein"  
"JS1\_M21\_00845" 18343 "s59E5H2" 0.6744693 "hypothetical protein"  
"JS1\_M21\_00845" 18343 "s63E6H2" 2.192979 "hypothetical protein"  
"JS1\_M21\_00846" 18344 "s59E13H2" 0.2047994 "Peptide methionine sulfoxide reductase MsrA"  
"JS1\_M21\_00846" 18344 "s59E25H2" 0 "Peptide methionine sulfoxide reductase MsrA"  
"JS1\_M21\_00846" 18344 "s59E5H2" 0.7177216 "Peptide methionine sulfoxide reductase MsrA"  
"JS1\_M21\_00846" 18344 "s63E6H2" 5.708519 "Peptide methionine sulfoxide reductase MsrA"  
"JS1\_M21\_00847" 18345 "s59E13H2" 1.347823 "Epoxyqueuosine reductase"  
"JS1\_M21\_00847" 18345 "s59E25H2" 0 "Epoxyqueuosine reductase"  
"JS1\_M21\_00847" 18345 "s59E5H2" 0.09921859 "Epoxyqueuosine reductase"  
"JS1\_M21\_00847" 18345 "s63E6H2" 5.843597 "Epoxyqueuosine reductase"  
"JS1\_M21\_00848" 18346 "s59E13H2" 0.09963738 "hypothetical protein"  
"JS1\_M21\_00848" 18346 "s59E25H2" 0 "hypothetical protein"  
"JS1\_M21\_00848" 18346 "s59E5H2" 0.509284 "hypothetical protein"  
"JS1\_M21\_00848" 18346 "s63E6H2" 5.040606 "hypothetical protein"  
"JS1\_M21\_00849" 18347 "s59E13H2" 0.09335555 "hypothetical protein"  
"JS1\_M21\_00849" 18347 "s59E25H2" 0 "hypothetical protein"  
"JS1\_M21\_00849" 18347 "s59E5H2" 1.081614 "hypothetical protein"  
"JS1\_M21\_00849" 18347 "s63E6H2" 0.4831736 "hypothetical protein"  
"JS1\_M21\_00850" 18348 "s59E13H2" 0.01462458 "hypothetical protein"  
"JS1\_M21\_00850" 18348 "s59E25H2" 0 "hypothetical protein"  
"JS1\_M21\_00850" 18348 "s59E5H2" 0.8432595 "hypothetical protein"  
"JS1\_M21\_00850" 18348 "s63E6H2" 0.2832325 "hypothetical protein"  
"JS1\_M21\_00851" 18349 "s59E13H2" 0.11507 "ASCH domain protein"  
"JS1\_M21\_00851" 18349 "s59E25H2" 0 "ASCH domain protein"  
"JS1\_M21\_00851" 18349 "s59E5H2" 0.5414925 "ASCH domain protein"  
"JS1\_M21\_00851" 18349 "s63E6H2" 0.5088017 "ASCH domain protein"  
"JS1\_M21\_00852" 18350 "s59E13H2" 0.04176489 "hypothetical protein"  
"JS1\_M21\_00852" 18350 "s59E25H2" 0 "hypothetical protein"  
"JS1\_M21\_00852" 18350 "s59E5H2" 0.3511082 "hypothetical protein"  
"JS1\_M21\_00852" 18350 "s63E6H2" 0.6135427 "hypothetical protein"  
"JS1\_M21\_00853" 18351 "s59E13H2" 0.05491606 "DsrE/DsrF-like family protein"  
"JS1\_M21\_00853" 18351 "s59E25H2" 0 "DsrE/DsrF-like family protein"  
"JS1\_M21\_00853" 18351 "s59E5H2" 0.470835 "DsrE/DsrF-like family protein"  
"JS1\_M21\_00853" 18351 "s63E6H2" 0.8131773 "DsrE/DsrF-like family protein"  
"JS1\_M21\_00854" 18352 "s59E13H2" 0.1367339 "putative cysteine desulfurase 2"  
"JS1\_M21\_00854" 18352 "s59E25H2" 0 "putative cysteine desulfurase 2"

"JS1\_M21\_00854" 18352 "s59E5H2" 0.7722881 "putative cysteine desulfurase 2"  
"JS1\_M21\_00854" 18352 "s63E6H2" 1.121109 "putative cysteine desulfurase 2"  
"JS1\_M21\_00855" 18353 "s59E13H2" 0.1561399 "NifU-like protein"  
"JS1\_M21\_00855" 18353 "s59E25H2" 0 "NifU-like protein"  
"JS1\_M21\_00855" 18353 "s59E5H2" 0.3849522 "NifU-like protein"  
"JS1\_M21\_00855" 18353 "s63E6H2" 0.6904008 "NifU-like protein"  
"JS1\_M21\_00856" 18354 "s59E13H2" 0.3343137 "Glycine betaine/carnitine/choline-binding protein OpuCC precursor"  
"JS1\_M21\_00856" 18354 "s59E25H2" 0 "Glycine betaine/carnitine/choline-binding protein OpuCC precursor"  
"JS1\_M21\_00856" 18354 "s59E5H2" 3.924563 "Glycine betaine/carnitine/choline-binding protein OpuCC precursor"  
"JS1\_M21\_00856" 18354 "s63E6H2" 0.4549 "Glycine betaine/carnitine/choline-binding protein OpuCC precursor"  
"JS1\_M21\_00857" 18355 "s59E13H2" 0.3884593 "Choline transport ATP-binding protein OpuBA"  
"JS1\_M21\_00857" 18355 "s59E25H2" 0 "Choline transport ATP-binding protein OpuBA"  
"JS1\_M21\_00857" 18355 "s59E5H2" 2.115096 "Choline transport ATP-binding protein OpuBA"  
"JS1\_M21\_00857" 18355 "s63E6H2" 0.5206137 "Choline transport ATP-binding protein OpuBA"  
"JS1\_M21\_00858" 18356 "s59E13H2" 0.4563382 "Glycine betaine/carnitine/choline transport system permease protein OpuCB"  
"JS1\_M21\_00858" 18356 "s59E25H2" 0 "Glycine betaine/carnitine/choline transport system permease protein OpuCB"  
"JS1\_M21\_00858" 18356 "s59E5H2" 0.729476 "Glycine betaine/carnitine/choline transport system permease protein OpuCB"  
"JS1\_M21\_00858" 18356 "s63E6H2" 0.4618312 "Glycine betaine/carnitine/choline transport system permease protein OpuCB"  
"JS1\_M21\_00859" 18357 "s59E13H2" 0.1538153 "Carnitine transport permease protein OpuCB"  
"JS1\_M21\_00859" 18357 "s59E25H2" 0 "Carnitine transport permease protein OpuCB"  
"JS1\_M21\_00859" 18357 "s59E5H2" 0.2912409 "Carnitine transport permease protein OpuCB"  
"JS1\_M21\_00859" 18357 "s63E6H2" 0.6120735 "Carnitine transport permease protein OpuCB"  
"JS1\_M21\_00860" 18358 "s59E13H2" 0.7365941 "Peptide methionine sulfoxide reductase MsrA/MsrB"  
"JS1\_M21\_00860" 18358 "s59E25H2" 0 "Peptide methionine sulfoxide reductase MsrA/MsrB"  
"JS1\_M21\_00860" 18358 "s59E5H2" 0.9608894 "Peptide methionine sulfoxide reductase MsrA/MsrB"  
"JS1\_M21\_00860" 18358 "s63E6H2" 2.332054 "Peptide methionine sulfoxide reductase MsrA/MsrB"  
"JS1\_M21\_00861" 18359 "s59E13H2" 0.1452201 "Nitroreductase family protein"  
"JS1\_M21\_00861" 18359 "s59E25H2" 0 "Nitroreductase family protein"  
"JS1\_M21\_00861" 18359 "s59E5H2" 1.285176 "Nitroreductase family protein"  
"JS1\_M21\_00861" 18359 "s63E6H2" 1.683874 "Nitroreductase family protein"  
"JS1\_M21\_00862" 18360 "s59E13H2" 2.188821 "Rubrerythrin"  
"JS1\_M21\_00862" 18360 "s59E25H2" 0 "Rubrerythrin"  
"JS1\_M21\_00862" 18360 "s59E5H2" 0.3676649 "Rubrerythrin"  
"JS1\_M21\_00862" 18360 "s63E6H2" 1.406305 "Rubrerythrin"  
"JS1\_M21\_00863" 18361 "s59E13H2" 3.958754 "GYD domain protein"  
"JS1\_M21\_00863" 18361 "s59E25H2" 0 "GYD domain protein"  
"JS1\_M21\_00863" 18361 "s59E5H2" 0.2898356 "GYD domain protein"  
"JS1\_M21\_00863" 18361 "s63E6H2" 2.644338 "GYD domain protein"  
"JS1\_M21\_00864" 18362 "s59E13H2" 4.460812 "5-aminovalerate aminotransferase DavT"  
"JS1\_M21\_00864" 18362 "s59E25H2" 0 "5-aminovalerate aminotransferase DavT"  
"JS1\_M21\_00864" 18362 "s59E5H2" 0.5759161 "5-aminovalerate aminotransferase DavT"  
"JS1\_M21\_00864" 18362 "s63E6H2" 0.6073429 "5-aminovalerate aminotransferase DavT"  
"JS1\_M21\_00865" 18363 "s59E13H2" 0.3727143 "Sialic acid TRAP transporter permease protein SiaT"  
"JS1\_M21\_00865" 18363 "s59E25H2" 0 "Sialic acid TRAP transporter permease protein SiaT"  
"JS1\_M21\_00865" 18363 "s59E5H2" 1.090056 "Sialic acid TRAP transporter permease protein SiaT"  
"JS1\_M21\_00865" 18363 "s63E6H2" 0.4358969 "Sialic acid TRAP transporter permease protein SiaT"  
"JS1\_M21\_00866" 18364 "s59E13H2" 0.2347873 "Tripartite ATP-independent periplasmic transporters, DctQ component"

"JS1\_M21\_00866" 18364 "s59E25H2" 0 "Tripartite ATP-independent periplasmic transporters, DctQ component"  
"JS1\_M21\_00866" 18364 "s59E5H2" 0.6435844 "Tripartite ATP-independent periplasmic transporters, DctQ component"  
"JS1\_M21\_00866" 18364 "s63E6H2" 0.177616 "Tripartite ATP-independent periplasmic transporters, DctQ component"  
"JS1\_M21\_00867" 18365 "s59E13H2" 0.3329246 "Sialic acid-binding periplasmic protein SiaP precursor"  
"JS1\_M21\_00867" 18365 "s59E25H2" 0 "Sialic acid-binding periplasmic protein SiaP precursor"  
"JS1\_M21\_00867" 18365 "s59E5H2" 0.5969648 "Sialic acid-binding periplasmic protein SiaP precursor"  
"JS1\_M21\_00867" 18365 "s63E6H2" 0.120988 "Sialic acid-binding periplasmic protein SiaP precursor"  
"JS1\_M21\_00869" 18367 "s59E13H2" 0.1722393 "Type I restriction enzyme EcoKI M protein"  
"JS1\_M21\_00869" 18367 "s59E25H2" 0 "Type I restriction enzyme EcoKI M protein"  
"JS1\_M21\_00869" 18367 "s59E5H2" 0.2591393 "Type I restriction enzyme EcoKI M protein"  
"JS1\_M21\_00869" 18367 "s63E6H2" 0.09082131 "Type I restriction enzyme EcoKI M protein"  
"JS1\_M21\_00870" 18368 "s59E13H2" 0.1668573 "hypothetical protein"  
"JS1\_M21\_00870" 18368 "s59E25H2" 0 "hypothetical protein"  
"JS1\_M21\_00870" 18368 "s59E5H2" 1.022927 "hypothetical protein"  
"JS1\_M21\_00870" 18368 "s63E6H2" 0.1426664 "hypothetical protein"  
"JS1\_M21\_00871" 18369 "s59E13H2" 0.3681312 "5'-nucleotidase"  
"JS1\_M21\_00871" 18369 "s59E25H2" 0 "5'-nucleotidase"  
"JS1\_M21\_00871" 18369 "s59E5H2" 0.5061413 "5'-nucleotidase"  
"JS1\_M21\_00871" 18369 "s63E6H2" 0.4953026 "5'-nucleotidase"  
"JS1\_M21\_00872" 18370 "s59E13H2" 0 "HTH-type transcriptional regulator MtrR"  
"JS1\_M21\_00872" 18370 "s59E25H2" 0 "HTH-type transcriptional regulator MtrR"  
"JS1\_M21\_00872" 18370 "s59E5H2" 0.1910095 "HTH-type transcriptional regulator MtrR"  
"JS1\_M21\_00872" 18370 "s63E6H2" 0.3327157 "HTH-type transcriptional regulator MtrR"  
"JS1\_M21\_00873" 18371 "s59E13H2" 0 "hypothetical protein"  
"JS1\_M21\_00873" 18371 "s59E25H2" 0 "hypothetical protein"  
"JS1\_M21\_00873" 18371 "s59E5H2" 0.1479196 "hypothetical protein"  
"JS1\_M21\_00873" 18371 "s63E6H2" 0.2821149 "hypothetical protein"  
"JS1\_M21\_00874" 18372 "s59E13H2" 0 "3 beta-hydroxysteroid dehydrogenase/Delta 5--"  
"JS1\_M21\_00874" 18372 "s59E25H2" 0 "3 beta-hydroxysteroid dehydrogenase/Delta 5--"  
"JS1\_M21\_00874" 18372 "s59E5H2" 0.2289804 "3 beta-hydroxysteroid dehydrogenase/Delta 5--"  
"JS1\_M21\_00874" 18372 "s63E6H2" 0.1663036 "3 beta-hydroxysteroid dehydrogenase/Delta 5--"  
"JS1\_M21\_00875" 18373 "s59E13H2" 0.1645327 "TPR repeat-containing protein YrrB"  
"JS1\_M21\_00875" 18373 "s59E25H2" 0 "TPR repeat-containing protein YrrB"  
"JS1\_M21\_00875" 18373 "s59E5H2" 0.4132767 "TPR repeat-containing protein YrrB"  
"JS1\_M21\_00875" 18373 "s63E6H2" 0.2917092 "TPR repeat-containing protein YrrB"  
"JS1\_M21\_00876" 18374 "s59E13H2" 0 "HTH-type transcriptional regulator KdgR"  
"JS1\_M21\_00876" 18374 "s59E25H2" 0 "HTH-type transcriptional regulator KdgR"  
"JS1\_M21\_00876" 18374 "s59E5H2" 0.116004 "HTH-type transcriptional regulator KdgR"  
"JS1\_M21\_00876" 18374 "s63E6H2" 0.008681343 "HTH-type transcriptional regulator KdgR"  
"JS1\_M21\_00877" 18375 "s59E13H2" 0 "Maltotriose-binding protein precursor"  
"JS1\_M21\_00877" 18375 "s59E25H2" 0 "Maltotriose-binding protein precursor"  
"JS1\_M21\_00877" 18375 "s59E5H2" 0 "Maltotriose-binding protein precursor"  
"JS1\_M21\_00877" 18375 "s63E6H2" 0 "Maltotriose-binding protein precursor"  
"JS1\_M21\_00878" 18376 "s59E13H2" 0 "Bacterial extracellular solute-binding protein"  
"JS1\_M21\_00878" 18376 "s59E25H2" 0 "Bacterial extracellular solute-binding protein"  
"JS1\_M21\_00878" 18376 "s59E5H2" 0 "Bacterial extracellular solute-binding protein"  
"JS1\_M21\_00878" 18376 "s63E6H2" 0.007909613 "Bacterial extracellular solute-binding protein"

"JS1\_M21\_00879" 18377 "s59E13H2" 0.003639213 "Lactose transport system permease protein LacF"  
"JS1\_M21\_00879" 18377 "s59E25H2" 0 "Lactose transport system permease protein LacF"  
"JS1\_M21\_00879" 18377 "s59E5H2" 0 "Lactose transport system permease protein LacF"  
"JS1\_M21\_00879" 18377 "s63E6H2" 0.01237661 "Lactose transport system permease protein LacF"  
"JS1\_M21\_00880" 18378 "s59E13H2" 0 "L-arabinose transport system permease protein AraQ"  
"JS1\_M21\_00880" 18378 "s59E25H2" 0 "L-arabinose transport system permease protein AraQ"  
"JS1\_M21\_00880" 18378 "s59E5H2" 0.003596522 "L-arabinose transport system permease protein AraQ"  
"JS1\_M21\_00880" 18378 "s63E6H2" 0 "L-arabinose transport system permease protein AraQ"  
"JS1\_M21\_00881" 18379 "s59E13H2" 0.001548087 "Beta-fructosidase"  
"JS1\_M21\_00881" 18379 "s59E25H2" 0 "Beta-fructosidase"  
"JS1\_M21\_00881" 18379 "s59E5H2" 0.01854448 "Beta-fructosidase"  
"JS1\_M21\_00881" 18379 "s63E6H2" 0 "Beta-fructosidase"  
"JS1\_M21\_00883" 18381 "s59E13H2" 5.787899 "Arsenical pump membrane protein"  
"JS1\_M21\_00883" 18381 "s59E25H2" 0.1960784 "Arsenical pump membrane protein"  
"JS1\_M21\_00883" 18381 "s59E5H2" 0.2931971 "Arsenical pump membrane protein"  
"JS1\_M21\_00883" 18381 "s63E6H2" 1.074675 "Arsenical pump membrane protein"  
"JS1\_M21\_00884" 18382 "s59E13H2" 3.832516 "inosine 5'-monophosphate dehydrogenase"  
"JS1\_M21\_00884" 18382 "s59E25H2" 0 "inosine 5'-monophosphate dehydrogenase"  
"JS1\_M21\_00884" 18382 "s59E5H2" 0.228692 "inosine 5'-monophosphate dehydrogenase"  
"JS1\_M21\_00884" 18382 "s63E6H2" 0.9190066 "inosine 5'-monophosphate dehydrogenase"  
"JS1\_M21\_00885" 18383 "s59E13H2" 3.791448 "putative sugar kinase"  
"JS1\_M21\_00885" 18383 "s59E25H2" 0.1441144 "putative sugar kinase"  
"JS1\_M21\_00885" 18383 "s59E5H2" 0.5945015 "putative sugar kinase"  
"JS1\_M21\_00885" 18383 "s63E6H2" 1.071727 "putative sugar kinase"  
"JS1\_M21\_00886" 18384 "s59E13H2" 3.407027 "putative kinase inhibitor protein"  
"JS1\_M21\_00886" 18384 "s59E25H2" 0.7360179 "putative kinase inhibitor protein"  
"JS1\_M21\_00886" 18384 "s59E5H2" 0.6025179 "putative kinase inhibitor protein"  
"JS1\_M21\_00886" 18384 "s63E6H2" 0.1454405 "putative kinase inhibitor protein"  
"JS1\_M21\_00887" 18385 "s59E13H2" 5.557556 "hypothetical protein"  
"JS1\_M21\_00887" 18385 "s59E25H2" 0.4448463 "hypothetical protein"  
"JS1\_M21\_00887" 18385 "s59E5H2" 0.488365 "hypothetical protein"  
"JS1\_M21\_00887" 18385 "s63E6H2" 0.3621556 "hypothetical protein"  
"JS1\_M21\_00888" 18386 "s59E13H2" 2.807651 "hypothetical protein"  
"JS1\_M21\_00888" 18386 "s59E25H2" 0 "hypothetical protein"  
"JS1\_M21\_00888" 18386 "s59E5H2" 0.001917517 "hypothetical protein"  
"JS1\_M21\_00888" 18386 "s63E6H2" 0.1106038 "hypothetical protein"  
"JS1\_M21\_00889" 18387 "s59E13H2" 0.2069177 "hypothetical protein"  
"JS1\_M21\_00889" 18387 "s59E25H2" 0 "hypothetical protein"  
"JS1\_M21\_00889" 18387 "s59E5H2" 0.343564 "hypothetical protein"  
"JS1\_M21\_00889" 18387 "s63E6H2" 0.2320847 "hypothetical protein"  
"JS1\_M21\_00890" 18388 "s59E13H2" 0.08754836 "HTH-type transcriptional repressor NsrR"  
"JS1\_M21\_00890" 18388 "s59E25H2" 0 "HTH-type transcriptional repressor NsrR"  
"JS1\_M21\_00890" 18388 "s59E5H2" 0.06651252 "HTH-type transcriptional repressor NsrR"  
"JS1\_M21\_00890" 18388 "s63E6H2" 0.1580893 "HTH-type transcriptional repressor NsrR"  
"JS1\_M21\_00891" 18389 "s59E13H2" 0.1136979 "Desulfoferrodoxin"  
"JS1\_M21\_00891" 18389 "s59E25H2" 0 "Desulfoferrodoxin"  
"JS1\_M21\_00891" 18389 "s59E5H2" 0.1221954 "Desulfoferrodoxin"

"JS1\_M21\_00891" 18389 "s63E6H2" 0.3228307 "Desulfoferrodoxin"  
"JS1\_M21\_00892" 18390 "s59E13H2" 0.1003759 "High molecular weight rubredoxin"  
"JS1\_M21\_00892" 18390 "s59E25H2" 0 "High molecular weight rubredoxin"  
"JS1\_M21\_00892" 18390 "s59E5H2" 2.151616 "High molecular weight rubredoxin"  
"JS1\_M21\_00892" 18390 "s63E6H2" 0.4715138 "High molecular weight rubredoxin"  
"JS1\_M21\_00893" 18391 "s59E13H2" 0.1111712 "Nitric oxide reductase"  
"JS1\_M21\_00893" 18391 "s59E25H2" 0 "Nitric oxide reductase"  
"JS1\_M21\_00893" 18391 "s59E5H2" 0.3042319 "Nitric oxide reductase"  
"JS1\_M21\_00893" 18391 "s63E6H2" 0.2099785 "Nitric oxide reductase"  
"JS1\_M21\_00894" 18392 "s59E13H2" 0.06752235 "Rubrerythrin-1"  
"JS1\_M21\_00894" 18392 "s59E25H2" 0 "Rubrerythrin-1"  
"JS1\_M21\_00894" 18392 "s59E5H2" 0.196805 "Rubrerythrin-1"  
"JS1\_M21\_00894" 18392 "s63E6H2" 0.1632012 "Rubrerythrin-1"  
"JS1\_M21\_00895" 18393 "s59E13H2" 0.09431555 "Fe/S biogenesis protein NfuA"  
"JS1\_M21\_00895" 18393 "s59E25H2" 0 "Fe/S biogenesis protein NfuA"  
"JS1\_M21\_00895" 18393 "s59E5H2" 0.06431321 "Fe/S biogenesis protein NfuA"  
"JS1\_M21\_00895" 18393 "s63E6H2" 0.1425506 "Fe/S biogenesis protein NfuA"  
"JS1\_M21\_00896" 18394 "s59E13H2" 0 "Carboxymuconolactone decarboxylase family protein"  
"JS1\_M21\_00896" 18394 "s59E25H2" 0 "Carboxymuconolactone decarboxylase family protein"  
"JS1\_M21\_00896" 18394 "s59E5H2" 0.1688987 "Carboxymuconolactone decarboxylase family protein"  
"JS1\_M21\_00896" 18394 "s63E6H2" 0.09689116 "Carboxymuconolactone decarboxylase family protein"  
"JS1\_M21\_00897" 18395 "s59E13H2" 0.09235004 "hypothetical protein"  
"JS1\_M21\_00897" 18395 "s59E25H2" 0 "hypothetical protein"  
"JS1\_M21\_00897" 18395 "s59E5H2" 0.3180969 "hypothetical protein"  
"JS1\_M21\_00897" 18395 "s63E6H2" 0.3272726 "hypothetical protein"  
"JS1\_M21\_00898" 18396 "s59E13H2" 0.2193322 "putative multidrug resistance ABC transporter ATP-binding/permease protein YheI"  
"JS1\_M21\_00898" 18396 "s59E25H2" 0 "putative multidrug resistance ABC transporter ATP-binding/permease protein YheI"  
"JS1\_M21\_00898" 18396 "s59E5H2" 2.826058 "putative multidrug resistance ABC transporter ATP-binding/permease protein YheI"  
"JS1\_M21\_00898" 18396 "s63E6H2" 1.327873 "putative multidrug resistance ABC transporter ATP-binding/permease protein YheI"  
"JS1\_M21\_00899" 18397 "s59E13H2" 0.2574144 "putative multidrug resistance ABC transporter ATP-binding/permease protein YheH"  
"JS1\_M21\_00899" 18397 "s59E25H2" 0 "putative multidrug resistance ABC transporter ATP-binding/permease protein YheH"  
"JS1\_M21\_00899" 18397 "s59E5H2" 2.233462 "putative multidrug resistance ABC transporter ATP-binding/permease protein YheH"  
"JS1\_M21\_00899" 18397 "s63E6H2" 0.9261021 "putative multidrug resistance ABC transporter ATP-binding/permease protein YheH"  
"JS1\_M21\_00900" 18398 "s59E13H2" 0.2921152 "hypothetical protein"  
"JS1\_M21\_00900" 18398 "s59E25H2" 0 "hypothetical protein"  
"JS1\_M21\_00900" 18398 "s59E5H2" 0.08505986 "hypothetical protein"  
"JS1\_M21\_00900" 18398 "s63E6H2" 1.408093 "hypothetical protein"  
"JS1\_M21\_00901" 18399 "s59E13H2" 0.3478555 "Dimethyl sulfoxide reductase DmsA precursor"  
"JS1\_M21\_00901" 18399 "s59E25H2" 0 "Dimethyl sulfoxide reductase DmsA precursor"  
"JS1\_M21\_00901" 18399 "s59E5H2" 0.8819392 "Dimethyl sulfoxide reductase DmsA precursor"  
"JS1\_M21\_00901" 18399 "s63E6H2" 0.6985242 "Dimethyl sulfoxide reductase DmsA precursor"  
"JS1\_M21\_00902" 18400 "s59E13H2" 0.4419905 "Putative NAD(P)H nitroreductase"  
"JS1\_M21\_00902" 18400 "s59E25H2" 0 "Putative NAD(P)H nitroreductase"  
"JS1\_M21\_00902" 18400 "s59E5H2" 0.1865383 "Putative NAD(P)H nitroreductase"  
"JS1\_M21\_00902" 18400 "s63E6H2" 1.151876 "Putative NAD(P)H nitroreductase"  
"JS1\_M21\_00903" 18401 "s59E13H2" 0.340193 "Cys-tRNA(Pro)/Cys-tRNA(Cys) deacylase YbaK"  
"JS1\_M21\_00903" 18401 "s59E25H2" 0 "Cys-tRNA(Pro)/Cys-tRNA(Cys) deacylase YbaK"

"JS1\_M21\_00903" 18401 "s59E5H2" 1.001023 "Cys-tRNA(Pro)/Cys-tRNA(Cys) deacylase Ybak"  
"JS1\_M21\_00903" 18401 "s63E6H2" 1.662429 "Cys-tRNA(Pro)/Cys-tRNA(Cys) deacylase Ybak"  
"JS1\_M21\_00904" 18402 "s59E13H2" 0.1578737 "ATP-dependent helicase/deoxyribonuclease subunit B"  
"JS1\_M21\_00904" 18402 "s59E25H2" 0 "ATP-dependent helicase/deoxyribonuclease subunit B"  
"JS1\_M21\_00904" 18402 "s59E5H2" 2.371691 "ATP-dependent helicase/deoxyribonuclease subunit B"  
"JS1\_M21\_00904" 18402 "s63E6H2" 1.739166 "ATP-dependent helicase/deoxyribonuclease subunit B"  
"JS1\_M21\_00905" 18403 "s59E13H2" 0.2782917 "ATP-dependent helicase/nuclease subunit A"  
"JS1\_M21\_00905" 18403 "s59E25H2" 0 "ATP-dependent helicase/nuclease subunit A"  
"JS1\_M21\_00905" 18403 "s59E5H2" 2.884534 "ATP-dependent helicase/nuclease subunit A"  
"JS1\_M21\_00905" 18403 "s63E6H2" 0.4600237 "ATP-dependent helicase/nuclease subunit A"  
"JS1\_M21\_00906" 18404 "s59E13H2" 0.2270038 "DegV domain-containing protein"  
"JS1\_M21\_00906" 18404 "s59E25H2" 0 "DegV domain-containing protein"  
"JS1\_M21\_00906" 18404 "s59E5H2" 0.7833423 "DegV domain-containing protein"  
"JS1\_M21\_00906" 18404 "s63E6H2" 0.534937 "DegV domain-containing protein"  
"JS1\_M21\_00907" 18405 "s59E13H2" 0.08557267 "protease TldD"  
"JS1\_M21\_00907" 18405 "s59E25H2" 0.1078636 "protease TldD"  
"JS1\_M21\_00907" 18405 "s59E5H2" 1.480897 "protease TldD"  
"JS1\_M21\_00907" 18405 "s63E6H2" 1.052267 "protease TldD"  
"JS1\_M21\_00908" 18406 "s59E13H2" 0.07505401 "protease TldD"  
"JS1\_M21\_00908" 18406 "s59E25H2" 0 "protease TldD"  
"JS1\_M21\_00908" 18406 "s59E5H2" 1.542375 "protease TldD"  
"JS1\_M21\_00908" 18406 "s63E6H2" 0.6230841 "protease TldD"  
"JS1\_M21\_00909" 18407 "s59E13H2" 0.1738233 "Xylose isomerase-like TIM barrel"  
"JS1\_M21\_00909" 18407 "s59E25H2" 0 "Xylose isomerase-like TIM barrel"  
"JS1\_M21\_00909" 18407 "s59E5H2" 0.9702247 "Xylose isomerase-like TIM barrel"  
"JS1\_M21\_00909" 18407 "s63E6H2" 1.422844 "Xylose isomerase-like TIM barrel"  
"JS1\_M21\_00910" 18408 "s59E13H2" 0 "Trehalose/maltose-binding protein MalE precursor"  
"JS1\_M21\_00910" 18408 "s59E25H2" 0 "Trehalose/maltose-binding protein MalE precursor"  
"JS1\_M21\_00910" 18408 "s59E5H2" 0 "Trehalose/maltose-binding protein MalE precursor"  
"JS1\_M21\_00910" 18408 "s63E6H2" 0 "Trehalose/maltose-binding protein MalE precursor"  
"JS1\_M21\_00911" 18409 "s59E13H2" 0 "Trehalose transport system permease protein SugA"  
"JS1\_M21\_00911" 18409 "s59E25H2" 0 "Trehalose transport system permease protein SugA"  
"JS1\_M21\_00911" 18409 "s59E5H2" 0 "Trehalose transport system permease protein SugA"  
"JS1\_M21\_00911" 18409 "s63E6H2" 0.003377383 "Trehalose transport system permease protein SugA"  
"JS1\_M21\_00912" 18410 "s59E13H2" 0 "Trehalose/maltose transport system permease protein MalG"  
"JS1\_M21\_00912" 18410 "s59E25H2" 0 "Trehalose/maltose transport system permease protein MalG"  
"JS1\_M21\_00912" 18410 "s59E5H2" 0 "Trehalose/maltose transport system permease protein MalG"  
"JS1\_M21\_00912" 18410 "s63E6H2" 0 "Trehalose/maltose transport system permease protein MalG"  
"JS1\_M21\_00914" 18412 "s59E13H2" 0.2942436 "methylcobalamin:coenzyme M methyltransferase"  
"JS1\_M21\_00914" 18412 "s59E25H2" 0 "methylcobalamin:coenzyme M methyltransferase"  
"JS1\_M21\_00914" 18412 "s59E5H2" 0.223233 "methylcobalamin:coenzyme M methyltransferase"  
"JS1\_M21\_00914" 18412 "s63E6H2" 0.1961681 "methylcobalamin:coenzyme M methyltransferase"  
"JS1\_M21\_00915" 18413 "s59E13H2" 0 "C4-dicarboxylate-binding periplasmic protein precursor"  
"JS1\_M21\_00915" 18413 "s59E25H2" 0 "C4-dicarboxylate-binding periplasmic protein precursor"  
"JS1\_M21\_00915" 18413 "s59E5H2" 0.03790638 "C4-dicarboxylate-binding periplasmic protein precursor"  
"JS1\_M21\_00915" 18413 "s63E6H2" 0.02695389 "C4-dicarboxylate-binding periplasmic protein precursor"  
"JS1\_M21\_00916" 18414 "s59E13H2" 0 "2,3-diketo-L-gulonate TRAP transporter small permease protein YiaM"

"JS1\_M21\_00916" 18414 "s59E25H2" 0 "2,3-diketo-L-gulonate TRAP transporter small permease protein YiaM"  
"JS1\_M21\_00916" 18414 "s59E5H2" 0.01062056 "2,3-diketo-L-gulonate TRAP transporter small permease protein YiaM"  
"JS1\_M21\_00916" 18414 "s63E6H2" 0.00745365 "2,3-diketo-L-gulonate TRAP transporter small permease protein YiaM"  
"JS1\_M21\_00917" 18415 "s59E13H2" 0 "Sialic acid TRAP transporter permease protein SiaT"  
"JS1\_M21\_00917" 18415 "s59E25H2" 0 "Sialic acid TRAP transporter permease protein SiaT"  
"JS1\_M21\_00917" 18415 "s59E5H2" 0.2056784 "Sialic acid TRAP transporter permease protein SiaT"  
"JS1\_M21\_00917" 18415 "s63E6H2" 0.008058151 "Sialic acid TRAP transporter permease protein SiaT"  
"JS1\_M21\_00918" 18416 "s59E13H2" 0 "Xylose isomerase-like TIM barrel"  
"JS1\_M21\_00918" 18416 "s59E25H2" 0 "Xylose isomerase-like TIM barrel"  
"JS1\_M21\_00918" 18416 "s59E5H2" 0.09386034 "Xylose isomerase-like TIM barrel"  
"JS1\_M21\_00918" 18416 "s63E6H2" 0.008126682 "Xylose isomerase-like TIM barrel"  
"JS1\_M21\_00919" 18417 "s59E13H2" 0 "2-(hydroxymethyl)glutarate dehydrogenase"  
"JS1\_M21\_00919" 18417 "s59E25H2" 0 "2-(hydroxymethyl)glutarate dehydrogenase"  
"JS1\_M21\_00919" 18417 "s59E5H2" 0.1234377 "2-(hydroxymethyl)glutarate dehydrogenase"  
"JS1\_M21\_00919" 18417 "s63E6H2" 0.005820886 "2-(hydroxymethyl)glutarate dehydrogenase"  
"JS1\_M21\_00920" 18418 "s59E13H2" 0 "Sorbitol dehydrogenase"  
"JS1\_M21\_00920" 18418 "s59E25H2" 0 "Sorbitol dehydrogenase"  
"JS1\_M21\_00920" 18418 "s59E5H2" 0.1189014 "Sorbitol dehydrogenase"  
"JS1\_M21\_00920" 18418 "s63E6H2" 0.0118295 "Sorbitol dehydrogenase"  
"JS1\_M21\_00921" 18419 "s59E13H2" 0.4820033 "Hydroxypyruvate isomerase"  
"JS1\_M21\_00921" 18419 "s59E25H2" 0 "Hydroxypyruvate isomerase"  
"JS1\_M21\_00921" 18419 "s59E5H2" 0.2426102 "Hydroxypyruvate isomerase"  
"JS1\_M21\_00921" 18419 "s63E6H2" 0.02677521 "Hydroxypyruvate isomerase"  
"JS1\_M21\_00922" 18420 "s59E13H2" 0.06889003 "hypothetical protein"  
"JS1\_M21\_00922" 18420 "s59E25H2" 0 "hypothetical protein"  
"JS1\_M21\_00922" 18420 "s59E5H2" 0.009269894 "hypothetical protein"  
"JS1\_M21\_00922" 18420 "s63E6H2" 0.1848919 "hypothetical protein"  
"JS1\_M21\_00923" 18421 "s59E13H2" 0.08570861 "Putrescine transport system permease protein PotH"  
"JS1\_M21\_00923" 18421 "s59E25H2" 0 "Putrescine transport system permease protein PotH"  
"JS1\_M21\_00923" 18421 "s59E5H2" 0.08509813 "Putrescine transport system permease protein PotH"  
"JS1\_M21\_00923" 18421 "s63E6H2" 0.09705993 "Putrescine transport system permease protein PotH"  
"JS1\_M21\_00924" 18422 "s59E13H2" 0.1020904 "Trehalose transport system permease protein SugB"  
"JS1\_M21\_00924" 18422 "s59E25H2" 0 "Trehalose transport system permease protein SugB"  
"JS1\_M21\_00924" 18422 "s59E5H2" 0.109886 "Trehalose transport system permease protein SugB"  
"JS1\_M21\_00924" 18422 "s63E6H2" 0.06435737 "Trehalose transport system permease protein SugB"  
"JS1\_M21\_00925" 18423 "s59E13H2" 0.07949985 "Spermidine/putrescine import ATP-binding protein PotA"  
"JS1\_M21\_00925" 18423 "s59E25H2" 0 "Spermidine/putrescine import ATP-binding protein PotA"  
"JS1\_M21\_00925" 18423 "s59E5H2" 0.03560577 "Spermidine/putrescine import ATP-binding protein PotA"  
"JS1\_M21\_00925" 18423 "s63E6H2" 0.04812771 "Spermidine/putrescine import ATP-binding protein PotA"  
"JS1\_M21\_00926" 18424 "s59E13H2" 0.105151 "Ribonuclease Z"  
"JS1\_M21\_00926" 18424 "s59E25H2" 0 "Ribonuclease Z"  
"JS1\_M21\_00926" 18424 "s59E5H2" 0.01016507 "Ribonuclease Z"  
"JS1\_M21\_00926" 18424 "s63E6H2" 0.01662208 "Ribonuclease Z"  
"JS1\_M21\_00927" 18425 "s59E13H2" 0.3741391 "Inositol 2-dehydrogenase"  
"JS1\_M21\_00927" 18425 "s59E25H2" 0 "Inositol 2-dehydrogenase"  
"JS1\_M21\_00927" 18425 "s59E5H2" 0.3967693 "Inositol 2-dehydrogenase"  
"JS1\_M21\_00927" 18425 "s63E6H2" 0.09055608 "Inositol 2-dehydrogenase"

"JS1\_M21\_00928" 18426 "s59E13H2" 0.129359 "Ribose operon repressor"  
"JS1\_M21\_00928" 18426 "s59E25H2" 0 "Ribose operon repressor"  
"JS1\_M21\_00928" 18426 "s59E5H2" 0.2268367 "Ribose operon repressor"  
"JS1\_M21\_00928" 18426 "s63E6H2" 0.1397938 "Ribose operon repressor"  
"JS1\_M21\_00929" 18427 "s59E13H2" 1.187364 "putative L-threonine 3-dehydrogenase"  
"JS1\_M21\_00929" 18427 "s59E25H2" 0 "putative L-threonine 3-dehydrogenase"  
"JS1\_M21\_00929" 18427 "s59E5H2" 0.4141174 "putative L-threonine 3-dehydrogenase"  
"JS1\_M21\_00929" 18427 "s63E6H2" 0.2458136 "putative L-threonine 3-dehydrogenase"  
"JS1\_M21\_00930" 18428 "s59E13H2" 0.5589081 "Creatinine amidohydrolase"  
"JS1\_M21\_00930" 18428 "s59E25H2" 0 "Creatinine amidohydrolase"  
"JS1\_M21\_00930" 18428 "s59E5H2" 0.6665976 "Creatinine amidohydrolase"  
"JS1\_M21\_00930" 18428 "s63E6H2" 0.2598694 "Creatinine amidohydrolase"  
"JS1\_M21\_00931" 18429 "s59E13H2" 0.2381756 "D-tagatose 3-epimerase"  
"JS1\_M21\_00931" 18429 "s59E25H2" 0 "D-tagatose 3-epimerase"  
"JS1\_M21\_00931" 18429 "s59E5H2" 0.3308749 "D-tagatose 3-epimerase"  
"JS1\_M21\_00931" 18429 "s63E6H2" 0.0539808 "D-tagatose 3-epimerase"  
"JS1\_M21\_00932" 18430 "s59E13H2" 0.004712741 "Tripartite tricarboxylate transporter family receptor"  
"JS1\_M21\_00932" 18430 "s59E25H2" 0 "Tripartite tricarboxylate transporter family receptor"  
"JS1\_M21\_00932" 18430 "s59E5H2" 0.224575 "Tripartite tricarboxylate transporter family receptor"  
"JS1\_M21\_00932" 18430 "s63E6H2" 0 "Tripartite tricarboxylate transporter family receptor"  
"JS1\_M21\_00933" 18431 "s59E13H2" 0.001735508 "Tripartite tricarboxylate transporter TctB family protein"  
"JS1\_M21\_00933" 18431 "s59E25H2" 0 "Tripartite tricarboxylate transporter TctB family protein"  
"JS1\_M21\_00933" 18431 "s59E5H2" 0.08156429 "Tripartite tricarboxylate transporter TctB family protein"  
"JS1\_M21\_00933" 18431 "s63E6H2" 0 "Tripartite tricarboxylate transporter TctB family protein"  
"JS1\_M21\_00934" 18432 "s59E13H2" 0.001013789 "Tripartite tricarboxylate transporter TctA family protein"  
"JS1\_M21\_00934" 18432 "s59E25H2" 0 "Tripartite tricarboxylate transporter TctA family protein"  
"JS1\_M21\_00934" 18432 "s59E5H2" 0.008021099 "Tripartite tricarboxylate transporter TctA family protein"  
"JS1\_M21\_00934" 18432 "s63E6H2" 0.003794589 "Tripartite tricarboxylate transporter TctA family protein"  
"JS1\_M21\_00935" 18433 "s59E13H2" 0.002465273 "Glucose--fructose oxidoreductase precursor"  
"JS1\_M21\_00935" 18433 "s59E25H2" 0 "Glucose--fructose oxidoreductase precursor"  
"JS1\_M21\_00935" 18433 "s59E5H2" 0.004938764 "Glucose--fructose oxidoreductase precursor"  
"JS1\_M21\_00935" 18433 "s63E6H2" 0 "Glucose--fructose oxidoreductase precursor"  
"JS1\_M21\_00936" 18434 "s59E13H2" 0.01520799 "Cupin domain protein"  
"JS1\_M21\_00936" 18434 "s59E25H2" 0 "Cupin domain protein"  
"JS1\_M21\_00936" 18434 "s59E5H2" 0 "Cupin domain protein"  
"JS1\_M21\_00936" 18434 "s63E6H2" 0 "Cupin domain protein"  
"JS1\_M21\_00937" 18435 "s59E13H2" 0.00401923 "Glucose--fructose oxidoreductase precursor"  
"JS1\_M21\_00937" 18435 "s59E25H2" 0 "Glucose--fructose oxidoreductase precursor"  
"JS1\_M21\_00937" 18435 "s59E5H2" 0 "Glucose--fructose oxidoreductase precursor"  
"JS1\_M21\_00937" 18435 "s63E6H2" 0 "Glucose--fructose oxidoreductase precursor"  
"JS1\_M21\_00938" 18436 "s59E13H2" 0.01471665 "Xylose isomerase-like TIM barrel"  
"JS1\_M21\_00938" 18436 "s59E25H2" 0 "Xylose isomerase-like TIM barrel"  
"JS1\_M21\_00938" 18436 "s59E5H2" 0.01754517 "Xylose isomerase-like TIM barrel"  
"JS1\_M21\_00938" 18436 "s63E6H2" 0 "Xylose isomerase-like TIM barrel"  
"JS1\_M21\_00939" 18437 "s59E13H2" 0 "Xylose isomerase-like TIM barrel"  
"JS1\_M21\_00939" 18437 "s59E25H2" 0 "Xylose isomerase-like TIM barrel"  
"JS1\_M21\_00939" 18437 "s59E5H2" 0 "Xylose isomerase-like TIM barrel"



"JS1\_M21\_00939" 18437 "s63E6H2" 0 "Xylose isomerase-like TIM barrel"  
"JS1\_M21\_00940" 18438 "s59E13H2" 0 "Iron uptake protein A1 precursor"  
"JS1\_M21\_00940" 18438 "s59E25H2" 0 "Iron uptake protein A1 precursor"  
"JS1\_M21\_00940" 18438 "s59E5H2" 0 "Iron uptake protein A1 precursor"  
"JS1\_M21\_00940" 18438 "s63E6H2" 0.003114237 "Iron uptake protein A1 precursor"  
"JS1\_M21\_00941" 18439 "s59E13H2" 0 "Trehalose/maltose import ATP-binding protein Malk"  
"JS1\_M21\_00941" 18439 "s59E25H2" 0 "Trehalose/maltose import ATP-binding protein Malk"  
"JS1\_M21\_00941" 18439 "s59E5H2" 0 "Trehalose/maltose import ATP-binding protein Malk"  
"JS1\_M21\_00941" 18439 "s63E6H2" 0 "Trehalose/maltose import ATP-binding protein Malk"  
"JS1\_M21\_00942" 18440 "s59E13H2" 0 "Putative 2-aminoethylphosphonate transport system permease protein PhnV"  
"JS1\_M21\_00942" 18440 "s59E25H2" 0 "Putative 2-aminoethylphosphonate transport system permease protein PhnV"  
"JS1\_M21\_00942" 18440 "s59E5H2" 0 "Putative 2-aminoethylphosphonate transport system permease protein PhnV"  
"JS1\_M21\_00942" 18440 "s63E6H2" 0 "Putative 2-aminoethylphosphonate transport system permease protein PhnV"  
"JS1\_M21\_00943" 18441 "s59E13H2" 0 "Glucosamine-6-phosphate deaminase 1"  
"JS1\_M21\_00943" 18441 "s59E25H2" 0 "Glucosamine-6-phosphate deaminase 1"  
"JS1\_M21\_00943" 18441 "s59E5H2" 0 "Glucosamine-6-phosphate deaminase 1"  
"JS1\_M21\_00943" 18441 "s63E6H2" 0 "Glucosamine-6-phosphate deaminase 1"  
"JS1\_M21\_00944" 18442 "s59E13H2" 0.005691373 "Uronate isomerase"  
"JS1\_M21\_00944" 18442 "s59E25H2" 0 "Uronate isomerase"  
"JS1\_M21\_00944" 18442 "s59E5H2" 0.1100685 "Uronate isomerase"  
"JS1\_M21\_00944" 18442 "s63E6H2" 0.0123754 "Uronate isomerase"  
"JS1\_M21\_00945" 18443 "s59E13H2" 0.1083251 "hypothetical protein"  
"JS1\_M21\_00945" 18443 "s59E25H2" 0 "hypothetical protein"  
"JS1\_M21\_00945" 18443 "s59E5H2" 0.09808261 "hypothetical protein"  
"JS1\_M21\_00945" 18443 "s63E6H2" 0.5915591 "hypothetical protein"  
"JS1\_M21\_00946" 18444 "s59E13H2" 0.04632846 "putative oxidoreductase"  
"JS1\_M21\_00946" 18444 "s59E25H2" 0 "putative oxidoreductase"  
"JS1\_M21\_00946" 18444 "s59E5H2" 0.8351695 "putative oxidoreductase"  
"JS1\_M21\_00946" 18444 "s63E6H2" 0.6448616 "putative oxidoreductase"  
"JS1\_M21\_00947" 18445 "s59E13H2" 0.08362572 "6-phosphogluconate dehydrogenase, NADP(+)-dependent, decarboxylating"  
"JS1\_M21\_00947" 18445 "s59E25H2" 0 "6-phosphogluconate dehydrogenase, NADP(+)-dependent, decarboxylating"  
"JS1\_M21\_00947" 18445 "s59E5H2" 0.4310625 "6-phosphogluconate dehydrogenase, NADP(+)-dependent, decarboxylating"  
"JS1\_M21\_00947" 18445 "s63E6H2" 0.6839547 "6-phosphogluconate dehydrogenase, NADP(+)-dependent, decarboxylating"  
"JS1\_M21\_00948" 18446 "s59E13H2" 1.269379 "hypothetical protein"  
"JS1\_M21\_00948" 18446 "s59E25H2" 0 "hypothetical protein"  
"JS1\_M21\_00948" 18446 "s59E5H2" 0.2171839 "hypothetical protein"  
"JS1\_M21\_00948" 18446 "s63E6H2" 0.7184978 "hypothetical protein"  
"JS1\_M21\_00949" 18447 "s59E13H2" 2.232709 "Pyrophosphate--fructose 6-phosphate 1-phosphotransferase"  
"JS1\_M21\_00949" 18447 "s59E25H2" 0 "Pyrophosphate--fructose 6-phosphate 1-phosphotransferase"  
"JS1\_M21\_00949" 18447 "s59E5H2" 0.2258445 "Pyrophosphate--fructose 6-phosphate 1-phosphotransferase"  
"JS1\_M21\_00949" 18447 "s63E6H2" 0.710679 "Pyrophosphate--fructose 6-phosphate 1-phosphotransferase"  
"JS1\_M21\_00950" 18448 "s59E13H2" 13.29192 "Signal peptidase I S"  
"JS1\_M21\_00950" 18448 "s59E25H2" 0 "Signal peptidase I S"  
"JS1\_M21\_00950" 18448 "s59E5H2" 1.209782 "Signal peptidase I S"  
"JS1\_M21\_00950" 18448 "s63E6H2" 0.5968572 "Signal peptidase I S"  
"JS1\_M21\_00952" 18450 "s59E13H2" 0.00538272 "hypothetical protein"  
"JS1\_M21\_00952" 18450 "s59E25H2" 0 "hypothetical protein"

"JS1\_M21\_00952" 18450 "s59E5H2" 0 "hypothetical protein"  
"JS1\_M21\_00952" 18450 "s63E6H2" 0.07519175 "hypothetical protein"  
"JS1\_M21\_00953" 18451 "s59E13H2" 0.003846305 "Xylose isomerase-like TIM barrel"  
"JS1\_M21\_00953" 18451 "s59E25H2" 0 "Xylose isomerase-like TIM barrel"  
"JS1\_M21\_00953" 18451 "s59E5H2" 0.008803722 "Xylose isomerase-like TIM barrel"  
"JS1\_M21\_00953" 18451 "s63E6H2" 0.07625952 "Xylose isomerase-like TIM barrel"  
"JS1\_M21\_00955" 18453 "s59E13H2" 0.04971961 "Transaldolase"  
"JS1\_M21\_00955" 18453 "s59E25H2" 0 "Transaldolase"  
"JS1\_M21\_00955" 18453 "s59E5H2" 0.01558051 "Transaldolase"  
"JS1\_M21\_00955" 18453 "s63E6H2" 0.1822574 "Transaldolase"  
"JS1\_M21\_00956" 18454 "s59E13H2" 0.006795694 "alpha-dehydro-beta-deoxy-D-glucarate aldolase"  
"JS1\_M21\_00956" 18454 "s59E25H2" 0 "alpha-dehydro-beta-deoxy-D-glucarate aldolase"  
"JS1\_M21\_00956" 18454 "s59E5H2" 0 "alpha-dehydro-beta-deoxy-D-glucarate aldolase"  
"JS1\_M21\_00956" 18454 "s63E6H2" 0.06732638 "alpha-dehydro-beta-deoxy-D-glucarate aldolase"  
"JS1\_M21\_00957" 18455 "s59E13H2" 3.437854 "hypothetical protein"  
"JS1\_M21\_00957" 18455 "s59E25H2" 0 "hypothetical protein"  
"JS1\_M21\_00957" 18455 "s59E5H2" 0.08337462 "hypothetical protein"  
"JS1\_M21\_00957" 18455 "s63E6H2" 0.1474557 "hypothetical protein"  
"JS1\_M21\_00959" 18457 "s59E13H2" 0 "hypothetical protein"  
"JS1\_M21\_00959" 18457 "s59E25H2" 0 "hypothetical protein"  
"JS1\_M21\_00959" 18457 "s59E5H2" 0 "hypothetical protein"  
"JS1\_M21\_00959" 18457 "s63E6H2" 0 "hypothetical protein"  
"JS1\_M21\_00960" 18458 "s59E13H2" 0 "hypothetical protein"  
"JS1\_M21\_00960" 18458 "s59E25H2" 0 "hypothetical protein"  
"JS1\_M21\_00960" 18458 "s59E5H2" 0 "hypothetical protein"  
"JS1\_M21\_00960" 18458 "s63E6H2" 0 "hypothetical protein"  
"JS1\_M21\_00961" 18459 "s59E13H2" 0 "hypothetical protein"  
"JS1\_M21\_00961" 18459 "s59E25H2" 0 "hypothetical protein"  
"JS1\_M21\_00961" 18459 "s59E5H2" 0 "hypothetical protein"  
"JS1\_M21\_00961" 18459 "s63E6H2" 0 "hypothetical protein"  
"JS1\_M21\_00963" 18461 "s59E13H2" 8.229408 "LL-diaminopimelate aminotransferase"  
"JS1\_M21\_00963" 18461 "s59E25H2" 0.3820396 "LL-diaminopimelate aminotransferase"  
"JS1\_M21\_00963" 18461 "s59E5H2" 1.214572 "LL-diaminopimelate aminotransferase"  
"JS1\_M21\_00963" 18461 "s63E6H2" 4.15891 "LL-diaminopimelate aminotransferase"  
"JS1\_M21\_00964" 18462 "s59E13H2" 3.294658 "hypothetical protein"  
"JS1\_M21\_00964" 18462 "s59E25H2" 0 "hypothetical protein"  
"JS1\_M21\_00964" 18462 "s59E5H2" 0.3633632 "hypothetical protein"  
"JS1\_M21\_00964" 18462 "s63E6H2" 5.075688 "hypothetical protein"  
"JS1\_M21\_00965" 18463 "s59E13H2" 0.07130869 "Glycerol kinase"  
"JS1\_M21\_00965" 18463 "s59E25H2" 0 "Glycerol kinase"  
"JS1\_M21\_00965" 18463 "s59E5H2" 0.02955345 "Glycerol kinase"  
"JS1\_M21\_00965" 18463 "s63E6H2" 5.647427 "Glycerol kinase"  
"JS1\_M21\_00966" 18464 "s59E13H2" 0.08420131 "Glycerol kinase"  
"JS1\_M21\_00966" 18464 "s59E25H2" 0 "Glycerol kinase"  
"JS1\_M21\_00966" 18464 "s59E5H2" 0.07934742 "Glycerol kinase"  
"JS1\_M21\_00966" 18464 "s63E6H2" 3.239586 "Glycerol kinase"  
"JS1\_M21\_00967" 18465 "s59E13H2" 0.1069767 "Fructose-bisphosphate aldolase"

"JS1\_M21\_00967" 18465 "s59E25H2" 0 "Fructose-bisphosphate aldolase"  
"JS1\_M21\_00967" 18465 "s59E5H2" 0.05494606 "Fructose-bisphosphate aldolase"  
"JS1\_M21\_00967" 18465 "s63E6H2" 4.191146 "Fructose-bisphosphate aldolase"  
"JS1\_M21\_00968" 18466 "s59E13H2" 0.06516592 "Glyoxylate reductase"  
"JS1\_M21\_00968" 18466 "s59E25H2" 0 "Glyoxylate reductase"  
"JS1\_M21\_00968" 18466 "s59E5H2" 0.03509589 "Glyoxylate reductase"  
"JS1\_M21\_00968" 18466 "s63E6H2" 2.35227 "Glyoxylate reductase"  
"JS1\_M21\_00969" 18467 "s59E13H2" 1.760297 "4-hydroxythreonine-4-phosphate dehydrogenase 2"  
"JS1\_M21\_00969" 18467 "s59E25H2" 0 "4-hydroxythreonine-4-phosphate dehydrogenase 2"  
"JS1\_M21\_00969" 18467 "s59E5H2" 0.001573492 "4-hydroxythreonine-4-phosphate dehydrogenase 2"  
"JS1\_M21\_00969" 18467 "s63E6H2" 0.04161929 "4-hydroxythreonine-4-phosphate dehydrogenase 2"  
"JS1\_M21\_00970" 18468 "s59E13H2" 2.57492 "hypothetical protein"  
"JS1\_M21\_00970" 18468 "s59E25H2" 0 "hypothetical protein"  
"JS1\_M21\_00970" 18468 "s59E5H2" 0.02378225 "hypothetical protein"  
"JS1\_M21\_00970" 18468 "s63E6H2" 0.3117395 "hypothetical protein"  
"JS1\_M21\_00971" 18469 "s59E13H2" 7.642752 "Isopropylmalate/citramalate isomerase small subunit"  
"JS1\_M21\_00971" 18469 "s59E25H2" 0 "Isopropylmalate/citramalate isomerase small subunit"  
"JS1\_M21\_00971" 18469 "s59E5H2" 1.414095 "Isopropylmalate/citramalate isomerase small subunit"  
"JS1\_M21\_00971" 18469 "s63E6H2" 0.8317626 "Isopropylmalate/citramalate isomerase small subunit"  
"JS1\_M21\_00972" 18470 "s59E13H2" 8.23865 "Isopropylmalate/citramalate isomerase large subunit"  
"JS1\_M21\_00972" 18470 "s59E25H2" 0 "Isopropylmalate/citramalate isomerase large subunit"  
"JS1\_M21\_00972" 18470 "s59E5H2" 1.392829 "Isopropylmalate/citramalate isomerase large subunit"  
"JS1\_M21\_00972" 18470 "s63E6H2" 0.4519609 "Isopropylmalate/citramalate isomerase large subunit"  
"JS1\_M21\_00973" 18471 "s59E13H2" 9.106647 "hypothetical protein"  
"JS1\_M21\_00973" 18471 "s59E25H2" 0 "hypothetical protein"  
"JS1\_M21\_00973" 18471 "s59E5H2" 1.148452 "hypothetical protein"  
"JS1\_M21\_00973" 18471 "s63E6H2" 0.1573525 "hypothetical protein"  
"JS1\_M21\_00974" 18472 "s59E13H2" 12.17204 "NAD-dependent malic enzyme"  
"JS1\_M21\_00974" 18472 "s59E25H2" 0.02295918 "NAD-dependent malic enzyme"  
"JS1\_M21\_00974" 18472 "s59E5H2" 1.342624 "NAD-dependent malic enzyme"  
"JS1\_M21\_00974" 18472 "s63E6H2" 0.06784404 "NAD-dependent malic enzyme"  
"JS1\_M21\_00975" 18473 "s59E13H2" 3.198545 "Fumarate hydratase class I, anaerobic"  
"JS1\_M21\_00975" 18473 "s59E25H2" 0.2972973 "Fumarate hydratase class I, anaerobic"  
"JS1\_M21\_00975" 18473 "s59E5H2" 0.9074481 "Fumarate hydratase class I, anaerobic"  
"JS1\_M21\_00975" 18473 "s63E6H2" 0.06161442 "Fumarate hydratase class I, anaerobic"  
"JS1\_M21\_00976" 18474 "s59E13H2" 9.160474 "L(+)-tartrate dehydratase subunit alpha"  
"JS1\_M21\_00976" 18474 "s59E25H2" 0 "L(+)-tartrate dehydratase subunit alpha"  
"JS1\_M21\_00976" 18474 "s59E5H2" 0.6524168 "L(+)-tartrate dehydratase subunit alpha"  
"JS1\_M21\_00976" 18474 "s63E6H2" 0.04861994 "L(+)-tartrate dehydratase subunit alpha"  
"JS1\_M21\_00977" 18475 "s59E13H2" 2.726059 "Argininosuccinate lyase 1"  
"JS1\_M21\_00977" 18475 "s59E25H2" 0 "Argininosuccinate lyase 1"  
"JS1\_M21\_00977" 18475 "s59E5H2" 0.06215084 "Argininosuccinate lyase 1"  
"JS1\_M21\_00977" 18475 "s63E6H2" 0.2160192 "Argininosuccinate lyase 1"  
"JS1\_M21\_00978" 18476 "s59E13H2" 2.450958 "Argininosuccinate synthase"  
"JS1\_M21\_00978" 18476 "s59E25H2" 0 "Argininosuccinate synthase"  
"JS1\_M21\_00978" 18476 "s59E5H2" 0.07463565 "Argininosuccinate synthase"  
"JS1\_M21\_00978" 18476 "s63E6H2" 0.09012333 "Argininosuccinate synthase"

"JS1\_M21\_00979" 18477 "s59E13H2" 0.7009579 "Acetylnithine aminotransferase"  
"JS1\_M21\_00979" 18477 "s59E25H2" 0 "Acetylnithine aminotransferase"  
"JS1\_M21\_00979" 18477 "s59E5H2" 0.04532185 "Acetylnithine aminotransferase"  
"JS1\_M21\_00979" 18477 "s63E6H2" 0.02523423 "Acetylnithine aminotransferase"  
"JS1\_M21\_00980" 18478 "s59E13H2" 2.674995 "LL-diaminopimelate aminotransferase"  
"JS1\_M21\_00980" 18478 "s59E25H2" 0 "LL-diaminopimelate aminotransferase"  
"JS1\_M21\_00980" 18478 "s59E5H2" 0.2817361 "LL-diaminopimelate aminotransferase"  
"JS1\_M21\_00980" 18478 "s63E6H2" 0.3576133 "LL-diaminopimelate aminotransferase"  
"JS1\_M21\_00981" 18479 "s59E13H2" 0.0271767 "Transposase"  
"JS1\_M21\_00981" 18479 "s59E25H2" 0 "Transposase"  
"JS1\_M21\_00981" 18479 "s59E5H2" 0 "Transposase"  
"JS1\_M21\_00981" 18479 "s63E6H2" 0.05107116 "Transposase"  
"JS1\_M21\_00982" 18480 "s59E13H2" 0 "dihydroorotase"  
"JS1\_M21\_00982" 18480 "s59E25H2" 0 "dihydroorotase"  
"JS1\_M21\_00982" 18480 "s59E5H2" 0 "dihydroorotase"  
"JS1\_M21\_00982" 18480 "s63E6H2" 0 "dihydroorotase"  
"JS1\_M21\_00983" 18481 "s59E13H2" 0 "DctM-like transporters"  
"JS1\_M21\_00983" 18481 "s59E25H2" 0 "DctM-like transporters"  
"JS1\_M21\_00983" 18481 "s59E5H2" 0 "DctM-like transporters"  
"JS1\_M21\_00983" 18481 "s63E6H2" 0.007094042 "DctM-like transporters"  
"JS1\_M21\_00986" 18484 "s59E13H2" 0 "hypothetical protein"  
"JS1\_M21\_00986" 18484 "s59E25H2" 0 "hypothetical protein"  
"JS1\_M21\_00986" 18484 "s59E5H2" 0 "hypothetical protein"  
"JS1\_M21\_00986" 18484 "s63E6H2" 0 "hypothetical protein"  
"JS1\_M21\_00987" 18485 "s59E13H2" 0 "Opine dehydrogenase"  
"JS1\_M21\_00987" 18485 "s59E25H2" 0 "Opine dehydrogenase"  
"JS1\_M21\_00987" 18485 "s59E5H2" 0 "Opine dehydrogenase"  
"JS1\_M21\_00987" 18485 "s63E6H2" 0 "Opine dehydrogenase"  
"JS1\_M21\_00988" 18486 "s59E13H2" 0.02718297 "hypothetical protein"  
"JS1\_M21\_00988" 18486 "s59E25H2" 0 "hypothetical protein"  
"JS1\_M21\_00988" 18486 "s59E5H2" 0 "hypothetical protein"  
"JS1\_M21\_00988" 18486 "s63E6H2" 0.06055478 "hypothetical protein"  
"JS1\_M21\_00989" 18487 "s59E13H2" 0 "putative HTH-type transcriptional regulator YdfH"  
"JS1\_M21\_00989" 18487 "s59E25H2" 0 "putative HTH-type transcriptional regulator YdfH"  
"JS1\_M21\_00989" 18487 "s59E5H2" 0 "putative HTH-type transcriptional regulator YdfH"  
"JS1\_M21\_00989" 18487 "s63E6H2" 0.01925989 "putative HTH-type transcriptional regulator YdfH"  
"JS1\_M21\_00990" 18488 "s59E13H2" 0.1769627 "Succinyl-CoA ligase [ADP-forming] subunit alpha"  
"JS1\_M21\_00990" 18488 "s59E25H2" 0 "Succinyl-CoA ligase [ADP-forming] subunit alpha"  
"JS1\_M21\_00990" 18488 "s59E5H2" 0 "Succinyl-CoA ligase [ADP-forming] subunit alpha"  
"JS1\_M21\_00990" 18488 "s63E6H2" 0.07517916 "Succinyl-CoA ligase [ADP-forming] subunit alpha"  
"JS1\_M21\_00991" 18489 "s59E13H2" 0.2911989 "Succinyl-CoA ligase [ADP-forming] subunit beta"  
"JS1\_M21\_00991" 18489 "s59E25H2" 0 "Succinyl-CoA ligase [ADP-forming] subunit beta"  
"JS1\_M21\_00991" 18489 "s59E5H2" 0.01763757 "Succinyl-CoA ligase [ADP-forming] subunit beta"  
"JS1\_M21\_00991" 18489 "s63E6H2" 0.02897955 "Succinyl-CoA ligase [ADP-forming] subunit beta"  
"JS1\_M21\_00992" 18490 "s59E13H2" 0.40198 "2-oxoglutarate synthase subunit KorC"  
"JS1\_M21\_00992" 18490 "s59E25H2" 0 "2-oxoglutarate synthase subunit KorC"  
"JS1\_M21\_00992" 18490 "s59E5H2" 0.03800455 "2-oxoglutarate synthase subunit KorC"

"JS1\_M21\_00992" 18490 "s63E6H2" 0.08197629 "2-oxoglutarate synthase subunit KorC"  
"JS1\_M21\_00993" 18491 "s59E13H2" 0.2981597 "2-oxoglutarate synthase subunit KorB"  
"JS1\_M21\_00993" 18491 "s59E25H2" 0 "2-oxoglutarate synthase subunit KorB"  
"JS1\_M21\_00993" 18491 "s59E5H2" 0.02323287 "2-oxoglutarate synthase subunit KorB"  
"JS1\_M21\_00993" 18491 "s63E6H2" 0.06793717 "2-oxoglutarate synthase subunit KorB"  
"JS1\_M21\_00994" 18492 "s59E13H2" 0.2425596 "2-oxoglutarate synthase subunit KorA"  
"JS1\_M21\_00994" 18492 "s59E25H2" 0 "2-oxoglutarate synthase subunit KorA"  
"JS1\_M21\_00994" 18492 "s59E5H2" 0.03857713 "2-oxoglutarate synthase subunit KorA"  
"JS1\_M21\_00994" 18492 "s63E6H2" 0.074092 "2-oxoglutarate synthase subunit KorA"  
"JS1\_M21\_00995" 18493 "s59E13H2" 0.06871282 "Ferredoxin"  
"JS1\_M21\_00995" 18493 "s59E25H2" 0 "Ferredoxin"  
"JS1\_M21\_00995" 18493 "s59E5H2" 0.02415384 "Ferredoxin"  
"JS1\_M21\_00995" 18493 "s63E6H2" 0.007399539 "Ferredoxin"  
"JS1\_M21\_00996" 18494 "s59E13H2" 0.6355913 "putative HTH-type transcriptional regulator YdfH"  
"JS1\_M21\_00996" 18494 "s59E25H2" 0 "putative HTH-type transcriptional regulator YdfH"  
"JS1\_M21\_00996" 18494 "s59E5H2" 0.004035235 "putative HTH-type transcriptional regulator YdfH"  
"JS1\_M21\_00996" 18494 "s63E6H2" 0.01048611 "putative HTH-type transcriptional regulator YdfH"  
"JS1\_M21\_00997" 18495 "s59E13H2" 2.56619 "Argininosuccinate lyase 1"  
"JS1\_M21\_00997" 18495 "s59E25H2" 0 "Argininosuccinate lyase 1"  
"JS1\_M21\_00997" 18495 "s59E5H2" 0.07576048 "Argininosuccinate lyase 1"  
"JS1\_M21\_00997" 18495 "s63E6H2" 0.006427307 "Argininosuccinate lyase 1"  
"JS1\_M21\_00998" 18496 "s59E13H2" 0.9052338 "Argininosuccinate synthase"  
"JS1\_M21\_00998" 18496 "s59E25H2" 0 "Argininosuccinate synthase"  
"JS1\_M21\_00998" 18496 "s59E5H2" 0.07388474 "Argininosuccinate synthase"  
"JS1\_M21\_00998" 18496 "s63E6H2" 0.05033893 "Argininosuccinate synthase"  
"JS1\_M21\_00999" 18497 "s59E13H2" 1.199335 "Acetylornithine aminotransferase"  
"JS1\_M21\_00999" 18497 "s59E25H2" 0 "Acetylornithine aminotransferase"  
"JS1\_M21\_00999" 18497 "s59E5H2" 0.03272293 "Acetylornithine aminotransferase"  
"JS1\_M21\_00999" 18497 "s63E6H2" 0.09528814 "Acetylornithine aminotransferase"  
"JS1\_M21\_01000" 18498 "s59E13H2" 0.1429418 "Acetylglutamate kinase"  
"JS1\_M21\_01000" 18498 "s59E25H2" 0 "Acetylglutamate kinase"  
"JS1\_M21\_01000" 18498 "s59E5H2" 0.02755441 "Acetylglutamate kinase"  
"JS1\_M21\_01000" 18498 "s63E6H2" 0.1299059 "Acetylglutamate kinase"  
"JS1\_M21\_01001" 18499 "s59E13H2" 0.04613369 "Arginine biosynthesis bifunctional protein ArgJ"  
"JS1\_M21\_01001" 18499 "s59E25H2" 0 "Arginine biosynthesis bifunctional protein ArgJ"  
"JS1\_M21\_01001" 18499 "s59E5H2" 0.05693171 "Arginine biosynthesis bifunctional protein ArgJ"  
"JS1\_M21\_01001" 18499 "s63E6H2" 0.2096936 "Arginine biosynthesis bifunctional protein ArgJ"  
"JS1\_M21\_01002" 18500 "s59E13H2" 0.02078027 "N-acetyl-gamma-glutamyl-phosphate reductase"  
"JS1\_M21\_01002" 18500 "s59E25H2" 0 "N-acetyl-gamma-glutamyl-phosphate reductase"  
"JS1\_M21\_01002" 18500 "s59E5H2" 0.03189921 "N-acetyl-gamma-glutamyl-phosphate reductase"  
"JS1\_M21\_01002" 18500 "s63E6H2" 0.1092911 "N-acetyl-gamma-glutamyl-phosphate reductase"  
"JS1\_M21\_01003" 18501 "s59E13H2" 0.5818709 "Rhamnulokinase"  
"JS1\_M21\_01003" 18501 "s59E25H2" 0 "Rhamnulokinase"  
"JS1\_M21\_01003" 18501 "s59E5H2" 0.5109638 "Rhamnulokinase"  
"JS1\_M21\_01003" 18501 "s63E6H2" 0.04996855 "Rhamnulokinase"  
"JS1\_M21\_01004" 18502 "s59E13H2" 0.35415 "Dihydrolipoyllysine-residue acetyltransferase component of pyruvate dehydrogenase complex"  
"JS1\_M21\_01004" 18502 "s59E25H2" 0 "Dihydrolipoyllysine-residue acetyltransferase component of pyruvate dehydrogenase complex"

"JS1\_M21\_01004" 18502 "s59E5H2" 0.3138728 "Dihydrolipoyllysine-residue acetyltransferase component of pyruvate dehydrogenase complex"  
"JS1\_M21\_01004" 18502 "s63E6H2" 0.1312851 "Dihydrolipoyllysine-residue acetyltransferase component of pyruvate dehydrogenase complex"  
"JS1\_M21\_01010" 18508 "s59E13H2" 0 "HTH-type transcriptional repressor YvoA"  
"JS1\_M21\_01010" 18508 "s59E25H2" 0 "HTH-type transcriptional repressor YvoA"  
"JS1\_M21\_01010" 18508 "s59E5H2" 0 "HTH-type transcriptional repressor YvoA"  
"JS1\_M21\_01010" 18508 "s63E6H2" 0.00518925 "HTH-type transcriptional repressor YvoA"  
"JS1\_M21\_01011" 18509 "s59E13H2" 0 "Glycerol kinase"  
"JS1\_M21\_01011" 18509 "s59E25H2" 0 "Glycerol kinase"  
"JS1\_M21\_01011" 18509 "s59E5H2" 0 "Glycerol kinase"  
"JS1\_M21\_01011" 18509 "s63E6H2" 0.01959016 "Glycerol kinase"  
"JS1\_M21\_01012" 18510 "s59E13H2" 0 "hypothetical protein"  
"JS1\_M21\_01012" 18510 "s59E25H2" 0 "hypothetical protein"  
"JS1\_M21\_01012" 18510 "s59E5H2" 0 "hypothetical protein"  
"JS1\_M21\_01012" 18510 "s63E6H2" 0 "hypothetical protein"  
"JS1\_M21\_01013" 18511 "s59E13H2" 0 "Oligopeptide transport ATP-binding protein OppF"  
"JS1\_M21\_01013" 18511 "s59E25H2" 0 "Oligopeptide transport ATP-binding protein OppF"  
"JS1\_M21\_01013" 18511 "s59E5H2" 0 "Oligopeptide transport ATP-binding protein OppF"  
"JS1\_M21\_01013" 18511 "s63E6H2" 0 "Oligopeptide transport ATP-binding protein OppF"  
"JS1\_M21\_01014" 18512 "s59E13H2" 0 "Oligopeptide transport ATP-binding protein OppD"  
"JS1\_M21\_01014" 18512 "s59E25H2" 0 "Oligopeptide transport ATP-binding protein OppD"  
"JS1\_M21\_01014" 18512 "s59E5H2" 0 "Oligopeptide transport ATP-binding protein OppD"  
"JS1\_M21\_01014" 18512 "s63E6H2" 0 "Oligopeptide transport ATP-binding protein OppD"  
"JS1\_M21\_01015" 18513 "s59E13H2" 0 "Dipeptide transport system permease protein DppC"  
"JS1\_M21\_01015" 18513 "s59E25H2" 0 "Dipeptide transport system permease protein DppC"  
"JS1\_M21\_01015" 18513 "s59E5H2" 0 "Dipeptide transport system permease protein DppC"  
"JS1\_M21\_01015" 18513 "s63E6H2" 0 "Dipeptide transport system permease protein DppC"  
"JS1\_M21\_01016" 18514 "s59E13H2" 0 "Glutathione-binding protein GsiB precursor"  
"JS1\_M21\_01016" 18514 "s59E25H2" 0 "Glutathione-binding protein GsiB precursor"  
"JS1\_M21\_01016" 18514 "s59E5H2" 0 "Glutathione-binding protein GsiB precursor"  
"JS1\_M21\_01016" 18514 "s63E6H2" 0 "Glutathione-binding protein GsiB precursor"  
"JS1\_M21\_01017" 18515 "s59E13H2" 0 "Glutathione transport system permease protein GsiC"  
"JS1\_M21\_01017" 18515 "s59E25H2" 0 "Glutathione transport system permease protein GsiC"  
"JS1\_M21\_01017" 18515 "s59E5H2" 0 "Glutathione transport system permease protein GsiC"  
"JS1\_M21\_01017" 18515 "s63E6H2" 0 "Glutathione transport system permease protein GsiC"  
"JS1\_M21\_01018" 18516 "s59E13H2" 0 "2-aminoethylphosphonate--pyruvate transaminase"  
"JS1\_M21\_01018" 18516 "s59E25H2" 0 "2-aminoethylphosphonate--pyruvate transaminase"  
"JS1\_M21\_01018" 18516 "s59E5H2" 0 "2-aminoethylphosphonate--pyruvate transaminase"  
"JS1\_M21\_01018" 18516 "s63E6H2" 0.002637061 "2-aminoethylphosphonate--pyruvate transaminase"  
"JS1\_M21\_01019" 18517 "s59E13H2" 0.004010652 "hypothetical protein"  
"JS1\_M21\_01019" 18517 "s59E25H2" 0 "hypothetical protein"  
"JS1\_M21\_01019" 18517 "s59E5H2" 0.1321398 "hypothetical protein"  
"JS1\_M21\_01019" 18517 "s63E6H2" 0.100646 "hypothetical protein"  
"JS1\_M21\_01020" 18518 "s59E13H2" 0 "Helix-turn-helix domain protein"  
"JS1\_M21\_01020" 18518 "s59E25H2" 0 "Helix-turn-helix domain protein"  
"JS1\_M21\_01020" 18518 "s59E5H2" 0.03437242 "Helix-turn-helix domain protein"  
"JS1\_M21\_01020" 18518 "s63E6H2" 0 "Helix-turn-helix domain protein"  
"JS1\_M21\_01023" 18521 "s59E13H2" 0.02109577 "hypothetical protein"

"JS1\_M21\_01023" 18521 "s59E25H2" 0 "hypothetical protein"  
"JS1\_M21\_01023" 18521 "s59E5H2" 0.1360985 "hypothetical protein"  
"JS1\_M21\_01023" 18521 "s63E6H2" 0.05981721 "hypothetical protein"  
"JS1\_M21\_01024" 18522 "s59E13H2" 0.06314776 "Peptidase family M50"  
"JS1\_M21\_01024" 18522 "s59E25H2" 0 "Peptidase family M50"  
"JS1\_M21\_01024" 18522 "s59E5H2" 0.2605386 "Peptidase family M50"  
"JS1\_M21\_01024" 18522 "s63E6H2" 0.07932159 "Peptidase family M50"  
"JS1\_M21\_01025" 18523 "s59E13H2" 0.08401679 "Tryptophan--tRNA ligase"  
"JS1\_M21\_01025" 18523 "s59E25H2" 0 "Tryptophan--tRNA ligase"  
"JS1\_M21\_01025" 18523 "s59E5H2" 0.2185709 "Tryptophan--tRNA ligase"  
"JS1\_M21\_01025" 18523 "s63E6H2" 0.06310266 "Tryptophan--tRNA ligase"  
"JS1\_M21\_01026" 18524 "s59E13H2" 1.352561 "Segregation and condensation protein A"  
"JS1\_M21\_01026" 18524 "s59E25H2" 0 "Segregation and condensation protein A"  
"JS1\_M21\_01026" 18524 "s59E5H2" 0.4246862 "Segregation and condensation protein A"  
"JS1\_M21\_01026" 18524 "s63E6H2" 0.08249481 "Segregation and condensation protein A"  
"JS1\_M21\_01027" 18525 "s59E13H2" 5.116983 "Segregation and condensation protein B"  
"JS1\_M21\_01027" 18525 "s59E25H2" 0 "Segregation and condensation protein B"  
"JS1\_M21\_01027" 18525 "s59E5H2" 0.2287767 "Segregation and condensation protein B"  
"JS1\_M21\_01027" 18525 "s63E6H2" 0.2242792 "Segregation and condensation protein B"  
"JS1\_M21\_01028" 18526 "s59E13H2" 4.003173 "Ribosomal large subunit pseudouridine synthase B"  
"JS1\_M21\_01028" 18526 "s59E25H2" 0 "Ribosomal large subunit pseudouridine synthase B"  
"JS1\_M21\_01028" 18526 "s59E5H2" 0.03738077 "Ribosomal large subunit pseudouridine synthase B"  
"JS1\_M21\_01028" 18526 "s63E6H2" 0.08090647 "Ribosomal large subunit pseudouridine synthase B"  
"JS1\_M21\_01029" 18527 "s59E13H2" 5.074433 "Cytidylate kinase"  
"JS1\_M21\_01029" 18527 "s59E25H2" 0 "Cytidylate kinase"  
"JS1\_M21\_01029" 18527 "s59E5H2" 0.0486352 "Cytidylate kinase"  
"JS1\_M21\_01029" 18527 "s63E6H2" 0.1024929 "Cytidylate kinase"  
"JS1\_M21\_01030" 18528 "s59E13H2" 6.12841 "4-hydroxy-3-methylbut-2-enyl diphosphate reductase"  
"JS1\_M21\_01030" 18528 "s59E25H2" 0 "4-hydroxy-3-methylbut-2-enyl diphosphate reductase"  
"JS1\_M21\_01030" 18528 "s59E5H2" 0.1492571 "4-hydroxy-3-methylbut-2-enyl diphosphate reductase"  
"JS1\_M21\_01030" 18528 "s63E6H2" 0.3821974 "4-hydroxy-3-methylbut-2-enyl diphosphate reductase"  
"JS1\_M21\_01031" 18529 "s59E13H2" 5.863491 "50S ribosomal protein L28"  
"JS1\_M21\_01031" 18529 "s59E25H2" 0 "50S ribosomal protein L28"  
"JS1\_M21\_01031" 18529 "s59E5H2" 0.1634897 "50S ribosomal protein L28"  
"JS1\_M21\_01031" 18529 "s63E6H2" 0.3114912 "50S ribosomal protein L28"  
"JS1\_M21\_01032" 18530 "s59E13H2" 5.737579 "Ribosomal RNA small subunit methyltransferase D"  
"JS1\_M21\_01032" 18530 "s59E25H2" 0 "Ribosomal RNA small subunit methyltransferase D"  
"JS1\_M21\_01032" 18530 "s59E5H2" 0.07539327 "Ribosomal RNA small subunit methyltransferase D"  
"JS1\_M21\_01032" 18530 "s63E6H2" 0.1704162 "Ribosomal RNA small subunit methyltransferase D"  
"JS1\_M21\_01033" 18531 "s59E13H2" 6.486993 "Phosphopantetheine adenylyltransferase"  
"JS1\_M21\_01033" 18531 "s59E25H2" 0 "Phosphopantetheine adenylyltransferase"  
"JS1\_M21\_01033" 18531 "s59E5H2" 0.1177588 "Phosphopantetheine adenylyltransferase"  
"JS1\_M21\_01033" 18531 "s63E6H2" 0.3294503 "Phosphopantetheine adenylyltransferase"  
"JS1\_M21\_01037" 18535 "s59E13H2" 0.1500398 "hypothetical protein"  
"JS1\_M21\_01037" 18535 "s59E25H2" 0 "hypothetical protein"  
"JS1\_M21\_01037" 18535 "s59E5H2" 0 "hypothetical protein"  
"JS1\_M21\_01037" 18535 "s63E6H2" 1.033493 "hypothetical protein"

"JS1\_M21\_01039" 18537 "s59E13H2" 0.5190903 "NADPH-dependent oxidoreductase"  
"JS1\_M21\_01039" 18537 "s59E25H2" 0 "NADPH-dependent oxidoreductase"  
"JS1\_M21\_01039" 18537 "s59E5H2" 0.01464492 "NADPH-dependent oxidoreductase"  
"JS1\_M21\_01039" 18537 "s63E6H2" 0.7909671 "NADPH-dependent oxidoreductase"  
"JS1\_M21\_01040" 18538 "s59E13H2" 0.7681913 "Glycine/sarcosine N-methyltransferase"  
"JS1\_M21\_01040" 18538 "s59E25H2" 0 "Glycine/sarcosine N-methyltransferase"  
"JS1\_M21\_01040" 18538 "s59E5H2" 0.02659405 "Glycine/sarcosine N-methyltransferase"  
"JS1\_M21\_01040" 18538 "s63E6H2" 0.4213219 "Glycine/sarcosine N-methyltransferase"  
"JS1\_M21\_01041" 18539 "s59E13H2" 0.01995953 "Acyl-coenzyme A:6-aminopenicillanic acid acyl-transferase"  
"JS1\_M21\_01041" 18539 "s59E25H2" 0 "Acyl-coenzyme A:6-aminopenicillanic acid acyl-transferase"  
"JS1\_M21\_01041" 18539 "s59E5H2" 0.01524059 "Acyl-coenzyme A:6-aminopenicillanic acid acyl-transferase"  
"JS1\_M21\_01041" 18539 "s63E6H2" 0.6752828 "Acyl-coenzyme A:6-aminopenicillanic acid acyl-transferase"  
"JS1\_M21\_01042" 18540 "s59E13H2" 0.1943744 "hypothetical protein"  
"JS1\_M21\_01042" 18540 "s59E25H2" 0 "hypothetical protein"  
"JS1\_M21\_01042" 18540 "s59E5H2" 0.2446012 "hypothetical protein"  
"JS1\_M21\_01042" 18540 "s63E6H2" 0.08582264 "hypothetical protein"  
"JS1\_M21\_01043" 18541 "s59E13H2" 0.2907936 "hypothetical protein"  
"JS1\_M21\_01043" 18541 "s59E25H2" 0.6969697 "hypothetical protein"  
"JS1\_M21\_01043" 18541 "s59E5H2" 5.732656 "hypothetical protein"  
"JS1\_M21\_01043" 18541 "s63E6H2" 0.4920373 "hypothetical protein"  
"JS1\_M21\_01044" 18542 "s59E13H2" 0.08983387 "Peptidase M15"  
"JS1\_M21\_01044" 18542 "s59E25H2" 0.4021164 "Peptidase M15"  
"JS1\_M21\_01044" 18542 "s59E5H2" 2.236404 "Peptidase M15"  
"JS1\_M21\_01044" 18542 "s63E6H2" 0.2029968 "Peptidase M15"  
"JS1\_M21\_01046" 18544 "s59E13H2" 0 "N-acetylglucosamine repressor"  
"JS1\_M21\_01046" 18544 "s59E25H2" 0 "N-acetylglucosamine repressor"  
"JS1\_M21\_01046" 18544 "s59E5H2" 0 "N-acetylglucosamine repressor"  
"JS1\_M21\_01046" 18544 "s63E6H2" 0.02022273 "N-acetylglucosamine repressor"  
"JS1\_M21\_01047" 18545 "s59E13H2" 0 "Glycosyl hydrolases family 15"  
"JS1\_M21\_01047" 18545 "s59E25H2" 0 "Glycosyl hydrolases family 15"  
"JS1\_M21\_01047" 18545 "s59E5H2" 0 "Glycosyl hydrolases family 15"  
"JS1\_M21\_01047" 18545 "s63E6H2" 0.02363079 "Glycosyl hydrolases family 15"  
"JS1\_M21\_01048" 18546 "s59E13H2" 0 "hypothetical protein"  
"JS1\_M21\_01048" 18546 "s59E25H2" 0 "hypothetical protein"  
"JS1\_M21\_01048" 18546 "s59E5H2" 0 "hypothetical protein"  
"JS1\_M21\_01048" 18546 "s63E6H2" 0.03045605 "hypothetical protein"  
"JS1\_M21\_01050" 18548 "s59E13H2" 0 "Maltotriose-binding protein precursor"  
"JS1\_M21\_01050" 18548 "s59E25H2" 0 "Maltotriose-binding protein precursor"  
"JS1\_M21\_01050" 18548 "s59E5H2" 0 "Maltotriose-binding protein precursor"  
"JS1\_M21\_01050" 18548 "s63E6H2" 0.01759846 "Maltotriose-binding protein precursor"  
"JS1\_M21\_01051" 18549 "s59E13H2" 0 "Lactose transport system permease protein LacF"  
"JS1\_M21\_01051" 18549 "s59E25H2" 0 "Lactose transport system permease protein LacF"  
"JS1\_M21\_01051" 18549 "s59E5H2" 0 "Lactose transport system permease protein LacF"  
"JS1\_M21\_01051" 18549 "s63E6H2" 0.04222606 "Lactose transport system permease protein LacF"  
"JS1\_M21\_01052" 18550 "s59E13H2" 0 "Trehalose/maltose transport system permease protein MalG"  
"JS1\_M21\_01052" 18550 "s59E25H2" 0 "Trehalose/maltose transport system permease protein MalG"  
"JS1\_M21\_01052" 18550 "s59E5H2" 0 "Trehalose/maltose transport system permease protein MalG"



"JS1\_M21\_01052" 18550 "s63E6H2" 0.004757389 "Trehalose/maltose transport system permease protein MalG"  
"JS1\_M21\_01053" 18551 "s59E13H2" 0 "Glycosyl hydrolases family 15"  
"JS1\_M21\_01053" 18551 "s59E25H2" 0 "Glycosyl hydrolases family 15"  
"JS1\_M21\_01053" 18551 "s59E5H2" 0 "Glycosyl hydrolases family 15"  
"JS1\_M21\_01053" 18551 "s63E6H2" 0.008847958 "Glycosyl hydrolases family 15"  
"JS1\_M21\_01054" 18552 "s59E13H2" 0 "Cycloisomaltooligosaccharide glucanotransferase precursor"  
"JS1\_M21\_01054" 18552 "s59E25H2" 0 "Cycloisomaltooligosaccharide glucanotransferase precursor"  
"JS1\_M21\_01054" 18552 "s59E5H2" 0 "Cycloisomaltooligosaccharide glucanotransferase precursor"  
"JS1\_M21\_01054" 18552 "s63E6H2" 0.04292408 "Cycloisomaltooligosaccharide glucanotransferase precursor"  
"JS1\_M21\_01055" 18553 "s59E13H2" 0 "hypothetical protein"  
"JS1\_M21\_01055" 18553 "s59E25H2" 0 "hypothetical protein"  
"JS1\_M21\_01055" 18553 "s59E5H2" 0 "hypothetical protein"  
"JS1\_M21\_01055" 18553 "s63E6H2" 0 "hypothetical protein"  
"JS1\_M21\_01056" 18554 "s59E13H2" 0.009349157 "Papain family cysteine protease"  
"JS1\_M21\_01056" 18554 "s59E25H2" 0 "Papain family cysteine protease"  
"JS1\_M21\_01056" 18554 "s59E5H2" 0.02551555 "Papain family cysteine protease"  
"JS1\_M21\_01056" 18554 "s63E6H2" 0.006361285 "Papain family cysteine protease"  
"JS1\_M21\_01057" 18555 "s59E13H2" 0 "hypothetical protein"  
"JS1\_M21\_01057" 18555 "s59E25H2" 0 "hypothetical protein"  
"JS1\_M21\_01057" 18555 "s59E5H2" 0 "hypothetical protein"  
"JS1\_M21\_01057" 18555 "s63E6H2" 0 "hypothetical protein"  
"JS1\_M21\_01058" 18556 "s59E13H2" 0 "hypothetical protein"  
"JS1\_M21\_01058" 18556 "s59E25H2" 0 "hypothetical protein"  
"JS1\_M21\_01058" 18556 "s59E5H2" 0 "hypothetical protein"  
"JS1\_M21\_01058" 18556 "s63E6H2" 0 "hypothetical protein"  
"JS1\_M21\_01060" 18558 "s59E13H2" 0 "hypothetical protein"  
"JS1\_M21\_01060" 18558 "s59E25H2" 0 "hypothetical protein"  
"JS1\_M21\_01060" 18558 "s59E5H2" 0 "hypothetical protein"  
"JS1\_M21\_01060" 18558 "s63E6H2" 0 "hypothetical protein"  
"JS1\_M21\_01061" 18559 "s59E13H2" 0 "hypothetical protein"  
"JS1\_M21\_01061" 18559 "s59E25H2" 0 "hypothetical protein"  
"JS1\_M21\_01061" 18559 "s59E5H2" 0 "hypothetical protein"  
"JS1\_M21\_01061" 18559 "s63E6H2" 0 "hypothetical protein"  
"JS1\_M21\_01063" 18561 "s59E13H2" 0 "D-tagatose 3-epimerase"  
"JS1\_M21\_01063" 18561 "s59E25H2" 0 "D-tagatose 3-epimerase"  
"JS1\_M21\_01063" 18561 "s59E5H2" 0 "D-tagatose 3-epimerase"  
"JS1\_M21\_01063" 18561 "s63E6H2" 0 "D-tagatose 3-epimerase"  
"JS1\_M21\_01064" 18562 "s59E13H2" 0.06775194 "Creatinine amidohydrolase"  
"JS1\_M21\_01064" 18562 "s59E25H2" 0 "Creatinine amidohydrolase"  
"JS1\_M21\_01064" 18562 "s59E5H2" 0.1190739 "Creatinine amidohydrolase"  
"JS1\_M21\_01064" 18562 "s63E6H2" 0.008262849 "Creatinine amidohydrolase"  
"JS1\_M21\_01065" 18563 "s59E13H2" 0 "L-threonine 3-dehydrogenase"  
"JS1\_M21\_01065" 18563 "s59E25H2" 0 "L-threonine 3-dehydrogenase"  
"JS1\_M21\_01065" 18563 "s59E5H2" 0 "L-threonine 3-dehydrogenase"  
"JS1\_M21\_01065" 18563 "s63E6H2" 0 "L-threonine 3-dehydrogenase"  
"JS1\_M21\_01066" 18564 "s59E13H2" 0 "dTDP-3-amino-3,6-dideoxy-alpha-D-galactopyranose transaminase"  
"JS1\_M21\_01066" 18564 "s59E25H2" 0 "dTDP-3-amino-3,6-dideoxy-alpha-D-galactopyranose transaminase"

"JS1\_M21\_01066" 18564 "s59E5H2" 0 "dTDP-3-amino-3,6-dideoxy-alpha-D-galactopyranose transaminase"  
"JS1\_M21\_01066" 18564 "s63E6H2" 0 "dTDP-3-amino-3,6-dideoxy-alpha-D-galactopyranose transaminase"  
"JS1\_M21\_01068" 18566 "s59E13H2" 0 "Cupin domain protein"  
"JS1\_M21\_01068" 18566 "s59E25H2" 0 "Cupin domain protein"  
"JS1\_M21\_01068" 18566 "s59E5H2" 0 "Cupin domain protein"  
"JS1\_M21\_01068" 18566 "s63E6H2" 0 "Cupin domain protein"  
"JS1\_M21\_01069" 18567 "s59E13H2" 0 "D-allose transport system permease protein AlsC"  
"JS1\_M21\_01069" 18567 "s59E25H2" 0 "D-allose transport system permease protein AlsC"  
"JS1\_M21\_01069" 18567 "s59E5H2" 0 "D-allose transport system permease protein AlsC"  
"JS1\_M21\_01069" 18567 "s63E6H2" 0 "D-allose transport system permease protein AlsC"  
"JS1\_M21\_01070" 18568 "s59E13H2" 0 "D-allose transport system permease protein AlsC"  
"JS1\_M21\_01070" 18568 "s59E25H2" 0 "D-allose transport system permease protein AlsC"  
"JS1\_M21\_01070" 18568 "s59E5H2" 0 "D-allose transport system permease protein AlsC"  
"JS1\_M21\_01070" 18568 "s63E6H2" 0 "D-allose transport system permease protein AlsC"  
"JS1\_M21\_01071" 18569 "s59E13H2" 0 "Arabinose import ATP-binding protein AraG"  
"JS1\_M21\_01071" 18569 "s59E25H2" 0 "Arabinose import ATP-binding protein AraG"  
"JS1\_M21\_01071" 18569 "s59E5H2" 0 "Arabinose import ATP-binding protein AraG"  
"JS1\_M21\_01071" 18569 "s63E6H2" 0 "Arabinose import ATP-binding protein AraG"  
"JS1\_M21\_01072" 18570 "s59E13H2" 0.4167228 "Hydrogen cyanide synthase subunit HcnB"  
"JS1\_M21\_01072" 18570 "s59E25H2" 0 "Hydrogen cyanide synthase subunit HcnB"  
"JS1\_M21\_01072" 18570 "s59E5H2" 0.3210836 "Hydrogen cyanide synthase subunit HcnB"  
"JS1\_M21\_01072" 18570 "s63E6H2" 1.63158 "Hydrogen cyanide synthase subunit HcnB"  
"JS1\_M21\_01073" 18571 "s59E13H2" 1.323813 "Hydrogen cyanide synthase subunit HcnA"  
"JS1\_M21\_01073" 18571 "s59E25H2" 0 "Hydrogen cyanide synthase subunit HcnA"  
"JS1\_M21\_01073" 18571 "s59E5H2" 0.08831686 "Hydrogen cyanide synthase subunit HcnA"  
"JS1\_M21\_01073" 18571 "s63E6H2" 1.110225 "Hydrogen cyanide synthase subunit HcnA"  
"JS1\_M21\_01074" 18572 "s59E13H2" 0.9758243 "Laccase domain protein"  
"JS1\_M21\_01074" 18572 "s59E25H2" 0 "Laccase domain protein"  
"JS1\_M21\_01074" 18572 "s59E5H2" 0.1090768 "Laccase domain protein"  
"JS1\_M21\_01074" 18572 "s63E6H2" 0.9349918 "Laccase domain protein"  
"JS1\_M21\_01076" 18574 "s59E13H2" 1.315585 "molybdenum cofactor biosynthesis protein A"  
"JS1\_M21\_01076" 18574 "s59E25H2" 0 "molybdenum cofactor biosynthesis protein A"  
"JS1\_M21\_01076" 18574 "s59E5H2" 0.1925799 "molybdenum cofactor biosynthesis protein A"  
"JS1\_M21\_01076" 18574 "s63E6H2" 1.061473 "molybdenum cofactor biosynthesis protein A"  
"JS1\_M21\_01077" 18575 "s59E13H2" 0.8418176 "hypothetical protein"  
"JS1\_M21\_01077" 18575 "s59E25H2" 0 "hypothetical protein"  
"JS1\_M21\_01077" 18575 "s59E5H2" 0.5164232 "hypothetical protein"  
"JS1\_M21\_01077" 18575 "s63E6H2" 1.28993 "hypothetical protein"  
"JS1\_M21\_01078" 18576 "s59E13H2" 0.2878303 "Anaerobic ribonucleoside-triphosphate reductase"  
"JS1\_M21\_01078" 18576 "s59E25H2" 0 "Anaerobic ribonucleoside-triphosphate reductase"  
"JS1\_M21\_01078" 18576 "s59E5H2" 0.4748428 "Anaerobic ribonucleoside-triphosphate reductase"  
"JS1\_M21\_01078" 18576 "s63E6H2" 1.319769 "Anaerobic ribonucleoside-triphosphate reductase"  
"JS1\_M21\_01079" 18577 "s59E13H2" 0.08227693 "Transcriptional repressor NrdR"  
"JS1\_M21\_01079" 18577 "s59E25H2" 0 "Transcriptional repressor NrdR"  
"JS1\_M21\_01079" 18577 "s59E5H2" 0.4077071 "Transcriptional repressor NrdR"  
"JS1\_M21\_01079" 18577 "s63E6H2" 1.443372 "Transcriptional repressor NrdR"  
"JS1\_M21\_01081" 18579 "s59E13H2" 0.1096087 "DNA-directed RNA polymerase subunit beta"

"JS1\_M21\_01081" 18579 "s59E25H2" 0 "DNA-directed RNA polymerase subunit beta"  
"JS1\_M21\_01081" 18579 "s59E5H2" 0.08581254 "DNA-directed RNA polymerase subunit beta"  
"JS1\_M21\_01081" 18579 "s63E6H2" 0.07834012 "DNA-directed RNA polymerase subunit beta"  
"JS1\_M21\_01082" 18580 "s59E13H2" 0.008950608 "30S ribosomal protein S12"  
"JS1\_M21\_01082" 18580 "s59E25H2" 0 "30S ribosomal protein S12"  
"JS1\_M21\_01082" 18580 "s59E5H2" 0.148419 "30S ribosomal protein S12"  
"JS1\_M21\_01082" 18580 "s63E6H2" 0.2746362 "30S ribosomal protein S12"  
"JS1\_M21\_01083" 18581 "s59E13H2" 0.008388061 "30S ribosomal protein S7"  
"JS1\_M21\_01083" 18581 "s59E25H2" 0 "30S ribosomal protein S7"  
"JS1\_M21\_01083" 18581 "s59E5H2" 0.07204067 "30S ribosomal protein S7"  
"JS1\_M21\_01083" 18581 "s63E6H2" 0.1708526 "30S ribosomal protein S7"  
"JS1\_M21\_01084" 18582 "s59E13H2" 0.04388696 "Elongation factor G"  
"JS1\_M21\_01084" 18582 "s59E25H2" 0 "Elongation factor G"  
"JS1\_M21\_01084" 18582 "s59E5H2" 0.1270076 "Elongation factor G"  
"JS1\_M21\_01084" 18582 "s63E6H2" 0.1902782 "Elongation factor G"  
"JS1\_M21\_01085" 18583 "s59E13H2" 0.2119916 "Elongation factor Tu"  
"JS1\_M21\_01085" 18583 "s59E25H2" 0 "Elongation factor Tu"  
"JS1\_M21\_01085" 18583 "s59E5H2" 0.3558049 "Elongation factor Tu"  
"JS1\_M21\_01085" 18583 "s63E6H2" 0.8487237 "Elongation factor Tu"  
"JS1\_M21\_01086" 18584 "s59E13H2" 3.407025 "30S ribosomal protein S10"  
"JS1\_M21\_01086" 18584 "s59E25H2" 0 "30S ribosomal protein S10"  
"JS1\_M21\_01086" 18584 "s59E5H2" 0.1026743 "30S ribosomal protein S10"  
"JS1\_M21\_01086" 18584 "s63E6H2" 0.265423 "30S ribosomal protein S10"  
"JS1\_M21\_01087" 18585 "s59E13H2" 0.0471286 "50S ribosomal protein L3"  
"JS1\_M21\_01087" 18585 "s59E25H2" 0 "50S ribosomal protein L3"  
"JS1\_M21\_01087" 18585 "s59E5H2" 0.1460615 "50S ribosomal protein L3"  
"JS1\_M21\_01087" 18585 "s63E6H2" 0.06211787 "50S ribosomal protein L3"  
"JS1\_M21\_01088" 18586 "s59E13H2" 0.03017434 "50S ribosomal protein L4"  
"JS1\_M21\_01088" 18586 "s59E25H2" 0 "50S ribosomal protein L4"  
"JS1\_M21\_01088" 18586 "s59E5H2" 0.1000503 "50S ribosomal protein L4"  
"JS1\_M21\_01088" 18586 "s63E6H2" 0.070662 "50S ribosomal protein L4"  
"JS1\_M21\_01089" 18587 "s59E13H2" 0.2068919 "Type II secretion system protein F"  
"JS1\_M21\_01089" 18587 "s59E25H2" 0 "Type II secretion system protein F"  
"JS1\_M21\_01089" 18587 "s59E5H2" 0.7533282 "Type II secretion system protein F"  
"JS1\_M21\_01089" 18587 "s63E6H2" 1.119482 "Type II secretion system protein F"  
"JS1\_M21\_01090" 18588 "s59E13H2" 0.6123747 "RNA polymerase sigma factor SigF"  
"JS1\_M21\_01090" 18588 "s59E25H2" 0 "RNA polymerase sigma factor SigF"  
"JS1\_M21\_01090" 18588 "s59E5H2" 0.1773754 "RNA polymerase sigma factor SigF"  
"JS1\_M21\_01090" 18588 "s63E6H2" 0.9086409 "RNA polymerase sigma factor SigF"  
"JS1\_M21\_01091" 18589 "s59E13H2" 0.09002496 "RNA polymerase sigma factor SigF"  
"JS1\_M21\_01091" 18589 "s59E25H2" 0 "RNA polymerase sigma factor SigF"  
"JS1\_M21\_01091" 18589 "s59E5H2" 0.037443 "RNA polymerase sigma factor SigF"  
"JS1\_M21\_01091" 18589 "s63E6H2" 0.02229921 "RNA polymerase sigma factor SigF"  
"JS1\_M21\_01094" 18592 "s59E13H2" 0.03000841 "hypothetical protein"  
"JS1\_M21\_01094" 18592 "s59E25H2" 0 "hypothetical protein"  
"JS1\_M21\_01094" 18592 "s59E5H2" 0.06986485 "hypothetical protein"  
"JS1\_M21\_01094" 18592 "s63E6H2" 0.004168656 "hypothetical protein"

"JS1\_M21\_01096" 18594 "s59E13H2" 0.0439467 "Plasmid stabilisation system protein"  
"JS1\_M21\_01096" 18594 "s59E25H2" 0 "Plasmid stabilisation system protein"  
"JS1\_M21\_01096" 18594 "s59E5H2" 0.0190365 "Plasmid stabilisation system protein"  
"JS1\_M21\_01096" 18594 "s63E6H2" 0.3049547 "Plasmid stabilisation system protein"  
"JS1\_M21\_01097" 18595 "s59E13H2" 0.07864788 "hypothetical protein"  
"JS1\_M21\_01097" 18595 "s59E25H2" 0 "hypothetical protein"  
"JS1\_M21\_01097" 18595 "s59E5H2" 0.005249513 "hypothetical protein"  
"JS1\_M21\_01097" 18595 "s63E6H2" 0.5237887 "hypothetical protein"  
"JS1\_M21\_01100" 18598 "s59E13H2" 0 "putative major pilin subunit"  
"JS1\_M21\_01100" 18598 "s59E25H2" 0 "putative major pilin subunit"  
"JS1\_M21\_01100" 18598 "s59E5H2" 0 "putative major pilin subunit"  
"JS1\_M21\_01100" 18598 "s63E6H2" 0.5482461 "putative major pilin subunit"  
"JS1\_M21\_01101" 18599 "s59E13H2" 0.07432341 "hypothetical protein"  
"JS1\_M21\_01101" 18599 "s59E25H2" 0 "hypothetical protein"  
"JS1\_M21\_01101" 18599 "s59E5H2" 0.007362829 "hypothetical protein"  
"JS1\_M21\_01101" 18599 "s63E6H2" 0.6556894 "hypothetical protein"  
"JS1\_M21\_01102" 18600 "s59E13H2" 0.02654036 "TPR repeat-containing protein YrrB"  
"JS1\_M21\_01102" 18600 "s59E25H2" 0 "TPR repeat-containing protein YrrB"  
"JS1\_M21\_01102" 18600 "s59E5H2" 0.03952007 "TPR repeat-containing protein YrrB"  
"JS1\_M21\_01102" 18600 "s63E6H2" 0.4617459 "TPR repeat-containing protein YrrB"  
"JS1\_M21\_01103" 18601 "s59E13H2" 0.01095693 "hypothetical protein"  
"JS1\_M21\_01103" 18601 "s59E25H2" 0 "hypothetical protein"  
"JS1\_M21\_01103" 18601 "s59E5H2" 0.2992198 "hypothetical protein"  
"JS1\_M21\_01103" 18601 "s63E6H2" 0.9287912 "hypothetical protein"  
"JS1\_M21\_01104" 18602 "s59E13H2" 0.08855004 "hypothetical protein"  
"JS1\_M21\_01104" 18602 "s59E25H2" 0 "hypothetical protein"  
"JS1\_M21\_01104" 18602 "s59E5H2" 1.623501 "hypothetical protein"  
"JS1\_M21\_01104" 18602 "s63E6H2" 0.9103346 "hypothetical protein"  
"JS1\_M21\_01107" 18605 "s59E13H2" 0 "Galactose/methyl galactoside import ATP-binding protein MglA"  
"JS1\_M21\_01107" 18605 "s59E25H2" 0 "Galactose/methyl galactoside import ATP-binding protein MglA"  
"JS1\_M21\_01107" 18605 "s59E5H2" 0 "Galactose/methyl galactoside import ATP-binding protein MglA"  
"JS1\_M21\_01107" 18605 "s63E6H2" 0.01989037 "Galactose/methyl galactoside import ATP-binding protein MglA"  
"JS1\_M21\_01108" 18606 "s59E13H2" 0.0768593 "hypothetical protein"  
"JS1\_M21\_01108" 18606 "s59E25H2" 0 "hypothetical protein"  
"JS1\_M21\_01108" 18606 "s59E5H2" 0 "hypothetical protein"  
"JS1\_M21\_01108" 18606 "s63E6H2" 0 "hypothetical protein"  
"JS1\_M21\_01113" 18611 "s59E13H2" 0.6109808 "Putative 2-C-methyl-D-erythritol 4-phosphate cytidyltransferase 2"  
"JS1\_M21\_01113" 18611 "s59E25H2" 0 "Putative 2-C-methyl-D-erythritol 4-phosphate cytidyltransferase 2"  
"JS1\_M21\_01113" 18611 "s59E5H2" 0.0665217 "Putative 2-C-methyl-D-erythritol 4-phosphate cytidyltransferase 2"  
"JS1\_M21\_01113" 18611 "s63E6H2" 0.2330478 "Putative 2-C-methyl-D-erythritol 4-phosphate cytidyltransferase 2"  
"JS1\_M21\_01114" 18612 "s59E13H2" 0.6795727 "4-diphosphocytidyl-2-C-methyl-D-erythritol kinase"  
"JS1\_M21\_01114" 18612 "s59E25H2" 0 "4-diphosphocytidyl-2-C-methyl-D-erythritol kinase"  
"JS1\_M21\_01114" 18612 "s59E5H2" 0.3152974 "4-diphosphocytidyl-2-C-methyl-D-erythritol kinase"  
"JS1\_M21\_01114" 18612 "s63E6H2" 0.3888478 "4-diphosphocytidyl-2-C-methyl-D-erythritol kinase"  
"JS1\_M21\_01115" 18613 "s59E13H2" 0.1581595 "2-C-methyl-D-erythritol 2,4-cyclodiphosphate synthase"  
"JS1\_M21\_01115" 18613 "s59E25H2" 0 "2-C-methyl-D-erythritol 2,4-cyclodiphosphate synthase"  
"JS1\_M21\_01115" 18613 "s59E5H2" 0.05840381 "2-C-methyl-D-erythritol 2,4-cyclodiphosphate synthase"

"JS1\_M21\_01115" 18613 "s63E6H2" 0.1081958 "2-C-methyl-D-erythritol 2,4-cyclodiphosphate synthase"  
"JS1\_M21\_01120" 18618 "s59E13H2" 0.1767064 "tRNA-splicing ligase RtcB"  
"JS1\_M21\_01120" 18618 "s59E25H2" 0 "tRNA-splicing ligase RtcB"  
"JS1\_M21\_01120" 18618 "s59E5H2" 0.766875 "tRNA-splicing ligase RtcB"  
"JS1\_M21\_01120" 18618 "s63E6H2" 0.04723833 "tRNA-splicing ligase RtcB"  
"JS1\_M21\_01121" 18619 "s59E13H2" 0.3380462 "Serine--tRNA ligase"  
"JS1\_M21\_01121" 18619 "s59E25H2" 0.1878931 "Serine--tRNA ligase"  
"JS1\_M21\_01121" 18619 "s59E5H2" 1.793499 "Serine--tRNA ligase"  
"JS1\_M21\_01121" 18619 "s63E6H2" 0.9017804 "Serine--tRNA ligase"  
"JS1\_M21\_01123" 18621 "s59E13H2" 0 "HTH domain protein"  
"JS1\_M21\_01123" 18621 "s59E25H2" 0 "HTH domain protein"  
"JS1\_M21\_01123" 18621 "s59E5H2" 0.0170005 "HTH domain protein"  
"JS1\_M21\_01123" 18621 "s63E6H2" 0.02497166 "HTH domain protein"  
"JS1\_M21\_01124" 18622 "s59E13H2" 0.4151391 "RDD family protein"  
"JS1\_M21\_01124" 18622 "s59E25H2" 0 "RDD family protein"  
"JS1\_M21\_01124" 18622 "s59E5H2" 1.711712 "RDD family protein"  
"JS1\_M21\_01124" 18622 "s63E6H2" 1.20268 "RDD family protein"  
"JS1\_M21\_01125" 18623 "s59E13H2" 0.4192535 "Hydroxyacylglutathione hydrolase"  
"JS1\_M21\_01125" 18623 "s59E25H2" 0 "Hydroxyacylglutathione hydrolase"  
"JS1\_M21\_01125" 18623 "s59E5H2" 0.5216659 "Hydroxyacylglutathione hydrolase"  
"JS1\_M21\_01125" 18623 "s63E6H2" 1.172515 "Hydroxyacylglutathione hydrolase"  
"JS1\_M21\_01126" 18624 "s59E13H2" 0 "hypothetical protein"  
"JS1\_M21\_01126" 18624 "s59E25H2" 0 "hypothetical protein"  
"JS1\_M21\_01126" 18624 "s59E5H2" 0.1391161 "hypothetical protein"  
"JS1\_M21\_01126" 18624 "s63E6H2" 0 "hypothetical protein"  
"JS1\_M21\_01128" 18626 "s59E13H2" 0 "hypothetical protein"  
"JS1\_M21\_01128" 18626 "s59E25H2" 0 "hypothetical protein"  
"JS1\_M21\_01128" 18626 "s59E5H2" 0.002081506 "hypothetical protein"  
"JS1\_M21\_01128" 18626 "s63E6H2" 0 "hypothetical protein"  
"JS1\_M21\_01129" 18627 "s59E13H2" 0.02114241 "Leucine-specific-binding protein precursor"  
"JS1\_M21\_01129" 18627 "s59E25H2" 0 "Leucine-specific-binding protein precursor"  
"JS1\_M21\_01129" 18627 "s59E5H2" 0.05897695 "Leucine-specific-binding protein precursor"  
"JS1\_M21\_01129" 18627 "s63E6H2" 0.003873362 "Leucine-specific-binding protein precursor"  
"JS1\_M21\_01130" 18628 "s59E13H2" 0.02325805 "putative branched-chain amino acid transport ATP-binding protein LivG"  
"JS1\_M21\_01130" 18628 "s59E25H2" 0 "putative branched-chain amino acid transport ATP-binding protein LivG"  
"JS1\_M21\_01130" 18628 "s59E5H2" 0.2287232 "putative branched-chain amino acid transport ATP-binding protein LivG"  
"JS1\_M21\_01130" 18628 "s63E6H2" 0.02565222 "putative branched-chain amino acid transport ATP-binding protein LivG"  
"JS1\_M21\_01131" 18629 "s59E13H2" 0.04484425 "High-affinity branched-chain amino acid transport ATP-binding protein LivF"  
"JS1\_M21\_01131" 18629 "s59E25H2" 0 "High-affinity branched-chain amino acid transport ATP-binding protein LivF"  
"JS1\_M21\_01131" 18629 "s59E5H2" 0.2478594 "High-affinity branched-chain amino acid transport ATP-binding protein LivF"  
"JS1\_M21\_01131" 18629 "s63E6H2" 0.01072319 "High-affinity branched-chain amino acid transport ATP-binding protein LivF"  
"JS1\_M21\_01132" 18630 "s59E13H2" 0.02003332 "branched-chain amino acid transporter permease subunit LivH"  
"JS1\_M21\_01132" 18630 "s59E25H2" 0 "branched-chain amino acid transporter permease subunit LivH"  
"JS1\_M21\_01132" 18630 "s59E5H2" 0.04738135 "branched-chain amino acid transporter permease subunit LivH"  
"JS1\_M21\_01132" 18630 "s63E6H2" 0.009615608 "branched-chain amino acid transporter permease subunit LivH"  
"JS1\_M21\_01133" 18631 "s59E13H2" 0.0004827225 "leucine/isoleucine/valine transporter permease subunit"  
"JS1\_M21\_01133" 18631 "s59E25H2" 0 "leucine/isoleucine/valine transporter permease subunit"

"JS1\_M21\_01133" 18631 "s59E5H2" 0.05627227 "leucine/isoleucine/valine transporter permease subunit"  
"JS1\_M21\_01133" 18631 "s63E6H2" 0 "leucine/isoleucine/valine transporter permease subunit"  
"JS1\_M21\_01134" 18632 "s59E13H2" 0 "Alanine dehydrogenase"  
"JS1\_M21\_01134" 18632 "s59E25H2" 0 "Alanine dehydrogenase"  
"JS1\_M21\_01134" 18632 "s59E5H2" 0 "Alanine dehydrogenase"  
"JS1\_M21\_01134" 18632 "s63E6H2" 0 "Alanine dehydrogenase"  
"JS1\_M21\_01135" 18633 "s59E13H2" 0 "hypothetical protein"  
"JS1\_M21\_01135" 18633 "s59E25H2" 0 "hypothetical protein"  
"JS1\_M21\_01135" 18633 "s59E5H2" 0 "hypothetical protein"  
"JS1\_M21\_01135" 18633 "s63E6H2" 0 "hypothetical protein"  
"JS1\_M21\_01138" 18636 "s59E13H2" 0 "Acyl carrier protein"  
"JS1\_M21\_01138" 18636 "s59E25H2" 0 "Acyl carrier protein"  
"JS1\_M21\_01138" 18636 "s59E5H2" 0 "Acyl carrier protein"  
"JS1\_M21\_01138" 18636 "s63E6H2" 0 "Acyl carrier protein"  
"JS1\_M21\_01139" 18637 "s59E13H2" 0 "hypothetical protein"  
"JS1\_M21\_01139" 18637 "s59E25H2" 0 "hypothetical protein"  
"JS1\_M21\_01139" 18637 "s59E5H2" 0 "hypothetical protein"  
"JS1\_M21\_01139" 18637 "s63E6H2" 0 "hypothetical protein"  
"JS1\_M21\_01140" 18638 "s59E13H2" 0.1667834 "Inositol-3-phosphate synthase"  
"JS1\_M21\_01140" 18638 "s59E25H2" 0 "Inositol-3-phosphate synthase"  
"JS1\_M21\_01140" 18638 "s59E5H2" 0.009240834 "Inositol-3-phosphate synthase"  
"JS1\_M21\_01140" 18638 "s63E6H2" 0 "Inositol-3-phosphate synthase"  
"JS1\_M21\_01141" 18639 "s59E13H2" 0.686505 "Bifunctional IPC transferase and DIPP synthase"  
"JS1\_M21\_01141" 18639 "s59E25H2" 0 "Bifunctional IPC transferase and DIPP synthase"  
"JS1\_M21\_01141" 18639 "s59E5H2" 0 "Bifunctional IPC transferase and DIPP synthase"  
"JS1\_M21\_01141" 18639 "s63E6H2" 0.02407014 "Bifunctional IPC transferase and DIPP synthase"  
"JS1\_M21\_01142" 18640 "s59E13H2" 0.002916861 "hypothetical protein"  
"JS1\_M21\_01142" 18640 "s59E25H2" 0 "hypothetical protein"  
"JS1\_M21\_01142" 18640 "s59E5H2" 0 "hypothetical protein"  
"JS1\_M21\_01142" 18640 "s63E6H2" 0 "hypothetical protein"  
"JS1\_M21\_01144" 18642 "s59E13H2" 0 "hypothetical protein"  
"JS1\_M21\_01144" 18642 "s59E25H2" 0 "hypothetical protein"  
"JS1\_M21\_01144" 18642 "s59E5H2" 0 "hypothetical protein"  
"JS1\_M21\_01144" 18642 "s63E6H2" 0.04306539 "hypothetical protein"  
"JS1\_M21\_01145" 18643 "s59E13H2" 0 "hypothetical protein"  
"JS1\_M21\_01145" 18643 "s59E25H2" 0 "hypothetical protein"  
"JS1\_M21\_01145" 18643 "s59E5H2" 0 "hypothetical protein"  
"JS1\_M21\_01145" 18643 "s63E6H2" 0 "hypothetical protein"  
"JS1\_M21\_01146" 18644 "s59E13H2" 0 "hypothetical protein"  
"JS1\_M21\_01146" 18644 "s59E25H2" 0 "hypothetical protein"  
"JS1\_M21\_01146" 18644 "s59E5H2" 0 "hypothetical protein"  
"JS1\_M21\_01146" 18644 "s63E6H2" 0 "hypothetical protein"  
"JS1\_M21\_01147" 18645 "s59E13H2" 0 "hypothetical protein"  
"JS1\_M21\_01147" 18645 "s59E25H2" 0 "hypothetical protein"  
"JS1\_M21\_01147" 18645 "s59E5H2" 0 "hypothetical protein"  
"JS1\_M21\_01147" 18645 "s63E6H2" 0 "hypothetical protein"  
"JS1\_M21\_01148" 18646 "s59E13H2" 0 "Helix-turn-helix domain protein"

"JS1\_M21\_01148" 18646 "s59E25H2" 0 "Helix-turn-helix domain protein"  
"JS1\_M21\_01148" 18646 "s59E5H2" 0 "Helix-turn-helix domain protein"  
"JS1\_M21\_01148" 18646 "s63E6H2" 0 "Helix-turn-helix domain protein"  
"JS1\_M21\_01150" 18648 "s59E13H2" 0 "ferrous iron efflux protein F"  
"JS1\_M21\_01150" 18648 "s59E25H2" 0 "ferrous iron efflux protein F"  
"JS1\_M21\_01150" 18648 "s59E5H2" 0 "ferrous iron efflux protein F"  
"JS1\_M21\_01150" 18648 "s63E6H2" 0.004517637 "ferrous iron efflux protein F"  
"JS1\_M21\_01151" 18649 "s59E13H2" 0 "Adenosylhomocysteinase"  
"JS1\_M21\_01151" 18649 "s59E25H2" 0 "Adenosylhomocysteinase"  
"JS1\_M21\_01151" 18649 "s59E5H2" 0 "Adenosylhomocysteinase"  
"JS1\_M21\_01151" 18649 "s63E6H2" 0 "Adenosylhomocysteinase"  
"JS1\_M21\_01152" 18650 "s59E13H2" 0.001637381 "hypothetical protein"  
"JS1\_M21\_01152" 18650 "s59E25H2" 0 "hypothetical protein"  
"JS1\_M21\_01152" 18650 "s59E5H2" 0 "hypothetical protein"  
"JS1\_M21\_01152" 18650 "s63E6H2" 0.010613 "hypothetical protein"  
"JS1\_M21\_01153" 18651 "s59E13H2" 10.48895 "Recombinase"  
"JS1\_M21\_01153" 18651 "s59E25H2" 0.3726379 "Recombinase"  
"JS1\_M21\_01153" 18651 "s59E5H2" 0.1397419 "Recombinase"  
"JS1\_M21\_01153" 18651 "s63E6H2" 1.22503 "Recombinase"  
"JS1\_M21\_01154" 18652 "s59E13H2" 18.03729 "hypothetical protein"  
"JS1\_M21\_01154" 18652 "s59E25H2" 0 "hypothetical protein"  
"JS1\_M21\_01154" 18652 "s59E5H2" 0.01211221 "hypothetical protein"  
"JS1\_M21\_01154" 18652 "s63E6H2" 0.1744826 "hypothetical protein"  
"JS1\_M21\_01155" 18653 "s59E13H2" 2.674173 "Helix-turn-helix"  
"JS1\_M21\_01155" 18653 "s59E25H2" 0 "Helix-turn-helix"  
"JS1\_M21\_01155" 18653 "s59E5H2" 0.009476423 "Helix-turn-helix"  
"JS1\_M21\_01155" 18653 "s63E6H2" 0.006696029 "Helix-turn-helix"  
"JS1\_M21\_01156" 18654 "s59E13H2" 0.2099287 "DNA primase"  
"JS1\_M21\_01156" 18654 "s59E25H2" 0 "DNA primase"  
"JS1\_M21\_01156" 18654 "s59E5H2" 0.4742959 "DNA primase"  
"JS1\_M21\_01156" 18654 "s63E6H2" 0.7381152 "DNA primase"  
"JS1\_M21\_01158" 18656 "s59E13H2" 0.06846485 "hypothetical protein"  
"JS1\_M21\_01158" 18656 "s59E25H2" 0 "hypothetical protein"  
"JS1\_M21\_01158" 18656 "s59E5H2" 1.04003 "hypothetical protein"  
"JS1\_M21\_01158" 18656 "s63E6H2" 0.4741051 "hypothetical protein"  
"JS1\_M21\_01162" 18660 "s59E13H2" 0 "Type-1 restriction enzyme R protein"  
"JS1\_M21\_01162" 18660 "s59E25H2" 0 "Type-1 restriction enzyme R protein"  
"JS1\_M21\_01162" 18660 "s59E5H2" 0 "Type-1 restriction enzyme R protein"  
"JS1\_M21\_01162" 18660 "s63E6H2" 0 "Type-1 restriction enzyme R protein"  
"JS1\_M21\_01163" 18661 "s59E13H2" 0 "Type I restriction enzyme EcoKI M protein"  
"JS1\_M21\_01163" 18661 "s59E25H2" 0 "Type I restriction enzyme EcoKI M protein"  
"JS1\_M21\_01163" 18661 "s59E5H2" 0 "Type I restriction enzyme EcoKI M protein"  
"JS1\_M21\_01163" 18661 "s63E6H2" 0.002752816 "Type I restriction enzyme EcoKI M protein"  
"JS1\_M21\_01164" 18662 "s59E13H2" 0 "Type I restriction modification DNA specificity domain protein"  
"JS1\_M21\_01164" 18662 "s59E25H2" 0 "Type I restriction modification DNA specificity domain protein"  
"JS1\_M21\_01164" 18662 "s59E5H2" 0 "Type I restriction modification DNA specificity domain protein"  
"JS1\_M21\_01164" 18662 "s63E6H2" 0.0003320415 "Type I restriction modification DNA specificity domain protein"

"JS1\_M21\_01166" 18664 "s59E13H2" 0 "hypothetical protein"  
"JS1\_M21\_01166" 18664 "s59E25H2" 0 "hypothetical protein"  
"JS1\_M21\_01166" 18664 "s59E5H2" 0 "hypothetical protein"  
"JS1\_M21\_01166" 18664 "s63E6H2" 0 "hypothetical protein"  
"JS1\_M21\_01167" 18665 "s59E13H2" 0 "TPR repeat-containing protein YrrB"  
"JS1\_M21\_01167" 18665 "s59E25H2" 0 "TPR repeat-containing protein YrrB"  
"JS1\_M21\_01167" 18665 "s59E5H2" 0 "TPR repeat-containing protein YrrB"  
"JS1\_M21\_01167" 18665 "s63E6H2" 0.0004802217 "TPR repeat-containing protein YrrB"  
"JS1\_M21\_01168" 18666 "s59E13H2" 0.01274681 "hypothetical protein"  
"JS1\_M21\_01168" 18666 "s59E25H2" 0 "hypothetical protein"  
"JS1\_M21\_01168" 18666 "s59E5H2" 0 "hypothetical protein"  
"JS1\_M21\_01168" 18666 "s63E6H2" 0 "hypothetical protein"  
"JS1\_M21\_01169" 18667 "s59E13H2" 0.02297453 "hypothetical protein"  
"JS1\_M21\_01169" 18667 "s59E25H2" 0 "hypothetical protein"  
"JS1\_M21\_01169" 18667 "s59E5H2" 0.07131525 "hypothetical protein"  
"JS1\_M21\_01169" 18667 "s63E6H2" 0 "hypothetical protein"  
"JS1\_M21\_01171" 18669 "s59E13H2" 0 "hypothetical protein"  
"JS1\_M21\_01171" 18669 "s59E25H2" 0 "hypothetical protein"  
"JS1\_M21\_01171" 18669 "s59E5H2" 0 "hypothetical protein"  
"JS1\_M21\_01171" 18669 "s63E6H2" 0.002520435 "hypothetical protein"  
"JS1\_M21\_01174" 18672 "s59E13H2" 0 "hypothetical protein"  
"JS1\_M21\_01174" 18672 "s59E25H2" 0 "hypothetical protein"  
"JS1\_M21\_01174" 18672 "s59E5H2" 0 "hypothetical protein"  
"JS1\_M21\_01174" 18672 "s63E6H2" 0 "hypothetical protein"  
"JS1\_M21\_01175" 18673 "s59E13H2" 0.1593882 "Lysine--tRNA ligase"  
"JS1\_M21\_01175" 18673 "s59E25H2" 0 "Lysine--tRNA ligase"  
"JS1\_M21\_01175" 18673 "s59E5H2" 0.2529804 "Lysine--tRNA ligase"  
"JS1\_M21\_01175" 18673 "s63E6H2" 0.2375599 "Lysine--tRNA ligase"  
"JS1\_M21\_01176" 18674 "s59E13H2" 0.07103803 "Transcription elongation factor GreA"  
"JS1\_M21\_01176" 18674 "s59E25H2" 0 "Transcription elongation factor GreA"  
"JS1\_M21\_01176" 18674 "s59E5H2" 0.2461858 "Transcription elongation factor GreA"  
"JS1\_M21\_01176" 18674 "s63E6H2" 0.1960892 "Transcription elongation factor GreA"  
"JS1\_M21\_01177" 18675 "s59E13H2" 0.01901195 "Putative pyridoxal phosphate-dependent acyltransferase"  
"JS1\_M21\_01177" 18675 "s59E25H2" 0 "Putative pyridoxal phosphate-dependent acyltransferase"  
"JS1\_M21\_01177" 18675 "s59E5H2" 0.1658615 "Putative pyridoxal phosphate-dependent acyltransferase"  
"JS1\_M21\_01177" 18675 "s63E6H2" 0.1872638 "Putative pyridoxal phosphate-dependent acyltransferase"  
"JS1\_M21\_01178" 18676 "s59E13H2" 0.07605662 "putative NH(3)-dependent NAD(+) synthetase"  
"JS1\_M21\_01178" 18676 "s59E25H2" 0 "putative NH(3)-dependent NAD(+) synthetase"  
"JS1\_M21\_01178" 18676 "s59E5H2" 0.1462305 "putative NH(3)-dependent NAD(+) synthetase"  
"JS1\_M21\_01178" 18676 "s63E6H2" 0.3781472 "putative NH(3)-dependent NAD(+) synthetase"  
"JS1\_M21\_01179" 18677 "s59E13H2" 0.1123618 "hypothetical protein"  
"JS1\_M21\_01179" 18677 "s59E25H2" 0 "hypothetical protein"  
"JS1\_M21\_01179" 18677 "s59E5H2" 0.1639411 "hypothetical protein"  
"JS1\_M21\_01179" 18677 "s63E6H2" 0.3808168 "hypothetical protein"  
"JS1\_M21\_01180" 18678 "s59E13H2" 0.1169252 "D-aminopeptidase"  
"JS1\_M21\_01180" 18678 "s59E25H2" 0 "D-aminopeptidase"  
"JS1\_M21\_01180" 18678 "s59E5H2" 0.2740005 "D-aminopeptidase"



"JS1\_M21\_01180" 18678 "s63E6H2" 0.3922318 "D-aminopeptidase"  
"JS1\_M21\_01181" 18679 "s59E13H2" 0.01429336 "Carbon monoxide dehydrogenase medium chain"  
"JS1\_M21\_01181" 18679 "s59E25H2" 0 "Carbon monoxide dehydrogenase medium chain"  
"JS1\_M21\_01181" 18679 "s59E5H2" 0.003236408 "Carbon monoxide dehydrogenase medium chain"  
"JS1\_M21\_01181" 18679 "s63E6H2" 0.4948163 "Carbon monoxide dehydrogenase medium chain"  
"JS1\_M21\_01182" 18680 "s59E13H2" 0.01100166 "Glyceraldehyde dehydrogenase medium chain"  
"JS1\_M21\_01182" 18680 "s59E25H2" 0 "Glyceraldehyde dehydrogenase medium chain"  
"JS1\_M21\_01182" 18680 "s59E5H2" 0.009536313 "Glyceraldehyde dehydrogenase medium chain"  
"JS1\_M21\_01182" 18680 "s63E6H2" 1.174594 "Glyceraldehyde dehydrogenase medium chain"  
"JS1\_M21\_01183" 18681 "s59E13H2" 0.01146059 "Nicotinate dehydrogenase small FeS subunit"  
"JS1\_M21\_01183" 18681 "s59E25H2" 0 "Nicotinate dehydrogenase small FeS subunit"  
"JS1\_M21\_01183" 18681 "s59E5H2" 0.01703258 "Nicotinate dehydrogenase small FeS subunit"  
"JS1\_M21\_01183" 18681 "s63E6H2" 0.9297722 "Nicotinate dehydrogenase small FeS subunit"  
"JS1\_M21\_01184" 18682 "s59E13H2" 0.6908141 "Endonuclease MutS2"  
"JS1\_M21\_01184" 18682 "s59E25H2" 0 "Endonuclease MutS2"  
"JS1\_M21\_01184" 18682 "s59E5H2" 0.4119292 "Endonuclease MutS2"  
"JS1\_M21\_01184" 18682 "s63E6H2" 1.094104 "Endonuclease MutS2"  
"JS1\_M21\_01185" 18683 "s59E13H2" 0.2645171 "hypothetical protein"  
"JS1\_M21\_01185" 18683 "s59E25H2" 0 "hypothetical protein"  
"JS1\_M21\_01185" 18683 "s59E5H2" 0.06878066 "hypothetical protein"  
"JS1\_M21\_01185" 18683 "s63E6H2" 0.3447017 "hypothetical protein"  
"JS1\_M21\_01186" 18684 "s59E13H2" 0.003226258 "Acyl-coenzyme A:6-aminopenicillanic acid acyl-transferase"  
"JS1\_M21\_01186" 18684 "s59E25H2" 0 "Acyl-coenzyme A:6-aminopenicillanic acid acyl-transferase"  
"JS1\_M21\_01186" 18684 "s59E5H2" 0 "Acyl-coenzyme A:6-aminopenicillanic acid acyl-transferase"  
"JS1\_M21\_01186" 18684 "s63E6H2" 0.5286305 "Acyl-coenzyme A:6-aminopenicillanic acid acyl-transferase"  
"JS1\_M21\_01187" 18685 "s59E13H2" 0.5084325 "Diaminopimelate epimerase"  
"JS1\_M21\_01187" 18685 "s59E25H2" 0 "Diaminopimelate epimerase"  
"JS1\_M21\_01187" 18685 "s59E5H2" 0.1491314 "Diaminopimelate epimerase"  
"JS1\_M21\_01187" 18685 "s63E6H2" 0.08976257 "Diaminopimelate epimerase"  
"JS1\_M21\_01190" 18688 "s59E13H2" 0.01239985 "Endonuclease III"  
"JS1\_M21\_01190" 18688 "s59E25H2" 0 "Endonuclease III"  
"JS1\_M21\_01190" 18688 "s59E5H2" 0 "Endonuclease III"  
"JS1\_M21\_01190" 18688 "s63E6H2" 0.008796207 "Endonuclease III"  
"JS1\_M21\_01191" 18689 "s59E13H2" 0.7162406 "Hydroxylamine reductase"  
"JS1\_M21\_01191" 18689 "s59E25H2" 0 "Hydroxylamine reductase"  
"JS1\_M21\_01191" 18689 "s59E5H2" 0.08267984 "Hydroxylamine reductase"  
"JS1\_M21\_01191" 18689 "s63E6H2" 0.04142023 "Hydroxylamine reductase"  
"JS1\_M21\_01192" 18690 "s59E13H2" 0.004506177 "3-oxoacyl-[acyl-carrier-protein] synthase 3 protein 1"  
"JS1\_M21\_01192" 18690 "s59E25H2" 0 "3-oxoacyl-[acyl-carrier-protein] synthase 3 protein 1"  
"JS1\_M21\_01192" 18690 "s59E5H2" 0.1152253 "3-oxoacyl-[acyl-carrier-protein] synthase 3 protein 1"  
"JS1\_M21\_01192" 18690 "s63E6H2" 0.05724664 "3-oxoacyl-[acyl-carrier-protein] synthase 3 protein 1"  
"JS1\_M21\_01193" 18691 "s59E13H2" 0.5387474 "inosine 5-monophosphate dehydrogenase"  
"JS1\_M21\_01193" 18691 "s59E25H2" 0 "inosine 5-monophosphate dehydrogenase"  
"JS1\_M21\_01193" 18691 "s59E5H2" 0.5329223 "inosine 5-monophosphate dehydrogenase"  
"JS1\_M21\_01193" 18691 "s63E6H2" 0.0642252 "inosine 5-monophosphate dehydrogenase"  
"JS1\_M21\_01194" 18692 "s59E13H2" 0.09638148 "Nitronate monoxygenase"  
"JS1\_M21\_01194" 18692 "s59E25H2" 0 "Nitronate monoxygenase"

"JS1\_M21\_01194" 18692 "s59E5H2" 0.5523864 "Nitronate monooxygenase"  
"JS1\_M21\_01194" 18692 "s63E6H2" 0.09584884 "Nitronate monooxygenase"  
"JS1\_M21\_01195" 18693 "s59E13H2" 0.0369687 "3-oxoacyl-[acyl-carrier-protein] synthase 3"  
"JS1\_M21\_01195" 18693 "s59E25H2" 0 "3-oxoacyl-[acyl-carrier-protein] synthase 3"  
"JS1\_M21\_01195" 18693 "s59E5H2" 0.2732379 "3-oxoacyl-[acyl-carrier-protein] synthase 3"  
"JS1\_M21\_01195" 18693 "s63E6H2" 0.0839293 "3-oxoacyl-[acyl-carrier-protein] synthase 3"  
"JS1\_M21\_01197" 18695 "s59E13H2" 0.3182517 "hypothetical protein"  
"JS1\_M21\_01197" 18695 "s59E25H2" 0.2886335 "hypothetical protein"  
"JS1\_M21\_01197" 18695 "s59E5H2" 0.05136821 "hypothetical protein"  
"JS1\_M21\_01197" 18695 "s63E6H2" 1.524753 "hypothetical protein"  
"JS1\_M21\_01201" 18699 "s59E13H2" 0.003438276 "2-C-methyl-D-erythritol 4-phosphate cytidylyltransferase"  
"JS1\_M21\_01201" 18699 "s59E25H2" 0 "2-C-methyl-D-erythritol 4-phosphate cytidylyltransferase"  
"JS1\_M21\_01201" 18699 "s59E5H2" 0 "2-C-methyl-D-erythritol 4-phosphate cytidylyltransferase"  
"JS1\_M21\_01201" 18699 "s63E6H2" 0.005169699 "2-C-methyl-D-erythritol 4-phosphate cytidylyltransferase"  
"JS1\_M21\_01202" 18700 "s59E13H2" 0 "hypothetical protein"  
"JS1\_M21\_01202" 18700 "s59E25H2" 0 "hypothetical protein"  
"JS1\_M21\_01202" 18700 "s59E5H2" 0 "hypothetical protein"  
"JS1\_M21\_01202" 18700 "s63E6H2" 0 "hypothetical protein"  
"JS1\_M21\_01204" 18702 "s59E13H2" 0.03020246 "Ultraviolet N-glycosylase/AP lyase"  
"JS1\_M21\_01204" 18702 "s59E25H2" 0 "Ultraviolet N-glycosylase/AP lyase"  
"JS1\_M21\_01204" 18702 "s59E5H2" 0.03036711 "Ultraviolet N-glycosylase/AP lyase"  
"JS1\_M21\_01204" 18702 "s63E6H2" 0.01901795 "Ultraviolet N-glycosylase/AP lyase"  
"JS1\_M21\_01205" 18703 "s59E13H2" 0.004592959 "Trehalose synthase"  
"JS1\_M21\_01205" 18703 "s59E25H2" 0 "Trehalose synthase"  
"JS1\_M21\_01205" 18703 "s59E5H2" 0.1264633 "Trehalose synthase"  
"JS1\_M21\_01205" 18703 "s63E6H2" 0.03808367 "Trehalose synthase"  
"JS1\_M21\_01206" 18704 "s59E13H2" 0.03552321 "hypothetical protein"  
"JS1\_M21\_01206" 18704 "s59E25H2" 0 "hypothetical protein"  
"JS1\_M21\_01206" 18704 "s59E5H2" 0.02312745 "hypothetical protein"  
"JS1\_M21\_01206" 18704 "s63E6H2" 0.2451377 "hypothetical protein"  
"JS1\_M21\_01209" 18707 "s59E13H2" 0.02520597 "Inner membrane ABC transporter permease protein YcjO"  
"JS1\_M21\_01209" 18707 "s59E25H2" 0 "Inner membrane ABC transporter permease protein YcjO"  
"JS1\_M21\_01209" 18707 "s59E5H2" 0.0747541 "Inner membrane ABC transporter permease protein YcjO"  
"JS1\_M21\_01209" 18707 "s63E6H2" 0.1292271 "Inner membrane ABC transporter permease protein YcjO"  
"JS1\_M21\_01210" 18708 "s59E13H2" 0.01362631 "electron transport complex protein RnfC"  
"JS1\_M21\_01210" 18708 "s59E25H2" 0 "electron transport complex protein RnfC"  
"JS1\_M21\_01210" 18708 "s59E5H2" 0.1824235 "electron transport complex protein RnfC"  
"JS1\_M21\_01210" 18708 "s63E6H2" 0.5521779 "electron transport complex protein RnfC"  
"JS1\_M21\_01214" 18712 "s59E13H2" 3.257733 "hypothetical protein"  
"JS1\_M21\_01214" 18712 "s59E25H2" 0 "hypothetical protein"  
"JS1\_M21\_01214" 18712 "s59E5H2" 0.813139 "hypothetical protein"  
"JS1\_M21\_01214" 18712 "s63E6H2" 0.6508952 "hypothetical protein"  
"JS1\_M21\_01215" 18713 "s59E13H2" 0.001654195 "Trehalose synthase"  
"JS1\_M21\_01215" 18713 "s59E25H2" 0 "Trehalose synthase"  
"JS1\_M21\_01215" 18713 "s59E5H2" 0.0588856 "Trehalose synthase"  
"JS1\_M21\_01215" 18713 "s63E6H2" 0.01231535 "Trehalose synthase"  
"JS1\_M21\_01217" 18715 "s59E13H2" 0.1093588 "Sporulation initiation inhibitor protein Soj"

"JS1\_M21\_01217" 18715 "s59E25H2" 0.5625774 "Sporulation initiation inhibitor protein Soj"  
"JS1\_M21\_01217" 18715 "s59E5H2" 0.4992089 "Sporulation initiation inhibitor protein Soj"  
"JS1\_M21\_01217" 18715 "s63E6H2" 0.8907025 "Sporulation initiation inhibitor protein Soj"  
"JS1\_M21\_01218" 18716 "s59E13H2" 0.045807 "LysM domain/BON superfamily protein"  
"JS1\_M21\_01218" 18716 "s59E25H2" 0 "LysM domain/BON superfamily protein"  
"JS1\_M21\_01218" 18716 "s59E5H2" 0.3065301 "LysM domain/BON superfamily protein"  
"JS1\_M21\_01218" 18716 "s63E6H2" 0.2708139 "LysM domain/BON superfamily protein"  
"JS1\_M21\_01219" 18717 "s59E13H2" 0.08893498 "hypothetical protein"  
"JS1\_M21\_01219" 18717 "s59E25H2" 0 "hypothetical protein"  
"JS1\_M21\_01219" 18717 "s59E5H2" 0.1705159 "hypothetical protein"  
"JS1\_M21\_01219" 18717 "s63E6H2" 0.2050072 "hypothetical protein"  
"JS1\_M21\_01220" 18718 "s59E13H2" 0.02584578 "50S ribosomal protein L2"  
"JS1\_M21\_01220" 18718 "s59E25H2" 0 "50S ribosomal protein L2"  
"JS1\_M21\_01220" 18718 "s59E5H2" 0.06486637 "50S ribosomal protein L2"  
"JS1\_M21\_01220" 18718 "s63E6H2" 0.3028419 "50S ribosomal protein L2"  
"JS1\_M21\_01225" 18723 "s59E13H2" 0.2342154 "hypothetical protein"  
"JS1\_M21\_01225" 18723 "s59E25H2" 0 "hypothetical protein"  
"JS1\_M21\_01225" 18723 "s59E5H2" 0.01745565 "hypothetical protein"  
"JS1\_M21\_01225" 18723 "s63E6H2" 0.01390207 "hypothetical protein"  
"JS1\_M21\_01226" 18724 "s59E13H2" 0.03506303 "Dihydroxy-acid dehydratase"  
"JS1\_M21\_01226" 18724 "s59E25H2" 0 "Dihydroxy-acid dehydratase"  
"JS1\_M21\_01226" 18724 "s59E5H2" 0.1277892 "Dihydroxy-acid dehydratase"  
"JS1\_M21\_01226" 18724 "s63E6H2" 0.05037837 "Dihydroxy-acid dehydratase"  
"JS1\_M21\_01227" 18725 "s59E13H2" 0.005730416 "2-hydroxy-3-oxopropionate reductase"  
"JS1\_M21\_01227" 18725 "s59E25H2" 0 "2-hydroxy-3-oxopropionate reductase"  
"JS1\_M21\_01227" 18725 "s59E5H2" 0.08396846 "2-hydroxy-3-oxopropionate reductase"  
"JS1\_M21\_01227" 18725 "s63E6H2" 0.08762445 "2-hydroxy-3-oxopropionate reductase"  
"JS1\_M21\_01229" 18727 "s59E13H2" 0.02495537 "LysM domain/BON superfamily protein"  
"JS1\_M21\_01229" 18727 "s59E25H2" 0 "LysM domain/BON superfamily protein"  
"JS1\_M21\_01229" 18727 "s59E5H2" 0.07914115 "LysM domain/BON superfamily protein"  
"JS1\_M21\_01229" 18727 "s63E6H2" 0.206892 "LysM domain/BON superfamily protein"  
"JS1\_M21\_01230" 18728 "s59E13H2" 0 "hypothetical protein"  
"JS1\_M21\_01230" 18728 "s59E25H2" 0 "hypothetical protein"  
"JS1\_M21\_01230" 18728 "s59E5H2" 0.01260913 "hypothetical protein"  
"JS1\_M21\_01230" 18728 "s63E6H2" 0.02958963 "hypothetical protein"  
"JS1\_M21\_01237" 18735 "s59E13H2" 0 "hypothetical protein"  
"JS1\_M21\_01237" 18735 "s59E25H2" 0 "hypothetical protein"  
"JS1\_M21\_01237" 18735 "s59E5H2" 0 "hypothetical protein"  
"JS1\_M21\_01237" 18735 "s63E6H2" 0 "hypothetical protein"  
"JS1\_M21\_01238" 18736 "s59E13H2" 0.02291075 "hypothetical protein"  
"JS1\_M21\_01238" 18736 "s59E25H2" 0 "hypothetical protein"  
"JS1\_M21\_01238" 18736 "s59E5H2" 0.2640806 "hypothetical protein"  
"JS1\_M21\_01238" 18736 "s63E6H2" 0.02658356 "hypothetical protein"  
"JS1\_M21\_01239" 18737 "s59E13H2" 0 "Aldehyde-alcohol dehydrogenase"  
"JS1\_M21\_01239" 18737 "s59E25H2" 0 "Aldehyde-alcohol dehydrogenase"  
"JS1\_M21\_01239" 18737 "s59E5H2" 0 "Aldehyde-alcohol dehydrogenase"  
"JS1\_M21\_01239" 18737 "s63E6H2" 0.04089929 "Aldehyde-alcohol dehydrogenase"

"JS1\_M21\_01242" 18740 "s59E13H2" 0.02944773 "putative inorganic polyphosphate/ATP-NAD kinase"  
"JS1\_M21\_01242" 18740 "s59E25H2" 0 "putative inorganic polyphosphate/ATP-NAD kinase"  
"JS1\_M21\_01242" 18740 "s59E5H2" 0.1759521 "putative inorganic polyphosphate/ATP-NAD kinase"  
"JS1\_M21\_01242" 18740 "s63E6H2" 0.02155258 "putative inorganic polyphosphate/ATP-NAD kinase"  
"JS1\_M21\_01243" 18741 "s59E13H2" 0.01615328 "hypothetical protein"  
"JS1\_M21\_01243" 18741 "s59E25H2" 0 "hypothetical protein"  
"JS1\_M21\_01243" 18741 "s59E5H2" 0.2172847 "hypothetical protein"  
"JS1\_M21\_01243" 18741 "s63E6H2" 0.03689884 "hypothetical protein"  
"JS1\_M21\_01244" 18742 "s59E13H2" 0.02507542 "16S/23S rRNA (cytidine-2'-O)-methyltransferase TlyA"  
"JS1\_M21\_01244" 18742 "s59E25H2" 0 "16S/23S rRNA (cytidine-2'-O)-methyltransferase TlyA"  
"JS1\_M21\_01244" 18742 "s59E5H2" 0.238379 "16S/23S rRNA (cytidine-2'-O)-methyltransferase TlyA"  
"JS1\_M21\_01244" 18742 "s63E6H2" 0.1056827 "16S/23S rRNA (cytidine-2'-O)-methyltransferase TlyA"  
"JS1\_M21\_01245" 18743 "s59E13H2" 0 "Divergent PAP2 family protein"  
"JS1\_M21\_01245" 18743 "s59E25H2" 0 "Divergent PAP2 family protein"  
"JS1\_M21\_01245" 18743 "s59E5H2" 0.251074 "Divergent PAP2 family protein"  
"JS1\_M21\_01245" 18743 "s63E6H2" 0.05099848 "Divergent PAP2 family protein"  
"JS1\_M21\_01246" 18744 "s59E13H2" 0.01018615 "Sporulation and spore germination"  
"JS1\_M21\_01246" 18744 "s59E25H2" 0 "Sporulation and spore germination"  
"JS1\_M21\_01246" 18744 "s59E5H2" 0.1652419 "Sporulation and spore germination"  
"JS1\_M21\_01246" 18744 "s63E6H2" 0.1773654 "Sporulation and spore germination"  
"JS1\_M21\_01247" 18745 "s59E13H2" 0.09979823 "N-acetylmuramoyl-L-alanine amidase AmiC precursor"  
"JS1\_M21\_01247" 18745 "s59E25H2" 0 "N-acetylmuramoyl-L-alanine amidase AmiC precursor"  
"JS1\_M21\_01247" 18745 "s59E5H2" 0.3101823 "N-acetylmuramoyl-L-alanine amidase AmiC precursor"  
"JS1\_M21\_01247" 18745 "s63E6H2" 0.3294661 "N-acetylmuramoyl-L-alanine amidase AmiC precursor"  
"JS1\_M21\_01248" 18746 "s59E13H2" 0.02186811 "Al-2 transport protein TqsA"  
"JS1\_M21\_01248" 18746 "s59E25H2" 0 "Al-2 transport protein TqsA"  
"JS1\_M21\_01248" 18746 "s59E5H2" 0.4654725 "Al-2 transport protein TqsA"  
"JS1\_M21\_01248" 18746 "s63E6H2" 0.3545195 "Al-2 transport protein TqsA"  
"JS1\_M21\_01249" 18747 "s59E13H2" 0.7073642 "Glutamine--tRNA ligase"  
"JS1\_M21\_01249" 18747 "s59E25H2" 0.2928404 "Glutamine--tRNA ligase"  
"JS1\_M21\_01249" 18747 "s59E5H2" 0.6531406 "Glutamine--tRNA ligase"  
"JS1\_M21\_01249" 18747 "s63E6H2" 0.252262 "Glutamine--tRNA ligase"  
"JS1\_M21\_01250" 18748 "s59E13H2" 0.0264975 "hypothetical protein"  
"JS1\_M21\_01250" 18748 "s59E25H2" 0 "hypothetical protein"  
"JS1\_M21\_01250" 18748 "s59E5H2" 0.2389558 "hypothetical protein"  
"JS1\_M21\_01250" 18748 "s63E6H2" 0.2298936 "hypothetical protein"  
"JS1\_M21\_01251" 18749 "s59E13H2" 0.05735083 "2-keto-3-deoxy-L-rhamnonate aldolase"  
"JS1\_M21\_01251" 18749 "s59E25H2" 0 "2-keto-3-deoxy-L-rhamnonate aldolase"  
"JS1\_M21\_01251" 18749 "s59E5H2" 0.1947855 "2-keto-3-deoxy-L-rhamnonate aldolase"  
"JS1\_M21\_01251" 18749 "s63E6H2" 0.2210644 "2-keto-3-deoxy-L-rhamnonate aldolase"  
"JS1\_M21\_01252" 18750 "s59E13H2" 0.1803028 "IMPACT family member YigZ"  
"JS1\_M21\_01252" 18750 "s59E25H2" 0 "IMPACT family member YigZ"  
"JS1\_M21\_01252" 18750 "s59E5H2" 0.09432699 "IMPACT family member YigZ"  
"JS1\_M21\_01252" 18750 "s63E6H2" 0.2750857 "IMPACT family member YigZ"  
"JS1\_M21\_01253" 18751 "s59E13H2" 0.1299359 "D-alanyl-D-alanine-carboxypeptidase/endopeptidase AmpH precursor"  
"JS1\_M21\_01253" 18751 "s59E25H2" 0 "D-alanyl-D-alanine-carboxypeptidase/endopeptidase AmpH precursor"  
"JS1\_M21\_01253" 18751 "s59E5H2" 0.6811501 "D-alanyl-D-alanine-carboxypeptidase/endopeptidase AmpH precursor"

"JS1\_M21\_01253" 18751 "s63E6H2" 0.1780363 "D-alanyl-D-alanine-carboxypeptidase/endopeptidase AmpH precursor"  
"JS1\_M21\_01254" 18752 "s59E13H2" 0.0203081 "hypothetical protein"  
"JS1\_M21\_01254" 18752 "s59E25H2" 0 "hypothetical protein"  
"JS1\_M21\_01254" 18752 "s59E5H2" 0.5936706 "hypothetical protein"  
"JS1\_M21\_01254" 18752 "s63E6H2" 0.08972445 "hypothetical protein"  
"JS1\_M21\_01255" 18753 "s59E13H2" 0.031744 "Outer membrane porin F precursor"  
"JS1\_M21\_01255" 18753 "s59E25H2" 0 "Outer membrane porin F precursor"  
"JS1\_M21\_01255" 18753 "s59E5H2" 0.8782127 "Outer membrane porin F precursor"  
"JS1\_M21\_01255" 18753 "s63E6H2" 0.3285769 "Outer membrane porin F precursor"  
"JS1\_M21\_01256" 18754 "s59E13H2" 0.01150348 "hypothetical protein"  
"JS1\_M21\_01256" 18754 "s59E25H2" 0 "hypothetical protein"  
"JS1\_M21\_01256" 18754 "s59E5H2" 0.6035753 "hypothetical protein"  
"JS1\_M21\_01256" 18754 "s63E6H2" 0.1605166 "hypothetical protein"  
"JS1\_M21\_01257" 18755 "s59E13H2" 0 "Large-conductance mechanosensitive channel"  
"JS1\_M21\_01257" 18755 "s59E25H2" 0 "Large-conductance mechanosensitive channel"  
"JS1\_M21\_01257" 18755 "s59E5H2" 0.03076344 "Large-conductance mechanosensitive channel"  
"JS1\_M21\_01257" 18755 "s63E6H2" 0 "Large-conductance mechanosensitive channel"  
"JS1\_M21\_01258" 18756 "s59E13H2" 0 "DNA polymerase IV"  
"JS1\_M21\_01258" 18756 "s59E25H2" 0 "DNA polymerase IV"  
"JS1\_M21\_01258" 18756 "s59E5H2" 0 "DNA polymerase IV"  
"JS1\_M21\_01258" 18756 "s63E6H2" 9.006355e-05 "DNA polymerase IV"  
"JS1\_M21\_01259" 18757 "s59E13H2" 0.01846679 "AAA-like domain protein"  
"JS1\_M21\_01259" 18757 "s59E25H2" 0 "AAA-like domain protein"  
"JS1\_M21\_01259" 18757 "s59E5H2" 0.1262291 "AAA-like domain protein"  
"JS1\_M21\_01259" 18757 "s63E6H2" 0.1373141 "AAA-like domain protein"  
"JS1\_M21\_01261" 18759 "s59E13H2" 0.6458992 "SsrA-binding protein"  
"JS1\_M21\_01261" 18759 "s59E25H2" 0 "SsrA-binding protein"  
"JS1\_M21\_01261" 18759 "s59E5H2" 0.361319 "SsrA-binding protein"  
"JS1\_M21\_01261" 18759 "s63E6H2" 0.270693 "SsrA-binding protein"  
"JS1\_M21\_01262" 18760 "s59E13H2" 0.08085174 "prephenate dehydrogenase"  
"JS1\_M21\_01262" 18760 "s59E25H2" 0 "prephenate dehydrogenase"  
"JS1\_M21\_01262" 18760 "s59E5H2" 0.2699899 "prephenate dehydrogenase"  
"JS1\_M21\_01262" 18760 "s63E6H2" 0.07231339 "prephenate dehydrogenase"  
"JS1\_M21\_01263" 18761 "s59E13H2" 0.04711255 "3-dehydroquininate dehydratase"  
"JS1\_M21\_01263" 18761 "s59E25H2" 0 "3-dehydroquininate dehydratase"  
"JS1\_M21\_01263" 18761 "s59E5H2" 0.389694 "3-dehydroquininate dehydratase"  
"JS1\_M21\_01263" 18761 "s63E6H2" 0.1862559 "3-dehydroquininate dehydratase"  
"JS1\_M21\_01264" 18762 "s59E13H2" 0.07042688 "3-dehydroquininate synthase"  
"JS1\_M21\_01264" 18762 "s59E25H2" 0 "3-dehydroquininate synthase"  
"JS1\_M21\_01264" 18762 "s59E5H2" 0.5733325 "3-dehydroquininate synthase"  
"JS1\_M21\_01264" 18762 "s63E6H2" 0.3075186 "3-dehydroquininate synthase"  
"JS1\_M21\_01265" 18763 "s59E13H2" 0.06906494 "Shikimate kinase 1"  
"JS1\_M21\_01265" 18763 "s59E25H2" 0 "Shikimate kinase 1"  
"JS1\_M21\_01265" 18763 "s59E5H2" 0.1927925 "Shikimate kinase 1"  
"JS1\_M21\_01265" 18763 "s63E6H2" 0.09552829 "Shikimate kinase 1"  
"JS1\_M21\_01266" 18764 "s59E13H2" 0.05276928 "Chorismate synthase"  
"JS1\_M21\_01266" 18764 "s59E25H2" 0 "Chorismate synthase"

"JS1\_M21\_01266" 18764 "s59E5H2" 0.1283817 "Chorismate synthase"  
"JS1\_M21\_01266" 18764 "s63E6H2" 0.08673966 "Chorismate synthase"  
"JS1\_M21\_01267" 18765 "s59E13H2" 0 "Shikimate dehydrogenase"  
"JS1\_M21\_01267" 18765 "s59E25H2" 0 "Shikimate dehydrogenase"  
"JS1\_M21\_01267" 18765 "s59E5H2" 0.09558752 "Shikimate dehydrogenase"  
"JS1\_M21\_01267" 18765 "s63E6H2" 0.05573734 "Shikimate dehydrogenase"  
"JS1\_M21\_01268" 18766 "s59E13H2" 0 "3-phosphoshikimate 1-carboxyvinyltransferase"  
"JS1\_M21\_01268" 18766 "s59E25H2" 0 "3-phosphoshikimate 1-carboxyvinyltransferase"  
"JS1\_M21\_01268" 18766 "s59E5H2" 0.08492903 "3-phosphoshikimate 1-carboxyvinyltransferase"  
"JS1\_M21\_01268" 18766 "s63E6H2" 0.06646142 "3-phosphoshikimate 1-carboxyvinyltransferase"  
"JS1\_M21\_01273" 18771 "s59E13H2" 0.4239515 "2-C-methyl-D-erythritol 2,4-cyclodiphosphate synthase"  
"JS1\_M21\_01273" 18771 "s59E25H2" 0 "2-C-methyl-D-erythritol 2,4-cyclodiphosphate synthase"  
"JS1\_M21\_01273" 18771 "s59E5H2" 0.06880521 "2-C-methyl-D-erythritol 2,4-cyclodiphosphate synthase"  
"JS1\_M21\_01273" 18771 "s63E6H2" 0.167316 "2-C-methyl-D-erythritol 2,4-cyclodiphosphate synthase"  
"JS1\_M21\_01274" 18772 "s59E13H2" 0.04391884 "4-diphosphocytidyl-2-C-methyl-D-erythritol kinase"  
"JS1\_M21\_01274" 18772 "s59E25H2" 0 "4-diphosphocytidyl-2-C-methyl-D-erythritol kinase"  
"JS1\_M21\_01274" 18772 "s59E5H2" 0.01782669 "4-diphosphocytidyl-2-C-methyl-D-erythritol kinase"  
"JS1\_M21\_01274" 18772 "s63E6H2" 0.02997719 "4-diphosphocytidyl-2-C-methyl-D-erythritol kinase"  
"JS1\_M21\_01275" 18773 "s59E13H2" 2.081663 "Bifunctional NAD(P)H-hydrate repair enzyme Nnr"  
"JS1\_M21\_01275" 18773 "s59E25H2" 0 "Bifunctional NAD(P)H-hydrate repair enzyme Nnr"  
"JS1\_M21\_01275" 18773 "s59E5H2" 0.1800541 "Bifunctional NAD(P)H-hydrate repair enzyme Nnr"  
"JS1\_M21\_01275" 18773 "s63E6H2" 0.01110246 "Bifunctional NAD(P)H-hydrate repair enzyme Nnr"  
"JS1\_M21\_01276" 18774 "s59E13H2" 0.07268231 "alanine racemase"  
"JS1\_M21\_01276" 18774 "s59E25H2" 0 "alanine racemase"  
"JS1\_M21\_01276" 18774 "s59E5H2" 0.1660337 "alanine racemase"  
"JS1\_M21\_01276" 18774 "s63E6H2" 0.5796931 "alanine racemase"  
"JS1\_M21\_01277" 18775 "s59E13H2" 0.01902004 "DctM-like transporters"  
"JS1\_M21\_01277" 18775 "s59E25H2" 0 "DctM-like transporters"  
"JS1\_M21\_01277" 18775 "s59E5H2" 0.1339039 "DctM-like transporters"  
"JS1\_M21\_01277" 18775 "s63E6H2" 0.04435761 "DctM-like transporters"  
"JS1\_M21\_01278" 18776 "s59E13H2" 0.04896069 "HTH-type transcriptional repressor YtrA"  
"JS1\_M21\_01278" 18776 "s59E25H2" 0 "HTH-type transcriptional repressor YtrA"  
"JS1\_M21\_01278" 18776 "s59E5H2" 0.3102786 "HTH-type transcriptional repressor YtrA"  
"JS1\_M21\_01278" 18776 "s63E6H2" 0.2178017 "HTH-type transcriptional repressor YtrA"  
"JS1\_M21\_01279" 18777 "s59E13H2" 0.03002641 "Ferredoxin"  
"JS1\_M21\_01279" 18777 "s59E25H2" 0 "Ferredoxin"  
"JS1\_M21\_01279" 18777 "s59E5H2" 0.1051428 "Ferredoxin"  
"JS1\_M21\_01279" 18777 "s63E6H2" 0.2330645 "Ferredoxin"  
"JS1\_M21\_01280" 18778 "s59E13H2" 0.1227557 "2-oxoglutarate synthase subunit KorA"  
"JS1\_M21\_01280" 18778 "s59E25H2" 0 "2-oxoglutarate synthase subunit KorA"  
"JS1\_M21\_01280" 18778 "s59E5H2" 0.2519907 "2-oxoglutarate synthase subunit KorA"  
"JS1\_M21\_01280" 18778 "s63E6H2" 0.2996748 "2-oxoglutarate synthase subunit KorA"  
"JS1\_M21\_01281" 18779 "s59E13H2" 0.07457801 "2-oxoglutarate synthase subunit KorB"  
"JS1\_M21\_01281" 18779 "s59E25H2" 0 "2-oxoglutarate synthase subunit KorB"  
"JS1\_M21\_01281" 18779 "s59E5H2" 0.3069499 "2-oxoglutarate synthase subunit KorB"  
"JS1\_M21\_01281" 18779 "s63E6H2" 0.209644 "2-oxoglutarate synthase subunit KorB"  
"JS1\_M21\_01282" 18780 "s59E13H2" 0.1393204 "2-oxoglutarate synthase subunit KorC"

"JS1\_M21\_01282" 18780 "s59E25H2" 0 "2-oxoglutarate synthase subunit KorC"  
"JS1\_M21\_01282" 18780 "s59E5H2" 0.7198352 "2-oxoglutarate synthase subunit KorC"  
"JS1\_M21\_01282" 18780 "s63E6H2" 0.29662 "2-oxoglutarate synthase subunit KorC"  
"JS1\_M21\_01283" 18781 "s59E13H2" 0.1425 "Acetate kinase"  
"JS1\_M21\_01283" 18781 "s59E25H2" 0 "Acetate kinase"  
"JS1\_M21\_01283" 18781 "s59E5H2" 0.3637196 "Acetate kinase"  
"JS1\_M21\_01283" 18781 "s63E6H2" 0.2193598 "Acetate kinase"  
"JS1\_M21\_01284" 18782 "s59E13H2" 0.1879875 "Sulfide dehydrogenase subunit beta precursor"  
"JS1\_M21\_01284" 18782 "s59E25H2" 0 "Sulfide dehydrogenase subunit beta precursor"  
"JS1\_M21\_01284" 18782 "s59E5H2" 0.1595098 "Sulfide dehydrogenase subunit beta precursor"  
"JS1\_M21\_01284" 18782 "s63E6H2" 0.3322353 "Sulfide dehydrogenase subunit beta precursor"  
"JS1\_M21\_01285" 18783 "s59E13H2" 0.2117236 "Sulfide dehydrogenase subunit alpha precursor"  
"JS1\_M21\_01285" 18783 "s59E25H2" 0 "Sulfide dehydrogenase subunit alpha precursor"  
"JS1\_M21\_01285" 18783 "s59E5H2" 0.2213569 "Sulfide dehydrogenase subunit alpha precursor"  
"JS1\_M21\_01285" 18783 "s63E6H2" 0.3915885 "Sulfide dehydrogenase subunit alpha precursor"  
"JS1\_M21\_01286" 18784 "s59E13H2" 0.04306604 "Glutamate dehydrogenase"  
"JS1\_M21\_01286" 18784 "s59E25H2" 0 "Glutamate dehydrogenase"  
"JS1\_M21\_01286" 18784 "s59E5H2" 0.01242278 "Glutamate dehydrogenase"  
"JS1\_M21\_01286" 18784 "s63E6H2" 0.4863571 "Glutamate dehydrogenase"  
"JS1\_M21\_01287" 18785 "s59E13H2" 0.1435256 "hypothetical protein"  
"JS1\_M21\_01287" 18785 "s59E25H2" 0 "hypothetical protein"  
"JS1\_M21\_01287" 18785 "s59E5H2" 0.1680016 "hypothetical protein"  
"JS1\_M21\_01287" 18785 "s63E6H2" 0.09365108 "hypothetical protein"  
"JS1\_M21\_01288" 18786 "s59E13H2" 0.1795619 "Methylmalonyl-CoA mutase"  
"JS1\_M21\_01288" 18786 "s59E25H2" 0 "Methylmalonyl-CoA mutase"  
"JS1\_M21\_01288" 18786 "s59E5H2" 0.1454328 "Methylmalonyl-CoA mutase"  
"JS1\_M21\_01288" 18786 "s63E6H2" 0.164054 "Methylmalonyl-CoA mutase"  
"JS1\_M21\_01289" 18787 "s59E13H2" 0.09779985 "Methylmalonyl-CoA mutase"  
"JS1\_M21\_01289" 18787 "s59E25H2" 0 "Methylmalonyl-CoA mutase"  
"JS1\_M21\_01289" 18787 "s59E5H2" 0.04802112 "Methylmalonyl-CoA mutase"  
"JS1\_M21\_01289" 18787 "s63E6H2" 0.298269 "Methylmalonyl-CoA mutase"  
"JS1\_M21\_01290" 18788 "s59E13H2" 0.2109217 "putative GTPase ArgK"  
"JS1\_M21\_01290" 18788 "s59E25H2" 0 "putative GTPase ArgK"  
"JS1\_M21\_01290" 18788 "s59E5H2" 0.1714863 "putative GTPase ArgK"  
"JS1\_M21\_01290" 18788 "s63E6H2" 0.1536322 "putative GTPase ArgK"  
"JS1\_M21\_01291" 18789 "s59E13H2" 0.1529543 "glyoxalase I"  
"JS1\_M21\_01291" 18789 "s59E25H2" 0 "glyoxalase I"  
"JS1\_M21\_01291" 18789 "s59E5H2" 0.2166768 "glyoxalase I"  
"JS1\_M21\_01291" 18789 "s63E6H2" 0.3204761 "glyoxalase I"  
"JS1\_M21\_01292" 18790 "s59E13H2" 0.1638473 "Methylmalonyl-CoA carboxyltransferase 12S subunit"  
"JS1\_M21\_01292" 18790 "s59E25H2" 0 "Methylmalonyl-CoA carboxyltransferase 12S subunit"  
"JS1\_M21\_01292" 18790 "s59E5H2" 0.2674259 "Methylmalonyl-CoA carboxyltransferase 12S subunit"  
"JS1\_M21\_01292" 18790 "s63E6H2" 0.446369 "Methylmalonyl-CoA carboxyltransferase 12S subunit"  
"JS1\_M21\_01293" 18791 "s59E13H2" 0.5235444 "Transposase IS116/IS110/IS902 family protein"  
"JS1\_M21\_01293" 18791 "s59E25H2" 0 "Transposase IS116/IS110/IS902 family protein"  
"JS1\_M21\_01293" 18791 "s59E5H2" 1.346028 "Transposase IS116/IS110/IS902 family protein"  
"JS1\_M21\_01293" 18791 "s63E6H2" 1.049861 "Transposase IS116/IS110/IS902 family protein"

"JS1\_M21\_01294" 18792 "s59E13H2" 0.1666444 "Oxaloacetate decarboxylase, gamma chain"  
"JS1\_M21\_01294" 18792 "s59E25H2" 0 "Oxaloacetate decarboxylase, gamma chain"  
"JS1\_M21\_01294" 18792 "s59E5H2" 0.2928019 "Oxaloacetate decarboxylase, gamma chain"  
"JS1\_M21\_01294" 18792 "s63E6H2" 0.06584208 "Oxaloacetate decarboxylase, gamma chain"  
"JS1\_M21\_01295" 18793 "s59E13H2" 0.1796189 "Glutaconyl-CoA decarboxylase subunit gamma"  
"JS1\_M21\_01295" 18793 "s59E25H2" 0 "Glutaconyl-CoA decarboxylase subunit gamma"  
"JS1\_M21\_01295" 18793 "s59E5H2" 0.4032571 "Glutaconyl-CoA decarboxylase subunit gamma"  
"JS1\_M21\_01295" 18793 "s63E6H2" 0.08158583 "Glutaconyl-CoA decarboxylase subunit gamma"  
"JS1\_M21\_01296" 18794 "s59E13H2" 0.2535901 "Glutaconyl-CoA decarboxylase subunit beta"  
"JS1\_M21\_01296" 18794 "s59E25H2" 0 "Glutaconyl-CoA decarboxylase subunit beta"  
"JS1\_M21\_01296" 18794 "s59E5H2" 0.5523289 "Glutaconyl-CoA decarboxylase subunit beta"  
"JS1\_M21\_01296" 18794 "s63E6H2" 0.4595269 "Glutaconyl-CoA decarboxylase subunit beta"  
"JS1\_M21\_01297" 18795 "s59E13H2" 0.6755452 "preprotein translocase subunit SecY"  
"JS1\_M21\_01297" 18795 "s59E25H2" 0 "preprotein translocase subunit SecY"  
"JS1\_M21\_01297" 18795 "s59E5H2" 0.1076512 "preprotein translocase subunit SecY"  
"JS1\_M21\_01297" 18795 "s63E6H2" 0.9437804 "preprotein translocase subunit SecY"  
"JS1\_M21\_01298" 18796 "s59E13H2" 3.135315 "Bifunctional NAD(P)H-hydrate repair enzyme Nnr"  
"JS1\_M21\_01298" 18796 "s59E25H2" 0 "Bifunctional NAD(P)H-hydrate repair enzyme Nnr"  
"JS1\_M21\_01298" 18796 "s59E5H2" 0.3599364 "Bifunctional NAD(P)H-hydrate repair enzyme Nnr"  
"JS1\_M21\_01298" 18796 "s63E6H2" 0.03587511 "Bifunctional NAD(P)H-hydrate repair enzyme Nnr"  
"JS1\_M21\_01299" 18797 "s59E13H2" 0.08287565 "50S ribosomal protein L5"  
"JS1\_M21\_01299" 18797 "s59E25H2" 0 "50S ribosomal protein L5"  
"JS1\_M21\_01299" 18797 "s59E5H2" 0.03749652 "50S ribosomal protein L5"  
"JS1\_M21\_01299" 18797 "s63E6H2" 0.04009436 "50S ribosomal protein L5"  
"JS1\_M21\_01300" 18798 "s59E13H2" 0.1750117 "30S ribosomal protein S14 type Z"  
"JS1\_M21\_01300" 18798 "s59E25H2" 0 "30S ribosomal protein S14 type Z"  
"JS1\_M21\_01300" 18798 "s59E5H2" 0.09003613 "30S ribosomal protein S14 type Z"  
"JS1\_M21\_01300" 18798 "s63E6H2" 0.1297569 "30S ribosomal protein S14 type Z"  
"JS1\_M21\_01301" 18799 "s59E13H2" 0.1250089 "30S ribosomal protein S8"  
"JS1\_M21\_01301" 18799 "s59E25H2" 0 "30S ribosomal protein S8"  
"JS1\_M21\_01301" 18799 "s59E5H2" 0.07935216 "30S ribosomal protein S8"  
"JS1\_M21\_01301" 18799 "s63E6H2" 0.1521803 "30S ribosomal protein S8"  
"JS1\_M21\_01302" 18800 "s59E13H2" 0.3940214 "50S ribosomal protein L6"  
"JS1\_M21\_01302" 18800 "s59E25H2" 0 "50S ribosomal protein L6"  
"JS1\_M21\_01302" 18800 "s59E5H2" 0.03677662 "50S ribosomal protein L6"  
"JS1\_M21\_01302" 18800 "s63E6H2" 0.1934565 "50S ribosomal protein L6"  
"JS1\_M21\_01303" 18801 "s59E13H2" 0.1530601 "50S ribosomal protein L18"  
"JS1\_M21\_01303" 18801 "s59E25H2" 0 "50S ribosomal protein L18"  
"JS1\_M21\_01303" 18801 "s59E5H2" 0.007349319 "50S ribosomal protein L18"  
"JS1\_M21\_01303" 18801 "s63E6H2" 0.0694498 "50S ribosomal protein L18"  
"JS1\_M21\_01304" 18802 "s59E13H2" 0.04891306 "hypothetical protein"  
"JS1\_M21\_01304" 18802 "s59E25H2" 0 "hypothetical protein"  
"JS1\_M21\_01304" 18802 "s59E5H2" 0.62214 "hypothetical protein"  
"JS1\_M21\_01304" 18802 "s63E6H2" 1.15141 "hypothetical protein"  
"JS1\_M21\_01305" 18803 "s59E13H2" 0.0850505 "50S ribosomal protein L9"  
"JS1\_M21\_01305" 18803 "s59E25H2" 0 "50S ribosomal protein L9"  
"JS1\_M21\_01305" 18803 "s59E5H2" 0.5489912 "50S ribosomal protein L9"



"JS1\_M21\_01305" 18803 "s63E6H2" 0.7033071 "50S ribosomal protein L9"  
"JS1\_M21\_01306" 18804 "s59E13H2" 0.02238658 "hypothetical protein"  
"JS1\_M21\_01306" 18804 "s59E25H2" 0 "hypothetical protein"  
"JS1\_M21\_01306" 18804 "s59E5H2" 0.5585937 "hypothetical protein"  
"JS1\_M21\_01306" 18804 "s63E6H2" 0.5218978 "hypothetical protein"  
"JS1\_M21\_01307" 18805 "s59E13H2" 0.04432593 "Sporulation protein YtfJ (Spore\_Ytfj)"  
"JS1\_M21\_01307" 18805 "s59E25H2" 0 "Sporulation protein YtfJ (Spore\_Ytfj)"  
"JS1\_M21\_01307" 18805 "s59E5H2" 0.7079549 "Sporulation protein YtfJ (Spore\_Ytfj)"  
"JS1\_M21\_01307" 18805 "s63E6H2" 0.5547152 "Sporulation protein YtfJ (Spore\_Ytfj)"  
"JS1\_M21\_01309" 18807 "s59E13H2" 0.03583616 "Orotate phosphoribosyltransferase"  
"JS1\_M21\_01309" 18807 "s59E25H2" 0 "Orotate phosphoribosyltransferase"  
"JS1\_M21\_01309" 18807 "s59E5H2" 0.06955803 "Orotate phosphoribosyltransferase"  
"JS1\_M21\_01309" 18807 "s63E6H2" 0.07690041 "Orotate phosphoribosyltransferase"  
"JS1\_M21\_01310" 18808 "s59E13H2" 0.04030603 "Orotidine 5'-phosphate decarboxylase"  
"JS1\_M21\_01310" 18808 "s59E25H2" 0 "Orotidine 5'-phosphate decarboxylase"  
"JS1\_M21\_01310" 18808 "s59E5H2" 1.928214 "Orotidine 5'-phosphate decarboxylase"  
"JS1\_M21\_01310" 18808 "s63E6H2" 0.1198357 "Orotidine 5'-phosphate decarboxylase"  
"JS1\_M21\_01311" 18809 "s59E13H2" 0.04141674 "Dihydroorotate dehydrogenase B (NAD(+)), catalytic subunit"  
"JS1\_M21\_01311" 18809 "s59E25H2" 0 "Dihydroorotate dehydrogenase B (NAD(+)), catalytic subunit"  
"JS1\_M21\_01311" 18809 "s59E5H2" 0.02326031 "Dihydroorotate dehydrogenase B (NAD(+)), catalytic subunit"  
"JS1\_M21\_01311" 18809 "s63E6H2" 0.07925732 "Dihydroorotate dehydrogenase B (NAD(+)), catalytic subunit"  
"JS1\_M21\_01312" 18810 "s59E13H2" 0.0127137 "Dihydroorotate dehydrogenase B (NAD(+)), electron transfer subunit"  
"JS1\_M21\_01312" 18810 "s59E25H2" 0 "Dihydroorotate dehydrogenase B (NAD(+)), electron transfer subunit"  
"JS1\_M21\_01312" 18810 "s59E5H2" 0.04053923 "Dihydroorotate dehydrogenase B (NAD(+)), electron transfer subunit"  
"JS1\_M21\_01312" 18810 "s63E6H2" 0.05599775 "Dihydroorotate dehydrogenase B (NAD(+)), electron transfer subunit"  
"JS1\_M21\_01313" 18811 "s59E13H2" 0.1167036 "Bifunctional protein PyrR"  
"JS1\_M21\_01313" 18811 "s59E25H2" 0 "Bifunctional protein PyrR"  
"JS1\_M21\_01313" 18811 "s59E5H2" 0.0990816 "Bifunctional protein PyrR"  
"JS1\_M21\_01313" 18811 "s63E6H2" 0.1316289 "Bifunctional protein PyrR"  
"JS1\_M21\_01314" 18812 "s59E13H2" 0.03691536 "hypothetical protein"  
"JS1\_M21\_01314" 18812 "s59E25H2" 0 "hypothetical protein"  
"JS1\_M21\_01314" 18812 "s59E5H2" 0.002406429 "hypothetical protein"  
"JS1\_M21\_01314" 18812 "s63E6H2" 0.04272917 "hypothetical protein"  
"JS1\_M21\_01315" 18813 "s59E13H2" 0.001336963 "Thioredoxin reductase"  
"JS1\_M21\_01315" 18813 "s59E25H2" 0 "Thioredoxin reductase"  
"JS1\_M21\_01315" 18813 "s59E5H2" 0.008401701 "Thioredoxin reductase"  
"JS1\_M21\_01315" 18813 "s63E6H2" 0.03223552 "Thioredoxin reductase"  
"JS1\_M21\_01316" 18814 "s59E13H2" 0.04555686 "L-2-hydroxyglutarate oxidase LhgO"  
"JS1\_M21\_01316" 18814 "s59E25H2" 0 "L-2-hydroxyglutarate oxidase LhgO"  
"JS1\_M21\_01316" 18814 "s59E5H2" 0.3176652 "L-2-hydroxyglutarate oxidase LhgO"  
"JS1\_M21\_01316" 18814 "s63E6H2" 0.06152797 "L-2-hydroxyglutarate oxidase LhgO"  
"JS1\_M21\_01317" 18815 "s59E13H2" 0.08780927 "putative HTH-type transcriptional regulator YdfH"  
"JS1\_M21\_01317" 18815 "s59E25H2" 0 "putative HTH-type transcriptional regulator YdfH"  
"JS1\_M21\_01317" 18815 "s59E5H2" 0.6611021 "putative HTH-type transcriptional regulator YdfH"  
"JS1\_M21\_01317" 18815 "s63E6H2" 0.02102865 "putative HTH-type transcriptional regulator YdfH"  
"JS1\_M21\_01318" 18816 "s59E13H2" 0.003152711 "D-malate dehydrogenase [decarboxylating]"  
"JS1\_M21\_01318" 18816 "s59E25H2" 0 "D-malate dehydrogenase [decarboxylating]"

"JS1\_M21\_01318" 18816 "s59E5H2" 0.6335442 "D-malate dehydrogenase [decarboxylating]"  
"JS1\_M21\_01318" 18816 "s63E6H2" 0.5402848 "D-malate dehydrogenase [decarboxylating]"  
"JS1\_M21\_01319" 18817 "s59E13H2" 0.0234308 "2,3-dimethylmalate dehydratase small subunit"  
"JS1\_M21\_01319" 18817 "s59E25H2" 0.1019608 "2,3-dimethylmalate dehydratase small subunit"  
"JS1\_M21\_01319" 18817 "s59E5H2" 0.4006841 "2,3-dimethylmalate dehydratase small subunit"  
"JS1\_M21\_01319" 18817 "s63E6H2" 0.8925112 "2,3-dimethylmalate dehydratase small subunit"  
"JS1\_M21\_01320" 18818 "s59E13H2" 0.2365012 "2,3-dimethylmalate dehydratase large subunit"  
"JS1\_M21\_01320" 18818 "s59E25H2" 0.6642914 "2,3-dimethylmalate dehydratase large subunit"  
"JS1\_M21\_01320" 18818 "s59E5H2" 1.00387 "2,3-dimethylmalate dehydratase large subunit"  
"JS1\_M21\_01320" 18818 "s63E6H2" 1.396172 "2,3-dimethylmalate dehydratase large subunit"  
"JS1\_M21\_01321" 18819 "s59E13H2" 0.0230745 "Pyrroline-5-carboxylate reductase"  
"JS1\_M21\_01321" 18819 "s59E25H2" 0 "Pyrroline-5-carboxylate reductase"  
"JS1\_M21\_01321" 18819 "s59E5H2" 1.548936 "Pyrroline-5-carboxylate reductase"  
"JS1\_M21\_01321" 18819 "s63E6H2" 0.3985362 "Pyrroline-5-carboxylate reductase"  
"JS1\_M21\_01322" 18820 "s59E13H2" 0.2304952 "hypothetical protein"  
"JS1\_M21\_01322" 18820 "s59E25H2" 0 "hypothetical protein"  
"JS1\_M21\_01322" 18820 "s59E5H2" 2.59926 "hypothetical protein"  
"JS1\_M21\_01322" 18820 "s63E6H2" 1.068752 "hypothetical protein"  
"JS1\_M21\_01323" 18821 "s59E13H2" 0.1779984 "Ferredoxin"  
"JS1\_M21\_01323" 18821 "s59E25H2" 0 "Ferredoxin"  
"JS1\_M21\_01323" 18821 "s59E5H2" 2.510514 "Ferredoxin"  
"JS1\_M21\_01323" 18821 "s63E6H2" 0.7631296 "Ferredoxin"  
"JS1\_M21\_01324" 18822 "s59E13H2" 0.1691509 "hypothetical protein"  
"JS1\_M21\_01324" 18822 "s59E25H2" 0 "hypothetical protein"  
"JS1\_M21\_01324" 18822 "s59E5H2" 1.118428 "hypothetical protein"  
"JS1\_M21\_01324" 18822 "s63E6H2" 0.5117547 "hypothetical protein"  
"JS1\_M21\_01325" 18823 "s59E13H2" 0.1436506 "2-isopropylmalate synthase"  
"JS1\_M21\_01325" 18823 "s59E25H2" 0 "2-isopropylmalate synthase"  
"JS1\_M21\_01325" 18823 "s59E5H2" 1.710916 "2-isopropylmalate synthase"  
"JS1\_M21\_01325" 18823 "s63E6H2" 0.6734033 "2-isopropylmalate synthase"  
"JS1\_M21\_01326" 18824 "s59E13H2" 0.1099152 "2-isopropylmalate synthase"  
"JS1\_M21\_01326" 18824 "s59E25H2" 0 "2-isopropylmalate synthase"  
"JS1\_M21\_01326" 18824 "s59E5H2" 1.890594 "2-isopropylmalate synthase"  
"JS1\_M21\_01326" 18824 "s63E6H2" 0.8137065 "2-isopropylmalate synthase"  
"JS1\_M21\_01327" 18825 "s59E13H2" 0.01611125 "P-protein"  
"JS1\_M21\_01327" 18825 "s59E25H2" 0 "P-protein"  
"JS1\_M21\_01327" 18825 "s59E5H2" 2.168388 "P-protein"  
"JS1\_M21\_01327" 18825 "s63E6H2" 0.606043 "P-protein"  
"JS1\_M21\_01328" 18826 "s59E13H2" 0.001742369 "Ketol-acid reductoisomerase"  
"JS1\_M21\_01328" 18826 "s59E25H2" 0 "Ketol-acid reductoisomerase"  
"JS1\_M21\_01328" 18826 "s59E5H2" 0.9481113 "Ketol-acid reductoisomerase"  
"JS1\_M21\_01328" 18826 "s63E6H2" 0.2752426 "Ketol-acid reductoisomerase"  
"JS1\_M21\_01329" 18827 "s59E13H2" 0.007059214 "Acetolactate synthase small subunit"  
"JS1\_M21\_01329" 18827 "s59E25H2" 0 "Acetolactate synthase small subunit"  
"JS1\_M21\_01329" 18827 "s59E5H2" 0.671534 "Acetolactate synthase small subunit"  
"JS1\_M21\_01329" 18827 "s63E6H2" 0.4232408 "Acetolactate synthase small subunit"  
"JS1\_M21\_01330" 18828 "s59E13H2" 0.03827865 "Acetolactate synthase large subunit"

"JS1\_M21\_01330" 18828 "s59E25H2" 0 "Acetolactate synthase large subunit"  
"JS1\_M21\_01330" 18828 "s59E5H2" 0.7302944 "Acetolactate synthase large subunit"  
"JS1\_M21\_01330" 18828 "s63E6H2" 0.4836182 "Acetolactate synthase large subunit"  
"JS1\_M21\_01333" 18831 "s59E13H2" 0.01811718 "Dihydroxy-acid dehydratase"  
"JS1\_M21\_01333" 18831 "s59E25H2" 0 "Dihydroxy-acid dehydratase"  
"JS1\_M21\_01333" 18831 "s59E5H2" 0.6537367 "Dihydroxy-acid dehydratase"  
"JS1\_M21\_01333" 18831 "s63E6H2" 0.08043537 "Dihydroxy-acid dehydratase"  
"JS1\_M21\_01335" 18833 "s59E13H2" 0 "hypothetical protein"  
"JS1\_M21\_01335" 18833 "s59E25H2" 0 "hypothetical protein"  
"JS1\_M21\_01335" 18833 "s59E5H2" 0 "hypothetical protein"  
"JS1\_M21\_01335" 18833 "s63E6H2" 0 "hypothetical protein"  
"JS1\_M21\_01336" 18834 "s59E13H2" 0.005554466 "Glutamate dehydrogenase"  
"JS1\_M21\_01336" 18834 "s59E25H2" 0 "Glutamate dehydrogenase"  
"JS1\_M21\_01336" 18834 "s59E5H2" 0 "Glutamate dehydrogenase"  
"JS1\_M21\_01336" 18834 "s63E6H2" 0.05833397 "Glutamate dehydrogenase"  
"JS1\_M21\_01337" 18835 "s59E13H2" 0.005534876 "putative transcriptional regulatory protein pdtaR"  
"JS1\_M21\_01337" 18835 "s59E25H2" 0 "putative transcriptional regulatory protein pdtaR"  
"JS1\_M21\_01337" 18835 "s59E5H2" 0.005518888 "putative transcriptional regulatory protein pdtaR"  
"JS1\_M21\_01337" 18835 "s63E6H2" 0.1205251 "putative transcriptional regulatory protein pdtaR"  
"JS1\_M21\_01339" 18837 "s59E13H2" 0.04680534 "Bifunctional homocysteine S-methyltransferase/5,10-methylenetetrahydrofolate reductase"  
"JS1\_M21\_01339" 18837 "s59E25H2" 0 "Bifunctional homocysteine S-methyltransferase/5,10-methylenetetrahydrofolate reductase"  
"JS1\_M21\_01339" 18837 "s59E5H2" 0.1901501 "Bifunctional homocysteine S-methyltransferase/5,10-methylenetetrahydrofolate reductase"  
"JS1\_M21\_01339" 18837 "s63E6H2" 0.04578798 "Bifunctional homocysteine S-methyltransferase/5,10-methylenetetrahydrofolate reductase"  
"JS1\_M21\_01340" 18838 "s59E13H2" 0.01821862 "hypothetical protein"  
"JS1\_M21\_01340" 18838 "s59E25H2" 0 "hypothetical protein"  
"JS1\_M21\_01340" 18838 "s59E5H2" 0.09267382 "hypothetical protein"  
"JS1\_M21\_01340" 18838 "s63E6H2" 0.1887021 "hypothetical protein"  
"JS1\_M21\_01341" 18839 "s59E13H2" 0.01747698 "D-3-phosphoglycerate dehydrogenase"  
"JS1\_M21\_01341" 18839 "s59E25H2" 0 "D-3-phosphoglycerate dehydrogenase"  
"JS1\_M21\_01341" 18839 "s59E5H2" 0.8710284 "D-3-phosphoglycerate dehydrogenase"  
"JS1\_M21\_01341" 18839 "s63E6H2" 0.2829511 "D-3-phosphoglycerate dehydrogenase"  
"JS1\_M21\_01342" 18840 "s59E13H2" 0.8571031 "Soluble hydrogenase 42 kDa subunit"  
"JS1\_M21\_01342" 18840 "s59E25H2" 0 "Soluble hydrogenase 42 kDa subunit"  
"JS1\_M21\_01342" 18840 "s59E5H2" 0.2696203 "Soluble hydrogenase 42 kDa subunit"  
"JS1\_M21\_01342" 18840 "s63E6H2" 0.01931636 "Soluble hydrogenase 42 kDa subunit"  
"JS1\_M21\_01343" 18841 "s59E13H2" 0.06041819 "Trp repressor protein"  
"JS1\_M21\_01343" 18841 "s59E25H2" 0 "Trp repressor protein"  
"JS1\_M21\_01343" 18841 "s59E5H2" 0.04995969 "Trp repressor protein"  
"JS1\_M21\_01343" 18841 "s63E6H2" 0.01176124 "Trp repressor protein"  
"JS1\_M21\_01344" 18842 "s59E13H2" 0.02164596 "Phosphoribosyl-AMP cyclohydrolase"  
"JS1\_M21\_01344" 18842 "s59E25H2" 0 "Phosphoribosyl-AMP cyclohydrolase"  
"JS1\_M21\_01344" 18842 "s59E5H2" 0.04670839 "Phosphoribosyl-AMP cyclohydrolase"  
"JS1\_M21\_01344" 18842 "s63E6H2" 0.02523902 "Phosphoribosyl-AMP cyclohydrolase"  
"JS1\_M21\_01345" 18843 "s59E13H2" 0.004336511 "Imidazole glycerol phosphate synthase subunit HisF"  
"JS1\_M21\_01345" 18843 "s59E25H2" 0 "Imidazole glycerol phosphate synthase subunit HisF"  
"JS1\_M21\_01345" 18843 "s59E5H2" 0.1086386 "Imidazole glycerol phosphate synthase subunit HisF"  
"JS1\_M21\_01345" 18843 "s63E6H2" 0.01921356 "Imidazole glycerol phosphate synthase subunit HisF"

"JS1\_M21\_01346" 18844 "s59E13H2" 0.01025688 "1-(5-phosphoribosyl)-5-[(5-phosphoribosylamino)methylideneamino] imidazole-4-carboxamide isomerase"  
"JS1\_M21\_01346" 18844 "s59E25H2" 0 "1-(5-phosphoribosyl)-5-[(5-phosphoribosylamino)methylideneamino] imidazole-4-carboxamide isomerase"  
"JS1\_M21\_01346" 18844 "s59E5H2" 0.01469953 "1-(5-phosphoribosyl)-5-[(5-phosphoribosylamino)methylideneamino] imidazole-4-carboxamide isomerase"  
"JS1\_M21\_01346" 18844 "s63E6H2" 0.02844507 "1-(5-phosphoribosyl)-5-[(5-phosphoribosylamino)methylideneamino] imidazole-4-carboxamide isomerase"  
"JS1\_M21\_01347" 18845 "s59E13H2" 0.02289268 "Imidazole glycerol phosphate synthase subunit HisH 1"  
"JS1\_M21\_01347" 18845 "s59E25H2" 0 "Imidazole glycerol phosphate synthase subunit HisH 1"  
"JS1\_M21\_01347" 18845 "s59E5H2" 0.07922238 "Imidazole glycerol phosphate synthase subunit HisH 1"  
"JS1\_M21\_01347" 18845 "s63E6H2" 0.08597571 "Imidazole glycerol phosphate synthase subunit HisH 1"  
"JS1\_M21\_01348" 18846 "s59E13H2" 0.02096807 "Imidazoleglycerol-phosphate dehydratase"  
"JS1\_M21\_01348" 18846 "s59E25H2" 0 "Imidazoleglycerol-phosphate dehydratase"  
"JS1\_M21\_01348" 18846 "s59E5H2" 0.2061881 "Imidazoleglycerol-phosphate dehydratase"  
"JS1\_M21\_01348" 18846 "s63E6H2" 0.07085619 "Imidazoleglycerol-phosphate dehydratase"  
"JS1\_M21\_01349" 18847 "s59E13H2" 0.03683287 "Pyrophosphatase PpaX"  
"JS1\_M21\_01349" 18847 "s59E25H2" 0 "Pyrophosphatase PpaX"  
"JS1\_M21\_01349" 18847 "s59E5H2" 0.05942726 "Pyrophosphatase PpaX"  
"JS1\_M21\_01349" 18847 "s63E6H2" 0.0487702 "Pyrophosphatase PpaX"  
"JS1\_M21\_01350" 18848 "s59E13H2" 0.04754862 "Histidinol dehydrogenase"  
"JS1\_M21\_01350" 18848 "s59E25H2" 0 "Histidinol dehydrogenase"  
"JS1\_M21\_01350" 18848 "s59E5H2" 0.06125264 "Histidinol dehydrogenase"  
"JS1\_M21\_01350" 18848 "s63E6H2" 0.05643584 "Histidinol dehydrogenase"  
"JS1\_M21\_01355" 18853 "s59E13H2" 0.005781653 "2-phosphosulfolactate phosphatase"  
"JS1\_M21\_01355" 18853 "s59E25H2" 0 "2-phosphosulfolactate phosphatase"  
"JS1\_M21\_01355" 18853 "s59E5H2" 0 "2-phosphosulfolactate phosphatase"  
"JS1\_M21\_01355" 18853 "s63E6H2" 0.002565101 "2-phosphosulfolactate phosphatase"  
"JS1\_M21\_01359" 18857 "s59E13H2" 0.6460085 "hypothetical protein"  
"JS1\_M21\_01359" 18857 "s59E25H2" 0 "hypothetical protein"  
"JS1\_M21\_01359" 18857 "s59E5H2" 0.3613318 "hypothetical protein"  
"JS1\_M21\_01359" 18857 "s63E6H2" 0.534156 "hypothetical protein"  
"JS1\_M21\_01360" 18858 "s59E13H2" 0.8143335 "Type II secretion system protein E"  
"JS1\_M21\_01360" 18858 "s59E25H2" 0 "Type II secretion system protein E"  
"JS1\_M21\_01360" 18858 "s59E5H2" 0.6050309 "Type II secretion system protein E"  
"JS1\_M21\_01360" 18858 "s63E6H2" 0.7951972 "Type II secretion system protein E"  
"JS1\_M21\_01361" 18859 "s59E13H2" 0.3106559 "hypothetical protein"  
"JS1\_M21\_01361" 18859 "s59E25H2" 0 "hypothetical protein"  
"JS1\_M21\_01361" 18859 "s59E5H2" 0.2290411 "hypothetical protein"  
"JS1\_M21\_01361" 18859 "s63E6H2" 0.2510071 "hypothetical protein"  
"JS1\_M21\_01362" 18860 "s59E13H2" 0.007807031 "Mitochondrial PGP phosphatase"  
"JS1\_M21\_01362" 18860 "s59E25H2" 0 "Mitochondrial PGP phosphatase"  
"JS1\_M21\_01362" 18860 "s59E5H2" 0.1265187 "Mitochondrial PGP phosphatase"  
"JS1\_M21\_01362" 18860 "s63E6H2" 0.2172745 "Mitochondrial PGP phosphatase"  
"JS1\_M21\_01363" 18861 "s59E13H2" 0.01738364 "Uridine kinase"  
"JS1\_M21\_01363" 18861 "s59E25H2" 0 "Uridine kinase"  
"JS1\_M21\_01363" 18861 "s59E5H2" 0.1523305 "Uridine kinase"  
"JS1\_M21\_01363" 18861 "s63E6H2" 0.07545416 "Uridine kinase"  
"JS1\_M21\_01364" 18862 "s59E13H2" 0.003798599 "putative aminodeoxychorismate lyase"  
"JS1\_M21\_01364" 18862 "s59E25H2" 0 "putative aminodeoxychorismate lyase"  
"JS1\_M21\_01364" 18862 "s59E5H2" 0.07308874 "putative aminodeoxychorismate lyase"

"JS1\_M21\_01364" 18862 "s63E6H2" 0.1022582 "putative aminodeoxychorismate lyase"  
"JS1\_M21\_01365" 18863 "s59E13H2" 0.05366626 "Putative Holliday junction resolvase"  
"JS1\_M21\_01365" 18863 "s59E25H2" 0 "Putative Holliday junction resolvase"  
"JS1\_M21\_01365" 18863 "s59E5H2" 0.07669951 "Putative Holliday junction resolvase"  
"JS1\_M21\_01365" 18863 "s63E6H2" 0.1082384 "Putative Holliday junction resolvase"  
"JS1\_M21\_01366" 18864 "s59E13H2" 0.05216563 "Alanine--tRNA ligase"  
"JS1\_M21\_01366" 18864 "s59E25H2" 0 "Alanine--tRNA ligase"  
"JS1\_M21\_01366" 18864 "s59E5H2" 0.07038518 "Alanine--tRNA ligase"  
"JS1\_M21\_01366" 18864 "s63E6H2" 0.2150191 "Alanine--tRNA ligase"  
"JS1\_M21\_01367" 18865 "s59E13H2" 0.01521232 "Type II secretion system protein E"  
"JS1\_M21\_01367" 18865 "s59E25H2" 0 "Type II secretion system protein E"  
"JS1\_M21\_01367" 18865 "s59E5H2" 0.205188 "Type II secretion system protein E"  
"JS1\_M21\_01367" 18865 "s63E6H2" 0.8259756 "Type II secretion system protein E"  
"JS1\_M21\_01368" 18866 "s59E13H2" 0.08897144 "30S ribosomal protein S1"  
"JS1\_M21\_01368" 18866 "s59E25H2" 0 "30S ribosomal protein S1"  
"JS1\_M21\_01368" 18866 "s59E5H2" 0.09625156 "30S ribosomal protein S1"  
"JS1\_M21\_01368" 18866 "s63E6H2" 0.5845196 "30S ribosomal protein S1"  
"JS1\_M21\_01369" 18867 "s59E13H2" 0.0003937128 "hypothetical protein"  
"JS1\_M21\_01369" 18867 "s59E25H2" 0 "hypothetical protein"  
"JS1\_M21\_01369" 18867 "s59E5H2" 0.01656859 "hypothetical protein"  
"JS1\_M21\_01369" 18867 "s63E6H2" 0.05241953 "hypothetical protein"  
"JS1\_M21\_01370" 18868 "s59E13H2" 0.09354892 "putative 5-formyltetrahydrofolate cyclo-ligase"  
"JS1\_M21\_01370" 18868 "s59E25H2" 0.3415301 "putative 5-formyltetrahydrofolate cyclo-ligase"  
"JS1\_M21\_01370" 18868 "s59E5H2" 0.09432482 "putative 5-formyltetrahydrofolate cyclo-ligase"  
"JS1\_M21\_01370" 18868 "s63E6H2" 0.3225595 "putative 5-formyltetrahydrofolate cyclo-ligase"  
"JS1\_M21\_01372" 18870 "s59E13H2" 0.1233918 "Aspartate--tRNA ligase"  
"JS1\_M21\_01372" 18870 "s59E25H2" 0 "Aspartate--tRNA ligase"  
"JS1\_M21\_01372" 18870 "s59E5H2" 0.1022098 "Aspartate--tRNA ligase"  
"JS1\_M21\_01372" 18870 "s63E6H2" 0.53205 "Aspartate--tRNA ligase"  
"JS1\_M21\_01373" 18871 "s59E13H2" 0.1179821 "Asparagine--tRNA ligase"  
"JS1\_M21\_01373" 18871 "s59E25H2" 0 "Asparagine--tRNA ligase"  
"JS1\_M21\_01373" 18871 "s59E5H2" 0.1067397 "Asparagine--tRNA ligase"  
"JS1\_M21\_01373" 18871 "s63E6H2" 0.6089844 "Asparagine--tRNA ligase"  
"JS1\_M21\_01374" 18872 "s59E13H2" 0.0959306 "Histidine--tRNA ligase"  
"JS1\_M21\_01374" 18872 "s59E25H2" 0 "Histidine--tRNA ligase"  
"JS1\_M21\_01374" 18872 "s59E5H2" 0.04957894 "Histidine--tRNA ligase"  
"JS1\_M21\_01374" 18872 "s63E6H2" 0.4947398 "Histidine--tRNA ligase"  
"JS1\_M21\_01375" 18873 "s59E13H2" 0.09815333 "Twitching mobility protein"  
"JS1\_M21\_01375" 18873 "s59E25H2" 0 "Twitching mobility protein"  
"JS1\_M21\_01375" 18873 "s59E5H2" 0.1268159 "Twitching mobility protein"  
"JS1\_M21\_01375" 18873 "s63E6H2" 0.4012044 "Twitching mobility protein"  
"JS1\_M21\_01376" 18874 "s59E13H2" 0.1366886 "bacteriophage N4 adsorption protein B"  
"JS1\_M21\_01376" 18874 "s59E25H2" 0 "bacteriophage N4 adsorption protein B"  
"JS1\_M21\_01376" 18874 "s59E5H2" 0.2309387 "bacteriophage N4 adsorption protein B"  
"JS1\_M21\_01376" 18874 "s63E6H2" 0.3681173 "bacteriophage N4 adsorption protein B"  
"JS1\_M21\_01378" 18876 "s59E13H2" 0.2442099 "Twitching mobility protein"  
"JS1\_M21\_01378" 18876 "s59E25H2" 0 "Twitching mobility protein"

"JS1\_M21\_01378" 18876 "s59E5H2" 0.1701547 "Twitching mobility protein"  
"JS1\_M21\_01378" 18876 "s63E6H2" 0.5423583 "Twitching mobility protein"  
"JS1\_M21\_01379" 18877 "s59E13H2" 0.275266 "S-adenosylmethionine synthase"  
"JS1\_M21\_01379" 18877 "s59E25H2" 0 "S-adenosylmethionine synthase"  
"JS1\_M21\_01379" 18877 "s59E5H2" 0.17023 "S-adenosylmethionine synthase"  
"JS1\_M21\_01379" 18877 "s63E6H2" 0.300455 "S-adenosylmethionine synthase"  
"JS1\_M21\_01380" 18878 "s59E13H2" 0.2513236 "Mannose-1-phosphate guanylyltransferase RfbM"  
"JS1\_M21\_01380" 18878 "s59E25H2" 0 "Mannose-1-phosphate guanylyltransferase RfbM"  
"JS1\_M21\_01380" 18878 "s59E5H2" 0.220799 "Mannose-1-phosphate guanylyltransferase RfbM"  
"JS1\_M21\_01380" 18878 "s63E6H2" 0.2131782 "Mannose-1-phosphate guanylyltransferase RfbM"  
"JS1\_M21\_01381" 18879 "s59E13H2" 0.07746775 "Riboflavin transporter RibU"  
"JS1\_M21\_01381" 18879 "s59E25H2" 0 "Riboflavin transporter RibU"  
"JS1\_M21\_01381" 18879 "s59E5H2" 0.151798 "Riboflavin transporter RibU"  
"JS1\_M21\_01381" 18879 "s63E6H2" 0.05516011 "Riboflavin transporter RibU"  
"JS1\_M21\_01383" 18881 "s59E13H2" 0.1943675 "Membrane-bound lytic murein transglycosylase C precursor"  
"JS1\_M21\_01383" 18881 "s59E25H2" 0 "Membrane-bound lytic murein transglycosylase C precursor"  
"JS1\_M21\_01383" 18881 "s59E5H2" 0.1764784 "Membrane-bound lytic murein transglycosylase C precursor"  
"JS1\_M21\_01383" 18881 "s63E6H2" 0.08218145 "Membrane-bound lytic murein transglycosylase C precursor"  
"JS1\_M21\_01384" 18882 "s59E13H2" 0.1229473 "Methionine--tRNA ligase"  
"JS1\_M21\_01384" 18882 "s59E25H2" 0 "Methionine--tRNA ligase"  
"JS1\_M21\_01384" 18882 "s59E5H2" 0.1419033 "Methionine--tRNA ligase"  
"JS1\_M21\_01384" 18882 "s63E6H2" 0.1365212 "Methionine--tRNA ligase"  
"JS1\_M21\_01385" 18883 "s59E13H2" 0.04908362 "Ribosomal RNA small subunit methyltransferase I"  
"JS1\_M21\_01385" 18883 "s59E25H2" 0 "Ribosomal RNA small subunit methyltransferase I"  
"JS1\_M21\_01385" 18883 "s59E5H2" 0.06524097 "Ribosomal RNA small subunit methyltransferase I"  
"JS1\_M21\_01385" 18883 "s63E6H2" 0.04681897 "Ribosomal RNA small subunit methyltransferase I"  
"JS1\_M21\_01386" 18884 "s59E13H2" 0.07016246 "Release factor glutamine methyltransferase"  
"JS1\_M21\_01386" 18884 "s59E25H2" 0 "Release factor glutamine methyltransferase"  
"JS1\_M21\_01386" 18884 "s59E5H2" 0.1552085 "Release factor glutamine methyltransferase"  
"JS1\_M21\_01386" 18884 "s63E6H2" 0.1068365 "Release factor glutamine methyltransferase"  
"JS1\_M21\_01387" 18885 "s59E13H2" 0.05575706 "hypothetical protein"  
"JS1\_M21\_01387" 18885 "s59E25H2" 0 "hypothetical protein"  
"JS1\_M21\_01387" 18885 "s59E5H2" 0.2901283 "hypothetical protein"  
"JS1\_M21\_01387" 18885 "s63E6H2" 0.1096025 "hypothetical protein"  
"JS1\_M21\_01388" 18886 "s59E13H2" 0.04534246 "DNA polymerase III subunit tau"  
"JS1\_M21\_01388" 18886 "s59E25H2" 0 "DNA polymerase III subunit tau"  
"JS1\_M21\_01388" 18886 "s59E5H2" 0.4268768 "DNA polymerase III subunit tau"  
"JS1\_M21\_01388" 18886 "s63E6H2" 0.07351236 "DNA polymerase III subunit tau"  
"JS1\_M21\_01389" 18887 "s59E13H2" 0.03870401 "Thymidylate kinase"  
"JS1\_M21\_01389" 18887 "s59E25H2" 0 "Thymidylate kinase"  
"JS1\_M21\_01389" 18887 "s59E5H2" 0.7264057 "Thymidylate kinase"  
"JS1\_M21\_01389" 18887 "s63E6H2" 0.09591768 "Thymidylate kinase"  
"JS1\_M21\_01390" 18888 "s59E13H2" 0.0260912 "inosine 5'-monophosphate dehydrogenase"  
"JS1\_M21\_01390" 18888 "s59E25H2" 0 "inosine 5'-monophosphate dehydrogenase"  
"JS1\_M21\_01390" 18888 "s59E5H2" 0.7616992 "inosine 5'-monophosphate dehydrogenase"  
"JS1\_M21\_01390" 18888 "s63E6H2" 0.1049015 "inosine 5'-monophosphate dehydrogenase"  
"JS1\_M21\_01391" 18889 "s59E13H2" 0.02503417 "Tagatose-6-phosphate kinase"

"JS1\_M21\_01391" 18889 "s59E25H2" 0 "Tagatose-6-phosphate kinase"  
"JS1\_M21\_01391" 18889 "s59E5H2" 0.6952627 "Tagatose-6-phosphate kinase"  
"JS1\_M21\_01391" 18889 "s63E6H2" 0.08925414 "Tagatose-6-phosphate kinase"  
"JS1\_M21\_01392" 18890 "s59E13H2" 0.01634307 "Rhomboid protease GluP"  
"JS1\_M21\_01392" 18890 "s59E25H2" 0 "Rhomboid protease GluP"  
"JS1\_M21\_01392" 18890 "s59E5H2" 0.6707094 "Rhomboid protease GluP"  
"JS1\_M21\_01392" 18890 "s63E6H2" 0.1517481 "Rhomboid protease GluP"  
"JS1\_M21\_01393" 18891 "s59E13H2" 0.04105583 "UDP-N-acetylglucosamine 2-epimerase"  
"JS1\_M21\_01393" 18891 "s59E25H2" 0 "UDP-N-acetylglucosamine 2-epimerase"  
"JS1\_M21\_01393" 18891 "s59E5H2" 1.777291 "UDP-N-acetylglucosamine 2-epimerase"  
"JS1\_M21\_01393" 18891 "s63E6H2" 0.08413841 "UDP-N-acetylglucosamine 2-epimerase"  
"JS1\_M21\_01394" 18892 "s59E13H2" 0.03689284 "tRNA-specific adenosine deaminase"  
"JS1\_M21\_01394" 18892 "s59E25H2" 0 "tRNA-specific adenosine deaminase"  
"JS1\_M21\_01394" 18892 "s59E5H2" 1.471982 "tRNA-specific adenosine deaminase"  
"JS1\_M21\_01394" 18892 "s63E6H2" 0.1036081 "tRNA-specific adenosine deaminase"  
"JS1\_M21\_01395" 18893 "s59E13H2" 0.031256 "Uracil phosphoribosyltransferase"  
"JS1\_M21\_01395" 18893 "s59E25H2" 0 "Uracil phosphoribosyltransferase"  
"JS1\_M21\_01395" 18893 "s59E5H2" 0.5748989 "Uracil phosphoribosyltransferase"  
"JS1\_M21\_01395" 18893 "s63E6H2" 0.1801593 "Uracil phosphoribosyltransferase"  
"JS1\_M21\_01396" 18894 "s59E13H2" 0.04546979 "Putative sugar phosphate isomerase YwIF"  
"JS1\_M21\_01396" 18894 "s59E25H2" 0 "Putative sugar phosphate isomerase YwIF"  
"JS1\_M21\_01396" 18894 "s59E5H2" 0.07551707 "Putative sugar phosphate isomerase YwIF"  
"JS1\_M21\_01396" 18894 "s63E6H2" 0.1246706 "Putative sugar phosphate isomerase YwIF"  
"JS1\_M21\_01397" 18895 "s59E13H2" 0.06435303 "Low molecular weight protein-tyrosine-phosphatase YwIE"  
"JS1\_M21\_01397" 18895 "s59E25H2" 0 "Low molecular weight protein-tyrosine-phosphatase YwIE"  
"JS1\_M21\_01397" 18895 "s59E5H2" 0.4504546 "Low molecular weight protein-tyrosine-phosphatase YwIE"  
"JS1\_M21\_01397" 18895 "s63E6H2" 0.1140108 "Low molecular weight protein-tyrosine-phosphatase YwIE"  
"JS1\_M21\_01398" 18896 "s59E13H2" 0.03151372 "Release factor glutamine methyltransferase"  
"JS1\_M21\_01398" 18896 "s59E25H2" 0 "Release factor glutamine methyltransferase"  
"JS1\_M21\_01398" 18896 "s59E5H2" 0.1629528 "Release factor glutamine methyltransferase"  
"JS1\_M21\_01398" 18896 "s63E6H2" 0.08119718 "Release factor glutamine methyltransferase"  
"JS1\_M21\_01399" 18897 "s59E13H2" 0.4366331 "Peptide chain release factor 1"  
"JS1\_M21\_01399" 18897 "s59E25H2" 0 "Peptide chain release factor 1"  
"JS1\_M21\_01399" 18897 "s59E5H2" 0.07197681 "Peptide chain release factor 1"  
"JS1\_M21\_01399" 18897 "s63E6H2" 0.1357708 "Peptide chain release factor 1"  
"JS1\_M21\_01402" 18900 "s59E13H2" 1.302522 "Lactose transport system permease protein LacF"  
"JS1\_M21\_01402" 18900 "s59E25H2" 0 "Lactose transport system permease protein LacF"  
"JS1\_M21\_01402" 18900 "s59E5H2" 0.05155923 "Lactose transport system permease protein LacF"  
"JS1\_M21\_01402" 18900 "s63E6H2" 0.01808519 "Lactose transport system permease protein LacF"  
"JS1\_M21\_01404" 18902 "s59E13H2" 0.4110718 "lipoprotein Nlpl"  
"JS1\_M21\_01404" 18902 "s59E25H2" 0 "lipoprotein Nlpl"  
"JS1\_M21\_01404" 18902 "s59E5H2" 0.09234586 "lipoprotein Nlpl"  
"JS1\_M21\_01404" 18902 "s63E6H2" 0.1025472 "lipoprotein Nlpl"  
"JS1\_M21\_01406" 18904 "s59E13H2" 2.752608 "Diaminopimelate epimerase"  
"JS1\_M21\_01406" 18904 "s59E25H2" 0 "Diaminopimelate epimerase"  
"JS1\_M21\_01406" 18904 "s59E5H2" 2.148955 "Diaminopimelate epimerase"  
"JS1\_M21\_01406" 18904 "s63E6H2" 1.13634 "Diaminopimelate epimerase"

"JS1\_M21\_01409" 18907 "s59E13H2" 3.306414 "phage T7 F exclusion suppressor FxsA"  
"JS1\_M21\_01409" 18907 "s59E25H2" 0 "phage T7 F exclusion suppressor FxsA"  
"JS1\_M21\_01409" 18907 "s59E5H2" 0.1628714 "phage T7 F exclusion suppressor FxsA"  
"JS1\_M21\_01409" 18907 "s63E6H2" 0.1054922 "phage T7 F exclusion suppressor FxsA"  
"JS1\_M21\_01410" 18908 "s59E13H2" 4.769075 "Holo-[acyl-carrier-protein] synthase"  
"JS1\_M21\_01410" 18908 "s59E25H2" 0.6282051 "Holo-[acyl-carrier-protein] synthase"  
"JS1\_M21\_01410" 18908 "s59E5H2" 0.4452823 "Holo-[acyl-carrier-protein] synthase"  
"JS1\_M21\_01410" 18908 "s63E6H2" 0.1951296 "Holo-[acyl-carrier-protein] synthase"  
"JS1\_M21\_01411" 18909 "s59E13H2" 5.048384 "Bifunctional NAD(P)H-hydrate repair enzyme Nnr"  
"JS1\_M21\_01411" 18909 "s59E25H2" 0.3877315 "Bifunctional NAD(P)H-hydrate repair enzyme Nnr"  
"JS1\_M21\_01411" 18909 "s59E5H2" 0.5014567 "Bifunctional NAD(P)H-hydrate repair enzyme Nnr"  
"JS1\_M21\_01411" 18909 "s63E6H2" 0.2239627 "Bifunctional NAD(P)H-hydrate repair enzyme Nnr"  
"JS1\_M21\_01412" 18910 "s59E13H2" 1.024994 "Alanine racemase"  
"JS1\_M21\_01412" 18910 "s59E25H2" 0 "Alanine racemase"  
"JS1\_M21\_01412" 18910 "s59E5H2" 0.2410948 "Alanine racemase"  
"JS1\_M21\_01412" 18910 "s63E6H2" 0.004997614 "Alanine racemase"  
"JS1\_M21\_01414" 18912 "s59E13H2" 0.7975207 "Ribose transport system permease protein RbsC"  
"JS1\_M21\_01414" 18912 "s59E25H2" 0 "Ribose transport system permease protein RbsC"  
"JS1\_M21\_01414" 18912 "s59E5H2" 0.4973483 "Ribose transport system permease protein RbsC"  
"JS1\_M21\_01414" 18912 "s63E6H2" 0.575294 "Ribose transport system permease protein RbsC"  
"JS1\_M21\_01415" 18913 "s59E13H2" 0.8401261 "Ribose transport system permease protein RbsC"  
"JS1\_M21\_01415" 18913 "s59E25H2" 0 "Ribose transport system permease protein RbsC"  
"JS1\_M21\_01415" 18913 "s59E5H2" 1.510813 "Ribose transport system permease protein RbsC"  
"JS1\_M21\_01415" 18913 "s63E6H2" 0.852626 "Ribose transport system permease protein RbsC"  
"JS1\_M21\_01417" 18915 "s59E13H2" 0 "hypothetical protein"  
"JS1\_M21\_01417" 18915 "s59E25H2" 0 "hypothetical protein"  
"JS1\_M21\_01417" 18915 "s59E5H2" 0.002436189 "hypothetical protein"  
"JS1\_M21\_01417" 18915 "s63E6H2" 0.001611178 "hypothetical protein"  
"JS1\_M21\_01421" 18919 "s59E13H2" 0.6173676 "Aldo/keto reductase family protein"  
"JS1\_M21\_01421" 18919 "s59E25H2" 0 "Aldo/keto reductase family protein"  
"JS1\_M21\_01421" 18919 "s59E5H2" 0.06369827 "Aldo/keto reductase family protein"  
"JS1\_M21\_01421" 18919 "s63E6H2" 0.1676259 "Aldo/keto reductase family protein"  
"JS1\_M21\_01422" 18920 "s59E13H2" 0.005210956 "putative 2-phosphosulfolactate phosphatase"  
"JS1\_M21\_01422" 18920 "s59E25H2" 0 "putative 2-phosphosulfolactate phosphatase"  
"JS1\_M21\_01422" 18920 "s59E5H2" 0.05585825 "putative 2-phosphosulfolactate phosphatase"  
"JS1\_M21\_01422" 18920 "s63E6H2" 0.005637889 "putative 2-phosphosulfolactate phosphatase"  
"JS1\_M21\_01423" 18921 "s59E13H2" 0.4684796 "Dihydroorotate dehydrogenase B (NAD(+) ), catalytic subunit"  
"JS1\_M21\_01423" 18921 "s59E25H2" 0 "Dihydroorotate dehydrogenase B (NAD(+) ), catalytic subunit"  
"JS1\_M21\_01423" 18921 "s59E5H2" 0.1644131 "Dihydroorotate dehydrogenase B (NAD(+) ), catalytic subunit"  
"JS1\_M21\_01423" 18921 "s63E6H2" 0.2839452 "Dihydroorotate dehydrogenase B (NAD(+) ), catalytic subunit"  
"JS1\_M21\_01424" 18922 "s59E13H2" 0.04380026 "Dihydroorotate dehydrogenase B (NAD(+) ), electron transfer subunit"  
"JS1\_M21\_01424" 18922 "s59E25H2" 0 "Dihydroorotate dehydrogenase B (NAD(+) ), electron transfer subunit"  
"JS1\_M21\_01424" 18922 "s59E5H2" 0.0510032 "Dihydroorotate dehydrogenase B (NAD(+) ), electron transfer subunit"  
"JS1\_M21\_01424" 18922 "s63E6H2" 0.190363 "Dihydroorotate dehydrogenase B (NAD(+) ), electron transfer subunit"  
"JS1\_M21\_01425" 18923 "s59E13H2" 0.001927091 "Aspartate carbamoyltransferase"  
"JS1\_M21\_01425" 18923 "s59E25H2" 0 "Aspartate carbamoyltransferase"  
"JS1\_M21\_01425" 18923 "s59E5H2" 0.02435269 "Aspartate carbamoyltransferase"



"JS1\_M21\_01425" 18923 "s63E6H2" 0.212683 "Aspartate carbamoyltransferase"  
"JS1\_M21\_01426" 18924 "s59E13H2" 0.1232195 "Carbamate kinase"  
"JS1\_M21\_01426" 18924 "s59E25H2" 0 "Carbamate kinase"  
"JS1\_M21\_01426" 18924 "s59E5H2" 0.02701955 "Carbamate kinase"  
"JS1\_M21\_01426" 18924 "s63E6H2" 0.03032116 "Carbamate kinase"  
"JS1\_M21\_01427" 18925 "s59E13H2" 0.03166578 "Pectin degradation repressor protein KdgR"  
"JS1\_M21\_01427" 18925 "s59E25H2" 0 "Pectin degradation repressor protein KdgR"  
"JS1\_M21\_01427" 18925 "s59E5H2" 0.7903427 "Pectin degradation repressor protein KdgR"  
"JS1\_M21\_01427" 18925 "s63E6H2" 0.1624885 "Pectin degradation repressor protein KdgR"  
"JS1\_M21\_01428" 18926 "s59E13H2" 0.2515309 "Sulfate/thiosulfate import ATP-binding protein CysA"  
"JS1\_M21\_01428" 18926 "s59E25H2" 0 "Sulfate/thiosulfate import ATP-binding protein CysA"  
"JS1\_M21\_01428" 18926 "s59E5H2" 1.374733 "Sulfate/thiosulfate import ATP-binding protein CysA"  
"JS1\_M21\_01428" 18926 "s63E6H2" 1.178164 "Sulfate/thiosulfate import ATP-binding protein CysA"  
"JS1\_M21\_01429" 18927 "s59E13H2" 0.3316595 "Bicarbonate transport system permease protein CmpB"  
"JS1\_M21\_01429" 18927 "s59E25H2" 0 "Bicarbonate transport system permease protein CmpB"  
"JS1\_M21\_01429" 18927 "s59E5H2" 1.785907 "Bicarbonate transport system permease protein CmpB"  
"JS1\_M21\_01429" 18927 "s63E6H2" 2.955444 "Bicarbonate transport system permease protein CmpB"  
"JS1\_M21\_01430" 18928 "s59E13H2" 0.123517 "Putative aliphatic sulfonates-binding protein precursor"  
"JS1\_M21\_01430" 18928 "s59E25H2" 0 "Putative aliphatic sulfonates-binding protein precursor"  
"JS1\_M21\_01430" 18928 "s59E5H2" 0.5135002 "Putative aliphatic sulfonates-binding protein precursor"  
"JS1\_M21\_01430" 18928 "s63E6H2" 1.826567 "Putative aliphatic sulfonates-binding protein precursor"  
"JS1\_M21\_01431" 18929 "s59E13H2" 0.01318305 "hypothetical protein"  
"JS1\_M21\_01431" 18929 "s59E25H2" 0 "hypothetical protein"  
"JS1\_M21\_01431" 18929 "s59E5H2" 0.01105345 "hypothetical protein"  
"JS1\_M21\_01431" 18929 "s63E6H2" 1.167274 "hypothetical protein"  
"JS1\_M21\_01432" 18930 "s59E13H2" 0.001634761 "bifunctional molybdenum cofactor biosynthesis protein MoaC/MogA"  
"JS1\_M21\_01432" 18930 "s59E25H2" 0 "bifunctional molybdenum cofactor biosynthesis protein MoaC/MogA"  
"JS1\_M21\_01432" 18930 "s59E5H2" 0 "bifunctional molybdenum cofactor biosynthesis protein MoaC/MogA"  
"JS1\_M21\_01432" 18930 "s63E6H2" 0.6433125 "bifunctional molybdenum cofactor biosynthesis protein MoaC/MogA"  
"JS1\_N06\_00001" 18931 "s59E13H2" 0 "Chromosome partition protein Smc"  
"JS1\_N06\_00001" 18931 "s59E25H2" 0 "Chromosome partition protein Smc"  
"JS1\_N06\_00001" 18931 "s59E5H2" 0 "Chromosome partition protein Smc"  
"JS1\_N06\_00001" 18931 "s63E6H2" 0 "Chromosome partition protein Smc"  
"JS1\_N06\_00002" 18932 "s59E13H2" 0 "Transcription elongation factor GreA"  
"JS1\_N06\_00002" 18932 "s59E25H2" 0 "Transcription elongation factor GreA"  
"JS1\_N06\_00002" 18932 "s59E5H2" 0 "Transcription elongation factor GreA"  
"JS1\_N06\_00002" 18932 "s63E6H2" 0.01346678 "Transcription elongation factor GreA"  
"JS1\_N06\_00003" 18933 "s59E13H2" 0 "50S ribosomal protein L10"  
"JS1\_N06\_00003" 18933 "s59E25H2" 0 "50S ribosomal protein L10"  
"JS1\_N06\_00003" 18933 "s59E5H2" 0 "50S ribosomal protein L10"  
"JS1\_N06\_00003" 18933 "s63E6H2" 0 "50S ribosomal protein L10"  
"JS1\_N06\_00004" 18934 "s59E13H2" 0 "50S ribosomal protein L7/L12"  
"JS1\_N06\_00004" 18934 "s59E25H2" 0 "50S ribosomal protein L7/L12"  
"JS1\_N06\_00004" 18934 "s59E5H2" 0 "50S ribosomal protein L7/L12"  
"JS1\_N06\_00004" 18934 "s63E6H2" 0.006104941 "50S ribosomal protein L7/L12"  
"JS1\_N06\_00005" 18935 "s59E13H2" 0.0292978 "4-hydroxy-3-methylbut-2-enyl diphosphate reductase"  
"JS1\_N06\_00005" 18935 "s59E25H2" 0 "4-hydroxy-3-methylbut-2-enyl diphosphate reductase"

"JS1\_N06\_00005" 18935 "s59E5H2" 0.01166753 "4-hydroxy-3-methylbut-2-enyl diphosphate reductase"  
"JS1\_N06\_00005" 18935 "s63E6H2" 0 "4-hydroxy-3-methylbut-2-enyl diphosphate reductase"  
"JS1\_N06\_00006" 18936 "s59E13H2" 0.02244927 "50S ribosomal protein L28"  
"JS1\_N06\_00006" 18936 "s59E25H2" 0 "50S ribosomal protein L28"  
"JS1\_N06\_00006" 18936 "s59E5H2" 0.005575464 "50S ribosomal protein L28"  
"JS1\_N06\_00006" 18936 "s63E6H2" 0.004535343 "50S ribosomal protein L28"  
"JS1\_N06\_00007" 18937 "s59E13H2" 0 "Ribulose-phosphate 3-epimerase"  
"JS1\_N06\_00007" 18937 "s59E25H2" 0 "Ribulose-phosphate 3-epimerase"  
"JS1\_N06\_00007" 18937 "s59E5H2" 0 "Ribulose-phosphate 3-epimerase"  
"JS1\_N06\_00007" 18937 "s63E6H2" 0 "Ribulose-phosphate 3-epimerase"  
"JS1\_N06\_00008" 18938 "s59E13H2" 0 "Competence protein ComM"  
"JS1\_N06\_00008" 18938 "s59E25H2" 0 "Competence protein ComM"  
"JS1\_N06\_00008" 18938 "s59E5H2" 0 "Competence protein ComM"  
"JS1\_N06\_00008" 18938 "s63E6H2" 0 "Competence protein ComM"  
"JS1\_N06\_00009" 18939 "s59E13H2" 0.06813982 "Glucokinase"  
"JS1\_N06\_00009" 18939 "s59E25H2" 0 "Glucokinase"  
"JS1\_N06\_00009" 18939 "s59E5H2" 0.3276323 "Glucokinase"  
"JS1\_N06\_00009" 18939 "s63E6H2" 0.1576429 "Glucokinase"  
"JS1\_N06\_00010" 18940 "s59E13H2" 0 "colicin V production protein"  
"JS1\_N06\_00010" 18940 "s59E25H2" 0 "colicin V production protein"  
"JS1\_N06\_00010" 18940 "s59E5H2" 0 "colicin V production protein"  
"JS1\_N06\_00010" 18940 "s63E6H2" 0.00374449 "colicin V production protein"  
"JS1\_N06\_00011" 18941 "s59E13H2" 0 "Signal recognition particle receptor FtsY"  
"JS1\_N06\_00011" 18941 "s59E25H2" 0 "Signal recognition particle receptor FtsY"  
"JS1\_N06\_00011" 18941 "s59E5H2" 0 "Signal recognition particle receptor FtsY"  
"JS1\_N06\_00011" 18941 "s63E6H2" 0.01085633 "Signal recognition particle receptor FtsY"  
"JS1\_N06\_00013" 18943 "s59E13H2" 0 "Competence protein ComM"  
"JS1\_N06\_00013" 18943 "s59E25H2" 0 "Competence protein ComM"  
"JS1\_N06\_00013" 18943 "s59E5H2" 0 "Competence protein ComM"  
"JS1\_N06\_00013" 18943 "s63E6H2" 0 "Competence protein ComM"  
"JS1\_N06\_00016" 18946 "s59E13H2" 0.04019377 "short chain dehydrogenase"  
"JS1\_N06\_00016" 18946 "s59E25H2" 0 "short chain dehydrogenase"  
"JS1\_N06\_00016" 18946 "s59E5H2" 0.09178398 "short chain dehydrogenase"  
"JS1\_N06\_00016" 18946 "s63E6H2" 1.200064 "short chain dehydrogenase"  
"JS1\_N06\_00017" 18947 "s59E13H2" 0.2043717 "Rhamnulokinase"  
"JS1\_N06\_00017" 18947 "s59E25H2" 0 "Rhamnulokinase"  
"JS1\_N06\_00017" 18947 "s59E5H2" 0.4924825 "Rhamnulokinase"  
"JS1\_N06\_00017" 18947 "s63E6H2" 0.685359 "Rhamnulokinase"  
"JS1\_N06\_00018" 18948 "s59E13H2" 0.1304145 "Dihydrolipoyllysine-residue acetyltransferase component of pyruvate dehydrogenase complex"  
"JS1\_N06\_00018" 18948 "s59E25H2" 0 "Dihydrolipoyllysine-residue acetyltransferase component of pyruvate dehydrogenase complex"  
"JS1\_N06\_00018" 18948 "s59E5H2" 0.2240646 "Dihydrolipoyllysine-residue acetyltransferase component of pyruvate dehydrogenase complex"  
"JS1\_N06\_00018" 18948 "s63E6H2" 0.2166105 "Dihydrolipoyllysine-residue acetyltransferase component of pyruvate dehydrogenase complex"  
"JS1\_N06\_00019" 18949 "s59E13H2" 0.05694131 "Pyruvate dehydrogenase E1 component subunit beta"  
"JS1\_N06\_00019" 18949 "s59E25H2" 0 "Pyruvate dehydrogenase E1 component subunit beta"  
"JS1\_N06\_00019" 18949 "s59E5H2" 0.8159905 "Pyruvate dehydrogenase E1 component subunit beta"  
"JS1\_N06\_00019" 18949 "s63E6H2" 0.3087176 "Pyruvate dehydrogenase E1 component subunit beta"  
"JS1\_N06\_00020" 18950 "s59E13H2" 0.08534927 "hypothetical protein"

"JS1\_N06\_00020" 18950 "s59E25H2" 0 "hypothetical protein"  
"JS1\_N06\_00020" 18950 "s59E5H2" 0.7436566 "hypothetical protein"  
"JS1\_N06\_00020" 18950 "s63E6H2" 0.3659015 "hypothetical protein"  
"JS1\_N06\_00021" 18951 "s59E13H2" 0.3696581 "Sorbitol-6-phosphate 2-dehydrogenase"  
"JS1\_N06\_00021" 18951 "s59E25H2" 0 "Sorbitol-6-phosphate 2-dehydrogenase"  
"JS1\_N06\_00021" 18951 "s59E5H2" 0.667776 "Sorbitol-6-phosphate 2-dehydrogenase"  
"JS1\_N06\_00021" 18951 "s63E6H2" 0.3092792 "Sorbitol-6-phosphate 2-dehydrogenase"  
"JS1\_N06\_00022" 18952 "s59E13H2" 0.6662315 "Sorbitol dehydrogenase"  
"JS1\_N06\_00022" 18952 "s59E25H2" 0 "Sorbitol dehydrogenase"  
"JS1\_N06\_00022" 18952 "s59E5H2" 0.5058291 "Sorbitol dehydrogenase"  
"JS1\_N06\_00022" 18952 "s63E6H2" 0.6731685 "Sorbitol dehydrogenase"  
"JS1\_N06\_00023" 18953 "s59E13H2" 1.012667 "D-ribose-binding periplasmic protein precursor"  
"JS1\_N06\_00023" 18953 "s59E25H2" 0 "D-ribose-binding periplasmic protein precursor"  
"JS1\_N06\_00023" 18953 "s59E5H2" 1.203064 "D-ribose-binding periplasmic protein precursor"  
"JS1\_N06\_00023" 18953 "s63E6H2" 0.8639241 "D-ribose-binding periplasmic protein precursor"  
"JS1\_N06\_00024" 18954 "s59E13H2" 0.6198038 "Mannitol-1-phosphate 5-dehydrogenase"  
"JS1\_N06\_00024" 18954 "s59E25H2" 0 "Mannitol-1-phosphate 5-dehydrogenase"  
"JS1\_N06\_00024" 18954 "s59E5H2" 0.2498721 "Mannitol-1-phosphate 5-dehydrogenase"  
"JS1\_N06\_00024" 18954 "s63E6H2" 0.5473013 "Mannitol-1-phosphate 5-dehydrogenase"  
"JS1\_N06\_00025" 18955 "s59E13H2" 0.6823642 "Xylose import ATP-binding protein XylG"  
"JS1\_N06\_00025" 18955 "s59E25H2" 0 "Xylose import ATP-binding protein XylG"  
"JS1\_N06\_00025" 18955 "s59E5H2" 0.358682 "Xylose import ATP-binding protein XylG"  
"JS1\_N06\_00025" 18955 "s63E6H2" 0.8540267 "Xylose import ATP-binding protein XylG"  
"JS1\_N06\_00026" 18956 "s59E13H2" 0.7586182 "Ribose transport system permease protein RbsC"  
"JS1\_N06\_00026" 18956 "s59E25H2" 0 "Ribose transport system permease protein RbsC"  
"JS1\_N06\_00026" 18956 "s59E5H2" 1.640374 "Ribose transport system permease protein RbsC"  
"JS1\_N06\_00026" 18956 "s63E6H2" 0.7502318 "Ribose transport system permease protein RbsC"  
"JS1\_N06\_00027" 18957 "s59E13H2" 0 "hypothetical protein"  
"JS1\_N06\_00027" 18957 "s59E25H2" 0 "hypothetical protein"  
"JS1\_N06\_00027" 18957 "s59E5H2" 0 "hypothetical protein"  
"JS1\_N06\_00027" 18957 "s63E6H2" 0 "hypothetical protein"  
"JS1\_N06\_00028" 18958 "s59E13H2" 0 "V-type sodium ATPase subunit K"  
"JS1\_N06\_00028" 18958 "s59E25H2" 0 "V-type sodium ATPase subunit K"  
"JS1\_N06\_00028" 18958 "s59E5H2" 0.003500647 "V-type sodium ATPase subunit K"  
"JS1\_N06\_00028" 18958 "s63E6H2" 0 "V-type sodium ATPase subunit K"  
"JS1\_N06\_00029" 18959 "s59E13H2" 0 "V-type ATP synthase subunit I"  
"JS1\_N06\_00029" 18959 "s59E25H2" 0 "V-type ATP synthase subunit I"  
"JS1\_N06\_00029" 18959 "s59E5H2" 0 "V-type ATP synthase subunit I"  
"JS1\_N06\_00029" 18959 "s63E6H2" 0 "V-type ATP synthase subunit I"  
"JS1\_N06\_00032" 18962 "s59E13H2" 0 "hypothetical protein"  
"JS1\_N06\_00032" 18962 "s59E25H2" 0 "hypothetical protein"  
"JS1\_N06\_00032" 18962 "s59E5H2" 0 "hypothetical protein"  
"JS1\_N06\_00032" 18962 "s63E6H2" 0 "hypothetical protein"  
"JS1\_N06\_00034" 18964 "s59E13H2" 0 "hypothetical protein"  
"JS1\_N06\_00034" 18964 "s59E25H2" 0 "hypothetical protein"  
"JS1\_N06\_00034" 18964 "s59E5H2" 0 "hypothetical protein"  
"JS1\_N06\_00034" 18964 "s63E6H2" 0 "hypothetical protein"

"JS1\_N06\_00035" 18965 "s59E13H2" 0.009551792 "Phosphate acetyltransferase"  
"JS1\_N06\_00035" 18965 "s59E25H2" 0 "Phosphate acetyltransferase"  
"JS1\_N06\_00035" 18965 "s59E5H2" 0 "Phosphate acetyltransferase"  
"JS1\_N06\_00035" 18965 "s63E6H2" 0.006230968 "Phosphate acetyltransferase"  
"JS1\_N06\_00036" 18966 "s59E13H2" 0 "Ribulose-phosphate 3-epimerase"  
"JS1\_N06\_00036" 18966 "s59E25H2" 0 "Ribulose-phosphate 3-epimerase"  
"JS1\_N06\_00036" 18966 "s59E5H2" 0 "Ribulose-phosphate 3-epimerase"  
"JS1\_N06\_00036" 18966 "s63E6H2" 0 "Ribulose-phosphate 3-epimerase"  
"JS1\_N06\_00037" 18967 "s59E13H2" 0.005759329 "Membrane-bound hydrogenase subunit beta"  
"JS1\_N06\_00037" 18967 "s59E25H2" 0 "Membrane-bound hydrogenase subunit beta"  
"JS1\_N06\_00037" 18967 "s59E5H2" 0.01928736 "Membrane-bound hydrogenase subunit beta"  
"JS1\_N06\_00037" 18967 "s63E6H2" 0.2018777 "Membrane-bound hydrogenase subunit beta"  
"JS1\_N06\_00038" 18968 "s59E13H2" 0 "GTPase Der"  
"JS1\_N06\_00038" 18968 "s59E25H2" 0 "GTPase Der"  
"JS1\_N06\_00038" 18968 "s59E5H2" 0 "GTPase Der"  
"JS1\_N06\_00038" 18968 "s63E6H2" 0.003012586 "GTPase Der"  
"JS1\_N06\_00039" 18969 "s59E13H2" 0.03822603 "Purine nucleoside phosphorylase DeoD-type"  
"JS1\_N06\_00039" 18969 "s59E25H2" 0 "Purine nucleoside phosphorylase DeoD-type"  
"JS1\_N06\_00039" 18969 "s59E5H2" 0.9690783 "Purine nucleoside phosphorylase DeoD-type"  
"JS1\_N06\_00039" 18969 "s63E6H2" 0.06800664 "Purine nucleoside phosphorylase DeoD-type"  
"JS1\_N06\_00040" 18970 "s59E13H2" 0 "7,8-dihydropterin-6-methyl-4-(beta-D-ribofuranosyl)-aminobenzene-5'-phosphate synthase"  
"JS1\_N06\_00040" 18970 "s59E25H2" 0 "7,8-dihydropterin-6-methyl-4-(beta-D-ribofuranosyl)-aminobenzene-5'-phosphate synthase"  
"JS1\_N06\_00040" 18970 "s59E5H2" 2.061019 "7,8-dihydropterin-6-methyl-4-(beta-D-ribofuranosyl)-aminobenzene-5'-phosphate synthase"  
"JS1\_N06\_00040" 18970 "s63E6H2" 0.03609962 "7,8-dihydropterin-6-methyl-4-(beta-D-ribofuranosyl)-aminobenzene-5'-phosphate synthase"  
"JS1\_N06\_00041" 18971 "s59E13H2" 0.0008637664 "Acytransferase family protein"  
"JS1\_N06\_00041" 18971 "s59E25H2" 0 "Acytransferase family protein"  
"JS1\_N06\_00041" 18971 "s59E5H2" 0.4129224 "Acytransferase family protein"  
"JS1\_N06\_00041" 18971 "s63E6H2" 0.03793795 "Acytransferase family protein"  
"JS1\_N06\_00042" 18972 "s59E13H2" 0.01935233 "UDP-N-acetylmuramoylalanine--D-glutamate ligase"  
"JS1\_N06\_00042" 18972 "s59E25H2" 0 "UDP-N-acetylmuramoylalanine--D-glutamate ligase"  
"JS1\_N06\_00042" 18972 "s59E5H2" 0.6634853 "UDP-N-acetylmuramoylalanine--D-glutamate ligase"  
"JS1\_N06\_00042" 18972 "s63E6H2" 0.1056934 "UDP-N-acetylmuramoylalanine--D-glutamate ligase"  
"JS1\_N06\_00044" 18974 "s59E13H2" 0.009198847 "tRNA-specific adenosine deaminase"  
"JS1\_N06\_00044" 18974 "s59E25H2" 0 "tRNA-specific adenosine deaminase"  
"JS1\_N06\_00044" 18974 "s59E5H2" 0.8219208 "tRNA-specific adenosine deaminase"  
"JS1\_N06\_00044" 18974 "s63E6H2" 0.1755757 "tRNA-specific adenosine deaminase"  
"JS1\_N06\_00050" 18980 "s59E13H2" 0 "hypothetical protein"  
"JS1\_N06\_00050" 18980 "s59E25H2" 0 "hypothetical protein"  
"JS1\_N06\_00050" 18980 "s59E5H2" 0 "hypothetical protein"  
"JS1\_N06\_00050" 18980 "s63E6H2" 0.003039645 "hypothetical protein"  
"JS1\_N06\_00051" 18981 "s59E13H2" 0 "Chromosome partition protein Smc"  
"JS1\_N06\_00051" 18981 "s59E25H2" 0 "Chromosome partition protein Smc"  
"JS1\_N06\_00051" 18981 "s59E5H2" 0 "Chromosome partition protein Smc"  
"JS1\_N06\_00051" 18981 "s63E6H2" 0.008386407 "Chromosome partition protein Smc"  
"JS1\_N06\_00052" 18982 "s59E13H2" 0 "Signal recognition particle receptor FtsY"  
"JS1\_N06\_00052" 18982 "s59E25H2" 0 "Signal recognition particle receptor FtsY"  
"JS1\_N06\_00052" 18982 "s59E5H2" 0 "Signal recognition particle receptor FtsY"

"JS1\_N06\_00052" 18982 "s63E6H2" 0.004699733 "Signal recognition particle receptor FtsY"  
"JS1\_N06\_00053" 18983 "s59E13H2" 0.005584538 "V-type ATP synthase alpha chain"  
"JS1\_N06\_00053" 18983 "s59E25H2" 0 "V-type ATP synthase alpha chain"  
"JS1\_N06\_00053" 18983 "s59E5H2" 0.03221562 "V-type ATP synthase alpha chain"  
"JS1\_N06\_00053" 18983 "s63E6H2" 0.02499913 "V-type ATP synthase alpha chain"  
"JS1\_N06\_00054" 18984 "s59E13H2" 0.004474358 "V-type sodium ATPase catalytic subunit A"  
"JS1\_N06\_00054" 18984 "s59E25H2" 0 "V-type sodium ATPase catalytic subunit A"  
"JS1\_N06\_00054" 18984 "s59E5H2" 0.01659095 "V-type sodium ATPase catalytic subunit A"  
"JS1\_N06\_00054" 18984 "s63E6H2" 0.01667361 "V-type sodium ATPase catalytic subunit A"  
"JS1\_N06\_00055" 18985 "s59E13H2" 0.05213429 "4-hydroxy-3-methylbut-2-enyl diphosphate reductase"  
"JS1\_N06\_00055" 18985 "s59E25H2" 0 "4-hydroxy-3-methylbut-2-enyl diphosphate reductase"  
"JS1\_N06\_00055" 18985 "s59E5H2" 0.00939976 "4-hydroxy-3-methylbut-2-enyl diphosphate reductase"  
"JS1\_N06\_00055" 18985 "s63E6H2" 0.03574793 "4-hydroxy-3-methylbut-2-enyl diphosphate reductase"  
"JS1\_N06\_00057" 18987 "s59E13H2" 0 "Pyrimidine-nucleoside phosphorylase"  
"JS1\_N06\_00057" 18987 "s59E25H2" 0 "Pyrimidine-nucleoside phosphorylase"  
"JS1\_N06\_00057" 18987 "s59E5H2" 0 "Pyrimidine-nucleoside phosphorylase"  
"JS1\_N06\_00057" 18987 "s63E6H2" 0 "Pyrimidine-nucleoside phosphorylase"  
"JS1\_N06\_00058" 18988 "s59E13H2" 0.001954943 "Multifunctional CCA protein"  
"JS1\_N06\_00058" 18988 "s59E25H2" 0 "Multifunctional CCA protein"  
"JS1\_N06\_00058" 18988 "s59E5H2" 0.01506954 "Multifunctional CCA protein"  
"JS1\_N06\_00058" 18988 "s63E6H2" 0.0258508 "Multifunctional CCA protein"  
"JS1\_N06\_00059" 18989 "s59E13H2" 0 "Peptidase family M50"  
"JS1\_N06\_00059" 18989 "s59E25H2" 0 "Peptidase family M50"  
"JS1\_N06\_00059" 18989 "s59E5H2" 0.02154059 "Peptidase family M50"  
"JS1\_N06\_00059" 18989 "s63E6H2" 0.006792293 "Peptidase family M50"  
"JS1\_N06\_00060" 18990 "s59E13H2" 0 "Tryptophan--tRNA ligase"  
"JS1\_N06\_00060" 18990 "s59E25H2" 0 "Tryptophan--tRNA ligase"  
"JS1\_N06\_00060" 18990 "s59E5H2" 0.04449603 "Tryptophan--tRNA ligase"  
"JS1\_N06\_00060" 18990 "s63E6H2" 0.01911866 "Tryptophan--tRNA ligase"  
"JS1\_N06\_00061" 18991 "s59E13H2" 0 "Segregation and condensation protein A"  
"JS1\_N06\_00061" 18991 "s59E25H2" 0 "Segregation and condensation protein A"  
"JS1\_N06\_00061" 18991 "s59E5H2" 0.002959285 "Segregation and condensation protein A"  
"JS1\_N06\_00061" 18991 "s63E6H2" 0.01588978 "Segregation and condensation protein A"  
"JS1\_N06\_00062" 18992 "s59E13H2" 0.001215815 "Segregation and condensation protein B"  
"JS1\_N06\_00062" 18992 "s59E25H2" 0 "Segregation and condensation protein B"  
"JS1\_N06\_00062" 18992 "s59E5H2" 0.04501062 "Segregation and condensation protein B"  
"JS1\_N06\_00062" 18992 "s63E6H2" 0.04198664 "Segregation and condensation protein B"  
"JS1\_N06\_00063" 18993 "s59E13H2" 1.005093 "Ribosomal large subunit pseudouridine synthase B"  
"JS1\_N06\_00063" 18993 "s59E25H2" 0 "Ribosomal large subunit pseudouridine synthase B"  
"JS1\_N06\_00063" 18993 "s59E5H2" 0.006475761 "Ribosomal large subunit pseudouridine synthase B"  
"JS1\_N06\_00063" 18993 "s63E6H2" 0.05385112 "Ribosomal large subunit pseudouridine synthase B"  
"JS1\_N06\_00064" 18994 "s59E13H2" 1.203161 "Cytidylate kinase"  
"JS1\_N06\_00064" 18994 "s59E25H2" 0.1082982 "Cytidylate kinase"  
"JS1\_N06\_00064" 18994 "s59E5H2" 0.005723129 "Cytidylate kinase"  
"JS1\_N06\_00064" 18994 "s63E6H2" 0.04388888 "Cytidylate kinase"  
"JS1\_N06\_00065" 18995 "s59E13H2" 2.28556 "4-hydroxy-3-methylbut-2-enyl diphosphate reductase"  
"JS1\_N06\_00065" 18995 "s59E25H2" 0 "4-hydroxy-3-methylbut-2-enyl diphosphate reductase"

"JS1\_N06\_00065" 18995 "s59E5H2" 0 "4-hydroxy-3-methylbut-2-enyl diphosphate reductase"  
"JS1\_N06\_00065" 18995 "s63E6H2" 0.07804735 "4-hydroxy-3-methylbut-2-enyl diphosphate reductase"  
"JS1\_N06\_00066" 18996 "s59E13H2" 0.02362747 "Acetate kinase"  
"JS1\_N06\_00066" 18996 "s59E25H2" 0 "Acetate kinase"  
"JS1\_N06\_00066" 18996 "s59E5H2" 0 "Acetate kinase"  
"JS1\_N06\_00066" 18996 "s63E6H2" 0.07932309 "Acetate kinase"  
"JS1\_N06\_00067" 18997 "s59E13H2" 0.01253673 "Phosphate acetyltransferase"  
"JS1\_N06\_00067" 18997 "s59E25H2" 0 "Phosphate acetyltransferase"  
"JS1\_N06\_00067" 18997 "s59E5H2" 0 "Phosphate acetyltransferase"  
"JS1\_N06\_00067" 18997 "s63E6H2" 0.005648522 "Phosphate acetyltransferase"  
"JS1\_N06\_00068" 18998 "s59E13H2" 0.0008885073 "hypothetical protein"  
"JS1\_N06\_00068" 18998 "s59E25H2" 0 "hypothetical protein"  
"JS1\_N06\_00068" 18998 "s59E5H2" 0 "hypothetical protein"  
"JS1\_N06\_00068" 18998 "s63E6H2" 0.003841486 "hypothetical protein"  
"JS1\_N06\_00069" 18999 "s59E13H2" 0 "Lon protease"  
"JS1\_N06\_00069" 18999 "s59E25H2" 0 "Lon protease"  
"JS1\_N06\_00069" 18999 "s59E5H2" 0 "Lon protease"  
"JS1\_N06\_00069" 18999 "s63E6H2" 0.007297596 "Lon protease"  
"JS1\_N06\_00070" 19000 "s59E13H2" 0.007097834 "Phosphopantetheine adenyltransferase"  
"JS1\_N06\_00070" 19000 "s59E25H2" 0 "Phosphopantetheine adenyltransferase"  
"JS1\_N06\_00070" 19000 "s59E5H2" 0 "Phosphopantetheine adenyltransferase"  
"JS1\_N06\_00070" 19000 "s63E6H2" 0 "Phosphopantetheine adenyltransferase"  
"JS1\_N06\_00071" 19001 "s59E13H2" 0 "Ribosomal RNA small subunit methyltransferase D"  
"JS1\_N06\_00071" 19001 "s59E25H2" 0 "Ribosomal RNA small subunit methyltransferase D"  
"JS1\_N06\_00071" 19001 "s59E5H2" 0 "Ribosomal RNA small subunit methyltransferase D"  
"JS1\_N06\_00071" 19001 "s63E6H2" 0 "Ribosomal RNA small subunit methyltransferase D"  
"JS1\_N06\_00078" 19008 "s59E13H2" 0 "V-type ATP synthase subunit E"  
"JS1\_N06\_00078" 19008 "s59E25H2" 0 "V-type ATP synthase subunit E"  
"JS1\_N06\_00078" 19008 "s59E5H2" 0.0145815 "V-type ATP synthase subunit E"  
"JS1\_N06\_00078" 19008 "s63E6H2" 0 "V-type ATP synthase subunit E"  
"JS1\_N06\_00079" 19009 "s59E13H2" 0 "hypothetical protein"  
"JS1\_N06\_00079" 19009 "s59E25H2" 0 "hypothetical protein"  
"JS1\_N06\_00079" 19009 "s59E5H2" 0 "hypothetical protein"  
"JS1\_N06\_00079" 19009 "s63E6H2" 0 "hypothetical protein"  
"JS1\_N06\_00080" 19010 "s59E13H2" 0 "Elongation factor G"  
"JS1\_N06\_00080" 19010 "s59E25H2" 0 "Elongation factor G"  
"JS1\_N06\_00080" 19010 "s59E5H2" 0 "Elongation factor G"  
"JS1\_N06\_00080" 19010 "s63E6H2" 0.006094412 "Elongation factor G"  
"JS1\_N06\_00082" 19012 "s59E13H2" 0 "hypothetical protein"  
"JS1\_N06\_00082" 19012 "s59E25H2" 0 "hypothetical protein"  
"JS1\_N06\_00082" 19012 "s59E5H2" 0 "hypothetical protein"  
"JS1\_N06\_00082" 19012 "s63E6H2" 0 "hypothetical protein"  
"JS1\_N06\_00083" 19013 "s59E13H2" 0.02337852 "Queuosine precursor transporter QueT"  
"JS1\_N06\_00083" 19013 "s59E25H2" 0 "Queuosine precursor transporter QueT"  
"JS1\_N06\_00083" 19013 "s59E5H2" 0.01226272 "Queuosine precursor transporter QueT"  
"JS1\_N06\_00083" 19013 "s63E6H2" 0.007404263 "Queuosine precursor transporter QueT"  
"JS1\_N06\_00084" 19014 "s59E13H2" 0.04543067 "Tyrosine--tRNA ligase"

"JS1\_N06\_00084" 19014 "s59E25H2" 0 "Tyrosine--tRNA ligase"  
"JS1\_N06\_00084" 19014 "s59E5H2" 0.04763939 "Tyrosine--tRNA ligase"  
"JS1\_N06\_00084" 19014 "s63E6H2" 0.04235089 "Tyrosine--tRNA ligase"  
"JS1\_N06\_00085" 19015 "s59E13H2" 0 "V-type ATP synthase subunit H"  
"JS1\_N06\_00085" 19015 "s59E25H2" 0 "V-type ATP synthase subunit H"  
"JS1\_N06\_00085" 19015 "s59E5H2" 0.01075684 "V-type ATP synthase subunit H"  
"JS1\_N06\_00085" 19015 "s63E6H2" 0.003536694 "V-type ATP synthase subunit H"  
"JS1\_N06\_00086" 19016 "s59E13H2" 0 "4-hydroxy-3-methylbut-2-en-1-yl diphosphate synthase"  
"JS1\_N06\_00086" 19016 "s59E25H2" 0 "4-hydroxy-3-methylbut-2-en-1-yl diphosphate synthase"  
"JS1\_N06\_00086" 19016 "s59E5H2" 0 "4-hydroxy-3-methylbut-2-en-1-yl diphosphate synthase"  
"JS1\_N06\_00086" 19016 "s63E6H2" 0 "4-hydroxy-3-methylbut-2-en-1-yl diphosphate synthase"  
"JS1\_N06\_00087" 19017 "s59E13H2" 0 "Regulator of sigma-W protease RasP"  
"JS1\_N06\_00087" 19017 "s59E25H2" 0 "Regulator of sigma-W protease RasP"  
"JS1\_N06\_00087" 19017 "s59E5H2" 0.01203106 "Regulator of sigma-W protease RasP"  
"JS1\_N06\_00087" 19017 "s63E6H2" 0 "Regulator of sigma-W protease RasP"  
"JS1\_N06\_00088" 19018 "s59E13H2" 0 "1-deoxy-D-xylulose 5-phosphate reductoisomerase"  
"JS1\_N06\_00088" 19018 "s59E25H2" 0 "1-deoxy-D-xylulose 5-phosphate reductoisomerase"  
"JS1\_N06\_00088" 19018 "s59E5H2" 0 "1-deoxy-D-xylulose 5-phosphate reductoisomerase"  
"JS1\_N06\_00088" 19018 "s63E6H2" 0 "1-deoxy-D-xylulose 5-phosphate reductoisomerase"  
"JS1\_N06\_00089" 19019 "s59E13H2" 0 "GTP-binding protein Der"  
"JS1\_N06\_00089" 19019 "s59E25H2" 0 "GTP-binding protein Der"  
"JS1\_N06\_00089" 19019 "s59E5H2" 0 "GTP-binding protein Der"  
"JS1\_N06\_00089" 19019 "s63E6H2" 0 "GTP-binding protein Der"  
"JS1\_N06\_00090" 19020 "s59E13H2" 0 "Ribulose-phosphate 3-epimerase"  
"JS1\_N06\_00090" 19020 "s59E25H2" 0 "Ribulose-phosphate 3-epimerase"  
"JS1\_N06\_00090" 19020 "s59E5H2" 0 "Ribulose-phosphate 3-epimerase"  
"JS1\_N06\_00090" 19020 "s63E6H2" 0 "Ribulose-phosphate 3-epimerase"  
"JS1\_N06\_00095" 19025 "s59E13H2" 0 "Signal recognition particle receptor FtsY"  
"JS1\_N06\_00095" 19025 "s59E25H2" 0 "Signal recognition particle receptor FtsY"  
"JS1\_N06\_00095" 19025 "s59E5H2" 0 "Signal recognition particle receptor FtsY"  
"JS1\_N06\_00095" 19025 "s63E6H2" 0 "Signal recognition particle receptor FtsY"  
"JS1\_N06\_00096" 19026 "s59E13H2" 0 "coproporphyrinogen III oxidase"  
"JS1\_N06\_00096" 19026 "s59E25H2" 0 "coproporphyrinogen III oxidase"  
"JS1\_N06\_00096" 19026 "s59E5H2" 0 "coproporphyrinogen III oxidase"  
"JS1\_N06\_00096" 19026 "s63E6H2" 0 "coproporphyrinogen III oxidase"  
"JS1\_N06\_00101" 19031 "s59E13H2" 0 "V-type ATP synthase subunit E"  
"JS1\_N06\_00101" 19031 "s59E25H2" 0 "V-type ATP synthase subunit E"  
"JS1\_N06\_00101" 19031 "s59E5H2" 0 "V-type ATP synthase subunit E"  
"JS1\_N06\_00101" 19031 "s63E6H2" 0.003028866 "V-type ATP synthase subunit E"  
"JS1\_N06\_00102" 19032 "s59E13H2" 0.006418532 "LL-diaminopimelate aminotransferase"  
"JS1\_N06\_00102" 19032 "s59E25H2" 0 "LL-diaminopimelate aminotransferase"  
"JS1\_N06\_00102" 19032 "s59E5H2" 0 "LL-diaminopimelate aminotransferase"  
"JS1\_N06\_00102" 19032 "s63E6H2" 0.03764351 "LL-diaminopimelate aminotransferase"  
"JS1\_N06\_00103" 19033 "s59E13H2" 0.007848443 "hypothetical protein"  
"JS1\_N06\_00103" 19033 "s59E25H2" 0 "hypothetical protein"  
"JS1\_N06\_00103" 19033 "s59E5H2" 0.01233501 "hypothetical protein"  
"JS1\_N06\_00103" 19033 "s63E6H2" 0.007872869 "hypothetical protein"

"JS1\_N06\_00104" 19034 "s59E13H2" 0.01645626 "Putative K(+)-stimulated pyrophosphate-energized sodium pump"  
"JS1\_N06\_00104" 19034 "s59E25H2" 0 "Putative K(+)-stimulated pyrophosphate-energized sodium pump"  
"JS1\_N06\_00104" 19034 "s59E5H2" 0.1654587 "Putative K(+)-stimulated pyrophosphate-energized sodium pump"  
"JS1\_N06\_00104" 19034 "s63E6H2" 0.07870282 "Putative K(+)-stimulated pyrophosphate-energized sodium pump"  
"JS1\_N06\_00105" 19035 "s59E13H2" 0.06426317 "Pyruvate, phosphate dikinase"  
"JS1\_N06\_00105" 19035 "s59E25H2" 0 "Pyruvate, phosphate dikinase"  
"JS1\_N06\_00105" 19035 "s59E5H2" 0.05453426 "Pyruvate, phosphate dikinase"  
"JS1\_N06\_00105" 19035 "s63E6H2" 0.07275892 "Pyruvate, phosphate dikinase"  
"JS1\_N06\_00106" 19036 "s59E13H2" 0.01415658 "Putative pyruvate, phosphate dikinase regulatory protein"  
"JS1\_N06\_00106" 19036 "s59E25H2" 0 "Putative pyruvate, phosphate dikinase regulatory protein"  
"JS1\_N06\_00106" 19036 "s59E5H2" 0.03879377 "Putative pyruvate, phosphate dikinase regulatory protein"  
"JS1\_N06\_00106" 19036 "s63E6H2" 0.02334092 "Putative pyruvate, phosphate dikinase regulatory protein"  
"JS1\_N06\_00107" 19037 "s59E13H2" 0.003684513 "Glycine--tRNA ligase beta subunit"  
"JS1\_N06\_00107" 19037 "s59E25H2" 0 "Glycine--tRNA ligase beta subunit"  
"JS1\_N06\_00107" 19037 "s59E5H2" 0.03805093 "Glycine--tRNA ligase beta subunit"  
"JS1\_N06\_00107" 19037 "s63E6H2" 0.02236589 "Glycine--tRNA ligase beta subunit"  
"JS1\_N06\_00108" 19038 "s59E13H2" 0.02188565 "Glycine--tRNA ligase alpha subunit"  
"JS1\_N06\_00108" 19038 "s59E25H2" 0 "Glycine--tRNA ligase alpha subunit"  
"JS1\_N06\_00108" 19038 "s59E5H2" 0.1778429 "Glycine--tRNA ligase alpha subunit"  
"JS1\_N06\_00108" 19038 "s63E6H2" 0.1227427 "Glycine--tRNA ligase alpha subunit"  
"JS1\_N06\_00109" 19039 "s59E13H2" 0.02319466 "DNA repair protein RecO"  
"JS1\_N06\_00109" 19039 "s59E25H2" 0 "DNA repair protein RecO"  
"JS1\_N06\_00109" 19039 "s59E5H2" 0.09655133 "DNA repair protein RecO"  
"JS1\_N06\_00109" 19039 "s63E6H2" 0.07884283 "DNA repair protein RecO"  
"JS1\_N06\_00110" 19040 "s59E13H2" 0.002727683 "Cytidine deaminase"  
"JS1\_N06\_00110" 19040 "s59E25H2" 0 "Cytidine deaminase"  
"JS1\_N06\_00110" 19040 "s59E5H2" 0.02972151 "Cytidine deaminase"  
"JS1\_N06\_00110" 19040 "s63E6H2" 0.07606562 "Cytidine deaminase"  
"JS1\_N06\_00111" 19041 "s59E13H2" 0.01485495 "Putative lipoprotein YerB precursor"  
"JS1\_N06\_00111" 19041 "s59E25H2" 0 "Putative lipoprotein YerB precursor"  
"JS1\_N06\_00111" 19041 "s59E5H2" 0.05793616 "Putative lipoprotein YerB precursor"  
"JS1\_N06\_00111" 19041 "s63E6H2" 0.1376478 "Putative lipoprotein YerB precursor"  
"JS1\_N06\_00112" 19042 "s59E13H2" 0.09336881 "Magnesium and cobalt efflux protein CorC"  
"JS1\_N06\_00112" 19042 "s59E25H2" 0 "Magnesium and cobalt efflux protein CorC"  
"JS1\_N06\_00112" 19042 "s59E5H2" 0.09418245 "Magnesium and cobalt efflux protein CorC"  
"JS1\_N06\_00112" 19042 "s63E6H2" 0.1384524 "Magnesium and cobalt efflux protein CorC"  
"JS1\_N06\_00113" 19043 "s59E13H2" 0 "Ribosomal RNA small subunit methyltransferase D"  
"JS1\_N06\_00113" 19043 "s59E25H2" 0 "Ribosomal RNA small subunit methyltransferase D"  
"JS1\_N06\_00113" 19043 "s59E5H2" 0 "Ribosomal RNA small subunit methyltransferase D"  
"JS1\_N06\_00113" 19043 "s63E6H2" 0.001636315 "Ribosomal RNA small subunit methyltransferase D"  
"JS1\_N06\_00114" 19044 "s59E13H2" 0.1652888 "4-hydroxy-3-methylbut-2-enyl diphosphate reductase"  
"JS1\_N06\_00114" 19044 "s59E25H2" 0 "4-hydroxy-3-methylbut-2-enyl diphosphate reductase"  
"JS1\_N06\_00114" 19044 "s59E5H2" 0 "4-hydroxy-3-methylbut-2-enyl diphosphate reductase"  
"JS1\_N06\_00114" 19044 "s63E6H2" 0.005719762 "4-hydroxy-3-methylbut-2-enyl diphosphate reductase"  
"JS1\_N06\_00115" 19045 "s59E13H2" 0.0354044 "hypothetical protein"  
"JS1\_N06\_00115" 19045 "s59E25H2" 0 "hypothetical protein"  
"JS1\_N06\_00115" 19045 "s59E5H2" 0.1192553 "hypothetical protein"



"JS1\_N06\_00115" 19045 "s63E6H2" 0.07389546 "hypothetical protein"  
"JS1\_N06\_00116" 19046 "s59E13H2" 0.777976 "LL-diaminopimelate aminotransferase"  
"JS1\_N06\_00116" 19046 "s59E25H2" 0 "LL-diaminopimelate aminotransferase"  
"JS1\_N06\_00116" 19046 "s59E5H2" 0.05603945 "LL-diaminopimelate aminotransferase"  
"JS1\_N06\_00116" 19046 "s63E6H2" 0.04302525 "LL-diaminopimelate aminotransferase"  
"JS1\_N06\_00117" 19047 "s59E13H2" 0 "1-deoxy-D-xylulose 5-phosphate reductoisomerase"  
"JS1\_N06\_00117" 19047 "s59E25H2" 0 "1-deoxy-D-xylulose 5-phosphate reductoisomerase"  
"JS1\_N06\_00117" 19047 "s59E5H2" 0 "1-deoxy-D-xylulose 5-phosphate reductoisomerase"  
"JS1\_N06\_00117" 19047 "s63E6H2" 0.006454554 "1-deoxy-D-xylulose 5-phosphate reductoisomerase"  
"JS1\_N06\_00122" 19052 "s59E13H2" 0 "D-tagatose 3-epimerase"  
"JS1\_N06\_00122" 19052 "s59E25H2" 0 "D-tagatose 3-epimerase"  
"JS1\_N06\_00122" 19052 "s59E5H2" 0 "D-tagatose 3-epimerase"  
"JS1\_N06\_00122" 19052 "s63E6H2" 0.07541908 "D-tagatose 3-epimerase"  
"JS1\_N06\_00123" 19053 "s59E13H2" 0.01739906 "Creatinine amidohydrolase"  
"JS1\_N06\_00123" 19053 "s59E25H2" 0 "Creatinine amidohydrolase"  
"JS1\_N06\_00123" 19053 "s59E5H2" 0.09654204 "Creatinine amidohydrolase"  
"JS1\_N06\_00123" 19053 "s63E6H2" 0.1068986 "Creatinine amidohydrolase"  
"JS1\_N06\_00124" 19054 "s59E13H2" 0 "hypothetical protein"  
"JS1\_N06\_00124" 19054 "s59E25H2" 0 "hypothetical protein"  
"JS1\_N06\_00124" 19054 "s59E5H2" 0 "hypothetical protein"  
"JS1\_N06\_00124" 19054 "s63E6H2" 0.003787865 "hypothetical protein"  
"JS1\_N06\_00128" 19058 "s59E13H2" 3.691953 "tetratricopeptide repeat protein"  
"JS1\_N06\_00128" 19058 "s59E25H2" 0 "tetratricopeptide repeat protein"  
"JS1\_N06\_00128" 19058 "s59E5H2" 0.5658771 "tetratricopeptide repeat protein"  
"JS1\_N06\_00128" 19058 "s63E6H2" 5.503022 "tetratricopeptide repeat protein"  
"JS1\_N06\_00129" 19059 "s59E13H2" 0 "Elongation factor Ts"  
"JS1\_N06\_00129" 19059 "s59E25H2" 0 "Elongation factor Ts"  
"JS1\_N06\_00129" 19059 "s59E5H2" 0 "Elongation factor Ts"  
"JS1\_N06\_00129" 19059 "s63E6H2" 0 "Elongation factor Ts"  
"JS1\_N06\_00130" 19060 "s59E13H2" 0 "hypothetical protein"  
"JS1\_N06\_00130" 19060 "s59E25H2" 0 "hypothetical protein"  
"JS1\_N06\_00130" 19060 "s59E5H2" 0.1056979 "hypothetical protein"  
"JS1\_N06\_00130" 19060 "s63E6H2" 1.001322 "hypothetical protein"  
"JS1\_N06\_00131" 19061 "s59E13H2" 0.02119976 "Group II intron-encoded protein LtrA"  
"JS1\_N06\_00131" 19061 "s59E25H2" 0 "Group II intron-encoded protein LtrA"  
"JS1\_N06\_00131" 19061 "s59E5H2" 0.8053552 "Group II intron-encoded protein LtrA"  
"JS1\_N06\_00131" 19061 "s63E6H2" 0.2140255 "Group II intron-encoded protein LtrA"  
"JS1\_N06\_00134" 19064 "s59E13H2" 0 "GTPase Der"  
"JS1\_N06\_00134" 19064 "s59E25H2" 0 "GTPase Der"  
"JS1\_N06\_00134" 19064 "s59E5H2" 0 "GTPase Der"  
"JS1\_N06\_00134" 19064 "s63E6H2" 0 "GTPase Der"  
"JS1\_N06\_00135" 19065 "s59E13H2" 0 "ferredoxin"  
"JS1\_N06\_00135" 19065 "s59E25H2" 0 "ferredoxin"  
"JS1\_N06\_00135" 19065 "s59E5H2" 0.003742321 "ferredoxin"  
"JS1\_N06\_00135" 19065 "s63E6H2" 0.001408958 "ferredoxin"  
"JS1\_N06\_00136" 19066 "s59E13H2" 0.01175376 "Thioredoxin reductase"  
"JS1\_N06\_00136" 19066 "s59E25H2" 0 "Thioredoxin reductase"

"JS1\_N06\_00136" 19066 "s59E5H2" 0.02873379 "Thioredoxin reductase"  
"JS1\_N06\_00136" 19066 "s63E6H2" 0.01881947 "Thioredoxin reductase"  
"JS1\_N06\_00137" 19067 "s59E13H2" 0 "Ribulose-phosphate 3-epimerase"  
"JS1\_N06\_00137" 19067 "s59E25H2" 0 "Ribulose-phosphate 3-epimerase"  
"JS1\_N06\_00137" 19067 "s59E5H2" 0 "Ribulose-phosphate 3-epimerase"  
"JS1\_N06\_00137" 19067 "s63E6H2" 0 "Ribulose-phosphate 3-epimerase"  
"JS1\_N06\_00139" 19069 "s59E13H2" 0.01837714 "Inosose isomerase"  
"JS1\_N06\_00139" 19069 "s59E25H2" 0 "Inosose isomerase"  
"JS1\_N06\_00139" 19069 "s59E5H2" 0.05918379 "Inosose isomerase"  
"JS1\_N06\_00139" 19069 "s63E6H2" 0.02081016 "Inosose isomerase"  
"JS1\_N06\_00140" 19070 "s59E13H2" 0.01246513 "Lipoyl synthase"  
"JS1\_N06\_00140" 19070 "s59E25H2" 0 "Lipoyl synthase"  
"JS1\_N06\_00140" 19070 "s59E5H2" 0.02470359 "Lipoyl synthase"  
"JS1\_N06\_00140" 19070 "s63E6H2" 0.02421125 "Lipoyl synthase"  
"JS1\_N06\_00141" 19071 "s59E13H2" 0.4601609 "LL-diaminopimelate aminotransferase"  
"JS1\_N06\_00141" 19071 "s59E25H2" 0 "LL-diaminopimelate aminotransferase"  
"JS1\_N06\_00141" 19071 "s59E5H2" 0.0747566 "LL-diaminopimelate aminotransferase"  
"JS1\_N06\_00141" 19071 "s63E6H2" 0.09974975 "LL-diaminopimelate aminotransferase"  
"JS1\_N06\_00143" 19073 "s59E13H2" 0.04100001 "LL-diaminopimelate aminotransferase"  
"JS1\_N06\_00143" 19073 "s59E25H2" 0 "LL-diaminopimelate aminotransferase"  
"JS1\_N06\_00143" 19073 "s59E5H2" 0.06472481 "LL-diaminopimelate aminotransferase"  
"JS1\_N06\_00143" 19073 "s63E6H2" 0.09339895 "LL-diaminopimelate aminotransferase"  
"JS1\_N06\_00144" 19074 "s59E13H2" 0 "hypothetical protein"  
"JS1\_N06\_00144" 19074 "s59E25H2" 0 "hypothetical protein"  
"JS1\_N06\_00144" 19074 "s59E5H2" 0 "hypothetical protein"  
"JS1\_N06\_00144" 19074 "s63E6H2" 0.002843813 "hypothetical protein"  
"JS1\_N06\_00145" 19075 "s59E13H2" 0 "recombination and DNA strand exchange inhibitor protein"  
"JS1\_N06\_00145" 19075 "s59E25H2" 0 "recombination and DNA strand exchange inhibitor protein"  
"JS1\_N06\_00145" 19075 "s59E5H2" 0 "recombination and DNA strand exchange inhibitor protein"  
"JS1\_N06\_00145" 19075 "s63E6H2" 0.01645957 "recombination and DNA strand exchange inhibitor protein"  
"JS1\_N06\_00146" 19076 "s59E13H2" 0 "Succinylglutamate desuccinylase / Aspartoacylase family protein"  
"JS1\_N06\_00146" 19076 "s59E25H2" 0 "Succinylglutamate desuccinylase / Aspartoacylase family protein"  
"JS1\_N06\_00146" 19076 "s59E5H2" 0 "Succinylglutamate desuccinylase / Aspartoacylase family protein"  
"JS1\_N06\_00146" 19076 "s63E6H2" 0.980591 "Succinylglutamate desuccinylase / Aspartoacylase family protein"  
"JS1\_N06\_00147" 19077 "s59E13H2" 0.03433102 "Vancomycin B-type resistance protein VanW"  
"JS1\_N06\_00147" 19077 "s59E25H2" 0.6144578 "Vancomycin B-type resistance protein VanW"  
"JS1\_N06\_00147" 19077 "s59E5H2" 0.1381144 "Vancomycin B-type resistance protein VanW"  
"JS1\_N06\_00147" 19077 "s63E6H2" 1.319645 "Vancomycin B-type resistance protein VanW"  
"JS1\_N06\_00148" 19078 "s59E13H2" 0 "L-lactate permease"  
"JS1\_N06\_00148" 19078 "s59E25H2" 0 "L-lactate permease"  
"JS1\_N06\_00148" 19078 "s59E5H2" 0 "L-lactate permease"  
"JS1\_N06\_00148" 19078 "s63E6H2" 0.009120909 "L-lactate permease"  
"JS1\_N06\_00150" 19080 "s59E13H2" 0 "Endonuclease MutS2"  
"JS1\_N06\_00150" 19080 "s59E25H2" 0 "Endonuclease MutS2"  
"JS1\_N06\_00150" 19080 "s59E5H2" 0 "Endonuclease MutS2"  
"JS1\_N06\_00150" 19080 "s63E6H2" 0.006694794 "Endonuclease MutS2"  
"JS1\_N06\_00151" 19081 "s59E13H2" 0 "V-type ATP synthase subunit E"

"JS1\_N06\_00151" 19081 "s59E25H2" 0 "V-type ATP synthase subunit E"  
"JS1\_N06\_00151" 19081 "s59E5H2" 0 "V-type ATP synthase subunit E"  
"JS1\_N06\_00151" 19081 "s63E6H2" 0.002768347 "V-type ATP synthase subunit E"  
"JS1\_N06\_00152" 19082 "s59E13H2" 0.005107587 "Phenylalanine--tRNA ligase alpha subunit"  
"JS1\_N06\_00152" 19082 "s59E25H2" 0 "Phenylalanine--tRNA ligase alpha subunit"  
"JS1\_N06\_00152" 19082 "s59E5H2" 0.1090001 "Phenylalanine--tRNA ligase alpha subunit"  
"JS1\_N06\_00152" 19082 "s63E6H2" 0.03359105 "Phenylalanine--tRNA ligase alpha subunit"  
"JS1\_N06\_00154" 19084 "s59E13H2" 0.01091073 "50S ribosomal protein L20"  
"JS1\_N06\_00154" 19084 "s59E25H2" 0 "50S ribosomal protein L20"  
"JS1\_N06\_00154" 19084 "s59E5H2" 0 "50S ribosomal protein L20"  
"JS1\_N06\_00154" 19084 "s63E6H2" 0.03962607 "50S ribosomal protein L20"  
"JS1\_N06\_00155" 19085 "s59E13H2" 0 "Phosphate acetyltransferase"  
"JS1\_N06\_00155" 19085 "s59E25H2" 0 "Phosphate acetyltransferase"  
"JS1\_N06\_00155" 19085 "s59E5H2" 0 "Phosphate acetyltransferase"  
"JS1\_N06\_00155" 19085 "s63E6H2" 0.004582287 "Phosphate acetyltransferase"  
"JS1\_N06\_00157" 19087 "s59E13H2" 0.4772427 "Fic/DOC family protein"  
"JS1\_N06\_00157" 19087 "s59E25H2" 0 "Fic/DOC family protein"  
"JS1\_N06\_00157" 19087 "s59E5H2" 0.2536543 "Fic/DOC family protein"  
"JS1\_N06\_00157" 19087 "s63E6H2" 0.2082527 "Fic/DOC family protein"  
"JS1\_N06\_00158" 19088 "s59E13H2" 0 "Vitamin B12 dependent methionine synthase, activation domain"  
"JS1\_N06\_00158" 19088 "s59E25H2" 0 "Vitamin B12 dependent methionine synthase, activation domain"  
"JS1\_N06\_00158" 19088 "s59E5H2" 0 "Vitamin B12 dependent methionine synthase, activation domain"  
"JS1\_N06\_00158" 19088 "s63E6H2" 0.1640696 "Vitamin B12 dependent methionine synthase, activation domain"  
"JS1\_N06\_00159" 19089 "s59E13H2" 0 "2Fe-2S ferredoxin"  
"JS1\_N06\_00159" 19089 "s59E25H2" 0 "2Fe-2S ferredoxin"  
"JS1\_N06\_00159" 19089 "s59E5H2" 0 "2Fe-2S ferredoxin"  
"JS1\_N06\_00159" 19089 "s63E6H2" 0.2753403 "2Fe-2S ferredoxin"  
"JS1\_N06\_00160" 19090 "s59E13H2" 1.070596 "Bifunctional protein FoLD protein"  
"JS1\_N06\_00160" 19090 "s59E25H2" 0 "Bifunctional protein FoLD protein"  
"JS1\_N06\_00160" 19090 "s59E5H2" 1.282817 "Bifunctional protein FoLD protein"  
"JS1\_N06\_00160" 19090 "s63E6H2" 0.3201053 "Bifunctional protein FoLD protein"  
"JS1\_N06\_00161" 19091 "s59E13H2" 0 "L-lactate permease"  
"JS1\_N06\_00161" 19091 "s59E25H2" 0 "L-lactate permease"  
"JS1\_N06\_00161" 19091 "s59E5H2" 0 "L-lactate permease"  
"JS1\_N06\_00161" 19091 "s63E6H2" 0.011569 "L-lactate permease"  
"JS1\_N06\_00162" 19092 "s59E13H2" 0 "hypothetical protein"  
"JS1\_N06\_00162" 19092 "s59E25H2" 0 "hypothetical protein"  
"JS1\_N06\_00162" 19092 "s59E5H2" 0 "hypothetical protein"  
"JS1\_N06\_00162" 19092 "s63E6H2" 0 "hypothetical protein"  
"JS1\_N06\_00165" 19095 "s59E13H2" 0 "3-oxoacyl-[acyl-carrier-protein] reductase FabG"  
"JS1\_N06\_00165" 19095 "s59E25H2" 0 "3-oxoacyl-[acyl-carrier-protein] reductase FabG"  
"JS1\_N06\_00165" 19095 "s59E5H2" 0 "3-oxoacyl-[acyl-carrier-protein] reductase FabG"  
"JS1\_N06\_00165" 19095 "s63E6H2" 0.03795334 "3-oxoacyl-[acyl-carrier-protein] reductase FabG"  
"JS1\_N06\_00166" 19096 "s59E13H2" 0 "Malonyl CoA-acyl carrier protein transacylase"  
"JS1\_N06\_00166" 19096 "s59E25H2" 0 "Malonyl CoA-acyl carrier protein transacylase"  
"JS1\_N06\_00166" 19096 "s59E5H2" 0 "Malonyl CoA-acyl carrier protein transacylase"  
"JS1\_N06\_00166" 19096 "s63E6H2" 0.02625409 "Malonyl CoA-acyl carrier protein transacylase"

"JS1\_N06\_00167" 19097 "s59E13H2" 0 "L-lactate permease"  
"JS1\_N06\_00167" 19097 "s59E25H2" 0 "L-lactate permease"  
"JS1\_N06\_00167" 19097 "s59E5H2" 0 "L-lactate permease"  
"JS1\_N06\_00167" 19097 "s63E6H2" 0.0115463 "L-lactate permease"  
"JS1\_N06\_00168" 19098 "s59E13H2" 1.177595 "NAD-dependent malic enzyme"  
"JS1\_N06\_00168" 19098 "s59E25H2" 0 "NAD-dependent malic enzyme"  
"JS1\_N06\_00168" 19098 "s59E5H2" 0.1555416 "NAD-dependent malic enzyme"  
"JS1\_N06\_00168" 19098 "s63E6H2" 0.072998 "NAD-dependent malic enzyme"  
"JS1\_N06\_00169" 19099 "s59E13H2" 0.8502735 "Fumarate hydratase class I, anaerobic"  
"JS1\_N06\_00169" 19099 "s59E25H2" 0 "Fumarate hydratase class I, anaerobic"  
"JS1\_N06\_00169" 19099 "s59E5H2" 0.008391956 "Fumarate hydratase class I, anaerobic"  
"JS1\_N06\_00169" 19099 "s63E6H2" 0.0001430421 "Fumarate hydratase class I, anaerobic"  
"JS1\_N06\_00172" 19102 "s59E13H2" 0 "Chromosome partition protein Smc"  
"JS1\_N06\_00172" 19102 "s59E25H2" 0 "Chromosome partition protein Smc"  
"JS1\_N06\_00172" 19102 "s59E5H2" 0 "Chromosome partition protein Smc"  
"JS1\_N06\_00172" 19102 "s63E6H2" 0.00222413 "Chromosome partition protein Smc"  
"JS1\_N06\_00173" 19103 "s59E13H2" 0 "Signal recognition particle receptor FtsY"  
"JS1\_N06\_00173" 19103 "s59E25H2" 0 "Signal recognition particle receptor FtsY"  
"JS1\_N06\_00173" 19103 "s59E5H2" 0 "Signal recognition particle receptor FtsY"  
"JS1\_N06\_00173" 19103 "s63E6H2" 0 "Signal recognition particle receptor FtsY"  
"JS1\_N06\_00174" 19104 "s59E13H2" 0 "Chromosome partition protein Smc"  
"JS1\_N06\_00174" 19104 "s59E25H2" 0 "Chromosome partition protein Smc"  
"JS1\_N06\_00174" 19104 "s59E5H2" 0 "Chromosome partition protein Smc"  
"JS1\_N06\_00174" 19104 "s63E6H2" 0.001204768 "Chromosome partition protein Smc"  
"JS1\_N06\_00175" 19105 "s59E13H2" 0.4810023 "Carbon starvation protein A"  
"JS1\_N06\_00175" 19105 "s59E25H2" 0 "Carbon starvation protein A"  
"JS1\_N06\_00175" 19105 "s59E5H2" 0.04830311 "Carbon starvation protein A"  
"JS1\_N06\_00175" 19105 "s63E6H2" 0.1227669 "Carbon starvation protein A"  
"JS1\_N06\_00178" 19108 "s59E13H2" 0.002482836 "hypothetical protein"  
"JS1\_N06\_00178" 19108 "s59E25H2" 0 "hypothetical protein"  
"JS1\_N06\_00178" 19108 "s59E5H2" 0 "hypothetical protein"  
"JS1\_N06\_00178" 19108 "s63E6H2" 0 "hypothetical protein"  
"JS1\_N06\_00180" 19110 "s59E13H2" 0.1881155 "Trehalose/maltose import ATP-binding protein Malk"  
"JS1\_N06\_00180" 19110 "s59E25H2" 0 "Trehalose/maltose import ATP-binding protein Malk"  
"JS1\_N06\_00180" 19110 "s59E5H2" 0.4310338 "Trehalose/maltose import ATP-binding protein Malk"  
"JS1\_N06\_00180" 19110 "s63E6H2" 0.7280812 "Trehalose/maltose import ATP-binding protein Malk"  
"JS1\_N06\_00181" 19111 "s59E13H2" 0.09374847 "Trehalose/maltose import ATP-binding protein Malk"  
"JS1\_N06\_00181" 19111 "s59E25H2" 0 "Trehalose/maltose import ATP-binding protein Malk"  
"JS1\_N06\_00181" 19111 "s59E5H2" 0.4080839 "Trehalose/maltose import ATP-binding protein Malk"  
"JS1\_N06\_00181" 19111 "s63E6H2" 1.034775 "Trehalose/maltose import ATP-binding protein Malk"  
"JS1\_N06\_00182" 19112 "s59E13H2" 0.0590527 "ureidoglycolate hydrolase"  
"JS1\_N06\_00182" 19112 "s59E25H2" 0 "ureidoglycolate hydrolase"  
"JS1\_N06\_00182" 19112 "s59E5H2" 0.3999871 "ureidoglycolate hydrolase"  
"JS1\_N06\_00182" 19112 "s63E6H2" 0.6712854 "ureidoglycolate hydrolase"  
"JS1\_N06\_00183" 19113 "s59E13H2" 0.0393114 "putative D-lyxose ketol-isomerase"  
"JS1\_N06\_00183" 19113 "s59E25H2" 0 "putative D-lyxose ketol-isomerase"  
"JS1\_N06\_00183" 19113 "s59E5H2" 0.1911294 "putative D-lyxose ketol-isomerase"

"JS1\_N06\_00183" 19113 "s63E6H2" 1.363867 "putative D-lyxose ketol-isomerase"  
"JS1\_N06\_00184" 19114 "s59E13H2" 0.2169698 "putative sugar kinase YdjH"  
"JS1\_N06\_00184" 19114 "s59E25H2" 0 "putative sugar kinase YdjH"  
"JS1\_N06\_00184" 19114 "s59E5H2" 0.2446255 "putative sugar kinase YdjH"  
"JS1\_N06\_00184" 19114 "s63E6H2" 1.436955 "putative sugar kinase YdjH"  
"JS1\_N06\_00185" 19115 "s59E13H2" 0.6834943 "Mannitol-1-phosphate 5-dehydrogenase"  
"JS1\_N06\_00185" 19115 "s59E25H2" 0 "Mannitol-1-phosphate 5-dehydrogenase"  
"JS1\_N06\_00185" 19115 "s59E5H2" 0.519596 "Mannitol-1-phosphate 5-dehydrogenase"  
"JS1\_N06\_00185" 19115 "s63E6H2" 1.518381 "Mannitol-1-phosphate 5-dehydrogenase"  
"JS1\_N06\_00186" 19116 "s59E13H2" 0 "GTPase Der"  
"JS1\_N06\_00186" 19116 "s59E25H2" 0 "GTPase Der"  
"JS1\_N06\_00186" 19116 "s59E5H2" 0 "GTPase Der"  
"JS1\_N06\_00186" 19116 "s63E6H2" 0 "GTPase Der"  
"JS1\_N06\_00189" 19119 "s59E13H2" 0 "L-asparaginase II"  
"JS1\_N06\_00189" 19119 "s59E25H2" 0 "L-asparaginase II"  
"JS1\_N06\_00189" 19119 "s59E5H2" 0 "L-asparaginase II"  
"JS1\_N06\_00189" 19119 "s63E6H2" 0.02263656 "L-asparaginase II"  
"JS1\_N06\_00190" 19120 "s59E13H2" 0.5915957 "protease TldD"  
"JS1\_N06\_00190" 19120 "s59E25H2" 0 "protease TldD"  
"JS1\_N06\_00190" 19120 "s59E5H2" 1.035316 "protease TldD"  
"JS1\_N06\_00190" 19120 "s63E6H2" 0.7790226 "protease TldD"  
"JS1\_N06\_00191" 19121 "s59E13H2" 0.2435675 "protease TldD"  
"JS1\_N06\_00191" 19121 "s59E25H2" 0 "protease TldD"  
"JS1\_N06\_00191" 19121 "s59E5H2" 0.06274952 "protease TldD"  
"JS1\_N06\_00191" 19121 "s63E6H2" 0.8675433 "protease TldD"  
"JS1\_N06\_00192" 19122 "s59E13H2" 0.09997986 "hypothetical protein"  
"JS1\_N06\_00192" 19122 "s59E25H2" 0 "hypothetical protein"  
"JS1\_N06\_00192" 19122 "s59E5H2" 0.4654864 "hypothetical protein"  
"JS1\_N06\_00192" 19122 "s63E6H2" 1.284577 "hypothetical protein"  
"JS1\_N06\_00193" 19123 "s59E13H2" 0.03004259 "Formamidase"  
"JS1\_N06\_00193" 19123 "s59E25H2" 0 "Formamidase"  
"JS1\_N06\_00193" 19123 "s59E5H2" 0.1197071 "Formamidase"  
"JS1\_N06\_00193" 19123 "s63E6H2" 0.2129255 "Formamidase"  
"JS1\_N06\_00194" 19124 "s59E13H2" 0.06136378 "Carbon-nitrogen hydrolase"  
"JS1\_N06\_00194" 19124 "s59E25H2" 0 "Carbon-nitrogen hydrolase"  
"JS1\_N06\_00194" 19124 "s59E5H2" 0.5767924 "Carbon-nitrogen hydrolase"  
"JS1\_N06\_00194" 19124 "s63E6H2" 0.7644313 "Carbon-nitrogen hydrolase"  
"JS1\_N06\_00195" 19125 "s59E13H2" 0.2527147 "Inner membrane symporter YicJ"  
"JS1\_N06\_00195" 19125 "s59E25H2" 0 "Inner membrane symporter YicJ"  
"JS1\_N06\_00195" 19125 "s59E5H2" 2.616388 "Inner membrane symporter YicJ"  
"JS1\_N06\_00195" 19125 "s63E6H2" 2.568363 "Inner membrane symporter YicJ"  
"JS1\_N06\_00198" 19128 "s59E13H2" 0 "hypothetical protein"  
"JS1\_N06\_00198" 19128 "s59E25H2" 0 "hypothetical protein"  
"JS1\_N06\_00198" 19128 "s59E5H2" 0 "hypothetical protein"  
"JS1\_N06\_00198" 19128 "s63E6H2" 0 "hypothetical protein"  
"JS1\_N06\_00199" 19129 "s59E13H2" 0 "Ribonuclease 3"  
"JS1\_N06\_00199" 19129 "s59E25H2" 0 "Ribonuclease 3"

"JS1\_N06\_00199" 19129 "s59E5H2" 0 "Ribonuclease 3"  
"JS1\_N06\_00199" 19129 "s63E6H2" 0.02093412 "Ribonuclease 3"  
"JS1\_N06\_00200" 19130 "s59E13H2" 0 "L-lactate permease"  
"JS1\_N06\_00200" 19130 "s59E25H2" 0 "L-lactate permease"  
"JS1\_N06\_00200" 19130 "s59E5H2" 0.006545028 "L-lactate permease"  
"JS1\_N06\_00200" 19130 "s63E6H2" 0.008277868 "L-lactate permease"  
"JS1\_N06\_00201" 19131 "s59E13H2" 0 "Lipoyl synthase"  
"JS1\_N06\_00201" 19131 "s59E25H2" 0 "Lipoyl synthase"  
"JS1\_N06\_00201" 19131 "s59E5H2" 0 "Lipoyl synthase"  
"JS1\_N06\_00201" 19131 "s63E6H2" 0 "Lipoyl synthase"  
"JS1\_N06\_00202" 19132 "s59E13H2" 0 "hypothetical protein"  
"JS1\_N06\_00202" 19132 "s59E25H2" 0 "hypothetical protein"  
"JS1\_N06\_00202" 19132 "s59E5H2" 0.06779452 "hypothetical protein"  
"JS1\_N06\_00202" 19132 "s63E6H2" 0 "hypothetical protein"  
"JS1\_N06\_00203" 19133 "s59E13H2" 0 "hypothetical protein"  
"JS1\_N06\_00203" 19133 "s59E25H2" 0 "hypothetical protein"  
"JS1\_N06\_00203" 19133 "s59E5H2" 0 "hypothetical protein"  
"JS1\_N06\_00203" 19133 "s63E6H2" 0 "hypothetical protein"  
"JS1\_N06\_00205" 19135 "s59E13H2" 0.007445796 "Elongation factor G"  
"JS1\_N06\_00205" 19135 "s59E25H2" 0 "Elongation factor G"  
"JS1\_N06\_00205" 19135 "s59E5H2" 0.08966632 "Elongation factor G"  
"JS1\_N06\_00205" 19135 "s63E6H2" 0.06163531 "Elongation factor G"  
"JS1\_N06\_00209" 19139 "s59E13H2" 0 "hypothetical protein"  
"JS1\_N06\_00209" 19139 "s59E25H2" 0 "hypothetical protein"  
"JS1\_N06\_00209" 19139 "s59E5H2" 0 "hypothetical protein"  
"JS1\_N06\_00209" 19139 "s63E6H2" 0 "hypothetical protein"  
"JS1\_N06\_00210" 19140 "s59E13H2" 0.1150657 "hypothetical protein"  
"JS1\_N06\_00210" 19140 "s59E25H2" 0 "hypothetical protein"  
"JS1\_N06\_00210" 19140 "s59E5H2" 0.03924106 "hypothetical protein"  
"JS1\_N06\_00210" 19140 "s63E6H2" 0.04454726 "hypothetical protein"  
"JS1\_N06\_00212" 19142 "s59E13H2" 0 "hypothetical protein"  
"JS1\_N06\_00212" 19142 "s59E25H2" 0 "hypothetical protein"  
"JS1\_N06\_00212" 19142 "s59E5H2" 0 "hypothetical protein"  
"JS1\_N06\_00212" 19142 "s63E6H2" 0 "hypothetical protein"  
"JS1\_N06\_00213" 19143 "s59E13H2" 0 "Xylose isomerase-like TIM barrel"  
"JS1\_N06\_00213" 19143 "s59E25H2" 0 "Xylose isomerase-like TIM barrel"  
"JS1\_N06\_00213" 19143 "s59E5H2" 0 "Xylose isomerase-like TIM barrel"  
"JS1\_N06\_00213" 19143 "s63E6H2" 0.0002398142 "Xylose isomerase-like TIM barrel"  
"JS1\_N06\_00215" 19145 "s59E13H2" 0.002892309 "hypothetical protein"  
"JS1\_N06\_00215" 19145 "s59E25H2" 0 "hypothetical protein"  
"JS1\_N06\_00215" 19145 "s59E5H2" 0.0115993 "hypothetical protein"  
"JS1\_N06\_00215" 19145 "s63E6H2" 0.1764222 "hypothetical protein"  
"JS1\_N06\_00216" 19146 "s59E13H2" 0 "hypothetical protein"  
"JS1\_N06\_00216" 19146 "s59E25H2" 0 "hypothetical protein"  
"JS1\_N06\_00216" 19146 "s59E5H2" 0.004629224 "hypothetical protein"  
"JS1\_N06\_00216" 19146 "s63E6H2" 0.05642828 "hypothetical protein"  
"JS1\_N06\_00217" 19147 "s59E13H2" 0.02790932 "Tetratricopeptide repeat protein"

"JS1\_N06\_00217" 19147 "s59E25H2" 0 "Tetratricopeptide repeat protein"  
"JS1\_N06\_00217" 19147 "s59E5H2" 0.3846909 "Tetratricopeptide repeat protein"  
"JS1\_N06\_00217" 19147 "s63E6H2" 0.173665 "Tetratricopeptide repeat protein"  
"JS1\_N06\_00218" 19148 "s59E13H2" 0 "Protein of unknown function (Hypoth\_ymh)"  
"JS1\_N06\_00218" 19148 "s59E25H2" 0 "Protein of unknown function (Hypoth\_ymh)"  
"JS1\_N06\_00218" 19148 "s59E5H2" 0 "Protein of unknown function (Hypoth\_ymh)"  
"JS1\_N06\_00218" 19148 "s63E6H2" 0 "Protein of unknown function (Hypoth\_ymh)"  
"JS1\_N06\_00219" 19149 "s59E13H2" 0 "hypothetical protein"  
"JS1\_N06\_00219" 19149 "s59E25H2" 0 "hypothetical protein"  
"JS1\_N06\_00219" 19149 "s59E5H2" 0 "hypothetical protein"  
"JS1\_N06\_00219" 19149 "s63E6H2" 0 "hypothetical protein"  
"JS1\_N06\_00220" 19150 "s59E13H2" 0 "Ion channel"  
"JS1\_N06\_00220" 19150 "s59E25H2" 0 "Ion channel"  
"JS1\_N06\_00220" 19150 "s59E5H2" 0 "Ion channel"  
"JS1\_N06\_00220" 19150 "s63E6H2" 0 "Ion channel"  
"JS1\_N06\_00221" 19151 "s59E13H2" 0 "L-lactate permease"  
"JS1\_N06\_00221" 19151 "s59E25H2" 0 "L-lactate permease"  
"JS1\_N06\_00221" 19151 "s59E5H2" 0 "L-lactate permease"  
"JS1\_N06\_00221" 19151 "s63E6H2" 0.05658598 "L-lactate permease"  
"JS1\_N06\_00222" 19152 "s59E13H2" 0 "1-deoxy-D-xylulose 5-phosphate reductoisomerase"  
"JS1\_N06\_00222" 19152 "s59E25H2" 0 "1-deoxy-D-xylulose 5-phosphate reductoisomerase"  
"JS1\_N06\_00222" 19152 "s59E5H2" 0 "1-deoxy-D-xylulose 5-phosphate reductoisomerase"  
"JS1\_N06\_00222" 19152 "s63E6H2" 0.002855424 "1-deoxy-D-xylulose 5-phosphate reductoisomerase"  
"JS1\_N06\_00225" 19155 "s59E13H2" 0 "Signal recognition particle protein"  
"JS1\_N06\_00225" 19155 "s59E25H2" 0 "Signal recognition particle protein"  
"JS1\_N06\_00225" 19155 "s59E5H2" 0 "Signal recognition particle protein"  
"JS1\_N06\_00225" 19155 "s63E6H2" 0.00492133 "Signal recognition particle protein"  
"JS1\_N06\_00226" 19156 "s59E13H2" 0 "Glycerol-3-phosphate acyltransferase"  
"JS1\_N06\_00226" 19156 "s59E25H2" 0 "Glycerol-3-phosphate acyltransferase"  
"JS1\_N06\_00226" 19156 "s59E5H2" 0 "Glycerol-3-phosphate acyltransferase"  
"JS1\_N06\_00226" 19156 "s63E6H2" 0 "Glycerol-3-phosphate acyltransferase"  
"JS1\_N06\_00227" 19157 "s59E13H2" 0 "GTPase Der"  
"JS1\_N06\_00227" 19157 "s59E25H2" 0 "GTPase Der"  
"JS1\_N06\_00227" 19157 "s59E5H2" 0 "GTPase Der"  
"JS1\_N06\_00227" 19157 "s63E6H2" 0 "GTPase Der"  
"JS1\_N06\_00231" 19161 "s59E13H2" 0 "Ribonuclease HII"  
"JS1\_N06\_00231" 19161 "s59E25H2" 0 "Ribonuclease HII"  
"JS1\_N06\_00231" 19161 "s59E5H2" 0 "Ribonuclease HII"  
"JS1\_N06\_00231" 19161 "s63E6H2" 0.002974467 "Ribonuclease HII"  
"JS1\_N06\_00232" 19162 "s59E13H2" 0 "hypothetical protein"  
"JS1\_N06\_00232" 19162 "s59E25H2" 0 "hypothetical protein"  
"JS1\_N06\_00232" 19162 "s59E5H2" 0 "hypothetical protein"  
"JS1\_N06\_00232" 19162 "s63E6H2" 0 "hypothetical protein"  
"JS1\_N06\_00233" 19163 "s59E13H2" 0 "Lon protease"  
"JS1\_N06\_00233" 19163 "s59E25H2" 0 "Lon protease"  
"JS1\_N06\_00233" 19163 "s59E5H2" 0 "Lon protease"  
"JS1\_N06\_00233" 19163 "s63E6H2" 0.006717922 "Lon protease"

"JS1\_N06\_00236" 19166 "s59E13H2" 0 "V-type ATP synthase subunit C"  
"JS1\_N06\_00236" 19166 "s59E25H2" 0 "V-type ATP synthase subunit C"  
"JS1\_N06\_00236" 19166 "s59E5H2" 0.007028399 "V-type ATP synthase subunit C"  
"JS1\_N06\_00236" 19166 "s63E6H2" 0 "V-type ATP synthase subunit C"  
"JS1\_N06\_00237" 19167 "s59E13H2" 0 "V-type ATP synthase subunit E"  
"JS1\_N06\_00237" 19167 "s59E25H2" 0 "V-type ATP synthase subunit E"  
"JS1\_N06\_00237" 19167 "s59E5H2" 0.01124231 "V-type ATP synthase subunit E"  
"JS1\_N06\_00237" 19167 "s63E6H2" 0.0008757436 "V-type ATP synthase subunit E"  
"JS1\_N06\_00240" 19170 "s59E13H2" 0 "hypothetical protein"  
"JS1\_N06\_00240" 19170 "s59E25H2" 0 "hypothetical protein"  
"JS1\_N06\_00240" 19170 "s59E5H2" 0 "hypothetical protein"  
"JS1\_N06\_00240" 19170 "s63E6H2" 0.003420962 "hypothetical protein"  
"JS1\_N06\_00243" 19173 "s59E13H2" 0.4441376 "Argininosuccinate lyase 1"  
"JS1\_N06\_00243" 19173 "s59E25H2" 0 "Argininosuccinate lyase 1"  
"JS1\_N06\_00243" 19173 "s59E5H2" 0.05921933 "Argininosuccinate lyase 1"  
"JS1\_N06\_00243" 19173 "s63E6H2" 0.1140761 "Argininosuccinate lyase 1"  
"JS1\_N06\_00244" 19174 "s59E13H2" 2.306156 "Argininosuccinate synthase"  
"JS1\_N06\_00244" 19174 "s59E25H2" 0 "Argininosuccinate synthase"  
"JS1\_N06\_00244" 19174 "s59E5H2" 0.1004587 "Argininosuccinate synthase"  
"JS1\_N06\_00244" 19174 "s63E6H2" 0.1131406 "Argininosuccinate synthase"  
"JS1\_N06\_00245" 19175 "s59E13H2" 0.2797577 "Acetylornithine aminotransferase"  
"JS1\_N06\_00245" 19175 "s59E25H2" 0 "Acetylornithine aminotransferase"  
"JS1\_N06\_00245" 19175 "s59E5H2" 0.009770708 "Acetylornithine aminotransferase"  
"JS1\_N06\_00245" 19175 "s63E6H2" 0.04049789 "Acetylornithine aminotransferase"  
"JS1\_N06\_00246" 19176 "s59E13H2" 0.1268862 "Acetylglutamate kinase"  
"JS1\_N06\_00246" 19176 "s59E25H2" 0 "Acetylglutamate kinase"  
"JS1\_N06\_00246" 19176 "s59E5H2" 0.03092955 "Acetylglutamate kinase"  
"JS1\_N06\_00246" 19176 "s63E6H2" 0.1601018 "Acetylglutamate kinase"  
"JS1\_N06\_00248" 19178 "s59E13H2" 0.03982119 "Arginine biosynthesis bifunctional protein ArgJ"  
"JS1\_N06\_00248" 19178 "s59E25H2" 0 "Arginine biosynthesis bifunctional protein ArgJ"  
"JS1\_N06\_00248" 19178 "s59E5H2" 0.04329703 "Arginine biosynthesis bifunctional protein ArgJ"  
"JS1\_N06\_00248" 19178 "s63E6H2" 0.1800268 "Arginine biosynthesis bifunctional protein ArgJ"  
"JS1\_N06\_00249" 19179 "s59E13H2" 0.004886649 "N-acetyl-gamma-glutamyl-phosphate reductase"  
"JS1\_N06\_00249" 19179 "s59E25H2" 0 "N-acetyl-gamma-glutamyl-phosphate reductase"  
"JS1\_N06\_00249" 19179 "s59E5H2" 0.004179229 "N-acetyl-gamma-glutamyl-phosphate reductase"  
"JS1\_N06\_00249" 19179 "s63E6H2" 0.1019415 "N-acetyl-gamma-glutamyl-phosphate reductase"  
"JS1\_N06\_00251" 19181 "s59E13H2" 0 "Nitronate monooxygenase"  
"JS1\_N06\_00251" 19181 "s59E25H2" 0 "Nitronate monooxygenase"  
"JS1\_N06\_00251" 19181 "s59E5H2" 0 "Nitronate monooxygenase"  
"JS1\_N06\_00251" 19181 "s63E6H2" 0.00384474 "Nitronate monooxygenase"  
"JS1\_N06\_00252" 19182 "s59E13H2" 0.00126033 "Orotate phosphoribosyltransferase"  
"JS1\_N06\_00252" 19182 "s59E25H2" 0 "Orotate phosphoribosyltransferase"  
"JS1\_N06\_00252" 19182 "s59E5H2" 0.0502148 "Orotate phosphoribosyltransferase"  
"JS1\_N06\_00252" 19182 "s63E6H2" 0.04119368 "Orotate phosphoribosyltransferase"  
"JS1\_N06\_00253" 19183 "s59E13H2" 0.0336187 "Orotidine 5'-phosphate decarboxylase"  
"JS1\_N06\_00253" 19183 "s59E25H2" 0 "Orotidine 5'-phosphate decarboxylase"  
"JS1\_N06\_00253" 19183 "s59E5H2" 1.257057 "Orotidine 5'-phosphate decarboxylase"



"JS1\_N06\_00253" 19183 "s63E6H2" 0.02055738 "Orotidine 5'-phosphate decarboxylase"  
"JS1\_N06\_00254" 19184 "s59E13H2" 0.0124378 "Dihydroorotate dehydrogenase B (NAD(+)), catalytic subunit"  
"JS1\_N06\_00254" 19184 "s59E25H2" 0 "Dihydroorotate dehydrogenase B (NAD(+)), catalytic subunit"  
"JS1\_N06\_00254" 19184 "s59E5H2" 0 "Dihydroorotate dehydrogenase B (NAD(+)), catalytic subunit"  
"JS1\_N06\_00254" 19184 "s63E6H2" 0.02684693 "Dihydroorotate dehydrogenase B (NAD(+)), catalytic subunit"  
"JS1\_N06\_00255" 19185 "s59E13H2" 0.0007701127 "Dihydroorotate dehydrogenase B (NAD(+)), electron transfer subunit"  
"JS1\_N06\_00255" 19185 "s59E25H2" 0 "Dihydroorotate dehydrogenase B (NAD(+)), electron transfer subunit"  
"JS1\_N06\_00255" 19185 "s59E5H2" 0 "Dihydroorotate dehydrogenase B (NAD(+)), electron transfer subunit"  
"JS1\_N06\_00255" 19185 "s63E6H2" 0.01279587 "Dihydroorotate dehydrogenase B (NAD(+)), electron transfer subunit"  
"JS1\_N06\_00256" 19186 "s59E13H2" 0.07130433 "Bifunctional protein PyrR"  
"JS1\_N06\_00256" 19186 "s59E25H2" 0 "Bifunctional protein PyrR"  
"JS1\_N06\_00256" 19186 "s59E5H2" 0.06050608 "Bifunctional protein PyrR"  
"JS1\_N06\_00256" 19186 "s63E6H2" 0.1038352 "Bifunctional protein PyrR"  
"JS1\_N06\_00258" 19188 "s59E13H2" 0.004011426 "hypothetical protein"  
"JS1\_N06\_00258" 19188 "s59E25H2" 0 "hypothetical protein"  
"JS1\_N06\_00258" 19188 "s59E5H2" 0.01569707 "hypothetical protein"  
"JS1\_N06\_00258" 19188 "s63E6H2" 0.06801406 "hypothetical protein"  
"JS1\_N06\_00259" 19189 "s59E13H2" 0.002809315 "Thioredoxin reductase"  
"JS1\_N06\_00259" 19189 "s59E25H2" 0 "Thioredoxin reductase"  
"JS1\_N06\_00259" 19189 "s59E5H2" 0.009861151 "Thioredoxin reductase"  
"JS1\_N06\_00259" 19189 "s63E6H2" 0.02672817 "Thioredoxin reductase"  
"JS1\_N06\_00260" 19190 "s59E13H2" 0 "L-2-hydroxyglutarate oxidase LhgO"  
"JS1\_N06\_00260" 19190 "s59E25H2" 0 "L-2-hydroxyglutarate oxidase LhgO"  
"JS1\_N06\_00260" 19190 "s59E5H2" 0.02005164 "L-2-hydroxyglutarate oxidase LhgO"  
"JS1\_N06\_00260" 19190 "s63E6H2" 0.07705287 "L-2-hydroxyglutarate oxidase LhgO"  
"JS1\_N06\_00261" 19191 "s59E13H2" 0 "D-malate dehydrogenase [decarboxylating]"  
"JS1\_N06\_00261" 19191 "s59E25H2" 0 "D-malate dehydrogenase [decarboxylating]"  
"JS1\_N06\_00261" 19191 "s59E5H2" 0.03131975 "D-malate dehydrogenase [decarboxylating]"  
"JS1\_N06\_00261" 19191 "s63E6H2" 0.1904092 "D-malate dehydrogenase [decarboxylating]"  
"JS1\_N06\_00262" 19192 "s59E13H2" 0.03135537 "2,3-dimethylmalate dehydratase small subunit"  
"JS1\_N06\_00262" 19192 "s59E25H2" 0.1031746 "2,3-dimethylmalate dehydratase small subunit"  
"JS1\_N06\_00262" 19192 "s59E5H2" 0.4501329 "2,3-dimethylmalate dehydratase small subunit"  
"JS1\_N06\_00262" 19192 "s63E6H2" 1.043575 "2,3-dimethylmalate dehydratase small subunit"  
"JS1\_N06\_00263" 19193 "s59E13H2" 0.2209268 "2,3-dimethylmalate dehydratase large subunit"  
"JS1\_N06\_00263" 19193 "s59E25H2" 0.6642914 "2,3-dimethylmalate dehydratase large subunit"  
"JS1\_N06\_00263" 19193 "s59E5H2" 0.8058373 "2,3-dimethylmalate dehydratase large subunit"  
"JS1\_N06\_00263" 19193 "s63E6H2" 1.422385 "2,3-dimethylmalate dehydratase large subunit"  
"JS1\_N06\_00264" 19194 "s59E13H2" 0.0161018 "Pyrroline-5-carboxylate reductase"  
"JS1\_N06\_00264" 19194 "s59E25H2" 0 "Pyrroline-5-carboxylate reductase"  
"JS1\_N06\_00264" 19194 "s59E5H2" 1.479777 "Pyrroline-5-carboxylate reductase"  
"JS1\_N06\_00264" 19194 "s63E6H2" 0.5796148 "Pyrroline-5-carboxylate reductase"  
"JS1\_N06\_00265" 19195 "s59E13H2" 0.2291651 "hypothetical protein"  
"JS1\_N06\_00265" 19195 "s59E25H2" 0 "hypothetical protein"  
"JS1\_N06\_00265" 19195 "s59E5H2" 2.549053 "hypothetical protein"  
"JS1\_N06\_00265" 19195 "s63E6H2" 1.065466 "hypothetical protein"  
"JS1\_N06\_00266" 19196 "s59E13H2" 0.1509261 "Ferredoxin"  
"JS1\_N06\_00266" 19196 "s59E25H2" 0 "Ferredoxin"

"JS1\_N06\_00266" 19196 "s59E5H2" 2.715267 "Ferredoxin"  
"JS1\_N06\_00266" 19196 "s63E6H2" 0.8850879 "Ferredoxin"  
"JS1\_N06\_00267" 19197 "s59E13H2" 0.01975844 "hypothetical protein"  
"JS1\_N06\_00267" 19197 "s59E25H2" 0 "hypothetical protein"  
"JS1\_N06\_00267" 19197 "s59E5H2" 2.030153 "hypothetical protein"  
"JS1\_N06\_00267" 19197 "s63E6H2" 0.5171376 "hypothetical protein"  
"JS1\_N06\_00268" 19198 "s59E13H2" 0.137039 "(R)-citramalate synthase CimA"  
"JS1\_N06\_00268" 19198 "s59E25H2" 0 "(R)-citramalate synthase CimA"  
"JS1\_N06\_00268" 19198 "s59E5H2" 2.126517 "(R)-citramalate synthase CimA"  
"JS1\_N06\_00268" 19198 "s63E6H2" 0.6701431 "(R)-citramalate synthase CimA"  
"JS1\_N06\_00269" 19199 "s59E13H2" 0.1172592 "2-isopropylmalate synthase"  
"JS1\_N06\_00269" 19199 "s59E25H2" 0 "2-isopropylmalate synthase"  
"JS1\_N06\_00269" 19199 "s59E5H2" 1.725603 "2-isopropylmalate synthase"  
"JS1\_N06\_00269" 19199 "s63E6H2" 0.8879592 "2-isopropylmalate synthase"  
"JS1\_N06\_00270" 19200 "s59E13H2" 0.0227876 "Prephenate dehydratase"  
"JS1\_N06\_00270" 19200 "s59E25H2" 0 "Prephenate dehydratase"  
"JS1\_N06\_00270" 19200 "s59E5H2" 1.822992 "Prephenate dehydratase"  
"JS1\_N06\_00270" 19200 "s63E6H2" 0.6879951 "Prephenate dehydratase"  
"JS1\_N06\_00271" 19201 "s59E13H2" 0.00377629 "Ketol-acid reductoisomerase"  
"JS1\_N06\_00271" 19201 "s59E25H2" 0 "Ketol-acid reductoisomerase"  
"JS1\_N06\_00271" 19201 "s59E5H2" 0.8922925 "Ketol-acid reductoisomerase"  
"JS1\_N06\_00271" 19201 "s63E6H2" 0.3442079 "Ketol-acid reductoisomerase"  
"JS1\_N06\_00272" 19202 "s59E13H2" 0.004571194 "Putative acetolactate synthase small subunit"  
"JS1\_N06\_00272" 19202 "s59E25H2" 0 "Putative acetolactate synthase small subunit"  
"JS1\_N06\_00272" 19202 "s59E5H2" 0.7485031 "Putative acetolactate synthase small subunit"  
"JS1\_N06\_00272" 19202 "s63E6H2" 0.4629011 "Putative acetolactate synthase small subunit"  
"JS1\_N06\_00273" 19203 "s59E13H2" 0.02431752 "Acetolactate synthase large subunit"  
"JS1\_N06\_00273" 19203 "s59E25H2" 0 "Acetolactate synthase large subunit"  
"JS1\_N06\_00273" 19203 "s59E5H2" 0.781326 "Acetolactate synthase large subunit"  
"JS1\_N06\_00273" 19203 "s63E6H2" 0.4770005 "Acetolactate synthase large subunit"  
"JS1\_N06\_00276" 19206 "s59E13H2" 0.0115801 "Dihydroxy-acid dehydratase"  
"JS1\_N06\_00276" 19206 "s59E25H2" 0 "Dihydroxy-acid dehydratase"  
"JS1\_N06\_00276" 19206 "s59E5H2" 0.1473785 "Dihydroxy-acid dehydratase"  
"JS1\_N06\_00276" 19206 "s63E6H2" 0.175769 "Dihydroxy-acid dehydratase"  
"JS1\_N06\_00277" 19207 "s59E13H2" 0 "Isocitrate dehydrogenase [NADP]"  
"JS1\_N06\_00277" 19207 "s59E25H2" 0 "Isocitrate dehydrogenase [NADP]"  
"JS1\_N06\_00277" 19207 "s59E5H2" 0 "Isocitrate dehydrogenase [NADP]"  
"JS1\_N06\_00277" 19207 "s63E6H2" 0.09848037 "Isocitrate dehydrogenase [NADP]"  
"JS1\_N06\_00278" 19208 "s59E13H2" 0 "Methanogen homoaconitase large subunit"  
"JS1\_N06\_00278" 19208 "s59E25H2" 0 "Methanogen homoaconitase large subunit"  
"JS1\_N06\_00278" 19208 "s59E5H2" 0 "Methanogen homoaconitase large subunit"  
"JS1\_N06\_00278" 19208 "s63E6H2" 0.1358462 "Methanogen homoaconitase large subunit"  
"JS1\_N06\_00279" 19209 "s59E13H2" 0.008719051 "(R)-citramalate synthase CimA"  
"JS1\_N06\_00279" 19209 "s59E25H2" 0 "(R)-citramalate synthase CimA"  
"JS1\_N06\_00279" 19209 "s59E5H2" 0 "(R)-citramalate synthase CimA"  
"JS1\_N06\_00279" 19209 "s63E6H2" 0.1775573 "(R)-citramalate synthase CimA"  
"JS1\_N06\_00280" 19210 "s59E13H2" 0.01239886 "Glutamate dehydrogenase"

"JS1\_N06\_00280" 19210 "s59E25H2" 0 "Glutamate dehydrogenase"  
"JS1\_N06\_00280" 19210 "s59E5H2" 0 "Glutamate dehydrogenase"  
"JS1\_N06\_00280" 19210 "s63E6H2" 0.098882 "Glutamate dehydrogenase"  
"JS1\_N06\_00281" 19211 "s59E13H2" 0.005534876 "putative transcriptional regulatory protein pdtaR"  
"JS1\_N06\_00281" 19211 "s59E25H2" 0 "putative transcriptional regulatory protein pdtaR"  
"JS1\_N06\_00281" 19211 "s59E5H2" 0.005518888 "putative transcriptional regulatory protein pdtaR"  
"JS1\_N06\_00281" 19211 "s63E6H2" 0.1288378 "putative transcriptional regulatory protein pdtaR"  
"JS1\_N06\_00283" 19213 "s59E13H2" 0.02778347 "Bifunctional homocysteine S-methyltransferase/5,10-methylenetetrahydrofolate reductase"  
"JS1\_N06\_00283" 19213 "s59E25H2" 0 "Bifunctional homocysteine S-methyltransferase/5,10-methylenetetrahydrofolate reductase"  
"JS1\_N06\_00283" 19213 "s59E5H2" 0.1796528 "Bifunctional homocysteine S-methyltransferase/5,10-methylenetetrahydrofolate reductase"  
"JS1\_N06\_00283" 19213 "s63E6H2" 0.05629803 "Bifunctional homocysteine S-methyltransferase/5,10-methylenetetrahydrofolate reductase"  
"JS1\_N06\_00284" 19214 "s59E13H2" 0 "hypothetical protein"  
"JS1\_N06\_00284" 19214 "s59E25H2" 0 "hypothetical protein"  
"JS1\_N06\_00284" 19214 "s59E5H2" 0 "hypothetical protein"  
"JS1\_N06\_00284" 19214 "s63E6H2" 0.02599117 "hypothetical protein"  
"JS1\_N06\_00285" 19215 "s59E13H2" 0.1866975 "Signal peptidase IB"  
"JS1\_N06\_00285" 19215 "s59E25H2" 0 "Signal peptidase IB"  
"JS1\_N06\_00285" 19215 "s59E5H2" 0.1161696 "Signal peptidase IB"  
"JS1\_N06\_00285" 19215 "s63E6H2" 0.2210542 "Signal peptidase IB"  
"JS1\_N06\_00286" 19216 "s59E13H2" 0 "V-type sodium ATPase subunit C"  
"JS1\_N06\_00286" 19216 "s59E25H2" 0 "V-type sodium ATPase subunit C"  
"JS1\_N06\_00286" 19216 "s59E5H2" 0 "V-type sodium ATPase subunit C"  
"JS1\_N06\_00286" 19216 "s63E6H2" 0 "V-type sodium ATPase subunit C"  
"JS1\_N06\_00290" 19220 "s59E13H2" 0.001041871 "Phenylalanine--tRNA ligase alpha subunit"  
"JS1\_N06\_00290" 19220 "s59E25H2" 0 "Phenylalanine--tRNA ligase alpha subunit"  
"JS1\_N06\_00290" 19220 "s59E5H2" 0.00851629 "Phenylalanine--tRNA ligase alpha subunit"  
"JS1\_N06\_00290" 19220 "s63E6H2" 0.003219202 "Phenylalanine--tRNA ligase alpha subunit"  
"JS1\_N06\_00291" 19221 "s59E13H2" 0.003450195 "Phenylalanine--tRNA ligase alpha subunit"  
"JS1\_N06\_00291" 19221 "s59E25H2" 0 "Phenylalanine--tRNA ligase alpha subunit"  
"JS1\_N06\_00291" 19221 "s59E5H2" 0.0080737 "Phenylalanine--tRNA ligase alpha subunit"  
"JS1\_N06\_00291" 19221 "s63E6H2" 0.003003459 "Phenylalanine--tRNA ligase alpha subunit"  
"JS1\_N06\_00303" 19233 "s59E13H2" 0 "Lon protease"  
"JS1\_N06\_00303" 19233 "s59E25H2" 0 "Lon protease"  
"JS1\_N06\_00303" 19233 "s59E5H2" 0 "Lon protease"  
"JS1\_N06\_00303" 19233 "s63E6H2" 0.002066034 "Lon protease"  
"JS1\_N06\_00306" 19236 "s59E13H2" 0 "V-type ATP synthase subunit I"  
"JS1\_N06\_00306" 19236 "s59E25H2" 0 "V-type ATP synthase subunit I"  
"JS1\_N06\_00306" 19236 "s59E5H2" 0.0302242 "V-type ATP synthase subunit I"  
"JS1\_N06\_00306" 19236 "s63E6H2" 0.005890784 "V-type ATP synthase subunit I"  
"JS1\_N06\_00309" 19239 "s59E13H2" 0.6663647 "hypothetical protein"  
"JS1\_N06\_00309" 19239 "s59E25H2" 0 "hypothetical protein"  
"JS1\_N06\_00309" 19239 "s59E5H2" 0.03121034 "hypothetical protein"  
"JS1\_N06\_00309" 19239 "s63E6H2" 0.00434235 "hypothetical protein"  
"JS1\_N06\_00310" 19240 "s59E13H2" 0.4538616 "hypothetical protein"  
"JS1\_N06\_00310" 19240 "s59E25H2" 0 "hypothetical protein"  
"JS1\_N06\_00310" 19240 "s59E5H2" 0.1359555 "hypothetical protein"  
"JS1\_N06\_00310" 19240 "s63E6H2" 0.07834725 "hypothetical protein"

"JS1\_N06\_00319" 19249 "s59E13H2" 0 "ATP-dependent DNA helicase UvrD1"  
"JS1\_N06\_00319" 19249 "s59E25H2" 0 "ATP-dependent DNA helicase UvrD1"  
"JS1\_N06\_00319" 19249 "s59E5H2" 0 "ATP-dependent DNA helicase UvrD1"  
"JS1\_N06\_00319" 19249 "s63E6H2" 0 "ATP-dependent DNA helicase UvrD1"  
"JS1\_N06\_00320" 19250 "s59E13H2" 0 "Patatin-like phospholipase"  
"JS1\_N06\_00320" 19250 "s59E25H2" 0 "Patatin-like phospholipase"  
"JS1\_N06\_00320" 19250 "s59E5H2" 0.007898024 "Patatin-like phospholipase"  
"JS1\_N06\_00320" 19250 "s63E6H2" 0 "Patatin-like phospholipase"  
"JS1\_N06\_00323" 19253 "s59E13H2" 0.1155141 "Putative peptidyl-prolyl cis-trans isomerase Cbf2 precursor"  
"JS1\_N06\_00323" 19253 "s59E25H2" 0 "Putative peptidyl-prolyl cis-trans isomerase Cbf2 precursor"  
"JS1\_N06\_00323" 19253 "s59E5H2" 0.007836399 "Putative peptidyl-prolyl cis-trans isomerase Cbf2 precursor"  
"JS1\_N06\_00323" 19253 "s63E6H2" 0.8067321 "Putative peptidyl-prolyl cis-trans isomerase Cbf2 precursor"  
"JS1\_N06\_00324" 19254 "s59E13H2" 0.006955593 "30S ribosomal protein S21"  
"JS1\_N06\_00324" 19254 "s59E25H2" 0 "30S ribosomal protein S21"  
"JS1\_N06\_00324" 19254 "s59E5H2" 0.2849491 "30S ribosomal protein S21"  
"JS1\_N06\_00324" 19254 "s63E6H2" 0.5078298 "30S ribosomal protein S21"  
"JS1\_N06\_00325" 19255 "s59E13H2" 0.000787706 "glutamyl-tRNA(Gln) amidotransferase subunit E"  
"JS1\_N06\_00325" 19255 "s59E25H2" 0 "glutamyl-tRNA(Gln) amidotransferase subunit E"  
"JS1\_N06\_00325" 19255 "s59E5H2" 0.08843708 "glutamyl-tRNA(Gln) amidotransferase subunit E"  
"JS1\_N06\_00325" 19255 "s63E6H2" 0.7185383 "glutamyl-tRNA(Gln) amidotransferase subunit E"  
"JS1\_N06\_00326" 19256 "s59E13H2" 0.04552276 "hypothetical protein"  
"JS1\_N06\_00326" 19256 "s59E25H2" 0 "hypothetical protein"  
"JS1\_N06\_00326" 19256 "s59E5H2" 0.2198892 "hypothetical protein"  
"JS1\_N06\_00326" 19256 "s63E6H2" 0.9620556 "hypothetical protein"  
"JS1\_N06\_00327" 19257 "s59E13H2" 0.02605688 "SigmaW regulon antibacterial"  
"JS1\_N06\_00327" 19257 "s59E25H2" 0 "SigmaW regulon antibacterial"  
"JS1\_N06\_00327" 19257 "s59E5H2" 0.1525324 "SigmaW regulon antibacterial"  
"JS1\_N06\_00327" 19257 "s63E6H2" 0.8577252 "SigmaW regulon antibacterial"  
"JS1\_N06\_00330" 19260 "s59E13H2" 0 "hypothetical protein"  
"JS1\_N06\_00330" 19260 "s59E25H2" 0 "hypothetical protein"  
"JS1\_N06\_00330" 19260 "s59E5H2" 0 "hypothetical protein"  
"JS1\_N06\_00330" 19260 "s63E6H2" 0 "hypothetical protein"  
"JS1\_N06\_00333" 19263 "s59E13H2" 0 "hypothetical protein"  
"JS1\_N06\_00333" 19263 "s59E25H2" 0 "hypothetical protein"  
"JS1\_N06\_00333" 19263 "s59E5H2" 0 "hypothetical protein"  
"JS1\_N06\_00333" 19263 "s63E6H2" 0.001864315 "hypothetical protein"  
"JS1\_N06\_00339" 19269 "s59E13H2" 0.000379396 "Phenylalanine--tRNA ligase beta subunit"  
"JS1\_N06\_00339" 19269 "s59E25H2" 0 "Phenylalanine--tRNA ligase beta subunit"  
"JS1\_N06\_00339" 19269 "s59E5H2" 0 "Phenylalanine--tRNA ligase beta subunit"  
"JS1\_N06\_00339" 19269 "s63E6H2" 0 "Phenylalanine--tRNA ligase beta subunit"  
"JS1\_N06\_00340" 19270 "s59E13H2" 0 "V-type sodium ATPase subunit C"  
"JS1\_N06\_00340" 19270 "s59E25H2" 0 "V-type sodium ATPase subunit C"  
"JS1\_N06\_00340" 19270 "s59E5H2" 0.01088995 "V-type sodium ATPase subunit C"  
"JS1\_N06\_00340" 19270 "s63E6H2" 0.004440899 "V-type sodium ATPase subunit C"  
"JS1\_N06\_00344" 19274 "s59E13H2" 0 "GTPase Der"  
"JS1\_N06\_00344" 19274 "s59E25H2" 0 "GTPase Der"  
"JS1\_N06\_00344" 19274 "s59E5H2" 0 "GTPase Der"

"JS1\_N06\_00344" 19274 "s63E6H2" 0 "GTPase Der"  
"JS1\_N06\_00345" 19275 "s59E13H2" 0 "GTPase Der"  
"JS1\_N06\_00345" 19275 "s59E25H2" 0 "GTPase Der"  
"JS1\_N06\_00345" 19275 "s59E5H2" 0 "GTPase Der"  
"JS1\_N06\_00345" 19275 "s63E6H2" 0.00231857 "GTPase Der"  
"JS1\_N06\_00348" 19278 "s59E13H2" 0 "DNA-directed RNA polymerase subunit delta"  
"JS1\_N06\_00348" 19278 "s59E25H2" 0 "DNA-directed RNA polymerase subunit delta"  
"JS1\_N06\_00348" 19278 "s59E5H2" 0.01897349 "DNA-directed RNA polymerase subunit delta"  
"JS1\_N06\_00348" 19278 "s63E6H2" 0.04693 "DNA-directed RNA polymerase subunit delta"  
"JS1\_N06\_00349" 19279 "s59E13H2" 0 "Carbonic anhydrase precursor"  
"JS1\_N06\_00349" 19279 "s59E25H2" 0 "Carbonic anhydrase precursor"  
"JS1\_N06\_00349" 19279 "s59E5H2" 0.01048423 "Carbonic anhydrase precursor"  
"JS1\_N06\_00349" 19279 "s63E6H2" 0.1323732 "Carbonic anhydrase precursor"  
"JS1\_N06\_00350" 19280 "s59E13H2" 0.00696023 "UvrABC system protein C"  
"JS1\_N06\_00350" 19280 "s59E25H2" 0 "UvrABC system protein C"  
"JS1\_N06\_00350" 19280 "s59E5H2" 0.05021314 "UvrABC system protein C"  
"JS1\_N06\_00350" 19280 "s63E6H2" 0.1090625 "UvrABC system protein C"  
"JS1\_N06\_00351" 19281 "s59E13H2" 0.001231951 "UvrABC system protein A"  
"JS1\_N06\_00351" 19281 "s59E25H2" 0.04427914 "UvrABC system protein A"  
"JS1\_N06\_00351" 19281 "s59E5H2" 0.05882855 "UvrABC system protein A"  
"JS1\_N06\_00351" 19281 "s63E6H2" 1.410096 "UvrABC system protein A"  
"JS1\_N06\_00352" 19282 "s59E13H2" 0.026117 "hypothetical protein"  
"JS1\_N06\_00352" 19282 "s59E25H2" 0 "hypothetical protein"  
"JS1\_N06\_00352" 19282 "s59E5H2" 0.2028476 "hypothetical protein"  
"JS1\_N06\_00352" 19282 "s63E6H2" 0.1139825 "hypothetical protein"  
"JS1\_N06\_00353" 19283 "s59E13H2" 0.01699326 "UvrABC system protein B"  
"JS1\_N06\_00353" 19283 "s59E25H2" 0 "UvrABC system protein B"  
"JS1\_N06\_00353" 19283 "s59E5H2" 0.2849527 "UvrABC system protein B"  
"JS1\_N06\_00353" 19283 "s63E6H2" 3.169425 "UvrABC system protein B"  
"JS1\_N06\_00354" 19284 "s59E13H2" 0.04652086 "Adenine deaminase"  
"JS1\_N06\_00354" 19284 "s59E25H2" 0 "Adenine deaminase"  
"JS1\_N06\_00354" 19284 "s59E5H2" 0.7992583 "Adenine deaminase"  
"JS1\_N06\_00354" 19284 "s63E6H2" 3.203725 "Adenine deaminase"  
"JS1\_N06\_00355" 19285 "s59E13H2" 0.00845981 "Dephospho-CoA kinase"  
"JS1\_N06\_00355" 19285 "s59E25H2" 0 "Dephospho-CoA kinase"  
"JS1\_N06\_00355" 19285 "s59E5H2" 0.09392261 "Dephospho-CoA kinase"  
"JS1\_N06\_00355" 19285 "s63E6H2" 2.201751 "Dephospho-CoA kinase"  
"JS1\_N06\_00356" 19286 "s59E13H2" 0.007879872 "DNA polymerase I"  
"JS1\_N06\_00356" 19286 "s59E25H2" 0.08633634 "DNA polymerase I"  
"JS1\_N06\_00356" 19286 "s59E5H2" 0.07196695 "DNA polymerase I"  
"JS1\_N06\_00356" 19286 "s63E6H2" 2.958551 "DNA polymerase I"  
"JS1\_N06\_00359" 19289 "s59E13H2" 0.00495964 "DNA polymerase III subunit alpha"  
"JS1\_N06\_00359" 19289 "s59E25H2" 0 "DNA polymerase III subunit alpha"  
"JS1\_N06\_00359" 19289 "s59E5H2" 0.03171861 "DNA polymerase III subunit alpha"  
"JS1\_N06\_00359" 19289 "s63E6H2" 1.83469 "DNA polymerase III subunit alpha"  
"JS1\_N06\_00362" 19292 "s59E13H2" 0.003405983 "Na(+)/H(+) antiporter subunit C"  
"JS1\_N06\_00362" 19292 "s59E25H2" 0.5870206 "Na(+)/H(+) antiporter subunit C"

"JS1\_N06\_00362" 19292 "s59E5H2" 0.3998416 "Na(+)/H(+) antiporter subunit C"  
"JS1\_N06\_00362" 19292 "s63E6H2" 5.884232 "Na(+)/H(+) antiporter subunit C"  
"JS1\_N06\_00363" 19293 "s59E13H2" 0.001305133 "Na(+)/H(+) antiporter subunit B"  
"JS1\_N06\_00363" 19293 "s59E25H2" 0 "Na(+)/H(+) antiporter subunit B"  
"JS1\_N06\_00363" 19293 "s59E5H2" 0.4118782 "Na(+)/H(+) antiporter subunit B"  
"JS1\_N06\_00363" 19293 "s63E6H2" 5.788262 "Na(+)/H(+) antiporter subunit B"  
"JS1\_N06\_00364" 19294 "s59E13H2" 0 "Na(+)/H(+) antiporter subunit A"  
"JS1\_N06\_00364" 19294 "s59E25H2" 0 "Na(+)/H(+) antiporter subunit A"  
"JS1\_N06\_00364" 19294 "s59E5H2" 0.3289594 "Na(+)/H(+) antiporter subunit A"  
"JS1\_N06\_00364" 19294 "s63E6H2" 5.371578 "Na(+)/H(+) antiporter subunit A"  
"JS1\_N06\_00365" 19295 "s59E13H2" 0 "Na(+)/H(+) antiporter subunit A"  
"JS1\_N06\_00365" 19295 "s59E25H2" 0 "Na(+)/H(+) antiporter subunit A"  
"JS1\_N06\_00365" 19295 "s59E5H2" 0.3848892 "Na(+)/H(+) antiporter subunit A"  
"JS1\_N06\_00365" 19295 "s63E6H2" 5.998341 "Na(+)/H(+) antiporter subunit A"  
"JS1\_N06\_00366" 19296 "s59E13H2" 0 "Membrane-bound hydrogenase subunit alpha"  
"JS1\_N06\_00366" 19296 "s59E25H2" 0 "Membrane-bound hydrogenase subunit alpha"  
"JS1\_N06\_00366" 19296 "s59E5H2" 0.8517795 "Membrane-bound hydrogenase subunit alpha"  
"JS1\_N06\_00366" 19296 "s63E6H2" 8.098686 "Membrane-bound hydrogenase subunit alpha"  
"JS1\_N06\_00367" 19297 "s59E13H2" 0 "F(420)H(2) dehydrogenase subunit C"  
"JS1\_N06\_00367" 19297 "s59E25H2" 0 "F(420)H(2) dehydrogenase subunit C"  
"JS1\_N06\_00367" 19297 "s59E5H2" 0.8750231 "F(420)H(2) dehydrogenase subunit C"  
"JS1\_N06\_00367" 19297 "s63E6H2" 6.379176 "F(420)H(2) dehydrogenase subunit C"  
"JS1\_N06\_00368" 19298 "s59E13H2" 0.00732336 "putative membrane-bound hydrogenase subunit mbhJ"  
"JS1\_N06\_00368" 19298 "s59E25H2" 0 "putative membrane-bound hydrogenase subunit mbhJ"  
"JS1\_N06\_00368" 19298 "s59E5H2" 0.5173965 "putative membrane-bound hydrogenase subunit mbhJ"  
"JS1\_N06\_00368" 19298 "s63E6H2" 6.186998 "putative membrane-bound hydrogenase subunit mbhJ"  
"JS1\_N06\_00369" 19299 "s59E13H2" 0.0002860525 "F(420)H(2) dehydrogenase subunit H"  
"JS1\_N06\_00369" 19299 "s59E25H2" 0 "F(420)H(2) dehydrogenase subunit H"  
"JS1\_N06\_00369" 19299 "s59E5H2" 0.3943802 "F(420)H(2) dehydrogenase subunit H"  
"JS1\_N06\_00369" 19299 "s63E6H2" 5.883147 "F(420)H(2) dehydrogenase subunit H"  
"JS1\_N06\_00370" 19300 "s59E13H2" 0.001310474 "Anaerobic dimethyl sulfoxide reductase chain B"  
"JS1\_N06\_00370" 19300 "s59E25H2" 0 "Anaerobic dimethyl sulfoxide reductase chain B"  
"JS1\_N06\_00370" 19300 "s59E5H2" 1.03852 "Anaerobic dimethyl sulfoxide reductase chain B"  
"JS1\_N06\_00370" 19300 "s63E6H2" 6.957549 "Anaerobic dimethyl sulfoxide reductase chain B"  
"JS1\_N06\_00371" 19301 "s59E13H2" 0.001218069 "Sulfhydrogenase 2 subunit gamma"  
"JS1\_N06\_00371" 19301 "s59E25H2" 0 "Sulfhydrogenase 2 subunit gamma"  
"JS1\_N06\_00371" 19301 "s59E5H2" 0.6984751 "Sulfhydrogenase 2 subunit gamma"  
"JS1\_N06\_00371" 19301 "s63E6H2" 3.216789 "Sulfhydrogenase 2 subunit gamma"  
"JS1\_N06\_00372" 19302 "s59E13H2" 0 "Sulfhydrogenase 2 subunit beta"  
"JS1\_N06\_00372" 19302 "s59E25H2" 0 "Sulfhydrogenase 2 subunit beta"  
"JS1\_N06\_00372" 19302 "s59E5H2" 0.1872092 "Sulfhydrogenase 2 subunit beta"  
"JS1\_N06\_00372" 19302 "s63E6H2" 0.8639879 "Sulfhydrogenase 2 subunit beta"  
"JS1\_N06\_00373" 19303 "s59E13H2" 0.09400219 "Redox-sensing transcriptional repressor Rex"  
"JS1\_N06\_00373" 19303 "s59E25H2" 0 "Redox-sensing transcriptional repressor Rex"  
"JS1\_N06\_00373" 19303 "s59E5H2" 0.5925341 "Redox-sensing transcriptional repressor Rex"  
"JS1\_N06\_00373" 19303 "s63E6H2" 0.7583114 "Redox-sensing transcriptional repressor Rex"  
"JS1\_N06\_00374" 19304 "s59E13H2" 0 "Inositol 2-dehydrogenase/D-chiro-inositol 3-dehydrogenase"

"JS1\_N06\_00374" 19304 "s59E25H2" 0 "Inositol 2-dehydrogenase/D-chiro-inositol 3-dehydrogenase"  
"JS1\_N06\_00374" 19304 "s59E5H2" 0 "Inositol 2-dehydrogenase/D-chiro-inositol 3-dehydrogenase"  
"JS1\_N06\_00374" 19304 "s63E6H2" 0 "Inositol 2-dehydrogenase/D-chiro-inositol 3-dehydrogenase"  
"JS1\_N06\_00375" 19305 "s59E13H2" 0 "dTDP-glucose 4,6-dehydratase"  
"JS1\_N06\_00375" 19305 "s59E25H2" 0 "dTDP-glucose 4,6-dehydratase"  
"JS1\_N06\_00375" 19305 "s59E5H2" 0 "dTDP-glucose 4,6-dehydratase"  
"JS1\_N06\_00375" 19305 "s63E6H2" 0 "dTDP-glucose 4,6-dehydratase"  
"JS1\_N06\_00376" 19306 "s59E13H2" 0 "Protein-glutamine gamma-glutamyltransferase"  
"JS1\_N06\_00376" 19306 "s59E25H2" 0 "Protein-glutamine gamma-glutamyltransferase"  
"JS1\_N06\_00376" 19306 "s59E5H2" 0.06078468 "Protein-glutamine gamma-glutamyltransferase"  
"JS1\_N06\_00376" 19306 "s63E6H2" 0.03805495 "Protein-glutamine gamma-glutamyltransferase"  
"JS1\_N06\_00377" 19307 "s59E13H2" 0.005761894 "hypothetical protein"  
"JS1\_N06\_00377" 19307 "s59E25H2" 0 "hypothetical protein"  
"JS1\_N06\_00377" 19307 "s59E5H2" 0.006607752 "hypothetical protein"  
"JS1\_N06\_00377" 19307 "s63E6H2" 0 "hypothetical protein"  
"JS1\_N06\_00378" 19308 "s59E13H2" 0.3918317 "hypothetical protein"  
"JS1\_N06\_00378" 19308 "s59E25H2" 0 "hypothetical protein"  
"JS1\_N06\_00378" 19308 "s59E5H2" 0.5919984 "hypothetical protein"  
"JS1\_N06\_00378" 19308 "s63E6H2" 0.1008438 "hypothetical protein"  
"JS1\_N06\_00379" 19309 "s59E13H2" 0.0982669 "B3/4 domain protein"  
"JS1\_N06\_00379" 19309 "s59E25H2" 0 "B3/4 domain protein"  
"JS1\_N06\_00379" 19309 "s59E5H2" 0.0280432 "B3/4 domain protein"  
"JS1\_N06\_00379" 19309 "s63E6H2" 0.6355848 "B3/4 domain protein"  
"JS1\_N06\_00380" 19310 "s59E13H2" 1.707512 "Soluble lytic murein transglycosylase precursor"  
"JS1\_N06\_00380" 19310 "s59E25H2" 0 "Soluble lytic murein transglycosylase precursor"  
"JS1\_N06\_00380" 19310 "s59E5H2" 0.4974402 "Soluble lytic murein transglycosylase precursor"  
"JS1\_N06\_00380" 19310 "s63E6H2" 0.2142812 "Soluble lytic murein transglycosylase precursor"  
"JS1\_N06\_00381" 19311 "s59E13H2" 0.6030269 "hypothetical protein"  
"JS1\_N06\_00381" 19311 "s59E25H2" 0 "hypothetical protein"  
"JS1\_N06\_00381" 19311 "s59E5H2" 0.5766606 "hypothetical protein"  
"JS1\_N06\_00381" 19311 "s63E6H2" 0.2422953 "hypothetical protein"  
"JS1\_N06\_00382" 19312 "s59E13H2" 0 "Helix-turn-helix domain protein"  
"JS1\_N06\_00382" 19312 "s59E25H2" 0 "Helix-turn-helix domain protein"  
"JS1\_N06\_00382" 19312 "s59E5H2" 0.1115908 "Helix-turn-helix domain protein"  
"JS1\_N06\_00382" 19312 "s63E6H2" 0.1602906 "Helix-turn-helix domain protein"  
"JS1\_N06\_00383" 19313 "s59E13H2" 1.576577 "Murein hydrolase activator NlpD precursor"  
"JS1\_N06\_00383" 19313 "s59E25H2" 0 "Murein hydrolase activator NlpD precursor"  
"JS1\_N06\_00383" 19313 "s59E5H2" 0.4706496 "Murein hydrolase activator NlpD precursor"  
"JS1\_N06\_00383" 19313 "s63E6H2" 0.2901449 "Murein hydrolase activator NlpD precursor"  
"JS1\_N06\_00384" 19314 "s59E13H2" 0.3536334 "Periplasmic dipeptide transport protein precursor"  
"JS1\_N06\_00384" 19314 "s59E25H2" 0 "Periplasmic dipeptide transport protein precursor"  
"JS1\_N06\_00384" 19314 "s59E5H2" 1.716153 "Periplasmic dipeptide transport protein precursor"  
"JS1\_N06\_00384" 19314 "s63E6H2" 0.1557823 "Periplasmic dipeptide transport protein precursor"  
"JS1\_N06\_00385" 19315 "s59E13H2" 1.270077 "Dipeptide transport system permease protein DppB"  
"JS1\_N06\_00385" 19315 "s59E25H2" 0 "Dipeptide transport system permease protein DppB"  
"JS1\_N06\_00385" 19315 "s59E5H2" 1.670599 "Dipeptide transport system permease protein DppB"  
"JS1\_N06\_00385" 19315 "s63E6H2" 0.3153851 "Dipeptide transport system permease protein DppB"

"JS1\_N06\_00386" 19316 "s59E13H2" 1.206882 "Glutathione transport system permease protein GsiD"  
"JS1\_N06\_00386" 19316 "s59E25H2" 0.4512472 "Glutathione transport system permease protein GsiD"  
"JS1\_N06\_00386" 19316 "s59E5H2" 1.198933 "Glutathione transport system permease protein GsiD"  
"JS1\_N06\_00386" 19316 "s63E6H2" 0.2027395 "Glutathione transport system permease protein GsiD"  
"JS1\_N06\_00387" 19317 "s59E13H2" 4.953103 "Oligopeptide transport ATP-binding protein OppD"  
"JS1\_N06\_00387" 19317 "s59E25H2" 0 "Oligopeptide transport ATP-binding protein OppD"  
"JS1\_N06\_00387" 19317 "s59E5H2" 2.086503 "Oligopeptide transport ATP-binding protein OppD"  
"JS1\_N06\_00387" 19317 "s63E6H2" 0.3365356 "Oligopeptide transport ATP-binding protein OppD"  
"JS1\_N06\_00388" 19318 "s59E13H2" 4.801851 "Oligopeptide transport ATP-binding protein OppF"  
"JS1\_N06\_00388" 19318 "s59E25H2" 0 "Oligopeptide transport ATP-binding protein OppF"  
"JS1\_N06\_00388" 19318 "s59E5H2" 1.865713 "Oligopeptide transport ATP-binding protein OppF"  
"JS1\_N06\_00388" 19318 "s63E6H2" 0.2954863 "Oligopeptide transport ATP-binding protein OppF"  
"JS1\_N06\_00389" 19319 "s59E13H2" 1.679592 "RNA polymerase-binding transcription factor CarD"  
"JS1\_N06\_00389" 19319 "s59E25H2" 0 "RNA polymerase-binding transcription factor CarD"  
"JS1\_N06\_00389" 19319 "s59E5H2" 0.9465408 "RNA polymerase-binding transcription factor CarD"  
"JS1\_N06\_00389" 19319 "s63E6H2" 0.2125204 "RNA polymerase-binding transcription factor CarD"  
"JS1\_N06\_00390" 19320 "s59E13H2" 0.9859803 "tRNA uridine 5-carboxymethylaminomethyl modification enzyme MnmG"  
"JS1\_N06\_00390" 19320 "s59E25H2" 0.1333333 "tRNA uridine 5-carboxymethylaminomethyl modification enzyme MnmG"  
"JS1\_N06\_00390" 19320 "s59E5H2" 2.348609 "tRNA uridine 5-carboxymethylaminomethyl modification enzyme MnmG"  
"JS1\_N06\_00390" 19320 "s63E6H2" 0.3476446 "tRNA uridine 5-carboxymethylaminomethyl modification enzyme MnmG"  
"JS1\_N06\_00393" 19323 "s59E13H2" 2.030958 "Oligopeptide transport ATP-binding protein OppF"  
"JS1\_N06\_00393" 19323 "s59E25H2" 0 "Oligopeptide transport ATP-binding protein OppF"  
"JS1\_N06\_00393" 19323 "s59E5H2" 0.5955694 "Oligopeptide transport ATP-binding protein OppF"  
"JS1\_N06\_00393" 19323 "s63E6H2" 0.108759 "Oligopeptide transport ATP-binding protein OppF"  
"JS1\_N06\_00394" 19324 "s59E13H2" 0.06129308 "Radical SAM superfamily protein"  
"JS1\_N06\_00394" 19324 "s59E25H2" 0 "Radical SAM superfamily protein"  
"JS1\_N06\_00394" 19324 "s59E5H2" 0.6005527 "Radical SAM superfamily protein"  
"JS1\_N06\_00394" 19324 "s63E6H2" 0.0775325 "Radical SAM superfamily protein"  
"JS1\_N06\_00396" 19326 "s59E13H2" 0.1358425 "Biotin transporter BioY"  
"JS1\_N06\_00396" 19326 "s59E25H2" 0.4588015 "Biotin transporter BioY"  
"JS1\_N06\_00396" 19326 "s59E5H2" 1.381489 "Biotin transporter BioY"  
"JS1\_N06\_00396" 19326 "s63E6H2" 4.320633 "Biotin transporter BioY"  
"JS1\_N06\_00397" 19327 "s59E13H2" 0.02334421 "Bifunctional ligase/repressor BirA"  
"JS1\_N06\_00397" 19327 "s59E25H2" 0 "Bifunctional ligase/repressor BirA"  
"JS1\_N06\_00397" 19327 "s59E5H2" 0.3652774 "Bifunctional ligase/repressor BirA"  
"JS1\_N06\_00397" 19327 "s63E6H2" 9.907234 "Bifunctional ligase/repressor BirA"  
"JS1\_N06\_00398" 19328 "s59E13H2" 0.01026291 "hypothetical protein"  
"JS1\_N06\_00398" 19328 "s59E25H2" 0 "hypothetical protein"  
"JS1\_N06\_00398" 19328 "s59E5H2" 0.2868444 "hypothetical protein"  
"JS1\_N06\_00398" 19328 "s63E6H2" 0.01670315 "hypothetical protein"  
"JS1\_N06\_00399" 19329 "s59E13H2" 0.01321125 "Deoxyadenosine/deoxycytidine kinase"  
"JS1\_N06\_00399" 19329 "s59E25H2" 0 "Deoxyadenosine/deoxycytidine kinase"  
"JS1\_N06\_00399" 19329 "s59E5H2" 0.2235996 "Deoxyadenosine/deoxycytidine kinase"  
"JS1\_N06\_00399" 19329 "s63E6H2" 1.783449 "Deoxyadenosine/deoxycytidine kinase"  
"JS1\_N06\_00400" 19330 "s59E13H2" 0.1239752 "Deoxyguanosine kinase"  
"JS1\_N06\_00400" 19330 "s59E25H2" 0 "Deoxyguanosine kinase"  
"JS1\_N06\_00400" 19330 "s59E5H2" 1.114724 "Deoxyguanosine kinase"



"JS1\_N06\_00400" 19330 "s63E6H2" 4.859938 "Deoxyguanosine kinase"  
"JS1\_N06\_00401" 19331 "s59E13H2" 0.09742925 "Octanoyltransferase LipM"  
"JS1\_N06\_00401" 19331 "s59E25H2" 0 "Octanoyltransferase LipM"  
"JS1\_N06\_00401" 19331 "s59E5H2" 0.4450012 "Octanoyltransferase LipM"  
"JS1\_N06\_00401" 19331 "s63E6H2" 5.350955 "Octanoyltransferase LipM"  
"JS1\_N06\_00403" 19333 "s59E13H2" 0.03784787 "endonuclease IV"  
"JS1\_N06\_00403" 19333 "s59E25H2" 0 "endonuclease IV"  
"JS1\_N06\_00403" 19333 "s59E5H2" 0.0269445 "endonuclease IV"  
"JS1\_N06\_00403" 19333 "s63E6H2" 0.02007667 "endonuclease IV"  
"JS1\_N06\_00405" 19335 "s59E13H2" 0.0992621 "4-hydroxyphenylacetate decarboxylase large subunit"  
"JS1\_N06\_00405" 19335 "s59E25H2" 0 "4-hydroxyphenylacetate decarboxylase large subunit"  
"JS1\_N06\_00405" 19335 "s59E5H2" 1.50408 "4-hydroxyphenylacetate decarboxylase large subunit"  
"JS1\_N06\_00405" 19335 "s63E6H2" 0.4638478 "4-hydroxyphenylacetate decarboxylase large subunit"  
"JS1\_N06\_00406" 19336 "s59E13H2" 1.08365 "RNA recognition motif. (a.k.a. RRM, RBD, or RNP domain)"  
"JS1\_N06\_00406" 19336 "s59E25H2" 0 "RNA recognition motif. (a.k.a. RRM, RBD, or RNP domain)"  
"JS1\_N06\_00406" 19336 "s59E5H2" 15.9443 "RNA recognition motif. (a.k.a. RRM, RBD, or RNP domain)"  
"JS1\_N06\_00406" 19336 "s63E6H2" 2.542479 "RNA recognition motif. (a.k.a. RRM, RBD, or RNP domain)"  
"JS1\_N06\_00407" 19337 "s59E13H2" 0.06615818 "1,3-propanediol dehydrogenase"  
"JS1\_N06\_00407" 19337 "s59E25H2" 0 "1,3-propanediol dehydrogenase"  
"JS1\_N06\_00407" 19337 "s59E5H2" 4.25889 "1,3-propanediol dehydrogenase"  
"JS1\_N06\_00407" 19337 "s63E6H2" 2.00602 "1,3-propanediol dehydrogenase"  
"JS1\_N06\_00408" 19338 "s59E13H2" 0.03456719 "Putative competence-damage inducible protein"  
"JS1\_N06\_00408" 19338 "s59E25H2" 0.1443381 "Putative competence-damage inducible protein"  
"JS1\_N06\_00408" 19338 "s59E5H2" 2.325841 "Putative competence-damage inducible protein"  
"JS1\_N06\_00408" 19338 "s63E6H2" 0.9026291 "Putative competence-damage inducible protein"  
"JS1\_N06\_00409" 19339 "s59E13H2" 0.01237847 "Tetratricopeptide repeat protein"  
"JS1\_N06\_00409" 19339 "s59E25H2" 0 "Tetratricopeptide repeat protein"  
"JS1\_N06\_00409" 19339 "s59E5H2" 2.162 "Tetratricopeptide repeat protein"  
"JS1\_N06\_00409" 19339 "s63E6H2" 0.05768525 "Tetratricopeptide repeat protein"  
"JS1\_N06\_00410" 19340 "s59E13H2" 0.1013001 "hypothetical protein"  
"JS1\_N06\_00410" 19340 "s59E25H2" 0 "hypothetical protein"  
"JS1\_N06\_00410" 19340 "s59E5H2" 2.086513 "hypothetical protein"  
"JS1\_N06\_00410" 19340 "s63E6H2" 11.01237 "hypothetical protein"  
"JS1\_N06\_00411" 19341 "s59E13H2" 2.347739 "MobA-like NTP transferase domain protein"  
"JS1\_N06\_00411" 19341 "s59E25H2" 0 "MobA-like NTP transferase domain protein"  
"JS1\_N06\_00411" 19341 "s59E5H2" 3.925751 "MobA-like NTP transferase domain protein"  
"JS1\_N06\_00411" 19341 "s63E6H2" 13.56205 "MobA-like NTP transferase domain protein"  
"JS1\_N06\_00412" 19342 "s59E13H2" 1.770602 "Methylated-DNA--protein-cysteine methyltransferase"  
"JS1\_N06\_00412" 19342 "s59E25H2" 0.1561905 "Methylated-DNA--protein-cysteine methyltransferase"  
"JS1\_N06\_00412" 19342 "s59E5H2" 4.935562 "Methylated-DNA--protein-cysteine methyltransferase"  
"JS1\_N06\_00412" 19342 "s63E6H2" 11.23177 "Methylated-DNA--protein-cysteine methyltransferase"  
"JS1\_N06\_00413" 19343 "s59E13H2" 1.080398 "D-alanine--D-alanine ligase"  
"JS1\_N06\_00413" 19343 "s59E25H2" 0.2950089 "D-alanine--D-alanine ligase"  
"JS1\_N06\_00413" 19343 "s59E5H2" 4.806634 "D-alanine--D-alanine ligase"  
"JS1\_N06\_00413" 19343 "s63E6H2" 8.154278 "D-alanine--D-alanine ligase"  
"JS1\_N06\_00414" 19344 "s59E13H2" 4.610118 "Ktr system potassium uptake protein A"  
"JS1\_N06\_00414" 19344 "s59E25H2" 0 "Ktr system potassium uptake protein A"

"JS1\_N06\_00414" 19344 "s59E5H2" 3.959734 "Ktr system potassium uptake protein A"  
"JS1\_N06\_00414" 19344 "s63E6H2" 9.755927 "Ktr system potassium uptake protein A"  
"JS1\_N06\_00415" 19345 "s59E13H2" 4.366357 "Ktr system potassium uptake protein B"  
"JS1\_N06\_00415" 19345 "s59E25H2" 0.05367232 "Ktr system potassium uptake protein B"  
"JS1\_N06\_00415" 19345 "s59E5H2" 2.24963 "Ktr system potassium uptake protein B"  
"JS1\_N06\_00415" 19345 "s63E6H2" 9.772567 "Ktr system potassium uptake protein B"  
"JS1\_N06\_00416" 19346 "s59E13H2" 6.270956 "Trk system potassium uptake protein TrkH"  
"JS1\_N06\_00416" 19346 "s59E25H2" 0.2383922 "Trk system potassium uptake protein TrkH"  
"JS1\_N06\_00416" 19346 "s59E5H2" 0.7665577 "Trk system potassium uptake protein TrkH"  
"JS1\_N06\_00416" 19346 "s63E6H2" 10.40748 "Trk system potassium uptake protein TrkH"  
"JS1\_N06\_00417" 19347 "s59E13H2" 3.976754 "Trk system potassium uptake protein TrkA"  
"JS1\_N06\_00417" 19347 "s59E25H2" 0 "Trk system potassium uptake protein TrkA"  
"JS1\_N06\_00417" 19347 "s59E5H2" 0.4994036 "Trk system potassium uptake protein TrkA"  
"JS1\_N06\_00417" 19347 "s63E6H2" 7.739596 "Trk system potassium uptake protein TrkA"  
"JS1\_N06\_00419" 19349 "s59E13H2" 3.27774 "Zinc ribbon domain protein"  
"JS1\_N06\_00419" 19349 "s59E25H2" 0 "Zinc ribbon domain protein"  
"JS1\_N06\_00419" 19349 "s59E5H2" 0.06540838 "Zinc ribbon domain protein"  
"JS1\_N06\_00419" 19349 "s63E6H2" 1.719781 "Zinc ribbon domain protein"  
"JS1\_N06\_00420" 19350 "s59E13H2" 1.520149 "hypothetical protein"  
"JS1\_N06\_00420" 19350 "s59E25H2" 0 "hypothetical protein"  
"JS1\_N06\_00420" 19350 "s59E5H2" 0.09577125 "hypothetical protein"  
"JS1\_N06\_00420" 19350 "s63E6H2" 4.028974 "hypothetical protein"  
"JS1\_N06\_00421" 19351 "s59E13H2" 2.805248 "Radical SAM superfamily protein"  
"JS1\_N06\_00421" 19351 "s59E25H2" 0 "Radical SAM superfamily protein"  
"JS1\_N06\_00421" 19351 "s59E5H2" 0.03036711 "Radical SAM superfamily protein"  
"JS1\_N06\_00421" 19351 "s63E6H2" 0.1016084 "Radical SAM superfamily protein"  
"JS1\_N06\_00422" 19352 "s59E13H2" 0.01436423 "Stage V sporulation protein S"  
"JS1\_N06\_00422" 19352 "s59E25H2" 0 "Stage V sporulation protein S"  
"JS1\_N06\_00422" 19352 "s59E5H2" 0 "Stage V sporulation protein S"  
"JS1\_N06\_00422" 19352 "s63E6H2" 0 "Stage V sporulation protein S"  
"JS1\_N06\_00423" 19353 "s59E13H2" 3.246606 "hypothetical protein"  
"JS1\_N06\_00423" 19353 "s59E25H2" 0 "hypothetical protein"  
"JS1\_N06\_00423" 19353 "s59E5H2" 0.1763289 "hypothetical protein"  
"JS1\_N06\_00423" 19353 "s63E6H2" 0.08784705 "hypothetical protein"  
"JS1\_N06\_00424" 19354 "s59E13H2" 3.738313 "DNA-binding protein HU"  
"JS1\_N06\_00424" 19354 "s59E25H2" 0 "DNA-binding protein HU"  
"JS1\_N06\_00424" 19354 "s59E5H2" 0.1757162 "DNA-binding protein HU"  
"JS1\_N06\_00424" 19354 "s63E6H2" 0.08559996 "DNA-binding protein HU"  
"JS1\_N06\_00425" 19355 "s59E13H2" 1.307422 "PEGA domain protein"  
"JS1\_N06\_00425" 19355 "s59E25H2" 0 "PEGA domain protein"  
"JS1\_N06\_00425" 19355 "s59E5H2" 0.06220088 "PEGA domain protein"  
"JS1\_N06\_00425" 19355 "s63E6H2" 0.07898884 "PEGA domain protein"  
"JS1\_N06\_00426" 19356 "s59E13H2" 0 "Heterodisulfide reductase subunit C-like protein"  
"JS1\_N06\_00426" 19356 "s59E25H2" 0 "Heterodisulfide reductase subunit C-like protein"  
"JS1\_N06\_00426" 19356 "s59E5H2" 0.2388797 "Heterodisulfide reductase subunit C-like protein"  
"JS1\_N06\_00426" 19356 "s63E6H2" 0.03645056 "Heterodisulfide reductase subunit C-like protein"  
"JS1\_N06\_00427" 19357 "s59E13H2" 0 "CoB--CoM heterodisulfide reductase subunit B"

"JS1\_N06\_00427" 19357 "s59E25H2" 0 "CoB--CoM heterodisulfide reductase subunit B"  
"JS1\_N06\_00427" 19357 "s59E5H2" 0.1546742 "CoB--CoM heterodisulfide reductase subunit B"  
"JS1\_N06\_00427" 19357 "s63E6H2" 0.03334051 "CoB--CoM heterodisulfide reductase subunit B"  
"JS1\_N06\_00428" 19358 "s59E13H2" 0 "CoB--CoM heterodisulfide reductase subunit B"  
"JS1\_N06\_00428" 19358 "s59E25H2" 0 "CoB--CoM heterodisulfide reductase subunit B"  
"JS1\_N06\_00428" 19358 "s59E5H2" 0.3170938 "CoB--CoM heterodisulfide reductase subunit B"  
"JS1\_N06\_00428" 19358 "s63E6H2" 0.0744713 "CoB--CoM heterodisulfide reductase subunit B"  
"JS1\_N06\_00429" 19359 "s59E13H2" 0 "Formate dehydrogenase subunit alpha"  
"JS1\_N06\_00429" 19359 "s59E25H2" 0 "Formate dehydrogenase subunit alpha"  
"JS1\_N06\_00429" 19359 "s59E5H2" 0.3259448 "Formate dehydrogenase subunit alpha"  
"JS1\_N06\_00429" 19359 "s63E6H2" 0.03943632 "Formate dehydrogenase subunit alpha"  
"JS1\_N06\_00430" 19360 "s59E13H2" 0.03038217 "Bacillibactin exporter"  
"JS1\_N06\_00430" 19360 "s59E25H2" 0 "Bacillibactin exporter"  
"JS1\_N06\_00430" 19360 "s59E5H2" 0.166232 "Bacillibactin exporter"  
"JS1\_N06\_00430" 19360 "s63E6H2" 0.1368972 "Bacillibactin exporter"  
"JS1\_N06\_00431" 19361 "s59E13H2" 0.03685426 "Tetrathionate reductase subunit B precursor"  
"JS1\_N06\_00431" 19361 "s59E25H2" 0 "Tetrathionate reductase subunit B precursor"  
"JS1\_N06\_00431" 19361 "s59E5H2" 0.1311457 "Tetrathionate reductase subunit B precursor"  
"JS1\_N06\_00431" 19361 "s63E6H2" 0.1695093 "Tetrathionate reductase subunit B precursor"  
"JS1\_N06\_00432" 19362 "s59E13H2" 0.1011607 "Tungsten-containing aldehyde ferredoxin oxidoreductase"  
"JS1\_N06\_00432" 19362 "s59E25H2" 0 "Tungsten-containing aldehyde ferredoxin oxidoreductase"  
"JS1\_N06\_00432" 19362 "s59E5H2" 0.3324973 "Tungsten-containing aldehyde ferredoxin oxidoreductase"  
"JS1\_N06\_00432" 19362 "s63E6H2" 0.5371146 "Tungsten-containing aldehyde ferredoxin oxidoreductase"  
"JS1\_N06\_00433" 19363 "s59E13H2" 0.03602482 "Haemolysin-III related"  
"JS1\_N06\_00433" 19363 "s59E25H2" 0 "Haemolysin-III related"  
"JS1\_N06\_00433" 19363 "s59E5H2" 0.07109145 "Haemolysin-III related"  
"JS1\_N06\_00433" 19363 "s63E6H2" 0.1563413 "Haemolysin-III related"  
"JS1\_N06\_00434" 19364 "s59E13H2" 0 "hypothetical protein"  
"JS1\_N06\_00434" 19364 "s59E25H2" 0 "hypothetical protein"  
"JS1\_N06\_00434" 19364 "s59E5H2" 0.08954509 "hypothetical protein"  
"JS1\_N06\_00434" 19364 "s63E6H2" 0.2816595 "hypothetical protein"  
"JS1\_N06\_00435" 19365 "s59E13H2" 0.08004962 "Microcin C7 self-immunity protein MccF"  
"JS1\_N06\_00435" 19365 "s59E25H2" 0 "Microcin C7 self-immunity protein MccF"  
"JS1\_N06\_00435" 19365 "s59E5H2" 0.6271816 "Microcin C7 self-immunity protein MccF"  
"JS1\_N06\_00435" 19365 "s63E6H2" 0.5021388 "Microcin C7 self-immunity protein MccF"  
"JS1\_N06\_00436" 19366 "s59E13H2" 0 "hypothetical protein"  
"JS1\_N06\_00436" 19366 "s59E25H2" 0 "hypothetical protein"  
"JS1\_N06\_00436" 19366 "s59E5H2" 0.05293831 "hypothetical protein"  
"JS1\_N06\_00436" 19366 "s63E6H2" 0.05818481 "hypothetical protein"  
"JS1\_N06\_00437" 19367 "s59E13H2" 0.03952355 "D-aminopeptidase"  
"JS1\_N06\_00437" 19367 "s59E25H2" 0 "D-aminopeptidase"  
"JS1\_N06\_00437" 19367 "s59E5H2" 0.05079676 "D-aminopeptidase"  
"JS1\_N06\_00437" 19367 "s63E6H2" 0.01752215 "D-aminopeptidase"  
"JS1\_N06\_00438" 19368 "s59E13H2" 0 "Transposase IS200 like protein"  
"JS1\_N06\_00438" 19368 "s59E25H2" 0 "Transposase IS200 like protein"  
"JS1\_N06\_00438" 19368 "s59E5H2" 0 "Transposase IS200 like protein"  
"JS1\_N06\_00438" 19368 "s63E6H2" 0.01794729 "Transposase IS200 like protein"

"JS1\_N06\_00439" 19369 "s59E13H2" 0.0313431 "hypothetical protein"  
"JS1\_N06\_00439" 19369 "s59E25H2" 0 "hypothetical protein"  
"JS1\_N06\_00439" 19369 "s59E5H2" 0.865393 "hypothetical protein"  
"JS1\_N06\_00439" 19369 "s63E6H2" 0.1035606 "hypothetical protein"  
"JS1\_N06\_00440" 19370 "s59E13H2" 0 "anhydro-N-acetylmuramic acid kinase"  
"JS1\_N06\_00440" 19370 "s59E25H2" 0 "anhydro-N-acetylmuramic acid kinase"  
"JS1\_N06\_00440" 19370 "s59E5H2" 0 "anhydro-N-acetylmuramic acid kinase"  
"JS1\_N06\_00440" 19370 "s63E6H2" 0.04777606 "anhydro-N-acetylmuramic acid kinase"  
"JS1\_N06\_00441" 19371 "s59E13H2" 0.04104426 "hypothetical protein"  
"JS1\_N06\_00441" 19371 "s59E25H2" 0 "hypothetical protein"  
"JS1\_N06\_00441" 19371 "s59E5H2" 1.25486 "hypothetical protein"  
"JS1\_N06\_00441" 19371 "s63E6H2" 0.1313772 "hypothetical protein"  
"JS1\_N06\_00442" 19372 "s59E13H2" 0.4461544 "Putative ribosome biogenesis GTPase RsgA"  
"JS1\_N06\_00442" 19372 "s59E25H2" 0 "Putative ribosome biogenesis GTPase RsgA"  
"JS1\_N06\_00442" 19372 "s59E5H2" 2.935902 "Putative ribosome biogenesis GTPase RsgA"  
"JS1\_N06\_00442" 19372 "s63E6H2" 0.3099242 "Putative ribosome biogenesis GTPase RsgA"  
"JS1\_N06\_00443" 19373 "s59E13H2" 0.009060819 "hypothetical protein"  
"JS1\_N06\_00443" 19373 "s59E25H2" 0 "hypothetical protein"  
"JS1\_N06\_00443" 19373 "s59E5H2" 0.03070502 "hypothetical protein"  
"JS1\_N06\_00443" 19373 "s63E6H2" 0.03495997 "hypothetical protein"  
"JS1\_N06\_00444" 19374 "s59E13H2" 0 "Vancomycin/teicoplanin A-type resistance protein VanA"  
"JS1\_N06\_00444" 19374 "s59E25H2" 0 "Vancomycin/teicoplanin A-type resistance protein VanA"  
"JS1\_N06\_00444" 19374 "s59E5H2" 0 "Vancomycin/teicoplanin A-type resistance protein VanA"  
"JS1\_N06\_00444" 19374 "s63E6H2" 0.02274 "Vancomycin/teicoplanin A-type resistance protein VanA"  
"JS1\_N06\_00445" 19375 "s59E13H2" 0 "hypothetical protein"  
"JS1\_N06\_00445" 19375 "s59E25H2" 0 "hypothetical protein"  
"JS1\_N06\_00445" 19375 "s59E5H2" 0 "hypothetical protein"  
"JS1\_N06\_00445" 19375 "s63E6H2" 0.02160088 "hypothetical protein"  
"JS1\_N06\_00446" 19376 "s59E13H2" 0 "hypothetical protein"  
"JS1\_N06\_00446" 19376 "s59E25H2" 0 "hypothetical protein"  
"JS1\_N06\_00446" 19376 "s59E5H2" 0.01430993 "hypothetical protein"  
"JS1\_N06\_00446" 19376 "s63E6H2" 0.1001909 "hypothetical protein"  
"JS1\_N06\_00447" 19377 "s59E13H2" 0.031128 "Cysteine/O-acetylserine efflux protein"  
"JS1\_N06\_00447" 19377 "s59E25H2" 0 "Cysteine/O-acetylserine efflux protein"  
"JS1\_N06\_00447" 19377 "s59E5H2" 0.008774667 "Cysteine/O-acetylserine efflux protein"  
"JS1\_N06\_00447" 19377 "s63E6H2" 0.3065025 "Cysteine/O-acetylserine efflux protein"  
"JS1\_N06\_00448" 19378 "s59E13H2" 0.1272534 "2-dehydropantoate 2-reductase"  
"JS1\_N06\_00448" 19378 "s59E25H2" 0 "2-dehydropantoate 2-reductase"  
"JS1\_N06\_00448" 19378 "s59E5H2" 0.1538049 "2-dehydropantoate 2-reductase"  
"JS1\_N06\_00448" 19378 "s63E6H2" 0.4702414 "2-dehydropantoate 2-reductase"  
"JS1\_N06\_00449" 19379 "s59E13H2" 0.02323107 "Putative redox-active protein (C\_GCAxxG\_C\_C)"  
"JS1\_N06\_00449" 19379 "s59E25H2" 0 "Putative redox-active protein (C\_GCAxxG\_C\_C)"  
"JS1\_N06\_00449" 19379 "s59E5H2" 0.03754296 "Putative redox-active protein (C\_GCAxxG\_C\_C)"  
"JS1\_N06\_00449" 19379 "s63E6H2" 0.3694502 "Putative redox-active protein (C\_GCAxxG\_C\_C)"  
"JS1\_N06\_00450" 19380 "s59E13H2" 0 "hypothetical protein"  
"JS1\_N06\_00450" 19380 "s59E25H2" 0 "hypothetical protein"  
"JS1\_N06\_00450" 19380 "s59E5H2" 0.003054384 "hypothetical protein"

"JS1\_N06\_00450" 19380 "s63E6H2" 0.1898148 "hypothetical protein"  
"JS1\_N06\_00451" 19381 "s59E13H2" 0 "DNA topoisomerase 1"  
"JS1\_N06\_00451" 19381 "s59E25H2" 0 "DNA topoisomerase 1"  
"JS1\_N06\_00451" 19381 "s59E5H2" 0 "DNA topoisomerase 1"  
"JS1\_N06\_00451" 19381 "s63E6H2" 0 "DNA topoisomerase 1"  
"JS1\_N06\_00452" 19382 "s59E13H2" 0 "ferredoxin"  
"JS1\_N06\_00452" 19382 "s59E25H2" 0 "ferredoxin"  
"JS1\_N06\_00452" 19382 "s59E5H2" 0 "ferredoxin"  
"JS1\_N06\_00452" 19382 "s63E6H2" 0 "ferredoxin"  
"JS1\_N06\_00459" 19389 "s59E13H2" 0.02142226 "DNA polymerase III subunit alpha"  
"JS1\_N06\_00459" 19389 "s59E25H2" 0 "DNA polymerase III subunit alpha"  
"JS1\_N06\_00459" 19389 "s59E5H2" 0.02738544 "DNA polymerase III subunit alpha"  
"JS1\_N06\_00459" 19389 "s63E6H2" 1.94379 "DNA polymerase III subunit alpha"  
"JS1\_N06\_00460" 19390 "s59E13H2" 0.06327497 "DNA polymerase III subunit alpha"  
"JS1\_N06\_00460" 19390 "s59E25H2" 0 "DNA polymerase III subunit alpha"  
"JS1\_N06\_00460" 19390 "s59E5H2" 0.4310788 "DNA polymerase III subunit alpha"  
"JS1\_N06\_00460" 19390 "s63E6H2" 1.827011 "DNA polymerase III subunit alpha"  
"JS1\_N06\_00461" 19391 "s59E13H2" 0.003611815 "6-phosphofructokinase 1"  
"JS1\_N06\_00461" 19391 "s59E25H2" 0 "6-phosphofructokinase 1"  
"JS1\_N06\_00461" 19391 "s59E5H2" 0.5800458 "6-phosphofructokinase 1"  
"JS1\_N06\_00461" 19391 "s63E6H2" 2.00319 "6-phosphofructokinase 1"  
"JS1\_N06\_00462" 19392 "s59E13H2" 0.007404858 "Fructose-bisphosphate aldolase"  
"JS1\_N06\_00462" 19392 "s59E25H2" 0 "Fructose-bisphosphate aldolase"  
"JS1\_N06\_00462" 19392 "s59E5H2" 0.4464677 "Fructose-bisphosphate aldolase"  
"JS1\_N06\_00462" 19392 "s63E6H2" 1.371683 "Fructose-bisphosphate aldolase"  
"JS1\_N06\_00463" 19393 "s59E13H2" 0.02307255 "Modulator of FtsH protease HflK"  
"JS1\_N06\_00463" 19393 "s59E25H2" 0 "Modulator of FtsH protease HflK"  
"JS1\_N06\_00463" 19393 "s59E5H2" 0.1781484 "Modulator of FtsH protease HflK"  
"JS1\_N06\_00463" 19393 "s63E6H2" 1.378502 "Modulator of FtsH protease HflK"  
"JS1\_N06\_00464" 19394 "s59E13H2" 0.2490216 "Modulator of FtsH protease HflC"  
"JS1\_N06\_00464" 19394 "s59E25H2" 0 "Modulator of FtsH protease HflC"  
"JS1\_N06\_00464" 19394 "s59E5H2" 0.7477757 "Modulator of FtsH protease HflC"  
"JS1\_N06\_00464" 19394 "s63E6H2" 2.263322 "Modulator of FtsH protease HflC"  
"JS1\_N06\_00465" 19395 "s59E13H2" 0.01514633 "Glyoxylate reductase"  
"JS1\_N06\_00465" 19395 "s59E25H2" 0 "Glyoxylate reductase"  
"JS1\_N06\_00465" 19395 "s59E5H2" 0.581451 "Glyoxylate reductase"  
"JS1\_N06\_00465" 19395 "s63E6H2" 0.3440325 "Glyoxylate reductase"  
"JS1\_N06\_00466" 19396 "s59E13H2" 0.02675444 "hypothetical protein"  
"JS1\_N06\_00466" 19396 "s59E25H2" 0 "hypothetical protein"  
"JS1\_N06\_00466" 19396 "s59E5H2" 0.4369308 "hypothetical protein"  
"JS1\_N06\_00466" 19396 "s63E6H2" 0.2245776 "hypothetical protein"  
"JS1\_N06\_00468" 19398 "s59E13H2" 0.01636412 "Aspartyl/glutamyl-tRNA(Asn/Gln) amidotransferase subunit B"  
"JS1\_N06\_00468" 19398 "s59E25H2" 0 "Aspartyl/glutamyl-tRNA(Asn/Gln) amidotransferase subunit B"  
"JS1\_N06\_00468" 19398 "s59E5H2" 0.3861615 "Aspartyl/glutamyl-tRNA(Asn/Gln) amidotransferase subunit B"  
"JS1\_N06\_00468" 19398 "s63E6H2" 0.3225296 "Aspartyl/glutamyl-tRNA(Asn/Gln) amidotransferase subunit B"  
"JS1\_N06\_00469" 19399 "s59E13H2" 0.07730924 "Glutamyl-tRNA(Gln) amidotransferase subunit A"  
"JS1\_N06\_00469" 19399 "s59E25H2" 0 "Glutamyl-tRNA(Gln) amidotransferase subunit A"

"JS1\_N06\_00469" 19399 "s59E5H2" 0.5134911 "Glutamyl-tRNA(Gln) amidotransferase subunit A"  
"JS1\_N06\_00469" 19399 "s63E6H2" 0.463082 "Glutamyl-tRNA(Gln) amidotransferase subunit A"  
"JS1\_N06\_00470" 19400 "s59E13H2" 0.002531457 "Aspartyl/glutamyl-tRNA(Asn/Gln) amidotransferase subunit C"  
"JS1\_N06\_00470" 19400 "s59E25H2" 0 "Aspartyl/glutamyl-tRNA(Asn/Gln) amidotransferase subunit C"  
"JS1\_N06\_00470" 19400 "s59E5H2" 0.1170112 "Aspartyl/glutamyl-tRNA(Asn/Gln) amidotransferase subunit C"  
"JS1\_N06\_00470" 19400 "s63E6H2" 0.1106265 "Aspartyl/glutamyl-tRNA(Asn/Gln) amidotransferase subunit C"  
"JS1\_N06\_00472" 19402 "s59E13H2" 0 "Chromosome partition protein Smc"  
"JS1\_N06\_00472" 19402 "s59E25H2" 0 "Chromosome partition protein Smc"  
"JS1\_N06\_00472" 19402 "s59E5H2" 0 "Chromosome partition protein Smc"  
"JS1\_N06\_00472" 19402 "s63E6H2" 0.007671484 "Chromosome partition protein Smc"  
"JS1\_N06\_00473" 19403 "s59E13H2" 0 "hypothetical protein"  
"JS1\_N06\_00473" 19403 "s59E25H2" 0 "hypothetical protein"  
"JS1\_N06\_00473" 19403 "s59E5H2" 0 "hypothetical protein"  
"JS1\_N06\_00473" 19403 "s63E6H2" 0.005026452 "hypothetical protein"  
"JS1\_N06\_00474" 19404 "s59E13H2" 0.2659207 "hypothetical protein"  
"JS1\_N06\_00474" 19404 "s59E25H2" 0 "hypothetical protein"  
"JS1\_N06\_00474" 19404 "s59E5H2" 0.3878634 "hypothetical protein"  
"JS1\_N06\_00474" 19404 "s63E6H2" 0.548038 "hypothetical protein"  
"JS1\_N06\_00475" 19405 "s59E13H2" 0.1297873 "hypothetical protein"  
"JS1\_N06\_00475" 19405 "s59E25H2" 0 "hypothetical protein"  
"JS1\_N06\_00475" 19405 "s59E5H2" 0.0863451 "hypothetical protein"  
"JS1\_N06\_00475" 19405 "s63E6H2" 0.05797351 "hypothetical protein"  
"JS1\_N06\_00476" 19406 "s59E13H2" 2.374916 "hypothetical protein"  
"JS1\_N06\_00476" 19406 "s59E25H2" 0 "hypothetical protein"  
"JS1\_N06\_00476" 19406 "s59E5H2" 0.05790818 "hypothetical protein"  
"JS1\_N06\_00476" 19406 "s63E6H2" 0.05706378 "hypothetical protein"  
"JS1\_N06\_00477" 19407 "s59E13H2" 0.005761894 "hypothetical protein"  
"JS1\_N06\_00477" 19407 "s59E25H2" 0 "hypothetical protein"  
"JS1\_N06\_00477" 19407 "s59E5H2" 0.02391632 "hypothetical protein"  
"JS1\_N06\_00477" 19407 "s63E6H2" 0.3831558 "hypothetical protein"  
"JS1\_N06\_00478" 19408 "s59E13H2" 0.02003371 "hypothetical protein"  
"JS1\_N06\_00478" 19408 "s59E25H2" 0 "hypothetical protein"  
"JS1\_N06\_00478" 19408 "s59E5H2" 0.02956945 "hypothetical protein"  
"JS1\_N06\_00478" 19408 "s63E6H2" 0.2291006 "hypothetical protein"  
"JS1\_N06\_00479" 19409 "s59E13H2" 1.107724 "Ferredoxin"  
"JS1\_N06\_00479" 19409 "s59E25H2" 0 "Ferredoxin"  
"JS1\_N06\_00479" 19409 "s59E5H2" 0.1161841 "Ferredoxin"  
"JS1\_N06\_00479" 19409 "s63E6H2" 1.756266 "Ferredoxin"  
"JS1\_N06\_00480" 19410 "s59E13H2" 1.065239 "Acetyl-CoA decarboxylase/synthase complex subunit gamma"  
"JS1\_N06\_00480" 19410 "s59E25H2" 0 "Acetyl-CoA decarboxylase/synthase complex subunit gamma"  
"JS1\_N06\_00480" 19410 "s59E5H2" 0.0844768 "Acetyl-CoA decarboxylase/synthase complex subunit gamma"  
"JS1\_N06\_00480" 19410 "s63E6H2" 2.27695 "Acetyl-CoA decarboxylase/synthase complex subunit gamma"  
"JS1\_N06\_00481" 19411 "s59E13H2" 0.002163962 "hypothetical protein"  
"JS1\_N06\_00481" 19411 "s59E25H2" 0 "hypothetical protein"  
"JS1\_N06\_00481" 19411 "s59E5H2" 0.1266316 "hypothetical protein"  
"JS1\_N06\_00481" 19411 "s63E6H2" 1.230516 "hypothetical protein"  
"JS1\_N06\_00482" 19412 "s59E13H2" 0.07934528 "putative tautomerase"

"JS1\_N06\_00482" 19412 "s59E25H2" 0 "putative tautomerase"  
"JS1\_N06\_00482" 19412 "s59E5H2" 0 "putative tautomerase"  
"JS1\_N06\_00482" 19412 "s63E6H2" 1.856789 "putative tautomerase"  
"JS1\_N06\_00486" 19416 "s59E13H2" 0 "ATP-dependent DNA helicase UvrD1"  
"JS1\_N06\_00486" 19416 "s59E25H2" 0 "ATP-dependent DNA helicase UvrD1"  
"JS1\_N06\_00486" 19416 "s59E5H2" 0 "ATP-dependent DNA helicase UvrD1"  
"JS1\_N06\_00486" 19416 "s63E6H2" 0 "ATP-dependent DNA helicase UvrD1"  
"JS1\_N06\_00498" 19428 "s59E13H2" 0.01396041 "V-type sodium ATPase subunit B"  
"JS1\_N06\_00498" 19428 "s59E25H2" 0 "V-type sodium ATPase subunit B"  
"JS1\_N06\_00498" 19428 "s59E5H2" 0.0712146 "V-type sodium ATPase subunit B"  
"JS1\_N06\_00498" 19428 "s63E6H2" 0.053083 "V-type sodium ATPase subunit B"  
"JS1\_N06\_00499" 19429 "s59E13H2" 0.002035783 "V-type sodium ATPase subunit D"  
"JS1\_N06\_00499" 19429 "s59E25H2" 0 "V-type sodium ATPase subunit D"  
"JS1\_N06\_00499" 19429 "s59E5H2" 0.03463116 "V-type sodium ATPase subunit D"  
"JS1\_N06\_00499" 19429 "s63E6H2" 0.007611468 "V-type sodium ATPase subunit D"  
"JS1\_N06\_00500" 19430 "s59E13H2" 0 "Tryptophan--tRNA ligase"  
"JS1\_N06\_00500" 19430 "s59E25H2" 0 "Tryptophan--tRNA ligase"  
"JS1\_N06\_00500" 19430 "s59E5H2" 0.004106315 "Tryptophan--tRNA ligase"  
"JS1\_N06\_00500" 19430 "s63E6H2" 0.007557536 "Tryptophan--tRNA ligase"  
"JS1\_N06\_00501" 19431 "s59E13H2" 0 "hypothetical protein"  
"JS1\_N06\_00501" 19431 "s59E25H2" 0 "hypothetical protein"  
"JS1\_N06\_00501" 19431 "s59E5H2" 0 "hypothetical protein"  
"JS1\_N06\_00501" 19431 "s63E6H2" 0 "hypothetical protein"  
"JS1\_N06\_00502" 19432 "s59E13H2" 0 "Chromosome partition protein Smc"  
"JS1\_N06\_00502" 19432 "s59E25H2" 0 "Chromosome partition protein Smc"  
"JS1\_N06\_00502" 19432 "s59E5H2" 0 "Chromosome partition protein Smc"  
"JS1\_N06\_00502" 19432 "s63E6H2" 0.00348511 "Chromosome partition protein Smc"  
"JS1\_N06\_00504" 19434 "s59E13H2" 0.1265179 "putative copper-exporting P-type ATPase A"  
"JS1\_N06\_00504" 19434 "s59E25H2" 0 "putative copper-exporting P-type ATPase A"  
"JS1\_N06\_00504" 19434 "s59E5H2" 0.01953722 "putative copper-exporting P-type ATPase A"  
"JS1\_N06\_00504" 19434 "s63E6H2" 0.2262832 "putative copper-exporting P-type ATPase A"  
"JS1\_N06\_00505" 19435 "s59E13H2" 0.002660609 "YHS domain protein"  
"JS1\_N06\_00505" 19435 "s59E25H2" 0 "YHS domain protein"  
"JS1\_N06\_00505" 19435 "s59E5H2" 0 "YHS domain protein"  
"JS1\_N06\_00505" 19435 "s63E6H2" 0.204603 "YHS domain protein"  
"JS1\_N06\_00506" 19436 "s59E13H2" 0 "Thiol-disulfide oxidoreductase ResA"  
"JS1\_N06\_00506" 19436 "s59E25H2" 0 "Thiol-disulfide oxidoreductase ResA"  
"JS1\_N06\_00506" 19436 "s59E5H2" 0 "Thiol-disulfide oxidoreductase ResA"  
"JS1\_N06\_00506" 19436 "s63E6H2" 0.06475237 "Thiol-disulfide oxidoreductase ResA"  
"JS1\_N06\_00507" 19437 "s59E13H2" 0.2549322 "hypothetical protein"  
"JS1\_N06\_00507" 19437 "s59E25H2" 0 "hypothetical protein"  
"JS1\_N06\_00507" 19437 "s59E5H2" 0.006765201 "hypothetical protein"  
"JS1\_N06\_00507" 19437 "s63E6H2" 0.09069434 "hypothetical protein"  
"JS1\_N06\_00508" 19438 "s59E13H2" 0.6552344 "Macrolide export ATP-binding/permease protein MacB"  
"JS1\_N06\_00508" 19438 "s59E25H2" 0 "Macrolide export ATP-binding/permease protein MacB"  
"JS1\_N06\_00508" 19438 "s59E5H2" 0.053615 "Macrolide export ATP-binding/permease protein MacB"  
"JS1\_N06\_00508" 19438 "s63E6H2" 0.3160205 "Macrolide export ATP-binding/permease protein MacB"

"JS1\_N06\_00509" 19439 "s59E13H2" 0.02718729 "putative ABC transporter ATP-binding protein"  
"JS1\_N06\_00509" 19439 "s59E25H2" 0 "putative ABC transporter ATP-binding protein"  
"JS1\_N06\_00509" 19439 "s59E5H2" 0.005850321 "putative ABC transporter ATP-binding protein"  
"JS1\_N06\_00509" 19439 "s63E6H2" 0.04133917 "putative ABC transporter ATP-binding protein"  
"JS1\_N06\_00510" 19440 "s59E13H2" 0.05211359 "putative ABC transporter ATP-binding protein"  
"JS1\_N06\_00510" 19440 "s59E25H2" 0 "putative ABC transporter ATP-binding protein"  
"JS1\_N06\_00510" 19440 "s59E5H2" 0.05971435 "putative ABC transporter ATP-binding protein"  
"JS1\_N06\_00510" 19440 "s63E6H2" 0.03266028 "putative ABC transporter ATP-binding protein"  
"JS1\_N06\_00511" 19441 "s59E13H2" 0.02309413 "hypothetical protein"  
"JS1\_N06\_00511" 19441 "s59E25H2" 0 "hypothetical protein"  
"JS1\_N06\_00511" 19441 "s59E5H2" 0.0657577 "hypothetical protein"  
"JS1\_N06\_00511" 19441 "s63E6H2" 0.04150766 "hypothetical protein"  
"JS1\_N06\_00512" 19442 "s59E13H2" 0.001847096 "Quinolate synthase A"  
"JS1\_N06\_00512" 19442 "s59E25H2" 0 "Quinolate synthase A"  
"JS1\_N06\_00512" 19442 "s59E5H2" 0.01347375 "Quinolate synthase A"  
"JS1\_N06\_00512" 19442 "s63E6H2" 0.1079277 "Quinolate synthase A"  
"JS1\_N06\_00513" 19443 "s59E13H2" 0 "tRNA-specific 2-thiouridylase MnmA"  
"JS1\_N06\_00513" 19443 "s59E25H2" 0 "tRNA-specific 2-thiouridylase MnmA"  
"JS1\_N06\_00513" 19443 "s59E5H2" 0 "tRNA-specific 2-thiouridylase MnmA"  
"JS1\_N06\_00513" 19443 "s63E6H2" 0.174548 "tRNA-specific 2-thiouridylase MnmA"  
"JS1\_N06\_00514" 19444 "s59E13H2" 0 "GMP synthase [glutamine-hydrolyzing] subunit B"  
"JS1\_N06\_00514" 19444 "s59E25H2" 0 "GMP synthase [glutamine-hydrolyzing] subunit B"  
"JS1\_N06\_00514" 19444 "s59E5H2" 0 "GMP synthase [glutamine-hydrolyzing] subunit B"  
"JS1\_N06\_00514" 19444 "s63E6H2" 0.1277572 "GMP synthase [glutamine-hydrolyzing] subunit B"  
"JS1\_N06\_00515" 19445 "s59E13H2" 0 "thiamine biosynthesis protein Thil"  
"JS1\_N06\_00515" 19445 "s59E25H2" 0 "thiamine biosynthesis protein Thil"  
"JS1\_N06\_00515" 19445 "s59E5H2" 0 "thiamine biosynthesis protein Thil"  
"JS1\_N06\_00515" 19445 "s63E6H2" 0.03571507 "thiamine biosynthesis protein Thil"  
"JS1\_N06\_00516" 19446 "s59E13H2" 0 "putative cysteine desulfurase"  
"JS1\_N06\_00516" 19446 "s59E25H2" 0 "putative cysteine desulfurase"  
"JS1\_N06\_00516" 19446 "s59E5H2" 0 "putative cysteine desulfurase"  
"JS1\_N06\_00516" 19446 "s63E6H2" 0.04903346 "putative cysteine desulfurase"  
"JS1\_N06\_00517" 19447 "s59E13H2" 0 "formate dehydrogenase accessory protein"  
"JS1\_N06\_00517" 19447 "s59E25H2" 0 "formate dehydrogenase accessory protein"  
"JS1\_N06\_00517" 19447 "s59E5H2" 0 "formate dehydrogenase accessory protein"  
"JS1\_N06\_00517" 19447 "s63E6H2" 0.04818312 "formate dehydrogenase accessory protein"  
"JS1\_N06\_00518" 19448 "s59E13H2" 0 "hypothetical protein"  
"JS1\_N06\_00518" 19448 "s59E25H2" 0 "hypothetical protein"  
"JS1\_N06\_00518" 19448 "s59E5H2" 0 "hypothetical protein"  
"JS1\_N06\_00518" 19448 "s63E6H2" 0.02463712 "hypothetical protein"  
"JS1\_N06\_00519" 19449 "s59E13H2" 0 "HTH-type transcriptional regulator CymR"  
"JS1\_N06\_00519" 19449 "s59E25H2" 0 "HTH-type transcriptional regulator CymR"  
"JS1\_N06\_00519" 19449 "s59E5H2" 0 "HTH-type transcriptional regulator CymR"  
"JS1\_N06\_00519" 19449 "s63E6H2" 0.07682753 "HTH-type transcriptional regulator CymR"  
"JS1\_N06\_00520" 19450 "s59E13H2" 0 "O-acetylserine sulfhydrylase"  
"JS1\_N06\_00520" 19450 "s59E25H2" 0 "O-acetylserine sulfhydrylase"  
"JS1\_N06\_00520" 19450 "s59E5H2" 0 "O-acetylserine sulfhydrylase"



"JS1\_N06\_00520" 19450 "s63E6H2" 0.244869 "O-acetylserine sulfhydrylase"  
"JS1\_N06\_00522" 19452 "s59E13H2" 0.001441872 "hypothetical protein"  
"JS1\_N06\_00522" 19452 "s59E25H2" 0 "hypothetical protein"  
"JS1\_N06\_00522" 19452 "s59E5H2" 0.006748167 "hypothetical protein"  
"JS1\_N06\_00522" 19452 "s63E6H2" 1.224044 "hypothetical protein"  
"JS1\_N06\_00523" 19453 "s59E13H2" 0 "Ferredoxin"  
"JS1\_N06\_00523" 19453 "s59E25H2" 0 "Ferredoxin"  
"JS1\_N06\_00523" 19453 "s59E5H2" 0 "Ferredoxin"  
"JS1\_N06\_00523" 19453 "s63E6H2" 1.049333 "Ferredoxin"  
"JS1\_N06\_00524" 19454 "s59E13H2" 0 "Serine acetyltransferase"  
"JS1\_N06\_00524" 19454 "s59E25H2" 0 "Serine acetyltransferase"  
"JS1\_N06\_00524" 19454 "s59E5H2" 0 "Serine acetyltransferase"  
"JS1\_N06\_00524" 19454 "s63E6H2" 0.6376499 "Serine acetyltransferase"  
"JS1\_N06\_00525" 19455 "s59E13H2" 0 "putative permease"  
"JS1\_N06\_00525" 19455 "s59E25H2" 0 "putative permease"  
"JS1\_N06\_00525" 19455 "s59E5H2" 0.1282114 "putative permease"  
"JS1\_N06\_00525" 19455 "s63E6H2" 0.006850409 "putative permease"  
"JS1\_N06\_00526" 19456 "s59E13H2" 0 "putative permease"  
"JS1\_N06\_00526" 19456 "s59E25H2" 0 "putative permease"  
"JS1\_N06\_00526" 19456 "s59E5H2" 0.001240242 "putative permease"  
"JS1\_N06\_00526" 19456 "s63E6H2" 0.009584017 "putative permease"  
"JS1\_N06\_00527" 19457 "s59E13H2" 0.3630819 "Methionine--tRNA ligase"  
"JS1\_N06\_00527" 19457 "s59E25H2" 0 "Methionine--tRNA ligase"  
"JS1\_N06\_00527" 19457 "s59E5H2" 1.45431 "Methionine--tRNA ligase"  
"JS1\_N06\_00527" 19457 "s63E6H2" 0.08290741 "Methionine--tRNA ligase"  
"JS1\_N06\_00528" 19458 "s59E13H2" 0.1333928 "NAD-dependent protein deacetylase"  
"JS1\_N06\_00528" 19458 "s59E25H2" 0 "NAD-dependent protein deacetylase"  
"JS1\_N06\_00528" 19458 "s59E5H2" 1.141348 "NAD-dependent protein deacetylase"  
"JS1\_N06\_00528" 19458 "s63E6H2" 0.2993077 "NAD-dependent protein deacetylase"  
"JS1\_N06\_00529" 19459 "s59E13H2" 0.6763714 "RNA recognition motif. (a.k.a. RRM, RBD, or RNP domain)"  
"JS1\_N06\_00529" 19459 "s59E25H2" 0 "RNA recognition motif. (a.k.a. RRM, RBD, or RNP domain)"  
"JS1\_N06\_00529" 19459 "s59E5H2" 1.875033 "RNA recognition motif. (a.k.a. RRM, RBD, or RNP domain)"  
"JS1\_N06\_00529" 19459 "s63E6H2" 1.462221 "RNA recognition motif. (a.k.a. RRM, RBD, or RNP domain)"  
"JS1\_N06\_00531" 19461 "s59E13H2" 0.6214665 "Thiamine transporter ThiT"  
"JS1\_N06\_00531" 19461 "s59E25H2" 0 "Thiamine transporter ThiT"  
"JS1\_N06\_00531" 19461 "s59E5H2" 0.8190284 "Thiamine transporter ThiT"  
"JS1\_N06\_00531" 19461 "s63E6H2" 1.314605 "Thiamine transporter ThiT"  
"JS1\_N06\_00532" 19462 "s59E13H2" 0.5160889 "Thiamine pyrophosphokinase"  
"JS1\_N06\_00532" 19462 "s59E25H2" 0 "Thiamine pyrophosphokinase"  
"JS1\_N06\_00532" 19462 "s59E5H2" 1.508814 "Thiamine pyrophosphokinase"  
"JS1\_N06\_00532" 19462 "s63E6H2" 0.962291 "Thiamine pyrophosphokinase"  
"JS1\_N06\_00533" 19463 "s59E13H2" 0.3190865 "Transketolase 2"  
"JS1\_N06\_00533" 19463 "s59E25H2" 0 "Transketolase 2"  
"JS1\_N06\_00533" 19463 "s59E5H2" 1.584674 "Transketolase 2"  
"JS1\_N06\_00533" 19463 "s63E6H2" 0.3603194 "Transketolase 2"  
"JS1\_N06\_00534" 19464 "s59E13H2" 0.3970861 "Benzylsuccinate synthase activating enzyme"  
"JS1\_N06\_00534" 19464 "s59E25H2" 0 "Benzylsuccinate synthase activating enzyme"

"JS1\_N06\_00534" 19464 "s59E5H2" 0.8253772 "Benzylsuccinate synthase activating enzyme"  
"JS1\_N06\_00534" 19464 "s63E6H2" 0.4365443 "Benzylsuccinate synthase activating enzyme"  
"JS1\_N06\_00539" 19469 "s59E13H2" 0 "Macrolide export ATP-binding/permease protein MacB"  
"JS1\_N06\_00539" 19469 "s59E25H2" 0 "Macrolide export ATP-binding/permease protein MacB"  
"JS1\_N06\_00539" 19469 "s59E5H2" 0.0591686 "Macrolide export ATP-binding/permease protein MacB"  
"JS1\_N06\_00539" 19469 "s63E6H2" 0.009514721 "Macrolide export ATP-binding/permease protein MacB"  
"JS1\_N06\_00554" 19484 "s59E13H2" 0 "Signal recognition particle protein"  
"JS1\_N06\_00554" 19484 "s59E25H2" 0 "Signal recognition particle protein"  
"JS1\_N06\_00554" 19484 "s59E5H2" 0 "Signal recognition particle protein"  
"JS1\_N06\_00554" 19484 "s63E6H2" 0.003359003 "Signal recognition particle protein"  
"JS1\_N06\_00559" 19489 "s59E13H2" 0.002975448 "V-type sodium ATPase subunit D"  
"JS1\_N06\_00559" 19489 "s59E25H2" 0 "V-type sodium ATPase subunit D"  
"JS1\_N06\_00559" 19489 "s59E5H2" 0.0223812 "V-type sodium ATPase subunit D"  
"JS1\_N06\_00559" 19489 "s63E6H2" 0.01707267 "V-type sodium ATPase subunit D"  
"JS1\_N06\_00562" 19492 "s59E13H2" 0 "4-hydroxy-3-methylbut-2-en-1-yl diphosphate synthase"  
"JS1\_N06\_00562" 19492 "s59E25H2" 0 "4-hydroxy-3-methylbut-2-en-1-yl diphosphate synthase"  
"JS1\_N06\_00562" 19492 "s59E5H2" 0 "4-hydroxy-3-methylbut-2-en-1-yl diphosphate synthase"  
"JS1\_N06\_00562" 19492 "s63E6H2" 0 "4-hydroxy-3-methylbut-2-en-1-yl diphosphate synthase"  
"JS1\_N06\_00563" 19493 "s59E13H2" 0 "Regulator of sigma-W protease RasP"  
"JS1\_N06\_00563" 19493 "s59E25H2" 0 "Regulator of sigma-W protease RasP"  
"JS1\_N06\_00563" 19493 "s59E5H2" 0 "Regulator of sigma-W protease RasP"  
"JS1\_N06\_00563" 19493 "s63E6H2" 0 "Regulator of sigma-W protease RasP"  
"JS1\_N06\_00566" 19496 "s59E13H2" 0 "Glycerol-3-phosphate acyltransferase"  
"JS1\_N06\_00566" 19496 "s59E25H2" 0 "Glycerol-3-phosphate acyltransferase"  
"JS1\_N06\_00566" 19496 "s59E5H2" 0.006857755 "Glycerol-3-phosphate acyltransferase"  
"JS1\_N06\_00566" 19496 "s63E6H2" 0 "Glycerol-3-phosphate acyltransferase"  
"JS1\_N06\_00584" 19514 "s59E13H2" 0 "ATP-dependent DNA helicase Rep"  
"JS1\_N06\_00584" 19514 "s59E25H2" 0 "ATP-dependent DNA helicase Rep"  
"JS1\_N06\_00584" 19514 "s59E5H2" 0 "ATP-dependent DNA helicase Rep"  
"JS1\_N06\_00584" 19514 "s63E6H2" 0 "ATP-dependent DNA helicase Rep"  
"JS1\_N06\_00588" 19518 "s59E13H2" 0 "Signal recognition particle receptor FtsY"  
"JS1\_N06\_00588" 19518 "s59E25H2" 0 "Signal recognition particle receptor FtsY"  
"JS1\_N06\_00588" 19518 "s59E5H2" 0 "Signal recognition particle receptor FtsY"  
"JS1\_N06\_00588" 19518 "s63E6H2" 0 "Signal recognition particle receptor FtsY"  
"JS1\_N06\_00589" 19519 "s59E13H2" 0 "Signal recognition particle receptor FtsY"  
"JS1\_N06\_00589" 19519 "s59E25H2" 0 "Signal recognition particle receptor FtsY"  
"JS1\_N06\_00589" 19519 "s59E5H2" 0 "Signal recognition particle receptor FtsY"  
"JS1\_N06\_00589" 19519 "s63E6H2" 0.005081504 "Signal recognition particle receptor FtsY"  
"JS1\_N06\_00591" 19521 "s59E13H2" 0 "hypothetical protein"  
"JS1\_N06\_00591" 19521 "s59E25H2" 0 "hypothetical protein"  
"JS1\_N06\_00591" 19521 "s59E5H2" 0.2067738 "hypothetical protein"  
"JS1\_N06\_00591" 19521 "s63E6H2" 0.5387631 "hypothetical protein"  
"JS1\_N06\_00592" 19522 "s59E13H2" 0.04014276 "2-hydroxyglutaryl-CoA dehydratase, D-component"  
"JS1\_N06\_00592" 19522 "s59E25H2" 0 "2-hydroxyglutaryl-CoA dehydratase, D-component"  
"JS1\_N06\_00592" 19522 "s59E5H2" 0.6156463 "2-hydroxyglutaryl-CoA dehydratase, D-component"  
"JS1\_N06\_00592" 19522 "s63E6H2" 1.76296 "2-hydroxyglutaryl-CoA dehydratase, D-component"  
"JS1\_N06\_00593" 19523 "s59E13H2" 0.03867619 "R-phenyllactate dehydratase activator"

"JS1\_N06\_00593" 19523 "s59E25H2" 0 "R-phenyllactate dehydratase activator"  
"JS1\_N06\_00593" 19523 "s59E5H2" 0.4539777 "R-phenyllactate dehydratase activator"  
"JS1\_N06\_00593" 19523 "s63E6H2" 0.8288252 "R-phenyllactate dehydratase activator"  
"JS1\_N06\_00595" 19525 "s59E13H2" 0 "hypothetical protein"  
"JS1\_N06\_00595" 19525 "s59E25H2" 0 "hypothetical protein"  
"JS1\_N06\_00595" 19525 "s59E5H2" 0 "hypothetical protein"  
"JS1\_N06\_00595" 19525 "s63E6H2" 0.05327172 "hypothetical protein"  
"JS1\_N06\_00596" 19526 "s59E13H2" 0.8837068 "Iron-sulfur flavoprotein"  
"JS1\_N06\_00596" 19526 "s59E25H2" 0 "Iron-sulfur flavoprotein"  
"JS1\_N06\_00596" 19526 "s59E5H2" 0.2230645 "Iron-sulfur flavoprotein"  
"JS1\_N06\_00596" 19526 "s63E6H2" 0.9392189 "Iron-sulfur flavoprotein"  
"JS1\_N06\_00597" 19527 "s59E13H2" 0 "hypothetical protein"  
"JS1\_N06\_00597" 19527 "s59E25H2" 0 "hypothetical protein"  
"JS1\_N06\_00597" 19527 "s59E5H2" 0.5758407 "hypothetical protein"  
"JS1\_N06\_00597" 19527 "s63E6H2" 0.1489291 "hypothetical protein"  
"JS1\_N06\_00598" 19528 "s59E13H2" 0.007767078 "hypothetical protein"  
"JS1\_N06\_00598" 19528 "s59E25H2" 0 "hypothetical protein"  
"JS1\_N06\_00598" 19528 "s59E5H2" 0.01526605 "hypothetical protein"  
"JS1\_N06\_00598" 19528 "s63E6H2" 0.06540302 "hypothetical protein"  
"JS1\_N06\_00599" 19529 "s59E13H2" 0 "putative diguanylate cyclase AdrA"  
"JS1\_N06\_00599" 19529 "s59E25H2" 0 "putative diguanylate cyclase AdrA"  
"JS1\_N06\_00599" 19529 "s59E5H2" 0.01480367 "putative diguanylate cyclase AdrA"  
"JS1\_N06\_00599" 19529 "s63E6H2" 0 "putative diguanylate cyclase AdrA"  
"JS1\_N06\_00600" 19530 "s59E13H2" 0.763256 "Glutamine cyclotransferase"  
"JS1\_N06\_00600" 19530 "s59E25H2" 0 "Glutamine cyclotransferase"  
"JS1\_N06\_00600" 19530 "s59E5H2" 0.02452152 "Glutamine cyclotransferase"  
"JS1\_N06\_00600" 19530 "s63E6H2" 0.2842355 "Glutamine cyclotransferase"  
"JS1\_N06\_00601" 19531 "s59E13H2" 1.724789 "Glutamine cyclotransferase"  
"JS1\_N06\_00601" 19531 "s59E25H2" 0 "Glutamine cyclotransferase"  
"JS1\_N06\_00601" 19531 "s59E5H2" 0.03648795 "Glutamine cyclotransferase"  
"JS1\_N06\_00601" 19531 "s63E6H2" 0.3431421 "Glutamine cyclotransferase"  
"JS1\_N06\_00602" 19532 "s59E13H2" 1.565226 "Anaerobic regulatory protein"  
"JS1\_N06\_00602" 19532 "s59E25H2" 0 "Anaerobic regulatory protein"  
"JS1\_N06\_00602" 19532 "s59E5H2" 0.2388818 "Anaerobic regulatory protein"  
"JS1\_N06\_00602" 19532 "s63E6H2" 0.1677956 "Anaerobic regulatory protein"  
"JS1\_N06\_00603" 19533 "s59E13H2" 0.02609435 "hypothetical protein"  
"JS1\_N06\_00603" 19533 "s59E25H2" 0 "hypothetical protein"  
"JS1\_N06\_00603" 19533 "s59E5H2" 0.9439169 "hypothetical protein"  
"JS1\_N06\_00603" 19533 "s63E6H2" 0.2536406 "hypothetical protein"  
"JS1\_N06\_00604" 19534 "s59E13H2" 0 "hypothetical protein"  
"JS1\_N06\_00604" 19534 "s59E25H2" 0 "hypothetical protein"  
"JS1\_N06\_00604" 19534 "s59E5H2" 0 "hypothetical protein"  
"JS1\_N06\_00604" 19534 "s63E6H2" 0.02662504 "hypothetical protein"  
"JS1\_N06\_00605" 19535 "s59E13H2" 0.002742585 "Lipoprotein-releasing system transmembrane protein LolE"  
"JS1\_N06\_00605" 19535 "s59E25H2" 0 "Lipoprotein-releasing system transmembrane protein LolE"  
"JS1\_N06\_00605" 19535 "s59E5H2" 0.02170549 "Lipoprotein-releasing system transmembrane protein LolE"  
"JS1\_N06\_00605" 19535 "s63E6H2" 0.09289328 "Lipoprotein-releasing system transmembrane protein LolE"

"JS1\_N06\_00606" 19536 "s59E13H2" 0.01081233 "Lipoprotein-releasing system transmembrane protein LolE"  
"JS1\_N06\_00606" 19536 "s59E25H2" 0 "Lipoprotein-releasing system transmembrane protein LolE"  
"JS1\_N06\_00606" 19536 "s59E5H2" 0.1224189 "Lipoprotein-releasing system transmembrane protein LolE"  
"JS1\_N06\_00606" 19536 "s63E6H2" 0.01645186 "Lipoprotein-releasing system transmembrane protein LolE"  
"JS1\_N06\_00607" 19537 "s59E13H2" 0.04688473 "putative ABC transporter ATP-binding protein"  
"JS1\_N06\_00607" 19537 "s59E25H2" 0 "putative ABC transporter ATP-binding protein"  
"JS1\_N06\_00607" 19537 "s59E5H2" 0.1015935 "putative ABC transporter ATP-binding protein"  
"JS1\_N06\_00607" 19537 "s63E6H2" 0.0297709 "putative ABC transporter ATP-binding protein"  
"JS1\_N06\_00608" 19538 "s59E13H2" 0.0009520537 "Lipoprotein-releasing system transmembrane protein LolE"  
"JS1\_N06\_00608" 19538 "s59E25H2" 0 "Lipoprotein-releasing system transmembrane protein LolE"  
"JS1\_N06\_00608" 19538 "s59E5H2" 0.2755995 "Lipoprotein-releasing system transmembrane protein LolE"  
"JS1\_N06\_00608" 19538 "s63E6H2" 0.05331371 "Lipoprotein-releasing system transmembrane protein LolE"  
"JS1\_N06\_00609" 19539 "s59E13H2" 0 "hypothetical protein"  
"JS1\_N06\_00609" 19539 "s59E25H2" 0 "hypothetical protein"  
"JS1\_N06\_00609" 19539 "s59E5H2" 0.03144899 "hypothetical protein"  
"JS1\_N06\_00609" 19539 "s63E6H2" 0.0418574 "hypothetical protein"  
"JS1\_N06\_00610" 19540 "s59E13H2" 0.1090349 "Putative ski2-type helicase"  
"JS1\_N06\_00610" 19540 "s59E25H2" 0.1103811 "Putative ski2-type helicase"  
"JS1\_N06\_00610" 19540 "s59E5H2" 0.4779017 "Putative ski2-type helicase"  
"JS1\_N06\_00610" 19540 "s63E6H2" 0.4615254 "Putative ski2-type helicase"  
"JS1\_N06\_00611" 19541 "s59E13H2" 0.2509837 "Tetratricopeptide repeat protein"  
"JS1\_N06\_00611" 19541 "s59E25H2" 0 "Tetratricopeptide repeat protein"  
"JS1\_N06\_00611" 19541 "s59E5H2" 0.3206794 "Tetratricopeptide repeat protein"  
"JS1\_N06\_00611" 19541 "s63E6H2" 0.4685319 "Tetratricopeptide repeat protein"  
"JS1\_N06\_00612" 19542 "s59E13H2" 0.200107 "hypothetical protein"  
"JS1\_N06\_00612" 19542 "s59E25H2" 0 "hypothetical protein"  
"JS1\_N06\_00612" 19542 "s59E5H2" 0.4381762 "hypothetical protein"  
"JS1\_N06\_00612" 19542 "s63E6H2" 0.4299395 "hypothetical protein"  
"JS1\_N06\_00613" 19543 "s59E13H2" 0.09272735 "ADP-ribose pyrophosphatase"  
"JS1\_N06\_00613" 19543 "s59E25H2" 0 "ADP-ribose pyrophosphatase"  
"JS1\_N06\_00613" 19543 "s59E5H2" 0.3441353 "ADP-ribose pyrophosphatase"  
"JS1\_N06\_00613" 19543 "s63E6H2" 0.4954924 "ADP-ribose pyrophosphatase"  
"JS1\_N06\_00614" 19544 "s59E13H2" 0.2046725 "Cupin domain protein"  
"JS1\_N06\_00614" 19544 "s59E25H2" 0 "Cupin domain protein"  
"JS1\_N06\_00614" 19544 "s59E5H2" 0.08641432 "Cupin domain protein"  
"JS1\_N06\_00614" 19544 "s63E6H2" 0.2495404 "Cupin domain protein"  
"JS1\_N06\_00615" 19545 "s59E13H2" 0.3425329 "Phosphoglycolate phosphatase"  
"JS1\_N06\_00615" 19545 "s59E25H2" 0 "Phosphoglycolate phosphatase"  
"JS1\_N06\_00615" 19545 "s59E5H2" 0.4210447 "Phosphoglycolate phosphatase"  
"JS1\_N06\_00615" 19545 "s63E6H2" 0.5072004 "Phosphoglycolate phosphatase"  
"JS1\_N06\_00616" 19546 "s59E13H2" 1.575381 "hypothetical protein"  
"JS1\_N06\_00616" 19546 "s59E25H2" 0 "hypothetical protein"  
"JS1\_N06\_00616" 19546 "s59E5H2" 0.05332807 "hypothetical protein"  
"JS1\_N06\_00616" 19546 "s63E6H2" 0.3750851 "hypothetical protein"  
"JS1\_N06\_00617" 19547 "s59E13H2" 3.821526 "hypothetical protein"  
"JS1\_N06\_00617" 19547 "s59E25H2" 0 "hypothetical protein"  
"JS1\_N06\_00617" 19547 "s59E5H2" 0.08590113 "hypothetical protein"

"JS1\_N06\_00617" 19547 "s63E6H2" 0.1308889 "hypothetical protein"  
"JS1\_N06\_00618" 19548 "s59E13H2" 0.056678 "Transaldolase"  
"JS1\_N06\_00618" 19548 "s59E25H2" 0 "Transaldolase"  
"JS1\_N06\_00618" 19548 "s59E5H2" 0.01527192 "Transaldolase"  
"JS1\_N06\_00618" 19548 "s63E6H2" 0.1798567 "Transaldolase"  
"JS1\_N06\_00620" 19550 "s59E13H2" 0 "hypothetical protein"  
"JS1\_N06\_00620" 19550 "s59E25H2" 0 "hypothetical protein"  
"JS1\_N06\_00620" 19550 "s59E5H2" 0.3510905 "hypothetical protein"  
"JS1\_N06\_00620" 19550 "s63E6H2" 0.2659024 "hypothetical protein"  
"JS1\_N06\_00626" 19556 "s59E13H2" 0 "Uridylate kinase"  
"JS1\_N06\_00626" 19556 "s59E25H2" 0 "Uridylate kinase"  
"JS1\_N06\_00626" 19556 "s59E5H2" 0 "Uridylate kinase"  
"JS1\_N06\_00626" 19556 "s63E6H2" 0 "Uridylate kinase"  
"JS1\_N06\_00627" 19557 "s59E13H2" 0 "DNA topoisomerase 1"  
"JS1\_N06\_00627" 19557 "s59E25H2" 0 "DNA topoisomerase 1"  
"JS1\_N06\_00627" 19557 "s59E5H2" 0 "DNA topoisomerase 1"  
"JS1\_N06\_00627" 19557 "s63E6H2" 0 "DNA topoisomerase 1"  
"JS1\_N06\_00634" 19564 "s59E13H2" 0.0626562 "Caffeine dehydrogenase subunit alpha"  
"JS1\_N06\_00634" 19564 "s59E25H2" 0 "Caffeine dehydrogenase subunit alpha"  
"JS1\_N06\_00634" 19564 "s59E5H2" 0.1338607 "Caffeine dehydrogenase subunit alpha"  
"JS1\_N06\_00634" 19564 "s63E6H2" 0.06965547 "Caffeine dehydrogenase subunit alpha"  
"JS1\_N06\_00635" 19565 "s59E13H2" 0.1456292 "Purine-binding protein precursor"  
"JS1\_N06\_00635" 19565 "s59E25H2" 0 "Purine-binding protein precursor"  
"JS1\_N06\_00635" 19565 "s59E5H2" 0.4850504 "Purine-binding protein precursor"  
"JS1\_N06\_00635" 19565 "s63E6H2" 0.2008575 "Purine-binding protein precursor"  
"JS1\_N06\_00636" 19566 "s59E13H2" 0.08947608 "Galactose/methyl galactoside import ATP-binding protein MglA"  
"JS1\_N06\_00636" 19566 "s59E25H2" 0 "Galactose/methyl galactoside import ATP-binding protein MglA"  
"JS1\_N06\_00636" 19566 "s59E5H2" 0.01244925 "Galactose/methyl galactoside import ATP-binding protein MglA"  
"JS1\_N06\_00636" 19566 "s63E6H2" 0.2404297 "Galactose/methyl galactoside import ATP-binding protein MglA"  
"JS1\_N06\_00637" 19567 "s59E13H2" 0.2599374 "D-allose transporter subunit"  
"JS1\_N06\_00637" 19567 "s59E25H2" 0 "D-allose transporter subunit"  
"JS1\_N06\_00637" 19567 "s59E5H2" 0.01641018 "D-allose transporter subunit"  
"JS1\_N06\_00637" 19567 "s63E6H2" 0.609715 "D-allose transporter subunit"  
"JS1\_N06\_00638" 19568 "s59E13H2" 0.1091026 "beta-methylgalactoside transporter inner membrane component"  
"JS1\_N06\_00638" 19568 "s59E25H2" 0 "beta-methylgalactoside transporter inner membrane component"  
"JS1\_N06\_00638" 19568 "s59E5H2" 0.02047349 "beta-methylgalactoside transporter inner membrane component"  
"JS1\_N06\_00638" 19568 "s63E6H2" 0.2785542 "beta-methylgalactoside transporter inner membrane component"  
"JS1\_N06\_00639" 19569 "s59E13H2" 0.1287246 "N-isopropylammelide isopropyl amidohydrolase"  
"JS1\_N06\_00639" 19569 "s59E25H2" 0 "N-isopropylammelide isopropyl amidohydrolase"  
"JS1\_N06\_00639" 19569 "s59E5H2" 0.01666878 "N-isopropylammelide isopropyl amidohydrolase"  
"JS1\_N06\_00639" 19569 "s63E6H2" 0.1076982 "N-isopropylammelide isopropyl amidohydrolase"  
"JS1\_N06\_00640" 19570 "s59E13H2" 0 "Modification methylase BamHI"  
"JS1\_N06\_00640" 19570 "s59E25H2" 0 "Modification methylase BamHI"  
"JS1\_N06\_00640" 19570 "s59E5H2" 0 "Modification methylase BamHI"  
"JS1\_N06\_00640" 19570 "s63E6H2" 0 "Modification methylase BamHI"  
"JS1\_N06\_00641" 19571 "s59E13H2" 0 "hypothetical protein"  
"JS1\_N06\_00641" 19571 "s59E25H2" 0 "hypothetical protein"

"JS1\_N06\_00641" 19571 "s59E5H2" 0.008689345 "hypothetical protein"  
"JS1\_N06\_00641" 19571 "s63E6H2" 0 "hypothetical protein"  
"JS1\_N06\_00650" 19580 "s59E13H2" 0 "Signal recognition particle protein"  
"JS1\_N06\_00650" 19580 "s59E25H2" 0 "Signal recognition particle protein"  
"JS1\_N06\_00650" 19580 "s59E5H2" 0.002561037 "Signal recognition particle protein"  
"JS1\_N06\_00650" 19580 "s63E6H2" 0.001116604 "Signal recognition particle protein"  
"JS1\_N06\_00651" 19581 "s59E13H2" 0 "hypothetical protein"  
"JS1\_N06\_00651" 19581 "s59E25H2" 0 "hypothetical protein"  
"JS1\_N06\_00651" 19581 "s59E5H2" 0 "hypothetical protein"  
"JS1\_N06\_00651" 19581 "s63E6H2" 0 "hypothetical protein"  
"JS1\_N06\_00652" 19582 "s59E13H2" 0.1011698 "Ribosome maturation factor RimM"  
"JS1\_N06\_00652" 19582 "s59E25H2" 0 "Ribosome maturation factor RimM"  
"JS1\_N06\_00652" 19582 "s59E5H2" 0.001398659 "Ribosome maturation factor RimM"  
"JS1\_N06\_00652" 19582 "s63E6H2" 0.0369883 "Ribosome maturation factor RimM"  
"JS1\_N06\_00653" 19583 "s59E13H2" 0.002290819 "tRNA (guanine-N(1)-)-methyltransferase"  
"JS1\_N06\_00653" 19583 "s59E25H2" 0 "tRNA (guanine-N(1)-)-methyltransferase"  
"JS1\_N06\_00653" 19583 "s59E5H2" 0.008805576 "tRNA (guanine-N(1)-)-methyltransferase"  
"JS1\_N06\_00653" 19583 "s63E6H2" 0.03716198 "tRNA (guanine-N(1)-)-methyltransferase"  
"JS1\_N06\_00654" 19584 "s59E13H2" 0 "50S ribosomal protein L19"  
"JS1\_N06\_00654" 19584 "s59E25H2" 0 "50S ribosomal protein L19"  
"JS1\_N06\_00654" 19584 "s59E5H2" 0 "50S ribosomal protein L19"  
"JS1\_N06\_00654" 19584 "s63E6H2" 0.07370918 "50S ribosomal protein L19"  
"JS1\_N06\_00655" 19585 "s59E13H2" 0 "Ribonuclease HII"  
"JS1\_N06\_00655" 19585 "s59E25H2" 0 "Ribonuclease HII"  
"JS1\_N06\_00655" 19585 "s59E5H2" 0 "Ribonuclease HII"  
"JS1\_N06\_00655" 19585 "s63E6H2" 0.02863963 "Ribonuclease HII"  
"JS1\_N06\_00658" 19588 "s59E13H2" 0 "Protein of unknown function (Hypoth\_ymh)"  
"JS1\_N06\_00658" 19588 "s59E25H2" 0 "Protein of unknown function (Hypoth\_ymh)"  
"JS1\_N06\_00658" 19588 "s59E5H2" 0 "Protein of unknown function (Hypoth\_ymh)"  
"JS1\_N06\_00658" 19588 "s63E6H2" 0 "Protein of unknown function (Hypoth\_ymh)"  
"JS1\_N06\_00660" 19590 "s59E13H2" 0 "3-oxoacyl-[acyl-carrier-protein] synthase 2"  
"JS1\_N06\_00660" 19590 "s59E25H2" 0 "3-oxoacyl-[acyl-carrier-protein] synthase 2"  
"JS1\_N06\_00660" 19590 "s59E5H2" 0 "3-oxoacyl-[acyl-carrier-protein] synthase 2"  
"JS1\_N06\_00660" 19590 "s63E6H2" 0.05991256 "3-oxoacyl-[acyl-carrier-protein] synthase 2"  
"JS1\_N06\_00667" 19597 "s59E13H2" 0.009851569 "Leucine--tRNA ligase"  
"JS1\_N06\_00667" 19597 "s59E25H2" 0 "Leucine--tRNA ligase"  
"JS1\_N06\_00667" 19597 "s59E5H2" 0.4463766 "Leucine--tRNA ligase"  
"JS1\_N06\_00667" 19597 "s63E6H2" 0.2510912 "Leucine--tRNA ligase"  
"JS1\_N06\_00668" 19598 "s59E13H2" 0.0687779 "Single-stranded DNA-binding protein ssb"  
"JS1\_N06\_00668" 19598 "s59E25H2" 0 "Single-stranded DNA-binding protein ssb"  
"JS1\_N06\_00668" 19598 "s59E5H2" 0.4418876 "Single-stranded DNA-binding protein ssb"  
"JS1\_N06\_00668" 19598 "s63E6H2" 0.1780674 "Single-stranded DNA-binding protein ssb"  
"JS1\_N06\_00676" 19606 "s59E13H2" 0.4829352 "LL-diaminopimelate aminotransferase"  
"JS1\_N06\_00676" 19606 "s59E25H2" 0 "LL-diaminopimelate aminotransferase"  
"JS1\_N06\_00676" 19606 "s59E5H2" 0.03427966 "LL-diaminopimelate aminotransferase"  
"JS1\_N06\_00676" 19606 "s63E6H2" 0.09441142 "LL-diaminopimelate aminotransferase"  
"JS1\_N06\_00678" 19608 "s59E13H2" 0.00430974 "hypothetical protein"

"JS1\_N06\_00678" 19608 "s59E25H2" 0 "hypothetical protein"  
"JS1\_N06\_00678" 19608 "s59E5H2" 0.003146983 "hypothetical protein"  
"JS1\_N06\_00678" 19608 "s63E6H2" 0.003182687 "hypothetical protein"  
"JS1\_N06\_00680" 19610 "s59E13H2" 0 "Trehalose/maltose transport system permease protein MalG"  
"JS1\_N06\_00680" 19610 "s59E25H2" 0 "Trehalose/maltose transport system permease protein MalG"  
"JS1\_N06\_00680" 19610 "s59E5H2" 0.01523603 "Trehalose/maltose transport system permease protein MalG"  
"JS1\_N06\_00680" 19610 "s63E6H2" 0.0008091647 "Trehalose/maltose transport system permease protein MalG"  
"JS1\_N06\_00681" 19611 "s59E13H2" 0 "Lactose transport system permease protein LacF"  
"JS1\_N06\_00681" 19611 "s59E25H2" 0 "Lactose transport system permease protein LacF"  
"JS1\_N06\_00681" 19611 "s59E5H2" 0.03248075 "Lactose transport system permease protein LacF"  
"JS1\_N06\_00681" 19611 "s63E6H2" 0.4106492 "Lactose transport system permease protein LacF"  
"JS1\_N06\_00682" 19612 "s59E13H2" 0 "Trehalose/maltose-binding protein MalE precursor"  
"JS1\_N06\_00682" 19612 "s59E25H2" 0 "Trehalose/maltose-binding protein MalE precursor"  
"JS1\_N06\_00682" 19612 "s59E5H2" 0.004777789 "Trehalose/maltose-binding protein MalE precursor"  
"JS1\_N06\_00682" 19612 "s63E6H2" 0.7820285 "Trehalose/maltose-binding protein MalE precursor"  
"JS1\_N06\_00683" 19613 "s59E13H2" 0 "putative fructose-bisphosphate aldolase"  
"JS1\_N06\_00683" 19613 "s59E25H2" 0 "putative fructose-bisphosphate aldolase"  
"JS1\_N06\_00683" 19613 "s59E5H2" 0.006273071 "putative fructose-bisphosphate aldolase"  
"JS1\_N06\_00683" 19613 "s63E6H2" 0 "putative fructose-bisphosphate aldolase"  
"JS1\_N06\_00684" 19614 "s59E13H2" 0.03437643 "putative D-lyxose ketol-isomerase"  
"JS1\_N06\_00684" 19614 "s59E25H2" 0 "putative D-lyxose ketol-isomerase"  
"JS1\_N06\_00684" 19614 "s59E5H2" 0.5134923 "putative D-lyxose ketol-isomerase"  
"JS1\_N06\_00684" 19614 "s63E6H2" 0.2077374 "putative D-lyxose ketol-isomerase"  
"JS1\_N06\_00685" 19615 "s59E13H2" 0.1172127 "pfkB family carbohydrate kinase"  
"JS1\_N06\_00685" 19615 "s59E25H2" 0 "pfkB family carbohydrate kinase"  
"JS1\_N06\_00685" 19615 "s59E5H2" 0.3248263 "pfkB family carbohydrate kinase"  
"JS1\_N06\_00685" 19615 "s63E6H2" 0.08113115 "pfkB family carbohydrate kinase"  
"JS1\_N06\_00686" 19616 "s59E13H2" 0.3324618 "putative sugar kinase"  
"JS1\_N06\_00686" 19616 "s59E25H2" 0 "putative sugar kinase"  
"JS1\_N06\_00686" 19616 "s59E5H2" 0.3664259 "putative sugar kinase"  
"JS1\_N06\_00686" 19616 "s63E6H2" 0.06428616 "putative sugar kinase"  
"JS1\_N06\_00687" 19617 "s59E13H2" 0.3666131 "Xylulose kinase"  
"JS1\_N06\_00687" 19617 "s59E25H2" 0 "Xylulose kinase"  
"JS1\_N06\_00687" 19617 "s59E5H2" 1.493795 "Xylulose kinase"  
"JS1\_N06\_00687" 19617 "s63E6H2" 1.583004 "Xylulose kinase"  
"JS1\_N06\_00688" 19618 "s59E13H2" 0.1767052 "putative mannose-6-phosphate isomerase GmuF"  
"JS1\_N06\_00688" 19618 "s59E25H2" 0 "putative mannose-6-phosphate isomerase GmuF"  
"JS1\_N06\_00688" 19618 "s59E5H2" 0.04664585 "putative mannose-6-phosphate isomerase GmuF"  
"JS1\_N06\_00688" 19618 "s63E6H2" 0.226782 "putative mannose-6-phosphate isomerase GmuF"  
"JS1\_N06\_00689" 19619 "s59E13H2" 0.1480625 "hypothetical protein"  
"JS1\_N06\_00689" 19619 "s59E25H2" 0 "hypothetical protein"  
"JS1\_N06\_00689" 19619 "s59E5H2" 0.07660301 "hypothetical protein"  
"JS1\_N06\_00689" 19619 "s63E6H2" 0.2628061 "hypothetical protein"  
"JS1\_N06\_00690" 19620 "s59E13H2" 0 "hypothetical protein"  
"JS1\_N06\_00690" 19620 "s59E25H2" 0 "hypothetical protein"  
"JS1\_N06\_00690" 19620 "s59E5H2" 0.02836095 "hypothetical protein"  
"JS1\_N06\_00690" 19620 "s63E6H2" 0.07111188 "hypothetical protein"

"JS1\_N06\_00691" 19621 "s59E13H2" 0.03554486 "hypothetical protein"  
"JS1\_N06\_00691" 19621 "s59E25H2" 0 "hypothetical protein"  
"JS1\_N06\_00691" 19621 "s59E5H2" 0.07852298 "hypothetical protein"  
"JS1\_N06\_00691" 19621 "s63E6H2" 0.3412976 "hypothetical protein"  
"JS1\_N06\_00692" 19622 "s59E13H2" 0.289667 "D-ribose-binding periplasmic protein precursor"  
"JS1\_N06\_00692" 19622 "s59E25H2" 0 "D-ribose-binding periplasmic protein precursor"  
"JS1\_N06\_00692" 19622 "s59E5H2" 0.6050557 "D-ribose-binding periplasmic protein precursor"  
"JS1\_N06\_00692" 19622 "s63E6H2" 0.2366945 "D-ribose-binding periplasmic protein precursor"  
"JS1\_N06\_00693" 19623 "s59E13H2" 0.02788275 "Glucose-6-phosphate 3-dehydrogenase"  
"JS1\_N06\_00693" 19623 "s59E25H2" 0 "Glucose-6-phosphate 3-dehydrogenase"  
"JS1\_N06\_00693" 19623 "s59E5H2" 0.7141887 "Glucose-6-phosphate 3-dehydrogenase"  
"JS1\_N06\_00693" 19623 "s63E6H2" 0.4232705 "Glucose-6-phosphate 3-dehydrogenase"  
"JS1\_N06\_00699" 19629 "s59E13H2" 0 "DNA topoisomerase 1"  
"JS1\_N06\_00699" 19629 "s59E25H2" 0 "DNA topoisomerase 1"  
"JS1\_N06\_00699" 19629 "s59E5H2" 0.005403911 "DNA topoisomerase 1"  
"JS1\_N06\_00699" 19629 "s63E6H2" 0.008138669 "DNA topoisomerase 1"  
"JS1\_N06\_00700" 19630 "s59E13H2" 0.006083825 "Glutamate racemase"  
"JS1\_N06\_00700" 19630 "s59E25H2" 0 "Glutamate racemase"  
"JS1\_N06\_00700" 19630 "s59E5H2" 0.009640577 "Glutamate racemase"  
"JS1\_N06\_00700" 19630 "s63E6H2" 0.06554285 "Glutamate racemase"  
"JS1\_N06\_00701" 19631 "s59E13H2" 0 "Branched-chain-amino-acid aminotransferase"  
"JS1\_N06\_00701" 19631 "s59E25H2" 0 "Branched-chain-amino-acid aminotransferase"  
"JS1\_N06\_00701" 19631 "s59E5H2" 0.2480627 "Branched-chain-amino-acid aminotransferase"  
"JS1\_N06\_00701" 19631 "s63E6H2" 0.06577537 "Branched-chain-amino-acid aminotransferase"  
"JS1\_N06\_00702" 19632 "s59E13H2" 0.04384237 "Aspartate aminotransferase"  
"JS1\_N06\_00702" 19632 "s59E25H2" 0 "Aspartate aminotransferase"  
"JS1\_N06\_00702" 19632 "s59E5H2" 0.3357621 "Aspartate aminotransferase"  
"JS1\_N06\_00702" 19632 "s63E6H2" 0.09220765 "Aspartate aminotransferase"  
"JS1\_N06\_00703" 19633 "s59E13H2" 0.0931807 "hypothetical protein"  
"JS1\_N06\_00703" 19633 "s59E25H2" 0 "hypothetical protein"  
"JS1\_N06\_00703" 19633 "s59E5H2" 0.6559924 "hypothetical protein"  
"JS1\_N06\_00703" 19633 "s63E6H2" 0.1014804 "hypothetical protein"  
"JS1\_N06\_00704" 19634 "s59E13H2" 0.09419841 "ATP-dependent DNA helicase PcrA"  
"JS1\_N06\_00704" 19634 "s59E25H2" 0 "ATP-dependent DNA helicase PcrA"  
"JS1\_N06\_00704" 19634 "s59E5H2" 0.1905105 "ATP-dependent DNA helicase PcrA"  
"JS1\_N06\_00704" 19634 "s63E6H2" 0.1321566 "ATP-dependent DNA helicase PcrA"  
"JS1\_N06\_00705" 19635 "s59E13H2" 0.003830616 "Putative peptidyl-prolyl cis-trans isomerase Cbf2 precursor"  
"JS1\_N06\_00705" 19635 "s59E25H2" 0 "Putative peptidyl-prolyl cis-trans isomerase Cbf2 precursor"  
"JS1\_N06\_00705" 19635 "s59E5H2" 0.05004491 "Putative peptidyl-prolyl cis-trans isomerase Cbf2 precursor"  
"JS1\_N06\_00705" 19635 "s63E6H2" 0.07179255 "Putative peptidyl-prolyl cis-trans isomerase Cbf2 precursor"  
"JS1\_N06\_00706" 19636 "s59E13H2" 0.0501988 "Putative multidrug export ATP-binding/permease protein"  
"JS1\_N06\_00706" 19636 "s59E25H2" 0 "Putative multidrug export ATP-binding/permease protein"  
"JS1\_N06\_00706" 19636 "s59E5H2" 0.2795194 "Putative multidrug export ATP-binding/permease protein"  
"JS1\_N06\_00706" 19636 "s63E6H2" 0.3281696 "Putative multidrug export ATP-binding/permease protein"  
"JS1\_N06\_00707" 19637 "s59E13H2" 0 "hypothetical protein"  
"JS1\_N06\_00707" 19637 "s59E25H2" 0 "hypothetical protein"  
"JS1\_N06\_00707" 19637 "s59E5H2" 0 "hypothetical protein"



"JS1\_N06\_00707" 19637 "s63E6H2" 0 "hypothetical protein"  
"JS1\_N06\_00713" 19643 "s59E13H2" 0 "DNA topoisomerase 1"  
"JS1\_N06\_00713" 19643 "s59E25H2" 0 "DNA topoisomerase 1"  
"JS1\_N06\_00713" 19643 "s59E5H2" 0.003819305 "DNA topoisomerase 1"  
"JS1\_N06\_00713" 19643 "s63E6H2" 0.007511503 "DNA topoisomerase 1"  
"JS1\_N06\_00714" 19644 "s59E13H2" 0 "DNA topoisomerase 1"  
"JS1\_N06\_00714" 19644 "s59E25H2" 0 "DNA topoisomerase 1"  
"JS1\_N06\_00714" 19644 "s59E5H2" 0 "DNA topoisomerase 1"  
"JS1\_N06\_00714" 19644 "s63E6H2" 0.00278996 "DNA topoisomerase 1"  
"JS1\_N06\_00720" 19650 "s59E13H2" 0.4705162 "Xylulose kinase"  
"JS1\_N06\_00720" 19650 "s59E25H2" 0 "Xylulose kinase"  
"JS1\_N06\_00720" 19650 "s59E5H2" 0.5337271 "Xylulose kinase"  
"JS1\_N06\_00720" 19650 "s63E6H2" 1.395192 "Xylulose kinase"  
"JS1\_N06\_00721" 19651 "s59E13H2" 2.454967 "D-tagatose-1,6-bisphosphate aldolase subunit GatY"  
"JS1\_N06\_00721" 19651 "s59E25H2" 0 "D-tagatose-1,6-bisphosphate aldolase subunit GatY"  
"JS1\_N06\_00721" 19651 "s59E5H2" 0.4620255 "D-tagatose-1,6-bisphosphate aldolase subunit GatY"  
"JS1\_N06\_00721" 19651 "s63E6H2" 2.035991 "D-tagatose-1,6-bisphosphate aldolase subunit GatY"  
"JS1\_N06\_00722" 19652 "s59E13H2" 2.46421 "Xylulose kinase"  
"JS1\_N06\_00722" 19652 "s59E25H2" 0 "Xylulose kinase"  
"JS1\_N06\_00722" 19652 "s59E5H2" 0.7180273 "Xylulose kinase"  
"JS1\_N06\_00722" 19652 "s63E6H2" 1.110488 "Xylulose kinase"  
"JS1\_N06\_00723" 19653 "s59E13H2" 4.64087 "Trehalose/maltose-binding protein MalE precursor"  
"JS1\_N06\_00723" 19653 "s59E25H2" 0 "Trehalose/maltose-binding protein MalE precursor"  
"JS1\_N06\_00723" 19653 "s59E5H2" 0.5385474 "Trehalose/maltose-binding protein MalE precursor"  
"JS1\_N06\_00723" 19653 "s63E6H2" 1.263877 "Trehalose/maltose-binding protein MalE precursor"  
"JS1\_N06\_00724" 19654 "s59E13H2" 4.017015 "Lactose transport system permease protein LacF"  
"JS1\_N06\_00724" 19654 "s59E25H2" 0 "Lactose transport system permease protein LacF"  
"JS1\_N06\_00724" 19654 "s59E5H2" 0.9442979 "Lactose transport system permease protein LacF"  
"JS1\_N06\_00724" 19654 "s63E6H2" 1.02314 "Lactose transport system permease protein LacF"  
"JS1\_N06\_00725" 19655 "s59E13H2" 1.932376 "L-arabinose transport system permease protein AraQ"  
"JS1\_N06\_00725" 19655 "s59E25H2" 0 "L-arabinose transport system permease protein AraQ"  
"JS1\_N06\_00725" 19655 "s59E5H2" 0.2270753 "L-arabinose transport system permease protein AraQ"  
"JS1\_N06\_00725" 19655 "s63E6H2" 0.8153118 "L-arabinose transport system permease protein AraQ"  
"JS1\_N06\_00726" 19656 "s59E13H2" 1.30443 "Alpha-D-glucose-1-phosphate phosphatase YihX"  
"JS1\_N06\_00726" 19656 "s59E25H2" 0 "Alpha-D-glucose-1-phosphate phosphatase YihX"  
"JS1\_N06\_00726" 19656 "s59E5H2" 0.4926376 "Alpha-D-glucose-1-phosphate phosphatase YihX"  
"JS1\_N06\_00726" 19656 "s63E6H2" 0.8621499 "Alpha-D-glucose-1-phosphate phosphatase YihX"  
"JS1\_N06\_00727" 19657 "s59E13H2" 0.0751956 "HTH-type transcriptional regulator PuuR"  
"JS1\_N06\_00727" 19657 "s59E25H2" 0 "HTH-type transcriptional regulator PuuR"  
"JS1\_N06\_00727" 19657 "s59E5H2" 0.2800394 "HTH-type transcriptional regulator PuuR"  
"JS1\_N06\_00727" 19657 "s63E6H2" 0.5934044 "HTH-type transcriptional regulator PuuR"  
"JS1\_N06\_00728" 19658 "s59E13H2" 0.08770557 "2,3-diketo-L-gulonate-binding periplasmic protein YiaO precursor"  
"JS1\_N06\_00728" 19658 "s59E25H2" 0 "2,3-diketo-L-gulonate-binding periplasmic protein YiaO precursor"  
"JS1\_N06\_00728" 19658 "s59E5H2" 0.5609383 "2,3-diketo-L-gulonate-binding periplasmic protein YiaO precursor"  
"JS1\_N06\_00728" 19658 "s63E6H2" 0.6632987 "2,3-diketo-L-gulonate-binding periplasmic protein YiaO precursor"  
"JS1\_N06\_00729" 19659 "s59E13H2" 0.1224936 "Sialic acid TRAP transporter permease protein SiaT"  
"JS1\_N06\_00729" 19659 "s59E25H2" 0 "Sialic acid TRAP transporter permease protein SiaT"

"JS1\_N06\_00729" 19659 "s59E5H2" 0.09729961 "Sialic acid TRAP transporter permease protein SiaT"  
"JS1\_N06\_00729" 19659 "s63E6H2" 0.2525698 "Sialic acid TRAP transporter permease protein SiaT"  
"JS1\_N06\_00730" 19660 "s59E13H2" 0 "Sialic acid TRAP transporter permease protein SiaT"  
"JS1\_N06\_00730" 19660 "s59E25H2" 0 "Sialic acid TRAP transporter permease protein SiaT"  
"JS1\_N06\_00730" 19660 "s59E5H2" 0.0973714 "Sialic acid TRAP transporter permease protein SiaT"  
"JS1\_N06\_00730" 19660 "s63E6H2" 0.2867019 "Sialic acid TRAP transporter permease protein SiaT"  
"JS1\_N06\_00731" 19661 "s59E13H2" 0.01257765 "Allantoinase"  
"JS1\_N06\_00731" 19661 "s59E25H2" 0 "Allantoinase"  
"JS1\_N06\_00731" 19661 "s59E5H2" 0.1282693 "Allantoinase"  
"JS1\_N06\_00731" 19661 "s63E6H2" 0.1746836 "Allantoinase"  
"JS1\_N06\_00732" 19662 "s59E13H2" 0.01479618 "Carbamate kinase"  
"JS1\_N06\_00732" 19662 "s59E25H2" 0 "Carbamate kinase"  
"JS1\_N06\_00732" 19662 "s59E5H2" 0.07846751 "Carbamate kinase"  
"JS1\_N06\_00732" 19662 "s63E6H2" 0.6580655 "Carbamate kinase"  
"JS1\_N06\_00733" 19663 "s59E13H2" 0.01552992 "Ornithine carbamoyltransferase"  
"JS1\_N06\_00733" 19663 "s59E25H2" 0 "Ornithine carbamoyltransferase"  
"JS1\_N06\_00733" 19663 "s59E5H2" 0.2143936 "Ornithine carbamoyltransferase"  
"JS1\_N06\_00733" 19663 "s63E6H2" 0.8635866 "Ornithine carbamoyltransferase"  
"JS1\_N06\_00734" 19664 "s59E13H2" 0.02063605 "Threonine synthase"  
"JS1\_N06\_00734" 19664 "s59E25H2" 0 "Threonine synthase"  
"JS1\_N06\_00734" 19664 "s59E5H2" 0.1963771 "Threonine synthase"  
"JS1\_N06\_00734" 19664 "s63E6H2" 0.6837037 "Threonine synthase"  
"JS1\_N06\_00735" 19665 "s59E13H2" 0.05755013 "putative succinyl-diaminopimelate desuccinylase"  
"JS1\_N06\_00735" 19665 "s59E25H2" 0 "putative succinyl-diaminopimelate desuccinylase"  
"JS1\_N06\_00735" 19665 "s59E5H2" 0.2225951 "putative succinyl-diaminopimelate desuccinylase"  
"JS1\_N06\_00735" 19665 "s63E6H2" 1.025654 "putative succinyl-diaminopimelate desuccinylase"  
"JS1\_N06\_00736" 19666 "s59E13H2" 0.05310944 "Cysteine synthase"  
"JS1\_N06\_00736" 19666 "s59E25H2" 0 "Cysteine synthase"  
"JS1\_N06\_00736" 19666 "s59E5H2" 0.4826505 "Cysteine synthase"  
"JS1\_N06\_00736" 19666 "s63E6H2" 1.345516 "Cysteine synthase"  
"JS1\_N06\_00737" 19667 "s59E13H2" 0.1258933 "Aspartate carbamoyltransferase"  
"JS1\_N06\_00737" 19667 "s59E25H2" 0 "Aspartate carbamoyltransferase"  
"JS1\_N06\_00737" 19667 "s59E5H2" 0.8131187 "Aspartate carbamoyltransferase"  
"JS1\_N06\_00737" 19667 "s63E6H2" 1.579009 "Aspartate carbamoyltransferase"  
"JS1\_N06\_00738" 19668 "s59E13H2" 1.976764 "putative xanthine dehydrogenase subunit D"  
"JS1\_N06\_00738" 19668 "s59E25H2" 0 "putative xanthine dehydrogenase subunit D"  
"JS1\_N06\_00738" 19668 "s59E5H2" 0.6688449 "putative xanthine dehydrogenase subunit D"  
"JS1\_N06\_00738" 19668 "s63E6H2" 1.458551 "putative xanthine dehydrogenase subunit D"  
"JS1\_N06\_00739" 19669 "s59E13H2" 1.576387 "Glyceraldehyde dehydrogenase medium chain"  
"JS1\_N06\_00739" 19669 "s59E25H2" 0 "Glyceraldehyde dehydrogenase medium chain"  
"JS1\_N06\_00739" 19669 "s59E5H2" 0.2230727 "Glyceraldehyde dehydrogenase medium chain"  
"JS1\_N06\_00739" 19669 "s63E6H2" 0.6937168 "Glyceraldehyde dehydrogenase medium chain"  
"JS1\_N06\_00740" 19670 "s59E13H2" 1.113837 "Nicotinate dehydrogenase small FeS subunit"  
"JS1\_N06\_00740" 19670 "s59E25H2" 0 "Nicotinate dehydrogenase small FeS subunit"  
"JS1\_N06\_00740" 19670 "s59E5H2" 0.1061956 "Nicotinate dehydrogenase small FeS subunit"  
"JS1\_N06\_00740" 19670 "s63E6H2" 0.5793367 "Nicotinate dehydrogenase small FeS subunit"  
"JS1\_N06\_00741" 19671 "s59E13H2" 0.9862304 "8-oxoguanine deaminase"

"JS1\_N06\_00741" 19671 "s59E25H2" 0 "8-oxoguanine deaminase"  
"JS1\_N06\_00741" 19671 "s59E5H2" 0.3533418 "8-oxoguanine deaminase"  
"JS1\_N06\_00741" 19671 "s63E6H2" 0.2091204 "8-oxoguanine deaminase"  
"JS1\_N06\_00742" 19672 "s59E13H2" 0.0263759 "5-methylthioadenosine/S-adenosylhomocysteine deaminase"  
"JS1\_N06\_00742" 19672 "s59E25H2" 0.3033033 "5-methylthioadenosine/S-adenosylhomocysteine deaminase"  
"JS1\_N06\_00742" 19672 "s59E5H2" 0.2812833 "5-methylthioadenosine/S-adenosylhomocysteine deaminase"  
"JS1\_N06\_00742" 19672 "s63E6H2" 0.6585121 "5-methylthioadenosine/S-adenosylhomocysteine deaminase"  
"JS1\_N06\_00743" 19673 "s59E13H2" 0 "Cupin domain protein"  
"JS1\_N06\_00743" 19673 "s59E25H2" 0 "Cupin domain protein"  
"JS1\_N06\_00743" 19673 "s59E5H2" 0 "Cupin domain protein"  
"JS1\_N06\_00743" 19673 "s63E6H2" 0.002334013 "Cupin domain protein"  
"JS1\_N06\_00744" 19674 "s59E13H2" 0.01912106 "Cell wall-binding protein YocH precursor"  
"JS1\_N06\_00744" 19674 "s59E25H2" 0 "Cell wall-binding protein YocH precursor"  
"JS1\_N06\_00744" 19674 "s59E5H2" 0.0832838 "Cell wall-binding protein YocH precursor"  
"JS1\_N06\_00744" 19674 "s63E6H2" 0.1813178 "Cell wall-binding protein YocH precursor"  
"JS1\_N06\_00745" 19675 "s59E13H2" 0.006883589 "hypothetical protein"  
"JS1\_N06\_00745" 19675 "s59E25H2" 0 "hypothetical protein"  
"JS1\_N06\_00745" 19675 "s59E5H2" 0.2723772 "hypothetical protein"  
"JS1\_N06\_00745" 19675 "s63E6H2" 0.5196849 "hypothetical protein"  
"JS1\_N06\_00746" 19676 "s59E13H2" 0.02657177 "Galactose/methyl galactoside import ATP-binding protein MglA"  
"JS1\_N06\_00746" 19676 "s59E25H2" 0 "Galactose/methyl galactoside import ATP-binding protein MglA"  
"JS1\_N06\_00746" 19676 "s59E5H2" 0.04820944 "Galactose/methyl galactoside import ATP-binding protein MglA"  
"JS1\_N06\_00746" 19676 "s63E6H2" 1.241477 "Galactose/methyl galactoside import ATP-binding protein MglA"  
"JS1\_N06\_00747" 19677 "s59E13H2" 0.2493211 "Xylulose kinase"  
"JS1\_N06\_00747" 19677 "s59E25H2" 0 "Xylulose kinase"  
"JS1\_N06\_00747" 19677 "s59E5H2" 0.2247536 "Xylulose kinase"  
"JS1\_N06\_00747" 19677 "s63E6H2" 0.5556332 "Xylulose kinase"  
"JS1\_N06\_00748" 19678 "s59E13H2" 0.3760245 "L-ribulose-5-phosphate 4-epimerase UlaF"  
"JS1\_N06\_00748" 19678 "s59E25H2" 0 "L-ribulose-5-phosphate 4-epimerase UlaF"  
"JS1\_N06\_00748" 19678 "s59E5H2" 0.2695895 "L-ribulose-5-phosphate 4-epimerase UlaF"  
"JS1\_N06\_00748" 19678 "s63E6H2" 0.7325828 "L-ribulose-5-phosphate 4-epimerase UlaF"  
"JS1\_N06\_00749" 19679 "s59E13H2" 0.351994 "Arabinose metabolism transcriptional repressor"  
"JS1\_N06\_00749" 19679 "s59E25H2" 0 "Arabinose metabolism transcriptional repressor"  
"JS1\_N06\_00749" 19679 "s59E5H2" 0.7135999 "Arabinose metabolism transcriptional repressor"  
"JS1\_N06\_00749" 19679 "s63E6H2" 0.4629832 "Arabinose metabolism transcriptional repressor"  
"JS1\_N06\_00750" 19680 "s59E13H2" 0.2188383 "hypothetical protein"  
"JS1\_N06\_00750" 19680 "s59E25H2" 0 "hypothetical protein"  
"JS1\_N06\_00750" 19680 "s59E5H2" 1.075017 "hypothetical protein"  
"JS1\_N06\_00750" 19680 "s63E6H2" 1.095909 "hypothetical protein"  
"JS1\_N06\_00751" 19681 "s59E13H2" 0.2248106 "methylcobalamin:coenzyme M methyltransferase"  
"JS1\_N06\_00751" 19681 "s59E25H2" 0 "methylcobalamin:coenzyme M methyltransferase"  
"JS1\_N06\_00751" 19681 "s59E5H2" 0.1060381 "methylcobalamin:coenzyme M methyltransferase"  
"JS1\_N06\_00751" 19681 "s63E6H2" 0.8955302 "methylcobalamin:coenzyme M methyltransferase"  
"JS1\_N06\_00752" 19682 "s59E13H2" 0.1380027 "Ribose transport system permease protein RbsC"  
"JS1\_N06\_00752" 19682 "s59E25H2" 0 "Ribose transport system permease protein RbsC"  
"JS1\_N06\_00752" 19682 "s59E5H2" 0.107311 "Ribose transport system permease protein RbsC"  
"JS1\_N06\_00752" 19682 "s63E6H2" 1.011864 "Ribose transport system permease protein RbsC"

"JS1\_N06\_00753" 19683 "s59E13H2" 0.197386 "putative amino-acid import ATP-binding protein YxeO"  
"JS1\_N06\_00753" 19683 "s59E25H2" 0 "putative amino-acid import ATP-binding protein YxeO"  
"JS1\_N06\_00753" 19683 "s59E5H2" 0.2138582 "putative amino-acid import ATP-binding protein YxeO"  
"JS1\_N06\_00753" 19683 "s63E6H2" 0.9414979 "putative amino-acid import ATP-binding protein YxeO"  
"JS1\_N06\_00754" 19684 "s59E13H2" 0.06494785 "hypothetical protein"  
"JS1\_N06\_00754" 19684 "s59E25H2" 0 "hypothetical protein"  
"JS1\_N06\_00754" 19684 "s59E5H2" 0.03208572 "hypothetical protein"  
"JS1\_N06\_00754" 19684 "s63E6H2" 0.881649 "hypothetical protein"  
"JS1\_N06\_00755" 19685 "s59E13H2" 0.1246943 "hypothetical protein"  
"JS1\_N06\_00755" 19685 "s59E25H2" 0 "hypothetical protein"  
"JS1\_N06\_00755" 19685 "s59E5H2" 0.1379964 "hypothetical protein"  
"JS1\_N06\_00755" 19685 "s63E6H2" 1.000738 "hypothetical protein"  
"JS1\_N06\_00756" 19686 "s59E13H2" 2.014683 "Aldose 1-epimerase precursor"  
"JS1\_N06\_00756" 19686 "s59E25H2" 0 "Aldose 1-epimerase precursor"  
"JS1\_N06\_00756" 19686 "s59E5H2" 0.1043874 "Aldose 1-epimerase precursor"  
"JS1\_N06\_00756" 19686 "s63E6H2" 0.1401799 "Aldose 1-epimerase precursor"  
"JS1\_N06\_00757" 19687 "s59E13H2" 0.07582421 "Nuclease SbcCD subunit C"  
"JS1\_N06\_00757" 19687 "s59E25H2" 0 "Nuclease SbcCD subunit C"  
"JS1\_N06\_00757" 19687 "s59E5H2" 0.048564 "Nuclease SbcCD subunit C"  
"JS1\_N06\_00757" 19687 "s63E6H2" 0.07145101 "Nuclease SbcCD subunit C"  
"JS1\_N06\_00758" 19688 "s59E13H2" 0.1912475 "DNA double-strand break repair Rad50 ATPase"  
"JS1\_N06\_00758" 19688 "s59E25H2" 0 "DNA double-strand break repair Rad50 ATPase"  
"JS1\_N06\_00758" 19688 "s59E5H2" 0.08261655 "DNA double-strand break repair Rad50 ATPase"  
"JS1\_N06\_00758" 19688 "s63E6H2" 0.2437923 "DNA double-strand break repair Rad50 ATPase"  
"JS1\_N06\_00760" 19690 "s59E13H2" 0.003356195 "putative fructose-bisphosphate aldolase"  
"JS1\_N06\_00760" 19690 "s59E25H2" 0 "putative fructose-bisphosphate aldolase"  
"JS1\_N06\_00760" 19690 "s59E5H2" 0.02267375 "putative fructose-bisphosphate aldolase"  
"JS1\_N06\_00760" 19690 "s63E6H2" 0.2139159 "putative fructose-bisphosphate aldolase"  
"JS1\_N06\_00761" 19691 "s59E13H2" 0.1079217 "putative metallophosphoesterase YhaO"  
"JS1\_N06\_00761" 19691 "s59E25H2" 0 "putative metallophosphoesterase YhaO"  
"JS1\_N06\_00761" 19691 "s59E5H2" 0.04657093 "putative metallophosphoesterase YhaO"  
"JS1\_N06\_00761" 19691 "s63E6H2" 0.2892026 "putative metallophosphoesterase YhaO"  
"JS1\_N06\_00762" 19692 "s59E13H2" 0.01062793 "tricarballoylate dehydrogenase"  
"JS1\_N06\_00762" 19692 "s59E25H2" 0 "tricarballoylate dehydrogenase"  
"JS1\_N06\_00762" 19692 "s59E5H2" 0.008248728 "tricarballoylate dehydrogenase"  
"JS1\_N06\_00762" 19692 "s63E6H2" 0.2517758 "tricarballoylate dehydrogenase"  
"JS1\_N06\_00763" 19693 "s59E13H2" 0.04518273 "putative ABC transporter ATP-binding protein YheS"  
"JS1\_N06\_00763" 19693 "s59E25H2" 0 "putative ABC transporter ATP-binding protein YheS"  
"JS1\_N06\_00763" 19693 "s59E5H2" 0.2612891 "putative ABC transporter ATP-binding protein YheS"  
"JS1\_N06\_00763" 19693 "s63E6H2" 1.288221 "putative ABC transporter ATP-binding protein YheS"  
"JS1\_N06\_00764" 19694 "s59E13H2" 0.007296168 "putative ABC transporter ATP-binding protein"  
"JS1\_N06\_00764" 19694 "s59E25H2" 0 "putative ABC transporter ATP-binding protein"  
"JS1\_N06\_00764" 19694 "s59E5H2" 0.2452368 "putative ABC transporter ATP-binding protein"  
"JS1\_N06\_00764" 19694 "s63E6H2" 1.172118 "putative ABC transporter ATP-binding protein"  
"JS1\_N06\_00765" 19695 "s59E13H2" 0 "Intracellular proteinase inhibitor"  
"JS1\_N06\_00765" 19695 "s59E25H2" 0 "Intracellular proteinase inhibitor"  
"JS1\_N06\_00765" 19695 "s59E5H2" 0.007714794 "Intracellular proteinase inhibitor"

"JS1\_N06\_00765" 19695 "s63E6H2" 0.0042795 "Intracellular proteinase inhibitor"  
"JS1\_N06\_00766" 19696 "s59E13H2" 0 "Subtilisin NAT precursor"  
"JS1\_N06\_00766" 19696 "s59E25H2" 0 "Subtilisin NAT precursor"  
"JS1\_N06\_00766" 19696 "s59E5H2" 0 "Subtilisin NAT precursor"  
"JS1\_N06\_00766" 19696 "s63E6H2" 0.002368408 "Subtilisin NAT precursor"  
"JS1\_N06\_00771" 19701 "s59E13H2" 0 "ATP-dependent DNA helicase PcrA"  
"JS1\_N06\_00771" 19701 "s59E25H2" 0 "ATP-dependent DNA helicase PcrA"  
"JS1\_N06\_00771" 19701 "s59E5H2" 0 "ATP-dependent DNA helicase PcrA"  
"JS1\_N06\_00771" 19701 "s63E6H2" 0 "ATP-dependent DNA helicase PcrA"  
"JS1\_N06\_00772" 19702 "s59E13H2" 0 "ATP-dependent DNA helicase Rep"  
"JS1\_N06\_00772" 19702 "s59E25H2" 0 "ATP-dependent DNA helicase Rep"  
"JS1\_N06\_00772" 19702 "s59E5H2" 0 "ATP-dependent DNA helicase Rep"  
"JS1\_N06\_00772" 19702 "s63E6H2" 0 "ATP-dependent DNA helicase Rep"  
"JS1\_N06\_00778" 19708 "s59E13H2" 0 "hypothetical protein"  
"JS1\_N06\_00778" 19708 "s59E25H2" 0 "hypothetical protein"  
"JS1\_N06\_00778" 19708 "s59E5H2" 0 "hypothetical protein"  
"JS1\_N06\_00778" 19708 "s63E6H2" 0 "hypothetical protein"  
"JS1\_N06\_00783" 19713 "s59E13H2" 0.04161509 "Phosphopantetheine adenylyltransferase"  
"JS1\_N06\_00783" 19713 "s59E25H2" 0 "Phosphopantetheine adenylyltransferase"  
"JS1\_N06\_00783" 19713 "s59E5H2" 0 "Phosphopantetheine adenylyltransferase"  
"JS1\_N06\_00783" 19713 "s63E6H2" 0.004422646 "Phosphopantetheine adenylyltransferase"  
"JS1\_N06\_00784" 19714 "s59E13H2" 0 "hypothetical protein"  
"JS1\_N06\_00784" 19714 "s59E25H2" 0 "hypothetical protein"  
"JS1\_N06\_00784" 19714 "s59E5H2" 0.02140619 "hypothetical protein"  
"JS1\_N06\_00784" 19714 "s63E6H2" 0.043042 "hypothetical protein"  
"JS1\_N06\_00785" 19715 "s59E13H2" 0.4501617 "1-acyl-sn-glycerol-3-phosphate acyltransferase"  
"JS1\_N06\_00785" 19715 "s59E25H2" 0 "1-acyl-sn-glycerol-3-phosphate acyltransferase"  
"JS1\_N06\_00785" 19715 "s59E5H2" 0.1698096 "1-acyl-sn-glycerol-3-phosphate acyltransferase"  
"JS1\_N06\_00785" 19715 "s63E6H2" 0.1595814 "1-acyl-sn-glycerol-3-phosphate acyltransferase"  
"JS1\_N06\_00786" 19716 "s59E13H2" 5.948302 "Aspartate racemase"  
"JS1\_N06\_00786" 19716 "s59E25H2" 0 "Aspartate racemase"  
"JS1\_N06\_00786" 19716 "s59E5H2" 0.8367838 "Aspartate racemase"  
"JS1\_N06\_00786" 19716 "s63E6H2" 0.2591363 "Aspartate racemase"  
"JS1\_N06\_00787" 19717 "s59E13H2" 0.4245605 "hypothetical protein"  
"JS1\_N06\_00787" 19717 "s59E25H2" 0 "hypothetical protein"  
"JS1\_N06\_00787" 19717 "s59E5H2" 0.1079213 "hypothetical protein"  
"JS1\_N06\_00787" 19717 "s63E6H2" 0.09192088 "hypothetical protein"  
"JS1\_N06\_00788" 19718 "s59E13H2" 5.842579 "hypothetical protein"  
"JS1\_N06\_00788" 19718 "s59E25H2" 0 "hypothetical protein"  
"JS1\_N06\_00788" 19718 "s59E5H2" 0.1953999 "hypothetical protein"  
"JS1\_N06\_00788" 19718 "s63E6H2" 0.2624642 "hypothetical protein"  
"JS1\_N06\_00789" 19719 "s59E13H2" 13.56959 "D-inositol 3-phosphate glycosyltransferase"  
"JS1\_N06\_00789" 19719 "s59E25H2" 0 "D-inositol 3-phosphate glycosyltransferase"  
"JS1\_N06\_00789" 19719 "s59E5H2" 0.9635095 "D-inositol 3-phosphate glycosyltransferase"  
"JS1\_N06\_00789" 19719 "s63E6H2" 1.125585 "D-inositol 3-phosphate glycosyltransferase"  
"JS1\_N06\_00790" 19720 "s59E13H2" 17.58115 "DNA-binding transcriptional dual regulator Crp"  
"JS1\_N06\_00790" 19720 "s59E25H2" 0.7038308 "DNA-binding transcriptional dual regulator Crp"

"JS1\_N06\_00790" 19720 "s59E5H2" 1.129352 "DNA-binding transcriptional dual regulator Crp"  
"JS1\_N06\_00790" 19720 "s63E6H2" 0.3897349 "DNA-binding transcriptional dual regulator Crp"  
"JS1\_N06\_00791" 19721 "s59E13H2" 4.20026 "Adenosine monophosphate-protein transferase SoFic"  
"JS1\_N06\_00791" 19721 "s59E25H2" 0 "Adenosine monophosphate-protein transferase SoFic"  
"JS1\_N06\_00791" 19721 "s59E5H2" 0.6876242 "Adenosine monophosphate-protein transferase SoFic"  
"JS1\_N06\_00791" 19721 "s63E6H2" 0.5421344 "Adenosine monophosphate-protein transferase SoFic"  
"JS1\_N06\_00792" 19722 "s59E13H2" 0 "hypothetical protein"  
"JS1\_N06\_00792" 19722 "s59E25H2" 0 "hypothetical protein"  
"JS1\_N06\_00792" 19722 "s59E5H2" 0 "hypothetical protein"  
"JS1\_N06\_00792" 19722 "s63E6H2" 0 "hypothetical protein"  
"JS1\_N06\_00793" 19723 "s59E13H2" 0 "Type I restriction enzyme EcoKI M protein"  
"JS1\_N06\_00793" 19723 "s59E25H2" 0 "Type I restriction enzyme EcoKI M protein"  
"JS1\_N06\_00793" 19723 "s59E5H2" 0 "Type I restriction enzyme EcoKI M protein"  
"JS1\_N06\_00793" 19723 "s63E6H2" 0 "Type I restriction enzyme EcoKI M protein"  
"JS1\_N06\_00795" 19725 "s59E13H2" 0 "Type-1 restriction enzyme MjaXIP specificity protein"  
"JS1\_N06\_00795" 19725 "s59E25H2" 0 "Type-1 restriction enzyme MjaXIP specificity protein"  
"JS1\_N06\_00795" 19725 "s59E5H2" 0 "Type-1 restriction enzyme MjaXIP specificity protein"  
"JS1\_N06\_00795" 19725 "s63E6H2" 0 "Type-1 restriction enzyme MjaXIP specificity protein"  
"JS1\_N06\_00796" 19726 "s59E13H2" 0 "Type-1 restriction enzyme R protein"  
"JS1\_N06\_00796" 19726 "s59E25H2" 0 "Type-1 restriction enzyme R protein"  
"JS1\_N06\_00796" 19726 "s59E5H2" 0 "Type-1 restriction enzyme R protein"  
"JS1\_N06\_00796" 19726 "s63E6H2" 0 "Type-1 restriction enzyme R protein"  
"JS1\_N06\_00798" 19728 "s59E13H2" 0.01092093 "recombination protein F"  
"JS1\_N06\_00798" 19728 "s59E25H2" 0 "recombination protein F"  
"JS1\_N06\_00798" 19728 "s59E5H2" 0.004764196 "recombination protein F"  
"JS1\_N06\_00798" 19728 "s63E6H2" 0 "recombination protein F"  
"JS1\_N06\_00799" 19729 "s59E13H2" 0.009078841 "DNA helicase II"  
"JS1\_N06\_00799" 19729 "s59E25H2" 0 "DNA helicase II"  
"JS1\_N06\_00799" 19729 "s59E5H2" 0.01543383 "DNA helicase II"  
"JS1\_N06\_00799" 19729 "s63E6H2" 0.06870311 "DNA helicase II"  
"JS1\_N06\_00801" 19731 "s59E13H2" 0 "hypothetical protein"  
"JS1\_N06\_00801" 19731 "s59E25H2" 0 "hypothetical protein"  
"JS1\_N06\_00801" 19731 "s59E5H2" 0 "hypothetical protein"  
"JS1\_N06\_00801" 19731 "s63E6H2" 0.007831171 "hypothetical protein"  
"JS1\_N06\_00803" 19733 "s59E13H2" 0.4109972 "Integrase core domain protein"  
"JS1\_N06\_00803" 19733 "s59E25H2" 0 "Integrase core domain protein"  
"JS1\_N06\_00803" 19733 "s59E5H2" 1.284692 "Integrase core domain protein"  
"JS1\_N06\_00803" 19733 "s63E6H2" 1.024321 "Integrase core domain protein"  
"JS1\_N06\_00804" 19734 "s59E13H2" 0 "hypothetical protein"  
"JS1\_N06\_00804" 19734 "s59E25H2" 0 "hypothetical protein"  
"JS1\_N06\_00804" 19734 "s59E5H2" 0 "hypothetical protein"  
"JS1\_N06\_00804" 19734 "s63E6H2" 5.581434 "hypothetical protein"  
"JS1\_N06\_00805" 19735 "s59E13H2" 0.005696962 "hypothetical protein"  
"JS1\_N06\_00805" 19735 "s59E25H2" 0 "hypothetical protein"  
"JS1\_N06\_00805" 19735 "s59E5H2" 1.372207 "hypothetical protein"  
"JS1\_N06\_00805" 19735 "s63E6H2" 0.1489715 "hypothetical protein"  
"JS1\_N06\_00806" 19736 "s59E13H2" 0 "YcfA-like protein"

"JS1\_N06\_00806" 19736 "s59E25H2" 0 "YcfA-like protein"  
"JS1\_N06\_00806" 19736 "s59E5H2" 1.790472 "YcfA-like protein"  
"JS1\_N06\_00806" 19736 "s63E6H2" 0.139957 "YcfA-like protein"  
"JS1\_N06\_00807" 19737 "s59E13H2" 0.5186706 "Ferredoxin-2"  
"JS1\_N06\_00807" 19737 "s59E25H2" 0 "Ferredoxin-2"  
"JS1\_N06\_00807" 19737 "s59E5H2" 0.7316971 "Ferredoxin-2"  
"JS1\_N06\_00807" 19737 "s63E6H2" 14.58056 "Ferredoxin-2"  
"JS1\_N06\_00808" 19738 "s59E13H2" 0.09660383 "Multidrug export protein MepA"  
"JS1\_N06\_00808" 19738 "s59E25H2" 0.1729692 "Multidrug export protein MepA"  
"JS1\_N06\_00808" 19738 "s59E5H2" 1.162204 "Multidrug export protein MepA"  
"JS1\_N06\_00808" 19738 "s63E6H2" 2.798555 "Multidrug export protein MepA"  
"JS1\_N06\_00809" 19739 "s59E13H2" 0.1284288 "hypothetical protein"  
"JS1\_N06\_00809" 19739 "s59E25H2" 0 "hypothetical protein"  
"JS1\_N06\_00809" 19739 "s59E5H2" 0.2840794 "hypothetical protein"  
"JS1\_N06\_00809" 19739 "s63E6H2" 0.4874655 "hypothetical protein"  
"JS1\_N06\_00810" 19740 "s59E13H2" 0.05279409 "hypothetical protein"  
"JS1\_N06\_00810" 19740 "s59E25H2" 0 "hypothetical protein"  
"JS1\_N06\_00810" 19740 "s59E5H2" 0.6652126 "hypothetical protein"  
"JS1\_N06\_00810" 19740 "s63E6H2" 2.257792 "hypothetical protein"  
"JS1\_N06\_00811" 19741 "s59E13H2" 0.07187446 "Aromatic amino acid exporter YddG"  
"JS1\_N06\_00811" 19741 "s59E25H2" 0 "Aromatic amino acid exporter YddG"  
"JS1\_N06\_00811" 19741 "s59E5H2" 0.1607233 "Aromatic amino acid exporter YddG"  
"JS1\_N06\_00811" 19741 "s63E6H2" 1.927167 "Aromatic amino acid exporter YddG"  
"JS1\_N06\_00814" 19744 "s59E13H2" 0.002419826 "V-type sodium ATPase subunit D"  
"JS1\_N06\_00814" 19744 "s59E25H2" 0 "V-type sodium ATPase subunit D"  
"JS1\_N06\_00814" 19744 "s59E5H2" 0.05005176 "V-type sodium ATPase subunit D"  
"JS1\_N06\_00814" 19744 "s63E6H2" 0.02139556 "V-type sodium ATPase subunit D"  
"JS1\_N06\_00819" 19749 "s59E13H2" 0 "GTPase Der"  
"JS1\_N06\_00819" 19749 "s59E25H2" 0 "GTPase Der"  
"JS1\_N06\_00819" 19749 "s59E5H2" 0 "GTPase Der"  
"JS1\_N06\_00819" 19749 "s63E6H2" 0 "GTPase Der"  
"JS1\_N06\_00820" 19750 "s59E13H2" 0 "GTPase Der"  
"JS1\_N06\_00820" 19750 "s59E25H2" 0 "GTPase Der"  
"JS1\_N06\_00820" 19750 "s59E5H2" 0 "GTPase Der"  
"JS1\_N06\_00820" 19750 "s63E6H2" 0 "GTPase Der"  
"JS1\_N06\_00828" 19758 "s59E13H2" 0 "ATP-dependent DNA helicase Rep"  
"JS1\_N06\_00828" 19758 "s59E25H2" 0 "ATP-dependent DNA helicase Rep"  
"JS1\_N06\_00828" 19758 "s59E5H2" 0 "ATP-dependent DNA helicase Rep"  
"JS1\_N06\_00828" 19758 "s63E6H2" 0 "ATP-dependent DNA helicase Rep"  
"JS1\_N06\_00840" 19770 "s59E13H2" 0 "DNA topoisomerase 1"  
"JS1\_N06\_00840" 19770 "s59E25H2" 0 "DNA topoisomerase 1"  
"JS1\_N06\_00840" 19770 "s59E5H2" 0 "DNA topoisomerase 1"  
"JS1\_N06\_00840" 19770 "s63E6H2" 0.0002388292 "DNA topoisomerase 1"  
"JS1\_N06\_00845" 19775 "s59E13H2" 0.08934605 "Chromosome partition protein Smc"  
"JS1\_N06\_00845" 19775 "s59E25H2" 0 "Chromosome partition protein Smc"  
"JS1\_N06\_00845" 19775 "s59E5H2" 0.160962 "Chromosome partition protein Smc"  
"JS1\_N06\_00845" 19775 "s63E6H2" 0.07663632 "Chromosome partition protein Smc"

"JS1\_N06\_00853" 19783 "s59E13H2" 0 "V-type ATP synthase subunit I"  
"JS1\_N06\_00853" 19783 "s59E25H2" 0 "V-type ATP synthase subunit I"  
"JS1\_N06\_00853" 19783 "s59E5H2" 0 "V-type ATP synthase subunit I"  
"JS1\_N06\_00853" 19783 "s63E6H2" 0 "V-type ATP synthase subunit I"  
"JS1\_N06\_00854" 19784 "s59E13H2" 0 "putative butyrate kinase 2"  
"JS1\_N06\_00854" 19784 "s59E25H2" 0 "putative butyrate kinase 2"  
"JS1\_N06\_00854" 19784 "s59E5H2" 0 "putative butyrate kinase 2"  
"JS1\_N06\_00854" 19784 "s63E6H2" 0.02677918 "putative butyrate kinase 2"  
"JS1\_N06\_00855" 19785 "s59E13H2" 0 "Phosphate acetyltransferase"  
"JS1\_N06\_00855" 19785 "s59E25H2" 0 "Phosphate acetyltransferase"  
"JS1\_N06\_00855" 19785 "s59E5H2" 0 "Phosphate acetyltransferase"  
"JS1\_N06\_00855" 19785 "s63E6H2" 0.05723348 "Phosphate acetyltransferase"  
"JS1\_N06\_00856" 19786 "s59E13H2" 0 "2-oxoglutarate-acceptor oxidoreductase subunit OorD"  
"JS1\_N06\_00856" 19786 "s59E25H2" 0 "2-oxoglutarate-acceptor oxidoreductase subunit OorD"  
"JS1\_N06\_00856" 19786 "s59E5H2" 0 "2-oxoglutarate-acceptor oxidoreductase subunit OorD"  
"JS1\_N06\_00856" 19786 "s63E6H2" 0.04362784 "2-oxoglutarate-acceptor oxidoreductase subunit OorD"  
"JS1\_N06\_00857" 19787 "s59E13H2" 0 "2-oxoglutarate synthase subunit KorA"  
"JS1\_N06\_00857" 19787 "s59E25H2" 0 "2-oxoglutarate synthase subunit KorA"  
"JS1\_N06\_00857" 19787 "s59E5H2" 0 "2-oxoglutarate synthase subunit KorA"  
"JS1\_N06\_00857" 19787 "s63E6H2" 0.05951486 "2-oxoglutarate synthase subunit KorA"  
"JS1\_N06\_00858" 19788 "s59E13H2" 0.004248791 "2-oxoglutarate synthase subunit KorA"  
"JS1\_N06\_00858" 19788 "s59E25H2" 0 "2-oxoglutarate synthase subunit KorA"  
"JS1\_N06\_00858" 19788 "s59E5H2" 0 "2-oxoglutarate synthase subunit KorA"  
"JS1\_N06\_00858" 19788 "s63E6H2" 0.03998563 "2-oxoglutarate synthase subunit KorA"  
"JS1\_N06\_00859" 19789 "s59E13H2" 0 "2-oxoglutarate synthase subunit KorB"  
"JS1\_N06\_00859" 19789 "s59E25H2" 0 "2-oxoglutarate synthase subunit KorB"  
"JS1\_N06\_00859" 19789 "s59E5H2" 0 "2-oxoglutarate synthase subunit KorB"  
"JS1\_N06\_00859" 19789 "s63E6H2" 0.02053152 "2-oxoglutarate synthase subunit KorB"  
"JS1\_N06\_00860" 19790 "s59E13H2" 0 "2-oxoglutarate synthase subunit KorC"  
"JS1\_N06\_00860" 19790 "s59E25H2" 0 "2-oxoglutarate synthase subunit KorC"  
"JS1\_N06\_00860" 19790 "s59E5H2" 0 "2-oxoglutarate synthase subunit KorC"  
"JS1\_N06\_00860" 19790 "s63E6H2" 0.02848323 "2-oxoglutarate synthase subunit KorC"  
"JS1\_N06\_00861" 19791 "s59E13H2" 0.1738898 "Lysine 6-dehydrogenase"  
"JS1\_N06\_00861" 19791 "s59E25H2" 0 "Lysine 6-dehydrogenase"  
"JS1\_N06\_00861" 19791 "s59E5H2" 0.1343278 "Lysine 6-dehydrogenase"  
"JS1\_N06\_00861" 19791 "s63E6H2" 0.4980419 "Lysine 6-dehydrogenase"  
"JS1\_N06\_00863" 19793 "s59E13H2" 0.3654116 "Lysine 6-dehydrogenase"  
"JS1\_N06\_00863" 19793 "s59E25H2" 0 "Lysine 6-dehydrogenase"  
"JS1\_N06\_00863" 19793 "s59E5H2" 0.2787116 "Lysine 6-dehydrogenase"  
"JS1\_N06\_00863" 19793 "s63E6H2" 0.987135 "Lysine 6-dehydrogenase"  
"JS1\_N06\_00864" 19794 "s59E13H2" 0.04615209 "5-aminovaleate aminotransferase DavT"  
"JS1\_N06\_00864" 19794 "s59E25H2" 0 "5-aminovaleate aminotransferase DavT"  
"JS1\_N06\_00864" 19794 "s59E5H2" 0.09969284 "5-aminovaleate aminotransferase DavT"  
"JS1\_N06\_00864" 19794 "s63E6H2" 0.4121013 "5-aminovaleate aminotransferase DavT"  
"JS1\_N06\_00865" 19795 "s59E13H2" 0.01873184 "Cyclic 2,3-diphosphoglycerate synthetase"  
"JS1\_N06\_00865" 19795 "s59E25H2" 0 "Cyclic 2,3-diphosphoglycerate synthetase"  
"JS1\_N06\_00865" 19795 "s59E5H2" 0.05790254 "Cyclic 2,3-diphosphoglycerate synthetase"



"JS1\_N06\_00865" 19795 "s63E6H2" 0.3003105 "Cyclic 2,3-diphosphoglycerate synthetase"  
"JS1\_N06\_00866" 19796 "s59E13H2" 1.451876 "Malate-2H(+)/Na(+)-lactate antiporter"  
"JS1\_N06\_00866" 19796 "s59E25H2" 0 "Malate-2H(+)/Na(+)-lactate antiporter"  
"JS1\_N06\_00866" 19796 "s59E5H2" 0.508701 "Malate-2H(+)/Na(+)-lactate antiporter"  
"JS1\_N06\_00866" 19796 "s63E6H2" 0.7458203 "Malate-2H(+)/Na(+)-lactate antiporter"  
"JS1\_N06\_00867" 19797 "s59E13H2" 1.18262 "Tungsten-containing aldehyde ferredoxin oxidoreductase"  
"JS1\_N06\_00867" 19797 "s59E25H2" 0 "Tungsten-containing aldehyde ferredoxin oxidoreductase"  
"JS1\_N06\_00867" 19797 "s59E5H2" 0.4962152 "Tungsten-containing aldehyde ferredoxin oxidoreductase"  
"JS1\_N06\_00867" 19797 "s63E6H2" 1.425746 "Tungsten-containing aldehyde ferredoxin oxidoreductase"  
"JS1\_N06\_00868" 19798 "s59E13H2" 0.2215564 "Aldehyde ferredoxin oxidoreductase, domains 2 & 3"  
"JS1\_N06\_00868" 19798 "s59E25H2" 0 "Aldehyde ferredoxin oxidoreductase, domains 2 & 3"  
"JS1\_N06\_00868" 19798 "s59E5H2" 0.19834 "Aldehyde ferredoxin oxidoreductase, domains 2 & 3"  
"JS1\_N06\_00868" 19798 "s63E6H2" 0.3067431 "Aldehyde ferredoxin oxidoreductase, domains 2 & 3"  
"JS1\_N06\_00869" 19799 "s59E13H2" 0.1101653 "Sulfur carrier protein ThiS"  
"JS1\_N06\_00869" 19799 "s59E25H2" 0 "Sulfur carrier protein ThiS"  
"JS1\_N06\_00869" 19799 "s59E5H2" 0.01310039 "Sulfur carrier protein ThiS"  
"JS1\_N06\_00869" 19799 "s63E6H2" 0.1031637 "Sulfur carrier protein ThiS"  
"JS1\_N06\_00870" 19800 "s59E13H2" 0.0706098 "Transcriptional regulator MntR"  
"JS1\_N06\_00870" 19800 "s59E25H2" 0 "Transcriptional regulator MntR"  
"JS1\_N06\_00870" 19800 "s59E5H2" 0.1305711 "Transcriptional regulator MntR"  
"JS1\_N06\_00870" 19800 "s63E6H2" 0.3286106 "Transcriptional regulator MntR"  
"JS1\_N06\_00871" 19801 "s59E13H2" 0.05082933 "FeoA domain protein"  
"JS1\_N06\_00871" 19801 "s59E25H2" 0 "FeoA domain protein"  
"JS1\_N06\_00871" 19801 "s59E5H2" 0.03803522 "FeoA domain protein"  
"JS1\_N06\_00871" 19801 "s63E6H2" 0.3795399 "FeoA domain protein"  
"JS1\_N06\_00872" 19802 "s59E13H2" 0.09803243 "hypothetical protein"  
"JS1\_N06\_00872" 19802 "s59E25H2" 0 "hypothetical protein"  
"JS1\_N06\_00872" 19802 "s59E5H2" 0.128796 "hypothetical protein"  
"JS1\_N06\_00872" 19802 "s63E6H2" 0.2722658 "hypothetical protein"  
"JS1\_N06\_00874" 19804 "s59E13H2" 0.3714713 "Tetrahedral aminopeptidase"  
"JS1\_N06\_00874" 19804 "s59E25H2" 0 "Tetrahedral aminopeptidase"  
"JS1\_N06\_00874" 19804 "s59E5H2" 0.1896648 "Tetrahedral aminopeptidase"  
"JS1\_N06\_00874" 19804 "s63E6H2" 0.1145748 "Tetrahedral aminopeptidase"  
"JS1\_N06\_00875" 19805 "s59E13H2" 0.04690239 "Endonuclease III"  
"JS1\_N06\_00875" 19805 "s59E25H2" 0 "Endonuclease III"  
"JS1\_N06\_00875" 19805 "s59E5H2" 0.1078799 "Endonuclease III"  
"JS1\_N06\_00875" 19805 "s63E6H2" 0.0770694 "Endonuclease III"  
"JS1\_N06\_00876" 19806 "s59E13H2" 0.04770519 "Trehalose synthase"  
"JS1\_N06\_00876" 19806 "s59E25H2" 0 "Trehalose synthase"  
"JS1\_N06\_00876" 19806 "s59E5H2" 0.4596356 "Trehalose synthase"  
"JS1\_N06\_00876" 19806 "s63E6H2" 0.1724146 "Trehalose synthase"  
"JS1\_N06\_00877" 19807 "s59E13H2" 0 "N-acetylglucosamine repressor"  
"JS1\_N06\_00877" 19807 "s59E25H2" 0 "N-acetylglucosamine repressor"  
"JS1\_N06\_00877" 19807 "s59E5H2" 0.2131071 "N-acetylglucosamine repressor"  
"JS1\_N06\_00877" 19807 "s63E6H2" 0.03453133 "N-acetylglucosamine repressor"  
"JS1\_N06\_00878" 19808 "s59E13H2" 0.02874216 "Multiple sugar-binding protein precursor"  
"JS1\_N06\_00878" 19808 "s59E25H2" 0 "Multiple sugar-binding protein precursor"

"JS1\_N06\_00878" 19808 "s59E5H2" 0.2741407 "Multiple sugar-binding protein precursor"  
"JS1\_N06\_00878" 19808 "s63E6H2" 0.2428576 "Multiple sugar-binding protein precursor"  
"JS1\_N06\_00879" 19809 "s59E13H2" 0.02923261 "Lactose transport system permease protein LacF"  
"JS1\_N06\_00879" 19809 "s59E25H2" 0 "Lactose transport system permease protein LacF"  
"JS1\_N06\_00879" 19809 "s59E5H2" 1.12886 "Lactose transport system permease protein LacF"  
"JS1\_N06\_00879" 19809 "s63E6H2" 0.03552171 "Lactose transport system permease protein LacF"  
"JS1\_N06\_00880" 19810 "s59E13H2" 0.004265451 "L-arabinose transport system permease protein AraQ"  
"JS1\_N06\_00880" 19810 "s59E25H2" 0 "L-arabinose transport system permease protein AraQ"  
"JS1\_N06\_00880" 19810 "s59E5H2" 0.2191502 "L-arabinose transport system permease protein AraQ"  
"JS1\_N06\_00880" 19810 "s63E6H2" 0.03349611 "L-arabinose transport system permease protein AraQ"  
"JS1\_N06\_00881" 19811 "s59E13H2" 0.002178014 "Lipoyl synthase"  
"JS1\_N06\_00881" 19811 "s59E25H2" 0 "Lipoyl synthase"  
"JS1\_N06\_00881" 19811 "s59E5H2" 0.04247392 "Lipoyl synthase"  
"JS1\_N06\_00881" 19811 "s63E6H2" 0.05745389 "Lipoyl synthase"  
"JS1\_N06\_00887" 19817 "s59E13H2" 0.01583716 "Glutamine amidotransferase subunit PdxT"  
"JS1\_N06\_00887" 19817 "s59E25H2" 0 "Glutamine amidotransferase subunit PdxT"  
"JS1\_N06\_00887" 19817 "s59E5H2" 0.08085852 "Glutamine amidotransferase subunit PdxT"  
"JS1\_N06\_00887" 19817 "s63E6H2" 0.08275125 "Glutamine amidotransferase subunit PdxT"  
"JS1\_N06\_00888" 19818 "s59E13H2" 0.02900128 "Pyridoxal biosynthesis lyase PdxS"  
"JS1\_N06\_00888" 19818 "s59E25H2" 0 "Pyridoxal biosynthesis lyase PdxS"  
"JS1\_N06\_00888" 19818 "s59E5H2" 0.5134814 "Pyridoxal biosynthesis lyase PdxS"  
"JS1\_N06\_00888" 19818 "s63E6H2" 0.4536386 "Pyridoxal biosynthesis lyase PdxS"  
"JS1\_N06\_00889" 19819 "s59E13H2" 0.14443 "Pyruvate-flavodoxin oxidoreductase"  
"JS1\_N06\_00889" 19819 "s59E25H2" 0 "Pyruvate-flavodoxin oxidoreductase"  
"JS1\_N06\_00889" 19819 "s59E5H2" 0.1459647 "Pyruvate-flavodoxin oxidoreductase"  
"JS1\_N06\_00889" 19819 "s63E6H2" 0.2895901 "Pyruvate-flavodoxin oxidoreductase"  
"JS1\_N06\_00890" 19820 "s59E13H2" 0.0305541 "Recombination protein RecR"  
"JS1\_N06\_00890" 19820 "s59E25H2" 0 "Recombination protein RecR"  
"JS1\_N06\_00890" 19820 "s59E5H2" 0.7300095 "Recombination protein RecR"  
"JS1\_N06\_00890" 19820 "s63E6H2" 0.4985218 "Recombination protein RecR"  
"JS1\_N06\_00891" 19821 "s59E13H2" 0.03560601 "Nucleoid-associated protein"  
"JS1\_N06\_00891" 19821 "s59E25H2" 0 "Nucleoid-associated protein"  
"JS1\_N06\_00891" 19821 "s59E5H2" 0.9264812 "Nucleoid-associated protein"  
"JS1\_N06\_00891" 19821 "s63E6H2" 0.3936702 "Nucleoid-associated protein"  
"JS1\_N06\_00892" 19822 "s59E13H2" 0.003846653 "hypothetical protein"  
"JS1\_N06\_00892" 19822 "s59E25H2" 0 "hypothetical protein"  
"JS1\_N06\_00892" 19822 "s59E5H2" 0.05563572 "hypothetical protein"  
"JS1\_N06\_00892" 19822 "s63E6H2" 0.07711947 "hypothetical protein"  
"JS1\_N06\_00893" 19823 "s59E13H2" 0 "hypothetical protein"  
"JS1\_N06\_00893" 19823 "s59E25H2" 0 "hypothetical protein"  
"JS1\_N06\_00893" 19823 "s59E5H2" 0 "hypothetical protein"  
"JS1\_N06\_00893" 19823 "s63E6H2" 0.08639076 "hypothetical protein"  
"JS1\_N06\_00894" 19824 "s59E13H2" 0 "hypothetical protein"  
"JS1\_N06\_00894" 19824 "s59E25H2" 0 "hypothetical protein"  
"JS1\_N06\_00894" 19824 "s59E5H2" 0.2333636 "hypothetical protein"  
"JS1\_N06\_00894" 19824 "s63E6H2" 0.08908292 "hypothetical protein"  
"JS1\_N06\_00895" 19825 "s59E13H2" 0.007372928 "sn-glycerol-3-phosphate transport system permease protein UgpA"

"JS1\_N06\_00895" 19825 "s59E25H2" 0 "sn-glycerol-3-phosphate transport system permease protein UgpA"  
"JS1\_N06\_00895" 19825 "s59E5H2" 0.455964 "sn-glycerol-3-phosphate transport system permease protein UgpA"  
"JS1\_N06\_00895" 19825 "s63E6H2" 0.5099443 "sn-glycerol-3-phosphate transport system permease protein UgpA"  
"JS1\_N06\_00896" 19826 "s59E13H2" 0.01298161 "sn-glycerol-3-phosphate-binding periplasmic protein UgpB precursor"  
"JS1\_N06\_00896" 19826 "s59E25H2" 0 "sn-glycerol-3-phosphate-binding periplasmic protein UgpB precursor"  
"JS1\_N06\_00896" 19826 "s59E5H2" 0.8040238 "sn-glycerol-3-phosphate-binding periplasmic protein UgpB precursor"  
"JS1\_N06\_00896" 19826 "s63E6H2" 0.3274172 "sn-glycerol-3-phosphate-binding periplasmic protein UgpB precursor"  
"JS1\_N06\_00898" 19828 "s59E13H2" 0.001388931 "Alanine--tRNA ligase"  
"JS1\_N06\_00898" 19828 "s59E25H2" 0 "Alanine--tRNA ligase"  
"JS1\_N06\_00898" 19828 "s59E5H2" 0 "Alanine--tRNA ligase"  
"JS1\_N06\_00898" 19828 "s63E6H2" 0.06533325 "Alanine--tRNA ligase"  
"JS1\_N06\_00899" 19829 "s59E13H2" 0.006714079 "Putative Holliday junction resolvase"  
"JS1\_N06\_00899" 19829 "s59E25H2" 0 "Putative Holliday junction resolvase"  
"JS1\_N06\_00899" 19829 "s59E5H2" 0 "Putative Holliday junction resolvase"  
"JS1\_N06\_00899" 19829 "s63E6H2" 0.06939115 "Putative Holliday junction resolvase"  
"JS1\_N06\_00900" 19830 "s59E13H2" 0.001781834 "putative aminodeoxychorismate lyase"  
"JS1\_N06\_00900" 19830 "s59E25H2" 0 "putative aminodeoxychorismate lyase"  
"JS1\_N06\_00900" 19830 "s59E5H2" 0.004186363 "putative aminodeoxychorismate lyase"  
"JS1\_N06\_00900" 19830 "s63E6H2" 0.0187007 "putative aminodeoxychorismate lyase"  
"JS1\_N06\_00901" 19831 "s59E13H2" 0.001988491 "Type II secretion system protein E"  
"JS1\_N06\_00901" 19831 "s59E25H2" 0 "Type II secretion system protein E"  
"JS1\_N06\_00901" 19831 "s59E5H2" 0.007596245 "Type II secretion system protein E"  
"JS1\_N06\_00901" 19831 "s63E6H2" 1.074073 "Type II secretion system protein E"  
"JS1\_N06\_00902" 19832 "s59E13H2" 0.2098316 "hypothetical protein"  
"JS1\_N06\_00902" 19832 "s59E25H2" 0 "hypothetical protein"  
"JS1\_N06\_00902" 19832 "s59E5H2" 0.1259773 "hypothetical protein"  
"JS1\_N06\_00902" 19832 "s63E6H2" 0.7380129 "hypothetical protein"  
"JS1\_N06\_00903" 19833 "s59E13H2" 0.00424374 "Mitochondrial PGP phosphatase"  
"JS1\_N06\_00903" 19833 "s59E25H2" 0 "Mitochondrial PGP phosphatase"  
"JS1\_N06\_00903" 19833 "s59E5H2" 0.02788804 "Mitochondrial PGP phosphatase"  
"JS1\_N06\_00903" 19833 "s63E6H2" 0.8785478 "Mitochondrial PGP phosphatase"  
"JS1\_N06\_00904" 19834 "s59E13H2" 0.01402996 "Leucine--tRNA ligase subunit alpha"  
"JS1\_N06\_00904" 19834 "s59E25H2" 0 "Leucine--tRNA ligase subunit alpha"  
"JS1\_N06\_00904" 19834 "s59E5H2" 0.1451526 "Leucine--tRNA ligase subunit alpha"  
"JS1\_N06\_00904" 19834 "s63E6H2" 0.1239444 "Leucine--tRNA ligase subunit alpha"  
"JS1\_N06\_00905" 19835 "s59E13H2" 0.0008105433 "ferredoxin"  
"JS1\_N06\_00905" 19835 "s59E25H2" 0 "ferredoxin"  
"JS1\_N06\_00905" 19835 "s59E5H2" 0 "ferredoxin"  
"JS1\_N06\_00905" 19835 "s63E6H2" 0.001378412 "ferredoxin"  
"JS1\_N06\_00910" 19840 "s59E13H2" 0 "L-lactate permease"  
"JS1\_N06\_00910" 19840 "s59E25H2" 0 "L-lactate permease"  
"JS1\_N06\_00910" 19840 "s59E5H2" 0 "L-lactate permease"  
"JS1\_N06\_00910" 19840 "s63E6H2" 0.03607269 "L-lactate permease"  
"JS1\_N06\_00912" 19842 "s59E13H2" 0 "hypothetical protein"  
"JS1\_N06\_00912" 19842 "s59E25H2" 0 "hypothetical protein"  
"JS1\_N06\_00912" 19842 "s59E5H2" 0 "hypothetical protein"  
"JS1\_N06\_00912" 19842 "s63E6H2" 0 "hypothetical protein"

"JS1\_N06\_00930" 19860 "s59E13H2" 0 "Phosphate acyltransferase"  
"JS1\_N06\_00930" 19860 "s59E25H2" 0 "Phosphate acyltransferase"  
"JS1\_N06\_00930" 19860 "s59E5H2" 0 "Phosphate acyltransferase"  
"JS1\_N06\_00930" 19860 "s63E6H2" 0.08785754 "Phosphate acyltransferase"  
"JS1\_N06\_00931" 19861 "s59E13H2" 0.02151739 "Transcription factor FapR"  
"JS1\_N06\_00931" 19861 "s59E25H2" 0 "Transcription factor FapR"  
"JS1\_N06\_00931" 19861 "s59E5H2" 0.03319545 "Transcription factor FapR"  
"JS1\_N06\_00931" 19861 "s63E6H2" 0.1084967 "Transcription factor FapR"  
"JS1\_N06\_00932" 19862 "s59E13H2" 0.003407538 "50S ribosomal protein L32"  
"JS1\_N06\_00932" 19862 "s59E25H2" 0 "50S ribosomal protein L32"  
"JS1\_N06\_00932" 19862 "s59E5H2" 0 "50S ribosomal protein L32"  
"JS1\_N06\_00932" 19862 "s63E6H2" 0.124779 "50S ribosomal protein L32"  
"JS1\_N06\_00933" 19863 "s59E13H2" 0 "V-type ATP synthase subunit I"  
"JS1\_N06\_00933" 19863 "s59E25H2" 0 "V-type ATP synthase subunit I"  
"JS1\_N06\_00933" 19863 "s59E5H2" 0 "V-type ATP synthase subunit I"  
"JS1\_N06\_00933" 19863 "s63E6H2" 0 "V-type ATP synthase subunit I"  
"JS1\_N06\_00934" 19864 "s59E13H2" 0 "V-type ATP synthase subunit I"  
"JS1\_N06\_00934" 19864 "s59E25H2" 0 "V-type ATP synthase subunit I"  
"JS1\_N06\_00934" 19864 "s59E5H2" 0 "V-type ATP synthase subunit I"  
"JS1\_N06\_00934" 19864 "s63E6H2" 0 "V-type ATP synthase subunit I"  
"JS1\_N06\_00937" 19867 "s59E13H2" 0 "hypothetical protein"  
"JS1\_N06\_00937" 19867 "s59E25H2" 0 "hypothetical protein"  
"JS1\_N06\_00937" 19867 "s59E5H2" 0 "hypothetical protein"  
"JS1\_N06\_00937" 19867 "s63E6H2" 0 "hypothetical protein"  
"JS1\_N06\_00938" 19868 "s59E13H2" 0 "hypothetical protein"  
"JS1\_N06\_00938" 19868 "s59E25H2" 0 "hypothetical protein"  
"JS1\_N06\_00938" 19868 "s59E5H2" 0 "hypothetical protein"  
"JS1\_N06\_00938" 19868 "s63E6H2" 0 "hypothetical protein"  
"JS1\_N06\_00939" 19869 "s59E13H2" 0.009857967 "hypothetical protein"  
"JS1\_N06\_00939" 19869 "s59E25H2" 0 "hypothetical protein"  
"JS1\_N06\_00939" 19869 "s59E5H2" 0 "hypothetical protein"  
"JS1\_N06\_00939" 19869 "s63E6H2" 0 "hypothetical protein"  
"JS1\_N06\_00941" 19871 "s59E13H2" 0 "hypothetical protein"  
"JS1\_N06\_00941" 19871 "s59E25H2" 0 "hypothetical protein"  
"JS1\_N06\_00941" 19871 "s59E5H2" 0.03488841 "hypothetical protein"  
"JS1\_N06\_00941" 19871 "s63E6H2" 0.004728336 "hypothetical protein"  
"JS1\_N06\_00942" 19872 "s59E13H2" 0 "V-type ATP synthase subunit I"  
"JS1\_N06\_00942" 19872 "s59E25H2" 0 "V-type ATP synthase subunit I"  
"JS1\_N06\_00942" 19872 "s59E5H2" 0 "V-type ATP synthase subunit I"  
"JS1\_N06\_00942" 19872 "s63E6H2" 0 "V-type ATP synthase subunit I"  
"JS1\_N06\_00943" 19873 "s59E13H2" 0.1366702 "Outer membrane protein assembly factor BamA precursor"  
"JS1\_N06\_00943" 19873 "s59E25H2" 0 "Outer membrane protein assembly factor BamA precursor"  
"JS1\_N06\_00943" 19873 "s59E5H2" 0.5078843 "Outer membrane protein assembly factor BamA precursor"  
"JS1\_N06\_00943" 19873 "s63E6H2" 0.3082984 "Outer membrane protein assembly factor BamA precursor"  
"JS1\_N06\_00944" 19874 "s59E13H2" 0.0592297 "hypothetical protein"  
"JS1\_N06\_00944" 19874 "s59E25H2" 0 "hypothetical protein"  
"JS1\_N06\_00944" 19874 "s59E5H2" 0.2092237 "hypothetical protein"

"JS1\_N06\_00944" 19874 "s63E6H2" 0.2386419 "hypothetical protein"  
"JS1\_N06\_00945" 19875 "s59E13H2" 0.08324241 "Biopolymer transport protein ExbB"  
"JS1\_N06\_00945" 19875 "s59E25H2" 0 "Biopolymer transport protein ExbB"  
"JS1\_N06\_00945" 19875 "s59E5H2" 0.2040631 "Biopolymer transport protein ExbB"  
"JS1\_N06\_00945" 19875 "s63E6H2" 0.3193368 "Biopolymer transport protein ExbB"  
"JS1\_N06\_00946" 19876 "s59E13H2" 0.01291269 "biopolymer transport protein ExbD"  
"JS1\_N06\_00946" 19876 "s59E25H2" 0 "biopolymer transport protein ExbD"  
"JS1\_N06\_00946" 19876 "s59E5H2" 0.05463078 "biopolymer transport protein ExbD"  
"JS1\_N06\_00946" 19876 "s63E6H2" 0.2474611 "biopolymer transport protein ExbD"  
"JS1\_N06\_00947" 19877 "s59E13H2" 0.4915799 "Putative lipoprotein YerB precursor"  
"JS1\_N06\_00947" 19877 "s59E25H2" 0 "Putative lipoprotein YerB precursor"  
"JS1\_N06\_00947" 19877 "s59E5H2" 0.1706309 "Putative lipoprotein YerB precursor"  
"JS1\_N06\_00947" 19877 "s63E6H2" 0.1361785 "Putative lipoprotein YerB precursor"  
"JS1\_N06\_00948" 19878 "s59E13H2" 0.07998932 "Tyrosine recombinase XerD"  
"JS1\_N06\_00948" 19878 "s59E25H2" 0 "Tyrosine recombinase XerD"  
"JS1\_N06\_00948" 19878 "s59E5H2" 0.07893087 "Tyrosine recombinase XerD"  
"JS1\_N06\_00948" 19878 "s63E6H2" 0.2090832 "Tyrosine recombinase XerD"  
"JS1\_N06\_00950" 19880 "s59E13H2" 0 "hypothetical protein"  
"JS1\_N06\_00950" 19880 "s59E25H2" 0 "hypothetical protein"  
"JS1\_N06\_00950" 19880 "s59E5H2" 0 "hypothetical protein"  
"JS1\_N06\_00950" 19880 "s63E6H2" 0.002897562 "hypothetical protein"  
"JS1\_N06\_00951" 19881 "s59E13H2" 0 "hypothetical protein"  
"JS1\_N06\_00951" 19881 "s59E25H2" 0 "hypothetical protein"  
"JS1\_N06\_00951" 19881 "s59E5H2" 0 "hypothetical protein"  
"JS1\_N06\_00951" 19881 "s63E6H2" 0 "hypothetical protein"  
"JS1\_N06\_00952" 19882 "s59E13H2" 0 "hypothetical protein"  
"JS1\_N06\_00952" 19882 "s59E25H2" 0 "hypothetical protein"  
"JS1\_N06\_00952" 19882 "s59E5H2" 0 "hypothetical protein"  
"JS1\_N06\_00952" 19882 "s63E6H2" 0 "hypothetical protein"  
"JS1\_N06\_00963" 19893 "s59E13H2" 0.02560656 "Protein-L-isoaspartate O-methyltransferase"  
"JS1\_N06\_00963" 19893 "s59E25H2" 0 "Protein-L-isoaspartate O-methyltransferase"  
"JS1\_N06\_00963" 19893 "s59E5H2" 0.2321972 "Protein-L-isoaspartate O-methyltransferase"  
"JS1\_N06\_00963" 19893 "s63E6H2" 0.3745945 "Protein-L-isoaspartate O-methyltransferase"  
"JS1\_N06\_00966" 19896 "s59E13H2" 0 "7-alpha-hydroxysteroid dehydrogenase"  
"JS1\_N06\_00966" 19896 "s59E25H2" 0 "7-alpha-hydroxysteroid dehydrogenase"  
"JS1\_N06\_00966" 19896 "s59E5H2" 0 "7-alpha-hydroxysteroid dehydrogenase"  
"JS1\_N06\_00966" 19896 "s63E6H2" 0 "7-alpha-hydroxysteroid dehydrogenase"  
"JS1\_N06\_00967" 19897 "s59E13H2" 0 "Cupin domain protein"  
"JS1\_N06\_00967" 19897 "s59E25H2" 0 "Cupin domain protein"  
"JS1\_N06\_00967" 19897 "s59E5H2" 0 "Cupin domain protein"  
"JS1\_N06\_00967" 19897 "s63E6H2" 0 "Cupin domain protein"  
"JS1\_N06\_00968" 19898 "s59E13H2" 0 "DNA-binding transcriptional repressor MngR"  
"JS1\_N06\_00968" 19898 "s59E25H2" 0 "DNA-binding transcriptional repressor MngR"  
"JS1\_N06\_00968" 19898 "s59E5H2" 0 "DNA-binding transcriptional repressor MngR"  
"JS1\_N06\_00968" 19898 "s63E6H2" 0 "DNA-binding transcriptional repressor MngR"  
"JS1\_N06\_00969" 19899 "s59E13H2" 0 "N-acetylglucosamine-6-phosphate deacetylase"  
"JS1\_N06\_00969" 19899 "s59E25H2" 0 "N-acetylglucosamine-6-phosphate deacetylase"

"JS1\_N06\_00969" 19899 "s59E5H2" 0 "N-acetylglucosamine-6-phosphate deacetylase"  
"JS1\_N06\_00969" 19899 "s63E6H2" 0 "N-acetylglucosamine-6-phosphate deacetylase"  
"JS1\_N06\_00970" 19900 "s59E13H2" 0 "Trehalose/maltose transport system permease protein MalG"  
"JS1\_N06\_00970" 19900 "s59E25H2" 0 "Trehalose/maltose transport system permease protein MalG"  
"JS1\_N06\_00970" 19900 "s59E5H2" 0 "Trehalose/maltose transport system permease protein MalG"  
"JS1\_N06\_00970" 19900 "s63E6H2" 0 "Trehalose/maltose transport system permease protein MalG"  
"JS1\_N06\_00971" 19901 "s59E13H2" 0 "hypothetical protein"  
"JS1\_N06\_00971" 19901 "s59E25H2" 0 "hypothetical protein"  
"JS1\_N06\_00971" 19901 "s59E5H2" 0 "hypothetical protein"  
"JS1\_N06\_00971" 19901 "s63E6H2" 0 "hypothetical protein"  
"JS1\_N06\_00972" 19902 "s59E13H2" 0 "Trehalose/maltose transport system permease protein MalF"  
"JS1\_N06\_00972" 19902 "s59E25H2" 0 "Trehalose/maltose transport system permease protein MalF"  
"JS1\_N06\_00972" 19902 "s59E5H2" 0 "Trehalose/maltose transport system permease protein MalF"  
"JS1\_N06\_00972" 19902 "s63E6H2" 0 "Trehalose/maltose transport system permease protein MalF"  
"JS1\_N06\_00973" 19903 "s59E13H2" 0 "Trehalose/maltose-binding protein MalE precursor"  
"JS1\_N06\_00973" 19903 "s59E25H2" 0 "Trehalose/maltose-binding protein MalE precursor"  
"JS1\_N06\_00973" 19903 "s59E5H2" 0.04776122 "Trehalose/maltose-binding protein MalE precursor"  
"JS1\_N06\_00973" 19903 "s63E6H2" 0 "Trehalose/maltose-binding protein MalE precursor"  
"JS1\_N06\_00974" 19904 "s59E13H2" 0 "hypothetical protein"  
"JS1\_N06\_00974" 19904 "s59E25H2" 0 "hypothetical protein"  
"JS1\_N06\_00974" 19904 "s59E5H2" 0.05406081 "hypothetical protein"  
"JS1\_N06\_00974" 19904 "s63E6H2" 0 "hypothetical protein"  
"JS1\_N06\_00975" 19905 "s59E13H2" 0 "hypothetical protein"  
"JS1\_N06\_00975" 19905 "s59E25H2" 0 "hypothetical protein"  
"JS1\_N06\_00975" 19905 "s59E5H2" 0 "hypothetical protein"  
"JS1\_N06\_00975" 19905 "s63E6H2" 0 "hypothetical protein"  
"JS1\_N06\_00976" 19906 "s59E13H2" 0.01885198 "Demethylmenaquinone methyltransferase"  
"JS1\_N06\_00976" 19906 "s59E25H2" 0 "Demethylmenaquinone methyltransferase"  
"JS1\_N06\_00976" 19906 "s59E5H2" 0.07220946 "Demethylmenaquinone methyltransferase"  
"JS1\_N06\_00976" 19906 "s63E6H2" 0.2666215 "Demethylmenaquinone methyltransferase"  
"JS1\_N06\_00979" 19909 "s59E13H2" 0 "Trehalose/maltose-binding protein MalE precursor"  
"JS1\_N06\_00979" 19909 "s59E25H2" 0 "Trehalose/maltose-binding protein MalE precursor"  
"JS1\_N06\_00979" 19909 "s59E5H2" 0.05260126 "Trehalose/maltose-binding protein MalE precursor"  
"JS1\_N06\_00979" 19909 "s63E6H2" 0 "Trehalose/maltose-binding protein MalE precursor"  
"JS1\_N06\_00980" 19910 "s59E13H2" 0 "Inner membrane ABC transporter permease protein YcjO"  
"JS1\_N06\_00980" 19910 "s59E25H2" 0 "Inner membrane ABC transporter permease protein YcjO"  
"JS1\_N06\_00980" 19910 "s59E5H2" 0.03915498 "Inner membrane ABC transporter permease protein YcjO"  
"JS1\_N06\_00980" 19910 "s63E6H2" 0 "Inner membrane ABC transporter permease protein YcjO"  
"JS1\_N06\_00981" 19911 "s59E13H2" 0 "Inner membrane ABC transporter permease protein YcjP"  
"JS1\_N06\_00981" 19911 "s59E25H2" 0 "Inner membrane ABC transporter permease protein YcjP"  
"JS1\_N06\_00981" 19911 "s59E5H2" 0.02820041 "Inner membrane ABC transporter permease protein YcjP"  
"JS1\_N06\_00981" 19911 "s63E6H2" 0 "Inner membrane ABC transporter permease protein YcjP"  
"JS1\_N06\_00982" 19912 "s59E13H2" 0 "Mannosylglycerate hydrolase"  
"JS1\_N06\_00982" 19912 "s59E25H2" 0 "Mannosylglycerate hydrolase"  
"JS1\_N06\_00982" 19912 "s59E5H2" 0.03356429 "Mannosylglycerate hydrolase"  
"JS1\_N06\_00982" 19912 "s63E6H2" 6.754766e-05 "Mannosylglycerate hydrolase"  
"JS1\_N06\_00983" 19913 "s59E13H2" 0 "Mannosylglycerate hydrolase"

"JS1\_N06\_00983" 19913 "s59E25H2" 0 "Mannosylglycerate hydrolase"  
"JS1\_N06\_00983" 19913 "s59E5H2" 0.02513061 "Mannosylglycerate hydrolase"  
"JS1\_N06\_00983" 19913 "s63E6H2" 0.01884761 "Mannosylglycerate hydrolase"  
"JS1\_N06\_00984" 19914 "s59E13H2" 0 "Uroporphyrinogen decarboxylase (URO-D)"  
"JS1\_N06\_00984" 19914 "s59E25H2" 0 "Uroporphyrinogen decarboxylase (URO-D)"  
"JS1\_N06\_00984" 19914 "s59E5H2" 0.004077885 "Uroporphyrinogen decarboxylase (URO-D)"  
"JS1\_N06\_00984" 19914 "s63E6H2" 0 "Uroporphyrinogen decarboxylase (URO-D)"  
"JS1\_N06\_00985" 19915 "s59E13H2" 0.04850659 "Transposase IS200 like protein"  
"JS1\_N06\_00985" 19915 "s59E25H2" 0 "Transposase IS200 like protein"  
"JS1\_N06\_00985" 19915 "s59E5H2" 0.4258452 "Transposase IS200 like protein"  
"JS1\_N06\_00985" 19915 "s63E6H2" 1.588601 "Transposase IS200 like protein"  
"JS1\_N06\_00986" 19916 "s59E13H2" 0.08890512 "Naphthalene 1,2-dioxygenase/salicylate 5-hydroxylase systems, ferredoxin component"  
"JS1\_N06\_00986" 19916 "s59E25H2" 0 "Naphthalene 1,2-dioxygenase/salicylate 5-hydroxylase systems, ferredoxin component"  
"JS1\_N06\_00986" 19916 "s59E5H2" 0.01827504 "Naphthalene 1,2-dioxygenase/salicylate 5-hydroxylase systems, ferredoxin component"  
"JS1\_N06\_00986" 19916 "s63E6H2" 0.2566013 "Naphthalene 1,2-dioxygenase/salicylate 5-hydroxylase systems, ferredoxin component"  
"JS1\_N06\_00987" 19917 "s59E13H2" 8.98489 "Transposase IS116/IS110/IS902 family protein"  
"JS1\_N06\_00987" 19917 "s59E25H2" 0 "Transposase IS116/IS110/IS902 family protein"  
"JS1\_N06\_00987" 19917 "s59E5H2" 0.3713105 "Transposase IS116/IS110/IS902 family protein"  
"JS1\_N06\_00987" 19917 "s63E6H2" 2.453528 "Transposase IS116/IS110/IS902 family protein"  
"JS1\_N06\_00988" 19918 "s59E13H2" 0.01673909 "hypothetical protein"  
"JS1\_N06\_00988" 19918 "s59E25H2" 0 "hypothetical protein"  
"JS1\_N06\_00988" 19918 "s59E5H2" 2.422385 "hypothetical protein"  
"JS1\_N06\_00988" 19918 "s63E6H2" 4.516705 "hypothetical protein"  
"JS1\_N06\_00990" 19920 "s59E13H2" 0.01272059 "hypothetical protein"  
"JS1\_N06\_00990" 19920 "s59E25H2" 0 "hypothetical protein"  
"JS1\_N06\_00990" 19920 "s59E5H2" 0.1587581 "hypothetical protein"  
"JS1\_N06\_00990" 19920 "s63E6H2" 0.3656063 "hypothetical protein"  
"JS1\_N06\_00991" 19921 "s59E13H2" 0.04471452 "hypothetical protein"  
"JS1\_N06\_00991" 19921 "s59E25H2" 0 "hypothetical protein"  
"JS1\_N06\_00991" 19921 "s59E5H2" 0.2799226 "hypothetical protein"  
"JS1\_N06\_00991" 19921 "s63E6H2" 0.4243923 "hypothetical protein"  
"JS1\_N06\_00992" 19922 "s59E13H2" 0.09744369 "putative cysteine desulfurase 2"  
"JS1\_N06\_00992" 19922 "s59E25H2" 0 "putative cysteine desulfurase 2"  
"JS1\_N06\_00992" 19922 "s59E5H2" 0.4993768 "putative cysteine desulfurase 2"  
"JS1\_N06\_00992" 19922 "s63E6H2" 0.7123992 "putative cysteine desulfurase 2"  
"JS1\_N06\_00993" 19923 "s59E13H2" 0.08371865 "NifU-like protein"  
"JS1\_N06\_00993" 19923 "s59E25H2" 0 "NifU-like protein"  
"JS1\_N06\_00993" 19923 "s59E5H2" 0.1778447 "NifU-like protein"  
"JS1\_N06\_00993" 19923 "s63E6H2" 0.5270343 "NifU-like protein"  
"JS1\_N06\_00994" 19924 "s59E13H2" 0 "HTH-type transcriptional regulator Mce2R"  
"JS1\_N06\_00994" 19924 "s59E25H2" 0 "HTH-type transcriptional regulator Mce2R"  
"JS1\_N06\_00994" 19924 "s59E5H2" 0 "HTH-type transcriptional regulator Mce2R"  
"JS1\_N06\_00994" 19924 "s63E6H2" 0 "HTH-type transcriptional regulator Mce2R"  
"JS1\_N06\_00995" 19925 "s59E13H2" 0 "Putative 2-hydroxyacid dehydrogenase YoaD"  
"JS1\_N06\_00995" 19925 "s59E25H2" 0 "Putative 2-hydroxyacid dehydrogenase YoaD"  
"JS1\_N06\_00995" 19925 "s59E5H2" 0 "Putative 2-hydroxyacid dehydrogenase YoaD"  
"JS1\_N06\_00995" 19925 "s63E6H2" 0 "Putative 2-hydroxyacid dehydrogenase YoaD"

"JS1\_N06\_00996" 19926 "s59E13H2" 0 "Fructose-bisphosphate aldolase"  
"JS1\_N06\_00996" 19926 "s59E25H2" 0 "Fructose-bisphosphate aldolase"  
"JS1\_N06\_00996" 19926 "s59E5H2" 0 "Fructose-bisphosphate aldolase"  
"JS1\_N06\_00996" 19926 "s63E6H2" 0 "Fructose-bisphosphate aldolase"  
"JS1\_N06\_00997" 19927 "s59E13H2" 0 "Glycerol kinase"  
"JS1\_N06\_00997" 19927 "s59E25H2" 0 "Glycerol kinase"  
"JS1\_N06\_00997" 19927 "s59E5H2" 0 "Glycerol kinase"  
"JS1\_N06\_00997" 19927 "s63E6H2" 0 "Glycerol kinase"  
"JS1\_N06\_00998" 19928 "s59E13H2" 0.1236238 "Monocarboxylate 2-oxoacid-binding periplasmic protein precursor"  
"JS1\_N06\_00998" 19928 "s59E25H2" 0 "Monocarboxylate 2-oxoacid-binding periplasmic protein precursor"  
"JS1\_N06\_00998" 19928 "s59E5H2" 0.3284083 "Monocarboxylate 2-oxoacid-binding periplasmic protein precursor"  
"JS1\_N06\_00998" 19928 "s63E6H2" 0.01602456 "Monocarboxylate 2-oxoacid-binding periplasmic protein precursor"  
"JS1\_N06\_00999" 19929 "s59E13H2" 0.1490051 "Tripartite ATP-independent periplasmic transporters, DctQ component"  
"JS1\_N06\_00999" 19929 "s59E25H2" 0 "Tripartite ATP-independent periplasmic transporters, DctQ component"  
"JS1\_N06\_00999" 19929 "s59E5H2" 0.593724 "Tripartite ATP-independent periplasmic transporters, DctQ component"  
"JS1\_N06\_00999" 19929 "s63E6H2" 0.05627948 "Tripartite ATP-independent periplasmic transporters, DctQ component"  
"JS1\_N06\_01000" 19930 "s59E13H2" 0.08445262 "Sialic acid TRAP transporter permease protein SiaT"  
"JS1\_N06\_01000" 19930 "s59E25H2" 0 "Sialic acid TRAP transporter permease protein SiaT"  
"JS1\_N06\_01000" 19930 "s59E5H2" 0.3084823 "Sialic acid TRAP transporter permease protein SiaT"  
"JS1\_N06\_01000" 19930 "s63E6H2" 0.03896911 "Sialic acid TRAP transporter permease protein SiaT"  
"JS1\_N06\_01001" 19931 "s59E13H2" 0.03872325 "hypothetical protein"  
"JS1\_N06\_01001" 19931 "s59E25H2" 0 "hypothetical protein"  
"JS1\_N06\_01001" 19931 "s59E5H2" 0.003161729 "hypothetical protein"  
"JS1\_N06\_01001" 19931 "s63E6H2" 0 "hypothetical protein"  
"JS1\_N06\_01002" 19932 "s59E13H2" 0.04245356 "4-hydroxythreonine-4-phosphate dehydrogenase 2"  
"JS1\_N06\_01002" 19932 "s59E25H2" 0 "4-hydroxythreonine-4-phosphate dehydrogenase 2"  
"JS1\_N06\_01002" 19932 "s59E5H2" 0.003848939 "4-hydroxythreonine-4-phosphate dehydrogenase 2"  
"JS1\_N06\_01002" 19932 "s63E6H2" 0 "4-hydroxythreonine-4-phosphate dehydrogenase 2"  
"JS1\_N06\_01003" 19933 "s59E13H2" 0.02289244 "hypothetical protein"  
"JS1\_N06\_01003" 19933 "s59E25H2" 0 "hypothetical protein"  
"JS1\_N06\_01003" 19933 "s59E5H2" 0 "hypothetical protein"  
"JS1\_N06\_01003" 19933 "s63E6H2" 0 "hypothetical protein"  
"JS1\_N06\_01005" 19935 "s59E13H2" 0.3570365 "Transposase IS116/IS110/IS902 family protein"  
"JS1\_N06\_01005" 19935 "s59E25H2" 0 "Transposase IS116/IS110/IS902 family protein"  
"JS1\_N06\_01005" 19935 "s59E5H2" 0.2931689 "Transposase IS116/IS110/IS902 family protein"  
"JS1\_N06\_01005" 19935 "s63E6H2" 0.4278187 "Transposase IS116/IS110/IS902 family protein"  
"JS1\_N06\_01006" 19936 "s59E13H2" 1.891614 "hypothetical protein"  
"JS1\_N06\_01006" 19936 "s59E25H2" 0 "hypothetical protein"  
"JS1\_N06\_01006" 19936 "s59E5H2" 0.04342661 "hypothetical protein"  
"JS1\_N06\_01006" 19936 "s63E6H2" 1.968091 "hypothetical protein"  
"JS1\_N06\_01007" 19937 "s59E13H2" 0.004336654 "Leucine carboxyl methyltransferase"  
"JS1\_N06\_01007" 19937 "s59E25H2" 0 "Leucine carboxyl methyltransferase"  
"JS1\_N06\_01007" 19937 "s59E5H2" 0.0006642681 "Leucine carboxyl methyltransferase"  
"JS1\_N06\_01007" 19937 "s63E6H2" 0.05122626 "Leucine carboxyl methyltransferase"  
"JS1\_N06\_01008" 19938 "s59E13H2" 0.07566534 "Inner membrane protein YbaN"  
"JS1\_N06\_01008" 19938 "s59E25H2" 0 "Inner membrane protein YbaN"  
"JS1\_N06\_01008" 19938 "s59E5H2" 0.4122356 "Inner membrane protein YbaN"



"JS1\_N06\_01008" 19938 "s63E6H2" 0.03899029 "Inner membrane protein YbaN"  
"JS1\_N06\_01009" 19939 "s59E13H2" 0.04576551 "Purine-binding protein precursor"  
"JS1\_N06\_01009" 19939 "s59E25H2" 0 "Purine-binding protein precursor"  
"JS1\_N06\_01009" 19939 "s59E5H2" 0.02280332 "Purine-binding protein precursor"  
"JS1\_N06\_01009" 19939 "s63E6H2" 0.02219052 "Purine-binding protein precursor"  
"JS1\_N06\_01010" 19940 "s59E13H2" 0.06035983 "hypothetical protein"  
"JS1\_N06\_01010" 19940 "s59E25H2" 0 "hypothetical protein"  
"JS1\_N06\_01010" 19940 "s59E5H2" 0.400396 "hypothetical protein"  
"JS1\_N06\_01010" 19940 "s63E6H2" 1.109553 "hypothetical protein"  
"JS1\_N06\_01011" 19941 "s59E13H2" 0.262281 "Succinyl-CoA ligase [ADP-forming] subunit alpha"  
"JS1\_N06\_01011" 19941 "s59E25H2" 0 "Succinyl-CoA ligase [ADP-forming] subunit alpha"  
"JS1\_N06\_01011" 19941 "s59E5H2" 0.3512542 "Succinyl-CoA ligase [ADP-forming] subunit alpha"  
"JS1\_N06\_01011" 19941 "s63E6H2" 0.8581284 "Succinyl-CoA ligase [ADP-forming] subunit alpha"  
"JS1\_N06\_01013" 19943 "s59E13H2" 0.1985208 "Ribose import ATP-binding protein RbsA"  
"JS1\_N06\_01013" 19943 "s59E25H2" 0.3063063 "Ribose import ATP-binding protein RbsA"  
"JS1\_N06\_01013" 19943 "s59E5H2" 0.1296834 "Ribose import ATP-binding protein RbsA"  
"JS1\_N06\_01013" 19943 "s63E6H2" 0.0591029 "Ribose import ATP-binding protein RbsA"  
"JS1\_N06\_01014" 19944 "s59E13H2" 0.187604 "D-allose transport system permease protein AlsC"  
"JS1\_N06\_01014" 19944 "s59E25H2" 0 "D-allose transport system permease protein AlsC"  
"JS1\_N06\_01014" 19944 "s59E5H2" 0.1090886 "D-allose transport system permease protein AlsC"  
"JS1\_N06\_01014" 19944 "s63E6H2" 0.08508709 "D-allose transport system permease protein AlsC"  
"JS1\_N06\_01015" 19945 "s59E13H2" 0.09902468 "Branched-chain amino acid transport system / permease component"  
"JS1\_N06\_01015" 19945 "s59E25H2" 0 "Branched-chain amino acid transport system / permease component"  
"JS1\_N06\_01015" 19945 "s59E5H2" 0.4489295 "Branched-chain amino acid transport system / permease component"  
"JS1\_N06\_01015" 19945 "s63E6H2" 0.110985 "Branched-chain amino acid transport system / permease component"  
"JS1\_N06\_01016" 19946 "s59E13H2" 0 "GYD domain protein"  
"JS1\_N06\_01016" 19946 "s59E25H2" 0 "GYD domain protein"  
"JS1\_N06\_01016" 19946 "s59E5H2" 0.05822278 "GYD domain protein"  
"JS1\_N06\_01016" 19946 "s63E6H2" 0.6309169 "GYD domain protein"  
"JS1\_N06\_01017" 19947 "s59E13H2" 0.1049963 "DinB superfamily protein"  
"JS1\_N06\_01017" 19947 "s59E25H2" 0 "DinB superfamily protein"  
"JS1\_N06\_01017" 19947 "s59E5H2" 0.1023051 "DinB superfamily protein"  
"JS1\_N06\_01017" 19947 "s63E6H2" 0.2489362 "DinB superfamily protein"  
"JS1\_N06\_01018" 19948 "s59E13H2" 0 "metal-dependent hydrolase"  
"JS1\_N06\_01018" 19948 "s59E25H2" 0 "metal-dependent hydrolase"  
"JS1\_N06\_01018" 19948 "s59E5H2" 0.02552579 "metal-dependent hydrolase"  
"JS1\_N06\_01018" 19948 "s63E6H2" 0.0896654 "metal-dependent hydrolase"  
"JS1\_N06\_01019" 19949 "s59E13H2" 0 "3 beta-hydroxysteroid dehydrogenase/Delta 5--"  
"JS1\_N06\_01019" 19949 "s59E25H2" 0 "3 beta-hydroxysteroid dehydrogenase/Delta 5--"  
"JS1\_N06\_01019" 19949 "s59E5H2" 0 "3 beta-hydroxysteroid dehydrogenase/Delta 5--"  
"JS1\_N06\_01019" 19949 "s63E6H2" 0.04964753 "3 beta-hydroxysteroid dehydrogenase/Delta 5--"  
"JS1\_N06\_01020" 19950 "s59E13H2" 0 "dTDP-glucose 4,6-dehydratase"  
"JS1\_N06\_01020" 19950 "s59E25H2" 0 "dTDP-glucose 4,6-dehydratase"  
"JS1\_N06\_01020" 19950 "s59E5H2" 0 "dTDP-glucose 4,6-dehydratase"  
"JS1\_N06\_01020" 19950 "s63E6H2" 0.000405286 "dTDP-glucose 4,6-dehydratase"  
"JS1\_N06\_01021" 19951 "s59E13H2" 0.1001018 "Pyruvate dehydrogenase complex repressor"  
"JS1\_N06\_01021" 19951 "s59E25H2" 0 "Pyruvate dehydrogenase complex repressor"

"JS1\_N06\_01021" 19951 "s59E5H2" 0.1735151 "Pyruvate dehydrogenase complex repressor"  
"JS1\_N06\_01021" 19951 "s63E6H2" 0.3817121 "Pyruvate dehydrogenase complex repressor"  
"JS1\_N06\_01022" 19952 "s59E13H2" 0 "hypothetical protein"  
"JS1\_N06\_01022" 19952 "s59E25H2" 0 "hypothetical protein"  
"JS1\_N06\_01022" 19952 "s59E5H2" 0 "hypothetical protein"  
"JS1\_N06\_01022" 19952 "s63E6H2" 0.05934773 "hypothetical protein"  
"JS1\_N06\_01023" 19953 "s59E13H2" 0.001068427 "Galactose/methyl galactoside import ATP-binding protein MglA"  
"JS1\_N06\_01023" 19953 "s59E25H2" 0 "Galactose/methyl galactoside import ATP-binding protein MglA"  
"JS1\_N06\_01023" 19953 "s59E5H2" 0 "Galactose/methyl galactoside import ATP-binding protein MglA"  
"JS1\_N06\_01023" 19953 "s63E6H2" 0.2636136 "Galactose/methyl galactoside import ATP-binding protein MglA"  
"JS1\_N06\_01024" 19954 "s59E13H2" 0 "Branched-chain amino acid transport system / permease component"  
"JS1\_N06\_01024" 19954 "s59E25H2" 0.4752381 "Branched-chain amino acid transport system / permease component"  
"JS1\_N06\_01024" 19954 "s59E5H2" 0 "Branched-chain amino acid transport system / permease component"  
"JS1\_N06\_01024" 19954 "s63E6H2" 1.158087 "Branched-chain amino acid transport system / permease component"  
"JS1\_N06\_01025" 19955 "s59E13H2" 0 "L-arabinose transporter permease protein"  
"JS1\_N06\_01025" 19955 "s59E25H2" 0 "L-arabinose transporter permease protein"  
"JS1\_N06\_01025" 19955 "s59E5H2" 0 "L-arabinose transporter permease protein"  
"JS1\_N06\_01025" 19955 "s63E6H2" 0.5965245 "L-arabinose transporter permease protein"  
"JS1\_N06\_01026" 19956 "s59E13H2" 0.009432062 "Xaa-Pro dipeptidase"  
"JS1\_N06\_01026" 19956 "s59E25H2" 0 "Xaa-Pro dipeptidase"  
"JS1\_N06\_01026" 19956 "s59E5H2" 0 "Xaa-Pro dipeptidase"  
"JS1\_N06\_01026" 19956 "s63E6H2" 0.04943495 "Xaa-Pro dipeptidase"  
"JS1\_N06\_01027" 19957 "s59E13H2" 0.5564996 "Tungsten-containing aldehyde ferredoxin oxidoreductase"  
"JS1\_N06\_01027" 19957 "s59E25H2" 0 "Tungsten-containing aldehyde ferredoxin oxidoreductase"  
"JS1\_N06\_01027" 19957 "s59E5H2" 0.06289214 "Tungsten-containing aldehyde ferredoxin oxidoreductase"  
"JS1\_N06\_01027" 19957 "s63E6H2" 0.1639584 "Tungsten-containing aldehyde ferredoxin oxidoreductase"  
"JS1\_N06\_01028" 19958 "s59E13H2" 0.06073476 "4-hydroxy-tetrahydrodipicolinate synthase"  
"JS1\_N06\_01028" 19958 "s59E25H2" 0 "4-hydroxy-tetrahydrodipicolinate synthase"  
"JS1\_N06\_01028" 19958 "s59E5H2" 0.01252562 "4-hydroxy-tetrahydrodipicolinate synthase"  
"JS1\_N06\_01028" 19958 "s63E6H2" 0.2705015 "4-hydroxy-tetrahydrodipicolinate synthase"  
"JS1\_N06\_01029" 19959 "s59E13H2" 0.02306422 "L-serine dehydratase, alpha chain"  
"JS1\_N06\_01029" 19959 "s59E25H2" 0 "L-serine dehydratase, alpha chain"  
"JS1\_N06\_01029" 19959 "s59E5H2" 0.02307898 "L-serine dehydratase, alpha chain"  
"JS1\_N06\_01029" 19959 "s63E6H2" 0.2804195 "L-serine dehydratase, alpha chain"  
"JS1\_N06\_01030" 19960 "s59E13H2" 0 "hypothetical protein"  
"JS1\_N06\_01030" 19960 "s59E25H2" 0 "hypothetical protein"  
"JS1\_N06\_01030" 19960 "s59E5H2" 0.0221976 "hypothetical protein"  
"JS1\_N06\_01030" 19960 "s63E6H2" 0.4104612 "hypothetical protein"  
"JS1\_N06\_01031" 19961 "s59E13H2" 0.007613554 "hypothetical protein"  
"JS1\_N06\_01031" 19961 "s59E25H2" 0 "hypothetical protein"  
"JS1\_N06\_01031" 19961 "s59E5H2" 0.07601988 "hypothetical protein"  
"JS1\_N06\_01031" 19961 "s63E6H2" 0.2398855 "hypothetical protein"  
"JS1\_N06\_01032" 19962 "s59E13H2" 0.01169202 "hypothetical protein"  
"JS1\_N06\_01032" 19962 "s59E25H2" 0 "hypothetical protein"  
"JS1\_N06\_01032" 19962 "s59E5H2" 0.08098146 "hypothetical protein"  
"JS1\_N06\_01032" 19962 "s63E6H2" 0.2976681 "hypothetical protein"  
"JS1\_N06\_01033" 19963 "s59E13H2" 0.03283991 "putative cysteine desulfurase 2"

"JS1\_N06\_01033" 19963 "s59E25H2" 0 "putative cysteine desulfurase 2"  
"JS1\_N06\_01033" 19963 "s59E5H2" 0.100291 "putative cysteine desulfurase 2"  
"JS1\_N06\_01033" 19963 "s63E6H2" 0.3694805 "putative cysteine desulfurase 2"  
"JS1\_N06\_01034" 19964 "s59E13H2" 0.04795641 "NifU-like protein"  
"JS1\_N06\_01034" 19964 "s59E25H2" 0 "NifU-like protein"  
"JS1\_N06\_01034" 19964 "s59E5H2" 0.1030312 "NifU-like protein"  
"JS1\_N06\_01034" 19964 "s63E6H2" 0.2145913 "NifU-like protein"  
"JS1\_N06\_01036" 19966 "s59E13H2" 0.03274149 "Aspartokinase"  
"JS1\_N06\_01036" 19966 "s59E25H2" 0.3098135 "Aspartokinase"  
"JS1\_N06\_01036" 19966 "s59E5H2" 0.17637 "Aspartokinase"  
"JS1\_N06\_01036" 19966 "s63E6H2" 0.3443994 "Aspartokinase"  
"JS1\_N06\_01037" 19967 "s59E13H2" 0 "hypothetical protein"  
"JS1\_N06\_01037" 19967 "s59E25H2" 0 "hypothetical protein"  
"JS1\_N06\_01037" 19967 "s59E5H2" 0 "hypothetical protein"  
"JS1\_N06\_01037" 19967 "s63E6H2" 0.2304207 "hypothetical protein"  
"JS1\_N06\_01038" 19968 "s59E13H2" 0 "hypothetical protein"  
"JS1\_N06\_01038" 19968 "s59E25H2" 0 "hypothetical protein"  
"JS1\_N06\_01038" 19968 "s59E5H2" 0 "hypothetical protein"  
"JS1\_N06\_01038" 19968 "s63E6H2" 0.2246246 "hypothetical protein"  
"JS1\_N06\_01040" 19970 "s59E13H2" 0.05673245 "DNA alkylation repair enzyme"  
"JS1\_N06\_01040" 19970 "s59E25H2" 0 "DNA alkylation repair enzyme"  
"JS1\_N06\_01040" 19970 "s59E5H2" 0.8936467 "DNA alkylation repair enzyme"  
"JS1\_N06\_01040" 19970 "s63E6H2" 1.486274 "DNA alkylation repair enzyme"  
"JS1\_N06\_01041" 19971 "s59E13H2" 0.0202746 "Isoprenylcysteine carboxyl methyltransferase (ICMT) family protein"  
"JS1\_N06\_01041" 19971 "s59E25H2" 0 "Isoprenylcysteine carboxyl methyltransferase (ICMT) family protein"  
"JS1\_N06\_01041" 19971 "s59E5H2" 1.00632 "Isoprenylcysteine carboxyl methyltransferase (ICMT) family protein"  
"JS1\_N06\_01041" 19971 "s63E6H2" 0.7683503 "Isoprenylcysteine carboxyl methyltransferase (ICMT) family protein"  
"JS1\_N06\_01042" 19972 "s59E13H2" 0 "hypothetical protein"  
"JS1\_N06\_01042" 19972 "s59E25H2" 0 "hypothetical protein"  
"JS1\_N06\_01042" 19972 "s59E5H2" 0.09467105 "hypothetical protein"  
"JS1\_N06\_01042" 19972 "s63E6H2" 0.9665044 "hypothetical protein"  
"JS1\_N06\_01043" 19973 "s59E13H2" 3.431129 "hypothetical protein"  
"JS1\_N06\_01043" 19973 "s59E25H2" 0 "hypothetical protein"  
"JS1\_N06\_01043" 19973 "s59E5H2" 0.1477624 "hypothetical protein"  
"JS1\_N06\_01043" 19973 "s63E6H2" 0.3400653 "hypothetical protein"  
"JS1\_N06\_01045" 19975 "s59E13H2" 0.04261401 "hypothetical protein"  
"JS1\_N06\_01045" 19975 "s59E25H2" 0 "hypothetical protein"  
"JS1\_N06\_01045" 19975 "s59E5H2" 0.04817917 "hypothetical protein"  
"JS1\_N06\_01045" 19975 "s63E6H2" 0.7413228 "hypothetical protein"  
"JS1\_N06\_01050" 19980 "s59E13H2" 0 "Na+/Pi-cotransporter"  
"JS1\_N06\_01050" 19980 "s59E25H2" 0 "Na+/Pi-cotransporter"  
"JS1\_N06\_01050" 19980 "s59E5H2" 0 "Na+/Pi-cotransporter"  
"JS1\_N06\_01050" 19980 "s63E6H2" 0.4128407 "Na+/Pi-cotransporter"  
"JS1\_N06\_01051" 19981 "s59E13H2" 0 "putative membrane protein"  
"JS1\_N06\_01051" 19981 "s59E25H2" 0 "putative membrane protein"  
"JS1\_N06\_01051" 19981 "s59E5H2" 0 "putative membrane protein"  
"JS1\_N06\_01051" 19981 "s63E6H2" 0.4786871 "putative membrane protein"

"JS1\_N06\_01053" 19983 "s59E13H2" 0.01161847 "Deoxyguanosinetriphosphate triphosphohydrolase"  
"JS1\_N06\_01053" 19983 "s59E25H2" 0 "Deoxyguanosinetriphosphate triphosphohydrolase"  
"JS1\_N06\_01053" 19983 "s59E5H2" 0 "Deoxyguanosinetriphosphate triphosphohydrolase"  
"JS1\_N06\_01053" 19983 "s63E6H2" 0 "Deoxyguanosinetriphosphate triphosphohydrolase"  
"JS1\_N06\_01054" 19984 "s59E13H2" 0 "hypothetical protein"  
"JS1\_N06\_01054" 19984 "s59E25H2" 0 "hypothetical protein"  
"JS1\_N06\_01054" 19984 "s59E5H2" 0 "hypothetical protein"  
"JS1\_N06\_01054" 19984 "s63E6H2" 0 "hypothetical protein"  
"JS1\_N06\_01055" 19985 "s59E13H2" 0.02685426 "putative metallophosphoesterase YhaO"  
"JS1\_N06\_01055" 19985 "s59E25H2" 0 "putative metallophosphoesterase YhaO"  
"JS1\_N06\_01055" 19985 "s59E5H2" 0.006395586 "putative metallophosphoesterase YhaO"  
"JS1\_N06\_01055" 19985 "s63E6H2" 0.04552461 "putative metallophosphoesterase YhaO"  
"JS1\_N06\_01056" 19986 "s59E13H2" 0.01435443 "DNA double-strand break repair Rad50 ATPase"  
"JS1\_N06\_01056" 19986 "s59E25H2" 0 "DNA double-strand break repair Rad50 ATPase"  
"JS1\_N06\_01056" 19986 "s59E5H2" 0.01835078 "DNA double-strand break repair Rad50 ATPase"  
"JS1\_N06\_01056" 19986 "s63E6H2" 0.01909711 "DNA double-strand break repair Rad50 ATPase"  
"JS1\_N06\_01057" 19987 "s59E13H2" 0 "hypothetical protein"  
"JS1\_N06\_01057" 19987 "s59E25H2" 0 "hypothetical protein"  
"JS1\_N06\_01057" 19987 "s59E5H2" 0.005099465 "hypothetical protein"  
"JS1\_N06\_01057" 19987 "s63E6H2" 0.03396411 "hypothetical protein"  
"JS1\_N06\_01058" 19988 "s59E13H2" 0.06083328 "recombination protein F"  
"JS1\_N06\_01058" 19988 "s59E25H2" 0 "recombination protein F"  
"JS1\_N06\_01058" 19988 "s59E5H2" 0.0008237117 "recombination protein F"  
"JS1\_N06\_01058" 19988 "s63E6H2" 0.1887703 "recombination protein F"  
"JS1\_N06\_01059" 19989 "s59E13H2" 0 "Glycerate 2-kinase"  
"JS1\_N06\_01059" 19989 "s59E25H2" 0 "Glycerate 2-kinase"  
"JS1\_N06\_01059" 19989 "s59E5H2" 0 "Glycerate 2-kinase"  
"JS1\_N06\_01059" 19989 "s63E6H2" 0.07342734 "Glycerate 2-kinase"  
"JS1\_N06\_01060" 19990 "s59E13H2" 0 "2-hydroxy-3-oxopropionate reductase"  
"JS1\_N06\_01060" 19990 "s59E25H2" 0 "2-hydroxy-3-oxopropionate reductase"  
"JS1\_N06\_01060" 19990 "s59E5H2" 0 "2-hydroxy-3-oxopropionate reductase"  
"JS1\_N06\_01060" 19990 "s63E6H2" 0.08818722 "2-hydroxy-3-oxopropionate reductase"  
"JS1\_N06\_01061" 19991 "s59E13H2" 0.007861004 "HTH-type transcriptional regulator DegA"  
"JS1\_N06\_01061" 19991 "s59E25H2" 0 "HTH-type transcriptional regulator DegA"  
"JS1\_N06\_01061" 19991 "s59E5H2" 0.1237969 "HTH-type transcriptional regulator DegA"  
"JS1\_N06\_01061" 19991 "s63E6H2" 0.01755007 "HTH-type transcriptional regulator DegA"  
"JS1\_N06\_01062" 19992 "s59E13H2" 0.04393401 "Maltotriose-binding protein precursor"  
"JS1\_N06\_01062" 19992 "s59E25H2" 0 "Maltotriose-binding protein precursor"  
"JS1\_N06\_01062" 19992 "s59E5H2" 0.2658924 "Maltotriose-binding protein precursor"  
"JS1\_N06\_01062" 19992 "s63E6H2" 0.2372377 "Maltotriose-binding protein precursor"  
"JS1\_N06\_01063" 19993 "s59E13H2" 0.04512577 "Trehalose/maltose transport system permease protein MalF"  
"JS1\_N06\_01063" 19993 "s59E25H2" 0 "Trehalose/maltose transport system permease protein MalF"  
"JS1\_N06\_01063" 19993 "s59E5H2" 0.3689348 "Trehalose/maltose transport system permease protein MalF"  
"JS1\_N06\_01063" 19993 "s63E6H2" 0.3117642 "Trehalose/maltose transport system permease protein MalF"  
"JS1\_N06\_01064" 19994 "s59E13H2" 0.01509954 "Inner membrane ABC transporter permease protein YcjP"  
"JS1\_N06\_01064" 19994 "s59E25H2" 0 "Inner membrane ABC transporter permease protein YcjP"  
"JS1\_N06\_01064" 19994 "s59E5H2" 0.3193924 "Inner membrane ABC transporter permease protein YcjP"

"JS1\_N06\_01064" 19994 "s63E6H2" 0.06776556 "Inner membrane ABC transporter permease protein YcjP"  
"JS1\_N06\_01065" 19995 "s59E13H2" 0 "Glycosyl transferases group 1"  
"JS1\_N06\_01065" 19995 "s59E25H2" 0 "Glycosyl transferases group 1"  
"JS1\_N06\_01065" 19995 "s59E5H2" 0.004469756 "Glycosyl transferases group 1"  
"JS1\_N06\_01065" 19995 "s63E6H2" 0.004500714 "Glycosyl transferases group 1"  
"JS1\_N06\_01066" 19996 "s59E13H2" 0.003371569 "Bifunctional protein GlmU"  
"JS1\_N06\_01066" 19996 "s59E25H2" 0 "Bifunctional protein GlmU"  
"JS1\_N06\_01066" 19996 "s59E5H2" 0.1831086 "Bifunctional protein GlmU"  
"JS1\_N06\_01066" 19996 "s63E6H2" 0.0222988 "Bifunctional protein GlmU"  
"JS1\_N06\_01067" 19997 "s59E13H2" 0.004656223 "DNA-directed RNA polymerase subunit beta"  
"JS1\_N06\_01067" 19997 "s59E25H2" 0 "DNA-directed RNA polymerase subunit beta"  
"JS1\_N06\_01067" 19997 "s59E5H2" 0.008306838 "DNA-directed RNA polymerase subunit beta"  
"JS1\_N06\_01067" 19997 "s63E6H2" 0.006355621 "DNA-directed RNA polymerase subunit beta"  
"JS1\_N06\_01068" 19998 "s59E13H2" 0.05881662 "DNA-directed RNA polymerase subunit beta"  
"JS1\_N06\_01068" 19998 "s59E25H2" 0.1377315 "DNA-directed RNA polymerase subunit beta"  
"JS1\_N06\_01068" 19998 "s59E5H2" 0.04463856 "DNA-directed RNA polymerase subunit beta"  
"JS1\_N06\_01068" 19998 "s63E6H2" 0.1115873 "DNA-directed RNA polymerase subunit beta"  
"JS1\_N06\_01070" 20000 "s59E13H2" 0 "50S ribosomal protein L10"  
"JS1\_N06\_01070" 20000 "s59E25H2" 0 "50S ribosomal protein L10"  
"JS1\_N06\_01070" 20000 "s59E5H2" 0 "50S ribosomal protein L10"  
"JS1\_N06\_01070" 20000 "s63E6H2" 0 "50S ribosomal protein L10"  
"JS1\_N06\_01072" 20002 "s59E13H2" 0.007071519 "50S ribosomal protein L1"  
"JS1\_N06\_01072" 20002 "s59E25H2" 0 "50S ribosomal protein L1"  
"JS1\_N06\_01072" 20002 "s59E5H2" 0.08009046 "50S ribosomal protein L1"  
"JS1\_N06\_01072" 20002 "s63E6H2" 0.1108035 "50S ribosomal protein L1"  
"JS1\_N06\_01073" 20003 "s59E13H2" 0.02479045 "50S ribosomal protein L11"  
"JS1\_N06\_01073" 20003 "s59E25H2" 0 "50S ribosomal protein L11"  
"JS1\_N06\_01073" 20003 "s59E5H2" 0.01349088 "50S ribosomal protein L11"  
"JS1\_N06\_01073" 20003 "s63E6H2" 0.1037022 "50S ribosomal protein L11"  
"JS1\_N06\_01074" 20004 "s59E13H2" 0 "hypothetical protein"  
"JS1\_N06\_01074" 20004 "s59E25H2" 0 "hypothetical protein"  
"JS1\_N06\_01074" 20004 "s59E5H2" 0 "hypothetical protein"  
"JS1\_N06\_01074" 20004 "s63E6H2" 0.0853719 "hypothetical protein"  
"JS1\_N06\_01075" 20005 "s59E13H2" 0.03097142 "preprotein translocase subunit SecE"  
"JS1\_N06\_01075" 20005 "s59E25H2" 0 "preprotein translocase subunit SecE"  
"JS1\_N06\_01075" 20005 "s59E5H2" 0.06154006 "preprotein translocase subunit SecE"  
"JS1\_N06\_01075" 20005 "s63E6H2" 0.07110652 "preprotein translocase subunit SecE"  
"JS1\_N06\_01077" 20007 "s59E13H2" 0.1240878 "50S ribosomal protein L33"  
"JS1\_N06\_01077" 20007 "s59E25H2" 0 "50S ribosomal protein L33"  
"JS1\_N06\_01077" 20007 "s59E5H2" 0.1529307 "50S ribosomal protein L33"  
"JS1\_N06\_01077" 20007 "s63E6H2" 0.1961584 "50S ribosomal protein L33"  
"JS1\_N06\_01078" 20008 "s59E13H2" 0.1706299 "Elongation factor Tu"  
"JS1\_N06\_01078" 20008 "s59E25H2" 0 "Elongation factor Tu"  
"JS1\_N06\_01078" 20008 "s59E5H2" 0.2453836 "Elongation factor Tu"  
"JS1\_N06\_01078" 20008 "s63E6H2" 0.8840313 "Elongation factor Tu"  
"JS1\_N06\_01082" 20012 "s59E13H2" 0.09177426 "RNA polymerase sigma-H factor"  
"JS1\_N06\_01082" 20012 "s59E25H2" 0 "RNA polymerase sigma-H factor"

"JS1\_N06\_01082" 20012 "s59E5H2" 0.08075133 "RNA polymerase sigma-H factor"  
"JS1\_N06\_01082" 20012 "s63E6H2" 0.2475222 "RNA polymerase sigma-H factor"  
"JS1\_N06\_01083" 20013 "s59E13H2" 0.01700256 "Cysteine--tRNA ligase"  
"JS1\_N06\_01083" 20013 "s59E25H2" 0 "Cysteine--tRNA ligase"  
"JS1\_N06\_01083" 20013 "s59E5H2" 0.03043975 "Cysteine--tRNA ligase"  
"JS1\_N06\_01083" 20013 "s63E6H2" 0.1054385 "Cysteine--tRNA ligase"  
"JS1\_N06\_01084" 20014 "s59E13H2" 0.00451959 "putative PIN and TRAM-domain containing protein precursor"  
"JS1\_N06\_01084" 20014 "s59E25H2" 0 "putative PIN and TRAM-domain containing protein precursor"  
"JS1\_N06\_01084" 20014 "s59E5H2" 0.01691784 "putative PIN and TRAM-domain containing protein precursor"  
"JS1\_N06\_01084" 20014 "s63E6H2" 0.1782718 "putative PIN and TRAM-domain containing protein precursor"  
"JS1\_N06\_01086" 20016 "s59E13H2" 0.002531147 "hypothetical protein"  
"JS1\_N06\_01086" 20016 "s59E25H2" 0 "hypothetical protein"  
"JS1\_N06\_01086" 20016 "s59E5H2" 0.05567916 "hypothetical protein"  
"JS1\_N06\_01086" 20016 "s63E6H2" 0.2150405 "hypothetical protein"  
"JS1\_N06\_01087" 20017 "s59E13H2" 0.02358791 "Negative regulator of genetic competence ClpC/MecB"  
"JS1\_N06\_01087" 20017 "s59E25H2" 0 "Negative regulator of genetic competence ClpC/MecB"  
"JS1\_N06\_01087" 20017 "s59E5H2" 0.1504976 "Negative regulator of genetic competence ClpC/MecB"  
"JS1\_N06\_01087" 20017 "s63E6H2" 0.2074271 "Negative regulator of genetic competence ClpC/MecB"  
"JS1\_N06\_01088" 20018 "s59E13H2" 0.04957641 "Putative ATP:guanido phosphotransferase"  
"JS1\_N06\_01088" 20018 "s59E25H2" 0 "Putative ATP:guanido phosphotransferase"  
"JS1\_N06\_01088" 20018 "s59E5H2" 0.3627564 "Putative ATP:guanido phosphotransferase"  
"JS1\_N06\_01088" 20018 "s63E6H2" 0.6008704 "Putative ATP:guanido phosphotransferase"  
"JS1\_N06\_01089" 20019 "s59E13H2" 0.6935924 "UvrABC system protein B"  
"JS1\_N06\_01089" 20019 "s59E25H2" 0 "UvrABC system protein B"  
"JS1\_N06\_01089" 20019 "s59E5H2" 0.06253964 "UvrABC system protein B"  
"JS1\_N06\_01089" 20019 "s63E6H2" 0.4806851 "UvrABC system protein B"  
"JS1\_N06\_01090" 20020 "s59E13H2" 0 "Copper-sensing transcriptional repressor CsoR"  
"JS1\_N06\_01090" 20020 "s59E25H2" 0 "Copper-sensing transcriptional repressor CsoR"  
"JS1\_N06\_01090" 20020 "s59E5H2" 0 "Copper-sensing transcriptional repressor CsoR"  
"JS1\_N06\_01090" 20020 "s63E6H2" 0.3008502 "Copper-sensing transcriptional repressor CsoR"  
"JS1\_N06\_01091" 20021 "s59E13H2" 0 "hypothetical protein"  
"JS1\_N06\_01091" 20021 "s59E25H2" 0 "hypothetical protein"  
"JS1\_N06\_01091" 20021 "s59E5H2" 0.00417144 "hypothetical protein"  
"JS1\_N06\_01091" 20021 "s63E6H2" 0.3877591 "hypothetical protein"  
"JS1\_N06\_01092" 20022 "s59E13H2" 0.0014201 "Phosphoglycerate kinase"  
"JS1\_N06\_01092" 20022 "s59E25H2" 0 "Phosphoglycerate kinase"  
"JS1\_N06\_01092" 20022 "s59E5H2" 0.09232582 "Phosphoglycerate kinase"  
"JS1\_N06\_01092" 20022 "s63E6H2" 0.6888544 "Phosphoglycerate kinase"  
"JS1\_N06\_01093" 20023 "s59E13H2" 0 "putative membrane protein Ydfk"  
"JS1\_N06\_01093" 20023 "s59E25H2" 0 "putative membrane protein Ydfk"  
"JS1\_N06\_01093" 20023 "s59E5H2" 0.02400948 "putative membrane protein Ydfk"  
"JS1\_N06\_01093" 20023 "s63E6H2" 0.3970558 "putative membrane protein Ydfk"  
"JS1\_N06\_01094" 20024 "s59E13H2" 0 "hypothetical protein"  
"JS1\_N06\_01094" 20024 "s59E25H2" 0 "hypothetical protein"  
"JS1\_N06\_01094" 20024 "s59E5H2" 0.1361234 "hypothetical protein"  
"JS1\_N06\_01094" 20024 "s63E6H2" 0.4863948 "hypothetical protein"  
"JS1\_N06\_01095" 20025 "s59E13H2" 0.0129202 "hypothetical protein"

"JS1\_N06\_01095" 20025 "s59E25H2" 0 "hypothetical protein"  
"JS1\_N06\_01095" 20025 "s59E5H2" 0.06497767 "hypothetical protein"  
"JS1\_N06\_01095" 20025 "s63E6H2" 0.4420068 "hypothetical protein"  
"JS1\_N06\_01096" 20026 "s59E13H2" 0.01352781 "Ribosomal silencing factor RsfS"  
"JS1\_N06\_01096" 20026 "s59E25H2" 0 "Ribosomal silencing factor RsfS"  
"JS1\_N06\_01096" 20026 "s59E5H2" 0.08829224 "Ribosomal silencing factor RsfS"  
"JS1\_N06\_01096" 20026 "s63E6H2" 0.461675 "Ribosomal silencing factor RsfS"  
"JS1\_N06\_01097" 20027 "s59E13H2" 0.00272941 "Putative transcriptional regulator YvhJ"  
"JS1\_N06\_01097" 20027 "s59E25H2" 0 "Putative transcriptional regulator YvhJ"  
"JS1\_N06\_01097" 20027 "s59E5H2" 0.03929122 "Putative transcriptional regulator YvhJ"  
"JS1\_N06\_01097" 20027 "s63E6H2" 0.2831102 "Putative transcriptional regulator YvhJ"  
"JS1\_N06\_01098" 20028 "s59E13H2" 0 "putative nicotinate-nucleotide adenyllyltransferase"  
"JS1\_N06\_01098" 20028 "s59E25H2" 0 "putative nicotinate-nucleotide adenyllyltransferase"  
"JS1\_N06\_01098" 20028 "s59E5H2" 0.00404586 "putative nicotinate-nucleotide adenyllyltransferase"  
"JS1\_N06\_01098" 20028 "s63E6H2" 0.4102619 "putative nicotinate-nucleotide adenyllyltransferase"  
"JS1\_N06\_01099" 20029 "s59E13H2" 0.08432897 "Nicotinate-nucleotide adenyllyltransferase"  
"JS1\_N06\_01099" 20029 "s59E25H2" 0 "Nicotinate-nucleotide adenyllyltransferase"  
"JS1\_N06\_01099" 20029 "s59E5H2" 0.01963515 "Nicotinate-nucleotide adenyllyltransferase"  
"JS1\_N06\_01099" 20029 "s63E6H2" 0.3849368 "Nicotinate-nucleotide adenyllyltransferase"  
"JS1\_N06\_01100" 20030 "s59E13H2" 0.336896 "lipoprotein Nlpl"  
"JS1\_N06\_01100" 20030 "s59E25H2" 0 "lipoprotein Nlpl"  
"JS1\_N06\_01100" 20030 "s59E5H2" 0.2504473 "lipoprotein Nlpl"  
"JS1\_N06\_01100" 20030 "s63E6H2" 0.3819789 "lipoprotein Nlpl"  
"JS1\_N06\_01101" 20031 "s59E13H2" 0.08240445 "hypothetical protein"  
"JS1\_N06\_01101" 20031 "s59E25H2" 0 "hypothetical protein"  
"JS1\_N06\_01101" 20031 "s59E5H2" 0.04179024 "hypothetical protein"  
"JS1\_N06\_01101" 20031 "s63E6H2" 0.2972604 "hypothetical protein"  
"JS1\_N06\_01102" 20032 "s59E13H2" 0.2142467 "2-C-methyl-D-erythritol 2,4-cyclodiphosphate synthase"  
"JS1\_N06\_01102" 20032 "s59E25H2" 0 "2-C-methyl-D-erythritol 2,4-cyclodiphosphate synthase"  
"JS1\_N06\_01102" 20032 "s59E5H2" 0.05994964 "2-C-methyl-D-erythritol 2,4-cyclodiphosphate synthase"  
"JS1\_N06\_01102" 20032 "s63E6H2" 0.4858872 "2-C-methyl-D-erythritol 2,4-cyclodiphosphate synthase"  
"JS1\_N06\_01103" 20033 "s59E13H2" 0.2753944 "4-diphosphocytidyl-2-C-methyl-D-erythritol kinase"  
"JS1\_N06\_01103" 20033 "s59E25H2" 0 "4-diphosphocytidyl-2-C-methyl-D-erythritol kinase"  
"JS1\_N06\_01103" 20033 "s59E5H2" 0.1123673 "4-diphosphocytidyl-2-C-methyl-D-erythritol kinase"  
"JS1\_N06\_01103" 20033 "s63E6H2" 0.4998621 "4-diphosphocytidyl-2-C-methyl-D-erythritol kinase"  
"JS1\_N06\_01104" 20034 "s59E13H2" 0.4737662 "Putative 2-C-methyl-D-erythritol 4-phosphate cytidyllyltransferase 2"  
"JS1\_N06\_01104" 20034 "s59E25H2" 0 "Putative 2-C-methyl-D-erythritol 4-phosphate cytidyllyltransferase 2"  
"JS1\_N06\_01104" 20034 "s59E5H2" 0.07588373 "Putative 2-C-methyl-D-erythritol 4-phosphate cytidyllyltransferase 2"  
"JS1\_N06\_01104" 20034 "s63E6H2" 0.4336131 "Putative 2-C-methyl-D-erythritol 4-phosphate cytidyllyltransferase 2"  
"JS1\_N06\_01105" 20035 "s59E13H2" 0.01141401 "SpoIVB peptidase S55"  
"JS1\_N06\_01105" 20035 "s59E25H2" 0 "SpoIVB peptidase S55"  
"JS1\_N06\_01105" 20035 "s59E5H2" 0.01304912 "SpoIVB peptidase S55"  
"JS1\_N06\_01105" 20035 "s63E6H2" 0.6653733 "SpoIVB peptidase S55"  
"JS1\_N06\_01106" 20036 "s59E13H2" 0.5875869 "Rod shape-determining protein MreB"  
"JS1\_N06\_01106" 20036 "s59E25H2" 0 "Rod shape-determining protein MreB"  
"JS1\_N06\_01106" 20036 "s59E5H2" 0.1694182 "Rod shape-determining protein MreB"  
"JS1\_N06\_01106" 20036 "s63E6H2" 0.7073615 "Rod shape-determining protein MreB"

"JS1\_N06\_01107" 20037 "s59E13H2" 0.1159155 "UDP-N-acetylglucosamine 1-carboxyvinyltransferase 1"  
"JS1\_N06\_01107" 20037 "s59E25H2" 0 "UDP-N-acetylglucosamine 1-carboxyvinyltransferase 1"  
"JS1\_N06\_01107" 20037 "s59E5H2" 0.1396417 "UDP-N-acetylglucosamine 1-carboxyvinyltransferase 1"  
"JS1\_N06\_01107" 20037 "s63E6H2" 0.5511263 "UDP-N-acetylglucosamine 1-carboxyvinyltransferase 1"  
"JS1\_N06\_01108" 20038 "s59E13H2" 0.2311361 "Methylthioribose-1-phosphate isomerase"  
"JS1\_N06\_01108" 20038 "s59E25H2" 0 "Methylthioribose-1-phosphate isomerase"  
"JS1\_N06\_01108" 20038 "s59E5H2" 0.1437503 "Methylthioribose-1-phosphate isomerase"  
"JS1\_N06\_01108" 20038 "s63E6H2" 0.335216 "Methylthioribose-1-phosphate isomerase"  
"JS1\_N06\_01109" 20039 "s59E13H2" 0.1437944 "Putative small multi-drug export protein"  
"JS1\_N06\_01109" 20039 "s59E25H2" 0 "Putative small multi-drug export protein"  
"JS1\_N06\_01109" 20039 "s59E5H2" 0.1249963 "Putative small multi-drug export protein"  
"JS1\_N06\_01109" 20039 "s63E6H2" 0.4121202 "Putative small multi-drug export protein"  
"JS1\_N06\_01110" 20040 "s59E13H2" 0.1153553 "Purine nucleoside phosphorylase 1"  
"JS1\_N06\_01110" 20040 "s59E25H2" 0 "Purine nucleoside phosphorylase 1"  
"JS1\_N06\_01110" 20040 "s59E5H2" 0.1705756 "Purine nucleoside phosphorylase 1"  
"JS1\_N06\_01110" 20040 "s63E6H2" 0.3876502 "Purine nucleoside phosphorylase 1"  
"JS1\_N06\_01111" 20041 "s59E13H2" 0 "GTPase Der"  
"JS1\_N06\_01111" 20041 "s59E25H2" 0 "GTPase Der"  
"JS1\_N06\_01111" 20041 "s59E5H2" 0 "GTPase Der"  
"JS1\_N06\_01111" 20041 "s63E6H2" 0 "GTPase Der"  
"JS1\_N06\_01112" 20042 "s59E13H2" 0 "GTPase Der"  
"JS1\_N06\_01112" 20042 "s59E25H2" 0 "GTPase Der"  
"JS1\_N06\_01112" 20042 "s59E5H2" 0 "GTPase Der"  
"JS1\_N06\_01112" 20042 "s63E6H2" 0 "GTPase Der"  
"JS1\_N06\_01115" 20045 "s59E13H2" 0 "Acyl carrier protein"  
"JS1\_N06\_01115" 20045 "s59E25H2" 0 "Acyl carrier protein"  
"JS1\_N06\_01115" 20045 "s59E5H2" 0 "Acyl carrier protein"  
"JS1\_N06\_01115" 20045 "s63E6H2" 0.1469297 "Acyl carrier protein"  
"JS1\_N06\_01116" 20046 "s59E13H2" 0 "3-oxoacyl-[acyl-carrier-protein] reductase FabG"  
"JS1\_N06\_01116" 20046 "s59E25H2" 0 "3-oxoacyl-[acyl-carrier-protein] reductase FabG"  
"JS1\_N06\_01116" 20046 "s59E5H2" 0 "3-oxoacyl-[acyl-carrier-protein] reductase FabG"  
"JS1\_N06\_01116" 20046 "s63E6H2" 0.03959619 "3-oxoacyl-[acyl-carrier-protein] reductase FabG"  
"JS1\_N06\_01117" 20047 "s59E13H2" 0 "Glucose 1-dehydrogenase 1"  
"JS1\_N06\_01117" 20047 "s59E25H2" 0 "Glucose 1-dehydrogenase 1"  
"JS1\_N06\_01117" 20047 "s59E5H2" 0 "Glucose 1-dehydrogenase 1"  
"JS1\_N06\_01117" 20047 "s63E6H2" 0.006295442 "Glucose 1-dehydrogenase 1"  
"JS1\_N06\_01119" 20049 "s59E13H2" 0 "formate dehydrogenase accessory protein"  
"JS1\_N06\_01119" 20049 "s59E25H2" 0 "formate dehydrogenase accessory protein"  
"JS1\_N06\_01119" 20049 "s59E5H2" 0.000610119 "formate dehydrogenase accessory protein"  
"JS1\_N06\_01119" 20049 "s63E6H2" 0.4895217 "formate dehydrogenase accessory protein"  
"JS1\_N06\_01120" 20050 "s59E13H2" 0 "putative molybdenum cofactor guanylyltransferase"  
"JS1\_N06\_01120" 20050 "s59E25H2" 0 "putative molybdenum cofactor guanylyltransferase"  
"JS1\_N06\_01120" 20050 "s59E5H2" 0 "putative molybdenum cofactor guanylyltransferase"  
"JS1\_N06\_01120" 20050 "s63E6H2" 0.5457756 "putative molybdenum cofactor guanylyltransferase"  
"JS1\_N06\_01121" 20051 "s59E13H2" 0 "Formate dehydrogenase subunit alpha"  
"JS1\_N06\_01121" 20051 "s59E25H2" 0 "Formate dehydrogenase subunit alpha"  
"JS1\_N06\_01121" 20051 "s59E5H2" 0.01772289 "Formate dehydrogenase subunit alpha"



"JS1\_N06\_01121" 20051 "s63E6H2" 0.09817531 "Formate dehydrogenase subunit alpha"  
"JS1\_N06\_01123" 20053 "s59E13H2" 0.01205064 "hypothetical protein"  
"JS1\_N06\_01123" 20053 "s59E25H2" 0 "hypothetical protein"  
"JS1\_N06\_01123" 20053 "s59E5H2" 0.008672943 "hypothetical protein"  
"JS1\_N06\_01123" 20053 "s63E6H2" 0 "hypothetical protein"  
"JS1\_N06\_01125" 20055 "s59E13H2" 0.2423003 "Phenylalanine--tRNA ligase beta subunit"  
"JS1\_N06\_01125" 20055 "s59E25H2" 0 "Phenylalanine--tRNA ligase beta subunit"  
"JS1\_N06\_01125" 20055 "s59E5H2" 0.1038645 "Phenylalanine--tRNA ligase beta subunit"  
"JS1\_N06\_01125" 20055 "s63E6H2" 0.1108264 "Phenylalanine--tRNA ligase beta subunit"  
"JS1\_N06\_01128" 20058 "s59E13H2" 0 "V-type ATP synthase subunit I"  
"JS1\_N06\_01128" 20058 "s59E25H2" 0 "V-type ATP synthase subunit I"  
"JS1\_N06\_01128" 20058 "s59E5H2" 0 "V-type ATP synthase subunit I"  
"JS1\_N06\_01128" 20058 "s63E6H2" 0 "V-type ATP synthase subunit I"  
"JS1\_N06\_01130" 20060 "s59E13H2" 0 "hypothetical protein"  
"JS1\_N06\_01130" 20060 "s59E25H2" 0 "hypothetical protein"  
"JS1\_N06\_01130" 20060 "s59E5H2" 0.03451134 "hypothetical protein"  
"JS1\_N06\_01130" 20060 "s63E6H2" 0 "hypothetical protein"  
"JS1\_N06\_01132" 20062 "s59E13H2" 0.006131904 "hypothetical protein"  
"JS1\_N06\_01132" 20062 "s59E25H2" 0 "hypothetical protein"  
"JS1\_N06\_01132" 20062 "s59E5H2" 0.01855817 "hypothetical protein"  
"JS1\_N06\_01132" 20062 "s63E6H2" 0.09452229 "hypothetical protein"  
"JS1\_N06\_01134" 20064 "s59E13H2" 0.9100654 "putative tyrosine recombinase XerC-like protein"  
"JS1\_N06\_01134" 20064 "s59E25H2" 0 "putative tyrosine recombinase XerC-like protein"  
"JS1\_N06\_01134" 20064 "s59E5H2" 0.2107245 "putative tyrosine recombinase XerC-like protein"  
"JS1\_N06\_01134" 20064 "s63E6H2" 0.03517378 "putative tyrosine recombinase XerC-like protein"  
"JS1\_N06\_01138" 20068 "s59E13H2" 0 "hypothetical protein"  
"JS1\_N06\_01138" 20068 "s59E25H2" 0 "hypothetical protein"  
"JS1\_N06\_01138" 20068 "s59E5H2" 0 "hypothetical protein"  
"JS1\_N06\_01138" 20068 "s63E6H2" 0 "hypothetical protein"  
"JS1\_N06\_01141" 20071 "s59E13H2" 0 "hypothetical protein"  
"JS1\_N06\_01141" 20071 "s59E25H2" 0 "hypothetical protein"  
"JS1\_N06\_01141" 20071 "s59E5H2" 0 "hypothetical protein"  
"JS1\_N06\_01141" 20071 "s63E6H2" 0 "hypothetical protein"  
"JS1\_N06\_01144" 20074 "s59E13H2" 0.005653269 "hypothetical protein"  
"JS1\_N06\_01144" 20074 "s59E25H2" 0 "hypothetical protein"  
"JS1\_N06\_01144" 20074 "s59E5H2" 0.02216753 "hypothetical protein"  
"JS1\_N06\_01144" 20074 "s63E6H2" 0.04479703 "hypothetical protein"  
"JS1\_N06\_01146" 20076 "s59E13H2" 0 "hypothetical protein"  
"JS1\_N06\_01146" 20076 "s59E25H2" 0 "hypothetical protein"  
"JS1\_N06\_01146" 20076 "s59E5H2" 0 "hypothetical protein"  
"JS1\_N06\_01146" 20076 "s63E6H2" 0.02550507 "hypothetical protein"  
"JS1\_N06\_01147" 20077 "s59E13H2" 0 "hypothetical protein"  
"JS1\_N06\_01147" 20077 "s59E25H2" 0 "hypothetical protein"  
"JS1\_N06\_01147" 20077 "s59E5H2" 0 "hypothetical protein"  
"JS1\_N06\_01147" 20077 "s63E6H2" 0 "hypothetical protein"  
"JS1\_N06\_01149" 20079 "s59E13H2" 0 "hypothetical protein"  
"JS1\_N06\_01149" 20079 "s59E25H2" 0 "hypothetical protein"

"JS1\_N06\_01149" 20079 "s59E5H2" 0 "hypothetical protein"  
"JS1\_N06\_01149" 20079 "s63E6H2" 0 "hypothetical protein"  
"JS1\_N06\_01151" 20081 "s59E13H2" 0 "Helix-turn-helix"  
"JS1\_N06\_01151" 20081 "s59E25H2" 0 "Helix-turn-helix"  
"JS1\_N06\_01151" 20081 "s59E5H2" 0 "Helix-turn-helix"  
"JS1\_N06\_01151" 20081 "s63E6H2" 0 "Helix-turn-helix"  
"JS1\_N06\_01152" 20082 "s59E13H2" 0.365848 "hypothetical protein"  
"JS1\_N06\_01152" 20082 "s59E25H2" 0 "hypothetical protein"  
"JS1\_N06\_01152" 20082 "s59E5H2" 0.6637509 "hypothetical protein"  
"JS1\_N06\_01152" 20082 "s63E6H2" 0.477108 "hypothetical protein"  
"JS1\_N06\_01153" 20083 "s59E13H2" 0.005329401 "Polyketide cyclase / dehydrase and lipid transport"  
"JS1\_N06\_01153" 20083 "s59E25H2" 0 "Polyketide cyclase / dehydrase and lipid transport"  
"JS1\_N06\_01153" 20083 "s59E5H2" 0 "Polyketide cyclase / dehydrase and lipid transport"  
"JS1\_N06\_01153" 20083 "s63E6H2" 0.02772269 "Polyketide cyclase / dehydrase and lipid transport"  
"JS1\_N06\_01154" 20084 "s59E13H2" 0 "hypothetical protein"  
"JS1\_N06\_01154" 20084 "s59E25H2" 0 "hypothetical protein"  
"JS1\_N06\_01154" 20084 "s59E5H2" 0.6443656 "hypothetical protein"  
"JS1\_N06\_01154" 20084 "s63E6H2" 0.07509979 "hypothetical protein"  
"JS1\_N06\_01155" 20085 "s59E13H2" 0 "Iron-sulfur flavoprotein"  
"JS1\_N06\_01155" 20085 "s59E25H2" 0 "Iron-sulfur flavoprotein"  
"JS1\_N06\_01155" 20085 "s59E5H2" 0.05359463 "Iron-sulfur flavoprotein"  
"JS1\_N06\_01155" 20085 "s63E6H2" 0.187107 "Iron-sulfur flavoprotein"  
"JS1\_N06\_01156" 20086 "s59E13H2" 0.3518932 "hypothetical protein"  
"JS1\_N06\_01156" 20086 "s59E25H2" 0 "hypothetical protein"  
"JS1\_N06\_01156" 20086 "s59E5H2" 0.1955286 "hypothetical protein"  
"JS1\_N06\_01156" 20086 "s63E6H2" 3.1913 "hypothetical protein"  
"JS1\_N06\_01157" 20087 "s59E13H2" 0.0762282 "Phytoene desaturase (lycopene-forming)"  
"JS1\_N06\_01157" 20087 "s59E25H2" 0 "Phytoene desaturase (lycopene-forming)"  
"JS1\_N06\_01157" 20087 "s59E5H2" 0.1534447 "Phytoene desaturase (lycopene-forming)"  
"JS1\_N06\_01157" 20087 "s63E6H2" 1.403982 "Phytoene desaturase (lycopene-forming)"  
"JS1\_N06\_01158" 20088 "s59E13H2" 0.04047246 "tRNA-specific adenosine deaminase"  
"JS1\_N06\_01158" 20088 "s59E25H2" 0 "tRNA-specific adenosine deaminase"  
"JS1\_N06\_01158" 20088 "s59E5H2" 0 "tRNA-specific adenosine deaminase"  
"JS1\_N06\_01158" 20088 "s63E6H2" 0.5033214 "tRNA-specific adenosine deaminase"  
"JS1\_N06\_01159" 20089 "s59E13H2" 0.2918971 "hypothetical protein"  
"JS1\_N06\_01159" 20089 "s59E25H2" 0 "hypothetical protein"  
"JS1\_N06\_01159" 20089 "s59E5H2" 0 "hypothetical protein"  
"JS1\_N06\_01159" 20089 "s63E6H2" 0.1399103 "hypothetical protein"  
"JS1\_N06\_01160" 20090 "s59E13H2" 0 "Alpha-monoglucosyldiacylglycerol synthase"  
"JS1\_N06\_01160" 20090 "s59E25H2" 0 "Alpha-monoglucosyldiacylglycerol synthase"  
"JS1\_N06\_01160" 20090 "s59E5H2" 0 "Alpha-monoglucosyldiacylglycerol synthase"  
"JS1\_N06\_01160" 20090 "s63E6H2" 0.04997519 "Alpha-monoglucosyldiacylglycerol synthase"  
"JS1\_N06\_01161" 20091 "s59E13H2" 0 "Diacetylchitobiose deacetylase"  
"JS1\_N06\_01161" 20091 "s59E25H2" 0 "Diacetylchitobiose deacetylase"  
"JS1\_N06\_01161" 20091 "s59E5H2" 0.004889253 "Diacetylchitobiose deacetylase"  
"JS1\_N06\_01161" 20091 "s63E6H2" 0.05475072 "Diacetylchitobiose deacetylase"  
"JS1\_N06\_01162" 20092 "s59E13H2" 0 "hypothetical protein"

"JS1\_N06\_01162" 20092 "s59E25H2" 0 "hypothetical protein"  
"JS1\_N06\_01162" 20092 "s59E5H2" 0.01149476 "hypothetical protein"  
"JS1\_N06\_01162" 20092 "s63E6H2" 0.01273388 "hypothetical protein"  
"JS1\_N06\_01163" 20093 "s59E13H2" 2.603274 "hypothetical protein"  
"JS1\_N06\_01163" 20093 "s59E25H2" 0 "hypothetical protein"  
"JS1\_N06\_01163" 20093 "s59E5H2" 0.2034667 "hypothetical protein"  
"JS1\_N06\_01163" 20093 "s63E6H2" 2.060599 "hypothetical protein"  
"JS1\_N06\_01164" 20094 "s59E13H2" 0 "hypothetical protein"  
"JS1\_N06\_01164" 20094 "s59E25H2" 0 "hypothetical protein"  
"JS1\_N06\_01164" 20094 "s59E5H2" 0.6807361 "hypothetical protein"  
"JS1\_N06\_01164" 20094 "s63E6H2" 1.056798 "hypothetical protein"  
"JS1\_N06\_01165" 20095 "s59E13H2" 0 "Magnesium transport protein CorA"  
"JS1\_N06\_01165" 20095 "s59E25H2" 0 "Magnesium transport protein CorA"  
"JS1\_N06\_01165" 20095 "s59E5H2" 1.83865 "Magnesium transport protein CorA"  
"JS1\_N06\_01165" 20095 "s63E6H2" 0.2895802 "Magnesium transport protein CorA"  
"JS1\_N06\_01166" 20096 "s59E13H2" 1.769338 "Small-conductance mechanosensitive channel MscMJ"  
"JS1\_N06\_01166" 20096 "s59E25H2" 0 "Small-conductance mechanosensitive channel MscMJ"  
"JS1\_N06\_01166" 20096 "s59E5H2" 1.174238 "Small-conductance mechanosensitive channel MscMJ"  
"JS1\_N06\_01166" 20096 "s63E6H2" 1.06903 "Small-conductance mechanosensitive channel MscMJ"  
"JS1\_N06\_01167" 20097 "s59E13H2" 1.520455 "LysE type translocator"  
"JS1\_N06\_01167" 20097 "s59E25H2" 0.4246795 "LysE type translocator"  
"JS1\_N06\_01167" 20097 "s59E5H2" 0.2925906 "LysE type translocator"  
"JS1\_N06\_01167" 20097 "s63E6H2" 5.651791 "LysE type translocator"  
"JS1\_N06\_01169" 20099 "s59E13H2" 0 "Phosphoserine phosphatase 1"  
"JS1\_N06\_01169" 20099 "s59E25H2" 0 "Phosphoserine phosphatase 1"  
"JS1\_N06\_01169" 20099 "s59E5H2" 0 "Phosphoserine phosphatase 1"  
"JS1\_N06\_01169" 20099 "s63E6H2" 0.04642367 "Phosphoserine phosphatase 1"  
"JS1\_N06\_01170" 20100 "s59E13H2" 0.02477029 "Nicotinate-nucleotide--dimethylbenzimidazole phosphoribosyltransferase"  
"JS1\_N06\_01170" 20100 "s59E25H2" 0 "Nicotinate-nucleotide--dimethylbenzimidazole phosphoribosyltransferase"  
"JS1\_N06\_01170" 20100 "s59E5H2" 0.2862394 "Nicotinate-nucleotide--dimethylbenzimidazole phosphoribosyltransferase"  
"JS1\_N06\_01170" 20100 "s63E6H2" 1.45516 "Nicotinate-nucleotide--dimethylbenzimidazole phosphoribosyltransferase"  
"JS1\_N06\_01171" 20101 "s59E13H2" 0.01406322 "Bifunctional adenosylcobalamin biosynthesis protein CobP"  
"JS1\_N06\_01171" 20101 "s59E25H2" 0 "Bifunctional adenosylcobalamin biosynthesis protein CobP"  
"JS1\_N06\_01171" 20101 "s59E5H2" 0.3117436 "Bifunctional adenosylcobalamin biosynthesis protein CobP"  
"JS1\_N06\_01171" 20101 "s63E6H2" 0.3463313 "Bifunctional adenosylcobalamin biosynthesis protein CobP"  
"JS1\_N06\_01172" 20102 "s59E13H2" 0.04523692 "Cobalamin synthase"  
"JS1\_N06\_01172" 20102 "s59E25H2" 0 "Cobalamin synthase"  
"JS1\_N06\_01172" 20102 "s59E5H2" 0.5425765 "Cobalamin synthase"  
"JS1\_N06\_01172" 20102 "s63E6H2" 1.558705 "Cobalamin synthase"  
"JS1\_N06\_01173" 20103 "s59E13H2" 1.238246 "Hemin import ATP-binding protein HmuV"  
"JS1\_N06\_01173" 20103 "s59E25H2" 0 "Hemin import ATP-binding protein HmuV"  
"JS1\_N06\_01173" 20103 "s59E5H2" 1.732552 "Hemin import ATP-binding protein HmuV"  
"JS1\_N06\_01173" 20103 "s63E6H2" 2.776642 "Hemin import ATP-binding protein HmuV"  
"JS1\_N06\_01174" 20104 "s59E13H2" 1.691567 "Hemin transport system permease protein HmuU"  
"JS1\_N06\_01174" 20104 "s59E25H2" 0 "Hemin transport system permease protein HmuU"  
"JS1\_N06\_01174" 20104 "s59E5H2" 2.130974 "Hemin transport system permease protein HmuU"  
"JS1\_N06\_01174" 20104 "s63E6H2" 4.669693 "Hemin transport system permease protein HmuU"

"JS1\_N06\_01175" 20105 "s59E13H2" 1.68601 "Vitamin B12-binding protein precursor"  
"JS1\_N06\_01175" 20105 "s59E25H2" 0 "Vitamin B12-binding protein precursor"  
"JS1\_N06\_01175" 20105 "s59E5H2" 1.746783 "Vitamin B12-binding protein precursor"  
"JS1\_N06\_01175" 20105 "s63E6H2" 3.713225 "Vitamin B12-binding protein precursor"  
"JS1\_N06\_01177" 20107 "s59E13H2" 0.01356274 "Cob(I)yrinic acid a,c-diamide adenosyltransferase"  
"JS1\_N06\_01177" 20107 "s59E25H2" 0 "Cob(I)yrinic acid a,c-diamide adenosyltransferase"  
"JS1\_N06\_01177" 20107 "s59E5H2" 0.01689894 "Cob(I)yrinic acid a,c-diamide adenosyltransferase"  
"JS1\_N06\_01177" 20107 "s63E6H2" 0.03175521 "Cob(I)yrinic acid a,c-diamide adenosyltransferase"  
"JS1\_N06\_01178" 20108 "s59E13H2" 0.03363134 "GMP synthase [glutamine-hydrolyzing]"  
"JS1\_N06\_01178" 20108 "s59E25H2" 0 "GMP synthase [glutamine-hydrolyzing]"  
"JS1\_N06\_01178" 20108 "s59E5H2" 0.09495163 "GMP synthase [glutamine-hydrolyzing]"  
"JS1\_N06\_01178" 20108 "s63E6H2" 0.2476592 "GMP synthase [glutamine-hydrolyzing]"  
"JS1\_N06\_01179" 20109 "s59E13H2" 0.1833739 "N5-carboxyaminoimidazole ribonucleotide mutase"  
"JS1\_N06\_01179" 20109 "s59E25H2" 0 "N5-carboxyaminoimidazole ribonucleotide mutase"  
"JS1\_N06\_01179" 20109 "s59E5H2" 0.2921729 "N5-carboxyaminoimidazole ribonucleotide mutase"  
"JS1\_N06\_01179" 20109 "s63E6H2" 0.06669667 "N5-carboxyaminoimidazole ribonucleotide mutase"  
"JS1\_N06\_01180" 20110 "s59E13H2" 0.06776885 "hypothetical protein"  
"JS1\_N06\_01180" 20110 "s59E25H2" 0 "hypothetical protein"  
"JS1\_N06\_01180" 20110 "s59E5H2" 0.4346133 "hypothetical protein"  
"JS1\_N06\_01180" 20110 "s63E6H2" 0.09529325 "hypothetical protein"  
"JS1\_N06\_01182" 20112 "s59E13H2" 0.04601664 "hypothetical protein"  
"JS1\_N06\_01182" 20112 "s59E25H2" 0 "hypothetical protein"  
"JS1\_N06\_01182" 20112 "s59E5H2" 0.2694118 "hypothetical protein"  
"JS1\_N06\_01182" 20112 "s63E6H2" 0.05807036 "hypothetical protein"  
"JS1\_N06\_01183" 20113 "s59E13H2" 0.4694716 "ATP-dependent RecD-like DNA helicase"  
"JS1\_N06\_01183" 20113 "s59E25H2" 0 "ATP-dependent RecD-like DNA helicase"  
"JS1\_N06\_01183" 20113 "s59E5H2" 0.5636969 "ATP-dependent RecD-like DNA helicase"  
"JS1\_N06\_01183" 20113 "s63E6H2" 0.1327184 "ATP-dependent RecD-like DNA helicase"  
"JS1\_N06\_01184" 20114 "s59E13H2" 0.01998079 "2,3-bisphosphoglycerate-independent phosphoglycerate mutase 1"  
"JS1\_N06\_01184" 20114 "s59E25H2" 0 "2,3-bisphosphoglycerate-independent phosphoglycerate mutase 1"  
"JS1\_N06\_01184" 20114 "s59E5H2" 0.06050235 "2,3-bisphosphoglycerate-independent phosphoglycerate mutase 1"  
"JS1\_N06\_01184" 20114 "s63E6H2" 0.05527175 "2,3-bisphosphoglycerate-independent phosphoglycerate mutase 1"  
"JS1\_N06\_01185" 20115 "s59E13H2" 0.02247339 "putative 2-phosphosulfolactate phosphatase"  
"JS1\_N06\_01185" 20115 "s59E25H2" 0 "putative 2-phosphosulfolactate phosphatase"  
"JS1\_N06\_01185" 20115 "s59E5H2" 0.2870127 "putative 2-phosphosulfolactate phosphatase"  
"JS1\_N06\_01185" 20115 "s63E6H2" 0.0817635 "putative 2-phosphosulfolactate phosphatase"  
"JS1\_N06\_01186" 20116 "s59E13H2" 0 "DNA helicase II"  
"JS1\_N06\_01186" 20116 "s59E25H2" 0 "DNA helicase II"  
"JS1\_N06\_01186" 20116 "s59E5H2" 0 "DNA helicase II"  
"JS1\_N06\_01186" 20116 "s63E6H2" 0 "DNA helicase II"  
"JS1\_N06\_01193" 20123 "s59E13H2" 0.005494682 "1-deoxy-D-xylulose 5-phosphate reductoisomerase"  
"JS1\_N06\_01193" 20123 "s59E25H2" 0 "1-deoxy-D-xylulose 5-phosphate reductoisomerase"  
"JS1\_N06\_01193" 20123 "s59E5H2" 0 "1-deoxy-D-xylulose 5-phosphate reductoisomerase"  
"JS1\_N06\_01193" 20123 "s63E6H2" 0.008446904 "1-deoxy-D-xylulose 5-phosphate reductoisomerase"  
"JS1\_N06\_01194" 20124 "s59E13H2" 0.006820204 "Phosphatidate cytidyltransferase"  
"JS1\_N06\_01194" 20124 "s59E25H2" 0 "Phosphatidate cytidyltransferase"  
"JS1\_N06\_01194" 20124 "s59E5H2" 0.02114231 "Phosphatidate cytidyltransferase"

"JS1\_N06\_01194" 20124 "s63E6H2" 0.04214087 "Phosphatidate cytidyltransferase"  
"JS1\_N06\_01195" 20125 "s59E13H2" 0.01402203 "Isoprenyl transferase"  
"JS1\_N06\_01195" 20125 "s59E25H2" 0 "Isoprenyl transferase"  
"JS1\_N06\_01195" 20125 "s59E5H2" 0.1028465 "Isoprenyl transferase"  
"JS1\_N06\_01195" 20125 "s63E6H2" 0.08182417 "Isoprenyl transferase"  
"JS1\_N06\_01196" 20126 "s59E13H2" 0.02546316 "Ferredoxin"  
"JS1\_N06\_01196" 20126 "s59E25H2" 0 "Ferredoxin"  
"JS1\_N06\_01196" 20126 "s59E5H2" 0.08560932 "Ferredoxin"  
"JS1\_N06\_01196" 20126 "s63E6H2" 0.02243293 "Ferredoxin"  
"JS1\_N06\_01197" 20127 "s59E13H2" 0.03598709 "Ribosome-recycling factor"  
"JS1\_N06\_01197" 20127 "s59E25H2" 0 "Ribosome-recycling factor"  
"JS1\_N06\_01197" 20127 "s59E5H2" 0.04047122 "Ribosome-recycling factor"  
"JS1\_N06\_01197" 20127 "s63E6H2" 0.07744013 "Ribosome-recycling factor"  
"JS1\_N06\_01198" 20128 "s59E13H2" 0.00797961 "Uridylate kinase"  
"JS1\_N06\_01198" 20128 "s59E25H2" 0 "Uridylate kinase"  
"JS1\_N06\_01198" 20128 "s59E5H2" 0.05757417 "Uridylate kinase"  
"JS1\_N06\_01198" 20128 "s63E6H2" 0.09325799 "Uridylate kinase"  
"JS1\_N06\_01199" 20129 "s59E13H2" 0 "Elongation factor Ts"  
"JS1\_N06\_01199" 20129 "s59E25H2" 0 "Elongation factor Ts"  
"JS1\_N06\_01199" 20129 "s59E5H2" 0.004971598 "Elongation factor Ts"  
"JS1\_N06\_01199" 20129 "s63E6H2" 0.00216828 "Elongation factor Ts"  
"JS1\_N06\_01200" 20130 "s59E13H2" 0.001519378 "30S ribosomal protein S2"  
"JS1\_N06\_01200" 20130 "s59E25H2" 0 "30S ribosomal protein S2"  
"JS1\_N06\_01200" 20130 "s59E5H2" 0 "30S ribosomal protein S2"  
"JS1\_N06\_01200" 20130 "s63E6H2" 0.03630328 "30S ribosomal protein S2"  
"JS1\_N06\_01201" 20131 "s59E13H2" 0.003651809 "ATP-dependent protease ATPase subunit HslU"  
"JS1\_N06\_01201" 20131 "s59E25H2" 0 "ATP-dependent protease ATPase subunit HslU"  
"JS1\_N06\_01201" 20131 "s59E5H2" 0.4125138 "ATP-dependent protease ATPase subunit HslU"  
"JS1\_N06\_01201" 20131 "s63E6H2" 0.02839144 "ATP-dependent protease ATPase subunit HslU"  
"JS1\_N06\_01202" 20132 "s59E13H2" 0.0005532858 "ATP-dependent protease subunit ClpQ"  
"JS1\_N06\_01202" 20132 "s59E25H2" 0 "ATP-dependent protease subunit ClpQ"  
"JS1\_N06\_01202" 20132 "s59E5H2" 0.04587183 "ATP-dependent protease subunit ClpQ"  
"JS1\_N06\_01202" 20132 "s63E6H2" 0.0481162 "ATP-dependent protease subunit ClpQ"  
"JS1\_N06\_01203" 20133 "s59E13H2" 0.005126784 "Tyrosine recombinase XerD"  
"JS1\_N06\_01203" 20133 "s59E25H2" 0 "Tyrosine recombinase XerD"  
"JS1\_N06\_01203" 20133 "s59E5H2" 0.03968218 "Tyrosine recombinase XerD"  
"JS1\_N06\_01203" 20133 "s63E6H2" 0.062612 "Tyrosine recombinase XerD"  
"JS1\_N06\_01204" 20134 "s59E13H2" 0 "DNA topoisomerase 1"  
"JS1\_N06\_01204" 20134 "s59E25H2" 0 "DNA topoisomerase 1"  
"JS1\_N06\_01204" 20134 "s59E5H2" 0 "DNA topoisomerase 1"  
"JS1\_N06\_01204" 20134 "s63E6H2" 0.008290993 "DNA topoisomerase 1"  
"JS1\_N06\_01210" 20140 "s59E13H2" 0 "hypothetical protein"  
"JS1\_N06\_01210" 20140 "s59E25H2" 0 "hypothetical protein"  
"JS1\_N06\_01210" 20140 "s59E5H2" 0 "hypothetical protein"  
"JS1\_N06\_01210" 20140 "s63E6H2" 1.861086 "hypothetical protein"  
"JS1\_N06\_01211" 20141 "s59E13H2" 0 "Isoprenylcysteine carboxyl methyltransferase (ICMT) family protein"  
"JS1\_N06\_01211" 20141 "s59E25H2" 0 "Isoprenylcysteine carboxyl methyltransferase (ICMT) family protein"

"JS1\_N06\_01211" 20141 "s59E5H2" 0.03076545 "Isoprenylcysteine carboxyl methyltransferase (ICMT) family protein"  
"JS1\_N06\_01211" 20141 "s63E6H2" 2.641509 "Isoprenylcysteine carboxyl methyltransferase (ICMT) family protein"  
"JS1\_N06\_01212" 20142 "s59E13H2" 0.0003277504 "hypothetical protein"  
"JS1\_N06\_01212" 20142 "s59E25H2" 0 "hypothetical protein"  
"JS1\_N06\_01212" 20142 "s59E5H2" 0.004781471 "hypothetical protein"  
"JS1\_N06\_01212" 20142 "s63E6H2" 0.356588 "hypothetical protein"  
"JS1\_N06\_01213" 20143 "s59E13H2" 0.07161927 "Curli production assembly/transport component CsgG"  
"JS1\_N06\_01213" 20143 "s59E25H2" 0 "Curli production assembly/transport component CsgG"  
"JS1\_N06\_01213" 20143 "s59E5H2" 0.284453 "Curli production assembly/transport component CsgG"  
"JS1\_N06\_01213" 20143 "s63E6H2" 0.4978135 "Curli production assembly/transport component CsgG"  
"JS1\_N06\_01214" 20144 "s59E13H2" 0.03933825 "Tryptophan synthase beta chain 1"  
"JS1\_N06\_01214" 20144 "s59E25H2" 0.183223 "Tryptophan synthase beta chain 1"  
"JS1\_N06\_01214" 20144 "s59E5H2" 0.8278481 "Tryptophan synthase beta chain 1"  
"JS1\_N06\_01214" 20144 "s63E6H2" 7.889862 "Tryptophan synthase beta chain 1"  
"JS1\_N06\_01216" 20146 "s59E13H2" 0 "Gamma-glutamyl phosphate reductase"  
"JS1\_N06\_01216" 20146 "s59E25H2" 0 "Gamma-glutamyl phosphate reductase"  
"JS1\_N06\_01216" 20146 "s59E5H2" 0.03699358 "Gamma-glutamyl phosphate reductase"  
"JS1\_N06\_01216" 20146 "s63E6H2" 0 "Gamma-glutamyl phosphate reductase"  
"JS1\_N06\_01218" 20148 "s59E13H2" 0.0002093118 "hypothetical protein"  
"JS1\_N06\_01218" 20148 "s59E25H2" 0 "hypothetical protein"  
"JS1\_N06\_01218" 20148 "s59E5H2" 0.1127691 "hypothetical protein"  
"JS1\_N06\_01218" 20148 "s63E6H2" 2.135322 "hypothetical protein"  
"JS1\_N06\_01219" 20149 "s59E13H2" 1.754813 "Ribosomal protein S12 methylthiotransferase RimO"  
"JS1\_N06\_01219" 20149 "s59E25H2" 0.168691 "Ribosomal protein S12 methylthiotransferase RimO"  
"JS1\_N06\_01219" 20149 "s59E5H2" 0.6777751 "Ribosomal protein S12 methylthiotransferase RimO"  
"JS1\_N06\_01219" 20149 "s63E6H2" 2.561617 "Ribosomal protein S12 methylthiotransferase RimO"  
"JS1\_N06\_01220" 20150 "s59E13H2" 0 "Putative ski2-type helicase"  
"JS1\_N06\_01220" 20150 "s59E25H2" 0 "Putative ski2-type helicase"  
"JS1\_N06\_01220" 20150 "s59E5H2" 0.1066796 "Putative ski2-type helicase"  
"JS1\_N06\_01220" 20150 "s63E6H2" 0.05270506 "Putative ski2-type helicase"  
"JS1\_N06\_01221" 20151 "s59E13H2" 0.0116302 "hypothetical protein"  
"JS1\_N06\_01221" 20151 "s59E25H2" 0 "hypothetical protein"  
"JS1\_N06\_01221" 20151 "s59E5H2" 0.7801103 "hypothetical protein"  
"JS1\_N06\_01221" 20151 "s63E6H2" 0.2127177 "hypothetical protein"  
"JS1\_N06\_01222" 20152 "s59E13H2" 0.002441239 "hypothetical protein"  
"JS1\_N06\_01222" 20152 "s59E25H2" 0 "hypothetical protein"  
"JS1\_N06\_01222" 20152 "s59E5H2" 0.2376667 "hypothetical protein"  
"JS1\_N06\_01222" 20152 "s63E6H2" 1.035816 "hypothetical protein"  
"JS1\_N06\_01223" 20153 "s59E13H2" 0.04229752 "RNA polymerase factor sigma-70"  
"JS1\_N06\_01223" 20153 "s59E25H2" 0 "RNA polymerase factor sigma-70"  
"JS1\_N06\_01223" 20153 "s59E5H2" 0.02575377 "RNA polymerase factor sigma-70"  
"JS1\_N06\_01223" 20153 "s63E6H2" 5.876738 "RNA polymerase factor sigma-70"  
"JS1\_N06\_01224" 20154 "s59E13H2" 0.1521233 "putative DNA-binding protein"  
"JS1\_N06\_01224" 20154 "s59E25H2" 0 "putative DNA-binding protein"  
"JS1\_N06\_01224" 20154 "s59E5H2" 0.08509143 "putative DNA-binding protein"  
"JS1\_N06\_01224" 20154 "s63E6H2" 7.958425 "putative DNA-binding protein"  
"JS1\_N06\_01225" 20155 "s59E13H2" 0.01677884 "hypothetical protein"

"JS1\_N06\_01225" 20155 "s59E25H2" 0 "hypothetical protein"  
"JS1\_N06\_01225" 20155 "s59E5H2" 0.118886 "hypothetical protein"  
"JS1\_N06\_01225" 20155 "s63E6H2" 1.318993 "hypothetical protein"  
"JS1\_N06\_01226" 20156 "s59E13H2" 0.5273256 "hypothetical protein"  
"JS1\_N06\_01226" 20156 "s59E25H2" 0.2197802 "hypothetical protein"  
"JS1\_N06\_01226" 20156 "s59E5H2" 1.560127 "hypothetical protein"  
"JS1\_N06\_01226" 20156 "s63E6H2" 12.1676 "hypothetical protein"  
"JS1\_N06\_01227" 20157 "s59E13H2" 0.1835443 "hypothetical protein"  
"JS1\_N06\_01227" 20157 "s59E25H2" 0 "hypothetical protein"  
"JS1\_N06\_01227" 20157 "s59E5H2" 0.361471 "hypothetical protein"  
"JS1\_N06\_01227" 20157 "s63E6H2" 1.702724 "hypothetical protein"  
"JS1\_N06\_01228" 20158 "s59E13H2" 0.2849237 "Peptidase M15"  
"JS1\_N06\_01228" 20158 "s59E25H2" 0 "Peptidase M15"  
"JS1\_N06\_01228" 20158 "s59E5H2" 0.03204051 "Peptidase M15"  
"JS1\_N06\_01228" 20158 "s63E6H2" 0.6720567 "Peptidase M15"  
"JS1\_N06\_01229" 20159 "s59E13H2" 0.07182236 "hypothetical protein"  
"JS1\_N06\_01229" 20159 "s59E25H2" 0 "hypothetical protein"  
"JS1\_N06\_01229" 20159 "s59E5H2" 0.05598209 "hypothetical protein"  
"JS1\_N06\_01229" 20159 "s63E6H2" 0.04116613 "hypothetical protein"  
"JS1\_N06\_01230" 20160 "s59E13H2" 6.44823 "D-alanyl-D-alanine carboxypeptidase precursor"  
"JS1\_N06\_01230" 20160 "s59E25H2" 0 "D-alanyl-D-alanine carboxypeptidase precursor"  
"JS1\_N06\_01230" 20160 "s59E5H2" 0.258998 "D-alanyl-D-alanine carboxypeptidase precursor"  
"JS1\_N06\_01230" 20160 "s63E6H2" 0.3751867 "D-alanyl-D-alanine carboxypeptidase precursor"  
"JS1\_N06\_01231" 20161 "s59E13H2" 5.789195 "3-chloro-4-hydroxyphenylacetate reductive dehalogenase precursor"  
"JS1\_N06\_01231" 20161 "s59E25H2" 0 "3-chloro-4-hydroxyphenylacetate reductive dehalogenase precursor"  
"JS1\_N06\_01231" 20161 "s59E5H2" 0.5939112 "3-chloro-4-hydroxyphenylacetate reductive dehalogenase precursor"  
"JS1\_N06\_01231" 20161 "s63E6H2" 0.1938503 "3-chloro-4-hydroxyphenylacetate reductive dehalogenase precursor"  
"JS1\_N06\_01232" 20162 "s59E13H2" 0.04396622 "Phosphoserine phosphatase 1"  
"JS1\_N06\_01232" 20162 "s59E25H2" 0 "Phosphoserine phosphatase 1"  
"JS1\_N06\_01232" 20162 "s59E5H2" 0 "Phosphoserine phosphatase 1"  
"JS1\_N06\_01232" 20162 "s63E6H2" 0.03315464 "Phosphoserine phosphatase 1"  
"JS1\_N06\_01233" 20163 "s59E13H2" 0.7781617 "putative hydrolase"  
"JS1\_N06\_01233" 20163 "s59E25H2" 0 "putative hydrolase"  
"JS1\_N06\_01233" 20163 "s59E5H2" 0.05964234 "putative hydrolase"  
"JS1\_N06\_01233" 20163 "s63E6H2" 0.2098601 "putative hydrolase"  
"JS1\_N06\_01234" 20164 "s59E13H2" 3.511851 "Ferredoxin-2"  
"JS1\_N06\_01234" 20164 "s59E25H2" 0 "Ferredoxin-2"  
"JS1\_N06\_01234" 20164 "s59E5H2" 0.120789 "Ferredoxin-2"  
"JS1\_N06\_01234" 20164 "s63E6H2" 0.2460805 "Ferredoxin-2"  
"JS1\_N06\_01235" 20165 "s59E13H2" 6.506014 "Glucose-6-phosphate 3-dehydrogenase"  
"JS1\_N06\_01235" 20165 "s59E25H2" 0 "Glucose-6-phosphate 3-dehydrogenase"  
"JS1\_N06\_01235" 20165 "s59E5H2" 0.2876144 "Glucose-6-phosphate 3-dehydrogenase"  
"JS1\_N06\_01235" 20165 "s63E6H2" 0.5771904 "Glucose-6-phosphate 3-dehydrogenase"  
"JS1\_N06\_01236" 20166 "s59E13H2" 4.977542 "Pyruvate formate-lyase 1-activating enzyme"  
"JS1\_N06\_01236" 20166 "s59E25H2" 0 "Pyruvate formate-lyase 1-activating enzyme"  
"JS1\_N06\_01236" 20166 "s59E5H2" 0.06238127 "Pyruvate formate-lyase 1-activating enzyme"  
"JS1\_N06\_01236" 20166 "s63E6H2" 1.131649 "Pyruvate formate-lyase 1-activating enzyme"

"JS1\_N06\_01237" 20167 "s59E13H2" 0 "Helix-turn-helix domain protein"  
"JS1\_N06\_01237" 20167 "s59E25H2" 0 "Helix-turn-helix domain protein"  
"JS1\_N06\_01237" 20167 "s59E5H2" 0 "Helix-turn-helix domain protein"  
"JS1\_N06\_01237" 20167 "s63E6H2" 0 "Helix-turn-helix domain protein"  
"JS1\_N06\_01238" 20168 "s59E13H2" 0.03972676 "Cyclic di-GMP phosphodiesterase response regulator RpfG"  
"JS1\_N06\_01238" 20168 "s59E25H2" 0 "Cyclic di-GMP phosphodiesterase response regulator RpfG"  
"JS1\_N06\_01238" 20168 "s59E5H2" 0.6987393 "Cyclic di-GMP phosphodiesterase response regulator RpfG"  
"JS1\_N06\_01238" 20168 "s63E6H2" 0.16959 "Cyclic di-GMP phosphodiesterase response regulator RpfG"  
"JS1\_N06\_01239" 20169 "s59E13H2" 0.006036985 "Cyclic di-GMP phosphodiesterase response regulator RpfG"  
"JS1\_N06\_01239" 20169 "s59E25H2" 0 "Cyclic di-GMP phosphodiesterase response regulator RpfG"  
"JS1\_N06\_01239" 20169 "s59E5H2" 0.04348438 "Cyclic di-GMP phosphodiesterase response regulator RpfG"  
"JS1\_N06\_01239" 20169 "s63E6H2" 0.1675704 "Cyclic di-GMP phosphodiesterase response regulator RpfG"  
"JS1\_N06\_01240" 20170 "s59E13H2" 0.08907148 "putative diguanylate cyclase YegE"  
"JS1\_N06\_01240" 20170 "s59E25H2" 0 "putative diguanylate cyclase YegE"  
"JS1\_N06\_01240" 20170 "s59E5H2" 0.05167928 "putative diguanylate cyclase YegE"  
"JS1\_N06\_01240" 20170 "s63E6H2" 0.03578491 "putative diguanylate cyclase YegE"  
"JS1\_N06\_01245" 20175 "s59E13H2" 0 "hypothetical protein"  
"JS1\_N06\_01245" 20175 "s59E25H2" 0 "hypothetical protein"  
"JS1\_N06\_01245" 20175 "s59E5H2" 0 "hypothetical protein"  
"JS1\_N06\_01245" 20175 "s63E6H2" 0 "hypothetical protein"  
"JS1\_N06\_01247" 20177 "s59E13H2" 0.5751668 "LL-diaminopimelate aminotransferase"  
"JS1\_N06\_01247" 20177 "s59E25H2" 0 "LL-diaminopimelate aminotransferase"  
"JS1\_N06\_01247" 20177 "s59E5H2" 0.1063736 "LL-diaminopimelate aminotransferase"  
"JS1\_N06\_01247" 20177 "s63E6H2" 0.06067049 "LL-diaminopimelate aminotransferase"  
"JS1\_N06\_01249" 20179 "s59E13H2" 0 "ATP-dependent DNA helicase Rep"  
"JS1\_N06\_01249" 20179 "s59E25H2" 0 "ATP-dependent DNA helicase Rep"  
"JS1\_N06\_01249" 20179 "s59E5H2" 0 "ATP-dependent DNA helicase Rep"  
"JS1\_N06\_01249" 20179 "s63E6H2" 0 "ATP-dependent DNA helicase Rep"  
"JS1\_N06\_01255" 20185 "s59E13H2" 0.005045123 "V-type ATP synthase alpha chain"  
"JS1\_N06\_01255" 20185 "s59E25H2" 0 "V-type ATP synthase alpha chain"  
"JS1\_N06\_01255" 20185 "s59E5H2" 0.02797064 "V-type ATP synthase alpha chain"  
"JS1\_N06\_01255" 20185 "s63E6H2" 0.05466497 "V-type ATP synthase alpha chain"  
"JS1\_N06\_01259" 20189 "s59E13H2" 0.009084558 "ferredoxin"  
"JS1\_N06\_01259" 20189 "s59E25H2" 0 "ferredoxin"  
"JS1\_N06\_01259" 20189 "s59E5H2" 0.0651868 "ferredoxin"  
"JS1\_N06\_01259" 20189 "s63E6H2" 0.03014155 "ferredoxin"  
"JS1\_N06\_01260" 20190 "s59E13H2" 0 "hypothetical protein"  
"JS1\_N06\_01260" 20190 "s59E25H2" 0 "hypothetical protein"  
"JS1\_N06\_01260" 20190 "s59E5H2" 0 "hypothetical protein"  
"JS1\_N06\_01260" 20190 "s63E6H2" 0.001981398 "hypothetical protein"  
"JS1\_N06\_01261" 20191 "s59E13H2" 0 "3-oxoacyl-[acyl-carrier-protein] synthase 3"  
"JS1\_N06\_01261" 20191 "s59E25H2" 0 "3-oxoacyl-[acyl-carrier-protein] synthase 3"  
"JS1\_N06\_01261" 20191 "s59E5H2" 0 "3-oxoacyl-[acyl-carrier-protein] synthase 3"  
"JS1\_N06\_01261" 20191 "s63E6H2" 0.03135337 "3-oxoacyl-[acyl-carrier-protein] synthase 3"  
"JS1\_N06\_01262" 20192 "s59E13H2" 0 "1-deoxy-D-xylulose 5-phosphate reductoisomerase"  
"JS1\_N06\_01262" 20192 "s59E25H2" 0 "1-deoxy-D-xylulose 5-phosphate reductoisomerase"  
"JS1\_N06\_01262" 20192 "s59E5H2" 0 "1-deoxy-D-xylulose 5-phosphate reductoisomerase"



"JS1\_N06\_01262" 20192 "s63E6H2" 0 "1-deoxy-D-xylulose 5-phosphate reductoisomerase"  
"JS1\_N06\_01267" 20197 "s59E13H2" 0 "V-type ATP synthase subunit I"  
"JS1\_N06\_01267" 20197 "s59E25H2" 0 "V-type ATP synthase subunit I"  
"JS1\_N06\_01267" 20197 "s59E5H2" 0 "V-type ATP synthase subunit I"  
"JS1\_N06\_01267" 20197 "s63E6H2" 0.001812484 "V-type ATP synthase subunit I"  
"JS1\_N06\_01271" 20201 "s59E13H2" 0.008065875 "Calcineurin-like phosphoesterase superfamily domain protein"  
"JS1\_N06\_01271" 20201 "s59E25H2" 0 "Calcineurin-like phosphoesterase superfamily domain protein"  
"JS1\_N06\_01271" 20201 "s59E5H2" 0.02934095 "Calcineurin-like phosphoesterase superfamily domain protein"  
"JS1\_N06\_01271" 20201 "s63E6H2" 0.02211948 "Calcineurin-like phosphoesterase superfamily domain protein"  
"JS1\_N06\_01274" 20204 "s59E13H2" 2.567315 "hypothetical protein"  
"JS1\_N06\_01274" 20204 "s59E25H2" 0 "hypothetical protein"  
"JS1\_N06\_01274" 20204 "s59E5H2" 0.5737001 "hypothetical protein"  
"JS1\_N06\_01274" 20204 "s63E6H2" 0.5520872 "hypothetical protein"  
"JS1\_N06\_01276" 20206 "s59E13H2" 0 "hypothetical protein"  
"JS1\_N06\_01276" 20206 "s59E25H2" 0 "hypothetical protein"  
"JS1\_N06\_01276" 20206 "s59E5H2" 0 "hypothetical protein"  
"JS1\_N06\_01276" 20206 "s63E6H2" 0 "hypothetical protein"  
"JS1\_N06\_01278" 20208 "s59E13H2" 0 "hypothetical protein"  
"JS1\_N06\_01278" 20208 "s59E25H2" 0 "hypothetical protein"  
"JS1\_N06\_01278" 20208 "s59E5H2" 0 "hypothetical protein"  
"JS1\_N06\_01278" 20208 "s63E6H2" 0 "hypothetical protein"  
"JS1\_N06\_01279" 20209 "s59E13H2" 0 "hypothetical protein"  
"JS1\_N06\_01279" 20209 "s59E25H2" 0 "hypothetical protein"  
"JS1\_N06\_01279" 20209 "s59E5H2" 0 "hypothetical protein"  
"JS1\_N06\_01279" 20209 "s63E6H2" 0 "hypothetical protein"  
"JS1\_N06\_01280" 20210 "s59E13H2" 0 "hypothetical protein"  
"JS1\_N06\_01280" 20210 "s59E25H2" 0 "hypothetical protein"  
"JS1\_N06\_01280" 20210 "s59E5H2" 0 "hypothetical protein"  
"JS1\_N06\_01280" 20210 "s63E6H2" 0 "hypothetical protein"  
"JS1\_N06\_01281" 20211 "s59E13H2" 0 "hypothetical protein"  
"JS1\_N06\_01281" 20211 "s59E25H2" 0 "hypothetical protein"  
"JS1\_N06\_01281" 20211 "s59E5H2" 0.0125691 "hypothetical protein"  
"JS1\_N06\_01281" 20211 "s63E6H2" 0.2261045 "hypothetical protein"  
"JS1\_N06\_01282" 20212 "s59E13H2" 0.003493253 "hypothetical protein"  
"JS1\_N06\_01282" 20212 "s59E25H2" 0 "hypothetical protein"  
"JS1\_N06\_01282" 20212 "s59E5H2" 0.00302619 "hypothetical protein"  
"JS1\_N06\_01282" 20212 "s63E6H2" 0.0749779 "hypothetical protein"  
"JS1\_N06\_01283" 20213 "s59E13H2" 0.2755485 "hypothetical protein"  
"JS1\_N06\_01283" 20213 "s59E25H2" 0 "hypothetical protein"  
"JS1\_N06\_01283" 20213 "s59E5H2" 0 "hypothetical protein"  
"JS1\_N06\_01283" 20213 "s63E6H2" 0.003242288 "hypothetical protein"  
"JS1\_N06\_01287" 20217 "s59E13H2" 0 "hypothetical protein"  
"JS1\_N06\_01287" 20217 "s59E25H2" 0 "hypothetical protein"  
"JS1\_N06\_01287" 20217 "s59E5H2" 0 "hypothetical protein"  
"JS1\_N06\_01287" 20217 "s63E6H2" 0 "hypothetical protein"  
"JS1\_N06\_01288" 20218 "s59E13H2" 0 "hypothetical protein"  
"JS1\_N06\_01288" 20218 "s59E25H2" 0 "hypothetical protein"

"JS1\_N06\_01288" 20218 "s59E5H2" 0 "hypothetical protein"  
"JS1\_N06\_01288" 20218 "s63E6H2" 0 "hypothetical protein"  
"JS1\_N06\_01290" 20220 "s59E13H2" 0 "hypothetical protein"  
"JS1\_N06\_01290" 20220 "s59E25H2" 0 "hypothetical protein"  
"JS1\_N06\_01290" 20220 "s59E5H2" 0 "hypothetical protein"  
"JS1\_N06\_01290" 20220 "s63E6H2" 0 "hypothetical protein"  
"JS1\_N06\_01291" 20221 "s59E13H2" 0.003193895 "hypothetical protein"  
"JS1\_N06\_01291" 20221 "s59E25H2" 0 "hypothetical protein"  
"JS1\_N06\_01291" 20221 "s59E5H2" 0 "hypothetical protein"  
"JS1\_N06\_01291" 20221 "s63E6H2" 0 "hypothetical protein"  
"JS1\_N06\_01292" 20222 "s59E13H2" 0.003267021 "hypothetical protein"  
"JS1\_N06\_01292" 20222 "s59E25H2" 0 "hypothetical protein"  
"JS1\_N06\_01292" 20222 "s59E5H2" 0 "hypothetical protein"  
"JS1\_N06\_01292" 20222 "s63E6H2" 0 "hypothetical protein"  
"JS1\_N06\_01293" 20223 "s59E13H2" 0 "hypothetical protein"  
"JS1\_N06\_01293" 20223 "s59E25H2" 0 "hypothetical protein"  
"JS1\_N06\_01293" 20223 "s59E5H2" 0 "hypothetical protein"  
"JS1\_N06\_01293" 20223 "s63E6H2" 0 "hypothetical protein"  
"JS1\_N06\_01294" 20224 "s59E13H2" 0 "hypothetical protein"  
"JS1\_N06\_01294" 20224 "s59E25H2" 0 "hypothetical protein"  
"JS1\_N06\_01294" 20224 "s59E5H2" 0 "hypothetical protein"  
"JS1\_N06\_01294" 20224 "s63E6H2" 0 "hypothetical protein"  
"JS1\_N06\_01295" 20225 "s59E13H2" 0 "hypothetical protein"  
"JS1\_N06\_01295" 20225 "s59E25H2" 0 "hypothetical protein"  
"JS1\_N06\_01295" 20225 "s59E5H2" 0 "hypothetical protein"  
"JS1\_N06\_01295" 20225 "s63E6H2" 0 "hypothetical protein"  
"JS1\_N06\_01296" 20226 "s59E13H2" 0 "Helix-turn-helix domain protein"  
"JS1\_N06\_01296" 20226 "s59E25H2" 0 "Helix-turn-helix domain protein"  
"JS1\_N06\_01296" 20226 "s59E5H2" 0 "Helix-turn-helix domain protein"  
"JS1\_N06\_01296" 20226 "s63E6H2" 0 "Helix-turn-helix domain protein"  
"JS1\_N06\_01300" 20230 "s59E13H2" 0 "ATP-dependent DNA helicase PcrA"  
"JS1\_N06\_01300" 20230 "s59E25H2" 0 "ATP-dependent DNA helicase PcrA"  
"JS1\_N06\_01300" 20230 "s59E5H2" 0 "ATP-dependent DNA helicase PcrA"  
"JS1\_N06\_01300" 20230 "s63E6H2" 0 "ATP-dependent DNA helicase PcrA"  
"JS1\_N06\_01301" 20231 "s59E13H2" 0 "ATP-dependent DNA helicase Rep"  
"JS1\_N06\_01301" 20231 "s59E25H2" 0 "ATP-dependent DNA helicase Rep"  
"JS1\_N06\_01301" 20231 "s59E5H2" 0 "ATP-dependent DNA helicase Rep"  
"JS1\_N06\_01301" 20231 "s63E6H2" 0 "ATP-dependent DNA helicase Rep"  
"JS1\_N06\_01307" 20237 "s59E13H2" 0.05955726 "D-ribose-binding periplasmic protein precursor"  
"JS1\_N06\_01307" 20237 "s59E25H2" 0 "D-ribose-binding periplasmic protein precursor"  
"JS1\_N06\_01307" 20237 "s59E5H2" 0.08544934 "D-ribose-binding periplasmic protein precursor"  
"JS1\_N06\_01307" 20237 "s63E6H2" 1.381519 "D-ribose-binding periplasmic protein precursor"  
"JS1\_N06\_01308" 20238 "s59E13H2" 0 "Xanthine phosphoribosyltransferase"  
"JS1\_N06\_01308" 20238 "s59E25H2" 0 "Xanthine phosphoribosyltransferase"  
"JS1\_N06\_01308" 20238 "s59E5H2" 0.004471093 "Xanthine phosphoribosyltransferase"  
"JS1\_N06\_01308" 20238 "s63E6H2" 0.6096538 "Xanthine phosphoribosyltransferase"  
"JS1\_N06\_01309" 20239 "s59E13H2" 0.1402892 "Cyclic di-GMP phosphodiesterase Gmr"

"JS1\_N06\_01309" 20239 "s59E25H2" 0 "Cyclic di-GMP phosphodiesterase Gmr"  
"JS1\_N06\_01309" 20239 "s59E5H2" 0.2861223 "Cyclic di-GMP phosphodiesterase Gmr"  
"JS1\_N06\_01309" 20239 "s63E6H2" 2.663117 "Cyclic di-GMP phosphodiesterase Gmr"  
"JS1\_N06\_01310" 20240 "s59E13H2" 0.1490594 "Multidrug export protein MepA"  
"JS1\_N06\_01310" 20240 "s59E25H2" 0 "Multidrug export protein MepA"  
"JS1\_N06\_01310" 20240 "s59E5H2" 3.166644 "Multidrug export protein MepA"  
"JS1\_N06\_01310" 20240 "s63E6H2" 0.9235038 "Multidrug export protein MepA"  
"JS1\_N06\_01311" 20241 "s59E13H2" 0.09862908 "putative HTH-type transcriptional regulator YusO"  
"JS1\_N06\_01311" 20241 "s59E25H2" 0 "putative HTH-type transcriptional regulator YusO"  
"JS1\_N06\_01311" 20241 "s59E5H2" 0.4198341 "putative HTH-type transcriptional regulator YusO"  
"JS1\_N06\_01311" 20241 "s63E6H2" 1.042705 "putative HTH-type transcriptional regulator YusO"  
"JS1\_N06\_01313" 20243 "s59E13H2" 3.036094 "Pyruvate kinase"  
"JS1\_N06\_01313" 20243 "s59E25H2" 0 "Pyruvate kinase"  
"JS1\_N06\_01313" 20243 "s59E5H2" 1.823962 "Pyruvate kinase"  
"JS1\_N06\_01313" 20243 "s63E6H2" 2.888516 "Pyruvate kinase"  
"JS1\_N06\_01314" 20244 "s59E13H2" 3.87969 "CGGC domain protein"  
"JS1\_N06\_01314" 20244 "s59E25H2" 0 "CGGC domain protein"  
"JS1\_N06\_01314" 20244 "s59E5H2" 1.611662 "CGGC domain protein"  
"JS1\_N06\_01314" 20244 "s63E6H2" 1.394603 "CGGC domain protein"  
"JS1\_N06\_01315" 20245 "s59E13H2" 1.548676 "hypothetical protein"  
"JS1\_N06\_01315" 20245 "s59E25H2" 1 "hypothetical protein"  
"JS1\_N06\_01315" 20245 "s59E5H2" 0.8999896 "hypothetical protein"  
"JS1\_N06\_01315" 20245 "s63E6H2" 0.4444437 "hypothetical protein"  
"JS1\_N06\_01316" 20246 "s59E13H2" 2.039062 "hypothetical protein"  
"JS1\_N06\_01316" 20246 "s59E25H2" 0.07407407 "hypothetical protein"  
"JS1\_N06\_01316" 20246 "s59E5H2" 1.16039 "hypothetical protein"  
"JS1\_N06\_01316" 20246 "s63E6H2" 0.9060018 "hypothetical protein"  
"JS1\_N06\_01317" 20247 "s59E13H2" 0.5937028 "hypothetical protein"  
"JS1\_N06\_01317" 20247 "s59E25H2" 0 "hypothetical protein"  
"JS1\_N06\_01317" 20247 "s59E5H2" 1.173912 "hypothetical protein"  
"JS1\_N06\_01317" 20247 "s63E6H2" 0.8158423 "hypothetical protein"  
"JS1\_N06\_01318" 20248 "s59E13H2" 5.035939 "ABC transporter ATP-binding protein YtrB"  
"JS1\_N06\_01318" 20248 "s59E25H2" 0 "ABC transporter ATP-binding protein YtrB"  
"JS1\_N06\_01318" 20248 "s59E5H2" 3.605204 "ABC transporter ATP-binding protein YtrB"  
"JS1\_N06\_01318" 20248 "s63E6H2" 3.771589 "ABC transporter ATP-binding protein YtrB"  
"JS1\_N06\_01319" 20249 "s59E13H2" 3.428552 "HTH-type transcriptional repressor YtrA"  
"JS1\_N06\_01319" 20249 "s59E25H2" 0 "HTH-type transcriptional repressor YtrA"  
"JS1\_N06\_01319" 20249 "s59E5H2" 1.445662 "HTH-type transcriptional repressor YtrA"  
"JS1\_N06\_01319" 20249 "s63E6H2" 3.722015 "HTH-type transcriptional repressor YtrA"  
"JS1\_N06\_01320" 20250 "s59E13H2" 0.05753425 "dTDP-3-amino-3,4,6-trideoxy-alpha-D-glucopyranose"  
"JS1\_N06\_01320" 20250 "s59E25H2" 0 "dTDP-3-amino-3,4,6-trideoxy-alpha-D-glucopyranose"  
"JS1\_N06\_01320" 20250 "s59E5H2" 0.3040444 "dTDP-3-amino-3,4,6-trideoxy-alpha-D-glucopyranose"  
"JS1\_N06\_01320" 20250 "s63E6H2" 0.7051737 "dTDP-3-amino-3,4,6-trideoxy-alpha-D-glucopyranose"  
"JS1\_N06\_01321" 20251 "s59E13H2" 0 "bifunctional 3-demethylubiquinone-9 3-methyltransferase/ 2-octaprenyl-6-hydroxy phenol methylase"  
"JS1\_N06\_01321" 20251 "s59E25H2" 0 "bifunctional 3-demethylubiquinone-9 3-methyltransferase/ 2-octaprenyl-6-hydroxy phenol methylase"  
"JS1\_N06\_01321" 20251 "s59E5H2" 0.0354422 "bifunctional 3-demethylubiquinone-9 3-methyltransferase/ 2-octaprenyl-6-hydroxy phenol methylase"  
"JS1\_N06\_01321" 20251 "s63E6H2" 0.1011817 "bifunctional 3-demethylubiquinone-9 3-methyltransferase/ 2-octaprenyl-6-hydroxy phenol methylase"

"JS1\_N06\_01322" 20252 "s59E13H2" 0 "hypothetical protein"  
"JS1\_N06\_01322" 20252 "s59E25H2" 0 "hypothetical protein"  
"JS1\_N06\_01322" 20252 "s59E5H2" 0.0151389 "hypothetical protein"  
"JS1\_N06\_01322" 20252 "s63E6H2" 0.05943698 "hypothetical protein"  
"JS1\_N06\_01323" 20253 "s59E13H2" 0.001517363 "N-acetylglucosamine-6-phosphate deacetylase"  
"JS1\_N06\_01323" 20253 "s59E25H2" 0 "N-acetylglucosamine-6-phosphate deacetylase"  
"JS1\_N06\_01323" 20253 "s59E5H2" 0.03392298 "N-acetylglucosamine-6-phosphate deacetylase"  
"JS1\_N06\_01323" 20253 "s63E6H2" 0.5083952 "N-acetylglucosamine-6-phosphate deacetylase"  
"JS1\_N06\_01324" 20254 "s59E13H2" 0 "Ribose import ATP-binding protein RbsA"  
"JS1\_N06\_01324" 20254 "s59E25H2" 0 "Ribose import ATP-binding protein RbsA"  
"JS1\_N06\_01324" 20254 "s59E5H2" 0.0247159 "Ribose import ATP-binding protein RbsA"  
"JS1\_N06\_01324" 20254 "s63E6H2" 0.141075 "Ribose import ATP-binding protein RbsA"  
"JS1\_N06\_01325" 20255 "s59E13H2" 0 "Ribose transport system permease protein RbsC"  
"JS1\_N06\_01325" 20255 "s59E25H2" 0 "Ribose transport system permease protein RbsC"  
"JS1\_N06\_01325" 20255 "s59E5H2" 0.1149821 "Ribose transport system permease protein RbsC"  
"JS1\_N06\_01325" 20255 "s63E6H2" 0.4620332 "Ribose transport system permease protein RbsC"  
"JS1\_N06\_01326" 20256 "s59E13H2" 0 "Glyoxylate reductase"  
"JS1\_N06\_01326" 20256 "s59E25H2" 0 "Glyoxylate reductase"  
"JS1\_N06\_01326" 20256 "s59E5H2" 0.3960024 "Glyoxylate reductase"  
"JS1\_N06\_01326" 20256 "s63E6H2" 0.4720515 "Glyoxylate reductase"  
"JS1\_N06\_01327" 20257 "s59E13H2" 0 "Inosose dehydratase"  
"JS1\_N06\_01327" 20257 "s59E25H2" 0 "Inosose dehydratase"  
"JS1\_N06\_01327" 20257 "s59E5H2" 0.5682753 "Inosose dehydratase"  
"JS1\_N06\_01327" 20257 "s63E6H2" 0.3889587 "Inosose dehydratase"  
"JS1\_N06\_01328" 20258 "s59E13H2" 0.006498418 "hypothetical protein"  
"JS1\_N06\_01328" 20258 "s59E25H2" 0 "hypothetical protein"  
"JS1\_N06\_01328" 20258 "s59E5H2" 0.1500156 "hypothetical protein"  
"JS1\_N06\_01328" 20258 "s63E6H2" 0 "hypothetical protein"  
"JS1\_N06\_01329" 20259 "s59E13H2" 0.004712741 "Tripartite tricarboxylate transporter family receptor"  
"JS1\_N06\_01329" 20259 "s59E25H2" 0 "Tripartite tricarboxylate transporter family receptor"  
"JS1\_N06\_01329" 20259 "s59E5H2" 0.2210793 "Tripartite tricarboxylate transporter family receptor"  
"JS1\_N06\_01329" 20259 "s63E6H2" 0 "Tripartite tricarboxylate transporter family receptor"  
"JS1\_N06\_01332" 20262 "s59E13H2" 0.002191736 "Thioredoxin reductase"  
"JS1\_N06\_01332" 20262 "s59E25H2" 0 "Thioredoxin reductase"  
"JS1\_N06\_01332" 20262 "s59E5H2" 0.02942598 "Thioredoxin reductase"  
"JS1\_N06\_01332" 20262 "s63E6H2" 0.002849667 "Thioredoxin reductase"  
"JS1\_N06\_01333" 20263 "s59E13H2" 0 "Thioredoxin reductase"  
"JS1\_N06\_01333" 20263 "s59E25H2" 0 "Thioredoxin reductase"  
"JS1\_N06\_01333" 20263 "s59E5H2" 0 "Thioredoxin reductase"  
"JS1\_N06\_01333" 20263 "s63E6H2" 0 "Thioredoxin reductase"  
"JS1\_N06\_01334" 20264 "s59E13H2" 0 "hypothetical protein"  
"JS1\_N06\_01334" 20264 "s59E25H2" 0 "hypothetical protein"  
"JS1\_N06\_01334" 20264 "s59E5H2" 0 "hypothetical protein"  
"JS1\_N06\_01334" 20264 "s63E6H2" 0.02603824 "hypothetical protein"  
"JS1\_N06\_01336" 20266 "s59E13H2" 0 "hypothetical protein"  
"JS1\_N06\_01336" 20266 "s59E25H2" 0 "hypothetical protein"  
"JS1\_N06\_01336" 20266 "s59E5H2" 0 "hypothetical protein"

"JS1\_N06\_01336" 20266 "s63E6H2" 9.184951e-05 "hypothetical protein"  
"JS1\_N06\_01337" 20267 "s59E13H2" 0 "hypothetical protein"  
"JS1\_N06\_01337" 20267 "s59E25H2" 0 "hypothetical protein"  
"JS1\_N06\_01337" 20267 "s59E5H2" 0 "hypothetical protein"  
"JS1\_N06\_01337" 20267 "s63E6H2" 0.007742001 "hypothetical protein"  
"JS1\_N06\_01339" 20269 "s59E13H2" 0 "GDP-6-deoxy-D-mannose reductase"  
"JS1\_N06\_01339" 20269 "s59E25H2" 0 "GDP-6-deoxy-D-mannose reductase"  
"JS1\_N06\_01339" 20269 "s59E5H2" 0 "GDP-6-deoxy-D-mannose reductase"  
"JS1\_N06\_01339" 20269 "s63E6H2" 0.0006584299 "GDP-6-deoxy-D-mannose reductase"  
"JS1\_N06\_01340" 20270 "s59E13H2" 0 "GDP-mannose 4,6-dehydratase"  
"JS1\_N06\_01340" 20270 "s59E25H2" 0 "GDP-mannose 4,6-dehydratase"  
"JS1\_N06\_01340" 20270 "s59E5H2" 0 "GDP-mannose 4,6-dehydratase"  
"JS1\_N06\_01340" 20270 "s63E6H2" 0.004278019 "GDP-mannose 4,6-dehydratase"  
"JS1\_N06\_01344" 20274 "s59E13H2" 0 "30S ribosomal protein S16"  
"JS1\_N06\_01344" 20274 "s59E25H2" 0 "30S ribosomal protein S16"  
"JS1\_N06\_01344" 20274 "s59E5H2" 0 "30S ribosomal protein S16"  
"JS1\_N06\_01344" 20274 "s63E6H2" 0.01665091 "30S ribosomal protein S16"  
"JS1\_N06\_01346" 20276 "s59E13H2" 0 "16S rRNA-processing protein RimM"  
"JS1\_N06\_01346" 20276 "s59E25H2" 0 "16S rRNA-processing protein RimM"  
"JS1\_N06\_01346" 20276 "s59E5H2" 0 "16S rRNA-processing protein RimM"  
"JS1\_N06\_01346" 20276 "s63E6H2" 0.001751236 "16S rRNA-processing protein RimM"  
"JS1\_N06\_01347" 20277 "s59E13H2" 0 "aminoimidazole riboside kinase"  
"JS1\_N06\_01347" 20277 "s59E25H2" 0 "aminoimidazole riboside kinase"  
"JS1\_N06\_01347" 20277 "s59E5H2" 0.04046202 "aminoimidazole riboside kinase"  
"JS1\_N06\_01347" 20277 "s63E6H2" 0 "aminoimidazole riboside kinase"  
"JS1\_N06\_01348" 20278 "s59E13H2" 0.01111648 "Serine hydroxymethyltransferase"  
"JS1\_N06\_01348" 20278 "s59E25H2" 0 "Serine hydroxymethyltransferase"  
"JS1\_N06\_01348" 20278 "s59E5H2" 0.122863 "Serine hydroxymethyltransferase"  
"JS1\_N06\_01348" 20278 "s63E6H2" 0.1081787 "Serine hydroxymethyltransferase"  
"JS1\_N06\_01349" 20279 "s59E13H2" 0.004630639 "Xaa-Pro dipeptidase"  
"JS1\_N06\_01349" 20279 "s59E25H2" 0 "Xaa-Pro dipeptidase"  
"JS1\_N06\_01349" 20279 "s59E5H2" 0.02094203 "Xaa-Pro dipeptidase"  
"JS1\_N06\_01349" 20279 "s63E6H2" 0.01690188 "Xaa-Pro dipeptidase"  
"JS1\_N06\_01350" 20280 "s59E13H2" 0 "Shikimate kinase 1"  
"JS1\_N06\_01350" 20280 "s59E25H2" 0 "Shikimate kinase 1"  
"JS1\_N06\_01350" 20280 "s59E5H2" 0 "Shikimate kinase 1"  
"JS1\_N06\_01350" 20280 "s63E6H2" 0.0179368 "Shikimate kinase 1"  
"JS1\_N06\_01351" 20281 "s59E13H2" 0.01110509 "Ribosomal protein S12 methylthiotransferase RimO"  
"JS1\_N06\_01351" 20281 "s59E25H2" 0 "Ribosomal protein S12 methylthiotransferase RimO"  
"JS1\_N06\_01351" 20281 "s59E5H2" 0.03481714 "Ribosomal protein S12 methylthiotransferase RimO"  
"JS1\_N06\_01351" 20281 "s63E6H2" 0.04829884 "Ribosomal protein S12 methylthiotransferase RimO"  
"JS1\_N06\_01352" 20282 "s59E13H2" 0.004919318 "hypothetical protein"  
"JS1\_N06\_01352" 20282 "s59E25H2" 0 "hypothetical protein"  
"JS1\_N06\_01352" 20282 "s59E5H2" 0 "hypothetical protein"  
"JS1\_N06\_01352" 20282 "s63E6H2" 0.02833478 "hypothetical protein"  
"JS1\_N06\_01353" 20283 "s59E13H2" 0.3333591 "hypothetical protein"  
"JS1\_N06\_01353" 20283 "s59E25H2" 0 "hypothetical protein"

"JS1\_N06\_01353" 20283 "s59E5H2" 0.02386727 "hypothetical protein"  
"JS1\_N06\_01353" 20283 "s63E6H2" 0.03774993 "hypothetical protein"  
"JS1\_N06\_01355" 20285 "s59E13H2" 0 "Adenylate cyclase 2"  
"JS1\_N06\_01355" 20285 "s59E25H2" 0 "Adenylate cyclase 2"  
"JS1\_N06\_01355" 20285 "s59E5H2" 0.01264252 "Adenylate cyclase 2"  
"JS1\_N06\_01355" 20285 "s63E6H2" 0.0475786 "Adenylate cyclase 2"  
"JS1\_N06\_01356" 20286 "s59E13H2" 1.628733 "hypothetical protein"  
"JS1\_N06\_01356" 20286 "s59E25H2" 0 "hypothetical protein"  
"JS1\_N06\_01356" 20286 "s59E5H2" 0.008406084 "hypothetical protein"  
"JS1\_N06\_01356" 20286 "s63E6H2" 0.05536861 "hypothetical protein"  
"JS1\_N06\_01357" 20287 "s59E13H2" 2.408869 "hypothetical protein"  
"JS1\_N06\_01357" 20287 "s59E25H2" 0 "hypothetical protein"  
"JS1\_N06\_01357" 20287 "s59E5H2" 0.00471614 "hypothetical protein"  
"JS1\_N06\_01357" 20287 "s63E6H2" 0.06047972 "hypothetical protein"  
"JS1\_N06\_01358" 20288 "s59E13H2" 0 "HEPN domain protein"  
"JS1\_N06\_01358" 20288 "s59E25H2" 0 "HEPN domain protein"  
"JS1\_N06\_01358" 20288 "s59E5H2" 0.006847704 "HEPN domain protein"  
"JS1\_N06\_01358" 20288 "s63E6H2" 0.02597233 "HEPN domain protein"  
"JS1\_N06\_01359" 20289 "s59E13H2" 0 "Nucleotidyltransferase domain protein"  
"JS1\_N06\_01359" 20289 "s59E25H2" 0 "Nucleotidyltransferase domain protein"  
"JS1\_N06\_01359" 20289 "s59E5H2" 0.02156214 "Nucleotidyltransferase domain protein"  
"JS1\_N06\_01359" 20289 "s63E6H2" 0.03852223 "Nucleotidyltransferase domain protein"  
"JS1\_N06\_01362" 20292 "s59E13H2" 0.0974203 "hypothetical protein"  
"JS1\_N06\_01362" 20292 "s59E25H2" 0 "hypothetical protein"  
"JS1\_N06\_01362" 20292 "s59E5H2" 0.0969767 "hypothetical protein"  
"JS1\_N06\_01362" 20292 "s63E6H2" 0.04303961 "hypothetical protein"  
"JS1\_N06\_01363" 20293 "s59E13H2" 0.02956508 "Type IV pilus biogenesis and competence protein PilQ precursor"  
"JS1\_N06\_01363" 20293 "s59E25H2" 0 "Type IV pilus biogenesis and competence protein PilQ precursor"  
"JS1\_N06\_01363" 20293 "s59E5H2" 0.02799724 "Type IV pilus biogenesis and competence protein PilQ precursor"  
"JS1\_N06\_01363" 20293 "s63E6H2" 0.02913993 "Type IV pilus biogenesis and competence protein PilQ precursor"  
"JS1\_N06\_01364" 20294 "s59E13H2" 0.001950166 "hypothetical protein"  
"JS1\_N06\_01364" 20294 "s59E25H2" 0 "hypothetical protein"  
"JS1\_N06\_01364" 20294 "s59E5H2" 0.01805512 "hypothetical protein"  
"JS1\_N06\_01364" 20294 "s63E6H2" 0.0166849 "hypothetical protein"  
"JS1\_N06\_01365" 20295 "s59E13H2" 0.01096602 "Pilus assembly protein, PilO"  
"JS1\_N06\_01365" 20295 "s59E25H2" 0 "Pilus assembly protein, PilO"  
"JS1\_N06\_01365" 20295 "s59E5H2" 0.02237511 "Pilus assembly protein, PilO"  
"JS1\_N06\_01365" 20295 "s63E6H2" 0.01092081 "Pilus assembly protein, PilO"  
"JS1\_N06\_01366" 20296 "s59E13H2" 0.04216291 "hypothetical protein"  
"JS1\_N06\_01366" 20296 "s59E25H2" 0 "hypothetical protein"  
"JS1\_N06\_01366" 20296 "s59E5H2" 0.03885669 "hypothetical protein"  
"JS1\_N06\_01366" 20296 "s63E6H2" 0.0229126 "hypothetical protein"  
"JS1\_N06\_01367" 20297 "s59E13H2" 0.0002808361 "Competence protein A"  
"JS1\_N06\_01367" 20297 "s59E25H2" 0 "Competence protein A"  
"JS1\_N06\_01367" 20297 "s59E5H2" 0.002146342 "Competence protein A"  
"JS1\_N06\_01367" 20297 "s63E6H2" 0.002505923 "Competence protein A"  
"JS1\_N06\_01368" 20298 "s59E13H2" 0 "hypothetical protein"

"JS1\_N06\_01368" 20298 "s59E25H2" 0 "hypothetical protein"  
"JS1\_N06\_01368" 20298 "s59E5H2" 0 "hypothetical protein"  
"JS1\_N06\_01368" 20298 "s63E6H2" 0.0105718 "hypothetical protein"  
"JS1\_N06\_01369" 20299 "s59E13H2" 0 "hypothetical protein"  
"JS1\_N06\_01369" 20299 "s59E25H2" 0 "hypothetical protein"  
"JS1\_N06\_01369" 20299 "s59E5H2" 0 "hypothetical protein"  
"JS1\_N06\_01369" 20299 "s63E6H2" 0 "hypothetical protein"  
"JS1\_N06\_01370" 20300 "s59E13H2" 0 "Bacterial Ig-like domain (group 1)"  
"JS1\_N06\_01370" 20300 "s59E25H2" 0 "Bacterial Ig-like domain (group 1)"  
"JS1\_N06\_01370" 20300 "s59E5H2" 0 "Bacterial Ig-like domain (group 1)"  
"JS1\_N06\_01370" 20300 "s63E6H2" 0.02213364 "Bacterial Ig-like domain (group 1)"  
"JS1\_N06\_01371" 20301 "s59E13H2" 0 "hypothetical protein"  
"JS1\_N06\_01371" 20301 "s59E25H2" 0 "hypothetical protein"  
"JS1\_N06\_01371" 20301 "s59E5H2" 0 "hypothetical protein"  
"JS1\_N06\_01371" 20301 "s63E6H2" 0.01823787 "hypothetical protein"  
"JS1\_N06\_01376" 20306 "s59E13H2" 0.005027164 "Transposase IS116/IS110/IS902 family protein"  
"JS1\_N06\_01376" 20306 "s59E25H2" 0 "Transposase IS116/IS110/IS902 family protein"  
"JS1\_N06\_01376" 20306 "s59E5H2" 0.1568507 "Transposase IS116/IS110/IS902 family protein"  
"JS1\_N06\_01376" 20306 "s63E6H2" 0.4105547 "Transposase IS116/IS110/IS902 family protein"  
"JS1\_N06\_01378" 20308 "s59E13H2" 0 "hypothetical protein"  
"JS1\_N06\_01378" 20308 "s59E25H2" 0 "hypothetical protein"  
"JS1\_N06\_01378" 20308 "s59E5H2" 0 "hypothetical protein"  
"JS1\_N06\_01378" 20308 "s63E6H2" 0.009654657 "hypothetical protein"  
"JS1\_N06\_01379" 20309 "s59E13H2" 0 "Ion channel"  
"JS1\_N06\_01379" 20309 "s59E25H2" 0 "Ion channel"  
"JS1\_N06\_01379" 20309 "s59E5H2" 0 "Ion channel"  
"JS1\_N06\_01379" 20309 "s63E6H2" 0 "Ion channel"  
"JS1\_N06\_01380" 20310 "s59E13H2" 0 "Malonyl CoA-acyl carrier protein transacylase"  
"JS1\_N06\_01380" 20310 "s59E25H2" 0 "Malonyl CoA-acyl carrier protein transacylase"  
"JS1\_N06\_01380" 20310 "s59E5H2" 0 "Malonyl CoA-acyl carrier protein transacylase"  
"JS1\_N06\_01380" 20310 "s63E6H2" 0.0105596 "Malonyl CoA-acyl carrier protein transacylase"  
"JS1\_N06\_01381" 20311 "s59E13H2" 0 "Acetate kinase"  
"JS1\_N06\_01381" 20311 "s59E25H2" 0 "Acetate kinase"  
"JS1\_N06\_01381" 20311 "s59E5H2" 0 "Acetate kinase"  
"JS1\_N06\_01381" 20311 "s63E6H2" 0.01141418 "Acetate kinase"  
"JS1\_N06\_01389" 20319 "s59E13H2" 0.001800613 "Putative ski2-type helicase"  
"JS1\_N06\_01389" 20319 "s59E25H2" 0 "Putative ski2-type helicase"  
"JS1\_N06\_01389" 20319 "s59E5H2" 0.09106549 "Putative ski2-type helicase"  
"JS1\_N06\_01389" 20319 "s63E6H2" 0.08455374 "Putative ski2-type helicase"  
"JS1\_N06\_01390" 20320 "s59E13H2" 0.1396175 "Molybdopterin-guanine dinucleotide biosynthesis adapter protein"  
"JS1\_N06\_01390" 20320 "s59E25H2" 0 "Molybdopterin-guanine dinucleotide biosynthesis adapter protein"  
"JS1\_N06\_01390" 20320 "s59E5H2" 0.1685887 "Molybdopterin-guanine dinucleotide biosynthesis adapter protein"  
"JS1\_N06\_01390" 20320 "s63E6H2" 0.1160486 "Molybdopterin-guanine dinucleotide biosynthesis adapter protein"  
"JS1\_N06\_01405" 20335 "s59E13H2" 0 "4-hydroxy-3-methylbut-2-en-1-yl diphosphate synthase"  
"JS1\_N06\_01405" 20335 "s59E25H2" 0 "4-hydroxy-3-methylbut-2-en-1-yl diphosphate synthase"  
"JS1\_N06\_01405" 20335 "s59E5H2" 0 "4-hydroxy-3-methylbut-2-en-1-yl diphosphate synthase"  
"JS1\_N06\_01405" 20335 "s63E6H2" 0 "4-hydroxy-3-methylbut-2-en-1-yl diphosphate synthase"

"JS1\_N06\_01406" 20336 "s59E13H2" 0.02073039 "Dipeptide transport system permease protein DppB"  
"JS1\_N06\_01406" 20336 "s59E25H2" 0 "Dipeptide transport system permease protein DppB"  
"JS1\_N06\_01406" 20336 "s59E5H2" 0.09787083 "Dipeptide transport system permease protein DppB"  
"JS1\_N06\_01406" 20336 "s63E6H2" 0.01840343 "Dipeptide transport system permease protein DppB"  
"JS1\_N06\_01407" 20337 "s59E13H2" 0.00203684 "Oligopeptide-binding protein OppA precursor"  
"JS1\_N06\_01407" 20337 "s59E25H2" 0 "Oligopeptide-binding protein OppA precursor"  
"JS1\_N06\_01407" 20337 "s59E5H2" 0.04709988 "Oligopeptide-binding protein OppA precursor"  
"JS1\_N06\_01407" 20337 "s63E6H2" 0.03025251 "Oligopeptide-binding protein OppA precursor"  
"JS1\_N06\_01408" 20338 "s59E13H2" 0 "hypothetical protein"  
"JS1\_N06\_01408" 20338 "s59E25H2" 0 "hypothetical protein"  
"JS1\_N06\_01408" 20338 "s59E5H2" 0 "hypothetical protein"  
"JS1\_N06\_01408" 20338 "s63E6H2" 0.007852416 "hypothetical protein"  
"JS1\_N06\_01409" 20339 "s59E13H2" 0.1017005 "ATP-dependent zinc metalloprotease FtsH"  
"JS1\_N06\_01409" 20339 "s59E25H2" 0 "ATP-dependent zinc metalloprotease FtsH"  
"JS1\_N06\_01409" 20339 "s59E5H2" 0.1600973 "ATP-dependent zinc metalloprotease FtsH"  
"JS1\_N06\_01409" 20339 "s63E6H2" 0.1303357 "ATP-dependent zinc metalloprotease FtsH"  
"JS1\_N06\_01410" 20340 "s59E13H2" 0 "Hypoxanthine-guanine phosphoribosyltransferase"  
"JS1\_N06\_01410" 20340 "s59E25H2" 0 "Hypoxanthine-guanine phosphoribosyltransferase"  
"JS1\_N06\_01410" 20340 "s59E5H2" 0 "Hypoxanthine-guanine phosphoribosyltransferase"  
"JS1\_N06\_01410" 20340 "s63E6H2" 0.020571 "Hypoxanthine-guanine phosphoribosyltransferase"  
"JS1\_N06\_01411" 20341 "s59E13H2" 0.003562107 "tRNA(Ile)-lysidine synthase"  
"JS1\_N06\_01411" 20341 "s59E25H2" 0 "tRNA(Ile)-lysidine synthase"  
"JS1\_N06\_01411" 20341 "s59E5H2" 0.01051306 "tRNA(Ile)-lysidine synthase"  
"JS1\_N06\_01411" 20341 "s63E6H2" 0.009947928 "tRNA(Ile)-lysidine synthase"  
"JS1\_N06\_01422" 20352 "s59E13H2" 0.001718441 "Putative peptidoglycan binding domain protein"  
"JS1\_N06\_01422" 20352 "s59E25H2" 0 "Putative peptidoglycan binding domain protein"  
"JS1\_N06\_01422" 20352 "s59E5H2" 0.002622486 "Putative peptidoglycan binding domain protein"  
"JS1\_N06\_01422" 20352 "s63E6H2" 0.1843098 "Putative peptidoglycan binding domain protein"  
"JS1\_N06\_01423" 20353 "s59E13H2" 0 "putative oxidoreductase YcjS"  
"JS1\_N06\_01423" 20353 "s59E25H2" 0 "putative oxidoreductase YcjS"  
"JS1\_N06\_01423" 20353 "s59E5H2" 0 "putative oxidoreductase YcjS"  
"JS1\_N06\_01423" 20353 "s63E6H2" 0.00720093 "putative oxidoreductase YcjS"  
"JS1\_N06\_01424" 20354 "s59E13H2" 0 "dTDP-glucose 4,6-dehydratase"  
"JS1\_N06\_01424" 20354 "s59E25H2" 0 "dTDP-glucose 4,6-dehydratase"  
"JS1\_N06\_01424" 20354 "s59E5H2" 0 "dTDP-glucose 4,6-dehydratase"  
"JS1\_N06\_01424" 20354 "s63E6H2" 0 "dTDP-glucose 4,6-dehydratase"  
"JS1\_N06\_01425" 20355 "s59E13H2" 0 "phosphodiesterase"  
"JS1\_N06\_01425" 20355 "s59E25H2" 0 "phosphodiesterase"  
"JS1\_N06\_01425" 20355 "s59E5H2" 0 "phosphodiesterase"  
"JS1\_N06\_01425" 20355 "s63E6H2" 0 "phosphodiesterase"  
"JS1\_N06\_01426" 20356 "s59E13H2" 0 "Coenzyme gamma-F420-2:alpha-L-glutamate ligase"  
"JS1\_N06\_01426" 20356 "s59E25H2" 0 "Coenzyme gamma-F420-2:alpha-L-glutamate ligase"  
"JS1\_N06\_01426" 20356 "s59E5H2" 0 "Coenzyme gamma-F420-2:alpha-L-glutamate ligase"  
"JS1\_N06\_01426" 20356 "s63E6H2" 0 "Coenzyme gamma-F420-2:alpha-L-glutamate ligase"  
"JS1\_N06\_01427" 20357 "s59E13H2" 0 "bifunctional 3-demethylubiquinone-9 3-methyltransferase/ 2-octaprenyl-6-hydroxy phenol methylase"  
"JS1\_N06\_01427" 20357 "s59E25H2" 0 "bifunctional 3-demethylubiquinone-9 3-methyltransferase/ 2-octaprenyl-6-hydroxy phenol methylase"  
"JS1\_N06\_01427" 20357 "s59E5H2" 0 "bifunctional 3-demethylubiquinone-9 3-methyltransferase/ 2-octaprenyl-6-hydroxy phenol methylase"



"JS1\_N06\_01427" 20357 "s63E6H2" 0 "bifunctional 3-demethylubiquinone-9 3-methyltransferase/ 2-octaprenyl-6-hydroxy phenol methylase"  
"JS1\_N06\_01428" 20358 "s59E13H2" 0 "Imidazole glycerol phosphate synthase subunit HisH 1"  
"JS1\_N06\_01428" 20358 "s59E25H2" 0 "Imidazole glycerol phosphate synthase subunit HisH 1"  
"JS1\_N06\_01428" 20358 "s59E5H2" 0 "Imidazole glycerol phosphate synthase subunit HisH 1"  
"JS1\_N06\_01428" 20358 "s63E6H2" 0 "Imidazole glycerol phosphate synthase subunit HisH 1"  
"JS1\_N06\_01429" 20359 "s59E13H2" 0 "tRNA(Ile)-lysidine synthase"  
"JS1\_N06\_01429" 20359 "s59E25H2" 0 "tRNA(Ile)-lysidine synthase"  
"JS1\_N06\_01429" 20359 "s59E5H2" 0 "tRNA(Ile)-lysidine synthase"  
"JS1\_N06\_01429" 20359 "s63E6H2" 0 "tRNA(Ile)-lysidine synthase"  
"JS1\_N06\_01430" 20360 "s59E13H2" 0 "Glycosyl transferases group 1"  
"JS1\_N06\_01430" 20360 "s59E25H2" 0 "Glycosyl transferases group 1"  
"JS1\_N06\_01430" 20360 "s59E5H2" 0 "Glycosyl transferases group 1"  
"JS1\_N06\_01430" 20360 "s63E6H2" 0.00477403 "Glycosyl transferases group 1"  
"JS1\_N06\_01431" 20361 "s59E13H2" 0 "Polysaccharide biosynthesis protein"  
"JS1\_N06\_01431" 20361 "s59E25H2" 0 "Polysaccharide biosynthesis protein"  
"JS1\_N06\_01431" 20361 "s59E5H2" 0 "Polysaccharide biosynthesis protein"  
"JS1\_N06\_01431" 20361 "s63E6H2" 0.01011557 "Polysaccharide biosynthesis protein"  
"JS1\_N06\_01432" 20362 "s59E13H2" 0 "hypothetical protein"  
"JS1\_N06\_01432" 20362 "s59E25H2" 0 "hypothetical protein"  
"JS1\_N06\_01432" 20362 "s59E5H2" 0 "hypothetical protein"  
"JS1\_N06\_01432" 20362 "s63E6H2" 0 "hypothetical protein"  
"JS1\_N06\_01433" 20363 "s59E13H2" 0 "GDP-mannose-dependent alpha-(1-6)-phosphatidylinositol monomannoside mannosyltransferase"  
"JS1\_N06\_01433" 20363 "s59E25H2" 0 "GDP-mannose-dependent alpha-(1-6)-phosphatidylinositol monomannoside mannosyltransferase"  
"JS1\_N06\_01433" 20363 "s59E5H2" 0 "GDP-mannose-dependent alpha-(1-6)-phosphatidylinositol monomannoside mannosyltransferase"  
"JS1\_N06\_01433" 20363 "s63E6H2" 0.001211933 "GDP-mannose-dependent alpha-(1-6)-phosphatidylinositol monomannoside mannosyltransferase"  
"JS1\_N06\_01434" 20364 "s59E13H2" 0 "hypothetical protein"  
"JS1\_N06\_01434" 20364 "s59E25H2" 0 "hypothetical protein"  
"JS1\_N06\_01434" 20364 "s59E5H2" 0 "hypothetical protein"  
"JS1\_N06\_01434" 20364 "s63E6H2" 0.002188544 "hypothetical protein"  
"JS1\_N06\_01441" 20371 "s59E13H2" 0 "Glycerol-3-phosphate acyltransferase"  
"JS1\_N06\_01441" 20371 "s59E25H2" 0 "Glycerol-3-phosphate acyltransferase"  
"JS1\_N06\_01441" 20371 "s59E5H2" 0 "Glycerol-3-phosphate acyltransferase"  
"JS1\_N06\_01441" 20371 "s63E6H2" 0 "Glycerol-3-phosphate acyltransferase"  
"JS1\_N06\_01442" 20372 "s59E13H2" 0 "putative glycerol-3-phosphate acyltransferase PIsY"  
"JS1\_N06\_01442" 20372 "s59E25H2" 0 "putative glycerol-3-phosphate acyltransferase PIsY"  
"JS1\_N06\_01442" 20372 "s59E5H2" 0 "putative glycerol-3-phosphate acyltransferase PIsY"  
"JS1\_N06\_01442" 20372 "s63E6H2" 0 "putative glycerol-3-phosphate acyltransferase PIsY"  
"JS1\_N06\_01444" 20374 "s59E13H2" 0 "Chromosome partition protein Smc"  
"JS1\_N06\_01444" 20374 "s59E25H2" 0 "Chromosome partition protein Smc"  
"JS1\_N06\_01444" 20374 "s59E5H2" 0 "Chromosome partition protein Smc"  
"JS1\_N06\_01444" 20374 "s63E6H2" 0.001084117 "Chromosome partition protein Smc"  
"JS1\_N06\_01448" 20378 "s59E13H2" 0.006553802 "Leucine--tRNA ligase subunit alpha"  
"JS1\_N06\_01448" 20378 "s59E25H2" 0 "Leucine--tRNA ligase subunit alpha"  
"JS1\_N06\_01448" 20378 "s59E5H2" 0.06756424 "Leucine--tRNA ligase subunit alpha"  
"JS1\_N06\_01448" 20378 "s63E6H2" 0.1297721 "Leucine--tRNA ligase subunit alpha"  
"JS1\_N06\_01450" 20380 "s59E13H2" 0.003918317 "UDP-N-acetyl-alpha-D-glucosamine C6 dehydratase"  
"JS1\_N06\_01450" 20380 "s59E25H2" 0 "UDP-N-acetyl-alpha-D-glucosamine C6 dehydratase"

"JS1\_N06\_01450" 20380 "s59E5H2" 0 "UDP-N-acetyl-alpha-D-glucosamine C6 dehydratase"  
"JS1\_N06\_01450" 20380 "s63E6H2" 0.009828185 "UDP-N-acetyl-alpha-D-glucosamine C6 dehydratase"  
"JS1\_N06\_01451" 20381 "s59E13H2" 0.008531911 "Pseudouridine kinase"  
"JS1\_N06\_01451" 20381 "s59E25H2" 0 "Pseudouridine kinase"  
"JS1\_N06\_01451" 20381 "s59E5H2" 0 "Pseudouridine kinase"  
"JS1\_N06\_01451" 20381 "s63E6H2" 0.02289619 "Pseudouridine kinase"  
"JS1\_N06\_01452" 20382 "s59E13H2" 0.01453396 "Pseudouridine-5'-phosphate glycosidase"  
"JS1\_N06\_01452" 20382 "s59E25H2" 0 "Pseudouridine-5'-phosphate glycosidase"  
"JS1\_N06\_01452" 20382 "s59E5H2" 0.01290643 "Pseudouridine-5'-phosphate glycosidase"  
"JS1\_N06\_01452" 20382 "s63E6H2" 0.06678037 "Pseudouridine-5'-phosphate glycosidase"  
"JS1\_N06\_01453" 20383 "s59E13H2" 0 "Digeranylgeranyllycerophospholipid reductase"  
"JS1\_N06\_01453" 20383 "s59E25H2" 0 "Digeranylgeranyllycerophospholipid reductase"  
"JS1\_N06\_01453" 20383 "s59E5H2" 0.03791293 "Digeranylgeranyllycerophospholipid reductase"  
"JS1\_N06\_01453" 20383 "s63E6H2" 0.4594863 "Digeranylgeranyllycerophospholipid reductase"  
"JS1\_N06\_01454" 20384 "s59E13H2" 0.008889873 "Bifunctional protein GlmU"  
"JS1\_N06\_01454" 20384 "s59E25H2" 0 "Bifunctional protein GlmU"  
"JS1\_N06\_01454" 20384 "s59E5H2" 0.0837758 "Bifunctional protein GlmU"  
"JS1\_N06\_01454" 20384 "s63E6H2" 1.764263 "Bifunctional protein GlmU"  
"JS1\_N06\_01455" 20385 "s59E13H2" 0.01091331 "translocation protein TolB"  
"JS1\_N06\_01455" 20385 "s59E25H2" 0 "translocation protein TolB"  
"JS1\_N06\_01455" 20385 "s59E5H2" 0.04395658 "translocation protein TolB"  
"JS1\_N06\_01455" 20385 "s63E6H2" 2.021611 "translocation protein TolB"  
"JS1\_N06\_01456" 20386 "s59E13H2" 0.003764583 "Transposase IS200 like protein"  
"JS1\_N06\_01456" 20386 "s59E25H2" 0 "Transposase IS200 like protein"  
"JS1\_N06\_01456" 20386 "s59E5H2" 0.01124089 "Transposase IS200 like protein"  
"JS1\_N06\_01456" 20386 "s63E6H2" 0.009990935 "Transposase IS200 like protein"  
"JS1\_N06\_01457" 20387 "s59E13H2" 0.006037968 "Amidohydrolase"  
"JS1\_N06\_01457" 20387 "s59E25H2" 0 "Amidohydrolase"  
"JS1\_N06\_01457" 20387 "s59E5H2" 0.1641278 "Amidohydrolase"  
"JS1\_N06\_01457" 20387 "s63E6H2" 12.63683 "Amidohydrolase"  
"JS1\_N06\_01458" 20388 "s59E13H2" 0.001332566 "hypothetical protein"  
"JS1\_N06\_01458" 20388 "s59E25H2" 0 "hypothetical protein"  
"JS1\_N06\_01458" 20388 "s59E5H2" 0.047145 "hypothetical protein"  
"JS1\_N06\_01458" 20388 "s63E6H2" 0.485352 "hypothetical protein"  
"JS1\_N06\_01459" 20389 "s59E13H2" 0.1805622 "Bifunctional phosphoglucose/phosphomannose isomerase"  
"JS1\_N06\_01459" 20389 "s59E25H2" 0 "Bifunctional phosphoglucose/phosphomannose isomerase"  
"JS1\_N06\_01459" 20389 "s59E5H2" 0.2447112 "Bifunctional phosphoglucose/phosphomannose isomerase"  
"JS1\_N06\_01459" 20389 "s63E6H2" 1.928384 "Bifunctional phosphoglucose/phosphomannose isomerase"  
"JS1\_N06\_01460" 20390 "s59E13H2" 0.6282315 "putative undecaprenyl-phosphate N-acetylglucosaminyl 1-phosphate transferase"  
"JS1\_N06\_01460" 20390 "s59E25H2" 0 "putative undecaprenyl-phosphate N-acetylglucosaminyl 1-phosphate transferase"  
"JS1\_N06\_01460" 20390 "s59E5H2" 0.1938565 "putative undecaprenyl-phosphate N-acetylglucosaminyl 1-phosphate transferase"  
"JS1\_N06\_01460" 20390 "s63E6H2" 5.876607 "putative undecaprenyl-phosphate N-acetylglucosaminyl 1-phosphate transferase"  
"JS1\_N06\_01461" 20391 "s59E13H2" 0.141143 "UDP-glucose 4-epimerase"  
"JS1\_N06\_01461" 20391 "s59E25H2" 0 "UDP-glucose 4-epimerase"  
"JS1\_N06\_01461" 20391 "s59E5H2" 0.1834437 "UDP-glucose 4-epimerase"  
"JS1\_N06\_01461" 20391 "s63E6H2" 3.838931 "UDP-glucose 4-epimerase"  
"JS1\_N06\_01462" 20392 "s59E13H2" 0.03496244 "Putative N-acetylmannosaminyltransferase"

"JS1\_N06\_01462" 20392 "s59E25H2" 0.3007836 "Putative N-acetylmannosaminyltransferase"  
"JS1\_N06\_01462" 20392 "s59E5H2" 0.1792965 "Putative N-acetylmannosaminyltransferase"  
"JS1\_N06\_01462" 20392 "s63E6H2" 8.687975 "Putative N-acetylmannosaminyltransferase"  
"JS1\_N06\_01463" 20393 "s59E13H2" 0.005618526 "rod shape-determining protein MreD"  
"JS1\_N06\_01463" 20393 "s59E25H2" 0 "rod shape-determining protein MreD"  
"JS1\_N06\_01463" 20393 "s59E5H2" 0.05224886 "rod shape-determining protein MreD"  
"JS1\_N06\_01463" 20393 "s63E6H2" 6.036275 "rod shape-determining protein MreD"  
"JS1\_N06\_01464" 20394 "s59E13H2" 0.01049254 "Stage V sporulation protein D"  
"JS1\_N06\_01464" 20394 "s59E25H2" 0.2721088 "Stage V sporulation protein D"  
"JS1\_N06\_01464" 20394 "s59E5H2" 0.06876201 "Stage V sporulation protein D"  
"JS1\_N06\_01464" 20394 "s63E6H2" 7.509404 "Stage V sporulation protein D"  
"JS1\_N06\_01465" 20395 "s59E13H2" 0.001646684 "Rod shape-determining protein RodA"  
"JS1\_N06\_01465" 20395 "s59E25H2" 0 "Rod shape-determining protein RodA"  
"JS1\_N06\_01465" 20395 "s59E5H2" 0.007875586 "Rod shape-determining protein RodA"  
"JS1\_N06\_01465" 20395 "s63E6H2" 4.381216 "Rod shape-determining protein RodA"  
"JS1\_N06\_01466" 20396 "s59E13H2" 0 "Radical SAM superfamily protein"  
"JS1\_N06\_01466" 20396 "s59E25H2" 0 "Radical SAM superfamily protein"  
"JS1\_N06\_01466" 20396 "s59E5H2" 0.02329825 "Radical SAM superfamily protein"  
"JS1\_N06\_01466" 20396 "s63E6H2" 4.024122 "Radical SAM superfamily protein"  
"JS1\_N06\_01467" 20397 "s59E13H2" 0 "hypothetical protein"  
"JS1\_N06\_01467" 20397 "s59E25H2" 0 "hypothetical protein"  
"JS1\_N06\_01467" 20397 "s59E5H2" 0 "hypothetical protein"  
"JS1\_N06\_01467" 20397 "s63E6H2" 0.2004392 "hypothetical protein"  
"JS1\_N06\_01468" 20398 "s59E13H2" 0.01455471 "Ribonuclease G"  
"JS1\_N06\_01468" 20398 "s59E25H2" 0 "Ribonuclease G"  
"JS1\_N06\_01468" 20398 "s59E5H2" 0.1377359 "Ribonuclease G"  
"JS1\_N06\_01468" 20398 "s63E6H2" 0.2473321 "Ribonuclease G"  
"JS1\_N06\_01469" 20399 "s59E13H2" 0 "50S ribosomal protein L21"  
"JS1\_N06\_01469" 20399 "s59E25H2" 0 "50S ribosomal protein L21"  
"JS1\_N06\_01469" 20399 "s59E5H2" 0.01413331 "50S ribosomal protein L21"  
"JS1\_N06\_01469" 20399 "s63E6H2" 0.1707462 "50S ribosomal protein L21"  
"JS1\_N06\_01470" 20400 "s59E13H2" 0 "50S ribosomal protein L27"  
"JS1\_N06\_01470" 20400 "s59E25H2" 0 "50S ribosomal protein L27"  
"JS1\_N06\_01470" 20400 "s59E5H2" 0 "50S ribosomal protein L27"  
"JS1\_N06\_01470" 20400 "s63E6H2" 0.1569202 "50S ribosomal protein L27"  
"JS1\_N06\_01471" 20401 "s59E13H2" 0 "GTPase Obg"  
"JS1\_N06\_01471" 20401 "s59E25H2" 0 "GTPase Obg"  
"JS1\_N06\_01471" 20401 "s59E5H2" 0 "GTPase Obg"  
"JS1\_N06\_01471" 20401 "s63E6H2" 0.05152044 "GTPase Obg"  
"JS1\_N06\_01472" 20402 "s59E13H2" 0 "GTPase Obg"  
"JS1\_N06\_01472" 20402 "s59E25H2" 0 "GTPase Obg"  
"JS1\_N06\_01472" 20402 "s59E5H2" 0 "GTPase Obg"  
"JS1\_N06\_01472" 20402 "s63E6H2" 0.004452437 "GTPase Obg"  
"JS1\_N06\_01476" 20406 "s59E13H2" 0.02320175 "hypothetical protein"  
"JS1\_N06\_01476" 20406 "s59E25H2" 0 "hypothetical protein"  
"JS1\_N06\_01476" 20406 "s59E5H2" 0 "hypothetical protein"  
"JS1\_N06\_01476" 20406 "s63E6H2" 0.0008766824 "hypothetical protein"

"JS1\_N06\_01479" 20409 "s59E13H2" 0.008430097 "nitroreductase A"  
"JS1\_N06\_01479" 20409 "s59E25H2" 0 "nitroreductase A"  
"JS1\_N06\_01479" 20409 "s59E5H2" 0.05318586 "nitroreductase A"  
"JS1\_N06\_01479" 20409 "s63E6H2" 0.002221963 "nitroreductase A"  
"JS1\_N06\_01480" 20410 "s59E13H2" 0 "hypothetical protein"  
"JS1\_N06\_01480" 20410 "s59E25H2" 0 "hypothetical protein"  
"JS1\_N06\_01480" 20410 "s59E5H2" 0 "hypothetical protein"  
"JS1\_N06\_01480" 20410 "s63E6H2" 0 "hypothetical protein"  
"JS1\_N06\_01481" 20411 "s59E13H2" 0 "Anti-sigma-V factor RsiV"  
"JS1\_N06\_01481" 20411 "s59E25H2" 0 "Anti-sigma-V factor RsiV"  
"JS1\_N06\_01481" 20411 "s59E5H2" 0 "Anti-sigma-V factor RsiV"  
"JS1\_N06\_01481" 20411 "s63E6H2" 0 "Anti-sigma-V factor RsiV"  
"JS1\_N06\_01483" 20413 "s59E13H2" 0.02261392 "CAAX amino terminal protease self- immunity"  
"JS1\_N06\_01483" 20413 "s59E25H2" 0.6129542 "CAAX amino terminal protease self- immunity"  
"JS1\_N06\_01483" 20413 "s59E5H2" 0.2930917 "CAAX amino terminal protease self- immunity"  
"JS1\_N06\_01483" 20413 "s63E6H2" 2.999683 "CAAX amino terminal protease self- immunity"  
"JS1\_N06\_01484" 20414 "s59E13H2" 0.01042636 "N-acetylglutamate synthase"  
"JS1\_N06\_01484" 20414 "s59E25H2" 0 "N-acetylglutamate synthase"  
"JS1\_N06\_01484" 20414 "s59E5H2" 0.343918 "N-acetylglutamate synthase"  
"JS1\_N06\_01484" 20414 "s63E6H2" 1.423819 "N-acetylglutamate synthase"  
"JS1\_N06\_01485" 20415 "s59E13H2" 0.1889335 "HTH-type transcriptional repressor YvoA"  
"JS1\_N06\_01485" 20415 "s59E25H2" 0 "HTH-type transcriptional repressor YvoA"  
"JS1\_N06\_01485" 20415 "s59E5H2" 0.03799365 "HTH-type transcriptional repressor YvoA"  
"JS1\_N06\_01485" 20415 "s63E6H2" 0.004395794 "HTH-type transcriptional repressor YvoA"  
"JS1\_N06\_01486" 20416 "s59E13H2" 0.1559932 "Inositol 2-dehydrogenase/D-chiro-inositol 3-dehydrogenase"  
"JS1\_N06\_01486" 20416 "s59E25H2" 0 "Inositol 2-dehydrogenase/D-chiro-inositol 3-dehydrogenase"  
"JS1\_N06\_01486" 20416 "s59E5H2" 0.02041655 "Inositol 2-dehydrogenase/D-chiro-inositol 3-dehydrogenase"  
"JS1\_N06\_01486" 20416 "s63E6H2" 0.00354925 "Inositol 2-dehydrogenase/D-chiro-inositol 3-dehydrogenase"  
"JS1\_N06\_01487" 20417 "s59E13H2" 0.07273732 "putative L-threonine 3-dehydrogenase"  
"JS1\_N06\_01487" 20417 "s59E25H2" 0 "putative L-threonine 3-dehydrogenase"  
"JS1\_N06\_01487" 20417 "s59E5H2" 0.07808037 "putative L-threonine 3-dehydrogenase"  
"JS1\_N06\_01487" 20417 "s63E6H2" 0.004513412 "putative L-threonine 3-dehydrogenase"  
"JS1\_N06\_01488" 20418 "s59E13H2" 0.07670884 "D-tagatose 3-epimerase"  
"JS1\_N06\_01488" 20418 "s59E25H2" 0 "D-tagatose 3-epimerase"  
"JS1\_N06\_01488" 20418 "s59E5H2" 0.01889453 "D-tagatose 3-epimerase"  
"JS1\_N06\_01488" 20418 "s63E6H2" 0.01671445 "D-tagatose 3-epimerase"  
"JS1\_N06\_01489" 20419 "s59E13H2" 0.1038997 "Levodione reductase"  
"JS1\_N06\_01489" 20419 "s59E25H2" 0 "Levodione reductase"  
"JS1\_N06\_01489" 20419 "s59E5H2" 0.0008827105 "Levodione reductase"  
"JS1\_N06\_01489" 20419 "s63E6H2" 0.01126243 "Levodione reductase"  
"JS1\_N06\_01490" 20420 "s59E13H2" 0.4189617 "Xylulose kinase"  
"JS1\_N06\_01490" 20420 "s59E25H2" 0 "Xylulose kinase"  
"JS1\_N06\_01490" 20420 "s59E5H2" 0.4805732 "Xylulose kinase"  
"JS1\_N06\_01490" 20420 "s63E6H2" 0.07996003 "Xylulose kinase"  
"JS1\_N06\_01491" 20421 "s59E13H2" 0.117588 "Glucose-6-phosphate isomerase"  
"JS1\_N06\_01491" 20421 "s59E25H2" 0 "Glucose-6-phosphate isomerase"  
"JS1\_N06\_01491" 20421 "s59E5H2" 0.3263731 "Glucose-6-phosphate isomerase"

"JS1\_N06\_01491" 20421 "s63E6H2" 0.09000816 "Glucose-6-phosphate isomerase"  
"JS1\_N06\_01492" 20422 "s59E13H2" 0.0289203 "D-allose-binding periplasmic protein precursor"  
"JS1\_N06\_01492" 20422 "s59E25H2" 0 "D-allose-binding periplasmic protein precursor"  
"JS1\_N06\_01492" 20422 "s59E5H2" 0.6177328 "D-allose-binding periplasmic protein precursor"  
"JS1\_N06\_01492" 20422 "s63E6H2" 0.4780766 "D-allose-binding periplasmic protein precursor"  
"JS1\_N06\_01493" 20423 "s59E13H2" 0.09632229 "Ribose import ATP-binding protein RbsA"  
"JS1\_N06\_01493" 20423 "s59E25H2" 0 "Ribose import ATP-binding protein RbsA"  
"JS1\_N06\_01493" 20423 "s59E5H2" 0.9772218 "Ribose import ATP-binding protein RbsA"  
"JS1\_N06\_01493" 20423 "s63E6H2" 0.6111983 "Ribose import ATP-binding protein RbsA"  
"JS1\_N06\_01494" 20424 "s59E13H2" 0.02820666 "Ribose transport system permease protein RbsC"  
"JS1\_N06\_01494" 20424 "s59E25H2" 0 "Ribose transport system permease protein RbsC"  
"JS1\_N06\_01494" 20424 "s59E5H2" 1.354038 "Ribose transport system permease protein RbsC"  
"JS1\_N06\_01494" 20424 "s63E6H2" 0.1214626 "Ribose transport system permease protein RbsC"  
"JS1\_N06\_01495" 20425 "s59E13H2" 0.4849695 "Tungsten-containing aldehyde ferredoxin oxidoreductase"  
"JS1\_N06\_01495" 20425 "s59E25H2" 0 "Tungsten-containing aldehyde ferredoxin oxidoreductase"  
"JS1\_N06\_01495" 20425 "s59E5H2" 1.250312 "Tungsten-containing aldehyde ferredoxin oxidoreductase"  
"JS1\_N06\_01495" 20425 "s63E6H2" 0.07352141 "Tungsten-containing aldehyde ferredoxin oxidoreductase"  
"JS1\_N06\_01496" 20426 "s59E13H2" 0.9012762 "ThiS family protein"  
"JS1\_N06\_01496" 20426 "s59E25H2" 0 "ThiS family protein"  
"JS1\_N06\_01496" 20426 "s59E5H2" 0.995732 "ThiS family protein"  
"JS1\_N06\_01496" 20426 "s63E6H2" 0.06392465 "ThiS family protein"  
"JS1\_N06\_01497" 20427 "s59E13H2" 0.6673407 "Glyoxylate reductase"  
"JS1\_N06\_01497" 20427 "s59E25H2" 0 "Glyoxylate reductase"  
"JS1\_N06\_01497" 20427 "s59E5H2" 0.8052169 "Glyoxylate reductase"  
"JS1\_N06\_01497" 20427 "s63E6H2" 0.04885876 "Glyoxylate reductase"  
"JS1\_N06\_01498" 20428 "s59E13H2" 0 "Nucleoside diphosphate kinase"  
"JS1\_N06\_01498" 20428 "s59E25H2" 0 "Nucleoside diphosphate kinase"  
"JS1\_N06\_01498" 20428 "s59E5H2" 0.1021428 "Nucleoside diphosphate kinase"  
"JS1\_N06\_01498" 20428 "s63E6H2" 0.006156803 "Nucleoside diphosphate kinase"  
"JS1\_N06\_01499" 20429 "s59E13H2" 0 "GYD domain protein"  
"JS1\_N06\_01499" 20429 "s59E25H2" 0 "GYD domain protein"  
"JS1\_N06\_01499" 20429 "s59E5H2" 0.515289 "GYD domain protein"  
"JS1\_N06\_01499" 20429 "s63E6H2" 0.04484293 "GYD domain protein"  
"JS1\_N06\_01500" 20430 "s59E13H2" 0.01391119 "Fe/S biogenesis protein NfuA"  
"JS1\_N06\_01500" 20430 "s59E25H2" 0 "Fe/S biogenesis protein NfuA"  
"JS1\_N06\_01500" 20430 "s59E5H2" 0.1064716 "Fe/S biogenesis protein NfuA"  
"JS1\_N06\_01500" 20430 "s63E6H2" 0.07640188 "Fe/S biogenesis protein NfuA"  
"JS1\_N06\_01501" 20431 "s59E13H2" 0.01110974 "nicotinic acid mononucleotide adenyllyltransferase"  
"JS1\_N06\_01501" 20431 "s59E25H2" 0 "nicotinic acid mononucleotide adenyllyltransferase"  
"JS1\_N06\_01501" 20431 "s59E5H2" 0.5639287 "nicotinic acid mononucleotide adenyllyltransferase"  
"JS1\_N06\_01501" 20431 "s63E6H2" 0.101356 "nicotinic acid mononucleotide adenyllyltransferase"  
"JS1\_N06\_01502" 20432 "s59E13H2" 0.03165493 "L-lactate dehydrogenase"  
"JS1\_N06\_01502" 20432 "s59E25H2" 0 "L-lactate dehydrogenase"  
"JS1\_N06\_01502" 20432 "s59E5H2" 0.270495 "L-lactate dehydrogenase"  
"JS1\_N06\_01502" 20432 "s63E6H2" 0.09158486 "L-lactate dehydrogenase"  
"JS1\_N06\_01503" 20433 "s59E13H2" 0.03000219 "NADPH-dependent FMN reductase"  
"JS1\_N06\_01503" 20433 "s59E25H2" 0 "NADPH-dependent FMN reductase"

"JS1\_N06\_01503" 20433 "s59E5H2" 0.2413747 "NADPH-dependent FMN reductase"  
"JS1\_N06\_01503" 20433 "s63E6H2" 0.1191552 "NADPH-dependent FMN reductase"  
"JS1\_N06\_01504" 20434 "s59E13H2" 0.2558631 "putative dual-specificity RNA methyltransferase RlmN"  
"JS1\_N06\_01504" 20434 "s59E25H2" 0 "putative dual-specificity RNA methyltransferase RlmN"  
"JS1\_N06\_01504" 20434 "s59E5H2" 0.05246362 "putative dual-specificity RNA methyltransferase RlmN"  
"JS1\_N06\_01504" 20434 "s63E6H2" 0.08395209 "putative dual-specificity RNA methyltransferase RlmN"  
"JS1\_N06\_01506" 20436 "s59E13H2" 0.006831556 "Putative zinc ribbon domain protein"  
"JS1\_N06\_01506" 20436 "s59E25H2" 0 "Putative zinc ribbon domain protein"  
"JS1\_N06\_01506" 20436 "s59E5H2" 0.02201593 "Putative zinc ribbon domain protein"  
"JS1\_N06\_01506" 20436 "s63E6H2" 0.1207435 "Putative zinc ribbon domain protein"  
"JS1\_N06\_01510" 20440 "s59E13H2" 0.05350332 "cell division protein MraZ"  
"JS1\_N06\_01510" 20440 "s59E25H2" 0 "cell division protein MraZ"  
"JS1\_N06\_01510" 20440 "s59E5H2" 0.7248371 "cell division protein MraZ"  
"JS1\_N06\_01510" 20440 "s63E6H2" 0.6377344 "cell division protein MraZ"  
"JS1\_N06\_01511" 20441 "s59E13H2" 0.01335773 "Ribosomal RNA small subunit methyltransferase H"  
"JS1\_N06\_01511" 20441 "s59E25H2" 0 "Ribosomal RNA small subunit methyltransferase H"  
"JS1\_N06\_01511" 20441 "s59E5H2" 0.2257615 "Ribosomal RNA small subunit methyltransferase H"  
"JS1\_N06\_01511" 20441 "s63E6H2" 0.4102932 "Ribosomal RNA small subunit methyltransferase H"  
"JS1\_N06\_01512" 20442 "s59E13H2" 0.00523641 "Cell division protein FtsL"  
"JS1\_N06\_01512" 20442 "s59E25H2" 0 "Cell division protein FtsL"  
"JS1\_N06\_01512" 20442 "s59E5H2" 0.07973526 "Cell division protein FtsL"  
"JS1\_N06\_01512" 20442 "s63E6H2" 0.1316766 "Cell division protein FtsL"  
"JS1\_N06\_01513" 20443 "s59E13H2" 0.02052024 "Stage V sporulation protein D"  
"JS1\_N06\_01513" 20443 "s59E25H2" 0 "Stage V sporulation protein D"  
"JS1\_N06\_01513" 20443 "s59E5H2" 0.09700116 "Stage V sporulation protein D"  
"JS1\_N06\_01513" 20443 "s63E6H2" 0.3753979 "Stage V sporulation protein D"  
"JS1\_N06\_01514" 20444 "s59E13H2" 0.012929 "UDP-N-acetylmuramoyl-L-alanyl-D-glutamate--L-lysine ligase"  
"JS1\_N06\_01514" 20444 "s59E25H2" 0 "UDP-N-acetylmuramoyl-L-alanyl-D-glutamate--L-lysine ligase"  
"JS1\_N06\_01514" 20444 "s59E5H2" 0.2206138 "UDP-N-acetylmuramoyl-L-alanyl-D-glutamate--L-lysine ligase"  
"JS1\_N06\_01514" 20444 "s63E6H2" 0.2752602 "UDP-N-acetylmuramoyl-L-alanyl-D-glutamate--L-lysine ligase"  
"JS1\_N06\_01515" 20445 "s59E13H2" 0.09302741 "UDP-N-acetylmuramoyl-tripeptide--D-alanyl-D-alanine ligase"  
"JS1\_N06\_01515" 20445 "s59E25H2" 0 "UDP-N-acetylmuramoyl-tripeptide--D-alanyl-D-alanine ligase"  
"JS1\_N06\_01515" 20445 "s59E5H2" 0.4231556 "UDP-N-acetylmuramoyl-tripeptide--D-alanyl-D-alanine ligase"  
"JS1\_N06\_01515" 20445 "s63E6H2" 0.2782398 "UDP-N-acetylmuramoyl-tripeptide--D-alanyl-D-alanine ligase"  
"JS1\_N06\_01516" 20446 "s59E13H2" 0.006151055 "Phospho-N-acetylmuramoyl-pentapeptide-transferase"  
"JS1\_N06\_01516" 20446 "s59E25H2" 0 "Phospho-N-acetylmuramoyl-pentapeptide-transferase"  
"JS1\_N06\_01516" 20446 "s59E5H2" 0.06380706 "Phospho-N-acetylmuramoyl-pentapeptide-transferase"  
"JS1\_N06\_01516" 20446 "s63E6H2" 0.06896254 "Phospho-N-acetylmuramoyl-pentapeptide-transferase"  
"JS1\_N06\_01517" 20447 "s59E13H2" 0.3863671 "Lipid II flippase FtsW"  
"JS1\_N06\_01517" 20447 "s59E25H2" 0 "Lipid II flippase FtsW"  
"JS1\_N06\_01517" 20447 "s59E5H2" 0.6186374 "Lipid II flippase FtsW"  
"JS1\_N06\_01517" 20447 "s63E6H2" 0.8746005 "Lipid II flippase FtsW"  
"JS1\_N06\_01518" 20448 "s59E13H2" 0.04487297 "UDP-N-acetylglucosamine--N-acetylmuramyl-(pentapeptide) pyrophosphoryl-undecaprenol N-acetylglucosamine transferase"  
"JS1\_N06\_01518" 20448 "s59E25H2" 0 "UDP-N-acetylglucosamine--N-acetylmuramyl-(pentapeptide) pyrophosphoryl-undecaprenol N-acetylglucosamine transferase"  
"JS1\_N06\_01518" 20448 "s59E5H2" 0.2664128 "UDP-N-acetylglucosamine--N-acetylmuramyl-(pentapeptide) pyrophosphoryl-undecaprenol N-acetylglucosamine transferase"  
"JS1\_N06\_01518" 20448 "s63E6H2" 0.302294 "UDP-N-acetylglucosamine--N-acetylmuramyl-(pentapeptide) pyrophosphoryl-undecaprenol N-acetylglucosamine transferase"  
"JS1\_N06\_01519" 20449 "s59E13H2" 0.156312 "UDP-N-acetylmuramate--L-alanine ligase"

"JS1\_N06\_01519" 20449 "s59E25H2" 0 "UDP-N-acetylmuramate--L-alanine ligase"  
"JS1\_N06\_01519" 20449 "s59E5H2" 0.3678671 "UDP-N-acetylmuramate--L-alanine ligase"  
"JS1\_N06\_01519" 20449 "s63E6H2" 0.2489542 "UDP-N-acetylmuramate--L-alanine ligase"  
"JS1\_N06\_01520" 20450 "s59E13H2" 0.02530619 "UDP-N-acetylenolpyruvoylglucosamine reductase"  
"JS1\_N06\_01520" 20450 "s59E25H2" 0 "UDP-N-acetylenolpyruvoylglucosamine reductase"  
"JS1\_N06\_01520" 20450 "s59E5H2" 0.04891868 "UDP-N-acetylenolpyruvoylglucosamine reductase"  
"JS1\_N06\_01520" 20450 "s63E6H2" 0.04834862 "UDP-N-acetylenolpyruvoylglucosamine reductase"  
"JS1\_N06\_01521" 20451 "s59E13H2" 0.004113246 "Cell division protein DivIB"  
"JS1\_N06\_01521" 20451 "s59E25H2" 0 "Cell division protein DivIB"  
"JS1\_N06\_01521" 20451 "s59E5H2" 0.03158286 "Cell division protein DivIB"  
"JS1\_N06\_01521" 20451 "s63E6H2" 0.04711074 "Cell division protein DivIB"  
"JS1\_N06\_01522" 20452 "s59E13H2" 0.0158592 "Cell division protein FtsA"  
"JS1\_N06\_01522" 20452 "s59E25H2" 0 "Cell division protein FtsA"  
"JS1\_N06\_01522" 20452 "s59E5H2" 0.2012924 "Cell division protein FtsA"  
"JS1\_N06\_01522" 20452 "s63E6H2" 0.1566043 "Cell division protein FtsA"  
"JS1\_N06\_01523" 20453 "s59E13H2" 0.1636042 "Cell division protein FtsZ"  
"JS1\_N06\_01523" 20453 "s59E25H2" 0 "Cell division protein FtsZ"  
"JS1\_N06\_01523" 20453 "s59E5H2" 0.3419925 "Cell division protein FtsZ"  
"JS1\_N06\_01523" 20453 "s63E6H2" 0.6940149 "Cell division protein FtsZ"  
"JS1\_N06\_01524" 20454 "s59E13H2" 0.03445337 "Transcriptional repressor NrdR"  
"JS1\_N06\_01524" 20454 "s59E25H2" 0 "Transcriptional repressor NrdR"  
"JS1\_N06\_01524" 20454 "s59E5H2" 0.3435807 "Transcriptional repressor NrdR"  
"JS1\_N06\_01524" 20454 "s63E6H2" 0.6390549 "Transcriptional repressor NrdR"  
"JS1\_N06\_01525" 20455 "s59E13H2" 0 "ribonucleotide-diphosphate reductase subunit alpha"  
"JS1\_N06\_01525" 20455 "s59E25H2" 0 "ribonucleotide-diphosphate reductase subunit alpha"  
"JS1\_N06\_01525" 20455 "s59E5H2" 0 "ribonucleotide-diphosphate reductase subunit alpha"  
"JS1\_N06\_01525" 20455 "s63E6H2" 0 "ribonucleotide-diphosphate reductase subunit alpha"  
"JS1\_N06\_01526" 20456 "s59E13H2" 0 "putative ATP-dependent RNA helicase"  
"JS1\_N06\_01526" 20456 "s59E25H2" 0 "putative ATP-dependent RNA helicase"  
"JS1\_N06\_01526" 20456 "s59E5H2" 0.001731594 "putative ATP-dependent RNA helicase"  
"JS1\_N06\_01526" 20456 "s63E6H2" 0.0876823 "putative ATP-dependent RNA helicase"  
"JS1\_N06\_01527" 20457 "s59E13H2" 0 "hypothetical protein"  
"JS1\_N06\_01527" 20457 "s59E25H2" 0 "hypothetical protein"  
"JS1\_N06\_01527" 20457 "s59E5H2" 0 "hypothetical protein"  
"JS1\_N06\_01527" 20457 "s63E6H2" 0.02672977 "hypothetical protein"  
"JS1\_N06\_01528" 20458 "s59E13H2" 0 "hypothetical protein"  
"JS1\_N06\_01528" 20458 "s59E25H2" 0 "hypothetical protein"  
"JS1\_N06\_01528" 20458 "s59E5H2" 0 "hypothetical protein"  
"JS1\_N06\_01528" 20458 "s63E6H2" 3.790444e-05 "hypothetical protein"  
"JS1\_N06\_01529" 20459 "s59E13H2" 0 "hypothetical protein"  
"JS1\_N06\_01529" 20459 "s59E25H2" 0 "hypothetical protein"  
"JS1\_N06\_01529" 20459 "s59E5H2" 0 "hypothetical protein"  
"JS1\_N06\_01529" 20459 "s63E6H2" 0.005437067 "hypothetical protein"  
"JS1\_N06\_01531" 20461 "s59E13H2" 0 "Divergent AAA domain protein"  
"JS1\_N06\_01531" 20461 "s59E25H2" 0 "Divergent AAA domain protein"  
"JS1\_N06\_01531" 20461 "s59E5H2" 0.04450414 "Divergent AAA domain protein"  
"JS1\_N06\_01531" 20461 "s63E6H2" 0 "Divergent AAA domain protein"

"JS1\_N06\_01532" 20462 "s59E13H2" 0 "hypothetical protein"  
"JS1\_N06\_01532" 20462 "s59E25H2" 0 "hypothetical protein"  
"JS1\_N06\_01532" 20462 "s59E5H2" 0 "hypothetical protein"  
"JS1\_N06\_01532" 20462 "s63E6H2" 0 "hypothetical protein"  
"JS1\_N06\_01533" 20463 "s59E13H2" 0 "hypothetical protein"  
"JS1\_N06\_01533" 20463 "s59E25H2" 0 "hypothetical protein"  
"JS1\_N06\_01533" 20463 "s59E5H2" 0 "hypothetical protein"  
"JS1\_N06\_01533" 20463 "s63E6H2" 0.02096307 "hypothetical protein"  
"JS1\_N06\_01534" 20464 "s59E13H2" 0.001238422 "PHP domain protein"  
"JS1\_N06\_01534" 20464 "s59E25H2" 0 "PHP domain protein"  
"JS1\_N06\_01534" 20464 "s59E5H2" 0 "PHP domain protein"  
"JS1\_N06\_01534" 20464 "s63E6H2" 0.004325133 "PHP domain protein"  
"JS1\_N06\_01535" 20465 "s59E13H2" 0 "hypothetical protein"  
"JS1\_N06\_01535" 20465 "s59E25H2" 0 "hypothetical protein"  
"JS1\_N06\_01535" 20465 "s59E5H2" 0.006265118 "hypothetical protein"  
"JS1\_N06\_01535" 20465 "s63E6H2" 0 "hypothetical protein"  
"JS1\_N06\_01536" 20466 "s59E13H2" 0 "hypothetical protein"  
"JS1\_N06\_01536" 20466 "s59E25H2" 0 "hypothetical protein"  
"JS1\_N06\_01536" 20466 "s59E5H2" 0 "hypothetical protein"  
"JS1\_N06\_01536" 20466 "s63E6H2" 0 "hypothetical protein"  
"JS1\_N06\_01538" 20468 "s59E13H2" 0 "Divergent AAA domain protein"  
"JS1\_N06\_01538" 20468 "s59E25H2" 0 "Divergent AAA domain protein"  
"JS1\_N06\_01538" 20468 "s59E5H2" 0 "Divergent AAA domain protein"  
"JS1\_N06\_01538" 20468 "s63E6H2" 0 "Divergent AAA domain protein"  
"JS1\_N06\_01542" 20472 "s59E13H2" 0 "exonuclease III"  
"JS1\_N06\_01542" 20472 "s59E25H2" 0 "exonuclease III"  
"JS1\_N06\_01542" 20472 "s59E5H2" 0 "exonuclease III"  
"JS1\_N06\_01542" 20472 "s63E6H2" 0.1434522 "exonuclease III"  
"JS1\_N06\_01543" 20473 "s59E13H2" 0.03045817 "hypothetical protein"  
"JS1\_N06\_01543" 20473 "s59E25H2" 0 "hypothetical protein"  
"JS1\_N06\_01543" 20473 "s59E5H2" 0 "hypothetical protein"  
"JS1\_N06\_01543" 20473 "s63E6H2" 0.01348109 "hypothetical protein"  
"JS1\_N06\_01544" 20474 "s59E13H2" 0.02257076 "hypothetical protein"  
"JS1\_N06\_01544" 20474 "s59E25H2" 0 "hypothetical protein"  
"JS1\_N06\_01544" 20474 "s59E5H2" 0 "hypothetical protein"  
"JS1\_N06\_01544" 20474 "s63E6H2" 0.03430282 "hypothetical protein"  
"JS1\_N06\_01545" 20475 "s59E13H2" 0.05883403 "Beta-lactamase superfamily domain protein"  
"JS1\_N06\_01545" 20475 "s59E25H2" 0 "Beta-lactamase superfamily domain protein"  
"JS1\_N06\_01545" 20475 "s59E5H2" 0.08241575 "Beta-lactamase superfamily domain protein"  
"JS1\_N06\_01545" 20475 "s63E6H2" 0.1687163 "Beta-lactamase superfamily domain protein"  
"JS1\_N06\_01546" 20476 "s59E13H2" 0.0219391 "hypothetical protein"  
"JS1\_N06\_01546" 20476 "s59E25H2" 0 "hypothetical protein"  
"JS1\_N06\_01546" 20476 "s59E5H2" 0.1309773 "hypothetical protein"  
"JS1\_N06\_01546" 20476 "s63E6H2" 0.6856932 "hypothetical protein"  
"JS1\_N06\_01547" 20477 "s59E13H2" 0 "hypothetical protein"  
"JS1\_N06\_01547" 20477 "s59E25H2" 0 "hypothetical protein"  
"JS1\_N06\_01547" 20477 "s59E5H2" 0 "hypothetical protein"



"JS1\_N06\_01547" 20477 "s63E6H2" 0 "hypothetical protein"  
"JS1\_N06\_01548" 20478 "s59E13H2" 0 "Glucosamine-6-phosphate deaminase 1"  
"JS1\_N06\_01548" 20478 "s59E25H2" 0 "Glucosamine-6-phosphate deaminase 1"  
"JS1\_N06\_01548" 20478 "s59E5H2" 0.03299 "Glucosamine-6-phosphate deaminase 1"  
"JS1\_N06\_01548" 20478 "s63E6H2" 0 "Glucosamine-6-phosphate deaminase 1"  
"JS1\_N06\_01549" 20479 "s59E13H2" 0 "Enoyl-[acyl-carrier-protein] reductase [NADPH] FabL"  
"JS1\_N06\_01549" 20479 "s59E25H2" 0 "Enoyl-[acyl-carrier-protein] reductase [NADPH] FabL"  
"JS1\_N06\_01549" 20479 "s59E5H2" 0.003130134 "Enoyl-[acyl-carrier-protein] reductase [NADPH] FabL"  
"JS1\_N06\_01549" 20479 "s63E6H2" 0 "Enoyl-[acyl-carrier-protein] reductase [NADPH] FabL"  
"JS1\_N06\_01550" 20480 "s59E13H2" 0.01524666 "Endonuclease MutS2"  
"JS1\_N06\_01550" 20480 "s59E25H2" 0 "Endonuclease MutS2"  
"JS1\_N06\_01550" 20480 "s59E5H2" 0 "Endonuclease MutS2"  
"JS1\_N06\_01550" 20480 "s63E6H2" 0.01523875 "Endonuclease MutS2"  
"JS1\_N06\_01553" 20483 "s59E13H2" 0 "RNA polymerase-associated protein RapA"  
"JS1\_N06\_01553" 20483 "s59E25H2" 0 "RNA polymerase-associated protein RapA"  
"JS1\_N06\_01553" 20483 "s59E5H2" 0 "RNA polymerase-associated protein RapA"  
"JS1\_N06\_01553" 20483 "s63E6H2" 0.08993516 "RNA polymerase-associated protein RapA"  
"JS1\_N06\_01554" 20484 "s59E13H2" 0 "Elongation factor P"  
"JS1\_N06\_01554" 20484 "s59E25H2" 0 "Elongation factor P"  
"JS1\_N06\_01554" 20484 "s59E5H2" 0 "Elongation factor P"  
"JS1\_N06\_01554" 20484 "s63E6H2" 0.01792896 "Elongation factor P"  
"JS1\_N06\_01555" 20485 "s59E13H2" 0 "hypothetical protein"  
"JS1\_N06\_01555" 20485 "s59E25H2" 0 "hypothetical protein"  
"JS1\_N06\_01555" 20485 "s59E5H2" 0 "hypothetical protein"  
"JS1\_N06\_01555" 20485 "s63E6H2" 0.02508777 "hypothetical protein"  
"JS1\_N06\_01556" 20486 "s59E13H2" 0 "hypothetical protein"  
"JS1\_N06\_01556" 20486 "s59E25H2" 0 "hypothetical protein"  
"JS1\_N06\_01556" 20486 "s59E5H2" 0.02782439 "hypothetical protein"  
"JS1\_N06\_01556" 20486 "s63E6H2" 0.01037647 "hypothetical protein"  
"JS1\_N06\_01557" 20487 "s59E13H2" 0.008731248 "Exodeoxyribonuclease 7 large subunit"  
"JS1\_N06\_01557" 20487 "s59E25H2" 0 "Exodeoxyribonuclease 7 large subunit"  
"JS1\_N06\_01557" 20487 "s59E5H2" 0.006563775 "Exodeoxyribonuclease 7 large subunit"  
"JS1\_N06\_01557" 20487 "s63E6H2" 0.03029265 "Exodeoxyribonuclease 7 large subunit"  
"JS1\_N06\_01558" 20488 "s59E13H2" 0.004894676 "Exodeoxyribonuclease 7 small subunit"  
"JS1\_N06\_01558" 20488 "s59E25H2" 0 "Exodeoxyribonuclease 7 small subunit"  
"JS1\_N06\_01558" 20488 "s59E5H2" 0 "Exodeoxyribonuclease 7 small subunit"  
"JS1\_N06\_01558" 20488 "s63E6H2" 0.0644855 "Exodeoxyribonuclease 7 small subunit"  
"JS1\_N06\_01559" 20489 "s59E13H2" 0 "Farnesyl diphosphate synthase"  
"JS1\_N06\_01559" 20489 "s59E25H2" 0 "Farnesyl diphosphate synthase"  
"JS1\_N06\_01559" 20489 "s59E5H2" 0.009339163 "Farnesyl diphosphate synthase"  
"JS1\_N06\_01559" 20489 "s63E6H2" 0.03202042 "Farnesyl diphosphate synthase"  
"JS1\_N06\_01560" 20490 "s59E13H2" 0 "Ribonuclease PH"  
"JS1\_N06\_01560" 20490 "s59E25H2" 0 "Ribonuclease PH"  
"JS1\_N06\_01560" 20490 "s59E5H2" 0.01114277 "Ribonuclease PH"  
"JS1\_N06\_01560" 20490 "s63E6H2" 0.1171059 "Ribonuclease PH"  
"JS1\_N06\_01561" 20491 "s59E13H2" 0 "Non-canonical purine NTP pyrophosphatase"  
"JS1\_N06\_01561" 20491 "s59E25H2" 0 "Non-canonical purine NTP pyrophosphatase"

"JS1\_N06\_01561" 20491 "s59E5H2" 0.007177502 "Non-canonical purine NTP pyrophosphatase"  
"JS1\_N06\_01561" 20491 "s63E6H2" 0.03734866 "Non-canonical purine NTP pyrophosphatase"  
"JS1\_N06\_01569" 20499 "s59E13H2" 0.04619513 "Trigger factor"  
"JS1\_N06\_01569" 20499 "s59E25H2" 0 "Trigger factor"  
"JS1\_N06\_01569" 20499 "s59E5H2" 0.01881453 "Trigger factor"  
"JS1\_N06\_01569" 20499 "s63E6H2" 0.06418577 "Trigger factor"  
"JS1\_N06\_01570" 20500 "s59E13H2" 0.1091108 "ATP-dependent Clp protease proteolytic subunit"  
"JS1\_N06\_01570" 20500 "s59E25H2" 0 "ATP-dependent Clp protease proteolytic subunit"  
"JS1\_N06\_01570" 20500 "s59E5H2" 0.03318381 "ATP-dependent Clp protease proteolytic subunit"  
"JS1\_N06\_01570" 20500 "s63E6H2" 0.06776829 "ATP-dependent Clp protease proteolytic subunit"  
"JS1\_N06\_01571" 20501 "s59E13H2" 0.01648089 "hypothetical protein"  
"JS1\_N06\_01571" 20501 "s59E25H2" 0 "hypothetical protein"  
"JS1\_N06\_01571" 20501 "s59E5H2" 0 "hypothetical protein"  
"JS1\_N06\_01571" 20501 "s63E6H2" 0.002093978 "hypothetical protein"  
"JS1\_N06\_01572" 20502 "s59E13H2" 0.02081756 "ATP-dependent Clp protease ATP-binding subunit ClpX"  
"JS1\_N06\_01572" 20502 "s59E25H2" 0 "ATP-dependent Clp protease ATP-binding subunit ClpX"  
"JS1\_N06\_01572" 20502 "s59E5H2" 0.06287144 "ATP-dependent Clp protease ATP-binding subunit ClpX"  
"JS1\_N06\_01572" 20502 "s63E6H2" 0.02274476 "ATP-dependent Clp protease ATP-binding subunit ClpX"  
"JS1\_N06\_01573" 20503 "s59E13H2" 0.05276595 "Lon protease 1"  
"JS1\_N06\_01573" 20503 "s59E25H2" 0 "Lon protease 1"  
"JS1\_N06\_01573" 20503 "s59E5H2" 0.03397935 "Lon protease 1"  
"JS1\_N06\_01573" 20503 "s63E6H2" 0.04267224 "Lon protease 1"  
"JS1\_N06\_01575" 20505 "s59E13H2" 0.1823902 "Valine--tRNA ligase"  
"JS1\_N06\_01575" 20505 "s59E25H2" 0 "Valine--tRNA ligase"  
"JS1\_N06\_01575" 20505 "s59E5H2" 0.1195075 "Valine--tRNA ligase"  
"JS1\_N06\_01575" 20505 "s63E6H2" 0.09588874 "Valine--tRNA ligase"  
"JS1\_N06\_01576" 20506 "s59E13H2" 0.04734224 "Bifunctional protein FolC"  
"JS1\_N06\_01576" 20506 "s59E25H2" 0 "Bifunctional protein FolC"  
"JS1\_N06\_01576" 20506 "s59E5H2" 0.06442756 "Bifunctional protein FolC"  
"JS1\_N06\_01576" 20506 "s63E6H2" 0.04974413 "Bifunctional protein FolC"  
"JS1\_N06\_01577" 20507 "s59E13H2" 0.005398865 "ComE operon protein 1"  
"JS1\_N06\_01577" 20507 "s59E25H2" 0 "ComE operon protein 1"  
"JS1\_N06\_01577" 20507 "s59E5H2" 0.0304935 "ComE operon protein 1"  
"JS1\_N06\_01577" 20507 "s63E6H2" 0.05326616 "ComE operon protein 1"  
"JS1\_N06\_01578" 20508 "s59E13H2" 0.001179502 "ComEC family competence protein"  
"JS1\_N06\_01578" 20508 "s59E25H2" 0 "ComEC family competence protein"  
"JS1\_N06\_01578" 20508 "s59E5H2" 0.02844802 "ComEC family competence protein"  
"JS1\_N06\_01578" 20508 "s63E6H2" 0.01197918 "ComEC family competence protein"  
"JS1\_N06\_01579" 20509 "s59E13H2" 0.002799863 "DNA polymerase III subunit delta"  
"JS1\_N06\_01579" 20509 "s59E25H2" 0 "DNA polymerase III subunit delta"  
"JS1\_N06\_01579" 20509 "s59E5H2" 0.06244519 "DNA polymerase III subunit delta"  
"JS1\_N06\_01579" 20509 "s63E6H2" 0.01696987 "DNA polymerase III subunit delta"  
"JS1\_N06\_01580" 20510 "s59E13H2" 0.09886878 "30S ribosomal protein S20"  
"JS1\_N06\_01580" 20510 "s59E25H2" 0 "30S ribosomal protein S20"  
"JS1\_N06\_01580" 20510 "s59E5H2" 0.06512765 "30S ribosomal protein S20"  
"JS1\_N06\_01580" 20510 "s63E6H2" 0.01572457 "30S ribosomal protein S20"  
"JS1\_N06\_01581" 20511 "s59E13H2" 0.3855314 "putative peptidoglycan biosynthesis protein MurJ"

"JS1\_N06\_01581" 20511 "s59E25H2" 0 "putative peptidoglycan biosynthesis protein MurJ"  
"JS1\_N06\_01581" 20511 "s59E5H2" 0.03412687 "putative peptidoglycan biosynthesis protein MurJ"  
"JS1\_N06\_01581" 20511 "s63E6H2" 0.03582229 "putative peptidoglycan biosynthesis protein MurJ"  
"JS1\_N06\_01582" 20512 "s59E13H2" 1.556443 "Elongation factor 4"  
"JS1\_N06\_01582" 20512 "s59E25H2" 0 "Elongation factor 4"  
"JS1\_N06\_01582" 20512 "s59E5H2" 0.1409394 "Elongation factor 4"  
"JS1\_N06\_01582" 20512 "s63E6H2" 0.0680311 "Elongation factor 4"  
"JS1\_N06\_01583" 20513 "s59E13H2" 0.04701295 "Oxygen-independent coproporphyrinogen-III oxidase 1"  
"JS1\_N06\_01583" 20513 "s59E25H2" 0 "Oxygen-independent coproporphyrinogen-III oxidase 1"  
"JS1\_N06\_01583" 20513 "s59E5H2" 0.01663948 "Oxygen-independent coproporphyrinogen-III oxidase 1"  
"JS1\_N06\_01583" 20513 "s63E6H2" 0.1022572 "Oxygen-independent coproporphyrinogen-III oxidase 1"  
"JS1\_N06\_01584" 20514 "s59E13H2" 0.006059184 "Heat-inducible transcription repressor HrcA"  
"JS1\_N06\_01584" 20514 "s59E25H2" 0 "Heat-inducible transcription repressor HrcA"  
"JS1\_N06\_01584" 20514 "s59E5H2" 0.01049364 "Heat-inducible transcription repressor HrcA"  
"JS1\_N06\_01584" 20514 "s63E6H2" 0.04874035 "Heat-inducible transcription repressor HrcA"  
"JS1\_N06\_01585" 20515 "s59E13H2" 0.007141513 "heat shock protein GrpE"  
"JS1\_N06\_01585" 20515 "s59E25H2" 0 "heat shock protein GrpE"  
"JS1\_N06\_01585" 20515 "s59E5H2" 0 "heat shock protein GrpE"  
"JS1\_N06\_01585" 20515 "s63E6H2" 0.07226325 "heat shock protein GrpE"  
"JS1\_N06\_01586" 20516 "s59E13H2" 0.05871234 "Chaperone protein DnaK"  
"JS1\_N06\_01586" 20516 "s59E25H2" 0 "Chaperone protein DnaK"  
"JS1\_N06\_01586" 20516 "s59E5H2" 0.01886381 "Chaperone protein DnaK"  
"JS1\_N06\_01586" 20516 "s63E6H2" 0.09893031 "Chaperone protein DnaK"  
"JS1\_N06\_01587" 20517 "s59E13H2" 0.01586783 "Chaperone protein DnaJ"  
"JS1\_N06\_01587" 20517 "s59E25H2" 0 "Chaperone protein DnaJ"  
"JS1\_N06\_01587" 20517 "s59E5H2" 0.003574015 "Chaperone protein DnaJ"  
"JS1\_N06\_01587" 20517 "s63E6H2" 0.1460584 "Chaperone protein DnaJ"  
"JS1\_N06\_01588" 20518 "s59E13H2" 0 "Threonylcarbamoyladenosine tRNA methylthiotransferase MtaB"  
"JS1\_N06\_01588" 20518 "s59E25H2" 0 "Threonylcarbamoyladenosine tRNA methylthiotransferase MtaB"  
"JS1\_N06\_01588" 20518 "s59E5H2" 0 "Threonylcarbamoyladenosine tRNA methylthiotransferase MtaB"  
"JS1\_N06\_01588" 20518 "s63E6H2" 0.1363278 "Threonylcarbamoyladenosine tRNA methylthiotransferase MtaB"  
"JS1\_N06\_01589" 20519 "s59E13H2" 0.009477392 "hypothetical protein"  
"JS1\_N06\_01589" 20519 "s59E25H2" 0 "hypothetical protein"  
"JS1\_N06\_01589" 20519 "s59E5H2" 0 "hypothetical protein"  
"JS1\_N06\_01589" 20519 "s63E6H2" 0.02358986 "hypothetical protein"  
"JS1\_N06\_01590" 20520 "s59E13H2" 0 "hypothetical protein"  
"JS1\_N06\_01590" 20520 "s59E25H2" 0 "hypothetical protein"  
"JS1\_N06\_01590" 20520 "s59E5H2" 0 "hypothetical protein"  
"JS1\_N06\_01590" 20520 "s63E6H2" 0.01273451 "hypothetical protein"  
"JS1\_N06\_01591" 20521 "s59E13H2" 0.0008823993 "Translation initiation factor IF-2"  
"JS1\_N06\_01591" 20521 "s59E25H2" 0 "Translation initiation factor IF-2"  
"JS1\_N06\_01591" 20521 "s59E5H2" 0.02210691 "Translation initiation factor IF-2"  
"JS1\_N06\_01591" 20521 "s63E6H2" 0.03901112 "Translation initiation factor IF-2"  
"JS1\_N06\_01592" 20522 "s59E13H2" 0 "Ribosome-binding factor A"  
"JS1\_N06\_01592" 20522 "s59E25H2" 0 "Ribosome-binding factor A"  
"JS1\_N06\_01592" 20522 "s59E5H2" 0.01012701 "Ribosome-binding factor A"  
"JS1\_N06\_01592" 20522 "s63E6H2" 0.0113129 "Ribosome-binding factor A"

"JS1\_N06\_01593" 20523 "s59E13H2" 0.003516322 "Bifunctional oligoribonuclease and PAP phosphatase NrnA"  
"JS1\_N06\_01593" 20523 "s59E25H2" 0 "Bifunctional oligoribonuclease and PAP phosphatase NrnA"  
"JS1\_N06\_01593" 20523 "s59E5H2" 0 "Bifunctional oligoribonuclease and PAP phosphatase NrnA"  
"JS1\_N06\_01593" 20523 "s63E6H2" 0.01360953 "Bifunctional oligoribonuclease and PAP phosphatase NrnA"  
"JS1\_N06\_01594" 20524 "s59E13H2" 0 "tRNA pseudouridine synthase B"  
"JS1\_N06\_01594" 20524 "s59E25H2" 0 "tRNA pseudouridine synthase B"  
"JS1\_N06\_01594" 20524 "s59E5H2" 0 "tRNA pseudouridine synthase B"  
"JS1\_N06\_01594" 20524 "s63E6H2" 0.03343609 "tRNA pseudouridine synthase B"  
"JS1\_N06\_01595" 20525 "s59E13H2" 0.01065632 "Riboflavin biosynthesis protein RibF"  
"JS1\_N06\_01595" 20525 "s59E25H2" 0 "Riboflavin biosynthesis protein RibF"  
"JS1\_N06\_01595" 20525 "s59E5H2" 0 "Riboflavin biosynthesis protein RibF"  
"JS1\_N06\_01595" 20525 "s63E6H2" 0.02237516 "Riboflavin biosynthesis protein RibF"  
"JS1\_N06\_01596" 20526 "s59E13H2" 0 "30S ribosomal protein S15"  
"JS1\_N06\_01596" 20526 "s59E25H2" 0 "30S ribosomal protein S15"  
"JS1\_N06\_01596" 20526 "s59E5H2" 0 "30S ribosomal protein S15"  
"JS1\_N06\_01596" 20526 "s63E6H2" 0.0504581 "30S ribosomal protein S15"  
"JS1\_N06\_01597" 20527 "s59E13H2" 0.000805316 "Polyribonucleotide nucleotidyltransferase"  
"JS1\_N06\_01597" 20527 "s59E25H2" 0 "Polyribonucleotide nucleotidyltransferase"  
"JS1\_N06\_01597" 20527 "s59E5H2" 0.003784251 "Polyribonucleotide nucleotidyltransferase"  
"JS1\_N06\_01597" 20527 "s63E6H2" 0.01896727 "Polyribonucleotide nucleotidyltransferase"  
"JS1\_N06\_01598" 20528 "s59E13H2" 0.1365645 "Deoxyuridine 5'-triphosphate nucleotidohydrolase"  
"JS1\_N06\_01598" 20528 "s59E25H2" 0 "Deoxyuridine 5'-triphosphate nucleotidohydrolase"  
"JS1\_N06\_01598" 20528 "s59E5H2" 0.08717361 "Deoxyuridine 5'-triphosphate nucleotidohydrolase"  
"JS1\_N06\_01598" 20528 "s63E6H2" 0.1134801 "Deoxyuridine 5'-triphosphate nucleotidohydrolase"  
"JS1\_N06\_01599" 20529 "s59E13H2" 2.049706 "hypothetical protein"  
"JS1\_N06\_01599" 20529 "s59E25H2" 0 "hypothetical protein"  
"JS1\_N06\_01599" 20529 "s59E5H2" 0.01472515 "hypothetical protein"  
"JS1\_N06\_01599" 20529 "s63E6H2" 0.1476507 "hypothetical protein"  
"JS1\_N06\_01600" 20530 "s59E13H2" 0.4740808 "Undecaprenyl-diphosphatase"  
"JS1\_N06\_01600" 20530 "s59E25H2" 0 "Undecaprenyl-diphosphatase"  
"JS1\_N06\_01600" 20530 "s59E5H2" 0.01679911 "Undecaprenyl-diphosphatase"  
"JS1\_N06\_01600" 20530 "s63E6H2" 0.09300285 "Undecaprenyl-diphosphatase"  
"JS1\_N06\_01601" 20531 "s59E13H2" 0.5214334 "DNA translocase SpoIIIE"  
"JS1\_N06\_01601" 20531 "s59E25H2" 0 "DNA translocase SpoIIIE"  
"JS1\_N06\_01601" 20531 "s59E5H2" 0.03426245 "DNA translocase SpoIIIE"  
"JS1\_N06\_01601" 20531 "s63E6H2" 0.06671674 "DNA translocase SpoIIIE"  
"JS1\_N06\_01602" 20532 "s59E13H2" 1.193251 "Membrane lipoprotein TmpC precursor"  
"JS1\_N06\_01602" 20532 "s59E25H2" 0 "Membrane lipoprotein TmpC precursor"  
"JS1\_N06\_01602" 20532 "s59E5H2" 0.198944 "Membrane lipoprotein TmpC precursor"  
"JS1\_N06\_01602" 20532 "s63E6H2" 0.04043045 "Membrane lipoprotein TmpC precursor"  
"JS1\_N06\_01603" 20533 "s59E13H2" 1.955846 "Galactose/methyl galactoside import ATP-binding protein MglA"  
"JS1\_N06\_01603" 20533 "s59E25H2" 0 "Galactose/methyl galactoside import ATP-binding protein MglA"  
"JS1\_N06\_01603" 20533 "s59E5H2" 0.3773573 "Galactose/methyl galactoside import ATP-binding protein MglA"  
"JS1\_N06\_01603" 20533 "s63E6H2" 0.2216511 "Galactose/methyl galactoside import ATP-binding protein MglA"  
"JS1\_N06\_01604" 20534 "s59E13H2" 1.98465 "D-allose transporter subunit"  
"JS1\_N06\_01604" 20534 "s59E25H2" 0 "D-allose transporter subunit"  
"JS1\_N06\_01604" 20534 "s59E5H2" 0.2480179 "D-allose transporter subunit"

"JS1\_N06\_01604" 20534 "s63E6H2" 0.2827599 "D-allose transporter subunit"  
"JS1\_N06\_01605" 20535 "s59E13H2" 1.320341 "L-arabinose transporter permease protein"  
"JS1\_N06\_01605" 20535 "s59E25H2" 0 "L-arabinose transporter permease protein"  
"JS1\_N06\_01605" 20535 "s59E5H2" 0.09769928 "L-arabinose transporter permease protein"  
"JS1\_N06\_01605" 20535 "s63E6H2" 0.541996 "L-arabinose transporter permease protein"  
"JS1\_N06\_01606" 20536 "s59E13H2" 0.199537 "Helix-turn-helix domain protein"  
"JS1\_N06\_01606" 20536 "s59E25H2" 0 "Helix-turn-helix domain protein"  
"JS1\_N06\_01606" 20536 "s59E5H2" 0.01664405 "Helix-turn-helix domain protein"  
"JS1\_N06\_01606" 20536 "s63E6H2" 0.1317769 "Helix-turn-helix domain protein"  
"JS1\_N06\_01607" 20537 "s59E13H2" 0 "hypothetical protein"  
"JS1\_N06\_01607" 20537 "s59E25H2" 0 "hypothetical protein"  
"JS1\_N06\_01607" 20537 "s59E5H2" 0 "hypothetical protein"  
"JS1\_N06\_01607" 20537 "s63E6H2" 0.06208726 "hypothetical protein"  
"JS1\_N06\_01608" 20538 "s59E13H2" 0 "2'-5'-RNA ligase"  
"JS1\_N06\_01608" 20538 "s59E25H2" 0 "2'-5'-RNA ligase"  
"JS1\_N06\_01608" 20538 "s59E5H2" 0 "2'-5'-RNA ligase"  
"JS1\_N06\_01608" 20538 "s63E6H2" 0.09327943 "2'-5'-RNA ligase"  
"JS1\_N06\_01609" 20539 "s59E13H2" 0.01278181 "DNA repair and recombination protein RadaA"  
"JS1\_N06\_01609" 20539 "s59E25H2" 0 "DNA repair and recombination protein RadaA"  
"JS1\_N06\_01609" 20539 "s59E5H2" 0.1863188 "DNA repair and recombination protein RadaA"  
"JS1\_N06\_01609" 20539 "s63E6H2" 0.2898143 "DNA repair and recombination protein RadaA"  
"JS1\_N06\_01610" 20540 "s59E13H2" 0 "recombination regulator RecX"  
"JS1\_N06\_01610" 20540 "s59E25H2" 0 "recombination regulator RecX"  
"JS1\_N06\_01610" 20540 "s59E5H2" 0 "recombination regulator RecX"  
"JS1\_N06\_01610" 20540 "s63E6H2" 0 "recombination regulator RecX"  
"JS1\_N06\_01611" 20541 "s59E13H2" 0.02345392 "Ribonuclease Y"  
"JS1\_N06\_01611" 20541 "s59E25H2" 0 "Ribonuclease Y"  
"JS1\_N06\_01611" 20541 "s59E5H2" 0.07602819 "Ribonuclease Y"  
"JS1\_N06\_01611" 20541 "s63E6H2" 0.09205428 "Ribonuclease Y"  
"JS1\_N06\_01612" 20542 "s59E13H2" 0.00129565 "(Dimethylallyl)adenosine tRNA methylthiotransferase MiaB"  
"JS1\_N06\_01612" 20542 "s59E25H2" 0 "(Dimethylallyl)adenosine tRNA methylthiotransferase MiaB"  
"JS1\_N06\_01612" 20542 "s59E5H2" 0.01195707 "(Dimethylallyl)adenosine tRNA methylthiotransferase MiaB"  
"JS1\_N06\_01612" 20542 "s63E6H2" 0.03595767 "(Dimethylallyl)adenosine tRNA methylthiotransferase MiaB"  
"JS1\_N06\_01616" 20546 "s59E13H2" 0 "hypothetical protein"  
"JS1\_N06\_01616" 20546 "s59E25H2" 0 "hypothetical protein"  
"JS1\_N06\_01616" 20546 "s59E5H2" 0 "hypothetical protein"  
"JS1\_N06\_01616" 20546 "s63E6H2" 0 "hypothetical protein"  
"JS1\_N06\_01618" 20548 "s59E13H2" 0.2853717 "putative NH(3)-dependent NAD(+) synthetase"  
"JS1\_N06\_01618" 20548 "s59E25H2" 0 "putative NH(3)-dependent NAD(+) synthetase"  
"JS1\_N06\_01618" 20548 "s59E5H2" 0.1311738 "putative NH(3)-dependent NAD(+) synthetase"  
"JS1\_N06\_01618" 20548 "s63E6H2" 1.009608 "putative NH(3)-dependent NAD(+) synthetase"  
"JS1\_N06\_01619" 20549 "s59E13H2" 0.1016517 "putative transcriptional regulatory protein"  
"JS1\_N06\_01619" 20549 "s59E25H2" 0 "putative transcriptional regulatory protein"  
"JS1\_N06\_01619" 20549 "s59E5H2" 0.04467233 "putative transcriptional regulatory protein"  
"JS1\_N06\_01619" 20549 "s63E6H2" 0.2401598 "putative transcriptional regulatory protein"  
"JS1\_N06\_01620" 20550 "s59E13H2" 0.1849951 "Crossover junction endodeoxyribonuclease RuvC"  
"JS1\_N06\_01620" 20550 "s59E25H2" 0 "Crossover junction endodeoxyribonuclease RuvC"

"JS1\_N06\_01620" 20550 "s59E5H2" 2.487382 "Crossover junction endodeoxyribonuclease RuvC"  
"JS1\_N06\_01620" 20550 "s63E6H2" 0.08241245 "Crossover junction endodeoxyribonuclease RuvC"  
"JS1\_N06\_01621" 20551 "s59E13H2" 0.3220993 "Holliday junction ATP-dependent DNA helicase RuvA"  
"JS1\_N06\_01621" 20551 "s59E25H2" 0 "Holliday junction ATP-dependent DNA helicase RuvA"  
"JS1\_N06\_01621" 20551 "s59E5H2" 0.08539276 "Holliday junction ATP-dependent DNA helicase RuvA"  
"JS1\_N06\_01621" 20551 "s63E6H2" 0.06755109 "Holliday junction ATP-dependent DNA helicase RuvA"  
"JS1\_N06\_01622" 20552 "s59E13H2" 0.2685677 "Holliday junction ATP-dependent DNA helicase RuvB"  
"JS1\_N06\_01622" 20552 "s59E25H2" 0 "Holliday junction ATP-dependent DNA helicase RuvB"  
"JS1\_N06\_01622" 20552 "s59E5H2" 0.1038187 "Holliday junction ATP-dependent DNA helicase RuvB"  
"JS1\_N06\_01622" 20552 "s63E6H2" 0.07318988 "Holliday junction ATP-dependent DNA helicase RuvB"  
"JS1\_N06\_01623" 20553 "s59E13H2" 0.1824093 "Amidase enhancer precursor"  
"JS1\_N06\_01623" 20553 "s59E25H2" 0 "Amidase enhancer precursor"  
"JS1\_N06\_01623" 20553 "s59E5H2" 0.1135863 "Amidase enhancer precursor"  
"JS1\_N06\_01623" 20553 "s63E6H2" 0.01431953 "Amidase enhancer precursor"  
"JS1\_N06\_01624" 20554 "s59E13H2" 0.6958634 "S-adenosylmethionine:tRNA ribosyltransferase-isomerase"  
"JS1\_N06\_01624" 20554 "s59E25H2" 0 "S-adenosylmethionine:tRNA ribosyltransferase-isomerase"  
"JS1\_N06\_01624" 20554 "s59E5H2" 0.1474653 "S-adenosylmethionine:tRNA ribosyltransferase-isomerase"  
"JS1\_N06\_01624" 20554 "s63E6H2" 0.05643282 "S-adenosylmethionine:tRNA ribosyltransferase-isomerase"  
"JS1\_N06\_01625" 20555 "s59E13H2" 0.01658786 "Queuine tRNA-ribosyltransferase"  
"JS1\_N06\_01625" 20555 "s59E25H2" 0 "Queuine tRNA-ribosyltransferase"  
"JS1\_N06\_01625" 20555 "s59E5H2" 0.07629912 "Queuine tRNA-ribosyltransferase"  
"JS1\_N06\_01625" 20555 "s63E6H2" 0.08241913 "Queuine tRNA-ribosyltransferase"  
"JS1\_N06\_01626" 20556 "s59E13H2" 0.004530463 "preprotein translocase subunit YajC"  
"JS1\_N06\_01626" 20556 "s59E25H2" 0 "preprotein translocase subunit YajC"  
"JS1\_N06\_01626" 20556 "s59E5H2" 0.04441145 "preprotein translocase subunit YajC"  
"JS1\_N06\_01626" 20556 "s63E6H2" 0.04539669 "preprotein translocase subunit YajC"  
"JS1\_N06\_01627" 20557 "s59E13H2" 0.0610819 "preprotein translocase subunit SecD"  
"JS1\_N06\_01627" 20557 "s59E25H2" 0 "preprotein translocase subunit SecD"  
"JS1\_N06\_01627" 20557 "s59E5H2" 0.3746666 "preprotein translocase subunit SecD"  
"JS1\_N06\_01627" 20557 "s63E6H2" 0.1557748 "preprotein translocase subunit SecD"  
"JS1\_N06\_01628" 20558 "s59E13H2" 0.001908037 "Protein-export membrane protein SecF"  
"JS1\_N06\_01628" 20558 "s59E25H2" 0 "Protein-export membrane protein SecF"  
"JS1\_N06\_01628" 20558 "s59E5H2" 0.1636588 "Protein-export membrane protein SecF"  
"JS1\_N06\_01628" 20558 "s63E6H2" 0.2177648 "Protein-export membrane protein SecF"  
"JS1\_N06\_01629" 20559 "s59E13H2" 0.009971934 "Single-stranded-DNA-specific exonuclease RecJ"  
"JS1\_N06\_01629" 20559 "s59E25H2" 0 "Single-stranded-DNA-specific exonuclease RecJ"  
"JS1\_N06\_01629" 20559 "s59E5H2" 0.2628609 "Single-stranded-DNA-specific exonuclease RecJ"  
"JS1\_N06\_01629" 20559 "s63E6H2" 0.5303816 "Single-stranded-DNA-specific exonuclease RecJ"  
"JS1\_N06\_01630" 20560 "s59E13H2" 0.002251521 "Adenine phosphoribosyltransferase"  
"JS1\_N06\_01630" 20560 "s59E25H2" 0 "Adenine phosphoribosyltransferase"  
"JS1\_N06\_01630" 20560 "s59E5H2" 0.04585515 "Adenine phosphoribosyltransferase"  
"JS1\_N06\_01630" 20560 "s63E6H2" 0.4792917 "Adenine phosphoribosyltransferase"  
"JS1\_N06\_01631" 20561 "s59E13H2" 0.02810968 "GTP pyrophosphokinase"  
"JS1\_N06\_01631" 20561 "s59E25H2" 0 "GTP pyrophosphokinase"  
"JS1\_N06\_01631" 20561 "s59E5H2" 0.1240408 "GTP pyrophosphokinase"  
"JS1\_N06\_01631" 20561 "s63E6H2" 0.4961132 "GTP pyrophosphokinase"  
"JS1\_N06\_01632" 20562 "s59E13H2" 0 "D-tyrosyl-tRNA(Tyr) deacylase"

"JS1\_N06\_01632" 20562 "s59E25H2" 0 "D-tyrosyl-tRNA(Tyr) deacylase"  
"JS1\_N06\_01632" 20562 "s59E5H2" 0.03162018 "D-tyrosyl-tRNA(Tyr) deacylase"  
"JS1\_N06\_01632" 20562 "s63E6H2" 0.4336834 "D-tyrosyl-tRNA(Tyr) deacylase"  
"JS1\_N06\_01633" 20563 "s59E13H2" 0 "putative glycerophosphoryl diester phosphodiesterase 1"  
"JS1\_N06\_01633" 20563 "s59E25H2" 0 "putative glycerophosphoryl diester phosphodiesterase 1"  
"JS1\_N06\_01633" 20563 "s59E5H2" 0 "putative glycerophosphoryl diester phosphodiesterase 1"  
"JS1\_N06\_01633" 20563 "s63E6H2" 0.281029 "putative glycerophosphoryl diester phosphodiesterase 1"  
"JS1\_N06\_01634" 20564 "s59E13H2" 0 "hypothetical protein"  
"JS1\_N06\_01634" 20564 "s59E25H2" 0 "hypothetical protein"  
"JS1\_N06\_01634" 20564 "s59E5H2" 0 "hypothetical protein"  
"JS1\_N06\_01634" 20564 "s63E6H2" 0.289125 "hypothetical protein"  
"JS1\_N06\_01635" 20565 "s59E13H2" 0 "Glycerophosphoryl diester phosphodiesterase family protein"  
"JS1\_N06\_01635" 20565 "s59E25H2" 0 "Glycerophosphoryl diester phosphodiesterase family protein"  
"JS1\_N06\_01635" 20565 "s59E5H2" 0 "Glycerophosphoryl diester phosphodiesterase family protein"  
"JS1\_N06\_01635" 20565 "s63E6H2" 0.03855645 "Glycerophosphoryl diester phosphodiesterase family protein"  
"JS1\_N06\_01636" 20566 "s59E13H2" 0 "putative metallo-hydrolase"  
"JS1\_N06\_01636" 20566 "s59E25H2" 0.6682692 "putative metallo-hydrolase"  
"JS1\_N06\_01636" 20566 "s59E5H2" 0 "putative metallo-hydrolase"  
"JS1\_N06\_01636" 20566 "s63E6H2" 0.2310617 "putative metallo-hydrolase"  
"JS1\_N06\_01637" 20567 "s59E13H2" 0.005201477 "Adenosylhomocysteinase"  
"JS1\_N06\_01637" 20567 "s59E25H2" 0 "Adenosylhomocysteinase"  
"JS1\_N06\_01637" 20567 "s59E5H2" 0.09313041 "Adenosylhomocysteinase"  
"JS1\_N06\_01637" 20567 "s63E6H2" 0.5230414 "Adenosylhomocysteinase"  
"JS1\_N06\_01638" 20568 "s59E13H2" 0.007065999 "DNA utilization protein GntX"  
"JS1\_N06\_01638" 20568 "s59E25H2" 0 "DNA utilization protein GntX"  
"JS1\_N06\_01638" 20568 "s59E5H2" 0.0528168 "DNA utilization protein GntX"  
"JS1\_N06\_01638" 20568 "s63E6H2" 0.5053289 "DNA utilization protein GntX"  
"JS1\_N06\_01639" 20569 "s59E13H2" 0 "Ribosome-associated factor Y"  
"JS1\_N06\_01639" 20569 "s59E25H2" 0 "Ribosome-associated factor Y"  
"JS1\_N06\_01639" 20569 "s59E5H2" 0.00243176 "Ribosome-associated factor Y"  
"JS1\_N06\_01639" 20569 "s63E6H2" 0.4691748 "Ribosome-associated factor Y"  
"JS1\_N06\_01641" 20571 "s59E13H2" 0.008964986 "hypothetical protein"  
"JS1\_N06\_01641" 20571 "s59E25H2" 0 "hypothetical protein"  
"JS1\_N06\_01641" 20571 "s59E5H2" 0.1889567 "hypothetical protein"  
"JS1\_N06\_01641" 20571 "s63E6H2" 0.5133622 "hypothetical protein"  
"JS1\_N06\_01642" 20572 "s59E13H2" 0.002110817 "Cyclic di-GMP phosphodiesterase response regulator RpfG"  
"JS1\_N06\_01642" 20572 "s59E25H2" 0 "Cyclic di-GMP phosphodiesterase response regulator RpfG"  
"JS1\_N06\_01642" 20572 "s59E5H2" 0.1170411 "Cyclic di-GMP phosphodiesterase response regulator RpfG"  
"JS1\_N06\_01642" 20572 "s63E6H2" 0.3499394 "Cyclic di-GMP phosphodiesterase response regulator RpfG"  
"JS1\_N06\_01643" 20573 "s59E13H2" 0.004776174 "hypothetical protein"  
"JS1\_N06\_01643" 20573 "s59E25H2" 0 "hypothetical protein"  
"JS1\_N06\_01643" 20573 "s59E5H2" 0.06500905 "hypothetical protein"  
"JS1\_N06\_01643" 20573 "s63E6H2" 0.5424347 "hypothetical protein"  
"JS1\_N06\_01644" 20574 "s59E13H2" 0.002444406 "preprotein translocase subunit SecA"  
"JS1\_N06\_01644" 20574 "s59E25H2" 0 "preprotein translocase subunit SecA"  
"JS1\_N06\_01644" 20574 "s59E5H2" 0.03903876 "preprotein translocase subunit SecA"  
"JS1\_N06\_01644" 20574 "s63E6H2" 0.3564494 "preprotein translocase subunit SecA"

"JS1\_N06\_01645" 20575 "s59E13H2" 0.001381424 "preprotein translocase subunit SecA"  
"JS1\_N06\_01645" 20575 "s59E25H2" 0 "preprotein translocase subunit SecA"  
"JS1\_N06\_01645" 20575 "s59E5H2" 0.03317662 "preprotein translocase subunit SecA"  
"JS1\_N06\_01645" 20575 "s63E6H2" 0.3909456 "preprotein translocase subunit SecA"  
"JS1\_N06\_01646" 20576 "s59E13H2" 0 "Peptide chain release factor 2"  
"JS1\_N06\_01646" 20576 "s59E25H2" 0 "Peptide chain release factor 2"  
"JS1\_N06\_01646" 20576 "s59E5H2" 0.01557502 "Peptide chain release factor 2"  
"JS1\_N06\_01646" 20576 "s63E6H2" 0.5887973 "Peptide chain release factor 2"  
"JS1\_N06\_01647" 20577 "s59E13H2" 0 "Acryloyl-CoA reductase electron transfer subunit gamma"  
"JS1\_N06\_01647" 20577 "s59E25H2" 0 "Acryloyl-CoA reductase electron transfer subunit gamma"  
"JS1\_N06\_01647" 20577 "s59E5H2" 0 "Acryloyl-CoA reductase electron transfer subunit gamma"  
"JS1\_N06\_01647" 20577 "s63E6H2" 0.05643066 "Acryloyl-CoA reductase electron transfer subunit gamma"  
"JS1\_N06\_01648" 20578 "s59E13H2" 0 "Acryloyl-CoA reductase electron transfer subunit beta"  
"JS1\_N06\_01648" 20578 "s59E25H2" 0 "Acryloyl-CoA reductase electron transfer subunit beta"  
"JS1\_N06\_01648" 20578 "s59E5H2" 0 "Acryloyl-CoA reductase electron transfer subunit beta"  
"JS1\_N06\_01648" 20578 "s63E6H2" 0.02324822 "Acryloyl-CoA reductase electron transfer subunit beta"  
"JS1\_N06\_01649" 20579 "s59E13H2" 0 "hypothetical protein"  
"JS1\_N06\_01649" 20579 "s59E25H2" 0 "hypothetical protein"  
"JS1\_N06\_01649" 20579 "s59E5H2" 0 "hypothetical protein"  
"JS1\_N06\_01649" 20579 "s63E6H2" 0.01754177 "hypothetical protein"  
"JS1\_N06\_01650" 20580 "s59E13H2" 0 "Methenyltetrahydrofolate cyclohydrolase"  
"JS1\_N06\_01650" 20580 "s59E25H2" 0 "Methenyltetrahydrofolate cyclohydrolase"  
"JS1\_N06\_01650" 20580 "s59E5H2" 0.006464008 "Methenyltetrahydrofolate cyclohydrolase"  
"JS1\_N06\_01650" 20580 "s63E6H2" 0.0738338 "Methenyltetrahydrofolate cyclohydrolase"  
"JS1\_N06\_01651" 20581 "s59E13H2" 0.007373688 "Glutamate 2,3-aminomutase"  
"JS1\_N06\_01651" 20581 "s59E25H2" 0 "Glutamate 2,3-aminomutase"  
"JS1\_N06\_01651" 20581 "s59E5H2" 0.01910858 "Glutamate 2,3-aminomutase"  
"JS1\_N06\_01651" 20581 "s63E6H2" 0.06340068 "Glutamate 2,3-aminomutase"  
"JS1\_N06\_01652" 20582 "s59E13H2" 0 "alkanesulfonate transporter substrate-binding subunit"  
"JS1\_N06\_01652" 20582 "s59E25H2" 0 "alkanesulfonate transporter substrate-binding subunit"  
"JS1\_N06\_01652" 20582 "s59E5H2" 0.04812217 "alkanesulfonate transporter substrate-binding subunit"  
"JS1\_N06\_01652" 20582 "s63E6H2" 0.04240112 "alkanesulfonate transporter substrate-binding subunit"  
"JS1\_N06\_01653" 20583 "s59E13H2" 0.03025001 "hypothetical protein"  
"JS1\_N06\_01653" 20583 "s59E25H2" 0 "hypothetical protein"  
"JS1\_N06\_01653" 20583 "s59E5H2" 0.1941276 "hypothetical protein"  
"JS1\_N06\_01653" 20583 "s63E6H2" 0.04162525 "hypothetical protein"  
"JS1\_N06\_01654" 20584 "s59E13H2" 0.03949462 "Sialic acid TRAP transporter permease protein SiaT"  
"JS1\_N06\_01654" 20584 "s59E25H2" 0 "Sialic acid TRAP transporter permease protein SiaT"  
"JS1\_N06\_01654" 20584 "s59E5H2" 0.3872104 "Sialic acid TRAP transporter permease protein SiaT"  
"JS1\_N06\_01654" 20584 "s63E6H2" 0.04867666 "Sialic acid TRAP transporter permease protein SiaT"  
"JS1\_N06\_01655" 20585 "s59E13H2" 0.01743424 "HTH-type transcriptional repressor YtrA"  
"JS1\_N06\_01655" 20585 "s59E25H2" 0 "HTH-type transcriptional repressor YtrA"  
"JS1\_N06\_01655" 20585 "s59E5H2" 0.2082047 "HTH-type transcriptional repressor YtrA"  
"JS1\_N06\_01655" 20585 "s63E6H2" 0.147899 "HTH-type transcriptional repressor YtrA"  
"JS1\_N06\_01656" 20586 "s59E13H2" 0.005209539 "Ferredoxin"  
"JS1\_N06\_01656" 20586 "s59E25H2" 0 "Ferredoxin"  
"JS1\_N06\_01656" 20586 "s59E5H2" 0.2437764 "Ferredoxin"



"JS1\_N06\_01656" 20586 "s63E6H2" 0.1299667 "Ferredoxin"  
"JS1\_N06\_01657" 20587 "s59E13H2" 0.06815879 "2-oxoglutarate synthase subunit KorA"  
"JS1\_N06\_01657" 20587 "s59E25H2" 0 "2-oxoglutarate synthase subunit KorA"  
"JS1\_N06\_01657" 20587 "s59E5H2" 0.1949338 "2-oxoglutarate synthase subunit KorA"  
"JS1\_N06\_01657" 20587 "s63E6H2" 0.2545775 "2-oxoglutarate synthase subunit KorA"  
"JS1\_N06\_01658" 20588 "s59E13H2" 0.03680248 "2-oxoglutarate synthase subunit KorB"  
"JS1\_N06\_01658" 20588 "s59E25H2" 0 "2-oxoglutarate synthase subunit KorB"  
"JS1\_N06\_01658" 20588 "s59E5H2" 0.1733951 "2-oxoglutarate synthase subunit KorB"  
"JS1\_N06\_01658" 20588 "s63E6H2" 0.1004111 "2-oxoglutarate synthase subunit KorB"  
"JS1\_N06\_01659" 20589 "s59E13H2" 0.04595704 "2-oxoglutarate synthase subunit KorC"  
"JS1\_N06\_01659" 20589 "s59E25H2" 0 "2-oxoglutarate synthase subunit KorC"  
"JS1\_N06\_01659" 20589 "s59E5H2" 0.2761837 "2-oxoglutarate synthase subunit KorC"  
"JS1\_N06\_01659" 20589 "s63E6H2" 0.1243899 "2-oxoglutarate synthase subunit KorC"  
"JS1\_N06\_01660" 20590 "s59E13H2" 0.06630651 "Acetate kinase"  
"JS1\_N06\_01660" 20590 "s59E25H2" 0 "Acetate kinase"  
"JS1\_N06\_01660" 20590 "s59E5H2" 0.2218568 "Acetate kinase"  
"JS1\_N06\_01660" 20590 "s63E6H2" 0.06290523 "Acetate kinase"  
"JS1\_N06\_01661" 20591 "s59E13H2" 0.06262465 "Sulfide dehydrogenase subunit beta precursor"  
"JS1\_N06\_01661" 20591 "s59E25H2" 0 "Sulfide dehydrogenase subunit beta precursor"  
"JS1\_N06\_01661" 20591 "s59E5H2" 0.2909987 "Sulfide dehydrogenase subunit beta precursor"  
"JS1\_N06\_01661" 20591 "s63E6H2" 0.130067 "Sulfide dehydrogenase subunit beta precursor"  
"JS1\_N06\_01662" 20592 "s59E13H2" 0.1023985 "Sulfide dehydrogenase subunit alpha precursor"  
"JS1\_N06\_01662" 20592 "s59E25H2" 0 "Sulfide dehydrogenase subunit alpha precursor"  
"JS1\_N06\_01662" 20592 "s59E5H2" 0.1706189 "Sulfide dehydrogenase subunit alpha precursor"  
"JS1\_N06\_01662" 20592 "s63E6H2" 0.2308773 "Sulfide dehydrogenase subunit alpha precursor"  
"JS1\_N06\_01663" 20593 "s59E13H2" 0.04096604 "Glutamate dehydrogenase"  
"JS1\_N06\_01663" 20593 "s59E25H2" 0 "Glutamate dehydrogenase"  
"JS1\_N06\_01663" 20593 "s59E5H2" 0.01838572 "Glutamate dehydrogenase"  
"JS1\_N06\_01663" 20593 "s63E6H2" 0.3668816 "Glutamate dehydrogenase"  
"JS1\_N06\_01664" 20594 "s59E13H2" 0.1110834 "hypothetical protein"  
"JS1\_N06\_01664" 20594 "s59E25H2" 0 "hypothetical protein"  
"JS1\_N06\_01664" 20594 "s59E5H2" 0.2049483 "hypothetical protein"  
"JS1\_N06\_01664" 20594 "s63E6H2" 0.09741123 "hypothetical protein"  
"JS1\_N06\_01665" 20595 "s59E13H2" 0.128252 "Methylmalonyl-CoA mutase"  
"JS1\_N06\_01665" 20595 "s59E25H2" 0 "Methylmalonyl-CoA mutase"  
"JS1\_N06\_01665" 20595 "s59E5H2" 0.07230626 "Methylmalonyl-CoA mutase"  
"JS1\_N06\_01665" 20595 "s63E6H2" 0.1861312 "Methylmalonyl-CoA mutase"  
"JS1\_N06\_01666" 20596 "s59E13H2" 0.1254114 "Methylmalonyl-CoA mutase"  
"JS1\_N06\_01666" 20596 "s59E25H2" 0 "Methylmalonyl-CoA mutase"  
"JS1\_N06\_01666" 20596 "s59E5H2" 0.0740172 "Methylmalonyl-CoA mutase"  
"JS1\_N06\_01666" 20596 "s63E6H2" 0.510952 "Methylmalonyl-CoA mutase"  
"JS1\_N06\_01667" 20597 "s59E13H2" 0.06877586 "putative GTPase/MT1543"  
"JS1\_N06\_01667" 20597 "s59E25H2" 0 "putative GTPase/MT1543"  
"JS1\_N06\_01667" 20597 "s59E5H2" 0.04770929 "putative GTPase/MT1543"  
"JS1\_N06\_01667" 20597 "s63E6H2" 0.5553996 "putative GTPase/MT1543"  
"JS1\_N06\_01668" 20598 "s59E13H2" 0.04516842 "putative lyase"  
"JS1\_N06\_01668" 20598 "s59E25H2" 0 "putative lyase"

"JS1\_N06\_01668" 20598 "s59E5H2" 0.1033148 "putative lyase"  
"JS1\_N06\_01668" 20598 "s63E6H2" 0.6872749 "putative lyase"  
"JS1\_N06\_01669" 20599 "s59E13H2" 0.08566503 "Methylmalonyl-CoA carboxyltransferase 12S subunit"  
"JS1\_N06\_01669" 20599 "s59E25H2" 0 "Methylmalonyl-CoA carboxyltransferase 12S subunit"  
"JS1\_N06\_01669" 20599 "s59E5H2" 0.1368158 "Methylmalonyl-CoA carboxyltransferase 12S subunit"  
"JS1\_N06\_01669" 20599 "s63E6H2" 0.8673315 "Methylmalonyl-CoA carboxyltransferase 12S subunit"  
"JS1\_N06\_01670" 20600 "s59E13H2" 0 "Oxaloacetate decarboxylase, gamma chain"  
"JS1\_N06\_01670" 20600 "s59E25H2" 0 "Oxaloacetate decarboxylase, gamma chain"  
"JS1\_N06\_01670" 20600 "s59E5H2" 0 "Oxaloacetate decarboxylase, gamma chain"  
"JS1\_N06\_01670" 20600 "s63E6H2" 0.7650105 "Oxaloacetate decarboxylase, gamma chain"  
"JS1\_N06\_01671" 20601 "s59E13H2" 0.002116919 "2-oxoglutarate carboxylase large subunit"  
"JS1\_N06\_01671" 20601 "s59E25H2" 0 "2-oxoglutarate carboxylase large subunit"  
"JS1\_N06\_01671" 20601 "s59E5H2" 0.003955036 "2-oxoglutarate carboxylase large subunit"  
"JS1\_N06\_01671" 20601 "s63E6H2" 0.8126131 "2-oxoglutarate carboxylase large subunit"  
"JS1\_N06\_01672" 20602 "s59E13H2" 0.08474137 "Glutaconyl-CoA decarboxylase subunit beta"  
"JS1\_N06\_01672" 20602 "s59E25H2" 0 "Glutaconyl-CoA decarboxylase subunit beta"  
"JS1\_N06\_01672" 20602 "s59E5H2" 0.1675502 "Glutaconyl-CoA decarboxylase subunit beta"  
"JS1\_N06\_01672" 20602 "s63E6H2" 0.8542679 "Glutaconyl-CoA decarboxylase subunit beta"  
"JS1\_N06\_01673" 20603 "s59E13H2" 0.03345111 "hypothetical protein"  
"JS1\_N06\_01673" 20603 "s59E25H2" 0 "hypothetical protein"  
"JS1\_N06\_01673" 20603 "s59E5H2" 0.07022668 "hypothetical protein"  
"JS1\_N06\_01673" 20603 "s63E6H2" 0.4110723 "hypothetical protein"  
"JS1\_N06\_01674" 20604 "s59E13H2" 0.02339441 "colanic acid biosynthesis protein"  
"JS1\_N06\_01674" 20604 "s59E25H2" 0 "colanic acid biosynthesis protein"  
"JS1\_N06\_01674" 20604 "s59E5H2" 0.1620887 "colanic acid biosynthesis protein"  
"JS1\_N06\_01674" 20604 "s63E6H2" 0.09809641 "colanic acid biosynthesis protein"  
"JS1\_N06\_01675" 20605 "s59E13H2" 0.03191329 "Cell division ATP-binding protein FtsE"  
"JS1\_N06\_01675" 20605 "s59E25H2" 0 "Cell division ATP-binding protein FtsE"  
"JS1\_N06\_01675" 20605 "s59E5H2" 0.2991605 "Cell division ATP-binding protein FtsE"  
"JS1\_N06\_01675" 20605 "s63E6H2" 0.219737 "Cell division ATP-binding protein FtsE"  
"JS1\_N06\_01676" 20606 "s59E13H2" 0.005438723 "Cell division protein FtsX"  
"JS1\_N06\_01676" 20606 "s59E25H2" 0 "Cell division protein FtsX"  
"JS1\_N06\_01676" 20606 "s59E5H2" 0.03322947 "Cell division protein FtsX"  
"JS1\_N06\_01676" 20606 "s63E6H2" 0.2584969 "Cell division protein FtsX"  
"JS1\_N06\_01677" 20607 "s59E13H2" 0 "Murein hydrolase activator EnvC precursor"  
"JS1\_N06\_01677" 20607 "s59E25H2" 0 "Murein hydrolase activator EnvC precursor"  
"JS1\_N06\_01677" 20607 "s59E5H2" 0.0134097 "Murein hydrolase activator EnvC precursor"  
"JS1\_N06\_01677" 20607 "s63E6H2" 0.1189339 "Murein hydrolase activator EnvC precursor"  
"JS1\_N06\_01678" 20608 "s59E13H2" 0.02470942 "putative CtpA-like serine protease"  
"JS1\_N06\_01678" 20608 "s59E25H2" 0 "putative CtpA-like serine protease"  
"JS1\_N06\_01678" 20608 "s59E5H2" 0.08467956 "putative CtpA-like serine protease"  
"JS1\_N06\_01678" 20608 "s63E6H2" 0.0624953 "putative CtpA-like serine protease"  
"JS1\_N06\_01679" 20609 "s59E13H2" 0 "Divergent polysaccharide deacetylase"  
"JS1\_N06\_01679" 20609 "s59E25H2" 0 "Divergent polysaccharide deacetylase"  
"JS1\_N06\_01679" 20609 "s59E5H2" 0.01601747 "Divergent polysaccharide deacetylase"  
"JS1\_N06\_01679" 20609 "s63E6H2" 0.01737034 "Divergent polysaccharide deacetylase"  
"JS1\_N06\_01680" 20610 "s59E13H2" 0.002567785 "Glutamate--tRNA ligase"

"JS1\_N06\_01680" 20610 "s59E25H2" 0 "Glutamate--tRNA ligase"  
"JS1\_N06\_01680" 20610 "s59E5H2" 0.004296822 "Glutamate--tRNA ligase"  
"JS1\_N06\_01680" 20610 "s63E6H2" 0.01404937 "Glutamate--tRNA ligase"  
"JS1\_N06\_01683" 20613 "s59E13H2" 0 "Transcription elongation factor GreA"  
"JS1\_N06\_01683" 20613 "s59E25H2" 0 "Transcription elongation factor GreA"  
"JS1\_N06\_01683" 20613 "s59E5H2" 0.008324037 "Transcription elongation factor GreA"  
"JS1\_N06\_01683" 20613 "s63E6H2" 0.01530521 "Transcription elongation factor GreA"  
"JS1\_N06\_01684" 20614 "s59E13H2" 0 "Threonylcarbamoyl-AMP synthase"  
"JS1\_N06\_01684" 20614 "s59E25H2" 0 "Threonylcarbamoyl-AMP synthase"  
"JS1\_N06\_01684" 20614 "s59E5H2" 0 "Threonylcarbamoyl-AMP synthase"  
"JS1\_N06\_01684" 20614 "s63E6H2" 0.02014545 "Threonylcarbamoyl-AMP synthase"  
"JS1\_N06\_01685" 20615 "s59E13H2" 0.02596052 "Chorismate mutase AroH"  
"JS1\_N06\_01685" 20615 "s59E25H2" 0 "Chorismate mutase AroH"  
"JS1\_N06\_01685" 20615 "s59E5H2" 0.06279999 "Chorismate mutase AroH"  
"JS1\_N06\_01685" 20615 "s63E6H2" 0.1077078 "Chorismate mutase AroH"  
"JS1\_N06\_01686" 20616 "s59E13H2" 0.01047632 "Phospho-2-dehydro-3-deoxyheptonate aldolase"  
"JS1\_N06\_01686" 20616 "s59E25H2" 0 "Phospho-2-dehydro-3-deoxyheptonate aldolase"  
"JS1\_N06\_01686" 20616 "s59E5H2" 0.09884076 "Phospho-2-dehydro-3-deoxyheptonate aldolase"  
"JS1\_N06\_01686" 20616 "s63E6H2" 0.288925 "Phospho-2-dehydro-3-deoxyheptonate aldolase"  
"JS1\_N06\_01687" 20617 "s59E13H2" 0.00159062 "3-phosphoshikimate 1-carboxyvinyltransferase 1"  
"JS1\_N06\_01687" 20617 "s59E25H2" 0 "3-phosphoshikimate 1-carboxyvinyltransferase 1"  
"JS1\_N06\_01687" 20617 "s59E5H2" 0.1453275 "3-phosphoshikimate 1-carboxyvinyltransferase 1"  
"JS1\_N06\_01687" 20617 "s63E6H2" 0.2565979 "3-phosphoshikimate 1-carboxyvinyltransferase 1"  
"JS1\_N06\_01688" 20618 "s59E13H2" 0 "Shikimate dehydrogenase"  
"JS1\_N06\_01688" 20618 "s59E25H2" 0 "Shikimate dehydrogenase"  
"JS1\_N06\_01688" 20618 "s59E5H2" 0.02118557 "Shikimate dehydrogenase"  
"JS1\_N06\_01688" 20618 "s63E6H2" 0.1202886 "Shikimate dehydrogenase"  
"JS1\_N06\_01689" 20619 "s59E13H2" 0.001271257 "Chorismate synthase"  
"JS1\_N06\_01689" 20619 "s59E25H2" 0 "Chorismate synthase"  
"JS1\_N06\_01689" 20619 "s59E5H2" 0.04831068 "Chorismate synthase"  
"JS1\_N06\_01689" 20619 "s63E6H2" 0.1585589 "Chorismate synthase"  
"JS1\_N06\_01690" 20620 "s59E13H2" 0.02231755 "Shikimate kinase"  
"JS1\_N06\_01690" 20620 "s59E25H2" 0 "Shikimate kinase"  
"JS1\_N06\_01690" 20620 "s59E5H2" 0.149445 "Shikimate kinase"  
"JS1\_N06\_01690" 20620 "s63E6H2" 0.205973 "Shikimate kinase"  
"JS1\_N06\_01691" 20621 "s59E13H2" 0.03958396 "3-dehydroquinate synthase"  
"JS1\_N06\_01691" 20621 "s59E25H2" 0 "3-dehydroquinate synthase"  
"JS1\_N06\_01691" 20621 "s59E5H2" 0.3372692 "3-dehydroquinate synthase"  
"JS1\_N06\_01691" 20621 "s63E6H2" 0.3341318 "3-dehydroquinate synthase"  
"JS1\_N06\_01692" 20622 "s59E13H2" 0.02565637 "3-dehydroquinate dehydratase"  
"JS1\_N06\_01692" 20622 "s59E25H2" 0 "3-dehydroquinate dehydratase"  
"JS1\_N06\_01692" 20622 "s59E5H2" 0.09218645 "3-dehydroquinate dehydratase"  
"JS1\_N06\_01692" 20622 "s63E6H2" 0.07979068 "3-dehydroquinate dehydratase"  
"JS1\_N06\_01693" 20623 "s59E13H2" 0.001983898 "prephenate dehydrogenase"  
"JS1\_N06\_01693" 20623 "s59E25H2" 0 "prephenate dehydrogenase"  
"JS1\_N06\_01693" 20623 "s59E5H2" 0.01502324 "prephenate dehydrogenase"  
"JS1\_N06\_01693" 20623 "s63E6H2" 0.04634327 "prephenate dehydrogenase"

"JS1\_N06\_01694" 20624 "s59E13H2" 0.5696051 "SsrA-binding protein"  
"JS1\_N06\_01694" 20624 "s59E25H2" 0 "SsrA-binding protein"  
"JS1\_N06\_01694" 20624 "s59E5H2" 0.3085295 "SsrA-binding protein"  
"JS1\_N06\_01694" 20624 "s63E6H2" 0.2407525 "SsrA-binding protein"  
"JS1\_N06\_01697" 20627 "s59E13H2" 0 "hypothetical protein"  
"JS1\_N06\_01697" 20627 "s59E25H2" 0 "hypothetical protein"  
"JS1\_N06\_01697" 20627 "s59E5H2" 0 "hypothetical protein"  
"JS1\_N06\_01697" 20627 "s63E6H2" 0.003198955 "hypothetical protein"  
"JS1\_N06\_01712" 20642 "s59E13H2" 0 "hypothetical protein"  
"JS1\_N06\_01712" 20642 "s59E25H2" 0 "hypothetical protein"  
"JS1\_N06\_01712" 20642 "s59E5H2" 0 "hypothetical protein"  
"JS1\_N06\_01712" 20642 "s63E6H2" 0.001537075 "hypothetical protein"  
"JS1\_N06\_01714" 20644 "s59E13H2" 0 "Ion channel"  
"JS1\_N06\_01714" 20644 "s59E25H2" 0 "Ion channel"  
"JS1\_N06\_01714" 20644 "s59E5H2" 0 "Ion channel"  
"JS1\_N06\_01714" 20644 "s63E6H2" 0 "Ion channel"  
"JS1\_N06\_01715" 20645 "s59E13H2" 0 "hypothetical protein"  
"JS1\_N06\_01715" 20645 "s59E25H2" 0 "hypothetical protein"  
"JS1\_N06\_01715" 20645 "s59E5H2" 0 "hypothetical protein"  
"JS1\_N06\_01715" 20645 "s63E6H2" 0 "hypothetical protein"  
"JS1\_N06\_01719" 20649 "s59E13H2" 0 "Lipoyl synthase"  
"JS1\_N06\_01719" 20649 "s59E25H2" 0 "Lipoyl synthase"  
"JS1\_N06\_01719" 20649 "s59E5H2" 0 "Lipoyl synthase"  
"JS1\_N06\_01719" 20649 "s63E6H2" 0.007710318 "Lipoyl synthase"  
"JS1\_N06\_01725" 20655 "s59E13H2" 0.005087424 "Thioredoxin reductase"  
"JS1\_N06\_01725" 20655 "s59E25H2" 0 "Thioredoxin reductase"  
"JS1\_N06\_01725" 20655 "s59E5H2" 0.01073007 "Thioredoxin reductase"  
"JS1\_N06\_01725" 20655 "s63E6H2" 0.009570872 "Thioredoxin reductase"  
"JS1\_N06\_01727" 20657 "s59E13H2" 0.4066857 "LL-diaminopimelate aminotransferase"  
"JS1\_N06\_01727" 20657 "s59E25H2" 0 "LL-diaminopimelate aminotransferase"  
"JS1\_N06\_01727" 20657 "s59E5H2" 0.07644253 "LL-diaminopimelate aminotransferase"  
"JS1\_N06\_01727" 20657 "s63E6H2" 0.1265871 "LL-diaminopimelate aminotransferase"  
"JS1\_N06\_01730" 20660 "s59E13H2" 0 "endonuclease IV"  
"JS1\_N06\_01730" 20660 "s59E25H2" 0 "endonuclease IV"  
"JS1\_N06\_01730" 20660 "s59E5H2" 0.01486075 "endonuclease IV"  
"JS1\_N06\_01730" 20660 "s63E6H2" 0.005958309 "endonuclease IV"  
"JS1\_N06\_01741" 20671 "s59E13H2" 0.4082881 "LL-diaminopimelate aminotransferase"  
"JS1\_N06\_01741" 20671 "s59E25H2" 0 "LL-diaminopimelate aminotransferase"  
"JS1\_N06\_01741" 20671 "s59E5H2" 0.06917912 "LL-diaminopimelate aminotransferase"  
"JS1\_N06\_01741" 20671 "s63E6H2" 0.07914963 "LL-diaminopimelate aminotransferase"  
"JS1\_N06\_01743" 20673 "s59E13H2" 0 "Tetracycline resistance protein TetM from transposon TnFO1"  
"JS1\_N06\_01743" 20673 "s59E25H2" 0 "Tetracycline resistance protein TetM from transposon TnFO1"  
"JS1\_N06\_01743" 20673 "s59E5H2" 0 "Tetracycline resistance protein TetM from transposon TnFO1"  
"JS1\_N06\_01743" 20673 "s63E6H2" 0.005154953 "Tetracycline resistance protein TetM from transposon TnFO1"  
"JS1\_N06\_01747" 20677 "s59E13H2" 0 "4-hydroxy-3-methylbut-2-en-1-yl diphosphate synthase"  
"JS1\_N06\_01747" 20677 "s59E25H2" 0 "4-hydroxy-3-methylbut-2-en-1-yl diphosphate synthase"  
"JS1\_N06\_01747" 20677 "s59E5H2" 0 "4-hydroxy-3-methylbut-2-en-1-yl diphosphate synthase"

"JS1\_N06\_01747" 20677 "s63E6H2" 0.001026289 "4-hydroxy-3-methylbut-2-en-1-yl diphosphate synthase"  
"JS1\_N06\_01750" 20680 "s59E13H2" 0 "50S ribosomal protein L35"  
"JS1\_N06\_01750" 20680 "s59E25H2" 0 "50S ribosomal protein L35"  
"JS1\_N06\_01750" 20680 "s59E5H2" 0.08487319 "50S ribosomal protein L35"  
"JS1\_N06\_01750" 20680 "s63E6H2" 0.05507121 "50S ribosomal protein L35"  
"JS1\_N06\_01754" 20684 "s59E13H2" 0 "Acyl carrier protein"  
"JS1\_N06\_01754" 20684 "s59E25H2" 0 "Acyl carrier protein"  
"JS1\_N06\_01754" 20684 "s59E5H2" 0 "Acyl carrier protein"  
"JS1\_N06\_01754" 20684 "s63E6H2" 0 "Acyl carrier protein"  
"JS1\_N06\_01755" 20685 "s59E13H2" 0 "3-oxoacyl-[acyl-carrier-protein] synthase 2"  
"JS1\_N06\_01755" 20685 "s59E25H2" 0 "3-oxoacyl-[acyl-carrier-protein] synthase 2"  
"JS1\_N06\_01755" 20685 "s59E5H2" 0 "3-oxoacyl-[acyl-carrier-protein] synthase 2"  
"JS1\_N06\_01755" 20685 "s63E6H2" 0.007849209 "3-oxoacyl-[acyl-carrier-protein] synthase 2"  
"JS1\_N06\_01756" 20686 "s59E13H2" 0 "3-oxoacyl-[acyl-carrier-protein] reductase FabG"  
"JS1\_N06\_01756" 20686 "s59E25H2" 0 "3-oxoacyl-[acyl-carrier-protein] reductase FabG"  
"JS1\_N06\_01756" 20686 "s59E5H2" 0 "3-oxoacyl-[acyl-carrier-protein] reductase FabG"  
"JS1\_N06\_01756" 20686 "s63E6H2" 0.08863393 "3-oxoacyl-[acyl-carrier-protein] reductase FabG"  
"JS1\_N06\_01759" 20689 "s59E13H2" 0 "Uridylate kinase"  
"JS1\_N06\_01759" 20689 "s59E25H2" 0 "Uridylate kinase"  
"JS1\_N06\_01759" 20689 "s59E5H2" 0 "Uridylate kinase"  
"JS1\_N06\_01759" 20689 "s63E6H2" 0 "Uridylate kinase"  
"JS1\_N06\_01763" 20693 "s59E13H2" 0 "hypothetical protein"  
"JS1\_N06\_01763" 20693 "s59E25H2" 0 "hypothetical protein"  
"JS1\_N06\_01763" 20693 "s59E5H2" 0.1084712 "hypothetical protein"  
"JS1\_N06\_01763" 20693 "s63E6H2" 0.001031637 "hypothetical protein"  
"JS1\_N06\_01764" 20694 "s59E13H2" 0 "methylcobalamin:coenzyme M methyltransferase"  
"JS1\_N06\_01764" 20694 "s59E25H2" 0 "methylcobalamin:coenzyme M methyltransferase"  
"JS1\_N06\_01764" 20694 "s59E5H2" 0.004284431 "methylcobalamin:coenzyme M methyltransferase"  
"JS1\_N06\_01764" 20694 "s63E6H2" 0.004431196 "methylcobalamin:coenzyme M methyltransferase"  
"JS1\_N06\_01765" 20695 "s59E13H2" 0 "Ribose transport system permease protein RbsC"  
"JS1\_N06\_01765" 20695 "s59E25H2" 0 "Ribose transport system permease protein RbsC"  
"JS1\_N06\_01765" 20695 "s59E5H2" 0.2883176 "Ribose transport system permease protein RbsC"  
"JS1\_N06\_01765" 20695 "s63E6H2" 0.005214507 "Ribose transport system permease protein RbsC"  
"JS1\_N06\_01766" 20696 "s59E13H2" 0 "Galactose/methyl galactoside import ATP-binding protein MglA"  
"JS1\_N06\_01766" 20696 "s59E25H2" 0 "Galactose/methyl galactoside import ATP-binding protein MglA"  
"JS1\_N06\_01766" 20696 "s59E5H2" 0.3532966 "Galactose/methyl galactoside import ATP-binding protein MglA"  
"JS1\_N06\_01766" 20696 "s63E6H2" 0.002329597 "Galactose/methyl galactoside import ATP-binding protein MglA"  
"JS1\_N06\_01767" 20697 "s59E13H2" 0.02302021 "Ribose transport system permease protein RbsC"  
"JS1\_N06\_01767" 20697 "s59E25H2" 0 "Ribose transport system permease protein RbsC"  
"JS1\_N06\_01767" 20697 "s59E5H2" 0.7590403 "Ribose transport system permease protein RbsC"  
"JS1\_N06\_01767" 20697 "s63E6H2" 0.002327571 "Ribose transport system permease protein RbsC"  
"JS1\_N06\_01768" 20698 "s59E13H2" 0 "hypothetical protein"  
"JS1\_N06\_01768" 20698 "s59E25H2" 0 "hypothetical protein"  
"JS1\_N06\_01768" 20698 "s59E5H2" 0.5284421 "hypothetical protein"  
"JS1\_N06\_01768" 20698 "s63E6H2" 0.006557577 "hypothetical protein"  
"JS1\_N06\_01780" 20710 "s59E13H2" 0 "Malonyl CoA-acyl carrier protein transacylase"  
"JS1\_N06\_01780" 20710 "s59E25H2" 0 "Malonyl CoA-acyl carrier protein transacylase"

"JS1\_N06\_01780" 20710 "s59E5H2" 0 "Malonyl CoA-acyl carrier protein transacylase"  
"JS1\_N06\_01780" 20710 "s63E6H2" 0.006816824 "Malonyl CoA-acyl carrier protein transacylase"  
"JS1\_N06\_01781" 20711 "s59E13H2" 0 "Ion channel"  
"JS1\_N06\_01781" 20711 "s59E25H2" 0 "Ion channel"  
"JS1\_N06\_01781" 20711 "s59E5H2" 0 "Ion channel"  
"JS1\_N06\_01781" 20711 "s63E6H2" 0.002396763 "Ion channel"  
"JS1\_N06\_01783" 20713 "s59E13H2" 0 "Elongation factor Ts"  
"JS1\_N06\_01783" 20713 "s59E25H2" 0 "Elongation factor Ts"  
"JS1\_N06\_01783" 20713 "s59E5H2" 0 "Elongation factor Ts"  
"JS1\_N06\_01783" 20713 "s63E6H2" 0.0116925 "Elongation factor Ts"  
"JS1\_N06\_01784" 20714 "s59E13H2" 0 "Succinylglutamate desuccinylase / Aspartoacylase family protein"  
"JS1\_N06\_01784" 20714 "s59E25H2" 0 "Succinylglutamate desuccinylase / Aspartoacylase family protein"  
"JS1\_N06\_01784" 20714 "s59E5H2" 0 "Succinylglutamate desuccinylase / Aspartoacylase family protein"  
"JS1\_N06\_01784" 20714 "s63E6H2" 0.1397135 "Succinylglutamate desuccinylase / Aspartoacylase family protein"  
"JS1\_N06\_01789" 20719 "s59E13H2" 0 "NADP-dependent malic enzyme"  
"JS1\_N06\_01789" 20719 "s59E25H2" 0 "NADP-dependent malic enzyme"  
"JS1\_N06\_01789" 20719 "s59E5H2" 0 "NADP-dependent malic enzyme"  
"JS1\_N06\_01789" 20719 "s63E6H2" 0 "NADP-dependent malic enzyme"  
"JS1\_N06\_01790" 20720 "s59E13H2" 0 "hypothetical protein"  
"JS1\_N06\_01790" 20720 "s59E25H2" 0 "hypothetical protein"  
"JS1\_N06\_01790" 20720 "s59E5H2" 0 "hypothetical protein"  
"JS1\_N06\_01790" 20720 "s63E6H2" 0 "hypothetical protein"  
"JS1\_N06\_01792" 20722 "s59E13H2" 0 "Regulator of sigma-W protease RasP"  
"JS1\_N06\_01792" 20722 "s59E25H2" 0 "Regulator of sigma-W protease RasP"  
"JS1\_N06\_01792" 20722 "s59E5H2" 0 "Regulator of sigma-W protease RasP"  
"JS1\_N06\_01792" 20722 "s63E6H2" 0 "Regulator of sigma-W protease RasP"  
"JS1\_N06\_01796" 20726 "s59E13H2" 0 "Inosose isomerase"  
"JS1\_N06\_01796" 20726 "s59E25H2" 0 "Inosose isomerase"  
"JS1\_N06\_01796" 20726 "s59E5H2" 0 "Inosose isomerase"  
"JS1\_N06\_01796" 20726 "s63E6H2" 0.00405286 "Inosose isomerase"  
"JS1\_N06\_01797" 20727 "s59E13H2" 0.001765165 "Thioredoxin reductase"  
"JS1\_N06\_01797" 20727 "s59E25H2" 0 "Thioredoxin reductase"  
"JS1\_N06\_01797" 20727 "s59E5H2" 0.008146681 "Thioredoxin reductase"  
"JS1\_N06\_01797" 20727 "s63E6H2" 0 "Thioredoxin reductase"  
"JS1\_N06\_01798" 20728 "s59E13H2" 0 "V-type ATP synthase subunit I"  
"JS1\_N06\_01798" 20728 "s59E25H2" 0 "V-type ATP synthase subunit I"  
"JS1\_N06\_01798" 20728 "s59E5H2" 0 "V-type ATP synthase subunit I"  
"JS1\_N06\_01798" 20728 "s63E6H2" 0 "V-type ATP synthase subunit I"  
"JS1\_N06\_01803" 20733 "s59E13H2" 0.001320802 "Endonuclease MutS2"  
"JS1\_N06\_01803" 20733 "s59E25H2" 0 "Endonuclease MutS2"  
"JS1\_N06\_01803" 20733 "s59E5H2" 0 "Endonuclease MutS2"  
"JS1\_N06\_01803" 20733 "s63E6H2" 0.01421823 "Endonuclease MutS2"  
"JS1\_N06\_01805" 20735 "s59E13H2" 0 "1-deoxy-D-xylulose 5-phosphate reductoisomerase"  
"JS1\_N06\_01805" 20735 "s59E25H2" 0 "1-deoxy-D-xylulose 5-phosphate reductoisomerase"  
"JS1\_N06\_01805" 20735 "s59E5H2" 0.003460157 "1-deoxy-D-xylulose 5-phosphate reductoisomerase"  
"JS1\_N06\_01805" 20735 "s63E6H2" 0.002589901 "1-deoxy-D-xylulose 5-phosphate reductoisomerase"  
"JS1\_N06\_01809" 20739 "s59E13H2" 0 "Elongation factor G"

"JS1\_N06\_01809" 20739 "s59E25H2" 0 "Elongation factor G"  
"JS1\_N06\_01809" 20739 "s59E5H2" 0 "Elongation factor G"  
"JS1\_N06\_01809" 20739 "s63E6H2" 0 "Elongation factor G"  
"JS1\_N06\_01810" 20740 "s59E13H2" 0.002607487 "Elongation factor G"  
"JS1\_N06\_01810" 20740 "s59E25H2" 0 "Elongation factor G"  
"JS1\_N06\_01810" 20740 "s59E5H2" 0.009252393 "Elongation factor G"  
"JS1\_N06\_01810" 20740 "s63E6H2" 0.02110614 "Elongation factor G"  
"JS1\_N06\_01815" 20745 "s59E13H2" 0 "DNA topoisomerase 1"  
"JS1\_N06\_01815" 20745 "s59E25H2" 0 "DNA topoisomerase 1"  
"JS1\_N06\_01815" 20745 "s59E5H2" 0 "DNA topoisomerase 1"  
"JS1\_N06\_01815" 20745 "s63E6H2" 0.01040077 "DNA topoisomerase 1"  
"JS1\_N06\_01816" 20746 "s59E13H2" 0 "Glycerol-3-phosphate acyltransferase"  
"JS1\_N06\_01816" 20746 "s59E25H2" 0 "Glycerol-3-phosphate acyltransferase"  
"JS1\_N06\_01816" 20746 "s59E5H2" 0 "Glycerol-3-phosphate acyltransferase"  
"JS1\_N06\_01816" 20746 "s63E6H2" 0 "Glycerol-3-phosphate acyltransferase"  
"JS1\_N06\_01819" 20749 "s59E13H2" 0 "Competence protein ComM"  
"JS1\_N06\_01819" 20749 "s59E25H2" 0 "Competence protein ComM"  
"JS1\_N06\_01819" 20749 "s59E5H2" 0 "Competence protein ComM"  
"JS1\_N06\_01819" 20749 "s63E6H2" 0 "Competence protein ComM"  
"JS1\_N06\_01820" 20750 "s59E13H2" 0 "hypothetical protein"  
"JS1\_N06\_01820" 20750 "s59E25H2" 0 "hypothetical protein"  
"JS1\_N06\_01820" 20750 "s59E5H2" 0.00395757 "hypothetical protein"  
"JS1\_N06\_01820" 20750 "s63E6H2" 0 "hypothetical protein"  
"JS1\_N06\_01829" 20759 "s59E13H2" 0.01132034 "hypothetical protein"  
"JS1\_N06\_01829" 20759 "s59E25H2" 0 "hypothetical protein"  
"JS1\_N06\_01829" 20759 "s59E5H2" 0.02078148 "hypothetical protein"  
"JS1\_N06\_01829" 20759 "s63E6H2" 0.02264433 "hypothetical protein"  
"JS1\_N06\_01830" 20760 "s59E13H2" 0 "L-lactate permease"  
"JS1\_N06\_01830" 20760 "s59E25H2" 0 "L-lactate permease"  
"JS1\_N06\_01830" 20760 "s59E5H2" 0 "L-lactate permease"  
"JS1\_N06\_01830" 20760 "s63E6H2" 0.00786081 "L-lactate permease"  
"JS1\_N06\_01833" 20763 "s59E13H2" 0.003727542 "Tagatose-6-phosphate kinase"  
"JS1\_N06\_01833" 20763 "s59E25H2" 0 "Tagatose-6-phosphate kinase"  
"JS1\_N06\_01833" 20763 "s59E5H2" 0.05768805 "Tagatose-6-phosphate kinase"  
"JS1\_N06\_01833" 20763 "s63E6H2" 0.08657612 "Tagatose-6-phosphate kinase"  
"JS1\_N06\_01834" 20764 "s59E13H2" 0.01088635 "Methylated protein"  
"JS1\_N06\_01834" 20764 "s59E25H2" 0 "Methylated protein"  
"JS1\_N06\_01834" 20764 "s59E5H2" 0.4223997 "Methylated protein"  
"JS1\_N06\_01834" 20764 "s63E6H2" 0.1211966 "Methylated protein"  
"JS1\_N06\_01835" 20765 "s59E13H2" 0 "Thymidylate kinase"  
"JS1\_N06\_01835" 20765 "s59E25H2" 0 "Thymidylate kinase"  
"JS1\_N06\_01835" 20765 "s59E5H2" 0.066852 "Thymidylate kinase"  
"JS1\_N06\_01835" 20765 "s63E6H2" 0.04022601 "Thymidylate kinase"  
"JS1\_N06\_01836" 20766 "s59E13H2" 0.0002622148 "DNA polymerase III subunit tau"  
"JS1\_N06\_01836" 20766 "s59E25H2" 0 "DNA polymerase III subunit tau"  
"JS1\_N06\_01836" 20766 "s59E5H2" 0.002299879 "DNA polymerase III subunit tau"  
"JS1\_N06\_01836" 20766 "s63E6H2" 0.05011795 "DNA polymerase III subunit tau"

"JS1\_N06\_01837" 20767 "s59E13H2" 0.007951581 "hypothetical protein"  
"JS1\_N06\_01837" 20767 "s59E25H2" 0 "hypothetical protein"  
"JS1\_N06\_01837" 20767 "s59E5H2" 0.08130603 "hypothetical protein"  
"JS1\_N06\_01837" 20767 "s63E6H2" 0.04038589 "hypothetical protein"  
"JS1\_N06\_01838" 20768 "s59E13H2" 0.01617127 "Release factor glutamine methyltransferase"  
"JS1\_N06\_01838" 20768 "s59E25H2" 0 "Release factor glutamine methyltransferase"  
"JS1\_N06\_01838" 20768 "s59E5H2" 0.07227163 "Release factor glutamine methyltransferase"  
"JS1\_N06\_01838" 20768 "s63E6H2" 0.09976336 "Release factor glutamine methyltransferase"  
"JS1\_N06\_01839" 20769 "s59E13H2" 0.004019322 "Ribosomal RNA small subunit methyltransferase I"  
"JS1\_N06\_01839" 20769 "s59E25H2" 0 "Ribosomal RNA small subunit methyltransferase I"  
"JS1\_N06\_01839" 20769 "s59E5H2" 0.03786477 "Ribosomal RNA small subunit methyltransferase I"  
"JS1\_N06\_01839" 20769 "s63E6H2" 0.04043043 "Ribosomal RNA small subunit methyltransferase I"  
"JS1\_N06\_01840" 20770 "s59E13H2" 0.05192773 "Methionine--tRNA ligase"  
"JS1\_N06\_01840" 20770 "s59E25H2" 0 "Methionine--tRNA ligase"  
"JS1\_N06\_01840" 20770 "s59E5H2" 0.01621173 "Methionine--tRNA ligase"  
"JS1\_N06\_01840" 20770 "s63E6H2" 0.04036777 "Methionine--tRNA ligase"  
"JS1\_N06\_01841" 20771 "s59E13H2" 0.0250533 "Methionine--tRNA ligase"  
"JS1\_N06\_01841" 20771 "s59E25H2" 0 "Methionine--tRNA ligase"  
"JS1\_N06\_01841" 20771 "s59E5H2" 0.05753159 "Methionine--tRNA ligase"  
"JS1\_N06\_01841" 20771 "s63E6H2" 0.06030177 "Methionine--tRNA ligase"  
"JS1\_N06\_01842" 20772 "s59E13H2" 0 "Methionine--tRNA ligase"  
"JS1\_N06\_01842" 20772 "s59E25H2" 0 "Methionine--tRNA ligase"  
"JS1\_N06\_01842" 20772 "s59E5H2" 0 "Methionine--tRNA ligase"  
"JS1\_N06\_01842" 20772 "s63E6H2" 0 "Methionine--tRNA ligase"  
"JS1\_N06\_01843" 20773 "s59E13H2" 0.009949038 "Membrane-bound lytic murein transglycosylase C precursor"  
"JS1\_N06\_01843" 20773 "s59E25H2" 0 "Membrane-bound lytic murein transglycosylase C precursor"  
"JS1\_N06\_01843" 20773 "s59E5H2" 0.00251689 "Membrane-bound lytic murein transglycosylase C precursor"  
"JS1\_N06\_01843" 20773 "s63E6H2" 0.01435156 "Membrane-bound lytic murein transglycosylase C precursor"  
"JS1\_N06\_01845" 20775 "s59E13H2" 0.09160162 "Riboflavin transporter RibU"  
"JS1\_N06\_01845" 20775 "s59E25H2" 0 "Riboflavin transporter RibU"  
"JS1\_N06\_01845" 20775 "s59E5H2" 0.05745853 "Riboflavin transporter RibU"  
"JS1\_N06\_01845" 20775 "s63E6H2" 0.07431388 "Riboflavin transporter RibU"  
"JS1\_N06\_01846" 20776 "s59E13H2" 0.01346926 "Mannose-1-phosphate guanylyltransferase 1"  
"JS1\_N06\_01846" 20776 "s59E25H2" 0 "Mannose-1-phosphate guanylyltransferase 1"  
"JS1\_N06\_01846" 20776 "s59E5H2" 0.02607909 "Mannose-1-phosphate guanylyltransferase 1"  
"JS1\_N06\_01846" 20776 "s63E6H2" 0.08162258 "Mannose-1-phosphate guanylyltransferase 1"  
"JS1\_N06\_01848" 20778 "s59E13H2" 0.1610272 "S-adenosylmethionine synthase"  
"JS1\_N06\_01848" 20778 "s59E25H2" 0 "S-adenosylmethionine synthase"  
"JS1\_N06\_01848" 20778 "s59E5H2" 0.07034588 "S-adenosylmethionine synthase"  
"JS1\_N06\_01848" 20778 "s63E6H2" 0.4117115 "S-adenosylmethionine synthase"  
"JS1\_N06\_01849" 20779 "s59E13H2" 0.05850185 "Twitching mobility protein"  
"JS1\_N06\_01849" 20779 "s59E25H2" 0 "Twitching mobility protein"  
"JS1\_N06\_01849" 20779 "s59E5H2" 0.0920808 "Twitching mobility protein"  
"JS1\_N06\_01849" 20779 "s63E6H2" 0.5089381 "Twitching mobility protein"  
"JS1\_N06\_01851" 20781 "s59E13H2" 0.03717129 "bacteriophage N4 adsorption protein B"  
"JS1\_N06\_01851" 20781 "s59E25H2" 0 "bacteriophage N4 adsorption protein B"  
"JS1\_N06\_01851" 20781 "s59E5H2" 0.0861488 "bacteriophage N4 adsorption protein B"



"JS1\_N06\_01851" 20781 "s63E6H2" 0.1915303 "bacteriophage N4 adsorption protein B"  
"JS1\_N06\_01852" 20782 "s59E13H2" 0.006462987 "Twitching mobility protein"  
"JS1\_N06\_01852" 20782 "s59E25H2" 0 "Twitching mobility protein"  
"JS1\_N06\_01852" 20782 "s59E5H2" 0.06054523 "Twitching mobility protein"  
"JS1\_N06\_01852" 20782 "s63E6H2" 0.1641982 "Twitching mobility protein"  
"JS1\_N06\_01853" 20783 "s59E13H2" 0.01433931 "Histidine--tRNA ligase"  
"JS1\_N06\_01853" 20783 "s59E25H2" 0 "Histidine--tRNA ligase"  
"JS1\_N06\_01853" 20783 "s59E5H2" 0.04529177 "Histidine--tRNA ligase"  
"JS1\_N06\_01853" 20783 "s63E6H2" 0.1032799 "Histidine--tRNA ligase"  
"JS1\_N06\_01854" 20784 "s59E13H2" 0.0248115 "Asparagine--tRNA ligase"  
"JS1\_N06\_01854" 20784 "s59E25H2" 0 "Asparagine--tRNA ligase"  
"JS1\_N06\_01854" 20784 "s59E5H2" 0.06523471 "Asparagine--tRNA ligase"  
"JS1\_N06\_01854" 20784 "s63E6H2" 0.1955599 "Asparagine--tRNA ligase"  
"JS1\_N06\_01855" 20785 "s59E13H2" 0.02067516 "hypothetical protein"  
"JS1\_N06\_01855" 20785 "s59E25H2" 0 "hypothetical protein"  
"JS1\_N06\_01855" 20785 "s59E5H2" 0.02157098 "hypothetical protein"  
"JS1\_N06\_01855" 20785 "s63E6H2" 0.03034621 "hypothetical protein"  
"JS1\_N06\_01856" 20786 "s59E13H2" 0.02956223 "Aspartate--tRNA ligase"  
"JS1\_N06\_01856" 20786 "s59E25H2" 0 "Aspartate--tRNA ligase"  
"JS1\_N06\_01856" 20786 "s59E5H2" 0.04654509 "Aspartate--tRNA ligase"  
"JS1\_N06\_01856" 20786 "s63E6H2" 0.1828242 "Aspartate--tRNA ligase"  
"JS1\_N06\_01858" 20788 "s59E13H2" 0.004831284 "putative 5-formyltetrahydrofolate cyclo-ligase"  
"JS1\_N06\_01858" 20788 "s59E25H2" 0.4066318 "putative 5-formyltetrahydrofolate cyclo-ligase"  
"JS1\_N06\_01858" 20788 "s59E5H2" 0.006507327 "putative 5-formyltetrahydrofolate cyclo-ligase"  
"JS1\_N06\_01858" 20788 "s63E6H2" 0.0678907 "putative 5-formyltetrahydrofolate cyclo-ligase"  
"JS1\_N06\_01859" 20789 "s59E13H2" 0.02691798 "30S ribosomal protein S1"  
"JS1\_N06\_01859" 20789 "s59E25H2" 0 "30S ribosomal protein S1"  
"JS1\_N06\_01859" 20789 "s59E5H2" 0.02664396 "30S ribosomal protein S1"  
"JS1\_N06\_01859" 20789 "s63E6H2" 0.2976811 "30S ribosomal protein S1"  
"JS1\_N06\_01860" 20790 "s59E13H2" 0.005411264 "Type II secretion system protein E"  
"JS1\_N06\_01860" 20790 "s59E25H2" 0 "Type II secretion system protein E"  
"JS1\_N06\_01860" 20790 "s59E5H2" 0.06275754 "Type II secretion system protein E"  
"JS1\_N06\_01860" 20790 "s63E6H2" 0.2730552 "Type II secretion system protein E"  
"JS1\_N06\_01861" 20791 "s59E13H2" 0.0135323 "Alanine--tRNA ligase"  
"JS1\_N06\_01861" 20791 "s59E25H2" 0 "Alanine--tRNA ligase"  
"JS1\_N06\_01861" 20791 "s59E5H2" 0.03288477 "Alanine--tRNA ligase"  
"JS1\_N06\_01861" 20791 "s63E6H2" 0.1542261 "Alanine--tRNA ligase"  
"JS1\_N06\_01862" 20792 "s59E13H2" 0.0008389421 "Alanine--tRNA ligase"  
"JS1\_N06\_01862" 20792 "s59E25H2" 0 "Alanine--tRNA ligase"  
"JS1\_N06\_01862" 20792 "s59E5H2" 0.002168675 "Alanine--tRNA ligase"  
"JS1\_N06\_01862" 20792 "s63E6H2" 0.05002082 "Alanine--tRNA ligase"  
"JS1\_N06\_01864" 20794 "s59E13H2" 0 "Signal recognition particle receptor FtsY"  
"JS1\_N06\_01864" 20794 "s59E25H2" 0 "Signal recognition particle receptor FtsY"  
"JS1\_N06\_01864" 20794 "s59E5H2" 0 "Signal recognition particle receptor FtsY"  
"JS1\_N06\_01864" 20794 "s63E6H2" 0 "Signal recognition particle receptor FtsY"  
"JS1\_N06\_01865" 20795 "s59E13H2" 0 "GTPase Der"  
"JS1\_N06\_01865" 20795 "s59E25H2" 0 "GTPase Der"

"JS1\_N06\_01865" 20795 "s59E5H2" 0 "GTPase Der"  
"JS1\_N06\_01865" 20795 "s63E6H2" 0.002393117 "GTPase Der"  
"JS1\_N06\_01869" 20799 "s59E13H2" 0 "Signal recognition particle protein"  
"JS1\_N06\_01869" 20799 "s59E25H2" 0 "Signal recognition particle protein"  
"JS1\_N06\_01869" 20799 "s59E5H2" 0 "Signal recognition particle protein"  
"JS1\_N06\_01869" 20799 "s63E6H2" 0.004565185 "Signal recognition particle protein"  
"JS1\_N06\_01872" 20802 "s59E13H2" 0 "Phenylalanine--tRNA ligase beta subunit"  
"JS1\_N06\_01872" 20802 "s59E25H2" 0 "Phenylalanine--tRNA ligase beta subunit"  
"JS1\_N06\_01872" 20802 "s59E5H2" 0 "Phenylalanine--tRNA ligase beta subunit"  
"JS1\_N06\_01872" 20802 "s63E6H2" 0.01615871 "Phenylalanine--tRNA ligase beta subunit"  
"JS1\_N06\_01873" 20803 "s59E13H2" 0 "hypothetical protein"  
"JS1\_N06\_01873" 20803 "s59E25H2" 0 "hypothetical protein"  
"JS1\_N06\_01873" 20803 "s59E5H2" 0 "hypothetical protein"  
"JS1\_N06\_01873" 20803 "s63E6H2" 0.01640187 "hypothetical protein"  
"JS1\_N06\_01879" 20809 "s59E13H2" 0 "V-type ATP synthase subunit I"  
"JS1\_N06\_01879" 20809 "s59E25H2" 0 "V-type ATP synthase subunit I"  
"JS1\_N06\_01879" 20809 "s59E5H2" 0 "V-type ATP synthase subunit I"  
"JS1\_N06\_01879" 20809 "s63E6H2" 0 "V-type ATP synthase subunit I"  
"JS1\_N06\_01882" 20812 "s59E13H2" 0 "Chromosome partition protein Smc"  
"JS1\_N06\_01882" 20812 "s59E25H2" 0 "Chromosome partition protein Smc"  
"JS1\_N06\_01882" 20812 "s59E5H2" 0 "Chromosome partition protein Smc"  
"JS1\_N06\_01882" 20812 "s63E6H2" 0.03624224 "Chromosome partition protein Smc"  
"JS1\_N06\_01883" 20813 "s59E13H2" 0.1504679 "putative multidrug resistance ABC transporter ATP-binding/permease protein YheH"  
"JS1\_N06\_01883" 20813 "s59E25H2" 0 "putative multidrug resistance ABC transporter ATP-binding/permease protein YheH"  
"JS1\_N06\_01883" 20813 "s59E5H2" 0.9780577 "putative multidrug resistance ABC transporter ATP-binding/permease protein YheH"  
"JS1\_N06\_01883" 20813 "s63E6H2" 0.3512679 "putative multidrug resistance ABC transporter ATP-binding/permease protein YheH"  
"JS1\_N06\_01884" 20814 "s59E13H2" 0 "Transposase IS200 like protein"  
"JS1\_N06\_01884" 20814 "s59E25H2" 0 "Transposase IS200 like protein"  
"JS1\_N06\_01884" 20814 "s59E5H2" 0.04369679 "Transposase IS200 like protein"  
"JS1\_N06\_01884" 20814 "s63E6H2" 0.01999107 "Transposase IS200 like protein"  
"JS1\_N06\_01885" 20815 "s59E13H2" 0.02738401 "Dimethyl sulfoxide reductase DmsA precursor"  
"JS1\_N06\_01885" 20815 "s59E25H2" 0 "Dimethyl sulfoxide reductase DmsA precursor"  
"JS1\_N06\_01885" 20815 "s59E5H2" 0.03644647 "Dimethyl sulfoxide reductase DmsA precursor"  
"JS1\_N06\_01885" 20815 "s63E6H2" 0.4492149 "Dimethyl sulfoxide reductase DmsA precursor"  
"JS1\_N06\_01886" 20816 "s59E13H2" 0.3684671 "Putative NAD(P)H nitroreductase"  
"JS1\_N06\_01886" 20816 "s59E25H2" 0 "Putative NAD(P)H nitroreductase"  
"JS1\_N06\_01886" 20816 "s59E5H2" 0.1463234 "Putative NAD(P)H nitroreductase"  
"JS1\_N06\_01886" 20816 "s63E6H2" 1.011941 "Putative NAD(P)H nitroreductase"  
"JS1\_N06\_01887" 20817 "s59E13H2" 0.0002041474 "Acylamino-acid-releasing enzyme"  
"JS1\_N06\_01887" 20817 "s59E25H2" 0 "Acylamino-acid-releasing enzyme"  
"JS1\_N06\_01887" 20817 "s59E5H2" 0.01557448 "Acylamino-acid-releasing enzyme"  
"JS1\_N06\_01887" 20817 "s63E6H2" 0.7672841 "Acylamino-acid-releasing enzyme"  
"JS1\_N06\_01888" 20818 "s59E13H2" 0.005624049 "ATP-dependent helicase/deoxyribonuclease subunit B"  
"JS1\_N06\_01888" 20818 "s59E25H2" 0 "ATP-dependent helicase/deoxyribonuclease subunit B"  
"JS1\_N06\_01888" 20818 "s59E5H2" 0.05681101 "ATP-dependent helicase/deoxyribonuclease subunit B"  
"JS1\_N06\_01888" 20818 "s63E6H2" 0.6146222 "ATP-dependent helicase/deoxyribonuclease subunit B"  
"JS1\_N06\_01889" 20819 "s59E13H2" 0.001572989 "ATP-dependent helicase/nuclease subunit A"

"JS1\_N06\_01889" 20819 "s59E25H2" 0 "ATP-dependent helicase/nuclease subunit A"  
"JS1\_N06\_01889" 20819 "s59E5H2" 0.1756467 "ATP-dependent helicase/nuclease subunit A"  
"JS1\_N06\_01889" 20819 "s63E6H2" 0.5552767 "ATP-dependent helicase/nuclease subunit A"  
"JS1\_N06\_01890" 20820 "s59E13H2" 0.04528248 "DegV domain-containing protein"  
"JS1\_N06\_01890" 20820 "s59E25H2" 0 "DegV domain-containing protein"  
"JS1\_N06\_01890" 20820 "s59E5H2" 0.3038736 "DegV domain-containing protein"  
"JS1\_N06\_01890" 20820 "s63E6H2" 1.46318 "DegV domain-containing protein"  
"JS1\_N06\_01891" 20821 "s59E13H2" 0 "protease TldD"  
"JS1\_N06\_01891" 20821 "s59E25H2" 0 "protease TldD"  
"JS1\_N06\_01891" 20821 "s59E5H2" 0 "protease TldD"  
"JS1\_N06\_01891" 20821 "s63E6H2" 1.169804 "protease TldD"  
"JS1\_N06\_01892" 20822 "s59E13H2" 0 "Putative modulator of DNA gyrase"  
"JS1\_N06\_01892" 20822 "s59E25H2" 0 "Putative modulator of DNA gyrase"  
"JS1\_N06\_01892" 20822 "s59E5H2" 0.004956607 "Putative modulator of DNA gyrase"  
"JS1\_N06\_01892" 20822 "s63E6H2" 1.660104 "Putative modulator of DNA gyrase"  
"JS1\_N06\_01893" 20823 "s59E13H2" 0 "HTH-type transcriptional repressor KstR2"  
"JS1\_N06\_01893" 20823 "s59E25H2" 0 "HTH-type transcriptional repressor KstR2"  
"JS1\_N06\_01893" 20823 "s59E5H2" 0 "HTH-type transcriptional repressor KstR2"  
"JS1\_N06\_01893" 20823 "s63E6H2" 1.524492 "HTH-type transcriptional repressor KstR2"  
"JS1\_N06\_01894" 20824 "s59E13H2" 0 "hypothetical protein"  
"JS1\_N06\_01894" 20824 "s59E25H2" 0 "hypothetical protein"  
"JS1\_N06\_01894" 20824 "s59E5H2" 0.001604081 "hypothetical protein"  
"JS1\_N06\_01894" 20824 "s63E6H2" 1.416647 "hypothetical protein"  
"JS1\_N06\_01895" 20825 "s59E13H2" 0.1003009 "hypothetical protein"  
"JS1\_N06\_01895" 20825 "s59E25H2" 0 "hypothetical protein"  
"JS1\_N06\_01895" 20825 "s59E5H2" 0.4846128 "hypothetical protein"  
"JS1\_N06\_01895" 20825 "s63E6H2" 0.6874411 "hypothetical protein"  
"JS1\_N06\_01896" 20826 "s59E13H2" 0.2303091 "MMPL family protein"  
"JS1\_N06\_01896" 20826 "s59E25H2" 0 "MMPL family protein"  
"JS1\_N06\_01896" 20826 "s59E5H2" 0.417522 "MMPL family protein"  
"JS1\_N06\_01896" 20826 "s63E6H2" 0.6709295 "MMPL family protein"  
"JS1\_N06\_01897" 20827 "s59E13H2" 0.1165274 "Chlorinase"  
"JS1\_N06\_01897" 20827 "s59E25H2" 0.2613511 "Chlorinase"  
"JS1\_N06\_01897" 20827 "s59E5H2" 0.3322418 "Chlorinase"  
"JS1\_N06\_01897" 20827 "s63E6H2" 0.5360816 "Chlorinase"  
"JS1\_N06\_01899" 20829 "s59E13H2" 0.007641355 "hypothetical protein"  
"JS1\_N06\_01899" 20829 "s59E25H2" 0 "hypothetical protein"  
"JS1\_N06\_01899" 20829 "s59E5H2" 0.01640201 "hypothetical protein"  
"JS1\_N06\_01899" 20829 "s63E6H2" 0.2166567 "hypothetical protein"  
"JS1\_N06\_01905" 20835 "s59E13H2" 0 "ATP-dependent DNA helicase Rep"  
"JS1\_N06\_01905" 20835 "s59E25H2" 0 "ATP-dependent DNA helicase Rep"  
"JS1\_N06\_01905" 20835 "s59E5H2" 0 "ATP-dependent DNA helicase Rep"  
"JS1\_N06\_01905" 20835 "s63E6H2" 0 "ATP-dependent DNA helicase Rep"  
"JS1\_N06\_01906" 20836 "s59E13H2" 0 "ATP-dependent DNA helicase PcrA"  
"JS1\_N06\_01906" 20836 "s59E25H2" 0 "ATP-dependent DNA helicase PcrA"  
"JS1\_N06\_01906" 20836 "s59E5H2" 0 "ATP-dependent DNA helicase PcrA"  
"JS1\_N06\_01906" 20836 "s63E6H2" 0 "ATP-dependent DNA helicase PcrA"

"JS1\_N06\_01910" 20840 "s59E13H2" 0.045462 "Deoxynucleoside kinase"  
"JS1\_N06\_01910" 20840 "s59E25H2" 0 "Deoxynucleoside kinase"  
"JS1\_N06\_01910" 20840 "s59E5H2" 0.3408115 "Deoxynucleoside kinase"  
"JS1\_N06\_01910" 20840 "s63E6H2" 3.139186 "Deoxynucleoside kinase"  
"JS1\_N06\_01912" 20842 "s59E13H2" 0.00131315 "hypothetical protein"  
"JS1\_N06\_01912" 20842 "s59E25H2" 0 "hypothetical protein"  
"JS1\_N06\_01912" 20842 "s59E5H2" 0.002199822 "hypothetical protein"  
"JS1\_N06\_01912" 20842 "s63E6H2" 0.004429453 "hypothetical protein"  
"JS1\_N06\_01913" 20843 "s59E13H2" 0 "hypothetical protein"  
"JS1\_N06\_01913" 20843 "s59E25H2" 0 "hypothetical protein"  
"JS1\_N06\_01913" 20843 "s59E5H2" 0 "hypothetical protein"  
"JS1\_N06\_01913" 20843 "s63E6H2" 0 "hypothetical protein"  
"JS1\_N06\_01919" 20849 "s59E13H2" 0 "4-hydroxy-3-methylbut-2-en-1-yl diphosphate synthase"  
"JS1\_N06\_01919" 20849 "s59E25H2" 0 "4-hydroxy-3-methylbut-2-en-1-yl diphosphate synthase"  
"JS1\_N06\_01919" 20849 "s59E5H2" 0 "4-hydroxy-3-methylbut-2-en-1-yl diphosphate synthase"  
"JS1\_N06\_01919" 20849 "s63E6H2" 0 "4-hydroxy-3-methylbut-2-en-1-yl diphosphate synthase"  
"JS1\_N06\_01921" 20851 "s59E13H2" 0 "30S ribosomal protein S2"  
"JS1\_N06\_01921" 20851 "s59E25H2" 0 "30S ribosomal protein S2"  
"JS1\_N06\_01921" 20851 "s59E5H2" 0 "30S ribosomal protein S2"  
"JS1\_N06\_01921" 20851 "s63E6H2" 0.01215858 "30S ribosomal protein S2"  
"JS1\_N06\_01922" 20852 "s59E13H2" 0.003212131 "30S ribosomal protein S2"  
"JS1\_N06\_01922" 20852 "s59E25H2" 0 "30S ribosomal protein S2"  
"JS1\_N06\_01922" 20852 "s59E5H2" 0.00686747 "30S ribosomal protein S2"  
"JS1\_N06\_01922" 20852 "s63E6H2" 0.003799556 "30S ribosomal protein S2"  
"JS1\_N06\_01925" 20855 "s59E13H2" 0 "RNA polymerase factor sigma-70"  
"JS1\_N06\_01925" 20855 "s59E25H2" 0 "RNA polymerase factor sigma-70"  
"JS1\_N06\_01925" 20855 "s59E5H2" 0 "RNA polymerase factor sigma-70"  
"JS1\_N06\_01925" 20855 "s63E6H2" 0.03908383 "RNA polymerase factor sigma-70"  
"JS1\_N06\_01926" 20856 "s59E13H2" 0 "sporulation sigma factor SigG"  
"JS1\_N06\_01926" 20856 "s59E25H2" 0 "sporulation sigma factor SigG"  
"JS1\_N06\_01926" 20856 "s59E5H2" 0 "sporulation sigma factor SigG"  
"JS1\_N06\_01926" 20856 "s63E6H2" 0.0243474 "sporulation sigma factor SigG"  
"JS1\_N06\_01927" 20857 "s59E13H2" 0.05305165 "hypothetical protein"  
"JS1\_N06\_01927" 20857 "s59E25H2" 0 "hypothetical protein"  
"JS1\_N06\_01927" 20857 "s59E5H2" 0.03114359 "hypothetical protein"  
"JS1\_N06\_01927" 20857 "s63E6H2" 0.1939773 "hypothetical protein"  
"JS1\_N06\_01929" 20859 "s59E13H2" 0.007879382 "hypothetical protein"  
"JS1\_N06\_01929" 20859 "s59E25H2" 0 "hypothetical protein"  
"JS1\_N06\_01929" 20859 "s59E5H2" 0.0156629 "hypothetical protein"  
"JS1\_N06\_01929" 20859 "s63E6H2" 0.06308846 "hypothetical protein"  
"JS1\_N06\_01930" 20860 "s59E13H2" 0.04491013 "Peptidase M15"  
"JS1\_N06\_01930" 20860 "s59E25H2" 0 "Peptidase M15"  
"JS1\_N06\_01930" 20860 "s59E5H2" 0 "Peptidase M15"  
"JS1\_N06\_01930" 20860 "s63E6H2" 0.2226041 "Peptidase M15"  
"JS1\_N06\_01931" 20861 "s59E13H2" 0.03941502 "YvrJ protein family protein"  
"JS1\_N06\_01931" 20861 "s59E25H2" 0 "YvrJ protein family protein"  
"JS1\_N06\_01931" 20861 "s59E5H2" 0 "YvrJ protein family protein"

"JS1\_N06\_01931" 20861 "s63E6H2" 0.1476562 "YvrJ protein family protein"  
"JS1\_N06\_01932" 20862 "s59E13H2" 0 "Trehalose/maltose transport system permease protein MalF"  
"JS1\_N06\_01932" 20862 "s59E25H2" 0 "Trehalose/maltose transport system permease protein MalF"  
"JS1\_N06\_01932" 20862 "s59E5H2" 0.04017247 "Trehalose/maltose transport system permease protein MalF"  
"JS1\_N06\_01932" 20862 "s63E6H2" 2.408278 "Trehalose/maltose transport system permease protein MalF"  
"JS1\_N06\_01933" 20863 "s59E13H2" 0 "Trehalose/maltose transport system permease protein MalG"  
"JS1\_N06\_01933" 20863 "s59E25H2" 0 "Trehalose/maltose transport system permease protein MalG"  
"JS1\_N06\_01933" 20863 "s59E5H2" 0.05491542 "Trehalose/maltose transport system permease protein MalG"  
"JS1\_N06\_01933" 20863 "s63E6H2" 0.1834193 "Trehalose/maltose transport system permease protein MalG"  
"JS1\_N06\_01934" 20864 "s59E13H2" 0 "Bacterial extracellular solute-binding protein"  
"JS1\_N06\_01934" 20864 "s59E25H2" 0 "Bacterial extracellular solute-binding protein"  
"JS1\_N06\_01934" 20864 "s59E5H2" 0.1110434 "Bacterial extracellular solute-binding protein"  
"JS1\_N06\_01934" 20864 "s63E6H2" 0.1611918 "Bacterial extracellular solute-binding protein"  
"JS1\_N06\_01935" 20865 "s59E13H2" 0.003453717 "L-glyceraldehyde 3-phosphate reductase"  
"JS1\_N06\_01935" 20865 "s59E25H2" 0 "L-glyceraldehyde 3-phosphate reductase"  
"JS1\_N06\_01935" 20865 "s59E5H2" 0.04948507 "L-glyceraldehyde 3-phosphate reductase"  
"JS1\_N06\_01935" 20865 "s63E6H2" 0.4252135 "L-glyceraldehyde 3-phosphate reductase"  
"JS1\_N06\_01936" 20866 "s59E13H2" 4.321942 "Xylulose kinase"  
"JS1\_N06\_01936" 20866 "s59E25H2" 0.1633987 "Xylulose kinase"  
"JS1\_N06\_01936" 20866 "s59E5H2" 0.04522332 "Xylulose kinase"  
"JS1\_N06\_01936" 20866 "s63E6H2" 0.3438732 "Xylulose kinase"  
"JS1\_N06\_01937" 20867 "s59E13H2" 0 "methylcobalamin:coenzyme M methyltransferase"  
"JS1\_N06\_01937" 20867 "s59E25H2" 0 "methylcobalamin:coenzyme M methyltransferase"  
"JS1\_N06\_01937" 20867 "s59E5H2" 0 "methylcobalamin:coenzyme M methyltransferase"  
"JS1\_N06\_01937" 20867 "s63E6H2" 1.371868 "methylcobalamin:coenzyme M methyltransferase"  
"JS1\_N06\_01938" 20868 "s59E13H2" 0 "Bacterial extracellular solute-binding protein"  
"JS1\_N06\_01938" 20868 "s59E25H2" 0 "Bacterial extracellular solute-binding protein"  
"JS1\_N06\_01938" 20868 "s59E5H2" 0.01110928 "Bacterial extracellular solute-binding protein"  
"JS1\_N06\_01938" 20868 "s63E6H2" 1.201736 "Bacterial extracellular solute-binding protein"  
"JS1\_N06\_01939" 20869 "s59E13H2" 0.04862362 "Alpha-glucosidase"  
"JS1\_N06\_01939" 20869 "s59E25H2" 0 "Alpha-glucosidase"  
"JS1\_N06\_01939" 20869 "s59E5H2" 0.0225672 "Alpha-glucosidase"  
"JS1\_N06\_01939" 20869 "s63E6H2" 1.528752 "Alpha-glucosidase"  
"JS1\_N06\_01940" 20870 "s59E13H2" 0.0148992 "Mannosylglycerate hydrolase"  
"JS1\_N06\_01940" 20870 "s59E25H2" 0 "Mannosylglycerate hydrolase"  
"JS1\_N06\_01940" 20870 "s59E5H2" 0.3180386 "Mannosylglycerate hydrolase"  
"JS1\_N06\_01940" 20870 "s63E6H2" 0.9263847 "Mannosylglycerate hydrolase"  
"JS1\_N06\_01941" 20871 "s59E13H2" 0.03235054 "PHP domain protein"  
"JS1\_N06\_01941" 20871 "s59E25H2" 0.1526419 "PHP domain protein"  
"JS1\_N06\_01941" 20871 "s59E5H2" 0.0531931 "PHP domain protein"  
"JS1\_N06\_01941" 20871 "s63E6H2" 0.6938758 "PHP domain protein"  
"JS1\_N06\_01942" 20872 "s59E13H2" 0 "putative D,D-dipeptide transport ATP-binding protein DdpF"  
"JS1\_N06\_01942" 20872 "s59E25H2" 0 "putative D,D-dipeptide transport ATP-binding protein DdpF"  
"JS1\_N06\_01942" 20872 "s59E5H2" 0 "putative D,D-dipeptide transport ATP-binding protein DdpF"  
"JS1\_N06\_01942" 20872 "s63E6H2" 0.7568056 "putative D,D-dipeptide transport ATP-binding protein DdpF"  
"JS1\_N06\_01943" 20873 "s59E13H2" 0 "Oligopeptide transport ATP-binding protein OppD"  
"JS1\_N06\_01943" 20873 "s59E25H2" 0 "Oligopeptide transport ATP-binding protein OppD"

"JS1\_N06\_01943" 20873 "s59E5H2" 0.035142 "Oligopeptide transport ATP-binding protein OppD"  
"JS1\_N06\_01943" 20873 "s63E6H2" 0.9644066 "Oligopeptide transport ATP-binding protein OppD"  
"JS1\_N06\_01944" 20874 "s59E13H2" 0 "Oligopeptide transport system permease protein OppC"  
"JS1\_N06\_01944" 20874 "s59E25H2" 0 "Oligopeptide transport system permease protein OppC"  
"JS1\_N06\_01944" 20874 "s59E5H2" 0.009165644 "Oligopeptide transport system permease protein OppC"  
"JS1\_N06\_01944" 20874 "s63E6H2" 1.093119 "Oligopeptide transport system permease protein OppC"  
"JS1\_N06\_01945" 20875 "s59E13H2" 0 "Dipeptide transport system permease protein DppB"  
"JS1\_N06\_01945" 20875 "s59E25H2" 0 "Dipeptide transport system permease protein DppB"  
"JS1\_N06\_01945" 20875 "s59E5H2" 0 "Dipeptide transport system permease protein DppB"  
"JS1\_N06\_01945" 20875 "s63E6H2" 2.400083 "Dipeptide transport system permease protein DppB"  
"JS1\_N06\_01946" 20876 "s59E13H2" 0 "Nickel-binding periplasmic protein precursor"  
"JS1\_N06\_01946" 20876 "s59E25H2" 0 "Nickel-binding periplasmic protein precursor"  
"JS1\_N06\_01946" 20876 "s59E5H2" 0.008300125 "Nickel-binding periplasmic protein precursor"  
"JS1\_N06\_01946" 20876 "s63E6H2" 5.149231 "Nickel-binding periplasmic protein precursor"  
"JS1\_N06\_01947" 20877 "s59E13H2" 0.1355406 "spermidine synthase"  
"JS1\_N06\_01947" 20877 "s59E25H2" 0.1364247 "spermidine synthase"  
"JS1\_N06\_01947" 20877 "s59E5H2" 0.2572414 "spermidine synthase"  
"JS1\_N06\_01947" 20877 "s63E6H2" 2.436128 "spermidine synthase"  
"JS1\_N06\_01948" 20878 "s59E13H2" 0 "Multiple sugar-binding protein precursor"  
"JS1\_N06\_01948" 20878 "s59E25H2" 0 "Multiple sugar-binding protein precursor"  
"JS1\_N06\_01948" 20878 "s59E5H2" 0 "Multiple sugar-binding protein precursor"  
"JS1\_N06\_01948" 20878 "s63E6H2" 0.00234261 "Multiple sugar-binding protein precursor"  
"JS1\_N06\_01949" 20879 "s59E13H2" 0 "Lactose transport system permease protein LacF"  
"JS1\_N06\_01949" 20879 "s59E25H2" 0 "Lactose transport system permease protein LacF"  
"JS1\_N06\_01949" 20879 "s59E5H2" 0 "Lactose transport system permease protein LacF"  
"JS1\_N06\_01949" 20879 "s63E6H2" 0 "Lactose transport system permease protein LacF"  
"JS1\_N06\_01950" 20880 "s59E13H2" 0 "L-arabinose transport system permease protein AraQ"  
"JS1\_N06\_01950" 20880 "s59E25H2" 0 "L-arabinose transport system permease protein AraQ"  
"JS1\_N06\_01950" 20880 "s59E5H2" 0 "L-arabinose transport system permease protein AraQ"  
"JS1\_N06\_01950" 20880 "s63E6H2" 0 "L-arabinose transport system permease protein AraQ"  
"JS1\_N06\_01951" 20881 "s59E13H2" 0 "hypothetical protein"  
"JS1\_N06\_01951" 20881 "s59E25H2" 0 "hypothetical protein"  
"JS1\_N06\_01951" 20881 "s59E5H2" 0 "hypothetical protein"  
"JS1\_N06\_01951" 20881 "s63E6H2" 0.02533037 "hypothetical protein"  
"JS1\_N06\_01952" 20882 "s59E13H2" 2.20039 "Vegetative catalase"  
"JS1\_N06\_01952" 20882 "s59E25H2" 0.162585 "Vegetative catalase"  
"JS1\_N06\_01952" 20882 "s59E5H2" 0.30456 "Vegetative catalase"  
"JS1\_N06\_01952" 20882 "s63E6H2" 1.694918 "Vegetative catalase"  
"JS1\_N06\_01953" 20883 "s59E13H2" 0.1297514 "Beta-1,4-mannooligosaccharide phosphorylase"  
"JS1\_N06\_01953" 20883 "s59E25H2" 0 "Beta-1,4-mannooligosaccharide phosphorylase"  
"JS1\_N06\_01953" 20883 "s59E5H2" 1.087487 "Beta-1,4-mannooligosaccharide phosphorylase"  
"JS1\_N06\_01953" 20883 "s63E6H2" 2.773596 "Beta-1,4-mannooligosaccharide phosphorylase"  
"JS1\_N06\_01954" 20884 "s59E13H2" 0.1082122 "hypothetical protein"  
"JS1\_N06\_01954" 20884 "s59E25H2" 0 "hypothetical protein"  
"JS1\_N06\_01954" 20884 "s59E5H2" 0.8862905 "hypothetical protein"  
"JS1\_N06\_01954" 20884 "s63E6H2" 3.252487 "hypothetical protein"  
"JS1\_N06\_01955" 20885 "s59E13H2" 0.2709087 "Glycosyl transferases group 1"

"JS1\_N06\_01955" 20885 "s59E25H2" 0 "Glycosyl transferases group 1"  
"JS1\_N06\_01955" 20885 "s59E5H2" 0.7779065 "Glycosyl transferases group 1"  
"JS1\_N06\_01955" 20885 "s63E6H2" 2.287895 "Glycosyl transferases group 1"  
"JS1\_N06\_01956" 20886 "s59E13H2" 0.4606656 "hypothetical protein"  
"JS1\_N06\_01956" 20886 "s59E25H2" 0 "hypothetical protein"  
"JS1\_N06\_01956" 20886 "s59E5H2" 0.1452613 "hypothetical protein"  
"JS1\_N06\_01956" 20886 "s63E6H2" 1.386892 "hypothetical protein"  
"JS1\_N06\_01957" 20887 "s59E13H2" 0.5443044 "Cyclic di-GMP phosphodiesterase response regulator RpfG"  
"JS1\_N06\_01957" 20887 "s59E25H2" 0 "Cyclic di-GMP phosphodiesterase response regulator RpfG"  
"JS1\_N06\_01957" 20887 "s59E5H2" 0.09816936 "Cyclic di-GMP phosphodiesterase response regulator RpfG"  
"JS1\_N06\_01957" 20887 "s63E6H2" 2.299816 "Cyclic di-GMP phosphodiesterase response regulator RpfG"  
"JS1\_N06\_01959" 20889 "s59E13H2" 0.05028354 "Penicillin-binding protein 1A"  
"JS1\_N06\_01959" 20889 "s59E25H2" 0 "Penicillin-binding protein 1A"  
"JS1\_N06\_01959" 20889 "s59E5H2" 0.02777462 "Penicillin-binding protein 1A"  
"JS1\_N06\_01959" 20889 "s63E6H2" 0.1086666 "Penicillin-binding protein 1A"  
"JS1\_N06\_01963" 20893 "s59E13H2" 0 "Ribulose-phosphate 3-epimerase"  
"JS1\_N06\_01963" 20893 "s59E25H2" 0 "Ribulose-phosphate 3-epimerase"  
"JS1\_N06\_01963" 20893 "s59E5H2" 0 "Ribulose-phosphate 3-epimerase"  
"JS1\_N06\_01963" 20893 "s63E6H2" 0 "Ribulose-phosphate 3-epimerase"  
"JS1\_N06\_01964" 20894 "s59E13H2" 0 "hypothetical protein"  
"JS1\_N06\_01964" 20894 "s59E25H2" 0 "hypothetical protein"  
"JS1\_N06\_01964" 20894 "s59E5H2" 0 "hypothetical protein"  
"JS1\_N06\_01964" 20894 "s63E6H2" 0.05093888 "hypothetical protein"  
"JS1\_N06\_01966" 20896 "s59E13H2" 0 "NADP-dependent malic enzyme"  
"JS1\_N06\_01966" 20896 "s59E25H2" 0 "NADP-dependent malic enzyme"  
"JS1\_N06\_01966" 20896 "s59E5H2" 0.006062924 "NADP-dependent malic enzyme"  
"JS1\_N06\_01966" 20896 "s63E6H2" 0 "NADP-dependent malic enzyme"  
"JS1\_N06\_01980" 20910 "s59E13H2" 0 "putative glycerol-3-phosphate acyltransferase"  
"JS1\_N06\_01980" 20910 "s59E25H2" 0 "putative glycerol-3-phosphate acyltransferase"  
"JS1\_N06\_01980" 20910 "s59E5H2" 0 "putative glycerol-3-phosphate acyltransferase"  
"JS1\_N06\_01980" 20910 "s63E6H2" 0 "putative glycerol-3-phosphate acyltransferase"  
"JS1\_N06\_01981" 20911 "s59E13H2" 0.1594266 "Sialic acid TRAP transporter permease protein SiaT"  
"JS1\_N06\_01981" 20911 "s59E25H2" 0 "Sialic acid TRAP transporter permease protein SiaT"  
"JS1\_N06\_01981" 20911 "s59E5H2" 0.06399193 "Sialic acid TRAP transporter permease protein SiaT"  
"JS1\_N06\_01981" 20911 "s63E6H2" 0.2486594 "Sialic acid TRAP transporter permease protein SiaT"  
"JS1\_N06\_01982" 20912 "s59E13H2" 0.04177376 "hypothetical protein"  
"JS1\_N06\_01982" 20912 "s59E25H2" 0 "hypothetical protein"  
"JS1\_N06\_01982" 20912 "s59E5H2" 0.04526166 "hypothetical protein"  
"JS1\_N06\_01982" 20912 "s63E6H2" 0.1828121 "hypothetical protein"  
"JS1\_N06\_01983" 20913 "s59E13H2" 0.1057193 "NMT1/THIS like protein"  
"JS1\_N06\_01983" 20913 "s59E25H2" 0 "NMT1/THIS like protein"  
"JS1\_N06\_01983" 20913 "s59E5H2" 0.07818104 "NMT1/THIS like protein"  
"JS1\_N06\_01983" 20913 "s63E6H2" 0.2452984 "NMT1/THIS like protein"  
"JS1\_N06\_01984" 20914 "s59E13H2" 0.07459919 "hypothetical protein"  
"JS1\_N06\_01984" 20914 "s59E25H2" 0 "hypothetical protein"  
"JS1\_N06\_01984" 20914 "s59E5H2" 0.1885093 "hypothetical protein"  
"JS1\_N06\_01984" 20914 "s63E6H2" 0.2783868 "hypothetical protein"

"JS1\_N06\_01985" 20915 "s59E13H2" 0 "Elongation factor G"  
"JS1\_N06\_01985" 20915 "s59E25H2" 0 "Elongation factor G"  
"JS1\_N06\_01985" 20915 "s59E5H2" 0.007205214 "Elongation factor G"  
"JS1\_N06\_01985" 20915 "s63E6H2" 0 "Elongation factor G"  
"JS1\_N06\_01993" 20923 "s59E13H2" 0.01424384 "endonuclease IV"  
"JS1\_N06\_01993" 20923 "s59E25H2" 0 "endonuclease IV"  
"JS1\_N06\_01993" 20923 "s59E5H2" 0.0491051 "endonuclease IV"  
"JS1\_N06\_01993" 20923 "s63E6H2" 0.02145372 "endonuclease IV"  
"JS1\_N06\_01995" 20925 "s59E13H2" 9.250947 "Xylulose kinase"  
"JS1\_N06\_01995" 20925 "s59E25H2" 0 "Xylulose kinase"  
"JS1\_N06\_01995" 20925 "s59E5H2" 0.08496925 "Xylulose kinase"  
"JS1\_N06\_01995" 20925 "s63E6H2" 0.9920119 "Xylulose kinase"  
"JS1\_N06\_01996" 20926 "s59E13H2" 11.19445 "Benzylsuccinate synthase alpha subunit"  
"JS1\_N06\_01996" 20926 "s59E25H2" 0 "Benzylsuccinate synthase alpha subunit"  
"JS1\_N06\_01996" 20926 "s59E5H2" 0.1289603 "Benzylsuccinate synthase alpha subunit"  
"JS1\_N06\_01996" 20926 "s63E6H2" 2.073166 "Benzylsuccinate synthase alpha subunit"  
"JS1\_N06\_01997" 20927 "s59E13H2" 0.08505894 "Sporulation initiation inhibitor protein Soj"  
"JS1\_N06\_01997" 20927 "s59E25H2" 0.5646766 "Sporulation initiation inhibitor protein Soj"  
"JS1\_N06\_01997" 20927 "s59E5H2" 0.5169607 "Sporulation initiation inhibitor protein Soj"  
"JS1\_N06\_01997" 20927 "s63E6H2" 1.773232 "Sporulation initiation inhibitor protein Soj"  
"JS1\_N06\_01998" 20928 "s59E13H2" 0.03403005 "Cell division protein FtsZ"  
"JS1\_N06\_01998" 20928 "s59E25H2" 0 "Cell division protein FtsZ"  
"JS1\_N06\_01998" 20928 "s59E5H2" 0.2283937 "Cell division protein FtsZ"  
"JS1\_N06\_01998" 20928 "s63E6H2" 1.750692 "Cell division protein FtsZ"  
"JS1\_N06\_01999" 20929 "s59E13H2" 0.04018787 "hypothetical protein"  
"JS1\_N06\_01999" 20929 "s59E25H2" 0.3888889 "hypothetical protein"  
"JS1\_N06\_01999" 20929 "s59E5H2" 3.521248 "hypothetical protein"  
"JS1\_N06\_01999" 20929 "s63E6H2" 17.38742 "hypothetical protein"  
"JS1\_N06\_02005" 20935 "s59E13H2" 0 "GTPase Der"  
"JS1\_N06\_02005" 20935 "s59E25H2" 0 "GTPase Der"  
"JS1\_N06\_02005" 20935 "s59E5H2" 0 "GTPase Der"  
"JS1\_N06\_02005" 20935 "s63E6H2" 0 "GTPase Der"  
"JS1\_N06\_02006" 20936 "s59E13H2" 0.01496432 "Glutamine--tRNA ligase"  
"JS1\_N06\_02006" 20936 "s59E25H2" 0 "Glutamine--tRNA ligase"  
"JS1\_N06\_02006" 20936 "s59E5H2" 0.2034553 "Glutamine--tRNA ligase"  
"JS1\_N06\_02006" 20936 "s63E6H2" 0.2339599 "Glutamine--tRNA ligase"  
"JS1\_N06\_02007" 20937 "s59E13H2" 0.006034901 "Al-2 transport protein TqsA"  
"JS1\_N06\_02007" 20937 "s59E25H2" 0 "Al-2 transport protein TqsA"  
"JS1\_N06\_02007" 20937 "s59E5H2" 0.2751609 "Al-2 transport protein TqsA"  
"JS1\_N06\_02007" 20937 "s63E6H2" 0.3743609 "Al-2 transport protein TqsA"  
"JS1\_N06\_02008" 20938 "s59E13H2" 0.02153514 "N-acetylmuramoyl-L-alanine amidase AmiC precursor"  
"JS1\_N06\_02008" 20938 "s59E25H2" 0 "N-acetylmuramoyl-L-alanine amidase AmiC precursor"  
"JS1\_N06\_02008" 20938 "s59E5H2" 0.07339865 "N-acetylmuramoyl-L-alanine amidase AmiC precursor"  
"JS1\_N06\_02008" 20938 "s63E6H2" 0.1766096 "N-acetylmuramoyl-L-alanine amidase AmiC precursor"  
"JS1\_N06\_02009" 20939 "s59E13H2" 0 "Sporulation and spore germination"  
"JS1\_N06\_02009" 20939 "s59E25H2" 0 "Sporulation and spore germination"  
"JS1\_N06\_02009" 20939 "s59E5H2" 0.005481479 "Sporulation and spore germination"



"JS1\_N06\_02009" 20939 "s63E6H2" 0.171529 "Sporulation and spore germination"  
"JS1\_N06\_02010" 20940 "s59E13H2" 0 "Divergent PAP2 family protein"  
"JS1\_N06\_02010" 20940 "s59E25H2" 0 "Divergent PAP2 family protein"  
"JS1\_N06\_02010" 20940 "s59E5H2" 0.01368298 "Divergent PAP2 family protein"  
"JS1\_N06\_02010" 20940 "s63E6H2" 0.1423827 "Divergent PAP2 family protein"  
"JS1\_N06\_02011" 20941 "s59E13H2" 0.01671694 "16S/23S rRNA (cytidine-2'-O)-methyltransferase TlyA"  
"JS1\_N06\_02011" 20941 "s59E25H2" 0 "16S/23S rRNA (cytidine-2'-O)-methyltransferase TlyA"  
"JS1\_N06\_02011" 20941 "s59E5H2" 0.1645843 "16S/23S rRNA (cytidine-2'-O)-methyltransferase TlyA"  
"JS1\_N06\_02011" 20941 "s63E6H2" 0.1791775 "16S/23S rRNA (cytidine-2'-O)-methyltransferase TlyA"  
"JS1\_N06\_02012" 20942 "s59E13H2" 0.008879209 "hypothetical protein"  
"JS1\_N06\_02012" 20942 "s59E25H2" 0 "hypothetical protein"  
"JS1\_N06\_02012" 20942 "s59E5H2" 0.1918388 "hypothetical protein"  
"JS1\_N06\_02012" 20942 "s63E6H2" 0.2010285 "hypothetical protein"  
"JS1\_N06\_02013" 20943 "s59E13H2" 0.00451755 "putative inorganic polyphosphate/ATP-NAD kinase"  
"JS1\_N06\_02013" 20943 "s59E25H2" 0 "putative inorganic polyphosphate/ATP-NAD kinase"  
"JS1\_N06\_02013" 20943 "s59E5H2" 0.09106797 "putative inorganic polyphosphate/ATP-NAD kinase"  
"JS1\_N06\_02013" 20943 "s63E6H2" 0.06527054 "putative inorganic polyphosphate/ATP-NAD kinase"  
"JS1\_N06\_02014" 20944 "s59E13H2" 0.007142048 "DNA repair protein RecN"  
"JS1\_N06\_02014" 20944 "s59E25H2" 0 "DNA repair protein RecN"  
"JS1\_N06\_02014" 20944 "s59E5H2" 0.0718569 "DNA repair protein RecN"  
"JS1\_N06\_02014" 20944 "s63E6H2" 0.0122436 "DNA repair protein RecN"  
"JS1\_N06\_02015" 20945 "s59E13H2" 0.006643301 "Arginine utilization regulatory protein RocR"  
"JS1\_N06\_02015" 20945 "s59E25H2" 0 "Arginine utilization regulatory protein RocR"  
"JS1\_N06\_02015" 20945 "s59E5H2" 0.1637716 "Arginine utilization regulatory protein RocR"  
"JS1\_N06\_02015" 20945 "s63E6H2" 0.04706693 "Arginine utilization regulatory protein RocR"  
"JS1\_N06\_02016" 20946 "s59E13H2" 0.03671199 "2-aminoadipate transaminase"  
"JS1\_N06\_02016" 20946 "s59E25H2" 0 "2-aminoadipate transaminase"  
"JS1\_N06\_02016" 20946 "s59E5H2" 0.08012234 "2-aminoadipate transaminase"  
"JS1\_N06\_02016" 20946 "s63E6H2" 0.05611806 "2-aminoadipate transaminase"  
"JS1\_N06\_02017" 20947 "s59E13H2" 0.01203356 "Phosphate acetyltransferase"  
"JS1\_N06\_02017" 20947 "s59E25H2" 0 "Phosphate acetyltransferase"  
"JS1\_N06\_02017" 20947 "s59E5H2" 0.1754765 "Phosphate acetyltransferase"  
"JS1\_N06\_02017" 20947 "s63E6H2" 0.0617895 "Phosphate acetyltransferase"  
"JS1\_N06\_02018" 20948 "s59E13H2" 0.0018069 "Butyrate kinase 2"  
"JS1\_N06\_02018" 20948 "s59E25H2" 0 "Butyrate kinase 2"  
"JS1\_N06\_02018" 20948 "s59E5H2" 0.0326046 "Butyrate kinase 2"  
"JS1\_N06\_02018" 20948 "s63E6H2" 0.0176039 "Butyrate kinase 2"  
"JS1\_N06\_02019" 20949 "s59E13H2" 0 "hypothetical protein"  
"JS1\_N06\_02019" 20949 "s59E25H2" 0 "hypothetical protein"  
"JS1\_N06\_02019" 20949 "s59E5H2" 0 "hypothetical protein"  
"JS1\_N06\_02019" 20949 "s63E6H2" 0.0149027 "hypothetical protein"  
"JS1\_N06\_02020" 20950 "s59E13H2" 0.007160169 "Ketoisovalerate oxidoreductase subunit VorC"  
"JS1\_N06\_02020" 20950 "s59E25H2" 0 "Ketoisovalerate oxidoreductase subunit VorC"  
"JS1\_N06\_02020" 20950 "s59E5H2" 0 "Ketoisovalerate oxidoreductase subunit VorC"  
"JS1\_N06\_02020" 20950 "s63E6H2" 0.007897116 "Ketoisovalerate oxidoreductase subunit VorC"  
"JS1\_N06\_02021" 20951 "s59E13H2" 0.02138566 "Ketoisovalerate oxidoreductase subunit VorB"  
"JS1\_N06\_02021" 20951 "s59E25H2" 0 "Ketoisovalerate oxidoreductase subunit VorB"

"JS1\_N06\_02021" 20951 "s59E5H2" 0.01843147 "Ketoisovalerate oxidoreductase subunit VorB"  
"JS1\_N06\_02021" 20951 "s63E6H2" 0.07148762 "Ketoisovalerate oxidoreductase subunit VorB"  
"JS1\_N06\_02022" 20952 "s59E13H2" 0.1015219 "Ketoisovalerate oxidoreductase subunit VorA"  
"JS1\_N06\_02022" 20952 "s59E25H2" 0 "Ketoisovalerate oxidoreductase subunit VorA"  
"JS1\_N06\_02022" 20952 "s59E5H2" 0.008008205 "Ketoisovalerate oxidoreductase subunit VorA"  
"JS1\_N06\_02022" 20952 "s63E6H2" 0.1949523 "Ketoisovalerate oxidoreductase subunit VorA"  
"JS1\_N06\_02023" 20953 "s59E13H2" 0.02207757 "Ketoisovalerate oxidoreductase subunit VorA"  
"JS1\_N06\_02023" 20953 "s59E25H2" 0 "Ketoisovalerate oxidoreductase subunit VorA"  
"JS1\_N06\_02023" 20953 "s59E5H2" 0.003512542 "Ketoisovalerate oxidoreductase subunit VorA"  
"JS1\_N06\_02023" 20953 "s63E6H2" 0.1742505 "Ketoisovalerate oxidoreductase subunit VorA"  
"JS1\_N06\_02024" 20954 "s59E13H2" 0.004149924 "Peptidase T"  
"JS1\_N06\_02024" 20954 "s59E25H2" 0 "Peptidase T"  
"JS1\_N06\_02024" 20954 "s59E5H2" 0.03601649 "Peptidase T"  
"JS1\_N06\_02024" 20954 "s63E6H2" 0.1821631 "Peptidase T"  
"JS1\_N06\_02025" 20955 "s59E13H2" 0 "ADP-ribose pyrophosphatase"  
"JS1\_N06\_02025" 20955 "s59E25H2" 0 "ADP-ribose pyrophosphatase"  
"JS1\_N06\_02025" 20955 "s59E5H2" 0.04233545 "ADP-ribose pyrophosphatase"  
"JS1\_N06\_02025" 20955 "s63E6H2" 0.1943856 "ADP-ribose pyrophosphatase"  
"JS1\_N06\_02026" 20956 "s59E13H2" 0.0719915 "hypothetical protein"  
"JS1\_N06\_02026" 20956 "s59E25H2" 0 "hypothetical protein"  
"JS1\_N06\_02026" 20956 "s59E5H2" 0.1161191 "hypothetical protein"  
"JS1\_N06\_02026" 20956 "s63E6H2" 0.187474 "hypothetical protein"  
"JS1\_N06\_02027" 20957 "s59E13H2" 0.0816538 "DNA primase"  
"JS1\_N06\_02027" 20957 "s59E25H2" 0 "DNA primase"  
"JS1\_N06\_02027" 20957 "s59E5H2" 0.3387577 "DNA primase"  
"JS1\_N06\_02027" 20957 "s63E6H2" 0.1726436 "DNA primase"  
"JS1\_N06\_02028" 20958 "s59E13H2" 0.1856144 "RNA polymerase sigma factor SigA"  
"JS1\_N06\_02028" 20958 "s59E25H2" 0 "RNA polymerase sigma factor SigA"  
"JS1\_N06\_02028" 20958 "s59E5H2" 1.7866 "RNA polymerase sigma factor SigA"  
"JS1\_N06\_02028" 20958 "s63E6H2" 0.2658412 "RNA polymerase sigma factor SigA"  
"JS1\_N06\_02030" 20960 "s59E13H2" 0 "Methyltransferase domain protein"  
"JS1\_N06\_02030" 20960 "s59E25H2" 0 "Methyltransferase domain protein"  
"JS1\_N06\_02030" 20960 "s59E5H2" 0 "Methyltransferase domain protein"  
"JS1\_N06\_02030" 20960 "s63E6H2" 0 "Methyltransferase domain protein"  
"JS1\_N06\_02031" 20961 "s59E13H2" 0 "hypothetical protein"  
"JS1\_N06\_02031" 20961 "s59E25H2" 0 "hypothetical protein"  
"JS1\_N06\_02031" 20961 "s59E5H2" 0 "hypothetical protein"  
"JS1\_N06\_02031" 20961 "s63E6H2" 0 "hypothetical protein"  
"JS1\_N06\_02032" 20962 "s59E13H2" 0 "hypothetical protein"  
"JS1\_N06\_02032" 20962 "s59E25H2" 0 "hypothetical protein"  
"JS1\_N06\_02032" 20962 "s59E5H2" 0 "hypothetical protein"  
"JS1\_N06\_02032" 20962 "s63E6H2" 0.03285761 "hypothetical protein"  
"JS1\_N06\_02033" 20963 "s59E13H2" 0 "hypothetical protein"  
"JS1\_N06\_02033" 20963 "s59E25H2" 0 "hypothetical protein"  
"JS1\_N06\_02033" 20963 "s59E5H2" 0 "hypothetical protein"  
"JS1\_N06\_02033" 20963 "s63E6H2" 0 "hypothetical protein"  
"JS1\_N06\_02034" 20964 "s59E13H2" 0 "hypothetical protein"

"JS1\_N06\_02034" 20964 "s59E25H2" 0 "hypothetical protein"  
"JS1\_N06\_02034" 20964 "s59E5H2" 0 "hypothetical protein"  
"JS1\_N06\_02034" 20964 "s63E6H2" 0 "hypothetical protein"  
"JS1\_N06\_02036" 20966 "s59E13H2" 0 "OsmC-like protein"  
"JS1\_N06\_02036" 20966 "s59E25H2" 0 "OsmC-like protein"  
"JS1\_N06\_02036" 20966 "s59E5H2" 0 "OsmC-like protein"  
"JS1\_N06\_02036" 20966 "s63E6H2" 0.2199186 "OsmC-like protein"  
"JS1\_N06\_02037" 20967 "s59E13H2" 0 "hypothetical protein"  
"JS1\_N06\_02037" 20967 "s59E25H2" 0 "hypothetical protein"  
"JS1\_N06\_02037" 20967 "s59E5H2" 0 "hypothetical protein"  
"JS1\_N06\_02037" 20967 "s63E6H2" 0.0150575 "hypothetical protein"  
"JS1\_N06\_02038" 20968 "s59E13H2" 0 "hypothetical protein"  
"JS1\_N06\_02038" 20968 "s59E25H2" 0 "hypothetical protein"  
"JS1\_N06\_02038" 20968 "s59E5H2" 0 "hypothetical protein"  
"JS1\_N06\_02038" 20968 "s63E6H2" 2.498228 "hypothetical protein"  
"JS1\_N06\_02039" 20969 "s59E13H2" 0.0662548 "Copper-exporting P-type ATPase B"  
"JS1\_N06\_02039" 20969 "s59E25H2" 0 "Copper-exporting P-type ATPase B"  
"JS1\_N06\_02039" 20969 "s59E5H2" 1.921753 "Copper-exporting P-type ATPase B"  
"JS1\_N06\_02039" 20969 "s63E6H2" 4.114867 "Copper-exporting P-type ATPase B"  
"JS1\_N06\_02040" 20970 "s59E13H2" 0 "hypothetical protein"  
"JS1\_N06\_02040" 20970 "s59E25H2" 0 "hypothetical protein"  
"JS1\_N06\_02040" 20970 "s59E5H2" 0 "hypothetical protein"  
"JS1\_N06\_02040" 20970 "s63E6H2" 0.006704263 "hypothetical protein"  
"JS1\_N06\_02041" 20971 "s59E13H2" 0 "hypothetical protein"  
"JS1\_N06\_02041" 20971 "s59E25H2" 0 "hypothetical protein"  
"JS1\_N06\_02041" 20971 "s59E5H2" 0 "hypothetical protein"  
"JS1\_N06\_02041" 20971 "s63E6H2" 0.005347523 "hypothetical protein"  
"JS1\_N06\_02042" 20972 "s59E13H2" 0 "Demethylmenaquinone methyltransferase"  
"JS1\_N06\_02042" 20972 "s59E25H2" 0 "Demethylmenaquinone methyltransferase"  
"JS1\_N06\_02042" 20972 "s59E5H2" 0 "Demethylmenaquinone methyltransferase"  
"JS1\_N06\_02042" 20972 "s63E6H2" 0.002714651 "Demethylmenaquinone methyltransferase"  
"JS1\_N06\_02043" 20973 "s59E13H2" 0.008550168 "Copper-exporting P-type ATPase B"  
"JS1\_N06\_02043" 20973 "s59E25H2" 0 "Copper-exporting P-type ATPase B"  
"JS1\_N06\_02043" 20973 "s59E5H2" 0.3320896 "Copper-exporting P-type ATPase B"  
"JS1\_N06\_02043" 20973 "s63E6H2" 2.839576 "Copper-exporting P-type ATPase B"  
"JS1\_N06\_02044" 20974 "s59E13H2" 0 "Cupin domain protein"  
"JS1\_N06\_02044" 20974 "s59E25H2" 0 "Cupin domain protein"  
"JS1\_N06\_02044" 20974 "s59E5H2" 0 "Cupin domain protein"  
"JS1\_N06\_02044" 20974 "s63E6H2" 0 "Cupin domain protein"  
"JS1\_N06\_02045" 20975 "s59E13H2" 0 "hypothetical protein"  
"JS1\_N06\_02045" 20975 "s59E25H2" 0 "hypothetical protein"  
"JS1\_N06\_02045" 20975 "s59E5H2" 0.0212906 "hypothetical protein"  
"JS1\_N06\_02045" 20975 "s63E6H2" 0 "hypothetical protein"  
"JS1\_N06\_02046" 20976 "s59E13H2" 0 "hypothetical protein"  
"JS1\_N06\_02046" 20976 "s59E25H2" 0 "hypothetical protein"  
"JS1\_N06\_02046" 20976 "s59E5H2" 0 "hypothetical protein"  
"JS1\_N06\_02046" 20976 "s63E6H2" 0 "hypothetical protein"

"JS1\_N06\_02047" 20977 "s59E13H2" 0 "Reverse rubrerythrin-2"  
"JS1\_N06\_02047" 20977 "s59E25H2" 0 "Reverse rubrerythrin-2"  
"JS1\_N06\_02047" 20977 "s59E5H2" 0.8129447 "Reverse rubrerythrin-2"  
"JS1\_N06\_02047" 20977 "s63E6H2" 0.03826268 "Reverse rubrerythrin-2"  
"JS1\_N06\_02048" 20978 "s59E13H2" 0 "hypothetical protein"  
"JS1\_N06\_02048" 20978 "s59E25H2" 0 "hypothetical protein"  
"JS1\_N06\_02048" 20978 "s59E5H2" 0 "hypothetical protein"  
"JS1\_N06\_02048" 20978 "s63E6H2" 0.02023312 "hypothetical protein"  
"JS1\_N06\_02049" 20979 "s59E13H2" 0 "hypothetical protein"  
"JS1\_N06\_02049" 20979 "s59E25H2" 0 "hypothetical protein"  
"JS1\_N06\_02049" 20979 "s59E5H2" 0.009449124 "hypothetical protein"  
"JS1\_N06\_02049" 20979 "s63E6H2" 0.0187879 "hypothetical protein"  
"JS1\_N06\_02050" 20980 "s59E13H2" 0.07108884 "5'-methylthioadenosine/S-adenosylhomocysteine nucleosidase"  
"JS1\_N06\_02050" 20980 "s59E25H2" 0 "5'-methylthioadenosine/S-adenosylhomocysteine nucleosidase"  
"JS1\_N06\_02050" 20980 "s59E5H2" 0.02943122 "5'-methylthioadenosine/S-adenosylhomocysteine nucleosidase"  
"JS1\_N06\_02050" 20980 "s63E6H2" 0.009160803 "5'-methylthioadenosine/S-adenosylhomocysteine nucleosidase"  
"JS1\_N06\_02051" 20981 "s59E13H2" 1.006612 "putative acetyltransferase"  
"JS1\_N06\_02051" 20981 "s59E25H2" 0 "putative acetyltransferase"  
"JS1\_N06\_02051" 20981 "s59E5H2" 0.2054863 "putative acetyltransferase"  
"JS1\_N06\_02051" 20981 "s63E6H2" 0.1025219 "putative acetyltransferase"  
"JS1\_N06\_02052" 20982 "s59E13H2" 0.04951126 "Demethylrebeccamycin-D-glucose O-methyltransferase"  
"JS1\_N06\_02052" 20982 "s59E25H2" 0 "Demethylrebeccamycin-D-glucose O-methyltransferase"  
"JS1\_N06\_02052" 20982 "s59E5H2" 0.1286174 "Demethylrebeccamycin-D-glucose O-methyltransferase"  
"JS1\_N06\_02052" 20982 "s63E6H2" 0.004464604 "Demethylrebeccamycin-D-glucose O-methyltransferase"  
"JS1\_N06\_02053" 20983 "s59E13H2" 0 "hypothetical protein"  
"JS1\_N06\_02053" 20983 "s59E25H2" 0 "hypothetical protein"  
"JS1\_N06\_02053" 20983 "s59E5H2" 0 "hypothetical protein"  
"JS1\_N06\_02053" 20983 "s63E6H2" 0 "hypothetical protein"  
"JS1\_N06\_02054" 20984 "s59E13H2" 0.141872 "Transposase IS200 like protein"  
"JS1\_N06\_02054" 20984 "s59E25H2" 0 "Transposase IS200 like protein"  
"JS1\_N06\_02054" 20984 "s59E5H2" 0.6232143 "Transposase IS200 like protein"  
"JS1\_N06\_02054" 20984 "s63E6H2" 0.6168756 "Transposase IS200 like protein"  
"JS1\_N06\_02056" 20986 "s59E13H2" 0.009462361 "Long-chain-fatty-acid--CoA ligase FadD15"  
"JS1\_N06\_02056" 20986 "s59E25H2" 0 "Long-chain-fatty-acid--CoA ligase FadD15"  
"JS1\_N06\_02056" 20986 "s59E5H2" 0.0145317 "Long-chain-fatty-acid--CoA ligase FadD15"  
"JS1\_N06\_02056" 20986 "s63E6H2" 0.4050091 "Long-chain-fatty-acid--CoA ligase FadD15"  
"JS1\_N06\_02057" 20987 "s59E13H2" 0.1164186 "Ornithine carbamoyltransferase"  
"JS1\_N06\_02057" 20987 "s59E25H2" 0 "Ornithine carbamoyltransferase"  
"JS1\_N06\_02057" 20987 "s59E5H2" 0.2262518 "Ornithine carbamoyltransferase"  
"JS1\_N06\_02057" 20987 "s63E6H2" 1.276911 "Ornithine carbamoyltransferase"  
"JS1\_N06\_02058" 20988 "s59E13H2" 0.09224186 "hypothetical protein"  
"JS1\_N06\_02058" 20988 "s59E25H2" 0 "hypothetical protein"  
"JS1\_N06\_02058" 20988 "s59E5H2" 0.1201054 "hypothetical protein"  
"JS1\_N06\_02058" 20988 "s63E6H2" 0.955498 "hypothetical protein"  
"JS1\_N06\_02059" 20989 "s59E13H2" 0 "hypothetical protein"  
"JS1\_N06\_02059" 20989 "s59E25H2" 0 "hypothetical protein"  
"JS1\_N06\_02059" 20989 "s59E5H2" 0 "hypothetical protein"

"JS1\_N06\_02059" 20989 "s63E6H2" 0.09223207 "hypothetical protein"  
"JS1\_N06\_02062" 20992 "s59E13H2" 0 "Protein of unknown function (Hypoth\_ymh)"  
"JS1\_N06\_02062" 20992 "s59E25H2" 0 "Protein of unknown function (Hypoth\_ymh)"  
"JS1\_N06\_02062" 20992 "s59E5H2" 0 "Protein of unknown function (Hypoth\_ymh)"  
"JS1\_N06\_02062" 20992 "s63E6H2" 0 "Protein of unknown function (Hypoth\_ymh)"  
"JS1\_N06\_02064" 20994 "s59E13H2" 0 "Chromosome partition protein Smc"  
"JS1\_N06\_02064" 20994 "s59E25H2" 0 "Chromosome partition protein Smc"  
"JS1\_N06\_02064" 20994 "s59E5H2" 0 "Chromosome partition protein Smc"  
"JS1\_N06\_02064" 20994 "s63E6H2" 0.001123298 "Chromosome partition protein Smc"  
"JS1\_N06\_02065" 20995 "s59E13H2" 0 "Signal recognition particle receptor FtsY"  
"JS1\_N06\_02065" 20995 "s59E25H2" 0 "Signal recognition particle receptor FtsY"  
"JS1\_N06\_02065" 20995 "s59E5H2" 0 "Signal recognition particle receptor FtsY"  
"JS1\_N06\_02065" 20995 "s63E6H2" 0.003280572 "Signal recognition particle receptor FtsY"  
"JS1\_N06\_02066" 20996 "s59E13H2" 0 "signal recognition particle protein"  
"JS1\_N06\_02066" 20996 "s59E25H2" 0 "signal recognition particle protein"  
"JS1\_N06\_02066" 20996 "s59E5H2" 0 "signal recognition particle protein"  
"JS1\_N06\_02066" 20996 "s63E6H2" 0 "signal recognition particle protein"  
"JS1\_N06\_02070" 21000 "s59E13H2" 0 "V-type sodium ATPase subunit C"  
"JS1\_N06\_02070" 21000 "s59E25H2" 0 "V-type sodium ATPase subunit C"  
"JS1\_N06\_02070" 21000 "s59E5H2" 0.06788663 "V-type sodium ATPase subunit C"  
"JS1\_N06\_02070" 21000 "s63E6H2" 0.004352219 "V-type sodium ATPase subunit C"  
"JS1\_N06\_02072" 21002 "s59E13H2" 0 "Endonuclease MutS2"  
"JS1\_N06\_02072" 21002 "s59E25H2" 0 "Endonuclease MutS2"  
"JS1\_N06\_02072" 21002 "s59E5H2" 0 "Endonuclease MutS2"  
"JS1\_N06\_02072" 21002 "s63E6H2" 0.008537896 "Endonuclease MutS2"  
"JS1\_N06\_02073" 21003 "s59E13H2" 0 "Phosphopantetheine adenylyltransferase"  
"JS1\_N06\_02073" 21003 "s59E25H2" 0 "Phosphopantetheine adenylyltransferase"  
"JS1\_N06\_02073" 21003 "s59E5H2" 0 "Phosphopantetheine adenylyltransferase"  
"JS1\_N06\_02073" 21003 "s63E6H2" 0.002647868 "Phosphopantetheine adenylyltransferase"  
"JS1\_N06\_02075" 21005 "s59E13H2" 0 "V-type proton ATPase subunit E"  
"JS1\_N06\_02075" 21005 "s59E25H2" 0 "V-type proton ATPase subunit E"  
"JS1\_N06\_02075" 21005 "s59E5H2" 0 "V-type proton ATPase subunit E"  
"JS1\_N06\_02075" 21005 "s63E6H2" 0 "V-type proton ATPase subunit E"  
"JS1\_N06\_02080" 21010 "s59E13H2" 0 "Ribosomal RNA small subunit methyltransferase D"  
"JS1\_N06\_02080" 21010 "s59E25H2" 0 "Ribosomal RNA small subunit methyltransferase D"  
"JS1\_N06\_02080" 21010 "s59E5H2" 0 "Ribosomal RNA small subunit methyltransferase D"  
"JS1\_N06\_02080" 21010 "s63E6H2" 0.001241545 "Ribosomal RNA small subunit methyltransferase D"  
"JS1\_N06\_02094" 21024 "s59E13H2" 0.002771196 "GTPase Der"  
"JS1\_N06\_02094" 21024 "s59E25H2" 0 "GTPase Der"  
"JS1\_N06\_02094" 21024 "s59E5H2" 0 "GTPase Der"  
"JS1\_N06\_02094" 21024 "s63E6H2" 0 "GTPase Der"  
"JS1\_N06\_02095" 21025 "s59E13H2" 0 "hypothetical protein"  
"JS1\_N06\_02095" 21025 "s59E25H2" 0 "hypothetical protein"  
"JS1\_N06\_02095" 21025 "s59E5H2" 0 "hypothetical protein"  
"JS1\_N06\_02095" 21025 "s63E6H2" 0.001363235 "hypothetical protein"  
"JS1\_N06\_02099" 21029 "s59E13H2" 0 "V-type ATP synthase subunit I"  
"JS1\_N06\_02099" 21029 "s59E25H2" 0 "V-type ATP synthase subunit I"

"JS1\_N06\_02099" 21029 "s59E5H2" 7.205214e-05 "V-type ATP synthase subunit I"  
"JS1\_N06\_02099" 21029 "s63E6H2" 0 "V-type ATP synthase subunit I"  
"JS1\_N06\_02107" 21037 "s59E13H2" 0 "lysyl-tRNA synthetase"  
"JS1\_N06\_02107" 21037 "s59E25H2" 0 "lysyl-tRNA synthetase"  
"JS1\_N06\_02107" 21037 "s59E5H2" 0 "lysyl-tRNA synthetase"  
"JS1\_N06\_02107" 21037 "s63E6H2" 0.003444931 "lysyl-tRNA synthetase"  
"JS1\_N06\_02108" 21038 "s59E13H2" 0.02337607 "Transcription elongation factor GreA"  
"JS1\_N06\_02108" 21038 "s59E25H2" 0 "Transcription elongation factor GreA"  
"JS1\_N06\_02108" 21038 "s59E5H2" 0.0468909 "Transcription elongation factor GreA"  
"JS1\_N06\_02108" 21038 "s63E6H2" 0.03035797 "Transcription elongation factor GreA"  
"JS1\_N06\_02109" 21039 "s59E13H2" 0.05572391 "1-acyl-sn-glycerol-3-phosphate acyltransferase"  
"JS1\_N06\_02109" 21039 "s59E25H2" 0 "1-acyl-sn-glycerol-3-phosphate acyltransferase"  
"JS1\_N06\_02109" 21039 "s59E5H2" 0.2424643 "1-acyl-sn-glycerol-3-phosphate acyltransferase"  
"JS1\_N06\_02109" 21039 "s63E6H2" 0.2739239 "1-acyl-sn-glycerol-3-phosphate acyltransferase"  
"JS1\_N06\_02110" 21040 "s59E13H2" 0.06438891 "phosphodiesterase"  
"JS1\_N06\_02110" 21040 "s59E25H2" 0 "phosphodiesterase"  
"JS1\_N06\_02110" 21040 "s59E5H2" 0.2647475 "phosphodiesterase"  
"JS1\_N06\_02110" 21040 "s63E6H2" 0.1482933 "phosphodiesterase"  
"JS1\_N06\_02112" 21042 "s59E13H2" 0.01066974 "V-type sodium ATPase subunit B"  
"JS1\_N06\_02112" 21042 "s59E25H2" 0 "V-type sodium ATPase subunit B"  
"JS1\_N06\_02112" 21042 "s59E5H2" 0.09396509 "V-type sodium ATPase subunit B"  
"JS1\_N06\_02112" 21042 "s63E6H2" 0.01524741 "V-type sodium ATPase subunit B"  
"JS1\_N06\_02113" 21043 "s59E13H2" 0 "hypothetical protein"  
"JS1\_N06\_02113" 21043 "s59E25H2" 0 "hypothetical protein"  
"JS1\_N06\_02113" 21043 "s59E5H2" 0 "hypothetical protein"  
"JS1\_N06\_02113" 21043 "s63E6H2" 0 "hypothetical protein"  
"JS1\_N06\_02117" 21047 "s59E13H2" 0 "hypothetical protein"  
"JS1\_N06\_02117" 21047 "s59E25H2" 0 "hypothetical protein"  
"JS1\_N06\_02117" 21047 "s59E5H2" 0 "hypothetical protein"  
"JS1\_N06\_02117" 21047 "s63E6H2" 0 "hypothetical protein"  
"JS1\_N06\_02118" 21048 "s59E13H2" 0 "hypothetical protein"  
"JS1\_N06\_02118" 21048 "s59E25H2" 0 "hypothetical protein"  
"JS1\_N06\_02118" 21048 "s59E5H2" 0 "hypothetical protein"  
"JS1\_N06\_02118" 21048 "s63E6H2" 0.004119849 "hypothetical protein"  
"JS1\_N06\_02119" 21049 "s59E13H2" 0.0007780305 "Signal recognition particle protein"  
"JS1\_N06\_02119" 21049 "s59E25H2" 0 "Signal recognition particle protein"  
"JS1\_N06\_02119" 21049 "s59E5H2" 0 "Signal recognition particle protein"  
"JS1\_N06\_02119" 21049 "s63E6H2" 0 "Signal recognition particle protein"  
"JS1\_N06\_02122" 21052 "s59E13H2" 0.0004025745 "Quinolate synthase A"  
"JS1\_N06\_02122" 21052 "s59E25H2" 0 "Quinolate synthase A"  
"JS1\_N06\_02122" 21052 "s59E5H2" 0 "Quinolate synthase A"  
"JS1\_N06\_02122" 21052 "s63E6H2" 0.04021584 "Quinolate synthase A"  
"JS1\_N06\_02123" 21053 "s59E13H2" 0.96805 "L-aspartate oxidase"  
"JS1\_N06\_02123" 21053 "s59E25H2" 0 "L-aspartate oxidase"  
"JS1\_N06\_02123" 21053 "s59E5H2" 0.583948 "L-aspartate oxidase"  
"JS1\_N06\_02123" 21053 "s63E6H2" 1.008052 "L-aspartate oxidase"  
"JS1\_N06\_02124" 21054 "s59E13H2" 0.5464729 "putative nicotinate-nucleotide pyrophosphorylase [carboxylating]"

"JS1\_N06\_02124" 21054 "s59E25H2" 0.4826389 "putative nicotinate-nucleotide pyrophosphorylase [carboxylating]"  
"JS1\_N06\_02124" 21054 "s59E5H2" 0.2091576 "putative nicotinate-nucleotide pyrophosphorylase [carboxylating]"  
"JS1\_N06\_02124" 21054 "s63E6H2" 0.1363196 "putative nicotinate-nucleotide pyrophosphorylase [carboxylating]"  
"JS1\_N06\_02125" 21055 "s59E13H2" 0.709325 "Type III pantothenate kinase"  
"JS1\_N06\_02125" 21055 "s59E25H2" 0 "Type III pantothenate kinase"  
"JS1\_N06\_02125" 21055 "s59E5H2" 4.555815 "Type III pantothenate kinase"  
"JS1\_N06\_02125" 21055 "s63E6H2" 1.293943 "Type III pantothenate kinase"  
"JS1\_N06\_02126" 21056 "s59E13H2" 2.422799 "Pantothenic acid transporter PanT"  
"JS1\_N06\_02126" 21056 "s59E25H2" 0 "Pantothenic acid transporter PanT"  
"JS1\_N06\_02126" 21056 "s59E5H2" 4.200896 "Pantothenic acid transporter PanT"  
"JS1\_N06\_02126" 21056 "s63E6H2" 1.852445 "Pantothenic acid transporter PanT"  
"JS1\_N06\_02127" 21057 "s59E13H2" 0.6052569 "Transcriptional regulatory protein ZraR"  
"JS1\_N06\_02127" 21057 "s59E25H2" 0 "Transcriptional regulatory protein ZraR"  
"JS1\_N06\_02127" 21057 "s59E5H2" 0.7492285 "Transcriptional regulatory protein ZraR"  
"JS1\_N06\_02127" 21057 "s63E6H2" 0.3719848 "Transcriptional regulatory protein ZraR"  
"JS1\_N06\_02128" 21058 "s59E13H2" 0.4170954 "Sensor protein ZraS"  
"JS1\_N06\_02128" 21058 "s59E25H2" 0 "Sensor protein ZraS"  
"JS1\_N06\_02128" 21058 "s59E5H2" 0.4748687 "Sensor protein ZraS"  
"JS1\_N06\_02128" 21058 "s63E6H2" 0.1830554 "Sensor protein ZraS"  
"JS1\_N06\_02129" 21059 "s59E13H2" 0.01744874 "Putative serine protease HtrA"  
"JS1\_N06\_02129" 21059 "s59E25H2" 0 "Putative serine protease HtrA"  
"JS1\_N06\_02129" 21059 "s59E5H2" 0.002339838 "Putative serine protease HtrA"  
"JS1\_N06\_02129" 21059 "s63E6H2" 0.116714 "Putative serine protease HtrA"  
"JS1\_N06\_02130" 21060 "s59E13H2" 0.0124495 "hypothetical protein"  
"JS1\_N06\_02130" 21060 "s59E25H2" 0 "hypothetical protein"  
"JS1\_N06\_02130" 21060 "s59E5H2" 0.02787126 "hypothetical protein"  
"JS1\_N06\_02130" 21060 "s63E6H2" 0.1128964 "hypothetical protein"  
"JS1\_N06\_02131" 21061 "s59E13H2" 0.01580932 "hypothetical protein"  
"JS1\_N06\_02131" 21061 "s59E25H2" 0 "hypothetical protein"  
"JS1\_N06\_02131" 21061 "s59E5H2" 0.04323129 "hypothetical protein"  
"JS1\_N06\_02131" 21061 "s63E6H2" 0.07437666 "hypothetical protein"  
"JS1\_N06\_02132" 21062 "s59E13H2" 0.1297372 "NAD synthetase"  
"JS1\_N06\_02132" 21062 "s59E25H2" 0 "NAD synthetase"  
"JS1\_N06\_02132" 21062 "s59E5H2" 0.03692394 "NAD synthetase"  
"JS1\_N06\_02132" 21062 "s63E6H2" 0.07194767 "NAD synthetase"  
"JS1\_N06\_02133" 21063 "s59E13H2" 0.1852814 "Thiol:disulfide interchange protein DsbD precursor"  
"JS1\_N06\_02133" 21063 "s59E25H2" 0 "Thiol:disulfide interchange protein DsbD precursor"  
"JS1\_N06\_02133" 21063 "s59E5H2" 0.004328643 "Thiol:disulfide interchange protein DsbD precursor"  
"JS1\_N06\_02133" 21063 "s63E6H2" 0.04761076 "Thiol:disulfide interchange protein DsbD precursor"  
"JS1\_N06\_02134" 21064 "s59E13H2" 0.3544068 "Thiol:disulfide interchange protein DsbD precursor"  
"JS1\_N06\_02134" 21064 "s59E25H2" 0 "Thiol:disulfide interchange protein DsbD precursor"  
"JS1\_N06\_02134" 21064 "s59E5H2" 0.0666032 "Thiol:disulfide interchange protein DsbD precursor"  
"JS1\_N06\_02134" 21064 "s63E6H2" 0.08347202 "Thiol:disulfide interchange protein DsbD precursor"  
"JS1\_N06\_02135" 21065 "s59E13H2" 0.282294 "NifU-like protein"  
"JS1\_N06\_02135" 21065 "s59E25H2" 0 "NifU-like protein"  
"JS1\_N06\_02135" 21065 "s59E5H2" 0.1020739 "NifU-like protein"  
"JS1\_N06\_02135" 21065 "s63E6H2" 0.09825933 "NifU-like protein"

"JS1\_N06\_02136" 21066 "s59E13H2" 0.1920438 "putative cysteine desulfurase 2"  
"JS1\_N06\_02136" 21066 "s59E25H2" 0 "putative cysteine desulfurase 2"  
"JS1\_N06\_02136" 21066 "s59E5H2" 0.05893555 "putative cysteine desulfurase 2"  
"JS1\_N06\_02136" 21066 "s63E6H2" 0.1984873 "putative cysteine desulfurase 2"  
"JS1\_N06\_02137" 21067 "s59E13H2" 0.01622972 "hypothetical protein"  
"JS1\_N06\_02137" 21067 "s59E25H2" 0 "hypothetical protein"  
"JS1\_N06\_02137" 21067 "s59E5H2" 0.06368062 "hypothetical protein"  
"JS1\_N06\_02137" 21067 "s63E6H2" 0.08511005 "hypothetical protein"  
"JS1\_N06\_02138" 21068 "s59E13H2" 0.006955593 "hypothetical protein"  
"JS1\_N06\_02138" 21068 "s59E25H2" 0 "hypothetical protein"  
"JS1\_N06\_02138" 21068 "s59E5H2" 0 "hypothetical protein"  
"JS1\_N06\_02138" 21068 "s63E6H2" 0.08333008 "hypothetical protein"  
"JS1\_N06\_02139" 21069 "s59E13H2" 0.005330231 "Acylphosphatase"  
"JS1\_N06\_02139" 21069 "s59E25H2" 0 "Acylphosphatase"  
"JS1\_N06\_02139" 21069 "s59E5H2" 0.006908092 "Acylphosphatase"  
"JS1\_N06\_02139" 21069 "s63E6H2" 0 "Acylphosphatase"  
"JS1\_N06\_02140" 21070 "s59E13H2" 0.139421 "Peptidase family M50"  
"JS1\_N06\_02140" 21070 "s59E25H2" 0 "Peptidase family M50"  
"JS1\_N06\_02140" 21070 "s59E5H2" 0.2188134 "Peptidase family M50"  
"JS1\_N06\_02140" 21070 "s63E6H2" 0.109461 "Peptidase family M50"  
"JS1\_N06\_02142" 21072 "s59E13H2" 0.004008618 "Leucine-, isoleucine-, valine-, threonine-, and alanine-binding protein precursor"  
"JS1\_N06\_02142" 21072 "s59E25H2" 0 "Leucine-, isoleucine-, valine-, threonine-, and alanine-binding protein precursor"  
"JS1\_N06\_02142" 21072 "s59E5H2" 0.008660478 "Leucine-, isoleucine-, valine-, threonine-, and alanine-binding protein precursor"  
"JS1\_N06\_02142" 21072 "s63E6H2" 0.02697818 "Leucine-, isoleucine-, valine-, threonine-, and alanine-binding protein precursor"  
"JS1\_N06\_02143" 21073 "s59E13H2" 0.02737173 "High-affinity branched-chain amino acid transport system permease protein LivH"  
"JS1\_N06\_02143" 21073 "s59E25H2" 0 "High-affinity branched-chain amino acid transport system permease protein LivH"  
"JS1\_N06\_02143" 21073 "s59E5H2" 0.01444595 "High-affinity branched-chain amino acid transport system permease protein LivH"  
"JS1\_N06\_02143" 21073 "s63E6H2" 0.00748352 "High-affinity branched-chain amino acid transport system permease protein LivH"  
"JS1\_N06\_02144" 21074 "s59E13H2" 0.003872926 "High-affinity branched-chain amino acid transport system permease protein LivH"  
"JS1\_N06\_02144" 21074 "s59E25H2" 0 "High-affinity branched-chain amino acid transport system permease protein LivH"  
"JS1\_N06\_02144" 21074 "s59E5H2" 0.003744682 "High-affinity branched-chain amino acid transport system permease protein LivH"  
"JS1\_N06\_02144" 21074 "s63E6H2" 0.06049607 "High-affinity branched-chain amino acid transport system permease protein LivH"  
"JS1\_N06\_02145" 21075 "s59E13H2" 0.04214219 "Lipopolysaccharide export system ATP-binding protein LptB"  
"JS1\_N06\_02145" 21075 "s59E25H2" 0 "Lipopolysaccharide export system ATP-binding protein LptB"  
"JS1\_N06\_02145" 21075 "s59E5H2" 0.01039373 "Lipopolysaccharide export system ATP-binding protein LptB"  
"JS1\_N06\_02145" 21075 "s63E6H2" 0.07663942 "Lipopolysaccharide export system ATP-binding protein LptB"  
"JS1\_N06\_02146" 21076 "s59E13H2" 0.1872164 "High-affinity branched-chain amino acid transport ATP-binding protein LivF"  
"JS1\_N06\_02146" 21076 "s59E25H2" 0 "High-affinity branched-chain amino acid transport ATP-binding protein LivF"  
"JS1\_N06\_02146" 21076 "s59E5H2" 0.0163272 "High-affinity branched-chain amino acid transport ATP-binding protein LivF"  
"JS1\_N06\_02146" 21076 "s63E6H2" 0.2326584 "High-affinity branched-chain amino acid transport ATP-binding protein LivF"  
"JS1\_N06\_02147" 21077 "s59E13H2" 3.421748 "TPR repeat-containing protein YfgC precursor"  
"JS1\_N06\_02147" 21077 "s59E25H2" 0 "TPR repeat-containing protein YfgC precursor"  
"JS1\_N06\_02147" 21077 "s59E5H2" 0.03486575 "TPR repeat-containing protein YfgC precursor"  
"JS1\_N06\_02147" 21077 "s63E6H2" 0.729899 "TPR repeat-containing protein YfgC precursor"  
"JS1\_N06\_02148" 21078 "s59E13H2" 0.7817351 "Alanine--tRNA ligase"  
"JS1\_N06\_02148" 21078 "s59E25H2" 0 "Alanine--tRNA ligase"  
"JS1\_N06\_02148" 21078 "s59E5H2" 0.08140135 "Alanine--tRNA ligase"



"JS1\_N06\_02148" 21078 "s63E6H2" 0.5218848 "Alanine--tRNA ligase"  
"JS1\_N06\_02149" 21079 "s59E13H2" 3.341102 "putative deoxyribonuclease YcfH"  
"JS1\_N06\_02149" 21079 "s59E25H2" 0 "putative deoxyribonuclease YcfH"  
"JS1\_N06\_02149" 21079 "s59E5H2" 0.08512207 "putative deoxyribonuclease YcfH"  
"JS1\_N06\_02149" 21079 "s63E6H2" 0.3331514 "putative deoxyribonuclease YcfH"  
"JS1\_N06\_02150" 21080 "s59E13H2" 4.81197 "hypothetical protein"  
"JS1\_N06\_02150" 21080 "s59E25H2" 0 "hypothetical protein"  
"JS1\_N06\_02150" 21080 "s59E5H2" 0.1912813 "hypothetical protein"  
"JS1\_N06\_02150" 21080 "s63E6H2" 0.7066879 "hypothetical protein"  
"JS1\_N06\_02151" 21081 "s59E13H2" 0.2183986 "hypothetical protein"  
"JS1\_N06\_02151" 21081 "s59E25H2" 0 "hypothetical protein"  
"JS1\_N06\_02151" 21081 "s59E5H2" 0.05850143 "hypothetical protein"  
"JS1\_N06\_02151" 21081 "s63E6H2" 0.3799402 "hypothetical protein"  
"JS1\_N06\_02152" 21082 "s59E13H2" 0.003518142 "hypothetical protein"  
"JS1\_N06\_02152" 21082 "s59E25H2" 0 "hypothetical protein"  
"JS1\_N06\_02152" 21082 "s59E5H2" 0.003686194 "hypothetical protein"  
"JS1\_N06\_02152" 21082 "s63E6H2" 0.07311133 "hypothetical protein"  
"JS1\_N06\_02153" 21083 "s59E13H2" 0.8037206 "hypothetical protein"  
"JS1\_N06\_02153" 21083 "s59E25H2" 0 "hypothetical protein"  
"JS1\_N06\_02153" 21083 "s59E5H2" 0.1897373 "hypothetical protein"  
"JS1\_N06\_02153" 21083 "s63E6H2" 0.4322407 "hypothetical protein"  
"JS1\_N06\_02154" 21084 "s59E13H2" 0.01490968 "hypothetical protein"  
"JS1\_N06\_02154" 21084 "s59E25H2" 0 "hypothetical protein"  
"JS1\_N06\_02154" 21084 "s59E5H2" 0.03715682 "hypothetical protein"  
"JS1\_N06\_02154" 21084 "s63E6H2" 0.1118086 "hypothetical protein"  
"JS1\_N06\_02155" 21085 "s59E13H2" 0 "hypothetical protein"  
"JS1\_N06\_02155" 21085 "s59E25H2" 0 "hypothetical protein"  
"JS1\_N06\_02155" 21085 "s59E5H2" 0 "hypothetical protein"  
"JS1\_N06\_02155" 21085 "s63E6H2" 0 "hypothetical protein"  
"JS1\_N06\_02156" 21086 "s59E13H2" 0.03073786 "hypothetical protein"  
"JS1\_N06\_02156" 21086 "s59E25H2" 0 "hypothetical protein"  
"JS1\_N06\_02156" 21086 "s59E5H2" 0.09097204 "hypothetical protein"  
"JS1\_N06\_02156" 21086 "s63E6H2" 0.1772497 "hypothetical protein"  
"JS1\_N06\_02157" 21087 "s59E13H2" 0.2406928 "NTE family protein RssA"  
"JS1\_N06\_02157" 21087 "s59E25H2" 0 "NTE family protein RssA"  
"JS1\_N06\_02157" 21087 "s59E5H2" 0.2183785 "NTE family protein RssA"  
"JS1\_N06\_02157" 21087 "s63E6H2" 0.4088162 "NTE family protein RssA"  
"JS1\_N06\_02158" 21088 "s59E13H2" 0.561669 "spermidine synthase"  
"JS1\_N06\_02158" 21088 "s59E25H2" 0 "spermidine synthase"  
"JS1\_N06\_02158" 21088 "s59E5H2" 0.9513024 "spermidine synthase"  
"JS1\_N06\_02158" 21088 "s63E6H2" 0.651873 "spermidine synthase"  
"JS1\_N06\_02159" 21089 "s59E13H2" 0.2480321 "Capsule biosynthesis protein CapA"  
"JS1\_N06\_02159" 21089 "s59E25H2" 0 "Capsule biosynthesis protein CapA"  
"JS1\_N06\_02159" 21089 "s59E5H2" 0.1639973 "Capsule biosynthesis protein CapA"  
"JS1\_N06\_02159" 21089 "s63E6H2" 0.5957397 "Capsule biosynthesis protein CapA"  
"JS1\_N06\_02160" 21090 "s59E13H2" 0.4622887 "hypothetical protein"  
"JS1\_N06\_02160" 21090 "s59E25H2" 0 "hypothetical protein"

"JS1\_N06\_02160" 21090 "s59E5H2" 0.9753445 "hypothetical protein"  
"JS1\_N06\_02160" 21090 "s63E6H2" 1.457454 "hypothetical protein"  
"JS1\_N06\_02161" 21091 "s59E13H2" 0.1065954 "Protein-L-isoaspartate O-methyltransferase"  
"JS1\_N06\_02161" 21091 "s59E25H2" 0 "Protein-L-isoaspartate O-methyltransferase"  
"JS1\_N06\_02161" 21091 "s59E5H2" 0.3981619 "Protein-L-isoaspartate O-methyltransferase"  
"JS1\_N06\_02161" 21091 "s63E6H2" 0.1981583 "Protein-L-isoaspartate O-methyltransferase"  
"JS1\_N06\_02162" 21092 "s59E13H2" 0 "PEGA domain protein"  
"JS1\_N06\_02162" 21092 "s59E25H2" 0 "PEGA domain protein"  
"JS1\_N06\_02162" 21092 "s59E5H2" 0.7416335 "PEGA domain protein"  
"JS1\_N06\_02162" 21092 "s63E6H2" 0.180236 "PEGA domain protein"  
"JS1\_N06\_02163" 21093 "s59E13H2" 0 "Acyl-CoA dehydrogenase"  
"JS1\_N06\_02163" 21093 "s59E25H2" 0 "Acyl-CoA dehydrogenase"  
"JS1\_N06\_02163" 21093 "s59E5H2" 0 "Acyl-CoA dehydrogenase"  
"JS1\_N06\_02163" 21093 "s63E6H2" 0.06823189 "Acyl-CoA dehydrogenase"  
"JS1\_N06\_02164" 21094 "s59E13H2" 0.5909924 "ABC-2 family transporter protein"  
"JS1\_N06\_02164" 21094 "s59E25H2" 0 "ABC-2 family transporter protein"  
"JS1\_N06\_02164" 21094 "s59E5H2" 1.514439 "ABC-2 family transporter protein"  
"JS1\_N06\_02164" 21094 "s63E6H2" 0.8077716 "ABC-2 family transporter protein"  
"JS1\_N06\_02165" 21095 "s59E13H2" 0.8252294 "putative ABC transporter ATP-binding protein YbhF"  
"JS1\_N06\_02165" 21095 "s59E25H2" 0 "putative ABC transporter ATP-binding protein YbhF"  
"JS1\_N06\_02165" 21095 "s59E5H2" 1.876047 "putative ABC transporter ATP-binding protein YbhF"  
"JS1\_N06\_02165" 21095 "s63E6H2" 1.062476 "putative ABC transporter ATP-binding protein YbhF"  
"JS1\_N06\_02166" 21096 "s59E13H2" 0.1201311 "Epoxyqueuosine reductase"  
"JS1\_N06\_02166" 21096 "s59E25H2" 0 "Epoxyqueuosine reductase"  
"JS1\_N06\_02166" 21096 "s59E5H2" 0.09650041 "Epoxyqueuosine reductase"  
"JS1\_N06\_02166" 21096 "s63E6H2" 0.1970677 "Epoxyqueuosine reductase"  
"JS1\_N06\_02167" 21097 "s59E13H2" 0.08136869 "Phage shock protein C"  
"JS1\_N06\_02167" 21097 "s59E25H2" 0 "Phage shock protein C"  
"JS1\_N06\_02167" 21097 "s59E5H2" 0.8060378 "Phage shock protein C"  
"JS1\_N06\_02167" 21097 "s63E6H2" 0.1820965 "Phage shock protein C"  
"JS1\_N06\_02168" 21098 "s59E13H2" 0.127116 "Adenosine specific kinase"  
"JS1\_N06\_02168" 21098 "s59E25H2" 0 "Adenosine specific kinase"  
"JS1\_N06\_02168" 21098 "s59E5H2" 0.0815957 "Adenosine specific kinase"  
"JS1\_N06\_02168" 21098 "s63E6H2" 0.08746373 "Adenosine specific kinase"  
"JS1\_N06\_02169" 21099 "s59E13H2" 0.2856584 "putative sulfoacetate transporter SauU"  
"JS1\_N06\_02169" 21099 "s59E25H2" 0 "putative sulfoacetate transporter SauU"  
"JS1\_N06\_02169" 21099 "s59E5H2" 0.7240965 "putative sulfoacetate transporter SauU"  
"JS1\_N06\_02169" 21099 "s63E6H2" 0.6308452 "putative sulfoacetate transporter SauU"  
"JS1\_N06\_02170" 21100 "s59E13H2" 0.1529683 "Pyrimidine 5'-nucleotidase YjjG"  
"JS1\_N06\_02170" 21100 "s59E25H2" 0 "Pyrimidine 5'-nucleotidase YjjG"  
"JS1\_N06\_02170" 21100 "s59E5H2" 0.2894071 "Pyrimidine 5'-nucleotidase YjjG"  
"JS1\_N06\_02170" 21100 "s63E6H2" 0.2624865 "Pyrimidine 5'-nucleotidase YjjG"  
"JS1\_N06\_02171" 21101 "s59E13H2" 0.008121057 "Poly-beta-1,6-N-acetyl-D-glucosamine N-deacetylase precursor"  
"JS1\_N06\_02171" 21101 "s59E25H2" 0 "Poly-beta-1,6-N-acetyl-D-glucosamine N-deacetylase precursor"  
"JS1\_N06\_02171" 21101 "s59E5H2" 0.5893153 "Poly-beta-1,6-N-acetyl-D-glucosamine N-deacetylase precursor"  
"JS1\_N06\_02171" 21101 "s63E6H2" 0.05665876 "Poly-beta-1,6-N-acetyl-D-glucosamine N-deacetylase precursor"  
"JS1\_N06\_02172" 21102 "s59E13H2" 0.3507099 "High-affinity branched-chain amino acid transport ATP-binding protein LivF"

"JS1\_N06\_02172" 21102 "s59E25H2" 0 "High-affinity branched-chain amino acid transport ATP-binding protein LivF"  
"JS1\_N06\_02172" 21102 "s59E5H2" 0.376871 "High-affinity branched-chain amino acid transport ATP-binding protein LivF"  
"JS1\_N06\_02172" 21102 "s63E6H2" 0.4292065 "High-affinity branched-chain amino acid transport ATP-binding protein LivF"  
"JS1\_N06\_02173" 21103 "s59E13H2" 0.6171186 "putative branched-chain amino acid transport ATP-binding protein LivG"  
"JS1\_N06\_02173" 21103 "s59E25H2" 0 "putative branched-chain amino acid transport ATP-binding protein LivG"  
"JS1\_N06\_02173" 21103 "s59E5H2" 0.557036 "putative branched-chain amino acid transport ATP-binding protein LivG"  
"JS1\_N06\_02173" 21103 "s63E6H2" 6.59425 "putative branched-chain amino acid transport ATP-binding protein LivG"  
"JS1\_N06\_02174" 21104 "s59E13H2" 0.7262147 "leucine/isoleucine/valine transporter permease subunit"  
"JS1\_N06\_02174" 21104 "s59E25H2" 0.2350187 "leucine/isoleucine/valine transporter permease subunit"  
"JS1\_N06\_02174" 21104 "s59E5H2" 0.3403553 "leucine/isoleucine/valine transporter permease subunit"  
"JS1\_N06\_02174" 21104 "s63E6H2" 9.606609 "leucine/isoleucine/valine transporter permease subunit"  
"JS1\_N06\_02175" 21105 "s59E13H2" 0.7577706 "High-affinity branched-chain amino acid transport system permease protein LivH"  
"JS1\_N06\_02175" 21105 "s59E25H2" 0.8310962 "High-affinity branched-chain amino acid transport system permease protein LivH"  
"JS1\_N06\_02175" 21105 "s59E5H2" 0.2214878 "High-affinity branched-chain amino acid transport system permease protein LivH"  
"JS1\_N06\_02175" 21105 "s63E6H2" 9.363724 "High-affinity branched-chain amino acid transport system permease protein LivH"  
"JS1\_N06\_02176" 21106 "s59E13H2" 0.03634018 "Leucine-, isoleucine-, valine-, threonine-, and alanine-binding protein precursor"  
"JS1\_N06\_02176" 21106 "s59E25H2" 0 "Leucine-, isoleucine-, valine-, threonine-, and alanine-binding protein precursor"  
"JS1\_N06\_02176" 21106 "s59E5H2" 0.1850189 "Leucine-, isoleucine-, valine-, threonine-, and alanine-binding protein precursor"  
"JS1\_N06\_02176" 21106 "s63E6H2" 7.786437 "Leucine-, isoleucine-, valine-, threonine-, and alanine-binding protein precursor"  
"JS1\_N06\_02177" 21107 "s59E13H2" 0.001717123 "Endonuclease YhcR precursor"  
"JS1\_N06\_02177" 21107 "s59E25H2" 0.1443053 "Endonuclease YhcR precursor"  
"JS1\_N06\_02177" 21107 "s59E5H2" 0.02928166 "Endonuclease YhcR precursor"  
"JS1\_N06\_02177" 21107 "s63E6H2" 0.9314653 "Endonuclease YhcR precursor"  
"JS1\_N06\_02178" 21108 "s59E13H2" 0 "Flavoredoxin"  
"JS1\_N06\_02178" 21108 "s59E25H2" 0 "Flavoredoxin"  
"JS1\_N06\_02178" 21108 "s59E5H2" 0.05587201 "Flavoredoxin"  
"JS1\_N06\_02178" 21108 "s63E6H2" 2.371622 "Flavoredoxin"  
"JS1\_N06\_02179" 21109 "s59E13H2" 0 "hypothetical protein"  
"JS1\_N06\_02179" 21109 "s59E25H2" 0 "hypothetical protein"  
"JS1\_N06\_02179" 21109 "s59E5H2" 0.05280393 "hypothetical protein"  
"JS1\_N06\_02179" 21109 "s63E6H2" 3.448926 "hypothetical protein"  
"JS1\_N06\_02181" 21111 "s59E13H2" 0.2661182 "hypothetical protein"  
"JS1\_N06\_02181" 21111 "s59E25H2" 0 "hypothetical protein"  
"JS1\_N06\_02181" 21111 "s59E5H2" 0.2413242 "hypothetical protein"  
"JS1\_N06\_02181" 21111 "s63E6H2" 2.06569 "hypothetical protein"  
"JS1\_N06\_02182" 21112 "s59E13H2" 0.2985387 "Malate dehydrogenase"  
"JS1\_N06\_02182" 21112 "s59E25H2" 0 "Malate dehydrogenase"  
"JS1\_N06\_02182" 21112 "s59E5H2" 1.832605 "Malate dehydrogenase"  
"JS1\_N06\_02182" 21112 "s63E6H2" 3.986518 "Malate dehydrogenase"  
"JS1\_N06\_02183" 21113 "s59E13H2" 0.1460452 "putative HTH-type transcriptional regulator YdfH"  
"JS1\_N06\_02183" 21113 "s59E25H2" 0 "putative HTH-type transcriptional regulator YdfH"  
"JS1\_N06\_02183" 21113 "s59E5H2" 0.7854636 "putative HTH-type transcriptional regulator YdfH"  
"JS1\_N06\_02183" 21113 "s63E6H2" 3.022303 "putative HTH-type transcriptional regulator YdfH"  
"JS1\_N06\_02184" 21114 "s59E13H2" 0.04677851 "putative epimerase/dehydratase"  
"JS1\_N06\_02184" 21114 "s59E25H2" 0 "putative epimerase/dehydratase"  
"JS1\_N06\_02184" 21114 "s59E5H2" 0.09116598 "putative epimerase/dehydratase"  
"JS1\_N06\_02184" 21114 "s63E6H2" 3.948849 "putative epimerase/dehydratase"

"JS1\_N06\_02185" 21115 "s59E13H2" 0.5908079 "2-amino-3-ketobutyrate coenzyme A ligase"  
"JS1\_N06\_02185" 21115 "s59E25H2" 0 "2-amino-3-ketobutyrate coenzyme A ligase"  
"JS1\_N06\_02185" 21115 "s59E5H2" 1.395129 "2-amino-3-ketobutyrate coenzyme A ligase"  
"JS1\_N06\_02185" 21115 "s63E6H2" 4.67345 "2-amino-3-ketobutyrate coenzyme A ligase"  
"JS1\_N06\_02188" 21118 "s59E13H2" 0.07155244 "Peptidase C39 family protein"  
"JS1\_N06\_02188" 21118 "s59E25H2" 0 "Peptidase C39 family protein"  
"JS1\_N06\_02188" 21118 "s59E5H2" 1.371518 "Peptidase C39 family protein"  
"JS1\_N06\_02188" 21118 "s63E6H2" 5.349109 "Peptidase C39 family protein"  
"JS1\_N06\_02192" 21122 "s59E13H2" 0 "hypothetical protein"  
"JS1\_N06\_02192" 21122 "s59E25H2" 0 "hypothetical protein"  
"JS1\_N06\_02192" 21122 "s59E5H2" 0 "hypothetical protein"  
"JS1\_N06\_02192" 21122 "s63E6H2" 0 "hypothetical protein"  
"JS1\_N06\_02196" 21126 "s59E13H2" 0.09150797 "Inosine-5'-monophosphate dehydrogenase"  
"JS1\_N06\_02196" 21126 "s59E25H2" 0 "Inosine-5'-monophosphate dehydrogenase"  
"JS1\_N06\_02196" 21126 "s59E5H2" 0.2438658 "Inosine-5'-monophosphate dehydrogenase"  
"JS1\_N06\_02196" 21126 "s63E6H2" 0.1637528 "Inosine-5'-monophosphate dehydrogenase"  
"JS1\_N06\_02197" 21127 "s59E13H2" 0.254054 "lipoprotein Nlpl"  
"JS1\_N06\_02197" 21127 "s59E25H2" 0 "lipoprotein Nlpl"  
"JS1\_N06\_02197" 21127 "s59E5H2" 0.0666583 "lipoprotein Nlpl"  
"JS1\_N06\_02197" 21127 "s63E6H2" 0.3402364 "lipoprotein Nlpl"  
"JS1\_N06\_02198" 21128 "s59E13H2" 0.1777331 "Membrane dipeptidase (Peptidase family M19)"  
"JS1\_N06\_02198" 21128 "s59E25H2" 0 "Membrane dipeptidase (Peptidase family M19)"  
"JS1\_N06\_02198" 21128 "s59E5H2" 0.2569535 "Membrane dipeptidase (Peptidase family M19)"  
"JS1\_N06\_02198" 21128 "s63E6H2" 0.5551627 "Membrane dipeptidase (Peptidase family M19)"  
"JS1\_N06\_02199" 21129 "s59E13H2" 0.04252149 "Ureidoglycolate lyase"  
"JS1\_N06\_02199" 21129 "s59E25H2" 0.3255208 "Ureidoglycolate lyase"  
"JS1\_N06\_02199" 21129 "s59E5H2" 0.3847542 "Ureidoglycolate lyase"  
"JS1\_N06\_02199" 21129 "s63E6H2" 0.5487271 "Ureidoglycolate lyase"  
"JS1\_N06\_02201" 21131 "s59E13H2" 0.3081026 "Folate transporter FolT"  
"JS1\_N06\_02201" 21131 "s59E25H2" 0 "Folate transporter FolT"  
"JS1\_N06\_02201" 21131 "s59E5H2" 0.004732238 "Folate transporter FolT"  
"JS1\_N06\_02201" 21131 "s63E6H2" 0.3228091 "Folate transporter FolT"  
"JS1\_N06\_02202" 21132 "s59E13H2" 1.651411 "Sorbitol dehydrogenase"  
"JS1\_N06\_02202" 21132 "s59E25H2" 0.7261209 "Sorbitol dehydrogenase"  
"JS1\_N06\_02202" 21132 "s59E5H2" 0.5394588 "Sorbitol dehydrogenase"  
"JS1\_N06\_02202" 21132 "s63E6H2" 1.042569 "Sorbitol dehydrogenase"  
"JS1\_N06\_02203" 21133 "s59E13H2" 0.236605 "Hydrogenase isoenzymes nickel incorporation protein HypB"  
"JS1\_N06\_02203" 21133 "s59E25H2" 0 "Hydrogenase isoenzymes nickel incorporation protein HypB"  
"JS1\_N06\_02203" 21133 "s59E5H2" 0.1831731 "Hydrogenase isoenzymes nickel incorporation protein HypB"  
"JS1\_N06\_02203" 21133 "s63E6H2" 0.7277165 "Hydrogenase isoenzymes nickel incorporation protein HypB"  
"JS1\_N06\_02204" 21134 "s59E13H2" 0.2965912 "Carbamoyltransferase HypF"  
"JS1\_N06\_02204" 21134 "s59E25H2" 0 "Carbamoyltransferase HypF"  
"JS1\_N06\_02204" 21134 "s59E5H2" 0.1319639 "Carbamoyltransferase HypF"  
"JS1\_N06\_02204" 21134 "s63E6H2" 0.7270707 "Carbamoyltransferase HypF"  
"JS1\_N06\_02205" 21135 "s59E13H2" 0.4903693 "Hydrogenase isoenzymes formation protein HypC"  
"JS1\_N06\_02205" 21135 "s59E25H2" 0 "Hydrogenase isoenzymes formation protein HypC"  
"JS1\_N06\_02205" 21135 "s59E5H2" 0.2995418 "Hydrogenase isoenzymes formation protein HypC"

"JS1\_N06\_02205" 21135 "s63E6H2" 0.8158632 "Hydrogenase isoenzymes formation protein HypC"  
"JS1\_N06\_02206" 21136 "s59E13H2" 0.3839849 "Hydrogenase expression/formation protein HypD"  
"JS1\_N06\_02206" 21136 "s59E25H2" 0 "Hydrogenase expression/formation protein HypD"  
"JS1\_N06\_02206" 21136 "s59E5H2" 0.4198944 "Hydrogenase expression/formation protein HypD"  
"JS1\_N06\_02206" 21136 "s63E6H2" 0.9386547 "Hydrogenase expression/formation protein HypD"  
"JS1\_N06\_02207" 21137 "s59E13H2" 0 "Transposase IS200 like protein"  
"JS1\_N06\_02207" 21137 "s59E25H2" 0 "Transposase IS200 like protein"  
"JS1\_N06\_02207" 21137 "s59E5H2" 0 "Transposase IS200 like protein"  
"JS1\_N06\_02207" 21137 "s63E6H2" 0.4395628 "Transposase IS200 like protein"  
"JS1\_N06\_02208" 21138 "s59E13H2" 0.3853233 "Hydrogenase expression/formation protein HypE"  
"JS1\_N06\_02208" 21138 "s59E25H2" 0 "Hydrogenase expression/formation protein HypE"  
"JS1\_N06\_02208" 21138 "s59E5H2" 0.05638027 "Hydrogenase expression/formation protein HypE"  
"JS1\_N06\_02208" 21138 "s63E6H2" 0.9462044 "Hydrogenase expression/formation protein HypE"  
"JS1\_N06\_02209" 21139 "s59E13H2" 0.8530736 "hypothetical protein"  
"JS1\_N06\_02209" 21139 "s59E25H2" 0 "hypothetical protein"  
"JS1\_N06\_02209" 21139 "s59E5H2" 4.824766 "hypothetical protein"  
"JS1\_N06\_02209" 21139 "s63E6H2" 1.030121 "hypothetical protein"  
"JS1\_N06\_02210" 21140 "s59E13H2" 1.261357 "Pyruvate formate-lyase 1-activating enzyme"  
"JS1\_N06\_02210" 21140 "s59E25H2" 0 "Pyruvate formate-lyase 1-activating enzyme"  
"JS1\_N06\_02210" 21140 "s59E5H2" 0.4545614 "Pyruvate formate-lyase 1-activating enzyme"  
"JS1\_N06\_02210" 21140 "s63E6H2" 1.298436 "Pyruvate formate-lyase 1-activating enzyme"  
"JS1\_N06\_02211" 21141 "s59E13H2" 0.7034034 "Na(+)/H(+) antiporter subunit E1"  
"JS1\_N06\_02211" 21141 "s59E25H2" 0 "Na(+)/H(+) antiporter subunit E1"  
"JS1\_N06\_02211" 21141 "s59E5H2" 1.71537 "Na(+)/H(+) antiporter subunit E1"  
"JS1\_N06\_02211" 21141 "s63E6H2" 1.273459 "Na(+)/H(+) antiporter subunit E1"  
"JS1\_N06\_02212" 21142 "s59E13H2" 1.717771 "putative monovalent cation/H+ antiporter subunit F"  
"JS1\_N06\_02212" 21142 "s59E25H2" 0 "putative monovalent cation/H+ antiporter subunit F"  
"JS1\_N06\_02212" 21142 "s59E5H2" 2.806451 "putative monovalent cation/H+ antiporter subunit F"  
"JS1\_N06\_02212" 21142 "s63E6H2" 1.467363 "putative monovalent cation/H+ antiporter subunit F"  
"JS1\_N06\_02213" 21143 "s59E13H2" 1.673534 "Na(+)/H(+) antiporter subunit G1"  
"JS1\_N06\_02213" 21143 "s59E25H2" 0 "Na(+)/H(+) antiporter subunit G1"  
"JS1\_N06\_02213" 21143 "s59E5H2" 2.469642 "Na(+)/H(+) antiporter subunit G1"  
"JS1\_N06\_02213" 21143 "s63E6H2" 1.86493 "Na(+)/H(+) antiporter subunit G1"  
"JS1\_N06\_02214" 21144 "s59E13H2" 0.8902043 "Glutamine-binding periplasmic protein precursor"  
"JS1\_N06\_02214" 21144 "s59E25H2" 0 "Glutamine-binding periplasmic protein precursor"  
"JS1\_N06\_02214" 21144 "s59E5H2" 2.468566 "Glutamine-binding periplasmic protein precursor"  
"JS1\_N06\_02214" 21144 "s63E6H2" 1.809309 "Glutamine-binding periplasmic protein precursor"  
"JS1\_N06\_02215" 21145 "s59E13H2" 0.3090602 "putative monovalent cation/H+ antiporter subunit B"  
"JS1\_N06\_02215" 21145 "s59E25H2" 0 "putative monovalent cation/H+ antiporter subunit B"  
"JS1\_N06\_02215" 21145 "s59E5H2" 2.701595 "putative monovalent cation/H+ antiporter subunit B"  
"JS1\_N06\_02215" 21145 "s63E6H2" 1.263772 "putative monovalent cation/H+ antiporter subunit B"  
"JS1\_N06\_02216" 21146 "s59E13H2" 0.2691455 "Na(+)/H(+) antiporter subunit B"  
"JS1\_N06\_02216" 21146 "s59E25H2" 0 "Na(+)/H(+) antiporter subunit B"  
"JS1\_N06\_02216" 21146 "s59E5H2" 3.085519 "Na(+)/H(+) antiporter subunit B"  
"JS1\_N06\_02216" 21146 "s63E6H2" 1.1493 "Na(+)/H(+) antiporter subunit B"  
"JS1\_N06\_02217" 21147 "s59E13H2" 0.1328158 "Na(+)/H(+) antiporter subunit C"  
"JS1\_N06\_02217" 21147 "s59E25H2" 0 "Na(+)/H(+) antiporter subunit C"

"JS1\_N06\_02217" 21147 "s59E5H2" 6.180304 "Na(+)/H(+) antiporter subunit C"  
"JS1\_N06\_02217" 21147 "s63E6H2" 1.087232 "Na(+)/H(+) antiporter subunit C"  
"JS1\_N06\_02218" 21148 "s59E13H2" 0.05416633 "Na(+)/H(+) antiporter subunit D1"  
"JS1\_N06\_02218" 21148 "s59E25H2" 0 "Na(+)/H(+) antiporter subunit D1"  
"JS1\_N06\_02218" 21148 "s59E5H2" 3.7399 "Na(+)/H(+) antiporter subunit D1"  
"JS1\_N06\_02218" 21148 "s63E6H2" 0.6994998 "Na(+)/H(+) antiporter subunit D1"  
"JS1\_N06\_02219" 21149 "s59E13H2" 0.02308027 "Hydrogenase-4 component B"  
"JS1\_N06\_02219" 21149 "s59E25H2" 0 "Hydrogenase-4 component B"  
"JS1\_N06\_02219" 21149 "s59E5H2" 3.138729 "Hydrogenase-4 component B"  
"JS1\_N06\_02219" 21149 "s63E6H2" 0.5032584 "Hydrogenase-4 component B"  
"JS1\_N06\_02220" 21150 "s59E13H2" 0.002873107 "Rod shape-determining protein MreB"  
"JS1\_N06\_02220" 21150 "s59E25H2" 0 "Rod shape-determining protein MreB"  
"JS1\_N06\_02220" 21150 "s59E5H2" 0.04240591 "Rod shape-determining protein MreB"  
"JS1\_N06\_02220" 21150 "s63E6H2" 0.08628386 "Rod shape-determining protein MreB"  
"JS1\_N06\_02221" 21151 "s59E13H2" 0.001794743 "Cell shape-determining protein MreC precursor"  
"JS1\_N06\_02221" 21151 "s59E25H2" 0 "Cell shape-determining protein MreC precursor"  
"JS1\_N06\_02221" 21151 "s59E5H2" 0.02008962 "Cell shape-determining protein MreC precursor"  
"JS1\_N06\_02221" 21151 "s63E6H2" 0.1406315 "Cell shape-determining protein MreC precursor"  
"JS1\_N06\_02222" 21152 "s59E13H2" 0.01205951 "Protease 3 precursor"  
"JS1\_N06\_02222" 21152 "s59E25H2" 0 "Protease 3 precursor"  
"JS1\_N06\_02222" 21152 "s59E5H2" 0.1523976 "Protease 3 precursor"  
"JS1\_N06\_02222" 21152 "s63E6H2" 0.2109183 "Protease 3 precursor"  
"JS1\_N06\_02223" 21153 "s59E13H2" 0 "hypothetical protein"  
"JS1\_N06\_02223" 21153 "s59E25H2" 0 "hypothetical protein"  
"JS1\_N06\_02223" 21153 "s59E5H2" 0 "hypothetical protein"  
"JS1\_N06\_02223" 21153 "s63E6H2" 0.05059642 "hypothetical protein"  
"JS1\_N06\_02224" 21154 "s59E13H2" 0.006469805 "30S ribosomal protein S6"  
"JS1\_N06\_02224" 21154 "s59E25H2" 0 "30S ribosomal protein S6"  
"JS1\_N06\_02224" 21154 "s59E5H2" 0.08934466 "30S ribosomal protein S6"  
"JS1\_N06\_02224" 21154 "s63E6H2" 0.02352589 "30S ribosomal protein S6"  
"JS1\_N06\_02225" 21155 "s59E13H2" 0.006654485 "30S ribosomal protein S18"  
"JS1\_N06\_02225" 21155 "s59E25H2" 0 "30S ribosomal protein S18"  
"JS1\_N06\_02225" 21155 "s59E5H2" 0.1708899 "30S ribosomal protein S18"  
"JS1\_N06\_02225" 21155 "s63E6H2" 0.2761734 "30S ribosomal protein S18"  
"JS1\_N06\_02226" 21156 "s59E13H2" 0.03346341 "hypothetical protein"  
"JS1\_N06\_02226" 21156 "s59E25H2" 0 "hypothetical protein"  
"JS1\_N06\_02226" 21156 "s59E5H2" 0.3925832 "hypothetical protein"  
"JS1\_N06\_02226" 21156 "s63E6H2" 0.5718131 "hypothetical protein"  
"JS1\_N06\_02227" 21157 "s59E13H2" 0.009660545 "50S ribosomal protein L9"  
"JS1\_N06\_02227" 21157 "s59E25H2" 0 "50S ribosomal protein L9"  
"JS1\_N06\_02227" 21157 "s59E5H2" 0.06031031 "50S ribosomal protein L9"  
"JS1\_N06\_02227" 21157 "s63E6H2" 0.09900736 "50S ribosomal protein L9"  
"JS1\_N06\_02228" 21158 "s59E13H2" 0.1267015 "Replicative DNA helicase"  
"JS1\_N06\_02228" 21158 "s59E25H2" 0 "Replicative DNA helicase"  
"JS1\_N06\_02228" 21158 "s59E5H2" 0.3859213 "Replicative DNA helicase"  
"JS1\_N06\_02228" 21158 "s63E6H2" 1.14842 "Replicative DNA helicase"  
"JS1\_N06\_02233" 21163 "s59E13H2" 0.02115068 "Ribosomal RNA small subunit methyltransferase A"

"JS1\_N06\_02233" 21163 "s59E25H2" 0 "Ribosomal RNA small subunit methyltransferase A"  
"JS1\_N06\_02233" 21163 "s59E5H2" 0.02290229 "Ribosomal RNA small subunit methyltransferase A"  
"JS1\_N06\_02233" 21163 "s63E6H2" 0.06024838 "Ribosomal RNA small subunit methyltransferase A"  
"JS1\_N06\_02234" 21164 "s59E13H2" 0.025704 "Putative septation protein SpoVG"  
"JS1\_N06\_02234" 21164 "s59E25H2" 0 "Putative septation protein SpoVG"  
"JS1\_N06\_02234" 21164 "s59E5H2" 0.04000449 "Putative septation protein SpoVG"  
"JS1\_N06\_02234" 21164 "s63E6H2" 0.07440934 "Putative septation protein SpoVG"  
"JS1\_N06\_02236" 21166 "s59E13H2" 0.0212952 "Bifunctional protein GlmU"  
"JS1\_N06\_02236" 21166 "s59E25H2" 0 "Bifunctional protein GlmU"  
"JS1\_N06\_02236" 21166 "s59E5H2" 0.06867666 "Bifunctional protein GlmU"  
"JS1\_N06\_02236" 21166 "s63E6H2" 0.1045153 "Bifunctional protein GlmU"  
"JS1\_N06\_02237" 21167 "s59E13H2" 0.003436394 "Ribose-phosphate pyrophosphokinase"  
"JS1\_N06\_02237" 21167 "s59E25H2" 0 "Ribose-phosphate pyrophosphokinase"  
"JS1\_N06\_02237" 21167 "s59E5H2" 0.07882312 "Ribose-phosphate pyrophosphokinase"  
"JS1\_N06\_02237" 21167 "s63E6H2" 0.06904939 "Ribose-phosphate pyrophosphokinase"  
"JS1\_N06\_02238" 21168 "s59E13H2" 0.00258645 "50S ribosomal protein L25"  
"JS1\_N06\_02238" 21168 "s59E25H2" 0 "50S ribosomal protein L25"  
"JS1\_N06\_02238" 21168 "s59E5H2" 0.03439289 "50S ribosomal protein L25"  
"JS1\_N06\_02238" 21168 "s63E6H2" 0.05661395 "50S ribosomal protein L25"  
"JS1\_N06\_02239" 21169 "s59E13H2" 0.006182749 "Peptidyl-tRNA hydrolase"  
"JS1\_N06\_02239" 21169 "s59E25H2" 0 "Peptidyl-tRNA hydrolase"  
"JS1\_N06\_02239" 21169 "s59E5H2" 0.01244285 "Peptidyl-tRNA hydrolase"  
"JS1\_N06\_02239" 21169 "s63E6H2" 0.1697836 "Peptidyl-tRNA hydrolase"  
"JS1\_N06\_02240" 21170 "s59E13H2" 0.03631218 "Galactose-1-phosphate uridylyltransferase"  
"JS1\_N06\_02240" 21170 "s59E25H2" 0 "Galactose-1-phosphate uridylyltransferase"  
"JS1\_N06\_02240" 21170 "s59E5H2" 0.03850086 "Galactose-1-phosphate uridylyltransferase"  
"JS1\_N06\_02240" 21170 "s63E6H2" 0.1359993 "Galactose-1-phosphate uridylyltransferase"  
"JS1\_N06\_02241" 21171 "s59E13H2" 0.04084791 "6-phosphofructokinase"  
"JS1\_N06\_02241" 21171 "s59E25H2" 0 "6-phosphofructokinase"  
"JS1\_N06\_02241" 21171 "s59E5H2" 0.1410052 "6-phosphofructokinase"  
"JS1\_N06\_02241" 21171 "s63E6H2" 0.2286593 "6-phosphofructokinase"  
"JS1\_N06\_02251" 21181 "s59E13H2" 0 "Patatin-like phospholipase"  
"JS1\_N06\_02251" 21181 "s59E25H2" 0 "Patatin-like phospholipase"  
"JS1\_N06\_02251" 21181 "s59E5H2" 0 "Patatin-like phospholipase"  
"JS1\_N06\_02251" 21181 "s63E6H2" 0 "Patatin-like phospholipase"  
"JS1\_N06\_02254" 21184 "s59E13H2" 0 "hypothetical protein"  
"JS1\_N06\_02254" 21184 "s59E25H2" 0 "hypothetical protein"  
"JS1\_N06\_02254" 21184 "s59E5H2" 0 "hypothetical protein"  
"JS1\_N06\_02254" 21184 "s63E6H2" 0.01007586 "hypothetical protein"  
"JS1\_N06\_02256" 21186 "s59E13H2" 0 "Phenylalanine--tRNA ligase beta subunit"  
"JS1\_N06\_02256" 21186 "s59E25H2" 0 "Phenylalanine--tRNA ligase beta subunit"  
"JS1\_N06\_02256" 21186 "s59E5H2" 0 "Phenylalanine--tRNA ligase beta subunit"  
"JS1\_N06\_02256" 21186 "s63E6H2" 0.009263679 "Phenylalanine--tRNA ligase beta subunit"  
"JS1\_N06\_02258" 21188 "s59E13H2" 0 "hypothetical protein"  
"JS1\_N06\_02258" 21188 "s59E25H2" 0 "hypothetical protein"  
"JS1\_N06\_02258" 21188 "s59E5H2" 0 "hypothetical protein"  
"JS1\_N06\_02258" 21188 "s63E6H2" 0.01743428 "hypothetical protein"

"JS1\_N06\_02259" 21189 "s59E13H2" 0.02435349 "Deoxyribose operon repressor"  
"JS1\_N06\_02259" 21189 "s59E25H2" 0 "Deoxyribose operon repressor"  
"JS1\_N06\_02259" 21189 "s59E5H2" 0.3330264 "Deoxyribose operon repressor"  
"JS1\_N06\_02259" 21189 "s63E6H2" 0.2852044 "Deoxyribose operon repressor"  
"JS1\_N06\_02260" 21190 "s59E13H2" 0.1173875 "Phosphate propanoyltransferase"  
"JS1\_N06\_02260" 21190 "s59E25H2" 0 "Phosphate propanoyltransferase"  
"JS1\_N06\_02260" 21190 "s59E5H2" 0.4442064 "Phosphate propanoyltransferase"  
"JS1\_N06\_02260" 21190 "s63E6H2" 3.075251 "Phosphate propanoyltransferase"  
"JS1\_N06\_02261" 21191 "s59E13H2" 0.0783868 "Deoxyribose-phosphate aldolase 1"  
"JS1\_N06\_02261" 21191 "s59E25H2" 0 "Deoxyribose-phosphate aldolase 1"  
"JS1\_N06\_02261" 21191 "s59E5H2" 0.118449 "Deoxyribose-phosphate aldolase 1"  
"JS1\_N06\_02261" 21191 "s63E6H2" 2.550702 "Deoxyribose-phosphate aldolase 1"  
"JS1\_N06\_02262" 21192 "s59E13H2" 0.1296134 "Putative sugar phosphate isomerase Ywlf"  
"JS1\_N06\_02262" 21192 "s59E25H2" 0 "Putative sugar phosphate isomerase Ywlf"  
"JS1\_N06\_02262" 21192 "s59E5H2" 0.4267056 "Putative sugar phosphate isomerase Ywlf"  
"JS1\_N06\_02262" 21192 "s63E6H2" 5.941231 "Putative sugar phosphate isomerase Ywlf"  
"JS1\_N06\_02263" 21193 "s59E13H2" 0.09511229 "Carbon dioxide concentrating mechanism protein CcmL"  
"JS1\_N06\_02263" 21193 "s59E25H2" 0 "Carbon dioxide concentrating mechanism protein CcmL"  
"JS1\_N06\_02263" 21193 "s59E5H2" 0.5923287 "Carbon dioxide concentrating mechanism protein CcmL"  
"JS1\_N06\_02263" 21193 "s63E6H2" 4.373846 "Carbon dioxide concentrating mechanism protein CcmL"  
"JS1\_N06\_02264" 21194 "s59E13H2" 0.07352319 "Carbon dioxide concentrating mechanism protein CcmL"  
"JS1\_N06\_02264" 21194 "s59E25H2" 0 "Carbon dioxide concentrating mechanism protein CcmL"  
"JS1\_N06\_02264" 21194 "s59E5H2" 0.5677709 "Carbon dioxide concentrating mechanism protein CcmL"  
"JS1\_N06\_02264" 21194 "s63E6H2" 2.027218 "Carbon dioxide concentrating mechanism protein CcmL"  
"JS1\_N06\_02265" 21195 "s59E13H2" 0.08384791 "Aldehyde-alcohol dehydrogenase"  
"JS1\_N06\_02265" 21195 "s59E25H2" 0 "Aldehyde-alcohol dehydrogenase"  
"JS1\_N06\_02265" 21195 "s59E5H2" 0.5620854 "Aldehyde-alcohol dehydrogenase"  
"JS1\_N06\_02265" 21195 "s63E6H2" 2.587355 "Aldehyde-alcohol dehydrogenase"  
"JS1\_N06\_02266" 21196 "s59E13H2" 0.125539 "BMC domain protein"  
"JS1\_N06\_02266" 21196 "s59E25H2" 0 "BMC domain protein"  
"JS1\_N06\_02266" 21196 "s59E5H2" 0.7610167 "BMC domain protein"  
"JS1\_N06\_02266" 21196 "s63E6H2" 3.04981 "BMC domain protein"  
"JS1\_N06\_02267" 21197 "s59E13H2" 0.1073096 "Electron transport complex protein RnfC"  
"JS1\_N06\_02267" 21197 "s59E25H2" 0 "Electron transport complex protein RnfC"  
"JS1\_N06\_02267" 21197 "s59E5H2" 0.709199 "Electron transport complex protein RnfC"  
"JS1\_N06\_02267" 21197 "s63E6H2" 2.586598 "Electron transport complex protein RnfC"  
"JS1\_N06\_02268" 21198 "s59E13H2" 0.0991655 "Carbon dioxide concentrating mechanism protein CcmL"  
"JS1\_N06\_02268" 21198 "s59E25H2" 0 "Carbon dioxide concentrating mechanism protein CcmL"  
"JS1\_N06\_02268" 21198 "s59E5H2" 0.486352 "Carbon dioxide concentrating mechanism protein CcmL"  
"JS1\_N06\_02268" 21198 "s63E6H2" 1.713853 "Carbon dioxide concentrating mechanism protein CcmL"  
"JS1\_N06\_02269" 21199 "s59E13H2" 0.06243302 "Carbon dioxide concentrating mechanism protein CcmL"  
"JS1\_N06\_02269" 21199 "s59E25H2" 0 "Carbon dioxide concentrating mechanism protein CcmL"  
"JS1\_N06\_02269" 21199 "s59E5H2" 0.4005579 "Carbon dioxide concentrating mechanism protein CcmL"  
"JS1\_N06\_02269" 21199 "s63E6H2" 1.62833 "Carbon dioxide concentrating mechanism protein CcmL"  
"JS1\_N06\_02270" 21200 "s59E13H2" 0.05416346 "hypothetical protein"  
"JS1\_N06\_02270" 21200 "s59E25H2" 0 "hypothetical protein"  
"JS1\_N06\_02270" 21200 "s59E5H2" 0.292962 "hypothetical protein"



"JS1\_N06\_02270" 21200 "s63E6H2" 1.623058 "hypothetical protein"  
"JS1\_N06\_02271" 21201 "s59E13H2" 0.08895837 "hypothetical protein"  
"JS1\_N06\_02271" 21201 "s59E25H2" 0 "hypothetical protein"  
"JS1\_N06\_02271" 21201 "s59E5H2" 0.3079992 "hypothetical protein"  
"JS1\_N06\_02271" 21201 "s63E6H2" 1.523582 "hypothetical protein"  
"JS1\_N06\_02272" 21202 "s59E13H2" 0.117271 "hypothetical protein"  
"JS1\_N06\_02272" 21202 "s59E25H2" 0 "hypothetical protein"  
"JS1\_N06\_02272" 21202 "s59E5H2" 0.1417487 "hypothetical protein"  
"JS1\_N06\_02272" 21202 "s63E6H2" 0.8024063 "hypothetical protein"  
"JS1\_N06\_02273" 21203 "s59E13H2" 0.1748232 "Ribokinase"  
"JS1\_N06\_02273" 21203 "s59E25H2" 0 "Ribokinase"  
"JS1\_N06\_02273" 21203 "s59E5H2" 0.1460955 "Ribokinase"  
"JS1\_N06\_02273" 21203 "s63E6H2" 0.2776144 "Ribokinase"  
"JS1\_N06\_02274" 21204 "s59E13H2" 0.09223406 "Trehalose/maltose transport system permease protein MalG"  
"JS1\_N06\_02274" 21204 "s59E25H2" 0 "Trehalose/maltose transport system permease protein MalG"  
"JS1\_N06\_02274" 21204 "s59E5H2" 0.2684318 "Trehalose/maltose transport system permease protein MalG"  
"JS1\_N06\_02274" 21204 "s63E6H2" 0.2296832 "Trehalose/maltose transport system permease protein MalG"  
"JS1\_N06\_02275" 21205 "s59E13H2" 0.05724748 "Inner membrane ABC transporter permease protein YcjO"  
"JS1\_N06\_02275" 21205 "s59E25H2" 0 "Inner membrane ABC transporter permease protein YcjO"  
"JS1\_N06\_02275" 21205 "s59E5H2" 0.1898441 "Inner membrane ABC transporter permease protein YcjO"  
"JS1\_N06\_02275" 21205 "s63E6H2" 0.2798105 "Inner membrane ABC transporter permease protein YcjO"  
"JS1\_N06\_02276" 21206 "s59E13H2" 0.1975844 "Trehalose/maltose-binding protein MalE precursor"  
"JS1\_N06\_02276" 21206 "s59E25H2" 0 "Trehalose/maltose-binding protein MalE precursor"  
"JS1\_N06\_02276" 21206 "s59E5H2" 0.3185933 "Trehalose/maltose-binding protein MalE precursor"  
"JS1\_N06\_02276" 21206 "s63E6H2" 0.4941352 "Trehalose/maltose-binding protein MalE precursor"  
"JS1\_N06\_02277" 21207 "s59E13H2" 0 "hypothetical protein"  
"JS1\_N06\_02277" 21207 "s59E25H2" 0 "hypothetical protein"  
"JS1\_N06\_02277" 21207 "s59E5H2" 0 "hypothetical protein"  
"JS1\_N06\_02277" 21207 "s63E6H2" 0.01852347 "hypothetical protein"  
"JS1\_N06\_02279" 21209 "s59E13H2" 0 "Ribonuclease HII"  
"JS1\_N06\_02279" 21209 "s59E25H2" 0 "Ribonuclease HII"  
"JS1\_N06\_02279" 21209 "s59E5H2" 0 "Ribonuclease HII"  
"JS1\_N06\_02279" 21209 "s63E6H2" 0.0006342261 "Ribonuclease HII"  
"JS1\_N06\_02281" 21211 "s59E13H2" 0 "Chromosome partition protein Smc"  
"JS1\_N06\_02281" 21211 "s59E25H2" 0 "Chromosome partition protein Smc"  
"JS1\_N06\_02281" 21211 "s59E5H2" 0 "Chromosome partition protein Smc"  
"JS1\_N06\_02281" 21211 "s63E6H2" 0.002608379 "Chromosome partition protein Smc"  
"JS1\_N06\_02287" 21217 "s59E13H2" 0 "hypothetical protein"  
"JS1\_N06\_02287" 21217 "s59E25H2" 0 "hypothetical protein"  
"JS1\_N06\_02287" 21217 "s59E5H2" 0 "hypothetical protein"  
"JS1\_N06\_02287" 21217 "s63E6H2" 0 "hypothetical protein"  
"JS1\_N06\_02290" 21220 "s59E13H2" 0.08914232 "TspO/MBR family protein"  
"JS1\_N06\_02290" 21220 "s59E25H2" 0 "TspO/MBR family protein"  
"JS1\_N06\_02290" 21220 "s59E5H2" 0 "TspO/MBR family protein"  
"JS1\_N06\_02290" 21220 "s63E6H2" 0.0460181 "TspO/MBR family protein"  
"JS1\_N06\_02291" 21221 "s59E13H2" 0 "hypothetical protein"  
"JS1\_N06\_02291" 21221 "s59E25H2" 0 "hypothetical protein"

"JS1\_N06\_02291" 21221 "s59E5H2" 0 "hypothetical protein"  
"JS1\_N06\_02291" 21221 "s63E6H2" 0 "hypothetical protein"  
"JS1\_N06\_02292" 21222 "s59E13H2" 0 "hypothetical protein"  
"JS1\_N06\_02292" 21222 "s59E25H2" 0 "hypothetical protein"  
"JS1\_N06\_02292" 21222 "s59E5H2" 0 "hypothetical protein"  
"JS1\_N06\_02292" 21222 "s63E6H2" 0 "hypothetical protein"  
"JS1\_N06\_02293" 21223 "s59E13H2" 0 "Putative serine protease HhoB precursor"  
"JS1\_N06\_02293" 21223 "s59E25H2" 0 "Putative serine protease HhoB precursor"  
"JS1\_N06\_02293" 21223 "s59E5H2" 0.02653999 "Putative serine protease HhoB precursor"  
"JS1\_N06\_02293" 21223 "s63E6H2" 0.01620705 "Putative serine protease HhoB precursor"  
"JS1\_N06\_02294" 21224 "s59E13H2" 0 "hypothetical protein"  
"JS1\_N06\_02294" 21224 "s59E25H2" 0 "hypothetical protein"  
"JS1\_N06\_02294" 21224 "s59E5H2" 0 "hypothetical protein"  
"JS1\_N06\_02294" 21224 "s63E6H2" 0 "hypothetical protein"  
"JS1\_N06\_02295" 21225 "s59E13H2" 0 "Caspase domain protein"  
"JS1\_N06\_02295" 21225 "s59E25H2" 0 "Caspase domain protein"  
"JS1\_N06\_02295" 21225 "s59E5H2" 0.2889463 "Caspase domain protein"  
"JS1\_N06\_02295" 21225 "s63E6H2" 0.1008454 "Caspase domain protein"  
"JS1\_N06\_02299" 21229 "s59E13H2" 0 "hypothetical protein"  
"JS1\_N06\_02299" 21229 "s59E25H2" 0 "hypothetical protein"  
"JS1\_N06\_02299" 21229 "s59E5H2" 0 "hypothetical protein"  
"JS1\_N06\_02299" 21229 "s63E6H2" 0 "hypothetical protein"  
"JS1\_N06\_02300" 21230 "s59E13H2" 0 "hypothetical protein"  
"JS1\_N06\_02300" 21230 "s59E25H2" 0 "hypothetical protein"  
"JS1\_N06\_02300" 21230 "s59E5H2" 0 "hypothetical protein"  
"JS1\_N06\_02300" 21230 "s63E6H2" 0 "hypothetical protein"  
"JS1\_N06\_02301" 21231 "s59E13H2" 0.003566971 "hypothetical protein"  
"JS1\_N06\_02301" 21231 "s59E25H2" 0 "hypothetical protein"  
"JS1\_N06\_02301" 21231 "s59E5H2" 0 "hypothetical protein"  
"JS1\_N06\_02301" 21231 "s63E6H2" 0 "hypothetical protein"  
"JS1\_N06\_02302" 21232 "s59E13H2" 0.045033 "hypothetical protein"  
"JS1\_N06\_02302" 21232 "s59E25H2" 0 "hypothetical protein"  
"JS1\_N06\_02302" 21232 "s59E5H2" 0 "hypothetical protein"  
"JS1\_N06\_02302" 21232 "s63E6H2" 0 "hypothetical protein"  
"JS1\_N06\_02303" 21233 "s59E13H2" 0.01598682 "hypothetical protein"  
"JS1\_N06\_02303" 21233 "s59E25H2" 0 "hypothetical protein"  
"JS1\_N06\_02303" 21233 "s59E5H2" 0 "hypothetical protein"  
"JS1\_N06\_02303" 21233 "s63E6H2" 0.007970624 "hypothetical protein"  
"JS1\_N06\_02304" 21234 "s59E13H2" 0.00290642 "ComEC family competence protein"  
"JS1\_N06\_02304" 21234 "s59E25H2" 0 "ComEC family competence protein"  
"JS1\_N06\_02304" 21234 "s59E5H2" 0 "ComEC family competence protein"  
"JS1\_N06\_02304" 21234 "s63E6H2" 0.003654502 "ComEC family competence protein"  
"JS1\_N06\_02305" 21235 "s59E13H2" 0 "hypothetical protein"  
"JS1\_N06\_02305" 21235 "s59E25H2" 0 "hypothetical protein"  
"JS1\_N06\_02305" 21235 "s59E5H2" 0 "hypothetical protein"  
"JS1\_N06\_02305" 21235 "s63E6H2" 0.00938162 "hypothetical protein"  
"JS1\_N06\_02306" 21236 "s59E13H2" 0 "hypothetical protein"

"JS1\_N06\_02306" 21236 "s59E25H2" 0 "hypothetical protein"  
"JS1\_N06\_02306" 21236 "s59E5H2" 0 "hypothetical protein"  
"JS1\_N06\_02306" 21236 "s63E6H2" 0 "hypothetical protein"  
"JS1\_N06\_02307" 21237 "s59E13H2" 0 "hypothetical protein"  
"JS1\_N06\_02307" 21237 "s59E25H2" 0 "hypothetical protein"  
"JS1\_N06\_02307" 21237 "s59E5H2" 0 "hypothetical protein"  
"JS1\_N06\_02307" 21237 "s63E6H2" 0 "hypothetical protein"  
"JS1\_N06\_02308" 21238 "s59E13H2" 0 "Ion channel"  
"JS1\_N06\_02308" 21238 "s59E25H2" 0 "Ion channel"  
"JS1\_N06\_02308" 21238 "s59E5H2" 0 "Ion channel"  
"JS1\_N06\_02308" 21238 "s63E6H2" 0.002038913 "Ion channel"  
"JS1\_N06\_02309" 21239 "s59E13H2" 0 "hypothetical protein"  
"JS1\_N06\_02309" 21239 "s59E25H2" 0 "hypothetical protein"  
"JS1\_N06\_02309" 21239 "s59E5H2" 0 "hypothetical protein"  
"JS1\_N06\_02309" 21239 "s63E6H2" 0 "hypothetical protein"  
"JS1\_N06\_02310" 21240 "s59E13H2" 0 "ComEC family competence protein"  
"JS1\_N06\_02310" 21240 "s59E25H2" 0 "ComEC family competence protein"  
"JS1\_N06\_02310" 21240 "s59E5H2" 0 "ComEC family competence protein"  
"JS1\_N06\_02310" 21240 "s63E6H2" 0 "ComEC family competence protein"  
"JS1\_N06\_02311" 21241 "s59E13H2" 0 "hypothetical protein"  
"JS1\_N06\_02311" 21241 "s59E25H2" 0 "hypothetical protein"  
"JS1\_N06\_02311" 21241 "s59E5H2" 0 "hypothetical protein"  
"JS1\_N06\_02311" 21241 "s63E6H2" 0 "hypothetical protein"  
"JS1\_N06\_02312" 21242 "s59E13H2" 0 "Tetratricopeptide repeat protein"  
"JS1\_N06\_02312" 21242 "s59E25H2" 0 "Tetratricopeptide repeat protein"  
"JS1\_N06\_02312" 21242 "s59E5H2" 0 "Tetratricopeptide repeat protein"  
"JS1\_N06\_02312" 21242 "s63E6H2" 0.004177389 "Tetratricopeptide repeat protein"  
"JS1\_N06\_02313" 21243 "s59E13H2" 0 "hypothetical protein"  
"JS1\_N06\_02313" 21243 "s59E25H2" 0 "hypothetical protein"  
"JS1\_N06\_02313" 21243 "s59E5H2" 0 "hypothetical protein"  
"JS1\_N06\_02313" 21243 "s63E6H2" 0 "hypothetical protein"  
"JS1\_N06\_02315" 21245 "s59E13H2" 0 "hypothetical protein"  
"JS1\_N06\_02315" 21245 "s59E25H2" 0 "hypothetical protein"  
"JS1\_N06\_02315" 21245 "s59E5H2" 0 "hypothetical protein"  
"JS1\_N06\_02315" 21245 "s63E6H2" 0 "hypothetical protein"  
"JS1\_N06\_02316" 21246 "s59E13H2" 0.0344286 "hypothetical protein"  
"JS1\_N06\_02316" 21246 "s59E25H2" 0 "hypothetical protein"  
"JS1\_N06\_02316" 21246 "s59E5H2" 0.1327289 "hypothetical protein"  
"JS1\_N06\_02316" 21246 "s63E6H2" 0.01176995 "hypothetical protein"  
"JS1\_N06\_02317" 21247 "s59E13H2" 0.1683751 "O-acetyl-ADP-ribose deacetylase"  
"JS1\_N06\_02317" 21247 "s59E25H2" 0 "O-acetyl-ADP-ribose deacetylase"  
"JS1\_N06\_02317" 21247 "s59E5H2" 0.4750557 "O-acetyl-ADP-ribose deacetylase"  
"JS1\_N06\_02317" 21247 "s63E6H2" 0.1231314 "O-acetyl-ADP-ribose deacetylase"  
"JS1\_N06\_02318" 21248 "s59E13H2" 0.06119615 "hypothetical protein"  
"JS1\_N06\_02318" 21248 "s59E25H2" 0 "hypothetical protein"  
"JS1\_N06\_02318" 21248 "s59E5H2" 0.005308772 "hypothetical protein"  
"JS1\_N06\_02318" 21248 "s63E6H2" 0.003339328 "hypothetical protein"

"JS1\_N06\_02321" 21251 "s59E13H2" 0.005828088 "hypothetical protein"  
"JS1\_N06\_02321" 21251 "s59E25H2" 0 "hypothetical protein"  
"JS1\_N06\_02321" 21251 "s59E5H2" 0.09397623 "hypothetical protein"  
"JS1\_N06\_02321" 21251 "s63E6H2" 0.1851546 "hypothetical protein"  
"JS1\_N06\_02323" 21253 "s59E13H2" 0.03215636 "Large-conductance mechanosensitive channel"  
"JS1\_N06\_02323" 21253 "s59E25H2" 0 "Large-conductance mechanosensitive channel"  
"JS1\_N06\_02323" 21253 "s59E5H2" 0.1701702 "Large-conductance mechanosensitive channel"  
"JS1\_N06\_02323" 21253 "s63E6H2" 0.2874352 "Large-conductance mechanosensitive channel"  
"JS1\_N06\_02324" 21254 "s59E13H2" 0.04092192 "AAA-like domain protein"  
"JS1\_N06\_02324" 21254 "s59E25H2" 0 "AAA-like domain protein"  
"JS1\_N06\_02324" 21254 "s59E5H2" 0.1631276 "AAA-like domain protein"  
"JS1\_N06\_02324" 21254 "s63E6H2" 0.2570413 "AAA-like domain protein"  
"JS1\_N06\_02326" 21256 "s59E13H2" 0.07593189 "hypothetical protein"  
"JS1\_N06\_02326" 21256 "s59E25H2" 0 "hypothetical protein"  
"JS1\_N06\_02326" 21256 "s59E5H2" 0.07956732 "hypothetical protein"  
"JS1\_N06\_02326" 21256 "s63E6H2" 0.008382051 "hypothetical protein"  
"JS1\_N06\_02327" 21257 "s59E13H2" 0.01112426 "Helix-turn-helix domain protein"  
"JS1\_N06\_02327" 21257 "s59E25H2" 0 "Helix-turn-helix domain protein"  
"JS1\_N06\_02327" 21257 "s59E5H2" 0.03962868 "Helix-turn-helix domain protein"  
"JS1\_N06\_02327" 21257 "s63E6H2" 0.2543067 "Helix-turn-helix domain protein"  
"JS1\_N06\_02328" 21258 "s59E13H2" 0.003580084 "hypothetical protein"  
"JS1\_N06\_02328" 21258 "s59E25H2" 0 "hypothetical protein"  
"JS1\_N06\_02328" 21258 "s59E5H2" 0.02129777 "hypothetical protein"  
"JS1\_N06\_02328" 21258 "s63E6H2" 0.276861 "hypothetical protein"  
"JS1\_N06\_02329" 21259 "s59E13H2" 0 "hypothetical protein"  
"JS1\_N06\_02329" 21259 "s59E25H2" 0 "hypothetical protein"  
"JS1\_N06\_02329" 21259 "s59E5H2" 0 "hypothetical protein"  
"JS1\_N06\_02329" 21259 "s63E6H2" 0.001867642 "hypothetical protein"  
"JS1\_N06\_02330" 21260 "s59E13H2" 0.001221765 "hypothetical protein"  
"JS1\_N06\_02330" 21260 "s59E25H2" 0 "hypothetical protein"  
"JS1\_N06\_02330" 21260 "s59E5H2" 0.002311934 "hypothetical protein"  
"JS1\_N06\_02330" 21260 "s63E6H2" 0.002040527 "hypothetical protein"  
"JS1\_N06\_02334" 21264 "s59E13H2" 0.0272584 "PemK-like protein"  
"JS1\_N06\_02334" 21264 "s59E25H2" 0 "PemK-like protein"  
"JS1\_N06\_02334" 21264 "s59E5H2" 0.610788 "PemK-like protein"  
"JS1\_N06\_02334" 21264 "s63E6H2" 0.005476837 "PemK-like protein"  
"JS1\_N06\_02335" 21265 "s59E13H2" 0.01812021 "hypothetical protein"  
"JS1\_N06\_02335" 21265 "s59E25H2" 0 "hypothetical protein"  
"JS1\_N06\_02335" 21265 "s59E5H2" 0.6134686 "hypothetical protein"  
"JS1\_N06\_02335" 21265 "s63E6H2" 0.007263972 "hypothetical protein"  
"JS1\_N06\_02336" 21266 "s59E13H2" 0.0506691 "hypothetical protein"  
"JS1\_N06\_02336" 21266 "s59E25H2" 0 "hypothetical protein"  
"JS1\_N06\_02336" 21266 "s59E5H2" 1.036659 "hypothetical protein"  
"JS1\_N06\_02336" 21266 "s63E6H2" 0.2323382 "hypothetical protein"  
"JS1\_N06\_02337" 21267 "s59E13H2" 0.04616679 "photosystem I assembly protein Ycf3"  
"JS1\_N06\_02337" 21267 "s59E25H2" 0 "photosystem I assembly protein Ycf3"  
"JS1\_N06\_02337" 21267 "s59E5H2" 0.5096304 "photosystem I assembly protein Ycf3"

"JS1\_N06\_02337" 21267 "s63E6H2" 0.123757 "photosystem I assembly protein Ycf3"  
"JS1\_N06\_02338" 21268 "s59E13H2" 0.06588815 "putative inner membrane transporter YicL"  
"JS1\_N06\_02338" 21268 "s59E25H2" 0 "putative inner membrane transporter YicL"  
"JS1\_N06\_02338" 21268 "s59E5H2" 0.3035769 "putative inner membrane transporter YicL"  
"JS1\_N06\_02338" 21268 "s63E6H2" 0.1938731 "putative inner membrane transporter YicL"  
"JS1\_N06\_02339" 21269 "s59E13H2" 0.02952635 "Acetyltransferase (GNAT) family protein"  
"JS1\_N06\_02339" 21269 "s59E25H2" 0 "Acetyltransferase (GNAT) family protein"  
"JS1\_N06\_02339" 21269 "s59E5H2" 1.109527 "Acetyltransferase (GNAT) family protein"  
"JS1\_N06\_02339" 21269 "s63E6H2" 0.8826689 "Acetyltransferase (GNAT) family protein"  
"JS1\_N06\_02340" 21270 "s59E13H2" 0.02806643 "hypothetical protein"  
"JS1\_N06\_02340" 21270 "s59E25H2" 0 "hypothetical protein"  
"JS1\_N06\_02340" 21270 "s59E5H2" 0.4611527 "hypothetical protein"  
"JS1\_N06\_02340" 21270 "s63E6H2" 0.270795 "hypothetical protein"  
"JS1\_N06\_02341" 21271 "s59E13H2" 0.01837833 "galactoside permease"  
"JS1\_N06\_02341" 21271 "s59E25H2" 0 "galactoside permease"  
"JS1\_N06\_02341" 21271 "s59E5H2" 0.3404975 "galactoside permease"  
"JS1\_N06\_02341" 21271 "s63E6H2" 0.8135325 "galactoside permease"  
"JS1\_N06\_02342" 21272 "s59E13H2" 0.02112297 "LemA family protein"  
"JS1\_N06\_02342" 21272 "s59E25H2" 0 "LemA family protein"  
"JS1\_N06\_02342" 21272 "s59E5H2" 0.5313149 "LemA family protein"  
"JS1\_N06\_02342" 21272 "s63E6H2" 0.8488502 "LemA family protein"  
"JS1\_N06\_02343" 21273 "s59E13H2" 0.05353555 "hypothetical protein"  
"JS1\_N06\_02343" 21273 "s59E25H2" 0 "hypothetical protein"  
"JS1\_N06\_02343" 21273 "s59E5H2" 0.5660205 "hypothetical protein"  
"JS1\_N06\_02343" 21273 "s63E6H2" 1.554921 "hypothetical protein"  
"JS1\_N06\_02344" 21274 "s59E13H2" 0.01062094 "Trifunctional nucleotide phosphoesterase protein YfkN precursor"  
"JS1\_N06\_02344" 21274 "s59E25H2" 0 "Trifunctional nucleotide phosphoesterase protein YfkN precursor"  
"JS1\_N06\_02344" 21274 "s59E5H2" 0.3059579 "Trifunctional nucleotide phosphoesterase protein YfkN precursor"  
"JS1\_N06\_02344" 21274 "s63E6H2" 1.00994 "Trifunctional nucleotide phosphoesterase protein YfkN precursor"  
"JS1\_N06\_02345" 21275 "s59E13H2" 0.1763054 "Macrolide export ATP-binding/permease protein MacB"  
"JS1\_N06\_02345" 21275 "s59E25H2" 0.1978654 "Macrolide export ATP-binding/permease protein MacB"  
"JS1\_N06\_02345" 21275 "s59E5H2" 0.6917139 "Macrolide export ATP-binding/permease protein MacB"  
"JS1\_N06\_02345" 21275 "s63E6H2" 1.091432 "Macrolide export ATP-binding/permease protein MacB"  
"JS1\_N06\_02346" 21276 "s59E13H2" 0.1206559 "putative ABC transporter ATP-binding protein"  
"JS1\_N06\_02346" 21276 "s59E25H2" 0 "putative ABC transporter ATP-binding protein"  
"JS1\_N06\_02346" 21276 "s59E5H2" 0.5046201 "putative ABC transporter ATP-binding protein"  
"JS1\_N06\_02346" 21276 "s63E6H2" 1.414367 "putative ABC transporter ATP-binding protein"  
"JS1\_N06\_02347" 21277 "s59E13H2" 0.1390653 "Putative efflux system component YknX"  
"JS1\_N06\_02347" 21277 "s59E25H2" 0 "Putative efflux system component YknX"  
"JS1\_N06\_02347" 21277 "s59E5H2" 0.4230999 "Putative efflux system component YknX"  
"JS1\_N06\_02347" 21277 "s63E6H2" 0.5261343 "Putative efflux system component YknX"  
"JS1\_N06\_02348" 21278 "s59E13H2" 0.1904452 "Outer membrane efflux protein"  
"JS1\_N06\_02348" 21278 "s59E25H2" 0 "Outer membrane efflux protein"  
"JS1\_N06\_02348" 21278 "s59E5H2" 0.2954365 "Outer membrane efflux protein"  
"JS1\_N06\_02348" 21278 "s63E6H2" 0.0631167 "Outer membrane efflux protein"  
"JS1\_N06\_02349" 21279 "s59E13H2" 0.09865414 "Outer membrane efflux protein"  
"JS1\_N06\_02349" 21279 "s59E25H2" 0 "Outer membrane efflux protein"

"JS1\_N06\_02349" 21279 "s59E5H2" 1.452475 "Outer membrane efflux protein"  
"JS1\_N06\_02349" 21279 "s63E6H2" 0.07368733 "Outer membrane efflux protein"  
"JS1\_N06\_02350" 21280 "s59E13H2" 0.03874247 "putative DMT superfamily transporter inner membrane protein"  
"JS1\_N06\_02350" 21280 "s59E25H2" 0 "putative DMT superfamily transporter inner membrane protein"  
"JS1\_N06\_02350" 21280 "s59E5H2" 2.046721 "putative DMT superfamily transporter inner membrane protein"  
"JS1\_N06\_02350" 21280 "s63E6H2" 0.08016773 "putative DMT superfamily transporter inner membrane protein"  
"JS1\_N06\_02351" 21281 "s59E13H2" 0.2808857 "hypothetical protein"  
"JS1\_N06\_02351" 21281 "s59E25H2" 0 "hypothetical protein"  
"JS1\_N06\_02351" 21281 "s59E5H2" 0.9028534 "hypothetical protein"  
"JS1\_N06\_02351" 21281 "s63E6H2" 0.09509924 "hypothetical protein"  
"JS1\_N06\_02352" 21282 "s59E13H2" 0.2033657 "hypothetical protein"  
"JS1\_N06\_02352" 21282 "s59E25H2" 0 "hypothetical protein"  
"JS1\_N06\_02352" 21282 "s59E5H2" 0.3976692 "hypothetical protein"  
"JS1\_N06\_02352" 21282 "s63E6H2" 0.06532487 "hypothetical protein"  
"JS1\_N06\_02353" 21283 "s59E13H2" 0.2617992 "hypothetical protein"  
"JS1\_N06\_02353" 21283 "s59E25H2" 0 "hypothetical protein"  
"JS1\_N06\_02353" 21283 "s59E5H2" 0.2910619 "hypothetical protein"  
"JS1\_N06\_02353" 21283 "s63E6H2" 0.02642873 "hypothetical protein"  
"JS1\_N06\_02354" 21284 "s59E13H2" 0.3621107 "isopentenyl pyrophosphate isomerase"  
"JS1\_N06\_02354" 21284 "s59E25H2" 0 "isopentenyl pyrophosphate isomerase"  
"JS1\_N06\_02354" 21284 "s59E5H2" 0.5013369 "isopentenyl pyrophosphate isomerase"  
"JS1\_N06\_02354" 21284 "s63E6H2" 0.06395851 "isopentenyl pyrophosphate isomerase"  
"JS1\_N06\_02355" 21285 "s59E13H2" 0.02567185 "3-oxoacyl-[acyl-carrier-protein] synthase 2"  
"JS1\_N06\_02355" 21285 "s59E25H2" 0 "3-oxoacyl-[acyl-carrier-protein] synthase 2"  
"JS1\_N06\_02355" 21285 "s59E5H2" 0.2704566 "3-oxoacyl-[acyl-carrier-protein] synthase 2"  
"JS1\_N06\_02355" 21285 "s63E6H2" 0.05316197 "3-oxoacyl-[acyl-carrier-protein] synthase 2"  
"JS1\_N06\_02356" 21286 "s59E13H2" 0.0374782 "3-oxoacyl-[acyl-carrier-protein] synthase 3"  
"JS1\_N06\_02356" 21286 "s59E25H2" 0 "3-oxoacyl-[acyl-carrier-protein] synthase 3"  
"JS1\_N06\_02356" 21286 "s59E5H2" 0.3082041 "3-oxoacyl-[acyl-carrier-protein] synthase 3"  
"JS1\_N06\_02356" 21286 "s63E6H2" 0.1718573 "3-oxoacyl-[acyl-carrier-protein] synthase 3"  
"JS1\_N06\_02357" 21287 "s59E13H2" 2.226978 "Hydroxylamine reductase"  
"JS1\_N06\_02357" 21287 "s59E25H2" 0 "Hydroxylamine reductase"  
"JS1\_N06\_02357" 21287 "s59E5H2" 0.3563057 "Hydroxylamine reductase"  
"JS1\_N06\_02357" 21287 "s63E6H2" 0.3401282 "Hydroxylamine reductase"  
"JS1\_N06\_02358" 21288 "s59E13H2" 0 "UDP-2-acetamido-2-deoxy-3-oxo-D-glucuronate aminotransferase"  
"JS1\_N06\_02358" 21288 "s59E25H2" 0 "UDP-2-acetamido-2-deoxy-3-oxo-D-glucuronate aminotransferase"  
"JS1\_N06\_02358" 21288 "s59E5H2" 0 "UDP-2-acetamido-2-deoxy-3-oxo-D-glucuronate aminotransferase"  
"JS1\_N06\_02358" 21288 "s63E6H2" 0 "UDP-2-acetamido-2-deoxy-3-oxo-D-glucuronate aminotransferase"  
"JS1\_N06\_02359" 21289 "s59E13H2" 0 "dTDP-3-amino-3,6-dideoxy-alpha-D-galactopyranose 3-N-acetyltransferase"  
"JS1\_N06\_02359" 21289 "s59E25H2" 0 "dTDP-3-amino-3,6-dideoxy-alpha-D-galactopyranose 3-N-acetyltransferase"  
"JS1\_N06\_02359" 21289 "s59E5H2" 0 "dTDP-3-amino-3,6-dideoxy-alpha-D-galactopyranose 3-N-acetyltransferase"  
"JS1\_N06\_02359" 21289 "s63E6H2" 0 "dTDP-3-amino-3,6-dideoxy-alpha-D-galactopyranose 3-N-acetyltransferase"  
"JS1\_N06\_02360" 21290 "s59E13H2" 0.007827653 "UDP-N-acetyl-D-glucosamine 6-dehydrogenase"  
"JS1\_N06\_02360" 21290 "s59E25H2" 0 "UDP-N-acetyl-D-glucosamine 6-dehydrogenase"  
"JS1\_N06\_02360" 21290 "s59E5H2" 0 "UDP-N-acetyl-D-glucosamine 6-dehydrogenase"  
"JS1\_N06\_02360" 21290 "s63E6H2" 0 "UDP-N-acetyl-D-glucosamine 6-dehydrogenase"  
"JS1\_N06\_02361" 21291 "s59E13H2" 0 "Inositol 2-dehydrogenase"

"JS1\_N06\_02361" 21291 "s59E25H2" 0 "Inositol 2-dehydrogenase"  
"JS1\_N06\_02361" 21291 "s59E5H2" 0 "Inositol 2-dehydrogenase"  
"JS1\_N06\_02361" 21291 "s63E6H2" 0 "Inositol 2-dehydrogenase"  
"JS1\_N06\_02362" 21292 "s59E13H2" 0 "dTDP-3-amino-3,6-dideoxy-alpha-D-galactopyranose transaminase"  
"JS1\_N06\_02362" 21292 "s59E25H2" 0 "dTDP-3-amino-3,6-dideoxy-alpha-D-galactopyranose transaminase"  
"JS1\_N06\_02362" 21292 "s59E5H2" 0.003428877 "dTDP-3-amino-3,6-dideoxy-alpha-D-galactopyranose transaminase"  
"JS1\_N06\_02362" 21292 "s63E6H2" 0.004757481 "dTDP-3-amino-3,6-dideoxy-alpha-D-galactopyranose transaminase"  
"JS1\_N06\_02363" 21293 "s59E13H2" 0 "hypothetical protein"  
"JS1\_N06\_02363" 21293 "s59E25H2" 0 "hypothetical protein"  
"JS1\_N06\_02363" 21293 "s59E5H2" 0 "hypothetical protein"  
"JS1\_N06\_02363" 21293 "s63E6H2" 0 "hypothetical protein"  
"JS1\_N06\_02364" 21294 "s59E13H2" 0 "dTDP-3-amino-3,6-dideoxy-alpha-D-galactopyranose 3-N-acetyltransferase"  
"JS1\_N06\_02364" 21294 "s59E25H2" 0 "dTDP-3-amino-3,6-dideoxy-alpha-D-galactopyranose 3-N-acetyltransferase"  
"JS1\_N06\_02364" 21294 "s59E5H2" 0 "dTDP-3-amino-3,6-dideoxy-alpha-D-galactopyranose 3-N-acetyltransferase"  
"JS1\_N06\_02364" 21294 "s63E6H2" 0 "dTDP-3-amino-3,6-dideoxy-alpha-D-galactopyranose 3-N-acetyltransferase"  
"JS1\_N06\_02365" 21295 "s59E13H2" 0.002251327 "MarR family protein"  
"JS1\_N06\_02365" 21295 "s59E25H2" 0 "MarR family protein"  
"JS1\_N06\_02365" 21295 "s59E5H2" 0.07659456 "MarR family protein"  
"JS1\_N06\_02365" 21295 "s63E6H2" 2.389552 "MarR family protein"  
"JS1\_N06\_02366" 21296 "s59E13H2" 0 "hypothetical protein"  
"JS1\_N06\_02366" 21296 "s59E25H2" 0 "hypothetical protein"  
"JS1\_N06\_02366" 21296 "s59E5H2" 0 "hypothetical protein"  
"JS1\_N06\_02366" 21296 "s63E6H2" 0.03233773 "hypothetical protein"  
"JS1\_N06\_02367" 21297 "s59E13H2" 0 "Nucleotidyltransferase domain protein"  
"JS1\_N06\_02367" 21297 "s59E25H2" 0 "Nucleotidyltransferase domain protein"  
"JS1\_N06\_02367" 21297 "s59E5H2" 0.5632659 "Nucleotidyltransferase domain protein"  
"JS1\_N06\_02367" 21297 "s63E6H2" 4.828254 "Nucleotidyltransferase domain protein"  
"JS1\_N06\_02368" 21298 "s59E13H2" 0 "Archaeal ATPase"  
"JS1\_N06\_02368" 21298 "s59E25H2" 0 "Archaeal ATPase"  
"JS1\_N06\_02368" 21298 "s59E5H2" 0.142383 "Archaeal ATPase"  
"JS1\_N06\_02368" 21298 "s63E6H2" 0.001164724 "Archaeal ATPase"  
"JS1\_N06\_02369" 21299 "s59E13H2" 0 "hypothetical protein"  
"JS1\_N06\_02369" 21299 "s59E25H2" 0 "hypothetical protein"  
"JS1\_N06\_02369" 21299 "s59E5H2" 0.05553862 "hypothetical protein"  
"JS1\_N06\_02369" 21299 "s63E6H2" 0.003214703 "hypothetical protein"  
"JS1\_N06\_02370" 21300 "s59E13H2" 0 "HEPN domain protein"  
"JS1\_N06\_02370" 21300 "s59E25H2" 0 "HEPN domain protein"  
"JS1\_N06\_02370" 21300 "s59E5H2" 0 "HEPN domain protein"  
"JS1\_N06\_02370" 21300 "s63E6H2" 0.01997709 "HEPN domain protein"  
"JS1\_N06\_02371" 21301 "s59E13H2" 0 "Nucleotidyltransferase domain protein"  
"JS1\_N06\_02371" 21301 "s59E25H2" 0 "Nucleotidyltransferase domain protein"  
"JS1\_N06\_02371" 21301 "s59E5H2" 0 "Nucleotidyltransferase domain protein"  
"JS1\_N06\_02371" 21301 "s63E6H2" 0.009411208 "Nucleotidyltransferase domain protein"  
"JS1\_N06\_02372" 21302 "s59E13H2" 0 "mRNA interferase MazF4"  
"JS1\_N06\_02372" 21302 "s59E25H2" 0 "mRNA interferase MazF4"  
"JS1\_N06\_02372" 21302 "s59E5H2" 1.192888 "mRNA interferase MazF4"  
"JS1\_N06\_02372" 21302 "s63E6H2" 0.8690516 "mRNA interferase MazF4"

"JS1\_N06\_02374" 21304 "s59E13H2" 0.0004536256 "hypothetical protein"  
"JS1\_N06\_02374" 21304 "s59E25H2" 0 "hypothetical protein"  
"JS1\_N06\_02374" 21304 "s59E5H2" 0.01698708 "hypothetical protein"  
"JS1\_N06\_02374" 21304 "s63E6H2" 0.002211452 "hypothetical protein"  
"JS1\_N06\_02375" 21305 "s59E13H2" 0.009683276 "hypothetical protein"  
"JS1\_N06\_02375" 21305 "s59E25H2" 0 "hypothetical protein"  
"JS1\_N06\_02375" 21305 "s59E5H2" 0.1443616 "hypothetical protein"  
"JS1\_N06\_02375" 21305 "s63E6H2" 1.450396 "hypothetical protein"  
"JS1\_N06\_02377" 21307 "s59E13H2" 0 "Phosphoglucomutase"  
"JS1\_N06\_02377" 21307 "s59E25H2" 0.06294472 "Phosphoglucomutase"  
"JS1\_N06\_02377" 21307 "s59E5H2" 0.1239616 "Phosphoglucomutase"  
"JS1\_N06\_02377" 21307 "s63E6H2" 4.648251 "Phosphoglucomutase"  
"JS1\_N06\_02378" 21308 "s59E13H2" 0 "hypothetical protein"  
"JS1\_N06\_02378" 21308 "s59E25H2" 0 "hypothetical protein"  
"JS1\_N06\_02378" 21308 "s59E5H2" 0 "hypothetical protein"  
"JS1\_N06\_02378" 21308 "s63E6H2" 0.05118558 "hypothetical protein"  
"JS1\_N06\_02379" 21309 "s59E13H2" 0 "cryptic autophosphorylating protein tyrosine kinase Etk"  
"JS1\_N06\_02379" 21309 "s59E25H2" 0 "cryptic autophosphorylating protein tyrosine kinase Etk"  
"JS1\_N06\_02379" 21309 "s59E5H2" 0.1331423 "cryptic autophosphorylating protein tyrosine kinase Etk"  
"JS1\_N06\_02379" 21309 "s63E6H2" 0.06738746 "cryptic autophosphorylating protein tyrosine kinase Etk"  
"JS1\_N06\_02380" 21310 "s59E13H2" 0 "O-Antigen ligase"  
"JS1\_N06\_02380" 21310 "s59E25H2" 0 "O-Antigen ligase"  
"JS1\_N06\_02380" 21310 "s59E5H2" 0.003582021 "O-Antigen ligase"  
"JS1\_N06\_02380" 21310 "s63E6H2" 0.007292253 "O-Antigen ligase"  
"JS1\_N06\_02381" 21311 "s59E13H2" 0.003151536 "hypothetical protein"  
"JS1\_N06\_02381" 21311 "s59E25H2" 0 "hypothetical protein"  
"JS1\_N06\_02381" 21311 "s59E5H2" 0 "hypothetical protein"  
"JS1\_N06\_02381" 21311 "s63E6H2" 0.01470678 "hypothetical protein"  
"JS1\_N06\_02382" 21312 "s59E13H2" 0 "hypothetical protein"  
"JS1\_N06\_02382" 21312 "s59E25H2" 0 "hypothetical protein"  
"JS1\_N06\_02382" 21312 "s59E5H2" 0.007755469 "hypothetical protein"  
"JS1\_N06\_02382" 21312 "s63E6H2" 0.1467848 "hypothetical protein"  
"JS1\_N06\_02383" 21313 "s59E13H2" 0 "hypothetical protein"  
"JS1\_N06\_02383" 21313 "s59E25H2" 0 "hypothetical protein"  
"JS1\_N06\_02383" 21313 "s59E5H2" 0.008425835 "hypothetical protein"  
"JS1\_N06\_02383" 21313 "s63E6H2" 0.01571816 "hypothetical protein"  
"JS1\_N06\_02384" 21314 "s59E13H2" 0 "hypothetical protein"  
"JS1\_N06\_02384" 21314 "s59E25H2" 0 "hypothetical protein"  
"JS1\_N06\_02384" 21314 "s59E5H2" 0 "hypothetical protein"  
"JS1\_N06\_02384" 21314 "s63E6H2" 0.0274533 "hypothetical protein"  
"JS1\_N06\_02385" 21315 "s59E13H2" 0.364366 "hypothetical protein"  
"JS1\_N06\_02385" 21315 "s59E25H2" 0 "hypothetical protein"  
"JS1\_N06\_02385" 21315 "s59E5H2" 0 "hypothetical protein"  
"JS1\_N06\_02385" 21315 "s63E6H2" 0.0637546 "hypothetical protein"  
"JS1\_N06\_02386" 21316 "s59E13H2" 0.001733858 "hypothetical protein"  
"JS1\_N06\_02386" 21316 "s59E25H2" 0 "hypothetical protein"  
"JS1\_N06\_02386" 21316 "s59E5H2" 0 "hypothetical protein"



"JS1\_N06\_02386" 21316 "s63E6H2" 0.02172685 "hypothetical protein"  
"JS1\_N06\_02387" 21317 "s59E13H2" 0 "L-lactate permease"  
"JS1\_N06\_02387" 21317 "s59E25H2" 0 "L-lactate permease"  
"JS1\_N06\_02387" 21317 "s59E5H2" 0 "L-lactate permease"  
"JS1\_N06\_02387" 21317 "s63E6H2" 0.04087253 "L-lactate permease"  
"JS1\_N06\_02389" 21319 "s59E13H2" 0 "Cyclic di-GMP phosphodiesterase response regulator RpfG"  
"JS1\_N06\_02389" 21319 "s59E25H2" 0 "Cyclic di-GMP phosphodiesterase response regulator RpfG"  
"JS1\_N06\_02389" 21319 "s59E5H2" 0 "Cyclic di-GMP phosphodiesterase response regulator RpfG"  
"JS1\_N06\_02389" 21319 "s63E6H2" 0.2409846 "Cyclic di-GMP phosphodiesterase response regulator RpfG"  
"JS1\_N06\_02390" 21320 "s59E13H2" 0.02147922 "hypothetical protein"  
"JS1\_N06\_02390" 21320 "s59E25H2" 0 "hypothetical protein"  
"JS1\_N06\_02390" 21320 "s59E5H2" 0.1067527 "hypothetical protein"  
"JS1\_N06\_02390" 21320 "s63E6H2" 0.09258873 "hypothetical protein"  
"JS1\_N06\_02392" 21322 "s59E13H2" 0 "Regulator of sigma-W protease RasP"  
"JS1\_N06\_02392" 21322 "s59E25H2" 0 "Regulator of sigma-W protease RasP"  
"JS1\_N06\_02392" 21322 "s59E5H2" 0 "Regulator of sigma-W protease RasP"  
"JS1\_N06\_02392" 21322 "s63E6H2" 0 "Regulator of sigma-W protease RasP"  
"JS1\_N06\_02402" 21332 "s59E13H2" 0 "Regulator of sigma-W protease RasP"  
"JS1\_N06\_02402" 21332 "s59E25H2" 0 "Regulator of sigma-W protease RasP"  
"JS1\_N06\_02402" 21332 "s59E5H2" 0 "Regulator of sigma-W protease RasP"  
"JS1\_N06\_02402" 21332 "s63E6H2" 0 "Regulator of sigma-W protease RasP"  
"JS1\_N06\_02405" 21335 "s59E13H2" 0 "V-type ATP synthase subunit I"  
"JS1\_N06\_02405" 21335 "s59E25H2" 0 "V-type ATP synthase subunit I"  
"JS1\_N06\_02405" 21335 "s59E5H2" 0 "V-type ATP synthase subunit I"  
"JS1\_N06\_02405" 21335 "s63E6H2" 0.007393998 "V-type ATP synthase subunit I"  
"JS1\_N06\_02406" 21336 "s59E13H2" 0.004278394 "colicin V production protein"  
"JS1\_N06\_02406" 21336 "s59E25H2" 0 "colicin V production protein"  
"JS1\_N06\_02406" 21336 "s59E5H2" 0 "colicin V production protein"  
"JS1\_N06\_02406" 21336 "s63E6H2" 0 "colicin V production protein"  
"JS1\_N06\_02407" 21337 "s59E13H2" 0 "3-oxoacyl-[acyl-carrier-protein] reductase FabG"  
"JS1\_N06\_02407" 21337 "s59E25H2" 0 "3-oxoacyl-[acyl-carrier-protein] reductase FabG"  
"JS1\_N06\_02407" 21337 "s59E5H2" 0.08364482 "3-oxoacyl-[acyl-carrier-protein] reductase FabG"  
"JS1\_N06\_02407" 21337 "s63E6H2" 0.02053931 "3-oxoacyl-[acyl-carrier-protein] reductase FabG"  
"JS1\_N06\_02408" 21338 "s59E13H2" 0 "hypothetical protein"  
"JS1\_N06\_02408" 21338 "s59E25H2" 0 "hypothetical protein"  
"JS1\_N06\_02408" 21338 "s59E5H2" 0.01441043 "hypothetical protein"  
"JS1\_N06\_02408" 21338 "s63E6H2" 0.006492081 "hypothetical protein"  
"JS1\_N06\_02409" 21339 "s59E13H2" 0.1055229 "Inositol 2-dehydrogenase/D-chiro-inositol 3-dehydrogenase"  
"JS1\_N06\_02409" 21339 "s59E25H2" 0 "Inositol 2-dehydrogenase/D-chiro-inositol 3-dehydrogenase"  
"JS1\_N06\_02409" 21339 "s59E5H2" 0.09195886 "Inositol 2-dehydrogenase/D-chiro-inositol 3-dehydrogenase"  
"JS1\_N06\_02409" 21339 "s63E6H2" 0.05626662 "Inositol 2-dehydrogenase/D-chiro-inositol 3-dehydrogenase"  
"JS1\_N06\_02410" 21340 "s59E13H2" 0.001412109 "Uronate isomerase"  
"JS1\_N06\_02410" 21340 "s59E25H2" 0 "Uronate isomerase"  
"JS1\_N06\_02410" 21340 "s59E5H2" 0.004592212 "Uronate isomerase"  
"JS1\_N06\_02410" 21340 "s63E6H2" 0.3011041 "Uronate isomerase"  
"JS1\_N06\_02411" 21341 "s59E13H2" 0.02476191 "hypothetical protein"  
"JS1\_N06\_02411" 21341 "s59E25H2" 0 "hypothetical protein"

"JS1\_N06\_02411" 21341 "s59E5H2" 0.04197758 "hypothetical protein"  
"JS1\_N06\_02411" 21341 "s63E6H2" 0.255857 "hypothetical protein"  
"JS1\_N06\_02412" 21342 "s59E13H2" 0.2605449 "Transposase IS116/IS110/IS902 family protein"  
"JS1\_N06\_02412" 21342 "s59E25H2" 0 "Transposase IS116/IS110/IS902 family protein"  
"JS1\_N06\_02412" 21342 "s59E5H2" 0.3792264 "Transposase IS116/IS110/IS902 family protein"  
"JS1\_N06\_02412" 21342 "s63E6H2" 0.7072695 "Transposase IS116/IS110/IS902 family protein"  
"JS1\_N06\_02413" 21343 "s59E13H2" 0.02104383 "putative oxidoreductase UxuB"  
"JS1\_N06\_02413" 21343 "s59E25H2" 0 "putative oxidoreductase UxuB"  
"JS1\_N06\_02413" 21343 "s59E5H2" 0.07162638 "putative oxidoreductase UxuB"  
"JS1\_N06\_02413" 21343 "s63E6H2" 0.2641212 "putative oxidoreductase UxuB"  
"JS1\_N06\_02414" 21344 "s59E13H2" 0.02310568 "6-phosphogluconate dehydrogenase, decarboxylating"  
"JS1\_N06\_02414" 21344 "s59E25H2" 0 "6-phosphogluconate dehydrogenase, decarboxylating"  
"JS1\_N06\_02414" 21344 "s59E5H2" 0.2993112 "6-phosphogluconate dehydrogenase, decarboxylating"  
"JS1\_N06\_02414" 21344 "s63E6H2" 0.5988243 "6-phosphogluconate dehydrogenase, decarboxylating"  
"JS1\_N06\_02415" 21345 "s59E13H2" 0.009399302 "hypothetical protein"  
"JS1\_N06\_02415" 21345 "s59E25H2" 0 "hypothetical protein"  
"JS1\_N06\_02415" 21345 "s59E5H2" 0.3187293 "hypothetical protein"  
"JS1\_N06\_02415" 21345 "s63E6H2" 0.04638431 "hypothetical protein"  
"JS1\_N06\_02416" 21346 "s59E13H2" 0.3680959 "6-phosphofructokinase 1"  
"JS1\_N06\_02416" 21346 "s59E25H2" 0 "6-phosphofructokinase 1"  
"JS1\_N06\_02416" 21346 "s59E5H2" 0.7093435 "6-phosphofructokinase 1"  
"JS1\_N06\_02416" 21346 "s63E6H2" 0.1682122 "6-phosphofructokinase 1"  
"JS1\_N06\_02417" 21347 "s59E13H2" 0.01015357 "hypothetical protein"  
"JS1\_N06\_02417" 21347 "s59E25H2" 0 "hypothetical protein"  
"JS1\_N06\_02417" 21347 "s59E5H2" 0.298799 "hypothetical protein"  
"JS1\_N06\_02417" 21347 "s63E6H2" 0.562049 "hypothetical protein"  
"JS1\_N06\_02418" 21348 "s59E13H2" 0.04465421 "putative binding protein component of ABC iron transporter precursor"  
"JS1\_N06\_02418" 21348 "s59E25H2" 0 "putative binding protein component of ABC iron transporter precursor"  
"JS1\_N06\_02418" 21348 "s59E5H2" 0.02774545 "putative binding protein component of ABC iron transporter precursor"  
"JS1\_N06\_02418" 21348 "s63E6H2" 0.7859402 "putative binding protein component of ABC iron transporter precursor"  
"JS1\_N06\_02419" 21349 "s59E13H2" 0.100128 "Putative 2-aminoethylphosphonate transport system permease protein PhnV"  
"JS1\_N06\_02419" 21349 "s59E25H2" 0 "Putative 2-aminoethylphosphonate transport system permease protein PhnV"  
"JS1\_N06\_02419" 21349 "s59E5H2" 0.6329307 "Putative 2-aminoethylphosphonate transport system permease protein PhnV"  
"JS1\_N06\_02419" 21349 "s63E6H2" 0.8456754 "Putative 2-aminoethylphosphonate transport system permease protein PhnV"  
"JS1\_N06\_02420" 21350 "s59E13H2" 1.034274 "Trehalose/maltose import ATP-binding protein Malk"  
"JS1\_N06\_02420" 21350 "s59E25H2" 0 "Trehalose/maltose import ATP-binding protein Malk"  
"JS1\_N06\_02420" 21350 "s59E5H2" 1.599705 "Trehalose/maltose import ATP-binding protein Malk"  
"JS1\_N06\_02420" 21350 "s63E6H2" 0.6333977 "Trehalose/maltose import ATP-binding protein Malk"  
"JS1\_N06\_02421" 21351 "s59E13H2" 0.1934273 "pfkB family carbohydrate kinase"  
"JS1\_N06\_02421" 21351 "s59E25H2" 0 "pfkB family carbohydrate kinase"  
"JS1\_N06\_02421" 21351 "s59E5H2" 0.5877474 "pfkB family carbohydrate kinase"  
"JS1\_N06\_02421" 21351 "s63E6H2" 0.1745702 "pfkB family carbohydrate kinase"  
"JS1\_N06\_02422" 21352 "s59E13H2" 0.05382567 "Bifunctional IPC transferase and DIPP synthase"  
"JS1\_N06\_02422" 21352 "s59E25H2" 0 "Bifunctional IPC transferase and DIPP synthase"  
"JS1\_N06\_02422" 21352 "s59E5H2" 0.7357161 "Bifunctional IPC transferase and DIPP synthase"  
"JS1\_N06\_02422" 21352 "s63E6H2" 0.1206208 "Bifunctional IPC transferase and DIPP synthase"  
"JS1\_N06\_02423" 21353 "s59E13H2" 0.02659265 "Trehalose/maltose import ATP-binding protein Malk"

"JS1\_N06\_02423" 21353 "s59E25H2" 0 "Trehalose/maltose import ATP-binding protein MalK"  
"JS1\_N06\_02423" 21353 "s59E5H2" 2.607118 "Trehalose/maltose import ATP-binding protein MalK"  
"JS1\_N06\_02423" 21353 "s63E6H2" 0.002810132 "Trehalose/maltose import ATP-binding protein MalK"  
"JS1\_N06\_02424" 21354 "s59E13H2" 0.00270918 "maltose ABC transporter periplasmic protein"  
"JS1\_N06\_02424" 21354 "s59E25H2" 0 "maltose ABC transporter periplasmic protein"  
"JS1\_N06\_02424" 21354 "s59E5H2" 0.117739 "maltose ABC transporter periplasmic protein"  
"JS1\_N06\_02424" 21354 "s63E6H2" 0.09760563 "maltose ABC transporter periplasmic protein"  
"JS1\_N06\_02425" 21355 "s59E13H2" 0.07891975 "Lactose transport system permease protein LacF"  
"JS1\_N06\_02425" 21355 "s59E25H2" 0 "Lactose transport system permease protein LacF"  
"JS1\_N06\_02425" 21355 "s59E5H2" 1.338417 "Lactose transport system permease protein LacF"  
"JS1\_N06\_02425" 21355 "s63E6H2" 0.07415165 "Lactose transport system permease protein LacF"  
"JS1\_N06\_02426" 21356 "s59E13H2" 0.1280602 "Trehalose transport system permease protein SugB"  
"JS1\_N06\_02426" 21356 "s59E25H2" 0 "Trehalose transport system permease protein SugB"  
"JS1\_N06\_02426" 21356 "s59E5H2" 2.038265 "Trehalose transport system permease protein SugB"  
"JS1\_N06\_02426" 21356 "s63E6H2" 0.07892944 "Trehalose transport system permease protein SugB"  
"JS1\_N06\_02427" 21357 "s59E13H2" 0.007709432 "endonuclease IV"  
"JS1\_N06\_02427" 21357 "s59E25H2" 0 "endonuclease IV"  
"JS1\_N06\_02427" 21357 "s59E5H2" 1.674459 "endonuclease IV"  
"JS1\_N06\_02427" 21357 "s63E6H2" 0.1601544 "endonuclease IV"  
"JS1\_N06\_02428" 21358 "s59E13H2" 0 "pfkB family carbohydrate kinase"  
"JS1\_N06\_02428" 21358 "s59E25H2" 0 "pfkB family carbohydrate kinase"  
"JS1\_N06\_02428" 21358 "s59E5H2" 0.2444486 "pfkB family carbohydrate kinase"  
"JS1\_N06\_02428" 21358 "s63E6H2" 0.3499222 "pfkB family carbohydrate kinase"  
"JS1\_N06\_02429" 21359 "s59E13H2" 0.04510919 "Transcriptional regulator KdgR"  
"JS1\_N06\_02429" 21359 "s59E25H2" 0 "Transcriptional regulator KdgR"  
"JS1\_N06\_02429" 21359 "s59E5H2" 0.111246 "Transcriptional regulator KdgR"  
"JS1\_N06\_02429" 21359 "s63E6H2" 1.385597 "Transcriptional regulator KdgR"  
"JS1\_N06\_02430" 21360 "s59E13H2" 0.2945835 "Indolepyruvate oxidoreductase subunit IorA"  
"JS1\_N06\_02430" 21360 "s59E25H2" 0 "Indolepyruvate oxidoreductase subunit IorA"  
"JS1\_N06\_02430" 21360 "s59E5H2" 0.2988259 "Indolepyruvate oxidoreductase subunit IorA"  
"JS1\_N06\_02430" 21360 "s63E6H2" 0.5368156 "Indolepyruvate oxidoreductase subunit IorA"  
"JS1\_N06\_02431" 21361 "s59E13H2" 0.1647559 "Indolepyruvate oxidoreductase subunit IorB"  
"JS1\_N06\_02431" 21361 "s59E25H2" 0 "Indolepyruvate oxidoreductase subunit IorB"  
"JS1\_N06\_02431" 21361 "s59E5H2" 0.3152868 "Indolepyruvate oxidoreductase subunit IorB"  
"JS1\_N06\_02431" 21361 "s63E6H2" 0.453581 "Indolepyruvate oxidoreductase subunit IorB"  
"JS1\_N06\_02432" 21362 "s59E13H2" 0.001481948 "Aspartate aminotransferase"  
"JS1\_N06\_02432" 21362 "s59E25H2" 0 "Aspartate aminotransferase"  
"JS1\_N06\_02432" 21362 "s59E5H2" 0.01036214 "Aspartate aminotransferase"  
"JS1\_N06\_02432" 21362 "s63E6H2" 0.05491207 "Aspartate aminotransferase"  
"JS1\_N06\_02433" 21363 "s59E13H2" 0.02186323 "Butyrate kinase 2"  
"JS1\_N06\_02433" 21363 "s59E25H2" 0 "Butyrate kinase 2"  
"JS1\_N06\_02433" 21363 "s59E5H2" 0.1163511 "Butyrate kinase 2"  
"JS1\_N06\_02433" 21363 "s63E6H2" 0.6789735 "Butyrate kinase 2"  
"JS1\_N06\_02434" 21364 "s59E13H2" 0.4784134 "Phosphate acetyltransferase"  
"JS1\_N06\_02434" 21364 "s59E25H2" 0 "Phosphate acetyltransferase"  
"JS1\_N06\_02434" 21364 "s59E5H2" 0.2796524 "Phosphate acetyltransferase"  
"JS1\_N06\_02434" 21364 "s63E6H2" 0.9462549 "Phosphate acetyltransferase"

"JS1\_N06\_02435" 21365 "s59E13H2" 0 "hypothetical protein"  
"JS1\_N06\_02435" 21365 "s59E25H2" 0 "hypothetical protein"  
"JS1\_N06\_02435" 21365 "s59E5H2" 0 "hypothetical protein"  
"JS1\_N06\_02435" 21365 "s63E6H2" 0.09611067 "hypothetical protein"  
"JS1\_N06\_02436" 21366 "s59E13H2" 0.02499041 "Transposase DDE domain protein"  
"JS1\_N06\_02436" 21366 "s59E25H2" 0 "Transposase DDE domain protein"  
"JS1\_N06\_02436" 21366 "s59E5H2" 0.6254554 "Transposase DDE domain protein"  
"JS1\_N06\_02436" 21366 "s63E6H2" 1.39271 "Transposase DDE domain protein"  
"JS1\_N06\_02437" 21367 "s59E13H2" 0.03449764 "D-glutamate deacylase"  
"JS1\_N06\_02437" 21367 "s59E25H2" 0 "D-glutamate deacylase"  
"JS1\_N06\_02437" 21367 "s59E5H2" 0.1482877 "D-glutamate deacylase"  
"JS1\_N06\_02437" 21367 "s63E6H2" 2.658707 "D-glutamate deacylase"  
"JS1\_N06\_02438" 21368 "s59E13H2" 2.267321 "GTP-binding protein TypA/BipA"  
"JS1\_N06\_02438" 21368 "s59E25H2" 0.1376096 "GTP-binding protein TypA/BipA"  
"JS1\_N06\_02438" 21368 "s59E5H2" 1.14458 "GTP-binding protein TypA/BipA"  
"JS1\_N06\_02438" 21368 "s63E6H2" 8.877836 "GTP-binding protein TypA/BipA"  
"JS1\_N06\_02439" 21369 "s59E13H2" 0.1682591 "Transcriptional repressor PagR"  
"JS1\_N06\_02439" 21369 "s59E25H2" 0 "Transcriptional repressor PagR"  
"JS1\_N06\_02439" 21369 "s59E5H2" 0.2368219 "Transcriptional repressor PagR"  
"JS1\_N06\_02439" 21369 "s63E6H2" 4.21248 "Transcriptional repressor PagR"  
"JS1\_N06\_02440" 21370 "s59E13H2" 0.1482671 "Coenzyme A disulfide reductase"  
"JS1\_N06\_02440" 21370 "s59E25H2" 0 "Coenzyme A disulfide reductase"  
"JS1\_N06\_02440" 21370 "s59E5H2" 0.3793176 "Coenzyme A disulfide reductase"  
"JS1\_N06\_02440" 21370 "s63E6H2" 0.06344631 "Coenzyme A disulfide reductase"  
"JS1\_N06\_02443" 21373 "s59E13H2" 0.4817785 "hypothetical protein"  
"JS1\_N06\_02443" 21373 "s59E25H2" 0 "hypothetical protein"  
"JS1\_N06\_02443" 21373 "s59E5H2" 0.2352977 "hypothetical protein"  
"JS1\_N06\_02443" 21373 "s63E6H2" 0.4438841 "hypothetical protein"  
"JS1\_N06\_02445" 21375 "s59E13H2" 2.600362 "hypothetical protein"  
"JS1\_N06\_02445" 21375 "s59E25H2" 0 "hypothetical protein"  
"JS1\_N06\_02445" 21375 "s59E5H2" 0.1339643 "hypothetical protein"  
"JS1\_N06\_02445" 21375 "s63E6H2" 0.1307196 "hypothetical protein"  
"JS1\_N06\_02446" 21376 "s59E13H2" 2.332759 "putative endonuclease 4"  
"JS1\_N06\_02446" 21376 "s59E25H2" 0 "putative endonuclease 4"  
"JS1\_N06\_02446" 21376 "s59E5H2" 0.2070551 "putative endonuclease 4"  
"JS1\_N06\_02446" 21376 "s63E6H2" 0.3379445 "putative endonuclease 4"  
"JS1\_N06\_02447" 21377 "s59E13H2" 4.939247 "pyrroloquinoline quinone biosynthesis protein PqqE"  
"JS1\_N06\_02447" 21377 "s59E25H2" 0.3131102 "pyrroloquinoline quinone biosynthesis protein PqqE"  
"JS1\_N06\_02447" 21377 "s59E5H2" 0.3390445 "pyrroloquinoline quinone biosynthesis protein PqqE"  
"JS1\_N06\_02447" 21377 "s63E6H2" 0.448142 "pyrroloquinoline quinone biosynthesis protein PqqE"  
"JS1\_N06\_02448" 21378 "s59E13H2" 4.887212 "putative inner membrane transporter yjIE"  
"JS1\_N06\_02448" 21378 "s59E25H2" 0 "putative inner membrane transporter yjIE"  
"JS1\_N06\_02448" 21378 "s59E5H2" 0.1432036 "putative inner membrane transporter yjIE"  
"JS1\_N06\_02448" 21378 "s63E6H2" 0.2741703 "putative inner membrane transporter yjIE"  
"JS1\_N06\_02449" 21379 "s59E13H2" 3.764596 "Radical SAM superfamily protein"  
"JS1\_N06\_02449" 21379 "s59E25H2" 0 "Radical SAM superfamily protein"  
"JS1\_N06\_02449" 21379 "s59E5H2" 0.196447 "Radical SAM superfamily protein"

"JS1\_N06\_02449" 21379 "s63E6H2" 0.2105651 "Radical SAM superfamily protein"  
"JS1\_N06\_02450" 21380 "s59E13H2" 2.214106 "dUMP phosphatase"  
"JS1\_N06\_02450" 21380 "s59E25H2" 0 "dUMP phosphatase"  
"JS1\_N06\_02450" 21380 "s59E5H2" 0.2356483 "dUMP phosphatase"  
"JS1\_N06\_02450" 21380 "s63E6H2" 0.1033568 "dUMP phosphatase"  
"JS1\_N06\_02451" 21381 "s59E13H2" 0 "V-type sodium ATPase subunit C"  
"JS1\_N06\_02451" 21381 "s59E25H2" 0 "V-type sodium ATPase subunit C"  
"JS1\_N06\_02451" 21381 "s59E5H2" 0.0130876 "V-type sodium ATPase subunit C"  
"JS1\_N06\_02451" 21381 "s63E6H2" 0 "V-type sodium ATPase subunit C"  
"JS1\_N06\_02454" 21384 "s59E13H2" 0 "V-type ATP synthase subunit I"  
"JS1\_N06\_02454" 21384 "s59E25H2" 0 "V-type ATP synthase subunit I"  
"JS1\_N06\_02454" 21384 "s59E5H2" 0 "V-type ATP synthase subunit I"  
"JS1\_N06\_02454" 21384 "s63E6H2" 0 "V-type ATP synthase subunit I"  
"JS1\_N06\_02455" 21385 "s59E13H2" 0 "Chromosome partition protein Smc"  
"JS1\_N06\_02455" 21385 "s59E25H2" 0 "Chromosome partition protein Smc"  
"JS1\_N06\_02455" 21385 "s59E5H2" 0 "Chromosome partition protein Smc"  
"JS1\_N06\_02455" 21385 "s63E6H2" 0.00116823 "Chromosome partition protein Smc"  
"JS1\_N06\_02457" 21387 "s59E13H2" 0.03609824 "hypothetical protein"  
"JS1\_N06\_02457" 21387 "s59E25H2" 0 "hypothetical protein"  
"JS1\_N06\_02457" 21387 "s59E5H2" 0.4743433 "hypothetical protein"  
"JS1\_N06\_02457" 21387 "s63E6H2" 0.2491664 "hypothetical protein"  
"JS1\_N06\_02458" 21388 "s59E13H2" 0.02862529 "5'-nucleotidase SurE"  
"JS1\_N06\_02458" 21388 "s59E25H2" 0 "5'-nucleotidase SurE"  
"JS1\_N06\_02458" 21388 "s59E5H2" 0.4086366 "5'-nucleotidase SurE"  
"JS1\_N06\_02458" 21388 "s63E6H2" 0.3259792 "5'-nucleotidase SurE"  
"JS1\_N06\_02459" 21389 "s59E13H2" 0.02308559 "dihydrolipoamide dehydrogenase"  
"JS1\_N06\_02459" 21389 "s59E25H2" 0 "dihydrolipoamide dehydrogenase"  
"JS1\_N06\_02459" 21389 "s59E5H2" 0.2689753 "dihydrolipoamide dehydrogenase"  
"JS1\_N06\_02459" 21389 "s63E6H2" 0.2896052 "dihydrolipoamide dehydrogenase"  
"JS1\_N06\_02461" 21391 "s59E13H2" 0.4180213 "Cyclic di-GMP phosphodiesterase response regulator RpfG"  
"JS1\_N06\_02461" 21391 "s59E25H2" 0 "Cyclic di-GMP phosphodiesterase response regulator RpfG"  
"JS1\_N06\_02461" 21391 "s59E5H2" 0.968613 "Cyclic di-GMP phosphodiesterase response regulator RpfG"  
"JS1\_N06\_02461" 21391 "s63E6H2" 0.03858066 "Cyclic di-GMP phosphodiesterase response regulator RpfG"  
"JS1\_N06\_02462" 21392 "s59E13H2" 1.494725 "Radical SAM superfamily protein"  
"JS1\_N06\_02462" 21392 "s59E25H2" 0 "Radical SAM superfamily protein"  
"JS1\_N06\_02462" 21392 "s59E5H2" 0.09182704 "Radical SAM superfamily protein"  
"JS1\_N06\_02462" 21392 "s63E6H2" 0.5797808 "Radical SAM superfamily protein"  
"JS1\_N06\_02463" 21393 "s59E13H2" 0 "Cystathionine beta-lyase PatB"  
"JS1\_N06\_02463" 21393 "s59E25H2" 0 "Cystathionine beta-lyase PatB"  
"JS1\_N06\_02463" 21393 "s59E5H2" 0 "Cystathionine beta-lyase PatB"  
"JS1\_N06\_02463" 21393 "s63E6H2" 0.1299235 "Cystathionine beta-lyase PatB"  
"JS1\_N06\_02464" 21394 "s59E13H2" 0.01913842 "hypothetical protein"  
"JS1\_N06\_02464" 21394 "s59E25H2" 0 "hypothetical protein"  
"JS1\_N06\_02464" 21394 "s59E5H2" 0.01225705 "hypothetical protein"  
"JS1\_N06\_02464" 21394 "s63E6H2" 0.1992441 "hypothetical protein"  
"JS1\_N06\_02465" 21395 "s59E13H2" 0 "photosystem I assembly protein Ycf3"  
"JS1\_N06\_02465" 21395 "s59E25H2" 0 "photosystem I assembly protein Ycf3"

"JS1\_N06\_02465" 21395 "s59E5H2" 0 "photosystem I assembly protein Ycf3"  
"JS1\_N06\_02465" 21395 "s63E6H2" 0 "photosystem I assembly protein Ycf3"  
"JS1\_N06\_02466" 21396 "s59E13H2" 0 "Lipoyl synthase"  
"JS1\_N06\_02466" 21396 "s59E25H2" 0 "Lipoyl synthase"  
"JS1\_N06\_02466" 21396 "s59E5H2" 0.004405976 "Lipoyl synthase"  
"JS1\_N06\_02466" 21396 "s63E6H2" 0.004864844 "Lipoyl synthase"  
"JS1\_N06\_02472" 21402 "s59E13H2" 0.1666267 "Zinc ribbon domain protein"  
"JS1\_N06\_02472" 21402 "s59E25H2" 0 "Zinc ribbon domain protein"  
"JS1\_N06\_02472" 21402 "s59E5H2" 0.06286182 "Zinc ribbon domain protein"  
"JS1\_N06\_02472" 21402 "s63E6H2" 0.5362595 "Zinc ribbon domain protein"  
"JS1\_N06\_02473" 21403 "s59E13H2" 2.611863 "NTE family protein RssA"  
"JS1\_N06\_02473" 21403 "s59E25H2" 0 "NTE family protein RssA"  
"JS1\_N06\_02473" 21403 "s59E5H2" 0.1615984 "NTE family protein RssA"  
"JS1\_N06\_02473" 21403 "s63E6H2" 1.195372 "NTE family protein RssA"  
"JS1\_N06\_02474" 21404 "s59E13H2" 1.052173 "Isochorismatase"  
"JS1\_N06\_02474" 21404 "s59E25H2" 0 "Isochorismatase"  
"JS1\_N06\_02474" 21404 "s59E5H2" 0.2253804 "Isochorismatase"  
"JS1\_N06\_02474" 21404 "s63E6H2" 0.9889676 "Isochorismatase"  
"JS1\_N06\_02475" 21405 "s59E13H2" 9.717447 "Fluoroacetyl-CoA thioesterase"  
"JS1\_N06\_02475" 21405 "s59E25H2" 0 "Fluoroacetyl-CoA thioesterase"  
"JS1\_N06\_02475" 21405 "s59E5H2" 0.6522404 "Fluoroacetyl-CoA thioesterase"  
"JS1\_N06\_02475" 21405 "s63E6H2" 1.286331 "Fluoroacetyl-CoA thioesterase"  
"JS1\_N06\_02478" 21408 "s59E13H2" 0 "Ribonuclease 3"  
"JS1\_N06\_02478" 21408 "s59E25H2" 0 "Ribonuclease 3"  
"JS1\_N06\_02478" 21408 "s59E5H2" 0 "Ribonuclease 3"  
"JS1\_N06\_02478" 21408 "s63E6H2" 0.02860497 "Ribonuclease 3"  
"JS1\_N06\_02479" 21409 "s59E13H2" 0 "hypothetical protein"  
"JS1\_N06\_02479" 21409 "s59E25H2" 0 "hypothetical protein"  
"JS1\_N06\_02479" 21409 "s59E5H2" 0 "hypothetical protein"  
"JS1\_N06\_02479" 21409 "s63E6H2" 0 "hypothetical protein"  
"JS1\_N06\_02480" 21410 "s59E13H2" 0 "V-type sodium ATPase subunit C"  
"JS1\_N06\_02480" 21410 "s59E25H2" 0 "V-type sodium ATPase subunit C"  
"JS1\_N06\_02480" 21410 "s59E5H2" 0 "V-type sodium ATPase subunit C"  
"JS1\_N06\_02480" 21410 "s63E6H2" 0 "V-type sodium ATPase subunit C"  
"JS1\_N06\_02484" 21414 "s59E13H2" 0 "hypothetical protein"  
"JS1\_N06\_02484" 21414 "s59E25H2" 0 "hypothetical protein"  
"JS1\_N06\_02484" 21414 "s59E5H2" 0 "hypothetical protein"  
"JS1\_N06\_02484" 21414 "s63E6H2" 0.01152969 "hypothetical protein"  
"JS1\_N06\_02489" 21419 "s59E13H2" 0.1059205 "Elongation factor G"  
"JS1\_N06\_02489" 21419 "s59E25H2" 0 "Elongation factor G"  
"JS1\_N06\_02489" 21419 "s59E5H2" 0.05917849 "Elongation factor G"  
"JS1\_N06\_02489" 21419 "s63E6H2" 0.1365907 "Elongation factor G"  
"JS1\_N06\_02490" 21420 "s59E13H2" 0 "Endonuclease MutS2"  
"JS1\_N06\_02490" 21420 "s59E25H2" 0 "Endonuclease MutS2"  
"JS1\_N06\_02490" 21420 "s59E5H2" 0 "Endonuclease MutS2"  
"JS1\_N06\_02490" 21420 "s63E6H2" 0 "Endonuclease MutS2"  
"JS1\_N06\_02500" 21430 "s59E13H2" 0.04498552 "hypothetical protein"

"JS1\_N06\_02500" 21430 "s59E25H2" 0 "hypothetical protein"  
"JS1\_N06\_02500" 21430 "s59E5H2" 0.1900843 "hypothetical protein"  
"JS1\_N06\_02500" 21430 "s63E6H2" 0.07179351 "hypothetical protein"  
"JS1\_N06\_02506" 21436 "s59E13H2" 0.04000219 "Phosphopantetheine adenyltransferase"  
"JS1\_N06\_02506" 21436 "s59E25H2" 0 "Phosphopantetheine adenyltransferase"  
"JS1\_N06\_02506" 21436 "s59E5H2" 0.008737492 "Phosphopantetheine adenyltransferase"  
"JS1\_N06\_02506" 21436 "s63E6H2" 0.01572457 "Phosphopantetheine adenyltransferase"  
"JS1\_N06\_02507" 21437 "s59E13H2" 0.01439491 "Nucleoside triphosphate pyrophosphohydrolase/pyrophosphatase MazG"  
"JS1\_N06\_02507" 21437 "s59E25H2" 0 "Nucleoside triphosphate pyrophosphohydrolase/pyrophosphatase MazG"  
"JS1\_N06\_02507" 21437 "s59E5H2" 0.1523981 "Nucleoside triphosphate pyrophosphohydrolase/pyrophosphatase MazG"  
"JS1\_N06\_02507" 21437 "s63E6H2" 0.2819799 "Nucleoside triphosphate pyrophosphohydrolase/pyrophosphatase MazG"  
"JS1\_N06\_02508" 21438 "s59E13H2" 0.08620415 "hypothetical protein"  
"JS1\_N06\_02508" 21438 "s59E25H2" 0 "hypothetical protein"  
"JS1\_N06\_02508" 21438 "s59E5H2" 0.06088666 "hypothetical protein"  
"JS1\_N06\_02508" 21438 "s63E6H2" 0.1438765 "hypothetical protein"  
"JS1\_N06\_02509" 21439 "s59E13H2" 0.04107754 "NTE family protein RssA"  
"JS1\_N06\_02509" 21439 "s59E25H2" 0 "NTE family protein RssA"  
"JS1\_N06\_02509" 21439 "s59E5H2" 0.1345951 "NTE family protein RssA"  
"JS1\_N06\_02509" 21439 "s63E6H2" 0.2652581 "NTE family protein RssA"  
"JS1\_N06\_02514" 21444 "s59E13H2" 0 "hypothetical protein"  
"JS1\_N06\_02514" 21444 "s59E25H2" 0 "hypothetical protein"  
"JS1\_N06\_02514" 21444 "s59E5H2" 0 "hypothetical protein"  
"JS1\_N06\_02514" 21444 "s63E6H2" 0 "hypothetical protein"  
"JS1\_N06\_02515" 21445 "s59E13H2" 0.01825843 "cell division protein FtsB"  
"JS1\_N06\_02515" 21445 "s59E25H2" 0 "cell division protein FtsB"  
"JS1\_N06\_02515" 21445 "s59E5H2" 0.2488614 "cell division protein FtsB"  
"JS1\_N06\_02515" 21445 "s63E6H2" 0.320197 "cell division protein FtsB"  
"JS1\_N06\_02516" 21446 "s59E13H2" 0.007232513 "Enolase"  
"JS1\_N06\_02516" 21446 "s59E25H2" 0 "Enolase"  
"JS1\_N06\_02516" 21446 "s59E5H2" 0.3100858 "Enolase"  
"JS1\_N06\_02516" 21446 "s63E6H2" 0.4401719 "Enolase"  
"JS1\_N06\_02517" 21447 "s59E13H2" 0.030207 "Magnesium transporter MgtE"  
"JS1\_N06\_02517" 21447 "s59E25H2" 0 "Magnesium transporter MgtE"  
"JS1\_N06\_02517" 21447 "s59E5H2" 0.3166384 "Magnesium transporter MgtE"  
"JS1\_N06\_02517" 21447 "s63E6H2" 0.2531526 "Magnesium transporter MgtE"  
"JS1\_N06\_02518" 21448 "s59E13H2" 0 "S4 domain protein"  
"JS1\_N06\_02518" 21448 "s59E25H2" 0 "S4 domain protein"  
"JS1\_N06\_02518" 21448 "s59E5H2" 0.01493665 "S4 domain protein"  
"JS1\_N06\_02518" 21448 "s63E6H2" 0.0185794 "S4 domain protein"  
"JS1\_N06\_02519" 21449 "s59E13H2" 0.03910526 "Lysine--tRNA ligase"  
"JS1\_N06\_02519" 21449 "s59E25H2" 0 "Lysine--tRNA ligase"  
"JS1\_N06\_02519" 21449 "s59E5H2" 0.1914888 "Lysine--tRNA ligase"  
"JS1\_N06\_02519" 21449 "s63E6H2" 0.1736864 "Lysine--tRNA ligase"  
"JS1\_N06\_02520" 21450 "s59E13H2" 0.01353786 "Transcription elongation factor GreA"  
"JS1\_N06\_02520" 21450 "s59E25H2" 0 "Transcription elongation factor GreA"  
"JS1\_N06\_02520" 21450 "s59E5H2" 0.06603762 "Transcription elongation factor GreA"  
"JS1\_N06\_02520" 21450 "s63E6H2" 0.07305451 "Transcription elongation factor GreA"

"JS1\_N06\_02521" 21451 "s59E13H2" 0.004274974 "Putative pyridoxal phosphate-dependent acyltransferase"  
"JS1\_N06\_02521" 21451 "s59E25H2" 0 "Putative pyridoxal phosphate-dependent acyltransferase"  
"JS1\_N06\_02521" 21451 "s59E5H2" 0.04841741 "Putative pyridoxal phosphate-dependent acyltransferase"  
"JS1\_N06\_02521" 21451 "s63E6H2" 0.1671779 "Putative pyridoxal phosphate-dependent acyltransferase"  
"JS1\_N06\_02522" 21452 "s59E13H2" 0.02196503 "hypothetical protein"  
"JS1\_N06\_02522" 21452 "s59E25H2" 0 "hypothetical protein"  
"JS1\_N06\_02522" 21452 "s59E5H2" 0.06994746 "hypothetical protein"  
"JS1\_N06\_02522" 21452 "s63E6H2" 0.07327144 "hypothetical protein"  
"JS1\_N06\_02526" 21456 "s59E13H2" 0.003946812 "Threonine--tRNA ligase"  
"JS1\_N06\_02526" 21456 "s59E25H2" 0 "Threonine--tRNA ligase"  
"JS1\_N06\_02526" 21456 "s59E5H2" 0.0571742 "Threonine--tRNA ligase"  
"JS1\_N06\_02526" 21456 "s63E6H2" 0.03499072 "Threonine--tRNA ligase"  
"JS1\_N06\_02527" 21457 "s59E13H2" 0 "hypothetical protein"  
"JS1\_N06\_02527" 21457 "s59E25H2" 0 "hypothetical protein"  
"JS1\_N06\_02527" 21457 "s59E5H2" 0 "hypothetical protein"  
"JS1\_N06\_02527" 21457 "s63E6H2" 0.004612345 "hypothetical protein"  
"JS1\_N06\_02528" 21458 "s59E13H2" 0 "hypothetical protein"  
"JS1\_N06\_02528" 21458 "s59E25H2" 0 "hypothetical protein"  
"JS1\_N06\_02528" 21458 "s59E5H2" 0 "hypothetical protein"  
"JS1\_N06\_02528" 21458 "s63E6H2" 8.494017e-05 "hypothetical protein"  
"JS1\_N06\_02531" 21461 "s59E13H2" 0.2248653 "4-hydroxy-3-methylbut-2-enyl diphosphate reductase"  
"JS1\_N06\_02531" 21461 "s59E25H2" 0 "4-hydroxy-3-methylbut-2-enyl diphosphate reductase"  
"JS1\_N06\_02531" 21461 "s59E5H2" 0.02056488 "4-hydroxy-3-methylbut-2-enyl diphosphate reductase"  
"JS1\_N06\_02531" 21461 "s63E6H2" 0.002758196 "4-hydroxy-3-methylbut-2-enyl diphosphate reductase"  
"JS1\_N06\_02538" 21468 "s59E13H2" 0.09207348 "Anaerobic ribonucleoside-triphosphate reductase"  
"JS1\_N06\_02538" 21468 "s59E25H2" 0 "Anaerobic ribonucleoside-triphosphate reductase"  
"JS1\_N06\_02538" 21468 "s59E5H2" 0.4174638 "Anaerobic ribonucleoside-triphosphate reductase"  
"JS1\_N06\_02538" 21468 "s63E6H2" 0.694091 "Anaerobic ribonucleoside-triphosphate reductase"  
"JS1\_N06\_02539" 21469 "s59E13H2" 0.3370871 "hypothetical protein"  
"JS1\_N06\_02539" 21469 "s59E25H2" 0 "hypothetical protein"  
"JS1\_N06\_02539" 21469 "s59E5H2" 0.6352456 "hypothetical protein"  
"JS1\_N06\_02539" 21469 "s63E6H2" 0.6797599 "hypothetical protein"  
"JS1\_N06\_02540" 21470 "s59E13H2" 0.2576113 "molybdenum cofactor biosynthesis protein A"  
"JS1\_N06\_02540" 21470 "s59E25H2" 0 "molybdenum cofactor biosynthesis protein A"  
"JS1\_N06\_02540" 21470 "s59E5H2" 0.0487036 "molybdenum cofactor biosynthesis protein A"  
"JS1\_N06\_02540" 21470 "s63E6H2" 0.4818029 "molybdenum cofactor biosynthesis protein A"  
"JS1\_N06\_02542" 21472 "s59E13H2" 0.0123235 "Laccase domain protein"  
"JS1\_N06\_02542" 21472 "s59E25H2" 0 "Laccase domain protein"  
"JS1\_N06\_02542" 21472 "s59E5H2" 0.1466692 "Laccase domain protein"  
"JS1\_N06\_02542" 21472 "s63E6H2" 0.2100218 "Laccase domain protein"  
"JS1\_N06\_02543" 21473 "s59E13H2" 0.02329896 "Hydrogen cyanide synthase subunit HcnA"  
"JS1\_N06\_02543" 21473 "s59E25H2" 0 "Hydrogen cyanide synthase subunit HcnA"  
"JS1\_N06\_02543" 21473 "s59E5H2" 0.09425056 "Hydrogen cyanide synthase subunit HcnA"  
"JS1\_N06\_02543" 21473 "s63E6H2" 0.1319166 "Hydrogen cyanide synthase subunit HcnA"  
"JS1\_N06\_02544" 21474 "s59E13H2" 0.08715654 "Hydrogen cyanide synthase subunit HcnB"  
"JS1\_N06\_02544" 21474 "s59E25H2" 0 "Hydrogen cyanide synthase subunit HcnB"  
"JS1\_N06\_02544" 21474 "s59E5H2" 0.1011724 "Hydrogen cyanide synthase subunit HcnB"



"JS1\_N06\_02544" 21474 "s63E6H2" 0.7266987 "Hydrogen cyanide synthase subunit HcnB"  
"JS1\_N06\_02545" 21475 "s59E13H2" 0.02498706 "ferredoxin"  
"JS1\_N06\_02545" 21475 "s59E25H2" 0 "ferredoxin"  
"JS1\_N06\_02545" 21475 "s59E5H2" 0.08030993 "ferredoxin"  
"JS1\_N06\_02545" 21475 "s63E6H2" 0.7981814 "ferredoxin"  
"JS1\_N06\_02546" 21476 "s59E13H2" 0.00466254 "Hydrogen cyanide synthase subunit HcnB"  
"JS1\_N06\_02546" 21476 "s59E25H2" 0 "Hydrogen cyanide synthase subunit HcnB"  
"JS1\_N06\_02546" 21476 "s59E5H2" 0.09406368 "Hydrogen cyanide synthase subunit HcnB"  
"JS1\_N06\_02546" 21476 "s63E6H2" 0.6811031 "Hydrogen cyanide synthase subunit HcnB"  
"JS1\_N06\_02547" 21477 "s59E13H2" 0 "Sarcosine oxidase subunit beta"  
"JS1\_N06\_02547" 21477 "s59E25H2" 0 "Sarcosine oxidase subunit beta"  
"JS1\_N06\_02547" 21477 "s59E5H2" 0.01523563 "Sarcosine oxidase subunit beta"  
"JS1\_N06\_02547" 21477 "s63E6H2" 0.2487257 "Sarcosine oxidase subunit beta"  
"JS1\_N06\_02548" 21478 "s59E13H2" 0.05445865 "Leucine-specific-binding protein precursor"  
"JS1\_N06\_02548" 21478 "s59E25H2" 0 "Leucine-specific-binding protein precursor"  
"JS1\_N06\_02548" 21478 "s59E5H2" 0.1047164 "Leucine-specific-binding protein precursor"  
"JS1\_N06\_02548" 21478 "s63E6H2" 1.890263 "Leucine-specific-binding protein precursor"  
"JS1\_N06\_02549" 21479 "s59E13H2" 0.04782733 "High-affinity branched-chain amino acid transport system permease protein LivH"  
"JS1\_N06\_02549" 21479 "s59E25H2" 0 "High-affinity branched-chain amino acid transport system permease protein LivH"  
"JS1\_N06\_02549" 21479 "s59E5H2" 0.4707269 "High-affinity branched-chain amino acid transport system permease protein LivH"  
"JS1\_N06\_02549" 21479 "s63E6H2" 1.863995 "High-affinity branched-chain amino acid transport system permease protein LivH"  
"JS1\_N06\_02550" 21480 "s59E13H2" 0.07956112 "leucine/isoleucine/valine transporter permease subunit"  
"JS1\_N06\_02550" 21480 "s59E25H2" 0 "leucine/isoleucine/valine transporter permease subunit"  
"JS1\_N06\_02550" 21480 "s59E5H2" 0.6249063 "leucine/isoleucine/valine transporter permease subunit"  
"JS1\_N06\_02550" 21480 "s63E6H2" 1.005182 "leucine/isoleucine/valine transporter permease subunit"  
"JS1\_N06\_02551" 21481 "s59E13H2" 0.3561165 "putative branched-chain amino acid transport ATP-binding protein LivG"  
"JS1\_N06\_02551" 21481 "s59E25H2" 0 "putative branched-chain amino acid transport ATP-binding protein LivG"  
"JS1\_N06\_02551" 21481 "s59E5H2" 0.7821682 "putative branched-chain amino acid transport ATP-binding protein LivG"  
"JS1\_N06\_02551" 21481 "s63E6H2" 1.244285 "putative branched-chain amino acid transport ATP-binding protein LivG"  
"JS1\_N06\_02552" 21482 "s59E13H2" 0.4913118 "High-affinity branched-chain amino acid transport ATP-binding protein LivF"  
"JS1\_N06\_02552" 21482 "s59E25H2" 0 "High-affinity branched-chain amino acid transport ATP-binding protein LivF"  
"JS1\_N06\_02552" 21482 "s59E5H2" 1.008159 "High-affinity branched-chain amino acid transport ATP-binding protein LivF"  
"JS1\_N06\_02552" 21482 "s63E6H2" 1.523455 "High-affinity branched-chain amino acid transport ATP-binding protein LivF"  
"JS1\_N06\_02553" 21483 "s59E13H2" 0.1138308 "hypothetical protein"  
"JS1\_N06\_02553" 21483 "s59E25H2" 0 "hypothetical protein"  
"JS1\_N06\_02553" 21483 "s59E5H2" 0.4701874 "hypothetical protein"  
"JS1\_N06\_02553" 21483 "s63E6H2" 0.636998 "hypothetical protein"  
"JS1\_N06\_02554" 21484 "s59E13H2" 0.09945384 "hypothetical protein"  
"JS1\_N06\_02554" 21484 "s59E25H2" 0 "hypothetical protein"  
"JS1\_N06\_02554" 21484 "s59E5H2" 0.1066151 "hypothetical protein"  
"JS1\_N06\_02554" 21484 "s63E6H2" 0.8944874 "hypothetical protein"  
"JS1\_N06\_02555" 21485 "s59E13H2" 0.1389335 "YGGT family protein"  
"JS1\_N06\_02555" 21485 "s59E25H2" 0 "YGGT family protein"  
"JS1\_N06\_02555" 21485 "s59E5H2" 0.3802136 "YGGT family protein"  
"JS1\_N06\_02555" 21485 "s63E6H2" 0.9123091 "YGGT family protein"  
"JS1\_N06\_02556" 21486 "s59E13H2" 0.1434475 "Septum site-determining protein DivIVA"  
"JS1\_N06\_02556" 21486 "s59E25H2" 0 "Septum site-determining protein DivIVA"

"JS1\_N06\_02556" 21486 "s59E5H2" 0.3530915 "Septum site-determining protein DivIVA"  
"JS1\_N06\_02556" 21486 "s63E6H2" 0.6679214 "Septum site-determining protein DivIVA"  
"JS1\_N06\_02557" 21487 "s59E13H2" 0 "hypothetical protein"  
"JS1\_N06\_02557" 21487 "s59E25H2" 0 "hypothetical protein"  
"JS1\_N06\_02557" 21487 "s59E5H2" 0 "hypothetical protein"  
"JS1\_N06\_02557" 21487 "s63E6H2" 0.4776275 "hypothetical protein"  
"JS1\_N06\_02559" 21489 "s59E13H2" 0.4207676 "Isoleucine--tRNA ligase"  
"JS1\_N06\_02559" 21489 "s59E25H2" 0 "Isoleucine--tRNA ligase"  
"JS1\_N06\_02559" 21489 "s59E5H2" 1.830201 "Isoleucine--tRNA ligase"  
"JS1\_N06\_02559" 21489 "s63E6H2" 1.486312 "Isoleucine--tRNA ligase"  
"JS1\_N06\_02560" 21490 "s59E13H2" 0.4799487 "Lipoprotein signal peptidase"  
"JS1\_N06\_02560" 21490 "s59E25H2" 0.1325967 "Lipoprotein signal peptidase"  
"JS1\_N06\_02560" 21490 "s59E5H2" 0.3896787 "Lipoprotein signal peptidase"  
"JS1\_N06\_02560" 21490 "s63E6H2" 0.5802755 "Lipoprotein signal peptidase"  
"JS1\_N06\_02561" 21491 "s59E13H2" 0 "Prolipoprotein diacylglyceryl transferase"  
"JS1\_N06\_02561" 21491 "s59E25H2" 0 "Prolipoprotein diacylglyceryl transferase"  
"JS1\_N06\_02561" 21491 "s59E5H2" 0.006035025 "Prolipoprotein diacylglyceryl transferase"  
"JS1\_N06\_02561" 21491 "s63E6H2" 0.1331601 "Prolipoprotein diacylglyceryl transferase"  
"JS1\_N06\_02562" 21492 "s59E13H2" 0.01208628 "Ribosomal large subunit pseudouridine synthase D"  
"JS1\_N06\_02562" 21492 "s59E25H2" 0 "Ribosomal large subunit pseudouridine synthase D"  
"JS1\_N06\_02562" 21492 "s59E5H2" 0.06416708 "Ribosomal large subunit pseudouridine synthase D"  
"JS1\_N06\_02562" 21492 "s63E6H2" 0.6756444 "Ribosomal large subunit pseudouridine synthase D"  
"JS1\_N06\_02563" 21493 "s59E13H2" 0.03867507 "hypothetical protein"  
"JS1\_N06\_02563" 21493 "s59E25H2" 0 "hypothetical protein"  
"JS1\_N06\_02563" 21493 "s59E5H2" 0.1671144 "hypothetical protein"  
"JS1\_N06\_02563" 21493 "s63E6H2" 0.7728724 "hypothetical protein"  
"JS1\_N06\_02564" 21494 "s59E13H2" 0.002012614 "hypothetical protein"  
"JS1\_N06\_02564" 21494 "s59E25H2" 0 "hypothetical protein"  
"JS1\_N06\_02564" 21494 "s59E5H2" 0.003752716 "hypothetical protein"  
"JS1\_N06\_02564" 21494 "s63E6H2" 0.1256598 "hypothetical protein"  
"JS1\_N06\_02565" 21495 "s59E13H2" 0 "hypothetical protein"  
"JS1\_N06\_02565" 21495 "s59E25H2" 0 "hypothetical protein"  
"JS1\_N06\_02565" 21495 "s59E5H2" 0.01201508 "hypothetical protein"  
"JS1\_N06\_02565" 21495 "s63E6H2" 0.0927415 "hypothetical protein"  
"JS1\_N06\_02566" 21496 "s59E13H2" 0 "Guanylate kinase"  
"JS1\_N06\_02566" 21496 "s59E25H2" 0 "Guanylate kinase"  
"JS1\_N06\_02566" 21496 "s59E5H2" 0.01789736 "Guanylate kinase"  
"JS1\_N06\_02566" 21496 "s63E6H2" 0.07915161 "Guanylate kinase"  
"JS1\_N06\_02567" 21497 "s59E13H2" 0 "DNA-directed RNA polymerase subunit omega"  
"JS1\_N06\_02567" 21497 "s59E25H2" 0 "DNA-directed RNA polymerase subunit omega"  
"JS1\_N06\_02567" 21497 "s59E5H2" 0.005014829 "DNA-directed RNA polymerase subunit omega"  
"JS1\_N06\_02567" 21497 "s63E6H2" 0.02652191 "DNA-directed RNA polymerase subunit omega"  
"JS1\_N06\_02568" 21498 "s59E13H2" 0.002609804 "Coenzyme A biosynthesis bifunctional protein CoaBC"  
"JS1\_N06\_02568" 21498 "s59E25H2" 0.05862647 "Coenzyme A biosynthesis bifunctional protein CoaBC"  
"JS1\_N06\_02568" 21498 "s59E5H2" 0.06450749 "Coenzyme A biosynthesis bifunctional protein CoaBC"  
"JS1\_N06\_02568" 21498 "s63E6H2" 0.0907973 "Coenzyme A biosynthesis bifunctional protein CoaBC"  
"JS1\_N06\_02569" 21499 "s59E13H2" 0.09276804 "Primosomal protein N"

"JS1\_N06\_02569" 21499 "s59E25H2" 0.3000963 "Primosomal protein N"  
"JS1\_N06\_02569" 21499 "s59E5H2" 0.5284509 "Primosomal protein N"  
"JS1\_N06\_02569" 21499 "s63E6H2" 2.477135 "Primosomal protein N"  
"JS1\_N06\_02570" 21500 "s59E13H2" 0 "Peptide deformylase 1"  
"JS1\_N06\_02570" 21500 "s59E25H2" 0 "Peptide deformylase 1"  
"JS1\_N06\_02570" 21500 "s59E5H2" 0 "Peptide deformylase 1"  
"JS1\_N06\_02570" 21500 "s63E6H2" 2.813522 "Peptide deformylase 1"  
"JS1\_N06\_02571" 21501 "s59E13H2" 0.008479611 "Methionyl-tRNA formyltransferase"  
"JS1\_N06\_02571" 21501 "s59E25H2" 0 "Methionyl-tRNA formyltransferase"  
"JS1\_N06\_02571" 21501 "s59E5H2" 0.005033549 "Methionyl-tRNA formyltransferase"  
"JS1\_N06\_02571" 21501 "s63E6H2" 2.749316 "Methionyl-tRNA formyltransferase"  
"JS1\_N06\_02572" 21502 "s59E13H2" 0.02228252 "Putative neutral zinc metallopeptidase"  
"JS1\_N06\_02572" 21502 "s59E25H2" 0.3185841 "Putative neutral zinc metallopeptidase"  
"JS1\_N06\_02572" 21502 "s59E5H2" 0.1482967 "Putative neutral zinc metallopeptidase"  
"JS1\_N06\_02572" 21502 "s63E6H2" 4.177602 "Putative neutral zinc metallopeptidase"  
"JS1\_N06\_02573" 21503 "s59E13H2" 0.004632065 "Ribosomal RNA small subunit methyltransferase B"  
"JS1\_N06\_02573" 21503 "s59E25H2" 0.1795977 "Ribosomal RNA small subunit methyltransferase B"  
"JS1\_N06\_02573" 21503 "s59E5H2" 0.008874526 "Ribosomal RNA small subunit methyltransferase B"  
"JS1\_N06\_02573" 21503 "s63E6H2" 3.595935 "Ribosomal RNA small subunit methyltransferase B"  
"JS1\_N06\_02574" 21504 "s59E13H2" 0 "Serine/threonine-protein kinase PK-1"  
"JS1\_N06\_02574" 21504 "s59E25H2" 0.2820513 "Serine/threonine-protein kinase PK-1"  
"JS1\_N06\_02574" 21504 "s59E5H2" 0 "Serine/threonine-protein kinase PK-1"  
"JS1\_N06\_02574" 21504 "s63E6H2" 2.650203 "Serine/threonine-protein kinase PK-1"  
"JS1\_N06\_02575" 21505 "s59E13H2" 0.2100298 "hypothetical protein"  
"JS1\_N06\_02575" 21505 "s59E25H2" 0 "hypothetical protein"  
"JS1\_N06\_02575" 21505 "s59E5H2" 0.6182753 "hypothetical protein"  
"JS1\_N06\_02575" 21505 "s63E6H2" 2.688641 "hypothetical protein"  
"JS1\_N06\_02576" 21506 "s59E13H2" 0.2562475 "hypothetical protein"  
"JS1\_N06\_02576" 21506 "s59E25H2" 0 "hypothetical protein"  
"JS1\_N06\_02576" 21506 "s59E5H2" 0.2695517 "hypothetical protein"  
"JS1\_N06\_02576" 21506 "s63E6H2" 0.0152101 "hypothetical protein"  
"JS1\_N06\_02577" 21507 "s59E13H2" 0.01434398 "Helix-turn-helix"  
"JS1\_N06\_02577" 21507 "s59E25H2" 0 "Helix-turn-helix"  
"JS1\_N06\_02577" 21507 "s59E5H2" 0.01628378 "Helix-turn-helix"  
"JS1\_N06\_02577" 21507 "s63E6H2" 0 "Helix-turn-helix"  
"JS1\_N06\_02578" 21508 "s59E13H2" 0.02611341 "Replicative DNA helicase"  
"JS1\_N06\_02578" 21508 "s59E25H2" 0 "Replicative DNA helicase"  
"JS1\_N06\_02578" 21508 "s59E5H2" 0.01801304 "Replicative DNA helicase"  
"JS1\_N06\_02578" 21508 "s63E6H2" 0.0006659629 "Replicative DNA helicase"  
"JS1\_N06\_02579" 21509 "s59E13H2" 0.003930193 "hypothetical protein"  
"JS1\_N06\_02579" 21509 "s59E25H2" 0 "hypothetical protein"  
"JS1\_N06\_02579" 21509 "s59E5H2" 0.00780931 "hypothetical protein"  
"JS1\_N06\_02579" 21509 "s63E6H2" 0.004411192 "hypothetical protein"  
"JS1\_N06\_02582" 21512 "s59E13H2" 0 "hypothetical protein"  
"JS1\_N06\_02582" 21512 "s59E25H2" 0 "hypothetical protein"  
"JS1\_N06\_02582" 21512 "s59E5H2" 0 "hypothetical protein"  
"JS1\_N06\_02582" 21512 "s63E6H2" 0.001691568 "hypothetical protein"

"JS1\_N06\_02583" 21513 "s59E13H2" 0.009837876 "tetratricopeptide repeat protein"  
"JS1\_N06\_02583" 21513 "s59E25H2" 0 "tetratricopeptide repeat protein"  
"JS1\_N06\_02583" 21513 "s59E5H2" 0.2827245 "tetratricopeptide repeat protein"  
"JS1\_N06\_02583" 21513 "s63E6H2" 0.05687189 "tetratricopeptide repeat protein"  
"JS1\_N06\_02584" 21514 "s59E13H2" 0.5444179 "Transposase IS116/IS110/IS902 family protein"  
"JS1\_N06\_02584" 21514 "s59E25H2" 0 "Transposase IS116/IS110/IS902 family protein"  
"JS1\_N06\_02584" 21514 "s59E5H2" 1.315328 "Transposase IS116/IS110/IS902 family protein"  
"JS1\_N06\_02584" 21514 "s63E6H2" 1.194671 "Transposase IS116/IS110/IS902 family protein"  
"JS1\_N06\_02585" 21515 "s59E13H2" 0.3697467 "Alpha-monoglucosyldiacylglycerol synthase"  
"JS1\_N06\_02585" 21515 "s59E25H2" 0 "Alpha-monoglucosyldiacylglycerol synthase"  
"JS1\_N06\_02585" 21515 "s59E5H2" 0.594247 "Alpha-monoglucosyldiacylglycerol synthase"  
"JS1\_N06\_02585" 21515 "s63E6H2" 0.2630483 "Alpha-monoglucosyldiacylglycerol synthase"  
"JS1\_N06\_02586" 21516 "s59E13H2" 0.7248976 "hypothetical protein"  
"JS1\_N06\_02586" 21516 "s59E25H2" 0 "hypothetical protein"  
"JS1\_N06\_02586" 21516 "s59E5H2" 0.8995202 "hypothetical protein"  
"JS1\_N06\_02586" 21516 "s63E6H2" 0.2416214 "hypothetical protein"  
"JS1\_N06\_02589" 21519 "s59E13H2" 0.09681801 "PKD domain protein"  
"JS1\_N06\_02589" 21519 "s59E25H2" 0 "PKD domain protein"  
"JS1\_N06\_02589" 21519 "s59E5H2" 0.007647724 "PKD domain protein"  
"JS1\_N06\_02589" 21519 "s63E6H2" 0.06130694 "PKD domain protein"  
"JS1\_N06\_02594" 21524 "s59E13H2" 0.008878715 "Endonuclease MutS2"  
"JS1\_N06\_02594" 21524 "s59E25H2" 0 "Endonuclease MutS2"  
"JS1\_N06\_02594" 21524 "s59E5H2" 0 "Endonuclease MutS2"  
"JS1\_N06\_02594" 21524 "s63E6H2" 0.01610933 "Endonuclease MutS2"  
"JS1\_N06\_02597" 21527 "s59E13H2" 0.003999805 "hypothetical protein"  
"JS1\_N06\_02597" 21527 "s59E25H2" 0 "hypothetical protein"  
"JS1\_N06\_02597" 21527 "s59E5H2" 0.002275331 "hypothetical protein"  
"JS1\_N06\_02597" 21527 "s63E6H2" 0.1509986 "hypothetical protein"  
"JS1\_N06\_02598" 21528 "s59E13H2" 0 "Response regulator aspartate phosphatase G"  
"JS1\_N06\_02598" 21528 "s59E25H2" 0.2627014 "Response regulator aspartate phosphatase G"  
"JS1\_N06\_02598" 21528 "s59E5H2" 0.02331315 "Response regulator aspartate phosphatase G"  
"JS1\_N06\_02598" 21528 "s63E6H2" 0.2321241 "Response regulator aspartate phosphatase G"  
"JS1\_N06\_02599" 21529 "s59E13H2" 0.131869 "Integrase core domain protein"  
"JS1\_N06\_02599" 21529 "s59E25H2" 0 "Integrase core domain protein"  
"JS1\_N06\_02599" 21529 "s59E5H2" 0.0886624 "Integrase core domain protein"  
"JS1\_N06\_02599" 21529 "s63E6H2" 0.9472035 "Integrase core domain protein"  
"JS1\_N06\_02600" 21530 "s59E13H2" 0 "UDP-glucose 6-dehydrogenase TuaD"  
"JS1\_N06\_02600" 21530 "s59E25H2" 0 "UDP-glucose 6-dehydrogenase TuaD"  
"JS1\_N06\_02600" 21530 "s59E5H2" 0.005706821 "UDP-glucose 6-dehydrogenase TuaD"  
"JS1\_N06\_02600" 21530 "s63E6H2" 0.04681235 "UDP-glucose 6-dehydrogenase TuaD"  
"JS1\_N06\_02601" 21531 "s59E13H2" 0 "dTDP-glucose 4,6-dehydratase"  
"JS1\_N06\_02601" 21531 "s59E25H2" 0 "dTDP-glucose 4,6-dehydratase"  
"JS1\_N06\_02601" 21531 "s59E5H2" 0 "dTDP-glucose 4,6-dehydratase"  
"JS1\_N06\_02601" 21531 "s63E6H2" 0.001271359 "dTDP-glucose 4,6-dehydratase"  
"JS1\_N06\_02603" 21533 "s59E13H2" 0 "Undecaprenyl-phosphate mannosyltransferase"  
"JS1\_N06\_02603" 21533 "s59E25H2" 0 "Undecaprenyl-phosphate mannosyltransferase"  
"JS1\_N06\_02603" 21533 "s59E5H2" 0 "Undecaprenyl-phosphate mannosyltransferase"

"JS1\_N06\_02603" 21533 "s63E6H2" 0 "Undecaprenyl-phosphate mannosyltransferase"  
"JS1\_N06\_02604" 21534 "s59E13H2" 0 "Glycogen synthase"  
"JS1\_N06\_02604" 21534 "s59E25H2" 0 "Glycogen synthase"  
"JS1\_N06\_02604" 21534 "s59E5H2" 0 "Glycogen synthase"  
"JS1\_N06\_02604" 21534 "s63E6H2" 0.3109468 "Glycogen synthase"  
"JS1\_N06\_02605" 21535 "s59E13H2" 0 "GDP-mannose-dependent alpha-(1-6)-phosphatidylinositol monomannoside mannosyltransferase"  
"JS1\_N06\_02605" 21535 "s59E25H2" 0 "GDP-mannose-dependent alpha-(1-6)-phosphatidylinositol monomannoside mannosyltransferase"  
"JS1\_N06\_02605" 21535 "s59E5H2" 0 "GDP-mannose-dependent alpha-(1-6)-phosphatidylinositol monomannoside mannosyltransferase"  
"JS1\_N06\_02605" 21535 "s63E6H2" 0 "GDP-mannose-dependent alpha-(1-6)-phosphatidylinositol monomannoside mannosyltransferase"  
"JS1\_N06\_02606" 21536 "s59E13H2" 0 "Alpha-D-kanosaminytransferase"  
"JS1\_N06\_02606" 21536 "s59E25H2" 0 "Alpha-D-kanosaminytransferase"  
"JS1\_N06\_02606" 21536 "s59E5H2" 0 "Alpha-D-kanosaminytransferase"  
"JS1\_N06\_02606" 21536 "s63E6H2" 0 "Alpha-D-kanosaminytransferase"  
"JS1\_N06\_02607" 21537 "s59E13H2" 0 "Glycosyltransferase AgIE"  
"JS1\_N06\_02607" 21537 "s59E25H2" 0 "Glycosyltransferase AgIE"  
"JS1\_N06\_02607" 21537 "s59E5H2" 0 "Glycosyltransferase AgIE"  
"JS1\_N06\_02607" 21537 "s63E6H2" 0.00235504 "Glycosyltransferase AgIE"  
"JS1\_N06\_02608" 21538 "s59E13H2" 0 "hypothetical protein"  
"JS1\_N06\_02608" 21538 "s59E25H2" 0 "hypothetical protein"  
"JS1\_N06\_02608" 21538 "s59E5H2" 0 "hypothetical protein"  
"JS1\_N06\_02608" 21538 "s63E6H2" 0.001318495 "hypothetical protein"  
"JS1\_N06\_02609" 21539 "s59E13H2" 0 "hypothetical protein"  
"JS1\_N06\_02609" 21539 "s59E25H2" 0 "hypothetical protein"  
"JS1\_N06\_02609" 21539 "s59E5H2" 0 "hypothetical protein"  
"JS1\_N06\_02609" 21539 "s63E6H2" 0.009848449 "hypothetical protein"  
"JS1\_N06\_02611" 21541 "s59E13H2" 0 "hypothetical protein"  
"JS1\_N06\_02611" 21541 "s59E25H2" 0 "hypothetical protein"  
"JS1\_N06\_02611" 21541 "s59E5H2" 0 "hypothetical protein"  
"JS1\_N06\_02611" 21541 "s63E6H2" 0.0003708499 "hypothetical protein"  
"JS1\_N06\_02612" 21542 "s59E13H2" 0 "hypothetical protein"  
"JS1\_N06\_02612" 21542 "s59E25H2" 0 "hypothetical protein"  
"JS1\_N06\_02612" 21542 "s59E5H2" 0 "hypothetical protein"  
"JS1\_N06\_02612" 21542 "s63E6H2" 0 "hypothetical protein"  
"JS1\_N06\_02613" 21543 "s59E13H2" 0 "hypothetical protein"  
"JS1\_N06\_02613" 21543 "s59E25H2" 0 "hypothetical protein"  
"JS1\_N06\_02613" 21543 "s59E5H2" 0 "hypothetical protein"  
"JS1\_N06\_02613" 21543 "s63E6H2" 0 "hypothetical protein"  
"JS1\_N06\_02616" 21546 "s59E13H2" 0 "CobQ/CobB/MinD/ParA nucleotide binding domain protein"  
"JS1\_N06\_02616" 21546 "s59E25H2" 0 "CobQ/CobB/MinD/ParA nucleotide binding domain protein"  
"JS1\_N06\_02616" 21546 "s59E5H2" 0 "CobQ/CobB/MinD/ParA nucleotide binding domain protein"  
"JS1\_N06\_02616" 21546 "s63E6H2" 0 "CobQ/CobB/MinD/ParA nucleotide binding domain protein"  
"JS1\_N06\_02618" 21548 "s59E13H2" 0.02315724 "hypothetical protein"  
"JS1\_N06\_02618" 21548 "s59E25H2" 0 "hypothetical protein"  
"JS1\_N06\_02618" 21548 "s59E5H2" 0.003323471 "hypothetical protein"  
"JS1\_N06\_02618" 21548 "s63E6H2" 0.0116532 "hypothetical protein"  
"JS1\_N06\_02620" 21550 "s59E13H2" 0.008062787 "CTP synthase"  
"JS1\_N06\_02620" 21550 "s59E25H2" 0 "CTP synthase"

"JS1\_N06\_02620" 21550 "s59E5H2" 0.09051231 "CTP synthase"  
"JS1\_N06\_02620" 21550 "s63E6H2" 0.1275932 "CTP synthase"  
"JS1\_N06\_02622" 21552 "s59E13H2" 0.09712342 "Spermidine synthase"  
"JS1\_N06\_02622" 21552 "s59E25H2" 0 "Spermidine synthase"  
"JS1\_N06\_02622" 21552 "s59E5H2" 0.01914364 "Spermidine synthase"  
"JS1\_N06\_02622" 21552 "s63E6H2" 0.1146226 "Spermidine synthase"  
"JS1\_N06\_02623" 21553 "s59E13H2" 0.1398183 "S-adenosylmethionine decarboxylase proenzyme"  
"JS1\_N06\_02623" 21553 "s59E25H2" 0 "S-adenosylmethionine decarboxylase proenzyme"  
"JS1\_N06\_02623" 21553 "s59E5H2" 0.1052918 "S-adenosylmethionine decarboxylase proenzyme"  
"JS1\_N06\_02623" 21553 "s63E6H2" 0.1637767 "S-adenosylmethionine decarboxylase proenzyme"  
"JS1\_N06\_02624" 21554 "s59E13H2" 0.1642387 "S-adenosylmethionine decarboxylase proenzyme precursor"  
"JS1\_N06\_02624" 21554 "s59E25H2" 0 "S-adenosylmethionine decarboxylase proenzyme precursor"  
"JS1\_N06\_02624" 21554 "s59E5H2" 0.02236253 "S-adenosylmethionine decarboxylase proenzyme precursor"  
"JS1\_N06\_02624" 21554 "s63E6H2" 0.173581 "S-adenosylmethionine decarboxylase proenzyme precursor"  
"JS1\_N06\_02625" 21555 "s59E13H2" 0 "Adenylosuccinate lyase"  
"JS1\_N06\_02625" 21555 "s59E25H2" 0 "Adenylosuccinate lyase"  
"JS1\_N06\_02625" 21555 "s59E5H2" 0.05373889 "Adenylosuccinate lyase"  
"JS1\_N06\_02625" 21555 "s63E6H2" 0.06034258 "Adenylosuccinate lyase"  
"JS1\_N06\_02626" 21556 "s59E13H2" 0.006424263 "Adenylosuccinate synthetase"  
"JS1\_N06\_02626" 21556 "s59E25H2" 0 "Adenylosuccinate synthetase"  
"JS1\_N06\_02626" 21556 "s59E5H2" 0.1253657 "Adenylosuccinate synthetase"  
"JS1\_N06\_02626" 21556 "s63E6H2" 0.08346358 "Adenylosuccinate synthetase"  
"JS1\_N06\_02627" 21557 "s59E13H2" 0.253258 "GMP synthase [glutamine-hydrolyzing]"  
"JS1\_N06\_02627" 21557 "s59E25H2" 0 "GMP synthase [glutamine-hydrolyzing]"  
"JS1\_N06\_02627" 21557 "s59E5H2" 0.1150291 "GMP synthase [glutamine-hydrolyzing]"  
"JS1\_N06\_02627" 21557 "s63E6H2" 0.0507313 "GMP synthase [glutamine-hydrolyzing]"  
"JS1\_N06\_02629" 21559 "s59E13H2" 0.08944368 "Formate--tetrahydrofolate ligase"  
"JS1\_N06\_02629" 21559 "s59E25H2" 0 "Formate--tetrahydrofolate ligase"  
"JS1\_N06\_02629" 21559 "s59E5H2" 0.06016863 "Formate--tetrahydrofolate ligase"  
"JS1\_N06\_02629" 21559 "s63E6H2" 0.2089049 "Formate--tetrahydrofolate ligase"  
"JS1\_N06\_02630" 21560 "s59E13H2" 0.0008627092 "Glycine cleavage system H protein"  
"JS1\_N06\_02630" 21560 "s59E25H2" 0 "Glycine cleavage system H protein"  
"JS1\_N06\_02630" 21560 "s59E5H2" 0.01415908 "Glycine cleavage system H protein"  
"JS1\_N06\_02630" 21560 "s63E6H2" 1.166532 "Glycine cleavage system H protein"  
"JS1\_N06\_02631" 21561 "s59E13H2" 0.02939048 "putative glycine dehydrogenase (decarboxylating) subunit 1"  
"JS1\_N06\_02631" 21561 "s59E25H2" 0 "putative glycine dehydrogenase (decarboxylating) subunit 1"  
"JS1\_N06\_02631" 21561 "s59E5H2" 0.09337427 "putative glycine dehydrogenase (decarboxylating) subunit 1"  
"JS1\_N06\_02631" 21561 "s63E6H2" 0.2393946 "putative glycine dehydrogenase (decarboxylating) subunit 1"  
"JS1\_N06\_02632" 21562 "s59E13H2" 4.214891 "putative glycine dehydrogenase (decarboxylating) subunit 2"  
"JS1\_N06\_02632" 21562 "s59E25H2" 0 "putative glycine dehydrogenase (decarboxylating) subunit 2"  
"JS1\_N06\_02632" 21562 "s59E5H2" 0.9250806 "putative glycine dehydrogenase (decarboxylating) subunit 2"  
"JS1\_N06\_02632" 21562 "s63E6H2" 0.235187 "putative glycine dehydrogenase (decarboxylating) subunit 2"  
"JS1\_N06\_02633" 21563 "s59E13H2" 0.5376032 "Aminomethyltransferase"  
"JS1\_N06\_02633" 21563 "s59E25H2" 0 "Aminomethyltransferase"  
"JS1\_N06\_02633" 21563 "s59E5H2" 0.2269499 "Aminomethyltransferase"  
"JS1\_N06\_02633" 21563 "s63E6H2" 0.1523811 "Aminomethyltransferase"  
"JS1\_N06\_02634" 21564 "s59E13H2" 0.003142556 "Amino-acid carrier protein AlsT"

"JS1\_N06\_02634" 21564 "s59E25H2" 0 "Amino-acid carrier protein AlsT"  
"JS1\_N06\_02634" 21564 "s59E5H2" 0 "Amino-acid carrier protein AlsT"  
"JS1\_N06\_02634" 21564 "s63E6H2" 0.405948 "Amino-acid carrier protein AlsT"  
"JS1\_N06\_02635" 21565 "s59E13H2" 3.922817 "60 kDa chaperonin"  
"JS1\_N06\_02635" 21565 "s59E25H2" 0 "60 kDa chaperonin"  
"JS1\_N06\_02635" 21565 "s59E5H2" 0.8505816 "60 kDa chaperonin"  
"JS1\_N06\_02635" 21565 "s63E6H2" 0.3208014 "60 kDa chaperonin"  
"JS1\_N06\_02636" 21566 "s59E13H2" 1.054591 "10 kDa chaperonin"  
"JS1\_N06\_02636" 21566 "s59E25H2" 0 "10 kDa chaperonin"  
"JS1\_N06\_02636" 21566 "s59E5H2" 0.3959159 "10 kDa chaperonin"  
"JS1\_N06\_02636" 21566 "s63E6H2" 0.08507032 "10 kDa chaperonin"  
"JS1\_N06\_02637" 21567 "s59E13H2" 9.479711 "tRNA N6-adenosine threonylcarbamoyltransferase"  
"JS1\_N06\_02637" 21567 "s59E25H2" 0 "tRNA N6-adenosine threonylcarbamoyltransferase"  
"JS1\_N06\_02637" 21567 "s59E5H2" 0.7766577 "tRNA N6-adenosine threonylcarbamoyltransferase"  
"JS1\_N06\_02637" 21567 "s63E6H2" 0.3273605 "tRNA N6-adenosine threonylcarbamoyltransferase"  
"JS1\_N06\_02638" 21568 "s59E13H2" 0.340495 "putative N-acetyltransferase"  
"JS1\_N06\_02638" 21568 "s59E25H2" 0 "putative N-acetyltransferase"  
"JS1\_N06\_02638" 21568 "s59E5H2" 0.01279507 "putative N-acetyltransferase"  
"JS1\_N06\_02638" 21568 "s63E6H2" 0.2212208 "putative N-acetyltransferase"  
"JS1\_N06\_02639" 21569 "s59E13H2" 1.458237 "tRNA threonylcarbamoyladenosine biosynthesis protein TsaB"  
"JS1\_N06\_02639" 21569 "s59E25H2" 0.1082621 "tRNA threonylcarbamoyladenosine biosynthesis protein TsaB"  
"JS1\_N06\_02639" 21569 "s59E5H2" 0.1795299 "tRNA threonylcarbamoyladenosine biosynthesis protein TsaB"  
"JS1\_N06\_02639" 21569 "s63E6H2" 0.03876197 "tRNA threonylcarbamoyladenosine biosynthesis protein TsaB"  
"JS1\_N06\_02640" 21570 "s59E13H2" 7.703909 "tRNA threonylcarbamoyladenosine biosynthesis protein TsaE"  
"JS1\_N06\_02640" 21570 "s59E25H2" 0.9287212 "tRNA threonylcarbamoyladenosine biosynthesis protein TsaE"  
"JS1\_N06\_02640" 21570 "s59E5H2" 0.6198864 "tRNA threonylcarbamoyladenosine biosynthesis protein TsaE"  
"JS1\_N06\_02640" 21570 "s63E6H2" 0.1302395 "tRNA threonylcarbamoyladenosine biosynthesis protein TsaE"  
"JS1\_N06\_02641" 21571 "s59E13H2" 5.184736 "Alanine racemase"  
"JS1\_N06\_02641" 21571 "s59E25H2" 0 "Alanine racemase"  
"JS1\_N06\_02641" 21571 "s59E5H2" 0.3592432 "Alanine racemase"  
"JS1\_N06\_02641" 21571 "s63E6H2" 0.4272879 "Alanine racemase"  
"JS1\_N06\_02642" 21572 "s59E13H2" 1.046448 "Bifunctional NAD(P)H-hydrate repair enzyme Nnr"  
"JS1\_N06\_02642" 21572 "s59E25H2" 0 "Bifunctional NAD(P)H-hydrate repair enzyme Nnr"  
"JS1\_N06\_02642" 21572 "s59E5H2" 0.2833119 "Bifunctional NAD(P)H-hydrate repair enzyme Nnr"  
"JS1\_N06\_02642" 21572 "s63E6H2" 0.5629632 "Bifunctional NAD(P)H-hydrate repair enzyme Nnr"  
"JS1\_N06\_02643" 21573 "s59E13H2" 0.03149635 "Holo-[acyl-carrier-protein] synthase"  
"JS1\_N06\_02643" 21573 "s59E25H2" 0 "Holo-[acyl-carrier-protein] synthase"  
"JS1\_N06\_02643" 21573 "s59E5H2" 0 "Holo-[acyl-carrier-protein] synthase"  
"JS1\_N06\_02643" 21573 "s63E6H2" 0.4804977 "Holo-[acyl-carrier-protein] synthase"  
"JS1\_N06\_02644" 21574 "s59E13H2" 0.2865142 "phage T7 F exclusion suppressor FxsA"  
"JS1\_N06\_02644" 21574 "s59E25H2" 0 "phage T7 F exclusion suppressor FxsA"  
"JS1\_N06\_02644" 21574 "s59E5H2" 0.05686388 "phage T7 F exclusion suppressor FxsA"  
"JS1\_N06\_02644" 21574 "s63E6H2" 0.7081605 "phage T7 F exclusion suppressor FxsA"  
"JS1\_N06\_02645" 21575 "s59E13H2" 0 "Thioesterase superfamily protein"  
"JS1\_N06\_02645" 21575 "s59E25H2" 0 "Thioesterase superfamily protein"  
"JS1\_N06\_02645" 21575 "s59E5H2" 0 "Thioesterase superfamily protein"  
"JS1\_N06\_02645" 21575 "s63E6H2" 0.1323341 "Thioesterase superfamily protein"

"JS1\_N06\_02646" 21576 "s59E13H2" 0.3502414 "L-allo-threonine aldolase"  
"JS1\_N06\_02646" 21576 "s59E25H2" 0 "L-allo-threonine aldolase"  
"JS1\_N06\_02646" 21576 "s59E5H2" 0.2212568 "L-allo-threonine aldolase"  
"JS1\_N06\_02646" 21576 "s63E6H2" 0.2387203 "L-allo-threonine aldolase"  
"JS1\_N06\_02647" 21577 "s59E13H2" 0.01395829 "Glutamine synthetase"  
"JS1\_N06\_02647" 21577 "s59E25H2" 0 "Glutamine synthetase"  
"JS1\_N06\_02647" 21577 "s59E5H2" 0.06044329 "Glutamine synthetase"  
"JS1\_N06\_02647" 21577 "s63E6H2" 1.556211 "Glutamine synthetase"  
"JS1\_N06\_02648" 21578 "s59E13H2" 0.003770463 "Glutamine--fructose-6-phosphate aminotransferase [isomerizing]"  
"JS1\_N06\_02648" 21578 "s59E25H2" 0 "Glutamine--fructose-6-phosphate aminotransferase [isomerizing]"  
"JS1\_N06\_02648" 21578 "s59E5H2" 0.04184044 "Glutamine--fructose-6-phosphate aminotransferase [isomerizing]"  
"JS1\_N06\_02648" 21578 "s63E6H2" 0.4556843 "Glutamine--fructose-6-phosphate aminotransferase [isomerizing]"  
"JS1\_N06\_02650" 21580 "s59E13H2" 0.01148422 "Phosphoglucosamine mutase"  
"JS1\_N06\_02650" 21580 "s59E25H2" 0 "Phosphoglucosamine mutase"  
"JS1\_N06\_02650" 21580 "s59E5H2" 0.00785914 "Phosphoglucosamine mutase"  
"JS1\_N06\_02650" 21580 "s63E6H2" 0.014695 "Phosphoglucosamine mutase"  
"JS1\_N06\_02651" 21581 "s59E13H2" 0.06116342 "YbbR-like protein"  
"JS1\_N06\_02651" 21581 "s59E25H2" 0 "YbbR-like protein"  
"JS1\_N06\_02651" 21581 "s59E5H2" 0.05371888 "YbbR-like protein"  
"JS1\_N06\_02651" 21581 "s63E6H2" 0.3692505 "YbbR-like protein"  
"JS1\_N06\_02652" 21582 "s59E13H2" 0.0821807 "DNA integrity scanning protein DisA"  
"JS1\_N06\_02652" 21582 "s59E25H2" 0 "DNA integrity scanning protein DisA"  
"JS1\_N06\_02652" 21582 "s59E5H2" 0.06310373 "DNA integrity scanning protein DisA"  
"JS1\_N06\_02652" 21582 "s63E6H2" 1.615927 "DNA integrity scanning protein DisA"  
"JS1\_N06\_02653" 21583 "s59E13H2" 0 "Polysaccharide biosynthesis protein"  
"JS1\_N06\_02653" 21583 "s59E25H2" 0 "Polysaccharide biosynthesis protein"  
"JS1\_N06\_02653" 21583 "s59E5H2" 0.00336885 "Polysaccharide biosynthesis protein"  
"JS1\_N06\_02653" 21583 "s63E6H2" 0.00293394 "Polysaccharide biosynthesis protein"  
"JS1\_N06\_02654" 21584 "s59E13H2" 0 "GDP-mannose-dependent alpha-(1-6)-phosphatidylinositol monomannoside mannosyltransferase"  
"JS1\_N06\_02654" 21584 "s59E25H2" 0 "GDP-mannose-dependent alpha-(1-6)-phosphatidylinositol monomannoside mannosyltransferase"  
"JS1\_N06\_02654" 21584 "s59E5H2" 0 "GDP-mannose-dependent alpha-(1-6)-phosphatidylinositol monomannoside mannosyltransferase"  
"JS1\_N06\_02654" 21584 "s63E6H2" 0.001667908 "GDP-mannose-dependent alpha-(1-6)-phosphatidylinositol monomannoside mannosyltransferase"  
"JS1\_N06\_02655" 21585 "s59E13H2" 0 "hypothetical protein"  
"JS1\_N06\_02655" 21585 "s59E25H2" 0 "hypothetical protein"  
"JS1\_N06\_02655" 21585 "s59E5H2" 0 "hypothetical protein"  
"JS1\_N06\_02655" 21585 "s63E6H2" 0.002394872 "hypothetical protein"  
"JS1\_N06\_02658" 21588 "s59E13H2" 0 "hypothetical protein"  
"JS1\_N06\_02658" 21588 "s59E25H2" 0 "hypothetical protein"  
"JS1\_N06\_02658" 21588 "s59E5H2" 0 "hypothetical protein"  
"JS1\_N06\_02658" 21588 "s63E6H2" 0 "hypothetical protein"  
"JS1\_N06\_02659" 21589 "s59E13H2" 0 "hypothetical protein"  
"JS1\_N06\_02659" 21589 "s59E25H2" 0 "hypothetical protein"  
"JS1\_N06\_02659" 21589 "s59E5H2" 0.006878924 "hypothetical protein"  
"JS1\_N06\_02659" 21589 "s63E6H2" 0.0005757474 "hypothetical protein"  
"JS1\_N06\_02660" 21590 "s59E13H2" 0 "hypothetical protein"  
"JS1\_N06\_02660" 21590 "s59E25H2" 0 "hypothetical protein"  
"JS1\_N06\_02660" 21590 "s59E5H2" 0 "hypothetical protein"



"JS1\_N06\_02660" 21590 "s63E6H2" 0.008713648 "hypothetical protein"  
"JS1\_N06\_02662" 21592 "s59E13H2" 0 "hypothetical protein"  
"JS1\_N06\_02662" 21592 "s59E25H2" 0 "hypothetical protein"  
"JS1\_N06\_02662" 21592 "s59E5H2" 0 "hypothetical protein"  
"JS1\_N06\_02662" 21592 "s63E6H2" 0 "hypothetical protein"  
"JS1\_N06\_02663" 21593 "s59E13H2" 0 "hypothetical protein"  
"JS1\_N06\_02663" 21593 "s59E25H2" 0 "hypothetical protein"  
"JS1\_N06\_02663" 21593 "s59E5H2" 0 "hypothetical protein"  
"JS1\_N06\_02663" 21593 "s63E6H2" 0 "hypothetical protein"  
"JS1\_N06\_02666" 21596 "s59E13H2" 0.05929694 "Nucleotidyltransferase domain protein"  
"JS1\_N06\_02666" 21596 "s59E25H2" 0 "Nucleotidyltransferase domain protein"  
"JS1\_N06\_02666" 21596 "s59E5H2" 0.112717 "Nucleotidyltransferase domain protein"  
"JS1\_N06\_02666" 21596 "s63E6H2" 0.3015435 "Nucleotidyltransferase domain protein"  
"JS1\_N06\_02667" 21597 "s59E13H2" 0.05513756 "HEPN domain protein"  
"JS1\_N06\_02667" 21597 "s59E25H2" 0 "HEPN domain protein"  
"JS1\_N06\_02667" 21597 "s59E5H2" 0.1243322 "HEPN domain protein"  
"JS1\_N06\_02667" 21597 "s63E6H2" 0.3501607 "HEPN domain protein"  
"JS1\_N06\_02668" 21598 "s59E13H2" 0 "colicin V production protein"  
"JS1\_N06\_02668" 21598 "s59E25H2" 0 "colicin V production protein"  
"JS1\_N06\_02668" 21598 "s59E5H2" 0 "colicin V production protein"  
"JS1\_N06\_02668" 21598 "s63E6H2" 0 "colicin V production protein"  
"JS1\_N06\_02679" 21609 "s59E13H2" 1.297766 "putative MscS family protein YkuT"  
"JS1\_N06\_02679" 21609 "s59E25H2" 0.5593607 "putative MscS family protein YkuT"  
"JS1\_N06\_02679" 21609 "s59E5H2" 1.230556 "putative MscS family protein YkuT"  
"JS1\_N06\_02679" 21609 "s63E6H2" 5.369463 "putative MscS family protein YkuT"  
"JS1\_N06\_02680" 21610 "s59E13H2" 0.4334341 "Chaperone protein ClpB 1"  
"JS1\_N06\_02680" 21610 "s59E25H2" 0 "Chaperone protein ClpB 1"  
"JS1\_N06\_02680" 21610 "s59E5H2" 0.0549564 "Chaperone protein ClpB 1"  
"JS1\_N06\_02680" 21610 "s63E6H2" 2.760011 "Chaperone protein ClpB 1"  
"JS1\_N06\_02681" 21611 "s59E13H2" 0.5882579 "Histidinol-phosphate aminotransferase 2"  
"JS1\_N06\_02681" 21611 "s59E25H2" 0 "Histidinol-phosphate aminotransferase 2"  
"JS1\_N06\_02681" 21611 "s59E5H2" 0.1175791 "Histidinol-phosphate aminotransferase 2"  
"JS1\_N06\_02681" 21611 "s63E6H2" 1.248914 "Histidinol-phosphate aminotransferase 2"  
"JS1\_N06\_02682" 21612 "s59E13H2" 1.611616 "B3/4 domain protein"  
"JS1\_N06\_02682" 21612 "s59E25H2" 0 "B3/4 domain protein"  
"JS1\_N06\_02682" 21612 "s59E5H2" 0.5080826 "B3/4 domain protein"  
"JS1\_N06\_02682" 21612 "s63E6H2" 1.36183 "B3/4 domain protein"  
"JS1\_N06\_02683" 21613 "s59E13H2" 1.356051 "UvrB/uvrC motif protein"  
"JS1\_N06\_02683" 21613 "s59E25H2" 0 "UvrB/uvrC motif protein"  
"JS1\_N06\_02683" 21613 "s59E5H2" 0.6099357 "UvrB/uvrC motif protein"  
"JS1\_N06\_02683" 21613 "s63E6H2" 1.863406 "UvrB/uvrC motif protein"  
"JS1\_N06\_02684" 21614 "s59E13H2" 1.212779 "putative membrane protein"  
"JS1\_N06\_02684" 21614 "s59E25H2" 0 "putative membrane protein"  
"JS1\_N06\_02684" 21614 "s59E5H2" 0.9805671 "putative membrane protein"  
"JS1\_N06\_02684" 21614 "s63E6H2" 1.575622 "putative membrane protein"  
"JS1\_N06\_02685" 21615 "s59E13H2" 0.2053059 "Glycerophosphoryl diester phosphodiesterase precursor"  
"JS1\_N06\_02685" 21615 "s59E25H2" 0 "Glycerophosphoryl diester phosphodiesterase precursor"

"JS1\_N06\_02685" 21615 "s59E5H2" 0.2500103 "Glycerophosphoryl diester phosphodiesterase precursor"  
"JS1\_N06\_02685" 21615 "s63E6H2" 0.7954631 "Glycerophosphoryl diester phosphodiesterase precursor"  
"JS1\_N06\_02686" 21616 "s59E13H2" 1.397601 "EamA-like transporter family protein"  
"JS1\_N06\_02686" 21616 "s59E25H2" 0 "EamA-like transporter family protein"  
"JS1\_N06\_02686" 21616 "s59E5H2" 0.3101546 "EamA-like transporter family protein"  
"JS1\_N06\_02686" 21616 "s63E6H2" 0.3529213 "EamA-like transporter family protein"  
"JS1\_N06\_02688" 21618 "s59E13H2" 2.308337 "Diaminopimelate decarboxylase"  
"JS1\_N06\_02688" 21618 "s59E25H2" 0 "Diaminopimelate decarboxylase"  
"JS1\_N06\_02688" 21618 "s59E5H2" 1.385279 "Diaminopimelate decarboxylase"  
"JS1\_N06\_02688" 21618 "s63E6H2" 1.450424 "Diaminopimelate decarboxylase"  
"JS1\_N06\_02689" 21619 "s59E13H2" 2.70832 "Aspartokinase"  
"JS1\_N06\_02689" 21619 "s59E25H2" 0.2022654 "Aspartokinase"  
"JS1\_N06\_02689" 21619 "s59E5H2" 2.412636 "Aspartokinase"  
"JS1\_N06\_02689" 21619 "s63E6H2" 1.443315 "Aspartokinase"  
"JS1\_N06\_02690" 21620 "s59E13H2" 0.9614437 "4-hydroxy-tetrahydrodipicolinate synthase"  
"JS1\_N06\_02690" 21620 "s59E25H2" 0 "4-hydroxy-tetrahydrodipicolinate synthase"  
"JS1\_N06\_02690" 21620 "s59E5H2" 2.082429 "4-hydroxy-tetrahydrodipicolinate synthase"  
"JS1\_N06\_02690" 21620 "s63E6H2" 1.272145 "4-hydroxy-tetrahydrodipicolinate synthase"  
"JS1\_N06\_02691" 21621 "s59E13H2" 0.15691 "hypothetical protein"  
"JS1\_N06\_02691" 21621 "s59E25H2" 0 "hypothetical protein"  
"JS1\_N06\_02691" 21621 "s59E5H2" 0.008741621 "hypothetical protein"  
"JS1\_N06\_02691" 21621 "s63E6H2" 0.01889348 "hypothetical protein"  
"JS1\_N06\_02692" 21622 "s59E13H2" 0.008744998 "4-hydroxy-tetrahydrodipicolinate reductase"  
"JS1\_N06\_02692" 21622 "s59E25H2" 0 "4-hydroxy-tetrahydrodipicolinate reductase"  
"JS1\_N06\_02692" 21622 "s59E5H2" 2.682941 "4-hydroxy-tetrahydrodipicolinate reductase"  
"JS1\_N06\_02692" 21622 "s63E6H2" 0.6875567 "4-hydroxy-tetrahydrodipicolinate reductase"  
"JS1\_N06\_02693" 21623 "s59E13H2" 0.4691515 "Diaminopimelate epimerase"  
"JS1\_N06\_02693" 21623 "s59E25H2" 0 "Diaminopimelate epimerase"  
"JS1\_N06\_02693" 21623 "s59E5H2" 0.2246429 "Diaminopimelate epimerase"  
"JS1\_N06\_02693" 21623 "s63E6H2" 0.1793034 "Diaminopimelate epimerase"  
"JS1\_N06\_02694" 21624 "s59E13H2" 0.9369599 "LL-diaminopimelate aminotransferase"  
"JS1\_N06\_02694" 21624 "s59E25H2" 0 "LL-diaminopimelate aminotransferase"  
"JS1\_N06\_02694" 21624 "s59E5H2" 0.2482751 "LL-diaminopimelate aminotransferase"  
"JS1\_N06\_02694" 21624 "s63E6H2" 0.2017233 "LL-diaminopimelate aminotransferase"  
"JS1\_N06\_02696" 21626 "s59E13H2" 0 "Phosphopantetheine adenylyltransferase"  
"JS1\_N06\_02696" 21626 "s59E25H2" 0 "Phosphopantetheine adenylyltransferase"  
"JS1\_N06\_02696" 21626 "s59E5H2" 0 "Phosphopantetheine adenylyltransferase"  
"JS1\_N06\_02696" 21626 "s63E6H2" 0 "Phosphopantetheine adenylyltransferase"  
"JS1\_N06\_02698" 21628 "s59E13H2" 0.01945063 "tRNA-specific 2-thiouridylase MnmA"  
"JS1\_N06\_02698" 21628 "s59E25H2" 0 "tRNA-specific 2-thiouridylase MnmA"  
"JS1\_N06\_02698" 21628 "s59E5H2" 0.07837206 "tRNA-specific 2-thiouridylase MnmA"  
"JS1\_N06\_02698" 21628 "s63E6H2" 0.08327936 "tRNA-specific 2-thiouridylase MnmA"  
"JS1\_N06\_02699" 21629 "s59E13H2" 0.0194229 "hypothetical protein"  
"JS1\_N06\_02699" 21629 "s59E25H2" 0 "hypothetical protein"  
"JS1\_N06\_02699" 21629 "s59E5H2" 0.06373055 "hypothetical protein"  
"JS1\_N06\_02699" 21629 "s63E6H2" 0.04911969 "hypothetical protein"  
"JS1\_N06\_02700" 21630 "s59E13H2" 0 "HTH-type transcriptional regulator CymR"

"JS1\_N06\_02700" 21630 "s59E25H2" 0 "HTH-type transcriptional regulator CymR"  
"JS1\_N06\_02700" 21630 "s59E5H2" 0 "HTH-type transcriptional regulator CymR"  
"JS1\_N06\_02700" 21630 "s63E6H2" 0.05360946 "HTH-type transcriptional regulator CymR"  
"JS1\_N06\_02701" 21631 "s59E13H2" 0 "Ferredoxin"  
"JS1\_N06\_02701" 21631 "s59E25H2" 0 "Ferredoxin"  
"JS1\_N06\_02701" 21631 "s59E5H2" 0.01621173 "Ferredoxin"  
"JS1\_N06\_02701" 21631 "s63E6H2" 0.01013215 "Ferredoxin"  
"JS1\_N06\_02702" 21632 "s59E13H2" 0.001394053 "Ribonuclease Z"  
"JS1\_N06\_02702" 21632 "s59E25H2" 0 "Ribonuclease Z"  
"JS1\_N06\_02702" 21632 "s59E5H2" 0.09022479 "Ribonuclease Z"  
"JS1\_N06\_02702" 21632 "s63E6H2" 0.03098001 "Ribonuclease Z"  
"JS1\_N06\_02703" 21633 "s59E13H2" 0 "Molybdopterin adenyllyltransferase"  
"JS1\_N06\_02703" 21633 "s59E25H2" 0 "Molybdopterin adenyllyltransferase"  
"JS1\_N06\_02703" 21633 "s59E5H2" 0 "Molybdopterin adenyllyltransferase"  
"JS1\_N06\_02703" 21633 "s63E6H2" 0.01030002 "Molybdopterin adenyllyltransferase"  
"JS1\_N06\_02704" 21634 "s59E13H2" 0 "MOSC domain protein"  
"JS1\_N06\_02704" 21634 "s59E25H2" 0 "MOSC domain protein"  
"JS1\_N06\_02704" 21634 "s59E5H2" 0 "MOSC domain protein"  
"JS1\_N06\_02704" 21634 "s63E6H2" 0.01651731 "MOSC domain protein"  
"JS1\_N06\_02705" 21635 "s59E13H2" 0 "Cyclic pyranopterin monophosphate synthase accessory protein"  
"JS1\_N06\_02705" 21635 "s59E25H2" 0 "Cyclic pyranopterin monophosphate synthase accessory protein"  
"JS1\_N06\_02705" 21635 "s59E5H2" 0.007617561 "Cyclic pyranopterin monophosphate synthase accessory protein"  
"JS1\_N06\_02705" 21635 "s63E6H2" 0.01198768 "Cyclic pyranopterin monophosphate synthase accessory protein"  
"JS1\_N06\_02706" 21636 "s59E13H2" 0 "Cyclic pyranopterin monophosphate synthase"  
"JS1\_N06\_02706" 21636 "s59E25H2" 0 "Cyclic pyranopterin monophosphate synthase"  
"JS1\_N06\_02706" 21636 "s59E5H2" 0 "Cyclic pyranopterin monophosphate synthase"  
"JS1\_N06\_02706" 21636 "s63E6H2" 0.04102924 "Cyclic pyranopterin monophosphate synthase"  
"JS1\_N06\_02707" 21637 "s59E13H2" 0.02355655 "Molybdopterin molybdenumtransferase"  
"JS1\_N06\_02707" 21637 "s59E25H2" 0 "Molybdopterin molybdenumtransferase"  
"JS1\_N06\_02707" 21637 "s59E5H2" 0.02630121 "Molybdopterin molybdenumtransferase"  
"JS1\_N06\_02707" 21637 "s63E6H2" 0.04874758 "Molybdopterin molybdenumtransferase"  
"JS1\_N06\_02708" 21638 "s59E13H2" 0.0009968031 "Molybdopterin molybdenumtransferase"  
"JS1\_N06\_02708" 21638 "s59E25H2" 0 "Molybdopterin molybdenumtransferase"  
"JS1\_N06\_02708" 21638 "s59E5H2" 0.008689899 "Molybdopterin molybdenumtransferase"  
"JS1\_N06\_02708" 21638 "s63E6H2" 0.01781429 "Molybdopterin molybdenumtransferase"  
"JS1\_N06\_02709" 21639 "s59E13H2" 0.001697983 "Sulfate/thiosulfate import ATP-binding protein CysA"  
"JS1\_N06\_02709" 21639 "s59E25H2" 0 "Sulfate/thiosulfate import ATP-binding protein CysA"  
"JS1\_N06\_02709" 21639 "s59E5H2" 0.07249187 "Sulfate/thiosulfate import ATP-binding protein CysA"  
"JS1\_N06\_02709" 21639 "s63E6H2" 0.08004398 "Sulfate/thiosulfate import ATP-binding protein CysA"  
"JS1\_N06\_02710" 21640 "s59E13H2" 0.004627788 "Molybdenum transport system permease protein ModB"  
"JS1\_N06\_02710" 21640 "s59E25H2" 0 "Molybdenum transport system permease protein ModB"  
"JS1\_N06\_02710" 21640 "s59E5H2" 0.09569245 "Molybdenum transport system permease protein ModB"  
"JS1\_N06\_02710" 21640 "s63E6H2" 0.08769578 "Molybdenum transport system permease protein ModB"  
"JS1\_N06\_02711" 21641 "s59E13H2" 0.4987644 "PBP superfamily domain protein"  
"JS1\_N06\_02711" 21641 "s59E25H2" 0 "PBP superfamily domain protein"  
"JS1\_N06\_02711" 21641 "s59E5H2" 0.0145094 "PBP superfamily domain protein"  
"JS1\_N06\_02711" 21641 "s63E6H2" 0.07473295 "PBP superfamily domain protein"

"JS1\_N06\_02713" 21643 "s59E13H2" 0.02159029 "Formamidopyrimidine-DNA glycosylase"  
"JS1\_N06\_02713" 21643 "s59E25H2" 0 "Formamidopyrimidine-DNA glycosylase"  
"JS1\_N06\_02713" 21643 "s59E5H2" 0.2392093 "Formamidopyrimidine-DNA glycosylase"  
"JS1\_N06\_02713" 21643 "s63E6H2" 0.114443 "Formamidopyrimidine-DNA glycosylase"  
"JS1\_N06\_02714" 21644 "s59E13H2" 0.9697993 "GMP/IMP nucleotidase YrfG"  
"JS1\_N06\_02714" 21644 "s59E25H2" 0 "GMP/IMP nucleotidase YrfG"  
"JS1\_N06\_02714" 21644 "s59E5H2" 0.3790352 "GMP/IMP nucleotidase YrfG"  
"JS1\_N06\_02714" 21644 "s63E6H2" 0.3827742 "GMP/IMP nucleotidase YrfG"  
"JS1\_N06\_02720" 21650 "s59E13H2" 0 "hypothetical protein"  
"JS1\_N06\_02720" 21650 "s59E25H2" 0 "hypothetical protein"  
"JS1\_N06\_02720" 21650 "s59E5H2" 0.0441076 "hypothetical protein"  
"JS1\_N06\_02720" 21650 "s63E6H2" 0.05016783 "hypothetical protein"  
"JS1\_N06\_02721" 21651 "s59E13H2" 0 "Murein DD-endopeptidase MepM"  
"JS1\_N06\_02721" 21651 "s59E25H2" 0 "Murein DD-endopeptidase MepM"  
"JS1\_N06\_02721" 21651 "s59E5H2" 0.1552616 "Murein DD-endopeptidase MepM"  
"JS1\_N06\_02721" 21651 "s63E6H2" 0.1507321 "Murein DD-endopeptidase MepM"  
"JS1\_N06\_02728" 21658 "s59E13H2" 0 "Patatin-like phospholipase"  
"JS1\_N06\_02728" 21658 "s59E25H2" 0 "Patatin-like phospholipase"  
"JS1\_N06\_02728" 21658 "s59E5H2" 0 "Patatin-like phospholipase"  
"JS1\_N06\_02728" 21658 "s63E6H2" 0 "Patatin-like phospholipase"  
"JS1\_N06\_02734" 21664 "s59E13H2" 0 "hypothetical protein"  
"JS1\_N06\_02734" 21664 "s59E25H2" 0 "hypothetical protein"  
"JS1\_N06\_02734" 21664 "s59E5H2" 0 "hypothetical protein"  
"JS1\_N06\_02734" 21664 "s63E6H2" 0.01074116 "hypothetical protein"  
"JS1\_N06\_02736" 21666 "s59E13H2" 0 "V-type sodium ATPase subunit K"  
"JS1\_N06\_02736" 21666 "s59E25H2" 0 "V-type sodium ATPase subunit K"  
"JS1\_N06\_02736" 21666 "s59E5H2" 0.001980315 "V-type sodium ATPase subunit K"  
"JS1\_N06\_02736" 21666 "s63E6H2" 0 "V-type sodium ATPase subunit K"  
"JS1\_O21\_00001" 9591 "s59E13H2" 0.04104268 "DNA-directed RNA polymerase subunit beta"  
"JS1\_O21\_00001" 9591 "s59E25H2" 0 "DNA-directed RNA polymerase subunit beta"  
"JS1\_O21\_00001" 9591 "s59E5H2" 0.1153107 "DNA-directed RNA polymerase subunit beta"  
"JS1\_O21\_00001" 9591 "s63E6H2" 0.05380785 "DNA-directed RNA polymerase subunit beta"  
"JS1\_O21\_00002" 9592 "s59E13H2" 0.1981988 "DNA-directed RNA polymerase subunit beta"  
"JS1\_O21\_00002" 9592 "s59E25H2" 0 "DNA-directed RNA polymerase subunit beta"  
"JS1\_O21\_00002" 9592 "s59E5H2" 0.07079234 "DNA-directed RNA polymerase subunit beta"  
"JS1\_O21\_00002" 9592 "s63E6H2" 0.1063565 "DNA-directed RNA polymerase subunit beta"  
"JS1\_O21\_00003" 9593 "s59E13H2" 0.01290469 "30S ribosomal protein S12"  
"JS1\_O21\_00003" 9593 "s59E25H2" 0 "30S ribosomal protein S12"  
"JS1\_O21\_00003" 9593 "s59E5H2" 0.1806749 "30S ribosomal protein S12"  
"JS1\_O21\_00003" 9593 "s63E6H2" 0.2558957 "30S ribosomal protein S12"  
"JS1\_O21\_00004" 9594 "s59E13H2" 0.009200285 "30S ribosomal protein S7"  
"JS1\_O21\_00004" 9594 "s59E25H2" 0 "30S ribosomal protein S7"  
"JS1\_O21\_00004" 9594 "s59E5H2" 0.07259139 "30S ribosomal protein S7"  
"JS1\_O21\_00004" 9594 "s63E6H2" 0.1940984 "30S ribosomal protein S7"  
"JS1\_O21\_00005" 9595 "s59E13H2" 0.0333781 "Elongation factor G"  
"JS1\_O21\_00005" 9595 "s59E25H2" 0 "Elongation factor G"  
"JS1\_O21\_00005" 9595 "s59E5H2" 0.0951802 "Elongation factor G"

"JS1\_O21\_00005" 9595 "s63E6H2" 0.2624322 "Elongation factor G"  
"JS1\_O21\_00006" 9596 "s59E13H2" 0.134149 "50S ribosomal protein L13"  
"JS1\_O21\_00006" 9596 "s59E25H2" 0 "50S ribosomal protein L13"  
"JS1\_O21\_00006" 9596 "s59E5H2" 0.217139 "50S ribosomal protein L13"  
"JS1\_O21\_00006" 9596 "s63E6H2" 1.124618 "50S ribosomal protein L13"  
"JS1\_O21\_00007" 9597 "s59E13H2" 0.251947 "tRNA pseudouridine synthase A"  
"JS1\_O21\_00007" 9597 "s59E25H2" 0 "tRNA pseudouridine synthase A"  
"JS1\_O21\_00007" 9597 "s59E5H2" 0.353967 "tRNA pseudouridine synthase A"  
"JS1\_O21\_00007" 9597 "s63E6H2" 0.932996 "tRNA pseudouridine synthase A"  
"JS1\_O21\_00008" 9598 "s59E13H2" 0.2749551 "Energy-coupling factor transporter transmembrane protein EcfT"  
"JS1\_O21\_00008" 9598 "s59E25H2" 0 "Energy-coupling factor transporter transmembrane protein EcfT"  
"JS1\_O21\_00008" 9598 "s59E5H2" 0.5534336 "Energy-coupling factor transporter transmembrane protein EcfT"  
"JS1\_O21\_00008" 9598 "s63E6H2" 0.9853782 "Energy-coupling factor transporter transmembrane protein EcfT"  
"JS1\_O21\_00009" 9599 "s59E13H2" 0.2831078 "Energy-coupling factor transporter ATP-binding protein EcfA2"  
"JS1\_O21\_00009" 9599 "s59E25H2" 0 "Energy-coupling factor transporter ATP-binding protein EcfA2"  
"JS1\_O21\_00009" 9599 "s59E5H2" 0.5763429 "Energy-coupling factor transporter ATP-binding protein EcfA2"  
"JS1\_O21\_00009" 9599 "s63E6H2" 1.749053 "Energy-coupling factor transporter ATP-binding protein EcfA2"  
"JS1\_O21\_00010" 9600 "s59E13H2" 0.2887785 "Energy-coupling factor transporter ATP-binding protein EcfA1"  
"JS1\_O21\_00010" 9600 "s59E25H2" 0 "Energy-coupling factor transporter ATP-binding protein EcfA1"  
"JS1\_O21\_00010" 9600 "s59E5H2" 0.2214823 "Energy-coupling factor transporter ATP-binding protein EcfA1"  
"JS1\_O21\_00010" 9600 "s63E6H2" 3.131661 "Energy-coupling factor transporter ATP-binding protein EcfA1"  
"JS1\_O21\_00011" 9601 "s59E13H2" 0.2849828 "50S ribosomal protein L17"  
"JS1\_O21\_00011" 9601 "s59E25H2" 0 "50S ribosomal protein L17"  
"JS1\_O21\_00011" 9601 "s59E5H2" 0.1912893 "50S ribosomal protein L17"  
"JS1\_O21\_00011" 9601 "s63E6H2" 2.56589 "50S ribosomal protein L17"  
"JS1\_O21\_00012" 9602 "s59E13H2" 0.2017122 "DNA-directed RNA polymerase subunit alpha"  
"JS1\_O21\_00012" 9602 "s59E25H2" 0 "DNA-directed RNA polymerase subunit alpha"  
"JS1\_O21\_00012" 9602 "s59E5H2" 0.142707 "DNA-directed RNA polymerase subunit alpha"  
"JS1\_O21\_00012" 9602 "s63E6H2" 1.313796 "DNA-directed RNA polymerase subunit alpha"  
"JS1\_O21\_00013" 9603 "s59E13H2" 0.2793665 "30S ribosomal protein S4"  
"JS1\_O21\_00013" 9603 "s59E25H2" 0 "30S ribosomal protein S4"  
"JS1\_O21\_00013" 9603 "s59E5H2" 0.1449836 "30S ribosomal protein S4"  
"JS1\_O21\_00013" 9603 "s63E6H2" 1.148765 "30S ribosomal protein S4"  
"JS1\_O21\_00014" 9604 "s59E13H2" 0.2083165 "30S ribosomal protein S11"  
"JS1\_O21\_00014" 9604 "s59E25H2" 0 "30S ribosomal protein S11"  
"JS1\_O21\_00014" 9604 "s59E5H2" 0.1413205 "30S ribosomal protein S11"  
"JS1\_O21\_00014" 9604 "s63E6H2" 0.959361 "30S ribosomal protein S11"  
"JS1\_O21\_00015" 9605 "s59E13H2" 0.2417344 "30S ribosomal protein S13"  
"JS1\_O21\_00015" 9605 "s59E25H2" 0 "30S ribosomal protein S13"  
"JS1\_O21\_00015" 9605 "s59E5H2" 0.1329963 "30S ribosomal protein S13"  
"JS1\_O21\_00015" 9605 "s63E6H2" 1.26364 "30S ribosomal protein S13"  
"JS1\_O21\_00016" 9606 "s59E13H2" 0.3360086 "50S ribosomal protein L36"  
"JS1\_O21\_00016" 9606 "s59E25H2" 0 "50S ribosomal protein L36"  
"JS1\_O21\_00016" 9606 "s59E5H2" 0.08770963 "50S ribosomal protein L36"  
"JS1\_O21\_00016" 9606 "s63E6H2" 0.8841469 "50S ribosomal protein L36"  
"JS1\_O21\_00017" 9607 "s59E13H2" 0.1650021 "Translation initiation factor IF-1"  
"JS1\_O21\_00017" 9607 "s59E25H2" 0 "Translation initiation factor IF-1"

"JS1\_O21\_00017" 9607 "s59E5H2" 0.07805649 "Translation initiation factor IF-1"  
"JS1\_O21\_00017" 9607 "s63E6H2" 0.7265314 "Translation initiation factor IF-1"  
"JS1\_O21\_00018" 9608 "s59E13H2" 0.136308 "methionine aminopeptidase"  
"JS1\_O21\_00018" 9608 "s59E25H2" 0 "methionine aminopeptidase"  
"JS1\_O21\_00018" 9608 "s59E5H2" 0.01621173 "methionine aminopeptidase"  
"JS1\_O21\_00018" 9608 "s63E6H2" 0.8694798 "methionine aminopeptidase"  
"JS1\_O21\_00019" 9609 "s59E13H2" 0.146579 "Adenylate kinase"  
"JS1\_O21\_00019" 9609 "s59E25H2" 0 "Adenylate kinase"  
"JS1\_O21\_00019" 9609 "s59E5H2" 0.02755233 "Adenylate kinase"  
"JS1\_O21\_00019" 9609 "s63E6H2" 0.9653798 "Adenylate kinase"  
"JS1\_O21\_00020" 9610 "s59E13H2" 0.6531954 "preprotein translocase subunit SecY"  
"JS1\_O21\_00020" 9610 "s59E25H2" 0 "preprotein translocase subunit SecY"  
"JS1\_O21\_00020" 9610 "s59E5H2" 0.1404378 "preprotein translocase subunit SecY"  
"JS1\_O21\_00020" 9610 "s63E6H2" 0.8141745 "preprotein translocase subunit SecY"  
"JS1\_O21\_00021" 9611 "s59E13H2" 0.1677702 "50S ribosomal protein L15"  
"JS1\_O21\_00021" 9611 "s59E25H2" 0 "50S ribosomal protein L15"  
"JS1\_O21\_00021" 9611 "s59E5H2" 0.1274882 "50S ribosomal protein L15"  
"JS1\_O21\_00021" 9611 "s63E6H2" 0.2912683 "50S ribosomal protein L15"  
"JS1\_O21\_00022" 9612 "s59E13H2" 0.09147309 "30S ribosomal protein S5"  
"JS1\_O21\_00022" 9612 "s59E25H2" 0 "30S ribosomal protein S5"  
"JS1\_O21\_00022" 9612 "s59E5H2" 0.08774638 "30S ribosomal protein S5"  
"JS1\_O21\_00022" 9612 "s63E6H2" 0.1525084 "30S ribosomal protein S5"  
"JS1\_O21\_00023" 9613 "s59E13H2" 0.2115944 "50S ribosomal protein L18"  
"JS1\_O21\_00023" 9613 "s59E25H2" 0 "50S ribosomal protein L18"  
"JS1\_O21\_00023" 9613 "s59E5H2" 0 "50S ribosomal protein L18"  
"JS1\_O21\_00023" 9613 "s63E6H2" 0.110756 "50S ribosomal protein L18"  
"JS1\_O21\_00024" 9614 "s59E13H2" 0.4176833 "50S ribosomal protein L6"  
"JS1\_O21\_00024" 9614 "s59E25H2" 0 "50S ribosomal protein L6"  
"JS1\_O21\_00024" 9614 "s59E5H2" 0.03665653 "50S ribosomal protein L6"  
"JS1\_O21\_00024" 9614 "s63E6H2" 0.1998285 "50S ribosomal protein L6"  
"JS1\_O21\_00025" 9615 "s59E13H2" 0.1347711 "30S ribosomal protein S8"  
"JS1\_O21\_00025" 9615 "s59E25H2" 0 "30S ribosomal protein S8"  
"JS1\_O21\_00025" 9615 "s59E5H2" 0.07935216 "30S ribosomal protein S8"  
"JS1\_O21\_00025" 9615 "s63E6H2" 0.1769698 "30S ribosomal protein S8"  
"JS1\_O21\_00026" 9616 "s59E13H2" 0.2512988 "30S ribosomal protein S14 type Z"  
"JS1\_O21\_00026" 9616 "s59E25H2" 0 "30S ribosomal protein S14 type Z"  
"JS1\_O21\_00026" 9616 "s59E5H2" 0.04750212 "30S ribosomal protein S14 type Z"  
"JS1\_O21\_00026" 9616 "s63E6H2" 0.1527667 "30S ribosomal protein S14 type Z"  
"JS1\_O21\_00027" 9617 "s59E13H2" 0.1609704 "50S ribosomal protein L5"  
"JS1\_O21\_00027" 9617 "s59E25H2" 0 "50S ribosomal protein L5"  
"JS1\_O21\_00027" 9617 "s59E5H2" 0.1325759 "50S ribosomal protein L5"  
"JS1\_O21\_00027" 9617 "s63E6H2" 0.1317855 "50S ribosomal protein L5"  
"JS1\_O21\_00028" 9618 "s59E13H2" 0.1236132 "50S ribosomal protein L24"  
"JS1\_O21\_00028" 9618 "s59E25H2" 0 "50S ribosomal protein L24"  
"JS1\_O21\_00028" 9618 "s59E5H2" 0.1517963 "50S ribosomal protein L24"  
"JS1\_O21\_00028" 9618 "s63E6H2" 0.2348103 "50S ribosomal protein L24"  
"JS1\_O21\_00029" 9619 "s59E13H2" 0.03743579 "50S ribosomal protein L14"

"JS1\_O21\_00029" 9619 "s59E25H2" 0 "50S ribosomal protein L14"  
"JS1\_O21\_00029" 9619 "s59E5H2" 0.1109339 "50S ribosomal protein L14"  
"JS1\_O21\_00029" 9619 "s63E6H2" 0.1507137 "50S ribosomal protein L14"  
"JS1\_O21\_00030" 9620 "s59E13H2" 0.02480289 "30S ribosomal protein S17"  
"JS1\_O21\_00030" 9620 "s59E25H2" 0 "30S ribosomal protein S17"  
"JS1\_O21\_00030" 9620 "s59E5H2" 0.06151661 "30S ribosomal protein S17"  
"JS1\_O21\_00030" 9620 "s63E6H2" 0.1220335 "30S ribosomal protein S17"  
"JS1\_O21\_00031" 9621 "s59E13H2" 0.04616901 "50S ribosomal protein L29"  
"JS1\_O21\_00031" 9621 "s59E25H2" 0 "50S ribosomal protein L29"  
"JS1\_O21\_00031" 9621 "s59E5H2" 0.05701518 "50S ribosomal protein L29"  
"JS1\_O21\_00031" 9621 "s63E6H2" 0.1727752 "50S ribosomal protein L29"  
"JS1\_O21\_00032" 9622 "s59E13H2" 0.02986136 "50S ribosomal protein L16"  
"JS1\_O21\_00032" 9622 "s59E25H2" 0 "50S ribosomal protein L16"  
"JS1\_O21\_00032" 9622 "s59E5H2" 0.1978751 "50S ribosomal protein L16"  
"JS1\_O21\_00032" 9622 "s63E6H2" 0.2367617 "50S ribosomal protein L16"  
"JS1\_O21\_00033" 9623 "s59E13H2" 0.04471452 "30S ribosomal protein S3"  
"JS1\_O21\_00033" 9623 "s59E25H2" 0 "30S ribosomal protein S3"  
"JS1\_O21\_00033" 9623 "s59E5H2" 0.04263575 "30S ribosomal protein S3"  
"JS1\_O21\_00033" 9623 "s63E6H2" 0.1740083 "30S ribosomal protein S3"  
"JS1\_O21\_00034" 9624 "s59E13H2" 2.910563 "50S ribosomal protein L22"  
"JS1\_O21\_00034" 9624 "s59E25H2" 0 "50S ribosomal protein L22"  
"JS1\_O21\_00034" 9624 "s59E5H2" 0.09412203 "50S ribosomal protein L22"  
"JS1\_O21\_00034" 9624 "s63E6H2" 0.2566165 "50S ribosomal protein L22"  
"JS1\_O21\_00035" 9625 "s59E13H2" 0.03302076 "30S ribosomal protein S19"  
"JS1\_O21\_00035" 9625 "s59E25H2" 0 "30S ribosomal protein S19"  
"JS1\_O21\_00035" 9625 "s59E5H2" 0.03646218 "30S ribosomal protein S19"  
"JS1\_O21\_00035" 9625 "s63E6H2" 0.2782608 "30S ribosomal protein S19"  
"JS1\_O21\_00036" 9626 "s59E13H2" 0.0258291 "50S ribosomal protein L2"  
"JS1\_O21\_00036" 9626 "s59E25H2" 0 "50S ribosomal protein L2"  
"JS1\_O21\_00036" 9626 "s59E5H2" 0.06486637 "50S ribosomal protein L2"  
"JS1\_O21\_00036" 9626 "s63E6H2" 0.30239 "50S ribosomal protein L2"  
"JS1\_O21\_00037" 9627 "s59E13H2" 0.02359588 "50S ribosomal protein L23"  
"JS1\_O21\_00037" 9627 "s59E25H2" 0 "50S ribosomal protein L23"  
"JS1\_O21\_00037" 9627 "s59E5H2" 0.06985681 "50S ribosomal protein L23"  
"JS1\_O21\_00037" 9627 "s63E6H2" 0.149217 "50S ribosomal protein L23"  
"JS1\_O21\_00038" 9628 "s59E13H2" 0.03024122 "50S ribosomal protein L4"  
"JS1\_O21\_00038" 9628 "s59E25H2" 0 "50S ribosomal protein L4"  
"JS1\_O21\_00038" 9628 "s59E5H2" 0.1103645 "50S ribosomal protein L4"  
"JS1\_O21\_00038" 9628 "s63E6H2" 0.07600086 "50S ribosomal protein L4"  
"JS1\_O21\_00039" 9629 "s59E13H2" 0.04814296 "50S ribosomal protein L3"  
"JS1\_O21\_00039" 9629 "s59E25H2" 0 "50S ribosomal protein L3"  
"JS1\_O21\_00039" 9629 "s59E5H2" 0.142788 "50S ribosomal protein L3"  
"JS1\_O21\_00039" 9629 "s63E6H2" 0.05877621 "50S ribosomal protein L3"  
"JS1\_O21\_00040" 9630 "s59E13H2" 3.164043 "30S ribosomal protein S10"  
"JS1\_O21\_00040" 9630 "s59E25H2" 0 "30S ribosomal protein S10"  
"JS1\_O21\_00040" 9630 "s59E5H2" 0.08787441 "30S ribosomal protein S10"  
"JS1\_O21\_00040" 9630 "s63E6H2" 0.2812173 "30S ribosomal protein S10"

"JS1\_O21\_00041" 9631 "s59E13H2" 0.2110502 "Elongation factor Tu"  
"JS1\_O21\_00041" 9631 "s59E25H2" 0 "Elongation factor Tu"  
"JS1\_O21\_00041" 9631 "s59E5H2" 0.3681702 "Elongation factor Tu"  
"JS1\_O21\_00041" 9631 "s63E6H2" 0.885301 "Elongation factor Tu"  
"JS1\_O21\_00042" 9632 "s59E13H2" 0.05280036 "Elongation factor G"  
"JS1\_O21\_00042" 9632 "s59E25H2" 0 "Elongation factor G"  
"JS1\_O21\_00042" 9632 "s59E5H2" 0.1300727 "Elongation factor G"  
"JS1\_O21\_00042" 9632 "s63E6H2" 0.1969439 "Elongation factor G"  
"JS1\_O21\_00043" 9633 "s59E13H2" 0.002277129 "hypothetical protein"  
"JS1\_O21\_00043" 9633 "s59E25H2" 0 "hypothetical protein"  
"JS1\_O21\_00043" 9633 "s59E5H2" 0 "hypothetical protein"  
"JS1\_O21\_00043" 9633 "s63E6H2" 0.006845232 "hypothetical protein"  
"JS1\_O21\_00045" 9635 "s59E13H2" 0.004715466 "Transposase DDE domain protein"  
"JS1\_O21\_00045" 9635 "s59E25H2" 0 "Transposase DDE domain protein"  
"JS1\_O21\_00045" 9635 "s59E5H2" 0 "Transposase DDE domain protein"  
"JS1\_O21\_00045" 9635 "s63E6H2" 0.01719039 "Transposase DDE domain protein"  
"JS1\_O21\_00046" 9636 "s59E13H2" 0.01074955 "hypothetical protein"  
"JS1\_O21\_00046" 9636 "s59E25H2" 0 "hypothetical protein"  
"JS1\_O21\_00046" 9636 "s59E5H2" 0 "hypothetical protein"  
"JS1\_O21\_00046" 9636 "s63E6H2" 0 "hypothetical protein"  
"JS1\_O21\_00047" 9637 "s59E13H2" 0 "L-serine dehydratase, alpha chain"  
"JS1\_O21\_00047" 9637 "s59E25H2" 0 "L-serine dehydratase, alpha chain"  
"JS1\_O21\_00047" 9637 "s59E5H2" 0 "L-serine dehydratase, alpha chain"  
"JS1\_O21\_00047" 9637 "s63E6H2" 0 "L-serine dehydratase, alpha chain"  
"JS1\_O21\_00048" 9638 "s59E13H2" 0 "L-serine dehydratase, alpha chain"  
"JS1\_O21\_00048" 9638 "s59E25H2" 0 "L-serine dehydratase, alpha chain"  
"JS1\_O21\_00048" 9638 "s59E5H2" 0 "L-serine dehydratase, alpha chain"  
"JS1\_O21\_00048" 9638 "s63E6H2" 0 "L-serine dehydratase, alpha chain"  
"JS1\_O21\_00050" 9640 "s59E13H2" 0.04079628 "DNA-directed RNA polymerase subunit beta"  
"JS1\_O21\_00050" 9640 "s59E25H2" 0 "DNA-directed RNA polymerase subunit beta"  
"JS1\_O21\_00050" 9640 "s59E5H2" 0.08738239 "DNA-directed RNA polymerase subunit beta"  
"JS1\_O21\_00050" 9640 "s63E6H2" 0.09245407 "DNA-directed RNA polymerase subunit beta"  
"JS1\_O21\_00052" 9642 "s59E13H2" 0.06038203 "Methylmalonate-semialdehyde dehydrogenase [acylating]"  
"JS1\_O21\_00052" 9642 "s59E25H2" 0 "Methylmalonate-semialdehyde dehydrogenase [acylating]"  
"JS1\_O21\_00052" 9642 "s59E5H2" 0.2134778 "Methylmalonate-semialdehyde dehydrogenase [acylating]"  
"JS1\_O21\_00052" 9642 "s63E6H2" 0.009355448 "Methylmalonate-semialdehyde dehydrogenase [acylating]"  
"JS1\_O21\_00053" 9643 "s59E13H2" 1.49695 "UvrB/uvrC motif protein"  
"JS1\_O21\_00053" 9643 "s59E25H2" 0 "UvrB/uvrC motif protein"  
"JS1\_O21\_00053" 9643 "s59E5H2" 0.3970357 "UvrB/uvrC motif protein"  
"JS1\_O21\_00053" 9643 "s63E6H2" 0.1903592 "UvrB/uvrC motif protein"  
"JS1\_O21\_00054" 9644 "s59E13H2" 0.03997791 "hypothetical protein"  
"JS1\_O21\_00054" 9644 "s59E25H2" 0 "hypothetical protein"  
"JS1\_O21\_00054" 9644 "s59E5H2" 0.08952375 "hypothetical protein"  
"JS1\_O21\_00054" 9644 "s63E6H2" 0.07357229 "hypothetical protein"  
"JS1\_O21\_00055" 9645 "s59E13H2" 0.02971777 "Phosphoglycerate kinase"  
"JS1\_O21\_00055" 9645 "s59E25H2" 0 "Phosphoglycerate kinase"  
"JS1\_O21\_00055" 9645 "s59E5H2" 0.1987018 "Phosphoglycerate kinase"



"JS1\_O21\_00055" 9645 "s63E6H2" 0.07508429 "Phosphoglycerate kinase"  
"JS1\_O21\_00056" 9646 "s59E13H2" 0.07518955 "putative membrane protein YdfK"  
"JS1\_O21\_00056" 9646 "s59E25H2" 0 "putative membrane protein YdfK"  
"JS1\_O21\_00056" 9646 "s59E5H2" 0.1028876 "putative membrane protein YdfK"  
"JS1\_O21\_00056" 9646 "s63E6H2" 0.374294 "putative membrane protein YdfK"  
"JS1\_O21\_00057" 9647 "s59E13H2" 0.04855962 "hypothetical protein"  
"JS1\_O21\_00057" 9647 "s59E25H2" 0 "hypothetical protein"  
"JS1\_O21\_00057" 9647 "s59E5H2" 0.4936578 "hypothetical protein"  
"JS1\_O21\_00057" 9647 "s63E6H2" 0.3746971 "hypothetical protein"  
"JS1\_O21\_00058" 9648 "s59E13H2" 0.08943172 "hypothetical protein"  
"JS1\_O21\_00058" 9648 "s59E25H2" 0 "hypothetical protein"  
"JS1\_O21\_00058" 9648 "s59E5H2" 0.4074287 "hypothetical protein"  
"JS1\_O21\_00058" 9648 "s63E6H2" 0.5006753 "hypothetical protein"  
"JS1\_O21\_00059" 9649 "s59E13H2" 0.03878105 "Ribosomal silencing factor RsfS"  
"JS1\_O21\_00059" 9649 "s59E25H2" 0 "Ribosomal silencing factor RsfS"  
"JS1\_O21\_00059" 9649 "s59E5H2" 0.2263732 "Ribosomal silencing factor RsfS"  
"JS1\_O21\_00059" 9649 "s63E6H2" 0.3740188 "Ribosomal silencing factor RsfS"  
"JS1\_O21\_00060" 9650 "s59E13H2" 0.0349834 "Putative transcriptional regulator YvhJ"  
"JS1\_O21\_00060" 9650 "s59E25H2" 0 "Putative transcriptional regulator YvhJ"  
"JS1\_O21\_00060" 9650 "s59E5H2" 0.2089467 "Putative transcriptional regulator YvhJ"  
"JS1\_O21\_00060" 9650 "s63E6H2" 0.3969494 "Putative transcriptional regulator YvhJ"  
"JS1\_O21\_00061" 9651 "s59E13H2" 0.03662308 "putative nicotinate-nucleotide adenyllyltransferase"  
"JS1\_O21\_00061" 9651 "s59E25H2" 0 "putative nicotinate-nucleotide adenyllyltransferase"  
"JS1\_O21\_00061" 9651 "s59E5H2" 0.3326942 "putative nicotinate-nucleotide adenyllyltransferase"  
"JS1\_O21\_00061" 9651 "s63E6H2" 0.3079112 "putative nicotinate-nucleotide adenyllyltransferase"  
"JS1\_O21\_00062" 9652 "s59E13H2" 0.1972572 "putative nicotinate-nucleotide adenyllyltransferase"  
"JS1\_O21\_00062" 9652 "s59E25H2" 0 "putative nicotinate-nucleotide adenyllyltransferase"  
"JS1\_O21\_00062" 9652 "s59E5H2" 0.3312795 "putative nicotinate-nucleotide adenyllyltransferase"  
"JS1\_O21\_00062" 9652 "s63E6H2" 0.226175 "putative nicotinate-nucleotide adenyllyltransferase"  
"JS1\_O21\_00063" 9653 "s59E13H2" 0.7613971 "lipoprotein Nlpl"  
"JS1\_O21\_00063" 9653 "s59E25H2" 0 "lipoprotein Nlpl"  
"JS1\_O21\_00063" 9653 "s59E5H2" 0.3380904 "lipoprotein Nlpl"  
"JS1\_O21\_00063" 9653 "s63E6H2" 0.2650546 "lipoprotein Nlpl"  
"JS1\_O21\_00064" 9654 "s59E13H2" 0.7412273 "hypothetical protein"  
"JS1\_O21\_00064" 9654 "s59E25H2" 0 "hypothetical protein"  
"JS1\_O21\_00064" 9654 "s59E5H2" 0.124945 "hypothetical protein"  
"JS1\_O21\_00064" 9654 "s63E6H2" 0.1309964 "hypothetical protein"  
"JS1\_O21\_00065" 9655 "s59E13H2" 0.6943855 "2-C-methyl-D-erythritol 2,4-cyclodiphosphate synthase"  
"JS1\_O21\_00065" 9655 "s59E25H2" 0 "2-C-methyl-D-erythritol 2,4-cyclodiphosphate synthase"  
"JS1\_O21\_00065" 9655 "s59E5H2" 0.09953328 "2-C-methyl-D-erythritol 2,4-cyclodiphosphate synthase"  
"JS1\_O21\_00065" 9655 "s63E6H2" 0.2605482 "2-C-methyl-D-erythritol 2,4-cyclodiphosphate synthase"  
"JS1\_O21\_00066" 9656 "s59E13H2" 0.685361 "4-diphosphocytidyl-2-C-methyl-D-erythritol kinase"  
"JS1\_O21\_00066" 9656 "s59E25H2" 0 "4-diphosphocytidyl-2-C-methyl-D-erythritol kinase"  
"JS1\_O21\_00066" 9656 "s59E5H2" 0.3312446 "4-diphosphocytidyl-2-C-methyl-D-erythritol kinase"  
"JS1\_O21\_00066" 9656 "s63E6H2" 0.3843769 "4-diphosphocytidyl-2-C-methyl-D-erythritol kinase"  
"JS1\_O21\_00067" 9657 "s59E13H2" 0.9307526 "Putative 2-C-methyl-D-erythritol 4-phosphate cytidyllyltransferase 2"  
"JS1\_O21\_00067" 9657 "s59E25H2" 0 "Putative 2-C-methyl-D-erythritol 4-phosphate cytidyllyltransferase 2"

"JS1\_O21\_00067" 9657 "s59E5H2" 0.2088062 "Putative 2-C-methyl-D-erythritol 4-phosphate cytidyltransferase 2"  
"JS1\_O21\_00067" 9657 "s63E6H2" 0.3073047 "Putative 2-C-methyl-D-erythritol 4-phosphate cytidyltransferase 2"  
"JS1\_O21\_00068" 9658 "s59E13H2" 0.9544517 "hypothetical protein"  
"JS1\_O21\_00068" 9658 "s59E25H2" 0 "hypothetical protein"  
"JS1\_O21\_00068" 9658 "s59E5H2" 0.1671295 "hypothetical protein"  
"JS1\_O21\_00068" 9658 "s63E6H2" 0.113667 "hypothetical protein"  
"JS1\_O21\_00069" 9659 "s59E13H2" 2.000843 "Rod shape-determining protein MreB"  
"JS1\_O21\_00069" 9659 "s59E25H2" 0 "Rod shape-determining protein MreB"  
"JS1\_O21\_00069" 9659 "s59E5H2" 0.2121035 "Rod shape-determining protein MreB"  
"JS1\_O21\_00069" 9659 "s63E6H2" 0.2375666 "Rod shape-determining protein MreB"  
"JS1\_O21\_00070" 9660 "s59E13H2" 0.04465267 "Carbonic anhydrase precursor"  
"JS1\_O21\_00070" 9660 "s59E25H2" 0 "Carbonic anhydrase precursor"  
"JS1\_O21\_00070" 9660 "s59E5H2" 0.1520257 "Carbonic anhydrase precursor"  
"JS1\_O21\_00070" 9660 "s63E6H2" 0.2166937 "Carbonic anhydrase precursor"  
"JS1\_O21\_00071" 9661 "s59E13H2" 0.05098449 "UvrABC system protein C"  
"JS1\_O21\_00071" 9661 "s59E25H2" 0 "UvrABC system protein C"  
"JS1\_O21\_00071" 9661 "s59E5H2" 0.2425924 "UvrABC system protein C"  
"JS1\_O21\_00071" 9661 "s63E6H2" 0.1686354 "UvrABC system protein C"  
"JS1\_O21\_00072" 9662 "s59E13H2" 0.06618246 "UvrABC system protein A"  
"JS1\_O21\_00072" 9662 "s59E25H2" 0 "UvrABC system protein A"  
"JS1\_O21\_00072" 9662 "s59E5H2" 1.007937 "UvrABC system protein A"  
"JS1\_O21\_00072" 9662 "s63E6H2" 0.2256936 "UvrABC system protein A"  
"JS1\_O21\_00073" 9663 "s59E13H2" 0.003529156 "Trehalose/maltose transport system permease protein MalF"  
"JS1\_O21\_00073" 9663 "s59E25H2" 0 "Trehalose/maltose transport system permease protein MalF"  
"JS1\_O21\_00073" 9663 "s59E5H2" 0.01533958 "Trehalose/maltose transport system permease protein MalF"  
"JS1\_O21\_00073" 9663 "s63E6H2" 0 "Trehalose/maltose transport system permease protein MalF"  
"JS1\_O21\_00074" 9664 "s59E13H2" 0.01172334 "Trehalose/maltose-binding protein MalE precursor"  
"JS1\_O21\_00074" 9664 "s59E25H2" 0 "Trehalose/maltose-binding protein MalE precursor"  
"JS1\_O21\_00074" 9664 "s59E5H2" 0.007806903 "Trehalose/maltose-binding protein MalE precursor"  
"JS1\_O21\_00074" 9664 "s63E6H2" 0.005626621 "Trehalose/maltose-binding protein MalE precursor"  
"JS1\_O21\_00075" 9665 "s59E13H2" 0.156484 "Putative septation protein SpoVG"  
"JS1\_O21\_00075" 9665 "s59E25H2" 0 "Putative septation protein SpoVG"  
"JS1\_O21\_00075" 9665 "s59E5H2" 0.1241333 "Putative septation protein SpoVG"  
"JS1\_O21\_00075" 9665 "s63E6H2" 0.1908662 "Putative septation protein SpoVG"  
"JS1\_O21\_00076" 9666 "s59E13H2" 0.08167991 "Carbon dioxide concentrating mechanism protein CcmL"  
"JS1\_O21\_00076" 9666 "s59E25H2" 0 "Carbon dioxide concentrating mechanism protein CcmL"  
"JS1\_O21\_00076" 9666 "s59E5H2" 0.3951047 "Carbon dioxide concentrating mechanism protein CcmL"  
"JS1\_O21\_00076" 9666 "s63E6H2" 1.605101 "Carbon dioxide concentrating mechanism protein CcmL"  
"JS1\_O21\_00077" 9667 "s59E13H2" 0.1187813 "Electron transport complex protein RnfC"  
"JS1\_O21\_00077" 9667 "s59E25H2" 0 "Electron transport complex protein RnfC"  
"JS1\_O21\_00077" 9667 "s59E5H2" 0.7737518 "Electron transport complex protein RnfC"  
"JS1\_O21\_00077" 9667 "s63E6H2" 2.639372 "Electron transport complex protein RnfC"  
"JS1\_O21\_00078" 9668 "s59E13H2" 0.1471452 "BMC domain protein"  
"JS1\_O21\_00078" 9668 "s59E25H2" 0 "BMC domain protein"  
"JS1\_O21\_00078" 9668 "s59E5H2" 0.8315889 "BMC domain protein"  
"JS1\_O21\_00078" 9668 "s63E6H2" 3.419452 "BMC domain protein"  
"JS1\_O21\_00079" 9669 "s59E13H2" 0.05576067 "Glutamine transport ATP-binding protein GlnQ"

"JS1\_O21\_00079" 9669 "s59E25H2" 0 "Glutamine transport ATP-binding protein GlnQ"  
"JS1\_O21\_00079" 9669 "s59E5H2" 0.4589541 "Glutamine transport ATP-binding protein GlnQ"  
"JS1\_O21\_00079" 9669 "s63E6H2" 0.1336532 "Glutamine transport ATP-binding protein GlnQ"  
"JS1\_O21\_00080" 9670 "s59E13H2" 0.0488675 "Inner membrane amino-acid ABC transporter permease protein YecS"  
"JS1\_O21\_00080" 9670 "s59E25H2" 0 "Inner membrane amino-acid ABC transporter permease protein YecS"  
"JS1\_O21\_00080" 9670 "s59E5H2" 0.3566337 "Inner membrane amino-acid ABC transporter permease protein YecS"  
"JS1\_O21\_00080" 9670 "s63E6H2" 0.1632239 "Inner membrane amino-acid ABC transporter permease protein YecS"  
"JS1\_O21\_00081" 9671 "s59E13H2" 0.04953694 "Indolepyruvate oxidoreductase subunit IorA"  
"JS1\_O21\_00081" 9671 "s59E25H2" 0 "Indolepyruvate oxidoreductase subunit IorA"  
"JS1\_O21\_00081" 9671 "s59E5H2" 0.2842165 "Indolepyruvate oxidoreductase subunit IorA"  
"JS1\_O21\_00081" 9671 "s63E6H2" 0.3329369 "Indolepyruvate oxidoreductase subunit IorA"  
"JS1\_O21\_00082" 9672 "s59E13H2" 0.05193036 "Indolepyruvate oxidoreductase subunit IorB"  
"JS1\_O21\_00082" 9672 "s59E25H2" 0 "Indolepyruvate oxidoreductase subunit IorB"  
"JS1\_O21\_00082" 9672 "s59E5H2" 0.2462915 "Indolepyruvate oxidoreductase subunit IorB"  
"JS1\_O21\_00082" 9672 "s63E6H2" 0.4687153 "Indolepyruvate oxidoreductase subunit IorB"  
"JS1\_O21\_00083" 9673 "s59E13H2" 0.0293229 "Succinyl-CoA ligase [ADP-forming] subunit alpha"  
"JS1\_O21\_00083" 9673 "s59E25H2" 0 "Succinyl-CoA ligase [ADP-forming] subunit alpha"  
"JS1\_O21\_00083" 9673 "s59E5H2" 0.2563032 "Succinyl-CoA ligase [ADP-forming] subunit alpha"  
"JS1\_O21\_00083" 9673 "s63E6H2" 0.3347844 "Succinyl-CoA ligase [ADP-forming] subunit alpha"  
"JS1\_O21\_00084" 9674 "s59E13H2" 0.001133731 "succinyl-CoA synthetase subunit beta"  
"JS1\_O21\_00084" 9674 "s59E25H2" 0 "succinyl-CoA synthetase subunit beta"  
"JS1\_O21\_00084" 9674 "s59E5H2" 0.05713386 "succinyl-CoA synthetase subunit beta"  
"JS1\_O21\_00084" 9674 "s63E6H2" 0.3335575 "succinyl-CoA synthetase subunit beta"  
"JS1\_O21\_00085" 9675 "s59E13H2" 0.006047951 "Lipopolysaccharide export system ATP-binding protein LptB"  
"JS1\_O21\_00085" 9675 "s59E25H2" 0 "Lipopolysaccharide export system ATP-binding protein LptB"  
"JS1\_O21\_00085" 9675 "s59E5H2" 0 "Lipopolysaccharide export system ATP-binding protein LptB"  
"JS1\_O21\_00085" 9675 "s63E6H2" 0 "Lipopolysaccharide export system ATP-binding protein LptB"  
"JS1\_O21\_00086" 9676 "s59E13H2" 0 "High-affinity branched-chain amino acid transport ATP-binding protein LivF"  
"JS1\_O21\_00086" 9676 "s59E25H2" 0 "High-affinity branched-chain amino acid transport ATP-binding protein LivF"  
"JS1\_O21\_00086" 9676 "s59E5H2" 0 "High-affinity branched-chain amino acid transport ATP-binding protein LivF"  
"JS1\_O21\_00086" 9676 "s63E6H2" 0 "High-affinity branched-chain amino acid transport ATP-binding protein LivF"  
"JS1\_O21\_00087" 9677 "s59E13H2" 1.135191 "leucine/isoleucine/valine transporter permease subunit"  
"JS1\_O21\_00087" 9677 "s59E25H2" 0 "leucine/isoleucine/valine transporter permease subunit"  
"JS1\_O21\_00087" 9677 "s59E5H2" 0 "leucine/isoleucine/valine transporter permease subunit"  
"JS1\_O21\_00087" 9677 "s63E6H2" 0.002512974 "leucine/isoleucine/valine transporter permease subunit"  
"JS1\_O21\_00088" 9678 "s59E13H2" 1.312995 "High-affinity branched-chain amino acid transport system permease protein LivH"  
"JS1\_O21\_00088" 9678 "s59E25H2" 0 "High-affinity branched-chain amino acid transport system permease protein LivH"  
"JS1\_O21\_00088" 9678 "s59E5H2" 0 "High-affinity branched-chain amino acid transport system permease protein LivH"  
"JS1\_O21\_00088" 9678 "s63E6H2" 0.00570058 "High-affinity branched-chain amino acid transport system permease protein LivH"  
"JS1\_O21\_00089" 9679 "s59E13H2" 1.371557 "hypothetical protein"  
"JS1\_O21\_00089" 9679 "s59E25H2" 0 "hypothetical protein"  
"JS1\_O21\_00089" 9679 "s59E5H2" 0 "hypothetical protein"  
"JS1\_O21\_00089" 9679 "s63E6H2" 0.01068385 "hypothetical protein"  
"JS1\_O21\_00090" 9680 "s59E13H2" 1.046651 "hypothetical protein"  
"JS1\_O21\_00090" 9680 "s59E25H2" 0 "hypothetical protein"  
"JS1\_O21\_00090" 9680 "s59E5H2" 0 "hypothetical protein"  
"JS1\_O21\_00090" 9680 "s63E6H2" 0.003232638 "hypothetical protein"

"JS1\_O21\_00091" 9681 "s59E13H2" 1.821278 "Tungsten-containing aldehyde ferredoxin oxidoreductase"  
"JS1\_O21\_00091" 9681 "s59E25H2" 0 "Tungsten-containing aldehyde ferredoxin oxidoreductase"  
"JS1\_O21\_00091" 9681 "s59E5H2" 0.09285448 "Tungsten-containing aldehyde ferredoxin oxidoreductase"  
"JS1\_O21\_00091" 9681 "s63E6H2" 0.01523849 "Tungsten-containing aldehyde ferredoxin oxidoreductase"  
"JS1\_O21\_00092" 9682 "s59E13H2" 2.251464 "Xanthine dehydrogenase molybdenum-binding subunit"  
"JS1\_O21\_00092" 9682 "s59E25H2" 0 "Xanthine dehydrogenase molybdenum-binding subunit"  
"JS1\_O21\_00092" 9682 "s59E5H2" 0.1527075 "Xanthine dehydrogenase molybdenum-binding subunit"  
"JS1\_O21\_00092" 9682 "s63E6H2" 0.09163798 "Xanthine dehydrogenase molybdenum-binding subunit"  
"JS1\_O21\_00093" 9683 "s59E13H2" 2.573522 "Glyceraldehyde dehydrogenase medium chain"  
"JS1\_O21\_00093" 9683 "s59E25H2" 0 "Glyceraldehyde dehydrogenase medium chain"  
"JS1\_O21\_00093" 9683 "s59E5H2" 0.3194676 "Glyceraldehyde dehydrogenase medium chain"  
"JS1\_O21\_00093" 9683 "s63E6H2" 0.08133011 "Glyceraldehyde dehydrogenase medium chain"  
"JS1\_O21\_00094" 9684 "s59E13H2" 2.746614 "Glyceraldehyde dehydrogenase small chain"  
"JS1\_O21\_00094" 9684 "s59E25H2" 0 "Glyceraldehyde dehydrogenase small chain"  
"JS1\_O21\_00094" 9684 "s59E5H2" 0.1569041 "Glyceraldehyde dehydrogenase small chain"  
"JS1\_O21\_00094" 9684 "s63E6H2" 0.07366669 "Glyceraldehyde dehydrogenase small chain"  
"JS1\_O21\_00095" 9685 "s59E13H2" 1.672344 "Glyceraldehyde dehydrogenase medium chain"  
"JS1\_O21\_00095" 9685 "s59E25H2" 0 "Glyceraldehyde dehydrogenase medium chain"  
"JS1\_O21\_00095" 9685 "s59E5H2" 0.09140382 "Glyceraldehyde dehydrogenase medium chain"  
"JS1\_O21\_00095" 9685 "s63E6H2" 0.07243099 "Glyceraldehyde dehydrogenase medium chain"  
"JS1\_O21\_00096" 9686 "s59E13H2" 0.006530039 "Nicotinate dehydrogenase small FeS subunit"  
"JS1\_O21\_00096" 9686 "s59E25H2" 0 "Nicotinate dehydrogenase small FeS subunit"  
"JS1\_O21\_00096" 9686 "s59E5H2" 0.07928016 "Nicotinate dehydrogenase small FeS subunit"  
"JS1\_O21\_00096" 9686 "s63E6H2" 0.1636663 "Nicotinate dehydrogenase small FeS subunit"  
"JS1\_O21\_00097" 9687 "s59E13H2" 0.02243942 "putative xanthine dehydrogenase subunit D"  
"JS1\_O21\_00097" 9687 "s59E25H2" 0 "putative xanthine dehydrogenase subunit D"  
"JS1\_O21\_00097" 9687 "s59E5H2" 0.02010758 "putative xanthine dehydrogenase subunit D"  
"JS1\_O21\_00097" 9687 "s63E6H2" 0.3604427 "putative xanthine dehydrogenase subunit D"  
"JS1\_O21\_00099" 9689 "s59E13H2" 0.05113398 "hypothetical protein"  
"JS1\_O21\_00099" 9689 "s59E25H2" 0 "hypothetical protein"  
"JS1\_O21\_00099" 9689 "s59E5H2" 0.004499755 "hypothetical protein"  
"JS1\_O21\_00099" 9689 "s63E6H2" 0 "hypothetical protein"  
"JS1\_O21\_00100" 9690 "s59E13H2" 0.05985578 "hypothetical protein"  
"JS1\_O21\_00100" 9690 "s59E25H2" 0 "hypothetical protein"  
"JS1\_O21\_00100" 9690 "s59E5H2" 0.1515768 "hypothetical protein"  
"JS1\_O21\_00100" 9690 "s63E6H2" 0.3163164 "hypothetical protein"  
"JS1\_O21\_00101" 9691 "s59E13H2" 0.054231 "Nicotine blue oxidoreductase"  
"JS1\_O21\_00101" 9691 "s59E25H2" 0 "Nicotine blue oxidoreductase"  
"JS1\_O21\_00101" 9691 "s59E5H2" 0.05024319 "Nicotine blue oxidoreductase"  
"JS1\_O21\_00101" 9691 "s63E6H2" 0.1235826 "Nicotine blue oxidoreductase"  
"JS1\_O21\_00102" 9692 "s59E13H2" 0.1496324 "hypothetical protein"  
"JS1\_O21\_00102" 9692 "s59E25H2" 0 "hypothetical protein"  
"JS1\_O21\_00102" 9692 "s59E5H2" 0.0003656782 "hypothetical protein"  
"JS1\_O21\_00102" 9692 "s63E6H2" 0.5638808 "hypothetical protein"  
"JS1\_O21\_00103" 9693 "s59E13H2" 0.07468157 "putative xanthine dehydrogenase subunit A"  
"JS1\_O21\_00103" 9693 "s59E25H2" 0 "putative xanthine dehydrogenase subunit A"  
"JS1\_O21\_00103" 9693 "s59E5H2" 0.05811792 "putative xanthine dehydrogenase subunit A"

"JS1\_O21\_00103" 9693 "s63E6H2" 0.2262769 "putative xanthine dehydrogenase subunit A"  
"JS1\_O21\_00104" 9694 "s59E13H2" 0.06304777 "DNA-binding transcriptional regulator ModE"  
"JS1\_O21\_00104" 9694 "s59E25H2" 0 "DNA-binding transcriptional regulator ModE"  
"JS1\_O21\_00104" 9694 "s59E5H2" 0.2542682 "DNA-binding transcriptional regulator ModE"  
"JS1\_O21\_00104" 9694 "s63E6H2" 0.1760505 "DNA-binding transcriptional regulator ModE"  
"JS1\_O21\_00105" 9695 "s59E13H2" 0.002161689 "bifunctional molybdenum cofactor biosynthesis protein MoaC/MogA"  
"JS1\_O21\_00105" 9695 "s59E25H2" 0 "bifunctional molybdenum cofactor biosynthesis protein MoaC/MogA"  
"JS1\_O21\_00105" 9695 "s59E5H2" 0.01134821 "bifunctional molybdenum cofactor biosynthesis protein MoaC/MogA"  
"JS1\_O21\_00105" 9695 "s63E6H2" 0.629719 "bifunctional molybdenum cofactor biosynthesis protein MoaC/MogA"  
"JS1\_O21\_00106" 9696 "s59E13H2" 0.01317347 "hypothetical protein"  
"JS1\_O21\_00106" 9696 "s59E25H2" 0 "hypothetical protein"  
"JS1\_O21\_00106" 9696 "s59E5H2" 0 "hypothetical protein"  
"JS1\_O21\_00106" 9696 "s63E6H2" 0.6137403 "hypothetical protein"  
"JS1\_O21\_00107" 9697 "s59E13H2" 0.1063143 "Taurine-binding periplasmic protein precursor"  
"JS1\_O21\_00107" 9697 "s59E25H2" 0 "Taurine-binding periplasmic protein precursor"  
"JS1\_O21\_00107" 9697 "s59E5H2" 0.4904532 "Taurine-binding periplasmic protein precursor"  
"JS1\_O21\_00107" 9697 "s63E6H2" 1.621825 "Taurine-binding periplasmic protein precursor"  
"JS1\_O21\_00108" 9698 "s59E13H2" 0.2720896 "Putative aliphatic sulfonates transport permease protein SsuC"  
"JS1\_O21\_00108" 9698 "s59E25H2" 0 "Putative aliphatic sulfonates transport permease protein SsuC"  
"JS1\_O21\_00108" 9698 "s59E5H2" 1.817629 "Putative aliphatic sulfonates transport permease protein SsuC"  
"JS1\_O21\_00108" 9698 "s63E6H2" 2.319943 "Putative aliphatic sulfonates transport permease protein SsuC"  
"JS1\_O21\_00109" 9699 "s59E13H2" 0.2856879 "Spermidine/putrescine import ATP-binding protein PotA"  
"JS1\_O21\_00109" 9699 "s59E25H2" 0 "Spermidine/putrescine import ATP-binding protein PotA"  
"JS1\_O21\_00109" 9699 "s59E5H2" 1.32385 "Spermidine/putrescine import ATP-binding protein PotA"  
"JS1\_O21\_00109" 9699 "s63E6H2" 1.103769 "Spermidine/putrescine import ATP-binding protein PotA"  
"JS1\_O21\_00110" 9700 "s59E13H2" 0.03223096 "Pectin degradation repressor protein KdgR"  
"JS1\_O21\_00110" 9700 "s59E25H2" 0 "Pectin degradation repressor protein KdgR"  
"JS1\_O21\_00110" 9700 "s59E5H2" 0.667738 "Pectin degradation repressor protein KdgR"  
"JS1\_O21\_00110" 9700 "s63E6H2" 0.157529 "Pectin degradation repressor protein KdgR"  
"JS1\_O21\_00111" 9701 "s59E13H2" 0.1317341 "Carbamate kinase"  
"JS1\_O21\_00111" 9701 "s59E25H2" 0 "Carbamate kinase"  
"JS1\_O21\_00111" 9701 "s59E5H2" 0.0205482 "Carbamate kinase"  
"JS1\_O21\_00111" 9701 "s63E6H2" 0.02614345 "Carbamate kinase"  
"JS1\_O21\_00112" 9702 "s59E13H2" 0.007279284 "Aspartate carbamoyltransferase"  
"JS1\_O21\_00112" 9702 "s59E25H2" 0 "Aspartate carbamoyltransferase"  
"JS1\_O21\_00112" 9702 "s59E5H2" 0.0306514 "Aspartate carbamoyltransferase"  
"JS1\_O21\_00112" 9702 "s63E6H2" 0.02363291 "Aspartate carbamoyltransferase"  
"JS1\_O21\_00113" 9703 "s59E13H2" 0.4858408 "Dihydroorotate dehydrogenase B (NAD(+) ), electron transfer subunit"  
"JS1\_O21\_00113" 9703 "s59E25H2" 0 "Dihydroorotate dehydrogenase B (NAD(+) ), electron transfer subunit"  
"JS1\_O21\_00113" 9703 "s59E5H2" 0.1452175 "Dihydroorotate dehydrogenase B (NAD(+) ), electron transfer subunit"  
"JS1\_O21\_00113" 9703 "s63E6H2" 0.04093085 "Dihydroorotate dehydrogenase B (NAD(+) ), electron transfer subunit"  
"JS1\_O21\_00114" 9704 "s59E13H2" 0.3983644 "Dihydroorotate dehydrogenase B (NAD(+) ), catalytic subunit"  
"JS1\_O21\_00114" 9704 "s59E25H2" 0 "Dihydroorotate dehydrogenase B (NAD(+) ), catalytic subunit"  
"JS1\_O21\_00114" 9704 "s59E5H2" 0.1870774 "Dihydroorotate dehydrogenase B (NAD(+) ), catalytic subunit"  
"JS1\_O21\_00114" 9704 "s63E6H2" 0.2126563 "Dihydroorotate dehydrogenase B (NAD(+) ), catalytic subunit"  
"JS1\_O21\_00115" 9705 "s59E13H2" 0.9107479 "High-affinity branched-chain amino acid transport system permease protein LivH"  
"JS1\_O21\_00115" 9705 "s59E25H2" 0 "High-affinity branched-chain amino acid transport system permease protein LivH"

"JS1\_O21\_00115" 9705 "s59E5H2" 0.2771944 "High-affinity branched-chain amino acid transport system permease protein LivH"  
"JS1\_O21\_00115" 9705 "s63E6H2" 0.2277693 "High-affinity branched-chain amino acid transport system permease protein LivH"  
"JS1\_O21\_00116" 9706 "s59E13H2" 0.1342917 "Na(+)/H(+) antiporter subunit D"  
"JS1\_O21\_00116" 9706 "s59E25H2" 0 "Na(+)/H(+) antiporter subunit D"  
"JS1\_O21\_00116" 9706 "s59E5H2" 5.252033 "Na(+)/H(+) antiporter subunit D"  
"JS1\_O21\_00116" 9706 "s63E6H2" 0.7357622 "Na(+)/H(+) antiporter subunit D"  
"JS1\_O21\_00117" 9707 "s59E13H2" 0.0954795 "Na(+)/H(+) antiporter subunit C"  
"JS1\_O21\_00117" 9707 "s59E25H2" 0 "Na(+)/H(+) antiporter subunit C"  
"JS1\_O21\_00117" 9707 "s59E5H2" 5.327418 "Na(+)/H(+) antiporter subunit C"  
"JS1\_O21\_00117" 9707 "s63E6H2" 0.9651396 "Na(+)/H(+) antiporter subunit C"  
"JS1\_O21\_00118" 9708 "s59E13H2" 0.2267099 "Na(+)/H(+) antiporter subunit B"  
"JS1\_O21\_00118" 9708 "s59E25H2" 0 "Na(+)/H(+) antiporter subunit B"  
"JS1\_O21\_00118" 9708 "s59E5H2" 2.538468 "Na(+)/H(+) antiporter subunit B"  
"JS1\_O21\_00118" 9708 "s63E6H2" 1.108628 "Na(+)/H(+) antiporter subunit B"  
"JS1\_O21\_00119" 9709 "s59E13H2" 0.623015 "putative monovalent cation/H+ antiporter subunit B"  
"JS1\_O21\_00119" 9709 "s59E25H2" 0 "putative monovalent cation/H+ antiporter subunit B"  
"JS1\_O21\_00119" 9709 "s59E5H2" 2.131122 "putative monovalent cation/H+ antiporter subunit B"  
"JS1\_O21\_00119" 9709 "s63E6H2" 1.025576 "putative monovalent cation/H+ antiporter subunit B"  
"JS1\_O21\_00120" 9710 "s59E13H2" 1.109206 "Glutamine-binding periplasmic protein precursor"  
"JS1\_O21\_00120" 9710 "s59E25H2" 0 "Glutamine-binding periplasmic protein precursor"  
"JS1\_O21\_00120" 9710 "s59E5H2" 1.580152 "Glutamine-binding periplasmic protein precursor"  
"JS1\_O21\_00120" 9710 "s63E6H2" 0.8653482 "Glutamine-binding periplasmic protein precursor"  
"JS1\_O21\_00121" 9711 "s59E13H2" 0.5234879 "Na(+)/H(+) antiporter subunit G"  
"JS1\_O21\_00121" 9711 "s59E25H2" 0 "Na(+)/H(+) antiporter subunit G"  
"JS1\_O21\_00121" 9711 "s59E5H2" 1.705252 "Na(+)/H(+) antiporter subunit G"  
"JS1\_O21\_00121" 9711 "s63E6H2" 0.7523021 "Na(+)/H(+) antiporter subunit G"  
"JS1\_O21\_00122" 9712 "s59E13H2" 1.418706 "putative monovalent cation/H+ antiporter subunit F"  
"JS1\_O21\_00122" 9712 "s59E25H2" 0 "putative monovalent cation/H+ antiporter subunit F"  
"JS1\_O21\_00122" 9712 "s59E5H2" 1.52706 "putative monovalent cation/H+ antiporter subunit F"  
"JS1\_O21\_00122" 9712 "s63E6H2" 1.12772 "putative monovalent cation/H+ antiporter subunit F"  
"JS1\_O21\_00123" 9713 "s59E13H2" 1.53118 "Na(+)/H(+) antiporter subunit E1"  
"JS1\_O21\_00123" 9713 "s59E25H2" 0 "Na(+)/H(+) antiporter subunit E1"  
"JS1\_O21\_00123" 9713 "s59E5H2" 1.132445 "Na(+)/H(+) antiporter subunit E1"  
"JS1\_O21\_00123" 9713 "s63E6H2" 0.9313642 "Na(+)/H(+) antiporter subunit E1"  
"JS1\_O21\_00124" 9714 "s59E13H2" 1.968036 "Pyruvate formate-lyase 1-activating enzyme"  
"JS1\_O21\_00124" 9714 "s59E25H2" 0 "Pyruvate formate-lyase 1-activating enzyme"  
"JS1\_O21\_00124" 9714 "s59E5H2" 0.5221022 "Pyruvate formate-lyase 1-activating enzyme"  
"JS1\_O21\_00124" 9714 "s63E6H2" 0.8364287 "Pyruvate formate-lyase 1-activating enzyme"  
"JS1\_O21\_00125" 9715 "s59E13H2" 1.537226 "hypothetical protein"  
"JS1\_O21\_00125" 9715 "s59E25H2" 0 "hypothetical protein"  
"JS1\_O21\_00125" 9715 "s59E5H2" 6.860095 "hypothetical protein"  
"JS1\_O21\_00125" 9715 "s63E6H2" 0.3076005 "hypothetical protein"  
"JS1\_O21\_00126" 9716 "s59E13H2" 1.376691 "Hydrogenase expression/formation protein HypE"  
"JS1\_O21\_00126" 9716 "s59E25H2" 0 "Hydrogenase expression/formation protein HypE"  
"JS1\_O21\_00126" 9716 "s59E5H2" 0.1002209 "Hydrogenase expression/formation protein HypE"  
"JS1\_O21\_00126" 9716 "s63E6H2" 0.6219696 "Hydrogenase expression/formation protein HypE"  
"JS1\_O21\_00127" 9717 "s59E13H2" 1.466545 "Hydrogenase expression/formation protein HypD"

"JS1\_O21\_00127" 9717 "s59E25H2" 0 "Hydrogenase expression/formation protein HypD"  
"JS1\_O21\_00127" 9717 "s59E5H2" 0.8125886 "Hydrogenase expression/formation protein HypD"  
"JS1\_O21\_00127" 9717 "s63E6H2" 1.052378 "Hydrogenase expression/formation protein HypD"  
"JS1\_O21\_00128" 9718 "s59E13H2" 0.9261887 "Hydrogenase isoenzymes formation protein HypC"  
"JS1\_O21\_00128" 9718 "s59E25H2" 0 "Hydrogenase isoenzymes formation protein HypC"  
"JS1\_O21\_00128" 9718 "s59E5H2" 0.4301363 "Hydrogenase isoenzymes formation protein HypC"  
"JS1\_O21\_00128" 9718 "s63E6H2" 0.829429 "Hydrogenase isoenzymes formation protein HypC"  
"JS1\_O21\_00129" 9719 "s59E13H2" 1.007142 "Carbamoyltransferase HypF"  
"JS1\_O21\_00129" 9719 "s59E25H2" 0 "Carbamoyltransferase HypF"  
"JS1\_O21\_00129" 9719 "s59E5H2" 0.3811753 "Carbamoyltransferase HypF"  
"JS1\_O21\_00129" 9719 "s63E6H2" 1.018599 "Carbamoyltransferase HypF"  
"JS1\_O21\_00130" 9720 "s59E13H2" 0.9075457 "Hydrogenase isoenzymes nickel incorporation protein HypB"  
"JS1\_O21\_00130" 9720 "s59E25H2" 0 "Hydrogenase isoenzymes nickel incorporation protein HypB"  
"JS1\_O21\_00130" 9720 "s59E5H2" 0.2227259 "Hydrogenase isoenzymes nickel incorporation protein HypB"  
"JS1\_O21\_00130" 9720 "s63E6H2" 0.9495413 "Hydrogenase isoenzymes nickel incorporation protein HypB"  
"JS1\_O21\_00131" 9721 "s59E13H2" 0.02004017 "putative glycosyl transferase"  
"JS1\_O21\_00131" 9721 "s59E25H2" 0 "putative glycosyl transferase"  
"JS1\_O21\_00131" 9721 "s59E5H2" 0 "putative glycosyl transferase"  
"JS1\_O21\_00131" 9721 "s63E6H2" 0 "putative glycosyl transferase"  
"JS1\_O21\_00132" 9722 "s59E13H2" 0.008820231 "putative sugar transferase EpsL"  
"JS1\_O21\_00132" 9722 "s59E25H2" 0 "putative sugar transferase EpsL"  
"JS1\_O21\_00132" 9722 "s59E5H2" 0 "putative sugar transferase EpsL"  
"JS1\_O21\_00132" 9722 "s63E6H2" 0 "putative sugar transferase EpsL"  
"JS1\_O21\_00133" 9723 "s59E13H2" 0.01365116 "MarR family protein"  
"JS1\_O21\_00133" 9723 "s59E25H2" 0 "MarR family protein"  
"JS1\_O21\_00133" 9723 "s59E5H2" 0.05929151 "MarR family protein"  
"JS1\_O21\_00133" 9723 "s63E6H2" 0.06947624 "MarR family protein"  
"JS1\_O21\_00134" 9724 "s59E13H2" 0.02775211 "hypothetical protein"  
"JS1\_O21\_00134" 9724 "s59E25H2" 0 "hypothetical protein"  
"JS1\_O21\_00134" 9724 "s59E5H2" 0 "hypothetical protein"  
"JS1\_O21\_00134" 9724 "s63E6H2" 0 "hypothetical protein"  
"JS1\_O21\_00135" 9725 "s59E13H2" 0.05116445 "(3S)-malyl-CoA thioesterase"  
"JS1\_O21\_00135" 9725 "s59E25H2" 0 "(3S)-malyl-CoA thioesterase"  
"JS1\_O21\_00135" 9725 "s59E5H2" 0 "(3S)-malyl-CoA thioesterase"  
"JS1\_O21\_00135" 9725 "s63E6H2" 0 "(3S)-malyl-CoA thioesterase"  
"JS1\_O21\_00136" 9726 "s59E13H2" 0.0524776 "Bifunctional protein PaaZ"  
"JS1\_O21\_00136" 9726 "s59E25H2" 0 "Bifunctional protein PaaZ"  
"JS1\_O21\_00136" 9726 "s59E5H2" 0 "Bifunctional protein PaaZ"  
"JS1\_O21\_00136" 9726 "s63E6H2" 0 "Bifunctional protein PaaZ"  
"JS1\_O21\_00137" 9727 "s59E13H2" 0.05991857 "Citrate lyase subunit beta"  
"JS1\_O21\_00137" 9727 "s59E25H2" 0 "Citrate lyase subunit beta"  
"JS1\_O21\_00137" 9727 "s59E5H2" 0 "Citrate lyase subunit beta"  
"JS1\_O21\_00137" 9727 "s63E6H2" 0 "Citrate lyase subunit beta"  
"JS1\_O21\_00138" 9728 "s59E13H2" 0.0530086 "Putative acetyltransferase EpsM"  
"JS1\_O21\_00138" 9728 "s59E25H2" 0 "Putative acetyltransferase EpsM"  
"JS1\_O21\_00138" 9728 "s59E5H2" 0 "Putative acetyltransferase EpsM"  
"JS1\_O21\_00138" 9728 "s63E6H2" 0 "Putative acetyltransferase EpsM"

"JS1\_O21\_00139" 9729 "s59E13H2" 0.0483518 "Putative pyridoxal phosphate-dependent aminotransferase EpsN"  
"JS1\_O21\_00139" 9729 "s59E25H2" 0 "Putative pyridoxal phosphate-dependent aminotransferase EpsN"  
"JS1\_O21\_00139" 9729 "s59E5H2" 0.003588311 "Putative pyridoxal phosphate-dependent aminotransferase EpsN"  
"JS1\_O21\_00139" 9729 "s63E6H2" 0.01022328 "Putative pyridoxal phosphate-dependent aminotransferase EpsN"  
"JS1\_O21\_00140" 9730 "s59E13H2" 0.1128098 "Integrase core domain protein"  
"JS1\_O21\_00140" 9730 "s59E25H2" 0 "Integrase core domain protein"  
"JS1\_O21\_00140" 9730 "s59E5H2" 0.0921278 "Integrase core domain protein"  
"JS1\_O21\_00140" 9730 "s63E6H2" 1.359876 "Integrase core domain protein"  
"JS1\_O21\_00141" 9731 "s59E13H2" 0.09597028 "transposase/IS protein"  
"JS1\_O21\_00141" 9731 "s59E25H2" 0 "transposase/IS protein"  
"JS1\_O21\_00141" 9731 "s59E5H2" 0.1404798 "transposase/IS protein"  
"JS1\_O21\_00141" 9731 "s63E6H2" 2.470563 "transposase/IS protein"  
"JS1\_O21\_00142" 9732 "s59E13H2" 0.4773441 "Transposase IS116/IS110/IS902 family protein"  
"JS1\_O21\_00142" 9732 "s59E25H2" 0 "Transposase IS116/IS110/IS902 family protein"  
"JS1\_O21\_00142" 9732 "s59E5H2" 1.03205 "Transposase IS116/IS110/IS902 family protein"  
"JS1\_O21\_00142" 9732 "s63E6H2" 0.8039426 "Transposase IS116/IS110/IS902 family protein"  
"JS1\_O21\_00143" 9733 "s59E13H2" 0.09724191 "hypothetical protein"  
"JS1\_O21\_00143" 9733 "s59E25H2" 0 "hypothetical protein"  
"JS1\_O21\_00143" 9733 "s59E5H2" 0.000855823 "hypothetical protein"  
"JS1\_O21\_00143" 9733 "s63E6H2" 0 "hypothetical protein"  
"JS1\_O21\_00144" 9734 "s59E13H2" 0.1842632 "mRNA interferase MazF9"  
"JS1\_O21\_00144" 9734 "s59E25H2" 0 "mRNA interferase MazF9"  
"JS1\_O21\_00144" 9734 "s59E5H2" 0.0002795126 "mRNA interferase MazF9"  
"JS1\_O21\_00144" 9734 "s63E6H2" 0.004873913 "mRNA interferase MazF9"  
"JS1\_O21\_00145" 9735 "s59E13H2" 0.2514691 "hypothetical protein"  
"JS1\_O21\_00145" 9735 "s59E25H2" 0 "hypothetical protein"  
"JS1\_O21\_00145" 9735 "s59E5H2" 0.03043255 "hypothetical protein"  
"JS1\_O21\_00145" 9735 "s63E6H2" 0.0345293 "hypothetical protein"  
"JS1\_O21\_00146" 9736 "s59E13H2" 0.1197572 "hypothetical protein"  
"JS1\_O21\_00146" 9736 "s59E25H2" 0 "hypothetical protein"  
"JS1\_O21\_00146" 9736 "s59E5H2" 0 "hypothetical protein"  
"JS1\_O21\_00146" 9736 "s63E6H2" 0.006020552 "hypothetical protein"  
"JS1\_O21\_00147" 9737 "s59E13H2" 0.08803123 "UDP-glucose 6-dehydrogenase TuoD"  
"JS1\_O21\_00147" 9737 "s59E25H2" 0 "UDP-glucose 6-dehydrogenase TuoD"  
"JS1\_O21\_00147" 9737 "s59E5H2" 0.1353285 "UDP-glucose 6-dehydrogenase TuoD"  
"JS1\_O21\_00147" 9737 "s63E6H2" 0.04474539 "UDP-glucose 6-dehydrogenase TuoD"  
"JS1\_O21\_00148" 9738 "s59E13H2" 0.03112392 "Polysaccharide biosynthesis protein"  
"JS1\_O21\_00148" 9738 "s59E25H2" 0 "Polysaccharide biosynthesis protein"  
"JS1\_O21\_00148" 9738 "s59E5H2" 0 "Polysaccharide biosynthesis protein"  
"JS1\_O21\_00148" 9738 "s63E6H2" 0 "Polysaccharide biosynthesis protein"  
"JS1\_O21\_00149" 9739 "s59E13H2" 0.03274047 "hypothetical protein"  
"JS1\_O21\_00149" 9739 "s59E25H2" 0 "hypothetical protein"  
"JS1\_O21\_00149" 9739 "s59E5H2" 0 "hypothetical protein"  
"JS1\_O21\_00149" 9739 "s63E6H2" 0 "hypothetical protein"  
"JS1\_O21\_00150" 9740 "s59E13H2" 0.02024304 "D-inositol 3-phosphate glycosyltransferase"  
"JS1\_O21\_00150" 9740 "s59E25H2" 0 "D-inositol 3-phosphate glycosyltransferase"  
"JS1\_O21\_00150" 9740 "s59E5H2" 0 "D-inositol 3-phosphate glycosyltransferase"



"JS1\_O21\_00150" 9740 "s63E6H2" 0 "D-inositol 3-phosphate glycosyltransferase"  
"JS1\_O21\_00151" 9741 "s59E13H2" 0.05863801 "GDP-mannose 4,6-dehydratase"  
"JS1\_O21\_00151" 9741 "s59E25H2" 0 "GDP-mannose 4,6-dehydratase"  
"JS1\_O21\_00151" 9741 "s59E5H2" 0 "GDP-mannose 4,6-dehydratase"  
"JS1\_O21\_00151" 9741 "s63E6H2" 0 "GDP-mannose 4,6-dehydratase"  
"JS1\_O21\_00152" 9742 "s59E13H2" 0.05246063 "Putative teichuronic acid biosynthesis glycosyltransferase TuaG"  
"JS1\_O21\_00152" 9742 "s59E25H2" 0 "Putative teichuronic acid biosynthesis glycosyltransferase TuaG"  
"JS1\_O21\_00152" 9742 "s59E5H2" 0 "Putative teichuronic acid biosynthesis glycosyltransferase TuaG"  
"JS1\_O21\_00152" 9742 "s63E6H2" 0.003377383 "Putative teichuronic acid biosynthesis glycosyltransferase TuaG"  
"JS1\_O21\_00153" 9743 "s59E13H2" 0.01667296 "NAD dependent epimerase/dehydratase family protein"  
"JS1\_O21\_00153" 9743 "s59E25H2" 0 "NAD dependent epimerase/dehydratase family protein"  
"JS1\_O21\_00153" 9743 "s59E5H2" 0.0196607 "NAD dependent epimerase/dehydratase family protein"  
"JS1\_O21\_00153" 9743 "s63E6H2" 0 "NAD dependent epimerase/dehydratase family protein"  
"JS1\_O21\_00154" 9744 "s59E13H2" 0.02033014 "UDP-glucose 4-epimerase"  
"JS1\_O21\_00154" 9744 "s59E25H2" 0 "UDP-glucose 4-epimerase"  
"JS1\_O21\_00154" 9744 "s59E5H2" 0.007215905 "UDP-glucose 4-epimerase"  
"JS1\_O21\_00154" 9744 "s63E6H2" 0.004341491 "UDP-glucose 4-epimerase"  
"JS1\_O21\_00155" 9745 "s59E13H2" 0.02052673 "hypothetical protein"  
"JS1\_O21\_00155" 9745 "s59E25H2" 0 "hypothetical protein"  
"JS1\_O21\_00155" 9745 "s59E5H2" 0 "hypothetical protein"  
"JS1\_O21\_00155" 9745 "s63E6H2" 0 "hypothetical protein"  
"JS1\_O21\_00156" 9746 "s59E13H2" 0.1585082 "Glycosyltransferase AgIE"  
"JS1\_O21\_00156" 9746 "s59E25H2" 0 "Glycosyltransferase AgIE"  
"JS1\_O21\_00156" 9746 "s59E5H2" 0 "Glycosyltransferase AgIE"  
"JS1\_O21\_00156" 9746 "s63E6H2" 0 "Glycosyltransferase AgIE"  
"JS1\_O21\_00157" 9747 "s59E13H2" 0.1385322 "hypothetical protein"  
"JS1\_O21\_00157" 9747 "s59E25H2" 0 "hypothetical protein"  
"JS1\_O21\_00157" 9747 "s59E5H2" 0 "hypothetical protein"  
"JS1\_O21\_00157" 9747 "s63E6H2" 0 "hypothetical protein"  
"JS1\_O21\_00158" 9748 "s59E13H2" 0.1443511 "hypothetical protein"  
"JS1\_O21\_00158" 9748 "s59E25H2" 0 "hypothetical protein"  
"JS1\_O21\_00158" 9748 "s59E5H2" 0 "hypothetical protein"  
"JS1\_O21\_00158" 9748 "s63E6H2" 0 "hypothetical protein"  
"JS1\_O21\_00159" 9749 "s59E13H2" 0.1584972 "Glycosyl transferases group 1"  
"JS1\_O21\_00159" 9749 "s59E25H2" 0 "Glycosyl transferases group 1"  
"JS1\_O21\_00159" 9749 "s59E5H2" 0 "Glycosyl transferases group 1"  
"JS1\_O21\_00159" 9749 "s63E6H2" 0 "Glycosyl transferases group 1"  
"JS1\_O21\_00160" 9750 "s59E13H2" 0.1099549 "Polysaccharide biosynthesis protein"  
"JS1\_O21\_00160" 9750 "s59E25H2" 0 "Polysaccharide biosynthesis protein"  
"JS1\_O21\_00160" 9750 "s59E5H2" 0 "Polysaccharide biosynthesis protein"  
"JS1\_O21\_00160" 9750 "s63E6H2" 0 "Polysaccharide biosynthesis protein"  
"JS1\_O21\_00161" 9751 "s59E13H2" 0.0001834809 "bifunctional 3-demethylubiquinone-9 3-methyltransferase/ 2-octaprenyl-6-hydroxy phenol methylase"  
"JS1\_O21\_00161" 9751 "s59E25H2" 0 "bifunctional 3-demethylubiquinone-9 3-methyltransferase/ 2-octaprenyl-6-hydroxy phenol methylase"  
"JS1\_O21\_00161" 9751 "s59E5H2" 0 "bifunctional 3-demethylubiquinone-9 3-methyltransferase/ 2-octaprenyl-6-hydroxy phenol methylase"  
"JS1\_O21\_00161" 9751 "s63E6H2" 0 "bifunctional 3-demethylubiquinone-9 3-methyltransferase/ 2-octaprenyl-6-hydroxy phenol methylase"  
"JS1\_O21\_00162" 9752 "s59E13H2" 0.0287431 "UDP-glucose 6-dehydrogenase TuaD"  
"JS1\_O21\_00162" 9752 "s59E25H2" 0 "UDP-glucose 6-dehydrogenase TuaD"

"JS1\_O21\_00162" 9752 "s59E5H2" 0.02572973 "UDP-glucose 6-dehydrogenase TuaD"  
"JS1\_O21\_00162" 9752 "s63E6H2" 0.02539292 "UDP-glucose 6-dehydrogenase TuaD"  
"JS1\_O21\_00163" 9753 "s59E13H2" 0.006350758 "hypothetical protein"  
"JS1\_O21\_00163" 9753 "s59E25H2" 0 "hypothetical protein"  
"JS1\_O21\_00163" 9753 "s59E5H2" 0.05698907 "hypothetical protein"  
"JS1\_O21\_00163" 9753 "s63E6H2" 1.42784 "hypothetical protein"  
"JS1\_O21\_00164" 9754 "s59E13H2" 0.003411822 "hypothetical protein"  
"JS1\_O21\_00164" 9754 "s59E25H2" 0 "hypothetical protein"  
"JS1\_O21\_00164" 9754 "s59E5H2" 0 "hypothetical protein"  
"JS1\_O21\_00164" 9754 "s63E6H2" 0.003624509 "hypothetical protein"  
"JS1\_O21\_00165" 9755 "s59E13H2" 0.0268556 "IS2 transposase TnpB"  
"JS1\_O21\_00165" 9755 "s59E25H2" 0 "IS2 transposase TnpB"  
"JS1\_O21\_00165" 9755 "s59E5H2" 0.3945653 "IS2 transposase TnpB"  
"JS1\_O21\_00165" 9755 "s63E6H2" 0.6110845 "IS2 transposase TnpB"  
"JS1\_O21\_00166" 9756 "s59E13H2" 0.09148203 "Transposase"  
"JS1\_O21\_00166" 9756 "s59E25H2" 0 "Transposase"  
"JS1\_O21\_00166" 9756 "s59E5H2" 0.9325939 "Transposase"  
"JS1\_O21\_00166" 9756 "s63E6H2" 0.8772694 "Transposase"  
"JS1\_O21\_00167" 9757 "s59E13H2" 0.001642293 "Divergent AAA domain protein"  
"JS1\_O21\_00167" 9757 "s59E25H2" 0 "Divergent AAA domain protein"  
"JS1\_O21\_00167" 9757 "s59E5H2" 0.05991705 "Divergent AAA domain protein"  
"JS1\_O21\_00167" 9757 "s63E6H2" 0.01626032 "Divergent AAA domain protein"  
"JS1\_O21\_00168" 9758 "s59E13H2" 0.00602174 "YcfA-like protein"  
"JS1\_O21\_00168" 9758 "s59E25H2" 0 "YcfA-like protein"  
"JS1\_O21\_00168" 9758 "s59E5H2" 0 "YcfA-like protein"  
"JS1\_O21\_00168" 9758 "s63E6H2" 0.03732008 "YcfA-like protein"  
"JS1\_O21\_00169" 9759 "s59E13H2" 0.007213207 "hypothetical protein"  
"JS1\_O21\_00169" 9759 "s59E25H2" 0 "hypothetical protein"  
"JS1\_O21\_00169" 9759 "s59E5H2" 0 "hypothetical protein"  
"JS1\_O21\_00169" 9759 "s63E6H2" 0.05621467 "hypothetical protein"  
"JS1\_O21\_00170" 9760 "s59E13H2" 0.008542225 "Archaeal ATPase"  
"JS1\_O21\_00170" 9760 "s59E25H2" 0 "Archaeal ATPase"  
"JS1\_O21\_00170" 9760 "s59E5H2" 0.008529352 "Archaeal ATPase"  
"JS1\_O21\_00170" 9760 "s63E6H2" 0.07190471 "Archaeal ATPase"  
"JS1\_O21\_00171" 9761 "s59E13H2" 0.0167217 "hypothetical protein"  
"JS1\_O21\_00171" 9761 "s59E25H2" 0 "hypothetical protein"  
"JS1\_O21\_00171" 9761 "s59E5H2" 0.01611947 "hypothetical protein"  
"JS1\_O21\_00171" 9761 "s63E6H2" 0.04414652 "hypothetical protein"  
"JS1\_O21\_00172" 9762 "s59E13H2" 0.04782947 "Ribosomal RNA small subunit methyltransferase H"  
"JS1\_O21\_00172" 9762 "s59E25H2" 0 "Ribosomal RNA small subunit methyltransferase H"  
"JS1\_O21\_00172" 9762 "s59E5H2" 0.2885931 "Ribosomal RNA small subunit methyltransferase H"  
"JS1\_O21\_00172" 9762 "s63E6H2" 0.2202661 "Ribosomal RNA small subunit methyltransferase H"  
"JS1\_O21\_00173" 9763 "s59E13H2" 0.09261506 "Cell division protein FtsL"  
"JS1\_O21\_00173" 9763 "s59E25H2" 0 "Cell division protein FtsL"  
"JS1\_O21\_00173" 9763 "s59E5H2" 0.384854 "Cell division protein FtsL"  
"JS1\_O21\_00173" 9763 "s63E6H2" 0.319721 "Cell division protein FtsL"  
"JS1\_O21\_00174" 9764 "s59E13H2" 0.09183614 "Stage V sporulation protein D"

"JS1\_O21\_00174" 9764 "s59E25H2" 0 "Stage V sporulation protein D"  
"JS1\_O21\_00174" 9764 "s59E5H2" 0.7045024 "Stage V sporulation protein D"  
"JS1\_O21\_00174" 9764 "s63E6H2" 0.7713582 "Stage V sporulation protein D"  
"JS1\_O21\_00176" 9766 "s59E13H2" 0.09170317 "Negative regulator of genetic competence ClpC/MecB"  
"JS1\_O21\_00176" 9766 "s59E25H2" 0 "Negative regulator of genetic competence ClpC/MecB"  
"JS1\_O21\_00176" 9766 "s59E5H2" 0.4186934 "Negative regulator of genetic competence ClpC/MecB"  
"JS1\_O21\_00176" 9766 "s63E6H2" 0.1430141 "Negative regulator of genetic competence ClpC/MecB"  
"JS1\_O21\_00177" 9767 "s59E13H2" 0.1236921 "hypothetical protein"  
"JS1\_O21\_00177" 9767 "s59E25H2" 0 "hypothetical protein"  
"JS1\_O21\_00177" 9767 "s59E5H2" 0.5038144 "hypothetical protein"  
"JS1\_O21\_00177" 9767 "s63E6H2" 0.6676511 "hypothetical protein"  
"JS1\_O21\_00178" 9768 "s59E13H2" 0.1159963 "hypothetical protein"  
"JS1\_O21\_00178" 9768 "s59E25H2" 0 "hypothetical protein"  
"JS1\_O21\_00178" 9768 "s59E5H2" 0.3550329 "hypothetical protein"  
"JS1\_O21\_00178" 9768 "s63E6H2" 0.744812 "hypothetical protein"  
"JS1\_O21\_00179" 9769 "s59E13H2" 0.06153841 "Putative K(+)-stimulated pyrophosphate-energized sodium pump"  
"JS1\_O21\_00179" 9769 "s59E25H2" 0 "Putative K(+)-stimulated pyrophosphate-energized sodium pump"  
"JS1\_O21\_00179" 9769 "s59E5H2" 0.3335904 "Putative K(+)-stimulated pyrophosphate-energized sodium pump"  
"JS1\_O21\_00179" 9769 "s63E6H2" 0.0824463 "Putative K(+)-stimulated pyrophosphate-energized sodium pump"  
"JS1\_O21\_00180" 9770 "s59E13H2" 0.1021881 "Pyrimidine-nucleoside phosphorylase"  
"JS1\_O21\_00180" 9770 "s59E25H2" 0 "Pyrimidine-nucleoside phosphorylase"  
"JS1\_O21\_00180" 9770 "s59E5H2" 0.2631936 "Pyrimidine-nucleoside phosphorylase"  
"JS1\_O21\_00180" 9770 "s63E6H2" 0.0844788 "Pyrimidine-nucleoside phosphorylase"  
"JS1\_O21\_00181" 9771 "s59E13H2" 0.04507331 "Multifunctional CCA protein"  
"JS1\_O21\_00181" 9771 "s59E25H2" 0 "Multifunctional CCA protein"  
"JS1\_O21\_00181" 9771 "s59E5H2" 0.2576635 "Multifunctional CCA protein"  
"JS1\_O21\_00181" 9771 "s63E6H2" 0.08863346 "Multifunctional CCA protein"  
"JS1\_O21\_00182" 9772 "s59E13H2" 0.04903263 "Peptidase family M50"  
"JS1\_O21\_00182" 9772 "s59E25H2" 0 "Peptidase family M50"  
"JS1\_O21\_00182" 9772 "s59E5H2" 0.2338693 "Peptidase family M50"  
"JS1\_O21\_00182" 9772 "s63E6H2" 0.06645001 "Peptidase family M50"  
"JS1\_O21\_00183" 9773 "s59E13H2" 0.08231842 "Tryptophan--tRNA ligase"  
"JS1\_O21\_00183" 9773 "s59E25H2" 0 "Tryptophan--tRNA ligase"  
"JS1\_O21\_00183" 9773 "s59E5H2" 0.1880857 "Tryptophan--tRNA ligase"  
"JS1\_O21\_00183" 9773 "s63E6H2" 0.06276389 "Tryptophan--tRNA ligase"  
"JS1\_O21\_00184" 9774 "s59E13H2" 13.73489 "PEGA domain protein"  
"JS1\_O21\_00184" 9774 "s59E25H2" 0 "PEGA domain protein"  
"JS1\_O21\_00184" 9774 "s59E5H2" 0.2926516 "PEGA domain protein"  
"JS1\_O21\_00184" 9774 "s63E6H2" 0.2844382 "PEGA domain protein"  
"JS1\_O21\_00185" 9775 "s59E13H2" 0.5652151 "Dihydrolipoyl dehydrogenase"  
"JS1\_O21\_00185" 9775 "s59E25H2" 0 "Dihydrolipoyl dehydrogenase"  
"JS1\_O21\_00185" 9775 "s59E5H2" 0.07737891 "Dihydrolipoyl dehydrogenase"  
"JS1\_O21\_00185" 9775 "s63E6H2" 0.6348236 "Dihydrolipoyl dehydrogenase"  
"JS1\_O21\_00186" 9776 "s59E13H2" 0.2143438 "hypothetical protein"  
"JS1\_O21\_00186" 9776 "s59E25H2" 0 "hypothetical protein"  
"JS1\_O21\_00186" 9776 "s59E5H2" 0.2085814 "hypothetical protein"  
"JS1\_O21\_00186" 9776 "s63E6H2" 0.6834034 "hypothetical protein"

"JS1\_O21\_00187" 9777 "s59E13H2" 1.172375 "hypothetical protein"  
"JS1\_O21\_00187" 9777 "s59E25H2" 0 "hypothetical protein"  
"JS1\_O21\_00187" 9777 "s59E5H2" 0.8996238 "hypothetical protein"  
"JS1\_O21\_00187" 9777 "s63E6H2" 0.5482076 "hypothetical protein"  
"JS1\_O21\_00188" 9778 "s59E13H2" 0.1794114 "Microcin C7 self-immunity protein MccF"  
"JS1\_O21\_00188" 9778 "s59E25H2" 0 "Microcin C7 self-immunity protein MccF"  
"JS1\_O21\_00188" 9778 "s59E5H2" 0.9685339 "Microcin C7 self-immunity protein MccF"  
"JS1\_O21\_00188" 9778 "s63E6H2" 0.7585583 "Microcin C7 self-immunity protein MccF"  
"JS1\_O21\_00189" 9779 "s59E13H2" 0.09208174 "Haemolysin-III related"  
"JS1\_O21\_00189" 9779 "s59E25H2" 0 "Haemolysin-III related"  
"JS1\_O21\_00189" 9779 "s59E5H2" 0.5012908 "Haemolysin-III related"  
"JS1\_O21\_00189" 9779 "s63E6H2" 0.9160814 "Haemolysin-III related"  
"JS1\_O21\_00190" 9780 "s59E13H2" 0.04255922 "putative PIN and TRAM-domain containing protein precursor"  
"JS1\_O21\_00190" 9780 "s59E25H2" 0 "putative PIN and TRAM-domain containing protein precursor"  
"JS1\_O21\_00190" 9780 "s59E5H2" 0.2467527 "putative PIN and TRAM-domain containing protein precursor"  
"JS1\_O21\_00190" 9780 "s63E6H2" 0.5373174 "putative PIN and TRAM-domain containing protein precursor"  
"JS1\_O21\_00191" 9781 "s59E13H2" 0.02338404 "hypothetical protein"  
"JS1\_O21\_00191" 9781 "s59E25H2" 0 "hypothetical protein"  
"JS1\_O21\_00191" 9781 "s59E5H2" 0.02640196 "hypothetical protein"  
"JS1\_O21\_00191" 9781 "s63E6H2" 0.03659153 "hypothetical protein"  
"JS1\_O21\_00192" 9782 "s59E13H2" 0.0141527 "Pseudouridine kinase"  
"JS1\_O21\_00192" 9782 "s59E25H2" 0 "Pseudouridine kinase"  
"JS1\_O21\_00192" 9782 "s59E5H2" 0.01393196 "Pseudouridine kinase"  
"JS1\_O21\_00192" 9782 "s63E6H2" 0.3349889 "Pseudouridine kinase"  
"JS1\_O21\_00193" 9783 "s59E13H2" 0.06493397 "Pseudouridine-5'-phosphate glycosidase"  
"JS1\_O21\_00193" 9783 "s59E25H2" 0 "Pseudouridine-5'-phosphate glycosidase"  
"JS1\_O21\_00193" 9783 "s59E5H2" 0.04615327 "Pseudouridine-5'-phosphate glycosidase"  
"JS1\_O21\_00193" 9783 "s63E6H2" 0.3063605 "Pseudouridine-5'-phosphate glycosidase"  
"JS1\_O21\_00194" 9784 "s59E13H2" 0.04747798 "Nucleotidyltransferase domain protein"  
"JS1\_O21\_00194" 9784 "s59E25H2" 0 "Nucleotidyltransferase domain protein"  
"JS1\_O21\_00194" 9784 "s59E5H2" 0.1075943 "Nucleotidyltransferase domain protein"  
"JS1\_O21\_00194" 9784 "s63E6H2" 0.05468336 "Nucleotidyltransferase domain protein"  
"JS1\_O21\_00195" 9785 "s59E13H2" 0.05904525 "hypothetical protein"  
"JS1\_O21\_00195" 9785 "s59E25H2" 0 "hypothetical protein"  
"JS1\_O21\_00195" 9785 "s59E5H2" 0.03298387 "hypothetical protein"  
"JS1\_O21\_00195" 9785 "s63E6H2" 0.0286252 "hypothetical protein"  
"JS1\_O21\_00196" 9786 "s59E13H2" 0.05010394 "Digeranylgeranyl glycerophospholipid reductase"  
"JS1\_O21\_00196" 9786 "s59E25H2" 0 "Digeranylgeranyl glycerophospholipid reductase"  
"JS1\_O21\_00196" 9786 "s59E5H2" 0.007710917 "Digeranylgeranyl glycerophospholipid reductase"  
"JS1\_O21\_00196" 9786 "s63E6H2" 0.3965267 "Digeranylgeranyl glycerophospholipid reductase"  
"JS1\_O21\_00197" 9787 "s59E13H2" 0.0488194 "Glucose-1-phosphate thymidyltransferase"  
"JS1\_O21\_00197" 9787 "s59E25H2" 0 "Glucose-1-phosphate thymidyltransferase"  
"JS1\_O21\_00197" 9787 "s59E5H2" 0.1376024 "Glucose-1-phosphate thymidyltransferase"  
"JS1\_O21\_00197" 9787 "s63E6H2" 0.7684609 "Glucose-1-phosphate thymidyltransferase"  
"JS1\_O21\_00198" 9788 "s59E13H2" 0.07484472 "translocation protein TolB"  
"JS1\_O21\_00198" 9788 "s59E25H2" 0.2175552 "translocation protein TolB"  
"JS1\_O21\_00198" 9788 "s59E5H2" 0.05629147 "translocation protein TolB"

"JS1\_O21\_00198" 9788 "s63E6H2" 0.6816236 "translocation protein TolB"  
"JS1\_O21\_00199" 9789 "s59E13H2" 0.01345496 "UDP-N-acetyl-alpha-D-glucosamine C6 dehydratase"  
"JS1\_O21\_00199" 9789 "s59E25H2" 0 "UDP-N-acetyl-alpha-D-glucosamine C6 dehydratase"  
"JS1\_O21\_00199" 9789 "s59E5H2" 0.003930909 "UDP-N-acetyl-alpha-D-glucosamine C6 dehydratase"  
"JS1\_O21\_00199" 9789 "s63E6H2" 0.006491112 "UDP-N-acetyl-alpha-D-glucosamine C6 dehydratase"  
"JS1\_O21\_00200" 9790 "s59E13H2" 0.04128574 "putative undecaprenyl-phosphate N-acetylglucosaminyl 1-phosphate transferase"  
"JS1\_O21\_00200" 9790 "s59E25H2" 0 "putative undecaprenyl-phosphate N-acetylglucosaminyl 1-phosphate transferase"  
"JS1\_O21\_00200" 9790 "s59E5H2" 0.0009932422 "putative undecaprenyl-phosphate N-acetylglucosaminyl 1-phosphate transferase"  
"JS1\_O21\_00200" 9790 "s63E6H2" 0.01571904 "putative undecaprenyl-phosphate N-acetylglucosaminyl 1-phosphate transferase"  
"JS1\_O21\_00201" 9791 "s59E13H2" 0.02415435 "UDP-glucose 4-epimerase"  
"JS1\_O21\_00201" 9791 "s59E25H2" 0 "UDP-glucose 4-epimerase"  
"JS1\_O21\_00201" 9791 "s59E5H2" 0.006876184 "UDP-glucose 4-epimerase"  
"JS1\_O21\_00201" 9791 "s63E6H2" 0.008896215 "UDP-glucose 4-epimerase"  
"JS1\_O21\_00202" 9792 "s59E13H2" 0.03625535 "Putative glycosyltransferase EpsF"  
"JS1\_O21\_00202" 9792 "s59E25H2" 0 "Putative glycosyltransferase EpsF"  
"JS1\_O21\_00202" 9792 "s59E5H2" 0 "Putative glycosyltransferase EpsF"  
"JS1\_O21\_00202" 9792 "s63E6H2" 0.0780741 "Putative glycosyltransferase EpsF"  
"JS1\_O21\_00203" 9793 "s59E13H2" 0.01402311 "hypothetical protein"  
"JS1\_O21\_00203" 9793 "s59E25H2" 0 "hypothetical protein"  
"JS1\_O21\_00203" 9793 "s59E5H2" 0 "hypothetical protein"  
"JS1\_O21\_00203" 9793 "s63E6H2" 0 "hypothetical protein"  
"JS1\_O21\_00204" 9794 "s59E13H2" 0.01037434 "GalNAc-alpha-(1-"  
"JS1\_O21\_00204" 9794 "s59E25H2" 0 "GalNAc-alpha-(1-"  
"JS1\_O21\_00204" 9794 "s59E5H2" 0.005795079 "GalNAc-alpha-(1-"  
"JS1\_O21\_00204" 9794 "s63E6H2" 0.001352764 "GalNAc-alpha-(1-"  
"JS1\_O21\_00205" 9795 "s59E13H2" 0.009289212 "Phenylacetate-coenzyme A ligase"  
"JS1\_O21\_00205" 9795 "s59E25H2" 0 "Phenylacetate-coenzyme A ligase"  
"JS1\_O21\_00205" 9795 "s59E5H2" 0 "Phenylacetate-coenzyme A ligase"  
"JS1\_O21\_00205" 9795 "s63E6H2" 0.000611006 "Phenylacetate-coenzyme A ligase"  
"JS1\_O21\_00206" 9796 "s59E13H2" 0.007939402 "Cyclic pyranopterin monophosphate synthase 1"  
"JS1\_O21\_00206" 9796 "s59E25H2" 0 "Cyclic pyranopterin monophosphate synthase 1"  
"JS1\_O21\_00206" 9796 "s59E5H2" 0 "Cyclic pyranopterin monophosphate synthase 1"  
"JS1\_O21\_00206" 9796 "s63E6H2" 0.006807709 "Cyclic pyranopterin monophosphate synthase 1"  
"JS1\_O21\_00207" 9797 "s59E13H2" 0.02586092 "Phenylacetate-coenzyme A ligase"  
"JS1\_O21\_00207" 9797 "s59E25H2" 0 "Phenylacetate-coenzyme A ligase"  
"JS1\_O21\_00207" 9797 "s59E5H2" 0.03227108 "Phenylacetate-coenzyme A ligase"  
"JS1\_O21\_00207" 9797 "s63E6H2" 0 "Phenylacetate-coenzyme A ligase"  
"JS1\_O21\_00208" 9798 "s59E13H2" 0.01987703 "hypothetical protein"  
"JS1\_O21\_00208" 9798 "s59E25H2" 0 "hypothetical protein"  
"JS1\_O21\_00208" 9798 "s59E5H2" 0.00954606 "hypothetical protein"  
"JS1\_O21\_00208" 9798 "s63E6H2" 0.003546252 "hypothetical protein"  
"JS1\_O21\_00209" 9799 "s59E13H2" 0.02394505 "N-acetylgalactosamine-N,N'-diacetylbaucillosaminyl-diphospho-undecaprenol 4-alpha-N-acetylgalactosaminyltransferase"  
"JS1\_O21\_00209" 9799 "s59E25H2" 0 "N-acetylgalactosamine-N,N'-diacetylbaucillosaminyl-diphospho-undecaprenol 4-alpha-N-acetylgalactosaminyltransferase"  
"JS1\_O21\_00209" 9799 "s59E5H2" 0 "N-acetylgalactosamine-N,N'-diacetylbaucillosaminyl-diphospho-undecaprenol 4-alpha-N-acetylgalactosaminyltransferase"  
"JS1\_O21\_00209" 9799 "s63E6H2" 0 "N-acetylgalactosamine-N,N'-diacetylbaucillosaminyl-diphospho-undecaprenol 4-alpha-N-acetylgalactosaminyltransferase"  
"JS1\_O21\_00210" 9800 "s59E13H2" 0.04728928 "UDP-Glc:alpha-D-GlcNAc-diphosphoundecaprenol beta-1,3-glucosyltransferase WfgD"  
"JS1\_O21\_00210" 9800 "s59E25H2" 0 "UDP-Glc:alpha-D-GlcNAc-diphosphoundecaprenol beta-1,3-glucosyltransferase WfgD"

"JS1\_O21\_00210" 9800 "s59E5H2" 0.004265351 "UDP-Glc:alpha-D-GlcNAc-diphosphoundecaprenol beta-1,3-glucosyltransferase WfgD"  
"JS1\_O21\_00210" 9800 "s63E6H2" 0.005964586 "UDP-Glc:alpha-D-GlcNAc-diphosphoundecaprenol beta-1,3-glucosyltransferase WfgD"  
"JS1\_O21\_00211" 9801 "s59E13H2" 0.03523712 "Lipopolysaccharide biosynthesis protein WzxC"  
"JS1\_O21\_00211" 9801 "s59E25H2" 0 "Lipopolysaccharide biosynthesis protein WzxC"  
"JS1\_O21\_00211" 9801 "s59E5H2" 0 "Lipopolysaccharide biosynthesis protein WzxC"  
"JS1\_O21\_00211" 9801 "s63E6H2" 0.0164419 "Lipopolysaccharide biosynthesis protein WzxC"  
"JS1\_O21\_00212" 9802 "s59E13H2" 0.004476548 "D-inositol 3-phosphate glycosyltransferase"  
"JS1\_O21\_00212" 9802 "s59E25H2" 0 "D-inositol 3-phosphate glycosyltransferase"  
"JS1\_O21\_00212" 9802 "s59E5H2" 0 "D-inositol 3-phosphate glycosyltransferase"  
"JS1\_O21\_00212" 9802 "s63E6H2" 0.09627101 "D-inositol 3-phosphate glycosyltransferase"  
"JS1\_O21\_00213" 9803 "s59E13H2" 2.998247 "YvrJ protein family protein"  
"JS1\_O21\_00213" 9803 "s59E25H2" 0.7518519 "YvrJ protein family protein"  
"JS1\_O21\_00213" 9803 "s59E5H2" 1.86579 "YvrJ protein family protein"  
"JS1\_O21\_00213" 9803 "s63E6H2" 5.074946 "YvrJ protein family protein"  
"JS1\_O21\_00214" 9804 "s59E13H2" 0.1884423 "Arsenate-mycothioli transferase ArsC2"  
"JS1\_O21\_00214" 9804 "s59E25H2" 0 "Arsenate-mycothioli transferase ArsC2"  
"JS1\_O21\_00214" 9804 "s59E5H2" 0.1951157 "Arsenate-mycothioli transferase ArsC2"  
"JS1\_O21\_00214" 9804 "s63E6H2" 0.08288242 "Arsenate-mycothioli transferase ArsC2"  
"JS1\_O21\_00215" 9805 "s59E13H2" 0.4132461 "Inner membrane symporter YicJ"  
"JS1\_O21\_00215" 9805 "s59E25H2" 0 "Inner membrane symporter YicJ"  
"JS1\_O21\_00215" 9805 "s59E5H2" 3.994373 "Inner membrane symporter YicJ"  
"JS1\_O21\_00215" 9805 "s63E6H2" 1.916851 "Inner membrane symporter YicJ"  
"JS1\_O21\_00216" 9806 "s59E13H2" 0.243433 "Carbon-nitrogen hydrolase"  
"JS1\_O21\_00216" 9806 "s59E25H2" 0 "Carbon-nitrogen hydrolase"  
"JS1\_O21\_00216" 9806 "s59E5H2" 2.265571 "Carbon-nitrogen hydrolase"  
"JS1\_O21\_00216" 9806 "s63E6H2" 1.032846 "Carbon-nitrogen hydrolase"  
"JS1\_O21\_00217" 9807 "s59E13H2" 0.08297555 "Formamidase"  
"JS1\_O21\_00217" 9807 "s59E25H2" 0 "Formamidase"  
"JS1\_O21\_00217" 9807 "s59E5H2" 0.4780647 "Formamidase"  
"JS1\_O21\_00217" 9807 "s63E6H2" 0.4990388 "Formamidase"  
"JS1\_O21\_00218" 9808 "s59E13H2" 0.1587651 "hypothetical protein"  
"JS1\_O21\_00218" 9808 "s59E25H2" 0 "hypothetical protein"  
"JS1\_O21\_00218" 9808 "s59E5H2" 1.056826 "hypothetical protein"  
"JS1\_O21\_00218" 9808 "s63E6H2" 1.398264 "hypothetical protein"  
"JS1\_O21\_00219" 9809 "s59E13H2" 0.5365551 "hypothetical protein"  
"JS1\_O21\_00219" 9809 "s59E25H2" 0 "hypothetical protein"  
"JS1\_O21\_00219" 9809 "s59E5H2" 0.05948561 "hypothetical protein"  
"JS1\_O21\_00219" 9809 "s63E6H2" 0.0009262665 "hypothetical protein"  
"JS1\_O21\_00220" 9810 "s59E13H2" 1.335799 "hypothetical protein"  
"JS1\_O21\_00220" 9810 "s59E25H2" 0 "hypothetical protein"  
"JS1\_O21\_00220" 9810 "s59E5H2" 0.3477137 "hypothetical protein"  
"JS1\_O21\_00220" 9810 "s63E6H2" 0.007420052 "hypothetical protein"  
"JS1\_O21\_00221" 9811 "s59E13H2" 1.295584 "hypothetical protein"  
"JS1\_O21\_00221" 9811 "s59E25H2" 0 "hypothetical protein"  
"JS1\_O21\_00221" 9811 "s59E5H2" 0.4683292 "hypothetical protein"  
"JS1\_O21\_00221" 9811 "s63E6H2" 0 "hypothetical protein"  
"JS1\_O21\_00222" 9812 "s59E13H2" 0.02824392 "hypothetical protein"

"JS1\_O21\_00222" 9812 "s59E25H2" 0 "hypothetical protein"  
"JS1\_O21\_00222" 9812 "s59E5H2" 0 "hypothetical protein"  
"JS1\_O21\_00222" 9812 "s63E6H2" 0 "hypothetical protein"  
"JS1\_O21\_00223" 9813 "s59E13H2" 0.02732107 "Opine dehydrogenase"  
"JS1\_O21\_00223" 9813 "s59E25H2" 0 "Opine dehydrogenase"  
"JS1\_O21\_00223" 9813 "s59E5H2" 0.003724317 "Opine dehydrogenase"  
"JS1\_O21\_00223" 9813 "s63E6H2" 0 "Opine dehydrogenase"  
"JS1\_O21\_00224" 9814 "s59E13H2" 0.06416442 "Transposase IS200 like protein"  
"JS1\_O21\_00224" 9814 "s59E25H2" 0 "Transposase IS200 like protein"  
"JS1\_O21\_00224" 9814 "s59E5H2" 0.1971141 "Transposase IS200 like protein"  
"JS1\_O21\_00224" 9814 "s63E6H2" 0.05392555 "Transposase IS200 like protein"  
"JS1\_O21\_00225" 9815 "s59E13H2" 0.09006601 "hypothetical protein"  
"JS1\_O21\_00225" 9815 "s59E25H2" 0 "hypothetical protein"  
"JS1\_O21\_00225" 9815 "s59E5H2" 0.1203706 "hypothetical protein"  
"JS1\_O21\_00225" 9815 "s63E6H2" 0.01402913 "hypothetical protein"  
"JS1\_O21\_00227" 9817 "s59E13H2" 0.5366453 "Homoserine dehydrogenase"  
"JS1\_O21\_00227" 9817 "s59E25H2" 0 "Homoserine dehydrogenase"  
"JS1\_O21\_00227" 9817 "s59E5H2" 0.1261164 "Homoserine dehydrogenase"  
"JS1\_O21\_00227" 9817 "s63E6H2" 0.2220807 "Homoserine dehydrogenase"  
"JS1\_O21\_00228" 9818 "s59E13H2" 0.2874296 "Homoserine kinase"  
"JS1\_O21\_00228" 9818 "s59E25H2" 0 "Homoserine kinase"  
"JS1\_O21\_00228" 9818 "s59E5H2" 0.1950176 "Homoserine kinase"  
"JS1\_O21\_00228" 9818 "s63E6H2" 0.5703738 "Homoserine kinase"  
"JS1\_O21\_00229" 9819 "s59E13H2" 1.308379 "Aspartokinase"  
"JS1\_O21\_00229" 9819 "s59E25H2" 0 "Aspartokinase"  
"JS1\_O21\_00229" 9819 "s59E5H2" 0.5268291 "Aspartokinase"  
"JS1\_O21\_00229" 9819 "s63E6H2" 0.9138954 "Aspartokinase"  
"JS1\_O21\_00230" 9820 "s59E13H2" 1.942377 "Aspartate-semialdehyde dehydrogenase"  
"JS1\_O21\_00230" 9820 "s59E25H2" 0 "Aspartate-semialdehyde dehydrogenase"  
"JS1\_O21\_00230" 9820 "s59E5H2" 0.5266588 "Aspartate-semialdehyde dehydrogenase"  
"JS1\_O21\_00230" 9820 "s63E6H2" 1.975012 "Aspartate-semialdehyde dehydrogenase"  
"JS1\_O21\_00231" 9821 "s59E13H2" 0.3323347 "Vancomycin/teicoplanin A-type resistance protein VanA"  
"JS1\_O21\_00231" 9821 "s59E25H2" 0 "Vancomycin/teicoplanin A-type resistance protein VanA"  
"JS1\_O21\_00231" 9821 "s59E5H2" 0.230681 "Vancomycin/teicoplanin A-type resistance protein VanA"  
"JS1\_O21\_00231" 9821 "s63E6H2" 1.994774 "Vancomycin/teicoplanin A-type resistance protein VanA"  
"JS1\_O21\_00232" 9822 "s59E13H2" 0.8419609 "TraB family protein"  
"JS1\_O21\_00232" 9822 "s59E25H2" 0 "TraB family protein"  
"JS1\_O21\_00232" 9822 "s59E5H2" 0.5539982 "TraB family protein"  
"JS1\_O21\_00232" 9822 "s63E6H2" 0.7881032 "TraB family protein"  
"JS1\_O21\_00233" 9823 "s59E13H2" 0.3608921 "hypothetical protein"  
"JS1\_O21\_00233" 9823 "s59E25H2" 0 "hypothetical protein"  
"JS1\_O21\_00233" 9823 "s59E5H2" 0.1343997 "hypothetical protein"  
"JS1\_O21\_00233" 9823 "s63E6H2" 0.1415301 "hypothetical protein"  
"JS1\_O21\_00234" 9824 "s59E13H2" 0.1530887 "flavodoxin"  
"JS1\_O21\_00234" 9824 "s59E25H2" 0 "flavodoxin"  
"JS1\_O21\_00234" 9824 "s59E5H2" 0.03865875 "flavodoxin"  
"JS1\_O21\_00234" 9824 "s63E6H2" 0.1714425 "flavodoxin"

"JS1\_O21\_00235" 9825 "s59E13H2" 0.009412461 "Adenosylhomocysteinase"  
"JS1\_O21\_00235" 9825 "s59E25H2" 0 "Adenosylhomocysteinase"  
"JS1\_O21\_00235" 9825 "s59E5H2" 0.2127258 "Adenosylhomocysteinase"  
"JS1\_O21\_00235" 9825 "s63E6H2" 0.3984522 "Adenosylhomocysteinase"  
"JS1\_O21\_00236" 9826 "s59E13H2" 0.01723441 "Beta-lactamase hydrolase-like protein"  
"JS1\_O21\_00236" 9826 "s59E25H2" 0 "Beta-lactamase hydrolase-like protein"  
"JS1\_O21\_00236" 9826 "s59E5H2" 0.1692968 "Beta-lactamase hydrolase-like protein"  
"JS1\_O21\_00236" 9826 "s63E6H2" 0.4128706 "Beta-lactamase hydrolase-like protein"  
"JS1\_O21\_00237" 9827 "s59E13H2" 0.02980869 "putative glycerophosphoryl diester phosphodiesterase 1"  
"JS1\_O21\_00237" 9827 "s59E25H2" 0 "putative glycerophosphoryl diester phosphodiesterase 1"  
"JS1\_O21\_00237" 9827 "s59E5H2" 0.05800735 "putative glycerophosphoryl diester phosphodiesterase 1"  
"JS1\_O21\_00237" 9827 "s63E6H2" 0.2833675 "putative glycerophosphoryl diester phosphodiesterase 1"  
"JS1\_O21\_00238" 9828 "s59E13H2" 0.01775995 "D-tyrosyl-tRNA(Tyr) deacylase"  
"JS1\_O21\_00238" 9828 "s59E25H2" 0 "D-tyrosyl-tRNA(Tyr) deacylase"  
"JS1\_O21\_00238" 9828 "s59E5H2" 0.06808928 "D-tyrosyl-tRNA(Tyr) deacylase"  
"JS1\_O21\_00238" 9828 "s63E6H2" 0.2569918 "D-tyrosyl-tRNA(Tyr) deacylase"  
"JS1\_O21\_00239" 9829 "s59E13H2" 0.05793982 "GTP pyrophosphokinase"  
"JS1\_O21\_00239" 9829 "s59E25H2" 0 "GTP pyrophosphokinase"  
"JS1\_O21\_00239" 9829 "s59E5H2" 0.1246492 "GTP pyrophosphokinase"  
"JS1\_O21\_00239" 9829 "s63E6H2" 0.3566019 "GTP pyrophosphokinase"  
"JS1\_O21\_00240" 9830 "s59E13H2" 0.02053173 "Adenine phosphoribosyltransferase"  
"JS1\_O21\_00240" 9830 "s59E25H2" 0 "Adenine phosphoribosyltransferase"  
"JS1\_O21\_00240" 9830 "s59E5H2" 0.1081719 "Adenine phosphoribosyltransferase"  
"JS1\_O21\_00240" 9830 "s63E6H2" 0.2242895 "Adenine phosphoribosyltransferase"  
"JS1\_O21\_00241" 9831 "s59E13H2" 0.6503584 "Cyclic 2,3-diphosphoglycerate synthetase"  
"JS1\_O21\_00241" 9831 "s59E25H2" 0 "Cyclic 2,3-diphosphoglycerate synthetase"  
"JS1\_O21\_00241" 9831 "s59E5H2" 0.2669067 "Cyclic 2,3-diphosphoglycerate synthetase"  
"JS1\_O21\_00241" 9831 "s63E6H2" 1.056077 "Cyclic 2,3-diphosphoglycerate synthetase"  
"JS1\_O21\_00242" 9832 "s59E13H2" 0.346074 "5-aminovalerate aminotransferase DavT"  
"JS1\_O21\_00242" 9832 "s59E25H2" 0 "5-aminovalerate aminotransferase DavT"  
"JS1\_O21\_00242" 9832 "s59E5H2" 0.2295855 "5-aminovalerate aminotransferase DavT"  
"JS1\_O21\_00242" 9832 "s63E6H2" 1.130096 "5-aminovalerate aminotransferase DavT"  
"JS1\_O21\_00243" 9833 "s59E13H2" 0.6401548 "Lysine 6-dehydrogenase"  
"JS1\_O21\_00243" 9833 "s59E25H2" 0 "Lysine 6-dehydrogenase"  
"JS1\_O21\_00243" 9833 "s59E5H2" 0.5376045 "Lysine 6-dehydrogenase"  
"JS1\_O21\_00243" 9833 "s63E6H2" 1.307682 "Lysine 6-dehydrogenase"  
"JS1\_O21\_00245" 9835 "s59E13H2" 0 "D-ribose-binding periplasmic protein precursor"  
"JS1\_O21\_00245" 9835 "s59E25H2" 0 "D-ribose-binding periplasmic protein precursor"  
"JS1\_O21\_00245" 9835 "s59E5H2" 0.8326791 "D-ribose-binding periplasmic protein precursor"  
"JS1\_O21\_00245" 9835 "s63E6H2" 0.03430627 "D-ribose-binding periplasmic protein precursor"  
"JS1\_O21\_00246" 9836 "s59E13H2" 0.1151587 "hypothetical protein"  
"JS1\_O21\_00246" 9836 "s59E25H2" 0.1243301 "hypothetical protein"  
"JS1\_O21\_00246" 9836 "s59E5H2" 0.6499463 "hypothetical protein"  
"JS1\_O21\_00246" 9836 "s63E6H2" 0.1798049 "hypothetical protein"  
"JS1\_O21\_00247" 9837 "s59E13H2" 1.68779 "Multidrug export protein MepA"  
"JS1\_O21\_00247" 9837 "s59E25H2" 0.5362319 "Multidrug export protein MepA"  
"JS1\_O21\_00247" 9837 "s59E5H2" 0.9881168 "Multidrug export protein MepA"



"JS1\_O21\_00247" 9837 "s63E6H2" 0.5828893 "Multidrug export protein MepA"  
"JS1\_O21\_00248" 9838 "s59E13H2" 1.510847 "L-asparaginase 1"  
"JS1\_O21\_00248" 9838 "s59E25H2" 0 "L-asparaginase 1"  
"JS1\_O21\_00248" 9838 "s59E5H2" 1.839321 "L-asparaginase 1"  
"JS1\_O21\_00248" 9838 "s63E6H2" 3.292433 "L-asparaginase 1"  
"JS1\_O21\_00249" 9839 "s59E13H2" 0.4165485 "Cyclic di-GMP phosphodiesterase Gmr"  
"JS1\_O21\_00249" 9839 "s59E25H2" 0 "Cyclic di-GMP phosphodiesterase Gmr"  
"JS1\_O21\_00249" 9839 "s59E5H2" 1.193285 "Cyclic di-GMP phosphodiesterase Gmr"  
"JS1\_O21\_00249" 9839 "s63E6H2" 2.450906 "Cyclic di-GMP phosphodiesterase Gmr"  
"JS1\_O21\_00250" 9840 "s59E13H2" 1.288882 "Folate transporter FolT"  
"JS1\_O21\_00250" 9840 "s59E25H2" 0 "Folate transporter FolT"  
"JS1\_O21\_00250" 9840 "s59E5H2" 0.3591779 "Folate transporter FolT"  
"JS1\_O21\_00250" 9840 "s63E6H2" 0.9259987 "Folate transporter FolT"  
"JS1\_O21\_00251" 9841 "s59E13H2" 0.06425772 "Ureidoglycolate lyase"  
"JS1\_O21\_00251" 9841 "s59E25H2" 0.3255208 "Ureidoglycolate lyase"  
"JS1\_O21\_00251" 9841 "s59E5H2" 0.400586 "Ureidoglycolate lyase"  
"JS1\_O21\_00251" 9841 "s63E6H2" 0.9555171 "Ureidoglycolate lyase"  
"JS1\_O21\_00252" 9842 "s59E13H2" 0.480848 "Membrane dipeptidase (Peptidase family M19)"  
"JS1\_O21\_00252" 9842 "s59E25H2" 0 "Membrane dipeptidase (Peptidase family M19)"  
"JS1\_O21\_00252" 9842 "s59E5H2" 0.5242118 "Membrane dipeptidase (Peptidase family M19)"  
"JS1\_O21\_00252" 9842 "s63E6H2" 1.642631 "Membrane dipeptidase (Peptidase family M19)"  
"JS1\_O21\_00253" 9843 "s59E13H2" 1.119837 "lipoprotein Nlpl"  
"JS1\_O21\_00253" 9843 "s59E25H2" 0 "lipoprotein Nlpl"  
"JS1\_O21\_00253" 9843 "s59E5H2" 0.4694459 "lipoprotein Nlpl"  
"JS1\_O21\_00253" 9843 "s63E6H2" 1.09074 "lipoprotein Nlpl"  
"JS1\_O21\_00254" 9844 "s59E13H2" 1.175552 "Inosine-5'-monophosphate dehydrogenase"  
"JS1\_O21\_00254" 9844 "s59E25H2" 0 "Inosine-5'-monophosphate dehydrogenase"  
"JS1\_O21\_00254" 9844 "s59E5H2" 1.073518 "Inosine-5'-monophosphate dehydrogenase"  
"JS1\_O21\_00254" 9844 "s63E6H2" 1.03215 "Inosine-5'-monophosphate dehydrogenase"  
"JS1\_O21\_00255" 9845 "s59E13H2" 0.6689301 "Quinolate synthase A"  
"JS1\_O21\_00255" 9845 "s59E25H2" 0 "Quinolate synthase A"  
"JS1\_O21\_00255" 9845 "s59E5H2" 0.5071051 "Quinolate synthase A"  
"JS1\_O21\_00255" 9845 "s63E6H2" 0.9593792 "Quinolate synthase A"  
"JS1\_O21\_00256" 9846 "s59E13H2" 2.424741 "L-aspartate oxidase"  
"JS1\_O21\_00256" 9846 "s59E25H2" 0 "L-aspartate oxidase"  
"JS1\_O21\_00256" 9846 "s59E5H2" 1.97066 "L-aspartate oxidase"  
"JS1\_O21\_00256" 9846 "s63E6H2" 1.929774 "L-aspartate oxidase"  
"JS1\_O21\_00257" 9847 "s59E13H2" 6.355029 "putative nicotinate-nucleotide pyrophosphorylase [carboxylating]"  
"JS1\_O21\_00257" 9847 "s59E25H2" 0.4548611 "putative nicotinate-nucleotide pyrophosphorylase [carboxylating]"  
"JS1\_O21\_00257" 9847 "s59E5H2" 3.866836 "putative nicotinate-nucleotide pyrophosphorylase [carboxylating]"  
"JS1\_O21\_00257" 9847 "s63E6H2" 3.398914 "putative nicotinate-nucleotide pyrophosphorylase [carboxylating]"  
"JS1\_O21\_00258" 9848 "s59E13H2" 7.606218 "Type III pantothenate kinase"  
"JS1\_O21\_00258" 9848 "s59E25H2" 0 "Type III pantothenate kinase"  
"JS1\_O21\_00258" 9848 "s59E5H2" 0.994116 "Type III pantothenate kinase"  
"JS1\_O21\_00258" 9848 "s63E6H2" 3.331173 "Type III pantothenate kinase"  
"JS1\_O21\_00259" 9849 "s59E13H2" 6.410514 "Pantothenic acid transporter PanT"  
"JS1\_O21\_00259" 9849 "s59E25H2" 0 "Pantothenic acid transporter PanT"

"JS1\_O21\_00259" 9849 "s59E5H2" 4.280051 "Pantothenic acid transporter PanT"  
"JS1\_O21\_00259" 9849 "s63E6H2" 4.440576 "Pantothenic acid transporter PanT"  
"JS1\_O21\_00260" 9850 "s59E13H2" 8.05273 "V-type ATP synthase subunit D"  
"JS1\_O21\_00260" 9850 "s59E25H2" 0 "V-type ATP synthase subunit D"  
"JS1\_O21\_00260" 9850 "s59E5H2" 6.360665 "V-type ATP synthase subunit D"  
"JS1\_O21\_00260" 9850 "s63E6H2" 4.238642 "V-type ATP synthase subunit D"  
"JS1\_O21\_00261" 9851 "s59E13H2" 7.52189 "V-type sodium ATPase subunit B"  
"JS1\_O21\_00261" 9851 "s59E25H2" 0.1224345 "V-type sodium ATPase subunit B"  
"JS1\_O21\_00261" 9851 "s59E5H2" 5.352143 "V-type sodium ATPase subunit B"  
"JS1\_O21\_00261" 9851 "s63E6H2" 3.518812 "V-type sodium ATPase subunit B"  
"JS1\_O21\_00262" 9852 "s59E13H2" 5.316503 "V-type ATP synthase alpha chain"  
"JS1\_O21\_00262" 9852 "s59E25H2" 0 "V-type ATP synthase alpha chain"  
"JS1\_O21\_00262" 9852 "s59E5H2" 4.09217 "V-type ATP synthase alpha chain"  
"JS1\_O21\_00262" 9852 "s63E6H2" 2.98448 "V-type ATP synthase alpha chain"  
"JS1\_O21\_00263" 9853 "s59E13H2" 3.512983 "V-type ATP synthase subunit E"  
"JS1\_O21\_00263" 9853 "s59E25H2" 0 "V-type ATP synthase subunit E"  
"JS1\_O21\_00263" 9853 "s59E5H2" 3.14716 "V-type ATP synthase subunit E"  
"JS1\_O21\_00263" 9853 "s63E6H2" 1.499992 "V-type ATP synthase subunit E"  
"JS1\_O21\_00264" 9854 "s59E13H2" 1.621621 "V-type ATP synthase subunit F"  
"JS1\_O21\_00264" 9854 "s59E25H2" 0 "V-type ATP synthase subunit F"  
"JS1\_O21\_00264" 9854 "s59E5H2" 2.843559 "V-type ATP synthase subunit F"  
"JS1\_O21\_00264" 9854 "s63E6H2" 1.424679 "V-type ATP synthase subunit F"  
"JS1\_O21\_00265" 9855 "s59E13H2" 1.106442 "V-type ATP synthase subunit K"  
"JS1\_O21\_00265" 9855 "s59E25H2" 0 "V-type ATP synthase subunit K"  
"JS1\_O21\_00265" 9855 "s59E5H2" 1.917217 "V-type ATP synthase subunit K"  
"JS1\_O21\_00265" 9855 "s63E6H2" 0.9285725 "V-type ATP synthase subunit K"  
"JS1\_O21\_00266" 9856 "s59E13H2" 1.336268 "V-type ATP synthase subunit I"  
"JS1\_O21\_00266" 9856 "s59E25H2" 0.1161103 "V-type ATP synthase subunit I"  
"JS1\_O21\_00266" 9856 "s59E5H2" 2.031133 "V-type ATP synthase subunit I"  
"JS1\_O21\_00266" 9856 "s63E6H2" 0.1880697 "V-type ATP synthase subunit I"  
"JS1\_O21\_00267" 9857 "s59E13H2" 1.189898 "V-type ATP synthase subunit C"  
"JS1\_O21\_00267" 9857 "s59E25H2" 0.4737345 "V-type ATP synthase subunit C"  
"JS1\_O21\_00267" 9857 "s59E5H2" 1.167446 "V-type ATP synthase subunit C"  
"JS1\_O21\_00267" 9857 "s63E6H2" 0.2461503 "V-type ATP synthase subunit C"  
"JS1\_O21\_00268" 9858 "s59E13H2" 1.074639 "hypothetical protein"  
"JS1\_O21\_00268" 9858 "s59E25H2" 0 "hypothetical protein"  
"JS1\_O21\_00268" 9858 "s59E5H2" 0.2238281 "hypothetical protein"  
"JS1\_O21\_00268" 9858 "s63E6H2" 0.1484903 "hypothetical protein"  
"JS1\_O21\_00269" 9859 "s59E13H2" 0.9624886 "Transcriptional regulatory protein ZraR"  
"JS1\_O21\_00269" 9859 "s59E25H2" 0 "Transcriptional regulatory protein ZraR"  
"JS1\_O21\_00269" 9859 "s59E5H2" 0.9910504 "Transcriptional regulatory protein ZraR"  
"JS1\_O21\_00269" 9859 "s63E6H2" 0.3081729 "Transcriptional regulatory protein ZraR"  
"JS1\_O21\_00270" 9860 "s59E13H2" 0.8337249 "Sensor protein ZraS"  
"JS1\_O21\_00270" 9860 "s59E25H2" 0 "Sensor protein ZraS"  
"JS1\_O21\_00270" 9860 "s59E5H2" 0.7057737 "Sensor protein ZraS"  
"JS1\_O21\_00270" 9860 "s63E6H2" 0.1642769 "Sensor protein ZraS"  
"JS1\_O21\_00271" 9861 "s59E13H2" 0.158266 "Putative serine protease HtrA"

"JS1\_O21\_00271" 9861 "s59E25H2" 0 "Putative serine protease HtrA"  
"JS1\_O21\_00271" 9861 "s59E5H2" 0.03502535 "Putative serine protease HtrA"  
"JS1\_O21\_00271" 9861 "s63E6H2" 0.07230519 "Putative serine protease HtrA"  
"JS1\_O21\_00272" 9862 "s59E13H2" 0.1255743 "hypothetical protein"  
"JS1\_O21\_00272" 9862 "s59E25H2" 0 "hypothetical protein"  
"JS1\_O21\_00272" 9862 "s59E5H2" 0.02916325 "hypothetical protein"  
"JS1\_O21\_00272" 9862 "s63E6H2" 0.08223788 "hypothetical protein"  
"JS1\_O21\_00273" 9863 "s59E13H2" 0.3283987 "hypothetical protein"  
"JS1\_O21\_00273" 9863 "s59E25H2" 0 "hypothetical protein"  
"JS1\_O21\_00273" 9863 "s59E5H2" 0.05474178 "hypothetical protein"  
"JS1\_O21\_00273" 9863 "s63E6H2" 0.08253153 "hypothetical protein"  
"JS1\_O21\_00274" 9864 "s59E13H2" 0.3668319 "Thiol:disulfide interchange protein DsbD precursor"  
"JS1\_O21\_00274" 9864 "s59E25H2" 0 "Thiol:disulfide interchange protein DsbD precursor"  
"JS1\_O21\_00274" 9864 "s59E5H2" 0.02778315 "Thiol:disulfide interchange protein DsbD precursor"  
"JS1\_O21\_00274" 9864 "s63E6H2" 0.06149774 "Thiol:disulfide interchange protein DsbD precursor"  
"JS1\_O21\_00275" 9865 "s59E13H2" 0.3520157 "thiol:disulfide interchange protein precursor"  
"JS1\_O21\_00275" 9865 "s59E25H2" 0 "thiol:disulfide interchange protein precursor"  
"JS1\_O21\_00275" 9865 "s59E5H2" 0.05988996 "thiol:disulfide interchange protein precursor"  
"JS1\_O21\_00275" 9865 "s63E6H2" 0.03071641 "thiol:disulfide interchange protein precursor"  
"JS1\_O21\_00276" 9866 "s59E13H2" 0 "Acetoin:2,6-dichlorophenolindophenol oxidoreductase subunit alpha"  
"JS1\_O21\_00276" 9866 "s59E25H2" 0 "Acetoin:2,6-dichlorophenolindophenol oxidoreductase subunit alpha"  
"JS1\_O21\_00276" 9866 "s59E5H2" 0 "Acetoin:2,6-dichlorophenolindophenol oxidoreductase subunit alpha"  
"JS1\_O21\_00276" 9866 "s63E6H2" 0 "Acetoin:2,6-dichlorophenolindophenol oxidoreductase subunit alpha"  
"JS1\_O21\_00277" 9867 "s59E13H2" 0.0318798 "Transposase IS200 like protein"  
"JS1\_O21\_00277" 9867 "s59E25H2" 0 "Transposase IS200 like protein"  
"JS1\_O21\_00277" 9867 "s59E5H2" 0.3240095 "Transposase IS200 like protein"  
"JS1\_O21\_00277" 9867 "s63E6H2" 0.1171248 "Transposase IS200 like protein"  
"JS1\_O21\_00278" 9868 "s59E13H2" 0 "hypothetical protein"  
"JS1\_O21\_00278" 9868 "s59E25H2" 0 "hypothetical protein"  
"JS1\_O21\_00278" 9868 "s59E5H2" 0.006221608 "hypothetical protein"  
"JS1\_O21\_00278" 9868 "s63E6H2" 0.002746346 "hypothetical protein"  
"JS1\_O21\_00279" 9869 "s59E13H2" 0.008536409 "hypothetical protein"  
"JS1\_O21\_00279" 9869 "s59E25H2" 0 "hypothetical protein"  
"JS1\_O21\_00279" 9869 "s59E5H2" 0 "hypothetical protein"  
"JS1\_O21\_00279" 9869 "s63E6H2" 0 "hypothetical protein"  
"JS1\_O21\_00280" 9870 "s59E13H2" 0.1577679 "hypothetical protein"  
"JS1\_O21\_00280" 9870 "s59E25H2" 0 "hypothetical protein"  
"JS1\_O21\_00280" 9870 "s59E5H2" 0 "hypothetical protein"  
"JS1\_O21\_00280" 9870 "s63E6H2" 0 "hypothetical protein"  
"JS1\_O21\_00281" 9871 "s59E13H2" 0.008020224 "hypothetical protein"  
"JS1\_O21\_00281" 9871 "s59E25H2" 0 "hypothetical protein"  
"JS1\_O21\_00281" 9871 "s59E5H2" 0 "hypothetical protein"  
"JS1\_O21\_00281" 9871 "s63E6H2" 0 "hypothetical protein"  
"JS1\_O21\_00282" 9872 "s59E13H2" 0.004717941 "hypothetical protein"  
"JS1\_O21\_00282" 9872 "s59E25H2" 0 "hypothetical protein"  
"JS1\_O21\_00282" 9872 "s59E5H2" 0 "hypothetical protein"  
"JS1\_O21\_00282" 9872 "s63E6H2" 0 "hypothetical protein"

"JS1\_O21\_00283" 9873 "s59E13H2" 0 "NYN domain protein"  
"JS1\_O21\_00283" 9873 "s59E25H2" 0 "NYN domain protein"  
"JS1\_O21\_00283" 9873 "s59E5H2" 0.01357261 "NYN domain protein"  
"JS1\_O21\_00283" 9873 "s63E6H2" 0 "NYN domain protein"  
"JS1\_O21\_00284" 9874 "s59E13H2" 0.001917632 "Secreted effector protein pipB2"  
"JS1\_O21\_00284" 9874 "s59E25H2" 0 "Secreted effector protein pipB2"  
"JS1\_O21\_00284" 9874 "s59E5H2" 0.01484129 "Secreted effector protein pipB2"  
"JS1\_O21\_00284" 9874 "s63E6H2" 0 "Secreted effector protein pipB2"  
"JS1\_O21\_00285" 9875 "s59E13H2" 0.005731924 "hypothetical protein"  
"JS1\_O21\_00285" 9875 "s59E25H2" 0 "hypothetical protein"  
"JS1\_O21\_00285" 9875 "s59E5H2" 0 "hypothetical protein"  
"JS1\_O21\_00285" 9875 "s63E6H2" 0 "hypothetical protein"  
"JS1\_O21\_00286" 9876 "s59E13H2" 0.008000477 "hypothetical protein"  
"JS1\_O21\_00286" 9876 "s59E25H2" 0 "hypothetical protein"  
"JS1\_O21\_00286" 9876 "s59E5H2" 0 "hypothetical protein"  
"JS1\_O21\_00286" 9876 "s63E6H2" 0 "hypothetical protein"  
"JS1\_O21\_00288" 9878 "s59E13H2" 0.05340828 "hypothetical protein"  
"JS1\_O21\_00288" 9878 "s59E25H2" 0 "hypothetical protein"  
"JS1\_O21\_00288" 9878 "s59E5H2" 0.4805177 "hypothetical protein"  
"JS1\_O21\_00288" 9878 "s63E6H2" 1.051825 "hypothetical protein"  
"JS1\_O21\_00289" 9879 "s59E13H2" 0.06325303 "hypothetical protein"  
"JS1\_O21\_00289" 9879 "s59E25H2" 0 "hypothetical protein"  
"JS1\_O21\_00289" 9879 "s59E5H2" 0.5788996 "hypothetical protein"  
"JS1\_O21\_00289" 9879 "s63E6H2" 0.787583 "hypothetical protein"  
"JS1\_O21\_00290" 9880 "s59E13H2" 0.0123655 "Acetyltransferase (GNAT) family protein"  
"JS1\_O21\_00290" 9880 "s59E25H2" 0.8367003 "Acetyltransferase (GNAT) family protein"  
"JS1\_O21\_00290" 9880 "s59E5H2" 0.06962311 "Acetyltransferase (GNAT) family protein"  
"JS1\_O21\_00290" 9880 "s63E6H2" 0.5087976 "Acetyltransferase (GNAT) family protein"  
"JS1\_O21\_00291" 9881 "s59E13H2" 0.08961203 "hypothetical protein"  
"JS1\_O21\_00291" 9881 "s59E25H2" 0 "hypothetical protein"  
"JS1\_O21\_00291" 9881 "s59E5H2" 0.2131144 "hypothetical protein"  
"JS1\_O21\_00291" 9881 "s63E6H2" 1.128332 "hypothetical protein"  
"JS1\_O21\_00292" 9882 "s59E13H2" 0.1110205 "Serine/threonine-protein kinase PknD"  
"JS1\_O21\_00292" 9882 "s59E25H2" 0 "Serine/threonine-protein kinase PknD"  
"JS1\_O21\_00292" 9882 "s59E5H2" 0.6915524 "Serine/threonine-protein kinase PknD"  
"JS1\_O21\_00292" 9882 "s63E6H2" 0.7165653 "Serine/threonine-protein kinase PknD"  
"JS1\_O21\_00293" 9883 "s59E13H2" 0.161234 "1-acyl-sn-glycerol-3-phosphate acyltransferase"  
"JS1\_O21\_00293" 9883 "s59E25H2" 0 "1-acyl-sn-glycerol-3-phosphate acyltransferase"  
"JS1\_O21\_00293" 9883 "s59E5H2" 0.2621819 "1-acyl-sn-glycerol-3-phosphate acyltransferase"  
"JS1\_O21\_00293" 9883 "s63E6H2" 0.5445857 "1-acyl-sn-glycerol-3-phosphate acyltransferase"  
"JS1\_O21\_00295" 9885 "s59E13H2" 0.2559185 "phosphodiesterase"  
"JS1\_O21\_00295" 9885 "s59E25H2" 0 "phosphodiesterase"  
"JS1\_O21\_00295" 9885 "s59E5H2" 0.557838 "phosphodiesterase"  
"JS1\_O21\_00295" 9885 "s63E6H2" 0.477675 "phosphodiesterase"  
"JS1\_O21\_00296" 9886 "s59E13H2" 0.09186435 "Trehalose/maltose import ATP-binding protein Malk"  
"JS1\_O21\_00296" 9886 "s59E25H2" 0 "Trehalose/maltose import ATP-binding protein Malk"  
"JS1\_O21\_00296" 9886 "s59E5H2" 0.2988086 "Trehalose/maltose import ATP-binding protein Malk"

"JS1\_O21\_00296" 9886 "s63E6H2" 0.6985078 "Trehalose/maltose import ATP-binding protein MalK"  
"JS1\_O21\_00297" 9887 "s59E13H2" 0.2115659 "Trehalose/maltose import ATP-binding protein MalK"  
"JS1\_O21\_00297" 9887 "s59E25H2" 0 "Trehalose/maltose import ATP-binding protein MalK"  
"JS1\_O21\_00297" 9887 "s59E5H2" 0.4548771 "Trehalose/maltose import ATP-binding protein MalK"  
"JS1\_O21\_00297" 9887 "s63E6H2" 0.7140147 "Trehalose/maltose import ATP-binding protein MalK"  
"JS1\_O21\_00298" 9888 "s59E13H2" 0.2230107 "Trehalose/maltose-binding protein MalE precursor"  
"JS1\_O21\_00298" 9888 "s59E25H2" 0 "Trehalose/maltose-binding protein MalE precursor"  
"JS1\_O21\_00298" 9888 "s59E5H2" 0.3626725 "Trehalose/maltose-binding protein MalE precursor"  
"JS1\_O21\_00298" 9888 "s63E6H2" 0.5080192 "Trehalose/maltose-binding protein MalE precursor"  
"JS1\_O21\_00299" 9889 "s59E13H2" 0.06605479 "Inner membrane ABC transporter permease protein YcjO"  
"JS1\_O21\_00299" 9889 "s59E25H2" 0 "Inner membrane ABC transporter permease protein YcjO"  
"JS1\_O21\_00299" 9889 "s59E5H2" 0.1586175 "Inner membrane ABC transporter permease protein YcjO"  
"JS1\_O21\_00299" 9889 "s63E6H2" 0.3572909 "Inner membrane ABC transporter permease protein YcjO"  
"JS1\_O21\_00300" 9890 "s59E13H2" 0.08474713 "Trehalose/maltose transport system permease protein MalG"  
"JS1\_O21\_00300" 9890 "s59E25H2" 0 "Trehalose/maltose transport system permease protein MalG"  
"JS1\_O21\_00300" 9890 "s59E5H2" 0.2322556 "Trehalose/maltose transport system permease protein MalG"  
"JS1\_O21\_00300" 9890 "s63E6H2" 0.2249337 "Trehalose/maltose transport system permease protein MalG"  
"JS1\_O21\_00301" 9891 "s59E13H2" 0.1713787 "Ribokinase"  
"JS1\_O21\_00301" 9891 "s59E25H2" 0 "Ribokinase"  
"JS1\_O21\_00301" 9891 "s59E5H2" 0.1475285 "Ribokinase"  
"JS1\_O21\_00301" 9891 "s63E6H2" 0.2987139 "Ribokinase"  
"JS1\_O21\_00302" 9892 "s59E13H2" 0.1556336 "xylose isomerase"  
"JS1\_O21\_00302" 9892 "s59E25H2" 0 "xylose isomerase"  
"JS1\_O21\_00302" 9892 "s59E5H2" 0.3787774 "xylose isomerase"  
"JS1\_O21\_00302" 9892 "s63E6H2" 1.497399 "xylose isomerase"  
"JS1\_O21\_00303" 9893 "s59E13H2" 0.1019939 "Ethanalamine utilization protein EutM precursor"  
"JS1\_O21\_00303" 9893 "s59E25H2" 0 "Ethanalamine utilization protein EutM precursor"  
"JS1\_O21\_00303" 9893 "s59E5H2" 0.3518546 "Ethanalamine utilization protein EutM precursor"  
"JS1\_O21\_00303" 9893 "s63E6H2" 1.389418 "Ethanalamine utilization protein EutM precursor"  
"JS1\_O21\_00304" 9894 "s59E13H2" 0.08291736 "Carbon dioxide concentrating mechanism protein CcmL"  
"JS1\_O21\_00304" 9894 "s59E25H2" 0 "Carbon dioxide concentrating mechanism protein CcmL"  
"JS1\_O21\_00304" 9894 "s59E5H2" 0.2823404 "Carbon dioxide concentrating mechanism protein CcmL"  
"JS1\_O21\_00304" 9894 "s63E6H2" 1.518318 "Carbon dioxide concentrating mechanism protein CcmL"  
"JS1\_O21\_00305" 9895 "s59E13H2" 3.400399 "Thioesterase superfamily protein"  
"JS1\_O21\_00305" 9895 "s59E25H2" 1.50463 "Thioesterase superfamily protein"  
"JS1\_O21\_00305" 9895 "s59E5H2" 0.4162888 "Thioesterase superfamily protein"  
"JS1\_O21\_00305" 9895 "s63E6H2" 0.107246 "Thioesterase superfamily protein"  
"JS1\_O21\_00306" 9896 "s59E13H2" 3.989981 "phage T7 F exclusion suppressor FxsA"  
"JS1\_O21\_00306" 9896 "s59E25H2" 0 "phage T7 F exclusion suppressor FxsA"  
"JS1\_O21\_00306" 9896 "s59E5H2" 0.1861484 "phage T7 F exclusion suppressor FxsA"  
"JS1\_O21\_00306" 9896 "s63E6H2" 0.1324548 "phage T7 F exclusion suppressor FxsA"  
"JS1\_O21\_00307" 9897 "s59E13H2" 6.085091 "Holo-[acyl-carrier-protein] synthase"  
"JS1\_O21\_00307" 9897 "s59E25H2" 0.2128205 "Holo-[acyl-carrier-protein] synthase"  
"JS1\_O21\_00307" 9897 "s59E5H2" 0.4624085 "Holo-[acyl-carrier-protein] synthase"  
"JS1\_O21\_00307" 9897 "s63E6H2" 0.324182 "Holo-[acyl-carrier-protein] synthase"  
"JS1\_O21\_00308" 9898 "s59E13H2" 8.5745 "Bifunctional NAD(P)H-hydrate repair enzyme Nnr"  
"JS1\_O21\_00308" 9898 "s59E25H2" 0.2278912 "Bifunctional NAD(P)H-hydrate repair enzyme Nnr"

"JS1\_O21\_00308" 9898 "s59E5H2" 0.782751 "Bifunctional NAD(P)H-hydrate repair enzyme Nnr"  
"JS1\_O21\_00308" 9898 "s63E6H2" 0.1628257 "Bifunctional NAD(P)H-hydrate repair enzyme Nnr"  
"JS1\_O21\_00309" 9899 "s59E13H2" 37.97835 "Alanine dehydrogenase"  
"JS1\_O21\_00309" 9899 "s59E25H2" 0.1801075 "Alanine dehydrogenase"  
"JS1\_O21\_00309" 9899 "s59E5H2" 0.2368133 "Alanine dehydrogenase"  
"JS1\_O21\_00309" 9899 "s63E6H2" 1.006956 "Alanine dehydrogenase"  
"JS1\_O21\_00310" 9900 "s59E13H2" 29.58523 "60 kDa chaperonin"  
"JS1\_O21\_00310" 9900 "s59E25H2" 0.03119266 "60 kDa chaperonin"  
"JS1\_O21\_00310" 9900 "s59E5H2" 1.926747 "60 kDa chaperonin"  
"JS1\_O21\_00310" 9900 "s63E6H2" 0.735397 "60 kDa chaperonin"  
"JS1\_O21\_00311" 9901 "s59E13H2" 18.3775 "10 kDa chaperonin"  
"JS1\_O21\_00311" 9901 "s59E25H2" 0 "10 kDa chaperonin"  
"JS1\_O21\_00311" 9901 "s59E5H2" 0.650877 "10 kDa chaperonin"  
"JS1\_O21\_00311" 9901 "s63E6H2" 0.4208152 "10 kDa chaperonin"  
"JS1\_O21\_00312" 9902 "s59E13H2" 17.3422 "tRNA N6-adenosine threonylcarbamoyltransferase"  
"JS1\_O21\_00312" 9902 "s59E25H2" 0 "tRNA N6-adenosine threonylcarbamoyltransferase"  
"JS1\_O21\_00312" 9902 "s59E5H2" 0.9939234 "tRNA N6-adenosine threonylcarbamoyltransferase"  
"JS1\_O21\_00312" 9902 "s63E6H2" 0.4885063 "tRNA N6-adenosine threonylcarbamoyltransferase"  
"JS1\_O21\_00313" 9903 "s59E13H2" 17.93969 "tRNA threonylcarbamoyladenine biosynthesis protein TsaB"  
"JS1\_O21\_00313" 9903 "s59E25H2" 0.1078014 "tRNA threonylcarbamoyladenine biosynthesis protein TsaB"  
"JS1\_O21\_00313" 9903 "s59E5H2" 0.3400555 "tRNA threonylcarbamoyladenine biosynthesis protein TsaB"  
"JS1\_O21\_00313" 9903 "s63E6H2" 0.3715955 "tRNA threonylcarbamoyladenine biosynthesis protein TsaB"  
"JS1\_O21\_00314" 9904 "s59E13H2" 16.90562 "tRNA threonylcarbamoyladenine biosynthesis protein TsaE"  
"JS1\_O21\_00314" 9904 "s59E25H2" 0.9266247 "tRNA threonylcarbamoyladenine biosynthesis protein TsaE"  
"JS1\_O21\_00314" 9904 "s59E5H2" 0.804537 "tRNA threonylcarbamoyladenine biosynthesis protein TsaE"  
"JS1\_O21\_00314" 9904 "s63E6H2" 0.2880079 "tRNA threonylcarbamoyladenine biosynthesis protein TsaE"  
"JS1\_O21\_00315" 9905 "s59E13H2" 11.04494 "Alanine racemase"  
"JS1\_O21\_00315" 9905 "s59E25H2" 0.581849 "Alanine racemase"  
"JS1\_O21\_00315" 9905 "s59E5H2" 0.6690812 "Alanine racemase"  
"JS1\_O21\_00315" 9905 "s63E6H2" 0.209934 "Alanine racemase"  
"JS1\_O21\_00316" 9906 "s59E13H2" 0.2896656 "Ribosomal RNA small subunit methyltransferase G"  
"JS1\_O21\_00316" 9906 "s59E25H2" 0 "Ribosomal RNA small subunit methyltransferase G"  
"JS1\_O21\_00316" 9906 "s59E5H2" 0.09434877 "Ribosomal RNA small subunit methyltransferase G"  
"JS1\_O21\_00316" 9906 "s63E6H2" 0.5373746 "Ribosomal RNA small subunit methyltransferase G"  
"JS1\_O21\_00317" 9907 "s59E13H2" 0.5189036 "Sporulation initiation inhibitor protein Soj"  
"JS1\_O21\_00317" 9907 "s59E25H2" 0 "Sporulation initiation inhibitor protein Soj"  
"JS1\_O21\_00317" 9907 "s59E5H2" 0.2365594 "Sporulation initiation inhibitor protein Soj"  
"JS1\_O21\_00317" 9907 "s63E6H2" 0.6952569 "Sporulation initiation inhibitor protein Soj"  
"JS1\_O21\_00318" 9908 "s59E13H2" 0.5174502 "putative chromosome-partitioning protein ParB"  
"JS1\_O21\_00318" 9908 "s59E25H2" 0 "putative chromosome-partitioning protein ParB"  
"JS1\_O21\_00318" 9908 "s59E5H2" 0.2612399 "putative chromosome-partitioning protein ParB"  
"JS1\_O21\_00318" 9908 "s63E6H2" 0.4557534 "putative chromosome-partitioning protein ParB"  
"JS1\_O21\_00319" 9909 "s59E13H2" 0.05338956 "hypothetical protein"  
"JS1\_O21\_00319" 9909 "s59E25H2" 0 "hypothetical protein"  
"JS1\_O21\_00319" 9909 "s59E5H2" 0.1481203 "hypothetical protein"  
"JS1\_O21\_00319" 9909 "s63E6H2" 0.3183156 "hypothetical protein"  
"JS1\_O21\_00320" 9910 "s59E13H2" 0.0902617 "Alkaline shock protein 23"

"JS1\_O21\_00320" 9910 "s59E25H2" 0 "Alkaline shock protein 23"  
"JS1\_O21\_00320" 9910 "s59E5H2" 0.1358483 "Alkaline shock protein 23"  
"JS1\_O21\_00320" 9910 "s63E6H2" 0.4121392 "Alkaline shock protein 23"  
"JS1\_O21\_00321" 9911 "s59E13H2" 0.04655336 "hypothetical protein"  
"JS1\_O21\_00321" 9911 "s59E25H2" 0 "hypothetical protein"  
"JS1\_O21\_00321" 9911 "s59E5H2" 0.2704884 "hypothetical protein"  
"JS1\_O21\_00321" 9911 "s63E6H2" 0.6318618 "hypothetical protein"  
"JS1\_O21\_00322" 9912 "s59E13H2" 1.222575 "hypothetical protein"  
"JS1\_O21\_00322" 9912 "s59E25H2" 0.3109453 "hypothetical protein"  
"JS1\_O21\_00322" 9912 "s59E5H2" 0.2304123 "hypothetical protein"  
"JS1\_O21\_00322" 9912 "s63E6H2" 0.8520306 "hypothetical protein"  
"JS1\_O21\_00323" 9913 "s59E13H2" 1.016102 "Threonine synthase"  
"JS1\_O21\_00323" 9913 "s59E25H2" 0 "Threonine synthase"  
"JS1\_O21\_00323" 9913 "s59E5H2" 0.5696882 "Threonine synthase"  
"JS1\_O21\_00323" 9913 "s63E6H2" 0.7662 "Threonine synthase"  
"JS1\_O21\_00324" 9914 "s59E13H2" 0.8929924 "Ribonuclease"  
"JS1\_O21\_00324" 9914 "s59E25H2" 0 "Ribonuclease"  
"JS1\_O21\_00324" 9914 "s59E5H2" 0.3358574 "Ribonuclease"  
"JS1\_O21\_00324" 9914 "s63E6H2" 0.8096188 "Ribonuclease"  
"JS1\_O21\_00325" 9915 "s59E13H2" 0.1177482 "Thioredoxin-1"  
"JS1\_O21\_00325" 9915 "s59E25H2" 0 "Thioredoxin-1"  
"JS1\_O21\_00325" 9915 "s59E5H2" 0.5389436 "Thioredoxin-1"  
"JS1\_O21\_00325" 9915 "s63E6H2" 0.1085949 "Thioredoxin-1"  
"JS1\_O21\_00326" 9916 "s59E13H2" 0.01921068 "Transcriptional repressor MprA"  
"JS1\_O21\_00326" 9916 "s59E25H2" 0 "Transcriptional repressor MprA"  
"JS1\_O21\_00326" 9916 "s59E5H2" 0.2515521 "Transcriptional repressor MprA"  
"JS1\_O21\_00326" 9916 "s63E6H2" 0.5295785 "Transcriptional repressor MprA"  
"JS1\_O21\_00327" 9917 "s59E13H2" 3.060907 "Integrase core domain protein"  
"JS1\_O21\_00327" 9917 "s59E25H2" 0 "Integrase core domain protein"  
"JS1\_O21\_00327" 9917 "s59E5H2" 1.161305 "Integrase core domain protein"  
"JS1\_O21\_00327" 9917 "s63E6H2" 1.483157 "Integrase core domain protein"  
"JS1\_O21\_00328" 9918 "s59E13H2" 0.3730134 "23S rRNA (uracil-C(5))-methyltransferase RlmCD"  
"JS1\_O21\_00328" 9918 "s59E25H2" 0 "23S rRNA (uracil-C(5))-methyltransferase RlmCD"  
"JS1\_O21\_00328" 9918 "s59E5H2" 0.3998181 "23S rRNA (uracil-C(5))-methyltransferase RlmCD"  
"JS1\_O21\_00328" 9918 "s63E6H2" 0.9511216 "23S rRNA (uracil-C(5))-methyltransferase RlmCD"  
"JS1\_O21\_00329" 9919 "s59E13H2" 0.5218711 "Poly(A) polymerase I precursor"  
"JS1\_O21\_00329" 9919 "s59E25H2" 0 "Poly(A) polymerase I precursor"  
"JS1\_O21\_00329" 9919 "s59E5H2" 0.278221 "Poly(A) polymerase I precursor"  
"JS1\_O21\_00329" 9919 "s63E6H2" 1.209013 "Poly(A) polymerase I precursor"  
"JS1\_O21\_00330" 9920 "s59E13H2" 0.466483 "hypothetical protein"  
"JS1\_O21\_00330" 9920 "s59E25H2" 0 "hypothetical protein"  
"JS1\_O21\_00330" 9920 "s59E5H2" 0 "hypothetical protein"  
"JS1\_O21\_00330" 9920 "s63E6H2" 0.01503328 "hypothetical protein"  
"JS1\_O21\_00331" 9921 "s59E13H2" 0.0527769 "D-glutamate deacylase"  
"JS1\_O21\_00331" 9921 "s59E25H2" 0 "D-glutamate deacylase"  
"JS1\_O21\_00331" 9921 "s59E5H2" 0.1796925 "D-glutamate deacylase"  
"JS1\_O21\_00331" 9921 "s63E6H2" 0.9599603 "D-glutamate deacylase"

"JS1\_O21\_00332" 9922 "s59E13H2" 0.1005934 "Oligopeptide-binding protein AppA precursor"  
"JS1\_O21\_00332" 9922 "s59E25H2" 0 "Oligopeptide-binding protein AppA precursor"  
"JS1\_O21\_00332" 9922 "s59E5H2" 0.7255173 "Oligopeptide-binding protein AppA precursor"  
"JS1\_O21\_00332" 9922 "s63E6H2" 0.4461945 "Oligopeptide-binding protein AppA precursor"  
"JS1\_O21\_00333" 9923 "s59E13H2" 0.148857 "Glutathione transport system permease protein GsiC"  
"JS1\_O21\_00333" 9923 "s59E25H2" 0 "Glutathione transport system permease protein GsiC"  
"JS1\_O21\_00333" 9923 "s59E5H2" 1.183954 "Glutathione transport system permease protein GsiC"  
"JS1\_O21\_00333" 9923 "s63E6H2" 0.3528433 "Glutathione transport system permease protein GsiC"  
"JS1\_O21\_00334" 9924 "s59E13H2" 0.2882707 "Glutathione transport system permease protein GsiD"  
"JS1\_O21\_00334" 9924 "s59E25H2" 0 "Glutathione transport system permease protein GsiD"  
"JS1\_O21\_00334" 9924 "s59E5H2" 0.9163412 "Glutathione transport system permease protein GsiD"  
"JS1\_O21\_00334" 9924 "s63E6H2" 0.2707783 "Glutathione transport system permease protein GsiD"  
"JS1\_O21\_00335" 9925 "s59E13H2" 0.1336753 "hypothetical protein"  
"JS1\_O21\_00335" 9925 "s59E25H2" 0 "hypothetical protein"  
"JS1\_O21\_00335" 9925 "s59E5H2" 0.04223746 "hypothetical protein"  
"JS1\_O21\_00335" 9925 "s63E6H2" 0.03465894 "hypothetical protein"  
"JS1\_O21\_00336" 9926 "s59E13H2" 0.04872654 "hypothetical protein"  
"JS1\_O21\_00336" 9926 "s59E25H2" 0 "hypothetical protein"  
"JS1\_O21\_00336" 9926 "s59E5H2" 0.1910544 "hypothetical protein"  
"JS1\_O21\_00336" 9926 "s63E6H2" 0.1045246 "hypothetical protein"  
"JS1\_O21\_00338" 9928 "s59E13H2" 0.9856137 "Cyclic di-GMP phosphodiesterase response regulator RpfG"  
"JS1\_O21\_00338" 9928 "s59E25H2" 0 "Cyclic di-GMP phosphodiesterase response regulator RpfG"  
"JS1\_O21\_00338" 9928 "s59E5H2" 0.1513175 "Cyclic di-GMP phosphodiesterase response regulator RpfG"  
"JS1\_O21\_00338" 9928 "s63E6H2" 0.4701649 "Cyclic di-GMP phosphodiesterase response regulator RpfG"  
"JS1\_O21\_00339" 9929 "s59E13H2" 0.1567443 "Pyruvate, phosphate dikinase"  
"JS1\_O21\_00339" 9929 "s59E25H2" 0 "Pyruvate, phosphate dikinase"  
"JS1\_O21\_00339" 9929 "s59E5H2" 0.1082193 "Pyruvate, phosphate dikinase"  
"JS1\_O21\_00339" 9929 "s63E6H2" 0.07696753 "Pyruvate, phosphate dikinase"  
"JS1\_O21\_00340" 9930 "s59E13H2" 0.02071278 "Putative pyruvate, phosphate dikinase regulatory protein"  
"JS1\_O21\_00340" 9930 "s59E25H2" 0 "Putative pyruvate, phosphate dikinase regulatory protein"  
"JS1\_O21\_00340" 9930 "s59E5H2" 0.09617366 "Putative pyruvate, phosphate dikinase regulatory protein"  
"JS1\_O21\_00340" 9930 "s63E6H2" 0.05112436 "Putative pyruvate, phosphate dikinase regulatory protein"  
"JS1\_O21\_00341" 9931 "s59E13H2" 0.08317275 "Glycine--tRNA ligase beta subunit"  
"JS1\_O21\_00341" 9931 "s59E25H2" 0 "Glycine--tRNA ligase beta subunit"  
"JS1\_O21\_00341" 9931 "s59E5H2" 0.08507498 "Glycine--tRNA ligase beta subunit"  
"JS1\_O21\_00341" 9931 "s63E6H2" 0.04270824 "Glycine--tRNA ligase beta subunit"  
"JS1\_O21\_00342" 9932 "s59E13H2" 0.07289781 "Glycine--tRNA ligase alpha subunit"  
"JS1\_O21\_00342" 9932 "s59E25H2" 0 "Glycine--tRNA ligase alpha subunit"  
"JS1\_O21\_00342" 9932 "s59E5H2" 0.2404927 "Glycine--tRNA ligase alpha subunit"  
"JS1\_O21\_00342" 9932 "s63E6H2" 0.3614732 "Glycine--tRNA ligase alpha subunit"  
"JS1\_O21\_00343" 9933 "s59E13H2" 0.09155392 "DNA repair protein RecO"  
"JS1\_O21\_00343" 9933 "s59E25H2" 0 "DNA repair protein RecO"  
"JS1\_O21\_00343" 9933 "s59E5H2" 0.3671827 "DNA repair protein RecO"  
"JS1\_O21\_00343" 9933 "s63E6H2" 0.787317 "DNA repair protein RecO"  
"JS1\_O21\_00344" 9934 "s59E13H2" 0.1002765 "Cytidine deaminase"  
"JS1\_O21\_00344" 9934 "s59E25H2" 0 "Cytidine deaminase"  
"JS1\_O21\_00344" 9934 "s59E5H2" 0.475319 "Cytidine deaminase"



"JS1\_O21\_00344" 9934 "s63E6H2" 0.694784 "Cytidine deaminase"  
"JS1\_O21\_00345" 9935 "s59E13H2" 0.1895696 "Putative lipoprotein YerB precursor"  
"JS1\_O21\_00345" 9935 "s59E25H2" 0 "Putative lipoprotein YerB precursor"  
"JS1\_O21\_00345" 9935 "s59E5H2" 0.3113311 "Putative lipoprotein YerB precursor"  
"JS1\_O21\_00345" 9935 "s63E6H2" 0.5239685 "Putative lipoprotein YerB precursor"  
"JS1\_O21\_00346" 9936 "s59E13H2" 0.2123015 "Magnesium and cobalt efflux protein CorC"  
"JS1\_O21\_00346" 9936 "s59E25H2" 0 "Magnesium and cobalt efflux protein CorC"  
"JS1\_O21\_00346" 9936 "s59E5H2" 0.3245823 "Magnesium and cobalt efflux protein CorC"  
"JS1\_O21\_00346" 9936 "s63E6H2" 0.3468395 "Magnesium and cobalt efflux protein CorC"  
"JS1\_O21\_00347" 9937 "s59E13H2" 0.2955235 "Magnesium and cobalt efflux protein CorC"  
"JS1\_O21\_00347" 9937 "s59E25H2" 0 "Magnesium and cobalt efflux protein CorC"  
"JS1\_O21\_00347" 9937 "s59E5H2" 0.2735455 "Magnesium and cobalt efflux protein CorC"  
"JS1\_O21\_00347" 9937 "s63E6H2" 0.263578 "Magnesium and cobalt efflux protein CorC"  
"JS1\_O21\_00348" 9938 "s59E13H2" 0.6614081 "Sialic acid TRAP transporter permease protein SiaT"  
"JS1\_O21\_00348" 9938 "s59E25H2" 0 "Sialic acid TRAP transporter permease protein SiaT"  
"JS1\_O21\_00348" 9938 "s59E5H2" 0.04079911 "Sialic acid TRAP transporter permease protein SiaT"  
"JS1\_O21\_00348" 9938 "s63E6H2" 0.304503 "Sialic acid TRAP transporter permease protein SiaT"  
"JS1\_O21\_00349" 9939 "s59E13H2" 0.1519592 "hypothetical protein"  
"JS1\_O21\_00349" 9939 "s59E25H2" 0 "hypothetical protein"  
"JS1\_O21\_00349" 9939 "s59E5H2" 0.0380181 "hypothetical protein"  
"JS1\_O21\_00349" 9939 "s63E6H2" 0.6140321 "hypothetical protein"  
"JS1\_O21\_00350" 9940 "s59E13H2" 0.1492617 "NMT1/THI5 like protein"  
"JS1\_O21\_00350" 9940 "s59E25H2" 0 "NMT1/THI5 like protein"  
"JS1\_O21\_00350" 9940 "s59E5H2" 0.1005328 "NMT1/THI5 like protein"  
"JS1\_O21\_00350" 9940 "s63E6H2" 0.5530146 "NMT1/THI5 like protein"  
"JS1\_O21\_00351" 9941 "s59E13H2" 0.1837946 "Endoribonuclease YbeY"  
"JS1\_O21\_00351" 9941 "s59E25H2" 0 "Endoribonuclease YbeY"  
"JS1\_O21\_00351" 9941 "s59E5H2" 0.3085849 "Endoribonuclease YbeY"  
"JS1\_O21\_00351" 9941 "s63E6H2" 0.4343855 "Endoribonuclease YbeY"  
"JS1\_O21\_00352" 9942 "s59E13H2" 0.1124138 "phosphodiesterase"  
"JS1\_O21\_00352" 9942 "s59E25H2" 0 "phosphodiesterase"  
"JS1\_O21\_00352" 9942 "s59E5H2" 0.3962136 "phosphodiesterase"  
"JS1\_O21\_00352" 9942 "s63E6H2" 0.6023835 "phosphodiesterase"  
"JS1\_O21\_00353" 9943 "s59E13H2" 0.04472769 "PhoH-like protein"  
"JS1\_O21\_00353" 9943 "s59E25H2" 0 "PhoH-like protein"  
"JS1\_O21\_00353" 9943 "s59E5H2" 0.2814507 "PhoH-like protein"  
"JS1\_O21\_00353" 9943 "s63E6H2" 0.5009845 "PhoH-like protein"  
"JS1\_O21\_00354" 9944 "s59E13H2" 0.01285644 "putative type I restriction enzymeP M protein"  
"JS1\_O21\_00354" 9944 "s59E25H2" 0 "putative type I restriction enzymeP M protein"  
"JS1\_O21\_00354" 9944 "s59E5H2" 0.006400534 "putative type I restriction enzymeP M protein"  
"JS1\_O21\_00354" 9944 "s63E6H2" 0 "putative type I restriction enzymeP M protein"  
"JS1\_O21\_00355" 9945 "s59E13H2" 0.01863657 "Type-1 restriction enzyme EcoKI specificity protein"  
"JS1\_O21\_00355" 9945 "s59E25H2" 0 "Type-1 restriction enzyme EcoKI specificity protein"  
"JS1\_O21\_00355" 9945 "s59E5H2" 0 "Type-1 restriction enzyme EcoKI specificity protein"  
"JS1\_O21\_00355" 9945 "s63E6H2" 0 "Type-1 restriction enzyme EcoKI specificity protein"  
"JS1\_O21\_00356" 9946 "s59E13H2" 0.5309815 "Type-1 restriction enzyme R protein"  
"JS1\_O21\_00356" 9946 "s59E25H2" 0 "Type-1 restriction enzyme R protein"

"JS1\_O21\_00356" 9946 "s59E5H2" 0.01013488 "Type-1 restriction enzyme R protein"  
"JS1\_O21\_00356" 9946 "s63E6H2" 0.04701062 "Type-1 restriction enzyme R protein"  
"JS1\_O21\_00359" 9949 "s59E13H2" 0.05426176 "hypothetical protein"  
"JS1\_O21\_00359" 9949 "s59E25H2" 0 "hypothetical protein"  
"JS1\_O21\_00359" 9949 "s59E5H2" 0 "hypothetical protein"  
"JS1\_O21\_00359" 9949 "s63E6H2" 0 "hypothetical protein"  
"JS1\_O21\_00361" 9951 "s59E13H2" 0.03677585 "hypothetical protein"  
"JS1\_O21\_00361" 9951 "s59E25H2" 0 "hypothetical protein"  
"JS1\_O21\_00361" 9951 "s59E5H2" 0 "hypothetical protein"  
"JS1\_O21\_00361" 9951 "s63E6H2" 0 "hypothetical protein"  
"JS1\_O21\_00362" 9952 "s59E13H2" 0.03888809 "hypothetical protein"  
"JS1\_O21\_00362" 9952 "s59E25H2" 0 "hypothetical protein"  
"JS1\_O21\_00362" 9952 "s59E5H2" 0.08752698 "hypothetical protein"  
"JS1\_O21\_00362" 9952 "s63E6H2" 0 "hypothetical protein"  
"JS1\_O21\_00363" 9953 "s59E13H2" 0.458922 "hypothetical protein"  
"JS1\_O21\_00363" 9953 "s59E25H2" 0.6218905 "hypothetical protein"  
"JS1\_O21\_00363" 9953 "s59E5H2" 0.7500346 "hypothetical protein"  
"JS1\_O21\_00363" 9953 "s63E6H2" 1.704817 "hypothetical protein"  
"JS1\_O21\_00364" 9954 "s59E13H2" 0.1211607 "ATP synthase subunit beta"  
"JS1\_O21\_00364" 9954 "s59E25H2" 0 "ATP synthase subunit beta"  
"JS1\_O21\_00364" 9954 "s59E5H2" 1.574359 "ATP synthase subunit beta"  
"JS1\_O21\_00364" 9954 "s63E6H2" 0.4887044 "ATP synthase subunit beta"  
"JS1\_O21\_00365" 9955 "s59E13H2" 0.1610936 "F0F1 ATP synthase subunit epsilon"  
"JS1\_O21\_00365" 9955 "s59E25H2" 0 "F0F1 ATP synthase subunit epsilon"  
"JS1\_O21\_00365" 9955 "s59E5H2" 1.20961 "F0F1 ATP synthase subunit epsilon"  
"JS1\_O21\_00365" 9955 "s63E6H2" 0.5424799 "F0F1 ATP synthase subunit epsilon"  
"JS1\_O21\_00366" 9956 "s59E13H2" 0.1893467 "Putative F0F1-ATPase subunit (ATPase\_gene1)"  
"JS1\_O21\_00366" 9956 "s59E25H2" 0 "Putative F0F1-ATPase subunit (ATPase\_gene1)"  
"JS1\_O21\_00366" 9956 "s59E5H2" 1.535211 "Putative F0F1-ATPase subunit (ATPase\_gene1)"  
"JS1\_O21\_00366" 9956 "s63E6H2" 0.6888736 "Putative F0F1-ATPase subunit (ATPase\_gene1)"  
"JS1\_O21\_00367" 9957 "s59E13H2" 0.2603034 "N-ATPase, AtpR subunit"  
"JS1\_O21\_00367" 9957 "s59E25H2" 0 "N-ATPase, AtpR subunit"  
"JS1\_O21\_00367" 9957 "s59E5H2" 2.055006 "N-ATPase, AtpR subunit"  
"JS1\_O21\_00367" 9957 "s63E6H2" 0.8647578 "N-ATPase, AtpR subunit"  
"JS1\_O21\_00368" 9958 "s59E13H2" 0.1929627 "F0F1 ATP synthase subunit A"  
"JS1\_O21\_00368" 9958 "s59E25H2" 0 "F0F1 ATP synthase subunit A"  
"JS1\_O21\_00368" 9958 "s59E5H2" 2.136083 "F0F1 ATP synthase subunit A"  
"JS1\_O21\_00368" 9958 "s63E6H2" 0.9008146 "F0F1 ATP synthase subunit A"  
"JS1\_O21\_00369" 9959 "s59E13H2" 0.243346 "ATP synthase subunit a"  
"JS1\_O21\_00369" 9959 "s59E25H2" 0 "ATP synthase subunit a"  
"JS1\_O21\_00369" 9959 "s59E5H2" 2.651519 "ATP synthase subunit a"  
"JS1\_O21\_00369" 9959 "s63E6H2" 0.9428782 "ATP synthase subunit a"  
"JS1\_O21\_00370" 9960 "s59E13H2" 0.2869311 "ATP synthase subunit c, sodium ion specific"  
"JS1\_O21\_00370" 9960 "s59E25H2" 0 "ATP synthase subunit c, sodium ion specific"  
"JS1\_O21\_00370" 9960 "s59E5H2" 2.263998 "ATP synthase subunit c, sodium ion specific"  
"JS1\_O21\_00370" 9960 "s63E6H2" 1.008442 "ATP synthase subunit c, sodium ion specific"  
"JS1\_O21\_00371" 9961 "s59E13H2" 0.4326466 "ATP synthase subunit b, sodium ion specific"

"JS1\_O21\_00371" 9961 "s59E25H2" 0 "ATP synthase subunit b, sodium ion specific"  
"JS1\_O21\_00371" 9961 "s59E5H2" 0.5358844 "ATP synthase subunit b, sodium ion specific"  
"JS1\_O21\_00371" 9961 "s63E6H2" 1.073847 "ATP synthase subunit b, sodium ion specific"  
"JS1\_O21\_00372" 9962 "s59E13H2" 0.5138811 "ATP synthase subunit alpha"  
"JS1\_O21\_00372" 9962 "s59E25H2" 0 "ATP synthase subunit alpha"  
"JS1\_O21\_00372" 9962 "s59E5H2" 0.9173777 "ATP synthase subunit alpha"  
"JS1\_O21\_00372" 9962 "s63E6H2" 1.98738 "ATP synthase subunit alpha"  
"JS1\_O21\_00373" 9963 "s59E13H2" 0.315046 "ATP synthase gamma chain, sodium ion specific"  
"JS1\_O21\_00373" 9963 "s59E25H2" 0 "ATP synthase gamma chain, sodium ion specific"  
"JS1\_O21\_00373" 9963 "s59E5H2" 1.154611 "ATP synthase gamma chain, sodium ion specific"  
"JS1\_O21\_00373" 9963 "s63E6H2" 2.056854 "ATP synthase gamma chain, sodium ion specific"  
"JS1\_O21\_00374" 9964 "s59E13H2" 0.2883742 "ubiquinone/menaquinone biosynthesis methyltransferase"  
"JS1\_O21\_00374" 9964 "s59E25H2" 0 "ubiquinone/menaquinone biosynthesis methyltransferase"  
"JS1\_O21\_00374" 9964 "s59E5H2" 2.476336 "ubiquinone/menaquinone biosynthesis methyltransferase"  
"JS1\_O21\_00374" 9964 "s63E6H2" 2.419741 "ubiquinone/menaquinone biosynthesis methyltransferase"  
"JS1\_O21\_00375" 9965 "s59E13H2" 0.4730629 "Glutathione amide reductase"  
"JS1\_O21\_00375" 9965 "s59E25H2" 0 "Glutathione amide reductase"  
"JS1\_O21\_00375" 9965 "s59E5H2" 2.058806 "Glutathione amide reductase"  
"JS1\_O21\_00375" 9965 "s63E6H2" 2.920622 "Glutathione amide reductase"  
"JS1\_O21\_00376" 9966 "s59E13H2" 0.2106614 "Ribose-5-phosphate isomerase B"  
"JS1\_O21\_00376" 9966 "s59E25H2" 0 "Ribose-5-phosphate isomerase B"  
"JS1\_O21\_00376" 9966 "s59E5H2" 1.438025 "Ribose-5-phosphate isomerase B"  
"JS1\_O21\_00376" 9966 "s63E6H2" 0.789288 "Ribose-5-phosphate isomerase B"  
"JS1\_O21\_00377" 9967 "s59E13H2" 0 "Branched-chain amino acid transport system / permease component"  
"JS1\_O21\_00377" 9967 "s59E25H2" 0 "Branched-chain amino acid transport system / permease component"  
"JS1\_O21\_00377" 9967 "s59E5H2" 0.07871812 "Branched-chain amino acid transport system / permease component"  
"JS1\_O21\_00377" 9967 "s63E6H2" 0.006453598 "Branched-chain amino acid transport system / permease component"  
"JS1\_O21\_00378" 9968 "s59E13H2" 0.01700256 "Allantoinase"  
"JS1\_O21\_00378" 9968 "s59E25H2" 0 "Allantoinase"  
"JS1\_O21\_00378" 9968 "s59E5H2" 0.1248757 "Allantoinase"  
"JS1\_O21\_00378" 9968 "s63E6H2" 0.0703594 "Allantoinase"  
"JS1\_O21\_00379" 9969 "s59E13H2" 0.04665337 "Ornithine carbamoyltransferase"  
"JS1\_O21\_00379" 9969 "s59E25H2" 0 "Ornithine carbamoyltransferase"  
"JS1\_O21\_00379" 9969 "s59E5H2" 0.2583333 "Ornithine carbamoyltransferase"  
"JS1\_O21\_00379" 9969 "s63E6H2" 0.3814569 "Ornithine carbamoyltransferase"  
"JS1\_O21\_00380" 9970 "s59E13H2" 0.06700335 "Carbamate kinase"  
"JS1\_O21\_00380" 9970 "s59E25H2" 0 "Carbamate kinase"  
"JS1\_O21\_00380" 9970 "s59E5H2" 0.06482988 "Carbamate kinase"  
"JS1\_O21\_00380" 9970 "s63E6H2" 0.2976934 "Carbamate kinase"  
"JS1\_O21\_00381" 9971 "s59E13H2" 0.07339951 "Threonine synthase"  
"JS1\_O21\_00381" 9971 "s59E25H2" 0 "Threonine synthase"  
"JS1\_O21\_00381" 9971 "s59E5H2" 0.2068963 "Threonine synthase"  
"JS1\_O21\_00381" 9971 "s63E6H2" 0.4510233 "Threonine synthase"  
"JS1\_O21\_00382" 9972 "s59E13H2" 0.0754419 "putative succinyl-diaminopimelate desuccinylase"  
"JS1\_O21\_00382" 9972 "s59E25H2" 0 "putative succinyl-diaminopimelate desuccinylase"  
"JS1\_O21\_00382" 9972 "s59E5H2" 0.2499201 "putative succinyl-diaminopimelate desuccinylase"  
"JS1\_O21\_00382" 9972 "s63E6H2" 0.9232901 "putative succinyl-diaminopimelate desuccinylase"

"JS1\_O21\_00383" 9973 "s59E13H2" 0.06606147 "Cysteine synthase"  
"JS1\_O21\_00383" 9973 "s59E25H2" 0 "Cysteine synthase"  
"JS1\_O21\_00383" 9973 "s59E5H2" 0.4851758 "Cysteine synthase"  
"JS1\_O21\_00383" 9973 "s63E6H2" 1.346382 "Cysteine synthase"  
"JS1\_O21\_00384" 9974 "s59E13H2" 0.1304575 "Aspartate carbamoyltransferase"  
"JS1\_O21\_00384" 9974 "s59E25H2" 0 "Aspartate carbamoyltransferase"  
"JS1\_O21\_00384" 9974 "s59E5H2" 0.8297212 "Aspartate carbamoyltransferase"  
"JS1\_O21\_00384" 9974 "s63E6H2" 1.522091 "Aspartate carbamoyltransferase"  
"JS1\_O21\_00385" 9975 "s59E13H2" 3.719531 "putative xanthine dehydrogenase subunit D"  
"JS1\_O21\_00385" 9975 "s59E25H2" 0 "putative xanthine dehydrogenase subunit D"  
"JS1\_O21\_00385" 9975 "s59E5H2" 0.5970793 "putative xanthine dehydrogenase subunit D"  
"JS1\_O21\_00385" 9975 "s63E6H2" 1.190854 "putative xanthine dehydrogenase subunit D"  
"JS1\_O21\_00386" 9976 "s59E13H2" 3.336073 "Glyceraldehyde dehydrogenase medium chain"  
"JS1\_O21\_00386" 9976 "s59E25H2" 0 "Glyceraldehyde dehydrogenase medium chain"  
"JS1\_O21\_00386" 9976 "s59E5H2" 0.4681115 "Glyceraldehyde dehydrogenase medium chain"  
"JS1\_O21\_00386" 9976 "s63E6H2" 0.6094574 "Glyceraldehyde dehydrogenase medium chain"  
"JS1\_O21\_00387" 9977 "s59E13H2" 3.138779 "Nicotinate dehydrogenase small FeS subunit"  
"JS1\_O21\_00387" 9977 "s59E25H2" 0 "Nicotinate dehydrogenase small FeS subunit"  
"JS1\_O21\_00387" 9977 "s59E5H2" 0.2341227 "Nicotinate dehydrogenase small FeS subunit"  
"JS1\_O21\_00387" 9977 "s63E6H2" 0.5303325 "Nicotinate dehydrogenase small FeS subunit"  
"JS1\_O21\_00388" 9978 "s59E13H2" 1.946307 "8-oxoguanine deaminase"  
"JS1\_O21\_00388" 9978 "s59E25H2" 0 "8-oxoguanine deaminase"  
"JS1\_O21\_00388" 9978 "s59E5H2" 0.2185661 "8-oxoguanine deaminase"  
"JS1\_O21\_00388" 9978 "s63E6H2" 0.1151755 "8-oxoguanine deaminase"  
"JS1\_O21\_00389" 9979 "s59E13H2" 0.161822 "5-methylthioadenosine/S-adenosylhomocysteine deaminase"  
"JS1\_O21\_00389" 9979 "s59E25H2" 0.1816817 "5-methylthioadenosine/S-adenosylhomocysteine deaminase"  
"JS1\_O21\_00389" 9979 "s59E5H2" 0.3088749 "5-methylthioadenosine/S-adenosylhomocysteine deaminase"  
"JS1\_O21\_00389" 9979 "s63E6H2" 1.092269 "5-methylthioadenosine/S-adenosylhomocysteine deaminase"  
"JS1\_O21\_00390" 9980 "s59E13H2" 0.1040471 "Cell wall-binding protein YocH precursor"  
"JS1\_O21\_00390" 9980 "s59E25H2" 0 "Cell wall-binding protein YocH precursor"  
"JS1\_O21\_00390" 9980 "s59E5H2" 0.1975492 "Cell wall-binding protein YocH precursor"  
"JS1\_O21\_00390" 9980 "s63E6H2" 0.2447384 "Cell wall-binding protein YocH precursor"  
"JS1\_O21\_00391" 9981 "s59E13H2" 0.2574611 "Galactose/methyl galactoside import ATP-binding protein MglA"  
"JS1\_O21\_00391" 9981 "s59E25H2" 0.1588542 "Galactose/methyl galactoside import ATP-binding protein MglA"  
"JS1\_O21\_00391" 9981 "s59E5H2" 1.317298 "Galactose/methyl galactoside import ATP-binding protein MglA"  
"JS1\_O21\_00391" 9981 "s63E6H2" 1.400603 "Galactose/methyl galactoside import ATP-binding protein MglA"  
"JS1\_O21\_00392" 9982 "s59E13H2" 0.2762465 "D-allose transporter subunit"  
"JS1\_O21\_00392" 9982 "s59E25H2" 0 "D-allose transporter subunit"  
"JS1\_O21\_00392" 9982 "s59E5H2" 2.627892 "D-allose transporter subunit"  
"JS1\_O21\_00392" 9982 "s63E6H2" 0.8116471 "D-allose transporter subunit"  
"JS1\_O21\_00393" 9983 "s59E13H2" 0.2058033 "Branched-chain amino acid transport system / permease component"  
"JS1\_O21\_00393" 9983 "s59E25H2" 0 "Branched-chain amino acid transport system / permease component"  
"JS1\_O21\_00393" 9983 "s59E5H2" 2.813607 "Branched-chain amino acid transport system / permease component"  
"JS1\_O21\_00393" 9983 "s63E6H2" 0.762088 "Branched-chain amino acid transport system / permease component"  
"JS1\_O21\_00394" 9984 "s59E13H2" 0.1650464 "Purine-binding protein precursor"  
"JS1\_O21\_00394" 9984 "s59E25H2" 0 "Purine-binding protein precursor"  
"JS1\_O21\_00394" 9984 "s59E5H2" 0.6609959 "Purine-binding protein precursor"

"JS1\_O21\_00394" 9984 "s63E6H2" 2.087099 "Purine-binding protein precursor"  
"JS1\_O21\_00395" 9985 "s59E13H2" 0.2872905 "Uridine phosphorylase"  
"JS1\_O21\_00395" 9985 "s59E25H2" 0 "Uridine phosphorylase"  
"JS1\_O21\_00395" 9985 "s59E5H2" 2.683613 "Uridine phosphorylase"  
"JS1\_O21\_00395" 9985 "s63E6H2" 3.53079 "Uridine phosphorylase"  
"JS1\_O21\_00396" 9986 "s59E13H2" 0.09369145 "Uridine phosphorylase"  
"JS1\_O21\_00396" 9986 "s59E25H2" 0 "Uridine phosphorylase"  
"JS1\_O21\_00396" 9986 "s59E5H2" 0.7381211 "Uridine phosphorylase"  
"JS1\_O21\_00396" 9986 "s63E6H2" 4.125191 "Uridine phosphorylase"  
"JS1\_O21\_00397" 9987 "s59E13H2" 0.02055605 "putative HTH-type transcriptional regulator YbbH"  
"JS1\_O21\_00397" 9987 "s59E25H2" 0 "putative HTH-type transcriptional regulator YbbH"  
"JS1\_O21\_00397" 9987 "s59E5H2" 0.1170847 "putative HTH-type transcriptional regulator YbbH"  
"JS1\_O21\_00397" 9987 "s63E6H2" 0.01536187 "putative HTH-type transcriptional regulator YbbH"  
"JS1\_O21\_00398" 9988 "s59E13H2" 0.07710065 "Glutamate 2,3-aminomutase"  
"JS1\_O21\_00398" 9988 "s59E25H2" 0 "Glutamate 2,3-aminomutase"  
"JS1\_O21\_00398" 9988 "s59E5H2" 0.1361343 "Glutamate 2,3-aminomutase"  
"JS1\_O21\_00398" 9988 "s63E6H2" 0.1421624 "Glutamate 2,3-aminomutase"  
"JS1\_O21\_00399" 9989 "s59E13H2" 0.09693946 "alkanesulfonate transporter substrate-binding subunit"  
"JS1\_O21\_00399" 9989 "s59E25H2" 0 "alkanesulfonate transporter substrate-binding subunit"  
"JS1\_O21\_00399" 9989 "s59E5H2" 0.2896462 "alkanesulfonate transporter substrate-binding subunit"  
"JS1\_O21\_00399" 9989 "s63E6H2" 0.03928845 "alkanesulfonate transporter substrate-binding subunit"  
"JS1\_O21\_00400" 9990 "s59E13H2" 0.1468906 "hypothetical protein"  
"JS1\_O21\_00400" 9990 "s59E25H2" 0 "hypothetical protein"  
"JS1\_O21\_00400" 9990 "s59E5H2" 0.8479983 "hypothetical protein"  
"JS1\_O21\_00400" 9990 "s63E6H2" 0.05731559 "hypothetical protein"  
"JS1\_O21\_00401" 9991 "s59E13H2" 0.09709454 "Sialic acid TRAP transporter permease protein SiaT"  
"JS1\_O21\_00401" 9991 "s59E25H2" 0 "Sialic acid TRAP transporter permease protein SiaT"  
"JS1\_O21\_00401" 9991 "s59E5H2" 0.5814205 "Sialic acid TRAP transporter permease protein SiaT"  
"JS1\_O21\_00401" 9991 "s63E6H2" 0.04306315 "Sialic acid TRAP transporter permease protein SiaT"  
"JS1\_O21\_00402" 9992 "s59E13H2" 0.03333671 "HTH-type transcriptional repressor YtrA"  
"JS1\_O21\_00402" 9992 "s59E25H2" 0 "HTH-type transcriptional repressor YtrA"  
"JS1\_O21\_00402" 9992 "s59E5H2" 0.3214434 "HTH-type transcriptional repressor YtrA"  
"JS1\_O21\_00402" 9992 "s63E6H2" 0.2161221 "HTH-type transcriptional repressor YtrA"  
"JS1\_O21\_00403" 9993 "s59E13H2" 0.05999556 "Ferredoxin"  
"JS1\_O21\_00403" 9993 "s59E25H2" 0 "Ferredoxin"  
"JS1\_O21\_00403" 9993 "s59E5H2" 0.272664 "Ferredoxin"  
"JS1\_O21\_00403" 9993 "s63E6H2" 0.3115949 "Ferredoxin"  
"JS1\_O21\_00404" 9994 "s59E13H2" 0.2000139 "2-oxoglutarate synthase subunit KorA"  
"JS1\_O21\_00404" 9994 "s59E25H2" 0 "2-oxoglutarate synthase subunit KorA"  
"JS1\_O21\_00404" 9994 "s59E5H2" 0.294857 "2-oxoglutarate synthase subunit KorA"  
"JS1\_O21\_00404" 9994 "s63E6H2" 0.3381611 "2-oxoglutarate synthase subunit KorA"  
"JS1\_O21\_00405" 9995 "s59E13H2" 0.08216974 "2-oxoglutarate synthase subunit KorB"  
"JS1\_O21\_00405" 9995 "s59E25H2" 0 "2-oxoglutarate synthase subunit KorB"  
"JS1\_O21\_00405" 9995 "s59E5H2" 0.303614 "2-oxoglutarate synthase subunit KorB"  
"JS1\_O21\_00405" 9995 "s63E6H2" 0.2144943 "2-oxoglutarate synthase subunit KorB"  
"JS1\_O21\_00406" 9996 "s59E13H2" 0.1694407 "2-oxoglutarate synthase subunit KorC"  
"JS1\_O21\_00406" 9996 "s59E25H2" 0 "2-oxoglutarate synthase subunit KorC"

"JS1\_O21\_00406" 9996 "s59E5H2" 0.61996 "2-oxoglutarate synthase subunit KorC"  
"JS1\_O21\_00406" 9996 "s63E6H2" 0.2586272 "2-oxoglutarate synthase subunit KorC"  
"JS1\_O21\_00407" 9997 "s59E13H2" 0.1490914 "Acetate kinase"  
"JS1\_O21\_00407" 9997 "s59E25H2" 0 "Acetate kinase"  
"JS1\_O21\_00407" 9997 "s59E5H2" 0.3980162 "Acetate kinase"  
"JS1\_O21\_00407" 9997 "s63E6H2" 0.1906916 "Acetate kinase"  
"JS1\_O21\_00408" 9998 "s59E13H2" 0.1880037 "Sulfide dehydrogenase subunit beta precursor"  
"JS1\_O21\_00408" 9998 "s59E25H2" 0 "Sulfide dehydrogenase subunit beta precursor"  
"JS1\_O21\_00408" 9998 "s59E5H2" 0.1877765 "Sulfide dehydrogenase subunit beta precursor"  
"JS1\_O21\_00408" 9998 "s63E6H2" 0.3331635 "Sulfide dehydrogenase subunit beta precursor"  
"JS1\_O21\_00409" 9999 "s59E13H2" 0.2218368 "Sulfide dehydrogenase subunit alpha precursor"  
"JS1\_O21\_00409" 9999 "s59E25H2" 0 "Sulfide dehydrogenase subunit alpha precursor"  
"JS1\_O21\_00409" 9999 "s59E5H2" 0.2321873 "Sulfide dehydrogenase subunit alpha precursor"  
"JS1\_O21\_00409" 9999 "s63E6H2" 0.3431534 "Sulfide dehydrogenase subunit alpha precursor"  
"JS1\_O21\_00410" 10000 "s59E13H2" 0.1813251 "Glutamate dehydrogenase"  
"JS1\_O21\_00410" 10000 "s59E25H2" 0 "Glutamate dehydrogenase"  
"JS1\_O21\_00410" 10000 "s59E5H2" 0.6274003 "Glutamate dehydrogenase"  
"JS1\_O21\_00410" 10000 "s63E6H2" 0.01833104 "Glutamate dehydrogenase"  
"JS1\_O21\_00411" 10001 "s59E13H2" 0.1555963 "hypothetical protein"  
"JS1\_O21\_00411" 10001 "s59E25H2" 0 "hypothetical protein"  
"JS1\_O21\_00411" 10001 "s59E5H2" 0.1721678 "hypothetical protein"  
"JS1\_O21\_00411" 10001 "s63E6H2" 0.09133518 "hypothetical protein"  
"JS1\_O21\_00412" 10002 "s59E13H2" 0.1840914 "Methylmalonyl-CoA mutase"  
"JS1\_O21\_00412" 10002 "s59E25H2" 0 "Methylmalonyl-CoA mutase"  
"JS1\_O21\_00412" 10002 "s59E5H2" 0.1111565 "Methylmalonyl-CoA mutase"  
"JS1\_O21\_00412" 10002 "s63E6H2" 0.171787 "Methylmalonyl-CoA mutase"  
"JS1\_O21\_00413" 10003 "s59E13H2" 0.1128 "Methylmalonyl-CoA mutase"  
"JS1\_O21\_00413" 10003 "s59E25H2" 0 "Methylmalonyl-CoA mutase"  
"JS1\_O21\_00413" 10003 "s59E5H2" 0.05870612 "Methylmalonyl-CoA mutase"  
"JS1\_O21\_00413" 10003 "s63E6H2" 0.2913146 "Methylmalonyl-CoA mutase"  
"JS1\_O21\_00414" 10004 "s59E13H2" 0.2157598 "putative GTPase ArgK"  
"JS1\_O21\_00414" 10004 "s59E25H2" 0 "putative GTPase ArgK"  
"JS1\_O21\_00414" 10004 "s59E5H2" 0.175602 "putative GTPase ArgK"  
"JS1\_O21\_00414" 10004 "s63E6H2" 0.2026744 "putative GTPase ArgK"  
"JS1\_O21\_00415" 10005 "s59E13H2" 0.1529543 "glyoxalase I"  
"JS1\_O21\_00415" 10005 "s59E25H2" 0 "glyoxalase I"  
"JS1\_O21\_00415" 10005 "s59E5H2" 0.2166768 "glyoxalase I"  
"JS1\_O21\_00415" 10005 "s63E6H2" 0.3368527 "glyoxalase I"  
"JS1\_O21\_00416" 10006 "s59E13H2" 0.1638965 "Methylmalonyl-CoA carboxyltransferase 12S subunit"  
"JS1\_O21\_00416" 10006 "s59E25H2" 0 "Methylmalonyl-CoA carboxyltransferase 12S subunit"  
"JS1\_O21\_00416" 10006 "s59E5H2" 0.2769739 "Methylmalonyl-CoA carboxyltransferase 12S subunit"  
"JS1\_O21\_00416" 10006 "s63E6H2" 0.4712016 "Methylmalonyl-CoA carboxyltransferase 12S subunit"  
"JS1\_O21\_00417" 10007 "s59E13H2" 0.138397 "Oxaloacetate decarboxylase, gamma chain"  
"JS1\_O21\_00417" 10007 "s59E25H2" 0 "Oxaloacetate decarboxylase, gamma chain"  
"JS1\_O21\_00417" 10007 "s59E5H2" 0.2360608 "Oxaloacetate decarboxylase, gamma chain"  
"JS1\_O21\_00417" 10007 "s63E6H2" 0.0338076 "Oxaloacetate decarboxylase, gamma chain"  
"JS1\_O21\_00418" 10008 "s59E13H2" 0.02849422 "Peptide chain release factor 2"

"JS1\_O21\_00418" 10008 "s59E25H2" 0 "Peptide chain release factor 2"  
"JS1\_O21\_00418" 10008 "s59E5H2" 0.1909331 "Peptide chain release factor 2"  
"JS1\_O21\_00418" 10008 "s63E6H2" 0.1962874 "Peptide chain release factor 2"  
"JS1\_O21\_00419" 10009 "s59E13H2" 0.03441338 "preprotein translocase subunit SecA"  
"JS1\_O21\_00419" 10009 "s59E25H2" 0 "preprotein translocase subunit SecA"  
"JS1\_O21\_00419" 10009 "s59E5H2" 0.2241826 "preprotein translocase subunit SecA"  
"JS1\_O21\_00419" 10009 "s63E6H2" 0.1162309 "preprotein translocase subunit SecA"  
"JS1\_O21\_00420" 10010 "s59E13H2" 0.6898133 "RNA polymerase sigma-54 factor"  
"JS1\_O21\_00420" 10010 "s59E25H2" 0 "RNA polymerase sigma-54 factor"  
"JS1\_O21\_00420" 10010 "s59E5H2" 0.2155523 "RNA polymerase sigma-54 factor"  
"JS1\_O21\_00420" 10010 "s63E6H2" 0.5011827 "RNA polymerase sigma-54 factor"  
"JS1\_O21\_00421" 10011 "s59E13H2" 0.7490321 "Glyceraldehyde-3-phosphate dehydrogenase"  
"JS1\_O21\_00421" 10011 "s59E25H2" 0 "Glyceraldehyde-3-phosphate dehydrogenase"  
"JS1\_O21\_00421" 10011 "s59E5H2" 0.5947395 "Glyceraldehyde-3-phosphate dehydrogenase"  
"JS1\_O21\_00421" 10011 "s63E6H2" 0.8857696 "Glyceraldehyde-3-phosphate dehydrogenase"  
"JS1\_O21\_00422" 10012 "s59E13H2" 0.557824 "Trehalose/maltose import ATP-binding protein Malk"  
"JS1\_O21\_00422" 10012 "s59E25H2" 0 "Trehalose/maltose import ATP-binding protein Malk"  
"JS1\_O21\_00422" 10012 "s59E5H2" 0.223114 "Trehalose/maltose import ATP-binding protein Malk"  
"JS1\_O21\_00422" 10012 "s63E6H2" 0.6264391 "Trehalose/maltose import ATP-binding protein Malk"  
"JS1\_O21\_00423" 10013 "s59E13H2" 0.6452747 "Putative sporulation transcription regulator WhiA"  
"JS1\_O21\_00423" 10013 "s59E25H2" 0 "Putative sporulation transcription regulator WhiA"  
"JS1\_O21\_00423" 10013 "s59E5H2" 0.2070862 "Putative sporulation transcription regulator WhiA"  
"JS1\_O21\_00423" 10013 "s63E6H2" 0.3859274 "Putative sporulation transcription regulator WhiA"  
"JS1\_O21\_00424" 10014 "s59E13H2" 0.485881 "glmZ(sRNA)-inactivating NTPase"  
"JS1\_O21\_00424" 10014 "s59E25H2" 0 "glmZ(sRNA)-inactivating NTPase"  
"JS1\_O21\_00424" 10014 "s59E5H2" 0.3434222 "glmZ(sRNA)-inactivating NTPase"  
"JS1\_O21\_00424" 10014 "s63E6H2" 0.8712621 "glmZ(sRNA)-inactivating NTPase"  
"JS1\_O21\_00425" 10015 "s59E13H2" 0.1469343 "Arginine--tRNA ligase"  
"JS1\_O21\_00425" 10015 "s59E25H2" 0 "Arginine--tRNA ligase"  
"JS1\_O21\_00425" 10015 "s59E5H2" 0.4437587 "Arginine--tRNA ligase"  
"JS1\_O21\_00425" 10015 "s63E6H2" 0.5364964 "Arginine--tRNA ligase"  
"JS1\_O21\_00427" 10017 "s59E13H2" 0.05700858 "Oligopeptide transport system permease protein OppC"  
"JS1\_O21\_00427" 10017 "s59E25H2" 0 "Oligopeptide transport system permease protein OppC"  
"JS1\_O21\_00427" 10017 "s59E5H2" 0.04244496 "Oligopeptide transport system permease protein OppC"  
"JS1\_O21\_00427" 10017 "s63E6H2" 0.6334319 "Oligopeptide transport system permease protein OppC"  
"JS1\_O21\_00428" 10018 "s59E13H2" 0.0804212 "Dipeptide transport system permease protein DppB"  
"JS1\_O21\_00428" 10018 "s59E25H2" 0 "Dipeptide transport system permease protein DppB"  
"JS1\_O21\_00428" 10018 "s59E5H2" 0.06860848 "Dipeptide transport system permease protein DppB"  
"JS1\_O21\_00428" 10018 "s63E6H2" 0.4415034 "Dipeptide transport system permease protein DppB"  
"JS1\_O21\_00429" 10019 "s59E13H2" 0.1726518 "Oligopeptide-binding protein OppA precursor"  
"JS1\_O21\_00429" 10019 "s59E25H2" 0 "Oligopeptide-binding protein OppA precursor"  
"JS1\_O21\_00429" 10019 "s59E5H2" 0.1011959 "Oligopeptide-binding protein OppA precursor"  
"JS1\_O21\_00429" 10019 "s63E6H2" 0.4042728 "Oligopeptide-binding protein OppA precursor"  
"JS1\_O21\_00431" 10021 "s59E13H2" 0.2084591 "ATP-dependent zinc metalloprotease FtsH"  
"JS1\_O21\_00431" 10021 "s59E25H2" 0 "ATP-dependent zinc metalloprotease FtsH"  
"JS1\_O21\_00431" 10021 "s59E5H2" 0.05276919 "ATP-dependent zinc metalloprotease FtsH"  
"JS1\_O21\_00431" 10021 "s63E6H2" 0.1696054 "ATP-dependent zinc metalloprotease FtsH"

"JS1\_O21\_00432" 10022 "s59E13H2" 0.501898 "Formate--tetrahydrofolate ligase"  
"JS1\_O21\_00432" 10022 "s59E25H2" 0 "Formate--tetrahydrofolate ligase"  
"JS1\_O21\_00432" 10022 "s59E5H2" 0.5236262 "Formate--tetrahydrofolate ligase"  
"JS1\_O21\_00432" 10022 "s63E6H2" 0.0705421 "Formate--tetrahydrofolate ligase"  
"JS1\_O21\_00433" 10023 "s59E13H2" 0.8770611 "Heterodisulfide reductase subunit A-like protein"  
"JS1\_O21\_00433" 10023 "s59E25H2" 0 "Heterodisulfide reductase subunit A-like protein"  
"JS1\_O21\_00433" 10023 "s59E5H2" 1.132445 "Heterodisulfide reductase subunit A-like protein"  
"JS1\_O21\_00433" 10023 "s63E6H2" 0.2057681 "Heterodisulfide reductase subunit A-like protein"  
"JS1\_O21\_00434" 10024 "s59E13H2" 0.4587142 "Heterodisulfide reductase subunit A-like protein"  
"JS1\_O21\_00434" 10024 "s59E25H2" 0 "Heterodisulfide reductase subunit A-like protein"  
"JS1\_O21\_00434" 10024 "s59E5H2" 0.5435526 "Heterodisulfide reductase subunit A-like protein"  
"JS1\_O21\_00434" 10024 "s63E6H2" 0.3430043 "Heterodisulfide reductase subunit A-like protein"  
"JS1\_O21\_00436" 10026 "s59E13H2" 2.907221 "CGGC domain protein"  
"JS1\_O21\_00436" 10026 "s59E25H2" 0 "CGGC domain protein"  
"JS1\_O21\_00436" 10026 "s59E5H2" 0.978324 "CGGC domain protein"  
"JS1\_O21\_00436" 10026 "s63E6H2" 0.5399625 "CGGC domain protein"  
"JS1\_O21\_00437" 10027 "s59E13H2" 0.4781688 "Type I phosphodiesterase / nucleotide pyrophosphatase"  
"JS1\_O21\_00437" 10027 "s59E25H2" 0 "Type I phosphodiesterase / nucleotide pyrophosphatase"  
"JS1\_O21\_00437" 10027 "s59E5H2" 0.102168 "Type I phosphodiesterase / nucleotide pyrophosphatase"  
"JS1\_O21\_00437" 10027 "s63E6H2" 0.04837873 "Type I phosphodiesterase / nucleotide pyrophosphatase"  
"JS1\_O21\_00438" 10028 "s59E13H2" 0.492714 "Dinitrogenase iron-molybdenum cofactor"  
"JS1\_O21\_00438" 10028 "s59E25H2" 0 "Dinitrogenase iron-molybdenum cofactor"  
"JS1\_O21\_00438" 10028 "s59E5H2" 0.08804718 "Dinitrogenase iron-molybdenum cofactor"  
"JS1\_O21\_00438" 10028 "s63E6H2" 0.09470893 "Dinitrogenase iron-molybdenum cofactor"  
"JS1\_O21\_00439" 10029 "s59E13H2" 0.4113979 "Dinitrogenase iron-molybdenum cofactor"  
"JS1\_O21\_00439" 10029 "s59E25H2" 0 "Dinitrogenase iron-molybdenum cofactor"  
"JS1\_O21\_00439" 10029 "s59E5H2" 0.2267446 "Dinitrogenase iron-molybdenum cofactor"  
"JS1\_O21\_00439" 10029 "s63E6H2" 0.1211574 "Dinitrogenase iron-molybdenum cofactor"  
"JS1\_O21\_00440" 10030 "s59E13H2" 0.2642365 "hypothetical protein"  
"JS1\_O21\_00440" 10030 "s59E25H2" 0 "hypothetical protein"  
"JS1\_O21\_00440" 10030 "s59E5H2" 0.04557889 "hypothetical protein"  
"JS1\_O21\_00440" 10030 "s63E6H2" 0.1097428 "hypothetical protein"  
"JS1\_O21\_00441" 10031 "s59E13H2" 0.6213663 "Ferric uptake regulation protein"  
"JS1\_O21\_00441" 10031 "s59E25H2" 0 "Ferric uptake regulation protein"  
"JS1\_O21\_00441" 10031 "s59E5H2" 0.2751266 "Ferric uptake regulation protein"  
"JS1\_O21\_00441" 10031 "s63E6H2" 0.1519442 "Ferric uptake regulation protein"  
"JS1\_O21\_00442" 10032 "s59E13H2" 0.3697936 "arsenite S-adenosylmethyltransferase"  
"JS1\_O21\_00442" 10032 "s59E25H2" 0 "arsenite S-adenosylmethyltransferase"  
"JS1\_O21\_00442" 10032 "s59E5H2" 0.036786 "arsenite S-adenosylmethyltransferase"  
"JS1\_O21\_00442" 10032 "s63E6H2" 0 "arsenite S-adenosylmethyltransferase"  
"JS1\_O21\_00443" 10033 "s59E13H2" 0.4121578 "7,8-dihydropterin-6-methyl-4-(beta-D-ribofuranosyl)-aminobenzene-5'-phosphate synthase"  
"JS1\_O21\_00443" 10033 "s59E25H2" 0 "7,8-dihydropterin-6-methyl-4-(beta-D-ribofuranosyl)-aminobenzene-5'-phosphate synthase"  
"JS1\_O21\_00443" 10033 "s59E5H2" 0.2331798 "7,8-dihydropterin-6-methyl-4-(beta-D-ribofuranosyl)-aminobenzene-5'-phosphate synthase"  
"JS1\_O21\_00443" 10033 "s63E6H2" 0.002002401 "7,8-dihydropterin-6-methyl-4-(beta-D-ribofuranosyl)-aminobenzene-5'-phosphate synthase"  
"JS1\_O21\_00444" 10034 "s59E13H2" 0.7640524 "hypothetical protein"  
"JS1\_O21\_00444" 10034 "s59E25H2" 0 "hypothetical protein"  
"JS1\_O21\_00444" 10034 "s59E5H2" 0.5817391 "hypothetical protein"



"JS1\_O21\_00444" 10034 "s63E6H2" 0.8415824 "hypothetical protein"  
"JS1\_O21\_00445" 10035 "s59E13H2" 0.6252205 "FeoA domain protein"  
"JS1\_O21\_00445" 10035 "s59E25H2" 0 "FeoA domain protein"  
"JS1\_O21\_00445" 10035 "s59E5H2" 0.4681752 "FeoA domain protein"  
"JS1\_O21\_00445" 10035 "s63E6H2" 3.004327 "FeoA domain protein"  
"JS1\_O21\_00446" 10036 "s59E13H2" 0.5701027 "Transcriptional regulator MntR"  
"JS1\_O21\_00446" 10036 "s59E25H2" 0 "Transcriptional regulator MntR"  
"JS1\_O21\_00446" 10036 "s59E5H2" 0.3036717 "Transcriptional regulator MntR"  
"JS1\_O21\_00446" 10036 "s63E6H2" 3.49592 "Transcriptional regulator MntR"  
"JS1\_O21\_00447" 10037 "s59E13H2" 0.5701478 "Sulfur carrier protein ThiS"  
"JS1\_O21\_00447" 10037 "s59E25H2" 0 "Sulfur carrier protein ThiS"  
"JS1\_O21\_00447" 10037 "s59E5H2" 0.1870081 "Sulfur carrier protein ThiS"  
"JS1\_O21\_00447" 10037 "s63E6H2" 2.190724 "Sulfur carrier protein ThiS"  
"JS1\_O21\_00448" 10038 "s59E13H2" 1.229326 "Tungsten-containing formaldehyde ferredoxin oxidoreductase"  
"JS1\_O21\_00448" 10038 "s59E25H2" 0 "Tungsten-containing formaldehyde ferredoxin oxidoreductase"  
"JS1\_O21\_00448" 10038 "s59E5H2" 0.5538934 "Tungsten-containing formaldehyde ferredoxin oxidoreductase"  
"JS1\_O21\_00448" 10038 "s63E6H2" 1.834725 "Tungsten-containing formaldehyde ferredoxin oxidoreductase"  
"JS1\_O21\_00449" 10039 "s59E13H2" 2.692266 "Malate-2H(+)/Na(+)-lactate antiporter"  
"JS1\_O21\_00449" 10039 "s59E25H2" 0 "Malate-2H(+)/Na(+)-lactate antiporter"  
"JS1\_O21\_00449" 10039 "s59E5H2" 0.3033201 "Malate-2H(+)/Na(+)-lactate antiporter"  
"JS1\_O21\_00449" 10039 "s63E6H2" 0.6452591 "Malate-2H(+)/Na(+)-lactate antiporter"  
"JS1\_O21\_00450" 10040 "s59E13H2" 4.935605 "Segregation and condensation protein B"  
"JS1\_O21\_00450" 10040 "s59E25H2" 0 "Segregation and condensation protein B"  
"JS1\_O21\_00450" 10040 "s59E5H2" 0.2284411 "Segregation and condensation protein B"  
"JS1\_O21\_00450" 10040 "s63E6H2" 0.2049211 "Segregation and condensation protein B"  
"JS1\_O21\_00451" 10041 "s59E13H2" 4.38736 "Ribosomal large subunit pseudouridine synthase B"  
"JS1\_O21\_00451" 10041 "s59E25H2" 0 "Ribosomal large subunit pseudouridine synthase B"  
"JS1\_O21\_00451" 10041 "s59E5H2" 0.03860893 "Ribosomal large subunit pseudouridine synthase B"  
"JS1\_O21\_00451" 10041 "s63E6H2" 0.08101533 "Ribosomal large subunit pseudouridine synthase B"  
"JS1\_O21\_00452" 10042 "s59E13H2" 5.311592 "Cytidylate kinase"  
"JS1\_O21\_00452" 10042 "s59E25H2" 0 "Cytidylate kinase"  
"JS1\_O21\_00452" 10042 "s59E5H2" 0.04654948 "Cytidylate kinase"  
"JS1\_O21\_00452" 10042 "s63E6H2" 0.09934839 "Cytidylate kinase"  
"JS1\_O21\_00453" 10043 "s59E13H2" 6.126585 "4-hydroxy-3-methylbut-2-enyl diphosphate reductase"  
"JS1\_O21\_00453" 10043 "s59E25H2" 0 "4-hydroxy-3-methylbut-2-enyl diphosphate reductase"  
"JS1\_O21\_00453" 10043 "s59E5H2" 0.1608558 "4-hydroxy-3-methylbut-2-enyl diphosphate reductase"  
"JS1\_O21\_00453" 10043 "s63E6H2" 0.3891734 "4-hydroxy-3-methylbut-2-enyl diphosphate reductase"  
"JS1\_O21\_00454" 10044 "s59E13H2" 5.818519 "50S ribosomal protein L28"  
"JS1\_O21\_00454" 10044 "s59E25H2" 0 "50S ribosomal protein L28"  
"JS1\_O21\_00454" 10044 "s59E5H2" 0.1592009 "50S ribosomal protein L28"  
"JS1\_O21\_00454" 10044 "s63E6H2" 0.2887502 "50S ribosomal protein L28"  
"JS1\_O21\_00455" 10045 "s59E13H2" 5.205762 "Ribosomal RNA small subunit methyltransferase D"  
"JS1\_O21\_00455" 10045 "s59E25H2" 0 "Ribosomal RNA small subunit methyltransferase D"  
"JS1\_O21\_00455" 10045 "s59E5H2" 0.07783375 "Ribosomal RNA small subunit methyltransferase D"  
"JS1\_O21\_00455" 10045 "s63E6H2" 0.1575059 "Ribosomal RNA small subunit methyltransferase D"  
"JS1\_O21\_00456" 10046 "s59E13H2" 5.602908 "Phosphopantetheine adenylyltransferase"  
"JS1\_O21\_00456" 10046 "s59E25H2" 0 "Phosphopantetheine adenylyltransferase"

"JS1\_O21\_00456" 10046 "s59E5H2" 0.09461817 "Phosphopantetheine adenylyltransferase"  
"JS1\_O21\_00456" 10046 "s63E6H2" 0.2562626 "Phosphopantetheine adenylyltransferase"  
"JS1\_O21\_00457" 10047 "s59E13H2" 5.822819 "Lon protease"  
"JS1\_O21\_00457" 10047 "s59E25H2" 0 "Lon protease"  
"JS1\_O21\_00457" 10047 "s59E5H2" 0.252792 "Lon protease"  
"JS1\_O21\_00457" 10047 "s63E6H2" 0.5392936 "Lon protease"  
"JS1\_O21\_00458" 10048 "s59E13H2" 5.565846 "hypothetical protein"  
"JS1\_O21\_00458" 10048 "s59E25H2" 0.3756614 "hypothetical protein"  
"JS1\_O21\_00458" 10048 "s59E5H2" 0.3088929 "hypothetical protein"  
"JS1\_O21\_00458" 10048 "s63E6H2" 0.4136858 "hypothetical protein"  
"JS1\_O21\_00459" 10049 "s59E13H2" 3.214109 "Phosphate acetyltransferase"  
"JS1\_O21\_00459" 10049 "s59E25H2" 0 "Phosphate acetyltransferase"  
"JS1\_O21\_00459" 10049 "s59E5H2" 0.3216945 "Phosphate acetyltransferase"  
"JS1\_O21\_00459" 10049 "s63E6H2" 0.2451131 "Phosphate acetyltransferase"  
"JS1\_O21\_00460" 10050 "s59E13H2" 0.363195 "Acetate kinase"  
"JS1\_O21\_00460" 10050 "s59E25H2" 0 "Acetate kinase"  
"JS1\_O21\_00460" 10050 "s59E5H2" 0.1327887 "Acetate kinase"  
"JS1\_O21\_00460" 10050 "s63E6H2" 0.1144094 "Acetate kinase"  
"JS1\_O21\_00461" 10051 "s59E13H2" 0.006358395 "50S ribosomal protein L32"  
"JS1\_O21\_00461" 10051 "s59E25H2" 0 "50S ribosomal protein L32"  
"JS1\_O21\_00461" 10051 "s59E5H2" 0.06918643 "50S ribosomal protein L32"  
"JS1\_O21\_00461" 10051 "s63E6H2" 0.0467307 "50S ribosomal protein L32"  
"JS1\_O21\_00462" 10052 "s59E13H2" 0.09513074 "Transcription factor FapR"  
"JS1\_O21\_00462" 10052 "s59E25H2" 0 "Transcription factor FapR"  
"JS1\_O21\_00462" 10052 "s59E5H2" 0.2017368 "Transcription factor FapR"  
"JS1\_O21\_00462" 10052 "s63E6H2" 0.03398406 "Transcription factor FapR"  
"JS1\_O21\_00463" 10053 "s59E13H2" 0.6354553 "Phosphate acyltransferase"  
"JS1\_O21\_00463" 10053 "s59E25H2" 0 "Phosphate acyltransferase"  
"JS1\_O21\_00463" 10053 "s59E5H2" 0.1263454 "Phosphate acyltransferase"  
"JS1\_O21\_00463" 10053 "s63E6H2" 0.1270124 "Phosphate acyltransferase"  
"JS1\_O21\_00464" 10054 "s59E13H2" 0.02136411 "3-oxoacyl-[acyl-carrier-protein] synthase 3"  
"JS1\_O21\_00464" 10054 "s59E25H2" 0 "3-oxoacyl-[acyl-carrier-protein] synthase 3"  
"JS1\_O21\_00464" 10054 "s59E5H2" 0.1375793 "3-oxoacyl-[acyl-carrier-protein] synthase 3"  
"JS1\_O21\_00464" 10054 "s63E6H2" 0.1274447 "3-oxoacyl-[acyl-carrier-protein] synthase 3"  
"JS1\_O21\_00465" 10055 "s59E13H2" 0.1118161 "Malonyl CoA-acyl carrier protein transacylase"  
"JS1\_O21\_00465" 10055 "s59E25H2" 0 "Malonyl CoA-acyl carrier protein transacylase"  
"JS1\_O21\_00465" 10055 "s59E5H2" 0.1751242 "Malonyl CoA-acyl carrier protein transacylase"  
"JS1\_O21\_00465" 10055 "s63E6H2" 0.09903936 "Malonyl CoA-acyl carrier protein transacylase"  
"JS1\_O21\_00466" 10056 "s59E13H2" 0.1307502 "3-oxoacyl-[acyl-carrier-protein] reductase FabG"  
"JS1\_O21\_00466" 10056 "s59E25H2" 0 "3-oxoacyl-[acyl-carrier-protein] reductase FabG"  
"JS1\_O21\_00466" 10056 "s59E5H2" 0.2388789 "3-oxoacyl-[acyl-carrier-protein] reductase FabG"  
"JS1\_O21\_00466" 10056 "s63E6H2" 0.1316772 "3-oxoacyl-[acyl-carrier-protein] reductase FabG"  
"JS1\_O21\_00467" 10057 "s59E13H2" 0.1042102 "Acyl carrier protein"  
"JS1\_O21\_00467" 10057 "s59E25H2" 0 "Acyl carrier protein"  
"JS1\_O21\_00467" 10057 "s59E5H2" 0.2563615 "Acyl carrier protein"  
"JS1\_O21\_00467" 10057 "s63E6H2" 0.1436604 "Acyl carrier protein"  
"JS1\_O21\_00468" 10058 "s59E13H2" 0.1668337 "3-oxoacyl-[acyl-carrier-protein] synthase 2"

"JS1\_O21\_00468" 10058 "s59E25H2" 0 "3-oxoacyl-[acyl-carrier-protein] synthase 2"  
"JS1\_O21\_00468" 10058 "s59E5H2" 0.1164771 "3-oxoacyl-[acyl-carrier-protein] synthase 2"  
"JS1\_O21\_00468" 10058 "s63E6H2" 0.1134166 "3-oxoacyl-[acyl-carrier-protein] synthase 2"  
"JS1\_O21\_00469" 10059 "s59E13H2" 0.04145223 "Ribonuclease 3"  
"JS1\_O21\_00469" 10059 "s59E25H2" 0 "Ribonuclease 3"  
"JS1\_O21\_00469" 10059 "s59E5H2" 0.1128716 "Ribonuclease 3"  
"JS1\_O21\_00469" 10059 "s63E6H2" 0.1178043 "Ribonuclease 3"  
"JS1\_O21\_00470" 10060 "s59E13H2" 0.01751368 "Chromosome partition protein Smc"  
"JS1\_O21\_00470" 10060 "s59E25H2" 0 "Chromosome partition protein Smc"  
"JS1\_O21\_00470" 10060 "s59E5H2" 0.05189571 "Chromosome partition protein Smc"  
"JS1\_O21\_00470" 10060 "s63E6H2" 0.0418909 "Chromosome partition protein Smc"  
"JS1\_O21\_00471" 10061 "s59E13H2" 0.01896362 "Signal recognition particle receptor FtsY"  
"JS1\_O21\_00471" 10061 "s59E25H2" 0 "Signal recognition particle receptor FtsY"  
"JS1\_O21\_00471" 10061 "s59E5H2" 0.03971082 "Signal recognition particle receptor FtsY"  
"JS1\_O21\_00471" 10061 "s63E6H2" 0.05803378 "Signal recognition particle receptor FtsY"  
"JS1\_O21\_00472" 10062 "s59E13H2" 0.07956609 "Signal recognition particle protein"  
"JS1\_O21\_00472" 10062 "s59E25H2" 0 "Signal recognition particle protein"  
"JS1\_O21\_00472" 10062 "s59E5H2" 0.08364421 "Signal recognition particle protein"  
"JS1\_O21\_00472" 10062 "s63E6H2" 0.0222264 "Signal recognition particle protein"  
"JS1\_O21\_00473" 10063 "s59E13H2" 0.01773816 "30S ribosomal protein S16"  
"JS1\_O21\_00473" 10063 "s59E25H2" 0 "30S ribosomal protein S16"  
"JS1\_O21\_00473" 10063 "s59E5H2" 0.02011817 "30S ribosomal protein S16"  
"JS1\_O21\_00473" 10063 "s63E6H2" 0.01784723 "30S ribosomal protein S16"  
"JS1\_O21\_00474" 10064 "s59E13H2" 0.03077323 "hypothetical protein"  
"JS1\_O21\_00474" 10064 "s59E25H2" 0 "hypothetical protein"  
"JS1\_O21\_00474" 10064 "s59E5H2" 0.02308944 "hypothetical protein"  
"JS1\_O21\_00474" 10064 "s63E6H2" 0.0240803 "hypothetical protein"  
"JS1\_O21\_00475" 10065 "s59E13H2" 0.9851076 "Ribosome maturation factor RimM"  
"JS1\_O21\_00475" 10065 "s59E25H2" 0 "Ribosome maturation factor RimM"  
"JS1\_O21\_00475" 10065 "s59E5H2" 0.03860829 "Ribosome maturation factor RimM"  
"JS1\_O21\_00475" 10065 "s63E6H2" 0.005282774 "Ribosome maturation factor RimM"  
"JS1\_O21\_00476" 10066 "s59E13H2" 0.01608367 "tRNA (guanine-N(1)-methyltransferase"  
"JS1\_O21\_00476" 10066 "s59E25H2" 0 "tRNA (guanine-N(1)-methyltransferase"  
"JS1\_O21\_00476" 10066 "s59E5H2" 0.06259175 "tRNA (guanine-N(1)-methyltransferase"  
"JS1\_O21\_00476" 10066 "s63E6H2" 0.01365048 "tRNA (guanine-N(1)-methyltransferase"  
"JS1\_O21\_00477" 10067 "s59E13H2" 0.01749987 "50S ribosomal protein L19"  
"JS1\_O21\_00477" 10067 "s59E25H2" 0 "50S ribosomal protein L19"  
"JS1\_O21\_00477" 10067 "s59E5H2" 0.06968695 "50S ribosomal protein L19"  
"JS1\_O21\_00477" 10067 "s63E6H2" 0.04343608 "50S ribosomal protein L19"  
"JS1\_O21\_00478" 10068 "s59E13H2" 0.03057686 "Ribonuclease HII"  
"JS1\_O21\_00478" 10068 "s59E25H2" 0 "Ribonuclease HII"  
"JS1\_O21\_00478" 10068 "s59E5H2" 0.1192786 "Ribonuclease HII"  
"JS1\_O21\_00478" 10068 "s63E6H2" 0.04112613 "Ribonuclease HII"  
"JS1\_O21\_00479" 10069 "s59E13H2" 0.03381039 "hypothetical protein"  
"JS1\_O21\_00479" 10069 "s59E25H2" 0 "hypothetical protein"  
"JS1\_O21\_00479" 10069 "s59E5H2" 0.08539881 "hypothetical protein"  
"JS1\_O21\_00479" 10069 "s63E6H2" 0.01550937 "hypothetical protein"

"JS1\_O21\_00480" 10070 "s59E13H2" 0.2187469 "Competence protein ComM"  
"JS1\_O21\_00480" 10070 "s59E25H2" 0 "Competence protein ComM"  
"JS1\_O21\_00480" 10070 "s59E5H2" 0.1890196 "Competence protein ComM"  
"JS1\_O21\_00480" 10070 "s63E6H2" 0.04313767 "Competence protein ComM"  
"JS1\_O21\_00481" 10071 "s59E13H2" 0.0167273 "Ribulose-phosphate 3-epimerase"  
"JS1\_O21\_00481" 10071 "s59E25H2" 0 "Ribulose-phosphate 3-epimerase"  
"JS1\_O21\_00481" 10071 "s59E5H2" 0.1527407 "Ribulose-phosphate 3-epimerase"  
"JS1\_O21\_00481" 10071 "s63E6H2" 0.0345881 "Ribulose-phosphate 3-epimerase"  
"JS1\_O21\_00482" 10072 "s59E13H2" 0.03328298 "GTPase Der"  
"JS1\_O21\_00482" 10072 "s59E25H2" 0 "GTPase Der"  
"JS1\_O21\_00482" 10072 "s59E5H2" 0.1658707 "GTPase Der"  
"JS1\_O21\_00482" 10072 "s63E6H2" 0.08520633 "GTPase Der"  
"JS1\_O21\_00483" 10073 "s59E13H2" 0.007965646 "Glycerol-3-phosphate acyltransferase"  
"JS1\_O21\_00483" 10073 "s59E25H2" 0 "Glycerol-3-phosphate acyltransferase"  
"JS1\_O21\_00483" 10073 "s59E5H2" 0.09055563 "Glycerol-3-phosphate acyltransferase"  
"JS1\_O21\_00483" 10073 "s63E6H2" 0.05511488 "Glycerol-3-phosphate acyltransferase"  
"JS1\_O21\_00484" 10074 "s59E13H2" 0.03349617 "hypothetical protein"  
"JS1\_O21\_00484" 10074 "s59E25H2" 0 "hypothetical protein"  
"JS1\_O21\_00484" 10074 "s59E5H2" 0.2407157 "hypothetical protein"  
"JS1\_O21\_00484" 10074 "s63E6H2" 0.05758026 "hypothetical protein"  
"JS1\_O21\_00485" 10075 "s59E13H2" 0.03658714 "DNA topoisomerase 1"  
"JS1\_O21\_00485" 10075 "s59E25H2" 0 "DNA topoisomerase 1"  
"JS1\_O21\_00485" 10075 "s59E5H2" 0.1437934 "DNA topoisomerase 1"  
"JS1\_O21\_00485" 10075 "s63E6H2" 0.06537477 "DNA topoisomerase 1"  
"JS1\_O21\_00486" 10076 "s59E13H2" 0.03945328 "Tyrosine recombinase XerD"  
"JS1\_O21\_00486" 10076 "s59E25H2" 0 "Tyrosine recombinase XerD"  
"JS1\_O21\_00486" 10076 "s59E5H2" 0.1767418 "Tyrosine recombinase XerD"  
"JS1\_O21\_00486" 10076 "s63E6H2" 0.08407343 "Tyrosine recombinase XerD"  
"JS1\_O21\_00487" 10077 "s59E13H2" 0.04000783 "ATP-dependent protease subunit ClpQ"  
"JS1\_O21\_00487" 10077 "s59E25H2" 0 "ATP-dependent protease subunit ClpQ"  
"JS1\_O21\_00487" 10077 "s59E5H2" 0.2607694 "ATP-dependent protease subunit ClpQ"  
"JS1\_O21\_00487" 10077 "s63E6H2" 0.07536937 "ATP-dependent protease subunit ClpQ"  
"JS1\_O21\_00488" 10078 "s59E13H2" 0.03634638 "ATP-dependent protease ATPase subunit ClpY"  
"JS1\_O21\_00488" 10078 "s59E25H2" 0 "ATP-dependent protease ATPase subunit ClpY"  
"JS1\_O21\_00488" 10078 "s59E5H2" 0.8242553 "ATP-dependent protease ATPase subunit ClpY"  
"JS1\_O21\_00488" 10078 "s63E6H2" 0.06762145 "ATP-dependent protease ATPase subunit ClpY"  
"JS1\_O21\_00489" 10079 "s59E13H2" 0.04586405 "30S ribosomal protein S2"  
"JS1\_O21\_00489" 10079 "s59E25H2" 0 "30S ribosomal protein S2"  
"JS1\_O21\_00489" 10079 "s59E5H2" 0.08139925 "30S ribosomal protein S2"  
"JS1\_O21\_00489" 10079 "s63E6H2" 0.02816567 "30S ribosomal protein S2"  
"JS1\_O21\_00490" 10080 "s59E13H2" 0.07047175 "Elongation factor Ts"  
"JS1\_O21\_00490" 10080 "s59E25H2" 0 "Elongation factor Ts"  
"JS1\_O21\_00490" 10080 "s59E5H2" 0.03728698 "Elongation factor Ts"  
"JS1\_O21\_00490" 10080 "s63E6H2" 0.01952465 "Elongation factor Ts"  
"JS1\_O21\_00491" 10081 "s59E13H2" 0.06678335 "Uridylate kinase"  
"JS1\_O21\_00491" 10081 "s59E25H2" 0 "Uridylate kinase"  
"JS1\_O21\_00491" 10081 "s59E5H2" 0.1399838 "Uridylate kinase"

"JS1\_O21\_00491" 10081 "s63E6H2" 0.1040065 "Uridylate kinase"  
"JS1\_O21\_00492" 10082 "s59E13H2" 0.0840508 "Ribosome-recycling factor"  
"JS1\_O21\_00492" 10082 "s59E25H2" 0 "Ribosome-recycling factor"  
"JS1\_O21\_00492" 10082 "s59E5H2" 0.08071856 "Ribosome-recycling factor"  
"JS1\_O21\_00492" 10082 "s63E6H2" 0.2421655 "Ribosome-recycling factor"  
"JS1\_O21\_00493" 10083 "s59E13H2" 0.06003775 "Ferredoxin"  
"JS1\_O21\_00493" 10083 "s59E25H2" 0 "Ferredoxin"  
"JS1\_O21\_00493" 10083 "s59E5H2" 0.1464744 "Ferredoxin"  
"JS1\_O21\_00493" 10083 "s63E6H2" 0.02485043 "Ferredoxin"  
"JS1\_O21\_00494" 10084 "s59E13H2" 0.03400821 "Ditrans, polycis-undecaprenyl-diphosphate synthase ((2E,6E)-farnesyl-diphosphate specific)"  
"JS1\_O21\_00494" 10084 "s59E25H2" 0 "Ditrans, polycis-undecaprenyl-diphosphate synthase ((2E,6E)-farnesyl-diphosphate specific)"  
"JS1\_O21\_00494" 10084 "s59E5H2" 0.1579671 "Ditrans, polycis-undecaprenyl-diphosphate synthase ((2E,6E)-farnesyl-diphosphate specific)"  
"JS1\_O21\_00494" 10084 "s63E6H2" 0.08708785 "Ditrans, polycis-undecaprenyl-diphosphate synthase ((2E,6E)-farnesyl-diphosphate specific)"  
"JS1\_O21\_00495" 10085 "s59E13H2" 0.03554799 "Phosphatidate cytidyltransferase"  
"JS1\_O21\_00495" 10085 "s59E25H2" 0 "Phosphatidate cytidyltransferase"  
"JS1\_O21\_00495" 10085 "s59E5H2" 0.136005 "Phosphatidate cytidyltransferase"  
"JS1\_O21\_00495" 10085 "s63E6H2" 0.04674101 "Phosphatidate cytidyltransferase"  
"JS1\_O21\_00496" 10086 "s59E13H2" 0.05506511 "1-deoxy-D-xylulose 5-phosphate reductoisomerase"  
"JS1\_O21\_00496" 10086 "s59E25H2" 0 "1-deoxy-D-xylulose 5-phosphate reductoisomerase"  
"JS1\_O21\_00496" 10086 "s59E5H2" 0.1155362 "1-deoxy-D-xylulose 5-phosphate reductoisomerase"  
"JS1\_O21\_00496" 10086 "s63E6H2" 0.04258087 "1-deoxy-D-xylulose 5-phosphate reductoisomerase"  
"JS1\_O21\_00497" 10087 "s59E13H2" 0.0526174 "Regulator of sigma-W protease RasP"  
"JS1\_O21\_00497" 10087 "s59E25H2" 0 "Regulator of sigma-W protease RasP"  
"JS1\_O21\_00497" 10087 "s59E5H2" 0.1610211 "Regulator of sigma-W protease RasP"  
"JS1\_O21\_00497" 10087 "s63E6H2" 0.04534571 "Regulator of sigma-W protease RasP"  
"JS1\_O21\_00498" 10088 "s59E13H2" 0.03651521 "4-hydroxy-3-methylbut-2-en-1-yl diphosphate synthase"  
"JS1\_O21\_00498" 10088 "s59E25H2" 0 "4-hydroxy-3-methylbut-2-en-1-yl diphosphate synthase"  
"JS1\_O21\_00498" 10088 "s59E5H2" 0.1266917 "4-hydroxy-3-methylbut-2-en-1-yl diphosphate synthase"  
"JS1\_O21\_00498" 10088 "s63E6H2" 0.03233628 "4-hydroxy-3-methylbut-2-en-1-yl diphosphate synthase"  
"JS1\_O21\_00499" 10089 "s59E13H2" 0.02434457 "V-type ATP synthase subunit H"  
"JS1\_O21\_00499" 10089 "s59E25H2" 0 "V-type ATP synthase subunit H"  
"JS1\_O21\_00499" 10089 "s59E5H2" 0.1618624 "V-type ATP synthase subunit H"  
"JS1\_O21\_00499" 10089 "s63E6H2" 0.01399384 "V-type ATP synthase subunit H"  
"JS1\_O21\_00500" 10090 "s59E13H2" 0.02959701 "V-type ATP synthase subunit I"  
"JS1\_O21\_00500" 10090 "s59E25H2" 0 "V-type ATP synthase subunit I"  
"JS1\_O21\_00500" 10090 "s59E5H2" 0.2166115 "V-type ATP synthase subunit I"  
"JS1\_O21\_00500" 10090 "s63E6H2" 0.04987151 "V-type ATP synthase subunit I"  
"JS1\_O21\_00501" 10091 "s59E13H2" 0.06405853 "V-type sodium ATPase subunit K"  
"JS1\_O21\_00501" 10091 "s59E25H2" 0 "V-type sodium ATPase subunit K"  
"JS1\_O21\_00501" 10091 "s59E5H2" 1.017125 "V-type sodium ATPase subunit K"  
"JS1\_O21\_00501" 10091 "s63E6H2" 0.1069037 "V-type sodium ATPase subunit K"  
"JS1\_O21\_00502" 10092 "s59E13H2" 0.9232064 "V-type ATP synthase subunit E"  
"JS1\_O21\_00502" 10092 "s59E25H2" 0 "V-type ATP synthase subunit E"  
"JS1\_O21\_00502" 10092 "s59E5H2" 0.2500734 "V-type ATP synthase subunit E"  
"JS1\_O21\_00502" 10092 "s63E6H2" 0.08215696 "V-type ATP synthase subunit E"  
"JS1\_O21\_00503" 10093 "s59E13H2" 0.02442362 "V-type sodium ATPase subunit C"  
"JS1\_O21\_00503" 10093 "s59E25H2" 0 "V-type sodium ATPase subunit C"

"JS1\_O21\_00503" 10093 "s59E5H2" 0.3556909 "V-type sodium ATPase subunit C"  
"JS1\_O21\_00503" 10093 "s63E6H2" 0.04436845 "V-type sodium ATPase subunit C"  
"JS1\_O21\_00504" 10094 "s59E13H2" 0.105759 "V-type sodium ATPase subunit G"  
"JS1\_O21\_00504" 10094 "s59E25H2" 0 "V-type sodium ATPase subunit G"  
"JS1\_O21\_00504" 10094 "s59E5H2" 0.5159991 "V-type sodium ATPase subunit G"  
"JS1\_O21\_00504" 10094 "s63E6H2" 0.06610995 "V-type sodium ATPase subunit G"  
"JS1\_O21\_00505" 10095 "s59E13H2" 0.1125498 "V-type sodium ATPase catalytic subunit A"  
"JS1\_O21\_00505" 10095 "s59E25H2" 0 "V-type sodium ATPase catalytic subunit A"  
"JS1\_O21\_00505" 10095 "s59E5H2" 0.5621176 "V-type sodium ATPase catalytic subunit A"  
"JS1\_O21\_00505" 10095 "s63E6H2" 0.4415989 "V-type sodium ATPase catalytic subunit A"  
"JS1\_O21\_00506" 10096 "s59E13H2" 0.2243068 "V-type sodium ATPase subunit B"  
"JS1\_O21\_00506" 10096 "s59E25H2" 0 "V-type sodium ATPase subunit B"  
"JS1\_O21\_00506" 10096 "s59E5H2" 0.7773256 "V-type sodium ATPase subunit B"  
"JS1\_O21\_00506" 10096 "s63E6H2" 0.6972252 "V-type sodium ATPase subunit B"  
"JS1\_O21\_00507" 10097 "s59E13H2" 0.1056507 "V-type sodium ATPase subunit D"  
"JS1\_O21\_00507" 10097 "s59E25H2" 0 "V-type sodium ATPase subunit D"  
"JS1\_O21\_00507" 10097 "s59E5H2" 0.3737093 "V-type sodium ATPase subunit D"  
"JS1\_O21\_00507" 10097 "s63E6H2" 0.5445981 "V-type sodium ATPase subunit D"  
"JS1\_O21\_00508" 10098 "s59E13H2" 0.2100477 "Diacylglycerol kinase"  
"JS1\_O21\_00508" 10098 "s59E25H2" 0 "Diacylglycerol kinase"  
"JS1\_O21\_00508" 10098 "s59E5H2" 0.1789086 "Diacylglycerol kinase"  
"JS1\_O21\_00508" 10098 "s63E6H2" 8.270523 "Diacylglycerol kinase"  
"JS1\_O21\_00509" 10099 "s59E13H2" 0.1740906 "1-acyl-sn-glycerol-3-phosphate acyltransferase"  
"JS1\_O21\_00509" 10099 "s59E25H2" 0 "1-acyl-sn-glycerol-3-phosphate acyltransferase"  
"JS1\_O21\_00509" 10099 "s59E5H2" 0.1408634 "1-acyl-sn-glycerol-3-phosphate acyltransferase"  
"JS1\_O21\_00509" 10099 "s63E6H2" 8.073017 "1-acyl-sn-glycerol-3-phosphate acyltransferase"  
"JS1\_O21\_00510" 10100 "s59E13H2" 2.805985 "putative tRNA-dihydrouridine synthase"  
"JS1\_O21\_00510" 10100 "s59E25H2" 0 "putative tRNA-dihydrouridine synthase"  
"JS1\_O21\_00510" 10100 "s59E5H2" 0.2820565 "putative tRNA-dihydrouridine synthase"  
"JS1\_O21\_00510" 10100 "s63E6H2" 0.3381742 "putative tRNA-dihydrouridine synthase"  
"JS1\_O21\_00511" 10101 "s59E13H2" 0.1968332 "hypothetical protein"  
"JS1\_O21\_00511" 10101 "s59E25H2" 0 "hypothetical protein"  
"JS1\_O21\_00511" 10101 "s59E5H2" 0.3113592 "hypothetical protein"  
"JS1\_O21\_00511" 10101 "s63E6H2" 0.02976209 "hypothetical protein"  
"JS1\_O21\_00512" 10102 "s59E13H2" 0.3007937 "Dihydrolipoyl dehydrogenase"  
"JS1\_O21\_00512" 10102 "s59E25H2" 0 "Dihydrolipoyl dehydrogenase"  
"JS1\_O21\_00512" 10102 "s59E5H2" 0.5953481 "Dihydrolipoyl dehydrogenase"  
"JS1\_O21\_00512" 10102 "s63E6H2" 0.0688771 "Dihydrolipoyl dehydrogenase"  
"JS1\_O21\_00513" 10103 "s59E13H2" 0.32875 "DNA alkylation repair enzyme"  
"JS1\_O21\_00513" 10103 "s59E25H2" 0 "DNA alkylation repair enzyme"  
"JS1\_O21\_00513" 10103 "s59E5H2" 0.5061129 "DNA alkylation repair enzyme"  
"JS1\_O21\_00513" 10103 "s63E6H2" 0.2892729 "DNA alkylation repair enzyme"  
"JS1\_O21\_00516" 10106 "s59E13H2" 0.2493176 "FMN reductase [NAD(P)H]"  
"JS1\_O21\_00516" 10106 "s59E25H2" 0 "FMN reductase [NAD(P)H]"  
"JS1\_O21\_00516" 10106 "s59E5H2" 0.06348042 "FMN reductase [NAD(P)H]"  
"JS1\_O21\_00516" 10106 "s63E6H2" 9.264503 "FMN reductase [NAD(P)H]"  
"JS1\_O21\_00517" 10107 "s59E13H2" 0.4538078 "Glyoxalase-like domain protein"

"JS1\_O21\_00517" 10107 "s59E25H2" 0 "Glyoxalase-like domain protein"  
"JS1\_O21\_00517" 10107 "s59E5H2" 0.1153943 "Glyoxalase-like domain protein"  
"JS1\_O21\_00517" 10107 "s63E6H2" 10.90422 "Glyoxalase-like domain protein"  
"JS1\_O21\_00518" 10108 "s59E13H2" 0.2230942 "Rubrerythrin"  
"JS1\_O21\_00518" 10108 "s59E25H2" 0 "Rubrerythrin"  
"JS1\_O21\_00518" 10108 "s59E5H2" 0.5680111 "Rubrerythrin"  
"JS1\_O21\_00518" 10108 "s63E6H2" 1.049506 "Rubrerythrin"  
"JS1\_O21\_00519" 10109 "s59E13H2" 0.114197 "hypothetical protein"  
"JS1\_O21\_00519" 10109 "s59E25H2" 0 "hypothetical protein"  
"JS1\_O21\_00519" 10109 "s59E5H2" 0.4602258 "hypothetical protein"  
"JS1\_O21\_00519" 10109 "s63E6H2" 3.54443 "hypothetical protein"  
"JS1\_O21\_00520" 10110 "s59E13H2" 0.3281217 "Exodeoxyribonuclease"  
"JS1\_O21\_00520" 10110 "s59E25H2" 0 "Exodeoxyribonuclease"  
"JS1\_O21\_00520" 10110 "s59E5H2" 1.638668 "Exodeoxyribonuclease"  
"JS1\_O21\_00520" 10110 "s63E6H2" 0.2237194 "Exodeoxyribonuclease"  
"JS1\_O21\_00521" 10111 "s59E13H2" 4.292574 "Isoprenylcysteine carboxyl methyltransferase (ICMT) family protein"  
"JS1\_O21\_00521" 10111 "s59E25H2" 0 "Isoprenylcysteine carboxyl methyltransferase (ICMT) family protein"  
"JS1\_O21\_00521" 10111 "s59E5H2" 0.7350525 "Isoprenylcysteine carboxyl methyltransferase (ICMT) family protein"  
"JS1\_O21\_00521" 10111 "s63E6H2" 4.184695 "Isoprenylcysteine carboxyl methyltransferase (ICMT) family protein"  
"JS1\_O21\_00523" 10113 "s59E13H2" 1.79605 "hypothetical protein"  
"JS1\_O21\_00523" 10113 "s59E25H2" 0 "hypothetical protein"  
"JS1\_O21\_00523" 10113 "s59E5H2" 2.70551 "hypothetical protein"  
"JS1\_O21\_00523" 10113 "s63E6H2" 0.211812 "hypothetical protein"  
"JS1\_O21\_00524" 10114 "s59E13H2" 0.2261656 "Sialic acid TRAP transporter permease protein SiaT"  
"JS1\_O21\_00524" 10114 "s59E25H2" 0 "Sialic acid TRAP transporter permease protein SiaT"  
"JS1\_O21\_00524" 10114 "s59E5H2" 4.60516 "Sialic acid TRAP transporter permease protein SiaT"  
"JS1\_O21\_00524" 10114 "s63E6H2" 0 "Sialic acid TRAP transporter permease protein SiaT"  
"JS1\_O21\_00525" 10115 "s59E13H2" 0.0716827 "Tripartite ATP-independent periplasmic transporters, DctQ component"  
"JS1\_O21\_00525" 10115 "s59E25H2" 0 "Tripartite ATP-independent periplasmic transporters, DctQ component"  
"JS1\_O21\_00525" 10115 "s59E5H2" 1.235667 "Tripartite ATP-independent periplasmic transporters, DctQ component"  
"JS1\_O21\_00525" 10115 "s63E6H2" 0 "Tripartite ATP-independent periplasmic transporters, DctQ component"  
"JS1\_O21\_00526" 10116 "s59E13H2" 0.2880448 "leucine/isoleucine/valine transporter permease subunit"  
"JS1\_O21\_00526" 10116 "s59E25H2" 0 "leucine/isoleucine/valine transporter permease subunit"  
"JS1\_O21\_00526" 10116 "s59E5H2" 1.530639 "leucine/isoleucine/valine transporter permease subunit"  
"JS1\_O21\_00526" 10116 "s63E6H2" 1.347176 "leucine/isoleucine/valine transporter permease subunit"  
"JS1\_O21\_00527" 10117 "s59E13H2" 0.7744385 "putative branched-chain amino acid transport ATP-binding protein LivG"  
"JS1\_O21\_00527" 10117 "s59E25H2" 0 "putative branched-chain amino acid transport ATP-binding protein LivG"  
"JS1\_O21\_00527" 10117 "s59E5H2" 1.934065 "putative branched-chain amino acid transport ATP-binding protein LivG"  
"JS1\_O21\_00527" 10117 "s63E6H2" 1.526682 "putative branched-chain amino acid transport ATP-binding protein LivG"  
"JS1\_O21\_00528" 10118 "s59E13H2" 1.073772 "High-affinity branched-chain amino acid transport ATP-binding protein LivF"  
"JS1\_O21\_00528" 10118 "s59E25H2" 0 "High-affinity branched-chain amino acid transport ATP-binding protein LivF"  
"JS1\_O21\_00528" 10118 "s59E5H2" 2.373086 "High-affinity branched-chain amino acid transport ATP-binding protein LivF"  
"JS1\_O21\_00528" 10118 "s63E6H2" 2.150553 "High-affinity branched-chain amino acid transport ATP-binding protein LivF"  
"JS1\_O21\_00529" 10119 "s59E13H2" 0.5715527 "hypothetical protein"  
"JS1\_O21\_00529" 10119 "s59E25H2" 0 "hypothetical protein"  
"JS1\_O21\_00529" 10119 "s59E5H2" 1.777098 "hypothetical protein"  
"JS1\_O21\_00529" 10119 "s63E6H2" 0.5680613 "hypothetical protein"

"JS1\_O21\_00530" 10120 "s59E13H2" 0.61192 "hypothetical protein"  
"JS1\_O21\_00530" 10120 "s59E25H2" 0 "hypothetical protein"  
"JS1\_O21\_00530" 10120 "s59E5H2" 2.00655 "hypothetical protein"  
"JS1\_O21\_00530" 10120 "s63E6H2" 0.6866765 "hypothetical protein"  
"JS1\_O21\_00531" 10121 "s59E13H2" 0.7276065 "YGGT family protein"  
"JS1\_O21\_00531" 10121 "s59E25H2" 0 "YGGT family protein"  
"JS1\_O21\_00531" 10121 "s59E5H2" 2.024125 "YGGT family protein"  
"JS1\_O21\_00531" 10121 "s63E6H2" 1.602883 "YGGT family protein"  
"JS1\_O21\_00532" 10122 "s59E13H2" 0.7645862 "Septum site-determining protein DivIVA"  
"JS1\_O21\_00532" 10122 "s59E25H2" 0 "Septum site-determining protein DivIVA"  
"JS1\_O21\_00532" 10122 "s59E5H2" 2.041813 "Septum site-determining protein DivIVA"  
"JS1\_O21\_00532" 10122 "s63E6H2" 1.692492 "Septum site-determining protein DivIVA"  
"JS1\_O21\_00533" 10123 "s59E13H2" 0.5483663 "hypothetical protein"  
"JS1\_O21\_00533" 10123 "s59E25H2" 0 "hypothetical protein"  
"JS1\_O21\_00533" 10123 "s59E5H2" 1.040436 "hypothetical protein"  
"JS1\_O21\_00533" 10123 "s63E6H2" 0.9925178 "hypothetical protein"  
"JS1\_O21\_00535" 10125 "s59E13H2" 0.5861454 "Isoleucine--tRNA ligase"  
"JS1\_O21\_00535" 10125 "s59E25H2" 0 "Isoleucine--tRNA ligase"  
"JS1\_O21\_00535" 10125 "s59E5H2" 2.676954 "Isoleucine--tRNA ligase"  
"JS1\_O21\_00535" 10125 "s63E6H2" 1.61819 "Isoleucine--tRNA ligase"  
"JS1\_O21\_00536" 10126 "s59E13H2" 0.7353736 "Lipoprotein signal peptidase"  
"JS1\_O21\_00536" 10126 "s59E25H2" 0.1333333 "Lipoprotein signal peptidase"  
"JS1\_O21\_00536" 10126 "s59E5H2" 3.441751 "Lipoprotein signal peptidase"  
"JS1\_O21\_00536" 10126 "s63E6H2" 0.888308 "Lipoprotein signal peptidase"  
"JS1\_O21\_00537" 10127 "s59E13H2" 0.8535872 "Prolipoprotein diacylglyceryl transferase"  
"JS1\_O21\_00537" 10127 "s59E25H2" 0 "Prolipoprotein diacylglyceryl transferase"  
"JS1\_O21\_00537" 10127 "s59E5H2" 3.257382 "Prolipoprotein diacylglyceryl transferase"  
"JS1\_O21\_00537" 10127 "s63E6H2" 1.160681 "Prolipoprotein diacylglyceryl transferase"  
"JS1\_O21\_00538" 10128 "s59E13H2" 0.8789551 "Ribosomal large subunit pseudouridine synthase D"  
"JS1\_O21\_00538" 10128 "s59E25H2" 0 "Ribosomal large subunit pseudouridine synthase D"  
"JS1\_O21\_00538" 10128 "s59E5H2" 2.844793 "Ribosomal large subunit pseudouridine synthase D"  
"JS1\_O21\_00538" 10128 "s63E6H2" 1.342144 "Ribosomal large subunit pseudouridine synthase D"  
"JS1\_O21\_00539" 10129 "s59E13H2" 0.6399639 "hypothetical protein"  
"JS1\_O21\_00539" 10129 "s59E25H2" 0 "hypothetical protein"  
"JS1\_O21\_00539" 10129 "s59E5H2" 0.7583076 "hypothetical protein"  
"JS1\_O21\_00539" 10129 "s63E6H2" 1.056881 "hypothetical protein"  
"JS1\_O21\_00540" 10130 "s59E13H2" 0.7184387 "hypothetical protein"  
"JS1\_O21\_00540" 10130 "s59E25H2" 0 "hypothetical protein"  
"JS1\_O21\_00540" 10130 "s59E5H2" 0.6805738 "hypothetical protein"  
"JS1\_O21\_00540" 10130 "s63E6H2" 1.008613 "hypothetical protein"  
"JS1\_O21\_00541" 10131 "s59E13H2" 0.7046361 "hypothetical protein"  
"JS1\_O21\_00541" 10131 "s59E25H2" 0 "hypothetical protein"  
"JS1\_O21\_00541" 10131 "s59E5H2" 0.1899992 "hypothetical protein"  
"JS1\_O21\_00541" 10131 "s63E6H2" 0.9723414 "hypothetical protein"  
"JS1\_O21\_00542" 10132 "s59E13H2" 0.8793584 "Guanylate kinase"  
"JS1\_O21\_00542" 10132 "s59E25H2" 0 "Guanylate kinase"  
"JS1\_O21\_00542" 10132 "s59E5H2" 0.2622007 "Guanylate kinase"



"JS1\_O21\_00542" 10132 "s63E6H2" 0.4764331 "Guanylate kinase"  
"JS1\_O21\_00543" 10133 "s59E13H2" 0.7525882 "DNA-directed RNA polymerase subunit omega"  
"JS1\_O21\_00543" 10133 "s59E25H2" 0 "DNA-directed RNA polymerase subunit omega"  
"JS1\_O21\_00543" 10133 "s59E5H2" 0.08476881 "DNA-directed RNA polymerase subunit omega"  
"JS1\_O21\_00543" 10133 "s63E6H2" 0.02339468 "DNA-directed RNA polymerase subunit omega"  
"JS1\_O21\_00544" 10134 "s59E13H2" 1.166367 "Coenzyme A biosynthesis bifunctional protein CoaBC"  
"JS1\_O21\_00544" 10134 "s59E25H2" 1.076214 "Coenzyme A biosynthesis bifunctional protein CoaBC"  
"JS1\_O21\_00544" 10134 "s59E5H2" 0.7333433 "Coenzyme A biosynthesis bifunctional protein CoaBC"  
"JS1\_O21\_00544" 10134 "s63E6H2" 1.675934 "Coenzyme A biosynthesis bifunctional protein CoaBC"  
"JS1\_O21\_00545" 10135 "s59E13H2" 0.1729989 "Primosomal protein N"  
"JS1\_O21\_00545" 10135 "s59E25H2" 0.1106259 "Primosomal protein N"  
"JS1\_O21\_00545" 10135 "s59E5H2" 0.8101619 "Primosomal protein N"  
"JS1\_O21\_00545" 10135 "s63E6H2" 2.407458 "Primosomal protein N"  
"JS1\_O21\_00546" 10136 "s59E13H2" 0.09257055 "Peptide deformylase 1"  
"JS1\_O21\_00546" 10136 "s59E25H2" 0.5112474 "Peptide deformylase 1"  
"JS1\_O21\_00546" 10136 "s59E5H2" 0.6787378 "Peptide deformylase 1"  
"JS1\_O21\_00546" 10136 "s63E6H2" 1.575531 "Peptide deformylase 1"  
"JS1\_O21\_00547" 10137 "s59E13H2" 0.1481903 "Methionyl-tRNA formyltransferase"  
"JS1\_O21\_00547" 10137 "s59E25H2" 0 "Methionyl-tRNA formyltransferase"  
"JS1\_O21\_00547" 10137 "s59E5H2" 0.2971475 "Methionyl-tRNA formyltransferase"  
"JS1\_O21\_00547" 10137 "s63E6H2" 0.4871727 "Methionyl-tRNA formyltransferase"  
"JS1\_O21\_00548" 10138 "s59E13H2" 0.1804266 "Putative neutral zinc metalloproteinase"  
"JS1\_O21\_00548" 10138 "s59E25H2" 0.6182085 "Putative neutral zinc metalloproteinase"  
"JS1\_O21\_00548" 10138 "s59E5H2" 1.130322 "Putative neutral zinc metalloproteinase"  
"JS1\_O21\_00548" 10138 "s63E6H2" 3.493038 "Putative neutral zinc metalloproteinase"  
"JS1\_O21\_00549" 10139 "s59E13H2" 1.9173 "Ribosomal RNA small subunit methyltransferase B"  
"JS1\_O21\_00549" 10139 "s59E25H2" 0.02873563 "Ribosomal RNA small subunit methyltransferase B"  
"JS1\_O21\_00549" 10139 "s59E5H2" 0.382909 "Ribosomal RNA small subunit methyltransferase B"  
"JS1\_O21\_00549" 10139 "s63E6H2" 0.1532881 "Ribosomal RNA small subunit methyltransferase B"  
"JS1\_O21\_00550" 10140 "s59E13H2" 2.817996 "Serine/threonine-protein kinase PK-1"  
"JS1\_O21\_00550" 10140 "s59E25H2" 1.681319 "Serine/threonine-protein kinase PK-1"  
"JS1\_O21\_00550" 10140 "s59E5H2" 0.3835589 "Serine/threonine-protein kinase PK-1"  
"JS1\_O21\_00550" 10140 "s63E6H2" 0.09190193 "Serine/threonine-protein kinase PK-1"  
"JS1\_O21\_00551" 10141 "s59E13H2" 2.58971 "hypothetical protein"  
"JS1\_O21\_00551" 10141 "s59E25H2" 0.1657559 "hypothetical protein"  
"JS1\_O21\_00551" 10141 "s59E5H2" 1.197158 "hypothetical protein"  
"JS1\_O21\_00551" 10141 "s63E6H2" 0.325541 "hypothetical protein"  
"JS1\_O21\_00553" 10143 "s59E13H2" 2.283773 "hypothetical protein"  
"JS1\_O21\_00553" 10143 "s59E25H2" 0 "hypothetical protein"  
"JS1\_O21\_00553" 10143 "s59E5H2" 0.7700927 "hypothetical protein"  
"JS1\_O21\_00553" 10143 "s63E6H2" 0.07665037 "hypothetical protein"  
"JS1\_O21\_00554" 10144 "s59E13H2" 2.411285 "putative ATP-dependent RNA helicase"  
"JS1\_O21\_00554" 10144 "s59E25H2" 0 "putative ATP-dependent RNA helicase"  
"JS1\_O21\_00554" 10144 "s59E5H2" 1.397701 "putative ATP-dependent RNA helicase"  
"JS1\_O21\_00554" 10144 "s63E6H2" 0.4386711 "putative ATP-dependent RNA helicase"  
"JS1\_O21\_00555" 10145 "s59E13H2" 1.84121 "Aminopeptidase 2"  
"JS1\_O21\_00555" 10145 "s59E25H2" 0 "Aminopeptidase 2"

"JS1\_O21\_00555" 10145 "s59E5H2" 1.323384 "Aminopeptidase 2"  
"JS1\_O21\_00555" 10145 "s63E6H2" 0.7849903 "Aminopeptidase 2"  
"JS1\_O21\_00556" 10146 "s59E13H2" 0.02725441 "HTH-type transcriptional regulator MurR"  
"JS1\_O21\_00556" 10146 "s59E25H2" 0 "HTH-type transcriptional regulator MurR"  
"JS1\_O21\_00556" 10146 "s59E5H2" 0 "HTH-type transcriptional regulator MurR"  
"JS1\_O21\_00556" 10146 "s63E6H2" 0.001618424 "HTH-type transcriptional regulator MurR"  
"JS1\_O21\_00557" 10147 "s59E13H2" 0.000920692 "Alanine dehydrogenase"  
"JS1\_O21\_00557" 10147 "s59E25H2" 0 "Alanine dehydrogenase"  
"JS1\_O21\_00557" 10147 "s59E5H2" 0.06032018 "Alanine dehydrogenase"  
"JS1\_O21\_00557" 10147 "s63E6H2" 0 "Alanine dehydrogenase"  
"JS1\_O21\_00558" 10148 "s59E13H2" 0.03143379 "alkanesulfonate transporter substrate-binding subunit"  
"JS1\_O21\_00558" 10148 "s59E25H2" 0 "alkanesulfonate transporter substrate-binding subunit"  
"JS1\_O21\_00558" 10148 "s59E5H2" 0.02016787 "alkanesulfonate transporter substrate-binding subunit"  
"JS1\_O21\_00558" 10148 "s63E6H2" 0.00354783 "alkanesulfonate transporter substrate-binding subunit"  
"JS1\_O21\_00559" 10149 "s59E13H2" 0 "hypothetical protein"  
"JS1\_O21\_00559" 10149 "s59E25H2" 0 "hypothetical protein"  
"JS1\_O21\_00559" 10149 "s59E5H2" 0.2143862 "hypothetical protein"  
"JS1\_O21\_00559" 10149 "s63E6H2" 0.0008851073 "hypothetical protein"  
"JS1\_O21\_00560" 10150 "s59E13H2" 0.3169126 "Sialic acid TRAP transporter permease protein SiaT"  
"JS1\_O21\_00560" 10150 "s59E25H2" 0 "Sialic acid TRAP transporter permease protein SiaT"  
"JS1\_O21\_00560" 10150 "s59E5H2" 0.7115568 "Sialic acid TRAP transporter permease protein SiaT"  
"JS1\_O21\_00560" 10150 "s63E6H2" 0.01366662 "Sialic acid TRAP transporter permease protein SiaT"  
"JS1\_O21\_00561" 10151 "s59E13H2" 0.7637513 "Opine dehydrogenase"  
"JS1\_O21\_00561" 10151 "s59E25H2" 0 "Opine dehydrogenase"  
"JS1\_O21\_00561" 10151 "s59E5H2" 0.1818408 "Opine dehydrogenase"  
"JS1\_O21\_00561" 10151 "s63E6H2" 0.01157392 "Opine dehydrogenase"  
"JS1\_O21\_00562" 10152 "s59E13H2" 10.92643 "Integrase core domain protein"  
"JS1\_O21\_00562" 10152 "s59E25H2" 0 "Integrase core domain protein"  
"JS1\_O21\_00562" 10152 "s59E5H2" 2.646023 "Integrase core domain protein"  
"JS1\_O21\_00562" 10152 "s63E6H2" 2.358812 "Integrase core domain protein"  
"JS1\_O21\_00563" 10153 "s59E13H2" 0.9760388 "hypothetical protein"  
"JS1\_O21\_00563" 10153 "s59E25H2" 0 "hypothetical protein"  
"JS1\_O21\_00563" 10153 "s59E5H2" 1.440487 "hypothetical protein"  
"JS1\_O21\_00563" 10153 "s63E6H2" 0.1032149 "hypothetical protein"  
"JS1\_O21\_00564" 10154 "s59E13H2" 1.535766 "Iron-sulfur flavoprotein"  
"JS1\_O21\_00564" 10154 "s59E25H2" 0 "Iron-sulfur flavoprotein"  
"JS1\_O21\_00564" 10154 "s59E5H2" 0.2552004 "Iron-sulfur flavoprotein"  
"JS1\_O21\_00564" 10154 "s63E6H2" 0.002302279 "Iron-sulfur flavoprotein"  
"JS1\_O21\_00565" 10155 "s59E13H2" 1.115423 "hypothetical protein"  
"JS1\_O21\_00565" 10155 "s59E25H2" 0 "hypothetical protein"  
"JS1\_O21\_00565" 10155 "s59E5H2" 0.169967 "hypothetical protein"  
"JS1\_O21\_00565" 10155 "s63E6H2" 0.005301909 "hypothetical protein"  
"JS1\_O21\_00566" 10156 "s59E13H2" 0.005548887 "PLAT/LH2 domain protein"  
"JS1\_O21\_00566" 10156 "s59E25H2" 0 "PLAT/LH2 domain protein"  
"JS1\_O21\_00566" 10156 "s59E5H2" 0.1715901 "PLAT/LH2 domain protein"  
"JS1\_O21\_00566" 10156 "s63E6H2" 0.0008565498 "PLAT/LH2 domain protein"  
"JS1\_O21\_00567" 10157 "s59E13H2" 0 "hypothetical protein"

"JS1\_O21\_00567" 10157 "s59E25H2" 0 "hypothetical protein"  
"JS1\_O21\_00567" 10157 "s59E5H2" 0.5755462 "hypothetical protein"  
"JS1\_O21\_00567" 10157 "s63E6H2" 0 "hypothetical protein"  
"JS1\_O21\_00568" 10158 "s59E13H2" 2.118783 "23S rRNA (uridine(2479)-2'-O)-methyltransferase"  
"JS1\_O21\_00568" 10158 "s59E25H2" 0 "23S rRNA (uridine(2479)-2'-O)-methyltransferase"  
"JS1\_O21\_00568" 10158 "s59E5H2" 0.5089783 "23S rRNA (uridine(2479)-2'-O)-methyltransferase"  
"JS1\_O21\_00568" 10158 "s63E6H2" 0.3246619 "23S rRNA (uridine(2479)-2'-O)-methyltransferase"  
"JS1\_O21\_00569" 10159 "s59E13H2" 0.02964043 "choline dehydrogenase"  
"JS1\_O21\_00569" 10159 "s59E25H2" 0 "choline dehydrogenase"  
"JS1\_O21\_00569" 10159 "s59E5H2" 0.383023 "choline dehydrogenase"  
"JS1\_O21\_00569" 10159 "s63E6H2" 0.210963 "choline dehydrogenase"  
"JS1\_O21\_00570" 10160 "s59E13H2" 0.06419714 "5'-nucleotidase SurE"  
"JS1\_O21\_00570" 10160 "s59E25H2" 0 "5'-nucleotidase SurE"  
"JS1\_O21\_00570" 10160 "s59E5H2" 0.5912551 "5'-nucleotidase SurE"  
"JS1\_O21\_00570" 10160 "s63E6H2" 0.2693417 "5'-nucleotidase SurE"  
"JS1\_O21\_00571" 10161 "s59E13H2" 0.04798071 "hypothetical protein"  
"JS1\_O21\_00571" 10161 "s59E25H2" 0 "hypothetical protein"  
"JS1\_O21\_00571" 10161 "s59E5H2" 0.7023583 "hypothetical protein"  
"JS1\_O21\_00571" 10161 "s63E6H2" 0.234503 "hypothetical protein"  
"JS1\_O21\_00572" 10162 "s59E13H2" 0.05357775 "Protein-L-isoaspartate O-methyltransferase"  
"JS1\_O21\_00572" 10162 "s59E25H2" 0 "Protein-L-isoaspartate O-methyltransferase"  
"JS1\_O21\_00572" 10162 "s59E5H2" 0.4088874 "Protein-L-isoaspartate O-methyltransferase"  
"JS1\_O21\_00572" 10162 "s63E6H2" 0.4613091 "Protein-L-isoaspartate O-methyltransferase"  
"JS1\_O21\_00574" 10164 "s59E13H2" 0.08838567 "Vancomycin B-type resistance protein VanW"  
"JS1\_O21\_00574" 10164 "s59E25H2" 0.3377483 "Vancomycin B-type resistance protein VanW"  
"JS1\_O21\_00574" 10164 "s59E5H2" 0.3904176 "Vancomycin B-type resistance protein VanW"  
"JS1\_O21\_00574" 10164 "s63E6H2" 0.5954438 "Vancomycin B-type resistance protein VanW"  
"JS1\_O21\_00575" 10165 "s59E13H2" 0.2313091 "aspartoacylase"  
"JS1\_O21\_00575" 10165 "s59E25H2" 0 "aspartoacylase"  
"JS1\_O21\_00575" 10165 "s59E5H2" 0.5110437 "aspartoacylase"  
"JS1\_O21\_00575" 10165 "s63E6H2" 0.2559771 "aspartoacylase"  
"JS1\_O21\_00576" 10166 "s59E13H2" 6.404402 "Putative peptidyl-prolyl cis-trans isomerase Cbf2 precursor"  
"JS1\_O21\_00576" 10166 "s59E25H2" 0 "Putative peptidyl-prolyl cis-trans isomerase Cbf2 precursor"  
"JS1\_O21\_00576" 10166 "s59E5H2" 0.3548717 "Putative peptidyl-prolyl cis-trans isomerase Cbf2 precursor"  
"JS1\_O21\_00576" 10166 "s63E6H2" 0.3312459 "Putative peptidyl-prolyl cis-trans isomerase Cbf2 precursor"  
"JS1\_O21\_00577" 10167 "s59E13H2" 0.9668105 "Lactose transport system permease protein LacG"  
"JS1\_O21\_00577" 10167 "s59E25H2" 0 "Lactose transport system permease protein LacG"  
"JS1\_O21\_00577" 10167 "s59E5H2" 0.6100108 "Lactose transport system permease protein LacG"  
"JS1\_O21\_00577" 10167 "s63E6H2" 0.4092131 "Lactose transport system permease protein LacG"  
"JS1\_O21\_00578" 10168 "s59E13H2" 6.231451 "Lactose transport system permease protein LacF"  
"JS1\_O21\_00578" 10168 "s59E25H2" 0 "Lactose transport system permease protein LacF"  
"JS1\_O21\_00578" 10168 "s59E5H2" 0.722937 "Lactose transport system permease protein LacF"  
"JS1\_O21\_00578" 10168 "s63E6H2" 0.5581186 "Lactose transport system permease protein LacF"  
"JS1\_O21\_00579" 10169 "s59E13H2" 5.213605 "Lactose-binding protein precursor"  
"JS1\_O21\_00579" 10169 "s59E25H2" 0 "Lactose-binding protein precursor"  
"JS1\_O21\_00579" 10169 "s59E5H2" 0.5550882 "Lactose-binding protein precursor"  
"JS1\_O21\_00579" 10169 "s63E6H2" 0.4242651 "Lactose-binding protein precursor"

"JS1\_O21\_00580" 10170 "s59E13H2" 0 "Protein of unknown function (Hypoth\_ymh)"  
"JS1\_O21\_00580" 10170 "s59E25H2" 0 "Protein of unknown function (Hypoth\_ymh)"  
"JS1\_O21\_00580" 10170 "s59E5H2" 0.006682081 "Protein of unknown function (Hypoth\_ymh)"  
"JS1\_O21\_00580" 10170 "s63E6H2" 0.009944067 "Protein of unknown function (Hypoth\_ymh)"  
"JS1\_O21\_00582" 10172 "s59E13H2" 0.04623851 "Transaldolase"  
"JS1\_O21\_00582" 10172 "s59E25H2" 0 "Transaldolase"  
"JS1\_O21\_00582" 10172 "s59E5H2" 0.01200869 "Transaldolase"  
"JS1\_O21\_00582" 10172 "s63E6H2" 0.1717038 "Transaldolase"  
"JS1\_O21\_00583" 10173 "s59E13H2" 15.93456 "LL-diaminopimelate aminotransferase"  
"JS1\_O21\_00583" 10173 "s59E25H2" 0.2145299 "LL-diaminopimelate aminotransferase"  
"JS1\_O21\_00583" 10173 "s59E5H2" 3.079439 "LL-diaminopimelate aminotransferase"  
"JS1\_O21\_00583" 10173 "s63E6H2" 3.18931 "LL-diaminopimelate aminotransferase"  
"JS1\_O21\_00584" 10174 "s59E13H2" 15.54565 "Diaminopimelate epimerase"  
"JS1\_O21\_00584" 10174 "s59E25H2" 0.5296167 "Diaminopimelate epimerase"  
"JS1\_O21\_00584" 10174 "s59E5H2" 7.944935 "Diaminopimelate epimerase"  
"JS1\_O21\_00584" 10174 "s63E6H2" 6.169293 "Diaminopimelate epimerase"  
"JS1\_O21\_00585" 10175 "s59E13H2" 6.337866 "Isopropylmalate/citramalate isomerase large subunit"  
"JS1\_O21\_00585" 10175 "s59E25H2" 0 "Isopropylmalate/citramalate isomerase large subunit"  
"JS1\_O21\_00585" 10175 "s59E5H2" 2.692853 "Isopropylmalate/citramalate isomerase large subunit"  
"JS1\_O21\_00585" 10175 "s63E6H2" 1.027264 "Isopropylmalate/citramalate isomerase large subunit"  
"JS1\_O21\_00586" 10176 "s59E13H2" 6.593677 "hypothetical protein"  
"JS1\_O21\_00586" 10176 "s59E25H2" 0 "hypothetical protein"  
"JS1\_O21\_00586" 10176 "s59E5H2" 0.136733 "hypothetical protein"  
"JS1\_O21\_00586" 10176 "s63E6H2" 0.1362307 "hypothetical protein"  
"JS1\_O21\_00587" 10177 "s59E13H2" 8.259725 "NAD-dependent malic enzyme"  
"JS1\_O21\_00587" 10177 "s59E25H2" 0.02295918 "NAD-dependent malic enzyme"  
"JS1\_O21\_00587" 10177 "s59E5H2" 1.172001 "NAD-dependent malic enzyme"  
"JS1\_O21\_00587" 10177 "s63E6H2" 0.05569063 "NAD-dependent malic enzyme"  
"JS1\_O21\_00588" 10178 "s59E13H2" 3.090526 "Fumarate hydratase class I, anaerobic"  
"JS1\_O21\_00588" 10178 "s59E25H2" 0.2972973 "Fumarate hydratase class I, anaerobic"  
"JS1\_O21\_00588" 10178 "s59E5H2" 0.86077 "Fumarate hydratase class I, anaerobic"  
"JS1\_O21\_00588" 10178 "s63E6H2" 0.05212854 "Fumarate hydratase class I, anaerobic"  
"JS1\_O21\_00589" 10179 "s59E13H2" 0.2335229 "hypothetical protein"  
"JS1\_O21\_00589" 10179 "s59E25H2" 0 "hypothetical protein"  
"JS1\_O21\_00589" 10179 "s59E5H2" 0.02029835 "hypothetical protein"  
"JS1\_O21\_00589" 10179 "s63E6H2" 0.1760187 "hypothetical protein"  
"JS1\_O21\_00590" 10180 "s59E13H2" 0.01651075 "hypothetical protein"  
"JS1\_O21\_00590" 10180 "s59E25H2" 0 "hypothetical protein"  
"JS1\_O21\_00590" 10180 "s59E5H2" 0.009661538 "hypothetical protein"  
"JS1\_O21\_00590" 10180 "s63E6H2" 0.1001752 "hypothetical protein"  
"JS1\_O21\_00591" 10181 "s59E13H2" 0.04071183 "Translation initiation factor IF-2"  
"JS1\_O21\_00591" 10181 "s59E25H2" 0 "Translation initiation factor IF-2"  
"JS1\_O21\_00591" 10181 "s59E5H2" 0.1247313 "Translation initiation factor IF-2"  
"JS1\_O21\_00591" 10181 "s63E6H2" 0.07775995 "Translation initiation factor IF-2"  
"JS1\_O21\_00592" 10182 "s59E13H2" 0.02081201 "Ribosome-binding factor A"  
"JS1\_O21\_00592" 10182 "s59E25H2" 0 "Ribosome-binding factor A"  
"JS1\_O21\_00592" 10182 "s59E5H2" 0.05195414 "Ribosome-binding factor A"

"JS1\_O21\_00592" 10182 "s63E6H2" 0.04301775 "Ribosome-binding factor A"  
"JS1\_O21\_00593" 10183 "s59E13H2" 0.03945705 "Bifunctional oligoribonuclease and PAP phosphatase NrnA"  
"JS1\_O21\_00593" 10183 "s59E25H2" 0 "Bifunctional oligoribonuclease and PAP phosphatase NrnA"  
"JS1\_O21\_00593" 10183 "s59E5H2" 0.05172081 "Bifunctional oligoribonuclease and PAP phosphatase NrnA"  
"JS1\_O21\_00593" 10183 "s63E6H2" 0.05561968 "Bifunctional oligoribonuclease and PAP phosphatase NrnA"  
"JS1\_O21\_00594" 10184 "s59E13H2" 0.04846405 "tRNA pseudouridine synthase B"  
"JS1\_O21\_00594" 10184 "s59E25H2" 0 "tRNA pseudouridine synthase B"  
"JS1\_O21\_00594" 10184 "s59E5H2" 0.07220954 "tRNA pseudouridine synthase B"  
"JS1\_O21\_00594" 10184 "s63E6H2" 0.05104111 "tRNA pseudouridine synthase B"  
"JS1\_O21\_00595" 10185 "s59E13H2" 0.08451491 "Riboflavin biosynthesis protein RibF"  
"JS1\_O21\_00595" 10185 "s59E25H2" 0 "Riboflavin biosynthesis protein RibF"  
"JS1\_O21\_00595" 10185 "s59E5H2" 0.03050092 "Riboflavin biosynthesis protein RibF"  
"JS1\_O21\_00595" 10185 "s63E6H2" 0.02931179 "Riboflavin biosynthesis protein RibF"  
"JS1\_O21\_00596" 10186 "s59E13H2" 0.03956959 "30S ribosomal protein S15"  
"JS1\_O21\_00596" 10186 "s59E25H2" 0 "30S ribosomal protein S15"  
"JS1\_O21\_00596" 10186 "s59E5H2" 0 "30S ribosomal protein S15"  
"JS1\_O21\_00596" 10186 "s63E6H2" 0.02861769 "30S ribosomal protein S15"  
"JS1\_O21\_00597" 10187 "s59E13H2" 2.285847 "Polyribonucleotide nucleotidyltransferase"  
"JS1\_O21\_00597" 10187 "s59E25H2" 0 "Polyribonucleotide nucleotidyltransferase"  
"JS1\_O21\_00597" 10187 "s59E5H2" 0.1273325 "Polyribonucleotide nucleotidyltransferase"  
"JS1\_O21\_00597" 10187 "s63E6H2" 0.02814297 "Polyribonucleotide nucleotidyltransferase"  
"JS1\_O21\_00598" 10188 "s59E13H2" 3.563109 "Deoxyuridine 5'-triphosphate nucleotidohydrolase"  
"JS1\_O21\_00598" 10188 "s59E25H2" 0 "Deoxyuridine 5'-triphosphate nucleotidohydrolase"  
"JS1\_O21\_00598" 10188 "s59E5H2" 0.111176 "Deoxyuridine 5'-triphosphate nucleotidohydrolase"  
"JS1\_O21\_00598" 10188 "s63E6H2" 0.086091 "Deoxyuridine 5'-triphosphate nucleotidohydrolase"  
"JS1\_O21\_00599" 10189 "s59E13H2" 0.2244275 "Trigger factor"  
"JS1\_O21\_00599" 10189 "s59E25H2" 0 "Trigger factor"  
"JS1\_O21\_00599" 10189 "s59E5H2" 0.04118789 "Trigger factor"  
"JS1\_O21\_00599" 10189 "s63E6H2" 0.09284188 "Trigger factor"  
"JS1\_O21\_00600" 10190 "s59E13H2" 0.2686598 "ATP-dependent Clp protease proteolytic subunit"  
"JS1\_O21\_00600" 10190 "s59E25H2" 0 "ATP-dependent Clp protease proteolytic subunit"  
"JS1\_O21\_00600" 10190 "s59E5H2" 0.07865392 "ATP-dependent Clp protease proteolytic subunit"  
"JS1\_O21\_00600" 10190 "s63E6H2" 0.1188197 "ATP-dependent Clp protease proteolytic subunit"  
"JS1\_O21\_00601" 10191 "s59E13H2" 0.1207595 "ATP-dependent Clp protease ATP-binding subunit ClpX"  
"JS1\_O21\_00601" 10191 "s59E25H2" 0 "ATP-dependent Clp protease ATP-binding subunit ClpX"  
"JS1\_O21\_00601" 10191 "s59E5H2" 0.1298715 "ATP-dependent Clp protease ATP-binding subunit ClpX"  
"JS1\_O21\_00601" 10191 "s63E6H2" 0.08398267 "ATP-dependent Clp protease ATP-binding subunit ClpX"  
"JS1\_O21\_00602" 10192 "s59E13H2" 0.0272041 "hypothetical protein"  
"JS1\_O21\_00602" 10192 "s59E25H2" 0 "hypothetical protein"  
"JS1\_O21\_00602" 10192 "s59E5H2" 0 "hypothetical protein"  
"JS1\_O21\_00602" 10192 "s63E6H2" 0 "hypothetical protein"  
"JS1\_O21\_00603" 10193 "s59E13H2" 0.2940537 "Lon protease 1"  
"JS1\_O21\_00603" 10193 "s59E25H2" 0 "Lon protease 1"  
"JS1\_O21\_00603" 10193 "s59E5H2" 0.1902756 "Lon protease 1"  
"JS1\_O21\_00603" 10193 "s63E6H2" 0.1150484 "Lon protease 1"  
"JS1\_O21\_00605" 10195 "s59E13H2" 0.688635 "Valine--tRNA ligase"  
"JS1\_O21\_00605" 10195 "s59E25H2" 0 "Valine--tRNA ligase"

"JS1\_O21\_00605" 10195 "s59E5H2" 0.3426335 "Valine--tRNA ligase"  
"JS1\_O21\_00605" 10195 "s63E6H2" 0.1841195 "Valine--tRNA ligase"  
"JS1\_O21\_00606" 10196 "s59E13H2" 0.8705544 "Folylpolyglutamate synthase"  
"JS1\_O21\_00606" 10196 "s59E25H2" 0.3695492 "Folylpolyglutamate synthase"  
"JS1\_O21\_00606" 10196 "s59E5H2" 0.303961 "Folylpolyglutamate synthase"  
"JS1\_O21\_00606" 10196 "s63E6H2" 0.09111296 "Folylpolyglutamate synthase"  
"JS1\_O21\_00607" 10197 "s59E13H2" 0.5116371 "ComE operon protein 1"  
"JS1\_O21\_00607" 10197 "s59E25H2" 0 "ComE operon protein 1"  
"JS1\_O21\_00607" 10197 "s59E5H2" 0.9523432 "ComE operon protein 1"  
"JS1\_O21\_00607" 10197 "s63E6H2" 0.07832007 "ComE operon protein 1"  
"JS1\_O21\_00608" 10198 "s59E13H2" 0.4731913 "ComEC family competence protein"  
"JS1\_O21\_00608" 10198 "s59E25H2" 0 "ComEC family competence protein"  
"JS1\_O21\_00608" 10198 "s59E5H2" 0.8300731 "ComEC family competence protein"  
"JS1\_O21\_00608" 10198 "s63E6H2" 0.07192815 "ComEC family competence protein"  
"JS1\_O21\_00609" 10199 "s59E13H2" 0.5570237 "DNA polymerase III subunit delta"  
"JS1\_O21\_00609" 10199 "s59E25H2" 0 "DNA polymerase III subunit delta"  
"JS1\_O21\_00609" 10199 "s59E5H2" 0.6302667 "DNA polymerase III subunit delta"  
"JS1\_O21\_00609" 10199 "s63E6H2" 0.05178654 "DNA polymerase III subunit delta"  
"JS1\_O21\_00610" 10200 "s59E13H2" 0.3030966 "30S ribosomal protein S20"  
"JS1\_O21\_00610" 10200 "s59E25H2" 0 "30S ribosomal protein S20"  
"JS1\_O21\_00610" 10200 "s59E5H2" 0.2373275 "30S ribosomal protein S20"  
"JS1\_O21\_00610" 10200 "s63E6H2" 0.04728764 "30S ribosomal protein S20"  
"JS1\_O21\_00611" 10201 "s59E13H2" 0.5948472 "putative peptidoglycan biosynthesis protein MurJ"  
"JS1\_O21\_00611" 10201 "s59E25H2" 0.126195 "putative peptidoglycan biosynthesis protein MurJ"  
"JS1\_O21\_00611" 10201 "s59E5H2" 0.4252971 "putative peptidoglycan biosynthesis protein MurJ"  
"JS1\_O21\_00611" 10201 "s63E6H2" 0.1307997 "putative peptidoglycan biosynthesis protein MurJ"  
"JS1\_O21\_00612" 10202 "s59E13H2" 1.373126 "Elongation factor 4"  
"JS1\_O21\_00612" 10202 "s59E25H2" 0 "Elongation factor 4"  
"JS1\_O21\_00612" 10202 "s59E5H2" 0.2596468 "Elongation factor 4"  
"JS1\_O21\_00612" 10202 "s63E6H2" 0.1153926 "Elongation factor 4"  
"JS1\_O21\_00613" 10203 "s59E13H2" 0.1605476 "Oxygen-independent coproporphyrinogen-III oxidase 1"  
"JS1\_O21\_00613" 10203 "s59E25H2" 0 "Oxygen-independent coproporphyrinogen-III oxidase 1"  
"JS1\_O21\_00613" 10203 "s59E5H2" 0.134613 "Oxygen-independent coproporphyrinogen-III oxidase 1"  
"JS1\_O21\_00613" 10203 "s63E6H2" 0.1159984 "Oxygen-independent coproporphyrinogen-III oxidase 1"  
"JS1\_O21\_00614" 10204 "s59E13H2" 0.08248982 "Heat-inducible transcription repressor HrcA"  
"JS1\_O21\_00614" 10204 "s59E25H2" 0 "Heat-inducible transcription repressor HrcA"  
"JS1\_O21\_00614" 10204 "s59E5H2" 0.1660603 "Heat-inducible transcription repressor HrcA"  
"JS1\_O21\_00614" 10204 "s63E6H2" 0.1342804 "Heat-inducible transcription repressor HrcA"  
"JS1\_O21\_00615" 10205 "s59E13H2" 0.1704929 "heat shock protein GrpE"  
"JS1\_O21\_00615" 10205 "s59E25H2" 0 "heat shock protein GrpE"  
"JS1\_O21\_00615" 10205 "s59E5H2" 0.04928869 "heat shock protein GrpE"  
"JS1\_O21\_00615" 10205 "s63E6H2" 0.1147619 "heat shock protein GrpE"  
"JS1\_O21\_00616" 10206 "s59E13H2" 0.1955032 "Chaperone protein DnaK"  
"JS1\_O21\_00616" 10206 "s59E25H2" 0 "Chaperone protein DnaK"  
"JS1\_O21\_00616" 10206 "s59E5H2" 0.08780314 "Chaperone protein DnaK"  
"JS1\_O21\_00616" 10206 "s63E6H2" 0.3001021 "Chaperone protein DnaK"  
"JS1\_O21\_00617" 10207 "s59E13H2" 0.08333217 "Chaperone protein DnaJ"

"JS1\_O21\_00617" 10207 "s59E25H2" 0.1128748 "Chaperone protein DnaJ"  
"JS1\_O21\_00617" 10207 "s59E5H2" 0.03725553 "Chaperone protein DnaJ"  
"JS1\_O21\_00617" 10207 "s63E6H2" 0.4459111 "Chaperone protein DnaJ"  
"JS1\_O21\_00618" 10208 "s59E13H2" 0.8769098 "Threonylcarbamoyladenosine tRNA methylthiotransferase MtaB"  
"JS1\_O21\_00618" 10208 "s59E25H2" 0 "Threonylcarbamoyladenosine tRNA methylthiotransferase MtaB"  
"JS1\_O21\_00618" 10208 "s59E5H2" 0.1901014 "Threonylcarbamoyladenosine tRNA methylthiotransferase MtaB"  
"JS1\_O21\_00618" 10208 "s63E6H2" 0.420572 "Threonylcarbamoyladenosine tRNA methylthiotransferase MtaB"  
"JS1\_O21\_00620" 10210 "s59E13H2" 0 "hypothetical protein"  
"JS1\_O21\_00620" 10210 "s59E25H2" 0 "hypothetical protein"  
"JS1\_O21\_00620" 10210 "s59E5H2" 0 "hypothetical protein"  
"JS1\_O21\_00620" 10210 "s63E6H2" 0 "hypothetical protein"  
"JS1\_O21\_00621" 10211 "s59E13H2" 0.008718531 "KHG/KDPG aldolase"  
"JS1\_O21\_00621" 10211 "s59E25H2" 0 "KHG/KDPG aldolase"  
"JS1\_O21\_00621" 10211 "s59E5H2" 0 "KHG/KDPG aldolase"  
"JS1\_O21\_00621" 10211 "s63E6H2" 0 "KHG/KDPG aldolase"  
"JS1\_O21\_00622" 10212 "s59E13H2" 0.03304002 "Tungsten-containing aldehyde ferredoxin oxidoreductase"  
"JS1\_O21\_00622" 10212 "s59E25H2" 0 "Tungsten-containing aldehyde ferredoxin oxidoreductase"  
"JS1\_O21\_00622" 10212 "s59E5H2" 0.002225663 "Tungsten-containing aldehyde ferredoxin oxidoreductase"  
"JS1\_O21\_00622" 10212 "s63E6H2" 0.009247464 "Tungsten-containing aldehyde ferredoxin oxidoreductase"  
"JS1\_O21\_00623" 10213 "s59E13H2" 0.04035286 "ThiS family protein"  
"JS1\_O21\_00623" 10213 "s59E25H2" 0 "ThiS family protein"  
"JS1\_O21\_00623" 10213 "s59E5H2" 0 "ThiS family protein"  
"JS1\_O21\_00623" 10213 "s63E6H2" 0 "ThiS family protein"  
"JS1\_O21\_00624" 10214 "s59E13H2" 0.05193949 "Glyoxylate reductase"  
"JS1\_O21\_00624" 10214 "s59E25H2" 0 "Glyoxylate reductase"  
"JS1\_O21\_00624" 10214 "s59E5H2" 0.01060261 "Glyoxylate reductase"  
"JS1\_O21\_00624" 10214 "s63E6H2" 0.00151341 "Glyoxylate reductase"  
"JS1\_O21\_00626" 10216 "s59E13H2" 0.2970146 "Hydroxyacylglutathione hydrolase"  
"JS1\_O21\_00626" 10216 "s59E25H2" 0 "Hydroxyacylglutathione hydrolase"  
"JS1\_O21\_00626" 10216 "s59E5H2" 0.3285075 "Hydroxyacylglutathione hydrolase"  
"JS1\_O21\_00626" 10216 "s63E6H2" 0.5985508 "Hydroxyacylglutathione hydrolase"  
"JS1\_O21\_00627" 10217 "s59E13H2" 0.3986935 "RDD family protein"  
"JS1\_O21\_00627" 10217 "s59E25H2" 0 "RDD family protein"  
"JS1\_O21\_00627" 10217 "s59E5H2" 1.739841 "RDD family protein"  
"JS1\_O21\_00627" 10217 "s63E6H2" 1.239179 "RDD family protein"  
"JS1\_O21\_00629" 10219 "s59E13H2" 0.4236131 "Serine--tRNA ligase"  
"JS1\_O21\_00629" 10219 "s59E25H2" 0.1878931 "Serine--tRNA ligase"  
"JS1\_O21\_00629" 10219 "s59E5H2" 1.694738 "Serine--tRNA ligase"  
"JS1\_O21\_00629" 10219 "s63E6H2" 1.122212 "Serine--tRNA ligase"  
"JS1\_O21\_00630" 10220 "s59E13H2" 0.163574 "Transposase IS116/IS110/IS902 family protein"  
"JS1\_O21\_00630" 10220 "s59E25H2" 0 "Transposase IS116/IS110/IS902 family protein"  
"JS1\_O21\_00630" 10220 "s59E5H2" 0.3824403 "Transposase IS116/IS110/IS902 family protein"  
"JS1\_O21\_00630" 10220 "s63E6H2" 1.0236 "Transposase IS116/IS110/IS902 family protein"  
"JS1\_O21\_00631" 10221 "s59E13H2" 0.2679144 "tRNA-splicing ligase RtcB"  
"JS1\_O21\_00631" 10221 "s59E25H2" 0 "tRNA-splicing ligase RtcB"  
"JS1\_O21\_00631" 10221 "s59E5H2" 0.6850069 "tRNA-splicing ligase RtcB"  
"JS1\_O21\_00631" 10221 "s63E6H2" 0.2260053 "tRNA-splicing ligase RtcB"

"JS1\_O21\_00632" 10222 "s59E13H2" 0.1421161 "hypothetical protein"  
"JS1\_O21\_00632" 10222 "s59E25H2" 0 "hypothetical protein"  
"JS1\_O21\_00632" 10222 "s59E5H2" 0.2521191 "hypothetical protein"  
"JS1\_O21\_00632" 10222 "s63E6H2" 0.07316553 "hypothetical protein"  
"JS1\_O21\_00638" 10228 "s59E13H2" 0.1501622 "Integrase core domain protein"  
"JS1\_O21\_00638" 10228 "s59E25H2" 0 "Integrase core domain protein"  
"JS1\_O21\_00638" 10228 "s59E5H2" 1.018012 "Integrase core domain protein"  
"JS1\_O21\_00638" 10228 "s63E6H2" 1.465288 "Integrase core domain protein"  
"JS1\_O21\_00639" 10229 "s59E13H2" 0.09819274 "Twitching mobility protein"  
"JS1\_O21\_00639" 10229 "s59E25H2" 0 "Twitching mobility protein"  
"JS1\_O21\_00639" 10229 "s59E5H2" 0.1291274 "Twitching mobility protein"  
"JS1\_O21\_00639" 10229 "s63E6H2" 0.4171862 "Twitching mobility protein"  
"JS1\_O21\_00640" 10230 "s59E13H2" 0.1439733 "bacteriophage N4 adsorption protein B"  
"JS1\_O21\_00640" 10230 "s59E25H2" 0 "bacteriophage N4 adsorption protein B"  
"JS1\_O21\_00640" 10230 "s59E5H2" 0.2318103 "bacteriophage N4 adsorption protein B"  
"JS1\_O21\_00640" 10230 "s63E6H2" 0.4126203 "bacteriophage N4 adsorption protein B"  
"JS1\_O21\_00642" 10232 "s59E13H2" 0.237189 "Twitching mobility protein"  
"JS1\_O21\_00642" 10232 "s59E25H2" 0 "Twitching mobility protein"  
"JS1\_O21\_00642" 10232 "s59E5H2" 0.1592251 "Twitching mobility protein"  
"JS1\_O21\_00642" 10232 "s63E6H2" 0.5135772 "Twitching mobility protein"  
"JS1\_O21\_00643" 10233 "s59E13H2" 0.2739411 "S-adenosylmethionine synthase"  
"JS1\_O21\_00643" 10233 "s59E25H2" 0 "S-adenosylmethionine synthase"  
"JS1\_O21\_00643" 10233 "s59E5H2" 0.1716656 "S-adenosylmethionine synthase"  
"JS1\_O21\_00643" 10233 "s63E6H2" 0.3247824 "S-adenosylmethionine synthase"  
"JS1\_O21\_00644" 10234 "s59E13H2" 0.2540457 "Mannose-1-phosphate guanylyltransferase RfbM"  
"JS1\_O21\_00644" 10234 "s59E25H2" 0 "Mannose-1-phosphate guanylyltransferase RfbM"  
"JS1\_O21\_00644" 10234 "s59E5H2" 0.2108421 "Mannose-1-phosphate guanylyltransferase RfbM"  
"JS1\_O21\_00644" 10234 "s63E6H2" 0.2123777 "Mannose-1-phosphate guanylyltransferase RfbM"  
"JS1\_O21\_00645" 10235 "s59E13H2" 0.2024457 "Riboflavin transporter RibU"  
"JS1\_O21\_00645" 10235 "s59E25H2" 0 "Riboflavin transporter RibU"  
"JS1\_O21\_00645" 10235 "s59E5H2" 0.1396163 "Riboflavin transporter RibU"  
"JS1\_O21\_00645" 10235 "s63E6H2" 0.1653544 "Riboflavin transporter RibU"  
"JS1\_O21\_00647" 10237 "s59E13H2" 0.2035689 "Membrane-bound lytic murein transglycosylase C precursor"  
"JS1\_O21\_00647" 10237 "s59E25H2" 0 "Membrane-bound lytic murein transglycosylase C precursor"  
"JS1\_O21\_00647" 10237 "s59E5H2" 0.1756607 "Membrane-bound lytic murein transglycosylase C precursor"  
"JS1\_O21\_00647" 10237 "s63E6H2" 0.09220676 "Membrane-bound lytic murein transglycosylase C precursor"  
"JS1\_O21\_00648" 10238 "s59E13H2" 0.008335955 "Cyclic di-GMP phosphodiesterase response regulator RpfG"  
"JS1\_O21\_00648" 10238 "s59E25H2" 0 "Cyclic di-GMP phosphodiesterase response regulator RpfG"  
"JS1\_O21\_00648" 10238 "s59E5H2" 0.01793876 "Cyclic di-GMP phosphodiesterase response regulator RpfG"  
"JS1\_O21\_00648" 10238 "s63E6H2" 4.178206e-05 "Cyclic di-GMP phosphodiesterase response regulator RpfG"  
"JS1\_O21\_00649" 10239 "s59E13H2" 3.181493 "Bifunctional purine biosynthesis protein PurH"  
"JS1\_O21\_00649" 10239 "s59E25H2" 0 "Bifunctional purine biosynthesis protein PurH"  
"JS1\_O21\_00649" 10239 "s59E5H2" 0.3098831 "Bifunctional purine biosynthesis protein PurH"  
"JS1\_O21\_00649" 10239 "s63E6H2" 0.7394559 "Bifunctional purine biosynthesis protein PurH"  
"JS1\_O21\_00650" 10240 "s59E13H2" 1.527494 "Phosphoribosylamine--glycine ligase"  
"JS1\_O21\_00650" 10240 "s59E25H2" 0 "Phosphoribosylamine--glycine ligase"  
"JS1\_O21\_00650" 10240 "s59E5H2" 0.1636107 "Phosphoribosylamine--glycine ligase"



"JS1\_O21\_00650" 10240 "s63E6H2" 0.4737765 "Phosphoribosylamine--glycine ligase"  
"JS1\_O21\_00651" 10241 "s59E13H2" 1.308752 "Phosphoribosylglycinamide formyltransferase"  
"JS1\_O21\_00651" 10241 "s59E25H2" 0 "Phosphoribosylglycinamide formyltransferase"  
"JS1\_O21\_00651" 10241 "s59E5H2" 0.07303996 "Phosphoribosylglycinamide formyltransferase"  
"JS1\_O21\_00651" 10241 "s63E6H2" 0.2658452 "Phosphoribosylglycinamide formyltransferase"  
"JS1\_O21\_00652" 10242 "s59E13H2" 1.358116 "Phosphoribosylformylglycinamide cyclo-ligase"  
"JS1\_O21\_00652" 10242 "s59E25H2" 0 "Phosphoribosylformylglycinamide cyclo-ligase"  
"JS1\_O21\_00652" 10242 "s59E5H2" 0.02570466 "Phosphoribosylformylglycinamide cyclo-ligase"  
"JS1\_O21\_00652" 10242 "s63E6H2" 0.2131479 "Phosphoribosylformylglycinamide cyclo-ligase"  
"JS1\_O21\_00653" 10243 "s59E13H2" 1.78926 "Amidophosphoribosyltransferase precursor"  
"JS1\_O21\_00653" 10243 "s59E25H2" 0 "Amidophosphoribosyltransferase precursor"  
"JS1\_O21\_00653" 10243 "s59E5H2" 0.133149 "Amidophosphoribosyltransferase precursor"  
"JS1\_O21\_00653" 10243 "s63E6H2" 0.8584127 "Amidophosphoribosyltransferase precursor"  
"JS1\_O21\_00654" 10244 "s59E13H2" 1.77839 "Phosphoribosylformylglycinamide synthase 2"  
"JS1\_O21\_00654" 10244 "s59E25H2" 0 "Phosphoribosylformylglycinamide synthase 2"  
"JS1\_O21\_00654" 10244 "s59E5H2" 1.404039 "Phosphoribosylformylglycinamide synthase 2"  
"JS1\_O21\_00654" 10244 "s63E6H2" 0.3465547 "Phosphoribosylformylglycinamide synthase 2"  
"JS1\_O21\_00655" 10245 "s59E13H2" 1.376196 "Multiple sugar-binding protein precursor"  
"JS1\_O21\_00655" 10245 "s59E25H2" 0 "Multiple sugar-binding protein precursor"  
"JS1\_O21\_00655" 10245 "s59E5H2" 0.6339223 "Multiple sugar-binding protein precursor"  
"JS1\_O21\_00655" 10245 "s63E6H2" 0.6243949 "Multiple sugar-binding protein precursor"  
"JS1\_O21\_00656" 10246 "s59E13H2" 1.532134 "Lactose transport system permease protein LacF"  
"JS1\_O21\_00656" 10246 "s59E25H2" 0 "Lactose transport system permease protein LacF"  
"JS1\_O21\_00656" 10246 "s59E5H2" 0.854802 "Lactose transport system permease protein LacF"  
"JS1\_O21\_00656" 10246 "s63E6H2" 0.590222 "Lactose transport system permease protein LacF"  
"JS1\_O21\_00657" 10247 "s59E13H2" 1.220857 "L-arabinose transport system permease protein AraQ"  
"JS1\_O21\_00657" 10247 "s59E25H2" 0 "L-arabinose transport system permease protein AraQ"  
"JS1\_O21\_00657" 10247 "s59E5H2" 0.7644007 "L-arabinose transport system permease protein AraQ"  
"JS1\_O21\_00657" 10247 "s63E6H2" 0.5571297 "L-arabinose transport system permease protein AraQ"  
"JS1\_O21\_00658" 10248 "s59E13H2" 0.9532662 "putative lipoprotein YbbD precursor"  
"JS1\_O21\_00658" 10248 "s59E25H2" 0 "putative lipoprotein YbbD precursor"  
"JS1\_O21\_00658" 10248 "s59E5H2" 0.4949507 "putative lipoprotein YbbD precursor"  
"JS1\_O21\_00658" 10248 "s63E6H2" 0.3860285 "putative lipoprotein YbbD precursor"  
"JS1\_O21\_00659" 10249 "s59E13H2" 1.418982 "putative oxidoreductase YcjS"  
"JS1\_O21\_00659" 10249 "s59E25H2" 0 "putative oxidoreductase YcjS"  
"JS1\_O21\_00659" 10249 "s59E5H2" 0.8326526 "putative oxidoreductase YcjS"  
"JS1\_O21\_00659" 10249 "s63E6H2" 0.586959 "putative oxidoreductase YcjS"  
"JS1\_O21\_00660" 10250 "s59E13H2" 1.571253 "Xylose isomerase-like TIM barrel"  
"JS1\_O21\_00660" 10250 "s59E25H2" 0 "Xylose isomerase-like TIM barrel"  
"JS1\_O21\_00660" 10250 "s59E5H2" 0.7617345 "Xylose isomerase-like TIM barrel"  
"JS1\_O21\_00660" 10250 "s63E6H2" 0.6442494 "Xylose isomerase-like TIM barrel"  
"JS1\_O21\_00661" 10251 "s59E13H2" 0.6762382 "Transposase IS116/IS110/IS902 family protein"  
"JS1\_O21\_00661" 10251 "s59E25H2" 0 "Transposase IS116/IS110/IS902 family protein"  
"JS1\_O21\_00661" 10251 "s59E5H2" 0.112652 "Transposase IS116/IS110/IS902 family protein"  
"JS1\_O21\_00661" 10251 "s63E6H2" 0.2867369 "Transposase IS116/IS110/IS902 family protein"  
"JS1\_O21\_00663" 10253 "s59E13H2" 0.004940421 "hypothetical protein"  
"JS1\_O21\_00663" 10253 "s59E25H2" 0 "hypothetical protein"

"JS1\_O21\_00663" 10253 "s59E5H2" 0 "hypothetical protein"  
"JS1\_O21\_00663" 10253 "s63E6H2" 0 "hypothetical protein"  
"JS1\_O21\_00664" 10254 "s59E13H2" 0.01768887 "2-dehydro-3-deoxy-D-gluconate 5-dehydrogenase"  
"JS1\_O21\_00664" 10254 "s59E25H2" 0 "2-dehydro-3-deoxy-D-gluconate 5-dehydrogenase"  
"JS1\_O21\_00664" 10254 "s59E5H2" 0 "2-dehydro-3-deoxy-D-gluconate 5-dehydrogenase"  
"JS1\_O21\_00664" 10254 "s63E6H2" 0 "2-dehydro-3-deoxy-D-gluconate 5-dehydrogenase"  
"JS1\_O21\_00666" 10256 "s59E13H2" 0.03315135 "Pyruvate synthase subunit PorC"  
"JS1\_O21\_00666" 10256 "s59E25H2" 0 "Pyruvate synthase subunit PorC"  
"JS1\_O21\_00666" 10256 "s59E5H2" 0.004328787 "Pyruvate synthase subunit PorC"  
"JS1\_O21\_00666" 10256 "s63E6H2" 0.001983992 "Pyruvate synthase subunit PorC"  
"JS1\_O21\_00667" 10257 "s59E13H2" 0.04414483 "Pyruvate synthase subunit PorD"  
"JS1\_O21\_00667" 10257 "s59E25H2" 0 "Pyruvate synthase subunit PorD"  
"JS1\_O21\_00667" 10257 "s59E5H2" 0.04668979 "Pyruvate synthase subunit PorD"  
"JS1\_O21\_00667" 10257 "s63E6H2" 0.006444047 "Pyruvate synthase subunit PorD"  
"JS1\_O21\_00668" 10258 "s59E13H2" 0.04124828 "Pyruvate synthase subunit PorA"  
"JS1\_O21\_00668" 10258 "s59E25H2" 0 "Pyruvate synthase subunit PorA"  
"JS1\_O21\_00668" 10258 "s59E5H2" 0.03242347 "Pyruvate synthase subunit PorA"  
"JS1\_O21\_00668" 10258 "s63E6H2" 0.003675849 "Pyruvate synthase subunit PorA"  
"JS1\_O21\_00669" 10259 "s59E13H2" 0.03501111 "Pyruvate synthase subunit PorA"  
"JS1\_O21\_00669" 10259 "s59E25H2" 0 "Pyruvate synthase subunit PorA"  
"JS1\_O21\_00669" 10259 "s59E5H2" 0.005524669 "Pyruvate synthase subunit PorA"  
"JS1\_O21\_00669" 10259 "s63E6H2" 0.008083078 "Pyruvate synthase subunit PorA"  
"JS1\_O21\_00670" 10260 "s59E13H2" 0.04734169 "Pyruvate synthase subunit PorB"  
"JS1\_O21\_00670" 10260 "s59E25H2" 0 "Pyruvate synthase subunit PorB"  
"JS1\_O21\_00670" 10260 "s59E5H2" 0.02165073 "Pyruvate synthase subunit PorB"  
"JS1\_O21\_00670" 10260 "s63E6H2" 0.002631727 "Pyruvate synthase subunit PorB"  
"JS1\_O21\_00671" 10261 "s59E13H2" 0.1197125 "Transposase IS200 like protein"  
"JS1\_O21\_00671" 10261 "s59E25H2" 0 "Transposase IS200 like protein"  
"JS1\_O21\_00671" 10261 "s59E5H2" 0.8902088 "Transposase IS200 like protein"  
"JS1\_O21\_00671" 10261 "s63E6H2" 0.6373507 "Transposase IS200 like protein"  
"JS1\_O21\_00672" 10262 "s59E13H2" 0.04740996 "EamA-like transporter family protein"  
"JS1\_O21\_00672" 10262 "s59E25H2" 0 "EamA-like transporter family protein"  
"JS1\_O21\_00672" 10262 "s59E5H2" 0.3452354 "EamA-like transporter family protein"  
"JS1\_O21\_00672" 10262 "s63E6H2" 0.02094909 "EamA-like transporter family protein"  
"JS1\_O21\_00673" 10263 "s59E13H2" 2.609215 "putative membrane protein"  
"JS1\_O21\_00673" 10263 "s59E25H2" 0 "putative membrane protein"  
"JS1\_O21\_00673" 10263 "s59E5H2" 1.920929 "putative membrane protein"  
"JS1\_O21\_00673" 10263 "s63E6H2" 2.143732 "putative membrane protein"  
"JS1\_O21\_00674" 10264 "s59E13H2" 2.086414 "UvrB/uvrC motif protein"  
"JS1\_O21\_00674" 10264 "s59E25H2" 0 "UvrB/uvrC motif protein"  
"JS1\_O21\_00674" 10264 "s59E5H2" 0.7302342 "UvrB/uvrC motif protein"  
"JS1\_O21\_00674" 10264 "s63E6H2" 2.08066 "UvrB/uvrC motif protein"  
"JS1\_O21\_00675" 10265 "s59E13H2" 3.033142 "B3/4 domain protein"  
"JS1\_O21\_00675" 10265 "s59E25H2" 0 "B3/4 domain protein"  
"JS1\_O21\_00675" 10265 "s59E5H2" 0.7223304 "B3/4 domain protein"  
"JS1\_O21\_00675" 10265 "s63E6H2" 1.381732 "B3/4 domain protein"  
"JS1\_O21\_00676" 10266 "s59E13H2" 4.583122 "Histidinol-phosphate aminotransferase 2"

"JS1\_O21\_00676" 10266 "s59E25H2" 0 "Histidinol-phosphate aminotransferase 2"  
"JS1\_O21\_00676" 10266 "s59E5H2" 0.9931605 "Histidinol-phosphate aminotransferase 2"  
"JS1\_O21\_00676" 10266 "s63E6H2" 2.438484 "Histidinol-phosphate aminotransferase 2"  
"JS1\_O21\_00677" 10267 "s59E13H2" 7.878638 "Chaperone protein ClpB 1"  
"JS1\_O21\_00677" 10267 "s59E25H2" 0.09199384 "Chaperone protein ClpB 1"  
"JS1\_O21\_00677" 10267 "s59E5H2" 0.2328986 "Chaperone protein ClpB 1"  
"JS1\_O21\_00677" 10267 "s63E6H2" 3.904182 "Chaperone protein ClpB 1"  
"JS1\_O21\_00678" 10268 "s59E13H2" 1.2095 "putative MscS family protein YkuT"  
"JS1\_O21\_00678" 10268 "s59E25H2" 1.413889 "putative MscS family protein YkuT"  
"JS1\_O21\_00678" 10268 "s59E5H2" 0.7968517 "putative MscS family protein YkuT"  
"JS1\_O21\_00678" 10268 "s63E6H2" 2.977568 "putative MscS family protein YkuT"  
"JS1\_O21\_00679" 10269 "s59E13H2" 7.484541 "putative MscS family protein YkuT"  
"JS1\_O21\_00679" 10269 "s59E25H2" 0.1492248 "putative MscS family protein YkuT"  
"JS1\_O21\_00679" 10269 "s59E5H2" 0.9794274 "putative MscS family protein YkuT"  
"JS1\_O21\_00679" 10269 "s63E6H2" 4.110566 "putative MscS family protein YkuT"  
"JS1\_O21\_00680" 10270 "s59E13H2" 10.98974 "hypothetical protein"  
"JS1\_O21\_00680" 10270 "s59E25H2" 0 "hypothetical protein"  
"JS1\_O21\_00680" 10270 "s59E5H2" 0.330326 "hypothetical protein"  
"JS1\_O21\_00680" 10270 "s63E6H2" 1.55709 "hypothetical protein"  
"JS1\_O21\_00681" 10271 "s59E13H2" 7.171893 "Tetratricopeptide repeat protein"  
"JS1\_O21\_00681" 10271 "s59E25H2" 0 "Tetratricopeptide repeat protein"  
"JS1\_O21\_00681" 10271 "s59E5H2" 0.8504441 "Tetratricopeptide repeat protein"  
"JS1\_O21\_00681" 10271 "s63E6H2" 4.690046 "Tetratricopeptide repeat protein"  
"JS1\_O21\_00682" 10272 "s59E13H2" 0.7820427 "Carbohydrate diacid regulator"  
"JS1\_O21\_00682" 10272 "s59E25H2" 0 "Carbohydrate diacid regulator"  
"JS1\_O21\_00682" 10272 "s59E5H2" 0.5232743 "Carbohydrate diacid regulator"  
"JS1\_O21\_00682" 10272 "s63E6H2" 3.47848 "Carbohydrate diacid regulator"  
"JS1\_O21\_00683" 10273 "s59E13H2" 0.005256547 "PLAT/LH2 domain protein"  
"JS1\_O21\_00683" 10273 "s59E25H2" 0 "PLAT/LH2 domain protein"  
"JS1\_O21\_00683" 10273 "s59E5H2" 0.09910462 "PLAT/LH2 domain protein"  
"JS1\_O21\_00683" 10273 "s63E6H2" 0.02346708 "PLAT/LH2 domain protein"  
"JS1\_O21\_00684" 10274 "s59E13H2" 0.1319343 "UDP-N-acetylmuramoyl-L-alanyl-D-glutamate--L-lysine ligase"  
"JS1\_O21\_00684" 10274 "s59E25H2" 0 "UDP-N-acetylmuramoyl-L-alanyl-D-glutamate--L-lysine ligase"  
"JS1\_O21\_00684" 10274 "s59E5H2" 0.7262152 "UDP-N-acetylmuramoyl-L-alanyl-D-glutamate--L-lysine ligase"  
"JS1\_O21\_00684" 10274 "s63E6H2" 0.477899 "UDP-N-acetylmuramoyl-L-alanyl-D-glutamate--L-lysine ligase"  
"JS1\_O21\_00685" 10275 "s59E13H2" 0.4366987 "UDP-N-acetylmuramoyl-tripeptide--D-alanyl-D-alanine ligase"  
"JS1\_O21\_00685" 10275 "s59E25H2" 0 "UDP-N-acetylmuramoyl-tripeptide--D-alanyl-D-alanine ligase"  
"JS1\_O21\_00685" 10275 "s59E5H2" 1.284164 "UDP-N-acetylmuramoyl-tripeptide--D-alanyl-D-alanine ligase"  
"JS1\_O21\_00685" 10275 "s63E6H2" 0.8737559 "UDP-N-acetylmuramoyl-tripeptide--D-alanyl-D-alanine ligase"  
"JS1\_O21\_00686" 10276 "s59E13H2" 0.8773262 "Phospho-N-acetylmuramoyl-pentapeptide-transferase"  
"JS1\_O21\_00686" 10276 "s59E25H2" 0 "Phospho-N-acetylmuramoyl-pentapeptide-transferase"  
"JS1\_O21\_00686" 10276 "s59E5H2" 1.10475 "Phospho-N-acetylmuramoyl-pentapeptide-transferase"  
"JS1\_O21\_00686" 10276 "s63E6H2" 1.744411 "Phospho-N-acetylmuramoyl-pentapeptide-transferase"  
"JS1\_O21\_00687" 10277 "s59E13H2" 0.05401123 "cell division protein MraZ"  
"JS1\_O21\_00687" 10277 "s59E25H2" 0 "cell division protein MraZ"  
"JS1\_O21\_00687" 10277 "s59E5H2" 0.1802941 "cell division protein MraZ"  
"JS1\_O21\_00687" 10277 "s63E6H2" 0.08280729 "cell division protein MraZ"

"JS1\_O21\_00691" 10281 "s59E13H2" 0.2891098 "hypothetical protein"  
"JS1\_O21\_00691" 10281 "s59E25H2" 0 "hypothetical protein"  
"JS1\_O21\_00691" 10281 "s59E5H2" 0.2125538 "hypothetical protein"  
"JS1\_O21\_00691" 10281 "s63E6H2" 0.351132 "hypothetical protein"  
"JS1\_O21\_00692" 10282 "s59E13H2" 0.677428 "HTH-type transcriptional regulator CymR"  
"JS1\_O21\_00692" 10282 "s59E25H2" 0 "HTH-type transcriptional regulator CymR"  
"JS1\_O21\_00692" 10282 "s59E5H2" 0.6619208 "HTH-type transcriptional regulator CymR"  
"JS1\_O21\_00692" 10282 "s63E6H2" 0.2335351 "HTH-type transcriptional regulator CymR"  
"JS1\_O21\_00693" 10283 "s59E13H2" 0.9700461 "Ribosome-binding ATPase YchF"  
"JS1\_O21\_00693" 10283 "s59E25H2" 0 "Ribosome-binding ATPase YchF"  
"JS1\_O21\_00693" 10283 "s59E5H2" 0.1352336 "Ribosome-binding ATPase YchF"  
"JS1\_O21\_00693" 10283 "s63E6H2" 0.1826221 "Ribosome-binding ATPase YchF"  
"JS1\_O21\_00694" 10284 "s59E13H2" 1.079918 "Cobalt import ATP-binding protein CbiO"  
"JS1\_O21\_00694" 10284 "s59E25H2" 0 "Cobalt import ATP-binding protein CbiO"  
"JS1\_O21\_00694" 10284 "s59E5H2" 0.3199672 "Cobalt import ATP-binding protein CbiO"  
"JS1\_O21\_00694" 10284 "s63E6H2" 0.4298293 "Cobalt import ATP-binding protein CbiO"  
"JS1\_O21\_00695" 10285 "s59E13H2" 1.022238 "Nickel transport protein NikQ"  
"JS1\_O21\_00695" 10285 "s59E25H2" 0 "Nickel transport protein NikQ"  
"JS1\_O21\_00695" 10285 "s59E5H2" 0.4883784 "Nickel transport protein NikQ"  
"JS1\_O21\_00695" 10285 "s63E6H2" 0.3733779 "Nickel transport protein NikQ"  
"JS1\_O21\_00696" 10286 "s59E13H2" 1.149238 "hypothetical protein"  
"JS1\_O21\_00696" 10286 "s59E25H2" 0 "hypothetical protein"  
"JS1\_O21\_00696" 10286 "s59E5H2" 0.4071312 "hypothetical protein"  
"JS1\_O21\_00696" 10286 "s63E6H2" 0.3027198 "hypothetical protein"  
"JS1\_O21\_00697" 10287 "s59E13H2" 1.026819 "Fused nickel transport protein NikMN"  
"JS1\_O21\_00697" 10287 "s59E25H2" 0 "Fused nickel transport protein NikMN"  
"JS1\_O21\_00697" 10287 "s59E5H2" 0.6437949 "Fused nickel transport protein NikMN"  
"JS1\_O21\_00697" 10287 "s63E6H2" 0.331757 "Fused nickel transport protein NikMN"  
"JS1\_O21\_00698" 10288 "s59E13H2" 0.779817 "Nickel uptake substrate-specific transmembrane region"  
"JS1\_O21\_00698" 10288 "s59E25H2" 0 "Nickel uptake substrate-specific transmembrane region"  
"JS1\_O21\_00698" 10288 "s59E5H2" 2.758003 "Nickel uptake substrate-specific transmembrane region"  
"JS1\_O21\_00698" 10288 "s63E6H2" 0.2266108 "Nickel uptake substrate-specific transmembrane region"  
"JS1\_O21\_00699" 10289 "s59E13H2" 0.8560883 "Putative nickel-responsive regulator"  
"JS1\_O21\_00699" 10289 "s59E25H2" 0 "Putative nickel-responsive regulator"  
"JS1\_O21\_00699" 10289 "s59E5H2" 1.109357 "Putative nickel-responsive regulator"  
"JS1\_O21\_00699" 10289 "s63E6H2" 0.1560788 "Putative nickel-responsive regulator"  
"JS1\_O21\_00700" 10290 "s59E13H2" 0.005223763 "Glyoxylate reductase"  
"JS1\_O21\_00700" 10290 "s59E25H2" 0 "Glyoxylate reductase"  
"JS1\_O21\_00700" 10290 "s59E5H2" 0.007875212 "Glyoxylate reductase"  
"JS1\_O21\_00700" 10290 "s63E6H2" 0.4593509 "Glyoxylate reductase"  
"JS1\_O21\_00701" 10291 "s59E13H2" 3.327967 "Kynurenine formamidase"  
"JS1\_O21\_00701" 10291 "s59E25H2" 0 "Kynurenine formamidase"  
"JS1\_O21\_00701" 10291 "s59E5H2" 0.01264311 "Kynurenine formamidase"  
"JS1\_O21\_00701" 10291 "s63E6H2" 1.173246 "Kynurenine formamidase"  
"JS1\_O21\_00702" 10292 "s59E13H2" 2.324887 "Ribose transport system permease protein RbsC"  
"JS1\_O21\_00702" 10292 "s59E25H2" 0 "Ribose transport system permease protein RbsC"  
"JS1\_O21\_00702" 10292 "s59E5H2" 0.006684222 "Ribose transport system permease protein RbsC"

"JS1\_O21\_00702" 10292 "s63E6H2" 1.192937 "Ribose transport system permease protein RbsC"  
"JS1\_O21\_00703" 10293 "s59E13H2" 1.918446 "Ribose import ATP-binding protein RbsA"  
"JS1\_O21\_00703" 10293 "s59E25H2" 0.148728 "Ribose import ATP-binding protein RbsA"  
"JS1\_O21\_00703" 10293 "s59E5H2" 0.02545443 "Ribose import ATP-binding protein RbsA"  
"JS1\_O21\_00703" 10293 "s63E6H2" 1.294187 "Ribose import ATP-binding protein RbsA"  
"JS1\_O21\_00704" 10294 "s59E13H2" 1.535664 "D-allose-binding periplasmic protein precursor"  
"JS1\_O21\_00704" 10294 "s59E25H2" 0 "D-allose-binding periplasmic protein precursor"  
"JS1\_O21\_00704" 10294 "s59E5H2" 0.02051515 "D-allose-binding periplasmic protein precursor"  
"JS1\_O21\_00704" 10294 "s63E6H2" 1.291353 "D-allose-binding periplasmic protein precursor"  
"JS1\_O21\_00705" 10295 "s59E13H2" 1.631578 "D-ribose-binding periplasmic protein precursor"  
"JS1\_O21\_00705" 10295 "s59E25H2" 0 "D-ribose-binding periplasmic protein precursor"  
"JS1\_O21\_00705" 10295 "s59E5H2" 0.0191757 "D-ribose-binding periplasmic protein precursor"  
"JS1\_O21\_00705" 10295 "s63E6H2" 1.332083 "D-ribose-binding periplasmic protein precursor"  
"JS1\_O21\_00706" 10296 "s59E13H2" 0.2711238 "Cysteine synthase B"  
"JS1\_O21\_00706" 10296 "s59E25H2" 0 "Cysteine synthase B"  
"JS1\_O21\_00706" 10296 "s59E5H2" 0.2378352 "Cysteine synthase B"  
"JS1\_O21\_00706" 10296 "s63E6H2" 0.4007127 "Cysteine synthase B"  
"JS1\_O21\_00707" 10297 "s59E13H2" 0.1377397 "hypothetical protein"  
"JS1\_O21\_00707" 10297 "s59E25H2" 0 "hypothetical protein"  
"JS1\_O21\_00707" 10297 "s59E5H2" 0.6386908 "hypothetical protein"  
"JS1\_O21\_00707" 10297 "s63E6H2" 0.05969008 "hypothetical protein"  
"JS1\_O21\_00708" 10298 "s59E13H2" 0.06648317 "hypothetical protein"  
"JS1\_O21\_00708" 10298 "s59E25H2" 0 "hypothetical protein"  
"JS1\_O21\_00708" 10298 "s59E5H2" 0.4026239 "hypothetical protein"  
"JS1\_O21\_00708" 10298 "s63E6H2" 0.03215431 "hypothetical protein"  
"JS1\_O21\_00709" 10299 "s59E13H2" 0.0256433 "hypothetical protein"  
"JS1\_O21\_00709" 10299 "s59E25H2" 0 "hypothetical protein"  
"JS1\_O21\_00709" 10299 "s59E5H2" 0.4085844 "hypothetical protein"  
"JS1\_O21\_00709" 10299 "s63E6H2" 0.04040671 "hypothetical protein"  
"JS1\_O21\_00710" 10300 "s59E13H2" 0.6075461 "ATP-dependent RecD-like DNA helicase"  
"JS1\_O21\_00710" 10300 "s59E25H2" 0 "ATP-dependent RecD-like DNA helicase"  
"JS1\_O21\_00710" 10300 "s59E5H2" 0.7244196 "ATP-dependent RecD-like DNA helicase"  
"JS1\_O21\_00710" 10300 "s63E6H2" 0.1363335 "ATP-dependent RecD-like DNA helicase"  
"JS1\_O21\_00711" 10301 "s59E13H2" 0.2675285 "2,3-bisphosphoglycerate-independent phosphoglycerate mutase"  
"JS1\_O21\_00711" 10301 "s59E25H2" 0 "2,3-bisphosphoglycerate-independent phosphoglycerate mutase"  
"JS1\_O21\_00711" 10301 "s59E5H2" 0.4405729 "2,3-bisphosphoglycerate-independent phosphoglycerate mutase"  
"JS1\_O21\_00711" 10301 "s63E6H2" 0.07456055 "2,3-bisphosphoglycerate-independent phosphoglycerate mutase"  
"JS1\_O21\_00712" 10302 "s59E13H2" 0.05490397 "putative 2-phosphosulfolactate phosphatase"  
"JS1\_O21\_00712" 10302 "s59E25H2" 0 "putative 2-phosphosulfolactate phosphatase"  
"JS1\_O21\_00712" 10302 "s59E5H2" 0.3239207 "putative 2-phosphosulfolactate phosphatase"  
"JS1\_O21\_00712" 10302 "s63E6H2" 0.08372266 "putative 2-phosphosulfolactate phosphatase"  
"JS1\_O21\_00713" 10303 "s59E13H2" 0.3030435 "Soluble hydrogenase 42 kDa subunit"  
"JS1\_O21\_00713" 10303 "s59E25H2" 0 "Soluble hydrogenase 42 kDa subunit"  
"JS1\_O21\_00713" 10303 "s59E5H2" 0.2092569 "Soluble hydrogenase 42 kDa subunit"  
"JS1\_O21\_00713" 10303 "s63E6H2" 0.07493558 "Soluble hydrogenase 42 kDa subunit"  
"JS1\_O21\_00714" 10304 "s59E13H2" 0.02881336 "VanZ like family protein"  
"JS1\_O21\_00714" 10304 "s59E25H2" 0 "VanZ like family protein"

"JS1\_O21\_00714" 10304 "s59E5H2" 0.1333982 "VanZ like family protein"  
"JS1\_O21\_00714" 10304 "s63E6H2" 0.0564949 "VanZ like family protein"  
"JS1\_O21\_00715" 10305 "s59E13H2" 0.4864118 "Tetrahedral aminopeptidase"  
"JS1\_O21\_00715" 10305 "s59E25H2" 0 "Tetrahedral aminopeptidase"  
"JS1\_O21\_00715" 10305 "s59E5H2" 0.3729164 "Tetrahedral aminopeptidase"  
"JS1\_O21\_00715" 10305 "s63E6H2" 0.1343325 "Tetrahedral aminopeptidase"  
"JS1\_O21\_00716" 10306 "s59E13H2" 0.1603187 "putative A/G-specific adenine glycosylase YfhQ"  
"JS1\_O21\_00716" 10306 "s59E25H2" 0 "putative A/G-specific adenine glycosylase YfhQ"  
"JS1\_O21\_00716" 10306 "s59E5H2" 0.2276367 "putative A/G-specific adenine glycosylase YfhQ"  
"JS1\_O21\_00716" 10306 "s63E6H2" 0.120487 "putative A/G-specific adenine glycosylase YfhQ"  
"JS1\_O21\_00717" 10307 "s59E13H2" 0.06349728 "Trehalose synthase"  
"JS1\_O21\_00717" 10307 "s59E25H2" 0 "Trehalose synthase"  
"JS1\_O21\_00717" 10307 "s59E5H2" 0.2878799 "Trehalose synthase"  
"JS1\_O21\_00717" 10307 "s63E6H2" 0.1583721 "Trehalose synthase"  
"JS1\_O21\_00718" 10308 "s59E13H2" 0.05151986 "4-alpha-glucanotransferase"  
"JS1\_O21\_00718" 10308 "s59E25H2" 0 "4-alpha-glucanotransferase"  
"JS1\_O21\_00718" 10308 "s59E5H2" 0.1824753 "4-alpha-glucanotransferase"  
"JS1\_O21\_00718" 10308 "s63E6H2" 0.1347836 "4-alpha-glucanotransferase"  
"JS1\_O21\_00719" 10309 "s59E13H2" 0.06483542 "hypothetical protein"  
"JS1\_O21\_00719" 10309 "s59E25H2" 0 "hypothetical protein"  
"JS1\_O21\_00719" 10309 "s59E5H2" 0.1035356 "hypothetical protein"  
"JS1\_O21\_00719" 10309 "s63E6H2" 0.4194241 "hypothetical protein"  
"JS1\_O21\_00720" 10310 "s59E13H2" 0.07594248 "Alpha-amylase 1"  
"JS1\_O21\_00720" 10310 "s59E25H2" 0 "Alpha-amylase 1"  
"JS1\_O21\_00720" 10310 "s59E5H2" 0.09650849 "Alpha-amylase 1"  
"JS1\_O21\_00720" 10310 "s63E6H2" 0.3340382 "Alpha-amylase 1"  
"JS1\_O21\_00722" 10312 "s59E13H2" 0.03536406 "Cyclic di-GMP phosphodiesterase response regulator RpfG"  
"JS1\_O21\_00722" 10312 "s59E25H2" 0 "Cyclic di-GMP phosphodiesterase response regulator RpfG"  
"JS1\_O21\_00722" 10312 "s59E5H2" 1.17964 "Cyclic di-GMP phosphodiesterase response regulator RpfG"  
"JS1\_O21\_00722" 10312 "s63E6H2" 0.0347431 "Cyclic di-GMP phosphodiesterase response regulator RpfG"  
"JS1\_O21\_00723" 10313 "s59E13H2" 0.04595659 "hypothetical protein"  
"JS1\_O21\_00723" 10313 "s59E25H2" 0 "hypothetical protein"  
"JS1\_O21\_00723" 10313 "s59E5H2" 0.07758472 "hypothetical protein"  
"JS1\_O21\_00723" 10313 "s63E6H2" 0.04555849 "hypothetical protein"  
"JS1\_O21\_00724" 10314 "s59E13H2" 0.02064491 "Imidazoleglycerol-phosphate dehydratase"  
"JS1\_O21\_00724" 10314 "s59E25H2" 0 "Imidazoleglycerol-phosphate dehydratase"  
"JS1\_O21\_00724" 10314 "s59E5H2" 0.1009678 "Imidazoleglycerol-phosphate dehydratase"  
"JS1\_O21\_00724" 10314 "s63E6H2" 0.04834344 "Imidazoleglycerol-phosphate dehydratase"  
"JS1\_O21\_00725" 10315 "s59E13H2" 0.01583557 "Imidazole glycerol phosphate synthase subunit HisH 1"  
"JS1\_O21\_00725" 10315 "s59E25H2" 0 "Imidazole glycerol phosphate synthase subunit HisH 1"  
"JS1\_O21\_00725" 10315 "s59E5H2" 0.07227731 "Imidazole glycerol phosphate synthase subunit HisH 1"  
"JS1\_O21\_00725" 10315 "s63E6H2" 0.07598099 "Imidazole glycerol phosphate synthase subunit HisH 1"  
"JS1\_O21\_00726" 10316 "s59E13H2" 0.006106419 "1-(5-phosphoribosyl)-5-[(5-phosphoribosylamino)methylideneamino] imidazole-4-carboxamide isomerase"  
"JS1\_O21\_00726" 10316 "s59E25H2" 0 "1-(5-phosphoribosyl)-5-[(5-phosphoribosylamino)methylideneamino] imidazole-4-carboxamide isomerase"  
"JS1\_O21\_00726" 10316 "s59E5H2" 0.02074835 "1-(5-phosphoribosyl)-5-[(5-phosphoribosylamino)methylideneamino] imidazole-4-carboxamide isomerase"  
"JS1\_O21\_00726" 10316 "s63E6H2" 0.02681058 "1-(5-phosphoribosyl)-5-[(5-phosphoribosylamino)methylideneamino] imidazole-4-carboxamide isomerase"  
"JS1\_O21\_00727" 10317 "s59E13H2" 0.00425064 "Imidazole glycerol phosphate synthase subunit HisF"

"JS1\_O21\_00727" 10317 "s59E25H2" 0 "Imidazole glycerol phosphate synthase subunit HisF"  
"JS1\_O21\_00727" 10317 "s59E5H2" 0.09038541 "Imidazole glycerol phosphate synthase subunit HisF"  
"JS1\_O21\_00727" 10317 "s63E6H2" 0.02293618 "Imidazole glycerol phosphate synthase subunit HisF"  
"JS1\_O21\_00728" 10318 "s59E13H2" 0.01845323 "Phosphoribosyl-AMP cyclohydrolase"  
"JS1\_O21\_00728" 10318 "s59E25H2" 0 "Phosphoribosyl-AMP cyclohydrolase"  
"JS1\_O21\_00728" 10318 "s59E5H2" 0.05775983 "Phosphoribosyl-AMP cyclohydrolase"  
"JS1\_O21\_00728" 10318 "s63E6H2" 0.02524732 "Phosphoribosyl-AMP cyclohydrolase"  
"JS1\_O21\_00729" 10319 "s59E13H2" 0.07157603 "Trp repressor protein"  
"JS1\_O21\_00729" 10319 "s59E25H2" 0 "Trp repressor protein"  
"JS1\_O21\_00729" 10319 "s59E5H2" 0.07661783 "Trp repressor protein"  
"JS1\_O21\_00729" 10319 "s63E6H2" 0.01823787 "Trp repressor protein"  
"JS1\_O21\_00730" 10320 "s59E13H2" 0.8640002 "Soluble hydrogenase 42 kDa subunit"  
"JS1\_O21\_00730" 10320 "s59E25H2" 0 "Soluble hydrogenase 42 kDa subunit"  
"JS1\_O21\_00730" 10320 "s59E5H2" 0.3868413 "Soluble hydrogenase 42 kDa subunit"  
"JS1\_O21\_00730" 10320 "s63E6H2" 0.01661445 "Soluble hydrogenase 42 kDa subunit"  
"JS1\_O21\_00731" 10321 "s59E13H2" 0.02988839 "D-3-phosphoglycerate dehydrogenase"  
"JS1\_O21\_00731" 10321 "s59E25H2" 0 "D-3-phosphoglycerate dehydrogenase"  
"JS1\_O21\_00731" 10321 "s59E5H2" 0.8371782 "D-3-phosphoglycerate dehydrogenase"  
"JS1\_O21\_00731" 10321 "s63E6H2" 0.1446657 "D-3-phosphoglycerate dehydrogenase"  
"JS1\_O21\_00732" 10322 "s59E13H2" 0.04101286 "hypothetical protein"  
"JS1\_O21\_00732" 10322 "s59E25H2" 0 "hypothetical protein"  
"JS1\_O21\_00732" 10322 "s59E5H2" 0.1232222 "hypothetical protein"  
"JS1\_O21\_00732" 10322 "s63E6H2" 0.2334252 "hypothetical protein"  
"JS1\_O21\_00733" 10323 "s59E13H2" 0.04367339 "Bifunctional homocysteine S-methyltransferase/5,10-methylenetetrahydrofolate reductase"  
"JS1\_O21\_00733" 10323 "s59E25H2" 0 "Bifunctional homocysteine S-methyltransferase/5,10-methylenetetrahydrofolate reductase"  
"JS1\_O21\_00733" 10323 "s59E5H2" 0.3472913 "Bifunctional homocysteine S-methyltransferase/5,10-methylenetetrahydrofolate reductase"  
"JS1\_O21\_00733" 10323 "s63E6H2" 0.03911685 "Bifunctional homocysteine S-methyltransferase/5,10-methylenetetrahydrofolate reductase"  
"JS1\_O21\_00734" 10324 "s59E13H2" 0.02763404 "Dihydroxy-acid dehydratase"  
"JS1\_O21\_00734" 10324 "s59E25H2" 0 "Dihydroxy-acid dehydratase"  
"JS1\_O21\_00734" 10324 "s59E5H2" 0.5040464 "Dihydroxy-acid dehydratase"  
"JS1\_O21\_00734" 10324 "s63E6H2" 0.05808977 "Dihydroxy-acid dehydratase"  
"JS1\_O21\_00737" 10327 "s59E13H2" 0.04076785 "Acetolactate synthase large subunit"  
"JS1\_O21\_00737" 10327 "s59E25H2" 0 "Acetolactate synthase large subunit"  
"JS1\_O21\_00737" 10327 "s59E5H2" 0.7345826 "Acetolactate synthase large subunit"  
"JS1\_O21\_00737" 10327 "s63E6H2" 0.4744611 "Acetolactate synthase large subunit"  
"JS1\_O21\_00738" 10328 "s59E13H2" 0.01340924 "Acetolactate synthase small subunit"  
"JS1\_O21\_00738" 10328 "s59E25H2" 0 "Acetolactate synthase small subunit"  
"JS1\_O21\_00738" 10328 "s59E5H2" 0.7176059 "Acetolactate synthase small subunit"  
"JS1\_O21\_00738" 10328 "s63E6H2" 0.3542074 "Acetolactate synthase small subunit"  
"JS1\_O21\_00739" 10329 "s59E13H2" 0.1610487 "hypothetical protein"  
"JS1\_O21\_00739" 10329 "s59E25H2" 0 "hypothetical protein"  
"JS1\_O21\_00739" 10329 "s59E5H2" 0.674211 "hypothetical protein"  
"JS1\_O21\_00739" 10329 "s63E6H2" 0.485864 "hypothetical protein"  
"JS1\_O21\_00740" 10330 "s59E13H2" 0.1450891 "2-isopropylmalate synthase"  
"JS1\_O21\_00740" 10330 "s59E25H2" 0 "2-isopropylmalate synthase"  
"JS1\_O21\_00740" 10330 "s59E5H2" 1.628201 "2-isopropylmalate synthase"  
"JS1\_O21\_00740" 10330 "s63E6H2" 0.6003308 "2-isopropylmalate synthase"

"JS1\_O21\_00741" 10331 "s59E13H2" 0.1491437 "2-isopropylmalate synthase"  
"JS1\_O21\_00741" 10331 "s59E25H2" 0 "2-isopropylmalate synthase"  
"JS1\_O21\_00741" 10331 "s59E5H2" 1.063407 "2-isopropylmalate synthase"  
"JS1\_O21\_00741" 10331 "s63E6H2" 0.8873383 "2-isopropylmalate synthase"  
"JS1\_O21\_00742" 10332 "s59E13H2" 0.01884441 "P-protein"  
"JS1\_O21\_00742" 10332 "s59E25H2" 0 "P-protein"  
"JS1\_O21\_00742" 10332 "s59E5H2" 1.845357 "P-protein"  
"JS1\_O21\_00742" 10332 "s63E6H2" 0.4892127 "P-protein"  
"JS1\_O21\_00743" 10333 "s59E13H2" 0.06581276 "Ketol-acid reductoisomerase"  
"JS1\_O21\_00743" 10333 "s59E25H2" 0 "Ketol-acid reductoisomerase"  
"JS1\_O21\_00743" 10333 "s59E5H2" 0.1073946 "Ketol-acid reductoisomerase"  
"JS1\_O21\_00743" 10333 "s63E6H2" 0.1010407 "Ketol-acid reductoisomerase"  
"JS1\_O21\_00744" 10334 "s59E13H2" 0.006040383 "Putative acetolactate synthase small subunit"  
"JS1\_O21\_00744" 10334 "s59E25H2" 0 "Putative acetolactate synthase small subunit"  
"JS1\_O21\_00744" 10334 "s59E5H2" 0.0277306 "Putative acetolactate synthase small subunit"  
"JS1\_O21\_00744" 10334 "s63E6H2" 0.03292949 "Putative acetolactate synthase small subunit"  
"JS1\_O21\_00745" 10335 "s59E13H2" 0.1504778 "Cell division ATP-binding protein FtsE"  
"JS1\_O21\_00745" 10335 "s59E25H2" 0 "Cell division ATP-binding protein FtsE"  
"JS1\_O21\_00745" 10335 "s59E5H2" 0.6869692 "Cell division ATP-binding protein FtsE"  
"JS1\_O21\_00745" 10335 "s63E6H2" 0.2002653 "Cell division ATP-binding protein FtsE"  
"JS1\_O21\_00746" 10336 "s59E13H2" 0.1381586 "colanic acid biosynthesis protein"  
"JS1\_O21\_00746" 10336 "s59E25H2" 0 "colanic acid biosynthesis protein"  
"JS1\_O21\_00746" 10336 "s59E5H2" 0.3235323 "colanic acid biosynthesis protein"  
"JS1\_O21\_00746" 10336 "s63E6H2" 0.09895643 "colanic acid biosynthesis protein"  
"JS1\_O21\_00747" 10337 "s59E13H2" 0.1670102 "hypothetical protein"  
"JS1\_O21\_00747" 10337 "s59E25H2" 0 "hypothetical protein"  
"JS1\_O21\_00747" 10337 "s59E5H2" 0.4754717 "hypothetical protein"  
"JS1\_O21\_00747" 10337 "s63E6H2" 0.1324911 "hypothetical protein"  
"JS1\_O21\_00748" 10338 "s59E13H2" 0.2562816 "Glutaconyl-CoA decarboxylase subunit beta"  
"JS1\_O21\_00748" 10338 "s59E25H2" 0 "Glutaconyl-CoA decarboxylase subunit beta"  
"JS1\_O21\_00748" 10338 "s59E5H2" 0.5460123 "Glutaconyl-CoA decarboxylase subunit beta"  
"JS1\_O21\_00748" 10338 "s63E6H2" 0.5309681 "Glutaconyl-CoA decarboxylase subunit beta"  
"JS1\_O21\_00749" 10339 "s59E13H2" 0.151931 "Glutaconyl-CoA decarboxylase subunit gamma"  
"JS1\_O21\_00749" 10339 "s59E25H2" 0 "Glutaconyl-CoA decarboxylase subunit gamma"  
"JS1\_O21\_00749" 10339 "s59E5H2" 0.3076313 "Glutaconyl-CoA decarboxylase subunit gamma"  
"JS1\_O21\_00749" 10339 "s63E6H2" 0.0754478 "Glutaconyl-CoA decarboxylase subunit gamma"  
"JS1\_O21\_00750" 10340 "s59E13H2" 8.524069 "Glucokinase"  
"JS1\_O21\_00750" 10340 "s59E25H2" 0.5454545 "Glucokinase"  
"JS1\_O21\_00750" 10340 "s59E5H2" 1.254333 "Glucokinase"  
"JS1\_O21\_00750" 10340 "s63E6H2" 2.074578 "Glucokinase"  
"JS1\_O21\_00751" 10341 "s59E13H2" 10.6334 "Multiple sugar-binding protein precursor"  
"JS1\_O21\_00751" 10341 "s59E25H2" 0 "Multiple sugar-binding protein precursor"  
"JS1\_O21\_00751" 10341 "s59E5H2" 0.9625036 "Multiple sugar-binding protein precursor"  
"JS1\_O21\_00751" 10341 "s63E6H2" 2.559651 "Multiple sugar-binding protein precursor"  
"JS1\_O21\_00752" 10342 "s59E13H2" 0.2395515 "RNA-metabolising metallo-beta-lactamase"  
"JS1\_O21\_00752" 10342 "s59E25H2" 0 "RNA-metabolising metallo-beta-lactamase"  
"JS1\_O21\_00752" 10342 "s59E5H2" 0.1025956 "RNA-metabolising metallo-beta-lactamase"



"JS1\_O21\_00752" 10342 "s63E6H2" 0.2019642 "RNA-metabolising metallo-beta-lactamase"  
"JS1\_O21\_00753" 10343 "s59E13H2" 0.4179102 "hypothetical protein"  
"JS1\_O21\_00753" 10343 "s59E25H2" 0.5242165 "hypothetical protein"  
"JS1\_O21\_00753" 10343 "s59E5H2" 0.5142953 "hypothetical protein"  
"JS1\_O21\_00753" 10343 "s63E6H2" 0 "hypothetical protein"  
"JS1\_O21\_00754" 10344 "s59E13H2" 0.3214317 "hypothetical protein"  
"JS1\_O21\_00754" 10344 "s59E25H2" 0.1343042 "hypothetical protein"  
"JS1\_O21\_00754" 10344 "s59E5H2" 0.8132886 "hypothetical protein"  
"JS1\_O21\_00754" 10344 "s63E6H2" 0.001987082 "hypothetical protein"  
"JS1\_O21\_00755" 10345 "s59E13H2" 11.1413 "Transposase IS116/IS110/IS902 family protein"  
"JS1\_O21\_00755" 10345 "s59E25H2" 0 "Transposase IS116/IS110/IS902 family protein"  
"JS1\_O21\_00755" 10345 "s59E5H2" 0.5074971 "Transposase IS116/IS110/IS902 family protein"  
"JS1\_O21\_00755" 10345 "s63E6H2" 2.738297 "Transposase IS116/IS110/IS902 family protein"  
"JS1\_O21\_00756" 10346 "s59E13H2" 0.1303971 "Transposase IS116/IS110/IS902 family protein"  
"JS1\_O21\_00756" 10346 "s59E25H2" 0 "Transposase IS116/IS110/IS902 family protein"  
"JS1\_O21\_00756" 10346 "s59E5H2" 0.5070927 "Transposase IS116/IS110/IS902 family protein"  
"JS1\_O21\_00756" 10346 "s63E6H2" 2.391084 "Transposase IS116/IS110/IS902 family protein"  
"JS1\_O21\_00757" 10347 "s59E13H2" 0.006660507 "hypothetical protein"  
"JS1\_O21\_00757" 10347 "s59E25H2" 0 "hypothetical protein"  
"JS1\_O21\_00757" 10347 "s59E5H2" 0 "hypothetical protein"  
"JS1\_O21\_00757" 10347 "s63E6H2" 0 "hypothetical protein"  
"JS1\_O21\_00758" 10348 "s59E13H2" 0.0001696486 "preprotein translocase subunit YajC"  
"JS1\_O21\_00758" 10348 "s59E25H2" 0 "preprotein translocase subunit YajC"  
"JS1\_O21\_00758" 10348 "s59E5H2" 0.04758078 "preprotein translocase subunit YajC"  
"JS1\_O21\_00758" 10348 "s63E6H2" 0.03106369 "preprotein translocase subunit YajC"  
"JS1\_O21\_00759" 10349 "s59E13H2" 0.0620207 "Glutamate--tRNA ligase 1"  
"JS1\_O21\_00759" 10349 "s59E25H2" 0 "Glutamate--tRNA ligase 1"  
"JS1\_O21\_00759" 10349 "s59E5H2" 0.3977793 "Glutamate--tRNA ligase 1"  
"JS1\_O21\_00759" 10349 "s63E6H2" 0.0990297 "Glutamate--tRNA ligase 1"  
"JS1\_O21\_00760" 10350 "s59E13H2" 0.04716619 "Divergent polysaccharide deacetylase"  
"JS1\_O21\_00760" 10350 "s59E25H2" 0 "Divergent polysaccharide deacetylase"  
"JS1\_O21\_00760" 10350 "s59E5H2" 0.3545036 "Divergent polysaccharide deacetylase"  
"JS1\_O21\_00760" 10350 "s63E6H2" 0.1227315 "Divergent polysaccharide deacetylase"  
"JS1\_O21\_00761" 10351 "s59E13H2" 0.1014083 "putative CtpA-like serine protease"  
"JS1\_O21\_00761" 10351 "s59E25H2" 0 "putative CtpA-like serine protease"  
"JS1\_O21\_00761" 10351 "s59E5H2" 0.2941425 "putative CtpA-like serine protease"  
"JS1\_O21\_00761" 10351 "s63E6H2" 0.1346035 "putative CtpA-like serine protease"  
"JS1\_O21\_00762" 10352 "s59E13H2" 0.05553597 "Murein hydrolase activator EnvC precursor"  
"JS1\_O21\_00762" 10352 "s59E25H2" 0 "Murein hydrolase activator EnvC precursor"  
"JS1\_O21\_00762" 10352 "s59E5H2" 0.2689947 "Murein hydrolase activator EnvC precursor"  
"JS1\_O21\_00762" 10352 "s63E6H2" 0.08002647 "Murein hydrolase activator EnvC precursor"  
"JS1\_O21\_00763" 10353 "s59E13H2" 0.0001220279 "YHS domain protein"  
"JS1\_O21\_00763" 10353 "s59E25H2" 0 "YHS domain protein"  
"JS1\_O21\_00763" 10353 "s59E5H2" 0 "YHS domain protein"  
"JS1\_O21\_00763" 10353 "s63E6H2" 0.01734908 "YHS domain protein"  
"JS1\_O21\_00764" 10354 "s59E13H2" 0.5163835 "hypothetical protein"  
"JS1\_O21\_00764" 10354 "s59E25H2" 0 "hypothetical protein"

"JS1\_O21\_00764" 10354 "s59E5H2" 1.177655 "hypothetical protein"  
"JS1\_O21\_00764" 10354 "s63E6H2" 1.635275 "hypothetical protein"  
"JS1\_O21\_00765" 10355 "s59E13H2" 0.03113052 "hypothetical protein"  
"JS1\_O21\_00765" 10355 "s59E25H2" 0 "hypothetical protein"  
"JS1\_O21\_00765" 10355 "s59E5H2" 0.1994834 "hypothetical protein"  
"JS1\_O21\_00765" 10355 "s63E6H2" 0.1491774 "hypothetical protein"  
"JS1\_O21\_00768" 10358 "s59E13H2" 0.121178 "hypothetical protein"  
"JS1\_O21\_00768" 10358 "s59E25H2" 0 "hypothetical protein"  
"JS1\_O21\_00768" 10358 "s59E5H2" 1.283625 "hypothetical protein"  
"JS1\_O21\_00768" 10358 "s63E6H2" 0.201275 "hypothetical protein"  
"JS1\_O21\_00769" 10359 "s59E13H2" 0.08826186 "Response regulator aspartate phosphatase G"  
"JS1\_O21\_00769" 10359 "s59E25H2" 0 "Response regulator aspartate phosphatase G"  
"JS1\_O21\_00769" 10359 "s59E5H2" 0.6489866 "Response regulator aspartate phosphatase G"  
"JS1\_O21\_00769" 10359 "s63E6H2" 0.1303959 "Response regulator aspartate phosphatase G"  
"JS1\_O21\_00770" 10360 "s59E13H2" 0.2896132 "Transcription-repair-coupling factor"  
"JS1\_O21\_00770" 10360 "s59E25H2" 0 "Transcription-repair-coupling factor"  
"JS1\_O21\_00770" 10360 "s59E5H2" 0.4399712 "Transcription-repair-coupling factor"  
"JS1\_O21\_00770" 10360 "s63E6H2" 0.3876644 "Transcription-repair-coupling factor"  
"JS1\_O21\_00771" 10361 "s59E13H2" 0.04577072 "hypothetical protein"  
"JS1\_O21\_00771" 10361 "s59E25H2" 0 "hypothetical protein"  
"JS1\_O21\_00771" 10361 "s59E5H2" 0.03767622 "hypothetical protein"  
"JS1\_O21\_00771" 10361 "s63E6H2" 0.1773906 "hypothetical protein"  
"JS1\_O21\_00772" 10362 "s59E13H2" 0.09588956 "Ribose-phosphate pyrophosphokinase"  
"JS1\_O21\_00772" 10362 "s59E25H2" 0 "Ribose-phosphate pyrophosphokinase"  
"JS1\_O21\_00772" 10362 "s59E5H2" 0.3003721 "Ribose-phosphate pyrophosphokinase"  
"JS1\_O21\_00772" 10362 "s63E6H2" 0.6198102 "Ribose-phosphate pyrophosphokinase"  
"JS1\_O21\_00773" 10363 "s59E13H2" 0.08140131 "Bifunctional protein GlmU"  
"JS1\_O21\_00773" 10363 "s59E25H2" 0 "Bifunctional protein GlmU"  
"JS1\_O21\_00773" 10363 "s59E5H2" 0.2270923 "Bifunctional protein GlmU"  
"JS1\_O21\_00773" 10363 "s63E6H2" 0.5760631 "Bifunctional protein GlmU"  
"JS1\_O21\_00774" 10364 "s59E13H2" 0.4238975 "Kynureninase"  
"JS1\_O21\_00774" 10364 "s59E25H2" 0 "Kynureninase"  
"JS1\_O21\_00774" 10364 "s59E5H2" 0.2303071 "Kynureninase"  
"JS1\_O21\_00774" 10364 "s63E6H2" 0.3156329 "Kynureninase"  
"JS1\_O21\_00775" 10365 "s59E13H2" 0.3500692 "General stress protein 69"  
"JS1\_O21\_00775" 10365 "s59E25H2" 0 "General stress protein 69"  
"JS1\_O21\_00775" 10365 "s59E5H2" 0.1342331 "General stress protein 69"  
"JS1\_O21\_00775" 10365 "s63E6H2" 0.3873723 "General stress protein 69"  
"JS1\_O21\_00776" 10366 "s59E13H2" 2.277131 "Glutamine cyclotransferase"  
"JS1\_O21\_00776" 10366 "s59E25H2" 0 "Glutamine cyclotransferase"  
"JS1\_O21\_00776" 10366 "s59E5H2" 0.09124445 "Glutamine cyclotransferase"  
"JS1\_O21\_00776" 10366 "s63E6H2" 0.3506598 "Glutamine cyclotransferase"  
"JS1\_O21\_00777" 10367 "s59E13H2" 1.770821 "Serine protease Do-like HtrA"  
"JS1\_O21\_00777" 10367 "s59E25H2" 0 "Serine protease Do-like HtrA"  
"JS1\_O21\_00777" 10367 "s59E5H2" 1.325018 "Serine protease Do-like HtrA"  
"JS1\_O21\_00777" 10367 "s63E6H2" 0.93809 "Serine protease Do-like HtrA"  
"JS1\_O21\_00778" 10368 "s59E13H2" 5.974344 "Membrane transport protein"

"JS1\_O21\_00778" 10368 "s59E25H2" 0.4780836 "Membrane transport protein"  
"JS1\_O21\_00778" 10368 "s59E5H2" 0.004379316 "Membrane transport protein"  
"JS1\_O21\_00778" 10368 "s63E6H2" 1.921055 "Membrane transport protein"  
"JS1\_O21\_00779" 10369 "s59E13H2" 6.721518 "Cysteine desulfurase"  
"JS1\_O21\_00779" 10369 "s59E25H2" 0.4296875 "Cysteine desulfurase"  
"JS1\_O21\_00779" 10369 "s59E5H2" 0.278794 "Cysteine desulfurase"  
"JS1\_O21\_00779" 10369 "s63E6H2" 4.417548 "Cysteine desulfurase"  
"JS1\_O21\_00780" 10370 "s59E13H2" 3.794411 "Endoribonuclease L-PSP"  
"JS1\_O21\_00780" 10370 "s59E25H2" 0 "Endoribonuclease L-PSP"  
"JS1\_O21\_00780" 10370 "s59E5H2" 0.1486426 "Endoribonuclease L-PSP"  
"JS1\_O21\_00780" 10370 "s63E6H2" 1.627499 "Endoribonuclease L-PSP"  
"JS1\_O21\_00781" 10371 "s59E13H2" 2.475765 "4'-demethylrebeccamycin synthase"  
"JS1\_O21\_00781" 10371 "s59E25H2" 0 "4'-demethylrebeccamycin synthase"  
"JS1\_O21\_00781" 10371 "s59E5H2" 0.9991818 "4'-demethylrebeccamycin synthase"  
"JS1\_O21\_00781" 10371 "s63E6H2" 2.544548 "4'-demethylrebeccamycin synthase"  
"JS1\_O21\_00782" 10372 "s59E13H2" 1.775803 "putative acetyltransferase"  
"JS1\_O21\_00782" 10372 "s59E25H2" 0 "putative acetyltransferase"  
"JS1\_O21\_00782" 10372 "s59E5H2" 0.7729295 "putative acetyltransferase"  
"JS1\_O21\_00782" 10372 "s63E6H2" 1.382671 "putative acetyltransferase"  
"JS1\_O21\_00783" 10373 "s59E13H2" 0 "Kynurenine formamidase"  
"JS1\_O21\_00783" 10373 "s59E25H2" 0 "Kynurenine formamidase"  
"JS1\_O21\_00783" 10373 "s59E5H2" 0 "Kynurenine formamidase"  
"JS1\_O21\_00783" 10373 "s63E6H2" 0 "Kynurenine formamidase"  
"JS1\_O21\_00784" 10374 "s59E13H2" 0 "N-acyl homoserine lactonase"  
"JS1\_O21\_00784" 10374 "s59E25H2" 0 "N-acyl homoserine lactonase"  
"JS1\_O21\_00784" 10374 "s59E5H2" 0 "N-acyl homoserine lactonase"  
"JS1\_O21\_00784" 10374 "s63E6H2" 0 "N-acyl homoserine lactonase"  
"JS1\_O21\_00785" 10375 "s59E13H2" 0.3753298 "putative HTH-type transcriptional regulator YdfH"  
"JS1\_O21\_00785" 10375 "s59E25H2" 0 "putative HTH-type transcriptional regulator YdfH"  
"JS1\_O21\_00785" 10375 "s59E5H2" 0 "putative HTH-type transcriptional regulator YdfH"  
"JS1\_O21\_00785" 10375 "s63E6H2" 0 "putative HTH-type transcriptional regulator YdfH"  
"JS1\_O21\_00787" 10377 "s59E13H2" 2.294734 "hypothetical protein"  
"JS1\_O21\_00787" 10377 "s59E25H2" 0 "hypothetical protein"  
"JS1\_O21\_00787" 10377 "s59E5H2" 1.491479 "hypothetical protein"  
"JS1\_O21\_00787" 10377 "s63E6H2" 3.53038 "hypothetical protein"  
"JS1\_O21\_00788" 10378 "s59E13H2" 0.6712147 "hypothetical protein"  
"JS1\_O21\_00788" 10378 "s59E25H2" 0 "hypothetical protein"  
"JS1\_O21\_00788" 10378 "s59E5H2" 0 "hypothetical protein"  
"JS1\_O21\_00788" 10378 "s63E6H2" 0.2345859 "hypothetical protein"  
"JS1\_O21\_00789" 10379 "s59E13H2" 0.04867685 "UDP-N-acetylglucosamine 2-epimerase"  
"JS1\_O21\_00789" 10379 "s59E25H2" 0 "UDP-N-acetylglucosamine 2-epimerase"  
"JS1\_O21\_00789" 10379 "s59E5H2" 0.02582983 "UDP-N-acetylglucosamine 2-epimerase"  
"JS1\_O21\_00789" 10379 "s63E6H2" 0.006976939 "UDP-N-acetylglucosamine 2-epimerase"  
"JS1\_O21\_00790" 10380 "s59E13H2" 0.8362092 "putative ABC transporter ATP-binding protein YbhF"  
"JS1\_O21\_00790" 10380 "s59E25H2" 0 "putative ABC transporter ATP-binding protein YbhF"  
"JS1\_O21\_00790" 10380 "s59E5H2" 1.237566 "putative ABC transporter ATP-binding protein YbhF"  
"JS1\_O21\_00790" 10380 "s63E6H2" 1.882494 "putative ABC transporter ATP-binding protein YbhF"

"JS1\_O21\_00791" 10381 "s59E13H2" 1.661317 "ABC-2 type transporter"  
"JS1\_O21\_00791" 10381 "s59E25H2" 0 "ABC-2 type transporter"  
"JS1\_O21\_00791" 10381 "s59E5H2" 1.372932 "ABC-2 type transporter"  
"JS1\_O21\_00791" 10381 "s63E6H2" 1.414381 "ABC-2 type transporter"  
"JS1\_O21\_00792" 10382 "s59E13H2" 14.61807 "Sodium:neurotransmitter symporter family protein"  
"JS1\_O21\_00792" 10382 "s59E25H2" 0 "Sodium:neurotransmitter symporter family protein"  
"JS1\_O21\_00792" 10382 "s59E5H2" 0.4965151 "Sodium:neurotransmitter symporter family protein"  
"JS1\_O21\_00792" 10382 "s63E6H2" 1.441987 "Sodium:neurotransmitter symporter family protein"  
"JS1\_O21\_00793" 10383 "s59E13H2" 3.102548 "TPR repeat-containing protein YfgC precursor"  
"JS1\_O21\_00793" 10383 "s59E25H2" 0 "TPR repeat-containing protein YfgC precursor"  
"JS1\_O21\_00793" 10383 "s59E5H2" 0.1781478 "TPR repeat-containing protein YfgC precursor"  
"JS1\_O21\_00793" 10383 "s63E6H2" 1.639382 "TPR repeat-containing protein YfgC precursor"  
"JS1\_O21\_00794" 10384 "s59E13H2" 0.110946 "Asparagine--tRNA ligase"  
"JS1\_O21\_00794" 10384 "s59E25H2" 0 "Asparagine--tRNA ligase"  
"JS1\_O21\_00794" 10384 "s59E5H2" 0.1226763 "Asparagine--tRNA ligase"  
"JS1\_O21\_00794" 10384 "s63E6H2" 0.6030787 "Asparagine--tRNA ligase"  
"JS1\_O21\_00795" 10385 "s59E13H2" 0.1256767 "Aspartate--tRNA ligase"  
"JS1\_O21\_00795" 10385 "s59E25H2" 0 "Aspartate--tRNA ligase"  
"JS1\_O21\_00795" 10385 "s59E5H2" 0.09858559 "Aspartate--tRNA ligase"  
"JS1\_O21\_00795" 10385 "s63E6H2" 0.5587377 "Aspartate--tRNA ligase"  
"JS1\_O21\_00797" 10387 "s59E13H2" 0.003117352 "5-deoxy-glucuronate isomerase"  
"JS1\_O21\_00797" 10387 "s59E25H2" 0 "5-deoxy-glucuronate isomerase"  
"JS1\_O21\_00797" 10387 "s59E5H2" 0 "5-deoxy-glucuronate isomerase"  
"JS1\_O21\_00797" 10387 "s63E6H2" 0 "5-deoxy-glucuronate isomerase"  
"JS1\_O21\_00798" 10388 "s59E13H2" 0.005929643 "Sialic acid TRAP transporter permease protein SiaT"  
"JS1\_O21\_00798" 10388 "s59E25H2" 0 "Sialic acid TRAP transporter permease protein SiaT"  
"JS1\_O21\_00798" 10388 "s59E5H2" 0 "Sialic acid TRAP transporter permease protein SiaT"  
"JS1\_O21\_00798" 10388 "s63E6H2" 0 "Sialic acid TRAP transporter permease protein SiaT"  
"JS1\_O21\_00799" 10389 "s59E13H2" 0.00784085 "2,3-diketo-L-gulonate TRAP transporter small permease protein YiaM"  
"JS1\_O21\_00799" 10389 "s59E25H2" 0 "2,3-diketo-L-gulonate TRAP transporter small permease protein YiaM"  
"JS1\_O21\_00799" 10389 "s59E5H2" 0 "2,3-diketo-L-gulonate TRAP transporter small permease protein YiaM"  
"JS1\_O21\_00799" 10389 "s63E6H2" 0 "2,3-diketo-L-gulonate TRAP transporter small permease protein YiaM"  
"JS1\_O21\_00800" 10390 "s59E13H2" 0.004497811 "2,3-diketo-L-gulonate-binding periplasmic protein YiaO precursor"  
"JS1\_O21\_00800" 10390 "s59E25H2" 0 "2,3-diketo-L-gulonate-binding periplasmic protein YiaO precursor"  
"JS1\_O21\_00800" 10390 "s59E5H2" 0 "2,3-diketo-L-gulonate-binding periplasmic protein YiaO precursor"  
"JS1\_O21\_00800" 10390 "s63E6H2" 0 "2,3-diketo-L-gulonate-binding periplasmic protein YiaO precursor"  
"JS1\_O21\_00801" 10391 "s59E13H2" 0.0326015 "putative homocitrate synthase AksA"  
"JS1\_O21\_00801" 10391 "s59E25H2" 0 "putative homocitrate synthase AksA"  
"JS1\_O21\_00801" 10391 "s59E5H2" 0.008741621 "putative homocitrate synthase AksA"  
"JS1\_O21\_00801" 10391 "s63E6H2" 0 "putative homocitrate synthase AksA"  
"JS1\_O21\_00802" 10392 "s59E13H2" 0.03697522 "Glyoxylate reductase"  
"JS1\_O21\_00802" 10392 "s59E25H2" 0 "Glyoxylate reductase"  
"JS1\_O21\_00802" 10392 "s59E5H2" 0 "Glyoxylate reductase"  
"JS1\_O21\_00802" 10392 "s63E6H2" 0 "Glyoxylate reductase"  
"JS1\_O21\_00803" 10393 "s59E13H2" 0.02246442 "HTH-type transcriptional regulator LutR"  
"JS1\_O21\_00803" 10393 "s59E25H2" 0 "HTH-type transcriptional regulator LutR"  
"JS1\_O21\_00803" 10393 "s59E5H2" 0.01128464 "HTH-type transcriptional regulator LutR"

"JS1\_O21\_00803" 10393 "s63E6H2" 0 "HTH-type transcriptional regulator LutR"  
"JS1\_O21\_00805" 10395 "s59E13H2" 0.2754771 "Peptidase M15"  
"JS1\_O21\_00805" 10395 "s59E25H2" 0.3897436 "Peptidase M15"  
"JS1\_O21\_00805" 10395 "s59E5H2" 5.515855 "Peptidase M15"  
"JS1\_O21\_00805" 10395 "s63E6H2" 0.808717 "Peptidase M15"  
"JS1\_O21\_00806" 10396 "s59E13H2" 0.2366051 "hypothetical protein"  
"JS1\_O21\_00806" 10396 "s59E25H2" 0.6969697 "hypothetical protein"  
"JS1\_O21\_00806" 10396 "s59E5H2" 7.134368 "hypothetical protein"  
"JS1\_O21\_00806" 10396 "s63E6H2" 0.6547211 "hypothetical protein"  
"JS1\_O21\_00807" 10397 "s59E13H2" 0.05210325 "hypothetical protein"  
"JS1\_O21\_00807" 10397 "s59E25H2" 0 "hypothetical protein"  
"JS1\_O21\_00807" 10397 "s59E5H2" 1.904018 "hypothetical protein"  
"JS1\_O21\_00807" 10397 "s63E6H2" 0.100787 "hypothetical protein"  
"JS1\_O21\_00808" 10398 "s59E13H2" 0.09484622 "hypothetical protein"  
"JS1\_O21\_00808" 10398 "s59E25H2" 0 "hypothetical protein"  
"JS1\_O21\_00808" 10398 "s59E5H2" 1.565925 "hypothetical protein"  
"JS1\_O21\_00808" 10398 "s63E6H2" 0.2010165 "hypothetical protein"  
"JS1\_O21\_00809" 10399 "s59E13H2" 0.03497799 "hypothetical protein"  
"JS1\_O21\_00809" 10399 "s59E25H2" 0 "hypothetical protein"  
"JS1\_O21\_00809" 10399 "s59E5H2" 0 "hypothetical protein"  
"JS1\_O21\_00809" 10399 "s63E6H2" 0.001454261 "hypothetical protein"  
"JS1\_O21\_00810" 10400 "s59E13H2" 0.05504244 "GTP pyrophosphokinase YwaC"  
"JS1\_O21\_00810" 10400 "s59E25H2" 0 "GTP pyrophosphokinase YwaC"  
"JS1\_O21\_00810" 10400 "s59E5H2" 0 "GTP pyrophosphokinase YwaC"  
"JS1\_O21\_00810" 10400 "s63E6H2" 0.06338537 "GTP pyrophosphokinase YwaC"  
"JS1\_O21\_00811" 10401 "s59E13H2" 4.481987 "Isochorismatase"  
"JS1\_O21\_00811" 10401 "s59E25H2" 0 "Isochorismatase"  
"JS1\_O21\_00811" 10401 "s59E5H2" 0.3256322 "Isochorismatase"  
"JS1\_O21\_00811" 10401 "s63E6H2" 2.268483 "Isochorismatase"  
"JS1\_O21\_00812" 10402 "s59E13H2" 16.31055 "Fluoroacetyl-CoA thioesterase"  
"JS1\_O21\_00812" 10402 "s59E25H2" 0 "Fluoroacetyl-CoA thioesterase"  
"JS1\_O21\_00812" 10402 "s59E5H2" 0.6708236 "Fluoroacetyl-CoA thioesterase"  
"JS1\_O21\_00812" 10402 "s63E6H2" 1.792793 "Fluoroacetyl-CoA thioesterase"  
"JS1\_O21\_00813" 10403 "s59E13H2" 3.352677 "D-arabitol-phosphate dehydrogenase"  
"JS1\_O21\_00813" 10403 "s59E25H2" 0 "D-arabitol-phosphate dehydrogenase"  
"JS1\_O21\_00813" 10403 "s59E5H2" 0.5781869 "D-arabitol-phosphate dehydrogenase"  
"JS1\_O21\_00813" 10403 "s63E6H2" 1.638072 "D-arabitol-phosphate dehydrogenase"  
"JS1\_O21\_00814" 10404 "s59E13H2" 2.749717 "Sorbitol dehydrogenase"  
"JS1\_O21\_00814" 10404 "s59E25H2" 0.7261209 "Sorbitol dehydrogenase"  
"JS1\_O21\_00814" 10404 "s59E5H2" 0.6278333 "Sorbitol dehydrogenase"  
"JS1\_O21\_00814" 10404 "s63E6H2" 1.49691 "Sorbitol dehydrogenase"  
"JS1\_O21\_00815" 10405 "s59E13H2" 0.09772178 "2-C-methyl-D-erythritol 4-phosphate cytidyltransferase"  
"JS1\_O21\_00815" 10405 "s59E25H2" 0 "2-C-methyl-D-erythritol 4-phosphate cytidyltransferase"  
"JS1\_O21\_00815" 10405 "s59E5H2" 0.05592619 "2-C-methyl-D-erythritol 4-phosphate cytidyltransferase"  
"JS1\_O21\_00815" 10405 "s63E6H2" 0.08869115 "2-C-methyl-D-erythritol 4-phosphate cytidyltransferase"  
"JS1\_O21\_00816" 10406 "s59E13H2" 0.06445602 "CTP synthase"  
"JS1\_O21\_00816" 10406 "s59E25H2" 0 "CTP synthase"

"JS1\_O21\_00816" 10406 "s59E5H2" 0.480575 "CTP synthase"  
"JS1\_O21\_00816" 10406 "s63E6H2" 0.4049911 "CTP synthase"  
"JS1\_O21\_00817" 10407 "s59E13H2" 0.09728754 "Trimethylamine methyltransferase MttB"  
"JS1\_O21\_00817" 10407 "s59E25H2" 0 "Trimethylamine methyltransferase MttB"  
"JS1\_O21\_00817" 10407 "s59E5H2" 2.02914 "Trimethylamine methyltransferase MttB"  
"JS1\_O21\_00817" 10407 "s63E6H2" 0.3010366 "Trimethylamine methyltransferase MttB"  
"JS1\_O21\_00818" 10408 "s59E13H2" 2.761963 "Acryloyl-CoA reductase electron transfer subunit gamma"  
"JS1\_O21\_00818" 10408 "s59E25H2" 0 "Acryloyl-CoA reductase electron transfer subunit gamma"  
"JS1\_O21\_00818" 10408 "s59E5H2" 0.2426956 "Acryloyl-CoA reductase electron transfer subunit gamma"  
"JS1\_O21\_00818" 10408 "s63E6H2" 0.9271067 "Acryloyl-CoA reductase electron transfer subunit gamma"  
"JS1\_O21\_00819" 10409 "s59E13H2" 3.121318 "bifunctional homocysteine S-methyltransferase/5,10-methylenetetrahydrofolate reductase protein"  
"JS1\_O21\_00819" 10409 "s59E25H2" 0 "bifunctional homocysteine S-methyltransferase/5,10-methylenetetrahydrofolate reductase protein"  
"JS1\_O21\_00819" 10409 "s59E5H2" 0.2841929 "bifunctional homocysteine S-methyltransferase/5,10-methylenetetrahydrofolate reductase protein"  
"JS1\_O21\_00819" 10409 "s63E6H2" 0.8775355 "bifunctional homocysteine S-methyltransferase/5,10-methylenetetrahydrofolate reductase protein"  
"JS1\_O21\_00821" 10411 "s59E13H2" 2.74002 "Trimethylamine corrinoid protein"  
"JS1\_O21\_00821" 10411 "s59E25H2" 0 "Trimethylamine corrinoid protein"  
"JS1\_O21\_00821" 10411 "s59E5H2" 0.4077264 "Trimethylamine corrinoid protein"  
"JS1\_O21\_00821" 10411 "s63E6H2" 0.3769352 "Trimethylamine corrinoid protein"  
"JS1\_O21\_00822" 10412 "s59E13H2" 0.2862149 "Transcriptional repressor MprA"  
"JS1\_O21\_00822" 10412 "s59E25H2" 0 "Transcriptional repressor MprA"  
"JS1\_O21\_00822" 10412 "s59E5H2" 0.2049163 "Transcriptional repressor MprA"  
"JS1\_O21\_00822" 10412 "s63E6H2" 0.4324671 "Transcriptional repressor MprA"  
"JS1\_O21\_00823" 10413 "s59E13H2" 0.601577 "Cadmium, cobalt and zinc/H(+)-K(+) antiporter"  
"JS1\_O21\_00823" 10413 "s59E25H2" 0 "Cadmium, cobalt and zinc/H(+)-K(+) antiporter"  
"JS1\_O21\_00823" 10413 "s59E5H2" 0.5567414 "Cadmium, cobalt and zinc/H(+)-K(+) antiporter"  
"JS1\_O21\_00823" 10413 "s63E6H2" 1.299883 "Cadmium, cobalt and zinc/H(+)-K(+) antiporter"  
"JS1\_O21\_00824" 10414 "s59E13H2" 0.7581854 "Glucose 1-dehydrogenase 2"  
"JS1\_O21\_00824" 10414 "s59E25H2" 0 "Glucose 1-dehydrogenase 2"  
"JS1\_O21\_00824" 10414 "s59E5H2" 0.2492404 "Glucose 1-dehydrogenase 2"  
"JS1\_O21\_00824" 10414 "s63E6H2" 0.1964211 "Glucose 1-dehydrogenase 2"  
"JS1\_O21\_00826" 10416 "s59E13H2" 1.076714 "putative diguanylate cyclase YedQ"  
"JS1\_O21\_00826" 10416 "s59E25H2" 0 "putative diguanylate cyclase YedQ"  
"JS1\_O21\_00826" 10416 "s59E5H2" 0.1759667 "putative diguanylate cyclase YedQ"  
"JS1\_O21\_00826" 10416 "s63E6H2" 0.03241457 "putative diguanylate cyclase YedQ"  
"JS1\_O21\_00827" 10417 "s59E13H2" 3.81432 "Soluble lytic murein transglycosylase precursor"  
"JS1\_O21\_00827" 10417 "s59E25H2" 0 "Soluble lytic murein transglycosylase precursor"  
"JS1\_O21\_00827" 10417 "s59E5H2" 0.5345807 "Soluble lytic murein transglycosylase precursor"  
"JS1\_O21\_00827" 10417 "s63E6H2" 0.1618095 "Soluble lytic murein transglycosylase precursor"  
"JS1\_O21\_00828" 10418 "s59E13H2" 3.359402 "hypothetical protein"  
"JS1\_O21\_00828" 10418 "s59E25H2" 0 "hypothetical protein"  
"JS1\_O21\_00828" 10418 "s59E5H2" 0.3506593 "hypothetical protein"  
"JS1\_O21\_00828" 10418 "s63E6H2" 0.08315799 "hypothetical protein"  
"JS1\_O21\_00829" 10419 "s59E13H2" 5.165578 "Murein hydrolase activator NlpD precursor"  
"JS1\_O21\_00829" 10419 "s59E25H2" 0 "Murein hydrolase activator NlpD precursor"  
"JS1\_O21\_00829" 10419 "s59E5H2" 0.698461 "Murein hydrolase activator NlpD precursor"  
"JS1\_O21\_00829" 10419 "s63E6H2" 0.2284738 "Murein hydrolase activator NlpD precursor"  
"JS1\_O21\_00830" 10420 "s59E13H2" 3.731418 "Periplasmic dipeptide transport protein precursor"

"JS1\_O21\_00830" 10420 "s59E25H2" 0 "Periplasmic dipeptide transport protein precursor"  
"JS1\_O21\_00830" 10420 "s59E5H2" 0.258188 "Periplasmic dipeptide transport protein precursor"  
"JS1\_O21\_00830" 10420 "s63E6H2" 0.1638173 "Periplasmic dipeptide transport protein precursor"  
"JS1\_O21\_00831" 10421 "s59E13H2" 5.080939 "Dipeptide transport system permease protein DppB"  
"JS1\_O21\_00831" 10421 "s59E25H2" 0 "Dipeptide transport system permease protein DppB"  
"JS1\_O21\_00831" 10421 "s59E5H2" 0.6296927 "Dipeptide transport system permease protein DppB"  
"JS1\_O21\_00831" 10421 "s63E6H2" 0.139122 "Dipeptide transport system permease protein DppB"  
"JS1\_O21\_00832" 10422 "s59E13H2" 5.34195 "Glutathione transport system permease protein GsiD"  
"JS1\_O21\_00832" 10422 "s59E25H2" 0 "Glutathione transport system permease protein GsiD"  
"JS1\_O21\_00832" 10422 "s59E5H2" 0.7557388 "Glutathione transport system permease protein GsiD"  
"JS1\_O21\_00832" 10422 "s63E6H2" 0.155015 "Glutathione transport system permease protein GsiD"  
"JS1\_O21\_00833" 10423 "s59E13H2" 7.070014 "Oligopeptide transport ATP-binding protein OppD"  
"JS1\_O21\_00833" 10423 "s59E25H2" 0.175813 "Oligopeptide transport ATP-binding protein OppD"  
"JS1\_O21\_00833" 10423 "s59E5H2" 2.088612 "Oligopeptide transport ATP-binding protein OppD"  
"JS1\_O21\_00833" 10423 "s63E6H2" 0.3646709 "Oligopeptide transport ATP-binding protein OppD"  
"JS1\_O21\_00834" 10424 "s59E13H2" 8.076288 "Oligopeptide transport ATP-binding protein OppF"  
"JS1\_O21\_00834" 10424 "s59E25H2" 0 "Oligopeptide transport ATP-binding protein OppF"  
"JS1\_O21\_00834" 10424 "s59E5H2" 2.587884 "Oligopeptide transport ATP-binding protein OppF"  
"JS1\_O21\_00834" 10424 "s63E6H2" 0.4015614 "Oligopeptide transport ATP-binding protein OppF"  
"JS1\_O21\_00835" 10425 "s59E13H2" 3.585916 "tRNA uridine 5-carboxymethylaminomethyl modification enzyme MnmG"  
"JS1\_O21\_00835" 10425 "s59E25H2" 0 "tRNA uridine 5-carboxymethylaminomethyl modification enzyme MnmG"  
"JS1\_O21\_00835" 10425 "s59E5H2" 1.882142 "tRNA uridine 5-carboxymethylaminomethyl modification enzyme MnmG"  
"JS1\_O21\_00835" 10425 "s63E6H2" 0.2855198 "tRNA uridine 5-carboxymethylaminomethyl modification enzyme MnmG"  
"JS1\_O21\_00836" 10426 "s59E13H2" 4.171037 "OsmC-like protein"  
"JS1\_O21\_00836" 10426 "s59E25H2" 0 "OsmC-like protein"  
"JS1\_O21\_00836" 10426 "s59E5H2" 0.5103939 "OsmC-like protein"  
"JS1\_O21\_00836" 10426 "s63E6H2" 0.2572601 "OsmC-like protein"  
"JS1\_O21\_00837" 10427 "s59E13H2" 4.270734 "Bifunctional protein FOLD protein"  
"JS1\_O21\_00837" 10427 "s59E25H2" 0 "Bifunctional protein FOLD protein"  
"JS1\_O21\_00837" 10427 "s59E5H2" 2.846418 "Bifunctional protein FOLD protein"  
"JS1\_O21\_00837" 10427 "s63E6H2" 0.3614345 "Bifunctional protein FOLD protein"  
"JS1\_O21\_00839" 10429 "s59E13H2" 0.02553924 "Alpha-1,4-glucan:maltose-1-phosphate maltosyltransferase 1"  
"JS1\_O21\_00839" 10429 "s59E25H2" 0 "Alpha-1,4-glucan:maltose-1-phosphate maltosyltransferase 1"  
"JS1\_O21\_00839" 10429 "s59E5H2" 0.1331425 "Alpha-1,4-glucan:maltose-1-phosphate maltosyltransferase 1"  
"JS1\_O21\_00839" 10429 "s63E6H2" 0.9461509 "Alpha-1,4-glucan:maltose-1-phosphate maltosyltransferase 1"  
"JS1\_O21\_00840" 10430 "s59E13H2" 1.283054 "L-allo-threonine aldolase"  
"JS1\_O21\_00840" 10430 "s59E25H2" 0 "L-allo-threonine aldolase"  
"JS1\_O21\_00840" 10430 "s59E5H2" 0.2941228 "L-allo-threonine aldolase"  
"JS1\_O21\_00840" 10430 "s63E6H2" 0.1372978 "L-allo-threonine aldolase"  
"JS1\_O21\_00841" 10431 "s59E13H2" 0.04408349 "Glutamine synthetase"  
"JS1\_O21\_00841" 10431 "s59E25H2" 0.1903687 "Glutamine synthetase"  
"JS1\_O21\_00841" 10431 "s59E5H2" 0.1008201 "Glutamine synthetase"  
"JS1\_O21\_00841" 10431 "s63E6H2" 0.2979767 "Glutamine synthetase"  
"JS1\_O21\_00842" 10432 "s59E13H2" 7.764142 "Lactose transport system permease protein LacF"  
"JS1\_O21\_00842" 10432 "s59E25H2" 0 "Lactose transport system permease protein LacF"  
"JS1\_O21\_00842" 10432 "s59E5H2" 0.6444344 "Lactose transport system permease protein LacF"  
"JS1\_O21\_00842" 10432 "s63E6H2" 1.827421 "Lactose transport system permease protein LacF"

"JS1\_O21\_00843" 10433 "s59E13H2" 7.37369 "L-arabinose transport system permease protein AraQ"  
"JS1\_O21\_00843" 10433 "s59E25H2" 0 "L-arabinose transport system permease protein AraQ"  
"JS1\_O21\_00843" 10433 "s59E5H2" 0.65085 "L-arabinose transport system permease protein AraQ"  
"JS1\_O21\_00843" 10433 "s63E6H2" 1.796465 "L-arabinose transport system permease protein AraQ"  
"JS1\_O21\_00844" 10434 "s59E13H2" 1.502176 "putative lipoprotein YbbD precursor"  
"JS1\_O21\_00844" 10434 "s59E25H2" 0 "putative lipoprotein YbbD precursor"  
"JS1\_O21\_00844" 10434 "s59E5H2" 0.3523973 "putative lipoprotein YbbD precursor"  
"JS1\_O21\_00844" 10434 "s63E6H2" 1.308045 "putative lipoprotein YbbD precursor"  
"JS1\_O21\_00845" 10435 "s59E13H2" 0.07080363 "tRNA(Ile)-lysine synthase"  
"JS1\_O21\_00845" 10435 "s59E25H2" 0 "tRNA(Ile)-lysine synthase"  
"JS1\_O21\_00845" 10435 "s59E5H2" 0.1925686 "tRNA(Ile)-lysine synthase"  
"JS1\_O21\_00845" 10435 "s63E6H2" 0.2974465 "tRNA(Ile)-lysine synthase"  
"JS1\_O21\_00846" 10436 "s59E13H2" 0.03388815 "Hypoxanthine-guanine phosphoribosyltransferase"  
"JS1\_O21\_00846" 10436 "s59E25H2" 0 "Hypoxanthine-guanine phosphoribosyltransferase"  
"JS1\_O21\_00846" 10436 "s59E5H2" 0.1547563 "Hypoxanthine-guanine phosphoribosyltransferase"  
"JS1\_O21\_00846" 10436 "s63E6H2" 0.1059878 "Hypoxanthine-guanine phosphoribosyltransferase"  
"JS1\_O21\_00847" 10437 "s59E13H2" 2.890094 "hypothetical protein"  
"JS1\_O21\_00847" 10437 "s59E25H2" 0 "hypothetical protein"  
"JS1\_O21\_00847" 10437 "s59E5H2" 0.1220735 "hypothetical protein"  
"JS1\_O21\_00847" 10437 "s63E6H2" 0.1462037 "hypothetical protein"  
"JS1\_O21\_00848" 10438 "s59E13H2" 3.814681 "Undecaprenyl-diphosphatase"  
"JS1\_O21\_00848" 10438 "s59E25H2" 0 "Undecaprenyl-diphosphatase"  
"JS1\_O21\_00848" 10438 "s59E5H2" 0.1549904 "Undecaprenyl-diphosphatase"  
"JS1\_O21\_00848" 10438 "s63E6H2" 0.1282231 "Undecaprenyl-diphosphatase"  
"JS1\_O21\_00849" 10439 "s59E13H2" 0.05990932 "Phosphate acetyltransferase"  
"JS1\_O21\_00849" 10439 "s59E25H2" 0 "Phosphate acetyltransferase"  
"JS1\_O21\_00849" 10439 "s59E5H2" 0.1078656 "Phosphate acetyltransferase"  
"JS1\_O21\_00849" 10439 "s63E6H2" 0.06610148 "Phosphate acetyltransferase"  
"JS1\_O21\_00850" 10440 "s59E13H2" 0.062555 "Butyrate kinase 2"  
"JS1\_O21\_00850" 10440 "s59E25H2" 0 "Butyrate kinase 2"  
"JS1\_O21\_00850" 10440 "s59E5H2" 0.1096179 "Butyrate kinase 2"  
"JS1\_O21\_00850" 10440 "s63E6H2" 0.04929659 "Butyrate kinase 2"  
"JS1\_O21\_00851" 10441 "s59E13H2" 0.06115515 "hypothetical protein"  
"JS1\_O21\_00851" 10441 "s59E25H2" 0 "hypothetical protein"  
"JS1\_O21\_00851" 10441 "s59E5H2" 0.1786926 "hypothetical protein"  
"JS1\_O21\_00851" 10441 "s63E6H2" 0.02537127 "hypothetical protein"  
"JS1\_O21\_00852" 10442 "s59E13H2" 0.05448548 "Ketoisovalerate oxidoreductase subunit VorC"  
"JS1\_O21\_00852" 10442 "s59E25H2" 0 "Ketoisovalerate oxidoreductase subunit VorC"  
"JS1\_O21\_00852" 10442 "s59E5H2" 0.1618789 "Ketoisovalerate oxidoreductase subunit VorC"  
"JS1\_O21\_00852" 10442 "s63E6H2" 0 "Ketoisovalerate oxidoreductase subunit VorC"  
"JS1\_O21\_00853" 10443 "s59E13H2" 0.02197335 "Ketoisovalerate oxidoreductase subunit VorB"  
"JS1\_O21\_00853" 10443 "s59E25H2" 0 "Ketoisovalerate oxidoreductase subunit VorB"  
"JS1\_O21\_00853" 10443 "s59E5H2" 0.2051797 "Ketoisovalerate oxidoreductase subunit VorB"  
"JS1\_O21\_00853" 10443 "s63E6H2" 0 "Ketoisovalerate oxidoreductase subunit VorB"  
"JS1\_O21\_00854" 10444 "s59E13H2" 0.01997289 "Ketoisovalerate oxidoreductase subunit VorA"  
"JS1\_O21\_00854" 10444 "s59E25H2" 0 "Ketoisovalerate oxidoreductase subunit VorA"  
"JS1\_O21\_00854" 10444 "s59E5H2" 0.3640804 "Ketoisovalerate oxidoreductase subunit VorA"



"JS1\_O21\_00854" 10444 "s63E6H2" 0.007894124 "Ketoisovalerate oxidoreductase subunit VorA"  
"JS1\_O21\_00855" 10445 "s59E13H2" 0.08689338 "Ketoisovalerate oxidoreductase subunit VorA"  
"JS1\_O21\_00855" 10445 "s59E25H2" 0 "Ketoisovalerate oxidoreductase subunit VorA"  
"JS1\_O21\_00855" 10445 "s59E5H2" 0.2585171 "Ketoisovalerate oxidoreductase subunit VorA"  
"JS1\_O21\_00855" 10445 "s63E6H2" 0.009895732 "Ketoisovalerate oxidoreductase subunit VorA"  
"JS1\_O21\_00856" 10446 "s59E13H2" 0.3881 "Peptidase T"  
"JS1\_O21\_00856" 10446 "s59E25H2" 0 "Peptidase T"  
"JS1\_O21\_00856" 10446 "s59E5H2" 0.2654475 "Peptidase T"  
"JS1\_O21\_00856" 10446 "s63E6H2" 0.04643144 "Peptidase T"  
"JS1\_O21\_00857" 10447 "s59E13H2" 0.325222 "ADP-ribose pyrophosphatase"  
"JS1\_O21\_00857" 10447 "s59E25H2" 0 "ADP-ribose pyrophosphatase"  
"JS1\_O21\_00857" 10447 "s59E5H2" 0.3700933 "ADP-ribose pyrophosphatase"  
"JS1\_O21\_00857" 10447 "s63E6H2" 0.08151622 "ADP-ribose pyrophosphatase"  
"JS1\_O21\_00858" 10448 "s59E13H2" 0.4026174 "hypothetical protein"  
"JS1\_O21\_00858" 10448 "s59E25H2" 0 "hypothetical protein"  
"JS1\_O21\_00858" 10448 "s59E5H2" 0.3200625 "hypothetical protein"  
"JS1\_O21\_00858" 10448 "s63E6H2" 0.08439484 "hypothetical protein"  
"JS1\_O21\_00859" 10449 "s59E13H2" 0.3076361 "DNA primase"  
"JS1\_O21\_00859" 10449 "s59E25H2" 0 "DNA primase"  
"JS1\_O21\_00859" 10449 "s59E5H2" 0.9201254 "DNA primase"  
"JS1\_O21\_00859" 10449 "s63E6H2" 0.1049362 "DNA primase"  
"JS1\_O21\_00860" 10450 "s59E13H2" 0.4787002 "RNA polymerase sigma factor SigA"  
"JS1\_O21\_00860" 10450 "s59E25H2" 0 "RNA polymerase sigma factor SigA"  
"JS1\_O21\_00860" 10450 "s59E5H2" 1.241549 "RNA polymerase sigma factor SigA"  
"JS1\_O21\_00860" 10450 "s63E6H2" 0.1713335 "RNA polymerase sigma factor SigA"  
"JS1\_O21\_00862" 10452 "s59E13H2" 4.510361 "Helix-turn-helix"  
"JS1\_O21\_00862" 10452 "s59E25H2" 0 "Helix-turn-helix"  
"JS1\_O21\_00862" 10452 "s59E5H2" 1.308806 "Helix-turn-helix"  
"JS1\_O21\_00862" 10452 "s63E6H2" 0.01823787 "Helix-turn-helix"  
"JS1\_O21\_00864" 10454 "s59E13H2" 0.4244514 "hypothetical protein"  
"JS1\_O21\_00864" 10454 "s59E25H2" 0 "hypothetical protein"  
"JS1\_O21\_00864" 10454 "s59E5H2" 3.115585 "hypothetical protein"  
"JS1\_O21\_00864" 10454 "s63E6H2" 0.158595 "hypothetical protein"  
"JS1\_O21\_00866" 10456 "s59E13H2" 0.3267831 "hypothetical protein"  
"JS1\_O21\_00866" 10456 "s59E25H2" 0 "hypothetical protein"  
"JS1\_O21\_00866" 10456 "s59E5H2" 2.422142 "hypothetical protein"  
"JS1\_O21\_00866" 10456 "s63E6H2" 0.3537103 "hypothetical protein"  
"JS1\_O21\_00867" 10457 "s59E13H2" 0.9825934 "Leucine-, isoleucine-, valine-, threonine-, and alanine-binding protein precursor"  
"JS1\_O21\_00867" 10457 "s59E25H2" 0 "Leucine-, isoleucine-, valine-, threonine-, and alanine-binding protein precursor"  
"JS1\_O21\_00867" 10457 "s59E5H2" 0.1298125 "Leucine-, isoleucine-, valine-, threonine-, and alanine-binding protein precursor"  
"JS1\_O21\_00867" 10457 "s63E6H2" 0.1879835 "Leucine-, isoleucine-, valine-, threonine-, and alanine-binding protein precursor"  
"JS1\_O21\_00868" 10458 "s59E13H2" 0.7606602 "High-affinity branched-chain amino acid transport ATP-binding protein LivF"  
"JS1\_O21\_00868" 10458 "s59E25H2" 0 "High-affinity branched-chain amino acid transport ATP-binding protein LivF"  
"JS1\_O21\_00868" 10458 "s59E5H2" 0.1835097 "High-affinity branched-chain amino acid transport ATP-binding protein LivF"  
"JS1\_O21\_00868" 10458 "s63E6H2" 0.1865153 "High-affinity branched-chain amino acid transport ATP-binding protein LivF"  
"JS1\_O21\_00869" 10459 "s59E13H2" 0.5359373 "leucine/isoleucine/valine transporter ATP-binding subunit"  
"JS1\_O21\_00869" 10459 "s59E25H2" 0 "leucine/isoleucine/valine transporter ATP-binding subunit"

"JS1\_O21\_00869" 10459 "s59E5H2" 0.04884304 "leucine/isoleucine/valine transporter ATP-binding subunit"  
"JS1\_O21\_00869" 10459 "s63E6H2" 0.09570984 "leucine/isoleucine/valine transporter ATP-binding subunit"  
"JS1\_O21\_00870" 10460 "s59E13H2" 0.2437131 "MMPL family protein"  
"JS1\_O21\_00870" 10460 "s59E25H2" 0 "MMPL family protein"  
"JS1\_O21\_00870" 10460 "s59E5H2" 0.4806918 "MMPL family protein"  
"JS1\_O21\_00870" 10460 "s63E6H2" 0.65895 "MMPL family protein"  
"JS1\_O21\_00871" 10461 "s59E13H2" 0.361371 "hypothetical protein"  
"JS1\_O21\_00871" 10461 "s59E25H2" 0 "hypothetical protein"  
"JS1\_O21\_00871" 10461 "s59E5H2" 0.8662614 "hypothetical protein"  
"JS1\_O21\_00871" 10461 "s63E6H2" 0.2944224 "hypothetical protein"  
"JS1\_O21\_00872" 10462 "s59E13H2" 0.1323029 "hypothetical protein"  
"JS1\_O21\_00872" 10462 "s59E25H2" 0.2035685 "hypothetical protein"  
"JS1\_O21\_00872" 10462 "s59E5H2" 0.8035129 "hypothetical protein"  
"JS1\_O21\_00872" 10462 "s63E6H2" 1.117031 "hypothetical protein"  
"JS1\_O21\_00873" 10463 "s59E13H2" 0.1954309 "HTH-type transcriptional regulator EthR"  
"JS1\_O21\_00873" 10463 "s59E25H2" 0 "HTH-type transcriptional regulator EthR"  
"JS1\_O21\_00873" 10463 "s59E5H2" 1.499089 "HTH-type transcriptional regulator EthR"  
"JS1\_O21\_00873" 10463 "s63E6H2" 1.71072 "HTH-type transcriptional regulator EthR"  
"JS1\_O21\_00874" 10464 "s59E13H2" 1.462256 "Glycerol kinase"  
"JS1\_O21\_00874" 10464 "s59E25H2" 0 "Glycerol kinase"  
"JS1\_O21\_00874" 10464 "s59E5H2" 1.191379 "Glycerol kinase"  
"JS1\_O21\_00874" 10464 "s63E6H2" 2.755689 "Glycerol kinase"  
"JS1\_O21\_00875" 10465 "s59E13H2" 0.4293896 "Galactokinase"  
"JS1\_O21\_00875" 10465 "s59E25H2" 0 "Galactokinase"  
"JS1\_O21\_00875" 10465 "s59E5H2" 0.4724838 "Galactokinase"  
"JS1\_O21\_00875" 10465 "s63E6H2" 0.6064246 "Galactokinase"  
"JS1\_O21\_00876" 10466 "s59E13H2" 0.4111528 "Galactose-1-phosphate uridylyltransferase"  
"JS1\_O21\_00876" 10466 "s59E25H2" 0 "Galactose-1-phosphate uridylyltransferase"  
"JS1\_O21\_00876" 10466 "s59E5H2" 0.3688906 "Galactose-1-phosphate uridylyltransferase"  
"JS1\_O21\_00876" 10466 "s63E6H2" 0.2383204 "Galactose-1-phosphate uridylyltransferase"  
"JS1\_O21\_00877" 10467 "s59E13H2" 0.3077907 "Alpha-galactosidase"  
"JS1\_O21\_00877" 10467 "s59E25H2" 0 "Alpha-galactosidase"  
"JS1\_O21\_00877" 10467 "s59E5H2" 0.6887212 "Alpha-galactosidase"  
"JS1\_O21\_00877" 10467 "s63E6H2" 0.09971118 "Alpha-galactosidase"  
"JS1\_O21\_00878" 10468 "s59E13H2" 0.6159387 "Beta-galactosidase"  
"JS1\_O21\_00878" 10468 "s59E25H2" 0 "Beta-galactosidase"  
"JS1\_O21\_00878" 10468 "s59E5H2" 0.7717014 "Beta-galactosidase"  
"JS1\_O21\_00878" 10468 "s63E6H2" 0.06080612 "Beta-galactosidase"  
"JS1\_O21\_00879" 10469 "s59E13H2" 0.639285 "Bifunctional trehalose-6-phosphate synthase/phosphatase"  
"JS1\_O21\_00879" 10469 "s59E25H2" 0.1677704 "Bifunctional trehalose-6-phosphate synthase/phosphatase"  
"JS1\_O21\_00879" 10469 "s59E5H2" 0.5434569 "Bifunctional trehalose-6-phosphate synthase/phosphatase"  
"JS1\_O21\_00879" 10469 "s63E6H2" 0.08113771 "Bifunctional trehalose-6-phosphate synthase/phosphatase"  
"JS1\_O21\_00880" 10470 "s59E13H2" 0.04244284 "Trehalose synthase/amylase TreS"  
"JS1\_O21\_00880" 10470 "s59E25H2" 0 "Trehalose synthase/amylase TreS"  
"JS1\_O21\_00880" 10470 "s59E5H2" 0.6973267 "Trehalose synthase/amylase TreS"  
"JS1\_O21\_00880" 10470 "s63E6H2" 0.6141221 "Trehalose synthase/amylase TreS"  
"JS1\_O21\_00881" 10471 "s59E13H2" 0.9923601 "1,4-alpha-glucan branching enzyme GlgB"

"JS1\_O21\_00881" 10471 "s59E25H2" 0 "1,4-alpha-glucan branching enzyme GlgB"  
"JS1\_O21\_00881" 10471 "s59E5H2" 0.6273495 "1,4-alpha-glucan branching enzyme GlgB"  
"JS1\_O21\_00881" 10471 "s63E6H2" 0.6293782 "1,4-alpha-glucan branching enzyme GlgB"  
"JS1\_O21\_00882" 10472 "s59E13H2" 1.366379 "hypothetical protein"  
"JS1\_O21\_00882" 10472 "s59E25H2" 0 "hypothetical protein"  
"JS1\_O21\_00882" 10472 "s59E5H2" 2.277125 "hypothetical protein"  
"JS1\_O21\_00882" 10472 "s63E6H2" 13.33985 "hypothetical protein"  
"JS1\_O21\_00883" 10473 "s59E13H2" 1.006944 "hypothetical protein"  
"JS1\_O21\_00883" 10473 "s59E25H2" 0 "hypothetical protein"  
"JS1\_O21\_00883" 10473 "s59E5H2" 1.110219 "hypothetical protein"  
"JS1\_O21\_00883" 10473 "s63E6H2" 7.003422 "hypothetical protein"  
"JS1\_O21\_00884" 10474 "s59E13H2" 0.1548571 "putative DNA-binding protein"  
"JS1\_O21\_00884" 10474 "s59E25H2" 0 "putative DNA-binding protein"  
"JS1\_O21\_00884" 10474 "s59E5H2" 0.008710782 "putative DNA-binding protein"  
"JS1\_O21\_00884" 10474 "s63E6H2" 0.1038923 "putative DNA-binding protein"  
"JS1\_O21\_00885" 10475 "s59E13H2" 0.208217 "RNA polymerase factor sigma-70"  
"JS1\_O21\_00885" 10475 "s59E25H2" 0 "RNA polymerase factor sigma-70"  
"JS1\_O21\_00885" 10475 "s59E5H2" 0.03077227 "RNA polymerase factor sigma-70"  
"JS1\_O21\_00885" 10475 "s63E6H2" 1.89792 "RNA polymerase factor sigma-70"  
"JS1\_O21\_00887" 10477 "s59E13H2" 0.3491833 "Putative ski2-type helicase"  
"JS1\_O21\_00887" 10477 "s59E25H2" 0 "Putative ski2-type helicase"  
"JS1\_O21\_00887" 10477 "s59E5H2" 0.6885474 "Putative ski2-type helicase"  
"JS1\_O21\_00887" 10477 "s63E6H2" 0.02079312 "Putative ski2-type helicase"  
"JS1\_O21\_00888" 10478 "s59E13H2" 0.1448179 "Acetyltransferase (GNAT) family protein"  
"JS1\_O21\_00888" 10478 "s59E25H2" 0 "Acetyltransferase (GNAT) family protein"  
"JS1\_O21\_00888" 10478 "s59E5H2" 1.754524 "Acetyltransferase (GNAT) family protein"  
"JS1\_O21\_00888" 10478 "s63E6H2" 1.166411 "Acetyltransferase (GNAT) family protein"  
"JS1\_O21\_00889" 10479 "s59E13H2" 0.07773116 "hypothetical protein"  
"JS1\_O21\_00889" 10479 "s59E25H2" 0 "hypothetical protein"  
"JS1\_O21\_00889" 10479 "s59E5H2" 1.912028 "hypothetical protein"  
"JS1\_O21\_00889" 10479 "s63E6H2" 1.088035 "hypothetical protein"  
"JS1\_O21\_00890" 10480 "s59E13H2" 0.04456183 "galactoside permease"  
"JS1\_O21\_00890" 10480 "s59E25H2" 0 "galactoside permease"  
"JS1\_O21\_00890" 10480 "s59E5H2" 1.06213 "galactoside permease"  
"JS1\_O21\_00890" 10480 "s63E6H2" 1.656618 "galactoside permease"  
"JS1\_O21\_00891" 10481 "s59E13H2" 0.08011101 "LemA family protein"  
"JS1\_O21\_00891" 10481 "s59E25H2" 0 "LemA family protein"  
"JS1\_O21\_00891" 10481 "s59E5H2" 1.063973 "LemA family protein"  
"JS1\_O21\_00891" 10481 "s63E6H2" 1.87503 "LemA family protein"  
"JS1\_O21\_00892" 10482 "s59E13H2" 0.102737 "hypothetical protein"  
"JS1\_O21\_00892" 10482 "s59E25H2" 0 "hypothetical protein"  
"JS1\_O21\_00892" 10482 "s59E5H2" 0.756628 "hypothetical protein"  
"JS1\_O21\_00892" 10482 "s63E6H2" 1.02949 "hypothetical protein"  
"JS1\_O21\_00893" 10483 "s59E13H2" 0.02127761 "Trifunctional nucleotide phosphoesterase protein YfkN precursor"  
"JS1\_O21\_00893" 10483 "s59E25H2" 0 "Trifunctional nucleotide phosphoesterase protein YfkN precursor"  
"JS1\_O21\_00893" 10483 "s59E5H2" 0.5934893 "Trifunctional nucleotide phosphoesterase protein YfkN precursor"  
"JS1\_O21\_00893" 10483 "s63E6H2" 1.439858 "Trifunctional nucleotide phosphoesterase protein YfkN precursor"

"JS1\_O21\_00894" 10484 "s59E13H2" 0.2263708 "Macrolide export ATP-binding/permease protein MacB"  
"JS1\_O21\_00894" 10484 "s59E25H2" 0.1978654 "Macrolide export ATP-binding/permease protein MacB"  
"JS1\_O21\_00894" 10484 "s59E5H2" 0.7774977 "Macrolide export ATP-binding/permease protein MacB"  
"JS1\_O21\_00894" 10484 "s63E6H2" 0.7796864 "Macrolide export ATP-binding/permease protein MacB"  
"JS1\_O21\_00895" 10485 "s59E13H2" 0.1295197 "putative ABC transporter ATP-binding protein"  
"JS1\_O21\_00895" 10485 "s59E25H2" 0 "putative ABC transporter ATP-binding protein"  
"JS1\_O21\_00895" 10485 "s59E5H2" 0.5187754 "putative ABC transporter ATP-binding protein"  
"JS1\_O21\_00895" 10485 "s63E6H2" 1.337453 "putative ABC transporter ATP-binding protein"  
"JS1\_O21\_00896" 10486 "s59E13H2" 0.1677365 "Cation efflux system protein CusB precursor"  
"JS1\_O21\_00896" 10486 "s59E25H2" 0 "Cation efflux system protein CusB precursor"  
"JS1\_O21\_00896" 10486 "s59E5H2" 0.5288627 "Cation efflux system protein CusB precursor"  
"JS1\_O21\_00896" 10486 "s63E6H2" 0.6055551 "Cation efflux system protein CusB precursor"  
"MCG\_K23\_00003" 21669 "s59E13H2" 0 "Thiamine transporter ThiT"  
"MCG\_K23\_00003" 21669 "s59E25H2" 0 "Thiamine transporter ThiT"  
"MCG\_K23\_00003" 21669 "s59E5H2" 0 "Thiamine transporter ThiT"  
"MCG\_K23\_00003" 21669 "s63E6H2" 0 "Thiamine transporter ThiT"  
"MCG\_K23\_00005" 21671 "s59E13H2" 0 "hypothetical protein"  
"MCG\_K23\_00005" 21671 "s59E25H2" 0 "hypothetical protein"  
"MCG\_K23\_00005" 21671 "s59E5H2" 0 "hypothetical protein"  
"MCG\_K23\_00005" 21671 "s63E6H2" 0 "hypothetical protein"  
"MCG\_K23\_00006" 21672 "s59E13H2" 0 "Malate dehydrogenase"  
"MCG\_K23\_00006" 21672 "s59E25H2" 0 "Malate dehydrogenase"  
"MCG\_K23\_00006" 21672 "s59E5H2" 0 "Malate dehydrogenase"  
"MCG\_K23\_00006" 21672 "s63E6H2" 0 "Malate dehydrogenase"  
"MCG\_K23\_00007" 21673 "s59E13H2" 0 "Nitroreductase family protein"  
"MCG\_K23\_00007" 21673 "s59E25H2" 0 "Nitroreductase family protein"  
"MCG\_K23\_00007" 21673 "s59E5H2" 0 "Nitroreductase family protein"  
"MCG\_K23\_00007" 21673 "s63E6H2" 0 "Nitroreductase family protein"  
"MCG\_K23\_00009" 21675 "s59E13H2" 0 "Iron-binding zinc finger CDGSH type"  
"MCG\_K23\_00009" 21675 "s59E25H2" 0 "Iron-binding zinc finger CDGSH type"  
"MCG\_K23\_00009" 21675 "s59E5H2" 0 "Iron-binding zinc finger CDGSH type"  
"MCG\_K23\_00009" 21675 "s63E6H2" 0 "Iron-binding zinc finger CDGSH type"  
"MCG\_K23\_00010" 21676 "s59E13H2" 0 "hypothetical protein"  
"MCG\_K23\_00010" 21676 "s59E25H2" 0 "hypothetical protein"  
"MCG\_K23\_00010" 21676 "s59E5H2" 0 "hypothetical protein"  
"MCG\_K23\_00010" 21676 "s63E6H2" 0 "hypothetical protein"  
"MCG\_K23\_00011" 21677 "s59E13H2" 0 "Albonoursin synthase"  
"MCG\_K23\_00011" 21677 "s59E25H2" 0 "Albonoursin synthase"  
"MCG\_K23\_00011" 21677 "s59E5H2" 0 "Albonoursin synthase"  
"MCG\_K23\_00011" 21677 "s63E6H2" 0 "Albonoursin synthase"  
"MCG\_K23\_00012" 21678 "s59E13H2" 0 "ABC-2 family transporter protein"  
"MCG\_K23\_00012" 21678 "s59E25H2" 0 "ABC-2 family transporter protein"  
"MCG\_K23\_00012" 21678 "s59E5H2" 0 "ABC-2 family transporter protein"  
"MCG\_K23\_00012" 21678 "s63E6H2" 0 "ABC-2 family transporter protein"  
"MCG\_K23\_00013" 21679 "s59E13H2" 0 "Daunorubicin/doxorubicin resistance ATP-binding protein DrrA"  
"MCG\_K23\_00013" 21679 "s59E25H2" 0 "Daunorubicin/doxorubicin resistance ATP-binding protein DrrA"  
"MCG\_K23\_00013" 21679 "s59E5H2" 0 "Daunorubicin/doxorubicin resistance ATP-binding protein DrrA"

"MCG\_K23\_00013" 21679 "s63E6H2" 0 "Daunorubicin/doxorubicin resistance ATP-binding protein DrrA"  
"MCG\_K23\_00014" 21680 "s59E13H2" 0 "hypothetical protein"  
"MCG\_K23\_00014" 21680 "s59E25H2" 0 "hypothetical protein"  
"MCG\_K23\_00014" 21680 "s59E5H2" 0 "hypothetical protein"  
"MCG\_K23\_00014" 21680 "s63E6H2" 0 "hypothetical protein"  
"MCG\_K23\_00015" 21681 "s59E13H2" 0 "hypothetical protein"  
"MCG\_K23\_00015" 21681 "s59E25H2" 0 "hypothetical protein"  
"MCG\_K23\_00015" 21681 "s59E5H2" 0 "hypothetical protein"  
"MCG\_K23\_00015" 21681 "s63E6H2" 0 "hypothetical protein"  
"MCG\_K23\_00016" 21682 "s59E13H2" 0 "hypothetical protein"  
"MCG\_K23\_00016" 21682 "s59E25H2" 0 "hypothetical protein"  
"MCG\_K23\_00016" 21682 "s59E5H2" 0 "hypothetical protein"  
"MCG\_K23\_00016" 21682 "s63E6H2" 0 "hypothetical protein"  
"MCG\_K23\_00017" 21683 "s59E13H2" 0 "hypothetical protein"  
"MCG\_K23\_00017" 21683 "s59E25H2" 0 "hypothetical protein"  
"MCG\_K23\_00017" 21683 "s59E5H2" 0 "hypothetical protein"  
"MCG\_K23\_00017" 21683 "s63E6H2" 0 "hypothetical protein"  
"MCG\_K23\_00018" 21684 "s59E13H2" 0 "hypothetical protein"  
"MCG\_K23\_00018" 21684 "s59E25H2" 0 "hypothetical protein"  
"MCG\_K23\_00018" 21684 "s59E5H2" 0 "hypothetical protein"  
"MCG\_K23\_00018" 21684 "s63E6H2" 0 "hypothetical protein"  
"MCG\_K23\_00019" 21685 "s59E13H2" 0 "hypothetical protein"  
"MCG\_K23\_00019" 21685 "s59E25H2" 0 "hypothetical protein"  
"MCG\_K23\_00019" 21685 "s59E5H2" 0 "hypothetical protein"  
"MCG\_K23\_00019" 21685 "s63E6H2" 0 "hypothetical protein"  
"MCG\_K23\_00020" 21686 "s59E13H2" 0 "ORC1-type DNA replication protein 1"  
"MCG\_K23\_00020" 21686 "s59E25H2" 0 "ORC1-type DNA replication protein 1"  
"MCG\_K23\_00020" 21686 "s59E5H2" 0 "ORC1-type DNA replication protein 1"  
"MCG\_K23\_00020" 21686 "s63E6H2" 0 "ORC1-type DNA replication protein 1"  
"MCG\_K23\_00021" 21687 "s59E13H2" 0 "Antilisterial bacteriocin subtilisin biosynthesis protein Alba"  
"MCG\_K23\_00021" 21687 "s59E25H2" 0 "Antilisterial bacteriocin subtilisin biosynthesis protein Alba"  
"MCG\_K23\_00021" 21687 "s59E5H2" 0 "Antilisterial bacteriocin subtilisin biosynthesis protein Alba"  
"MCG\_K23\_00021" 21687 "s63E6H2" 0 "Antilisterial bacteriocin subtilisin biosynthesis protein Alba"  
"MCG\_K23\_00022" 21688 "s59E13H2" 0 "hypothetical protein"  
"MCG\_K23\_00022" 21688 "s59E25H2" 0 "hypothetical protein"  
"MCG\_K23\_00022" 21688 "s59E5H2" 0 "hypothetical protein"  
"MCG\_K23\_00022" 21688 "s63E6H2" 0 "hypothetical protein"  
"MCG\_K23\_00023" 21689 "s59E13H2" 0 "hypothetical protein"  
"MCG\_K23\_00023" 21689 "s59E25H2" 0 "hypothetical protein"  
"MCG\_K23\_00023" 21689 "s59E5H2" 0 "hypothetical protein"  
"MCG\_K23\_00023" 21689 "s63E6H2" 0 "hypothetical protein"  
"MCG\_K23\_00024" 21690 "s59E13H2" 0 "Inosine-5'-monophosphate dehydrogenase"  
"MCG\_K23\_00024" 21690 "s59E25H2" 0 "Inosine-5'-monophosphate dehydrogenase"  
"MCG\_K23\_00024" 21690 "s59E5H2" 0 "Inosine-5'-monophosphate dehydrogenase"  
"MCG\_K23\_00024" 21690 "s63E6H2" 0 "Inosine-5'-monophosphate dehydrogenase"  
"MCG\_K23\_00025" 21691 "s59E13H2" 0 "hypothetical protein"  
"MCG\_K23\_00025" 21691 "s59E25H2" 0 "hypothetical protein"

"MCG\_K23\_00025" 21691 "s59E5H2" 0 "hypothetical protein"  
"MCG\_K23\_00025" 21691 "s63E6H2" 0 "hypothetical protein"  
"MCG\_K23\_00026" 21692 "s59E13H2" 0 "putative kinase inhibitor protein"  
"MCG\_K23\_00026" 21692 "s59E25H2" 0 "putative kinase inhibitor protein"  
"MCG\_K23\_00026" 21692 "s59E5H2" 0 "putative kinase inhibitor protein"  
"MCG\_K23\_00026" 21692 "s63E6H2" 0 "putative kinase inhibitor protein"  
"MCG\_K23\_00027" 21693 "s59E13H2" 0 "hypothetical protein"  
"MCG\_K23\_00027" 21693 "s59E25H2" 0 "hypothetical protein"  
"MCG\_K23\_00027" 21693 "s59E5H2" 0 "hypothetical protein"  
"MCG\_K23\_00027" 21693 "s63E6H2" 0 "hypothetical protein"  
"MCG\_K23\_00028" 21694 "s59E13H2" 0 "hypothetical protein"  
"MCG\_K23\_00028" 21694 "s59E25H2" 0 "hypothetical protein"  
"MCG\_K23\_00028" 21694 "s59E5H2" 0 "hypothetical protein"  
"MCG\_K23\_00028" 21694 "s63E6H2" 0 "hypothetical protein"  
"MCG\_K23\_00029" 21695 "s59E13H2" 0 "hypothetical protein"  
"MCG\_K23\_00029" 21695 "s59E25H2" 0 "hypothetical protein"  
"MCG\_K23\_00029" 21695 "s59E5H2" 0 "hypothetical protein"  
"MCG\_K23\_00029" 21695 "s63E6H2" 0 "hypothetical protein"  
"MCG\_K23\_00030" 21696 "s59E13H2" 0 "hypothetical protein"  
"MCG\_K23\_00030" 21696 "s59E25H2" 0 "hypothetical protein"  
"MCG\_K23\_00030" 21696 "s59E5H2" 0 "hypothetical protein"  
"MCG\_K23\_00030" 21696 "s63E6H2" 0 "hypothetical protein"  
"MCG\_K23\_00031" 21697 "s59E13H2" 0 "UDP-N-acetylglucosamine 2-epimerase"  
"MCG\_K23\_00031" 21697 "s59E25H2" 0 "UDP-N-acetylglucosamine 2-epimerase"  
"MCG\_K23\_00031" 21697 "s59E5H2" 0 "UDP-N-acetylglucosamine 2-epimerase"  
"MCG\_K23\_00031" 21697 "s63E6H2" 0 "UDP-N-acetylglucosamine 2-epimerase"  
"MCG\_K23\_00032" 21698 "s59E13H2" 0 "Beta-monoglucosyldiacylglycerol synthase"  
"MCG\_K23\_00032" 21698 "s59E25H2" 0 "Beta-monoglucosyldiacylglycerol synthase"  
"MCG\_K23\_00032" 21698 "s59E5H2" 0 "Beta-monoglucosyldiacylglycerol synthase"  
"MCG\_K23\_00032" 21698 "s63E6H2" 0 "Beta-monoglucosyldiacylglycerol synthase"  
"MCG\_K23\_00036" 21702 "s59E13H2" 0 "hypothetical protein"  
"MCG\_K23\_00036" 21702 "s59E25H2" 0 "hypothetical protein"  
"MCG\_K23\_00036" 21702 "s59E5H2" 0 "hypothetical protein"  
"MCG\_K23\_00036" 21702 "s63E6H2" 0 "hypothetical protein"  
"MCG\_K23\_00040" 21706 "s59E13H2" 0 "hypothetical protein"  
"MCG\_K23\_00040" 21706 "s59E25H2" 0 "hypothetical protein"  
"MCG\_K23\_00040" 21706 "s59E5H2" 0 "hypothetical protein"  
"MCG\_K23\_00040" 21706 "s63E6H2" 0 "hypothetical protein"  
"MCG\_K23\_00042" 21708 "s59E13H2" 0 "hypothetical protein"  
"MCG\_K23\_00042" 21708 "s59E25H2" 0 "hypothetical protein"  
"MCG\_K23\_00042" 21708 "s59E5H2" 0 "hypothetical protein"  
"MCG\_K23\_00042" 21708 "s63E6H2" 0 "hypothetical protein"  
"MCG\_K23\_00047" 21713 "s59E13H2" 0 "hypothetical protein"  
"MCG\_K23\_00047" 21713 "s59E25H2" 0 "hypothetical protein"  
"MCG\_K23\_00047" 21713 "s59E5H2" 0 "hypothetical protein"  
"MCG\_K23\_00047" 21713 "s63E6H2" 0 "hypothetical protein"  
"MCG\_K23\_00048" 21714 "s59E13H2" 0 "Antilisterial bacteriocin subtilisin biosynthesis protein Alba"

"MCG\_K23\_00048" 21714 "s59E25H2" 0 "Antilisterial bacteriocin subtilisin biosynthesis protein Alba"  
"MCG\_K23\_00048" 21714 "s59E5H2" 0 "Antilisterial bacteriocin subtilisin biosynthesis protein Alba"  
"MCG\_K23\_00048" 21714 "s63E6H2" 0 "Antilisterial bacteriocin subtilisin biosynthesis protein Alba"  
"MCG\_K23\_00049" 21715 "s59E13H2" 0 "DNA-directed RNA polymerase subunit H"  
"MCG\_K23\_00049" 21715 "s59E25H2" 0 "DNA-directed RNA polymerase subunit H"  
"MCG\_K23\_00049" 21715 "s59E5H2" 0 "DNA-directed RNA polymerase subunit H"  
"MCG\_K23\_00049" 21715 "s63E6H2" 0 "DNA-directed RNA polymerase subunit H"  
"MCG\_K23\_00051" 21717 "s59E13H2" 0 "hypothetical protein"  
"MCG\_K23\_00051" 21717 "s59E25H2" 0 "hypothetical protein"  
"MCG\_K23\_00051" 21717 "s59E5H2" 0 "hypothetical protein"  
"MCG\_K23\_00051" 21717 "s63E6H2" 0 "hypothetical protein"  
"MCG\_K23\_00052" 21718 "s59E13H2" 0 "Asparagine synthetase B [glutamine-hydrolyzing]"  
"MCG\_K23\_00052" 21718 "s59E25H2" 0 "Asparagine synthetase B [glutamine-hydrolyzing]"  
"MCG\_K23\_00052" 21718 "s59E5H2" 0 "Asparagine synthetase B [glutamine-hydrolyzing]"  
"MCG\_K23\_00052" 21718 "s63E6H2" 0 "Asparagine synthetase B [glutamine-hydrolyzing]"  
"MCG\_K23\_00053" 21719 "s59E13H2" 0 "Adenylosuccinate lyase"  
"MCG\_K23\_00053" 21719 "s59E25H2" 0 "Adenylosuccinate lyase"  
"MCG\_K23\_00053" 21719 "s59E5H2" 0 "Adenylosuccinate lyase"  
"MCG\_K23\_00053" 21719 "s63E6H2" 0 "Adenylosuccinate lyase"  
"MCG\_K23\_00054" 21720 "s59E13H2" 0 "Putative ski2-type helicase"  
"MCG\_K23\_00054" 21720 "s59E25H2" 0 "Putative ski2-type helicase"  
"MCG\_K23\_00054" 21720 "s59E5H2" 0 "Putative ski2-type helicase"  
"MCG\_K23\_00054" 21720 "s63E6H2" 0 "Putative ski2-type helicase"  
"MCG\_K23\_00055" 21721 "s59E13H2" 0 "putative cysteine desulfurase 2"  
"MCG\_K23\_00055" 21721 "s59E25H2" 0 "putative cysteine desulfurase 2"  
"MCG\_K23\_00055" 21721 "s59E5H2" 0 "putative cysteine desulfurase 2"  
"MCG\_K23\_00055" 21721 "s63E6H2" 0 "putative cysteine desulfurase 2"  
"MCG\_K23\_00056" 21722 "s59E13H2" 0 "NifU-like protein"  
"MCG\_K23\_00056" 21722 "s59E25H2" 0 "NifU-like protein"  
"MCG\_K23\_00056" 21722 "s59E5H2" 0 "NifU-like protein"  
"MCG\_K23\_00056" 21722 "s63E6H2" 0 "NifU-like protein"  
"MCG\_K23\_00057" 21723 "s59E13H2" 0 "putative cysteine desulfurase"  
"MCG\_K23\_00057" 21723 "s59E25H2" 0 "putative cysteine desulfurase"  
"MCG\_K23\_00057" 21723 "s59E5H2" 0 "putative cysteine desulfurase"  
"MCG\_K23\_00057" 21723 "s63E6H2" 0 "putative cysteine desulfurase"  
"MCG\_K23\_00059" 21725 "s59E13H2" 0 "D-inositol-3-phosphate glycosyltransferase"  
"MCG\_K23\_00059" 21725 "s59E25H2" 0 "D-inositol-3-phosphate glycosyltransferase"  
"MCG\_K23\_00059" 21725 "s59E5H2" 0 "D-inositol-3-phosphate glycosyltransferase"  
"MCG\_K23\_00059" 21725 "s63E6H2" 0 "D-inositol-3-phosphate glycosyltransferase"  
"MCG\_K23\_00061" 21727 "s59E13H2" 0 "Polysaccharide pyruvyl transferase"  
"MCG\_K23\_00061" 21727 "s59E25H2" 0 "Polysaccharide pyruvyl transferase"  
"MCG\_K23\_00061" 21727 "s59E5H2" 0 "Polysaccharide pyruvyl transferase"  
"MCG\_K23\_00061" 21727 "s63E6H2" 0 "Polysaccharide pyruvyl transferase"  
"MCG\_K23\_00062" 21728 "s59E13H2" 0 "hypothetical protein"  
"MCG\_K23\_00062" 21728 "s59E25H2" 0 "hypothetical protein"  
"MCG\_K23\_00062" 21728 "s59E5H2" 0 "hypothetical protein"  
"MCG\_K23\_00062" 21728 "s63E6H2" 0 "hypothetical protein"

"MCG\_K23\_00063" 21729 "s59E13H2" 0 "hypothetical protein"  
"MCG\_K23\_00063" 21729 "s59E25H2" 0 "hypothetical protein"  
"MCG\_K23\_00063" 21729 "s59E5H2" 0 "hypothetical protein"  
"MCG\_K23\_00063" 21729 "s63E6H2" 0 "hypothetical protein"  
"MCG\_K23\_00064" 21730 "s59E13H2" 0 "hypothetical protein"  
"MCG\_K23\_00064" 21730 "s59E25H2" 0 "hypothetical protein"  
"MCG\_K23\_00064" 21730 "s59E5H2" 0 "hypothetical protein"  
"MCG\_K23\_00064" 21730 "s63E6H2" 0 "hypothetical protein"  
"MCG\_K23\_00065" 21731 "s59E13H2" 0 "D-inositol-3-phosphate glycosyltransferase"  
"MCG\_K23\_00065" 21731 "s59E25H2" 0 "D-inositol-3-phosphate glycosyltransferase"  
"MCG\_K23\_00065" 21731 "s59E5H2" 0 "D-inositol-3-phosphate glycosyltransferase"  
"MCG\_K23\_00065" 21731 "s63E6H2" 0 "D-inositol-3-phosphate glycosyltransferase"  
"MCG\_K23\_00066" 21732 "s59E13H2" 0 "UDP-N-acetyl-D-mannosamine dehydrogenase"  
"MCG\_K23\_00066" 21732 "s59E25H2" 0 "UDP-N-acetyl-D-mannosamine dehydrogenase"  
"MCG\_K23\_00066" 21732 "s59E5H2" 0 "UDP-N-acetyl-D-mannosamine dehydrogenase"  
"MCG\_K23\_00066" 21732 "s63E6H2" 0 "UDP-N-acetyl-D-mannosamine dehydrogenase"  
"MCG\_K23\_00067" 21733 "s59E13H2" 0 "dTDP-3-amino-3,6-dideoxy-alpha-D-galactopyranose 3-N-acetyltransferase"  
"MCG\_K23\_00067" 21733 "s59E25H2" 0 "dTDP-3-amino-3,6-dideoxy-alpha-D-galactopyranose 3-N-acetyltransferase"  
"MCG\_K23\_00067" 21733 "s59E5H2" 0 "dTDP-3-amino-3,6-dideoxy-alpha-D-galactopyranose 3-N-acetyltransferase"  
"MCG\_K23\_00067" 21733 "s63E6H2" 0 "dTDP-3-amino-3,6-dideoxy-alpha-D-galactopyranose 3-N-acetyltransferase"  
"MCG\_K23\_00068" 21734 "s59E13H2" 0 "hypothetical protein"  
"MCG\_K23\_00068" 21734 "s59E25H2" 0 "hypothetical protein"  
"MCG\_K23\_00068" 21734 "s59E5H2" 0 "hypothetical protein"  
"MCG\_K23\_00068" 21734 "s63E6H2" 0 "hypothetical protein"  
"MCG\_K23\_00070" 21736 "s59E13H2" 0 "hypothetical protein"  
"MCG\_K23\_00070" 21736 "s59E25H2" 0 "hypothetical protein"  
"MCG\_K23\_00070" 21736 "s59E5H2" 0 "hypothetical protein"  
"MCG\_K23\_00070" 21736 "s63E6H2" 0 "hypothetical protein"  
"MCG\_K23\_00072" 21738 "s59E13H2" 0 "hypothetical protein"  
"MCG\_K23\_00072" 21738 "s59E25H2" 0 "hypothetical protein"  
"MCG\_K23\_00072" 21738 "s59E5H2" 0 "hypothetical protein"  
"MCG\_K23\_00072" 21738 "s63E6H2" 0 "hypothetical protein"  
"MCG\_K23\_00073" 21739 "s59E13H2" 0 "hypothetical protein"  
"MCG\_K23\_00073" 21739 "s59E25H2" 0 "hypothetical protein"  
"MCG\_K23\_00073" 21739 "s59E5H2" 0 "hypothetical protein"  
"MCG\_K23\_00073" 21739 "s63E6H2" 0 "hypothetical protein"  
"MCG\_K23\_00074" 21740 "s59E13H2" 0 "hypothetical protein"  
"MCG\_K23\_00074" 21740 "s59E25H2" 0 "hypothetical protein"  
"MCG\_K23\_00074" 21740 "s59E5H2" 0 "hypothetical protein"  
"MCG\_K23\_00074" 21740 "s63E6H2" 0 "hypothetical protein"  
"MCG\_K23\_00079" 21745 "s59E13H2" 0 "Inner membrane transport permease YbhR"  
"MCG\_K23\_00079" 21745 "s59E25H2" 0 "Inner membrane transport permease YbhR"  
"MCG\_K23\_00079" 21745 "s59E5H2" 0 "Inner membrane transport permease YbhR"  
"MCG\_K23\_00079" 21745 "s63E6H2" 0 "Inner membrane transport permease YbhR"  
"MCG\_K23\_00080" 21746 "s59E13H2" 0 "Daunorubicin/doxorubicin resistance ATP-binding protein DrrA"  
"MCG\_K23\_00080" 21746 "s59E25H2" 0 "Daunorubicin/doxorubicin resistance ATP-binding protein DrrA"  
"MCG\_K23\_00080" 21746 "s59E5H2" 0 "Daunorubicin/doxorubicin resistance ATP-binding protein DrrA"



"MCG\_K23\_00080" 21746 "s63E6H2" 0 "Daunorubicin/doxorubicin resistance ATP-binding protein DrrA"  
"MCG\_K23\_00081" 21747 "s59E13H2" 0 "Transcriptional regulator YqjI"  
"MCG\_K23\_00081" 21747 "s59E25H2" 0 "Transcriptional regulator YqjI"  
"MCG\_K23\_00081" 21747 "s59E5H2" 0 "Transcriptional regulator YqjI"  
"MCG\_K23\_00081" 21747 "s63E6H2" 0 "Transcriptional regulator YqjI"  
"MCG\_K23\_00082" 21748 "s59E13H2" 0 "putative ABC transporter ATP-binding protein YbhF"  
"MCG\_K23\_00082" 21748 "s59E25H2" 0 "putative ABC transporter ATP-binding protein YbhF"  
"MCG\_K23\_00082" 21748 "s59E5H2" 0 "putative ABC transporter ATP-binding protein YbhF"  
"MCG\_K23\_00082" 21748 "s63E6H2" 0 "putative ABC transporter ATP-binding protein YbhF"  
"MCG\_K23\_00083" 21749 "s59E13H2" 0 "hypothetical protein"  
"MCG\_K23\_00083" 21749 "s59E25H2" 0 "hypothetical protein"  
"MCG\_K23\_00083" 21749 "s59E5H2" 0 "hypothetical protein"  
"MCG\_K23\_00083" 21749 "s63E6H2" 0 "hypothetical protein"  
"MCG\_K23\_00084" 21750 "s59E13H2" 0 "hypothetical protein"  
"MCG\_K23\_00084" 21750 "s59E25H2" 0 "hypothetical protein"  
"MCG\_K23\_00084" 21750 "s59E5H2" 0 "hypothetical protein"  
"MCG\_K23\_00084" 21750 "s63E6H2" 0 "hypothetical protein"  
"MCG\_K23\_00085" 21751 "s59E13H2" 0 "tRNA 2'-O-methylase"  
"MCG\_K23\_00085" 21751 "s59E25H2" 0 "tRNA 2'-O-methylase"  
"MCG\_K23\_00085" 21751 "s59E5H2" 0 "tRNA 2'-O-methylase"  
"MCG\_K23\_00085" 21751 "s63E6H2" 0 "tRNA 2'-O-methylase"  
"MCG\_K23\_00086" 21752 "s59E13H2" 0 "Transcription factor E"  
"MCG\_K23\_00086" 21752 "s59E25H2" 0 "Transcription factor E"  
"MCG\_K23\_00086" 21752 "s59E5H2" 0 "Transcription factor E"  
"MCG\_K23\_00086" 21752 "s63E6H2" 0 "Transcription factor E"  
"MCG\_K23\_00087" 21753 "s59E13H2" 0 "tRNA (cytidine(56)-2'-O)-methyltransferase"  
"MCG\_K23\_00087" 21753 "s59E25H2" 0 "tRNA (cytidine(56)-2'-O)-methyltransferase"  
"MCG\_K23\_00087" 21753 "s59E5H2" 0 "tRNA (cytidine(56)-2'-O)-methyltransferase"  
"MCG\_K23\_00087" 21753 "s63E6H2" 0 "tRNA (cytidine(56)-2'-O)-methyltransferase"  
"MCG\_K23\_00088" 21754 "s59E13H2" 0 "GTPase HflX"  
"MCG\_K23\_00088" 21754 "s59E25H2" 0 "GTPase HflX"  
"MCG\_K23\_00088" 21754 "s59E5H2" 0 "GTPase HflX"  
"MCG\_K23\_00088" 21754 "s63E6H2" 0 "GTPase HflX"  
"MCG\_K23\_00089" 21755 "s59E13H2" 0 "transcription factor"  
"MCG\_K23\_00089" 21755 "s59E25H2" 0 "transcription factor"  
"MCG\_K23\_00089" 21755 "s59E5H2" 0 "transcription factor"  
"MCG\_K23\_00089" 21755 "s63E6H2" 0 "transcription factor"  
"MCG\_K23\_00090" 21756 "s59E13H2" 0 "tRNA-guanine(15) transglycosylase"  
"MCG\_K23\_00090" 21756 "s59E25H2" 0 "tRNA-guanine(15) transglycosylase"  
"MCG\_K23\_00090" 21756 "s59E5H2" 0 "tRNA-guanine(15) transglycosylase"  
"MCG\_K23\_00090" 21756 "s63E6H2" 0 "tRNA-guanine(15) transglycosylase"  
"MCG\_K23\_00091" 21757 "s59E13H2" 0 "Nascent polypeptide-associated complex protein"  
"MCG\_K23\_00091" 21757 "s59E25H2" 0 "Nascent polypeptide-associated complex protein"  
"MCG\_K23\_00091" 21757 "s59E5H2" 0 "Nascent polypeptide-associated complex protein"  
"MCG\_K23\_00091" 21757 "s63E6H2" 0 "Nascent polypeptide-associated complex protein"  
"MCG\_K23\_00092" 21758 "s59E13H2" 0 "putative sugar kinase"  
"MCG\_K23\_00092" 21758 "s59E25H2" 0 "putative sugar kinase"

"MCG\_K23\_00092" 21758 "s59E5H2" 0 "putative sugar kinase"  
"MCG\_K23\_00092" 21758 "s63E6H2" 0 "putative sugar kinase"  
"MCG\_K23\_00094" 21760 "s59E13H2" 0 "Threonine--tRNA ligase"  
"MCG\_K23\_00094" 21760 "s59E25H2" 0 "Threonine--tRNA ligase"  
"MCG\_K23\_00094" 21760 "s59E5H2" 0 "Threonine--tRNA ligase"  
"MCG\_K23\_00094" 21760 "s63E6H2" 0 "Threonine--tRNA ligase"  
"MCG\_K23\_00095" 21761 "s59E13H2" 0 "Branched-chain-amino-acid aminotransferase"  
"MCG\_K23\_00095" 21761 "s59E25H2" 0 "Branched-chain-amino-acid aminotransferase"  
"MCG\_K23\_00095" 21761 "s59E5H2" 0 "Branched-chain-amino-acid aminotransferase"  
"MCG\_K23\_00095" 21761 "s63E6H2" 0 "Branched-chain-amino-acid aminotransferase"  
"MCG\_K23\_00096" 21762 "s59E13H2" 0 "Glutamate-pyruvate aminotransferase AlaA"  
"MCG\_K23\_00096" 21762 "s59E25H2" 0 "Glutamate-pyruvate aminotransferase AlaA"  
"MCG\_K23\_00096" 21762 "s59E5H2" 0 "Glutamate-pyruvate aminotransferase AlaA"  
"MCG\_K23\_00096" 21762 "s63E6H2" 0 "Glutamate-pyruvate aminotransferase AlaA"  
"MCG\_K23\_00097" 21763 "s59E13H2" 0 "Proline--tRNA ligase"  
"MCG\_K23\_00097" 21763 "s59E25H2" 0 "Proline--tRNA ligase"  
"MCG\_K23\_00097" 21763 "s59E5H2" 0 "Proline--tRNA ligase"  
"MCG\_K23\_00097" 21763 "s63E6H2" 0 "Proline--tRNA ligase"  
"MCG\_K23\_00098" 21764 "s59E13H2" 0 "hypothetical protein"  
"MCG\_K23\_00098" 21764 "s59E25H2" 0 "hypothetical protein"  
"MCG\_K23\_00098" 21764 "s59E5H2" 0 "hypothetical protein"  
"MCG\_K23\_00098" 21764 "s63E6H2" 0 "hypothetical protein"  
"MCG\_K23\_00099" 21765 "s59E13H2" 0 "Peptidyl-prolyl cis-trans isomerase A precursor"  
"MCG\_K23\_00099" 21765 "s59E25H2" 0 "Peptidyl-prolyl cis-trans isomerase A precursor"  
"MCG\_K23\_00099" 21765 "s59E5H2" 0 "Peptidyl-prolyl cis-trans isomerase A precursor"  
"MCG\_K23\_00099" 21765 "s63E6H2" 0.003602542 "Peptidyl-prolyl cis-trans isomerase A precursor"  
"MCG\_K23\_00101" 21767 "s59E13H2" 0 "hypothetical protein"  
"MCG\_K23\_00101" 21767 "s59E25H2" 0 "hypothetical protein"  
"MCG\_K23\_00101" 21767 "s59E5H2" 0 "hypothetical protein"  
"MCG\_K23\_00101" 21767 "s63E6H2" 0 "hypothetical protein"  
"MCG\_K23\_00102" 21768 "s59E13H2" 0 "hypothetical protein"  
"MCG\_K23\_00102" 21768 "s59E25H2" 0 "hypothetical protein"  
"MCG\_K23\_00102" 21768 "s59E5H2" 0 "hypothetical protein"  
"MCG\_K23\_00102" 21768 "s63E6H2" 0 "hypothetical protein"  
"MCG\_K23\_00103" 21769 "s59E13H2" 0 "lineage-specific thermal regulator protein"  
"MCG\_K23\_00103" 21769 "s59E25H2" 0 "lineage-specific thermal regulator protein"  
"MCG\_K23\_00103" 21769 "s59E5H2" 0 "lineage-specific thermal regulator protein"  
"MCG\_K23\_00103" 21769 "s63E6H2" 0 "lineage-specific thermal regulator protein"  
"MCG\_K23\_00105" 21771 "s59E13H2" 0 "NADP-reducing hydrogenase subunit HndC"  
"MCG\_K23\_00105" 21771 "s59E25H2" 0 "NADP-reducing hydrogenase subunit HndC"  
"MCG\_K23\_00105" 21771 "s59E5H2" 0 "NADP-reducing hydrogenase subunit HndC"  
"MCG\_K23\_00105" 21771 "s63E6H2" 0 "NADP-reducing hydrogenase subunit HndC"  
"MCG\_K23\_00106" 21772 "s59E13H2" 0 "F(420)H(2) dehydrogenase subunit F"  
"MCG\_K23\_00106" 21772 "s59E25H2" 0 "F(420)H(2) dehydrogenase subunit F"  
"MCG\_K23\_00106" 21772 "s59E5H2" 0 "F(420)H(2) dehydrogenase subunit F"  
"MCG\_K23\_00106" 21772 "s63E6H2" 0 "F(420)H(2) dehydrogenase subunit F"  
"MCG\_K23\_00107" 21773 "s59E13H2" 0 "Diaminopimelate decarboxylase"

"MCG\_K23\_00107" 21773 "s59E25H2" 0 "Diaminopimelate decarboxylase"  
"MCG\_K23\_00107" 21773 "s59E5H2" 0 "Diaminopimelate decarboxylase"  
"MCG\_K23\_00107" 21773 "s63E6H2" 0 "Diaminopimelate decarboxylase"  
"MCG\_K23\_00108" 21774 "s59E13H2" 0 "Diaminopimelate epimerase"  
"MCG\_K23\_00108" 21774 "s59E25H2" 0 "Diaminopimelate epimerase"  
"MCG\_K23\_00108" 21774 "s59E5H2" 0 "Diaminopimelate epimerase"  
"MCG\_K23\_00108" 21774 "s63E6H2" 0 "Diaminopimelate epimerase"  
"MCG\_K23\_00109" 21775 "s59E13H2" 0 "LL-diaminopimelate aminotransferase"  
"MCG\_K23\_00109" 21775 "s59E25H2" 0 "LL-diaminopimelate aminotransferase"  
"MCG\_K23\_00109" 21775 "s59E5H2" 0 "LL-diaminopimelate aminotransferase"  
"MCG\_K23\_00109" 21775 "s63E6H2" 0 "LL-diaminopimelate aminotransferase"  
"MCG\_K23\_00110" 21776 "s59E13H2" 0 "F420-dependent methylenetetrahydromethanopterin dehydrogenase"  
"MCG\_K23\_00110" 21776 "s59E25H2" 0 "F420-dependent methylenetetrahydromethanopterin dehydrogenase"  
"MCG\_K23\_00110" 21776 "s59E5H2" 0 "F420-dependent methylenetetrahydromethanopterin dehydrogenase"  
"MCG\_K23\_00110" 21776 "s63E6H2" 0 "F420-dependent methylenetetrahydromethanopterin dehydrogenase"  
"MCG\_K23\_00111" 21777 "s59E13H2" 0 "Tetrahedral aminopeptidase"  
"MCG\_K23\_00111" 21777 "s59E25H2" 0 "Tetrahedral aminopeptidase"  
"MCG\_K23\_00111" 21777 "s59E5H2" 0 "Tetrahedral aminopeptidase"  
"MCG\_K23\_00111" 21777 "s63E6H2" 0 "Tetrahedral aminopeptidase"  
"MCG\_K23\_00112" 21778 "s59E13H2" 0 "hypothetical protein"  
"MCG\_K23\_00112" 21778 "s59E25H2" 0 "hypothetical protein"  
"MCG\_K23\_00112" 21778 "s59E5H2" 0 "hypothetical protein"  
"MCG\_K23\_00112" 21778 "s63E6H2" 0 "hypothetical protein"  
"MCG\_K23\_00113" 21779 "s59E13H2" 0 "Adenylate kinase"  
"MCG\_K23\_00113" 21779 "s59E25H2" 0 "Adenylate kinase"  
"MCG\_K23\_00113" 21779 "s59E5H2" 0 "Adenylate kinase"  
"MCG\_K23\_00113" 21779 "s63E6H2" 0 "Adenylate kinase"  
"MCG\_K23\_00114" 21780 "s59E13H2" 0 "tRNA-splicing ligase RtcB"  
"MCG\_K23\_00114" 21780 "s59E25H2" 0 "tRNA-splicing ligase RtcB"  
"MCG\_K23\_00114" 21780 "s59E5H2" 0 "tRNA-splicing ligase RtcB"  
"MCG\_K23\_00114" 21780 "s63E6H2" 0 "tRNA-splicing ligase RtcB"  
"MCG\_K23\_00115" 21781 "s59E13H2" 0 "hypothetical protein"  
"MCG\_K23\_00115" 21781 "s59E25H2" 0 "hypothetical protein"  
"MCG\_K23\_00115" 21781 "s59E5H2" 0 "hypothetical protein"  
"MCG\_K23\_00115" 21781 "s63E6H2" 0 "hypothetical protein"  
"MCG\_K23\_00118" 21784 "s59E13H2" 0 "hypothetical protein"  
"MCG\_K23\_00118" 21784 "s59E25H2" 0 "hypothetical protein"  
"MCG\_K23\_00118" 21784 "s59E5H2" 0 "hypothetical protein"  
"MCG\_K23\_00118" 21784 "s63E6H2" 0 "hypothetical protein"  
"MCG\_K23\_00119" 21785 "s59E13H2" 0 "hypothetical protein"  
"MCG\_K23\_00119" 21785 "s59E25H2" 0 "hypothetical protein"  
"MCG\_K23\_00119" 21785 "s59E5H2" 0 "hypothetical protein"  
"MCG\_K23\_00119" 21785 "s63E6H2" 0 "hypothetical protein"  
"MCG\_K23\_00120" 21786 "s59E13H2" 0 "hypothetical protein"  
"MCG\_K23\_00120" 21786 "s59E25H2" 0 "hypothetical protein"  
"MCG\_K23\_00120" 21786 "s59E5H2" 0 "hypothetical protein"  
"MCG\_K23\_00120" 21786 "s63E6H2" 0 "hypothetical protein"

"MCG\_K23\_00123" 21789 "s59E13H2" 0 "hypothetical protein"  
"MCG\_K23\_00123" 21789 "s59E25H2" 0 "hypothetical protein"  
"MCG\_K23\_00123" 21789 "s59E5H2" 0 "hypothetical protein"  
"MCG\_K23\_00123" 21789 "s63E6H2" 0 "hypothetical protein"  
"MCG\_K23\_00124" 21790 "s59E13H2" 0 "N-acetylneuraminase"  
"MCG\_K23\_00124" 21790 "s59E25H2" 0 "N-acetylneuraminase"  
"MCG\_K23\_00124" 21790 "s59E5H2" 0 "N-acetylneuraminase"  
"MCG\_K23\_00124" 21790 "s63E6H2" 0 "N-acetylneuraminase"  
"MCG\_K23\_00125" 21791 "s59E13H2" 0 "hypothetical protein"  
"MCG\_K23\_00125" 21791 "s59E25H2" 0 "hypothetical protein"  
"MCG\_K23\_00125" 21791 "s59E5H2" 0 "hypothetical protein"  
"MCG\_K23\_00125" 21791 "s63E6H2" 0 "hypothetical protein"  
"MCG\_K23\_00126" 21792 "s59E13H2" 0 "hypothetical protein"  
"MCG\_K23\_00126" 21792 "s59E25H2" 0 "hypothetical protein"  
"MCG\_K23\_00126" 21792 "s59E5H2" 0 "hypothetical protein"  
"MCG\_K23\_00126" 21792 "s63E6H2" 0 "hypothetical protein"  
"MCG\_K23\_00127" 21793 "s59E13H2" 0 "hypothetical protein"  
"MCG\_K23\_00127" 21793 "s59E25H2" 0 "hypothetical protein"  
"MCG\_K23\_00127" 21793 "s59E5H2" 0 "hypothetical protein"  
"MCG\_K23\_00127" 21793 "s63E6H2" 0 "hypothetical protein"  
"MCG\_K23\_00129" 21795 "s59E13H2" 0 "hypothetical protein"  
"MCG\_K23\_00129" 21795 "s59E25H2" 0 "hypothetical protein"  
"MCG\_K23\_00129" 21795 "s59E5H2" 0 "hypothetical protein"  
"MCG\_K23\_00129" 21795 "s63E6H2" 0 "hypothetical protein"  
"MCG\_K23\_00132" 21798 "s59E13H2" 0 "EcoKI restriction-modification system protein HsdS"  
"MCG\_K23\_00132" 21798 "s59E25H2" 0 "EcoKI restriction-modification system protein HsdS"  
"MCG\_K23\_00132" 21798 "s59E5H2" 0 "EcoKI restriction-modification system protein HsdS"  
"MCG\_K23\_00132" 21798 "s63E6H2" 0 "EcoKI restriction-modification system protein HsdS"  
"MCG\_K23\_00133" 21799 "s59E13H2" 0 "hypothetical protein"  
"MCG\_K23\_00133" 21799 "s59E25H2" 0 "hypothetical protein"  
"MCG\_K23\_00133" 21799 "s59E5H2" 0 "hypothetical protein"  
"MCG\_K23\_00133" 21799 "s63E6H2" 0 "hypothetical protein"  
"MCG\_K23\_00134" 21800 "s59E13H2" 0 "Iron-sulfur flavoprotein"  
"MCG\_K23\_00134" 21800 "s59E25H2" 0 "Iron-sulfur flavoprotein"  
"MCG\_K23\_00134" 21800 "s59E5H2" 0.008600881 "Iron-sulfur flavoprotein"  
"MCG\_K23\_00134" 21800 "s63E6H2" 0 "Iron-sulfur flavoprotein"  
"MCG\_K23\_00138" 21804 "s59E13H2" 0 "anhydro-N-acetylmuramic acid kinase"  
"MCG\_K23\_00138" 21804 "s59E25H2" 0 "anhydro-N-acetylmuramic acid kinase"  
"MCG\_K23\_00138" 21804 "s59E5H2" 0 "anhydro-N-acetylmuramic acid kinase"  
"MCG\_K23\_00138" 21804 "s63E6H2" 0 "anhydro-N-acetylmuramic acid kinase"  
"MCG\_K23\_00140" 21806 "s59E13H2" 0 "PQQ enzyme repeat protein"  
"MCG\_K23\_00140" 21806 "s59E25H2" 0 "PQQ enzyme repeat protein"  
"MCG\_K23\_00140" 21806 "s59E5H2" 0 "PQQ enzyme repeat protein"  
"MCG\_K23\_00140" 21806 "s63E6H2" 0 "PQQ enzyme repeat protein"  
"MCG\_K23\_00141" 21807 "s59E13H2" 0 "Cupin domain protein"  
"MCG\_K23\_00141" 21807 "s59E25H2" 0 "Cupin domain protein"  
"MCG\_K23\_00141" 21807 "s59E5H2" 0 "Cupin domain protein"

"MCG\_K23\_00141" 21807 "s63E6H2" 0 "Cupin domain protein"  
"MCG\_K23\_00142" 21808 "s59E13H2" 0 "Glycosyltransferase AgIG"  
"MCG\_K23\_00142" 21808 "s59E25H2" 0 "Glycosyltransferase AgIG"  
"MCG\_K23\_00142" 21808 "s59E5H2" 0 "Glycosyltransferase AgIG"  
"MCG\_K23\_00142" 21808 "s63E6H2" 0 "Glycosyltransferase AgIG"  
"MCG\_K23\_00143" 21809 "s59E13H2" 0 "hypothetical protein"  
"MCG\_K23\_00143" 21809 "s59E25H2" 0 "hypothetical protein"  
"MCG\_K23\_00143" 21809 "s59E5H2" 0 "hypothetical protein"  
"MCG\_K23\_00143" 21809 "s63E6H2" 0 "hypothetical protein"  
"MCG\_K23\_00145" 21811 "s59E13H2" 0 "hypothetical protein"  
"MCG\_K23\_00145" 21811 "s59E25H2" 0 "hypothetical protein"  
"MCG\_K23\_00145" 21811 "s59E5H2" 0 "hypothetical protein"  
"MCG\_K23\_00145" 21811 "s63E6H2" 0 "hypothetical protein"  
"MCG\_K23\_00148" 21814 "s59E13H2" 0 "Archaeal histone A"  
"MCG\_K23\_00148" 21814 "s59E25H2" 0 "Archaeal histone A"  
"MCG\_K23\_00148" 21814 "s59E5H2" 0 "Archaeal histone A"  
"MCG\_K23\_00148" 21814 "s63E6H2" 0 "Archaeal histone A"  
"MCG\_K23\_00149" 21815 "s59E13H2" 0 "hypothetical protein"  
"MCG\_K23\_00149" 21815 "s59E25H2" 0 "hypothetical protein"  
"MCG\_K23\_00149" 21815 "s59E5H2" 0 "hypothetical protein"  
"MCG\_K23\_00149" 21815 "s63E6H2" 0 "hypothetical protein"  
"MCG\_K23\_00150" 21816 "s59E13H2" 0 "Poly-beta-1,6-N-acetyl-D-glucosamine synthase"  
"MCG\_K23\_00150" 21816 "s59E25H2" 0 "Poly-beta-1,6-N-acetyl-D-glucosamine synthase"  
"MCG\_K23\_00150" 21816 "s59E5H2" 0 "Poly-beta-1,6-N-acetyl-D-glucosamine synthase"  
"MCG\_K23\_00150" 21816 "s63E6H2" 0 "Poly-beta-1,6-N-acetyl-D-glucosamine synthase"  
"MCG\_K23\_00151" 21817 "s59E13H2" 0 "hypothetical protein"  
"MCG\_K23\_00151" 21817 "s59E25H2" 0 "hypothetical protein"  
"MCG\_K23\_00151" 21817 "s59E5H2" 0 "hypothetical protein"  
"MCG\_K23\_00151" 21817 "s63E6H2" 0 "hypothetical protein"  
"MCG\_K23\_00152" 21818 "s59E13H2" 0 "Acetyltransferase (GNAT) family protein"  
"MCG\_K23\_00152" 21818 "s59E25H2" 0 "Acetyltransferase (GNAT) family protein"  
"MCG\_K23\_00152" 21818 "s59E5H2" 0 "Acetyltransferase (GNAT) family protein"  
"MCG\_K23\_00152" 21818 "s63E6H2" 0 "Acetyltransferase (GNAT) family protein"  
"MCG\_K23\_00153" 21819 "s59E13H2" 0 "Acetoin utilization protein AcuC"  
"MCG\_K23\_00153" 21819 "s59E25H2" 0 "Acetoin utilization protein AcuC"  
"MCG\_K23\_00153" 21819 "s59E5H2" 0 "Acetoin utilization protein AcuC"  
"MCG\_K23\_00153" 21819 "s63E6H2" 0 "Acetoin utilization protein AcuC"  
"MCG\_K23\_00154" 21820 "s59E13H2" 0 "hypothetical protein"  
"MCG\_K23\_00154" 21820 "s59E25H2" 0 "hypothetical protein"  
"MCG\_K23\_00154" 21820 "s59E5H2" 0 "hypothetical protein"  
"MCG\_K23\_00154" 21820 "s63E6H2" 0 "hypothetical protein"  
"MCG\_K23\_00158" 21824 "s59E13H2" 0 "hypothetical protein"  
"MCG\_K23\_00158" 21824 "s59E25H2" 0 "hypothetical protein"  
"MCG\_K23\_00158" 21824 "s59E5H2" 0 "hypothetical protein"  
"MCG\_K23\_00158" 21824 "s63E6H2" 0 "hypothetical protein"  
"MCG\_K23\_00159" 21825 "s59E13H2" 0 "Periplasmic copper-binding protein (NosD)"  
"MCG\_K23\_00159" 21825 "s59E25H2" 0 "Periplasmic copper-binding protein (NosD)"

"MCG\_K23\_00159" 21825 "s59E5H2" 0 "Periplasmic copper-binding protein (NosD)"  
"MCG\_K23\_00159" 21825 "s63E6H2" 0 "Periplasmic copper-binding protein (NosD)"  
"MCG\_K23\_00160" 21826 "s59E13H2" 0 "hypothetical protein"  
"MCG\_K23\_00160" 21826 "s59E25H2" 0 "hypothetical protein"  
"MCG\_K23\_00160" 21826 "s59E5H2" 0 "hypothetical protein"  
"MCG\_K23\_00160" 21826 "s63E6H2" 0 "hypothetical protein"  
"MCG\_K23\_00163" 21829 "s59E13H2" 0 "hypothetical protein"  
"MCG\_K23\_00163" 21829 "s59E25H2" 0 "hypothetical protein"  
"MCG\_K23\_00163" 21829 "s59E5H2" 0 "hypothetical protein"  
"MCG\_K23\_00163" 21829 "s63E6H2" 0 "hypothetical protein"  
"MCG\_K23\_00164" 21830 "s59E13H2" 0 "hypothetical protein"  
"MCG\_K23\_00164" 21830 "s59E25H2" 0 "hypothetical protein"  
"MCG\_K23\_00164" 21830 "s59E5H2" 0 "hypothetical protein"  
"MCG\_K23\_00164" 21830 "s63E6H2" 0 "hypothetical protein"  
"MCG\_K23\_00165" 21831 "s59E13H2" 0 "hypothetical protein"  
"MCG\_K23\_00165" 21831 "s59E25H2" 0 "hypothetical protein"  
"MCG\_K23\_00165" 21831 "s59E5H2" 0 "hypothetical protein"  
"MCG\_K23\_00165" 21831 "s63E6H2" 0 "hypothetical protein"  
"MCG\_K23\_00166" 21832 "s59E13H2" 0 "hypothetical protein"  
"MCG\_K23\_00166" 21832 "s59E25H2" 0 "hypothetical protein"  
"MCG\_K23\_00166" 21832 "s59E5H2" 0 "hypothetical protein"  
"MCG\_K23\_00166" 21832 "s63E6H2" 0 "hypothetical protein"  
"MCG\_K23\_00167" 21833 "s59E13H2" 0 "hypothetical protein"  
"MCG\_K23\_00167" 21833 "s59E25H2" 0 "hypothetical protein"  
"MCG\_K23\_00167" 21833 "s59E5H2" 0 "hypothetical protein"  
"MCG\_K23\_00167" 21833 "s63E6H2" 0 "hypothetical protein"  
"MCG\_K23\_00168" 21834 "s59E13H2" 0 "L-lysine 2,3-aminomutase"  
"MCG\_K23\_00168" 21834 "s59E25H2" 0 "L-lysine 2,3-aminomutase"  
"MCG\_K23\_00168" 21834 "s59E5H2" 0 "L-lysine 2,3-aminomutase"  
"MCG\_K23\_00168" 21834 "s63E6H2" 0 "L-lysine 2,3-aminomutase"  
"MCG\_K23\_00169" 21835 "s59E13H2" 0 "L-2,4-diaminobutyric acid acetyltransferase"  
"MCG\_K23\_00169" 21835 "s59E25H2" 0 "L-2,4-diaminobutyric acid acetyltransferase"  
"MCG\_K23\_00169" 21835 "s59E5H2" 0 "L-2,4-diaminobutyric acid acetyltransferase"  
"MCG\_K23\_00169" 21835 "s63E6H2" 0 "L-2,4-diaminobutyric acid acetyltransferase"  
"MCG\_K23\_00171" 21837 "s59E13H2" 0 "hypothetical protein"  
"MCG\_K23\_00171" 21837 "s59E25H2" 0 "hypothetical protein"  
"MCG\_K23\_00171" 21837 "s59E5H2" 0 "hypothetical protein"  
"MCG\_K23\_00171" 21837 "s63E6H2" 0 "hypothetical protein"  
"MCG\_K23\_00172" 21838 "s59E13H2" 0 "Sarcosine/dimethylglycine N-methyltransferase"  
"MCG\_K23\_00172" 21838 "s59E25H2" 0 "Sarcosine/dimethylglycine N-methyltransferase"  
"MCG\_K23\_00172" 21838 "s59E5H2" 0 "Sarcosine/dimethylglycine N-methyltransferase"  
"MCG\_K23\_00172" 21838 "s63E6H2" 0 "Sarcosine/dimethylglycine N-methyltransferase"  
"MCG\_K23\_00173" 21839 "s59E13H2" 0 "hypothetical protein"  
"MCG\_K23\_00173" 21839 "s59E25H2" 0 "hypothetical protein"  
"MCG\_K23\_00173" 21839 "s59E5H2" 0 "hypothetical protein"  
"MCG\_K23\_00173" 21839 "s63E6H2" 0 "hypothetical protein"  
"MCG\_K23\_00174" 21840 "s59E13H2" 0 "hypothetical protein"

"MCG\_K23\_00174" 21840 "s59E25H2" 0 "hypothetical protein"  
"MCG\_K23\_00174" 21840 "s59E5H2" 0 "hypothetical protein"  
"MCG\_K23\_00174" 21840 "s63E6H2" 0 "hypothetical protein"  
"MCG\_K23\_00175" 21841 "s59E13H2" 0 "KaiC"  
"MCG\_K23\_00175" 21841 "s59E25H2" 0 "KaiC"  
"MCG\_K23\_00175" 21841 "s59E5H2" 0 "KaiC"  
"MCG\_K23\_00175" 21841 "s63E6H2" 0 "KaiC"  
"MCG\_K23\_00176" 21842 "s59E13H2" 0 "hypothetical protein"  
"MCG\_K23\_00176" 21842 "s59E25H2" 0 "hypothetical protein"  
"MCG\_K23\_00176" 21842 "s59E5H2" 0 "hypothetical protein"  
"MCG\_K23\_00176" 21842 "s63E6H2" 0 "hypothetical protein"  
"MCG\_K23\_00177" 21843 "s59E13H2" 0 "hypothetical protein"  
"MCG\_K23\_00177" 21843 "s59E25H2" 0 "hypothetical protein"  
"MCG\_K23\_00177" 21843 "s59E5H2" 0 "hypothetical protein"  
"MCG\_K23\_00177" 21843 "s63E6H2" 0 "hypothetical protein"  
"MCG\_K23\_00178" 21844 "s59E13H2" 0 "hypothetical protein"  
"MCG\_K23\_00178" 21844 "s59E25H2" 0 "hypothetical protein"  
"MCG\_K23\_00178" 21844 "s59E5H2" 0 "hypothetical protein"  
"MCG\_K23\_00178" 21844 "s63E6H2" 0 "hypothetical protein"  
"MCG\_K23\_00179" 21845 "s59E13H2" 0 "Copper-exporting P-type ATPase B"  
"MCG\_K23\_00179" 21845 "s59E25H2" 0 "Copper-exporting P-type ATPase B"  
"MCG\_K23\_00179" 21845 "s59E5H2" 0 "Copper-exporting P-type ATPase B"  
"MCG\_K23\_00179" 21845 "s63E6H2" 0 "Copper-exporting P-type ATPase B"  
"MCG\_K23\_00181" 21847 "s59E13H2" 0 "TATA-box-binding protein"  
"MCG\_K23\_00181" 21847 "s59E25H2" 0 "TATA-box-binding protein"  
"MCG\_K23\_00181" 21847 "s59E5H2" 0 "TATA-box-binding protein"  
"MCG\_K23\_00181" 21847 "s63E6H2" 0 "TATA-box-binding protein"  
"MCG\_K23\_00182" 21848 "s59E13H2" 0 "DNA-directed RNA polymerase subunit M"  
"MCG\_K23\_00182" 21848 "s59E25H2" 0 "DNA-directed RNA polymerase subunit M"  
"MCG\_K23\_00182" 21848 "s59E5H2" 0 "DNA-directed RNA polymerase subunit M"  
"MCG\_K23\_00182" 21848 "s63E6H2" 0 "DNA-directed RNA polymerase subunit M"  
"MCG\_K23\_00183" 21849 "s59E13H2" 0 "Small-conductance mechanosensitive channel MscMJ"  
"MCG\_K23\_00183" 21849 "s59E25H2" 0 "Small-conductance mechanosensitive channel MscMJ"  
"MCG\_K23\_00183" 21849 "s59E5H2" 0 "Small-conductance mechanosensitive channel MscMJ"  
"MCG\_K23\_00183" 21849 "s63E6H2" 0 "Small-conductance mechanosensitive channel MscMJ"  
"MCG\_K23\_00185" 21851 "s59E13H2" 0 "Bifunctional IPC transferase and DIPP synthase"  
"MCG\_K23\_00185" 21851 "s59E25H2" 0 "Bifunctional IPC transferase and DIPP synthase"  
"MCG\_K23\_00185" 21851 "s59E5H2" 0 "Bifunctional IPC transferase and DIPP synthase"  
"MCG\_K23\_00185" 21851 "s63E6H2" 0 "Bifunctional IPC transferase and DIPP synthase"  
"MCG\_K23\_00186" 21852 "s59E13H2" 0 "Bifunctional IPC transferase and DIPP synthase"  
"MCG\_K23\_00186" 21852 "s59E25H2" 0 "Bifunctional IPC transferase and DIPP synthase"  
"MCG\_K23\_00186" 21852 "s59E5H2" 0 "Bifunctional IPC transferase and DIPP synthase"  
"MCG\_K23\_00186" 21852 "s63E6H2" 0 "Bifunctional IPC transferase and DIPP synthase"  
"MCG\_K23\_00187" 21853 "s59E13H2" 0 "endonuclease IV"  
"MCG\_K23\_00187" 21853 "s59E25H2" 0 "endonuclease IV"  
"MCG\_K23\_00187" 21853 "s59E5H2" 0 "endonuclease IV"  
"MCG\_K23\_00187" 21853 "s63E6H2" 0 "endonuclease IV"

"MCG\_K23\_00188" 21854 "s59E13H2" 0 "hypothetical protein"  
"MCG\_K23\_00188" 21854 "s59E25H2" 0 "hypothetical protein"  
"MCG\_K23\_00188" 21854 "s59E5H2" 0 "hypothetical protein"  
"MCG\_K23\_00188" 21854 "s63E6H2" 0 "hypothetical protein"  
"MCG\_K23\_00190" 21856 "s59E13H2" 0 "hypothetical protein"  
"MCG\_K23\_00190" 21856 "s59E25H2" 0 "hypothetical protein"  
"MCG\_K23\_00190" 21856 "s59E5H2" 0 "hypothetical protein"  
"MCG\_K23\_00190" 21856 "s63E6H2" 0 "hypothetical protein"  
"MCG\_K23\_00191" 21857 "s59E13H2" 0 "hypothetical protein"  
"MCG\_K23\_00191" 21857 "s59E25H2" 0 "hypothetical protein"  
"MCG\_K23\_00191" 21857 "s59E5H2" 0 "hypothetical protein"  
"MCG\_K23\_00191" 21857 "s63E6H2" 0 "hypothetical protein"  
"MCG\_K23\_00192" 21858 "s59E13H2" 0 "hypothetical protein"  
"MCG\_K23\_00192" 21858 "s59E25H2" 0 "hypothetical protein"  
"MCG\_K23\_00192" 21858 "s59E5H2" 0 "hypothetical protein"  
"MCG\_K23\_00192" 21858 "s63E6H2" 0 "hypothetical protein"  
"MCG\_K23\_00193" 21859 "s59E13H2" 0 "hypothetical protein"  
"MCG\_K23\_00193" 21859 "s59E25H2" 0 "hypothetical protein"  
"MCG\_K23\_00193" 21859 "s59E5H2" 0 "hypothetical protein"  
"MCG\_K23\_00193" 21859 "s63E6H2" 0 "hypothetical protein"  
"MCG\_K23\_00195" 21861 "s59E13H2" 0 "molybdenum cofactor biosynthesis protein A"  
"MCG\_K23\_00195" 21861 "s59E25H2" 0 "molybdenum cofactor biosynthesis protein A"  
"MCG\_K23\_00195" 21861 "s59E5H2" 0 "molybdenum cofactor biosynthesis protein A"  
"MCG\_K23\_00195" 21861 "s63E6H2" 0 "molybdenum cofactor biosynthesis protein A"  
"MCG\_K23\_00196" 21862 "s59E13H2" 0 "Transcription factor Pcc1"  
"MCG\_K23\_00196" 21862 "s59E25H2" 0 "Transcription factor Pcc1"  
"MCG\_K23\_00196" 21862 "s59E5H2" 0 "Transcription factor Pcc1"  
"MCG\_K23\_00196" 21862 "s63E6H2" 0 "Transcription factor Pcc1"  
"MCG\_K23\_00197" 21863 "s59E13H2" 0 "50S ribosomal protein L37Ae"  
"MCG\_K23\_00197" 21863 "s59E25H2" 0 "50S ribosomal protein L37Ae"  
"MCG\_K23\_00197" 21863 "s59E5H2" 0 "50S ribosomal protein L37Ae"  
"MCG\_K23\_00197" 21863 "s63E6H2" 0 "50S ribosomal protein L37Ae"  
"MCG\_K23\_00198" 21864 "s59E13H2" 0 "Exosome complex component Rrp42"  
"MCG\_K23\_00198" 21864 "s59E25H2" 0 "Exosome complex component Rrp42"  
"MCG\_K23\_00198" 21864 "s59E5H2" 0 "Exosome complex component Rrp42"  
"MCG\_K23\_00198" 21864 "s63E6H2" 0 "Exosome complex component Rrp42"  
"MCG\_K23\_00199" 21865 "s59E13H2" 0 "Exosome complex component Rrp41"  
"MCG\_K23\_00199" 21865 "s59E25H2" 0 "Exosome complex component Rrp41"  
"MCG\_K23\_00199" 21865 "s59E5H2" 0 "Exosome complex component Rrp41"  
"MCG\_K23\_00199" 21865 "s63E6H2" 0 "Exosome complex component Rrp41"  
"MCG\_K23\_00200" 21866 "s59E13H2" 0 "dihydroneopterin triphosphate pyrophosphatase"  
"MCG\_K23\_00200" 21866 "s59E25H2" 0 "dihydroneopterin triphosphate pyrophosphatase"  
"MCG\_K23\_00200" 21866 "s59E5H2" 0 "dihydroneopterin triphosphate pyrophosphatase"  
"MCG\_K23\_00200" 21866 "s63E6H2" 0 "dihydroneopterin triphosphate pyrophosphatase"  
"MCG\_K23\_00201" 21867 "s59E13H2" 0 "Translation initiation factor 2 subunit gamma"  
"MCG\_K23\_00201" 21867 "s59E25H2" 0 "Translation initiation factor 2 subunit gamma"  
"MCG\_K23\_00201" 21867 "s59E5H2" 0 "Translation initiation factor 2 subunit gamma"



"MCG\_K23\_00201" 21867 "s63E6H2" 0 "Translation initiation factor 2 subunit gamma"  
"MCG\_K23\_00202" 21868 "s59E13H2" 0 "30S ribosomal protein S6e"  
"MCG\_K23\_00202" 21868 "s59E25H2" 0 "30S ribosomal protein S6e"  
"MCG\_K23\_00202" 21868 "s59E5H2" 0 "30S ribosomal protein S6e"  
"MCG\_K23\_00202" 21868 "s63E6H2" 0 "30S ribosomal protein S6e"  
"MCG\_K23\_00203" 21869 "s59E13H2" 0 "Bifunctional enzyme Fae/Hps"  
"MCG\_K23\_00203" 21869 "s59E25H2" 0 "Bifunctional enzyme Fae/Hps"  
"MCG\_K23\_00203" 21869 "s59E5H2" 0 "Bifunctional enzyme Fae/Hps"  
"MCG\_K23\_00203" 21869 "s63E6H2" 0 "Bifunctional enzyme Fae/Hps"  
"MCG\_K23\_00205" 21871 "s59E13H2" 0 "Phenylacetate-coenzyme A ligase"  
"MCG\_K23\_00205" 21871 "s59E25H2" 0 "Phenylacetate-coenzyme A ligase"  
"MCG\_K23\_00205" 21871 "s59E5H2" 0 "Phenylacetate-coenzyme A ligase"  
"MCG\_K23\_00205" 21871 "s63E6H2" 0 "Phenylacetate-coenzyme A ligase"  
"MCG\_K23\_00206" 21872 "s59E13H2" 0 "hypothetical protein"  
"MCG\_K23\_00206" 21872 "s59E25H2" 0 "hypothetical protein"  
"MCG\_K23\_00206" 21872 "s59E5H2" 0 "hypothetical protein"  
"MCG\_K23\_00206" 21872 "s63E6H2" 0 "hypothetical protein"  
"MCG\_K23\_00207" 21873 "s59E13H2" 0 "hypothetical protein"  
"MCG\_K23\_00207" 21873 "s59E25H2" 0 "hypothetical protein"  
"MCG\_K23\_00207" 21873 "s59E5H2" 0 "hypothetical protein"  
"MCG\_K23\_00207" 21873 "s63E6H2" 0 "hypothetical protein"  
"MCG\_K23\_00208" 21874 "s59E13H2" 0 "hypothetical protein"  
"MCG\_K23\_00208" 21874 "s59E25H2" 0 "hypothetical protein"  
"MCG\_K23\_00208" 21874 "s59E5H2" 0 "hypothetical protein"  
"MCG\_K23\_00208" 21874 "s63E6H2" 0 "hypothetical protein"  
"MCG\_K23\_00210" 21876 "s59E13H2" 0 "short chain dehydrogenase"  
"MCG\_K23\_00210" 21876 "s59E25H2" 0 "short chain dehydrogenase"  
"MCG\_K23\_00210" 21876 "s59E5H2" 0.4033882 "short chain dehydrogenase"  
"MCG\_K23\_00210" 21876 "s63E6H2" 0 "short chain dehydrogenase"  
"MCG\_K23\_00211" 21877 "s59E13H2" 0 "hypothetical protein"  
"MCG\_K23\_00211" 21877 "s59E25H2" 0 "hypothetical protein"  
"MCG\_K23\_00211" 21877 "s59E5H2" 0 "hypothetical protein"  
"MCG\_K23\_00211" 21877 "s63E6H2" 0 "hypothetical protein"  
"MCG\_K23\_00212" 21878 "s59E13H2" 0 "Quinone oxidoreductase 1"  
"MCG\_K23\_00212" 21878 "s59E25H2" 0 "Quinone oxidoreductase 1"  
"MCG\_K23\_00212" 21878 "s59E5H2" 0 "Quinone oxidoreductase 1"  
"MCG\_K23\_00212" 21878 "s63E6H2" 0 "Quinone oxidoreductase 1"  
"MCG\_K23\_00213" 21879 "s59E13H2" 0 "hypothetical protein"  
"MCG\_K23\_00213" 21879 "s59E25H2" 0 "hypothetical protein"  
"MCG\_K23\_00213" 21879 "s59E5H2" 0 "hypothetical protein"  
"MCG\_K23\_00213" 21879 "s63E6H2" 0 "hypothetical protein"  
"MCG\_K23\_00214" 21880 "s59E13H2" 0 "hypothetical protein"  
"MCG\_K23\_00214" 21880 "s59E25H2" 0 "hypothetical protein"  
"MCG\_K23\_00214" 21880 "s59E5H2" 0 "hypothetical protein"  
"MCG\_K23\_00214" 21880 "s63E6H2" 0 "hypothetical protein"  
"MCG\_K23\_00215" 21881 "s59E13H2" 0 "hypothetical protein"  
"MCG\_K23\_00215" 21881 "s59E25H2" 0 "hypothetical protein"

"MCG\_K23\_00215" 21881 "s59E5H2" 0 "hypothetical protein"  
"MCG\_K23\_00215" 21881 "s63E6H2" 0 "hypothetical protein"  
"MCG\_K23\_00217" 21883 "s59E13H2" 0 "hypothetical protein"  
"MCG\_K23\_00217" 21883 "s59E25H2" 0 "hypothetical protein"  
"MCG\_K23\_00217" 21883 "s59E5H2" 0 "hypothetical protein"  
"MCG\_K23\_00217" 21883 "s63E6H2" 0 "hypothetical protein"  
"MCG\_K23\_00218" 21884 "s59E13H2" 0 "Undecaprenyl phosphate-alpha-4-amino-4-deoxy-L-arabinose arabinosyl transferase"  
"MCG\_K23\_00218" 21884 "s59E25H2" 0 "Undecaprenyl phosphate-alpha-4-amino-4-deoxy-L-arabinose arabinosyl transferase"  
"MCG\_K23\_00218" 21884 "s59E5H2" 0 "Undecaprenyl phosphate-alpha-4-amino-4-deoxy-L-arabinose arabinosyl transferase"  
"MCG\_K23\_00218" 21884 "s63E6H2" 0 "Undecaprenyl phosphate-alpha-4-amino-4-deoxy-L-arabinose arabinosyl transferase"  
"MCG\_K23\_00219" 21885 "s59E13H2" 0 "hypothetical protein"  
"MCG\_K23\_00219" 21885 "s59E25H2" 0 "hypothetical protein"  
"MCG\_K23\_00219" 21885 "s59E5H2" 0 "hypothetical protein"  
"MCG\_K23\_00219" 21885 "s63E6H2" 0 "hypothetical protein"  
"MCG\_K23\_00220" 21886 "s59E13H2" 0 "hypothetical protein"  
"MCG\_K23\_00220" 21886 "s59E25H2" 0 "hypothetical protein"  
"MCG\_K23\_00220" 21886 "s59E5H2" 0 "hypothetical protein"  
"MCG\_K23\_00220" 21886 "s63E6H2" 0 "hypothetical protein"  
"MCG\_K23\_00221" 21887 "s59E13H2" 0 "hypothetical protein"  
"MCG\_K23\_00221" 21887 "s59E25H2" 0 "hypothetical protein"  
"MCG\_K23\_00221" 21887 "s59E5H2" 0 "hypothetical protein"  
"MCG\_K23\_00221" 21887 "s63E6H2" 0 "hypothetical protein"  
"MCG\_K23\_00223" 21889 "s59E13H2" 0 "Transcription initiation factor IIB"  
"MCG\_K23\_00223" 21889 "s59E25H2" 0 "Transcription initiation factor IIB"  
"MCG\_K23\_00223" 21889 "s59E5H2" 0 "Transcription initiation factor IIB"  
"MCG\_K23\_00223" 21889 "s63E6H2" 0 "Transcription initiation factor IIB"  
"MCG\_K23\_00224" 21890 "s59E13H2" 0 "translation initiation factor Sui1"  
"MCG\_K23\_00224" 21890 "s59E25H2" 0 "translation initiation factor Sui1"  
"MCG\_K23\_00224" 21890 "s59E5H2" 0 "translation initiation factor Sui1"  
"MCG\_K23\_00224" 21890 "s63E6H2" 0 "translation initiation factor Sui1"  
"MCG\_K23\_00225" 21891 "s59E13H2" 0 "Nicotinate phosphoribosyltransferase pncB2"  
"MCG\_K23\_00225" 21891 "s59E25H2" 0 "Nicotinate phosphoribosyltransferase pncB2"  
"MCG\_K23\_00225" 21891 "s59E5H2" 0 "Nicotinate phosphoribosyltransferase pncB2"  
"MCG\_K23\_00225" 21891 "s63E6H2" 0 "Nicotinate phosphoribosyltransferase pncB2"  
"MCG\_K23\_00226" 21892 "s59E13H2" 0 "hypothetical protein"  
"MCG\_K23\_00226" 21892 "s59E25H2" 0 "hypothetical protein"  
"MCG\_K23\_00226" 21892 "s59E5H2" 0 "hypothetical protein"  
"MCG\_K23\_00226" 21892 "s63E6H2" 0 "hypothetical protein"  
"MCG\_K23\_00227" 21893 "s59E13H2" 0 "acetyl-CoA acetyltransferase"  
"MCG\_K23\_00227" 21893 "s59E25H2" 0 "acetyl-CoA acetyltransferase"  
"MCG\_K23\_00227" 21893 "s59E5H2" 0 "acetyl-CoA acetyltransferase"  
"MCG\_K23\_00227" 21893 "s63E6H2" 0 "acetyl-CoA acetyltransferase"  
"MCG\_K23\_00228" 21894 "s59E13H2" 0 "PQB biosynthetic 3-oxoacyl-[acyl-carrier-protein] synthase III"  
"MCG\_K23\_00228" 21894 "s59E25H2" 0 "PQB biosynthetic 3-oxoacyl-[acyl-carrier-protein] synthase III"  
"MCG\_K23\_00228" 21894 "s59E5H2" 0 "PQB biosynthetic 3-oxoacyl-[acyl-carrier-protein] synthase III"  
"MCG\_K23\_00228" 21894 "s63E6H2" 0 "PQB biosynthetic 3-oxoacyl-[acyl-carrier-protein] synthase III"  
"MCG\_K23\_00229" 21895 "s59E13H2" 0 "hypothetical protein"

"MCG\_K23\_00229" 21895 "s59E25H2" 0 "hypothetical protein"  
"MCG\_K23\_00229" 21895 "s59E5H2" 0 "hypothetical protein"  
"MCG\_K23\_00229" 21895 "s63E6H2" 0 "hypothetical protein"  
"MCG\_K23\_00230" 21896 "s59E13H2" 0 "single-stranded DNA-binding protein"  
"MCG\_K23\_00230" 21896 "s59E25H2" 0 "single-stranded DNA-binding protein"  
"MCG\_K23\_00230" 21896 "s59E5H2" 0 "single-stranded DNA-binding protein"  
"MCG\_K23\_00230" 21896 "s63E6H2" 0 "single-stranded DNA-binding protein"  
"MCG\_K23\_00231" 21897 "s59E13H2" 0 "Phosphoglycolate phosphatase"  
"MCG\_K23\_00231" 21897 "s59E25H2" 0 "Phosphoglycolate phosphatase"  
"MCG\_K23\_00231" 21897 "s59E5H2" 0 "Phosphoglycolate phosphatase"  
"MCG\_K23\_00231" 21897 "s63E6H2" 0 "Phosphoglycolate phosphatase"  
"MCG\_K23\_00234" 21900 "s59E13H2" 0 "50S ribosomal protein L37e"  
"MCG\_K23\_00234" 21900 "s59E25H2" 0 "50S ribosomal protein L37e"  
"MCG\_K23\_00234" 21900 "s59E5H2" 0 "50S ribosomal protein L37e"  
"MCG\_K23\_00234" 21900 "s63E6H2" 0 "50S ribosomal protein L37e"  
"MCG\_K23\_00235" 21901 "s59E13H2" 0 "Putative snRNP Sm-like protein"  
"MCG\_K23\_00235" 21901 "s59E25H2" 0 "Putative snRNP Sm-like protein"  
"MCG\_K23\_00235" 21901 "s59E5H2" 0 "Putative snRNP Sm-like protein"  
"MCG\_K23\_00235" 21901 "s63E6H2" 0 "Putative snRNP Sm-like protein"  
"MCG\_K23\_00236" 21902 "s59E13H2" 0 "hypothetical protein"  
"MCG\_K23\_00236" 21902 "s59E25H2" 0 "hypothetical protein"  
"MCG\_K23\_00236" 21902 "s59E5H2" 0 "hypothetical protein"  
"MCG\_K23\_00236" 21902 "s63E6H2" 0 "hypothetical protein"  
"MCG\_K23\_00237" 21903 "s59E13H2" 0 "MtN3/saliva family protein"  
"MCG\_K23\_00237" 21903 "s59E25H2" 0 "MtN3/saliva family protein"  
"MCG\_K23\_00237" 21903 "s59E5H2" 0 "MtN3/saliva family protein"  
"MCG\_K23\_00237" 21903 "s63E6H2" 0 "MtN3/saliva family protein"  
"MCG\_K23\_00238" 21904 "s59E13H2" 0 "Putative universal stress protein"  
"MCG\_K23\_00238" 21904 "s59E25H2" 0 "Putative universal stress protein"  
"MCG\_K23\_00238" 21904 "s59E5H2" 0 "Putative universal stress protein"  
"MCG\_K23\_00238" 21904 "s63E6H2" 0 "Putative universal stress protein"  
"MCG\_K23\_00239" 21905 "s59E13H2" 0 "CorA-like Mg2+ transporter protein"  
"MCG\_K23\_00239" 21905 "s59E25H2" 0 "CorA-like Mg2+ transporter protein"  
"MCG\_K23\_00239" 21905 "s59E5H2" 0 "CorA-like Mg2+ transporter protein"  
"MCG\_K23\_00239" 21905 "s63E6H2" 0 "CorA-like Mg2+ transporter protein"  
"MCG\_K23\_00240" 21906 "s59E13H2" 0 "Putative peroxiredoxin bcp"  
"MCG\_K23\_00240" 21906 "s59E25H2" 0 "Putative peroxiredoxin bcp"  
"MCG\_K23\_00240" 21906 "s59E5H2" 0 "Putative peroxiredoxin bcp"  
"MCG\_K23\_00240" 21906 "s63E6H2" 0 "Putative peroxiredoxin bcp"  
"MCG\_K23\_00241" 21907 "s59E13H2" 0 "Universal stress protein/MSMEI\_3859"  
"MCG\_K23\_00241" 21907 "s59E25H2" 0 "Universal stress protein/MSMEI\_3859"  
"MCG\_K23\_00241" 21907 "s59E5H2" 0 "Universal stress protein/MSMEI\_3859"  
"MCG\_K23\_00241" 21907 "s63E6H2" 0 "Universal stress protein/MSMEI\_3859"  
"MCG\_K23\_00242" 21908 "s59E13H2" 0 "Coenzyme F420 hydrogenase subunit beta"  
"MCG\_K23\_00242" 21908 "s59E25H2" 0 "Coenzyme F420 hydrogenase subunit beta"  
"MCG\_K23\_00242" 21908 "s59E5H2" 0 "Coenzyme F420 hydrogenase subunit beta"  
"MCG\_K23\_00242" 21908 "s63E6H2" 0 "Coenzyme F420 hydrogenase subunit beta"

"MCG\_K23\_00243" 21909 "s59E13H2" 0 "Coenzyme F420 hydrogenase subunit beta"  
"MCG\_K23\_00243" 21909 "s59E25H2" 0 "Coenzyme F420 hydrogenase subunit beta"  
"MCG\_K23\_00243" 21909 "s59E5H2" 0 "Coenzyme F420 hydrogenase subunit beta"  
"MCG\_K23\_00243" 21909 "s63E6H2" 0 "Coenzyme F420 hydrogenase subunit beta"  
"MCG\_K23\_00244" 21910 "s59E13H2" 0 "NADH-ubiquinone/plastoquinone oxidoreductase, chain 3"  
"MCG\_K23\_00244" 21910 "s59E25H2" 0 "NADH-ubiquinone/plastoquinone oxidoreductase, chain 3"  
"MCG\_K23\_00244" 21910 "s59E5H2" 0 "NADH-ubiquinone/plastoquinone oxidoreductase, chain 3"  
"MCG\_K23\_00244" 21910 "s63E6H2" 0 "NADH-ubiquinone/plastoquinone oxidoreductase, chain 3"  
"MCG\_K23\_00245" 21911 "s59E13H2" 0 "putative membrane-bound hydrogenase subunit mbhJ"  
"MCG\_K23\_00245" 21911 "s59E25H2" 0 "putative membrane-bound hydrogenase subunit mbhJ"  
"MCG\_K23\_00245" 21911 "s59E5H2" 0 "putative membrane-bound hydrogenase subunit mbhJ"  
"MCG\_K23\_00245" 21911 "s63E6H2" 0 "putative membrane-bound hydrogenase subunit mbhJ"  
"MCG\_K23\_00246" 21912 "s59E13H2" 0 "Formate hydrogenlyase subunit 5 precursor"  
"MCG\_K23\_00246" 21912 "s59E25H2" 0 "Formate hydrogenlyase subunit 5 precursor"  
"MCG\_K23\_00246" 21912 "s59E5H2" 0 "Formate hydrogenlyase subunit 5 precursor"  
"MCG\_K23\_00246" 21912 "s63E6H2" 0 "Formate hydrogenlyase subunit 5 precursor"  
"MCG\_K23\_00247" 21913 "s59E13H2" 0 "NADH-quinone oxidoreductase subunit H"  
"MCG\_K23\_00247" 21913 "s59E25H2" 0 "NADH-quinone oxidoreductase subunit H"  
"MCG\_K23\_00247" 21913 "s59E5H2" 0 "NADH-quinone oxidoreductase subunit H"  
"MCG\_K23\_00247" 21913 "s63E6H2" 0 "NADH-quinone oxidoreductase subunit H"  
"MCG\_K23\_00248" 21914 "s59E13H2" 0 "NAD(P)H-quinone oxidoreductase subunit I"  
"MCG\_K23\_00248" 21914 "s59E25H2" 0 "NAD(P)H-quinone oxidoreductase subunit I"  
"MCG\_K23\_00248" 21914 "s59E5H2" 0 "NAD(P)H-quinone oxidoreductase subunit I"  
"MCG\_K23\_00248" 21914 "s63E6H2" 0 "NAD(P)H-quinone oxidoreductase subunit I"  
"MCG\_K23\_00249" 21915 "s59E13H2" 0 "NADH:ubiquinone oxidoreductase subunit J"  
"MCG\_K23\_00249" 21915 "s59E25H2" 0 "NADH:ubiquinone oxidoreductase subunit J"  
"MCG\_K23\_00249" 21915 "s59E5H2" 0 "NADH:ubiquinone oxidoreductase subunit J"  
"MCG\_K23\_00249" 21915 "s63E6H2" 0 "NADH:ubiquinone oxidoreductase subunit J"  
"MCG\_K23\_00250" 21916 "s59E13H2" 0 "NADH:ubiquinone oxidoreductase subunit K"  
"MCG\_K23\_00250" 21916 "s59E25H2" 0 "NADH:ubiquinone oxidoreductase subunit K"  
"MCG\_K23\_00250" 21916 "s59E5H2" 0 "NADH:ubiquinone oxidoreductase subunit K"  
"MCG\_K23\_00250" 21916 "s63E6H2" 0 "NADH:ubiquinone oxidoreductase subunit K"  
"MCG\_K23\_00251" 21917 "s59E13H2" 0 "Na(+)/H(+) antiporter subunit A"  
"MCG\_K23\_00251" 21917 "s59E25H2" 0 "Na(+)/H(+) antiporter subunit A"  
"MCG\_K23\_00251" 21917 "s59E5H2" 0 "Na(+)/H(+) antiporter subunit A"  
"MCG\_K23\_00251" 21917 "s63E6H2" 0 "Na(+)/H(+) antiporter subunit A"  
"MCG\_K23\_00252" 21918 "s59E13H2" 0 "NADH-quinone oxidoreductase subunit M"  
"MCG\_K23\_00252" 21918 "s59E25H2" 0 "NADH-quinone oxidoreductase subunit M"  
"MCG\_K23\_00252" 21918 "s59E5H2" 0 "NADH-quinone oxidoreductase subunit M"  
"MCG\_K23\_00252" 21918 "s63E6H2" 0 "NADH-quinone oxidoreductase subunit M"  
"MCG\_K23\_00253" 21919 "s59E13H2" 0 "F(420)H(2) dehydrogenase subunit N"  
"MCG\_K23\_00253" 21919 "s59E25H2" 0 "F(420)H(2) dehydrogenase subunit N"  
"MCG\_K23\_00253" 21919 "s59E5H2" 0 "F(420)H(2) dehydrogenase subunit N"  
"MCG\_K23\_00253" 21919 "s63E6H2" 0 "F(420)H(2) dehydrogenase subunit N"  
"MCG\_K23\_00254" 21920 "s59E13H2" 0 "V-type ATP synthase subunit E"  
"MCG\_K23\_00254" 21920 "s59E25H2" 0 "V-type ATP synthase subunit E"  
"MCG\_K23\_00254" 21920 "s59E5H2" 0 "V-type ATP synthase subunit E"

"MCG\_K23\_00254" 21920 "s63E6H2" 0 "V-type ATP synthase subunit E"  
"MCG\_K23\_00255" 21921 "s59E13H2" 0 "hypothetical protein"  
"MCG\_K23\_00255" 21921 "s59E25H2" 0 "hypothetical protein"  
"MCG\_K23\_00255" 21921 "s59E5H2" 0 "hypothetical protein"  
"MCG\_K23\_00255" 21921 "s63E6H2" 0 "hypothetical protein"  
"MCG\_K23\_00256" 21922 "s59E13H2" 0 "V-type ATP synthase alpha chain"  
"MCG\_K23\_00256" 21922 "s59E25H2" 0 "V-type ATP synthase alpha chain"  
"MCG\_K23\_00256" 21922 "s59E5H2" 0 "V-type ATP synthase alpha chain"  
"MCG\_K23\_00256" 21922 "s63E6H2" 0 "V-type ATP synthase alpha chain"  
"MCG\_K23\_00257" 21923 "s59E13H2" 0 "V-type ATP synthase subunit F"  
"MCG\_K23\_00257" 21923 "s59E25H2" 0 "V-type ATP synthase subunit F"  
"MCG\_K23\_00257" 21923 "s59E5H2" 0 "V-type ATP synthase subunit F"  
"MCG\_K23\_00257" 21923 "s63E6H2" 0 "V-type ATP synthase subunit F"  
"MCG\_K23\_00258" 21924 "s59E13H2" 0 "Phosphoenolpyruvate carboxylase"  
"MCG\_K23\_00258" 21924 "s59E25H2" 0 "Phosphoenolpyruvate carboxylase"  
"MCG\_K23\_00258" 21924 "s59E5H2" 0 "Phosphoenolpyruvate carboxylase"  
"MCG\_K23\_00258" 21924 "s63E6H2" 0 "Phosphoenolpyruvate carboxylase"  
"MCG\_K23\_00259" 21925 "s59E13H2" 0 "hypothetical protein"  
"MCG\_K23\_00259" 21925 "s59E25H2" 0 "hypothetical protein"  
"MCG\_K23\_00259" 21925 "s59E5H2" 0 "hypothetical protein"  
"MCG\_K23\_00259" 21925 "s63E6H2" 0 "hypothetical protein"  
"MCG\_K23\_00260" 21926 "s59E13H2" 0 "Transcriptional regulator PadR-like family protein"  
"MCG\_K23\_00260" 21926 "s59E25H2" 0 "Transcriptional regulator PadR-like family protein"  
"MCG\_K23\_00260" 21926 "s59E5H2" 0 "Transcriptional regulator PadR-like family protein"  
"MCG\_K23\_00260" 21926 "s63E6H2" 0 "Transcriptional regulator PadR-like family protein"  
"MCG\_K23\_00263" 21929 "s59E13H2" 0 "hypothetical protein"  
"MCG\_K23\_00263" 21929 "s59E25H2" 0 "hypothetical protein"  
"MCG\_K23\_00263" 21929 "s59E5H2" 0 "hypothetical protein"  
"MCG\_K23\_00263" 21929 "s63E6H2" 0 "hypothetical protein"  
"MCG\_K23\_00266" 21932 "s59E13H2" 0 "Low molecular weight protein-tyrosine-phosphatase wzb"  
"MCG\_K23\_00266" 21932 "s59E25H2" 0 "Low molecular weight protein-tyrosine-phosphatase wzb"  
"MCG\_K23\_00266" 21932 "s59E5H2" 0 "Low molecular weight protein-tyrosine-phosphatase wzb"  
"MCG\_K23\_00266" 21932 "s63E6H2" 0 "Low molecular weight protein-tyrosine-phosphatase wzb"  
"MCG\_K23\_00267" 21933 "s59E13H2" 0 "hypothetical protein"  
"MCG\_K23\_00267" 21933 "s59E25H2" 0 "hypothetical protein"  
"MCG\_K23\_00267" 21933 "s59E5H2" 0 "hypothetical protein"  
"MCG\_K23\_00267" 21933 "s63E6H2" 0 "hypothetical protein"  
"MCG\_K23\_00268" 21934 "s59E13H2" 0 "hypothetical protein"  
"MCG\_K23\_00268" 21934 "s59E25H2" 0 "hypothetical protein"  
"MCG\_K23\_00268" 21934 "s59E5H2" 0 "hypothetical protein"  
"MCG\_K23\_00268" 21934 "s63E6H2" 0 "hypothetical protein"  
"MCG\_K23\_00269" 21935 "s59E13H2" 0 "hypothetical protein"  
"MCG\_K23\_00269" 21935 "s59E25H2" 0 "hypothetical protein"  
"MCG\_K23\_00269" 21935 "s59E5H2" 0 "hypothetical protein"  
"MCG\_K23\_00269" 21935 "s63E6H2" 0 "hypothetical protein"  
"MCG\_K23\_00270" 21936 "s59E13H2" 0 "RDD family protein"  
"MCG\_K23\_00270" 21936 "s59E25H2" 0 "RDD family protein"

"MCG\_K23\_00270" 21936 "s59E5H2" 0 "RDD family protein"  
"MCG\_K23\_00270" 21936 "s63E6H2" 0 "RDD family protein"  
"MCG\_K23\_00271" 21937 "s59E13H2" 0 "hypothetical protein"  
"MCG\_K23\_00271" 21937 "s59E25H2" 0 "hypothetical protein"  
"MCG\_K23\_00271" 21937 "s59E5H2" 0 "hypothetical protein"  
"MCG\_K23\_00271" 21937 "s63E6H2" 0 "hypothetical protein"  
"MCG\_K23\_00272" 21938 "s59E13H2" 0 "Glycosyltransferase AgIJ"  
"MCG\_K23\_00272" 21938 "s59E25H2" 0 "Glycosyltransferase AgIJ"  
"MCG\_K23\_00272" 21938 "s59E5H2" 0 "Glycosyltransferase AgIJ"  
"MCG\_K23\_00272" 21938 "s63E6H2" 0 "Glycosyltransferase AgIJ"  
"MCG\_K23\_00273" 21939 "s59E13H2" 0 "GDP-mannose 6-dehydrogenase"  
"MCG\_K23\_00273" 21939 "s59E25H2" 0 "GDP-mannose 6-dehydrogenase"  
"MCG\_K23\_00273" 21939 "s59E5H2" 0 "GDP-mannose 6-dehydrogenase"  
"MCG\_K23\_00273" 21939 "s63E6H2" 0 "GDP-mannose 6-dehydrogenase"  
"MCG\_K23\_00274" 21940 "s59E13H2" 0 "Poly-beta-1,6-N-acetyl-D-glucosamine synthase"  
"MCG\_K23\_00274" 21940 "s59E25H2" 0 "Poly-beta-1,6-N-acetyl-D-glucosamine synthase"  
"MCG\_K23\_00274" 21940 "s59E5H2" 0 "Poly-beta-1,6-N-acetyl-D-glucosamine synthase"  
"MCG\_K23\_00274" 21940 "s63E6H2" 0 "Poly-beta-1,6-N-acetyl-D-glucosamine synthase"  
"MCG\_K23\_00275" 21941 "s59E13H2" 0 "Phenylacetate-coenzyme A ligase"  
"MCG\_K23\_00275" 21941 "s59E25H2" 0 "Phenylacetate-coenzyme A ligase"  
"MCG\_K23\_00275" 21941 "s59E5H2" 0 "Phenylacetate-coenzyme A ligase"  
"MCG\_K23\_00275" 21941 "s63E6H2" 0 "Phenylacetate-coenzyme A ligase"  
"MCG\_K23\_00276" 21942 "s59E13H2" 0 "hypothetical protein"  
"MCG\_K23\_00276" 21942 "s59E25H2" 0 "hypothetical protein"  
"MCG\_K23\_00276" 21942 "s59E5H2" 0 "hypothetical protein"  
"MCG\_K23\_00276" 21942 "s63E6H2" 0 "hypothetical protein"  
"MCG\_K23\_00277" 21943 "s59E13H2" 0 "Carboxypeptidase T precursor"  
"MCG\_K23\_00277" 21943 "s59E25H2" 0 "Carboxypeptidase T precursor"  
"MCG\_K23\_00277" 21943 "s59E5H2" 0 "Carboxypeptidase T precursor"  
"MCG\_K23\_00277" 21943 "s63E6H2" 0 "Carboxypeptidase T precursor"  
"MCG\_K23\_00278" 21944 "s59E13H2" 0 "ORC1-type DNA replication protein"  
"MCG\_K23\_00278" 21944 "s59E25H2" 0 "ORC1-type DNA replication protein"  
"MCG\_K23\_00278" 21944 "s59E5H2" 0 "ORC1-type DNA replication protein"  
"MCG\_K23\_00278" 21944 "s63E6H2" 0 "ORC1-type DNA replication protein"  
"MCG\_K23\_00279" 21945 "s59E13H2" 0 "Polyketide cyclase / dehydrase and lipid transport"  
"MCG\_K23\_00279" 21945 "s59E25H2" 0 "Polyketide cyclase / dehydrase and lipid transport"  
"MCG\_K23\_00279" 21945 "s59E5H2" 0 "Polyketide cyclase / dehydrase and lipid transport"  
"MCG\_K23\_00279" 21945 "s63E6H2" 0 "Polyketide cyclase / dehydrase and lipid transport"  
"MCG\_K23\_00280" 21946 "s59E13H2" 0 "hypothetical protein"  
"MCG\_K23\_00280" 21946 "s59E25H2" 0 "hypothetical protein"  
"MCG\_K23\_00280" 21946 "s59E5H2" 0 "hypothetical protein"  
"MCG\_K23\_00280" 21946 "s63E6H2" 0 "hypothetical protein"  
"MCG\_K23\_00281" 21947 "s59E13H2" 0 "FG-GAP repeat protein"  
"MCG\_K23\_00281" 21947 "s59E25H2" 0 "FG-GAP repeat protein"  
"MCG\_K23\_00281" 21947 "s59E5H2" 0 "FG-GAP repeat protein"  
"MCG\_K23\_00281" 21947 "s63E6H2" 0 "FG-GAP repeat protein"  
"MCG\_K23\_00282" 21948 "s59E13H2" 0 "Ubiquinone biosynthesis O-methyltransferase"

"MCG\_K23\_00282" 21948 "s59E25H2" 0 "Ubiquinone biosynthesis O-methyltransferase"  
"MCG\_K23\_00282" 21948 "s59E5H2" 0 "Ubiquinone biosynthesis O-methyltransferase"  
"MCG\_K23\_00282" 21948 "s63E6H2" 0 "Ubiquinone biosynthesis O-methyltransferase"  
"MCG\_K23\_00283" 21949 "s59E13H2" 0 "hypothetical protein"  
"MCG\_K23\_00283" 21949 "s59E25H2" 0 "hypothetical protein"  
"MCG\_K23\_00283" 21949 "s59E5H2" 0 "hypothetical protein"  
"MCG\_K23\_00283" 21949 "s63E6H2" 0 "hypothetical protein"  
"MCG\_K23\_00284" 21950 "s59E13H2" 0 "hypothetical protein"  
"MCG\_K23\_00284" 21950 "s59E25H2" 0 "hypothetical protein"  
"MCG\_K23\_00284" 21950 "s59E5H2" 0 "hypothetical protein"  
"MCG\_K23\_00284" 21950 "s63E6H2" 0 "hypothetical protein"  
"MCG\_K23\_00285" 21951 "s59E13H2" 0 "D-inositol 3-phosphate glycosyltransferase"  
"MCG\_K23\_00285" 21951 "s59E25H2" 0 "D-inositol 3-phosphate glycosyltransferase"  
"MCG\_K23\_00285" 21951 "s59E5H2" 0 "D-inositol 3-phosphate glycosyltransferase"  
"MCG\_K23\_00285" 21951 "s63E6H2" 0 "D-inositol 3-phosphate glycosyltransferase"  
"MCG\_K23\_00286" 21952 "s59E13H2" 0 "hypothetical protein"  
"MCG\_K23\_00286" 21952 "s59E25H2" 0 "hypothetical protein"  
"MCG\_K23\_00286" 21952 "s59E5H2" 0 "hypothetical protein"  
"MCG\_K23\_00286" 21952 "s63E6H2" 0 "hypothetical protein"  
"MCG\_K23\_00287" 21953 "s59E13H2" 0 "hypothetical protein"  
"MCG\_K23\_00287" 21953 "s59E25H2" 0 "hypothetical protein"  
"MCG\_K23\_00287" 21953 "s59E5H2" 0 "hypothetical protein"  
"MCG\_K23\_00287" 21953 "s63E6H2" 0 "hypothetical protein"  
"MCG\_K23\_00288" 21954 "s59E13H2" 0 "Beta-monoglucosyldiacylglycerol synthase"  
"MCG\_K23\_00288" 21954 "s59E25H2" 0 "Beta-monoglucosyldiacylglycerol synthase"  
"MCG\_K23\_00288" 21954 "s59E5H2" 0 "Beta-monoglucosyldiacylglycerol synthase"  
"MCG\_K23\_00288" 21954 "s63E6H2" 0 "Beta-monoglucosyldiacylglycerol synthase"  
"MCG\_K23\_00289" 21955 "s59E13H2" 0 "hypothetical protein"  
"MCG\_K23\_00289" 21955 "s59E25H2" 0 "hypothetical protein"  
"MCG\_K23\_00289" 21955 "s59E5H2" 0 "hypothetical protein"  
"MCG\_K23\_00289" 21955 "s63E6H2" 0 "hypothetical protein"  
"MCG\_K23\_00290" 21956 "s59E13H2" 0 "hypothetical protein"  
"MCG\_K23\_00290" 21956 "s59E25H2" 0 "hypothetical protein"  
"MCG\_K23\_00290" 21956 "s59E5H2" 0 "hypothetical protein"  
"MCG\_K23\_00290" 21956 "s63E6H2" 0 "hypothetical protein"  
"MCG\_K23\_00291" 21957 "s59E13H2" 0 "Periplasmic copper-binding protein (NosD)"  
"MCG\_K23\_00291" 21957 "s59E25H2" 0 "Periplasmic copper-binding protein (NosD)"  
"MCG\_K23\_00291" 21957 "s59E5H2" 0 "Periplasmic copper-binding protein (NosD)"  
"MCG\_K23\_00291" 21957 "s63E6H2" 0 "Periplasmic copper-binding protein (NosD)"  
"MCG\_K23\_00292" 21958 "s59E13H2" 0 "hypothetical protein"  
"MCG\_K23\_00292" 21958 "s59E25H2" 0 "hypothetical protein"  
"MCG\_K23\_00292" 21958 "s59E5H2" 0 "hypothetical protein"  
"MCG\_K23\_00292" 21958 "s63E6H2" 0 "hypothetical protein"  
"MCG\_K23\_00293" 21959 "s59E13H2" 0 "hypothetical protein"  
"MCG\_K23\_00293" 21959 "s59E25H2" 0 "hypothetical protein"  
"MCG\_K23\_00293" 21959 "s59E5H2" 0 "hypothetical protein"  
"MCG\_K23\_00293" 21959 "s63E6H2" 0 "hypothetical protein"

"MCG\_K23\_00295" 21961 "s59E13H2" 0 "Thermophilic serine proteinase precursor"  
"MCG\_K23\_00295" 21961 "s59E25H2" 0 "Thermophilic serine proteinase precursor"  
"MCG\_K23\_00295" 21961 "s59E5H2" 0 "Thermophilic serine proteinase precursor"  
"MCG\_K23\_00295" 21961 "s63E6H2" 0 "Thermophilic serine proteinase precursor"  
"MCG\_K23\_00296" 21962 "s59E13H2" 0 "hypothetical protein"  
"MCG\_K23\_00296" 21962 "s59E25H2" 0 "hypothetical protein"  
"MCG\_K23\_00296" 21962 "s59E5H2" 0 "hypothetical protein"  
"MCG\_K23\_00296" 21962 "s63E6H2" 0 "hypothetical protein"  
"MCG\_K23\_00297" 21963 "s59E13H2" 0 "Antilisterial bacteriocin subtilosin biosynthesis protein AlbA"  
"MCG\_K23\_00297" 21963 "s59E25H2" 0 "Antilisterial bacteriocin subtilosin biosynthesis protein AlbA"  
"MCG\_K23\_00297" 21963 "s59E5H2" 0 "Antilisterial bacteriocin subtilosin biosynthesis protein AlbA"  
"MCG\_K23\_00297" 21963 "s63E6H2" 0 "Antilisterial bacteriocin subtilosin biosynthesis protein AlbA"  
"MCG\_K23\_00298" 21964 "s59E13H2" 0 "F(420)H(2) dehydrogenase subunit F"  
"MCG\_K23\_00298" 21964 "s59E25H2" 0 "F(420)H(2) dehydrogenase subunit F"  
"MCG\_K23\_00298" 21964 "s59E5H2" 0 "F(420)H(2) dehydrogenase subunit F"  
"MCG\_K23\_00298" 21964 "s63E6H2" 0 "F(420)H(2) dehydrogenase subunit F"  
"MCG\_K23\_00299" 21965 "s59E13H2" 0 "hypothetical protein"  
"MCG\_K23\_00299" 21965 "s59E25H2" 0 "hypothetical protein"  
"MCG\_K23\_00299" 21965 "s59E5H2" 0 "hypothetical protein"  
"MCG\_K23\_00299" 21965 "s63E6H2" 0 "hypothetical protein"  
"MCG\_K23\_00300" 21966 "s59E13H2" 0 "Oxygen-independent coproporphyrinogen-III oxidase 1"  
"MCG\_K23\_00300" 21966 "s59E25H2" 0 "Oxygen-independent coproporphyrinogen-III oxidase 1"  
"MCG\_K23\_00300" 21966 "s59E5H2" 0 "Oxygen-independent coproporphyrinogen-III oxidase 1"  
"MCG\_K23\_00300" 21966 "s63E6H2" 0 "Oxygen-independent coproporphyrinogen-III oxidase 1"  
"MCG\_K23\_00301" 21967 "s59E13H2" 0 "(Dimethylallyl)adenosine tRNA methylthiotransferase MiaB"  
"MCG\_K23\_00301" 21967 "s59E25H2" 0 "(Dimethylallyl)adenosine tRNA methylthiotransferase MiaB"  
"MCG\_K23\_00301" 21967 "s59E5H2" 0 "(Dimethylallyl)adenosine tRNA methylthiotransferase MiaB"  
"MCG\_K23\_00301" 21967 "s63E6H2" 0 "(Dimethylallyl)adenosine tRNA methylthiotransferase MiaB"  
"MCG\_K23\_00302" 21968 "s59E13H2" 0 "Anaerobic sulfatase-maturing enzyme"  
"MCG\_K23\_00302" 21968 "s59E25H2" 0 "Anaerobic sulfatase-maturing enzyme"  
"MCG\_K23\_00302" 21968 "s59E5H2" 0 "Anaerobic sulfatase-maturing enzyme"  
"MCG\_K23\_00302" 21968 "s63E6H2" 0 "Anaerobic sulfatase-maturing enzyme"  
"MCG\_K23\_00303" 21969 "s59E13H2" 0 "Serine/threonine-protein kinase AfsK"  
"MCG\_K23\_00303" 21969 "s59E25H2" 0 "Serine/threonine-protein kinase AfsK"  
"MCG\_K23\_00303" 21969 "s59E5H2" 0 "Serine/threonine-protein kinase AfsK"  
"MCG\_K23\_00303" 21969 "s63E6H2" 0 "Serine/threonine-protein kinase AfsK"  
"MCG\_K23\_00304" 21970 "s59E13H2" 0 "Threonylcarbamoyladenosine tRNA methylthiotransferase MtaB"  
"MCG\_K23\_00304" 21970 "s59E25H2" 0 "Threonylcarbamoyladenosine tRNA methylthiotransferase MtaB"  
"MCG\_K23\_00304" 21970 "s59E5H2" 0 "Threonylcarbamoyladenosine tRNA methylthiotransferase MtaB"  
"MCG\_K23\_00304" 21970 "s63E6H2" 0 "Threonylcarbamoyladenosine tRNA methylthiotransferase MtaB"  
"MCG\_K23\_00305" 21971 "s59E13H2" 0 "N-substituted formamide deformylase precursor"  
"MCG\_K23\_00305" 21971 "s59E25H2" 0 "N-substituted formamide deformylase precursor"  
"MCG\_K23\_00305" 21971 "s59E5H2" 0 "N-substituted formamide deformylase precursor"  
"MCG\_K23\_00305" 21971 "s63E6H2" 0 "N-substituted formamide deformylase precursor"  
"MCG\_K23\_00306" 21972 "s59E13H2" 0 "cobalamin biosynthesis protein"  
"MCG\_K23\_00306" 21972 "s59E25H2" 0 "cobalamin biosynthesis protein"  
"MCG\_K23\_00306" 21972 "s59E5H2" 0 "cobalamin biosynthesis protein"



"MCG\_K23\_00306" 21972 "s63E6H2" 0 "cobalamin biosynthesis protein"  
"MCG\_K23\_00307" 21973 "s59E13H2" 0 "coproporphyrinogen III oxidase"  
"MCG\_K23\_00307" 21973 "s59E25H2" 0 "coproporphyrinogen III oxidase"  
"MCG\_K23\_00307" 21973 "s59E5H2" 0 "coproporphyrinogen III oxidase"  
"MCG\_K23\_00307" 21973 "s63E6H2" 0 "coproporphyrinogen III oxidase"  
"MCG\_K23\_00308" 21974 "s59E13H2" 0 "Ribosomal protein S12 methylthiotransferase RimO"  
"MCG\_K23\_00308" 21974 "s59E25H2" 0 "Ribosomal protein S12 methylthiotransferase RimO"  
"MCG\_K23\_00308" 21974 "s59E5H2" 0 "Ribosomal protein S12 methylthiotransferase RimO"  
"MCG\_K23\_00308" 21974 "s63E6H2" 0 "Ribosomal protein S12 methylthiotransferase RimO"  
"MCG\_K23\_00309" 21975 "s59E13H2" 0.003419346 "Quinone oxidoreductase 1"  
"MCG\_K23\_00309" 21975 "s59E25H2" 0 "Quinone oxidoreductase 1"  
"MCG\_K23\_00309" 21975 "s59E5H2" 0 "Quinone oxidoreductase 1"  
"MCG\_K23\_00309" 21975 "s63E6H2" 0.001558137 "Quinone oxidoreductase 1"  
"MCG\_K23\_00310" 21976 "s59E13H2" 0 "NAD-dependent alcohol dehydrogenase"  
"MCG\_K23\_00310" 21976 "s59E25H2" 0 "NAD-dependent alcohol dehydrogenase"  
"MCG\_K23\_00310" 21976 "s59E5H2" 0 "NAD-dependent alcohol dehydrogenase"  
"MCG\_K23\_00310" 21976 "s63E6H2" 0 "NAD-dependent alcohol dehydrogenase"  
"MCG\_K23\_00311" 21977 "s59E13H2" 0 "Hemerythrin HHE cation binding domain protein"  
"MCG\_K23\_00311" 21977 "s59E25H2" 0 "Hemerythrin HHE cation binding domain protein"  
"MCG\_K23\_00311" 21977 "s59E5H2" 0 "Hemerythrin HHE cation binding domain protein"  
"MCG\_K23\_00311" 21977 "s63E6H2" 0 "Hemerythrin HHE cation binding domain protein"  
"MCG\_K23\_00312" 21978 "s59E13H2" 0 "protoporphyrinogen oxidase"  
"MCG\_K23\_00312" 21978 "s59E25H2" 0 "protoporphyrinogen oxidase"  
"MCG\_K23\_00312" 21978 "s59E5H2" 0 "protoporphyrinogen oxidase"  
"MCG\_K23\_00312" 21978 "s63E6H2" 0 "protoporphyrinogen oxidase"  
"MCG\_K23\_00313" 21979 "s59E13H2" 0 "MarR family protein"  
"MCG\_K23\_00313" 21979 "s59E25H2" 0 "MarR family protein"  
"MCG\_K23\_00313" 21979 "s59E5H2" 0 "MarR family protein"  
"MCG\_K23\_00313" 21979 "s63E6H2" 0 "MarR family protein"  
"MCG\_K23\_00314" 21980 "s59E13H2" 0 "Cysteine desulfurase"  
"MCG\_K23\_00314" 21980 "s59E25H2" 0 "Cysteine desulfurase"  
"MCG\_K23\_00314" 21980 "s59E5H2" 0 "Cysteine desulfurase"  
"MCG\_K23\_00314" 21980 "s63E6H2" 0 "Cysteine desulfurase"  
"MCG\_K23\_00315" 21981 "s59E13H2" 0 "Histidine-specific methyltransferase EgtD"  
"MCG\_K23\_00315" 21981 "s59E25H2" 0 "Histidine-specific methyltransferase EgtD"  
"MCG\_K23\_00315" 21981 "s59E5H2" 0 "Histidine-specific methyltransferase EgtD"  
"MCG\_K23\_00315" 21981 "s63E6H2" 0 "Histidine-specific methyltransferase EgtD"  
"MCG\_K23\_00316" 21982 "s59E13H2" 0 "Thermosome subunit beta"  
"MCG\_K23\_00316" 21982 "s59E25H2" 0 "Thermosome subunit beta"  
"MCG\_K23\_00316" 21982 "s59E5H2" 0 "Thermosome subunit beta"  
"MCG\_K23\_00316" 21982 "s63E6H2" 0 "Thermosome subunit beta"  
"MCG\_K23\_00317" 21983 "s59E13H2" 0 "molybdopterin synthase small subunit"  
"MCG\_K23\_00317" 21983 "s59E25H2" 0 "molybdopterin synthase small subunit"  
"MCG\_K23\_00317" 21983 "s59E5H2" 0 "molybdopterin synthase small subunit"  
"MCG\_K23\_00317" 21983 "s63E6H2" 0 "molybdopterin synthase small subunit"  
"MCG\_K23\_00318" 21984 "s59E13H2" 0 "putative translation initiation factor IF-2"  
"MCG\_K23\_00318" 21984 "s59E25H2" 0 "putative translation initiation factor IF-2"

"MCG\_K23\_00318" 21984 "s59E5H2" 0 "putative translation initiation factor IF-2"  
"MCG\_K23\_00318" 21984 "s63E6H2" 0 "putative translation initiation factor IF-2"  
"MCG\_K23\_00319" 21985 "s59E13H2" 0 "hypothetical protein"  
"MCG\_K23\_00319" 21985 "s59E25H2" 0 "hypothetical protein"  
"MCG\_K23\_00319" 21985 "s59E5H2" 0 "hypothetical protein"  
"MCG\_K23\_00319" 21985 "s63E6H2" 0 "hypothetical protein"  
"MCG\_K23\_00320" 21986 "s59E13H2" 0 "Type 2 DNA topoisomerase 6 subunit A"  
"MCG\_K23\_00320" 21986 "s59E25H2" 0 "Type 2 DNA topoisomerase 6 subunit A"  
"MCG\_K23\_00320" 21986 "s59E5H2" 0.006900839 "Type 2 DNA topoisomerase 6 subunit A"  
"MCG\_K23\_00320" 21986 "s63E6H2" 0 "Type 2 DNA topoisomerase 6 subunit A"  
"MCG\_K23\_00321" 21987 "s59E13H2" 0 "Type 2 DNA topoisomerase 6 subunit B"  
"MCG\_K23\_00321" 21987 "s59E25H2" 0 "Type 2 DNA topoisomerase 6 subunit B"  
"MCG\_K23\_00321" 21987 "s59E5H2" 0 "Type 2 DNA topoisomerase 6 subunit B"  
"MCG\_K23\_00321" 21987 "s63E6H2" 0 "Type 2 DNA topoisomerase 6 subunit B"  
"MCG\_K23\_00322" 21988 "s59E13H2" 0 "putative ABC transporter ATP-binding protein YheS"  
"MCG\_K23\_00322" 21988 "s59E25H2" 0 "putative ABC transporter ATP-binding protein YheS"  
"MCG\_K23\_00322" 21988 "s59E5H2" 0 "putative ABC transporter ATP-binding protein YheS"  
"MCG\_K23\_00322" 21988 "s63E6H2" 0 "putative ABC transporter ATP-binding protein YheS"  
"MCG\_K23\_00323" 21989 "s59E13H2" 0 "hypothetical protein"  
"MCG\_K23\_00323" 21989 "s59E25H2" 0 "hypothetical protein"  
"MCG\_K23\_00323" 21989 "s59E5H2" 0 "hypothetical protein"  
"MCG\_K23\_00323" 21989 "s63E6H2" 0 "hypothetical protein"  
"MCG\_K23\_00324" 21990 "s59E13H2" 0 "Regulatory protein Cgi121"  
"MCG\_K23\_00324" 21990 "s59E25H2" 0 "Regulatory protein Cgi121"  
"MCG\_K23\_00324" 21990 "s59E5H2" 0 "Regulatory protein Cgi121"  
"MCG\_K23\_00324" 21990 "s63E6H2" 0 "Regulatory protein Cgi121"  
"MCG\_K23\_00325" 21991 "s59E13H2" 0 "xanthine-guanine phosphoribosyltransferase"  
"MCG\_K23\_00325" 21991 "s59E25H2" 0 "xanthine-guanine phosphoribosyltransferase"  
"MCG\_K23\_00325" 21991 "s59E5H2" 0 "xanthine-guanine phosphoribosyltransferase"  
"MCG\_K23\_00325" 21991 "s63E6H2" 0 "xanthine-guanine phosphoribosyltransferase"  
"MCG\_K23\_00326" 21992 "s59E13H2" 0 "hypothetical protein"  
"MCG\_K23\_00326" 21992 "s59E25H2" 0 "hypothetical protein"  
"MCG\_K23\_00326" 21992 "s59E5H2" 0 "hypothetical protein"  
"MCG\_K23\_00326" 21992 "s63E6H2" 0 "hypothetical protein"  
"MCG\_K23\_00328" 21994 "s59E13H2" 0 "hypothetical protein"  
"MCG\_K23\_00328" 21994 "s59E25H2" 0 "hypothetical protein"  
"MCG\_K23\_00328" 21994 "s59E5H2" 0 "hypothetical protein"  
"MCG\_K23\_00328" 21994 "s63E6H2" 0 "hypothetical protein"  
"MCG\_K23\_00331" 21997 "s59E13H2" 0 "Roadblock/LC7 domain protein"  
"MCG\_K23\_00331" 21997 "s59E25H2" 0 "Roadblock/LC7 domain protein"  
"MCG\_K23\_00331" 21997 "s59E5H2" 0 "Roadblock/LC7 domain protein"  
"MCG\_K23\_00331" 21997 "s63E6H2" 0 "Roadblock/LC7 domain protein"  
"MCG\_K23\_00332" 21998 "s59E13H2" 0 "Soluble hydrogenase 42 kDa subunit"  
"MCG\_K23\_00332" 21998 "s59E25H2" 0 "Soluble hydrogenase 42 kDa subunit"  
"MCG\_K23\_00332" 21998 "s59E5H2" 0 "Soluble hydrogenase 42 kDa subunit"  
"MCG\_K23\_00332" 21998 "s63E6H2" 0 "Soluble hydrogenase 42 kDa subunit"  
"MCG\_K23\_00333" 21999 "s59E13H2" 0 "hypothetical protein"

"MCG\_K23\_00333" 21999 "s59E25H2" 0 "hypothetical protein"  
"MCG\_K23\_00333" 21999 "s59E5H2" 0 "hypothetical protein"  
"MCG\_K23\_00333" 21999 "s63E6H2" 0 "hypothetical protein"  
"MCG\_K23\_00334" 22000 "s59E13H2" 0 "Copper-transporting P-type ATPase"  
"MCG\_K23\_00334" 22000 "s59E25H2" 0 "Copper-transporting P-type ATPase"  
"MCG\_K23\_00334" 22000 "s59E5H2" 0 "Copper-transporting P-type ATPase"  
"MCG\_K23\_00334" 22000 "s63E6H2" 0 "Copper-transporting P-type ATPase"  
"MCG\_K23\_00335" 22001 "s59E13H2" 0 "DEAD-box ATP-dependent RNA helicase CshA"  
"MCG\_K23\_00335" 22001 "s59E25H2" 0 "DEAD-box ATP-dependent RNA helicase CshA"  
"MCG\_K23\_00335" 22001 "s59E5H2" 0 "DEAD-box ATP-dependent RNA helicase CshA"  
"MCG\_K23\_00335" 22001 "s63E6H2" 0 "DEAD-box ATP-dependent RNA helicase CshA"  
"MCG\_K23\_00336" 22002 "s59E13H2" 0 "Xaa-Pro dipeptidase"  
"MCG\_K23\_00336" 22002 "s59E25H2" 0 "Xaa-Pro dipeptidase"  
"MCG\_K23\_00336" 22002 "s59E5H2" 0 "Xaa-Pro dipeptidase"  
"MCG\_K23\_00336" 22002 "s63E6H2" 0 "Xaa-Pro dipeptidase"  
"MCG\_K23\_00337" 22003 "s59E13H2" 0 "DNA-3-methyladenine glycosylase"  
"MCG\_K23\_00337" 22003 "s59E25H2" 0 "DNA-3-methyladenine glycosylase"  
"MCG\_K23\_00337" 22003 "s59E5H2" 0 "DNA-3-methyladenine glycosylase"  
"MCG\_K23\_00337" 22003 "s63E6H2" 0 "DNA-3-methyladenine glycosylase"  
"MCG\_K23\_00338" 22004 "s59E13H2" 0 "Elongation factor 2"  
"MCG\_K23\_00338" 22004 "s59E25H2" 0 "Elongation factor 2"  
"MCG\_K23\_00338" 22004 "s59E5H2" 0 "Elongation factor 2"  
"MCG\_K23\_00338" 22004 "s63E6H2" 0 "Elongation factor 2"  
"MCG\_K23\_00339" 22005 "s59E13H2" 0 "F420-non-reducing hydrogenase iron-sulfur subunit D"  
"MCG\_K23\_00339" 22005 "s59E25H2" 0 "F420-non-reducing hydrogenase iron-sulfur subunit D"  
"MCG\_K23\_00339" 22005 "s59E5H2" 0 "F420-non-reducing hydrogenase iron-sulfur subunit D"  
"MCG\_K23\_00339" 22005 "s63E6H2" 0 "F420-non-reducing hydrogenase iron-sulfur subunit D"  
"MCG\_K23\_00340" 22006 "s59E13H2" 0 "Sulfide dehydrogenase subunit beta precursor"  
"MCG\_K23\_00340" 22006 "s59E25H2" 0 "Sulfide dehydrogenase subunit beta precursor"  
"MCG\_K23\_00340" 22006 "s59E5H2" 0 "Sulfide dehydrogenase subunit beta precursor"  
"MCG\_K23\_00340" 22006 "s63E6H2" 0 "Sulfide dehydrogenase subunit beta precursor"  
"MCG\_K23\_00341" 22007 "s59E13H2" 0 "Sulfide dehydrogenase subunit alpha precursor"  
"MCG\_K23\_00341" 22007 "s59E25H2" 0 "Sulfide dehydrogenase subunit alpha precursor"  
"MCG\_K23\_00341" 22007 "s59E5H2" 0 "Sulfide dehydrogenase subunit alpha precursor"  
"MCG\_K23\_00341" 22007 "s63E6H2" 0 "Sulfide dehydrogenase subunit alpha precursor"  
"MCG\_K23\_00342" 22008 "s59E13H2" 0 "TraX protein"  
"MCG\_K23\_00342" 22008 "s59E25H2" 0 "TraX protein"  
"MCG\_K23\_00342" 22008 "s59E5H2" 0 "TraX protein"  
"MCG\_K23\_00342" 22008 "s63E6H2" 0 "TraX protein"  
"MCG\_K23\_00343" 22009 "s59E13H2" 0 "nitrous-oxide reductase"  
"MCG\_K23\_00343" 22009 "s59E25H2" 0 "nitrous-oxide reductase"  
"MCG\_K23\_00343" 22009 "s59E5H2" 0 "nitrous-oxide reductase"  
"MCG\_K23\_00343" 22009 "s63E6H2" 0 "nitrous-oxide reductase"  
"MCG\_K23\_00344" 22010 "s59E13H2" 0 "ribosomal-protein-alanine N-acetyltransferase"  
"MCG\_K23\_00344" 22010 "s59E25H2" 0 "ribosomal-protein-alanine N-acetyltransferase"  
"MCG\_K23\_00344" 22010 "s59E5H2" 0 "ribosomal-protein-alanine N-acetyltransferase"  
"MCG\_K23\_00344" 22010 "s63E6H2" 0 "ribosomal-protein-alanine N-acetyltransferase"

"MCG\_K23\_00345" 22011 "s59E13H2" 0 "Ultraviolet N-glycosylase/AP lyase"  
"MCG\_K23\_00345" 22011 "s59E25H2" 0 "Ultraviolet N-glycosylase/AP lyase"  
"MCG\_K23\_00345" 22011 "s59E5H2" 0 "Ultraviolet N-glycosylase/AP lyase"  
"MCG\_K23\_00345" 22011 "s63E6H2" 0 "Ultraviolet N-glycosylase/AP lyase"  
"MCG\_K23\_00346" 22012 "s59E13H2" 0 "Zinc-containing ferredoxin-1"  
"MCG\_K23\_00346" 22012 "s59E25H2" 0 "Zinc-containing ferredoxin-1"  
"MCG\_K23\_00346" 22012 "s59E5H2" 0 "Zinc-containing ferredoxin-1"  
"MCG\_K23\_00346" 22012 "s63E6H2" 0 "Zinc-containing ferredoxin-1"  
"MCG\_K23\_00347" 22013 "s59E13H2" 0 "Spore protein SP21"  
"MCG\_K23\_00347" 22013 "s59E25H2" 0 "Spore protein SP21"  
"MCG\_K23\_00347" 22013 "s59E5H2" 0 "Spore protein SP21"  
"MCG\_K23\_00347" 22013 "s63E6H2" 0 "Spore protein SP21"  
"MCG\_K23\_00348" 22014 "s59E13H2" 0 "Digeranylgeranyl glyceryl phosphate synthase"  
"MCG\_K23\_00348" 22014 "s59E25H2" 0 "Digeranylgeranyl glyceryl phosphate synthase"  
"MCG\_K23\_00348" 22014 "s59E5H2" 0 "Digeranylgeranyl glyceryl phosphate synthase"  
"MCG\_K23\_00348" 22014 "s63E6H2" 0 "Digeranylgeranyl glyceryl phosphate synthase"  
"MCG\_K23\_00349" 22015 "s59E13H2" 0 "hypothetical protein"  
"MCG\_K23\_00349" 22015 "s59E25H2" 0 "hypothetical protein"  
"MCG\_K23\_00349" 22015 "s59E5H2" 0 "hypothetical protein"  
"MCG\_K23\_00349" 22015 "s63E6H2" 0 "hypothetical protein"  
"MCG\_K23\_00350" 22016 "s59E13H2" 0 "putative cysteine desulfurase 2"  
"MCG\_K23\_00350" 22016 "s59E25H2" 0 "putative cysteine desulfurase 2"  
"MCG\_K23\_00350" 22016 "s59E5H2" 0 "putative cysteine desulfurase 2"  
"MCG\_K23\_00350" 22016 "s63E6H2" 0 "putative cysteine desulfurase 2"  
"MCG\_K23\_00351" 22017 "s59E13H2" 0 "D-3-phosphoglycerate dehydrogenase"  
"MCG\_K23\_00351" 22017 "s59E25H2" 0 "D-3-phosphoglycerate dehydrogenase"  
"MCG\_K23\_00351" 22017 "s59E5H2" 0 "D-3-phosphoglycerate dehydrogenase"  
"MCG\_K23\_00351" 22017 "s63E6H2" 0 "D-3-phosphoglycerate dehydrogenase"  
"MCG\_K23\_00353" 22019 "s59E13H2" 0 "site-specific tyrosine recombinase XerD"  
"MCG\_K23\_00353" 22019 "s59E25H2" 0 "site-specific tyrosine recombinase XerD"  
"MCG\_K23\_00353" 22019 "s59E5H2" 0 "site-specific tyrosine recombinase XerD"  
"MCG\_K23\_00353" 22019 "s63E6H2" 0 "site-specific tyrosine recombinase XerD"  
"MCG\_K23\_00356" 22022 "s59E13H2" 0 "hypothetical protein"  
"MCG\_K23\_00356" 22022 "s59E25H2" 0 "hypothetical protein"  
"MCG\_K23\_00356" 22022 "s59E5H2" 0 "hypothetical protein"  
"MCG\_K23\_00356" 22022 "s63E6H2" 0 "hypothetical protein"  
"MCG\_K23\_00357" 22023 "s59E13H2" 0 "hypothetical protein"  
"MCG\_K23\_00357" 22023 "s59E25H2" 0 "hypothetical protein"  
"MCG\_K23\_00357" 22023 "s59E5H2" 0 "hypothetical protein"  
"MCG\_K23\_00357" 22023 "s63E6H2" 0 "hypothetical protein"  
"MCG\_K23\_00358" 22024 "s59E13H2" 0 "hypothetical protein"  
"MCG\_K23\_00358" 22024 "s59E25H2" 0 "hypothetical protein"  
"MCG\_K23\_00358" 22024 "s59E5H2" 0 "hypothetical protein"  
"MCG\_K23\_00358" 22024 "s63E6H2" 0 "hypothetical protein"  
"MCG\_K23\_00363" 22029 "s59E13H2" 0 "hypothetical protein"  
"MCG\_K23\_00363" 22029 "s59E25H2" 0 "hypothetical protein"  
"MCG\_K23\_00363" 22029 "s59E5H2" 0 "hypothetical protein"

"MCG\_K23\_00363" 22029 "s63E6H2" 0 "hypothetical protein"  
"MCG\_K23\_00364" 22030 "s59E13H2" 0 "hypothetical protein"  
"MCG\_K23\_00364" 22030 "s59E25H2" 0 "hypothetical protein"  
"MCG\_K23\_00364" 22030 "s59E5H2" 0 "hypothetical protein"  
"MCG\_K23\_00364" 22030 "s63E6H2" 0 "hypothetical protein"  
"MCG\_K23\_00365" 22031 "s59E13H2" 0 "hypothetical protein"  
"MCG\_K23\_00365" 22031 "s59E25H2" 0 "hypothetical protein"  
"MCG\_K23\_00365" 22031 "s59E5H2" 0 "hypothetical protein"  
"MCG\_K23\_00365" 22031 "s63E6H2" 0 "hypothetical protein"  
"MCG\_K23\_00366" 22032 "s59E13H2" 0 "diadenosine tetraphosphatase"  
"MCG\_K23\_00366" 22032 "s59E25H2" 0 "diadenosine tetraphosphatase"  
"MCG\_K23\_00366" 22032 "s59E5H2" 0 "diadenosine tetraphosphatase"  
"MCG\_K23\_00366" 22032 "s63E6H2" 0 "diadenosine tetraphosphatase"  
"MCG\_K23\_00367" 22033 "s59E13H2" 0 "Putative electron transport protein YccM"  
"MCG\_K23\_00367" 22033 "s59E25H2" 0 "Putative electron transport protein YccM"  
"MCG\_K23\_00367" 22033 "s59E5H2" 0 "Putative electron transport protein YccM"  
"MCG\_K23\_00367" 22033 "s63E6H2" 0 "Putative electron transport protein YccM"  
"MCG\_K23\_00368" 22034 "s59E13H2" 0 "hypothetical protein"  
"MCG\_K23\_00368" 22034 "s59E25H2" 0 "hypothetical protein"  
"MCG\_K23\_00368" 22034 "s59E5H2" 0 "hypothetical protein"  
"MCG\_K23\_00368" 22034 "s63E6H2" 0 "hypothetical protein"  
"MCG\_K23\_00369" 22035 "s59E13H2" 0 "Digeranylgeranyl glycerophospholipid reductase"  
"MCG\_K23\_00369" 22035 "s59E25H2" 0 "Digeranylgeranyl glycerophospholipid reductase"  
"MCG\_K23\_00369" 22035 "s59E5H2" 0 "Digeranylgeranyl glycerophospholipid reductase"  
"MCG\_K23\_00369" 22035 "s63E6H2" 0 "Digeranylgeranyl glycerophospholipid reductase"  
"MCG\_K23\_00370" 22036 "s59E13H2" 0 "HxlR-like helix-turn-helix"  
"MCG\_K23\_00370" 22036 "s59E25H2" 0 "HxlR-like helix-turn-helix"  
"MCG\_K23\_00370" 22036 "s59E5H2" 0 "HxlR-like helix-turn-helix"  
"MCG\_K23\_00370" 22036 "s63E6H2" 0 "HxlR-like helix-turn-helix"  
"MCG\_K23\_00371" 22037 "s59E13H2" 0 "putative HTH-type transcriptional regulator"  
"MCG\_K23\_00371" 22037 "s59E25H2" 0 "putative HTH-type transcriptional regulator"  
"MCG\_K23\_00371" 22037 "s59E5H2" 0 "putative HTH-type transcriptional regulator"  
"MCG\_K23\_00371" 22037 "s63E6H2" 0 "putative HTH-type transcriptional regulator"  
"MCG\_K23\_00372" 22038 "s59E13H2" 0 "Asparagine--tRNA ligase"  
"MCG\_K23\_00372" 22038 "s59E25H2" 0 "Asparagine--tRNA ligase"  
"MCG\_K23\_00372" 22038 "s59E5H2" 0 "Asparagine--tRNA ligase"  
"MCG\_K23\_00372" 22038 "s63E6H2" 0 "Asparagine--tRNA ligase"  
"MCG\_K23\_00373" 22039 "s59E13H2" 0 "Phosphoenolpyruvate carboxykinase [GTP]"  
"MCG\_K23\_00373" 22039 "s59E25H2" 0 "Phosphoenolpyruvate carboxykinase [GTP]"  
"MCG\_K23\_00373" 22039 "s59E5H2" 0 "Phosphoenolpyruvate carboxykinase [GTP]"  
"MCG\_K23\_00373" 22039 "s63E6H2" 0.0001001903 "Phosphoenolpyruvate carboxykinase [GTP]"  
"MCG\_K23\_00376" 22042 "s59E13H2" 0 "hypothetical protein"  
"MCG\_K23\_00376" 22042 "s59E25H2" 0 "hypothetical protein"  
"MCG\_K23\_00376" 22042 "s59E5H2" 0 "hypothetical protein"  
"MCG\_K23\_00376" 22042 "s63E6H2" 0 "hypothetical protein"  
"MCG\_K23\_00377" 22043 "s59E13H2" 0 "hypothetical protein"  
"MCG\_K23\_00377" 22043 "s59E25H2" 0 "hypothetical protein"

"MCG\_K23\_00377" 22043 "s59E5H2" 0 "hypothetical protein"  
"MCG\_K23\_00377" 22043 "s63E6H2" 0 "hypothetical protein"  
"MCG\_K23\_00378" 22044 "s59E13H2" 0 "Asparagine synthetase B [glutamine-hydrolyzing]"  
"MCG\_K23\_00378" 22044 "s59E25H2" 0 "Asparagine synthetase B [glutamine-hydrolyzing]"  
"MCG\_K23\_00378" 22044 "s59E5H2" 0 "Asparagine synthetase B [glutamine-hydrolyzing]"  
"MCG\_K23\_00378" 22044 "s63E6H2" 0 "Asparagine synthetase B [glutamine-hydrolyzing]"  
"MCG\_K23\_00379" 22045 "s59E13H2" 0 "Protease HtpX"  
"MCG\_K23\_00379" 22045 "s59E25H2" 0 "Protease HtpX"  
"MCG\_K23\_00379" 22045 "s59E5H2" 0 "Protease HtpX"  
"MCG\_K23\_00379" 22045 "s63E6H2" 0 "Protease HtpX"  
"MCG\_K23\_00380" 22046 "s59E13H2" 0 "hypothetical protein"  
"MCG\_K23\_00380" 22046 "s59E25H2" 0 "hypothetical protein"  
"MCG\_K23\_00380" 22046 "s59E5H2" 0 "hypothetical protein"  
"MCG\_K23\_00380" 22046 "s63E6H2" 0 "hypothetical protein"  
"MCG\_K23\_00381" 22047 "s59E13H2" 0 "hypothetical protein"  
"MCG\_K23\_00381" 22047 "s59E25H2" 0 "hypothetical protein"  
"MCG\_K23\_00381" 22047 "s59E5H2" 0 "hypothetical protein"  
"MCG\_K23\_00381" 22047 "s63E6H2" 0 "hypothetical protein"  
"MCG\_K23\_00382" 22048 "s59E13H2" 0 "Ferredoxin-2"  
"MCG\_K23\_00382" 22048 "s59E25H2" 0 "Ferredoxin-2"  
"MCG\_K23\_00382" 22048 "s59E5H2" 0 "Ferredoxin-2"  
"MCG\_K23\_00382" 22048 "s63E6H2" 0 "Ferredoxin-2"  
"MCG\_K23\_00384" 22050 "s59E13H2" 0 "hypothetical protein"  
"MCG\_K23\_00384" 22050 "s59E25H2" 0 "hypothetical protein"  
"MCG\_K23\_00384" 22050 "s59E5H2" 0 "hypothetical protein"  
"MCG\_K23\_00384" 22050 "s63E6H2" 0 "hypothetical protein"  
"MCG\_K23\_00386" 22052 "s59E13H2" 0 "hypothetical protein"  
"MCG\_K23\_00386" 22052 "s59E25H2" 0 "hypothetical protein"  
"MCG\_K23\_00386" 22052 "s59E5H2" 0 "hypothetical protein"  
"MCG\_K23\_00386" 22052 "s63E6H2" 0 "hypothetical protein"  
"MCG\_K23\_00387" 22053 "s59E13H2" 0 "hypothetical protein"  
"MCG\_K23\_00387" 22053 "s59E25H2" 0 "hypothetical protein"  
"MCG\_K23\_00387" 22053 "s59E5H2" 0 "hypothetical protein"  
"MCG\_K23\_00387" 22053 "s63E6H2" 0 "hypothetical protein"  
"MCG\_K23\_00388" 22054 "s59E13H2" 0 "Phosphoribosylformylglycinamide cyclo-ligase"  
"MCG\_K23\_00388" 22054 "s59E25H2" 0 "Phosphoribosylformylglycinamide cyclo-ligase"  
"MCG\_K23\_00388" 22054 "s59E5H2" 0 "Phosphoribosylformylglycinamide cyclo-ligase"  
"MCG\_K23\_00388" 22054 "s63E6H2" 0 "Phosphoribosylformylglycinamide cyclo-ligase"  
"MCG\_K23\_00389" 22055 "s59E13H2" 0 "phosphoribosylformylglycinamide synthase subunit PurS"  
"MCG\_K23\_00389" 22055 "s59E25H2" 0 "phosphoribosylformylglycinamide synthase subunit PurS"  
"MCG\_K23\_00389" 22055 "s59E5H2" 0 "phosphoribosylformylglycinamide synthase subunit PurS"  
"MCG\_K23\_00389" 22055 "s63E6H2" 0 "phosphoribosylformylglycinamide synthase subunit PurS"  
"MCG\_K23\_00390" 22056 "s59E13H2" 0 "Phosphoribosylformylglycinamide synthase 2"  
"MCG\_K23\_00390" 22056 "s59E25H2" 0 "Phosphoribosylformylglycinamide synthase 2"  
"MCG\_K23\_00390" 22056 "s59E5H2" 0 "Phosphoribosylformylglycinamide synthase 2"  
"MCG\_K23\_00390" 22056 "s63E6H2" 0 "Phosphoribosylformylglycinamide synthase 2"  
"MCG\_K23\_00391" 22057 "s59E13H2" 0 "Phosphoribosylformylglycinamide synthase 1"

"MCG\_K23\_00391" 22057 "s59E25H2" 0 "Phosphoribosylformylglycinamide synthase 1"  
"MCG\_K23\_00391" 22057 "s59E5H2" 0 "Phosphoribosylformylglycinamide synthase 1"  
"MCG\_K23\_00391" 22057 "s63E6H2" 0 "Phosphoribosylformylglycinamide synthase 1"  
"MCG\_K23\_00392" 22058 "s59E13H2" 0 "putative sugar kinase YdjH"  
"MCG\_K23\_00392" 22058 "s59E25H2" 0 "putative sugar kinase YdjH"  
"MCG\_K23\_00392" 22058 "s59E5H2" 0 "putative sugar kinase YdjH"  
"MCG\_K23\_00392" 22058 "s63E6H2" 0 "putative sugar kinase YdjH"  
"MCG\_K23\_00393" 22059 "s59E13H2" 0 "Formylmethanofuran--tetrahydromethanopterin formyltransferase"  
"MCG\_K23\_00393" 22059 "s59E25H2" 0 "Formylmethanofuran--tetrahydromethanopterin formyltransferase"  
"MCG\_K23\_00393" 22059 "s59E5H2" 0 "Formylmethanofuran--tetrahydromethanopterin formyltransferase"  
"MCG\_K23\_00393" 22059 "s63E6H2" 0 "Formylmethanofuran--tetrahydromethanopterin formyltransferase"  
"MCG\_K23\_00394" 22060 "s59E13H2" 0 "haloacid dehalogenase-like hydrolase"  
"MCG\_K23\_00394" 22060 "s59E25H2" 0 "haloacid dehalogenase-like hydrolase"  
"MCG\_K23\_00394" 22060 "s59E5H2" 0 "haloacid dehalogenase-like hydrolase"  
"MCG\_K23\_00394" 22060 "s63E6H2" 0 "haloacid dehalogenase-like hydrolase"  
"MCG\_K23\_00395" 22061 "s59E13H2" 0 "Phosphoribosylamine--glycine ligase"  
"MCG\_K23\_00395" 22061 "s59E25H2" 0 "Phosphoribosylamine--glycine ligase"  
"MCG\_K23\_00395" 22061 "s59E5H2" 0 "Phosphoribosylamine--glycine ligase"  
"MCG\_K23\_00395" 22061 "s63E6H2" 0 "Phosphoribosylamine--glycine ligase"  
"MCG\_K23\_00396" 22062 "s59E13H2" 0 "Amidophosphoribosyltransferase precursor"  
"MCG\_K23\_00396" 22062 "s59E25H2" 0 "Amidophosphoribosyltransferase precursor"  
"MCG\_K23\_00396" 22062 "s59E5H2" 0 "Amidophosphoribosyltransferase precursor"  
"MCG\_K23\_00396" 22062 "s63E6H2" 0 "Amidophosphoribosyltransferase precursor"  
"MCG\_K23\_00397" 22063 "s59E13H2" 0 "S-adenosylmethionine synthase"  
"MCG\_K23\_00397" 22063 "s59E25H2" 0 "S-adenosylmethionine synthase"  
"MCG\_K23\_00397" 22063 "s59E5H2" 0 "S-adenosylmethionine synthase"  
"MCG\_K23\_00397" 22063 "s63E6H2" 0 "S-adenosylmethionine synthase"  
"MCG\_K23\_00398" 22064 "s59E13H2" 0 "hypothetical protein"  
"MCG\_K23\_00398" 22064 "s59E25H2" 0 "hypothetical protein"  
"MCG\_K23\_00398" 22064 "s59E5H2" 0 "hypothetical protein"  
"MCG\_K23\_00398" 22064 "s63E6H2" 0 "hypothetical protein"  
"MCG\_K23\_00399" 22065 "s59E13H2" 0 "hypothetical protein"  
"MCG\_K23\_00399" 22065 "s59E25H2" 0 "hypothetical protein"  
"MCG\_K23\_00399" 22065 "s59E5H2" 0 "hypothetical protein"  
"MCG\_K23\_00399" 22065 "s63E6H2" 0 "hypothetical protein"  
"MCG\_K23\_00400" 22066 "s59E13H2" 0 "7-carboxy-7-deazaguanine synthase"  
"MCG\_K23\_00400" 22066 "s59E25H2" 0 "7-carboxy-7-deazaguanine synthase"  
"MCG\_K23\_00400" 22066 "s59E5H2" 0 "7-carboxy-7-deazaguanine synthase"  
"MCG\_K23\_00400" 22066 "s63E6H2" 0 "7-carboxy-7-deazaguanine synthase"  
"MCG\_K23\_00401" 22067 "s59E13H2" 0 "Phosphoribosyl-AMP cyclohydrolase"  
"MCG\_K23\_00401" 22067 "s59E25H2" 0 "Phosphoribosyl-AMP cyclohydrolase"  
"MCG\_K23\_00401" 22067 "s59E5H2" 0 "Phosphoribosyl-AMP cyclohydrolase"  
"MCG\_K23\_00401" 22067 "s63E6H2" 0 "Phosphoribosyl-AMP cyclohydrolase"  
"MCG\_K23\_00402" 22068 "s59E13H2" 0 "Imidazole glycerol phosphate synthase subunit HisF"  
"MCG\_K23\_00402" 22068 "s59E25H2" 0 "Imidazole glycerol phosphate synthase subunit HisF"  
"MCG\_K23\_00402" 22068 "s59E5H2" 0 "Imidazole glycerol phosphate synthase subunit HisF"  
"MCG\_K23\_00402" 22068 "s63E6H2" 0 "Imidazole glycerol phosphate synthase subunit HisF"

"MCG\_K23\_00403" 22069 "s59E13H2" 0 "Phosphoribosyl isomerase A"  
"MCG\_K23\_00403" 22069 "s59E25H2" 0 "Phosphoribosyl isomerase A"  
"MCG\_K23\_00403" 22069 "s59E5H2" 0 "Phosphoribosyl isomerase A"  
"MCG\_K23\_00403" 22069 "s63E6H2" 0 "Phosphoribosyl isomerase A"  
"MCG\_K23\_00404" 22070 "s59E13H2" 0 "Imidazole glycerol phosphate synthase subunit HisH 1"  
"MCG\_K23\_00404" 22070 "s59E25H2" 0 "Imidazole glycerol phosphate synthase subunit HisH 1"  
"MCG\_K23\_00404" 22070 "s59E5H2" 0 "Imidazole glycerol phosphate synthase subunit HisH 1"  
"MCG\_K23\_00404" 22070 "s63E6H2" 0 "Imidazole glycerol phosphate synthase subunit HisH 1"  
"MCG\_K23\_00405" 22071 "s59E13H2" 0 "Imidazoleglycerol-phosphate dehydratase"  
"MCG\_K23\_00405" 22071 "s59E25H2" 0 "Imidazoleglycerol-phosphate dehydratase"  
"MCG\_K23\_00405" 22071 "s59E5H2" 0 "Imidazoleglycerol-phosphate dehydratase"  
"MCG\_K23\_00405" 22071 "s63E6H2" 0 "Imidazoleglycerol-phosphate dehydratase"  
"MCG\_K23\_00406" 22072 "s59E13H2" 0 "Histidinol-phosphate aminotransferase 2"  
"MCG\_K23\_00406" 22072 "s59E25H2" 0 "Histidinol-phosphate aminotransferase 2"  
"MCG\_K23\_00406" 22072 "s59E5H2" 0 "Histidinol-phosphate aminotransferase 2"  
"MCG\_K23\_00406" 22072 "s63E6H2" 0 "Histidinol-phosphate aminotransferase 2"  
"MCG\_K23\_00407" 22073 "s59E13H2" 0 "Histidinol dehydrogenase"  
"MCG\_K23\_00407" 22073 "s59E25H2" 0 "Histidinol dehydrogenase"  
"MCG\_K23\_00407" 22073 "s59E5H2" 0 "Histidinol dehydrogenase"  
"MCG\_K23\_00407" 22073 "s63E6H2" 0 "Histidinol dehydrogenase"  
"MCG\_K23\_00408" 22074 "s59E13H2" 0 "ATP phosphoribosyltransferase"  
"MCG\_K23\_00408" 22074 "s59E25H2" 0 "ATP phosphoribosyltransferase"  
"MCG\_K23\_00408" 22074 "s59E5H2" 0 "ATP phosphoribosyltransferase"  
"MCG\_K23\_00408" 22074 "s63E6H2" 0 "ATP phosphoribosyltransferase"  
"MCG\_K23\_00410" 22076 "s59E13H2" 0 "hypothetical protein"  
"MCG\_K23\_00410" 22076 "s59E25H2" 0 "hypothetical protein"  
"MCG\_K23\_00410" 22076 "s59E5H2" 0 "hypothetical protein"  
"MCG\_K23\_00410" 22076 "s63E6H2" 0 "hypothetical protein"  
"MCG\_K23\_00411" 22077 "s59E13H2" 0 "PAC2 family protein"  
"MCG\_K23\_00411" 22077 "s59E25H2" 0 "PAC2 family protein"  
"MCG\_K23\_00411" 22077 "s59E5H2" 0 "PAC2 family protein"  
"MCG\_K23\_00411" 22077 "s63E6H2" 0 "PAC2 family protein"  
"MCG\_K23\_00412" 22078 "s59E13H2" 0 "Fcf1"  
"MCG\_K23\_00412" 22078 "s59E25H2" 0 "Fcf1"  
"MCG\_K23\_00412" 22078 "s59E5H2" 0 "Fcf1"  
"MCG\_K23\_00412" 22078 "s63E6H2" 0 "Fcf1"  
"MCG\_K23\_00413" 22079 "s59E13H2" 0 "DNA-directed RNA polymerase subunit E"  
"MCG\_K23\_00413" 22079 "s59E25H2" 0 "DNA-directed RNA polymerase subunit E"  
"MCG\_K23\_00413" 22079 "s59E5H2" 0 "DNA-directed RNA polymerase subunit E"  
"MCG\_K23\_00413" 22079 "s63E6H2" 0 "DNA-directed RNA polymerase subunit E"  
"MCG\_K23\_00414" 22080 "s59E13H2" 0 "Transcription elongation factor Spt4"  
"MCG\_K23\_00414" 22080 "s59E25H2" 0 "Transcription elongation factor Spt4"  
"MCG\_K23\_00414" 22080 "s59E5H2" 0 "Transcription elongation factor Spt4"  
"MCG\_K23\_00414" 22080 "s63E6H2" 0 "Transcription elongation factor Spt4"  
"MCG\_K23\_00415" 22081 "s59E13H2" 0 "hypothetical protein"  
"MCG\_K23\_00415" 22081 "s59E25H2" 0 "hypothetical protein"  
"MCG\_K23\_00415" 22081 "s59E5H2" 0 "hypothetical protein"



"MCG\_K23\_00415" 22081 "s63E6H2" 0 "hypothetical protein"  
"MCG\_K23\_00416" 22082 "s59E13H2" 0 "30S ribosomal protein S24e"  
"MCG\_K23\_00416" 22082 "s59E25H2" 0 "30S ribosomal protein S24e"  
"MCG\_K23\_00416" 22082 "s59E5H2" 0 "30S ribosomal protein S24e"  
"MCG\_K23\_00416" 22082 "s63E6H2" 0 "30S ribosomal protein S24e"  
"MCG\_K23\_00417" 22083 "s59E13H2" 0 "30S ribosomal protein S27ae"  
"MCG\_K23\_00417" 22083 "s59E25H2" 0 "30S ribosomal protein S27ae"  
"MCG\_K23\_00417" 22083 "s59E5H2" 0 "30S ribosomal protein S27ae"  
"MCG\_K23\_00417" 22083 "s63E6H2" 0 "30S ribosomal protein S27ae"  
"MCG\_K23\_00419" 22085 "s59E13H2" 0 "30S ribosomal protein S19"  
"MCG\_K23\_00419" 22085 "s59E25H2" 0 "30S ribosomal protein S19"  
"MCG\_K23\_00419" 22085 "s59E5H2" 0 "30S ribosomal protein S19"  
"MCG\_K23\_00419" 22085 "s63E6H2" 0 "30S ribosomal protein S19"  
"MCG\_K23\_00420" 22086 "s59E13H2" 0 "50S ribosomal protein L2"  
"MCG\_K23\_00420" 22086 "s59E25H2" 0 "50S ribosomal protein L2"  
"MCG\_K23\_00420" 22086 "s59E5H2" 0 "50S ribosomal protein L2"  
"MCG\_K23\_00420" 22086 "s63E6H2" 0 "50S ribosomal protein L2"  
"MCG\_K23\_00421" 22087 "s59E13H2" 0 "50S ribosomal protein L23P"  
"MCG\_K23\_00421" 22087 "s59E25H2" 0 "50S ribosomal protein L23P"  
"MCG\_K23\_00421" 22087 "s59E5H2" 0 "50S ribosomal protein L23P"  
"MCG\_K23\_00421" 22087 "s63E6H2" 0 "50S ribosomal protein L23P"  
"MCG\_K23\_00422" 22088 "s59E13H2" 0 "50S ribosomal protein L4"  
"MCG\_K23\_00422" 22088 "s59E25H2" 0 "50S ribosomal protein L4"  
"MCG\_K23\_00422" 22088 "s59E5H2" 0 "50S ribosomal protein L4"  
"MCG\_K23\_00422" 22088 "s63E6H2" 0 "50S ribosomal protein L4"  
"MCG\_K23\_00423" 22089 "s59E13H2" 0 "50S ribosomal protein L3"  
"MCG\_K23\_00423" 22089 "s59E25H2" 0 "50S ribosomal protein L3"  
"MCG\_K23\_00423" 22089 "s59E5H2" 0 "50S ribosomal protein L3"  
"MCG\_K23\_00423" 22089 "s63E6H2" 0 "50S ribosomal protein L3"  
"MCG\_K23\_00424" 22090 "s59E13H2" 0 "hypothetical protein"  
"MCG\_K23\_00424" 22090 "s59E25H2" 0 "hypothetical protein"  
"MCG\_K23\_00424" 22090 "s59E5H2" 0 "hypothetical protein"  
"MCG\_K23\_00424" 22090 "s63E6H2" 0 "hypothetical protein"  
"MCG\_K23\_00425" 22091 "s59E13H2" 0 "Adenosylhomocysteinase"  
"MCG\_K23\_00425" 22091 "s59E25H2" 0 "Adenosylhomocysteinase"  
"MCG\_K23\_00425" 22091 "s59E5H2" 0 "Adenosylhomocysteinase"  
"MCG\_K23\_00425" 22091 "s63E6H2" 0 "Adenosylhomocysteinase"  
"MCG\_K23\_00426" 22092 "s59E13H2" 0 "hypothetical protein"  
"MCG\_K23\_00426" 22092 "s59E25H2" 0 "hypothetical protein"  
"MCG\_K23\_00426" 22092 "s59E5H2" 0 "hypothetical protein"  
"MCG\_K23\_00426" 22092 "s63E6H2" 0 "hypothetical protein"  
"MCG\_K23\_00427" 22093 "s59E13H2" 0 "Ubiquinone/menaquinone biosynthesis C-methyltransferase UbiE"  
"MCG\_K23\_00427" 22093 "s59E25H2" 0 "Ubiquinone/menaquinone biosynthesis C-methyltransferase UbiE"  
"MCG\_K23\_00427" 22093 "s59E5H2" 0 "Ubiquinone/menaquinone biosynthesis C-methyltransferase UbiE"  
"MCG\_K23\_00427" 22093 "s63E6H2" 0 "Ubiquinone/menaquinone biosynthesis C-methyltransferase UbiE"  
"MCG\_K23\_00429" 22095 "s59E13H2" 0 "hypothetical protein"  
"MCG\_K23\_00429" 22095 "s59E25H2" 0 "hypothetical protein"

"MCG\_K23\_00429" 22095 "s59E5H2" 0 "hypothetical protein"  
"MCG\_K23\_00429" 22095 "s63E6H2" 0 "hypothetical protein"  
"MCG\_K23\_00430" 22096 "s59E13H2" 0 "Hydrogenase expression/formation protein HypE"  
"MCG\_K23\_00430" 22096 "s59E25H2" 0 "Hydrogenase expression/formation protein HypE"  
"MCG\_K23\_00430" 22096 "s59E5H2" 0 "Hydrogenase expression/formation protein HypE"  
"MCG\_K23\_00430" 22096 "s63E6H2" 0 "Hydrogenase expression/formation protein HypE"  
"MCG\_K23\_00431" 22097 "s59E13H2" 0 "Glycosyltransferase AgII"  
"MCG\_K23\_00431" 22097 "s59E25H2" 0 "Glycosyltransferase AgII"  
"MCG\_K23\_00431" 22097 "s59E5H2" 0 "Glycosyltransferase AgII"  
"MCG\_K23\_00431" 22097 "s63E6H2" 0 "Glycosyltransferase AgII"  
"MCG\_K23\_00432" 22098 "s59E13H2" 0 "Glycosyltransferase AgII"  
"MCG\_K23\_00432" 22098 "s59E25H2" 0 "Glycosyltransferase AgII"  
"MCG\_K23\_00432" 22098 "s59E5H2" 0 "Glycosyltransferase AgII"  
"MCG\_K23\_00432" 22098 "s63E6H2" 0 "Glycosyltransferase AgII"  
"MCG\_K23\_00433" 22099 "s59E13H2" 0 "Antilisterial bacteriocin subtilisin biosynthesis protein Alba"  
"MCG\_K23\_00433" 22099 "s59E25H2" 0 "Antilisterial bacteriocin subtilisin biosynthesis protein Alba"  
"MCG\_K23\_00433" 22099 "s59E5H2" 0 "Antilisterial bacteriocin subtilisin biosynthesis protein Alba"  
"MCG\_K23\_00433" 22099 "s63E6H2" 0 "Antilisterial bacteriocin subtilisin biosynthesis protein Alba"  
"MCG\_K23\_00434" 22100 "s59E13H2" 0 "cytidylate kinase"  
"MCG\_K23\_00434" 22100 "s59E25H2" 0 "cytidylate kinase"  
"MCG\_K23\_00434" 22100 "s59E5H2" 0 "cytidylate kinase"  
"MCG\_K23\_00434" 22100 "s63E6H2" 0 "cytidylate kinase"  
"MCG\_K23\_00435" 22101 "s59E13H2" 0 "hypothetical protein"  
"MCG\_K23\_00435" 22101 "s59E25H2" 0 "hypothetical protein"  
"MCG\_K23\_00435" 22101 "s59E5H2" 0 "hypothetical protein"  
"MCG\_K23\_00435" 22101 "s63E6H2" 0 "hypothetical protein"  
"MCG\_K23\_00436" 22102 "s59E13H2" 0 "preprotein translocase subunit SecY"  
"MCG\_K23\_00436" 22102 "s59E25H2" 0 "preprotein translocase subunit SecY"  
"MCG\_K23\_00436" 22102 "s59E5H2" 0 "preprotein translocase subunit SecY"  
"MCG\_K23\_00436" 22102 "s63E6H2" 0 "preprotein translocase subunit SecY"  
"MCG\_K23\_00437" 22103 "s59E13H2" 0 "50S ribosomal protein L15P"  
"MCG\_K23\_00437" 22103 "s59E25H2" 0 "50S ribosomal protein L15P"  
"MCG\_K23\_00437" 22103 "s59E5H2" 0 "50S ribosomal protein L15P"  
"MCG\_K23\_00437" 22103 "s63E6H2" 0 "50S ribosomal protein L15P"  
"MCG\_K23\_00438" 22104 "s59E13H2" 0 "Hsp20/alpha crystallin family protein"  
"MCG\_K23\_00438" 22104 "s59E25H2" 0 "Hsp20/alpha crystallin family protein"  
"MCG\_K23\_00438" 22104 "s59E5H2" 0 "Hsp20/alpha crystallin family protein"  
"MCG\_K23\_00438" 22104 "s63E6H2" 0 "Hsp20/alpha crystallin family protein"  
"MCG\_K23\_00439" 22105 "s59E13H2" 0 "50S ribosomal protein L30P"  
"MCG\_K23\_00439" 22105 "s59E25H2" 0 "50S ribosomal protein L30P"  
"MCG\_K23\_00439" 22105 "s59E5H2" 0 "50S ribosomal protein L30P"  
"MCG\_K23\_00439" 22105 "s63E6H2" 0 "50S ribosomal protein L30P"  
"MCG\_K23\_00440" 22106 "s59E13H2" 0 "30S ribosomal protein S5"  
"MCG\_K23\_00440" 22106 "s59E25H2" 0 "30S ribosomal protein S5"  
"MCG\_K23\_00440" 22106 "s59E5H2" 0 "30S ribosomal protein S5"  
"MCG\_K23\_00440" 22106 "s63E6H2" 0 "30S ribosomal protein S5"  
"MCG\_K23\_00441" 22107 "s59E13H2" 0 "50S ribosomal protein L18P"

"MCG\_K23\_00441" 22107 "s59E25H2" 0 "50S ribosomal protein L18P"  
"MCG\_K23\_00441" 22107 "s59E5H2" 0 "50S ribosomal protein L18P"  
"MCG\_K23\_00441" 22107 "s63E6H2" 0 "50S ribosomal protein L18P"  
"MCG\_K23\_00442" 22108 "s59E13H2" 0 "50S ribosomal protein L19e"  
"MCG\_K23\_00442" 22108 "s59E25H2" 0 "50S ribosomal protein L19e"  
"MCG\_K23\_00442" 22108 "s59E5H2" 0 "50S ribosomal protein L19e"  
"MCG\_K23\_00442" 22108 "s63E6H2" 0 "50S ribosomal protein L19e"  
"MCG\_K23\_00443" 22109 "s59E13H2" 0 "50S ribosomal protein L32e"  
"MCG\_K23\_00443" 22109 "s59E25H2" 0 "50S ribosomal protein L32e"  
"MCG\_K23\_00443" 22109 "s59E5H2" 0 "50S ribosomal protein L32e"  
"MCG\_K23\_00443" 22109 "s63E6H2" 0 "50S ribosomal protein L32e"  
"MCG\_K23\_00444" 22110 "s59E13H2" 0 "50S ribosomal protein L6"  
"MCG\_K23\_00444" 22110 "s59E25H2" 0 "50S ribosomal protein L6"  
"MCG\_K23\_00444" 22110 "s59E5H2" 0 "50S ribosomal protein L6"  
"MCG\_K23\_00444" 22110 "s63E6H2" 0 "50S ribosomal protein L6"  
"MCG\_K23\_00445" 22111 "s59E13H2" 0 "30S ribosomal protein S8"  
"MCG\_K23\_00445" 22111 "s59E25H2" 0 "30S ribosomal protein S8"  
"MCG\_K23\_00445" 22111 "s59E5H2" 0 "30S ribosomal protein S8"  
"MCG\_K23\_00445" 22111 "s63E6H2" 0 "30S ribosomal protein S8"  
"MCG\_K23\_00446" 22112 "s59E13H2" 0 "30S ribosomal protein S14 type Z"  
"MCG\_K23\_00446" 22112 "s59E25H2" 0 "30S ribosomal protein S14 type Z"  
"MCG\_K23\_00446" 22112 "s59E5H2" 0 "30S ribosomal protein S14 type Z"  
"MCG\_K23\_00446" 22112 "s63E6H2" 0 "30S ribosomal protein S14 type Z"  
"MCG\_K23\_00447" 22113 "s59E13H2" 0 "50S ribosomal protein L5"  
"MCG\_K23\_00447" 22113 "s59E25H2" 0 "50S ribosomal protein L5"  
"MCG\_K23\_00447" 22113 "s59E5H2" 0 "50S ribosomal protein L5"  
"MCG\_K23\_00447" 22113 "s63E6H2" 0 "50S ribosomal protein L5"  
"MCG\_K23\_00448" 22114 "s59E13H2" 0 "30S ribosomal protein S4e"  
"MCG\_K23\_00448" 22114 "s59E25H2" 0 "30S ribosomal protein S4e"  
"MCG\_K23\_00448" 22114 "s59E5H2" 0 "30S ribosomal protein S4e"  
"MCG\_K23\_00448" 22114 "s63E6H2" 0 "30S ribosomal protein S4e"  
"MCG\_K23\_00449" 22115 "s59E13H2" 0 "50S ribosomal protein L24P"  
"MCG\_K23\_00449" 22115 "s59E25H2" 0 "50S ribosomal protein L24P"  
"MCG\_K23\_00449" 22115 "s59E5H2" 0 "50S ribosomal protein L24P"  
"MCG\_K23\_00449" 22115 "s63E6H2" 0 "50S ribosomal protein L24P"  
"MCG\_K23\_00450" 22116 "s59E13H2" 0 "50S ribosomal protein L14"  
"MCG\_K23\_00450" 22116 "s59E25H2" 0 "50S ribosomal protein L14"  
"MCG\_K23\_00450" 22116 "s59E5H2" 0 "50S ribosomal protein L14"  
"MCG\_K23\_00450" 22116 "s63E6H2" 0 "50S ribosomal protein L14"  
"MCG\_K23\_00451" 22117 "s59E13H2" 0 "30S ribosomal protein S17P"  
"MCG\_K23\_00451" 22117 "s59E25H2" 0 "30S ribosomal protein S17P"  
"MCG\_K23\_00451" 22117 "s59E5H2" 0 "30S ribosomal protein S17P"  
"MCG\_K23\_00451" 22117 "s63E6H2" 0 "30S ribosomal protein S17P"  
"MCG\_K23\_00452" 22118 "s59E13H2" 0 "Ribonuclease P protein component 1"  
"MCG\_K23\_00452" 22118 "s59E25H2" 0 "Ribonuclease P protein component 1"  
"MCG\_K23\_00452" 22118 "s59E5H2" 0 "Ribonuclease P protein component 1"  
"MCG\_K23\_00452" 22118 "s63E6H2" 0 "Ribonuclease P protein component 1"

"MCG\_K23\_00453" 22119 "s59E13H2" 0 "50S ribosomal protein L29P"  
"MCG\_K23\_00453" 22119 "s59E25H2" 0 "50S ribosomal protein L29P"  
"MCG\_K23\_00453" 22119 "s59E5H2" 0 "50S ribosomal protein L29P"  
"MCG\_K23\_00453" 22119 "s63E6H2" 0 "50S ribosomal protein L29P"  
"MCG\_K23\_00454" 22120 "s59E13H2" 0 "30S ribosomal protein S3"  
"MCG\_K23\_00454" 22120 "s59E25H2" 0 "30S ribosomal protein S3"  
"MCG\_K23\_00454" 22120 "s59E5H2" 0 "30S ribosomal protein S3"  
"MCG\_K23\_00454" 22120 "s63E6H2" 0 "30S ribosomal protein S3"  
"MCG\_K23\_00455" 22121 "s59E13H2" 0 "50S ribosomal protein L22P"  
"MCG\_K23\_00455" 22121 "s59E25H2" 0 "50S ribosomal protein L22P"  
"MCG\_K23\_00455" 22121 "s59E5H2" 0 "50S ribosomal protein L22P"  
"MCG\_K23\_00455" 22121 "s63E6H2" 0 "50S ribosomal protein L22P"  
"MCG\_K23\_00456" 22122 "s59E13H2" 0 "Hydrogenase expression/formation protein HypE"  
"MCG\_K23\_00456" 22122 "s59E25H2" 0 "Hydrogenase expression/formation protein HypE"  
"MCG\_K23\_00456" 22122 "s59E5H2" 0 "Hydrogenase expression/formation protein HypE"  
"MCG\_K23\_00456" 22122 "s63E6H2" 0 "Hydrogenase expression/formation protein HypE"  
"MCG\_K23\_00458" 22124 "s59E13H2" 0 "Hydrogenase expression/formation protein HypD"  
"MCG\_K23\_00458" 22124 "s59E25H2" 0 "Hydrogenase expression/formation protein HypD"  
"MCG\_K23\_00458" 22124 "s59E5H2" 0.007243848 "Hydrogenase expression/formation protein HypD"  
"MCG\_K23\_00458" 22124 "s63E6H2" 0 "Hydrogenase expression/formation protein HypD"  
"MCG\_K23\_00459" 22125 "s59E13H2" 0 "Hydrogenase isoenzymes formation protein HypC"  
"MCG\_K23\_00459" 22125 "s59E25H2" 0 "Hydrogenase isoenzymes formation protein HypC"  
"MCG\_K23\_00459" 22125 "s59E5H2" 0 "Hydrogenase isoenzymes formation protein HypC"  
"MCG\_K23\_00459" 22125 "s63E6H2" 0 "Hydrogenase isoenzymes formation protein HypC"  
"MCG\_K23\_00460" 22126 "s59E13H2" 0 "Carbamoyltransferase HypF"  
"MCG\_K23\_00460" 22126 "s59E25H2" 0 "Carbamoyltransferase HypF"  
"MCG\_K23\_00460" 22126 "s59E5H2" 0 "Carbamoyltransferase HypF"  
"MCG\_K23\_00460" 22126 "s63E6H2" 0 "Carbamoyltransferase HypF"  
"MCG\_K23\_00461" 22127 "s59E13H2" 0 "Carboxymuconolactone decarboxylase family protein"  
"MCG\_K23\_00461" 22127 "s59E25H2" 0 "Carboxymuconolactone decarboxylase family protein"  
"MCG\_K23\_00461" 22127 "s59E5H2" 0 "Carboxymuconolactone decarboxylase family protein"  
"MCG\_K23\_00461" 22127 "s63E6H2" 0 "Carboxymuconolactone decarboxylase family protein"  
"MCG\_K23\_00463" 22129 "s59E13H2" 0 "Long-chain-fatty-acid--CoA ligase"  
"MCG\_K23\_00463" 22129 "s59E25H2" 0 "Long-chain-fatty-acid--CoA ligase"  
"MCG\_K23\_00463" 22129 "s59E5H2" 0 "Long-chain-fatty-acid--CoA ligase"  
"MCG\_K23\_00463" 22129 "s63E6H2" 0 "Long-chain-fatty-acid--CoA ligase"  
"MCG\_K23\_00465" 22131 "s59E13H2" 0 "hypothetical protein"  
"MCG\_K23\_00465" 22131 "s59E25H2" 0 "hypothetical protein"  
"MCG\_K23\_00465" 22131 "s59E5H2" 0 "hypothetical protein"  
"MCG\_K23\_00465" 22131 "s63E6H2" 0 "hypothetical protein"  
"MCG\_K23\_00466" 22132 "s59E13H2" 0 "2,3-bisphosphoglycerate-independent phosphoglycerate mutase"  
"MCG\_K23\_00466" 22132 "s59E25H2" 0 "2,3-bisphosphoglycerate-independent phosphoglycerate mutase"  
"MCG\_K23\_00466" 22132 "s59E5H2" 0 "2,3-bisphosphoglycerate-independent phosphoglycerate mutase"  
"MCG\_K23\_00466" 22132 "s63E6H2" 0 "2,3-bisphosphoglycerate-independent phosphoglycerate mutase"  
"MCG\_K23\_00467" 22133 "s59E13H2" 0 "hypothetical protein"  
"MCG\_K23\_00467" 22133 "s59E25H2" 0 "hypothetical protein"  
"MCG\_K23\_00467" 22133 "s59E5H2" 0 "hypothetical protein"

"MCG\_K23\_00467" 22133 "s63E6H2" 0 "hypothetical protein"  
"MCG\_K23\_00468" 22134 "s59E13H2" 0 "CDP-diacylglycerol--glycerol-3-phosphate 3-phosphatidyltransferase"  
"MCG\_K23\_00468" 22134 "s59E25H2" 0 "CDP-diacylglycerol--glycerol-3-phosphate 3-phosphatidyltransferase"  
"MCG\_K23\_00468" 22134 "s59E5H2" 0 "CDP-diacylglycerol--glycerol-3-phosphate 3-phosphatidyltransferase"  
"MCG\_K23\_00468" 22134 "s63E6H2" 0 "CDP-diacylglycerol--glycerol-3-phosphate 3-phosphatidyltransferase"  
"MCG\_K23\_00469" 22135 "s59E13H2" 0 "hypothetical protein"  
"MCG\_K23\_00469" 22135 "s59E25H2" 0 "hypothetical protein"  
"MCG\_K23\_00469" 22135 "s59E5H2" 0 "hypothetical protein"  
"MCG\_K23\_00469" 22135 "s63E6H2" 0 "hypothetical protein"  
"MCG\_K23\_00470" 22136 "s59E13H2" 0 "hypothetical protein"  
"MCG\_K23\_00470" 22136 "s59E25H2" 0 "hypothetical protein"  
"MCG\_K23\_00470" 22136 "s59E5H2" 0 "hypothetical protein"  
"MCG\_K23\_00470" 22136 "s63E6H2" 0 "hypothetical protein"  
"MCG\_K23\_00471" 22137 "s59E13H2" 0 "6-phosphofructokinase"  
"MCG\_K23\_00471" 22137 "s59E25H2" 0 "6-phosphofructokinase"  
"MCG\_K23\_00471" 22137 "s59E5H2" 0 "6-phosphofructokinase"  
"MCG\_K23\_00471" 22137 "s63E6H2" 0 "6-phosphofructokinase"  
"MCG\_K23\_00472" 22138 "s59E13H2" 0 "Zinc transporter ZupT"  
"MCG\_K23\_00472" 22138 "s59E25H2" 0 "Zinc transporter ZupT"  
"MCG\_K23\_00472" 22138 "s59E5H2" 0 "Zinc transporter ZupT"  
"MCG\_K23\_00472" 22138 "s63E6H2" 0 "Zinc transporter ZupT"  
"MCG\_K23\_00474" 22140 "s59E13H2" 0 "SPFH domain / Band 7 family protein"  
"MCG\_K23\_00474" 22140 "s59E25H2" 0 "SPFH domain / Band 7 family protein"  
"MCG\_K23\_00474" 22140 "s59E5H2" 0 "SPFH domain / Band 7 family protein"  
"MCG\_K23\_00474" 22140 "s63E6H2" 0 "SPFH domain / Band 7 family protein"  
"MCG\_K23\_00475" 22141 "s59E13H2" 0 "hypothetical protein"  
"MCG\_K23\_00475" 22141 "s59E25H2" 0 "hypothetical protein"  
"MCG\_K23\_00475" 22141 "s59E5H2" 0 "hypothetical protein"  
"MCG\_K23\_00475" 22141 "s63E6H2" 0 "hypothetical protein"  
"MCG\_K23\_00476" 22142 "s59E13H2" 0 "Flagellin N-methylase"  
"MCG\_K23\_00476" 22142 "s59E25H2" 0 "Flagellin N-methylase"  
"MCG\_K23\_00476" 22142 "s59E5H2" 0 "Flagellin N-methylase"  
"MCG\_K23\_00476" 22142 "s63E6H2" 0 "Flagellin N-methylase"  
"MCG\_K23\_00477" 22143 "s59E13H2" 0 "hypothetical protein"  
"MCG\_K23\_00477" 22143 "s59E25H2" 0 "hypothetical protein"  
"MCG\_K23\_00477" 22143 "s59E5H2" 0 "hypothetical protein"  
"MCG\_K23\_00477" 22143 "s63E6H2" 0 "hypothetical protein"  
"MCG\_K23\_00478" 22144 "s59E13H2" 0 "Aspartate carbamoyltransferase regulatory chain"  
"MCG\_K23\_00478" 22144 "s59E25H2" 0 "Aspartate carbamoyltransferase regulatory chain"  
"MCG\_K23\_00478" 22144 "s59E5H2" 0 "Aspartate carbamoyltransferase regulatory chain"  
"MCG\_K23\_00478" 22144 "s63E6H2" 0 "Aspartate carbamoyltransferase regulatory chain"  
"MCG\_K23\_00479" 22145 "s59E13H2" 0 "hypothetical protein"  
"MCG\_K23\_00479" 22145 "s59E25H2" 0 "hypothetical protein"  
"MCG\_K23\_00479" 22145 "s59E5H2" 0 "hypothetical protein"  
"MCG\_K23\_00479" 22145 "s63E6H2" 0 "hypothetical protein"  
"MCG\_K23\_00483" 22149 "s59E13H2" 0 "hypothetical protein"  
"MCG\_K23\_00483" 22149 "s59E25H2" 0 "hypothetical protein"

"MCG\_K23\_00483" 22149 "s59E5H2" 0 "hypothetical protein"  
"MCG\_K23\_00483" 22149 "s63E6H2" 0 "hypothetical protein"  
"MCG\_K23\_00484" 22150 "s59E13H2" 0 "hypothetical protein"  
"MCG\_K23\_00484" 22150 "s59E25H2" 0 "hypothetical protein"  
"MCG\_K23\_00484" 22150 "s59E5H2" 0 "hypothetical protein"  
"MCG\_K23\_00484" 22150 "s63E6H2" 0 "hypothetical protein"  
"MCG\_K23\_00485" 22151 "s59E13H2" 0 "protoporphyrinogen oxidase"  
"MCG\_K23\_00485" 22151 "s59E25H2" 0 "protoporphyrinogen oxidase"  
"MCG\_K23\_00485" 22151 "s59E5H2" 0 "protoporphyrinogen oxidase"  
"MCG\_K23\_00485" 22151 "s63E6H2" 0 "protoporphyrinogen oxidase"  
"MCG\_K23\_00492" 22158 "s59E13H2" 0 "Ferrous-iron efflux pump FieF"  
"MCG\_K23\_00492" 22158 "s59E25H2" 0 "Ferrous-iron efflux pump FieF"  
"MCG\_K23\_00492" 22158 "s59E5H2" 0 "Ferrous-iron efflux pump FieF"  
"MCG\_K23\_00492" 22158 "s63E6H2" 0 "Ferrous-iron efflux pump FieF"  
"MCG\_K23\_00493" 22159 "s59E13H2" 0 "hypothetical protein"  
"MCG\_K23\_00493" 22159 "s59E25H2" 0 "hypothetical protein"  
"MCG\_K23\_00493" 22159 "s59E5H2" 0 "hypothetical protein"  
"MCG\_K23\_00493" 22159 "s63E6H2" 0 "hypothetical protein"  
"MCG\_K23\_00495" 22161 "s59E13H2" 0 "hypothetical protein"  
"MCG\_K23\_00495" 22161 "s59E25H2" 0 "hypothetical protein"  
"MCG\_K23\_00495" 22161 "s59E5H2" 0 "hypothetical protein"  
"MCG\_K23\_00495" 22161 "s63E6H2" 0 "hypothetical protein"  
"MCG\_K23\_00496" 22162 "s59E13H2" 0 "L-allo-threonine aldolase"  
"MCG\_K23\_00496" 22162 "s59E25H2" 0 "L-allo-threonine aldolase"  
"MCG\_K23\_00496" 22162 "s59E5H2" 0 "L-allo-threonine aldolase"  
"MCG\_K23\_00496" 22162 "s63E6H2" 0 "L-allo-threonine aldolase"  
"MCG\_K23\_00499" 22165 "s59E13H2" 0 "Circadian clock protein kinase KaiC"  
"MCG\_K23\_00499" 22165 "s59E25H2" 0 "Circadian clock protein kinase KaiC"  
"MCG\_K23\_00499" 22165 "s59E5H2" 0 "Circadian clock protein kinase KaiC"  
"MCG\_K23\_00499" 22165 "s63E6H2" 0 "Circadian clock protein kinase KaiC"  
"MCG\_K23\_00500" 22166 "s59E13H2" 0 "Small heat shock protein HSP16.5"  
"MCG\_K23\_00500" 22166 "s59E25H2" 0 "Small heat shock protein HSP16.5"  
"MCG\_K23\_00500" 22166 "s59E5H2" 0 "Small heat shock protein HSP16.5"  
"MCG\_K23\_00500" 22166 "s63E6H2" 0 "Small heat shock protein HSP16.5"  
"MCG\_K23\_00503" 22169 "s59E13H2" 0 "hypothetical protein"  
"MCG\_K23\_00503" 22169 "s59E25H2" 0 "hypothetical protein"  
"MCG\_K23\_00503" 22169 "s59E5H2" 0 "hypothetical protein"  
"MCG\_K23\_00503" 22169 "s63E6H2" 0 "hypothetical protein"  
"MCG\_K23\_00505" 22171 "s59E13H2" 0 "hypothetical protein"  
"MCG\_K23\_00505" 22171 "s59E25H2" 0 "hypothetical protein"  
"MCG\_K23\_00505" 22171 "s59E5H2" 0 "hypothetical protein"  
"MCG\_K23\_00505" 22171 "s63E6H2" 0 "hypothetical protein"  
"MCG\_K23\_00506" 22172 "s59E13H2" 0 "DNA/RNA-binding protein Alba"  
"MCG\_K23\_00506" 22172 "s59E25H2" 0 "DNA/RNA-binding protein Alba"  
"MCG\_K23\_00506" 22172 "s59E5H2" 0 "DNA/RNA-binding protein Alba"  
"MCG\_K23\_00506" 22172 "s63E6H2" 0 "DNA/RNA-binding protein Alba"  
"MCG\_K23\_00508" 22174 "s59E13H2" 0 "Putative peroxiredoxin bcp"

"MCG\_K23\_00508" 22174 "s59E25H2" 0 "Putative peroxiredoxin bcp"  
"MCG\_K23\_00508" 22174 "s59E5H2" 0 "Putative peroxiredoxin bcp"  
"MCG\_K23\_00508" 22174 "s63E6H2" 0 "Putative peroxiredoxin bcp"  
"MCG\_K23\_00509" 22175 "s59E13H2" 0 "hypothetical protein"  
"MCG\_K23\_00509" 22175 "s59E25H2" 0 "hypothetical protein"  
"MCG\_K23\_00509" 22175 "s59E5H2" 0 "hypothetical protein"  
"MCG\_K23\_00509" 22175 "s63E6H2" 0 "hypothetical protein"  
"MCG\_K23\_00510" 22176 "s59E13H2" 0 "nicotinamidase/pyrazinamidase"  
"MCG\_K23\_00510" 22176 "s59E25H2" 0 "nicotinamidase/pyrazinamidase"  
"MCG\_K23\_00510" 22176 "s59E5H2" 0 "nicotinamidase/pyrazinamidase"  
"MCG\_K23\_00510" 22176 "s63E6H2" 0 "nicotinamidase/pyrazinamidase"  
"MCG\_K23\_00511" 22177 "s59E13H2" 0 "Thiamine precursor transporter HmpT"  
"MCG\_K23\_00511" 22177 "s59E25H2" 0 "Thiamine precursor transporter HmpT"  
"MCG\_K23\_00511" 22177 "s59E5H2" 0 "Thiamine precursor transporter HmpT"  
"MCG\_K23\_00511" 22177 "s63E6H2" 0 "Thiamine precursor transporter HmpT"  
"MCG\_K23\_00512" 22178 "s59E13H2" 0 "RDD family protein"  
"MCG\_K23\_00512" 22178 "s59E25H2" 0 "RDD family protein"  
"MCG\_K23\_00512" 22178 "s59E5H2" 0 "RDD family protein"  
"MCG\_K23\_00512" 22178 "s63E6H2" 0 "RDD family protein"  
"MCG\_K23\_00513" 22179 "s59E13H2" 0 "hypothetical protein"  
"MCG\_K23\_00513" 22179 "s59E25H2" 0 "hypothetical protein"  
"MCG\_K23\_00513" 22179 "s59E5H2" 0 "hypothetical protein"  
"MCG\_K23\_00513" 22179 "s63E6H2" 0 "hypothetical protein"  
"MCG\_K23\_00514" 22180 "s59E13H2" 0 "hypothetical protein"  
"MCG\_K23\_00514" 22180 "s59E25H2" 0 "hypothetical protein"  
"MCG\_K23\_00514" 22180 "s59E5H2" 0 "hypothetical protein"  
"MCG\_K23\_00514" 22180 "s63E6H2" 0 "hypothetical protein"  
"MCG\_K23\_00515" 22181 "s59E13H2" 0 "hypothetical protein"  
"MCG\_K23\_00515" 22181 "s59E25H2" 0 "hypothetical protein"  
"MCG\_K23\_00515" 22181 "s59E5H2" 0 "hypothetical protein"  
"MCG\_K23\_00515" 22181 "s63E6H2" 0 "hypothetical protein"  
"MCG\_K23\_00516" 22182 "s59E13H2" 0 "putative dolichyl-phosphate-mannose--protein mannosyltransferase"  
"MCG\_K23\_00516" 22182 "s59E25H2" 0 "putative dolichyl-phosphate-mannose--protein mannosyltransferase"  
"MCG\_K23\_00516" 22182 "s59E5H2" 0 "putative dolichyl-phosphate-mannose--protein mannosyltransferase"  
"MCG\_K23\_00516" 22182 "s63E6H2" 0 "putative dolichyl-phosphate-mannose--protein mannosyltransferase"  
"MCG\_K23\_00517" 22183 "s59E13H2" 0 "Glycosyltransferase AgID"  
"MCG\_K23\_00517" 22183 "s59E25H2" 0 "Glycosyltransferase AgID"  
"MCG\_K23\_00517" 22183 "s59E5H2" 0 "Glycosyltransferase AgID"  
"MCG\_K23\_00517" 22183 "s63E6H2" 0 "Glycosyltransferase AgID"  
"MCG\_K23\_00518" 22184 "s59E13H2" 0 "hypothetical protein"  
"MCG\_K23\_00518" 22184 "s59E25H2" 0 "hypothetical protein"  
"MCG\_K23\_00518" 22184 "s59E5H2" 0 "hypothetical protein"  
"MCG\_K23\_00518" 22184 "s63E6H2" 0 "hypothetical protein"  
"MCG\_K23\_00519" 22185 "s59E13H2" 0 "site-specific tyrosine recombinase XerC"  
"MCG\_K23\_00519" 22185 "s59E25H2" 0 "site-specific tyrosine recombinase XerC"  
"MCG\_K23\_00519" 22185 "s59E5H2" 0 "site-specific tyrosine recombinase XerC"  
"MCG\_K23\_00519" 22185 "s63E6H2" 0 "site-specific tyrosine recombinase XerC"

"MCG\_K23\_00520" 22186 "s59E13H2" 0 "hypothetical protein"  
"MCG\_K23\_00520" 22186 "s59E25H2" 0 "hypothetical protein"  
"MCG\_K23\_00520" 22186 "s59E5H2" 0 "hypothetical protein"  
"MCG\_K23\_00520" 22186 "s63E6H2" 0 "hypothetical protein"  
"MCG\_K23\_00522" 22188 "s59E13H2" 0 "hypothetical protein"  
"MCG\_K23\_00522" 22188 "s59E25H2" 0 "hypothetical protein"  
"MCG\_K23\_00522" 22188 "s59E5H2" 0 "hypothetical protein"  
"MCG\_K23\_00522" 22188 "s63E6H2" 0 "hypothetical protein"  
"MCG\_K23\_00523" 22189 "s59E13H2" 0 "Chromosome-partitioning protein Spo0J"  
"MCG\_K23\_00523" 22189 "s59E25H2" 0 "Chromosome-partitioning protein Spo0J"  
"MCG\_K23\_00523" 22189 "s59E5H2" 0 "Chromosome-partitioning protein Spo0J"  
"MCG\_K23\_00523" 22189 "s63E6H2" 0 "Chromosome-partitioning protein Spo0J"  
"MCG\_K23\_00525" 22191 "s59E13H2" 0 "hypothetical protein"  
"MCG\_K23\_00525" 22191 "s59E25H2" 0 "hypothetical protein"  
"MCG\_K23\_00525" 22191 "s59E5H2" 0 "hypothetical protein"  
"MCG\_K23\_00525" 22191 "s63E6H2" 0 "hypothetical protein"  
"MCG\_K23\_00526" 22192 "s59E13H2" 0 "hypothetical protein"  
"MCG\_K23\_00526" 22192 "s59E25H2" 0 "hypothetical protein"  
"MCG\_K23\_00526" 22192 "s59E5H2" 0 "hypothetical protein"  
"MCG\_K23\_00526" 22192 "s63E6H2" 0 "hypothetical protein"  
"MCG\_K23\_00527" 22193 "s59E13H2" 0 "AsnC family protein"  
"MCG\_K23\_00527" 22193 "s59E25H2" 0 "AsnC family protein"  
"MCG\_K23\_00527" 22193 "s59E5H2" 0 "AsnC family protein"  
"MCG\_K23\_00527" 22193 "s63E6H2" 0 "AsnC family protein"  
"MCG\_K23\_00531" 22197 "s59E13H2" 0 "hypothetical protein"  
"MCG\_K23\_00531" 22197 "s59E25H2" 0 "hypothetical protein"  
"MCG\_K23\_00531" 22197 "s59E5H2" 0 "hypothetical protein"  
"MCG\_K23\_00531" 22197 "s63E6H2" 0 "hypothetical protein"  
"MCG\_K23\_00532" 22198 "s59E13H2" 0 "hypothetical protein"  
"MCG\_K23\_00532" 22198 "s59E25H2" 0 "hypothetical protein"  
"MCG\_K23\_00532" 22198 "s59E5H2" 0 "hypothetical protein"  
"MCG\_K23\_00532" 22198 "s63E6H2" 0 "hypothetical protein"  
"MCG\_K23\_00533" 22199 "s59E13H2" 0 "Polyketide cyclase / dehydrase and lipid transport"  
"MCG\_K23\_00533" 22199 "s59E25H2" 0 "Polyketide cyclase / dehydrase and lipid transport"  
"MCG\_K23\_00533" 22199 "s59E5H2" 0 "Polyketide cyclase / dehydrase and lipid transport"  
"MCG\_K23\_00533" 22199 "s63E6H2" 0 "Polyketide cyclase / dehydrase and lipid transport"  
"MCG\_K23\_00534" 22200 "s59E13H2" 0 "Transcription initiation factor IIB"  
"MCG\_K23\_00534" 22200 "s59E25H2" 0 "Transcription initiation factor IIB"  
"MCG\_K23\_00534" 22200 "s59E5H2" 0 "Transcription initiation factor IIB"  
"MCG\_K23\_00534" 22200 "s63E6H2" 0 "Transcription initiation factor IIB"  
"MCG\_K23\_00535" 22201 "s59E13H2" 0 "hypothetical protein"  
"MCG\_K23\_00535" 22201 "s59E25H2" 0 "hypothetical protein"  
"MCG\_K23\_00535" 22201 "s59E5H2" 0 "hypothetical protein"  
"MCG\_K23\_00535" 22201 "s63E6H2" 0 "hypothetical protein"  
"MCG\_K23\_00536" 22202 "s59E13H2" 0 "DNA-binding transcriptional regulator AsnC"  
"MCG\_K23\_00536" 22202 "s59E25H2" 0 "DNA-binding transcriptional regulator AsnC"  
"MCG\_K23\_00536" 22202 "s59E5H2" 0 "DNA-binding transcriptional regulator AsnC"



"MCG\_K23\_00536" 22202 "s63E6H2" 0 "DNA-binding transcriptional regulator AsnC"  
"MCG\_K23\_00537" 22203 "s59E13H2" 0 "hypothetical protein"  
"MCG\_K23\_00537" 22203 "s59E25H2" 0 "hypothetical protein"  
"MCG\_K23\_00537" 22203 "s59E5H2" 0 "hypothetical protein"  
"MCG\_K23\_00537" 22203 "s63E6H2" 0 "hypothetical protein"  
"MCG\_K23\_00539" 22205 "s59E13H2" 0 "hypothetical protein"  
"MCG\_K23\_00539" 22205 "s59E25H2" 0 "hypothetical protein"  
"MCG\_K23\_00539" 22205 "s59E5H2" 0 "hypothetical protein"  
"MCG\_K23\_00539" 22205 "s63E6H2" 0 "hypothetical protein"  
"MCG\_K23\_00540" 22206 "s59E13H2" 0 "GH3 auxin-responsive promoter"  
"MCG\_K23\_00540" 22206 "s59E25H2" 0 "GH3 auxin-responsive promoter"  
"MCG\_K23\_00540" 22206 "s59E5H2" 0 "GH3 auxin-responsive promoter"  
"MCG\_K23\_00540" 22206 "s63E6H2" 0 "GH3 auxin-responsive promoter"  
"MCG\_K23\_00541" 22207 "s59E13H2" 0 "Ribose 1,5-bisphosphate isomerase"  
"MCG\_K23\_00541" 22207 "s59E25H2" 0 "Ribose 1,5-bisphosphate isomerase"  
"MCG\_K23\_00541" 22207 "s59E5H2" 0 "Ribose 1,5-bisphosphate isomerase"  
"MCG\_K23\_00541" 22207 "s63E6H2" 0 "Ribose 1,5-bisphosphate isomerase"  
"MCG\_K23\_00542" 22208 "s59E13H2" 0 "Ribulose biphosphate carboxylase"  
"MCG\_K23\_00542" 22208 "s59E25H2" 0 "Ribulose biphosphate carboxylase"  
"MCG\_K23\_00542" 22208 "s59E5H2" 0 "Ribulose biphosphate carboxylase"  
"MCG\_K23\_00542" 22208 "s63E6H2" 0 "Ribulose biphosphate carboxylase"  
"MCG\_K23\_00543" 22209 "s59E13H2" 0 "AMP phosphorylase"  
"MCG\_K23\_00543" 22209 "s59E25H2" 0 "AMP phosphorylase"  
"MCG\_K23\_00543" 22209 "s59E5H2" 0 "AMP phosphorylase"  
"MCG\_K23\_00543" 22209 "s63E6H2" 0 "AMP phosphorylase"  
"MCG\_K23\_00544" 22210 "s59E13H2" 0 "Putative thiamine pyrophosphate-containing protein YdaP"  
"MCG\_K23\_00544" 22210 "s59E25H2" 0 "Putative thiamine pyrophosphate-containing protein YdaP"  
"MCG\_K23\_00544" 22210 "s59E5H2" 0 "Putative thiamine pyrophosphate-containing protein YdaP"  
"MCG\_K23\_00544" 22210 "s63E6H2" 0 "Putative thiamine pyrophosphate-containing protein YdaP"  
"MCG\_K23\_00549" 22215 "s59E13H2" 0 "hypothetical protein"  
"MCG\_K23\_00549" 22215 "s59E25H2" 0 "hypothetical protein"  
"MCG\_K23\_00549" 22215 "s59E5H2" 0 "hypothetical protein"  
"MCG\_K23\_00549" 22215 "s63E6H2" 0 "hypothetical protein"  
"MCG\_K23\_00550" 22216 "s59E13H2" 0 "Helix-turn-helix"  
"MCG\_K23\_00550" 22216 "s59E25H2" 0 "Helix-turn-helix"  
"MCG\_K23\_00550" 22216 "s59E5H2" 0 "Helix-turn-helix"  
"MCG\_K23\_00550" 22216 "s63E6H2" 0 "Helix-turn-helix"  
"MCG\_K23\_00551" 22217 "s59E13H2" 0 "tellurite resistance protein TehB"  
"MCG\_K23\_00551" 22217 "s59E25H2" 0 "tellurite resistance protein TehB"  
"MCG\_K23\_00551" 22217 "s59E5H2" 0 "tellurite resistance protein TehB"  
"MCG\_K23\_00551" 22217 "s63E6H2" 0 "tellurite resistance protein TehB"  
"MCG\_K23\_00552" 22218 "s59E13H2" 0 "Sodium Bile acid symporter family protein"  
"MCG\_K23\_00552" 22218 "s59E25H2" 0 "Sodium Bile acid symporter family protein"  
"MCG\_K23\_00552" 22218 "s59E5H2" 0 "Sodium Bile acid symporter family protein"  
"MCG\_K23\_00552" 22218 "s63E6H2" 0 "Sodium Bile acid symporter family protein"  
"MCG\_K23\_00553" 22219 "s59E13H2" 0 "hypothetical protein"  
"MCG\_K23\_00553" 22219 "s59E25H2" 0 "hypothetical protein"

"MCG\_K23\_00553" 22219 "s59E5H2" 0 "hypothetical protein"  
"MCG\_K23\_00553" 22219 "s63E6H2" 0 "hypothetical protein"  
"MCG\_K23\_00554" 22220 "s59E13H2" 0 "Cupin domain protein"  
"MCG\_K23\_00554" 22220 "s59E25H2" 0 "Cupin domain protein"  
"MCG\_K23\_00554" 22220 "s59E5H2" 0 "Cupin domain protein"  
"MCG\_K23\_00554" 22220 "s63E6H2" 0 "Cupin domain protein"  
"MCG\_K23\_00557" 22223 "s59E13H2" 0 "hypothetical protein"  
"MCG\_K23\_00557" 22223 "s59E25H2" 0 "hypothetical protein"  
"MCG\_K23\_00557" 22223 "s59E5H2" 0 "hypothetical protein"  
"MCG\_K23\_00557" 22223 "s63E6H2" 0 "hypothetical protein"  
"MCG\_K23\_00558" 22224 "s59E13H2" 0 "Chromosome partition protein Smc"  
"MCG\_K23\_00558" 22224 "s59E25H2" 0 "Chromosome partition protein Smc"  
"MCG\_K23\_00558" 22224 "s59E5H2" 0 "Chromosome partition protein Smc"  
"MCG\_K23\_00558" 22224 "s63E6H2" 0 "Chromosome partition protein Smc"  
"MCG\_K23\_00559" 22225 "s59E13H2" 0 "ScpA/B protein"  
"MCG\_K23\_00559" 22225 "s59E25H2" 0 "ScpA/B protein"  
"MCG\_K23\_00559" 22225 "s59E5H2" 0 "ScpA/B protein"  
"MCG\_K23\_00559" 22225 "s63E6H2" 0 "ScpA/B protein"  
"MCG\_K23\_00560" 22226 "s59E13H2" 0 "Segregation and condensation protein B"  
"MCG\_K23\_00560" 22226 "s59E25H2" 0 "Segregation and condensation protein B"  
"MCG\_K23\_00560" 22226 "s59E5H2" 0 "Segregation and condensation protein B"  
"MCG\_K23\_00560" 22226 "s63E6H2" 0 "Segregation and condensation protein B"  
"MCG\_K23\_00561" 22227 "s59E13H2" 0 "Tyrosine recombinase XerC"  
"MCG\_K23\_00561" 22227 "s59E25H2" 0 "Tyrosine recombinase XerC"  
"MCG\_K23\_00561" 22227 "s59E5H2" 0 "Tyrosine recombinase XerC"  
"MCG\_K23\_00561" 22227 "s63E6H2" 0 "Tyrosine recombinase XerC"  
"MCG\_K23\_00567" 22233 "s59E13H2" 0 "hypothetical protein"  
"MCG\_K23\_00567" 22233 "s59E25H2" 0 "hypothetical protein"  
"MCG\_K23\_00567" 22233 "s59E5H2" 0 "hypothetical protein"  
"MCG\_K23\_00567" 22233 "s63E6H2" 0 "hypothetical protein"  
"MCG\_K23\_00568" 22234 "s59E13H2" 0 "Digeranylgeranyl glyceryl phosphate synthase"  
"MCG\_K23\_00568" 22234 "s59E25H2" 0 "Digeranylgeranyl glyceryl phosphate synthase"  
"MCG\_K23\_00568" 22234 "s59E5H2" 0 "Digeranylgeranyl glyceryl phosphate synthase"  
"MCG\_K23\_00568" 22234 "s63E6H2" 0 "Digeranylgeranyl glyceryl phosphate synthase"  
"MCG\_K23\_00570" 22236 "s59E13H2" 0 "30S ribosomal protein S8e"  
"MCG\_K23\_00570" 22236 "s59E25H2" 0 "30S ribosomal protein S8e"  
"MCG\_K23\_00570" 22236 "s59E5H2" 0 "30S ribosomal protein S8e"  
"MCG\_K23\_00570" 22236 "s63E6H2" 0 "30S ribosomal protein S8e"  
"MCG\_K23\_00571" 22237 "s59E13H2" 0 "Signal recognition particle 19 kDa protein"  
"MCG\_K23\_00571" 22237 "s59E25H2" 0 "Signal recognition particle 19 kDa protein"  
"MCG\_K23\_00571" 22237 "s59E5H2" 0 "Signal recognition particle 19 kDa protein"  
"MCG\_K23\_00571" 22237 "s63E6H2" 0 "Signal recognition particle 19 kDa protein"  
"MCG\_K23\_00572" 22238 "s59E13H2" 0 "Glutamate--tRNA ligase"  
"MCG\_K23\_00572" 22238 "s59E25H2" 0 "Glutamate--tRNA ligase"  
"MCG\_K23\_00572" 22238 "s59E5H2" 0 "Glutamate--tRNA ligase"  
"MCG\_K23\_00572" 22238 "s63E6H2" 0 "Glutamate--tRNA ligase"  
"MCG\_K23\_00573" 22239 "s59E13H2" 0 "Short chain isoprenyl diphosphate synthase"

"MCG\_K23\_00573" 22239 "s59E25H2" 0 "Short chain isoprenyl diphosphate synthase"  
"MCG\_K23\_00573" 22239 "s59E5H2" 0 "Short chain isoprenyl diphosphate synthase"  
"MCG\_K23\_00573" 22239 "s63E6H2" 0 "Short chain isoprenyl diphosphate synthase"  
"MCG\_K23\_00574" 22240 "s59E13H2" 0 "Isopentenyl-diphosphate delta-isomerase"  
"MCG\_K23\_00574" 22240 "s59E25H2" 0 "Isopentenyl-diphosphate delta-isomerase"  
"MCG\_K23\_00574" 22240 "s59E5H2" 0 "Isopentenyl-diphosphate delta-isomerase"  
"MCG\_K23\_00574" 22240 "s63E6H2" 0 "Isopentenyl-diphosphate delta-isomerase"  
"MCG\_K23\_00575" 22241 "s59E13H2" 0 "Isopentenyl phosphate kinase"  
"MCG\_K23\_00575" 22241 "s59E25H2" 0 "Isopentenyl phosphate kinase"  
"MCG\_K23\_00575" 22241 "s59E5H2" 0 "Isopentenyl phosphate kinase"  
"MCG\_K23\_00575" 22241 "s63E6H2" 0 "Isopentenyl phosphate kinase"  
"MCG\_K23\_00576" 22242 "s59E13H2" 0 "hypothetical protein"  
"MCG\_K23\_00576" 22242 "s59E25H2" 0 "hypothetical protein"  
"MCG\_K23\_00576" 22242 "s59E5H2" 0 "hypothetical protein"  
"MCG\_K23\_00576" 22242 "s63E6H2" 0 "hypothetical protein"  
"MCG\_K23\_00577" 22243 "s59E13H2" 0 "hypothetical protein"  
"MCG\_K23\_00577" 22243 "s59E25H2" 0 "hypothetical protein"  
"MCG\_K23\_00577" 22243 "s59E5H2" 0 "hypothetical protein"  
"MCG\_K23\_00577" 22243 "s63E6H2" 0 "hypothetical protein"  
"MCG\_K23\_00578" 22244 "s59E13H2" 0 "3-octaprenyl-4-hydroxybenzoate carboxy-lyase"  
"MCG\_K23\_00578" 22244 "s59E25H2" 0 "3-octaprenyl-4-hydroxybenzoate carboxy-lyase"  
"MCG\_K23\_00578" 22244 "s59E5H2" 0 "3-octaprenyl-4-hydroxybenzoate carboxy-lyase"  
"MCG\_K23\_00578" 22244 "s63E6H2" 0 "3-octaprenyl-4-hydroxybenzoate carboxy-lyase"  
"MCG\_K23\_00579" 22245 "s59E13H2" 0 "Mevalonate kinase"  
"MCG\_K23\_00579" 22245 "s59E25H2" 0 "Mevalonate kinase"  
"MCG\_K23\_00579" 22245 "s59E5H2" 0 "Mevalonate kinase"  
"MCG\_K23\_00579" 22245 "s63E6H2" 0 "Mevalonate kinase"  
"MCG\_K23\_00580" 22246 "s59E13H2" 0 "DNA polymerase 1"  
"MCG\_K23\_00580" 22246 "s59E25H2" 0 "DNA polymerase 1"  
"MCG\_K23\_00580" 22246 "s59E5H2" 0 "DNA polymerase 1"  
"MCG\_K23\_00580" 22246 "s63E6H2" 0 "DNA polymerase 1"  
"MCG\_K23\_00581" 22247 "s59E13H2" 0 "phospho-N-acetylmuramoyl-pentapeptide-transferase"  
"MCG\_K23\_00581" 22247 "s59E25H2" 0 "phospho-N-acetylmuramoyl-pentapeptide-transferase"  
"MCG\_K23\_00581" 22247 "s59E5H2" 0 "phospho-N-acetylmuramoyl-pentapeptide-transferase"  
"MCG\_K23\_00581" 22247 "s63E6H2" 0 "phospho-N-acetylmuramoyl-pentapeptide-transferase"  
"MCG\_K23\_00582" 22248 "s59E13H2" 0 "Oligosaccharyl transferase STT3 subunit"  
"MCG\_K23\_00582" 22248 "s59E25H2" 0 "Oligosaccharyl transferase STT3 subunit"  
"MCG\_K23\_00582" 22248 "s59E5H2" 0 "Oligosaccharyl transferase STT3 subunit"  
"MCG\_K23\_00582" 22248 "s63E6H2" 0 "Oligosaccharyl transferase STT3 subunit"  
"MCG\_K23\_00583" 22249 "s59E13H2" 0 "K(+)/H(+) antiporter NhaP2"  
"MCG\_K23\_00583" 22249 "s59E25H2" 0 "K(+)/H(+) antiporter NhaP2"  
"MCG\_K23\_00583" 22249 "s59E5H2" 0 "K(+)/H(+) antiporter NhaP2"  
"MCG\_K23\_00583" 22249 "s63E6H2" 0 "K(+)/H(+) antiporter NhaP2"  
"MCG\_K23\_00584" 22250 "s59E13H2" 0 "DNA topoisomerase 1"  
"MCG\_K23\_00584" 22250 "s59E25H2" 0 "DNA topoisomerase 1"  
"MCG\_K23\_00584" 22250 "s59E5H2" 0 "DNA topoisomerase 1"  
"MCG\_K23\_00584" 22250 "s63E6H2" 0 "DNA topoisomerase 1"

"MCG\_K23\_00586" 22252 "s59E13H2" 0 "hypothetical protein"  
"MCG\_K23\_00586" 22252 "s59E25H2" 0 "hypothetical protein"  
"MCG\_K23\_00586" 22252 "s59E5H2" 0 "hypothetical protein"  
"MCG\_K23\_00586" 22252 "s63E6H2" 0 "hypothetical protein"  
"MCG\_K23\_00587" 22253 "s59E13H2" 0 "hypothetical protein"  
"MCG\_K23\_00587" 22253 "s59E25H2" 0 "hypothetical protein"  
"MCG\_K23\_00587" 22253 "s59E5H2" 0 "hypothetical protein"  
"MCG\_K23\_00587" 22253 "s63E6H2" 0 "hypothetical protein"  
"MCG\_K23\_00588" 22254 "s59E13H2" 0 "DNA repair and recombination protein RadB"  
"MCG\_K23\_00588" 22254 "s59E25H2" 0 "DNA repair and recombination protein RadB"  
"MCG\_K23\_00588" 22254 "s59E5H2" 0 "DNA repair and recombination protein RadB"  
"MCG\_K23\_00588" 22254 "s63E6H2" 0 "DNA repair and recombination protein RadB"  
"MCG\_K23\_00589" 22255 "s59E13H2" 0 "ATP-dependent DNA helicase"  
"MCG\_K23\_00589" 22255 "s59E25H2" 0 "ATP-dependent DNA helicase"  
"MCG\_K23\_00589" 22255 "s59E5H2" 0 "ATP-dependent DNA helicase"  
"MCG\_K23\_00589" 22255 "s63E6H2" 0 "ATP-dependent DNA helicase"  
"MCG\_K23\_00591" 22257 "s59E13H2" 0 "Threonylcarbamoyl-AMP synthase"  
"MCG\_K23\_00591" 22257 "s59E25H2" 0 "Threonylcarbamoyl-AMP synthase"  
"MCG\_K23\_00591" 22257 "s59E5H2" 0 "Threonylcarbamoyl-AMP synthase"  
"MCG\_K23\_00591" 22257 "s63E6H2" 0 "Threonylcarbamoyl-AMP synthase"  
"MCG\_K23\_00592" 22258 "s59E13H2" 0 "Thermosome subunit alpha"  
"MCG\_K23\_00592" 22258 "s59E25H2" 0 "Thermosome subunit alpha"  
"MCG\_K23\_00592" 22258 "s59E5H2" 0 "Thermosome subunit alpha"  
"MCG\_K23\_00592" 22258 "s63E6H2" 0 "Thermosome subunit alpha"  
"MCG\_K23\_00593" 22259 "s59E13H2" 0 "Putative thymidylate synthase"  
"MCG\_K23\_00593" 22259 "s59E25H2" 0 "Putative thymidylate synthase"  
"MCG\_K23\_00593" 22259 "s59E5H2" 0.003975564 "Putative thymidylate synthase"  
"MCG\_K23\_00593" 22259 "s63E6H2" 0 "Putative thymidylate synthase"  
"MCG\_K23\_00594" 22260 "s59E13H2" 0 "tRNA-specific adenosine deaminase"  
"MCG\_K23\_00594" 22260 "s59E25H2" 0 "tRNA-specific adenosine deaminase"  
"MCG\_K23\_00594" 22260 "s59E5H2" 0 "tRNA-specific adenosine deaminase"  
"MCG\_K23\_00594" 22260 "s63E6H2" 0 "tRNA-specific adenosine deaminase"  
"MCG\_K23\_00595" 22261 "s59E13H2" 0 "putative NUDIX hydrolase"  
"MCG\_K23\_00595" 22261 "s59E25H2" 0 "putative NUDIX hydrolase"  
"MCG\_K23\_00595" 22261 "s59E5H2" 0 "putative NUDIX hydrolase"  
"MCG\_K23\_00595" 22261 "s63E6H2" 0 "putative NUDIX hydrolase"  
"MCG\_K23\_00596" 22262 "s59E13H2" 0 "hypothetical protein"  
"MCG\_K23\_00596" 22262 "s59E25H2" 0 "hypothetical protein"  
"MCG\_K23\_00596" 22262 "s59E5H2" 0 "hypothetical protein"  
"MCG\_K23\_00596" 22262 "s63E6H2" 0 "hypothetical protein"  
"MCG\_K23\_00597" 22263 "s59E13H2" 0 "Type I phosphodiesterase / nucleotide pyrophosphatase"  
"MCG\_K23\_00597" 22263 "s59E25H2" 0 "Type I phosphodiesterase / nucleotide pyrophosphatase"  
"MCG\_K23\_00597" 22263 "s59E5H2" 0 "Type I phosphodiesterase / nucleotide pyrophosphatase"  
"MCG\_K23\_00597" 22263 "s63E6H2" 0 "Type I phosphodiesterase / nucleotide pyrophosphatase"  
"MCG\_K23\_00598" 22264 "s59E13H2" 0 "Adenosylcobinamide-phosphate guanylyltransferase"  
"MCG\_K23\_00598" 22264 "s59E25H2" 0 "Adenosylcobinamide-phosphate guanylyltransferase"  
"MCG\_K23\_00598" 22264 "s59E5H2" 0 "Adenosylcobinamide-phosphate guanylyltransferase"

"MCG\_K23\_00598" 22264 "s63E6H2" 0 "Adenosylcobinamide-phosphate guanylyltransferase"  
"MCG\_K23\_00599" 22265 "s59E13H2" 0 "Cobalamin synthase"  
"MCG\_K23\_00599" 22265 "s59E25H2" 0 "Cobalamin synthase"  
"MCG\_K23\_00599" 22265 "s59E5H2" 0 "Cobalamin synthase"  
"MCG\_K23\_00599" 22265 "s63E6H2" 0 "Cobalamin synthase"  
"MCG\_K23\_00600" 22266 "s59E13H2" 0 "hypothetical protein"  
"MCG\_K23\_00600" 22266 "s59E25H2" 0 "hypothetical protein"  
"MCG\_K23\_00600" 22266 "s59E5H2" 0 "hypothetical protein"  
"MCG\_K23\_00600" 22266 "s63E6H2" 0 "hypothetical protein"  
"MCG\_K23\_00601" 22267 "s59E13H2" 0 "tRNA-specific 2-thiouridylase MnmA"  
"MCG\_K23\_00601" 22267 "s59E25H2" 0 "tRNA-specific 2-thiouridylase MnmA"  
"MCG\_K23\_00601" 22267 "s59E5H2" 0 "tRNA-specific 2-thiouridylase MnmA"  
"MCG\_K23\_00601" 22267 "s63E6H2" 0 "tRNA-specific 2-thiouridylase MnmA"  
"MCG\_K23\_00602" 22268 "s59E13H2" 0 "Cobalamin import ATP-binding protein BtuD"  
"MCG\_K23\_00602" 22268 "s59E25H2" 0 "Cobalamin import ATP-binding protein BtuD"  
"MCG\_K23\_00602" 22268 "s59E5H2" 0 "Cobalamin import ATP-binding protein BtuD"  
"MCG\_K23\_00602" 22268 "s63E6H2" 0 "Cobalamin import ATP-binding protein BtuD"  
"MCG\_K23\_00603" 22269 "s59E13H2" 0 "Cobalamin import system permease protein BtuC"  
"MCG\_K23\_00603" 22269 "s59E25H2" 0 "Cobalamin import system permease protein BtuC"  
"MCG\_K23\_00603" 22269 "s59E5H2" 0 "Cobalamin import system permease protein BtuC"  
"MCG\_K23\_00603" 22269 "s63E6H2" 0 "Cobalamin import system permease protein BtuC"  
"MCG\_K23\_00604" 22270 "s59E13H2" 0 "Cobalamin-binding protein precursor"  
"MCG\_K23\_00604" 22270 "s59E25H2" 0 "Cobalamin-binding protein precursor"  
"MCG\_K23\_00604" 22270 "s59E5H2" 0 "Cobalamin-binding protein precursor"  
"MCG\_K23\_00604" 22270 "s63E6H2" 0 "Cobalamin-binding protein precursor"  
"MCG\_K23\_00605" 22271 "s59E13H2" 0 "Multiple sugar-binding protein precursor"  
"MCG\_K23\_00605" 22271 "s59E25H2" 0 "Multiple sugar-binding protein precursor"  
"MCG\_K23\_00605" 22271 "s59E5H2" 0 "Multiple sugar-binding protein precursor"  
"MCG\_K23\_00605" 22271 "s63E6H2" 0 "Multiple sugar-binding protein precursor"  
"MCG\_K23\_00606" 22272 "s59E13H2" 0 "Inositol 2-dehydrogenase"  
"MCG\_K23\_00606" 22272 "s59E25H2" 0 "Inositol 2-dehydrogenase"  
"MCG\_K23\_00606" 22272 "s59E5H2" 0 "Inositol 2-dehydrogenase"  
"MCG\_K23\_00606" 22272 "s63E6H2" 0 "Inositol 2-dehydrogenase"  
"MCG\_K23\_00607" 22273 "s59E13H2" 0 "Xylose isomerase-like TIM barrel"  
"MCG\_K23\_00607" 22273 "s59E25H2" 0 "Xylose isomerase-like TIM barrel"  
"MCG\_K23\_00607" 22273 "s59E5H2" 0 "Xylose isomerase-like TIM barrel"  
"MCG\_K23\_00607" 22273 "s63E6H2" 0 "Xylose isomerase-like TIM barrel"  
"MCG\_K23\_00608" 22274 "s59E13H2" 0 "hypothetical protein"  
"MCG\_K23\_00608" 22274 "s59E25H2" 0 "hypothetical protein"  
"MCG\_K23\_00608" 22274 "s59E5H2" 0 "hypothetical protein"  
"MCG\_K23\_00608" 22274 "s63E6H2" 0 "hypothetical protein"  
"MCG\_K23\_00609" 22275 "s59E13H2" 0 "Trehalose/maltose import ATP-binding protein Malk"  
"MCG\_K23\_00609" 22275 "s59E25H2" 0 "Trehalose/maltose import ATP-binding protein Malk"  
"MCG\_K23\_00609" 22275 "s59E5H2" 0 "Trehalose/maltose import ATP-binding protein Malk"  
"MCG\_K23\_00609" 22275 "s63E6H2" 0 "Trehalose/maltose import ATP-binding protein Malk"  
"MCG\_K23\_00610" 22276 "s59E13H2" 0 "D-tagatose 3-epimerase"  
"MCG\_K23\_00610" 22276 "s59E25H2" 0 "D-tagatose 3-epimerase"

"MCG\_K23\_00610" 22276 "s59E5H2" 0 "D-tagatose 3-epimerase"  
"MCG\_K23\_00610" 22276 "s63E6H2" 0 "D-tagatose 3-epimerase"  
"MCG\_K23\_00611" 22277 "s59E13H2" 0 "hypothetical protein"  
"MCG\_K23\_00611" 22277 "s59E25H2" 0 "hypothetical protein"  
"MCG\_K23\_00611" 22277 "s59E5H2" 0 "hypothetical protein"  
"MCG\_K23\_00611" 22277 "s63E6H2" 0 "hypothetical protein"  
"MCG\_K23\_00612" 22278 "s59E13H2" 0 "Glucokinase"  
"MCG\_K23\_00612" 22278 "s59E25H2" 0 "Glucokinase"  
"MCG\_K23\_00612" 22278 "s59E5H2" 0 "Glucokinase"  
"MCG\_K23\_00612" 22278 "s63E6H2" 0 "Glucokinase"  
"MCG\_K23\_00613" 22279 "s59E13H2" 0 "putative oxidoreductase YcjS"  
"MCG\_K23\_00613" 22279 "s59E25H2" 0 "putative oxidoreductase YcjS"  
"MCG\_K23\_00613" 22279 "s59E5H2" 0 "putative oxidoreductase YcjS"  
"MCG\_K23\_00613" 22279 "s63E6H2" 0 "putative oxidoreductase YcjS"  
"MCG\_K23\_00614" 22280 "s59E13H2" 0 "putative sulfoacetate transporter SauU"  
"MCG\_K23\_00614" 22280 "s59E25H2" 0 "putative sulfoacetate transporter SauU"  
"MCG\_K23\_00614" 22280 "s59E5H2" 0 "putative sulfoacetate transporter SauU"  
"MCG\_K23\_00614" 22280 "s63E6H2" 0 "putative sulfoacetate transporter SauU"  
"MCG\_K23\_00615" 22281 "s59E13H2" 0 "Inositol 2-dehydrogenase"  
"MCG\_K23\_00615" 22281 "s59E25H2" 0 "Inositol 2-dehydrogenase"  
"MCG\_K23\_00615" 22281 "s59E5H2" 0 "Inositol 2-dehydrogenase"  
"MCG\_K23\_00615" 22281 "s63E6H2" 0 "Inositol 2-dehydrogenase"  
"MCG\_K23\_00616" 22282 "s59E13H2" 0 "fructoselysine 3-epimerase"  
"MCG\_K23\_00616" 22282 "s59E25H2" 0 "fructoselysine 3-epimerase"  
"MCG\_K23\_00616" 22282 "s59E5H2" 0 "fructoselysine 3-epimerase"  
"MCG\_K23\_00616" 22282 "s63E6H2" 0 "fructoselysine 3-epimerase"  
"MCG\_K23\_00617" 22283 "s59E13H2" 0 "Inositol 2-dehydrogenase/D-chiro-inositol 3-dehydrogenase"  
"MCG\_K23\_00617" 22283 "s59E25H2" 0 "Inositol 2-dehydrogenase/D-chiro-inositol 3-dehydrogenase"  
"MCG\_K23\_00617" 22283 "s59E5H2" 0 "Inositol 2-dehydrogenase/D-chiro-inositol 3-dehydrogenase"  
"MCG\_K23\_00617" 22283 "s63E6H2" 0 "Inositol 2-dehydrogenase/D-chiro-inositol 3-dehydrogenase"  
"MCG\_K23\_00618" 22284 "s59E13H2" 0 "Xaa-Pro dipeptidase"  
"MCG\_K23\_00618" 22284 "s59E25H2" 0 "Xaa-Pro dipeptidase"  
"MCG\_K23\_00618" 22284 "s59E5H2" 0 "Xaa-Pro dipeptidase"  
"MCG\_K23\_00618" 22284 "s63E6H2" 0 "Xaa-Pro dipeptidase"  
"MCG\_K23\_00620" 22286 "s59E13H2" 0 "hypothetical protein"  
"MCG\_K23\_00620" 22286 "s59E25H2" 0 "hypothetical protein"  
"MCG\_K23\_00620" 22286 "s59E5H2" 0 "hypothetical protein"  
"MCG\_K23\_00620" 22286 "s63E6H2" 0 "hypothetical protein"  
"MCG\_K23\_00621" 22287 "s59E13H2" 0 "Glutathione synthetase"  
"MCG\_K23\_00621" 22287 "s59E25H2" 0 "Glutathione synthetase"  
"MCG\_K23\_00621" 22287 "s59E5H2" 0 "Glutathione synthetase"  
"MCG\_K23\_00621" 22287 "s63E6H2" 0 "Glutathione synthetase"  
"MCG\_K23\_00622" 22288 "s59E13H2" 0 "hypothetical protein"  
"MCG\_K23\_00622" 22288 "s59E25H2" 0 "hypothetical protein"  
"MCG\_K23\_00622" 22288 "s59E5H2" 0.02594905 "hypothetical protein"  
"MCG\_K23\_00622" 22288 "s63E6H2" 0.002787545 "hypothetical protein"  
"MCG\_K23\_00623" 22289 "s59E13H2" 0 "N-formylglutamate amidohydrolase"

"MCG\_K23\_00623" 22289 "s59E25H2" 0 "N-formylglutamate amidohydrolase"  
"MCG\_K23\_00623" 22289 "s59E5H2" 0.2116601 "N-formylglutamate amidohydrolase"  
"MCG\_K23\_00623" 22289 "s63E6H2" 0 "N-formylglutamate amidohydrolase"  
"MCG\_K23\_00624" 22290 "s59E13H2" 0 "Small-conductance mechanosensitive channel"  
"MCG\_K23\_00624" 22290 "s59E25H2" 0 "Small-conductance mechanosensitive channel"  
"MCG\_K23\_00624" 22290 "s59E5H2" 0 "Small-conductance mechanosensitive channel"  
"MCG\_K23\_00624" 22290 "s63E6H2" 0 "Small-conductance mechanosensitive channel"  
"MCG\_K23\_00625" 22291 "s59E13H2" 0 "putative membrane protein"  
"MCG\_K23\_00625" 22291 "s59E25H2" 0 "putative membrane protein"  
"MCG\_K23\_00625" 22291 "s59E5H2" 0 "putative membrane protein"  
"MCG\_K23\_00625" 22291 "s63E6H2" 0 "putative membrane protein"  
"MCG\_K23\_00626" 22292 "s59E13H2" 0 "Magnesium transport protein CorA"  
"MCG\_K23\_00626" 22292 "s59E25H2" 0 "Magnesium transport protein CorA"  
"MCG\_K23\_00626" 22292 "s59E5H2" 0 "Magnesium transport protein CorA"  
"MCG\_K23\_00626" 22292 "s63E6H2" 0 "Magnesium transport protein CorA"  
"MCG\_K23\_00628" 22294 "s59E13H2" 0 "hypothetical protein"  
"MCG\_K23\_00628" 22294 "s59E25H2" 0 "hypothetical protein"  
"MCG\_K23\_00628" 22294 "s59E5H2" 0 "hypothetical protein"  
"MCG\_K23\_00628" 22294 "s63E6H2" 0 "hypothetical protein"  
"MCG\_K23\_00629" 22295 "s59E13H2" 0 "Ribonuclease HI"  
"MCG\_K23\_00629" 22295 "s59E25H2" 0 "Ribonuclease HI"  
"MCG\_K23\_00629" 22295 "s59E5H2" 0 "Ribonuclease HI"  
"MCG\_K23\_00629" 22295 "s63E6H2" 0 "Ribonuclease HI"  
"MCG\_K23\_00630" 22296 "s59E13H2" 0 "hypothetical protein"  
"MCG\_K23\_00630" 22296 "s59E25H2" 0 "hypothetical protein"  
"MCG\_K23\_00630" 22296 "s59E5H2" 0 "hypothetical protein"  
"MCG\_K23\_00630" 22296 "s63E6H2" 0 "hypothetical protein"  
"MCG\_K23\_00631" 22297 "s59E13H2" 0 "flavodoxin"  
"MCG\_K23\_00631" 22297 "s59E25H2" 0 "flavodoxin"  
"MCG\_K23\_00631" 22297 "s59E5H2" 0 "flavodoxin"  
"MCG\_K23\_00631" 22297 "s63E6H2" 0 "flavodoxin"  
"MCG\_K23\_00632" 22298 "s59E13H2" 0 "hypothetical protein"  
"MCG\_K23\_00632" 22298 "s59E25H2" 0 "hypothetical protein"  
"MCG\_K23\_00632" 22298 "s59E5H2" 0 "hypothetical protein"  
"MCG\_K23\_00632" 22298 "s63E6H2" 0 "hypothetical protein"  
"MCG\_K23\_00633" 22299 "s59E13H2" 0 "Lactoylglutathione lyase"  
"MCG\_K23\_00633" 22299 "s59E25H2" 0 "Lactoylglutathione lyase"  
"MCG\_K23\_00633" 22299 "s59E5H2" 0 "Lactoylglutathione lyase"  
"MCG\_K23\_00633" 22299 "s63E6H2" 0 "Lactoylglutathione lyase"  
"MCG\_K23\_00634" 22300 "s59E13H2" 0 "putative HAD-hydrolase"  
"MCG\_K23\_00634" 22300 "s59E25H2" 0 "putative HAD-hydrolase"  
"MCG\_K23\_00634" 22300 "s59E5H2" 0 "putative HAD-hydrolase"  
"MCG\_K23\_00634" 22300 "s63E6H2" 0 "putative HAD-hydrolase"  
"MCG\_K23\_00635" 22301 "s59E13H2" 0 "hypothetical protein"  
"MCG\_K23\_00635" 22301 "s59E25H2" 0 "hypothetical protein"  
"MCG\_K23\_00635" 22301 "s59E5H2" 0 "hypothetical protein"  
"MCG\_K23\_00635" 22301 "s63E6H2" 0 "hypothetical protein"

"MCG\_K23\_00636" 22302 "s59E13H2" 0 "hypothetical protein"  
"MCG\_K23\_00636" 22302 "s59E25H2" 0 "hypothetical protein"  
"MCG\_K23\_00636" 22302 "s59E5H2" 0 "hypothetical protein"  
"MCG\_K23\_00636" 22302 "s63E6H2" 0 "hypothetical protein"  
"MCG\_K23\_00637" 22303 "s59E13H2" 0 "putative aspartokinase"  
"MCG\_K23\_00637" 22303 "s59E25H2" 0 "putative aspartokinase"  
"MCG\_K23\_00637" 22303 "s59E5H2" 0 "putative aspartokinase"  
"MCG\_K23\_00637" 22303 "s63E6H2" 0 "putative aspartokinase"  
"MCG\_K23\_00638" 22304 "s59E13H2" 0 "Phosphoserine phosphatase"  
"MCG\_K23\_00638" 22304 "s59E25H2" 0 "Phosphoserine phosphatase"  
"MCG\_K23\_00638" 22304 "s59E5H2" 0 "Phosphoserine phosphatase"  
"MCG\_K23\_00638" 22304 "s63E6H2" 0 "Phosphoserine phosphatase"  
"MCG\_K23\_00639" 22305 "s59E13H2" 0 "GIY-YIG nuclease superfamily protein"  
"MCG\_K23\_00639" 22305 "s59E25H2" 0 "GIY-YIG nuclease superfamily protein"  
"MCG\_K23\_00639" 22305 "s59E5H2" 0 "GIY-YIG nuclease superfamily protein"  
"MCG\_K23\_00639" 22305 "s63E6H2" 0 "GIY-YIG nuclease superfamily protein"  
"MCG\_K23\_00640" 22306 "s59E13H2" 0 "hypothetical protein"  
"MCG\_K23\_00640" 22306 "s59E25H2" 0 "hypothetical protein"  
"MCG\_K23\_00640" 22306 "s59E5H2" 0 "hypothetical protein"  
"MCG\_K23\_00640" 22306 "s63E6H2" 0 "hypothetical protein"  
"MCG\_K23\_00641" 22307 "s59E13H2" 0 "putative RNA-binding protein"  
"MCG\_K23\_00641" 22307 "s59E25H2" 0 "putative RNA-binding protein"  
"MCG\_K23\_00641" 22307 "s59E5H2" 0 "putative RNA-binding protein"  
"MCG\_K23\_00641" 22307 "s63E6H2" 0 "putative RNA-binding protein"  
"MCG\_K23\_00642" 22308 "s59E13H2" 0 "hypothetical protein"  
"MCG\_K23\_00642" 22308 "s59E25H2" 0 "hypothetical protein"  
"MCG\_K23\_00642" 22308 "s59E5H2" 0 "hypothetical protein"  
"MCG\_K23\_00642" 22308 "s63E6H2" 0 "hypothetical protein"  
"MCG\_K23\_00643" 22309 "s59E13H2" 0 "hypothetical protein"  
"MCG\_K23\_00643" 22309 "s59E25H2" 0 "hypothetical protein"  
"MCG\_K23\_00643" 22309 "s59E5H2" 0 "hypothetical protein"  
"MCG\_K23\_00643" 22309 "s63E6H2" 0 "hypothetical protein"  
"MCG\_K23\_00644" 22310 "s59E13H2" 0 "DNA alkylation repair enzyme"  
"MCG\_K23\_00644" 22310 "s59E25H2" 0 "DNA alkylation repair enzyme"  
"MCG\_K23\_00644" 22310 "s59E5H2" 0 "DNA alkylation repair enzyme"  
"MCG\_K23\_00644" 22310 "s63E6H2" 0 "DNA alkylation repair enzyme"  
"MCG\_K23\_00645" 22311 "s59E13H2" 0 "hypothetical protein"  
"MCG\_K23\_00645" 22311 "s59E25H2" 0 "hypothetical protein"  
"MCG\_K23\_00645" 22311 "s59E5H2" 0 "hypothetical protein"  
"MCG\_K23\_00645" 22311 "s63E6H2" 0 "hypothetical protein"  
"MCG\_K23\_00646" 22312 "s59E13H2" 0 "hypothetical protein"  
"MCG\_K23\_00646" 22312 "s59E25H2" 0 "hypothetical protein"  
"MCG\_K23\_00646" 22312 "s59E5H2" 0 "hypothetical protein"  
"MCG\_K23\_00646" 22312 "s63E6H2" 0 "hypothetical protein"  
"MCG\_K23\_00647" 22313 "s59E13H2" 0 "putative polyketide biosynthesis zinc-dependent hydrolase PksB"  
"MCG\_K23\_00647" 22313 "s59E25H2" 0 "putative polyketide biosynthesis zinc-dependent hydrolase PksB"  
"MCG\_K23\_00647" 22313 "s59E5H2" 0 "putative polyketide biosynthesis zinc-dependent hydrolase PksB"



"MCG\_K23\_00647" 22313 "s63E6H2" 0 "putative polyketide biosynthesis zinc-dependent hydrolase PksB"  
"MCG\_K23\_00648" 22314 "s59E13H2" 0 "Putative conjugal transfer protein/MT3759"  
"MCG\_K23\_00648" 22314 "s59E25H2" 0 "Putative conjugal transfer protein/MT3759"  
"MCG\_K23\_00648" 22314 "s59E5H2" 0 "Putative conjugal transfer protein/MT3759"  
"MCG\_K23\_00648" 22314 "s63E6H2" 0 "Putative conjugal transfer protein/MT3759"  
"MCG\_K23\_00649" 22315 "s59E13H2" 0 "hypothetical protein"  
"MCG\_K23\_00649" 22315 "s59E25H2" 0 "hypothetical protein"  
"MCG\_K23\_00649" 22315 "s59E5H2" 0 "hypothetical protein"  
"MCG\_K23\_00649" 22315 "s63E6H2" 0 "hypothetical protein"  
"MCG\_K23\_00650" 22316 "s59E13H2" 0 "ThiS family protein"  
"MCG\_K23\_00650" 22316 "s59E25H2" 0 "ThiS family protein"  
"MCG\_K23\_00650" 22316 "s59E5H2" 0 "ThiS family protein"  
"MCG\_K23\_00650" 22316 "s63E6H2" 0 "ThiS family protein"  
"MCG\_K23\_00651" 22317 "s59E13H2" 0 "Tungsten-containing aldehyde ferredoxin oxidoreductase"  
"MCG\_K23\_00651" 22317 "s59E25H2" 0 "Tungsten-containing aldehyde ferredoxin oxidoreductase"  
"MCG\_K23\_00651" 22317 "s59E5H2" 0.005412613 "Tungsten-containing aldehyde ferredoxin oxidoreductase"  
"MCG\_K23\_00651" 22317 "s63E6H2" 0 "Tungsten-containing aldehyde ferredoxin oxidoreductase"  
"MCG\_K23\_00652" 22318 "s59E13H2" 0 "Electron transport protein HydN"  
"MCG\_K23\_00652" 22318 "s59E25H2" 0 "Electron transport protein HydN"  
"MCG\_K23\_00652" 22318 "s59E5H2" 0 "Electron transport protein HydN"  
"MCG\_K23\_00652" 22318 "s63E6H2" 0 "Electron transport protein HydN"  
"MCG\_K23\_00653" 22319 "s59E13H2" 0 "Tungsten-containing aldehyde ferredoxin oxidoreductase"  
"MCG\_K23\_00653" 22319 "s59E25H2" 0 "Tungsten-containing aldehyde ferredoxin oxidoreductase"  
"MCG\_K23\_00653" 22319 "s59E5H2" 0 "Tungsten-containing aldehyde ferredoxin oxidoreductase"  
"MCG\_K23\_00653" 22319 "s63E6H2" 0 "Tungsten-containing aldehyde ferredoxin oxidoreductase"  
"MCG\_K23\_00654" 22320 "s59E13H2" 0 "Electron transport protein HydN"  
"MCG\_K23\_00654" 22320 "s59E25H2" 0 "Electron transport protein HydN"  
"MCG\_K23\_00654" 22320 "s59E5H2" 0 "Electron transport protein HydN"  
"MCG\_K23\_00654" 22320 "s63E6H2" 0 "Electron transport protein HydN"  
"MCG\_K23\_00655" 22321 "s59E13H2" 0 "Hydrogenase 3 maturation protease"  
"MCG\_K23\_00655" 22321 "s59E25H2" 0 "Hydrogenase 3 maturation protease"  
"MCG\_K23\_00655" 22321 "s59E5H2" 0 "Hydrogenase 3 maturation protease"  
"MCG\_K23\_00655" 22321 "s63E6H2" 0 "Hydrogenase 3 maturation protease"  
"MCG\_K23\_00656" 22322 "s59E13H2" 0 "F420-non-reducing hydrogenase iron-sulfur subunit A"  
"MCG\_K23\_00656" 22322 "s59E25H2" 0 "F420-non-reducing hydrogenase iron-sulfur subunit A"  
"MCG\_K23\_00656" 22322 "s59E5H2" 0 "F420-non-reducing hydrogenase iron-sulfur subunit A"  
"MCG\_K23\_00656" 22322 "s63E6H2" 0 "F420-non-reducing hydrogenase iron-sulfur subunit A"  
"MCG\_K23\_00657" 22323 "s59E13H2" 0 "F420-non-reducing hydrogenase iron-sulfur subunit G"  
"MCG\_K23\_00657" 22323 "s59E25H2" 0 "F420-non-reducing hydrogenase iron-sulfur subunit G"  
"MCG\_K23\_00657" 22323 "s59E5H2" 0 "F420-non-reducing hydrogenase iron-sulfur subunit G"  
"MCG\_K23\_00657" 22323 "s63E6H2" 0 "F420-non-reducing hydrogenase iron-sulfur subunit G"  
"MCG\_K23\_00658" 22324 "s59E13H2" 0 "CoB--CoM heterodisulfide reductase subunit B"  
"MCG\_K23\_00658" 22324 "s59E25H2" 0 "CoB--CoM heterodisulfide reductase subunit B"  
"MCG\_K23\_00658" 22324 "s59E5H2" 0 "CoB--CoM heterodisulfide reductase subunit B"  
"MCG\_K23\_00658" 22324 "s63E6H2" 0 "CoB--CoM heterodisulfide reductase subunit B"  
"MCG\_K23\_00659" 22325 "s59E13H2" 0 "CoB--CoM heterodisulfide reductase iron-sulfur subunit C"  
"MCG\_K23\_00659" 22325 "s59E25H2" 0 "CoB--CoM heterodisulfide reductase iron-sulfur subunit C"

"MCG\_K23\_00659" 22325 "s59E5H2" 0 "CoB--CoM heterodisulfide reductase iron-sulfur subunit C"  
"MCG\_K23\_00659" 22325 "s63E6H2" 0 "CoB--CoM heterodisulfide reductase iron-sulfur subunit C"  
"MCG\_K23\_00660" 22326 "s59E13H2" 0 "Sulfhydrogenase 1 subunit gamma"  
"MCG\_K23\_00660" 22326 "s59E25H2" 0 "Sulfhydrogenase 1 subunit gamma"  
"MCG\_K23\_00660" 22326 "s59E5H2" 0 "Sulfhydrogenase 1 subunit gamma"  
"MCG\_K23\_00660" 22326 "s63E6H2" 0 "Sulfhydrogenase 1 subunit gamma"  
"MCG\_K23\_00661" 22327 "s59E13H2" 0 "Sulfhydrogenase 1 subunit delta"  
"MCG\_K23\_00661" 22327 "s59E25H2" 0 "Sulfhydrogenase 1 subunit delta"  
"MCG\_K23\_00661" 22327 "s59E5H2" 0 "Sulfhydrogenase 1 subunit delta"  
"MCG\_K23\_00661" 22327 "s63E6H2" 0 "Sulfhydrogenase 1 subunit delta"  
"MCG\_K23\_00662" 22328 "s59E13H2" 0 "Sulfhydrogenase 1 subunit alpha"  
"MCG\_K23\_00662" 22328 "s59E25H2" 0 "Sulfhydrogenase 1 subunit alpha"  
"MCG\_K23\_00662" 22328 "s59E5H2" 0 "Sulfhydrogenase 1 subunit alpha"  
"MCG\_K23\_00662" 22328 "s63E6H2" 0 "Sulfhydrogenase 1 subunit alpha"  
"MCG\_K23\_00663" 22329 "s59E13H2" 0 "tRNA (pseudouridine(54)-N(1))-methyltransferase"  
"MCG\_K23\_00663" 22329 "s59E25H2" 0 "tRNA (pseudouridine(54)-N(1))-methyltransferase"  
"MCG\_K23\_00663" 22329 "s59E5H2" 0 "tRNA (pseudouridine(54)-N(1))-methyltransferase"  
"MCG\_K23\_00663" 22329 "s63E6H2" 0 "tRNA (pseudouridine(54)-N(1))-methyltransferase"  
"MCG\_K23\_00664" 22330 "s59E13H2" 0 "Thiamine-monophosphate kinase"  
"MCG\_K23\_00664" 22330 "s59E25H2" 0 "Thiamine-monophosphate kinase"  
"MCG\_K23\_00664" 22330 "s59E5H2" 0 "Thiamine-monophosphate kinase"  
"MCG\_K23\_00664" 22330 "s63E6H2" 0 "Thiamine-monophosphate kinase"  
"MCG\_K23\_00668" 22334 "s59E13H2" 0 "Phthiotriol/phenolphthiotriol dimycocerosates methyltransferase"  
"MCG\_K23\_00668" 22334 "s59E25H2" 0 "Phthiotriol/phenolphthiotriol dimycocerosates methyltransferase"  
"MCG\_K23\_00668" 22334 "s59E5H2" 0 "Phthiotriol/phenolphthiotriol dimycocerosates methyltransferase"  
"MCG\_K23\_00668" 22334 "s63E6H2" 0 "Phthiotriol/phenolphthiotriol dimycocerosates methyltransferase"  
"MCG\_K23\_00670" 22336 "s59E13H2" 0 "hypothetical protein"  
"MCG\_K23\_00670" 22336 "s59E25H2" 0 "hypothetical protein"  
"MCG\_K23\_00670" 22336 "s59E5H2" 0 "hypothetical protein"  
"MCG\_K23\_00670" 22336 "s63E6H2" 0 "hypothetical protein"  
"MCG\_K23\_00671" 22337 "s59E13H2" 0 "hypothetical protein"  
"MCG\_K23\_00671" 22337 "s59E25H2" 0 "hypothetical protein"  
"MCG\_K23\_00671" 22337 "s59E5H2" 0 "hypothetical protein"  
"MCG\_K23\_00671" 22337 "s63E6H2" 0 "hypothetical protein"  
"MCG\_K23\_00673" 22339 "s59E13H2" 0 "hypothetical protein"  
"MCG\_K23\_00673" 22339 "s59E25H2" 0 "hypothetical protein"  
"MCG\_K23\_00673" 22339 "s59E5H2" 0 "hypothetical protein"  
"MCG\_K23\_00673" 22339 "s63E6H2" 0 "hypothetical protein"  
"MCG\_K23\_00674" 22340 "s59E13H2" 0 "Transcriptional regulator MntR"  
"MCG\_K23\_00674" 22340 "s59E25H2" 0 "Transcriptional regulator MntR"  
"MCG\_K23\_00674" 22340 "s59E5H2" 0 "Transcriptional regulator MntR"  
"MCG\_K23\_00674" 22340 "s63E6H2" 0 "Transcriptional regulator MntR"  
"MCG\_K23\_00675" 22341 "s59E13H2" 0 "Hydroxylamine reductase"  
"MCG\_K23\_00675" 22341 "s59E25H2" 0 "Hydroxylamine reductase"  
"MCG\_K23\_00675" 22341 "s59E5H2" 0 "Hydroxylamine reductase"  
"MCG\_K23\_00675" 22341 "s63E6H2" 0 "Hydroxylamine reductase"  
"MCG\_K23\_00676" 22342 "s59E13H2" 0 "Hydroxylamine reductase"

"MCG\_K23\_00676" 22342 "s59E25H2" 0 "Hydroxylamine reductase"  
"MCG\_K23\_00676" 22342 "s59E5H2" 0 "Hydroxylamine reductase"  
"MCG\_K23\_00676" 22342 "s63E6H2" 0 "Hydroxylamine reductase"  
"MCG\_K23\_00677" 22343 "s59E13H2" 0 "Hydroxylamine reductase"  
"MCG\_K23\_00677" 22343 "s59E25H2" 0 "Hydroxylamine reductase"  
"MCG\_K23\_00677" 22343 "s59E5H2" 0 "Hydroxylamine reductase"  
"MCG\_K23\_00677" 22343 "s63E6H2" 0 "Hydroxylamine reductase"  
"MCG\_K23\_00678" 22344 "s59E13H2" 0 "HTH DNA binding domain protein"  
"MCG\_K23\_00678" 22344 "s59E25H2" 0 "HTH DNA binding domain protein"  
"MCG\_K23\_00678" 22344 "s59E5H2" 0 "HTH DNA binding domain protein"  
"MCG\_K23\_00678" 22344 "s63E6H2" 0 "HTH DNA binding domain protein"  
"MCG\_K23\_00679" 22345 "s59E13H2" 0 "Putative serine protease HtrA"  
"MCG\_K23\_00679" 22345 "s59E25H2" 0 "Putative serine protease HtrA"  
"MCG\_K23\_00679" 22345 "s59E5H2" 0 "Putative serine protease HtrA"  
"MCG\_K23\_00679" 22345 "s63E6H2" 0 "Putative serine protease HtrA"  
"MCG\_K23\_00680" 22346 "s59E13H2" 0 "Adenylosuccinate synthetase"  
"MCG\_K23\_00680" 22346 "s59E25H2" 0 "Adenylosuccinate synthetase"  
"MCG\_K23\_00680" 22346 "s59E5H2" 0 "Adenylosuccinate synthetase"  
"MCG\_K23\_00680" 22346 "s63E6H2" 0 "Adenylosuccinate synthetase"  
"MCG\_K23\_00681" 22347 "s59E13H2" 0 "Flagellin N-methylase"  
"MCG\_K23\_00681" 22347 "s59E25H2" 0 "Flagellin N-methylase"  
"MCG\_K23\_00681" 22347 "s59E5H2" 0 "Flagellin N-methylase"  
"MCG\_K23\_00681" 22347 "s63E6H2" 0 "Flagellin N-methylase"  
"MCG\_K23\_00684" 22350 "s59E13H2" 0 "Phosphodiesterase"  
"MCG\_K23\_00684" 22350 "s59E25H2" 0 "Phosphodiesterase"  
"MCG\_K23\_00684" 22350 "s59E5H2" 0 "Phosphodiesterase"  
"MCG\_K23\_00684" 22350 "s63E6H2" 0 "Phosphodiesterase"  
"MCG\_K23\_00685" 22351 "s59E13H2" 0 "hypothetical protein"  
"MCG\_K23\_00685" 22351 "s59E25H2" 0 "hypothetical protein"  
"MCG\_K23\_00685" 22351 "s59E5H2" 0 "hypothetical protein"  
"MCG\_K23\_00685" 22351 "s63E6H2" 0 "hypothetical protein"  
"MCG\_K23\_00686" 22352 "s59E13H2" 0 "putative metallohydrolase"  
"MCG\_K23\_00686" 22352 "s59E25H2" 0 "putative metallohydrolase"  
"MCG\_K23\_00686" 22352 "s59E5H2" 0 "putative metallohydrolase"  
"MCG\_K23\_00686" 22352 "s63E6H2" 0 "putative metallohydrolase"  
"MCG\_K23\_00687" 22353 "s59E13H2" 0 "50S ribosomal protein L14e"  
"MCG\_K23\_00687" 22353 "s59E25H2" 0 "50S ribosomal protein L14e"  
"MCG\_K23\_00687" 22353 "s59E5H2" 0 "50S ribosomal protein L14e"  
"MCG\_K23\_00687" 22353 "s63E6H2" 0 "50S ribosomal protein L14e"  
"MCG\_K23\_00688" 22354 "s59E13H2" 0 "putative tRNA pseudouridine synthase B"  
"MCG\_K23\_00688" 22354 "s59E25H2" 0 "putative tRNA pseudouridine synthase B"  
"MCG\_K23\_00688" 22354 "s59E5H2" 0 "putative tRNA pseudouridine synthase B"  
"MCG\_K23\_00688" 22354 "s63E6H2" 0 "putative tRNA pseudouridine synthase B"  
"MCG\_K23\_00689" 22355 "s59E13H2" 0 "putative S-adenosylmethionine-dependent methyltransferase"  
"MCG\_K23\_00689" 22355 "s59E25H2" 0 "putative S-adenosylmethionine-dependent methyltransferase"  
"MCG\_K23\_00689" 22355 "s59E5H2" 0 "putative S-adenosylmethionine-dependent methyltransferase"  
"MCG\_K23\_00689" 22355 "s63E6H2" 0 "putative S-adenosylmethionine-dependent methyltransferase"

"MCG\_K23\_00690" 22356 "s59E13H2" 0 "putative tyrosine recombinase XerC-like protein"  
"MCG\_K23\_00690" 22356 "s59E25H2" 0 "putative tyrosine recombinase XerC-like protein"  
"MCG\_K23\_00690" 22356 "s59E5H2" 0 "putative tyrosine recombinase XerC-like protein"  
"MCG\_K23\_00690" 22356 "s63E6H2" 0 "putative tyrosine recombinase XerC-like protein"  
"MCG\_K23\_00691" 22357 "s59E13H2" 0 "L-arabinose transport system permease protein AraQ"  
"MCG\_K23\_00691" 22357 "s59E25H2" 0 "L-arabinose transport system permease protein AraQ"  
"MCG\_K23\_00691" 22357 "s59E5H2" 0 "L-arabinose transport system permease protein AraQ"  
"MCG\_K23\_00691" 22357 "s63E6H2" 0 "L-arabinose transport system permease protein AraQ"  
"MCG\_K23\_00692" 22358 "s59E13H2" 0 "L-arabinose transport system permease protein AraP"  
"MCG\_K23\_00692" 22358 "s59E25H2" 0 "L-arabinose transport system permease protein AraP"  
"MCG\_K23\_00692" 22358 "s59E5H2" 0 "L-arabinose transport system permease protein AraP"  
"MCG\_K23\_00692" 22358 "s63E6H2" 0 "L-arabinose transport system permease protein AraP"  
"MG2\_P15\_00001" 22360 "s59E13H2" 0 "Diaminopimelate epimerase"  
"MG2\_P15\_00001" 22360 "s59E25H2" 0 "Diaminopimelate epimerase"  
"MG2\_P15\_00001" 22360 "s59E5H2" 0 "Diaminopimelate epimerase"  
"MG2\_P15\_00001" 22360 "s63E6H2" 0 "Diaminopimelate epimerase"  
"MG2\_P15\_00002" 22361 "s59E13H2" 0 "4-hydroxy-tetrahydrodipicolinate synthase"  
"MG2\_P15\_00002" 22361 "s59E25H2" 0 "4-hydroxy-tetrahydrodipicolinate synthase"  
"MG2\_P15\_00002" 22361 "s59E5H2" 0 "4-hydroxy-tetrahydrodipicolinate synthase"  
"MG2\_P15\_00002" 22361 "s63E6H2" 0 "4-hydroxy-tetrahydrodipicolinate synthase"  
"MG2\_P15\_00003" 22362 "s59E13H2" 0 "hypothetical protein"  
"MG2\_P15\_00003" 22362 "s59E25H2" 0 "hypothetical protein"  
"MG2\_P15\_00003" 22362 "s59E5H2" 0 "hypothetical protein"  
"MG2\_P15\_00003" 22362 "s63E6H2" 0 "hypothetical protein"  
"MG2\_P15\_00004" 22363 "s59E13H2" 0 "hypothetical protein"  
"MG2\_P15\_00004" 22363 "s59E25H2" 0 "hypothetical protein"  
"MG2\_P15\_00004" 22363 "s59E5H2" 0 "hypothetical protein"  
"MG2\_P15\_00004" 22363 "s63E6H2" 0 "hypothetical protein"  
"MG2\_P15\_00005" 22364 "s59E13H2" 0 "hypothetical protein"  
"MG2\_P15\_00005" 22364 "s59E25H2" 0 "hypothetical protein"  
"MG2\_P15\_00005" 22364 "s59E5H2" 0 "hypothetical protein"  
"MG2\_P15\_00005" 22364 "s63E6H2" 0 "hypothetical protein"  
"MG2\_P15\_00006" 22365 "s59E13H2" 0 "DNA adenine methyltransferase YhdJ"  
"MG2\_P15\_00006" 22365 "s59E25H2" 0 "DNA adenine methyltransferase YhdJ"  
"MG2\_P15\_00006" 22365 "s59E5H2" 0 "DNA adenine methyltransferase YhdJ"  
"MG2\_P15\_00006" 22365 "s63E6H2" 0 "DNA adenine methyltransferase YhdJ"  
"MG2\_P15\_00007" 22366 "s59E13H2" 0 "R.Pab1 restriction endonuclease"  
"MG2\_P15\_00007" 22366 "s59E25H2" 0 "R.Pab1 restriction endonuclease"  
"MG2\_P15\_00007" 22366 "s59E5H2" 0 "R.Pab1 restriction endonuclease"  
"MG2\_P15\_00007" 22366 "s63E6H2" 0 "R.Pab1 restriction endonuclease"  
"MG2\_P15\_00008" 22367 "s59E13H2" 0 "Modification methylase TaqI"  
"MG2\_P15\_00008" 22367 "s59E25H2" 0 "Modification methylase TaqI"  
"MG2\_P15\_00008" 22367 "s59E5H2" 0 "Modification methylase TaqI"  
"MG2\_P15\_00008" 22367 "s63E6H2" 0 "Modification methylase TaqI"  
"MG2\_P15\_00010" 22369 "s59E13H2" 0 "hypothetical protein"  
"MG2\_P15\_00010" 22369 "s59E25H2" 0 "hypothetical protein"  
"MG2\_P15\_00010" 22369 "s59E5H2" 0 "hypothetical protein"

"MG2\_P15\_00010" 22369 "s63E6H2" 0 "hypothetical protein"  
"MG2\_P15\_00011" 22370 "s59E13H2" 0 "Bifunctional folate synthesis protein"  
"MG2\_P15\_00011" 22370 "s59E25H2" 0 "Bifunctional folate synthesis protein"  
"MG2\_P15\_00011" 22370 "s59E5H2" 0 "Bifunctional folate synthesis protein"  
"MG2\_P15\_00011" 22370 "s63E6H2" 0 "Bifunctional folate synthesis protein"  
"MG2\_P15\_00012" 22371 "s59E13H2" 0 "hypothetical protein"  
"MG2\_P15\_00012" 22371 "s59E25H2" 0 "hypothetical protein"  
"MG2\_P15\_00012" 22371 "s59E5H2" 0 "hypothetical protein"  
"MG2\_P15\_00012" 22371 "s63E6H2" 0 "hypothetical protein"  
"MG2\_P15\_00013" 22372 "s59E13H2" 0 "Guanylate kinase"  
"MG2\_P15\_00013" 22372 "s59E25H2" 0 "Guanylate kinase"  
"MG2\_P15\_00013" 22372 "s59E5H2" 0 "Guanylate kinase"  
"MG2\_P15\_00013" 22372 "s63E6H2" 0 "Guanylate kinase"  
"MG2\_P15\_00014" 22373 "s59E13H2" 0 "Na(+)-translocating NADH-quinone reductase subunit F"  
"MG2\_P15\_00014" 22373 "s59E25H2" 0 "Na(+)-translocating NADH-quinone reductase subunit F"  
"MG2\_P15\_00014" 22373 "s59E5H2" 0 "Na(+)-translocating NADH-quinone reductase subunit F"  
"MG2\_P15\_00014" 22373 "s63E6H2" 0 "Na(+)-translocating NADH-quinone reductase subunit F"  
"MG2\_P15\_00015" 22374 "s59E13H2" 0 "Thioredoxin"  
"MG2\_P15\_00015" 22374 "s59E25H2" 0 "Thioredoxin"  
"MG2\_P15\_00015" 22374 "s59E5H2" 0 "Thioredoxin"  
"MG2\_P15\_00015" 22374 "s63E6H2" 0 "Thioredoxin"  
"MG2\_P15\_00016" 22375 "s59E13H2" 0 "Integrase core domain protein"  
"MG2\_P15\_00016" 22375 "s59E25H2" 0 "Integrase core domain protein"  
"MG2\_P15\_00016" 22375 "s59E5H2" 0 "Integrase core domain protein"  
"MG2\_P15\_00016" 22375 "s63E6H2" 0 "Integrase core domain protein"  
"MG2\_P15\_00019" 22378 "s59E13H2" 0 "hypothetical protein"  
"MG2\_P15\_00019" 22378 "s59E25H2" 0 "hypothetical protein"  
"MG2\_P15\_00019" 22378 "s59E5H2" 0 "hypothetical protein"  
"MG2\_P15\_00019" 22378 "s63E6H2" 0 "hypothetical protein"  
"MG2\_P15\_00022" 22381 "s59E13H2" 0 "mRNA interferase EndoA"  
"MG2\_P15\_00022" 22381 "s59E25H2" 0 "mRNA interferase EndoA"  
"MG2\_P15\_00022" 22381 "s59E5H2" 0 "mRNA interferase EndoA"  
"MG2\_P15\_00022" 22381 "s63E6H2" 0 "mRNA interferase EndoA"  
"MG2\_P15\_00023" 22382 "s59E13H2" 0 "Putative nickel-responsive regulator"  
"MG2\_P15\_00023" 22382 "s59E25H2" 0 "Putative nickel-responsive regulator"  
"MG2\_P15\_00023" 22382 "s59E5H2" 0 "Putative nickel-responsive regulator"  
"MG2\_P15\_00023" 22382 "s63E6H2" 0 "Putative nickel-responsive regulator"  
"MG2\_P15\_00026" 22385 "s59E13H2" 0 "hypothetical protein"  
"MG2\_P15\_00026" 22385 "s59E25H2" 0 "hypothetical protein"  
"MG2\_P15\_00026" 22385 "s59E5H2" 0 "hypothetical protein"  
"MG2\_P15\_00026" 22385 "s63E6H2" 0 "hypothetical protein"  
"MG2\_P15\_00029" 22388 "s59E13H2" 0 "Helix-turn-helix"  
"MG2\_P15\_00029" 22388 "s59E25H2" 0 "Helix-turn-helix"  
"MG2\_P15\_00029" 22388 "s59E5H2" 0 "Helix-turn-helix"  
"MG2\_P15\_00029" 22388 "s63E6H2" 0 "Helix-turn-helix"  
"MG2\_P15\_00030" 22389 "s59E13H2" 0 "Helix-turn-helix domain protein"  
"MG2\_P15\_00030" 22389 "s59E25H2" 0 "Helix-turn-helix domain protein"

"MG2\_P15\_00030" 22389 "s59E5H2" 0 "Helix-turn-helix domain protein"  
"MG2\_P15\_00030" 22389 "s63E6H2" 0 "Helix-turn-helix domain protein"  
"MG2\_P15\_00031" 22390 "s59E13H2" 0 "Tyrosine recombinase XerC"  
"MG2\_P15\_00031" 22390 "s59E25H2" 0 "Tyrosine recombinase XerC"  
"MG2\_P15\_00031" 22390 "s59E5H2" 0.007087849 "Tyrosine recombinase XerC"  
"MG2\_P15\_00031" 22390 "s63E6H2" 0 "Tyrosine recombinase XerC"  
"MG2\_P15\_00032" 22391 "s59E13H2" 0 "HTH-type transcriptional regulator SinR"  
"MG2\_P15\_00032" 22391 "s59E25H2" 0 "HTH-type transcriptional regulator SinR"  
"MG2\_P15\_00032" 22391 "s59E5H2" 0 "HTH-type transcriptional regulator SinR"  
"MG2\_P15\_00032" 22391 "s63E6H2" 0 "HTH-type transcriptional regulator SinR"  
"MG2\_P15\_00033" 22392 "s59E13H2" 0 "Modification methylase Pvull"  
"MG2\_P15\_00033" 22392 "s59E25H2" 0 "Modification methylase Pvull"  
"MG2\_P15\_00033" 22392 "s59E5H2" 0.001978897 "Modification methylase Pvull"  
"MG2\_P15\_00033" 22392 "s63E6H2" 0 "Modification methylase Pvull"  
"MG2\_P15\_00034" 22393 "s59E13H2" 0 "hypothetical protein"  
"MG2\_P15\_00034" 22393 "s59E25H2" 0 "hypothetical protein"  
"MG2\_P15\_00034" 22393 "s59E5H2" 0.00416507 "hypothetical protein"  
"MG2\_P15\_00034" 22393 "s63E6H2" 0 "hypothetical protein"  
"MG2\_P15\_00036" 22395 "s59E13H2" 0 "Bifunctional ligase/repressor BirA"  
"MG2\_P15\_00036" 22395 "s59E25H2" 0 "Bifunctional ligase/repressor BirA"  
"MG2\_P15\_00036" 22395 "s59E5H2" 0 "Bifunctional ligase/repressor BirA"  
"MG2\_P15\_00036" 22395 "s63E6H2" 0 "Bifunctional ligase/repressor BirA"  
"MG2\_P15\_00037" 22396 "s59E13H2" 0 "Riboflavin biosynthesis protein RibF"  
"MG2\_P15\_00037" 22396 "s59E25H2" 0 "Riboflavin biosynthesis protein RibF"  
"MG2\_P15\_00037" 22396 "s59E5H2" 0 "Riboflavin biosynthesis protein RibF"  
"MG2\_P15\_00037" 22396 "s63E6H2" 0 "Riboflavin biosynthesis protein RibF"  
"MG2\_P15\_00038" 22397 "s59E13H2" 0 "H/ACA RNA-protein complex component Cbf5p"  
"MG2\_P15\_00038" 22397 "s59E25H2" 0 "H/ACA RNA-protein complex component Cbf5p"  
"MG2\_P15\_00038" 22397 "s59E5H2" 0 "H/ACA RNA-protein complex component Cbf5p"  
"MG2\_P15\_00038" 22397 "s63E6H2" 0 "H/ACA RNA-protein complex component Cbf5p"  
"MG2\_P15\_00039" 22398 "s59E13H2" 0 "tRNA pseudouridine synthase B"  
"MG2\_P15\_00039" 22398 "s59E25H2" 0 "tRNA pseudouridine synthase B"  
"MG2\_P15\_00039" 22398 "s59E5H2" 0 "tRNA pseudouridine synthase B"  
"MG2\_P15\_00039" 22398 "s63E6H2" 0 "tRNA pseudouridine synthase B"  
"MG2\_P15\_00040" 22399 "s59E13H2" 0 "hypothetical protein"  
"MG2\_P15\_00040" 22399 "s59E25H2" 0 "hypothetical protein"  
"MG2\_P15\_00040" 22399 "s59E5H2" 0 "hypothetical protein"  
"MG2\_P15\_00040" 22399 "s63E6H2" 0 "hypothetical protein"  
"MG2\_P15\_00041" 22400 "s59E13H2" 0 "Translation initiation factor IF-2"  
"MG2\_P15\_00041" 22400 "s59E25H2" 0 "Translation initiation factor IF-2"  
"MG2\_P15\_00041" 22400 "s59E5H2" 0 "Translation initiation factor IF-2"  
"MG2\_P15\_00041" 22400 "s63E6H2" 0 "Translation initiation factor IF-2"  
"MG2\_P15\_00042" 22401 "s59E13H2" 0 "hypothetical protein"  
"MG2\_P15\_00042" 22401 "s59E25H2" 0 "hypothetical protein"  
"MG2\_P15\_00042" 22401 "s59E5H2" 0 "hypothetical protein"  
"MG2\_P15\_00042" 22401 "s63E6H2" 0 "hypothetical protein"  
"MG2\_P15\_00043" 22402 "s59E13H2" 0 "hypothetical protein"

"MG2\_P15\_00043" 22402 "s59E25H2" 0 "hypothetical protein"  
"MG2\_P15\_00043" 22402 "s59E5H2" 0 "hypothetical protein"  
"MG2\_P15\_00043" 22402 "s63E6H2" 0 "hypothetical protein"  
"MG2\_P15\_00044" 22403 "s59E13H2" 0 "Acryloyl-CoA reductase electron transfer subunit beta"  
"MG2\_P15\_00044" 22403 "s59E25H2" 0 "Acryloyl-CoA reductase electron transfer subunit beta"  
"MG2\_P15\_00044" 22403 "s59E5H2" 0 "Acryloyl-CoA reductase electron transfer subunit beta"  
"MG2\_P15\_00044" 22403 "s63E6H2" 0 "Acryloyl-CoA reductase electron transfer subunit beta"  
"MG2\_P15\_00045" 22404 "s59E13H2" 0 "Acryloyl-CoA reductase electron transfer subunit gamma"  
"MG2\_P15\_00045" 22404 "s59E25H2" 0 "Acryloyl-CoA reductase electron transfer subunit gamma"  
"MG2\_P15\_00045" 22404 "s59E5H2" 0 "Acryloyl-CoA reductase electron transfer subunit gamma"  
"MG2\_P15\_00045" 22404 "s63E6H2" 0 "Acryloyl-CoA reductase electron transfer subunit gamma"  
"MG2\_P15\_00046" 22405 "s59E13H2" 0 "Acyl-CoA dehydrogenase"  
"MG2\_P15\_00046" 22405 "s59E25H2" 0 "Acyl-CoA dehydrogenase"  
"MG2\_P15\_00046" 22405 "s59E5H2" 0 "Acyl-CoA dehydrogenase"  
"MG2\_P15\_00046" 22405 "s63E6H2" 0 "Acyl-CoA dehydrogenase"  
"MG2\_P15\_00047" 22406 "s59E13H2" 0 "Crossover junction endodeoxyribonuclease RuvC"  
"MG2\_P15\_00047" 22406 "s59E25H2" 0 "Crossover junction endodeoxyribonuclease RuvC"  
"MG2\_P15\_00047" 22406 "s59E5H2" 0 "Crossover junction endodeoxyribonuclease RuvC"  
"MG2\_P15\_00047" 22406 "s63E6H2" 0 "Crossover junction endodeoxyribonuclease RuvC"  
"MG2\_P15\_00048" 22407 "s59E13H2" 0 "Dihydropteroate synthase"  
"MG2\_P15\_00048" 22407 "s59E25H2" 0 "Dihydropteroate synthase"  
"MG2\_P15\_00048" 22407 "s59E5H2" 0 "Dihydropteroate synthase"  
"MG2\_P15\_00048" 22407 "s63E6H2" 0 "Dihydropteroate synthase"  
"MG2\_P15\_00049" 22408 "s59E13H2" 0 "ATP-dependent zinc metalloprotease FtsH"  
"MG2\_P15\_00049" 22408 "s59E25H2" 0 "ATP-dependent zinc metalloprotease FtsH"  
"MG2\_P15\_00049" 22408 "s59E5H2" 0 "ATP-dependent zinc metalloprotease FtsH"  
"MG2\_P15\_00049" 22408 "s63E6H2" 0 "ATP-dependent zinc metalloprotease FtsH"  
"MG2\_P15\_00050" 22409 "s59E13H2" 0 "Enolase"  
"MG2\_P15\_00050" 22409 "s59E25H2" 0 "Enolase"  
"MG2\_P15\_00050" 22409 "s59E5H2" 0 "Enolase"  
"MG2\_P15\_00050" 22409 "s63E6H2" 0 "Enolase"  
"MG2\_P15\_00051" 22410 "s59E13H2" 0 "3-oxoacyl-[acyl-carrier-protein] synthase 2"  
"MG2\_P15\_00051" 22410 "s59E25H2" 0 "3-oxoacyl-[acyl-carrier-protein] synthase 2"  
"MG2\_P15\_00051" 22410 "s59E5H2" 0 "3-oxoacyl-[acyl-carrier-protein] synthase 2"  
"MG2\_P15\_00051" 22410 "s63E6H2" 0 "3-oxoacyl-[acyl-carrier-protein] synthase 2"  
"MG2\_P15\_00052" 22411 "s59E13H2" 0 "Ribonuclease 3"  
"MG2\_P15\_00052" 22411 "s59E25H2" 0 "Ribonuclease 3"  
"MG2\_P15\_00052" 22411 "s59E5H2" 0 "Ribonuclease 3"  
"MG2\_P15\_00052" 22411 "s63E6H2" 0 "Ribonuclease 3"  
"MG2\_P15\_00053" 22412 "s59E13H2" 0 "putative phosphoglucosamine mutase"  
"MG2\_P15\_00053" 22412 "s59E25H2" 0 "putative phosphoglucosamine mutase"  
"MG2\_P15\_00053" 22412 "s59E5H2" 0 "putative phosphoglucosamine mutase"  
"MG2\_P15\_00053" 22412 "s63E6H2" 0 "putative phosphoglucosamine mutase"  
"MG2\_P15\_00054" 22413 "s59E13H2" 0 "Bifunctional protein GlmU"  
"MG2\_P15\_00054" 22413 "s59E25H2" 0 "Bifunctional protein GlmU"  
"MG2\_P15\_00054" 22413 "s59E5H2" 0 "Bifunctional protein GlmU"  
"MG2\_P15\_00054" 22413 "s63E6H2" 0 "Bifunctional protein GlmU"

"MG2\_P15\_00056" 22415 "s59E13H2" 0 "Cyclic di-GMP phosphodiesterase response regulator RpfG"  
"MG2\_P15\_00056" 22415 "s59E25H2" 0 "Cyclic di-GMP phosphodiesterase response regulator RpfG"  
"MG2\_P15\_00056" 22415 "s59E5H2" 0 "Cyclic di-GMP phosphodiesterase response regulator RpfG"  
"MG2\_P15\_00056" 22415 "s63E6H2" 0 "Cyclic di-GMP phosphodiesterase response regulator RpfG"  
"MG2\_P15\_00057" 22416 "s59E13H2" 0 "hypothetical protein"  
"MG2\_P15\_00057" 22416 "s59E25H2" 0 "hypothetical protein"  
"MG2\_P15\_00057" 22416 "s59E5H2" 0 "hypothetical protein"  
"MG2\_P15\_00057" 22416 "s63E6H2" 0 "hypothetical protein"  
"MG2\_P15\_00058" 22417 "s59E13H2" 0 "Twitching mobility protein"  
"MG2\_P15\_00058" 22417 "s59E25H2" 0 "Twitching mobility protein"  
"MG2\_P15\_00058" 22417 "s59E5H2" 0 "Twitching mobility protein"  
"MG2\_P15\_00058" 22417 "s63E6H2" 0 "Twitching mobility protein"  
"MG2\_P15\_00059" 22418 "s59E13H2" 0 "hypothetical protein"  
"MG2\_P15\_00059" 22418 "s59E25H2" 0 "hypothetical protein"  
"MG2\_P15\_00059" 22418 "s59E5H2" 0 "hypothetical protein"  
"MG2\_P15\_00059" 22418 "s63E6H2" 0 "hypothetical protein"  
"MG2\_P15\_00060" 22419 "s59E13H2" 0 "Regulatory protein RecX"  
"MG2\_P15\_00060" 22419 "s59E25H2" 0 "Regulatory protein RecX"  
"MG2\_P15\_00060" 22419 "s59E5H2" 0 "Regulatory protein RecX"  
"MG2\_P15\_00060" 22419 "s63E6H2" 0 "Regulatory protein RecX"  
"MG2\_P15\_00064" 22423 "s59E13H2" 0 "Integrase core domain protein"  
"MG2\_P15\_00064" 22423 "s59E25H2" 0 "Integrase core domain protein"  
"MG2\_P15\_00064" 22423 "s59E5H2" 0.03955247 "Integrase core domain protein"  
"MG2\_P15\_00064" 22423 "s63E6H2" 0.1128059 "Integrase core domain protein"  
"MG2\_P15\_00065" 22424 "s59E13H2" 0.002383973 "transposase/IS protein"  
"MG2\_P15\_00065" 22424 "s59E25H2" 0 "transposase/IS protein"  
"MG2\_P15\_00065" 22424 "s59E5H2" 0.08044854 "transposase/IS protein"  
"MG2\_P15\_00065" 22424 "s63E6H2" 0.3185662 "transposase/IS protein"  
"MG2\_P15\_00066" 22425 "s59E13H2" 0 "Helix-turn-helix domain protein"  
"MG2\_P15\_00066" 22425 "s59E25H2" 0 "Helix-turn-helix domain protein"  
"MG2\_P15\_00066" 22425 "s59E5H2" 0 "Helix-turn-helix domain protein"  
"MG2\_P15\_00066" 22425 "s63E6H2" 0.02492688 "Helix-turn-helix domain protein"  
"MG2\_P15\_00067" 22426 "s59E13H2" 0 "Helix-turn-helix domain protein"  
"MG2\_P15\_00067" 22426 "s59E25H2" 0 "Helix-turn-helix domain protein"  
"MG2\_P15\_00067" 22426 "s59E5H2" 0 "Helix-turn-helix domain protein"  
"MG2\_P15\_00067" 22426 "s63E6H2" 0 "Helix-turn-helix domain protein"  
"MG2\_P15\_00068" 22427 "s59E13H2" 0 "DNA-invertase hin"  
"MG2\_P15\_00068" 22427 "s59E25H2" 0 "DNA-invertase hin"  
"MG2\_P15\_00068" 22427 "s59E5H2" 0 "DNA-invertase hin"  
"MG2\_P15\_00068" 22427 "s63E6H2" 0 "DNA-invertase hin"  
"MG2\_P15\_00069" 22428 "s59E13H2" 0 "hypothetical protein"  
"MG2\_P15\_00069" 22428 "s59E25H2" 0 "hypothetical protein"  
"MG2\_P15\_00069" 22428 "s59E5H2" 0 "hypothetical protein"  
"MG2\_P15\_00069" 22428 "s63E6H2" 0 "hypothetical protein"  
"MG2\_P15\_00073" 22432 "s59E13H2" 0 "hypothetical protein"  
"MG2\_P15\_00073" 22432 "s59E25H2" 0 "hypothetical protein"  
"MG2\_P15\_00073" 22432 "s59E5H2" 0 "hypothetical protein"



"MG2\_P15\_00073" 22432 "s63E6H2" 0 "hypothetical protein"  
"MG2\_P15\_00074" 22433 "s59E13H2" 0 "hypothetical protein"  
"MG2\_P15\_00074" 22433 "s59E25H2" 0 "hypothetical protein"  
"MG2\_P15\_00074" 22433 "s59E5H2" 0 "hypothetical protein"  
"MG2\_P15\_00074" 22433 "s63E6H2" 0 "hypothetical protein"  
"MG2\_P15\_00076" 22435 "s59E13H2" 0 "hypothetical protein"  
"MG2\_P15\_00076" 22435 "s59E25H2" 0 "hypothetical protein"  
"MG2\_P15\_00076" 22435 "s59E5H2" 0 "hypothetical protein"  
"MG2\_P15\_00076" 22435 "s63E6H2" 0 "hypothetical protein"  
"MG2\_P15\_00080" 22439 "s59E13H2" 0 "Putative zinc ribbon domain protein"  
"MG2\_P15\_00080" 22439 "s59E25H2" 0 "Putative zinc ribbon domain protein"  
"MG2\_P15\_00080" 22439 "s59E5H2" 0 "Putative zinc ribbon domain protein"  
"MG2\_P15\_00080" 22439 "s63E6H2" 0 "Putative zinc ribbon domain protein"  
"MG2\_P15\_00081" 22440 "s59E13H2" 0 "Putative Holliday junction resolvase"  
"MG2\_P15\_00081" 22440 "s59E25H2" 0 "Putative Holliday junction resolvase"  
"MG2\_P15\_00081" 22440 "s59E5H2" 0 "Putative Holliday junction resolvase"  
"MG2\_P15\_00081" 22440 "s63E6H2" 0 "Putative Holliday junction resolvase"  
"MG2\_P15\_00082" 22441 "s59E13H2" 0 "hypothetical protein"  
"MG2\_P15\_00082" 22441 "s59E25H2" 0 "hypothetical protein"  
"MG2\_P15\_00082" 22441 "s59E5H2" 0 "hypothetical protein"  
"MG2\_P15\_00082" 22441 "s63E6H2" 0 "hypothetical protein"  
"MG2\_P15\_00083" 22442 "s59E13H2" 0 "Purine nucleoside phosphorylase 1"  
"MG2\_P15\_00083" 22442 "s59E25H2" 0 "Purine nucleoside phosphorylase 1"  
"MG2\_P15\_00083" 22442 "s59E5H2" 0 "Purine nucleoside phosphorylase 1"  
"MG2\_P15\_00083" 22442 "s63E6H2" 0 "Purine nucleoside phosphorylase 1"  
"MG2\_P15\_00084" 22443 "s59E13H2" 0 "50S ribosomal protein L13"  
"MG2\_P15\_00084" 22443 "s59E25H2" 0 "50S ribosomal protein L13"  
"MG2\_P15\_00084" 22443 "s59E5H2" 0 "50S ribosomal protein L13"  
"MG2\_P15\_00084" 22443 "s63E6H2" 0 "50S ribosomal protein L13"  
"MG2\_P15\_00086" 22445 "s59E13H2" 0 "2-dehydro-3-deoxygluconokinase"  
"MG2\_P15\_00086" 22445 "s59E25H2" 0 "2-dehydro-3-deoxygluconokinase"  
"MG2\_P15\_00086" 22445 "s59E5H2" 0 "2-dehydro-3-deoxygluconokinase"  
"MG2\_P15\_00086" 22445 "s63E6H2" 0 "2-dehydro-3-deoxygluconokinase"  
"MG2\_P15\_00087" 22446 "s59E13H2" 0 "Glutamine--tRNA ligase"  
"MG2\_P15\_00087" 22446 "s59E25H2" 0 "Glutamine--tRNA ligase"  
"MG2\_P15\_00087" 22446 "s59E5H2" 0 "Glutamine--tRNA ligase"  
"MG2\_P15\_00087" 22446 "s63E6H2" 0 "Glutamine--tRNA ligase"  
"MG2\_P15\_00089" 22448 "s59E13H2" 0 "Glutamate--tRNA ligase 1"  
"MG2\_P15\_00089" 22448 "s59E25H2" 0 "Glutamate--tRNA ligase 1"  
"MG2\_P15\_00089" 22448 "s59E5H2" 0 "Glutamate--tRNA ligase 1"  
"MG2\_P15\_00089" 22448 "s63E6H2" 0 "Glutamate--tRNA ligase 1"  
"MG2\_P15\_00090" 22449 "s59E13H2" 0 "Tetratricopeptide repeat protein"  
"MG2\_P15\_00090" 22449 "s59E25H2" 0 "Tetratricopeptide repeat protein"  
"MG2\_P15\_00090" 22449 "s59E5H2" 0 "Tetratricopeptide repeat protein"  
"MG2\_P15\_00090" 22449 "s63E6H2" 0 "Tetratricopeptide repeat protein"  
"MG2\_P15\_00091" 22450 "s59E13H2" 0 "Riboflavin biosynthesis protein RibD"  
"MG2\_P15\_00091" 22450 "s59E25H2" 0 "Riboflavin biosynthesis protein RibD"

"MG2\_P15\_00091" 22450 "s59E5H2" 0 "Riboflavin biosynthesis protein RibD"  
"MG2\_P15\_00091" 22450 "s63E6H2" 0 "Riboflavin biosynthesis protein RibD"  
"MG2\_P15\_00092" 22451 "s59E13H2" 0 "Riboflavin synthase"  
"MG2\_P15\_00092" 22451 "s59E25H2" 0 "Riboflavin synthase"  
"MG2\_P15\_00092" 22451 "s59E5H2" 0 "Riboflavin synthase"  
"MG2\_P15\_00092" 22451 "s63E6H2" 0 "Riboflavin synthase"  
"MG2\_P15\_00093" 22452 "s59E13H2" 0 "Riboflavin biosynthesis protein RibBA"  
"MG2\_P15\_00093" 22452 "s59E25H2" 0 "Riboflavin biosynthesis protein RibBA"  
"MG2\_P15\_00093" 22452 "s59E5H2" 0 "Riboflavin biosynthesis protein RibBA"  
"MG2\_P15\_00093" 22452 "s63E6H2" 0 "Riboflavin biosynthesis protein RibBA"  
"MG2\_P15\_00094" 22453 "s59E13H2" 0 "6,7-dimethyl-8-ribityllumazine synthase"  
"MG2\_P15\_00094" 22453 "s59E25H2" 0 "6,7-dimethyl-8-ribityllumazine synthase"  
"MG2\_P15\_00094" 22453 "s59E5H2" 0 "6,7-dimethyl-8-ribityllumazine synthase"  
"MG2\_P15\_00094" 22453 "s63E6H2" 0 "6,7-dimethyl-8-ribityllumazine synthase"  
"MG2\_P15\_00095" 22454 "s59E13H2" 0 "Phosphodiesterase YfcE"  
"MG2\_P15\_00095" 22454 "s59E25H2" 0 "Phosphodiesterase YfcE"  
"MG2\_P15\_00095" 22454 "s59E5H2" 0 "Phosphodiesterase YfcE"  
"MG2\_P15\_00095" 22454 "s63E6H2" 0 "Phosphodiesterase YfcE"  
"MG2\_P15\_00096" 22455 "s59E13H2" 0 "hypothetical protein"  
"MG2\_P15\_00096" 22455 "s59E25H2" 0 "hypothetical protein"  
"MG2\_P15\_00096" 22455 "s59E5H2" 0 "hypothetical protein"  
"MG2\_P15\_00096" 22455 "s63E6H2" 0 "hypothetical protein"  
"MG2\_P15\_00097" 22456 "s59E13H2" 0 "DAK2 domain protein"  
"MG2\_P15\_00097" 22456 "s59E25H2" 0 "DAK2 domain protein"  
"MG2\_P15\_00097" 22456 "s59E5H2" 0 "DAK2 domain protein"  
"MG2\_P15\_00097" 22456 "s63E6H2" 0 "DAK2 domain protein"  
"MG2\_P15\_00098" 22457 "s59E13H2" 0 "ATP-dependent DNA helicase RecG"  
"MG2\_P15\_00098" 22457 "s59E25H2" 0 "ATP-dependent DNA helicase RecG"  
"MG2\_P15\_00098" 22457 "s59E5H2" 0 "ATP-dependent DNA helicase RecG"  
"MG2\_P15\_00098" 22457 "s63E6H2" 0 "ATP-dependent DNA helicase RecG"  
"MG2\_P15\_00099" 22458 "s59E13H2" 0 "Ribosomal RNA small subunit methyltransferase D"  
"MG2\_P15\_00099" 22458 "s59E25H2" 0 "Ribosomal RNA small subunit methyltransferase D"  
"MG2\_P15\_00099" 22458 "s59E5H2" 0 "Ribosomal RNA small subunit methyltransferase D"  
"MG2\_P15\_00099" 22458 "s63E6H2" 0 "Ribosomal RNA small subunit methyltransferase D"  
"MG2\_P15\_00100" 22459 "s59E13H2" 0 "Succinyl-CoA ligase [ADP-forming] subunit alpha"  
"MG2\_P15\_00100" 22459 "s59E25H2" 0 "Succinyl-CoA ligase [ADP-forming] subunit alpha"  
"MG2\_P15\_00100" 22459 "s59E5H2" 0 "Succinyl-CoA ligase [ADP-forming] subunit alpha"  
"MG2\_P15\_00100" 22459 "s63E6H2" 0 "Succinyl-CoA ligase [ADP-forming] subunit alpha"  
"MG2\_P15\_00101" 22460 "s59E13H2" 0 "50S ribosomal protein L32"  
"MG2\_P15\_00101" 22460 "s59E25H2" 0 "50S ribosomal protein L32"  
"MG2\_P15\_00101" 22460 "s59E5H2" 0 "50S ribosomal protein L32"  
"MG2\_P15\_00101" 22460 "s63E6H2" 0 "50S ribosomal protein L32"  
"MG2\_P15\_00102" 22461 "s59E13H2" 0 "hypothetical protein"  
"MG2\_P15\_00102" 22461 "s59E25H2" 0 "hypothetical protein"  
"MG2\_P15\_00102" 22461 "s59E5H2" 0 "hypothetical protein"  
"MG2\_P15\_00102" 22461 "s63E6H2" 0 "hypothetical protein"  
"MG2\_P15\_00103" 22462 "s59E13H2" 0 "Phosphopantetheine adenyltransferase"

"MG2\_P15\_00103" 22462 "s59E25H2" 0 "Phosphopantetheine adenylyltransferase"  
"MG2\_P15\_00103" 22462 "s59E5H2" 0 "Phosphopantetheine adenylyltransferase"  
"MG2\_P15\_00103" 22462 "s63E6H2" 0 "Phosphopantetheine adenylyltransferase"  
"MG2\_P15\_00104" 22463 "s59E13H2" 0 "Transcriptional repressor SdpR"  
"MG2\_P15\_00104" 22463 "s59E25H2" 0 "Transcriptional repressor SdpR"  
"MG2\_P15\_00104" 22463 "s59E5H2" 0 "Transcriptional repressor SdpR"  
"MG2\_P15\_00104" 22463 "s63E6H2" 0 "Transcriptional repressor SdpR"  
"MG2\_P15\_00105" 22464 "s59E13H2" 0 "putative ABC transporter ATP-binding protein YbhF"  
"MG2\_P15\_00105" 22464 "s59E25H2" 0 "putative ABC transporter ATP-binding protein YbhF"  
"MG2\_P15\_00105" 22464 "s59E5H2" 0 "putative ABC transporter ATP-binding protein YbhF"  
"MG2\_P15\_00105" 22464 "s63E6H2" 0 "putative ABC transporter ATP-binding protein YbhF"  
"MG2\_P15\_00106" 22465 "s59E13H2" 0 "ABC-2 type transporter"  
"MG2\_P15\_00106" 22465 "s59E25H2" 0 "ABC-2 type transporter"  
"MG2\_P15\_00106" 22465 "s59E5H2" 0 "ABC-2 type transporter"  
"MG2\_P15\_00106" 22465 "s63E6H2" 0 "ABC-2 type transporter"  
"MG2\_P15\_00107" 22466 "s59E13H2" 0 "Sulfate transporter family protein"  
"MG2\_P15\_00107" 22466 "s59E25H2" 0 "Sulfate transporter family protein"  
"MG2\_P15\_00107" 22466 "s59E5H2" 0 "Sulfate transporter family protein"  
"MG2\_P15\_00107" 22466 "s63E6H2" 0 "Sulfate transporter family protein"  
"MG2\_P15\_00108" 22467 "s59E13H2" 0 "hypothetical protein"  
"MG2\_P15\_00108" 22467 "s59E25H2" 0 "hypothetical protein"  
"MG2\_P15\_00108" 22467 "s59E5H2" 0 "hypothetical protein"  
"MG2\_P15\_00108" 22467 "s63E6H2" 0 "hypothetical protein"  
"MG2\_P15\_00109" 22468 "s59E13H2" 0 "Toxin MazF5"  
"MG2\_P15\_00109" 22468 "s59E25H2" 0 "Toxin MazF5"  
"MG2\_P15\_00109" 22468 "s59E5H2" 0 "Toxin MazF5"  
"MG2\_P15\_00109" 22468 "s63E6H2" 0 "Toxin MazF5"  
"MG2\_P15\_00110" 22469 "s59E13H2" 0 "Asparagine--tRNA ligase"  
"MG2\_P15\_00110" 22469 "s59E25H2" 0 "Asparagine--tRNA ligase"  
"MG2\_P15\_00110" 22469 "s59E5H2" 0 "Asparagine--tRNA ligase"  
"MG2\_P15\_00110" 22469 "s63E6H2" 0 "Asparagine--tRNA ligase"  
"MG2\_P15\_00111" 22470 "s59E13H2" 0 "hypothetical protein"  
"MG2\_P15\_00111" 22470 "s59E25H2" 0 "hypothetical protein"  
"MG2\_P15\_00111" 22470 "s59E5H2" 0 "hypothetical protein"  
"MG2\_P15\_00111" 22470 "s63E6H2" 0 "hypothetical protein"  
"MG2\_P15\_00112" 22471 "s59E13H2" 0 "hypothetical protein"  
"MG2\_P15\_00112" 22471 "s59E25H2" 0 "hypothetical protein"  
"MG2\_P15\_00112" 22471 "s59E5H2" 0 "hypothetical protein"  
"MG2\_P15\_00112" 22471 "s63E6H2" 0 "hypothetical protein"  
"MG2\_P15\_00113" 22472 "s59E13H2" 0 "Replication-associated recombination protein A"  
"MG2\_P15\_00113" 22472 "s59E25H2" 0 "Replication-associated recombination protein A"  
"MG2\_P15\_00113" 22472 "s59E5H2" 0 "Replication-associated recombination protein A"  
"MG2\_P15\_00113" 22472 "s63E6H2" 0 "Replication-associated recombination protein A"  
"MG2\_P15\_00114" 22473 "s59E13H2" 0 "hypothetical protein"  
"MG2\_P15\_00114" 22473 "s59E25H2" 0 "hypothetical protein"  
"MG2\_P15\_00114" 22473 "s59E5H2" 0 "hypothetical protein"  
"MG2\_P15\_00114" 22473 "s63E6H2" 0 "hypothetical protein"

"MG2\_P15\_00115" 22474 "s59E13H2" 0 "Malate dehydrogenase"  
"MG2\_P15\_00115" 22474 "s59E25H2" 0 "Malate dehydrogenase"  
"MG2\_P15\_00115" 22474 "s59E5H2" 0 "Malate dehydrogenase"  
"MG2\_P15\_00115" 22474 "s63E6H2" 0 "Malate dehydrogenase"  
"MG2\_P15\_00116" 22475 "s59E13H2" 0 "nitroreductase A"  
"MG2\_P15\_00116" 22475 "s59E25H2" 0 "nitroreductase A"  
"MG2\_P15\_00116" 22475 "s59E5H2" 0 "nitroreductase A"  
"MG2\_P15\_00116" 22475 "s63E6H2" 0 "nitroreductase A"  
"MG2\_P15\_00117" 22476 "s59E13H2" 0 "transaldolase"  
"MG2\_P15\_00117" 22476 "s59E25H2" 0 "transaldolase"  
"MG2\_P15\_00117" 22476 "s59E5H2" 0 "transaldolase"  
"MG2\_P15\_00117" 22476 "s63E6H2" 0 "transaldolase"  
"MG2\_P15\_00118" 22477 "s59E13H2" 0 "Pyrroline-5-carboxylate reductase"  
"MG2\_P15\_00118" 22477 "s59E25H2" 0 "Pyrroline-5-carboxylate reductase"  
"MG2\_P15\_00118" 22477 "s59E5H2" 0 "Pyrroline-5-carboxylate reductase"  
"MG2\_P15\_00118" 22477 "s63E6H2" 0 "Pyrroline-5-carboxylate reductase"  
"MG2\_P15\_00119" 22478 "s59E13H2" 0 "Glutamate 5-kinase"  
"MG2\_P15\_00119" 22478 "s59E25H2" 0 "Glutamate 5-kinase"  
"MG2\_P15\_00119" 22478 "s59E5H2" 0 "Glutamate 5-kinase"  
"MG2\_P15\_00119" 22478 "s63E6H2" 0 "Glutamate 5-kinase"  
"MG2\_P15\_00120" 22479 "s59E13H2" 0 "Gamma-glutamyl phosphate reductase"  
"MG2\_P15\_00120" 22479 "s59E25H2" 0 "Gamma-glutamyl phosphate reductase"  
"MG2\_P15\_00120" 22479 "s59E5H2" 0 "Gamma-glutamyl phosphate reductase"  
"MG2\_P15\_00120" 22479 "s63E6H2" 0 "Gamma-glutamyl phosphate reductase"  
"MG2\_P15\_00121" 22480 "s59E13H2" 0 "Proline--tRNA ligase"  
"MG2\_P15\_00121" 22480 "s59E25H2" 0 "Proline--tRNA ligase"  
"MG2\_P15\_00121" 22480 "s59E5H2" 0 "Proline--tRNA ligase"  
"MG2\_P15\_00121" 22480 "s63E6H2" 0 "Proline--tRNA ligase"  
"MG2\_P15\_00122" 22481 "s59E13H2" 0 "Nucleotidyltransferase domain protein"  
"MG2\_P15\_00122" 22481 "s59E25H2" 0 "Nucleotidyltransferase domain protein"  
"MG2\_P15\_00122" 22481 "s59E5H2" 0 "Nucleotidyltransferase domain protein"  
"MG2\_P15\_00122" 22481 "s63E6H2" 0 "Nucleotidyltransferase domain protein"  
"MG2\_P15\_00123" 22482 "s59E13H2" 0 "2,5-dihydroxypyridine 5,6-dioxygenase"  
"MG2\_P15\_00123" 22482 "s59E25H2" 0 "2,5-dihydroxypyridine 5,6-dioxygenase"  
"MG2\_P15\_00123" 22482 "s59E5H2" 0 "2,5-dihydroxypyridine 5,6-dioxygenase"  
"MG2\_P15\_00123" 22482 "s63E6H2" 0 "2,5-dihydroxypyridine 5,6-dioxygenase"  
"MG2\_P15\_00124" 22483 "s59E13H2" 0 "Dimethylamine corrinoid protein"  
"MG2\_P15\_00124" 22483 "s59E25H2" 0 "Dimethylamine corrinoid protein"  
"MG2\_P15\_00124" 22483 "s59E5H2" 0 "Dimethylamine corrinoid protein"  
"MG2\_P15\_00124" 22483 "s63E6H2" 0 "Dimethylamine corrinoid protein"  
"MG2\_P15\_00125" 22484 "s59E13H2" 0 "Trimethylamine methyltransferase MttB"  
"MG2\_P15\_00125" 22484 "s59E25H2" 0 "Trimethylamine methyltransferase MttB"  
"MG2\_P15\_00125" 22484 "s59E5H2" 0 "Trimethylamine methyltransferase MttB"  
"MG2\_P15\_00125" 22484 "s63E6H2" 0 "Trimethylamine methyltransferase MttB"  
"MG2\_P15\_00126" 22485 "s59E13H2" 0 "Leucine-, isoleucine-, valine-, threonine-, and alanine-binding protein precursor"  
"MG2\_P15\_00126" 22485 "s59E25H2" 0 "Leucine-, isoleucine-, valine-, threonine-, and alanine-binding protein precursor"  
"MG2\_P15\_00126" 22485 "s59E5H2" 0 "Leucine-, isoleucine-, valine-, threonine-, and alanine-binding protein precursor"

"MG2\_P15\_00126" 22485 "s63E6H2" 0 "Leucine-, isoleucine-, valine-, threonine-, and alanine-binding protein precursor"  
"MG2\_P15\_00127" 22486 "s59E13H2" 0 "hypothetical protein"  
"MG2\_P15\_00127" 22486 "s59E25H2" 0 "hypothetical protein"  
"MG2\_P15\_00127" 22486 "s59E5H2" 0 "hypothetical protein"  
"MG2\_P15\_00127" 22486 "s63E6H2" 0 "hypothetical protein"  
"MG2\_P15\_00128" 22487 "s59E13H2" 0 "HTH-type transcriptional regulator LutR"  
"MG2\_P15\_00128" 22487 "s59E25H2" 0 "HTH-type transcriptional regulator LutR"  
"MG2\_P15\_00128" 22487 "s59E5H2" 0 "HTH-type transcriptional regulator LutR"  
"MG2\_P15\_00128" 22487 "s63E6H2" 0 "HTH-type transcriptional regulator LutR"  
"MG2\_P15\_00129" 22488 "s59E13H2" 0 "hypothetical protein"  
"MG2\_P15\_00129" 22488 "s59E25H2" 0 "hypothetical protein"  
"MG2\_P15\_00129" 22488 "s59E5H2" 0 "hypothetical protein"  
"MG2\_P15\_00129" 22488 "s63E6H2" 0 "hypothetical protein"  
"MG2\_P15\_00130" 22489 "s59E13H2" 0 "Sulfite exporter TauE/SafE"  
"MG2\_P15\_00130" 22489 "s59E25H2" 0 "Sulfite exporter TauE/SafE"  
"MG2\_P15\_00130" 22489 "s59E5H2" 0 "Sulfite exporter TauE/SafE"  
"MG2\_P15\_00130" 22489 "s63E6H2" 0 "Sulfite exporter TauE/SafE"  
"MG2\_P15\_00132" 22491 "s59E13H2" 0 "Sulfate adenyllyltransferase"  
"MG2\_P15\_00132" 22491 "s59E25H2" 0 "Sulfate adenyllyltransferase"  
"MG2\_P15\_00132" 22491 "s59E5H2" 0 "Sulfate adenyllyltransferase"  
"MG2\_P15\_00132" 22491 "s63E6H2" 0 "Sulfate adenyllyltransferase"  
"MG2\_P15\_00133" 22492 "s59E13H2" 0 "sulfate adenyllyltransferase subunit 2"  
"MG2\_P15\_00133" 22492 "s59E25H2" 0 "sulfate adenyllyltransferase subunit 2"  
"MG2\_P15\_00133" 22492 "s59E5H2" 0 "sulfate adenyllyltransferase subunit 2"  
"MG2\_P15\_00133" 22492 "s63E6H2" 0 "sulfate adenyllyltransferase subunit 2"  
"MG2\_P15\_00134" 22493 "s59E13H2" 0 "Arylsulfatase"  
"MG2\_P15\_00134" 22493 "s59E25H2" 0 "Arylsulfatase"  
"MG2\_P15\_00134" 22493 "s59E5H2" 0 "Arylsulfatase"  
"MG2\_P15\_00134" 22493 "s63E6H2" 0 "Arylsulfatase"  
"MG2\_P15\_00135" 22494 "s59E13H2" 0 "hypothetical protein"  
"MG2\_P15\_00135" 22494 "s59E25H2" 0 "hypothetical protein"  
"MG2\_P15\_00135" 22494 "s59E5H2" 0 "hypothetical protein"  
"MG2\_P15\_00135" 22494 "s63E6H2" 0.1009565 "hypothetical protein"  
"MG2\_P15\_00136" 22495 "s59E13H2" 0 "hypothetical protein"  
"MG2\_P15\_00136" 22495 "s59E25H2" 0 "hypothetical protein"  
"MG2\_P15\_00136" 22495 "s59E5H2" 0 "hypothetical protein"  
"MG2\_P15\_00136" 22495 "s63E6H2" 0 "hypothetical protein"  
"MG2\_P15\_00137" 22496 "s59E13H2" 0 "sugar phosphate antiporter"  
"MG2\_P15\_00137" 22496 "s59E25H2" 0 "sugar phosphate antiporter"  
"MG2\_P15\_00137" 22496 "s59E5H2" 0 "sugar phosphate antiporter"  
"MG2\_P15\_00137" 22496 "s63E6H2" 0 "sugar phosphate antiporter"  
"MG2\_P15\_00138" 22497 "s59E13H2" 0 "putative regulator PrIF"  
"MG2\_P15\_00138" 22497 "s59E25H2" 0 "putative regulator PrIF"  
"MG2\_P15\_00138" 22497 "s59E5H2" 0 "putative regulator PrIF"  
"MG2\_P15\_00138" 22497 "s63E6H2" 0 "putative regulator PrIF"  
"MG2\_P15\_00139" 22498 "s59E13H2" 0 "tRNA(fMet)-specific endonuclease VapC"  
"MG2\_P15\_00139" 22498 "s59E25H2" 0 "tRNA(fMet)-specific endonuclease VapC"

"MG2\_P15\_00139" 22498 "s59E5H2" 0 "tRNA(fMet)-specific endonuclease VapC"  
"MG2\_P15\_00139" 22498 "s63E6H2" 0 "tRNA(fMet)-specific endonuclease VapC"  
"MG2\_P15\_00140" 22499 "s59E13H2" 0 "hypothetical protein"  
"MG2\_P15\_00140" 22499 "s59E25H2" 0 "hypothetical protein"  
"MG2\_P15\_00140" 22499 "s59E5H2" 0 "hypothetical protein"  
"MG2\_P15\_00140" 22499 "s63E6H2" 0 "hypothetical protein"  
"MG2\_P15\_00141" 22500 "s59E13H2" 0 "chaperone protein DnaJ"  
"MG2\_P15\_00141" 22500 "s59E25H2" 0 "chaperone protein DnaJ"  
"MG2\_P15\_00141" 22500 "s59E5H2" 0 "chaperone protein DnaJ"  
"MG2\_P15\_00141" 22500 "s63E6H2" 0 "chaperone protein DnaJ"  
"MG2\_P15\_00142" 22501 "s59E13H2" 0 "hypothetical protein"  
"MG2\_P15\_00142" 22501 "s59E25H2" 0 "hypothetical protein"  
"MG2\_P15\_00142" 22501 "s59E5H2" 0 "hypothetical protein"  
"MG2\_P15\_00142" 22501 "s63E6H2" 0 "hypothetical protein"  
"MG2\_P15\_00143" 22502 "s59E13H2" 0 "Gas vesicle synthesis protein GvpL/GvpF"  
"MG2\_P15\_00143" 22502 "s59E25H2" 0 "Gas vesicle synthesis protein GvpL/GvpF"  
"MG2\_P15\_00143" 22502 "s59E5H2" 0 "Gas vesicle synthesis protein GvpL/GvpF"  
"MG2\_P15\_00143" 22502 "s63E6H2" 0 "Gas vesicle synthesis protein GvpL/GvpF"  
"MG2\_P15\_00144" 22503 "s59E13H2" 0 "Denitrification regulatory protein NirQ"  
"MG2\_P15\_00144" 22503 "s59E25H2" 0 "Denitrification regulatory protein NirQ"  
"MG2\_P15\_00144" 22503 "s59E5H2" 0 "Denitrification regulatory protein NirQ"  
"MG2\_P15\_00144" 22503 "s63E6H2" 0 "Denitrification regulatory protein NirQ"  
"MG2\_P15\_00145" 22504 "s59E13H2" 0 "hypothetical protein"  
"MG2\_P15\_00145" 22504 "s59E25H2" 0 "hypothetical protein"  
"MG2\_P15\_00145" 22504 "s59E5H2" 0 "hypothetical protein"  
"MG2\_P15\_00145" 22504 "s63E6H2" 0 "hypothetical protein"  
"MG2\_P15\_00146" 22505 "s59E13H2" 0 "chaperone protein DnaJ"  
"MG2\_P15\_00146" 22505 "s59E25H2" 0 "chaperone protein DnaJ"  
"MG2\_P15\_00146" 22505 "s59E5H2" 0 "chaperone protein DnaJ"  
"MG2\_P15\_00146" 22505 "s63E6H2" 0 "chaperone protein DnaJ"  
"MG2\_P15\_00148" 22507 "s59E13H2" 0 "hypothetical protein"  
"MG2\_P15\_00148" 22507 "s59E25H2" 0 "hypothetical protein"  
"MG2\_P15\_00148" 22507 "s59E5H2" 0 "hypothetical protein"  
"MG2\_P15\_00148" 22507 "s63E6H2" 0 "hypothetical protein"  
"MG2\_P15\_00149" 22508 "s59E13H2" 0 "Denitrification regulatory protein NirQ"  
"MG2\_P15\_00149" 22508 "s59E25H2" 0 "Denitrification regulatory protein NirQ"  
"MG2\_P15\_00149" 22508 "s59E5H2" 0 "Denitrification regulatory protein NirQ"  
"MG2\_P15\_00149" 22508 "s63E6H2" 0 "Denitrification regulatory protein NirQ"  
"MG2\_P15\_00150" 22509 "s59E13H2" 0 "chaperone protein DnaJ"  
"MG2\_P15\_00150" 22509 "s59E25H2" 0 "chaperone protein DnaJ"  
"MG2\_P15\_00150" 22509 "s59E5H2" 0 "chaperone protein DnaJ"  
"MG2\_P15\_00150" 22509 "s63E6H2" 0 "chaperone protein DnaJ"  
"MG2\_P15\_00151" 22510 "s59E13H2" 0 "hypothetical protein"  
"MG2\_P15\_00151" 22510 "s59E25H2" 0 "hypothetical protein"  
"MG2\_P15\_00151" 22510 "s59E5H2" 0 "hypothetical protein"  
"MG2\_P15\_00151" 22510 "s63E6H2" 0 "hypothetical protein"  
"MG2\_P15\_00152" 22511 "s59E13H2" 0 "Gas vesicle structural protein"

"MG2\_P15\_00152" 22511 "s59E25H2" 0 "Gas vesicle structural protein"  
"MG2\_P15\_00152" 22511 "s59E5H2" 0 "Gas vesicle structural protein"  
"MG2\_P15\_00152" 22511 "s63E6H2" 0 "Gas vesicle structural protein"  
"MG2\_P15\_00153" 22512 "s59E13H2" 0 "hypothetical protein"  
"MG2\_P15\_00153" 22512 "s59E25H2" 0 "hypothetical protein"  
"MG2\_P15\_00153" 22512 "s59E5H2" 0 "hypothetical protein"  
"MG2\_P15\_00153" 22512 "s63E6H2" 0 "hypothetical protein"  
"MG2\_P15\_00154" 22513 "s59E13H2" 0 "putative formate acetyltransferase 2"  
"MG2\_P15\_00154" 22513 "s59E25H2" 0 "putative formate acetyltransferase 2"  
"MG2\_P15\_00154" 22513 "s59E5H2" 0 "putative formate acetyltransferase 2"  
"MG2\_P15\_00154" 22513 "s63E6H2" 0 "putative formate acetyltransferase 2"  
"MG2\_P15\_00155" 22514 "s59E13H2" 0 "putative L-threonine 3-dehydrogenase"  
"MG2\_P15\_00155" 22514 "s59E25H2" 0 "putative L-threonine 3-dehydrogenase"  
"MG2\_P15\_00155" 22514 "s59E5H2" 0 "putative L-threonine 3-dehydrogenase"  
"MG2\_P15\_00155" 22514 "s63E6H2" 0 "putative L-threonine 3-dehydrogenase"  
"MG2\_P15\_00156" 22515 "s59E13H2" 0 "Ribose transport system permease protein RbsC"  
"MG2\_P15\_00156" 22515 "s59E25H2" 0 "Ribose transport system permease protein RbsC"  
"MG2\_P15\_00156" 22515 "s59E5H2" 0 "Ribose transport system permease protein RbsC"  
"MG2\_P15\_00156" 22515 "s63E6H2" 0 "Ribose transport system permease protein RbsC"  
"MG2\_P15\_00157" 22516 "s59E13H2" 0 "Ribose transport system permease protein RbsC"  
"MG2\_P15\_00157" 22516 "s59E25H2" 0 "Ribose transport system permease protein RbsC"  
"MG2\_P15\_00157" 22516 "s59E5H2" 0 "Ribose transport system permease protein RbsC"  
"MG2\_P15\_00157" 22516 "s63E6H2" 0 "Ribose transport system permease protein RbsC"  
"MG2\_P15\_00158" 22517 "s59E13H2" 0 "Inosose isomerase"  
"MG2\_P15\_00158" 22517 "s59E25H2" 0 "Inosose isomerase"  
"MG2\_P15\_00158" 22517 "s59E5H2" 0 "Inosose isomerase"  
"MG2\_P15\_00158" 22517 "s63E6H2" 0 "Inosose isomerase"  
"MG2\_P15\_00159" 22518 "s59E13H2" 0 "Galactose/methyl galactoside import ATP-binding protein MglA"  
"MG2\_P15\_00159" 22518 "s59E25H2" 0 "Galactose/methyl galactoside import ATP-binding protein MglA"  
"MG2\_P15\_00159" 22518 "s59E5H2" 0 "Galactose/methyl galactoside import ATP-binding protein MglA"  
"MG2\_P15\_00159" 22518 "s63E6H2" 0 "Galactose/methyl galactoside import ATP-binding protein MglA"  
"MG2\_P15\_00160" 22519 "s59E13H2" 0 "D-ribose-binding periplasmic protein precursor"  
"MG2\_P15\_00160" 22519 "s59E25H2" 0 "D-ribose-binding periplasmic protein precursor"  
"MG2\_P15\_00160" 22519 "s59E5H2" 0 "D-ribose-binding periplasmic protein precursor"  
"MG2\_P15\_00160" 22519 "s63E6H2" 0 "D-ribose-binding periplasmic protein precursor"  
"MG2\_P15\_00161" 22520 "s59E13H2" 0 "4-hydroxyphenylacetate decarboxylase large subunit"  
"MG2\_P15\_00161" 22520 "s59E25H2" 0 "4-hydroxyphenylacetate decarboxylase large subunit"  
"MG2\_P15\_00161" 22520 "s59E5H2" 0 "4-hydroxyphenylacetate decarboxylase large subunit"  
"MG2\_P15\_00161" 22520 "s63E6H2" 0 "4-hydroxyphenylacetate decarboxylase large subunit"  
"MG2\_P15\_00163" 22522 "s59E13H2" 0 "D-tagatose 3-epimerase"  
"MG2\_P15\_00163" 22522 "s59E25H2" 0 "D-tagatose 3-epimerase"  
"MG2\_P15\_00163" 22522 "s59E5H2" 0 "D-tagatose 3-epimerase"  
"MG2\_P15\_00163" 22522 "s63E6H2" 0 "D-tagatose 3-epimerase"  
"MG2\_P15\_00164" 22523 "s59E13H2" 0 "Transketolase 2"  
"MG2\_P15\_00164" 22523 "s59E25H2" 0 "Transketolase 2"  
"MG2\_P15\_00164" 22523 "s59E5H2" 0 "Transketolase 2"  
"MG2\_P15\_00164" 22523 "s63E6H2" 0 "Transketolase 2"

"MG2\_P15\_00165" 22524 "s59E13H2" 0 "1-deoxy-D-xylulose-5-phosphate synthase"  
"MG2\_P15\_00165" 22524 "s59E25H2" 0 "1-deoxy-D-xylulose-5-phosphate synthase"  
"MG2\_P15\_00165" 22524 "s59E5H2" 0 "1-deoxy-D-xylulose-5-phosphate synthase"  
"MG2\_P15\_00165" 22524 "s63E6H2" 0 "1-deoxy-D-xylulose-5-phosphate synthase"  
"MG2\_P15\_00167" 22526 "s59E13H2" 0 "General stress protein 69"  
"MG2\_P15\_00167" 22526 "s59E25H2" 0 "General stress protein 69"  
"MG2\_P15\_00167" 22526 "s59E5H2" 0 "General stress protein 69"  
"MG2\_P15\_00167" 22526 "s63E6H2" 0 "General stress protein 69"  
"MG2\_P15\_00168" 22527 "s59E13H2" 0 "putative HTH-type transcriptional regulator YdfH"  
"MG2\_P15\_00168" 22527 "s59E25H2" 0 "putative HTH-type transcriptional regulator YdfH"  
"MG2\_P15\_00168" 22527 "s59E5H2" 0 "putative HTH-type transcriptional regulator YdfH"  
"MG2\_P15\_00168" 22527 "s63E6H2" 0 "putative HTH-type transcriptional regulator YdfH"  
"MG2\_P15\_00169" 22528 "s59E13H2" 0 "Hydrogen cyanide synthase subunit HcnA"  
"MG2\_P15\_00169" 22528 "s59E25H2" 0 "Hydrogen cyanide synthase subunit HcnA"  
"MG2\_P15\_00169" 22528 "s59E5H2" 0 "Hydrogen cyanide synthase subunit HcnA"  
"MG2\_P15\_00169" 22528 "s63E6H2" 0 "Hydrogen cyanide synthase subunit HcnA"  
"MG2\_P15\_00170" 22529 "s59E13H2" 0 "Hydrogen cyanide synthase subunit HcnB"  
"MG2\_P15\_00170" 22529 "s59E25H2" 0 "Hydrogen cyanide synthase subunit HcnB"  
"MG2\_P15\_00170" 22529 "s59E5H2" 0 "Hydrogen cyanide synthase subunit HcnB"  
"MG2\_P15\_00170" 22529 "s63E6H2" 0 "Hydrogen cyanide synthase subunit HcnB"  
"MG2\_P15\_00171" 22530 "s59E13H2" 0 "ferredoxin"  
"MG2\_P15\_00171" 22530 "s59E25H2" 0 "ferredoxin"  
"MG2\_P15\_00171" 22530 "s59E5H2" 0 "ferredoxin"  
"MG2\_P15\_00171" 22530 "s63E6H2" 0 "ferredoxin"  
"MG2\_P15\_00172" 22531 "s59E13H2" 0 "Hydrogen cyanide synthase subunit HcnB"  
"MG2\_P15\_00172" 22531 "s59E25H2" 0 "Hydrogen cyanide synthase subunit HcnB"  
"MG2\_P15\_00172" 22531 "s59E5H2" 0 "Hydrogen cyanide synthase subunit HcnB"  
"MG2\_P15\_00172" 22531 "s63E6H2" 0 "Hydrogen cyanide synthase subunit HcnB"  
"MG2\_P15\_00173" 22532 "s59E13H2" 0 "Hydrogen cyanide synthase subunit HcnC precursor"  
"MG2\_P15\_00173" 22532 "s59E25H2" 0 "Hydrogen cyanide synthase subunit HcnC precursor"  
"MG2\_P15\_00173" 22532 "s59E5H2" 0 "Hydrogen cyanide synthase subunit HcnC precursor"  
"MG2\_P15\_00173" 22532 "s63E6H2" 0 "Hydrogen cyanide synthase subunit HcnC precursor"  
"MG2\_P15\_00174" 22533 "s59E13H2" 0 "putative FAD-linked oxidoreductase"  
"MG2\_P15\_00174" 22533 "s59E25H2" 0 "putative FAD-linked oxidoreductase"  
"MG2\_P15\_00174" 22533 "s59E5H2" 0 "putative FAD-linked oxidoreductase"  
"MG2\_P15\_00174" 22533 "s63E6H2" 0 "putative FAD-linked oxidoreductase"  
"MG2\_P15\_00175" 22534 "s59E13H2" 0 "Branched-chain amino acid transport system / permease component"  
"MG2\_P15\_00175" 22534 "s59E25H2" 0 "Branched-chain amino acid transport system / permease component"  
"MG2\_P15\_00175" 22534 "s59E5H2" 0 "Branched-chain amino acid transport system / permease component"  
"MG2\_P15\_00175" 22534 "s63E6H2" 0 "Branched-chain amino acid transport system / permease component"  
"MG2\_P15\_00176" 22535 "s59E13H2" 0 "4-hydroxybenzoyl-CoA reductase subunit alpha"  
"MG2\_P15\_00176" 22535 "s59E25H2" 0 "4-hydroxybenzoyl-CoA reductase subunit alpha"  
"MG2\_P15\_00176" 22535 "s59E5H2" 0.003536591 "4-hydroxybenzoyl-CoA reductase subunit alpha"  
"MG2\_P15\_00176" 22535 "s63E6H2" 0 "4-hydroxybenzoyl-CoA reductase subunit alpha"  
"MG2\_P15\_00178" 22537 "s59E13H2" 0 "Glycerate 2-kinase"  
"MG2\_P15\_00178" 22537 "s59E25H2" 0 "Glycerate 2-kinase"  
"MG2\_P15\_00178" 22537 "s59E5H2" 0 "Glycerate 2-kinase"



"MG2\_P15\_00178" 22537 "s63E6H2" 0 "Glycerate 2-kinase"  
"MG2\_P15\_00179" 22538 "s59E13H2" 0 "R-phenyllactate dehydratase activator"  
"MG2\_P15\_00179" 22538 "s59E25H2" 0 "R-phenyllactate dehydratase activator"  
"MG2\_P15\_00179" 22538 "s59E5H2" 0 "R-phenyllactate dehydratase activator"  
"MG2\_P15\_00179" 22538 "s63E6H2" 0 "R-phenyllactate dehydratase activator"  
"MG2\_P15\_00180" 22539 "s59E13H2" 0 "hypothetical protein"  
"MG2\_P15\_00180" 22539 "s59E25H2" 0 "hypothetical protein"  
"MG2\_P15\_00180" 22539 "s59E5H2" 0 "hypothetical protein"  
"MG2\_P15\_00180" 22539 "s63E6H2" 0 "hypothetical protein"  
"MG2\_P15\_00181" 22540 "s59E13H2" 0 "HTH-type transcriptional regulator LutR"  
"MG2\_P15\_00181" 22540 "s59E25H2" 0 "HTH-type transcriptional regulator LutR"  
"MG2\_P15\_00181" 22540 "s59E5H2" 0 "HTH-type transcriptional regulator LutR"  
"MG2\_P15\_00181" 22540 "s63E6H2" 0 "HTH-type transcriptional regulator LutR"  
"MG2\_P15\_00182" 22541 "s59E13H2" 0 "2,3-diketo-L-gulonate-binding periplasmic protein YiaO precursor"  
"MG2\_P15\_00182" 22541 "s59E25H2" 0 "2,3-diketo-L-gulonate-binding periplasmic protein YiaO precursor"  
"MG2\_P15\_00182" 22541 "s59E5H2" 0 "2,3-diketo-L-gulonate-binding periplasmic protein YiaO precursor"  
"MG2\_P15\_00182" 22541 "s63E6H2" 0 "2,3-diketo-L-gulonate-binding periplasmic protein YiaO precursor"  
"MG2\_P15\_00183" 22542 "s59E13H2" 0 "Sialic acid TRAP transporter permease protein SiaT"  
"MG2\_P15\_00183" 22542 "s59E25H2" 0 "Sialic acid TRAP transporter permease protein SiaT"  
"MG2\_P15\_00183" 22542 "s59E5H2" 0 "Sialic acid TRAP transporter permease protein SiaT"  
"MG2\_P15\_00183" 22542 "s63E6H2" 0 "Sialic acid TRAP transporter permease protein SiaT"  
"MG2\_P15\_00184" 22543 "s59E13H2" 0 "Sialic acid TRAP transporter permease protein SiaT"  
"MG2\_P15\_00184" 22543 "s59E25H2" 0 "Sialic acid TRAP transporter permease protein SiaT"  
"MG2\_P15\_00184" 22543 "s59E5H2" 0 "Sialic acid TRAP transporter permease protein SiaT"  
"MG2\_P15\_00184" 22543 "s63E6H2" 0 "Sialic acid TRAP transporter permease protein SiaT"  
"MG2\_P15\_00185" 22544 "s59E13H2" 0 "Cupin domain protein"  
"MG2\_P15\_00185" 22544 "s59E25H2" 0 "Cupin domain protein"  
"MG2\_P15\_00185" 22544 "s59E5H2" 0 "Cupin domain protein"  
"MG2\_P15\_00185" 22544 "s63E6H2" 0 "Cupin domain protein"  
"MG2\_P15\_00188" 22547 "s59E13H2" 0 "Group II intron-encoded protein LtrA"  
"MG2\_P15\_00188" 22547 "s59E25H2" 0 "Group II intron-encoded protein LtrA"  
"MG2\_P15\_00188" 22547 "s59E5H2" 0 "Group II intron-encoded protein LtrA"  
"MG2\_P15\_00188" 22547 "s63E6H2" 0 "Group II intron-encoded protein LtrA"  
"MG2\_P15\_00190" 22549 "s59E13H2" 0 "putative FAD-linked oxidoreductase"  
"MG2\_P15\_00190" 22549 "s59E25H2" 0 "putative FAD-linked oxidoreductase"  
"MG2\_P15\_00190" 22549 "s59E5H2" 0 "putative FAD-linked oxidoreductase"  
"MG2\_P15\_00190" 22549 "s63E6H2" 0 "putative FAD-linked oxidoreductase"  
"MG2\_P15\_00191" 22550 "s59E13H2" 0 "CoB--CoM heterodisulfide reductase iron-sulfur subunit D"  
"MG2\_P15\_00191" 22550 "s59E25H2" 0 "CoB--CoM heterodisulfide reductase iron-sulfur subunit D"  
"MG2\_P15\_00191" 22550 "s59E5H2" 0 "CoB--CoM heterodisulfide reductase iron-sulfur subunit D"  
"MG2\_P15\_00191" 22550 "s63E6H2" 0 "CoB--CoM heterodisulfide reductase iron-sulfur subunit D"  
"MG2\_P15\_00192" 22551 "s59E13H2" 0 "NADH oxidase"  
"MG2\_P15\_00192" 22551 "s59E25H2" 0 "NADH oxidase"  
"MG2\_P15\_00192" 22551 "s59E5H2" 0 "NADH oxidase"  
"MG2\_P15\_00192" 22551 "s63E6H2" 0 "NADH oxidase"  
"MG2\_P15\_00193" 22552 "s59E13H2" 0 "N-acyl homoserine lactonase"  
"MG2\_P15\_00193" 22552 "s59E25H2" 0 "N-acyl homoserine lactonase"

"MG2\_P15\_00193" 22552 "s59E5H2" 0 "N-acyl homoserine lactonase"  
"MG2\_P15\_00193" 22552 "s63E6H2" 0 "N-acyl homoserine lactonase"  
"MG2\_P15\_00194" 22553 "s59E13H2" 0 "2,3-diketo-L-gulonate-binding periplasmic protein YiaO precursor"  
"MG2\_P15\_00194" 22553 "s59E25H2" 0 "2,3-diketo-L-gulonate-binding periplasmic protein YiaO precursor"  
"MG2\_P15\_00194" 22553 "s59E5H2" 0 "2,3-diketo-L-gulonate-binding periplasmic protein YiaO precursor"  
"MG2\_P15\_00194" 22553 "s63E6H2" 0 "2,3-diketo-L-gulonate-binding periplasmic protein YiaO precursor"  
"MG2\_P15\_00195" 22554 "s59E13H2" 0 "2,3-diketo-L-gulonate TRAP transporter small permease protein YiaM"  
"MG2\_P15\_00195" 22554 "s59E25H2" 0 "2,3-diketo-L-gulonate TRAP transporter small permease protein YiaM"  
"MG2\_P15\_00195" 22554 "s59E5H2" 0 "2,3-diketo-L-gulonate TRAP transporter small permease protein YiaM"  
"MG2\_P15\_00195" 22554 "s63E6H2" 0 "2,3-diketo-L-gulonate TRAP transporter small permease protein YiaM"  
"MG2\_P15\_00196" 22555 "s59E13H2" 0 "Sialic acid TRAP transporter permease protein SiaT"  
"MG2\_P15\_00196" 22555 "s59E25H2" 0 "Sialic acid TRAP transporter permease protein SiaT"  
"MG2\_P15\_00196" 22555 "s59E5H2" 0 "Sialic acid TRAP transporter permease protein SiaT"  
"MG2\_P15\_00196" 22555 "s63E6H2" 0 "Sialic acid TRAP transporter permease protein SiaT"  
"MG2\_P15\_00197" 22556 "s59E13H2" 0 "Arylmalonate decarboxylase"  
"MG2\_P15\_00197" 22556 "s59E25H2" 0 "Arylmalonate decarboxylase"  
"MG2\_P15\_00197" 22556 "s59E5H2" 0 "Arylmalonate decarboxylase"  
"MG2\_P15\_00197" 22556 "s63E6H2" 0 "Arylmalonate decarboxylase"  
"MG2\_P15\_00198" 22557 "s59E13H2" 0 "Asp/Glu/Hydantoin racemase"  
"MG2\_P15\_00198" 22557 "s59E25H2" 0 "Asp/Glu/Hydantoin racemase"  
"MG2\_P15\_00198" 22557 "s59E5H2" 0 "Asp/Glu/Hydantoin racemase"  
"MG2\_P15\_00198" 22557 "s63E6H2" 0 "Asp/Glu/Hydantoin racemase"  
"MG2\_P15\_00199" 22558 "s59E13H2" 0 "hypothetical protein"  
"MG2\_P15\_00199" 22558 "s59E25H2" 0 "hypothetical protein"  
"MG2\_P15\_00199" 22558 "s59E5H2" 0 "hypothetical protein"  
"MG2\_P15\_00199" 22558 "s63E6H2" 0 "hypothetical protein"  
"MG2\_P15\_00200" 22559 "s59E13H2" 0 "Signal peptidase I S"  
"MG2\_P15\_00200" 22559 "s59E25H2" 0 "Signal peptidase I S"  
"MG2\_P15\_00200" 22559 "s59E5H2" 0 "Signal peptidase I S"  
"MG2\_P15\_00200" 22559 "s63E6H2" 0 "Signal peptidase I S"  
"MG2\_P15\_00201" 22560 "s59E13H2" 0 "50S ribosomal protein L19"  
"MG2\_P15\_00201" 22560 "s59E25H2" 0 "50S ribosomal protein L19"  
"MG2\_P15\_00201" 22560 "s59E5H2" 0 "50S ribosomal protein L19"  
"MG2\_P15\_00201" 22560 "s63E6H2" 0 "50S ribosomal protein L19"  
"MG2\_P15\_00202" 22561 "s59E13H2" 0 "tRNA (guanine-N(1)-)-methyltransferase"  
"MG2\_P15\_00202" 22561 "s59E25H2" 0 "tRNA (guanine-N(1)-)-methyltransferase"  
"MG2\_P15\_00202" 22561 "s59E5H2" 0 "tRNA (guanine-N(1)-)-methyltransferase"  
"MG2\_P15\_00202" 22561 "s63E6H2" 0 "tRNA (guanine-N(1)-)-methyltransferase"  
"MG2\_P15\_00203" 22562 "s59E13H2" 0 "hypothetical protein"  
"MG2\_P15\_00203" 22562 "s59E25H2" 0 "hypothetical protein"  
"MG2\_P15\_00203" 22562 "s59E5H2" 0 "hypothetical protein"  
"MG2\_P15\_00203" 22562 "s63E6H2" 0 "hypothetical protein"  
"MG2\_P15\_00204" 22563 "s59E13H2" 0 "30S ribosomal protein S16"  
"MG2\_P15\_00204" 22563 "s59E25H2" 0 "30S ribosomal protein S16"  
"MG2\_P15\_00204" 22563 "s59E5H2" 0 "30S ribosomal protein S16"  
"MG2\_P15\_00204" 22563 "s63E6H2" 0 "30S ribosomal protein S16"  
"MG2\_P15\_00205" 22564 "s59E13H2" 0 "Ribulose-phosphate 3-epimerase"

"MG2\_P15\_00205" 22564 "s59E25H2" 0 "Ribulose-phosphate 3-epimerase"  
"MG2\_P15\_00205" 22564 "s59E5H2" 0 "Ribulose-phosphate 3-epimerase"  
"MG2\_P15\_00205" 22564 "s63E6H2" 0 "Ribulose-phosphate 3-epimerase"  
"MG2\_P15\_00206" 22565 "s59E13H2" 0 "Serine/threonine-protein kinase PrkC"  
"MG2\_P15\_00206" 22565 "s59E25H2" 0 "Serine/threonine-protein kinase PrkC"  
"MG2\_P15\_00206" 22565 "s59E5H2" 0 "Serine/threonine-protein kinase PrkC"  
"MG2\_P15\_00206" 22565 "s63E6H2" 0 "Serine/threonine-protein kinase PrkC"  
"MG2\_P15\_00207" 22566 "s59E13H2" 0 "50S ribosomal protein L20"  
"MG2\_P15\_00207" 22566 "s59E25H2" 0 "50S ribosomal protein L20"  
"MG2\_P15\_00207" 22566 "s59E5H2" 0 "50S ribosomal protein L20"  
"MG2\_P15\_00207" 22566 "s63E6H2" 0 "50S ribosomal protein L20"  
"MG2\_P15\_00208" 22567 "s59E13H2" 0 "50S ribosomal protein L35"  
"MG2\_P15\_00208" 22567 "s59E25H2" 0 "50S ribosomal protein L35"  
"MG2\_P15\_00208" 22567 "s59E5H2" 0 "50S ribosomal protein L35"  
"MG2\_P15\_00208" 22567 "s63E6H2" 0 "50S ribosomal protein L35"  
"MG2\_P15\_00209" 22568 "s59E13H2" 0 "Translation initiation factor IF-3"  
"MG2\_P15\_00209" 22568 "s59E25H2" 0 "Translation initiation factor IF-3"  
"MG2\_P15\_00209" 22568 "s59E5H2" 0 "Translation initiation factor IF-3"  
"MG2\_P15\_00209" 22568 "s63E6H2" 0 "Translation initiation factor IF-3"  
"MG2\_P15\_00210" 22569 "s59E13H2" 0 "Threonine--tRNA ligase 2"  
"MG2\_P15\_00210" 22569 "s59E25H2" 0 "Threonine--tRNA ligase 2"  
"MG2\_P15\_00210" 22569 "s59E5H2" 0 "Threonine--tRNA ligase 2"  
"MG2\_P15\_00210" 22569 "s63E6H2" 0 "Threonine--tRNA ligase 2"  
"MG2\_P15\_00213" 22572 "s59E13H2" 0 "Polymer-forming cytoskeletal"  
"MG2\_P15\_00213" 22572 "s59E25H2" 0 "Polymer-forming cytoskeletal"  
"MG2\_P15\_00213" 22572 "s59E5H2" 0 "Polymer-forming cytoskeletal"  
"MG2\_P15\_00213" 22572 "s63E6H2" 0 "Polymer-forming cytoskeletal"  
"MG2\_P15\_00214" 22573 "s59E13H2" 0 "Murein DD-endopeptidase MepM"  
"MG2\_P15\_00214" 22573 "s59E25H2" 0 "Murein DD-endopeptidase MepM"  
"MG2\_P15\_00214" 22573 "s59E5H2" 0 "Murein DD-endopeptidase MepM"  
"MG2\_P15\_00214" 22573 "s63E6H2" 0 "Murein DD-endopeptidase MepM"  
"MG2\_P15\_00215" 22574 "s59E13H2" 0 "DNA polymerase I"  
"MG2\_P15\_00215" 22574 "s59E25H2" 0 "DNA polymerase I"  
"MG2\_P15\_00215" 22574 "s59E5H2" 0 "DNA polymerase I"  
"MG2\_P15\_00215" 22574 "s63E6H2" 0 "DNA polymerase I"  
"MG2\_P15\_00216" 22575 "s59E13H2" 0 "Glutamyl-tRNA(Gln) amidotransferase subunit A"  
"MG2\_P15\_00216" 22575 "s59E25H2" 0 "Glutamyl-tRNA(Gln) amidotransferase subunit A"  
"MG2\_P15\_00216" 22575 "s59E5H2" 0 "Glutamyl-tRNA(Gln) amidotransferase subunit A"  
"MG2\_P15\_00216" 22575 "s63E6H2" 0 "Glutamyl-tRNA(Gln) amidotransferase subunit A"  
"MG2\_P15\_00217" 22576 "s59E13H2" 0 "Thymidylate synthase 1"  
"MG2\_P15\_00217" 22576 "s59E25H2" 0 "Thymidylate synthase 1"  
"MG2\_P15\_00217" 22576 "s59E5H2" 0 "Thymidylate synthase 1"  
"MG2\_P15\_00217" 22576 "s63E6H2" 0 "Thymidylate synthase 1"  
"MG2\_P15\_00218" 22577 "s59E13H2" 0 "UDP-glucose 4-epimerase"  
"MG2\_P15\_00218" 22577 "s59E25H2" 0 "UDP-glucose 4-epimerase"  
"MG2\_P15\_00218" 22577 "s59E5H2" 0 "UDP-glucose 4-epimerase"  
"MG2\_P15\_00218" 22577 "s63E6H2" 0 "UDP-glucose 4-epimerase"

"MG2\_P15\_00219" 22578 "s59E13H2" 0 "Pyruvate synthase subunit PorB"  
"MG2\_P15\_00219" 22578 "s59E25H2" 0 "Pyruvate synthase subunit PorB"  
"MG2\_P15\_00219" 22578 "s59E5H2" 0 "Pyruvate synthase subunit PorB"  
"MG2\_P15\_00219" 22578 "s63E6H2" 0 "Pyruvate synthase subunit PorB"  
"MG2\_P15\_00220" 22579 "s59E13H2" 0 "Pyruvate synthase subunit PorA"  
"MG2\_P15\_00220" 22579 "s59E25H2" 0 "Pyruvate synthase subunit PorA"  
"MG2\_P15\_00220" 22579 "s59E5H2" 0 "Pyruvate synthase subunit PorA"  
"MG2\_P15\_00220" 22579 "s63E6H2" 0 "Pyruvate synthase subunit PorA"  
"MG2\_P15\_00221" 22580 "s59E13H2" 0 "Pyruvate synthase subunit PorD"  
"MG2\_P15\_00221" 22580 "s59E25H2" 0 "Pyruvate synthase subunit PorD"  
"MG2\_P15\_00221" 22580 "s59E5H2" 0 "Pyruvate synthase subunit PorD"  
"MG2\_P15\_00221" 22580 "s63E6H2" 0 "Pyruvate synthase subunit PorD"  
"MG2\_P15\_00222" 22581 "s59E13H2" 0 "Pyruvate synthase subunit PorC"  
"MG2\_P15\_00222" 22581 "s59E25H2" 0 "Pyruvate synthase subunit PorC"  
"MG2\_P15\_00222" 22581 "s59E5H2" 0 "Pyruvate synthase subunit PorC"  
"MG2\_P15\_00222" 22581 "s63E6H2" 0 "Pyruvate synthase subunit PorC"  
"MG2\_P15\_00223" 22582 "s59E13H2" 0 "Phosphatidylglycerophosphatase A"  
"MG2\_P15\_00223" 22582 "s59E25H2" 0 "Phosphatidylglycerophosphatase A"  
"MG2\_P15\_00223" 22582 "s59E5H2" 0 "Phosphatidylglycerophosphatase A"  
"MG2\_P15\_00223" 22582 "s63E6H2" 0 "Phosphatidylglycerophosphatase A"  
"MG2\_P15\_00224" 22583 "s59E13H2" 0 "CDP-diacylglycerol--glycerol-3-phosphate 3-phosphatidyltransferase"  
"MG2\_P15\_00224" 22583 "s59E25H2" 0 "CDP-diacylglycerol--glycerol-3-phosphate 3-phosphatidyltransferase"  
"MG2\_P15\_00224" 22583 "s59E5H2" 0 "CDP-diacylglycerol--glycerol-3-phosphate 3-phosphatidyltransferase"  
"MG2\_P15\_00224" 22583 "s63E6H2" 0 "CDP-diacylglycerol--glycerol-3-phosphate 3-phosphatidyltransferase"  
"MG2\_P15\_00225" 22584 "s59E13H2" 0 "DNA translocase SpoIIIE"  
"MG2\_P15\_00225" 22584 "s59E25H2" 0 "DNA translocase SpoIIIE"  
"MG2\_P15\_00225" 22584 "s59E5H2" 0 "DNA translocase SpoIIIE"  
"MG2\_P15\_00225" 22584 "s63E6H2" 0 "DNA translocase SpoIIIE"  
"MG2\_P15\_00226" 22585 "s59E13H2" 0 "N-carbamoylsarcosine amidase"  
"MG2\_P15\_00226" 22585 "s59E25H2" 0 "N-carbamoylsarcosine amidase"  
"MG2\_P15\_00226" 22585 "s59E5H2" 0 "N-carbamoylsarcosine amidase"  
"MG2\_P15\_00226" 22585 "s63E6H2" 0 "N-carbamoylsarcosine amidase"  
"MG2\_P15\_00227" 22586 "s59E13H2" 0 "Succinyl-diaminopimelate desuccinylase"  
"MG2\_P15\_00227" 22586 "s59E25H2" 0 "Succinyl-diaminopimelate desuccinylase"  
"MG2\_P15\_00227" 22586 "s59E5H2" 0 "Succinyl-diaminopimelate desuccinylase"  
"MG2\_P15\_00227" 22586 "s63E6H2" 0 "Succinyl-diaminopimelate desuccinylase"  
"MG2\_P15\_00228" 22587 "s59E13H2" 0 "Tungsten-containing aldehyde ferredoxin oxidoreductase"  
"MG2\_P15\_00228" 22587 "s59E25H2" 0 "Tungsten-containing aldehyde ferredoxin oxidoreductase"  
"MG2\_P15\_00228" 22587 "s59E5H2" 0 "Tungsten-containing aldehyde ferredoxin oxidoreductase"  
"MG2\_P15\_00228" 22587 "s63E6H2" 0 "Tungsten-containing aldehyde ferredoxin oxidoreductase"  
"MG2\_P15\_00229" 22588 "s59E13H2" 0 "Sulfur carrier protein CysO"  
"MG2\_P15\_00229" 22588 "s59E25H2" 0 "Sulfur carrier protein CysO"  
"MG2\_P15\_00229" 22588 "s59E5H2" 0 "Sulfur carrier protein CysO"  
"MG2\_P15\_00229" 22588 "s63E6H2" 0 "Sulfur carrier protein CysO"  
"MG2\_P15\_00230" 22589 "s59E13H2" 0 "4-hydroxy-tetrahydrodipicolinate synthase"  
"MG2\_P15\_00230" 22589 "s59E25H2" 0 "4-hydroxy-tetrahydrodipicolinate synthase"  
"MG2\_P15\_00230" 22589 "s59E5H2" 0 "4-hydroxy-tetrahydrodipicolinate synthase"

"MG2\_P15\_00230" 22589 "s63E6H2" 0 "4-hydroxy-tetrahydrodipicolinate synthase"  
"MG2\_P15\_00231" 22590 "s59E13H2" 0 "Methylated-thiol--coenzyme M methyltransferase"  
"MG2\_P15\_00231" 22590 "s59E25H2" 0 "Methylated-thiol--coenzyme M methyltransferase"  
"MG2\_P15\_00231" 22590 "s59E5H2" 0 "Methylated-thiol--coenzyme M methyltransferase"  
"MG2\_P15\_00231" 22590 "s63E6H2" 0 "Methylated-thiol--coenzyme M methyltransferase"  
"MG2\_P15\_00232" 22591 "s59E13H2" 0 "Inner membrane ABC transporter permease protein YcjP"  
"MG2\_P15\_00232" 22591 "s59E25H2" 0 "Inner membrane ABC transporter permease protein YcjP"  
"MG2\_P15\_00232" 22591 "s59E5H2" 0 "Inner membrane ABC transporter permease protein YcjP"  
"MG2\_P15\_00232" 22591 "s63E6H2" 0 "Inner membrane ABC transporter permease protein YcjP"  
"MG2\_P15\_00233" 22592 "s59E13H2" 0 "Inner membrane ABC transporter permease protein YcjO"  
"MG2\_P15\_00233" 22592 "s59E25H2" 0 "Inner membrane ABC transporter permease protein YcjO"  
"MG2\_P15\_00233" 22592 "s59E5H2" 0 "Inner membrane ABC transporter permease protein YcjO"  
"MG2\_P15\_00233" 22592 "s63E6H2" 0 "Inner membrane ABC transporter permease protein YcjO"  
"MG2\_P15\_00234" 22593 "s59E13H2" 0 "Trehalose/maltose-binding protein MalE precursor"  
"MG2\_P15\_00234" 22593 "s59E25H2" 0 "Trehalose/maltose-binding protein MalE precursor"  
"MG2\_P15\_00234" 22593 "s59E5H2" 0 "Trehalose/maltose-binding protein MalE precursor"  
"MG2\_P15\_00234" 22593 "s63E6H2" 0 "Trehalose/maltose-binding protein MalE precursor"  
"MG2\_P15\_00235" 22594 "s59E13H2" 0 "hypothetical protein"  
"MG2\_P15\_00235" 22594 "s59E25H2" 0 "hypothetical protein"  
"MG2\_P15\_00235" 22594 "s59E5H2" 0 "hypothetical protein"  
"MG2\_P15\_00235" 22594 "s63E6H2" 0 "hypothetical protein"  
"MG2\_P15\_00236" 22595 "s59E13H2" 0 "Integrase core domain protein"  
"MG2\_P15\_00236" 22595 "s59E25H2" 0 "Integrase core domain protein"  
"MG2\_P15\_00236" 22595 "s59E5H2" 0 "Integrase core domain protein"  
"MG2\_P15\_00236" 22595 "s63E6H2" 0.01908181 "Integrase core domain protein"  
"MG2\_P15\_00237" 22596 "s59E13H2" 0 "hypothetical protein"  
"MG2\_P15\_00237" 22596 "s59E25H2" 0 "hypothetical protein"  
"MG2\_P15\_00237" 22596 "s59E5H2" 0 "hypothetical protein"  
"MG2\_P15\_00237" 22596 "s63E6H2" 0 "hypothetical protein"  
"MG2\_P15\_00238" 22597 "s59E13H2" 0 "NADPH-dependent 7-cyano-7-deazaguanine reductase"  
"MG2\_P15\_00238" 22597 "s59E25H2" 0 "NADPH-dependent 7-cyano-7-deazaguanine reductase"  
"MG2\_P15\_00238" 22597 "s59E5H2" 0 "NADPH-dependent 7-cyano-7-deazaguanine reductase"  
"MG2\_P15\_00238" 22597 "s63E6H2" 0 "NADPH-dependent 7-cyano-7-deazaguanine reductase"  
"MG2\_P15\_00239" 22598 "s59E13H2" 0 "hypothetical protein"  
"MG2\_P15\_00239" 22598 "s59E25H2" 0 "hypothetical protein"  
"MG2\_P15\_00239" 22598 "s59E5H2" 0 "hypothetical protein"  
"MG2\_P15\_00239" 22598 "s63E6H2" 0.01496524 "hypothetical protein"  
"MG2\_P15\_00240" 22599 "s59E13H2" 0 "mRNA interferase EndoA"  
"MG2\_P15\_00240" 22599 "s59E25H2" 0 "mRNA interferase EndoA"  
"MG2\_P15\_00240" 22599 "s59E5H2" 0 "mRNA interferase EndoA"  
"MG2\_P15\_00240" 22599 "s63E6H2" 0 "mRNA interferase EndoA"  
"MG2\_P15\_00241" 22600 "s59E13H2" 0 "Putative nickel-responsive regulator"  
"MG2\_P15\_00241" 22600 "s59E25H2" 0 "Putative nickel-responsive regulator"  
"MG2\_P15\_00241" 22600 "s59E5H2" 0 "Putative nickel-responsive regulator"  
"MG2\_P15\_00241" 22600 "s63E6H2" 0 "Putative nickel-responsive regulator"  
"MG2\_P15\_00242" 22601 "s59E13H2" 0 "Toxin ParE2"  
"MG2\_P15\_00242" 22601 "s59E25H2" 0 "Toxin ParE2"

"MG2\_P15\_00242" 22601 "s59E5H2" 0 "Toxin ParE2"  
"MG2\_P15\_00242" 22601 "s63E6H2" 0 "Toxin ParE2"  
"MG2\_P15\_00243" 22602 "s59E13H2" 0 "Putative addiction module component"  
"MG2\_P15\_00243" 22602 "s59E25H2" 0 "Putative addiction module component"  
"MG2\_P15\_00243" 22602 "s59E5H2" 0 "Putative addiction module component"  
"MG2\_P15\_00243" 22602 "s63E6H2" 0 "Putative addiction module component"  
"MG2\_P15\_00244" 22603 "s59E13H2" 0 "hypothetical protein"  
"MG2\_P15\_00244" 22603 "s59E25H2" 0 "hypothetical protein"  
"MG2\_P15\_00244" 22603 "s59E5H2" 0.01368808 "hypothetical protein"  
"MG2\_P15\_00244" 22603 "s63E6H2" 0 "hypothetical protein"  
"MG2\_P15\_00246" 22605 "s59E13H2" 0 "mRNA interferase EndoA"  
"MG2\_P15\_00246" 22605 "s59E25H2" 0 "mRNA interferase EndoA"  
"MG2\_P15\_00246" 22605 "s59E5H2" 0 "mRNA interferase EndoA"  
"MG2\_P15\_00246" 22605 "s63E6H2" 0 "mRNA interferase EndoA"  
"MG2\_P15\_00247" 22606 "s59E13H2" 0 "Ribonuclease VapC32"  
"MG2\_P15\_00247" 22606 "s59E25H2" 0 "Ribonuclease VapC32"  
"MG2\_P15\_00247" 22606 "s59E5H2" 0 "Ribonuclease VapC32"  
"MG2\_P15\_00247" 22606 "s63E6H2" 0 "Ribonuclease VapC32"  
"MG2\_P15\_00248" 22607 "s59E13H2" 0 "Antitoxin VapB32"  
"MG2\_P15\_00248" 22607 "s59E25H2" 0 "Antitoxin VapB32"  
"MG2\_P15\_00248" 22607 "s59E5H2" 0 "Antitoxin VapB32"  
"MG2\_P15\_00248" 22607 "s63E6H2" 0 "Antitoxin VapB32"  
"MG2\_P15\_00250" 22609 "s59E13H2" 0 "50S ribosomal protein L21"  
"MG2\_P15\_00250" 22609 "s59E25H2" 0 "50S ribosomal protein L21"  
"MG2\_P15\_00250" 22609 "s59E5H2" 0 "50S ribosomal protein L21"  
"MG2\_P15\_00250" 22609 "s63E6H2" 0 "50S ribosomal protein L21"  
"MG2\_P15\_00251" 22610 "s59E13H2" 0 "Adenosylhomocysteinase"  
"MG2\_P15\_00251" 22610 "s59E25H2" 0 "Adenosylhomocysteinase"  
"MG2\_P15\_00251" 22610 "s59E5H2" 0 "Adenosylhomocysteinase"  
"MG2\_P15\_00251" 22610 "s63E6H2" 0 "Adenosylhomocysteinase"  
"MG2\_P15\_00252" 22611 "s59E13H2" 0 "4-hydroxythreonine-4-phosphate dehydrogenase"  
"MG2\_P15\_00252" 22611 "s59E25H2" 0 "4-hydroxythreonine-4-phosphate dehydrogenase"  
"MG2\_P15\_00252" 22611 "s59E5H2" 0 "4-hydroxythreonine-4-phosphate dehydrogenase"  
"MG2\_P15\_00252" 22611 "s63E6H2" 0 "4-hydroxythreonine-4-phosphate dehydrogenase"  
"MG2\_P15\_00253" 22612 "s59E13H2" 0 "Cell division protein FtsA"  
"MG2\_P15\_00253" 22612 "s59E25H2" 0 "Cell division protein FtsA"  
"MG2\_P15\_00253" 22612 "s59E5H2" 0 "Cell division protein FtsA"  
"MG2\_P15\_00253" 22612 "s63E6H2" 0 "Cell division protein FtsA"  
"MG2\_P15\_00254" 22613 "s59E13H2" 0 "Cell division protein DivIB"  
"MG2\_P15\_00254" 22613 "s59E25H2" 0 "Cell division protein DivIB"  
"MG2\_P15\_00254" 22613 "s59E5H2" 0 "Cell division protein DivIB"  
"MG2\_P15\_00254" 22613 "s63E6H2" 0 "Cell division protein DivIB"  
"MG2\_P15\_00255" 22614 "s59E13H2" 0 "D-alanine--D-alanine ligase B"  
"MG2\_P15\_00255" 22614 "s59E25H2" 0 "D-alanine--D-alanine ligase B"  
"MG2\_P15\_00255" 22614 "s59E5H2" 0 "D-alanine--D-alanine ligase B"  
"MG2\_P15\_00255" 22614 "s63E6H2" 0 "D-alanine--D-alanine ligase B"  
"MG2\_P15\_00256" 22615 "s59E13H2" 0 "UDP-N-acetylenolpyruvoylglucosamine reductase"

"MG2\_P15\_00256" 22615 "s59E25H2" 0 "UDP-N-acetylenolpyruvoylglucosamine reductase"  
"MG2\_P15\_00256" 22615 "s59E5H2" 0 "UDP-N-acetylenolpyruvoylglucosamine reductase"  
"MG2\_P15\_00256" 22615 "s63E6H2" 0 "UDP-N-acetylenolpyruvoylglucosamine reductase"  
"MG2\_P15\_00258" 22617 "s59E13H2" 0 "Glycerol dehydrogenase"  
"MG2\_P15\_00258" 22617 "s59E25H2" 0 "Glycerol dehydrogenase"  
"MG2\_P15\_00258" 22617 "s59E5H2" 0 "Glycerol dehydrogenase"  
"MG2\_P15\_00258" 22617 "s63E6H2" 0 "Glycerol dehydrogenase"  
"MG2\_P15\_00259" 22618 "s59E13H2" 0 "putative acetoacetate decarboxylase"  
"MG2\_P15\_00259" 22618 "s59E25H2" 0 "putative acetoacetate decarboxylase"  
"MG2\_P15\_00259" 22618 "s59E5H2" 0 "putative acetoacetate decarboxylase"  
"MG2\_P15\_00259" 22618 "s63E6H2" 0 "putative acetoacetate decarboxylase"  
"MG2\_P15\_00260" 22619 "s59E13H2" 0 "Trehalose/maltose import ATP-binding protein MalK"  
"MG2\_P15\_00260" 22619 "s59E25H2" 0 "Trehalose/maltose import ATP-binding protein MalK"  
"MG2\_P15\_00260" 22619 "s59E5H2" 0 "Trehalose/maltose import ATP-binding protein MalK"  
"MG2\_P15\_00260" 22619 "s63E6H2" 0 "Trehalose/maltose import ATP-binding protein MalK"  
"MG2\_P15\_00261" 22620 "s59E13H2" 0 "heat shock protein GrpE"  
"MG2\_P15\_00261" 22620 "s59E25H2" 0 "heat shock protein GrpE"  
"MG2\_P15\_00261" 22620 "s59E5H2" 0 "heat shock protein GrpE"  
"MG2\_P15\_00261" 22620 "s63E6H2" 0 "heat shock protein GrpE"  
"MG2\_P15\_00262" 22621 "s59E13H2" 0 "Chaperone protein DnaK"  
"MG2\_P15\_00262" 22621 "s59E25H2" 0 "Chaperone protein DnaK"  
"MG2\_P15\_00262" 22621 "s59E5H2" 0 "Chaperone protein DnaK"  
"MG2\_P15\_00262" 22621 "s63E6H2" 0 "Chaperone protein DnaK"  
"MG2\_P15\_00263" 22622 "s59E13H2" 0 "Chaperone protein DnaJ"  
"MG2\_P15\_00263" 22622 "s59E25H2" 0 "Chaperone protein DnaJ"  
"MG2\_P15\_00263" 22622 "s59E5H2" 0 "Chaperone protein DnaJ"  
"MG2\_P15\_00263" 22622 "s63E6H2" 0 "Chaperone protein DnaJ"  
"MG2\_P15\_00264" 22623 "s59E13H2" 0 "Threonylcarbamoyl-adenosine tRNA methyltransferase MtaB"  
"MG2\_P15\_00264" 22623 "s59E25H2" 0 "Threonylcarbamoyl-adenosine tRNA methyltransferase MtaB"  
"MG2\_P15\_00264" 22623 "s59E5H2" 0 "Threonylcarbamoyl-adenosine tRNA methyltransferase MtaB"  
"MG2\_P15\_00264" 22623 "s63E6H2" 0 "Threonylcarbamoyl-adenosine tRNA methyltransferase MtaB"  
"MG2\_P15\_00265" 22624 "s59E13H2" 0 "Histidinol dehydrogenase"  
"MG2\_P15\_00265" 22624 "s59E25H2" 0 "Histidinol dehydrogenase"  
"MG2\_P15\_00265" 22624 "s59E5H2" 0 "Histidinol dehydrogenase"  
"MG2\_P15\_00265" 22624 "s63E6H2" 0 "Histidinol dehydrogenase"  
"MG2\_P15\_00266" 22625 "s59E13H2" 0 "hypothetical protein"  
"MG2\_P15\_00266" 22625 "s59E25H2" 0 "hypothetical protein"  
"MG2\_P15\_00266" 22625 "s59E5H2" 0 "hypothetical protein"  
"MG2\_P15\_00266" 22625 "s63E6H2" 0 "hypothetical protein"  
"MG2\_P15\_00267" 22626 "s59E13H2" 0 "Exoglucanase B precursor"  
"MG2\_P15\_00267" 22626 "s59E25H2" 0 "Exoglucanase B precursor"  
"MG2\_P15\_00267" 22626 "s59E5H2" 0 "Exoglucanase B precursor"  
"MG2\_P15\_00267" 22626 "s63E6H2" 0 "Exoglucanase B precursor"  
"MG2\_P15\_00268" 22627 "s59E13H2" 0 "hypothetical protein"  
"MG2\_P15\_00268" 22627 "s59E25H2" 0 "hypothetical protein"  
"MG2\_P15\_00268" 22627 "s59E5H2" 0 "hypothetical protein"  
"MG2\_P15\_00268" 22627 "s63E6H2" 0 "hypothetical protein"

"MG2\_P15\_00269" 22628 "s59E13H2" 0 "Triosephosphate isomerase"  
"MG2\_P15\_00269" 22628 "s59E25H2" 0 "Triosephosphate isomerase"  
"MG2\_P15\_00269" 22628 "s59E5H2" 0 "Triosephosphate isomerase"  
"MG2\_P15\_00269" 22628 "s63E6H2" 0 "Triosephosphate isomerase"  
"MG2\_P15\_00270" 22629 "s59E13H2" 0 "Phosphoglycerate kinase"  
"MG2\_P15\_00270" 22629 "s59E25H2" 0 "Phosphoglycerate kinase"  
"MG2\_P15\_00270" 22629 "s59E5H2" 0 "Phosphoglycerate kinase"  
"MG2\_P15\_00270" 22629 "s63E6H2" 0 "Phosphoglycerate kinase"  
"MG2\_P15\_00271" 22630 "s59E13H2" 0 "Glyceraldehyde-3-phosphate dehydrogenase"  
"MG2\_P15\_00271" 22630 "s59E25H2" 0 "Glyceraldehyde-3-phosphate dehydrogenase"  
"MG2\_P15\_00271" 22630 "s59E5H2" 0 "Glyceraldehyde-3-phosphate dehydrogenase"  
"MG2\_P15\_00271" 22630 "s63E6H2" 0 "Glyceraldehyde-3-phosphate dehydrogenase"  
"MG2\_P15\_00272" 22631 "s59E13H2" 0 "Thiamine-monophosphate kinase"  
"MG2\_P15\_00272" 22631 "s59E25H2" 0 "Thiamine-monophosphate kinase"  
"MG2\_P15\_00272" 22631 "s59E5H2" 0 "Thiamine-monophosphate kinase"  
"MG2\_P15\_00272" 22631 "s63E6H2" 0 "Thiamine-monophosphate kinase"  
"MG2\_P15\_00273" 22632 "s59E13H2" 0 "AsnC family protein"  
"MG2\_P15\_00273" 22632 "s59E25H2" 0 "AsnC family protein"  
"MG2\_P15\_00273" 22632 "s59E5H2" 0 "AsnC family protein"  
"MG2\_P15\_00273" 22632 "s63E6H2" 0 "AsnC family protein"  
"MG2\_P15\_00274" 22633 "s59E13H2" 0 "Peptide deformylase"  
"MG2\_P15\_00274" 22633 "s59E25H2" 0 "Peptide deformylase"  
"MG2\_P15\_00274" 22633 "s59E5H2" 0 "Peptide deformylase"  
"MG2\_P15\_00274" 22633 "s63E6H2" 0 "Peptide deformylase"  
"MG2\_P15\_00275" 22634 "s59E13H2" 0 "hypothetical protein"  
"MG2\_P15\_00275" 22634 "s59E25H2" 0 "hypothetical protein"  
"MG2\_P15\_00275" 22634 "s59E5H2" 0 "hypothetical protein"  
"MG2\_P15\_00275" 22634 "s63E6H2" 0 "hypothetical protein"  
"MG2\_P15\_00276" 22635 "s59E13H2" 0 "Thermophilic serine proteinase precursor"  
"MG2\_P15\_00276" 22635 "s59E25H2" 0 "Thermophilic serine proteinase precursor"  
"MG2\_P15\_00276" 22635 "s59E5H2" 0 "Thermophilic serine proteinase precursor"  
"MG2\_P15\_00276" 22635 "s63E6H2" 0 "Thermophilic serine proteinase precursor"  
"MG2\_P15\_00277" 22636 "s59E13H2" 0 "hypothetical protein"  
"MG2\_P15\_00277" 22636 "s59E25H2" 0 "hypothetical protein"  
"MG2\_P15\_00277" 22636 "s59E5H2" 0 "hypothetical protein"  
"MG2\_P15\_00277" 22636 "s63E6H2" 0 "hypothetical protein"  
"MG2\_P15\_00278" 22637 "s59E13H2" 0 "hypothetical protein"  
"MG2\_P15\_00278" 22637 "s59E25H2" 0 "hypothetical protein"  
"MG2\_P15\_00278" 22637 "s59E5H2" 0 "hypothetical protein"  
"MG2\_P15\_00278" 22637 "s63E6H2" 0 "hypothetical protein"  
"MG2\_P15\_00279" 22638 "s59E13H2" 0 "hypothetical protein"  
"MG2\_P15\_00279" 22638 "s59E25H2" 0 "hypothetical protein"  
"MG2\_P15\_00279" 22638 "s59E5H2" 0 "hypothetical protein"  
"MG2\_P15\_00279" 22638 "s63E6H2" 0 "hypothetical protein"  
"MG2\_P15\_00280" 22639 "s59E13H2" 0 "Immune inhibitor A precursor"  
"MG2\_P15\_00280" 22639 "s59E25H2" 0 "Immune inhibitor A precursor"  
"MG2\_P15\_00280" 22639 "s59E5H2" 0 "Immune inhibitor A precursor"



"MG2\_P15\_00280" 22639 "s63E6H2" 0 "Immune inhibitor A precursor"  
"MG2\_P15\_00283" 22642 "s59E13H2" 0 "CoB--CoM heterodisulfide reductase iron-sulfur subunit D"  
"MG2\_P15\_00283" 22642 "s59E25H2" 0 "CoB--CoM heterodisulfide reductase iron-sulfur subunit D"  
"MG2\_P15\_00283" 22642 "s59E5H2" 0 "CoB--CoM heterodisulfide reductase iron-sulfur subunit D"  
"MG2\_P15\_00283" 22642 "s63E6H2" 0 "CoB--CoM heterodisulfide reductase iron-sulfur subunit D"  
"MG2\_P15\_00284" 22643 "s59E13H2" 0 "hypothetical protein"  
"MG2\_P15\_00284" 22643 "s59E25H2" 0 "hypothetical protein"  
"MG2\_P15\_00284" 22643 "s59E5H2" 0 "hypothetical protein"  
"MG2\_P15\_00284" 22643 "s63E6H2" 0 "hypothetical protein"  
"MG2\_P15\_00286" 22645 "s59E13H2" 0 "DNA polymerase III subunits gamma and tau"  
"MG2\_P15\_00286" 22645 "s59E25H2" 0 "DNA polymerase III subunits gamma and tau"  
"MG2\_P15\_00286" 22645 "s59E5H2" 0 "DNA polymerase III subunits gamma and tau"  
"MG2\_P15\_00286" 22645 "s63E6H2" 0.00200045 "DNA polymerase III subunits gamma and tau"  
"MG2\_P15\_00287" 22646 "s59E13H2" 0 "Threonine-phosphate decarboxylase"  
"MG2\_P15\_00287" 22646 "s59E25H2" 0 "Threonine-phosphate decarboxylase"  
"MG2\_P15\_00287" 22646 "s59E5H2" 0 "Threonine-phosphate decarboxylase"  
"MG2\_P15\_00287" 22646 "s63E6H2" 0 "Threonine-phosphate decarboxylase"  
"MG2\_P15\_00288" 22647 "s59E13H2" 0 "Heme-binding protein A precursor"  
"MG2\_P15\_00288" 22647 "s59E25H2" 0 "Heme-binding protein A precursor"  
"MG2\_P15\_00288" 22647 "s59E5H2" 0 "Heme-binding protein A precursor"  
"MG2\_P15\_00288" 22647 "s63E6H2" 0 "Heme-binding protein A precursor"  
"MG2\_P15\_00289" 22648 "s59E13H2" 0 "Dipeptide transport system permease protein DppB"  
"MG2\_P15\_00289" 22648 "s59E25H2" 0 "Dipeptide transport system permease protein DppB"  
"MG2\_P15\_00289" 22648 "s59E5H2" 0 "Dipeptide transport system permease protein DppB"  
"MG2\_P15\_00289" 22648 "s63E6H2" 0 "Dipeptide transport system permease protein DppB"  
"MG2\_P15\_00290" 22649 "s59E13H2" 0 "putative D,D-dipeptide transport system permease protein DdpC"  
"MG2\_P15\_00290" 22649 "s59E25H2" 0 "putative D,D-dipeptide transport system permease protein DdpC"  
"MG2\_P15\_00290" 22649 "s59E5H2" 0 "putative D,D-dipeptide transport system permease protein DdpC"  
"MG2\_P15\_00290" 22649 "s63E6H2" 0 "putative D,D-dipeptide transport system permease protein DdpC"  
"MG2\_P15\_00291" 22650 "s59E13H2" 0 "Glutathione import ATP-binding protein GsiA"  
"MG2\_P15\_00291" 22650 "s59E25H2" 0 "Glutathione import ATP-binding protein GsiA"  
"MG2\_P15\_00291" 22650 "s59E5H2" 0 "Glutathione import ATP-binding protein GsiA"  
"MG2\_P15\_00291" 22650 "s63E6H2" 0 "Glutathione import ATP-binding protein GsiA"  
"MG2\_P15\_00292" 22651 "s59E13H2" 0 "Oligopeptide transport ATP-binding protein OppF"  
"MG2\_P15\_00292" 22651 "s59E25H2" 0 "Oligopeptide transport ATP-binding protein OppF"  
"MG2\_P15\_00292" 22651 "s59E5H2" 0 "Oligopeptide transport ATP-binding protein OppF"  
"MG2\_P15\_00292" 22651 "s63E6H2" 0 "Oligopeptide transport ATP-binding protein OppF"  
"MG2\_P15\_00293" 22652 "s59E13H2" 0 "Putative nicotinate phosphoribosyltransferase"  
"MG2\_P15\_00293" 22652 "s59E25H2" 0 "Putative nicotinate phosphoribosyltransferase"  
"MG2\_P15\_00293" 22652 "s59E5H2" 0 "Putative nicotinate phosphoribosyltransferase"  
"MG2\_P15\_00293" 22652 "s63E6H2" 0 "Putative nicotinate phosphoribosyltransferase"  
"MG2\_P15\_00294" 22653 "s59E13H2" 0 "Aspartokinase"  
"MG2\_P15\_00294" 22653 "s59E25H2" 0 "Aspartokinase"  
"MG2\_P15\_00294" 22653 "s59E5H2" 0 "Aspartokinase"  
"MG2\_P15\_00294" 22653 "s63E6H2" 0 "Aspartokinase"  
"MG2\_P15\_00295" 22654 "s59E13H2" 0 "Aspartokinase"  
"MG2\_P15\_00295" 22654 "s59E25H2" 0 "Aspartokinase"

"MG2\_P15\_00295" 22654 "s59E5H2" 0 "Aspartokinase"  
"MG2\_P15\_00295" 22654 "s63E6H2" 0 "Aspartokinase"  
"MG2\_P15\_00296" 22655 "s59E13H2" 0 "Aspartate-semialdehyde dehydrogenase"  
"MG2\_P15\_00296" 22655 "s59E25H2" 0 "Aspartate-semialdehyde dehydrogenase"  
"MG2\_P15\_00296" 22655 "s59E5H2" 0 "Aspartate-semialdehyde dehydrogenase"  
"MG2\_P15\_00296" 22655 "s63E6H2" 0 "Aspartate-semialdehyde dehydrogenase"  
"MG2\_P15\_00297" 22656 "s59E13H2" 0 "Riboflavin biosynthesis protein RibD"  
"MG2\_P15\_00297" 22656 "s59E25H2" 0 "Riboflavin biosynthesis protein RibD"  
"MG2\_P15\_00297" 22656 "s59E5H2" 0 "Riboflavin biosynthesis protein RibD"  
"MG2\_P15\_00297" 22656 "s63E6H2" 0 "Riboflavin biosynthesis protein RibD"  
"MG2\_P15\_00298" 22657 "s59E13H2" 0 "Sulfate permease CysP"  
"MG2\_P15\_00298" 22657 "s59E25H2" 0 "Sulfate permease CysP"  
"MG2\_P15\_00298" 22657 "s59E5H2" 0 "Sulfate permease CysP"  
"MG2\_P15\_00298" 22657 "s63E6H2" 0 "Sulfate permease CysP"  
"MG2\_P15\_00299" 22658 "s59E13H2" 0 "PhoU domain protein"  
"MG2\_P15\_00299" 22658 "s59E25H2" 0 "PhoU domain protein"  
"MG2\_P15\_00299" 22658 "s59E5H2" 0 "PhoU domain protein"  
"MG2\_P15\_00299" 22658 "s63E6H2" 0 "PhoU domain protein"  
"MG2\_P15\_00300" 22659 "s59E13H2" 0 "Orotidine 5'-phosphate decarboxylase"  
"MG2\_P15\_00300" 22659 "s59E25H2" 0 "Orotidine 5'-phosphate decarboxylase"  
"MG2\_P15\_00300" 22659 "s59E5H2" 0 "Orotidine 5'-phosphate decarboxylase"  
"MG2\_P15\_00300" 22659 "s63E6H2" 0 "Orotidine 5'-phosphate decarboxylase"  
"MG2\_P15\_00301" 22660 "s59E13H2" 0 "hypothetical protein"  
"MG2\_P15\_00301" 22660 "s59E25H2" 0 "hypothetical protein"  
"MG2\_P15\_00301" 22660 "s59E5H2" 0 "hypothetical protein"  
"MG2\_P15\_00301" 22660 "s63E6H2" 0 "hypothetical protein"  
"MG2\_P15\_00302" 22661 "s59E13H2" 0 "tRNA-specific 2-thiouridylase MnmA"  
"MG2\_P15\_00302" 22661 "s59E25H2" 0 "tRNA-specific 2-thiouridylase MnmA"  
"MG2\_P15\_00302" 22661 "s59E5H2" 0 "tRNA-specific 2-thiouridylase MnmA"  
"MG2\_P15\_00302" 22661 "s63E6H2" 0 "tRNA-specific 2-thiouridylase MnmA"  
"MG2\_P15\_00303" 22662 "s59E13H2" 0 "Radical SAM superfamily protein"  
"MG2\_P15\_00303" 22662 "s59E25H2" 0 "Radical SAM superfamily protein"  
"MG2\_P15\_00303" 22662 "s59E5H2" 0 "Radical SAM superfamily protein"  
"MG2\_P15\_00303" 22662 "s63E6H2" 0 "Radical SAM superfamily protein"  
"MG2\_P15\_00304" 22663 "s59E13H2" 0 "Pyruvate formate-lyase 1-activating enzyme"  
"MG2\_P15\_00304" 22663 "s59E25H2" 0 "Pyruvate formate-lyase 1-activating enzyme"  
"MG2\_P15\_00304" 22663 "s59E5H2" 0 "Pyruvate formate-lyase 1-activating enzyme"  
"MG2\_P15\_00304" 22663 "s63E6H2" 0 "Pyruvate formate-lyase 1-activating enzyme"  
"MG2\_P15\_00305" 22664 "s59E13H2" 0 "chromosome segregation protein"  
"MG2\_P15\_00305" 22664 "s59E25H2" 0 "chromosome segregation protein"  
"MG2\_P15\_00305" 22664 "s59E5H2" 0 "chromosome segregation protein"  
"MG2\_P15\_00305" 22664 "s63E6H2" 0 "chromosome segregation protein"  
"MG2\_P15\_00306" 22665 "s59E13H2" 0 "exonuclease subunit SbcD"  
"MG2\_P15\_00306" 22665 "s59E25H2" 0 "exonuclease subunit SbcD"  
"MG2\_P15\_00306" 22665 "s59E5H2" 0 "exonuclease subunit SbcD"  
"MG2\_P15\_00306" 22665 "s63E6H2" 0 "exonuclease subunit SbcD"  
"MG2\_P15\_00307" 22666 "s59E13H2" 0 "Sorbitol dehydrogenase"

"MG2\_P15\_00307" 22666 "s59E25H2" 0 "Sorbitol dehydrogenase"  
"MG2\_P15\_00307" 22666 "s59E5H2" 0 "Sorbitol dehydrogenase"  
"MG2\_P15\_00307" 22666 "s63E6H2" 0 "Sorbitol dehydrogenase"  
"MG2\_P15\_00308" 22667 "s59E13H2" 0 "putative aldolase LsrF"  
"MG2\_P15\_00308" 22667 "s59E25H2" 0 "putative aldolase LsrF"  
"MG2\_P15\_00308" 22667 "s59E5H2" 0 "putative aldolase LsrF"  
"MG2\_P15\_00308" 22667 "s63E6H2" 0 "putative aldolase LsrF"  
"MG2\_P15\_00309" 22668 "s59E13H2" 0 "Transglycosylase SLT domain protein"  
"MG2\_P15\_00309" 22668 "s59E25H2" 0 "Transglycosylase SLT domain protein"  
"MG2\_P15\_00309" 22668 "s59E5H2" 0 "Transglycosylase SLT domain protein"  
"MG2\_P15\_00309" 22668 "s63E6H2" 0 "Transglycosylase SLT domain protein"  
"MG2\_P15\_00310" 22669 "s59E13H2" 0 "DNA polymerase III PolC-type"  
"MG2\_P15\_00310" 22669 "s59E25H2" 0 "DNA polymerase III PolC-type"  
"MG2\_P15\_00310" 22669 "s59E5H2" 0 "DNA polymerase III PolC-type"  
"MG2\_P15\_00310" 22669 "s63E6H2" 0 "DNA polymerase III PolC-type"  
"MG2\_P15\_00311" 22670 "s59E13H2" 0 "hypothetical protein"  
"MG2\_P15\_00311" 22670 "s59E25H2" 0 "hypothetical protein"  
"MG2\_P15\_00311" 22670 "s59E5H2" 0 "hypothetical protein"  
"MG2\_P15\_00311" 22670 "s63E6H2" 0 "hypothetical protein"  
"MG2\_P15\_00312" 22671 "s59E13H2" 0 "Inositol-1-monophosphatase"  
"MG2\_P15\_00312" 22671 "s59E25H2" 0 "Inositol-1-monophosphatase"  
"MG2\_P15\_00312" 22671 "s59E5H2" 0 "Inositol-1-monophosphatase"  
"MG2\_P15\_00312" 22671 "s63E6H2" 0 "Inositol-1-monophosphatase"  
"MG2\_P15\_00313" 22672 "s59E13H2" 0 "threonine efflux system"  
"MG2\_P15\_00313" 22672 "s59E25H2" 0 "threonine efflux system"  
"MG2\_P15\_00313" 22672 "s59E5H2" 0 "threonine efflux system"  
"MG2\_P15\_00313" 22672 "s63E6H2" 0 "threonine efflux system"  
"MG2\_P15\_00314" 22673 "s59E13H2" 0 "GMP synthase [glutamine-hydrolyzing] subunit A"  
"MG2\_P15\_00314" 22673 "s59E25H2" 0 "GMP synthase [glutamine-hydrolyzing] subunit A"  
"MG2\_P15\_00314" 22673 "s59E5H2" 0 "GMP synthase [glutamine-hydrolyzing] subunit A"  
"MG2\_P15\_00314" 22673 "s63E6H2" 0 "GMP synthase [glutamine-hydrolyzing] subunit A"  
"MG2\_P15\_00315" 22674 "s59E13H2" 0 "Trimethylamine methyltransferase MttB"  
"MG2\_P15\_00315" 22674 "s59E25H2" 0 "Trimethylamine methyltransferase MttB"  
"MG2\_P15\_00315" 22674 "s59E5H2" 0 "Trimethylamine methyltransferase MttB"  
"MG2\_P15\_00315" 22674 "s63E6H2" 0 "Trimethylamine methyltransferase MttB"  
"MG2\_P15\_00316" 22675 "s59E13H2" 0 "Glutamine synthetase 1"  
"MG2\_P15\_00316" 22675 "s59E25H2" 0 "Glutamine synthetase 1"  
"MG2\_P15\_00316" 22675 "s59E5H2" 0 "Glutamine synthetase 1"  
"MG2\_P15\_00316" 22675 "s63E6H2" 0 "Glutamine synthetase 1"  
"MG2\_P15\_00317" 22676 "s59E13H2" 0 "Glutathione import ATP-binding protein GsiA"  
"MG2\_P15\_00317" 22676 "s59E25H2" 0 "Glutathione import ATP-binding protein GsiA"  
"MG2\_P15\_00317" 22676 "s59E5H2" 0 "Glutathione import ATP-binding protein GsiA"  
"MG2\_P15\_00317" 22676 "s63E6H2" 0 "Glutathione import ATP-binding protein GsiA"  
"MG2\_P15\_00318" 22677 "s59E13H2" 0 "Glutathione transport system permease protein GsiD"  
"MG2\_P15\_00318" 22677 "s59E25H2" 0 "Glutathione transport system permease protein GsiD"  
"MG2\_P15\_00318" 22677 "s59E5H2" 0.06119564 "Glutathione transport system permease protein GsiD"  
"MG2\_P15\_00318" 22677 "s63E6H2" 0 "Glutathione transport system permease protein GsiD"

"MG2\_P15\_00319" 22678 "s59E13H2" 0 "Dipeptide transport system permease protein DppB"  
"MG2\_P15\_00319" 22678 "s59E25H2" 0 "Dipeptide transport system permease protein DppB"  
"MG2\_P15\_00319" 22678 "s59E5H2" 0.0415967 "Dipeptide transport system permease protein DppB"  
"MG2\_P15\_00319" 22678 "s63E6H2" 0.112858 "Dipeptide transport system permease protein DppB"  
"MG2\_P15\_00320" 22679 "s59E13H2" 0 "Heme-binding protein A precursor"  
"MG2\_P15\_00320" 22679 "s59E25H2" 0 "Heme-binding protein A precursor"  
"MG2\_P15\_00320" 22679 "s59E5H2" 0 "Heme-binding protein A precursor"  
"MG2\_P15\_00320" 22679 "s63E6H2" 0.02718987 "Heme-binding protein A precursor"  
"MG2\_P15\_00321" 22680 "s59E13H2" 0 "Trimethylamine methyltransferase MttB"  
"MG2\_P15\_00321" 22680 "s59E25H2" 0 "Trimethylamine methyltransferase MttB"  
"MG2\_P15\_00321" 22680 "s59E5H2" 0 "Trimethylamine methyltransferase MttB"  
"MG2\_P15\_00321" 22680 "s63E6H2" 0.002110864 "Trimethylamine methyltransferase MttB"  
"MG2\_P15\_00322" 22681 "s59E13H2" 0 "putative HTH-type transcriptional regulator YdfH"  
"MG2\_P15\_00322" 22681 "s59E25H2" 0 "putative HTH-type transcriptional regulator YdfH"  
"MG2\_P15\_00322" 22681 "s59E5H2" 0 "putative HTH-type transcriptional regulator YdfH"  
"MG2\_P15\_00322" 22681 "s63E6H2" 0 "putative HTH-type transcriptional regulator YdfH"  
"MG2\_P15\_00323" 22682 "s59E13H2" 0 "Vitamin B12 dependent methionine synthase, activation domain"  
"MG2\_P15\_00323" 22682 "s59E25H2" 0 "Vitamin B12 dependent methionine synthase, activation domain"  
"MG2\_P15\_00323" 22682 "s59E5H2" 0 "Vitamin B12 dependent methionine synthase, activation domain"  
"MG2\_P15\_00323" 22682 "s63E6H2" 0 "Vitamin B12 dependent methionine synthase, activation domain"  
"MG2\_P15\_00324" 22683 "s59E13H2" 0 "Ribosomal protein S12 methylthiotransferase RimO"  
"MG2\_P15\_00324" 22683 "s59E25H2" 0 "Ribosomal protein S12 methylthiotransferase RimO"  
"MG2\_P15\_00324" 22683 "s59E5H2" 0 "Ribosomal protein S12 methylthiotransferase RimO"  
"MG2\_P15\_00324" 22683 "s63E6H2" 0 "Ribosomal protein S12 methylthiotransferase RimO"  
"MG2\_P15\_00325" 22684 "s59E13H2" 0 "6-phosphofructokinase isozyme 1"  
"MG2\_P15\_00325" 22684 "s59E25H2" 0 "6-phosphofructokinase isozyme 1"  
"MG2\_P15\_00325" 22684 "s59E5H2" 0 "6-phosphofructokinase isozyme 1"  
"MG2\_P15\_00325" 22684 "s63E6H2" 0 "6-phosphofructokinase isozyme 1"  
"MG2\_P15\_00326" 22685 "s59E13H2" 0 "putative permease YjgP/YjgQ family protein"  
"MG2\_P15\_00326" 22685 "s59E25H2" 0 "putative permease YjgP/YjgQ family protein"  
"MG2\_P15\_00326" 22685 "s59E5H2" 0 "putative permease YjgP/YjgQ family protein"  
"MG2\_P15\_00326" 22685 "s63E6H2" 0 "putative permease YjgP/YjgQ family protein"  
"MG2\_P15\_00327" 22686 "s59E13H2" 0 "putative permease YjgP/YjgQ family protein"  
"MG2\_P15\_00327" 22686 "s59E25H2" 0 "putative permease YjgP/YjgQ family protein"  
"MG2\_P15\_00327" 22686 "s59E5H2" 0 "putative permease YjgP/YjgQ family protein"  
"MG2\_P15\_00327" 22686 "s63E6H2" 0 "putative permease YjgP/YjgQ family protein"  
"MG2\_P15\_00328" 22687 "s59E13H2" 0 "hypothetical protein"  
"MG2\_P15\_00328" 22687 "s59E25H2" 0 "hypothetical protein"  
"MG2\_P15\_00328" 22687 "s59E5H2" 0 "hypothetical protein"  
"MG2\_P15\_00328" 22687 "s63E6H2" 0 "hypothetical protein"  
"MG2\_P15\_00329" 22688 "s59E13H2" 0 "GMP/IMP nucleotidase YrfG"  
"MG2\_P15\_00329" 22688 "s59E25H2" 0 "GMP/IMP nucleotidase YrfG"  
"MG2\_P15\_00329" 22688 "s59E5H2" 0 "GMP/IMP nucleotidase YrfG"  
"MG2\_P15\_00329" 22688 "s63E6H2" 0 "GMP/IMP nucleotidase YrfG"  
"MG2\_P15\_00330" 22689 "s59E13H2" 0 "CYTH domain protein"  
"MG2\_P15\_00330" 22689 "s59E25H2" 0 "CYTH domain protein"  
"MG2\_P15\_00330" 22689 "s59E5H2" 0 "CYTH domain protein"

"MG2\_P15\_00330" 22689 "s63E6H2" 0 "CYTH domain protein"  
"MG2\_P15\_00331" 22690 "s59E13H2" 0 "RNA recognition motif. (a.k.a. RRM, RBD, or RNP domain)"  
"MG2\_P15\_00331" 22690 "s59E25H2" 0 "RNA recognition motif. (a.k.a. RRM, RBD, or RNP domain)"  
"MG2\_P15\_00331" 22690 "s59E5H2" 0 "RNA recognition motif. (a.k.a. RRM, RBD, or RNP domain)"  
"MG2\_P15\_00331" 22690 "s63E6H2" 0 "RNA recognition motif. (a.k.a. RRM, RBD, or RNP domain)"  
"MG2\_P15\_00332" 22691 "s59E13H2" 0 "Lipid II flippase FtsW"  
"MG2\_P15\_00332" 22691 "s59E25H2" 0 "Lipid II flippase FtsW"  
"MG2\_P15\_00332" 22691 "s59E5H2" 0 "Lipid II flippase FtsW"  
"MG2\_P15\_00332" 22691 "s63E6H2" 0 "Lipid II flippase FtsW"  
"MG2\_P15\_00333" 22692 "s59E13H2" 0 "UDP-N-acetylmuramoylalanine--D-glutamate ligase"  
"MG2\_P15\_00333" 22692 "s59E25H2" 0 "UDP-N-acetylmuramoylalanine--D-glutamate ligase"  
"MG2\_P15\_00333" 22692 "s59E5H2" 0 "UDP-N-acetylmuramoylalanine--D-glutamate ligase"  
"MG2\_P15\_00333" 22692 "s63E6H2" 0 "UDP-N-acetylmuramoylalanine--D-glutamate ligase"  
"MG2\_P15\_00334" 22693 "s59E13H2" 0 "Phospho-N-acetylmuramoyl-pentapeptide-transferase"  
"MG2\_P15\_00334" 22693 "s59E25H2" 0 "Phospho-N-acetylmuramoyl-pentapeptide-transferase"  
"MG2\_P15\_00334" 22693 "s59E5H2" 0 "Phospho-N-acetylmuramoyl-pentapeptide-transferase"  
"MG2\_P15\_00334" 22693 "s63E6H2" 0 "Phospho-N-acetylmuramoyl-pentapeptide-transferase"  
"MG2\_P15\_00335" 22694 "s59E13H2" 0 "UDP-N-acetylmuramoyl-tripeptide--D-alanyl-D-alanine ligase"  
"MG2\_P15\_00335" 22694 "s59E25H2" 0 "UDP-N-acetylmuramoyl-tripeptide--D-alanyl-D-alanine ligase"  
"MG2\_P15\_00335" 22694 "s59E5H2" 0 "UDP-N-acetylmuramoyl-tripeptide--D-alanyl-D-alanine ligase"  
"MG2\_P15\_00335" 22694 "s63E6H2" 0 "UDP-N-acetylmuramoyl-tripeptide--D-alanyl-D-alanine ligase"  
"MG2\_P15\_00336" 22695 "s59E13H2" 0 "UDP-N-acetylmuramoyl-L-alanyl-D-glutamate--2,6-diaminopimelate ligase"  
"MG2\_P15\_00336" 22695 "s59E25H2" 0 "UDP-N-acetylmuramoyl-L-alanyl-D-glutamate--2,6-diaminopimelate ligase"  
"MG2\_P15\_00336" 22695 "s59E5H2" 0 "UDP-N-acetylmuramoyl-L-alanyl-D-glutamate--2,6-diaminopimelate ligase"  
"MG2\_P15\_00336" 22695 "s63E6H2" 0 "UDP-N-acetylmuramoyl-L-alanyl-D-glutamate--2,6-diaminopimelate ligase"  
"MG2\_P15\_00337" 22696 "s59E13H2" 0 "Stage V sporulation protein D"  
"MG2\_P15\_00337" 22696 "s59E25H2" 0 "Stage V sporulation protein D"  
"MG2\_P15\_00337" 22696 "s59E5H2" 0 "Stage V sporulation protein D"  
"MG2\_P15\_00337" 22696 "s63E6H2" 0 "Stage V sporulation protein D"  
"MG2\_P15\_00338" 22697 "s59E13H2" 0 "Cell division protein FtsL"  
"MG2\_P15\_00338" 22697 "s59E25H2" 0 "Cell division protein FtsL"  
"MG2\_P15\_00338" 22697 "s59E5H2" 0 "Cell division protein FtsL"  
"MG2\_P15\_00338" 22697 "s63E6H2" 0 "Cell division protein FtsL"  
"MG2\_P15\_00339" 22698 "s59E13H2" 0 "Ribosomal RNA small subunit methyltransferase H"  
"MG2\_P15\_00339" 22698 "s59E25H2" 0 "Ribosomal RNA small subunit methyltransferase H"  
"MG2\_P15\_00339" 22698 "s59E5H2" 0 "Ribosomal RNA small subunit methyltransferase H"  
"MG2\_P15\_00339" 22698 "s63E6H2" 0 "Ribosomal RNA small subunit methyltransferase H"  
"MG2\_P15\_00340" 22699 "s59E13H2" 0 "cell division protein MraZ"  
"MG2\_P15\_00340" 22699 "s59E25H2" 0 "cell division protein MraZ"  
"MG2\_P15\_00340" 22699 "s59E5H2" 0 "cell division protein MraZ"  
"MG2\_P15\_00340" 22699 "s63E6H2" 0 "cell division protein MraZ"  
"MG2\_P15\_00341" 22700 "s59E13H2" 0 "Octanoyltransferase"  
"MG2\_P15\_00341" 22700 "s59E25H2" 0 "Octanoyltransferase"  
"MG2\_P15\_00341" 22700 "s59E5H2" 0 "Octanoyltransferase"  
"MG2\_P15\_00341" 22700 "s63E6H2" 0 "Octanoyltransferase"  
"MG2\_P15\_00342" 22701 "s59E13H2" 0 "Dihydrolipoyl dehydrogenase"  
"MG2\_P15\_00342" 22701 "s59E25H2" 0 "Dihydrolipoyl dehydrogenase"

"MG2\_P15\_00342" 22701 "s59E5H2" 0 "Dihydrolipoyl dehydrogenase"  
"MG2\_P15\_00342" 22701 "s63E6H2" 0 "Dihydrolipoyl dehydrogenase"  
"MG2\_P15\_00343" 22702 "s59E13H2" 0 "putative 3-hydroxybutyryl-CoA dehydrogenase"  
"MG2\_P15\_00343" 22702 "s59E25H2" 0 "putative 3-hydroxybutyryl-CoA dehydrogenase"  
"MG2\_P15\_00343" 22702 "s59E5H2" 0 "putative 3-hydroxybutyryl-CoA dehydrogenase"  
"MG2\_P15\_00343" 22702 "s63E6H2" 0 "putative 3-hydroxybutyryl-CoA dehydrogenase"  
"MG2\_P15\_00344" 22703 "s59E13H2" 0 "Thermophilic metalloprotease (M29)"  
"MG2\_P15\_00344" 22703 "s59E25H2" 0 "Thermophilic metalloprotease (M29)"  
"MG2\_P15\_00344" 22703 "s59E5H2" 0 "Thermophilic metalloprotease (M29)"  
"MG2\_P15\_00344" 22703 "s63E6H2" 0 "Thermophilic metalloprotease (M29)"  
"MG2\_P15\_00345" 22704 "s59E13H2" 0 "DNA-binding transcriptional repressor PuuR"  
"MG2\_P15\_00345" 22704 "s59E25H2" 0 "DNA-binding transcriptional repressor PuuR"  
"MG2\_P15\_00345" 22704 "s59E5H2" 0 "DNA-binding transcriptional repressor PuuR"  
"MG2\_P15\_00345" 22704 "s63E6H2" 0 "DNA-binding transcriptional repressor PuuR"  
"MG2\_P15\_00346" 22705 "s59E13H2" 0 "Tungsten-containing aldehyde ferredoxin oxidoreductase"  
"MG2\_P15\_00346" 22705 "s59E25H2" 0 "Tungsten-containing aldehyde ferredoxin oxidoreductase"  
"MG2\_P15\_00346" 22705 "s59E5H2" 0 "Tungsten-containing aldehyde ferredoxin oxidoreductase"  
"MG2\_P15\_00346" 22705 "s63E6H2" 0 "Tungsten-containing aldehyde ferredoxin oxidoreductase"  
"MG2\_P15\_00347" 22706 "s59E13H2" 0 "Purine-binding protein precursor"  
"MG2\_P15\_00347" 22706 "s59E25H2" 0 "Purine-binding protein precursor"  
"MG2\_P15\_00347" 22706 "s59E5H2" 0 "Purine-binding protein precursor"  
"MG2\_P15\_00347" 22706 "s63E6H2" 0 "Purine-binding protein precursor"  
"MG2\_P15\_00348" 22707 "s59E13H2" 0 "Arabinose import ATP-binding protein AraG"  
"MG2\_P15\_00348" 22707 "s59E25H2" 0 "Arabinose import ATP-binding protein AraG"  
"MG2\_P15\_00348" 22707 "s59E5H2" 0 "Arabinose import ATP-binding protein AraG"  
"MG2\_P15\_00348" 22707 "s63E6H2" 0 "Arabinose import ATP-binding protein AraG"  
"MG2\_P15\_00349" 22708 "s59E13H2" 0 "Gas vesicle synthesis protein GvpL/GvpF"  
"MG2\_P15\_00349" 22708 "s59E25H2" 0 "Gas vesicle synthesis protein GvpL/GvpF"  
"MG2\_P15\_00349" 22708 "s59E5H2" 0 "Gas vesicle synthesis protein GvpL/GvpF"  
"MG2\_P15\_00349" 22708 "s63E6H2" 0 "Gas vesicle synthesis protein GvpL/GvpF"  
"MG2\_P15\_00350" 22709 "s59E13H2" 0 "Gas vesicle protein G"  
"MG2\_P15\_00350" 22709 "s59E25H2" 0 "Gas vesicle protein G"  
"MG2\_P15\_00350" 22709 "s59E5H2" 0 "Gas vesicle protein G"  
"MG2\_P15\_00350" 22709 "s63E6H2" 0 "Gas vesicle protein G"  
"MG2\_P15\_00352" 22711 "s59E13H2" 0 "Gas vesicle synthesis protein GvpO"  
"MG2\_P15\_00352" 22711 "s59E25H2" 0 "Gas vesicle synthesis protein GvpO"  
"MG2\_P15\_00352" 22711 "s59E5H2" 0 "Gas vesicle synthesis protein GvpO"  
"MG2\_P15\_00352" 22711 "s63E6H2" 0 "Gas vesicle synthesis protein GvpO"  
"MG2\_P15\_00353" 22712 "s59E13H2" 0 "Putative arsenical pump-driving ATPase"  
"MG2\_P15\_00353" 22712 "s59E25H2" 0 "Putative arsenical pump-driving ATPase"  
"MG2\_P15\_00353" 22712 "s59E5H2" 0 "Putative arsenical pump-driving ATPase"  
"MG2\_P15\_00353" 22712 "s63E6H2" 0 "Putative arsenical pump-driving ATPase"  
"MG2\_P15\_00354" 22713 "s59E13H2" 0 "chaperone protein DnaJ"  
"MG2\_P15\_00354" 22713 "s59E25H2" 0 "chaperone protein DnaJ"  
"MG2\_P15\_00354" 22713 "s59E5H2" 0 "chaperone protein DnaJ"  
"MG2\_P15\_00354" 22713 "s63E6H2" 0 "chaperone protein DnaJ"  
"MG2\_P15\_00355" 22714 "s59E13H2" 0 "Gas vesicle structural protein"

"MG2\_P15\_00355" 22714 "s59E25H2" 0 "Gas vesicle structural protein"  
"MG2\_P15\_00355" 22714 "s59E5H2" 0 "Gas vesicle structural protein"  
"MG2\_P15\_00355" 22714 "s63E6H2" 0 "Gas vesicle structural protein"  
"MG2\_P15\_00357" 22716 "s59E13H2" 0 "Hsp20/alpha crystallin family protein"  
"MG2\_P15\_00357" 22716 "s59E25H2" 0 "Hsp20/alpha crystallin family protein"  
"MG2\_P15\_00357" 22716 "s59E5H2" 0 "Hsp20/alpha crystallin family protein"  
"MG2\_P15\_00357" 22716 "s63E6H2" 0 "Hsp20/alpha crystallin family protein"  
"MG2\_P15\_00358" 22717 "s59E13H2" 0 "Gas vesicle protein K"  
"MG2\_P15\_00358" 22717 "s59E25H2" 0 "Gas vesicle protein K"  
"MG2\_P15\_00358" 22717 "s59E5H2" 0 "Gas vesicle protein K"  
"MG2\_P15\_00358" 22717 "s63E6H2" 0 "Gas vesicle protein K"  
"MG2\_P15\_00359" 22718 "s59E13H2" 0 "Gas vesicle synthesis protein GvpL/GvpF"  
"MG2\_P15\_00359" 22718 "s59E25H2" 0 "Gas vesicle synthesis protein GvpL/GvpF"  
"MG2\_P15\_00359" 22718 "s59E5H2" 0 "Gas vesicle synthesis protein GvpL/GvpF"  
"MG2\_P15\_00359" 22718 "s63E6H2" 0 "Gas vesicle synthesis protein GvpL/GvpF"  
"MG2\_P15\_00360" 22719 "s59E13H2" 0 "Cysteine desulfurase"  
"MG2\_P15\_00360" 22719 "s59E25H2" 0 "Cysteine desulfurase"  
"MG2\_P15\_00360" 22719 "s59E5H2" 0 "Cysteine desulfurase"  
"MG2\_P15\_00360" 22719 "s63E6H2" 0 "Cysteine desulfurase"  
"MG2\_P15\_00361" 22720 "s59E13H2" 0 "Quinolate synthase A"  
"MG2\_P15\_00361" 22720 "s59E25H2" 0 "Quinolate synthase A"  
"MG2\_P15\_00361" 22720 "s59E5H2" 0 "Quinolate synthase A"  
"MG2\_P15\_00361" 22720 "s63E6H2" 0 "Quinolate synthase A"  
"MG2\_P15\_00362" 22721 "s59E13H2" 0 "O-acetylserine sulfhydrylase"  
"MG2\_P15\_00362" 22721 "s59E25H2" 0 "O-acetylserine sulfhydrylase"  
"MG2\_P15\_00362" 22721 "s59E5H2" 0 "O-acetylserine sulfhydrylase"  
"MG2\_P15\_00362" 22721 "s63E6H2" 0 "O-acetylserine sulfhydrylase"  
"MG2\_P15\_00363" 22722 "s59E13H2" 0 "hypothetical protein"  
"MG2\_P15\_00363" 22722 "s59E25H2" 0 "hypothetical protein"  
"MG2\_P15\_00363" 22722 "s59E5H2" 0 "hypothetical protein"  
"MG2\_P15\_00363" 22722 "s63E6H2" 0 "hypothetical protein"  
"MG2\_P15\_00364" 22723 "s59E13H2" 0 "Respiratory nitrate reductase 1 beta chain"  
"MG2\_P15\_00364" 22723 "s59E25H2" 0 "Respiratory nitrate reductase 1 beta chain"  
"MG2\_P15\_00364" 22723 "s59E5H2" 0 "Respiratory nitrate reductase 1 beta chain"  
"MG2\_P15\_00364" 22723 "s63E6H2" 0 "Respiratory nitrate reductase 1 beta chain"  
"MG2\_P15\_00365" 22724 "s59E13H2" 0 "putative adenyltransferase"  
"MG2\_P15\_00365" 22724 "s59E25H2" 0 "putative adenyltransferase"  
"MG2\_P15\_00365" 22724 "s59E5H2" 0 "putative adenyltransferase"  
"MG2\_P15\_00365" 22724 "s63E6H2" 0 "putative adenyltransferase"  
"MG2\_P15\_00366" 22725 "s59E13H2" 0 "Putative ribose 1,5-bisphosphate isomerase"  
"MG2\_P15\_00366" 22725 "s59E25H2" 0 "Putative ribose 1,5-bisphosphate isomerase"  
"MG2\_P15\_00366" 22725 "s59E5H2" 0 "Putative ribose 1,5-bisphosphate isomerase"  
"MG2\_P15\_00366" 22725 "s63E6H2" 0 "Putative ribose 1,5-bisphosphate isomerase"  
"MG2\_P15\_00368" 22727 "s59E13H2" 0 "Heterodisulfide reductase subunit A-like protein"  
"MG2\_P15\_00368" 22727 "s59E25H2" 0 "Heterodisulfide reductase subunit A-like protein"  
"MG2\_P15\_00368" 22727 "s59E5H2" 0 "Heterodisulfide reductase subunit A-like protein"  
"MG2\_P15\_00368" 22727 "s63E6H2" 0 "Heterodisulfide reductase subunit A-like protein"

"MG2\_P15\_00369" 22728 "s59E13H2" 0 "Fe/S biogenesis protein NfuA"  
"MG2\_P15\_00369" 22728 "s59E25H2" 0 "Fe/S biogenesis protein NfuA"  
"MG2\_P15\_00369" 22728 "s59E5H2" 0 "Fe/S biogenesis protein NfuA"  
"MG2\_P15\_00369" 22728 "s63E6H2" 0 "Fe/S biogenesis protein NfuA"  
"MG2\_P15\_00370" 22729 "s59E13H2" 0 "HTH-type transcriptional regulator CymR"  
"MG2\_P15\_00370" 22729 "s59E25H2" 0 "HTH-type transcriptional regulator CymR"  
"MG2\_P15\_00370" 22729 "s59E5H2" 0 "HTH-type transcriptional regulator CymR"  
"MG2\_P15\_00370" 22729 "s63E6H2" 0 "HTH-type transcriptional regulator CymR"  
"MG2\_P15\_00371" 22730 "s59E13H2" 0 "Copper-transporting P-type ATPase"  
"MG2\_P15\_00371" 22730 "s59E25H2" 0 "Copper-transporting P-type ATPase"  
"MG2\_P15\_00371" 22730 "s59E5H2" 0 "Copper-transporting P-type ATPase"  
"MG2\_P15\_00371" 22730 "s63E6H2" 0 "Copper-transporting P-type ATPase"  
"MG2\_P15\_00372" 22731 "s59E13H2" 0 "Copper-exporting P-type ATPase A"  
"MG2\_P15\_00372" 22731 "s59E25H2" 0 "Copper-exporting P-type ATPase A"  
"MG2\_P15\_00372" 22731 "s59E5H2" 0 "Copper-exporting P-type ATPase A"  
"MG2\_P15\_00372" 22731 "s63E6H2" 0 "Copper-exporting P-type ATPase A"  
"MG2\_P15\_00373" 22732 "s59E13H2" 0 "Copper-sensing transcriptional repressor CsoR"  
"MG2\_P15\_00373" 22732 "s59E25H2" 0 "Copper-sensing transcriptional repressor CsoR"  
"MG2\_P15\_00373" 22732 "s59E5H2" 0 "Copper-sensing transcriptional repressor CsoR"  
"MG2\_P15\_00373" 22732 "s63E6H2" 0 "Copper-sensing transcriptional repressor CsoR"  
"MG2\_P15\_00374" 22733 "s59E13H2" 0 "GMP synthase subunit B"  
"MG2\_P15\_00374" 22733 "s59E25H2" 0 "GMP synthase subunit B"  
"MG2\_P15\_00374" 22733 "s59E5H2" 0 "GMP synthase subunit B"  
"MG2\_P15\_00374" 22733 "s63E6H2" 0 "GMP synthase subunit B"  
"MG2\_P15\_00375" 22734 "s59E13H2" 0 "formate dehydrogenase accessory protein"  
"MG2\_P15\_00375" 22734 "s59E25H2" 0 "formate dehydrogenase accessory protein"  
"MG2\_P15\_00375" 22734 "s59E5H2" 0 "formate dehydrogenase accessory protein"  
"MG2\_P15\_00375" 22734 "s63E6H2" 0 "formate dehydrogenase accessory protein"  
"MG2\_P15\_00376" 22735 "s59E13H2" 0 "Putative ribose 1,5-bisphosphate isomerase"  
"MG2\_P15\_00376" 22735 "s59E25H2" 0 "Putative ribose 1,5-bisphosphate isomerase"  
"MG2\_P15\_00376" 22735 "s59E5H2" 0 "Putative ribose 1,5-bisphosphate isomerase"  
"MG2\_P15\_00376" 22735 "s63E6H2" 0 "Putative ribose 1,5-bisphosphate isomerase"  
"MG2\_P15\_00377" 22736 "s59E13H2" 0 "bifunctional sulfur carrier protein/thiazole synthase protein"  
"MG2\_P15\_00377" 22736 "s59E25H2" 0 "bifunctional sulfur carrier protein/thiazole synthase protein"  
"MG2\_P15\_00377" 22736 "s59E5H2" 0 "bifunctional sulfur carrier protein/thiazole synthase protein"  
"MG2\_P15\_00377" 22736 "s63E6H2" 0 "bifunctional sulfur carrier protein/thiazole synthase protein"  
"MG2\_P15\_00378" 22737 "s59E13H2" 0 "putative adenyllyltransferase"  
"MG2\_P15\_00378" 22737 "s59E25H2" 0 "putative adenyllyltransferase"  
"MG2\_P15\_00378" 22737 "s59E5H2" 0 "putative adenyllyltransferase"  
"MG2\_P15\_00378" 22737 "s63E6H2" 0 "putative adenyllyltransferase"  
"MG2\_P15\_00379" 22738 "s59E13H2" 0 "hypothetical protein"  
"MG2\_P15\_00379" 22738 "s59E25H2" 0 "hypothetical protein"  
"MG2\_P15\_00379" 22738 "s59E5H2" 0 "hypothetical protein"  
"MG2\_P15\_00379" 22738 "s63E6H2" 0 "hypothetical protein"  
"NT-A5\_00006" 38389 "s59E13H2" 0 "Aspartokinase"  
"NT-A5\_00006" 38389 "s59E25H2" 0 "Aspartokinase"  
"NT-A5\_00006" 38389 "s59E5H2" 0 "Aspartokinase"



"NT-A5\_00006" 38389 "s63E6H2" 0 "Aspartokinase"  
"NT-A5\_00007" 38390 "s59E13H2" 0 "Aspartokinase"  
"NT-A5\_00007" 38390 "s59E25H2" 0 "Aspartokinase"  
"NT-A5\_00007" 38390 "s59E5H2" 0 "Aspartokinase"  
"NT-A5\_00007" 38390 "s63E6H2" 0 "Aspartokinase"  
"NT-A5\_00008" 38391 "s59E13H2" 0 "Riboflavin biosynthesis protein RibD"  
"NT-A5\_00008" 38391 "s59E25H2" 0 "Riboflavin biosynthesis protein RibD"  
"NT-A5\_00008" 38391 "s59E5H2" 0 "Riboflavin biosynthesis protein RibD"  
"NT-A5\_00008" 38391 "s63E6H2" 0.002808857 "Riboflavin biosynthesis protein RibD"  
"NT-A5\_00012" 38395 "s59E13H2" 0 "Nucleoid-associated protein"  
"NT-A5\_00012" 38395 "s59E25H2" 0 "Nucleoid-associated protein"  
"NT-A5\_00012" 38395 "s59E5H2" 0 "Nucleoid-associated protein"  
"NT-A5\_00012" 38395 "s63E6H2" 0 "Nucleoid-associated protein"  
"NT-A5\_00013" 38396 "s59E13H2" 0 "Recombination protein RecR"  
"NT-A5\_00013" 38396 "s59E25H2" 0 "Recombination protein RecR"  
"NT-A5\_00013" 38396 "s59E5H2" 0 "Recombination protein RecR"  
"NT-A5\_00013" 38396 "s63E6H2" 0.003861307 "Recombination protein RecR"  
"NT-A5\_00014" 38397 "s59E13H2" 0 "Glutamate dehydrogenase"  
"NT-A5\_00014" 38397 "s59E25H2" 0 "Glutamate dehydrogenase"  
"NT-A5\_00014" 38397 "s59E5H2" 0 "Glutamate dehydrogenase"  
"NT-A5\_00014" 38397 "s63E6H2" 0.7480442 "Glutamate dehydrogenase"  
"NT-A5\_00015" 38398 "s59E13H2" 0 "Nitrogen regulatory protein P-II"  
"NT-A5\_00015" 38398 "s59E25H2" 0 "Nitrogen regulatory protein P-II"  
"NT-A5\_00015" 38398 "s59E5H2" 0 "Nitrogen regulatory protein P-II"  
"NT-A5\_00015" 38398 "s63E6H2" 0.7447841 "Nitrogen regulatory protein P-II"  
"NT-A5\_00017" 38400 "s59E13H2" 0 "molybdenum cofactor biosynthesis protein A"  
"NT-A5\_00017" 38400 "s59E25H2" 0 "molybdenum cofactor biosynthesis protein A"  
"NT-A5\_00017" 38400 "s59E5H2" 0.01092183 "molybdenum cofactor biosynthesis protein A"  
"NT-A5\_00017" 38400 "s63E6H2" 0.5784559 "molybdenum cofactor biosynthesis protein A"  
"NT-A5\_00018" 38401 "s59E13H2" 0 "Anaerobic ribonucleoside-triphosphate reductase"  
"NT-A5\_00018" 38401 "s59E25H2" 0.1175364 "Anaerobic ribonucleoside-triphosphate reductase"  
"NT-A5\_00018" 38401 "s59E5H2" 0.007271271 "Anaerobic ribonucleoside-triphosphate reductase"  
"NT-A5\_00018" 38401 "s63E6H2" 0.7064266 "Anaerobic ribonucleoside-triphosphate reductase"  
"NT-A5\_00019" 38402 "s59E13H2" 0 "putative transposase"  
"NT-A5\_00019" 38402 "s59E25H2" 0 "putative transposase"  
"NT-A5\_00019" 38402 "s59E5H2" 0 "putative transposase"  
"NT-A5\_00019" 38402 "s63E6H2" 7.08161e-05 "putative transposase"  
"NT-A5\_00020" 38403 "s59E13H2" 0 "tRNA uridine 5-carboxymethylaminomethyl modification enzyme MnmG"  
"NT-A5\_00020" 38403 "s59E25H2" 0 "tRNA uridine 5-carboxymethylaminomethyl modification enzyme MnmG"  
"NT-A5\_00020" 38403 "s59E5H2" 0 "tRNA uridine 5-carboxymethylaminomethyl modification enzyme MnmG"  
"NT-A5\_00020" 38403 "s63E6H2" 0.8186885 "tRNA uridine 5-carboxymethylaminomethyl modification enzyme MnmG"  
"NT-A5\_00021" 38404 "s59E13H2" 0 "50S ribosomal protein L1"  
"NT-A5\_00021" 38404 "s59E25H2" 0 "50S ribosomal protein L1"  
"NT-A5\_00021" 38404 "s59E5H2" 0 "50S ribosomal protein L1"  
"NT-A5\_00021" 38404 "s63E6H2" 0 "50S ribosomal protein L1"  
"NT-A5\_00022" 38405 "s59E13H2" 0 "50S ribosomal protein L10"  
"NT-A5\_00022" 38405 "s59E25H2" 0 "50S ribosomal protein L10"

"NT-A5\_00022" 38405 "s59E5H2" 0 "50S ribosomal protein L10"  
"NT-A5\_00022" 38405 "s63E6H2" 0 "50S ribosomal protein L10"  
"NT-A5\_00023" 38406 "s59E13H2" 0 "50S ribosomal protein L7/L12"  
"NT-A5\_00023" 38406 "s59E25H2" 0 "50S ribosomal protein L7/L12"  
"NT-A5\_00023" 38406 "s59E5H2" 0 "50S ribosomal protein L7/L12"  
"NT-A5\_00023" 38406 "s63E6H2" 0 "50S ribosomal protein L7/L12"  
"NT-A5\_00024" 38407 "s59E13H2" 0 "DNA-directed RNA polymerase subunit beta"  
"NT-A5\_00024" 38407 "s59E25H2" 0 "DNA-directed RNA polymerase subunit beta"  
"NT-A5\_00024" 38407 "s59E5H2" 0 "DNA-directed RNA polymerase subunit beta"  
"NT-A5\_00024" 38407 "s63E6H2" 0 "DNA-directed RNA polymerase subunit beta"  
"NT-A5\_00025" 38408 "s59E13H2" 0 "30S ribosomal protein S10"  
"NT-A5\_00025" 38408 "s59E25H2" 0 "30S ribosomal protein S10"  
"NT-A5\_00025" 38408 "s59E5H2" 0 "30S ribosomal protein S10"  
"NT-A5\_00025" 38408 "s63E6H2" 0.001573926 "30S ribosomal protein S10"  
"NT-A5\_00026" 38409 "s59E13H2" 0 "Elongation factor G"  
"NT-A5\_00026" 38409 "s59E25H2" 0 "Elongation factor G"  
"NT-A5\_00026" 38409 "s59E5H2" 0 "Elongation factor G"  
"NT-A5\_00026" 38409 "s63E6H2" 0.001249729 "Elongation factor G"  
"NT-A5\_00027" 38410 "s59E13H2" 0 "30S ribosomal protein S7"  
"NT-A5\_00027" 38410 "s59E25H2" 0 "30S ribosomal protein S7"  
"NT-A5\_00027" 38410 "s59E5H2" 0 "30S ribosomal protein S7"  
"NT-A5\_00027" 38410 "s63E6H2" 0 "30S ribosomal protein S7"  
"NT-A5\_00028" 38411 "s59E13H2" 0 "30S ribosomal protein S12"  
"NT-A5\_00028" 38411 "s59E25H2" 0 "30S ribosomal protein S12"  
"NT-A5\_00028" 38411 "s59E5H2" 0 "30S ribosomal protein S12"  
"NT-A5\_00028" 38411 "s63E6H2" 0 "30S ribosomal protein S12"  
"NT-A5\_00029" 38412 "s59E13H2" 0.002386609 "DNA-directed RNA polymerase subunit beta"  
"NT-A5\_00029" 38412 "s59E25H2" 0 "DNA-directed RNA polymerase subunit beta"  
"NT-A5\_00029" 38412 "s59E5H2" 0 "DNA-directed RNA polymerase subunit beta"  
"NT-A5\_00029" 38412 "s63E6H2" 0 "DNA-directed RNA polymerase subunit beta"  
"NT-A5\_00030" 38413 "s59E13H2" 0.008560456 "DNA-directed RNA polymerase subunit beta"  
"NT-A5\_00030" 38413 "s59E25H2" 0 "DNA-directed RNA polymerase subunit beta"  
"NT-A5\_00030" 38413 "s59E5H2" 0 "DNA-directed RNA polymerase subunit beta"  
"NT-A5\_00030" 38413 "s63E6H2" 0 "DNA-directed RNA polymerase subunit beta"  
"NT-A5\_00034" 38417 "s59E13H2" 0 "hypothetical protein"  
"NT-A5\_00034" 38417 "s59E25H2" 0 "hypothetical protein"  
"NT-A5\_00034" 38417 "s59E5H2" 0 "hypothetical protein"  
"NT-A5\_00034" 38417 "s63E6H2" 0 "hypothetical protein"  
"NT-A5\_00035" 38418 "s59E13H2" 0 "Putative septation protein SpoVG"  
"NT-A5\_00035" 38418 "s59E25H2" 0 "Putative septation protein SpoVG"  
"NT-A5\_00035" 38418 "s59E5H2" 0 "Putative septation protein SpoVG"  
"NT-A5\_00035" 38418 "s63E6H2" 0 "Putative septation protein SpoVG"  
"NT-A5\_00036" 38419 "s59E13H2" 0 "4-diphosphocytidyl-2-C-methyl-D-erythritol kinase"  
"NT-A5\_00036" 38419 "s59E25H2" 0 "4-diphosphocytidyl-2-C-methyl-D-erythritol kinase"  
"NT-A5\_00036" 38419 "s59E5H2" 0 "4-diphosphocytidyl-2-C-methyl-D-erythritol kinase"  
"NT-A5\_00036" 38419 "s63E6H2" 0.003460947 "4-diphosphocytidyl-2-C-methyl-D-erythritol kinase"  
"NT-A5\_00040" 38423 "s59E13H2" 0 "Cysteine--tRNA ligase"

"NT-A5\_00040" 38423 "s59E25H2" 0 "Cysteine--tRNA ligase"  
"NT-A5\_00040" 38423 "s59E5H2" 0.00471834 "Cysteine--tRNA ligase"  
"NT-A5\_00040" 38423 "s63E6H2" 0.005149249 "Cysteine--tRNA ligase"  
"NT-A5\_00041" 38424 "s59E13H2" 0 "Lipid-A-disaccharide synthase"  
"NT-A5\_00041" 38424 "s59E25H2" 0 "Lipid-A-disaccharide synthase"  
"NT-A5\_00041" 38424 "s59E5H2" 0 "Lipid-A-disaccharide synthase"  
"NT-A5\_00041" 38424 "s63E6H2" 0.02704504 "Lipid-A-disaccharide synthase"  
"NT-A5\_00042" 38425 "s59E13H2" 0 "hypothetical protein"  
"NT-A5\_00042" 38425 "s59E25H2" 0 "hypothetical protein"  
"NT-A5\_00042" 38425 "s59E5H2" 0 "hypothetical protein"  
"NT-A5\_00042" 38425 "s63E6H2" 0.003689917 "hypothetical protein"  
"NT-A5\_00043" 38426 "s59E13H2" 0 "Type II secretion system protein G precursor"  
"NT-A5\_00043" 38426 "s59E25H2" 0 "Type II secretion system protein G precursor"  
"NT-A5\_00043" 38426 "s59E5H2" 0 "Type II secretion system protein G precursor"  
"NT-A5\_00043" 38426 "s63E6H2" 0.004177389 "Type II secretion system protein G precursor"  
"NT-A5\_00044" 38427 "s59E13H2" 0 "Leader peptidase PppA"  
"NT-A5\_00044" 38427 "s59E25H2" 0 "Leader peptidase PppA"  
"NT-A5\_00044" 38427 "s59E5H2" 0 "Leader peptidase PppA"  
"NT-A5\_00044" 38427 "s63E6H2" 0 "Leader peptidase PppA"  
"NT-A5\_00045" 38428 "s59E13H2" 0 "cell division protein FtsB"  
"NT-A5\_00045" 38428 "s59E25H2" 0 "cell division protein FtsB"  
"NT-A5\_00045" 38428 "s59E5H2" 0 "cell division protein FtsB"  
"NT-A5\_00045" 38428 "s63E6H2" 0.005108292 "cell division protein FtsB"  
"NT-A5\_00049" 38432 "s59E13H2" 0 "AsnC family protein"  
"NT-A5\_00049" 38432 "s59E25H2" 0 "AsnC family protein"  
"NT-A5\_00049" 38432 "s59E5H2" 0 "AsnC family protein"  
"NT-A5\_00049" 38432 "s63E6H2" 0 "AsnC family protein"  
"NT-A5\_00050" 38433 "s59E13H2" 0 "hypothetical protein"  
"NT-A5\_00050" 38433 "s59E25H2" 0 "hypothetical protein"  
"NT-A5\_00050" 38433 "s59E5H2" 0.0132808 "hypothetical protein"  
"NT-A5\_00050" 38433 "s63E6H2" 0 "hypothetical protein"  
"NT-A5\_00051" 38434 "s59E13H2" 0 "Methionyl-tRNA formyltransferase"  
"NT-A5\_00051" 38434 "s59E25H2" 0 "Methionyl-tRNA formyltransferase"  
"NT-A5\_00051" 38434 "s59E5H2" 0.008391166 "Methionyl-tRNA formyltransferase"  
"NT-A5\_00051" 38434 "s63E6H2" 0 "Methionyl-tRNA formyltransferase"  
"NT-A5\_00053" 38436 "s59E13H2" 0 "30S ribosomal protein S21"  
"NT-A5\_00053" 38436 "s59E25H2" 0 "30S ribosomal protein S21"  
"NT-A5\_00053" 38436 "s59E5H2" 0 "30S ribosomal protein S21"  
"NT-A5\_00053" 38436 "s63E6H2" 0 "30S ribosomal protein S21"  
"NT-A5\_00054" 38437 "s59E13H2" 0 "Polyribonucleotide nucleotidyltransferase"  
"NT-A5\_00054" 38437 "s59E25H2" 0 "Polyribonucleotide nucleotidyltransferase"  
"NT-A5\_00054" 38437 "s59E5H2" 0.00320203 "Polyribonucleotide nucleotidyltransferase"  
"NT-A5\_00054" 38437 "s63E6H2" 0.00166301 "Polyribonucleotide nucleotidyltransferase"  
"NT-A5\_00055" 38438 "s59E13H2" 0 "30S ribosomal protein S15"  
"NT-A5\_00055" 38438 "s59E25H2" 0 "30S ribosomal protein S15"  
"NT-A5\_00055" 38438 "s59E5H2" 0 "30S ribosomal protein S15"  
"NT-A5\_00055" 38438 "s63E6H2" 0.003799556 "30S ribosomal protein S15"

"NT-A5\_00056" 38439 "s59E13H2" 0 "Pseudopilin GspJ"  
"NT-A5\_00056" 38439 "s59E25H2" 0 "Pseudopilin GspJ"  
"NT-A5\_00056" 38439 "s59E5H2" 0 "Pseudopilin GspJ"  
"NT-A5\_00056" 38439 "s63E6H2" 0.004801966 "Pseudopilin GspJ"  
"NT-A5\_00057" 38440 "s59E13H2" 0 "hypothetical protein"  
"NT-A5\_00057" 38440 "s59E25H2" 0 "hypothetical protein"  
"NT-A5\_00057" 38440 "s59E5H2" 0 "hypothetical protein"  
"NT-A5\_00057" 38440 "s63E6H2" 0 "hypothetical protein"  
"NT-A5\_00058" 38441 "s59E13H2" 0 "Putative ribose 1,5-bisphosphate isomerase"  
"NT-A5\_00058" 38441 "s59E25H2" 0 "Putative ribose 1,5-bisphosphate isomerase"  
"NT-A5\_00058" 38441 "s59E5H2" 0 "Putative ribose 1,5-bisphosphate isomerase"  
"NT-A5\_00058" 38441 "s63E6H2" 0 "Putative ribose 1,5-bisphosphate isomerase"  
"NT-A5\_00059" 38442 "s59E13H2" 0 "hypothetical protein"  
"NT-A5\_00059" 38442 "s59E25H2" 0 "hypothetical protein"  
"NT-A5\_00059" 38442 "s59E5H2" 0 "hypothetical protein"  
"NT-A5\_00059" 38442 "s63E6H2" 0.02809679 "hypothetical protein"  
"NT-A5\_00060" 38443 "s59E13H2" 0 "Uroporphyrinogen decarboxylase (URO-D)"  
"NT-A5\_00060" 38443 "s59E25H2" 0 "Uroporphyrinogen decarboxylase (URO-D)"  
"NT-A5\_00060" 38443 "s59E5H2" 0 "Uroporphyrinogen decarboxylase (URO-D)"  
"NT-A5\_00060" 38443 "s63E6H2" 0 "Uroporphyrinogen decarboxylase (URO-D)"  
"NT-A5\_00061" 38444 "s59E13H2" 0 "L-arabinolactonase"  
"NT-A5\_00061" 38444 "s59E25H2" 0 "L-arabinolactonase"  
"NT-A5\_00061" 38444 "s59E5H2" 0 "L-arabinolactonase"  
"NT-A5\_00061" 38444 "s63E6H2" 0 "L-arabinolactonase"  
"NT-A5\_00062" 38445 "s59E13H2" 0 "Type II secretion system protein G precursor"  
"NT-A5\_00062" 38445 "s59E25H2" 0 "Type II secretion system protein G precursor"  
"NT-A5\_00062" 38445 "s59E5H2" 0 "Type II secretion system protein G precursor"  
"NT-A5\_00062" 38445 "s63E6H2" 0 "Type II secretion system protein G precursor"  
"NT-A5\_00063" 38446 "s59E13H2" 0.004124544 "translocation protein TolB"  
"NT-A5\_00063" 38446 "s59E25H2" 0 "translocation protein TolB"  
"NT-A5\_00063" 38446 "s59E5H2" 0 "translocation protein TolB"  
"NT-A5\_00063" 38446 "s63E6H2" 0 "translocation protein TolB"  
"NT-A5\_00064" 38447 "s59E13H2" 0.009913718 "hypothetical protein"  
"NT-A5\_00064" 38447 "s59E25H2" 0 "hypothetical protein"  
"NT-A5\_00064" 38447 "s59E5H2" 0 "hypothetical protein"  
"NT-A5\_00064" 38447 "s63E6H2" 0 "hypothetical protein"  
"NT-A5\_00065" 38448 "s59E13H2" 0.004254185 "hypothetical protein"  
"NT-A5\_00065" 38448 "s59E25H2" 0 "hypothetical protein"  
"NT-A5\_00065" 38448 "s59E5H2" 0 "hypothetical protein"  
"NT-A5\_00065" 38448 "s63E6H2" 0 "hypothetical protein"  
"NT-A5\_00066" 38449 "s59E13H2" 0.002154749 "Pyruvate carboxylase subunit A"  
"NT-A5\_00066" 38449 "s59E25H2" 0 "Pyruvate carboxylase subunit A"  
"NT-A5\_00066" 38449 "s59E5H2" 0 "Pyruvate carboxylase subunit A"  
"NT-A5\_00066" 38449 "s63E6H2" 0 "Pyruvate carboxylase subunit A"  
"NT-A5\_00067" 38450 "s59E13H2" 0.004911625 "Biotin carboxyl carrier protein of acetyl-CoA carboxylase"  
"NT-A5\_00067" 38450 "s59E25H2" 0 "Biotin carboxyl carrier protein of acetyl-CoA carboxylase"  
"NT-A5\_00067" 38450 "s59E5H2" 0 "Biotin carboxyl carrier protein of acetyl-CoA carboxylase"

"NT-A5\_00067" 38450 "s63E6H2" 0 "Biotin carboxyl carrier protein of acetyl-CoA carboxylase"  
"NT-A5\_00068" 38451 "s59E13H2" 0.001184196 "Elongation factor P"  
"NT-A5\_00068" 38451 "s59E25H2" 0 "Elongation factor P"  
"NT-A5\_00068" 38451 "s59E5H2" 0 "Elongation factor P"  
"NT-A5\_00068" 38451 "s63E6H2" 0 "Elongation factor P"  
"NT-A5\_00069" 38452 "s59E13H2" 0.00675855 "Xaa-Pro dipeptidase"  
"NT-A5\_00069" 38452 "s59E25H2" 0 "Xaa-Pro dipeptidase"  
"NT-A5\_00069" 38452 "s59E5H2" 0 "Xaa-Pro dipeptidase"  
"NT-A5\_00069" 38452 "s63E6H2" 0 "Xaa-Pro dipeptidase"  
"NT-A5\_00070" 38453 "s59E13H2" 0 "Mannose-1-phosphate guanylyltransferase RfbM"  
"NT-A5\_00070" 38453 "s59E25H2" 0 "Mannose-1-phosphate guanylyltransferase RfbM"  
"NT-A5\_00070" 38453 "s59E5H2" 0 "Mannose-1-phosphate guanylyltransferase RfbM"  
"NT-A5\_00070" 38453 "s63E6H2" 0 "Mannose-1-phosphate guanylyltransferase RfbM"  
"NT-A5\_00071" 38454 "s59E13H2" 0 "hypothetical protein"  
"NT-A5\_00071" 38454 "s59E25H2" 0 "hypothetical protein"  
"NT-A5\_00071" 38454 "s59E5H2" 0 "hypothetical protein"  
"NT-A5\_00071" 38454 "s63E6H2" 0 "hypothetical protein"  
"NT-A5\_00072" 38455 "s59E13H2" 0 "Major Facilitator Superfamily protein"  
"NT-A5\_00072" 38455 "s59E25H2" 0 "Major Facilitator Superfamily protein"  
"NT-A5\_00072" 38455 "s59E5H2" 0.005086034 "Major Facilitator Superfamily protein"  
"NT-A5\_00072" 38455 "s63E6H2" 0 "Major Facilitator Superfamily protein"  
"NT-A5\_00073" 38456 "s59E13H2" 0 "TrkA-C domain protein"  
"NT-A5\_00073" 38456 "s59E25H2" 0 "TrkA-C domain protein"  
"NT-A5\_00073" 38456 "s59E5H2" 0.005795144 "TrkA-C domain protein"  
"NT-A5\_00073" 38456 "s63E6H2" 0 "TrkA-C domain protein"  
"NT-A5\_00074" 38457 "s59E13H2" 0 "Magnesium transport protein CorA"  
"NT-A5\_00074" 38457 "s59E25H2" 0 "Magnesium transport protein CorA"  
"NT-A5\_00074" 38457 "s59E5H2" 0.001720118 "Magnesium transport protein CorA"  
"NT-A5\_00074" 38457 "s63E6H2" 0.1474784 "Magnesium transport protein CorA"  
"NT-A5\_00075" 38458 "s59E13H2" 0 "D-inositol 3-phosphate glycosyltransferase"  
"NT-A5\_00075" 38458 "s59E25H2" 0 "D-inositol 3-phosphate glycosyltransferase"  
"NT-A5\_00075" 38458 "s59E5H2" 0.004111671 "D-inositol 3-phosphate glycosyltransferase"  
"NT-A5\_00075" 38458 "s63E6H2" 0.08088098 "D-inositol 3-phosphate glycosyltransferase"  
"NT-A5\_00076" 38459 "s59E13H2" 0 "Bifunctional IPC transferase and DIPP synthase"  
"NT-A5\_00076" 38459 "s59E25H2" 0 "Bifunctional IPC transferase and DIPP synthase"  
"NT-A5\_00076" 38459 "s59E5H2" 0 "Bifunctional IPC transferase and DIPP synthase"  
"NT-A5\_00076" 38459 "s63E6H2" 0.4018763 "Bifunctional IPC transferase and DIPP synthase"  
"NT-A5\_00077" 38460 "s59E13H2" 0 "RimK-like ATP-grasp domain protein"  
"NT-A5\_00077" 38460 "s59E25H2" 0 "RimK-like ATP-grasp domain protein"  
"NT-A5\_00077" 38460 "s59E5H2" 0 "RimK-like ATP-grasp domain protein"  
"NT-A5\_00077" 38460 "s63E6H2" 0.03835928 "RimK-like ATP-grasp domain protein"  
"NT-A5\_00080" 38463 "s59E13H2" 0.009305597 "D-alanine--D-alanine ligase"  
"NT-A5\_00080" 38463 "s59E25H2" 0 "D-alanine--D-alanine ligase"  
"NT-A5\_00080" 38463 "s59E5H2" 0.002005071 "D-alanine--D-alanine ligase"  
"NT-A5\_00080" 38463 "s63E6H2" 0.003071738 "D-alanine--D-alanine ligase"  
"NT-A5\_00081" 38464 "s59E13H2" 0.0048919 "Bifunctional IPC transferase and DIPP synthase"  
"NT-A5\_00081" 38464 "s59E25H2" 0 "Bifunctional IPC transferase and DIPP synthase"

"NT-A5\_00081" 38464 "s59E5H2" 0 "Bifunctional IPC transferase and DIPP synthase"  
"NT-A5\_00081" 38464 "s63E6H2" 0.006944016 "Bifunctional IPC transferase and DIPP synthase"  
"NT-A5\_00082" 38465 "s59E13H2" 0 "Tetrahydromethanopterin:alpha-L-glutamate ligase"  
"NT-A5\_00082" 38465 "s59E25H2" 0 "Tetrahydromethanopterin:alpha-L-glutamate ligase"  
"NT-A5\_00082" 38465 "s59E5H2" 0 "Tetrahydromethanopterin:alpha-L-glutamate ligase"  
"NT-A5\_00082" 38465 "s63E6H2" 0 "Tetrahydromethanopterin:alpha-L-glutamate ligase"  
"NT-A5\_00083" 38466 "s59E13H2" 0 "hypothetical protein"  
"NT-A5\_00083" 38466 "s59E25H2" 0 "hypothetical protein"  
"NT-A5\_00083" 38466 "s59E5H2" 0 "hypothetical protein"  
"NT-A5\_00083" 38466 "s63E6H2" 0.003147434 "hypothetical protein"  
"NT-A5\_00085" 38468 "s59E13H2" 0.005322824 "'Cold-shock' DNA-binding domain protein"  
"NT-A5\_00085" 38468 "s59E25H2" 0 "'Cold-shock' DNA-binding domain protein"  
"NT-A5\_00085" 38468 "s59E5H2" 0 "'Cold-shock' DNA-binding domain protein"  
"NT-A5\_00085" 38468 "s63E6H2" 0 "'Cold-shock' DNA-binding domain protein"  
"NT-A5\_00086" 38469 "s59E13H2" 0.0003392972 "DNA-directed RNA polymerase subunit omega"  
"NT-A5\_00086" 38469 "s59E25H2" 0 "DNA-directed RNA polymerase subunit omega"  
"NT-A5\_00086" 38469 "s59E5H2" 0 "DNA-directed RNA polymerase subunit omega"  
"NT-A5\_00086" 38469 "s63E6H2" 0.01159019 "DNA-directed RNA polymerase subunit omega"  
"NT-A5\_00087" 38470 "s59E13H2" 0.005324034 "60 kDa chaperonin"  
"NT-A5\_00087" 38470 "s59E25H2" 0 "60 kDa chaperonin"  
"NT-A5\_00087" 38470 "s59E5H2" 0.002411745 "60 kDa chaperonin"  
"NT-A5\_00087" 38470 "s63E6H2" 2.75602 "60 kDa chaperonin"  
"NT-A5\_00088" 38471 "s59E13H2" 0.004110123 "10 kDa chaperonin"  
"NT-A5\_00088" 38471 "s59E25H2" 0 "10 kDa chaperonin"  
"NT-A5\_00088" 38471 "s59E5H2" 0 "10 kDa chaperonin"  
"NT-A5\_00088" 38471 "s63E6H2" 0.6352858 "10 kDa chaperonin"  
"NT-A5\_00090" 38473 "s59E13H2" 0 "putative acrEF/envCD operon repressor"  
"NT-A5\_00090" 38473 "s59E25H2" 0 "putative acrEF/envCD operon repressor"  
"NT-A5\_00090" 38473 "s59E5H2" 0 "putative acrEF/envCD operon repressor"  
"NT-A5\_00090" 38473 "s63E6H2" 0.01118289 "putative acrEF/envCD operon repressor"  
"NT-A5\_00091" 38474 "s59E13H2" 0 "CRISPR-associated endonuclease Cas9"  
"NT-A5\_00091" 38474 "s59E25H2" 0 "CRISPR-associated endonuclease Cas9"  
"NT-A5\_00091" 38474 "s59E5H2" 0 "CRISPR-associated endonuclease Cas9"  
"NT-A5\_00091" 38474 "s63E6H2" 0 "CRISPR-associated endonuclease Cas9"  
"NT-A5\_00092" 38475 "s59E13H2" 0 "Phosphoribosylaminoimidazole-succinocarboxamide synthase"  
"NT-A5\_00092" 38475 "s59E25H2" 0 "Phosphoribosylaminoimidazole-succinocarboxamide synthase"  
"NT-A5\_00092" 38475 "s59E5H2" 0 "Phosphoribosylaminoimidazole-succinocarboxamide synthase"  
"NT-A5\_00092" 38475 "s63E6H2" 0.003377383 "Phosphoribosylaminoimidazole-succinocarboxamide synthase"  
"NT-A5\_00093" 38476 "s59E13H2" 0 "Oligopeptide transport ATP-binding protein OppD"  
"NT-A5\_00093" 38476 "s59E25H2" 0 "Oligopeptide transport ATP-binding protein OppD"  
"NT-A5\_00093" 38476 "s59E5H2" 0.00403685 "Oligopeptide transport ATP-binding protein OppD"  
"NT-A5\_00093" 38476 "s63E6H2" 0.1098253 "Oligopeptide transport ATP-binding protein OppD"  
"NT-A5\_00094" 38477 "s59E13H2" 0 "Oligopeptide transport ATP-binding protein OppF"  
"NT-A5\_00094" 38477 "s59E25H2" 0 "Oligopeptide transport ATP-binding protein OppF"  
"NT-A5\_00094" 38477 "s59E5H2" 0.02657842 "Oligopeptide transport ATP-binding protein OppF"  
"NT-A5\_00094" 38477 "s63E6H2" 0.1566909 "Oligopeptide transport ATP-binding protein OppF"  
"NT-A5\_00095" 38478 "s59E13H2" 0 "hypothetical protein"

"NT-A5\_00095" 38478 "s59E25H2" 0 "hypothetical protein"  
"NT-A5\_00095" 38478 "s59E5H2" 0 "hypothetical protein"  
"NT-A5\_00095" 38478 "s63E6H2" 0.006121802 "hypothetical protein"  
"NT-A5\_00096" 38479 "s59E13H2" 0 "Peptide chain release factor 1"  
"NT-A5\_00096" 38479 "s59E25H2" 0 "Peptide chain release factor 1"  
"NT-A5\_00096" 38479 "s59E5H2" 0 "Peptide chain release factor 1"  
"NT-A5\_00096" 38479 "s63E6H2" 0.01535432 "Peptide chain release factor 1"  
"NT-A5\_00097" 38480 "s59E13H2" 0 "Transcription-repair-coupling factor"  
"NT-A5\_00097" 38480 "s59E25H2" 0 "Transcription-repair-coupling factor"  
"NT-A5\_00097" 38480 "s59E5H2" 0 "Transcription-repair-coupling factor"  
"NT-A5\_00097" 38480 "s63E6H2" 0.01163879 "Transcription-repair-coupling factor"  
"NT-A5\_00098" 38481 "s59E13H2" 0 "peptidylprolyl isomerase"  
"NT-A5\_00098" 38481 "s59E25H2" 0 "peptidylprolyl isomerase"  
"NT-A5\_00098" 38481 "s59E5H2" 0 "peptidylprolyl isomerase"  
"NT-A5\_00098" 38481 "s63E6H2" 0 "peptidylprolyl isomerase"  
"NT-A5\_00099" 38482 "s59E13H2" 0 "UDP-N-acetylglucosamine 1-carboxyvinyltransferase 1"  
"NT-A5\_00099" 38482 "s59E25H2" 0 "UDP-N-acetylglucosamine 1-carboxyvinyltransferase 1"  
"NT-A5\_00099" 38482 "s59E5H2" 0 "UDP-N-acetylglucosamine 1-carboxyvinyltransferase 1"  
"NT-A5\_00099" 38482 "s63E6H2" 0 "UDP-N-acetylglucosamine 1-carboxyvinyltransferase 1"  
"NT-A5\_00100" 38483 "s59E13H2" 0 "Rod shape-determining protein MreB"  
"NT-A5\_00100" 38483 "s59E25H2" 0 "Rod shape-determining protein MreB"  
"NT-A5\_00100" 38483 "s59E5H2" 0 "Rod shape-determining protein MreB"  
"NT-A5\_00100" 38483 "s63E6H2" 0 "Rod shape-determining protein MreB"  
"NT-A5\_00101" 38484 "s59E13H2" 0 "hypothetical protein"  
"NT-A5\_00101" 38484 "s59E25H2" 0 "hypothetical protein"  
"NT-A5\_00101" 38484 "s59E5H2" 0 "hypothetical protein"  
"NT-A5\_00101" 38484 "s63E6H2" 0 "hypothetical protein"  
"NT-A5\_00103" 38486 "s59E13H2" 0 "hypothetical protein"  
"NT-A5\_00103" 38486 "s59E25H2" 0 "hypothetical protein"  
"NT-A5\_00103" 38486 "s59E5H2" 0 "hypothetical protein"  
"NT-A5\_00103" 38486 "s63E6H2" 0 "hypothetical protein"  
"NT-A5\_00104" 38487 "s59E13H2" 0 "2-ketoisovalerate ferredoxin oxidoreductase subunit delta"  
"NT-A5\_00104" 38487 "s59E25H2" 0 "2-ketoisovalerate ferredoxin oxidoreductase subunit delta"  
"NT-A5\_00104" 38487 "s59E5H2" 0.0429875 "2-ketoisovalerate ferredoxin oxidoreductase subunit delta"  
"NT-A5\_00104" 38487 "s63E6H2" 0.02100326 "2-ketoisovalerate ferredoxin oxidoreductase subunit delta"  
"NT-A5\_00105" 38488 "s59E13H2" 0 "putative glycine dehydrogenase (decarboxylating) subunit 1"  
"NT-A5\_00105" 38488 "s59E25H2" 0 "putative glycine dehydrogenase (decarboxylating) subunit 1"  
"NT-A5\_00105" 38488 "s59E5H2" 0.0001345372 "putative glycine dehydrogenase (decarboxylating) subunit 1"  
"NT-A5\_00105" 38488 "s63E6H2" 0.1354933 "putative glycine dehydrogenase (decarboxylating) subunit 1"  
"NT-A5\_00106" 38489 "s59E13H2" 0 "Orotidine 5'-phosphate decarboxylase"  
"NT-A5\_00106" 38489 "s59E25H2" 0 "Orotidine 5'-phosphate decarboxylase"  
"NT-A5\_00106" 38489 "s59E5H2" 0 "Orotidine 5'-phosphate decarboxylase"  
"NT-A5\_00106" 38489 "s63E6H2" 0.004293284 "Orotidine 5'-phosphate decarboxylase"  
"NT-A5\_00107" 38490 "s59E13H2" 0 "hypothetical protein"  
"NT-A5\_00107" 38490 "s59E25H2" 0 "hypothetical protein"  
"NT-A5\_00107" 38490 "s59E5H2" 0 "hypothetical protein"  
"NT-A5\_00107" 38490 "s63E6H2" 0.01059051 "hypothetical protein"

"NT-A5\_00108" 38491 "s59E13H2" 0 "Type II secretion system protein E"  
"NT-A5\_00108" 38491 "s59E25H2" 0 "Type II secretion system protein E"  
"NT-A5\_00108" 38491 "s59E5H2" 0.001969383 "Type II secretion system protein E"  
"NT-A5\_00108" 38491 "s63E6H2" 0.03825957 "Type II secretion system protein E"  
"NT-A5\_00109" 38492 "s59E13H2" 0 "S-adenosylmethionine:tRNA ribosyltransferase-isomerase"  
"NT-A5\_00109" 38492 "s59E25H2" 0 "S-adenosylmethionine:tRNA ribosyltransferase-isomerase"  
"NT-A5\_00109" 38492 "s59E5H2" 0 "S-adenosylmethionine:tRNA ribosyltransferase-isomerase"  
"NT-A5\_00109" 38492 "s63E6H2" 0.04934884 "S-adenosylmethionine:tRNA ribosyltransferase-isomerase"  
"NT-A5\_00110" 38493 "s59E13H2" 0 "Queuine tRNA-ribosyltransferase"  
"NT-A5\_00110" 38493 "s59E25H2" 0 "Queuine tRNA-ribosyltransferase"  
"NT-A5\_00110" 38493 "s59E5H2" 0 "Queuine tRNA-ribosyltransferase"  
"NT-A5\_00110" 38493 "s63E6H2" 0.1172708 "Queuine tRNA-ribosyltransferase"  
"NT-A5\_00111" 38494 "s59E13H2" 0 "preprotein translocase subunit YajC"  
"NT-A5\_00111" 38494 "s59E25H2" 0 "preprotein translocase subunit YajC"  
"NT-A5\_00111" 38494 "s59E5H2" 0 "preprotein translocase subunit YajC"  
"NT-A5\_00111" 38494 "s63E6H2" 0.1101154 "preprotein translocase subunit YajC"  
"NT-A5\_00112" 38495 "s59E13H2" 0 "Peptidyl-prolyl cis-trans isomerase D"  
"NT-A5\_00112" 38495 "s59E25H2" 0 "Peptidyl-prolyl cis-trans isomerase D"  
"NT-A5\_00112" 38495 "s59E5H2" 0 "Peptidyl-prolyl cis-trans isomerase D"  
"NT-A5\_00112" 38495 "s63E6H2" 0.06315332 "Peptidyl-prolyl cis-trans isomerase D"  
"NT-A5\_00114" 38497 "s59E13H2" 0 "Rod shape-determining protein MreB"  
"NT-A5\_00114" 38497 "s59E25H2" 0 "Rod shape-determining protein MreB"  
"NT-A5\_00114" 38497 "s59E5H2" 0 "Rod shape-determining protein MreB"  
"NT-A5\_00114" 38497 "s63E6H2" 0.1351927 "Rod shape-determining protein MreB"  
"NT-A5\_00115" 38498 "s59E13H2" 0 "Cell shape-determining protein MreC"  
"NT-A5\_00115" 38498 "s59E25H2" 0 "Cell shape-determining protein MreC"  
"NT-A5\_00115" 38498 "s59E5H2" 0 "Cell shape-determining protein MreC"  
"NT-A5\_00115" 38498 "s63E6H2" 0.5800034 "Cell shape-determining protein MreC"  
"NT-A5\_00116" 38499 "s59E13H2" 0 "rod shape-determining protein MreD"  
"NT-A5\_00116" 38499 "s59E25H2" 0 "rod shape-determining protein MreD"  
"NT-A5\_00116" 38499 "s59E5H2" 0.008089687 "rod shape-determining protein MreD"  
"NT-A5\_00116" 38499 "s63E6H2" 0.4474284 "rod shape-determining protein MreD"  
"NT-A5\_00117" 38500 "s59E13H2" 0 "Glutamyl-tRNA(Gln) amidotransferase subunit C"  
"NT-A5\_00117" 38500 "s59E25H2" 0 "Glutamyl-tRNA(Gln) amidotransferase subunit C"  
"NT-A5\_00117" 38500 "s59E5H2" 0.01362006 "Glutamyl-tRNA(Gln) amidotransferase subunit C"  
"NT-A5\_00117" 38500 "s63E6H2" 0.272865 "Glutamyl-tRNA(Gln) amidotransferase subunit C"  
"NT-A5\_00118" 38501 "s59E13H2" 0 "Methylthioribose-1-phosphate isomerase"  
"NT-A5\_00118" 38501 "s59E25H2" 0 "Methylthioribose-1-phosphate isomerase"  
"NT-A5\_00118" 38501 "s59E5H2" 0.004099519 "Methylthioribose-1-phosphate isomerase"  
"NT-A5\_00118" 38501 "s63E6H2" 0.6797973 "Methylthioribose-1-phosphate isomerase"  
"NT-A5\_00119" 38502 "s59E13H2" 0 "Ribosomal RNA small subunit methyltransferase A"  
"NT-A5\_00119" 38502 "s59E25H2" 0 "Ribosomal RNA small subunit methyltransferase A"  
"NT-A5\_00119" 38502 "s59E5H2" 0.008856951 "Ribosomal RNA small subunit methyltransferase A"  
"NT-A5\_00119" 38502 "s63E6H2" 0.3127432 "Ribosomal RNA small subunit methyltransferase A"  
"NT-A5\_00120" 38503 "s59E13H2" 0 "Methionine--tRNA ligase"  
"NT-A5\_00120" 38503 "s59E25H2" 0 "Methionine--tRNA ligase"  
"NT-A5\_00120" 38503 "s59E5H2" 0.002110403 "Methionine--tRNA ligase"



"NT-A5\_00120" 38503 "s63E6H2" 0.2314607 "Methionine--tRNA ligase"  
"NT-A5\_00121" 38504 "s59E13H2" 0 "Ribulose-phosphate 3-epimerase"  
"NT-A5\_00121" 38504 "s59E25H2" 0 "Ribulose-phosphate 3-epimerase"  
"NT-A5\_00121" 38504 "s59E5H2" 0.01765441 "Ribulose-phosphate 3-epimerase"  
"NT-A5\_00121" 38504 "s63E6H2" 0.2040092 "Ribulose-phosphate 3-epimerase"  
"NT-A5\_00122" 38505 "s59E13H2" 0 "2-isopropylmalate synthase"  
"NT-A5\_00122" 38505 "s59E25H2" 0 "2-isopropylmalate synthase"  
"NT-A5\_00122" 38505 "s59E5H2" 0 "2-isopropylmalate synthase"  
"NT-A5\_00122" 38505 "s63E6H2" 0.09896667 "2-isopropylmalate synthase"  
"NT-A5\_00123" 38506 "s59E13H2" 0 "Phenylalanine--tRNA ligase alpha subunit"  
"NT-A5\_00123" 38506 "s59E25H2" 0 "Phenylalanine--tRNA ligase alpha subunit"  
"NT-A5\_00123" 38506 "s59E5H2" 0.008620524 "Phenylalanine--tRNA ligase alpha subunit"  
"NT-A5\_00123" 38506 "s63E6H2" 0 "Phenylalanine--tRNA ligase alpha subunit"  
"NT-A5\_00124" 38507 "s59E13H2" 0.001418992 "Cell division protein FtsZ"  
"NT-A5\_00124" 38507 "s59E25H2" 0 "Cell division protein FtsZ"  
"NT-A5\_00124" 38507 "s59E5H2" 0.02083311 "Cell division protein FtsZ"  
"NT-A5\_00124" 38507 "s63E6H2" 4.75705 "Cell division protein FtsZ"  
"NT-A5\_00125" 38508 "s59E13H2" 0 "hypothetical protein"  
"NT-A5\_00125" 38508 "s59E25H2" 0 "hypothetical protein"  
"NT-A5\_00125" 38508 "s59E5H2" 0.003077227 "hypothetical protein"  
"NT-A5\_00125" 38508 "s63E6H2" 5.696632 "hypothetical protein"  
"NT-A5\_00126" 38509 "s59E13H2" 0 "Ribonuclease PH"  
"NT-A5\_00126" 38509 "s59E25H2" 0 "Ribonuclease PH"  
"NT-A5\_00126" 38509 "s59E5H2" 0.04204562 "Ribonuclease PH"  
"NT-A5\_00126" 38509 "s63E6H2" 6.971141 "Ribonuclease PH"  
"NT-A5\_00127" 38510 "s59E13H2" 0 "Dephospho-CoA kinase"  
"NT-A5\_00127" 38510 "s59E25H2" 0.4243197 "Dephospho-CoA kinase"  
"NT-A5\_00127" 38510 "s59E5H2" 0.03984006 "Dephospho-CoA kinase"  
"NT-A5\_00127" 38510 "s63E6H2" 11.34843 "Dephospho-CoA kinase"  
"NT-A5\_00128" 38511 "s59E13H2" 0 "ABC-2 family transporter protein"  
"NT-A5\_00128" 38511 "s59E25H2" 0.3793911 "ABC-2 family transporter protein"  
"NT-A5\_00128" 38511 "s59E5H2" 0.05283683 "ABC-2 family transporter protein"  
"NT-A5\_00128" 38511 "s63E6H2" 12.67379 "ABC-2 family transporter protein"  
"NT-A5\_00129" 38512 "s59E13H2" 0 "Daunorubicin/doxorubicin resistance ATP-binding protein DrrA"  
"NT-A5\_00129" 38512 "s59E25H2" 0.07053942 "Daunorubicin/doxorubicin resistance ATP-binding protein DrrA"  
"NT-A5\_00129" 38512 "s59E5H2" 0.03437425 "Daunorubicin/doxorubicin resistance ATP-binding protein DrrA"  
"NT-A5\_00129" 38512 "s63E6H2" 8.490934 "Daunorubicin/doxorubicin resistance ATP-binding protein DrrA"  
"NT-A5\_00130" 38513 "s59E13H2" 0.003238953 "Transglutaminase-like superfamily protein"  
"NT-A5\_00130" 38513 "s59E25H2" 2.889447 "Transglutaminase-like superfamily protein"  
"NT-A5\_00130" 38513 "s59E5H2" 0.0944734 "Transglutaminase-like superfamily protein"  
"NT-A5\_00130" 38513 "s63E6H2" 8.289503 "Transglutaminase-like superfamily protein"  
"NT-A5\_00131" 38514 "s59E13H2" 0 "Phosphoglucosamine mutase"  
"NT-A5\_00131" 38514 "s59E25H2" 0 "Phosphoglucosamine mutase"  
"NT-A5\_00131" 38514 "s59E5H2" 0 "Phosphoglucosamine mutase"  
"NT-A5\_00131" 38514 "s63E6H2" 0 "Phosphoglucosamine mutase"  
"NT-A5\_00132" 38515 "s59E13H2" 0 "Ketoisovalerate oxidoreductase subunit VorA"  
"NT-A5\_00132" 38515 "s59E25H2" 0 "Ketoisovalerate oxidoreductase subunit VorA"

"NT-A5\_00132" 38515 "s59E5H2" 0 "Ketoisovalerate oxidoreductase subunit VorA"  
"NT-A5\_00132" 38515 "s63E6H2" 0 "Ketoisovalerate oxidoreductase subunit VorA"  
"NT-A5\_00133" 38516 "s59E13H2" 0 "Phosphoglucomutase"  
"NT-A5\_00133" 38516 "s59E25H2" 0 "Phosphoglucomutase"  
"NT-A5\_00133" 38516 "s59E5H2" 0 "Phosphoglucomutase"  
"NT-A5\_00133" 38516 "s63E6H2" 0 "Phosphoglucomutase"  
"NT-A5\_00134" 38517 "s59E13H2" 0 "hypothetical protein"  
"NT-A5\_00134" 38517 "s59E25H2" 0 "hypothetical protein"  
"NT-A5\_00134" 38517 "s59E5H2" 0 "hypothetical protein"  
"NT-A5\_00134" 38517 "s63E6H2" 0 "hypothetical protein"  
"NT-A5\_00135" 38518 "s59E13H2" 0 "Ribonuclease VapC11"  
"NT-A5\_00135" 38518 "s59E25H2" 0 "Ribonuclease VapC11"  
"NT-A5\_00135" 38518 "s59E5H2" 0 "Ribonuclease VapC11"  
"NT-A5\_00135" 38518 "s63E6H2" 0 "Ribonuclease VapC11"  
"NT-A5\_00136" 38519 "s59E13H2" 0 "2-dehydro-3-deoxygluconokinase"  
"NT-A5\_00136" 38519 "s59E25H2" 0 "2-dehydro-3-deoxygluconokinase"  
"NT-A5\_00136" 38519 "s59E5H2" 0 "2-dehydro-3-deoxygluconokinase"  
"NT-A5\_00136" 38519 "s63E6H2" 0 "2-dehydro-3-deoxygluconokinase"  
"NT-A5\_00137" 38520 "s59E13H2" 0 "phosphoribosylglycinamide formyltransferase"  
"NT-A5\_00137" 38520 "s59E25H2" 0 "phosphoribosylglycinamide formyltransferase"  
"NT-A5\_00137" 38520 "s59E5H2" 0 "phosphoribosylglycinamide formyltransferase"  
"NT-A5\_00137" 38520 "s63E6H2" 0.003472881 "phosphoribosylglycinamide formyltransferase"  
"NT-A5\_00138" 38521 "s59E13H2" 0 "haloacid dehalogenase-like hydrolase"  
"NT-A5\_00138" 38521 "s59E25H2" 0 "haloacid dehalogenase-like hydrolase"  
"NT-A5\_00138" 38521 "s59E5H2" 0 "haloacid dehalogenase-like hydrolase"  
"NT-A5\_00138" 38521 "s63E6H2" 0.01813944 "haloacid dehalogenase-like hydrolase"  
"NT-A5\_00139" 38522 "s59E13H2" 0 "putative ABC transporter ATP-binding protein Yjjk"  
"NT-A5\_00139" 38522 "s59E25H2" 0 "putative ABC transporter ATP-binding protein Yjjk"  
"NT-A5\_00139" 38522 "s59E5H2" 0 "putative ABC transporter ATP-binding protein Yjjk"  
"NT-A5\_00139" 38522 "s63E6H2" 0.009441686 "putative ABC transporter ATP-binding protein Yjjk"  
"NT-A5\_00140" 38523 "s59E13H2" 0 "Putative GTP cyclohydrolase 1 type 2"  
"NT-A5\_00140" 38523 "s59E25H2" 0 "Putative GTP cyclohydrolase 1 type 2"  
"NT-A5\_00140" 38523 "s59E5H2" 0 "Putative GTP cyclohydrolase 1 type 2"  
"NT-A5\_00140" 38523 "s63E6H2" 0.002648084 "Putative GTP cyclohydrolase 1 type 2"  
"NT-A5\_00141" 38524 "s59E13H2" 0 "Hydroxyacylglutathione hydrolase"  
"NT-A5\_00141" 38524 "s59E25H2" 0 "Hydroxyacylglutathione hydrolase"  
"NT-A5\_00141" 38524 "s59E5H2" 0 "Hydroxyacylglutathione hydrolase"  
"NT-A5\_00141" 38524 "s63E6H2" 0.00192184 "Hydroxyacylglutathione hydrolase"  
"NT-A5\_00142" 38525 "s59E13H2" 0 "putative adenylyltransferase"  
"NT-A5\_00142" 38525 "s59E25H2" 0 "putative adenylyltransferase"  
"NT-A5\_00142" 38525 "s59E5H2" 0 "putative adenylyltransferase"  
"NT-A5\_00142" 38525 "s63E6H2" 0.004687645 "putative adenylyltransferase"  
"NT-A5\_00143" 38526 "s59E13H2" 0 "molybdopterin synthase small subunit"  
"NT-A5\_00143" 38526 "s59E25H2" 0 "molybdopterin synthase small subunit"  
"NT-A5\_00143" 38526 "s59E5H2" 0 "molybdopterin synthase small subunit"  
"NT-A5\_00143" 38526 "s63E6H2" 0.009155557 "molybdopterin synthase small subunit"  
"NT-A5\_00144" 38527 "s59E13H2" 0 "putative tartrate dehydrogenase/decarboxylase TtuC"

"NT-A5\_00144" 38527 "s59E25H2" 0 "putative tartrate dehydrogenase/decarboxylase TtuC"  
"NT-A5\_00144" 38527 "s59E5H2" 0 "putative tartrate dehydrogenase/decarboxylase TtuC"  
"NT-A5\_00144" 38527 "s63E6H2" 0.001144659 "putative tartrate dehydrogenase/decarboxylase TtuC"  
"NT-A5\_00145" 38528 "s59E13H2" 0 "2-oxoisovalerate dehydrogenase subunit beta"  
"NT-A5\_00145" 38528 "s59E25H2" 0 "2-oxoisovalerate dehydrogenase subunit beta"  
"NT-A5\_00145" 38528 "s59E5H2" 0 "2-oxoisovalerate dehydrogenase subunit beta"  
"NT-A5\_00145" 38528 "s63E6H2" 0 "2-oxoisovalerate dehydrogenase subunit beta"  
"NT-A5\_00146" 38529 "s59E13H2" 0 "Acetoin:2,6-dichlorophenolindophenol oxidoreductase subunit alpha"  
"NT-A5\_00146" 38529 "s59E25H2" 0 "Acetoin:2,6-dichlorophenolindophenol oxidoreductase subunit alpha"  
"NT-A5\_00146" 38529 "s59E5H2" 0 "Acetoin:2,6-dichlorophenolindophenol oxidoreductase subunit alpha"  
"NT-A5\_00146" 38529 "s63E6H2" 0 "Acetoin:2,6-dichlorophenolindophenol oxidoreductase subunit alpha"  
"NT-A5\_00147" 38530 "s59E13H2" 0 "Tungsten-containing aldehyde ferredoxin oxidoreductase"  
"NT-A5\_00147" 38530 "s59E25H2" 0 "Tungsten-containing aldehyde ferredoxin oxidoreductase"  
"NT-A5\_00147" 38530 "s59E5H2" 0 "Tungsten-containing aldehyde ferredoxin oxidoreductase"  
"NT-A5\_00147" 38530 "s63E6H2" 0.000680033 "Tungsten-containing aldehyde ferredoxin oxidoreductase"  
"NT-A5\_00148" 38531 "s59E13H2" 0 "NAD/NADP-dependent betaine aldehyde dehydrogenase"  
"NT-A5\_00148" 38531 "s59E25H2" 0 "NAD/NADP-dependent betaine aldehyde dehydrogenase"  
"NT-A5\_00148" 38531 "s59E5H2" 0.005414828 "NAD/NADP-dependent betaine aldehyde dehydrogenase"  
"NT-A5\_00148" 38531 "s63E6H2" 0.002783782 "NAD/NADP-dependent betaine aldehyde dehydrogenase"  
"NT-A5\_00149" 38532 "s59E13H2" 0 "L-arabinose isomerase"  
"NT-A5\_00149" 38532 "s59E25H2" 0 "L-arabinose isomerase"  
"NT-A5\_00149" 38532 "s59E5H2" 0 "L-arabinose isomerase"  
"NT-A5\_00149" 38532 "s63E6H2" 0 "L-arabinose isomerase"  
"NT-A5\_00150" 38533 "s59E13H2" 0 "Xylulose kinase"  
"NT-A5\_00150" 38533 "s59E25H2" 0 "Xylulose kinase"  
"NT-A5\_00150" 38533 "s59E5H2" 0 "Xylulose kinase"  
"NT-A5\_00150" 38533 "s63E6H2" 0 "Xylulose kinase"  
"NT-A5\_00151" 38534 "s59E13H2" 0 "hypothetical protein"  
"NT-A5\_00151" 38534 "s59E25H2" 0 "hypothetical protein"  
"NT-A5\_00151" 38534 "s59E5H2" 0 "hypothetical protein"  
"NT-A5\_00151" 38534 "s63E6H2" 0 "hypothetical protein"  
"NT-A5\_00152" 38535 "s59E13H2" 0.001580817 "transcriptional regulator PhoU"  
"NT-A5\_00152" 38535 "s59E25H2" 0 "transcriptional regulator PhoU"  
"NT-A5\_00152" 38535 "s59E5H2" 0 "transcriptional regulator PhoU"  
"NT-A5\_00152" 38535 "s63E6H2" 0.0150969 "transcriptional regulator PhoU"  
"NT-A5\_00153" 38536 "s59E13H2" 0.005292962 "Na+/Pi-cotransporter"  
"NT-A5\_00153" 38536 "s59E25H2" 0 "Na+/Pi-cotransporter"  
"NT-A5\_00153" 38536 "s59E5H2" 0 "Na+/Pi-cotransporter"  
"NT-A5\_00153" 38536 "s63E6H2" 0 "Na+/Pi-cotransporter"  
"NT-A5\_00155" 38538 "s59E13H2" 0 "acetoacetate metabolism regulatory protein AtoC"  
"NT-A5\_00155" 38538 "s59E25H2" 0 "acetoacetate metabolism regulatory protein AtoC"  
"NT-A5\_00155" 38538 "s59E5H2" 0 "acetoacetate metabolism regulatory protein AtoC"  
"NT-A5\_00155" 38538 "s63E6H2" 0 "acetoacetate metabolism regulatory protein AtoC"  
"NT-A5\_00156" 38539 "s59E13H2" 0 "Sporulation kinase A"  
"NT-A5\_00156" 38539 "s59E25H2" 0 "Sporulation kinase A"  
"NT-A5\_00156" 38539 "s59E5H2" 0.005265622 "Sporulation kinase A"  
"NT-A5\_00156" 38539 "s63E6H2" 0.001001248 "Sporulation kinase A"

"NT-A5\_00157" 38540 "s59E13H2" 0 "hypothetical protein"  
"NT-A5\_00157" 38540 "s59E25H2" 0 "hypothetical protein"  
"NT-A5\_00157" 38540 "s59E5H2" 0 "hypothetical protein"  
"NT-A5\_00157" 38540 "s63E6H2" 0 "hypothetical protein"  
"NT-A5\_00158" 38541 "s59E13H2" 0 "hypothetical protein"  
"NT-A5\_00158" 38541 "s59E25H2" 0 "hypothetical protein"  
"NT-A5\_00158" 38541 "s59E5H2" 0 "hypothetical protein"  
"NT-A5\_00158" 38541 "s63E6H2" 0 "hypothetical protein"  
"NT-A5\_00159" 38542 "s59E13H2" 0 "Transposase IS200 like protein"  
"NT-A5\_00159" 38542 "s59E25H2" 0 "Transposase IS200 like protein"  
"NT-A5\_00159" 38542 "s59E5H2" 0 "Transposase IS200 like protein"  
"NT-A5\_00159" 38542 "s63E6H2" 0 "Transposase IS200 like protein"  
"NT-A5\_00160" 38543 "s59E13H2" 0 "Xylulose kinase"  
"NT-A5\_00160" 38543 "s59E25H2" 0 "Xylulose kinase"  
"NT-A5\_00160" 38543 "s59E5H2" 0 "Xylulose kinase"  
"NT-A5\_00160" 38543 "s63E6H2" 0 "Xylulose kinase"  
"NT-A5\_00161" 38544 "s59E13H2" 0 "Amidohydrolase"  
"NT-A5\_00161" 38544 "s59E25H2" 0 "Amidohydrolase"  
"NT-A5\_00161" 38544 "s59E5H2" 0 "Amidohydrolase"  
"NT-A5\_00161" 38544 "s63E6H2" 0 "Amidohydrolase"  
"NT-A5\_00162" 38545 "s59E13H2" 0 "3-oxoacyl-[acyl-carrier-protein] reductase FabG"  
"NT-A5\_00162" 38545 "s59E25H2" 0 "3-oxoacyl-[acyl-carrier-protein] reductase FabG"  
"NT-A5\_00162" 38545 "s59E5H2" 0 "3-oxoacyl-[acyl-carrier-protein] reductase FabG"  
"NT-A5\_00162" 38545 "s63E6H2" 0 "3-oxoacyl-[acyl-carrier-protein] reductase FabG"  
"NT-A5\_00163" 38546 "s59E13H2" 0 "Major Facilitator Superfamily protein"  
"NT-A5\_00163" 38546 "s59E25H2" 0 "Major Facilitator Superfamily protein"  
"NT-A5\_00163" 38546 "s59E5H2" 0 "Major Facilitator Superfamily protein"  
"NT-A5\_00163" 38546 "s63E6H2" 0 "Major Facilitator Superfamily protein"  
"NT-A5\_00164" 38547 "s59E13H2" 0 "2-dehydro-3-deoxygluconokinase"  
"NT-A5\_00164" 38547 "s59E25H2" 0 "2-dehydro-3-deoxygluconokinase"  
"NT-A5\_00164" 38547 "s59E5H2" 0.01388298 "2-dehydro-3-deoxygluconokinase"  
"NT-A5\_00164" 38547 "s63E6H2" 0.07239169 "2-dehydro-3-deoxygluconokinase"  
"NT-A5\_00167" 38550 "s59E13H2" 0 "Elongation factor Tu"  
"NT-A5\_00167" 38550 "s59E25H2" 0 "Elongation factor Tu"  
"NT-A5\_00167" 38550 "s59E5H2" 0 "Elongation factor Tu"  
"NT-A5\_00167" 38550 "s63E6H2" 0 "Elongation factor Tu"  
"NT-A5\_00168" 38551 "s59E13H2" 0 "preprotein translocase subunit SecE"  
"NT-A5\_00168" 38551 "s59E25H2" 0 "preprotein translocase subunit SecE"  
"NT-A5\_00168" 38551 "s59E5H2" 0 "preprotein translocase subunit SecE"  
"NT-A5\_00168" 38551 "s63E6H2" 0 "preprotein translocase subunit SecE"  
"NT-A5\_00169" 38552 "s59E13H2" 0 "hypothetical protein"  
"NT-A5\_00169" 38552 "s59E25H2" 0 "hypothetical protein"  
"NT-A5\_00169" 38552 "s59E5H2" 0 "hypothetical protein"  
"NT-A5\_00169" 38552 "s63E6H2" 0.00874685 "hypothetical protein"  
"NT-A5\_00170" 38553 "s59E13H2" 0 "50S ribosomal protein L11"  
"NT-A5\_00170" 38553 "s59E25H2" 0 "50S ribosomal protein L11"  
"NT-A5\_00170" 38553 "s59E5H2" 0 "50S ribosomal protein L11"

"NT-A5\_00170" 38553 "s63E6H2" 0.09742451 "50S ribosomal protein L11"  
"NT-A5\_00171" 38554 "s59E13H2" 0 "Crossover junction endodeoxyribonuclease RuvC"  
"NT-A5\_00171" 38554 "s59E25H2" 0 "Crossover junction endodeoxyribonuclease RuvC"  
"NT-A5\_00171" 38554 "s59E5H2" 0 "Crossover junction endodeoxyribonuclease RuvC"  
"NT-A5\_00171" 38554 "s63E6H2" 0 "Crossover junction endodeoxyribonuclease RuvC"  
"NT-A5\_00172" 38555 "s59E13H2" 0 "Fosmidomycin resistance protein"  
"NT-A5\_00172" 38555 "s59E25H2" 0 "Fosmidomycin resistance protein"  
"NT-A5\_00172" 38555 "s59E5H2" 0 "Fosmidomycin resistance protein"  
"NT-A5\_00172" 38555 "s63E6H2" 0 "Fosmidomycin resistance protein"  
"NT-A5\_00173" 38556 "s59E13H2" 0 "hypothetical protein"  
"NT-A5\_00173" 38556 "s59E25H2" 0 "hypothetical protein"  
"NT-A5\_00173" 38556 "s59E5H2" 0 "hypothetical protein"  
"NT-A5\_00173" 38556 "s63E6H2" 0 "hypothetical protein"  
"NT-A5\_00174" 38557 "s59E13H2" 0 "Threonine synthase"  
"NT-A5\_00174" 38557 "s59E25H2" 0 "Threonine synthase"  
"NT-A5\_00174" 38557 "s59E5H2" 0 "Threonine synthase"  
"NT-A5\_00174" 38557 "s63E6H2" 0.2047753 "Threonine synthase"  
"NT-A5\_00177" 38560 "s59E13H2" 0 "SAF domain protein"  
"NT-A5\_00177" 38560 "s59E25H2" 0 "SAF domain protein"  
"NT-A5\_00177" 38560 "s59E5H2" 0 "SAF domain protein"  
"NT-A5\_00177" 38560 "s63E6H2" 0 "SAF domain protein"  
"NT-A5\_00178" 38561 "s59E13H2" 0 "Acetoin:2,6-dichlorophenolindophenol oxidoreductase subunit alpha"  
"NT-A5\_00178" 38561 "s59E25H2" 0 "Acetoin:2,6-dichlorophenolindophenol oxidoreductase subunit alpha"  
"NT-A5\_00178" 38561 "s59E5H2" 0 "Acetoin:2,6-dichlorophenolindophenol oxidoreductase subunit alpha"  
"NT-A5\_00178" 38561 "s63E6H2" 0.00310593 "Acetoin:2,6-dichlorophenolindophenol oxidoreductase subunit alpha"  
"NT-A5\_00179" 38562 "s59E13H2" 0 "2-oxoisovalerate dehydrogenase subunit beta"  
"NT-A5\_00179" 38562 "s59E25H2" 0 "2-oxoisovalerate dehydrogenase subunit beta"  
"NT-A5\_00179" 38562 "s59E5H2" 0.1467458 "2-oxoisovalerate dehydrogenase subunit beta"  
"NT-A5\_00179" 38562 "s63E6H2" 0.004367945 "2-oxoisovalerate dehydrogenase subunit beta"  
"NT-A5\_00180" 38563 "s59E13H2" 0 "Sorbitol dehydrogenase"  
"NT-A5\_00180" 38563 "s59E25H2" 0 "Sorbitol dehydrogenase"  
"NT-A5\_00180" 38563 "s59E5H2" 0 "Sorbitol dehydrogenase"  
"NT-A5\_00180" 38563 "s63E6H2" 0.003695254 "Sorbitol dehydrogenase"  
"NT-A5\_00181" 38564 "s59E13H2" 0 "Acetoin:2,6-dichlorophenolindophenol oxidoreductase subunit alpha"  
"NT-A5\_00181" 38564 "s59E25H2" 0 "Acetoin:2,6-dichlorophenolindophenol oxidoreductase subunit alpha"  
"NT-A5\_00181" 38564 "s59E5H2" 0 "Acetoin:2,6-dichlorophenolindophenol oxidoreductase subunit alpha"  
"NT-A5\_00181" 38564 "s63E6H2" 0.00440994 "Acetoin:2,6-dichlorophenolindophenol oxidoreductase subunit alpha"  
"NT-A5\_00183" 38566 "s59E13H2" 0 "50S ribosomal protein L22"  
"NT-A5\_00183" 38566 "s59E25H2" 0 "50S ribosomal protein L22"  
"NT-A5\_00183" 38566 "s59E5H2" 0 "50S ribosomal protein L22"  
"NT-A5\_00183" 38566 "s63E6H2" 0 "50S ribosomal protein L22"  
"NT-A5\_00184" 38567 "s59E13H2" 0 "30S ribosomal protein S3"  
"NT-A5\_00184" 38567 "s59E25H2" 0 "30S ribosomal protein S3"  
"NT-A5\_00184" 38567 "s59E5H2" 0 "30S ribosomal protein S3"  
"NT-A5\_00184" 38567 "s63E6H2" 0 "30S ribosomal protein S3"  
"NT-A5\_00185" 38568 "s59E13H2" 0 "50S ribosomal protein L16"  
"NT-A5\_00185" 38568 "s59E25H2" 0 "50S ribosomal protein L16"

"NT-A5\_00185" 38568 "s59E5H2" 0 "50S ribosomal protein L16"  
"NT-A5\_00185" 38568 "s63E6H2" 0.00202643 "50S ribosomal protein L16"  
"NT-A5\_00186" 38569 "s59E13H2" 0 "50S ribosomal protein L29"  
"NT-A5\_00186" 38569 "s59E25H2" 0 "50S ribosomal protein L29"  
"NT-A5\_00186" 38569 "s59E5H2" 0 "50S ribosomal protein L29"  
"NT-A5\_00186" 38569 "s63E6H2" 0.008162802 "50S ribosomal protein L29"  
"NT-A5\_00187" 38570 "s59E13H2" 0 "30S ribosomal protein S17"  
"NT-A5\_00187" 38570 "s59E25H2" 0 "30S ribosomal protein S17"  
"NT-A5\_00187" 38570 "s59E5H2" 0 "30S ribosomal protein S17"  
"NT-A5\_00187" 38570 "s63E6H2" 0.001236912 "30S ribosomal protein S17"  
"NT-A5\_00188" 38571 "s59E13H2" 0 "50S ribosomal protein L14"  
"NT-A5\_00188" 38571 "s59E25H2" 0 "50S ribosomal protein L14"  
"NT-A5\_00188" 38571 "s59E5H2" 0 "50S ribosomal protein L14"  
"NT-A5\_00188" 38571 "s63E6H2" 0 "50S ribosomal protein L14"  
"NT-A5\_00189" 38572 "s59E13H2" 0 "50S ribosomal protein L24"  
"NT-A5\_00189" 38572 "s59E25H2" 0 "50S ribosomal protein L24"  
"NT-A5\_00189" 38572 "s59E5H2" 0 "50S ribosomal protein L24"  
"NT-A5\_00189" 38572 "s63E6H2" 0.004666366 "50S ribosomal protein L24"  
"NT-A5\_00190" 38573 "s59E13H2" 0 "50S ribosomal protein L5"  
"NT-A5\_00190" 38573 "s59E25H2" 0 "50S ribosomal protein L5"  
"NT-A5\_00190" 38573 "s59E5H2" 0 "50S ribosomal protein L5"  
"NT-A5\_00190" 38573 "s63E6H2" 0.002627678 "50S ribosomal protein L5"  
"NT-A5\_00191" 38574 "s59E13H2" 0 "30S ribosomal protein S14 type Z"  
"NT-A5\_00191" 38574 "s59E25H2" 0 "30S ribosomal protein S14 type Z"  
"NT-A5\_00191" 38574 "s59E5H2" 0 "30S ribosomal protein S14 type Z"  
"NT-A5\_00191" 38574 "s63E6H2" 0 "30S ribosomal protein S14 type Z"  
"NT-A5\_00192" 38575 "s59E13H2" 0 "30S ribosomal protein S8"  
"NT-A5\_00192" 38575 "s59E25H2" 0 "30S ribosomal protein S8"  
"NT-A5\_00192" 38575 "s59E5H2" 0.0005282018 "30S ribosomal protein S8"  
"NT-A5\_00192" 38575 "s63E6H2" 0 "30S ribosomal protein S8"  
"NT-A5\_00193" 38576 "s59E13H2" 0 "50S ribosomal protein L6"  
"NT-A5\_00193" 38576 "s59E25H2" 0 "50S ribosomal protein L6"  
"NT-A5\_00193" 38576 "s59E5H2" 0 "50S ribosomal protein L6"  
"NT-A5\_00193" 38576 "s63E6H2" 0 "50S ribosomal protein L6"  
"NT-A5\_00194" 38577 "s59E13H2" 0 "50S ribosomal protein L18"  
"NT-A5\_00194" 38577 "s59E25H2" 0 "50S ribosomal protein L18"  
"NT-A5\_00194" 38577 "s59E5H2" 0 "50S ribosomal protein L18"  
"NT-A5\_00194" 38577 "s63E6H2" 0 "50S ribosomal protein L18"  
"NT-A5\_00196" 38579 "s59E13H2" 0 "30S ribosomal protein S5"  
"NT-A5\_00196" 38579 "s59E25H2" 0 "30S ribosomal protein S5"  
"NT-A5\_00196" 38579 "s59E5H2" 0 "30S ribosomal protein S5"  
"NT-A5\_00196" 38579 "s63E6H2" 0 "30S ribosomal protein S5"  
"NT-A5\_00197" 38580 "s59E13H2" 0 "50S ribosomal protein L15"  
"NT-A5\_00197" 38580 "s59E25H2" 0 "50S ribosomal protein L15"  
"NT-A5\_00197" 38580 "s59E5H2" 0 "50S ribosomal protein L15"  
"NT-A5\_00197" 38580 "s63E6H2" 0 "50S ribosomal protein L15"  
"NT-A5\_00198" 38581 "s59E13H2" 0 "preprotein translocase subunit SecY"

"NT-A5\_00198" 38581 "s59E25H2" 0 "preprotein translocase subunit SecY"  
"NT-A5\_00198" 38581 "s59E5H2" 0 "preprotein translocase subunit SecY"  
"NT-A5\_00198" 38581 "s63E6H2" 0.00114105 "preprotein translocase subunit SecY"  
"NT-A5\_00199" 38582 "s59E13H2" 0 "Adenylate kinase"  
"NT-A5\_00199" 38582 "s59E25H2" 0 "Adenylate kinase"  
"NT-A5\_00199" 38582 "s59E5H2" 0 "Adenylate kinase"  
"NT-A5\_00199" 38582 "s63E6H2" 0 "Adenylate kinase"  
"NT-A5\_00200" 38583 "s59E13H2" 0 "Translation initiation factor IF-1"  
"NT-A5\_00200" 38583 "s59E25H2" 0 "Translation initiation factor IF-1"  
"NT-A5\_00200" 38583 "s59E5H2" 0 "Translation initiation factor IF-1"  
"NT-A5\_00200" 38583 "s63E6H2" 0 "Translation initiation factor IF-1"  
"NT-A5\_00201" 38584 "s59E13H2" 0 "30S ribosomal protein S13"  
"NT-A5\_00201" 38584 "s59E25H2" 0 "30S ribosomal protein S13"  
"NT-A5\_00201" 38584 "s59E5H2" 0 "30S ribosomal protein S13"  
"NT-A5\_00201" 38584 "s63E6H2" 0 "30S ribosomal protein S13"  
"NT-A5\_00202" 38585 "s59E13H2" 0 "30S ribosomal protein S11"  
"NT-A5\_00202" 38585 "s59E25H2" 0 "30S ribosomal protein S11"  
"NT-A5\_00202" 38585 "s59E5H2" 0 "30S ribosomal protein S11"  
"NT-A5\_00202" 38585 "s63E6H2" 0.00753106 "30S ribosomal protein S11"  
"NT-A5\_00203" 38586 "s59E13H2" 0 "30S ribosomal protein S4"  
"NT-A5\_00203" 38586 "s59E25H2" 0 "30S ribosomal protein S4"  
"NT-A5\_00203" 38586 "s59E5H2" 0 "30S ribosomal protein S4"  
"NT-A5\_00203" 38586 "s63E6H2" 0.00245926 "30S ribosomal protein S4"  
"NT-A5\_00204" 38587 "s59E13H2" 0 "DNA-directed RNA polymerase subunit alpha"  
"NT-A5\_00204" 38587 "s59E25H2" 0 "DNA-directed RNA polymerase subunit alpha"  
"NT-A5\_00204" 38587 "s59E5H2" 0 "DNA-directed RNA polymerase subunit alpha"  
"NT-A5\_00204" 38587 "s63E6H2" 0.002962692 "DNA-directed RNA polymerase subunit alpha"  
"NT-A5\_00205" 38588 "s59E13H2" 0 "50S ribosomal protein L17"  
"NT-A5\_00205" 38588 "s59E25H2" 0 "50S ribosomal protein L17"  
"NT-A5\_00205" 38588 "s59E5H2" 0 "50S ribosomal protein L17"  
"NT-A5\_00205" 38588 "s63E6H2" 0 "50S ribosomal protein L17"  
"NT-A5\_00209" 38592 "s59E13H2" 0 "tRNA pseudouridine synthase A"  
"NT-A5\_00209" 38592 "s59E25H2" 0 "tRNA pseudouridine synthase A"  
"NT-A5\_00209" 38592 "s59E5H2" 0 "tRNA pseudouridine synthase A"  
"NT-A5\_00209" 38592 "s63E6H2" 0 "tRNA pseudouridine synthase A"  
"NT-A5\_00210" 38593 "s59E13H2" 0 "tRNA(Ile)-lysidine synthase"  
"NT-A5\_00210" 38593 "s59E25H2" 0 "tRNA(Ile)-lysidine synthase"  
"NT-A5\_00210" 38593 "s59E5H2" 0 "tRNA(Ile)-lysidine synthase"  
"NT-A5\_00210" 38593 "s63E6H2" 0 "tRNA(Ile)-lysidine synthase"  
"NT-A5\_00211" 38594 "s59E13H2" 0 "tRNA(Ile)-lysidine synthase"  
"NT-A5\_00211" 38594 "s59E25H2" 0 "tRNA(Ile)-lysidine synthase"  
"NT-A5\_00211" 38594 "s59E5H2" 0.02533083 "tRNA(Ile)-lysidine synthase"  
"NT-A5\_00211" 38594 "s63E6H2" 0 "tRNA(Ile)-lysidine synthase"  
"NT-A5\_00212" 38595 "s59E13H2" 0 "Imidazoleglycerol-phosphate dehydratase"  
"NT-A5\_00212" 38595 "s59E25H2" 0 "Imidazoleglycerol-phosphate dehydratase"  
"NT-A5\_00212" 38595 "s59E5H2" 0.003127136 "Imidazoleglycerol-phosphate dehydratase"  
"NT-A5\_00212" 38595 "s63E6H2" 0 "Imidazoleglycerol-phosphate dehydratase"

"NT-A5\_00213" 38596 "s59E13H2" 0 "D-tyrosyl-tRNA(Tyr) deacylase"  
"NT-A5\_00213" 38596 "s59E25H2" 0 "D-tyrosyl-tRNA(Tyr) deacylase"  
"NT-A5\_00213" 38596 "s59E5H2" 0 "D-tyrosyl-tRNA(Tyr) deacylase"  
"NT-A5\_00213" 38596 "s63E6H2" 0 "D-tyrosyl-tRNA(Tyr) deacylase"  
"NT-A5\_00214" 38597 "s59E13H2" 0 "hypothetical protein"  
"NT-A5\_00214" 38597 "s59E25H2" 0 "hypothetical protein"  
"NT-A5\_00214" 38597 "s59E5H2" 0.001419209 "hypothetical protein"  
"NT-A5\_00214" 38597 "s63E6H2" 0 "hypothetical protein"  
"NT-A5\_00215" 38598 "s59E13H2" 0 "Prenyltransferase and squalene oxidase repeat protein"  
"NT-A5\_00215" 38598 "s59E25H2" 0 "Prenyltransferase and squalene oxidase repeat protein"  
"NT-A5\_00215" 38598 "s59E5H2" 0.0001872642 "Prenyltransferase and squalene oxidase repeat protein"  
"NT-A5\_00215" 38598 "s63E6H2" 0 "Prenyltransferase and squalene oxidase repeat protein"  
"NT-A5\_00216" 38599 "s59E13H2" 0 "L-arabinose transport system permease protein AraQ"  
"NT-A5\_00216" 38599 "s59E25H2" 0 "L-arabinose transport system permease protein AraQ"  
"NT-A5\_00216" 38599 "s59E5H2" 0 "L-arabinose transport system permease protein AraQ"  
"NT-A5\_00216" 38599 "s63E6H2" 0 "L-arabinose transport system permease protein AraQ"  
"NT-A5\_00217" 38600 "s59E13H2" 0 "Lactose transport system permease protein LacF"  
"NT-A5\_00217" 38600 "s59E25H2" 0 "Lactose transport system permease protein LacF"  
"NT-A5\_00217" 38600 "s59E5H2" 0 "Lactose transport system permease protein LacF"  
"NT-A5\_00217" 38600 "s63E6H2" 0 "Lactose transport system permease protein LacF"  
"NT-A5\_00218" 38601 "s59E13H2" 0 "Transketolase 1"  
"NT-A5\_00218" 38601 "s59E25H2" 0 "Transketolase 1"  
"NT-A5\_00218" 38601 "s59E5H2" 0 "Transketolase 1"  
"NT-A5\_00218" 38601 "s63E6H2" 0.01575714 "Transketolase 1"  
"NT-A5\_00219" 38602 "s59E13H2" 0 "Serine hydroxymethyltransferase"  
"NT-A5\_00219" 38602 "s59E25H2" 0 "Serine hydroxymethyltransferase"  
"NT-A5\_00219" 38602 "s59E5H2" 0.002147763 "Serine hydroxymethyltransferase"  
"NT-A5\_00219" 38602 "s63E6H2" 0.004096526 "Serine hydroxymethyltransferase"  
"NT-A5\_00220" 38603 "s59E13H2" 0 "Aspartate aminotransferase"  
"NT-A5\_00220" 38603 "s59E25H2" 0 "Aspartate aminotransferase"  
"NT-A5\_00220" 38603 "s59E5H2" 0 "Aspartate aminotransferase"  
"NT-A5\_00220" 38603 "s63E6H2" 0 "Aspartate aminotransferase"  
"NT-A5\_00222" 38605 "s59E13H2" 0 "FR47-like protein"  
"NT-A5\_00222" 38605 "s59E25H2" 0 "FR47-like protein"  
"NT-A5\_00222" 38605 "s59E5H2" 0 "FR47-like protein"  
"NT-A5\_00222" 38605 "s63E6H2" 0 "FR47-like protein"  
"NT-A5\_00223" 38606 "s59E13H2" 0 "Beta-galactosidase BgaH"  
"NT-A5\_00223" 38606 "s59E25H2" 0 "Beta-galactosidase BgaH"  
"NT-A5\_00223" 38606 "s59E5H2" 0 "Beta-galactosidase BgaH"  
"NT-A5\_00223" 38606 "s63E6H2" 0 "Beta-galactosidase BgaH"  
"NT-A5\_00224" 38607 "s59E13H2" 0 "hypothetical protein"  
"NT-A5\_00224" 38607 "s59E25H2" 0 "hypothetical protein"  
"NT-A5\_00224" 38607 "s59E5H2" 0 "hypothetical protein"  
"NT-A5\_00224" 38607 "s63E6H2" 0 "hypothetical protein"  
"NT-A5\_00225" 38608 "s59E13H2" 0 "Tetrahedral aminopeptidase"  
"NT-A5\_00225" 38608 "s59E25H2" 0 "Tetrahedral aminopeptidase"  
"NT-A5\_00225" 38608 "s59E5H2" 0.007669573 "Tetrahedral aminopeptidase"



"NT-A5\_00225" 38608 "s63E6H2" 0 "Tetrahedral aminopeptidase"  
"NT-A5\_00226" 38609 "s59E13H2" 0 "Protein-export membrane protein SecG"  
"NT-A5\_00226" 38609 "s59E25H2" 0 "Protein-export membrane protein SecG"  
"NT-A5\_00226" 38609 "s59E5H2" 0 "Protein-export membrane protein SecG"  
"NT-A5\_00226" 38609 "s63E6H2" 0 "Protein-export membrane protein SecG"  
"NT-A5\_00227" 38610 "s59E13H2" 0 "Triosephosphate isomerase"  
"NT-A5\_00227" 38610 "s59E25H2" 0 "Triosephosphate isomerase"  
"NT-A5\_00227" 38610 "s59E5H2" 0 "Triosephosphate isomerase"  
"NT-A5\_00227" 38610 "s63E6H2" 0.007341788 "Triosephosphate isomerase"  
"NT-A5\_00228" 38611 "s59E13H2" 0 "Phosphoglycerate kinase"  
"NT-A5\_00228" 38611 "s59E25H2" 0 "Phosphoglycerate kinase"  
"NT-A5\_00228" 38611 "s59E5H2" 0 "Phosphoglycerate kinase"  
"NT-A5\_00228" 38611 "s63E6H2" 0.004639093 "Phosphoglycerate kinase"  
"NT-A5\_00229" 38612 "s59E13H2" 0 "Glyceraldehyde-3-phosphate dehydrogenase"  
"NT-A5\_00229" 38612 "s59E25H2" 0 "Glyceraldehyde-3-phosphate dehydrogenase"  
"NT-A5\_00229" 38612 "s59E5H2" 0 "Glyceraldehyde-3-phosphate dehydrogenase"  
"NT-A5\_00229" 38612 "s63E6H2" 0 "Glyceraldehyde-3-phosphate dehydrogenase"  
"NT-A5\_00230" 38613 "s59E13H2" 0 "Thiamine-monophosphate kinase"  
"NT-A5\_00230" 38613 "s59E25H2" 0 "Thiamine-monophosphate kinase"  
"NT-A5\_00230" 38613 "s59E5H2" 0 "Thiamine-monophosphate kinase"  
"NT-A5\_00230" 38613 "s63E6H2" 0 "Thiamine-monophosphate kinase"  
"NT-A5\_00231" 38614 "s59E13H2" 0 "Transposase, Mutator family"  
"NT-A5\_00231" 38614 "s59E25H2" 0 "Transposase, Mutator family"  
"NT-A5\_00231" 38614 "s59E5H2" 0 "Transposase, Mutator family"  
"NT-A5\_00231" 38614 "s63E6H2" 0 "Transposase, Mutator family"  
"NT-A5\_00233" 38616 "s59E13H2" 0 "AsnC family protein"  
"NT-A5\_00233" 38616 "s59E25H2" 0 "AsnC family protein"  
"NT-A5\_00233" 38616 "s59E5H2" 0 "AsnC family protein"  
"NT-A5\_00233" 38616 "s63E6H2" 0 "AsnC family protein"  
"NT-A5\_00234" 38617 "s59E13H2" 0 "Peptide deformylase"  
"NT-A5\_00234" 38617 "s59E25H2" 0 "Peptide deformylase"  
"NT-A5\_00234" 38617 "s59E5H2" 0 "Peptide deformylase"  
"NT-A5\_00234" 38617 "s63E6H2" 0 "Peptide deformylase"  
"NT-A5\_00235" 38618 "s59E13H2" 0 "Aspartate 1-decarboxylase precursor"  
"NT-A5\_00235" 38618 "s59E25H2" 0 "Aspartate 1-decarboxylase precursor"  
"NT-A5\_00235" 38618 "s59E5H2" 0 "Aspartate 1-decarboxylase precursor"  
"NT-A5\_00235" 38618 "s63E6H2" 0 "Aspartate 1-decarboxylase precursor"  
"NT-A5\_00236" 38619 "s59E13H2" 0 "tRNA(fMet)-specific endonuclease VapC"  
"NT-A5\_00236" 38619 "s59E25H2" 0 "tRNA(fMet)-specific endonuclease VapC"  
"NT-A5\_00236" 38619 "s59E5H2" 0 "tRNA(fMet)-specific endonuclease VapC"  
"NT-A5\_00236" 38619 "s63E6H2" 0 "tRNA(fMet)-specific endonuclease VapC"  
"NT-A5\_00237" 38620 "s59E13H2" 0 "putative regulator PrIF"  
"NT-A5\_00237" 38620 "s59E25H2" 0 "putative regulator PrIF"  
"NT-A5\_00237" 38620 "s59E5H2" 0 "putative regulator PrIF"  
"NT-A5\_00237" 38620 "s63E6H2" 0 "putative regulator PrIF"  
"NT-A5\_00238" 38621 "s59E13H2" 0 "heat shock protein 90"  
"NT-A5\_00238" 38621 "s59E25H2" 0 "heat shock protein 90"

"NT-A5\_00238" 38621 "s59E5H2" 0 "heat shock protein 90"  
"NT-A5\_00238" 38621 "s63E6H2" 0 "heat shock protein 90"  
"NT-A5\_00239" 38622 "s59E13H2" 0 "hypothetical protein"  
"NT-A5\_00239" 38622 "s59E25H2" 0 "hypothetical protein"  
"NT-A5\_00239" 38622 "s59E5H2" 0 "hypothetical protein"  
"NT-A5\_00239" 38622 "s63E6H2" 0 "hypothetical protein"  
"NT-A5\_00240" 38623 "s59E13H2" 0 "Plasmid stabilisation system protein"  
"NT-A5\_00240" 38623 "s59E25H2" 0 "Plasmid stabilisation system protein"  
"NT-A5\_00240" 38623 "s59E5H2" 0 "Plasmid stabilisation system protein"  
"NT-A5\_00240" 38623 "s63E6H2" 0 "Plasmid stabilisation system protein"  
"NT-A5\_00241" 38624 "s59E13H2" 0 "Undecaprenyl-diphosphatase"  
"NT-A5\_00241" 38624 "s59E25H2" 0 "Undecaprenyl-diphosphatase"  
"NT-A5\_00241" 38624 "s59E5H2" 0 "Undecaprenyl-diphosphatase"  
"NT-A5\_00241" 38624 "s63E6H2" 0 "Undecaprenyl-diphosphatase"  
"NT-A5\_00242" 38625 "s59E13H2" 0 "hypothetical protein"  
"NT-A5\_00242" 38625 "s59E25H2" 0 "hypothetical protein"  
"NT-A5\_00242" 38625 "s59E5H2" 0 "hypothetical protein"  
"NT-A5\_00242" 38625 "s63E6H2" 0 "hypothetical protein"  
"NT-A5\_00243" 38626 "s59E13H2" 0 "hypothetical protein"  
"NT-A5\_00243" 38626 "s59E25H2" 0 "hypothetical protein"  
"NT-A5\_00243" 38626 "s59E5H2" 0 "hypothetical protein"  
"NT-A5\_00243" 38626 "s63E6H2" 0 "hypothetical protein"  
"NT-A5\_00245" 38628 "s59E13H2" 0 "mRNA interferase EndoA"  
"NT-A5\_00245" 38628 "s59E25H2" 0 "mRNA interferase EndoA"  
"NT-A5\_00245" 38628 "s59E5H2" 0 "mRNA interferase EndoA"  
"NT-A5\_00245" 38628 "s63E6H2" 0 "mRNA interferase EndoA"  
"NT-A5\_00246" 38629 "s59E13H2" 0 "D-inositol-3-phosphate glycosyltransferase"  
"NT-A5\_00246" 38629 "s59E25H2" 0 "D-inositol-3-phosphate glycosyltransferase"  
"NT-A5\_00246" 38629 "s59E5H2" 0 "D-inositol-3-phosphate glycosyltransferase"  
"NT-A5\_00246" 38629 "s63E6H2" 0 "D-inositol-3-phosphate glycosyltransferase"  
"NT-A5\_00247" 38630 "s59E13H2" 0 "hypothetical protein"  
"NT-A5\_00247" 38630 "s59E25H2" 0 "hypothetical protein"  
"NT-A5\_00247" 38630 "s59E5H2" 0 "hypothetical protein"  
"NT-A5\_00247" 38630 "s63E6H2" 0 "hypothetical protein"  
"NT-A5\_00248" 38631 "s59E13H2" 0 "4-hydroxyphenylacetate decarboxylase activating enzyme"  
"NT-A5\_00248" 38631 "s59E25H2" 0 "4-hydroxyphenylacetate decarboxylase activating enzyme"  
"NT-A5\_00248" 38631 "s59E5H2" 0 "4-hydroxyphenylacetate decarboxylase activating enzyme"  
"NT-A5\_00248" 38631 "s63E6H2" 0 "4-hydroxyphenylacetate decarboxylase activating enzyme"  
"NT-A5\_00249" 38632 "s59E13H2" 0 "hypothetical protein"  
"NT-A5\_00249" 38632 "s59E25H2" 0 "hypothetical protein"  
"NT-A5\_00249" 38632 "s59E5H2" 0 "hypothetical protein"  
"NT-A5\_00249" 38632 "s63E6H2" 0 "hypothetical protein"  
"NT-A5\_00251" 38634 "s59E13H2" 0 "Mannosylglycerate hydrolase"  
"NT-A5\_00251" 38634 "s59E25H2" 0 "Mannosylglycerate hydrolase"  
"NT-A5\_00251" 38634 "s59E5H2" 0.003481366 "Mannosylglycerate hydrolase"  
"NT-A5\_00251" 38634 "s63E6H2" 0 "Mannosylglycerate hydrolase"  
"NT-A5\_00252" 38635 "s59E13H2" 0 "L-arabinose transport system permease protein AraQ"

"NT-A5\_00252" 38635 "s59E25H2" 0 "L-arabinose transport system permease protein AraQ"  
"NT-A5\_00252" 38635 "s59E5H2" 0.005092147 "L-arabinose transport system permease protein AraQ"  
"NT-A5\_00252" 38635 "s63E6H2" 0 "L-arabinose transport system permease protein AraQ"  
"NT-A5\_00253" 38636 "s59E13H2" 0 "Lactose transport system permease protein LacF"  
"NT-A5\_00253" 38636 "s59E25H2" 0 "Lactose transport system permease protein LacF"  
"NT-A5\_00253" 38636 "s59E5H2" 0 "Lactose transport system permease protein LacF"  
"NT-A5\_00253" 38636 "s63E6H2" 0 "Lactose transport system permease protein LacF"  
"NT-A5\_00254" 38637 "s59E13H2" 0 "Lactose-binding protein precursor"  
"NT-A5\_00254" 38637 "s59E25H2" 0 "Lactose-binding protein precursor"  
"NT-A5\_00254" 38637 "s59E5H2" 0 "Lactose-binding protein precursor"  
"NT-A5\_00254" 38637 "s63E6H2" 0 "Lactose-binding protein precursor"  
"NT-A5\_00255" 38638 "s59E13H2" 0 "HTH-type transcriptional regulator DegA"  
"NT-A5\_00255" 38638 "s59E25H2" 0 "HTH-type transcriptional regulator DegA"  
"NT-A5\_00255" 38638 "s59E5H2" 0.008976244 "HTH-type transcriptional regulator DegA"  
"NT-A5\_00255" 38638 "s63E6H2" 0 "HTH-type transcriptional regulator DegA"  
"NT-A5\_00256" 38639 "s59E13H2" 0 "Aspartate--tRNA ligase"  
"NT-A5\_00256" 38639 "s59E25H2" 0 "Aspartate--tRNA ligase"  
"NT-A5\_00256" 38639 "s59E5H2" 0 "Aspartate--tRNA ligase"  
"NT-A5\_00256" 38639 "s63E6H2" 0 "Aspartate--tRNA ligase"  
"NT-A5\_00257" 38640 "s59E13H2" 0 "Histidine--tRNA ligase"  
"NT-A5\_00257" 38640 "s59E25H2" 0 "Histidine--tRNA ligase"  
"NT-A5\_00257" 38640 "s59E5H2" 0 "Histidine--tRNA ligase"  
"NT-A5\_00257" 38640 "s63E6H2" 0 "Histidine--tRNA ligase"  
"NT-A5\_00258" 38641 "s59E13H2" 0 "putative aminodeoxychorismate lyase"  
"NT-A5\_00258" 38641 "s59E25H2" 0 "putative aminodeoxychorismate lyase"  
"NT-A5\_00258" 38641 "s59E5H2" 0.007884654 "putative aminodeoxychorismate lyase"  
"NT-A5\_00258" 38641 "s63E6H2" 0 "putative aminodeoxychorismate lyase"  
"NT-A5\_00259" 38642 "s59E13H2" 0 "Putative Holliday junction resolvase"  
"NT-A5\_00259" 38642 "s59E25H2" 0 "Putative Holliday junction resolvase"  
"NT-A5\_00259" 38642 "s59E5H2" 0.01968568 "Putative Holliday junction resolvase"  
"NT-A5\_00259" 38642 "s63E6H2" 0 "Putative Holliday junction resolvase"  
"NT-A5\_00260" 38643 "s59E13H2" 0 "Putative zinc ribbon domain protein"  
"NT-A5\_00260" 38643 "s59E25H2" 0 "Putative zinc ribbon domain protein"  
"NT-A5\_00260" 38643 "s59E5H2" 0.007970769 "Putative zinc ribbon domain protein"  
"NT-A5\_00260" 38643 "s63E6H2" 0 "Putative zinc ribbon domain protein"  
"NT-A5\_00264" 38647 "s59E13H2" 0 "Regulatory protein RecX"  
"NT-A5\_00264" 38647 "s59E25H2" 0 "Regulatory protein RecX"  
"NT-A5\_00264" 38647 "s59E5H2" 0 "Regulatory protein RecX"  
"NT-A5\_00264" 38647 "s63E6H2" 0 "Regulatory protein RecX"  
"NT-A5\_00265" 38648 "s59E13H2" 0 "putative phosphoglucosamine mutase"  
"NT-A5\_00265" 38648 "s59E25H2" 0 "putative phosphoglucosamine mutase"  
"NT-A5\_00265" 38648 "s59E5H2" 0.005886403 "putative phosphoglucosamine mutase"  
"NT-A5\_00265" 38648 "s63E6H2" 0 "putative phosphoglucosamine mutase"  
"NT-A5\_00266" 38649 "s59E13H2" 0 "Ribonuclease 3"  
"NT-A5\_00266" 38649 "s59E25H2" 0 "Ribonuclease 3"  
"NT-A5\_00266" 38649 "s59E5H2" 0 "Ribonuclease 3"  
"NT-A5\_00266" 38649 "s63E6H2" 0 "Ribonuclease 3"

"NT-A5\_00267" 38650 "s59E13H2" 0 "3-oxoacyl-[acyl-carrier-protein] synthase 2"  
"NT-A5\_00267" 38650 "s59E25H2" 0 "3-oxoacyl-[acyl-carrier-protein] synthase 2"  
"NT-A5\_00267" 38650 "s59E5H2" 0 "3-oxoacyl-[acyl-carrier-protein] synthase 2"  
"NT-A5\_00267" 38650 "s63E6H2" 0 "3-oxoacyl-[acyl-carrier-protein] synthase 2"  
"NT-A5\_00268" 38651 "s59E13H2" 0 "Acyl carrier protein"  
"NT-A5\_00268" 38651 "s59E25H2" 0 "Acyl carrier protein"  
"NT-A5\_00268" 38651 "s59E5H2" 0.02669789 "Acyl carrier protein"  
"NT-A5\_00268" 38651 "s63E6H2" 0 "Acyl carrier protein"  
"NT-A5\_00269" 38652 "s59E13H2" 0 "3-oxoacyl-[acyl-carrier-protein] reductase FabG"  
"NT-A5\_00269" 38652 "s59E25H2" 0 "3-oxoacyl-[acyl-carrier-protein] reductase FabG"  
"NT-A5\_00269" 38652 "s59E5H2" 0 "3-oxoacyl-[acyl-carrier-protein] reductase FabG"  
"NT-A5\_00269" 38652 "s63E6H2" 0 "3-oxoacyl-[acyl-carrier-protein] reductase FabG"  
"NT-A5\_00270" 38653 "s59E13H2" 0 "Ribosomal large subunit pseudouridine synthase D"  
"NT-A5\_00270" 38653 "s59E25H2" 0 "Ribosomal large subunit pseudouridine synthase D"  
"NT-A5\_00270" 38653 "s59E5H2" 0 "Ribosomal large subunit pseudouridine synthase D"  
"NT-A5\_00270" 38653 "s63E6H2" 0 "Ribosomal large subunit pseudouridine synthase D"  
"NT-A5\_00271" 38654 "s59E13H2" 0 "Lipoprotein signal peptidase"  
"NT-A5\_00271" 38654 "s59E25H2" 0 "Lipoprotein signal peptidase"  
"NT-A5\_00271" 38654 "s59E5H2" 0 "Lipoprotein signal peptidase"  
"NT-A5\_00271" 38654 "s63E6H2" 0 "Lipoprotein signal peptidase"  
"NT-A5\_00272" 38655 "s59E13H2" 0 "putative sugar kinase YdjH"  
"NT-A5\_00272" 38655 "s59E25H2" 0 "putative sugar kinase YdjH"  
"NT-A5\_00272" 38655 "s59E5H2" 0 "putative sugar kinase YdjH"  
"NT-A5\_00272" 38655 "s63E6H2" 0 "putative sugar kinase YdjH"  
"NT-A5\_00273" 38656 "s59E13H2" 0 "Isoleucine--tRNA ligase"  
"NT-A5\_00273" 38656 "s59E25H2" 0 "Isoleucine--tRNA ligase"  
"NT-A5\_00273" 38656 "s59E5H2" 0 "Isoleucine--tRNA ligase"  
"NT-A5\_00273" 38656 "s63E6H2" 0.001543204 "Isoleucine--tRNA ligase"  
"NT-A5\_00274" 38657 "s59E13H2" 0 "Purine nucleoside phosphorylase 1"  
"NT-A5\_00274" 38657 "s59E25H2" 0 "Purine nucleoside phosphorylase 1"  
"NT-A5\_00274" 38657 "s59E5H2" 0 "Purine nucleoside phosphorylase 1"  
"NT-A5\_00274" 38657 "s63E6H2" 0 "Purine nucleoside phosphorylase 1"  
"NT-A5\_00275" 38658 "s59E13H2" 0 "50S ribosomal protein L13"  
"NT-A5\_00275" 38658 "s59E25H2" 0 "50S ribosomal protein L13"  
"NT-A5\_00275" 38658 "s59E5H2" 0 "50S ribosomal protein L13"  
"NT-A5\_00275" 38658 "s63E6H2" 0 "50S ribosomal protein L13"  
"NT-A5\_00278" 38661 "s59E13H2" 0 "Glutamate--tRNA ligase 2"  
"NT-A5\_00278" 38661 "s59E25H2" 0 "Glutamate--tRNA ligase 2"  
"NT-A5\_00278" 38661 "s59E5H2" 0 "Glutamate--tRNA ligase 2"  
"NT-A5\_00278" 38661 "s63E6H2" 0.003938305 "Glutamate--tRNA ligase 2"  
"NT-A5\_00279" 38662 "s59E13H2" 0 "Curli production assembly/transport component CsgG"  
"NT-A5\_00279" 38662 "s59E25H2" 0 "Curli production assembly/transport component CsgG"  
"NT-A5\_00279" 38662 "s59E5H2" 0 "Curli production assembly/transport component CsgG"  
"NT-A5\_00279" 38662 "s63E6H2" 0 "Curli production assembly/transport component CsgG"  
"NT-A5\_00280" 38663 "s59E13H2" 0 "hypothetical protein"  
"NT-A5\_00280" 38663 "s59E25H2" 0 "hypothetical protein"  
"NT-A5\_00280" 38663 "s59E5H2" 0 "hypothetical protein"

"NT-A5\_00280" 38663 "s63E6H2" 0 "hypothetical protein"  
"NT-A5\_00281" 38664 "s59E13H2" 0 "hypothetical protein"  
"NT-A5\_00281" 38664 "s59E25H2" 0 "hypothetical protein"  
"NT-A5\_00281" 38664 "s59E5H2" 0 "hypothetical protein"  
"NT-A5\_00281" 38664 "s63E6H2" 0 "hypothetical protein"  
"NT-A5\_00282" 38665 "s59E13H2" 0 "hypothetical protein"  
"NT-A5\_00282" 38665 "s59E25H2" 0 "hypothetical protein"  
"NT-A5\_00282" 38665 "s59E5H2" 0 "hypothetical protein"  
"NT-A5\_00282" 38665 "s63E6H2" 0 "hypothetical protein"  
"NT-A5\_00283" 38666 "s59E13H2" 0 "hypothetical protein"  
"NT-A5\_00283" 38666 "s59E25H2" 0 "hypothetical protein"  
"NT-A5\_00283" 38666 "s59E5H2" 0 "hypothetical protein"  
"NT-A5\_00283" 38666 "s63E6H2" 0 "hypothetical protein"  
"NT-A5\_00284" 38667 "s59E13H2" 0 "Curli production assembly/transport component CsgG"  
"NT-A5\_00284" 38667 "s59E25H2" 0 "Curli production assembly/transport component CsgG"  
"NT-A5\_00284" 38667 "s59E5H2" 0 "Curli production assembly/transport component CsgG"  
"NT-A5\_00284" 38667 "s63E6H2" 0 "Curli production assembly/transport component CsgG"  
"NT-A5\_00285" 38668 "s59E13H2" 0 "hypothetical protein"  
"NT-A5\_00285" 38668 "s59E25H2" 0 "hypothetical protein"  
"NT-A5\_00285" 38668 "s59E5H2" 0 "hypothetical protein"  
"NT-A5\_00285" 38668 "s63E6H2" 0 "hypothetical protein"  
"NT-A5\_00286" 38669 "s59E13H2" 0 "Transcriptional regulatory protein ZraR"  
"NT-A5\_00286" 38669 "s59E25H2" 0 "Transcriptional regulatory protein ZraR"  
"NT-A5\_00286" 38669 "s59E5H2" 0 "Transcriptional regulatory protein ZraR"  
"NT-A5\_00286" 38669 "s63E6H2" 0.00147826 "Transcriptional regulatory protein ZraR"  
"NT-A5\_00287" 38670 "s59E13H2" 0 "Alginate biosynthesis sensor protein KinB"  
"NT-A5\_00287" 38670 "s59E25H2" 0 "Alginate biosynthesis sensor protein KinB"  
"NT-A5\_00287" 38670 "s59E5H2" 0 "Alginate biosynthesis sensor protein KinB"  
"NT-A5\_00287" 38670 "s63E6H2" 0.02320184 "Alginate biosynthesis sensor protein KinB"  
"NT-A5\_00289" 38672 "s59E13H2" 0 "Response regulator MprA"  
"NT-A5\_00289" 38672 "s59E25H2" 0 "Response regulator MprA"  
"NT-A5\_00289" 38672 "s59E5H2" 0 "Response regulator MprA"  
"NT-A5\_00289" 38672 "s63E6H2" 0.006447731 "Response regulator MprA"  
"NT-A5\_00290" 38673 "s59E13H2" 0 "Sensor protein ZraS"  
"NT-A5\_00290" 38673 "s59E25H2" 0 "Sensor protein ZraS"  
"NT-A5\_00290" 38673 "s59E5H2" 0 "Sensor protein ZraS"  
"NT-A5\_00290" 38673 "s63E6H2" 0 "Sensor protein ZraS"  
"NT-A5\_00293" 38676 "s59E13H2" 0 "3-oxoacyl-[acyl-carrier-protein] synthase 2"  
"NT-A5\_00293" 38676 "s59E25H2" 0 "3-oxoacyl-[acyl-carrier-protein] synthase 2"  
"NT-A5\_00293" 38676 "s59E5H2" 0.0007031595 "3-oxoacyl-[acyl-carrier-protein] synthase 2"  
"NT-A5\_00293" 38676 "s63E6H2" 0 "3-oxoacyl-[acyl-carrier-protein] synthase 2"  
"NT-A5\_00294" 38677 "s59E13H2" 0 "Sporulation kinase E"  
"NT-A5\_00294" 38677 "s59E25H2" 0 "Sporulation kinase E"  
"NT-A5\_00294" 38677 "s59E5H2" 0.001114275 "Sporulation kinase E"  
"NT-A5\_00294" 38677 "s63E6H2" 0 "Sporulation kinase E"  
"NT-A5\_00295" 38678 "s59E13H2" 0 "Sensor protein ZraS"  
"NT-A5\_00295" 38678 "s59E25H2" 0 "Sensor protein ZraS"

"NT-A5\_00295" 38678 "s59E5H2" 0.003948099 "Sensor protein ZraS"  
"NT-A5\_00295" 38678 "s63E6H2" 0 "Sensor protein ZraS"  
"NT-A5\_00296" 38679 "s59E13H2" 0 "Cyclic di-GMP phosphodiesterase response regulator RpfG"  
"NT-A5\_00296" 38679 "s59E25H2" 0 "Cyclic di-GMP phosphodiesterase response regulator RpfG"  
"NT-A5\_00296" 38679 "s59E5H2" 0.01050133 "Cyclic di-GMP phosphodiesterase response regulator RpfG"  
"NT-A5\_00296" 38679 "s63E6H2" 0 "Cyclic di-GMP phosphodiesterase response regulator RpfG"  
"NT-A5\_00297" 38680 "s59E13H2" 0 "putative diguanylate cyclase YdaM"  
"NT-A5\_00297" 38680 "s59E25H2" 0 "putative diguanylate cyclase YdaM"  
"NT-A5\_00297" 38680 "s59E5H2" 0 "putative diguanylate cyclase YdaM"  
"NT-A5\_00297" 38680 "s63E6H2" 0 "putative diguanylate cyclase YdaM"  
"NT-A5\_00298" 38681 "s59E13H2" 0 "Acetoin utilization protein AcuC"  
"NT-A5\_00298" 38681 "s59E25H2" 0 "Acetoin utilization protein AcuC"  
"NT-A5\_00298" 38681 "s59E5H2" 0 "Acetoin utilization protein AcuC"  
"NT-A5\_00298" 38681 "s63E6H2" 0.02634359 "Acetoin utilization protein AcuC"  
"NT-A5\_00299" 38682 "s59E13H2" 0 "Peptide chain release factor 1"  
"NT-A5\_00299" 38682 "s59E25H2" 0 "Peptide chain release factor 1"  
"NT-A5\_00299" 38682 "s59E5H2" 0 "Peptide chain release factor 1"  
"NT-A5\_00299" 38682 "s63E6H2" 0.0100255 "Peptide chain release factor 1"  
"NT-A5\_00301" 38684 "s59E13H2" 0 "Fe/S biogenesis protein NfuA"  
"NT-A5\_00301" 38684 "s59E25H2" 0 "Fe/S biogenesis protein NfuA"  
"NT-A5\_00301" 38684 "s59E5H2" 0 "Fe/S biogenesis protein NfuA"  
"NT-A5\_00301" 38684 "s63E6H2" 0.05312532 "Fe/S biogenesis protein NfuA"  
"NT-A5\_00302" 38685 "s59E13H2" 0 "(S)-2-haloacid dehalogenase 4A"  
"NT-A5\_00302" 38685 "s59E25H2" 0 "(S)-2-haloacid dehalogenase 4A"  
"NT-A5\_00302" 38685 "s59E5H2" 0 "(S)-2-haloacid dehalogenase 4A"  
"NT-A5\_00302" 38685 "s63E6H2" 0.01328633 "(S)-2-haloacid dehalogenase 4A"  
"NT-A5\_00303" 38686 "s59E13H2" 0 "2-oxoglutaramate amidase"  
"NT-A5\_00303" 38686 "s59E25H2" 0 "2-oxoglutaramate amidase"  
"NT-A5\_00303" 38686 "s59E5H2" 0 "2-oxoglutaramate amidase"  
"NT-A5\_00303" 38686 "s63E6H2" 0.01189364 "2-oxoglutaramate amidase"  
"NT-A5\_00304" 38687 "s59E13H2" 0 "putative methyltransferase YcgJ"  
"NT-A5\_00304" 38687 "s59E25H2" 0 "putative methyltransferase YcgJ"  
"NT-A5\_00304" 38687 "s59E5H2" 0.009630541 "putative methyltransferase YcgJ"  
"NT-A5\_00304" 38687 "s63E6H2" 0 "putative methyltransferase YcgJ"  
"NT-A5\_00305" 38688 "s59E13H2" 0 "hypothetical protein"  
"NT-A5\_00305" 38688 "s59E25H2" 0 "hypothetical protein"  
"NT-A5\_00305" 38688 "s59E5H2" 0 "hypothetical protein"  
"NT-A5\_00305" 38688 "s63E6H2" 0 "hypothetical protein"  
"NT-A5\_00306" 38689 "s59E13H2" 0 "putative kinase inhibitor protein"  
"NT-A5\_00306" 38689 "s59E25H2" 0 "putative kinase inhibitor protein"  
"NT-A5\_00306" 38689 "s59E5H2" 0 "putative kinase inhibitor protein"  
"NT-A5\_00306" 38689 "s63E6H2" 0 "putative kinase inhibitor protein"  
"NT-A5\_00307" 38690 "s59E13H2" 0 "Cupin domain protein"  
"NT-A5\_00307" 38690 "s59E25H2" 0 "Cupin domain protein"  
"NT-A5\_00307" 38690 "s59E5H2" 0 "Cupin domain protein"  
"NT-A5\_00307" 38690 "s63E6H2" 0 "Cupin domain protein"  
"NT-A5\_00308" 38691 "s59E13H2" 0 "hypothetical protein"

"NT-A5\_00308" 38691 "s59E25H2" 0 "hypothetical protein"  
"NT-A5\_00308" 38691 "s59E5H2" 0 "hypothetical protein"  
"NT-A5\_00308" 38691 "s63E6H2" 0 "hypothetical protein"  
"NT-A5\_00310" 38693 "s59E13H2" 0 "putative transporter"  
"NT-A5\_00310" 38693 "s59E25H2" 0 "putative transporter"  
"NT-A5\_00310" 38693 "s59E5H2" 0 "putative transporter"  
"NT-A5\_00310" 38693 "s63E6H2" 0.008757436 "putative transporter"  
"NT-A5\_00311" 38694 "s59E13H2" 0 "Major Facilitator Superfamily protein"  
"NT-A5\_00311" 38694 "s59E25H2" 0 "Major Facilitator Superfamily protein"  
"NT-A5\_00311" 38694 "s59E5H2" 0 "Major Facilitator Superfamily protein"  
"NT-A5\_00311" 38694 "s63E6H2" 0.001152648 "Major Facilitator Superfamily protein"  
"NT-A5\_00312" 38695 "s59E13H2" 0.002596483 "Transposase IS116/IS110/IS902 family protein"  
"NT-A5\_00312" 38695 "s59E25H2" 0 "Transposase IS116/IS110/IS902 family protein"  
"NT-A5\_00312" 38695 "s59E5H2" 0.008990717 "Transposase IS116/IS110/IS902 family protein"  
"NT-A5\_00312" 38695 "s63E6H2" 0.02130121 "Transposase IS116/IS110/IS902 family protein"  
"NT-A5\_00313" 38696 "s59E13H2" 0 "FMN reductase [NAD(P)H]"  
"NT-A5\_00313" 38696 "s59E25H2" 0 "FMN reductase [NAD(P)H]"  
"NT-A5\_00313" 38696 "s59E5H2" 0 "FMN reductase [NAD(P)H]"  
"NT-A5\_00313" 38696 "s63E6H2" 0.008800832 "FMN reductase [NAD(P)H]"  
"NT-A5\_00314" 38697 "s59E13H2" 0 "Pyrroline-5-carboxylate reductase"  
"NT-A5\_00314" 38697 "s59E25H2" 0 "Pyrroline-5-carboxylate reductase"  
"NT-A5\_00314" 38697 "s59E5H2" 0.01601735 "Pyrroline-5-carboxylate reductase"  
"NT-A5\_00314" 38697 "s63E6H2" 0.008922123 "Pyrroline-5-carboxylate reductase"  
"NT-A5\_00315" 38698 "s59E13H2" 0 "Septum site-determining protein DivIVA"  
"NT-A5\_00315" 38698 "s59E25H2" 0 "Septum site-determining protein DivIVA"  
"NT-A5\_00315" 38698 "s59E5H2" 0.02820356 "Septum site-determining protein DivIVA"  
"NT-A5\_00315" 38698 "s63E6H2" 0.04441069 "Septum site-determining protein DivIVA"  
"NT-A5\_00316" 38699 "s59E13H2" 0 "Xylose isomerase-like TIM barrel"  
"NT-A5\_00316" 38699 "s59E25H2" 0 "Xylose isomerase-like TIM barrel"  
"NT-A5\_00316" 38699 "s59E5H2" 0.01092445 "Xylose isomerase-like TIM barrel"  
"NT-A5\_00316" 38699 "s63E6H2" 0.08115196 "Xylose isomerase-like TIM barrel"  
"NT-A5\_00317" 38700 "s59E13H2" 0 "putative FAD-linked oxidoreductase"  
"NT-A5\_00317" 38700 "s59E25H2" 0 "putative FAD-linked oxidoreductase"  
"NT-A5\_00317" 38700 "s59E5H2" 0 "putative FAD-linked oxidoreductase"  
"NT-A5\_00317" 38700 "s63E6H2" 0.04823249 "putative FAD-linked oxidoreductase"  
"NT-A5\_00318" 38701 "s59E13H2" 0 "Penicillin-binding protein 2D"  
"NT-A5\_00318" 38701 "s59E25H2" 0 "Penicillin-binding protein 2D"  
"NT-A5\_00318" 38701 "s59E5H2" 0 "Penicillin-binding protein 2D"  
"NT-A5\_00318" 38701 "s63E6H2" 0.03631316 "Penicillin-binding protein 2D"  
"NT-A5\_00319" 38702 "s59E13H2" 0 "DNA utilization protein GntX"  
"NT-A5\_00319" 38702 "s59E25H2" 0 "DNA utilization protein GntX"  
"NT-A5\_00319" 38702 "s59E5H2" 0 "DNA utilization protein GntX"  
"NT-A5\_00319" 38702 "s63E6H2" 0.004077373 "DNA utilization protein GntX"  
"NT-A5\_00320" 38703 "s59E13H2" 0 "Cold shock protein CspC"  
"NT-A5\_00320" 38703 "s59E25H2" 0 "Cold shock protein CspC"  
"NT-A5\_00320" 38703 "s59E5H2" 0 "Cold shock protein CspC"  
"NT-A5\_00320" 38703 "s63E6H2" 0 "Cold shock protein CspC"

"NT-A5\_00321" 38704 "s59E13H2" 0 "Ribosome-associated factor Y"  
"NT-A5\_00321" 38704 "s59E25H2" 0 "Ribosome-associated factor Y"  
"NT-A5\_00321" 38704 "s59E5H2" 0 "Ribosome-associated factor Y"  
"NT-A5\_00321" 38704 "s63E6H2" 0.02074244 "Ribosome-associated factor Y"  
"NT-A5\_00322" 38705 "s59E13H2" 0 "PTS system fructose-specific EIIABC component"  
"NT-A5\_00322" 38705 "s59E25H2" 0 "PTS system fructose-specific EIIABC component"  
"NT-A5\_00322" 38705 "s59E5H2" 0 "PTS system fructose-specific EIIABC component"  
"NT-A5\_00322" 38705 "s63E6H2" 0.0553402 "PTS system fructose-specific EIIABC component"  
"NT-A5\_00323" 38706 "s59E13H2" 0 "Bifunctional protein GImU"  
"NT-A5\_00323" 38706 "s59E25H2" 0 "Bifunctional protein GImU"  
"NT-A5\_00323" 38706 "s59E5H2" 0 "Bifunctional protein GImU"  
"NT-A5\_00323" 38706 "s63E6H2" 0.03306311 "Bifunctional protein GImU"  
"NT-A5\_00324" 38707 "s59E13H2" 0 "V-type ATP synthase alpha chain"  
"NT-A5\_00324" 38707 "s59E25H2" 0 "V-type ATP synthase alpha chain"  
"NT-A5\_00324" 38707 "s59E5H2" 0 "V-type ATP synthase alpha chain"  
"NT-A5\_00324" 38707 "s63E6H2" 0.2731462 "V-type ATP synthase alpha chain"  
"NT-A5\_00325" 38708 "s59E13H2" 0 "von Willebrand factor type A domain protein"  
"NT-A5\_00325" 38708 "s59E25H2" 0 "von Willebrand factor type A domain protein"  
"NT-A5\_00325" 38708 "s59E5H2" 0 "von Willebrand factor type A domain protein"  
"NT-A5\_00325" 38708 "s63E6H2" 0.00360749 "von Willebrand factor type A domain protein"  
"NT-A5\_00326" 38709 "s59E13H2" 0 "hypothetical protein"  
"NT-A5\_00326" 38709 "s59E25H2" 0 "hypothetical protein"  
"NT-A5\_00326" 38709 "s59E5H2" 0.01717301 "hypothetical protein"  
"NT-A5\_00326" 38709 "s63E6H2" 0.01595489 "hypothetical protein"  
"NT-A5\_00327" 38710 "s59E13H2" 0 "hypothetical protein"  
"NT-A5\_00327" 38710 "s59E25H2" 0 "hypothetical protein"  
"NT-A5\_00327" 38710 "s59E5H2" 0.03108168 "hypothetical protein"  
"NT-A5\_00327" 38710 "s63E6H2" 0.0007926511 "hypothetical protein"  
"NT-A5\_00328" 38711 "s59E13H2" 0 "Holliday junction DNA helicase RuvB"  
"NT-A5\_00328" 38711 "s59E25H2" 0 "Holliday junction DNA helicase RuvB"  
"NT-A5\_00328" 38711 "s59E5H2" 0.07892338 "Holliday junction DNA helicase RuvB"  
"NT-A5\_00328" 38711 "s63E6H2" 0 "Holliday junction DNA helicase RuvB"  
"NT-A5\_00329" 38712 "s59E13H2" 0 "hypothetical protein"  
"NT-A5\_00329" 38712 "s59E25H2" 0 "hypothetical protein"  
"NT-A5\_00329" 38712 "s59E5H2" 0 "hypothetical protein"  
"NT-A5\_00329" 38712 "s63E6H2" 0 "hypothetical protein"  
"NT-A5\_00330" 38713 "s59E13H2" 0 "hypothetical protein"  
"NT-A5\_00330" 38713 "s59E25H2" 0 "hypothetical protein"  
"NT-A5\_00330" 38713 "s59E5H2" 0 "hypothetical protein"  
"NT-A5\_00330" 38713 "s63E6H2" 0 "hypothetical protein"  
"NT-A5\_00331" 38714 "s59E13H2" 0.004952411 "hypothetical protein"  
"NT-A5\_00331" 38714 "s59E25H2" 0.7774343 "hypothetical protein"  
"NT-A5\_00331" 38714 "s59E5H2" 0.01226947 "hypothetical protein"  
"NT-A5\_00331" 38714 "s63E6H2" 5.474941 "hypothetical protein"  
"NT-A5\_00332" 38715 "s59E13H2" 0 "hypothetical protein"  
"NT-A5\_00332" 38715 "s59E25H2" 0 "hypothetical protein"  
"NT-A5\_00332" 38715 "s59E5H2" 0 "hypothetical protein"



"NT-A5\_00332" 38715 "s63E6H2" 0.6998562 "hypothetical protein"  
"NT-A5\_00333" 38716 "s59E13H2" 0 "Glutamate 5-kinase"  
"NT-A5\_00333" 38716 "s59E25H2" 0 "Glutamate 5-kinase"  
"NT-A5\_00333" 38716 "s59E5H2" 0 "Glutamate 5-kinase"  
"NT-A5\_00333" 38716 "s63E6H2" 0.01538479 "Glutamate 5-kinase"  
"NT-A5\_00334" 38717 "s59E13H2" 0 "GTPase Era"  
"NT-A5\_00334" 38717 "s59E25H2" 0 "GTPase Era"  
"NT-A5\_00334" 38717 "s59E5H2" 0 "GTPase Era"  
"NT-A5\_00334" 38717 "s63E6H2" 0.006494967 "GTPase Era"  
"NT-A5\_00335" 38718 "s59E13H2" 0 "putative glutamine synthetase 2"  
"NT-A5\_00335" 38718 "s59E25H2" 0 "putative glutamine synthetase 2"  
"NT-A5\_00335" 38718 "s59E5H2" 0 "putative glutamine synthetase 2"  
"NT-A5\_00335" 38718 "s63E6H2" 0.003730132 "putative glutamine synthetase 2"  
"NT-A5\_00336" 38719 "s59E13H2" 0 "hypothetical protein"  
"NT-A5\_00336" 38719 "s59E25H2" 0 "hypothetical protein"  
"NT-A5\_00336" 38719 "s59E5H2" 0 "hypothetical protein"  
"NT-A5\_00336" 38719 "s63E6H2" 0.009321577 "hypothetical protein"  
"NT-A5\_00337" 38720 "s59E13H2" 0 "DNA polymerase family B, exonuclease domain"  
"NT-A5\_00337" 38720 "s59E25H2" 0 "DNA polymerase family B, exonuclease domain"  
"NT-A5\_00337" 38720 "s59E5H2" 0 "DNA polymerase family B, exonuclease domain"  
"NT-A5\_00337" 38720 "s63E6H2" 0.009101033 "DNA polymerase family B, exonuclease domain"  
"NT-A5\_00338" 38721 "s59E13H2" 0 "Putative ski2-type helicase"  
"NT-A5\_00338" 38721 "s59E25H2" 0.1099338 "Putative ski2-type helicase"  
"NT-A5\_00338" 38721 "s59E5H2" 0 "Putative ski2-type helicase"  
"NT-A5\_00338" 38721 "s63E6H2" 0.01887398 "Putative ski2-type helicase"  
"NT-A5\_00339" 38722 "s59E13H2" 0 "putative HTH-type transcriptional regulator YdfH"  
"NT-A5\_00339" 38722 "s59E25H2" 0 "putative HTH-type transcriptional regulator YdfH"  
"NT-A5\_00339" 38722 "s59E5H2" 0 "putative HTH-type transcriptional regulator YdfH"  
"NT-A5\_00339" 38722 "s63E6H2" 0.0007243799 "putative HTH-type transcriptional regulator YdfH"  
"NT-A5\_00340" 38723 "s59E13H2" 0 "D-arabitol-phosphate dehydrogenase"  
"NT-A5\_00340" 38723 "s59E25H2" 0 "D-arabitol-phosphate dehydrogenase"  
"NT-A5\_00340" 38723 "s59E5H2" 0 "D-arabitol-phosphate dehydrogenase"  
"NT-A5\_00340" 38723 "s63E6H2" 0.0004522756 "D-arabitol-phosphate dehydrogenase"  
"NT-A5\_00341" 38724 "s59E13H2" 0 "2,3-bisphosphoglycerate-independent phosphoglycerate mutase 1"  
"NT-A5\_00341" 38724 "s59E25H2" 0 "2,3-bisphosphoglycerate-independent phosphoglycerate mutase 1"  
"NT-A5\_00341" 38724 "s59E5H2" 0 "2,3-bisphosphoglycerate-independent phosphoglycerate mutase 1"  
"NT-A5\_00341" 38724 "s63E6H2" 0.3136082 "2,3-bisphosphoglycerate-independent phosphoglycerate mutase 1"  
"NT-A5\_00342" 38725 "s59E13H2" 0 "hypothetical protein"  
"NT-A5\_00342" 38725 "s59E25H2" 0 "hypothetical protein"  
"NT-A5\_00342" 38725 "s59E5H2" 0 "hypothetical protein"  
"NT-A5\_00342" 38725 "s63E6H2" 0.3921841 "hypothetical protein"  
"NT-A5\_00343" 38726 "s59E13H2" 0 "Murein DD-endopeptidase MepM"  
"NT-A5\_00343" 38726 "s59E25H2" 0 "Murein DD-endopeptidase MepM"  
"NT-A5\_00343" 38726 "s59E5H2" 0.004966094 "Murein DD-endopeptidase MepM"  
"NT-A5\_00343" 38726 "s63E6H2" 0.3480534 "Murein DD-endopeptidase MepM"  
"NT-A5\_00344" 38727 "s59E13H2" 0 "3-methyladenine DNA glycosylase"  
"NT-A5\_00344" 38727 "s59E25H2" 0 "3-methyladenine DNA glycosylase"

"NT-A5\_00344" 38727 "s59E5H2" 0 "3-methyladenine DNA glycosylase"  
"NT-A5\_00344" 38727 "s63E6H2" 0.005365314 "3-methyladenine DNA glycosylase"  
"NT-A5\_00345" 38728 "s59E13H2" 0 "General stress protein 69"  
"NT-A5\_00345" 38728 "s59E25H2" 0 "General stress protein 69"  
"NT-A5\_00345" 38728 "s59E5H2" 0 "General stress protein 69"  
"NT-A5\_00345" 38728 "s63E6H2" 0.3697516 "General stress protein 69"  
"NT-A5\_00346" 38729 "s59E13H2" 0 "hypothetical protein"  
"NT-A5\_00346" 38729 "s59E25H2" 0 "hypothetical protein"  
"NT-A5\_00346" 38729 "s59E5H2" 0 "hypothetical protein"  
"NT-A5\_00346" 38729 "s63E6H2" 0.2436645 "hypothetical protein"  
"NT-A5\_00347" 38730 "s59E13H2" 0 "hypothetical protein"  
"NT-A5\_00347" 38730 "s59E25H2" 0 "hypothetical protein"  
"NT-A5\_00347" 38730 "s59E5H2" 0 "hypothetical protein"  
"NT-A5\_00347" 38730 "s63E6H2" 0.01129011 "hypothetical protein"  
"NT-A5\_00348" 38731 "s59E13H2" 0 "hypothetical protein"  
"NT-A5\_00348" 38731 "s59E25H2" 0 "hypothetical protein"  
"NT-A5\_00348" 38731 "s59E5H2" 0 "hypothetical protein"  
"NT-A5\_00348" 38731 "s63E6H2" 0.01067253 "hypothetical protein"  
"NT-A5\_00349" 38732 "s59E13H2" 0 "PHP domain protein"  
"NT-A5\_00349" 38732 "s59E25H2" 0 "PHP domain protein"  
"NT-A5\_00349" 38732 "s59E5H2" 0 "PHP domain protein"  
"NT-A5\_00349" 38732 "s63E6H2" 0.4100087 "PHP domain protein"  
"NT-A5\_00353" 38736 "s59E13H2" 0 "hypothetical protein"  
"NT-A5\_00353" 38736 "s59E25H2" 0 "hypothetical protein"  
"NT-A5\_00353" 38736 "s59E5H2" 0 "hypothetical protein"  
"NT-A5\_00353" 38736 "s63E6H2" 0 "hypothetical protein"  
"NT-A5\_00354" 38737 "s59E13H2" 0 "Ribulose biphosphate carboxylase"  
"NT-A5\_00354" 38737 "s59E25H2" 0 "Ribulose biphosphate carboxylase"  
"NT-A5\_00354" 38737 "s59E5H2" 0 "Ribulose biphosphate carboxylase"  
"NT-A5\_00354" 38737 "s63E6H2" 0 "Ribulose biphosphate carboxylase"  
"NT-A5\_00355" 38738 "s59E13H2" 0 "Transketolase 2"  
"NT-A5\_00355" 38738 "s59E25H2" 0 "Transketolase 2"  
"NT-A5\_00355" 38738 "s59E5H2" 0 "Transketolase 2"  
"NT-A5\_00355" 38738 "s63E6H2" 0 "Transketolase 2"  
"NT-A5\_00356" 38739 "s59E13H2" 0 "1-deoxy-D-xylulose-5-phosphate synthase"  
"NT-A5\_00356" 38739 "s59E25H2" 0 "1-deoxy-D-xylulose-5-phosphate synthase"  
"NT-A5\_00356" 38739 "s59E5H2" 0 "1-deoxy-D-xylulose-5-phosphate synthase"  
"NT-A5\_00356" 38739 "s63E6H2" 0 "1-deoxy-D-xylulose-5-phosphate synthase"  
"NT-A5\_00357" 38740 "s59E13H2" 0 "Glucose-6-phosphate isomerase"  
"NT-A5\_00357" 38740 "s59E25H2" 0 "Glucose-6-phosphate isomerase"  
"NT-A5\_00357" 38740 "s59E5H2" 0 "Glucose-6-phosphate isomerase"  
"NT-A5\_00357" 38740 "s63E6H2" 0 "Glucose-6-phosphate isomerase"  
"NT-A5\_00358" 38741 "s59E13H2" 0 "Glycerol kinase"  
"NT-A5\_00358" 38741 "s59E25H2" 0 "Glycerol kinase"  
"NT-A5\_00358" 38741 "s59E5H2" 0 "Glycerol kinase"  
"NT-A5\_00358" 38741 "s63E6H2" 0 "Glycerol kinase"  
"NT-A5\_00359" 38742 "s59E13H2" 0 "Non-reducing end beta-L-arabinofuranosidase"

"NT-A5\_00359" 38742 "s59E25H2" 0 "Non-reducing end beta-L-arabinofuranosidase"  
"NT-A5\_00359" 38742 "s59E5H2" 0 "Non-reducing end beta-L-arabinofuranosidase"  
"NT-A5\_00359" 38742 "s63E6H2" 0 "Non-reducing end beta-L-arabinofuranosidase"  
"NT-A5\_00360" 38743 "s59E13H2" 0 "ADP-ribosylglycohydrolase"  
"NT-A5\_00360" 38743 "s59E25H2" 0 "ADP-ribosylglycohydrolase"  
"NT-A5\_00360" 38743 "s59E5H2" 0 "ADP-ribosylglycohydrolase"  
"NT-A5\_00360" 38743 "s63E6H2" 0.007672116 "ADP-ribosylglycohydrolase"  
"NT-A5\_00361" 38744 "s59E13H2" 0 "D-aminopeptidase"  
"NT-A5\_00361" 38744 "s59E25H2" 0 "D-aminopeptidase"  
"NT-A5\_00361" 38744 "s59E5H2" 0 "D-aminopeptidase"  
"NT-A5\_00361" 38744 "s63E6H2" 0 "D-aminopeptidase"  
"NT-A5\_00362" 38745 "s59E13H2" 0 "hypothetical protein"  
"NT-A5\_00362" 38745 "s59E25H2" 0 "hypothetical protein"  
"NT-A5\_00362" 38745 "s59E5H2" 0 "hypothetical protein"  
"NT-A5\_00362" 38745 "s63E6H2" 0 "hypothetical protein"  
"NT-A5\_00363" 38746 "s59E13H2" 0 "D-arabitol-phosphate dehydrogenase"  
"NT-A5\_00363" 38746 "s59E25H2" 0 "D-arabitol-phosphate dehydrogenase"  
"NT-A5\_00363" 38746 "s59E5H2" 0 "D-arabitol-phosphate dehydrogenase"  
"NT-A5\_00363" 38746 "s63E6H2" 0 "D-arabitol-phosphate dehydrogenase"  
"NT-A5\_00364" 38747 "s59E13H2" 0 "5-deoxy-glucuronate isomerase"  
"NT-A5\_00364" 38747 "s59E25H2" 0 "5-deoxy-glucuronate isomerase"  
"NT-A5\_00364" 38747 "s59E5H2" 0 "5-deoxy-glucuronate isomerase"  
"NT-A5\_00364" 38747 "s63E6H2" 0 "5-deoxy-glucuronate isomerase"  
"NT-A5\_00365" 38748 "s59E13H2" 0 "D-tagatose 3-epimerase"  
"NT-A5\_00365" 38748 "s59E25H2" 0 "D-tagatose 3-epimerase"  
"NT-A5\_00365" 38748 "s59E5H2" 0 "D-tagatose 3-epimerase"  
"NT-A5\_00365" 38748 "s63E6H2" 0 "D-tagatose 3-epimerase"  
"NT-A5\_00366" 38749 "s59E13H2" 0 "hypothetical protein"  
"NT-A5\_00366" 38749 "s59E25H2" 0 "hypothetical protein"  
"NT-A5\_00366" 38749 "s59E5H2" 0 "hypothetical protein"  
"NT-A5\_00366" 38749 "s63E6H2" 0 "hypothetical protein"  
"NT-A5\_00367" 38750 "s59E13H2" 0 "Exo-beta-D-glucosaminidase precursor"  
"NT-A5\_00367" 38750 "s59E25H2" 0 "Exo-beta-D-glucosaminidase precursor"  
"NT-A5\_00367" 38750 "s59E5H2" 0 "Exo-beta-D-glucosaminidase precursor"  
"NT-A5\_00367" 38750 "s63E6H2" 0 "Exo-beta-D-glucosaminidase precursor"  
"NT-A5\_00368" 38751 "s59E13H2" 0 "1,5-anhydro-D-fructose reductase"  
"NT-A5\_00368" 38751 "s59E25H2" 0 "1,5-anhydro-D-fructose reductase"  
"NT-A5\_00368" 38751 "s59E5H2" 0 "1,5-anhydro-D-fructose reductase"  
"NT-A5\_00368" 38751 "s63E6H2" 0 "1,5-anhydro-D-fructose reductase"  
"NT-A5\_00369" 38752 "s59E13H2" 0 "Glucose--fructose oxidoreductase precursor"  
"NT-A5\_00369" 38752 "s59E25H2" 0 "Glucose--fructose oxidoreductase precursor"  
"NT-A5\_00369" 38752 "s59E5H2" 0 "Glucose--fructose oxidoreductase precursor"  
"NT-A5\_00369" 38752 "s63E6H2" 0 "Glucose--fructose oxidoreductase precursor"  
"NT-A5\_00370" 38753 "s59E13H2" 0 "D-tagatose 3-epimerase"  
"NT-A5\_00370" 38753 "s59E25H2" 0 "D-tagatose 3-epimerase"  
"NT-A5\_00370" 38753 "s59E5H2" 0 "D-tagatose 3-epimerase"  
"NT-A5\_00370" 38753 "s63E6H2" 0 "D-tagatose 3-epimerase"

"NT-A5\_00371" 38754 "s59E13H2" 0 "Glycosyl hydrolases family 43"  
"NT-A5\_00371" 38754 "s59E25H2" 0 "Glycosyl hydrolases family 43"  
"NT-A5\_00371" 38754 "s59E5H2" 0 "Glycosyl hydrolases family 43"  
"NT-A5\_00371" 38754 "s63E6H2" 0 "Glycosyl hydrolases family 43"  
"NT-A5\_00372" 38755 "s59E13H2" 0 "FCD domain protein"  
"NT-A5\_00372" 38755 "s59E25H2" 0 "FCD domain protein"  
"NT-A5\_00372" 38755 "s59E5H2" 0 "FCD domain protein"  
"NT-A5\_00372" 38755 "s63E6H2" 0 "FCD domain protein"  
"NT-A5\_00373" 38756 "s59E13H2" 0 "Dipeptide transport system permease protein DppC"  
"NT-A5\_00373" 38756 "s59E25H2" 0 "Dipeptide transport system permease protein DppC"  
"NT-A5\_00373" 38756 "s59E5H2" 0 "Dipeptide transport system permease protein DppC"  
"NT-A5\_00373" 38756 "s63E6H2" 0 "Dipeptide transport system permease protein DppC"  
"NT-A5\_00374" 38757 "s59E13H2" 0 "Inner membrane ABC transporter permease protein YejB"  
"NT-A5\_00374" 38757 "s59E25H2" 0 "Inner membrane ABC transporter permease protein YejB"  
"NT-A5\_00374" 38757 "s59E5H2" 0 "Inner membrane ABC transporter permease protein YejB"  
"NT-A5\_00374" 38757 "s63E6H2" 0 "Inner membrane ABC transporter permease protein YejB"  
"NT-A5\_00377" 38760 "s59E13H2" 0 "Indolepyruvate oxidoreductase subunit IorA"  
"NT-A5\_00377" 38760 "s59E25H2" 0 "Indolepyruvate oxidoreductase subunit IorA"  
"NT-A5\_00377" 38760 "s59E5H2" 0 "Indolepyruvate oxidoreductase subunit IorA"  
"NT-A5\_00377" 38760 "s63E6H2" 0 "Indolepyruvate oxidoreductase subunit IorA"  
"NT-A5\_00378" 38761 "s59E13H2" 0 "NADH pyrophosphatase"  
"NT-A5\_00378" 38761 "s59E25H2" 0 "NADH pyrophosphatase"  
"NT-A5\_00378" 38761 "s59E5H2" 0 "NADH pyrophosphatase"  
"NT-A5\_00378" 38761 "s63E6H2" 0.003479201 "NADH pyrophosphatase"  
"NT-A5\_00379" 38762 "s59E13H2" 0 "Beta-galactosidase"  
"NT-A5\_00379" 38762 "s59E25H2" 0 "Beta-galactosidase"  
"NT-A5\_00379" 38762 "s59E5H2" 0 "Beta-galactosidase"  
"NT-A5\_00379" 38762 "s63E6H2" 0 "Beta-galactosidase"  
"NT-A5\_00380" 38763 "s59E13H2" 0 "Lactose transport system permease protein LacF"  
"NT-A5\_00380" 38763 "s59E25H2" 0 "Lactose transport system permease protein LacF"  
"NT-A5\_00380" 38763 "s59E5H2" 0 "Lactose transport system permease protein LacF"  
"NT-A5\_00380" 38763 "s63E6H2" 0 "Lactose transport system permease protein LacF"  
"NT-A5\_00381" 38764 "s59E13H2" 0 "Putative endoglucanase"  
"NT-A5\_00381" 38764 "s59E25H2" 0 "Putative endoglucanase"  
"NT-A5\_00381" 38764 "s59E5H2" 0 "Putative endoglucanase"  
"NT-A5\_00381" 38764 "s63E6H2" 0 "Putative endoglucanase"  
"NT-A5\_00382" 38765 "s59E13H2" 0 "Bacterial extracellular solute-binding protein"  
"NT-A5\_00382" 38765 "s59E25H2" 0 "Bacterial extracellular solute-binding protein"  
"NT-A5\_00382" 38765 "s59E5H2" 0 "Bacterial extracellular solute-binding protein"  
"NT-A5\_00382" 38765 "s63E6H2" 0 "Bacterial extracellular solute-binding protein"  
"NT-A5\_00383" 38766 "s59E13H2" 0 "RNA polymerase sigma factor"  
"NT-A5\_00383" 38766 "s59E25H2" 0 "RNA polymerase sigma factor"  
"NT-A5\_00383" 38766 "s59E5H2" 0 "RNA polymerase sigma factor"  
"NT-A5\_00383" 38766 "s63E6H2" 0 "RNA polymerase sigma factor"  
"NT-A5\_00385" 38768 "s59E13H2" 0 "Cysteine synthase"  
"NT-A5\_00385" 38768 "s59E25H2" 0 "Cysteine synthase"  
"NT-A5\_00385" 38768 "s59E5H2" 0 "Cysteine synthase"

"NT-A5\_00385" 38768 "s63E6H2" 0 "Cysteine synthase"  
"NT-A5\_00386" 38769 "s59E13H2" 0 "CysO-cysteine peptidase"  
"NT-A5\_00386" 38769 "s59E25H2" 0 "CysO-cysteine peptidase"  
"NT-A5\_00386" 38769 "s59E5H2" 0 "CysO-cysteine peptidase"  
"NT-A5\_00386" 38769 "s63E6H2" 0 "CysO-cysteine peptidase"  
"NT-A5\_00387" 38770 "s59E13H2" 0 "Phosphoadenosine phosphosulfate reductase"  
"NT-A5\_00387" 38770 "s59E25H2" 0 "Phosphoadenosine phosphosulfate reductase"  
"NT-A5\_00387" 38770 "s59E5H2" 0 "Phosphoadenosine phosphosulfate reductase"  
"NT-A5\_00387" 38770 "s63E6H2" 0 "Phosphoadenosine phosphosulfate reductase"  
"NT-A5\_00388" 38771 "s59E13H2" 0 "HTH-type transcriptional regulator CymR"  
"NT-A5\_00388" 38771 "s59E25H2" 0 "HTH-type transcriptional regulator CymR"  
"NT-A5\_00388" 38771 "s59E5H2" 0 "HTH-type transcriptional regulator CymR"  
"NT-A5\_00388" 38771 "s63E6H2" 0 "HTH-type transcriptional regulator CymR"  
"NT-A5\_00389" 38772 "s59E13H2" 0 "hypothetical protein"  
"NT-A5\_00389" 38772 "s59E25H2" 0 "hypothetical protein"  
"NT-A5\_00389" 38772 "s59E5H2" 0 "hypothetical protein"  
"NT-A5\_00389" 38772 "s63E6H2" 0 "hypothetical protein"  
"NT-A5\_00390" 38773 "s59E13H2" 0 "hypothetical protein"  
"NT-A5\_00390" 38773 "s59E25H2" 0 "hypothetical protein"  
"NT-A5\_00390" 38773 "s59E5H2" 0 "hypothetical protein"  
"NT-A5\_00390" 38773 "s63E6H2" 0.005931529 "hypothetical protein"  
"NT-A5\_00391" 38774 "s59E13H2" 0 "hypothetical protein"  
"NT-A5\_00391" 38774 "s59E25H2" 0 "hypothetical protein"  
"NT-A5\_00391" 38774 "s59E5H2" 0 "hypothetical protein"  
"NT-A5\_00391" 38774 "s63E6H2" 0 "hypothetical protein"  
"NT-A5\_00392" 38775 "s59E13H2" 0 "Quinolinate synthase A"  
"NT-A5\_00392" 38775 "s59E25H2" 0 "Quinolinate synthase A"  
"NT-A5\_00392" 38775 "s59E5H2" 0 "Quinolinate synthase A"  
"NT-A5\_00392" 38775 "s63E6H2" 0 "Quinolinate synthase A"  
"NT-A5\_00393" 38776 "s59E13H2" 0 "formate dehydrogenase accessory protein"  
"NT-A5\_00393" 38776 "s59E25H2" 0 "formate dehydrogenase accessory protein"  
"NT-A5\_00393" 38776 "s59E5H2" 0 "formate dehydrogenase accessory protein"  
"NT-A5\_00393" 38776 "s63E6H2" 0 "formate dehydrogenase accessory protein"  
"NT-A5\_00394" 38777 "s59E13H2" 0 "NifU-like protein"  
"NT-A5\_00394" 38777 "s59E25H2" 0 "NifU-like protein"  
"NT-A5\_00394" 38777 "s59E5H2" 0 "NifU-like protein"  
"NT-A5\_00394" 38777 "s63E6H2" 0 "NifU-like protein"  
"NT-A5\_00395" 38778 "s59E13H2" 0 "Fumarate hydratase class I, anaerobic"  
"NT-A5\_00395" 38778 "s59E25H2" 0 "Fumarate hydratase class I, anaerobic"  
"NT-A5\_00395" 38778 "s59E5H2" 0 "Fumarate hydratase class I, anaerobic"  
"NT-A5\_00395" 38778 "s63E6H2" 0 "Fumarate hydratase class I, anaerobic"  
"NT-A5\_00396" 38779 "s59E13H2" 0 "L(+)-tartrate dehydratase subunit alpha"  
"NT-A5\_00396" 38779 "s59E25H2" 0 "L(+)-tartrate dehydratase subunit alpha"  
"NT-A5\_00396" 38779 "s59E5H2" 0 "L(+)-tartrate dehydratase subunit alpha"  
"NT-A5\_00396" 38779 "s63E6H2" 0 "L(+)-tartrate dehydratase subunit alpha"  
"NT-A5\_00397" 38780 "s59E13H2" 0 "hypothetical protein"  
"NT-A5\_00397" 38780 "s59E25H2" 0 "hypothetical protein"

"NT-A5\_00397" 38780 "s59E5H2" 0.02369908 "hypothetical protein"  
"NT-A5\_00397" 38780 "s63E6H2" 0.01901914 "hypothetical protein"  
"NT-A5\_00398" 38781 "s59E13H2" 0 "trigger factor"  
"NT-A5\_00398" 38781 "s59E25H2" 0 "trigger factor"  
"NT-A5\_00398" 38781 "s59E5H2" 0 "trigger factor"  
"NT-A5\_00398" 38781 "s63E6H2" 0.1162841 "trigger factor"  
"NT-A5\_00399" 38782 "s59E13H2" 0 "ATP-dependent Clp protease proteolytic subunit"  
"NT-A5\_00399" 38782 "s59E25H2" 0 "ATP-dependent Clp protease proteolytic subunit"  
"NT-A5\_00399" 38782 "s59E5H2" 0 "ATP-dependent Clp protease proteolytic subunit"  
"NT-A5\_00399" 38782 "s63E6H2" 0.2710324 "ATP-dependent Clp protease proteolytic subunit"  
"NT-A5\_00401" 38784 "s59E13H2" 0 "hypothetical protein"  
"NT-A5\_00401" 38784 "s59E25H2" 0 "hypothetical protein"  
"NT-A5\_00401" 38784 "s59E5H2" 0.243176 "hypothetical protein"  
"NT-A5\_00401" 38784 "s63E6H2" 0.001144337 "hypothetical protein"  
"NT-A5\_00402" 38785 "s59E13H2" 0 "Dihydroxy-acid dehydratase"  
"NT-A5\_00402" 38785 "s59E25H2" 0 "Dihydroxy-acid dehydratase"  
"NT-A5\_00402" 38785 "s59E5H2" 0.2788163 "Dihydroxy-acid dehydratase"  
"NT-A5\_00402" 38785 "s63E6H2" 0.001746922 "Dihydroxy-acid dehydratase"  
"NT-A5\_00403" 38786 "s59E13H2" 0 "Histidinol-phosphate aminotransferase 2"  
"NT-A5\_00403" 38786 "s59E25H2" 0 "Histidinol-phosphate aminotransferase 2"  
"NT-A5\_00403" 38786 "s59E5H2" 0.1848982 "Histidinol-phosphate aminotransferase 2"  
"NT-A5\_00403" 38786 "s63E6H2" 0.0007209939 "Histidinol-phosphate aminotransferase 2"  
"NT-A5\_00404" 38787 "s59E13H2" 0 "Cytidylate kinase"  
"NT-A5\_00404" 38787 "s59E25H2" 0 "Cytidylate kinase"  
"NT-A5\_00404" 38787 "s59E5H2" 0.4320886 "Cytidylate kinase"  
"NT-A5\_00404" 38787 "s63E6H2" 0.009795812 "Cytidylate kinase"  
"NT-A5\_00405" 38788 "s59E13H2" 0 "1-acyl-sn-glycerol-3-phosphate acyltransferase"  
"NT-A5\_00405" 38788 "s59E25H2" 0 "1-acyl-sn-glycerol-3-phosphate acyltransferase"  
"NT-A5\_00405" 38788 "s59E5H2" 0.354097 "1-acyl-sn-glycerol-3-phosphate acyltransferase"  
"NT-A5\_00405" 38788 "s63E6H2" 0.007222158 "1-acyl-sn-glycerol-3-phosphate acyltransferase"  
"NT-A5\_00406" 38789 "s59E13H2" 0 "4-hydroxy-3-methylbut-2-enyl diphosphate reductase"  
"NT-A5\_00406" 38789 "s59E25H2" 0 "4-hydroxy-3-methylbut-2-enyl diphosphate reductase"  
"NT-A5\_00406" 38789 "s59E5H2" 0.2136385 "4-hydroxy-3-methylbut-2-enyl diphosphate reductase"  
"NT-A5\_00406" 38789 "s63E6H2" 0.00471381 "4-hydroxy-3-methylbut-2-enyl diphosphate reductase"  
"NT-A5\_00407" 38790 "s59E13H2" 0 "30S ribosomal protein S1"  
"NT-A5\_00407" 38790 "s59E25H2" 0 "30S ribosomal protein S1"  
"NT-A5\_00407" 38790 "s59E5H2" 0.006528424 "30S ribosomal protein S1"  
"NT-A5\_00407" 38790 "s63E6H2" 0.00381859 "30S ribosomal protein S1"  
"NT-A5\_00408" 38791 "s59E13H2" 0 "Glycerol-3-phosphate acyltransferase"  
"NT-A5\_00408" 38791 "s59E25H2" 0 "Glycerol-3-phosphate acyltransferase"  
"NT-A5\_00408" 38791 "s59E5H2" 0 "Glycerol-3-phosphate acyltransferase"  
"NT-A5\_00408" 38791 "s63E6H2" 0.008771406 "Glycerol-3-phosphate acyltransferase"  
"NT-A5\_00409" 38792 "s59E13H2" 0 "DNA-binding protein HU 1"  
"NT-A5\_00409" 38792 "s59E25H2" 0 "DNA-binding protein HU 1"  
"NT-A5\_00409" 38792 "s59E5H2" 0 "DNA-binding protein HU 1"  
"NT-A5\_00409" 38792 "s63E6H2" 0.001002081 "DNA-binding protein HU 1"  
"NT-A5\_00411" 38794 "s59E13H2" 0 "L-fucose isomerase"

"NT-A5\_00411" 38794 "s59E25H2" 0 "L-fucose isomerase"  
"NT-A5\_00411" 38794 "s59E5H2" 0.2153059 "L-fucose isomerase"  
"NT-A5\_00411" 38794 "s63E6H2" 0.01616476 "L-fucose isomerase"  
"NT-A5\_00412" 38795 "s59E13H2" 0 "hypothetical protein"  
"NT-A5\_00412" 38795 "s59E25H2" 0 "hypothetical protein"  
"NT-A5\_00412" 38795 "s59E5H2" 0.0001918548 "hypothetical protein"  
"NT-A5\_00412" 38795 "s63E6H2" 0 "hypothetical protein"  
"NT-A5\_00413" 38796 "s59E13H2" 0 "L-glutamine:2-deoxy-scylo-inosose aminotransferase"  
"NT-A5\_00413" 38796 "s59E25H2" 0 "L-glutamine:2-deoxy-scylo-inosose aminotransferase"  
"NT-A5\_00413" 38796 "s59E5H2" 0 "L-glutamine:2-deoxy-scylo-inosose aminotransferase"  
"NT-A5\_00413" 38796 "s63E6H2" 0 "L-glutamine:2-deoxy-scylo-inosose aminotransferase"  
"NT-A5\_00415" 38798 "s59E13H2" 0 "Divergent polysaccharide deacetylase"  
"NT-A5\_00415" 38798 "s59E25H2" 0 "Divergent polysaccharide deacetylase"  
"NT-A5\_00415" 38798 "s59E5H2" 0 "Divergent polysaccharide deacetylase"  
"NT-A5\_00415" 38798 "s63E6H2" 0 "Divergent polysaccharide deacetylase"  
"NT-A5\_00416" 38799 "s59E13H2" 0.002308087 "Carboxy-terminal processing protease CtpB precursor"  
"NT-A5\_00416" 38799 "s59E25H2" 0 "Carboxy-terminal processing protease CtpB precursor"  
"NT-A5\_00416" 38799 "s59E5H2" 0 "Carboxy-terminal processing protease CtpB precursor"  
"NT-A5\_00416" 38799 "s63E6H2" 0 "Carboxy-terminal processing protease CtpB precursor"  
"NT-A5\_00417" 38800 "s59E13H2" 0 "DNA polymerase/3'-5' exonuclease PolX"  
"NT-A5\_00417" 38800 "s59E25H2" 0 "DNA polymerase/3'-5' exonuclease PolX"  
"NT-A5\_00417" 38800 "s59E5H2" 0 "DNA polymerase/3'-5' exonuclease PolX"  
"NT-A5\_00417" 38800 "s63E6H2" 0 "DNA polymerase/3'-5' exonuclease PolX"  
"NT-A5\_00418" 38801 "s59E13H2" 0 "Methylated-thiol--coenzyme M methyltransferase"  
"NT-A5\_00418" 38801 "s59E25H2" 0 "Methylated-thiol--coenzyme M methyltransferase"  
"NT-A5\_00418" 38801 "s59E5H2" 0 "Methylated-thiol--coenzyme M methyltransferase"  
"NT-A5\_00418" 38801 "s63E6H2" 1.111918 "Methylated-thiol--coenzyme M methyltransferase"  
"NT-A5\_00419" 38802 "s59E13H2" 0 "Plasmid pRiA4b ORF-3-like protein"  
"NT-A5\_00419" 38802 "s59E25H2" 0 "Plasmid pRiA4b ORF-3-like protein"  
"NT-A5\_00419" 38802 "s59E5H2" 0 "Plasmid pRiA4b ORF-3-like protein"  
"NT-A5\_00419" 38802 "s63E6H2" 0.3319944 "Plasmid pRiA4b ORF-3-like protein"  
"NT-A5\_00421" 38804 "s59E13H2" 0 "hypothetical protein"  
"NT-A5\_00421" 38804 "s59E25H2" 0 "hypothetical protein"  
"NT-A5\_00421" 38804 "s59E5H2" 0.007482338 "hypothetical protein"  
"NT-A5\_00421" 38804 "s63E6H2" 5.092957 "hypothetical protein"  
"NT-A5\_00422" 38805 "s59E13H2" 0 "hypothetical protein"  
"NT-A5\_00422" 38805 "s59E25H2" 0 "hypothetical protein"  
"NT-A5\_00422" 38805 "s59E5H2" 0 "hypothetical protein"  
"NT-A5\_00422" 38805 "s63E6H2" 1.002253 "hypothetical protein"  
"NT-A5\_00424" 38807 "s59E13H2" 0 "PIN domain protein"  
"NT-A5\_00424" 38807 "s59E25H2" 0 "PIN domain protein"  
"NT-A5\_00424" 38807 "s59E5H2" 0 "PIN domain protein"  
"NT-A5\_00424" 38807 "s63E6H2" 1.021347 "PIN domain protein"  
"NT-A5\_00425" 38808 "s59E13H2" 0 "4-hydroxy-tetrahydrodipicolinate synthase"  
"NT-A5\_00425" 38808 "s59E25H2" 0.5681558 "4-hydroxy-tetrahydrodipicolinate synthase"  
"NT-A5\_00425" 38808 "s59E5H2" 0 "4-hydroxy-tetrahydrodipicolinate synthase"  
"NT-A5\_00425" 38808 "s63E6H2" 1.237599 "4-hydroxy-tetrahydrodipicolinate synthase"

"NT-A5\_00426" 38809 "s59E13H2" 0 "Diaminopimelate decarboxylase"  
"NT-A5\_00426" 38809 "s59E25H2" 0 "Diaminopimelate decarboxylase"  
"NT-A5\_00426" 38809 "s59E5H2" 0 "Diaminopimelate decarboxylase"  
"NT-A5\_00426" 38809 "s63E6H2" 0.8045401 "Diaminopimelate decarboxylase"  
"NT-A5\_00427" 38810 "s59E13H2" 0 "Argininosuccinate lyase"  
"NT-A5\_00427" 38810 "s59E25H2" 0 "Argininosuccinate lyase"  
"NT-A5\_00427" 38810 "s59E5H2" 0 "Argininosuccinate lyase"  
"NT-A5\_00427" 38810 "s63E6H2" 0.4143544 "Argininosuccinate lyase"  
"NT-A5\_00428" 38811 "s59E13H2" 0 "Zinc ribbon domain protein"  
"NT-A5\_00428" 38811 "s59E25H2" 0 "Zinc ribbon domain protein"  
"NT-A5\_00428" 38811 "s59E5H2" 0 "Zinc ribbon domain protein"  
"NT-A5\_00428" 38811 "s63E6H2" 0.02324917 "Zinc ribbon domain protein"  
"NT-A5\_00429" 38812 "s59E13H2" 0 "L-threonine 3-dehydrogenase"  
"NT-A5\_00429" 38812 "s59E25H2" 0 "L-threonine 3-dehydrogenase"  
"NT-A5\_00429" 38812 "s59E5H2" 0 "L-threonine 3-dehydrogenase"  
"NT-A5\_00429" 38812 "s63E6H2" 0.002896568 "L-threonine 3-dehydrogenase"  
"NT-A5\_00430" 38813 "s59E13H2" 0 "dTDP-4-oxo-6-deoxy-D-allose reductase"  
"NT-A5\_00430" 38813 "s59E25H2" 0 "dTDP-4-oxo-6-deoxy-D-allose reductase"  
"NT-A5\_00430" 38813 "s59E5H2" 0.01645267 "dTDP-4-oxo-6-deoxy-D-allose reductase"  
"NT-A5\_00430" 38813 "s63E6H2" 0.02033529 "dTDP-4-oxo-6-deoxy-D-allose reductase"  
"NT-A5\_00431" 38814 "s59E13H2" 0 "hypothetical protein"  
"NT-A5\_00431" 38814 "s59E25H2" 0 "hypothetical protein"  
"NT-A5\_00431" 38814 "s59E5H2" 0.03079975 "hypothetical protein"  
"NT-A5\_00431" 38814 "s63E6H2" 0.008096206 "hypothetical protein"  
"NT-A5\_00432" 38815 "s59E13H2" 0 "Sulfate permease CysP"  
"NT-A5\_00432" 38815 "s59E25H2" 0 "Sulfate permease CysP"  
"NT-A5\_00432" 38815 "s59E5H2" 0.04707368 "Sulfate permease CysP"  
"NT-A5\_00432" 38815 "s63E6H2" 0.003289659 "Sulfate permease CysP"  
"NT-A5\_00433" 38816 "s59E13H2" 0 "Nucleotidyltransferase domain protein"  
"NT-A5\_00433" 38816 "s59E25H2" 0 "Nucleotidyltransferase domain protein"  
"NT-A5\_00433" 38816 "s59E5H2" 0.06865688 "Nucleotidyltransferase domain protein"  
"NT-A5\_00433" 38816 "s63E6H2" 0 "Nucleotidyltransferase domain protein"  
"NT-A5\_00434" 38817 "s59E13H2" 0 "hypothetical protein"  
"NT-A5\_00434" 38817 "s59E25H2" 0 "hypothetical protein"  
"NT-A5\_00434" 38817 "s59E5H2" 0.01163093 "hypothetical protein"  
"NT-A5\_00434" 38817 "s63E6H2" 0 "hypothetical protein"  
"NT-A5\_00436" 38819 "s59E13H2" 0 "putative sugar kinase"  
"NT-A5\_00436" 38819 "s59E25H2" 0 "putative sugar kinase"  
"NT-A5\_00436" 38819 "s59E5H2" 0 "putative sugar kinase"  
"NT-A5\_00436" 38819 "s63E6H2" 0 "putative sugar kinase"  
"NT-A5\_00437" 38820 "s59E13H2" 0 "HTH-type transcriptional repressor PurR"  
"NT-A5\_00437" 38820 "s59E25H2" 0 "HTH-type transcriptional repressor PurR"  
"NT-A5\_00437" 38820 "s59E5H2" 0 "HTH-type transcriptional repressor PurR"  
"NT-A5\_00437" 38820 "s63E6H2" 0.004446398 "HTH-type transcriptional repressor PurR"  
"NT-A5\_00438" 38821 "s59E13H2" 0 "putative ABC transporter-binding protein precursor"  
"NT-A5\_00438" 38821 "s59E25H2" 0 "putative ABC transporter-binding protein precursor"  
"NT-A5\_00438" 38821 "s59E5H2" 0 "putative ABC transporter-binding protein precursor"



"NT-A5\_00438" 38821 "s63E6H2" 0.001551631 "putative ABC transporter-binding protein precursor"  
"NT-A5\_00439" 38822 "s59E13H2" 0 "Inner membrane ABC transporter permease protein YejB"  
"NT-A5\_00439" 38822 "s59E25H2" 0 "Inner membrane ABC transporter permease protein YejB"  
"NT-A5\_00439" 38822 "s59E5H2" 0 "Inner membrane ABC transporter permease protein YejB"  
"NT-A5\_00439" 38822 "s63E6H2" 0 "Inner membrane ABC transporter permease protein YejB"  
"NT-A5\_00440" 38823 "s59E13H2" 0 "Oligopeptide transport system permease protein OppC"  
"NT-A5\_00440" 38823 "s59E25H2" 0 "Oligopeptide transport system permease protein OppC"  
"NT-A5\_00440" 38823 "s59E5H2" 0 "Oligopeptide transport system permease protein OppC"  
"NT-A5\_00440" 38823 "s63E6H2" 0 "Oligopeptide transport system permease protein OppC"  
"NT-A5\_00441" 38824 "s59E13H2" 0 "Alpha-L-fucosidase"  
"NT-A5\_00441" 38824 "s59E25H2" 0 "Alpha-L-fucosidase"  
"NT-A5\_00441" 38824 "s59E5H2" 0 "Alpha-L-fucosidase"  
"NT-A5\_00441" 38824 "s63E6H2" 0.002118731 "Alpha-L-fucosidase"  
"NT-A5\_00442" 38825 "s59E13H2" 0 "Alcohol dehydrogenase"  
"NT-A5\_00442" 38825 "s59E25H2" 0 "Alcohol dehydrogenase"  
"NT-A5\_00442" 38825 "s59E5H2" 0.000208377 "Alcohol dehydrogenase"  
"NT-A5\_00442" 38825 "s63E6H2" 0.002609875 "Alcohol dehydrogenase"  
"NT-A5\_00444" 38827 "s59E13H2" 0 "Glucose-6-phosphate 3-dehydrogenase"  
"NT-A5\_00444" 38827 "s59E25H2" 0 "Glucose-6-phosphate 3-dehydrogenase"  
"NT-A5\_00444" 38827 "s59E5H2" 0 "Glucose-6-phosphate 3-dehydrogenase"  
"NT-A5\_00444" 38827 "s63E6H2" 0.001286721 "Glucose-6-phosphate 3-dehydrogenase"  
"NT-A5\_00445" 38828 "s59E13H2" 0 "Shikimate dehydrogenase"  
"NT-A5\_00445" 38828 "s59E25H2" 0 "Shikimate dehydrogenase"  
"NT-A5\_00445" 38828 "s59E5H2" 0 "Shikimate dehydrogenase"  
"NT-A5\_00445" 38828 "s63E6H2" 0.0005441339 "Shikimate dehydrogenase"  
"NT-A5\_00446" 38829 "s59E13H2" 0 "Chorismate synthase"  
"NT-A5\_00446" 38829 "s59E25H2" 0 "Chorismate synthase"  
"NT-A5\_00446" 38829 "s59E5H2" 0 "Chorismate synthase"  
"NT-A5\_00446" 38829 "s63E6H2" 0.001210662 "Chorismate synthase"  
"NT-A5\_00447" 38830 "s59E13H2" 0 "N-acetylmuramic acid 6-phosphate etherase"  
"NT-A5\_00447" 38830 "s59E25H2" 0 "N-acetylmuramic acid 6-phosphate etherase"  
"NT-A5\_00447" 38830 "s59E5H2" 0 "N-acetylmuramic acid 6-phosphate etherase"  
"NT-A5\_00447" 38830 "s63E6H2" 0 "N-acetylmuramic acid 6-phosphate etherase"  
"NT-A5\_00448" 38831 "s59E13H2" 0 "Anhydro-N-acetylmuramic acid kinase"  
"NT-A5\_00448" 38831 "s59E25H2" 0 "Anhydro-N-acetylmuramic acid kinase"  
"NT-A5\_00448" 38831 "s59E5H2" 0 "Anhydro-N-acetylmuramic acid kinase"  
"NT-A5\_00448" 38831 "s63E6H2" 0 "Anhydro-N-acetylmuramic acid kinase"  
"NT-A5\_00449" 38832 "s59E13H2" 0 "Trehalose transport system permease protein SugB"  
"NT-A5\_00449" 38832 "s59E25H2" 0 "Trehalose transport system permease protein SugB"  
"NT-A5\_00449" 38832 "s59E5H2" 0 "Trehalose transport system permease protein SugB"  
"NT-A5\_00449" 38832 "s63E6H2" 0 "Trehalose transport system permease protein SugB"  
"NT-A5\_00450" 38833 "s59E13H2" 0 "Trehalose/maltose transport system permease protein MalF"  
"NT-A5\_00450" 38833 "s59E25H2" 0 "Trehalose/maltose transport system permease protein MalF"  
"NT-A5\_00450" 38833 "s59E5H2" 0 "Trehalose/maltose transport system permease protein MalF"  
"NT-A5\_00450" 38833 "s63E6H2" 0 "Trehalose/maltose transport system permease protein MalF"  
"NT-A5\_00451" 38834 "s59E13H2" 0 "Trehalose/maltose-binding protein MalE precursor"  
"NT-A5\_00451" 38834 "s59E25H2" 0 "Trehalose/maltose-binding protein MalE precursor"

"NT-A5\_00451" 38834 "s59E5H2" 0 "Trehalose/maltose-binding protein MalE precursor"  
"NT-A5\_00451" 38834 "s63E6H2" 0 "Trehalose/maltose-binding protein MalE precursor"  
"NT-A5\_00452" 38835 "s59E13H2" 0 "putative HTH-type transcriptional regulator YbbH"  
"NT-A5\_00452" 38835 "s59E25H2" 0 "putative HTH-type transcriptional regulator YbbH"  
"NT-A5\_00452" 38835 "s59E5H2" 0 "putative HTH-type transcriptional regulator YbbH"  
"NT-A5\_00452" 38835 "s63E6H2" 0 "putative HTH-type transcriptional regulator YbbH"  
"NT-A5\_00454" 38837 "s59E13H2" 0.005589115 "Integrase core domain protein"  
"NT-A5\_00454" 38837 "s59E25H2" 0 "Integrase core domain protein"  
"NT-A5\_00454" 38837 "s59E5H2" 0 "Integrase core domain protein"  
"NT-A5\_00454" 38837 "s63E6H2" 0.003186488 "Integrase core domain protein"  
"NT-A5\_00455" 38838 "s59E13H2" 0 "Shikimate kinase"  
"NT-A5\_00455" 38838 "s59E25H2" 0 "Shikimate kinase"  
"NT-A5\_00455" 38838 "s59E5H2" 0 "Shikimate kinase"  
"NT-A5\_00455" 38838 "s63E6H2" 0.007237249 "Shikimate kinase"  
"NT-A5\_00456" 38839 "s59E13H2" 0 "3-dehydroquinase synthase"  
"NT-A5\_00456" 38839 "s59E25H2" 0 "3-dehydroquinase synthase"  
"NT-A5\_00456" 38839 "s59E5H2" 0 "3-dehydroquinase synthase"  
"NT-A5\_00456" 38839 "s63E6H2" 0.008345765 "3-dehydroquinase synthase"  
"NT-A5\_00457" 38840 "s59E13H2" 0 "3-dehydroquinase dehydratase"  
"NT-A5\_00457" 38840 "s59E25H2" 0 "3-dehydroquinase dehydratase"  
"NT-A5\_00457" 38840 "s59E5H2" 0 "3-dehydroquinase dehydratase"  
"NT-A5\_00457" 38840 "s63E6H2" 0.01466017 "3-dehydroquinase dehydratase"  
"NT-A5\_00458" 38841 "s59E13H2" 0 "P-protein"  
"NT-A5\_00458" 38841 "s59E25H2" 0 "P-protein"  
"NT-A5\_00458" 38841 "s59E5H2" 0.007586847 "P-protein"  
"NT-A5\_00458" 38841 "s63E6H2" 0.006233848 "P-protein"  
"NT-A5\_00459" 38842 "s59E13H2" 0 "Phospho-2-dehydro-3-deoxyheptonate aldolase"  
"NT-A5\_00459" 38842 "s59E25H2" 0 "Phospho-2-dehydro-3-deoxyheptonate aldolase"  
"NT-A5\_00459" 38842 "s59E5H2" 0.003969244 "Phospho-2-dehydro-3-deoxyheptonate aldolase"  
"NT-A5\_00459" 38842 "s63E6H2" 0.005344036 "Phospho-2-dehydro-3-deoxyheptonate aldolase"  
"NT-A5\_00460" 38843 "s59E13H2" 0 "3-phosphoshikimate 1-carboxyvinyltransferase 1"  
"NT-A5\_00460" 38843 "s59E25H2" 0 "3-phosphoshikimate 1-carboxyvinyltransferase 1"  
"NT-A5\_00460" 38843 "s59E5H2" 0.008105866 "3-phosphoshikimate 1-carboxyvinyltransferase 1"  
"NT-A5\_00460" 38843 "s63E6H2" 0.01591592 "3-phosphoshikimate 1-carboxyvinyltransferase 1"  
"NT-A5\_00461" 38844 "s59E13H2" 0 "Pantothenate synthetase"  
"NT-A5\_00461" 38844 "s59E25H2" 0 "Pantothenate synthetase"  
"NT-A5\_00461" 38844 "s59E5H2" 0.01757216 "Pantothenate synthetase"  
"NT-A5\_00461" 38844 "s63E6H2" 0.01351189 "Pantothenate synthetase"  
"NT-A5\_00462" 38845 "s59E13H2" 0 "hypothetical protein"  
"NT-A5\_00462" 38845 "s59E25H2" 0 "hypothetical protein"  
"NT-A5\_00462" 38845 "s59E5H2" 0 "hypothetical protein"  
"NT-A5\_00462" 38845 "s63E6H2" 0 "hypothetical protein"  
"NT-A5\_00464" 38847 "s59E13H2" 0 "hypothetical protein"  
"NT-A5\_00464" 38847 "s59E25H2" 0 "hypothetical protein"  
"NT-A5\_00464" 38847 "s59E5H2" 0 "hypothetical protein"  
"NT-A5\_00464" 38847 "s63E6H2" 0.02622439 "hypothetical protein"  
"NT-A5\_00465" 38848 "s59E13H2" 0 "hypothetical protein"

"NT-A5\_00465" 38848 "s59E25H2" 0 "hypothetical protein"  
"NT-A5\_00465" 38848 "s59E5H2" 0 "hypothetical protein"  
"NT-A5\_00465" 38848 "s63E6H2" 0.08240815 "hypothetical protein"  
"NT-A5\_00467" 38850 "s59E13H2" 0 "hypothetical protein"  
"NT-A5\_00467" 38850 "s59E25H2" 0 "hypothetical protein"  
"NT-A5\_00467" 38850 "s59E5H2" 0 "hypothetical protein"  
"NT-A5\_00467" 38850 "s63E6H2" 0.03969592 "hypothetical protein"  
"NT-A5\_00468" 38851 "s59E13H2" 0 "hypothetical protein"  
"NT-A5\_00468" 38851 "s59E25H2" 0 "hypothetical protein"  
"NT-A5\_00468" 38851 "s59E5H2" 0 "hypothetical protein"  
"NT-A5\_00468" 38851 "s63E6H2" 0 "hypothetical protein"  
"NT-A5\_00469" 38852 "s59E13H2" 0 "hypothetical protein"  
"NT-A5\_00469" 38852 "s59E25H2" 0 "hypothetical protein"  
"NT-A5\_00469" 38852 "s59E5H2" 0 "hypothetical protein"  
"NT-A5\_00469" 38852 "s63E6H2" 0 "hypothetical protein"  
"NT-A5\_00472" 38855 "s59E13H2" 0 "tRNA(fMet)-specific endonuclease VapC"  
"NT-A5\_00472" 38855 "s59E25H2" 0 "tRNA(fMet)-specific endonuclease VapC"  
"NT-A5\_00472" 38855 "s59E5H2" 0.007579511 "tRNA(fMet)-specific endonuclease VapC"  
"NT-A5\_00472" 38855 "s63E6H2" 0.008079402 "tRNA(fMet)-specific endonuclease VapC"  
"NT-A5\_00473" 38856 "s59E13H2" 0 "Undecaprenyl-phosphate mannosyltransferase"  
"NT-A5\_00473" 38856 "s59E25H2" 0 "Undecaprenyl-phosphate mannosyltransferase"  
"NT-A5\_00473" 38856 "s59E5H2" 0 "Undecaprenyl-phosphate mannosyltransferase"  
"NT-A5\_00473" 38856 "s63E6H2" 0.0009691621 "Undecaprenyl-phosphate mannosyltransferase"  
"NT-A5\_00474" 38857 "s59E13H2" 0 "Dolichyl-phosphate-mannose-protein mannosyltransferase"  
"NT-A5\_00474" 38857 "s59E25H2" 0 "Dolichyl-phosphate-mannose-protein mannosyltransferase"  
"NT-A5\_00474" 38857 "s59E5H2" 0 "Dolichyl-phosphate-mannose-protein mannosyltransferase"  
"NT-A5\_00474" 38857 "s63E6H2" 0 "Dolichyl-phosphate-mannose-protein mannosyltransferase"  
"NT-A5\_00475" 38858 "s59E13H2" 0 "hypothetical protein"  
"NT-A5\_00475" 38858 "s59E25H2" 0 "hypothetical protein"  
"NT-A5\_00475" 38858 "s59E5H2" 0 "hypothetical protein"  
"NT-A5\_00475" 38858 "s63E6H2" 0 "hypothetical protein"  
"NT-A5\_00476" 38859 "s59E13H2" 0 "Putative O-antigen transporter"  
"NT-A5\_00476" 38859 "s59E25H2" 0 "Putative O-antigen transporter"  
"NT-A5\_00476" 38859 "s59E5H2" 0 "Putative O-antigen transporter"  
"NT-A5\_00476" 38859 "s63E6H2" 0 "Putative O-antigen transporter"  
"NT-A5\_00477" 38860 "s59E13H2" 0 "hypothetical protein"  
"NT-A5\_00477" 38860 "s59E25H2" 0 "hypothetical protein"  
"NT-A5\_00477" 38860 "s59E5H2" 0 "hypothetical protein"  
"NT-A5\_00477" 38860 "s63E6H2" 0 "hypothetical protein"  
"NT-A5\_00478" 38861 "s59E13H2" 0 "N-acetylglucosaminyl-diphospho-decaprenol L-rhamnosyltransferase"  
"NT-A5\_00478" 38861 "s59E25H2" 0 "N-acetylglucosaminyl-diphospho-decaprenol L-rhamnosyltransferase"  
"NT-A5\_00478" 38861 "s59E5H2" 0 "N-acetylglucosaminyl-diphospho-decaprenol L-rhamnosyltransferase"  
"NT-A5\_00478" 38861 "s63E6H2" 0 "N-acetylglucosaminyl-diphospho-decaprenol L-rhamnosyltransferase"  
"NT-A5\_00479" 38862 "s59E13H2" 0 "O-Antigen ligase"  
"NT-A5\_00479" 38862 "s59E25H2" 0 "O-Antigen ligase"  
"NT-A5\_00479" 38862 "s59E5H2" 0 "O-Antigen ligase"  
"NT-A5\_00479" 38862 "s63E6H2" 0 "O-Antigen ligase"

"NT-A5\_00480" 38863 "s59E13H2" 0 "N-acetylglucosaminyl-diphospho-decaprenol L-rhamnosyltransferase"  
"NT-A5\_00480" 38863 "s59E25H2" 0 "N-acetylglucosaminyl-diphospho-decaprenol L-rhamnosyltransferase"  
"NT-A5\_00480" 38863 "s59E5H2" 0 "N-acetylglucosaminyl-diphospho-decaprenol L-rhamnosyltransferase"  
"NT-A5\_00480" 38863 "s63E6H2" 0 "N-acetylglucosaminyl-diphospho-decaprenol L-rhamnosyltransferase"  
"NT-A5\_00481" 38864 "s59E13H2" 0 "GDP-mannose 6-dehydrogenase"  
"NT-A5\_00481" 38864 "s59E25H2" 0 "GDP-mannose 6-dehydrogenase"  
"NT-A5\_00481" 38864 "s59E5H2" 0 "GDP-mannose 6-dehydrogenase"  
"NT-A5\_00481" 38864 "s63E6H2" 0 "GDP-mannose 6-dehydrogenase"  
"NT-A5\_00482" 38865 "s59E13H2" 0 "Spore coat protein SA"  
"NT-A5\_00482" 38865 "s59E25H2" 0 "Spore coat protein SA"  
"NT-A5\_00482" 38865 "s59E5H2" 0 "Spore coat protein SA"  
"NT-A5\_00482" 38865 "s63E6H2" 0 "Spore coat protein SA"  
"NT-A5\_00483" 38866 "s59E13H2" 0 "UDP-glucose:undecaprenyl-phosphate glucose-1-phosphate transferase"  
"NT-A5\_00483" 38866 "s59E25H2" 0 "UDP-glucose:undecaprenyl-phosphate glucose-1-phosphate transferase"  
"NT-A5\_00483" 38866 "s59E5H2" 0 "UDP-glucose:undecaprenyl-phosphate glucose-1-phosphate transferase"  
"NT-A5\_00483" 38866 "s63E6H2" 0 "UDP-glucose:undecaprenyl-phosphate glucose-1-phosphate transferase"  
"NT-A5\_00484" 38867 "s59E13H2" 0 "Putative pyridoxal phosphate-dependent aminotransferase EpsN"  
"NT-A5\_00484" 38867 "s59E25H2" 0 "Putative pyridoxal phosphate-dependent aminotransferase EpsN"  
"NT-A5\_00484" 38867 "s59E5H2" 0 "Putative pyridoxal phosphate-dependent aminotransferase EpsN"  
"NT-A5\_00484" 38867 "s63E6H2" 0 "Putative pyridoxal phosphate-dependent aminotransferase EpsN"  
"NT-A5\_00485" 38868 "s59E13H2" 0 "UDP-N-acetyl-alpha-D-glucosamine C6 dehydratase"  
"NT-A5\_00485" 38868 "s59E25H2" 0 "UDP-N-acetyl-alpha-D-glucosamine C6 dehydratase"  
"NT-A5\_00485" 38868 "s59E5H2" 0.001912813 "UDP-N-acetyl-alpha-D-glucosamine C6 dehydratase"  
"NT-A5\_00485" 38868 "s63E6H2" 0.004927763 "UDP-N-acetyl-alpha-D-glucosamine C6 dehydratase"  
"NT-A5\_00486" 38869 "s59E13H2" 0 "Digeranylgeranyl glycerophospholipid reductase"  
"NT-A5\_00486" 38869 "s59E25H2" 0 "Digeranylgeranyl glycerophospholipid reductase"  
"NT-A5\_00486" 38869 "s59E5H2" 0.07595497 "Digeranylgeranyl glycerophospholipid reductase"  
"NT-A5\_00486" 38869 "s63E6H2" 0 "Digeranylgeranyl glycerophospholipid reductase"  
"NT-A5\_00487" 38870 "s59E13H2" 0 "Ribosomal RNA small subunit methyltransferase I"  
"NT-A5\_00487" 38870 "s59E25H2" 0 "Ribosomal RNA small subunit methyltransferase I"  
"NT-A5\_00487" 38870 "s59E5H2" 0.1381584 "Ribosomal RNA small subunit methyltransferase I"  
"NT-A5\_00487" 38870 "s63E6H2" 0.02027326 "Ribosomal RNA small subunit methyltransferase I"  
"NT-A5\_00488" 38871 "s59E13H2" 0 "O-Antigen ligase"  
"NT-A5\_00488" 38871 "s59E25H2" 0 "O-Antigen ligase"  
"NT-A5\_00488" 38871 "s59E5H2" 0 "O-Antigen ligase"  
"NT-A5\_00488" 38871 "s63E6H2" 0.003494508 "O-Antigen ligase"  
"NT-A5\_00489" 38872 "s59E13H2" 0 "2'-5'-RNA ligase"  
"NT-A5\_00489" 38872 "s59E25H2" 0 "2'-5'-RNA ligase"  
"NT-A5\_00489" 38872 "s59E5H2" 0.1730096 "2'-5'-RNA ligase"  
"NT-A5\_00489" 38872 "s63E6H2" 0 "2'-5'-RNA ligase"  
"NT-A5\_00490" 38873 "s59E13H2" 0 "DNA repair and recombination protein RadA"  
"NT-A5\_00490" 38873 "s59E25H2" 0 "DNA repair and recombination protein RadA"  
"NT-A5\_00490" 38873 "s59E5H2" 0.06701773 "DNA repair and recombination protein RadA"  
"NT-A5\_00490" 38873 "s63E6H2" 0.005646292 "DNA repair and recombination protein RadA"  
"NT-A5\_00491" 38874 "s59E13H2" 0 "N-acetylmuramoyl-L-alanine amidase AmiA precursor"  
"NT-A5\_00491" 38874 "s59E25H2" 0 "N-acetylmuramoyl-L-alanine amidase AmiA precursor"  
"NT-A5\_00491" 38874 "s59E5H2" 0 "N-acetylmuramoyl-L-alanine amidase AmiA precursor"

"NT-A5\_00491" 38874 "s63E6H2" 0.009562697 "N-acetylmuramoyl-L-alanine amidase AmiA precursor"  
"NT-A5\_00492" 38875 "s59E13H2" 0 "Sporulation and spore germination"  
"NT-A5\_00492" 38875 "s59E25H2" 0 "Sporulation and spore germination"  
"NT-A5\_00492" 38875 "s59E5H2" 0 "Sporulation and spore germination"  
"NT-A5\_00492" 38875 "s63E6H2" 0 "Sporulation and spore germination"  
"NT-A5\_00493" 38876 "s59E13H2" 0 "hypothetical protein"  
"NT-A5\_00493" 38876 "s59E25H2" 0 "hypothetical protein"  
"NT-A5\_00493" 38876 "s59E5H2" 0 "hypothetical protein"  
"NT-A5\_00493" 38876 "s63E6H2" 0 "hypothetical protein"  
"NT-A5\_00494" 38877 "s59E13H2" 0 "Dihydrolipoyllysine-residue acetyltransferase component of pyruvate dehydrogenase complex"  
"NT-A5\_00494" 38877 "s59E25H2" 0 "Dihydrolipoyllysine-residue acetyltransferase component of pyruvate dehydrogenase complex"  
"NT-A5\_00494" 38877 "s59E5H2" 0.006809474 "Dihydrolipoyllysine-residue acetyltransferase component of pyruvate dehydrogenase complex"  
"NT-A5\_00494" 38877 "s63E6H2" 0.002277175 "Dihydrolipoyllysine-residue acetyltransferase component of pyruvate dehydrogenase complex"  
"NT-A5\_00495" 38878 "s59E13H2" 0 "Riboflavin synthase"  
"NT-A5\_00495" 38878 "s59E25H2" 0 "Riboflavin synthase"  
"NT-A5\_00495" 38878 "s59E5H2" 0 "Riboflavin synthase"  
"NT-A5\_00495" 38878 "s63E6H2" 0.01149262 "Riboflavin synthase"  
"NT-A5\_00496" 38879 "s59E13H2" 0 "Riboflavin biosynthesis protein RibBA"  
"NT-A5\_00496" 38879 "s59E25H2" 0 "Riboflavin biosynthesis protein RibBA"  
"NT-A5\_00496" 38879 "s59E5H2" 0 "Riboflavin biosynthesis protein RibBA"  
"NT-A5\_00496" 38879 "s63E6H2" 0.01059293 "Riboflavin biosynthesis protein RibBA"  
"NT-A5\_00497" 38880 "s59E13H2" 0.0001624448 "6,7-dimethyl-8-ribityllumazine synthase"  
"NT-A5\_00497" 38880 "s59E25H2" 0 "6,7-dimethyl-8-ribityllumazine synthase"  
"NT-A5\_00497" 38880 "s59E5H2" 0 "6,7-dimethyl-8-ribityllumazine synthase"  
"NT-A5\_00497" 38880 "s63E6H2" 0.00478857 "6,7-dimethyl-8-ribityllumazine synthase"  
"NT-A5\_00498" 38881 "s59E13H2" 0.002233801 "Release factor glutamine methyltransferase"  
"NT-A5\_00498" 38881 "s59E25H2" 0 "Release factor glutamine methyltransferase"  
"NT-A5\_00498" 38881 "s59E5H2" 0.003913796 "Release factor glutamine methyltransferase"  
"NT-A5\_00498" 38881 "s63E6H2" 0.002632339 "Release factor glutamine methyltransferase"  
"NT-A5\_00499" 38882 "s59E13H2" 0 "hypothetical protein"  
"NT-A5\_00499" 38882 "s59E25H2" 0 "hypothetical protein"  
"NT-A5\_00499" 38882 "s59E5H2" 0 "hypothetical protein"  
"NT-A5\_00499" 38882 "s63E6H2" 0.001645392 "hypothetical protein"  
"NT-A5\_00500" 38883 "s59E13H2" 0 "Stage V sporulation protein D"  
"NT-A5\_00500" 38883 "s59E25H2" 0 "Stage V sporulation protein D"  
"NT-A5\_00500" 38883 "s59E5H2" 0.003837426 "Stage V sporulation protein D"  
"NT-A5\_00500" 38883 "s63E6H2" 0.005519675 "Stage V sporulation protein D"  
"NT-A5\_00501" 38884 "s59E13H2" 0 "Rod shape-determining protein RodA"  
"NT-A5\_00501" 38884 "s59E25H2" 0 "Rod shape-determining protein RodA"  
"NT-A5\_00501" 38884 "s59E5H2" 0.003778222 "Rod shape-determining protein RodA"  
"NT-A5\_00501" 38884 "s63E6H2" 0.004233489 "Rod shape-determining protein RodA"  
"NT-A5\_00502" 38885 "s59E13H2" 0 "Bifunctional homocysteine S-methyltransferase/5,10-methylenetetrahydrofolate reductase"  
"NT-A5\_00502" 38885 "s59E25H2" 0 "Bifunctional homocysteine S-methyltransferase/5,10-methylenetetrahydrofolate reductase"  
"NT-A5\_00502" 38885 "s59E5H2" 0 "Bifunctional homocysteine S-methyltransferase/5,10-methylenetetrahydrofolate reductase"  
"NT-A5\_00502" 38885 "s63E6H2" 0.008701728 "Bifunctional homocysteine S-methyltransferase/5,10-methylenetetrahydrofolate reductase"  
"NT-A5\_00503" 38886 "s59E13H2" 0 "2,3-dimethylmalate dehydratase large subunit"  
"NT-A5\_00503" 38886 "s59E25H2" 0 "2,3-dimethylmalate dehydratase large subunit"

"NT-A5\_00503" 38886 "s59E5H2" 0.02171833 "2,3-dimethylmalate dehydratase large subunit"  
"NT-A5\_00503" 38886 "s63E6H2" 0.002127511 "2,3-dimethylmalate dehydratase large subunit"  
"NT-A5\_00504" 38887 "s59E13H2" 0 "LL-diaminopimelate aminotransferase"  
"NT-A5\_00504" 38887 "s59E25H2" 0 "LL-diaminopimelate aminotransferase"  
"NT-A5\_00504" 38887 "s59E5H2" 0.01050299 "LL-diaminopimelate aminotransferase"  
"NT-A5\_00504" 38887 "s63E6H2" 0.01069331 "LL-diaminopimelate aminotransferase"  
"NT-A5\_00505" 38888 "s59E13H2" 0 "Apolipoprotein A1/A4/E domain protein"  
"NT-A5\_00505" 38888 "s59E25H2" 0 "Apolipoprotein A1/A4/E domain protein"  
"NT-A5\_00505" 38888 "s59E5H2" 0.002066201 "Apolipoprotein A1/A4/E domain protein"  
"NT-A5\_00505" 38888 "s63E6H2" 0.01843455 "Apolipoprotein A1/A4/E domain protein"  
"NT-A5\_00506" 38889 "s59E13H2" 0 "Resuscitation-promoting factor Rpf precursor"  
"NT-A5\_00506" 38889 "s59E25H2" 0 "Resuscitation-promoting factor Rpf precursor"  
"NT-A5\_00506" 38889 "s59E5H2" 0.01083062 "Resuscitation-promoting factor Rpf precursor"  
"NT-A5\_00506" 38889 "s63E6H2" 0.0229491 "Resuscitation-promoting factor Rpf precursor"  
"NT-A5\_00508" 38891 "s59E13H2" 0 "50S ribosomal protein L31"  
"NT-A5\_00508" 38891 "s59E25H2" 0 "50S ribosomal protein L31"  
"NT-A5\_00508" 38891 "s59E5H2" 0 "50S ribosomal protein L31"  
"NT-A5\_00508" 38891 "s63E6H2" 0.0192364 "50S ribosomal protein L31"  
"NT-A5\_00509" 38892 "s59E13H2" 0 "hypothetical protein"  
"NT-A5\_00509" 38892 "s59E25H2" 0 "hypothetical protein"  
"NT-A5\_00509" 38892 "s59E5H2" 0.01497149 "hypothetical protein"  
"NT-A5\_00509" 38892 "s63E6H2" 0.02586427 "hypothetical protein"  
"NT-A5\_00510" 38893 "s59E13H2" 0 "Bifunctional NAD(P)H-hydrate repair enzyme Nnr"  
"NT-A5\_00510" 38893 "s59E25H2" 0 "Bifunctional NAD(P)H-hydrate repair enzyme Nnr"  
"NT-A5\_00510" 38893 "s59E5H2" 0.02529114 "Bifunctional NAD(P)H-hydrate repair enzyme Nnr"  
"NT-A5\_00510" 38893 "s63E6H2" 0.01977624 "Bifunctional NAD(P)H-hydrate repair enzyme Nnr"  
"NT-A5\_00511" 38894 "s59E13H2" 0 "Holo-[acyl-carrier-protein] synthase"  
"NT-A5\_00511" 38894 "s59E25H2" 0 "Holo-[acyl-carrier-protein] synthase"  
"NT-A5\_00511" 38894 "s59E5H2" 0.01098356 "Holo-[acyl-carrier-protein] synthase"  
"NT-A5\_00511" 38894 "s63E6H2" 0.005008412 "Holo-[acyl-carrier-protein] synthase"  
"NT-A5\_00512" 38895 "s59E13H2" 0 "Pyridoxine 5'-phosphate synthase"  
"NT-A5\_00512" 38895 "s59E25H2" 0 "Pyridoxine 5'-phosphate synthase"  
"NT-A5\_00512" 38895 "s59E5H2" 0.04384177 "Pyridoxine 5'-phosphate synthase"  
"NT-A5\_00512" 38895 "s63E6H2" 0.005952108 "Pyridoxine 5'-phosphate synthase"  
"NT-A5\_00513" 38896 "s59E13H2" 0 "4-hydroxy-tetrahydrodipicolinate reductase"  
"NT-A5\_00513" 38896 "s59E25H2" 0 "4-hydroxy-tetrahydrodipicolinate reductase"  
"NT-A5\_00513" 38896 "s59E5H2" 0.004805768 "4-hydroxy-tetrahydrodipicolinate reductase"  
"NT-A5\_00513" 38896 "s63E6H2" 0.001894944 "4-hydroxy-tetrahydrodipicolinate reductase"  
"NT-A5\_00515" 38898 "s59E13H2" 0 "SsrA-binding protein"  
"NT-A5\_00515" 38898 "s59E25H2" 0 "SsrA-binding protein"  
"NT-A5\_00515" 38898 "s59E5H2" 0 "SsrA-binding protein"  
"NT-A5\_00515" 38898 "s63E6H2" 0.006479061 "SsrA-binding protein"  
"NT-A5\_00516" 38899 "s59E13H2" 0 "DNA-binding protein HU"  
"NT-A5\_00516" 38899 "s59E25H2" 0 "DNA-binding protein HU"  
"NT-A5\_00516" 38899 "s59E5H2" 0 "DNA-binding protein HU"  
"NT-A5\_00516" 38899 "s63E6H2" 0.007259518 "DNA-binding protein HU"  
"NT-A5\_00517" 38900 "s59E13H2" 0 "hypothetical protein"

"NT-A5\_00517" 38900 "s59E25H2" 0 "hypothetical protein"  
"NT-A5\_00517" 38900 "s59E5H2" 0 "hypothetical protein"  
"NT-A5\_00517" 38900 "s63E6H2" 0.003978902 "hypothetical protein"  
"NT-A5\_00518" 38901 "s59E13H2" 0.001774242 "Peptide chain release factor 2"  
"NT-A5\_00518" 38901 "s59E25H2" 0 "Peptide chain release factor 2"  
"NT-A5\_00518" 38901 "s59E5H2" 0.007792835 "Peptide chain release factor 2"  
"NT-A5\_00518" 38901 "s63E6H2" 0.005517079 "Peptide chain release factor 2"  
"NT-A5\_00519" 38902 "s59E13H2" 0.01281765 "putative oxidoreductase/MSMEI\_1564"  
"NT-A5\_00519" 38902 "s59E25H2" 0 "putative oxidoreductase/MSMEI\_1564"  
"NT-A5\_00519" 38902 "s59E5H2" 0.04764634 "putative oxidoreductase/MSMEI\_1564"  
"NT-A5\_00519" 38902 "s63E6H2" 0.01004859 "putative oxidoreductase/MSMEI\_1564"  
"NT-A5\_00520" 38903 "s59E13H2" 0.0243808 "50S ribosomal protein L28"  
"NT-A5\_00520" 38903 "s59E25H2" 0 "50S ribosomal protein L28"  
"NT-A5\_00520" 38903 "s59E5H2" 0 "50S ribosomal protein L28"  
"NT-A5\_00520" 38903 "s63E6H2" 0 "50S ribosomal protein L28"  
"NT-A5\_00521" 38904 "s59E13H2" 0.006343151 "ATP-dependent DNA helicase RecG"  
"NT-A5\_00521" 38904 "s59E25H2" 0 "ATP-dependent DNA helicase RecG"  
"NT-A5\_00521" 38904 "s59E5H2" 0.01571762 "ATP-dependent DNA helicase RecG"  
"NT-A5\_00521" 38904 "s63E6H2" 0.009520397 "ATP-dependent DNA helicase RecG"  
"NT-A5\_00522" 38905 "s59E13H2" 0.002265907 "General secretion pathway protein K"  
"NT-A5\_00522" 38905 "s59E25H2" 0 "General secretion pathway protein K"  
"NT-A5\_00522" 38905 "s59E5H2" 0 "General secretion pathway protein K"  
"NT-A5\_00522" 38905 "s63E6H2" 0.007199372 "General secretion pathway protein K"  
"NT-A5\_00523" 38906 "s59E13H2" 0 "Type II secretion system protein G precursor"  
"NT-A5\_00523" 38906 "s59E25H2" 0 "Type II secretion system protein G precursor"  
"NT-A5\_00523" 38906 "s59E5H2" 0.001630999 "Type II secretion system protein G precursor"  
"NT-A5\_00523" 38906 "s63E6H2" 0 "Type II secretion system protein G precursor"  
"NT-A5\_00524" 38907 "s59E13H2" 0 "hypothetical protein"  
"NT-A5\_00524" 38907 "s59E25H2" 0 "hypothetical protein"  
"NT-A5\_00524" 38907 "s59E5H2" 0 "hypothetical protein"  
"NT-A5\_00524" 38907 "s63E6H2" 0.0006818923 "hypothetical protein"  
"NT-A5\_00525" 38908 "s59E13H2" 0 "hypothetical protein"  
"NT-A5\_00525" 38908 "s59E25H2" 0 "hypothetical protein"  
"NT-A5\_00525" 38908 "s59E5H2" 0 "hypothetical protein"  
"NT-A5\_00525" 38908 "s63E6H2" 0 "hypothetical protein"  
"NT-A5\_00526" 38909 "s59E13H2" 0 "hypothetical protein"  
"NT-A5\_00526" 38909 "s59E25H2" 0 "hypothetical protein"  
"NT-A5\_00526" 38909 "s59E5H2" 0 "hypothetical protein"  
"NT-A5\_00526" 38909 "s63E6H2" 0.00153203 "hypothetical protein"  
"NT-A5\_00527" 38910 "s59E13H2" 0.001318797 "Type II secretion system protein G precursor"  
"NT-A5\_00527" 38910 "s59E25H2" 0 "Type II secretion system protein G precursor"  
"NT-A5\_00527" 38910 "s59E5H2" 0 "Type II secretion system protein G precursor"  
"NT-A5\_00527" 38910 "s63E6H2" 0 "Type II secretion system protein G precursor"  
"NT-A5\_00528" 38911 "s59E13H2" 0 "Transposase IS200 like protein"  
"NT-A5\_00528" 38911 "s59E25H2" 0 "Transposase IS200 like protein"  
"NT-A5\_00528" 38911 "s59E5H2" 0 "Transposase IS200 like protein"  
"NT-A5\_00528" 38911 "s63E6H2" 0.03932625 "Transposase IS200 like protein"

"NT-A5\_00529" 38912 "s59E13H2" 0 "hypothetical protein"  
"NT-A5\_00529" 38912 "s59E25H2" 0 "hypothetical protein"  
"NT-A5\_00529" 38912 "s59E5H2" 0 "hypothetical protein"  
"NT-A5\_00529" 38912 "s63E6H2" 0 "hypothetical protein"  
"NT-A5\_00530" 38913 "s59E13H2" 0 "Transcriptional regulatory protein ZraR"  
"NT-A5\_00530" 38913 "s59E25H2" 0 "Transcriptional regulatory protein ZraR"  
"NT-A5\_00530" 38913 "s59E5H2" 0 "Transcriptional regulatory protein ZraR"  
"NT-A5\_00530" 38913 "s63E6H2" 0 "Transcriptional regulatory protein ZraR"  
"NT-A5\_00531" 38914 "s59E13H2" 0 "RNA polymerase factor sigma-54"  
"NT-A5\_00531" 38914 "s59E25H2" 0 "RNA polymerase factor sigma-54"  
"NT-A5\_00531" 38914 "s59E5H2" 0.003303124 "RNA polymerase factor sigma-54"  
"NT-A5\_00531" 38914 "s63E6H2" 0 "RNA polymerase factor sigma-54"  
"NT-A5\_00532" 38915 "s59E13H2" 0 "Sporulation kinase E"  
"NT-A5\_00532" 38915 "s59E25H2" 0 "Sporulation kinase E"  
"NT-A5\_00532" 38915 "s59E5H2" 0.006470702 "Sporulation kinase E"  
"NT-A5\_00532" 38915 "s63E6H2" 0 "Sporulation kinase E"  
"NT-A5\_00533" 38916 "s59E13H2" 0 "Sporulation initiation phosphotransferase F"  
"NT-A5\_00533" 38916 "s59E25H2" 0 "Sporulation initiation phosphotransferase F"  
"NT-A5\_00533" 38916 "s59E5H2" 0 "Sporulation initiation phosphotransferase F"  
"NT-A5\_00533" 38916 "s63E6H2" 0 "Sporulation initiation phosphotransferase F"  
"NT-A5\_00534" 38917 "s59E13H2" 0 "Gas vesicle structural protein"  
"NT-A5\_00534" 38917 "s59E25H2" 0 "Gas vesicle structural protein"  
"NT-A5\_00534" 38917 "s59E5H2" 0 "Gas vesicle structural protein"  
"NT-A5\_00534" 38917 "s63E6H2" 0 "Gas vesicle structural protein"  
"NT-A5\_00535" 38918 "s59E13H2" 0 "hypothetical protein"  
"NT-A5\_00535" 38918 "s59E25H2" 0 "hypothetical protein"  
"NT-A5\_00535" 38918 "s59E5H2" 0.03379214 "hypothetical protein"  
"NT-A5\_00535" 38918 "s63E6H2" 0 "hypothetical protein"  
"NT-A5\_00536" 38919 "s59E13H2" 0 "hypothetical protein"  
"NT-A5\_00536" 38919 "s59E25H2" 0 "hypothetical protein"  
"NT-A5\_00536" 38919 "s59E5H2" 0 "hypothetical protein"  
"NT-A5\_00536" 38919 "s63E6H2" 0 "hypothetical protein"  
"NT-A5\_00537" 38920 "s59E13H2" 0 "Putative nicotinate phosphoribosyltransferase"  
"NT-A5\_00537" 38920 "s59E25H2" 0 "Putative nicotinate phosphoribosyltransferase"  
"NT-A5\_00537" 38920 "s59E5H2" 0 "Putative nicotinate phosphoribosyltransferase"  
"NT-A5\_00537" 38920 "s63E6H2" 0 "Putative nicotinate phosphoribosyltransferase"  
"NT-A5\_00538" 38921 "s59E13H2" 0 "Oligopeptide transport ATP-binding protein OppF"  
"NT-A5\_00538" 38921 "s59E25H2" 0 "Oligopeptide transport ATP-binding protein OppF"  
"NT-A5\_00538" 38921 "s59E5H2" 0 "Oligopeptide transport ATP-binding protein OppF"  
"NT-A5\_00538" 38921 "s63E6H2" 0.002833249 "Oligopeptide transport ATP-binding protein OppF"  
"NT-A5\_00539" 38922 "s59E13H2" 0 "Oligopeptide transport ATP-binding protein OppD"  
"NT-A5\_00539" 38922 "s59E25H2" 0 "Oligopeptide transport ATP-binding protein OppD"  
"NT-A5\_00539" 38922 "s59E5H2" 0 "Oligopeptide transport ATP-binding protein OppD"  
"NT-A5\_00539" 38922 "s63E6H2" 0 "Oligopeptide transport ATP-binding protein OppD"  
"NT-A5\_00540" 38923 "s59E13H2" 0 "hypothetical protein"  
"NT-A5\_00540" 38923 "s59E25H2" 0 "hypothetical protein"  
"NT-A5\_00540" 38923 "s59E5H2" 0 "hypothetical protein"



"NT-A5\_00540" 38923 "s63E6H2" 0 "hypothetical protein"  
"NT-A5\_00541" 38924 "s59E13H2" 0 "Oligopeptide transport system permease protein OppC"  
"NT-A5\_00541" 38924 "s59E25H2" 0 "Oligopeptide transport system permease protein OppC"  
"NT-A5\_00541" 38924 "s59E5H2" 0 "Oligopeptide transport system permease protein OppC"  
"NT-A5\_00541" 38924 "s63E6H2" 0 "Oligopeptide transport system permease protein OppC"  
"NT-A5\_00542" 38925 "s59E13H2" 0 "Dipeptide transport system permease protein DppB"  
"NT-A5\_00542" 38925 "s59E25H2" 0 "Dipeptide transport system permease protein DppB"  
"NT-A5\_00542" 38925 "s59E5H2" 0 "Dipeptide transport system permease protein DppB"  
"NT-A5\_00542" 38925 "s63E6H2" 0 "Dipeptide transport system permease protein DppB"  
"NT-A5\_00543" 38926 "s59E13H2" 0 "Periplasmic oligopeptide-binding protein precursor"  
"NT-A5\_00543" 38926 "s59E25H2" 0 "Periplasmic oligopeptide-binding protein precursor"  
"NT-A5\_00543" 38926 "s59E5H2" 0 "Periplasmic oligopeptide-binding protein precursor"  
"NT-A5\_00543" 38926 "s63E6H2" 0.5259147 "Periplasmic oligopeptide-binding protein precursor"  
"NT-A5\_00544" 38927 "s59E13H2" 0 "Oligopeptide-binding protein OppA precursor"  
"NT-A5\_00544" 38927 "s59E25H2" 0 "Oligopeptide-binding protein OppA precursor"  
"NT-A5\_00544" 38927 "s59E5H2" 0 "Oligopeptide-binding protein OppA precursor"  
"NT-A5\_00544" 38927 "s63E6H2" 0.002115086 "Oligopeptide-binding protein OppA precursor"  
"NT-A5\_00545" 38928 "s59E13H2" 0 "hypothetical protein"  
"NT-A5\_00545" 38928 "s59E25H2" 0 "hypothetical protein"  
"NT-A5\_00545" 38928 "s59E5H2" 0 "hypothetical protein"  
"NT-A5\_00545" 38928 "s63E6H2" 1.419205 "hypothetical protein"  
"NT-A5\_00546" 38929 "s59E13H2" 0 "Altronate oxidoreductase"  
"NT-A5\_00546" 38929 "s59E25H2" 0 "Altronate oxidoreductase"  
"NT-A5\_00546" 38929 "s59E5H2" 0 "Altronate oxidoreductase"  
"NT-A5\_00546" 38929 "s63E6H2" 1.75354 "Altronate oxidoreductase"  
"NT-A5\_00547" 38930 "s59E13H2" 0 "hypothetical protein"  
"NT-A5\_00547" 38930 "s59E25H2" 0 "hypothetical protein"  
"NT-A5\_00547" 38930 "s59E5H2" 0.03166993 "hypothetical protein"  
"NT-A5\_00547" 38930 "s63E6H2" 1.320707 "hypothetical protein"  
"NT-A5\_00548" 38931 "s59E13H2" 0 "V-type ATP synthase alpha chain"  
"NT-A5\_00548" 38931 "s59E25H2" 0 "V-type ATP synthase alpha chain"  
"NT-A5\_00548" 38931 "s59E5H2" 0 "V-type ATP synthase alpha chain"  
"NT-A5\_00548" 38931 "s63E6H2" 0.06444047 "V-type ATP synthase alpha chain"  
"NT-A5\_00549" 38932 "s59E13H2" 0 "tagatose 1,6-diphosphate aldolase"  
"NT-A5\_00549" 38932 "s59E25H2" 0 "tagatose 1,6-diphosphate aldolase"  
"NT-A5\_00549" 38932 "s59E5H2" 0.007629051 "tagatose 1,6-diphosphate aldolase"  
"NT-A5\_00549" 38932 "s63E6H2" 0.004589268 "tagatose 1,6-diphosphate aldolase"  
"NT-A5\_00550" 38933 "s59E13H2" 0 "V-type ATP synthase beta chain"  
"NT-A5\_00550" 38933 "s59E25H2" 0 "V-type ATP synthase beta chain"  
"NT-A5\_00550" 38933 "s59E5H2" 0 "V-type ATP synthase beta chain"  
"NT-A5\_00550" 38933 "s63E6H2" 0.0067945 "V-type ATP synthase beta chain"  
"NT-A5\_00551" 38934 "s59E13H2" 0 "V-type ATP synthase beta chain"  
"NT-A5\_00551" 38934 "s59E25H2" 0 "V-type ATP synthase beta chain"  
"NT-A5\_00551" 38934 "s59E5H2" 0 "V-type ATP synthase beta chain"  
"NT-A5\_00551" 38934 "s63E6H2" 0.09286839 "V-type ATP synthase beta chain"  
"NT-A5\_00552" 38935 "s59E13H2" 0.001291753 "2,5-dihydroxypyridine 5,6-dioxygenase"  
"NT-A5\_00552" 38935 "s59E25H2" 0 "2,5-dihydroxypyridine 5,6-dioxygenase"

"NT-A5\_00552" 38935 "s59E5H2" 0 "2,5-dihydroxypyridine 5,6-dioxygenase"  
"NT-A5\_00552" 38935 "s63E6H2" 0.2425521 "2,5-dihydroxypyridine 5,6-dioxygenase"  
"NT-A5\_00554" 38937 "s59E13H2" 0 "Peptidase T"  
"NT-A5\_00554" 38937 "s59E25H2" 0 "Peptidase T"  
"NT-A5\_00554" 38937 "s59E5H2" 0 "Peptidase T"  
"NT-A5\_00554" 38937 "s63E6H2" 0.1543669 "Peptidase T"  
"NT-A5\_00555" 38938 "s59E13H2" 0 "Xaa-Pro dipeptidase"  
"NT-A5\_00555" 38938 "s59E25H2" 0 "Xaa-Pro dipeptidase"  
"NT-A5\_00555" 38938 "s59E5H2" 0 "Xaa-Pro dipeptidase"  
"NT-A5\_00555" 38938 "s63E6H2" 0.07032843 "Xaa-Pro dipeptidase"  
"NT-A5\_00556" 38939 "s59E13H2" 0 "Hydantoinase B/oxoprolinase"  
"NT-A5\_00556" 38939 "s59E25H2" 0 "Hydantoinase B/oxoprolinase"  
"NT-A5\_00556" 38939 "s59E5H2" 0 "Hydantoinase B/oxoprolinase"  
"NT-A5\_00556" 38939 "s63E6H2" 0.03483335 "Hydantoinase B/oxoprolinase"  
"NT-A5\_00557" 38940 "s59E13H2" 0 "Inner membrane ABC transporter permease protein YcjP"  
"NT-A5\_00557" 38940 "s59E25H2" 0 "Inner membrane ABC transporter permease protein YcjP"  
"NT-A5\_00557" 38940 "s59E5H2" 0 "Inner membrane ABC transporter permease protein YcjP"  
"NT-A5\_00557" 38940 "s63E6H2" 0 "Inner membrane ABC transporter permease protein YcjP"  
"NT-A5\_00558" 38941 "s59E13H2" 0 "sn-glycerol-3-phosphate transport system permease protein UgpA"  
"NT-A5\_00558" 38941 "s59E25H2" 0 "sn-glycerol-3-phosphate transport system permease protein UgpA"  
"NT-A5\_00558" 38941 "s59E5H2" 0 "sn-glycerol-3-phosphate transport system permease protein UgpA"  
"NT-A5\_00558" 38941 "s63E6H2" 0 "sn-glycerol-3-phosphate transport system permease protein UgpA"  
"NT-A5\_00559" 38942 "s59E13H2" 0 "Trehalose/maltose-binding protein MalE precursor"  
"NT-A5\_00559" 38942 "s59E25H2" 0 "Trehalose/maltose-binding protein MalE precursor"  
"NT-A5\_00559" 38942 "s59E5H2" 0 "Trehalose/maltose-binding protein MalE precursor"  
"NT-A5\_00559" 38942 "s63E6H2" 0 "Trehalose/maltose-binding protein MalE precursor"  
"NT-A5\_00560" 38943 "s59E13H2" 0 "Bifunctional IPC transferase and DIPP synthase"  
"NT-A5\_00560" 38943 "s59E25H2" 0 "Bifunctional IPC transferase and DIPP synthase"  
"NT-A5\_00560" 38943 "s59E5H2" 0.0026748 "Bifunctional IPC transferase and DIPP synthase"  
"NT-A5\_00560" 38943 "s63E6H2" 0.01977551 "Bifunctional IPC transferase and DIPP synthase"  
"NT-A5\_00561" 38944 "s59E13H2" 0 "UTP--glucose-1-phosphate uridylyltransferase AgIF"  
"NT-A5\_00561" 38944 "s59E25H2" 0 "UTP--glucose-1-phosphate uridylyltransferase AgIF"  
"NT-A5\_00561" 38944 "s59E5H2" 0.02250285 "UTP--glucose-1-phosphate uridylyltransferase AgIF"  
"NT-A5\_00561" 38944 "s63E6H2" 0.08272068 "UTP--glucose-1-phosphate uridylyltransferase AgIF"  
"NT-A5\_00562" 38945 "s59E13H2" 0 "Pyrophosphate--fructose 6-phosphate 1-phosphotransferase"  
"NT-A5\_00562" 38945 "s59E25H2" 0 "Pyrophosphate--fructose 6-phosphate 1-phosphotransferase"  
"NT-A5\_00562" 38945 "s59E5H2" 0.01989678 "Pyrophosphate--fructose 6-phosphate 1-phosphotransferase"  
"NT-A5\_00562" 38945 "s63E6H2" 0.02421514 "Pyrophosphate--fructose 6-phosphate 1-phosphotransferase"  
"NT-A5\_00563" 38946 "s59E13H2" 0 "Tetratricopeptide repeat protein"  
"NT-A5\_00563" 38946 "s59E25H2" 0 "Tetratricopeptide repeat protein"  
"NT-A5\_00563" 38946 "s59E5H2" 0.6353766 "Tetratricopeptide repeat protein"  
"NT-A5\_00563" 38946 "s63E6H2" 0.04177302 "Tetratricopeptide repeat protein"  
"NT-A5\_00564" 38947 "s59E13H2" 0 "hypothetical protein"  
"NT-A5\_00564" 38947 "s59E25H2" 0 "hypothetical protein"  
"NT-A5\_00564" 38947 "s59E5H2" 0.3505208 "hypothetical protein"  
"NT-A5\_00564" 38947 "s63E6H2" 0.07357388 "hypothetical protein"  
"NT-A5\_00566" 38949 "s59E13H2" 0 "aminoimidazole riboside kinase"

"NT-A5\_00566" 38949 "s59E25H2" 0 "aminoimidazole riboside kinase"  
"NT-A5\_00566" 38949 "s59E5H2" 0 "aminoimidazole riboside kinase"  
"NT-A5\_00566" 38949 "s63E6H2" 0.01233157 "aminoimidazole riboside kinase"  
"NT-A5\_00567" 38950 "s59E13H2" 0 "putative sugar kinase YdjH"  
"NT-A5\_00567" 38950 "s59E25H2" 0 "putative sugar kinase YdjH"  
"NT-A5\_00567" 38950 "s59E5H2" 0.0120623 "putative sugar kinase YdjH"  
"NT-A5\_00567" 38950 "s63E6H2" 0.0939395 "putative sugar kinase YdjH"  
"NT-A5\_00568" 38951 "s59E13H2" 0 "1-deoxy-D-xylulose-5-phosphate synthase"  
"NT-A5\_00568" 38951 "s59E25H2" 0 "1-deoxy-D-xylulose-5-phosphate synthase"  
"NT-A5\_00568" 38951 "s59E5H2" 0 "1-deoxy-D-xylulose-5-phosphate synthase"  
"NT-A5\_00568" 38951 "s63E6H2" 0.01972275 "1-deoxy-D-xylulose-5-phosphate synthase"  
"NT-A5\_00569" 38952 "s59E13H2" 0 "Transposase IS200 like protein"  
"NT-A5\_00569" 38952 "s59E25H2" 0 "Transposase IS200 like protein"  
"NT-A5\_00569" 38952 "s59E5H2" 0 "Transposase IS200 like protein"  
"NT-A5\_00569" 38952 "s63E6H2" 0 "Transposase IS200 like protein"  
"NT-A5\_00572" 38955 "s59E13H2" 0 "hypothetical protein"  
"NT-A5\_00572" 38955 "s59E25H2" 0 "hypothetical protein"  
"NT-A5\_00572" 38955 "s59E5H2" 0.0007408587 "hypothetical protein"  
"NT-A5\_00572" 38955 "s63E6H2" 0.02364713 "hypothetical protein"  
"NT-A5\_00573" 38956 "s59E13H2" 0 "Sporulation kinase A"  
"NT-A5\_00573" 38956 "s59E25H2" 0 "Sporulation kinase A"  
"NT-A5\_00573" 38956 "s59E5H2" 0.004675649 "Sporulation kinase A"  
"NT-A5\_00573" 38956 "s63E6H2" 0.06520592 "Sporulation kinase A"  
"NT-A5\_00574" 38957 "s59E13H2" 0 "Twitching mobility protein"  
"NT-A5\_00574" 38957 "s59E25H2" 0 "Twitching mobility protein"  
"NT-A5\_00574" 38957 "s59E5H2" 0 "Twitching mobility protein"  
"NT-A5\_00574" 38957 "s63E6H2" 0 "Twitching mobility protein"  
"NT-A5\_00575" 38958 "s59E13H2" 0 "Type II secretion system protein E"  
"NT-A5\_00575" 38958 "s59E25H2" 0 "Type II secretion system protein E"  
"NT-A5\_00575" 38958 "s59E5H2" 0 "Type II secretion system protein E"  
"NT-A5\_00575" 38958 "s63E6H2" 0 "Type II secretion system protein E"  
"NT-A5\_00576" 38959 "s59E13H2" 0 "Type II secretion system protein F"  
"NT-A5\_00576" 38959 "s59E25H2" 0 "Type II secretion system protein F"  
"NT-A5\_00576" 38959 "s59E5H2" 0 "Type II secretion system protein F"  
"NT-A5\_00576" 38959 "s63E6H2" 0 "Type II secretion system protein F"  
"NT-A5\_00577" 38960 "s59E13H2" 0 "Fimbrial protein precursor"  
"NT-A5\_00577" 38960 "s59E25H2" 0 "Fimbrial protein precursor"  
"NT-A5\_00577" 38960 "s59E5H2" 0 "Fimbrial protein precursor"  
"NT-A5\_00577" 38960 "s63E6H2" 0 "Fimbrial protein precursor"  
"NT-A5\_00578" 38961 "s59E13H2" 0 "hypothetical protein"  
"NT-A5\_00578" 38961 "s59E25H2" 0 "hypothetical protein"  
"NT-A5\_00578" 38961 "s59E5H2" 0 "hypothetical protein"  
"NT-A5\_00578" 38961 "s63E6H2" 0 "hypothetical protein"  
"NT-A5\_00579" 38962 "s59E13H2" 0 "hypothetical protein"  
"NT-A5\_00579" 38962 "s59E25H2" 0 "hypothetical protein"  
"NT-A5\_00579" 38962 "s59E5H2" 0.01080782 "hypothetical protein"  
"NT-A5\_00579" 38962 "s63E6H2" 0 "hypothetical protein"

"NT-A5\_00580" 38963 "s59E13H2" 0.004061876 "hypothetical protein"  
"NT-A5\_00580" 38963 "s59E25H2" 0 "hypothetical protein"  
"NT-A5\_00580" 38963 "s59E5H2" 0.001796697 "hypothetical protein"  
"NT-A5\_00580" 38963 "s63E6H2" 0 "hypothetical protein"  
"NT-A5\_00581" 38964 "s59E13H2" 0.9516476 "Competence protein A"  
"NT-A5\_00581" 38964 "s59E25H2" 0 "Competence protein A"  
"NT-A5\_00581" 38964 "s59E5H2" 0 "Competence protein A"  
"NT-A5\_00581" 38964 "s63E6H2" 0 "Competence protein A"  
"NT-A5\_00582" 38965 "s59E13H2" 0.6194606 "Fimbrial assembly protein (PilN)"  
"NT-A5\_00582" 38965 "s59E25H2" 0 "Fimbrial assembly protein (PilN)"  
"NT-A5\_00582" 38965 "s59E5H2" 0.006119497 "Fimbrial assembly protein (PilN)"  
"NT-A5\_00582" 38965 "s63E6H2" 0 "Fimbrial assembly protein (PilN)"  
"NT-A5\_00583" 38966 "s59E13H2" 0.5662382 "hypothetical protein"  
"NT-A5\_00583" 38966 "s59E25H2" 0 "hypothetical protein"  
"NT-A5\_00583" 38966 "s59E5H2" 0 "hypothetical protein"  
"NT-A5\_00583" 38966 "s63E6H2" 0 "hypothetical protein"  
"NT-A5\_00584" 38967 "s59E13H2" 0.8255024 "hypothetical protein"  
"NT-A5\_00584" 38967 "s59E25H2" 0 "hypothetical protein"  
"NT-A5\_00584" 38967 "s59E5H2" 0 "hypothetical protein"  
"NT-A5\_00584" 38967 "s63E6H2" 0 "hypothetical protein"  
"NT-A5\_00585" 38968 "s59E13H2" 0.8113877 "Type IV pilus biogenesis and competence protein PilQ precursor"  
"NT-A5\_00585" 38968 "s59E25H2" 0 "Type IV pilus biogenesis and competence protein PilQ precursor"  
"NT-A5\_00585" 38968 "s59E5H2" 0 "Type IV pilus biogenesis and competence protein PilQ precursor"  
"NT-A5\_00585" 38968 "s63E6H2" 0 "Type IV pilus biogenesis and competence protein PilQ precursor"  
"NT-A5\_00586" 38969 "s59E13H2" 0.01025736 "Putative type II secretion system protein D precursor"  
"NT-A5\_00586" 38969 "s59E25H2" 0 "Putative type II secretion system protein D precursor"  
"NT-A5\_00586" 38969 "s59E5H2" 0 "Putative type II secretion system protein D precursor"  
"NT-A5\_00586" 38969 "s63E6H2" 0 "Putative type II secretion system protein D precursor"  
"NT-A5\_00587" 38970 "s59E13H2" 0 "hypothetical protein"  
"NT-A5\_00587" 38970 "s59E25H2" 0 "hypothetical protein"  
"NT-A5\_00587" 38970 "s59E5H2" 0 "hypothetical protein"  
"NT-A5\_00587" 38970 "s63E6H2" 0 "hypothetical protein"  
"NT-A5\_00588" 38971 "s59E13H2" 0 "Prolipoprotein diacylglycerol transferase"  
"NT-A5\_00588" 38971 "s59E25H2" 0 "Prolipoprotein diacylglycerol transferase"  
"NT-A5\_00588" 38971 "s59E5H2" 0 "Prolipoprotein diacylglycerol transferase"  
"NT-A5\_00588" 38971 "s63E6H2" 0.0115918 "Prolipoprotein diacylglycerol transferase"  
"NT-A5\_00589" 38972 "s59E13H2" 0 "Multidrug resistance protein NorM"  
"NT-A5\_00589" 38972 "s59E25H2" 0 "Multidrug resistance protein NorM"  
"NT-A5\_00589" 38972 "s59E5H2" 0 "Multidrug resistance protein NorM"  
"NT-A5\_00589" 38972 "s63E6H2" 0.01161905 "Multidrug resistance protein NorM"  
"NT-A5\_00591" 38974 "s59E13H2" 0 "Deoxyribose-phosphate aldolase 2"  
"NT-A5\_00591" 38974 "s59E25H2" 0 "Deoxyribose-phosphate aldolase 2"  
"NT-A5\_00591" 38974 "s59E5H2" 0 "Deoxyribose-phosphate aldolase 2"  
"NT-A5\_00591" 38974 "s63E6H2" 0 "Deoxyribose-phosphate aldolase 2"  
"NT-A5\_00592" 38975 "s59E13H2" 0 "Glucose-6-phosphate 3-dehydrogenase"  
"NT-A5\_00592" 38975 "s59E25H2" 0 "Glucose-6-phosphate 3-dehydrogenase"  
"NT-A5\_00592" 38975 "s59E5H2" 0 "Glucose-6-phosphate 3-dehydrogenase"

"NT-A5\_00592" 38975 "s63E6H2" 0 "Glucose-6-phosphate 3-dehydrogenase"  
"NT-A5\_00593" 38976 "s59E13H2" 0 "Phospholipase B"  
"NT-A5\_00593" 38976 "s59E25H2" 0 "Phospholipase B"  
"NT-A5\_00593" 38976 "s59E5H2" 0 "Phospholipase B"  
"NT-A5\_00593" 38976 "s63E6H2" 0.01537457 "Phospholipase B"  
"NT-A5\_00594" 38977 "s59E13H2" 0 "Trifunctional nucleotide phosphoesterase protein YfkN precursor"  
"NT-A5\_00594" 38977 "s59E25H2" 0 "Trifunctional nucleotide phosphoesterase protein YfkN precursor"  
"NT-A5\_00594" 38977 "s59E5H2" 0 "Trifunctional nucleotide phosphoesterase protein YfkN precursor"  
"NT-A5\_00594" 38977 "s63E6H2" 0.00218884 "Trifunctional nucleotide phosphoesterase protein YfkN precursor"  
"NT-A5\_00595" 38978 "s59E13H2" 0 "Outer-membrane lipoprotein carrier protein"  
"NT-A5\_00595" 38978 "s59E25H2" 0 "Outer-membrane lipoprotein carrier protein"  
"NT-A5\_00595" 38978 "s59E5H2" 0 "Outer-membrane lipoprotein carrier protein"  
"NT-A5\_00595" 38978 "s63E6H2" 0 "Outer-membrane lipoprotein carrier protein"  
"NT-A5\_00596" 38979 "s59E13H2" 0 "putative calcium/sodium:proton antiporter"  
"NT-A5\_00596" 38979 "s59E25H2" 0 "putative calcium/sodium:proton antiporter"  
"NT-A5\_00596" 38979 "s59E5H2" 0 "putative calcium/sodium:proton antiporter"  
"NT-A5\_00596" 38979 "s63E6H2" 0 "putative calcium/sodium:proton antiporter"  
"NT-A5\_00597" 38980 "s59E13H2" 0 "hypothetical protein"  
"NT-A5\_00597" 38980 "s59E25H2" 0 "hypothetical protein"  
"NT-A5\_00597" 38980 "s59E5H2" 0 "hypothetical protein"  
"NT-A5\_00597" 38980 "s63E6H2" 0 "hypothetical protein"  
"NT-A5\_00598" 38981 "s59E13H2" 0 "Transaldolase"  
"NT-A5\_00598" 38981 "s59E25H2" 0 "Transaldolase"  
"NT-A5\_00598" 38981 "s59E5H2" 0 "Transaldolase"  
"NT-A5\_00598" 38981 "s63E6H2" 0 "Transaldolase"  
"NT-A5\_00599" 38982 "s59E13H2" 0 "hypothetical protein"  
"NT-A5\_00599" 38982 "s59E25H2" 0 "hypothetical protein"  
"NT-A5\_00599" 38982 "s59E5H2" 0 "hypothetical protein"  
"NT-A5\_00599" 38982 "s63E6H2" 0 "hypothetical protein"  
"NT-A5\_00600" 38983 "s59E13H2" 0 "Uroporphyrinogen decarboxylase (URO-D)"  
"NT-A5\_00600" 38983 "s59E25H2" 0 "Uroporphyrinogen decarboxylase (URO-D)"  
"NT-A5\_00600" 38983 "s59E5H2" 0 "Uroporphyrinogen decarboxylase (URO-D)"  
"NT-A5\_00600" 38983 "s63E6H2" 0 "Uroporphyrinogen decarboxylase (URO-D)"  
"NT-A5\_00605" 38988 "s59E13H2" 0 "hypothetical protein"  
"NT-A5\_00605" 38988 "s59E25H2" 0 "hypothetical protein"  
"NT-A5\_00605" 38988 "s59E5H2" 0 "hypothetical protein"  
"NT-A5\_00605" 38988 "s63E6H2" 0 "hypothetical protein"  
"NT-A5\_00606" 38989 "s59E13H2" 0 "hypothetical protein"  
"NT-A5\_00606" 38989 "s59E25H2" 0 "hypothetical protein"  
"NT-A5\_00606" 38989 "s59E5H2" 0 "hypothetical protein"  
"NT-A5\_00606" 38989 "s63E6H2" 0 "hypothetical protein"  
"NT-A5\_00607" 38990 "s59E13H2" 0 "hypothetical protein"  
"NT-A5\_00607" 38990 "s59E25H2" 0 "hypothetical protein"  
"NT-A5\_00607" 38990 "s59E5H2" 0 "hypothetical protein"  
"NT-A5\_00607" 38990 "s63E6H2" 0 "hypothetical protein"  
"NT-A5\_00608" 38991 "s59E13H2" 0 "NADP-reducing hydrogenase subunit HndC"  
"NT-A5\_00608" 38991 "s59E25H2" 0 "NADP-reducing hydrogenase subunit HndC"

"NT-A5\_00608" 38991 "s59E5H2" 0 "NADP-reducing hydrogenase subunit HndC"  
"NT-A5\_00608" 38991 "s63E6H2" 0 "NADP-reducing hydrogenase subunit HndC"  
"NT-A5\_00609" 38992 "s59E13H2" 0 "hypothetical protein"  
"NT-A5\_00609" 38992 "s59E25H2" 0 "hypothetical protein"  
"NT-A5\_00609" 38992 "s59E5H2" 0 "hypothetical protein"  
"NT-A5\_00609" 38992 "s63E6H2" 0 "hypothetical protein"  
"NT-A5\_00610" 38993 "s59E13H2" 0 "Serine/threonine-protein kinase RsbT"  
"NT-A5\_00610" 38993 "s59E25H2" 0 "Serine/threonine-protein kinase RsbT"  
"NT-A5\_00610" 38993 "s59E5H2" 0 "Serine/threonine-protein kinase RsbT"  
"NT-A5\_00610" 38993 "s63E6H2" 0 "Serine/threonine-protein kinase RsbT"  
"NT-A5\_00611" 38994 "s59E13H2" 0 "DRTGG domain protein"  
"NT-A5\_00611" 38994 "s59E25H2" 0 "DRTGG domain protein"  
"NT-A5\_00611" 38994 "s59E5H2" 0 "DRTGG domain protein"  
"NT-A5\_00611" 38994 "s63E6H2" 0 "DRTGG domain protein"  
"NT-A5\_00612" 38995 "s59E13H2" 0 "hypothetical protein"  
"NT-A5\_00612" 38995 "s59E25H2" 0 "hypothetical protein"  
"NT-A5\_00612" 38995 "s59E5H2" 0 "hypothetical protein"  
"NT-A5\_00612" 38995 "s63E6H2" 0 "hypothetical protein"  
"NT-A5\_00613" 38996 "s59E13H2" 0 "Globin-coupled histidine kinase"  
"NT-A5\_00613" 38996 "s59E25H2" 0 "Globin-coupled histidine kinase"  
"NT-A5\_00613" 38996 "s59E5H2" 0 "Globin-coupled histidine kinase"  
"NT-A5\_00613" 38996 "s63E6H2" 0 "Globin-coupled histidine kinase"  
"NT-A5\_00614" 38997 "s59E13H2" 0 "CoB--CoM heterodisulfide reductase iron-sulfur subunit A"  
"NT-A5\_00614" 38997 "s59E25H2" 0 "CoB--CoM heterodisulfide reductase iron-sulfur subunit A"  
"NT-A5\_00614" 38997 "s59E5H2" 0 "CoB--CoM heterodisulfide reductase iron-sulfur subunit A"  
"NT-A5\_00614" 38997 "s63E6H2" 0 "CoB--CoM heterodisulfide reductase iron-sulfur subunit A"  
"NT-A5\_00615" 38998 "s59E13H2" 0 "F420-non-reducing hydrogenase vhc iron-sulfur subunit D"  
"NT-A5\_00615" 38998 "s59E25H2" 0 "F420-non-reducing hydrogenase vhc iron-sulfur subunit D"  
"NT-A5\_00615" 38998 "s59E5H2" 0 "F420-non-reducing hydrogenase vhc iron-sulfur subunit D"  
"NT-A5\_00615" 38998 "s63E6H2" 0 "F420-non-reducing hydrogenase vhc iron-sulfur subunit D"  
"NT-A5\_00616" 38999 "s59E13H2" 0 "Formate dehydrogenase subunit beta"  
"NT-A5\_00616" 38999 "s59E25H2" 0 "Formate dehydrogenase subunit beta"  
"NT-A5\_00616" 38999 "s59E5H2" 0 "Formate dehydrogenase subunit beta"  
"NT-A5\_00616" 38999 "s63E6H2" 0 "Formate dehydrogenase subunit beta"  
"NT-A5\_00617" 39000 "s59E13H2" 0 "Sulphydrogenase 2 subunit beta"  
"NT-A5\_00617" 39000 "s59E25H2" 0 "Sulphydrogenase 2 subunit beta"  
"NT-A5\_00617" 39000 "s59E5H2" 0 "Sulphydrogenase 2 subunit beta"  
"NT-A5\_00617" 39000 "s63E6H2" 0 "Sulphydrogenase 2 subunit beta"  
"NT-A5\_00618" 39001 "s59E13H2" 0 "Sulphydrogenase 2 subunit gamma"  
"NT-A5\_00618" 39001 "s59E25H2" 0 "Sulphydrogenase 2 subunit gamma"  
"NT-A5\_00618" 39001 "s59E5H2" 0 "Sulphydrogenase 2 subunit gamma"  
"NT-A5\_00618" 39001 "s63E6H2" 0 "Sulphydrogenase 2 subunit gamma"  
"NT-A5\_00619" 39002 "s59E13H2" 0 "Cytochrome c-type biogenesis protein CcmE"  
"NT-A5\_00619" 39002 "s59E25H2" 0 "Cytochrome c-type biogenesis protein CcmE"  
"NT-A5\_00619" 39002 "s59E5H2" 0 "Cytochrome c-type biogenesis protein CcmE"  
"NT-A5\_00619" 39002 "s63E6H2" 0 "Cytochrome c-type biogenesis protein CcmE"  
"NT-A5\_00620" 39003 "s59E13H2" 0 "Daunorubicin/doxorubicin resistance ATP-binding protein DrrA"

"NT-A5\_00620" 39003 "s59E25H2" 0 "Daunorubicin/doxorubicin resistance ATP-binding protein DrrA"  
"NT-A5\_00620" 39003 "s59E5H2" 0.005581817 "Daunorubicin/doxorubicin resistance ATP-binding protein DrrA"  
"NT-A5\_00620" 39003 "s63E6H2" 0 "Daunorubicin/doxorubicin resistance ATP-binding protein DrrA"  
"NT-A5\_00621" 39004 "s59E13H2" 0 "CcmB protein"  
"NT-A5\_00621" 39004 "s59E25H2" 0 "CcmB protein"  
"NT-A5\_00621" 39004 "s59E5H2" 0 "CcmB protein"  
"NT-A5\_00621" 39004 "s63E6H2" 0 "CcmB protein"  
"NT-A5\_00622" 39005 "s59E13H2" 0 "Cytochrome c-type protein TorC"  
"NT-A5\_00622" 39005 "s59E25H2" 0 "Cytochrome c-type protein TorC"  
"NT-A5\_00622" 39005 "s59E5H2" 0 "Cytochrome c-type protein TorC"  
"NT-A5\_00622" 39005 "s63E6H2" 0 "Cytochrome c-type protein TorC"  
"NT-A5\_00627" 39010 "s59E13H2" 0 "hypothetical protein"  
"NT-A5\_00627" 39010 "s59E25H2" 0 "hypothetical protein"  
"NT-A5\_00627" 39010 "s59E5H2" 0.01353601 "hypothetical protein"  
"NT-A5\_00627" 39010 "s63E6H2" 0 "hypothetical protein"  
"NT-A5\_00628" 39011 "s59E13H2" 0 "hypothetical protein"  
"NT-A5\_00628" 39011 "s59E25H2" 0 "hypothetical protein"  
"NT-A5\_00628" 39011 "s59E5H2" 0.03566581 "hypothetical protein"  
"NT-A5\_00628" 39011 "s63E6H2" 0 "hypothetical protein"  
"NT-A5\_00629" 39012 "s59E13H2" 0 "hypothetical protein"  
"NT-A5\_00629" 39012 "s59E25H2" 0 "hypothetical protein"  
"NT-A5\_00629" 39012 "s59E5H2" 0.04317933 "hypothetical protein"  
"NT-A5\_00629" 39012 "s63E6H2" 0 "hypothetical protein"  
"NT-A5\_00630" 39013 "s59E13H2" 0 "Chaperone protein DnaJ"  
"NT-A5\_00630" 39013 "s59E25H2" 0 "Chaperone protein DnaJ"  
"NT-A5\_00630" 39013 "s59E5H2" 0.04707864 "Chaperone protein DnaJ"  
"NT-A5\_00630" 39013 "s63E6H2" 0 "Chaperone protein DnaJ"  
"NT-A5\_00631" 39014 "s59E13H2" 0 "Gas vesicle synthesis protein GvpL/GvpF"  
"NT-A5\_00631" 39014 "s59E25H2" 0 "Gas vesicle synthesis protein GvpL/GvpF"  
"NT-A5\_00631" 39014 "s59E5H2" 0.08217309 "Gas vesicle synthesis protein GvpL/GvpF"  
"NT-A5\_00631" 39014 "s63E6H2" 0 "Gas vesicle synthesis protein GvpL/GvpF"  
"NT-A5\_00632" 39015 "s59E13H2" 0 "Gas vesicle synthesis protein GvpL/GvpF"  
"NT-A5\_00632" 39015 "s59E25H2" 0 "Gas vesicle synthesis protein GvpL/GvpF"  
"NT-A5\_00632" 39015 "s59E5H2" 0.05096918 "Gas vesicle synthesis protein GvpL/GvpF"  
"NT-A5\_00632" 39015 "s63E6H2" 0 "Gas vesicle synthesis protein GvpL/GvpF"  
"NT-A5\_00633" 39016 "s59E13H2" 0 "Gas vesicle protein G"  
"NT-A5\_00633" 39016 "s59E25H2" 0 "Gas vesicle protein G"  
"NT-A5\_00633" 39016 "s59E5H2" 0.078762 "Gas vesicle protein G"  
"NT-A5\_00633" 39016 "s63E6H2" 0 "Gas vesicle protein G"  
"NT-A5\_00634" 39017 "s59E13H2" 0 "Primosomal protein N"  
"NT-A5\_00634" 39017 "s59E25H2" 0 "Primosomal protein N"  
"NT-A5\_00634" 39017 "s59E5H2" 0 "Primosomal protein N"  
"NT-A5\_00634" 39017 "s63E6H2" 0.001568444 "Primosomal protein N"  
"NT-A5\_00636" 39019 "s59E13H2" 0 "hypothetical protein"  
"NT-A5\_00636" 39019 "s59E25H2" 0 "hypothetical protein"  
"NT-A5\_00636" 39019 "s59E5H2" 0 "hypothetical protein"  
"NT-A5\_00636" 39019 "s63E6H2" 0 "hypothetical protein"

"NT-A5\_00637" 39020 "s59E13H2" 0 "hypothetical protein"  
"NT-A5\_00637" 39020 "s59E25H2" 0 "hypothetical protein"  
"NT-A5\_00637" 39020 "s59E5H2" 0 "hypothetical protein"  
"NT-A5\_00637" 39020 "s63E6H2" 0 "hypothetical protein"  
"NT-A5\_00639" 39022 "s59E13H2" 0 "putative glycine dehydrogenase (decarboxylating) subunit 1"  
"NT-A5\_00639" 39022 "s59E25H2" 0 "putative glycine dehydrogenase (decarboxylating) subunit 1"  
"NT-A5\_00639" 39022 "s59E5H2" 0.01035936 "putative glycine dehydrogenase (decarboxylating) subunit 1"  
"NT-A5\_00639" 39022 "s63E6H2" 0.2285325 "putative glycine dehydrogenase (decarboxylating) subunit 1"  
"NT-A5\_00640" 39023 "s59E13H2" 0 "Sulphydrogenase 2 subunit beta"  
"NT-A5\_00640" 39023 "s59E25H2" 0 "Sulphydrogenase 2 subunit beta"  
"NT-A5\_00640" 39023 "s59E5H2" 0 "Sulphydrogenase 2 subunit beta"  
"NT-A5\_00640" 39023 "s63E6H2" 0 "Sulphydrogenase 2 subunit beta"  
"NT-A5\_00641" 39024 "s59E13H2" 0 "Sulphydrogenase 2 subunit gamma"  
"NT-A5\_00641" 39024 "s59E25H2" 0 "Sulphydrogenase 2 subunit gamma"  
"NT-A5\_00641" 39024 "s59E5H2" 0 "Sulphydrogenase 2 subunit gamma"  
"NT-A5\_00641" 39024 "s63E6H2" 0 "Sulphydrogenase 2 subunit gamma"  
"NT-A5\_00642" 39025 "s59E13H2" 0 "Sulphydrogenase 1 subunit delta"  
"NT-A5\_00642" 39025 "s59E25H2" 0 "Sulphydrogenase 1 subunit delta"  
"NT-A5\_00642" 39025 "s59E5H2" 0 "Sulphydrogenase 1 subunit delta"  
"NT-A5\_00642" 39025 "s63E6H2" 0 "Sulphydrogenase 1 subunit delta"  
"NT-A5\_00643" 39026 "s59E13H2" 0 "Sulphydrogenase 1 subunit alpha"  
"NT-A5\_00643" 39026 "s59E25H2" 0 "Sulphydrogenase 1 subunit alpha"  
"NT-A5\_00643" 39026 "s59E5H2" 0 "Sulphydrogenase 1 subunit alpha"  
"NT-A5\_00643" 39026 "s63E6H2" 0 "Sulphydrogenase 1 subunit alpha"  
"NT-A5\_00644" 39027 "s59E13H2" 0 "Nif-specific regulatory protein"  
"NT-A5\_00644" 39027 "s59E25H2" 0 "Nif-specific regulatory protein"  
"NT-A5\_00644" 39027 "s59E5H2" 0 "Nif-specific regulatory protein"  
"NT-A5\_00644" 39027 "s63E6H2" 0 "Nif-specific regulatory protein"  
"NT-A5\_00645" 39028 "s59E13H2" 0 "Molybdopterin adenyllyltransferase"  
"NT-A5\_00645" 39028 "s59E25H2" 0 "Molybdopterin adenyllyltransferase"  
"NT-A5\_00645" 39028 "s59E5H2" 0 "Molybdopterin adenyllyltransferase"  
"NT-A5\_00645" 39028 "s63E6H2" 0.006115912 "Molybdopterin adenyllyltransferase"  
"NT-A5\_00646" 39029 "s59E13H2" 0 "MOSC domain protein"  
"NT-A5\_00646" 39029 "s59E25H2" 0 "MOSC domain protein"  
"NT-A5\_00646" 39029 "s59E5H2" 0 "MOSC domain protein"  
"NT-A5\_00646" 39029 "s63E6H2" 0 "MOSC domain protein"  
"NT-A5\_00647" 39030 "s59E13H2" 0 "Cyclic pyranopterin monophosphate synthase accessory protein 2"  
"NT-A5\_00647" 39030 "s59E25H2" 0 "Cyclic pyranopterin monophosphate synthase accessory protein 2"  
"NT-A5\_00647" 39030 "s59E5H2" 0 "Cyclic pyranopterin monophosphate synthase accessory protein 2"  
"NT-A5\_00647" 39030 "s63E6H2" 0 "Cyclic pyranopterin monophosphate synthase accessory protein 2"  
"NT-A5\_00648" 39031 "s59E13H2" 0 "Cyclic pyranopterin monophosphate synthase 1"  
"NT-A5\_00648" 39031 "s59E25H2" 0 "Cyclic pyranopterin monophosphate synthase 1"  
"NT-A5\_00648" 39031 "s59E5H2" 0 "Cyclic pyranopterin monophosphate synthase 1"  
"NT-A5\_00648" 39031 "s63E6H2" 0.003219202 "Cyclic pyranopterin monophosphate synthase 1"  
"NT-A5\_00649" 39032 "s59E13H2" 0 "Molybdopterin molybdenumtransferase"  
"NT-A5\_00649" 39032 "s59E25H2" 0 "Molybdopterin molybdenumtransferase"  
"NT-A5\_00649" 39032 "s59E5H2" 0 "Molybdopterin molybdenumtransferase"



"NT-A5\_00649" 39032 "s63E6H2" 0.09820119 "Molybdopterin molybdenumtransferase"  
"NT-A5\_00650" 39033 "s59E13H2" 0 "Acyl-coenzyme A thioesterase Paal"  
"NT-A5\_00650" 39033 "s59E25H2" 0 "Acyl-coenzyme A thioesterase Paal"  
"NT-A5\_00650" 39033 "s59E5H2" 0 "Acyl-coenzyme A thioesterase Paal"  
"NT-A5\_00650" 39033 "s63E6H2" 0.07675827 "Acyl-coenzyme A thioesterase Paal"  
"NT-A5\_00651" 39034 "s59E13H2" 0 "Sulfate/thiosulfate import ATP-binding protein CysA"  
"NT-A5\_00651" 39034 "s59E25H2" 0 "Sulfate/thiosulfate import ATP-binding protein CysA"  
"NT-A5\_00651" 39034 "s59E5H2" 0 "Sulfate/thiosulfate import ATP-binding protein CysA"  
"NT-A5\_00651" 39034 "s63E6H2" 0.006305675 "Sulfate/thiosulfate import ATP-binding protein CysA"  
"NT-A5\_00652" 39035 "s59E13H2" 0 "Sulfate transport system permease protein CysW"  
"NT-A5\_00652" 39035 "s59E25H2" 0 "Sulfate transport system permease protein CysW"  
"NT-A5\_00652" 39035 "s59E5H2" 0 "Sulfate transport system permease protein CysW"  
"NT-A5\_00652" 39035 "s63E6H2" 0.008856896 "Sulfate transport system permease protein CysW"  
"NT-A5\_00653" 39036 "s59E13H2" 0 "PBP superfamily domain protein"  
"NT-A5\_00653" 39036 "s59E25H2" 0 "PBP superfamily domain protein"  
"NT-A5\_00653" 39036 "s59E5H2" 0 "PBP superfamily domain protein"  
"NT-A5\_00653" 39036 "s63E6H2" 0.003619913 "PBP superfamily domain protein"  
"NT-A5\_00655" 39038 "s59E13H2" 0 "Peptidase family M50"  
"NT-A5\_00655" 39038 "s59E25H2" 0 "Peptidase family M50"  
"NT-A5\_00655" 39038 "s59E5H2" 0.008322023 "Peptidase family M50"  
"NT-A5\_00655" 39038 "s63E6H2" 0.009335087 "Peptidase family M50"  
"NT-A5\_00656" 39039 "s59E13H2" 0 "GYD domain protein"  
"NT-A5\_00656" 39039 "s59E25H2" 0 "GYD domain protein"  
"NT-A5\_00656" 39039 "s59E5H2" 0.3171983 "GYD domain protein"  
"NT-A5\_00656" 39039 "s63E6H2" 0 "GYD domain protein"  
"NT-A5\_00657" 39040 "s59E13H2" 0 "DNA-binding protein HU"  
"NT-A5\_00657" 39040 "s59E25H2" 0 "DNA-binding protein HU"  
"NT-A5\_00657" 39040 "s59E5H2" 0.05908672 "DNA-binding protein HU"  
"NT-A5\_00657" 39040 "s63E6H2" 0 "DNA-binding protein HU"  
"NT-A5\_00658" 39041 "s59E13H2" 0 "putative acetyltransferase"  
"NT-A5\_00658" 39041 "s59E25H2" 0 "putative acetyltransferase"  
"NT-A5\_00658" 39041 "s59E5H2" 0.00358129 "putative acetyltransferase"  
"NT-A5\_00658" 39041 "s63E6H2" 0 "putative acetyltransferase"  
"NT-A5\_00659" 39042 "s59E13H2" 0 "DNA-binding protein HU"  
"NT-A5\_00659" 39042 "s59E25H2" 0 "DNA-binding protein HU"  
"NT-A5\_00659" 39042 "s59E5H2" 0.07707996 "DNA-binding protein HU"  
"NT-A5\_00659" 39042 "s63E6H2" 0 "DNA-binding protein HU"  
"NT-A5\_00660" 39043 "s59E13H2" 0 "Nucleotidyltransferase domain protein"  
"NT-A5\_00660" 39043 "s59E25H2" 0 "Nucleotidyltransferase domain protein"  
"NT-A5\_00660" 39043 "s59E5H2" 0 "Nucleotidyltransferase domain protein"  
"NT-A5\_00660" 39043 "s63E6H2" 0 "Nucleotidyltransferase domain protein"  
"NT-A5\_00661" 39044 "s59E13H2" 0 "hypothetical protein"  
"NT-A5\_00661" 39044 "s59E25H2" 0 "hypothetical protein"  
"NT-A5\_00661" 39044 "s59E5H2" 0 "hypothetical protein"  
"NT-A5\_00661" 39044 "s63E6H2" 0 "hypothetical protein"  
"NT-A5\_00662" 39045 "s59E13H2" 0 "hypothetical protein"  
"NT-A5\_00662" 39045 "s59E25H2" 0 "hypothetical protein"

"NT-A5\_00662" 39045 "s59E5H2" 0.0008955052 "hypothetical protein"  
"NT-A5\_00662" 39045 "s63E6H2" 0 "hypothetical protein"  
"NT-A5\_00663" 39046 "s59E13H2" 0 "NADH oxidase"  
"NT-A5\_00663" 39046 "s59E25H2" 0 "NADH oxidase"  
"NT-A5\_00663" 39046 "s59E5H2" 0.1667843 "NADH oxidase"  
"NT-A5\_00663" 39046 "s63E6H2" 0 "NADH oxidase"  
"NT-A5\_00664" 39047 "s59E13H2" 0 "DNA-binding protein HU"  
"NT-A5\_00664" 39047 "s59E25H2" 0 "DNA-binding protein HU"  
"NT-A5\_00664" 39047 "s59E5H2" 0.00745367 "DNA-binding protein HU"  
"NT-A5\_00664" 39047 "s63E6H2" 0 "DNA-binding protein HU"  
"NT-A5\_00665" 39048 "s59E13H2" 0 "Integrase core domain protein"  
"NT-A5\_00665" 39048 "s59E25H2" 0 "Integrase core domain protein"  
"NT-A5\_00665" 39048 "s59E5H2" 0 "Integrase core domain protein"  
"NT-A5\_00665" 39048 "s63E6H2" 0.005185707 "Integrase core domain protein"  
"NT-A5\_00666" 39049 "s59E13H2" 0 "D-2-hydroxyacid dehydrogenase"  
"NT-A5\_00666" 39049 "s59E25H2" 0 "D-2-hydroxyacid dehydrogenase"  
"NT-A5\_00666" 39049 "s59E5H2" 0 "D-2-hydroxyacid dehydrogenase"  
"NT-A5\_00666" 39049 "s63E6H2" 6.254413e-06 "D-2-hydroxyacid dehydrogenase"  
"NT-A5\_00667" 39050 "s59E13H2" 0 "Cytochrome c-type protein TorC"  
"NT-A5\_00667" 39050 "s59E25H2" 0 "Cytochrome c-type protein TorC"  
"NT-A5\_00667" 39050 "s59E5H2" 0 "Cytochrome c-type protein TorC"  
"NT-A5\_00667" 39050 "s63E6H2" 0 "Cytochrome c-type protein TorC"  
"NT-A5\_00668" 39051 "s59E13H2" 0 "Sensor histidine kinase YycG"  
"NT-A5\_00668" 39051 "s59E25H2" 0 "Sensor histidine kinase YycG"  
"NT-A5\_00668" 39051 "s59E5H2" 0 "Sensor histidine kinase YycG"  
"NT-A5\_00668" 39051 "s63E6H2" 0 "Sensor histidine kinase YycG"  
"NT-A5\_00669" 39052 "s59E13H2" 0 "Transcriptional regulatory protein AfsQ1"  
"NT-A5\_00669" 39052 "s59E25H2" 0 "Transcriptional regulatory protein AfsQ1"  
"NT-A5\_00669" 39052 "s59E5H2" 0 "Transcriptional regulatory protein AfsQ1"  
"NT-A5\_00669" 39052 "s63E6H2" 0 "Transcriptional regulatory protein AfsQ1"  
"NT-A5\_00670" 39053 "s59E13H2" 0 "Sulfhydrogenase 1 subunit gamma"  
"NT-A5\_00670" 39053 "s59E25H2" 0 "Sulfhydrogenase 1 subunit gamma"  
"NT-A5\_00670" 39053 "s59E5H2" 0 "Sulfhydrogenase 1 subunit gamma"  
"NT-A5\_00670" 39053 "s63E6H2" 0 "Sulfhydrogenase 1 subunit gamma"  
"NT-A5\_00671" 39054 "s59E13H2" 0 "Type-1 restriction enzyme R protein"  
"NT-A5\_00671" 39054 "s59E25H2" 0 "Type-1 restriction enzyme R protein"  
"NT-A5\_00671" 39054 "s59E5H2" 0 "Type-1 restriction enzyme R protein"  
"NT-A5\_00671" 39054 "s63E6H2" 0 "Type-1 restriction enzyme R protein"  
"NT-A5\_00674" 39057 "s59E13H2" 0 "Sulfite reductase [ferredoxin]"  
"NT-A5\_00674" 39057 "s59E25H2" 0 "Sulfite reductase [ferredoxin]"  
"NT-A5\_00674" 39057 "s59E5H2" 0 "Sulfite reductase [ferredoxin]"  
"NT-A5\_00674" 39057 "s63E6H2" 0 "Sulfite reductase [ferredoxin]"  
"NT-A5\_00675" 39058 "s59E13H2" 0 "Threonine synthase"  
"NT-A5\_00675" 39058 "s59E25H2" 0 "Threonine synthase"  
"NT-A5\_00675" 39058 "s59E5H2" 0 "Threonine synthase"  
"NT-A5\_00675" 39058 "s63E6H2" 0 "Threonine synthase"  
"NT-A5\_00676" 39059 "s59E13H2" 0 "Sulfur carrier protein CysO"

"NT-A5\_00676" 39059 "s59E25H2" 0 "Sulfur carrier protein CysO"  
"NT-A5\_00676" 39059 "s59E5H2" 0 "Sulfur carrier protein CysO"  
"NT-A5\_00676" 39059 "s63E6H2" 0 "Sulfur carrier protein CysO"  
"NT-A5\_00677" 39060 "s59E13H2" 0 "putative adenylyltransferase/sulfurtransferase MoeZ"  
"NT-A5\_00677" 39060 "s59E25H2" 0 "putative adenylyltransferase/sulfurtransferase MoeZ"  
"NT-A5\_00677" 39060 "s59E5H2" 0 "putative adenylyltransferase/sulfurtransferase MoeZ"  
"NT-A5\_00677" 39060 "s63E6H2" 0 "putative adenylyltransferase/sulfurtransferase MoeZ"  
"NT-A5\_00678" 39061 "s59E13H2" 0 "V-type ATP synthase subunit E"  
"NT-A5\_00678" 39061 "s59E25H2" 0 "V-type ATP synthase subunit E"  
"NT-A5\_00678" 39061 "s59E5H2" 0.006895615 "V-type ATP synthase subunit E"  
"NT-A5\_00678" 39061 "s63E6H2" 0.1563623 "V-type ATP synthase subunit E"  
"NT-A5\_00679" 39062 "s59E13H2" 0 "V-type sodium ATPase subunit K"  
"NT-A5\_00679" 39062 "s59E25H2" 0 "V-type sodium ATPase subunit K"  
"NT-A5\_00679" 39062 "s59E5H2" 0.006027439 "V-type sodium ATPase subunit K"  
"NT-A5\_00679" 39062 "s63E6H2" 0.08312259 "V-type sodium ATPase subunit K"  
"NT-A5\_00680" 39063 "s59E13H2" 0 "UvrABC system protein B"  
"NT-A5\_00680" 39063 "s59E25H2" 0 "UvrABC system protein B"  
"NT-A5\_00680" 39063 "s59E5H2" 0.04243828 "UvrABC system protein B"  
"NT-A5\_00680" 39063 "s63E6H2" 0.09157256 "UvrABC system protein B"  
"NT-A5\_00681" 39064 "s59E13H2" 0 "Gram-negative bacterial tonB protein"  
"NT-A5\_00681" 39064 "s59E25H2" 0 "Gram-negative bacterial tonB protein"  
"NT-A5\_00681" 39064 "s59E5H2" 0.006484693 "Gram-negative bacterial tonB protein"  
"NT-A5\_00681" 39064 "s63E6H2" 0.0007793961 "Gram-negative bacterial tonB protein"  
"NT-A5\_00682" 39065 "s59E13H2" 0 "V-type ATP synthase alpha chain"  
"NT-A5\_00682" 39065 "s59E25H2" 0 "V-type ATP synthase alpha chain"  
"NT-A5\_00682" 39065 "s59E5H2" 0.005940279 "V-type ATP synthase alpha chain"  
"NT-A5\_00682" 39065 "s63E6H2" 0.08058453 "V-type ATP synthase alpha chain"  
"NT-A5\_00686" 39069 "s59E13H2" 0 "Beta-galactosidase"  
"NT-A5\_00686" 39069 "s59E25H2" 0 "Beta-galactosidase"  
"NT-A5\_00686" 39069 "s59E5H2" 0 "Beta-galactosidase"  
"NT-A5\_00686" 39069 "s63E6H2" 0 "Beta-galactosidase"  
"NT-A5\_00687" 39070 "s59E13H2" 0 "hypothetical protein"  
"NT-A5\_00687" 39070 "s59E25H2" 0 "hypothetical protein"  
"NT-A5\_00687" 39070 "s59E5H2" 0 "hypothetical protein"  
"NT-A5\_00687" 39070 "s63E6H2" 0 "hypothetical protein"  
"NT-A5\_00688" 39071 "s59E13H2" 0.0002223249 "putative ATP-dependent helicase DinG"  
"NT-A5\_00688" 39071 "s59E25H2" 0 "putative ATP-dependent helicase DinG"  
"NT-A5\_00688" 39071 "s59E5H2" 0 "putative ATP-dependent helicase DinG"  
"NT-A5\_00688" 39071 "s63E6H2" 0.3718792 "putative ATP-dependent helicase DinG"  
"NT-A5\_00689" 39072 "s59E13H2" 0 "putative type I restriction enzyme P M protein"  
"NT-A5\_00689" 39072 "s59E25H2" 0 "putative type I restriction enzyme P M protein"  
"NT-A5\_00689" 39072 "s59E5H2" 0 "putative type I restriction enzyme P M protein"  
"NT-A5\_00689" 39072 "s63E6H2" 0 "putative type I restriction enzyme P M protein"  
"NT-A5\_00690" 39073 "s59E13H2" 0 "hypothetical protein"  
"NT-A5\_00690" 39073 "s59E25H2" 0 "hypothetical protein"  
"NT-A5\_00690" 39073 "s59E5H2" 0 "hypothetical protein"  
"NT-A5\_00690" 39073 "s63E6H2" 0 "hypothetical protein"

"NT-A5\_00692" 39075 "s59E13H2" 0 "Type-1 restriction enzyme MjaXIP specificity protein"  
"NT-A5\_00692" 39075 "s59E25H2" 0 "Type-1 restriction enzyme MjaXIP specificity protein"  
"NT-A5\_00692" 39075 "s59E5H2" 0 "Type-1 restriction enzyme MjaXIP specificity protein"  
"NT-A5\_00692" 39075 "s63E6H2" 0 "Type-1 restriction enzyme MjaXIP specificity protein"  
"NT-A5\_00693" 39076 "s59E13H2" 0 "Mannosylglycerate hydrolase"  
"NT-A5\_00693" 39076 "s59E25H2" 0 "Mannosylglycerate hydrolase"  
"NT-A5\_00693" 39076 "s59E5H2" 0.009495007 "Mannosylglycerate hydrolase"  
"NT-A5\_00693" 39076 "s63E6H2" 0.005355156 "Mannosylglycerate hydrolase"  
"NT-A5\_00694" 39077 "s59E13H2" 0 "ATP-dependent Clp protease proteolytic subunit precursor"  
"NT-A5\_00694" 39077 "s59E25H2" 0 "ATP-dependent Clp protease proteolytic subunit precursor"  
"NT-A5\_00694" 39077 "s59E5H2" 0.0007667711 "ATP-dependent Clp protease proteolytic subunit precursor"  
"NT-A5\_00694" 39077 "s63E6H2" 0.2494426 "ATP-dependent Clp protease proteolytic subunit precursor"  
"NT-A5\_00695" 39078 "s59E13H2" 0 "DNA integrity scanning protein DisA"  
"NT-A5\_00695" 39078 "s59E25H2" 0 "DNA integrity scanning protein DisA"  
"NT-A5\_00695" 39078 "s59E5H2" 0 "DNA integrity scanning protein DisA"  
"NT-A5\_00695" 39078 "s63E6H2" 0 "DNA integrity scanning protein DisA"  
"NT-A5\_00696" 39079 "s59E13H2" 0 "putative PIN and TRAM-domain containing protein precursor"  
"NT-A5\_00696" 39079 "s59E25H2" 0 "putative PIN and TRAM-domain containing protein precursor"  
"NT-A5\_00696" 39079 "s59E5H2" 0 "putative PIN and TRAM-domain containing protein precursor"  
"NT-A5\_00696" 39079 "s63E6H2" 0 "putative PIN and TRAM-domain containing protein precursor"  
"NT-A5\_00697" 39080 "s59E13H2" 0 "Putative 2-C-methyl-D-erythritol 4-phosphate cytidyltransferase 2"  
"NT-A5\_00697" 39080 "s59E25H2" 0 "Putative 2-C-methyl-D-erythritol 4-phosphate cytidyltransferase 2"  
"NT-A5\_00697" 39080 "s59E5H2" 0 "Putative 2-C-methyl-D-erythritol 4-phosphate cytidyltransferase 2"  
"NT-A5\_00697" 39080 "s63E6H2" 0.002202641 "Putative 2-C-methyl-D-erythritol 4-phosphate cytidyltransferase 2"  
"NT-A5\_00698" 39081 "s59E13H2" 0 "2-C-methyl-D-erythritol 2,4-cyclodiphosphate synthase"  
"NT-A5\_00698" 39081 "s59E25H2" 0 "2-C-methyl-D-erythritol 2,4-cyclodiphosphate synthase"  
"NT-A5\_00698" 39081 "s59E5H2" 0 "2-C-methyl-D-erythritol 2,4-cyclodiphosphate synthase"  
"NT-A5\_00698" 39081 "s63E6H2" 0 "2-C-methyl-D-erythritol 2,4-cyclodiphosphate synthase"  
"NT-A5\_00699" 39082 "s59E13H2" 0 "hypothetical protein"  
"NT-A5\_00699" 39082 "s59E25H2" 0 "hypothetical protein"  
"NT-A5\_00699" 39082 "s59E5H2" 0 "hypothetical protein"  
"NT-A5\_00699" 39082 "s63E6H2" 0.09250912 "hypothetical protein"  
"NT-A5\_00700" 39083 "s59E13H2" 0 "Sulfite exporter TauE/SafE"  
"NT-A5\_00700" 39083 "s59E25H2" 0 "Sulfite exporter TauE/SafE"  
"NT-A5\_00700" 39083 "s59E5H2" 0.004166241 "Sulfite exporter TauE/SafE"  
"NT-A5\_00700" 39083 "s63E6H2" 0.06666954 "Sulfite exporter TauE/SafE"  
"NT-A5\_00701" 39084 "s59E13H2" 0.0008625669 "General stress protein 69"  
"NT-A5\_00701" 39084 "s59E25H2" 0 "General stress protein 69"  
"NT-A5\_00701" 39084 "s59E5H2" 0 "General stress protein 69"  
"NT-A5\_00701" 39084 "s63E6H2" 0.0148587 "General stress protein 69"  
"NT-A5\_00702" 39085 "s59E13H2" 0 "N-acetyl-gamma-glutamyl-phosphate reductase"  
"NT-A5\_00702" 39085 "s59E25H2" 0 "N-acetyl-gamma-glutamyl-phosphate reductase"  
"NT-A5\_00702" 39085 "s59E5H2" 0 "N-acetyl-gamma-glutamyl-phosphate reductase"  
"NT-A5\_00702" 39085 "s63E6H2" 0.005947781 "N-acetyl-gamma-glutamyl-phosphate reductase"  
"NT-A5\_00703" 39086 "s59E13H2" 0 "Arginine biosynthesis bifunctional protein ArgJ"  
"NT-A5\_00703" 39086 "s59E25H2" 0 "Arginine biosynthesis bifunctional protein ArgJ"  
"NT-A5\_00703" 39086 "s59E5H2" 0 "Arginine biosynthesis bifunctional protein ArgJ"

"NT-A5\_00703" 39086 "s63E6H2" 0.008672725 "Arginine biosynthesis bifunctional protein ArgJ"  
"NT-A5\_00705" 39088 "s59E13H2" 0 "2-oxoisovalerate dehydrogenase subunit beta"  
"NT-A5\_00705" 39088 "s59E25H2" 0 "2-oxoisovalerate dehydrogenase subunit beta"  
"NT-A5\_00705" 39088 "s59E5H2" 0 "2-oxoisovalerate dehydrogenase subunit beta"  
"NT-A5\_00705" 39088 "s63E6H2" 0 "2-oxoisovalerate dehydrogenase subunit beta"  
"NT-A5\_00706" 39089 "s59E13H2" 0 "Acetoin:2,6-dichlorophenolindophenol oxidoreductase subunit alpha"  
"NT-A5\_00706" 39089 "s59E25H2" 0 "Acetoin:2,6-dichlorophenolindophenol oxidoreductase subunit alpha"  
"NT-A5\_00706" 39089 "s59E5H2" 0.02067655 "Acetoin:2,6-dichlorophenolindophenol oxidoreductase subunit alpha"  
"NT-A5\_00706" 39089 "s63E6H2" 0 "Acetoin:2,6-dichlorophenolindophenol oxidoreductase subunit alpha"  
"NT-A5\_00707" 39090 "s59E13H2" 0 "D-tagatose-1,6-bisphosphate aldolase subunit KbaY"  
"NT-A5\_00707" 39090 "s59E25H2" 0 "D-tagatose-1,6-bisphosphate aldolase subunit KbaY"  
"NT-A5\_00707" 39090 "s59E5H2" 0 "D-tagatose-1,6-bisphosphate aldolase subunit KbaY"  
"NT-A5\_00707" 39090 "s63E6H2" 0 "D-tagatose-1,6-bisphosphate aldolase subunit KbaY"  
"NT-A5\_00708" 39091 "s59E13H2" 0 "Inositol 2-dehydrogenase"  
"NT-A5\_00708" 39091 "s59E25H2" 0 "Inositol 2-dehydrogenase"  
"NT-A5\_00708" 39091 "s59E5H2" 0 "Inositol 2-dehydrogenase"  
"NT-A5\_00708" 39091 "s63E6H2" 0.01765071 "Inositol 2-dehydrogenase"  
"NT-A5\_00709" 39092 "s59E13H2" 0 "2-dehydro-3-deoxygluconokinase"  
"NT-A5\_00709" 39092 "s59E25H2" 0 "2-dehydro-3-deoxygluconokinase"  
"NT-A5\_00709" 39092 "s59E5H2" 0 "2-dehydro-3-deoxygluconokinase"  
"NT-A5\_00709" 39092 "s63E6H2" 0.09352507 "2-dehydro-3-deoxygluconokinase"  
"NT-A5\_00711" 39094 "s59E13H2" 0 "hypothetical protein"  
"NT-A5\_00711" 39094 "s59E25H2" 0 "hypothetical protein"  
"NT-A5\_00711" 39094 "s59E5H2" 0 "hypothetical protein"  
"NT-A5\_00711" 39094 "s63E6H2" 0 "hypothetical protein"  
"NT-A5\_00713" 39096 "s59E13H2" 0 "Xaa-Pro dipeptidase"  
"NT-A5\_00713" 39096 "s59E25H2" 0 "Xaa-Pro dipeptidase"  
"NT-A5\_00713" 39096 "s59E5H2" 0 "Xaa-Pro dipeptidase"  
"NT-A5\_00713" 39096 "s63E6H2" 0 "Xaa-Pro dipeptidase"  
"NT-A5\_00714" 39097 "s59E13H2" 0 "Squalene--hopene cyclase"  
"NT-A5\_00714" 39097 "s59E25H2" 0 "Squalene--hopene cyclase"  
"NT-A5\_00714" 39097 "s59E5H2" 0 "Squalene--hopene cyclase"  
"NT-A5\_00714" 39097 "s63E6H2" 0 "Squalene--hopene cyclase"  
"NT-A5\_00715" 39098 "s59E13H2" 0 "hypothetical protein"  
"NT-A5\_00715" 39098 "s59E25H2" 0 "hypothetical protein"  
"NT-A5\_00715" 39098 "s59E5H2" 0 "hypothetical protein"  
"NT-A5\_00715" 39098 "s63E6H2" 0 "hypothetical protein"  
"NT-A5\_00717" 39100 "s59E13H2" 0 "Taurine--pyruvate aminotransferase"  
"NT-A5\_00717" 39100 "s59E25H2" 0 "Taurine--pyruvate aminotransferase"  
"NT-A5\_00717" 39100 "s59E5H2" 0 "Taurine--pyruvate aminotransferase"  
"NT-A5\_00717" 39100 "s63E6H2" 0 "Taurine--pyruvate aminotransferase"  
"NT-A5\_00722" 39105 "s59E13H2" 0 "V-type ATP synthase beta chain"  
"NT-A5\_00722" 39105 "s59E25H2" 0 "V-type ATP synthase beta chain"  
"NT-A5\_00722" 39105 "s59E5H2" 0 "V-type ATP synthase beta chain"  
"NT-A5\_00722" 39105 "s63E6H2" 0.3639387 "V-type ATP synthase beta chain"  
"NT-A5\_00723" 39106 "s59E13H2" 0 "V-type ATP synthase beta chain"  
"NT-A5\_00723" 39106 "s59E25H2" 0 "V-type ATP synthase beta chain"

"NT-A5\_00723" 39106 "s59E5H2" 0 "V-type ATP synthase beta chain"  
"NT-A5\_00723" 39106 "s63E6H2" 0.02267411 "V-type ATP synthase beta chain"  
"NT-A5\_00725" 39108 "s59E13H2" 0 "Hydrogenase isoenzymes formation protein HypC"  
"NT-A5\_00725" 39108 "s59E25H2" 0 "Hydrogenase isoenzymes formation protein HypC"  
"NT-A5\_00725" 39108 "s59E5H2" 0 "Hydrogenase isoenzymes formation protein HypC"  
"NT-A5\_00725" 39108 "s63E6H2" 0.003368255 "Hydrogenase isoenzymes formation protein HypC"  
"NT-A5\_00726" 39109 "s59E13H2" 0 "Hydrogenase expression/formation protein HypD"  
"NT-A5\_00726" 39109 "s59E25H2" 0 "Hydrogenase expression/formation protein HypD"  
"NT-A5\_00726" 39109 "s59E5H2" 0 "Hydrogenase expression/formation protein HypD"  
"NT-A5\_00726" 39109 "s63E6H2" 0.0007599112 "Hydrogenase expression/formation protein HypD"  
"NT-A5\_00727" 39110 "s59E13H2" 0 "Hydrogenase expression/formation protein HypE"  
"NT-A5\_00727" 39110 "s59E25H2" 0 "Hydrogenase expression/formation protein HypE"  
"NT-A5\_00727" 39110 "s59E5H2" 0 "Hydrogenase expression/formation protein HypE"  
"NT-A5\_00727" 39110 "s63E6H2" 0.01153135 "Hydrogenase expression/formation protein HypE"  
"NT-A5\_00728" 39111 "s59E13H2" 0 "putative hydrogenase nickel incorporation protein HypB"  
"NT-A5\_00728" 39111 "s59E25H2" 0 "putative hydrogenase nickel incorporation protein HypB"  
"NT-A5\_00728" 39111 "s59E5H2" 0 "putative hydrogenase nickel incorporation protein HypB"  
"NT-A5\_00728" 39111 "s63E6H2" 0.005216012 "putative hydrogenase nickel incorporation protein HypB"  
"NT-A5\_00729" 39112 "s59E13H2" 0 "putative hydrogenase nickel incorporation protein HypA"  
"NT-A5\_00729" 39112 "s59E25H2" 0 "putative hydrogenase nickel incorporation protein HypA"  
"NT-A5\_00729" 39112 "s59E5H2" 0 "putative hydrogenase nickel incorporation protein HypA"  
"NT-A5\_00729" 39112 "s63E6H2" 0.01095893 "putative hydrogenase nickel incorporation protein HypA"  
"NT-A5\_00730" 39113 "s59E13H2" 0.006704542 "Integrase core domain protein"  
"NT-A5\_00730" 39113 "s59E25H2" 0 "Integrase core domain protein"  
"NT-A5\_00730" 39113 "s59E5H2" 0.3160944 "Integrase core domain protein"  
"NT-A5\_00730" 39113 "s63E6H2" 0 "Integrase core domain protein"  
"NT-A5\_00731" 39114 "s59E13H2" 0 "Transposase"  
"NT-A5\_00731" 39114 "s59E25H2" 0 "Transposase"  
"NT-A5\_00731" 39114 "s59E5H2" 0.2250144 "Transposase"  
"NT-A5\_00731" 39114 "s63E6H2" 0 "Transposase"  
"NT-A5\_00732" 39115 "s59E13H2" 0 "hypothetical protein"  
"NT-A5\_00732" 39115 "s59E25H2" 0 "hypothetical protein"  
"NT-A5\_00732" 39115 "s59E5H2" 0.004606613 "hypothetical protein"  
"NT-A5\_00732" 39115 "s63E6H2" 0 "hypothetical protein"  
"NT-A5\_00733" 39116 "s59E13H2" 0 "hypothetical protein"  
"NT-A5\_00733" 39116 "s59E25H2" 0 "hypothetical protein"  
"NT-A5\_00733" 39116 "s59E5H2" 0 "hypothetical protein"  
"NT-A5\_00733" 39116 "s63E6H2" 0 "hypothetical protein"  
"NT-A5\_00734" 39117 "s59E13H2" 0 "hypothetical protein"  
"NT-A5\_00734" 39117 "s59E25H2" 0 "hypothetical protein"  
"NT-A5\_00734" 39117 "s59E5H2" 0 "hypothetical protein"  
"NT-A5\_00734" 39117 "s63E6H2" 0 "hypothetical protein"  
"NT-A5\_00735" 39118 "s59E13H2" 0 "hypothetical protein"  
"NT-A5\_00735" 39118 "s59E25H2" 0 "hypothetical protein"  
"NT-A5\_00735" 39118 "s59E5H2" 0.003270788 "hypothetical protein"  
"NT-A5\_00735" 39118 "s63E6H2" 0 "hypothetical protein"  
"NT-A5\_00736" 39119 "s59E13H2" 0 "Modification methylase FokI"

"NT-A5\_00736" 39119 "s59E25H2" 0 "Modification methylase FokI"  
"NT-A5\_00736" 39119 "s59E5H2" 0 "Modification methylase FokI"  
"NT-A5\_00736" 39119 "s63E6H2" 0 "Modification methylase FokI"  
"NT-A5\_00737" 39120 "s59E13H2" 0 "Modification methylase FokI"  
"NT-A5\_00737" 39120 "s59E25H2" 0 "Modification methylase FokI"  
"NT-A5\_00737" 39120 "s59E5H2" 0 "Modification methylase FokI"  
"NT-A5\_00737" 39120 "s63E6H2" 0 "Modification methylase FokI"  
"NT-A5\_00738" 39121 "s59E13H2" 0 "LexA repressor"  
"NT-A5\_00738" 39121 "s59E25H2" 0 "LexA repressor"  
"NT-A5\_00738" 39121 "s59E5H2" 0 "LexA repressor"  
"NT-A5\_00738" 39121 "s63E6H2" 0 "LexA repressor"  
"NT-A5\_00740" 39123 "s59E13H2" 0 "hypothetical protein"  
"NT-A5\_00740" 39123 "s59E25H2" 0 "hypothetical protein"  
"NT-A5\_00740" 39123 "s59E5H2" 0 "hypothetical protein"  
"NT-A5\_00740" 39123 "s63E6H2" 0 "hypothetical protein"  
"NT-A5\_00744" 39127 "s59E13H2" 0.004531354 "Carbamoyltransferase HypF"  
"NT-A5\_00744" 39127 "s59E25H2" 0 "Carbamoyltransferase HypF"  
"NT-A5\_00744" 39127 "s59E5H2" 0 "Carbamoyltransferase HypF"  
"NT-A5\_00744" 39127 "s63E6H2" 0 "Carbamoyltransferase HypF"  
"NT-A5\_00749" 39132 "s59E13H2" 0 "V-type ATP synthase alpha chain"  
"NT-A5\_00749" 39132 "s59E25H2" 0 "V-type ATP synthase alpha chain"  
"NT-A5\_00749" 39132 "s59E5H2" 0 "V-type ATP synthase alpha chain"  
"NT-A5\_00749" 39132 "s63E6H2" 0.1883735 "V-type ATP synthase alpha chain"  
"NT-A5\_00753" 39136 "s59E13H2" 0 "hypothetical protein"  
"NT-A5\_00753" 39136 "s59E25H2" 0.5043371 "hypothetical protein"  
"NT-A5\_00753" 39136 "s59E5H2" 0 "hypothetical protein"  
"NT-A5\_00753" 39136 "s63E6H2" 0.341751 "hypothetical protein"  
"NT-A5\_00754" 39137 "s59E13H2" 0 "Radical SAM superfamily protein"  
"NT-A5\_00754" 39137 "s59E25H2" 0 "Radical SAM superfamily protein"  
"NT-A5\_00754" 39137 "s59E5H2" 0 "Radical SAM superfamily protein"  
"NT-A5\_00754" 39137 "s63E6H2" 0.5589211 "Radical SAM superfamily protein"  
"NT-A5\_00755" 39138 "s59E13H2" 0 "hypothetical protein"  
"NT-A5\_00755" 39138 "s59E25H2" 0 "hypothetical protein"  
"NT-A5\_00755" 39138 "s59E5H2" 0.007144768 "hypothetical protein"  
"NT-A5\_00755" 39138 "s63E6H2" 0.4026475 "hypothetical protein"  
"NT-A5\_00756" 39139 "s59E13H2" 0.001588386 "tRNA-specific 2-thiouridylase MnmA"  
"NT-A5\_00756" 39139 "s59E25H2" 0 "tRNA-specific 2-thiouridylase MnmA"  
"NT-A5\_00756" 39139 "s59E5H2" 0.05239704 "tRNA-specific 2-thiouridylase MnmA"  
"NT-A5\_00756" 39139 "s63E6H2" 0.6365677 "tRNA-specific 2-thiouridylase MnmA"  
"NT-A5\_00757" 39140 "s59E13H2" 0 "hypothetical protein"  
"NT-A5\_00757" 39140 "s59E25H2" 0 "hypothetical protein"  
"NT-A5\_00757" 39140 "s59E5H2" 0.06426497 "hypothetical protein"  
"NT-A5\_00757" 39140 "s63E6H2" 0.7354693 "hypothetical protein"  
"NT-A5\_00758" 39141 "s59E13H2" 0.006405911 "Intracellular exo-alpha-(1-"  
"NT-A5\_00758" 39141 "s59E25H2" 0 "Intracellular exo-alpha-(1-"  
"NT-A5\_00758" 39141 "s59E5H2" 0.0878423 "Intracellular exo-alpha-(1-"  
"NT-A5\_00758" 39141 "s63E6H2" 0.5190617 "Intracellular exo-alpha-(1-"

"NT-A5\_00759" 39142 "s59E13H2" 0 "Intracellular exo-alpha-(1-"  
"NT-A5\_00759" 39142 "s59E25H2" 0 "Intracellular exo-alpha-(1-"  
"NT-A5\_00759" 39142 "s59E5H2" 0 "Intracellular exo-alpha-(1-"  
"NT-A5\_00759" 39142 "s63E6H2" 0.2627819 "Intracellular exo-alpha-(1-"  
"NT-A5\_00760" 39143 "s59E13H2" 0 "Octanoyltransferase LipM"  
"NT-A5\_00760" 39143 "s59E25H2" 0 "Octanoyltransferase LipM"  
"NT-A5\_00760" 39143 "s59E5H2" 0.02168128 "Octanoyltransferase LipM"  
"NT-A5\_00760" 39143 "s63E6H2" 0.5218426 "Octanoyltransferase LipM"  
"NT-A5\_00761" 39144 "s59E13H2" 0 "Thioredoxin reductase"  
"NT-A5\_00761" 39144 "s59E25H2" 0 "Thioredoxin reductase"  
"NT-A5\_00761" 39144 "s59E5H2" 0.0002237288 "Thioredoxin reductase"  
"NT-A5\_00761" 39144 "s63E6H2" 1.212121 "Thioredoxin reductase"  
"NT-A5\_00762" 39145 "s59E13H2" 0 "putative inorganic polyphosphate/ATP-NAD kinase"  
"NT-A5\_00762" 39145 "s59E25H2" 0 "putative inorganic polyphosphate/ATP-NAD kinase"  
"NT-A5\_00762" 39145 "s59E5H2" 0.01622987 "putative inorganic polyphosphate/ATP-NAD kinase"  
"NT-A5\_00762" 39145 "s63E6H2" 1.222481 "putative inorganic polyphosphate/ATP-NAD kinase"  
"NT-A5\_00763" 39146 "s59E13H2" 0 "Divergent PAP2 family protein"  
"NT-A5\_00763" 39146 "s59E25H2" 0 "Divergent PAP2 family protein"  
"NT-A5\_00763" 39146 "s59E5H2" 0 "Divergent PAP2 family protein"  
"NT-A5\_00763" 39146 "s63E6H2" 0.8182395 "Divergent PAP2 family protein"  
"NT-A5\_00764" 39147 "s59E13H2" 0 "Exodeoxyribonuclease 7 small subunit"  
"NT-A5\_00764" 39147 "s59E25H2" 0 "Exodeoxyribonuclease 7 small subunit"  
"NT-A5\_00764" 39147 "s59E5H2" 0 "Exodeoxyribonuclease 7 small subunit"  
"NT-A5\_00764" 39147 "s63E6H2" 0.6238846 "Exodeoxyribonuclease 7 small subunit"  
"NT-A5\_00765" 39148 "s59E13H2" 0 "exodeoxyribonuclease VII large subunit"  
"NT-A5\_00765" 39148 "s59E25H2" 0 "exodeoxyribonuclease VII large subunit"  
"NT-A5\_00765" 39148 "s59E5H2" 0 "exodeoxyribonuclease VII large subunit"  
"NT-A5\_00765" 39148 "s63E6H2" 0.09720183 "exodeoxyribonuclease VII large subunit"  
"NT-A5\_00766" 39149 "s59E13H2" 0 "V-type ATP synthase alpha chain"  
"NT-A5\_00766" 39149 "s59E25H2" 0 "V-type ATP synthase alpha chain"  
"NT-A5\_00766" 39149 "s59E5H2" 0 "V-type ATP synthase alpha chain"  
"NT-A5\_00766" 39149 "s63E6H2" 0.1332447 "V-type ATP synthase alpha chain"  
"NT-A5\_00768" 39151 "s59E13H2" 0 "V-type ATP synthase beta chain"  
"NT-A5\_00768" 39151 "s59E25H2" 0 "V-type ATP synthase beta chain"  
"NT-A5\_00768" 39151 "s59E5H2" 0.009663928 "V-type ATP synthase beta chain"  
"NT-A5\_00768" 39151 "s63E6H2" 0.05851501 "V-type ATP synthase beta chain"  
"NT-A5\_00772" 39155 "s59E13H2" 0 "hypothetical protein"  
"NT-A5\_00772" 39155 "s59E25H2" 0 "hypothetical protein"  
"NT-A5\_00772" 39155 "s59E5H2" 0 "hypothetical protein"  
"NT-A5\_00772" 39155 "s63E6H2" 0 "hypothetical protein"  
"NT-A5\_00773" 39156 "s59E13H2" 0 "hypothetical protein"  
"NT-A5\_00773" 39156 "s59E25H2" 0 "hypothetical protein"  
"NT-A5\_00773" 39156 "s59E5H2" 0 "hypothetical protein"  
"NT-A5\_00773" 39156 "s63E6H2" 0 "hypothetical protein"  
"NT-A5\_00775" 39158 "s59E13H2" 0 "Ketol-acid reductoisomerase"  
"NT-A5\_00775" 39158 "s59E25H2" 0 "Ketol-acid reductoisomerase"  
"NT-A5\_00775" 39158 "s59E5H2" 0.02609388 "Ketol-acid reductoisomerase"



"NT-A5\_00775" 39158 "s63E6H2" 0.9373927 "Ketol-acid reductoisomerase"  
"NT-A5\_00776" 39159 "s59E13H2" 0 "hypothetical protein"  
"NT-A5\_00776" 39159 "s59E25H2" 0 "hypothetical protein"  
"NT-A5\_00776" 39159 "s59E5H2" 0 "hypothetical protein"  
"NT-A5\_00776" 39159 "s63E6H2" 0.7755496 "hypothetical protein"  
"NT-A5\_00777" 39160 "s59E13H2" 0 "hypothetical protein"  
"NT-A5\_00777" 39160 "s59E25H2" 0 "hypothetical protein"  
"NT-A5\_00777" 39160 "s59E5H2" 0 "hypothetical protein"  
"NT-A5\_00777" 39160 "s63E6H2" 0 "hypothetical protein"  
"NT-A5\_00780" 39163 "s59E13H2" 0 "Helix-turn-helix domain protein"  
"NT-A5\_00780" 39163 "s59E25H2" 0 "Helix-turn-helix domain protein"  
"NT-A5\_00780" 39163 "s59E5H2" 0.02460709 "Helix-turn-helix domain protein"  
"NT-A5\_00780" 39163 "s63E6H2" 0.1315008 "Helix-turn-helix domain protein"  
"NT-A5\_00781" 39164 "s59E13H2" 0 "hypothetical protein"  
"NT-A5\_00781" 39164 "s59E25H2" 0 "hypothetical protein"  
"NT-A5\_00781" 39164 "s59E5H2" 0 "hypothetical protein"  
"NT-A5\_00781" 39164 "s63E6H2" 0.0001743165 "hypothetical protein"  
"NT-A5\_00782" 39165 "s59E13H2" 0 "Demethylrebeccamycin-D-glucose O-methyltransferase"  
"NT-A5\_00782" 39165 "s59E25H2" 0 "Demethylrebeccamycin-D-glucose O-methyltransferase"  
"NT-A5\_00782" 39165 "s59E5H2" 0 "Demethylrebeccamycin-D-glucose O-methyltransferase"  
"NT-A5\_00782" 39165 "s63E6H2" 0 "Demethylrebeccamycin-D-glucose O-methyltransferase"  
"NT-A5\_00783" 39166 "s59E13H2" 0 "(R)-stereoselective amidase"  
"NT-A5\_00783" 39166 "s59E25H2" 0 "(R)-stereoselective amidase"  
"NT-A5\_00783" 39166 "s59E5H2" 0.006758309 "(R)-stereoselective amidase"  
"NT-A5\_00783" 39166 "s63E6H2" 0.005638092 "(R)-stereoselective amidase"  
"NT-A5\_00784" 39167 "s59E13H2" 0 "Glutamate decarboxylase"  
"NT-A5\_00784" 39167 "s59E25H2" 0 "Glutamate decarboxylase"  
"NT-A5\_00784" 39167 "s59E5H2" 0.01025593 "Glutamate decarboxylase"  
"NT-A5\_00784" 39167 "s63E6H2" 0.001159808 "Glutamate decarboxylase"  
"NT-A5\_00785" 39168 "s59E13H2" 0 "Glutamate/gamma-aminobutyrate antiporter"  
"NT-A5\_00785" 39168 "s59E25H2" 0 "Glutamate/gamma-aminobutyrate antiporter"  
"NT-A5\_00785" 39168 "s59E5H2" 0.001929968 "Glutamate/gamma-aminobutyrate antiporter"  
"NT-A5\_00785" 39168 "s63E6H2" 0 "Glutamate/gamma-aminobutyrate antiporter"  
"NT-A5\_00787" 39170 "s59E13H2" 0.03045817 "hypothetical protein"  
"NT-A5\_00787" 39170 "s59E25H2" 0 "hypothetical protein"  
"NT-A5\_00787" 39170 "s59E5H2" 0 "hypothetical protein"  
"NT-A5\_00787" 39170 "s63E6H2" 0 "hypothetical protein"  
"NT-A5\_00788" 39171 "s59E13H2" 0 "hypothetical protein"  
"NT-A5\_00788" 39171 "s59E25H2" 0 "hypothetical protein"  
"NT-A5\_00788" 39171 "s59E5H2" 0 "hypothetical protein"  
"NT-A5\_00788" 39171 "s63E6H2" 0 "hypothetical protein"  
"NT-A5\_00789" 39172 "s59E13H2" 0 "Restriction endonuclease BglII"  
"NT-A5\_00789" 39172 "s59E25H2" 0 "Restriction endonuclease BglII"  
"NT-A5\_00789" 39172 "s59E5H2" 0 "Restriction endonuclease BglII"  
"NT-A5\_00789" 39172 "s63E6H2" 0 "Restriction endonuclease BglII"  
"NT-A5\_00795" 39178 "s59E13H2" 0 "Trigger factor"  
"NT-A5\_00795" 39178 "s59E25H2" 0 "Trigger factor"

"NT-A5\_00795" 39178 "s59E5H2" 0.01095758 "Trigger factor"  
"NT-A5\_00795" 39178 "s63E6H2" 0.366255 "Trigger factor"  
"NT-A5\_00797" 39180 "s59E13H2" 0 "4-hydroxy-tetrahydrodipicolinate synthase"  
"NT-A5\_00797" 39180 "s59E25H2" 0 "4-hydroxy-tetrahydrodipicolinate synthase"  
"NT-A5\_00797" 39180 "s59E5H2" 0 "4-hydroxy-tetrahydrodipicolinate synthase"  
"NT-A5\_00797" 39180 "s63E6H2" 0.02985831 "4-hydroxy-tetrahydrodipicolinate synthase"  
"NT-A5\_00798" 39181 "s59E13H2" 0 "Hydrogen cyanide synthase subunit HcnB"  
"NT-A5\_00798" 39181 "s59E25H2" 0 "Hydrogen cyanide synthase subunit HcnB"  
"NT-A5\_00798" 39181 "s59E5H2" 0 "Hydrogen cyanide synthase subunit HcnB"  
"NT-A5\_00798" 39181 "s63E6H2" 0.03709248 "Hydrogen cyanide synthase subunit HcnB"  
"NT-A5\_00800" 39183 "s59E13H2" 0 "putative deoxyribonuclease YcfH"  
"NT-A5\_00800" 39183 "s59E25H2" 0 "putative deoxyribonuclease YcfH"  
"NT-A5\_00800" 39183 "s59E5H2" 0 "putative deoxyribonuclease YcfH"  
"NT-A5\_00800" 39183 "s63E6H2" 0 "putative deoxyribonuclease YcfH"  
"NT-A5\_00801" 39184 "s59E13H2" 0 "acetyltransferase"  
"NT-A5\_00801" 39184 "s59E25H2" 0 "acetyltransferase"  
"NT-A5\_00801" 39184 "s59E5H2" 0 "acetyltransferase"  
"NT-A5\_00801" 39184 "s63E6H2" 0 "acetyltransferase"  
"NT-A5\_00803" 39186 "s59E13H2" 0 "dephospho-CoA kinase/protein folding accessory domain-containing protein"  
"NT-A5\_00803" 39186 "s59E25H2" 0 "dephospho-CoA kinase/protein folding accessory domain-containing protein"  
"NT-A5\_00803" 39186 "s59E5H2" 0 "dephospho-CoA kinase/protein folding accessory domain-containing protein"  
"NT-A5\_00803" 39186 "s63E6H2" 0 "dephospho-CoA kinase/protein folding accessory domain-containing protein"  
"NT-A5\_00805" 39188 "s59E13H2" 0 "Antitoxin VapB32"  
"NT-A5\_00805" 39188 "s59E25H2" 0 "Antitoxin VapB32"  
"NT-A5\_00805" 39188 "s59E5H2" 0 "Antitoxin VapB32"  
"NT-A5\_00805" 39188 "s63E6H2" 0 "Antitoxin VapB32"  
"NT-A5\_00806" 39189 "s59E13H2" 0 "Ribonuclease VapC32"  
"NT-A5\_00806" 39189 "s59E25H2" 0 "Ribonuclease VapC32"  
"NT-A5\_00806" 39189 "s59E5H2" 0 "Ribonuclease VapC32"  
"NT-A5\_00806" 39189 "s63E6H2" 0 "Ribonuclease VapC32"  
"NT-A5\_00807" 39190 "s59E13H2" 0 "methylcobalamin:coenzyme M methyltransferase"  
"NT-A5\_00807" 39190 "s59E25H2" 0 "methylcobalamin:coenzyme M methyltransferase"  
"NT-A5\_00807" 39190 "s59E5H2" 0 "methylcobalamin:coenzyme M methyltransferase"  
"NT-A5\_00807" 39190 "s63E6H2" 0.01379465 "methylcobalamin:coenzyme M methyltransferase"  
"NT-A5\_00808" 39191 "s59E13H2" 0 "hypothetical protein"  
"NT-A5\_00808" 39191 "s59E25H2" 0 "hypothetical protein"  
"NT-A5\_00808" 39191 "s59E5H2" 0 "hypothetical protein"  
"NT-A5\_00808" 39191 "s63E6H2" 0.0003595279 "hypothetical protein"  
"NT-A5\_00811" 39194 "s59E13H2" 0 "hypothetical protein"  
"NT-A5\_00811" 39194 "s59E25H2" 0 "hypothetical protein"  
"NT-A5\_00811" 39194 "s59E5H2" 0 "hypothetical protein"  
"NT-A5\_00811" 39194 "s63E6H2" 0.0349878 "hypothetical protein"  
"NT-A5\_00812" 39195 "s59E13H2" 0 "Beta-1,4-mannooligosaccharide phosphorylase"  
"NT-A5\_00812" 39195 "s59E25H2" 0 "Beta-1,4-mannooligosaccharide phosphorylase"  
"NT-A5\_00812" 39195 "s59E5H2" 0 "Beta-1,4-mannooligosaccharide phosphorylase"  
"NT-A5\_00812" 39195 "s63E6H2" 0.02317047 "Beta-1,4-mannooligosaccharide phosphorylase"  
"NT-A5\_00813" 39196 "s59E13H2" 0 "3-isopropylmalate dehydrogenase"

"NT-A5\_00813" 39196 "s59E25H2" 0 "3-isopropylmalate dehydrogenase"  
"NT-A5\_00813" 39196 "s59E5H2" 0 "3-isopropylmalate dehydrogenase"  
"NT-A5\_00813" 39196 "s63E6H2" 0.09946679 "3-isopropylmalate dehydrogenase"  
"NT-A5\_00814" 39197 "s59E13H2" 0 "Nucleoside diphosphate kinase"  
"NT-A5\_00814" 39197 "s59E25H2" 0 "Nucleoside diphosphate kinase"  
"NT-A5\_00814" 39197 "s59E5H2" 0 "Nucleoside diphosphate kinase"  
"NT-A5\_00814" 39197 "s63E6H2" 0.1728114 "Nucleoside diphosphate kinase"  
"NT-A5\_00815" 39198 "s59E13H2" 0.002318531 "putative endonuclease 4"  
"NT-A5\_00815" 39198 "s59E25H2" 0 "putative endonuclease 4"  
"NT-A5\_00815" 39198 "s59E5H2" 0 "putative endonuclease 4"  
"NT-A5\_00815" 39198 "s63E6H2" 0.1196088 "putative endonuclease 4"  
"NT-A5\_00816" 39199 "s59E13H2" 0 "Hydrogenase expression/formation protein HypE"  
"NT-A5\_00816" 39199 "s59E25H2" 0 "Hydrogenase expression/formation protein HypE"  
"NT-A5\_00816" 39199 "s59E5H2" 0 "Hydrogenase expression/formation protein HypE"  
"NT-A5\_00816" 39199 "s63E6H2" 0.01629562 "Hydrogenase expression/formation protein HypE"  
"NT-A5\_00817" 39200 "s59E13H2" 0 "SpoVT / AbrB like domain protein"  
"NT-A5\_00817" 39200 "s59E25H2" 0 "SpoVT / AbrB like domain protein"  
"NT-A5\_00817" 39200 "s59E5H2" 0 "SpoVT / AbrB like domain protein"  
"NT-A5\_00817" 39200 "s63E6H2" 0.04048092 "SpoVT / AbrB like domain protein"  
"NT-A5\_00818" 39201 "s59E13H2" 0 "hypothetical protein"  
"NT-A5\_00818" 39201 "s59E25H2" 0 "hypothetical protein"  
"NT-A5\_00818" 39201 "s59E5H2" 0 "hypothetical protein"  
"NT-A5\_00818" 39201 "s63E6H2" 0.05256311 "hypothetical protein"  
"NT-A5\_00819" 39202 "s59E13H2" 0 "Flavodoxin"  
"NT-A5\_00819" 39202 "s59E25H2" 0 "Flavodoxin"  
"NT-A5\_00819" 39202 "s59E5H2" 0 "Flavodoxin"  
"NT-A5\_00819" 39202 "s63E6H2" 0.06383254 "Flavodoxin"  
"NT-A5\_00820" 39203 "s59E13H2" 0 "1-(5-phosphoribosyl)-5-[(5-phosphoribosylamino)methylideneamino] imidazole-4-carboxamide isomerase"  
"NT-A5\_00820" 39203 "s59E25H2" 0 "1-(5-phosphoribosyl)-5-[(5-phosphoribosylamino)methylideneamino] imidazole-4-carboxamide isomerase"  
"NT-A5\_00820" 39203 "s59E5H2" 0 "1-(5-phosphoribosyl)-5-[(5-phosphoribosylamino)methylideneamino] imidazole-4-carboxamide isomerase"  
"NT-A5\_00820" 39203 "s63E6H2" 0.05727817 "1-(5-phosphoribosyl)-5-[(5-phosphoribosylamino)methylideneamino] imidazole-4-carboxamide isomerase"  
"NT-A5\_00821" 39204 "s59E13H2" 0 "Phosphoribosyl-AMP cyclohydrolase"  
"NT-A5\_00821" 39204 "s59E25H2" 0 "Phosphoribosyl-AMP cyclohydrolase"  
"NT-A5\_00821" 39204 "s59E5H2" 0 "Phosphoribosyl-AMP cyclohydrolase"  
"NT-A5\_00821" 39204 "s63E6H2" 0.08949799 "Phosphoribosyl-AMP cyclohydrolase"  
"NT-A5\_00822" 39205 "s59E13H2" 0 "Amidase enhancer precursor"  
"NT-A5\_00822" 39205 "s59E25H2" 0 "Amidase enhancer precursor"  
"NT-A5\_00822" 39205 "s59E5H2" 0 "Amidase enhancer precursor"  
"NT-A5\_00822" 39205 "s63E6H2" 0.1601838 "Amidase enhancer precursor"  
"NT-A5\_00824" 39207 "s59E13H2" 0.001604265 "2,3-bisphosphoglycerate-independent phosphoglycerate mutase 1"  
"NT-A5\_00824" 39207 "s59E25H2" 0 "2,3-bisphosphoglycerate-independent phosphoglycerate mutase 1"  
"NT-A5\_00824" 39207 "s59E5H2" 0 "2,3-bisphosphoglycerate-independent phosphoglycerate mutase 1"  
"NT-A5\_00824" 39207 "s63E6H2" 0.2440931 "2,3-bisphosphoglycerate-independent phosphoglycerate mutase 1"  
"NT-A5\_00825" 39208 "s59E13H2" 0.001498563 "hypothetical protein"  
"NT-A5\_00825" 39208 "s59E25H2" 0 "hypothetical protein"  
"NT-A5\_00825" 39208 "s59E5H2" 0 "hypothetical protein"  
"NT-A5\_00825" 39208 "s63E6H2" 0.1673905 "hypothetical protein"

"NT-A5\_00826" 39209 "s59E13H2" 0 "Sorbitol dehydrogenase"  
"NT-A5\_00826" 39209 "s59E25H2" 0 "Sorbitol dehydrogenase"  
"NT-A5\_00826" 39209 "s59E5H2" 0 "Sorbitol dehydrogenase"  
"NT-A5\_00826" 39209 "s63E6H2" 0.2858127 "Sorbitol dehydrogenase"  
"NT-A5\_00827" 39210 "s59E13H2" 0 "Transcriptional regulator LsrR"  
"NT-A5\_00827" 39210 "s59E25H2" 0 "Transcriptional regulator LsrR"  
"NT-A5\_00827" 39210 "s59E5H2" 0 "Transcriptional regulator LsrR"  
"NT-A5\_00827" 39210 "s63E6H2" 0.3106826 "Transcriptional regulator LsrR"  
"NT-A5\_00828" 39211 "s59E13H2" 0 "methylcobalamin:coenzyme M methyltransferase"  
"NT-A5\_00828" 39211 "s59E25H2" 0 "methylcobalamin:coenzyme M methyltransferase"  
"NT-A5\_00828" 39211 "s59E5H2" 0 "methylcobalamin:coenzyme M methyltransferase"  
"NT-A5\_00828" 39211 "s63E6H2" 0.2528059 "methylcobalamin:coenzyme M methyltransferase"  
"NT-A5\_00829" 39212 "s59E13H2" 0 "D-tagatose 3-epimerase"  
"NT-A5\_00829" 39212 "s59E25H2" 0 "D-tagatose 3-epimerase"  
"NT-A5\_00829" 39212 "s59E5H2" 0 "D-tagatose 3-epimerase"  
"NT-A5\_00829" 39212 "s63E6H2" 0.2033475 "D-tagatose 3-epimerase"  
"NT-A5\_00830" 39213 "s59E13H2" 0 "putative L-threonine 3-dehydrogenase"  
"NT-A5\_00830" 39213 "s59E25H2" 0 "putative L-threonine 3-dehydrogenase"  
"NT-A5\_00830" 39213 "s59E5H2" 0.008996283 "putative L-threonine 3-dehydrogenase"  
"NT-A5\_00830" 39213 "s63E6H2" 0.2534074 "putative L-threonine 3-dehydrogenase"  
"NT-A5\_00831" 39214 "s59E13H2" 0 "L-xylulose/3-keto-L-gulonate kinase"  
"NT-A5\_00831" 39214 "s59E25H2" 0 "L-xylulose/3-keto-L-gulonate kinase"  
"NT-A5\_00831" 39214 "s59E5H2" 0.004245156 "L-xylulose/3-keto-L-gulonate kinase"  
"NT-A5\_00831" 39214 "s63E6H2" 0.2078289 "L-xylulose/3-keto-L-gulonate kinase"  
"NT-A5\_00833" 39216 "s59E13H2" 0 "hypothetical protein"  
"NT-A5\_00833" 39216 "s59E25H2" 0 "hypothetical protein"  
"NT-A5\_00833" 39216 "s59E5H2" 0 "hypothetical protein"  
"NT-A5\_00833" 39216 "s63E6H2" 0 "hypothetical protein"  
"NT-A5\_00836" 39219 "s59E13H2" 0 "hypothetical protein"  
"NT-A5\_00836" 39219 "s59E25H2" 0 "hypothetical protein"  
"NT-A5\_00836" 39219 "s59E5H2" 0 "hypothetical protein"  
"NT-A5\_00836" 39219 "s63E6H2" 0 "hypothetical protein"  
"NT-A5\_00837" 39220 "s59E13H2" 0.004767316 "Phospholipase D precursor"  
"NT-A5\_00837" 39220 "s59E25H2" 0 "Phospholipase D precursor"  
"NT-A5\_00837" 39220 "s59E5H2" 0 "Phospholipase D precursor"  
"NT-A5\_00837" 39220 "s63E6H2" 0 "Phospholipase D precursor"  
"NT-A5\_00838" 39221 "s59E13H2" 0.04032967 "L-ribulose-5-phosphate 4-epimerase UlaF"  
"NT-A5\_00838" 39221 "s59E25H2" 0 "L-ribulose-5-phosphate 4-epimerase UlaF"  
"NT-A5\_00838" 39221 "s59E5H2" 0 "L-ribulose-5-phosphate 4-epimerase UlaF"  
"NT-A5\_00838" 39221 "s63E6H2" 0 "L-ribulose-5-phosphate 4-epimerase UlaF"  
"NT-A5\_00839" 39222 "s59E13H2" 0 "Ribulokinase"  
"NT-A5\_00839" 39222 "s59E25H2" 0 "Ribulokinase"  
"NT-A5\_00839" 39222 "s59E5H2" 0.004551166 "Ribulokinase"  
"NT-A5\_00839" 39222 "s63E6H2" 0 "Ribulokinase"  
"NT-A5\_00840" 39223 "s59E13H2" 0 "2-isopropylmalate synthase"  
"NT-A5\_00840" 39223 "s59E25H2" 0 "2-isopropylmalate synthase"  
"NT-A5\_00840" 39223 "s59E5H2" 0 "2-isopropylmalate synthase"

"NT-A5\_00840" 39223 "s63E6H2" 0.004454249 "2-isopropylmalate synthase"  
"NT-A5\_00841" 39224 "s59E13H2" 0 "2,3-dimethylmalate dehydratase small subunit"  
"NT-A5\_00841" 39224 "s59E25H2" 0 "2,3-dimethylmalate dehydratase small subunit"  
"NT-A5\_00841" 39224 "s59E5H2" 0 "2,3-dimethylmalate dehydratase small subunit"  
"NT-A5\_00841" 39224 "s63E6H2" 0 "2,3-dimethylmalate dehydratase small subunit"  
"NT-A5\_00842" 39225 "s59E13H2" 0 "hypothetical protein"  
"NT-A5\_00842" 39225 "s59E25H2" 0 "hypothetical protein"  
"NT-A5\_00842" 39225 "s59E5H2" 0 "hypothetical protein"  
"NT-A5\_00842" 39225 "s63E6H2" 0 "hypothetical protein"  
"NT-A5\_00843" 39226 "s59E13H2" 0 "Ketoisovalerate oxidoreductase subunit VorB"  
"NT-A5\_00843" 39226 "s59E25H2" 0 "Ketoisovalerate oxidoreductase subunit VorB"  
"NT-A5\_00843" 39226 "s59E5H2" 0.007654265 "Ketoisovalerate oxidoreductase subunit VorB"  
"NT-A5\_00843" 39226 "s63E6H2" 0 "Ketoisovalerate oxidoreductase subunit VorB"  
"NT-A5\_00844" 39227 "s59E13H2" 0 "Regulator of sigma-W protease RasP"  
"NT-A5\_00844" 39227 "s59E25H2" 0 "Regulator of sigma-W protease RasP"  
"NT-A5\_00844" 39227 "s59E5H2" 0.003888942 "Regulator of sigma-W protease RasP"  
"NT-A5\_00844" 39227 "s63E6H2" 0 "Regulator of sigma-W protease RasP"  
"NT-A5\_00845" 39228 "s59E13H2" 0 "Phosphatidate cytidylyltransferase"  
"NT-A5\_00845" 39228 "s59E25H2" 0 "Phosphatidate cytidylyltransferase"  
"NT-A5\_00845" 39228 "s59E5H2" 0.0556093 "Phosphatidate cytidylyltransferase"  
"NT-A5\_00845" 39228 "s63E6H2" 0 "Phosphatidate cytidylyltransferase"  
"NT-A5\_00846" 39229 "s59E13H2" 0 "Ditrans, polycis-undecaprenyl-diphosphate synthase ((2E,6E)-farnesyl-diphosphate specific)"  
"NT-A5\_00846" 39229 "s59E25H2" 0 "Ditrans, polycis-undecaprenyl-diphosphate synthase ((2E,6E)-farnesyl-diphosphate specific)"  
"NT-A5\_00846" 39229 "s59E5H2" 0.1426007 "Ditrans, polycis-undecaprenyl-diphosphate synthase ((2E,6E)-farnesyl-diphosphate specific)"  
"NT-A5\_00846" 39229 "s63E6H2" 0 "Ditrans, polycis-undecaprenyl-diphosphate synthase ((2E,6E)-farnesyl-diphosphate specific)"  
"NT-A5\_00847" 39230 "s59E13H2" 0.1183821 "UDP-3-O-[3-hydroxymyristoyl] N-acetylglucosamine deacetylase"  
"NT-A5\_00847" 39230 "s59E25H2" 0 "UDP-3-O-[3-hydroxymyristoyl] N-acetylglucosamine deacetylase"  
"NT-A5\_00847" 39230 "s59E5H2" 0.03904102 "UDP-3-O-[3-hydroxymyristoyl] N-acetylglucosamine deacetylase"  
"NT-A5\_00847" 39230 "s63E6H2" 0 "UDP-3-O-[3-hydroxymyristoyl] N-acetylglucosamine deacetylase"  
"NT-A5\_00848" 39231 "s59E13H2" 0.4607379 "UDP-3-O-acylglucosamine N-acyltransferase"  
"NT-A5\_00848" 39231 "s59E25H2" 0 "UDP-3-O-acylglucosamine N-acyltransferase"  
"NT-A5\_00848" 39231 "s59E5H2" 0.01482489 "UDP-3-O-acylglucosamine N-acyltransferase"  
"NT-A5\_00848" 39231 "s63E6H2" 0.002994812 "UDP-3-O-acylglucosamine N-acyltransferase"  
"NT-A5\_00849" 39232 "s59E13H2" 0 "Outer membrane protein (OmpH-like)"  
"NT-A5\_00849" 39232 "s59E25H2" 0 "Outer membrane protein (OmpH-like)"  
"NT-A5\_00849" 39232 "s59E5H2" 0 "Outer membrane protein (OmpH-like)"  
"NT-A5\_00849" 39232 "s63E6H2" 0 "Outer membrane protein (OmpH-like)"  
"NT-A5\_00850" 39233 "s59E13H2" 0 "Endoribonuclease YbeY"  
"NT-A5\_00850" 39233 "s59E25H2" 0 "Endoribonuclease YbeY"  
"NT-A5\_00850" 39233 "s59E5H2" 0.005606558 "Endoribonuclease YbeY"  
"NT-A5\_00850" 39233 "s63E6H2" 0 "Endoribonuclease YbeY"  
"NT-A5\_00851" 39234 "s59E13H2" 0 "7TM receptor with intracellular HD hydrolase"  
"NT-A5\_00851" 39234 "s59E25H2" 0 "7TM receptor with intracellular HD hydrolase"  
"NT-A5\_00851" 39234 "s59E5H2" 0.003566364 "7TM receptor with intracellular HD hydrolase"  
"NT-A5\_00851" 39234 "s63E6H2" 0.0003955004 "7TM receptor with intracellular HD hydrolase"  
"NT-A5\_00852" 39235 "s59E13H2" 0 "PhoH-like protein"  
"NT-A5\_00852" 39235 "s59E25H2" 0 "PhoH-like protein"

"NT-A5\_00852" 39235 "s59E5H2" 0 "PhoH-like protein"  
"NT-A5\_00852" 39235 "s63E6H2" 0.003049055 "PhoH-like protein"  
"NT-A5\_00853" 39236 "s59E13H2" 0 "YacP-like NYN domain protein"  
"NT-A5\_00853" 39236 "s59E25H2" 0 "YacP-like NYN domain protein"  
"NT-A5\_00853" 39236 "s59E5H2" 0 "YacP-like NYN domain protein"  
"NT-A5\_00853" 39236 "s63E6H2" 0.003760023 "YacP-like NYN domain protein"  
"NT-A5\_00854" 39237 "s59E13H2" 0.02437608 "Trehalose/maltose import ATP-binding protein Malk"  
"NT-A5\_00854" 39237 "s59E25H2" 0 "Trehalose/maltose import ATP-binding protein Malk"  
"NT-A5\_00854" 39237 "s59E5H2" 0 "Trehalose/maltose import ATP-binding protein Malk"  
"NT-A5\_00854" 39237 "s63E6H2" 0 "Trehalose/maltose import ATP-binding protein Malk"  
"NT-A5\_00855" 39238 "s59E13H2" 0.0001985044 "hypothetical protein"  
"NT-A5\_00855" 39238 "s59E25H2" 0 "hypothetical protein"  
"NT-A5\_00855" 39238 "s59E5H2" 0 "hypothetical protein"  
"NT-A5\_00855" 39238 "s63E6H2" 0 "hypothetical protein"  
"NT-A5\_00856" 39239 "s59E13H2" 0.1896364 "DNA ligase"  
"NT-A5\_00856" 39239 "s59E25H2" 0 "DNA ligase"  
"NT-A5\_00856" 39239 "s59E5H2" 0 "DNA ligase"  
"NT-A5\_00856" 39239 "s63E6H2" 0 "DNA ligase"  
"NT-A5\_00857" 39240 "s59E13H2" 0.3492108 "Tyrosine--tRNA ligase"  
"NT-A5\_00857" 39240 "s59E25H2" 0 "Tyrosine--tRNA ligase"  
"NT-A5\_00857" 39240 "s59E5H2" 0 "Tyrosine--tRNA ligase"  
"NT-A5\_00857" 39240 "s63E6H2" 0 "Tyrosine--tRNA ligase"  
"NT-A5\_00858" 39241 "s59E13H2" 0.141547 "tRNA dimethylallyltransferase"  
"NT-A5\_00858" 39241 "s59E25H2" 0 "tRNA dimethylallyltransferase"  
"NT-A5\_00858" 39241 "s59E5H2" 0 "tRNA dimethylallyltransferase"  
"NT-A5\_00858" 39241 "s63E6H2" 0 "tRNA dimethylallyltransferase"  
"NT-A5\_00859" 39242 "s59E13H2" 0.06850302 "(Dimethylallyl)adenosine tRNA methylthiotransferase MiaB"  
"NT-A5\_00859" 39242 "s59E25H2" 0 "(Dimethylallyl)adenosine tRNA methylthiotransferase MiaB"  
"NT-A5\_00859" 39242 "s59E5H2" 0 "(Dimethylallyl)adenosine tRNA methylthiotransferase MiaB"  
"NT-A5\_00859" 39242 "s63E6H2" 0 "(Dimethylallyl)adenosine tRNA methylthiotransferase MiaB"  
"NT-A5\_00860" 39243 "s59E13H2" 0.0008548119 "hypothetical protein"  
"NT-A5\_00860" 39243 "s59E25H2" 0 "hypothetical protein"  
"NT-A5\_00860" 39243 "s59E5H2" 0 "hypothetical protein"  
"NT-A5\_00860" 39243 "s63E6H2" 0 "hypothetical protein"  
"NT-A5\_00861" 39244 "s59E13H2" 0 "(Dimethylallyl)adenosine tRNA methylthiotransferase MiaB"  
"NT-A5\_00861" 39244 "s59E25H2" 0 "(Dimethylallyl)adenosine tRNA methylthiotransferase MiaB"  
"NT-A5\_00861" 39244 "s59E5H2" 0 "(Dimethylallyl)adenosine tRNA methylthiotransferase MiaB"  
"NT-A5\_00861" 39244 "s63E6H2" 0 "(Dimethylallyl)adenosine tRNA methylthiotransferase MiaB"  
"NT-A5\_00862" 39245 "s59E13H2" 0 "DNA-invertase hin"  
"NT-A5\_00862" 39245 "s59E25H2" 0 "DNA-invertase hin"  
"NT-A5\_00862" 39245 "s59E5H2" 0 "DNA-invertase hin"  
"NT-A5\_00862" 39245 "s63E6H2" 0 "DNA-invertase hin"  
"NT-A5\_00863" 39246 "s59E13H2" 0 "hypothetical protein"  
"NT-A5\_00863" 39246 "s59E25H2" 0 "hypothetical protein"  
"NT-A5\_00863" 39246 "s59E5H2" 0 "hypothetical protein"  
"NT-A5\_00863" 39246 "s63E6H2" 0 "hypothetical protein"  
"NT-A5\_00864" 39247 "s59E13H2" 0 "hypothetical protein"

"NT-A5\_00864" 39247 "s59E25H2" 0 "hypothetical protein"  
"NT-A5\_00864" 39247 "s59E5H2" 0 "hypothetical protein"  
"NT-A5\_00864" 39247 "s63E6H2" 0 "hypothetical protein"  
"NT-A5\_00865" 39248 "s59E13H2" 0 "Sulfur carrier protein ThiS adenylyltransferase"  
"NT-A5\_00865" 39248 "s59E25H2" 0 "Sulfur carrier protein ThiS adenylyltransferase"  
"NT-A5\_00865" 39248 "s59E5H2" 0 "Sulfur carrier protein ThiS adenylyltransferase"  
"NT-A5\_00865" 39248 "s63E6H2" 0 "Sulfur carrier protein ThiS adenylyltransferase"  
"NT-A5\_00867" 39250 "s59E13H2" 0 "chaperone protein DnaJ"  
"NT-A5\_00867" 39250 "s59E25H2" 0 "chaperone protein DnaJ"  
"NT-A5\_00867" 39250 "s59E5H2" 0 "chaperone protein DnaJ"  
"NT-A5\_00867" 39250 "s63E6H2" 0 "chaperone protein DnaJ"  
"NT-A5\_00868" 39251 "s59E13H2" 0 "hypothetical protein"  
"NT-A5\_00868" 39251 "s59E25H2" 0 "hypothetical protein"  
"NT-A5\_00868" 39251 "s59E5H2" 0 "hypothetical protein"  
"NT-A5\_00868" 39251 "s63E6H2" 0 "hypothetical protein"  
"NT-A5\_00869" 39252 "s59E13H2" 0 "Denitrification regulatory protein NirQ"  
"NT-A5\_00869" 39252 "s59E25H2" 0 "Denitrification regulatory protein NirQ"  
"NT-A5\_00869" 39252 "s59E5H2" 0 "Denitrification regulatory protein NirQ"  
"NT-A5\_00869" 39252 "s63E6H2" 0 "Denitrification regulatory protein NirQ"  
"NT-A5\_00870" 39253 "s59E13H2" 0 "hypothetical protein"  
"NT-A5\_00870" 39253 "s59E25H2" 0 "hypothetical protein"  
"NT-A5\_00870" 39253 "s59E5H2" 0 "hypothetical protein"  
"NT-A5\_00870" 39253 "s63E6H2" 0 "hypothetical protein"  
"NT-A5\_00871" 39254 "s59E13H2" 0 "chaperone protein DnaJ"  
"NT-A5\_00871" 39254 "s59E25H2" 0 "chaperone protein DnaJ"  
"NT-A5\_00871" 39254 "s59E5H2" 0 "chaperone protein DnaJ"  
"NT-A5\_00871" 39254 "s63E6H2" 0 "chaperone protein DnaJ"  
"NT-A5\_00873" 39256 "s59E13H2" 0 "Gas vesicle structural protein"  
"NT-A5\_00873" 39256 "s59E25H2" 0 "Gas vesicle structural protein"  
"NT-A5\_00873" 39256 "s59E5H2" 0.01564883 "Gas vesicle structural protein"  
"NT-A5\_00873" 39256 "s63E6H2" 0 "Gas vesicle structural protein"  
"NT-A5\_00874" 39257 "s59E13H2" 0 "hypothetical protein"  
"NT-A5\_00874" 39257 "s59E25H2" 0 "hypothetical protein"  
"NT-A5\_00874" 39257 "s59E5H2" 0.001839629 "hypothetical protein"  
"NT-A5\_00874" 39257 "s63E6H2" 0 "hypothetical protein"  
"NT-A5\_00881" 39264 "s59E13H2" 0 "hypothetical protein"  
"NT-A5\_00881" 39264 "s59E25H2" 0 "hypothetical protein"  
"NT-A5\_00881" 39264 "s59E5H2" 0 "hypothetical protein"  
"NT-A5\_00881" 39264 "s63E6H2" 0 "hypothetical protein"  
"NT-A5\_00882" 39265 "s59E13H2" 0 "hypothetical protein"  
"NT-A5\_00882" 39265 "s59E25H2" 0 "hypothetical protein"  
"NT-A5\_00882" 39265 "s59E5H2" 0 "hypothetical protein"  
"NT-A5\_00882" 39265 "s63E6H2" 0 "hypothetical protein"  
"NT-A5\_00884" 39267 "s59E13H2" 0 "hypothetical protein"  
"NT-A5\_00884" 39267 "s59E25H2" 0 "hypothetical protein"  
"NT-A5\_00884" 39267 "s59E5H2" 0.2363332 "hypothetical protein"  
"NT-A5\_00884" 39267 "s63E6H2" 0.1647164 "hypothetical protein"

"NT-A5\_00885" 39268 "s59E13H2" 0 "NADP-reducing hydrogenase subunit HndC"  
"NT-A5\_00885" 39268 "s59E25H2" 0 "NADP-reducing hydrogenase subunit HndC"  
"NT-A5\_00885" 39268 "s59E5H2" 0 "NADP-reducing hydrogenase subunit HndC"  
"NT-A5\_00885" 39268 "s63E6H2" 0.007851422 "NADP-reducing hydrogenase subunit HndC"  
"NT-A5\_00886" 39269 "s59E13H2" 0 "NADP-reducing hydrogenase subunit HndC"  
"NT-A5\_00886" 39269 "s59E25H2" 0 "NADP-reducing hydrogenase subunit HndC"  
"NT-A5\_00886" 39269 "s59E5H2" 0 "NADP-reducing hydrogenase subunit HndC"  
"NT-A5\_00886" 39269 "s63E6H2" 0.007338525 "NADP-reducing hydrogenase subunit HndC"  
"NT-A5\_00887" 39270 "s59E13H2" 0 "NADP-reducing hydrogenase subunit HndA"  
"NT-A5\_00887" 39270 "s59E25H2" 0 "NADP-reducing hydrogenase subunit HndA"  
"NT-A5\_00887" 39270 "s59E5H2" 0 "NADP-reducing hydrogenase subunit HndA"  
"NT-A5\_00887" 39270 "s63E6H2" 0.02714697 "NADP-reducing hydrogenase subunit HndA"  
"NT-A5\_00888" 39271 "s59E13H2" 0 "Iron-sulfur protein"  
"NT-A5\_00888" 39271 "s59E25H2" 0 "Iron-sulfur protein"  
"NT-A5\_00888" 39271 "s59E5H2" 0 "Iron-sulfur protein"  
"NT-A5\_00888" 39271 "s63E6H2" 0.04620005 "Iron-sulfur protein"  
"NT-A5\_00889" 39272 "s59E13H2" 0 "Nitrogen fixation protein VnfA"  
"NT-A5\_00889" 39272 "s59E25H2" 0 "Nitrogen fixation protein VnfA"  
"NT-A5\_00889" 39272 "s59E5H2" 0 "Nitrogen fixation protein VnfA"  
"NT-A5\_00889" 39272 "s63E6H2" 0.01544514 "Nitrogen fixation protein VnfA"  
"NT-A5\_00892" 39275 "s59E13H2" 0 "N-acetylgalactosamine-N,N'-diacetylbaucillosaminyldiphosphoundecaprenol 4-alpha-N-acetylgalactosaminyltransferase"  
"NT-A5\_00892" 39275 "s59E25H2" 0 "N-acetylgalactosamine-N,N'-diacetylbaucillosaminyldiphosphoundecaprenol 4-alpha-N-acetylgalactosaminyltransferase"  
"NT-A5\_00892" 39275 "s59E5H2" 0.02136283 "N-acetylgalactosamine-N,N'-diacetylbaucillosaminyldiphosphoundecaprenol 4-alpha-N-acetylgalactosaminyltransferase"  
"NT-A5\_00892" 39275 "s63E6H2" 0 "N-acetylgalactosamine-N,N'-diacetylbaucillosaminyldiphosphoundecaprenol 4-alpha-N-acetylgalactosaminyltransferase"  
"NT-A5\_00893" 39276 "s59E13H2" 0 "V-type ATP synthase alpha chain"  
"NT-A5\_00893" 39276 "s59E25H2" 0 "V-type ATP synthase alpha chain"  
"NT-A5\_00893" 39276 "s59E5H2" 0 "V-type ATP synthase alpha chain"  
"NT-A5\_00893" 39276 "s63E6H2" 0.1779983 "V-type ATP synthase alpha chain"  
"NT-A5\_00895" 39278 "s59E13H2" 0 "Glutamate-1-semialdehyde 2,1-aminomutase 1"  
"NT-A5\_00895" 39278 "s59E25H2" 0 "Glutamate-1-semialdehyde 2,1-aminomutase 1"  
"NT-A5\_00895" 39278 "s59E5H2" 0 "Glutamate-1-semialdehyde 2,1-aminomutase 1"  
"NT-A5\_00895" 39278 "s63E6H2" 0 "Glutamate-1-semialdehyde 2,1-aminomutase 1"  
"NT-A5\_00896" 39279 "s59E13H2" 0 "hypothetical protein"  
"NT-A5\_00896" 39279 "s59E25H2" 0 "hypothetical protein"  
"NT-A5\_00896" 39279 "s59E5H2" 0 "hypothetical protein"  
"NT-A5\_00896" 39279 "s63E6H2" 0 "hypothetical protein"  
"NT-A5\_00897" 39280 "s59E13H2" 0 "murein L,D-transpeptidase"  
"NT-A5\_00897" 39280 "s59E25H2" 0 "murein L,D-transpeptidase"  
"NT-A5\_00897" 39280 "s59E5H2" 0 "murein L,D-transpeptidase"  
"NT-A5\_00897" 39280 "s63E6H2" 0 "murein L,D-transpeptidase"  
"NT-A5\_00898" 39281 "s59E13H2" 0 "Peptidase M15"  
"NT-A5\_00898" 39281 "s59E25H2" 0 "Peptidase M15"  
"NT-A5\_00898" 39281 "s59E5H2" 0.008550492 "Peptidase M15"  
"NT-A5\_00898" 39281 "s63E6H2" 0 "Peptidase M15"  
"NT-E05\_00001" 23928 "s59E13H2" 0 "2-dehydro-3-deoxygluconokinase"  
"NT-E05\_00001" 23928 "s59E25H2" 0 "2-dehydro-3-deoxygluconokinase"  
"NT-E05\_00001" 23928 "s59E5H2" 0 "2-dehydro-3-deoxygluconokinase"



"NT-E05\_00001" 23928 "s63E6H2" 0 "2-dehydro-3-deoxygluconokinase"  
"NT-E05\_00002" 23929 "s59E13H2" 0 "Phosphoglucomutase"  
"NT-E05\_00002" 23929 "s59E25H2" 0 "Phosphoglucomutase"  
"NT-E05\_00002" 23929 "s59E5H2" 0 "Phosphoglucomutase"  
"NT-E05\_00002" 23929 "s63E6H2" 0 "Phosphoglucomutase"  
"NT-E05\_00003" 23930 "s59E13H2" 0 "2-oxoglutarate synthase subunit KorC"  
"NT-E05\_00003" 23930 "s59E25H2" 0 "2-oxoglutarate synthase subunit KorC"  
"NT-E05\_00003" 23930 "s59E5H2" 0 "2-oxoglutarate synthase subunit KorC"  
"NT-E05\_00003" 23930 "s63E6H2" 0 "2-oxoglutarate synthase subunit KorC"  
"NT-E05\_00004" 23931 "s59E13H2" 0 "Tyrosine recombinase XerD"  
"NT-E05\_00004" 23931 "s59E25H2" 0 "Tyrosine recombinase XerD"  
"NT-E05\_00004" 23931 "s59E5H2" 0 "Tyrosine recombinase XerD"  
"NT-E05\_00004" 23931 "s63E6H2" 0 "Tyrosine recombinase XerD"  
"NT-E05\_00005" 23932 "s59E13H2" 0 "CCA-adding enzyme"  
"NT-E05\_00005" 23932 "s59E25H2" 0 "CCA-adding enzyme"  
"NT-E05\_00005" 23932 "s59E5H2" 0 "CCA-adding enzyme"  
"NT-E05\_00005" 23932 "s63E6H2" 0 "CCA-adding enzyme"  
"NT-E05\_00006" 23933 "s59E13H2" 0 "Peptidase family M50"  
"NT-E05\_00006" 23933 "s59E25H2" 0 "Peptidase family M50"  
"NT-E05\_00006" 23933 "s59E5H2" 0.01275222 "Peptidase family M50"  
"NT-E05\_00006" 23933 "s63E6H2" 0 "Peptidase family M50"  
"NT-E05\_00007" 23934 "s59E13H2" 0 "RNA recognition motif. (a.k.a. RRM, RBD, or RNP domain)"  
"NT-E05\_00007" 23934 "s59E25H2" 0 "RNA recognition motif. (a.k.a. RRM, RBD, or RNP domain)"  
"NT-E05\_00007" 23934 "s59E5H2" 0.02513729 "RNA recognition motif. (a.k.a. RRM, RBD, or RNP domain)"  
"NT-E05\_00007" 23934 "s63E6H2" 0 "RNA recognition motif. (a.k.a. RRM, RBD, or RNP domain)"  
"NT-E05\_00008" 23935 "s59E13H2" 0 "Amidophosphoribosyltransferase precursor"  
"NT-E05\_00008" 23935 "s59E25H2" 0 "Amidophosphoribosyltransferase precursor"  
"NT-E05\_00008" 23935 "s59E5H2" 0.005472171 "Amidophosphoribosyltransferase precursor"  
"NT-E05\_00008" 23935 "s63E6H2" 0 "Amidophosphoribosyltransferase precursor"  
"NT-E05\_00009" 23936 "s59E13H2" 0 "Phenylalanine--tRNA ligase beta subunit"  
"NT-E05\_00009" 23936 "s59E25H2" 0 "Phenylalanine--tRNA ligase beta subunit"  
"NT-E05\_00009" 23936 "s59E5H2" 0 "Phenylalanine--tRNA ligase beta subunit"  
"NT-E05\_00009" 23936 "s63E6H2" 0 "Phenylalanine--tRNA ligase beta subunit"  
"NT-E05\_00010" 23937 "s59E13H2" 0 "hypothetical protein"  
"NT-E05\_00010" 23937 "s59E25H2" 0 "hypothetical protein"  
"NT-E05\_00010" 23937 "s59E5H2" 0 "hypothetical protein"  
"NT-E05\_00010" 23937 "s63E6H2" 0 "hypothetical protein"  
"NT-E05\_00011" 23938 "s59E13H2" 0 "hypothetical protein"  
"NT-E05\_00011" 23938 "s59E25H2" 0 "hypothetical protein"  
"NT-E05\_00011" 23938 "s59E5H2" 0 "hypothetical protein"  
"NT-E05\_00011" 23938 "s63E6H2" 0 "hypothetical protein"  
"NT-E05\_00012" 23939 "s59E13H2" 0 "Transposase"  
"NT-E05\_00012" 23939 "s59E25H2" 0 "Transposase"  
"NT-E05\_00012" 23939 "s59E5H2" 0 "Transposase"  
"NT-E05\_00012" 23939 "s63E6H2" 0.004071623 "Transposase"  
"NT-E05\_00013" 23940 "s59E13H2" 0 "hypothetical protein"  
"NT-E05\_00013" 23940 "s59E25H2" 0 "hypothetical protein"

"NT-E05\_00013" 23940 "s59E5H2" 0 "hypothetical protein"  
"NT-E05\_00013" 23940 "s63E6H2" 0.002400739 "hypothetical protein"  
"NT-E05\_00014" 23941 "s59E13H2" 0 "hypothetical protein"  
"NT-E05\_00014" 23941 "s59E25H2" 0 "hypothetical protein"  
"NT-E05\_00014" 23941 "s59E5H2" 0 "hypothetical protein"  
"NT-E05\_00014" 23941 "s63E6H2" 0 "hypothetical protein"  
"NT-E05\_00015" 23942 "s59E13H2" 0 "Modulator of FtsH protease HflC"  
"NT-E05\_00015" 23942 "s59E25H2" 0 "Modulator of FtsH protease HflC"  
"NT-E05\_00015" 23942 "s59E5H2" 0 "Modulator of FtsH protease HflC"  
"NT-E05\_00015" 23942 "s63E6H2" 0 "Modulator of FtsH protease HflC"  
"NT-E05\_00016" 23943 "s59E13H2" 0 "hypothetical protein"  
"NT-E05\_00016" 23943 "s59E25H2" 0 "hypothetical protein"  
"NT-E05\_00016" 23943 "s59E5H2" 0 "hypothetical protein"  
"NT-E05\_00016" 23943 "s63E6H2" 0 "hypothetical protein"  
"NT-E05\_00017" 23944 "s59E13H2" 0 "hypothetical protein"  
"NT-E05\_00017" 23944 "s59E25H2" 0 "hypothetical protein"  
"NT-E05\_00017" 23944 "s59E5H2" 0 "hypothetical protein"  
"NT-E05\_00017" 23944 "s63E6H2" 0 "hypothetical protein"  
"NT-E05\_00018" 23945 "s59E13H2" 0 "Tyrosine recombinase XerD"  
"NT-E05\_00018" 23945 "s59E25H2" 0 "Tyrosine recombinase XerD"  
"NT-E05\_00018" 23945 "s59E5H2" 0 "Tyrosine recombinase XerD"  
"NT-E05\_00018" 23945 "s63E6H2" 0 "Tyrosine recombinase XerD"  
"NT-E05\_00019" 23946 "s59E13H2" 0 "hypothetical protein"  
"NT-E05\_00019" 23946 "s59E25H2" 0 "hypothetical protein"  
"NT-E05\_00019" 23946 "s59E5H2" 0 "hypothetical protein"  
"NT-E05\_00019" 23946 "s63E6H2" 0.01413168 "hypothetical protein"  
"NT-E05\_00021" 23948 "s59E13H2" 0 "Nucleotidyltransferase domain protein"  
"NT-E05\_00021" 23948 "s59E25H2" 0 "Nucleotidyltransferase domain protein"  
"NT-E05\_00021" 23948 "s59E5H2" 0 "Nucleotidyltransferase domain protein"  
"NT-E05\_00021" 23948 "s63E6H2" 0 "Nucleotidyltransferase domain protein"  
"NT-E05\_00022" 23949 "s59E13H2" 0 "hypothetical protein"  
"NT-E05\_00022" 23949 "s59E25H2" 0 "hypothetical protein"  
"NT-E05\_00022" 23949 "s59E5H2" 0 "hypothetical protein"  
"NT-E05\_00022" 23949 "s63E6H2" 0 "hypothetical protein"  
"NT-E05\_00023" 23950 "s59E13H2" 0 "hypothetical protein"  
"NT-E05\_00023" 23950 "s59E25H2" 0 "hypothetical protein"  
"NT-E05\_00023" 23950 "s59E5H2" 0 "hypothetical protein"  
"NT-E05\_00023" 23950 "s63E6H2" 0 "hypothetical protein"  
"NT-E05\_00024" 23951 "s59E13H2" 0 "hypothetical protein"  
"NT-E05\_00024" 23951 "s59E25H2" 0 "hypothetical protein"  
"NT-E05\_00024" 23951 "s59E5H2" 0 "hypothetical protein"  
"NT-E05\_00024" 23951 "s63E6H2" 0 "hypothetical protein"  
"NT-E05\_00028" 23955 "s59E13H2" 0 "hypothetical protein"  
"NT-E05\_00028" 23955 "s59E25H2" 0 "hypothetical protein"  
"NT-E05\_00028" 23955 "s59E5H2" 0 "hypothetical protein"  
"NT-E05\_00028" 23955 "s63E6H2" 0 "hypothetical protein"  
"NT-E05\_00029" 23956 "s59E13H2" 0 "hypothetical protein"

"NT-E05\_00029" 23956 "s59E25H2" 0 "hypothetical protein"  
"NT-E05\_00029" 23956 "s59E5H2" 0 "hypothetical protein"  
"NT-E05\_00029" 23956 "s63E6H2" 0 "hypothetical protein"  
"NT-E05\_00030" 23957 "s59E13H2" 0 "hypothetical protein"  
"NT-E05\_00030" 23957 "s59E25H2" 0 "hypothetical protein"  
"NT-E05\_00030" 23957 "s59E5H2" 0 "hypothetical protein"  
"NT-E05\_00030" 23957 "s63E6H2" 0 "hypothetical protein"  
"NT-E05\_00031" 23958 "s59E13H2" 0 "hypothetical protein"  
"NT-E05\_00031" 23958 "s59E25H2" 0 "hypothetical protein"  
"NT-E05\_00031" 23958 "s59E5H2" 0 "hypothetical protein"  
"NT-E05\_00031" 23958 "s63E6H2" 0 "hypothetical protein"  
"NT-E05\_00032" 23959 "s59E13H2" 0 "putative tyrosine recombinase XerC-like protein"  
"NT-E05\_00032" 23959 "s59E25H2" 0 "putative tyrosine recombinase XerC-like protein"  
"NT-E05\_00032" 23959 "s59E5H2" 0.02508959 "putative tyrosine recombinase XerC-like protein"  
"NT-E05\_00032" 23959 "s63E6H2" 0.001513791 "putative tyrosine recombinase XerC-like protein"  
"NT-E05\_00033" 23960 "s59E13H2" 0 "hypothetical protein"  
"NT-E05\_00033" 23960 "s59E25H2" 0 "hypothetical protein"  
"NT-E05\_00033" 23960 "s59E5H2" 0 "hypothetical protein"  
"NT-E05\_00033" 23960 "s63E6H2" 0 "hypothetical protein"  
"NT-E05\_00034" 23961 "s59E13H2" 0 "Helix-turn-helix domain protein"  
"NT-E05\_00034" 23961 "s59E25H2" 0 "Helix-turn-helix domain protein"  
"NT-E05\_00034" 23961 "s59E5H2" 0 "Helix-turn-helix domain protein"  
"NT-E05\_00034" 23961 "s63E6H2" 0 "Helix-turn-helix domain protein"  
"NT-E05\_00035" 23962 "s59E13H2" 0 "transcriptional repressor Dica"  
"NT-E05\_00035" 23962 "s59E25H2" 0 "transcriptional repressor Dica"  
"NT-E05\_00035" 23962 "s59E5H2" 0 "transcriptional repressor Dica"  
"NT-E05\_00035" 23962 "s63E6H2" 0 "transcriptional repressor Dica"  
"NT-E05\_00036" 23963 "s59E13H2" 0 "Divergent AAA domain protein"  
"NT-E05\_00036" 23963 "s59E25H2" 0 "Divergent AAA domain protein"  
"NT-E05\_00036" 23963 "s59E5H2" 0 "Divergent AAA domain protein"  
"NT-E05\_00036" 23963 "s63E6H2" 0 "Divergent AAA domain protein"  
"NT-E05\_00037" 23964 "s59E13H2" 0 "Tyrosine recombinase XerD"  
"NT-E05\_00037" 23964 "s59E25H2" 0 "Tyrosine recombinase XerD"  
"NT-E05\_00037" 23964 "s59E5H2" 0 "Tyrosine recombinase XerD"  
"NT-E05\_00037" 23964 "s63E6H2" 0 "Tyrosine recombinase XerD"  
"NT-E05\_00038" 23965 "s59E13H2" 0 "Transposase DDE domain protein"  
"NT-E05\_00038" 23965 "s59E25H2" 0 "Transposase DDE domain protein"  
"NT-E05\_00038" 23965 "s59E5H2" 0.002202542 "Transposase DDE domain protein"  
"NT-E05\_00038" 23965 "s63E6H2" 0 "Transposase DDE domain protein"  
"NT-E05\_00040" 23967 "s59E13H2" 0 "hypothetical protein"  
"NT-E05\_00040" 23967 "s59E25H2" 0 "hypothetical protein"  
"NT-E05\_00040" 23967 "s59E5H2" 0 "hypothetical protein"  
"NT-E05\_00040" 23967 "s63E6H2" 0.01823787 "hypothetical protein"  
"NT-E05\_00041" 23968 "s59E13H2" 0 "Integrase core domain protein"  
"NT-E05\_00041" 23968 "s59E25H2" 0 "Integrase core domain protein"  
"NT-E05\_00041" 23968 "s59E5H2" 0.03973953 "Integrase core domain protein"  
"NT-E05\_00041" 23968 "s63E6H2" 0.07341911 "Integrase core domain protein"

"NT-E05\_00042" 23969 "s59E13H2" 0 "transposase/IS protein"  
"NT-E05\_00042" 23969 "s59E25H2" 0 "transposase/IS protein"  
"NT-E05\_00042" 23969 "s59E5H2" 0.06345237 "transposase/IS protein"  
"NT-E05\_00042" 23969 "s63E6H2" 0.3881512 "transposase/IS protein"  
"NT-E05\_00044" 23971 "s59E13H2" 0 "hypothetical protein"  
"NT-E05\_00044" 23971 "s59E25H2" 0 "hypothetical protein"  
"NT-E05\_00044" 23971 "s59E5H2" 0 "hypothetical protein"  
"NT-E05\_00044" 23971 "s63E6H2" 0 "hypothetical protein"  
"NT-E05\_00045" 23972 "s59E13H2" 0 "hypothetical protein"  
"NT-E05\_00045" 23972 "s59E25H2" 0 "hypothetical protein"  
"NT-E05\_00045" 23972 "s59E5H2" 0 "hypothetical protein"  
"NT-E05\_00045" 23972 "s63E6H2" 0 "hypothetical protein"  
"NT-E05\_00047" 23974 "s59E13H2" 0 "Chromosome-partitioning protein Spo0J"  
"NT-E05\_00047" 23974 "s59E25H2" 0 "Chromosome-partitioning protein Spo0J"  
"NT-E05\_00047" 23974 "s59E5H2" 0 "Chromosome-partitioning protein Spo0J"  
"NT-E05\_00047" 23974 "s63E6H2" 0 "Chromosome-partitioning protein Spo0J"  
"NT-E05\_00048" 23975 "s59E13H2" 0 "Helix-turn-helix"  
"NT-E05\_00048" 23975 "s59E25H2" 0 "Helix-turn-helix"  
"NT-E05\_00048" 23975 "s59E5H2" 0 "Helix-turn-helix"  
"NT-E05\_00048" 23975 "s63E6H2" 0 "Helix-turn-helix"  
"NT-E05\_00050" 23977 "s59E13H2" 0 "Adenosylhomocysteinase"  
"NT-E05\_00050" 23977 "s59E25H2" 0 "Adenosylhomocysteinase"  
"NT-E05\_00050" 23977 "s59E5H2" 0 "Adenosylhomocysteinase"  
"NT-E05\_00050" 23977 "s63E6H2" 0 "Adenosylhomocysteinase"  
"NT-E05\_00051" 23978 "s59E13H2" 0 "4-hydroxythreonine-4-phosphate dehydrogenase 2"  
"NT-E05\_00051" 23978 "s59E25H2" 0 "4-hydroxythreonine-4-phosphate dehydrogenase 2"  
"NT-E05\_00051" 23978 "s59E5H2" 0 "4-hydroxythreonine-4-phosphate dehydrogenase 2"  
"NT-E05\_00051" 23978 "s63E6H2" 0 "4-hydroxythreonine-4-phosphate dehydrogenase 2"  
"NT-E05\_00052" 23979 "s59E13H2" 0 "Cell division protein FtsA"  
"NT-E05\_00052" 23979 "s59E25H2" 0 "Cell division protein FtsA"  
"NT-E05\_00052" 23979 "s59E5H2" 0 "Cell division protein FtsA"  
"NT-E05\_00052" 23979 "s63E6H2" 0 "Cell division protein FtsA"  
"NT-E05\_00053" 23980 "s59E13H2" 0 "Cell division protein DivIB"  
"NT-E05\_00053" 23980 "s59E25H2" 0 "Cell division protein DivIB"  
"NT-E05\_00053" 23980 "s59E5H2" 0 "Cell division protein DivIB"  
"NT-E05\_00053" 23980 "s63E6H2" 0 "Cell division protein DivIB"  
"NT-E05\_00054" 23981 "s59E13H2" 0 "UDP-N-acetylenolpyruvoylglucosamine reductase"  
"NT-E05\_00054" 23981 "s59E25H2" 0 "UDP-N-acetylenolpyruvoylglucosamine reductase"  
"NT-E05\_00054" 23981 "s59E5H2" 1.025171 "UDP-N-acetylenolpyruvoylglucosamine reductase"  
"NT-E05\_00054" 23981 "s63E6H2" 0 "UDP-N-acetylenolpyruvoylglucosamine reductase"  
"NT-E05\_00055" 23982 "s59E13H2" 0 "hypothetical protein"  
"NT-E05\_00055" 23982 "s59E25H2" 0 "hypothetical protein"  
"NT-E05\_00055" 23982 "s59E5H2" 0.8825092 "hypothetical protein"  
"NT-E05\_00055" 23982 "s63E6H2" 0 "hypothetical protein"  
"NT-E05\_00056" 23983 "s59E13H2" 0 "tRNA-splicing ligase RtcB"  
"NT-E05\_00056" 23983 "s59E25H2" 0 "tRNA-splicing ligase RtcB"  
"NT-E05\_00056" 23983 "s59E5H2" 0.7688734 "tRNA-splicing ligase RtcB"

"NT-E05\_00056" 23983 "s63E6H2" 0.0008117746 "tRNA-splicing ligase RtcB"  
"NT-E05\_00057" 23984 "s59E13H2" 0 "2-isopropylmalate synthase"  
"NT-E05\_00057" 23984 "s59E25H2" 0 "2-isopropylmalate synthase"  
"NT-E05\_00057" 23984 "s59E5H2" 0 "2-isopropylmalate synthase"  
"NT-E05\_00057" 23984 "s63E6H2" 0.001712585 "2-isopropylmalate synthase"  
"NT-E05\_00058" 23985 "s59E13H2" 0 "2,3-dimethylmalate dehydratase small subunit"  
"NT-E05\_00058" 23985 "s59E25H2" 0 "2,3-dimethylmalate dehydratase small subunit"  
"NT-E05\_00058" 23985 "s59E5H2" 0 "2,3-dimethylmalate dehydratase small subunit"  
"NT-E05\_00058" 23985 "s63E6H2" 0 "2,3-dimethylmalate dehydratase small subunit"  
"NT-E05\_00059" 23986 "s59E13H2" 0 "Ketoisovalerate oxidoreductase subunit VorB"  
"NT-E05\_00059" 23986 "s59E25H2" 0 "Ketoisovalerate oxidoreductase subunit VorB"  
"NT-E05\_00059" 23986 "s59E5H2" 0 "Ketoisovalerate oxidoreductase subunit VorB"  
"NT-E05\_00059" 23986 "s63E6H2" 0 "Ketoisovalerate oxidoreductase subunit VorB"  
"NT-E05\_00060" 23987 "s59E13H2" 0 "Regulator of sigma-W protease RasP"  
"NT-E05\_00060" 23987 "s59E25H2" 0 "Regulator of sigma-W protease RasP"  
"NT-E05\_00060" 23987 "s59E5H2" 0.005717181 "Regulator of sigma-W protease RasP"  
"NT-E05\_00060" 23987 "s63E6H2" 0 "Regulator of sigma-W protease RasP"  
"NT-E05\_00061" 23988 "s59E13H2" 0 "Phosphatidate cytidylyltransferase"  
"NT-E05\_00061" 23988 "s59E25H2" 0 "Phosphatidate cytidylyltransferase"  
"NT-E05\_00061" 23988 "s59E5H2" 0 "Phosphatidate cytidylyltransferase"  
"NT-E05\_00061" 23988 "s63E6H2" 0 "Phosphatidate cytidylyltransferase"  
"NT-E05\_00062" 23989 "s59E13H2" 0 "Ditrans, polycis-undecaprenyl-diphosphate synthase ((2E,6E)-farnesyl-diphosphate specific)"  
"NT-E05\_00062" 23989 "s59E25H2" 0 "Ditrans, polycis-undecaprenyl-diphosphate synthase ((2E,6E)-farnesyl-diphosphate specific)"  
"NT-E05\_00062" 23989 "s59E5H2" 0 "Ditrans, polycis-undecaprenyl-diphosphate synthase ((2E,6E)-farnesyl-diphosphate specific)"  
"NT-E05\_00062" 23989 "s63E6H2" 0 "Ditrans, polycis-undecaprenyl-diphosphate synthase ((2E,6E)-farnesyl-diphosphate specific)"  
"NT-E05\_00063" 23990 "s59E13H2" 0 "UDP-3-O-[3-hydroxymyristoyl] N-acetylglucosamine deacetylase"  
"NT-E05\_00063" 23990 "s59E25H2" 0 "UDP-3-O-[3-hydroxymyristoyl] N-acetylglucosamine deacetylase"  
"NT-E05\_00063" 23990 "s59E5H2" 0 "UDP-3-O-[3-hydroxymyristoyl] N-acetylglucosamine deacetylase"  
"NT-E05\_00063" 23990 "s63E6H2" 0.002390517 "UDP-3-O-[3-hydroxymyristoyl] N-acetylglucosamine deacetylase"  
"NT-E05\_00064" 23991 "s59E13H2" 0 "UDP-3-O-acylglucosamine N-acyltransferase"  
"NT-E05\_00064" 23991 "s59E25H2" 0 "UDP-3-O-acylglucosamine N-acyltransferase"  
"NT-E05\_00064" 23991 "s59E5H2" 0 "UDP-3-O-acylglucosamine N-acyltransferase"  
"NT-E05\_00064" 23991 "s63E6H2" 0.004601188 "UDP-3-O-acylglucosamine N-acyltransferase"  
"NT-E05\_00065" 23992 "s59E13H2" 0 "periplasmic chaperone"  
"NT-E05\_00065" 23992 "s59E25H2" 0 "periplasmic chaperone"  
"NT-E05\_00065" 23992 "s59E5H2" 0 "periplasmic chaperone"  
"NT-E05\_00065" 23992 "s63E6H2" 0.002182309 "periplasmic chaperone"  
"NT-E05\_00066" 23993 "s59E13H2" 0 "Endoribonuclease YbeY"  
"NT-E05\_00066" 23993 "s59E25H2" 0 "Endoribonuclease YbeY"  
"NT-E05\_00066" 23993 "s59E5H2" 0.003017768 "Endoribonuclease YbeY"  
"NT-E05\_00066" 23993 "s63E6H2" 0 "Endoribonuclease YbeY"  
"NT-E05\_00067" 23994 "s59E13H2" 0 "7TM receptor with intracellular HD hydrolase"  
"NT-E05\_00067" 23994 "s59E25H2" 0 "7TM receptor with intracellular HD hydrolase"  
"NT-E05\_00067" 23994 "s59E5H2" 0.06006187 "7TM receptor with intracellular HD hydrolase"  
"NT-E05\_00067" 23994 "s63E6H2" 0 "7TM receptor with intracellular HD hydrolase"  
"NT-E05\_00068" 23995 "s59E13H2" 0 "PhoH-like protein"  
"NT-E05\_00068" 23995 "s59E25H2" 0 "PhoH-like protein"

"NT-E05\_00068" 23995 "s59E5H2" 0.06479643 "PhoH-like protein"  
"NT-E05\_00068" 23995 "s63E6H2" 0 "PhoH-like protein"  
"NT-E05\_00069" 23996 "s59E13H2" 0 "YacP-like NYN domain protein"  
"NT-E05\_00069" 23996 "s59E25H2" 0 "YacP-like NYN domain protein"  
"NT-E05\_00069" 23996 "s59E5H2" 0 "YacP-like NYN domain protein"  
"NT-E05\_00069" 23996 "s63E6H2" 0 "YacP-like NYN domain protein"  
"NT-E05\_00070" 23997 "s59E13H2" 0 "Trehalose/maltose import ATP-binding protein Malk"  
"NT-E05\_00070" 23997 "s59E25H2" 0 "Trehalose/maltose import ATP-binding protein Malk"  
"NT-E05\_00070" 23997 "s59E5H2" 0 "Trehalose/maltose import ATP-binding protein Malk"  
"NT-E05\_00070" 23997 "s63E6H2" 0 "Trehalose/maltose import ATP-binding protein Malk"  
"NT-E05\_00071" 23998 "s59E13H2" 0 "hypothetical protein"  
"NT-E05\_00071" 23998 "s59E25H2" 0 "hypothetical protein"  
"NT-E05\_00071" 23998 "s59E5H2" 0 "hypothetical protein"  
"NT-E05\_00071" 23998 "s63E6H2" 0 "hypothetical protein"  
"NT-E05\_00072" 23999 "s59E13H2" 0 "hypothetical protein"  
"NT-E05\_00072" 23999 "s59E25H2" 0 "hypothetical protein"  
"NT-E05\_00072" 23999 "s59E5H2" 0 "hypothetical protein"  
"NT-E05\_00072" 23999 "s63E6H2" 0 "hypothetical protein"  
"NT-E05\_00074" 24001 "s59E13H2" 0 "3-oxoadipate enol-lactonase 2"  
"NT-E05\_00074" 24001 "s59E25H2" 0 "3-oxoadipate enol-lactonase 2"  
"NT-E05\_00074" 24001 "s59E5H2" 0 "3-oxoadipate enol-lactonase 2"  
"NT-E05\_00074" 24001 "s63E6H2" 0 "3-oxoadipate enol-lactonase 2"  
"NT-E05\_00075" 24002 "s59E13H2" 0 "Acyl-coenzyme A:6-aminopenicillanic acid acyl-transferase"  
"NT-E05\_00075" 24002 "s59E25H2" 0 "Acyl-coenzyme A:6-aminopenicillanic acid acyl-transferase"  
"NT-E05\_00075" 24002 "s59E5H2" 0 "Acyl-coenzyme A:6-aminopenicillanic acid acyl-transferase"  
"NT-E05\_00075" 24002 "s63E6H2" 0 "Acyl-coenzyme A:6-aminopenicillanic acid acyl-transferase"  
"NT-E05\_00077" 24004 "s59E13H2" 0 "hypothetical protein"  
"NT-E05\_00077" 24004 "s59E25H2" 0 "hypothetical protein"  
"NT-E05\_00077" 24004 "s59E5H2" 0 "hypothetical protein"  
"NT-E05\_00077" 24004 "s63E6H2" 0 "hypothetical protein"  
"NT-E05\_00079" 24006 "s59E13H2" 0 "HTH-type transcriptional repressor YvoA"  
"NT-E05\_00079" 24006 "s59E25H2" 0 "HTH-type transcriptional repressor YvoA"  
"NT-E05\_00079" 24006 "s59E5H2" 0 "HTH-type transcriptional repressor YvoA"  
"NT-E05\_00079" 24006 "s63E6H2" 0 "HTH-type transcriptional repressor YvoA"  
"NT-E05\_00080" 24007 "s59E13H2" 0 "Phosphoribosylglycinamide formyltransferase"  
"NT-E05\_00080" 24007 "s59E25H2" 0 "Phosphoribosylglycinamide formyltransferase"  
"NT-E05\_00080" 24007 "s59E5H2" 0 "Phosphoribosylglycinamide formyltransferase"  
"NT-E05\_00080" 24007 "s63E6H2" 0 "Phosphoribosylglycinamide formyltransferase"  
"NT-E05\_00081" 24008 "s59E13H2" 0 "haloacid dehalogenase-like hydrolase"  
"NT-E05\_00081" 24008 "s59E25H2" 0 "haloacid dehalogenase-like hydrolase"  
"NT-E05\_00081" 24008 "s59E5H2" 0 "haloacid dehalogenase-like hydrolase"  
"NT-E05\_00081" 24008 "s63E6H2" 0 "haloacid dehalogenase-like hydrolase"  
"NT-E05\_00082" 24009 "s59E13H2" 0 "hypothetical protein"  
"NT-E05\_00082" 24009 "s59E25H2" 0 "hypothetical protein"  
"NT-E05\_00082" 24009 "s59E5H2" 0 "hypothetical protein"  
"NT-E05\_00082" 24009 "s63E6H2" 0 "hypothetical protein"  
"NT-E05\_00083" 24010 "s59E13H2" 0 "Multiple sugar-binding protein precursor"

"NT-E05\_00083" 24010 "s59E25H2" 0 "Multiple sugar-binding protein precursor"  
"NT-E05\_00083" 24010 "s59E5H2" 0 "Multiple sugar-binding protein precursor"  
"NT-E05\_00083" 24010 "s63E6H2" 0 "Multiple sugar-binding protein precursor"  
"NT-E05\_00084" 24011 "s59E13H2" 0 "Lactose transport system permease protein LacF"  
"NT-E05\_00084" 24011 "s59E25H2" 0 "Lactose transport system permease protein LacF"  
"NT-E05\_00084" 24011 "s59E5H2" 0 "Lactose transport system permease protein LacF"  
"NT-E05\_00084" 24011 "s63E6H2" 0 "Lactose transport system permease protein LacF"  
"NT-E05\_00085" 24012 "s59E13H2" 0 "L-arabinose transport system permease protein AraQ"  
"NT-E05\_00085" 24012 "s59E25H2" 0 "L-arabinose transport system permease protein AraQ"  
"NT-E05\_00085" 24012 "s59E5H2" 0 "L-arabinose transport system permease protein AraQ"  
"NT-E05\_00085" 24012 "s63E6H2" 0 "L-arabinose transport system permease protein AraQ"  
"NT-E05\_00086" 24013 "s59E13H2" 0 "Trehalose synthase"  
"NT-E05\_00086" 24013 "s59E25H2" 0 "Trehalose synthase"  
"NT-E05\_00086" 24013 "s59E5H2" 0 "Trehalose synthase"  
"NT-E05\_00086" 24013 "s63E6H2" 0 "Trehalose synthase"  
"NT-E05\_00087" 24014 "s59E13H2" 0 "Bifunctional trehalose-6-phosphate synthase/phosphatase"  
"NT-E05\_00087" 24014 "s59E25H2" 0 "Bifunctional trehalose-6-phosphate synthase/phosphatase"  
"NT-E05\_00087" 24014 "s59E5H2" 0 "Bifunctional trehalose-6-phosphate synthase/phosphatase"  
"NT-E05\_00087" 24014 "s63E6H2" 0 "Bifunctional trehalose-6-phosphate synthase/phosphatase"  
"NT-E05\_00088" 24015 "s59E13H2" 0 "Trehalose synthase"  
"NT-E05\_00088" 24015 "s59E25H2" 0 "Trehalose synthase"  
"NT-E05\_00088" 24015 "s59E5H2" 0 "Trehalose synthase"  
"NT-E05\_00088" 24015 "s63E6H2" 0 "Trehalose synthase"  
"NT-E05\_00089" 24016 "s59E13H2" 0 "hypothetical protein"  
"NT-E05\_00089" 24016 "s59E25H2" 0 "hypothetical protein"  
"NT-E05\_00089" 24016 "s59E5H2" 0 "hypothetical protein"  
"NT-E05\_00089" 24016 "s63E6H2" 0 "hypothetical protein"  
"NT-E05\_00090" 24017 "s59E13H2" 0 "Holliday junction ATP-dependent DNA helicase RuvA"  
"NT-E05\_00090" 24017 "s59E25H2" 0 "Holliday junction ATP-dependent DNA helicase RuvA"  
"NT-E05\_00090" 24017 "s59E5H2" 0 "Holliday junction ATP-dependent DNA helicase RuvA"  
"NT-E05\_00090" 24017 "s63E6H2" 0 "Holliday junction ATP-dependent DNA helicase RuvA"  
"NT-E05\_00091" 24018 "s59E13H2" 0 "Holliday junction ATP-dependent DNA helicase RuvB"  
"NT-E05\_00091" 24018 "s59E25H2" 0 "Holliday junction ATP-dependent DNA helicase RuvB"  
"NT-E05\_00091" 24018 "s59E5H2" 0 "Holliday junction ATP-dependent DNA helicase RuvB"  
"NT-E05\_00091" 24018 "s63E6H2" 0 "Holliday junction ATP-dependent DNA helicase RuvB"  
"NT-E05\_00092" 24019 "s59E13H2" 0 "hypothetical protein"  
"NT-E05\_00092" 24019 "s59E25H2" 0 "hypothetical protein"  
"NT-E05\_00092" 24019 "s59E5H2" 0 "hypothetical protein"  
"NT-E05\_00092" 24019 "s63E6H2" 0.003070725 "hypothetical protein"  
"NT-E05\_00093" 24020 "s59E13H2" 0 "Phosphate acetyltransferase"  
"NT-E05\_00093" 24020 "s59E25H2" 0 "Phosphate acetyltransferase"  
"NT-E05\_00093" 24020 "s59E5H2" 0 "Phosphate acetyltransferase"  
"NT-E05\_00093" 24020 "s63E6H2" 0 "Phosphate acetyltransferase"  
"NT-E05\_00094" 24021 "s59E13H2" 0 "Sodium/pantothenate symporter"  
"NT-E05\_00094" 24021 "s59E25H2" 0 "Sodium/pantothenate symporter"  
"NT-E05\_00094" 24021 "s59E5H2" 0 "Sodium/pantothenate symporter"  
"NT-E05\_00094" 24021 "s63E6H2" 0 "Sodium/pantothenate symporter"

"NT-E05\_00095" 24022 "s59E13H2" 0 "hypothetical protein"  
"NT-E05\_00095" 24022 "s59E25H2" 0 "hypothetical protein"  
"NT-E05\_00095" 24022 "s59E5H2" 0 "hypothetical protein"  
"NT-E05\_00095" 24022 "s63E6H2" 0 "hypothetical protein"  
"NT-E05\_00096" 24023 "s59E13H2" 0 "putative cation efflux system protein/MT2084"  
"NT-E05\_00096" 24023 "s59E25H2" 0 "putative cation efflux system protein/MT2084"  
"NT-E05\_00096" 24023 "s59E5H2" 0 "putative cation efflux system protein/MT2084"  
"NT-E05\_00096" 24023 "s63E6H2" 0 "putative cation efflux system protein/MT2084"  
"NT-E05\_00097" 24024 "s59E13H2" 0 "CoB--CoM heterodisulfide reductase iron-sulfur subunit A"  
"NT-E05\_00097" 24024 "s59E25H2" 0 "CoB--CoM heterodisulfide reductase iron-sulfur subunit A"  
"NT-E05\_00097" 24024 "s59E5H2" 0 "CoB--CoM heterodisulfide reductase iron-sulfur subunit A"  
"NT-E05\_00097" 24024 "s63E6H2" 0 "CoB--CoM heterodisulfide reductase iron-sulfur subunit A"  
"NT-E05\_00098" 24025 "s59E13H2" 0 "7,8-dihydropterin-6-methyl-4-(beta-D-ribofuranosyl)-aminobenzene-5'-phosphate synthase"  
"NT-E05\_00098" 24025 "s59E25H2" 0 "7,8-dihydropterin-6-methyl-4-(beta-D-ribofuranosyl)-aminobenzene-5'-phosphate synthase"  
"NT-E05\_00098" 24025 "s59E5H2" 0 "7,8-dihydropterin-6-methyl-4-(beta-D-ribofuranosyl)-aminobenzene-5'-phosphate synthase"  
"NT-E05\_00098" 24025 "s63E6H2" 0 "7,8-dihydropterin-6-methyl-4-(beta-D-ribofuranosyl)-aminobenzene-5'-phosphate synthase"  
"NT-E05\_00099" 24026 "s59E13H2" 0 "Quinolate synthase A"  
"NT-E05\_00099" 24026 "s59E25H2" 0 "Quinolate synthase A"  
"NT-E05\_00099" 24026 "s59E5H2" 0.09059912 "Quinolate synthase A"  
"NT-E05\_00099" 24026 "s63E6H2" 0 "Quinolate synthase A"  
"NT-E05\_00100" 24027 "s59E13H2" 0 "Septum site-determining protein MinD"  
"NT-E05\_00100" 24027 "s59E25H2" 0 "Septum site-determining protein MinD"  
"NT-E05\_00100" 24027 "s59E5H2" 0 "Septum site-determining protein MinD"  
"NT-E05\_00100" 24027 "s63E6H2" 0 "Septum site-determining protein MinD"  
"NT-E05\_00101" 24028 "s59E13H2" 0 "formate dehydrogenase-H ferredoxin subunit"  
"NT-E05\_00101" 24028 "s59E25H2" 0 "formate dehydrogenase-H ferredoxin subunit"  
"NT-E05\_00101" 24028 "s59E5H2" 0 "formate dehydrogenase-H ferredoxin subunit"  
"NT-E05\_00101" 24028 "s63E6H2" 0 "formate dehydrogenase-H ferredoxin subunit"  
"NT-E05\_00102" 24029 "s59E13H2" 0 "Zinc ribbon domain protein"  
"NT-E05\_00102" 24029 "s59E25H2" 0 "Zinc ribbon domain protein"  
"NT-E05\_00102" 24029 "s59E5H2" 0 "Zinc ribbon domain protein"  
"NT-E05\_00102" 24029 "s63E6H2" 0 "Zinc ribbon domain protein"  
"NT-E05\_00104" 24031 "s59E13H2" 0 "Dinitrogenase iron-molybdenum cofactor"  
"NT-E05\_00104" 24031 "s59E25H2" 0 "Dinitrogenase iron-molybdenum cofactor"  
"NT-E05\_00104" 24031 "s59E5H2" 0 "Dinitrogenase iron-molybdenum cofactor"  
"NT-E05\_00104" 24031 "s63E6H2" 0 "Dinitrogenase iron-molybdenum cofactor"  
"NT-E05\_00105" 24032 "s59E13H2" 0 "hypothetical protein"  
"NT-E05\_00105" 24032 "s59E25H2" 0 "hypothetical protein"  
"NT-E05\_00105" 24032 "s59E5H2" 0 "hypothetical protein"  
"NT-E05\_00105" 24032 "s63E6H2" 0 "hypothetical protein"  
"NT-E05\_00107" 24034 "s59E13H2" 0 "Dinitrogenase iron-molybdenum cofactor"  
"NT-E05\_00107" 24034 "s59E25H2" 0 "Dinitrogenase iron-molybdenum cofactor"  
"NT-E05\_00107" 24034 "s59E5H2" 0 "Dinitrogenase iron-molybdenum cofactor"  
"NT-E05\_00107" 24034 "s63E6H2" 0 "Dinitrogenase iron-molybdenum cofactor"  
"NT-E05\_00108" 24035 "s59E13H2" 0 "Ferric uptake regulation protein"  
"NT-E05\_00108" 24035 "s59E25H2" 0 "Ferric uptake regulation protein"  
"NT-E05\_00108" 24035 "s59E5H2" 0 "Ferric uptake regulation protein"



"NT-E05\_00108" 24035 "s63E6H2" 0 "Ferric uptake regulation protein"  
"NT-E05\_00109" 24036 "s59E13H2" 0 "Sulfhydrogenase 1 subunit alpha"  
"NT-E05\_00109" 24036 "s59E25H2" 0 "Sulfhydrogenase 1 subunit alpha"  
"NT-E05\_00109" 24036 "s59E5H2" 0 "Sulfhydrogenase 1 subunit alpha"  
"NT-E05\_00109" 24036 "s63E6H2" 0 "Sulfhydrogenase 1 subunit alpha"  
"NT-E05\_00110" 24037 "s59E13H2" 0 "Sulfhydrogenase 1 subunit delta"  
"NT-E05\_00110" 24037 "s59E25H2" 0 "Sulfhydrogenase 1 subunit delta"  
"NT-E05\_00110" 24037 "s59E5H2" 0 "Sulfhydrogenase 1 subunit delta"  
"NT-E05\_00110" 24037 "s63E6H2" 0 "Sulfhydrogenase 1 subunit delta"  
"NT-E05\_00111" 24038 "s59E13H2" 0 "Sulfhydrogenase 2 subunit gamma"  
"NT-E05\_00111" 24038 "s59E25H2" 0 "Sulfhydrogenase 2 subunit gamma"  
"NT-E05\_00111" 24038 "s59E5H2" 0 "Sulfhydrogenase 2 subunit gamma"  
"NT-E05\_00111" 24038 "s63E6H2" 0 "Sulfhydrogenase 2 subunit gamma"  
"NT-E05\_00112" 24039 "s59E13H2" 0 "Sulfhydrogenase 1 subunit beta"  
"NT-E05\_00112" 24039 "s59E25H2" 0 "Sulfhydrogenase 1 subunit beta"  
"NT-E05\_00112" 24039 "s59E5H2" 0 "Sulfhydrogenase 1 subunit beta"  
"NT-E05\_00112" 24039 "s63E6H2" 0 "Sulfhydrogenase 1 subunit beta"  
"NT-E05\_00113" 24040 "s59E13H2" 0 "Alkaline phosphatase synthesis sensor protein PhoR"  
"NT-E05\_00113" 24040 "s59E25H2" 0 "Alkaline phosphatase synthesis sensor protein PhoR"  
"NT-E05\_00113" 24040 "s59E5H2" 0 "Alkaline phosphatase synthesis sensor protein PhoR"  
"NT-E05\_00113" 24040 "s63E6H2" 0 "Alkaline phosphatase synthesis sensor protein PhoR"  
"NT-E05\_00114" 24041 "s59E13H2" 0 "Response regulator PleD"  
"NT-E05\_00114" 24041 "s59E25H2" 0 "Response regulator PleD"  
"NT-E05\_00114" 24041 "s59E5H2" 0 "Response regulator PleD"  
"NT-E05\_00114" 24041 "s63E6H2" 0 "Response regulator PleD"  
"NT-E05\_00115" 24042 "s59E13H2" 0 "Transcriptional regulatory protein ZraR"  
"NT-E05\_00115" 24042 "s59E25H2" 0 "Transcriptional regulatory protein ZraR"  
"NT-E05\_00115" 24042 "s59E5H2" 0 "Transcriptional regulatory protein ZraR"  
"NT-E05\_00115" 24042 "s63E6H2" 0 "Transcriptional regulatory protein ZraR"  
"NT-E05\_00118" 24045 "s59E13H2" 0 "DNA ligase"  
"NT-E05\_00118" 24045 "s59E25H2" 0 "DNA ligase"  
"NT-E05\_00118" 24045 "s59E5H2" 0 "DNA ligase"  
"NT-E05\_00118" 24045 "s63E6H2" 0 "DNA ligase"  
"NT-E05\_00119" 24046 "s59E13H2" 0 "Tyrosine--tRNA ligase"  
"NT-E05\_00119" 24046 "s59E25H2" 0 "Tyrosine--tRNA ligase"  
"NT-E05\_00119" 24046 "s59E5H2" 0 "Tyrosine--tRNA ligase"  
"NT-E05\_00119" 24046 "s63E6H2" 0 "Tyrosine--tRNA ligase"  
"NT-E05\_00120" 24047 "s59E13H2" 0 "tRNA dimethylallyltransferase"  
"NT-E05\_00120" 24047 "s59E25H2" 0 "tRNA dimethylallyltransferase"  
"NT-E05\_00120" 24047 "s59E5H2" 0 "tRNA dimethylallyltransferase"  
"NT-E05\_00120" 24047 "s63E6H2" 0 "tRNA dimethylallyltransferase"  
"NT-E05\_00121" 24048 "s59E13H2" 0 "(Dimethylallyl)adenosine tRNA methylthiotransferase MiaB"  
"NT-E05\_00121" 24048 "s59E25H2" 0 "(Dimethylallyl)adenosine tRNA methylthiotransferase MiaB"  
"NT-E05\_00121" 24048 "s59E5H2" 0 "(Dimethylallyl)adenosine tRNA methylthiotransferase MiaB"  
"NT-E05\_00121" 24048 "s63E6H2" 0 "(Dimethylallyl)adenosine tRNA methylthiotransferase MiaB"  
"NT-E05\_00122" 24049 "s59E13H2" 0 "Error-prone DNA polymerase"  
"NT-E05\_00122" 24049 "s59E25H2" 0 "Error-prone DNA polymerase"

"NT-E05\_00122" 24049 "s59E5H2" 0 "Error-prone DNA polymerase"  
"NT-E05\_00122" 24049 "s63E6H2" 0 "Error-prone DNA polymerase"  
"NT-E05\_00123" 24050 "s59E13H2" 0 "putative nicotinate-nucleotide pyrophosphorylase [carboxylating]"  
"NT-E05\_00123" 24050 "s59E25H2" 0 "putative nicotinate-nucleotide pyrophosphorylase [carboxylating]"  
"NT-E05\_00123" 24050 "s59E5H2" 0 "putative nicotinate-nucleotide pyrophosphorylase [carboxylating]"  
"NT-E05\_00123" 24050 "s63E6H2" 0 "putative nicotinate-nucleotide pyrophosphorylase [carboxylating]"  
"NT-E05\_00124" 24051 "s59E13H2" 0 "hypothetical protein"  
"NT-E05\_00124" 24051 "s59E25H2" 0 "hypothetical protein"  
"NT-E05\_00124" 24051 "s59E5H2" 0 "hypothetical protein"  
"NT-E05\_00124" 24051 "s63E6H2" 0 "hypothetical protein"  
"NT-E05\_00126" 24053 "s59E13H2" 0 "hypothetical protein"  
"NT-E05\_00126" 24053 "s59E25H2" 0 "hypothetical protein"  
"NT-E05\_00126" 24053 "s59E5H2" 0 "hypothetical protein"  
"NT-E05\_00126" 24053 "s63E6H2" 0 "hypothetical protein"  
"NT-E05\_00127" 24054 "s59E13H2" 0 "Archaeal Lon protease"  
"NT-E05\_00127" 24054 "s59E25H2" 0 "Archaeal Lon protease"  
"NT-E05\_00127" 24054 "s59E5H2" 0 "Archaeal Lon protease"  
"NT-E05\_00127" 24054 "s63E6H2" 0 "Archaeal Lon protease"  
"NT-E05\_00128" 24055 "s59E13H2" 0 "putative multidrug resistance ABC transporter ATP-binding/permease protein Yhel"  
"NT-E05\_00128" 24055 "s59E25H2" 0 "putative multidrug resistance ABC transporter ATP-binding/permease protein Yhel"  
"NT-E05\_00128" 24055 "s59E5H2" 0.002975395 "putative multidrug resistance ABC transporter ATP-binding/permease protein Yhel"  
"NT-E05\_00128" 24055 "s63E6H2" 0.002613851 "putative multidrug resistance ABC transporter ATP-binding/permease protein Yhel"  
"NT-E05\_00129" 24056 "s59E13H2" 0 "putative ABC transporter ATP-binding protein"  
"NT-E05\_00129" 24056 "s59E25H2" 0 "putative ABC transporter ATP-binding protein"  
"NT-E05\_00129" 24056 "s59E5H2" 0.005403911 "putative ABC transporter ATP-binding protein"  
"NT-E05\_00129" 24056 "s63E6H2" 0 "putative ABC transporter ATP-binding protein"  
"NT-E05\_00130" 24057 "s59E13H2" 0 "Desulfoferrodoxin"  
"NT-E05\_00130" 24057 "s59E25H2" 0 "Desulfoferrodoxin"  
"NT-E05\_00130" 24057 "s59E5H2" 0 "Desulfoferrodoxin"  
"NT-E05\_00130" 24057 "s63E6H2" 0 "Desulfoferrodoxin"  
"NT-E05\_00131" 24058 "s59E13H2" 0 "2-oxoglutarate synthase subunit KorA"  
"NT-E05\_00131" 24058 "s59E25H2" 0 "2-oxoglutarate synthase subunit KorA"  
"NT-E05\_00131" 24058 "s59E5H2" 0 "2-oxoglutarate synthase subunit KorA"  
"NT-E05\_00131" 24058 "s63E6H2" 0.003039645 "2-oxoglutarate synthase subunit KorA"  
"NT-E05\_00132" 24059 "s59E13H2" 0 "putative cysteine desulfurase 2"  
"NT-E05\_00132" 24059 "s59E25H2" 0 "putative cysteine desulfurase 2"  
"NT-E05\_00132" 24059 "s59E5H2" 0.01270687 "putative cysteine desulfurase 2"  
"NT-E05\_00132" 24059 "s63E6H2" 0 "putative cysteine desulfurase 2"  
"NT-E05\_00133" 24060 "s59E13H2" 0 "DsrE/DsrF-like family protein"  
"NT-E05\_00133" 24060 "s59E25H2" 0 "DsrE/DsrF-like family protein"  
"NT-E05\_00133" 24060 "s59E5H2" 0.09009917 "DsrE/DsrF-like family protein"  
"NT-E05\_00133" 24060 "s63E6H2" 0 "DsrE/DsrF-like family protein"  
"NT-E05\_00134" 24061 "s59E13H2" 0 "Sulfurtransferase Tusa"  
"NT-E05\_00134" 24061 "s59E25H2" 0 "Sulfurtransferase Tusa"  
"NT-E05\_00134" 24061 "s59E5H2" 0.05535545 "Sulfurtransferase Tusa"  
"NT-E05\_00134" 24061 "s63E6H2" 0 "Sulfurtransferase Tusa"  
"NT-E05\_00135" 24062 "s59E13H2" 0 "D-inositol-3-phosphate glycosyltransferase"

"NT-E05\_00135" 24062 "s59E25H2" 0 "D-inositol-3-phosphate glycosyltransferase"  
"NT-E05\_00135" 24062 "s59E5H2" 0.02754834 "D-inositol-3-phosphate glycosyltransferase"  
"NT-E05\_00135" 24062 "s63E6H2" 0 "D-inositol-3-phosphate glycosyltransferase"  
"NT-E05\_00136" 24063 "s59E13H2" 0 "High molecular weight rubredoxin"  
"NT-E05\_00136" 24063 "s59E25H2" 0 "High molecular weight rubredoxin"  
"NT-E05\_00136" 24063 "s59E5H2" 0.0258213 "High molecular weight rubredoxin"  
"NT-E05\_00136" 24063 "s63E6H2" 0 "High molecular weight rubredoxin"  
"NT-E05\_00138" 24065 "s59E13H2" 0 "Cadmium, cobalt and zinc/H(+)-K(+) antiporter"  
"NT-E05\_00138" 24065 "s59E25H2" 0 "Cadmium, cobalt and zinc/H(+)-K(+) antiporter"  
"NT-E05\_00138" 24065 "s59E5H2" 0 "Cadmium, cobalt and zinc/H(+)-K(+) antiporter"  
"NT-E05\_00138" 24065 "s63E6H2" 0 "Cadmium, cobalt and zinc/H(+)-K(+) antiporter"  
"NT-E05\_00139" 24066 "s59E13H2" 0 "hypothetical protein"  
"NT-E05\_00139" 24066 "s59E25H2" 0 "hypothetical protein"  
"NT-E05\_00139" 24066 "s59E5H2" 0 "hypothetical protein"  
"NT-E05\_00139" 24066 "s63E6H2" 0 "hypothetical protein"  
"NT-E05\_00140" 24067 "s59E13H2" 0 "Rubrerythrin"  
"NT-E05\_00140" 24067 "s59E25H2" 0 "Rubrerythrin"  
"NT-E05\_00140" 24067 "s59E5H2" 0 "Rubrerythrin"  
"NT-E05\_00140" 24067 "s63E6H2" 0 "Rubrerythrin"  
"NT-E05\_00141" 24068 "s59E13H2" 0 "Peroxide operon regulator"  
"NT-E05\_00141" 24068 "s59E25H2" 0 "Peroxide operon regulator"  
"NT-E05\_00141" 24068 "s59E5H2" 0.0243176 "Peroxide operon regulator"  
"NT-E05\_00141" 24068 "s63E6H2" 0 "Peroxide operon regulator"  
"NT-E05\_00142" 24069 "s59E13H2" 0 "putative peroxiredoxin"  
"NT-E05\_00142" 24069 "s59E25H2" 0 "putative peroxiredoxin"  
"NT-E05\_00142" 24069 "s59E5H2" 0.1808965 "putative peroxiredoxin"  
"NT-E05\_00142" 24069 "s63E6H2" 0 "putative peroxiredoxin"  
"NT-E05\_00143" 24070 "s59E13H2" 0 "hypothetical protein"  
"NT-E05\_00143" 24070 "s59E25H2" 0 "hypothetical protein"  
"NT-E05\_00143" 24070 "s59E5H2" 0.0747541 "hypothetical protein"  
"NT-E05\_00143" 24070 "s63E6H2" 0 "hypothetical protein"  
"NT-E05\_00144" 24071 "s59E13H2" 0 "Desulfoferrodoxin"  
"NT-E05\_00144" 24071 "s59E25H2" 0 "Desulfoferrodoxin"  
"NT-E05\_00144" 24071 "s59E5H2" 0.002951367 "Desulfoferrodoxin"  
"NT-E05\_00144" 24071 "s63E6H2" 0 "Desulfoferrodoxin"  
"NT-E05\_00145" 24072 "s59E13H2" 0 "Endonuclease III"  
"NT-E05\_00145" 24072 "s59E25H2" 0 "Endonuclease III"  
"NT-E05\_00145" 24072 "s59E5H2" 0 "Endonuclease III"  
"NT-E05\_00145" 24072 "s63E6H2" 0 "Endonuclease III"  
"NT-E05\_00146" 24073 "s59E13H2" 0 "Putative zinc metalloprotease Rip3"  
"NT-E05\_00146" 24073 "s59E25H2" 0 "Putative zinc metalloprotease Rip3"  
"NT-E05\_00146" 24073 "s59E5H2" 0.01202479 "Putative zinc metalloprotease Rip3"  
"NT-E05\_00146" 24073 "s63E6H2" 0 "Putative zinc metalloprotease Rip3"  
"NT-E05\_00147" 24074 "s59E13H2" 0 "putative trifunctional 2-polyprenylphenol hydroxylase/glutamate synthase subunit beta/ferritin domain-containing protein"  
"NT-E05\_00147" 24074 "s59E25H2" 0 "putative trifunctional 2-polyprenylphenol hydroxylase/glutamate synthase subunit beta/ferritin domain-containing protein"  
"NT-E05\_00147" 24074 "s59E5H2" 0 "putative trifunctional 2-polyprenylphenol hydroxylase/glutamate synthase subunit beta/ferritin domain-containing protein"  
"NT-E05\_00147" 24074 "s63E6H2" 0 "putative trifunctional 2-polyprenylphenol hydroxylase/glutamate synthase subunit beta/ferritin domain-containing protein"

"NT-E05\_00148" 24075 "s59E13H2" 0 "putative trifunctional 2-polyprenylphenol hydroxylase/glutamate synthase subunit beta/ferritin domain-containing protein"  
"NT-E05\_00148" 24075 "s59E25H2" 0 "putative trifunctional 2-polyprenylphenol hydroxylase/glutamate synthase subunit beta/ferritin domain-containing protein"  
"NT-E05\_00148" 24075 "s59E5H2" 0 "putative trifunctional 2-polyprenylphenol hydroxylase/glutamate synthase subunit beta/ferritin domain-containing protein"  
"NT-E05\_00148" 24075 "s63E6H2" 0 "putative trifunctional 2-polyprenylphenol hydroxylase/glutamate synthase subunit beta/ferritin domain-containing protein"  
"NT-E05\_00149" 24076 "s59E13H2" 0 "Acyl transferase"  
"NT-E05\_00149" 24076 "s59E25H2" 0 "Acyl transferase"  
"NT-E05\_00149" 24076 "s59E5H2" 0 "Acyl transferase"  
"NT-E05\_00149" 24076 "s63E6H2" 0 "Acyl transferase"  
"NT-E05\_00150" 24077 "s59E13H2" 0 "Glycosyl transferases group 1"  
"NT-E05\_00150" 24077 "s59E25H2" 0 "Glycosyl transferases group 1"  
"NT-E05\_00150" 24077 "s59E5H2" 0.0147344 "Glycosyl transferases group 1"  
"NT-E05\_00150" 24077 "s63E6H2" 0 "Glycosyl transferases group 1"  
"NT-E05\_00151" 24078 "s59E13H2" 0 "Fosmidomycin resistance protein"  
"NT-E05\_00151" 24078 "s59E25H2" 0 "Fosmidomycin resistance protein"  
"NT-E05\_00151" 24078 "s59E5H2" 0 "Fosmidomycin resistance protein"  
"NT-E05\_00151" 24078 "s63E6H2" 0 "Fosmidomycin resistance protein"  
"NT-E05\_00152" 24079 "s59E13H2" 0 "Bacterial Ig-like domain (group 1)"  
"NT-E05\_00152" 24079 "s59E25H2" 0 "Bacterial Ig-like domain (group 1)"  
"NT-E05\_00152" 24079 "s59E5H2" 0 "Bacterial Ig-like domain (group 1)"  
"NT-E05\_00152" 24079 "s63E6H2" 0.08488321 "Bacterial Ig-like domain (group 1)"  
"NT-E05\_00153" 24080 "s59E13H2" 0 "putative tyrosine recombinase XerC-like protein"  
"NT-E05\_00153" 24080 "s59E25H2" 0 "putative tyrosine recombinase XerC-like protein"  
"NT-E05\_00153" 24080 "s59E5H2" 0 "putative tyrosine recombinase XerC-like protein"  
"NT-E05\_00153" 24080 "s63E6H2" 0 "putative tyrosine recombinase XerC-like protein"  
"NT-E05\_00154" 24081 "s59E13H2" 0 "hypothetical protein"  
"NT-E05\_00154" 24081 "s59E25H2" 0 "hypothetical protein"  
"NT-E05\_00154" 24081 "s59E5H2" 0 "hypothetical protein"  
"NT-E05\_00154" 24081 "s63E6H2" 0 "hypothetical protein"  
"NT-E05\_00156" 24083 "s59E13H2" 0 "Ribonuclease Z"  
"NT-E05\_00156" 24083 "s59E25H2" 0 "Ribonuclease Z"  
"NT-E05\_00156" 24083 "s59E5H2" 0 "Ribonuclease Z"  
"NT-E05\_00156" 24083 "s63E6H2" 0 "Ribonuclease Z"  
"NT-E05\_00157" 24084 "s59E13H2" 0 "Inositol-3-phosphate synthase"  
"NT-E05\_00157" 24084 "s59E25H2" 0 "Inositol-3-phosphate synthase"  
"NT-E05\_00157" 24084 "s59E5H2" 0.007091708 "Inositol-3-phosphate synthase"  
"NT-E05\_00157" 24084 "s63E6H2" 0.00411393 "Inositol-3-phosphate synthase"  
"NT-E05\_00158" 24085 "s59E13H2" 0 "Bifunctional IPC transferase and DIPP synthase"  
"NT-E05\_00158" 24085 "s59E25H2" 0 "Bifunctional IPC transferase and DIPP synthase"  
"NT-E05\_00158" 24085 "s59E5H2" 0.002602317 "Bifunctional IPC transferase and DIPP synthase"  
"NT-E05\_00158" 24085 "s63E6H2" 0.02221161 "Bifunctional IPC transferase and DIPP synthase"  
"NT-E05\_00159" 24086 "s59E13H2" 0 "hypothetical protein"  
"NT-E05\_00159" 24086 "s59E25H2" 0 "hypothetical protein"  
"NT-E05\_00159" 24086 "s59E5H2" 0 "hypothetical protein"  
"NT-E05\_00159" 24086 "s63E6H2" 0 "hypothetical protein"  
"NT-E05\_00160" 24087 "s59E13H2" 0 "site-specific tyrosine recombinase XerC"  
"NT-E05\_00160" 24087 "s59E25H2" 0 "site-specific tyrosine recombinase XerC"  
"NT-E05\_00160" 24087 "s59E5H2" 0 "site-specific tyrosine recombinase XerC"

"NT-E05\_00160" 24087 "s63E6H2" 0 "site-specific tyrosine recombinase XerC"  
"NT-E05\_00161" 24088 "s59E13H2" 0 "hypothetical protein"  
"NT-E05\_00161" 24088 "s59E25H2" 0 "hypothetical protein"  
"NT-E05\_00161" 24088 "s59E5H2" 0 "hypothetical protein"  
"NT-E05\_00161" 24088 "s63E6H2" 0 "hypothetical protein"  
"NT-E05\_00162" 24089 "s59E13H2" 0.0006072343 "Type III restriction enzyme, res subunit"  
"NT-E05\_00162" 24089 "s59E25H2" 0 "Type III restriction enzyme, res subunit"  
"NT-E05\_00162" 24089 "s59E5H2" 0.1284201 "Type III restriction enzyme, res subunit"  
"NT-E05\_00162" 24089 "s63E6H2" 0.0006031041 "Type III restriction enzyme, res subunit"  
"NT-E05\_00164" 24091 "s59E13H2" 0 "hypothetical protein"  
"NT-E05\_00164" 24091 "s59E25H2" 0 "hypothetical protein"  
"NT-E05\_00164" 24091 "s59E5H2" 0 "hypothetical protein"  
"NT-E05\_00164" 24091 "s63E6H2" 0 "hypothetical protein"  
"NT-E05\_00165" 24092 "s59E13H2" 0 "NADH oxidase"  
"NT-E05\_00165" 24092 "s59E25H2" 0 "NADH oxidase"  
"NT-E05\_00165" 24092 "s59E5H2" 0 "NADH oxidase"  
"NT-E05\_00165" 24092 "s63E6H2" 0 "NADH oxidase"  
"NT-E05\_00166" 24093 "s59E13H2" 0 "D-alanyl-D-alanine carboxypeptidase precursor"  
"NT-E05\_00166" 24093 "s59E25H2" 0 "D-alanyl-D-alanine carboxypeptidase precursor"  
"NT-E05\_00166" 24093 "s59E5H2" 0 "D-alanyl-D-alanine carboxypeptidase precursor"  
"NT-E05\_00166" 24093 "s63E6H2" 0 "D-alanyl-D-alanine carboxypeptidase precursor"  
"NT-E05\_00167" 24094 "s59E13H2" 0 "Phosphodiesterase"  
"NT-E05\_00167" 24094 "s59E25H2" 0 "Phosphodiesterase"  
"NT-E05\_00167" 24094 "s59E5H2" 0 "Phosphodiesterase"  
"NT-E05\_00167" 24094 "s63E6H2" 0.008220423 "Phosphodiesterase"  
"NT-E05\_00168" 24095 "s59E13H2" 0 "hypothetical protein"  
"NT-E05\_00168" 24095 "s59E25H2" 0 "hypothetical protein"  
"NT-E05\_00168" 24095 "s59E5H2" 0 "hypothetical protein"  
"NT-E05\_00168" 24095 "s63E6H2" 0.008766722 "hypothetical protein"  
"NT-E05\_00169" 24096 "s59E13H2" 0 "LOG family protein YgdH"  
"NT-E05\_00169" 24096 "s59E25H2" 0 "LOG family protein YgdH"  
"NT-E05\_00169" 24096 "s59E5H2" 0 "LOG family protein YgdH"  
"NT-E05\_00169" 24096 "s63E6H2" 0 "LOG family protein YgdH"  
"NT-E05\_00170" 24097 "s59E13H2" 0 "Ribonuclease"  
"NT-E05\_00170" 24097 "s59E25H2" 0 "Ribonuclease"  
"NT-E05\_00170" 24097 "s59E5H2" 0 "Ribonuclease"  
"NT-E05\_00170" 24097 "s63E6H2" 0 "Ribonuclease"  
"NT-E05\_00172" 24099 "s59E13H2" 0 "Thermophilic metalloprotease (M29)"  
"NT-E05\_00172" 24099 "s59E25H2" 0 "Thermophilic metalloprotease (M29)"  
"NT-E05\_00172" 24099 "s59E5H2" 0 "Thermophilic metalloprotease (M29)"  
"NT-E05\_00172" 24099 "s63E6H2" 0.02187623 "Thermophilic metalloprotease (M29)"  
"NT-E05\_00174" 24101 "s59E13H2" 0 "Nucleotidyltransferase domain protein"  
"NT-E05\_00174" 24101 "s59E25H2" 0 "Nucleotidyltransferase domain protein"  
"NT-E05\_00174" 24101 "s59E5H2" 0 "Nucleotidyltransferase domain protein"  
"NT-E05\_00174" 24101 "s63E6H2" 0 "Nucleotidyltransferase domain protein"  
"NT-E05\_00175" 24102 "s59E13H2" 0 "PD-(D/E)XK nuclease superfamily protein"  
"NT-E05\_00175" 24102 "s59E25H2" 0 "PD-(D/E)XK nuclease superfamily protein"

"NT-E05\_00175" 24102 "s59E5H2" 0 "PD-(D/E)XK nuclease superfamily protein"  
"NT-E05\_00175" 24102 "s63E6H2" 0.004195212 "PD-(D/E)XK nuclease superfamily protein"  
"NT-E05\_00176" 24103 "s59E13H2" 0 "hypothetical protein"  
"NT-E05\_00176" 24103 "s59E25H2" 0 "hypothetical protein"  
"NT-E05\_00176" 24103 "s59E5H2" 0.003199013 "hypothetical protein"  
"NT-E05\_00176" 24103 "s63E6H2" 0 "hypothetical protein"  
"NT-E05\_00177" 24104 "s59E13H2" 0 "sporulation inhibitor KapD"  
"NT-E05\_00177" 24104 "s59E25H2" 0 "sporulation inhibitor KapD"  
"NT-E05\_00177" 24104 "s59E5H2" 0 "sporulation inhibitor KapD"  
"NT-E05\_00177" 24104 "s63E6H2" 0.07544398 "sporulation inhibitor KapD"  
"NT-E05\_00178" 24105 "s59E13H2" 0 "hypothetical protein"  
"NT-E05\_00178" 24105 "s59E25H2" 0 "hypothetical protein"  
"NT-E05\_00178" 24105 "s59E5H2" 0 "hypothetical protein"  
"NT-E05\_00178" 24105 "s63E6H2" 0 "hypothetical protein"  
"NT-E05\_00180" 24107 "s59E13H2" 0 "hypothetical protein"  
"NT-E05\_00180" 24107 "s59E25H2" 0 "hypothetical protein"  
"NT-E05\_00180" 24107 "s59E5H2" 0 "hypothetical protein"  
"NT-E05\_00180" 24107 "s63E6H2" 0 "hypothetical protein"  
"NT-E05\_00182" 24109 "s59E13H2" 0 "DNA-binding protein HU"  
"NT-E05\_00182" 24109 "s59E25H2" 0 "DNA-binding protein HU"  
"NT-E05\_00182" 24109 "s59E5H2" 0 "DNA-binding protein HU"  
"NT-E05\_00182" 24109 "s63E6H2" 0 "DNA-binding protein HU"  
"NT-E05\_00183" 24110 "s59E13H2" 0 "hypothetical protein"  
"NT-E05\_00183" 24110 "s59E25H2" 0 "hypothetical protein"  
"NT-E05\_00183" 24110 "s59E5H2" 0 "hypothetical protein"  
"NT-E05\_00183" 24110 "s63E6H2" 0 "hypothetical protein"  
"NT-E05\_00184" 24111 "s59E13H2" 0 "hypothetical protein"  
"NT-E05\_00184" 24111 "s59E25H2" 0 "hypothetical protein"  
"NT-E05\_00184" 24111 "s59E5H2" 0 "hypothetical protein"  
"NT-E05\_00184" 24111 "s63E6H2" 0 "hypothetical protein"  
"NT-E05\_00187" 24114 "s59E13H2" 0 "Alpha/beta hydrolase family protein"  
"NT-E05\_00187" 24114 "s59E25H2" 0 "Alpha/beta hydrolase family protein"  
"NT-E05\_00187" 24114 "s59E5H2" 0.005427982 "Alpha/beta hydrolase family protein"  
"NT-E05\_00187" 24114 "s63E6H2" 0 "Alpha/beta hydrolase family protein"  
"NT-E05\_00188" 24115 "s59E13H2" 0 "Flavodoxin"  
"NT-E05\_00188" 24115 "s59E25H2" 0 "Flavodoxin"  
"NT-E05\_00188" 24115 "s59E5H2" 0 "Flavodoxin"  
"NT-E05\_00188" 24115 "s63E6H2" 0 "Flavodoxin"  
"NT-E05\_00189" 24116 "s59E13H2" 0 "putative methyltransferase YcgJ"  
"NT-E05\_00189" 24116 "s59E25H2" 0 "putative methyltransferase YcgJ"  
"NT-E05\_00189" 24116 "s59E5H2" 0 "putative methyltransferase YcgJ"  
"NT-E05\_00189" 24116 "s63E6H2" 0.0007775835 "putative methyltransferase YcgJ"  
"NT-E05\_00191" 24118 "s59E13H2" 0 "DNA polymerase IV"  
"NT-E05\_00191" 24118 "s59E25H2" 0 "DNA polymerase IV"  
"NT-E05\_00191" 24118 "s59E5H2" 0 "DNA polymerase IV"  
"NT-E05\_00191" 24118 "s63E6H2" 0 "DNA polymerase IV"  
"NT-E05\_00194" 24121 "s59E13H2" 0 "photosystem I assembly protein Ycf3"

"NT-E05\_00194" 24121 "s59E25H2" 0 "photosystem I assembly protein Ycf3"  
"NT-E05\_00194" 24121 "s59E5H2" 0 "photosystem I assembly protein Ycf3"  
"NT-E05\_00194" 24121 "s63E6H2" 0 "photosystem I assembly protein Ycf3"  
"NT-E05\_00196" 24123 "s59E13H2" 0 "hypothetical protein"  
"NT-E05\_00196" 24123 "s59E25H2" 0 "hypothetical protein"  
"NT-E05\_00196" 24123 "s59E5H2" 0 "hypothetical protein"  
"NT-E05\_00196" 24123 "s63E6H2" 0 "hypothetical protein"  
"NT-E05\_00197" 24124 "s59E13H2" 0 "hypothetical protein"  
"NT-E05\_00197" 24124 "s59E25H2" 0 "hypothetical protein"  
"NT-E05\_00197" 24124 "s59E5H2" 0 "hypothetical protein"  
"NT-E05\_00197" 24124 "s63E6H2" 0 "hypothetical protein"  
"NT-E05\_00198" 24125 "s59E13H2" 0 "methylcobalamin:coenzyme M methyltransferase"  
"NT-E05\_00198" 24125 "s59E25H2" 0 "methylcobalamin:coenzyme M methyltransferase"  
"NT-E05\_00198" 24125 "s59E5H2" 0 "methylcobalamin:coenzyme M methyltransferase"  
"NT-E05\_00198" 24125 "s63E6H2" 0 "methylcobalamin:coenzyme M methyltransferase"  
"NT-E05\_00199" 24126 "s59E13H2" 0 "methylcobalamin:coenzyme M methyltransferase"  
"NT-E05\_00199" 24126 "s59E25H2" 0 "methylcobalamin:coenzyme M methyltransferase"  
"NT-E05\_00199" 24126 "s59E5H2" 0 "methylcobalamin:coenzyme M methyltransferase"  
"NT-E05\_00199" 24126 "s63E6H2" 0 "methylcobalamin:coenzyme M methyltransferase"  
"NT-E05\_00200" 24127 "s59E13H2" 0.001695104 "Trehalose/maltose-binding protein MalE precursor"  
"NT-E05\_00200" 24127 "s59E25H2" 0 "Trehalose/maltose-binding protein MalE precursor"  
"NT-E05\_00200" 24127 "s59E5H2" 0 "Trehalose/maltose-binding protein MalE precursor"  
"NT-E05\_00200" 24127 "s63E6H2" 0 "Trehalose/maltose-binding protein MalE precursor"  
"NT-E05\_00201" 24128 "s59E13H2" 0 "Trehalose transport system permease protein SugA"  
"NT-E05\_00201" 24128 "s59E25H2" 0 "Trehalose transport system permease protein SugA"  
"NT-E05\_00201" 24128 "s59E5H2" 0 "Trehalose transport system permease protein SugA"  
"NT-E05\_00201" 24128 "s63E6H2" 0 "Trehalose transport system permease protein SugA"  
"NT-E05\_00202" 24129 "s59E13H2" 0 "Inner membrane ABC transporter permease protein YcjP"  
"NT-E05\_00202" 24129 "s59E25H2" 0 "Inner membrane ABC transporter permease protein YcjP"  
"NT-E05\_00202" 24129 "s59E5H2" 0 "Inner membrane ABC transporter permease protein YcjP"  
"NT-E05\_00202" 24129 "s63E6H2" 0 "Inner membrane ABC transporter permease protein YcjP"  
"NT-E05\_00203" 24130 "s59E13H2" 0 "Tungsten-containing aldehyde ferredoxin oxidoreductase"  
"NT-E05\_00203" 24130 "s59E25H2" 0 "Tungsten-containing aldehyde ferredoxin oxidoreductase"  
"NT-E05\_00203" 24130 "s59E5H2" 0 "Tungsten-containing aldehyde ferredoxin oxidoreductase"  
"NT-E05\_00203" 24130 "s63E6H2" 0 "Tungsten-containing aldehyde ferredoxin oxidoreductase"  
"NT-E05\_00204" 24131 "s59E13H2" 0 "methylcobalamin:coenzyme M methyltransferase"  
"NT-E05\_00204" 24131 "s59E25H2" 0 "methylcobalamin:coenzyme M methyltransferase"  
"NT-E05\_00204" 24131 "s59E5H2" 0 "methylcobalamin:coenzyme M methyltransferase"  
"NT-E05\_00204" 24131 "s63E6H2" 0 "methylcobalamin:coenzyme M methyltransferase"  
"NT-E05\_00205" 24132 "s59E13H2" 0 "DNA topoisomerase 1"  
"NT-E05\_00205" 24132 "s59E25H2" 0 "DNA topoisomerase 1"  
"NT-E05\_00205" 24132 "s59E5H2" 0.005548931 "DNA topoisomerase 1"  
"NT-E05\_00205" 24132 "s63E6H2" 0 "DNA topoisomerase 1"  
"NT-E05\_00206" 24133 "s59E13H2" 0 "Tyrosine recombinase XerC"  
"NT-E05\_00206" 24133 "s59E25H2" 0 "Tyrosine recombinase XerC"  
"NT-E05\_00206" 24133 "s59E5H2" 0 "Tyrosine recombinase XerC"  
"NT-E05\_00206" 24133 "s63E6H2" 0 "Tyrosine recombinase XerC"

"NT-E05\_00207" 24134 "s59E13H2" 0 "ATP-dependent protease subunit HslV precursor"  
"NT-E05\_00207" 24134 "s59E25H2" 0 "ATP-dependent protease subunit HslV precursor"  
"NT-E05\_00207" 24134 "s59E5H2" 0 "ATP-dependent protease subunit HslV precursor"  
"NT-E05\_00207" 24134 "s63E6H2" 0 "ATP-dependent protease subunit HslV precursor"  
"NT-E05\_00208" 24135 "s59E13H2" 0 "ATP-dependent protease ATPase subunit ClpY"  
"NT-E05\_00208" 24135 "s59E25H2" 0 "ATP-dependent protease ATPase subunit ClpY"  
"NT-E05\_00208" 24135 "s59E5H2" 0.005677076 "ATP-dependent protease ATPase subunit ClpY"  
"NT-E05\_00208" 24135 "s63E6H2" 0 "ATP-dependent protease ATPase subunit ClpY"  
"NT-E05\_00209" 24136 "s59E13H2" 0 "Beta-1,4-mannooligosaccharide phosphorylase"  
"NT-E05\_00209" 24136 "s59E25H2" 0 "Beta-1,4-mannooligosaccharide phosphorylase"  
"NT-E05\_00209" 24136 "s59E5H2" 0 "Beta-1,4-mannooligosaccharide phosphorylase"  
"NT-E05\_00209" 24136 "s63E6H2" 0 "Beta-1,4-mannooligosaccharide phosphorylase"  
"NT-E05\_00210" 24137 "s59E13H2" 0 "putative endonuclease 4"  
"NT-E05\_00210" 24137 "s59E25H2" 0 "putative endonuclease 4"  
"NT-E05\_00210" 24137 "s59E5H2" 0 "putative endonuclease 4"  
"NT-E05\_00210" 24137 "s63E6H2" 0 "putative endonuclease 4"  
"NT-E05\_00211" 24138 "s59E13H2" 0 "Nucleoside diphosphate kinase"  
"NT-E05\_00211" 24138 "s59E25H2" 0 "Nucleoside diphosphate kinase"  
"NT-E05\_00211" 24138 "s59E5H2" 0 "Nucleoside diphosphate kinase"  
"NT-E05\_00211" 24138 "s63E6H2" 0 "Nucleoside diphosphate kinase"  
"NT-E05\_00212" 24139 "s59E13H2" 0 "3-isopropylmalate dehydrogenase"  
"NT-E05\_00212" 24139 "s59E25H2" 0 "3-isopropylmalate dehydrogenase"  
"NT-E05\_00212" 24139 "s59E5H2" 0 "3-isopropylmalate dehydrogenase"  
"NT-E05\_00212" 24139 "s63E6H2" 0 "3-isopropylmalate dehydrogenase"  
"NT-E05\_00213" 24140 "s59E13H2" 0 "RNA 3'-terminal phosphate cyclase"  
"NT-E05\_00213" 24140 "s59E25H2" 0 "RNA 3'-terminal phosphate cyclase"  
"NT-E05\_00213" 24140 "s59E5H2" 0 "RNA 3'-terminal phosphate cyclase"  
"NT-E05\_00213" 24140 "s63E6H2" 0 "RNA 3'-terminal phosphate cyclase"  
"NT-E05\_00214" 24141 "s59E13H2" 0 "Dihydroorotase"  
"NT-E05\_00214" 24141 "s59E25H2" 0 "Dihydroorotase"  
"NT-E05\_00214" 24141 "s59E5H2" 0 "Dihydroorotase"  
"NT-E05\_00214" 24141 "s63E6H2" 0 "Dihydroorotase"  
"NT-E05\_00215" 24142 "s59E13H2" 0 "Aspartate carbamoyltransferase"  
"NT-E05\_00215" 24142 "s59E25H2" 0 "Aspartate carbamoyltransferase"  
"NT-E05\_00215" 24142 "s59E5H2" 0 "Aspartate carbamoyltransferase"  
"NT-E05\_00215" 24142 "s63E6H2" 0 "Aspartate carbamoyltransferase"  
"NT-E05\_00216" 24143 "s59E13H2" 0 "Bifunctional protein PyrR"  
"NT-E05\_00216" 24143 "s59E25H2" 0 "Bifunctional protein PyrR"  
"NT-E05\_00216" 24143 "s59E5H2" 0 "Bifunctional protein PyrR"  
"NT-E05\_00216" 24143 "s63E6H2" 0 "Bifunctional protein PyrR"  
"NT-E05\_00218" 24145 "s59E13H2" 0 "tRNA(fMet)-specific endonuclease VapC"  
"NT-E05\_00218" 24145 "s59E25H2" 0 "tRNA(fMet)-specific endonuclease VapC"  
"NT-E05\_00218" 24145 "s59E5H2" 0 "tRNA(fMet)-specific endonuclease VapC"  
"NT-E05\_00218" 24145 "s63E6H2" 0 "tRNA(fMet)-specific endonuclease VapC"  
"NT-E05\_00219" 24146 "s59E13H2" 0 "putative regulator PrIF"  
"NT-E05\_00219" 24146 "s59E25H2" 0 "putative regulator PrIF"  
"NT-E05\_00219" 24146 "s59E5H2" 0 "putative regulator PrIF"



"NT-E05\_00219" 24146 "s63E6H2" 0 "putative regulator PrIF"  
"NT-E05\_00221" 24148 "s59E13H2" 0 "DNA mismatch repair protein"  
"NT-E05\_00221" 24148 "s59E25H2" 0 "DNA mismatch repair protein"  
"NT-E05\_00221" 24148 "s59E5H2" 0 "DNA mismatch repair protein"  
"NT-E05\_00221" 24148 "s63E6H2" 0 "DNA mismatch repair protein"  
"NT-E05\_00222" 24149 "s59E13H2" 0 "Ribbon-helix-helix protein, copG family"  
"NT-E05\_00222" 24149 "s59E25H2" 0 "Ribbon-helix-helix protein, copG family"  
"NT-E05\_00222" 24149 "s59E5H2" 0 "Ribbon-helix-helix protein, copG family"  
"NT-E05\_00222" 24149 "s63E6H2" 0 "Ribbon-helix-helix protein, copG family"  
"NT-E05\_00223" 24150 "s59E13H2" 0 "hypothetical protein"  
"NT-E05\_00223" 24150 "s59E25H2" 0 "hypothetical protein"  
"NT-E05\_00223" 24150 "s59E5H2" 0 "hypothetical protein"  
"NT-E05\_00223" 24150 "s63E6H2" 0 "hypothetical protein"  
"NT-E05\_00226" 24153 "s59E13H2" 0 "HEPN domain protein"  
"NT-E05\_00226" 24153 "s59E25H2" 0 "HEPN domain protein"  
"NT-E05\_00226" 24153 "s59E5H2" 0 "HEPN domain protein"  
"NT-E05\_00226" 24153 "s63E6H2" 0 "HEPN domain protein"  
"NT-E05\_00228" 24155 "s59E13H2" 0 "hypothetical protein"  
"NT-E05\_00228" 24155 "s59E25H2" 0 "hypothetical protein"  
"NT-E05\_00228" 24155 "s59E5H2" 0 "hypothetical protein"  
"NT-E05\_00228" 24155 "s63E6H2" 0 "hypothetical protein"  
"NT-E05\_00229" 24156 "s59E13H2" 0 "Phospholipase D precursor"  
"NT-E05\_00229" 24156 "s59E25H2" 0 "Phospholipase D precursor"  
"NT-E05\_00229" 24156 "s59E5H2" 0 "Phospholipase D precursor"  
"NT-E05\_00229" 24156 "s63E6H2" 0 "Phospholipase D precursor"  
"NT-E05\_00230" 24157 "s59E13H2" 0 "hypothetical protein"  
"NT-E05\_00230" 24157 "s59E25H2" 0 "hypothetical protein"  
"NT-E05\_00230" 24157 "s59E5H2" 0 "hypothetical protein"  
"NT-E05\_00230" 24157 "s63E6H2" 0 "hypothetical protein"  
"NT-E05\_00231" 24158 "s59E13H2" 0 "PhoD-like phosphatase"  
"NT-E05\_00231" 24158 "s59E25H2" 0 "PhoD-like phosphatase"  
"NT-E05\_00231" 24158 "s59E5H2" 0 "PhoD-like phosphatase"  
"NT-E05\_00231" 24158 "s63E6H2" 0 "PhoD-like phosphatase"  
"NT-E05\_00233" 24160 "s59E13H2" 0 "Transcriptional regulatory protein ZraR"  
"NT-E05\_00233" 24160 "s59E25H2" 0 "Transcriptional regulatory protein ZraR"  
"NT-E05\_00233" 24160 "s59E5H2" 0 "Transcriptional regulatory protein ZraR"  
"NT-E05\_00233" 24160 "s63E6H2" 0 "Transcriptional regulatory protein ZraR"  
"NT-E05\_00235" 24162 "s59E13H2" 0 "hypothetical protein"  
"NT-E05\_00235" 24162 "s59E25H2" 0 "hypothetical protein"  
"NT-E05\_00235" 24162 "s59E5H2" 0 "hypothetical protein"  
"NT-E05\_00235" 24162 "s63E6H2" 0 "hypothetical protein"  
"NT-E05\_00236" 24163 "s59E13H2" 0 "hypothetical protein"  
"NT-E05\_00236" 24163 "s59E25H2" 0 "hypothetical protein"  
"NT-E05\_00236" 24163 "s59E5H2" 0 "hypothetical protein"  
"NT-E05\_00236" 24163 "s63E6H2" 0 "hypothetical protein"  
"NT-E05\_00237" 24164 "s59E13H2" 0 "Helix-turn-helix domain protein"  
"NT-E05\_00237" 24164 "s59E25H2" 0 "Helix-turn-helix domain protein"

"NT-E05\_00237" 24164 "s59E5H2" 0 "Helix-turn-helix domain protein"  
"NT-E05\_00237" 24164 "s63E6H2" 0 "Helix-turn-helix domain protein"  
"NT-E05\_00238" 24165 "s59E13H2" 0 "60 kDa chaperonin"  
"NT-E05\_00238" 24165 "s59E25H2" 0 "60 kDa chaperonin"  
"NT-E05\_00238" 24165 "s59E5H2" 0 "60 kDa chaperonin"  
"NT-E05\_00238" 24165 "s63E6H2" 0.001805433 "60 kDa chaperonin"  
"NT-E05\_00239" 24166 "s59E13H2" 0 "10 kDa chaperonin"  
"NT-E05\_00239" 24166 "s59E25H2" 0 "10 kDa chaperonin"  
"NT-E05\_00239" 24166 "s59E5H2" 0 "10 kDa chaperonin"  
"NT-E05\_00239" 24166 "s63E6H2" 0 "10 kDa chaperonin"  
"NT-E05\_00240" 24167 "s59E13H2" 0 "Recombination protein RecR"  
"NT-E05\_00240" 24167 "s59E25H2" 0 "Recombination protein RecR"  
"NT-E05\_00240" 24167 "s59E5H2" 0.01242093 "Recombination protein RecR"  
"NT-E05\_00240" 24167 "s63E6H2" 0 "Recombination protein RecR"  
"NT-E05\_00241" 24168 "s59E13H2" 0 "Nucleoid-associated protein YbaB"  
"NT-E05\_00241" 24168 "s59E25H2" 0 "Nucleoid-associated protein YbaB"  
"NT-E05\_00241" 24168 "s59E5H2" 0 "Nucleoid-associated protein YbaB"  
"NT-E05\_00241" 24168 "s63E6H2" 0 "Nucleoid-associated protein YbaB"  
"NT-E05\_00243" 24170 "s59E13H2" 0 "hypothetical protein"  
"NT-E05\_00243" 24170 "s59E25H2" 0 "hypothetical protein"  
"NT-E05\_00243" 24170 "s59E5H2" 0.00860108 "hypothetical protein"  
"NT-E05\_00243" 24170 "s63E6H2" 0 "hypothetical protein"  
"NT-E05\_00244" 24171 "s59E13H2" 0 "Phytochrome-like protein cph2"  
"NT-E05\_00244" 24171 "s59E25H2" 0 "Phytochrome-like protein cph2"  
"NT-E05\_00244" 24171 "s59E5H2" 0 "Phytochrome-like protein cph2"  
"NT-E05\_00244" 24171 "s63E6H2" 0 "Phytochrome-like protein cph2"  
"NT-E05\_00245" 24172 "s59E13H2" 0 "Cyclic di-GMP phosphodiesterase response regulator RpfG"  
"NT-E05\_00245" 24172 "s59E25H2" 0 "Cyclic di-GMP phosphodiesterase response regulator RpfG"  
"NT-E05\_00245" 24172 "s59E5H2" 0 "Cyclic di-GMP phosphodiesterase response regulator RpfG"  
"NT-E05\_00245" 24172 "s63E6H2" 0 "Cyclic di-GMP phosphodiesterase response regulator RpfG"  
"NT-E05\_00246" 24173 "s59E13H2" 0 "hypothetical protein"  
"NT-E05\_00246" 24173 "s59E25H2" 0 "hypothetical protein"  
"NT-E05\_00246" 24173 "s59E5H2" 0 "hypothetical protein"  
"NT-E05\_00246" 24173 "s63E6H2" 0 "hypothetical protein"  
"NT-E05\_00247" 24174 "s59E13H2" 0 "Phd\_YefM"  
"NT-E05\_00247" 24174 "s59E25H2" 0 "Phd\_YefM"  
"NT-E05\_00247" 24174 "s59E5H2" 0 "Phd\_YefM"  
"NT-E05\_00247" 24174 "s63E6H2" 0 "Phd\_YefM"  
"NT-E05\_00248" 24175 "s59E13H2" 0 "hypothetical protein"  
"NT-E05\_00248" 24175 "s59E25H2" 0 "hypothetical protein"  
"NT-E05\_00248" 24175 "s59E5H2" 0 "hypothetical protein"  
"NT-E05\_00248" 24175 "s63E6H2" 0 "hypothetical protein"  
"NT-E05\_00249" 24176 "s59E13H2" 0 "hypothetical protein"  
"NT-E05\_00249" 24176 "s59E25H2" 0 "hypothetical protein"  
"NT-E05\_00249" 24176 "s59E5H2" 0 "hypothetical protein"  
"NT-E05\_00249" 24176 "s63E6H2" 0 "hypothetical protein"  
"NT-E05\_00251" 24178 "s59E13H2" 0 "hypothetical protein"

"NT-E05\_00251" 24178 "s59E25H2" 0 "hypothetical protein"  
"NT-E05\_00251" 24178 "s59E5H2" 0 "hypothetical protein"  
"NT-E05\_00251" 24178 "s63E6H2" 0 "hypothetical protein"  
"NT-E05\_00252" 24179 "s59E13H2" 0 "hypothetical protein"  
"NT-E05\_00252" 24179 "s59E25H2" 0 "hypothetical protein"  
"NT-E05\_00252" 24179 "s59E5H2" 0 "hypothetical protein"  
"NT-E05\_00252" 24179 "s63E6H2" 0 "hypothetical protein"  
"NT-E05\_00253" 24180 "s59E13H2" 0 "SpoVT / AbrB like domain protein"  
"NT-E05\_00253" 24180 "s59E25H2" 0 "SpoVT / AbrB like domain protein"  
"NT-E05\_00253" 24180 "s59E5H2" 0 "SpoVT / AbrB like domain protein"  
"NT-E05\_00253" 24180 "s63E6H2" 0 "SpoVT / AbrB like domain protein"  
"NT-E05\_00254" 24181 "s59E13H2" 0 "hypothetical protein"  
"NT-E05\_00254" 24181 "s59E25H2" 0 "hypothetical protein"  
"NT-E05\_00254" 24181 "s59E5H2" 0 "hypothetical protein"  
"NT-E05\_00254" 24181 "s63E6H2" 0 "hypothetical protein"  
"NT-E05\_00255" 24182 "s59E13H2" 0 "hypothetical protein"  
"NT-E05\_00255" 24182 "s59E25H2" 0 "hypothetical protein"  
"NT-E05\_00255" 24182 "s59E5H2" 0 "hypothetical protein"  
"NT-E05\_00255" 24182 "s63E6H2" 0 "hypothetical protein"  
"NT-E05\_00256" 24183 "s59E13H2" 0 "hypothetical protein"  
"NT-E05\_00256" 24183 "s59E25H2" 0 "hypothetical protein"  
"NT-E05\_00256" 24183 "s59E5H2" 0 "hypothetical protein"  
"NT-E05\_00256" 24183 "s63E6H2" 0 "hypothetical protein"  
"NT-E05\_00258" 24185 "s59E13H2" 0 "ABC-2 type transporter"  
"NT-E05\_00258" 24185 "s59E25H2" 0 "ABC-2 type transporter"  
"NT-E05\_00258" 24185 "s59E5H2" 0 "ABC-2 type transporter"  
"NT-E05\_00258" 24185 "s63E6H2" 0 "ABC-2 type transporter"  
"NT-E05\_00259" 24186 "s59E13H2" 0 "Fluoroquinolones export ATP-binding protein/MT2762"  
"NT-E05\_00259" 24186 "s59E25H2" 0 "Fluoroquinolones export ATP-binding protein/MT2762"  
"NT-E05\_00259" 24186 "s59E5H2" 0 "Fluoroquinolones export ATP-binding protein/MT2762"  
"NT-E05\_00259" 24186 "s63E6H2" 0 "Fluoroquinolones export ATP-binding protein/MT2762"  
"NT-E05\_00260" 24187 "s59E13H2" 0 "Transposase IS116/IS110/IS902 family protein"  
"NT-E05\_00260" 24187 "s59E25H2" 0 "Transposase IS116/IS110/IS902 family protein"  
"NT-E05\_00260" 24187 "s59E5H2" 0 "Transposase IS116/IS110/IS902 family protein"  
"NT-E05\_00260" 24187 "s63E6H2" 0 "Transposase IS116/IS110/IS902 family protein"  
"NT-E05\_00262" 24189 "s59E13H2" 0 "hypothetical protein"  
"NT-E05\_00262" 24189 "s59E25H2" 0 "hypothetical protein"  
"NT-E05\_00262" 24189 "s59E5H2" 0.01226688 "hypothetical protein"  
"NT-E05\_00262" 24189 "s63E6H2" 0 "hypothetical protein"  
"NT-E05\_00263" 24190 "s59E13H2" 0 "hypothetical protein"  
"NT-E05\_00263" 24190 "s59E25H2" 0 "hypothetical protein"  
"NT-E05\_00263" 24190 "s59E5H2" 0 "hypothetical protein"  
"NT-E05\_00263" 24190 "s63E6H2" 0 "hypothetical protein"  
"NT-E05\_00264" 24191 "s59E13H2" 0 "hypothetical protein"  
"NT-E05\_00264" 24191 "s59E25H2" 0 "hypothetical protein"  
"NT-E05\_00264" 24191 "s59E5H2" 0 "hypothetical protein"  
"NT-E05\_00264" 24191 "s63E6H2" 0 "hypothetical protein"

"NT-E05\_00265" 24192 "s59E13H2" 0 "Bacterial Ig-like domain (group 1)"  
"NT-E05\_00265" 24192 "s59E25H2" 0 "Bacterial Ig-like domain (group 1)"  
"NT-E05\_00265" 24192 "s59E5H2" 0 "Bacterial Ig-like domain (group 1)"  
"NT-E05\_00265" 24192 "s63E6H2" 0 "Bacterial Ig-like domain (group 1)"  
"NT-E05\_00266" 24193 "s59E13H2" 0 "hypothetical protein"  
"NT-E05\_00266" 24193 "s59E25H2" 0 "hypothetical protein"  
"NT-E05\_00266" 24193 "s59E5H2" 0 "hypothetical protein"  
"NT-E05\_00266" 24193 "s63E6H2" 0 "hypothetical protein"  
"NT-E05\_00267" 24194 "s59E13H2" 0 "Integrase core domain protein"  
"NT-E05\_00267" 24194 "s59E25H2" 0 "Integrase core domain protein"  
"NT-E05\_00267" 24194 "s59E5H2" 0 "Integrase core domain protein"  
"NT-E05\_00267" 24194 "s63E6H2" 0 "Integrase core domain protein"  
"NT-E05\_00268" 24195 "s59E13H2" 0 "Bacterial Ig-like domain (group 1)"  
"NT-E05\_00268" 24195 "s59E25H2" 0 "Bacterial Ig-like domain (group 1)"  
"NT-E05\_00268" 24195 "s59E5H2" 0 "Bacterial Ig-like domain (group 1)"  
"NT-E05\_00268" 24195 "s63E6H2" 0.004083105 "Bacterial Ig-like domain (group 1)"  
"NT-E05\_00269" 24196 "s59E13H2" 0 "site-specific tyrosine recombinase XerC"  
"NT-E05\_00269" 24196 "s59E25H2" 0 "site-specific tyrosine recombinase XerC"  
"NT-E05\_00269" 24196 "s59E5H2" 0 "site-specific tyrosine recombinase XerC"  
"NT-E05\_00269" 24196 "s63E6H2" 0 "site-specific tyrosine recombinase XerC"  
"NT-E05\_00270" 24197 "s59E13H2" 0 "hypothetical protein"  
"NT-E05\_00270" 24197 "s59E25H2" 0 "hypothetical protein"  
"NT-E05\_00270" 24197 "s59E5H2" 0 "hypothetical protein"  
"NT-E05\_00270" 24197 "s63E6H2" 0 "hypothetical protein"  
"NT-E05\_00272" 24199 "s59E13H2" 0 "hypothetical protein"  
"NT-E05\_00272" 24199 "s59E25H2" 0 "hypothetical protein"  
"NT-E05\_00272" 24199 "s59E5H2" 0 "hypothetical protein"  
"NT-E05\_00272" 24199 "s63E6H2" 0 "hypothetical protein"  
"NT-E05\_00273" 24200 "s59E13H2" 0 "Glucose--fructose oxidoreductase precursor"  
"NT-E05\_00273" 24200 "s59E25H2" 0 "Glucose--fructose oxidoreductase precursor"  
"NT-E05\_00273" 24200 "s59E5H2" 0 "Glucose--fructose oxidoreductase precursor"  
"NT-E05\_00273" 24200 "s63E6H2" 0 "Glucose--fructose oxidoreductase precursor"  
"NT-E05\_00274" 24201 "s59E13H2" 0 "3-hydroxypropionyl-coenzyme A dehydratase"  
"NT-E05\_00274" 24201 "s59E25H2" 0 "3-hydroxypropionyl-coenzyme A dehydratase"  
"NT-E05\_00274" 24201 "s59E5H2" 0 "3-hydroxypropionyl-coenzyme A dehydratase"  
"NT-E05\_00274" 24201 "s63E6H2" 0 "3-hydroxypropionyl-coenzyme A dehydratase"  
"NT-E05\_00275" 24202 "s59E13H2" 0 "Glucose--fructose oxidoreductase precursor"  
"NT-E05\_00275" 24202 "s59E25H2" 0 "Glucose--fructose oxidoreductase precursor"  
"NT-E05\_00275" 24202 "s59E5H2" 0 "Glucose--fructose oxidoreductase precursor"  
"NT-E05\_00275" 24202 "s63E6H2" 0 "Glucose--fructose oxidoreductase precursor"  
"NT-E05\_00276" 24203 "s59E13H2" 0 "Lactoylglutathione lyase"  
"NT-E05\_00276" 24203 "s59E25H2" 0 "Lactoylglutathione lyase"  
"NT-E05\_00276" 24203 "s59E5H2" 0 "Lactoylglutathione lyase"  
"NT-E05\_00276" 24203 "s63E6H2" 0 "Lactoylglutathione lyase"  
"NT-E05\_00277" 24204 "s59E13H2" 0 "Acetate CoA-transferase YdiF"  
"NT-E05\_00277" 24204 "s59E25H2" 0 "Acetate CoA-transferase YdiF"  
"NT-E05\_00277" 24204 "s59E5H2" 0 "Acetate CoA-transferase YdiF"

"NT-E05\_00277" 24204 "s63E6H2" 0 "Acetate CoA-transferase Ydif"  
"NT-E05\_00278" 24205 "s59E13H2" 0 "putative L-threonine 3-dehydrogenase"  
"NT-E05\_00278" 24205 "s59E25H2" 0 "putative L-threonine 3-dehydrogenase"  
"NT-E05\_00278" 24205 "s59E5H2" 0 "putative L-threonine 3-dehydrogenase"  
"NT-E05\_00278" 24205 "s63E6H2" 0 "putative L-threonine 3-dehydrogenase"  
"NT-E05\_00279" 24206 "s59E13H2" 0 "Formyl-coenzyme A transferase"  
"NT-E05\_00279" 24206 "s59E25H2" 0 "Formyl-coenzyme A transferase"  
"NT-E05\_00279" 24206 "s59E5H2" 0 "Formyl-coenzyme A transferase"  
"NT-E05\_00279" 24206 "s63E6H2" 0 "Formyl-coenzyme A transferase"  
"NT-E05\_00280" 24207 "s59E13H2" 0 "HTH-type transcriptional repressor PurR"  
"NT-E05\_00280" 24207 "s59E25H2" 0 "HTH-type transcriptional repressor PurR"  
"NT-E05\_00280" 24207 "s59E5H2" 0 "HTH-type transcriptional repressor PurR"  
"NT-E05\_00280" 24207 "s63E6H2" 0 "HTH-type transcriptional repressor PurR"  
"NT-E05\_00281" 24208 "s59E13H2" 0 "4-hydroxy-tetrahydrodipicolinate synthase"  
"NT-E05\_00281" 24208 "s59E25H2" 0 "4-hydroxy-tetrahydrodipicolinate synthase"  
"NT-E05\_00281" 24208 "s59E5H2" 0 "4-hydroxy-tetrahydrodipicolinate synthase"  
"NT-E05\_00281" 24208 "s63E6H2" 0 "4-hydroxy-tetrahydrodipicolinate synthase"  
"NT-E05\_00282" 24209 "s59E13H2" 0 "3-hydroxypropionyl-coenzyme A dehydratase"  
"NT-E05\_00282" 24209 "s59E25H2" 0 "3-hydroxypropionyl-coenzyme A dehydratase"  
"NT-E05\_00282" 24209 "s59E5H2" 0 "3-hydroxypropionyl-coenzyme A dehydratase"  
"NT-E05\_00282" 24209 "s63E6H2" 0 "3-hydroxypropionyl-coenzyme A dehydratase"  
"NT-E05\_00283" 24210 "s59E13H2" 0 "L-aspartate oxidase"  
"NT-E05\_00283" 24210 "s59E25H2" 0 "L-aspartate oxidase"  
"NT-E05\_00283" 24210 "s59E5H2" 0 "L-aspartate oxidase"  
"NT-E05\_00283" 24210 "s63E6H2" 0 "L-aspartate oxidase"  
"NT-E05\_00284" 24211 "s59E13H2" 0 "Methylcobamide:CoM methyltransferase MtaA"  
"NT-E05\_00284" 24211 "s59E25H2" 0 "Methylcobamide:CoM methyltransferase MtaA"  
"NT-E05\_00284" 24211 "s59E5H2" 0 "Methylcobamide:CoM methyltransferase MtaA"  
"NT-E05\_00284" 24211 "s63E6H2" 0 "Methylcobamide:CoM methyltransferase MtaA"  
"NT-E05\_00287" 24214 "s59E13H2" 0 "putative tyrosine recombinase XerC-like protein"  
"NT-E05\_00287" 24214 "s59E25H2" 0 "putative tyrosine recombinase XerC-like protein"  
"NT-E05\_00287" 24214 "s59E5H2" 0 "putative tyrosine recombinase XerC-like protein"  
"NT-E05\_00287" 24214 "s63E6H2" 0 "putative tyrosine recombinase XerC-like protein"  
"NT-E05\_00288" 24215 "s59E13H2" 0 "hypothetical protein"  
"NT-E05\_00288" 24215 "s59E25H2" 0 "hypothetical protein"  
"NT-E05\_00288" 24215 "s59E5H2" 0 "hypothetical protein"  
"NT-E05\_00288" 24215 "s63E6H2" 0 "hypothetical protein"  
"NT-E05\_00289" 24216 "s59E13H2" 0 "YEATS family protein"  
"NT-E05\_00289" 24216 "s59E25H2" 0 "YEATS family protein"  
"NT-E05\_00289" 24216 "s59E5H2" 0 "YEATS family protein"  
"NT-E05\_00289" 24216 "s63E6H2" 0 "YEATS family protein"  
"NT-E05\_00290" 24217 "s59E13H2" 0 "hypothetical protein"  
"NT-E05\_00290" 24217 "s59E25H2" 0 "hypothetical protein"  
"NT-E05\_00290" 24217 "s59E5H2" 0 "hypothetical protein"  
"NT-E05\_00290" 24217 "s63E6H2" 0 "hypothetical protein"  
"NT-E05\_00291" 24218 "s59E13H2" 0 "hypothetical protein"  
"NT-E05\_00291" 24218 "s59E25H2" 0 "hypothetical protein"

"NT-E05\_00291" 24218 "s59E5H2" 0 "hypothetical protein"  
"NT-E05\_00291" 24218 "s63E6H2" 0 "hypothetical protein"  
"NT-E05\_00292" 24219 "s59E13H2" 0 "Sporulation initiation inhibitor protein Soj"  
"NT-E05\_00292" 24219 "s59E25H2" 0 "Sporulation initiation inhibitor protein Soj"  
"NT-E05\_00292" 24219 "s59E5H2" 0 "Sporulation initiation inhibitor protein Soj"  
"NT-E05\_00292" 24219 "s63E6H2" 0 "Sporulation initiation inhibitor protein Soj"  
"NT-E05\_00296" 24223 "s59E13H2" 0 "methylcobalamin:coenzyme M methyltransferase"  
"NT-E05\_00296" 24223 "s59E25H2" 0 "methylcobalamin:coenzyme M methyltransferase"  
"NT-E05\_00296" 24223 "s59E5H2" 0 "methylcobalamin:coenzyme M methyltransferase"  
"NT-E05\_00296" 24223 "s63E6H2" 0 "methylcobalamin:coenzyme M methyltransferase"  
"NT-E05\_00297" 24224 "s59E13H2" 0 "Inner membrane ABC transporter permease protein YcjP"  
"NT-E05\_00297" 24224 "s59E25H2" 0 "Inner membrane ABC transporter permease protein YcjP"  
"NT-E05\_00297" 24224 "s59E5H2" 0 "Inner membrane ABC transporter permease protein YcjP"  
"NT-E05\_00297" 24224 "s63E6H2" 0 "Inner membrane ABC transporter permease protein YcjP"  
"NT-E05\_00298" 24225 "s59E13H2" 0 "Trehalose/maltose transport system permease protein MalF"  
"NT-E05\_00298" 24225 "s59E25H2" 0 "Trehalose/maltose transport system permease protein MalF"  
"NT-E05\_00298" 24225 "s59E5H2" 0 "Trehalose/maltose transport system permease protein MalF"  
"NT-E05\_00298" 24225 "s63E6H2" 0 "Trehalose/maltose transport system permease protein MalF"  
"NT-E05\_00299" 24226 "s59E13H2" 0 "Trehalose/maltose-binding protein MalE precursor"  
"NT-E05\_00299" 24226 "s59E25H2" 0 "Trehalose/maltose-binding protein MalE precursor"  
"NT-E05\_00299" 24226 "s59E5H2" 0 "Trehalose/maltose-binding protein MalE precursor"  
"NT-E05\_00299" 24226 "s63E6H2" 0 "Trehalose/maltose-binding protein MalE precursor"  
"NT-E05\_00300" 24227 "s59E13H2" 0 "Ribbon-helix-helix domain protein"  
"NT-E05\_00300" 24227 "s59E25H2" 0 "Ribbon-helix-helix domain protein"  
"NT-E05\_00300" 24227 "s59E5H2" 0 "Ribbon-helix-helix domain protein"  
"NT-E05\_00300" 24227 "s63E6H2" 0 "Ribbon-helix-helix domain protein"  
"NT-E05\_00302" 24229 "s59E13H2" 0 "DNA-binding protein HU"  
"NT-E05\_00302" 24229 "s59E25H2" 0 "DNA-binding protein HU"  
"NT-E05\_00302" 24229 "s59E5H2" 0 "DNA-binding protein HU"  
"NT-E05\_00302" 24229 "s63E6H2" 0 "DNA-binding protein HU"  
"NT-E05\_00303" 24230 "s59E13H2" 0 "hypothetical protein"  
"NT-E05\_00303" 24230 "s59E25H2" 0 "hypothetical protein"  
"NT-E05\_00303" 24230 "s59E5H2" 0 "hypothetical protein"  
"NT-E05\_00303" 24230 "s63E6H2" 0 "hypothetical protein"  
"NT-E05\_00304" 24231 "s59E13H2" 0 "hypothetical protein"  
"NT-E05\_00304" 24231 "s59E25H2" 0 "hypothetical protein"  
"NT-E05\_00304" 24231 "s59E5H2" 0 "hypothetical protein"  
"NT-E05\_00304" 24231 "s63E6H2" 0 "hypothetical protein"  
"NT-E05\_00305" 24232 "s59E13H2" 0 "DNA-binding protein HU"  
"NT-E05\_00305" 24232 "s59E25H2" 0 "DNA-binding protein HU"  
"NT-E05\_00305" 24232 "s59E5H2" 0 "DNA-binding protein HU"  
"NT-E05\_00305" 24232 "s63E6H2" 0 "DNA-binding protein HU"  
"NT-E05\_00306" 24233 "s59E13H2" 0 "Cold shock protein CspB"  
"NT-E05\_00306" 24233 "s59E25H2" 0 "Cold shock protein CspB"  
"NT-E05\_00306" 24233 "s59E5H2" 0 "Cold shock protein CspB"  
"NT-E05\_00306" 24233 "s63E6H2" 0 "Cold shock protein CspB"  
"NT-E05\_00307" 24234 "s59E13H2" 0 "hypothetical protein"

"NT-E05\_00307" 24234 "s59E25H2" 0 "hypothetical protein"  
"NT-E05\_00307" 24234 "s59E5H2" 0 "hypothetical protein"  
"NT-E05\_00307" 24234 "s63E6H2" 0 "hypothetical protein"  
"NT-E05\_00308" 24235 "s59E13H2" 0 "Helix-turn-helix"  
"NT-E05\_00308" 24235 "s59E25H2" 0 "Helix-turn-helix"  
"NT-E05\_00308" 24235 "s59E5H2" 0 "Helix-turn-helix"  
"NT-E05\_00308" 24235 "s63E6H2" 0 "Helix-turn-helix"  
"NT-E05\_00309" 24236 "s59E13H2" 0 "Flavodoxin"  
"NT-E05\_00309" 24236 "s59E25H2" 0 "Flavodoxin"  
"NT-E05\_00309" 24236 "s59E5H2" 0 "Flavodoxin"  
"NT-E05\_00309" 24236 "s63E6H2" 0 "Flavodoxin"  
"NT-E05\_00310" 24237 "s59E13H2" 0 "hypothetical protein"  
"NT-E05\_00310" 24237 "s59E25H2" 0 "hypothetical protein"  
"NT-E05\_00310" 24237 "s59E5H2" 0 "hypothetical protein"  
"NT-E05\_00310" 24237 "s63E6H2" 0 "hypothetical protein"  
"NT-E05\_00312" 24239 "s59E13H2" 0 "Glucosyl-3-phosphoglycerate synthase"  
"NT-E05\_00312" 24239 "s59E25H2" 0 "Glucosyl-3-phosphoglycerate synthase"  
"NT-E05\_00312" 24239 "s59E5H2" 0 "Glucosyl-3-phosphoglycerate synthase"  
"NT-E05\_00312" 24239 "s63E6H2" 0 "Glucosyl-3-phosphoglycerate synthase"  
"NT-E05\_00313" 24240 "s59E13H2" 0 "Phosphoserine phosphatase 1"  
"NT-E05\_00313" 24240 "s59E25H2" 0 "Phosphoserine phosphatase 1"  
"NT-E05\_00313" 24240 "s59E5H2" 0 "Phosphoserine phosphatase 1"  
"NT-E05\_00313" 24240 "s63E6H2" 0 "Phosphoserine phosphatase 1"  
"NT-E05\_00314" 24241 "s59E13H2" 0 "Septum site-determining protein DivIVA"  
"NT-E05\_00314" 24241 "s59E25H2" 0 "Septum site-determining protein DivIVA"  
"NT-E05\_00314" 24241 "s59E5H2" 0 "Septum site-determining protein DivIVA"  
"NT-E05\_00314" 24241 "s63E6H2" 0 "Septum site-determining protein DivIVA"  
"NT-E05\_00315" 24242 "s59E13H2" 0 "Pyrroline-5-carboxylate reductase"  
"NT-E05\_00315" 24242 "s59E25H2" 0 "Pyrroline-5-carboxylate reductase"  
"NT-E05\_00315" 24242 "s59E5H2" 0 "Pyrroline-5-carboxylate reductase"  
"NT-E05\_00315" 24242 "s63E6H2" 0 "Pyrroline-5-carboxylate reductase"  
"NT-E05\_00316" 24243 "s59E13H2" 0 "hypothetical protein"  
"NT-E05\_00316" 24243 "s59E25H2" 0 "hypothetical protein"  
"NT-E05\_00316" 24243 "s59E5H2" 0 "hypothetical protein"  
"NT-E05\_00316" 24243 "s63E6H2" 0 "hypothetical protein"  
"NT-E05\_00319" 24246 "s59E13H2" 0 "PIN domain protein"  
"NT-E05\_00319" 24246 "s59E25H2" 0 "PIN domain protein"  
"NT-E05\_00319" 24246 "s59E5H2" 0 "PIN domain protein"  
"NT-E05\_00319" 24246 "s63E6H2" 0 "PIN domain protein"  
"NT-E05\_00320" 24247 "s59E13H2" 0 "hypothetical protein"  
"NT-E05\_00320" 24247 "s59E25H2" 0 "hypothetical protein"  
"NT-E05\_00320" 24247 "s59E5H2" 0 "hypothetical protein"  
"NT-E05\_00320" 24247 "s63E6H2" 0 "hypothetical protein"  
"NT-E05\_00323" 24250 "s59E13H2" 0 "Caspase domain protein"  
"NT-E05\_00323" 24250 "s59E25H2" 0 "Caspase domain protein"  
"NT-E05\_00323" 24250 "s59E5H2" 0 "Caspase domain protein"  
"NT-E05\_00323" 24250 "s63E6H2" 0 "Caspase domain protein"

"NT-E05\_00326" 24253 "s59E13H2" 0 "hypothetical protein"  
"NT-E05\_00326" 24253 "s59E25H2" 0 "hypothetical protein"  
"NT-E05\_00326" 24253 "s59E5H2" 0 "hypothetical protein"  
"NT-E05\_00326" 24253 "s63E6H2" 0 "hypothetical protein"  
"NT-E05\_00327" 24254 "s59E13H2" 0 "Type-1 restriction enzyme R protein"  
"NT-E05\_00327" 24254 "s59E25H2" 0 "Type-1 restriction enzyme R protein"  
"NT-E05\_00327" 24254 "s59E5H2" 0 "Type-1 restriction enzyme R protein"  
"NT-E05\_00327" 24254 "s63E6H2" 0 "Type-1 restriction enzyme R protein"  
"NT-E05\_00328" 24255 "s59E13H2" 0 "Chromosome partition protein Smc"  
"NT-E05\_00328" 24255 "s59E25H2" 0 "Chromosome partition protein Smc"  
"NT-E05\_00328" 24255 "s59E5H2" 0 "Chromosome partition protein Smc"  
"NT-E05\_00328" 24255 "s63E6H2" 0 "Chromosome partition protein Smc"  
"NT-E05\_00329" 24256 "s59E13H2" 0 "Type-1 restriction enzyme MjaXIP specificity protein"  
"NT-E05\_00329" 24256 "s59E25H2" 0 "Type-1 restriction enzyme MjaXIP specificity protein"  
"NT-E05\_00329" 24256 "s59E5H2" 0 "Type-1 restriction enzyme MjaXIP specificity protein"  
"NT-E05\_00329" 24256 "s63E6H2" 0 "Type-1 restriction enzyme MjaXIP specificity protein"  
"NT-E05\_00330" 24257 "s59E13H2" 0 "hypothetical protein"  
"NT-E05\_00330" 24257 "s59E25H2" 0 "hypothetical protein"  
"NT-E05\_00330" 24257 "s59E5H2" 0 "hypothetical protein"  
"NT-E05\_00330" 24257 "s63E6H2" 0 "hypothetical protein"  
"NT-E05\_00332" 24259 "s59E13H2" 0 "putative type I restriction enzymeP M protein"  
"NT-E05\_00332" 24259 "s59E25H2" 0 "putative type I restriction enzymeP M protein"  
"NT-E05\_00332" 24259 "s59E5H2" 0 "putative type I restriction enzymeP M protein"  
"NT-E05\_00332" 24259 "s63E6H2" 0 "putative type I restriction enzymeP M protein"  
"NT-E05\_00333" 24260 "s59E13H2" 0 "hypothetical protein"  
"NT-E05\_00333" 24260 "s59E25H2" 0 "hypothetical protein"  
"NT-E05\_00333" 24260 "s59E5H2" 0 "hypothetical protein"  
"NT-E05\_00333" 24260 "s63E6H2" 0 "hypothetical protein"  
"NT-E05\_00335" 24262 "s59E13H2" 0 "hypothetical protein"  
"NT-E05\_00335" 24262 "s59E25H2" 0 "hypothetical protein"  
"NT-E05\_00335" 24262 "s59E5H2" 0 "hypothetical protein"  
"NT-E05\_00335" 24262 "s63E6H2" 0 "hypothetical protein"  
"NT-E05\_00336" 24263 "s59E13H2" 0 "hypothetical protein"  
"NT-E05\_00336" 24263 "s59E25H2" 0 "hypothetical protein"  
"NT-E05\_00336" 24263 "s59E5H2" 0 "hypothetical protein"  
"NT-E05\_00336" 24263 "s63E6H2" 0 "hypothetical protein"  
"NT-E05\_00337" 24264 "s59E13H2" 0 "Al-2 transport protein TqsA"  
"NT-E05\_00337" 24264 "s59E25H2" 0 "Al-2 transport protein TqsA"  
"NT-E05\_00337" 24264 "s59E5H2" 0 "Al-2 transport protein TqsA"  
"NT-E05\_00337" 24264 "s63E6H2" 0 "Al-2 transport protein TqsA"  
"NT-E05\_00341" 24268 "s59E13H2" 0 "Ubiquinone biosynthesis O-methyltransferase"  
"NT-E05\_00341" 24268 "s59E25H2" 0 "Ubiquinone biosynthesis O-methyltransferase"  
"NT-E05\_00341" 24268 "s59E5H2" 0 "Ubiquinone biosynthesis O-methyltransferase"  
"NT-E05\_00341" 24268 "s63E6H2" 0 "Ubiquinone biosynthesis O-methyltransferase"  
"NT-E05\_00342" 24269 "s59E13H2" 0 "GDP-L-fucose synthase"  
"NT-E05\_00342" 24269 "s59E25H2" 0 "GDP-L-fucose synthase"  
"NT-E05\_00342" 24269 "s59E5H2" 0 "GDP-L-fucose synthase"



"NT-E05\_00342" 24269 "s63E6H2" 0 "GDP-L-fucose synthase"  
"NT-E05\_00343" 24270 "s59E13H2" 0 "hypothetical protein"  
"NT-E05\_00343" 24270 "s59E25H2" 0 "hypothetical protein"  
"NT-E05\_00343" 24270 "s59E5H2" 0 "hypothetical protein"  
"NT-E05\_00343" 24270 "s63E6H2" 0 "hypothetical protein"  
"NT-E05\_00344" 24271 "s59E13H2" 0 "GDP-mannose 4,6-dehydratase"  
"NT-E05\_00344" 24271 "s59E25H2" 0 "GDP-mannose 4,6-dehydratase"  
"NT-E05\_00344" 24271 "s59E5H2" 0 "GDP-mannose 4,6-dehydratase"  
"NT-E05\_00344" 24271 "s63E6H2" 0 "GDP-mannose 4,6-dehydratase"  
"NT-E05\_00345" 24272 "s59E13H2" 0 "hypothetical protein"  
"NT-E05\_00345" 24272 "s59E25H2" 0 "hypothetical protein"  
"NT-E05\_00345" 24272 "s59E5H2" 0 "hypothetical protein"  
"NT-E05\_00345" 24272 "s63E6H2" 0 "hypothetical protein"  
"NT-E05\_00349" 24276 "s59E13H2" 0 "Nucleotidyltransferase domain protein"  
"NT-E05\_00349" 24276 "s59E25H2" 0 "Nucleotidyltransferase domain protein"  
"NT-E05\_00349" 24276 "s59E5H2" 0 "Nucleotidyltransferase domain protein"  
"NT-E05\_00349" 24276 "s63E6H2" 0 "Nucleotidyltransferase domain protein"  
"NT-E05\_00350" 24277 "s59E13H2" 0 "HEPN domain protein"  
"NT-E05\_00350" 24277 "s59E25H2" 0 "HEPN domain protein"  
"NT-E05\_00350" 24277 "s59E5H2" 0 "HEPN domain protein"  
"NT-E05\_00350" 24277 "s63E6H2" 0 "HEPN domain protein"  
"NT-E05\_00351" 24278 "s59E13H2" 0 "hypothetical protein"  
"NT-E05\_00351" 24278 "s59E25H2" 0 "hypothetical protein"  
"NT-E05\_00351" 24278 "s59E5H2" 0 "hypothetical protein"  
"NT-E05\_00351" 24278 "s63E6H2" 0 "hypothetical protein"  
"NT-E05\_00352" 24279 "s59E13H2" 0 "hypothetical protein"  
"NT-E05\_00352" 24279 "s59E25H2" 0 "hypothetical protein"  
"NT-E05\_00352" 24279 "s59E5H2" 0.03271197 "hypothetical protein"  
"NT-E05\_00352" 24279 "s63E6H2" 0.006695124 "hypothetical protein"  
"NT-E05\_00353" 24280 "s59E13H2" 0 "hypothetical protein"  
"NT-E05\_00353" 24280 "s59E25H2" 0 "hypothetical protein"  
"NT-E05\_00353" 24280 "s59E5H2" 0 "hypothetical protein"  
"NT-E05\_00353" 24280 "s63E6H2" 0 "hypothetical protein"  
"NT-E05\_00354" 24281 "s59E13H2" 0 "hypothetical protein"  
"NT-E05\_00354" 24281 "s59E25H2" 0 "hypothetical protein"  
"NT-E05\_00354" 24281 "s59E5H2" 0 "hypothetical protein"  
"NT-E05\_00354" 24281 "s63E6H2" 0 "hypothetical protein"  
"NT-E05\_00356" 24283 "s59E13H2" 0 "hypothetical protein"  
"NT-E05\_00356" 24283 "s59E25H2" 0 "hypothetical protein"  
"NT-E05\_00356" 24283 "s59E5H2" 0 "hypothetical protein"  
"NT-E05\_00356" 24283 "s63E6H2" 0 "hypothetical protein"  
"NT-E05\_00357" 24284 "s59E13H2" 0 "hypothetical protein"  
"NT-E05\_00357" 24284 "s59E25H2" 0 "hypothetical protein"  
"NT-E05\_00357" 24284 "s59E5H2" 0 "hypothetical protein"  
"NT-E05\_00357" 24284 "s63E6H2" 0 "hypothetical protein"  
"NT-E05\_00358" 24285 "s59E13H2" 0 "hypothetical protein"  
"NT-E05\_00358" 24285 "s59E25H2" 0 "hypothetical protein"

"NT-E05\_00358" 24285 "s59E5H2" 0 "hypothetical protein"  
"NT-E05\_00358" 24285 "s63E6H2" 0 "hypothetical protein"  
"NT-E05\_00359" 24286 "s59E13H2" 0 "hypothetical protein"  
"NT-E05\_00359" 24286 "s59E25H2" 0 "hypothetical protein"  
"NT-E05\_00359" 24286 "s59E5H2" 0 "hypothetical protein"  
"NT-E05\_00359" 24286 "s63E6H2" 0 "hypothetical protein"  
"NT-E05\_00360" 24287 "s59E13H2" 0 "hypothetical protein"  
"NT-E05\_00360" 24287 "s59E25H2" 0 "hypothetical protein"  
"NT-E05\_00360" 24287 "s59E5H2" 0 "hypothetical protein"  
"NT-E05\_00360" 24287 "s63E6H2" 0 "hypothetical protein"  
"NT-E05\_00367" 24294 "s59E13H2" 0 "hypothetical protein"  
"NT-E05\_00367" 24294 "s59E25H2" 0 "hypothetical protein"  
"NT-E05\_00367" 24294 "s59E5H2" 0 "hypothetical protein"  
"NT-E05\_00367" 24294 "s63E6H2" 0 "hypothetical protein"  
"NT-E05\_00368" 24295 "s59E13H2" 0 "Macrocin-O-methyltransferase (TylF)"  
"NT-E05\_00368" 24295 "s59E25H2" 0 "Macrocin-O-methyltransferase (TylF)"  
"NT-E05\_00368" 24295 "s59E5H2" 0 "Macrocin-O-methyltransferase (TylF)"  
"NT-E05\_00368" 24295 "s63E6H2" 0 "Macrocin-O-methyltransferase (TylF)"  
"NT-E05\_00369" 24296 "s59E13H2" 0 "hypothetical protein"  
"NT-E05\_00369" 24296 "s59E25H2" 0 "hypothetical protein"  
"NT-E05\_00369" 24296 "s59E5H2" 0 "hypothetical protein"  
"NT-E05\_00369" 24296 "s63E6H2" 0 "hypothetical protein"  
"NT-E05\_00370" 24297 "s59E13H2" 0 "colanic acid exporter"  
"NT-E05\_00370" 24297 "s59E25H2" 0 "colanic acid exporter"  
"NT-E05\_00370" 24297 "s59E5H2" 0 "colanic acid exporter"  
"NT-E05\_00370" 24297 "s63E6H2" 0 "colanic acid exporter"  
"NT-E05\_00371" 24298 "s59E13H2" 0 "Maltotriose-binding protein precursor"  
"NT-E05\_00371" 24298 "s59E25H2" 0 "Maltotriose-binding protein precursor"  
"NT-E05\_00371" 24298 "s59E5H2" 0 "Maltotriose-binding protein precursor"  
"NT-E05\_00371" 24298 "s63E6H2" 0.001131462 "Maltotriose-binding protein precursor"  
"NT-E05\_00372" 24299 "s59E13H2" 0 "Trehalose/maltose transport system permease protein MalF"  
"NT-E05\_00372" 24299 "s59E25H2" 0 "Trehalose/maltose transport system permease protein MalF"  
"NT-E05\_00372" 24299 "s59E5H2" 0 "Trehalose/maltose transport system permease protein MalF"  
"NT-E05\_00372" 24299 "s63E6H2" 0 "Trehalose/maltose transport system permease protein MalF"  
"NT-E05\_00373" 24300 "s59E13H2" 0 "L-arabinose transport system permease protein AraQ"  
"NT-E05\_00373" 24300 "s59E25H2" 0 "L-arabinose transport system permease protein AraQ"  
"NT-E05\_00373" 24300 "s59E5H2" 0 "L-arabinose transport system permease protein AraQ"  
"NT-E05\_00373" 24300 "s63E6H2" 0 "L-arabinose transport system permease protein AraQ"  
"NT-E05\_00374" 24301 "s59E13H2" 0 "Methylated-thiol--coenzyme M methyltransferase"  
"NT-E05\_00374" 24301 "s59E25H2" 0 "Methylated-thiol--coenzyme M methyltransferase"  
"NT-E05\_00374" 24301 "s59E5H2" 0 "Methylated-thiol--coenzyme M methyltransferase"  
"NT-E05\_00374" 24301 "s63E6H2" 0 "Methylated-thiol--coenzyme M methyltransferase"  
"NT-E05\_00375" 24302 "s59E13H2" 0 "putative L-threonine 3-dehydrogenase"  
"NT-E05\_00375" 24302 "s59E25H2" 0 "putative L-threonine 3-dehydrogenase"  
"NT-E05\_00375" 24302 "s59E5H2" 0 "putative L-threonine 3-dehydrogenase"  
"NT-E05\_00375" 24302 "s63E6H2" 0 "putative L-threonine 3-dehydrogenase"  
"NT-E05\_00376" 24303 "s59E13H2" 0 "2-dehydro-3-deoxy-D-gluconate 5-dehydrogenase"

"NT-E05\_00376" 24303 "s59E25H2" 0 "2-dehydro-3-deoxy-D-gluconate 5-dehydrogenase"  
"NT-E05\_00376" 24303 "s59E5H2" 0 "2-dehydro-3-deoxy-D-gluconate 5-dehydrogenase"  
"NT-E05\_00376" 24303 "s63E6H2" 0 "2-dehydro-3-deoxy-D-gluconate 5-dehydrogenase"  
"NT-E05\_00377" 24304 "s59E13H2" 0 "5-deoxy-glucuronate isomerase"  
"NT-E05\_00377" 24304 "s59E25H2" 0 "5-deoxy-glucuronate isomerase"  
"NT-E05\_00377" 24304 "s59E5H2" 0 "5-deoxy-glucuronate isomerase"  
"NT-E05\_00377" 24304 "s63E6H2" 0 "5-deoxy-glucuronate isomerase"  
"NT-E05\_00378" 24305 "s59E13H2" 0 "TPR repeat-containing protein YrrB"  
"NT-E05\_00378" 24305 "s59E25H2" 0 "TPR repeat-containing protein YrrB"  
"NT-E05\_00378" 24305 "s59E5H2" 0.00278728 "TPR repeat-containing protein YrrB"  
"NT-E05\_00378" 24305 "s63E6H2" 0.0005354041 "TPR repeat-containing protein YrrB"  
"NT-E05\_00379" 24306 "s59E13H2" 0 "hypothetical protein"  
"NT-E05\_00379" 24306 "s59E25H2" 0 "hypothetical protein"  
"NT-E05\_00379" 24306 "s59E5H2" 0 "hypothetical protein"  
"NT-E05\_00379" 24306 "s63E6H2" 0 "hypothetical protein"  
"NT-E05\_00380" 24307 "s59E13H2" 0 "hypothetical protein"  
"NT-E05\_00380" 24307 "s59E25H2" 0 "hypothetical protein"  
"NT-E05\_00380" 24307 "s59E5H2" 0 "hypothetical protein"  
"NT-E05\_00380" 24307 "s63E6H2" 0 "hypothetical protein"  
"NT-E05\_00383" 24310 "s59E13H2" 0 "hypothetical protein"  
"NT-E05\_00383" 24310 "s59E25H2" 0 "hypothetical protein"  
"NT-E05\_00383" 24310 "s59E5H2" 0 "hypothetical protein"  
"NT-E05\_00383" 24310 "s63E6H2" 0 "hypothetical protein"  
"NT-E05\_00384" 24311 "s59E13H2" 0 "hypothetical protein"  
"NT-E05\_00384" 24311 "s59E25H2" 0 "hypothetical protein"  
"NT-E05\_00384" 24311 "s59E5H2" 0 "hypothetical protein"  
"NT-E05\_00384" 24311 "s63E6H2" 0 "hypothetical protein"  
"NT-E05\_00385" 24312 "s59E13H2" 0 "Tetratricopeptide repeat protein"  
"NT-E05\_00385" 24312 "s59E25H2" 0 "Tetratricopeptide repeat protein"  
"NT-E05\_00385" 24312 "s59E5H2" 0 "Tetratricopeptide repeat protein"  
"NT-E05\_00385" 24312 "s63E6H2" 0 "Tetratricopeptide repeat protein"  
"NT-E05\_00386" 24313 "s59E13H2" 0 "Cyclic pyranopterin monophosphate synthase"  
"NT-E05\_00386" 24313 "s59E25H2" 0 "Cyclic pyranopterin monophosphate synthase"  
"NT-E05\_00386" 24313 "s59E5H2" 0 "Cyclic pyranopterin monophosphate synthase"  
"NT-E05\_00386" 24313 "s63E6H2" 0 "Cyclic pyranopterin monophosphate synthase"  
"NT-E05\_00387" 24314 "s59E13H2" 0 "Anaerobic sulfatase-maturing enzyme"  
"NT-E05\_00387" 24314 "s59E25H2" 0 "Anaerobic sulfatase-maturing enzyme"  
"NT-E05\_00387" 24314 "s59E5H2" 0 "Anaerobic sulfatase-maturing enzyme"  
"NT-E05\_00387" 24314 "s63E6H2" 0 "Anaerobic sulfatase-maturing enzyme"  
"NT-E05\_00388" 24315 "s59E13H2" 0 "hypothetical protein"  
"NT-E05\_00388" 24315 "s59E25H2" 0 "hypothetical protein"  
"NT-E05\_00388" 24315 "s59E5H2" 0 "hypothetical protein"  
"NT-E05\_00388" 24315 "s63E6H2" 0 "hypothetical protein"  
"NT-E05\_00389" 24316 "s59E13H2" 0 "Phospholipase D precursor"  
"NT-E05\_00389" 24316 "s59E25H2" 0 "Phospholipase D precursor"  
"NT-E05\_00389" 24316 "s59E5H2" 0 "Phospholipase D precursor"  
"NT-E05\_00389" 24316 "s63E6H2" 0 "Phospholipase D precursor"

"NT-E05\_00390" 24317 "s59E13H2" 0 "ATP-dependent DNA ligase"  
"NT-E05\_00390" 24317 "s59E25H2" 0 "ATP-dependent DNA ligase"  
"NT-E05\_00390" 24317 "s59E5H2" 0 "ATP-dependent DNA ligase"  
"NT-E05\_00390" 24317 "s63E6H2" 0 "ATP-dependent DNA ligase"  
"NT-E05\_00392" 24319 "s59E13H2" 0 "hypothetical protein"  
"NT-E05\_00392" 24319 "s59E25H2" 0 "hypothetical protein"  
"NT-E05\_00392" 24319 "s59E5H2" 0 "hypothetical protein"  
"NT-E05\_00392" 24319 "s63E6H2" 0 "hypothetical protein"  
"NT-E05\_00394" 24321 "s59E13H2" 0 "Phd\_YefM"  
"NT-E05\_00394" 24321 "s59E25H2" 0 "Phd\_YefM"  
"NT-E05\_00394" 24321 "s59E5H2" 0 "Phd\_YefM"  
"NT-E05\_00394" 24321 "s63E6H2" 0 "Phd\_YefM"  
"NT-E05\_00395" 24322 "s59E13H2" 0 "Pyruvate dehydrogenase E1 component subunit beta"  
"NT-E05\_00395" 24322 "s59E25H2" 0 "Pyruvate dehydrogenase E1 component subunit beta"  
"NT-E05\_00395" 24322 "s59E5H2" 0 "Pyruvate dehydrogenase E1 component subunit beta"  
"NT-E05\_00395" 24322 "s63E6H2" 0 "Pyruvate dehydrogenase E1 component subunit beta"  
"NT-E05\_00396" 24323 "s59E13H2" 0 "Arylsulfatase"  
"NT-E05\_00396" 24323 "s59E25H2" 0 "Arylsulfatase"  
"NT-E05\_00396" 24323 "s59E5H2" 0 "Arylsulfatase"  
"NT-E05\_00396" 24323 "s63E6H2" 0 "Arylsulfatase"  
"NT-E05\_00397" 24324 "s59E13H2" 0 "Arylsulfatase"  
"NT-E05\_00397" 24324 "s59E25H2" 0 "Arylsulfatase"  
"NT-E05\_00397" 24324 "s59E5H2" 0 "Arylsulfatase"  
"NT-E05\_00397" 24324 "s63E6H2" 0 "Arylsulfatase"  
"NT-E05\_00398" 24325 "s59E13H2" 0 "tRNA(fMet)-specific endonuclease VapC"  
"NT-E05\_00398" 24325 "s59E25H2" 0 "tRNA(fMet)-specific endonuclease VapC"  
"NT-E05\_00398" 24325 "s59E5H2" 0 "tRNA(fMet)-specific endonuclease VapC"  
"NT-E05\_00398" 24325 "s63E6H2" 0 "tRNA(fMet)-specific endonuclease VapC"  
"NT-E05\_00399" 24326 "s59E13H2" 0 "hypothetical protein"  
"NT-E05\_00399" 24326 "s59E25H2" 0 "hypothetical protein"  
"NT-E05\_00399" 24326 "s59E5H2" 0 "hypothetical protein"  
"NT-E05\_00399" 24326 "s63E6H2" 0 "hypothetical protein"  
"NT-E05\_00401" 24328 "s59E13H2" 0 "hypothetical protein"  
"NT-E05\_00401" 24328 "s59E25H2" 0 "hypothetical protein"  
"NT-E05\_00401" 24328 "s59E5H2" 0 "hypothetical protein"  
"NT-E05\_00401" 24328 "s63E6H2" 0 "hypothetical protein"  
"NT-E05\_00402" 24329 "s59E13H2" 0 "Sulfatase"  
"NT-E05\_00402" 24329 "s59E25H2" 0 "Sulfatase"  
"NT-E05\_00402" 24329 "s59E5H2" 0 "Sulfatase"  
"NT-E05\_00402" 24329 "s63E6H2" 0 "Sulfatase"  
"NT-E05\_00403" 24330 "s59E13H2" 0 "HEPN domain protein"  
"NT-E05\_00403" 24330 "s59E25H2" 0 "HEPN domain protein"  
"NT-E05\_00403" 24330 "s59E5H2" 0 "HEPN domain protein"  
"NT-E05\_00403" 24330 "s63E6H2" 0 "HEPN domain protein"  
"NT-E05\_00404" 24331 "s59E13H2" 0 "hypothetical protein"  
"NT-E05\_00404" 24331 "s59E25H2" 0 "hypothetical protein"  
"NT-E05\_00404" 24331 "s59E5H2" 0 "hypothetical protein"

"NT-E05\_00404" 24331 "s63E6H2" 0 "hypothetical protein"  
"NT-E05\_00405" 24332 "s59E13H2" 0 "Sulfate adenylyltransferase"  
"NT-E05\_00405" 24332 "s59E25H2" 0 "Sulfate adenylyltransferase"  
"NT-E05\_00405" 24332 "s59E5H2" 0 "Sulfate adenylyltransferase"  
"NT-E05\_00405" 24332 "s63E6H2" 0 "Sulfate adenylyltransferase"  
"NT-E05\_00406" 24333 "s59E13H2" 0 "Choline-sulfatase"  
"NT-E05\_00406" 24333 "s59E25H2" 0 "Choline-sulfatase"  
"NT-E05\_00406" 24333 "s59E5H2" 0 "Choline-sulfatase"  
"NT-E05\_00406" 24333 "s63E6H2" 0 "Choline-sulfatase"  
"NT-E05\_00407" 24334 "s59E13H2" 0 "sulfate adenylyltransferase subunit 2"  
"NT-E05\_00407" 24334 "s59E25H2" 0 "sulfate adenylyltransferase subunit 2"  
"NT-E05\_00407" 24334 "s59E5H2" 0.01788483 "sulfate adenylyltransferase subunit 2"  
"NT-E05\_00407" 24334 "s63E6H2" 0 "sulfate adenylyltransferase subunit 2"  
"NT-E05\_00409" 24336 "s59E13H2" 0 "Sodium-dependent dicarboxylate transporter SdcS"  
"NT-E05\_00409" 24336 "s59E25H2" 0 "Sodium-dependent dicarboxylate transporter SdcS"  
"NT-E05\_00409" 24336 "s59E5H2" 0 "Sodium-dependent dicarboxylate transporter SdcS"  
"NT-E05\_00409" 24336 "s63E6H2" 0 "Sodium-dependent dicarboxylate transporter SdcS"  
"NT-E05\_00410" 24337 "s59E13H2" 0 "Sulfate transporter family protein"  
"NT-E05\_00410" 24337 "s59E25H2" 0 "Sulfate transporter family protein"  
"NT-E05\_00410" 24337 "s59E5H2" 0 "Sulfate transporter family protein"  
"NT-E05\_00410" 24337 "s63E6H2" 0 "Sulfate transporter family protein"  
"NT-E05\_00411" 24338 "s59E13H2" 0 "Sulfite exporter TauE/SafE"  
"NT-E05\_00411" 24338 "s59E25H2" 0 "Sulfite exporter TauE/SafE"  
"NT-E05\_00411" 24338 "s59E5H2" 0 "Sulfite exporter TauE/SafE"  
"NT-E05\_00411" 24338 "s63E6H2" 0 "Sulfite exporter TauE/SafE"  
"NT-E05\_00412" 24339 "s59E13H2" 0 "Glutamate dehydrogenase"  
"NT-E05\_00412" 24339 "s59E25H2" 0 "Glutamate dehydrogenase"  
"NT-E05\_00412" 24339 "s59E5H2" 0.009191699 "Glutamate dehydrogenase"  
"NT-E05\_00412" 24339 "s63E6H2" 0.002338917 "Glutamate dehydrogenase"  
"NT-E05\_00413" 24340 "s59E13H2" 0 "Transposase DDE domain protein"  
"NT-E05\_00413" 24340 "s59E25H2" 0 "Transposase DDE domain protein"  
"NT-E05\_00413" 24340 "s59E5H2" 0.004672131 "Transposase DDE domain protein"  
"NT-E05\_00413" 24340 "s63E6H2" 0 "Transposase DDE domain protein"  
"NT-E05\_00414" 24341 "s59E13H2" 0 "hypothetical protein"  
"NT-E05\_00414" 24341 "s59E25H2" 0 "hypothetical protein"  
"NT-E05\_00414" 24341 "s59E5H2" 0.01083882 "hypothetical protein"  
"NT-E05\_00414" 24341 "s63E6H2" 0 "hypothetical protein"  
"NT-E05\_00415" 24342 "s59E13H2" 0 "hypothetical protein"  
"NT-E05\_00415" 24342 "s59E25H2" 0 "hypothetical protein"  
"NT-E05\_00415" 24342 "s59E5H2" 0.01447476 "hypothetical protein"  
"NT-E05\_00415" 24342 "s63E6H2" 0 "hypothetical protein"  
"NT-E05\_00416" 24343 "s59E13H2" 0 "hypothetical protein"  
"NT-E05\_00416" 24343 "s59E25H2" 0 "hypothetical protein"  
"NT-E05\_00416" 24343 "s59E5H2" 0 "hypothetical protein"  
"NT-E05\_00416" 24343 "s63E6H2" 0 "hypothetical protein"  
"NT-E05\_00417" 24344 "s59E13H2" 0 "Imidazole glycerol phosphate synthase subunit HisH 1"  
"NT-E05\_00417" 24344 "s59E25H2" 0 "Imidazole glycerol phosphate synthase subunit HisH 1"

"NT-E05\_00417" 24344 "s59E5H2" 0 "Imidazole glycerol phosphate synthase subunit HisH 1"  
"NT-E05\_00417" 24344 "s63E6H2" 0 "Imidazole glycerol phosphate synthase subunit HisH 1"  
"NT-E05\_00418" 24345 "s59E13H2" 0 "Imidazole glycerol phosphate synthase subunit HisF"  
"NT-E05\_00418" 24345 "s59E25H2" 0 "Imidazole glycerol phosphate synthase subunit HisF"  
"NT-E05\_00418" 24345 "s59E5H2" 0 "Imidazole glycerol phosphate synthase subunit HisF"  
"NT-E05\_00418" 24345 "s63E6H2" 0 "Imidazole glycerol phosphate synthase subunit HisF"  
"NT-E05\_00419" 24346 "s59E13H2" 0.001390166 "hypothetical protein"  
"NT-E05\_00419" 24346 "s59E25H2" 0 "hypothetical protein"  
"NT-E05\_00419" 24346 "s59E5H2" 0.004793613 "hypothetical protein"  
"NT-E05\_00419" 24346 "s63E6H2" 0.009112693 "hypothetical protein"  
"NT-E05\_00421" 24348 "s59E13H2" 0 "putative glutamine synthetase 2"  
"NT-E05\_00421" 24348 "s59E25H2" 0 "putative glutamine synthetase 2"  
"NT-E05\_00421" 24348 "s59E5H2" 0 "putative glutamine synthetase 2"  
"NT-E05\_00421" 24348 "s63E6H2" 0 "putative glutamine synthetase 2"  
"NT-E05\_00422" 24349 "s59E13H2" 0 "Possibl zinc metallo-peptidase"  
"NT-E05\_00422" 24349 "s59E25H2" 0 "Possibl zinc metallo-peptidase"  
"NT-E05\_00422" 24349 "s59E5H2" 0 "Possibl zinc metallo-peptidase"  
"NT-E05\_00422" 24349 "s63E6H2" 0 "Possibl zinc metallo-peptidase"  
"NT-E05\_00423" 24350 "s59E13H2" 0 "LOG family protein ORF6 in fasciation locus"  
"NT-E05\_00423" 24350 "s59E25H2" 0 "LOG family protein ORF6 in fasciation locus"  
"NT-E05\_00423" 24350 "s59E5H2" 0 "LOG family protein ORF6 in fasciation locus"  
"NT-E05\_00423" 24350 "s63E6H2" 0 "LOG family protein ORF6 in fasciation locus"  
"NT-E05\_00424" 24351 "s59E13H2" 0 "tRNA uridine 5-carboxymethylaminomethyl modification enzyme MnmG"  
"NT-E05\_00424" 24351 "s59E25H2" 0 "tRNA uridine 5-carboxymethylaminomethyl modification enzyme MnmG"  
"NT-E05\_00424" 24351 "s59E5H2" 0 "tRNA uridine 5-carboxymethylaminomethyl modification enzyme MnmG"  
"NT-E05\_00424" 24351 "s63E6H2" 0 "tRNA uridine 5-carboxymethylaminomethyl modification enzyme MnmG"  
"NT-E05\_00425" 24352 "s59E13H2" 0 "Epoxyqueuosine reductase"  
"NT-E05\_00425" 24352 "s59E25H2" 0 "Epoxyqueuosine reductase"  
"NT-E05\_00425" 24352 "s59E5H2" 0 "Epoxyqueuosine reductase"  
"NT-E05\_00425" 24352 "s63E6H2" 0 "Epoxyqueuosine reductase"  
"NT-E05\_00426" 24353 "s59E13H2" 0 "General stress protein 69"  
"NT-E05\_00426" 24353 "s59E25H2" 0 "General stress protein 69"  
"NT-E05\_00426" 24353 "s59E5H2" 0 "General stress protein 69"  
"NT-E05\_00426" 24353 "s63E6H2" 0 "General stress protein 69"  
"NT-E05\_00427" 24354 "s59E13H2" 0.0005060753 "Rhodopirellula transposase"  
"NT-E05\_00427" 24354 "s59E25H2" 0 "Rhodopirellula transposase"  
"NT-E05\_00427" 24354 "s59E5H2" 0 "Rhodopirellula transposase"  
"NT-E05\_00427" 24354 "s63E6H2" 0 "Rhodopirellula transposase"  
"NT-E05\_00428" 24355 "s59E13H2" 0.002908333 "hypothetical protein"  
"NT-E05\_00428" 24355 "s59E25H2" 0 "hypothetical protein"  
"NT-E05\_00428" 24355 "s59E5H2" 0.2909105 "hypothetical protein"  
"NT-E05\_00428" 24355 "s63E6H2" 0.02749901 "hypothetical protein"  
"NT-E05\_00429" 24356 "s59E13H2" 0.001531991 "Transposase DDE domain protein"  
"NT-E05\_00429" 24356 "s59E25H2" 0 "Transposase DDE domain protein"  
"NT-E05\_00429" 24356 "s59E5H2" 0.1631707 "Transposase DDE domain protein"  
"NT-E05\_00429" 24356 "s63E6H2" 0.02082349 "Transposase DDE domain protein"  
"NT-E05\_00431" 24358 "s59E13H2" 0 "methylcobalamin:coenzyme M methyltransferase"

"NT-E05\_00431" 24358 "s59E25H2" 0 "methylcobalamin:coenzyme M methyltransferase"  
"NT-E05\_00431" 24358 "s59E5H2" 0 "methylcobalamin:coenzyme M methyltransferase"  
"NT-E05\_00431" 24358 "s63E6H2" 0 "methylcobalamin:coenzyme M methyltransferase"  
"NT-E05\_00433" 24360 "s59E13H2" 0 "IS2 repressor TnpA"  
"NT-E05\_00433" 24360 "s59E25H2" 0 "IS2 repressor TnpA"  
"NT-E05\_00433" 24360 "s59E5H2" 0 "IS2 repressor TnpA"  
"NT-E05\_00433" 24360 "s63E6H2" 0 "IS2 repressor TnpA"  
"NT-E05\_00434" 24361 "s59E13H2" 0 "IS2 transposase TnpB"  
"NT-E05\_00434" 24361 "s59E25H2" 0 "IS2 transposase TnpB"  
"NT-E05\_00434" 24361 "s59E5H2" 0 "IS2 transposase TnpB"  
"NT-E05\_00434" 24361 "s63E6H2" 0.002638732 "IS2 transposase TnpB"  
"NT-E05\_00435" 24362 "s59E13H2" 0 "Replication initiator protein A"  
"NT-E05\_00435" 24362 "s59E25H2" 0 "Replication initiator protein A"  
"NT-E05\_00435" 24362 "s59E5H2" 0 "Replication initiator protein A"  
"NT-E05\_00435" 24362 "s63E6H2" 0 "Replication initiator protein A"  
"NT-E05\_00436" 24363 "s59E13H2" 0 "UDP-glucose 4-epimerase"  
"NT-E05\_00436" 24363 "s59E25H2" 0 "UDP-glucose 4-epimerase"  
"NT-E05\_00436" 24363 "s59E5H2" 0 "UDP-glucose 4-epimerase"  
"NT-E05\_00436" 24363 "s63E6H2" 0 "UDP-glucose 4-epimerase"  
"NT-E05\_00437" 24364 "s59E13H2" 0 "UDP-glucose 6-dehydrogenase TuaD"  
"NT-E05\_00437" 24364 "s59E25H2" 0 "UDP-glucose 6-dehydrogenase TuaD"  
"NT-E05\_00437" 24364 "s59E5H2" 0 "UDP-glucose 6-dehydrogenase TuaD"  
"NT-E05\_00437" 24364 "s63E6H2" 0 "UDP-glucose 6-dehydrogenase TuaD"  
"NT-E05\_00438" 24365 "s59E13H2" 0 "hypothetical protein"  
"NT-E05\_00438" 24365 "s59E25H2" 0 "hypothetical protein"  
"NT-E05\_00438" 24365 "s59E5H2" 0 "hypothetical protein"  
"NT-E05\_00438" 24365 "s63E6H2" 0 "hypothetical protein"  
"NT-E05\_00439" 24366 "s59E13H2" 0 "UDP-glucose 4-epimerase"  
"NT-E05\_00439" 24366 "s59E25H2" 0 "UDP-glucose 4-epimerase"  
"NT-E05\_00439" 24366 "s59E5H2" 0 "UDP-glucose 4-epimerase"  
"NT-E05\_00439" 24366 "s63E6H2" 0 "UDP-glucose 4-epimerase"  
"NT-E05\_00440" 24367 "s59E13H2" 0 "hypothetical protein"  
"NT-E05\_00440" 24367 "s59E25H2" 0 "hypothetical protein"  
"NT-E05\_00440" 24367 "s59E5H2" 0 "hypothetical protein"  
"NT-E05\_00440" 24367 "s63E6H2" 0 "hypothetical protein"  
"NT-E05\_00442" 24369 "s59E13H2" 0 "Bifunctional protein GlmU"  
"NT-E05\_00442" 24369 "s59E25H2" 0 "Bifunctional protein GlmU"  
"NT-E05\_00442" 24369 "s59E5H2" 0 "Bifunctional protein GlmU"  
"NT-E05\_00442" 24369 "s63E6H2" 0 "Bifunctional protein GlmU"  
"NT-E05\_00443" 24370 "s59E13H2" 0 "dTDP-glucose 4,6-dehydratase"  
"NT-E05\_00443" 24370 "s59E25H2" 0 "dTDP-glucose 4,6-dehydratase"  
"NT-E05\_00443" 24370 "s59E5H2" 0 "dTDP-glucose 4,6-dehydratase"  
"NT-E05\_00443" 24370 "s63E6H2" 0 "dTDP-glucose 4,6-dehydratase"  
"NT-E05\_00444" 24371 "s59E13H2" 0 "dTDP-4-dehydrorhamnose 3,5-epimerase"  
"NT-E05\_00444" 24371 "s59E25H2" 0 "dTDP-4-dehydrorhamnose 3,5-epimerase"  
"NT-E05\_00444" 24371 "s59E5H2" 0 "dTDP-4-dehydrorhamnose 3,5-epimerase"  
"NT-E05\_00444" 24371 "s63E6H2" 0 "dTDP-4-dehydrorhamnose 3,5-epimerase"

"NT-E05\_00445" 24372 "s59E13H2" 0 "Chain length determinant protein"  
"NT-E05\_00445" 24372 "s59E25H2" 0 "Chain length determinant protein"  
"NT-E05\_00445" 24372 "s59E5H2" 0 "Chain length determinant protein"  
"NT-E05\_00445" 24372 "s63E6H2" 0 "Chain length determinant protein"  
"NT-E05\_00446" 24373 "s59E13H2" 0 "Thermostable alkaline protease precursor"  
"NT-E05\_00446" 24373 "s59E25H2" 0 "Thermostable alkaline protease precursor"  
"NT-E05\_00446" 24373 "s59E5H2" 0 "Thermostable alkaline protease precursor"  
"NT-E05\_00446" 24373 "s63E6H2" 0 "Thermostable alkaline protease precursor"  
"NT-E05\_00447" 24374 "s59E13H2" 0 "hypothetical protein"  
"NT-E05\_00447" 24374 "s59E25H2" 0 "hypothetical protein"  
"NT-E05\_00447" 24374 "s59E5H2" 0 "hypothetical protein"  
"NT-E05\_00447" 24374 "s63E6H2" 0 "hypothetical protein"  
"NT-E05\_00448" 24375 "s59E13H2" 0 "dTDP-L-rhamnose 4-epimerase"  
"NT-E05\_00448" 24375 "s59E25H2" 0 "dTDP-L-rhamnose 4-epimerase"  
"NT-E05\_00448" 24375 "s59E5H2" 0 "dTDP-L-rhamnose 4-epimerase"  
"NT-E05\_00448" 24375 "s63E6H2" 0 "dTDP-L-rhamnose 4-epimerase"  
"NT-E05\_00449" 24376 "s59E13H2" 0 "D-inositol 3-phosphate glycosyltransferase"  
"NT-E05\_00449" 24376 "s59E25H2" 0 "D-inositol 3-phosphate glycosyltransferase"  
"NT-E05\_00449" 24376 "s59E5H2" 0 "D-inositol 3-phosphate glycosyltransferase"  
"NT-E05\_00449" 24376 "s63E6H2" 0 "D-inositol 3-phosphate glycosyltransferase"  
"NT-E05\_00450" 24377 "s59E13H2" 0 "dTDP-4-amino-4,6-dideoxy-D-glucose acyltransferase"  
"NT-E05\_00450" 24377 "s59E25H2" 0 "dTDP-4-amino-4,6-dideoxy-D-glucose acyltransferase"  
"NT-E05\_00450" 24377 "s59E5H2" 0 "dTDP-4-amino-4,6-dideoxy-D-glucose acyltransferase"  
"NT-E05\_00450" 24377 "s63E6H2" 0 "dTDP-4-amino-4,6-dideoxy-D-glucose acyltransferase"  
"NT-E05\_00451" 24378 "s59E13H2" 0 "hypothetical protein"  
"NT-E05\_00451" 24378 "s59E25H2" 0 "hypothetical protein"  
"NT-E05\_00451" 24378 "s59E5H2" 0 "hypothetical protein"  
"NT-E05\_00451" 24378 "s63E6H2" 0 "hypothetical protein"  
"NT-E05\_00453" 24380 "s59E13H2" 0 "putative S-adenosylmethionine-dependent methyltransferase/MSMEI\_2290"  
"NT-E05\_00453" 24380 "s59E25H2" 0 "putative S-adenosylmethionine-dependent methyltransferase/MSMEI\_2290"  
"NT-E05\_00453" 24380 "s59E5H2" 0 "putative S-adenosylmethionine-dependent methyltransferase/MSMEI\_2290"  
"NT-E05\_00453" 24380 "s63E6H2" 0 "putative S-adenosylmethionine-dependent methyltransferase/MSMEI\_2290"  
"NT-E05\_00454" 24381 "s59E13H2" 0 "hypothetical protein"  
"NT-E05\_00454" 24381 "s59E25H2" 0 "hypothetical protein"  
"NT-E05\_00454" 24381 "s59E5H2" 0 "hypothetical protein"  
"NT-E05\_00454" 24381 "s63E6H2" 0 "hypothetical protein"  
"NT-E05\_00455" 24382 "s59E13H2" 0 "bifunctional 3-demethylubiquinone-9 3-methyltransferase/ 2-octaprenyl-6-hydroxy phenol methylase"  
"NT-E05\_00455" 24382 "s59E25H2" 0 "bifunctional 3-demethylubiquinone-9 3-methyltransferase/ 2-octaprenyl-6-hydroxy phenol methylase"  
"NT-E05\_00455" 24382 "s59E5H2" 0 "bifunctional 3-demethylubiquinone-9 3-methyltransferase/ 2-octaprenyl-6-hydroxy phenol methylase"  
"NT-E05\_00455" 24382 "s63E6H2" 0 "bifunctional 3-demethylubiquinone-9 3-methyltransferase/ 2-octaprenyl-6-hydroxy phenol methylase"  
"NT-E05\_00456" 24383 "s59E13H2" 0 "putative 4-amino-4-deoxy-L-arabinose-phosphoundecaprenol flippase subunit ArnF"  
"NT-E05\_00456" 24383 "s59E25H2" 0 "putative 4-amino-4-deoxy-L-arabinose-phosphoundecaprenol flippase subunit ArnF"  
"NT-E05\_00456" 24383 "s59E5H2" 0 "putative 4-amino-4-deoxy-L-arabinose-phosphoundecaprenol flippase subunit ArnF"  
"NT-E05\_00456" 24383 "s63E6H2" 0 "putative 4-amino-4-deoxy-L-arabinose-phosphoundecaprenol flippase subunit ArnF"  
"NT-E05\_00457" 24384 "s59E13H2" 0 "Spore coat protein SA"  
"NT-E05\_00457" 24384 "s59E25H2" 0 "Spore coat protein SA"  
"NT-E05\_00457" 24384 "s59E5H2" 0 "Spore coat protein SA"



"NT-E05\_00457" 24384 "s63E6H2" 0 "Spore coat protein SA"  
"NT-E05\_00458" 24385 "s59E13H2" 0 "Undecaprenyl-phosphate mannosyltransferase"  
"NT-E05\_00458" 24385 "s59E25H2" 0 "Undecaprenyl-phosphate mannosyltransferase"  
"NT-E05\_00458" 24385 "s59E5H2" 0 "Undecaprenyl-phosphate mannosyltransferase"  
"NT-E05\_00458" 24385 "s63E6H2" 0 "Undecaprenyl-phosphate mannosyltransferase"  
"NT-E05\_00459" 24386 "s59E13H2" 0 "hypothetical protein"  
"NT-E05\_00459" 24386 "s59E25H2" 0 "hypothetical protein"  
"NT-E05\_00459" 24386 "s59E5H2" 0 "hypothetical protein"  
"NT-E05\_00459" 24386 "s63E6H2" 0 "hypothetical protein"  
"NT-E05\_00460" 24387 "s59E13H2" 0 "Ribosomal protein S12 methylthiotransferase RimO"  
"NT-E05\_00460" 24387 "s59E25H2" 0 "Ribosomal protein S12 methylthiotransferase RimO"  
"NT-E05\_00460" 24387 "s59E5H2" 0 "Ribosomal protein S12 methylthiotransferase RimO"  
"NT-E05\_00460" 24387 "s63E6H2" 0 "Ribosomal protein S12 methylthiotransferase RimO"  
"NT-E05\_00461" 24388 "s59E13H2" 0 "hypothetical protein"  
"NT-E05\_00461" 24388 "s59E25H2" 0 "hypothetical protein"  
"NT-E05\_00461" 24388 "s59E5H2" 0 "hypothetical protein"  
"NT-E05\_00461" 24388 "s63E6H2" 0.03805252 "hypothetical protein"  
"NT-E05\_00462" 24389 "s59E13H2" 0 "D,D-heptose 1,7-bisphosphate phosphatase"  
"NT-E05\_00462" 24389 "s59E25H2" 0 "D,D-heptose 1,7-bisphosphate phosphatase"  
"NT-E05\_00462" 24389 "s59E5H2" 0 "D,D-heptose 1,7-bisphosphate phosphatase"  
"NT-E05\_00462" 24389 "s63E6H2" 0 "D,D-heptose 1,7-bisphosphate phosphatase"  
"NT-E05\_00463" 24390 "s59E13H2" 0 "Undecaprenyl-phosphate 4-deoxy-4-formamido-L-arabinose transferase"  
"NT-E05\_00463" 24390 "s59E25H2" 0 "Undecaprenyl-phosphate 4-deoxy-4-formamido-L-arabinose transferase"  
"NT-E05\_00463" 24390 "s59E5H2" 0 "Undecaprenyl-phosphate 4-deoxy-4-formamido-L-arabinose transferase"  
"NT-E05\_00463" 24390 "s63E6H2" 0 "Undecaprenyl-phosphate 4-deoxy-4-formamido-L-arabinose transferase"  
"NT-E05\_00464" 24391 "s59E13H2" 0 "PA14 domain protein"  
"NT-E05\_00464" 24391 "s59E25H2" 0 "PA14 domain protein"  
"NT-E05\_00464" 24391 "s59E5H2" 0 "PA14 domain protein"  
"NT-E05\_00464" 24391 "s63E6H2" 0 "PA14 domain protein"  
"NT-E05\_00465" 24392 "s59E13H2" 0 "hypothetical protein"  
"NT-E05\_00465" 24392 "s59E25H2" 0 "hypothetical protein"  
"NT-E05\_00465" 24392 "s59E5H2" 0 "hypothetical protein"  
"NT-E05\_00465" 24392 "s63E6H2" 0 "hypothetical protein"  
"NT-E05\_00466" 24393 "s59E13H2" 0 "UDP-N-acetylglucosamine 2-epimerase"  
"NT-E05\_00466" 24393 "s59E25H2" 0 "UDP-N-acetylglucosamine 2-epimerase"  
"NT-E05\_00466" 24393 "s59E5H2" 0 "UDP-N-acetylglucosamine 2-epimerase"  
"NT-E05\_00466" 24393 "s63E6H2" 0 "UDP-N-acetylglucosamine 2-epimerase"  
"NT-E05\_00467" 24394 "s59E13H2" 0 "hypothetical protein"  
"NT-E05\_00467" 24394 "s59E25H2" 0 "hypothetical protein"  
"NT-E05\_00467" 24394 "s59E5H2" 0 "hypothetical protein"  
"NT-E05\_00467" 24394 "s63E6H2" 0 "hypothetical protein"  
"NT-E05\_00468" 24395 "s59E13H2" 0 "dTDP-glucose 4,6-dehydratase"  
"NT-E05\_00468" 24395 "s59E25H2" 0 "dTDP-glucose 4,6-dehydratase"  
"NT-E05\_00468" 24395 "s59E5H2" 0 "dTDP-glucose 4,6-dehydratase"  
"NT-E05\_00468" 24395 "s63E6H2" 0 "dTDP-glucose 4,6-dehydratase"  
"NT-E05\_00469" 24396 "s59E13H2" 0 "UDP-glucose 4-epimerase"  
"NT-E05\_00469" 24396 "s59E25H2" 0 "UDP-glucose 4-epimerase"

"NT-E05\_00469" 24396 "s59E5H2" 0 "UDP-glucose 4-epimerase"  
"NT-E05\_00469" 24396 "s63E6H2" 0 "UDP-glucose 4-epimerase"  
"NT-E05\_00470" 24397 "s59E13H2" 0 "Putative teichuronic acid biosynthesis glycosyltransferase TuaH"  
"NT-E05\_00470" 24397 "s59E25H2" 0 "Putative teichuronic acid biosynthesis glycosyltransferase TuaH"  
"NT-E05\_00470" 24397 "s59E5H2" 0 "Putative teichuronic acid biosynthesis glycosyltransferase TuaH"  
"NT-E05\_00470" 24397 "s63E6H2" 0 "Putative teichuronic acid biosynthesis glycosyltransferase TuaH"  
"NT-E05\_00471" 24398 "s59E13H2" 0 "Glycosyltransferase AgIJ"  
"NT-E05\_00471" 24398 "s59E25H2" 0 "Glycosyltransferase AgIJ"  
"NT-E05\_00471" 24398 "s59E5H2" 0.01241908 "Glycosyltransferase AgIJ"  
"NT-E05\_00471" 24398 "s63E6H2" 0 "Glycosyltransferase AgIJ"  
"NT-E05\_00472" 24399 "s59E13H2" 0 "hypothetical protein"  
"NT-E05\_00472" 24399 "s59E25H2" 0 "hypothetical protein"  
"NT-E05\_00472" 24399 "s59E5H2" 0 "hypothetical protein"  
"NT-E05\_00472" 24399 "s63E6H2" 0 "hypothetical protein"  
"NT-E05\_00473" 24400 "s59E13H2" 0 "Asparagine--tRNA ligase"  
"NT-E05\_00473" 24400 "s59E25H2" 0 "Asparagine--tRNA ligase"  
"NT-E05\_00473" 24400 "s59E5H2" 0 "Asparagine--tRNA ligase"  
"NT-E05\_00473" 24400 "s63E6H2" 0 "Asparagine--tRNA ligase"  
"NT-E05\_00474" 24401 "s59E13H2" 0 "L-allo-threonine aldolase"  
"NT-E05\_00474" 24401 "s59E25H2" 0 "L-allo-threonine aldolase"  
"NT-E05\_00474" 24401 "s59E5H2" 0 "L-allo-threonine aldolase"  
"NT-E05\_00474" 24401 "s63E6H2" 0 "L-allo-threonine aldolase"  
"NT-E05\_00475" 24402 "s59E13H2" 0 "Copper-transporting P-type ATPase"  
"NT-E05\_00475" 24402 "s59E25H2" 0 "Copper-transporting P-type ATPase"  
"NT-E05\_00475" 24402 "s59E5H2" 0 "Copper-transporting P-type ATPase"  
"NT-E05\_00475" 24402 "s63E6H2" 0 "Copper-transporting P-type ATPase"  
"NT-E05\_00476" 24403 "s59E13H2" 0 "Archaeal ATPase"  
"NT-E05\_00476" 24403 "s59E25H2" 0 "Archaeal ATPase"  
"NT-E05\_00476" 24403 "s59E5H2" 0 "Archaeal ATPase"  
"NT-E05\_00476" 24403 "s63E6H2" 0.001509999 "Archaeal ATPase"  
"NT-E05\_00477" 24404 "s59E13H2" 0 "hypothetical protein"  
"NT-E05\_00477" 24404 "s59E25H2" 0 "hypothetical protein"  
"NT-E05\_00477" 24404 "s59E5H2" 0 "hypothetical protein"  
"NT-E05\_00477" 24404 "s63E6H2" 0 "hypothetical protein"  
"NT-E05\_00478" 24405 "s59E13H2" 0 "ComEC family competence protein"  
"NT-E05\_00478" 24405 "s59E25H2" 0 "ComEC family competence protein"  
"NT-E05\_00478" 24405 "s59E5H2" 0 "ComEC family competence protein"  
"NT-E05\_00478" 24405 "s63E6H2" 0 "ComEC family competence protein"  
"NT-E05\_00479" 24406 "s59E13H2" 0 "Transposase"  
"NT-E05\_00479" 24406 "s59E25H2" 0 "Transposase"  
"NT-E05\_00479" 24406 "s59E5H2" 0.006860848 "Transposase"  
"NT-E05\_00479" 24406 "s63E6H2" 0 "Transposase"  
"NT-E05\_00480" 24407 "s59E13H2" 0.04134058 "hypothetical protein"  
"NT-E05\_00480" 24407 "s59E25H2" 0 "hypothetical protein"  
"NT-E05\_00480" 24407 "s59E5H2" 0.02106609 "hypothetical protein"  
"NT-E05\_00480" 24407 "s63E6H2" 0 "hypothetical protein"  
"NT-E05\_00481" 24408 "s59E13H2" 0.0421805 "hypothetical protein"

"NT-E05\_00481" 24408 "s59E25H2" 0 "hypothetical protein"  
"NT-E05\_00481" 24408 "s59E5H2" 0.02910299 "hypothetical protein"  
"NT-E05\_00481" 24408 "s63E6H2" 0 "hypothetical protein"  
"NT-E05\_00482" 24409 "s59E13H2" 0 "Transposase IS116/IS110/IS902 family protein"  
"NT-E05\_00482" 24409 "s59E25H2" 0 "Transposase IS116/IS110/IS902 family protein"  
"NT-E05\_00482" 24409 "s59E5H2" 0 "Transposase IS116/IS110/IS902 family protein"  
"NT-E05\_00482" 24409 "s63E6H2" 0 "Transposase IS116/IS110/IS902 family protein"  
"NT-E05\_00483" 24410 "s59E13H2" 0 "UTP--glucose-1-phosphate uridylyltransferase"  
"NT-E05\_00483" 24410 "s59E25H2" 0 "UTP--glucose-1-phosphate uridylyltransferase"  
"NT-E05\_00483" 24410 "s59E5H2" 0 "UTP--glucose-1-phosphate uridylyltransferase"  
"NT-E05\_00483" 24410 "s63E6H2" 0 "UTP--glucose-1-phosphate uridylyltransferase"  
"NT-E05\_00484" 24411 "s59E13H2" 0 "Replication-associated recombination protein A"  
"NT-E05\_00484" 24411 "s59E25H2" 0 "Replication-associated recombination protein A"  
"NT-E05\_00484" 24411 "s59E5H2" 0 "Replication-associated recombination protein A"  
"NT-E05\_00484" 24411 "s63E6H2" 0 "Replication-associated recombination protein A"  
"NT-E05\_00486" 24413 "s59E13H2" 0 "TPR repeat-containing protein YfgC precursor"  
"NT-E05\_00486" 24413 "s59E25H2" 0 "TPR repeat-containing protein YfgC precursor"  
"NT-E05\_00486" 24413 "s59E5H2" 0 "TPR repeat-containing protein YfgC precursor"  
"NT-E05\_00486" 24413 "s63E6H2" 0 "TPR repeat-containing protein YfgC precursor"  
"NT-E05\_00487" 24414 "s59E13H2" 0 "Lipase 1 precursor"  
"NT-E05\_00487" 24414 "s59E25H2" 0 "Lipase 1 precursor"  
"NT-E05\_00487" 24414 "s59E5H2" 0 "Lipase 1 precursor"  
"NT-E05\_00487" 24414 "s63E6H2" 0 "Lipase 1 precursor"  
"NT-E05\_00488" 24415 "s59E13H2" 0 "Pyruvate dehydrogenase E1 component subunit beta"  
"NT-E05\_00488" 24415 "s59E25H2" 0 "Pyruvate dehydrogenase E1 component subunit beta"  
"NT-E05\_00488" 24415 "s59E5H2" 0 "Pyruvate dehydrogenase E1 component subunit beta"  
"NT-E05\_00488" 24415 "s63E6H2" 0 "Pyruvate dehydrogenase E1 component subunit beta"  
"NT-E05\_00489" 24416 "s59E13H2" 0 "putative methyltransferase YcgJ"  
"NT-E05\_00489" 24416 "s59E25H2" 0 "putative methyltransferase YcgJ"  
"NT-E05\_00489" 24416 "s59E5H2" 0 "putative methyltransferase YcgJ"  
"NT-E05\_00489" 24416 "s63E6H2" 0 "putative methyltransferase YcgJ"  
"NT-E05\_00491" 24418 "s59E13H2" 0 "hypothetical protein"  
"NT-E05\_00491" 24418 "s59E25H2" 0 "hypothetical protein"  
"NT-E05\_00491" 24418 "s59E5H2" 0 "hypothetical protein"  
"NT-E05\_00491" 24418 "s63E6H2" 0 "hypothetical protein"  
"NT-E05\_00492" 24419 "s59E13H2" 0 "hypothetical protein"  
"NT-E05\_00492" 24419 "s59E25H2" 0 "hypothetical protein"  
"NT-E05\_00492" 24419 "s59E5H2" 0 "hypothetical protein"  
"NT-E05\_00492" 24419 "s63E6H2" 0 "hypothetical protein"  
"NT-E05\_00493" 24420 "s59E13H2" 0 "hypothetical protein"  
"NT-E05\_00493" 24420 "s59E25H2" 0 "hypothetical protein"  
"NT-E05\_00493" 24420 "s59E5H2" 0 "hypothetical protein"  
"NT-E05\_00493" 24420 "s63E6H2" 0 "hypothetical protein"  
"NT-E05\_00494" 24421 "s59E13H2" 0 "Prefoldin subunit"  
"NT-E05\_00494" 24421 "s59E25H2" 0 "Prefoldin subunit"  
"NT-E05\_00494" 24421 "s59E5H2" 0 "Prefoldin subunit"  
"NT-E05\_00494" 24421 "s63E6H2" 0 "Prefoldin subunit"

"NT-E05\_00496" 24423 "s59E13H2" 0 "hypothetical protein"  
"NT-E05\_00496" 24423 "s59E25H2" 0 "hypothetical protein"  
"NT-E05\_00496" 24423 "s59E5H2" 0 "hypothetical protein"  
"NT-E05\_00496" 24423 "s63E6H2" 0 "hypothetical protein"  
"NT-E05\_00497" 24424 "s59E13H2" 0 "hypothetical protein"  
"NT-E05\_00497" 24424 "s59E25H2" 0 "hypothetical protein"  
"NT-E05\_00497" 24424 "s59E5H2" 0 "hypothetical protein"  
"NT-E05\_00497" 24424 "s63E6H2" 0.004373988 "hypothetical protein"  
"NT-E05\_00498" 24425 "s59E13H2" 0 "hypothetical protein"  
"NT-E05\_00498" 24425 "s59E25H2" 0 "hypothetical protein"  
"NT-E05\_00498" 24425 "s59E5H2" 0 "hypothetical protein"  
"NT-E05\_00498" 24425 "s63E6H2" 0 "hypothetical protein"  
"NT-E05\_00499" 24426 "s59E13H2" 0 "RNA recognition motif. (a.k.a. RRM, RBD, or RNP domain)"  
"NT-E05\_00499" 24426 "s59E25H2" 0 "RNA recognition motif. (a.k.a. RRM, RBD, or RNP domain)"  
"NT-E05\_00499" 24426 "s59E5H2" 0 "RNA recognition motif. (a.k.a. RRM, RBD, or RNP domain)"  
"NT-E05\_00499" 24426 "s63E6H2" 0.00384705 "RNA recognition motif. (a.k.a. RRM, RBD, or RNP domain)"  
"NT-E05\_00500" 24427 "s59E13H2" 0 "hypothetical protein"  
"NT-E05\_00500" 24427 "s59E25H2" 0 "hypothetical protein"  
"NT-E05\_00500" 24427 "s59E5H2" 0 "hypothetical protein"  
"NT-E05\_00500" 24427 "s63E6H2" 0 "hypothetical protein"  
"NT-E05\_00501" 24428 "s59E13H2" 0 "hypothetical protein"  
"NT-E05\_00501" 24428 "s59E25H2" 0 "hypothetical protein"  
"NT-E05\_00501" 24428 "s59E5H2" 0 "hypothetical protein"  
"NT-E05\_00501" 24428 "s63E6H2" 0 "hypothetical protein"  
"NT-E05\_00502" 24429 "s59E13H2" 0 "putative carboxylesterase nap"  
"NT-E05\_00502" 24429 "s59E25H2" 0 "putative carboxylesterase nap"  
"NT-E05\_00502" 24429 "s59E5H2" 0 "putative carboxylesterase nap"  
"NT-E05\_00502" 24429 "s63E6H2" 0 "putative carboxylesterase nap"  
"NT-E05\_00503" 24430 "s59E13H2" 0 "putative ABC transporter ATP-binding protein Yjjk"  
"NT-E05\_00503" 24430 "s59E25H2" 0 "putative ABC transporter ATP-binding protein Yjjk"  
"NT-E05\_00503" 24430 "s59E5H2" 0 "putative ABC transporter ATP-binding protein Yjjk"  
"NT-E05\_00503" 24430 "s63E6H2" 0.008536738 "putative ABC transporter ATP-binding protein Yjjk"  
"NT-E05\_00505" 24432 "s59E13H2" 0 "SprT-like family protein"  
"NT-E05\_00505" 24432 "s59E25H2" 0 "SprT-like family protein"  
"NT-E05\_00505" 24432 "s59E5H2" 0.02488978 "SprT-like family protein"  
"NT-E05\_00505" 24432 "s63E6H2" 0.09468195 "SprT-like family protein"  
"NT-E05\_00506" 24433 "s59E13H2" 0 "PD-(D/E)XK nuclease superfamily protein"  
"NT-E05\_00506" 24433 "s59E25H2" 0 "PD-(D/E)XK nuclease superfamily protein"  
"NT-E05\_00506" 24433 "s59E5H2" 0 "PD-(D/E)XK nuclease superfamily protein"  
"NT-E05\_00506" 24433 "s63E6H2" 0 "PD-(D/E)XK nuclease superfamily protein"  
"NT-E05\_00507" 24434 "s59E13H2" 0 "ATP-dependent helicase/nuclease subunit A"  
"NT-E05\_00507" 24434 "s59E25H2" 0 "ATP-dependent helicase/nuclease subunit A"  
"NT-E05\_00507" 24434 "s59E5H2" 0 "ATP-dependent helicase/nuclease subunit A"  
"NT-E05\_00507" 24434 "s63E6H2" 0.0009448975 "ATP-dependent helicase/nuclease subunit A"  
"NT-E05\_00508" 24435 "s59E13H2" 0 "PD-(D/E)XK nuclease superfamily protein"  
"NT-E05\_00508" 24435 "s59E25H2" 0 "PD-(D/E)XK nuclease superfamily protein"  
"NT-E05\_00508" 24435 "s59E5H2" 0.6549716 "PD-(D/E)XK nuclease superfamily protein"

"NT-E05\_00508" 24435 "s63E6H2" 0.001935817 "PD-(D/E)XK nuclease superfamily protein"  
"NT-E05\_00509" 24436 "s59E13H2" 0 "hypothetical protein"  
"NT-E05\_00509" 24436 "s59E25H2" 0 "hypothetical protein"  
"NT-E05\_00509" 24436 "s59E5H2" 0 "hypothetical protein"  
"NT-E05\_00509" 24436 "s63E6H2" 0 "hypothetical protein"  
"NT-E05\_00510" 24437 "s59E13H2" 0 "Type I restriction enzyme EcoR124II R protein"  
"NT-E05\_00510" 24437 "s59E25H2" 0 "Type I restriction enzyme EcoR124II R protein"  
"NT-E05\_00510" 24437 "s59E5H2" 0 "Type I restriction enzyme EcoR124II R protein"  
"NT-E05\_00510" 24437 "s63E6H2" 0 "Type I restriction enzyme EcoR124II R protein"  
"NT-E05\_00511" 24438 "s59E13H2" 0 "Type-1 restriction enzyme MjaXIP specificity protein"  
"NT-E05\_00511" 24438 "s59E25H2" 0 "Type-1 restriction enzyme MjaXIP specificity protein"  
"NT-E05\_00511" 24438 "s59E5H2" 0 "Type-1 restriction enzyme MjaXIP specificity protein"  
"NT-E05\_00511" 24438 "s63E6H2" 0 "Type-1 restriction enzyme MjaXIP specificity protein"  
"NT-E05\_00512" 24439 "s59E13H2" 0 "hypothetical protein"  
"NT-E05\_00512" 24439 "s59E25H2" 0 "hypothetical protein"  
"NT-E05\_00512" 24439 "s59E5H2" 0 "hypothetical protein"  
"NT-E05\_00512" 24439 "s63E6H2" 0 "hypothetical protein"  
"NT-E05\_00513" 24440 "s59E13H2" 0 "hypothetical protein"  
"NT-E05\_00513" 24440 "s59E25H2" 0 "hypothetical protein"  
"NT-E05\_00513" 24440 "s59E5H2" 0 "hypothetical protein"  
"NT-E05\_00513" 24440 "s63E6H2" 0 "hypothetical protein"  
"NT-E05\_00514" 24441 "s59E13H2" 0 "putative type I restriction enzymeP M protein"  
"NT-E05\_00514" 24441 "s59E25H2" 0 "putative type I restriction enzymeP M protein"  
"NT-E05\_00514" 24441 "s59E5H2" 0 "putative type I restriction enzymeP M protein"  
"NT-E05\_00514" 24441 "s63E6H2" 0 "putative type I restriction enzymeP M protein"  
"NT-E05\_00515" 24442 "s59E13H2" 0 "Helix-turn-helix"  
"NT-E05\_00515" 24442 "s59E25H2" 0 "Helix-turn-helix"  
"NT-E05\_00515" 24442 "s59E5H2" 0 "Helix-turn-helix"  
"NT-E05\_00515" 24442 "s63E6H2" 0 "Helix-turn-helix"  
"NT-E05\_00520" 24447 "s59E13H2" 0 "Ribbon-helix-helix protein, copG family"  
"NT-E05\_00520" 24447 "s59E25H2" 0 "Ribbon-helix-helix protein, copG family"  
"NT-E05\_00520" 24447 "s59E5H2" 0 "Ribbon-helix-helix protein, copG family"  
"NT-E05\_00520" 24447 "s63E6H2" 0.0001654228 "Ribbon-helix-helix protein, copG family"  
"NT-E05\_00522" 24449 "s59E13H2" 0 "Membrane-bound lytic murein transglycosylase A precursor"  
"NT-E05\_00522" 24449 "s59E25H2" 0 "Membrane-bound lytic murein transglycosylase A precursor"  
"NT-E05\_00522" 24449 "s59E5H2" 0 "Membrane-bound lytic murein transglycosylase A precursor"  
"NT-E05\_00522" 24449 "s63E6H2" 0 "Membrane-bound lytic murein transglycosylase A precursor"  
"NT-E05\_00523" 24450 "s59E13H2" 0 "Dimethylamine corrinoid protein"  
"NT-E05\_00523" 24450 "s59E25H2" 0 "Dimethylamine corrinoid protein"  
"NT-E05\_00523" 24450 "s59E5H2" 0 "Dimethylamine corrinoid protein"  
"NT-E05\_00523" 24450 "s63E6H2" 0 "Dimethylamine corrinoid protein"  
"NT-E05\_00524" 24451 "s59E13H2" 0 "putative 5-formyltetrahydrofolate cyclo-ligase"  
"NT-E05\_00524" 24451 "s59E25H2" 0 "putative 5-formyltetrahydrofolate cyclo-ligase"  
"NT-E05\_00524" 24451 "s59E5H2" 0 "putative 5-formyltetrahydrofolate cyclo-ligase"  
"NT-E05\_00524" 24451 "s63E6H2" 0 "putative 5-formyltetrahydrofolate cyclo-ligase"  
"NT-E05\_00525" 24452 "s59E13H2" 0 "Methenyltetrahydrofolate cyclohydrolase"  
"NT-E05\_00525" 24452 "s59E25H2" 0 "Methenyltetrahydrofolate cyclohydrolase"

"NT-E05\_00525" 24452 "s59E5H2" 0 "Methenyltetrahydrofolate cyclohydrolase"  
"NT-E05\_00525" 24452 "s63E6H2" 0 "Methenyltetrahydrofolate cyclohydrolase"  
"NT-E05\_00526" 24453 "s59E13H2" 0 "undecaprenyldiphospho-muramoylpentapeptide beta-N- acetylglucosaminyltransferase"  
"NT-E05\_00526" 24453 "s59E25H2" 0 "undecaprenyldiphospho-muramoylpentapeptide beta-N- acetylglucosaminyltransferase"  
"NT-E05\_00526" 24453 "s59E5H2" 0.0002732314 "undecaprenyldiphospho-muramoylpentapeptide beta-N- acetylglucosaminyltransferase"  
"NT-E05\_00526" 24453 "s63E6H2" 0 "undecaprenyldiphospho-muramoylpentapeptide beta-N- acetylglucosaminyltransferase"  
"NT-E05\_00527" 24454 "s59E13H2" 0 "hypothetical protein"  
"NT-E05\_00527" 24454 "s59E25H2" 0 "hypothetical protein"  
"NT-E05\_00527" 24454 "s59E5H2" 0.007742917 "hypothetical protein"  
"NT-E05\_00527" 24454 "s63E6H2" 0 "hypothetical protein"  
"NT-E05\_00528" 24455 "s59E13H2" 0 "Alpha-D-kanosaminyltransferase"  
"NT-E05\_00528" 24455 "s59E25H2" 0 "Alpha-D-kanosaminyltransferase"  
"NT-E05\_00528" 24455 "s59E5H2" 0 "Alpha-D-kanosaminyltransferase"  
"NT-E05\_00528" 24455 "s63E6H2" 0 "Alpha-D-kanosaminyltransferase"  
"NT-E05\_00529" 24456 "s59E13H2" 0 "6-carboxy-5,6,7,8-tetrahydropterin synthase"  
"NT-E05\_00529" 24456 "s59E25H2" 0 "6-carboxy-5,6,7,8-tetrahydropterin synthase"  
"NT-E05\_00529" 24456 "s59E5H2" 0 "6-carboxy-5,6,7,8-tetrahydropterin synthase"  
"NT-E05\_00529" 24456 "s63E6H2" 0 "6-carboxy-5,6,7,8-tetrahydropterin synthase"  
"NT-E05\_00530" 24457 "s59E13H2" 0 "3-hexulose-6-phosphate synthase"  
"NT-E05\_00530" 24457 "s59E25H2" 0 "3-hexulose-6-phosphate synthase"  
"NT-E05\_00530" 24457 "s59E5H2" 0 "3-hexulose-6-phosphate synthase"  
"NT-E05\_00530" 24457 "s63E6H2" 0 "3-hexulose-6-phosphate synthase"  
"NT-E05\_00531" 24458 "s59E13H2" 0 "Magnesium transporter MgtE"  
"NT-E05\_00531" 24458 "s59E25H2" 0 "Magnesium transporter MgtE"  
"NT-E05\_00531" 24458 "s59E5H2" 0 "Magnesium transporter MgtE"  
"NT-E05\_00531" 24458 "s63E6H2" 0 "Magnesium transporter MgtE"  
"NT-E05\_00532" 24459 "s59E13H2" 0 "Sodium/hydrogen exchanger family protein"  
"NT-E05\_00532" 24459 "s59E25H2" 0 "Sodium/hydrogen exchanger family protein"  
"NT-E05\_00532" 24459 "s59E5H2" 0 "Sodium/hydrogen exchanger family protein"  
"NT-E05\_00532" 24459 "s63E6H2" 0 "Sodium/hydrogen exchanger family protein"  
"NT-E05\_00534" 24461 "s59E13H2" 0 "Sodium/hydrogen exchanger family protein"  
"NT-E05\_00534" 24461 "s59E25H2" 0 "Sodium/hydrogen exchanger family protein"  
"NT-E05\_00534" 24461 "s59E5H2" 0 "Sodium/hydrogen exchanger family protein"  
"NT-E05\_00534" 24461 "s63E6H2" 0 "Sodium/hydrogen exchanger family protein"  
"NT-E05\_00535" 24462 "s59E13H2" 0 "hypothetical protein"  
"NT-E05\_00535" 24462 "s59E25H2" 0 "hypothetical protein"  
"NT-E05\_00535" 24462 "s59E5H2" 0 "hypothetical protein"  
"NT-E05\_00535" 24462 "s63E6H2" 0 "hypothetical protein"  
"NT-E05\_00536" 24463 "s59E13H2" 0 "Hemolysin C"  
"NT-E05\_00536" 24463 "s59E25H2" 0 "Hemolysin C"  
"NT-E05\_00536" 24463 "s59E5H2" 0.02617559 "Hemolysin C"  
"NT-E05\_00536" 24463 "s63E6H2" 0 "Hemolysin C"  
"NT-E05\_00537" 24464 "s59E13H2" 0 "Ribose-5-phosphate isomerase B"  
"NT-E05\_00537" 24464 "s59E25H2" 0 "Ribose-5-phosphate isomerase B"  
"NT-E05\_00537" 24464 "s59E5H2" 0.02107883 "Ribose-5-phosphate isomerase B"  
"NT-E05\_00537" 24464 "s63E6H2" 0 "Ribose-5-phosphate isomerase B"  
"NT-E05\_00538" 24465 "s59E13H2" 0 "GTPase HflX"

"NT-E05\_00538" 24465 "s59E25H2" 0 "GTPase HflX"  
"NT-E05\_00538" 24465 "s59E5H2" 0 "GTPase HflX"  
"NT-E05\_00538" 24465 "s63E6H2" 0 "GTPase HflX"  
"NT-E05\_00539" 24466 "s59E13H2" 0 "Intracellular protease 1"  
"NT-E05\_00539" 24466 "s59E25H2" 0 "Intracellular protease 1"  
"NT-E05\_00539" 24466 "s59E5H2" 0 "Intracellular protease 1"  
"NT-E05\_00539" 24466 "s63E6H2" 0 "Intracellular protease 1"  
"NT-E05\_00540" 24467 "s59E13H2" 0 "Transketolase"  
"NT-E05\_00540" 24467 "s59E25H2" 0 "Transketolase"  
"NT-E05\_00540" 24467 "s59E5H2" 0.02878995 "Transketolase"  
"NT-E05\_00540" 24467 "s63E6H2" 0 "Transketolase"  
"NT-E05\_00541" 24468 "s59E13H2" 0 "Ferredoxin"  
"NT-E05\_00541" 24468 "s59E25H2" 0 "Ferredoxin"  
"NT-E05\_00541" 24468 "s59E5H2" 0 "Ferredoxin"  
"NT-E05\_00541" 24468 "s63E6H2" 0 "Ferredoxin"  
"NT-E05\_00542" 24469 "s59E13H2" 0 "Undecaprenyl-diphosphatase"  
"NT-E05\_00542" 24469 "s59E25H2" 0 "Undecaprenyl-diphosphatase"  
"NT-E05\_00542" 24469 "s59E5H2" 0 "Undecaprenyl-diphosphatase"  
"NT-E05\_00542" 24469 "s63E6H2" 0 "Undecaprenyl-diphosphatase"  
"NT-E05\_00543" 24470 "s59E13H2" 0 "Acyl-[acyl-carrier-protein]--UDP-N-acetylglucosamine O-acyltransferase"  
"NT-E05\_00543" 24470 "s59E25H2" 0 "Acyl-[acyl-carrier-protein]--UDP-N-acetylglucosamine O-acyltransferase"  
"NT-E05\_00543" 24470 "s59E5H2" 0 "Acyl-[acyl-carrier-protein]--UDP-N-acetylglucosamine O-acyltransferase"  
"NT-E05\_00543" 24470 "s63E6H2" 0 "Acyl-[acyl-carrier-protein]--UDP-N-acetylglucosamine O-acyltransferase"  
"NT-E05\_00544" 24471 "s59E13H2" 0 "Adenylosuccinate lyase"  
"NT-E05\_00544" 24471 "s59E25H2" 0 "Adenylosuccinate lyase"  
"NT-E05\_00544" 24471 "s59E5H2" 0 "Adenylosuccinate lyase"  
"NT-E05\_00544" 24471 "s63E6H2" 0 "Adenylosuccinate lyase"  
"NT-E05\_00545" 24472 "s59E13H2" 0 "Argininosuccinate synthase"  
"NT-E05\_00545" 24472 "s59E25H2" 0 "Argininosuccinate synthase"  
"NT-E05\_00545" 24472 "s59E5H2" 0.00675152 "Argininosuccinate synthase"  
"NT-E05\_00545" 24472 "s63E6H2" 0 "Argininosuccinate synthase"  
"NT-E05\_00546" 24473 "s59E13H2" 0 "Ornithine carbamoyltransferase"  
"NT-E05\_00546" 24473 "s59E25H2" 0 "Ornithine carbamoyltransferase"  
"NT-E05\_00546" 24473 "s59E5H2" 0 "Ornithine carbamoyltransferase"  
"NT-E05\_00546" 24473 "s63E6H2" 0 "Ornithine carbamoyltransferase"  
"NT-E05\_00547" 24474 "s59E13H2" 0 "Aspartyl/glutamyl-tRNA(Asn/Gln) amidotransferase subunit B"  
"NT-E05\_00547" 24474 "s59E25H2" 0 "Aspartyl/glutamyl-tRNA(Asn/Gln) amidotransferase subunit B"  
"NT-E05\_00547" 24474 "s59E5H2" 0 "Aspartyl/glutamyl-tRNA(Asn/Gln) amidotransferase subunit B"  
"NT-E05\_00547" 24474 "s63E6H2" 0 "Aspartyl/glutamyl-tRNA(Asn/Gln) amidotransferase subunit B"  
"NT-E05\_00548" 24475 "s59E13H2" 0 "Trehalose transport system permease protein SugA"  
"NT-E05\_00548" 24475 "s59E25H2" 0 "Trehalose transport system permease protein SugA"  
"NT-E05\_00548" 24475 "s59E5H2" 0 "Trehalose transport system permease protein SugA"  
"NT-E05\_00548" 24475 "s63E6H2" 0 "Trehalose transport system permease protein SugA"  
"NT-E05\_00549" 24476 "s59E13H2" 0 "Trehalose/maltose-binding protein MalE precursor"  
"NT-E05\_00549" 24476 "s59E25H2" 0 "Trehalose/maltose-binding protein MalE precursor"  
"NT-E05\_00549" 24476 "s59E5H2" 0 "Trehalose/maltose-binding protein MalE precursor"  
"NT-E05\_00549" 24476 "s63E6H2" 0 "Trehalose/maltose-binding protein MalE precursor"

"NT-E05\_00550" 24477 "s59E13H2" 0 "hypothetical protein"  
"NT-E05\_00550" 24477 "s59E25H2" 0 "hypothetical protein"  
"NT-E05\_00550" 24477 "s59E5H2" 0 "hypothetical protein"  
"NT-E05\_00550" 24477 "s63E6H2" 0 "hypothetical protein"  
"NT-E05\_00551" 24478 "s59E13H2" 0 "Glucitol operon repressor"  
"NT-E05\_00551" 24478 "s59E25H2" 0 "Glucitol operon repressor"  
"NT-E05\_00551" 24478 "s59E5H2" 0 "Glucitol operon repressor"  
"NT-E05\_00551" 24478 "s63E6H2" 0 "Glucitol operon repressor"  
"NT-E05\_00552" 24479 "s59E13H2" 0 "2-amino-3,7-dideoxy-D-threo-hept-6-ulosonate synthase"  
"NT-E05\_00552" 24479 "s59E25H2" 0 "2-amino-3,7-dideoxy-D-threo-hept-6-ulosonate synthase"  
"NT-E05\_00552" 24479 "s59E5H2" 0 "2-amino-3,7-dideoxy-D-threo-hept-6-ulosonate synthase"  
"NT-E05\_00552" 24479 "s63E6H2" 0 "2-amino-3,7-dideoxy-D-threo-hept-6-ulosonate synthase"  
"NT-E05\_00553" 24480 "s59E13H2" 0 "Sorbitol dehydrogenase"  
"NT-E05\_00553" 24480 "s59E25H2" 0 "Sorbitol dehydrogenase"  
"NT-E05\_00553" 24480 "s59E5H2" 0 "Sorbitol dehydrogenase"  
"NT-E05\_00553" 24480 "s63E6H2" 0 "Sorbitol dehydrogenase"  
"NT-E05\_00554" 24481 "s59E13H2" 0 "2,2-dialkylglycine decarboxylase"  
"NT-E05\_00554" 24481 "s59E25H2" 0 "2,2-dialkylglycine decarboxylase"  
"NT-E05\_00554" 24481 "s59E5H2" 0 "2,2-dialkylglycine decarboxylase"  
"NT-E05\_00554" 24481 "s63E6H2" 0 "2,2-dialkylglycine decarboxylase"  
"NT-E05\_00555" 24482 "s59E13H2" 0 "3-hexulose-6-phosphate isomerase"  
"NT-E05\_00555" 24482 "s59E25H2" 0 "3-hexulose-6-phosphate isomerase"  
"NT-E05\_00555" 24482 "s59E5H2" 0 "3-hexulose-6-phosphate isomerase"  
"NT-E05\_00555" 24482 "s63E6H2" 0 "3-hexulose-6-phosphate isomerase"  
"NT-E05\_00556" 24483 "s59E13H2" 0 "2-amino-3,7-dideoxy-D-threo-hept-6-ulosonate synthase"  
"NT-E05\_00556" 24483 "s59E25H2" 0 "2-amino-3,7-dideoxy-D-threo-hept-6-ulosonate synthase"  
"NT-E05\_00556" 24483 "s59E5H2" 0 "2-amino-3,7-dideoxy-D-threo-hept-6-ulosonate synthase"  
"NT-E05\_00556" 24483 "s63E6H2" 0 "2-amino-3,7-dideoxy-D-threo-hept-6-ulosonate synthase"  
"NT-E05\_00557" 24484 "s59E13H2" 0 "Xylulose kinase"  
"NT-E05\_00557" 24484 "s59E25H2" 0 "Xylulose kinase"  
"NT-E05\_00557" 24484 "s59E5H2" 0 "Xylulose kinase"  
"NT-E05\_00557" 24484 "s63E6H2" 0 "Xylulose kinase"  
"NT-E05\_00558" 24485 "s59E13H2" 0 "putative zinc-type alcohol dehydrogenase-like protein YjmD"  
"NT-E05\_00558" 24485 "s59E25H2" 0 "putative zinc-type alcohol dehydrogenase-like protein YjmD"  
"NT-E05\_00558" 24485 "s59E5H2" 0 "putative zinc-type alcohol dehydrogenase-like protein YjmD"  
"NT-E05\_00558" 24485 "s63E6H2" 0 "putative zinc-type alcohol dehydrogenase-like protein YjmD"  
"NT-E05\_00559" 24486 "s59E13H2" 0 "Arylsulfatase"  
"NT-E05\_00559" 24486 "s59E25H2" 0 "Arylsulfatase"  
"NT-E05\_00559" 24486 "s59E5H2" 0 "Arylsulfatase"  
"NT-E05\_00559" 24486 "s63E6H2" 0 "Arylsulfatase"  
"NT-E05\_00560" 24487 "s59E13H2" 0.000285581 "Arylsulfatase"  
"NT-E05\_00560" 24487 "s59E25H2" 0 "Arylsulfatase"  
"NT-E05\_00560" 24487 "s59E5H2" 0 "Arylsulfatase"  
"NT-E05\_00560" 24487 "s63E6H2" 0 "Arylsulfatase"  
"NT-E05\_00561" 24488 "s59E13H2" 0 "Trehalose/maltose-binding protein MalE precursor"  
"NT-E05\_00561" 24488 "s59E25H2" 0 "Trehalose/maltose-binding protein MalE precursor"  
"NT-E05\_00561" 24488 "s59E5H2" 0 "Trehalose/maltose-binding protein MalE precursor"



"NT-E05\_00561" 24488 "s63E6H2" 0 "Trehalose/maltose-binding protein MalE precursor"  
"NT-E05\_00562" 24489 "s59E13H2" 0 "Trehalose/maltose transport system permease protein MalF"  
"NT-E05\_00562" 24489 "s59E25H2" 0 "Trehalose/maltose transport system permease protein MalF"  
"NT-E05\_00562" 24489 "s59E5H2" 0 "Trehalose/maltose transport system permease protein MalF"  
"NT-E05\_00562" 24489 "s63E6H2" 0 "Trehalose/maltose transport system permease protein MalF"  
"NT-E05\_00563" 24490 "s59E13H2" 0 "Trehalose/maltose transport system permease protein MalG"  
"NT-E05\_00563" 24490 "s59E25H2" 0 "Trehalose/maltose transport system permease protein MalG"  
"NT-E05\_00563" 24490 "s59E5H2" 0 "Trehalose/maltose transport system permease protein MalG"  
"NT-E05\_00563" 24490 "s63E6H2" 0 "Trehalose/maltose transport system permease protein MalG"  
"NT-E05\_00564" 24491 "s59E13H2" 0 "Type I phosphodiesterase / nucleotide pyrophosphatase"  
"NT-E05\_00564" 24491 "s59E25H2" 0 "Type I phosphodiesterase / nucleotide pyrophosphatase"  
"NT-E05\_00564" 24491 "s59E5H2" 0 "Type I phosphodiesterase / nucleotide pyrophosphatase"  
"NT-E05\_00564" 24491 "s63E6H2" 0 "Type I phosphodiesterase / nucleotide pyrophosphatase"  
"NT-E05\_00565" 24492 "s59E13H2" 0 "hypothetical protein"  
"NT-E05\_00565" 24492 "s59E25H2" 0 "hypothetical protein"  
"NT-E05\_00565" 24492 "s59E5H2" 0 "hypothetical protein"  
"NT-E05\_00565" 24492 "s63E6H2" 0 "hypothetical protein"  
"NT-E05\_00566" 24493 "s59E13H2" 0 "Magnesium transporter MgtE"  
"NT-E05\_00566" 24493 "s59E25H2" 0 "Magnesium transporter MgtE"  
"NT-E05\_00566" 24493 "s59E5H2" 0 "Magnesium transporter MgtE"  
"NT-E05\_00566" 24493 "s63E6H2" 0 "Magnesium transporter MgtE"  
"NT-E05\_00567" 24494 "s59E13H2" 0 "Acetoin utilization protein AcuC"  
"NT-E05\_00567" 24494 "s59E25H2" 0 "Acetoin utilization protein AcuC"  
"NT-E05\_00567" 24494 "s59E5H2" 0 "Acetoin utilization protein AcuC"  
"NT-E05\_00567" 24494 "s63E6H2" 0 "Acetoin utilization protein AcuC"  
"NT-E05\_00568" 24495 "s59E13H2" 0 "Putative serine protease HtrA"  
"NT-E05\_00568" 24495 "s59E25H2" 0 "Putative serine protease HtrA"  
"NT-E05\_00568" 24495 "s59E5H2" 0.003728397 "Putative serine protease HtrA"  
"NT-E05\_00568" 24495 "s63E6H2" 0 "Putative serine protease HtrA"  
"NT-E05\_00569" 24496 "s59E13H2" 0 "Penicillin-binding protein 2D"  
"NT-E05\_00569" 24496 "s59E25H2" 0 "Penicillin-binding protein 2D"  
"NT-E05\_00569" 24496 "s59E5H2" 0 "Penicillin-binding protein 2D"  
"NT-E05\_00569" 24496 "s63E6H2" 0 "Penicillin-binding protein 2D"  
"NT-E05\_00570" 24497 "s59E13H2" 0 "Chlorinase"  
"NT-E05\_00570" 24497 "s59E25H2" 0 "Chlorinase"  
"NT-E05\_00570" 24497 "s59E5H2" 0 "Chlorinase"  
"NT-E05\_00570" 24497 "s63E6H2" 0 "Chlorinase"  
"NT-E05\_00571" 24498 "s59E13H2" 0 "S-adenosylmethionine synthase"  
"NT-E05\_00571" 24498 "s59E25H2" 0 "S-adenosylmethionine synthase"  
"NT-E05\_00571" 24498 "s59E5H2" 0 "S-adenosylmethionine synthase"  
"NT-E05\_00571" 24498 "s63E6H2" 0 "S-adenosylmethionine synthase"  
"NT-E05\_00572" 24499 "s59E13H2" 0 "PTS system fructose-specific EIIABC component"  
"NT-E05\_00572" 24499 "s59E25H2" 0 "PTS system fructose-specific EIIABC component"  
"NT-E05\_00572" 24499 "s59E5H2" 0 "PTS system fructose-specific EIIABC component"  
"NT-E05\_00572" 24499 "s63E6H2" 0 "PTS system fructose-specific EIIABC component"  
"NT-E05\_00573" 24500 "s59E13H2" 0 "Light-repressed protein A"  
"NT-E05\_00573" 24500 "s59E25H2" 0 "Light-repressed protein A"

"NT-E05\_00573" 24500 "s59E5H2" 0 "Light-repressed protein A"  
"NT-E05\_00573" 24500 "s63E6H2" 0 "Light-repressed protein A"  
"NT-E05\_00574" 24501 "s59E13H2" 0 "Cold shock-like protein CspLA"  
"NT-E05\_00574" 24501 "s59E25H2" 0 "Cold shock-like protein CspLA"  
"NT-E05\_00574" 24501 "s59E5H2" 0.0721581 "Cold shock-like protein CspLA"  
"NT-E05\_00574" 24501 "s63E6H2" 0 "Cold shock-like protein CspLA"  
"NT-E05\_00575" 24502 "s59E13H2" 0 "DNA utilization protein GntX"  
"NT-E05\_00575" 24502 "s59E25H2" 0 "DNA utilization protein GntX"  
"NT-E05\_00575" 24502 "s59E5H2" 0.04177136 "DNA utilization protein GntX"  
"NT-E05\_00575" 24502 "s63E6H2" 0 "DNA utilization protein GntX"  
"NT-E05\_00576" 24503 "s59E13H2" 0 "hypothetical protein"  
"NT-E05\_00576" 24503 "s59E25H2" 0 "hypothetical protein"  
"NT-E05\_00576" 24503 "s59E5H2" 0 "hypothetical protein"  
"NT-E05\_00576" 24503 "s63E6H2" 0 "hypothetical protein"  
"NT-E05\_00577" 24504 "s59E13H2" 0 "PHB/PHA accumulation regulator DNA-binding domain protein"  
"NT-E05\_00577" 24504 "s59E25H2" 0 "PHB/PHA accumulation regulator DNA-binding domain protein"  
"NT-E05\_00577" 24504 "s59E5H2" 0 "PHB/PHA accumulation regulator DNA-binding domain protein"  
"NT-E05\_00577" 24504 "s63E6H2" 0 "PHB/PHA accumulation regulator DNA-binding domain protein"  
"NT-E05\_00579" 24506 "s59E13H2" 0 "VCP-like ATPase"  
"NT-E05\_00579" 24506 "s59E25H2" 0 "VCP-like ATPase"  
"NT-E05\_00579" 24506 "s59E5H2" 0.003612601 "VCP-like ATPase"  
"NT-E05\_00579" 24506 "s63E6H2" 0 "VCP-like ATPase"  
"NT-E05\_00581" 24508 "s59E13H2" 0 "Group II intron-encoded protein LtrA"  
"NT-E05\_00581" 24508 "s59E25H2" 0 "Group II intron-encoded protein LtrA"  
"NT-E05\_00581" 24508 "s59E5H2" 0 "Group II intron-encoded protein LtrA"  
"NT-E05\_00581" 24508 "s63E6H2" 0 "Group II intron-encoded protein LtrA"  
"NT-E05\_00585" 24512 "s59E13H2" 0 "Putative pyridoxal phosphate-dependent aminotransferase EpsN"  
"NT-E05\_00585" 24512 "s59E25H2" 0 "Putative pyridoxal phosphate-dependent aminotransferase EpsN"  
"NT-E05\_00585" 24512 "s59E5H2" 0.04428702 "Putative pyridoxal phosphate-dependent aminotransferase EpsN"  
"NT-E05\_00585" 24512 "s63E6H2" 0 "Putative pyridoxal phosphate-dependent aminotransferase EpsN"  
"NT-E05\_00586" 24513 "s59E13H2" 0 "Digeranylgeranyl glycerophospholipid reductase"  
"NT-E05\_00586" 24513 "s59E25H2" 0 "Digeranylgeranyl glycerophospholipid reductase"  
"NT-E05\_00586" 24513 "s59E5H2" 0 "Digeranylgeranyl glycerophospholipid reductase"  
"NT-E05\_00586" 24513 "s63E6H2" 0 "Digeranylgeranyl glycerophospholipid reductase"  
"NT-E05\_00587" 24514 "s59E13H2" 0 "HEPN domain protein"  
"NT-E05\_00587" 24514 "s59E25H2" 0 "HEPN domain protein"  
"NT-E05\_00587" 24514 "s59E5H2" 0 "HEPN domain protein"  
"NT-E05\_00587" 24514 "s63E6H2" 0 "HEPN domain protein"  
"NT-E05\_00588" 24515 "s59E13H2" 0 "Nucleotidyltransferase domain protein"  
"NT-E05\_00588" 24515 "s59E25H2" 0 "Nucleotidyltransferase domain protein"  
"NT-E05\_00588" 24515 "s59E5H2" 0 "Nucleotidyltransferase domain protein"  
"NT-E05\_00588" 24515 "s63E6H2" 0 "Nucleotidyltransferase domain protein"  
"NT-E05\_00589" 24516 "s59E13H2" 0 "Ribosomal RNA small subunit methyltransferase I"  
"NT-E05\_00589" 24516 "s59E25H2" 0 "Ribosomal RNA small subunit methyltransferase I"  
"NT-E05\_00589" 24516 "s59E5H2" 0 "Ribosomal RNA small subunit methyltransferase I"  
"NT-E05\_00589" 24516 "s63E6H2" 0 "Ribosomal RNA small subunit methyltransferase I"  
"NT-E05\_00590" 24517 "s59E13H2" 0 "2'-5'-RNA ligase"

"NT-E05\_00590" 24517 "s59E25H2" 0 "2'-5'-RNA ligase"  
"NT-E05\_00590" 24517 "s59E5H2" 0 "2'-5'-RNA ligase"  
"NT-E05\_00590" 24517 "s63E6H2" 0 "2'-5'-RNA ligase"  
"NT-E05\_00591" 24518 "s59E13H2" 0 "Transposase IS200 like protein"  
"NT-E05\_00591" 24518 "s59E25H2" 0 "Transposase IS200 like protein"  
"NT-E05\_00591" 24518 "s59E5H2" 0 "Transposase IS200 like protein"  
"NT-E05\_00591" 24518 "s63E6H2" 0 "Transposase IS200 like protein"  
"NT-E05\_00592" 24519 "s59E13H2" 0 "DNA repair and recombination protein RadA"  
"NT-E05\_00592" 24519 "s59E25H2" 0 "DNA repair and recombination protein RadA"  
"NT-E05\_00592" 24519 "s59E5H2" 0 "DNA repair and recombination protein RadA"  
"NT-E05\_00592" 24519 "s63E6H2" 0 "DNA repair and recombination protein RadA"  
"NT-E05\_00593" 24520 "s59E13H2" 0 "N-acetylmuramoyl-L-alanine amidase AmiC precursor"  
"NT-E05\_00593" 24520 "s59E25H2" 0 "N-acetylmuramoyl-L-alanine amidase AmiC precursor"  
"NT-E05\_00593" 24520 "s59E5H2" 0 "N-acetylmuramoyl-L-alanine amidase AmiC precursor"  
"NT-E05\_00593" 24520 "s63E6H2" 0 "N-acetylmuramoyl-L-alanine amidase AmiC precursor"  
"NT-E05\_00594" 24521 "s59E13H2" 0 "Sporulation and spore germination"  
"NT-E05\_00594" 24521 "s59E25H2" 0 "Sporulation and spore germination"  
"NT-E05\_00594" 24521 "s59E5H2" 0 "Sporulation and spore germination"  
"NT-E05\_00594" 24521 "s63E6H2" 0 "Sporulation and spore germination"  
"NT-E05\_00595" 24522 "s59E13H2" 0 "hypothetical protein"  
"NT-E05\_00595" 24522 "s59E25H2" 0 "hypothetical protein"  
"NT-E05\_00595" 24522 "s59E5H2" 0 "hypothetical protein"  
"NT-E05\_00595" 24522 "s63E6H2" 0 "hypothetical protein"  
"NT-E05\_00596" 24523 "s59E13H2" 0 "Dihydrolypyllysine-residue acetyltransferase component of pyruvate dehydrogenase complex"  
"NT-E05\_00596" 24523 "s59E25H2" 0 "Dihydrolypyllysine-residue acetyltransferase component of pyruvate dehydrogenase complex"  
"NT-E05\_00596" 24523 "s59E5H2" 0.003771479 "Dihydrolypyllysine-residue acetyltransferase component of pyruvate dehydrogenase complex"  
"NT-E05\_00596" 24523 "s63E6H2" 0 "Dihydrolypyllysine-residue acetyltransferase component of pyruvate dehydrogenase complex"  
"NT-E05\_00597" 24524 "s59E13H2" 0 "Riboflavin synthase"  
"NT-E05\_00597" 24524 "s59E25H2" 0 "Riboflavin synthase"  
"NT-E05\_00597" 24524 "s59E5H2" 0.01583118 "Riboflavin synthase"  
"NT-E05\_00597" 24524 "s63E6H2" 0 "Riboflavin synthase"  
"NT-E05\_00598" 24525 "s59E13H2" 0 "Riboflavin biosynthesis protein RibBA"  
"NT-E05\_00598" 24525 "s59E25H2" 0 "Riboflavin biosynthesis protein RibBA"  
"NT-E05\_00598" 24525 "s59E5H2" 0 "Riboflavin biosynthesis protein RibBA"  
"NT-E05\_00598" 24525 "s63E6H2" 0 "Riboflavin biosynthesis protein RibBA"  
"NT-E05\_00599" 24526 "s59E13H2" 0 "6,7-dimethyl-8-ribityllumazine synthase"  
"NT-E05\_00599" 24526 "s59E25H2" 0 "6,7-dimethyl-8-ribityllumazine synthase"  
"NT-E05\_00599" 24526 "s59E5H2" 0 "6,7-dimethyl-8-ribityllumazine synthase"  
"NT-E05\_00599" 24526 "s63E6H2" 0 "6,7-dimethyl-8-ribityllumazine synthase"  
"NT-E05\_00600" 24527 "s59E13H2" 0 "Release factor glutamine methyltransferase"  
"NT-E05\_00600" 24527 "s59E25H2" 0 "Release factor glutamine methyltransferase"  
"NT-E05\_00600" 24527 "s59E5H2" 0 "Release factor glutamine methyltransferase"  
"NT-E05\_00600" 24527 "s63E6H2" 0 "Release factor glutamine methyltransferase"  
"NT-E05\_00601" 24528 "s59E13H2" 0 "Stage V sporulation protein D"  
"NT-E05\_00601" 24528 "s59E25H2" 0 "Stage V sporulation protein D"  
"NT-E05\_00601" 24528 "s59E5H2" 0 "Stage V sporulation protein D"  
"NT-E05\_00601" 24528 "s63E6H2" 0 "Stage V sporulation protein D"

"NT-E05\_00602" 24529 "s59E13H2" 0 "Rod shape-determining protein RodA"  
"NT-E05\_00602" 24529 "s59E25H2" 0 "Rod shape-determining protein RodA"  
"NT-E05\_00602" 24529 "s59E5H2" 0 "Rod shape-determining protein RodA"  
"NT-E05\_00602" 24529 "s63E6H2" 0 "Rod shape-determining protein RodA"  
"NT-E05\_00603" 24530 "s59E13H2" 0 "2,3-dimethylmalate dehydratase large subunit"  
"NT-E05\_00603" 24530 "s59E25H2" 0 "2,3-dimethylmalate dehydratase large subunit"  
"NT-E05\_00603" 24530 "s59E5H2" 0 "2,3-dimethylmalate dehydratase large subunit"  
"NT-E05\_00603" 24530 "s63E6H2" 0 "2,3-dimethylmalate dehydratase large subunit"  
"NT-E05\_00605" 24532 "s59E13H2" 0 "hypothetical protein"  
"NT-E05\_00605" 24532 "s59E25H2" 0 "hypothetical protein"  
"NT-E05\_00605" 24532 "s59E5H2" 0 "hypothetical protein"  
"NT-E05\_00605" 24532 "s63E6H2" 0 "hypothetical protein"  
"NT-E05\_00606" 24533 "s59E13H2" 0 "LysM domain/BON superfamily protein"  
"NT-E05\_00606" 24533 "s59E25H2" 0 "LysM domain/BON superfamily protein"  
"NT-E05\_00606" 24533 "s59E5H2" 0 "LysM domain/BON superfamily protein"  
"NT-E05\_00606" 24533 "s63E6H2" 0 "LysM domain/BON superfamily protein"  
"NT-E05\_00607" 24534 "s59E13H2" 0 "50S ribosomal protein L31"  
"NT-E05\_00607" 24534 "s59E25H2" 0 "50S ribosomal protein L31"  
"NT-E05\_00607" 24534 "s59E5H2" 0 "50S ribosomal protein L31"  
"NT-E05\_00607" 24534 "s63E6H2" 0 "50S ribosomal protein L31"  
"NT-E05\_00608" 24535 "s59E13H2" 0 "hypothetical protein"  
"NT-E05\_00608" 24535 "s59E25H2" 0 "hypothetical protein"  
"NT-E05\_00608" 24535 "s59E5H2" 0 "hypothetical protein"  
"NT-E05\_00608" 24535 "s63E6H2" 0 "hypothetical protein"  
"NT-E05\_00609" 24536 "s59E13H2" 0 "Bifunctional NAD(P)H-hydrate repair enzyme Nnr"  
"NT-E05\_00609" 24536 "s59E25H2" 0 "Bifunctional NAD(P)H-hydrate repair enzyme Nnr"  
"NT-E05\_00609" 24536 "s59E5H2" 0 "Bifunctional NAD(P)H-hydrate repair enzyme Nnr"  
"NT-E05\_00609" 24536 "s63E6H2" 0 "Bifunctional NAD(P)H-hydrate repair enzyme Nnr"  
"NT-E05\_00610" 24537 "s59E13H2" 0 "Holo-[acyl-carrier-protein] synthase"  
"NT-E05\_00610" 24537 "s59E25H2" 0 "Holo-[acyl-carrier-protein] synthase"  
"NT-E05\_00610" 24537 "s59E5H2" 0 "Holo-[acyl-carrier-protein] synthase"  
"NT-E05\_00610" 24537 "s63E6H2" 0 "Holo-[acyl-carrier-protein] synthase"  
"NT-E05\_00611" 24538 "s59E13H2" 0 "Pyridoxine 5'-phosphate synthase"  
"NT-E05\_00611" 24538 "s59E25H2" 0 "Pyridoxine 5'-phosphate synthase"  
"NT-E05\_00611" 24538 "s59E5H2" 0 "Pyridoxine 5'-phosphate synthase"  
"NT-E05\_00611" 24538 "s63E6H2" 0 "Pyridoxine 5'-phosphate synthase"  
"NT-E05\_00612" 24539 "s59E13H2" 0 "LL-diaminopimelate aminotransferase"  
"NT-E05\_00612" 24539 "s59E25H2" 0 "LL-diaminopimelate aminotransferase"  
"NT-E05\_00612" 24539 "s59E5H2" 0 "LL-diaminopimelate aminotransferase"  
"NT-E05\_00612" 24539 "s63E6H2" 0 "LL-diaminopimelate aminotransferase"  
"NT-E05\_00613" 24540 "s59E13H2" 0 "4-hydroxy-tetrahydrodipicolinate reductase"  
"NT-E05\_00613" 24540 "s59E25H2" 0 "4-hydroxy-tetrahydrodipicolinate reductase"  
"NT-E05\_00613" 24540 "s59E5H2" 0 "4-hydroxy-tetrahydrodipicolinate reductase"  
"NT-E05\_00613" 24540 "s63E6H2" 0 "4-hydroxy-tetrahydrodipicolinate reductase"  
"NT-E05\_00615" 24542 "s59E13H2" 0 "SsrA-binding protein"  
"NT-E05\_00615" 24542 "s59E25H2" 0 "SsrA-binding protein"  
"NT-E05\_00615" 24542 "s59E5H2" 0.007586948 "SsrA-binding protein"

"NT-E05\_00615" 24542 "s63E6H2" 0 "SsrA-binding protein"  
"NT-E05\_00616" 24543 "s59E13H2" 0 "Electron transport complex protein RnfE"  
"NT-E05\_00616" 24543 "s59E25H2" 0 "Electron transport complex protein RnfE"  
"NT-E05\_00616" 24543 "s59E5H2" 0.007474066 "Electron transport complex protein RnfE"  
"NT-E05\_00616" 24543 "s63E6H2" 0 "Electron transport complex protein RnfE"  
"NT-E05\_00617" 24544 "s59E13H2" 0 "Murein DD-endopeptidase MepM"  
"NT-E05\_00617" 24544 "s59E25H2" 0 "Murein DD-endopeptidase MepM"  
"NT-E05\_00617" 24544 "s59E5H2" 0 "Murein DD-endopeptidase MepM"  
"NT-E05\_00617" 24544 "s63E6H2" 0 "Murein DD-endopeptidase MepM"  
"NT-E05\_00618" 24545 "s59E13H2" 0 "Polymer-forming cytoskeletal"  
"NT-E05\_00618" 24545 "s59E25H2" 0 "Polymer-forming cytoskeletal"  
"NT-E05\_00618" 24545 "s59E5H2" 0 "Polymer-forming cytoskeletal"  
"NT-E05\_00618" 24545 "s63E6H2" 0 "Polymer-forming cytoskeletal"  
"NT-E05\_00621" 24548 "s59E13H2" 0 "Threonine--tRNA ligase 2"  
"NT-E05\_00621" 24548 "s59E25H2" 0 "Threonine--tRNA ligase 2"  
"NT-E05\_00621" 24548 "s59E5H2" 0 "Threonine--tRNA ligase 2"  
"NT-E05\_00621" 24548 "s63E6H2" 0 "Threonine--tRNA ligase 2"  
"NT-E05\_00622" 24549 "s59E13H2" 0 "Translation initiation factor IF-3"  
"NT-E05\_00622" 24549 "s59E25H2" 0 "Translation initiation factor IF-3"  
"NT-E05\_00622" 24549 "s59E5H2" 0 "Translation initiation factor IF-3"  
"NT-E05\_00622" 24549 "s63E6H2" 0 "Translation initiation factor IF-3"  
"NT-E05\_00623" 24550 "s59E13H2" 0 "50S ribosomal protein L35"  
"NT-E05\_00623" 24550 "s59E25H2" 0 "50S ribosomal protein L35"  
"NT-E05\_00623" 24550 "s59E5H2" 0 "50S ribosomal protein L35"  
"NT-E05\_00623" 24550 "s63E6H2" 0 "50S ribosomal protein L35"  
"NT-E05\_00624" 24551 "s59E13H2" 0 "50S ribosomal protein L20"  
"NT-E05\_00624" 24551 "s59E25H2" 0 "50S ribosomal protein L20"  
"NT-E05\_00624" 24551 "s59E5H2" 0 "50S ribosomal protein L20"  
"NT-E05\_00624" 24551 "s63E6H2" 0 "50S ribosomal protein L20"  
"NT-E05\_00625" 24552 "s59E13H2" 0 "Serine/threonine-protein kinase PrkC"  
"NT-E05\_00625" 24552 "s59E25H2" 0 "Serine/threonine-protein kinase PrkC"  
"NT-E05\_00625" 24552 "s59E5H2" 0 "Serine/threonine-protein kinase PrkC"  
"NT-E05\_00625" 24552 "s63E6H2" 0 "Serine/threonine-protein kinase PrkC"  
"NT-E05\_00626" 24553 "s59E13H2" 0 "Ribulose-phosphate 3-epimerase"  
"NT-E05\_00626" 24553 "s59E25H2" 0 "Ribulose-phosphate 3-epimerase"  
"NT-E05\_00626" 24553 "s59E5H2" 0 "Ribulose-phosphate 3-epimerase"  
"NT-E05\_00626" 24553 "s63E6H2" 0 "Ribulose-phosphate 3-epimerase"  
"NT-E05\_00627" 24554 "s59E13H2" 0 "30S ribosomal protein S16"  
"NT-E05\_00627" 24554 "s59E25H2" 0 "30S ribosomal protein S16"  
"NT-E05\_00627" 24554 "s59E5H2" 0 "30S ribosomal protein S16"  
"NT-E05\_00627" 24554 "s63E6H2" 0 "30S ribosomal protein S16"  
"NT-E05\_00628" 24555 "s59E13H2" 0 "hypothetical protein"  
"NT-E05\_00628" 24555 "s59E25H2" 0 "hypothetical protein"  
"NT-E05\_00628" 24555 "s59E5H2" 0 "hypothetical protein"  
"NT-E05\_00628" 24555 "s63E6H2" 0 "hypothetical protein"  
"NT-E05\_00629" 24556 "s59E13H2" 0 "tRNA (guanine-N(1)-)-methyltransferase"  
"NT-E05\_00629" 24556 "s59E25H2" 0 "tRNA (guanine-N(1)-)-methyltransferase"

"NT-E05\_00629" 24556 "s59E5H2" 0 "tRNA (guanine-N(1)-methyltransferase"  
"NT-E05\_00629" 24556 "s63E6H2" 0 "tRNA (guanine-N(1)-methyltransferase"  
"NT-E05\_00630" 24557 "s59E13H2" 0 "50S ribosomal protein L19"  
"NT-E05\_00630" 24557 "s59E25H2" 0 "50S ribosomal protein L19"  
"NT-E05\_00630" 24557 "s59E5H2" 0 "50S ribosomal protein L19"  
"NT-E05\_00630" 24557 "s63E6H2" 0 "50S ribosomal protein L19"  
"NT-E05\_00631" 24558 "s59E13H2" 0 "Signal peptidase IB"  
"NT-E05\_00631" 24558 "s59E25H2" 0 "Signal peptidase IB"  
"NT-E05\_00631" 24558 "s59E5H2" 0 "Signal peptidase IB"  
"NT-E05\_00631" 24558 "s63E6H2" 0 "Signal peptidase IB"  
"NT-E05\_00632" 24559 "s59E13H2" 0 "hypothetical protein"  
"NT-E05\_00632" 24559 "s59E25H2" 0 "hypothetical protein"  
"NT-E05\_00632" 24559 "s59E5H2" 0 "hypothetical protein"  
"NT-E05\_00632" 24559 "s63E6H2" 0 "hypothetical protein"  
"NT-E05\_00633" 24560 "s59E13H2" 0 "hypothetical protein"  
"NT-E05\_00633" 24560 "s59E25H2" 0 "hypothetical protein"  
"NT-E05\_00633" 24560 "s59E5H2" 0.004333699 "hypothetical protein"  
"NT-E05\_00633" 24560 "s63E6H2" 0 "hypothetical protein"  
"NT-E05\_00634" 24561 "s59E13H2" 0 "Alanine racemase"  
"NT-E05\_00634" 24561 "s59E25H2" 0 "Alanine racemase"  
"NT-E05\_00634" 24561 "s59E5H2" 0 "Alanine racemase"  
"NT-E05\_00634" 24561 "s63E6H2" 0 "Alanine racemase"  
"NT-E05\_00635" 24562 "s59E13H2" 0 "D-alanine--D-alanine ligase B"  
"NT-E05\_00635" 24562 "s59E25H2" 0 "D-alanine--D-alanine ligase B"  
"NT-E05\_00635" 24562 "s59E5H2" 0 "D-alanine--D-alanine ligase B"  
"NT-E05\_00635" 24562 "s63E6H2" 0 "D-alanine--D-alanine ligase B"  
"NT-E05\_00636" 24563 "s59E13H2" 0 "HTH-type transcriptional regulator PuuR"  
"NT-E05\_00636" 24563 "s59E25H2" 0 "HTH-type transcriptional regulator PuuR"  
"NT-E05\_00636" 24563 "s59E5H2" 0 "HTH-type transcriptional regulator PuuR"  
"NT-E05\_00636" 24563 "s63E6H2" 0 "HTH-type transcriptional regulator PuuR"  
"NT-E05\_00637" 24564 "s59E13H2" 0 "photosystem I assembly protein Ycf3"  
"NT-E05\_00637" 24564 "s59E25H2" 0 "photosystem I assembly protein Ycf3"  
"NT-E05\_00637" 24564 "s59E5H2" 0 "photosystem I assembly protein Ycf3"  
"NT-E05\_00637" 24564 "s63E6H2" 0 "photosystem I assembly protein Ycf3"  
"NT-E05\_00638" 24565 "s59E13H2" 0 "hypothetical protein"  
"NT-E05\_00638" 24565 "s59E25H2" 0 "hypothetical protein"  
"NT-E05\_00638" 24565 "s59E5H2" 0 "hypothetical protein"  
"NT-E05\_00638" 24565 "s63E6H2" 0 "hypothetical protein"  
"NT-E05\_00639" 24566 "s59E13H2" 0 "R-phenyllactate dehydratase activator"  
"NT-E05\_00639" 24566 "s59E25H2" 0 "R-phenyllactate dehydratase activator"  
"NT-E05\_00639" 24566 "s59E5H2" 0 "R-phenyllactate dehydratase activator"  
"NT-E05\_00639" 24566 "s63E6H2" 0.0003655176 "R-phenyllactate dehydratase activator"  
"NT-E05\_00640" 24567 "s59E13H2" 0 "Arabinose operon protein AraL"  
"NT-E05\_00640" 24567 "s59E25H2" 0 "Arabinose operon protein AraL"  
"NT-E05\_00640" 24567 "s59E5H2" 0 "Arabinose operon protein AraL"  
"NT-E05\_00640" 24567 "s63E6H2" 0 "Arabinose operon protein AraL"  
"NT-E05\_00642" 24569 "s59E13H2" 0 "DNA polymerase III subunit alpha"

"NT-E05\_00642" 24569 "s59E25H2" 0 "DNA polymerase III subunit alpha"  
"NT-E05\_00642" 24569 "s59E5H2" 0 "DNA polymerase III subunit alpha"  
"NT-E05\_00642" 24569 "s63E6H2" 0 "DNA polymerase III subunit alpha"  
"NT-E05\_00643" 24570 "s59E13H2" 0 "DNA polymerase III subunit alpha"  
"NT-E05\_00643" 24570 "s59E25H2" 0 "DNA polymerase III subunit alpha"  
"NT-E05\_00643" 24570 "s59E5H2" 0 "DNA polymerase III subunit alpha"  
"NT-E05\_00643" 24570 "s63E6H2" 0 "DNA polymerase III subunit alpha"  
"NT-E05\_00644" 24571 "s59E13H2" 0 "tol-pal system protein YbgF"  
"NT-E05\_00644" 24571 "s59E25H2" 0 "tol-pal system protein YbgF"  
"NT-E05\_00644" 24571 "s59E5H2" 0.009198396 "tol-pal system protein YbgF"  
"NT-E05\_00644" 24571 "s63E6H2" 0 "tol-pal system protein YbgF"  
"NT-E05\_00645" 24572 "s59E13H2" 0 "hypothetical protein"  
"NT-E05\_00645" 24572 "s59E25H2" 0 "hypothetical protein"  
"NT-E05\_00645" 24572 "s59E5H2" 0 "hypothetical protein"  
"NT-E05\_00645" 24572 "s63E6H2" 0.005775831 "hypothetical protein"  
"NT-E05\_00646" 24573 "s59E13H2" 0 "hypothetical protein"  
"NT-E05\_00646" 24573 "s59E25H2" 0 "hypothetical protein"  
"NT-E05\_00646" 24573 "s59E5H2" 0 "hypothetical protein"  
"NT-E05\_00646" 24573 "s63E6H2" 0 "hypothetical protein"  
"NT-E05\_00647" 24574 "s59E13H2" 0 "SAF domain protein"  
"NT-E05\_00647" 24574 "s59E25H2" 0 "SAF domain protein"  
"NT-E05\_00647" 24574 "s59E5H2" 0 "SAF domain protein"  
"NT-E05\_00647" 24574 "s63E6H2" 0 "SAF domain protein"  
"NT-E05\_00648" 24575 "s59E13H2" 0 "putative L-threonine 3-dehydrogenase"  
"NT-E05\_00648" 24575 "s59E25H2" 0 "putative L-threonine 3-dehydrogenase"  
"NT-E05\_00648" 24575 "s59E5H2" 0 "putative L-threonine 3-dehydrogenase"  
"NT-E05\_00648" 24575 "s63E6H2" 0 "putative L-threonine 3-dehydrogenase"  
"NT-E05\_00649" 24576 "s59E13H2" 0 "putative sugar kinase YdjH"  
"NT-E05\_00649" 24576 "s59E25H2" 0 "putative sugar kinase YdjH"  
"NT-E05\_00649" 24576 "s59E5H2" 0 "putative sugar kinase YdjH"  
"NT-E05\_00649" 24576 "s63E6H2" 0 "putative sugar kinase YdjH"  
"NT-E05\_00650" 24577 "s59E13H2" 0 "Xylulose kinase"  
"NT-E05\_00650" 24577 "s59E25H2" 0 "Xylulose kinase"  
"NT-E05\_00650" 24577 "s59E5H2" 0.005082886 "Xylulose kinase"  
"NT-E05\_00650" 24577 "s63E6H2" 0 "Xylulose kinase"  
"NT-E05\_00651" 24578 "s59E13H2" 0 "1,5-anhydro-D-fructose reductase"  
"NT-E05\_00651" 24578 "s59E25H2" 0 "1,5-anhydro-D-fructose reductase"  
"NT-E05\_00651" 24578 "s59E5H2" 0 "1,5-anhydro-D-fructose reductase"  
"NT-E05\_00651" 24578 "s63E6H2" 0 "1,5-anhydro-D-fructose reductase"  
"NT-E05\_00652" 24579 "s59E13H2" 0 "Glucose-6-phosphate isomerase"  
"NT-E05\_00652" 24579 "s59E25H2" 0 "Glucose-6-phosphate isomerase"  
"NT-E05\_00652" 24579 "s59E5H2" 0 "Glucose-6-phosphate isomerase"  
"NT-E05\_00652" 24579 "s63E6H2" 0 "Glucose-6-phosphate isomerase"  
"NT-E05\_00653" 24580 "s59E13H2" 0 "dTDP-3-amino-3,6-dideoxy-alpha-D-galactopyranose transaminase"  
"NT-E05\_00653" 24580 "s59E25H2" 0 "dTDP-3-amino-3,6-dideoxy-alpha-D-galactopyranose transaminase"  
"NT-E05\_00653" 24580 "s59E5H2" 0 "dTDP-3-amino-3,6-dideoxy-alpha-D-galactopyranose transaminase"  
"NT-E05\_00653" 24580 "s63E6H2" 0 "dTDP-3-amino-3,6-dideoxy-alpha-D-galactopyranose transaminase"

"NT-E05\_00654" 24581 "s59E13H2" 0 "Nucleotidyltransferase domain protein"  
"NT-E05\_00654" 24581 "s59E25H2" 0 "Nucleotidyltransferase domain protein"  
"NT-E05\_00654" 24581 "s59E5H2" 0 "Nucleotidyltransferase domain protein"  
"NT-E05\_00654" 24581 "s63E6H2" 0 "Nucleotidyltransferase domain protein"  
"NT-E05\_00655" 24582 "s59E13H2" 0 "Phosphoribosylformylglycinamide synthase 2"  
"NT-E05\_00655" 24582 "s59E25H2" 0 "Phosphoribosylformylglycinamide synthase 2"  
"NT-E05\_00655" 24582 "s59E5H2" 0 "Phosphoribosylformylglycinamide synthase 2"  
"NT-E05\_00655" 24582 "s63E6H2" 0 "Phosphoribosylformylglycinamide synthase 2"  
"NT-E05\_00656" 24583 "s59E13H2" 0 "Pyruvate formate-lyase 1-activating enzyme"  
"NT-E05\_00656" 24583 "s59E25H2" 0 "Pyruvate formate-lyase 1-activating enzyme"  
"NT-E05\_00656" 24583 "s59E5H2" 0 "Pyruvate formate-lyase 1-activating enzyme"  
"NT-E05\_00656" 24583 "s63E6H2" 0 "Pyruvate formate-lyase 1-activating enzyme"  
"NT-E05\_00657" 24584 "s59E13H2" 0 "Anaerobic ribonucleoside-triphosphate reductase"  
"NT-E05\_00657" 24584 "s59E25H2" 0 "Anaerobic ribonucleoside-triphosphate reductase"  
"NT-E05\_00657" 24584 "s59E5H2" 0 "Anaerobic ribonucleoside-triphosphate reductase"  
"NT-E05\_00657" 24584 "s63E6H2" 0.0007173962 "Anaerobic ribonucleoside-triphosphate reductase"  
"NT-E05\_00658" 24585 "s59E13H2" 0 "Phosphoribosylformylglycinamide synthase 1"  
"NT-E05\_00658" 24585 "s59E25H2" 0 "Phosphoribosylformylglycinamide synthase 1"  
"NT-E05\_00658" 24585 "s59E5H2" 0 "Phosphoribosylformylglycinamide synthase 1"  
"NT-E05\_00658" 24585 "s63E6H2" 0 "Phosphoribosylformylglycinamide synthase 1"  
"NT-E05\_00659" 24586 "s59E13H2" 0 "phosphoribosylformylglycinamide synthase subunit PurS"  
"NT-E05\_00659" 24586 "s59E25H2" 0 "phosphoribosylformylglycinamide synthase subunit PurS"  
"NT-E05\_00659" 24586 "s59E5H2" 0 "phosphoribosylformylglycinamide synthase subunit PurS"  
"NT-E05\_00659" 24586 "s63E6H2" 0 "phosphoribosylformylglycinamide synthase subunit PurS"  
"NT-E05\_00660" 24587 "s59E13H2" 0 "GMP synthase [glutamine-hydrolyzing]"  
"NT-E05\_00660" 24587 "s59E25H2" 0 "GMP synthase [glutamine-hydrolyzing]"  
"NT-E05\_00660" 24587 "s59E5H2" 0.0168481 "GMP synthase [glutamine-hydrolyzing]"  
"NT-E05\_00660" 24587 "s63E6H2" 0 "GMP synthase [glutamine-hydrolyzing]"  
"NT-E05\_00661" 24588 "s59E13H2" 0 "hypothetical protein"  
"NT-E05\_00661" 24588 "s59E25H2" 0 "hypothetical protein"  
"NT-E05\_00661" 24588 "s59E5H2" 0 "hypothetical protein"  
"NT-E05\_00661" 24588 "s63E6H2" 0 "hypothetical protein"  
"NT-E05\_00662" 24589 "s59E13H2" 0 "hypothetical protein"  
"NT-E05\_00662" 24589 "s59E25H2" 0 "hypothetical protein"  
"NT-E05\_00662" 24589 "s59E5H2" 0 "hypothetical protein"  
"NT-E05\_00662" 24589 "s63E6H2" 0 "hypothetical protein"  
"NT-E05\_00663" 24590 "s59E13H2" 0 "hypothetical protein"  
"NT-E05\_00663" 24590 "s59E25H2" 0 "hypothetical protein"  
"NT-E05\_00663" 24590 "s59E5H2" 0 "hypothetical protein"  
"NT-E05\_00663" 24590 "s63E6H2" 0 "hypothetical protein"  
"NT-E05\_00664" 24591 "s59E13H2" 0 "Type I phosphodiesterase / nucleotide pyrophosphatase"  
"NT-E05\_00664" 24591 "s59E25H2" 0 "Type I phosphodiesterase / nucleotide pyrophosphatase"  
"NT-E05\_00664" 24591 "s59E5H2" 0 "Type I phosphodiesterase / nucleotide pyrophosphatase"  
"NT-E05\_00664" 24591 "s63E6H2" 0 "Type I phosphodiesterase / nucleotide pyrophosphatase"  
"NT-E05\_00665" 24592 "s59E13H2" 0 "Trehalose transport system permease protein SugB"  
"NT-E05\_00665" 24592 "s59E25H2" 0 "Trehalose transport system permease protein SugB"  
"NT-E05\_00665" 24592 "s59E5H2" 0 "Trehalose transport system permease protein SugB"



"NT-E05\_00665" 24592 "s63E6H2" 0 "Trehalose transport system permease protein SugB"  
"NT-E05\_00666" 24593 "s59E13H2" 0 "Trehalose/maltose transport system permease protein MalF"  
"NT-E05\_00666" 24593 "s59E25H2" 0 "Trehalose/maltose transport system permease protein MalF"  
"NT-E05\_00666" 24593 "s59E5H2" 0 "Trehalose/maltose transport system permease protein MalF"  
"NT-E05\_00666" 24593 "s63E6H2" 0 "Trehalose/maltose transport system permease protein MalF"  
"NT-E05\_00667" 24594 "s59E13H2" 0 "Trehalose/maltose-binding protein MalE precursor"  
"NT-E05\_00667" 24594 "s59E25H2" 0 "Trehalose/maltose-binding protein MalE precursor"  
"NT-E05\_00667" 24594 "s59E5H2" 0 "Trehalose/maltose-binding protein MalE precursor"  
"NT-E05\_00667" 24594 "s63E6H2" 0 "Trehalose/maltose-binding protein MalE precursor"  
"NT-E05\_00668" 24595 "s59E13H2" 0 "Transcriptional regulator KdgR"  
"NT-E05\_00668" 24595 "s59E25H2" 0 "Transcriptional regulator KdgR"  
"NT-E05\_00668" 24595 "s59E5H2" 0.02033686 "Transcriptional regulator KdgR"  
"NT-E05\_00668" 24595 "s63E6H2" 0 "Transcriptional regulator KdgR"  
"NT-E05\_00669" 24596 "s59E13H2" 0 "hypothetical protein"  
"NT-E05\_00669" 24596 "s59E25H2" 0 "hypothetical protein"  
"NT-E05\_00669" 24596 "s59E5H2" 0 "hypothetical protein"  
"NT-E05\_00669" 24596 "s63E6H2" 0 "hypothetical protein"  
"NT-E05\_00670" 24597 "s59E13H2" 0 "Transposase"  
"NT-E05\_00670" 24597 "s59E25H2" 0 "Transposase"  
"NT-E05\_00670" 24597 "s59E5H2" 0 "Transposase"  
"NT-E05\_00670" 24597 "s63E6H2" 0 "Transposase"  
"NT-E05\_00671" 24598 "s59E13H2" 0 "Hydroxypyruvate isomerase"  
"NT-E05\_00671" 24598 "s59E25H2" 0 "Hydroxypyruvate isomerase"  
"NT-E05\_00671" 24598 "s59E5H2" 0 "Hydroxypyruvate isomerase"  
"NT-E05\_00671" 24598 "s63E6H2" 0 "Hydroxypyruvate isomerase"  
"NT-E05\_00672" 24599 "s59E13H2" 0 "Xylose import ATP-binding protein XylG"  
"NT-E05\_00672" 24599 "s59E25H2" 0 "Xylose import ATP-binding protein XylG"  
"NT-E05\_00672" 24599 "s59E5H2" 0 "Xylose import ATP-binding protein XylG"  
"NT-E05\_00672" 24599 "s63E6H2" 0 "Xylose import ATP-binding protein XylG"  
"NT-E05\_00673" 24600 "s59E13H2" 0 "Ribose transport system permease protein RbsC"  
"NT-E05\_00673" 24600 "s59E25H2" 0 "Ribose transport system permease protein RbsC"  
"NT-E05\_00673" 24600 "s59E5H2" 0 "Ribose transport system permease protein RbsC"  
"NT-E05\_00673" 24600 "s63E6H2" 0 "Ribose transport system permease protein RbsC"  
"NT-E05\_00674" 24601 "s59E13H2" 0 "Periplasmic binding proteins and sugar binding domain of LacI family protein"  
"NT-E05\_00674" 24601 "s59E25H2" 0 "Periplasmic binding proteins and sugar binding domain of LacI family protein"  
"NT-E05\_00674" 24601 "s59E5H2" 0 "Periplasmic binding proteins and sugar binding domain of LacI family protein"  
"NT-E05\_00674" 24601 "s63E6H2" 0 "Periplasmic binding proteins and sugar binding domain of LacI family protein"  
"NT-E05\_00675" 24602 "s59E13H2" 0 "Divergent AAA domain protein"  
"NT-E05\_00675" 24602 "s59E25H2" 0 "Divergent AAA domain protein"  
"NT-E05\_00675" 24602 "s59E5H2" 0 "Divergent AAA domain protein"  
"NT-E05\_00675" 24602 "s63E6H2" 0 "Divergent AAA domain protein"  
"NT-E05\_00676" 24603 "s59E13H2" 0 "DNA adenine methyltransferase YhdJ"  
"NT-E05\_00676" 24603 "s59E25H2" 0 "DNA adenine methyltransferase YhdJ"  
"NT-E05\_00676" 24603 "s59E5H2" 0.03445584 "DNA adenine methyltransferase YhdJ"  
"NT-E05\_00676" 24603 "s63E6H2" 0 "DNA adenine methyltransferase YhdJ"  
"NT-E05\_00677" 24604 "s59E13H2" 0 "Adenosine monophosphate-protein transferase SoFic"  
"NT-E05\_00677" 24604 "s59E25H2" 0 "Adenosine monophosphate-protein transferase SoFic"

"NT-E05\_00677" 24604 "s59E5H2" 0.07441888 "Adenosine monophosphate-protein transferase SoFic"  
"NT-E05\_00677" 24604 "s63E6H2" 0 "Adenosine monophosphate-protein transferase SoFic"  
"NT-E05\_00678" 24605 "s59E13H2" 0 "Helix-turn-helix"  
"NT-E05\_00678" 24605 "s59E25H2" 0 "Helix-turn-helix"  
"NT-E05\_00678" 24605 "s59E5H2" 0.04711297 "Helix-turn-helix"  
"NT-E05\_00678" 24605 "s63E6H2" 0 "Helix-turn-helix"  
"NT-E05\_00681" 24608 "s59E13H2" 0.002893527 "hypothetical protein"  
"NT-E05\_00681" 24608 "s59E25H2" 0 "hypothetical protein"  
"NT-E05\_00681" 24608 "s59E5H2" 0 "hypothetical protein"  
"NT-E05\_00681" 24608 "s63E6H2" 0 "hypothetical protein"  
"NT-E05\_00682" 24609 "s59E13H2" 0 "Recombinase"  
"NT-E05\_00682" 24609 "s59E25H2" 0 "Recombinase"  
"NT-E05\_00682" 24609 "s59E5H2" 0 "Recombinase"  
"NT-E05\_00682" 24609 "s63E6H2" 0 "Recombinase"  
"NT-E05\_00683" 24610 "s59E13H2" 0 "hypothetical protein"  
"NT-E05\_00683" 24610 "s59E25H2" 0 "hypothetical protein"  
"NT-E05\_00683" 24610 "s59E5H2" 0 "hypothetical protein"  
"NT-E05\_00683" 24610 "s63E6H2" 0 "hypothetical protein"  
"NT-E05\_00684" 24611 "s59E13H2" 0 "Reverse transcriptase (RNA-dependent DNA polymerase)"  
"NT-E05\_00684" 24611 "s59E25H2" 0 "Reverse transcriptase (RNA-dependent DNA polymerase)"  
"NT-E05\_00684" 24611 "s59E5H2" 0 "Reverse transcriptase (RNA-dependent DNA polymerase)"  
"NT-E05\_00684" 24611 "s63E6H2" 0 "Reverse transcriptase (RNA-dependent DNA polymerase)"  
"NT-E05\_00692" 24619 "s59E13H2" 0 "putative formate transporter 1"  
"NT-E05\_00692" 24619 "s59E25H2" 0 "putative formate transporter 1"  
"NT-E05\_00692" 24619 "s59E5H2" 0 "putative formate transporter 1"  
"NT-E05\_00692" 24619 "s63E6H2" 0 "putative formate transporter 1"  
"NT-E05\_00693" 24620 "s59E13H2" 0 "Redox-sensing transcriptional repressor Rex"  
"NT-E05\_00693" 24620 "s59E25H2" 0 "Redox-sensing transcriptional repressor Rex"  
"NT-E05\_00693" 24620 "s59E5H2" 0 "Redox-sensing transcriptional repressor Rex"  
"NT-E05\_00693" 24620 "s63E6H2" 0 "Redox-sensing transcriptional repressor Rex"  
"NT-E05\_00694" 24621 "s59E13H2" 0 "Alkaline phosphatase synthesis transcriptional regulatory protein PhoP"  
"NT-E05\_00694" 24621 "s59E25H2" 0 "Alkaline phosphatase synthesis transcriptional regulatory protein PhoP"  
"NT-E05\_00694" 24621 "s59E5H2" 0 "Alkaline phosphatase synthesis transcriptional regulatory protein PhoP"  
"NT-E05\_00694" 24621 "s63E6H2" 0 "Alkaline phosphatase synthesis transcriptional regulatory protein PhoP"  
"NT-E05\_00695" 24622 "s59E13H2" 0 "Adaptive-response sensory-kinase SasA"  
"NT-E05\_00695" 24622 "s59E25H2" 0 "Adaptive-response sensory-kinase SasA"  
"NT-E05\_00695" 24622 "s59E5H2" 0.009434086 "Adaptive-response sensory-kinase SasA"  
"NT-E05\_00695" 24622 "s63E6H2" 0 "Adaptive-response sensory-kinase SasA"  
"NT-E05\_00696" 24623 "s59E13H2" 0 "GTPase Obg"  
"NT-E05\_00696" 24623 "s59E25H2" 0 "GTPase Obg"  
"NT-E05\_00696" 24623 "s59E5H2" 0 "GTPase Obg"  
"NT-E05\_00696" 24623 "s63E6H2" 0 "GTPase Obg"  
"NT-E05\_00697" 24624 "s59E13H2" 0 "Leucine efflux protein"  
"NT-E05\_00697" 24624 "s59E25H2" 0 "Leucine efflux protein"  
"NT-E05\_00697" 24624 "s59E5H2" 0 "Leucine efflux protein"  
"NT-E05\_00697" 24624 "s63E6H2" 0 "Leucine efflux protein"  
"NT-E05\_00698" 24625 "s59E13H2" 0 "Fosmidomycin resistance protein"

"NT-E05\_00698" 24625 "s59E25H2" 0 "Fosmidomycin resistance protein"  
"NT-E05\_00698" 24625 "s59E5H2" 0 "Fosmidomycin resistance protein"  
"NT-E05\_00698" 24625 "s63E6H2" 0 "Fosmidomycin resistance protein"  
"NT-E05\_00699" 24626 "s59E13H2" 0 "Branched-chain-amino-acid aminotransferase"  
"NT-E05\_00699" 24626 "s59E25H2" 0 "Branched-chain-amino-acid aminotransferase"  
"NT-E05\_00699" 24626 "s59E5H2" 0 "Branched-chain-amino-acid aminotransferase"  
"NT-E05\_00699" 24626 "s63E6H2" 0 "Branched-chain-amino-acid aminotransferase"  
"NT-E05\_00700" 24627 "s59E13H2" 0 "hypothetical protein"  
"NT-E05\_00700" 24627 "s59E25H2" 0 "hypothetical protein"  
"NT-E05\_00700" 24627 "s59E5H2" 0 "hypothetical protein"  
"NT-E05\_00700" 24627 "s63E6H2" 0 "hypothetical protein"  
"NT-E05\_00701" 24628 "s59E13H2" 0 "Bifunctional homocysteine S-methyltransferase/5,10-methylenetetrahydrofolate reductase"  
"NT-E05\_00701" 24628 "s59E25H2" 0 "Bifunctional homocysteine S-methyltransferase/5,10-methylenetetrahydrofolate reductase"  
"NT-E05\_00701" 24628 "s59E5H2" 0 "Bifunctional homocysteine S-methyltransferase/5,10-methylenetetrahydrofolate reductase"  
"NT-E05\_00701" 24628 "s63E6H2" 0 "Bifunctional homocysteine S-methyltransferase/5,10-methylenetetrahydrofolate reductase"  
"NT-E05\_00702" 24629 "s59E13H2" 0 "Glycine cleavage system H protein"  
"NT-E05\_00702" 24629 "s59E25H2" 0 "Glycine cleavage system H protein"  
"NT-E05\_00702" 24629 "s59E5H2" 0 "Glycine cleavage system H protein"  
"NT-E05\_00702" 24629 "s63E6H2" 0 "Glycine cleavage system H protein"  
"NT-E05\_00703" 24630 "s59E13H2" 0 "Murein DD-endopeptidase MepM"  
"NT-E05\_00703" 24630 "s59E25H2" 0 "Murein DD-endopeptidase MepM"  
"NT-E05\_00703" 24630 "s59E5H2" 0 "Murein DD-endopeptidase MepM"  
"NT-E05\_00703" 24630 "s63E6H2" 0 "Murein DD-endopeptidase MepM"  
"NT-E05\_00704" 24631 "s59E13H2" 0 "Divalent-cation tolerance protein CutA"  
"NT-E05\_00704" 24631 "s59E25H2" 0 "Divalent-cation tolerance protein CutA"  
"NT-E05\_00704" 24631 "s59E5H2" 0 "Divalent-cation tolerance protein CutA"  
"NT-E05\_00704" 24631 "s63E6H2" 0 "Divalent-cation tolerance protein CutA"  
"NT-E05\_00705" 24632 "s59E13H2" 0 "Ribosomal protein S12 methylthiotransferase RimO"  
"NT-E05\_00705" 24632 "s59E25H2" 0 "Ribosomal protein S12 methylthiotransferase RimO"  
"NT-E05\_00705" 24632 "s59E5H2" 0 "Ribosomal protein S12 methylthiotransferase RimO"  
"NT-E05\_00705" 24632 "s63E6H2" 0.203153 "Ribosomal protein S12 methylthiotransferase RimO"  
"NT-E05\_00706" 24633 "s59E13H2" 0 "6-phosphofructokinase"  
"NT-E05\_00706" 24633 "s59E25H2" 0 "6-phosphofructokinase"  
"NT-E05\_00706" 24633 "s59E5H2" 0 "6-phosphofructokinase"  
"NT-E05\_00706" 24633 "s63E6H2" 0.3134662 "6-phosphofructokinase"  
"NT-E05\_00707" 24634 "s59E13H2" 0 "putative permease YjgP/YjgQ family protein"  
"NT-E05\_00707" 24634 "s59E25H2" 0 "putative permease YjgP/YjgQ family protein"  
"NT-E05\_00707" 24634 "s59E5H2" 0 "putative permease YjgP/YjgQ family protein"  
"NT-E05\_00707" 24634 "s63E6H2" 0.1461639 "putative permease YjgP/YjgQ family protein"  
"NT-E05\_00708" 24635 "s59E13H2" 0 "putative permease YjgP/YjgQ family protein"  
"NT-E05\_00708" 24635 "s59E25H2" 0 "putative permease YjgP/YjgQ family protein"  
"NT-E05\_00708" 24635 "s59E5H2" 0 "putative permease YjgP/YjgQ family protein"  
"NT-E05\_00708" 24635 "s63E6H2" 0 "putative permease YjgP/YjgQ family protein"  
"NT-E05\_00710" 24637 "s59E13H2" 0 "Methyladenine glycosylase"  
"NT-E05\_00710" 24637 "s59E25H2" 0 "Methyladenine glycosylase"  
"NT-E05\_00710" 24637 "s59E5H2" 0 "Methyladenine glycosylase"  
"NT-E05\_00710" 24637 "s63E6H2" 0 "Methyladenine glycosylase"

"NT-E05\_00711" 24638 "s59E13H2" 0 "phosphodiesterase"  
"NT-E05\_00711" 24638 "s59E25H2" 0 "phosphodiesterase"  
"NT-E05\_00711" 24638 "s59E5H2" 0 "phosphodiesterase"  
"NT-E05\_00711" 24638 "s63E6H2" 0 "phosphodiesterase"  
"NT-E05\_00712" 24639 "s59E13H2" 0 "DNA-3-methyladenine glycosylase 1"  
"NT-E05\_00712" 24639 "s59E25H2" 0 "DNA-3-methyladenine glycosylase 1"  
"NT-E05\_00712" 24639 "s59E5H2" 0 "DNA-3-methyladenine glycosylase 1"  
"NT-E05\_00712" 24639 "s63E6H2" 0 "DNA-3-methyladenine glycosylase 1"  
"NT-E05\_00713" 24640 "s59E13H2" 0 "HEPN domain protein"  
"NT-E05\_00713" 24640 "s59E25H2" 0 "HEPN domain protein"  
"NT-E05\_00713" 24640 "s59E5H2" 0 "HEPN domain protein"  
"NT-E05\_00713" 24640 "s63E6H2" 0 "HEPN domain protein"  
"NT-E05\_00714" 24641 "s59E13H2" 0 "Nucleotidyltransferase domain protein"  
"NT-E05\_00714" 24641 "s59E25H2" 0 "Nucleotidyltransferase domain protein"  
"NT-E05\_00714" 24641 "s59E5H2" 0 "Nucleotidyltransferase domain protein"  
"NT-E05\_00714" 24641 "s63E6H2" 0 "Nucleotidyltransferase domain protein"  
"NT-E05\_00716" 24643 "s59E13H2" 0 "hypothetical protein"  
"NT-E05\_00716" 24643 "s59E25H2" 0 "hypothetical protein"  
"NT-E05\_00716" 24643 "s59E5H2" 0 "hypothetical protein"  
"NT-E05\_00716" 24643 "s63E6H2" 0 "hypothetical protein"  
"NT-E05\_00717" 24644 "s59E13H2" 0 "CYTH domain protein"  
"NT-E05\_00717" 24644 "s59E25H2" 0 "CYTH domain protein"  
"NT-E05\_00717" 24644 "s59E5H2" 0 "CYTH domain protein"  
"NT-E05\_00717" 24644 "s63E6H2" 0 "CYTH domain protein"  
"NT-E05\_00718" 24645 "s59E13H2" 0 "Lipid II flippase FtsW"  
"NT-E05\_00718" 24645 "s59E25H2" 0 "Lipid II flippase FtsW"  
"NT-E05\_00718" 24645 "s59E5H2" 0 "Lipid II flippase FtsW"  
"NT-E05\_00718" 24645 "s63E6H2" 0 "Lipid II flippase FtsW"  
"NT-E05\_00719" 24646 "s59E13H2" 0 "UDP-N-acetylmuramoylalanine--D-glutamate ligase"  
"NT-E05\_00719" 24646 "s59E25H2" 0 "UDP-N-acetylmuramoylalanine--D-glutamate ligase"  
"NT-E05\_00719" 24646 "s59E5H2" 0 "UDP-N-acetylmuramoylalanine--D-glutamate ligase"  
"NT-E05\_00719" 24646 "s63E6H2" 0 "UDP-N-acetylmuramoylalanine--D-glutamate ligase"  
"NT-E05\_00720" 24647 "s59E13H2" 0 "Phospho-N-acetylmuramoyl-pentapeptide-transferase"  
"NT-E05\_00720" 24647 "s59E25H2" 0 "Phospho-N-acetylmuramoyl-pentapeptide-transferase"  
"NT-E05\_00720" 24647 "s59E5H2" 0 "Phospho-N-acetylmuramoyl-pentapeptide-transferase"  
"NT-E05\_00720" 24647 "s63E6H2" 0 "Phospho-N-acetylmuramoyl-pentapeptide-transferase"  
"NT-E05\_00721" 24648 "s59E13H2" 0 "UDP-N-acetylmuramoyl-tripeptide--D-alanyl-D-alanine ligase"  
"NT-E05\_00721" 24648 "s59E25H2" 0 "UDP-N-acetylmuramoyl-tripeptide--D-alanyl-D-alanine ligase"  
"NT-E05\_00721" 24648 "s59E5H2" 0.005542769 "UDP-N-acetylmuramoyl-tripeptide--D-alanyl-D-alanine ligase"  
"NT-E05\_00721" 24648 "s63E6H2" 0 "UDP-N-acetylmuramoyl-tripeptide--D-alanyl-D-alanine ligase"  
"NT-E05\_00722" 24649 "s59E13H2" 0 "UDP-N-acetylmuramoyl-L-alanyl-D-glutamate--L-lysine ligase"  
"NT-E05\_00722" 24649 "s59E25H2" 0 "UDP-N-acetylmuramoyl-L-alanyl-D-glutamate--L-lysine ligase"  
"NT-E05\_00722" 24649 "s59E5H2" 0 "UDP-N-acetylmuramoyl-L-alanyl-D-glutamate--L-lysine ligase"  
"NT-E05\_00722" 24649 "s63E6H2" 0 "UDP-N-acetylmuramoyl-L-alanyl-D-glutamate--L-lysine ligase"  
"NT-E05\_00723" 24650 "s59E13H2" 0 "hypothetical protein"  
"NT-E05\_00723" 24650 "s59E25H2" 0 "hypothetical protein"  
"NT-E05\_00723" 24650 "s59E5H2" 0 "hypothetical protein"

"NT-E05\_00723" 24650 "s63E6H2" 0 "hypothetical protein"  
"NT-E05\_00724" 24651 "s59E13H2" 0 "Stage V sporulation protein D"  
"NT-E05\_00724" 24651 "s59E25H2" 0 "Stage V sporulation protein D"  
"NT-E05\_00724" 24651 "s59E5H2" 0 "Stage V sporulation protein D"  
"NT-E05\_00724" 24651 "s63E6H2" 0 "Stage V sporulation protein D"  
"NT-E05\_00725" 24652 "s59E13H2" 0 "Cell division protein FtsL"  
"NT-E05\_00725" 24652 "s59E25H2" 0 "Cell division protein FtsL"  
"NT-E05\_00725" 24652 "s59E5H2" 0 "Cell division protein FtsL"  
"NT-E05\_00725" 24652 "s63E6H2" 0 "Cell division protein FtsL"  
"NT-E05\_00726" 24653 "s59E13H2" 0 "Ribosomal RNA small subunit methyltransferase H"  
"NT-E05\_00726" 24653 "s59E25H2" 0 "Ribosomal RNA small subunit methyltransferase H"  
"NT-E05\_00726" 24653 "s59E5H2" 0 "Ribosomal RNA small subunit methyltransferase H"  
"NT-E05\_00726" 24653 "s63E6H2" 0 "Ribosomal RNA small subunit methyltransferase H"  
"NT-E05\_00727" 24654 "s59E13H2" 0 "cell division protein MraZ"  
"NT-E05\_00727" 24654 "s59E25H2" 0 "cell division protein MraZ"  
"NT-E05\_00727" 24654 "s59E5H2" 0 "cell division protein MraZ"  
"NT-E05\_00727" 24654 "s63E6H2" 0 "cell division protein MraZ"  
"NT-E05\_00728" 24655 "s59E13H2" 0 "hypothetical protein"  
"NT-E05\_00728" 24655 "s59E25H2" 0 "hypothetical protein"  
"NT-E05\_00728" 24655 "s59E5H2" 0 "hypothetical protein"  
"NT-E05\_00728" 24655 "s63E6H2" 0 "hypothetical protein"  
"NT-E05\_00730" 24657 "s59E13H2" 0 "hypothetical protein"  
"NT-E05\_00730" 24657 "s59E25H2" 0 "hypothetical protein"  
"NT-E05\_00730" 24657 "s59E5H2" 0 "hypothetical protein"  
"NT-E05\_00730" 24657 "s63E6H2" 0 "hypothetical protein"  
"NT-E05\_00731" 24658 "s59E13H2" 0 "Beta-1,4-mannooligosaccharide phosphorylase"  
"NT-E05\_00731" 24658 "s59E25H2" 0 "Beta-1,4-mannooligosaccharide phosphorylase"  
"NT-E05\_00731" 24658 "s59E5H2" 0 "Beta-1,4-mannooligosaccharide phosphorylase"  
"NT-E05\_00731" 24658 "s63E6H2" 0 "Beta-1,4-mannooligosaccharide phosphorylase"  
"NT-E05\_00732" 24659 "s59E13H2" 0 "hypothetical protein"  
"NT-E05\_00732" 24659 "s59E25H2" 0 "hypothetical protein"  
"NT-E05\_00732" 24659 "s59E5H2" 0 "hypothetical protein"  
"NT-E05\_00732" 24659 "s63E6H2" 0.004036112 "hypothetical protein"  
"NT-E05\_00733" 24660 "s59E13H2" 0 "Tetrahydromethanopterin:alpha-L-glutamate ligase"  
"NT-E05\_00733" 24660 "s59E25H2" 0 "Tetrahydromethanopterin:alpha-L-glutamate ligase"  
"NT-E05\_00733" 24660 "s59E5H2" 0 "Tetrahydromethanopterin:alpha-L-glutamate ligase"  
"NT-E05\_00733" 24660 "s63E6H2" 0 "Tetrahydromethanopterin:alpha-L-glutamate ligase"  
"NT-E05\_00734" 24661 "s59E13H2" 0.00249342 "Bifunctional IPC transferase and DIPP synthase"  
"NT-E05\_00734" 24661 "s59E25H2" 0 "Bifunctional IPC transferase and DIPP synthase"  
"NT-E05\_00734" 24661 "s59E5H2" 0 "Bifunctional IPC transferase and DIPP synthase"  
"NT-E05\_00734" 24661 "s63E6H2" 0.00320997 "Bifunctional IPC transferase and DIPP synthase"  
"NT-E05\_00735" 24662 "s59E13H2" 0 "putative acetyltransferase"  
"NT-E05\_00735" 24662 "s59E25H2" 0 "putative acetyltransferase"  
"NT-E05\_00735" 24662 "s59E5H2" 0 "putative acetyltransferase"  
"NT-E05\_00735" 24662 "s63E6H2" 0 "putative acetyltransferase"  
"NT-E05\_00736" 24663 "s59E13H2" 0.009703351 "Vancomycin/teicoplanin A-type resistance protein VanA"  
"NT-E05\_00736" 24663 "s59E25H2" 0 "Vancomycin/teicoplanin A-type resistance protein VanA"

"NT-E05\_00736" 24663 "s59E5H2" 0 "Vancomycin/teicoplanin A-type resistance protein VanA"  
"NT-E05\_00736" 24663 "s63E6H2" 0 "Vancomycin/teicoplanin A-type resistance protein VanA"  
"NT-E05\_00738" 24665 "s59E13H2" 0 "L-arabinose transport system permease protein AraQ"  
"NT-E05\_00738" 24665 "s59E25H2" 0 "L-arabinose transport system permease protein AraQ"  
"NT-E05\_00738" 24665 "s59E5H2" 0 "L-arabinose transport system permease protein AraQ"  
"NT-E05\_00738" 24665 "s63E6H2" 0 "L-arabinose transport system permease protein AraQ"  
"NT-E05\_00739" 24666 "s59E13H2" 0 "Arylsulfotransferase (ASST)"  
"NT-E05\_00739" 24666 "s59E25H2" 0 "Arylsulfotransferase (ASST)"  
"NT-E05\_00739" 24666 "s59E5H2" 0 "Arylsulfotransferase (ASST)"  
"NT-E05\_00739" 24666 "s63E6H2" 0 "Arylsulfotransferase (ASST)"  
"NT-E05\_00740" 24667 "s59E13H2" 0 "hypothetical protein"  
"NT-E05\_00740" 24667 "s59E25H2" 0 "hypothetical protein"  
"NT-E05\_00740" 24667 "s59E5H2" 0 "hypothetical protein"  
"NT-E05\_00740" 24667 "s63E6H2" 0 "hypothetical protein"  
"NT-E05\_00741" 24668 "s59E13H2" 0 "putative tyrosine recombinase XerC-like protein"  
"NT-E05\_00741" 24668 "s59E25H2" 0 "putative tyrosine recombinase XerC-like protein"  
"NT-E05\_00741" 24668 "s59E5H2" 0 "putative tyrosine recombinase XerC-like protein"  
"NT-E05\_00741" 24668 "s63E6H2" 0 "putative tyrosine recombinase XerC-like protein"  
"NT-E05\_00744" 24671 "s59E13H2" 0 "hypothetical protein"  
"NT-E05\_00744" 24671 "s59E25H2" 0 "hypothetical protein"  
"NT-E05\_00744" 24671 "s59E5H2" 0 "hypothetical protein"  
"NT-E05\_00744" 24671 "s63E6H2" 0 "hypothetical protein"  
"NT-E05\_00745" 24672 "s59E13H2" 0 "Opacity family porin protein"  
"NT-E05\_00745" 24672 "s59E25H2" 0 "Opacity family porin protein"  
"NT-E05\_00745" 24672 "s59E5H2" 0 "Opacity family porin protein"  
"NT-E05\_00745" 24672 "s63E6H2" 0 "Opacity family porin protein"  
"NT-E05\_00748" 24675 "s59E13H2" 0 "Putative transposase DNA-binding domain protein"  
"NT-E05\_00748" 24675 "s59E25H2" 0 "Putative transposase DNA-binding domain protein"  
"NT-E05\_00748" 24675 "s59E5H2" 0 "Putative transposase DNA-binding domain protein"  
"NT-E05\_00748" 24675 "s63E6H2" 0 "Putative transposase DNA-binding domain protein"  
"NT-E05\_00749" 24676 "s59E13H2" 0 "pyrroloquinoline quinone biosynthesis protein PqqE"  
"NT-E05\_00749" 24676 "s59E25H2" 0 "pyrroloquinoline quinone biosynthesis protein PqqE"  
"NT-E05\_00749" 24676 "s59E5H2" 0 "pyrroloquinoline quinone biosynthesis protein PqqE"  
"NT-E05\_00749" 24676 "s63E6H2" 0 "pyrroloquinoline quinone biosynthesis protein PqqE"  
"NT-E05\_00750" 24677 "s59E13H2" 0 "Ribosomal protein S12 methylthiotransferase RimO"  
"NT-E05\_00750" 24677 "s59E25H2" 0 "Ribosomal protein S12 methylthiotransferase RimO"  
"NT-E05\_00750" 24677 "s59E5H2" 0 "Ribosomal protein S12 methylthiotransferase RimO"  
"NT-E05\_00750" 24677 "s63E6H2" 0 "Ribosomal protein S12 methylthiotransferase RimO"  
"NT-E05\_00751" 24678 "s59E13H2" 0 "ADP-ribose pyrophosphatase"  
"NT-E05\_00751" 24678 "s59E25H2" 0 "ADP-ribose pyrophosphatase"  
"NT-E05\_00751" 24678 "s59E5H2" 0.002209847 "ADP-ribose pyrophosphatase"  
"NT-E05\_00751" 24678 "s63E6H2" 0 "ADP-ribose pyrophosphatase"  
"NT-E05\_00752" 24679 "s59E13H2" 0 "Phosphopantetheine adenyltransferase"  
"NT-E05\_00752" 24679 "s59E25H2" 0 "Phosphopantetheine adenyltransferase"  
"NT-E05\_00752" 24679 "s59E5H2" 0 "Phosphopantetheine adenyltransferase"  
"NT-E05\_00752" 24679 "s63E6H2" 0 "Phosphopantetheine adenyltransferase"  
"NT-E05\_00753" 24680 "s59E13H2" 0 "succinyl-CoA synthetase subunit alpha"

"NT-E05\_00753" 24680 "s59E25H2" 0 "succinyl-CoA synthetase subunit alpha"  
"NT-E05\_00753" 24680 "s59E5H2" 0 "succinyl-CoA synthetase subunit alpha"  
"NT-E05\_00753" 24680 "s63E6H2" 0 "succinyl-CoA synthetase subunit alpha"  
"NT-E05\_00754" 24681 "s59E13H2" 0 "50S ribosomal protein L32"  
"NT-E05\_00754" 24681 "s59E25H2" 0 "50S ribosomal protein L32"  
"NT-E05\_00754" 24681 "s59E5H2" 0 "50S ribosomal protein L32"  
"NT-E05\_00754" 24681 "s63E6H2" 0 "50S ribosomal protein L32"  
"NT-E05\_00755" 24682 "s59E13H2" 0 "Phosphate acyltransferase"  
"NT-E05\_00755" 24682 "s59E25H2" 0 "Phosphate acyltransferase"  
"NT-E05\_00755" 24682 "s59E5H2" 0 "Phosphate acyltransferase"  
"NT-E05\_00755" 24682 "s63E6H2" 0 "Phosphate acyltransferase"  
"NT-E05\_00756" 24683 "s59E13H2" 0 "3-oxoacyl-[acyl-carrier-protein] synthase 3"  
"NT-E05\_00756" 24683 "s59E25H2" 0 "3-oxoacyl-[acyl-carrier-protein] synthase 3"  
"NT-E05\_00756" 24683 "s59E5H2" 0 "3-oxoacyl-[acyl-carrier-protein] synthase 3"  
"NT-E05\_00756" 24683 "s63E6H2" 0 "3-oxoacyl-[acyl-carrier-protein] synthase 3"  
"NT-E05\_00757" 24684 "s59E13H2" 0 "hypothetical protein"  
"NT-E05\_00757" 24684 "s59E25H2" 0 "hypothetical protein"  
"NT-E05\_00757" 24684 "s59E5H2" 0 "hypothetical protein"  
"NT-E05\_00757" 24684 "s63E6H2" 0 "hypothetical protein"  
"NT-E05\_00758" 24685 "s59E13H2" 0 "Elongation factor G"  
"NT-E05\_00758" 24685 "s59E25H2" 0 "Elongation factor G"  
"NT-E05\_00758" 24685 "s59E5H2" 0.002007396 "Elongation factor G"  
"NT-E05\_00758" 24685 "s63E6H2" 0 "Elongation factor G"  
"NT-E05\_00759" 24686 "s59E13H2" 0 "Biotin transporter BioY"  
"NT-E05\_00759" 24686 "s59E25H2" 0 "Biotin transporter BioY"  
"NT-E05\_00759" 24686 "s59E5H2" 0.006788833 "Biotin transporter BioY"  
"NT-E05\_00759" 24686 "s63E6H2" 0 "Biotin transporter BioY"  
"NT-E05\_00760" 24687 "s59E13H2" 0 "putative N-acetyltransferase"  
"NT-E05\_00760" 24687 "s59E25H2" 0 "putative N-acetyltransferase"  
"NT-E05\_00760" 24687 "s59E5H2" 0 "putative N-acetyltransferase"  
"NT-E05\_00760" 24687 "s63E6H2" 0 "putative N-acetyltransferase"  
"NT-E05\_00761" 24688 "s59E13H2" 0 "tRNA threonylcarbamoyladenosine biosynthesis protein TsaB"  
"NT-E05\_00761" 24688 "s59E25H2" 0 "tRNA threonylcarbamoyladenosine biosynthesis protein TsaB"  
"NT-E05\_00761" 24688 "s59E5H2" 0 "tRNA threonylcarbamoyladenosine biosynthesis protein TsaB"  
"NT-E05\_00761" 24688 "s63E6H2" 0 "tRNA threonylcarbamoyladenosine biosynthesis protein TsaB"  
"NT-E05\_00762" 24689 "s59E13H2" 0 "tRNA threonylcarbamoyladenosine biosynthesis protein TsaE"  
"NT-E05\_00762" 24689 "s59E25H2" 0 "tRNA threonylcarbamoyladenosine biosynthesis protein TsaE"  
"NT-E05\_00762" 24689 "s59E5H2" 0 "tRNA threonylcarbamoyladenosine biosynthesis protein TsaE"  
"NT-E05\_00762" 24689 "s63E6H2" 0 "tRNA threonylcarbamoyladenosine biosynthesis protein TsaE"  
"NT-E05\_00763" 24690 "s59E13H2" 0 "Thiamine-phosphate synthase"  
"NT-E05\_00763" 24690 "s59E25H2" 0 "Thiamine-phosphate synthase"  
"NT-E05\_00763" 24690 "s59E5H2" 0 "Thiamine-phosphate synthase"  
"NT-E05\_00763" 24690 "s63E6H2" 0 "Thiamine-phosphate synthase"  
"NT-E05\_00764" 24691 "s59E13H2" 0 "Proline--tRNA ligase"  
"NT-E05\_00764" 24691 "s59E25H2" 0 "Proline--tRNA ligase"  
"NT-E05\_00764" 24691 "s59E5H2" 0 "Proline--tRNA ligase"  
"NT-E05\_00764" 24691 "s63E6H2" 0 "Proline--tRNA ligase"

"NT-E05\_00765" 24692 "s59E13H2" 0 "hypothetical protein"  
"NT-E05\_00765" 24692 "s59E25H2" 0 "hypothetical protein"  
"NT-E05\_00765" 24692 "s59E5H2" 0 "hypothetical protein"  
"NT-E05\_00765" 24692 "s63E6H2" 0 "hypothetical protein"  
"NT-E05\_00766" 24693 "s59E13H2" 0 "Translation initiation factor IF-2"  
"NT-E05\_00766" 24693 "s59E25H2" 0 "Translation initiation factor IF-2"  
"NT-E05\_00766" 24693 "s59E5H2" 0 "Translation initiation factor IF-2"  
"NT-E05\_00766" 24693 "s63E6H2" 0 "Translation initiation factor IF-2"  
"NT-E05\_00767" 24694 "s59E13H2" 0 "hypothetical protein"  
"NT-E05\_00767" 24694 "s59E25H2" 0 "hypothetical protein"  
"NT-E05\_00767" 24694 "s59E5H2" 0 "hypothetical protein"  
"NT-E05\_00767" 24694 "s63E6H2" 0 "hypothetical protein"  
"NT-E05\_00768" 24695 "s59E13H2" 0 "tRNA pseudouridine synthase B"  
"NT-E05\_00768" 24695 "s59E25H2" 0 "tRNA pseudouridine synthase B"  
"NT-E05\_00768" 24695 "s59E5H2" 0 "tRNA pseudouridine synthase B"  
"NT-E05\_00768" 24695 "s63E6H2" 0 "tRNA pseudouridine synthase B"  
"NT-E05\_00769" 24696 "s59E13H2" 0 "Riboflavin biosynthesis protein RibF"  
"NT-E05\_00769" 24696 "s59E25H2" 0 "Riboflavin biosynthesis protein RibF"  
"NT-E05\_00769" 24696 "s59E5H2" 0 "Riboflavin biosynthesis protein RibF"  
"NT-E05\_00769" 24696 "s63E6H2" 0 "Riboflavin biosynthesis protein RibF"  
"NT-E05\_00770" 24697 "s59E13H2" 0 "Bifunctional ligase/repressor BirA"  
"NT-E05\_00770" 24697 "s59E25H2" 0 "Bifunctional ligase/repressor BirA"  
"NT-E05\_00770" 24697 "s59E5H2" 0 "Bifunctional ligase/repressor BirA"  
"NT-E05\_00770" 24697 "s63E6H2" 0 "Bifunctional ligase/repressor BirA"  
"NT-E05\_00771" 24698 "s59E13H2" 0 "Type III pantothenate kinase"  
"NT-E05\_00771" 24698 "s59E25H2" 0 "Type III pantothenate kinase"  
"NT-E05\_00771" 24698 "s59E5H2" 0 "Type III pantothenate kinase"  
"NT-E05\_00771" 24698 "s63E6H2" 0 "Type III pantothenate kinase"  
"NT-E05\_00772" 24699 "s59E13H2" 0 "Processive diacylglycerol beta-glucosyltransferase"  
"NT-E05\_00772" 24699 "s59E25H2" 0 "Processive diacylglycerol beta-glucosyltransferase"  
"NT-E05\_00772" 24699 "s59E5H2" 0 "Processive diacylglycerol beta-glucosyltransferase"  
"NT-E05\_00772" 24699 "s63E6H2" 0 "Processive diacylglycerol beta-glucosyltransferase"  
"NT-E05\_00773" 24700 "s59E13H2" 0 "Soluble epoxide hydrolase"  
"NT-E05\_00773" 24700 "s59E25H2" 0 "Soluble epoxide hydrolase"  
"NT-E05\_00773" 24700 "s59E5H2" 0 "Soluble epoxide hydrolase"  
"NT-E05\_00773" 24700 "s63E6H2" 0 "Soluble epoxide hydrolase"  
"NT-E05\_00774" 24701 "s59E13H2" 0 "hypothetical protein"  
"NT-E05\_00774" 24701 "s59E25H2" 0 "hypothetical protein"  
"NT-E05\_00774" 24701 "s59E5H2" 0 "hypothetical protein"  
"NT-E05\_00774" 24701 "s63E6H2" 0 "hypothetical protein"  
"NT-E05\_00775" 24702 "s59E13H2" 0 "Ribose transport system permease protein RbsC"  
"NT-E05\_00775" 24702 "s59E25H2" 0 "Ribose transport system permease protein RbsC"  
"NT-E05\_00775" 24702 "s59E5H2" 0.07827698 "Ribose transport system permease protein RbsC"  
"NT-E05\_00775" 24702 "s63E6H2" 0.003308728 "Ribose transport system permease protein RbsC"  
"NT-E05\_00776" 24703 "s59E13H2" 0 "Ribose transport system permease protein RbsC"  
"NT-E05\_00776" 24703 "s59E25H2" 0 "Ribose transport system permease protein RbsC"  
"NT-E05\_00776" 24703 "s59E5H2" 0.007171545 "Ribose transport system permease protein RbsC"



"NT-E05\_00776" 24703 "s63E6H2" 0 "Ribose transport system permease protein RbsC"  
"NT-E05\_00777" 24704 "s59E13H2" 0 "Ribose import ATP-binding protein RbsA"  
"NT-E05\_00777" 24704 "s59E25H2" 0 "Ribose import ATP-binding protein RbsA"  
"NT-E05\_00777" 24704 "s59E5H2" 0 "Ribose import ATP-binding protein RbsA"  
"NT-E05\_00777" 24704 "s63E6H2" 0.03886629 "Ribose import ATP-binding protein RbsA"  
"NT-E05\_00778" 24705 "s59E13H2" 0 "3-oxoacyl-[acyl-carrier-protein] reductase FabG"  
"NT-E05\_00778" 24705 "s59E25H2" 0 "3-oxoacyl-[acyl-carrier-protein] reductase FabG"  
"NT-E05\_00778" 24705 "s59E5H2" 0 "3-oxoacyl-[acyl-carrier-protein] reductase FabG"  
"NT-E05\_00778" 24705 "s63E6H2" 0 "3-oxoacyl-[acyl-carrier-protein] reductase FabG"  
"NT-E05\_00782" 24709 "s59E13H2" 0 "S23 ribosomal protein"  
"NT-E05\_00782" 24709 "s59E25H2" 0 "S23 ribosomal protein"  
"NT-E05\_00782" 24709 "s59E5H2" 0 "S23 ribosomal protein"  
"NT-E05\_00782" 24709 "s63E6H2" 0 "S23 ribosomal protein"  
"NT-E05\_00783" 24710 "s59E13H2" 0 "hypothetical protein"  
"NT-E05\_00783" 24710 "s59E25H2" 0 "hypothetical protein"  
"NT-E05\_00783" 24710 "s59E5H2" 0 "hypothetical protein"  
"NT-E05\_00783" 24710 "s63E6H2" 0 "hypothetical protein"  
"NT-E05\_00784" 24711 "s59E13H2" 0 "hypothetical protein"  
"NT-E05\_00784" 24711 "s59E25H2" 0 "hypothetical protein"  
"NT-E05\_00784" 24711 "s59E5H2" 0 "hypothetical protein"  
"NT-E05\_00784" 24711 "s63E6H2" 0.005945972 "hypothetical protein"  
"NT-E05\_00785" 24712 "s59E13H2" 0 "hypothetical protein"  
"NT-E05\_00785" 24712 "s59E25H2" 0 "hypothetical protein"  
"NT-E05\_00785" 24712 "s59E5H2" 0 "hypothetical protein"  
"NT-E05\_00785" 24712 "s63E6H2" 0 "hypothetical protein"  
"NT-E05\_00786" 24713 "s59E13H2" 0 "Modulator of FtsH protease HflC"  
"NT-E05\_00786" 24713 "s59E25H2" 0 "Modulator of FtsH protease HflC"  
"NT-E05\_00786" 24713 "s59E5H2" 0 "Modulator of FtsH protease HflC"  
"NT-E05\_00786" 24713 "s63E6H2" 2.659448 "Modulator of FtsH protease HflC"  
"NT-E05\_00788" 24715 "s59E13H2" 0 "Fosmidomycin resistance protein"  
"NT-E05\_00788" 24715 "s59E25H2" 0.4340176 "Fosmidomycin resistance protein"  
"NT-E05\_00788" 24715 "s59E5H2" 0 "Fosmidomycin resistance protein"  
"NT-E05\_00788" 24715 "s63E6H2" 2.654885 "Fosmidomycin resistance protein"  
"NT-E05\_00789" 24716 "s59E13H2" 0 "Ribonuclease Y"  
"NT-E05\_00789" 24716 "s59E25H2" 0 "Ribonuclease Y"  
"NT-E05\_00789" 24716 "s59E5H2" 0.03790097 "Ribonuclease Y"  
"NT-E05\_00789" 24716 "s63E6H2" 0 "Ribonuclease Y"  
"NT-E05\_00790" 24717 "s59E13H2" 0 "putative nicotinate-nucleotide adenyllyltransferase"  
"NT-E05\_00790" 24717 "s59E25H2" 0 "putative nicotinate-nucleotide adenyllyltransferase"  
"NT-E05\_00790" 24717 "s59E5H2" 0.05151191 "putative nicotinate-nucleotide adenyllyltransferase"  
"NT-E05\_00790" 24717 "s63E6H2" 0 "putative nicotinate-nucleotide adenyllyltransferase"  
"NT-E05\_00791" 24718 "s59E13H2" 0 "Ribosomal silencing factor RsfS"  
"NT-E05\_00791" 24718 "s59E25H2" 0 "Ribosomal silencing factor RsfS"  
"NT-E05\_00791" 24718 "s59E5H2" 0.05240862 "Ribosomal silencing factor RsfS"  
"NT-E05\_00791" 24718 "s63E6H2" 0 "Ribosomal silencing factor RsfS"  
"NT-E05\_00793" 24720 "s59E13H2" 0 "Dihydroxy-acid dehydratase"  
"NT-E05\_00793" 24720 "s59E25H2" 0 "Dihydroxy-acid dehydratase"

"NT-E05\_00793" 24720 "s59E5H2" 0.04055838 "Dihydroxy-acid dehydratase"  
"NT-E05\_00793" 24720 "s63E6H2" 0 "Dihydroxy-acid dehydratase"  
"NT-E05\_00794" 24721 "s59E13H2" 0 "Histidinol-phosphate aminotransferase 2"  
"NT-E05\_00794" 24721 "s59E25H2" 0 "Histidinol-phosphate aminotransferase 2"  
"NT-E05\_00794" 24721 "s59E5H2" 0.07244834 "Histidinol-phosphate aminotransferase 2"  
"NT-E05\_00794" 24721 "s63E6H2" 0 "Histidinol-phosphate aminotransferase 2"  
"NT-E05\_00795" 24722 "s59E13H2" 0 "Cytidylate kinase"  
"NT-E05\_00795" 24722 "s59E25H2" 0 "Cytidylate kinase"  
"NT-E05\_00795" 24722 "s59E5H2" 0.02502864 "Cytidylate kinase"  
"NT-E05\_00795" 24722 "s63E6H2" 0 "Cytidylate kinase"  
"NT-E05\_00796" 24723 "s59E13H2" 0 "1-acyl-sn-glycerol-3-phosphate acyltransferase"  
"NT-E05\_00796" 24723 "s59E25H2" 0 "1-acyl-sn-glycerol-3-phosphate acyltransferase"  
"NT-E05\_00796" 24723 "s59E5H2" 0.07405168 "1-acyl-sn-glycerol-3-phosphate acyltransferase"  
"NT-E05\_00796" 24723 "s63E6H2" 0 "1-acyl-sn-glycerol-3-phosphate acyltransferase"  
"NT-E05\_00797" 24724 "s59E13H2" 0 "4-hydroxy-3-methylbut-2-enyl diphosphate reductase"  
"NT-E05\_00797" 24724 "s59E25H2" 0 "4-hydroxy-3-methylbut-2-enyl diphosphate reductase"  
"NT-E05\_00797" 24724 "s59E5H2" 0 "4-hydroxy-3-methylbut-2-enyl diphosphate reductase"  
"NT-E05\_00797" 24724 "s63E6H2" 0 "4-hydroxy-3-methylbut-2-enyl diphosphate reductase"  
"NT-E05\_00798" 24725 "s59E13H2" 0 "30S ribosomal protein S1"  
"NT-E05\_00798" 24725 "s59E25H2" 0 "30S ribosomal protein S1"  
"NT-E05\_00798" 24725 "s59E5H2" 0 "30S ribosomal protein S1"  
"NT-E05\_00798" 24725 "s63E6H2" 0 "30S ribosomal protein S1"  
"NT-E05\_00799" 24726 "s59E13H2" 0 "Glycerol-3-phosphate acyltransferase"  
"NT-E05\_00799" 24726 "s59E25H2" 0 "Glycerol-3-phosphate acyltransferase"  
"NT-E05\_00799" 24726 "s59E5H2" 0 "Glycerol-3-phosphate acyltransferase"  
"NT-E05\_00799" 24726 "s63E6H2" 0 "Glycerol-3-phosphate acyltransferase"  
"NT-E05\_00800" 24727 "s59E13H2" 0 "DNA-binding protein HU"  
"NT-E05\_00800" 24727 "s59E25H2" 0 "DNA-binding protein HU"  
"NT-E05\_00800" 24727 "s59E5H2" 0 "DNA-binding protein HU"  
"NT-E05\_00800" 24727 "s63E6H2" 0 "DNA-binding protein HU"  
"NT-E05\_00801" 24728 "s59E13H2" 0 "HTH-type transcriptional repressor YcgE"  
"NT-E05\_00801" 24728 "s59E25H2" 0 "HTH-type transcriptional repressor YcgE"  
"NT-E05\_00801" 24728 "s59E5H2" 0 "HTH-type transcriptional repressor YcgE"  
"NT-E05\_00801" 24728 "s63E6H2" 0 "HTH-type transcriptional repressor YcgE"  
"NT-E05\_00803" 24730 "s59E13H2" 0 "Tryptophan--tRNA ligase"  
"NT-E05\_00803" 24730 "s59E25H2" 0 "Tryptophan--tRNA ligase"  
"NT-E05\_00803" 24730 "s59E5H2" 0.01263658 "Tryptophan--tRNA ligase"  
"NT-E05\_00803" 24730 "s63E6H2" 0 "Tryptophan--tRNA ligase"  
"NT-E05\_00804" 24731 "s59E13H2" 0 "3-oxoacyl-[acyl-carrier-protein] reductase FabG"  
"NT-E05\_00804" 24731 "s59E25H2" 0 "3-oxoacyl-[acyl-carrier-protein] reductase FabG"  
"NT-E05\_00804" 24731 "s59E5H2" 0.04480966 "3-oxoacyl-[acyl-carrier-protein] reductase FabG"  
"NT-E05\_00804" 24731 "s63E6H2" 0 "3-oxoacyl-[acyl-carrier-protein] reductase FabG"  
"NT-E05\_00805" 24732 "s59E13H2" 0 "hypothetical protein"  
"NT-E05\_00805" 24732 "s59E25H2" 0 "hypothetical protein"  
"NT-E05\_00805" 24732 "s59E5H2" 0 "hypothetical protein"  
"NT-E05\_00805" 24732 "s63E6H2" 0 "hypothetical protein"  
"NT-E05\_00807" 24734 "s59E13H2" 0 "Transposase"

"NT-E05\_00807" 24734 "s59E25H2" 0 "Transposase"  
"NT-E05\_00807" 24734 "s59E5H2" 0 "Transposase"  
"NT-E05\_00807" 24734 "s63E6H2" 0 "Transposase"  
"NT-E05\_00808" 24735 "s59E13H2" 0 "IS2 transposase TnpB"  
"NT-E05\_00808" 24735 "s59E25H2" 0 "IS2 transposase TnpB"  
"NT-E05\_00808" 24735 "s59E5H2" 0 "IS2 transposase TnpB"  
"NT-E05\_00808" 24735 "s63E6H2" 0 "IS2 transposase TnpB"  
"NT-E05\_00809" 24736 "s59E13H2" 0 "D-tagatose 3-epimerase"  
"NT-E05\_00809" 24736 "s59E25H2" 0 "D-tagatose 3-epimerase"  
"NT-E05\_00809" 24736 "s59E5H2" 0 "D-tagatose 3-epimerase"  
"NT-E05\_00809" 24736 "s63E6H2" 0 "D-tagatose 3-epimerase"  
"NT-E05\_00810" 24737 "s59E13H2" 0 "Acetoin:2,6-dichlorophenolindophenol oxidoreductase subunit alpha"  
"NT-E05\_00810" 24737 "s59E25H2" 0 "Acetoin:2,6-dichlorophenolindophenol oxidoreductase subunit alpha"  
"NT-E05\_00810" 24737 "s59E5H2" 0 "Acetoin:2,6-dichlorophenolindophenol oxidoreductase subunit alpha"  
"NT-E05\_00810" 24737 "s63E6H2" 0 "Acetoin:2,6-dichlorophenolindophenol oxidoreductase subunit alpha"  
"NT-E05\_00811" 24738 "s59E13H2" 0 "2-oxoisovalerate dehydrogenase subunit beta"  
"NT-E05\_00811" 24738 "s59E25H2" 0 "2-oxoisovalerate dehydrogenase subunit beta"  
"NT-E05\_00811" 24738 "s59E5H2" 0 "2-oxoisovalerate dehydrogenase subunit beta"  
"NT-E05\_00811" 24738 "s63E6H2" 0 "2-oxoisovalerate dehydrogenase subunit beta"  
"NT-E05\_00812" 24739 "s59E13H2" 0 "NAD-dependent methanol dehydrogenase"  
"NT-E05\_00812" 24739 "s59E25H2" 0 "NAD-dependent methanol dehydrogenase"  
"NT-E05\_00812" 24739 "s59E5H2" 0 "NAD-dependent methanol dehydrogenase"  
"NT-E05\_00812" 24739 "s63E6H2" 0 "NAD-dependent methanol dehydrogenase"  
"NT-E05\_00813" 24740 "s59E13H2" 0 "hypothetical protein"  
"NT-E05\_00813" 24740 "s59E25H2" 0 "hypothetical protein"  
"NT-E05\_00813" 24740 "s59E5H2" 0 "hypothetical protein"  
"NT-E05\_00813" 24740 "s63E6H2" 0 "hypothetical protein"  
"NT-E05\_00814" 24741 "s59E13H2" 0 "Glucosyl-3-phosphoglycerate synthase"  
"NT-E05\_00814" 24741 "s59E25H2" 0 "Glucosyl-3-phosphoglycerate synthase"  
"NT-E05\_00814" 24741 "s59E5H2" 0 "Glucosyl-3-phosphoglycerate synthase"  
"NT-E05\_00814" 24741 "s63E6H2" 0 "Glucosyl-3-phosphoglycerate synthase"  
"NT-E05\_00815" 24742 "s59E13H2" 0 "Phosphoserine phosphatase 1"  
"NT-E05\_00815" 24742 "s59E25H2" 0 "Phosphoserine phosphatase 1"  
"NT-E05\_00815" 24742 "s59E5H2" 0 "Phosphoserine phosphatase 1"  
"NT-E05\_00815" 24742 "s63E6H2" 0 "Phosphoserine phosphatase 1"  
"NT-E05\_00817" 24744 "s59E13H2" 0 "DNA-binding transcriptional repressor PuuR"  
"NT-E05\_00817" 24744 "s59E25H2" 0 "DNA-binding transcriptional repressor PuuR"  
"NT-E05\_00817" 24744 "s59E5H2" 0 "DNA-binding transcriptional repressor PuuR"  
"NT-E05\_00817" 24744 "s63E6H2" 0 "DNA-binding transcriptional repressor PuuR"  
"NT-E05\_00818" 24745 "s59E13H2" 0 "hypothetical protein"  
"NT-E05\_00818" 24745 "s59E25H2" 0 "hypothetical protein"  
"NT-E05\_00818" 24745 "s59E5H2" 0 "hypothetical protein"  
"NT-E05\_00818" 24745 "s63E6H2" 0 "hypothetical protein"  
"NT-E05\_00820" 24747 "s59E13H2" 0 "UDP-2-acetamido-2-deoxy-3-oxo-D-glucuronate aminotransferase"  
"NT-E05\_00820" 24747 "s59E25H2" 0 "UDP-2-acetamido-2-deoxy-3-oxo-D-glucuronate aminotransferase"  
"NT-E05\_00820" 24747 "s59E5H2" 0 "UDP-2-acetamido-2-deoxy-3-oxo-D-glucuronate aminotransferase"  
"NT-E05\_00820" 24747 "s63E6H2" 0 "UDP-2-acetamido-2-deoxy-3-oxo-D-glucuronate aminotransferase"

"NT-E05\_00821" 24748 "s59E13H2" 0 "spermidine synthase"  
"NT-E05\_00821" 24748 "s59E25H2" 0 "spermidine synthase"  
"NT-E05\_00821" 24748 "s59E5H2" 0.00352429 "spermidine synthase"  
"NT-E05\_00821" 24748 "s63E6H2" 0 "spermidine synthase"  
"NT-E05\_00822" 24749 "s59E13H2" 0 "Protein-L-isoaspartate O-methyltransferase"  
"NT-E05\_00822" 24749 "s59E25H2" 0 "Protein-L-isoaspartate O-methyltransferase"  
"NT-E05\_00822" 24749 "s59E5H2" 0 "Protein-L-isoaspartate O-methyltransferase"  
"NT-E05\_00822" 24749 "s63E6H2" 0 "Protein-L-isoaspartate O-methyltransferase"  
"NT-E05\_00823" 24750 "s59E13H2" 0 "Archaeal ATPase"  
"NT-E05\_00823" 24750 "s59E25H2" 0 "Archaeal ATPase"  
"NT-E05\_00823" 24750 "s59E5H2" 0 "Archaeal ATPase"  
"NT-E05\_00823" 24750 "s63E6H2" 0 "Archaeal ATPase"  
"NT-E05\_00824" 24751 "s59E13H2" 0 "Xylose isomerase"  
"NT-E05\_00824" 24751 "s59E25H2" 0 "Xylose isomerase"  
"NT-E05\_00824" 24751 "s59E5H2" 0 "Xylose isomerase"  
"NT-E05\_00824" 24751 "s63E6H2" 0 "Xylose isomerase"  
"NT-E05\_00825" 24752 "s59E13H2" 0 "2,3-diketo-5-methylthiopentyl-1-phosphate enolase"  
"NT-E05\_00825" 24752 "s59E25H2" 0 "2,3-diketo-5-methylthiopentyl-1-phosphate enolase"  
"NT-E05\_00825" 24752 "s59E5H2" 0 "2,3-diketo-5-methylthiopentyl-1-phosphate enolase"  
"NT-E05\_00825" 24752 "s63E6H2" 0 "2,3-diketo-5-methylthiopentyl-1-phosphate enolase"  
"NT-E05\_00826" 24753 "s59E13H2" 0 "2-oxoisovalerate dehydrogenase subunit beta"  
"NT-E05\_00826" 24753 "s59E25H2" 0 "2-oxoisovalerate dehydrogenase subunit beta"  
"NT-E05\_00826" 24753 "s59E5H2" 0 "2-oxoisovalerate dehydrogenase subunit beta"  
"NT-E05\_00826" 24753 "s63E6H2" 0 "2-oxoisovalerate dehydrogenase subunit beta"  
"NT-E05\_00827" 24754 "s59E13H2" 0 "Acetoin:2,6-dichlorophenolindophenol oxidoreductase subunit alpha"  
"NT-E05\_00827" 24754 "s59E25H2" 0 "Acetoin:2,6-dichlorophenolindophenol oxidoreductase subunit alpha"  
"NT-E05\_00827" 24754 "s59E5H2" 0 "Acetoin:2,6-dichlorophenolindophenol oxidoreductase subunit alpha"  
"NT-E05\_00827" 24754 "s63E6H2" 0 "Acetoin:2,6-dichlorophenolindophenol oxidoreductase subunit alpha"  
"NT-E05\_00828" 24755 "s59E13H2" 0 "2-dehydro-3-deoxy-D-gluconate 5-dehydrogenase"  
"NT-E05\_00828" 24755 "s59E25H2" 0 "2-dehydro-3-deoxy-D-gluconate 5-dehydrogenase"  
"NT-E05\_00828" 24755 "s59E5H2" 0 "2-dehydro-3-deoxy-D-gluconate 5-dehydrogenase"  
"NT-E05\_00828" 24755 "s63E6H2" 0 "2-dehydro-3-deoxy-D-gluconate 5-dehydrogenase"  
"NT-E05\_00829" 24756 "s59E13H2" 0 "Phospholipase D precursor"  
"NT-E05\_00829" 24756 "s59E25H2" 0 "Phospholipase D precursor"  
"NT-E05\_00829" 24756 "s59E5H2" 0 "Phospholipase D precursor"  
"NT-E05\_00829" 24756 "s63E6H2" 0 "Phospholipase D precursor"  
"NT-E05\_00830" 24757 "s59E13H2" 0 "Glutamine--fructose-6-phosphate aminotransferase [isomerizing]"  
"NT-E05\_00830" 24757 "s59E25H2" 0 "Glutamine--fructose-6-phosphate aminotransferase [isomerizing]"  
"NT-E05\_00830" 24757 "s59E5H2" 0.002219937 "Glutamine--fructose-6-phosphate aminotransferase [isomerizing]"  
"NT-E05\_00830" 24757 "s63E6H2" 0 "Glutamine--fructose-6-phosphate aminotransferase [isomerizing]"  
"NT-E05\_00831" 24758 "s59E13H2" 0 "1,3-propanediol dehydrogenase"  
"NT-E05\_00831" 24758 "s59E25H2" 0 "1,3-propanediol dehydrogenase"  
"NT-E05\_00831" 24758 "s59E5H2" 0 "1,3-propanediol dehydrogenase"  
"NT-E05\_00831" 24758 "s63E6H2" 0 "1,3-propanediol dehydrogenase"  
"NT-E05\_00832" 24759 "s59E13H2" 0 "V-type ATP synthase subunit I"  
"NT-E05\_00832" 24759 "s59E25H2" 0 "V-type ATP synthase subunit I"  
"NT-E05\_00832" 24759 "s59E5H2" 0 "V-type ATP synthase subunit I"

"NT-E05\_00832" 24759 "s63E6H2" 0 "V-type ATP synthase subunit I"  
"NT-E05\_00833" 24760 "s59E13H2" 0 "hypothetical protein"  
"NT-E05\_00833" 24760 "s59E25H2" 0 "hypothetical protein"  
"NT-E05\_00833" 24760 "s59E5H2" 0 "hypothetical protein"  
"NT-E05\_00833" 24760 "s63E6H2" 0 "hypothetical protein"  
"NT-E05\_00834" 24761 "s59E13H2" 0 "tRNA-specific adenosine deaminase"  
"NT-E05\_00834" 24761 "s59E25H2" 0 "tRNA-specific adenosine deaminase"  
"NT-E05\_00834" 24761 "s59E5H2" 0 "tRNA-specific adenosine deaminase"  
"NT-E05\_00834" 24761 "s63E6H2" 0 "tRNA-specific adenosine deaminase"  
"NT-E05\_00835" 24762 "s59E13H2" 0 "Threonylcarbamoyl-AMP synthase"  
"NT-E05\_00835" 24762 "s59E25H2" 0 "Threonylcarbamoyl-AMP synthase"  
"NT-E05\_00835" 24762 "s59E5H2" 0 "Threonylcarbamoyl-AMP synthase"  
"NT-E05\_00835" 24762 "s63E6H2" 0 "Threonylcarbamoyl-AMP synthase"  
"NT-E05\_00836" 24763 "s59E13H2" 0 "Gamma-glutamyl phosphate reductase"  
"NT-E05\_00836" 24763 "s59E25H2" 0 "Gamma-glutamyl phosphate reductase"  
"NT-E05\_00836" 24763 "s59E5H2" 0.009208574 "Gamma-glutamyl phosphate reductase"  
"NT-E05\_00836" 24763 "s63E6H2" 0 "Gamma-glutamyl phosphate reductase"  
"NT-E05\_00837" 24764 "s59E13H2" 0 "Riboflavin synthase"  
"NT-E05\_00837" 24764 "s59E25H2" 0 "Riboflavin synthase"  
"NT-E05\_00837" 24764 "s59E5H2" 0 "Riboflavin synthase"  
"NT-E05\_00837" 24764 "s63E6H2" 0 "Riboflavin synthase"  
"NT-E05\_00838" 24765 "s59E13H2" 0 "Riboflavin biosynthesis protein RibBA"  
"NT-E05\_00838" 24765 "s59E25H2" 0 "Riboflavin biosynthesis protein RibBA"  
"NT-E05\_00838" 24765 "s59E5H2" 0 "Riboflavin biosynthesis protein RibBA"  
"NT-E05\_00838" 24765 "s63E6H2" 0 "Riboflavin biosynthesis protein RibBA"  
"NT-E05\_00839" 24766 "s59E13H2" 0 "6,7-dimethyl-8-ribityllumazine synthase"  
"NT-E05\_00839" 24766 "s59E25H2" 0 "6,7-dimethyl-8-ribityllumazine synthase"  
"NT-E05\_00839" 24766 "s59E5H2" 0 "6,7-dimethyl-8-ribityllumazine synthase"  
"NT-E05\_00839" 24766 "s63E6H2" 0 "6,7-dimethyl-8-ribityllumazine synthase"  
"NT-E05\_00840" 24767 "s59E13H2" 0 "Phosphodiesterase YfcE"  
"NT-E05\_00840" 24767 "s59E25H2" 0 "Phosphodiesterase YfcE"  
"NT-E05\_00840" 24767 "s59E5H2" 0 "Phosphodiesterase YfcE"  
"NT-E05\_00840" 24767 "s63E6H2" 0 "Phosphodiesterase YfcE"  
"NT-E05\_00841" 24768 "s59E13H2" 0 "50S ribosomal protein L28"  
"NT-E05\_00841" 24768 "s59E25H2" 0 "50S ribosomal protein L28"  
"NT-E05\_00841" 24768 "s59E5H2" 0 "50S ribosomal protein L28"  
"NT-E05\_00841" 24768 "s63E6H2" 0 "50S ribosomal protein L28"  
"NT-E05\_00842" 24769 "s59E13H2" 0 "hypothetical protein"  
"NT-E05\_00842" 24769 "s59E25H2" 0 "hypothetical protein"  
"NT-E05\_00842" 24769 "s59E5H2" 0 "hypothetical protein"  
"NT-E05\_00842" 24769 "s63E6H2" 0 "hypothetical protein"  
"NT-E05\_00843" 24770 "s59E13H2" 0 "DAK2 domain protein"  
"NT-E05\_00843" 24770 "s59E25H2" 0 "DAK2 domain protein"  
"NT-E05\_00843" 24770 "s59E5H2" 0 "DAK2 domain protein"  
"NT-E05\_00843" 24770 "s63E6H2" 0 "DAK2 domain protein"  
"NT-E05\_00844" 24771 "s59E13H2" 0 "ATP-dependent DNA helicase RecG"  
"NT-E05\_00844" 24771 "s59E25H2" 0 "ATP-dependent DNA helicase RecG"

"NT-E05\_00844" 24771 "s59E5H2" 0 "ATP-dependent DNA helicase RecG"  
"NT-E05\_00844" 24771 "s63E6H2" 0 "ATP-dependent DNA helicase RecG"  
"NT-E05\_00845" 24772 "s59E13H2" 0 "Ribosomal RNA small subunit methyltransferase D"  
"NT-E05\_00845" 24772 "s59E25H2" 0 "Ribosomal RNA small subunit methyltransferase D"  
"NT-E05\_00845" 24772 "s59E5H2" 0 "Ribosomal RNA small subunit methyltransferase D"  
"NT-E05\_00845" 24772 "s63E6H2" 0 "Ribosomal RNA small subunit methyltransferase D"  
"NT-E05\_00846" 24773 "s59E13H2" 0 "Putative transposase"  
"NT-E05\_00846" 24773 "s59E25H2" 0 "Putative transposase"  
"NT-E05\_00846" 24773 "s59E5H2" 0 "Putative transposase"  
"NT-E05\_00846" 24773 "s63E6H2" 0 "Putative transposase"  
"NT-E05\_00847" 24774 "s59E13H2" 0 "Transposase, Mutator family"  
"NT-E05\_00847" 24774 "s59E25H2" 0 "Transposase, Mutator family"  
"NT-E05\_00847" 24774 "s59E5H2" 0 "Transposase, Mutator family"  
"NT-E05\_00847" 24774 "s63E6H2" 0 "Transposase, Mutator family"  
"NT-E05\_00849" 24776 "s59E13H2" 0 "D-ribose-binding periplasmic protein precursor"  
"NT-E05\_00849" 24776 "s59E25H2" 0 "D-ribose-binding periplasmic protein precursor"  
"NT-E05\_00849" 24776 "s59E5H2" 0 "D-ribose-binding periplasmic protein precursor"  
"NT-E05\_00849" 24776 "s63E6H2" 0 "D-ribose-binding periplasmic protein precursor"  
"NT-E05\_00850" 24777 "s59E13H2" 0 "Ribose transport system permease protein RbsC"  
"NT-E05\_00850" 24777 "s59E25H2" 0 "Ribose transport system permease protein RbsC"  
"NT-E05\_00850" 24777 "s59E5H2" 0.006235282 "Ribose transport system permease protein RbsC"  
"NT-E05\_00850" 24777 "s63E6H2" 0 "Ribose transport system permease protein RbsC"  
"NT-E05\_00851" 24778 "s59E13H2" 0 "Galactose/methyl galactoside import ATP-binding protein MglA"  
"NT-E05\_00851" 24778 "s59E25H2" 0 "Galactose/methyl galactoside import ATP-binding protein MglA"  
"NT-E05\_00851" 24778 "s59E5H2" 0.009451628 "Galactose/methyl galactoside import ATP-binding protein MglA"  
"NT-E05\_00851" 24778 "s63E6H2" 0 "Galactose/methyl galactoside import ATP-binding protein MglA"  
"NT-E05\_00854" 24781 "s59E13H2" 0 "methylcobalamin:coenzyme M methyltransferase"  
"NT-E05\_00854" 24781 "s59E25H2" 0 "methylcobalamin:coenzyme M methyltransferase"  
"NT-E05\_00854" 24781 "s59E5H2" 0.01446427 "methylcobalamin:coenzyme M methyltransferase"  
"NT-E05\_00854" 24781 "s63E6H2" 0.0003414094 "methylcobalamin:coenzyme M methyltransferase"  
"NT-E05\_00855" 24782 "s59E13H2" 0 "5-dehydro-2-deoxygluconokinase"  
"NT-E05\_00855" 24782 "s59E25H2" 0 "5-dehydro-2-deoxygluconokinase"  
"NT-E05\_00855" 24782 "s59E5H2" 0.0148904 "5-dehydro-2-deoxygluconokinase"  
"NT-E05\_00855" 24782 "s63E6H2" 0.007584819 "5-dehydro-2-deoxygluconokinase"  
"NT-E05\_00856" 24783 "s59E13H2" 0 "Ribulose biphosphate carboxylase"  
"NT-E05\_00856" 24783 "s59E25H2" 0 "Ribulose biphosphate carboxylase"  
"NT-E05\_00856" 24783 "s59E5H2" 0 "Ribulose biphosphate carboxylase"  
"NT-E05\_00856" 24783 "s63E6H2" 0 "Ribulose biphosphate carboxylase"  
"NT-E05\_00857" 24784 "s59E13H2" 0 "Putative ski2-type helicase"  
"NT-E05\_00857" 24784 "s59E25H2" 0 "Putative ski2-type helicase"  
"NT-E05\_00857" 24784 "s59E5H2" 0 "Putative ski2-type helicase"  
"NT-E05\_00857" 24784 "s63E6H2" 0 "Putative ski2-type helicase"  
"NT-E05\_00858" 24785 "s59E13H2" 0 "hypothetical protein"  
"NT-E05\_00858" 24785 "s59E25H2" 0 "hypothetical protein"  
"NT-E05\_00858" 24785 "s59E5H2" 0 "hypothetical protein"  
"NT-E05\_00858" 24785 "s63E6H2" 0 "hypothetical protein"  
"NT-E05\_00859" 24786 "s59E13H2" 0.006098892 "DNA polymerase III subunit alpha"

"NT-E05\_00859" 24786 "s59E25H2" 0 "DNA polymerase III subunit alpha"  
"NT-E05\_00859" 24786 "s59E5H2" 0 "DNA polymerase III subunit alpha"  
"NT-E05\_00859" 24786 "s63E6H2" 0 "DNA polymerase III subunit alpha"  
"NT-E05\_00860" 24787 "s59E13H2" 0 "Transposase IS200 like protein"  
"NT-E05\_00860" 24787 "s59E25H2" 0 "Transposase IS200 like protein"  
"NT-E05\_00860" 24787 "s59E5H2" 0 "Transposase IS200 like protein"  
"NT-E05\_00860" 24787 "s63E6H2" 0 "Transposase IS200 like protein"  
"NT-E05\_00861" 24788 "s59E13H2" 0 "Putative NAD(P)H nitroreductase"  
"NT-E05\_00861" 24788 "s59E25H2" 0 "Putative NAD(P)H nitroreductase"  
"NT-E05\_00861" 24788 "s59E5H2" 0 "Putative NAD(P)H nitroreductase"  
"NT-E05\_00861" 24788 "s63E6H2" 0 "Putative NAD(P)H nitroreductase"  
"NT-E05\_00863" 24790 "s59E13H2" 0 "Calcineurin-like phosphoesterase"  
"NT-E05\_00863" 24790 "s59E25H2" 0 "Calcineurin-like phosphoesterase"  
"NT-E05\_00863" 24790 "s59E5H2" 0 "Calcineurin-like phosphoesterase"  
"NT-E05\_00863" 24790 "s63E6H2" 0 "Calcineurin-like phosphoesterase"  
"NT-E05\_00864" 24791 "s59E13H2" 0 "hypothetical protein"  
"NT-E05\_00864" 24791 "s59E25H2" 0 "hypothetical protein"  
"NT-E05\_00864" 24791 "s59E5H2" 0 "hypothetical protein"  
"NT-E05\_00864" 24791 "s63E6H2" 0 "hypothetical protein"  
"NT-E05\_00865" 24792 "s59E13H2" 0 "Phospholipase D precursor"  
"NT-E05\_00865" 24792 "s59E25H2" 0 "Phospholipase D precursor"  
"NT-E05\_00865" 24792 "s59E5H2" 0.003492963 "Phospholipase D precursor"  
"NT-E05\_00865" 24792 "s63E6H2" 0 "Phospholipase D precursor"  
"NT-E05\_00866" 24793 "s59E13H2" 0 "Mannose-1-phosphate guanylyltransferase RfbM"  
"NT-E05\_00866" 24793 "s59E25H2" 0 "Mannose-1-phosphate guanylyltransferase RfbM"  
"NT-E05\_00866" 24793 "s59E5H2" 0 "Mannose-1-phosphate guanylyltransferase RfbM"  
"NT-E05\_00866" 24793 "s63E6H2" 0 "Mannose-1-phosphate guanylyltransferase RfbM"  
"NT-E05\_00867" 24794 "s59E13H2" 0 "Xaa-Pro dipeptidase"  
"NT-E05\_00867" 24794 "s59E25H2" 0 "Xaa-Pro dipeptidase"  
"NT-E05\_00867" 24794 "s59E5H2" 0.003612989 "Xaa-Pro dipeptidase"  
"NT-E05\_00867" 24794 "s63E6H2" 0 "Xaa-Pro dipeptidase"  
"NT-E05\_00868" 24795 "s59E13H2" 0 "Elongation factor P"  
"NT-E05\_00868" 24795 "s59E25H2" 0 "Elongation factor P"  
"NT-E05\_00868" 24795 "s59E5H2" 0.02039541 "Elongation factor P"  
"NT-E05\_00868" 24795 "s63E6H2" 0 "Elongation factor P"  
"NT-E05\_00869" 24796 "s59E13H2" 0 "Biotin carboxyl carrier protein of acetyl-CoA carboxylase"  
"NT-E05\_00869" 24796 "s59E25H2" 0 "Biotin carboxyl carrier protein of acetyl-CoA carboxylase"  
"NT-E05\_00869" 24796 "s59E5H2" 0.01034258 "Biotin carboxyl carrier protein of acetyl-CoA carboxylase"  
"NT-E05\_00869" 24796 "s63E6H2" 0 "Biotin carboxyl carrier protein of acetyl-CoA carboxylase"  
"NT-E05\_00870" 24797 "s59E13H2" 0 "Pyruvate carboxylase subunit A"  
"NT-E05\_00870" 24797 "s59E25H2" 0 "Pyruvate carboxylase subunit A"  
"NT-E05\_00870" 24797 "s59E5H2" 0.03243539 "Pyruvate carboxylase subunit A"  
"NT-E05\_00870" 24797 "s63E6H2" 0 "Pyruvate carboxylase subunit A"  
"NT-E05\_00871" 24798 "s59E13H2" 0 "hypothetical protein"  
"NT-E05\_00871" 24798 "s59E25H2" 0 "hypothetical protein"  
"NT-E05\_00871" 24798 "s59E5H2" 0.1153013 "hypothetical protein"  
"NT-E05\_00871" 24798 "s63E6H2" 0 "hypothetical protein"

"NT-E05\_00872" 24799 "s59E13H2" 0 "hypothetical protein"  
"NT-E05\_00872" 24799 "s59E25H2" 0 "hypothetical protein"  
"NT-E05\_00872" 24799 "s59E5H2" 0.0290072 "hypothetical protein"  
"NT-E05\_00872" 24799 "s63E6H2" 0 "hypothetical protein"  
"NT-E05\_00873" 24800 "s59E13H2" 0 "translocation protein TolB"  
"NT-E05\_00873" 24800 "s59E25H2" 0 "translocation protein TolB"  
"NT-E05\_00873" 24800 "s59E5H2" 0.002116338 "translocation protein TolB"  
"NT-E05\_00873" 24800 "s63E6H2" 0.0007305584 "translocation protein TolB"  
"NT-E05\_00874" 24801 "s59E13H2" 0 "RNA polymerase sigma-54 factor"  
"NT-E05\_00874" 24801 "s59E25H2" 0 "RNA polymerase sigma-54 factor"  
"NT-E05\_00874" 24801 "s59E5H2" 0 "RNA polymerase sigma-54 factor"  
"NT-E05\_00874" 24801 "s63E6H2" 0.007710825 "RNA polymerase sigma-54 factor"  
"NT-E05\_00875" 24802 "s59E13H2" 0 "Phosphoheptose isomerase"  
"NT-E05\_00875" 24802 "s59E25H2" 0 "Phosphoheptose isomerase"  
"NT-E05\_00875" 24802 "s59E5H2" 0 "Phosphoheptose isomerase"  
"NT-E05\_00875" 24802 "s63E6H2" 0 "Phosphoheptose isomerase"  
"NT-E05\_00877" 24804 "s59E13H2" 0 "hypothetical protein"  
"NT-E05\_00877" 24804 "s59E25H2" 0 "hypothetical protein"  
"NT-E05\_00877" 24804 "s59E5H2" 0.003045841 "hypothetical protein"  
"NT-E05\_00877" 24804 "s63E6H2" 0 "hypothetical protein"  
"NT-E05\_00878" 24805 "s59E13H2" 0 "Archaeal ATPase"  
"NT-E05\_00878" 24805 "s59E25H2" 0 "Archaeal ATPase"  
"NT-E05\_00878" 24805 "s59E5H2" 0 "Archaeal ATPase"  
"NT-E05\_00878" 24805 "s63E6H2" 0 "Archaeal ATPase"  
"NT-E05\_00880" 24807 "s59E13H2" 0 "D-glycero-beta-D-manno-heptose-1,7-bisphosphate 7-phosphatase"  
"NT-E05\_00880" 24807 "s59E25H2" 0 "D-glycero-beta-D-manno-heptose-1,7-bisphosphate 7-phosphatase"  
"NT-E05\_00880" 24807 "s59E5H2" 0 "D-glycero-beta-D-manno-heptose-1,7-bisphosphate 7-phosphatase"  
"NT-E05\_00880" 24807 "s63E6H2" 0 "D-glycero-beta-D-manno-heptose-1,7-bisphosphate 7-phosphatase"  
"NT-E05\_00881" 24808 "s59E13H2" 0 "Sporulation initiation phosphotransferase F"  
"NT-E05\_00881" 24808 "s59E25H2" 0 "Sporulation initiation phosphotransferase F"  
"NT-E05\_00881" 24808 "s59E5H2" 0 "Sporulation initiation phosphotransferase F"  
"NT-E05\_00881" 24808 "s63E6H2" 0 "Sporulation initiation phosphotransferase F"  
"NT-E05\_00882" 24809 "s59E13H2" 0 "hypothetical protein"  
"NT-E05\_00882" 24809 "s59E25H2" 0 "hypothetical protein"  
"NT-E05\_00882" 24809 "s59E5H2" 0 "hypothetical protein"  
"NT-E05\_00882" 24809 "s63E6H2" 0 "hypothetical protein"  
"NT-E05\_00883" 24810 "s59E13H2" 0 "Doxorubicin resistance ATP-binding protein DrrA"  
"NT-E05\_00883" 24810 "s59E25H2" 0 "Doxorubicin resistance ATP-binding protein DrrA"  
"NT-E05\_00883" 24810 "s59E5H2" 0 "Doxorubicin resistance ATP-binding protein DrrA"  
"NT-E05\_00883" 24810 "s63E6H2" 0 "Doxorubicin resistance ATP-binding protein DrrA"  
"NT-E05\_00885" 24812 "s59E13H2" 0 "hypothetical protein"  
"NT-E05\_00885" 24812 "s59E25H2" 0 "hypothetical protein"  
"NT-E05\_00885" 24812 "s59E5H2" 0.004231978 "hypothetical protein"  
"NT-E05\_00885" 24812 "s63E6H2" 0 "hypothetical protein"  
"NT-E05\_00886" 24813 "s59E13H2" 0 "hypothetical protein"  
"NT-E05\_00886" 24813 "s59E25H2" 0 "hypothetical protein"  
"NT-E05\_00886" 24813 "s59E5H2" 0 "hypothetical protein"



"NT-E05\_00886" 24813 "s63E6H2" 0 "hypothetical protein"  
"NT-E05\_00889" 24816 "s59E13H2" 0 "hypothetical protein"  
"NT-E05\_00889" 24816 "s59E25H2" 0 "hypothetical protein"  
"NT-E05\_00889" 24816 "s59E5H2" 0.01778378 "hypothetical protein"  
"NT-E05\_00889" 24816 "s63E6H2" 0 "hypothetical protein"  
"NT-E05\_00890" 24817 "s59E13H2" 0 "hypothetical protein"  
"NT-E05\_00890" 24817 "s59E25H2" 0 "hypothetical protein"  
"NT-E05\_00890" 24817 "s59E5H2" 0.009984055 "hypothetical protein"  
"NT-E05\_00890" 24817 "s63E6H2" 0 "hypothetical protein"  
"NT-E05\_00896" 24823 "s59E13H2" 0 "ATP-dependent Clp protease proteolytic subunit"  
"NT-E05\_00896" 24823 "s59E25H2" 0 "ATP-dependent Clp protease proteolytic subunit"  
"NT-E05\_00896" 24823 "s59E5H2" 0 "ATP-dependent Clp protease proteolytic subunit"  
"NT-E05\_00896" 24823 "s63E6H2" 0.009916134 "ATP-dependent Clp protease proteolytic subunit"  
"NT-E05\_00897" 24824 "s59E13H2" 0.0004418111 "V-type sodium ATPase catalytic subunit A"  
"NT-E05\_00897" 24824 "s59E25H2" 0 "V-type sodium ATPase catalytic subunit A"  
"NT-E05\_00897" 24824 "s59E5H2" 0 "V-type sodium ATPase catalytic subunit A"  
"NT-E05\_00897" 24824 "s63E6H2" 0.01165624 "V-type sodium ATPase catalytic subunit A"  
"NT-E05\_00898" 24825 "s59E13H2" 0 "V-type sodium ATPase subunit B"  
"NT-E05\_00898" 24825 "s59E25H2" 0 "V-type sodium ATPase subunit B"  
"NT-E05\_00898" 24825 "s59E5H2" 0 "V-type sodium ATPase subunit B"  
"NT-E05\_00898" 24825 "s63E6H2" 0.01335343 "V-type sodium ATPase subunit B"  
"NT-E05\_00899" 24826 "s59E13H2" 0 "V-type sodium ATPase subunit D"  
"NT-E05\_00899" 24826 "s59E25H2" 0 "V-type sodium ATPase subunit D"  
"NT-E05\_00899" 24826 "s59E5H2" 0 "V-type sodium ATPase subunit D"  
"NT-E05\_00899" 24826 "s63E6H2" 0.0009360176 "V-type sodium ATPase subunit D"  
"NT-E05\_00900" 24827 "s59E13H2" 0 "hypothetical protein"  
"NT-E05\_00900" 24827 "s59E25H2" 0 "hypothetical protein"  
"NT-E05\_00900" 24827 "s59E5H2" 0 "hypothetical protein"  
"NT-E05\_00900" 24827 "s63E6H2" 0.002135698 "hypothetical protein"  
"NT-E05\_00901" 24828 "s59E13H2" 0 "hypothetical protein"  
"NT-E05\_00901" 24828 "s59E25H2" 0 "hypothetical protein"  
"NT-E05\_00901" 24828 "s59E5H2" 0 "hypothetical protein"  
"NT-E05\_00901" 24828 "s63E6H2" 0 "hypothetical protein"  
"NT-E05\_00902" 24829 "s59E13H2" 0 "Chondroitin synthase"  
"NT-E05\_00902" 24829 "s59E25H2" 0 "Chondroitin synthase"  
"NT-E05\_00902" 24829 "s59E5H2" 0 "Chondroitin synthase"  
"NT-E05\_00902" 24829 "s63E6H2" 0 "Chondroitin synthase"  
"NT-E05\_00903" 24830 "s59E13H2" 0 "Glycosyltransferase AgIE"  
"NT-E05\_00903" 24830 "s59E25H2" 0 "Glycosyltransferase AgIE"  
"NT-E05\_00903" 24830 "s59E5H2" 0 "Glycosyltransferase AgIE"  
"NT-E05\_00903" 24830 "s63E6H2" 0 "Glycosyltransferase AgIE"  
"NT-E05\_00904" 24831 "s59E13H2" 0 "Chondroitin synthase"  
"NT-E05\_00904" 24831 "s59E25H2" 0 "Chondroitin synthase"  
"NT-E05\_00904" 24831 "s59E5H2" 0 "Chondroitin synthase"  
"NT-E05\_00904" 24831 "s63E6H2" 0 "Chondroitin synthase"  
"NT-E05\_00905" 24832 "s59E13H2" 0 "Spore coat protein SA"  
"NT-E05\_00905" 24832 "s59E25H2" 0 "Spore coat protein SA"

"NT-E05\_00905" 24832 "s59E5H2" 0 "Spore coat protein SA"  
"NT-E05\_00905" 24832 "s63E6H2" 0 "Spore coat protein SA"  
"NT-E05\_00907" 24834 "s59E13H2" 0 "molybdenum cofactor biosynthesis protein A"  
"NT-E05\_00907" 24834 "s59E25H2" 0 "molybdenum cofactor biosynthesis protein A"  
"NT-E05\_00907" 24834 "s59E5H2" 0 "molybdenum cofactor biosynthesis protein A"  
"NT-E05\_00907" 24834 "s63E6H2" 0 "molybdenum cofactor biosynthesis protein A"  
"NT-E05\_00908" 24835 "s59E13H2" 0 "GDP-mannose-dependent alpha-(1-6)-phosphatidylinositol monomannoside mannosyltransferase"  
"NT-E05\_00908" 24835 "s59E25H2" 0 "GDP-mannose-dependent alpha-(1-6)-phosphatidylinositol monomannoside mannosyltransferase"  
"NT-E05\_00908" 24835 "s59E5H2" 0 "GDP-mannose-dependent alpha-(1-6)-phosphatidylinositol monomannoside mannosyltransferase"  
"NT-E05\_00908" 24835 "s63E6H2" 0 "GDP-mannose-dependent alpha-(1-6)-phosphatidylinositol monomannoside mannosyltransferase"  
"NT-E05\_00909" 24836 "s59E13H2" 0 "putative ABC transporter ATP-binding protein"  
"NT-E05\_00909" 24836 "s59E25H2" 0 "putative ABC transporter ATP-binding protein"  
"NT-E05\_00909" 24836 "s59E5H2" 0.01414774 "putative ABC transporter ATP-binding protein"  
"NT-E05\_00909" 24836 "s63E6H2" 0 "putative ABC transporter ATP-binding protein"  
"NT-E05\_00910" 24837 "s59E13H2" 0 "Lipid-A-disaccharide synthase"  
"NT-E05\_00910" 24837 "s59E25H2" 0 "Lipid-A-disaccharide synthase"  
"NT-E05\_00910" 24837 "s59E5H2" 0.0003163265 "Lipid-A-disaccharide synthase"  
"NT-E05\_00910" 24837 "s63E6H2" 0 "Lipid-A-disaccharide synthase"  
"NT-E05\_00911" 24838 "s59E13H2" 0 "Lipid-A-disaccharide synthase"  
"NT-E05\_00911" 24838 "s59E25H2" 0 "Lipid-A-disaccharide synthase"  
"NT-E05\_00911" 24838 "s59E5H2" 0 "Lipid-A-disaccharide synthase"  
"NT-E05\_00911" 24838 "s63E6H2" 0 "Lipid-A-disaccharide synthase"  
"NT-E05\_00912" 24839 "s59E13H2" 0 "Pantothenate synthetase"  
"NT-E05\_00912" 24839 "s59E25H2" 0 "Pantothenate synthetase"  
"NT-E05\_00912" 24839 "s59E5H2" 0.03755814 "Pantothenate synthetase"  
"NT-E05\_00912" 24839 "s63E6H2" 0 "Pantothenate synthetase"  
"NT-E05\_00913" 24840 "s59E13H2" 0 "hypothetical protein"  
"NT-E05\_00913" 24840 "s59E25H2" 0 "hypothetical protein"  
"NT-E05\_00913" 24840 "s59E5H2" 0 "hypothetical protein"  
"NT-E05\_00913" 24840 "s63E6H2" 0 "hypothetical protein"  
"NT-E05\_00917" 24844 "s59E13H2" 0 "hypothetical protein"  
"NT-E05\_00917" 24844 "s59E25H2" 0 "hypothetical protein"  
"NT-E05\_00917" 24844 "s59E5H2" 0 "hypothetical protein"  
"NT-E05\_00917" 24844 "s63E6H2" 0 "hypothetical protein"  
"NT-E05\_00918" 24845 "s59E13H2" 0 "hypothetical protein"  
"NT-E05\_00918" 24845 "s59E25H2" 0 "hypothetical protein"  
"NT-E05\_00918" 24845 "s59E5H2" 0 "hypothetical protein"  
"NT-E05\_00918" 24845 "s63E6H2" 0 "hypothetical protein"  
"NT-E05\_00919" 24846 "s59E13H2" 0 "Type I phosphodiesterase / nucleotide pyrophosphatase"  
"NT-E05\_00919" 24846 "s59E25H2" 0 "Type I phosphodiesterase / nucleotide pyrophosphatase"  
"NT-E05\_00919" 24846 "s59E5H2" 0 "Type I phosphodiesterase / nucleotide pyrophosphatase"  
"NT-E05\_00919" 24846 "s63E6H2" 0 "Type I phosphodiesterase / nucleotide pyrophosphatase"  
"NT-E05\_00920" 24847 "s59E13H2" 0.001000772 "Competence protein ComM"  
"NT-E05\_00920" 24847 "s59E25H2" 0 "Competence protein ComM"  
"NT-E05\_00920" 24847 "s59E5H2" 0 "Competence protein ComM"  
"NT-E05\_00920" 24847 "s63E6H2" 0 "Competence protein ComM"  
"NT-E05\_00921" 24848 "s59E13H2" 0 "hypothetical protein"

"NT-E05\_00921" 24848 "s59E25H2" 0 "hypothetical protein"  
"NT-E05\_00921" 24848 "s59E5H2" 0 "hypothetical protein"  
"NT-E05\_00921" 24848 "s63E6H2" 0 "hypothetical protein"  
"NT-E05\_00922" 24849 "s59E13H2" 0 "3-methyladenine DNA glycosylase"  
"NT-E05\_00922" 24849 "s59E25H2" 0 "3-methyladenine DNA glycosylase"  
"NT-E05\_00922" 24849 "s59E5H2" 0 "3-methyladenine DNA glycosylase"  
"NT-E05\_00922" 24849 "s63E6H2" 0 "3-methyladenine DNA glycosylase"  
"NT-E05\_00923" 24850 "s59E13H2" 0 "Glycerol-3-phosphate dehydrogenase [NAD(P)+]"  
"NT-E05\_00923" 24850 "s59E25H2" 0 "Glycerol-3-phosphate dehydrogenase [NAD(P)+]"  
"NT-E05\_00923" 24850 "s59E5H2" 0 "Glycerol-3-phosphate dehydrogenase [NAD(P)+]"  
"NT-E05\_00923" 24850 "s63E6H2" 0 "Glycerol-3-phosphate dehydrogenase [NAD(P)+]"  
"NT-E05\_00924" 24851 "s59E13H2" 0 "AsnC family protein"  
"NT-E05\_00924" 24851 "s59E25H2" 0 "AsnC family protein"  
"NT-E05\_00924" 24851 "s59E5H2" 0 "AsnC family protein"  
"NT-E05\_00924" 24851 "s63E6H2" 0 "AsnC family protein"  
"NT-E05\_00925" 24852 "s59E13H2" 0 "Helix-turn-helix domain protein"  
"NT-E05\_00925" 24852 "s59E25H2" 0 "Helix-turn-helix domain protein"  
"NT-E05\_00925" 24852 "s59E5H2" 0 "Helix-turn-helix domain protein"  
"NT-E05\_00925" 24852 "s63E6H2" 0 "Helix-turn-helix domain protein"  
"NT-E05\_00926" 24853 "s59E13H2" 0 "(Dimethylallyl)adenosine tRNA methylthiotransferase MiaB"  
"NT-E05\_00926" 24853 "s59E25H2" 0 "(Dimethylallyl)adenosine tRNA methylthiotransferase MiaB"  
"NT-E05\_00926" 24853 "s59E5H2" 0 "(Dimethylallyl)adenosine tRNA methylthiotransferase MiaB"  
"NT-E05\_00926" 24853 "s63E6H2" 0 "(Dimethylallyl)adenosine tRNA methylthiotransferase MiaB"  
"NT-E05\_00927" 24854 "s59E13H2" 0 "Ribose-phosphate pyrophosphokinase"  
"NT-E05\_00927" 24854 "s59E25H2" 0 "Ribose-phosphate pyrophosphokinase"  
"NT-E05\_00927" 24854 "s59E5H2" 0 "Ribose-phosphate pyrophosphokinase"  
"NT-E05\_00927" 24854 "s63E6H2" 0 "Ribose-phosphate pyrophosphokinase"  
"NT-E05\_00928" 24855 "s59E13H2" 0 "50S ribosomal protein L25"  
"NT-E05\_00928" 24855 "s59E25H2" 0 "50S ribosomal protein L25"  
"NT-E05\_00928" 24855 "s59E5H2" 0 "50S ribosomal protein L25"  
"NT-E05\_00928" 24855 "s63E6H2" 0 "50S ribosomal protein L25"  
"NT-E05\_00929" 24856 "s59E13H2" 0 "Peptidyl-tRNA hydrolase"  
"NT-E05\_00929" 24856 "s59E25H2" 0 "Peptidyl-tRNA hydrolase"  
"NT-E05\_00929" 24856 "s59E5H2" 0 "Peptidyl-tRNA hydrolase"  
"NT-E05\_00929" 24856 "s63E6H2" 0 "Peptidyl-tRNA hydrolase"  
"NT-E05\_00930" 24857 "s59E13H2" 0 "Putative K(+)-stimulated pyrophosphate-energized sodium pump"  
"NT-E05\_00930" 24857 "s59E25H2" 0 "Putative K(+)-stimulated pyrophosphate-energized sodium pump"  
"NT-E05\_00930" 24857 "s59E5H2" 0.001192039 "Putative K(+)-stimulated pyrophosphate-energized sodium pump"  
"NT-E05\_00930" 24857 "s63E6H2" 0 "Putative K(+)-stimulated pyrophosphate-energized sodium pump"  
"NT-E05\_00931" 24858 "s59E13H2" 0 "hypothetical protein"  
"NT-E05\_00931" 24858 "s59E25H2" 0 "hypothetical protein"  
"NT-E05\_00931" 24858 "s59E5H2" 0.005612483 "hypothetical protein"  
"NT-E05\_00931" 24858 "s63E6H2" 0 "hypothetical protein"  
"NT-E05\_00932" 24859 "s59E13H2" 0 "2-hydroxy-3-oxopropionate reductase"  
"NT-E05\_00932" 24859 "s59E25H2" 0 "2-hydroxy-3-oxopropionate reductase"  
"NT-E05\_00932" 24859 "s59E5H2" 0 "2-hydroxy-3-oxopropionate reductase"  
"NT-E05\_00932" 24859 "s63E6H2" 0 "2-hydroxy-3-oxopropionate reductase"

"NT-E05\_00933" 24860 "s59E13H2" 0 "hypothetical protein"  
"NT-E05\_00933" 24860 "s59E25H2" 0 "hypothetical protein"  
"NT-E05\_00933" 24860 "s59E5H2" 0 "hypothetical protein"  
"NT-E05\_00933" 24860 "s63E6H2" 0 "hypothetical protein"  
"NT-E05\_00934" 24861 "s59E13H2" 0 "hypothetical protein"  
"NT-E05\_00934" 24861 "s59E25H2" 0 "hypothetical protein"  
"NT-E05\_00934" 24861 "s59E5H2" 0 "hypothetical protein"  
"NT-E05\_00934" 24861 "s63E6H2" 0 "hypothetical protein"  
"NT-E05\_00937" 24864 "s59E13H2" 0 "preprotein translocase subunit SecD"  
"NT-E05\_00937" 24864 "s59E25H2" 0 "preprotein translocase subunit SecD"  
"NT-E05\_00937" 24864 "s59E5H2" 0 "preprotein translocase subunit SecD"  
"NT-E05\_00937" 24864 "s63E6H2" 0 "preprotein translocase subunit SecD"  
"NT-E05\_00938" 24865 "s59E13H2" 0 "preprotein translocase subunit SecF"  
"NT-E05\_00938" 24865 "s59E25H2" 0 "preprotein translocase subunit SecF"  
"NT-E05\_00938" 24865 "s59E5H2" 0 "preprotein translocase subunit SecF"  
"NT-E05\_00938" 24865 "s63E6H2" 0 "preprotein translocase subunit SecF"  
"NT-E05\_00939" 24866 "s59E13H2" 0 "UDP-N-acetylglucosamine--N-acetylmuramyl-(pentapeptide) pyrophosphoryl-undecaprenol N-acetylglucosamine transferase"  
"NT-E05\_00939" 24866 "s59E25H2" 0 "UDP-N-acetylglucosamine--N-acetylmuramyl-(pentapeptide) pyrophosphoryl-undecaprenol N-acetylglucosamine transferase"  
"NT-E05\_00939" 24866 "s59E5H2" 0 "UDP-N-acetylglucosamine--N-acetylmuramyl-(pentapeptide) pyrophosphoryl-undecaprenol N-acetylglucosamine transferase"  
"NT-E05\_00939" 24866 "s63E6H2" 0 "UDP-N-acetylglucosamine--N-acetylmuramyl-(pentapeptide) pyrophosphoryl-undecaprenol N-acetylglucosamine transferase"  
"NT-E05\_00940" 24867 "s59E13H2" 0 "UDP-N-acetylmuramate--L-alanine ligase"  
"NT-E05\_00940" 24867 "s59E25H2" 0 "UDP-N-acetylmuramate--L-alanine ligase"  
"NT-E05\_00940" 24867 "s59E5H2" 0 "UDP-N-acetylmuramate--L-alanine ligase"  
"NT-E05\_00940" 24867 "s63E6H2" 0 "UDP-N-acetylmuramate--L-alanine ligase"  
"NT-E05\_00941" 24868 "s59E13H2" 0 "2-isopropylmalate synthase"  
"NT-E05\_00941" 24868 "s59E25H2" 0 "2-isopropylmalate synthase"  
"NT-E05\_00941" 24868 "s59E5H2" 0 "2-isopropylmalate synthase"  
"NT-E05\_00941" 24868 "s63E6H2" 0 "2-isopropylmalate synthase"  
"NT-E05\_00942" 24869 "s59E13H2" 0 "50S ribosomal protein L9"  
"NT-E05\_00942" 24869 "s59E25H2" 0 "50S ribosomal protein L9"  
"NT-E05\_00942" 24869 "s59E5H2" 0 "50S ribosomal protein L9"  
"NT-E05\_00942" 24869 "s63E6H2" 0 "50S ribosomal protein L9"  
"NT-E05\_00943" 24870 "s59E13H2" 0 "Single-stranded DNA-binding protein ssb"  
"NT-E05\_00943" 24870 "s59E25H2" 0 "Single-stranded DNA-binding protein ssb"  
"NT-E05\_00943" 24870 "s59E5H2" 0 "Single-stranded DNA-binding protein ssb"  
"NT-E05\_00943" 24870 "s63E6H2" 0 "Single-stranded DNA-binding protein ssb"  
"NT-E05\_00944" 24871 "s59E13H2" 0 "30S ribosomal protein S6"  
"NT-E05\_00944" 24871 "s59E25H2" 0 "30S ribosomal protein S6"  
"NT-E05\_00944" 24871 "s59E5H2" 0 "30S ribosomal protein S6"  
"NT-E05\_00944" 24871 "s63E6H2" 0 "30S ribosomal protein S6"  
"NT-E05\_00945" 24872 "s59E13H2" 0 "Ribosome-binding ATPase YchF"  
"NT-E05\_00945" 24872 "s59E25H2" 0 "Ribosome-binding ATPase YchF"  
"NT-E05\_00945" 24872 "s59E5H2" 0 "Ribosome-binding ATPase YchF"  
"NT-E05\_00945" 24872 "s63E6H2" 0 "Ribosome-binding ATPase YchF"  
"NT-E05\_00946" 24873 "s59E13H2" 0 "RNA polymerase sigma factor SigA"  
"NT-E05\_00946" 24873 "s59E25H2" 0 "RNA polymerase sigma factor SigA"  
"NT-E05\_00946" 24873 "s59E5H2" 0 "RNA polymerase sigma factor SigA"

"NT-E05\_00946" 24873 "s63E6H2" 0 "RNA polymerase sigma factor SigA"  
"NT-E05\_00947" 24874 "s59E13H2" 0 "DNA repair protein RecO"  
"NT-E05\_00947" 24874 "s59E25H2" 0 "DNA repair protein RecO"  
"NT-E05\_00947" 24874 "s59E5H2" 0 "DNA repair protein RecO"  
"NT-E05\_00947" 24874 "s63E6H2" 0 "DNA repair protein RecO"  
"NT-E05\_00948" 24875 "s59E13H2" 0 "Bifunctional purine biosynthesis protein PurH"  
"NT-E05\_00948" 24875 "s59E25H2" 0 "Bifunctional purine biosynthesis protein PurH"  
"NT-E05\_00948" 24875 "s59E5H2" 0 "Bifunctional purine biosynthesis protein PurH"  
"NT-E05\_00948" 24875 "s63E6H2" 0 "Bifunctional purine biosynthesis protein PurH"  
"NT-E05\_00949" 24876 "s59E13H2" 0 "Serine hydroxymethyltransferase"  
"NT-E05\_00949" 24876 "s59E25H2" 0 "Serine hydroxymethyltransferase"  
"NT-E05\_00949" 24876 "s59E5H2" 0.00229926 "Serine hydroxymethyltransferase"  
"NT-E05\_00949" 24876 "s63E6H2" 0 "Serine hydroxymethyltransferase"  
"NT-E05\_00950" 24877 "s59E13H2" 0 "Folypolyglutamate synthase"  
"NT-E05\_00950" 24877 "s59E25H2" 0 "Folypolyglutamate synthase"  
"NT-E05\_00950" 24877 "s59E5H2" 0.001521722 "Folypolyglutamate synthase"  
"NT-E05\_00950" 24877 "s63E6H2" 0 "Folypolyglutamate synthase"  
"NT-E05\_00951" 24878 "s59E13H2" 0 "Phosphoenolpyruvate-protein phosphotransferase"  
"NT-E05\_00951" 24878 "s59E25H2" 0 "Phosphoenolpyruvate-protein phosphotransferase"  
"NT-E05\_00951" 24878 "s59E5H2" 0 "Phosphoenolpyruvate-protein phosphotransferase"  
"NT-E05\_00951" 24878 "s63E6H2" 0 "Phosphoenolpyruvate-protein phosphotransferase"  
"NT-E05\_00952" 24879 "s59E13H2" 0 "Bifunctional phosphoglucose/phosphomannose isomerase"  
"NT-E05\_00952" 24879 "s59E25H2" 0 "Bifunctional phosphoglucose/phosphomannose isomerase"  
"NT-E05\_00952" 24879 "s59E5H2" 0 "Bifunctional phosphoglucose/phosphomannose isomerase"  
"NT-E05\_00952" 24879 "s63E6H2" 0 "Bifunctional phosphoglucose/phosphomannose isomerase"  
"NT-E05\_00953" 24880 "s59E13H2" 0 "Galactose-1-phosphate uridylyltransferase"  
"NT-E05\_00953" 24880 "s59E25H2" 0 "Galactose-1-phosphate uridylyltransferase"  
"NT-E05\_00953" 24880 "s59E5H2" 0 "Galactose-1-phosphate uridylyltransferase"  
"NT-E05\_00953" 24880 "s63E6H2" 0 "Galactose-1-phosphate uridylyltransferase"  
"NT-E05\_00954" 24881 "s59E13H2" 0 "Ribosome-recycling factor"  
"NT-E05\_00954" 24881 "s59E25H2" 0 "Ribosome-recycling factor"  
"NT-E05\_00954" 24881 "s59E5H2" 0 "Ribosome-recycling factor"  
"NT-E05\_00954" 24881 "s63E6H2" 0 "Ribosome-recycling factor"  
"NT-E05\_00955" 24882 "s59E13H2" 0 "Uridylate kinase"  
"NT-E05\_00955" 24882 "s59E25H2" 0 "Uridylate kinase"  
"NT-E05\_00955" 24882 "s59E5H2" 0 "Uridylate kinase"  
"NT-E05\_00955" 24882 "s63E6H2" 0 "Uridylate kinase"  
"NT-E05\_00956" 24883 "s59E13H2" 0 "Elongation factor Ts"  
"NT-E05\_00956" 24883 "s59E25H2" 0 "Elongation factor Ts"  
"NT-E05\_00956" 24883 "s59E5H2" 0 "Elongation factor Ts"  
"NT-E05\_00956" 24883 "s63E6H2" 0 "Elongation factor Ts"  
"NT-E05\_00957" 24884 "s59E13H2" 0 "30S ribosomal protein S2"  
"NT-E05\_00957" 24884 "s59E25H2" 0 "30S ribosomal protein S2"  
"NT-E05\_00957" 24884 "s59E5H2" 0 "30S ribosomal protein S2"  
"NT-E05\_00957" 24884 "s63E6H2" 0.002911537 "30S ribosomal protein S2"  
"NT-E05\_00958" 24885 "s59E13H2" 0 "Homoserine dehydrogenase"  
"NT-E05\_00958" 24885 "s59E25H2" 0 "Homoserine dehydrogenase"

"NT-E05\_00958" 24885 "s59E5H2" 0 "Homoserine dehydrogenase"  
"NT-E05\_00958" 24885 "s63E6H2" 0 "Homoserine dehydrogenase"  
"NT-E05\_00959" 24886 "s59E13H2" 0 "Poly(hydroxyalcanoate) granule associated protein (phasin)"  
"NT-E05\_00959" 24886 "s59E25H2" 0 "Poly(hydroxyalcanoate) granule associated protein (phasin)"  
"NT-E05\_00959" 24886 "s59E5H2" 0 "Poly(hydroxyalcanoate) granule associated protein (phasin)"  
"NT-E05\_00959" 24886 "s63E6H2" 0 "Poly(hydroxyalcanoate) granule associated protein (phasin)"  
"NT-E05\_00960" 24887 "s59E13H2" 0 "Putative membrane protein insertion efficiency factor"  
"NT-E05\_00960" 24887 "s59E25H2" 0 "Putative membrane protein insertion efficiency factor"  
"NT-E05\_00960" 24887 "s59E5H2" 0 "Putative membrane protein insertion efficiency factor"  
"NT-E05\_00960" 24887 "s63E6H2" 0 "Putative membrane protein insertion efficiency factor"  
"NT-E05\_00961" 24888 "s59E13H2" 0 "Membrane protein insertase YidC"  
"NT-E05\_00961" 24888 "s59E25H2" 0 "Membrane protein insertase YidC"  
"NT-E05\_00961" 24888 "s59E5H2" 0.01548761 "Membrane protein insertase YidC"  
"NT-E05\_00961" 24888 "s63E6H2" 0 "Membrane protein insertase YidC"  
"NT-E05\_00962" 24889 "s59E13H2" 0 "tRNA modification GTPase MnmE"  
"NT-E05\_00962" 24889 "s59E25H2" 0 "tRNA modification GTPase MnmE"  
"NT-E05\_00962" 24889 "s59E5H2" 0 "tRNA modification GTPase MnmE"  
"NT-E05\_00962" 24889 "s63E6H2" 0 "tRNA modification GTPase MnmE"  
"NT-E05\_00963" 24890 "s59E13H2" 0 "Inner membrane protein YohC"  
"NT-E05\_00963" 24890 "s59E25H2" 0 "Inner membrane protein YohC"  
"NT-E05\_00963" 24890 "s59E5H2" 0.01359165 "Inner membrane protein YohC"  
"NT-E05\_00963" 24890 "s63E6H2" 0 "Inner membrane protein YohC"  
"NT-E05\_00964" 24891 "s59E13H2" 0 "Fatty acid metabolism regulator protein"  
"NT-E05\_00964" 24891 "s59E25H2" 0 "Fatty acid metabolism regulator protein"  
"NT-E05\_00964" 24891 "s59E5H2" 0 "Fatty acid metabolism regulator protein"  
"NT-E05\_00964" 24891 "s63E6H2" 0 "Fatty acid metabolism regulator protein"  
"NT-E05\_00965" 24892 "s59E13H2" 0 "hypothetical protein"  
"NT-E05\_00965" 24892 "s59E25H2" 0 "hypothetical protein"  
"NT-E05\_00965" 24892 "s59E5H2" 0 "hypothetical protein"  
"NT-E05\_00965" 24892 "s63E6H2" 0 "hypothetical protein"  
"NT-E05\_00966" 24893 "s59E13H2" 0 "10 kDa chaperonin"  
"NT-E05\_00966" 24893 "s59E25H2" 0 "10 kDa chaperonin"  
"NT-E05\_00966" 24893 "s59E5H2" 0 "10 kDa chaperonin"  
"NT-E05\_00966" 24893 "s63E6H2" 0 "10 kDa chaperonin"  
"NT-E05\_00967" 24894 "s59E13H2" 0 "60 kDa chaperonin"  
"NT-E05\_00967" 24894 "s59E25H2" 0 "60 kDa chaperonin"  
"NT-E05\_00967" 24894 "s59E5H2" 0 "60 kDa chaperonin"  
"NT-E05\_00967" 24894 "s63E6H2" 0 "60 kDa chaperonin"  
"NT-E05\_00968" 24895 "s59E13H2" 0 "hypothetical protein"  
"NT-E05\_00968" 24895 "s59E25H2" 0 "hypothetical protein"  
"NT-E05\_00968" 24895 "s59E5H2" 0 "hypothetical protein"  
"NT-E05\_00968" 24895 "s63E6H2" 0 "hypothetical protein"  
"NT-E05\_00970" 24897 "s59E13H2" 0 "Ketoisovalerate oxidoreductase subunit VorA"  
"NT-E05\_00970" 24897 "s59E25H2" 0 "Ketoisovalerate oxidoreductase subunit VorA"  
"NT-E05\_00970" 24897 "s59E5H2" 0 "Ketoisovalerate oxidoreductase subunit VorA"  
"NT-E05\_00970" 24897 "s63E6H2" 0 "Ketoisovalerate oxidoreductase subunit VorA"  
"NT-E05\_00971" 24898 "s59E13H2" 0 "hypothetical protein"

"NT-E05\_00971" 24898 "s59E25H2" 0 "hypothetical protein"  
"NT-E05\_00971" 24898 "s59E5H2" 0 "hypothetical protein"  
"NT-E05\_00971" 24898 "s63E6H2" 0 "hypothetical protein"  
"NT-E05\_00972" 24899 "s59E13H2" 0 "FtsH protease regulator HflK"  
"NT-E05\_00972" 24899 "s59E25H2" 0 "FtsH protease regulator HflK"  
"NT-E05\_00972" 24899 "s59E5H2" 0 "FtsH protease regulator HflK"  
"NT-E05\_00972" 24899 "s63E6H2" 0 "FtsH protease regulator HflK"  
"NT-E05\_00973" 24900 "s59E13H2" 0 "hypothetical protein"  
"NT-E05\_00973" 24900 "s59E25H2" 0 "hypothetical protein"  
"NT-E05\_00973" 24900 "s59E5H2" 0 "hypothetical protein"  
"NT-E05\_00973" 24900 "s63E6H2" 0 "hypothetical protein"  
"NT-E05\_00974" 24901 "s59E13H2" 0 "Coenzyme A biosynthesis bifunctional protein CoaBC"  
"NT-E05\_00974" 24901 "s59E25H2" 0 "Coenzyme A biosynthesis bifunctional protein CoaBC"  
"NT-E05\_00974" 24901 "s59E5H2" 0 "Coenzyme A biosynthesis bifunctional protein CoaBC"  
"NT-E05\_00974" 24901 "s63E6H2" 0 "Coenzyme A biosynthesis bifunctional protein CoaBC"  
"NT-E05\_00975" 24902 "s59E13H2" 0 "putative metallo-hydrolase"  
"NT-E05\_00975" 24902 "s59E25H2" 0 "putative metallo-hydrolase"  
"NT-E05\_00975" 24902 "s59E5H2" 0 "putative metallo-hydrolase"  
"NT-E05\_00975" 24902 "s63E6H2" 0 "putative metallo-hydrolase"  
"NT-E05\_00976" 24903 "s59E13H2" 0 "Adenine phosphoribosyltransferase"  
"NT-E05\_00976" 24903 "s59E25H2" 0 "Adenine phosphoribosyltransferase"  
"NT-E05\_00976" 24903 "s59E5H2" 0 "Adenine phosphoribosyltransferase"  
"NT-E05\_00976" 24903 "s63E6H2" 0 "Adenine phosphoribosyltransferase"  
"NT-E05\_00977" 24904 "s59E13H2" 0 "Single-stranded-DNA-specific exonuclease RecJ"  
"NT-E05\_00977" 24904 "s59E25H2" 0 "Single-stranded-DNA-specific exonuclease RecJ"  
"NT-E05\_00977" 24904 "s59E5H2" 0 "Single-stranded-DNA-specific exonuclease RecJ"  
"NT-E05\_00977" 24904 "s63E6H2" 0 "Single-stranded-DNA-specific exonuclease RecJ"  
"NT-E05\_00978" 24905 "s59E13H2" 0 "Thiamine biosynthesis lipoprotein ApbE precursor"  
"NT-E05\_00978" 24905 "s59E25H2" 0 "Thiamine biosynthesis lipoprotein ApbE precursor"  
"NT-E05\_00978" 24905 "s59E5H2" 0 "Thiamine biosynthesis lipoprotein ApbE precursor"  
"NT-E05\_00978" 24905 "s63E6H2" 0 "Thiamine biosynthesis lipoprotein ApbE precursor"  
"NT-E05\_00979" 24906 "s59E13H2" 0 "Ribonuclease Z"  
"NT-E05\_00979" 24906 "s59E25H2" 0 "Ribonuclease Z"  
"NT-E05\_00979" 24906 "s59E5H2" 0.004461782 "Ribonuclease Z"  
"NT-E05\_00979" 24906 "s63E6H2" 0 "Ribonuclease Z"  
"NT-E05\_00980" 24907 "s59E13H2" 0 "hypothetical protein"  
"NT-E05\_00980" 24907 "s59E25H2" 0 "hypothetical protein"  
"NT-E05\_00980" 24907 "s59E5H2" 0 "hypothetical protein"  
"NT-E05\_00980" 24907 "s63E6H2" 0 "hypothetical protein"  
"NT-E05\_00981" 24908 "s59E13H2" 0 "hypothetical protein"  
"NT-E05\_00981" 24908 "s59E25H2" 0 "hypothetical protein"  
"NT-E05\_00981" 24908 "s59E5H2" 0 "hypothetical protein"  
"NT-E05\_00981" 24908 "s63E6H2" 0 "hypothetical protein"  
"NT-E05\_00982" 24909 "s59E13H2" 0 "ATP-dependent helicase HepA"  
"NT-E05\_00982" 24909 "s59E25H2" 0 "ATP-dependent helicase HepA"  
"NT-E05\_00982" 24909 "s59E5H2" 0.1034092 "ATP-dependent helicase HepA"  
"NT-E05\_00982" 24909 "s63E6H2" 0 "ATP-dependent helicase HepA"

"NT-E05\_00983" 24910 "s59E13H2" 0 "RNA polymerase-associated protein RapA"  
"NT-E05\_00983" 24910 "s59E25H2" 0 "RNA polymerase-associated protein RapA"  
"NT-E05\_00983" 24910 "s59E5H2" 0.08963564 "RNA polymerase-associated protein RapA"  
"NT-E05\_00983" 24910 "s63E6H2" 0 "RNA polymerase-associated protein RapA"  
"NT-E05\_00984" 24911 "s59E13H2" 0 "Tetratricopeptide repeat protein"  
"NT-E05\_00984" 24911 "s59E25H2" 0 "Tetratricopeptide repeat protein"  
"NT-E05\_00984" 24911 "s59E5H2" 0 "Tetratricopeptide repeat protein"  
"NT-E05\_00984" 24911 "s63E6H2" 0 "Tetratricopeptide repeat protein"  
"NT-E05\_00985" 24912 "s59E13H2" 0 "Spore photoproduct lyase"  
"NT-E05\_00985" 24912 "s59E25H2" 0 "Spore photoproduct lyase"  
"NT-E05\_00985" 24912 "s59E5H2" 0 "Spore photoproduct lyase"  
"NT-E05\_00985" 24912 "s63E6H2" 0 "Spore photoproduct lyase"  
"NT-E05\_00986" 24913 "s59E13H2" 0 "hypothetical protein"  
"NT-E05\_00986" 24913 "s59E25H2" 0 "hypothetical protein"  
"NT-E05\_00986" 24913 "s59E5H2" 0 "hypothetical protein"  
"NT-E05\_00986" 24913 "s63E6H2" 0 "hypothetical protein"  
"NT-E05\_00988" 24915 "s59E13H2" 0 "hypothetical protein"  
"NT-E05\_00988" 24915 "s59E25H2" 0 "hypothetical protein"  
"NT-E05\_00988" 24915 "s59E5H2" 0 "hypothetical protein"  
"NT-E05\_00988" 24915 "s63E6H2" 0 "hypothetical protein"  
"NT-E05\_00989" 24916 "s59E13H2" 0 "hypothetical protein"  
"NT-E05\_00989" 24916 "s59E25H2" 0 "hypothetical protein"  
"NT-E05\_00989" 24916 "s59E5H2" 0 "hypothetical protein"  
"NT-E05\_00989" 24916 "s63E6H2" 0 "hypothetical protein"  
"NT-E05\_00990" 24917 "s59E13H2" 0 "Pyruvate kinase, alpha/beta domain"  
"NT-E05\_00990" 24917 "s59E25H2" 0 "Pyruvate kinase, alpha/beta domain"  
"NT-E05\_00990" 24917 "s59E5H2" 0 "Pyruvate kinase, alpha/beta domain"  
"NT-E05\_00990" 24917 "s63E6H2" 0 "Pyruvate kinase, alpha/beta domain"  
"NT-E05\_00991" 24918 "s59E13H2" 0 "Archaeal ATPase"  
"NT-E05\_00991" 24918 "s59E25H2" 0 "Archaeal ATPase"  
"NT-E05\_00991" 24918 "s59E5H2" 0.006372536 "Archaeal ATPase"  
"NT-E05\_00991" 24918 "s63E6H2" 0.00119005 "Archaeal ATPase"  
"NT-E05\_00992" 24919 "s59E13H2" 0 "hypothetical protein"  
"NT-E05\_00992" 24919 "s59E25H2" 0 "hypothetical protein"  
"NT-E05\_00992" 24919 "s59E5H2" 0 "hypothetical protein"  
"NT-E05\_00992" 24919 "s63E6H2" 0 "hypothetical protein"  
"NT-E05\_00993" 24920 "s59E13H2" 0 "PIN domain protein"  
"NT-E05\_00993" 24920 "s59E25H2" 0 "PIN domain protein"  
"NT-E05\_00993" 24920 "s59E5H2" 0 "PIN domain protein"  
"NT-E05\_00993" 24920 "s63E6H2" 0 "PIN domain protein"  
"NT-E05\_00994" 24921 "s59E13H2" 0 "SpoVT / AbrB like domain protein"  
"NT-E05\_00994" 24921 "s59E25H2" 0 "SpoVT / AbrB like domain protein"  
"NT-E05\_00994" 24921 "s59E5H2" 0 "SpoVT / AbrB like domain protein"  
"NT-E05\_00994" 24921 "s63E6H2" 0 "SpoVT / AbrB like domain protein"  
"NT-E05\_00995" 24922 "s59E13H2" 0 "hypothetical protein"  
"NT-E05\_00995" 24922 "s59E25H2" 0 "hypothetical protein"  
"NT-E05\_00995" 24922 "s59E5H2" 0 "hypothetical protein"



"NT-E05\_00995" 24922 "s63E6H2" 0 "hypothetical protein"  
"NT-E05\_00996" 24923 "s59E13H2" 0 "hypothetical protein"  
"NT-E05\_00996" 24923 "s59E25H2" 0 "hypothetical protein"  
"NT-E05\_00996" 24923 "s59E5H2" 0 "hypothetical protein"  
"NT-E05\_00996" 24923 "s63E6H2" 0 "hypothetical protein"  
"NT-E05\_00997" 24924 "s59E13H2" 0 "Cupin domain protein"  
"NT-E05\_00997" 24924 "s59E25H2" 0 "Cupin domain protein"  
"NT-E05\_00997" 24924 "s59E5H2" 0 "Cupin domain protein"  
"NT-E05\_00997" 24924 "s63E6H2" 0 "Cupin domain protein"  
"NT-E05\_00998" 24925 "s59E13H2" 0 "Phosphopantetheine adenyltransferase"  
"NT-E05\_00998" 24925 "s59E25H2" 0 "Phosphopantetheine adenyltransferase"  
"NT-E05\_00998" 24925 "s59E5H2" 0 "Phosphopantetheine adenyltransferase"  
"NT-E05\_00998" 24925 "s63E6H2" 0 "Phosphopantetheine adenyltransferase"  
"NT-E05\_00999" 24926 "s59E13H2" 0 "hypothetical protein"  
"NT-E05\_00999" 24926 "s59E25H2" 0 "hypothetical protein"  
"NT-E05\_00999" 24926 "s59E5H2" 0 "hypothetical protein"  
"NT-E05\_00999" 24926 "s63E6H2" 0 "hypothetical protein"  
"NT-E05\_01000" 24927 "s59E13H2" 0 "50S ribosomal protein L32"  
"NT-E05\_01000" 24927 "s59E25H2" 0 "50S ribosomal protein L32"  
"NT-E05\_01000" 24927 "s59E5H2" 0 "50S ribosomal protein L32"  
"NT-E05\_01000" 24927 "s63E6H2" 0 "50S ribosomal protein L32"  
"NT-E05\_01002" 24929 "s59E13H2" 0 "Trehalose/maltose-binding protein MalE precursor"  
"NT-E05\_01002" 24929 "s59E25H2" 0 "Trehalose/maltose-binding protein MalE precursor"  
"NT-E05\_01002" 24929 "s59E5H2" 0 "Trehalose/maltose-binding protein MalE precursor"  
"NT-E05\_01002" 24929 "s63E6H2" 0 "Trehalose/maltose-binding protein MalE precursor"  
"NT-E05\_01003" 24930 "s59E13H2" 0 "L-arabinose transport system permease protein AraP"  
"NT-E05\_01003" 24930 "s59E25H2" 0 "L-arabinose transport system permease protein AraP"  
"NT-E05\_01003" 24930 "s59E5H2" 0 "L-arabinose transport system permease protein AraP"  
"NT-E05\_01003" 24930 "s63E6H2" 0 "L-arabinose transport system permease protein AraP"  
"NT-E05\_01004" 24931 "s59E13H2" 0 "L-arabinose transport system permease protein AraQ"  
"NT-E05\_01004" 24931 "s59E25H2" 0 "L-arabinose transport system permease protein AraQ"  
"NT-E05\_01004" 24931 "s59E5H2" 0 "L-arabinose transport system permease protein AraQ"  
"NT-E05\_01004" 24931 "s63E6H2" 0 "L-arabinose transport system permease protein AraQ"  
"NT-E05\_01005" 24932 "s59E13H2" 0 "Arylsulfatase"  
"NT-E05\_01005" 24932 "s59E25H2" 0 "Arylsulfatase"  
"NT-E05\_01005" 24932 "s59E5H2" 0.002273527 "Arylsulfatase"  
"NT-E05\_01005" 24932 "s63E6H2" 0 "Arylsulfatase"  
"NT-E05\_01007" 24934 "s59E13H2" 0 "Phd\_YefM"  
"NT-E05\_01007" 24934 "s59E25H2" 0 "Phd\_YefM"  
"NT-E05\_01007" 24934 "s59E5H2" 0 "Phd\_YefM"  
"NT-E05\_01007" 24934 "s63E6H2" 0 "Phd\_YefM"  
"NT-E05\_01008" 24935 "s59E13H2" 0 "Plasmid stabilisation system protein"  
"NT-E05\_01008" 24935 "s59E25H2" 0 "Plasmid stabilisation system protein"  
"NT-E05\_01008" 24935 "s59E5H2" 0 "Plasmid stabilisation system protein"  
"NT-E05\_01008" 24935 "s63E6H2" 0 "Plasmid stabilisation system protein"  
"NT-E05\_01009" 24936 "s59E13H2" 0 "hypothetical protein"  
"NT-E05\_01009" 24936 "s59E25H2" 0 "hypothetical protein"

"NT-E05\_01009" 24936 "s59E5H2" 0 "hypothetical protein"  
"NT-E05\_01009" 24936 "s63E6H2" 0 "hypothetical protein"  
"NT-E05\_01010" 24937 "s59E13H2" 0 "hypothetical protein"  
"NT-E05\_01010" 24937 "s59E25H2" 0 "hypothetical protein"  
"NT-E05\_01010" 24937 "s59E5H2" 0 "hypothetical protein"  
"NT-E05\_01010" 24937 "s63E6H2" 0 "hypothetical protein"  
"NT-E05\_01011" 24938 "s59E13H2" 0 "Ribonuclease VapC1"  
"NT-E05\_01011" 24938 "s59E25H2" 0 "Ribonuclease VapC1"  
"NT-E05\_01011" 24938 "s59E5H2" 0 "Ribonuclease VapC1"  
"NT-E05\_01011" 24938 "s63E6H2" 0 "Ribonuclease VapC1"  
"NT-E05\_01012" 24939 "s59E13H2" 0 "putative tyrosine recombinase XerC-like protein"  
"NT-E05\_01012" 24939 "s59E25H2" 0 "putative tyrosine recombinase XerC-like protein"  
"NT-E05\_01012" 24939 "s59E5H2" 0 "putative tyrosine recombinase XerC-like protein"  
"NT-E05\_01012" 24939 "s63E6H2" 0 "putative tyrosine recombinase XerC-like protein"  
"NT-E05\_01013" 24940 "s59E13H2" 0 "hypothetical protein"  
"NT-E05\_01013" 24940 "s59E25H2" 0 "hypothetical protein"  
"NT-E05\_01013" 24940 "s59E5H2" 0 "hypothetical protein"  
"NT-E05\_01013" 24940 "s63E6H2" 0 "hypothetical protein"  
"NT-E05\_01014" 24941 "s59E13H2" 0 "hypothetical protein"  
"NT-E05\_01014" 24941 "s59E25H2" 0 "hypothetical protein"  
"NT-E05\_01014" 24941 "s59E5H2" 0 "hypothetical protein"  
"NT-E05\_01014" 24941 "s63E6H2" 0 "hypothetical protein"  
"NT-E05\_01015" 24942 "s59E13H2" 0 "hypothetical protein"  
"NT-E05\_01015" 24942 "s59E25H2" 0 "hypothetical protein"  
"NT-E05\_01015" 24942 "s59E5H2" 0 "hypothetical protein"  
"NT-E05\_01015" 24942 "s63E6H2" 0 "hypothetical protein"  
"NT-E05\_01016" 24943 "s59E13H2" 0 "hypothetical protein"  
"NT-E05\_01016" 24943 "s59E25H2" 0 "hypothetical protein"  
"NT-E05\_01016" 24943 "s59E5H2" 0 "hypothetical protein"  
"NT-E05\_01016" 24943 "s63E6H2" 0 "hypothetical protein"  
"NT-E05\_01017" 24944 "s59E13H2" 0 "hypothetical protein"  
"NT-E05\_01017" 24944 "s59E25H2" 0 "hypothetical protein"  
"NT-E05\_01017" 24944 "s59E5H2" 0 "hypothetical protein"  
"NT-E05\_01017" 24944 "s63E6H2" 0 "hypothetical protein"  
"NT-E05\_01018" 24945 "s59E13H2" 0 "Endonuclease III"  
"NT-E05\_01018" 24945 "s59E25H2" 0 "Endonuclease III"  
"NT-E05\_01018" 24945 "s59E5H2" 0 "Endonuclease III"  
"NT-E05\_01018" 24945 "s63E6H2" 0 "Endonuclease III"  
"NT-E05\_01020" 24947 "s59E13H2" 0 "glucose-6-phosphate isomerase"  
"NT-E05\_01020" 24947 "s59E25H2" 0 "glucose-6-phosphate isomerase"  
"NT-E05\_01020" 24947 "s59E5H2" 0 "glucose-6-phosphate isomerase"  
"NT-E05\_01020" 24947 "s63E6H2" 0 "glucose-6-phosphate isomerase"  
"NT-E05\_01021" 24948 "s59E13H2" 0 "Arylsulfatase"  
"NT-E05\_01021" 24948 "s59E25H2" 0 "Arylsulfatase"  
"NT-E05\_01021" 24948 "s59E5H2" 0 "Arylsulfatase"  
"NT-E05\_01021" 24948 "s63E6H2" 0 "Arylsulfatase"  
"NT-E05\_01023" 24950 "s59E13H2" 0 "methylcobalamin:coenzyme M methyltransferase"

"NT-E05\_01023" 24950 "s59E25H2" 0 "methylcobalamin:coenzyme M methyltransferase"  
"NT-E05\_01023" 24950 "s59E5H2" 0 "methylcobalamin:coenzyme M methyltransferase"  
"NT-E05\_01023" 24950 "s63E6H2" 0 "methylcobalamin:coenzyme M methyltransferase"  
"NT-E05\_01024" 24951 "s59E13H2" 0 "Lactose transport system permease protein LacF"  
"NT-E05\_01024" 24951 "s59E25H2" 0 "Lactose transport system permease protein LacF"  
"NT-E05\_01024" 24951 "s59E5H2" 0 "Lactose transport system permease protein LacF"  
"NT-E05\_01024" 24951 "s63E6H2" 0 "Lactose transport system permease protein LacF"  
"NT-E05\_01025" 24952 "s59E13H2" 0 "L-arabinose transport system permease protein AraQ"  
"NT-E05\_01025" 24952 "s59E25H2" 0 "L-arabinose transport system permease protein AraQ"  
"NT-E05\_01025" 24952 "s59E5H2" 0 "L-arabinose transport system permease protein AraQ"  
"NT-E05\_01025" 24952 "s63E6H2" 0 "L-arabinose transport system permease protein AraQ"  
"NT-E05\_01026" 24953 "s59E13H2" 0 "Maltotriose-binding protein precursor"  
"NT-E05\_01026" 24953 "s59E25H2" 0 "Maltotriose-binding protein precursor"  
"NT-E05\_01026" 24953 "s59E5H2" 0 "Maltotriose-binding protein precursor"  
"NT-E05\_01026" 24953 "s63E6H2" 0 "Maltotriose-binding protein precursor"  
"NT-E05\_01028" 24955 "s59E13H2" 0 "Type I phosphodiesterase / nucleotide pyrophosphatase"  
"NT-E05\_01028" 24955 "s59E25H2" 0 "Type I phosphodiesterase / nucleotide pyrophosphatase"  
"NT-E05\_01028" 24955 "s59E5H2" 0 "Type I phosphodiesterase / nucleotide pyrophosphatase"  
"NT-E05\_01028" 24955 "s63E6H2" 0 "Type I phosphodiesterase / nucleotide pyrophosphatase"  
"NT-E05\_01029" 24956 "s59E13H2" 0 "hypothetical protein"  
"NT-E05\_01029" 24956 "s59E25H2" 0 "hypothetical protein"  
"NT-E05\_01029" 24956 "s59E5H2" 0 "hypothetical protein"  
"NT-E05\_01029" 24956 "s63E6H2" 0 "hypothetical protein"  
"NT-E05\_01030" 24957 "s59E13H2" 0 "Arylsulfotransferase (ASST)"  
"NT-E05\_01030" 24957 "s59E25H2" 0 "Arylsulfotransferase (ASST)"  
"NT-E05\_01030" 24957 "s59E5H2" 0 "Arylsulfotransferase (ASST)"  
"NT-E05\_01030" 24957 "s63E6H2" 0 "Arylsulfotransferase (ASST)"  
"NT-E05\_01031" 24958 "s59E13H2" 0 "Arylsulfotransferase (ASST)"  
"NT-E05\_01031" 24958 "s59E25H2" 0 "Arylsulfotransferase (ASST)"  
"NT-E05\_01031" 24958 "s59E5H2" 0 "Arylsulfotransferase (ASST)"  
"NT-E05\_01031" 24958 "s63E6H2" 0 "Arylsulfotransferase (ASST)"  
"NT-E05\_01032" 24959 "s59E13H2" 0 "Xylulose kinase"  
"NT-E05\_01032" 24959 "s59E25H2" 0 "Xylulose kinase"  
"NT-E05\_01032" 24959 "s59E5H2" 0 "Xylulose kinase"  
"NT-E05\_01032" 24959 "s63E6H2" 0 "Xylulose kinase"  
"NT-E05\_01033" 24960 "s59E13H2" 0 "Xylulose kinase"  
"NT-E05\_01033" 24960 "s59E25H2" 0 "Xylulose kinase"  
"NT-E05\_01033" 24960 "s59E5H2" 0 "Xylulose kinase"  
"NT-E05\_01033" 24960 "s63E6H2" 0 "Xylulose kinase"  
"NT-E05\_01034" 24961 "s59E13H2" 0 "Xylulose kinase"  
"NT-E05\_01034" 24961 "s59E25H2" 0 "Xylulose kinase"  
"NT-E05\_01034" 24961 "s59E5H2" 0.0735046 "Xylulose kinase"  
"NT-E05\_01034" 24961 "s63E6H2" 0 "Xylulose kinase"  
"NT-E05\_01035" 24962 "s59E13H2" 0 "Ribulose-phosphate 3-epimerase"  
"NT-E05\_01035" 24962 "s59E25H2" 0 "Ribulose-phosphate 3-epimerase"  
"NT-E05\_01035" 24962 "s59E5H2" 0 "Ribulose-phosphate 3-epimerase"  
"NT-E05\_01035" 24962 "s63E6H2" 0 "Ribulose-phosphate 3-epimerase"

"NT-E05\_01036" 24963 "s59E13H2" 0 "Electron transport complex protein RnfC"  
"NT-E05\_01036" 24963 "s59E25H2" 0 "Electron transport complex protein RnfC"  
"NT-E05\_01036" 24963 "s59E5H2" 0 "Electron transport complex protein RnfC"  
"NT-E05\_01036" 24963 "s63E6H2" 0 "Electron transport complex protein RnfC"  
"NT-E05\_01037" 24964 "s59E13H2" 0 "Acetylornithine aminotransferase"  
"NT-E05\_01037" 24964 "s59E25H2" 0 "Acetylornithine aminotransferase"  
"NT-E05\_01037" 24964 "s59E5H2" 0 "Acetylornithine aminotransferase"  
"NT-E05\_01037" 24964 "s63E6H2" 0 "Acetylornithine aminotransferase"  
"NT-E05\_01038" 24965 "s59E13H2" 0 "Major Facilitator Superfamily protein"  
"NT-E05\_01038" 24965 "s59E25H2" 0 "Major Facilitator Superfamily protein"  
"NT-E05\_01038" 24965 "s59E5H2" 0 "Major Facilitator Superfamily protein"  
"NT-E05\_01038" 24965 "s63E6H2" 0 "Major Facilitator Superfamily protein"  
"NT-E05\_01039" 24966 "s59E13H2" 0 "Negative regulator of genetic competence ClpC/MecB"  
"NT-E05\_01039" 24966 "s59E25H2" 0 "Negative regulator of genetic competence ClpC/MecB"  
"NT-E05\_01039" 24966 "s59E5H2" 0 "Negative regulator of genetic competence ClpC/MecB"  
"NT-E05\_01039" 24966 "s63E6H2" 0 "Negative regulator of genetic competence ClpC/MecB"  
"NT-E05\_01040" 24967 "s59E13H2" 0 "MarR family protein"  
"NT-E05\_01040" 24967 "s59E25H2" 0 "MarR family protein"  
"NT-E05\_01040" 24967 "s59E5H2" 0 "MarR family protein"  
"NT-E05\_01040" 24967 "s63E6H2" 0 "MarR family protein"  
"NT-E05\_01041" 24968 "s59E13H2" 0 "Cystathionine gamma-synthase"  
"NT-E05\_01041" 24968 "s59E25H2" 0 "Cystathionine gamma-synthase"  
"NT-E05\_01041" 24968 "s59E5H2" 0 "Cystathionine gamma-synthase"  
"NT-E05\_01041" 24968 "s63E6H2" 0 "Cystathionine gamma-synthase"  
"NT-E05\_01042" 24969 "s59E13H2" 0 "PHP domain protein"  
"NT-E05\_01042" 24969 "s59E25H2" 0 "PHP domain protein"  
"NT-E05\_01042" 24969 "s59E5H2" 0 "PHP domain protein"  
"NT-E05\_01042" 24969 "s63E6H2" 0 "PHP domain protein"  
"NT-E05\_01043" 24970 "s59E13H2" 0 "UvrB/uvrC motif protein"  
"NT-E05\_01043" 24970 "s59E25H2" 0 "UvrB/uvrC motif protein"  
"NT-E05\_01043" 24970 "s59E5H2" 0 "UvrB/uvrC motif protein"  
"NT-E05\_01043" 24970 "s63E6H2" 0 "UvrB/uvrC motif protein"  
"NT-E05\_01044" 24971 "s59E13H2" 0 "hypothetical protein"  
"NT-E05\_01044" 24971 "s59E25H2" 0 "hypothetical protein"  
"NT-E05\_01044" 24971 "s59E5H2" 0 "hypothetical protein"  
"NT-E05\_01044" 24971 "s63E6H2" 0 "hypothetical protein"  
"NT-E05\_01046" 24973 "s59E13H2" 0 "Pyrophosphatase PpaX"  
"NT-E05\_01046" 24973 "s59E25H2" 0 "Pyrophosphatase PpaX"  
"NT-E05\_01046" 24973 "s59E5H2" 0 "Pyrophosphatase PpaX"  
"NT-E05\_01046" 24973 "s63E6H2" 0 "Pyrophosphatase PpaX"  
"NT-E05\_01047" 24974 "s59E13H2" 0 "hypothetical protein"  
"NT-E05\_01047" 24974 "s59E25H2" 0 "hypothetical protein"  
"NT-E05\_01047" 24974 "s59E5H2" 0 "hypothetical protein"  
"NT-E05\_01047" 24974 "s63E6H2" 0 "hypothetical protein"  
"NT-E05\_01048" 24975 "s59E13H2" 0 "Ribonuclease VapC11"  
"NT-E05\_01048" 24975 "s59E25H2" 0 "Ribonuclease VapC11"  
"NT-E05\_01048" 24975 "s59E5H2" 0 "Ribonuclease VapC11"

"NT-E05\_01048" 24975 "s63E6H2" 0 "Ribonuclease VapC11"  
"NT-E05\_01049" 24976 "s59E13H2" 0 "FMN reductase [NAD(P)H]"  
"NT-E05\_01049" 24976 "s59E25H2" 0 "FMN reductase [NAD(P)H]"  
"NT-E05\_01049" 24976 "s59E5H2" 0 "FMN reductase [NAD(P)H]"  
"NT-E05\_01049" 24976 "s63E6H2" 0 "FMN reductase [NAD(P)H]"  
"NT-E05\_01050" 24977 "s59E13H2" 0 "D-aminopeptidase"  
"NT-E05\_01050" 24977 "s59E25H2" 0 "D-aminopeptidase"  
"NT-E05\_01050" 24977 "s59E5H2" 0 "D-aminopeptidase"  
"NT-E05\_01050" 24977 "s63E6H2" 0 "D-aminopeptidase"  
"NT-E05\_01051" 24978 "s59E13H2" 0 "Lipoyl synthase"  
"NT-E05\_01051" 24978 "s59E25H2" 0 "Lipoyl synthase"  
"NT-E05\_01051" 24978 "s59E5H2" 0.004579585 "Lipoyl synthase"  
"NT-E05\_01051" 24978 "s63E6H2" 0 "Lipoyl synthase"  
"NT-E05\_01052" 24979 "s59E13H2" 0 "tRNA(Ile)-lysidine synthase"  
"NT-E05\_01052" 24979 "s59E25H2" 0 "tRNA(Ile)-lysidine synthase"  
"NT-E05\_01052" 24979 "s59E5H2" 0 "tRNA(Ile)-lysidine synthase"  
"NT-E05\_01052" 24979 "s63E6H2" 0 "tRNA(Ile)-lysidine synthase"  
"NT-E05\_01053" 24980 "s59E13H2" 0 "N5-carboxyaminoimidazole ribonucleotide mutase"  
"NT-E05\_01053" 24980 "s59E25H2" 0 "N5-carboxyaminoimidazole ribonucleotide mutase"  
"NT-E05\_01053" 24980 "s59E5H2" 0 "N5-carboxyaminoimidazole ribonucleotide mutase"  
"NT-E05\_01053" 24980 "s63E6H2" 0 "N5-carboxyaminoimidazole ribonucleotide mutase"  
"NT-E05\_01054" 24981 "s59E13H2" 0 "hypothetical protein"  
"NT-E05\_01054" 24981 "s59E25H2" 0 "hypothetical protein"  
"NT-E05\_01054" 24981 "s59E5H2" 0 "hypothetical protein"  
"NT-E05\_01054" 24981 "s63E6H2" 0 "hypothetical protein"  
"NT-E05\_01055" 24982 "s59E13H2" 0 "hypothetical protein"  
"NT-E05\_01055" 24982 "s59E25H2" 0 "hypothetical protein"  
"NT-E05\_01055" 24982 "s59E5H2" 0 "hypothetical protein"  
"NT-E05\_01055" 24982 "s63E6H2" 0 "hypothetical protein"  
"NT-E05\_01056" 24983 "s59E13H2" 0 "hypothetical protein"  
"NT-E05\_01056" 24983 "s59E25H2" 0 "hypothetical protein"  
"NT-E05\_01056" 24983 "s59E5H2" 0 "hypothetical protein"  
"NT-E05\_01056" 24983 "s63E6H2" 0 "hypothetical protein"  
"NT-E05\_01057" 24984 "s59E13H2" 0 "chromosome segregation protein"  
"NT-E05\_01057" 24984 "s59E25H2" 0 "chromosome segregation protein"  
"NT-E05\_01057" 24984 "s59E5H2" 0 "chromosome segregation protein"  
"NT-E05\_01057" 24984 "s63E6H2" 0 "chromosome segregation protein"  
"NT-E05\_01059" 24986 "s59E13H2" 0 "hypothetical protein"  
"NT-E05\_01059" 24986 "s59E25H2" 0 "hypothetical protein"  
"NT-E05\_01059" 24986 "s59E5H2" 0 "hypothetical protein"  
"NT-E05\_01059" 24986 "s63E6H2" 0 "hypothetical protein"  
"NT-E05\_01060" 24987 "s59E13H2" 0 "Ribonuclease VapC21"  
"NT-E05\_01060" 24987 "s59E25H2" 0 "Ribonuclease VapC21"  
"NT-E05\_01060" 24987 "s59E5H2" 0 "Ribonuclease VapC21"  
"NT-E05\_01060" 24987 "s63E6H2" 0 "Ribonuclease VapC21"  
"NT-E05\_01061" 24988 "s59E13H2" 0 "hypothetical protein"  
"NT-E05\_01061" 24988 "s59E25H2" 0 "hypothetical protein"

"NT-E05\_01061" 24988 "s59E5H2" 0 "hypothetical protein"  
"NT-E05\_01061" 24988 "s63E6H2" 0 "hypothetical protein"  
"NT-E05\_01062" 24989 "s59E13H2" 0 "Cobalt import ATP-binding protein CbiO"  
"NT-E05\_01062" 24989 "s59E25H2" 0 "Cobalt import ATP-binding protein CbiO"  
"NT-E05\_01062" 24989 "s59E5H2" 0 "Cobalt import ATP-binding protein CbiO"  
"NT-E05\_01062" 24989 "s63E6H2" 0 "Cobalt import ATP-binding protein CbiO"  
"NT-E05\_01063" 24990 "s59E13H2" 0 "Nickel transport protein NikQ"  
"NT-E05\_01063" 24990 "s59E25H2" 0 "Nickel transport protein NikQ"  
"NT-E05\_01063" 24990 "s59E5H2" 0 "Nickel transport protein NikQ"  
"NT-E05\_01063" 24990 "s63E6H2" 0 "Nickel transport protein NikQ"  
"NT-E05\_01064" 24991 "s59E13H2" 0 "hypothetical protein"  
"NT-E05\_01064" 24991 "s59E25H2" 0 "hypothetical protein"  
"NT-E05\_01064" 24991 "s59E5H2" 0 "hypothetical protein"  
"NT-E05\_01064" 24991 "s63E6H2" 0 "hypothetical protein"  
"NT-E05\_01065" 24992 "s59E13H2" 0 "Nickel uptake substrate-specific transmembrane region"  
"NT-E05\_01065" 24992 "s59E25H2" 0 "Nickel uptake substrate-specific transmembrane region"  
"NT-E05\_01065" 24992 "s59E5H2" 0 "Nickel uptake substrate-specific transmembrane region"  
"NT-E05\_01065" 24992 "s63E6H2" 0.001904079 "Nickel uptake substrate-specific transmembrane region"  
"NT-E05\_01066" 24993 "s59E13H2" 0 "Cobalt transport protein CbiM"  
"NT-E05\_01066" 24993 "s59E25H2" 0 "Cobalt transport protein CbiM"  
"NT-E05\_01066" 24993 "s59E5H2" 0 "Cobalt transport protein CbiM"  
"NT-E05\_01066" 24993 "s63E6H2" 0 "Cobalt transport protein CbiM"  
"NT-E05\_01067" 24994 "s59E13H2" 0 "Putative nickel-responsive regulator"  
"NT-E05\_01067" 24994 "s59E25H2" 0 "Putative nickel-responsive regulator"  
"NT-E05\_01067" 24994 "s59E5H2" 0 "Putative nickel-responsive regulator"  
"NT-E05\_01067" 24994 "s63E6H2" 0 "Putative nickel-responsive regulator"  
"NT-E05\_01068" 24995 "s59E13H2" 0 "hypothetical protein"  
"NT-E05\_01068" 24995 "s59E25H2" 0 "hypothetical protein"  
"NT-E05\_01068" 24995 "s59E5H2" 0 "hypothetical protein"  
"NT-E05\_01068" 24995 "s63E6H2" 0 "hypothetical protein"  
"NT-E05\_01069" 24996 "s59E13H2" 0 "Uracil DNA glycosylase superfamily protein"  
"NT-E05\_01069" 24996 "s59E25H2" 0 "Uracil DNA glycosylase superfamily protein"  
"NT-E05\_01069" 24996 "s59E5H2" 0 "Uracil DNA glycosylase superfamily protein"  
"NT-E05\_01069" 24996 "s63E6H2" 0 "Uracil DNA glycosylase superfamily protein"  
"NT-E05\_01070" 24997 "s59E13H2" 0 "hypothetical protein"  
"NT-E05\_01070" 24997 "s59E25H2" 0 "hypothetical protein"  
"NT-E05\_01070" 24997 "s59E5H2" 0 "hypothetical protein"  
"NT-E05\_01070" 24997 "s63E6H2" 0 "hypothetical protein"  
"NT-E05\_01071" 24998 "s59E13H2" 0 "Late embryogenesis abundant protein"  
"NT-E05\_01071" 24998 "s59E25H2" 0 "Late embryogenesis abundant protein"  
"NT-E05\_01071" 24998 "s59E5H2" 0 "Late embryogenesis abundant protein"  
"NT-E05\_01071" 24998 "s63E6H2" 0 "Late embryogenesis abundant protein"  
"NT-E05\_01072" 24999 "s59E13H2" 0 "Modulator of FtsH protease HflK"  
"NT-E05\_01072" 24999 "s59E25H2" 0 "Modulator of FtsH protease HflK"  
"NT-E05\_01072" 24999 "s59E5H2" 0.01451874 "Modulator of FtsH protease HflK"  
"NT-E05\_01072" 24999 "s63E6H2" 0 "Modulator of FtsH protease HflK"  
"NT-E05\_01074" 25001 "s59E13H2" 0 "sn-glycerol-3-phosphate-binding periplasmic protein UgpB precursor"

"NT-E05\_01074" 25001 "s59E25H2" 0 "sn-glycerol-3-phosphate-binding periplasmic protein UgpB precursor"  
"NT-E05\_01074" 25001 "s59E5H2" 0 "sn-glycerol-3-phosphate-binding periplasmic protein UgpB precursor"  
"NT-E05\_01074" 25001 "s63E6H2" 0 "sn-glycerol-3-phosphate-binding periplasmic protein UgpB precursor"  
"NT-E05\_01075" 25002 "s59E13H2" 0 "Trehalose/maltose transport system permease protein MalF"  
"NT-E05\_01075" 25002 "s59E25H2" 0 "Trehalose/maltose transport system permease protein MalF"  
"NT-E05\_01075" 25002 "s59E5H2" 0 "Trehalose/maltose transport system permease protein MalF"  
"NT-E05\_01075" 25002 "s63E6H2" 0 "Trehalose/maltose transport system permease protein MalF"  
"NT-E05\_01079" 25006 "s59E13H2" 0 "Amidohydrolase"  
"NT-E05\_01079" 25006 "s59E25H2" 0 "Amidohydrolase"  
"NT-E05\_01079" 25006 "s59E5H2" 0 "Amidohydrolase"  
"NT-E05\_01079" 25006 "s63E6H2" 0 "Amidohydrolase"  
"NT-E05\_01080" 25007 "s59E13H2" 0 "Transcriptional regulator KdgR"  
"NT-E05\_01080" 25007 "s59E25H2" 0 "Transcriptional regulator KdgR"  
"NT-E05\_01080" 25007 "s59E5H2" 0 "Transcriptional regulator KdgR"  
"NT-E05\_01080" 25007 "s63E6H2" 0 "Transcriptional regulator KdgR"  
"NT-E05\_01081" 25008 "s59E13H2" 0 "putative transcriptional regulatory protein pdtaR"  
"NT-E05\_01081" 25008 "s59E25H2" 0 "putative transcriptional regulatory protein pdtaR"  
"NT-E05\_01081" 25008 "s59E5H2" 0 "putative transcriptional regulatory protein pdtaR"  
"NT-E05\_01081" 25008 "s63E6H2" 0 "putative transcriptional regulatory protein pdtaR"  
"NT-E05\_01082" 25009 "s59E13H2" 0 "putative NH(3)-dependent NAD(+) synthetase"  
"NT-E05\_01082" 25009 "s59E25H2" 0 "putative NH(3)-dependent NAD(+) synthetase"  
"NT-E05\_01082" 25009 "s59E5H2" 0 "putative NH(3)-dependent NAD(+) synthetase"  
"NT-E05\_01082" 25009 "s63E6H2" 0 "putative NH(3)-dependent NAD(+) synthetase"  
"NT-E05\_01083" 25010 "s59E13H2" 0 "AP-4-A phosphorylase"  
"NT-E05\_01083" 25010 "s59E25H2" 0 "AP-4-A phosphorylase"  
"NT-E05\_01083" 25010 "s59E5H2" 0 "AP-4-A phosphorylase"  
"NT-E05\_01083" 25010 "s63E6H2" 0 "AP-4-A phosphorylase"  
"NT-E05\_01084" 25011 "s59E13H2" 0 "Chromosomal replication initiator protein DnaA"  
"NT-E05\_01084" 25011 "s59E25H2" 0 "Chromosomal replication initiator protein DnaA"  
"NT-E05\_01084" 25011 "s59E5H2" 0.08053294 "Chromosomal replication initiator protein DnaA"  
"NT-E05\_01084" 25011 "s63E6H2" 0 "Chromosomal replication initiator protein DnaA"  
"NT-E05\_01085" 25012 "s59E13H2" 0 "Thioredoxin"  
"NT-E05\_01085" 25012 "s59E25H2" 0 "Thioredoxin"  
"NT-E05\_01085" 25012 "s59E5H2" 0.0188889 "Thioredoxin"  
"NT-E05\_01085" 25012 "s63E6H2" 0 "Thioredoxin"  
"NT-E05\_01086" 25013 "s59E13H2" 0 "Na(+)-translocating NADH-quinone reductase subunit F"  
"NT-E05\_01086" 25013 "s59E25H2" 0 "Na(+)-translocating NADH-quinone reductase subunit F"  
"NT-E05\_01086" 25013 "s59E5H2" 0.0008333953 "Na(+)-translocating NADH-quinone reductase subunit F"  
"NT-E05\_01086" 25013 "s63E6H2" 0 "Na(+)-translocating NADH-quinone reductase subunit F"  
"NT-E05\_01088" 25015 "s59E13H2" 0 "Guanylate kinase"  
"NT-E05\_01088" 25015 "s59E25H2" 0 "Guanylate kinase"  
"NT-E05\_01088" 25015 "s59E5H2" 0 "Guanylate kinase"  
"NT-E05\_01088" 25015 "s63E6H2" 0 "Guanylate kinase"  
"NT-E05\_01089" 25016 "s59E13H2" 0 "hypothetical protein"  
"NT-E05\_01089" 25016 "s59E25H2" 0 "hypothetical protein"  
"NT-E05\_01089" 25016 "s59E5H2" 0 "hypothetical protein"  
"NT-E05\_01089" 25016 "s63E6H2" 0 "hypothetical protein"

"NT-E05\_01090" 25017 "s59E13H2" 0 "Bifunctional folate synthesis protein"  
"NT-E05\_01090" 25017 "s59E25H2" 0 "Bifunctional folate synthesis protein"  
"NT-E05\_01090" 25017 "s59E5H2" 0 "Bifunctional folate synthesis protein"  
"NT-E05\_01090" 25017 "s63E6H2" 0 "Bifunctional folate synthesis protein"  
"NT-E05\_01093" 25020 "s59E13H2" 0 "Purine catabolism protein PucG"  
"NT-E05\_01093" 25020 "s59E25H2" 0 "Purine catabolism protein PucG"  
"NT-E05\_01093" 25020 "s59E5H2" 0 "Purine catabolism protein PucG"  
"NT-E05\_01093" 25020 "s63E6H2" 0 "Purine catabolism protein PucG"  
"NT-E05\_01094" 25021 "s59E13H2" 0 "putative FAD-linked oxidoreductase"  
"NT-E05\_01094" 25021 "s59E25H2" 0 "putative FAD-linked oxidoreductase"  
"NT-E05\_01094" 25021 "s59E5H2" 0 "putative FAD-linked oxidoreductase"  
"NT-E05\_01094" 25021 "s63E6H2" 0 "putative FAD-linked oxidoreductase"  
"NT-E05\_01095" 25022 "s59E13H2" 0 "hypothetical protein"  
"NT-E05\_01095" 25022 "s59E25H2" 0 "hypothetical protein"  
"NT-E05\_01095" 25022 "s59E5H2" 0 "hypothetical protein"  
"NT-E05\_01095" 25022 "s63E6H2" 0 "hypothetical protein"  
"NT-E05\_01096" 25023 "s59E13H2" 0 "hypothetical protein"  
"NT-E05\_01096" 25023 "s59E25H2" 0 "hypothetical protein"  
"NT-E05\_01096" 25023 "s59E5H2" 0 "hypothetical protein"  
"NT-E05\_01096" 25023 "s63E6H2" 0 "hypothetical protein"  
"NT-E05\_01097" 25024 "s59E13H2" 0 "4-hydroxy-tetrahydrodipicolinate synthase"  
"NT-E05\_01097" 25024 "s59E25H2" 0 "4-hydroxy-tetrahydrodipicolinate synthase"  
"NT-E05\_01097" 25024 "s59E5H2" 0 "4-hydroxy-tetrahydrodipicolinate synthase"  
"NT-E05\_01097" 25024 "s63E6H2" 0 "4-hydroxy-tetrahydrodipicolinate synthase"  
"NT-E05\_01098" 25025 "s59E13H2" 0 "Diaminopimelate decarboxylase"  
"NT-E05\_01098" 25025 "s59E25H2" 0 "Diaminopimelate decarboxylase"  
"NT-E05\_01098" 25025 "s59E5H2" 0 "Diaminopimelate decarboxylase"  
"NT-E05\_01098" 25025 "s63E6H2" 0 "Diaminopimelate decarboxylase"  
"NT-E05\_01099" 25026 "s59E13H2" 0 "Argininosuccinate lyase 1"  
"NT-E05\_01099" 25026 "s59E25H2" 0 "Argininosuccinate lyase 1"  
"NT-E05\_01099" 25026 "s59E5H2" 0 "Argininosuccinate lyase 1"  
"NT-E05\_01099" 25026 "s63E6H2" 0 "Argininosuccinate lyase 1"  
"NT-E05\_01100" 25027 "s59E13H2" 0 "Zinc ribbon domain protein"  
"NT-E05\_01100" 25027 "s59E25H2" 0 "Zinc ribbon domain protein"  
"NT-E05\_01100" 25027 "s59E5H2" 0 "Zinc ribbon domain protein"  
"NT-E05\_01100" 25027 "s63E6H2" 0 "Zinc ribbon domain protein"  
"NT-E05\_01101" 25028 "s59E13H2" 0 "hypothetical protein"  
"NT-E05\_01101" 25028 "s59E25H2" 0 "hypothetical protein"  
"NT-E05\_01101" 25028 "s59E5H2" 0 "hypothetical protein"  
"NT-E05\_01101" 25028 "s63E6H2" 0 "hypothetical protein"  
"NT-E05\_01102" 25029 "s59E13H2" 0 "putative L-threonine 3-dehydrogenase"  
"NT-E05\_01102" 25029 "s59E25H2" 0 "putative L-threonine 3-dehydrogenase"  
"NT-E05\_01102" 25029 "s59E5H2" 0 "putative L-threonine 3-dehydrogenase"  
"NT-E05\_01102" 25029 "s63E6H2" 0 "putative L-threonine 3-dehydrogenase"  
"NT-E05\_01103" 25030 "s59E13H2" 0 "UDP-glucose 4-epimerase"  
"NT-E05\_01103" 25030 "s59E25H2" 0 "UDP-glucose 4-epimerase"  
"NT-E05\_01103" 25030 "s59E5H2" 0 "UDP-glucose 4-epimerase"



"NT-E05\_01103" 25030 "s63E6H2" 0 "UDP-glucose 4-epimerase"  
"NT-E05\_01104" 25031 "s59E13H2" 0 "Xylulose kinase"  
"NT-E05\_01104" 25031 "s59E25H2" 0 "Xylulose kinase"  
"NT-E05\_01104" 25031 "s59E5H2" 0.009858486 "Xylulose kinase"  
"NT-E05\_01104" 25031 "s63E6H2" 0 "Xylulose kinase"  
"NT-E05\_01105" 25032 "s59E13H2" 0 "Cellulose synthase operon protein C precursor"  
"NT-E05\_01105" 25032 "s59E25H2" 0 "Cellulose synthase operon protein C precursor"  
"NT-E05\_01105" 25032 "s59E5H2" 0 "Cellulose synthase operon protein C precursor"  
"NT-E05\_01105" 25032 "s63E6H2" 0 "Cellulose synthase operon protein C precursor"  
"NT-E05\_01106" 25033 "s59E13H2" 0 "Gram-negative bacterial tonB protein"  
"NT-E05\_01106" 25033 "s59E25H2" 0 "Gram-negative bacterial tonB protein"  
"NT-E05\_01106" 25033 "s59E5H2" 0 "Gram-negative bacterial tonB protein"  
"NT-E05\_01106" 25033 "s63E6H2" 0 "Gram-negative bacterial tonB protein"  
"NT-E05\_01107" 25034 "s59E13H2" 0 "Colicin I receptor precursor"  
"NT-E05\_01107" 25034 "s59E25H2" 0 "Colicin I receptor precursor"  
"NT-E05\_01107" 25034 "s59E5H2" 1.275134 "Colicin I receptor precursor"  
"NT-E05\_01107" 25034 "s63E6H2" 0.001327328 "Colicin I receptor precursor"  
"NT-E05\_01109" 25036 "s59E13H2" 0 "Ribosomal protein S12 methylthiotransferase RimO"  
"NT-E05\_01109" 25036 "s59E25H2" 0 "Ribosomal protein S12 methylthiotransferase RimO"  
"NT-E05\_01109" 25036 "s59E5H2" 1.091785 "Ribosomal protein S12 methylthiotransferase RimO"  
"NT-E05\_01109" 25036 "s63E6H2" 0 "Ribosomal protein S12 methylthiotransferase RimO"  
"NT-E05\_01110" 25037 "s59E13H2" 0 "5-methyltetrahydrofolate:corrinoid/iron-sulfur protein co-methyltransferase"  
"NT-E05\_01110" 25037 "s59E25H2" 0 "5-methyltetrahydrofolate:corrinoid/iron-sulfur protein co-methyltransferase"  
"NT-E05\_01110" 25037 "s59E5H2" 0.7362272 "5-methyltetrahydrofolate:corrinoid/iron-sulfur protein co-methyltransferase"  
"NT-E05\_01110" 25037 "s63E6H2" 0 "5-methyltetrahydrofolate:corrinoid/iron-sulfur protein co-methyltransferase"  
"NT-E05\_01111" 25038 "s59E13H2" 0 "Bifunctional homocysteine S-methyltransferase/5,10-methylenetetrahydrofolate reductase"  
"NT-E05\_01111" 25038 "s59E25H2" 0 "Bifunctional homocysteine S-methyltransferase/5,10-methylenetetrahydrofolate reductase"  
"NT-E05\_01111" 25038 "s59E5H2" 0.5069914 "Bifunctional homocysteine S-methyltransferase/5,10-methylenetetrahydrofolate reductase"  
"NT-E05\_01111" 25038 "s63E6H2" 0 "Bifunctional homocysteine S-methyltransferase/5,10-methylenetetrahydrofolate reductase"  
"NT-E05\_01113" 25040 "s59E13H2" 0 "Bifunctional adenosylcobalamin biosynthesis protein CobP"  
"NT-E05\_01113" 25040 "s59E25H2" 0 "Bifunctional adenosylcobalamin biosynthesis protein CobP"  
"NT-E05\_01113" 25040 "s59E5H2" 0.4470586 "Bifunctional adenosylcobalamin biosynthesis protein CobP"  
"NT-E05\_01113" 25040 "s63E6H2" 0 "Bifunctional adenosylcobalamin biosynthesis protein CobP"  
"NT-E05\_01114" 25041 "s59E13H2" 0 "Nicotinate-nucleotide--dimethylbenzimidazole phosphoribosyltransferase"  
"NT-E05\_01114" 25041 "s59E25H2" 0 "Nicotinate-nucleotide--dimethylbenzimidazole phosphoribosyltransferase"  
"NT-E05\_01114" 25041 "s59E5H2" 0.5316135 "Nicotinate-nucleotide--dimethylbenzimidazole phosphoribosyltransferase"  
"NT-E05\_01114" 25041 "s63E6H2" 0 "Nicotinate-nucleotide--dimethylbenzimidazole phosphoribosyltransferase"  
"NT-E05\_01115" 25042 "s59E13H2" 0 "Cobalamin synthase"  
"NT-E05\_01115" 25042 "s59E25H2" 0 "Cobalamin synthase"  
"NT-E05\_01115" 25042 "s59E5H2" 0.7419429 "Cobalamin synthase"  
"NT-E05\_01115" 25042 "s63E6H2" 0 "Cobalamin synthase"  
"NT-E05\_01116" 25043 "s59E13H2" 0 "Asparagine synthetase B [glutamine-hydrolyzing]"  
"NT-E05\_01116" 25043 "s59E25H2" 0 "Asparagine synthetase B [glutamine-hydrolyzing]"  
"NT-E05\_01116" 25043 "s59E5H2" 0.8108323 "Asparagine synthetase B [glutamine-hydrolyzing]"  
"NT-E05\_01116" 25043 "s63E6H2" 0 "Asparagine synthetase B [glutamine-hydrolyzing]"  
"NT-E05\_01117" 25044 "s59E13H2" 0 "ATP-binding region"  
"NT-E05\_01117" 25044 "s59E25H2" 0 "ATP-binding region"

"NT-E05\_01117" 25044 "s59E5H2" 0.5467861 "ATP-binding region"  
"NT-E05\_01117" 25044 "s63E6H2" 0 "ATP-binding region"  
"NT-E05\_01118" 25045 "s59E13H2" 0 "cobalamin biosynthesis protein"  
"NT-E05\_01118" 25045 "s59E25H2" 0 "cobalamin biosynthesis protein"  
"NT-E05\_01118" 25045 "s59E5H2" 0.0002045644 "cobalamin biosynthesis protein"  
"NT-E05\_01118" 25045 "s63E6H2" 0 "cobalamin biosynthesis protein"  
"NT-E05\_01119" 25046 "s59E13H2" 0 "Cobalamin-binding protein precursor"  
"NT-E05\_01119" 25046 "s59E25H2" 0 "Cobalamin-binding protein precursor"  
"NT-E05\_01119" 25046 "s59E5H2" 0 "Cobalamin-binding protein precursor"  
"NT-E05\_01119" 25046 "s63E6H2" 0 "Cobalamin-binding protein precursor"  
"NT-E05\_01120" 25047 "s59E13H2" 0 "Cobalamin import system permease protein BtuC"  
"NT-E05\_01120" 25047 "s59E25H2" 0 "Cobalamin import system permease protein BtuC"  
"NT-E05\_01120" 25047 "s59E5H2" 0 "Cobalamin import system permease protein BtuC"  
"NT-E05\_01120" 25047 "s63E6H2" 0 "Cobalamin import system permease protein BtuC"  
"NT-E05\_01121" 25048 "s59E13H2" 0 "Cobalamin import ATP-binding protein BtuD"  
"NT-E05\_01121" 25048 "s59E25H2" 0 "Cobalamin import ATP-binding protein BtuD"  
"NT-E05\_01121" 25048 "s59E5H2" 0 "Cobalamin import ATP-binding protein BtuD"  
"NT-E05\_01121" 25048 "s63E6H2" 0 "Cobalamin import ATP-binding protein BtuD"  
"NT-E05\_01122" 25049 "s59E13H2" 0 "Threonine-phosphate decarboxylase"  
"NT-E05\_01122" 25049 "s59E25H2" 0 "Threonine-phosphate decarboxylase"  
"NT-E05\_01122" 25049 "s59E5H2" 0 "Threonine-phosphate decarboxylase"  
"NT-E05\_01122" 25049 "s63E6H2" 0 "Threonine-phosphate decarboxylase"  
"NT-E05\_01123" 25050 "s59E13H2" 0 "Glutamate dehydrogenase"  
"NT-E05\_01123" 25050 "s59E25H2" 0 "Glutamate dehydrogenase"  
"NT-E05\_01123" 25050 "s59E5H2" 0 "Glutamate dehydrogenase"  
"NT-E05\_01123" 25050 "s63E6H2" 0 "Glutamate dehydrogenase"  
"NT-E05\_01124" 25051 "s59E13H2" 0 "Nitrogen regulatory protein P-II"  
"NT-E05\_01124" 25051 "s59E25H2" 0 "Nitrogen regulatory protein P-II"  
"NT-E05\_01124" 25051 "s59E5H2" 0 "Nitrogen regulatory protein P-II"  
"NT-E05\_01124" 25051 "s63E6H2" 0 "Nitrogen regulatory protein P-II"  
"NT-E05\_01126" 25053 "s59E13H2" 0 "methylcobalamin:coenzyme M methyltransferase"  
"NT-E05\_01126" 25053 "s59E25H2" 0 "methylcobalamin:coenzyme M methyltransferase"  
"NT-E05\_01126" 25053 "s59E5H2" 0 "methylcobalamin:coenzyme M methyltransferase"  
"NT-E05\_01126" 25053 "s63E6H2" 0 "methylcobalamin:coenzyme M methyltransferase"  
"NT-E05\_01127" 25054 "s59E13H2" 0 "Phosphoadenosine phosphosulfate reductase"  
"NT-E05\_01127" 25054 "s59E25H2" 0 "Phosphoadenosine phosphosulfate reductase"  
"NT-E05\_01127" 25054 "s59E5H2" 0 "Phosphoadenosine phosphosulfate reductase"  
"NT-E05\_01127" 25054 "s63E6H2" 0 "Phosphoadenosine phosphosulfate reductase"  
"NT-E05\_01128" 25055 "s59E13H2" 0 "Trehalose transport system permease protein SugB"  
"NT-E05\_01128" 25055 "s59E25H2" 0 "Trehalose transport system permease protein SugB"  
"NT-E05\_01128" 25055 "s59E5H2" 0 "Trehalose transport system permease protein SugB"  
"NT-E05\_01128" 25055 "s63E6H2" 0 "Trehalose transport system permease protein SugB"  
"NT-E05\_01129" 25056 "s59E13H2" 0 "Trehalose/maltose transport system permease protein MalF"  
"NT-E05\_01129" 25056 "s59E25H2" 0 "Trehalose/maltose transport system permease protein MalF"  
"NT-E05\_01129" 25056 "s59E5H2" 0 "Trehalose/maltose transport system permease protein MalF"  
"NT-E05\_01129" 25056 "s63E6H2" 0 "Trehalose/maltose transport system permease protein MalF"  
"NT-E05\_01130" 25057 "s59E13H2" 0 "Trehalose/maltose-binding protein MalE precursor"

"NT-E05\_01130" 25057 "s59E25H2" 0 "Trehalose/maltose-binding protein MalE precursor"  
"NT-E05\_01130" 25057 "s59E5H2" 0 "Trehalose/maltose-binding protein MalE precursor"  
"NT-E05\_01130" 25057 "s63E6H2" 0 "Trehalose/maltose-binding protein MalE precursor"  
"NT-E05\_01131" 25058 "s59E13H2" 0 "Glyoxylate reductase"  
"NT-E05\_01131" 25058 "s59E25H2" 0 "Glyoxylate reductase"  
"NT-E05\_01131" 25058 "s59E5H2" 0 "Glyoxylate reductase"  
"NT-E05\_01131" 25058 "s63E6H2" 0 "Glyoxylate reductase"  
"NT-E05\_01132" 25059 "s59E13H2" 0 "Choline-sulfatase"  
"NT-E05\_01132" 25059 "s59E25H2" 0 "Choline-sulfatase"  
"NT-E05\_01132" 25059 "s59E5H2" 0 "Choline-sulfatase"  
"NT-E05\_01132" 25059 "s63E6H2" 0 "Choline-sulfatase"  
"NT-E05\_01133" 25060 "s59E13H2" 0 "Branched-chain-amino-acid aminotransferase"  
"NT-E05\_01133" 25060 "s59E25H2" 0 "Branched-chain-amino-acid aminotransferase"  
"NT-E05\_01133" 25060 "s59E5H2" 0 "Branched-chain-amino-acid aminotransferase"  
"NT-E05\_01133" 25060 "s63E6H2" 0 "Branched-chain-amino-acid aminotransferase"  
"NT-E05\_01134" 25061 "s59E13H2" 0 "UDP-D-galactose:(glucosyl)lipopolysaccharide-1,6-D-galactosyltransferase"  
"NT-E05\_01134" 25061 "s59E25H2" 0 "UDP-D-galactose:(glucosyl)lipopolysaccharide-1,6-D-galactosyltransferase"  
"NT-E05\_01134" 25061 "s59E5H2" 0 "UDP-D-galactose:(glucosyl)lipopolysaccharide-1,6-D-galactosyltransferase"  
"NT-E05\_01134" 25061 "s63E6H2" 0 "UDP-D-galactose:(glucosyl)lipopolysaccharide-1,6-D-galactosyltransferase"  
"NT-E05\_01135" 25062 "s59E13H2" 0 "hypothetical protein"  
"NT-E05\_01135" 25062 "s59E25H2" 0 "hypothetical protein"  
"NT-E05\_01135" 25062 "s59E5H2" 0 "hypothetical protein"  
"NT-E05\_01135" 25062 "s63E6H2" 0 "hypothetical protein"  
"NT-E05\_01136" 25063 "s59E13H2" 0 "hypothetical protein"  
"NT-E05\_01136" 25063 "s59E25H2" 0 "hypothetical protein"  
"NT-E05\_01136" 25063 "s59E5H2" 0 "hypothetical protein"  
"NT-E05\_01136" 25063 "s63E6H2" 0 "hypothetical protein"  
"NT-E05\_01137" 25064 "s59E13H2" 0 "O-methyltransferase"  
"NT-E05\_01137" 25064 "s59E25H2" 0 "O-methyltransferase"  
"NT-E05\_01137" 25064 "s59E5H2" 0 "O-methyltransferase"  
"NT-E05\_01137" 25064 "s63E6H2" 0 "O-methyltransferase"  
"NT-E05\_01138" 25065 "s59E13H2" 0 "Spore protein YkvP"  
"NT-E05\_01138" 25065 "s59E25H2" 0 "Spore protein YkvP"  
"NT-E05\_01138" 25065 "s59E5H2" 0 "Spore protein YkvP"  
"NT-E05\_01138" 25065 "s63E6H2" 0 "Spore protein YkvP"  
"NT-E05\_01139" 25066 "s59E13H2" 0 "hypothetical protein"  
"NT-E05\_01139" 25066 "s59E25H2" 0 "hypothetical protein"  
"NT-E05\_01139" 25066 "s59E5H2" 0 "hypothetical protein"  
"NT-E05\_01139" 25066 "s63E6H2" 0 "hypothetical protein"  
"NT-E05\_01140" 25067 "s59E13H2" 0 "colanic acid biosynthesis protein"  
"NT-E05\_01140" 25067 "s59E25H2" 0 "colanic acid biosynthesis protein"  
"NT-E05\_01140" 25067 "s59E5H2" 0 "colanic acid biosynthesis protein"  
"NT-E05\_01140" 25067 "s63E6H2" 0 "colanic acid biosynthesis protein"  
"NT-E05\_01141" 25068 "s59E13H2" 0 "Coenzyme F420 hydrogenase subunit beta"  
"NT-E05\_01141" 25068 "s59E25H2" 0 "Coenzyme F420 hydrogenase subunit beta"  
"NT-E05\_01141" 25068 "s59E5H2" 0 "Coenzyme F420 hydrogenase subunit beta"  
"NT-E05\_01141" 25068 "s63E6H2" 0 "Coenzyme F420 hydrogenase subunit beta"

"NT-E05\_01142" 25069 "s59E13H2" 0 "hypothetical protein"  
"NT-E05\_01142" 25069 "s59E25H2" 0 "hypothetical protein"  
"NT-E05\_01142" 25069 "s59E5H2" 0 "hypothetical protein"  
"NT-E05\_01142" 25069 "s63E6H2" 0 "hypothetical protein"  
"NT-E05\_01143" 25070 "s59E13H2" 0 "GDP-mannose-dependent alpha-(1-2)-phosphatidylinositol mannosyltransferase"  
"NT-E05\_01143" 25070 "s59E25H2" 0 "GDP-mannose-dependent alpha-(1-2)-phosphatidylinositol mannosyltransferase"  
"NT-E05\_01143" 25070 "s59E5H2" 0 "GDP-mannose-dependent alpha-(1-2)-phosphatidylinositol mannosyltransferase"  
"NT-E05\_01143" 25070 "s63E6H2" 0 "GDP-mannose-dependent alpha-(1-2)-phosphatidylinositol mannosyltransferase"  
"NT-E05\_01144" 25071 "s59E13H2" 0 "hypothetical protein"  
"NT-E05\_01144" 25071 "s59E25H2" 0 "hypothetical protein"  
"NT-E05\_01144" 25071 "s59E5H2" 0.02010573 "hypothetical protein"  
"NT-E05\_01144" 25071 "s63E6H2" 0 "hypothetical protein"  
"NT-E05\_01145" 25072 "s59E13H2" 0 "putative methyltransferase YcgJ"  
"NT-E05\_01145" 25072 "s59E25H2" 0 "putative methyltransferase YcgJ"  
"NT-E05\_01145" 25072 "s59E5H2" 0 "putative methyltransferase YcgJ"  
"NT-E05\_01145" 25072 "s63E6H2" 0 "putative methyltransferase YcgJ"  
"NT-E05\_01146" 25073 "s59E13H2" 0 "Methyltransferase domain protein"  
"NT-E05\_01146" 25073 "s59E25H2" 0 "Methyltransferase domain protein"  
"NT-E05\_01146" 25073 "s59E5H2" 0 "Methyltransferase domain protein"  
"NT-E05\_01146" 25073 "s63E6H2" 0 "Methyltransferase domain protein"  
"NT-E05\_01147" 25074 "s59E13H2" 0 "putative glycosyl transferase"  
"NT-E05\_01147" 25074 "s59E25H2" 0 "putative glycosyl transferase"  
"NT-E05\_01147" 25074 "s59E5H2" 0.0175269 "putative glycosyl transferase"  
"NT-E05\_01147" 25074 "s63E6H2" 0 "putative glycosyl transferase"  
"NT-E05\_01148" 25075 "s59E13H2" 0 "GDP-L-fucose synthase"  
"NT-E05\_01148" 25075 "s59E25H2" 0 "GDP-L-fucose synthase"  
"NT-E05\_01148" 25075 "s59E5H2" 0 "GDP-L-fucose synthase"  
"NT-E05\_01148" 25075 "s63E6H2" 0 "GDP-L-fucose synthase"  
"NT-E05\_01149" 25076 "s59E13H2" 0 "colanic acid exporter"  
"NT-E05\_01149" 25076 "s59E25H2" 0 "colanic acid exporter"  
"NT-E05\_01149" 25076 "s59E5H2" 0 "colanic acid exporter"  
"NT-E05\_01149" 25076 "s63E6H2" 0 "colanic acid exporter"  
"NT-E05\_01150" 25077 "s59E13H2" 0 "O-Antigen ligase"  
"NT-E05\_01150" 25077 "s59E25H2" 0 "O-Antigen ligase"  
"NT-E05\_01150" 25077 "s59E5H2" 0 "O-Antigen ligase"  
"NT-E05\_01150" 25077 "s63E6H2" 0 "O-Antigen ligase"  
"NT-E05\_01151" 25078 "s59E13H2" 0 "Putative teichuronic acid biosynthesis glycosyltransferase TuoC"  
"NT-E05\_01151" 25078 "s59E25H2" 0 "Putative teichuronic acid biosynthesis glycosyltransferase TuoC"  
"NT-E05\_01151" 25078 "s59E5H2" 0 "Putative teichuronic acid biosynthesis glycosyltransferase TuoC"  
"NT-E05\_01151" 25078 "s63E6H2" 0 "Putative teichuronic acid biosynthesis glycosyltransferase TuoC"  
"NT-E05\_01152" 25079 "s59E13H2" 0 "Putative N-acetylmannosaminyltransferase"  
"NT-E05\_01152" 25079 "s59E25H2" 0 "Putative N-acetylmannosaminyltransferase"  
"NT-E05\_01152" 25079 "s59E5H2" 0 "Putative N-acetylmannosaminyltransferase"  
"NT-E05\_01152" 25079 "s63E6H2" 0 "Putative N-acetylmannosaminyltransferase"  
"NT-E05\_01153" 25080 "s59E13H2" 0 "VanZ like family protein"  
"NT-E05\_01153" 25080 "s59E25H2" 0 "VanZ like family protein"  
"NT-E05\_01153" 25080 "s59E5H2" 0 "VanZ like family protein"

"NT-E05\_01153" 25080 "s63E6H2" 0 "VanZ like family protein"  
"NT-E05\_01154" 25081 "s59E13H2" 0 "UDP-glucose:undecaprenyl-phosphate glucose-1-phosphate transferase"  
"NT-E05\_01154" 25081 "s59E25H2" 0 "UDP-glucose:undecaprenyl-phosphate glucose-1-phosphate transferase"  
"NT-E05\_01154" 25081 "s59E5H2" 0 "UDP-glucose:undecaprenyl-phosphate glucose-1-phosphate transferase"  
"NT-E05\_01154" 25081 "s63E6H2" 0 "UDP-glucose:undecaprenyl-phosphate glucose-1-phosphate transferase"  
"NT-E05\_01156" 25083 "s59E13H2" 0 "hypothetical protein"  
"NT-E05\_01156" 25083 "s59E25H2" 0 "hypothetical protein"  
"NT-E05\_01156" 25083 "s59E5H2" 0 "hypothetical protein"  
"NT-E05\_01156" 25083 "s63E6H2" 0 "hypothetical protein"  
"NT-E05\_01157" 25084 "s59E13H2" 0 "hypothetical protein"  
"NT-E05\_01157" 25084 "s59E25H2" 0 "hypothetical protein"  
"NT-E05\_01157" 25084 "s59E5H2" 0 "hypothetical protein"  
"NT-E05\_01157" 25084 "s63E6H2" 0 "hypothetical protein"  
"NT-E05\_01158" 25085 "s59E13H2" 0 "Leucine-, isoleucine-, valine-, threonine-, and alanine-binding protein precursor"  
"NT-E05\_01158" 25085 "s59E25H2" 0 "Leucine-, isoleucine-, valine-, threonine-, and alanine-binding protein precursor"  
"NT-E05\_01158" 25085 "s59E5H2" 0 "Leucine-, isoleucine-, valine-, threonine-, and alanine-binding protein precursor"  
"NT-E05\_01158" 25085 "s63E6H2" 0 "Leucine-, isoleucine-, valine-, threonine-, and alanine-binding protein precursor"  
"NT-E05\_01159" 25086 "s59E13H2" 0 "High-affinity branched-chain amino acid transport system permease protein LivH"  
"NT-E05\_01159" 25086 "s59E25H2" 0 "High-affinity branched-chain amino acid transport system permease protein LivH"  
"NT-E05\_01159" 25086 "s59E5H2" 0 "High-affinity branched-chain amino acid transport system permease protein LivH"  
"NT-E05\_01159" 25086 "s63E6H2" 0 "High-affinity branched-chain amino acid transport system permease protein LivH"  
"NT-E05\_01160" 25087 "s59E13H2" 0 "High-affinity branched-chain amino acid transport system permease protein LivH"  
"NT-E05\_01160" 25087 "s59E25H2" 0 "High-affinity branched-chain amino acid transport system permease protein LivH"  
"NT-E05\_01160" 25087 "s59E5H2" 0 "High-affinity branched-chain amino acid transport system permease protein LivH"  
"NT-E05\_01160" 25087 "s63E6H2" 0 "High-affinity branched-chain amino acid transport system permease protein LivH"  
"NT-E05\_01161" 25088 "s59E13H2" 0 "putative branched-chain amino acid transport ATP-binding protein LivG"  
"NT-E05\_01161" 25088 "s59E25H2" 0 "putative branched-chain amino acid transport ATP-binding protein LivG"  
"NT-E05\_01161" 25088 "s59E5H2" 0 "putative branched-chain amino acid transport ATP-binding protein LivG"  
"NT-E05\_01161" 25088 "s63E6H2" 0 "putative branched-chain amino acid transport ATP-binding protein LivG"  
"NT-E05\_01162" 25089 "s59E13H2" 0 "High-affinity branched-chain amino acid transport ATP-binding protein LivF"  
"NT-E05\_01162" 25089 "s59E25H2" 0 "High-affinity branched-chain amino acid transport ATP-binding protein LivF"  
"NT-E05\_01162" 25089 "s59E5H2" 0.002271848 "High-affinity branched-chain amino acid transport ATP-binding protein LivF"  
"NT-E05\_01162" 25089 "s63E6H2" 0 "High-affinity branched-chain amino acid transport ATP-binding protein LivF"  
"NT-E05\_01163" 25090 "s59E13H2" 0 "Phenylacetate-coenzyme A ligase"  
"NT-E05\_01163" 25090 "s59E25H2" 0 "Phenylacetate-coenzyme A ligase"  
"NT-E05\_01163" 25090 "s59E5H2" 0.001431912 "Phenylacetate-coenzyme A ligase"  
"NT-E05\_01163" 25090 "s63E6H2" 0 "Phenylacetate-coenzyme A ligase"  
"NT-E05\_01164" 25091 "s59E13H2" 0 "Phenylacetate-coenzyme A ligase"  
"NT-E05\_01164" 25091 "s59E25H2" 0 "Phenylacetate-coenzyme A ligase"  
"NT-E05\_01164" 25091 "s59E5H2" 0 "Phenylacetate-coenzyme A ligase"  
"NT-E05\_01164" 25091 "s63E6H2" 0 "Phenylacetate-coenzyme A ligase"  
"NT-E05\_01165" 25092 "s59E13H2" 0 "HTH-type transcriptional regulator GlnR"  
"NT-E05\_01165" 25092 "s59E25H2" 0 "HTH-type transcriptional regulator GlnR"  
"NT-E05\_01165" 25092 "s59E5H2" 0 "HTH-type transcriptional regulator GlnR"  
"NT-E05\_01165" 25092 "s63E6H2" 0 "HTH-type transcriptional regulator GlnR"  
"NT-E05\_01166" 25093 "s59E13H2" 0 "N-acetyl-gamma-glutamyl-phosphate reductase"  
"NT-E05\_01166" 25093 "s59E25H2" 0 "N-acetyl-gamma-glutamyl-phosphate reductase"

"NT-E05\_01166" 25093 "s59E5H2" 0 "N-acetyl-gamma-glutamyl-phosphate reductase"  
"NT-E05\_01166" 25093 "s63E6H2" 0 "N-acetyl-gamma-glutamyl-phosphate reductase"  
"NT-E05\_01167" 25094 "s59E13H2" 0 "Arginine biosynthesis bifunctional protein ArgJ"  
"NT-E05\_01167" 25094 "s59E25H2" 0 "Arginine biosynthesis bifunctional protein ArgJ"  
"NT-E05\_01167" 25094 "s59E5H2" 0 "Arginine biosynthesis bifunctional protein ArgJ"  
"NT-E05\_01167" 25094 "s63E6H2" 0 "Arginine biosynthesis bifunctional protein ArgJ"  
"NT-E05\_01168" 25095 "s59E13H2" 0 "Polyribonucleotide 5'-hydroxyl-kinase"  
"NT-E05\_01168" 25095 "s59E25H2" 0 "Polyribonucleotide 5'-hydroxyl-kinase"  
"NT-E05\_01168" 25095 "s59E5H2" 0 "Polyribonucleotide 5'-hydroxyl-kinase"  
"NT-E05\_01168" 25095 "s63E6H2" 0 "Polyribonucleotide 5'-hydroxyl-kinase"  
"NT-E05\_01169" 25096 "s59E13H2" 0 "1-deoxy-D-xylulose-5-phosphate synthase"  
"NT-E05\_01169" 25096 "s59E25H2" 0 "1-deoxy-D-xylulose-5-phosphate synthase"  
"NT-E05\_01169" 25096 "s59E5H2" 0 "1-deoxy-D-xylulose-5-phosphate synthase"  
"NT-E05\_01169" 25096 "s63E6H2" 0 "1-deoxy-D-xylulose-5-phosphate synthase"  
"NT-E05\_01170" 25097 "s59E13H2" 0 "Transketolase 1"  
"NT-E05\_01170" 25097 "s59E25H2" 0 "Transketolase 1"  
"NT-E05\_01170" 25097 "s59E5H2" 0 "Transketolase 1"  
"NT-E05\_01170" 25097 "s63E6H2" 0 "Transketolase 1"  
"NT-E05\_01171" 25098 "s59E13H2" 0 "5-dehydro-2-deoxygluconokinase"  
"NT-E05\_01171" 25098 "s59E25H2" 0 "5-dehydro-2-deoxygluconokinase"  
"NT-E05\_01171" 25098 "s59E5H2" 0 "5-dehydro-2-deoxygluconokinase"  
"NT-E05\_01171" 25098 "s63E6H2" 0 "5-dehydro-2-deoxygluconokinase"  
"NT-E05\_01172" 25099 "s59E13H2" 0 "fructoselysine 3-epimerase"  
"NT-E05\_01172" 25099 "s59E25H2" 0 "fructoselysine 3-epimerase"  
"NT-E05\_01172" 25099 "s59E5H2" 0 "fructoselysine 3-epimerase"  
"NT-E05\_01172" 25099 "s63E6H2" 0 "fructoselysine 3-epimerase"  
"NT-E05\_01173" 25100 "s59E13H2" 0 "Type I phosphodiesterase / nucleotide pyrophosphatase"  
"NT-E05\_01173" 25100 "s59E25H2" 0 "Type I phosphodiesterase / nucleotide pyrophosphatase"  
"NT-E05\_01173" 25100 "s59E5H2" 0 "Type I phosphodiesterase / nucleotide pyrophosphatase"  
"NT-E05\_01173" 25100 "s63E6H2" 0 "Type I phosphodiesterase / nucleotide pyrophosphatase"  
"NT-E05\_01174" 25101 "s59E13H2" 0 "Arylsulfotransferase (ASST)"  
"NT-E05\_01174" 25101 "s59E25H2" 0 "Arylsulfotransferase (ASST)"  
"NT-E05\_01174" 25101 "s59E5H2" 0 "Arylsulfotransferase (ASST)"  
"NT-E05\_01174" 25101 "s63E6H2" 0 "Arylsulfotransferase (ASST)"  
"NT-E05\_01175" 25102 "s59E13H2" 0 "Arylsulfotransferase (ASST)"  
"NT-E05\_01175" 25102 "s59E25H2" 0 "Arylsulfotransferase (ASST)"  
"NT-E05\_01175" 25102 "s59E5H2" 0 "Arylsulfotransferase (ASST)"  
"NT-E05\_01175" 25102 "s63E6H2" 0 "Arylsulfotransferase (ASST)"  
"NT-E05\_01176" 25103 "s59E13H2" 0 "Putative aliphatic sulfonates transport permease protein SsuC"  
"NT-E05\_01176" 25103 "s59E25H2" 0 "Putative aliphatic sulfonates transport permease protein SsuC"  
"NT-E05\_01176" 25103 "s59E5H2" 0 "Putative aliphatic sulfonates transport permease protein SsuC"  
"NT-E05\_01176" 25103 "s63E6H2" 0 "Putative aliphatic sulfonates transport permease protein SsuC"  
"NT-E05\_01177" 25104 "s59E13H2" 0 "Putative aliphatic sulfonates transport permease protein SsuC"  
"NT-E05\_01177" 25104 "s59E25H2" 0 "Putative aliphatic sulfonates transport permease protein SsuC"  
"NT-E05\_01177" 25104 "s59E5H2" 0 "Putative aliphatic sulfonates transport permease protein SsuC"  
"NT-E05\_01177" 25104 "s63E6H2" 0 "Putative aliphatic sulfonates transport permease protein SsuC"  
"NT-E05\_01178" 25105 "s59E13H2" 0 "Aliphatic sulfonates import ATP-binding protein SsuB"

"NT-E05\_01178" 25105 "s59E25H2" 0 "Aliphatic sulfonates import ATP-binding protein SsuB"  
"NT-E05\_01178" 25105 "s59E5H2" 0 "Aliphatic sulfonates import ATP-binding protein SsuB"  
"NT-E05\_01178" 25105 "s63E6H2" 0 "Aliphatic sulfonates import ATP-binding protein SsuB"  
"NT-E05\_01179" 25106 "s59E13H2" 0 "Putative aliphatic sulfonates-binding protein precursor"  
"NT-E05\_01179" 25106 "s59E25H2" 0 "Putative aliphatic sulfonates-binding protein precursor"  
"NT-E05\_01179" 25106 "s59E5H2" 0 "Putative aliphatic sulfonates-binding protein precursor"  
"NT-E05\_01179" 25106 "s63E6H2" 0 "Putative aliphatic sulfonates-binding protein precursor"  
"NT-E05\_01180" 25107 "s59E13H2" 0 "HTH-type transcriptional repressor YvoA"  
"NT-E05\_01180" 25107 "s59E25H2" 0 "HTH-type transcriptional repressor YvoA"  
"NT-E05\_01180" 25107 "s59E5H2" 0 "HTH-type transcriptional repressor YvoA"  
"NT-E05\_01180" 25107 "s63E6H2" 0 "HTH-type transcriptional repressor YvoA"  
"NT-E05\_01181" 25108 "s59E13H2" 0 "5-dehydro-2-deoxygluconokinase"  
"NT-E05\_01181" 25108 "s59E25H2" 0 "5-dehydro-2-deoxygluconokinase"  
"NT-E05\_01181" 25108 "s59E5H2" 0 "5-dehydro-2-deoxygluconokinase"  
"NT-E05\_01181" 25108 "s63E6H2" 0 "5-dehydro-2-deoxygluconokinase"  
"NT-E05\_01182" 25109 "s59E13H2" 0 "D-tagatose 3-epimerase"  
"NT-E05\_01182" 25109 "s59E25H2" 0 "D-tagatose 3-epimerase"  
"NT-E05\_01182" 25109 "s59E5H2" 0 "D-tagatose 3-epimerase"  
"NT-E05\_01182" 25109 "s63E6H2" 0 "D-tagatose 3-epimerase"  
"NT-E05\_01184" 25111 "s59E13H2" 0 "Pyruvate dehydrogenase E1 component subunit beta"  
"NT-E05\_01184" 25111 "s59E25H2" 0 "Pyruvate dehydrogenase E1 component subunit beta"  
"NT-E05\_01184" 25111 "s59E5H2" 0 "Pyruvate dehydrogenase E1 component subunit beta"  
"NT-E05\_01184" 25111 "s63E6H2" 0 "Pyruvate dehydrogenase E1 component subunit beta"  
"NT-E05\_01185" 25112 "s59E13H2" 0 "Sorbitol dehydrogenase"  
"NT-E05\_01185" 25112 "s59E25H2" 0 "Sorbitol dehydrogenase"  
"NT-E05\_01185" 25112 "s59E5H2" 0 "Sorbitol dehydrogenase"  
"NT-E05\_01185" 25112 "s63E6H2" 0.0002717661 "Sorbitol dehydrogenase"  
"NT-E05\_01186" 25113 "s59E13H2" 0 "Cupin domain protein"  
"NT-E05\_01186" 25113 "s59E25H2" 0 "Cupin domain protein"  
"NT-E05\_01186" 25113 "s59E5H2" 0 "Cupin domain protein"  
"NT-E05\_01186" 25113 "s63E6H2" 0.005498181 "Cupin domain protein"  
"NT-E05\_01187" 25114 "s59E13H2" 0 "Xylulose kinase"  
"NT-E05\_01187" 25114 "s59E25H2" 0 "Xylulose kinase"  
"NT-E05\_01187" 25114 "s59E5H2" 0 "Xylulose kinase"  
"NT-E05\_01187" 25114 "s63E6H2" 0 "Xylulose kinase"  
"NT-E05\_01188" 25115 "s59E13H2" 0 "Xylose isomerase"  
"NT-E05\_01188" 25115 "s59E25H2" 0 "Xylose isomerase"  
"NT-E05\_01188" 25115 "s59E5H2" 0 "Xylose isomerase"  
"NT-E05\_01188" 25115 "s63E6H2" 0 "Xylose isomerase"  
"NT-E05\_01189" 25116 "s59E13H2" 0 "Ribose transport system permease protein RbsC"  
"NT-E05\_01189" 25116 "s59E25H2" 0 "Ribose transport system permease protein RbsC"  
"NT-E05\_01189" 25116 "s59E5H2" 0.002726444 "Ribose transport system permease protein RbsC"  
"NT-E05\_01189" 25116 "s63E6H2" 0 "Ribose transport system permease protein RbsC"  
"NT-E05\_01190" 25117 "s59E13H2" 0 "Galactose/methyl galactoside import ATP-binding protein MglA"  
"NT-E05\_01190" 25117 "s59E25H2" 0 "Galactose/methyl galactoside import ATP-binding protein MglA"  
"NT-E05\_01190" 25117 "s59E5H2" 0.03139934 "Galactose/methyl galactoside import ATP-binding protein MglA"  
"NT-E05\_01190" 25117 "s63E6H2" 0 "Galactose/methyl galactoside import ATP-binding protein MglA"

"NT-E05\_01191" 25118 "s59E13H2" 0 "D-ribose-binding periplasmic protein precursor"  
"NT-E05\_01191" 25118 "s59E25H2" 0 "D-ribose-binding periplasmic protein precursor"  
"NT-E05\_01191" 25118 "s59E5H2" 0 "D-ribose-binding periplasmic protein precursor"  
"NT-E05\_01191" 25118 "s63E6H2" 0 "D-ribose-binding periplasmic protein precursor"  
"NT-E05\_01193" 25120 "s59E13H2" 0 "Sorbitol dehydrogenase"  
"NT-E05\_01193" 25120 "s59E25H2" 0 "Sorbitol dehydrogenase"  
"NT-E05\_01193" 25120 "s59E5H2" 0.004872891 "Sorbitol dehydrogenase"  
"NT-E05\_01193" 25120 "s63E6H2" 0.01995389 "Sorbitol dehydrogenase"  
"NT-E05\_01195" 25122 "s59E13H2" 0 "Phosphoribosylamine--glycine ligase"  
"NT-E05\_01195" 25122 "s59E25H2" 0 "Phosphoribosylamine--glycine ligase"  
"NT-E05\_01195" 25122 "s59E5H2" 0 "Phosphoribosylamine--glycine ligase"  
"NT-E05\_01195" 25122 "s63E6H2" 0 "Phosphoribosylamine--glycine ligase"  
"NT-E05\_01196" 25123 "s59E13H2" 0 "Biopolymer transport protein ExbB"  
"NT-E05\_01196" 25123 "s59E25H2" 0 "Biopolymer transport protein ExbB"  
"NT-E05\_01196" 25123 "s59E5H2" 0 "Biopolymer transport protein ExbB"  
"NT-E05\_01196" 25123 "s63E6H2" 0 "Biopolymer transport protein ExbB"  
"NT-E05\_01197" 25124 "s59E13H2" 0 "Biopolymer transport protein ExbD"  
"NT-E05\_01197" 25124 "s59E25H2" 0 "Biopolymer transport protein ExbD"  
"NT-E05\_01197" 25124 "s59E5H2" 0 "Biopolymer transport protein ExbD"  
"NT-E05\_01197" 25124 "s63E6H2" 0 "Biopolymer transport protein ExbD"  
"NT-E05\_01198" 25125 "s59E13H2" 0 "transport protein TonB"  
"NT-E05\_01198" 25125 "s59E25H2" 0 "transport protein TonB"  
"NT-E05\_01198" 25125 "s59E5H2" 0 "transport protein TonB"  
"NT-E05\_01198" 25125 "s63E6H2" 0 "transport protein TonB"  
"NT-E05\_01199" 25126 "s59E13H2" 0 "UvrABC system protein B"  
"NT-E05\_01199" 25126 "s59E25H2" 0 "UvrABC system protein B"  
"NT-E05\_01199" 25126 "s59E5H2" 0 "UvrABC system protein B"  
"NT-E05\_01199" 25126 "s63E6H2" 0 "UvrABC system protein B"  
"NT-E05\_01200" 25127 "s59E13H2" 0 "V-type sodium ATPase subunit K"  
"NT-E05\_01200" 25127 "s59E25H2" 0 "V-type sodium ATPase subunit K"  
"NT-E05\_01200" 25127 "s59E5H2" 0 "V-type sodium ATPase subunit K"  
"NT-E05\_01200" 25127 "s63E6H2" 0 "V-type sodium ATPase subunit K"  
"NT-E05\_01201" 25128 "s59E13H2" 0 "V-type ATP synthase subunit E"  
"NT-E05\_01201" 25128 "s59E25H2" 0 "V-type ATP synthase subunit E"  
"NT-E05\_01201" 25128 "s59E5H2" 0 "V-type ATP synthase subunit E"  
"NT-E05\_01201" 25128 "s63E6H2" 0 "V-type ATP synthase subunit E"  
"NT-E05\_01202" 25129 "s59E13H2" 0 "Ribulokinase"  
"NT-E05\_01202" 25129 "s59E25H2" 0 "Ribulokinase"  
"NT-E05\_01202" 25129 "s59E5H2" 0.01734889 "Ribulokinase"  
"NT-E05\_01202" 25129 "s63E6H2" 0 "Ribulokinase"  
"NT-E05\_01203" 25130 "s59E13H2" 0 "L-ribulose-5-phosphate 4-epimerase UlaF"  
"NT-E05\_01203" 25130 "s59E25H2" 0 "L-ribulose-5-phosphate 4-epimerase UlaF"  
"NT-E05\_01203" 25130 "s59E5H2" 0.0296084 "L-ribulose-5-phosphate 4-epimerase UlaF"  
"NT-E05\_01203" 25130 "s63E6H2" 0 "L-ribulose-5-phosphate 4-epimerase UlaF"  
"NT-E05\_01204" 25131 "s59E13H2" 0 "Isopropylmalate/citramalate isomerase large subunit"  
"NT-E05\_01204" 25131 "s59E25H2" 0 "Isopropylmalate/citramalate isomerase large subunit"  
"NT-E05\_01204" 25131 "s59E5H2" 0 "Isopropylmalate/citramalate isomerase large subunit"



"NT-E05\_01204" 25131 "s63E6H2" 0 "Isopropylmalate/citramalate isomerase large subunit"  
"NT-E05\_01205" 25132 "s59E13H2" 0 "Methanogen homoaconitase small subunit"  
"NT-E05\_01205" 25132 "s59E25H2" 0 "Methanogen homoaconitase small subunit"  
"NT-E05\_01205" 25132 "s59E5H2" 0.007791685 "Methanogen homoaconitase small subunit"  
"NT-E05\_01205" 25132 "s63E6H2" 0 "Methanogen homoaconitase small subunit"  
"NT-E05\_01206" 25133 "s59E13H2" 0 "ATP-dependent Clp protease proteolytic subunit"  
"NT-E05\_01206" 25133 "s59E25H2" 0 "ATP-dependent Clp protease proteolytic subunit"  
"NT-E05\_01206" 25133 "s59E5H2" 0 "ATP-dependent Clp protease proteolytic subunit"  
"NT-E05\_01206" 25133 "s63E6H2" 0 "ATP-dependent Clp protease proteolytic subunit"  
"NT-E05\_01211" 25138 "s59E13H2" 0 "NADH oxidase"  
"NT-E05\_01211" 25138 "s59E25H2" 0 "NADH oxidase"  
"NT-E05\_01211" 25138 "s59E5H2" 0 "NADH oxidase"  
"NT-E05\_01211" 25138 "s63E6H2" 0 "NADH oxidase"  
"NT-E05\_01212" 25139 "s59E13H2" 0 "hypothetical protein"  
"NT-E05\_01212" 25139 "s59E25H2" 0 "hypothetical protein"  
"NT-E05\_01212" 25139 "s59E5H2" 0 "hypothetical protein"  
"NT-E05\_01212" 25139 "s63E6H2" 0 "hypothetical protein"  
"NT-E05\_01213" 25140 "s59E13H2" 0 "Pyrophosphate--fructose 6-phosphate 1-phosphotransferase"  
"NT-E05\_01213" 25140 "s59E25H2" 0 "Pyrophosphate--fructose 6-phosphate 1-phosphotransferase"  
"NT-E05\_01213" 25140 "s59E5H2" 0 "Pyrophosphate--fructose 6-phosphate 1-phosphotransferase"  
"NT-E05\_01213" 25140 "s63E6H2" 0 "Pyrophosphate--fructose 6-phosphate 1-phosphotransferase"  
"NT-E05\_01214" 25141 "s59E13H2" 0 "hypothetical protein"  
"NT-E05\_01214" 25141 "s59E25H2" 0 "hypothetical protein"  
"NT-E05\_01214" 25141 "s59E5H2" 0 "hypothetical protein"  
"NT-E05\_01214" 25141 "s63E6H2" 0 "hypothetical protein"  
"NT-E05\_01215" 25142 "s59E13H2" 0 "Branched-chain-amino-acid aminotransferase"  
"NT-E05\_01215" 25142 "s59E25H2" 0 "Branched-chain-amino-acid aminotransferase"  
"NT-E05\_01215" 25142 "s59E5H2" 0 "Branched-chain-amino-acid aminotransferase"  
"NT-E05\_01215" 25142 "s63E6H2" 0 "Branched-chain-amino-acid aminotransferase"  
"NT-E05\_01216" 25143 "s59E13H2" 0 "Chloroplast import component protein (Tic20)"  
"NT-E05\_01216" 25143 "s59E25H2" 0 "Chloroplast import component protein (Tic20)"  
"NT-E05\_01216" 25143 "s59E5H2" 0 "Chloroplast import component protein (Tic20)"  
"NT-E05\_01216" 25143 "s63E6H2" 0 "Chloroplast import component protein (Tic20)"  
"NT-E05\_01217" 25144 "s59E13H2" 0 "Autoinducer 2-degrading protein LsrG"  
"NT-E05\_01217" 25144 "s59E25H2" 0 "Autoinducer 2-degrading protein LsrG"  
"NT-E05\_01217" 25144 "s59E5H2" 0 "Autoinducer 2-degrading protein LsrG"  
"NT-E05\_01217" 25144 "s63E6H2" 0 "Autoinducer 2-degrading protein LsrG"  
"NT-E05\_01219" 25146 "s59E13H2" 0 "hypothetical protein"  
"NT-E05\_01219" 25146 "s59E25H2" 0 "hypothetical protein"  
"NT-E05\_01219" 25146 "s59E5H2" 0 "hypothetical protein"  
"NT-E05\_01219" 25146 "s63E6H2" 0 "hypothetical protein"  
"NT-E05\_01220" 25147 "s59E13H2" 0 "Transposase DDE domain protein"  
"NT-E05\_01220" 25147 "s59E25H2" 0 "Transposase DDE domain protein"  
"NT-E05\_01220" 25147 "s59E5H2" 0.002401738 "Transposase DDE domain protein"  
"NT-E05\_01220" 25147 "s63E6H2" 0 "Transposase DDE domain protein"  
"NT-E05\_01221" 25148 "s59E13H2" 0 "hypothetical protein"  
"NT-E05\_01221" 25148 "s59E25H2" 0 "hypothetical protein"

"NT-E05\_01221" 25148 "s59E5H2" 0 "hypothetical protein"  
"NT-E05\_01221" 25148 "s63E6H2" 0 "hypothetical protein"  
"NT-E05\_01222" 25149 "s59E13H2" 0 "hypothetical protein"  
"NT-E05\_01222" 25149 "s59E25H2" 0 "hypothetical protein"  
"NT-E05\_01222" 25149 "s59E5H2" 0 "hypothetical protein"  
"NT-E05\_01222" 25149 "s63E6H2" 0 "hypothetical protein"  
"NT-E05\_01223" 25150 "s59E13H2" 0 "Modification methylase PaeR71"  
"NT-E05\_01223" 25150 "s59E25H2" 0 "Modification methylase PaeR71"  
"NT-E05\_01223" 25150 "s59E5H2" 0.0104029 "Modification methylase PaeR71"  
"NT-E05\_01223" 25150 "s63E6H2" 0.0009391687 "Modification methylase PaeR71"  
"NT-E05\_01224" 25151 "s59E13H2" 0 "hypothetical protein"  
"NT-E05\_01224" 25151 "s59E25H2" 0 "hypothetical protein"  
"NT-E05\_01224" 25151 "s59E5H2" 0 "hypothetical protein"  
"NT-E05\_01224" 25151 "s63E6H2" 0 "hypothetical protein"  
"NT-E05\_01225" 25152 "s59E13H2" 0 "hypothetical protein"  
"NT-E05\_01225" 25152 "s59E25H2" 0 "hypothetical protein"  
"NT-E05\_01225" 25152 "s59E5H2" 0 "hypothetical protein"  
"NT-E05\_01225" 25152 "s63E6H2" 0 "hypothetical protein"  
"NT-E05\_01226" 25153 "s59E13H2" 0 "Dihydroorotate dehydrogenase B (NAD(+) , catalytic subunit"  
"NT-E05\_01226" 25153 "s59E25H2" 0 "Dihydroorotate dehydrogenase B (NAD(+) , catalytic subunit"  
"NT-E05\_01226" 25153 "s59E5H2" 0 "Dihydroorotate dehydrogenase B (NAD(+) , catalytic subunit"  
"NT-E05\_01226" 25153 "s63E6H2" 0.00496674 "Dihydroorotate dehydrogenase B (NAD(+) , catalytic subunit"  
"NT-E05\_01227" 25154 "s59E13H2" 0 "putative membrane protein"  
"NT-E05\_01227" 25154 "s59E25H2" 0 "putative membrane protein"  
"NT-E05\_01227" 25154 "s59E5H2" 0 "putative membrane protein"  
"NT-E05\_01227" 25154 "s63E6H2" 0 "putative membrane protein"  
"NT-E05\_01228" 25155 "s59E13H2" 0 "hypothetical protein"  
"NT-E05\_01228" 25155 "s59E25H2" 0 "hypothetical protein"  
"NT-E05\_01228" 25155 "s59E5H2" 0 "hypothetical protein"  
"NT-E05\_01228" 25155 "s63E6H2" 0 "hypothetical protein"  
"NT-E05\_01229" 25156 "s59E13H2" 0 "Indolepyruvate oxidoreductase subunit IorB"  
"NT-E05\_01229" 25156 "s59E25H2" 0 "Indolepyruvate oxidoreductase subunit IorB"  
"NT-E05\_01229" 25156 "s59E5H2" 0 "Indolepyruvate oxidoreductase subunit IorB"  
"NT-E05\_01229" 25156 "s63E6H2" 0 "Indolepyruvate oxidoreductase subunit IorB"  
"NT-E05\_01230" 25157 "s59E13H2" 0 "Transaldolase"  
"NT-E05\_01230" 25157 "s59E25H2" 0 "Transaldolase"  
"NT-E05\_01230" 25157 "s59E5H2" 0.02751565 "Transaldolase"  
"NT-E05\_01230" 25157 "s63E6H2" 0 "Transaldolase"  
"NT-E05\_01231" 25158 "s59E13H2" 0 "Phenylacetate-coenzyme A ligase"  
"NT-E05\_01231" 25158 "s59E25H2" 0 "Phenylacetate-coenzyme A ligase"  
"NT-E05\_01231" 25158 "s59E5H2" 0 "Phenylacetate-coenzyme A ligase"  
"NT-E05\_01231" 25158 "s63E6H2" 0 "Phenylacetate-coenzyme A ligase"  
"NT-E05\_01232" 25159 "s59E13H2" 0 "hypothetical protein"  
"NT-E05\_01232" 25159 "s59E25H2" 0 "hypothetical protein"  
"NT-E05\_01232" 25159 "s59E5H2" 0 "hypothetical protein"  
"NT-E05\_01232" 25159 "s63E6H2" 0 "hypothetical protein"  
"NT-E05\_01233" 25160 "s59E13H2" 0 "Putative transposase DNA-binding domain protein"

"NT-E05\_01233" 25160 "s59E25H2" 0 "Putative transposase DNA-binding domain protein"  
"NT-E05\_01233" 25160 "s59E5H2" 0.01613342 "Putative transposase DNA-binding domain protein"  
"NT-E05\_01233" 25160 "s63E6H2" 0 "Putative transposase DNA-binding domain protein"  
"NT-E05\_01234" 25161 "s59E13H2" 0 "Integrase core domain protein"  
"NT-E05\_01234" 25161 "s59E25H2" 0 "Integrase core domain protein"  
"NT-E05\_01234" 25161 "s59E5H2" 0 "Integrase core domain protein"  
"NT-E05\_01234" 25161 "s63E6H2" 0 "Integrase core domain protein"  
"NT-E05\_01235" 25162 "s59E13H2" 0 "transposase/IS protein"  
"NT-E05\_01235" 25162 "s59E25H2" 0 "transposase/IS protein"  
"NT-E05\_01235" 25162 "s59E5H2" 0 "transposase/IS protein"  
"NT-E05\_01235" 25162 "s63E6H2" 0 "transposase/IS protein"  
"NT-E05\_01238" 25165 "s59E13H2" 0 "hypothetical protein"  
"NT-E05\_01238" 25165 "s59E25H2" 0 "hypothetical protein"  
"NT-E05\_01238" 25165 "s59E5H2" 0 "hypothetical protein"  
"NT-E05\_01238" 25165 "s63E6H2" 0 "hypothetical protein"  
"NT-E05\_01239" 25166 "s59E13H2" 0 "hypothetical protein"  
"NT-E05\_01239" 25166 "s59E25H2" 0 "hypothetical protein"  
"NT-E05\_01239" 25166 "s59E5H2" 0 "hypothetical protein"  
"NT-E05\_01239" 25166 "s63E6H2" 0 "hypothetical protein"  
"NT-E05\_01240" 25167 "s59E13H2" 0 "hypothetical protein"  
"NT-E05\_01240" 25167 "s59E25H2" 0 "hypothetical protein"  
"NT-E05\_01240" 25167 "s59E5H2" 0 "hypothetical protein"  
"NT-E05\_01240" 25167 "s63E6H2" 0 "hypothetical protein"  
"NT-E05\_01241" 25168 "s59E13H2" 0 "hypothetical protein"  
"NT-E05\_01241" 25168 "s59E25H2" 0 "hypothetical protein"  
"NT-E05\_01241" 25168 "s59E5H2" 0 "hypothetical protein"  
"NT-E05\_01241" 25168 "s63E6H2" 0 "hypothetical protein"  
"NT-E05\_01242" 25169 "s59E13H2" 0 "HNH endonuclease"  
"NT-E05\_01242" 25169 "s59E25H2" 0 "HNH endonuclease"  
"NT-E05\_01242" 25169 "s59E5H2" 0 "HNH endonuclease"  
"NT-E05\_01242" 25169 "s63E6H2" 0 "HNH endonuclease"  
"NT-E05\_01243" 25170 "s59E13H2" 0 "Acetolactate synthase large subunit"  
"NT-E05\_01243" 25170 "s59E25H2" 0 "Acetolactate synthase large subunit"  
"NT-E05\_01243" 25170 "s59E5H2" 0 "Acetolactate synthase large subunit"  
"NT-E05\_01243" 25170 "s63E6H2" 0 "Acetolactate synthase large subunit"  
"NT-E05\_01244" 25171 "s59E13H2" 0 "preprotein translocase subunit SecA"  
"NT-E05\_01244" 25171 "s59E25H2" 0 "preprotein translocase subunit SecA"  
"NT-E05\_01244" 25171 "s59E5H2" 0 "preprotein translocase subunit SecA"  
"NT-E05\_01244" 25171 "s63E6H2" 0 "preprotein translocase subunit SecA"  
"NT-E05\_01245" 25172 "s59E13H2" 0 "Methylated-DNA--protein-cysteine methyltransferase"  
"NT-E05\_01245" 25172 "s59E25H2" 0 "Methylated-DNA--protein-cysteine methyltransferase"  
"NT-E05\_01245" 25172 "s59E5H2" 0 "Methylated-DNA--protein-cysteine methyltransferase"  
"NT-E05\_01245" 25172 "s63E6H2" 0 "Methylated-DNA--protein-cysteine methyltransferase"  
"NT-E05\_01246" 25173 "s59E13H2" 0 "UvrABC system protein C"  
"NT-E05\_01246" 25173 "s59E25H2" 0 "UvrABC system protein C"  
"NT-E05\_01246" 25173 "s59E5H2" 0 "UvrABC system protein C"  
"NT-E05\_01246" 25173 "s63E6H2" 0 "UvrABC system protein C"

"NT-E05\_01247" 25174 "s59E13H2" 0 "hypothetical protein"  
"NT-E05\_01247" 25174 "s59E25H2" 0 "hypothetical protein"  
"NT-E05\_01247" 25174 "s59E5H2" 0 "hypothetical protein"  
"NT-E05\_01247" 25174 "s63E6H2" 0 "hypothetical protein"  
"NT-E05\_01248" 25175 "s59E13H2" 0 "Ribosomal RNA small subunit methyltransferase D"  
"NT-E05\_01248" 25175 "s59E25H2" 0 "Ribosomal RNA small subunit methyltransferase D"  
"NT-E05\_01248" 25175 "s59E5H2" 0 "Ribosomal RNA small subunit methyltransferase D"  
"NT-E05\_01248" 25175 "s63E6H2" 0 "Ribosomal RNA small subunit methyltransferase D"  
"NT-E05\_01249" 25176 "s59E13H2" 0 "Octanoyltransferase"  
"NT-E05\_01249" 25176 "s59E25H2" 0 "Octanoyltransferase"  
"NT-E05\_01249" 25176 "s59E5H2" 0 "Octanoyltransferase"  
"NT-E05\_01249" 25176 "s63E6H2" 0 "Octanoyltransferase"  
"NT-E05\_01250" 25177 "s59E13H2" 0 "Outer membrane protein assembly factor BamA precursor"  
"NT-E05\_01250" 25177 "s59E25H2" 0 "Outer membrane protein assembly factor BamA precursor"  
"NT-E05\_01250" 25177 "s59E5H2" 0 "Outer membrane protein assembly factor BamA precursor"  
"NT-E05\_01250" 25177 "s63E6H2" 0 "Outer membrane protein assembly factor BamA precursor"  
"NT-E05\_01251" 25178 "s59E13H2" 0 "Negative regulator of genetic competence ClpC/MecB"  
"NT-E05\_01251" 25178 "s59E25H2" 0 "Negative regulator of genetic competence ClpC/MecB"  
"NT-E05\_01251" 25178 "s59E5H2" 0 "Negative regulator of genetic competence ClpC/MecB"  
"NT-E05\_01251" 25178 "s63E6H2" 0 "Negative regulator of genetic competence ClpC/MecB"  
"NT-E05\_01252" 25179 "s59E13H2" 0 "Adenylosuccinate synthetase"  
"NT-E05\_01252" 25179 "s59E25H2" 0 "Adenylosuccinate synthetase"  
"NT-E05\_01252" 25179 "s59E5H2" 0 "Adenylosuccinate synthetase"  
"NT-E05\_01252" 25179 "s63E6H2" 0 "Adenylosuccinate synthetase"  
"NT-E05\_01253" 25180 "s59E13H2" 0 "Replicative DNA helicase"  
"NT-E05\_01253" 25180 "s59E25H2" 0 "Replicative DNA helicase"  
"NT-E05\_01253" 25180 "s59E5H2" 0 "Replicative DNA helicase"  
"NT-E05\_01253" 25180 "s63E6H2" 0 "Replicative DNA helicase"  
"NT-E05\_01254" 25181 "s59E13H2" 0 "D-3-phosphoglycerate dehydrogenase"  
"NT-E05\_01254" 25181 "s59E25H2" 0 "D-3-phosphoglycerate dehydrogenase"  
"NT-E05\_01254" 25181 "s59E5H2" 0 "D-3-phosphoglycerate dehydrogenase"  
"NT-E05\_01254" 25181 "s63E6H2" 0 "D-3-phosphoglycerate dehydrogenase"  
"NT-E05\_01255" 25182 "s59E13H2" 0 "Soluble hydrogenase 42 kDa subunit"  
"NT-E05\_01255" 25182 "s59E25H2" 0 "Soluble hydrogenase 42 kDa subunit"  
"NT-E05\_01255" 25182 "s59E5H2" 0 "Soluble hydrogenase 42 kDa subunit"  
"NT-E05\_01255" 25182 "s63E6H2" 0 "Soluble hydrogenase 42 kDa subunit"  
"NT-E05\_01256" 25183 "s59E13H2" 0 "50S ribosomal protein L27"  
"NT-E05\_01256" 25183 "s59E25H2" 0 "50S ribosomal protein L27"  
"NT-E05\_01256" 25183 "s59E5H2" 0 "50S ribosomal protein L27"  
"NT-E05\_01256" 25183 "s63E6H2" 0 "50S ribosomal protein L27"  
"NT-E05\_01257" 25184 "s59E13H2" 0 "hypothetical protein"  
"NT-E05\_01257" 25184 "s59E25H2" 0 "hypothetical protein"  
"NT-E05\_01257" 25184 "s59E5H2" 0 "hypothetical protein"  
"NT-E05\_01257" 25184 "s63E6H2" 0 "hypothetical protein"  
"NT-E05\_01258" 25185 "s59E13H2" 0 "Gas vesicle structural protein"  
"NT-E05\_01258" 25185 "s59E25H2" 0 "Gas vesicle structural protein"  
"NT-E05\_01258" 25185 "s59E5H2" 0 "Gas vesicle structural protein"

"NT-E05\_01258" 25185 "s63E6H2" 0 "Gas vesicle structural protein"  
"NT-E05\_01259" 25186 "s59E13H2" 0 "hypothetical protein"  
"NT-E05\_01259" 25186 "s59E25H2" 0 "hypothetical protein"  
"NT-E05\_01259" 25186 "s59E5H2" 0 "hypothetical protein"  
"NT-E05\_01259" 25186 "s63E6H2" 0 "hypothetical protein"  
"NT-E05\_01260" 25187 "s59E13H2" 0 "Denitrification regulatory protein NirQ"  
"NT-E05\_01260" 25187 "s59E25H2" 0 "Denitrification regulatory protein NirQ"  
"NT-E05\_01260" 25187 "s59E5H2" 0 "Denitrification regulatory protein NirQ"  
"NT-E05\_01260" 25187 "s63E6H2" 0 "Denitrification regulatory protein NirQ"  
"NT-E05\_01261" 25188 "s59E13H2" 0 "hypothetical protein"  
"NT-E05\_01261" 25188 "s59E25H2" 0 "hypothetical protein"  
"NT-E05\_01261" 25188 "s59E5H2" 0 "hypothetical protein"  
"NT-E05\_01261" 25188 "s63E6H2" 0 "hypothetical protein"  
"NT-E05\_01262" 25189 "s59E13H2" 0 "Chaperone protein DnaJ"  
"NT-E05\_01262" 25189 "s59E25H2" 0 "Chaperone protein DnaJ"  
"NT-E05\_01262" 25189 "s59E5H2" 0 "Chaperone protein DnaJ"  
"NT-E05\_01262" 25189 "s63E6H2" 0 "Chaperone protein DnaJ"  
"NT-E05\_01263" 25190 "s59E13H2" 0 "hypothetical protein"  
"NT-E05\_01263" 25190 "s59E25H2" 0 "hypothetical protein"  
"NT-E05\_01263" 25190 "s59E5H2" 0 "hypothetical protein"  
"NT-E05\_01263" 25190 "s63E6H2" 0 "hypothetical protein"  
"NT-E05\_01264" 25191 "s59E13H2" 0 "Chaperone protein DnaJ"  
"NT-E05\_01264" 25191 "s59E25H2" 0 "Chaperone protein DnaJ"  
"NT-E05\_01264" 25191 "s59E5H2" 0.02487462 "Chaperone protein DnaJ"  
"NT-E05\_01264" 25191 "s63E6H2" 0 "Chaperone protein DnaJ"  
"NT-E05\_01265" 25192 "s59E13H2" 0 "Gas vesicle synthesis protein GvpL/GvpF"  
"NT-E05\_01265" 25192 "s59E25H2" 0 "Gas vesicle synthesis protein GvpL/GvpF"  
"NT-E05\_01265" 25192 "s59E5H2" 0.007177714 "Gas vesicle synthesis protein GvpL/GvpF"  
"NT-E05\_01265" 25192 "s63E6H2" 0 "Gas vesicle synthesis protein GvpL/GvpF"  
"NT-E05\_01266" 25193 "s59E13H2" 0 "Gas vesicle protein G"  
"NT-E05\_01266" 25193 "s59E25H2" 0 "Gas vesicle protein G"  
"NT-E05\_01266" 25193 "s59E5H2" 0 "Gas vesicle protein G"  
"NT-E05\_01266" 25193 "s63E6H2" 0 "Gas vesicle protein G"  
"NT-E05\_01267" 25194 "s59E13H2" 0 "Gas vesicle synthesis protein GvpO"  
"NT-E05\_01267" 25194 "s59E25H2" 0 "Gas vesicle synthesis protein GvpO"  
"NT-E05\_01267" 25194 "s59E5H2" 0 "Gas vesicle synthesis protein GvpO"  
"NT-E05\_01267" 25194 "s63E6H2" 0 "Gas vesicle synthesis protein GvpO"  
"NT-E05\_01268" 25195 "s59E13H2" 0 "Gas vesicle structural protein"  
"NT-E05\_01268" 25195 "s59E25H2" 0 "Gas vesicle structural protein"  
"NT-E05\_01268" 25195 "s59E5H2" 0 "Gas vesicle structural protein"  
"NT-E05\_01268" 25195 "s63E6H2" 0 "Gas vesicle structural protein"  
"NT-E05\_01270" 25197 "s59E13H2" 0 "hypothetical protein"  
"NT-E05\_01270" 25197 "s59E25H2" 0 "hypothetical protein"  
"NT-E05\_01270" 25197 "s59E5H2" 0.06553566 "hypothetical protein"  
"NT-E05\_01270" 25197 "s63E6H2" 0.03319769 "hypothetical protein"  
"NT-E05\_01271" 25198 "s59E13H2" 0 "Gas vesicle protein K"  
"NT-E05\_01271" 25198 "s59E25H2" 0 "Gas vesicle protein K"

"NT-E05\_01271" 25198 "s59E5H2" 0.1253514 "Gas vesicle protein K"  
"NT-E05\_01271" 25198 "s63E6H2" 0.05476789 "Gas vesicle protein K"  
"NT-E05\_01272" 25199 "s59E13H2" 0 "Gas vesicle synthesis protein GvpL/GvpF"  
"NT-E05\_01272" 25199 "s59E25H2" 0 "Gas vesicle synthesis protein GvpL/GvpF"  
"NT-E05\_01272" 25199 "s59E5H2" 0.1120411 "Gas vesicle synthesis protein GvpL/GvpF"  
"NT-E05\_01272" 25199 "s63E6H2" 0.05740757 "Gas vesicle synthesis protein GvpL/GvpF"  
"NT-E05\_01273" 25200 "s59E13H2" 0.001560309 "Gas vesicle structural protein"  
"NT-E05\_01273" 25200 "s59E25H2" 0 "Gas vesicle structural protein"  
"NT-E05\_01273" 25200 "s59E5H2" 0.2630828 "Gas vesicle structural protein"  
"NT-E05\_01273" 25200 "s63E6H2" 0.07186158 "Gas vesicle structural protein"  
"NT-E05\_01274" 25201 "s59E13H2" 0 "hypothetical protein"  
"NT-E05\_01274" 25201 "s59E25H2" 0 "hypothetical protein"  
"NT-E05\_01274" 25201 "s59E5H2" 0.1919985 "hypothetical protein"  
"NT-E05\_01274" 25201 "s63E6H2" 0.05496272 "hypothetical protein"  
"NT-E05\_01275" 25202 "s59E13H2" 0 "hypothetical protein"  
"NT-E05\_01275" 25202 "s59E25H2" 0 "hypothetical protein"  
"NT-E05\_01275" 25202 "s59E5H2" 0 "hypothetical protein"  
"NT-E05\_01275" 25202 "s63E6H2" 0 "hypothetical protein"  
"NT-E05\_01276" 25203 "s59E13H2" 0 "hypothetical protein"  
"NT-E05\_01276" 25203 "s59E25H2" 0 "hypothetical protein"  
"NT-E05\_01276" 25203 "s59E5H2" 0 "hypothetical protein"  
"NT-E05\_01276" 25203 "s63E6H2" 0 "hypothetical protein"  
"NT-E05\_01277" 25204 "s59E13H2" 0 "IS2 transposase TnpB"  
"NT-E05\_01277" 25204 "s59E25H2" 0 "IS2 transposase TnpB"  
"NT-E05\_01277" 25204 "s59E5H2" 0.02666646 "IS2 transposase TnpB"  
"NT-E05\_01277" 25204 "s63E6H2" 0.001341358 "IS2 transposase TnpB"  
"NT-E05\_01278" 25205 "s59E13H2" 0 "hypothetical protein"  
"NT-E05\_01278" 25205 "s59E25H2" 0 "hypothetical protein"  
"NT-E05\_01278" 25205 "s59E5H2" 0 "hypothetical protein"  
"NT-E05\_01278" 25205 "s63E6H2" 0 "hypothetical protein"  
"NT-E05\_01279" 25206 "s59E13H2" 0 "DNA-invertase hin"  
"NT-E05\_01279" 25206 "s59E25H2" 0 "DNA-invertase hin"  
"NT-E05\_01279" 25206 "s59E5H2" 0 "DNA-invertase hin"  
"NT-E05\_01279" 25206 "s63E6H2" 0 "DNA-invertase hin"  
"NT-E05\_01280" 25207 "s59E13H2" 0 "hypothetical protein"  
"NT-E05\_01280" 25207 "s59E25H2" 0 "hypothetical protein"  
"NT-E05\_01280" 25207 "s59E5H2" 0 "hypothetical protein"  
"NT-E05\_01280" 25207 "s63E6H2" 0 "hypothetical protein"  
"NT-E05\_01281" 25208 "s59E13H2" 0 "Modulator of FtsH protease HflC"  
"NT-E05\_01281" 25208 "s59E25H2" 0 "Modulator of FtsH protease HflC"  
"NT-E05\_01281" 25208 "s59E5H2" 0 "Modulator of FtsH protease HflC"  
"NT-E05\_01281" 25208 "s63E6H2" 0 "Modulator of FtsH protease HflC"  
"NT-E05\_01282" 25209 "s59E13H2" 0 "Riboflavin biosynthesis protein RibD"  
"NT-E05\_01282" 25209 "s59E25H2" 0 "Riboflavin biosynthesis protein RibD"  
"NT-E05\_01282" 25209 "s59E5H2" 0 "Riboflavin biosynthesis protein RibD"  
"NT-E05\_01282" 25209 "s63E6H2" 0 "Riboflavin biosynthesis protein RibD"  
"NT-E05\_01283" 25210 "s59E13H2" 0 "Aspartate-semialdehyde dehydrogenase"

"NT-E05\_01283" 25210 "s59E25H2" 0 "Aspartate-semialdehyde dehydrogenase"  
"NT-E05\_01283" 25210 "s59E5H2" 0.0124019 "Aspartate-semialdehyde dehydrogenase"  
"NT-E05\_01283" 25210 "s63E6H2" 0 "Aspartate-semialdehyde dehydrogenase"  
"NT-E05\_01284" 25211 "s59E13H2" 0 "Aspartokinase"  
"NT-E05\_01284" 25211 "s59E25H2" 0 "Aspartokinase"  
"NT-E05\_01284" 25211 "s59E5H2" 0 "Aspartokinase"  
"NT-E05\_01284" 25211 "s63E6H2" 0 "Aspartokinase"  
"NT-E05\_01285" 25212 "s59E13H2" 0 "Aspartokinase"  
"NT-E05\_01285" 25212 "s59E25H2" 0 "Aspartokinase"  
"NT-E05\_01285" 25212 "s59E5H2" 0 "Aspartokinase"  
"NT-E05\_01285" 25212 "s63E6H2" 0 "Aspartokinase"  
"NT-E05\_01286" 25213 "s59E13H2" 0 "Putative nicotinate phosphoribosyltransferase"  
"NT-E05\_01286" 25213 "s59E25H2" 0 "Putative nicotinate phosphoribosyltransferase"  
"NT-E05\_01286" 25213 "s59E5H2" 0 "Putative nicotinate phosphoribosyltransferase"  
"NT-E05\_01286" 25213 "s63E6H2" 0 "Putative nicotinate phosphoribosyltransferase"  
"NT-E05\_01287" 25214 "s59E13H2" 0 "hypothetical protein"  
"NT-E05\_01287" 25214 "s59E25H2" 0 "hypothetical protein"  
"NT-E05\_01287" 25214 "s59E5H2" 0 "hypothetical protein"  
"NT-E05\_01287" 25214 "s63E6H2" 0 "hypothetical protein"  
"NT-E05\_01288" 25215 "s59E13H2" 0 "Major Facilitator Superfamily protein"  
"NT-E05\_01288" 25215 "s59E25H2" 0 "Major Facilitator Superfamily protein"  
"NT-E05\_01288" 25215 "s59E5H2" 0 "Major Facilitator Superfamily protein"  
"NT-E05\_01288" 25215 "s63E6H2" 0 "Major Facilitator Superfamily protein"  
"NT-E05\_01289" 25216 "s59E13H2" 0 "TrkA-C domain protein"  
"NT-E05\_01289" 25216 "s59E25H2" 0 "TrkA-C domain protein"  
"NT-E05\_01289" 25216 "s59E5H2" 0 "TrkA-C domain protein"  
"NT-E05\_01289" 25216 "s63E6H2" 0 "TrkA-C domain protein"  
"NT-E05\_01290" 25217 "s59E13H2" 0 "Magnesium transport protein CorA"  
"NT-E05\_01290" 25217 "s59E25H2" 0 "Magnesium transport protein CorA"  
"NT-E05\_01290" 25217 "s59E5H2" 0 "Magnesium transport protein CorA"  
"NT-E05\_01290" 25217 "s63E6H2" 0.0453007 "Magnesium transport protein CorA"  
"NT-E05\_01291" 25218 "s59E13H2" 0 "hypothetical protein"  
"NT-E05\_01291" 25218 "s59E25H2" 0 "hypothetical protein"  
"NT-E05\_01291" 25218 "s59E5H2" 0 "hypothetical protein"  
"NT-E05\_01291" 25218 "s63E6H2" 0 "hypothetical protein"  
"NT-E05\_01292" 25219 "s59E13H2" 0 "Beta-1,4-mannooligosaccharide phosphorylase"  
"NT-E05\_01292" 25219 "s59E25H2" 0 "Beta-1,4-mannooligosaccharide phosphorylase"  
"NT-E05\_01292" 25219 "s59E5H2" 0 "Beta-1,4-mannooligosaccharide phosphorylase"  
"NT-E05\_01292" 25219 "s63E6H2" 0 "Beta-1,4-mannooligosaccharide phosphorylase"  
"NT-E05\_01293" 25220 "s59E13H2" 0 "Beta-1,4-mannooligosaccharide phosphorylase"  
"NT-E05\_01293" 25220 "s59E25H2" 0 "Beta-1,4-mannooligosaccharide phosphorylase"  
"NT-E05\_01293" 25220 "s59E5H2" 0 "Beta-1,4-mannooligosaccharide phosphorylase"  
"NT-E05\_01293" 25220 "s63E6H2" 0 "Beta-1,4-mannooligosaccharide phosphorylase"  
"NT-E05\_01294" 25221 "s59E13H2" 0 "hypothetical protein"  
"NT-E05\_01294" 25221 "s59E25H2" 0 "hypothetical protein"  
"NT-E05\_01294" 25221 "s59E5H2" 0 "hypothetical protein"  
"NT-E05\_01294" 25221 "s63E6H2" 0 "hypothetical protein"

"NT-E05\_01295" 25222 "s59E13H2" 0 "hypothetical protein"  
"NT-E05\_01295" 25222 "s59E25H2" 0 "hypothetical protein"  
"NT-E05\_01295" 25222 "s59E5H2" 0 "hypothetical protein"  
"NT-E05\_01295" 25222 "s63E6H2" 0 "hypothetical protein"  
"NT-E05\_01296" 25223 "s59E13H2" 0 "hypothetical protein"  
"NT-E05\_01296" 25223 "s59E25H2" 0 "hypothetical protein"  
"NT-E05\_01296" 25223 "s59E5H2" 0 "hypothetical protein"  
"NT-E05\_01296" 25223 "s63E6H2" 0 "hypothetical protein"  
"NT-E05\_01297" 25224 "s59E13H2" 0 "hypothetical protein"  
"NT-E05\_01297" 25224 "s59E25H2" 0 "hypothetical protein"  
"NT-E05\_01297" 25224 "s59E5H2" 0 "hypothetical protein"  
"NT-E05\_01297" 25224 "s63E6H2" 0 "hypothetical protein"  
"NT-E05\_01298" 25225 "s59E13H2" 0 "Integrase core domain protein"  
"NT-E05\_01298" 25225 "s59E25H2" 0 "Integrase core domain protein"  
"NT-E05\_01298" 25225 "s59E5H2" 0 "Integrase core domain protein"  
"NT-E05\_01298" 25225 "s63E6H2" 0 "Integrase core domain protein"  
"NT-E05\_01299" 25226 "s59E13H2" 0 "Transposase"  
"NT-E05\_01299" 25226 "s59E25H2" 0 "Transposase"  
"NT-E05\_01299" 25226 "s59E5H2" 0 "Transposase"  
"NT-E05\_01299" 25226 "s63E6H2" 0 "Transposase"  
"NT-E05\_01300" 25227 "s59E13H2" 0 "Modulator of FtsH protease HflC"  
"NT-E05\_01300" 25227 "s59E25H2" 0 "Modulator of FtsH protease HflC"  
"NT-E05\_01300" 25227 "s59E5H2" 0 "Modulator of FtsH protease HflC"  
"NT-E05\_01300" 25227 "s63E6H2" 0 "Modulator of FtsH protease HflC"  
"NT-E05\_01301" 25228 "s59E13H2" 0 "NADP-reducing hydrogenase subunit HndC"  
"NT-E05\_01301" 25228 "s59E25H2" 0 "NADP-reducing hydrogenase subunit HndC"  
"NT-E05\_01301" 25228 "s59E5H2" 0 "NADP-reducing hydrogenase subunit HndC"  
"NT-E05\_01301" 25228 "s63E6H2" 0 "NADP-reducing hydrogenase subunit HndC"  
"NT-E05\_01302" 25229 "s59E13H2" 0 "Formate dehydrogenase subunit alpha"  
"NT-E05\_01302" 25229 "s59E25H2" 0 "Formate dehydrogenase subunit alpha"  
"NT-E05\_01302" 25229 "s59E5H2" 0.01858114 "Formate dehydrogenase subunit alpha"  
"NT-E05\_01302" 25229 "s63E6H2" 0 "Formate dehydrogenase subunit alpha"  
"NT-E05\_01304" 25231 "s59E13H2" 0 "Ribonuclease VapC19"  
"NT-E05\_01304" 25231 "s59E25H2" 0 "Ribonuclease VapC19"  
"NT-E05\_01304" 25231 "s59E5H2" 0 "Ribonuclease VapC19"  
"NT-E05\_01304" 25231 "s63E6H2" 0 "Ribonuclease VapC19"  
"NT-E05\_01305" 25232 "s59E13H2" 0 "putative glycerophosphoryl diester phosphodiesterase 1"  
"NT-E05\_01305" 25232 "s59E25H2" 0 "putative glycerophosphoryl diester phosphodiesterase 1"  
"NT-E05\_01305" 25232 "s59E5H2" 0 "putative glycerophosphoryl diester phosphodiesterase 1"  
"NT-E05\_01305" 25232 "s63E6H2" 0 "putative glycerophosphoryl diester phosphodiesterase 1"  
"NT-E05\_01306" 25233 "s59E13H2" 0 "DNA polymerase/3'-5' exonuclease PolX"  
"NT-E05\_01306" 25233 "s59E25H2" 0 "DNA polymerase/3'-5' exonuclease PolX"  
"NT-E05\_01306" 25233 "s59E5H2" 0 "DNA polymerase/3'-5' exonuclease PolX"  
"NT-E05\_01306" 25233 "s63E6H2" 0 "DNA polymerase/3'-5' exonuclease PolX"  
"NT-E05\_01307" 25234 "s59E13H2" 0 "Dephospho-CoA kinase"  
"NT-E05\_01307" 25234 "s59E25H2" 0 "Dephospho-CoA kinase"  
"NT-E05\_01307" 25234 "s59E5H2" 0 "Dephospho-CoA kinase"



"NT-E05\_01307" 25234 "s63E6H2" 0 "Dephospho-CoA kinase"  
"NT-E05\_01308" 25235 "s59E13H2" 0 "Non-canonical purine NTP pyrophosphatase"  
"NT-E05\_01308" 25235 "s59E25H2" 0 "Non-canonical purine NTP pyrophosphatase"  
"NT-E05\_01308" 25235 "s59E5H2" 0 "Non-canonical purine NTP pyrophosphatase"  
"NT-E05\_01308" 25235 "s63E6H2" 0 "Non-canonical purine NTP pyrophosphatase"  
"NT-E05\_01309" 25236 "s59E13H2" 0 "Ribonuclease PH"  
"NT-E05\_01309" 25236 "s59E25H2" 0 "Ribonuclease PH"  
"NT-E05\_01309" 25236 "s59E5H2" 0 "Ribonuclease PH"  
"NT-E05\_01309" 25236 "s63E6H2" 0 "Ribonuclease PH"  
"NT-E05\_01310" 25237 "s59E13H2" 0 "Fumarate hydratase class I, anaerobic"  
"NT-E05\_01310" 25237 "s59E25H2" 0 "Fumarate hydratase class I, anaerobic"  
"NT-E05\_01310" 25237 "s59E5H2" 0 "Fumarate hydratase class I, anaerobic"  
"NT-E05\_01310" 25237 "s63E6H2" 0 "Fumarate hydratase class I, anaerobic"  
"NT-E05\_01311" 25238 "s59E13H2" 0 "hypothetical protein"  
"NT-E05\_01311" 25238 "s59E25H2" 0 "hypothetical protein"  
"NT-E05\_01311" 25238 "s59E5H2" 0 "hypothetical protein"  
"NT-E05\_01311" 25238 "s63E6H2" 0 "hypothetical protein"  
"NT-E05\_01312" 25239 "s59E13H2" 0 "Cell division protein FtsZ"  
"NT-E05\_01312" 25239 "s59E25H2" 0 "Cell division protein FtsZ"  
"NT-E05\_01312" 25239 "s59E5H2" 0 "Cell division protein FtsZ"  
"NT-E05\_01312" 25239 "s63E6H2" 0 "Cell division protein FtsZ"  
"NT-E05\_01313" 25240 "s59E13H2" 0 "Phenylalanine--tRNA ligase alpha subunit"  
"NT-E05\_01313" 25240 "s59E25H2" 0 "Phenylalanine--tRNA ligase alpha subunit"  
"NT-E05\_01313" 25240 "s59E5H2" 0 "Phenylalanine--tRNA ligase alpha subunit"  
"NT-E05\_01313" 25240 "s63E6H2" 0 "Phenylalanine--tRNA ligase alpha subunit"  
"NT-E05\_01316" 25243 "s59E13H2" 0 "Tagatose-6-phosphate kinase"  
"NT-E05\_01316" 25243 "s59E25H2" 0 "Tagatose-6-phosphate kinase"  
"NT-E05\_01316" 25243 "s59E5H2" 0 "Tagatose-6-phosphate kinase"  
"NT-E05\_01316" 25243 "s63E6H2" 0 "Tagatose-6-phosphate kinase"  
"NT-E05\_01317" 25244 "s59E13H2" 0 "heat shock protein GrpE"  
"NT-E05\_01317" 25244 "s59E25H2" 0 "heat shock protein GrpE"  
"NT-E05\_01317" 25244 "s59E5H2" 0 "heat shock protein GrpE"  
"NT-E05\_01317" 25244 "s63E6H2" 0 "heat shock protein GrpE"  
"NT-E05\_01318" 25245 "s59E13H2" 0 "Chaperone protein DnaK"  
"NT-E05\_01318" 25245 "s59E25H2" 0 "Chaperone protein DnaK"  
"NT-E05\_01318" 25245 "s59E5H2" 0.0004524204 "Chaperone protein DnaK"  
"NT-E05\_01318" 25245 "s63E6H2" 0 "Chaperone protein DnaK"  
"NT-E05\_01319" 25246 "s59E13H2" 0 "Chaperone protein DnaJ"  
"NT-E05\_01319" 25246 "s59E25H2" 0 "Chaperone protein DnaJ"  
"NT-E05\_01319" 25246 "s59E5H2" 0.005785863 "Chaperone protein DnaJ"  
"NT-E05\_01319" 25246 "s63E6H2" 0 "Chaperone protein DnaJ"  
"NT-E05\_01320" 25247 "s59E13H2" 0 "Threonylcarbamoyladenosine tRNA methylthiotransferase MtaB"  
"NT-E05\_01320" 25247 "s59E25H2" 0 "Threonylcarbamoyladenosine tRNA methylthiotransferase MtaB"  
"NT-E05\_01320" 25247 "s59E5H2" 0.001675338 "Threonylcarbamoyladenosine tRNA methylthiotransferase MtaB"  
"NT-E05\_01320" 25247 "s63E6H2" 0 "Threonylcarbamoyladenosine tRNA methylthiotransferase MtaB"  
"NT-E05\_01321" 25248 "s59E13H2" 0 "Histidinol dehydrogenase"  
"NT-E05\_01321" 25248 "s59E25H2" 0 "Histidinol dehydrogenase"

"NT-E05\_01321" 25248 "s59E5H2" 0.01319445 "Histidinol dehydrogenase"  
"NT-E05\_01321" 25248 "s63E6H2" 0 "Histidinol dehydrogenase"  
"NT-E05\_01322" 25249 "s59E13H2" 0 "hypothetical protein"  
"NT-E05\_01322" 25249 "s59E25H2" 0 "hypothetical protein"  
"NT-E05\_01322" 25249 "s59E5H2" 0.03392765 "hypothetical protein"  
"NT-E05\_01322" 25249 "s63E6H2" 0 "hypothetical protein"  
"NT-E05\_01323" 25250 "s59E13H2" 0 "Exoglucanase B precursor"  
"NT-E05\_01323" 25250 "s59E25H2" 0 "Exoglucanase B precursor"  
"NT-E05\_01323" 25250 "s59E5H2" 0.005396875 "Exoglucanase B precursor"  
"NT-E05\_01323" 25250 "s63E6H2" 0 "Exoglucanase B precursor"  
"NT-E05\_01324" 25251 "s59E13H2" 0 "hypothetical protein"  
"NT-E05\_01324" 25251 "s59E25H2" 0 "hypothetical protein"  
"NT-E05\_01324" 25251 "s59E5H2" 0 "hypothetical protein"  
"NT-E05\_01324" 25251 "s63E6H2" 0 "hypothetical protein"  
"NT-E05\_01325" 25252 "s59E13H2" 0 "hypothetical protein"  
"NT-E05\_01325" 25252 "s59E25H2" 0 "hypothetical protein"  
"NT-E05\_01325" 25252 "s59E5H2" 0 "hypothetical protein"  
"NT-E05\_01325" 25252 "s63E6H2" 0 "hypothetical protein"  
"NT-E05\_01327" 25254 "s59E13H2" 0 "hypothetical protein"  
"NT-E05\_01327" 25254 "s59E25H2" 0 "hypothetical protein"  
"NT-E05\_01327" 25254 "s59E5H2" 0 "hypothetical protein"  
"NT-E05\_01327" 25254 "s63E6H2" 0 "hypothetical protein"  
"NT-E05\_01328" 25255 "s59E13H2" 0 "hypothetical protein"  
"NT-E05\_01328" 25255 "s59E25H2" 0 "hypothetical protein"  
"NT-E05\_01328" 25255 "s59E5H2" 0 "hypothetical protein"  
"NT-E05\_01328" 25255 "s63E6H2" 0 "hypothetical protein"  
"NT-E05\_01332" 25259 "s59E13H2" 0 "hypothetical protein"  
"NT-E05\_01332" 25259 "s59E25H2" 0 "hypothetical protein"  
"NT-E05\_01332" 25259 "s59E5H2" 0.0156429 "hypothetical protein"  
"NT-E05\_01332" 25259 "s63E6H2" 0 "hypothetical protein"  
"NT-E05\_01333" 25260 "s59E13H2" 0 "Putative transposase"  
"NT-E05\_01333" 25260 "s59E25H2" 0 "Putative transposase"  
"NT-E05\_01333" 25260 "s59E5H2" 0 "Putative transposase"  
"NT-E05\_01333" 25260 "s63E6H2" 0.000245173 "Putative transposase"  
"NT-E05\_01336" 25263 "s59E13H2" 0 "Inner membrane ABC transporter permease protein YcjP"  
"NT-E05\_01336" 25263 "s59E25H2" 0 "Inner membrane ABC transporter permease protein YcjP"  
"NT-E05\_01336" 25263 "s59E5H2" 0 "Inner membrane ABC transporter permease protein YcjP"  
"NT-E05\_01336" 25263 "s63E6H2" 0 "Inner membrane ABC transporter permease protein YcjP"  
"NT-E05\_01337" 25264 "s59E13H2" 0 "Trehalose/maltose transport system permease protein MalF"  
"NT-E05\_01337" 25264 "s59E25H2" 0 "Trehalose/maltose transport system permease protein MalF"  
"NT-E05\_01337" 25264 "s59E5H2" 0 "Trehalose/maltose transport system permease protein MalF"  
"NT-E05\_01337" 25264 "s63E6H2" 0 "Trehalose/maltose transport system permease protein MalF"  
"NT-E05\_01338" 25265 "s59E13H2" 0 "hypothetical protein"  
"NT-E05\_01338" 25265 "s59E25H2" 0 "hypothetical protein"  
"NT-E05\_01338" 25265 "s59E5H2" 0 "hypothetical protein"  
"NT-E05\_01338" 25265 "s63E6H2" 0 "hypothetical protein"  
"NT-E05\_01339" 25266 "s59E13H2" 0 "Transposase"

"NT-E05\_01339" 25266 "s59E25H2" 0 "Transposase"  
"NT-E05\_01339" 25266 "s59E5H2" 0 "Transposase"  
"NT-E05\_01339" 25266 "s63E6H2" 0 "Transposase"  
"NT-E05\_01340" 25267 "s59E13H2" 0 "hypothetical protein"  
"NT-E05\_01340" 25267 "s59E25H2" 0 "hypothetical protein"  
"NT-E05\_01340" 25267 "s59E5H2" 0 "hypothetical protein"  
"NT-E05\_01340" 25267 "s63E6H2" 0 "hypothetical protein"  
"NT-E05\_01341" 25268 "s59E13H2" 0 "D-arabitol-phosphate dehydrogenase"  
"NT-E05\_01341" 25268 "s59E25H2" 0 "D-arabitol-phosphate dehydrogenase"  
"NT-E05\_01341" 25268 "s59E5H2" 0 "D-arabitol-phosphate dehydrogenase"  
"NT-E05\_01341" 25268 "s63E6H2" 0 "D-arabitol-phosphate dehydrogenase"  
"NT-E05\_01342" 25269 "s59E13H2" 0 "Trehalose/maltose import ATP-binding protein MalK"  
"NT-E05\_01342" 25269 "s59E25H2" 0 "Trehalose/maltose import ATP-binding protein MalK"  
"NT-E05\_01342" 25269 "s59E5H2" 0 "Trehalose/maltose import ATP-binding protein MalK"  
"NT-E05\_01342" 25269 "s63E6H2" 0 "Trehalose/maltose import ATP-binding protein MalK"  
"NT-E05\_01343" 25270 "s59E13H2" 0 "hypothetical protein"  
"NT-E05\_01343" 25270 "s59E25H2" 0 "hypothetical protein"  
"NT-E05\_01343" 25270 "s59E5H2" 0.004111671 "hypothetical protein"  
"NT-E05\_01343" 25270 "s63E6H2" 0 "hypothetical protein"  
"NT-E05\_01344" 25271 "s59E13H2" 0 "RNA polymerase sigma factor"  
"NT-E05\_01344" 25271 "s59E25H2" 0 "RNA polymerase sigma factor"  
"NT-E05\_01344" 25271 "s59E5H2" 0 "RNA polymerase sigma factor"  
"NT-E05\_01344" 25271 "s63E6H2" 0 "RNA polymerase sigma factor"  
"NT-E05\_01345" 25272 "s59E13H2" 0 "Octanoyltransferase LipM"  
"NT-E05\_01345" 25272 "s59E25H2" 0 "Octanoyltransferase LipM"  
"NT-E05\_01345" 25272 "s59E5H2" 0 "Octanoyltransferase LipM"  
"NT-E05\_01345" 25272 "s63E6H2" 0.005639122 "Octanoyltransferase LipM"  
"NT-E05\_01346" 25273 "s59E13H2" 0 "putative glycine dehydrogenase (decarboxylating) subunit 2"  
"NT-E05\_01346" 25273 "s59E25H2" 0 "putative glycine dehydrogenase (decarboxylating) subunit 2"  
"NT-E05\_01346" 25273 "s59E5H2" 0 "putative glycine dehydrogenase (decarboxylating) subunit 2"  
"NT-E05\_01346" 25273 "s63E6H2" 0 "putative glycine dehydrogenase (decarboxylating) subunit 2"  
"NT-E05\_01347" 25274 "s59E13H2" 0 "putative glycine dehydrogenase (decarboxylating) subunit 1"  
"NT-E05\_01347" 25274 "s59E25H2" 0 "putative glycine dehydrogenase (decarboxylating) subunit 1"  
"NT-E05\_01347" 25274 "s59E5H2" 0 "putative glycine dehydrogenase (decarboxylating) subunit 1"  
"NT-E05\_01347" 25274 "s63E6H2" 0.009554459 "putative glycine dehydrogenase (decarboxylating) subunit 1"  
"NT-E05\_01348" 25275 "s59E13H2" 0 "Glycine cleavage system H protein"  
"NT-E05\_01348" 25275 "s59E25H2" 0 "Glycine cleavage system H protein"  
"NT-E05\_01348" 25275 "s59E5H2" 0 "Glycine cleavage system H protein"  
"NT-E05\_01348" 25275 "s63E6H2" 0 "Glycine cleavage system H protein"  
"NT-E05\_01349" 25276 "s59E13H2" 0 "Transketolase 1"  
"NT-E05\_01349" 25276 "s59E25H2" 0 "Transketolase 1"  
"NT-E05\_01349" 25276 "s59E5H2" 0 "Transketolase 1"  
"NT-E05\_01349" 25276 "s63E6H2" 0.004309899 "Transketolase 1"  
"NT-E05\_01350" 25277 "s59E13H2" 0 "Serine hydroxymethyltransferase"  
"NT-E05\_01350" 25277 "s59E25H2" 0 "Serine hydroxymethyltransferase"  
"NT-E05\_01350" 25277 "s59E5H2" 0 "Serine hydroxymethyltransferase"  
"NT-E05\_01350" 25277 "s63E6H2" 0.000405286 "Serine hydroxymethyltransferase"

"NT-E05\_01351" 25278 "s59E13H2" 0 "Aspartate aminotransferase"  
"NT-E05\_01351" 25278 "s59E25H2" 0 "Aspartate aminotransferase"  
"NT-E05\_01351" 25278 "s59E5H2" 0 "Aspartate aminotransferase"  
"NT-E05\_01351" 25278 "s63E6H2" 0.00113032 "Aspartate aminotransferase"  
"NT-E05\_01353" 25280 "s59E13H2" 0 "Ribosomal protein S6 modification protein"  
"NT-E05\_01353" 25280 "s59E25H2" 0 "Ribosomal protein S6 modification protein"  
"NT-E05\_01353" 25280 "s59E5H2" 0 "Ribosomal protein S6 modification protein"  
"NT-E05\_01353" 25280 "s63E6H2" 0 "Ribosomal protein S6 modification protein"  
"NT-E05\_01354" 25281 "s59E13H2" 0 "hypothetical protein"  
"NT-E05\_01354" 25281 "s59E25H2" 0 "hypothetical protein"  
"NT-E05\_01354" 25281 "s59E5H2" 0 "hypothetical protein"  
"NT-E05\_01354" 25281 "s63E6H2" 0 "hypothetical protein"  
"NT-E05\_01355" 25282 "s59E13H2" 0 "hypothetical protein"  
"NT-E05\_01355" 25282 "s59E25H2" 0 "hypothetical protein"  
"NT-E05\_01355" 25282 "s59E5H2" 0 "hypothetical protein"  
"NT-E05\_01355" 25282 "s63E6H2" 0 "hypothetical protein"  
"NT-E05\_01356" 25283 "s59E13H2" 0 "ComEC family competence protein"  
"NT-E05\_01356" 25283 "s59E25H2" 0 "ComEC family competence protein"  
"NT-E05\_01356" 25283 "s59E5H2" 0.005133195 "ComEC family competence protein"  
"NT-E05\_01356" 25283 "s63E6H2" 0 "ComEC family competence protein"  
"NT-E05\_01357" 25284 "s59E13H2" 0 "Acetamidase"  
"NT-E05\_01357" 25284 "s59E25H2" 0 "Acetamidase"  
"NT-E05\_01357" 25284 "s59E5H2" 0 "Acetamidase"  
"NT-E05\_01357" 25284 "s63E6H2" 0 "Acetamidase"  
"NT-E05\_01358" 25285 "s59E13H2" 0 "D-tagatose 3-epimerase"  
"NT-E05\_01358" 25285 "s59E25H2" 0 "D-tagatose 3-epimerase"  
"NT-E05\_01358" 25285 "s59E5H2" 0 "D-tagatose 3-epimerase"  
"NT-E05\_01358" 25285 "s63E6H2" 0 "D-tagatose 3-epimerase"  
"NT-E05\_01360" 25287 "s59E13H2" 0 "Glucose--fructose oxidoreductase precursor"  
"NT-E05\_01360" 25287 "s59E25H2" 0 "Glucose--fructose oxidoreductase precursor"  
"NT-E05\_01360" 25287 "s59E5H2" 0.007110409 "Glucose--fructose oxidoreductase precursor"  
"NT-E05\_01360" 25287 "s63E6H2" 0 "Glucose--fructose oxidoreductase precursor"  
"NT-E05\_01361" 25288 "s59E13H2" 0 "Inositol 2-dehydrogenase"  
"NT-E05\_01361" 25288 "s59E25H2" 0 "Inositol 2-dehydrogenase"  
"NT-E05\_01361" 25288 "s59E5H2" 0.02295073 "Inositol 2-dehydrogenase"  
"NT-E05\_01361" 25288 "s63E6H2" 0 "Inositol 2-dehydrogenase"  
"NT-E05\_01362" 25289 "s59E13H2" 0 "Xylulose kinase"  
"NT-E05\_01362" 25289 "s59E25H2" 0 "Xylulose kinase"  
"NT-E05\_01362" 25289 "s59E5H2" 0.005125995 "Xylulose kinase"  
"NT-E05\_01362" 25289 "s63E6H2" 0 "Xylulose kinase"  
"NT-E05\_01363" 25290 "s59E13H2" 0 "Tungsten-containing aldehyde ferredoxin oxidoreductase"  
"NT-E05\_01363" 25290 "s59E25H2" 0 "Tungsten-containing aldehyde ferredoxin oxidoreductase"  
"NT-E05\_01363" 25290 "s59E5H2" 0 "Tungsten-containing aldehyde ferredoxin oxidoreductase"  
"NT-E05\_01363" 25290 "s63E6H2" 0 "Tungsten-containing aldehyde ferredoxin oxidoreductase"  
"NT-E05\_01364" 25291 "s59E13H2" 0 "putative oxidoreductase YghA"  
"NT-E05\_01364" 25291 "s59E25H2" 0 "putative oxidoreductase YghA"  
"NT-E05\_01364" 25291 "s59E5H2" 0 "putative oxidoreductase YghA"

"NT-E05\_01364" 25291 "s63E6H2" 0 "putative oxidoreductase YghA"  
"NT-E05\_01365" 25292 "s59E13H2" 0 "HTH-type transcriptional repressor YvoA"  
"NT-E05\_01365" 25292 "s59E25H2" 0 "HTH-type transcriptional repressor YvoA"  
"NT-E05\_01365" 25292 "s59E5H2" 0 "HTH-type transcriptional repressor YvoA"  
"NT-E05\_01365" 25292 "s63E6H2" 0 "HTH-type transcriptional repressor YvoA"  
"NT-E05\_01366" 25293 "s59E13H2" 0 "D,D-heptose 1,7-bisphosphate phosphatase"  
"NT-E05\_01366" 25293 "s59E25H2" 0 "D,D-heptose 1,7-bisphosphate phosphatase"  
"NT-E05\_01366" 25293 "s59E5H2" 0.009936223 "D,D-heptose 1,7-bisphosphate phosphatase"  
"NT-E05\_01366" 25293 "s63E6H2" 0 "D,D-heptose 1,7-bisphosphate phosphatase"  
"NT-E05\_01367" 25294 "s59E13H2" 0 "ComE operon protein 1"  
"NT-E05\_01367" 25294 "s59E25H2" 0 "ComE operon protein 1"  
"NT-E05\_01367" 25294 "s59E5H2" 0 "ComE operon protein 1"  
"NT-E05\_01367" 25294 "s63E6H2" 0 "ComE operon protein 1"  
"NT-E05\_01368" 25295 "s59E13H2" 0 "Leucine--tRNA ligase"  
"NT-E05\_01368" 25295 "s59E25H2" 0 "Leucine--tRNA ligase"  
"NT-E05\_01368" 25295 "s59E5H2" 0 "Leucine--tRNA ligase"  
"NT-E05\_01368" 25295 "s63E6H2" 0.009672268 "Leucine--tRNA ligase"  
"NT-E05\_01374" 25301 "s59E13H2" 0 "Helix-turn-helix domain protein"  
"NT-E05\_01374" 25301 "s59E25H2" 0 "Helix-turn-helix domain protein"  
"NT-E05\_01374" 25301 "s59E5H2" 0 "Helix-turn-helix domain protein"  
"NT-E05\_01374" 25301 "s63E6H2" 0 "Helix-turn-helix domain protein"  
"NT-E05\_01375" 25302 "s59E13H2" 0 "hypothetical protein"  
"NT-E05\_01375" 25302 "s59E25H2" 0 "hypothetical protein"  
"NT-E05\_01375" 25302 "s59E5H2" 0 "hypothetical protein"  
"NT-E05\_01375" 25302 "s63E6H2" 0 "hypothetical protein"  
"NT-E05\_01376" 25303 "s59E13H2" 0 "hypothetical protein"  
"NT-E05\_01376" 25303 "s59E25H2" 0 "hypothetical protein"  
"NT-E05\_01376" 25303 "s59E5H2" 0 "hypothetical protein"  
"NT-E05\_01376" 25303 "s63E6H2" 0 "hypothetical protein"  
"NT-E05\_01377" 25304 "s59E13H2" 0 "Cold shock-like protein CspLA"  
"NT-E05\_01377" 25304 "s59E25H2" 0 "Cold shock-like protein CspLA"  
"NT-E05\_01377" 25304 "s59E5H2" 0 "Cold shock-like protein CspLA"  
"NT-E05\_01377" 25304 "s63E6H2" 0 "Cold shock-like protein CspLA"  
"NT-E05\_01379" 25306 "s59E13H2" 0 "Phage Terminase"  
"NT-E05\_01379" 25306 "s59E25H2" 0 "Phage Terminase"  
"NT-E05\_01379" 25306 "s59E5H2" 0 "Phage Terminase"  
"NT-E05\_01379" 25306 "s63E6H2" 0 "Phage Terminase"  
"NT-E05\_01385" 25312 "s59E13H2" 0 "hypothetical protein"  
"NT-E05\_01385" 25312 "s59E25H2" 0 "hypothetical protein"  
"NT-E05\_01385" 25312 "s59E5H2" 0 "hypothetical protein"  
"NT-E05\_01385" 25312 "s63E6H2" 0 "hypothetical protein"  
"NT-E05\_01388" 25315 "s59E13H2" 0 "hypothetical protein"  
"NT-E05\_01388" 25315 "s59E25H2" 0 "hypothetical protein"  
"NT-E05\_01388" 25315 "s59E5H2" 0 "hypothetical protein"  
"NT-E05\_01388" 25315 "s63E6H2" 0 "hypothetical protein"  
"NT-E05\_01389" 25316 "s59E13H2" 0 "hypothetical protein"  
"NT-E05\_01389" 25316 "s59E25H2" 0 "hypothetical protein"

"NT-E05\_01389" 25316 "s59E5H2" 0 "hypothetical protein"  
"NT-E05\_01389" 25316 "s63E6H2" 0 "hypothetical protein"  
"NT-E05\_01390" 25317 "s59E13H2" 0 "hypothetical protein"  
"NT-E05\_01390" 25317 "s59E25H2" 0 "hypothetical protein"  
"NT-E05\_01390" 25317 "s59E5H2" 0 "hypothetical protein"  
"NT-E05\_01390" 25317 "s63E6H2" 0 "hypothetical protein"  
"NT-E05\_01393" 25320 "s59E13H2" 0 "Vegetative catalase"  
"NT-E05\_01393" 25320 "s59E25H2" 0 "Vegetative catalase"  
"NT-E05\_01393" 25320 "s59E5H2" 0.03331516 "Vegetative catalase"  
"NT-E05\_01393" 25320 "s63E6H2" 0.001808881 "Vegetative catalase"  
"NT-E05\_01394" 25321 "s59E13H2" 0 "Inner membrane protein YbaN"  
"NT-E05\_01394" 25321 "s59E25H2" 0 "Inner membrane protein YbaN"  
"NT-E05\_01394" 25321 "s59E5H2" 0.006679834 "Inner membrane protein YbaN"  
"NT-E05\_01394" 25321 "s63E6H2" 0 "Inner membrane protein YbaN"  
"NT-E05\_01395" 25322 "s59E13H2" 0 "RNA polymerase sigma factor SigA"  
"NT-E05\_01395" 25322 "s59E25H2" 0 "RNA polymerase sigma factor SigA"  
"NT-E05\_01395" 25322 "s59E5H2" 0 "RNA polymerase sigma factor SigA"  
"NT-E05\_01395" 25322 "s63E6H2" 0.009514795 "RNA polymerase sigma factor SigA"  
"NT-E05\_01396" 25323 "s59E13H2" 0 "hypothetical protein"  
"NT-E05\_01396" 25323 "s59E25H2" 0 "hypothetical protein"  
"NT-E05\_01396" 25323 "s59E5H2" 0 "hypothetical protein"  
"NT-E05\_01396" 25323 "s63E6H2" 0 "hypothetical protein"  
"NT-E05\_01397" 25324 "s59E13H2" 0 "Fatty acid metabolism regulator protein"  
"NT-E05\_01397" 25324 "s59E25H2" 0 "Fatty acid metabolism regulator protein"  
"NT-E05\_01397" 25324 "s59E5H2" 0 "Fatty acid metabolism regulator protein"  
"NT-E05\_01397" 25324 "s63E6H2" 0 "Fatty acid metabolism regulator protein"  
"NT-E05\_01399" 25326 "s59E13H2" 0 "Riboflavin biosynthesis protein RibD"  
"NT-E05\_01399" 25326 "s59E25H2" 0 "Riboflavin biosynthesis protein RibD"  
"NT-E05\_01399" 25326 "s59E5H2" 0 "Riboflavin biosynthesis protein RibD"  
"NT-E05\_01399" 25326 "s63E6H2" 0 "Riboflavin biosynthesis protein RibD"  
"NT-E05\_01400" 25327 "s59E13H2" 0 "transcriptional regulator PhoU"  
"NT-E05\_01400" 25327 "s59E25H2" 0 "transcriptional regulator PhoU"  
"NT-E05\_01400" 25327 "s59E5H2" 0 "transcriptional regulator PhoU"  
"NT-E05\_01400" 25327 "s63E6H2" 0 "transcriptional regulator PhoU"  
"NT-E05\_01401" 25328 "s59E13H2" 0 "Orotidine 5'-phosphate decarboxylase"  
"NT-E05\_01401" 25328 "s59E25H2" 0 "Orotidine 5'-phosphate decarboxylase"  
"NT-E05\_01401" 25328 "s59E5H2" 0 "Orotidine 5'-phosphate decarboxylase"  
"NT-E05\_01401" 25328 "s63E6H2" 0 "Orotidine 5'-phosphate decarboxylase"  
"NT-E05\_01402" 25329 "s59E13H2" 0 "DNA recombination protein RmuC"  
"NT-E05\_01402" 25329 "s59E25H2" 0 "DNA recombination protein RmuC"  
"NT-E05\_01402" 25329 "s59E5H2" 0 "DNA recombination protein RmuC"  
"NT-E05\_01402" 25329 "s63E6H2" 0 "DNA recombination protein RmuC"  
"NT-E05\_01403" 25330 "s59E13H2" 0 "hypothetical protein"  
"NT-E05\_01403" 25330 "s59E25H2" 0 "hypothetical protein"  
"NT-E05\_01403" 25330 "s59E5H2" 0 "hypothetical protein"  
"NT-E05\_01403" 25330 "s63E6H2" 0 "hypothetical protein"  
"NT-E05\_01405" 25332 "s59E13H2" 0 "hypothetical protein"

"NT-E05\_01405" 25332 "s59E25H2" 0 "hypothetical protein"  
"NT-E05\_01405" 25332 "s59E5H2" 0 "hypothetical protein"  
"NT-E05\_01405" 25332 "s63E6H2" 0 "hypothetical protein"  
"NT-E05\_01406" 25333 "s59E13H2" 0 "hypothetical protein"  
"NT-E05\_01406" 25333 "s59E25H2" 0 "hypothetical protein"  
"NT-E05\_01406" 25333 "s59E5H2" 0 "hypothetical protein"  
"NT-E05\_01406" 25333 "s63E6H2" 0 "hypothetical protein"  
"NT-E05\_01408" 25335 "s59E13H2" 0 "Carbamoyl-phosphate synthase large chain"  
"NT-E05\_01408" 25335 "s59E25H2" 0 "Carbamoyl-phosphate synthase large chain"  
"NT-E05\_01408" 25335 "s59E5H2" 0 "Carbamoyl-phosphate synthase large chain"  
"NT-E05\_01408" 25335 "s63E6H2" 0.001564162 "Carbamoyl-phosphate synthase large chain"  
"NT-E05\_01409" 25336 "s59E13H2" 0 "hypothetical protein"  
"NT-E05\_01409" 25336 "s59E25H2" 0 "hypothetical protein"  
"NT-E05\_01409" 25336 "s59E5H2" 0.005537341 "hypothetical protein"  
"NT-E05\_01409" 25336 "s63E6H2" 0 "hypothetical protein"  
"NT-E05\_01410" 25337 "s59E13H2" 0 "hypothetical protein"  
"NT-E05\_01410" 25337 "s59E25H2" 0 "hypothetical protein"  
"NT-E05\_01410" 25337 "s59E5H2" 0 "hypothetical protein"  
"NT-E05\_01410" 25337 "s63E6H2" 0 "hypothetical protein"  
"NT-E05\_01411" 25338 "s59E13H2" 0 "2-amino-3,7-dideoxy-D-threo-hept-6-ulosonate synthase"  
"NT-E05\_01411" 25338 "s59E25H2" 0 "2-amino-3,7-dideoxy-D-threo-hept-6-ulosonate synthase"  
"NT-E05\_01411" 25338 "s59E5H2" 0 "2-amino-3,7-dideoxy-D-threo-hept-6-ulosonate synthase"  
"NT-E05\_01411" 25338 "s63E6H2" 0 "2-amino-3,7-dideoxy-D-threo-hept-6-ulosonate synthase"  
"NT-E05\_01412" 25339 "s59E13H2" 0 "Radical SAM superfamily protein"  
"NT-E05\_01412" 25339 "s59E25H2" 0 "Radical SAM superfamily protein"  
"NT-E05\_01412" 25339 "s59E5H2" 0 "Radical SAM superfamily protein"  
"NT-E05\_01412" 25339 "s63E6H2" 0.001255672 "Radical SAM superfamily protein"  
"NT-E05\_01413" 25340 "s59E13H2" 0 "2,3-bisphosphoglycerate-independent phosphoglycerate mutase"  
"NT-E05\_01413" 25340 "s59E25H2" 0 "2,3-bisphosphoglycerate-independent phosphoglycerate mutase"  
"NT-E05\_01413" 25340 "s59E5H2" 0 "2,3-bisphosphoglycerate-independent phosphoglycerate mutase"  
"NT-E05\_01413" 25340 "s63E6H2" 0.003807851 "2,3-bisphosphoglycerate-independent phosphoglycerate mutase"  
"NT-E05\_01414" 25341 "s59E13H2" 0 "Threonine synthase"  
"NT-E05\_01414" 25341 "s59E25H2" 0 "Threonine synthase"  
"NT-E05\_01414" 25341 "s59E5H2" 0 "Threonine synthase"  
"NT-E05\_01414" 25341 "s63E6H2" 0 "Threonine synthase"  
"NT-E05\_01415" 25342 "s59E13H2" 0 "Crossover junction endodeoxyribonuclease RuvC"  
"NT-E05\_01415" 25342 "s59E25H2" 0 "Crossover junction endodeoxyribonuclease RuvC"  
"NT-E05\_01415" 25342 "s59E5H2" 0 "Crossover junction endodeoxyribonuclease RuvC"  
"NT-E05\_01415" 25342 "s63E6H2" 0 "Crossover junction endodeoxyribonuclease RuvC"  
"NT-E05\_01416" 25343 "s59E13H2" 0 "Dihydropteroate synthase"  
"NT-E05\_01416" 25343 "s59E25H2" 0 "Dihydropteroate synthase"  
"NT-E05\_01416" 25343 "s59E5H2" 0 "Dihydropteroate synthase"  
"NT-E05\_01416" 25343 "s63E6H2" 0 "Dihydropteroate synthase"  
"NT-E05\_01417" 25344 "s59E13H2" 0 "ATP-dependent zinc metalloprotease FtsH"  
"NT-E05\_01417" 25344 "s59E25H2" 0 "ATP-dependent zinc metalloprotease FtsH"  
"NT-E05\_01417" 25344 "s59E5H2" 0.004052933 "ATP-dependent zinc metalloprotease FtsH"  
"NT-E05\_01417" 25344 "s63E6H2" 0 "ATP-dependent zinc metalloprotease FtsH"

"NT-E05\_01418" 25345 "s59E13H2" 0 "Isocitrate dehydrogenase [NADP]"  
"NT-E05\_01418" 25345 "s59E25H2" 0 "Isocitrate dehydrogenase [NADP]"  
"NT-E05\_01418" 25345 "s59E5H2" 0 "Isocitrate dehydrogenase [NADP]"  
"NT-E05\_01418" 25345 "s63E6H2" 0 "Isocitrate dehydrogenase [NADP]"  
"NT-E05\_01419" 25346 "s59E13H2" 0 "Enolase"  
"NT-E05\_01419" 25346 "s59E25H2" 0 "Enolase"  
"NT-E05\_01419" 25346 "s59E5H2" 0 "Enolase"  
"NT-E05\_01419" 25346 "s63E6H2" 0 "Enolase"  
"NT-E05\_01420" 25347 "s59E13H2" 0 "hypothetical protein"  
"NT-E05\_01420" 25347 "s59E25H2" 0 "hypothetical protein"  
"NT-E05\_01420" 25347 "s59E5H2" 0 "hypothetical protein"  
"NT-E05\_01420" 25347 "s63E6H2" 0 "hypothetical protein"  
"NT-E05\_01421" 25348 "s59E13H2" 0 "N5-carboxyaminoimidazole ribonucleotide mutase"  
"NT-E05\_01421" 25348 "s59E25H2" 0 "N5-carboxyaminoimidazole ribonucleotide mutase"  
"NT-E05\_01421" 25348 "s59E5H2" 0 "N5-carboxyaminoimidazole ribonucleotide mutase"  
"NT-E05\_01421" 25348 "s63E6H2" 0 "N5-carboxyaminoimidazole ribonucleotide mutase"  
"NT-E05\_01422" 25349 "s59E13H2" 0 "ATP phosphoribosyltransferase"  
"NT-E05\_01422" 25349 "s59E25H2" 0 "ATP phosphoribosyltransferase"  
"NT-E05\_01422" 25349 "s59E5H2" 0 "ATP phosphoribosyltransferase"  
"NT-E05\_01422" 25349 "s63E6H2" 0 "ATP phosphoribosyltransferase"  
"NT-E05\_01423" 25350 "s59E13H2" 0 "Type II secretion system protein D precursor"  
"NT-E05\_01423" 25350 "s59E25H2" 0 "Type II secretion system protein D precursor"  
"NT-E05\_01423" 25350 "s59E5H2" 0 "Type II secretion system protein D precursor"  
"NT-E05\_01423" 25350 "s63E6H2" 0 "Type II secretion system protein D precursor"  
"NT-E05\_01424" 25351 "s59E13H2" 0 "Type IV pilus biogenesis and competence protein PilQ precursor"  
"NT-E05\_01424" 25351 "s59E25H2" 0 "Type IV pilus biogenesis and competence protein PilQ precursor"  
"NT-E05\_01424" 25351 "s59E5H2" 0 "Type IV pilus biogenesis and competence protein PilQ precursor"  
"NT-E05\_01424" 25351 "s63E6H2" 0 "Type IV pilus biogenesis and competence protein PilQ precursor"  
"NT-E05\_01425" 25352 "s59E13H2" 0 "hypothetical protein"  
"NT-E05\_01425" 25352 "s59E25H2" 0 "hypothetical protein"  
"NT-E05\_01425" 25352 "s59E5H2" 0 "hypothetical protein"  
"NT-E05\_01425" 25352 "s63E6H2" 0 "hypothetical protein"  
"NT-E05\_01426" 25353 "s59E13H2" 0 "Pilus assembly protein, PilO"  
"NT-E05\_01426" 25353 "s59E25H2" 0 "Pilus assembly protein, PilO"  
"NT-E05\_01426" 25353 "s59E5H2" 0 "Pilus assembly protein, PilO"  
"NT-E05\_01426" 25353 "s63E6H2" 0 "Pilus assembly protein, PilO"  
"NT-E05\_01427" 25354 "s59E13H2" 0 "Fimbrial assembly protein (PilN)"  
"NT-E05\_01427" 25354 "s59E25H2" 0 "Fimbrial assembly protein (PilN)"  
"NT-E05\_01427" 25354 "s59E5H2" 0 "Fimbrial assembly protein (PilN)"  
"NT-E05\_01427" 25354 "s63E6H2" 0 "Fimbrial assembly protein (PilN)"  
"NT-E05\_01428" 25355 "s59E13H2" 0 "Cell division protein FtsA"  
"NT-E05\_01428" 25355 "s59E25H2" 0 "Cell division protein FtsA"  
"NT-E05\_01428" 25355 "s59E5H2" 0 "Cell division protein FtsA"  
"NT-E05\_01428" 25355 "s63E6H2" 0 "Cell division protein FtsA"  
"NT-E05\_01429" 25356 "s59E13H2" 0 "D-tyrosyl-tRNA(Tyr) deacylase"  
"NT-E05\_01429" 25356 "s59E25H2" 0 "D-tyrosyl-tRNA(Tyr) deacylase"  
"NT-E05\_01429" 25356 "s59E5H2" 0 "D-tyrosyl-tRNA(Tyr) deacylase"



"NT-E05\_01429" 25356 "s63E6H2" 0 "D-tyrosyl-tRNA(Tyr) deacylase"  
"NT-E05\_01430" 25357 "s59E13H2" 0 "Imidazoleglycerol-phosphate dehydratase"  
"NT-E05\_01430" 25357 "s59E25H2" 0 "Imidazoleglycerol-phosphate dehydratase"  
"NT-E05\_01430" 25357 "s59E5H2" 0 "Imidazoleglycerol-phosphate dehydratase"  
"NT-E05\_01430" 25357 "s63E6H2" 0 "Imidazoleglycerol-phosphate dehydratase"  
"NT-E05\_01431" 25358 "s59E13H2" 0 "tRNA(Ile)-lysidine synthase"  
"NT-E05\_01431" 25358 "s59E25H2" 0 "tRNA(Ile)-lysidine synthase"  
"NT-E05\_01431" 25358 "s59E5H2" 0 "tRNA(Ile)-lysidine synthase"  
"NT-E05\_01431" 25358 "s63E6H2" 0 "tRNA(Ile)-lysidine synthase"  
"NT-E05\_01432" 25359 "s59E13H2" 0 "Putative ATP:guanido phosphotransferase"  
"NT-E05\_01432" 25359 "s59E25H2" 0 "Putative ATP:guanido phosphotransferase"  
"NT-E05\_01432" 25359 "s59E5H2" 0 "Putative ATP:guanido phosphotransferase"  
"NT-E05\_01432" 25359 "s63E6H2" 0 "Putative ATP:guanido phosphotransferase"  
"NT-E05\_01433" 25360 "s59E13H2" 0 "UvrB/uvrC motif protein"  
"NT-E05\_01433" 25360 "s59E25H2" 0 "UvrB/uvrC motif protein"  
"NT-E05\_01433" 25360 "s59E5H2" 0 "UvrB/uvrC motif protein"  
"NT-E05\_01433" 25360 "s63E6H2" 0 "UvrB/uvrC motif protein"  
"NT-E05\_01434" 25361 "s59E13H2" 0 "tRNA pseudouridine synthase A"  
"NT-E05\_01434" 25361 "s59E25H2" 0 "tRNA pseudouridine synthase A"  
"NT-E05\_01434" 25361 "s59E5H2" 0 "tRNA pseudouridine synthase A"  
"NT-E05\_01434" 25361 "s63E6H2" 0 "tRNA pseudouridine synthase A"  
"NT-E05\_01435" 25362 "s59E13H2" 0 "hypothetical protein"  
"NT-E05\_01435" 25362 "s59E25H2" 0 "hypothetical protein"  
"NT-E05\_01435" 25362 "s59E5H2" 0 "hypothetical protein"  
"NT-E05\_01435" 25362 "s63E6H2" 0 "hypothetical protein"  
"NT-E05\_01436" 25363 "s59E13H2" 0 "50S ribosomal protein L17"  
"NT-E05\_01436" 25363 "s59E25H2" 0 "50S ribosomal protein L17"  
"NT-E05\_01436" 25363 "s59E5H2" 0 "50S ribosomal protein L17"  
"NT-E05\_01436" 25363 "s63E6H2" 0 "50S ribosomal protein L17"  
"NT-E05\_01437" 25364 "s59E13H2" 0 "DNA-directed RNA polymerase subunit alpha"  
"NT-E05\_01437" 25364 "s59E25H2" 0 "DNA-directed RNA polymerase subunit alpha"  
"NT-E05\_01437" 25364 "s59E5H2" 0 "DNA-directed RNA polymerase subunit alpha"  
"NT-E05\_01437" 25364 "s63E6H2" 0 "DNA-directed RNA polymerase subunit alpha"  
"NT-E05\_01438" 25365 "s59E13H2" 0 "30S ribosomal protein S4"  
"NT-E05\_01438" 25365 "s59E25H2" 0 "30S ribosomal protein S4"  
"NT-E05\_01438" 25365 "s59E5H2" 0 "30S ribosomal protein S4"  
"NT-E05\_01438" 25365 "s63E6H2" 0 "30S ribosomal protein S4"  
"NT-E05\_01439" 25366 "s59E13H2" 0 "30S ribosomal protein S11"  
"NT-E05\_01439" 25366 "s59E25H2" 0 "30S ribosomal protein S11"  
"NT-E05\_01439" 25366 "s59E5H2" 0 "30S ribosomal protein S11"  
"NT-E05\_01439" 25366 "s63E6H2" 0 "30S ribosomal protein S11"  
"NT-E05\_01440" 25367 "s59E13H2" 0 "30S ribosomal protein S13"  
"NT-E05\_01440" 25367 "s59E25H2" 0 "30S ribosomal protein S13"  
"NT-E05\_01440" 25367 "s59E5H2" 0 "30S ribosomal protein S13"  
"NT-E05\_01440" 25367 "s63E6H2" 0 "30S ribosomal protein S13"  
"NT-E05\_01441" 25368 "s59E13H2" 0 "Translation initiation factor IF-1"  
"NT-E05\_01441" 25368 "s59E25H2" 0 "Translation initiation factor IF-1"

"NT-E05\_01441" 25368 "s59E5H2" 0 "Translation initiation factor IF-1"  
"NT-E05\_01441" 25368 "s63E6H2" 0 "Translation initiation factor IF-1"  
"NT-E05\_01442" 25369 "s59E13H2" 0 "Adenylate kinase"  
"NT-E05\_01442" 25369 "s59E25H2" 0 "Adenylate kinase"  
"NT-E05\_01442" 25369 "s59E5H2" 0 "Adenylate kinase"  
"NT-E05\_01442" 25369 "s63E6H2" 0 "Adenylate kinase"  
"NT-E05\_01443" 25370 "s59E13H2" 0 "preprotein translocase subunit SecY"  
"NT-E05\_01443" 25370 "s59E25H2" 0 "preprotein translocase subunit SecY"  
"NT-E05\_01443" 25370 "s59E5H2" 0.003841941 "preprotein translocase subunit SecY"  
"NT-E05\_01443" 25370 "s63E6H2" 0 "preprotein translocase subunit SecY"  
"NT-E05\_01444" 25371 "s59E13H2" 0 "50S ribosomal protein L15"  
"NT-E05\_01444" 25371 "s59E25H2" 0 "50S ribosomal protein L15"  
"NT-E05\_01444" 25371 "s59E5H2" 0.01110151 "50S ribosomal protein L15"  
"NT-E05\_01444" 25371 "s63E6H2" 0 "50S ribosomal protein L15"  
"NT-E05\_01445" 25372 "s59E13H2" 0 "30S ribosomal protein S5"  
"NT-E05\_01445" 25372 "s59E25H2" 0 "30S ribosomal protein S5"  
"NT-E05\_01445" 25372 "s59E5H2" 0 "30S ribosomal protein S5"  
"NT-E05\_01445" 25372 "s63E6H2" 0 "30S ribosomal protein S5"  
"NT-E05\_01446" 25373 "s59E13H2" 0 "50S ribosomal protein L18"  
"NT-E05\_01446" 25373 "s59E25H2" 0 "50S ribosomal protein L18"  
"NT-E05\_01446" 25373 "s59E5H2" 0 "50S ribosomal protein L18"  
"NT-E05\_01446" 25373 "s63E6H2" 0 "50S ribosomal protein L18"  
"NT-E05\_01447" 25374 "s59E13H2" 0 "50S ribosomal protein L6"  
"NT-E05\_01447" 25374 "s59E25H2" 0 "50S ribosomal protein L6"  
"NT-E05\_01447" 25374 "s59E5H2" 0 "50S ribosomal protein L6"  
"NT-E05\_01447" 25374 "s63E6H2" 0 "50S ribosomal protein L6"  
"NT-E05\_01448" 25375 "s59E13H2" 0 "30S ribosomal protein S8"  
"NT-E05\_01448" 25375 "s59E25H2" 0 "30S ribosomal protein S8"  
"NT-E05\_01448" 25375 "s59E5H2" 0 "30S ribosomal protein S8"  
"NT-E05\_01448" 25375 "s63E6H2" 0 "30S ribosomal protein S8"  
"NT-E05\_01449" 25376 "s59E13H2" 0 "30S ribosomal protein S14 type Z"  
"NT-E05\_01449" 25376 "s59E25H2" 0 "30S ribosomal protein S14 type Z"  
"NT-E05\_01449" 25376 "s59E5H2" 0 "30S ribosomal protein S14 type Z"  
"NT-E05\_01449" 25376 "s63E6H2" 0 "30S ribosomal protein S14 type Z"  
"NT-E05\_01450" 25377 "s59E13H2" 0 "50S ribosomal protein L5"  
"NT-E05\_01450" 25377 "s59E25H2" 0 "50S ribosomal protein L5"  
"NT-E05\_01450" 25377 "s59E5H2" 0 "50S ribosomal protein L5"  
"NT-E05\_01450" 25377 "s63E6H2" 0 "50S ribosomal protein L5"  
"NT-E05\_01451" 25378 "s59E13H2" 0 "50S ribosomal protein L24"  
"NT-E05\_01451" 25378 "s59E25H2" 0 "50S ribosomal protein L24"  
"NT-E05\_01451" 25378 "s59E5H2" 0 "50S ribosomal protein L24"  
"NT-E05\_01451" 25378 "s63E6H2" 0 "50S ribosomal protein L24"  
"NT-E05\_01452" 25379 "s59E13H2" 0 "50S ribosomal protein L14"  
"NT-E05\_01452" 25379 "s59E25H2" 0 "50S ribosomal protein L14"  
"NT-E05\_01452" 25379 "s59E5H2" 0 "50S ribosomal protein L14"  
"NT-E05\_01452" 25379 "s63E6H2" 0 "50S ribosomal protein L14"  
"NT-E05\_01453" 25380 "s59E13H2" 0 "30S ribosomal protein S17"

"NT-E05\_01453" 25380 "s59E25H2" 0 "30S ribosomal protein S17"  
"NT-E05\_01453" 25380 "s59E5H2" 0 "30S ribosomal protein S17"  
"NT-E05\_01453" 25380 "s63E6H2" 0 "30S ribosomal protein S17"  
"NT-E05\_01454" 25381 "s59E13H2" 0 "50S ribosomal protein L29"  
"NT-E05\_01454" 25381 "s59E25H2" 0 "50S ribosomal protein L29"  
"NT-E05\_01454" 25381 "s59E5H2" 0 "50S ribosomal protein L29"  
"NT-E05\_01454" 25381 "s63E6H2" 0 "50S ribosomal protein L29"  
"NT-E05\_01455" 25382 "s59E13H2" 0 "50S ribosomal protein L16"  
"NT-E05\_01455" 25382 "s59E25H2" 0 "50S ribosomal protein L16"  
"NT-E05\_01455" 25382 "s59E5H2" 0 "50S ribosomal protein L16"  
"NT-E05\_01455" 25382 "s63E6H2" 0 "50S ribosomal protein L16"  
"NT-E05\_01456" 25383 "s59E13H2" 0 "30S ribosomal protein S3"  
"NT-E05\_01456" 25383 "s59E25H2" 0 "30S ribosomal protein S3"  
"NT-E05\_01456" 25383 "s59E5H2" 0 "30S ribosomal protein S3"  
"NT-E05\_01456" 25383 "s63E6H2" 0 "30S ribosomal protein S3"  
"NT-E05\_01457" 25384 "s59E13H2" 0 "50S ribosomal protein L22"  
"NT-E05\_01457" 25384 "s59E25H2" 0 "50S ribosomal protein L22"  
"NT-E05\_01457" 25384 "s59E5H2" 0 "50S ribosomal protein L22"  
"NT-E05\_01457" 25384 "s63E6H2" 0 "50S ribosomal protein L22"  
"NT-E05\_01458" 25385 "s59E13H2" 0 "30S ribosomal protein S19"  
"NT-E05\_01458" 25385 "s59E25H2" 0 "30S ribosomal protein S19"  
"NT-E05\_01458" 25385 "s59E5H2" 0 "30S ribosomal protein S19"  
"NT-E05\_01458" 25385 "s63E6H2" 0 "30S ribosomal protein S19"  
"NT-E05\_01459" 25386 "s59E13H2" 0 "50S ribosomal protein L2"  
"NT-E05\_01459" 25386 "s59E25H2" 0 "50S ribosomal protein L2"  
"NT-E05\_01459" 25386 "s59E5H2" 0 "50S ribosomal protein L2"  
"NT-E05\_01459" 25386 "s63E6H2" 0 "50S ribosomal protein L2"  
"NT-E05\_01460" 25387 "s59E13H2" 0 "50S ribosomal protein L23"  
"NT-E05\_01460" 25387 "s59E25H2" 0 "50S ribosomal protein L23"  
"NT-E05\_01460" 25387 "s59E5H2" 0 "50S ribosomal protein L23"  
"NT-E05\_01460" 25387 "s63E6H2" 0 "50S ribosomal protein L23"  
"NT-E05\_01461" 25388 "s59E13H2" 0 "50S ribosomal protein L4"  
"NT-E05\_01461" 25388 "s59E25H2" 0 "50S ribosomal protein L4"  
"NT-E05\_01461" 25388 "s59E5H2" 0 "50S ribosomal protein L4"  
"NT-E05\_01461" 25388 "s63E6H2" 0 "50S ribosomal protein L4"  
"NT-E05\_01462" 25389 "s59E13H2" 0 "50S ribosomal protein L3"  
"NT-E05\_01462" 25389 "s59E25H2" 0 "50S ribosomal protein L3"  
"NT-E05\_01462" 25389 "s59E5H2" 0 "50S ribosomal protein L3"  
"NT-E05\_01462" 25389 "s63E6H2" 0 "50S ribosomal protein L3"  
"NT-E05\_01463" 25390 "s59E13H2" 0 "30S ribosomal protein S10"  
"NT-E05\_01463" 25390 "s59E25H2" 0 "30S ribosomal protein S10"  
"NT-E05\_01463" 25390 "s59E5H2" 0 "30S ribosomal protein S10"  
"NT-E05\_01463" 25390 "s63E6H2" 0 "30S ribosomal protein S10"  
"NT-E05\_01464" 25391 "s59E13H2" 0 "Elongation factor G"  
"NT-E05\_01464" 25391 "s59E25H2" 0 "Elongation factor G"  
"NT-E05\_01464" 25391 "s59E5H2" 0 "Elongation factor G"  
"NT-E05\_01464" 25391 "s63E6H2" 0 "Elongation factor G"

"NT-E05\_01465" 25392 "s59E13H2" 0 "30S ribosomal protein S7"  
"NT-E05\_01465" 25392 "s59E25H2" 0 "30S ribosomal protein S7"  
"NT-E05\_01465" 25392 "s59E5H2" 0 "30S ribosomal protein S7"  
"NT-E05\_01465" 25392 "s63E6H2" 0 "30S ribosomal protein S7"  
"NT-E05\_01466" 25393 "s59E13H2" 0 "30S ribosomal protein S12"  
"NT-E05\_01466" 25393 "s59E25H2" 0 "30S ribosomal protein S12"  
"NT-E05\_01466" 25393 "s59E5H2" 0 "30S ribosomal protein S12"  
"NT-E05\_01466" 25393 "s63E6H2" 0 "30S ribosomal protein S12"  
"NT-E05\_01467" 25394 "s59E13H2" 0 "DNA-directed RNA polymerase subunit beta"  
"NT-E05\_01467" 25394 "s59E25H2" 0 "DNA-directed RNA polymerase subunit beta"  
"NT-E05\_01467" 25394 "s59E5H2" 0 "DNA-directed RNA polymerase subunit beta"  
"NT-E05\_01467" 25394 "s63E6H2" 0 "DNA-directed RNA polymerase subunit beta"  
"NT-E05\_01468" 25395 "s59E13H2" 0 "DNA-directed RNA polymerase subunit beta"  
"NT-E05\_01468" 25395 "s59E25H2" 0 "DNA-directed RNA polymerase subunit beta"  
"NT-E05\_01468" 25395 "s59E5H2" 0 "DNA-directed RNA polymerase subunit beta"  
"NT-E05\_01468" 25395 "s63E6H2" 0.0009413825 "DNA-directed RNA polymerase subunit beta"  
"NT-E05\_01469" 25396 "s59E13H2" 0 "50S ribosomal protein L10"  
"NT-E05\_01469" 25396 "s59E25H2" 0 "50S ribosomal protein L10"  
"NT-E05\_01469" 25396 "s59E5H2" 0 "50S ribosomal protein L10"  
"NT-E05\_01469" 25396 "s63E6H2" 0 "50S ribosomal protein L10"  
"NT-E05\_01470" 25397 "s59E13H2" 0 "50S ribosomal protein L1"  
"NT-E05\_01470" 25397 "s59E25H2" 0 "50S ribosomal protein L1"  
"NT-E05\_01470" 25397 "s59E5H2" 0 "50S ribosomal protein L1"  
"NT-E05\_01470" 25397 "s63E6H2" 0 "50S ribosomal protein L1"  
"NT-E05\_01471" 25398 "s59E13H2" 0 "50S ribosomal protein L11"  
"NT-E05\_01471" 25398 "s59E25H2" 0 "50S ribosomal protein L11"  
"NT-E05\_01471" 25398 "s59E5H2" 0 "50S ribosomal protein L11"  
"NT-E05\_01471" 25398 "s63E6H2" 0 "50S ribosomal protein L11"  
"NT-E05\_01472" 25399 "s59E13H2" 0 "hypothetical protein"  
"NT-E05\_01472" 25399 "s59E25H2" 0 "hypothetical protein"  
"NT-E05\_01472" 25399 "s59E5H2" 0 "hypothetical protein"  
"NT-E05\_01472" 25399 "s63E6H2" 0 "hypothetical protein"  
"NT-E05\_01473" 25400 "s59E13H2" 0 "preprotein translocase subunit SecE"  
"NT-E05\_01473" 25400 "s59E25H2" 0 "preprotein translocase subunit SecE"  
"NT-E05\_01473" 25400 "s59E5H2" 0 "preprotein translocase subunit SecE"  
"NT-E05\_01473" 25400 "s63E6H2" 0 "preprotein translocase subunit SecE"  
"NT-E05\_01475" 25402 "s59E13H2" 0 "Elongation factor Tu"  
"NT-E05\_01475" 25402 "s59E25H2" 0 "Elongation factor Tu"  
"NT-E05\_01475" 25402 "s59E5H2" 0 "Elongation factor Tu"  
"NT-E05\_01475" 25402 "s63E6H2" 0 "Elongation factor Tu"  
"NT-E05\_01478" 25405 "s59E13H2" 0 "Pyruvate, phosphate dikinase"  
"NT-E05\_01478" 25405 "s59E25H2" 0 "Pyruvate, phosphate dikinase"  
"NT-E05\_01478" 25405 "s59E5H2" 0 "Pyruvate, phosphate dikinase"  
"NT-E05\_01478" 25405 "s63E6H2" 0 "Pyruvate, phosphate dikinase"  
"NT-E05\_01479" 25406 "s59E13H2" 0 "Modulator of FtsH protease HflC"  
"NT-E05\_01479" 25406 "s59E25H2" 0 "Modulator of FtsH protease HflC"  
"NT-E05\_01479" 25406 "s59E5H2" 0 "Modulator of FtsH protease HflC"

"NT-E05\_01479" 25406 "s63E6H2" 0.9406079 "Modulator of FtsH protease HflC"  
"NT-E05\_01483" 25410 "s59E13H2" 0 "HEPN domain protein"  
"NT-E05\_01483" 25410 "s59E25H2" 0 "HEPN domain protein"  
"NT-E05\_01483" 25410 "s59E5H2" 0 "HEPN domain protein"  
"NT-E05\_01483" 25410 "s63E6H2" 0 "HEPN domain protein"  
"NT-E05\_01484" 25411 "s59E13H2" 0 "Nucleotidyltransferase domain protein"  
"NT-E05\_01484" 25411 "s59E25H2" 0 "Nucleotidyltransferase domain protein"  
"NT-E05\_01484" 25411 "s59E5H2" 0 "Nucleotidyltransferase domain protein"  
"NT-E05\_01484" 25411 "s63E6H2" 0 "Nucleotidyltransferase domain protein"  
"NT-E05\_01486" 25413 "s59E13H2" 0 "hypothetical protein"  
"NT-E05\_01486" 25413 "s59E25H2" 0 "hypothetical protein"  
"NT-E05\_01486" 25413 "s59E5H2" 0 "hypothetical protein"  
"NT-E05\_01486" 25413 "s63E6H2" 0 "hypothetical protein"  
"NT-E05\_01487" 25414 "s59E13H2" 0 "Glycerate 2-kinase"  
"NT-E05\_01487" 25414 "s59E25H2" 0 "Glycerate 2-kinase"  
"NT-E05\_01487" 25414 "s59E5H2" 0 "Glycerate 2-kinase"  
"NT-E05\_01487" 25414 "s63E6H2" 0 "Glycerate 2-kinase"  
"NT-E05\_01488" 25415 "s59E13H2" 0 "Acetylglutamate kinase"  
"NT-E05\_01488" 25415 "s59E25H2" 0 "Acetylglutamate kinase"  
"NT-E05\_01488" 25415 "s59E5H2" 0 "Acetylglutamate kinase"  
"NT-E05\_01488" 25415 "s63E6H2" 0 "Acetylglutamate kinase"  
"NT-E05\_01490" 25417 "s59E13H2" 0 "methylcobalamin:coenzyme M methyltransferase"  
"NT-E05\_01490" 25417 "s59E25H2" 0 "methylcobalamin:coenzyme M methyltransferase"  
"NT-E05\_01490" 25417 "s59E5H2" 0 "methylcobalamin:coenzyme M methyltransferase"  
"NT-E05\_01490" 25417 "s63E6H2" 0 "methylcobalamin:coenzyme M methyltransferase"  
"NT-E05\_01491" 25418 "s59E13H2" 0 "Arylsulfotransferase (ASST)"  
"NT-E05\_01491" 25418 "s59E25H2" 0 "Arylsulfotransferase (ASST)"  
"NT-E05\_01491" 25418 "s59E5H2" 0 "Arylsulfotransferase (ASST)"  
"NT-E05\_01491" 25418 "s63E6H2" 0 "Arylsulfotransferase (ASST)"  
"NT-E05\_01492" 25419 "s59E13H2" 0 "Glucosamine-6-phosphate deaminase 1"  
"NT-E05\_01492" 25419 "s59E25H2" 0 "Glucosamine-6-phosphate deaminase 1"  
"NT-E05\_01492" 25419 "s59E5H2" 0 "Glucosamine-6-phosphate deaminase 1"  
"NT-E05\_01492" 25419 "s63E6H2" 0 "Glucosamine-6-phosphate deaminase 1"  
"NT-E05\_01493" 25420 "s59E13H2" 0 "Putative 4,5-dihydroxyphthalate dehydrogenase"  
"NT-E05\_01493" 25420 "s59E25H2" 0 "Putative 4,5-dihydroxyphthalate dehydrogenase"  
"NT-E05\_01493" 25420 "s59E5H2" 0 "Putative 4,5-dihydroxyphthalate dehydrogenase"  
"NT-E05\_01493" 25420 "s63E6H2" 0 "Putative 4,5-dihydroxyphthalate dehydrogenase"  
"NT-E05\_01494" 25421 "s59E13H2" 0 "D-aminopeptidase"  
"NT-E05\_01494" 25421 "s59E25H2" 0 "D-aminopeptidase"  
"NT-E05\_01494" 25421 "s59E5H2" 0 "D-aminopeptidase"  
"NT-E05\_01494" 25421 "s63E6H2" 0 "D-aminopeptidase"  
"NT-E05\_01495" 25422 "s59E13H2" 0 "L-glutamine:2-deoxy-scylo-inosose aminotransferase"  
"NT-E05\_01495" 25422 "s59E25H2" 0 "L-glutamine:2-deoxy-scylo-inosose aminotransferase"  
"NT-E05\_01495" 25422 "s59E5H2" 0 "L-glutamine:2-deoxy-scylo-inosose aminotransferase"  
"NT-E05\_01495" 25422 "s63E6H2" 0 "L-glutamine:2-deoxy-scylo-inosose aminotransferase"  
"NT-E05\_01496" 25423 "s59E13H2" 0 "hypothetical protein"  
"NT-E05\_01496" 25423 "s59E25H2" 0 "hypothetical protein"

"NT-E05\_01496" 25423 "s59E5H2" 0 "hypothetical protein"  
"NT-E05\_01496" 25423 "s63E6H2" 0 "hypothetical protein"  
"NT-E05\_01497" 25424 "s59E13H2" 0 "Amidohydrolase"  
"NT-E05\_01497" 25424 "s59E25H2" 0 "Amidohydrolase"  
"NT-E05\_01497" 25424 "s59E5H2" 0 "Amidohydrolase"  
"NT-E05\_01497" 25424 "s63E6H2" 0 "Amidohydrolase"  
"NT-E05\_01500" 25427 "s59E13H2" 0 "hypothetical protein"  
"NT-E05\_01500" 25427 "s59E25H2" 0 "hypothetical protein"  
"NT-E05\_01500" 25427 "s59E5H2" 0 "hypothetical protein"  
"NT-E05\_01500" 25427 "s63E6H2" 0 "hypothetical protein"  
"NT-E05\_01501" 25428 "s59E13H2" 0 "methylcobalamin:coenzyme M methyltransferase"  
"NT-E05\_01501" 25428 "s59E25H2" 0 "methylcobalamin:coenzyme M methyltransferase"  
"NT-E05\_01501" 25428 "s59E5H2" 0 "methylcobalamin:coenzyme M methyltransferase"  
"NT-E05\_01501" 25428 "s63E6H2" 0 "methylcobalamin:coenzyme M methyltransferase"  
"NT-E05\_01502" 25429 "s59E13H2" 0 "Trehalose/maltose-binding protein MalE precursor"  
"NT-E05\_01502" 25429 "s59E25H2" 0 "Trehalose/maltose-binding protein MalE precursor"  
"NT-E05\_01502" 25429 "s59E5H2" 0 "Trehalose/maltose-binding protein MalE precursor"  
"NT-E05\_01502" 25429 "s63E6H2" 0 "Trehalose/maltose-binding protein MalE precursor"  
"NT-E05\_01503" 25430 "s59E13H2" 0 "L-arabinose transport system permease protein AraQ"  
"NT-E05\_01503" 25430 "s59E25H2" 0 "L-arabinose transport system permease protein AraQ"  
"NT-E05\_01503" 25430 "s59E5H2" 0 "L-arabinose transport system permease protein AraQ"  
"NT-E05\_01503" 25430 "s63E6H2" 0 "L-arabinose transport system permease protein AraQ"  
"NT-E05\_01504" 25431 "s59E13H2" 0 "Lactose transport system permease protein LacF"  
"NT-E05\_01504" 25431 "s59E25H2" 0 "Lactose transport system permease protein LacF"  
"NT-E05\_01504" 25431 "s59E5H2" 0 "Lactose transport system permease protein LacF"  
"NT-E05\_01504" 25431 "s63E6H2" 0 "Lactose transport system permease protein LacF"  
"NT-E05\_01505" 25432 "s59E13H2" 0 "putative HTH-type transcriptional regulator YdfH"  
"NT-E05\_01505" 25432 "s59E25H2" 0 "putative HTH-type transcriptional regulator YdfH"  
"NT-E05\_01505" 25432 "s59E5H2" 0 "putative HTH-type transcriptional regulator YdfH"  
"NT-E05\_01505" 25432 "s63E6H2" 0 "putative HTH-type transcriptional regulator YdfH"  
"NT-E05\_01506" 25433 "s59E13H2" 0 "putative oxidoreductase UxuB"  
"NT-E05\_01506" 25433 "s59E25H2" 0 "putative oxidoreductase UxuB"  
"NT-E05\_01506" 25433 "s59E5H2" 0 "putative oxidoreductase UxuB"  
"NT-E05\_01506" 25433 "s63E6H2" 0 "putative oxidoreductase UxuB"  
"NT-E05\_01507" 25434 "s59E13H2" 0 "6-phosphogluconate dehydrogenase, NADP(+)-dependent, decarboxylating"  
"NT-E05\_01507" 25434 "s59E25H2" 0 "6-phosphogluconate dehydrogenase, NADP(+)-dependent, decarboxylating"  
"NT-E05\_01507" 25434 "s59E5H2" 0.02823734 "6-phosphogluconate dehydrogenase, NADP(+)-dependent, decarboxylating"  
"NT-E05\_01507" 25434 "s63E6H2" 0 "6-phosphogluconate dehydrogenase, NADP(+)-dependent, decarboxylating"  
"NT-E05\_01508" 25435 "s59E13H2" 0 "hypothetical protein"  
"NT-E05\_01508" 25435 "s59E25H2" 0 "hypothetical protein"  
"NT-E05\_01508" 25435 "s59E5H2" 0 "hypothetical protein"  
"NT-E05\_01508" 25435 "s63E6H2" 0 "hypothetical protein"  
"NT-E05\_01509" 25436 "s59E13H2" 0 "6-phosphofructokinase 1"  
"NT-E05\_01509" 25436 "s59E25H2" 0 "6-phosphofructokinase 1"  
"NT-E05\_01509" 25436 "s59E5H2" 0.02168984 "6-phosphofructokinase 1"  
"NT-E05\_01509" 25436 "s63E6H2" 0 "6-phosphofructokinase 1"  
"NT-E05\_01510" 25437 "s59E13H2" 0 "hypothetical protein"

"NT-E05\_01510" 25437 "s59E25H2" 0 "hypothetical protein"  
"NT-E05\_01510" 25437 "s59E5H2" 0.00336968 "hypothetical protein"  
"NT-E05\_01510" 25437 "s63E6H2" 0 "hypothetical protein"  
"NT-E05\_01511" 25438 "s59E13H2" 0 "hypothetical protein"  
"NT-E05\_01511" 25438 "s59E25H2" 0 "hypothetical protein"  
"NT-E05\_01511" 25438 "s59E5H2" 0 "hypothetical protein"  
"NT-E05\_01511" 25438 "s63E6H2" 0 "hypothetical protein"  
"NT-E05\_01512" 25439 "s59E13H2" 0 "2-dehydro-3-deoxygluconokinase"  
"NT-E05\_01512" 25439 "s59E25H2" 0 "2-dehydro-3-deoxygluconokinase"  
"NT-E05\_01512" 25439 "s59E5H2" 0.002448421 "2-dehydro-3-deoxygluconokinase"  
"NT-E05\_01512" 25439 "s63E6H2" 0 "2-dehydro-3-deoxygluconokinase"  
"NT-E05\_01513" 25440 "s59E13H2" 0 "5-deoxy-glucuronate isomerase"  
"NT-E05\_01513" 25440 "s59E25H2" 0 "5-deoxy-glucuronate isomerase"  
"NT-E05\_01513" 25440 "s59E5H2" 0 "5-deoxy-glucuronate isomerase"  
"NT-E05\_01513" 25440 "s63E6H2" 0 "5-deoxy-glucuronate isomerase"  
"NT-E05\_01514" 25441 "s59E13H2" 0 "putative transposase"  
"NT-E05\_01514" 25441 "s59E25H2" 0 "putative transposase"  
"NT-E05\_01514" 25441 "s59E5H2" 0 "putative transposase"  
"NT-E05\_01514" 25441 "s63E6H2" 0 "putative transposase"  
"NT-E05\_01515" 25442 "s59E13H2" 0 "D-tagatose 3-epimerase"  
"NT-E05\_01515" 25442 "s59E25H2" 0 "D-tagatose 3-epimerase"  
"NT-E05\_01515" 25442 "s59E5H2" 0 "D-tagatose 3-epimerase"  
"NT-E05\_01515" 25442 "s63E6H2" 0 "D-tagatose 3-epimerase"  
"NT-E05\_01516" 25443 "s59E13H2" 0 "putative zinc-type alcohol dehydrogenase-like protein Yjmd"  
"NT-E05\_01516" 25443 "s59E25H2" 0 "putative zinc-type alcohol dehydrogenase-like protein Yjmd"  
"NT-E05\_01516" 25443 "s59E5H2" 0 "putative zinc-type alcohol dehydrogenase-like protein Yjmd"  
"NT-E05\_01516" 25443 "s63E6H2" 0.0005840886 "putative zinc-type alcohol dehydrogenase-like protein Yjmd"  
"NT-E05\_01517" 25444 "s59E13H2" 0 "putative L-threonine 3-dehydrogenase"  
"NT-E05\_01517" 25444 "s59E25H2" 0 "putative L-threonine 3-dehydrogenase"  
"NT-E05\_01517" 25444 "s59E5H2" 0 "putative L-threonine 3-dehydrogenase"  
"NT-E05\_01517" 25444 "s63E6H2" 0 "putative L-threonine 3-dehydrogenase"  
"NT-E05\_01518" 25445 "s59E13H2" 0 "pfb family carbohydrate kinase"  
"NT-E05\_01518" 25445 "s59E25H2" 0 "pfb family carbohydrate kinase"  
"NT-E05\_01518" 25445 "s59E5H2" 0 "pfb family carbohydrate kinase"  
"NT-E05\_01518" 25445 "s63E6H2" 0 "pfb family carbohydrate kinase"  
"NT-E05\_01519" 25446 "s59E13H2" 0 "Pyrophosphate--fructose 6-phosphate 1-phosphotransferase"  
"NT-E05\_01519" 25446 "s59E25H2" 0 "Pyrophosphate--fructose 6-phosphate 1-phosphotransferase"  
"NT-E05\_01519" 25446 "s59E5H2" 0.0031004 "Pyrophosphate--fructose 6-phosphate 1-phosphotransferase"  
"NT-E05\_01519" 25446 "s63E6H2" 0.001120606 "Pyrophosphate--fructose 6-phosphate 1-phosphotransferase"  
"NT-E05\_01520" 25447 "s59E13H2" 0 "putative sugar kinase YdjH"  
"NT-E05\_01520" 25447 "s59E25H2" 0 "putative sugar kinase YdjH"  
"NT-E05\_01520" 25447 "s59E5H2" 0 "putative sugar kinase YdjH"  
"NT-E05\_01520" 25447 "s63E6H2" 0 "putative sugar kinase YdjH"  
"NT-E05\_01521" 25448 "s59E13H2" 0 "hypothetical protein"  
"NT-E05\_01521" 25448 "s59E25H2" 0 "hypothetical protein"  
"NT-E05\_01521" 25448 "s59E5H2" 0 "hypothetical protein"  
"NT-E05\_01521" 25448 "s63E6H2" 0 "hypothetical protein"

"NT-E05\_01522" 25449 "s59E13H2" 0 "DNA polymerase III subunits gamma and tau"  
"NT-E05\_01522" 25449 "s59E25H2" 0 "DNA polymerase III subunits gamma and tau"  
"NT-E05\_01522" 25449 "s59E5H2" 0 "DNA polymerase III subunits gamma and tau"  
"NT-E05\_01522" 25449 "s63E6H2" 0.00200045 "DNA polymerase III subunits gamma and tau"  
"NT-E05\_01523" 25450 "s59E13H2" 0 "hypothetical protein"  
"NT-E05\_01523" 25450 "s59E25H2" 0 "hypothetical protein"  
"NT-E05\_01523" 25450 "s59E5H2" 0 "hypothetical protein"  
"NT-E05\_01523" 25450 "s63E6H2" 0 "hypothetical protein"  
"NT-E05\_01524" 25451 "s59E13H2" 0 "site-specific tyrosine recombinase XerC"  
"NT-E05\_01524" 25451 "s59E25H2" 0 "site-specific tyrosine recombinase XerC"  
"NT-E05\_01524" 25451 "s59E5H2" 0 "site-specific tyrosine recombinase XerC"  
"NT-E05\_01524" 25451 "s63E6H2" 0 "site-specific tyrosine recombinase XerC"  
"NT-E05\_01525" 25452 "s59E13H2" 0 "hypothetical protein"  
"NT-E05\_01525" 25452 "s59E25H2" 0 "hypothetical protein"  
"NT-E05\_01525" 25452 "s59E5H2" 0 "hypothetical protein"  
"NT-E05\_01525" 25452 "s63E6H2" 0.007216934 "hypothetical protein"  
"NT-E05\_01526" 25453 "s59E13H2" 0 "Transposase DDE domain protein"  
"NT-E05\_01526" 25453 "s59E25H2" 0 "Transposase DDE domain protein"  
"NT-E05\_01526" 25453 "s59E5H2" 0 "Transposase DDE domain protein"  
"NT-E05\_01526" 25453 "s63E6H2" 0 "Transposase DDE domain protein"  
"NT-E05\_01528" 25455 "s59E13H2" 0 "Chromosomal replication initiator protein DnaA"  
"NT-E05\_01528" 25455 "s59E25H2" 0 "Chromosomal replication initiator protein DnaA"  
"NT-E05\_01528" 25455 "s59E5H2" 0 "Chromosomal replication initiator protein DnaA"  
"NT-E05\_01528" 25455 "s63E6H2" 0 "Chromosomal replication initiator protein DnaA"  
"NT-E05\_01529" 25456 "s59E13H2" 0 "hypothetical protein"  
"NT-E05\_01529" 25456 "s59E25H2" 0 "hypothetical protein"  
"NT-E05\_01529" 25456 "s59E5H2" 0 "hypothetical protein"  
"NT-E05\_01529" 25456 "s63E6H2" 0.05714532 "hypothetical protein"  
"NT-E05\_01531" 25458 "s59E13H2" 0 "UDP-glucose:undecaprenyl-phosphate glucose-1-phosphate transferase"  
"NT-E05\_01531" 25458 "s59E25H2" 0 "UDP-glucose:undecaprenyl-phosphate glucose-1-phosphate transferase"  
"NT-E05\_01531" 25458 "s59E5H2" 0 "UDP-glucose:undecaprenyl-phosphate glucose-1-phosphate transferase"  
"NT-E05\_01531" 25458 "s63E6H2" 0.0001919776 "UDP-glucose:undecaprenyl-phosphate glucose-1-phosphate transferase"  
"NT-P03\_00001" 25459 "s59E13H2" 0 "Acetoin utilization protein AcuC"  
"NT-P03\_00001" 25459 "s59E25H2" 0 "Acetoin utilization protein AcuC"  
"NT-P03\_00001" 25459 "s59E5H2" 0 "Acetoin utilization protein AcuC"  
"NT-P03\_00001" 25459 "s63E6H2" 0.02957477 "Acetoin utilization protein AcuC"  
"NT-P03\_00002" 25460 "s59E13H2" 0 "Prolipoprotein diacylglyceryl transferase"  
"NT-P03\_00002" 25460 "s59E25H2" 0 "Prolipoprotein diacylglyceryl transferase"  
"NT-P03\_00002" 25460 "s59E5H2" 0 "Prolipoprotein diacylglyceryl transferase"  
"NT-P03\_00002" 25460 "s63E6H2" 0.01257784 "Prolipoprotein diacylglyceryl transferase"  
"NT-P03\_00003" 25461 "s59E13H2" 0 "Multidrug resistance protein NorM"  
"NT-P03\_00003" 25461 "s59E25H2" 0 "Multidrug resistance protein NorM"  
"NT-P03\_00003" 25461 "s59E5H2" 0 "Multidrug resistance protein NorM"  
"NT-P03\_00003" 25461 "s63E6H2" 0.01161905 "Multidrug resistance protein NorM"  
"NT-P03\_00004" 25462 "s59E13H2" 0 "Deoxyribose-phosphate aldolase 2"  
"NT-P03\_00004" 25462 "s59E25H2" 0 "Deoxyribose-phosphate aldolase 2"  
"NT-P03\_00004" 25462 "s59E5H2" 0 "Deoxyribose-phosphate aldolase 2"



"NT-P03\_00004" 25462 "s63E6H2" 0 "Deoxyribose-phosphate aldolase 2"  
"NT-P03\_00005" 25463 "s59E13H2" 0 "Glucose-6-phosphate 3-dehydrogenase"  
"NT-P03\_00005" 25463 "s59E25H2" 0 "Glucose-6-phosphate 3-dehydrogenase"  
"NT-P03\_00005" 25463 "s59E5H2" 0 "Glucose-6-phosphate 3-dehydrogenase"  
"NT-P03\_00005" 25463 "s63E6H2" 0 "Glucose-6-phosphate 3-dehydrogenase"  
"NT-P03\_00006" 25464 "s59E13H2" 0 "Phospholipase B"  
"NT-P03\_00006" 25464 "s59E25H2" 0 "Phospholipase B"  
"NT-P03\_00006" 25464 "s59E5H2" 0 "Phospholipase B"  
"NT-P03\_00006" 25464 "s63E6H2" 0.01537457 "Phospholipase B"  
"NT-P03\_00007" 25465 "s59E13H2" 0 "Trifunctional nucleotide phosphoesterase protein YfkN precursor"  
"NT-P03\_00007" 25465 "s59E25H2" 0 "Trifunctional nucleotide phosphoesterase protein YfkN precursor"  
"NT-P03\_00007" 25465 "s59E5H2" 0 "Trifunctional nucleotide phosphoesterase protein YfkN precursor"  
"NT-P03\_00007" 25465 "s63E6H2" 0.00218884 "Trifunctional nucleotide phosphoesterase protein YfkN precursor"  
"NT-P03\_00008" 25466 "s59E13H2" 0 "Outer-membrane lipoprotein carrier protein"  
"NT-P03\_00008" 25466 "s59E25H2" 0 "Outer-membrane lipoprotein carrier protein"  
"NT-P03\_00008" 25466 "s59E5H2" 0 "Outer-membrane lipoprotein carrier protein"  
"NT-P03\_00008" 25466 "s63E6H2" 0 "Outer-membrane lipoprotein carrier protein"  
"NT-P03\_00009" 25467 "s59E13H2" 0 "Twitching mobility protein"  
"NT-P03\_00009" 25467 "s59E25H2" 0 "Twitching mobility protein"  
"NT-P03\_00009" 25467 "s59E5H2" 0 "Twitching mobility protein"  
"NT-P03\_00009" 25467 "s63E6H2" 0.103617 "Twitching mobility protein"  
"NT-P03\_00010" 25468 "s59E13H2" 0 "Acetolactate synthase large subunit IlvB1"  
"NT-P03\_00010" 25468 "s59E25H2" 0 "Acetolactate synthase large subunit IlvB1"  
"NT-P03\_00010" 25468 "s59E5H2" 0.02978656 "Acetolactate synthase large subunit IlvB1"  
"NT-P03\_00010" 25468 "s63E6H2" 0.0008164268 "Acetolactate synthase large subunit IlvB1"  
"NT-P03\_00011" 25469 "s59E13H2" 0 "Phosphoserine phosphatase RsbU"  
"NT-P03\_00011" 25469 "s59E25H2" 0 "Phosphoserine phosphatase RsbU"  
"NT-P03\_00011" 25469 "s59E5H2" 0.110431 "Phosphoserine phosphatase RsbU"  
"NT-P03\_00011" 25469 "s63E6H2" 0 "Phosphoserine phosphatase RsbU"  
"NT-P03\_00012" 25470 "s59E13H2" 0 "hypothetical protein"  
"NT-P03\_00012" 25470 "s59E25H2" 0 "hypothetical protein"  
"NT-P03\_00012" 25470 "s59E5H2" 0 "hypothetical protein"  
"NT-P03\_00012" 25470 "s63E6H2" 0 "hypothetical protein"  
"NT-P03\_00013" 25471 "s59E13H2" 0 "Serine/threonine-protein kinase BtrW"  
"NT-P03\_00013" 25471 "s59E25H2" 0 "Serine/threonine-protein kinase BtrW"  
"NT-P03\_00013" 25471 "s59E5H2" 0 "Serine/threonine-protein kinase BtrW"  
"NT-P03\_00013" 25471 "s63E6H2" 0 "Serine/threonine-protein kinase BtrW"  
"NT-P03\_00014" 25472 "s59E13H2" 0 "Putative anti-sigma factor antagonist BtrV"  
"NT-P03\_00014" 25472 "s59E25H2" 0 "Putative anti-sigma factor antagonist BtrV"  
"NT-P03\_00014" 25472 "s59E5H2" 0.08811783 "Putative anti-sigma factor antagonist BtrV"  
"NT-P03\_00014" 25472 "s63E6H2" 0 "Putative anti-sigma factor antagonist BtrV"  
"NT-P03\_00015" 25473 "s59E13H2" 0 "hypothetical protein"  
"NT-P03\_00015" 25473 "s59E25H2" 0 "hypothetical protein"  
"NT-P03\_00015" 25473 "s59E5H2" 0 "hypothetical protein"  
"NT-P03\_00015" 25473 "s63E6H2" 0 "hypothetical protein"  
"NT-P03\_00016" 25474 "s59E13H2" 0 "ATP-dependent Clp protease proteolytic subunit"  
"NT-P03\_00016" 25474 "s59E25H2" 0 "ATP-dependent Clp protease proteolytic subunit"

"NT-P03\_00016" 25474 "s59E5H2" 0.0005819596 "ATP-dependent Clp protease proteolytic subunit"  
"NT-P03\_00016" 25474 "s63E6H2" 0.5757763 "ATP-dependent Clp protease proteolytic subunit"  
"NT-P03\_00017" 25475 "s59E13H2" 0 "V-type ATP synthase alpha chain"  
"NT-P03\_00017" 25475 "s59E25H2" 0 "V-type ATP synthase alpha chain"  
"NT-P03\_00017" 25475 "s59E5H2" 0.007908397 "V-type ATP synthase alpha chain"  
"NT-P03\_00017" 25475 "s63E6H2" 0.3638832 "V-type ATP synthase alpha chain"  
"NT-P03\_00018" 25476 "s59E13H2" 0 "Primosomal protein N"  
"NT-P03\_00018" 25476 "s59E25H2" 0 "Primosomal protein N"  
"NT-P03\_00018" 25476 "s59E5H2" 0 "Primosomal protein N"  
"NT-P03\_00018" 25476 "s63E6H2" 0.001825612 "Primosomal protein N"  
"NT-P03\_00019" 25477 "s59E13H2" 0 "Alanine--tRNA ligase"  
"NT-P03\_00019" 25477 "s59E25H2" 0 "Alanine--tRNA ligase"  
"NT-P03\_00019" 25477 "s59E5H2" 0 "Alanine--tRNA ligase"  
"NT-P03\_00019" 25477 "s63E6H2" 0 "Alanine--tRNA ligase"  
"NT-P03\_00021" 25479 "s59E13H2" 0 "Cysteine--tRNA ligase"  
"NT-P03\_00021" 25479 "s59E25H2" 0 "Cysteine--tRNA ligase"  
"NT-P03\_00021" 25479 "s59E5H2" 0.004793613 "Cysteine--tRNA ligase"  
"NT-P03\_00021" 25479 "s63E6H2" 0.00425259 "Cysteine--tRNA ligase"  
"NT-P03\_00022" 25480 "s59E13H2" 0 "2-C-methyl-D-erythritol 2,4-cyclodiphosphate synthase"  
"NT-P03\_00022" 25480 "s59E25H2" 0 "2-C-methyl-D-erythritol 2,4-cyclodiphosphate synthase"  
"NT-P03\_00022" 25480 "s59E5H2" 0 "2-C-methyl-D-erythritol 2,4-cyclodiphosphate synthase"  
"NT-P03\_00022" 25480 "s63E6H2" 0 "2-C-methyl-D-erythritol 2,4-cyclodiphosphate synthase"  
"NT-P03\_00023" 25481 "s59E13H2" 0 "2-C-methyl-D-erythritol 4-phosphate cytidyltransferase"  
"NT-P03\_00023" 25481 "s59E25H2" 0 "2-C-methyl-D-erythritol 4-phosphate cytidyltransferase"  
"NT-P03\_00023" 25481 "s59E5H2" 0 "2-C-methyl-D-erythritol 4-phosphate cytidyltransferase"  
"NT-P03\_00023" 25481 "s63E6H2" 0.002202641 "2-C-methyl-D-erythritol 4-phosphate cytidyltransferase"  
"NT-P03\_00024" 25482 "s59E13H2" 0 "putative PIN and TRAM-domain containing protein precursor"  
"NT-P03\_00024" 25482 "s59E25H2" 0 "putative PIN and TRAM-domain containing protein precursor"  
"NT-P03\_00024" 25482 "s59E5H2" 0 "putative PIN and TRAM-domain containing protein precursor"  
"NT-P03\_00024" 25482 "s63E6H2" 0 "putative PIN and TRAM-domain containing protein precursor"  
"NT-P03\_00025" 25483 "s59E13H2" 0 "DNA integrity scanning protein DisA"  
"NT-P03\_00025" 25483 "s59E25H2" 0 "DNA integrity scanning protein DisA"  
"NT-P03\_00025" 25483 "s59E5H2" 0 "DNA integrity scanning protein DisA"  
"NT-P03\_00025" 25483 "s63E6H2" 0 "DNA integrity scanning protein DisA"  
"NT-P03\_00026" 25484 "s59E13H2" 0 "hypothetical protein"  
"NT-P03\_00026" 25484 "s59E25H2" 0 "hypothetical protein"  
"NT-P03\_00026" 25484 "s59E5H2" 0 "hypothetical protein"  
"NT-P03\_00026" 25484 "s63E6H2" 0 "hypothetical protein"  
"NT-P03\_00027" 25485 "s59E13H2" 0 "Rod shape-determining protein MreB"  
"NT-P03\_00027" 25485 "s59E25H2" 0 "Rod shape-determining protein MreB"  
"NT-P03\_00027" 25485 "s59E5H2" 0 "Rod shape-determining protein MreB"  
"NT-P03\_00027" 25485 "s63E6H2" 0 "Rod shape-determining protein MreB"  
"NT-P03\_00028" 25486 "s59E13H2" 0 "UDP-N-acetylglucosamine 1-carboxyvinyltransferase 1"  
"NT-P03\_00028" 25486 "s59E25H2" 0 "UDP-N-acetylglucosamine 1-carboxyvinyltransferase 1"  
"NT-P03\_00028" 25486 "s59E5H2" 0 "UDP-N-acetylglucosamine 1-carboxyvinyltransferase 1"  
"NT-P03\_00028" 25486 "s63E6H2" 0 "UDP-N-acetylglucosamine 1-carboxyvinyltransferase 1"  
"NT-P03\_00029" 25487 "s59E13H2" 0 "peptidylprolyl isomerase"

"NT-P03\_00029" 25487 "s59E25H2" 0 "peptidylprolyl isomerase"  
"NT-P03\_00029" 25487 "s59E5H2" 0 "peptidylprolyl isomerase"  
"NT-P03\_00029" 25487 "s63E6H2" 0 "peptidylprolyl isomerase"  
"NT-P03\_00030" 25488 "s59E13H2" 0 "Transcription-repair-coupling factor"  
"NT-P03\_00030" 25488 "s59E25H2" 0 "Transcription-repair-coupling factor"  
"NT-P03\_00030" 25488 "s59E5H2" 0 "Transcription-repair-coupling factor"  
"NT-P03\_00030" 25488 "s63E6H2" 0.01163879 "Transcription-repair-coupling factor"  
"NT-P03\_00031" 25489 "s59E13H2" 0 "Peptide chain release factor 1"  
"NT-P03\_00031" 25489 "s59E25H2" 0 "Peptide chain release factor 1"  
"NT-P03\_00031" 25489 "s59E5H2" 0 "Peptide chain release factor 1"  
"NT-P03\_00031" 25489 "s63E6H2" 0.01535432 "Peptide chain release factor 1"  
"NT-P03\_00032" 25490 "s59E13H2" 0 "hypothetical protein"  
"NT-P03\_00032" 25490 "s59E25H2" 0 "hypothetical protein"  
"NT-P03\_00032" 25490 "s59E5H2" 0 "hypothetical protein"  
"NT-P03\_00032" 25490 "s63E6H2" 0.006121802 "hypothetical protein"  
"NT-P03\_00033" 25491 "s59E13H2" 0 "Oligopeptide transport ATP-binding protein OppF"  
"NT-P03\_00033" 25491 "s59E25H2" 0 "Oligopeptide transport ATP-binding protein OppF"  
"NT-P03\_00033" 25491 "s59E5H2" 0.02657842 "Oligopeptide transport ATP-binding protein OppF"  
"NT-P03\_00033" 25491 "s63E6H2" 0.1567145 "Oligopeptide transport ATP-binding protein OppF"  
"NT-P03\_00034" 25492 "s59E13H2" 0 "Oligopeptide transport ATP-binding protein OppD"  
"NT-P03\_00034" 25492 "s59E25H2" 0 "Oligopeptide transport ATP-binding protein OppD"  
"NT-P03\_00034" 25492 "s59E5H2" 0.00403685 "Oligopeptide transport ATP-binding protein OppD"  
"NT-P03\_00034" 25492 "s63E6H2" 0.1097167 "Oligopeptide transport ATP-binding protein OppD"  
"NT-P03\_00035" 25493 "s59E13H2" 0 "Phosphoribosylaminoimidazole-succinocarboxamide synthase"  
"NT-P03\_00035" 25493 "s59E25H2" 0 "Phosphoribosylaminoimidazole-succinocarboxamide synthase"  
"NT-P03\_00035" 25493 "s59E5H2" 0 "Phosphoribosylaminoimidazole-succinocarboxamide synthase"  
"NT-P03\_00035" 25493 "s63E6H2" 0.003377383 "Phosphoribosylaminoimidazole-succinocarboxamide synthase"  
"NT-P03\_00036" 25494 "s59E13H2" 0 "CRISPR-associated endonuclease Cas9"  
"NT-P03\_00036" 25494 "s59E25H2" 0 "CRISPR-associated endonuclease Cas9"  
"NT-P03\_00036" 25494 "s59E5H2" 0 "CRISPR-associated endonuclease Cas9"  
"NT-P03\_00036" 25494 "s63E6H2" 0 "CRISPR-associated endonuclease Cas9"  
"NT-P03\_00037" 25495 "s59E13H2" 0 "putative acrEF/envCD operon repressor"  
"NT-P03\_00037" 25495 "s59E25H2" 0 "putative acrEF/envCD operon repressor"  
"NT-P03\_00037" 25495 "s59E5H2" 0 "putative acrEF/envCD operon repressor"  
"NT-P03\_00037" 25495 "s63E6H2" 0.01118289 "putative acrEF/envCD operon repressor"  
"NT-P03\_00038" 25496 "s59E13H2" 0 "10 kDa chaperonin"  
"NT-P03\_00038" 25496 "s59E25H2" 0 "10 kDa chaperonin"  
"NT-P03\_00038" 25496 "s59E5H2" 0 "10 kDa chaperonin"  
"NT-P03\_00038" 25496 "s63E6H2" 0.5358295 "10 kDa chaperonin"  
"NT-P03\_00039" 25497 "s59E13H2" 0.005324034 "60 kDa chaperonin"  
"NT-P03\_00039" 25497 "s59E25H2" 0 "60 kDa chaperonin"  
"NT-P03\_00039" 25497 "s59E5H2" 0.002411745 "60 kDa chaperonin"  
"NT-P03\_00039" 25497 "s63E6H2" 2.709716 "60 kDa chaperonin"  
"NT-P03\_00040" 25498 "s59E13H2" 0.0003392972 "DNA-directed RNA polymerase subunit omega"  
"NT-P03\_00040" 25498 "s59E25H2" 0 "DNA-directed RNA polymerase subunit omega"  
"NT-P03\_00040" 25498 "s59E5H2" 0 "DNA-directed RNA polymerase subunit omega"  
"NT-P03\_00040" 25498 "s63E6H2" 0.009959161 "DNA-directed RNA polymerase subunit omega"

"NT-P03\_00041" 25499 "s59E13H2" 0.007935254 "Cold shock-like protein CspLA"  
"NT-P03\_00041" 25499 "s59E25H2" 0 "Cold shock-like protein CspLA"  
"NT-P03\_00041" 25499 "s59E5H2" 0 "Cold shock-like protein CspLA"  
"NT-P03\_00041" 25499 "s63E6H2" 0 "Cold shock-like protein CspLA"  
"NT-P03\_00044" 25502 "s59E13H2" 0 "hypothetical protein"  
"NT-P03\_00044" 25502 "s59E25H2" 0 "hypothetical protein"  
"NT-P03\_00044" 25502 "s59E5H2" 0 "hypothetical protein"  
"NT-P03\_00044" 25502 "s63E6H2" 0.003147434 "hypothetical protein"  
"NT-P03\_00045" 25503 "s59E13H2" 0 "Alpha-aminoadipate--LysW ligase LysX"  
"NT-P03\_00045" 25503 "s59E25H2" 0 "Alpha-aminoadipate--LysW ligase LysX"  
"NT-P03\_00045" 25503 "s59E5H2" 0 "Alpha-aminoadipate--LysW ligase LysX"  
"NT-P03\_00045" 25503 "s63E6H2" 0 "Alpha-aminoadipate--LysW ligase LysX"  
"NT-P03\_00046" 25504 "s59E13H2" 0.0048919 "Bifunctional IPC transferase and DIPP synthase"  
"NT-P03\_00046" 25504 "s59E25H2" 0 "Bifunctional IPC transferase and DIPP synthase"  
"NT-P03\_00046" 25504 "s59E5H2" 0 "Bifunctional IPC transferase and DIPP synthase"  
"NT-P03\_00046" 25504 "s63E6H2" 0.006944016 "Bifunctional IPC transferase and DIPP synthase"  
"NT-P03\_00047" 25505 "s59E13H2" 0.009305597 "D-alanine--D-alanine ligase"  
"NT-P03\_00047" 25505 "s59E25H2" 0 "D-alanine--D-alanine ligase"  
"NT-P03\_00047" 25505 "s59E5H2" 0.002005071 "D-alanine--D-alanine ligase"  
"NT-P03\_00047" 25505 "s63E6H2" 0.003071738 "D-alanine--D-alanine ligase"  
"NT-P03\_00049" 25507 "s59E13H2" 0 "Major Facilitator Superfamily protein"  
"NT-P03\_00049" 25507 "s59E25H2" 0 "Major Facilitator Superfamily protein"  
"NT-P03\_00049" 25507 "s59E5H2" 0 "Major Facilitator Superfamily protein"  
"NT-P03\_00049" 25507 "s63E6H2" 0 "Major Facilitator Superfamily protein"  
"NT-P03\_00050" 25508 "s59E13H2" 0.006793545 "Major Facilitator Superfamily protein"  
"NT-P03\_00050" 25508 "s59E25H2" 0 "Major Facilitator Superfamily protein"  
"NT-P03\_00050" 25508 "s59E5H2" 0 "Major Facilitator Superfamily protein"  
"NT-P03\_00050" 25508 "s63E6H2" 0 "Major Facilitator Superfamily protein"  
"NT-P03\_00051" 25509 "s59E13H2" 0 "DNA utilization protein GntX"  
"NT-P03\_00051" 25509 "s59E25H2" 0 "DNA utilization protein GntX"  
"NT-P03\_00051" 25509 "s59E5H2" 0 "DNA utilization protein GntX"  
"NT-P03\_00051" 25509 "s63E6H2" 0.004077373 "DNA utilization protein GntX"  
"NT-P03\_00052" 25510 "s59E13H2" 0 "Cold shock protein CspC"  
"NT-P03\_00052" 25510 "s59E25H2" 0 "Cold shock protein CspC"  
"NT-P03\_00052" 25510 "s59E5H2" 0 "Cold shock protein CspC"  
"NT-P03\_00052" 25510 "s63E6H2" 0 "Cold shock protein CspC"  
"NT-P03\_00053" 25511 "s59E13H2" 0 "Ribosome-associated factor Y"  
"NT-P03\_00053" 25511 "s59E25H2" 0 "Ribosome-associated factor Y"  
"NT-P03\_00053" 25511 "s59E5H2" 0 "Ribosome-associated factor Y"  
"NT-P03\_00053" 25511 "s63E6H2" 0.02074244 "Ribosome-associated factor Y"  
"NT-P03\_00054" 25512 "s59E13H2" 0 "PTS system fructose-specific EIIBC component"  
"NT-P03\_00054" 25512 "s59E25H2" 0 "PTS system fructose-specific EIIBC component"  
"NT-P03\_00054" 25512 "s59E5H2" 0 "PTS system fructose-specific EIIBC component"  
"NT-P03\_00054" 25512 "s63E6H2" 0.0553402 "PTS system fructose-specific EIIBC component"  
"NT-P03\_00055" 25513 "s59E13H2" 0 "Bifunctional protein GlmU"  
"NT-P03\_00055" 25513 "s59E25H2" 0 "Bifunctional protein GlmU"  
"NT-P03\_00055" 25513 "s59E5H2" 0 "Bifunctional protein GlmU"

"NT-P03\_00055" 25513 "s63E6H2" 0.03306311 "Bifunctional protein GlmU"  
"NT-P03\_00056" 25514 "s59E13H2" 0 "S-adenosylmethionine synthase"  
"NT-P03\_00056" 25514 "s59E25H2" 0 "S-adenosylmethionine synthase"  
"NT-P03\_00056" 25514 "s59E5H2" 0.003414482 "S-adenosylmethionine synthase"  
"NT-P03\_00056" 25514 "s63E6H2" 0.05301521 "S-adenosylmethionine synthase"  
"NT-P03\_00057" 25515 "s59E13H2" 0 "Penicillin-binding protein 2D"  
"NT-P03\_00057" 25515 "s59E25H2" 0 "Penicillin-binding protein 2D"  
"NT-P03\_00057" 25515 "s59E5H2" 0.001378075 "Penicillin-binding protein 2D"  
"NT-P03\_00057" 25515 "s63E6H2" 0.03800572 "Penicillin-binding protein 2D"  
"NT-P03\_00058" 25516 "s59E13H2" 0 "putative FAD-linked oxidoreductase"  
"NT-P03\_00058" 25516 "s59E25H2" 0 "putative FAD-linked oxidoreductase"  
"NT-P03\_00058" 25516 "s59E5H2" 0 "putative FAD-linked oxidoreductase"  
"NT-P03\_00058" 25516 "s63E6H2" 0.04823249 "putative FAD-linked oxidoreductase"  
"NT-P03\_00059" 25517 "s59E13H2" 0 "Xylose isomerase-like TIM barrel"  
"NT-P03\_00059" 25517 "s59E25H2" 0 "Xylose isomerase-like TIM barrel"  
"NT-P03\_00059" 25517 "s59E5H2" 0.01092445 "Xylose isomerase-like TIM barrel"  
"NT-P03\_00059" 25517 "s63E6H2" 0.08115196 "Xylose isomerase-like TIM barrel"  
"NT-P03\_00060" 25518 "s59E13H2" 0 "Septum site-determining protein DivIVA"  
"NT-P03\_00060" 25518 "s59E25H2" 0 "Septum site-determining protein DivIVA"  
"NT-P03\_00060" 25518 "s59E5H2" 0.02820356 "Septum site-determining protein DivIVA"  
"NT-P03\_00060" 25518 "s63E6H2" 0.04441069 "Septum site-determining protein DivIVA"  
"NT-P03\_00061" 25519 "s59E13H2" 0 "Pyrroline-5-carboxylate reductase"  
"NT-P03\_00061" 25519 "s59E25H2" 0 "Pyrroline-5-carboxylate reductase"  
"NT-P03\_00061" 25519 "s59E5H2" 0.01655324 "Pyrroline-5-carboxylate reductase"  
"NT-P03\_00061" 25519 "s63E6H2" 0.00881384 "Pyrroline-5-carboxylate reductase"  
"NT-P03\_00062" 25520 "s59E13H2" 0 "FMN reductase [NAD(P)H]"  
"NT-P03\_00062" 25520 "s59E25H2" 0 "FMN reductase [NAD(P)H]"  
"NT-P03\_00062" 25520 "s59E5H2" 0 "FMN reductase [NAD(P)H]"  
"NT-P03\_00062" 25520 "s63E6H2" 0.008800832 "FMN reductase [NAD(P)H]"  
"NT-P03\_00063" 25521 "s59E13H2" 0 "Major Facilitator Superfamily protein"  
"NT-P03\_00063" 25521 "s59E25H2" 0 "Major Facilitator Superfamily protein"  
"NT-P03\_00063" 25521 "s59E5H2" 0 "Major Facilitator Superfamily protein"  
"NT-P03\_00063" 25521 "s63E6H2" 0.001152648 "Major Facilitator Superfamily protein"  
"NT-P03\_00064" 25522 "s59E13H2" 0 "putative transporter"  
"NT-P03\_00064" 25522 "s59E25H2" 0 "putative transporter"  
"NT-P03\_00064" 25522 "s59E5H2" 0 "putative transporter"  
"NT-P03\_00064" 25522 "s63E6H2" 0.008757436 "putative transporter"  
"NT-P03\_00067" 25525 "s59E13H2" 0 "Group II intron-encoded protein LtrA"  
"NT-P03\_00067" 25525 "s59E25H2" 0 "Group II intron-encoded protein LtrA"  
"NT-P03\_00067" 25525 "s59E5H2" 0 "Group II intron-encoded protein LtrA"  
"NT-P03\_00067" 25525 "s63E6H2" 0 "Group II intron-encoded protein LtrA"  
"NT-P03\_00068" 25526 "s59E13H2" 0 "hypothetical protein"  
"NT-P03\_00068" 25526 "s59E25H2" 0 "hypothetical protein"  
"NT-P03\_00068" 25526 "s59E5H2" 0 "hypothetical protein"  
"NT-P03\_00068" 25526 "s63E6H2" 0 "hypothetical protein"  
"NT-P03\_00069" 25527 "s59E13H2" 0 "Cupin domain protein"  
"NT-P03\_00069" 25527 "s59E25H2" 0 "Cupin domain protein"

"NT-P03\_00069" 25527 "s59E5H2" 0 "Cupin domain protein"  
"NT-P03\_00069" 25527 "s63E6H2" 0 "Cupin domain protein"  
"NT-P03\_00070" 25528 "s59E13H2" 0 "putative kinase inhibitor protein"  
"NT-P03\_00070" 25528 "s59E25H2" 0 "putative kinase inhibitor protein"  
"NT-P03\_00070" 25528 "s59E5H2" 0 "putative kinase inhibitor protein"  
"NT-P03\_00070" 25528 "s63E6H2" 0 "putative kinase inhibitor protein"  
"NT-P03\_00071" 25529 "s59E13H2" 0 "hypothetical protein"  
"NT-P03\_00071" 25529 "s59E25H2" 0 "hypothetical protein"  
"NT-P03\_00071" 25529 "s59E5H2" 0 "hypothetical protein"  
"NT-P03\_00071" 25529 "s63E6H2" 0 "hypothetical protein"  
"NT-P03\_00072" 25530 "s59E13H2" 0 "putative methyltransferase YcgJ"  
"NT-P03\_00072" 25530 "s59E25H2" 0 "putative methyltransferase YcgJ"  
"NT-P03\_00072" 25530 "s59E5H2" 0.009630541 "putative methyltransferase YcgJ"  
"NT-P03\_00072" 25530 "s63E6H2" 0 "putative methyltransferase YcgJ"  
"NT-P03\_00073" 25531 "s59E13H2" 0 "2-oxoglutaramate amidase"  
"NT-P03\_00073" 25531 "s59E25H2" 0 "2-oxoglutaramate amidase"  
"NT-P03\_00073" 25531 "s59E5H2" 0 "2-oxoglutaramate amidase"  
"NT-P03\_00073" 25531 "s63E6H2" 0.01189364 "2-oxoglutaramate amidase"  
"NT-P03\_00074" 25532 "s59E13H2" 0 "(S)-2-haloacid dehalogenase 4A"  
"NT-P03\_00074" 25532 "s59E25H2" 0 "(S)-2-haloacid dehalogenase 4A"  
"NT-P03\_00074" 25532 "s59E5H2" 0 "(S)-2-haloacid dehalogenase 4A"  
"NT-P03\_00074" 25532 "s63E6H2" 0.01328633 "(S)-2-haloacid dehalogenase 4A"  
"NT-P03\_00075" 25533 "s59E13H2" 0 "Fe/S biogenesis protein NfuA"  
"NT-P03\_00075" 25533 "s59E25H2" 0 "Fe/S biogenesis protein NfuA"  
"NT-P03\_00075" 25533 "s59E5H2" 0 "Fe/S biogenesis protein NfuA"  
"NT-P03\_00075" 25533 "s63E6H2" 0.05312532 "Fe/S biogenesis protein NfuA"  
"NT-P03\_00077" 25535 "s59E13H2" 0 "Peptide chain release factor 1"  
"NT-P03\_00077" 25535 "s59E25H2" 0 "Peptide chain release factor 1"  
"NT-P03\_00077" 25535 "s59E5H2" 0 "Peptide chain release factor 1"  
"NT-P03\_00077" 25535 "s63E6H2" 0.0100255 "Peptide chain release factor 1"  
"NT-P03\_00078" 25536 "s59E13H2" 0 "Putative transposase"  
"NT-P03\_00078" 25536 "s59E25H2" 0 "Putative transposase"  
"NT-P03\_00078" 25536 "s59E5H2" 0 "Putative transposase"  
"NT-P03\_00078" 25536 "s63E6H2" 0 "Putative transposase"  
"NT-P03\_00080" 25538 "s59E13H2" 0 "Lactose transport system permease protein LacF"  
"NT-P03\_00080" 25538 "s59E25H2" 0 "Lactose transport system permease protein LacF"  
"NT-P03\_00080" 25538 "s59E5H2" 0 "Lactose transport system permease protein LacF"  
"NT-P03\_00080" 25538 "s63E6H2" 0 "Lactose transport system permease protein LacF"  
"NT-P03\_00082" 25540 "s59E13H2" 0 "L-arabinose transport system permease protein AraQ"  
"NT-P03\_00082" 25540 "s59E25H2" 0 "L-arabinose transport system permease protein AraQ"  
"NT-P03\_00082" 25540 "s59E5H2" 0 "L-arabinose transport system permease protein AraQ"  
"NT-P03\_00082" 25540 "s63E6H2" 0 "L-arabinose transport system permease protein AraQ"  
"NT-P03\_00083" 25541 "s59E13H2" 0 "hypothetical protein"  
"NT-P03\_00083" 25541 "s59E25H2" 0 "hypothetical protein"  
"NT-P03\_00083" 25541 "s59E5H2" 0 "hypothetical protein"  
"NT-P03\_00083" 25541 "s63E6H2" 0 "hypothetical protein"  
"NT-P03\_00085" 25543 "s59E13H2" 0 "Methylcobamide:CoM methyltransferase MtbA"

"NT-P03\_00085" 25543 "s59E25H2" 0 "Methylcobamide:CoM methyltransferase MtbA"  
"NT-P03\_00085" 25543 "s59E5H2" 0 "Methylcobamide:CoM methyltransferase MtbA"  
"NT-P03\_00085" 25543 "s63E6H2" 0 "Methylcobamide:CoM methyltransferase MtbA"  
"NT-P03\_00086" 25544 "s59E13H2" 0.190126 "Putative transposase"  
"NT-P03\_00086" 25544 "s59E25H2" 0 "Putative transposase"  
"NT-P03\_00086" 25544 "s59E5H2" 0.08145223 "Putative transposase"  
"NT-P03\_00086" 25544 "s63E6H2" 0.01080195 "Putative transposase"  
"NT-P03\_00087" 25545 "s59E13H2" 0.1602362 "hypothetical protein"  
"NT-P03\_00087" 25545 "s59E25H2" 0 "hypothetical protein"  
"NT-P03\_00087" 25545 "s59E5H2" 0.06514715 "hypothetical protein"  
"NT-P03\_00087" 25545 "s63E6H2" 0.0213338 "hypothetical protein"  
"NT-P03\_00088" 25546 "s59E13H2" 0.002734677 "Methylcobamide:CoM methyltransferase MtbA"  
"NT-P03\_00088" 25546 "s59E25H2" 0 "Methylcobamide:CoM methyltransferase MtbA"  
"NT-P03\_00088" 25546 "s59E5H2" 0.0004948636 "Methylcobamide:CoM methyltransferase MtbA"  
"NT-P03\_00088" 25546 "s63E6H2" 0.0004453692 "Methylcobamide:CoM methyltransferase MtbA"  
"NT-P03\_00089" 25547 "s59E13H2" 0 "Uroporphyrinogen decarboxylase (URO-D)"  
"NT-P03\_00089" 25547 "s59E25H2" 0 "Uroporphyrinogen decarboxylase (URO-D)"  
"NT-P03\_00089" 25547 "s59E5H2" 0 "Uroporphyrinogen decarboxylase (URO-D)"  
"NT-P03\_00089" 25547 "s63E6H2" 0 "Uroporphyrinogen decarboxylase (URO-D)"  
"NT-P03\_00090" 25548 "s59E13H2" 0 "L-fucose mutarotase"  
"NT-P03\_00090" 25548 "s59E25H2" 0 "L-fucose mutarotase"  
"NT-P03\_00090" 25548 "s59E5H2" 0 "L-fucose mutarotase"  
"NT-P03\_00090" 25548 "s63E6H2" 0 "L-fucose mutarotase"  
"NT-P03\_00091" 25549 "s59E13H2" 0 "L-fucose mutarotase"  
"NT-P03\_00091" 25549 "s59E25H2" 0 "L-fucose mutarotase"  
"NT-P03\_00091" 25549 "s59E5H2" 0 "L-fucose mutarotase"  
"NT-P03\_00091" 25549 "s63E6H2" 0 "L-fucose mutarotase"  
"NT-P03\_00092" 25550 "s59E13H2" 0 "Trimethylamine methyltransferase MttB"  
"NT-P03\_00092" 25550 "s59E25H2" 0 "Trimethylamine methyltransferase MttB"  
"NT-P03\_00092" 25550 "s59E5H2" 0 "Trimethylamine methyltransferase MttB"  
"NT-P03\_00092" 25550 "s63E6H2" 0.003995892 "Trimethylamine methyltransferase MttB"  
"NT-P03\_00093" 25551 "s59E13H2" 0 "Beta-galactosidase"  
"NT-P03\_00093" 25551 "s59E25H2" 0 "Beta-galactosidase"  
"NT-P03\_00093" 25551 "s59E5H2" 0 "Beta-galactosidase"  
"NT-P03\_00093" 25551 "s63E6H2" 0.003176039 "Beta-galactosidase"  
"NT-P03\_00094" 25552 "s59E13H2" 0 "Beta-galactosidase"  
"NT-P03\_00094" 25552 "s59E25H2" 0 "Beta-galactosidase"  
"NT-P03\_00094" 25552 "s59E5H2" 0 "Beta-galactosidase"  
"NT-P03\_00094" 25552 "s63E6H2" 0.005507475 "Beta-galactosidase"  
"NT-P03\_00095" 25553 "s59E13H2" 0 "hypothetical protein"  
"NT-P03\_00095" 25553 "s59E25H2" 0 "hypothetical protein"  
"NT-P03\_00095" 25553 "s59E5H2" 0.001832631 "hypothetical protein"  
"NT-P03\_00095" 25553 "s63E6H2" 0.5030304 "hypothetical protein"  
"NT-P03\_00096" 25554 "s59E13H2" 0 "Glycosyl hydrolases family 43"  
"NT-P03\_00096" 25554 "s59E25H2" 0.3333333 "Glycosyl hydrolases family 43"  
"NT-P03\_00096" 25554 "s59E5H2" 0.009335108 "Glycosyl hydrolases family 43"  
"NT-P03\_00096" 25554 "s63E6H2" 6.084968 "Glycosyl hydrolases family 43"

"NT-P03\_00097" 25555 "s59E13H2" 0 "methylcobalamin:coenzyme M methyltransferase"  
"NT-P03\_00097" 25555 "s59E25H2" 0.2354049 "methylcobalamin:coenzyme M methyltransferase"  
"NT-P03\_00097" 25555 "s59E5H2" 0 "methylcobalamin:coenzyme M methyltransferase"  
"NT-P03\_00097" 25555 "s63E6H2" 7.417472 "methylcobalamin:coenzyme M methyltransferase"  
"NT-P03\_00098" 25556 "s59E13H2" 0 "3-hexulose-6-phosphate isomerase"  
"NT-P03\_00098" 25556 "s59E25H2" 0.3678756 "3-hexulose-6-phosphate isomerase"  
"NT-P03\_00098" 25556 "s59E5H2" 0.005963902 "3-hexulose-6-phosphate isomerase"  
"NT-P03\_00098" 25556 "s63E6H2" 9.024595 "3-hexulose-6-phosphate isomerase"  
"NT-P03\_00099" 25557 "s59E13H2" 0 "hypothetical protein"  
"NT-P03\_00099" 25557 "s59E25H2" 0 "hypothetical protein"  
"NT-P03\_00099" 25557 "s59E5H2" 0.01500247 "hypothetical protein"  
"NT-P03\_00099" 25557 "s63E6H2" 5.049424 "hypothetical protein"  
"NT-P03\_00100" 25558 "s59E13H2" 0 "hypothetical protein"  
"NT-P03\_00100" 25558 "s59E25H2" 0 "hypothetical protein"  
"NT-P03\_00100" 25558 "s59E5H2" 0.006196876 "hypothetical protein"  
"NT-P03\_00100" 25558 "s63E6H2" 6.361283 "hypothetical protein"  
"NT-P03\_00102" 25560 "s59E13H2" 0 "Methylcobamide:CoM methyltransferase MtbA"  
"NT-P03\_00102" 25560 "s59E25H2" 0 "Methylcobamide:CoM methyltransferase MtbA"  
"NT-P03\_00102" 25560 "s59E5H2" 0 "Methylcobamide:CoM methyltransferase MtbA"  
"NT-P03\_00102" 25560 "s63E6H2" 1.137319 "Methylcobamide:CoM methyltransferase MtbA"  
"NT-P03\_00104" 25562 "s59E13H2" 0 "Plasmid pRiA4b ORF-3-like protein"  
"NT-P03\_00104" 25562 "s59E25H2" 0 "Plasmid pRiA4b ORF-3-like protein"  
"NT-P03\_00104" 25562 "s59E5H2" 0 "Plasmid pRiA4b ORF-3-like protein"  
"NT-P03\_00104" 25562 "s63E6H2" 0.3222783 "Plasmid pRiA4b ORF-3-like protein"  
"NT-P03\_00105" 25563 "s59E13H2" 0 "Plasmid pRiA4b ORF-3-like protein"  
"NT-P03\_00105" 25563 "s59E25H2" 0 "Plasmid pRiA4b ORF-3-like protein"  
"NT-P03\_00105" 25563 "s59E5H2" 0 "Plasmid pRiA4b ORF-3-like protein"  
"NT-P03\_00105" 25563 "s63E6H2" 0.3369422 "Plasmid pRiA4b ORF-3-like protein"  
"NT-P03\_00106" 25564 "s59E13H2" 0 "hypothetical protein"  
"NT-P03\_00106" 25564 "s59E25H2" 0 "hypothetical protein"  
"NT-P03\_00106" 25564 "s59E5H2" 0 "hypothetical protein"  
"NT-P03\_00106" 25564 "s63E6H2" 3.820217 "hypothetical protein"  
"NT-P03\_00107" 25565 "s59E13H2" 0 "hypothetical protein"  
"NT-P03\_00107" 25565 "s59E25H2" 0 "hypothetical protein"  
"NT-P03\_00107" 25565 "s59E5H2" 0 "hypothetical protein"  
"NT-P03\_00107" 25565 "s63E6H2" 1.00207 "hypothetical protein"  
"NT-P03\_00108" 25566 "s59E13H2" 0 "PIN domain protein"  
"NT-P03\_00108" 25566 "s59E25H2" 0 "PIN domain protein"  
"NT-P03\_00108" 25566 "s59E5H2" 0 "PIN domain protein"  
"NT-P03\_00108" 25566 "s63E6H2" 0.8432596 "PIN domain protein"  
"NT-P03\_00109" 25567 "s59E13H2" 0 "4-hydroxy-tetrahydrodipicolinate synthase"  
"NT-P03\_00109" 25567 "s59E25H2" 0.5681558 "4-hydroxy-tetrahydrodipicolinate synthase"  
"NT-P03\_00109" 25567 "s59E5H2" 0 "4-hydroxy-tetrahydrodipicolinate synthase"  
"NT-P03\_00109" 25567 "s63E6H2" 1.206241 "4-hydroxy-tetrahydrodipicolinate synthase"  
"NT-P03\_00110" 25568 "s59E13H2" 0 "Diaminopimelate decarboxylase"  
"NT-P03\_00110" 25568 "s59E25H2" 0 "Diaminopimelate decarboxylase"  
"NT-P03\_00110" 25568 "s59E5H2" 0 "Diaminopimelate decarboxylase"



"NT-P03\_00110" 25568 "s63E6H2" 0.5027004 "Diaminopimelate decarboxylase"  
"NT-P03\_00111" 25569 "s59E13H2" 0 "Argininosuccinate lyase"  
"NT-P03\_00111" 25569 "s59E25H2" 0 "Argininosuccinate lyase"  
"NT-P03\_00111" 25569 "s59E5H2" 0 "Argininosuccinate lyase"  
"NT-P03\_00111" 25569 "s63E6H2" 0.4131851 "Argininosuccinate lyase"  
"NT-P03\_00112" 25570 "s59E13H2" 0 "L-threonine 3-dehydrogenase"  
"NT-P03\_00112" 25570 "s59E25H2" 0 "L-threonine 3-dehydrogenase"  
"NT-P03\_00112" 25570 "s59E5H2" 0 "L-threonine 3-dehydrogenase"  
"NT-P03\_00112" 25570 "s63E6H2" 0.004140206 "L-threonine 3-dehydrogenase"  
"NT-P03\_00113" 25571 "s59E13H2" 0 "dTDP-4-oxo-6-deoxy-D-allose reductase"  
"NT-P03\_00113" 25571 "s59E25H2" 0 "dTDP-4-oxo-6-deoxy-D-allose reductase"  
"NT-P03\_00113" 25571 "s59E5H2" 0.01645267 "dTDP-4-oxo-6-deoxy-D-allose reductase"  
"NT-P03\_00113" 25571 "s63E6H2" 0.02085158 "dTDP-4-oxo-6-deoxy-D-allose reductase"  
"NT-P03\_00114" 25572 "s59E13H2" 0 "hypothetical protein"  
"NT-P03\_00114" 25572 "s59E25H2" 0 "hypothetical protein"  
"NT-P03\_00114" 25572 "s59E5H2" 0.03079975 "hypothetical protein"  
"NT-P03\_00114" 25572 "s63E6H2" 0.008096206 "hypothetical protein"  
"NT-P03\_00115" 25573 "s59E13H2" 0 "Sulfate permease CysP"  
"NT-P03\_00115" 25573 "s59E25H2" 0 "Sulfate permease CysP"  
"NT-P03\_00115" 25573 "s59E5H2" 0.03889763 "Sulfate permease CysP"  
"NT-P03\_00115" 25573 "s63E6H2" 0.003289659 "Sulfate permease CysP"  
"NT-P03\_00116" 25574 "s59E13H2" 0 "Nucleotidyltransferase domain protein"  
"NT-P03\_00116" 25574 "s59E25H2" 0 "Nucleotidyltransferase domain protein"  
"NT-P03\_00116" 25574 "s59E5H2" 0.06865688 "Nucleotidyltransferase domain protein"  
"NT-P03\_00116" 25574 "s63E6H2" 0 "Nucleotidyltransferase domain protein"  
"NT-P03\_00117" 25575 "s59E13H2" 0 "hypothetical protein"  
"NT-P03\_00117" 25575 "s59E25H2" 0 "hypothetical protein"  
"NT-P03\_00117" 25575 "s59E5H2" 0.01163093 "hypothetical protein"  
"NT-P03\_00117" 25575 "s63E6H2" 0 "hypothetical protein"  
"NT-P03\_00119" 25577 "s59E13H2" 0 "putative sugar kinase"  
"NT-P03\_00119" 25577 "s59E25H2" 0 "putative sugar kinase"  
"NT-P03\_00119" 25577 "s59E5H2" 0 "putative sugar kinase"  
"NT-P03\_00119" 25577 "s63E6H2" 0 "putative sugar kinase"  
"NT-P03\_00120" 25578 "s59E13H2" 0 "HTH-type transcriptional repressor PurR"  
"NT-P03\_00120" 25578 "s59E25H2" 0 "HTH-type transcriptional repressor PurR"  
"NT-P03\_00120" 25578 "s59E5H2" 0 "HTH-type transcriptional repressor PurR"  
"NT-P03\_00120" 25578 "s63E6H2" 0.002930981 "HTH-type transcriptional repressor PurR"  
"NT-P03\_00121" 25579 "s59E13H2" 0 "Xaa-Pro dipeptidase"  
"NT-P03\_00121" 25579 "s59E25H2" 0 "Xaa-Pro dipeptidase"  
"NT-P03\_00121" 25579 "s59E5H2" 0 "Xaa-Pro dipeptidase"  
"NT-P03\_00121" 25579 "s63E6H2" 0 "Xaa-Pro dipeptidase"  
"NT-P03\_00122" 25580 "s59E13H2" 0 "L-Ala-D/L-Glu epimerase"  
"NT-P03\_00122" 25580 "s59E25H2" 0 "L-Ala-D/L-Glu epimerase"  
"NT-P03\_00122" 25580 "s59E5H2" 0 "L-Ala-D/L-Glu epimerase"  
"NT-P03\_00122" 25580 "s63E6H2" 0 "L-Ala-D/L-Glu epimerase"  
"NT-P03\_00123" 25581 "s59E13H2" 0 "Alpha-L-fucosidase"  
"NT-P03\_00123" 25581 "s59E25H2" 0 "Alpha-L-fucosidase"

"NT-P03\_00123" 25581 "s59E5H2" 0 "Alpha-L-fucosidase"  
"NT-P03\_00123" 25581 "s63E6H2" 0 "Alpha-L-fucosidase"  
"NT-P03\_00124" 25582 "s59E13H2" 0 "hypothetical protein"  
"NT-P03\_00124" 25582 "s59E25H2" 0 "hypothetical protein"  
"NT-P03\_00124" 25582 "s59E5H2" 0 "hypothetical protein"  
"NT-P03\_00124" 25582 "s63E6H2" 0 "hypothetical protein"  
"NT-P03\_00125" 25583 "s59E13H2" 0 "1,5-anhydro-D-fructose reductase"  
"NT-P03\_00125" 25583 "s59E25H2" 0 "1,5-anhydro-D-fructose reductase"  
"NT-P03\_00125" 25583 "s59E5H2" 0 "1,5-anhydro-D-fructose reductase"  
"NT-P03\_00125" 25583 "s63E6H2" 0 "1,5-anhydro-D-fructose reductase"  
"NT-P03\_00126" 25584 "s59E13H2" 0 "Inosose dehydratase"  
"NT-P03\_00126" 25584 "s59E25H2" 0 "Inosose dehydratase"  
"NT-P03\_00126" 25584 "s59E5H2" 0 "Inosose dehydratase"  
"NT-P03\_00126" 25584 "s63E6H2" 0.004659455 "Inosose dehydratase"  
"NT-P03\_00127" 25585 "s59E13H2" 0 "Peptide deformylase"  
"NT-P03\_00127" 25585 "s59E25H2" 0 "Peptide deformylase"  
"NT-P03\_00127" 25585 "s59E5H2" 0 "Peptide deformylase"  
"NT-P03\_00127" 25585 "s63E6H2" 0 "Peptide deformylase"  
"NT-P03\_00128" 25586 "s59E13H2" 0 "Succinyl-CoA ligase [ADP-forming] subunit alpha"  
"NT-P03\_00128" 25586 "s59E25H2" 0 "Succinyl-CoA ligase [ADP-forming] subunit alpha"  
"NT-P03\_00128" 25586 "s59E5H2" 0 "Succinyl-CoA ligase [ADP-forming] subunit alpha"  
"NT-P03\_00128" 25586 "s63E6H2" 0 "Succinyl-CoA ligase [ADP-forming] subunit alpha"  
"NT-P03\_00129" 25587 "s59E13H2" 0 "hypothetical protein"  
"NT-P03\_00129" 25587 "s59E25H2" 0 "hypothetical protein"  
"NT-P03\_00129" 25587 "s59E5H2" 0 "hypothetical protein"  
"NT-P03\_00129" 25587 "s63E6H2" 0 "hypothetical protein"  
"NT-P03\_00130" 25588 "s59E13H2" 0 "Phosphopantetheine adenyltransferase"  
"NT-P03\_00130" 25588 "s59E25H2" 0 "Phosphopantetheine adenyltransferase"  
"NT-P03\_00130" 25588 "s59E5H2" 0 "Phosphopantetheine adenyltransferase"  
"NT-P03\_00130" 25588 "s63E6H2" 0 "Phosphopantetheine adenyltransferase"  
"NT-P03\_00131" 25589 "s59E13H2" 0 "Ribosomal RNA small subunit methyltransferase D"  
"NT-P03\_00131" 25589 "s59E25H2" 0 "Ribosomal RNA small subunit methyltransferase D"  
"NT-P03\_00131" 25589 "s59E5H2" 0 "Ribosomal RNA small subunit methyltransferase D"  
"NT-P03\_00131" 25589 "s63E6H2" 0 "Ribosomal RNA small subunit methyltransferase D"  
"NT-P03\_00132" 25590 "s59E13H2" 0 "ATP-dependent DNA helicase RecG"  
"NT-P03\_00132" 25590 "s59E25H2" 0 "ATP-dependent DNA helicase RecG"  
"NT-P03\_00132" 25590 "s59E5H2" 0 "ATP-dependent DNA helicase RecG"  
"NT-P03\_00132" 25590 "s63E6H2" 0 "ATP-dependent DNA helicase RecG"  
"NT-P03\_00133" 25591 "s59E13H2" 0 "DAK2 domain protein"  
"NT-P03\_00133" 25591 "s59E25H2" 0 "DAK2 domain protein"  
"NT-P03\_00133" 25591 "s59E5H2" 0 "DAK2 domain protein"  
"NT-P03\_00133" 25591 "s63E6H2" 0 "DAK2 domain protein"  
"NT-P03\_00134" 25592 "s59E13H2" 0 "hypothetical protein"  
"NT-P03\_00134" 25592 "s59E25H2" 0 "hypothetical protein"  
"NT-P03\_00134" 25592 "s59E5H2" 0 "hypothetical protein"  
"NT-P03\_00134" 25592 "s63E6H2" 0 "hypothetical protein"  
"NT-P03\_00136" 25594 "s59E13H2" 0 "hypothetical protein"

"NT-P03\_00136" 25594 "s59E25H2" 0 "hypothetical protein"  
"NT-P03\_00136" 25594 "s59E5H2" 0 "hypothetical protein"  
"NT-P03\_00136" 25594 "s63E6H2" 0 "hypothetical protein"  
"NT-P03\_00139" 25597 "s59E13H2" 0 "hypothetical protein"  
"NT-P03\_00139" 25597 "s59E25H2" 0 "hypothetical protein"  
"NT-P03\_00139" 25597 "s59E5H2" 0 "hypothetical protein"  
"NT-P03\_00139" 25597 "s63E6H2" 0.004293624 "hypothetical protein"  
"NT-P03\_00147" 25605 "s59E13H2" 0 "Transcriptional regulator KdgR"  
"NT-P03\_00147" 25605 "s59E25H2" 0 "Transcriptional regulator KdgR"  
"NT-P03\_00147" 25605 "s59E5H2" 0 "Transcriptional regulator KdgR"  
"NT-P03\_00147" 25605 "s63E6H2" 0 "Transcriptional regulator KdgR"  
"NT-P03\_00148" 25606 "s59E13H2" 0 "4-hydroxy-4-methyl-2-oxoglutarate aldolase"  
"NT-P03\_00148" 25606 "s59E25H2" 0 "4-hydroxy-4-methyl-2-oxoglutarate aldolase"  
"NT-P03\_00148" 25606 "s59E5H2" 0 "4-hydroxy-4-methyl-2-oxoglutarate aldolase"  
"NT-P03\_00148" 25606 "s63E6H2" 0 "4-hydroxy-4-methyl-2-oxoglutarate aldolase"  
"NT-P03\_00149" 25607 "s59E13H2" 0 "Lactose transport system permease protein LacF"  
"NT-P03\_00149" 25607 "s59E25H2" 0 "Lactose transport system permease protein LacF"  
"NT-P03\_00149" 25607 "s59E5H2" 0 "Lactose transport system permease protein LacF"  
"NT-P03\_00149" 25607 "s63E6H2" 0 "Lactose transport system permease protein LacF"  
"NT-P03\_00150" 25608 "s59E13H2" 0 "Lactose transport system permease protein LacG"  
"NT-P03\_00150" 25608 "s59E25H2" 0 "Lactose transport system permease protein LacG"  
"NT-P03\_00150" 25608 "s59E5H2" 0 "Lactose transport system permease protein LacG"  
"NT-P03\_00150" 25608 "s63E6H2" 0 "Lactose transport system permease protein LacG"  
"NT-P03\_00151" 25609 "s59E13H2" 0 "Putative ABC transporter substrate-binding protein YesO"  
"NT-P03\_00151" 25609 "s59E25H2" 0 "Putative ABC transporter substrate-binding protein YesO"  
"NT-P03\_00151" 25609 "s59E5H2" 0 "Putative ABC transporter substrate-binding protein YesO"  
"NT-P03\_00151" 25609 "s63E6H2" 0 "Putative ABC transporter substrate-binding protein YesO"  
"NT-P03\_00152" 25610 "s59E13H2" 0 "hypothetical protein"  
"NT-P03\_00152" 25610 "s59E25H2" 0 "hypothetical protein"  
"NT-P03\_00152" 25610 "s59E5H2" 0 "hypothetical protein"  
"NT-P03\_00152" 25610 "s63E6H2" 0 "hypothetical protein"  
"NT-P03\_00154" 25612 "s59E13H2" 0 "Amidohydrolase"  
"NT-P03\_00154" 25612 "s59E25H2" 0 "Amidohydrolase"  
"NT-P03\_00154" 25612 "s59E5H2" 0 "Amidohydrolase"  
"NT-P03\_00154" 25612 "s63E6H2" 0 "Amidohydrolase"  
"NT-P03\_00155" 25613 "s59E13H2" 0 "D-gluconate dehydratase"  
"NT-P03\_00155" 25613 "s59E25H2" 0 "D-gluconate dehydratase"  
"NT-P03\_00155" 25613 "s59E5H2" 0 "D-gluconate dehydratase"  
"NT-P03\_00155" 25613 "s63E6H2" 0 "D-gluconate dehydratase"  
"NT-P03\_00156" 25614 "s59E13H2" 0 "hypothetical protein"  
"NT-P03\_00156" 25614 "s59E25H2" 0 "hypothetical protein"  
"NT-P03\_00156" 25614 "s59E5H2" 0 "hypothetical protein"  
"NT-P03\_00156" 25614 "s63E6H2" 0 "hypothetical protein"  
"NT-P03\_00157" 25615 "s59E13H2" 0 "D-galactonate dehydratase"  
"NT-P03\_00157" 25615 "s59E25H2" 0 "D-galactonate dehydratase"  
"NT-P03\_00157" 25615 "s59E5H2" 0 "D-galactonate dehydratase"  
"NT-P03\_00157" 25615 "s63E6H2" 0 "D-galactonate dehydratase"

"NT-P03\_00158" 25616 "s59E13H2" 0 "3-oxoacyl-[acyl-carrier-protein] reductase FabG"  
"NT-P03\_00158" 25616 "s59E25H2" 0 "3-oxoacyl-[acyl-carrier-protein] reductase FabG"  
"NT-P03\_00158" 25616 "s59E5H2" 0 "3-oxoacyl-[acyl-carrier-protein] reductase FabG"  
"NT-P03\_00158" 25616 "s63E6H2" 0 "3-oxoacyl-[acyl-carrier-protein] reductase FabG"  
"NT-P03\_00159" 25617 "s59E13H2" 0 "putative L-ascorbate-6-phosphate lactonase UlaG"  
"NT-P03\_00159" 25617 "s59E25H2" 0 "putative L-ascorbate-6-phosphate lactonase UlaG"  
"NT-P03\_00159" 25617 "s59E5H2" 0 "putative L-ascorbate-6-phosphate lactonase UlaG"  
"NT-P03\_00159" 25617 "s63E6H2" 0 "putative L-ascorbate-6-phosphate lactonase UlaG"  
"NT-P03\_00160" 25618 "s59E13H2" 0 "putative L-ascorbate-6-phosphate lactonase UlaG"  
"NT-P03\_00160" 25618 "s59E25H2" 0 "putative L-ascorbate-6-phosphate lactonase UlaG"  
"NT-P03\_00160" 25618 "s59E5H2" 0 "putative L-ascorbate-6-phosphate lactonase UlaG"  
"NT-P03\_00160" 25618 "s63E6H2" 0 "putative L-ascorbate-6-phosphate lactonase UlaG"  
"NT-P03\_00161" 25619 "s59E13H2" 0 "putative amino-acid metabolite efflux pump"  
"NT-P03\_00161" 25619 "s59E25H2" 0 "putative amino-acid metabolite efflux pump"  
"NT-P03\_00161" 25619 "s59E5H2" 0 "putative amino-acid metabolite efflux pump"  
"NT-P03\_00161" 25619 "s63E6H2" 0 "putative amino-acid metabolite efflux pump"  
"NT-P03\_00162" 25620 "s59E13H2" 0 "hypothetical protein"  
"NT-P03\_00162" 25620 "s59E25H2" 0 "hypothetical protein"  
"NT-P03\_00162" 25620 "s59E5H2" 0 "hypothetical protein"  
"NT-P03\_00162" 25620 "s63E6H2" 0 "hypothetical protein"  
"NT-P03\_00163" 25621 "s59E13H2" 0 "Helix-turn-helix domain protein"  
"NT-P03\_00163" 25621 "s59E25H2" 0 "Helix-turn-helix domain protein"  
"NT-P03\_00163" 25621 "s59E5H2" 0 "Helix-turn-helix domain protein"  
"NT-P03\_00163" 25621 "s63E6H2" 0.09182622 "Helix-turn-helix domain protein"  
"NT-P03\_00164" 25622 "s59E13H2" 0 "Tyrosine recombinase XerD"  
"NT-P03\_00164" 25622 "s59E25H2" 0 "Tyrosine recombinase XerD"  
"NT-P03\_00164" 25622 "s59E5H2" 0 "Tyrosine recombinase XerD"  
"NT-P03\_00164" 25622 "s63E6H2" 0.03126894 "Tyrosine recombinase XerD"  
"NT-P03\_00167" 25625 "s59E13H2" 0 "hypothetical protein"  
"NT-P03\_00167" 25625 "s59E25H2" 0 "hypothetical protein"  
"NT-P03\_00167" 25625 "s59E5H2" 0 "hypothetical protein"  
"NT-P03\_00167" 25625 "s63E6H2" 0 "hypothetical protein"  
"NT-P03\_00169" 25627 "s59E13H2" 0 "Cold shock-like protein"  
"NT-P03\_00169" 25627 "s59E25H2" 0 "Cold shock-like protein"  
"NT-P03\_00169" 25627 "s59E5H2" 0 "Cold shock-like protein"  
"NT-P03\_00169" 25627 "s63E6H2" 0 "Cold shock-like protein"  
"NT-P03\_00170" 25628 "s59E13H2" 0 "hypothetical protein"  
"NT-P03\_00170" 25628 "s59E25H2" 0 "hypothetical protein"  
"NT-P03\_00170" 25628 "s59E5H2" 0 "hypothetical protein"  
"NT-P03\_00170" 25628 "s63E6H2" 0 "hypothetical protein"  
"NT-P03\_00171" 25629 "s59E13H2" 0 "excinuclease ABC subunit C"  
"NT-P03\_00171" 25629 "s59E25H2" 0 "excinuclease ABC subunit C"  
"NT-P03\_00171" 25629 "s59E5H2" 0 "excinuclease ABC subunit C"  
"NT-P03\_00171" 25629 "s63E6H2" 0 "excinuclease ABC subunit C"  
"NT-P03\_00173" 25631 "s59E13H2" 0 "putative cold shock protein A"  
"NT-P03\_00173" 25631 "s59E25H2" 0 "putative cold shock protein A"  
"NT-P03\_00173" 25631 "s59E5H2" 0 "putative cold shock protein A"

"NT-P03\_00173" 25631 "s63E6H2" 0 "putative cold shock protein A"  
"NT-P03\_00174" 25632 "s59E13H2" 0 "hypothetical protein"  
"NT-P03\_00174" 25632 "s59E25H2" 0 "hypothetical protein"  
"NT-P03\_00174" 25632 "s59E5H2" 0 "hypothetical protein"  
"NT-P03\_00174" 25632 "s63E6H2" 0 "hypothetical protein"  
"NT-P03\_00175" 25633 "s59E13H2" 0 "hypothetical protein"  
"NT-P03\_00175" 25633 "s59E25H2" 0 "hypothetical protein"  
"NT-P03\_00175" 25633 "s59E5H2" 0 "hypothetical protein"  
"NT-P03\_00175" 25633 "s63E6H2" 0 "hypothetical protein"  
"NT-P03\_00176" 25634 "s59E13H2" 0 "HNH endonuclease"  
"NT-P03\_00176" 25634 "s59E25H2" 0 "HNH endonuclease"  
"NT-P03\_00176" 25634 "s59E5H2" 0 "HNH endonuclease"  
"NT-P03\_00176" 25634 "s63E6H2" 0 "HNH endonuclease"  
"NT-P03\_00177" 25635 "s59E13H2" 0 "putative tyrosine recombinase XerC-like protein"  
"NT-P03\_00177" 25635 "s59E25H2" 0 "putative tyrosine recombinase XerC-like protein"  
"NT-P03\_00177" 25635 "s59E5H2" 0 "putative tyrosine recombinase XerC-like protein"  
"NT-P03\_00177" 25635 "s63E6H2" 0 "putative tyrosine recombinase XerC-like protein"  
"NT-P03\_00178" 25636 "s59E13H2" 0 "hypothetical protein"  
"NT-P03\_00178" 25636 "s59E25H2" 0 "hypothetical protein"  
"NT-P03\_00178" 25636 "s59E5H2" 0 "hypothetical protein"  
"NT-P03\_00178" 25636 "s63E6H2" 0 "hypothetical protein"  
"NT-P03\_00180" 25638 "s59E13H2" 0 "site-specific tyrosine recombinase XerC"  
"NT-P03\_00180" 25638 "s59E25H2" 0 "site-specific tyrosine recombinase XerC"  
"NT-P03\_00180" 25638 "s59E5H2" 0 "site-specific tyrosine recombinase XerC"  
"NT-P03\_00180" 25638 "s63E6H2" 0 "site-specific tyrosine recombinase XerC"  
"NT-P03\_00181" 25639 "s59E13H2" 0 "hypothetical protein"  
"NT-P03\_00181" 25639 "s59E25H2" 0 "hypothetical protein"  
"NT-P03\_00181" 25639 "s59E5H2" 0 "hypothetical protein"  
"NT-P03\_00181" 25639 "s63E6H2" 0 "hypothetical protein"  
"NT-P03\_00182" 25640 "s59E13H2" 0 "Modification methylase DpnIIB"  
"NT-P03\_00182" 25640 "s59E25H2" 0 "Modification methylase DpnIIB"  
"NT-P03\_00182" 25640 "s59E5H2" 0 "Modification methylase DpnIIB"  
"NT-P03\_00182" 25640 "s63E6H2" 0 "Modification methylase DpnIIB"  
"NT-P03\_00183" 25641 "s59E13H2" 0 "hypothetical protein"  
"NT-P03\_00183" 25641 "s59E25H2" 0 "hypothetical protein"  
"NT-P03\_00183" 25641 "s59E5H2" 0 "hypothetical protein"  
"NT-P03\_00183" 25641 "s63E6H2" 0 "hypothetical protein"  
"NT-P03\_00184" 25642 "s59E13H2" 0 "Polyketide cyclase / dehydrase and lipid transport"  
"NT-P03\_00184" 25642 "s59E25H2" 0 "Polyketide cyclase / dehydrase and lipid transport"  
"NT-P03\_00184" 25642 "s59E5H2" 0 "Polyketide cyclase / dehydrase and lipid transport"  
"NT-P03\_00184" 25642 "s63E6H2" 0 "Polyketide cyclase / dehydrase and lipid transport"  
"NT-P03\_00185" 25643 "s59E13H2" 0 "Polymer-forming cytoskeletal"  
"NT-P03\_00185" 25643 "s59E25H2" 0 "Polymer-forming cytoskeletal"  
"NT-P03\_00185" 25643 "s59E5H2" 0 "Polymer-forming cytoskeletal"  
"NT-P03\_00185" 25643 "s63E6H2" 0 "Polymer-forming cytoskeletal"  
"NT-P03\_00186" 25644 "s59E13H2" 0 "hypothetical protein"  
"NT-P03\_00186" 25644 "s59E25H2" 0 "hypothetical protein"

"NT-P03\_00186" 25644 "s59E5H2" 0 "hypothetical protein"  
"NT-P03\_00186" 25644 "s63E6H2" 0 "hypothetical protein"  
"NT-P03\_00187" 25645 "s59E13H2" 0 "Cold shock-like protein CspE"  
"NT-P03\_00187" 25645 "s59E25H2" 0 "Cold shock-like protein CspE"  
"NT-P03\_00187" 25645 "s59E5H2" 0 "Cold shock-like protein CspE"  
"NT-P03\_00187" 25645 "s63E6H2" 0 "Cold shock-like protein CspE"  
"NT-P03\_00188" 25646 "s59E13H2" 0 "putative tyrosine recombinase XerC-like protein"  
"NT-P03\_00188" 25646 "s59E25H2" 0 "putative tyrosine recombinase XerC-like protein"  
"NT-P03\_00188" 25646 "s59E5H2" 0 "putative tyrosine recombinase XerC-like protein"  
"NT-P03\_00188" 25646 "s63E6H2" 0 "putative tyrosine recombinase XerC-like protein"  
"NT-P03\_00190" 25648 "s59E13H2" 0 "Endonuclease YhcR precursor"  
"NT-P03\_00190" 25648 "s59E25H2" 0 "Endonuclease YhcR precursor"  
"NT-P03\_00190" 25648 "s59E5H2" 0 "Endonuclease YhcR precursor"  
"NT-P03\_00190" 25648 "s63E6H2" 0 "Endonuclease YhcR precursor"  
"NT-P03\_00191" 25649 "s59E13H2" 0 "DNA adenine methyltransferase YhdJ"  
"NT-P03\_00191" 25649 "s59E25H2" 0 "DNA adenine methyltransferase YhdJ"  
"NT-P03\_00191" 25649 "s59E5H2" 0 "DNA adenine methyltransferase YhdJ"  
"NT-P03\_00191" 25649 "s63E6H2" 0 "DNA adenine methyltransferase YhdJ"  
"NT-P03\_00192" 25650 "s59E13H2" 0 "hypothetical protein"  
"NT-P03\_00192" 25650 "s59E25H2" 0 "hypothetical protein"  
"NT-P03\_00192" 25650 "s59E5H2" 0 "hypothetical protein"  
"NT-P03\_00192" 25650 "s63E6H2" 0 "hypothetical protein"  
"NT-P03\_00194" 25652 "s59E13H2" 0 "hypothetical protein"  
"NT-P03\_00194" 25652 "s59E25H2" 0 "hypothetical protein"  
"NT-P03\_00194" 25652 "s59E5H2" 0 "hypothetical protein"  
"NT-P03\_00194" 25652 "s63E6H2" 0 "hypothetical protein"  
"NT-P03\_00195" 25653 "s59E13H2" 0 "Sporulation initiation inhibitor protein Soj"  
"NT-P03\_00195" 25653 "s59E25H2" 0 "Sporulation initiation inhibitor protein Soj"  
"NT-P03\_00195" 25653 "s59E5H2" 0 "Sporulation initiation inhibitor protein Soj"  
"NT-P03\_00195" 25653 "s63E6H2" 0 "Sporulation initiation inhibitor protein Soj"  
"NT-P03\_00196" 25654 "s59E13H2" 0 "hypothetical protein"  
"NT-P03\_00196" 25654 "s59E25H2" 0 "hypothetical protein"  
"NT-P03\_00196" 25654 "s59E5H2" 0 "hypothetical protein"  
"NT-P03\_00196" 25654 "s63E6H2" 0 "hypothetical protein"  
"NT-P03\_00197" 25655 "s59E13H2" 0 "hypothetical protein"  
"NT-P03\_00197" 25655 "s59E25H2" 0 "hypothetical protein"  
"NT-P03\_00197" 25655 "s59E5H2" 0 "hypothetical protein"  
"NT-P03\_00197" 25655 "s63E6H2" 0 "hypothetical protein"  
"NT-P03\_00199" 25657 "s59E13H2" 0 "DNA-binding protein HU"  
"NT-P03\_00199" 25657 "s59E25H2" 0 "DNA-binding protein HU"  
"NT-P03\_00199" 25657 "s59E5H2" 0 "DNA-binding protein HU"  
"NT-P03\_00199" 25657 "s63E6H2" 0 "DNA-binding protein HU"  
"NT-P03\_00200" 25658 "s59E13H2" 0 "hypothetical protein"  
"NT-P03\_00200" 25658 "s59E25H2" 0 "hypothetical protein"  
"NT-P03\_00200" 25658 "s59E5H2" 0 "hypothetical protein"  
"NT-P03\_00200" 25658 "s63E6H2" 0 "hypothetical protein"  
"NT-P03\_00202" 25660 "s59E13H2" 0 "hypothetical protein"

"NT-P03\_00202" 25660 "s59E25H2" 0 "hypothetical protein"  
"NT-P03\_00202" 25660 "s59E5H2" 0 "hypothetical protein"  
"NT-P03\_00202" 25660 "s63E6H2" 0.001639024 "hypothetical protein"  
"NT-P03\_00203" 25661 "s59E13H2" 0 "hypothetical protein"  
"NT-P03\_00203" 25661 "s59E25H2" 0 "hypothetical protein"  
"NT-P03\_00203" 25661 "s59E5H2" 0 "hypothetical protein"  
"NT-P03\_00203" 25661 "s63E6H2" 0.002786341 "hypothetical protein"  
"NT-P03\_00204" 25662 "s59E13H2" 0 "hypothetical protein"  
"NT-P03\_00204" 25662 "s59E25H2" 0 "hypothetical protein"  
"NT-P03\_00204" 25662 "s59E5H2" 0 "hypothetical protein"  
"NT-P03\_00204" 25662 "s63E6H2" 0.005647856 "hypothetical protein"  
"NT-P03\_00205" 25663 "s59E13H2" 0 "Outer membrane protein assembly factor BamD precursor"  
"NT-P03\_00205" 25663 "s59E25H2" 0 "Outer membrane protein assembly factor BamD precursor"  
"NT-P03\_00205" 25663 "s59E5H2" 0 "Outer membrane protein assembly factor BamD precursor"  
"NT-P03\_00205" 25663 "s63E6H2" 0.004439684 "Outer membrane protein assembly factor BamD precursor"  
"NT-P03\_00206" 25664 "s59E13H2" 0 "Low specificity L-threonine aldolase"  
"NT-P03\_00206" 25664 "s59E25H2" 0 "Low specificity L-threonine aldolase"  
"NT-P03\_00206" 25664 "s59E5H2" 0 "Low specificity L-threonine aldolase"  
"NT-P03\_00206" 25664 "s63E6H2" 0.007386494 "Low specificity L-threonine aldolase"  
"NT-P03\_00207" 25665 "s59E13H2" 0.0008013168 "DNA polymerase III subunit alpha"  
"NT-P03\_00207" 25665 "s59E25H2" 0 "DNA polymerase III subunit alpha"  
"NT-P03\_00207" 25665 "s59E5H2" 0 "DNA polymerase III subunit alpha"  
"NT-P03\_00207" 25665 "s63E6H2" 0.004232394 "DNA polymerase III subunit alpha"  
"NT-P03\_00208" 25666 "s59E13H2" 0 "hypothetical protein"  
"NT-P03\_00208" 25666 "s59E25H2" 0 "hypothetical protein"  
"NT-P03\_00208" 25666 "s59E5H2" 0 "hypothetical protein"  
"NT-P03\_00208" 25666 "s63E6H2" 0.6732901 "hypothetical protein"  
"NT-P03\_00209" 25667 "s59E13H2" 0 "Flavodoxin"  
"NT-P03\_00209" 25667 "s59E25H2" 0 "Flavodoxin"  
"NT-P03\_00209" 25667 "s59E5H2" 0 "Flavodoxin"  
"NT-P03\_00209" 25667 "s63E6H2" 0.01294854 "Flavodoxin"  
"NT-P03\_00210" 25668 "s59E13H2" 0 "Major Facilitator Superfamily protein"  
"NT-P03\_00210" 25668 "s59E25H2" 0 "Major Facilitator Superfamily protein"  
"NT-P03\_00210" 25668 "s59E5H2" 0 "Major Facilitator Superfamily protein"  
"NT-P03\_00210" 25668 "s63E6H2" 0.008627329 "Major Facilitator Superfamily protein"  
"NT-P03\_00211" 25669 "s59E13H2" 0 "Inosose dehydratase"  
"NT-P03\_00211" 25669 "s59E25H2" 0 "Inosose dehydratase"  
"NT-P03\_00211" 25669 "s59E5H2" 0 "Inosose dehydratase"  
"NT-P03\_00211" 25669 "s63E6H2" 0.003102577 "Inosose dehydratase"  
"NT-P03\_00212" 25670 "s59E13H2" 0 "Lipoyl synthase"  
"NT-P03\_00212" 25670 "s59E25H2" 0 "Lipoyl synthase"  
"NT-P03\_00212" 25670 "s59E5H2" 0 "Lipoyl synthase"  
"NT-P03\_00212" 25670 "s63E6H2" 0 "Lipoyl synthase"  
"NT-P03\_00213" 25671 "s59E13H2" 0 "D-aminopeptidase"  
"NT-P03\_00213" 25671 "s59E25H2" 0 "D-aminopeptidase"  
"NT-P03\_00213" 25671 "s59E5H2" 0 "D-aminopeptidase"  
"NT-P03\_00213" 25671 "s63E6H2" 0 "D-aminopeptidase"

"NT-P03\_00214" 25672 "s59E13H2" 0 "PTS-dependent dihydroxyacetone kinase, dihydroxyacetone-binding subunit DhaK"  
"NT-P03\_00214" 25672 "s59E25H2" 0 "PTS-dependent dihydroxyacetone kinase, dihydroxyacetone-binding subunit DhaK"  
"NT-P03\_00214" 25672 "s59E5H2" 0.02525567 "PTS-dependent dihydroxyacetone kinase, dihydroxyacetone-binding subunit DhaK"  
"NT-P03\_00214" 25672 "s63E6H2" 0.001509299 "PTS-dependent dihydroxyacetone kinase, dihydroxyacetone-binding subunit DhaK"  
"NT-P03\_00215" 25673 "s59E13H2" 0 "Ribose-5-phosphate isomerase B"  
"NT-P03\_00215" 25673 "s59E25H2" 0 "Ribose-5-phosphate isomerase B"  
"NT-P03\_00215" 25673 "s59E5H2" 0.02752392 "Ribose-5-phosphate isomerase B"  
"NT-P03\_00215" 25673 "s63E6H2" 0 "Ribose-5-phosphate isomerase B"  
"NT-P03\_00216" 25674 "s59E13H2" 0 "PTS-dependent dihydroxyacetone kinase, ADP-binding subunit DhaL"  
"NT-P03\_00216" 25674 "s59E25H2" 0 "PTS-dependent dihydroxyacetone kinase, ADP-binding subunit DhaL"  
"NT-P03\_00216" 25674 "s59E5H2" 0.02498711 "PTS-dependent dihydroxyacetone kinase, ADP-binding subunit DhaL"  
"NT-P03\_00216" 25674 "s63E6H2" 0.004483252 "PTS-dependent dihydroxyacetone kinase, ADP-binding subunit DhaL"  
"NT-P03\_00217" 25675 "s59E13H2" 0 "Heterodisulfide reductase subunit A-like protein"  
"NT-P03\_00217" 25675 "s59E25H2" 0 "Heterodisulfide reductase subunit A-like protein"  
"NT-P03\_00217" 25675 "s59E5H2" 0.04076774 "Heterodisulfide reductase subunit A-like protein"  
"NT-P03\_00217" 25675 "s63E6H2" 0.006988203 "Heterodisulfide reductase subunit A-like protein"  
"NT-P03\_00218" 25676 "s59E13H2" 0 "hypothetical protein"  
"NT-P03\_00218" 25676 "s59E25H2" 0 "hypothetical protein"  
"NT-P03\_00218" 25676 "s59E5H2" 0.05611955 "hypothetical protein"  
"NT-P03\_00218" 25676 "s63E6H2" 0.007330475 "hypothetical protein"  
"NT-P03\_00219" 25677 "s59E13H2" 0 "O-acetylserine sulfhydrylase"  
"NT-P03\_00219" 25677 "s59E25H2" 0 "O-acetylserine sulfhydrylase"  
"NT-P03\_00219" 25677 "s59E5H2" 0.01003583 "O-acetylserine sulfhydrylase"  
"NT-P03\_00219" 25677 "s63E6H2" 0.003289659 "O-acetylserine sulfhydrylase"  
"NT-P03\_00220" 25678 "s59E13H2" 0 "Cysteine desulfurase"  
"NT-P03\_00220" 25678 "s59E25H2" 0 "Cysteine desulfurase"  
"NT-P03\_00220" 25678 "s59E5H2" 0.004292567 "Cysteine desulfurase"  
"NT-P03\_00220" 25678 "s63E6H2" 0.004412304 "Cysteine desulfurase"  
"NT-P03\_00221" 25679 "s59E13H2" 0 "HTH-type transcriptional regulator IscR"  
"NT-P03\_00221" 25679 "s59E25H2" 0 "HTH-type transcriptional regulator IscR"  
"NT-P03\_00221" 25679 "s59E5H2" 0 "HTH-type transcriptional regulator IscR"  
"NT-P03\_00221" 25679 "s63E6H2" 0.003535473 "HTH-type transcriptional regulator IscR"  
"NT-P03\_00222" 25680 "s59E13H2" 0 "Serine acetyltransferase"  
"NT-P03\_00222" 25680 "s59E25H2" 0 "Serine acetyltransferase"  
"NT-P03\_00222" 25680 "s59E5H2" 0 "Serine acetyltransferase"  
"NT-P03\_00222" 25680 "s63E6H2" 0.001575129 "Serine acetyltransferase"  
"NT-P03\_00223" 25681 "s59E13H2" 0 "Thiol:disulfide interchange protein DsbD precursor"  
"NT-P03\_00223" 25681 "s59E25H2" 0 "Thiol:disulfide interchange protein DsbD precursor"  
"NT-P03\_00223" 25681 "s59E5H2" 0 "Thiol:disulfide interchange protein DsbD precursor"  
"NT-P03\_00223" 25681 "s63E6H2" 0.001577958 "Thiol:disulfide interchange protein DsbD precursor"  
"NT-P03\_00224" 25682 "s59E13H2" 0 "Thiol-disulfide oxidoreductase ResA"  
"NT-P03\_00224" 25682 "s59E25H2" 0 "Thiol-disulfide oxidoreductase ResA"  
"NT-P03\_00224" 25682 "s59E5H2" 0.006190396 "Thiol-disulfide oxidoreductase ResA"  
"NT-P03\_00224" 25682 "s63E6H2" 0 "Thiol-disulfide oxidoreductase ResA"  
"NT-P03\_00225" 25683 "s59E13H2" 0 "hypothetical protein"  
"NT-P03\_00225" 25683 "s59E25H2" 0 "hypothetical protein"  
"NT-P03\_00225" 25683 "s59E5H2" 0 "hypothetical protein"



"NT-P03\_00225" 25683 "s63E6H2" 0 "hypothetical protein"  
"NT-P03\_00226" 25684 "s59E13H2" 0 "Holliday junction ATP-dependent DNA helicase RuvB"  
"NT-P03\_00226" 25684 "s59E25H2" 0 "Holliday junction ATP-dependent DNA helicase RuvB"  
"NT-P03\_00226" 25684 "s59E5H2" 0 "Holliday junction ATP-dependent DNA helicase RuvB"  
"NT-P03\_00226" 25684 "s63E6H2" 0.008359762 "Holliday junction ATP-dependent DNA helicase RuvB"  
"NT-P03\_00227" 25685 "s59E13H2" 0 "Holliday junction ATP-dependent DNA helicase RuvA"  
"NT-P03\_00227" 25685 "s59E25H2" 0 "Holliday junction ATP-dependent DNA helicase RuvA"  
"NT-P03\_00227" 25685 "s59E5H2" 0 "Holliday junction ATP-dependent DNA helicase RuvA"  
"NT-P03\_00227" 25685 "s63E6H2" 0.009951786 "Holliday junction ATP-dependent DNA helicase RuvA"  
"NT-P03\_00228" 25686 "s59E13H2" 0 "Ketoisovalerate oxidoreductase subunit VorC"  
"NT-P03\_00228" 25686 "s59E25H2" 0 "Ketoisovalerate oxidoreductase subunit VorC"  
"NT-P03\_00228" 25686 "s59E5H2" 0 "Ketoisovalerate oxidoreductase subunit VorC"  
"NT-P03\_00228" 25686 "s63E6H2" 0.007465794 "Ketoisovalerate oxidoreductase subunit VorC"  
"NT-P03\_00229" 25687 "s59E13H2" 0 "hypothetical protein"  
"NT-P03\_00229" 25687 "s59E25H2" 0 "hypothetical protein"  
"NT-P03\_00229" 25687 "s59E5H2" 0 "hypothetical protein"  
"NT-P03\_00229" 25687 "s63E6H2" 0.01051058 "hypothetical protein"  
"NT-P03\_00230" 25688 "s59E13H2" 0 "hypothetical protein"  
"NT-P03\_00230" 25688 "s59E25H2" 0 "hypothetical protein"  
"NT-P03\_00230" 25688 "s59E5H2" 0 "hypothetical protein"  
"NT-P03\_00230" 25688 "s63E6H2" 0.01094272 "hypothetical protein"  
"NT-P03\_00232" 25690 "s59E13H2" 0.002652018 "Alpha-galactosidase"  
"NT-P03\_00232" 25690 "s59E25H2" 0 "Alpha-galactosidase"  
"NT-P03\_00232" 25690 "s59E5H2" 0 "Alpha-galactosidase"  
"NT-P03\_00232" 25690 "s63E6H2" 4.396622 "Alpha-galactosidase"  
"NT-P03\_00234" 25692 "s59E13H2" 0 "Na(+)-translocating NADH-quinone reductase subunit B"  
"NT-P03\_00234" 25692 "s59E25H2" 0 "Na(+)-translocating NADH-quinone reductase subunit B"  
"NT-P03\_00234" 25692 "s59E5H2" 0 "Na(+)-translocating NADH-quinone reductase subunit B"  
"NT-P03\_00234" 25692 "s63E6H2" 0 "Na(+)-translocating NADH-quinone reductase subunit B"  
"NT-P03\_00235" 25693 "s59E13H2" 0 "Na(+)-translocating NADH-quinone reductase subunit C"  
"NT-P03\_00235" 25693 "s59E25H2" 0 "Na(+)-translocating NADH-quinone reductase subunit C"  
"NT-P03\_00235" 25693 "s59E5H2" 0 "Na(+)-translocating NADH-quinone reductase subunit C"  
"NT-P03\_00235" 25693 "s63E6H2" 0 "Na(+)-translocating NADH-quinone reductase subunit C"  
"NT-P03\_00236" 25694 "s59E13H2" 0 "Glycine--tRNA ligase alpha subunit"  
"NT-P03\_00236" 25694 "s59E25H2" 0 "Glycine--tRNA ligase alpha subunit"  
"NT-P03\_00236" 25694 "s59E5H2" 0 "Glycine--tRNA ligase alpha subunit"  
"NT-P03\_00236" 25694 "s63E6H2" 0.002882668 "Glycine--tRNA ligase alpha subunit"  
"NT-P03\_00237" 25695 "s59E13H2" 0 "Glycine--tRNA ligase beta subunit"  
"NT-P03\_00237" 25695 "s59E25H2" 0 "Glycine--tRNA ligase beta subunit"  
"NT-P03\_00237" 25695 "s59E5H2" 0.003356275 "Glycine--tRNA ligase beta subunit"  
"NT-P03\_00237" 25695 "s63E6H2" 0.1553221 "Glycine--tRNA ligase beta subunit"  
"NT-P03\_00238" 25696 "s59E13H2" 0 "hypothetical protein"  
"NT-P03\_00238" 25696 "s59E25H2" 0 "hypothetical protein"  
"NT-P03\_00238" 25696 "s59E5H2" 0 "hypothetical protein"  
"NT-P03\_00238" 25696 "s63E6H2" 0.2749266 "hypothetical protein"  
"NT-P03\_00239" 25697 "s59E13H2" 0 "putative tRNA sulfurtransferase"  
"NT-P03\_00239" 25697 "s59E25H2" 0 "putative tRNA sulfurtransferase"

"NT-P03\_00239" 25697 "s59E5H2" 0 "putative tRNA sulfurtransferase"  
"NT-P03\_00239" 25697 "s63E6H2" 0.6464991 "putative tRNA sulfurtransferase"  
"NT-P03\_00240" 25698 "s59E13H2" 0 "putative hydrolase YutF"  
"NT-P03\_00240" 25698 "s59E25H2" 0 "putative hydrolase YutF"  
"NT-P03\_00240" 25698 "s59E5H2" 0 "putative hydrolase YutF"  
"NT-P03\_00240" 25698 "s63E6H2" 0.2888298 "putative hydrolase YutF"  
"NT-P03\_00241" 25699 "s59E13H2" 0 "Acylphosphatase"  
"NT-P03\_00241" 25699 "s59E25H2" 0 "Acylphosphatase"  
"NT-P03\_00241" 25699 "s59E5H2" 0 "Acylphosphatase"  
"NT-P03\_00241" 25699 "s63E6H2" 0.226873 "Acylphosphatase"  
"NT-P03\_00242" 25700 "s59E13H2" 0 "hypothetical protein"  
"NT-P03\_00242" 25700 "s59E25H2" 0 "hypothetical protein"  
"NT-P03\_00242" 25700 "s59E5H2" 0 "hypothetical protein"  
"NT-P03\_00242" 25700 "s63E6H2" 0.2025679 "hypothetical protein"  
"NT-P03\_00243" 25701 "s59E13H2" 0 "Uracil DNA glycosylase superfamily protein"  
"NT-P03\_00243" 25701 "s59E25H2" 0 "Uracil DNA glycosylase superfamily protein"  
"NT-P03\_00243" 25701 "s59E5H2" 0 "Uracil DNA glycosylase superfamily protein"  
"NT-P03\_00243" 25701 "s63E6H2" 0 "Uracil DNA glycosylase superfamily protein"  
"NT-P03\_00244" 25702 "s59E13H2" 0 "Spore protein SP21"  
"NT-P03\_00244" 25702 "s59E25H2" 0 "Spore protein SP21"  
"NT-P03\_00244" 25702 "s59E5H2" 0.004350318 "Spore protein SP21"  
"NT-P03\_00244" 25702 "s63E6H2" 0.03330227 "Spore protein SP21"  
"NT-P03\_00245" 25703 "s59E13H2" 0 "putative HTH-type transcriptional regulator/MT0088"  
"NT-P03\_00245" 25703 "s59E25H2" 0 "putative HTH-type transcriptional regulator/MT0088"  
"NT-P03\_00245" 25703 "s59E5H2" 0.004679675 "putative HTH-type transcriptional regulator/MT0088"  
"NT-P03\_00245" 25703 "s63E6H2" 0.04802848 "putative HTH-type transcriptional regulator/MT0088"  
"NT-P03\_00248" 25706 "s59E13H2" 0 "General stress protein 69"  
"NT-P03\_00248" 25706 "s59E25H2" 0 "General stress protein 69"  
"NT-P03\_00248" 25706 "s59E5H2" 0.1260626 "General stress protein 69"  
"NT-P03\_00248" 25706 "s63E6H2" 0.6739041 "General stress protein 69"  
"NT-P03\_00249" 25707 "s59E13H2" 0 "hypothetical protein"  
"NT-P03\_00249" 25707 "s59E25H2" 0 "hypothetical protein"  
"NT-P03\_00249" 25707 "s59E5H2" 0 "hypothetical protein"  
"NT-P03\_00249" 25707 "s63E6H2" 0.9126285 "hypothetical protein"  
"NT-P03\_00250" 25708 "s59E13H2" 0 "Serine/threonine-protein kinase pkn1"  
"NT-P03\_00250" 25708 "s59E25H2" 0 "Serine/threonine-protein kinase pkn1"  
"NT-P03\_00250" 25708 "s59E5H2" 0.00422802 "Serine/threonine-protein kinase pkn1"  
"NT-P03\_00250" 25708 "s63E6H2" 0.9992018 "Serine/threonine-protein kinase pkn1"  
"NT-P03\_00251" 25709 "s59E13H2" 0 "hypothetical protein"  
"NT-P03\_00251" 25709 "s59E25H2" 0 "hypothetical protein"  
"NT-P03\_00251" 25709 "s59E5H2" 0 "hypothetical protein"  
"NT-P03\_00251" 25709 "s63E6H2" 0.7101338 "hypothetical protein"  
"NT-P03\_00252" 25710 "s59E13H2" 0 "Pyridoxal 4-dehydrogenase"  
"NT-P03\_00252" 25710 "s59E25H2" 0 "Pyridoxal 4-dehydrogenase"  
"NT-P03\_00252" 25710 "s59E5H2" 0 "Pyridoxal 4-dehydrogenase"  
"NT-P03\_00252" 25710 "s63E6H2" 0.9910136 "Pyridoxal 4-dehydrogenase"  
"NT-P03\_00253" 25711 "s59E13H2" 0 "hypothetical protein"

"NT-P03\_00253" 25711 "s59E25H2" 0 "hypothetical protein"  
"NT-P03\_00253" 25711 "s59E5H2" 0.02148849 "hypothetical protein"  
"NT-P03\_00253" 25711 "s63E6H2" 1.145696 "hypothetical protein"  
"NT-P03\_00254" 25712 "s59E13H2" 0 "Tetratricopeptide repeat protein"  
"NT-P03\_00254" 25712 "s59E25H2" 0 "Tetratricopeptide repeat protein"  
"NT-P03\_00254" 25712 "s59E5H2" 0 "Tetratricopeptide repeat protein"  
"NT-P03\_00254" 25712 "s63E6H2" 1.266438 "Tetratricopeptide repeat protein"  
"NT-P03\_00255" 25713 "s59E13H2" 0 "Ketol-acid reductoisomerase"  
"NT-P03\_00255" 25713 "s59E25H2" 0 "Ketol-acid reductoisomerase"  
"NT-P03\_00255" 25713 "s59E5H2" 0.02975832 "Ketol-acid reductoisomerase"  
"NT-P03\_00255" 25713 "s63E6H2" 1.134387 "Ketol-acid reductoisomerase"  
"NT-P03\_00256" 25714 "s59E13H2" 0 "hypothetical protein"  
"NT-P03\_00256" 25714 "s59E25H2" 0 "hypothetical protein"  
"NT-P03\_00256" 25714 "s59E5H2" 0 "hypothetical protein"  
"NT-P03\_00256" 25714 "s63E6H2" 0.8205783 "hypothetical protein"  
"NT-P03\_00258" 25716 "s59E13H2" 0 "hypothetical protein"  
"NT-P03\_00258" 25716 "s59E25H2" 0 "hypothetical protein"  
"NT-P03\_00258" 25716 "s59E5H2" 0 "hypothetical protein"  
"NT-P03\_00258" 25716 "s63E6H2" 0 "hypothetical protein"  
"NT-P03\_00259" 25717 "s59E13H2" 0 "hypothetical protein"  
"NT-P03\_00259" 25717 "s59E25H2" 0 "hypothetical protein"  
"NT-P03\_00259" 25717 "s59E5H2" 0 "hypothetical protein"  
"NT-P03\_00259" 25717 "s63E6H2" 0.2741187 "hypothetical protein"  
"NT-P03\_00261" 25719 "s59E13H2" 0 "Helix-turn-helix domain protein"  
"NT-P03\_00261" 25719 "s59E25H2" 0 "Helix-turn-helix domain protein"  
"NT-P03\_00261" 25719 "s59E5H2" 0.02391895 "Helix-turn-helix domain protein"  
"NT-P03\_00261" 25719 "s63E6H2" 0.1271336 "Helix-turn-helix domain protein"  
"NT-P03\_00262" 25720 "s59E13H2" 0 "hypothetical protein"  
"NT-P03\_00262" 25720 "s59E25H2" 0 "hypothetical protein"  
"NT-P03\_00262" 25720 "s59E5H2" 0 "hypothetical protein"  
"NT-P03\_00262" 25720 "s63E6H2" 0.0001743165 "hypothetical protein"  
"NT-P03\_00263" 25721 "s59E13H2" 0 "hypothetical protein"  
"NT-P03\_00263" 25721 "s59E25H2" 0 "hypothetical protein"  
"NT-P03\_00263" 25721 "s59E5H2" 0 "hypothetical protein"  
"NT-P03\_00263" 25721 "s63E6H2" 0 "hypothetical protein"  
"NT-P03\_00264" 25722 "s59E13H2" 0 "Antilisterial bacteriocin subtilisin biosynthesis protein Alba"  
"NT-P03\_00264" 25722 "s59E25H2" 0 "Antilisterial bacteriocin subtilisin biosynthesis protein Alba"  
"NT-P03\_00264" 25722 "s59E5H2" 0.005313469 "Antilisterial bacteriocin subtilisin biosynthesis protein Alba"  
"NT-P03\_00264" 25722 "s63E6H2" 0 "Antilisterial bacteriocin subtilisin biosynthesis protein Alba"  
"NT-P03\_00265" 25723 "s59E13H2" 0 "HTH-type transcriptional repressor AseR"  
"NT-P03\_00265" 25723 "s59E25H2" 0 "HTH-type transcriptional repressor AseR"  
"NT-P03\_00265" 25723 "s59E5H2" 0.0003954081 "HTH-type transcriptional repressor AseR"  
"NT-P03\_00265" 25723 "s63E6H2" 0 "HTH-type transcriptional repressor AseR"  
"NT-P03\_00266" 25724 "s59E13H2" 0 "Transposase"  
"NT-P03\_00266" 25724 "s59E25H2" 0 "Transposase"  
"NT-P03\_00266" 25724 "s59E5H2" 0 "Transposase"  
"NT-P03\_00266" 25724 "s63E6H2" 0 "Transposase"

"NT-P03\_00268" 25726 "s59E13H2" 0 "hypothetical protein"  
"NT-P03\_00268" 25726 "s59E25H2" 0 "hypothetical protein"  
"NT-P03\_00268" 25726 "s59E5H2" 0 "hypothetical protein"  
"NT-P03\_00268" 25726 "s63E6H2" 0 "hypothetical protein"  
"NT-P03\_00269" 25727 "s59E13H2" 0 "(R)-stereoselective amidase"  
"NT-P03\_00269" 25727 "s59E25H2" 0 "(R)-stereoselective amidase"  
"NT-P03\_00269" 25727 "s59E5H2" 0.006758309 "(R)-stereoselective amidase"  
"NT-P03\_00269" 25727 "s63E6H2" 0.005638092 "(R)-stereoselective amidase"  
"NT-P03\_00270" 25728 "s59E13H2" 0 "Glutamate decarboxylase"  
"NT-P03\_00270" 25728 "s59E25H2" 0 "Glutamate decarboxylase"  
"NT-P03\_00270" 25728 "s59E5H2" 0.01025593 "Glutamate decarboxylase"  
"NT-P03\_00270" 25728 "s63E6H2" 0.001159808 "Glutamate decarboxylase"  
"NT-P03\_00271" 25729 "s59E13H2" 0 "Glutamate/gamma-aminobutyrate antiporter"  
"NT-P03\_00271" 25729 "s59E25H2" 0 "Glutamate/gamma-aminobutyrate antiporter"  
"NT-P03\_00271" 25729 "s59E5H2" 0.001929968 "Glutamate/gamma-aminobutyrate antiporter"  
"NT-P03\_00271" 25729 "s63E6H2" 0 "Glutamate/gamma-aminobutyrate antiporter"  
"NT-P03\_00274" 25732 "s59E13H2" 0.03045817 "hypothetical protein"  
"NT-P03\_00274" 25732 "s59E25H2" 0 "hypothetical protein"  
"NT-P03\_00274" 25732 "s59E5H2" 0 "hypothetical protein"  
"NT-P03\_00274" 25732 "s63E6H2" 0 "hypothetical protein"  
"NT-P03\_00275" 25733 "s59E13H2" 0 "hypothetical protein"  
"NT-P03\_00275" 25733 "s59E25H2" 0 "hypothetical protein"  
"NT-P03\_00275" 25733 "s59E5H2" 0 "hypothetical protein"  
"NT-P03\_00275" 25733 "s63E6H2" 0 "hypothetical protein"  
"NT-P03\_00276" 25734 "s59E13H2" 0 "Phosphate acetyltransferase"  
"NT-P03\_00276" 25734 "s59E25H2" 0 "Phosphate acetyltransferase"  
"NT-P03\_00276" 25734 "s59E5H2" 0 "Phosphate acetyltransferase"  
"NT-P03\_00276" 25734 "s63E6H2" 0.01338114 "Phosphate acetyltransferase"  
"NT-P03\_00278" 25736 "s59E13H2" 0 "hypothetical protein"  
"NT-P03\_00278" 25736 "s59E25H2" 0 "hypothetical protein"  
"NT-P03\_00278" 25736 "s59E5H2" 0 "hypothetical protein"  
"NT-P03\_00278" 25736 "s63E6H2" 0 "hypothetical protein"  
"NT-P03\_00279" 25737 "s59E13H2" 0 "hypothetical protein"  
"NT-P03\_00279" 25737 "s59E25H2" 0 "hypothetical protein"  
"NT-P03\_00279" 25737 "s59E5H2" 0.02368924 "hypothetical protein"  
"NT-P03\_00279" 25737 "s63E6H2" 0 "hypothetical protein"  
"NT-P03\_00280" 25738 "s59E13H2" 0 "Sodium/pantothenate symporter"  
"NT-P03\_00280" 25738 "s59E25H2" 0 "Sodium/pantothenate symporter"  
"NT-P03\_00280" 25738 "s59E5H2" 0.001522649 "Sodium/pantothenate symporter"  
"NT-P03\_00280" 25738 "s63E6H2" 0.0009964213 "Sodium/pantothenate symporter"  
"NT-P03\_00281" 25739 "s59E13H2" 0 "NADP-reducing hydrogenase subunit HndC"  
"NT-P03\_00281" 25739 "s59E25H2" 0 "NADP-reducing hydrogenase subunit HndC"  
"NT-P03\_00281" 25739 "s59E5H2" 0 "NADP-reducing hydrogenase subunit HndC"  
"NT-P03\_00281" 25739 "s63E6H2" 0 "NADP-reducing hydrogenase subunit HndC"  
"NT-P03\_00282" 25740 "s59E13H2" 0 "NADP-reducing hydrogenase subunit HndA"  
"NT-P03\_00282" 25740 "s59E25H2" 0 "NADP-reducing hydrogenase subunit HndA"  
"NT-P03\_00282" 25740 "s59E5H2" 0.007696479 "NADP-reducing hydrogenase subunit HndA"

"NT-P03\_00282" 25740 "s63E6H2" 0 "NADP-reducing hydrogenase subunit HndA"  
"NT-P03\_00283" 25741 "s59E13H2" 0 "Sulfopropanediol 3-dehydrogenase"  
"NT-P03\_00283" 25741 "s59E25H2" 0 "Sulfopropanediol 3-dehydrogenase"  
"NT-P03\_00283" 25741 "s59E5H2" 0 "Sulfopropanediol 3-dehydrogenase"  
"NT-P03\_00283" 25741 "s63E6H2" 0 "Sulfopropanediol 3-dehydrogenase"  
"NT-P03\_00284" 25742 "s59E13H2" 0 "Gluconate 5-dehydrogenase"  
"NT-P03\_00284" 25742 "s59E25H2" 0 "Gluconate 5-dehydrogenase"  
"NT-P03\_00284" 25742 "s59E5H2" 0 "Gluconate 5-dehydrogenase"  
"NT-P03\_00284" 25742 "s63E6H2" 0 "Gluconate 5-dehydrogenase"  
"NT-P03\_00285" 25743 "s59E13H2" 0 "Trehalose utilisation"  
"NT-P03\_00285" 25743 "s59E25H2" 0 "Trehalose utilisation"  
"NT-P03\_00285" 25743 "s59E5H2" 0 "Trehalose utilisation"  
"NT-P03\_00285" 25743 "s63E6H2" 0 "Trehalose utilisation"  
"NT-P03\_00286" 25744 "s59E13H2" 0 "putative oxidoreductase YvaA"  
"NT-P03\_00286" 25744 "s59E25H2" 0 "putative oxidoreductase YvaA"  
"NT-P03\_00286" 25744 "s59E5H2" 0 "putative oxidoreductase YvaA"  
"NT-P03\_00286" 25744 "s63E6H2" 0.0039552 "putative oxidoreductase YvaA"  
"NT-P03\_00287" 25745 "s59E13H2" 0 "hypothetical protein"  
"NT-P03\_00287" 25745 "s59E25H2" 0 "hypothetical protein"  
"NT-P03\_00287" 25745 "s59E5H2" 0 "hypothetical protein"  
"NT-P03\_00287" 25745 "s63E6H2" 0.001870551 "hypothetical protein"  
"NT-P03\_00289" 25747 "s59E13H2" 0 "Amidophosphoribosyltransferase precursor"  
"NT-P03\_00289" 25747 "s59E25H2" 0 "Amidophosphoribosyltransferase precursor"  
"NT-P03\_00289" 25747 "s59E5H2" 0 "Amidophosphoribosyltransferase precursor"  
"NT-P03\_00289" 25747 "s63E6H2" 0.002537601 "Amidophosphoribosyltransferase precursor"  
"NT-P03\_00290" 25748 "s59E13H2" 0 "DNA polymerase III subunit tau"  
"NT-P03\_00290" 25748 "s59E25H2" 0 "DNA polymerase III subunit tau"  
"NT-P03\_00290" 25748 "s59E5H2" 0.001937618 "DNA polymerase III subunit tau"  
"NT-P03\_00290" 25748 "s63E6H2" 0.001124577 "DNA polymerase III subunit tau"  
"NT-P03\_00291" 25749 "s59E13H2" 0 "Nucleoid-associated protein"  
"NT-P03\_00291" 25749 "s59E25H2" 0 "Nucleoid-associated protein"  
"NT-P03\_00291" 25749 "s59E5H2" 0 "Nucleoid-associated protein"  
"NT-P03\_00291" 25749 "s63E6H2" 0.00560463 "Nucleoid-associated protein"  
"NT-P03\_00292" 25750 "s59E13H2" 0 "Recombination protein RecR"  
"NT-P03\_00292" 25750 "s59E25H2" 0 "Recombination protein RecR"  
"NT-P03\_00292" 25750 "s59E5H2" 0 "Recombination protein RecR"  
"NT-P03\_00292" 25750 "s63E6H2" 0.005474385 "Recombination protein RecR"  
"NT-P03\_00293" 25751 "s59E13H2" 0.002969054 "Glutamate dehydrogenase"  
"NT-P03\_00293" 25751 "s59E25H2" 0 "Glutamate dehydrogenase"  
"NT-P03\_00293" 25751 "s59E5H2" 0 "Glutamate dehydrogenase"  
"NT-P03\_00293" 25751 "s63E6H2" 0.6886751 "Glutamate dehydrogenase"  
"NT-P03\_00294" 25752 "s59E13H2" 0 "Nitrogen regulatory protein P-II"  
"NT-P03\_00294" 25752 "s59E25H2" 0 "Nitrogen regulatory protein P-II"  
"NT-P03\_00294" 25752 "s59E5H2" 0 "Nitrogen regulatory protein P-II"  
"NT-P03\_00294" 25752 "s63E6H2" 0.6655933 "Nitrogen regulatory protein P-II"  
"NT-P03\_00295" 25753 "s59E13H2" 0 "Phosphoribosylformylglycinamide synthase 2"  
"NT-P03\_00295" 25753 "s59E25H2" 0 "Phosphoribosylformylglycinamide synthase 2"

"NT-P03\_00295" 25753 "s59E5H2" 0.001808509 "Phosphoribosylformylglycinamide synthase 2"  
"NT-P03\_00295" 25753 "s63E6H2" 0.007149245 "Phosphoribosylformylglycinamide synthase 2"  
"NT-P03\_00296" 25754 "s59E13H2" 0 "pyruvate formate lyase-activating enzyme 1"  
"NT-P03\_00296" 25754 "s59E25H2" 0 "pyruvate formate lyase-activating enzyme 1"  
"NT-P03\_00296" 25754 "s59E5H2" 0.01092183 "pyruvate formate lyase-activating enzyme 1"  
"NT-P03\_00296" 25754 "s63E6H2" 0.6519204 "pyruvate formate lyase-activating enzyme 1"  
"NT-P03\_00297" 25755 "s59E13H2" 0 "Anaerobic ribonucleoside-triphosphate reductase"  
"NT-P03\_00297" 25755 "s59E25H2" 0.1175364 "Anaerobic ribonucleoside-triphosphate reductase"  
"NT-P03\_00297" 25755 "s59E5H2" 0.007286515 "Anaerobic ribonucleoside-triphosphate reductase"  
"NT-P03\_00297" 25755 "s63E6H2" 0.6950854 "Anaerobic ribonucleoside-triphosphate reductase"  
"NT-P03\_00298" 25756 "s59E13H2" 0 "Phosphoribosylformylglycinamide synthase 1"  
"NT-P03\_00298" 25756 "s59E25H2" 0 "Phosphoribosylformylglycinamide synthase 1"  
"NT-P03\_00298" 25756 "s59E5H2" 0.01115571 "Phosphoribosylformylglycinamide synthase 1"  
"NT-P03\_00298" 25756 "s63E6H2" 0.01860315 "Phosphoribosylformylglycinamide synthase 1"  
"NT-P03\_00299" 25757 "s59E13H2" 0 "phosphoribosylformylglycinamide synthase subunit PurS"  
"NT-P03\_00299" 25757 "s59E25H2" 0 "phosphoribosylformylglycinamide synthase subunit PurS"  
"NT-P03\_00299" 25757 "s59E5H2" 0 "phosphoribosylformylglycinamide synthase subunit PurS"  
"NT-P03\_00299" 25757 "s63E6H2" 0 "phosphoribosylformylglycinamide synthase subunit PurS"  
"NT-P03\_00300" 25758 "s59E13H2" 0 "tRNA uridine 5-carboxymethylaminomethyl modification enzyme MnmG"  
"NT-P03\_00300" 25758 "s59E25H2" 0 "tRNA uridine 5-carboxymethylaminomethyl modification enzyme MnmG"  
"NT-P03\_00300" 25758 "s59E5H2" 0.00223669 "tRNA uridine 5-carboxymethylaminomethyl modification enzyme MnmG"  
"NT-P03\_00300" 25758 "s63E6H2" 0.5892237 "tRNA uridine 5-carboxymethylaminomethyl modification enzyme MnmG"  
"NT-P03\_00301" 25759 "s59E13H2" 0 "L-arabinose isomerase"  
"NT-P03\_00301" 25759 "s59E25H2" 0 "L-arabinose isomerase"  
"NT-P03\_00301" 25759 "s59E5H2" 0 "L-arabinose isomerase"  
"NT-P03\_00301" 25759 "s63E6H2" 0.09664212 "L-arabinose isomerase"  
"NT-P03\_00302" 25760 "s59E13H2" 0 "Sulfite exporter TauE/SafE"  
"NT-P03\_00302" 25760 "s59E25H2" 0 "Sulfite exporter TauE/SafE"  
"NT-P03\_00302" 25760 "s59E5H2" 0.004166241 "Sulfite exporter TauE/SafE"  
"NT-P03\_00302" 25760 "s63E6H2" 0.06666954 "Sulfite exporter TauE/SafE"  
"NT-P03\_00303" 25761 "s59E13H2" 0.001498786 "General stress protein 69"  
"NT-P03\_00303" 25761 "s59E25H2" 0 "General stress protein 69"  
"NT-P03\_00303" 25761 "s59E5H2" 0 "General stress protein 69"  
"NT-P03\_00303" 25761 "s63E6H2" 0.03034833 "General stress protein 69"  
"NT-P03\_00304" 25762 "s59E13H2" 0 "Xylulose kinase"  
"NT-P03\_00304" 25762 "s59E25H2" 0 "Xylulose kinase"  
"NT-P03\_00304" 25762 "s59E5H2" 0 "Xylulose kinase"  
"NT-P03\_00304" 25762 "s63E6H2" 0.1132213 "Xylulose kinase"  
"NT-P03\_00305" 25763 "s59E13H2" 0 "GMP synthase [glutamine-hydrolyzing]"  
"NT-P03\_00305" 25763 "s59E25H2" 0 "GMP synthase [glutamine-hydrolyzing]"  
"NT-P03\_00305" 25763 "s59E5H2" 0 "GMP synthase [glutamine-hydrolyzing]"  
"NT-P03\_00305" 25763 "s63E6H2" 0.0009780067 "GMP synthase [glutamine-hydrolyzing]"  
"NT-P03\_00306" 25764 "s59E13H2" 0 "Meso-diaminopimelate D-dehydrogenase"  
"NT-P03\_00306" 25764 "s59E25H2" 0 "Meso-diaminopimelate D-dehydrogenase"  
"NT-P03\_00306" 25764 "s59E5H2" 0 "Meso-diaminopimelate D-dehydrogenase"  
"NT-P03\_00306" 25764 "s63E6H2" 0 "Meso-diaminopimelate D-dehydrogenase"  
"NT-P03\_00313" 25771 "s59E13H2" 0 "Phage integrase family protein"

"NT-P03\_00313" 25771 "s59E25H2" 0 "Phage integrase family protein"  
"NT-P03\_00313" 25771 "s59E5H2" 0 "Phage integrase family protein"  
"NT-P03\_00313" 25771 "s63E6H2" 0 "Phage integrase family protein"  
"NT-P03\_00314" 25772 "s59E13H2" 0 "Restriction endonuclease BglII"  
"NT-P03\_00314" 25772 "s59E25H2" 0 "Restriction endonuclease BglII"  
"NT-P03\_00314" 25772 "s59E5H2" 0 "Restriction endonuclease BglII"  
"NT-P03\_00314" 25772 "s63E6H2" 0 "Restriction endonuclease BglII"  
"NT-P03\_00315" 25773 "s59E13H2" 0 "7,8-dihydropterin-6-methyl-4-(beta-D-ribofuranosyl)-aminobenzene-5'-phosphate synthase"  
"NT-P03\_00315" 25773 "s59E25H2" 0 "7,8-dihydropterin-6-methyl-4-(beta-D-ribofuranosyl)-aminobenzene-5'-phosphate synthase"  
"NT-P03\_00315" 25773 "s59E5H2" 0 "7,8-dihydropterin-6-methyl-4-(beta-D-ribofuranosyl)-aminobenzene-5'-phosphate synthase"  
"NT-P03\_00315" 25773 "s63E6H2" 0 "7,8-dihydropterin-6-methyl-4-(beta-D-ribofuranosyl)-aminobenzene-5'-phosphate synthase"  
"NT-P03\_00316" 25774 "s59E13H2" 0 "Septum site-determining protein MinD"  
"NT-P03\_00316" 25774 "s59E25H2" 0 "Septum site-determining protein MinD"  
"NT-P03\_00316" 25774 "s59E5H2" 0 "Septum site-determining protein MinD"  
"NT-P03\_00316" 25774 "s63E6H2" 0 "Septum site-determining protein MinD"  
"NT-P03\_00317" 25775 "s59E13H2" 0 "CobQ/CobB/MinD/ParA nucleotide binding domain protein"  
"NT-P03\_00317" 25775 "s59E25H2" 0 "CobQ/CobB/MinD/ParA nucleotide binding domain protein"  
"NT-P03\_00317" 25775 "s59E5H2" 0 "CobQ/CobB/MinD/ParA nucleotide binding domain protein"  
"NT-P03\_00317" 25775 "s63E6H2" 0 "CobQ/CobB/MinD/ParA nucleotide binding domain protein"  
"NT-P03\_00318" 25776 "s59E13H2" 0 "ATP-dependent helicase/nuclease subunit A"  
"NT-P03\_00318" 25776 "s59E25H2" 0 "ATP-dependent helicase/nuclease subunit A"  
"NT-P03\_00318" 25776 "s59E5H2" 0.001284952 "ATP-dependent helicase/nuclease subunit A"  
"NT-P03\_00318" 25776 "s63E6H2" 0.0009351288 "ATP-dependent helicase/nuclease subunit A"  
"NT-P03\_00319" 25777 "s59E13H2" 0 "PD-(D/E)XK nuclease superfamily protein"  
"NT-P03\_00319" 25777 "s59E25H2" 0 "PD-(D/E)XK nuclease superfamily protein"  
"NT-P03\_00319" 25777 "s59E5H2" 0 "PD-(D/E)XK nuclease superfamily protein"  
"NT-P03\_00319" 25777 "s63E6H2" 0 "PD-(D/E)XK nuclease superfamily protein"  
"NT-P03\_00320" 25778 "s59E13H2" 0 "hypothetical protein"  
"NT-P03\_00320" 25778 "s59E25H2" 0 "hypothetical protein"  
"NT-P03\_00320" 25778 "s59E5H2" 2.021561 "hypothetical protein"  
"NT-P03\_00320" 25778 "s63E6H2" 0 "hypothetical protein"  
"NT-P03\_00321" 25779 "s59E13H2" 0 "hypothetical protein"  
"NT-P03\_00321" 25779 "s59E25H2" 0 "hypothetical protein"  
"NT-P03\_00321" 25779 "s59E5H2" 1.658087 "hypothetical protein"  
"NT-P03\_00321" 25779 "s63E6H2" 0 "hypothetical protein"  
"NT-P03\_00322" 25780 "s59E13H2" 0 "Type-1 restriction enzyme R protein"  
"NT-P03\_00322" 25780 "s59E25H2" 0 "Type-1 restriction enzyme R protein"  
"NT-P03\_00322" 25780 "s59E5H2" 0.006407494 "Type-1 restriction enzyme R protein"  
"NT-P03\_00322" 25780 "s63E6H2" 0 "Type-1 restriction enzyme R protein"  
"NT-P03\_00323" 25781 "s59E13H2" 0 "putative type I restriction enzymeP M protein"  
"NT-P03\_00323" 25781 "s59E25H2" 0 "putative type I restriction enzymeP M protein"  
"NT-P03\_00323" 25781 "s59E5H2" 0 "putative type I restriction enzymeP M protein"  
"NT-P03\_00323" 25781 "s63E6H2" 0 "putative type I restriction enzymeP M protein"  
"NT-P03\_00324" 25782 "s59E13H2" 0 "hypothetical protein"  
"NT-P03\_00324" 25782 "s59E25H2" 0 "hypothetical protein"  
"NT-P03\_00324" 25782 "s59E5H2" 0 "hypothetical protein"  
"NT-P03\_00324" 25782 "s63E6H2" 0 "hypothetical protein"

"NT-P03\_00325" 25783 "s59E13H2" 0 "hypothetical protein"  
"NT-P03\_00325" 25783 "s59E25H2" 0 "hypothetical protein"  
"NT-P03\_00325" 25783 "s59E5H2" 0 "hypothetical protein"  
"NT-P03\_00325" 25783 "s63E6H2" 0 "hypothetical protein"  
"NT-P03\_00326" 25784 "s59E13H2" 0 "AAA-like domain protein"  
"NT-P03\_00326" 25784 "s59E25H2" 0 "AAA-like domain protein"  
"NT-P03\_00326" 25784 "s59E5H2" 0 "AAA-like domain protein"  
"NT-P03\_00326" 25784 "s63E6H2" 0 "AAA-like domain protein"  
"NT-P03\_00327" 25785 "s59E13H2" 0 "N-glycosyltransferase"  
"NT-P03\_00327" 25785 "s59E25H2" 0 "N-glycosyltransferase"  
"NT-P03\_00327" 25785 "s59E5H2" 0 "N-glycosyltransferase"  
"NT-P03\_00327" 25785 "s63E6H2" 0 "N-glycosyltransferase"  
"NT-P03\_00328" 25786 "s59E13H2" 0 "Thermonuclease precursor"  
"NT-P03\_00328" 25786 "s59E25H2" 0 "Thermonuclease precursor"  
"NT-P03\_00328" 25786 "s59E5H2" 0 "Thermonuclease precursor"  
"NT-P03\_00328" 25786 "s63E6H2" 0 "Thermonuclease precursor"  
"NT-P03\_00329" 25787 "s59E13H2" 0 "D-alanyl-D-alanine carboxypeptidase precursor"  
"NT-P03\_00329" 25787 "s59E25H2" 0 "D-alanyl-D-alanine carboxypeptidase precursor"  
"NT-P03\_00329" 25787 "s59E5H2" 0 "D-alanyl-D-alanine carboxypeptidase precursor"  
"NT-P03\_00329" 25787 "s63E6H2" 0.001983809 "D-alanyl-D-alanine carboxypeptidase precursor"  
"NT-P03\_00330" 25788 "s59E13H2" 0 "hypothetical protein"  
"NT-P03\_00330" 25788 "s59E25H2" 0 "hypothetical protein"  
"NT-P03\_00330" 25788 "s59E5H2" 0 "hypothetical protein"  
"NT-P03\_00330" 25788 "s63E6H2" 0 "hypothetical protein"  
"NT-P03\_00333" 25791 "s59E13H2" 0 "Flavodoxin"  
"NT-P03\_00333" 25791 "s59E25H2" 0 "Flavodoxin"  
"NT-P03\_00333" 25791 "s59E5H2" 0.007650115 "Flavodoxin"  
"NT-P03\_00333" 25791 "s63E6H2" 0 "Flavodoxin"  
"NT-P03\_00334" 25792 "s59E13H2" 0 "hypothetical protein"  
"NT-P03\_00334" 25792 "s59E25H2" 0 "hypothetical protein"  
"NT-P03\_00334" 25792 "s59E5H2" 0.011415 "hypothetical protein"  
"NT-P03\_00334" 25792 "s63E6H2" 0 "hypothetical protein"  
"NT-P03\_00335" 25793 "s59E13H2" 0 "Penicillin-binding protein 2D"  
"NT-P03\_00335" 25793 "s59E25H2" 0 "Penicillin-binding protein 2D"  
"NT-P03\_00335" 25793 "s59E5H2" 0 "Penicillin-binding protein 2D"  
"NT-P03\_00335" 25793 "s63E6H2" 0 "Penicillin-binding protein 2D"  
"NT-P03\_00336" 25794 "s59E13H2" 0 "Putative non-heme bromoperoxidase BpoC"  
"NT-P03\_00336" 25794 "s59E25H2" 0 "Putative non-heme bromoperoxidase BpoC"  
"NT-P03\_00336" 25794 "s59E5H2" 0 "Putative non-heme bromoperoxidase BpoC"  
"NT-P03\_00336" 25794 "s63E6H2" 0 "Putative non-heme bromoperoxidase BpoC"  
"NT-P03\_00337" 25795 "s59E13H2" 0 "Endonuclease YncB precursor"  
"NT-P03\_00337" 25795 "s59E25H2" 0 "Endonuclease YncB precursor"  
"NT-P03\_00337" 25795 "s59E5H2" 0 "Endonuclease YncB precursor"  
"NT-P03\_00337" 25795 "s63E6H2" 0.006429129 "Endonuclease YncB precursor"  
"NT-P03\_00338" 25796 "s59E13H2" 0 "Iron-sulfur flavoprotein"  
"NT-P03\_00338" 25796 "s59E25H2" 0 "Iron-sulfur flavoprotein"  
"NT-P03\_00338" 25796 "s59E5H2" 0.007101474 "Iron-sulfur flavoprotein"



"NT-P03\_00338" 25796 "s63E6H2" 0.004180175 "Iron-sulfur flavoprotein"  
"NT-P03\_00339" 25797 "s59E13H2" 0 "Golgi phosphoprotein 3 (GPP34)"  
"NT-P03\_00339" 25797 "s59E25H2" 0 "Golgi phosphoprotein 3 (GPP34)"  
"NT-P03\_00339" 25797 "s59E5H2" 0.2838804 "Golgi phosphoprotein 3 (GPP34)"  
"NT-P03\_00339" 25797 "s63E6H2" 0.001379098 "Golgi phosphoprotein 3 (GPP34)"  
"NT-P03\_00340" 25798 "s59E13H2" 0 "hypothetical protein"  
"NT-P03\_00340" 25798 "s59E25H2" 0 "hypothetical protein"  
"NT-P03\_00340" 25798 "s59E5H2" 0 "hypothetical protein"  
"NT-P03\_00340" 25798 "s63E6H2" 0.01828145 "hypothetical protein"  
"NT-P03\_00341" 25799 "s59E13H2" 0 "Chloroplast import component protein (Tic20)"  
"NT-P03\_00341" 25799 "s59E25H2" 0 "Chloroplast import component protein (Tic20)"  
"NT-P03\_00341" 25799 "s59E5H2" 0 "Chloroplast import component protein (Tic20)"  
"NT-P03\_00341" 25799 "s63E6H2" 0 "Chloroplast import component protein (Tic20)"  
"NT-P03\_00342" 25800 "s59E13H2" 0 "Integrase core domain protein"  
"NT-P03\_00342" 25800 "s59E25H2" 0 "Integrase core domain protein"  
"NT-P03\_00342" 25800 "s59E5H2" 0.04321823 "Integrase core domain protein"  
"NT-P03\_00342" 25800 "s63E6H2" 9.161827 "Integrase core domain protein"  
"NT-P03\_00343" 25801 "s59E13H2" 0 "Ribosomal RNA small subunit methyltransferase H"  
"NT-P03\_00343" 25801 "s59E25H2" 0 "Ribosomal RNA small subunit methyltransferase H"  
"NT-P03\_00343" 25801 "s59E5H2" 0 "Ribosomal RNA small subunit methyltransferase H"  
"NT-P03\_00343" 25801 "s63E6H2" 0.2488535 "Ribosomal RNA small subunit methyltransferase H"  
"NT-P03\_00344" 25802 "s59E13H2" 0 "Cell division protein FtsL"  
"NT-P03\_00344" 25802 "s59E25H2" 0 "Cell division protein FtsL"  
"NT-P03\_00344" 25802 "s59E5H2" 0.001723661 "Cell division protein FtsL"  
"NT-P03\_00344" 25802 "s63E6H2" 0.2792455 "Cell division protein FtsL"  
"NT-P03\_00345" 25803 "s59E13H2" 0 "Stage V sporulation protein D"  
"NT-P03\_00345" 25803 "s59E25H2" 0 "Stage V sporulation protein D"  
"NT-P03\_00345" 25803 "s59E5H2" 0.005006425 "Stage V sporulation protein D"  
"NT-P03\_00345" 25803 "s63E6H2" 0.2400308 "Stage V sporulation protein D"  
"NT-P03\_00346" 25804 "s59E13H2" 0 "UDP-N-acetylmuramoyl-L-alanyl-D-glutamate--2,6-diaminopimelate ligase"  
"NT-P03\_00346" 25804 "s59E25H2" 0 "UDP-N-acetylmuramoyl-L-alanyl-D-glutamate--2,6-diaminopimelate ligase"  
"NT-P03\_00346" 25804 "s59E5H2" 0 "UDP-N-acetylmuramoyl-L-alanyl-D-glutamate--2,6-diaminopimelate ligase"  
"NT-P03\_00346" 25804 "s63E6H2" 0.09183796 "UDP-N-acetylmuramoyl-L-alanyl-D-glutamate--2,6-diaminopimelate ligase"  
"NT-P03\_00347" 25805 "s59E13H2" 0 "UDP-N-acetylmuramoyl-tripeptide--D-alanyl-D-alanine ligase"  
"NT-P03\_00347" 25805 "s59E25H2" 0 "UDP-N-acetylmuramoyl-tripeptide--D-alanyl-D-alanine ligase"  
"NT-P03\_00347" 25805 "s59E5H2" 0.009863001 "UDP-N-acetylmuramoyl-tripeptide--D-alanyl-D-alanine ligase"  
"NT-P03\_00347" 25805 "s63E6H2" 0.02295612 "UDP-N-acetylmuramoyl-tripeptide--D-alanyl-D-alanine ligase"  
"NT-P03\_00348" 25806 "s59E13H2" 0 "Phospho-N-acetylmuramoyl-pentapeptide-transferase"  
"NT-P03\_00348" 25806 "s59E25H2" 0 "Phospho-N-acetylmuramoyl-pentapeptide-transferase"  
"NT-P03\_00348" 25806 "s59E5H2" 0.02311934 "Phospho-N-acetylmuramoyl-pentapeptide-transferase"  
"NT-P03\_00348" 25806 "s63E6H2" 0.01652862 "Phospho-N-acetylmuramoyl-pentapeptide-transferase"  
"NT-P03\_00349" 25807 "s59E13H2" 0.001700256 "UDP-N-acetylmuramoylalanine--D-glutamate ligase"  
"NT-P03\_00349" 25807 "s59E25H2" 0 "UDP-N-acetylmuramoylalanine--D-glutamate ligase"  
"NT-P03\_00349" 25807 "s59E5H2" 0.07033219 "UDP-N-acetylmuramoylalanine--D-glutamate ligase"  
"NT-P03\_00349" 25807 "s63E6H2" 0.0175406 "UDP-N-acetylmuramoylalanine--D-glutamate ligase"  
"NT-P03\_00350" 25808 "s59E13H2" 0.001074441 "Lipid II flippase FtsW"  
"NT-P03\_00350" 25808 "s59E25H2" 0 "Lipid II flippase FtsW"

"NT-P03\_00350" 25808 "s59E5H2" 0.05522533 "Lipid II flippase FtsW"  
"NT-P03\_00350" 25808 "s63E6H2" 0.001180711 "Lipid II flippase FtsW"  
"NT-P03\_00351" 25809 "s59E13H2" 0.05834071 "CYTH domain protein"  
"NT-P03\_00351" 25809 "s59E25H2" 0 "CYTH domain protein"  
"NT-P03\_00351" 25809 "s59E5H2" 0 "CYTH domain protein"  
"NT-P03\_00351" 25809 "s63E6H2" 0.005608027 "CYTH domain protein"  
"NT-P03\_00353" 25811 "s59E13H2" 0.09069856 "putative permease YjgP/YjgQ family protein"  
"NT-P03\_00353" 25811 "s59E25H2" 0 "putative permease YjgP/YjgQ family protein"  
"NT-P03\_00353" 25811 "s59E5H2" 0 "putative permease YjgP/YjgQ family protein"  
"NT-P03\_00353" 25811 "s63E6H2" 0 "putative permease YjgP/YjgQ family protein"  
"NT-P03\_00354" 25812 "s59E13H2" 0.09763238 "putative permease YjgP/YjgQ family protein"  
"NT-P03\_00354" 25812 "s59E25H2" 0 "putative permease YjgP/YjgQ family protein"  
"NT-P03\_00354" 25812 "s59E5H2" 0.0183733 "putative permease YjgP/YjgQ family protein"  
"NT-P03\_00354" 25812 "s63E6H2" 0 "putative permease YjgP/YjgQ family protein"  
"NT-P03\_00355" 25813 "s59E13H2" 0.0002381437 "Transposase DDE domain protein"  
"NT-P03\_00355" 25813 "s59E25H2" 0 "Transposase DDE domain protein"  
"NT-P03\_00355" 25813 "s59E5H2" 0.01547864 "Transposase DDE domain protein"  
"NT-P03\_00355" 25813 "s63E6H2" 0.04967895 "Transposase DDE domain protein"  
"NT-P03\_00356" 25814 "s59E13H2" 0 "hypothetical protein"  
"NT-P03\_00356" 25814 "s59E25H2" 0 "hypothetical protein"  
"NT-P03\_00356" 25814 "s59E5H2" 0 "hypothetical protein"  
"NT-P03\_00356" 25814 "s63E6H2" 0.01741 "hypothetical protein"  
"NT-P03\_00357" 25815 "s59E13H2" 0.0984909 "6-phosphofructokinase isozyme 1"  
"NT-P03\_00357" 25815 "s59E25H2" 0 "6-phosphofructokinase isozyme 1"  
"NT-P03\_00357" 25815 "s59E5H2" 0 "6-phosphofructokinase isozyme 1"  
"NT-P03\_00357" 25815 "s63E6H2" 0.004711606 "6-phosphofructokinase isozyme 1"  
"NT-P03\_00358" 25816 "s59E13H2" 0.09662882 "Ribosomal protein S12 methylthiotransferase RimO"  
"NT-P03\_00358" 25816 "s59E25H2" 0 "Ribosomal protein S12 methylthiotransferase RimO"  
"NT-P03\_00358" 25816 "s59E5H2" 0.02914342 "Ribosomal protein S12 methylthiotransferase RimO"  
"NT-P03\_00358" 25816 "s63E6H2" 0.00581067 "Ribosomal protein S12 methylthiotransferase RimO"  
"NT-P03\_00359" 25817 "s59E13H2" 0.1388104 "hypothetical protein"  
"NT-P03\_00359" 25817 "s59E25H2" 0 "hypothetical protein"  
"NT-P03\_00359" 25817 "s59E5H2" 0.004413194 "hypothetical protein"  
"NT-P03\_00359" 25817 "s63E6H2" 0.02924138 "hypothetical protein"  
"NT-P03\_00360" 25818 "s59E13H2" 0.008778253 "Phage shock protein C"  
"NT-P03\_00360" 25818 "s59E25H2" 0 "Phage shock protein C"  
"NT-P03\_00360" 25818 "s59E5H2" 0 "Phage shock protein C"  
"NT-P03\_00360" 25818 "s63E6H2" 0.05329628 "Phage shock protein C"  
"NT-P03\_00361" 25819 "s59E13H2" 0.01912788 "Xylulose kinase"  
"NT-P03\_00361" 25819 "s59E25H2" 0 "Xylulose kinase"  
"NT-P03\_00361" 25819 "s59E5H2" 0 "Xylulose kinase"  
"NT-P03\_00361" 25819 "s63E6H2" 0.05075356 "Xylulose kinase"  
"NT-P03\_00362" 25820 "s59E13H2" 0.01794341 "Inner membrane transport permease YbhR"  
"NT-P03\_00362" 25820 "s59E25H2" 0 "Inner membrane transport permease YbhR"  
"NT-P03\_00362" 25820 "s59E5H2" 0.006474251 "Inner membrane transport permease YbhR"  
"NT-P03\_00362" 25820 "s63E6H2" 0.1505677 "Inner membrane transport permease YbhR"  
"NT-P03\_00363" 25821 "s59E13H2" 0 "putative ABC transporter ATP-binding protein YbhF"

"NT-P03\_00363" 25821 "s59E25H2" 0 "putative ABC transporter ATP-binding protein YbhF"  
"NT-P03\_00363" 25821 "s59E5H2" 0 "putative ABC transporter ATP-binding protein YbhF"  
"NT-P03\_00363" 25821 "s63E6H2" 0.09648692 "putative ABC transporter ATP-binding protein YbhF"  
"NT-P03\_00364" 25822 "s59E13H2" 0 "hypothetical protein"  
"NT-P03\_00364" 25822 "s59E25H2" 0 "hypothetical protein"  
"NT-P03\_00364" 25822 "s59E5H2" 0 "hypothetical protein"  
"NT-P03\_00364" 25822 "s63E6H2" 0.000503829 "hypothetical protein"  
"NT-P03\_00366" 25824 "s59E13H2" 0 "hypothetical protein"  
"NT-P03\_00366" 25824 "s59E25H2" 0 "hypothetical protein"  
"NT-P03\_00366" 25824 "s59E5H2" 0 "hypothetical protein"  
"NT-P03\_00366" 25824 "s63E6H2" 0 "hypothetical protein"  
"NT-P03\_00369" 25827 "s59E13H2" 0 "DNA polymerase III subunit delta"  
"NT-P03\_00369" 25827 "s59E25H2" 0 "DNA polymerase III subunit delta"  
"NT-P03\_00369" 25827 "s59E5H2" 0 "DNA polymerase III subunit delta"  
"NT-P03\_00369" 25827 "s63E6H2" 0.03302493 "DNA polymerase III subunit delta"  
"NT-P03\_00370" 25828 "s59E13H2" 0 "hypothetical protein"  
"NT-P03\_00370" 25828 "s59E25H2" 0 "hypothetical protein"  
"NT-P03\_00370" 25828 "s59E5H2" 0 "hypothetical protein"  
"NT-P03\_00370" 25828 "s63E6H2" 0.07667942 "hypothetical protein"  
"NT-P03\_00371" 25829 "s59E13H2" 0 "putative tyrosine recombinase XerC-like protein"  
"NT-P03\_00371" 25829 "s59E25H2" 0 "putative tyrosine recombinase XerC-like protein"  
"NT-P03\_00371" 25829 "s59E5H2" 0 "putative tyrosine recombinase XerC-like protein"  
"NT-P03\_00371" 25829 "s63E6H2" 0 "putative tyrosine recombinase XerC-like protein"  
"NT-P03\_00372" 25830 "s59E13H2" 0 "hypothetical protein"  
"NT-P03\_00372" 25830 "s59E25H2" 0 "hypothetical protein"  
"NT-P03\_00372" 25830 "s59E5H2" 0 "hypothetical protein"  
"NT-P03\_00372" 25830 "s63E6H2" 0 "hypothetical protein"  
"NT-P03\_00373" 25831 "s59E13H2" 0 "YcfA-like protein"  
"NT-P03\_00373" 25831 "s59E25H2" 0 "YcfA-like protein"  
"NT-P03\_00373" 25831 "s59E5H2" 0 "YcfA-like protein"  
"NT-P03\_00373" 25831 "s63E6H2" 0 "YcfA-like protein"  
"NT-P03\_00375" 25833 "s59E13H2" 0 "Phd\_YefM"  
"NT-P03\_00375" 25833 "s59E25H2" 0 "Phd\_YefM"  
"NT-P03\_00375" 25833 "s59E5H2" 0 "Phd\_YefM"  
"NT-P03\_00375" 25833 "s63E6H2" 0.001099446 "Phd\_YefM"  
"NT-P03\_00376" 25834 "s59E13H2" 0 "Toxin RelE2"  
"NT-P03\_00376" 25834 "s59E25H2" 0 "Toxin RelE2"  
"NT-P03\_00376" 25834 "s59E5H2" 0 "Toxin RelE2"  
"NT-P03\_00376" 25834 "s63E6H2" 0 "Toxin RelE2"  
"NT-P03\_00378" 25836 "s59E13H2" 0 "Putative nickel-responsive regulator"  
"NT-P03\_00378" 25836 "s59E25H2" 0 "Putative nickel-responsive regulator"  
"NT-P03\_00378" 25836 "s59E5H2" 0 "Putative nickel-responsive regulator"  
"NT-P03\_00378" 25836 "s63E6H2" 0 "Putative nickel-responsive regulator"  
"NT-P03\_00379" 25837 "s59E13H2" 0 "mRNA interferase EndoA"  
"NT-P03\_00379" 25837 "s59E25H2" 0 "mRNA interferase EndoA"  
"NT-P03\_00379" 25837 "s59E5H2" 0 "mRNA interferase EndoA"  
"NT-P03\_00379" 25837 "s63E6H2" 0 "mRNA interferase EndoA"

"NT-P03\_00381" 25839 "s59E13H2" 0 "hypothetical protein"  
"NT-P03\_00381" 25839 "s59E25H2" 0 "hypothetical protein"  
"NT-P03\_00381" 25839 "s59E5H2" 0 "hypothetical protein"  
"NT-P03\_00381" 25839 "s63E6H2" 0.0009140961 "hypothetical protein"  
"NT-P03\_00382" 25840 "s59E13H2" 0 "hypothetical protein"  
"NT-P03\_00382" 25840 "s59E25H2" 0 "hypothetical protein"  
"NT-P03\_00382" 25840 "s59E5H2" 0 "hypothetical protein"  
"NT-P03\_00382" 25840 "s63E6H2" 0 "hypothetical protein"  
"NT-P03\_00383" 25841 "s59E13H2" 0 "hypothetical protein"  
"NT-P03\_00383" 25841 "s59E25H2" 0 "hypothetical protein"  
"NT-P03\_00383" 25841 "s59E5H2" 0.4382397 "hypothetical protein"  
"NT-P03\_00383" 25841 "s63E6H2" 0.005059538 "hypothetical protein"  
"NT-P03\_00385" 25843 "s59E13H2" 0 "Bifunctional protein FoD protein"  
"NT-P03\_00385" 25843 "s59E25H2" 0 "Bifunctional protein FoD protein"  
"NT-P03\_00385" 25843 "s59E5H2" 0 "Bifunctional protein FoD protein"  
"NT-P03\_00385" 25843 "s63E6H2" 0 "Bifunctional protein FoD protein"  
"NT-P03\_00386" 25844 "s59E13H2" 0 "Formate--tetrahydrofolate ligase"  
"NT-P03\_00386" 25844 "s59E25H2" 0 "Formate--tetrahydrofolate ligase"  
"NT-P03\_00386" 25844 "s59E5H2" 0 "Formate--tetrahydrofolate ligase"  
"NT-P03\_00386" 25844 "s63E6H2" 0 "Formate--tetrahydrofolate ligase"  
"NT-P03\_00387" 25845 "s59E13H2" 0 "GTP cyclohydrolase 1"  
"NT-P03\_00387" 25845 "s59E25H2" 0 "GTP cyclohydrolase 1"  
"NT-P03\_00387" 25845 "s59E5H2" 0 "GTP cyclohydrolase 1"  
"NT-P03\_00387" 25845 "s63E6H2" 0 "GTP cyclohydrolase 1"  
"NT-P03\_00388" 25846 "s59E13H2" 0 "DNA polymerase III subunit tau"  
"NT-P03\_00388" 25846 "s59E25H2" 0 "DNA polymerase III subunit tau"  
"NT-P03\_00388" 25846 "s59E5H2" 0 "DNA polymerase III subunit tau"  
"NT-P03\_00388" 25846 "s63E6H2" 0 "DNA polymerase III subunit tau"  
"NT-P03\_00389" 25847 "s59E13H2" 0 "Thymidylate kinase"  
"NT-P03\_00389" 25847 "s59E25H2" 0 "Thymidylate kinase"  
"NT-P03\_00389" 25847 "s59E5H2" 0 "Thymidylate kinase"  
"NT-P03\_00389" 25847 "s63E6H2" 0 "Thymidylate kinase"  
"NT-P03\_00390" 25848 "s59E13H2" 0 "Nucleotidyltransferase domain protein"  
"NT-P03\_00390" 25848 "s59E25H2" 0 "Nucleotidyltransferase domain protein"  
"NT-P03\_00390" 25848 "s59E5H2" 0 "Nucleotidyltransferase domain protein"  
"NT-P03\_00390" 25848 "s63E6H2" 0.009669981 "Nucleotidyltransferase domain protein"  
"NT-P03\_00391" 25849 "s59E13H2" 0 "Acetyl-coenzyme A carboxylase carboxyl transferase subunit beta"  
"NT-P03\_00391" 25849 "s59E25H2" 0 "Acetyl-coenzyme A carboxylase carboxyl transferase subunit beta"  
"NT-P03\_00391" 25849 "s59E5H2" 0.01909769 "Acetyl-coenzyme A carboxylase carboxyl transferase subunit beta"  
"NT-P03\_00391" 25849 "s63E6H2" 0.00890467 "Acetyl-coenzyme A carboxylase carboxyl transferase subunit beta"  
"NT-P03\_00392" 25850 "s59E13H2" 0 "Ketoisovalerate oxidoreductase subunit VorD"  
"NT-P03\_00392" 25850 "s59E25H2" 0 "Ketoisovalerate oxidoreductase subunit VorD"  
"NT-P03\_00392" 25850 "s59E5H2" 0 "Ketoisovalerate oxidoreductase subunit VorD"  
"NT-P03\_00392" 25850 "s63E6H2" 0.001045899 "Ketoisovalerate oxidoreductase subunit VorD"  
"NT-P03\_00393" 25851 "s59E13H2" 0 "4-hydroxy-3-methylbut-2-en-1-yl diphosphate synthase"  
"NT-P03\_00393" 25851 "s59E25H2" 0 "4-hydroxy-3-methylbut-2-en-1-yl diphosphate synthase"  
"NT-P03\_00393" 25851 "s59E5H2" 0.03353232 "4-hydroxy-3-methylbut-2-en-1-yl diphosphate synthase"

"NT-P03\_00393" 25851 "s63E6H2" 0.02091697 "4-hydroxy-3-methylbut-2-en-1-yl diphosphate synthase"  
"NT-P03\_00394" 25852 "s59E13H2" 0 "CTP synthase"  
"NT-P03\_00394" 25852 "s59E25H2" 0 "CTP synthase"  
"NT-P03\_00394" 25852 "s59E5H2" 0.1614457 "CTP synthase"  
"NT-P03\_00394" 25852 "s63E6H2" 0.01896296 "CTP synthase"  
"NT-P03\_00395" 25853 "s59E13H2" 0 "Electron transport complex protein RnfA"  
"NT-P03\_00395" 25853 "s59E25H2" 0 "Electron transport complex protein RnfA"  
"NT-P03\_00395" 25853 "s59E5H2" 0.1922928 "Electron transport complex protein RnfA"  
"NT-P03\_00395" 25853 "s63E6H2" 0.008883868 "Electron transport complex protein RnfA"  
"NT-P03\_00396" 25854 "s59E13H2" 0 "Electron transport complex protein RnfA"  
"NT-P03\_00396" 25854 "s59E25H2" 0 "Electron transport complex protein RnfA"  
"NT-P03\_00396" 25854 "s59E5H2" 0.1284291 "Electron transport complex protein RnfA"  
"NT-P03\_00396" 25854 "s63E6H2" 0.00607929 "Electron transport complex protein RnfA"  
"NT-P03\_00397" 25855 "s59E13H2" 0 "Electron transport complex protein rnfB"  
"NT-P03\_00397" 25855 "s59E25H2" 0 "Electron transport complex protein rnfB"  
"NT-P03\_00397" 25855 "s59E5H2" 0.02679808 "Electron transport complex protein rnfB"  
"NT-P03\_00397" 25855 "s63E6H2" 0.01690906 "Electron transport complex protein rnfB"  
"NT-P03\_00398" 25856 "s59E13H2" 0 "Ketoisovalerate oxidoreductase subunit VorD"  
"NT-P03\_00398" 25856 "s59E25H2" 0 "Ketoisovalerate oxidoreductase subunit VorD"  
"NT-P03\_00398" 25856 "s59E5H2" 0.005800198 "Ketoisovalerate oxidoreductase subunit VorD"  
"NT-P03\_00398" 25856 "s63E6H2" 0.01971041 "Ketoisovalerate oxidoreductase subunit VorD"  
"NT-P03\_00399" 25857 "s59E13H2" 0 "protochlorophyllide reductase iron-sulfur ATP-binding protein"  
"NT-P03\_00399" 25857 "s59E25H2" 0 "protochlorophyllide reductase iron-sulfur ATP-binding protein"  
"NT-P03\_00399" 25857 "s59E5H2" 0 "protochlorophyllide reductase iron-sulfur ATP-binding protein"  
"NT-P03\_00399" 25857 "s63E6H2" 0.007506464 "protochlorophyllide reductase iron-sulfur ATP-binding protein"  
"NT-P03\_00400" 25858 "s59E13H2" 0 "hypothetical protein"  
"NT-P03\_00400" 25858 "s59E25H2" 0 "hypothetical protein"  
"NT-P03\_00400" 25858 "s59E5H2" 0.003459513 "hypothetical protein"  
"NT-P03\_00400" 25858 "s63E6H2" 0.004696772 "hypothetical protein"  
"NT-P03\_00401" 25859 "s59E13H2" 0 "Carbon monoxide dehydrogenase 1"  
"NT-P03\_00401" 25859 "s59E25H2" 0 "Carbon monoxide dehydrogenase 1"  
"NT-P03\_00401" 25859 "s59E5H2" 0.002663539 "Carbon monoxide dehydrogenase 1"  
"NT-P03\_00401" 25859 "s63E6H2" 0.008512286 "Carbon monoxide dehydrogenase 1"  
"NT-P03\_00402" 25860 "s59E13H2" 0 "Carbon monoxide dehydrogenase/acetyl-CoA synthase subunit alpha"  
"NT-P03\_00402" 25860 "s59E25H2" 0 "Carbon monoxide dehydrogenase/acetyl-CoA synthase subunit alpha"  
"NT-P03\_00402" 25860 "s59E5H2" 0 "Carbon monoxide dehydrogenase/acetyl-CoA synthase subunit alpha"  
"NT-P03\_00402" 25860 "s63E6H2" 0.006045628 "Carbon monoxide dehydrogenase/acetyl-CoA synthase subunit alpha"  
"NT-P03\_00403" 25861 "s59E13H2" 0 "Corrinoid/iron-sulfur protein large subunit"  
"NT-P03\_00403" 25861 "s59E25H2" 0 "Corrinoid/iron-sulfur protein large subunit"  
"NT-P03\_00403" 25861 "s59E5H2" 0 "Corrinoid/iron-sulfur protein large subunit"  
"NT-P03\_00403" 25861 "s63E6H2" 0.003057738 "Corrinoid/iron-sulfur protein large subunit"  
"NT-P03\_00404" 25862 "s59E13H2" 0 "Corrinoid/iron-sulfur protein small subunit"  
"NT-P03\_00404" 25862 "s59E25H2" 0 "Corrinoid/iron-sulfur protein small subunit"  
"NT-P03\_00404" 25862 "s59E5H2" 0 "Corrinoid/iron-sulfur protein small subunit"  
"NT-P03\_00404" 25862 "s63E6H2" 0.001768406 "Corrinoid/iron-sulfur protein small subunit"  
"NT-P03\_00405" 25863 "s59E13H2" 0 "5-methyltetrahydrofolate:corrinoid/iron-sulfur protein co-methyltransferase"  
"NT-P03\_00405" 25863 "s59E25H2" 0 "5-methyltetrahydrofolate:corrinoid/iron-sulfur protein co-methyltransferase"

"NT-P03\_00405" 25863 "s59E5H2" 0 "5-methyltetrahydrofolate:corrinoid/iron-sulfur protein co-methyltransferase"  
"NT-P03\_00405" 25863 "s63E6H2" 0.0009527245 "5-methyltetrahydrofolate:corrinoid/iron-sulfur protein co-methyltransferase"  
"NT-P03\_00406" 25864 "s59E13H2" 0 "Inner membrane protein YohC"  
"NT-P03\_00406" 25864 "s59E25H2" 0 "Inner membrane protein YohC"  
"NT-P03\_00406" 25864 "s59E5H2" 0.006321556 "Inner membrane protein YohC"  
"NT-P03\_00406" 25864 "s63E6H2" 0 "Inner membrane protein YohC"  
"NT-P03\_00407" 25865 "s59E13H2" 0.002873057 "Na(+)-translocating NADH-quinone reductase subunit F"  
"NT-P03\_00407" 25865 "s59E25H2" 0 "Na(+)-translocating NADH-quinone reductase subunit F"  
"NT-P03\_00407" 25865 "s59E5H2" 0.07571581 "Na(+)-translocating NADH-quinone reductase subunit F"  
"NT-P03\_00407" 25865 "s63E6H2" 0 "Na(+)-translocating NADH-quinone reductase subunit F"  
"NT-P03\_00408" 25866 "s59E13H2" 0 "S-adenosyl-L-methionine-binding protein"  
"NT-P03\_00408" 25866 "s59E25H2" 0 "S-adenosyl-L-methionine-binding protein"  
"NT-P03\_00408" 25866 "s59E5H2" 0 "S-adenosyl-L-methionine-binding protein"  
"NT-P03\_00408" 25866 "s63E6H2" 0 "S-adenosyl-L-methionine-binding protein"  
"NT-P03\_00409" 25867 "s59E13H2" 0 "methylcobalamin:coenzyme M methyltransferase"  
"NT-P03\_00409" 25867 "s59E25H2" 0 "methylcobalamin:coenzyme M methyltransferase"  
"NT-P03\_00409" 25867 "s59E5H2" 0.03587398 "methylcobalamin:coenzyme M methyltransferase"  
"NT-P03\_00409" 25867 "s63E6H2" 0 "methylcobalamin:coenzyme M methyltransferase"  
"NT-P03\_00410" 25868 "s59E13H2" 0 "Inositol 2-dehydrogenase/D-chiro-inositol 3-dehydrogenase"  
"NT-P03\_00410" 25868 "s59E25H2" 0 "Inositol 2-dehydrogenase/D-chiro-inositol 3-dehydrogenase"  
"NT-P03\_00410" 25868 "s59E5H2" 0 "Inositol 2-dehydrogenase/D-chiro-inositol 3-dehydrogenase"  
"NT-P03\_00410" 25868 "s63E6H2" 0 "Inositol 2-dehydrogenase/D-chiro-inositol 3-dehydrogenase"  
"NT-P03\_00414" 25872 "s59E13H2" 0 "hypothetical protein"  
"NT-P03\_00414" 25872 "s59E25H2" 0 "hypothetical protein"  
"NT-P03\_00414" 25872 "s59E5H2" 0 "hypothetical protein"  
"NT-P03\_00414" 25872 "s63E6H2" 0 "hypothetical protein"  
"NT-P03\_00416" 25874 "s59E13H2" 0 "LexA repressor"  
"NT-P03\_00416" 25874 "s59E25H2" 0 "LexA repressor"  
"NT-P03\_00416" 25874 "s59E5H2" 0 "LexA repressor"  
"NT-P03\_00416" 25874 "s63E6H2" 0 "LexA repressor"  
"NT-P03\_00417" 25875 "s59E13H2" 0 "Glucosamine-6-phosphate deaminase 1"  
"NT-P03\_00417" 25875 "s59E25H2" 0 "Glucosamine-6-phosphate deaminase 1"  
"NT-P03\_00417" 25875 "s59E5H2" 0 "Glucosamine-6-phosphate deaminase 1"  
"NT-P03\_00417" 25875 "s63E6H2" 0.002018356 "Glucosamine-6-phosphate deaminase 1"  
"NT-P03\_00418" 25876 "s59E13H2" 0 "methylcobalamin:coenzyme M methyltransferase"  
"NT-P03\_00418" 25876 "s59E25H2" 0 "methylcobalamin:coenzyme M methyltransferase"  
"NT-P03\_00418" 25876 "s59E5H2" 0 "methylcobalamin:coenzyme M methyltransferase"  
"NT-P03\_00418" 25876 "s63E6H2" 0 "methylcobalamin:coenzyme M methyltransferase"  
"NT-P03\_00419" 25877 "s59E13H2" 0 "methylcobalamin:coenzyme M methyltransferase"  
"NT-P03\_00419" 25877 "s59E25H2" 0 "methylcobalamin:coenzyme M methyltransferase"  
"NT-P03\_00419" 25877 "s59E5H2" 0 "methylcobalamin:coenzyme M methyltransferase"  
"NT-P03\_00419" 25877 "s63E6H2" 0 "methylcobalamin:coenzyme M methyltransferase"  
"NT-P03\_00420" 25878 "s59E13H2" 0 "methylcobalamin:coenzyme M methyltransferase"  
"NT-P03\_00420" 25878 "s59E25H2" 0 "methylcobalamin:coenzyme M methyltransferase"  
"NT-P03\_00420" 25878 "s59E5H2" 0 "methylcobalamin:coenzyme M methyltransferase"  
"NT-P03\_00420" 25878 "s63E6H2" 0 "methylcobalamin:coenzyme M methyltransferase"  
"NT-P03\_00421" 25879 "s59E13H2" 0 "Dipeptide transport system permease protein DppC"

"NT-P03\_00421" 25879 "s59E25H2" 0 "Dipeptide transport system permease protein DppC"  
"NT-P03\_00421" 25879 "s59E5H2" 0 "Dipeptide transport system permease protein DppC"  
"NT-P03\_00421" 25879 "s63E6H2" 0 "Dipeptide transport system permease protein DppC"  
"NT-P03\_00422" 25880 "s59E13H2" 0 "Inner membrane ABC transporter permease protein YejB"  
"NT-P03\_00422" 25880 "s59E25H2" 0 "Inner membrane ABC transporter permease protein YejB"  
"NT-P03\_00422" 25880 "s59E5H2" 0 "Inner membrane ABC transporter permease protein YejB"  
"NT-P03\_00422" 25880 "s63E6H2" 0 "Inner membrane ABC transporter permease protein YejB"  
"NT-P03\_00424" 25882 "s59E13H2" 0 "Trimethylamine methyltransferase MttB"  
"NT-P03\_00424" 25882 "s59E25H2" 0 "Trimethylamine methyltransferase MttB"  
"NT-P03\_00424" 25882 "s59E5H2" 0 "Trimethylamine methyltransferase MttB"  
"NT-P03\_00424" 25882 "s63E6H2" 0 "Trimethylamine methyltransferase MttB"  
"NT-P03\_00425" 25883 "s59E13H2" 0 "putative ABC transporter-binding protein precursor"  
"NT-P03\_00425" 25883 "s59E25H2" 0 "putative ABC transporter-binding protein precursor"  
"NT-P03\_00425" 25883 "s59E5H2" 0 "putative ABC transporter-binding protein precursor"  
"NT-P03\_00425" 25883 "s63E6H2" 0 "putative ABC transporter-binding protein precursor"  
"NT-P03\_00426" 25884 "s59E13H2" 0 "Alpha-glucosidase"  
"NT-P03\_00426" 25884 "s59E25H2" 0 "Alpha-glucosidase"  
"NT-P03\_00426" 25884 "s59E5H2" 0 "Alpha-glucosidase"  
"NT-P03\_00426" 25884 "s63E6H2" 0 "Alpha-glucosidase"  
"NT-P03\_00427" 25885 "s59E13H2" 0 "Trimethylamine methyltransferase MttB"  
"NT-P03\_00427" 25885 "s59E25H2" 0 "Trimethylamine methyltransferase MttB"  
"NT-P03\_00427" 25885 "s59E5H2" 0 "Trimethylamine methyltransferase MttB"  
"NT-P03\_00427" 25885 "s63E6H2" 0 "Trimethylamine methyltransferase MttB"  
"NT-P03\_00428" 25886 "s59E13H2" 0 "Trimethylamine methyltransferase MttB"  
"NT-P03\_00428" 25886 "s59E25H2" 0 "Trimethylamine methyltransferase MttB"  
"NT-P03\_00428" 25886 "s59E5H2" 0 "Trimethylamine methyltransferase MttB"  
"NT-P03\_00428" 25886 "s63E6H2" 0 "Trimethylamine methyltransferase MttB"  
"NT-P03\_00429" 25887 "s59E13H2" 0 "Dimethylamine corrinoid protein"  
"NT-P03\_00429" 25887 "s59E25H2" 0 "Dimethylamine corrinoid protein"  
"NT-P03\_00429" 25887 "s59E5H2" 0 "Dimethylamine corrinoid protein"  
"NT-P03\_00429" 25887 "s63E6H2" 0 "Dimethylamine corrinoid protein"  
"NT-P03\_00430" 25888 "s59E13H2" 0 "HTH-type transcriptional repressor CsiR"  
"NT-P03\_00430" 25888 "s59E25H2" 0 "HTH-type transcriptional repressor CsiR"  
"NT-P03\_00430" 25888 "s59E5H2" 0 "HTH-type transcriptional repressor CsiR"  
"NT-P03\_00430" 25888 "s63E6H2" 0 "HTH-type transcriptional repressor CsiR"  
"NT-P03\_00431" 25889 "s59E13H2" 0 "hypothetical protein"  
"NT-P03\_00431" 25889 "s59E25H2" 0 "hypothetical protein"  
"NT-P03\_00431" 25889 "s59E5H2" 0.02800558 "hypothetical protein"  
"NT-P03\_00431" 25889 "s63E6H2" 0.001186086 "hypothetical protein"  
"NT-P03\_00432" 25890 "s59E13H2" 0.005736979 "hypothetical protein"  
"NT-P03\_00432" 25890 "s59E25H2" 0 "hypothetical protein"  
"NT-P03\_00432" 25890 "s59E5H2" 0 "hypothetical protein"  
"NT-P03\_00432" 25890 "s63E6H2" 0 "hypothetical protein"  
"NT-P03\_00433" 25891 "s59E13H2" 0 "Streptopain precursor"  
"NT-P03\_00433" 25891 "s59E25H2" 0 "Streptopain precursor"  
"NT-P03\_00433" 25891 "s59E5H2" 0 "Streptopain precursor"  
"NT-P03\_00433" 25891 "s63E6H2" 0 "Streptopain precursor"

"NT-P03\_00434" 25892 "s59E13H2" 0 "hypothetical protein"  
"NT-P03\_00434" 25892 "s59E25H2" 0 "hypothetical protein"  
"NT-P03\_00434" 25892 "s59E5H2" 0 "hypothetical protein"  
"NT-P03\_00434" 25892 "s63E6H2" 0 "hypothetical protein"  
"NT-P03\_00435" 25893 "s59E13H2" 0 "hypothetical protein"  
"NT-P03\_00435" 25893 "s59E25H2" 0 "hypothetical protein"  
"NT-P03\_00435" 25893 "s59E5H2" 0 "hypothetical protein"  
"NT-P03\_00435" 25893 "s63E6H2" 0 "hypothetical protein"  
"NT-P03\_00437" 25895 "s59E13H2" 0 "hypothetical protein"  
"NT-P03\_00437" 25895 "s59E25H2" 0 "hypothetical protein"  
"NT-P03\_00437" 25895 "s59E5H2" 0 "hypothetical protein"  
"NT-P03\_00437" 25895 "s63E6H2" 0 "hypothetical protein"  
"NT-P03\_00439" 25897 "s59E13H2" 0 "hypothetical protein"  
"NT-P03\_00439" 25897 "s59E25H2" 0 "hypothetical protein"  
"NT-P03\_00439" 25897 "s59E5H2" 0 "hypothetical protein"  
"NT-P03\_00439" 25897 "s63E6H2" 0 "hypothetical protein"  
"NT-P03\_00441" 25899 "s59E13H2" 0.0832398 "hypothetical protein"  
"NT-P03\_00441" 25899 "s59E25H2" 0 "hypothetical protein"  
"NT-P03\_00441" 25899 "s59E5H2" 0 "hypothetical protein"  
"NT-P03\_00441" 25899 "s63E6H2" 0 "hypothetical protein"  
"NT-P03\_00443" 25901 "s59E13H2" 0 "Acyl carrier protein"  
"NT-P03\_00443" 25901 "s59E25H2" 0 "Acyl carrier protein"  
"NT-P03\_00443" 25901 "s59E5H2" 0 "Acyl carrier protein"  
"NT-P03\_00443" 25901 "s63E6H2" 0 "Acyl carrier protein"  
"NT-P03\_00444" 25902 "s59E13H2" 0 "Bifunctional protein GlmU"  
"NT-P03\_00444" 25902 "s59E25H2" 0 "Bifunctional protein GlmU"  
"NT-P03\_00444" 25902 "s59E5H2" 0 "Bifunctional protein GlmU"  
"NT-P03\_00444" 25902 "s63E6H2" 0 "Bifunctional protein GlmU"  
"NT-P03\_00445" 25903 "s59E13H2" 0.0006297244 "Acetate kinase"  
"NT-P03\_00445" 25903 "s59E25H2" 0 "Acetate kinase"  
"NT-P03\_00445" 25903 "s59E5H2" 0 "Acetate kinase"  
"NT-P03\_00445" 25903 "s63E6H2" 0 "Acetate kinase"  
"NT-P03\_00446" 25904 "s59E13H2" 0.0003608088 "Phosphate acetyltransferase"  
"NT-P03\_00446" 25904 "s59E25H2" 0 "Phosphate acetyltransferase"  
"NT-P03\_00446" 25904 "s59E5H2" 0 "Phosphate acetyltransferase"  
"NT-P03\_00446" 25904 "s63E6H2" 0.001465804 "Phosphate acetyltransferase"  
"NT-P03\_00447" 25905 "s59E13H2" 0 "Glucosamine-6-phosphate deaminase 1"  
"NT-P03\_00447" 25905 "s59E25H2" 0 "Glucosamine-6-phosphate deaminase 1"  
"NT-P03\_00447" 25905 "s59E5H2" 0 "Glucosamine-6-phosphate deaminase 1"  
"NT-P03\_00447" 25905 "s63E6H2" 0 "Glucosamine-6-phosphate deaminase 1"  
"NT-P03\_00448" 25906 "s59E13H2" 0 "HTH-type transcriptional repressor YvoA"  
"NT-P03\_00448" 25906 "s59E25H2" 0 "HTH-type transcriptional repressor YvoA"  
"NT-P03\_00448" 25906 "s59E5H2" 0 "HTH-type transcriptional repressor YvoA"  
"NT-P03\_00448" 25906 "s63E6H2" 0.003377383 "HTH-type transcriptional repressor YvoA"  
"NT-P03\_00449" 25907 "s59E13H2" 0 "Malonyl CoA-acyl carrier protein transacylase"  
"NT-P03\_00449" 25907 "s59E25H2" 0 "Malonyl CoA-acyl carrier protein transacylase"  
"NT-P03\_00449" 25907 "s59E5H2" 0 "Malonyl CoA-acyl carrier protein transacylase"



"NT-P03\_00449" 25907 "s63E6H2" 0.001009936 "Malonyl CoA-acyl carrier protein transacylase"  
"NT-P03\_00450" 25908 "s59E13H2" 0 "DNA gyrase subunit A"  
"NT-P03\_00450" 25908 "s59E25H2" 0 "DNA gyrase subunit A"  
"NT-P03\_00450" 25908 "s59E5H2" 0 "DNA gyrase subunit A"  
"NT-P03\_00450" 25908 "s63E6H2" 0.004860403 "DNA gyrase subunit A"  
"NT-P03\_00451" 25909 "s59E13H2" 0 "DNA gyrase subunit B"  
"NT-P03\_00451" 25909 "s59E25H2" 0 "DNA gyrase subunit B"  
"NT-P03\_00451" 25909 "s59E5H2" 0 "DNA gyrase subunit B"  
"NT-P03\_00451" 25909 "s63E6H2" 0.005598333 "DNA gyrase subunit B"  
"NT-P03\_00452" 25910 "s59E13H2" 0 "Acetyl-coenzyme A carboxylase carboxyl transferase subunit alpha"  
"NT-P03\_00452" 25910 "s59E25H2" 0 "Acetyl-coenzyme A carboxylase carboxyl transferase subunit alpha"  
"NT-P03\_00452" 25910 "s59E5H2" 0 "Acetyl-coenzyme A carboxylase carboxyl transferase subunit alpha"  
"NT-P03\_00452" 25910 "s63E6H2" 0.001574718 "Acetyl-coenzyme A carboxylase carboxyl transferase subunit alpha"  
"NT-P03\_00453" 25911 "s59E13H2" 0 "Divergent polysaccharide deacetylase"  
"NT-P03\_00453" 25911 "s59E25H2" 0 "Divergent polysaccharide deacetylase"  
"NT-P03\_00453" 25911 "s59E5H2" 0 "Divergent polysaccharide deacetylase"  
"NT-P03\_00453" 25911 "s63E6H2" 0 "Divergent polysaccharide deacetylase"  
"NT-P03\_00454" 25912 "s59E13H2" 0.002308087 "Carboxy-terminal processing protease CtpB precursor"  
"NT-P03\_00454" 25912 "s59E25H2" 0 "Carboxy-terminal processing protease CtpB precursor"  
"NT-P03\_00454" 25912 "s59E5H2" 0 "Carboxy-terminal processing protease CtpB precursor"  
"NT-P03\_00454" 25912 "s63E6H2" 0 "Carboxy-terminal processing protease CtpB precursor"  
"NT-P03\_00455" 25913 "s59E13H2" 0 "DNA polymerase/3'-5' exonuclease PolX"  
"NT-P03\_00455" 25913 "s59E25H2" 0 "DNA polymerase/3'-5' exonuclease PolX"  
"NT-P03\_00455" 25913 "s59E5H2" 0 "DNA polymerase/3'-5' exonuclease PolX"  
"NT-P03\_00455" 25913 "s63E6H2" 0 "DNA polymerase/3'-5' exonuclease PolX"  
"NT-P03\_00456" 25914 "s59E13H2" 0 "Polymer-forming cytoskeletal"  
"NT-P03\_00456" 25914 "s59E25H2" 0 "Polymer-forming cytoskeletal"  
"NT-P03\_00456" 25914 "s59E5H2" 0 "Polymer-forming cytoskeletal"  
"NT-P03\_00456" 25914 "s63E6H2" 0.3576099 "Polymer-forming cytoskeletal"  
"NT-P03\_00457" 25915 "s59E13H2" 0 "R-phenyllactate dehydratase activator"  
"NT-P03\_00457" 25915 "s59E25H2" 0 "R-phenyllactate dehydratase activator"  
"NT-P03\_00457" 25915 "s59E5H2" 0.002756985 "R-phenyllactate dehydratase activator"  
"NT-P03\_00457" 25915 "s63E6H2" 0.52662 "R-phenyllactate dehydratase activator"  
"NT-P03\_00458" 25916 "s59E13H2" 0.008356719 "hypothetical protein"  
"NT-P03\_00458" 25916 "s59E25H2" 0 "hypothetical protein"  
"NT-P03\_00458" 25916 "s59E5H2" 0 "hypothetical protein"  
"NT-P03\_00458" 25916 "s63E6H2" 1.738298 "hypothetical protein"  
"NT-P03\_00459" 25917 "s59E13H2" 0 "TPR repeat-containing protein YrrB"  
"NT-P03\_00459" 25917 "s59E25H2" 0 "TPR repeat-containing protein YrrB"  
"NT-P03\_00459" 25917 "s59E5H2" 0 "TPR repeat-containing protein YrrB"  
"NT-P03\_00459" 25917 "s63E6H2" 1.707328 "TPR repeat-containing protein YrrB"  
"NT-P03\_00460" 25918 "s59E13H2" 0.001321504 "Alanine racemase"  
"NT-P03\_00460" 25918 "s59E25H2" 0.3477523 "Alanine racemase"  
"NT-P03\_00460" 25918 "s59E5H2" 0 "Alanine racemase"  
"NT-P03\_00460" 25918 "s63E6H2" 2.43844 "Alanine racemase"  
"NT-P03\_00461" 25919 "s59E13H2" 0 "hypothetical protein"  
"NT-P03\_00461" 25919 "s59E25H2" 0 "hypothetical protein"

"NT-P03\_00461" 25919 "s59E5H2" 0 "hypothetical protein"  
"NT-P03\_00461" 25919 "s63E6H2" 2.550801 "hypothetical protein"  
"NT-P03\_00462" 25920 "s59E13H2" 0 "Signal peptidase I S"  
"NT-P03\_00462" 25920 "s59E25H2" 0 "Signal peptidase I S"  
"NT-P03\_00462" 25920 "s59E5H2" 0 "Signal peptidase I S"  
"NT-P03\_00462" 25920 "s63E6H2" 2.384966 "Signal peptidase I S"  
"NT-P03\_00463" 25921 "s59E13H2" 0 "50S ribosomal protein L19"  
"NT-P03\_00463" 25921 "s59E25H2" 0.2367601 "50S ribosomal protein L19"  
"NT-P03\_00463" 25921 "s59E5H2" 0 "50S ribosomal protein L19"  
"NT-P03\_00463" 25921 "s63E6H2" 2.285036 "50S ribosomal protein L19"  
"NT-P03\_00464" 25922 "s59E13H2" 0 "tRNA (guanine-N(1)-methyltransferase"  
"NT-P03\_00464" 25922 "s59E25H2" 0.2069892 "tRNA (guanine-N(1)-methyltransferase"  
"NT-P03\_00464" 25922 "s59E5H2" 0 "tRNA (guanine-N(1)-methyltransferase"  
"NT-P03\_00464" 25922 "s63E6H2" 1.824187 "tRNA (guanine-N(1)-methyltransferase"  
"NT-P03\_00465" 25923 "s59E13H2" 0 "hypothetical protein"  
"NT-P03\_00465" 25923 "s59E25H2" 0 "hypothetical protein"  
"NT-P03\_00465" 25923 "s59E5H2" 0 "hypothetical protein"  
"NT-P03\_00465" 25923 "s63E6H2" 1.474007 "hypothetical protein"  
"NT-P03\_00466" 25924 "s59E13H2" 0 "30S ribosomal protein S16"  
"NT-P03\_00466" 25924 "s59E25H2" 0 "30S ribosomal protein S16"  
"NT-P03\_00466" 25924 "s59E5H2" 0 "30S ribosomal protein S16"  
"NT-P03\_00466" 25924 "s63E6H2" 1.333274 "30S ribosomal protein S16"  
"NT-P03\_00467" 25925 "s59E13H2" 0 "Ribulose-phosphate 3-epimerase"  
"NT-P03\_00467" 25925 "s59E25H2" 0 "Ribulose-phosphate 3-epimerase"  
"NT-P03\_00467" 25925 "s59E5H2" 0 "Ribulose-phosphate 3-epimerase"  
"NT-P03\_00467" 25925 "s63E6H2" 1.252641 "Ribulose-phosphate 3-epimerase"  
"NT-P03\_00468" 25926 "s59E13H2" 0 "Serine/threonine-protein kinase PrkC"  
"NT-P03\_00468" 25926 "s59E25H2" 0 "Serine/threonine-protein kinase PrkC"  
"NT-P03\_00468" 25926 "s59E5H2" 0 "Serine/threonine-protein kinase PrkC"  
"NT-P03\_00468" 25926 "s63E6H2" 1.012841 "Serine/threonine-protein kinase PrkC"  
"NT-P03\_00469" 25927 "s59E13H2" 0 "50S ribosomal protein L20"  
"NT-P03\_00469" 25927 "s59E25H2" 0 "50S ribosomal protein L20"  
"NT-P03\_00469" 25927 "s59E5H2" 0 "50S ribosomal protein L20"  
"NT-P03\_00469" 25927 "s63E6H2" 1.593855 "50S ribosomal protein L20"  
"NT-P03\_00470" 25928 "s59E13H2" 0 "50S ribosomal protein L35"  
"NT-P03\_00470" 25928 "s59E25H2" 0 "50S ribosomal protein L35"  
"NT-P03\_00470" 25928 "s59E5H2" 0 "50S ribosomal protein L35"  
"NT-P03\_00470" 25928 "s63E6H2" 0.1358341 "50S ribosomal protein L35"  
"NT-P03\_00471" 25929 "s59E13H2" 0 "Translation initiation factor IF-3"  
"NT-P03\_00471" 25929 "s59E25H2" 0 "Translation initiation factor IF-3"  
"NT-P03\_00471" 25929 "s59E5H2" 0 "Translation initiation factor IF-3"  
"NT-P03\_00471" 25929 "s63E6H2" 0.3376257 "Translation initiation factor IF-3"  
"NT-P03\_00472" 25930 "s59E13H2" 0 "L-arabinose transport system permease protein AraQ"  
"NT-P03\_00472" 25930 "s59E25H2" 0 "L-arabinose transport system permease protein AraQ"  
"NT-P03\_00472" 25930 "s59E5H2" 0 "L-arabinose transport system permease protein AraQ"  
"NT-P03\_00472" 25930 "s63E6H2" 0 "L-arabinose transport system permease protein AraQ"  
"NT-P03\_00473" 25931 "s59E13H2" 0 "L-arabinose transport system permease protein AraP"

"NT-P03\_00473" 25931 "s59E25H2" 0 "L-arabinose transport system permease protein AraP"  
"NT-P03\_00473" 25931 "s59E5H2" 0 "L-arabinose transport system permease protein AraP"  
"NT-P03\_00473" 25931 "s63E6H2" 0 "L-arabinose transport system permease protein AraP"  
"NT-P03\_00474" 25932 "s59E13H2" 0 "sn-glycerol-3-phosphate-binding periplasmic protein UgpB precursor"  
"NT-P03\_00474" 25932 "s59E25H2" 0 "sn-glycerol-3-phosphate-binding periplasmic protein UgpB precursor"  
"NT-P03\_00474" 25932 "s59E5H2" 0 "sn-glycerol-3-phosphate-binding periplasmic protein UgpB precursor"  
"NT-P03\_00474" 25932 "s63E6H2" 0 "sn-glycerol-3-phosphate-binding periplasmic protein UgpB precursor"  
"NT-P03\_00475" 25933 "s59E13H2" 0 "putative oxidoreductase YcjS"  
"NT-P03\_00475" 25933 "s59E25H2" 0 "putative oxidoreductase YcjS"  
"NT-P03\_00475" 25933 "s59E5H2" 0 "putative oxidoreductase YcjS"  
"NT-P03\_00475" 25933 "s63E6H2" 0 "putative oxidoreductase YcjS"  
"NT-P03\_00476" 25934 "s59E13H2" 0 "hypothetical protein"  
"NT-P03\_00476" 25934 "s59E25H2" 0 "hypothetical protein"  
"NT-P03\_00476" 25934 "s59E5H2" 0 "hypothetical protein"  
"NT-P03\_00476" 25934 "s63E6H2" 0 "hypothetical protein"  
"NT-P03\_00477" 25935 "s59E13H2" 0 "Iron-sulfur flavoprotein"  
"NT-P03\_00477" 25935 "s59E25H2" 0 "Iron-sulfur flavoprotein"  
"NT-P03\_00477" 25935 "s59E5H2" 0 "Iron-sulfur flavoprotein"  
"NT-P03\_00477" 25935 "s63E6H2" 0 "Iron-sulfur flavoprotein"  
"NT-P03\_00478" 25936 "s59E13H2" 0 "Inosose isomerase"  
"NT-P03\_00478" 25936 "s59E25H2" 0 "Inosose isomerase"  
"NT-P03\_00478" 25936 "s59E5H2" 0 "Inosose isomerase"  
"NT-P03\_00478" 25936 "s63E6H2" 0 "Inosose isomerase"  
"NT-P03\_00480" 25938 "s59E13H2" 0 "hypothetical protein"  
"NT-P03\_00480" 25938 "s59E25H2" 0 "hypothetical protein"  
"NT-P03\_00480" 25938 "s59E5H2" 0 "hypothetical protein"  
"NT-P03\_00480" 25938 "s63E6H2" 0.006878833 "hypothetical protein"  
"NT-P03\_00481" 25939 "s59E13H2" 0 "Acetolactate synthase isozyme 3 large subunit"  
"NT-P03\_00481" 25939 "s59E25H2" 0 "Acetolactate synthase isozyme 3 large subunit"  
"NT-P03\_00481" 25939 "s59E5H2" 0 "Acetolactate synthase isozyme 3 large subunit"  
"NT-P03\_00481" 25939 "s63E6H2" 0 "Acetolactate synthase isozyme 3 large subunit"  
"NT-P03\_00482" 25940 "s59E13H2" 0 "1-deoxy-D-xylulose-5-phosphate synthase"  
"NT-P03\_00482" 25940 "s59E25H2" 0 "1-deoxy-D-xylulose-5-phosphate synthase"  
"NT-P03\_00482" 25940 "s59E5H2" 0 "1-deoxy-D-xylulose-5-phosphate synthase"  
"NT-P03\_00482" 25940 "s63E6H2" 0 "1-deoxy-D-xylulose-5-phosphate synthase"  
"NT-P03\_00483" 25941 "s59E13H2" 0 "hypothetical protein"  
"NT-P03\_00483" 25941 "s59E25H2" 0 "hypothetical protein"  
"NT-P03\_00483" 25941 "s59E5H2" 0 "hypothetical protein"  
"NT-P03\_00483" 25941 "s63E6H2" 0 "hypothetical protein"  
"NT-P03\_00484" 25942 "s59E13H2" 0 "Phosphoribosyl-ATP pyrophosphatase"  
"NT-P03\_00484" 25942 "s59E25H2" 0 "Phosphoribosyl-ATP pyrophosphatase"  
"NT-P03\_00484" 25942 "s59E5H2" 0 "Phosphoribosyl-ATP pyrophosphatase"  
"NT-P03\_00484" 25942 "s63E6H2" 0 "Phosphoribosyl-ATP pyrophosphatase"  
"NT-P03\_00485" 25943 "s59E13H2" 0 "hypothetical protein"  
"NT-P03\_00485" 25943 "s59E25H2" 0 "hypothetical protein"  
"NT-P03\_00485" 25943 "s59E5H2" 0 "hypothetical protein"  
"NT-P03\_00485" 25943 "s63E6H2" 0 "hypothetical protein"

"NT-P03\_00486" 25944 "s59E13H2" 0 "Histidine--tRNA ligase"  
"NT-P03\_00486" 25944 "s59E25H2" 0 "Histidine--tRNA ligase"  
"NT-P03\_00486" 25944 "s59E5H2" 0 "Histidine--tRNA ligase"  
"NT-P03\_00486" 25944 "s63E6H2" 0 "Histidine--tRNA ligase"  
"NT-P03\_00487" 25945 "s59E13H2" 0 "Elongation factor 1-alpha"  
"NT-P03\_00487" 25945 "s59E25H2" 0 "Elongation factor 1-alpha"  
"NT-P03\_00487" 25945 "s59E5H2" 0 "Elongation factor 1-alpha"  
"NT-P03\_00487" 25945 "s63E6H2" 0 "Elongation factor 1-alpha"  
"NT-P03\_00488" 25946 "s59E13H2" 0 "Elongation factor 1-alpha"  
"NT-P03\_00488" 25946 "s59E25H2" 0 "Elongation factor 1-alpha"  
"NT-P03\_00488" 25946 "s59E5H2" 0 "Elongation factor 1-alpha"  
"NT-P03\_00488" 25946 "s63E6H2" 0 "Elongation factor 1-alpha"  
"NT-P03\_00489" 25947 "s59E13H2" 0 "Histidine decarboxylase proenzyme precursor"  
"NT-P03\_00489" 25947 "s59E25H2" 0 "Histidine decarboxylase proenzyme precursor"  
"NT-P03\_00489" 25947 "s59E5H2" 0 "Histidine decarboxylase proenzyme precursor"  
"NT-P03\_00489" 25947 "s63E6H2" 0 "Histidine decarboxylase proenzyme precursor"  
"NT-P03\_00490" 25948 "s59E13H2" 0 "ATP phosphoribosyltransferase"  
"NT-P03\_00490" 25948 "s59E25H2" 0 "ATP phosphoribosyltransferase"  
"NT-P03\_00490" 25948 "s59E5H2" 0 "ATP phosphoribosyltransferase"  
"NT-P03\_00490" 25948 "s63E6H2" 0 "ATP phosphoribosyltransferase"  
"NT-P03\_00492" 25950 "s59E13H2" 0 "Aldehyde ferredoxin oxidoreductase, domains 2 & 3"  
"NT-P03\_00492" 25950 "s59E25H2" 0 "Aldehyde ferredoxin oxidoreductase, domains 2 & 3"  
"NT-P03\_00492" 25950 "s59E5H2" 0 "Aldehyde ferredoxin oxidoreductase, domains 2 & 3"  
"NT-P03\_00492" 25950 "s63E6H2" 0 "Aldehyde ferredoxin oxidoreductase, domains 2 & 3"  
"NT-P03\_00495" 25953 "s59E13H2" 0 "hypothetical protein"  
"NT-P03\_00495" 25953 "s59E25H2" 0 "hypothetical protein"  
"NT-P03\_00495" 25953 "s59E5H2" 0 "hypothetical protein"  
"NT-P03\_00495" 25953 "s63E6H2" 0 "hypothetical protein"  
"NT-P03\_00496" 25954 "s59E13H2" 0 "Chromosome partition protein Smc"  
"NT-P03\_00496" 25954 "s59E25H2" 0 "Chromosome partition protein Smc"  
"NT-P03\_00496" 25954 "s59E5H2" 0 "Chromosome partition protein Smc"  
"NT-P03\_00496" 25954 "s63E6H2" 0 "Chromosome partition protein Smc"  
"NT-P03\_00497" 25955 "s59E13H2" 0 "hypothetical protein"  
"NT-P03\_00497" 25955 "s59E25H2" 0 "hypothetical protein"  
"NT-P03\_00497" 25955 "s59E5H2" 0 "hypothetical protein"  
"NT-P03\_00497" 25955 "s63E6H2" 0 "hypothetical protein"  
"NT-P03\_00499" 25957 "s59E13H2" 0 "Cold shock-like protein CspLA"  
"NT-P03\_00499" 25957 "s59E25H2" 0 "Cold shock-like protein CspLA"  
"NT-P03\_00499" 25957 "s59E5H2" 0.01285476 "Cold shock-like protein CspLA"  
"NT-P03\_00499" 25957 "s63E6H2" 0.02972097 "Cold shock-like protein CspLA"  
"NT-P03\_00501" 25959 "s59E13H2" 0 "Integrase core domain protein"  
"NT-P03\_00501" 25959 "s59E25H2" 0 "Integrase core domain protein"  
"NT-P03\_00501" 25959 "s59E5H2" 0 "Integrase core domain protein"  
"NT-P03\_00501" 25959 "s63E6H2" 0 "Integrase core domain protein"  
"NT-P03\_00502" 25960 "s59E13H2" 0 "RNA polymerase sigma factor"  
"NT-P03\_00502" 25960 "s59E25H2" 0 "RNA polymerase sigma factor"  
"NT-P03\_00502" 25960 "s59E5H2" 0 "RNA polymerase sigma factor"

"NT-P03\_00502" 25960 "s63E6H2" 0 "RNA polymerase sigma factor"  
"NT-P03\_00503" 25961 "s59E13H2" 0 "ECF RNA polymerase sigma-E factor"  
"NT-P03\_00503" 25961 "s59E25H2" 0 "ECF RNA polymerase sigma-E factor"  
"NT-P03\_00503" 25961 "s59E5H2" 0 "ECF RNA polymerase sigma-E factor"  
"NT-P03\_00503" 25961 "s63E6H2" 0 "ECF RNA polymerase sigma-E factor"  
"NT-P03\_00504" 25962 "s59E13H2" 0 "D-aminoacylase"  
"NT-P03\_00504" 25962 "s59E25H2" 0 "D-aminoacylase"  
"NT-P03\_00504" 25962 "s59E5H2" 0 "D-aminoacylase"  
"NT-P03\_00504" 25962 "s63E6H2" 0 "D-aminoacylase"  
"NT-P03\_00505" 25963 "s59E13H2" 0.001343998 "hypothetical protein"  
"NT-P03\_00505" 25963 "s59E25H2" 0 "hypothetical protein"  
"NT-P03\_00505" 25963 "s59E5H2" 0 "hypothetical protein"  
"NT-P03\_00505" 25963 "s63E6H2" 0 "hypothetical protein"  
"NT-P03\_00506" 25964 "s59E13H2" 0.01004197 "Transposase DDE domain protein"  
"NT-P03\_00506" 25964 "s59E25H2" 0 "Transposase DDE domain protein"  
"NT-P03\_00506" 25964 "s59E5H2" 0.00260156 "Transposase DDE domain protein"  
"NT-P03\_00506" 25964 "s63E6H2" 0 "Transposase DDE domain protein"  
"NT-P03\_00507" 25965 "s59E13H2" 0 "hypothetical protein"  
"NT-P03\_00507" 25965 "s59E25H2" 0 "hypothetical protein"  
"NT-P03\_00507" 25965 "s59E5H2" 0 "hypothetical protein"  
"NT-P03\_00507" 25965 "s63E6H2" 0.3215385 "hypothetical protein"  
"NT-P03\_00508" 25966 "s59E13H2" 0 "Pyruvate kinase"  
"NT-P03\_00508" 25966 "s59E25H2" 0 "Pyruvate kinase"  
"NT-P03\_00508" 25966 "s59E5H2" 0.002802441 "Pyruvate kinase"  
"NT-P03\_00508" 25966 "s63E6H2" 0 "Pyruvate kinase"  
"NT-P03\_00509" 25967 "s59E13H2" 0 "Carbamoyl-phosphate synthase large chain"  
"NT-P03\_00509" 25967 "s59E25H2" 0 "Carbamoyl-phosphate synthase large chain"  
"NT-P03\_00509" 25967 "s59E5H2" 0.01272044 "Carbamoyl-phosphate synthase large chain"  
"NT-P03\_00509" 25967 "s63E6H2" 0.004834591 "Carbamoyl-phosphate synthase large chain"  
"NT-P03\_00510" 25968 "s59E13H2" 0.01974843 "Imidazole glycerol phosphate synthase subunit HisF"  
"NT-P03\_00510" 25968 "s59E25H2" 0 "Imidazole glycerol phosphate synthase subunit HisF"  
"NT-P03\_00510" 25968 "s59E5H2" 0.01197337 "Imidazole glycerol phosphate synthase subunit HisF"  
"NT-P03\_00510" 25968 "s63E6H2" 0.01617965 "Imidazole glycerol phosphate synthase subunit HisF"  
"NT-P03\_00511" 25969 "s59E13H2" 0.08933991 "General stress protein 69"  
"NT-P03\_00511" 25969 "s59E25H2" 0 "General stress protein 69"  
"NT-P03\_00511" 25969 "s59E5H2" 0 "General stress protein 69"  
"NT-P03\_00511" 25969 "s63E6H2" 0.00579591 "General stress protein 69"  
"NT-P03\_00512" 25970 "s59E13H2" 0 "hypothetical protein"  
"NT-P03\_00512" 25970 "s59E25H2" 0 "hypothetical protein"  
"NT-P03\_00512" 25970 "s59E5H2" 0.01295621 "hypothetical protein"  
"NT-P03\_00512" 25970 "s63E6H2" 0.002461371 "hypothetical protein"  
"NT-P03\_00513" 25971 "s59E13H2" 0 "hypothetical protein"  
"NT-P03\_00513" 25971 "s59E25H2" 0 "hypothetical protein"  
"NT-P03\_00513" 25971 "s59E5H2" 0 "hypothetical protein"  
"NT-P03\_00513" 25971 "s63E6H2" 0.0007689578 "hypothetical protein"  
"NT-P03\_00514" 25972 "s59E13H2" 0 "Glutamine--tRNA ligase"  
"NT-P03\_00514" 25972 "s59E25H2" 0 "Glutamine--tRNA ligase"

"NT-P03\_00514" 25972 "s59E5H2" 0 "Glutamine--tRNA ligase"  
"NT-P03\_00514" 25972 "s63E6H2" 0.005152631 "Glutamine--tRNA ligase"  
"NT-P03\_00515" 25973 "s59E13H2" 0 "putative polyketide biosynthesis zinc-dependent hydrolase PksB"  
"NT-P03\_00515" 25973 "s59E25H2" 0 "putative polyketide biosynthesis zinc-dependent hydrolase PksB"  
"NT-P03\_00515" 25973 "s59E5H2" 0 "putative polyketide biosynthesis zinc-dependent hydrolase PksB"  
"NT-P03\_00515" 25973 "s63E6H2" 0.004760656 "putative polyketide biosynthesis zinc-dependent hydrolase PksB"  
"NT-P03\_00516" 25974 "s59E13H2" 0 "hypothetical protein"  
"NT-P03\_00516" 25974 "s59E25H2" 0 "hypothetical protein"  
"NT-P03\_00516" 25974 "s59E5H2" 0 "hypothetical protein"  
"NT-P03\_00516" 25974 "s63E6H2" 0 "hypothetical protein"  
"NT-P03\_00517" 25975 "s59E13H2" 0 "putative trifunctional 2-polyprenylphenol hydroxylase/glutamate synthase subunit beta/ferritin domain-containing protein"  
"NT-P03\_00517" 25975 "s59E25H2" 0 "putative trifunctional 2-polyprenylphenol hydroxylase/glutamate synthase subunit beta/ferritin domain-containing protein"  
"NT-P03\_00517" 25975 "s59E5H2" 0 "putative trifunctional 2-polyprenylphenol hydroxylase/glutamate synthase subunit beta/ferritin domain-containing protein"  
"NT-P03\_00517" 25975 "s63E6H2" 0.001283825 "putative trifunctional 2-polyprenylphenol hydroxylase/glutamate synthase subunit beta/ferritin domain-containing protein"  
"NT-P03\_00518" 25976 "s59E13H2" 0 "putative trifunctional 2-polyprenylphenol hydroxylase/glutamate synthase subunit beta/ferritin domain-containing protein"  
"NT-P03\_00518" 25976 "s59E25H2" 0 "putative trifunctional 2-polyprenylphenol hydroxylase/glutamate synthase subunit beta/ferritin domain-containing protein"  
"NT-P03\_00518" 25976 "s59E5H2" 0 "putative trifunctional 2-polyprenylphenol hydroxylase/glutamate synthase subunit beta/ferritin domain-containing protein"  
"NT-P03\_00518" 25976 "s63E6H2" 0.01391245 "putative trifunctional 2-polyprenylphenol hydroxylase/glutamate synthase subunit beta/ferritin domain-containing protein"  
"NT-P03\_00519" 25977 "s59E13H2" 0 "VIT family protein"  
"NT-P03\_00519" 25977 "s59E25H2" 0 "VIT family protein"  
"NT-P03\_00519" 25977 "s59E5H2" 0 "VIT family protein"  
"NT-P03\_00519" 25977 "s63E6H2" 0 "VIT family protein"  
"NT-P03\_00520" 25978 "s59E13H2" 0 "Peroxide operon regulator"  
"NT-P03\_00520" 25978 "s59E25H2" 0 "Peroxide operon regulator"  
"NT-P03\_00520" 25978 "s59E5H2" 0 "Peroxide operon regulator"  
"NT-P03\_00520" 25978 "s63E6H2" 0 "Peroxide operon regulator"  
"NT-P03\_00521" 25979 "s59E13H2" 0 "Rubrerythrin"  
"NT-P03\_00521" 25979 "s59E25H2" 0 "Rubrerythrin"  
"NT-P03\_00521" 25979 "s59E5H2" 0 "Rubrerythrin"  
"NT-P03\_00521" 25979 "s63E6H2" 0 "Rubrerythrin"  
"NT-P03\_00522" 25980 "s59E13H2" 0 "Hemerythrin HHE cation binding domain protein"  
"NT-P03\_00522" 25980 "s59E25H2" 0 "Hemerythrin HHE cation binding domain protein"  
"NT-P03\_00522" 25980 "s59E5H2" 0 "Hemerythrin HHE cation binding domain protein"  
"NT-P03\_00522" 25980 "s63E6H2" 0 "Hemerythrin HHE cation binding domain protein"  
"NT-P03\_00523" 25981 "s59E13H2" 0 "PAC2 family protein"  
"NT-P03\_00523" 25981 "s59E25H2" 0 "PAC2 family protein"  
"NT-P03\_00523" 25981 "s59E5H2" 0 "PAC2 family protein"  
"NT-P03\_00523" 25981 "s63E6H2" 0 "PAC2 family protein"  
"NT-P03\_00524" 25982 "s59E13H2" 0 "Cadmium, cobalt and zinc/H(+)-K(+) antiporter"  
"NT-P03\_00524" 25982 "s59E25H2" 0 "Cadmium, cobalt and zinc/H(+)-K(+) antiporter"  
"NT-P03\_00524" 25982 "s59E5H2" 0.009029319 "Cadmium, cobalt and zinc/H(+)-K(+) antiporter"  
"NT-P03\_00524" 25982 "s63E6H2" 0 "Cadmium, cobalt and zinc/H(+)-K(+) antiporter"  
"NT-P19\_00002" 22740 "s59E13H2" 0.005589115 "Integrase core domain protein"  
"NT-P19\_00002" 22740 "s59E25H2" 0 "Integrase core domain protein"  
"NT-P19\_00002" 22740 "s59E5H2" 0 "Integrase core domain protein"  
"NT-P19\_00002" 22740 "s63E6H2" 0.005883499 "Integrase core domain protein"  
"NT-P19\_00003" 22741 "s59E13H2" 0 "hypothetical protein"

"NT-P19\_00003" 22741 "s59E25H2" 0 "hypothetical protein"  
"NT-P19\_00003" 22741 "s59E5H2" 0 "hypothetical protein"  
"NT-P19\_00003" 22741 "s63E6H2" 0.002160088 "hypothetical protein"  
"NT-P19\_00004" 22742 "s59E13H2" 0 "Ribbon-helix-helix protein, copG family"  
"NT-P19\_00004" 22742 "s59E25H2" 0 "Ribbon-helix-helix protein, copG family"  
"NT-P19\_00004" 22742 "s59E5H2" 0 "Ribbon-helix-helix protein, copG family"  
"NT-P19\_00004" 22742 "s63E6H2" 0 "Ribbon-helix-helix protein, copG family"  
"NT-P19\_00005" 22743 "s59E13H2" 0 "hypothetical protein"  
"NT-P19\_00005" 22743 "s59E25H2" 0 "hypothetical protein"  
"NT-P19\_00005" 22743 "s59E5H2" 0 "hypothetical protein"  
"NT-P19\_00005" 22743 "s63E6H2" 0 "hypothetical protein"  
"NT-P19\_00006" 22744 "s59E13H2" 0 "methylcobalamin:coenzyme M methyltransferase"  
"NT-P19\_00006" 22744 "s59E25H2" 0 "methylcobalamin:coenzyme M methyltransferase"  
"NT-P19\_00006" 22744 "s59E5H2" 0 "methylcobalamin:coenzyme M methyltransferase"  
"NT-P19\_00006" 22744 "s63E6H2" 0.00944747 "methylcobalamin:coenzyme M methyltransferase"  
"NT-P19\_00007" 22745 "s59E13H2" 0 "5-dehydro-2-deoxygluconokinase"  
"NT-P19\_00007" 22745 "s59E25H2" 0 "5-dehydro-2-deoxygluconokinase"  
"NT-P19\_00007" 22745 "s59E5H2" 0 "5-dehydro-2-deoxygluconokinase"  
"NT-P19\_00007" 22745 "s63E6H2" 0.4000838 "5-dehydro-2-deoxygluconokinase"  
"NT-P19\_00008" 22746 "s59E13H2" 0 "Aspartate-semialdehyde dehydrogenase 2"  
"NT-P19\_00008" 22746 "s59E25H2" 0 "Aspartate-semialdehyde dehydrogenase 2"  
"NT-P19\_00008" 22746 "s59E5H2" 0.01312815 "Aspartate-semialdehyde dehydrogenase 2"  
"NT-P19\_00008" 22746 "s63E6H2" 0.5882142 "Aspartate-semialdehyde dehydrogenase 2"  
"NT-P19\_00009" 22747 "s59E13H2" 0 "putative ABC transporter-binding protein precursor"  
"NT-P19\_00009" 22747 "s59E25H2" 0 "putative ABC transporter-binding protein precursor"  
"NT-P19\_00009" 22747 "s59E5H2" 0 "putative ABC transporter-binding protein precursor"  
"NT-P19\_00009" 22747 "s63E6H2" 0.001551631 "putative ABC transporter-binding protein precursor"  
"NT-P19\_00010" 22748 "s59E13H2" 0 "Inner membrane ABC transporter permease protein YejB"  
"NT-P19\_00010" 22748 "s59E25H2" 0 "Inner membrane ABC transporter permease protein YejB"  
"NT-P19\_00010" 22748 "s59E5H2" 0 "Inner membrane ABC transporter permease protein YejB"  
"NT-P19\_00010" 22748 "s63E6H2" 0 "Inner membrane ABC transporter permease protein YejB"  
"NT-P19\_00011" 22749 "s59E13H2" 0 "Oligopeptide transport system permease protein OppC"  
"NT-P19\_00011" 22749 "s59E25H2" 0 "Oligopeptide transport system permease protein OppC"  
"NT-P19\_00011" 22749 "s59E5H2" 0 "Oligopeptide transport system permease protein OppC"  
"NT-P19\_00011" 22749 "s63E6H2" 0 "Oligopeptide transport system permease protein OppC"  
"NT-P19\_00012" 22750 "s59E13H2" 0 "Alpha-L-fucosidase"  
"NT-P19\_00012" 22750 "s59E25H2" 0 "Alpha-L-fucosidase"  
"NT-P19\_00012" 22750 "s59E5H2" 0 "Alpha-L-fucosidase"  
"NT-P19\_00012" 22750 "s63E6H2" 0.002118731 "Alpha-L-fucosidase"  
"NT-P19\_00013" 22751 "s59E13H2" 0 "Alcohol dehydrogenase"  
"NT-P19\_00013" 22751 "s59E25H2" 0 "Alcohol dehydrogenase"  
"NT-P19\_00013" 22751 "s59E5H2" 0.000208377 "Alcohol dehydrogenase"  
"NT-P19\_00013" 22751 "s63E6H2" 0.002609875 "Alcohol dehydrogenase"  
"NT-P19\_00015" 22753 "s59E13H2" 0 "Glucose-6-phosphate 3-dehydrogenase"  
"NT-P19\_00015" 22753 "s59E25H2" 0 "Glucose-6-phosphate 3-dehydrogenase"  
"NT-P19\_00015" 22753 "s59E5H2" 0 "Glucose-6-phosphate 3-dehydrogenase"  
"NT-P19\_00015" 22753 "s63E6H2" 0.001286721 "Glucose-6-phosphate 3-dehydrogenase"

"NT-P19\_00016" 22754 "s59E13H2" 0 "Shikimate dehydrogenase"  
"NT-P19\_00016" 22754 "s59E25H2" 0 "Shikimate dehydrogenase"  
"NT-P19\_00016" 22754 "s59E5H2" 0 "Shikimate dehydrogenase"  
"NT-P19\_00016" 22754 "s63E6H2" 0.0005441339 "Shikimate dehydrogenase"  
"NT-P19\_00017" 22755 "s59E13H2" 0 "Chorismate synthase"  
"NT-P19\_00017" 22755 "s59E25H2" 0 "Chorismate synthase"  
"NT-P19\_00017" 22755 "s59E5H2" 0 "Chorismate synthase"  
"NT-P19\_00017" 22755 "s63E6H2" 0.001210662 "Chorismate synthase"  
"NT-P19\_00018" 22756 "s59E13H2" 0 "N-acetylmuramic acid 6-phosphate etherase"  
"NT-P19\_00018" 22756 "s59E25H2" 0 "N-acetylmuramic acid 6-phosphate etherase"  
"NT-P19\_00018" 22756 "s59E5H2" 0 "N-acetylmuramic acid 6-phosphate etherase"  
"NT-P19\_00018" 22756 "s63E6H2" 0 "N-acetylmuramic acid 6-phosphate etherase"  
"NT-P19\_00019" 22757 "s59E13H2" 0 "Anhydro-N-acetylmuramic acid kinase"  
"NT-P19\_00019" 22757 "s59E25H2" 0 "Anhydro-N-acetylmuramic acid kinase"  
"NT-P19\_00019" 22757 "s59E5H2" 0 "Anhydro-N-acetylmuramic acid kinase"  
"NT-P19\_00019" 22757 "s63E6H2" 0 "Anhydro-N-acetylmuramic acid kinase"  
"NT-P19\_00020" 22758 "s59E13H2" 0 "Trehalose transport system permease protein SugB"  
"NT-P19\_00020" 22758 "s59E25H2" 0 "Trehalose transport system permease protein SugB"  
"NT-P19\_00020" 22758 "s59E5H2" 0 "Trehalose transport system permease protein SugB"  
"NT-P19\_00020" 22758 "s63E6H2" 0 "Trehalose transport system permease protein SugB"  
"NT-P19\_00021" 22759 "s59E13H2" 0 "Trehalose/maltose transport system permease protein MalF"  
"NT-P19\_00021" 22759 "s59E25H2" 0 "Trehalose/maltose transport system permease protein MalF"  
"NT-P19\_00021" 22759 "s59E5H2" 0 "Trehalose/maltose transport system permease protein MalF"  
"NT-P19\_00021" 22759 "s63E6H2" 0 "Trehalose/maltose transport system permease protein MalF"  
"NT-P19\_00022" 22760 "s59E13H2" 0 "Trehalose/maltose-binding protein MalE precursor"  
"NT-P19\_00022" 22760 "s59E25H2" 0 "Trehalose/maltose-binding protein MalE precursor"  
"NT-P19\_00022" 22760 "s59E5H2" 0 "Trehalose/maltose-binding protein MalE precursor"  
"NT-P19\_00022" 22760 "s63E6H2" 0 "Trehalose/maltose-binding protein MalE precursor"  
"NT-P19\_00023" 22761 "s59E13H2" 0 "putative HTH-type transcriptional regulator YbbH"  
"NT-P19\_00023" 22761 "s59E25H2" 0 "putative HTH-type transcriptional regulator YbbH"  
"NT-P19\_00023" 22761 "s59E5H2" 0 "putative HTH-type transcriptional regulator YbbH"  
"NT-P19\_00023" 22761 "s63E6H2" 0 "putative HTH-type transcriptional regulator YbbH"  
"NT-P19\_00025" 22763 "s59E13H2" 0 "Glutamate--cysteine ligase GshA"  
"NT-P19\_00025" 22763 "s59E25H2" 0 "Glutamate--cysteine ligase GshA"  
"NT-P19\_00025" 22763 "s59E5H2" 0 "Glutamate--cysteine ligase GshA"  
"NT-P19\_00025" 22763 "s63E6H2" 0.1056962 "Glutamate--cysteine ligase GshA"  
"NT-P19\_00026" 22764 "s59E13H2" 0 "LysE type translocator"  
"NT-P19\_00026" 22764 "s59E25H2" 0 "LysE type translocator"  
"NT-P19\_00026" 22764 "s59E5H2" 0 "LysE type translocator"  
"NT-P19\_00026" 22764 "s63E6H2" 0.142442 "LysE type translocator"  
"NT-P19\_00027" 22765 "s59E13H2" 0 "Adenosine specific kinase"  
"NT-P19\_00027" 22765 "s59E25H2" 0 "Adenosine specific kinase"  
"NT-P19\_00027" 22765 "s59E5H2" 0 "Adenosine specific kinase"  
"NT-P19\_00027" 22765 "s63E6H2" 0.09881677 "Adenosine specific kinase"  
"NT-P19\_00028" 22766 "s59E13H2" 0 "GTPase ObgE"  
"NT-P19\_00028" 22766 "s59E25H2" 0 "GTPase ObgE"  
"NT-P19\_00028" 22766 "s59E5H2" 0 "GTPase ObgE"



"NT-P19\_00028" 22766 "s63E6H2" 0.1531797 "GTPase ObgE"  
"NT-P19\_00029" 22767 "s59E13H2" 0 "Ornithine carbamoyltransferase"  
"NT-P19\_00029" 22767 "s59E25H2" 0 "Ornithine carbamoyltransferase"  
"NT-P19\_00029" 22767 "s59E5H2" 0 "Ornithine carbamoyltransferase"  
"NT-P19\_00029" 22767 "s63E6H2" 0.1844482 "Ornithine carbamoyltransferase"  
"NT-P19\_00030" 22768 "s59E13H2" 0 "Acyl-CoA dehydrogenase"  
"NT-P19\_00030" 22768 "s59E25H2" 0 "Acyl-CoA dehydrogenase"  
"NT-P19\_00030" 22768 "s59E5H2" 0 "Acyl-CoA dehydrogenase"  
"NT-P19\_00030" 22768 "s63E6H2" 0.1910497 "Acyl-CoA dehydrogenase"  
"NT-P19\_00031" 22769 "s59E13H2" 0 "Acryloyl-CoA reductase electron transfer subunit gamma"  
"NT-P19\_00031" 22769 "s59E25H2" 0 "Acryloyl-CoA reductase electron transfer subunit gamma"  
"NT-P19\_00031" 22769 "s59E5H2" 0 "Acryloyl-CoA reductase electron transfer subunit gamma"  
"NT-P19\_00031" 22769 "s63E6H2" 0.08619235 "Acryloyl-CoA reductase electron transfer subunit gamma"  
"NT-P19\_00032" 22770 "s59E13H2" 0 "Acryloyl-CoA reductase electron transfer subunit beta"  
"NT-P19\_00032" 22770 "s59E25H2" 0 "Acryloyl-CoA reductase electron transfer subunit beta"  
"NT-P19\_00032" 22770 "s59E5H2" 0 "Acryloyl-CoA reductase electron transfer subunit beta"  
"NT-P19\_00032" 22770 "s63E6H2" 0.009483896 "Acryloyl-CoA reductase electron transfer subunit beta"  
"NT-P19\_00033" 22771 "s59E13H2" 0 "putative hydrolase"  
"NT-P19\_00033" 22771 "s59E25H2" 0 "putative hydrolase"  
"NT-P19\_00033" 22771 "s59E5H2" 0.004836377 "putative hydrolase"  
"NT-P19\_00033" 22771 "s63E6H2" 0.0992488 "putative hydrolase"  
"NT-P19\_00035" 22773 "s59E13H2" 0 "Proline--tRNA ligase"  
"NT-P19\_00035" 22773 "s59E25H2" 0 "Proline--tRNA ligase"  
"NT-P19\_00035" 22773 "s59E5H2" 0.00202408 "Proline--tRNA ligase"  
"NT-P19\_00035" 22773 "s63E6H2" 0.1305329 "Proline--tRNA ligase"  
"NT-P19\_00036" 22774 "s59E13H2" 0 "hypothetical protein"  
"NT-P19\_00036" 22774 "s59E25H2" 0 "hypothetical protein"  
"NT-P19\_00036" 22774 "s59E5H2" 0.007097481 "hypothetical protein"  
"NT-P19\_00036" 22774 "s63E6H2" 0.006190792 "hypothetical protein"  
"NT-P19\_00037" 22775 "s59E13H2" 0 "Translation initiation factor IF-2"  
"NT-P19\_00037" 22775 "s59E25H2" 0 "Translation initiation factor IF-2"  
"NT-P19\_00037" 22775 "s59E5H2" 0 "Translation initiation factor IF-2"  
"NT-P19\_00037" 22775 "s63E6H2" 0.00316516 "Translation initiation factor IF-2"  
"NT-P19\_00038" 22776 "s59E13H2" 0 "hypothetical protein"  
"NT-P19\_00038" 22776 "s59E25H2" 0 "hypothetical protein"  
"NT-P19\_00038" 22776 "s59E5H2" 0 "hypothetical protein"  
"NT-P19\_00038" 22776 "s63E6H2" 0 "hypothetical protein"  
"NT-P19\_00039" 22777 "s59E13H2" 0 "tRNA pseudouridine synthase B"  
"NT-P19\_00039" 22777 "s59E25H2" 0 "tRNA pseudouridine synthase B"  
"NT-P19\_00039" 22777 "s59E5H2" 0 "tRNA pseudouridine synthase B"  
"NT-P19\_00039" 22777 "s63E6H2" 0.001396678 "tRNA pseudouridine synthase B"  
"NT-P19\_00040" 22778 "s59E13H2" 0 "Riboflavin biosynthesis protein RibF"  
"NT-P19\_00040" 22778 "s59E25H2" 0 "Riboflavin biosynthesis protein RibF"  
"NT-P19\_00040" 22778 "s59E5H2" 0 "Riboflavin biosynthesis protein RibF"  
"NT-P19\_00040" 22778 "s63E6H2" 0.00614573 "Riboflavin biosynthesis protein RibF"  
"NT-P19\_00041" 22779 "s59E13H2" 0 "Bifunctional ligase/repressor BirA"  
"NT-P19\_00041" 22779 "s59E25H2" 0 "Bifunctional ligase/repressor BirA"

"NT-P19\_00041" 22779 "s59E5H2" 0 "Bifunctional ligase/repressor BirA"  
"NT-P19\_00041" 22779 "s63E6H2" 0.006357567 "Bifunctional ligase/repressor BirA"  
"NT-P19\_00042" 22780 "s59E13H2" 0 "Type III pantothenate kinase"  
"NT-P19\_00042" 22780 "s59E25H2" 0 "Type III pantothenate kinase"  
"NT-P19\_00042" 22780 "s59E5H2" 0.02971083 "Type III pantothenate kinase"  
"NT-P19\_00042" 22780 "s63E6H2" 0.00223468 "Type III pantothenate kinase"  
"NT-P19\_00043" 22781 "s59E13H2" 0 "Fosmidomycin resistance protein"  
"NT-P19\_00043" 22781 "s59E25H2" 0 "Fosmidomycin resistance protein"  
"NT-P19\_00043" 22781 "s59E5H2" 0.01520699 "Fosmidomycin resistance protein"  
"NT-P19\_00043" 22781 "s63E6H2" 0.002815617 "Fosmidomycin resistance protein"  
"NT-P19\_00044" 22782 "s59E13H2" 0 "hypothetical protein"  
"NT-P19\_00044" 22782 "s59E25H2" 0 "hypothetical protein"  
"NT-P19\_00044" 22782 "s59E5H2" 0 "hypothetical protein"  
"NT-P19\_00044" 22782 "s63E6H2" 0 "hypothetical protein"  
"NT-P19\_00047" 22785 "s59E13H2" 0 "hypothetical protein"  
"NT-P19\_00047" 22785 "s59E25H2" 0 "hypothetical protein"  
"NT-P19\_00047" 22785 "s59E5H2" 0 "hypothetical protein"  
"NT-P19\_00047" 22785 "s63E6H2" 0.2885411 "hypothetical protein"  
"NT-P19\_00049" 22787 "s59E13H2" 0 "imidazolonepropionase"  
"NT-P19\_00049" 22787 "s59E25H2" 0 "imidazolonepropionase"  
"NT-P19\_00049" 22787 "s59E5H2" 0 "imidazolonepropionase"  
"NT-P19\_00049" 22787 "s63E6H2" 0 "imidazolonepropionase"  
"NT-P19\_00050" 22788 "s59E13H2" 0 "hypothetical protein"  
"NT-P19\_00050" 22788 "s59E25H2" 0 "hypothetical protein"  
"NT-P19\_00050" 22788 "s59E5H2" 0 "hypothetical protein"  
"NT-P19\_00050" 22788 "s63E6H2" 0 "hypothetical protein"  
"NT-P19\_00051" 22789 "s59E13H2" 0 "hypothetical protein"  
"NT-P19\_00051" 22789 "s59E25H2" 0 "hypothetical protein"  
"NT-P19\_00051" 22789 "s59E5H2" 0 "hypothetical protein"  
"NT-P19\_00051" 22789 "s63E6H2" 0 "hypothetical protein"  
"NT-P19\_00052" 22790 "s59E13H2" 0 "Arginine deiminase"  
"NT-P19\_00052" 22790 "s59E25H2" 0 "Arginine deiminase"  
"NT-P19\_00052" 22790 "s59E5H2" 0 "Arginine deiminase"  
"NT-P19\_00052" 22790 "s63E6H2" 0 "Arginine deiminase"  
"NT-P19\_00053" 22791 "s59E13H2" 0 "S-adenosyl-L-methionine-dependent 2-deoxy-scylo-inosamine dehydrogenase"  
"NT-P19\_00053" 22791 "s59E25H2" 0 "S-adenosyl-L-methionine-dependent 2-deoxy-scylo-inosamine dehydrogenase"  
"NT-P19\_00053" 22791 "s59E5H2" 0 "S-adenosyl-L-methionine-dependent 2-deoxy-scylo-inosamine dehydrogenase"  
"NT-P19\_00053" 22791 "s63E6H2" 0 "S-adenosyl-L-methionine-dependent 2-deoxy-scylo-inosamine dehydrogenase"  
"NT-P19\_00054" 22792 "s59E13H2" 0 "Acetyltransferase (GNAT) family protein"  
"NT-P19\_00054" 22792 "s59E25H2" 0 "Acetyltransferase (GNAT) family protein"  
"NT-P19\_00054" 22792 "s59E5H2" 0 "Acetyltransferase (GNAT) family protein"  
"NT-P19\_00054" 22792 "s63E6H2" 0 "Acetyltransferase (GNAT) family protein"  
"NT-P19\_00055" 22793 "s59E13H2" 0 "putative tyrosine recombinase XerC-like protein"  
"NT-P19\_00055" 22793 "s59E25H2" 0 "putative tyrosine recombinase XerC-like protein"  
"NT-P19\_00055" 22793 "s59E5H2" 0.02190687 "putative tyrosine recombinase XerC-like protein"  
"NT-P19\_00055" 22793 "s63E6H2" 0.004520031 "putative tyrosine recombinase XerC-like protein"  
"NT-P19\_00057" 22795 "s59E13H2" 0 "Helix-turn-helix domain protein"

"NT-P19\_00057" 22795 "s59E25H2" 0 "Helix-turn-helix domain protein"  
"NT-P19\_00057" 22795 "s59E5H2" 0 "Helix-turn-helix domain protein"  
"NT-P19\_00057" 22795 "s63E6H2" 0.0003268435 "Helix-turn-helix domain protein"  
"NT-P19\_00058" 22796 "s59E13H2" 0 "transcriptional repressor Dica"  
"NT-P19\_00058" 22796 "s59E25H2" 0 "transcriptional repressor Dica"  
"NT-P19\_00058" 22796 "s59E5H2" 0 "transcriptional repressor Dica"  
"NT-P19\_00058" 22796 "s63E6H2" 0.0008724906 "transcriptional repressor Dica"  
"NT-P19\_00059" 22797 "s59E13H2" 0 "Glutamine cyclotransferase"  
"NT-P19\_00059" 22797 "s59E25H2" 0 "Glutamine cyclotransferase"  
"NT-P19\_00059" 22797 "s59E5H2" 0 "Glutamine cyclotransferase"  
"NT-P19\_00059" 22797 "s63E6H2" 0.01407143 "Glutamine cyclotransferase"  
"NT-P19\_00060" 22798 "s59E13H2" 0 "Reverse transcriptase (RNA-dependent DNA polymerase)"  
"NT-P19\_00060" 22798 "s59E25H2" 0 "Reverse transcriptase (RNA-dependent DNA polymerase)"  
"NT-P19\_00060" 22798 "s59E5H2" 0 "Reverse transcriptase (RNA-dependent DNA polymerase)"  
"NT-P19\_00060" 22798 "s63E6H2" 0 "Reverse transcriptase (RNA-dependent DNA polymerase)"  
"NT-P19\_00061" 22799 "s59E13H2" 0 "Tyrosine recombinase XerD"  
"NT-P19\_00061" 22799 "s59E25H2" 0 "Tyrosine recombinase XerD"  
"NT-P19\_00061" 22799 "s59E5H2" 0 "Tyrosine recombinase XerD"  
"NT-P19\_00061" 22799 "s63E6H2" 0 "Tyrosine recombinase XerD"  
"NT-P19\_00066" 22804 "s59E13H2" 0 "hypothetical protein"  
"NT-P19\_00066" 22804 "s59E25H2" 0 "hypothetical protein"  
"NT-P19\_00066" 22804 "s59E5H2" 0 "hypothetical protein"  
"NT-P19\_00066" 22804 "s63E6H2" 0 "hypothetical protein"  
"NT-P19\_00067" 22805 "s59E13H2" 0 "putative methyltransferase"  
"NT-P19\_00067" 22805 "s59E25H2" 0 "putative methyltransferase"  
"NT-P19\_00067" 22805 "s59E5H2" 0 "putative methyltransferase"  
"NT-P19\_00067" 22805 "s63E6H2" 0 "putative methyltransferase"  
"NT-P19\_00068" 22806 "s59E13H2" 0 "hypothetical protein"  
"NT-P19\_00068" 22806 "s59E25H2" 0 "hypothetical protein"  
"NT-P19\_00068" 22806 "s59E5H2" 0 "hypothetical protein"  
"NT-P19\_00068" 22806 "s63E6H2" 0 "hypothetical protein"  
"NT-P19\_00069" 22807 "s59E13H2" 0 "hypothetical protein"  
"NT-P19\_00069" 22807 "s59E25H2" 0 "hypothetical protein"  
"NT-P19\_00069" 22807 "s59E5H2" 0 "hypothetical protein"  
"NT-P19\_00069" 22807 "s63E6H2" 0 "hypothetical protein"  
"NT-P19\_00070" 22808 "s59E13H2" 0 "PglZ domain protein"  
"NT-P19\_00070" 22808 "s59E25H2" 0 "PglZ domain protein"  
"NT-P19\_00070" 22808 "s59E5H2" 0 "PglZ domain protein"  
"NT-P19\_00070" 22808 "s63E6H2" 0 "PglZ domain protein"  
"NT-P19\_00071" 22809 "s59E13H2" 0 "hypothetical protein"  
"NT-P19\_00071" 22809 "s59E25H2" 0 "hypothetical protein"  
"NT-P19\_00071" 22809 "s59E5H2" 0 "hypothetical protein"  
"NT-P19\_00071" 22809 "s63E6H2" 0 "hypothetical protein"  
"NT-P19\_00072" 22810 "s59E13H2" 0 "chromosome segregation protein"  
"NT-P19\_00072" 22810 "s59E25H2" 0 "chromosome segregation protein"  
"NT-P19\_00072" 22810 "s59E5H2" 0 "chromosome segregation protein"  
"NT-P19\_00072" 22810 "s63E6H2" 0 "chromosome segregation protein"

"NT-P19\_00075" 22813 "s59E13H2" 0 "Modification methylase Mjall"  
"NT-P19\_00075" 22813 "s59E25H2" 0 "Modification methylase Mjall"  
"NT-P19\_00075" 22813 "s59E5H2" 0.0125798 "Modification methylase Mjall"  
"NT-P19\_00075" 22813 "s63E6H2" 0 "Modification methylase Mjall"  
"NT-P19\_00078" 22816 "s59E13H2" 0 "Cypemycin methyltransferase"  
"NT-P19\_00078" 22816 "s59E25H2" 0 "Cypemycin methyltransferase"  
"NT-P19\_00078" 22816 "s59E5H2" 0 "Cypemycin methyltransferase"  
"NT-P19\_00078" 22816 "s63E6H2" 0.0007319804 "Cypemycin methyltransferase"  
"NT-P19\_00079" 22817 "s59E13H2" 0 "NIF3 (NGG1p interacting factor 3)"  
"NT-P19\_00079" 22817 "s59E25H2" 0 "NIF3 (NGG1p interacting factor 3)"  
"NT-P19\_00079" 22817 "s59E5H2" 0 "NIF3 (NGG1p interacting factor 3)"  
"NT-P19\_00079" 22817 "s63E6H2" 0 "NIF3 (NGG1p interacting factor 3)"  
"NT-P19\_00080" 22818 "s59E13H2" 0 "Ubiquinone biosynthesis O-methyltransferase"  
"NT-P19\_00080" 22818 "s59E25H2" 0 "Ubiquinone biosynthesis O-methyltransferase"  
"NT-P19\_00080" 22818 "s59E5H2" 0 "Ubiquinone biosynthesis O-methyltransferase"  
"NT-P19\_00080" 22818 "s63E6H2" 0 "Ubiquinone biosynthesis O-methyltransferase"  
"NT-P19\_00081" 22819 "s59E13H2" 0 "Demethylrebeccamycin-D-glucose O-methyltransferase"  
"NT-P19\_00081" 22819 "s59E25H2" 0 "Demethylrebeccamycin-D-glucose O-methyltransferase"  
"NT-P19\_00081" 22819 "s59E5H2" 0 "Demethylrebeccamycin-D-glucose O-methyltransferase"  
"NT-P19\_00081" 22819 "s63E6H2" 0 "Demethylrebeccamycin-D-glucose O-methyltransferase"  
"NT-P19\_00082" 22820 "s59E13H2" 0 "Adenine deaminase"  
"NT-P19\_00082" 22820 "s59E25H2" 0 "Adenine deaminase"  
"NT-P19\_00082" 22820 "s59E5H2" 0 "Adenine deaminase"  
"NT-P19\_00082" 22820 "s63E6H2" 0 "Adenine deaminase"  
"NT-P19\_00083" 22821 "s59E13H2" 0 "Cupin domain protein"  
"NT-P19\_00083" 22821 "s59E25H2" 0 "Cupin domain protein"  
"NT-P19\_00083" 22821 "s59E5H2" 0 "Cupin domain protein"  
"NT-P19\_00083" 22821 "s63E6H2" 0 "Cupin domain protein"  
"NT-P19\_00084" 22822 "s59E13H2" 0 "putative HAD-hydrolase"  
"NT-P19\_00084" 22822 "s59E25H2" 0 "putative HAD-hydrolase"  
"NT-P19\_00084" 22822 "s59E5H2" 0 "putative HAD-hydrolase"  
"NT-P19\_00084" 22822 "s63E6H2" 0 "putative HAD-hydrolase"  
"NT-P19\_00085" 22823 "s59E13H2" 0 "Tellurite methyltransferase"  
"NT-P19\_00085" 22823 "s59E25H2" 0 "Tellurite methyltransferase"  
"NT-P19\_00085" 22823 "s59E5H2" 0 "Tellurite methyltransferase"  
"NT-P19\_00085" 22823 "s63E6H2" 0 "Tellurite methyltransferase"  
"NT-P19\_00086" 22824 "s59E13H2" 0 "hypothetical protein"  
"NT-P19\_00086" 22824 "s59E25H2" 0 "hypothetical protein"  
"NT-P19\_00086" 22824 "s59E5H2" 0 "hypothetical protein"  
"NT-P19\_00086" 22824 "s63E6H2" 0 "hypothetical protein"  
"NT-P19\_00087" 22825 "s59E13H2" 0 "hypothetical protein"  
"NT-P19\_00087" 22825 "s59E25H2" 0 "hypothetical protein"  
"NT-P19\_00087" 22825 "s59E5H2" 0 "hypothetical protein"  
"NT-P19\_00087" 22825 "s63E6H2" 0 "hypothetical protein"  
"NT-P19\_00088" 22826 "s59E13H2" 0.004545239 "transcriptional repressor DicA"  
"NT-P19\_00088" 22826 "s59E25H2" 0 "transcriptional repressor DicA"  
"NT-P19\_00088" 22826 "s59E5H2" 0 "transcriptional repressor DicA"

"NT-P19\_00088" 22826 "s63E6H2" 0 "transcriptional repressor DicA"  
"NT-P19\_00089" 22827 "s59E13H2" 0 "Putative ribosome biogenesis GTPase RsgA"  
"NT-P19\_00089" 22827 "s59E25H2" 0 "Putative ribosome biogenesis GTPase RsgA"  
"NT-P19\_00089" 22827 "s59E5H2" 0 "Putative ribosome biogenesis GTPase RsgA"  
"NT-P19\_00089" 22827 "s63E6H2" 0 "Putative ribosome biogenesis GTPase RsgA"  
"NT-P19\_00090" 22828 "s59E13H2" 0 "Demethylrebeccamycin-D-glucose O-methyltransferase"  
"NT-P19\_00090" 22828 "s59E25H2" 0 "Demethylrebeccamycin-D-glucose O-methyltransferase"  
"NT-P19\_00090" 22828 "s59E5H2" 0 "Demethylrebeccamycin-D-glucose O-methyltransferase"  
"NT-P19\_00090" 22828 "s63E6H2" 0 "Demethylrebeccamycin-D-glucose O-methyltransferase"  
"NT-P19\_00091" 22829 "s59E13H2" 0 "Acetyltransferase (GNAT) family protein"  
"NT-P19\_00091" 22829 "s59E25H2" 0 "Acetyltransferase (GNAT) family protein"  
"NT-P19\_00091" 22829 "s59E5H2" 0 "Acetyltransferase (GNAT) family protein"  
"NT-P19\_00091" 22829 "s63E6H2" 0 "Acetyltransferase (GNAT) family protein"  
"NT-P19\_00092" 22830 "s59E13H2" 0 "Aspartate--tRNA ligase"  
"NT-P19\_00092" 22830 "s59E25H2" 0 "Aspartate--tRNA ligase"  
"NT-P19\_00092" 22830 "s59E5H2" 0 "Aspartate--tRNA ligase"  
"NT-P19\_00092" 22830 "s63E6H2" 0 "Aspartate--tRNA ligase"  
"NT-P19\_00093" 22831 "s59E13H2" 0 "Nucleoside-triphosphatase THEP1"  
"NT-P19\_00093" 22831 "s59E25H2" 0 "Nucleoside-triphosphatase THEP1"  
"NT-P19\_00093" 22831 "s59E5H2" 0 "Nucleoside-triphosphatase THEP1"  
"NT-P19\_00093" 22831 "s63E6H2" 0 "Nucleoside-triphosphatase THEP1"  
"NT-P19\_00094" 22832 "s59E13H2" 0 "Phosphodiesterase"  
"NT-P19\_00094" 22832 "s59E25H2" 0 "Phosphodiesterase"  
"NT-P19\_00094" 22832 "s59E5H2" 0 "Phosphodiesterase"  
"NT-P19\_00094" 22832 "s63E6H2" 0.008269344 "Phosphodiesterase"  
"NT-P19\_00095" 22833 "s59E13H2" 0 "Bifunctional homocysteine S-methyltransferase/5,10-methylenetetrahydrofolate reductase"  
"NT-P19\_00095" 22833 "s59E25H2" 0 "Bifunctional homocysteine S-methyltransferase/5,10-methylenetetrahydrofolate reductase"  
"NT-P19\_00095" 22833 "s59E5H2" 0 "Bifunctional homocysteine S-methyltransferase/5,10-methylenetetrahydrofolate reductase"  
"NT-P19\_00095" 22833 "s63E6H2" 0 "Bifunctional homocysteine S-methyltransferase/5,10-methylenetetrahydrofolate reductase"  
"NT-P19\_00096" 22834 "s59E13H2" 0 "Nucleotidyltransferase domain protein"  
"NT-P19\_00096" 22834 "s59E25H2" 0 "Nucleotidyltransferase domain protein"  
"NT-P19\_00096" 22834 "s59E5H2" 0 "Nucleotidyltransferase domain protein"  
"NT-P19\_00096" 22834 "s63E6H2" 0 "Nucleotidyltransferase domain protein"  
"NT-P19\_00097" 22835 "s59E13H2" 0 "hypothetical protein"  
"NT-P19\_00097" 22835 "s59E25H2" 0 "hypothetical protein"  
"NT-P19\_00097" 22835 "s59E5H2" 0 "hypothetical protein"  
"NT-P19\_00097" 22835 "s63E6H2" 0 "hypothetical protein"  
"NT-P19\_00099" 22837 "s59E13H2" 0 "Demethylrebeccamycin-D-glucose O-methyltransferase"  
"NT-P19\_00099" 22837 "s59E25H2" 0 "Demethylrebeccamycin-D-glucose O-methyltransferase"  
"NT-P19\_00099" 22837 "s59E5H2" 0 "Demethylrebeccamycin-D-glucose O-methyltransferase"  
"NT-P19\_00099" 22837 "s63E6H2" 0 "Demethylrebeccamycin-D-glucose O-methyltransferase"  
"NT-P19\_00100" 22838 "s59E13H2" 0 "ubiquinone/menaquinone biosynthesis methyltransferase"  
"NT-P19\_00100" 22838 "s59E25H2" 0 "ubiquinone/menaquinone biosynthesis methyltransferase"  
"NT-P19\_00100" 22838 "s59E5H2" 0 "ubiquinone/menaquinone biosynthesis methyltransferase"  
"NT-P19\_00100" 22838 "s63E6H2" 0 "ubiquinone/menaquinone biosynthesis methyltransferase"  
"NT-P19\_00101" 22839 "s59E13H2" 0 "hypothetical protein"  
"NT-P19\_00101" 22839 "s59E25H2" 0 "hypothetical protein"

"NT-P19\_00101" 22839 "s59E5H2" 0 "hypothetical protein"  
"NT-P19\_00101" 22839 "s63E6H2" 0.01741735 "hypothetical protein"  
"NT-P19\_00102" 22840 "s59E13H2" 0 "Mannosylglycerate hydrolase"  
"NT-P19\_00102" 22840 "s59E25H2" 0 "Mannosylglycerate hydrolase"  
"NT-P19\_00102" 22840 "s59E5H2" 0.006520335 "Mannosylglycerate hydrolase"  
"NT-P19\_00102" 22840 "s63E6H2" 0.0048823 "Mannosylglycerate hydrolase"  
"NT-P19\_00103" 22841 "s59E13H2" 0 "Uroporphyrinogen decarboxylase (URO-D)"  
"NT-P19\_00103" 22841 "s59E25H2" 0 "Uroporphyrinogen decarboxylase (URO-D)"  
"NT-P19\_00103" 22841 "s59E5H2" 0 "Uroporphyrinogen decarboxylase (URO-D)"  
"NT-P19\_00103" 22841 "s63E6H2" 0 "Uroporphyrinogen decarboxylase (URO-D)"  
"NT-P19\_00104" 22842 "s59E13H2" 0 "hypothetical protein"  
"NT-P19\_00104" 22842 "s59E25H2" 0 "hypothetical protein"  
"NT-P19\_00104" 22842 "s59E5H2" 0 "hypothetical protein"  
"NT-P19\_00104" 22842 "s63E6H2" 0 "hypothetical protein"  
"NT-P19\_00105" 22843 "s59E13H2" 0 "Transaldolase"  
"NT-P19\_00105" 22843 "s59E25H2" 0 "Transaldolase"  
"NT-P19\_00105" 22843 "s59E5H2" 0 "Transaldolase"  
"NT-P19\_00105" 22843 "s63E6H2" 0 "Transaldolase"  
"NT-P19\_00106" 22844 "s59E13H2" 0 "hypothetical protein"  
"NT-P19\_00106" 22844 "s59E25H2" 0 "hypothetical protein"  
"NT-P19\_00106" 22844 "s59E5H2" 0 "hypothetical protein"  
"NT-P19\_00106" 22844 "s63E6H2" 0 "hypothetical protein"  
"NT-P19\_00107" 22845 "s59E13H2" 0 "putative membrane protein"  
"NT-P19\_00107" 22845 "s59E25H2" 0 "putative membrane protein"  
"NT-P19\_00107" 22845 "s59E5H2" 0 "putative membrane protein"  
"NT-P19\_00107" 22845 "s63E6H2" 0 "putative membrane protein"  
"NT-P19\_00108" 22846 "s59E13H2" 0 "Dihydroorotate dehydrogenase B (NAD(+) , catalytic subunit"  
"NT-P19\_00108" 22846 "s59E25H2" 0 "Dihydroorotate dehydrogenase B (NAD(+) , catalytic subunit"  
"NT-P19\_00108" 22846 "s59E5H2" 0 "Dihydroorotate dehydrogenase B (NAD(+) , catalytic subunit"  
"NT-P19\_00108" 22846 "s63E6H2" 0 "Dihydroorotate dehydrogenase B (NAD(+) , catalytic subunit"  
"NT-P19\_00109" 22847 "s59E13H2" 0 "hypothetical protein"  
"NT-P19\_00109" 22847 "s59E25H2" 0 "hypothetical protein"  
"NT-P19\_00109" 22847 "s59E5H2" 0 "hypothetical protein"  
"NT-P19\_00109" 22847 "s63E6H2" 0 "hypothetical protein"  
"NT-P19\_00110" 22848 "s59E13H2" 0 "Dihydroorotate dehydrogenase B (NAD(+) , electron transfer subunit"  
"NT-P19\_00110" 22848 "s59E25H2" 0 "Dihydroorotate dehydrogenase B (NAD(+) , electron transfer subunit"  
"NT-P19\_00110" 22848 "s59E5H2" 0 "Dihydroorotate dehydrogenase B (NAD(+) , electron transfer subunit"  
"NT-P19\_00110" 22848 "s63E6H2" 0.005858511 "Dihydroorotate dehydrogenase B (NAD(+) , electron transfer subunit"  
"NT-P19\_00111" 22849 "s59E13H2" 0 "Ribonuclease HII"  
"NT-P19\_00111" 22849 "s59E25H2" 0 "Ribonuclease HII"  
"NT-P19\_00111" 22849 "s59E5H2" 0 "Ribonuclease HII"  
"NT-P19\_00111" 22849 "s63E6H2" 0.004339865 "Ribonuclease HII"  
"NT-P19\_00112" 22850 "s59E13H2" 0 "Lipopolysaccharide-assembly, LptC-related"  
"NT-P19\_00112" 22850 "s59E25H2" 0 "Lipopolysaccharide-assembly, LptC-related"  
"NT-P19\_00112" 22850 "s59E5H2" 0 "Lipopolysaccharide-assembly, LptC-related"  
"NT-P19\_00112" 22850 "s63E6H2" 0.004688814 "Lipopolysaccharide-assembly, LptC-related"  
"NT-P19\_00113" 22851 "s59E13H2" 0 "lipopolysaccharide transport periplasmic protein LptA"

"NT-P19\_00113" 22851 "s59E25H2" 0 "lipopolysaccharide transport periplasmic protein LptA"  
"NT-P19\_00113" 22851 "s59E5H2" 0 "lipopolysaccharide transport periplasmic protein LptA"  
"NT-P19\_00113" 22851 "s63E6H2" 0.01563956 "lipopolysaccharide transport periplasmic protein LptA"  
"NT-P19\_00114" 22852 "s59E13H2" 0 "Lipopolysaccharide export system ATP-binding protein LptB"  
"NT-P19\_00114" 22852 "s59E25H2" 0 "Lipopolysaccharide export system ATP-binding protein LptB"  
"NT-P19\_00114" 22852 "s59E5H2" 0 "Lipopolysaccharide export system ATP-binding protein LptB"  
"NT-P19\_00114" 22852 "s63E6H2" 0.01191372 "Lipopolysaccharide export system ATP-binding protein LptB"  
"NT-P19\_00115" 22853 "s59E13H2" 0 "LPS-assembly protein LptD precursor"  
"NT-P19\_00115" 22853 "s59E25H2" 0 "LPS-assembly protein LptD precursor"  
"NT-P19\_00115" 22853 "s59E5H2" 0 "LPS-assembly protein LptD precursor"  
"NT-P19\_00115" 22853 "s63E6H2" 0.02076447 "LPS-assembly protein LptD precursor"  
"NT-P19\_00116" 22854 "s59E13H2" 0 "Phosphoribosylamine--glycine ligase"  
"NT-P19\_00116" 22854 "s59E25H2" 0 "Phosphoribosylamine--glycine ligase"  
"NT-P19\_00116" 22854 "s59E5H2" 0 "Phosphoribosylamine--glycine ligase"  
"NT-P19\_00116" 22854 "s63E6H2" 0.04148419 "Phosphoribosylamine--glycine ligase"  
"NT-P19\_00117" 22855 "s59E13H2" 0 "Biopolymer transport protein ExbB"  
"NT-P19\_00117" 22855 "s59E25H2" 0 "Biopolymer transport protein ExbB"  
"NT-P19\_00117" 22855 "s59E5H2" 0.008007868 "Biopolymer transport protein ExbB"  
"NT-P19\_00117" 22855 "s63E6H2" 0.03633924 "Biopolymer transport protein ExbB"  
"NT-P19\_00118" 22856 "s59E13H2" 0 "Biopolymer transport protein ExbD"  
"NT-P19\_00118" 22856 "s59E25H2" 0 "Biopolymer transport protein ExbD"  
"NT-P19\_00118" 22856 "s59E5H2" 0 "Biopolymer transport protein ExbD"  
"NT-P19\_00118" 22856 "s63E6H2" 0.05428776 "Biopolymer transport protein ExbD"  
"NT-P19\_00119" 22857 "s59E13H2" 0 "Gram-negative bacterial tonB protein"  
"NT-P19\_00119" 22857 "s59E25H2" 0 "Gram-negative bacterial tonB protein"  
"NT-P19\_00119" 22857 "s59E5H2" 0.001289006 "Gram-negative bacterial tonB protein"  
"NT-P19\_00119" 22857 "s63E6H2" 0.04715942 "Gram-negative bacterial tonB protein"  
"NT-P19\_00120" 22858 "s59E13H2" 0 "UvrABC system protein B"  
"NT-P19\_00120" 22858 "s59E25H2" 0 "UvrABC system protein B"  
"NT-P19\_00120" 22858 "s59E5H2" 0.04243828 "UvrABC system protein B"  
"NT-P19\_00120" 22858 "s63E6H2" 0.09156949 "UvrABC system protein B"  
"NT-P19\_00121" 22859 "s59E13H2" 0 "V-type sodium ATPase subunit K"  
"NT-P19\_00121" 22859 "s59E25H2" 0 "V-type sodium ATPase subunit K"  
"NT-P19\_00121" 22859 "s59E5H2" 0.006027439 "V-type sodium ATPase subunit K"  
"NT-P19\_00121" 22859 "s63E6H2" 0.08312259 "V-type sodium ATPase subunit K"  
"NT-P19\_00122" 22860 "s59E13H2" 0 "V-type ATP synthase subunit E"  
"NT-P19\_00122" 22860 "s59E25H2" 0 "V-type ATP synthase subunit E"  
"NT-P19\_00122" 22860 "s59E5H2" 0.007796267 "V-type ATP synthase subunit E"  
"NT-P19\_00122" 22860 "s63E6H2" 0.1598135 "V-type ATP synthase subunit E"  
"NT-P19\_00123" 22861 "s59E13H2" 0 "tRNA-splicing ligase RtcB"  
"NT-P19\_00123" 22861 "s59E25H2" 0 "tRNA-splicing ligase RtcB"  
"NT-P19\_00123" 22861 "s59E5H2" 0.003452051 "tRNA-splicing ligase RtcB"  
"NT-P19\_00123" 22861 "s63E6H2" 0.2084561 "tRNA-splicing ligase RtcB"  
"NT-P19\_00126" 22864 "s59E13H2" 0 "hypothetical protein"  
"NT-P19\_00126" 22864 "s59E25H2" 0 "hypothetical protein"  
"NT-P19\_00126" 22864 "s59E5H2" 0 "hypothetical protein"  
"NT-P19\_00126" 22864 "s63E6H2" 0 "hypothetical protein"

"NT-P19\_00127" 22865 "s59E13H2" 0 "VCP-like ATPase"  
"NT-P19\_00127" 22865 "s59E25H2" 0 "VCP-like ATPase"  
"NT-P19\_00127" 22865 "s59E5H2" 0 "VCP-like ATPase"  
"NT-P19\_00127" 22865 "s63E6H2" 0 "VCP-like ATPase"  
"NT-P19\_00128" 22866 "s59E13H2" 0 "General stress protein 69"  
"NT-P19\_00128" 22866 "s59E25H2" 0 "General stress protein 69"  
"NT-P19\_00128" 22866 "s59E5H2" 0 "General stress protein 69"  
"NT-P19\_00128" 22866 "s63E6H2" 0 "General stress protein 69"  
"NT-P19\_00129" 22867 "s59E13H2" 0 "hypothetical protein"  
"NT-P19\_00129" 22867 "s59E25H2" 0 "hypothetical protein"  
"NT-P19\_00129" 22867 "s59E5H2" 1.407345 "hypothetical protein"  
"NT-P19\_00129" 22867 "s63E6H2" 0 "hypothetical protein"  
"NT-P19\_00130" 22868 "s59E13H2" 0 "hypothetical protein"  
"NT-P19\_00130" 22868 "s59E25H2" 0 "hypothetical protein"  
"NT-P19\_00130" 22868 "s59E5H2" 1.276981 "hypothetical protein"  
"NT-P19\_00130" 22868 "s63E6H2" 0 "hypothetical protein"  
"NT-P19\_00131" 22869 "s59E13H2" 0 "hypothetical protein"  
"NT-P19\_00131" 22869 "s59E25H2" 0 "hypothetical protein"  
"NT-P19\_00131" 22869 "s59E5H2" 0.3138231 "hypothetical protein"  
"NT-P19\_00131" 22869 "s63E6H2" 0 "hypothetical protein"  
"NT-P19\_00132" 22870 "s59E13H2" 0 "Alpha-acetolactate decarboxylase"  
"NT-P19\_00132" 22870 "s59E25H2" 0 "Alpha-acetolactate decarboxylase"  
"NT-P19\_00132" 22870 "s59E5H2" 0 "Alpha-acetolactate decarboxylase"  
"NT-P19\_00132" 22870 "s63E6H2" 0 "Alpha-acetolactate decarboxylase"  
"NT-P19\_00133" 22871 "s59E13H2" 0 "Methyl-accepting chemotaxis protein 4"  
"NT-P19\_00133" 22871 "s59E25H2" 0 "Methyl-accepting chemotaxis protein 4"  
"NT-P19\_00133" 22871 "s59E5H2" 0 "Methyl-accepting chemotaxis protein 4"  
"NT-P19\_00133" 22871 "s63E6H2" 0.01229096 "Methyl-accepting chemotaxis protein 4"  
"NT-P19\_00134" 22872 "s59E13H2" 0 "ABC transporter substrate binding protein"  
"NT-P19\_00134" 22872 "s59E25H2" 0 "ABC transporter substrate binding protein"  
"NT-P19\_00134" 22872 "s59E5H2" 0.01816355 "ABC transporter substrate binding protein"  
"NT-P19\_00134" 22872 "s63E6H2" 0.01060189 "ABC transporter substrate binding protein"  
"NT-P19\_00135" 22873 "s59E13H2" 0 "Glutamate/aspartate periplasmic-binding protein precursor"  
"NT-P19\_00135" 22873 "s59E25H2" 0 "Glutamate/aspartate periplasmic-binding protein precursor"  
"NT-P19\_00135" 22873 "s59E5H2" 0.0302619 "Glutamate/aspartate periplasmic-binding protein precursor"  
"NT-P19\_00135" 22873 "s63E6H2" 0.004730666 "Glutamate/aspartate periplasmic-binding protein precursor"  
"NT-P19\_00136" 22874 "s59E13H2" 0 "hypothetical protein"  
"NT-P19\_00136" 22874 "s59E25H2" 0 "hypothetical protein"  
"NT-P19\_00136" 22874 "s59E5H2" 0.003330317 "hypothetical protein"  
"NT-P19\_00136" 22874 "s63E6H2" 0 "hypothetical protein"  
"NT-P19\_00138" 22876 "s59E13H2" 0 "hypothetical protein"  
"NT-P19\_00138" 22876 "s59E25H2" 0 "hypothetical protein"  
"NT-P19\_00138" 22876 "s59E5H2" 0 "hypothetical protein"  
"NT-P19\_00138" 22876 "s63E6H2" 0.000718364 "hypothetical protein"  
"NT-P19\_00139" 22877 "s59E13H2" 0 "hypothetical protein"  
"NT-P19\_00139" 22877 "s59E25H2" 0 "hypothetical protein"  
"NT-P19\_00139" 22877 "s59E5H2" 0.01388697 "hypothetical protein"



"NT-P19\_00139" 22877 "s63E6H2" 0 "hypothetical protein"  
"NT-P19\_00141" 22879 "s59E13H2" 0 "hypothetical protein"  
"NT-P19\_00141" 22879 "s59E25H2" 0 "hypothetical protein"  
"NT-P19\_00141" 22879 "s59E5H2" 0 "hypothetical protein"  
"NT-P19\_00141" 22879 "s63E6H2" 0 "hypothetical protein"  
"NT-P19\_00142" 22880 "s59E13H2" 0 "hypothetical protein"  
"NT-P19\_00142" 22880 "s59E25H2" 0 "hypothetical protein"  
"NT-P19\_00142" 22880 "s59E5H2" 0 "hypothetical protein"  
"NT-P19\_00142" 22880 "s63E6H2" 0.02995592 "hypothetical protein"  
"NT-P19\_00144" 22882 "s59E13H2" 0 "Integrase core domain protein"  
"NT-P19\_00144" 22882 "s59E25H2" 0 "Integrase core domain protein"  
"NT-P19\_00144" 22882 "s59E5H2" 0.03132436 "Integrase core domain protein"  
"NT-P19\_00144" 22882 "s63E6H2" 0.0161728 "Integrase core domain protein"  
"NT-P19\_00145" 22883 "s59E13H2" 0 "transposase/IS protein"  
"NT-P19\_00145" 22883 "s59E25H2" 0 "transposase/IS protein"  
"NT-P19\_00145" 22883 "s59E5H2" 0.0469603 "transposase/IS protein"  
"NT-P19\_00145" 22883 "s63E6H2" 0.00303372 "transposase/IS protein"  
"NT-P19\_00146" 22884 "s59E13H2" 0 "Tyrosine recombinase XerD"  
"NT-P19\_00146" 22884 "s59E25H2" 0 "Tyrosine recombinase XerD"  
"NT-P19\_00146" 22884 "s59E5H2" 0 "Tyrosine recombinase XerD"  
"NT-P19\_00146" 22884 "s63E6H2" 0.02117619 "Tyrosine recombinase XerD"  
"NT-P19\_00147" 22885 "s59E13H2" 0 "hypothetical protein"  
"NT-P19\_00147" 22885 "s59E25H2" 0 "hypothetical protein"  
"NT-P19\_00147" 22885 "s59E5H2" 0 "hypothetical protein"  
"NT-P19\_00147" 22885 "s63E6H2" 0 "hypothetical protein"  
"NT-P19\_00148" 22886 "s59E13H2" 0 "Tyrosine recombinase XerD"  
"NT-P19\_00148" 22886 "s59E25H2" 0 "Tyrosine recombinase XerD"  
"NT-P19\_00148" 22886 "s59E5H2" 0 "Tyrosine recombinase XerD"  
"NT-P19\_00148" 22886 "s63E6H2" 0.001552357 "Tyrosine recombinase XerD"  
"NT-P19\_00150" 22888 "s59E13H2" 0 "CAAX amino terminal protease self- immunity"  
"NT-P19\_00150" 22888 "s59E25H2" 0 "CAAX amino terminal protease self- immunity"  
"NT-P19\_00150" 22888 "s59E5H2" 0 "CAAX amino terminal protease self- immunity"  
"NT-P19\_00150" 22888 "s63E6H2" 0 "CAAX amino terminal protease self- immunity"  
"NT-P19\_00151" 22889 "s59E13H2" 0 "hypothetical protein"  
"NT-P19\_00151" 22889 "s59E25H2" 0 "hypothetical protein"  
"NT-P19\_00151" 22889 "s59E5H2" 0 "hypothetical protein"  
"NT-P19\_00151" 22889 "s63E6H2" 0 "hypothetical protein"  
"NT-P19\_00153" 22891 "s59E13H2" 0 "hypothetical protein"  
"NT-P19\_00153" 22891 "s59E25H2" 0 "hypothetical protein"  
"NT-P19\_00153" 22891 "s59E5H2" 0 "hypothetical protein"  
"NT-P19\_00153" 22891 "s63E6H2" 0 "hypothetical protein"  
"NT-P19\_00154" 22892 "s59E13H2" 0 "hypothetical protein"  
"NT-P19\_00154" 22892 "s59E25H2" 0 "hypothetical protein"  
"NT-P19\_00154" 22892 "s59E5H2" 0 "hypothetical protein"  
"NT-P19\_00154" 22892 "s63E6H2" 0 "hypothetical protein"  
"NT-P19\_00155" 22893 "s59E13H2" 0 "NHL repeat protein"  
"NT-P19\_00155" 22893 "s59E25H2" 0 "NHL repeat protein"

"NT-P19\_00155" 22893 "s59E5H2" 0 "NHL repeat protein"  
"NT-P19\_00155" 22893 "s63E6H2" 0.005493876 "NHL repeat protein"  
"NT-P19\_00156" 22894 "s59E13H2" 0 "hypothetical protein"  
"NT-P19\_00156" 22894 "s59E25H2" 0 "hypothetical protein"  
"NT-P19\_00156" 22894 "s59E5H2" 0 "hypothetical protein"  
"NT-P19\_00156" 22894 "s63E6H2" 0 "hypothetical protein"  
"NT-P19\_00157" 22895 "s59E13H2" 0 "hypothetical protein"  
"NT-P19\_00157" 22895 "s59E25H2" 0 "hypothetical protein"  
"NT-P19\_00157" 22895 "s59E5H2" 0 "hypothetical protein"  
"NT-P19\_00157" 22895 "s63E6H2" 0 "hypothetical protein"  
"NT-P19\_00158" 22896 "s59E13H2" 0 "SpoVT / AbrB like domain protein"  
"NT-P19\_00158" 22896 "s59E25H2" 0 "SpoVT / AbrB like domain protein"  
"NT-P19\_00158" 22896 "s59E5H2" 0 "SpoVT / AbrB like domain protein"  
"NT-P19\_00158" 22896 "s63E6H2" 0 "SpoVT / AbrB like domain protein"  
"NT-P19\_00159" 22897 "s59E13H2" 0 "PIN domain protein"  
"NT-P19\_00159" 22897 "s59E25H2" 0 "PIN domain protein"  
"NT-P19\_00159" 22897 "s59E5H2" 0 "PIN domain protein"  
"NT-P19\_00159" 22897 "s63E6H2" 0 "PIN domain protein"  
"NT-P19\_00160" 22898 "s59E13H2" 0 "hypothetical protein"  
"NT-P19\_00160" 22898 "s59E25H2" 0 "hypothetical protein"  
"NT-P19\_00160" 22898 "s59E5H2" 0 "hypothetical protein"  
"NT-P19\_00160" 22898 "s63E6H2" 0 "hypothetical protein"  
"NT-P19\_00161" 22899 "s59E13H2" 0 "hypothetical protein"  
"NT-P19\_00161" 22899 "s59E25H2" 0 "hypothetical protein"  
"NT-P19\_00161" 22899 "s59E5H2" 0 "hypothetical protein"  
"NT-P19\_00161" 22899 "s63E6H2" 0 "hypothetical protein"  
"NT-P19\_00163" 22901 "s59E13H2" 0 "Inosose dehydratase"  
"NT-P19\_00163" 22901 "s59E25H2" 0 "Inosose dehydratase"  
"NT-P19\_00163" 22901 "s59E5H2" 0 "Inosose dehydratase"  
"NT-P19\_00163" 22901 "s63E6H2" 0 "Inosose dehydratase"  
"NT-P19\_00164" 22902 "s59E13H2" 0 "Inosose dehydratase"  
"NT-P19\_00164" 22902 "s59E25H2" 0 "Inosose dehydratase"  
"NT-P19\_00164" 22902 "s59E5H2" 0 "Inosose dehydratase"  
"NT-P19\_00164" 22902 "s63E6H2" 0 "Inosose dehydratase"  
"NT-P19\_00166" 22904 "s59E13H2" 0 "Integrase core domain protein"  
"NT-P19\_00166" 22904 "s59E25H2" 0 "Integrase core domain protein"  
"NT-P19\_00166" 22904 "s59E5H2" 0 "Integrase core domain protein"  
"NT-P19\_00166" 22904 "s63E6H2" 0 "Integrase core domain protein"  
"NT-P19\_00167" 22905 "s59E13H2" 0 "Xylulose kinase"  
"NT-P19\_00167" 22905 "s59E25H2" 0 "Xylulose kinase"  
"NT-P19\_00167" 22905 "s59E5H2" 0 "Xylulose kinase"  
"NT-P19\_00167" 22905 "s63E6H2" 0 "Xylulose kinase"  
"NT-P19\_00168" 22906 "s59E13H2" 0 "Pyruvate dehydrogenase E1 component subunit beta"  
"NT-P19\_00168" 22906 "s59E25H2" 0 "Pyruvate dehydrogenase E1 component subunit beta"  
"NT-P19\_00168" 22906 "s59E5H2" 0 "Pyruvate dehydrogenase E1 component subunit beta"  
"NT-P19\_00168" 22906 "s63E6H2" 0 "Pyruvate dehydrogenase E1 component subunit beta"  
"NT-P19\_00169" 22907 "s59E13H2" 0 "General stress protein 69"

"NT-P19\_00169" 22907 "s59E25H2" 0 "General stress protein 69"  
"NT-P19\_00169" 22907 "s59E5H2" 0 "General stress protein 69"  
"NT-P19\_00169" 22907 "s63E6H2" 0 "General stress protein 69"  
"NT-P19\_00170" 22908 "s59E13H2" 0 "hypothetical protein"  
"NT-P19\_00170" 22908 "s59E25H2" 0 "hypothetical protein"  
"NT-P19\_00170" 22908 "s59E5H2" 0 "hypothetical protein"  
"NT-P19\_00170" 22908 "s63E6H2" 0.7144086 "hypothetical protein"  
"NT-P19\_00171" 22909 "s59E13H2" 0 "hypothetical protein"  
"NT-P19\_00171" 22909 "s59E25H2" 0 "hypothetical protein"  
"NT-P19\_00171" 22909 "s59E5H2" 0 "hypothetical protein"  
"NT-P19\_00171" 22909 "s63E6H2" 0.1235878 "hypothetical protein"  
"NT-P19\_00172" 22910 "s59E13H2" 0 "Sporulation kinase A"  
"NT-P19\_00172" 22910 "s59E25H2" 0 "Sporulation kinase A"  
"NT-P19\_00172" 22910 "s59E5H2" 0.0008094927 "Sporulation kinase A"  
"NT-P19\_00172" 22910 "s63E6H2" 0.05731433 "Sporulation kinase A"  
"NT-P19\_00173" 22911 "s59E13H2" 0 "2-oxoglutarate oxidoreductase subunit KorB"  
"NT-P19\_00173" 22911 "s59E25H2" 0 "2-oxoglutarate oxidoreductase subunit KorB"  
"NT-P19\_00173" 22911 "s59E5H2" 0.01883758 "2-oxoglutarate oxidoreductase subunit KorB"  
"NT-P19\_00173" 22911 "s63E6H2" 0.3652997 "2-oxoglutarate oxidoreductase subunit KorB"  
"NT-P19\_00174" 22912 "s59E13H2" 0 "2-oxoglutarate oxidoreductase subunit KorA"  
"NT-P19\_00174" 22912 "s59E25H2" 0 "2-oxoglutarate oxidoreductase subunit KorA"  
"NT-P19\_00174" 22912 "s59E5H2" 0.009358676 "2-oxoglutarate oxidoreductase subunit KorA"  
"NT-P19\_00174" 22912 "s63E6H2" 0.1428808 "2-oxoglutarate oxidoreductase subunit KorA"  
"NT-P19\_00175" 22913 "s59E13H2" 0 "Ferredoxin thioredoxin reductase catalytic beta chain"  
"NT-P19\_00175" 22913 "s59E25H2" 0 "Ferredoxin thioredoxin reductase catalytic beta chain"  
"NT-P19\_00175" 22913 "s59E5H2" 0 "Ferredoxin thioredoxin reductase catalytic beta chain"  
"NT-P19\_00175" 22913 "s63E6H2" 0 "Ferredoxin thioredoxin reductase catalytic beta chain"  
"NT-P19\_00176" 22914 "s59E13H2" 0 "Glutaredoxin"  
"NT-P19\_00176" 22914 "s59E25H2" 0 "Glutaredoxin"  
"NT-P19\_00176" 22914 "s59E5H2" 0 "Glutaredoxin"  
"NT-P19\_00176" 22914 "s63E6H2" 0 "Glutaredoxin"  
"NT-P19\_00177" 22915 "s59E13H2" 0 "Desulfoferrodoxin"  
"NT-P19\_00177" 22915 "s59E25H2" 0 "Desulfoferrodoxin"  
"NT-P19\_00177" 22915 "s59E5H2" 0 "Desulfoferrodoxin"  
"NT-P19\_00177" 22915 "s63E6H2" 0.05648673 "Desulfoferrodoxin"  
"NT-P19\_00178" 22916 "s59E13H2" 0 "NifU-like protein"  
"NT-P19\_00178" 22916 "s59E25H2" 0 "NifU-like protein"  
"NT-P19\_00178" 22916 "s59E5H2" 0 "NifU-like protein"  
"NT-P19\_00178" 22916 "s63E6H2" 0.02929317 "NifU-like protein"  
"NT-P19\_00179" 22917 "s59E13H2" 0 "putative cysteine desulfurase 2"  
"NT-P19\_00179" 22917 "s59E25H2" 0 "putative cysteine desulfurase 2"  
"NT-P19\_00179" 22917 "s59E5H2" 0 "putative cysteine desulfurase 2"  
"NT-P19\_00179" 22917 "s63E6H2" 0.03429627 "putative cysteine desulfurase 2"  
"NT-P19\_00180" 22918 "s59E13H2" 0 "DsrE/DsrF-like family protein"  
"NT-P19\_00180" 22918 "s59E25H2" 0 "DsrE/DsrF-like family protein"  
"NT-P19\_00180" 22918 "s59E5H2" 0 "DsrE/DsrF-like family protein"  
"NT-P19\_00180" 22918 "s63E6H2" 0.02316159 "DsrE/DsrF-like family protein"

"NT-P19\_00181" 22919 "s59E13H2" 0 "Sulfurtransferase TusA"  
"NT-P19\_00181" 22919 "s59E25H2" 0 "Sulfurtransferase TusA"  
"NT-P19\_00181" 22919 "s59E5H2" 0 "Sulfurtransferase TusA"  
"NT-P19\_00181" 22919 "s63E6H2" 0.03965298 "Sulfurtransferase TusA"  
"NT-P19\_00183" 22921 "s59E13H2" 0 "Iron-sulfur flavoprotein"  
"NT-P19\_00183" 22921 "s59E25H2" 0 "Iron-sulfur flavoprotein"  
"NT-P19\_00183" 22921 "s59E5H2" 0.02771236 "Iron-sulfur flavoprotein"  
"NT-P19\_00183" 22921 "s63E6H2" 0.001195074 "Iron-sulfur flavoprotein"  
"NT-P19\_00184" 22922 "s59E13H2" 0 "Cadmium, cobalt and zinc/H(+)-K(+) antiporter"  
"NT-P19\_00184" 22922 "s59E25H2" 0 "Cadmium, cobalt and zinc/H(+)-K(+) antiporter"  
"NT-P19\_00184" 22922 "s59E5H2" 0.009029319 "Cadmium, cobalt and zinc/H(+)-K(+) antiporter"  
"NT-P19\_00184" 22922 "s63E6H2" 0 "Cadmium, cobalt and zinc/H(+)-K(+) antiporter"  
"NT-P19\_00185" 22923 "s59E13H2" 0 "PAC2 family protein"  
"NT-P19\_00185" 22923 "s59E25H2" 0 "PAC2 family protein"  
"NT-P19\_00185" 22923 "s59E5H2" 0 "PAC2 family protein"  
"NT-P19\_00185" 22923 "s63E6H2" 0 "PAC2 family protein"  
"NT-P19\_00186" 22924 "s59E13H2" 0 "Hemerythrin HHE cation binding domain protein"  
"NT-P19\_00186" 22924 "s59E25H2" 0 "Hemerythrin HHE cation binding domain protein"  
"NT-P19\_00186" 22924 "s59E5H2" 0 "Hemerythrin HHE cation binding domain protein"  
"NT-P19\_00186" 22924 "s63E6H2" 0 "Hemerythrin HHE cation binding domain protein"  
"NT-P19\_00187" 22925 "s59E13H2" 0 "Rubrerythrin"  
"NT-P19\_00187" 22925 "s59E25H2" 0 "Rubrerythrin"  
"NT-P19\_00187" 22925 "s59E5H2" 0 "Rubrerythrin"  
"NT-P19\_00187" 22925 "s63E6H2" 0 "Rubrerythrin"  
"NT-P19\_00188" 22926 "s59E13H2" 0 "Peroxide operon regulator"  
"NT-P19\_00188" 22926 "s59E25H2" 0 "Peroxide operon regulator"  
"NT-P19\_00188" 22926 "s59E5H2" 0 "Peroxide operon regulator"  
"NT-P19\_00188" 22926 "s63E6H2" 0 "Peroxide operon regulator"  
"NT-P19\_00189" 22927 "s59E13H2" 0 "VIT family protein"  
"NT-P19\_00189" 22927 "s59E25H2" 0 "VIT family protein"  
"NT-P19\_00189" 22927 "s59E5H2" 0 "VIT family protein"  
"NT-P19\_00189" 22927 "s63E6H2" 0 "VIT family protein"  
"NT-P19\_00190" 22928 "s59E13H2" 0 "putative trifunctional 2-polyprenylphenol hydroxylase/glutamate synthase subunit beta/ferritin domain-containing protein"  
"NT-P19\_00190" 22928 "s59E25H2" 0 "putative trifunctional 2-polyprenylphenol hydroxylase/glutamate synthase subunit beta/ferritin domain-containing protein"  
"NT-P19\_00190" 22928 "s59E5H2" 0 "putative trifunctional 2-polyprenylphenol hydroxylase/glutamate synthase subunit beta/ferritin domain-containing protein"  
"NT-P19\_00190" 22928 "s63E6H2" 0.01391245 "putative trifunctional 2-polyprenylphenol hydroxylase/glutamate synthase subunit beta/ferritin domain-containing protein"  
"NT-P19\_00191" 22929 "s59E13H2" 0 "putative trifunctional 2-polyprenylphenol hydroxylase/glutamate synthase subunit beta/ferritin domain-containing protein"  
"NT-P19\_00191" 22929 "s59E25H2" 0 "putative trifunctional 2-polyprenylphenol hydroxylase/glutamate synthase subunit beta/ferritin domain-containing protein"  
"NT-P19\_00191" 22929 "s59E5H2" 0 "putative trifunctional 2-polyprenylphenol hydroxylase/glutamate synthase subunit beta/ferritin domain-containing protein"  
"NT-P19\_00191" 22929 "s63E6H2" 0.00115796 "putative trifunctional 2-polyprenylphenol hydroxylase/glutamate synthase subunit beta/ferritin domain-containing protein"  
"NT-P19\_00192" 22930 "s59E13H2" 0 "hypothetical protein"  
"NT-P19\_00192" 22930 "s59E25H2" 0 "hypothetical protein"  
"NT-P19\_00192" 22930 "s59E5H2" 0 "hypothetical protein"  
"NT-P19\_00192" 22930 "s63E6H2" 0 "hypothetical protein"  
"NT-P19\_00193" 22931 "s59E13H2" 0 "putative polyketide biosynthesis zinc-dependent hydrolase PksB"  
"NT-P19\_00193" 22931 "s59E25H2" 0 "putative polyketide biosynthesis zinc-dependent hydrolase PksB"  
"NT-P19\_00193" 22931 "s59E5H2" 0 "putative polyketide biosynthesis zinc-dependent hydrolase PksB"

"NT-P19\_00193" 22931 "s63E6H2" 0.004760656 "putative polyketide biosynthesis zinc-dependent hydrolase PksB"  
"NT-P19\_00194" 22932 "s59E13H2" 0 "Glutamine--tRNA ligase"  
"NT-P19\_00194" 22932 "s59E25H2" 0 "Glutamine--tRNA ligase"  
"NT-P19\_00194" 22932 "s59E5H2" 0 "Glutamine--tRNA ligase"  
"NT-P19\_00194" 22932 "s63E6H2" 0.005152631 "Glutamine--tRNA ligase"  
"NT-P19\_00195" 22933 "s59E13H2" 0 "hypothetical protein"  
"NT-P19\_00195" 22933 "s59E25H2" 0 "hypothetical protein"  
"NT-P19\_00195" 22933 "s59E5H2" 0 "hypothetical protein"  
"NT-P19\_00195" 22933 "s63E6H2" 0.0007689578 "hypothetical protein"  
"NT-P19\_00196" 22934 "s59E13H2" 0 "hypothetical protein"  
"NT-P19\_00196" 22934 "s59E25H2" 0 "hypothetical protein"  
"NT-P19\_00196" 22934 "s59E5H2" 0.01295621 "hypothetical protein"  
"NT-P19\_00196" 22934 "s63E6H2" 0.002461371 "hypothetical protein"  
"NT-P19\_00197" 22935 "s59E13H2" 0.06198858 "General stress protein 69"  
"NT-P19\_00197" 22935 "s59E25H2" 0 "General stress protein 69"  
"NT-P19\_00197" 22935 "s59E5H2" 0 "General stress protein 69"  
"NT-P19\_00197" 22935 "s63E6H2" 0.00579591 "General stress protein 69"  
"NT-P19\_00198" 22936 "s59E13H2" 0.01838459 "Imidazole glycerol phosphate synthase subunit HisF"  
"NT-P19\_00198" 22936 "s59E25H2" 0 "Imidazole glycerol phosphate synthase subunit HisF"  
"NT-P19\_00198" 22936 "s59E5H2" 0.01197337 "Imidazole glycerol phosphate synthase subunit HisF"  
"NT-P19\_00198" 22936 "s63E6H2" 0.01617965 "Imidazole glycerol phosphate synthase subunit HisF"  
"NT-P19\_00199" 22937 "s59E13H2" 0 "Carbamoyl-phosphate synthase large chain"  
"NT-P19\_00199" 22937 "s59E25H2" 0 "Carbamoyl-phosphate synthase large chain"  
"NT-P19\_00199" 22937 "s59E5H2" 0.01272044 "Carbamoyl-phosphate synthase large chain"  
"NT-P19\_00199" 22937 "s63E6H2" 0.004834591 "Carbamoyl-phosphate synthase large chain"  
"NT-P19\_00200" 22938 "s59E13H2" 0 "Pyruvate kinase"  
"NT-P19\_00200" 22938 "s59E25H2" 0 "Pyruvate kinase"  
"NT-P19\_00200" 22938 "s59E5H2" 0.002802441 "Pyruvate kinase"  
"NT-P19\_00200" 22938 "s63E6H2" 0 "Pyruvate kinase"  
"NT-P19\_00201" 22939 "s59E13H2" 0 "hypothetical protein"  
"NT-P19\_00201" 22939 "s59E25H2" 0 "hypothetical protein"  
"NT-P19\_00201" 22939 "s59E5H2" 0 "hypothetical protein"  
"NT-P19\_00201" 22939 "s63E6H2" 0.1269711 "hypothetical protein"  
"NT-P19\_00202" 22940 "s59E13H2" 0 "Putative ankyrin repeat protein"  
"NT-P19\_00202" 22940 "s59E25H2" 0 "Putative ankyrin repeat protein"  
"NT-P19\_00202" 22940 "s59E5H2" 0.02667853 "Putative ankyrin repeat protein"  
"NT-P19\_00202" 22940 "s63E6H2" 0.5702728 "Putative ankyrin repeat protein"  
"NT-P19\_00209" 22947 "s59E13H2" 0 "alpha-mannosidase"  
"NT-P19\_00209" 22947 "s59E25H2" 0 "alpha-mannosidase"  
"NT-P19\_00209" 22947 "s59E5H2" 0.1757241 "alpha-mannosidase"  
"NT-P19\_00209" 22947 "s63E6H2" 0 "alpha-mannosidase"  
"NT-P19\_00210" 22948 "s59E13H2" 0 "Methylcobamide:CoM methyltransferase MtaA"  
"NT-P19\_00210" 22948 "s59E25H2" 0 "Methylcobamide:CoM methyltransferase MtaA"  
"NT-P19\_00210" 22948 "s59E5H2" 0.01247499 "Methylcobamide:CoM methyltransferase MtaA"  
"NT-P19\_00210" 22948 "s63E6H2" 0 "Methylcobamide:CoM methyltransferase MtaA"  
"NT-P19\_00211" 22949 "s59E13H2" 0 "L-arabinose isomerase"  
"NT-P19\_00211" 22949 "s59E25H2" 0 "L-arabinose isomerase"

"NT-P19\_00211" 22949 "s59E5H2" 0.01461827 "L-arabinose isomerase"  
"NT-P19\_00211" 22949 "s63E6H2" 0 "L-arabinose isomerase"  
"NT-P19\_00212" 22950 "s59E13H2" 0 "L-glutamine:2-deoxy-scyllo-inosose aminotransferase"  
"NT-P19\_00212" 22950 "s59E25H2" 0 "L-glutamine:2-deoxy-scyllo-inosose aminotransferase"  
"NT-P19\_00212" 22950 "s59E5H2" 0.00620954 "L-glutamine:2-deoxy-scyllo-inosose aminotransferase"  
"NT-P19\_00212" 22950 "s63E6H2" 0 "L-glutamine:2-deoxy-scyllo-inosose aminotransferase"  
"NT-P19\_00213" 22951 "s59E13H2" 0 "Hydroxypyruvate isomerase"  
"NT-P19\_00213" 22951 "s59E25H2" 0 "Hydroxypyruvate isomerase"  
"NT-P19\_00213" 22951 "s59E5H2" 0 "Hydroxypyruvate isomerase"  
"NT-P19\_00213" 22951 "s63E6H2" 0 "Hydroxypyruvate isomerase"  
"NT-P19\_00214" 22952 "s59E13H2" 0 "Trimethylamine methyltransferase MttB"  
"NT-P19\_00214" 22952 "s59E25H2" 0 "Trimethylamine methyltransferase MttB"  
"NT-P19\_00214" 22952 "s59E5H2" 0 "Trimethylamine methyltransferase MttB"  
"NT-P19\_00214" 22952 "s63E6H2" 0 "Trimethylamine methyltransferase MttB"  
"NT-P19\_00215" 22953 "s59E13H2" 0 "hypothetical protein"  
"NT-P19\_00215" 22953 "s59E25H2" 0 "hypothetical protein"  
"NT-P19\_00215" 22953 "s59E5H2" 0 "hypothetical protein"  
"NT-P19\_00215" 22953 "s63E6H2" 0 "hypothetical protein"  
"NT-P19\_00216" 22954 "s59E13H2" 0 "methylcobalamin:coenzyme M methyltransferase"  
"NT-P19\_00216" 22954 "s59E25H2" 0 "methylcobalamin:coenzyme M methyltransferase"  
"NT-P19\_00216" 22954 "s59E5H2" 0 "methylcobalamin:coenzyme M methyltransferase"  
"NT-P19\_00216" 22954 "s63E6H2" 0 "methylcobalamin:coenzyme M methyltransferase"  
"NT-P19\_00217" 22955 "s59E13H2" 0 "methylcobalamin:coenzyme M methyltransferase"  
"NT-P19\_00217" 22955 "s59E25H2" 0 "methylcobalamin:coenzyme M methyltransferase"  
"NT-P19\_00217" 22955 "s59E5H2" 0 "methylcobalamin:coenzyme M methyltransferase"  
"NT-P19\_00217" 22955 "s63E6H2" 0 "methylcobalamin:coenzyme M methyltransferase"  
"NT-P19\_00218" 22956 "s59E13H2" 0 "methylcobalamin:coenzyme M methyltransferase"  
"NT-P19\_00218" 22956 "s59E25H2" 0 "methylcobalamin:coenzyme M methyltransferase"  
"NT-P19\_00218" 22956 "s59E5H2" 0.00326516 "methylcobalamin:coenzyme M methyltransferase"  
"NT-P19\_00218" 22956 "s63E6H2" 0 "methylcobalamin:coenzyme M methyltransferase"  
"NT-P19\_00220" 22958 "s59E13H2" 0 "Methylcobamide:CoM methyltransferase MtaA"  
"NT-P19\_00220" 22958 "s59E25H2" 0 "Methylcobamide:CoM methyltransferase MtaA"  
"NT-P19\_00220" 22958 "s59E5H2" 0.006219026 "Methylcobamide:CoM methyltransferase MtaA"  
"NT-P19\_00220" 22958 "s63E6H2" 0 "Methylcobamide:CoM methyltransferase MtaA"  
"NT-P19\_00221" 22959 "s59E13H2" 0 "Periplasmic beta-glucosidase precursor"  
"NT-P19\_00221" 22959 "s59E25H2" 0 "Periplasmic beta-glucosidase precursor"  
"NT-P19\_00221" 22959 "s59E5H2" 0.01926522 "Periplasmic beta-glucosidase precursor"  
"NT-P19\_00221" 22959 "s63E6H2" 0 "Periplasmic beta-glucosidase precursor"  
"NT-P19\_00222" 22960 "s59E13H2" 0 "N-acetyl-gamma-glutamyl-phosphate reductase"  
"NT-P19\_00222" 22960 "s59E25H2" 0 "N-acetyl-gamma-glutamyl-phosphate reductase"  
"NT-P19\_00222" 22960 "s59E5H2" 0 "N-acetyl-gamma-glutamyl-phosphate reductase"  
"NT-P19\_00222" 22960 "s63E6H2" 0.005947781 "N-acetyl-gamma-glutamyl-phosphate reductase"  
"NT-P19\_00223" 22961 "s59E13H2" 0 "Arginine biosynthesis bifunctional protein ArgJ"  
"NT-P19\_00223" 22961 "s59E25H2" 0 "Arginine biosynthesis bifunctional protein ArgJ"  
"NT-P19\_00223" 22961 "s59E5H2" 0 "Arginine biosynthesis bifunctional protein ArgJ"  
"NT-P19\_00223" 22961 "s63E6H2" 0.008672725 "Arginine biosynthesis bifunctional protein ArgJ"  
"NT-P19\_00224" 22962 "s59E13H2" 0 "D-glycero-alpha-D-manno-heptose 1-phosphate guanylyltransferase"

"NT-P19\_00224" 22962 "s59E25H2" 0 "D-glycero-alpha-D-manno-heptose 1-phosphate guanylyltransferase"  
"NT-P19\_00224" 22962 "s59E5H2" 0 "D-glycero-alpha-D-manno-heptose 1-phosphate guanylyltransferase"  
"NT-P19\_00224" 22962 "s63E6H2" 0 "D-glycero-alpha-D-manno-heptose 1-phosphate guanylyltransferase"  
"NT-P19\_00225" 22963 "s59E13H2" 0 "D-glycero-alpha-D-manno-heptose 7-phosphate kinase"  
"NT-P19\_00225" 22963 "s59E25H2" 0 "D-glycero-alpha-D-manno-heptose 7-phosphate kinase"  
"NT-P19\_00225" 22963 "s59E5H2" 0 "D-glycero-alpha-D-manno-heptose 7-phosphate kinase"  
"NT-P19\_00225" 22963 "s63E6H2" 0 "D-glycero-alpha-D-manno-heptose 7-phosphate kinase"  
"NT-P19\_00226" 22964 "s59E13H2" 0 "Phosphoheptose isomerase"  
"NT-P19\_00226" 22964 "s59E25H2" 0 "Phosphoheptose isomerase"  
"NT-P19\_00226" 22964 "s59E5H2" 0 "Phosphoheptose isomerase"  
"NT-P19\_00226" 22964 "s63E6H2" 0 "Phosphoheptose isomerase"  
"NT-P19\_00227" 22965 "s59E13H2" 0 "Undecaprenyl-phosphate 4-deoxy-4-formamido-L-arabinose transferase"  
"NT-P19\_00227" 22965 "s59E25H2" 0 "Undecaprenyl-phosphate 4-deoxy-4-formamido-L-arabinose transferase"  
"NT-P19\_00227" 22965 "s59E5H2" 0 "Undecaprenyl-phosphate 4-deoxy-4-formamido-L-arabinose transferase"  
"NT-P19\_00227" 22965 "s63E6H2" 0 "Undecaprenyl-phosphate 4-deoxy-4-formamido-L-arabinose transferase"  
"NT-P19\_00228" 22966 "s59E13H2" 0 "GDP-mannose-dependent alpha-(1-6)-phosphatidylinositol monomannoside mannosyltransferase"  
"NT-P19\_00228" 22966 "s59E25H2" 0 "GDP-mannose-dependent alpha-(1-6)-phosphatidylinositol monomannoside mannosyltransferase"  
"NT-P19\_00228" 22966 "s59E5H2" 0 "GDP-mannose-dependent alpha-(1-6)-phosphatidylinositol monomannoside mannosyltransferase"  
"NT-P19\_00228" 22966 "s63E6H2" 0 "GDP-mannose-dependent alpha-(1-6)-phosphatidylinositol monomannoside mannosyltransferase"  
"NT-P19\_00229" 22967 "s59E13H2" 0 "Mannosylfructose-phosphate synthase"  
"NT-P19\_00229" 22967 "s59E25H2" 0 "Mannosylfructose-phosphate synthase"  
"NT-P19\_00229" 22967 "s59E5H2" 0 "Mannosylfructose-phosphate synthase"  
"NT-P19\_00229" 22967 "s63E6H2" 0 "Mannosylfructose-phosphate synthase"  
"NT-P19\_00230" 22968 "s59E13H2" 0 "hypothetical protein"  
"NT-P19\_00230" 22968 "s59E25H2" 0 "hypothetical protein"  
"NT-P19\_00230" 22968 "s59E5H2" 0 "hypothetical protein"  
"NT-P19\_00230" 22968 "s63E6H2" 0 "hypothetical protein"  
"NT-P19\_00231" 22969 "s59E13H2" 0 "putative cell division protein YtgP"  
"NT-P19\_00231" 22969 "s59E25H2" 0 "putative cell division protein YtgP"  
"NT-P19\_00231" 22969 "s59E5H2" 0 "putative cell division protein YtgP"  
"NT-P19\_00231" 22969 "s63E6H2" 0 "putative cell division protein YtgP"  
"NT-P19\_00232" 22970 "s59E13H2" 0 "Dolichyl-phosphate-mannose-protein mannosyltransferase"  
"NT-P19\_00232" 22970 "s59E25H2" 0 "Dolichyl-phosphate-mannose-protein mannosyltransferase"  
"NT-P19\_00232" 22970 "s59E5H2" 0 "Dolichyl-phosphate-mannose-protein mannosyltransferase"  
"NT-P19\_00232" 22970 "s63E6H2" 0 "Dolichyl-phosphate-mannose-protein mannosyltransferase"  
"NT-P19\_00233" 22971 "s59E13H2" 0 "UDP-N-acetyl-D-mannosamine dehydrogenase"  
"NT-P19\_00233" 22971 "s59E25H2" 0 "UDP-N-acetyl-D-mannosamine dehydrogenase"  
"NT-P19\_00233" 22971 "s59E5H2" 0 "UDP-N-acetyl-D-mannosamine dehydrogenase"  
"NT-P19\_00233" 22971 "s63E6H2" 0 "UDP-N-acetyl-D-mannosamine dehydrogenase"  
"NT-P19\_00234" 22972 "s59E13H2" 0 "GDP-mannose 4,6-dehydratase"  
"NT-P19\_00234" 22972 "s59E25H2" 0 "GDP-mannose 4,6-dehydratase"  
"NT-P19\_00234" 22972 "s59E5H2" 0 "GDP-mannose 4,6-dehydratase"  
"NT-P19\_00234" 22972 "s63E6H2" 0 "GDP-mannose 4,6-dehydratase"  
"NT-P19\_00235" 22973 "s59E13H2" 0 "GDP-L-fucose synthase"  
"NT-P19\_00235" 22973 "s59E25H2" 0 "GDP-L-fucose synthase"  
"NT-P19\_00235" 22973 "s59E5H2" 0 "GDP-L-fucose synthase"  
"NT-P19\_00235" 22973 "s63E6H2" 0 "GDP-L-fucose synthase"

"NT-P19\_00236" 22974 "s59E13H2" 0 "Glycosyltransferase AgIJ"  
"NT-P19\_00236" 22974 "s59E25H2" 0 "Glycosyltransferase AgIJ"  
"NT-P19\_00236" 22974 "s59E5H2" 0 "Glycosyltransferase AgIJ"  
"NT-P19\_00236" 22974 "s63E6H2" 0 "Glycosyltransferase AgIJ"  
"NT-P19\_00237" 22975 "s59E13H2" 0 "hypothetical protein"  
"NT-P19\_00237" 22975 "s59E25H2" 0 "hypothetical protein"  
"NT-P19\_00237" 22975 "s59E5H2" 0 "hypothetical protein"  
"NT-P19\_00237" 22975 "s63E6H2" 0 "hypothetical protein"  
"NT-P19\_00238" 22976 "s59E13H2" 0 "N-acetylgalactosamine-N,N'-diacetylba  
"NT-P19\_00238" 22976 "s59E25H2" 0 "N-acetylgalactosamine-N,N'-diacetylba  
"NT-P19\_00238" 22976 "s59E5H2" 0 "N-acetylgalactosamine-N,N'-diacetylba  
"NT-P19\_00238" 22976 "s63E6H2" 0 "N-acetylgalactosamine-N,N'-diacetylba  
"NT-P19\_00239" 22977 "s59E13H2" 0 "Polysaccharide biosynthesis protein"  
"NT-P19\_00239" 22977 "s59E25H2" 0 "Polysaccharide biosynthesis protein"  
"NT-P19\_00239" 22977 "s59E5H2" 0 "Polysaccharide biosynthesis protein"  
"NT-P19\_00239" 22977 "s63E6H2" 0 "Polysaccharide biosynthesis protein"  
"NT-P19\_00240" 22978 "s59E13H2" 0 "O-Antigen ligase"  
"NT-P19\_00240" 22978 "s59E25H2" 0 "O-Antigen ligase"  
"NT-P19\_00240" 22978 "s59E5H2" 0 "O-Antigen ligase"  
"NT-P19\_00240" 22978 "s63E6H2" 0 "O-Antigen ligase"  
"NT-P19\_00243" 22981 "s59E13H2" 0 "putative glycine dehydrogenase (decarboxylating) subunit 1"  
"NT-P19\_00243" 22981 "s59E25H2" 0 "putative glycine dehydrogenase (decarboxylating) subunit 1"  
"NT-P19\_00243" 22981 "s59E5H2" 0.01035936 "putative glycine dehydrogenase (decarboxylating) subunit 1"  
"NT-P19\_00243" 22981 "s63E6H2" 0.2313746 "putative glycine dehydrogenase (decarboxylating) subunit 1"  
"NT-P19\_00245" 22983 "s59E13H2" 0 "Modulator of FtsH protease HflC"  
"NT-P19\_00245" 22983 "s59E25H2" 0 "Modulator of FtsH protease HflC"  
"NT-P19\_00245" 22983 "s59E5H2" 0 "Modulator of FtsH protease HflC"  
"NT-P19\_00245" 22983 "s63E6H2" 0.075457 "Modulator of FtsH protease HflC"  
"NT-P19\_00246" 22984 "s59E13H2" 0 "Pyruvate, phosphate dikinase"  
"NT-P19\_00246" 22984 "s59E25H2" 0 "Pyruvate, phosphate dikinase"  
"NT-P19\_00246" 22984 "s59E5H2" 0 "Pyruvate, phosphate dikinase"  
"NT-P19\_00246" 22984 "s63E6H2" 0.04032186 "Pyruvate, phosphate dikinase"  
"NT-P19\_00247" 22985 "s59E13H2" 0 "hypothetical protein"  
"NT-P19\_00247" 22985 "s59E25H2" 0 "hypothetical protein"  
"NT-P19\_00247" 22985 "s59E5H2" 0 "hypothetical protein"  
"NT-P19\_00247" 22985 "s63E6H2" 0.09462704 "hypothetical protein"  
"NT-P19\_00250" 22988 "s59E13H2" 0 "Elongation factor Tu-A"  
"NT-P19\_00250" 22988 "s59E25H2" 0 "Elongation factor Tu-A"  
"NT-P19\_00250" 22988 "s59E5H2" 0 "Elongation factor Tu-A"  
"NT-P19\_00250" 22988 "s63E6H2" 0.03466155 "Elongation factor Tu-A"  
"NT-P19\_00252" 22990 "s59E13H2" 0 "preprotein translocase subunit SecE"  
"NT-P19\_00252" 22990 "s59E25H2" 0 "preprotein translocase subunit SecE"  
"NT-P19\_00252" 22990 "s59E5H2" 0 "preprotein translocase subunit SecE"  
"NT-P19\_00252" 22990 "s63E6H2" 0 "preprotein translocase subunit SecE"  
"NT-P19\_00253" 22991 "s59E13H2" 0 "hypothetical protein"  
"NT-P19\_00253" 22991 "s59E25H2" 0 "hypothetical protein"  
"NT-P19\_00253" 22991 "s59E5H2" 0 "hypothetical protein"



"NT-P19\_00253" 22991 "s63E6H2" 0.00874685 "hypothetical protein"  
"NT-P19\_00254" 22992 "s59E13H2" 0 "50S ribosomal protein L11"  
"NT-P19\_00254" 22992 "s59E25H2" 0 "50S ribosomal protein L11"  
"NT-P19\_00254" 22992 "s59E5H2" 0 "50S ribosomal protein L11"  
"NT-P19\_00254" 22992 "s63E6H2" 0.09742451 "50S ribosomal protein L11"  
"NT-P19\_00255" 22993 "s59E13H2" 0 "50S ribosomal protein L1"  
"NT-P19\_00255" 22993 "s59E25H2" 0 "50S ribosomal protein L1"  
"NT-P19\_00255" 22993 "s59E5H2" 0 "50S ribosomal protein L1"  
"NT-P19\_00255" 22993 "s63E6H2" 0.0007014565 "50S ribosomal protein L1"  
"NT-P19\_00256" 22994 "s59E13H2" 0 "50S ribosomal protein L10"  
"NT-P19\_00256" 22994 "s59E25H2" 0 "50S ribosomal protein L10"  
"NT-P19\_00256" 22994 "s59E5H2" 0 "50S ribosomal protein L10"  
"NT-P19\_00256" 22994 "s63E6H2" 0 "50S ribosomal protein L10"  
"NT-P19\_00257" 22995 "s59E13H2" 0 "50S ribosomal protein L7/L12"  
"NT-P19\_00257" 22995 "s59E25H2" 0 "50S ribosomal protein L7/L12"  
"NT-P19\_00257" 22995 "s59E5H2" 0 "50S ribosomal protein L7/L12"  
"NT-P19\_00257" 22995 "s63E6H2" 0 "50S ribosomal protein L7/L12"  
"NT-P19\_00258" 22996 "s59E13H2" 0.005219401 "DNA-directed RNA polymerase subunit beta"  
"NT-P19\_00258" 22996 "s59E25H2" 0 "DNA-directed RNA polymerase subunit beta"  
"NT-P19\_00258" 22996 "s59E5H2" 0 "DNA-directed RNA polymerase subunit beta"  
"NT-P19\_00258" 22996 "s63E6H2" 0 "DNA-directed RNA polymerase subunit beta"  
"NT-P19\_00259" 22997 "s59E13H2" 0.002386609 "DNA-directed RNA polymerase subunit beta"  
"NT-P19\_00259" 22997 "s59E25H2" 0 "DNA-directed RNA polymerase subunit beta"  
"NT-P19\_00259" 22997 "s59E5H2" 0 "DNA-directed RNA polymerase subunit beta"  
"NT-P19\_00259" 22997 "s63E6H2" 0 "DNA-directed RNA polymerase subunit beta"  
"NT-P19\_00260" 22998 "s59E13H2" 0 "30S ribosomal protein S12"  
"NT-P19\_00260" 22998 "s59E25H2" 0 "30S ribosomal protein S12"  
"NT-P19\_00260" 22998 "s59E5H2" 0 "30S ribosomal protein S12"  
"NT-P19\_00260" 22998 "s63E6H2" 0 "30S ribosomal protein S12"  
"NT-P19\_00261" 22999 "s59E13H2" 0 "30S ribosomal protein S7"  
"NT-P19\_00261" 22999 "s59E25H2" 0 "30S ribosomal protein S7"  
"NT-P19\_00261" 22999 "s59E5H2" 0 "30S ribosomal protein S7"  
"NT-P19\_00261" 22999 "s63E6H2" 0 "30S ribosomal protein S7"  
"NT-P19\_00262" 23000 "s59E13H2" 0 "Elongation factor G"  
"NT-P19\_00262" 23000 "s59E25H2" 0 "Elongation factor G"  
"NT-P19\_00262" 23000 "s59E5H2" 0 "Elongation factor G"  
"NT-P19\_00262" 23000 "s63E6H2" 0.001249729 "Elongation factor G"  
"NT-P19\_00263" 23001 "s59E13H2" 0 "30S ribosomal protein S10"  
"NT-P19\_00263" 23001 "s59E25H2" 0 "30S ribosomal protein S10"  
"NT-P19\_00263" 23001 "s59E5H2" 0 "30S ribosomal protein S10"  
"NT-P19\_00263" 23001 "s63E6H2" 0.001573926 "30S ribosomal protein S10"  
"NT-P19\_00264" 23002 "s59E13H2" 0 "50S ribosomal protein L3"  
"NT-P19\_00264" 23002 "s59E25H2" 0 "50S ribosomal protein L3"  
"NT-P19\_00264" 23002 "s59E5H2" 0 "50S ribosomal protein L3"  
"NT-P19\_00264" 23002 "s63E6H2" 0 "50S ribosomal protein L3"  
"NT-P19\_00265" 23003 "s59E13H2" 0 "50S ribosomal protein L4"  
"NT-P19\_00265" 23003 "s59E25H2" 0 "50S ribosomal protein L4"

"NT-P19\_00265" 23003 "s59E5H2" 0 "50S ribosomal protein L4"  
"NT-P19\_00265" 23003 "s63E6H2" 0 "50S ribosomal protein L4"  
"NT-P19\_00266" 23004 "s59E13H2" 0 "50S ribosomal protein L23"  
"NT-P19\_00266" 23004 "s59E25H2" 0 "50S ribosomal protein L23"  
"NT-P19\_00266" 23004 "s59E5H2" 0 "50S ribosomal protein L23"  
"NT-P19\_00266" 23004 "s63E6H2" 0 "50S ribosomal protein L23"  
"NT-P19\_00267" 23005 "s59E13H2" 0 "50S ribosomal protein L2"  
"NT-P19\_00267" 23005 "s59E25H2" 0 "50S ribosomal protein L2"  
"NT-P19\_00267" 23005 "s59E5H2" 0 "50S ribosomal protein L2"  
"NT-P19\_00267" 23005 "s63E6H2" 0 "50S ribosomal protein L2"  
"NT-P19\_00268" 23006 "s59E13H2" 0 "30S ribosomal protein S19"  
"NT-P19\_00268" 23006 "s59E25H2" 0 "30S ribosomal protein S19"  
"NT-P19\_00268" 23006 "s59E5H2" 0 "30S ribosomal protein S19"  
"NT-P19\_00268" 23006 "s63E6H2" 0 "30S ribosomal protein S19"  
"NT-P19\_00269" 23007 "s59E13H2" 0 "50S ribosomal protein L22"  
"NT-P19\_00269" 23007 "s59E25H2" 0 "50S ribosomal protein L22"  
"NT-P19\_00269" 23007 "s59E5H2" 0 "50S ribosomal protein L22"  
"NT-P19\_00269" 23007 "s63E6H2" 0 "50S ribosomal protein L22"  
"NT-P19\_00270" 23008 "s59E13H2" 0 "30S ribosomal protein S3"  
"NT-P19\_00270" 23008 "s59E25H2" 0 "30S ribosomal protein S3"  
"NT-P19\_00270" 23008 "s59E5H2" 0 "30S ribosomal protein S3"  
"NT-P19\_00270" 23008 "s63E6H2" 0 "30S ribosomal protein S3"  
"NT-P19\_00271" 23009 "s59E13H2" 0 "50S ribosomal protein L16"  
"NT-P19\_00271" 23009 "s59E25H2" 0 "50S ribosomal protein L16"  
"NT-P19\_00271" 23009 "s59E5H2" 0 "50S ribosomal protein L16"  
"NT-P19\_00271" 23009 "s63E6H2" 0.00202643 "50S ribosomal protein L16"  
"NT-P19\_00272" 23010 "s59E13H2" 0 "50S ribosomal protein L29"  
"NT-P19\_00272" 23010 "s59E25H2" 0 "50S ribosomal protein L29"  
"NT-P19\_00272" 23010 "s59E5H2" 0 "50S ribosomal protein L29"  
"NT-P19\_00272" 23010 "s63E6H2" 0.008162802 "50S ribosomal protein L29"  
"NT-P19\_00273" 23011 "s59E13H2" 0 "30S ribosomal protein S17"  
"NT-P19\_00273" 23011 "s59E25H2" 0 "30S ribosomal protein S17"  
"NT-P19\_00273" 23011 "s59E5H2" 0 "30S ribosomal protein S17"  
"NT-P19\_00273" 23011 "s63E6H2" 0.001236912 "30S ribosomal protein S17"  
"NT-P19\_00274" 23012 "s59E13H2" 0 "50S ribosomal protein L14"  
"NT-P19\_00274" 23012 "s59E25H2" 0 "50S ribosomal protein L14"  
"NT-P19\_00274" 23012 "s59E5H2" 0 "50S ribosomal protein L14"  
"NT-P19\_00274" 23012 "s63E6H2" 0 "50S ribosomal protein L14"  
"NT-P19\_00275" 23013 "s59E13H2" 0 "50S ribosomal protein L24"  
"NT-P19\_00275" 23013 "s59E25H2" 0 "50S ribosomal protein L24"  
"NT-P19\_00275" 23013 "s59E5H2" 0 "50S ribosomal protein L24"  
"NT-P19\_00275" 23013 "s63E6H2" 0.004666366 "50S ribosomal protein L24"  
"NT-P19\_00276" 23014 "s59E13H2" 0 "50S ribosomal protein L5"  
"NT-P19\_00276" 23014 "s59E25H2" 0 "50S ribosomal protein L5"  
"NT-P19\_00276" 23014 "s59E5H2" 0 "50S ribosomal protein L5"  
"NT-P19\_00276" 23014 "s63E6H2" 0.002627678 "50S ribosomal protein L5"  
"NT-P19\_00277" 23015 "s59E13H2" 0 "30S ribosomal protein S14 type Z"

"NT-P19\_00277" 23015 "s59E25H2" 0 "30S ribosomal protein S14 type Z"  
"NT-P19\_00277" 23015 "s59E5H2" 0 "30S ribosomal protein S14 type Z"  
"NT-P19\_00277" 23015 "s63E6H2" 0 "30S ribosomal protein S14 type Z"  
"NT-P19\_00278" 23016 "s59E13H2" 0 "30S ribosomal protein S8"  
"NT-P19\_00278" 23016 "s59E25H2" 0 "30S ribosomal protein S8"  
"NT-P19\_00278" 23016 "s59E5H2" 0.0005282018 "30S ribosomal protein S8"  
"NT-P19\_00278" 23016 "s63E6H2" 0 "30S ribosomal protein S8"  
"NT-P19\_00279" 23017 "s59E13H2" 0 "50S ribosomal protein L6"  
"NT-P19\_00279" 23017 "s59E25H2" 0 "50S ribosomal protein L6"  
"NT-P19\_00279" 23017 "s59E5H2" 0 "50S ribosomal protein L6"  
"NT-P19\_00279" 23017 "s63E6H2" 0 "50S ribosomal protein L6"  
"NT-P19\_00280" 23018 "s59E13H2" 0 "50S ribosomal protein L18"  
"NT-P19\_00280" 23018 "s59E25H2" 0 "50S ribosomal protein L18"  
"NT-P19\_00280" 23018 "s59E5H2" 0 "50S ribosomal protein L18"  
"NT-P19\_00280" 23018 "s63E6H2" 0 "50S ribosomal protein L18"  
"NT-P19\_00282" 23020 "s59E13H2" 0 "30S ribosomal protein S5"  
"NT-P19\_00282" 23020 "s59E25H2" 0 "30S ribosomal protein S5"  
"NT-P19\_00282" 23020 "s59E5H2" 0 "30S ribosomal protein S5"  
"NT-P19\_00282" 23020 "s63E6H2" 0 "30S ribosomal protein S5"  
"NT-P19\_00283" 23021 "s59E13H2" 0 "50S ribosomal protein L15"  
"NT-P19\_00283" 23021 "s59E25H2" 0 "50S ribosomal protein L15"  
"NT-P19\_00283" 23021 "s59E5H2" 0 "50S ribosomal protein L15"  
"NT-P19\_00283" 23021 "s63E6H2" 0 "50S ribosomal protein L15"  
"NT-P19\_00284" 23022 "s59E13H2" 0 "preprotein translocase subunit SecY"  
"NT-P19\_00284" 23022 "s59E25H2" 0 "preprotein translocase subunit SecY"  
"NT-P19\_00284" 23022 "s59E5H2" 0 "preprotein translocase subunit SecY"  
"NT-P19\_00284" 23022 "s63E6H2" 0.00114105 "preprotein translocase subunit SecY"  
"NT-P19\_00285" 23023 "s59E13H2" 0 "Adenylate kinase"  
"NT-P19\_00285" 23023 "s59E25H2" 0 "Adenylate kinase"  
"NT-P19\_00285" 23023 "s59E5H2" 0 "Adenylate kinase"  
"NT-P19\_00285" 23023 "s63E6H2" 0 "Adenylate kinase"  
"NT-P19\_00286" 23024 "s59E13H2" 0 "Translation initiation factor IF-1"  
"NT-P19\_00286" 23024 "s59E25H2" 0 "Translation initiation factor IF-1"  
"NT-P19\_00286" 23024 "s59E5H2" 0 "Translation initiation factor IF-1"  
"NT-P19\_00286" 23024 "s63E6H2" 0 "Translation initiation factor IF-1"  
"NT-P19\_00287" 23025 "s59E13H2" 0 "30S ribosomal protein S13"  
"NT-P19\_00287" 23025 "s59E25H2" 0 "30S ribosomal protein S13"  
"NT-P19\_00287" 23025 "s59E5H2" 0 "30S ribosomal protein S13"  
"NT-P19\_00287" 23025 "s63E6H2" 0 "30S ribosomal protein S13"  
"NT-P19\_00288" 23026 "s59E13H2" 0 "30S ribosomal protein S11"  
"NT-P19\_00288" 23026 "s59E25H2" 0 "30S ribosomal protein S11"  
"NT-P19\_00288" 23026 "s59E5H2" 0 "30S ribosomal protein S11"  
"NT-P19\_00288" 23026 "s63E6H2" 0.00753106 "30S ribosomal protein S11"  
"NT-P19\_00289" 23027 "s59E13H2" 0 "30S ribosomal protein S4"  
"NT-P19\_00289" 23027 "s59E25H2" 0 "30S ribosomal protein S4"  
"NT-P19\_00289" 23027 "s59E5H2" 0 "30S ribosomal protein S4"  
"NT-P19\_00289" 23027 "s63E6H2" 0.00245926 "30S ribosomal protein S4"

"NT-P19\_00290" 23028 "s59E13H2" 0 "DNA-directed RNA polymerase subunit alpha"  
"NT-P19\_00290" 23028 "s59E25H2" 0 "DNA-directed RNA polymerase subunit alpha"  
"NT-P19\_00290" 23028 "s59E5H2" 0 "DNA-directed RNA polymerase subunit alpha"  
"NT-P19\_00290" 23028 "s63E6H2" 0.002962692 "DNA-directed RNA polymerase subunit alpha"  
"NT-P19\_00291" 23029 "s59E13H2" 0 "50S ribosomal protein L17"  
"NT-P19\_00291" 23029 "s59E25H2" 0 "50S ribosomal protein L17"  
"NT-P19\_00291" 23029 "s59E5H2" 0 "50S ribosomal protein L17"  
"NT-P19\_00291" 23029 "s63E6H2" 0 "50S ribosomal protein L17"  
"NT-P19\_00295" 23033 "s59E13H2" 0 "tRNA pseudouridine synthase A"  
"NT-P19\_00295" 23033 "s59E25H2" 0 "tRNA pseudouridine synthase A"  
"NT-P19\_00295" 23033 "s59E5H2" 0 "tRNA pseudouridine synthase A"  
"NT-P19\_00295" 23033 "s63E6H2" 0 "tRNA pseudouridine synthase A"  
"NT-P19\_00296" 23034 "s59E13H2" 0 "tRNA(Ile)-lysidine synthase"  
"NT-P19\_00296" 23034 "s59E25H2" 0 "tRNA(Ile)-lysidine synthase"  
"NT-P19\_00296" 23034 "s59E5H2" 0.003499254 "tRNA(Ile)-lysidine synthase"  
"NT-P19\_00296" 23034 "s63E6H2" 0 "tRNA(Ile)-lysidine synthase"  
"NT-P19\_00297" 23035 "s59E13H2" 0 "Imidazoleglycerol-phosphate dehydratase"  
"NT-P19\_00297" 23035 "s59E25H2" 0 "Imidazoleglycerol-phosphate dehydratase"  
"NT-P19\_00297" 23035 "s59E5H2" 0.003127136 "Imidazoleglycerol-phosphate dehydratase"  
"NT-P19\_00297" 23035 "s63E6H2" 0 "Imidazoleglycerol-phosphate dehydratase"  
"NT-P19\_00298" 23036 "s59E13H2" 0 "D-tyrosyl-tRNA(Tyr) deacylase"  
"NT-P19\_00298" 23036 "s59E25H2" 0 "D-tyrosyl-tRNA(Tyr) deacylase"  
"NT-P19\_00298" 23036 "s59E5H2" 0 "D-tyrosyl-tRNA(Tyr) deacylase"  
"NT-P19\_00298" 23036 "s63E6H2" 0 "D-tyrosyl-tRNA(Tyr) deacylase"  
"NT-P19\_00299" 23037 "s59E13H2" 0 "Competence protein A"  
"NT-P19\_00299" 23037 "s59E25H2" 0 "Competence protein A"  
"NT-P19\_00299" 23037 "s59E5H2" 0 "Competence protein A"  
"NT-P19\_00299" 23037 "s63E6H2" 0.00277799 "Competence protein A"  
"NT-P19\_00300" 23038 "s59E13H2" 0 "Fimbrial assembly protein (PilN)"  
"NT-P19\_00300" 23038 "s59E25H2" 0 "Fimbrial assembly protein (PilN)"  
"NT-P19\_00300" 23038 "s59E5H2" 0 "Fimbrial assembly protein (PilN)"  
"NT-P19\_00300" 23038 "s63E6H2" 0 "Fimbrial assembly protein (PilN)"  
"NT-P19\_00301" 23039 "s59E13H2" 0 "Pilus assembly protein, PilO"  
"NT-P19\_00301" 23039 "s59E25H2" 0 "Pilus assembly protein, PilO"  
"NT-P19\_00301" 23039 "s59E5H2" 0 "Pilus assembly protein, PilO"  
"NT-P19\_00301" 23039 "s63E6H2" 0 "Pilus assembly protein, PilO"  
"NT-P19\_00302" 23040 "s59E13H2" 0 "hypothetical protein"  
"NT-P19\_00302" 23040 "s59E25H2" 0 "hypothetical protein"  
"NT-P19\_00302" 23040 "s59E5H2" 0 "hypothetical protein"  
"NT-P19\_00302" 23040 "s63E6H2" 0 "hypothetical protein"  
"NT-P19\_00303" 23041 "s59E13H2" 0 "Type IV pilus biogenesis and competence protein PilQ precursor"  
"NT-P19\_00303" 23041 "s59E25H2" 0 "Type IV pilus biogenesis and competence protein PilQ precursor"  
"NT-P19\_00303" 23041 "s59E5H2" 0 "Type IV pilus biogenesis and competence protein PilQ precursor"  
"NT-P19\_00303" 23041 "s63E6H2" 0.002324152 "Type IV pilus biogenesis and competence protein PilQ precursor"  
"NT-P19\_00304" 23042 "s59E13H2" 0 "Type II secretion system protein D precursor"  
"NT-P19\_00304" 23042 "s59E25H2" 0 "Type II secretion system protein D precursor"  
"NT-P19\_00304" 23042 "s59E5H2" 0.00305533 "Type II secretion system protein D precursor"

"NT-P19\_00304" 23042 "s63E6H2" 0 "Type II secretion system protein D precursor"  
"NT-P19\_00305" 23043 "s59E13H2" 0 "ATP phosphoribosyltransferase"  
"NT-P19\_00305" 23043 "s59E25H2" 0 "ATP phosphoribosyltransferase"  
"NT-P19\_00305" 23043 "s59E5H2" 0 "ATP phosphoribosyltransferase"  
"NT-P19\_00305" 23043 "s63E6H2" 0 "ATP phosphoribosyltransferase"  
"NT-P19\_00306" 23044 "s59E13H2" 0 "hypothetical protein"  
"NT-P19\_00306" 23044 "s59E25H2" 0 "hypothetical protein"  
"NT-P19\_00306" 23044 "s59E5H2" 0 "hypothetical protein"  
"NT-P19\_00306" 23044 "s63E6H2" 0.03722736 "hypothetical protein"  
"NT-P19\_00308" 23046 "s59E13H2" 0 "hypothetical protein"  
"NT-P19\_00308" 23046 "s59E25H2" 0 "hypothetical protein"  
"NT-P19\_00308" 23046 "s59E5H2" 0 "hypothetical protein"  
"NT-P19\_00308" 23046 "s63E6H2" 0.08240815 "hypothetical protein"  
"NT-P19\_00309" 23047 "s59E13H2" 0 "hypothetical protein"  
"NT-P19\_00309" 23047 "s59E25H2" 0 "hypothetical protein"  
"NT-P19\_00309" 23047 "s59E5H2" 0 "hypothetical protein"  
"NT-P19\_00309" 23047 "s63E6H2" 0.02622439 "hypothetical protein"  
"NT-P19\_00311" 23049 "s59E13H2" 0 "hypothetical protein"  
"NT-P19\_00311" 23049 "s59E25H2" 0 "hypothetical protein"  
"NT-P19\_00311" 23049 "s59E5H2" 0.009790615 "hypothetical protein"  
"NT-P19\_00311" 23049 "s63E6H2" 2.012626 "hypothetical protein"  
"NT-P19\_00313" 23051 "s59E13H2" 0 "Cold shock-like protein CspLA"  
"NT-P19\_00313" 23051 "s59E25H2" 0 "Cold shock-like protein CspLA"  
"NT-P19\_00313" 23051 "s59E5H2" 0.01063536 "Cold shock-like protein CspLA"  
"NT-P19\_00313" 23051 "s63E6H2" 0.02604178 "Cold shock-like protein CspLA"  
"NT-P19\_00315" 23053 "s59E13H2" 0.005104836 "DNA alkylation repair enzyme"  
"NT-P19\_00315" 23053 "s59E25H2" 0 "DNA alkylation repair enzyme"  
"NT-P19\_00315" 23053 "s59E5H2" 0.3974008 "DNA alkylation repair enzyme"  
"NT-P19\_00315" 23053 "s63E6H2" 0.8017285 "DNA alkylation repair enzyme"  
"NT-P19\_00316" 23054 "s59E13H2" 0 "Bacterial alpha-L-rhamnosidase"  
"NT-P19\_00316" 23054 "s59E25H2" 0 "Bacterial alpha-L-rhamnosidase"  
"NT-P19\_00316" 23054 "s59E5H2" 0 "Bacterial alpha-L-rhamnosidase"  
"NT-P19\_00316" 23054 "s63E6H2" 0 "Bacterial alpha-L-rhamnosidase"  
"NT-P19\_00317" 23055 "s59E13H2" 0 "Oligopeptide transport ATP-binding protein OppF"  
"NT-P19\_00317" 23055 "s59E25H2" 0 "Oligopeptide transport ATP-binding protein OppF"  
"NT-P19\_00317" 23055 "s59E5H2" 0 "Oligopeptide transport ATP-binding protein OppF"  
"NT-P19\_00317" 23055 "s63E6H2" 0 "Oligopeptide transport ATP-binding protein OppF"  
"NT-P19\_00318" 23056 "s59E13H2" 0 "Oligopeptide transport ATP-binding protein OppD"  
"NT-P19\_00318" 23056 "s59E25H2" 0 "Oligopeptide transport ATP-binding protein OppD"  
"NT-P19\_00318" 23056 "s59E5H2" 0 "Oligopeptide transport ATP-binding protein OppD"  
"NT-P19\_00318" 23056 "s63E6H2" 0 "Oligopeptide transport ATP-binding protein OppD"  
"NT-P19\_00319" 23057 "s59E13H2" 0 "Dipeptide transport system permease protein DppC"  
"NT-P19\_00319" 23057 "s59E25H2" 0 "Dipeptide transport system permease protein DppC"  
"NT-P19\_00319" 23057 "s59E5H2" 0 "Dipeptide transport system permease protein DppC"  
"NT-P19\_00319" 23057 "s63E6H2" 0 "Dipeptide transport system permease protein DppC"  
"NT-P19\_00320" 23058 "s59E13H2" 0 "Oligopeptide transport system permease protein OppB"  
"NT-P19\_00320" 23058 "s59E25H2" 0 "Oligopeptide transport system permease protein OppB"

"NT-P19\_00320" 23058 "s59E5H2" 0 "Oligopeptide transport system permease protein OppB"  
"NT-P19\_00320" 23058 "s63E6H2" 0 "Oligopeptide transport system permease protein OppB"  
"NT-P19\_00321" 23059 "s59E13H2" 0 "Oligopeptide-binding protein AppA precursor"  
"NT-P19\_00321" 23059 "s59E25H2" 0 "Oligopeptide-binding protein AppA precursor"  
"NT-P19\_00321" 23059 "s59E5H2" 0 "Oligopeptide-binding protein AppA precursor"  
"NT-P19\_00321" 23059 "s63E6H2" 0 "Oligopeptide-binding protein AppA precursor"  
"NT-P19\_00322" 23060 "s59E13H2" 0 "putative HTH-type transcriptional repressor ExuR"  
"NT-P19\_00322" 23060 "s59E25H2" 0 "putative HTH-type transcriptional repressor ExuR"  
"NT-P19\_00322" 23060 "s59E5H2" 0 "putative HTH-type transcriptional repressor ExuR"  
"NT-P19\_00322" 23060 "s63E6H2" 0 "putative HTH-type transcriptional repressor ExuR"  
"NT-P19\_00324" 23062 "s59E13H2" 0 "Transposase"  
"NT-P19\_00324" 23062 "s59E25H2" 0 "Transposase"  
"NT-P19\_00324" 23062 "s59E5H2" 0.004404068 "Transposase"  
"NT-P19\_00324" 23062 "s63E6H2" 0 "Transposase"  
"NT-P19\_00325" 23063 "s59E13H2" 0 "hypothetical protein"  
"NT-P19\_00325" 23063 "s59E25H2" 0 "hypothetical protein"  
"NT-P19\_00325" 23063 "s59E5H2" 0 "hypothetical protein"  
"NT-P19\_00325" 23063 "s63E6H2" 0 "hypothetical protein"  
"NT-P19\_00326" 23064 "s59E13H2" 0.01628585 "Rhodopirellula transposase"  
"NT-P19\_00326" 23064 "s59E25H2" 0 "Rhodopirellula transposase"  
"NT-P19\_00326" 23064 "s59E5H2" 0 "Rhodopirellula transposase"  
"NT-P19\_00326" 23064 "s63E6H2" 0 "Rhodopirellula transposase"  
"NT-P19\_00329" 23067 "s59E13H2" 0 "GDP-mannose-dependent alpha-(1-2)-phosphatidylinositol mannosyltransferase"  
"NT-P19\_00329" 23067 "s59E25H2" 0.1097988 "GDP-mannose-dependent alpha-(1-2)-phosphatidylinositol mannosyltransferase"  
"NT-P19\_00329" 23067 "s59E5H2" 0.002595579 "GDP-mannose-dependent alpha-(1-2)-phosphatidylinositol mannosyltransferase"  
"NT-P19\_00329" 23067 "s63E6H2" 6.537106 "GDP-mannose-dependent alpha-(1-2)-phosphatidylinositol mannosyltransferase"  
"NT-P19\_00330" 23068 "s59E13H2" 0 "Beta-1,4-mannooligosaccharide phosphorylase"  
"NT-P19\_00330" 23068 "s59E25H2" 0 "Beta-1,4-mannooligosaccharide phosphorylase"  
"NT-P19\_00330" 23068 "s59E5H2" 0.04115688 "Beta-1,4-mannooligosaccharide phosphorylase"  
"NT-P19\_00330" 23068 "s63E6H2" 4.056265 "Beta-1,4-mannooligosaccharide phosphorylase"  
"NT-P19\_00331" 23069 "s59E13H2" 0 "Beta-1,4-mannooligosaccharide phosphorylase"  
"NT-P19\_00331" 23069 "s59E25H2" 0 "Beta-1,4-mannooligosaccharide phosphorylase"  
"NT-P19\_00331" 23069 "s59E5H2" 0.003741169 "Beta-1,4-mannooligosaccharide phosphorylase"  
"NT-P19\_00331" 23069 "s63E6H2" 3.296729 "Beta-1,4-mannooligosaccharide phosphorylase"  
"NT-P19\_00332" 23070 "s59E13H2" 0 "hypothetical protein"  
"NT-P19\_00332" 23070 "s59E25H2" 0 "hypothetical protein"  
"NT-P19\_00332" 23070 "s59E5H2" 0.003341983 "hypothetical protein"  
"NT-P19\_00332" 23070 "s63E6H2" 0.01086903 "hypothetical protein"  
"NT-P19\_00333" 23071 "s59E13H2" 0 "putative metallophosphoesterase YhaO"  
"NT-P19\_00333" 23071 "s59E25H2" 0 "putative metallophosphoesterase YhaO"  
"NT-P19\_00333" 23071 "s59E5H2" 0 "putative metallophosphoesterase YhaO"  
"NT-P19\_00333" 23071 "s63E6H2" 0 "putative metallophosphoesterase YhaO"  
"NT-P19\_00334" 23072 "s59E13H2" 0 "Beta-glucosidase A"  
"NT-P19\_00334" 23072 "s59E25H2" 0 "Beta-glucosidase A"  
"NT-P19\_00334" 23072 "s59E5H2" 0.0007771111 "Beta-glucosidase A"  
"NT-P19\_00334" 23072 "s63E6H2" 0 "Beta-glucosidase A"  
"NT-P19\_00335" 23073 "s59E13H2" 0 "hypothetical protein"

"NT-P19\_00335" 23073 "s59E25H2" 0 "hypothetical protein"  
"NT-P19\_00335" 23073 "s59E5H2" 0 "hypothetical protein"  
"NT-P19\_00335" 23073 "s63E6H2" 0 "hypothetical protein"  
"NT-P19\_00336" 23074 "s59E13H2" 0 "hypothetical protein"  
"NT-P19\_00336" 23074 "s59E25H2" 0 "hypothetical protein"  
"NT-P19\_00336" 23074 "s59E5H2" 0 "hypothetical protein"  
"NT-P19\_00336" 23074 "s63E6H2" 0 "hypothetical protein"  
"NT-P19\_00338" 23076 "s59E13H2" 0 "hypothetical protein"  
"NT-P19\_00338" 23076 "s59E25H2" 0 "hypothetical protein"  
"NT-P19\_00338" 23076 "s59E5H2" 0 "hypothetical protein"  
"NT-P19\_00338" 23076 "s63E6H2" 0.3116471 "hypothetical protein"  
"NT-P19\_00339" 23077 "s59E13H2" 0 "hypothetical protein"  
"NT-P19\_00339" 23077 "s59E25H2" 0 "hypothetical protein"  
"NT-P19\_00339" 23077 "s59E5H2" 0 "hypothetical protein"  
"NT-P19\_00339" 23077 "s63E6H2" 0.00137982 "hypothetical protein"  
"NT-P19\_00340" 23078 "s59E13H2" 0 "hypothetical protein"  
"NT-P19\_00340" 23078 "s59E25H2" 0 "hypothetical protein"  
"NT-P19\_00340" 23078 "s59E5H2" 0 "hypothetical protein"  
"NT-P19\_00340" 23078 "s63E6H2" 0 "hypothetical protein"  
"NT-P19\_00342" 23080 "s59E13H2" 0 "Pyruvate kinase, alpha/beta domain"  
"NT-P19\_00342" 23080 "s59E25H2" 0 "Pyruvate kinase, alpha/beta domain"  
"NT-P19\_00342" 23080 "s59E5H2" 0 "Pyruvate kinase, alpha/beta domain"  
"NT-P19\_00342" 23080 "s63E6H2" 0.00379689 "Pyruvate kinase, alpha/beta domain"  
"NT-P19\_00343" 23081 "s59E13H2" 0 "Archaeal ATPase"  
"NT-P19\_00343" 23081 "s59E25H2" 0 "Archaeal ATPase"  
"NT-P19\_00343" 23081 "s59E5H2" 0 "Archaeal ATPase"  
"NT-P19\_00343" 23081 "s63E6H2" 0.06966331 "Archaeal ATPase"  
"NT-P19\_00344" 23082 "s59E13H2" 0.008922135 "Glucosamine-6-phosphate deaminase"  
"NT-P19\_00344" 23082 "s59E25H2" 0 "Glucosamine-6-phosphate deaminase"  
"NT-P19\_00344" 23082 "s59E5H2" 0 "Glucosamine-6-phosphate deaminase"  
"NT-P19\_00344" 23082 "s63E6H2" 0.004835343 "Glucosamine-6-phosphate deaminase"  
"NT-P19\_00345" 23083 "s59E13H2" 0.00115185 "Trimethylamine methyltransferase MttB"  
"NT-P19\_00345" 23083 "s59E25H2" 0 "Trimethylamine methyltransferase MttB"  
"NT-P19\_00345" 23083 "s59E5H2" 0.6169907 "Trimethylamine methyltransferase MttB"  
"NT-P19\_00345" 23083 "s63E6H2" 0.002847372 "Trimethylamine methyltransferase MttB"  
"NT-P19\_00346" 23084 "s59E13H2" 0 "Trimethylamine methyltransferase MttB"  
"NT-P19\_00346" 23084 "s59E25H2" 0 "Trimethylamine methyltransferase MttB"  
"NT-P19\_00346" 23084 "s59E5H2" 0 "Trimethylamine methyltransferase MttB"  
"NT-P19\_00346" 23084 "s63E6H2" 0 "Trimethylamine methyltransferase MttB"  
"NT-P19\_00348" 23086 "s59E13H2" 0 "Beta-galactosidase"  
"NT-P19\_00348" 23086 "s59E25H2" 0 "Beta-galactosidase"  
"NT-P19\_00348" 23086 "s59E5H2" 0 "Beta-galactosidase"  
"NT-P19\_00348" 23086 "s63E6H2" 0 "Beta-galactosidase"  
"NT-P19\_00349" 23087 "s59E13H2" 0 "Inner membrane ABC transporter permease protein YcjO"  
"NT-P19\_00349" 23087 "s59E25H2" 0 "Inner membrane ABC transporter permease protein YcjO"  
"NT-P19\_00349" 23087 "s59E5H2" 0 "Inner membrane ABC transporter permease protein YcjO"  
"NT-P19\_00349" 23087 "s63E6H2" 0 "Inner membrane ABC transporter permease protein YcjO"

"NT-P19\_00350" 23088 "s59E13H2" 0 "Trehalose/maltose-binding protein MalE precursor"  
"NT-P19\_00350" 23088 "s59E25H2" 0 "Trehalose/maltose-binding protein MalE precursor"  
"NT-P19\_00350" 23088 "s59E5H2" 0 "Trehalose/maltose-binding protein MalE precursor"  
"NT-P19\_00350" 23088 "s63E6H2" 0 "Trehalose/maltose-binding protein MalE precursor"  
"NT-P19\_00351" 23089 "s59E13H2" 0 "Inosose isomerase"  
"NT-P19\_00351" 23089 "s59E25H2" 0 "Inosose isomerase"  
"NT-P19\_00351" 23089 "s59E5H2" 0 "Inosose isomerase"  
"NT-P19\_00351" 23089 "s63E6H2" 0.001613011 "Inosose isomerase"  
"NT-P19\_00352" 23090 "s59E13H2" 0 "putative HTH-type transcriptional regulator YdfH"  
"NT-P19\_00352" 23090 "s59E25H2" 0 "putative HTH-type transcriptional regulator YdfH"  
"NT-P19\_00352" 23090 "s59E5H2" 0 "putative HTH-type transcriptional regulator YdfH"  
"NT-P19\_00352" 23090 "s63E6H2" 0.01264316 "putative HTH-type transcriptional regulator YdfH"  
"NT-P19\_00353" 23091 "s59E13H2" 0 "Exodeoxyribonuclease 7 large subunit"  
"NT-P19\_00353" 23091 "s59E25H2" 0 "Exodeoxyribonuclease 7 large subunit"  
"NT-P19\_00353" 23091 "s59E5H2" 0 "Exodeoxyribonuclease 7 large subunit"  
"NT-P19\_00353" 23091 "s63E6H2" 0.3169123 "Exodeoxyribonuclease 7 large subunit"  
"NT-P19\_00354" 23092 "s59E13H2" 0 "exodeoxyribonuclease VII large subunit"  
"NT-P19\_00354" 23092 "s59E25H2" 0 "exodeoxyribonuclease VII large subunit"  
"NT-P19\_00354" 23092 "s59E5H2" 0 "exodeoxyribonuclease VII large subunit"  
"NT-P19\_00354" 23092 "s63E6H2" 0.381527 "exodeoxyribonuclease VII large subunit"  
"NT-P19\_00355" 23093 "s59E13H2" 0 "Exodeoxyribonuclease 7 small subunit"  
"NT-P19\_00355" 23093 "s59E25H2" 0 "Exodeoxyribonuclease 7 small subunit"  
"NT-P19\_00355" 23093 "s59E5H2" 0 "Exodeoxyribonuclease 7 small subunit"  
"NT-P19\_00355" 23093 "s63E6H2" 0.623924 "Exodeoxyribonuclease 7 small subunit"  
"NT-P19\_00356" 23094 "s59E13H2" 0 "Divergent PAP2 family protein"  
"NT-P19\_00356" 23094 "s59E25H2" 0 "Divergent PAP2 family protein"  
"NT-P19\_00356" 23094 "s59E5H2" 0 "Divergent PAP2 family protein"  
"NT-P19\_00356" 23094 "s63E6H2" 0.8235657 "Divergent PAP2 family protein"  
"NT-P19\_00357" 23095 "s59E13H2" 0 "putative inorganic polyphosphate/ATP-NAD kinase"  
"NT-P19\_00357" 23095 "s59E25H2" 0 "putative inorganic polyphosphate/ATP-NAD kinase"  
"NT-P19\_00357" 23095 "s59E5H2" 0.01622987 "putative inorganic polyphosphate/ATP-NAD kinase"  
"NT-P19\_00357" 23095 "s63E6H2" 1.224589 "putative inorganic polyphosphate/ATP-NAD kinase"  
"NT-P19\_00358" 23096 "s59E13H2" 0 "Thioredoxin reductase"  
"NT-P19\_00358" 23096 "s59E25H2" 0 "Thioredoxin reductase"  
"NT-P19\_00358" 23096 "s59E5H2" 0.0002237288 "Thioredoxin reductase"  
"NT-P19\_00358" 23096 "s63E6H2" 1.242253 "Thioredoxin reductase"  
"NT-P19\_00359" 23097 "s59E13H2" 0 "Octanoyltransferase LipM"  
"NT-P19\_00359" 23097 "s59E25H2" 0 "Octanoyltransferase LipM"  
"NT-P19\_00359" 23097 "s59E5H2" 0.02168128 "Octanoyltransferase LipM"  
"NT-P19\_00359" 23097 "s63E6H2" 0.5461269 "Octanoyltransferase LipM"  
"NT-P19\_00360" 23098 "s59E13H2" 0 "putative glycine dehydrogenase (decarboxylating) subunit 2"  
"NT-P19\_00360" 23098 "s59E25H2" 0 "putative glycine dehydrogenase (decarboxylating) subunit 2"  
"NT-P19\_00360" 23098 "s59E5H2" 0 "putative glycine dehydrogenase (decarboxylating) subunit 2"  
"NT-P19\_00360" 23098 "s63E6H2" 0.2517713 "putative glycine dehydrogenase (decarboxylating) subunit 2"  
"NT-P19\_00361" 23099 "s59E13H2" 0 "Glycine cleavage system H protein"  
"NT-P19\_00361" 23099 "s59E25H2" 0 "Glycine cleavage system H protein"  
"NT-P19\_00361" 23099 "s59E5H2" 0 "Glycine cleavage system H protein"



"NT-P19\_00361" 23099 "s63E6H2" 0.1398865 "Glycine cleavage system H protein"  
"NT-P19\_00362" 23100 "s59E13H2" 0 "Transketolase 1"  
"NT-P19\_00362" 23100 "s59E25H2" 0 "Transketolase 1"  
"NT-P19\_00362" 23100 "s59E5H2" 0 "Transketolase 1"  
"NT-P19\_00362" 23100 "s63E6H2" 0.01896117 "Transketolase 1"  
"NT-P19\_00363" 23101 "s59E13H2" 0 "Serine hydroxymethyltransferase"  
"NT-P19\_00363" 23101 "s59E25H2" 0 "Serine hydroxymethyltransferase"  
"NT-P19\_00363" 23101 "s59E5H2" 0.002147763 "Serine hydroxymethyltransferase"  
"NT-P19\_00363" 23101 "s63E6H2" 0.004096526 "Serine hydroxymethyltransferase"  
"NT-P19\_00364" 23102 "s59E13H2" 0 "Aspartate aminotransferase"  
"NT-P19\_00364" 23102 "s59E25H2" 0 "Aspartate aminotransferase"  
"NT-P19\_00364" 23102 "s59E5H2" 0 "Aspartate aminotransferase"  
"NT-P19\_00364" 23102 "s63E6H2" 0 "Aspartate aminotransferase"  
"NT-P19\_00366" 23104 "s59E13H2" 0 "FR47-like protein"  
"NT-P19\_00366" 23104 "s59E25H2" 0 "FR47-like protein"  
"NT-P19\_00366" 23104 "s59E5H2" 0 "FR47-like protein"  
"NT-P19\_00366" 23104 "s63E6H2" 0 "FR47-like protein"  
"NT-P19\_00367" 23105 "s59E13H2" 0 "Beta-galactosidase BgaH"  
"NT-P19\_00367" 23105 "s59E25H2" 0 "Beta-galactosidase BgaH"  
"NT-P19\_00367" 23105 "s59E5H2" 0 "Beta-galactosidase BgaH"  
"NT-P19\_00367" 23105 "s63E6H2" 0 "Beta-galactosidase BgaH"  
"NT-P19\_00368" 23106 "s59E13H2" 0 "hypothetical protein"  
"NT-P19\_00368" 23106 "s59E25H2" 0 "hypothetical protein"  
"NT-P19\_00368" 23106 "s59E5H2" 0 "hypothetical protein"  
"NT-P19\_00368" 23106 "s63E6H2" 0 "hypothetical protein"  
"NT-P19\_00369" 23107 "s59E13H2" 0 "Tetrahedral aminopeptidase"  
"NT-P19\_00369" 23107 "s59E25H2" 0 "Tetrahedral aminopeptidase"  
"NT-P19\_00369" 23107 "s59E5H2" 0.007669573 "Tetrahedral aminopeptidase"  
"NT-P19\_00369" 23107 "s63E6H2" 0 "Tetrahedral aminopeptidase"  
"NT-P19\_00370" 23108 "s59E13H2" 0 "Protein-export membrane protein SecG"  
"NT-P19\_00370" 23108 "s59E25H2" 0 "Protein-export membrane protein SecG"  
"NT-P19\_00370" 23108 "s59E5H2" 0 "Protein-export membrane protein SecG"  
"NT-P19\_00370" 23108 "s63E6H2" 0 "Protein-export membrane protein SecG"  
"NT-P19\_00371" 23109 "s59E13H2" 0 "Triosephosphate isomerase"  
"NT-P19\_00371" 23109 "s59E25H2" 0 "Triosephosphate isomerase"  
"NT-P19\_00371" 23109 "s59E5H2" 0 "Triosephosphate isomerase"  
"NT-P19\_00371" 23109 "s63E6H2" 0.007341788 "Triosephosphate isomerase"  
"NT-P19\_00372" 23110 "s59E13H2" 0 "Phosphoglycerate kinase"  
"NT-P19\_00372" 23110 "s59E25H2" 0 "Phosphoglycerate kinase"  
"NT-P19\_00372" 23110 "s59E5H2" 0 "Phosphoglycerate kinase"  
"NT-P19\_00372" 23110 "s63E6H2" 0.004639093 "Phosphoglycerate kinase"  
"NT-P19\_00373" 23111 "s59E13H2" 0 "Glyceraldehyde-3-phosphate dehydrogenase"  
"NT-P19\_00373" 23111 "s59E25H2" 0 "Glyceraldehyde-3-phosphate dehydrogenase"  
"NT-P19\_00373" 23111 "s59E5H2" 0 "Glyceraldehyde-3-phosphate dehydrogenase"  
"NT-P19\_00373" 23111 "s63E6H2" 0 "Glyceraldehyde-3-phosphate dehydrogenase"  
"NT-P19\_00374" 23112 "s59E13H2" 0 "Thiamine-monophosphate kinase"  
"NT-P19\_00374" 23112 "s59E25H2" 0 "Thiamine-monophosphate kinase"

"NT-P19\_00374" 23112 "s59E5H2" 0 "Thiamine-monophosphate kinase"  
"NT-P19\_00374" 23112 "s63E6H2" 0 "Thiamine-monophosphate kinase"  
"NT-P19\_00375" 23113 "s59E13H2" 0 "Transposase, Mutator family"  
"NT-P19\_00375" 23113 "s59E25H2" 0 "Transposase, Mutator family"  
"NT-P19\_00375" 23113 "s59E5H2" 0 "Transposase, Mutator family"  
"NT-P19\_00375" 23113 "s63E6H2" 0 "Transposase, Mutator family"  
"NT-P19\_00377" 23115 "s59E13H2" 0 "AsnC family protein"  
"NT-P19\_00377" 23115 "s59E25H2" 0 "AsnC family protein"  
"NT-P19\_00377" 23115 "s59E5H2" 0 "AsnC family protein"  
"NT-P19\_00377" 23115 "s63E6H2" 0 "AsnC family protein"  
"NT-P19\_00378" 23116 "s59E13H2" 0 "Peptide deformylase"  
"NT-P19\_00378" 23116 "s59E25H2" 0 "Peptide deformylase"  
"NT-P19\_00378" 23116 "s59E5H2" 0 "Peptide deformylase"  
"NT-P19\_00378" 23116 "s63E6H2" 0 "Peptide deformylase"  
"NT-P19\_00379" 23117 "s59E13H2" 0 "Aspartate 1-decarboxylase precursor"  
"NT-P19\_00379" 23117 "s59E25H2" 0 "Aspartate 1-decarboxylase precursor"  
"NT-P19\_00379" 23117 "s59E5H2" 0 "Aspartate 1-decarboxylase precursor"  
"NT-P19\_00379" 23117 "s63E6H2" 0 "Aspartate 1-decarboxylase precursor"  
"NT-P19\_00380" 23118 "s59E13H2" 0 "tRNA(fMet)-specific endonuclease VapC"  
"NT-P19\_00380" 23118 "s59E25H2" 0 "tRNA(fMet)-specific endonuclease VapC"  
"NT-P19\_00380" 23118 "s59E5H2" 0 "tRNA(fMet)-specific endonuclease VapC"  
"NT-P19\_00380" 23118 "s63E6H2" 0 "tRNA(fMet)-specific endonuclease VapC"  
"NT-P19\_00381" 23119 "s59E13H2" 0 "putative regulator PrIF"  
"NT-P19\_00381" 23119 "s59E25H2" 0 "putative regulator PrIF"  
"NT-P19\_00381" 23119 "s59E5H2" 0 "putative regulator PrIF"  
"NT-P19\_00381" 23119 "s63E6H2" 0 "putative regulator PrIF"  
"NT-P19\_00382" 23120 "s59E13H2" 0 "heat shock protein 90"  
"NT-P19\_00382" 23120 "s59E25H2" 0 "heat shock protein 90"  
"NT-P19\_00382" 23120 "s59E5H2" 0 "heat shock protein 90"  
"NT-P19\_00382" 23120 "s63E6H2" 0 "heat shock protein 90"  
"NT-P19\_00383" 23121 "s59E13H2" 0 "hypothetical protein"  
"NT-P19\_00383" 23121 "s59E25H2" 0 "hypothetical protein"  
"NT-P19\_00383" 23121 "s59E5H2" 0 "hypothetical protein"  
"NT-P19\_00383" 23121 "s63E6H2" 0 "hypothetical protein"  
"NT-P19\_00384" 23122 "s59E13H2" 0 "Plasmid stabilisation system protein"  
"NT-P19\_00384" 23122 "s59E25H2" 0 "Plasmid stabilisation system protein"  
"NT-P19\_00384" 23122 "s59E5H2" 0 "Plasmid stabilisation system protein"  
"NT-P19\_00384" 23122 "s63E6H2" 0 "Plasmid stabilisation system protein"  
"NT-P19\_00385" 23123 "s59E13H2" 0 "Undecaprenyl-diphosphatase"  
"NT-P19\_00385" 23123 "s59E25H2" 0 "Undecaprenyl-diphosphatase"  
"NT-P19\_00385" 23123 "s59E5H2" 0 "Undecaprenyl-diphosphatase"  
"NT-P19\_00385" 23123 "s63E6H2" 0 "Undecaprenyl-diphosphatase"  
"NT-P19\_00386" 23124 "s59E13H2" 0 "hypothetical protein"  
"NT-P19\_00386" 23124 "s59E25H2" 0 "hypothetical protein"  
"NT-P19\_00386" 23124 "s59E5H2" 0 "hypothetical protein"  
"NT-P19\_00386" 23124 "s63E6H2" 0 "hypothetical protein"  
"NT-P19\_00387" 23125 "s59E13H2" 0 "hypothetical protein"

"NT-P19\_00387" 23125 "s59E25H2" 0 "hypothetical protein"  
"NT-P19\_00387" 23125 "s59E5H2" 0 "hypothetical protein"  
"NT-P19\_00387" 23125 "s63E6H2" 0 "hypothetical protein"  
"NT-P19\_00389" 23127 "s59E13H2" 0 "mRNA interferase EndoA"  
"NT-P19\_00389" 23127 "s59E25H2" 0 "mRNA interferase EndoA"  
"NT-P19\_00389" 23127 "s59E5H2" 0 "mRNA interferase EndoA"  
"NT-P19\_00389" 23127 "s63E6H2" 0 "mRNA interferase EndoA"  
"NT-P19\_00390" 23128 "s59E13H2" 0 "D-inositol-3-phosphate glycosyltransferase"  
"NT-P19\_00390" 23128 "s59E25H2" 0 "D-inositol-3-phosphate glycosyltransferase"  
"NT-P19\_00390" 23128 "s59E5H2" 0 "D-inositol-3-phosphate glycosyltransferase"  
"NT-P19\_00390" 23128 "s63E6H2" 0 "D-inositol-3-phosphate glycosyltransferase"  
"NT-P19\_00391" 23129 "s59E13H2" 0 "hypothetical protein"  
"NT-P19\_00391" 23129 "s59E25H2" 0 "hypothetical protein"  
"NT-P19\_00391" 23129 "s59E5H2" 0 "hypothetical protein"  
"NT-P19\_00391" 23129 "s63E6H2" 0 "hypothetical protein"  
"NT-P19\_00392" 23130 "s59E13H2" 0 "hypothetical protein"  
"NT-P19\_00392" 23130 "s59E25H2" 0 "hypothetical protein"  
"NT-P19\_00392" 23130 "s59E5H2" 0 "hypothetical protein"  
"NT-P19\_00392" 23130 "s63E6H2" 0 "hypothetical protein"  
"NT-P19\_00393" 23131 "s59E13H2" 0 "hypothetical protein"  
"NT-P19\_00393" 23131 "s59E25H2" 0 "hypothetical protein"  
"NT-P19\_00393" 23131 "s59E5H2" 0 "hypothetical protein"  
"NT-P19\_00393" 23131 "s63E6H2" 0 "hypothetical protein"  
"NT-P19\_00394" 23132 "s59E13H2" 0 "hypothetical protein"  
"NT-P19\_00394" 23132 "s59E25H2" 0 "hypothetical protein"  
"NT-P19\_00394" 23132 "s59E5H2" 0 "hypothetical protein"  
"NT-P19\_00394" 23132 "s63E6H2" 0 "hypothetical protein"  
"NT-P19\_00395" 23133 "s59E13H2" 0 "Chain length determinant protein"  
"NT-P19\_00395" 23133 "s59E25H2" 0 "Chain length determinant protein"  
"NT-P19\_00395" 23133 "s59E5H2" 0.01225887 "Chain length determinant protein"  
"NT-P19\_00395" 23133 "s63E6H2" 0 "Chain length determinant protein"  
"NT-P19\_00396" 23134 "s59E13H2" 0 "putative transposase"  
"NT-P19\_00396" 23134 "s59E25H2" 0 "putative transposase"  
"NT-P19\_00396" 23134 "s59E5H2" 0 "putative transposase"  
"NT-P19\_00396" 23134 "s63E6H2" 7.08161e-05 "putative transposase"  
"NT-P19\_00397" 23135 "s59E13H2" 0 "Anaerobic ribonucleoside-triphosphate reductase"  
"NT-P19\_00397" 23135 "s59E25H2" 0.1175364 "Anaerobic ribonucleoside-triphosphate reductase"  
"NT-P19\_00397" 23135 "s59E5H2" 0.007271271 "Anaerobic ribonucleoside-triphosphate reductase"  
"NT-P19\_00397" 23135 "s63E6H2" 0.6969461 "Anaerobic ribonucleoside-triphosphate reductase"  
"NT-P19\_00398" 23136 "s59E13H2" 0 "molybdenum cofactor biosynthesis protein A"  
"NT-P19\_00398" 23136 "s59E25H2" 0 "molybdenum cofactor biosynthesis protein A"  
"NT-P19\_00398" 23136 "s59E5H2" 0.01092183 "molybdenum cofactor biosynthesis protein A"  
"NT-P19\_00398" 23136 "s63E6H2" 0.6570763 "molybdenum cofactor biosynthesis protein A"  
"NT-P19\_00399" 23137 "s59E13H2" 0 "Nitrogen regulatory protein P-II"  
"NT-P19\_00399" 23137 "s59E25H2" 0 "Nitrogen regulatory protein P-II"  
"NT-P19\_00399" 23137 "s59E5H2" 0 "Nitrogen regulatory protein P-II"  
"NT-P19\_00399" 23137 "s63E6H2" 0.8214684 "Nitrogen regulatory protein P-II"

"NT-P19\_00400" 23138 "s59E13H2" 0 "Glutamate dehydrogenase"  
"NT-P19\_00400" 23138 "s59E25H2" 0 "Glutamate dehydrogenase"  
"NT-P19\_00400" 23138 "s59E5H2" 0 "Glutamate dehydrogenase"  
"NT-P19\_00400" 23138 "s63E6H2" 0.7479907 "Glutamate dehydrogenase"  
"NT-P19\_00401" 23139 "s59E13H2" 0 "Recombination protein RecR"  
"NT-P19\_00401" 23139 "s59E25H2" 0 "Recombination protein RecR"  
"NT-P19\_00401" 23139 "s59E5H2" 0 "Recombination protein RecR"  
"NT-P19\_00401" 23139 "s63E6H2" 0.005000543 "Recombination protein RecR"  
"NT-P19\_00402" 23140 "s59E13H2" 0 "Nucleoid-associated protein"  
"NT-P19\_00402" 23140 "s59E25H2" 0 "Nucleoid-associated protein"  
"NT-P19\_00402" 23140 "s59E5H2" 0 "Nucleoid-associated protein"  
"NT-P19\_00402" 23140 "s63E6H2" 0.00560463 "Nucleoid-associated protein"  
"NT-P19\_00403" 23141 "s59E13H2" 0 "DNA polymerase III subunit tau"  
"NT-P19\_00403" 23141 "s59E25H2" 0 "DNA polymerase III subunit tau"  
"NT-P19\_00403" 23141 "s59E5H2" 0.001937618 "DNA polymerase III subunit tau"  
"NT-P19\_00403" 23141 "s63E6H2" 0.001124577 "DNA polymerase III subunit tau"  
"NT-P19\_00404" 23142 "s59E13H2" 0 "Amidophosphoribosyltransferase precursor"  
"NT-P19\_00404" 23142 "s59E25H2" 0 "Amidophosphoribosyltransferase precursor"  
"NT-P19\_00404" 23142 "s59E5H2" 0 "Amidophosphoribosyltransferase precursor"  
"NT-P19\_00404" 23142 "s63E6H2" 0.001897083 "Amidophosphoribosyltransferase precursor"  
"NT-P19\_00405" 23143 "s59E13H2" 0 "Amidophosphoribosyltransferase precursor"  
"NT-P19\_00405" 23143 "s59E25H2" 0 "Amidophosphoribosyltransferase precursor"  
"NT-P19\_00405" 23143 "s59E5H2" 0 "Amidophosphoribosyltransferase precursor"  
"NT-P19\_00405" 23143 "s63E6H2" 0.00342151 "Amidophosphoribosyltransferase precursor"  
"NT-P19\_00407" 23145 "s59E13H2" 0 "hypothetical protein"  
"NT-P19\_00407" 23145 "s59E25H2" 0 "hypothetical protein"  
"NT-P19\_00407" 23145 "s59E5H2" 0 "hypothetical protein"  
"NT-P19\_00407" 23145 "s63E6H2" 0.001796834 "hypothetical protein"  
"NT-P19\_00408" 23146 "s59E13H2" 0 "putative oxidoreductase YvaA"  
"NT-P19\_00408" 23146 "s59E25H2" 0 "putative oxidoreductase YvaA"  
"NT-P19\_00408" 23146 "s59E5H2" 0 "putative oxidoreductase YvaA"  
"NT-P19\_00408" 23146 "s63E6H2" 0.0039552 "putative oxidoreductase YvaA"  
"NT-P19\_00409" 23147 "s59E13H2" 0 "Trehalose utilisation"  
"NT-P19\_00409" 23147 "s59E25H2" 0 "Trehalose utilisation"  
"NT-P19\_00409" 23147 "s59E5H2" 0.01100553 "Trehalose utilisation"  
"NT-P19\_00409" 23147 "s63E6H2" 0 "Trehalose utilisation"  
"NT-P19\_00410" 23148 "s59E13H2" 0 "Gluconate 5-dehydrogenase"  
"NT-P19\_00410" 23148 "s59E25H2" 0 "Gluconate 5-dehydrogenase"  
"NT-P19\_00410" 23148 "s59E5H2" 0 "Gluconate 5-dehydrogenase"  
"NT-P19\_00410" 23148 "s63E6H2" 0 "Gluconate 5-dehydrogenase"  
"NT-P19\_00411" 23149 "s59E13H2" 0 "Sulfopropanediol 3-dehydrogenase"  
"NT-P19\_00411" 23149 "s59E25H2" 0 "Sulfopropanediol 3-dehydrogenase"  
"NT-P19\_00411" 23149 "s59E5H2" 0 "Sulfopropanediol 3-dehydrogenase"  
"NT-P19\_00411" 23149 "s63E6H2" 0 "Sulfopropanediol 3-dehydrogenase"  
"NT-P19\_00412" 23150 "s59E13H2" 0 "Acyl carrier protein"  
"NT-P19\_00412" 23150 "s59E25H2" 0 "Acyl carrier protein"  
"NT-P19\_00412" 23150 "s59E5H2" 0 "Acyl carrier protein"

"NT-P19\_00412" 23150 "s63E6H2" 0 "Acyl carrier protein"  
"NT-P19\_00413" 23151 "s59E13H2" 0 "Bifunctional protein GlmU"  
"NT-P19\_00413" 23151 "s59E25H2" 0 "Bifunctional protein GlmU"  
"NT-P19\_00413" 23151 "s59E5H2" 0 "Bifunctional protein GlmU"  
"NT-P19\_00413" 23151 "s63E6H2" 0 "Bifunctional protein GlmU"  
"NT-P19\_00414" 23152 "s59E13H2" 0 "Acetate kinase"  
"NT-P19\_00414" 23152 "s59E25H2" 0 "Acetate kinase"  
"NT-P19\_00414" 23152 "s59E5H2" 0 "Acetate kinase"  
"NT-P19\_00414" 23152 "s63E6H2" 0 "Acetate kinase"  
"NT-P19\_00415" 23153 "s59E13H2" 0 "Phosphate acetyltransferase"  
"NT-P19\_00415" 23153 "s59E25H2" 0 "Phosphate acetyltransferase"  
"NT-P19\_00415" 23153 "s59E5H2" 0 "Phosphate acetyltransferase"  
"NT-P19\_00415" 23153 "s63E6H2" 0.001482898 "Phosphate acetyltransferase"  
"NT-P19\_00416" 23154 "s59E13H2" 0 "Glucosamine-6-phosphate deaminase 1"  
"NT-P19\_00416" 23154 "s59E25H2" 0 "Glucosamine-6-phosphate deaminase 1"  
"NT-P19\_00416" 23154 "s59E5H2" 0 "Glucosamine-6-phosphate deaminase 1"  
"NT-P19\_00416" 23154 "s63E6H2" 0 "Glucosamine-6-phosphate deaminase 1"  
"NT-P19\_00417" 23155 "s59E13H2" 0 "HTH-type transcriptional repressor YvoA"  
"NT-P19\_00417" 23155 "s59E25H2" 0 "HTH-type transcriptional repressor YvoA"  
"NT-P19\_00417" 23155 "s59E5H2" 0 "HTH-type transcriptional repressor YvoA"  
"NT-P19\_00417" 23155 "s63E6H2" 0.003377383 "HTH-type transcriptional repressor YvoA"  
"NT-P19\_00418" 23156 "s59E13H2" 0 "Malonyl CoA-acyl carrier protein transacylase"  
"NT-P19\_00418" 23156 "s59E25H2" 0 "Malonyl CoA-acyl carrier protein transacylase"  
"NT-P19\_00418" 23156 "s59E5H2" 0 "Malonyl CoA-acyl carrier protein transacylase"  
"NT-P19\_00418" 23156 "s63E6H2" 0.001009936 "Malonyl CoA-acyl carrier protein transacylase"  
"NT-P19\_00419" 23157 "s59E13H2" 0 "DNA gyrase subunit A"  
"NT-P19\_00419" 23157 "s59E25H2" 0 "DNA gyrase subunit A"  
"NT-P19\_00419" 23157 "s59E5H2" 0 "DNA gyrase subunit A"  
"NT-P19\_00419" 23157 "s63E6H2" 0.00419418 "DNA gyrase subunit A"  
"NT-P19\_00420" 23158 "s59E13H2" 0 "DNA gyrase subunit B"  
"NT-P19\_00420" 23158 "s59E25H2" 0 "DNA gyrase subunit B"  
"NT-P19\_00420" 23158 "s59E5H2" 0 "DNA gyrase subunit B"  
"NT-P19\_00420" 23158 "s63E6H2" 0.002984017 "DNA gyrase subunit B"  
"NT-P19\_00421" 23159 "s59E13H2" 0.002596483 "Transposase IS116/IS110/IS902 family protein"  
"NT-P19\_00421" 23159 "s59E25H2" 0 "Transposase IS116/IS110/IS902 family protein"  
"NT-P19\_00421" 23159 "s59E5H2" 0.003950227 "Transposase IS116/IS110/IS902 family protein"  
"NT-P19\_00421" 23159 "s63E6H2" 0.02130121 "Transposase IS116/IS110/IS902 family protein"  
"NT-P19\_00422" 23160 "s59E13H2" 0 "2-oxoisovalerate dehydrogenase subunit beta"  
"NT-P19\_00422" 23160 "s59E25H2" 0 "2-oxoisovalerate dehydrogenase subunit beta"  
"NT-P19\_00422" 23160 "s59E5H2" 0.1467458 "2-oxoisovalerate dehydrogenase subunit beta"  
"NT-P19\_00422" 23160 "s63E6H2" 0.004170244 "2-oxoisovalerate dehydrogenase subunit beta"  
"NT-P19\_00423" 23161 "s59E13H2" 0 "Acetoin:2,6-dichlorophenolindophenol oxidoreductase subunit alpha"  
"NT-P19\_00423" 23161 "s59E25H2" 0 "Acetoin:2,6-dichlorophenolindophenol oxidoreductase subunit alpha"  
"NT-P19\_00423" 23161 "s59E5H2" 0 "Acetoin:2,6-dichlorophenolindophenol oxidoreductase subunit alpha"  
"NT-P19\_00423" 23161 "s63E6H2" 0.006224485 "Acetoin:2,6-dichlorophenolindophenol oxidoreductase subunit alpha"  
"NT-P19\_00424" 23162 "s59E13H2" 0 "SAF domain protein"  
"NT-P19\_00424" 23162 "s59E25H2" 0 "SAF domain protein"

"NT-P19\_00424" 23162 "s59E5H2" 0 "SAF domain protein"  
"NT-P19\_00424" 23162 "s63E6H2" 0.04627093 "SAF domain protein"  
"NT-P19\_00425" 23163 "s59E13H2" 0 "L-xylulose/3-keto-L-gulonate kinase"  
"NT-P19\_00425" 23163 "s59E25H2" 0 "L-xylulose/3-keto-L-gulonate kinase"  
"NT-P19\_00425" 23163 "s59E5H2" 0.004245156 "L-xylulose/3-keto-L-gulonate kinase"  
"NT-P19\_00425" 23163 "s63E6H2" 0.218761 "L-xylulose/3-keto-L-gulonate kinase"  
"NT-P19\_00426" 23164 "s59E13H2" 0 "putative L-threonine 3-dehydrogenase"  
"NT-P19\_00426" 23164 "s59E25H2" 0 "putative L-threonine 3-dehydrogenase"  
"NT-P19\_00426" 23164 "s59E5H2" 0.008996283 "putative L-threonine 3-dehydrogenase"  
"NT-P19\_00426" 23164 "s63E6H2" 0.2533901 "putative L-threonine 3-dehydrogenase"  
"NT-P19\_00427" 23165 "s59E13H2" 0 "D-tagatose 3-epimerase"  
"NT-P19\_00427" 23165 "s59E25H2" 0 "D-tagatose 3-epimerase"  
"NT-P19\_00427" 23165 "s59E5H2" 0 "D-tagatose 3-epimerase"  
"NT-P19\_00427" 23165 "s63E6H2" 0.2041101 "D-tagatose 3-epimerase"  
"NT-P19\_00428" 23166 "s59E13H2" 0 "methylcobalamin:coenzyme M methyltransferase"  
"NT-P19\_00428" 23166 "s59E25H2" 0 "methylcobalamin:coenzyme M methyltransferase"  
"NT-P19\_00428" 23166 "s59E5H2" 0 "methylcobalamin:coenzyme M methyltransferase"  
"NT-P19\_00428" 23166 "s63E6H2" 0.2538835 "methylcobalamin:coenzyme M methyltransferase"  
"NT-P19\_00429" 23167 "s59E13H2" 0 "Transcriptional regulator LsrR"  
"NT-P19\_00429" 23167 "s59E25H2" 0 "Transcriptional regulator LsrR"  
"NT-P19\_00429" 23167 "s59E5H2" 0 "Transcriptional regulator LsrR"  
"NT-P19\_00429" 23167 "s63E6H2" 0.3106227 "Transcriptional regulator LsrR"  
"NT-P19\_00430" 23168 "s59E13H2" 0 "Sorbitol dehydrogenase"  
"NT-P19\_00430" 23168 "s59E25H2" 0 "Sorbitol dehydrogenase"  
"NT-P19\_00430" 23168 "s59E5H2" 0 "Sorbitol dehydrogenase"  
"NT-P19\_00430" 23168 "s63E6H2" 0.2897737 "Sorbitol dehydrogenase"  
"NT-P19\_00431" 23169 "s59E13H2" 0.001498563 "hypothetical protein"  
"NT-P19\_00431" 23169 "s59E25H2" 0 "hypothetical protein"  
"NT-P19\_00431" 23169 "s59E5H2" 0 "hypothetical protein"  
"NT-P19\_00431" 23169 "s63E6H2" 0.1844298 "hypothetical protein"  
"NT-P19\_00432" 23170 "s59E13H2" 0.001604265 "2,3-bisphosphoglycerate-independent phosphoglycerate mutase 1"  
"NT-P19\_00432" 23170 "s59E25H2" 0 "2,3-bisphosphoglycerate-independent phosphoglycerate mutase 1"  
"NT-P19\_00432" 23170 "s59E5H2" 0 "2,3-bisphosphoglycerate-independent phosphoglycerate mutase 1"  
"NT-P19\_00432" 23170 "s63E6H2" 0.2444449 "2,3-bisphosphoglycerate-independent phosphoglycerate mutase 1"  
"NT-P19\_00433" 23171 "s59E13H2" 0 "Amidase enhancer precursor"  
"NT-P19\_00433" 23171 "s59E25H2" 0 "Amidase enhancer precursor"  
"NT-P19\_00433" 23171 "s59E5H2" 0 "Amidase enhancer precursor"  
"NT-P19\_00433" 23171 "s63E6H2" 0.1601838 "Amidase enhancer precursor"  
"NT-P19\_00434" 23172 "s59E13H2" 0 "Phosphoribosyl-AMP cyclohydrolase"  
"NT-P19\_00434" 23172 "s59E25H2" 0 "Phosphoribosyl-AMP cyclohydrolase"  
"NT-P19\_00434" 23172 "s59E5H2" 0 "Phosphoribosyl-AMP cyclohydrolase"  
"NT-P19\_00434" 23172 "s63E6H2" 0.08949799 "Phosphoribosyl-AMP cyclohydrolase"  
"NT-P19\_00435" 23173 "s59E13H2" 0 "1-(5-phosphoribosyl)-5-[(5-phosphoribosylamino)methylideneamino] imidazole-4-carboxamide isomerase"  
"NT-P19\_00435" 23173 "s59E25H2" 0 "1-(5-phosphoribosyl)-5-[(5-phosphoribosylamino)methylideneamino] imidazole-4-carboxamide isomerase"  
"NT-P19\_00435" 23173 "s59E5H2" 0 "1-(5-phosphoribosyl)-5-[(5-phosphoribosylamino)methylideneamino] imidazole-4-carboxamide isomerase"  
"NT-P19\_00435" 23173 "s63E6H2" 0.0584049 "1-(5-phosphoribosyl)-5-[(5-phosphoribosylamino)methylideneamino] imidazole-4-carboxamide isomerase"  
"NT-P19\_00436" 23174 "s59E13H2" 0 "Flavodoxin"

"NT-P19\_00436" 23174 "s59E25H2" 0 "Flavodoxin"  
"NT-P19\_00436" 23174 "s59E5H2" 0 "Flavodoxin"  
"NT-P19\_00436" 23174 "s63E6H2" 0.06524604 "Flavodoxin"  
"NT-P19\_00437" 23175 "s59E13H2" 0 "hypothetical protein"  
"NT-P19\_00437" 23175 "s59E25H2" 0 "hypothetical protein"  
"NT-P19\_00437" 23175 "s59E5H2" 0 "hypothetical protein"  
"NT-P19\_00437" 23175 "s63E6H2" 0.05256311 "hypothetical protein"  
"NT-P19\_00438" 23176 "s59E13H2" 0 "SpoVT / AbrB like domain protein"  
"NT-P19\_00438" 23176 "s59E25H2" 0 "SpoVT / AbrB like domain protein"  
"NT-P19\_00438" 23176 "s59E5H2" 0 "SpoVT / AbrB like domain protein"  
"NT-P19\_00438" 23176 "s63E6H2" 0.04048092 "SpoVT / AbrB like domain protein"  
"NT-P19\_00439" 23177 "s59E13H2" 0 "Hydrogenase expression/formation protein HypE"  
"NT-P19\_00439" 23177 "s59E25H2" 0 "Hydrogenase expression/formation protein HypE"  
"NT-P19\_00439" 23177 "s59E5H2" 0 "Hydrogenase expression/formation protein HypE"  
"NT-P19\_00439" 23177 "s63E6H2" 0.01629562 "Hydrogenase expression/formation protein HypE"  
"NT-P19\_00440" 23178 "s59E13H2" 0.002318531 "putative endonuclease 4"  
"NT-P19\_00440" 23178 "s59E25H2" 0 "putative endonuclease 4"  
"NT-P19\_00440" 23178 "s59E5H2" 0 "putative endonuclease 4"  
"NT-P19\_00440" 23178 "s63E6H2" 0.1196088 "putative endonuclease 4"  
"NT-P19\_00441" 23179 "s59E13H2" 0 "Nucleoside diphosphate kinase"  
"NT-P19\_00441" 23179 "s59E25H2" 0 "Nucleoside diphosphate kinase"  
"NT-P19\_00441" 23179 "s59E5H2" 0 "Nucleoside diphosphate kinase"  
"NT-P19\_00441" 23179 "s63E6H2" 0.1728892 "Nucleoside diphosphate kinase"  
"NT-P19\_00442" 23180 "s59E13H2" 0 "3-isopropylmalate dehydrogenase"  
"NT-P19\_00442" 23180 "s59E25H2" 0 "3-isopropylmalate dehydrogenase"  
"NT-P19\_00442" 23180 "s59E5H2" 0 "3-isopropylmalate dehydrogenase"  
"NT-P19\_00442" 23180 "s63E6H2" 0.09946679 "3-isopropylmalate dehydrogenase"  
"NT-P19\_00443" 23181 "s59E13H2" 0 "Beta-1,4-mannooligosaccharide phosphorylase"  
"NT-P19\_00443" 23181 "s59E25H2" 0 "Beta-1,4-mannooligosaccharide phosphorylase"  
"NT-P19\_00443" 23181 "s59E5H2" 0 "Beta-1,4-mannooligosaccharide phosphorylase"  
"NT-P19\_00443" 23181 "s63E6H2" 0.02317047 "Beta-1,4-mannooligosaccharide phosphorylase"  
"NT-P19\_00444" 23182 "s59E13H2" 0 "hypothetical protein"  
"NT-P19\_00444" 23182 "s59E25H2" 0 "hypothetical protein"  
"NT-P19\_00444" 23182 "s59E5H2" 0 "hypothetical protein"  
"NT-P19\_00444" 23182 "s63E6H2" 0.0349878 "hypothetical protein"  
"NT-P19\_00446" 23184 "s59E13H2" 0 "hypothetical protein"  
"NT-P19\_00446" 23184 "s59E25H2" 0 "hypothetical protein"  
"NT-P19\_00446" 23184 "s59E5H2" 0 "hypothetical protein"  
"NT-P19\_00446" 23184 "s63E6H2" 0.0003595279 "hypothetical protein"  
"NT-P19\_00447" 23185 "s59E13H2" 0 "methylcobalamin:coenzyme M methyltransferase"  
"NT-P19\_00447" 23185 "s59E25H2" 0 "methylcobalamin:coenzyme M methyltransferase"  
"NT-P19\_00447" 23185 "s59E5H2" 0 "methylcobalamin:coenzyme M methyltransferase"  
"NT-P19\_00447" 23185 "s63E6H2" 0.01379465 "methylcobalamin:coenzyme M methyltransferase"  
"NT-P19\_00448" 23186 "s59E13H2" 0 "Ribonuclease VapC32"  
"NT-P19\_00448" 23186 "s59E25H2" 0 "Ribonuclease VapC32"  
"NT-P19\_00448" 23186 "s59E5H2" 0 "Ribonuclease VapC32"  
"NT-P19\_00448" 23186 "s63E6H2" 0 "Ribonuclease VapC32"

"NT-P19\_00449" 23187 "s59E13H2" 0 "Antitoxin VapB32"  
"NT-P19\_00449" 23187 "s59E25H2" 0 "Antitoxin VapB32"  
"NT-P19\_00449" 23187 "s59E5H2" 0 "Antitoxin VapB32"  
"NT-P19\_00449" 23187 "s63E6H2" 0 "Antitoxin VapB32"  
"NT-P19\_00451" 23189 "s59E13H2" 0 "dephospho-CoA kinase/protein folding accessory domain-containing protein"  
"NT-P19\_00451" 23189 "s59E25H2" 0 "dephospho-CoA kinase/protein folding accessory domain-containing protein"  
"NT-P19\_00451" 23189 "s59E5H2" 0 "dephospho-CoA kinase/protein folding accessory domain-containing protein"  
"NT-P19\_00451" 23189 "s63E6H2" 0 "dephospho-CoA kinase/protein folding accessory domain-containing protein"  
"NT-P19\_00453" 23191 "s59E13H2" 0 "acetyltransferase"  
"NT-P19\_00453" 23191 "s59E25H2" 0 "acetyltransferase"  
"NT-P19\_00453" 23191 "s59E5H2" 0 "acetyltransferase"  
"NT-P19\_00453" 23191 "s63E6H2" 0 "acetyltransferase"  
"NT-P19\_00454" 23192 "s59E13H2" 0 "putative deoxyribonuclease YcfH"  
"NT-P19\_00454" 23192 "s59E25H2" 0 "putative deoxyribonuclease YcfH"  
"NT-P19\_00454" 23192 "s59E5H2" 0 "putative deoxyribonuclease YcfH"  
"NT-P19\_00454" 23192 "s63E6H2" 0 "putative deoxyribonuclease YcfH"  
"NT-P19\_00455" 23193 "s59E13H2" 0 "hypothetical protein"  
"NT-P19\_00455" 23193 "s59E25H2" 0 "hypothetical protein"  
"NT-P19\_00455" 23193 "s59E5H2" 0 "hypothetical protein"  
"NT-P19\_00455" 23193 "s63E6H2" 0 "hypothetical protein"  
"NT-P19\_00456" 23194 "s59E13H2" 0 "Dihydroorotase"  
"NT-P19\_00456" 23194 "s59E25H2" 0 "Dihydroorotase"  
"NT-P19\_00456" 23194 "s59E5H2" 0 "Dihydroorotase"  
"NT-P19\_00456" 23194 "s63E6H2" 0.002324017 "Dihydroorotase"  
"NT-P19\_00457" 23195 "s59E13H2" 0 "Aspartate carbamoyltransferase"  
"NT-P19\_00457" 23195 "s59E25H2" 0 "Aspartate carbamoyltransferase"  
"NT-P19\_00457" 23195 "s59E5H2" 0 "Aspartate carbamoyltransferase"  
"NT-P19\_00457" 23195 "s63E6H2" 0.0003894442 "Aspartate carbamoyltransferase"  
"NT-P19\_00458" 23196 "s59E13H2" 0 "Bifunctional protein PyrR"  
"NT-P19\_00458" 23196 "s59E25H2" 0 "Bifunctional protein PyrR"  
"NT-P19\_00458" 23196 "s59E5H2" 0 "Bifunctional protein PyrR"  
"NT-P19\_00458" 23196 "s63E6H2" 0 "Bifunctional protein PyrR"  
"NT-P19\_00459" 23197 "s59E13H2" 0 "Xylulose kinase"  
"NT-P19\_00459" 23197 "s59E25H2" 0 "Xylulose kinase"  
"NT-P19\_00459" 23197 "s59E5H2" 0.004399102 "Xylulose kinase"  
"NT-P19\_00459" 23197 "s63E6H2" 0.1216685 "Xylulose kinase"  
"NT-P19\_00460" 23198 "s59E13H2" 0 "Glyoxylate reductase"  
"NT-P19\_00460" 23198 "s59E25H2" 0 "Glyoxylate reductase"  
"NT-P19\_00460" 23198 "s59E5H2" 0 "Glyoxylate reductase"  
"NT-P19\_00460" 23198 "s63E6H2" 0.2255399 "Glyoxylate reductase"  
"NT-P19\_00461" 23199 "s59E13H2" 0 "Phosphorylated carbohydrates phosphatase"  
"NT-P19\_00461" 23199 "s59E25H2" 0 "Phosphorylated carbohydrates phosphatase"  
"NT-P19\_00461" 23199 "s59E5H2" 0 "Phosphorylated carbohydrates phosphatase"  
"NT-P19\_00461" 23199 "s63E6H2" 0.002207081 "Phosphorylated carbohydrates phosphatase"  
"NT-P19\_00462" 23200 "s59E13H2" 0 "D-tagatose-1,6-bisphosphate aldolase subunit GatY"  
"NT-P19\_00462" 23200 "s59E25H2" 0 "D-tagatose-1,6-bisphosphate aldolase subunit GatY"  
"NT-P19\_00462" 23200 "s59E5H2" 0 "D-tagatose-1,6-bisphosphate aldolase subunit GatY"



"NT-P19\_00462" 23200 "s63E6H2" 0 "D-tagatose-1,6-bisphosphate aldolase subunit GatY"  
"NT-P19\_00463" 23201 "s59E13H2" 0 "Xylulose kinase"  
"NT-P19\_00463" 23201 "s59E25H2" 0 "Xylulose kinase"  
"NT-P19\_00463" 23201 "s59E5H2" 0 "Xylulose kinase"  
"NT-P19\_00463" 23201 "s63E6H2" 0 "Xylulose kinase"  
"NT-P19\_00464" 23202 "s59E13H2" 0 "Succinate-semialdehyde dehydrogenase [NADP(+)] GabD"  
"NT-P19\_00464" 23202 "s59E25H2" 0 "Succinate-semialdehyde dehydrogenase [NADP(+)] GabD"  
"NT-P19\_00464" 23202 "s59E5H2" 0 "Succinate-semialdehyde dehydrogenase [NADP(+)] GabD"  
"NT-P19\_00464" 23202 "s63E6H2" 0 "Succinate-semialdehyde dehydrogenase [NADP(+)] GabD"  
"NT-P19\_00465" 23203 "s59E13H2" 0 "hypothetical protein"  
"NT-P19\_00465" 23203 "s59E25H2" 0 "hypothetical protein"  
"NT-P19\_00465" 23203 "s59E5H2" 0 "hypothetical protein"  
"NT-P19\_00465" 23203 "s63E6H2" 0 "hypothetical protein"  
"NT-P19\_00466" 23204 "s59E13H2" 0 "4-hydroxy-tetrahydrodipicolinate synthase"  
"NT-P19\_00466" 23204 "s59E25H2" 0 "4-hydroxy-tetrahydrodipicolinate synthase"  
"NT-P19\_00466" 23204 "s59E5H2" 0 "4-hydroxy-tetrahydrodipicolinate synthase"  
"NT-P19\_00466" 23204 "s63E6H2" 0.5083226 "4-hydroxy-tetrahydrodipicolinate synthase"  
"NT-P19\_00467" 23205 "s59E13H2" 0 "hypothetical protein"  
"NT-P19\_00467" 23205 "s59E25H2" 0 "hypothetical protein"  
"NT-P19\_00467" 23205 "s59E5H2" 0.001908721 "hypothetical protein"  
"NT-P19\_00467" 23205 "s63E6H2" 5.915107 "hypothetical protein"  
"NT-P19\_00468" 23206 "s59E13H2" 0 "Beta-galactosidase BgaA"  
"NT-P19\_00468" 23206 "s59E25H2" 0 "Beta-galactosidase BgaA"  
"NT-P19\_00468" 23206 "s59E5H2" 0.002951987 "Beta-galactosidase BgaA"  
"NT-P19\_00468" 23206 "s63E6H2" 8.127227 "Beta-galactosidase BgaA"  
"NT-P19\_00469" 23207 "s59E13H2" 0 "L-arabinose transport system permease protein AraQ"  
"NT-P19\_00469" 23207 "s59E25H2" 0 "L-arabinose transport system permease protein AraQ"  
"NT-P19\_00469" 23207 "s59E5H2" 0.008849357 "L-arabinose transport system permease protein AraQ"  
"NT-P19\_00469" 23207 "s63E6H2" 6.20656 "L-arabinose transport system permease protein AraQ"  
"NT-P19\_00470" 23208 "s59E13H2" 0 "Lactose transport system permease protein LacF"  
"NT-P19\_00470" 23208 "s59E25H2" 0 "Lactose transport system permease protein LacF"  
"NT-P19\_00470" 23208 "s59E5H2" 0 "Lactose transport system permease protein LacF"  
"NT-P19\_00470" 23208 "s63E6H2" 2.29434 "Lactose transport system permease protein LacF"  
"NT-P19\_00471" 23209 "s59E13H2" 0 "putative arabinose-binding protein precursor"  
"NT-P19\_00471" 23209 "s59E25H2" 0 "putative arabinose-binding protein precursor"  
"NT-P19\_00471" 23209 "s59E5H2" 0 "putative arabinose-binding protein precursor"  
"NT-P19\_00471" 23209 "s63E6H2" 0.02786223 "putative arabinose-binding protein precursor"  
"NT-P19\_00472" 23210 "s59E13H2" 0 "Arabinose metabolism transcriptional repressor"  
"NT-P19\_00472" 23210 "s59E25H2" 0 "Arabinose metabolism transcriptional repressor"  
"NT-P19\_00472" 23210 "s59E5H2" 0 "Arabinose metabolism transcriptional repressor"  
"NT-P19\_00472" 23210 "s63E6H2" 0.005449826 "Arabinose metabolism transcriptional repressor"  
"NT-P19\_00473" 23211 "s59E13H2" 0 "putative glycine dehydrogenase (decarboxylating) subunit 1"  
"NT-P19\_00473" 23211 "s59E25H2" 0 "putative glycine dehydrogenase (decarboxylating) subunit 1"  
"NT-P19\_00473" 23211 "s59E5H2" 0.0001345372 "putative glycine dehydrogenase (decarboxylating) subunit 1"  
"NT-P19\_00473" 23211 "s63E6H2" 0.1283714 "putative glycine dehydrogenase (decarboxylating) subunit 1"  
"NT-P19\_00474" 23212 "s59E13H2" 0 "Hydrogenase 3 maturation protease"  
"NT-P19\_00474" 23212 "s59E25H2" 0 "Hydrogenase 3 maturation protease"

"NT-P19\_00474" 23212 "s59E5H2" 0 "Hydrogenase 3 maturation protease"  
"NT-P19\_00474" 23212 "s63E6H2" 0 "Hydrogenase 3 maturation protease"  
"NT-P19\_00475" 23213 "s59E13H2" 0 "putative molybdenum cofactor guanylyltransferase"  
"NT-P19\_00475" 23213 "s59E25H2" 0 "putative molybdenum cofactor guanylyltransferase"  
"NT-P19\_00475" 23213 "s59E5H2" 0 "putative molybdenum cofactor guanylyltransferase"  
"NT-P19\_00475" 23213 "s63E6H2" 0.007510325 "putative molybdenum cofactor guanylyltransferase"  
"NT-P19\_00476" 23214 "s59E13H2" 0 "hypothetical protein"  
"NT-P19\_00476" 23214 "s59E25H2" 0 "hypothetical protein"  
"NT-P19\_00476" 23214 "s59E5H2" 0 "hypothetical protein"  
"NT-P19\_00476" 23214 "s63E6H2" 0.005636736 "hypothetical protein"  
"NT-P19\_00477" 23215 "s59E13H2" 0 "DNA polymerase family B, exonuclease domain"  
"NT-P19\_00477" 23215 "s59E25H2" 0 "DNA polymerase family B, exonuclease domain"  
"NT-P19\_00477" 23215 "s59E5H2" 0 "DNA polymerase family B, exonuclease domain"  
"NT-P19\_00477" 23215 "s63E6H2" 0.007114896 "DNA polymerase family B, exonuclease domain"  
"NT-P19\_00478" 23216 "s59E13H2" 0 "Putative ski2-type helicase"  
"NT-P19\_00478" 23216 "s59E25H2" 0.1099338 "Putative ski2-type helicase"  
"NT-P19\_00478" 23216 "s59E5H2" 0 "Putative ski2-type helicase"  
"NT-P19\_00478" 23216 "s63E6H2" 0.01887398 "Putative ski2-type helicase"  
"NT-P19\_00479" 23217 "s59E13H2" 0 "putative HTH-type transcriptional regulator YdfH"  
"NT-P19\_00479" 23217 "s59E25H2" 0 "putative HTH-type transcriptional regulator YdfH"  
"NT-P19\_00479" 23217 "s59E5H2" 0 "putative HTH-type transcriptional regulator YdfH"  
"NT-P19\_00479" 23217 "s63E6H2" 0.0007243799 "putative HTH-type transcriptional regulator YdfH"  
"NT-P19\_00480" 23218 "s59E13H2" 0 "D-arabitol-phosphate dehydrogenase"  
"NT-P19\_00480" 23218 "s59E25H2" 0 "D-arabitol-phosphate dehydrogenase"  
"NT-P19\_00480" 23218 "s59E5H2" 0 "D-arabitol-phosphate dehydrogenase"  
"NT-P19\_00480" 23218 "s63E6H2" 0.0004522756 "D-arabitol-phosphate dehydrogenase"  
"NT-P19\_00481" 23219 "s59E13H2" 0 "L-arabinose isomerase"  
"NT-P19\_00481" 23219 "s59E25H2" 0 "L-arabinose isomerase"  
"NT-P19\_00481" 23219 "s59E5H2" 0 "L-arabinose isomerase"  
"NT-P19\_00481" 23219 "s63E6H2" 0 "L-arabinose isomerase"  
"NT-P19\_00482" 23220 "s59E13H2" 0 "NAD/NADP-dependent betaine aldehyde dehydrogenase"  
"NT-P19\_00482" 23220 "s59E25H2" 0 "NAD/NADP-dependent betaine aldehyde dehydrogenase"  
"NT-P19\_00482" 23220 "s59E5H2" 0.005414828 "NAD/NADP-dependent betaine aldehyde dehydrogenase"  
"NT-P19\_00482" 23220 "s63E6H2" 0.002783782 "NAD/NADP-dependent betaine aldehyde dehydrogenase"  
"NT-P19\_00483" 23221 "s59E13H2" 0 "Tungsten-containing aldehyde ferredoxin oxidoreductase"  
"NT-P19\_00483" 23221 "s59E25H2" 0 "Tungsten-containing aldehyde ferredoxin oxidoreductase"  
"NT-P19\_00483" 23221 "s59E5H2" 0 "Tungsten-containing aldehyde ferredoxin oxidoreductase"  
"NT-P19\_00483" 23221 "s63E6H2" 0.000680033 "Tungsten-containing aldehyde ferredoxin oxidoreductase"  
"NT-P19\_00484" 23222 "s59E13H2" 0 "Acetoin:2,6-dichlorophenolindophenol oxidoreductase subunit alpha"  
"NT-P19\_00484" 23222 "s59E25H2" 0 "Acetoin:2,6-dichlorophenolindophenol oxidoreductase subunit alpha"  
"NT-P19\_00484" 23222 "s59E5H2" 0 "Acetoin:2,6-dichlorophenolindophenol oxidoreductase subunit alpha"  
"NT-P19\_00484" 23222 "s63E6H2" 0 "Acetoin:2,6-dichlorophenolindophenol oxidoreductase subunit alpha"  
"NT-P19\_00485" 23223 "s59E13H2" 0 "2-oxoisovalerate dehydrogenase subunit beta"  
"NT-P19\_00485" 23223 "s59E25H2" 0 "2-oxoisovalerate dehydrogenase subunit beta"  
"NT-P19\_00485" 23223 "s59E5H2" 0 "2-oxoisovalerate dehydrogenase subunit beta"  
"NT-P19\_00485" 23223 "s63E6H2" 0 "2-oxoisovalerate dehydrogenase subunit beta"  
"NT-P19\_00486" 23224 "s59E13H2" 0 "putative tartrate dehydrogenase/decarboxylase TtuC"

"NT-P19\_00486" 23224 "s59E25H2" 0 "putative tartrate dehydrogenase/decarboxylase TtuC"  
"NT-P19\_00486" 23224 "s59E5H2" 0 "putative tartrate dehydrogenase/decarboxylase TtuC"  
"NT-P19\_00486" 23224 "s63E6H2" 0.001144659 "putative tartrate dehydrogenase/decarboxylase TtuC"  
"NT-P19\_00487" 23225 "s59E13H2" 0 "molybdopterin synthase small subunit"  
"NT-P19\_00487" 23225 "s59E25H2" 0 "molybdopterin synthase small subunit"  
"NT-P19\_00487" 23225 "s59E5H2" 0 "molybdopterin synthase small subunit"  
"NT-P19\_00487" 23225 "s63E6H2" 0.009302045 "molybdopterin synthase small subunit"  
"NT-P19\_00488" 23226 "s59E13H2" 0 "putative adenyllyltransferase"  
"NT-P19\_00488" 23226 "s59E25H2" 0 "putative adenyllyltransferase"  
"NT-P19\_00488" 23226 "s59E5H2" 0 "putative adenyllyltransferase"  
"NT-P19\_00488" 23226 "s63E6H2" 0.004687645 "putative adenyllyltransferase"  
"NT-P19\_00489" 23227 "s59E13H2" 0 "Hydroxyacylglutathione hydrolase"  
"NT-P19\_00489" 23227 "s59E25H2" 0 "Hydroxyacylglutathione hydrolase"  
"NT-P19\_00489" 23227 "s59E5H2" 0 "Hydroxyacylglutathione hydrolase"  
"NT-P19\_00489" 23227 "s63E6H2" 0.00192184 "Hydroxyacylglutathione hydrolase"  
"NT-P19\_00490" 23228 "s59E13H2" 0 "Putative GTP cyclohydrolase 1 type 2"  
"NT-P19\_00490" 23228 "s59E25H2" 0 "Putative GTP cyclohydrolase 1 type 2"  
"NT-P19\_00490" 23228 "s59E5H2" 0 "Putative GTP cyclohydrolase 1 type 2"  
"NT-P19\_00490" 23228 "s63E6H2" 0.002648084 "Putative GTP cyclohydrolase 1 type 2"  
"NT-P19\_00491" 23229 "s59E13H2" 0 "putative ABC transporter ATP-binding protein Yjjk"  
"NT-P19\_00491" 23229 "s59E25H2" 0 "putative ABC transporter ATP-binding protein Yjjk"  
"NT-P19\_00491" 23229 "s59E5H2" 0 "putative ABC transporter ATP-binding protein Yjjk"  
"NT-P19\_00491" 23229 "s63E6H2" 0.009557298 "putative ABC transporter ATP-binding protein Yjjk"  
"NT-P19\_00492" 23230 "s59E13H2" 0 "haloacid dehalogenase-like hydrolase"  
"NT-P19\_00492" 23230 "s59E25H2" 0 "haloacid dehalogenase-like hydrolase"  
"NT-P19\_00492" 23230 "s59E5H2" 0 "haloacid dehalogenase-like hydrolase"  
"NT-P19\_00492" 23230 "s63E6H2" 0.01813365 "haloacid dehalogenase-like hydrolase"  
"NT-P19\_00493" 23231 "s59E13H2" 0 "phosphoribosylglycinamide formyltransferase"  
"NT-P19\_00493" 23231 "s59E25H2" 0 "phosphoribosylglycinamide formyltransferase"  
"NT-P19\_00493" 23231 "s59E5H2" 0 "phosphoribosylglycinamide formyltransferase"  
"NT-P19\_00493" 23231 "s63E6H2" 0.003472881 "phosphoribosylglycinamide formyltransferase"  
"NT-P19\_00494" 23232 "s59E13H2" 0 "2-dehydro-3-deoxygluconokinase"  
"NT-P19\_00494" 23232 "s59E25H2" 0 "2-dehydro-3-deoxygluconokinase"  
"NT-P19\_00494" 23232 "s59E5H2" 0 "2-dehydro-3-deoxygluconokinase"  
"NT-P19\_00494" 23232 "s63E6H2" 0 "2-dehydro-3-deoxygluconokinase"  
"NT-P19\_00495" 23233 "s59E13H2" 0 "Ribonuclease VapC11"  
"NT-P19\_00495" 23233 "s59E25H2" 0 "Ribonuclease VapC11"  
"NT-P19\_00495" 23233 "s59E5H2" 0 "Ribonuclease VapC11"  
"NT-P19\_00495" 23233 "s63E6H2" 0 "Ribonuclease VapC11"  
"NT-P19\_00496" 23234 "s59E13H2" 0 "hypothetical protein"  
"NT-P19\_00496" 23234 "s59E25H2" 0 "hypothetical protein"  
"NT-P19\_00496" 23234 "s59E5H2" 0 "hypothetical protein"  
"NT-P19\_00496" 23234 "s63E6H2" 0 "hypothetical protein"  
"NT-P19\_00497" 23235 "s59E13H2" 0 "Phosphoglucomutase"  
"NT-P19\_00497" 23235 "s59E25H2" 0 "Phosphoglucomutase"  
"NT-P19\_00497" 23235 "s59E5H2" 0 "Phosphoglucomutase"  
"NT-P19\_00497" 23235 "s63E6H2" 0 "Phosphoglucomutase"

"NT-P19\_00498" 23236 "s59E13H2" 0 "Ketoisovalerate oxidoreductase subunit VorA"  
"NT-P19\_00498" 23236 "s59E25H2" 0 "Ketoisovalerate oxidoreductase subunit VorA"  
"NT-P19\_00498" 23236 "s59E5H2" 0 "Ketoisovalerate oxidoreductase subunit VorA"  
"NT-P19\_00498" 23236 "s63E6H2" 0 "Ketoisovalerate oxidoreductase subunit VorA"  
"NT-P19\_00499" 23237 "s59E13H2" 0 "Tyrosine recombinase XerD"  
"NT-P19\_00499" 23237 "s59E25H2" 0 "Tyrosine recombinase XerD"  
"NT-P19\_00499" 23237 "s59E5H2" 0 "Tyrosine recombinase XerD"  
"NT-P19\_00499" 23237 "s63E6H2" 0.03839315 "Tyrosine recombinase XerD"  
"NT-P19\_00500" 23238 "s59E13H2" 0 "Glyoxylate reductase"  
"NT-P19\_00500" 23238 "s59E25H2" 0 "Glyoxylate reductase"  
"NT-P19\_00500" 23238 "s59E5H2" 0.001583623 "Glyoxylate reductase"  
"NT-P19\_00500" 23238 "s63E6H2" 0 "Glyoxylate reductase"  
"NT-P19\_00501" 23239 "s59E13H2" 0 "CCA-adding enzyme"  
"NT-P19\_00501" 23239 "s59E25H2" 0 "CCA-adding enzyme"  
"NT-P19\_00501" 23239 "s59E5H2" 0 "CCA-adding enzyme"  
"NT-P19\_00501" 23239 "s63E6H2" 0.8609288 "CCA-adding enzyme"  
"NT-P19\_00502" 23240 "s59E13H2" 0 "Zinc metalloprotease"  
"NT-P19\_00502" 23240 "s59E25H2" 0 "Zinc metalloprotease"  
"NT-P19\_00502" 23240 "s59E5H2" 0 "Zinc metalloprotease"  
"NT-P19\_00502" 23240 "s63E6H2" 1.644912 "Zinc metalloprotease"  
"NT-P19\_00503" 23241 "s59E13H2" 0 "Phenylalanine--tRNA ligase beta subunit"  
"NT-P19\_00503" 23241 "s59E25H2" 0 "Phenylalanine--tRNA ligase beta subunit"  
"NT-P19\_00503" 23241 "s59E5H2" 0 "Phenylalanine--tRNA ligase beta subunit"  
"NT-P19\_00503" 23241 "s63E6H2" 1.796547 "Phenylalanine--tRNA ligase beta subunit"  
"NT-P19\_00504" 23242 "s59E13H2" 0.003043337 "60 kDa chaperonin"  
"NT-P19\_00504" 23242 "s59E25H2" 0 "60 kDa chaperonin"  
"NT-P19\_00504" 23242 "s59E5H2" 0 "60 kDa chaperonin"  
"NT-P19\_00504" 23242 "s63E6H2" 2.942728 "60 kDa chaperonin"  
"NT-P19\_00505" 23243 "s59E13H2" 0 "10 kDa chaperonin"  
"NT-P19\_00505" 23243 "s59E25H2" 0 "10 kDa chaperonin"  
"NT-P19\_00505" 23243 "s59E5H2" 0 "10 kDa chaperonin"  
"NT-P19\_00505" 23243 "s63E6H2" 0.8627986 "10 kDa chaperonin"  
"NT-P19\_00506" 23244 "s59E13H2" 0 "Riboflavin synthase"  
"NT-P19\_00506" 23244 "s59E25H2" 0 "Riboflavin synthase"  
"NT-P19\_00506" 23244 "s59E5H2" 0 "Riboflavin synthase"  
"NT-P19\_00506" 23244 "s63E6H2" 0 "Riboflavin synthase"  
"NT-P19\_00507" 23245 "s59E13H2" 0 "Riboflavin biosynthesis protein RibBA"  
"NT-P19\_00507" 23245 "s59E25H2" 0 "Riboflavin biosynthesis protein RibBA"  
"NT-P19\_00507" 23245 "s59E5H2" 0 "Riboflavin biosynthesis protein RibBA"  
"NT-P19\_00507" 23245 "s63E6H2" 0 "Riboflavin biosynthesis protein RibBA"  
"NT-P19\_00508" 23246 "s59E13H2" 0 "6,7-dimethyl-8-ribityllumazine synthase"  
"NT-P19\_00508" 23246 "s59E25H2" 0 "6,7-dimethyl-8-ribityllumazine synthase"  
"NT-P19\_00508" 23246 "s59E5H2" 0 "6,7-dimethyl-8-ribityllumazine synthase"  
"NT-P19\_00508" 23246 "s63E6H2" 0 "6,7-dimethyl-8-ribityllumazine synthase"  
"NT-P19\_00509" 23247 "s59E13H2" 0 "Phosphodiesterase YfcE"  
"NT-P19\_00509" 23247 "s59E25H2" 0 "Phosphodiesterase YfcE"  
"NT-P19\_00509" 23247 "s59E5H2" 0 "Phosphodiesterase YfcE"

"NT-P19\_00509" 23247 "s63E6H2" 0 "Phosphodiesterase YfcE"  
"NT-P19\_00510" 23248 "s59E13H2" 0 "50S ribosomal protein L28"  
"NT-P19\_00510" 23248 "s59E25H2" 0 "50S ribosomal protein L28"  
"NT-P19\_00510" 23248 "s59E5H2" 0 "50S ribosomal protein L28"  
"NT-P19\_00510" 23248 "s63E6H2" 0 "50S ribosomal protein L28"  
"NT-P19\_00511" 23249 "s59E13H2" 0 "hypothetical protein"  
"NT-P19\_00511" 23249 "s59E25H2" 0 "hypothetical protein"  
"NT-P19\_00511" 23249 "s59E5H2" 0 "hypothetical protein"  
"NT-P19\_00511" 23249 "s63E6H2" 0 "hypothetical protein"  
"NT-P19\_00512" 23250 "s59E13H2" 0 "DAK2 domain protein"  
"NT-P19\_00512" 23250 "s59E25H2" 0 "DAK2 domain protein"  
"NT-P19\_00512" 23250 "s59E5H2" 0 "DAK2 domain protein"  
"NT-P19\_00512" 23250 "s63E6H2" 0 "DAK2 domain protein"  
"NT-P19\_00513" 23251 "s59E13H2" 0 "ATP-dependent DNA helicase RecG"  
"NT-P19\_00513" 23251 "s59E25H2" 0 "ATP-dependent DNA helicase RecG"  
"NT-P19\_00513" 23251 "s59E5H2" 0 "ATP-dependent DNA helicase RecG"  
"NT-P19\_00513" 23251 "s63E6H2" 0 "ATP-dependent DNA helicase RecG"  
"NT-P19\_00514" 23252 "s59E13H2" 0 "Ribosomal RNA small subunit methyltransferase D"  
"NT-P19\_00514" 23252 "s59E25H2" 0 "Ribosomal RNA small subunit methyltransferase D"  
"NT-P19\_00514" 23252 "s59E5H2" 0 "Ribosomal RNA small subunit methyltransferase D"  
"NT-P19\_00514" 23252 "s63E6H2" 0 "Ribosomal RNA small subunit methyltransferase D"  
"NT-P19\_00515" 23253 "s59E13H2" 0 "Succinyl-CoA ligase [ADP-forming] subunit alpha"  
"NT-P19\_00515" 23253 "s59E25H2" 0 "Succinyl-CoA ligase [ADP-forming] subunit alpha"  
"NT-P19\_00515" 23253 "s59E5H2" 0 "Succinyl-CoA ligase [ADP-forming] subunit alpha"  
"NT-P19\_00515" 23253 "s63E6H2" 0 "Succinyl-CoA ligase [ADP-forming] subunit alpha"  
"NT-P19\_00516" 23254 "s59E13H2" 0 "50S ribosomal protein L32"  
"NT-P19\_00516" 23254 "s59E25H2" 0 "50S ribosomal protein L32"  
"NT-P19\_00516" 23254 "s59E5H2" 0 "50S ribosomal protein L32"  
"NT-P19\_00516" 23254 "s63E6H2" 0 "50S ribosomal protein L32"  
"NT-P19\_00517" 23255 "s59E13H2" 0 "hypothetical protein"  
"NT-P19\_00517" 23255 "s59E25H2" 0 "hypothetical protein"  
"NT-P19\_00517" 23255 "s59E5H2" 0 "hypothetical protein"  
"NT-P19\_00517" 23255 "s63E6H2" 0 "hypothetical protein"  
"NT-P19\_00518" 23256 "s59E13H2" 0 "Phosphopantetheine adenylyltransferase"  
"NT-P19\_00518" 23256 "s59E25H2" 0 "Phosphopantetheine adenylyltransferase"  
"NT-P19\_00518" 23256 "s59E5H2" 0 "Phosphopantetheine adenylyltransferase"  
"NT-P19\_00518" 23256 "s63E6H2" 0 "Phosphopantetheine adenylyltransferase"  
"NT-P19\_00519" 23257 "s59E13H2" 0.01933527 "hypothetical protein"  
"NT-P19\_00519" 23257 "s59E25H2" 0 "hypothetical protein"  
"NT-P19\_00519" 23257 "s59E5H2" 0.1366842 "hypothetical protein"  
"NT-P19\_00519" 23257 "s63E6H2" 0.5871441 "hypothetical protein"  
"NT-P19\_00520" 23258 "s59E13H2" 0 "hypothetical protein"  
"NT-P19\_00520" 23258 "s59E25H2" 0 "hypothetical protein"  
"NT-P19\_00520" 23258 "s59E5H2" 0.06426497 "hypothetical protein"  
"NT-P19\_00520" 23258 "s63E6H2" 0.7362487 "hypothetical protein"  
"NT-P19\_00521" 23259 "s59E13H2" 0.001588386 "tRNA-specific 2-thiouridylase MnmA"  
"NT-P19\_00521" 23259 "s59E25H2" 0 "tRNA-specific 2-thiouridylase MnmA"

"NT-P19\_00521" 23259 "s59E5H2" 0.05239704 "tRNA-specific 2-thiouridylase MnmA"  
"NT-P19\_00521" 23259 "s63E6H2" 0.6363941 "tRNA-specific 2-thiouridylase MnmA"  
"NT-P19\_00522" 23260 "s59E13H2" 0 "hypothetical protein"  
"NT-P19\_00522" 23260 "s59E25H2" 0 "hypothetical protein"  
"NT-P19\_00522" 23260 "s59E5H2" 0.007144768 "hypothetical protein"  
"NT-P19\_00522" 23260 "s63E6H2" 0.4026475 "hypothetical protein"  
"NT-P19\_00523" 23261 "s59E13H2" 0 "Radical SAM superfamily protein"  
"NT-P19\_00523" 23261 "s59E25H2" 0 "Radical SAM superfamily protein"  
"NT-P19\_00523" 23261 "s59E5H2" 0 "Radical SAM superfamily protein"  
"NT-P19\_00523" 23261 "s63E6H2" 0.559049 "Radical SAM superfamily protein"  
"NT-P19\_00524" 23262 "s59E13H2" 0 "hypothetical protein"  
"NT-P19\_00524" 23262 "s59E25H2" 0.5043371 "hypothetical protein"  
"NT-P19\_00524" 23262 "s59E5H2" 0 "hypothetical protein"  
"NT-P19\_00524" 23262 "s63E6H2" 0.4136704 "hypothetical protein"  
"NT-P19\_00525" 23263 "s59E13H2" 0 "hypothetical protein"  
"NT-P19\_00525" 23263 "s59E25H2" 0 "hypothetical protein"  
"NT-P19\_00525" 23263 "s59E5H2" 0 "hypothetical protein"  
"NT-P19\_00525" 23263 "s63E6H2" 0 "hypothetical protein"  
"NT-P19\_00526" 23264 "s59E13H2" 0 "Type-1 restriction enzyme R protein"  
"NT-P19\_00526" 23264 "s59E25H2" 0 "Type-1 restriction enzyme R protein"  
"NT-P19\_00526" 23264 "s59E5H2" 0 "Type-1 restriction enzyme R protein"  
"NT-P19\_00526" 23264 "s63E6H2" 0 "Type-1 restriction enzyme R protein"  
"NT-P19\_00528" 23266 "s59E13H2" 0 "Type-1 restriction enzyme MjaXIP specificity protein"  
"NT-P19\_00528" 23266 "s59E25H2" 0 "Type-1 restriction enzyme MjaXIP specificity protein"  
"NT-P19\_00528" 23266 "s59E5H2" 0 "Type-1 restriction enzyme MjaXIP specificity protein"  
"NT-P19\_00528" 23266 "s63E6H2" 0 "Type-1 restriction enzyme MjaXIP specificity protein"  
"NT-P19\_00530" 23268 "s59E13H2" 0 "hypothetical protein"  
"NT-P19\_00530" 23268 "s59E25H2" 0 "hypothetical protein"  
"NT-P19\_00530" 23268 "s59E5H2" 0 "hypothetical protein"  
"NT-P19\_00530" 23268 "s63E6H2" 0 "hypothetical protein"  
"NT-P19\_00531" 23269 "s59E13H2" 0 "putative type I restriction enzymeP M protein"  
"NT-P19\_00531" 23269 "s59E25H2" 0 "putative type I restriction enzymeP M protein"  
"NT-P19\_00531" 23269 "s59E5H2" 0 "putative type I restriction enzymeP M protein"  
"NT-P19\_00531" 23269 "s63E6H2" 0 "putative type I restriction enzymeP M protein"  
"NT-P19\_00532" 23270 "s59E13H2" 0.0002223249 "putative ATP-dependent helicase DinG"  
"NT-P19\_00532" 23270 "s59E25H2" 0 "putative ATP-dependent helicase DinG"  
"NT-P19\_00532" 23270 "s59E5H2" 0 "putative ATP-dependent helicase DinG"  
"NT-P19\_00532" 23270 "s63E6H2" 0.3915081 "putative ATP-dependent helicase DinG"  
"NT-P19\_00533" 23271 "s59E13H2" 0 "PHP domain protein"  
"NT-P19\_00533" 23271 "s59E25H2" 0 "PHP domain protein"  
"NT-P19\_00533" 23271 "s59E5H2" 0 "PHP domain protein"  
"NT-P19\_00533" 23271 "s63E6H2" 0.4285815 "PHP domain protein"  
"NT-P19\_00534" 23272 "s59E13H2" 0 "hypothetical protein"  
"NT-P19\_00534" 23272 "s59E25H2" 0 "hypothetical protein"  
"NT-P19\_00534" 23272 "s59E5H2" 0 "hypothetical protein"  
"NT-P19\_00534" 23272 "s63E6H2" 0.01198489 "hypothetical protein"  
"NT-P19\_00535" 23273 "s59E13H2" 0 "hypothetical protein"

"NT-P19\_00535" 23273 "s59E25H2" 0 "hypothetical protein"  
"NT-P19\_00535" 23273 "s59E5H2" 0 "hypothetical protein"  
"NT-P19\_00535" 23273 "s63E6H2" 0.01038304 "hypothetical protein"  
"NT-P19\_00536" 23274 "s59E13H2" 0 "hypothetical protein"  
"NT-P19\_00536" 23274 "s59E25H2" 0 "hypothetical protein"  
"NT-P19\_00536" 23274 "s59E5H2" 0 "hypothetical protein"  
"NT-P19\_00536" 23274 "s63E6H2" 0.2436645 "hypothetical protein"  
"NT-P19\_00537" 23275 "s59E13H2" 0 "General stress protein 69"  
"NT-P19\_00537" 23275 "s59E25H2" 0 "General stress protein 69"  
"NT-P19\_00537" 23275 "s59E5H2" 0 "General stress protein 69"  
"NT-P19\_00537" 23275 "s63E6H2" 0.3715409 "General stress protein 69"  
"NT-P19\_00538" 23276 "s59E13H2" 0 "3-methyladenine DNA glycosylase"  
"NT-P19\_00538" 23276 "s59E25H2" 0 "3-methyladenine DNA glycosylase"  
"NT-P19\_00538" 23276 "s59E5H2" 0 "3-methyladenine DNA glycosylase"  
"NT-P19\_00538" 23276 "s63E6H2" 0.005365314 "3-methyladenine DNA glycosylase"  
"NT-P19\_00539" 23277 "s59E13H2" 0 "Murein DD-endopeptidase MepM"  
"NT-P19\_00539" 23277 "s59E25H2" 0 "Murein DD-endopeptidase MepM"  
"NT-P19\_00539" 23277 "s59E5H2" 0.004966094 "Murein DD-endopeptidase MepM"  
"NT-P19\_00539" 23277 "s63E6H2" 0.3467822 "Murein DD-endopeptidase MepM"  
"NT-P19\_00540" 23278 "s59E13H2" 0 "hypothetical protein"  
"NT-P19\_00540" 23278 "s59E25H2" 0 "hypothetical protein"  
"NT-P19\_00540" 23278 "s59E5H2" 0 "hypothetical protein"  
"NT-P19\_00540" 23278 "s63E6H2" 0.3925936 "hypothetical protein"  
"NT-P19\_00541" 23279 "s59E13H2" 0 "2,3-bisphosphoglycerate-independent phosphoglycerate mutase 1"  
"NT-P19\_00541" 23279 "s59E25H2" 0 "2,3-bisphosphoglycerate-independent phosphoglycerate mutase 1"  
"NT-P19\_00541" 23279 "s59E5H2" 0 "2,3-bisphosphoglycerate-independent phosphoglycerate mutase 1"  
"NT-P19\_00541" 23279 "s63E6H2" 0.3512612 "2,3-bisphosphoglycerate-independent phosphoglycerate mutase 1"  
"NT-P19\_00542" 23280 "s59E13H2" 0 "Threonine synthase"  
"NT-P19\_00542" 23280 "s59E25H2" 0 "Threonine synthase"  
"NT-P19\_00542" 23280 "s59E5H2" 0 "Threonine synthase"  
"NT-P19\_00542" 23280 "s63E6H2" 0.2049678 "Threonine synthase"  
"NT-P19\_00543" 23281 "s59E13H2" 0 "Fosmidomycin resistance protein"  
"NT-P19\_00543" 23281 "s59E25H2" 0 "Fosmidomycin resistance protein"  
"NT-P19\_00543" 23281 "s59E5H2" 0 "Fosmidomycin resistance protein"  
"NT-P19\_00543" 23281 "s63E6H2" 0 "Fosmidomycin resistance protein"  
"NT-P19\_00544" 23282 "s59E13H2" 0 "Crossover junction endodeoxyribonuclease RuvC"  
"NT-P19\_00544" 23282 "s59E25H2" 0 "Crossover junction endodeoxyribonuclease RuvC"  
"NT-P19\_00544" 23282 "s59E5H2" 0 "Crossover junction endodeoxyribonuclease RuvC"  
"NT-P19\_00544" 23282 "s63E6H2" 0 "Crossover junction endodeoxyribonuclease RuvC"  
"NT-P19\_00545" 23283 "s59E13H2" 0 "Dihydropteroate synthase"  
"NT-P19\_00545" 23283 "s59E25H2" 0 "Dihydropteroate synthase"  
"NT-P19\_00545" 23283 "s59E5H2" 0.02185821 "Dihydropteroate synthase"  
"NT-P19\_00545" 23283 "s63E6H2" 0.002526721 "Dihydropteroate synthase"  
"NT-P19\_00546" 23284 "s59E13H2" 0 "ATP-dependent zinc metalloprotease FtsH"  
"NT-P19\_00546" 23284 "s59E25H2" 0 "ATP-dependent zinc metalloprotease FtsH"  
"NT-P19\_00546" 23284 "s59E5H2" 0 "ATP-dependent zinc metalloprotease FtsH"  
"NT-P19\_00546" 23284 "s63E6H2" 0.001558792 "ATP-dependent zinc metalloprotease FtsH"

"NT-P19\_00547" 23285 "s59E13H2" 0 "Enolase"  
"NT-P19\_00547" 23285 "s59E25H2" 0 "Enolase"  
"NT-P19\_00547" 23285 "s59E5H2" 0 "Enolase"  
"NT-P19\_00547" 23285 "s63E6H2" 0 "Enolase"  
"NT-P19\_00548" 23286 "s59E13H2" 0 "hypothetical protein"  
"NT-P19\_00548" 23286 "s59E25H2" 0 "hypothetical protein"  
"NT-P19\_00548" 23286 "s59E5H2" 0 "hypothetical protein"  
"NT-P19\_00548" 23286 "s63E6H2" 0 "hypothetical protein"  
"NT-P19\_00549" 23287 "s59E13H2" 0 "N5-carboxyaminoimidazole ribonucleotide mutase"  
"NT-P19\_00549" 23287 "s59E25H2" 0 "N5-carboxyaminoimidazole ribonucleotide mutase"  
"NT-P19\_00549" 23287 "s59E5H2" 0 "N5-carboxyaminoimidazole ribonucleotide mutase"  
"NT-P19\_00549" 23287 "s63E6H2" 0 "N5-carboxyaminoimidazole ribonucleotide mutase"  
"NT-P19\_00550" 23288 "s59E13H2" 0 "Tagatose 1,6-diphosphate aldolase 2"  
"NT-P19\_00550" 23288 "s59E25H2" 0 "Tagatose 1,6-diphosphate aldolase 2"  
"NT-P19\_00550" 23288 "s59E5H2" 0.1058628 "Tagatose 1,6-diphosphate aldolase 2"  
"NT-P19\_00550" 23288 "s63E6H2" 1.258553 "Tagatose 1,6-diphosphate aldolase 2"  
"NT-P19\_00551" 23289 "s59E13H2" 0 "V-type sodium ATPase subunit D"  
"NT-P19\_00551" 23289 "s59E25H2" 0 "V-type sodium ATPase subunit D"  
"NT-P19\_00551" 23289 "s59E5H2" 0.03674659 "V-type sodium ATPase subunit D"  
"NT-P19\_00551" 23289 "s63E6H2" 1.331246 "V-type sodium ATPase subunit D"  
"NT-P19\_00552" 23290 "s59E13H2" 0 "V-type sodium ATPase subunit B"  
"NT-P19\_00552" 23290 "s59E25H2" 0 "V-type sodium ATPase subunit B"  
"NT-P19\_00552" 23290 "s59E5H2" 0.03528505 "V-type sodium ATPase subunit B"  
"NT-P19\_00552" 23290 "s63E6H2" 0.9674584 "V-type sodium ATPase subunit B"  
"NT-P19\_00553" 23291 "s59E13H2" 0 "V-type ATP synthase alpha chain"  
"NT-P19\_00553" 23291 "s59E25H2" 0 "V-type ATP synthase alpha chain"  
"NT-P19\_00553" 23291 "s59E5H2" 0.007908397 "V-type ATP synthase alpha chain"  
"NT-P19\_00553" 23291 "s63E6H2" 0.3644269 "V-type ATP synthase alpha chain"  
"NT-P19\_00554" 23292 "s59E13H2" 0 "ATP-dependent Clp protease proteolytic subunit"  
"NT-P19\_00554" 23292 "s59E25H2" 0 "ATP-dependent Clp protease proteolytic subunit"  
"NT-P19\_00554" 23292 "s59E5H2" 0.0005819596 "ATP-dependent Clp protease proteolytic subunit"  
"NT-P19\_00554" 23292 "s63E6H2" 0.5695827 "ATP-dependent Clp protease proteolytic subunit"  
"NT-P19\_00555" 23293 "s59E13H2" 0 "Trigger factor"  
"NT-P19\_00555" 23293 "s59E25H2" 0 "Trigger factor"  
"NT-P19\_00555" 23293 "s59E5H2" 0.01095758 "Trigger factor"  
"NT-P19\_00555" 23293 "s63E6H2" 0.3877829 "Trigger factor"  
"NT-P19\_00561" 23299 "s59E13H2" 0 "Phage integrase family protein"  
"NT-P19\_00561" 23299 "s59E25H2" 0 "Phage integrase family protein"  
"NT-P19\_00561" 23299 "s59E5H2" 0 "Phage integrase family protein"  
"NT-P19\_00561" 23299 "s63E6H2" 0 "Phage integrase family protein"  
"NT-P19\_00562" 23300 "s59E13H2" 0 "Restriction endonuclease BglII"  
"NT-P19\_00562" 23300 "s59E25H2" 0 "Restriction endonuclease BglII"  
"NT-P19\_00562" 23300 "s59E5H2" 0 "Restriction endonuclease BglII"  
"NT-P19\_00562" 23300 "s63E6H2" 0 "Restriction endonuclease BglII"  
"NT-P19\_00563" 23301 "s59E13H2" 0 "hypothetical protein"  
"NT-P19\_00563" 23301 "s59E25H2" 0 "hypothetical protein"  
"NT-P19\_00563" 23301 "s59E5H2" 0 "hypothetical protein"



"NT-P19\_00563" 23301 "s63E6H2" 0 "hypothetical protein"  
"NT-P19\_00564" 23302 "s59E13H2" 0.03045817 "hypothetical protein"  
"NT-P19\_00564" 23302 "s59E25H2" 0 "hypothetical protein"  
"NT-P19\_00564" 23302 "s59E5H2" 0 "hypothetical protein"  
"NT-P19\_00564" 23302 "s63E6H2" 0 "hypothetical protein"  
"NT-P19\_00566" 23304 "s59E13H2" 0 "Glutamate/gamma-aminobutyrate antiporter"  
"NT-P19\_00566" 23304 "s59E25H2" 0 "Glutamate/gamma-aminobutyrate antiporter"  
"NT-P19\_00566" 23304 "s59E5H2" 0.001929968 "Glutamate/gamma-aminobutyrate antiporter"  
"NT-P19\_00566" 23304 "s63E6H2" 0 "Glutamate/gamma-aminobutyrate antiporter"  
"NT-P19\_00567" 23305 "s59E13H2" 0 "Glutamate decarboxylase"  
"NT-P19\_00567" 23305 "s59E25H2" 0 "Glutamate decarboxylase"  
"NT-P19\_00567" 23305 "s59E5H2" 0.01025593 "Glutamate decarboxylase"  
"NT-P19\_00567" 23305 "s63E6H2" 0.001159808 "Glutamate decarboxylase"  
"NT-P19\_00568" 23306 "s59E13H2" 0 "(R)-stereoselective amidase"  
"NT-P19\_00568" 23306 "s59E25H2" 0 "(R)-stereoselective amidase"  
"NT-P19\_00568" 23306 "s59E5H2" 0.006951906 "(R)-stereoselective amidase"  
"NT-P19\_00568" 23306 "s63E6H2" 0.005256052 "(R)-stereoselective amidase"  
"NT-P19\_00569" 23307 "s59E13H2" 0 "Demethylrebeccamycin-D-glucose O-methyltransferase"  
"NT-P19\_00569" 23307 "s59E25H2" 0 "Demethylrebeccamycin-D-glucose O-methyltransferase"  
"NT-P19\_00569" 23307 "s59E5H2" 0 "Demethylrebeccamycin-D-glucose O-methyltransferase"  
"NT-P19\_00569" 23307 "s63E6H2" 0 "Demethylrebeccamycin-D-glucose O-methyltransferase"  
"NT-P19\_00570" 23308 "s59E13H2" 0 "hypothetical protein"  
"NT-P19\_00570" 23308 "s59E25H2" 0 "hypothetical protein"  
"NT-P19\_00570" 23308 "s59E5H2" 0 "hypothetical protein"  
"NT-P19\_00570" 23308 "s63E6H2" 0.0001743165 "hypothetical protein"  
"NT-P19\_00571" 23309 "s59E13H2" 0 "Helix-turn-helix domain protein"  
"NT-P19\_00571" 23309 "s59E25H2" 0 "Helix-turn-helix domain protein"  
"NT-P19\_00571" 23309 "s59E5H2" 0.02460709 "Helix-turn-helix domain protein"  
"NT-P19\_00571" 23309 "s63E6H2" 0.1345043 "Helix-turn-helix domain protein"  
"NT-P19\_00574" 23312 "s59E13H2" 0 "hypothetical protein"  
"NT-P19\_00574" 23312 "s59E25H2" 0 "hypothetical protein"  
"NT-P19\_00574" 23312 "s59E5H2" 0 "hypothetical protein"  
"NT-P19\_00574" 23312 "s63E6H2" 0 "hypothetical protein"  
"NT-P19\_00575" 23313 "s59E13H2" 0 "hypothetical protein"  
"NT-P19\_00575" 23313 "s59E25H2" 0 "hypothetical protein"  
"NT-P19\_00575" 23313 "s59E5H2" 0 "hypothetical protein"  
"NT-P19\_00575" 23313 "s63E6H2" 0.8000485 "hypothetical protein"  
"NT-P19\_00576" 23314 "s59E13H2" 0 "Ketol-acid reductoisomerase"  
"NT-P19\_00576" 23314 "s59E25H2" 0 "Ketol-acid reductoisomerase"  
"NT-P19\_00576" 23314 "s59E5H2" 0.02975832 "Ketol-acid reductoisomerase"  
"NT-P19\_00576" 23314 "s63E6H2" 1.13289 "Ketol-acid reductoisomerase"  
"NT-P19\_00577" 23315 "s59E13H2" 0 "Tetratricopeptide repeat protein"  
"NT-P19\_00577" 23315 "s59E25H2" 0 "Tetratricopeptide repeat protein"  
"NT-P19\_00577" 23315 "s59E5H2" 0 "Tetratricopeptide repeat protein"  
"NT-P19\_00577" 23315 "s63E6H2" 1.283487 "Tetratricopeptide repeat protein"  
"NT-P19\_00578" 23316 "s59E13H2" 0 "hypothetical protein"  
"NT-P19\_00578" 23316 "s59E25H2" 0 "hypothetical protein"

"NT-P19\_00578" 23316 "s59E5H2" 0.02148849 "hypothetical protein"  
"NT-P19\_00578" 23316 "s63E6H2" 1.144027 "hypothetical protein"  
"NT-P19\_00579" 23317 "s59E13H2" 0 "hypothetical protein"  
"NT-P19\_00579" 23317 "s59E25H2" 0 "hypothetical protein"  
"NT-P19\_00579" 23317 "s59E5H2" 0 "hypothetical protein"  
"NT-P19\_00579" 23317 "s63E6H2" 1.162089 "hypothetical protein"  
"NT-P19\_00580" 23318 "s59E13H2" 0 "hypothetical protein"  
"NT-P19\_00580" 23318 "s59E25H2" 0 "hypothetical protein"  
"NT-P19\_00580" 23318 "s59E5H2" 0 "hypothetical protein"  
"NT-P19\_00580" 23318 "s63E6H2" 0.7632311 "hypothetical protein"  
"NT-P19\_00581" 23319 "s59E13H2" 0 "hypothetical protein"  
"NT-P19\_00581" 23319 "s59E25H2" 0 "hypothetical protein"  
"NT-P19\_00581" 23319 "s59E5H2" 0 "hypothetical protein"  
"NT-P19\_00581" 23319 "s63E6H2" 0.718207 "hypothetical protein"  
"NT-P19\_00582" 23320 "s59E13H2" 0 "Serine/threonine-protein kinase pkn1"  
"NT-P19\_00582" 23320 "s59E25H2" 0 "Serine/threonine-protein kinase pkn1"  
"NT-P19\_00582" 23320 "s59E5H2" 0.00422802 "Serine/threonine-protein kinase pkn1"  
"NT-P19\_00582" 23320 "s63E6H2" 0.9396604 "Serine/threonine-protein kinase pkn1"  
"NT-P19\_00583" 23321 "s59E13H2" 0 "hypothetical protein"  
"NT-P19\_00583" 23321 "s59E25H2" 0 "hypothetical protein"  
"NT-P19\_00583" 23321 "s59E5H2" 0 "hypothetical protein"  
"NT-P19\_00583" 23321 "s63E6H2" 0.03029163 "hypothetical protein"  
"NT-P19\_00584" 23322 "s59E13H2" 0 "ECF RNA polymerase sigma-E factor"  
"NT-P19\_00584" 23322 "s59E25H2" 0 "ECF RNA polymerase sigma-E factor"  
"NT-P19\_00584" 23322 "s59E5H2" 0 "ECF RNA polymerase sigma-E factor"  
"NT-P19\_00584" 23322 "s63E6H2" 0.01689451 "ECF RNA polymerase sigma-E factor"  
"NT-P19\_00585" 23323 "s59E13H2" 0 "hypothetical protein"  
"NT-P19\_00585" 23323 "s59E25H2" 0 "hypothetical protein"  
"NT-P19\_00585" 23323 "s59E5H2" 0 "hypothetical protein"  
"NT-P19\_00585" 23323 "s63E6H2" 0.01018513 "hypothetical protein"  
"NT-P19\_00586" 23324 "s59E13H2" 0 "hypothetical protein"  
"NT-P19\_00586" 23324 "s59E25H2" 0 "hypothetical protein"  
"NT-P19\_00586" 23324 "s59E5H2" 0 "hypothetical protein"  
"NT-P19\_00586" 23324 "s63E6H2" 0.00521082 "hypothetical protein"  
"NT-P19\_00589" 23327 "s59E13H2" 0 "putative HTH-type transcriptional regulator/MT0088"  
"NT-P19\_00589" 23327 "s59E25H2" 0 "putative HTH-type transcriptional regulator/MT0088"  
"NT-P19\_00589" 23327 "s59E5H2" 0.004679675 "putative HTH-type transcriptional regulator/MT0088"  
"NT-P19\_00589" 23327 "s63E6H2" 0.04802848 "putative HTH-type transcriptional regulator/MT0088"  
"NT-P19\_00590" 23328 "s59E13H2" 0 "Spore protein SP21"  
"NT-P19\_00590" 23328 "s59E25H2" 0 "Spore protein SP21"  
"NT-P19\_00590" 23328 "s59E5H2" 0.004350318 "Spore protein SP21"  
"NT-P19\_00590" 23328 "s63E6H2" 0.03367187 "Spore protein SP21"  
"NT-P19\_00591" 23329 "s59E13H2" 0 "Uracil DNA glycosylase superfamily protein"  
"NT-P19\_00591" 23329 "s59E25H2" 0 "Uracil DNA glycosylase superfamily protein"  
"NT-P19\_00591" 23329 "s59E5H2" 0 "Uracil DNA glycosylase superfamily protein"  
"NT-P19\_00591" 23329 "s63E6H2" 0 "Uracil DNA glycosylase superfamily protein"  
"NT-P19\_00592" 23330 "s59E13H2" 0 "hypothetical protein"

"NT-P19\_00592" 23330 "s59E25H2" 0 "hypothetical protein"  
"NT-P19\_00592" 23330 "s59E5H2" 0 "hypothetical protein"  
"NT-P19\_00592" 23330 "s63E6H2" 0.1965487 "hypothetical protein"  
"NT-P19\_00593" 23331 "s59E13H2" 0 "Acylphosphatase"  
"NT-P19\_00593" 23331 "s59E25H2" 0 "Acylphosphatase"  
"NT-P19\_00593" 23331 "s59E5H2" 0 "Acylphosphatase"  
"NT-P19\_00593" 23331 "s63E6H2" 0.2032531 "Acylphosphatase"  
"NT-P19\_00594" 23332 "s59E13H2" 0 "putative hydrolase YutF"  
"NT-P19\_00594" 23332 "s59E25H2" 0 "putative hydrolase YutF"  
"NT-P19\_00594" 23332 "s59E5H2" 0 "putative hydrolase YutF"  
"NT-P19\_00594" 23332 "s63E6H2" 0.2851209 "putative hydrolase YutF"  
"NT-P19\_00595" 23333 "s59E13H2" 0 "putative tRNA sulfurtransferase"  
"NT-P19\_00595" 23333 "s59E25H2" 0 "putative tRNA sulfurtransferase"  
"NT-P19\_00595" 23333 "s59E5H2" 0 "putative tRNA sulfurtransferase"  
"NT-P19\_00595" 23333 "s63E6H2" 0.6434841 "putative tRNA sulfurtransferase"  
"NT-P19\_00596" 23334 "s59E13H2" 0 "hypothetical protein"  
"NT-P19\_00596" 23334 "s59E25H2" 0 "hypothetical protein"  
"NT-P19\_00596" 23334 "s59E5H2" 0 "hypothetical protein"  
"NT-P19\_00596" 23334 "s63E6H2" 0.2716554 "hypothetical protein"  
"NT-P19\_00597" 23335 "s59E13H2" 0 "Glycine--tRNA ligase beta subunit"  
"NT-P19\_00597" 23335 "s59E25H2" 0 "Glycine--tRNA ligase beta subunit"  
"NT-P19\_00597" 23335 "s59E5H2" 0.003946575 "Glycine--tRNA ligase beta subunit"  
"NT-P19\_00597" 23335 "s63E6H2" 0.1638217 "Glycine--tRNA ligase beta subunit"  
"NT-P19\_00598" 23336 "s59E13H2" 0 "CoB--CoM heterodisulfide reductase iron-sulfur subunit C"  
"NT-P19\_00598" 23336 "s59E25H2" 0 "CoB--CoM heterodisulfide reductase iron-sulfur subunit C"  
"NT-P19\_00598" 23336 "s59E5H2" 0 "CoB--CoM heterodisulfide reductase iron-sulfur subunit C"  
"NT-P19\_00598" 23336 "s63E6H2" 0 "CoB--CoM heterodisulfide reductase iron-sulfur subunit C"  
"NT-P19\_00599" 23337 "s59E13H2" 0 "CoB--CoM heterodisulfide reductase subunit B"  
"NT-P19\_00599" 23337 "s59E25H2" 0 "CoB--CoM heterodisulfide reductase subunit B"  
"NT-P19\_00599" 23337 "s59E5H2" 0 "CoB--CoM heterodisulfide reductase subunit B"  
"NT-P19\_00599" 23337 "s63E6H2" 0 "CoB--CoM heterodisulfide reductase subunit B"  
"NT-P19\_00600" 23338 "s59E13H2" 0 "CoB--CoM heterodisulfide reductase iron-sulfur subunit A"  
"NT-P19\_00600" 23338 "s59E25H2" 0 "CoB--CoM heterodisulfide reductase iron-sulfur subunit A"  
"NT-P19\_00600" 23338 "s59E5H2" 0 "CoB--CoM heterodisulfide reductase iron-sulfur subunit A"  
"NT-P19\_00600" 23338 "s63E6H2" 0 "CoB--CoM heterodisulfide reductase iron-sulfur subunit A"  
"NT-P19\_00601" 23339 "s59E13H2" 0 "NADP-reducing hydrogenase subunit HndB"  
"NT-P19\_00601" 23339 "s59E25H2" 0 "NADP-reducing hydrogenase subunit HndB"  
"NT-P19\_00601" 23339 "s59E5H2" 0 "NADP-reducing hydrogenase subunit HndB"  
"NT-P19\_00601" 23339 "s63E6H2" 0 "NADP-reducing hydrogenase subunit HndB"  
"NT-P19\_00602" 23340 "s59E13H2" 0 "NADP-reducing hydrogenase subunit HndC"  
"NT-P19\_00602" 23340 "s59E25H2" 0 "NADP-reducing hydrogenase subunit HndC"  
"NT-P19\_00602" 23340 "s59E5H2" 0 "NADP-reducing hydrogenase subunit HndC"  
"NT-P19\_00602" 23340 "s63E6H2" 0 "NADP-reducing hydrogenase subunit HndC"  
"NT-P19\_00603" 23341 "s59E13H2" 0 "hypothetical protein"  
"NT-P19\_00603" 23341 "s59E25H2" 0 "hypothetical protein"  
"NT-P19\_00603" 23341 "s59E5H2" 0 "hypothetical protein"  
"NT-P19\_00603" 23341 "s63E6H2" 0 "hypothetical protein"

"NT-P19\_00604" 23342 "s59E13H2" 0 "Serine/threonine-protein kinase RsbT"  
"NT-P19\_00604" 23342 "s59E25H2" 0 "Serine/threonine-protein kinase RsbT"  
"NT-P19\_00604" 23342 "s59E5H2" 0 "Serine/threonine-protein kinase RsbT"  
"NT-P19\_00604" 23342 "s63E6H2" 0 "Serine/threonine-protein kinase RsbT"  
"NT-P19\_00605" 23343 "s59E13H2" 0 "DRTGG domain protein"  
"NT-P19\_00605" 23343 "s59E25H2" 0 "DRTGG domain protein"  
"NT-P19\_00605" 23343 "s59E5H2" 0 "DRTGG domain protein"  
"NT-P19\_00605" 23343 "s63E6H2" 0 "DRTGG domain protein"  
"NT-P19\_00606" 23344 "s59E13H2" 0 "hypothetical protein"  
"NT-P19\_00606" 23344 "s59E25H2" 0 "hypothetical protein"  
"NT-P19\_00606" 23344 "s59E5H2" 0 "hypothetical protein"  
"NT-P19\_00606" 23344 "s63E6H2" 0 "hypothetical protein"  
"NT-P19\_00607" 23345 "s59E13H2" 0 "Globin-coupled histidine kinase"  
"NT-P19\_00607" 23345 "s59E25H2" 0 "Globin-coupled histidine kinase"  
"NT-P19\_00607" 23345 "s59E5H2" 0 "Globin-coupled histidine kinase"  
"NT-P19\_00607" 23345 "s63E6H2" 0 "Globin-coupled histidine kinase"  
"NT-P19\_00608" 23346 "s59E13H2" 0 "CoB--CoM heterodisulfide reductase iron-sulfur subunit A"  
"NT-P19\_00608" 23346 "s59E25H2" 0 "CoB--CoM heterodisulfide reductase iron-sulfur subunit A"  
"NT-P19\_00608" 23346 "s59E5H2" 0 "CoB--CoM heterodisulfide reductase iron-sulfur subunit A"  
"NT-P19\_00608" 23346 "s63E6H2" 0 "CoB--CoM heterodisulfide reductase iron-sulfur subunit A"  
"NT-P19\_00609" 23347 "s59E13H2" 0 "F420-non-reducing hydrogenase vhc iron-sulfur subunit D"  
"NT-P19\_00609" 23347 "s59E25H2" 0 "F420-non-reducing hydrogenase vhc iron-sulfur subunit D"  
"NT-P19\_00609" 23347 "s59E5H2" 0 "F420-non-reducing hydrogenase vhc iron-sulfur subunit D"  
"NT-P19\_00609" 23347 "s63E6H2" 0 "F420-non-reducing hydrogenase vhc iron-sulfur subunit D"  
"NT-P19\_00610" 23348 "s59E13H2" 0 "Formate dehydrogenase subunit beta"  
"NT-P19\_00610" 23348 "s59E25H2" 0 "Formate dehydrogenase subunit beta"  
"NT-P19\_00610" 23348 "s59E5H2" 0 "Formate dehydrogenase subunit beta"  
"NT-P19\_00610" 23348 "s63E6H2" 0 "Formate dehydrogenase subunit beta"  
"NT-P19\_00611" 23349 "s59E13H2" 0 "Sulfhydrogenase 2 subunit beta"  
"NT-P19\_00611" 23349 "s59E25H2" 0 "Sulfhydrogenase 2 subunit beta"  
"NT-P19\_00611" 23349 "s59E5H2" 0 "Sulfhydrogenase 2 subunit beta"  
"NT-P19\_00611" 23349 "s63E6H2" 0 "Sulfhydrogenase 2 subunit beta"  
"NT-P19\_00612" 23350 "s59E13H2" 0 "Sulfhydrogenase 2 subunit gamma"  
"NT-P19\_00612" 23350 "s59E25H2" 0 "Sulfhydrogenase 2 subunit gamma"  
"NT-P19\_00612" 23350 "s59E5H2" 0 "Sulfhydrogenase 2 subunit gamma"  
"NT-P19\_00612" 23350 "s63E6H2" 0 "Sulfhydrogenase 2 subunit gamma"  
"NT-P19\_00613" 23351 "s59E13H2" 0 "Cytochrome c-type biogenesis protein CcmE"  
"NT-P19\_00613" 23351 "s59E25H2" 0 "Cytochrome c-type biogenesis protein CcmE"  
"NT-P19\_00613" 23351 "s59E5H2" 0 "Cytochrome c-type biogenesis protein CcmE"  
"NT-P19\_00613" 23351 "s63E6H2" 0 "Cytochrome c-type biogenesis protein CcmE"  
"NT-P19\_00614" 23352 "s59E13H2" 0 "Daunorubicin/doxorubicin resistance ATP-binding protein DrrA"  
"NT-P19\_00614" 23352 "s59E25H2" 0 "Daunorubicin/doxorubicin resistance ATP-binding protein DrrA"  
"NT-P19\_00614" 23352 "s59E5H2" 0.005581817 "Daunorubicin/doxorubicin resistance ATP-binding protein DrrA"  
"NT-P19\_00614" 23352 "s63E6H2" 0 "Daunorubicin/doxorubicin resistance ATP-binding protein DrrA"  
"NT-P19\_00615" 23353 "s59E13H2" 0 "CcmB protein"  
"NT-P19\_00615" 23353 "s59E25H2" 0 "CcmB protein"  
"NT-P19\_00615" 23353 "s59E5H2" 0 "CcmB protein"

"NT-P19\_00615" 23353 "s63E6H2" 0 "CcmB protein"  
"NT-P19\_00616" 23354 "s59E13H2" 0 "Cytochrome c-type protein TorC"  
"NT-P19\_00616" 23354 "s59E25H2" 0 "Cytochrome c-type protein TorC"  
"NT-P19\_00616" 23354 "s59E5H2" 0 "Cytochrome c-type protein TorC"  
"NT-P19\_00616" 23354 "s63E6H2" 0 "Cytochrome c-type protein TorC"  
"NT-P19\_00617" 23355 "s59E13H2" 0 "Heptaprenyl diphosphate synthase component 2"  
"NT-P19\_00617" 23355 "s59E25H2" 0 "Heptaprenyl diphosphate synthase component 2"  
"NT-P19\_00617" 23355 "s59E5H2" 0 "Heptaprenyl diphosphate synthase component 2"  
"NT-P19\_00617" 23355 "s63E6H2" 0 "Heptaprenyl diphosphate synthase component 2"  
"NT-P19\_00618" 23356 "s59E13H2" 0 "Doubled CXXCH motif (Paired\_CXXCH\_1)"  
"NT-P19\_00618" 23356 "s59E25H2" 0 "Doubled CXXCH motif (Paired\_CXXCH\_1)"  
"NT-P19\_00618" 23356 "s59E5H2" 0 "Doubled CXXCH motif (Paired\_CXXCH\_1)"  
"NT-P19\_00618" 23356 "s63E6H2" 0 "Doubled CXXCH motif (Paired\_CXXCH\_1)"  
"NT-P19\_00619" 23357 "s59E13H2" 0 "Nitrate reductase cytochrome c-type subunit (NapB)"  
"NT-P19\_00619" 23357 "s59E25H2" 0 "Nitrate reductase cytochrome c-type subunit (NapB)"  
"NT-P19\_00619" 23357 "s59E5H2" 0 "Nitrate reductase cytochrome c-type subunit (NapB)"  
"NT-P19\_00619" 23357 "s63E6H2" 0 "Nitrate reductase cytochrome c-type subunit (NapB)"  
"NT-P19\_00620" 23358 "s59E13H2" 0 "Glutamyl-tRNA reductase"  
"NT-P19\_00620" 23358 "s59E25H2" 0 "Glutamyl-tRNA reductase"  
"NT-P19\_00620" 23358 "s59E5H2" 0 "Glutamyl-tRNA reductase"  
"NT-P19\_00620" 23358 "s63E6H2" 0 "Glutamyl-tRNA reductase"  
"NT-P19\_00621" 23359 "s59E13H2" 0 "Uroporphyrinogen-III C-methyltransferase"  
"NT-P19\_00621" 23359 "s59E25H2" 0 "Uroporphyrinogen-III C-methyltransferase"  
"NT-P19\_00621" 23359 "s59E5H2" 0 "Uroporphyrinogen-III C-methyltransferase"  
"NT-P19\_00621" 23359 "s63E6H2" 0 "Uroporphyrinogen-III C-methyltransferase"  
"NT-P19\_00622" 23360 "s59E13H2" 0 "Delta-aminolevulinic acid dehydratase"  
"NT-P19\_00622" 23360 "s59E25H2" 0 "Delta-aminolevulinic acid dehydratase"  
"NT-P19\_00622" 23360 "s59E5H2" 0 "Delta-aminolevulinic acid dehydratase"  
"NT-P19\_00622" 23360 "s63E6H2" 0 "Delta-aminolevulinic acid dehydratase"  
"NT-P19\_00623" 23361 "s59E13H2" 0 "Glutamate-1-semialdehyde 2,1-aminomutase"  
"NT-P19\_00623" 23361 "s59E25H2" 0 "Glutamate-1-semialdehyde 2,1-aminomutase"  
"NT-P19\_00623" 23361 "s59E5H2" 0 "Glutamate-1-semialdehyde 2,1-aminomutase"  
"NT-P19\_00623" 23361 "s63E6H2" 0 "Glutamate-1-semialdehyde 2,1-aminomutase"  
"NT-P19\_00624" 23362 "s59E13H2" 0 "Siroheme synthase"  
"NT-P19\_00624" 23362 "s59E25H2" 0 "Siroheme synthase"  
"NT-P19\_00624" 23362 "s59E5H2" 0 "Siroheme synthase"  
"NT-P19\_00624" 23362 "s63E6H2" 0 "Siroheme synthase"  
"NT-P19\_00625" 23363 "s59E13H2" 0 "Antilisterial bacteriocin subtilisin biosynthesis protein Alba"  
"NT-P19\_00625" 23363 "s59E25H2" 0 "Antilisterial bacteriocin subtilisin biosynthesis protein Alba"  
"NT-P19\_00625" 23363 "s59E5H2" 0 "Antilisterial bacteriocin subtilisin biosynthesis protein Alba"  
"NT-P19\_00625" 23363 "s63E6H2" 0 "Antilisterial bacteriocin subtilisin biosynthesis protein Alba"  
"NT-P19\_00626" 23364 "s59E13H2" 0 "Antilisterial bacteriocin subtilisin biosynthesis protein Alba"  
"NT-P19\_00626" 23364 "s59E25H2" 0 "Antilisterial bacteriocin subtilisin biosynthesis protein Alba"  
"NT-P19\_00626" 23364 "s59E5H2" 0 "Antilisterial bacteriocin subtilisin biosynthesis protein Alba"  
"NT-P19\_00626" 23364 "s63E6H2" 0 "Antilisterial bacteriocin subtilisin biosynthesis protein Alba"  
"NT-P19\_00627" 23365 "s59E13H2" 0 "putative HTH-type transcriptional regulator"  
"NT-P19\_00627" 23365 "s59E25H2" 0 "putative HTH-type transcriptional regulator"

"NT-P19\_00627" 23365 "s59E5H2" 0 "putative HTH-type transcriptional regulator"  
"NT-P19\_00627" 23365 "s63E6H2" 0 "putative HTH-type transcriptional regulator"  
"NT-P19\_00628" 23366 "s59E13H2" 0 "hypothetical protein"  
"NT-P19\_00628" 23366 "s59E25H2" 0 "hypothetical protein"  
"NT-P19\_00628" 23366 "s59E5H2" 0 "hypothetical protein"  
"NT-P19\_00628" 23366 "s63E6H2" 0 "hypothetical protein"  
"NT-P19\_00629" 23367 "s59E13H2" 0 "Cytochrome c-type biogenesis protein CcmF"  
"NT-P19\_00629" 23367 "s59E25H2" 0 "Cytochrome c-type biogenesis protein CcmF"  
"NT-P19\_00629" 23367 "s59E5H2" 0 "Cytochrome c-type biogenesis protein CcmF"  
"NT-P19\_00629" 23367 "s63E6H2" 0 "Cytochrome c-type biogenesis protein CcmF"  
"NT-P19\_00630" 23368 "s59E13H2" 0 "Cytochrome c-type biogenesis protein CcmH precursor"  
"NT-P19\_00630" 23368 "s59E25H2" 0 "Cytochrome c-type biogenesis protein CcmH precursor"  
"NT-P19\_00630" 23368 "s59E5H2" 0 "Cytochrome c-type biogenesis protein CcmH precursor"  
"NT-P19\_00630" 23368 "s63E6H2" 0 "Cytochrome c-type biogenesis protein CcmH precursor"  
"NT-P19\_00631" 23369 "s59E13H2" 0 "hypothetical protein"  
"NT-P19\_00631" 23369 "s59E25H2" 0 "hypothetical protein"  
"NT-P19\_00631" 23369 "s59E5H2" 0 "hypothetical protein"  
"NT-P19\_00631" 23369 "s63E6H2" 0 "hypothetical protein"  
"NT-P19\_00632" 23370 "s59E13H2" 0 "hypothetical protein"  
"NT-P19\_00632" 23370 "s59E25H2" 0 "hypothetical protein"  
"NT-P19\_00632" 23370 "s59E5H2" 0 "hypothetical protein"  
"NT-P19\_00632" 23370 "s63E6H2" 0 "hypothetical protein"  
"NT-P19\_00633" 23371 "s59E13H2" 0 "Heme exporter protein C"  
"NT-P19\_00633" 23371 "s59E25H2" 0 "Heme exporter protein C"  
"NT-P19\_00633" 23371 "s59E5H2" 0 "Heme exporter protein C"  
"NT-P19\_00633" 23371 "s63E6H2" 0 "Heme exporter protein C"  
"NT-P19\_00634" 23372 "s59E13H2" 0 "hypothetical protein"  
"NT-P19\_00634" 23372 "s59E25H2" 0 "hypothetical protein"  
"NT-P19\_00634" 23372 "s59E5H2" 0 "hypothetical protein"  
"NT-P19\_00634" 23372 "s63E6H2" 0 "hypothetical protein"  
"NT-P19\_00635" 23373 "s59E13H2" 0 "1,4-dihydroxy-2-naphthoate octaprenyltransferase"  
"NT-P19\_00635" 23373 "s59E25H2" 0 "1,4-dihydroxy-2-naphthoate octaprenyltransferase"  
"NT-P19\_00635" 23373 "s59E5H2" 0 "1,4-dihydroxy-2-naphthoate octaprenyltransferase"  
"NT-P19\_00635" 23373 "s63E6H2" 0 "1,4-dihydroxy-2-naphthoate octaprenyltransferase"  
"NT-P19\_00636" 23374 "s59E13H2" 0 "Antilisterial bacteriocin subtilosin biosynthesis protein Alba"  
"NT-P19\_00636" 23374 "s59E25H2" 0 "Antilisterial bacteriocin subtilosin biosynthesis protein Alba"  
"NT-P19\_00636" 23374 "s59E5H2" 0 "Antilisterial bacteriocin subtilosin biosynthesis protein Alba"  
"NT-P19\_00636" 23374 "s63E6H2" 0 "Antilisterial bacteriocin subtilosin biosynthesis protein Alba"  
"NT-P19\_00637" 23375 "s59E13H2" 0 "B12 binding domain protein"  
"NT-P19\_00637" 23375 "s59E25H2" 0 "B12 binding domain protein"  
"NT-P19\_00637" 23375 "s59E5H2" 0 "B12 binding domain protein"  
"NT-P19\_00637" 23375 "s63E6H2" 0 "B12 binding domain protein"  
"NT-P19\_00638" 23376 "s59E13H2" 0 "hypothetical protein"  
"NT-P19\_00638" 23376 "s59E25H2" 0 "hypothetical protein"  
"NT-P19\_00638" 23376 "s59E5H2" 0 "hypothetical protein"  
"NT-P19\_00638" 23376 "s63E6H2" 0 "hypothetical protein"  
"NT-P19\_00639" 23377 "s59E13H2" 0 "HTH-type transcriptional regulator CymR"

"NT-P19\_00639" 23377 "s59E25H2" 0 "HTH-type transcriptional regulator CymR"  
"NT-P19\_00639" 23377 "s59E5H2" 0 "HTH-type transcriptional regulator CymR"  
"NT-P19\_00639" 23377 "s63E6H2" 0 "HTH-type transcriptional regulator CymR"  
"NT-P19\_00640" 23378 "s59E13H2" 0 "hypothetical protein"  
"NT-P19\_00640" 23378 "s59E25H2" 0 "hypothetical protein"  
"NT-P19\_00640" 23378 "s59E5H2" 0 "hypothetical protein"  
"NT-P19\_00640" 23378 "s63E6H2" 0 "hypothetical protein"  
"NT-P19\_00641" 23379 "s59E13H2" 0 "Redox-sensing transcriptional repressor Rex"  
"NT-P19\_00641" 23379 "s59E25H2" 0 "Redox-sensing transcriptional repressor Rex"  
"NT-P19\_00641" 23379 "s59E5H2" 0 "Redox-sensing transcriptional repressor Rex"  
"NT-P19\_00641" 23379 "s63E6H2" 0 "Redox-sensing transcriptional repressor Rex"  
"NT-P19\_00642" 23380 "s59E13H2" 0 "CoB--CoM heterodisulfide reductase iron-sulfur subunit C"  
"NT-P19\_00642" 23380 "s59E25H2" 0 "CoB--CoM heterodisulfide reductase iron-sulfur subunit C"  
"NT-P19\_00642" 23380 "s59E5H2" 0 "CoB--CoM heterodisulfide reductase iron-sulfur subunit C"  
"NT-P19\_00642" 23380 "s63E6H2" 0 "CoB--CoM heterodisulfide reductase iron-sulfur subunit C"  
"NT-P19\_00643" 23381 "s59E13H2" 0 "CoB--CoM heterodisulfide reductase subunit B"  
"NT-P19\_00643" 23381 "s59E25H2" 0 "CoB--CoM heterodisulfide reductase subunit B"  
"NT-P19\_00643" 23381 "s59E5H2" 0 "CoB--CoM heterodisulfide reductase subunit B"  
"NT-P19\_00643" 23381 "s63E6H2" 0 "CoB--CoM heterodisulfide reductase subunit B"  
"NT-P19\_00644" 23382 "s59E13H2" 0 "CoB--CoM heterodisulfide reductase iron-sulfur subunit A"  
"NT-P19\_00644" 23382 "s59E25H2" 0 "CoB--CoM heterodisulfide reductase iron-sulfur subunit A"  
"NT-P19\_00644" 23382 "s59E5H2" 0 "CoB--CoM heterodisulfide reductase iron-sulfur subunit A"  
"NT-P19\_00644" 23382 "s63E6H2" 0 "CoB--CoM heterodisulfide reductase iron-sulfur subunit A"  
"NT-P19\_00645" 23383 "s59E13H2" 0 "F420-non-reducing hydrogenase iron-sulfur subunit D"  
"NT-P19\_00645" 23383 "s59E25H2" 0 "F420-non-reducing hydrogenase iron-sulfur subunit D"  
"NT-P19\_00645" 23383 "s59E5H2" 0 "F420-non-reducing hydrogenase iron-sulfur subunit D"  
"NT-P19\_00645" 23383 "s63E6H2" 0 "F420-non-reducing hydrogenase iron-sulfur subunit D"  
"NT-P19\_00646" 23384 "s59E13H2" 0 "Formate dehydrogenase subunit beta"  
"NT-P19\_00646" 23384 "s59E25H2" 0 "Formate dehydrogenase subunit beta"  
"NT-P19\_00646" 23384 "s59E5H2" 0 "Formate dehydrogenase subunit beta"  
"NT-P19\_00646" 23384 "s63E6H2" 0 "Formate dehydrogenase subunit beta"  
"NT-P19\_00647" 23385 "s59E13H2" 0 "Sulfhydrogenase 2 subunit beta"  
"NT-P19\_00647" 23385 "s59E25H2" 0 "Sulfhydrogenase 2 subunit beta"  
"NT-P19\_00647" 23385 "s59E5H2" 0 "Sulfhydrogenase 2 subunit beta"  
"NT-P19\_00647" 23385 "s63E6H2" 0 "Sulfhydrogenase 2 subunit beta"  
"NT-P19\_00648" 23386 "s59E13H2" 0 "Sulfhydrogenase 1 subunit gamma"  
"NT-P19\_00648" 23386 "s59E25H2" 0 "Sulfhydrogenase 1 subunit gamma"  
"NT-P19\_00648" 23386 "s59E5H2" 0 "Sulfhydrogenase 1 subunit gamma"  
"NT-P19\_00648" 23386 "s63E6H2" 0 "Sulfhydrogenase 1 subunit gamma"  
"NT-P19\_00649" 23387 "s59E13H2" 0 "Transcriptional regulatory protein AfsQ1"  
"NT-P19\_00649" 23387 "s59E25H2" 0 "Transcriptional regulatory protein AfsQ1"  
"NT-P19\_00649" 23387 "s59E5H2" 0 "Transcriptional regulatory protein AfsQ1"  
"NT-P19\_00649" 23387 "s63E6H2" 0 "Transcriptional regulatory protein AfsQ1"  
"NT-P19\_00650" 23388 "s59E13H2" 0 "Sensor histidine kinase YycG"  
"NT-P19\_00650" 23388 "s59E25H2" 0 "Sensor histidine kinase YycG"  
"NT-P19\_00650" 23388 "s59E5H2" 0 "Sensor histidine kinase YycG"  
"NT-P19\_00650" 23388 "s63E6H2" 0 "Sensor histidine kinase YycG"

"NT-P19\_00651" 23389 "s59E13H2" 0 "Cytochrome c-type protein TorC"  
"NT-P19\_00651" 23389 "s59E25H2" 0 "Cytochrome c-type protein TorC"  
"NT-P19\_00651" 23389 "s59E5H2" 0 "Cytochrome c-type protein TorC"  
"NT-P19\_00651" 23389 "s63E6H2" 0 "Cytochrome c-type protein TorC"  
"NT-P19\_00652" 23390 "s59E13H2" 0 "D-2-hydroxyacid dehydrogenase"  
"NT-P19\_00652" 23390 "s59E25H2" 0 "D-2-hydroxyacid dehydrogenase"  
"NT-P19\_00652" 23390 "s59E5H2" 0 "D-2-hydroxyacid dehydrogenase"  
"NT-P19\_00652" 23390 "s63E6H2" 6.254413e-06 "D-2-hydroxyacid dehydrogenase"  
"NT-P19\_00654" 23392 "s59E13H2" 0 "Glucose-6-phosphate isomerase"  
"NT-P19\_00654" 23392 "s59E25H2" 0 "Glucose-6-phosphate isomerase"  
"NT-P19\_00654" 23392 "s59E5H2" 0 "Glucose-6-phosphate isomerase"  
"NT-P19\_00654" 23392 "s63E6H2" 0 "Glucose-6-phosphate isomerase"  
"NT-P19\_00655" 23393 "s59E13H2" 0 "Glycerol kinase"  
"NT-P19\_00655" 23393 "s59E25H2" 0 "Glycerol kinase"  
"NT-P19\_00655" 23393 "s59E5H2" 0 "Glycerol kinase"  
"NT-P19\_00655" 23393 "s63E6H2" 0 "Glycerol kinase"  
"NT-P19\_00656" 23394 "s59E13H2" 0 "Non-reducing end beta-L-arabinofuranosidase"  
"NT-P19\_00656" 23394 "s59E25H2" 0 "Non-reducing end beta-L-arabinofuranosidase"  
"NT-P19\_00656" 23394 "s59E5H2" 0 "Non-reducing end beta-L-arabinofuranosidase"  
"NT-P19\_00656" 23394 "s63E6H2" 0 "Non-reducing end beta-L-arabinofuranosidase"  
"NT-P19\_00657" 23395 "s59E13H2" 0 "ADP-ribosylglycohydrolase"  
"NT-P19\_00657" 23395 "s59E25H2" 0 "ADP-ribosylglycohydrolase"  
"NT-P19\_00657" 23395 "s59E5H2" 0 "ADP-ribosylglycohydrolase"  
"NT-P19\_00657" 23395 "s63E6H2" 0.007672116 "ADP-ribosylglycohydrolase"  
"NT-P19\_00658" 23396 "s59E13H2" 0 "D-aminopeptidase"  
"NT-P19\_00658" 23396 "s59E25H2" 0 "D-aminopeptidase"  
"NT-P19\_00658" 23396 "s59E5H2" 0 "D-aminopeptidase"  
"NT-P19\_00658" 23396 "s63E6H2" 0 "D-aminopeptidase"  
"NT-P19\_00659" 23397 "s59E13H2" 0 "hypothetical protein"  
"NT-P19\_00659" 23397 "s59E25H2" 0 "hypothetical protein"  
"NT-P19\_00659" 23397 "s59E5H2" 0 "hypothetical protein"  
"NT-P19\_00659" 23397 "s63E6H2" 0 "hypothetical protein"  
"NT-P19\_00660" 23398 "s59E13H2" 0 "D-arabitol-phosphate dehydrogenase"  
"NT-P19\_00660" 23398 "s59E25H2" 0 "D-arabitol-phosphate dehydrogenase"  
"NT-P19\_00660" 23398 "s59E5H2" 0 "D-arabitol-phosphate dehydrogenase"  
"NT-P19\_00660" 23398 "s63E6H2" 0 "D-arabitol-phosphate dehydrogenase"  
"NT-P19\_00661" 23399 "s59E13H2" 0 "5-deoxy-glucuronate isomerase"  
"NT-P19\_00661" 23399 "s59E25H2" 0 "5-deoxy-glucuronate isomerase"  
"NT-P19\_00661" 23399 "s59E5H2" 0 "5-deoxy-glucuronate isomerase"  
"NT-P19\_00661" 23399 "s63E6H2" 0 "5-deoxy-glucuronate isomerase"  
"NT-P19\_00662" 23400 "s59E13H2" 0 "D-tagatose 3-epimerase"  
"NT-P19\_00662" 23400 "s59E25H2" 0 "D-tagatose 3-epimerase"  
"NT-P19\_00662" 23400 "s59E5H2" 0 "D-tagatose 3-epimerase"  
"NT-P19\_00662" 23400 "s63E6H2" 0 "D-tagatose 3-epimerase"  
"NT-P19\_00663" 23401 "s59E13H2" 0 "hypothetical protein"  
"NT-P19\_00663" 23401 "s59E25H2" 0 "hypothetical protein"  
"NT-P19\_00663" 23401 "s59E5H2" 0 "hypothetical protein"



"NT-P19\_00663" 23401 "s63E6H2" 0 "hypothetical protein"  
"NT-P19\_00664" 23402 "s59E13H2" 0 "Glycosyl hydrolases family 2, TIM barrel domain"  
"NT-P19\_00664" 23402 "s59E25H2" 0 "Glycosyl hydrolases family 2, TIM barrel domain"  
"NT-P19\_00664" 23402 "s59E5H2" 0 "Glycosyl hydrolases family 2, TIM barrel domain"  
"NT-P19\_00664" 23402 "s63E6H2" 0 "Glycosyl hydrolases family 2, TIM barrel domain"  
"NT-P19\_00665" 23403 "s59E13H2" 0 "Xylulose kinase"  
"NT-P19\_00665" 23403 "s59E25H2" 0 "Xylulose kinase"  
"NT-P19\_00665" 23403 "s59E5H2" 0.009032897 "Xylulose kinase"  
"NT-P19\_00665" 23403 "s63E6H2" 0.008067565 "Xylulose kinase"  
"NT-P19\_00666" 23404 "s59E13H2" 0 "Glyoxylate reductase"  
"NT-P19\_00666" 23404 "s59E25H2" 0 "Glyoxylate reductase"  
"NT-P19\_00666" 23404 "s59E5H2" 0 "Glyoxylate reductase"  
"NT-P19\_00666" 23404 "s63E6H2" 0.006304448 "Glyoxylate reductase"  
"NT-P19\_00667" 23405 "s59E13H2" 0.009280528 "Ribose transport system permease protein RbsC"  
"NT-P19\_00667" 23405 "s59E25H2" 0 "Ribose transport system permease protein RbsC"  
"NT-P19\_00667" 23405 "s59E5H2" 0.5857869 "Ribose transport system permease protein RbsC"  
"NT-P19\_00667" 23405 "s63E6H2" 0.0689378 "Ribose transport system permease protein RbsC"  
"NT-P19\_00668" 23406 "s59E13H2" 0.05393166 "Ribose import ATP-binding protein RbsA"  
"NT-P19\_00668" 23406 "s59E25H2" 0 "Ribose import ATP-binding protein RbsA"  
"NT-P19\_00668" 23406 "s59E5H2" 0.4336803 "Ribose import ATP-binding protein RbsA"  
"NT-P19\_00668" 23406 "s63E6H2" 0.3459903 "Ribose import ATP-binding protein RbsA"  
"NT-P19\_00669" 23407 "s59E13H2" 0.006736519 "D-ribose-binding periplasmic protein precursor"  
"NT-P19\_00669" 23407 "s59E25H2" 0 "D-ribose-binding periplasmic protein precursor"  
"NT-P19\_00669" 23407 "s59E5H2" 0.2388926 "D-ribose-binding periplasmic protein precursor"  
"NT-P19\_00669" 23407 "s63E6H2" 0.3228034 "D-ribose-binding periplasmic protein precursor"  
"NT-P19\_00670" 23408 "s59E13H2" 0 "2-(R)-hydroxypropyl-CoM dehydrogenase"  
"NT-P19\_00670" 23408 "s59E25H2" 0 "2-(R)-hydroxypropyl-CoM dehydrogenase"  
"NT-P19\_00670" 23408 "s59E5H2" 0 "2-(R)-hydroxypropyl-CoM dehydrogenase"  
"NT-P19\_00670" 23408 "s63E6H2" 0 "2-(R)-hydroxypropyl-CoM dehydrogenase"  
"NT-P19\_00671" 23409 "s59E13H2" 0 "HTH-type transcriptional repressor YvoA"  
"NT-P19\_00671" 23409 "s59E25H2" 0 "HTH-type transcriptional repressor YvoA"  
"NT-P19\_00671" 23409 "s59E5H2" 0 "HTH-type transcriptional repressor YvoA"  
"NT-P19\_00671" 23409 "s63E6H2" 0 "HTH-type transcriptional repressor YvoA"  
"NT-P19\_00672" 23410 "s59E13H2" 0 "Sorbitol dehydrogenase"  
"NT-P19\_00672" 23410 "s59E25H2" 0 "Sorbitol dehydrogenase"  
"NT-P19\_00672" 23410 "s59E5H2" 0 "Sorbitol dehydrogenase"  
"NT-P19\_00672" 23410 "s63E6H2" 0.009515925 "Sorbitol dehydrogenase"  
"NT-P19\_00673" 23411 "s59E13H2" 0 "D-arabitol-phosphate dehydrogenase"  
"NT-P19\_00673" 23411 "s59E25H2" 0 "D-arabitol-phosphate dehydrogenase"  
"NT-P19\_00673" 23411 "s59E5H2" 0 "D-arabitol-phosphate dehydrogenase"  
"NT-P19\_00673" 23411 "s63E6H2" 0.002896603 "D-arabitol-phosphate dehydrogenase"  
"NT-P19\_00674" 23412 "s59E13H2" 0 "Inositol 2-dehydrogenase"  
"NT-P19\_00674" 23412 "s59E25H2" 0 "Inositol 2-dehydrogenase"  
"NT-P19\_00674" 23412 "s59E5H2" 0 "Inositol 2-dehydrogenase"  
"NT-P19\_00674" 23412 "s63E6H2" 0.01717414 "Inositol 2-dehydrogenase"  
"NT-P19\_00675" 23413 "s59E13H2" 0 "D-tagatose-1,6-bisphosphate aldolase subunit KbaY"  
"NT-P19\_00675" 23413 "s59E25H2" 0 "D-tagatose-1,6-bisphosphate aldolase subunit KbaY"

"NT-P19\_00675" 23413 "s59E5H2" 0 "D-tagatose-1,6-bisphosphate aldolase subunit KbaY"  
"NT-P19\_00675" 23413 "s63E6H2" 0 "D-tagatose-1,6-bisphosphate aldolase subunit KbaY"  
"NT-P19\_00676" 23414 "s59E13H2" 0 "Acetoin:2,6-dichlorophenolindophenol oxidoreductase subunit alpha"  
"NT-P19\_00676" 23414 "s59E25H2" 0 "Acetoin:2,6-dichlorophenolindophenol oxidoreductase subunit alpha"  
"NT-P19\_00676" 23414 "s59E5H2" 0.02067655 "Acetoin:2,6-dichlorophenolindophenol oxidoreductase subunit alpha"  
"NT-P19\_00676" 23414 "s63E6H2" 0 "Acetoin:2,6-dichlorophenolindophenol oxidoreductase subunit alpha"  
"NT-P19\_00677" 23415 "s59E13H2" 0 "2-oxoisovalerate dehydrogenase subunit beta"  
"NT-P19\_00677" 23415 "s59E25H2" 0 "2-oxoisovalerate dehydrogenase subunit beta"  
"NT-P19\_00677" 23415 "s59E5H2" 0 "2-oxoisovalerate dehydrogenase subunit beta"  
"NT-P19\_00677" 23415 "s63E6H2" 0 "2-oxoisovalerate dehydrogenase subunit beta"  
"NT-P19\_00679" 23417 "s59E13H2" 0 "Phosphoribosylaminoimidazole-succinocarboxamide synthase"  
"NT-P19\_00679" 23417 "s59E25H2" 0 "Phosphoribosylaminoimidazole-succinocarboxamide synthase"  
"NT-P19\_00679" 23417 "s59E5H2" 0 "Phosphoribosylaminoimidazole-succinocarboxamide synthase"  
"NT-P19\_00679" 23417 "s63E6H2" 0 "Phosphoribosylaminoimidazole-succinocarboxamide synthase"  
"NT-P19\_00680" 23418 "s59E13H2" 0 "Oligopeptide transport ATP-binding protein OppD"  
"NT-P19\_00680" 23418 "s59E25H2" 0 "Oligopeptide transport ATP-binding protein OppD"  
"NT-P19\_00680" 23418 "s59E5H2" 0.00403685 "Oligopeptide transport ATP-binding protein OppD"  
"NT-P19\_00680" 23418 "s63E6H2" 0.1098253 "Oligopeptide transport ATP-binding protein OppD"  
"NT-P19\_00681" 23419 "s59E13H2" 0 "Oligopeptide transport ATP-binding protein OppF"  
"NT-P19\_00681" 23419 "s59E25H2" 0 "Oligopeptide transport ATP-binding protein OppF"  
"NT-P19\_00681" 23419 "s59E5H2" 0.02657842 "Oligopeptide transport ATP-binding protein OppF"  
"NT-P19\_00681" 23419 "s63E6H2" 0.1566909 "Oligopeptide transport ATP-binding protein OppF"  
"NT-P19\_00682" 23420 "s59E13H2" 0 "hypothetical protein"  
"NT-P19\_00682" 23420 "s59E25H2" 0 "hypothetical protein"  
"NT-P19\_00682" 23420 "s59E5H2" 0 "hypothetical protein"  
"NT-P19\_00682" 23420 "s63E6H2" 0.006121802 "hypothetical protein"  
"NT-P19\_00683" 23421 "s59E13H2" 0 "Peptide chain release factor 1"  
"NT-P19\_00683" 23421 "s59E25H2" 0 "Peptide chain release factor 1"  
"NT-P19\_00683" 23421 "s59E5H2" 0 "Peptide chain release factor 1"  
"NT-P19\_00683" 23421 "s63E6H2" 0.01535432 "Peptide chain release factor 1"  
"NT-P19\_00684" 23422 "s59E13H2" 0 "Transcription-repair-coupling factor"  
"NT-P19\_00684" 23422 "s59E25H2" 0 "Transcription-repair-coupling factor"  
"NT-P19\_00684" 23422 "s59E5H2" 0 "Transcription-repair-coupling factor"  
"NT-P19\_00684" 23422 "s63E6H2" 0.01163879 "Transcription-repair-coupling factor"  
"NT-P19\_00685" 23423 "s59E13H2" 0 "peptidylprolyl isomerase"  
"NT-P19\_00685" 23423 "s59E25H2" 0 "peptidylprolyl isomerase"  
"NT-P19\_00685" 23423 "s59E5H2" 0 "peptidylprolyl isomerase"  
"NT-P19\_00685" 23423 "s63E6H2" 0 "peptidylprolyl isomerase"  
"NT-P19\_00686" 23424 "s59E13H2" 0 "UDP-N-acetylglucosamine 1-carboxyvinyltransferase 1"  
"NT-P19\_00686" 23424 "s59E25H2" 0 "UDP-N-acetylglucosamine 1-carboxyvinyltransferase 1"  
"NT-P19\_00686" 23424 "s59E5H2" 0 "UDP-N-acetylglucosamine 1-carboxyvinyltransferase 1"  
"NT-P19\_00686" 23424 "s63E6H2" 0 "UDP-N-acetylglucosamine 1-carboxyvinyltransferase 1"  
"NT-P19\_00687" 23425 "s59E13H2" 0 "Rod shape-determining protein MreB"  
"NT-P19\_00687" 23425 "s59E25H2" 0 "Rod shape-determining protein MreB"  
"NT-P19\_00687" 23425 "s59E5H2" 0 "Rod shape-determining protein MreB"  
"NT-P19\_00687" 23425 "s63E6H2" 0 "Rod shape-determining protein MreB"  
"NT-P19\_00688" 23426 "s59E13H2" 0 "hypothetical protein"

"NT-P19\_00688" 23426 "s59E25H2" 0 "hypothetical protein"  
"NT-P19\_00688" 23426 "s59E5H2" 0 "hypothetical protein"  
"NT-P19\_00688" 23426 "s63E6H2" 0 "hypothetical protein"  
"NT-P19\_00689" 23427 "s59E13H2" 0 "DNA integrity scanning protein DisA"  
"NT-P19\_00689" 23427 "s59E25H2" 0 "DNA integrity scanning protein DisA"  
"NT-P19\_00689" 23427 "s59E5H2" 0 "DNA integrity scanning protein DisA"  
"NT-P19\_00689" 23427 "s63E6H2" 0 "DNA integrity scanning protein DisA"  
"NT-P19\_00690" 23428 "s59E13H2" 0 "putative PIN and TRAM-domain containing protein precursor"  
"NT-P19\_00690" 23428 "s59E25H2" 0 "putative PIN and TRAM-domain containing protein precursor"  
"NT-P19\_00690" 23428 "s59E5H2" 0 "putative PIN and TRAM-domain containing protein precursor"  
"NT-P19\_00690" 23428 "s63E6H2" 0 "putative PIN and TRAM-domain containing protein precursor"  
"NT-P19\_00691" 23429 "s59E13H2" 0 "Putative 2-C-methyl-D-erythritol 4-phosphate cytidyltransferase 2"  
"NT-P19\_00691" 23429 "s59E25H2" 0 "Putative 2-C-methyl-D-erythritol 4-phosphate cytidyltransferase 2"  
"NT-P19\_00691" 23429 "s59E5H2" 0 "Putative 2-C-methyl-D-erythritol 4-phosphate cytidyltransferase 2"  
"NT-P19\_00691" 23429 "s63E6H2" 0.002202641 "Putative 2-C-methyl-D-erythritol 4-phosphate cytidyltransferase 2"  
"NT-P19\_00692" 23430 "s59E13H2" 0 "2-C-methyl-D-erythritol 2,4-cyclodiphosphate synthase"  
"NT-P19\_00692" 23430 "s59E25H2" 0 "2-C-methyl-D-erythritol 2,4-cyclodiphosphate synthase"  
"NT-P19\_00692" 23430 "s59E5H2" 0 "2-C-methyl-D-erythritol 2,4-cyclodiphosphate synthase"  
"NT-P19\_00692" 23430 "s63E6H2" 5.00353e-05 "2-C-methyl-D-erythritol 2,4-cyclodiphosphate synthase"  
"NT-P19\_00693" 23431 "s59E13H2" 0 "Cysteine--tRNA ligase"  
"NT-P19\_00693" 23431 "s59E25H2" 0 "Cysteine--tRNA ligase"  
"NT-P19\_00693" 23431 "s59E5H2" 0.00471834 "Cysteine--tRNA ligase"  
"NT-P19\_00693" 23431 "s63E6H2" 0.005149249 "Cysteine--tRNA ligase"  
"NT-P19\_00695" 23433 "s59E13H2" 0 "Alanine--tRNA ligase"  
"NT-P19\_00695" 23433 "s59E25H2" 0 "Alanine--tRNA ligase"  
"NT-P19\_00695" 23433 "s59E5H2" 0 "Alanine--tRNA ligase"  
"NT-P19\_00695" 23433 "s63E6H2" 0 "Alanine--tRNA ligase"  
"NT-P19\_00696" 23434 "s59E13H2" 0 "Primosomal protein N"  
"NT-P19\_00696" 23434 "s59E25H2" 0 "Primosomal protein N"  
"NT-P19\_00696" 23434 "s59E5H2" 0 "Primosomal protein N"  
"NT-P19\_00696" 23434 "s63E6H2" 0.001568444 "Primosomal protein N"  
"NT-P19\_00697" 23435 "s59E13H2" 0 "hypothetical protein"  
"NT-P19\_00697" 23435 "s59E25H2" 0 "hypothetical protein"  
"NT-P19\_00697" 23435 "s59E5H2" 0 "hypothetical protein"  
"NT-P19\_00697" 23435 "s63E6H2" 0 "hypothetical protein"  
"NT-P19\_00698" 23436 "s59E13H2" 0 "4-hydroxyphenylacetate decarboxylase large subunit"  
"NT-P19\_00698" 23436 "s59E25H2" 0 "4-hydroxyphenylacetate decarboxylase large subunit"  
"NT-P19\_00698" 23436 "s59E5H2" 0 "4-hydroxyphenylacetate decarboxylase large subunit"  
"NT-P19\_00698" 23436 "s63E6H2" 0 "4-hydroxyphenylacetate decarboxylase large subunit"  
"NT-P19\_00699" 23437 "s59E13H2" 0 "4-hydroxyphenylacetate decarboxylase activating enzyme"  
"NT-P19\_00699" 23437 "s59E25H2" 0 "4-hydroxyphenylacetate decarboxylase activating enzyme"  
"NT-P19\_00699" 23437 "s59E5H2" 0 "4-hydroxyphenylacetate decarboxylase activating enzyme"  
"NT-P19\_00699" 23437 "s63E6H2" 0 "4-hydroxyphenylacetate decarboxylase activating enzyme"  
"NT-P19\_00700" 23438 "s59E13H2" 0 "hypothetical protein"  
"NT-P19\_00700" 23438 "s59E25H2" 0 "hypothetical protein"  
"NT-P19\_00700" 23438 "s59E5H2" 0 "hypothetical protein"  
"NT-P19\_00700" 23438 "s63E6H2" 0 "hypothetical protein"

"NT-P19\_00701" 23439 "s59E13H2" 0 "Mannosylglycerate hydrolase"  
"NT-P19\_00701" 23439 "s59E25H2" 0 "Mannosylglycerate hydrolase"  
"NT-P19\_00701" 23439 "s59E5H2" 0.003481366 "Mannosylglycerate hydrolase"  
"NT-P19\_00701" 23439 "s63E6H2" 0 "Mannosylglycerate hydrolase"  
"NT-P19\_00702" 23440 "s59E13H2" 0 "L-arabinose transport system permease protein AraQ"  
"NT-P19\_00702" 23440 "s59E25H2" 0 "L-arabinose transport system permease protein AraQ"  
"NT-P19\_00702" 23440 "s59E5H2" 0.005092147 "L-arabinose transport system permease protein AraQ"  
"NT-P19\_00702" 23440 "s63E6H2" 0 "L-arabinose transport system permease protein AraQ"  
"NT-P19\_00703" 23441 "s59E13H2" 0 "Lactose transport system permease protein LacF"  
"NT-P19\_00703" 23441 "s59E25H2" 0 "Lactose transport system permease protein LacF"  
"NT-P19\_00703" 23441 "s59E5H2" 0 "Lactose transport system permease protein LacF"  
"NT-P19\_00703" 23441 "s63E6H2" 0 "Lactose transport system permease protein LacF"  
"NT-P19\_00704" 23442 "s59E13H2" 0 "Lactose-binding protein precursor"  
"NT-P19\_00704" 23442 "s59E25H2" 0 "Lactose-binding protein precursor"  
"NT-P19\_00704" 23442 "s59E5H2" 0 "Lactose-binding protein precursor"  
"NT-P19\_00704" 23442 "s63E6H2" 0 "Lactose-binding protein precursor"  
"NT-P19\_00705" 23443 "s59E13H2" 0 "HTH-type transcriptional regulator DegA"  
"NT-P19\_00705" 23443 "s59E25H2" 0 "HTH-type transcriptional regulator DegA"  
"NT-P19\_00705" 23443 "s59E5H2" 0.008976244 "HTH-type transcriptional regulator DegA"  
"NT-P19\_00705" 23443 "s63E6H2" 0 "HTH-type transcriptional regulator DegA"  
"NT-P19\_00706" 23444 "s59E13H2" 0 "Aspartate--tRNA ligase"  
"NT-P19\_00706" 23444 "s59E25H2" 0 "Aspartate--tRNA ligase"  
"NT-P19\_00706" 23444 "s59E5H2" 0 "Aspartate--tRNA ligase"  
"NT-P19\_00706" 23444 "s63E6H2" 0 "Aspartate--tRNA ligase"  
"NT-P19\_00707" 23445 "s59E13H2" 0 "Histidine--tRNA ligase"  
"NT-P19\_00707" 23445 "s59E25H2" 0 "Histidine--tRNA ligase"  
"NT-P19\_00707" 23445 "s59E5H2" 0 "Histidine--tRNA ligase"  
"NT-P19\_00707" 23445 "s63E6H2" 0 "Histidine--tRNA ligase"  
"NT-P19\_00708" 23446 "s59E13H2" 0 "putative aminodeoxychorismate lyase"  
"NT-P19\_00708" 23446 "s59E25H2" 0 "putative aminodeoxychorismate lyase"  
"NT-P19\_00708" 23446 "s59E5H2" 0.007884654 "putative aminodeoxychorismate lyase"  
"NT-P19\_00708" 23446 "s63E6H2" 0 "putative aminodeoxychorismate lyase"  
"NT-P19\_00709" 23447 "s59E13H2" 0 "Putative Holliday junction resolvase"  
"NT-P19\_00709" 23447 "s59E25H2" 0 "Putative Holliday junction resolvase"  
"NT-P19\_00709" 23447 "s59E5H2" 0.01968568 "Putative Holliday junction resolvase"  
"NT-P19\_00709" 23447 "s63E6H2" 0 "Putative Holliday junction resolvase"  
"NT-P19\_00710" 23448 "s59E13H2" 0 "Putative zinc ribbon domain protein"  
"NT-P19\_00710" 23448 "s59E25H2" 0 "Putative zinc ribbon domain protein"  
"NT-P19\_00710" 23448 "s59E5H2" 0.007970769 "Putative zinc ribbon domain protein"  
"NT-P19\_00710" 23448 "s63E6H2" 0 "Putative zinc ribbon domain protein"  
"NT-P19\_00714" 23452 "s59E13H2" 0 "Regulatory protein RecX"  
"NT-P19\_00714" 23452 "s59E25H2" 0 "Regulatory protein RecX"  
"NT-P19\_00714" 23452 "s59E5H2" 0 "Regulatory protein RecX"  
"NT-P19\_00714" 23452 "s63E6H2" 0 "Regulatory protein RecX"  
"NT-P19\_00715" 23453 "s59E13H2" 0 "putative phosphoglucosamine mutase"  
"NT-P19\_00715" 23453 "s59E25H2" 0 "putative phosphoglucosamine mutase"  
"NT-P19\_00715" 23453 "s59E5H2" 0.005886403 "putative phosphoglucosamine mutase"

"NT-P19\_00715" 23453 "s63E6H2" 0 "putative phosphoglucosamine mutase"  
"NT-P19\_00716" 23454 "s59E13H2" 0 "Ribonuclease 3"  
"NT-P19\_00716" 23454 "s59E25H2" 0 "Ribonuclease 3"  
"NT-P19\_00716" 23454 "s59E5H2" 0 "Ribonuclease 3"  
"NT-P19\_00716" 23454 "s63E6H2" 0 "Ribonuclease 3"  
"NT-P19\_00717" 23455 "s59E13H2" 0 "3-oxoacyl-[acyl-carrier-protein] synthase 2"  
"NT-P19\_00717" 23455 "s59E25H2" 0 "3-oxoacyl-[acyl-carrier-protein] synthase 2"  
"NT-P19\_00717" 23455 "s59E5H2" 0 "3-oxoacyl-[acyl-carrier-protein] synthase 2"  
"NT-P19\_00717" 23455 "s63E6H2" 0 "3-oxoacyl-[acyl-carrier-protein] synthase 2"  
"NT-P19\_00718" 23456 "s59E13H2" 0 "Acyl carrier protein"  
"NT-P19\_00718" 23456 "s59E25H2" 0 "Acyl carrier protein"  
"NT-P19\_00718" 23456 "s59E5H2" 0.02669789 "Acyl carrier protein"  
"NT-P19\_00718" 23456 "s63E6H2" 0 "Acyl carrier protein"  
"NT-P19\_00719" 23457 "s59E13H2" 0 "3-oxoacyl-[acyl-carrier-protein] reductase FabG"  
"NT-P19\_00719" 23457 "s59E25H2" 0 "3-oxoacyl-[acyl-carrier-protein] reductase FabG"  
"NT-P19\_00719" 23457 "s59E5H2" 0 "3-oxoacyl-[acyl-carrier-protein] reductase FabG"  
"NT-P19\_00719" 23457 "s63E6H2" 0 "3-oxoacyl-[acyl-carrier-protein] reductase FabG"  
"NT-P19\_00720" 23458 "s59E13H2" 0 "Ribosomal large subunit pseudouridine synthase D"  
"NT-P19\_00720" 23458 "s59E25H2" 0 "Ribosomal large subunit pseudouridine synthase D"  
"NT-P19\_00720" 23458 "s59E5H2" 0 "Ribosomal large subunit pseudouridine synthase D"  
"NT-P19\_00720" 23458 "s63E6H2" 0 "Ribosomal large subunit pseudouridine synthase D"  
"NT-P19\_00721" 23459 "s59E13H2" 0 "Lipoprotein signal peptidase"  
"NT-P19\_00721" 23459 "s59E25H2" 0 "Lipoprotein signal peptidase"  
"NT-P19\_00721" 23459 "s59E5H2" 0 "Lipoprotein signal peptidase"  
"NT-P19\_00721" 23459 "s63E6H2" 0 "Lipoprotein signal peptidase"  
"NT-P19\_00722" 23460 "s59E13H2" 0 "putative sugar kinase YdjH"  
"NT-P19\_00722" 23460 "s59E25H2" 0 "putative sugar kinase YdjH"  
"NT-P19\_00722" 23460 "s59E5H2" 0 "putative sugar kinase YdjH"  
"NT-P19\_00722" 23460 "s63E6H2" 0 "putative sugar kinase YdjH"  
"NT-P19\_00723" 23461 "s59E13H2" 0 "Isoleucine--tRNA ligase"  
"NT-P19\_00723" 23461 "s59E25H2" 0 "Isoleucine--tRNA ligase"  
"NT-P19\_00723" 23461 "s59E5H2" 0 "Isoleucine--tRNA ligase"  
"NT-P19\_00723" 23461 "s63E6H2" 0.001543204 "Isoleucine--tRNA ligase"  
"NT-P19\_00724" 23462 "s59E13H2" 0 "Purine nucleoside phosphorylase 1"  
"NT-P19\_00724" 23462 "s59E25H2" 0 "Purine nucleoside phosphorylase 1"  
"NT-P19\_00724" 23462 "s59E5H2" 0 "Purine nucleoside phosphorylase 1"  
"NT-P19\_00724" 23462 "s63E6H2" 0 "Purine nucleoside phosphorylase 1"  
"NT-P19\_00725" 23463 "s59E13H2" 0 "50S ribosomal protein L13"  
"NT-P19\_00725" 23463 "s59E25H2" 0 "50S ribosomal protein L13"  
"NT-P19\_00725" 23463 "s59E5H2" 0 "50S ribosomal protein L13"  
"NT-P19\_00725" 23463 "s63E6H2" 0 "50S ribosomal protein L13"  
"NT-P19\_00728" 23466 "s59E13H2" 0 "Glutamate--tRNA ligase 2"  
"NT-P19\_00728" 23466 "s59E25H2" 0 "Glutamate--tRNA ligase 2"  
"NT-P19\_00728" 23466 "s59E5H2" 0 "Glutamate--tRNA ligase 2"  
"NT-P19\_00728" 23466 "s63E6H2" 0.003715121 "Glutamate--tRNA ligase 2"  
"NT-P19\_00729" 23467 "s59E13H2" 0 "mannitol-1-phosphate 5-dehydrogenase"  
"NT-P19\_00729" 23467 "s59E25H2" 0 "mannitol-1-phosphate 5-dehydrogenase"

"NT-P19\_00729" 23467 "s59E5H2" 0.0201518 "mannitol-1-phosphate 5-dehydrogenase"  
"NT-P19\_00729" 23467 "s63E6H2" 0.6100118 "mannitol-1-phosphate 5-dehydrogenase"  
"NT-P19\_00730" 23468 "s59E13H2" 0 "Xylose isomerase"  
"NT-P19\_00730" 23468 "s59E25H2" 0 "Xylose isomerase"  
"NT-P19\_00730" 23468 "s59E5H2" 0.007190804 "Xylose isomerase"  
"NT-P19\_00730" 23468 "s63E6H2" 0.9941124 "Xylose isomerase"  
"NT-P19\_00731" 23469 "s59E13H2" 0 "LOG family protein YgdH"  
"NT-P19\_00731" 23469 "s59E25H2" 0 "LOG family protein YgdH"  
"NT-P19\_00731" 23469 "s59E5H2" 0 "LOG family protein YgdH"  
"NT-P19\_00731" 23469 "s63E6H2" 0.8852431 "LOG family protein YgdH"  
"NT-P19\_00732" 23470 "s59E13H2" 0 "Vitamin B12 dependent methionine synthase, activation domain"  
"NT-P19\_00732" 23470 "s59E25H2" 0 "Vitamin B12 dependent methionine synthase, activation domain"  
"NT-P19\_00732" 23470 "s59E5H2" 0 "Vitamin B12 dependent methionine synthase, activation domain"  
"NT-P19\_00732" 23470 "s63E6H2" 0.1825203 "Vitamin B12 dependent methionine synthase, activation domain"  
"NT-P19\_00733" 23471 "s59E13H2" 0 "hypothetical protein"  
"NT-P19\_00733" 23471 "s59E25H2" 0 "hypothetical protein"  
"NT-P19\_00733" 23471 "s59E5H2" 0.01332251 "hypothetical protein"  
"NT-P19\_00733" 23471 "s63E6H2" 0.1836962 "hypothetical protein"  
"NT-P19\_00734" 23472 "s59E13H2" 0 "hypothetical protein"  
"NT-P19\_00734" 23472 "s59E25H2" 0 "hypothetical protein"  
"NT-P19\_00734" 23472 "s59E5H2" 0 "hypothetical protein"  
"NT-P19\_00734" 23472 "s63E6H2" 0.1058706 "hypothetical protein"  
"NT-P19\_00735" 23473 "s59E13H2" 0 "Inner membrane transport protein YdhC"  
"NT-P19\_00735" 23473 "s59E25H2" 0 "Inner membrane transport protein YdhC"  
"NT-P19\_00735" 23473 "s59E5H2" 0 "Inner membrane transport protein YdhC"  
"NT-P19\_00735" 23473 "s63E6H2" 0.1040532 "Inner membrane transport protein YdhC"  
"NT-P19\_00736" 23474 "s59E13H2" 0 "PAP2 superfamily protein"  
"NT-P19\_00736" 23474 "s59E25H2" 0 "PAP2 superfamily protein"  
"NT-P19\_00736" 23474 "s59E5H2" 0 "PAP2 superfamily protein"  
"NT-P19\_00736" 23474 "s63E6H2" 0.07596514 "PAP2 superfamily protein"  
"NT-P19\_00737" 23475 "s59E13H2" 0 "Glycerol-3-phosphate regulon repressor"  
"NT-P19\_00737" 23475 "s59E25H2" 0 "Glycerol-3-phosphate regulon repressor"  
"NT-P19\_00737" 23475 "s59E5H2" 0 "Glycerol-3-phosphate regulon repressor"  
"NT-P19\_00737" 23475 "s63E6H2" 0.004489785 "Glycerol-3-phosphate regulon repressor"  
"NT-P19\_00738" 23476 "s59E13H2" 0 "Bacterial extracellular solute-binding protein"  
"NT-P19\_00738" 23476 "s59E25H2" 0 "Bacterial extracellular solute-binding protein"  
"NT-P19\_00738" 23476 "s59E5H2" 0 "Bacterial extracellular solute-binding protein"  
"NT-P19\_00738" 23476 "s63E6H2" 0.003589946 "Bacterial extracellular solute-binding protein"  
"NT-P19\_00739" 23477 "s59E13H2" 0 "Lactose transport system permease protein LacF"  
"NT-P19\_00739" 23477 "s59E25H2" 0 "Lactose transport system permease protein LacF"  
"NT-P19\_00739" 23477 "s59E5H2" 0 "Lactose transport system permease protein LacF"  
"NT-P19\_00739" 23477 "s63E6H2" 0.002544819 "Lactose transport system permease protein LacF"  
"NT-P19\_00740" 23478 "s59E13H2" 0 "L-arabinose transport system permease protein AraQ"  
"NT-P19\_00740" 23478 "s59E25H2" 0 "L-arabinose transport system permease protein AraQ"  
"NT-P19\_00740" 23478 "s59E5H2" 0 "L-arabinose transport system permease protein AraQ"  
"NT-P19\_00740" 23478 "s63E6H2" 0.0007420729 "L-arabinose transport system permease protein AraQ"  
"NT-P19\_00741" 23479 "s59E13H2" 0 "hypothetical protein"

"NT-P19\_00741" 23479 "s59E25H2" 0 "hypothetical protein"  
"NT-P19\_00741" 23479 "s59E5H2" 0 "hypothetical protein"  
"NT-P19\_00741" 23479 "s63E6H2" 0 "hypothetical protein"  
"NT-P19\_00742" 23480 "s59E13H2" 0 "Intracellular protease 1"  
"NT-P19\_00742" 23480 "s59E25H2" 0 "Intracellular protease 1"  
"NT-P19\_00742" 23480 "s59E5H2" 0.2697777 "Intracellular protease 1"  
"NT-P19\_00742" 23480 "s63E6H2" 0.004710927 "Intracellular protease 1"  
"NT-P19\_00743" 23481 "s59E13H2" 0 "Maltotriose-binding protein precursor"  
"NT-P19\_00743" 23481 "s59E25H2" 0 "Maltotriose-binding protein precursor"  
"NT-P19\_00743" 23481 "s59E5H2" 0 "Maltotriose-binding protein precursor"  
"NT-P19\_00743" 23481 "s63E6H2" 0.001131462 "Maltotriose-binding protein precursor"  
"NT-P19\_00744" 23482 "s59E13H2" 0 "Trehalose/maltose transport system permease protein MalF"  
"NT-P19\_00744" 23482 "s59E25H2" 0 "Trehalose/maltose transport system permease protein MalF"  
"NT-P19\_00744" 23482 "s59E5H2" 0 "Trehalose/maltose transport system permease protein MalF"  
"NT-P19\_00744" 23482 "s63E6H2" 0 "Trehalose/maltose transport system permease protein MalF"  
"NT-P19\_00745" 23483 "s59E13H2" 0 "L-arabinose transport system permease protein AraQ"  
"NT-P19\_00745" 23483 "s59E25H2" 0 "L-arabinose transport system permease protein AraQ"  
"NT-P19\_00745" 23483 "s59E5H2" 0 "L-arabinose transport system permease protein AraQ"  
"NT-P19\_00745" 23483 "s63E6H2" 0 "L-arabinose transport system permease protein AraQ"  
"NT-P19\_00746" 23484 "s59E13H2" 0 "Methylated-thiol--coenzyme M methyltransferase"  
"NT-P19\_00746" 23484 "s59E25H2" 0 "Methylated-thiol--coenzyme M methyltransferase"  
"NT-P19\_00746" 23484 "s59E5H2" 0 "Methylated-thiol--coenzyme M methyltransferase"  
"NT-P19\_00746" 23484 "s63E6H2" 0 "Methylated-thiol--coenzyme M methyltransferase"  
"NT-P19\_00747" 23485 "s59E13H2" 0 "putative L-threonine 3-dehydrogenase"  
"NT-P19\_00747" 23485 "s59E25H2" 0 "putative L-threonine 3-dehydrogenase"  
"NT-P19\_00747" 23485 "s59E5H2" 0 "putative L-threonine 3-dehydrogenase"  
"NT-P19\_00747" 23485 "s63E6H2" 0 "putative L-threonine 3-dehydrogenase"  
"NT-P19\_00748" 23486 "s59E13H2" 0 "2-dehydro-3-deoxy-D-gluconate 5-dehydrogenase"  
"NT-P19\_00748" 23486 "s59E25H2" 0 "2-dehydro-3-deoxy-D-gluconate 5-dehydrogenase"  
"NT-P19\_00748" 23486 "s59E5H2" 0 "2-dehydro-3-deoxy-D-gluconate 5-dehydrogenase"  
"NT-P19\_00748" 23486 "s63E6H2" 0 "2-dehydro-3-deoxy-D-gluconate 5-dehydrogenase"  
"NT-P19\_00749" 23487 "s59E13H2" 0 "5-deoxy-glucuronate isomerase"  
"NT-P19\_00749" 23487 "s59E25H2" 0 "5-deoxy-glucuronate isomerase"  
"NT-P19\_00749" 23487 "s59E5H2" 0 "5-deoxy-glucuronate isomerase"  
"NT-P19\_00749" 23487 "s63E6H2" 0 "5-deoxy-glucuronate isomerase"  
"NT-P19\_00751" 23489 "s59E13H2" 0 "Trehalose/maltose-binding protein MalE precursor"  
"NT-P19\_00751" 23489 "s59E25H2" 0 "Trehalose/maltose-binding protein MalE precursor"  
"NT-P19\_00751" 23489 "s59E5H2" 0.005968319 "Trehalose/maltose-binding protein MalE precursor"  
"NT-P19\_00751" 23489 "s63E6H2" 0.0007069989 "Trehalose/maltose-binding protein MalE precursor"  
"NT-P19\_00752" 23490 "s59E13H2" 0 "Trehalose transport system permease protein SugA"  
"NT-P19\_00752" 23490 "s59E25H2" 0 "Trehalose transport system permease protein SugA"  
"NT-P19\_00752" 23490 "s59E5H2" 0 "Trehalose transport system permease protein SugA"  
"NT-P19\_00752" 23490 "s63E6H2" 0 "Trehalose transport system permease protein SugA"  
"NT-P19\_00753" 23491 "s59E13H2" 0 "Trehalose/maltose transport system permease protein MalG"  
"NT-P19\_00753" 23491 "s59E25H2" 0 "Trehalose/maltose transport system permease protein MalG"  
"NT-P19\_00753" 23491 "s59E5H2" 0 "Trehalose/maltose transport system permease protein MalG"  
"NT-P19\_00753" 23491 "s63E6H2" 0.003571765 "Trehalose/maltose transport system permease protein MalG"

"NT-P19\_00754" 23492 "s59E13H2" 0 "3-oxoacyl-[acyl-carrier-protein] reductase FabG"  
"NT-P19\_00754" 23492 "s59E25H2" 0 "3-oxoacyl-[acyl-carrier-protein] reductase FabG"  
"NT-P19\_00754" 23492 "s59E5H2" 0 "3-oxoacyl-[acyl-carrier-protein] reductase FabG"  
"NT-P19\_00754" 23492 "s63E6H2" 0 "3-oxoacyl-[acyl-carrier-protein] reductase FabG"  
"NT-P19\_00755" 23493 "s59E13H2" 0 "2-keto-3-deoxy-L-fuconate dehydrogenase"  
"NT-P19\_00755" 23493 "s59E25H2" 0 "2-keto-3-deoxy-L-fuconate dehydrogenase"  
"NT-P19\_00755" 23493 "s59E5H2" 0 "2-keto-3-deoxy-L-fuconate dehydrogenase"  
"NT-P19\_00755" 23493 "s63E6H2" 0 "2-keto-3-deoxy-L-fuconate dehydrogenase"  
"NT-P19\_00756" 23494 "s59E13H2" 0 "Glycerol kinase"  
"NT-P19\_00756" 23494 "s59E25H2" 0 "Glycerol kinase"  
"NT-P19\_00756" 23494 "s59E5H2" 0 "Glycerol kinase"  
"NT-P19\_00756" 23494 "s63E6H2" 0 "Glycerol kinase"  
"NT-P19\_00757" 23495 "s59E13H2" 0 "2-dehydro-3-deoxy-D-gluconate 5-dehydrogenase"  
"NT-P19\_00757" 23495 "s59E25H2" 0 "2-dehydro-3-deoxy-D-gluconate 5-dehydrogenase"  
"NT-P19\_00757" 23495 "s59E5H2" 0 "2-dehydro-3-deoxy-D-gluconate 5-dehydrogenase"  
"NT-P19\_00757" 23495 "s63E6H2" 0 "2-dehydro-3-deoxy-D-gluconate 5-dehydrogenase"  
"NT-P19\_00758" 23496 "s59E13H2" 0 "Alcohol dehydrogenase"  
"NT-P19\_00758" 23496 "s59E25H2" 0 "Alcohol dehydrogenase"  
"NT-P19\_00758" 23496 "s59E5H2" 0 "Alcohol dehydrogenase"  
"NT-P19\_00758" 23496 "s63E6H2" 0.002557574 "Alcohol dehydrogenase"  
"NT-P19\_00759" 23497 "s59E13H2" 0 "hypothetical protein"  
"NT-P19\_00759" 23497 "s59E25H2" 0 "hypothetical protein"  
"NT-P19\_00759" 23497 "s59E5H2" 0.007539588 "hypothetical protein"  
"NT-P19\_00759" 23497 "s63E6H2" 0.001158827 "hypothetical protein"  
"NT-P19\_00760" 23498 "s59E13H2" 0 "Ribose transport system permease protein RbsC"  
"NT-P19\_00760" 23498 "s59E25H2" 0 "Ribose transport system permease protein RbsC"  
"NT-P19\_00760" 23498 "s59E5H2" 0 "Ribose transport system permease protein RbsC"  
"NT-P19\_00760" 23498 "s63E6H2" 0.0006198491 "Ribose transport system permease protein RbsC"  
"NT-P19\_00761" 23499 "s59E13H2" 0 "Ribose transport system permease protein RbsC"  
"NT-P19\_00761" 23499 "s59E25H2" 0 "Ribose transport system permease protein RbsC"  
"NT-P19\_00761" 23499 "s59E5H2" 0.008339369 "Ribose transport system permease protein RbsC"  
"NT-P19\_00761" 23499 "s63E6H2" 0.003108443 "Ribose transport system permease protein RbsC"  
"NT-P19\_00762" 23500 "s59E13H2" 0 "Xylose import ATP-binding protein XylG"  
"NT-P19\_00762" 23500 "s59E25H2" 0 "Xylose import ATP-binding protein XylG"  
"NT-P19\_00762" 23500 "s59E5H2" 0 "Xylose import ATP-binding protein XylG"  
"NT-P19\_00762" 23500 "s63E6H2" 0.04493767 "Xylose import ATP-binding protein XylG"  
"NT-P19\_00763" 23501 "s59E13H2" 0 "methylcobalamin:coenzyme M methyltransferase"  
"NT-P19\_00763" 23501 "s59E25H2" 0 "methylcobalamin:coenzyme M methyltransferase"  
"NT-P19\_00763" 23501 "s59E5H2" 0.006369973 "methylcobalamin:coenzyme M methyltransferase"  
"NT-P19\_00763" 23501 "s63E6H2" 0 "methylcobalamin:coenzyme M methyltransferase"  
"NT-P19\_00764" 23502 "s59E13H2" 0 "Alpha/beta hydrolase family protein"  
"NT-P19\_00764" 23502 "s59E25H2" 0 "Alpha/beta hydrolase family protein"  
"NT-P19\_00764" 23502 "s59E5H2" 0 "Alpha/beta hydrolase family protein"  
"NT-P19\_00764" 23502 "s63E6H2" 0.00318439 "Alpha/beta hydrolase family protein"  
"NT-P19\_00765" 23503 "s59E13H2" 0 "putative amino acid permease YhdG"  
"NT-P19\_00765" 23503 "s59E25H2" 0 "putative amino acid permease YhdG"  
"NT-P19\_00765" 23503 "s59E5H2" 0 "putative amino acid permease YhdG"



"NT-P19\_00765" 23503 "s63E6H2" 0.001171782 "putative amino acid permease YhdG"  
"NT-P19\_00766" 23504 "s59E13H2" 0 "hypothetical protein"  
"NT-P19\_00766" 23504 "s59E25H2" 0 "hypothetical protein"  
"NT-P19\_00766" 23504 "s59E5H2" 0 "hypothetical protein"  
"NT-P19\_00766" 23504 "s63E6H2" 0 "hypothetical protein"  
"NT-P19\_00767" 23505 "s59E13H2" 0 "2-dehydro-3-deoxy-D-gluconate 5-dehydrogenase"  
"NT-P19\_00767" 23505 "s59E25H2" 0 "2-dehydro-3-deoxy-D-gluconate 5-dehydrogenase"  
"NT-P19\_00767" 23505 "s59E5H2" 0 "2-dehydro-3-deoxy-D-gluconate 5-dehydrogenase"  
"NT-P19\_00767" 23505 "s63E6H2" 0 "2-dehydro-3-deoxy-D-gluconate 5-dehydrogenase"  
"NT-P19\_00772" 23510 "s59E13H2" 0 "GDP-mannose mannosyl hydrolase"  
"NT-P19\_00772" 23510 "s59E25H2" 0 "GDP-mannose mannosyl hydrolase"  
"NT-P19\_00772" 23510 "s59E5H2" 0 "GDP-mannose mannosyl hydrolase"  
"NT-P19\_00772" 23510 "s63E6H2" 0 "GDP-mannose mannosyl hydrolase"  
"NT-P19\_00773" 23511 "s59E13H2" 0.006810078 "Transposase IS116/IS110/IS902 family protein"  
"NT-P19\_00773" 23511 "s59E25H2" 0 "Transposase IS116/IS110/IS902 family protein"  
"NT-P19\_00773" 23511 "s59E5H2" 0.06838547 "Transposase IS116/IS110/IS902 family protein"  
"NT-P19\_00773" 23511 "s63E6H2" 0.9960623 "Transposase IS116/IS110/IS902 family protein"  
"NT-P19\_00775" 23513 "s59E13H2" 0 "hypothetical protein"  
"NT-P19\_00775" 23513 "s59E25H2" 0 "hypothetical protein"  
"NT-P19\_00775" 23513 "s59E5H2" 0.008671392 "hypothetical protein"  
"NT-P19\_00775" 23513 "s63E6H2" 0.00442987 "hypothetical protein"  
"NT-P19\_00776" 23514 "s59E13H2" 0 "Sensor protein EvgS precursor"  
"NT-P19\_00776" 23514 "s59E25H2" 0 "Sensor protein EvgS precursor"  
"NT-P19\_00776" 23514 "s59E5H2" 0 "Sensor protein EvgS precursor"  
"NT-P19\_00776" 23514 "s63E6H2" 0 "Sensor protein EvgS precursor"  
"NT-P19\_00777" 23515 "s59E13H2" 0 "Transcriptional regulatory protein BasR"  
"NT-P19\_00777" 23515 "s59E25H2" 0 "Transcriptional regulatory protein BasR"  
"NT-P19\_00777" 23515 "s59E5H2" 0 "Transcriptional regulatory protein BasR"  
"NT-P19\_00777" 23515 "s63E6H2" 0 "Transcriptional regulatory protein BasR"  
"NT-P19\_00779" 23517 "s59E13H2" 0 "DNA polymerase III subunit alpha"  
"NT-P19\_00779" 23517 "s59E25H2" 0 "DNA polymerase III subunit alpha"  
"NT-P19\_00779" 23517 "s59E5H2" 0 "DNA polymerase III subunit alpha"  
"NT-P19\_00779" 23517 "s63E6H2" 0 "DNA polymerase III subunit alpha"  
"NT-P19\_00780" 23518 "s59E13H2" 0 "putative sugar kinase YdjH"  
"NT-P19\_00780" 23518 "s59E25H2" 0 "putative sugar kinase YdjH"  
"NT-P19\_00780" 23518 "s59E5H2" 0 "putative sugar kinase YdjH"  
"NT-P19\_00780" 23518 "s63E6H2" 0.006134556 "putative sugar kinase YdjH"  
"NT-P19\_00781" 23519 "s59E13H2" 0 "putative L-threonine 3-dehydrogenase"  
"NT-P19\_00781" 23519 "s59E25H2" 0 "putative L-threonine 3-dehydrogenase"  
"NT-P19\_00781" 23519 "s59E5H2" 0.001074553 "putative L-threonine 3-dehydrogenase"  
"NT-P19\_00781" 23519 "s63E6H2" 0.004111258 "putative L-threonine 3-dehydrogenase"  
"NT-P19\_00782" 23520 "s59E13H2" 0 "hypothetical protein"  
"NT-P19\_00782" 23520 "s59E25H2" 0 "hypothetical protein"  
"NT-P19\_00782" 23520 "s59E5H2" 0.0004503259 "hypothetical protein"  
"NT-P19\_00782" 23520 "s63E6H2" 0.002786341 "hypothetical protein"  
"NT-P19\_00783" 23521 "s59E13H2" 0 "hypothetical protein"  
"NT-P19\_00783" 23521 "s59E25H2" 0 "hypothetical protein"

"NT-P19\_00783" 23521 "s59E5H2" 0 "hypothetical protein"  
"NT-P19\_00783" 23521 "s63E6H2" 0.00568453 "hypothetical protein"  
"NT-P19\_00784" 23522 "s59E13H2" 0 "Outer membrane protein assembly factor BamD precursor"  
"NT-P19\_00784" 23522 "s59E25H2" 0 "Outer membrane protein assembly factor BamD precursor"  
"NT-P19\_00784" 23522 "s59E5H2" 0 "Outer membrane protein assembly factor BamD precursor"  
"NT-P19\_00784" 23522 "s63E6H2" 0.004457267 "Outer membrane protein assembly factor BamD precursor"  
"NT-P19\_00785" 23523 "s59E13H2" 0 "Low specificity L-threonine aldolase"  
"NT-P19\_00785" 23523 "s59E25H2" 0 "Low specificity L-threonine aldolase"  
"NT-P19\_00785" 23523 "s59E5H2" 0 "Low specificity L-threonine aldolase"  
"NT-P19\_00785" 23523 "s63E6H2" 0.007386494 "Low specificity L-threonine aldolase"  
"NT-P19\_00786" 23524 "s59E13H2" 0.0008013168 "DNA polymerase III subunit alpha"  
"NT-P19\_00786" 23524 "s59E25H2" 0 "DNA polymerase III subunit alpha"  
"NT-P19\_00786" 23524 "s59E5H2" 0 "DNA polymerase III subunit alpha"  
"NT-P19\_00786" 23524 "s63E6H2" 0.004232394 "DNA polymerase III subunit alpha"  
"NT-P19\_00787" 23525 "s59E13H2" 0 "hypothetical protein"  
"NT-P19\_00787" 23525 "s59E25H2" 0 "hypothetical protein"  
"NT-P19\_00787" 23525 "s59E5H2" 0 "hypothetical protein"  
"NT-P19\_00787" 23525 "s63E6H2" 0.6811075 "hypothetical protein"  
"NT-P19\_00788" 23526 "s59E13H2" 0 "Flavodoxin"  
"NT-P19\_00788" 23526 "s59E25H2" 0 "Flavodoxin"  
"NT-P19\_00788" 23526 "s59E5H2" 0 "Flavodoxin"  
"NT-P19\_00788" 23526 "s63E6H2" 0.01294854 "Flavodoxin"  
"NT-P19\_00789" 23527 "s59E13H2" 0 "sugar phosphate antiporter"  
"NT-P19\_00789" 23527 "s59E25H2" 0 "sugar phosphate antiporter"  
"NT-P19\_00789" 23527 "s59E5H2" 0 "sugar phosphate antiporter"  
"NT-P19\_00789" 23527 "s63E6H2" 0.008627329 "sugar phosphate antiporter"  
"NT-P19\_00790" 23528 "s59E13H2" 0 "Inosose dehydratase"  
"NT-P19\_00790" 23528 "s59E25H2" 0 "Inosose dehydratase"  
"NT-P19\_00790" 23528 "s59E5H2" 0 "Inosose dehydratase"  
"NT-P19\_00790" 23528 "s63E6H2" 0.003102577 "Inosose dehydratase"  
"NT-P19\_00791" 23529 "s59E13H2" 0 "Lipoyl synthase"  
"NT-P19\_00791" 23529 "s59E25H2" 0 "Lipoyl synthase"  
"NT-P19\_00791" 23529 "s59E5H2" 0 "Lipoyl synthase"  
"NT-P19\_00791" 23529 "s63E6H2" 0 "Lipoyl synthase"  
"NT-P19\_00792" 23530 "s59E13H2" 0 "D-aminopeptidase"  
"NT-P19\_00792" 23530 "s59E25H2" 0 "D-aminopeptidase"  
"NT-P19\_00792" 23530 "s59E5H2" 0 "D-aminopeptidase"  
"NT-P19\_00792" 23530 "s63E6H2" 0 "D-aminopeptidase"  
"NT-P19\_00793" 23531 "s59E13H2" 0 "PTS-dependent dihydroxyacetone kinase, dihydroxyacetone-binding subunit DhaK"  
"NT-P19\_00793" 23531 "s59E25H2" 0 "PTS-dependent dihydroxyacetone kinase, dihydroxyacetone-binding subunit DhaK"  
"NT-P19\_00793" 23531 "s59E5H2" 0.02525567 "PTS-dependent dihydroxyacetone kinase, dihydroxyacetone-binding subunit DhaK"  
"NT-P19\_00793" 23531 "s63E6H2" 0.001509299 "PTS-dependent dihydroxyacetone kinase, dihydroxyacetone-binding subunit DhaK"  
"NT-P19\_00794" 23532 "s59E13H2" 0 "Ribose-5-phosphate isomerase B"  
"NT-P19\_00794" 23532 "s59E25H2" 0 "Ribose-5-phosphate isomerase B"  
"NT-P19\_00794" 23532 "s59E5H2" 0 "Ribose-5-phosphate isomerase B"  
"NT-P19\_00794" 23532 "s63E6H2" 0 "Ribose-5-phosphate isomerase B"  
"NT-P19\_00795" 23533 "s59E13H2" 0 "PTS-dependent dihydroxyacetone kinase, ADP-binding subunit DhaL"

"NT-P19\_00795" 23533 "s59E25H2" 0 "PTS-dependent dihydroxyacetone kinase, ADP-binding subunit DhaL"  
"NT-P19\_00795" 23533 "s59E5H2" 0.01755075 "PTS-dependent dihydroxyacetone kinase, ADP-binding subunit DhaL"  
"NT-P19\_00795" 23533 "s63E6H2" 0.004483252 "PTS-dependent dihydroxyacetone kinase, ADP-binding subunit DhaL"  
"NT-P19\_00796" 23534 "s59E13H2" 0 "Heterodisulfide reductase subunit A-like protein"  
"NT-P19\_00796" 23534 "s59E25H2" 0 "Heterodisulfide reductase subunit A-like protein"  
"NT-P19\_00796" 23534 "s59E5H2" 0.04076774 "Heterodisulfide reductase subunit A-like protein"  
"NT-P19\_00796" 23534 "s63E6H2" 0.006988203 "Heterodisulfide reductase subunit A-like protein"  
"NT-P19\_00797" 23535 "s59E13H2" 0 "hypothetical protein"  
"NT-P19\_00797" 23535 "s59E25H2" 0 "hypothetical protein"  
"NT-P19\_00797" 23535 "s59E5H2" 0.05611955 "hypothetical protein"  
"NT-P19\_00797" 23535 "s63E6H2" 0.007330475 "hypothetical protein"  
"NT-P19\_00798" 23536 "s59E13H2" 0 "O-acetylserine sulfhydrylase"  
"NT-P19\_00798" 23536 "s59E25H2" 0 "O-acetylserine sulfhydrylase"  
"NT-P19\_00798" 23536 "s59E5H2" 0.01003583 "O-acetylserine sulfhydrylase"  
"NT-P19\_00798" 23536 "s63E6H2" 0.003289659 "O-acetylserine sulfhydrylase"  
"NT-P19\_00799" 23537 "s59E13H2" 0 "Cysteine desulfurase"  
"NT-P19\_00799" 23537 "s59E25H2" 0 "Cysteine desulfurase"  
"NT-P19\_00799" 23537 "s59E5H2" 0.004292567 "Cysteine desulfurase"  
"NT-P19\_00799" 23537 "s63E6H2" 0.004412304 "Cysteine desulfurase"  
"NT-P19\_00800" 23538 "s59E13H2" 0 "HTH-type transcriptional regulator IscR"  
"NT-P19\_00800" 23538 "s59E25H2" 0 "HTH-type transcriptional regulator IscR"  
"NT-P19\_00800" 23538 "s59E5H2" 0 "HTH-type transcriptional regulator IscR"  
"NT-P19\_00800" 23538 "s63E6H2" 0.004263398 "HTH-type transcriptional regulator IscR"  
"NT-P19\_00801" 23539 "s59E13H2" 0 "Serine acetyltransferase"  
"NT-P19\_00801" 23539 "s59E25H2" 0 "Serine acetyltransferase"  
"NT-P19\_00801" 23539 "s59E5H2" 0 "Serine acetyltransferase"  
"NT-P19\_00801" 23539 "s63E6H2" 0.001548088 "Serine acetyltransferase"  
"NT-P19\_00802" 23540 "s59E13H2" 0 "Thiol:disulfide interchange protein DsbD precursor"  
"NT-P19\_00802" 23540 "s59E25H2" 0 "Thiol:disulfide interchange protein DsbD precursor"  
"NT-P19\_00802" 23540 "s59E5H2" 0 "Thiol:disulfide interchange protein DsbD precursor"  
"NT-P19\_00802" 23540 "s63E6H2" 0.001577958 "Thiol:disulfide interchange protein DsbD precursor"  
"NT-P19\_00803" 23541 "s59E13H2" 0 "Thiol-disulfide oxidoreductase ResA"  
"NT-P19\_00803" 23541 "s59E25H2" 0 "Thiol-disulfide oxidoreductase ResA"  
"NT-P19\_00803" 23541 "s59E5H2" 0.006190396 "Thiol-disulfide oxidoreductase ResA"  
"NT-P19\_00803" 23541 "s63E6H2" 0 "Thiol-disulfide oxidoreductase ResA"  
"NT-P19\_00804" 23542 "s59E13H2" 0 "hypothetical protein"  
"NT-P19\_00804" 23542 "s59E25H2" 0 "hypothetical protein"  
"NT-P19\_00804" 23542 "s59E5H2" 0 "hypothetical protein"  
"NT-P19\_00804" 23542 "s63E6H2" 0 "hypothetical protein"  
"NT-P19\_00805" 23543 "s59E13H2" 0 "Holliday junction ATP-dependent DNA helicase RuvB"  
"NT-P19\_00805" 23543 "s59E25H2" 0 "Holliday junction ATP-dependent DNA helicase RuvB"  
"NT-P19\_00805" 23543 "s59E5H2" 0 "Holliday junction ATP-dependent DNA helicase RuvB"  
"NT-P19\_00805" 23543 "s63E6H2" 0.008359762 "Holliday junction ATP-dependent DNA helicase RuvB"  
"NT-P19\_00806" 23544 "s59E13H2" 0 "Holliday junction ATP-dependent DNA helicase RuvA"  
"NT-P19\_00806" 23544 "s59E25H2" 0 "Holliday junction ATP-dependent DNA helicase RuvA"  
"NT-P19\_00806" 23544 "s59E5H2" 0 "Holliday junction ATP-dependent DNA helicase RuvA"  
"NT-P19\_00806" 23544 "s63E6H2" 0.009951786 "Holliday junction ATP-dependent DNA helicase RuvA"

"NT-P19\_00807" 23545 "s59E13H2" 0 "Ketoisovalerate oxidoreductase subunit VorC"  
"NT-P19\_00807" 23545 "s59E25H2" 0 "Ketoisovalerate oxidoreductase subunit VorC"  
"NT-P19\_00807" 23545 "s59E5H2" 0 "Ketoisovalerate oxidoreductase subunit VorC"  
"NT-P19\_00807" 23545 "s63E6H2" 0.007522774 "Ketoisovalerate oxidoreductase subunit VorC"  
"NT-P19\_00808" 23546 "s59E13H2" 0.002652018 "Alpha-galactosidase"  
"NT-P19\_00808" 23546 "s59E25H2" 0 "Alpha-galactosidase"  
"NT-P19\_00808" 23546 "s59E5H2" 0 "Alpha-galactosidase"  
"NT-P19\_00808" 23546 "s63E6H2" 4.388474 "Alpha-galactosidase"  
"NT-P19\_00809" 23547 "s59E13H2" 0 "hypothetical protein"  
"NT-P19\_00809" 23547 "s59E25H2" 0 "hypothetical protein"  
"NT-P19\_00809" 23547 "s59E5H2" 0 "hypothetical protein"  
"NT-P19\_00809" 23547 "s63E6H2" 0 "hypothetical protein"  
"NT-P19\_00810" 23548 "s59E13H2" 0 "methylcobalamin:coenzyme M methyltransferase"  
"NT-P19\_00810" 23548 "s59E25H2" 0 "methylcobalamin:coenzyme M methyltransferase"  
"NT-P19\_00810" 23548 "s59E5H2" 0 "methylcobalamin:coenzyme M methyltransferase"  
"NT-P19\_00810" 23548 "s63E6H2" 0 "methylcobalamin:coenzyme M methyltransferase"  
"NT-P19\_00811" 23549 "s59E13H2" 0 "L-arabinose isomerase"  
"NT-P19\_00811" 23549 "s59E25H2" 0 "L-arabinose isomerase"  
"NT-P19\_00811" 23549 "s59E5H2" 0 "L-arabinose isomerase"  
"NT-P19\_00811" 23549 "s63E6H2" 0 "L-arabinose isomerase"  
"NT-P19\_00812" 23550 "s59E13H2" 0 "Adenosylmethionine-8-amino-7-oxononanoate aminotransferase"  
"NT-P19\_00812" 23550 "s59E25H2" 0 "Adenosylmethionine-8-amino-7-oxononanoate aminotransferase"  
"NT-P19\_00812" 23550 "s59E5H2" 0 "Adenosylmethionine-8-amino-7-oxononanoate aminotransferase"  
"NT-P19\_00812" 23550 "s63E6H2" 0 "Adenosylmethionine-8-amino-7-oxononanoate aminotransferase"  
"NT-P19\_00813" 23551 "s59E13H2" 0 "Trimethylamine methyltransferase MttB"  
"NT-P19\_00813" 23551 "s59E25H2" 0 "Trimethylamine methyltransferase MttB"  
"NT-P19\_00813" 23551 "s59E5H2" 0 "Trimethylamine methyltransferase MttB"  
"NT-P19\_00813" 23551 "s63E6H2" 0 "Trimethylamine methyltransferase MttB"  
"NT-P19\_00814" 23552 "s59E13H2" 0 "alpha-mannosidase"  
"NT-P19\_00814" 23552 "s59E25H2" 0 "alpha-mannosidase"  
"NT-P19\_00814" 23552 "s59E5H2" 0 "alpha-mannosidase"  
"NT-P19\_00814" 23552 "s63E6H2" 0 "alpha-mannosidase"  
"NT-P19\_00815" 23553 "s59E13H2" 0 "methylcobalamin:coenzyme M methyltransferase"  
"NT-P19\_00815" 23553 "s59E25H2" 0 "methylcobalamin:coenzyme M methyltransferase"  
"NT-P19\_00815" 23553 "s59E5H2" 0 "methylcobalamin:coenzyme M methyltransferase"  
"NT-P19\_00815" 23553 "s63E6H2" 0 "methylcobalamin:coenzyme M methyltransferase"  
"NT-P19\_00817" 23555 "s59E13H2" 0 "Beta-galactosidase LacZ"  
"NT-P19\_00817" 23555 "s59E25H2" 0 "Beta-galactosidase LacZ"  
"NT-P19\_00817" 23555 "s59E5H2" 0 "Beta-galactosidase LacZ"  
"NT-P19\_00817" 23555 "s63E6H2" 0 "Beta-galactosidase LacZ"  
"NT-P19\_00818" 23556 "s59E13H2" 0 "hypothetical protein"  
"NT-P19\_00818" 23556 "s59E25H2" 0 "hypothetical protein"  
"NT-P19\_00818" 23556 "s59E5H2" 0 "hypothetical protein"  
"NT-P19\_00818" 23556 "s63E6H2" 0 "hypothetical protein"  
"NT-P19\_00819" 23557 "s59E13H2" 0 "5-deoxy-glucuronate isomerase"  
"NT-P19\_00819" 23557 "s59E25H2" 0 "5-deoxy-glucuronate isomerase"  
"NT-P19\_00819" 23557 "s59E5H2" 0 "5-deoxy-glucuronate isomerase"

"NT-P19\_00819" 23557 "s63E6H2" 0 "5-deoxy-glucuronate isomerase"  
"NT-P19\_00820" 23558 "s59E13H2" 0 "2-keto-3-deoxy-L-rhamnonate aldolase"  
"NT-P19\_00820" 23558 "s59E25H2" 0 "2-keto-3-deoxy-L-rhamnonate aldolase"  
"NT-P19\_00820" 23558 "s59E5H2" 0 "2-keto-3-deoxy-L-rhamnonate aldolase"  
"NT-P19\_00820" 23558 "s63E6H2" 0 "2-keto-3-deoxy-L-rhamnonate aldolase"  
"NT-P19\_00822" 23560 "s59E13H2" 0 "PBP superfamily domain protein"  
"NT-P19\_00822" 23560 "s59E25H2" 0 "PBP superfamily domain protein"  
"NT-P19\_00822" 23560 "s59E5H2" 0 "PBP superfamily domain protein"  
"NT-P19\_00822" 23560 "s63E6H2" 0.003619913 "PBP superfamily domain protein"  
"NT-P19\_00823" 23561 "s59E13H2" 0 "Sulfate transport system permease protein CysW"  
"NT-P19\_00823" 23561 "s59E25H2" 0 "Sulfate transport system permease protein CysW"  
"NT-P19\_00823" 23561 "s59E5H2" 0 "Sulfate transport system permease protein CysW"  
"NT-P19\_00823" 23561 "s63E6H2" 0.008856896 "Sulfate transport system permease protein CysW"  
"NT-P19\_00824" 23562 "s59E13H2" 0 "Sulfate/thiosulfate import ATP-binding protein CysA"  
"NT-P19\_00824" 23562 "s59E25H2" 0 "Sulfate/thiosulfate import ATP-binding protein CysA"  
"NT-P19\_00824" 23562 "s59E5H2" 0 "Sulfate/thiosulfate import ATP-binding protein CysA"  
"NT-P19\_00824" 23562 "s63E6H2" 0.006305675 "Sulfate/thiosulfate import ATP-binding protein CysA"  
"NT-P19\_00825" 23563 "s59E13H2" 0 "Acyl-coenzyme A thioesterase Paal"  
"NT-P19\_00825" 23563 "s59E25H2" 0 "Acyl-coenzyme A thioesterase Paal"  
"NT-P19\_00825" 23563 "s59E5H2" 0 "Acyl-coenzyme A thioesterase Paal"  
"NT-P19\_00825" 23563 "s63E6H2" 0.07675827 "Acyl-coenzyme A thioesterase Paal"  
"NT-P19\_00826" 23564 "s59E13H2" 0 "Molybdopterin molybdenumtransferase"  
"NT-P19\_00826" 23564 "s59E25H2" 0 "Molybdopterin molybdenumtransferase"  
"NT-P19\_00826" 23564 "s59E5H2" 0 "Molybdopterin molybdenumtransferase"  
"NT-P19\_00826" 23564 "s63E6H2" 0.09820623 "Molybdopterin molybdenumtransferase"  
"NT-P19\_00827" 23565 "s59E13H2" 0 "Cyclic pyranopterin monophosphate synthase 1"  
"NT-P19\_00827" 23565 "s59E25H2" 0 "Cyclic pyranopterin monophosphate synthase 1"  
"NT-P19\_00827" 23565 "s59E5H2" 0 "Cyclic pyranopterin monophosphate synthase 1"  
"NT-P19\_00827" 23565 "s63E6H2" 0.003219202 "Cyclic pyranopterin monophosphate synthase 1"  
"NT-P19\_00828" 23566 "s59E13H2" 0 "Cyclic pyranopterin monophosphate synthase accessory protein 2"  
"NT-P19\_00828" 23566 "s59E25H2" 0 "Cyclic pyranopterin monophosphate synthase accessory protein 2"  
"NT-P19\_00828" 23566 "s59E5H2" 0 "Cyclic pyranopterin monophosphate synthase accessory protein 2"  
"NT-P19\_00828" 23566 "s63E6H2" 0 "Cyclic pyranopterin monophosphate synthase accessory protein 2"  
"NT-P19\_00829" 23567 "s59E13H2" 0 "MOSC domain protein"  
"NT-P19\_00829" 23567 "s59E25H2" 0 "MOSC domain protein"  
"NT-P19\_00829" 23567 "s59E5H2" 0 "MOSC domain protein"  
"NT-P19\_00829" 23567 "s63E6H2" 0 "MOSC domain protein"  
"NT-P19\_00830" 23568 "s59E13H2" 0 "Molybdopterin adenyllyltransferase"  
"NT-P19\_00830" 23568 "s59E25H2" 0 "Molybdopterin adenyllyltransferase"  
"NT-P19\_00830" 23568 "s59E5H2" 0 "Molybdopterin adenyllyltransferase"  
"NT-P19\_00830" 23568 "s63E6H2" 0.006115912 "Molybdopterin adenyllyltransferase"  
"NT-P19\_00831" 23569 "s59E13H2" 0 "Nif-specific regulatory protein"  
"NT-P19\_00831" 23569 "s59E25H2" 0 "Nif-specific regulatory protein"  
"NT-P19\_00831" 23569 "s59E5H2" 0 "Nif-specific regulatory protein"  
"NT-P19\_00831" 23569 "s63E6H2" 0 "Nif-specific regulatory protein"  
"NT-P19\_00832" 23570 "s59E13H2" 0 "Sulfhydrogenase 1 subunit alpha"  
"NT-P19\_00832" 23570 "s59E25H2" 0 "Sulfhydrogenase 1 subunit alpha"

"NT-P19\_00832" 23570 "s59E5H2" 0 "Sulfhydrogenase 1 subunit alpha"  
"NT-P19\_00832" 23570 "s63E6H2" 0 "Sulfhydrogenase 1 subunit alpha"  
"NT-P19\_00833" 23571 "s59E13H2" 0 "Sulfhydrogenase 1 subunit delta"  
"NT-P19\_00833" 23571 "s59E25H2" 0 "Sulfhydrogenase 1 subunit delta"  
"NT-P19\_00833" 23571 "s59E5H2" 0 "Sulfhydrogenase 1 subunit delta"  
"NT-P19\_00833" 23571 "s63E6H2" 0 "Sulfhydrogenase 1 subunit delta"  
"NT-P19\_00834" 23572 "s59E13H2" 0 "Sulfhydrogenase 2 subunit gamma"  
"NT-P19\_00834" 23572 "s59E25H2" 0 "Sulfhydrogenase 2 subunit gamma"  
"NT-P19\_00834" 23572 "s59E5H2" 0 "Sulfhydrogenase 2 subunit gamma"  
"NT-P19\_00834" 23572 "s63E6H2" 0 "Sulfhydrogenase 2 subunit gamma"  
"NT-P19\_00835" 23573 "s59E13H2" 0 "Sulfhydrogenase 2 subunit beta"  
"NT-P19\_00835" 23573 "s59E25H2" 0 "Sulfhydrogenase 2 subunit beta"  
"NT-P19\_00835" 23573 "s59E5H2" 0 "Sulfhydrogenase 2 subunit beta"  
"NT-P19\_00835" 23573 "s63E6H2" 0 "Sulfhydrogenase 2 subunit beta"  
"NT-P19\_00836" 23574 "s59E13H2" 0 "putative HTH-type transcriptional regulator/MT0088"  
"NT-P19\_00836" 23574 "s59E25H2" 0 "putative HTH-type transcriptional regulator/MT0088"  
"NT-P19\_00836" 23574 "s59E5H2" 0 "putative HTH-type transcriptional regulator/MT0088"  
"NT-P19\_00836" 23574 "s63E6H2" 0 "putative HTH-type transcriptional regulator/MT0088"  
"NT-P19\_00837" 23575 "s59E13H2" 0 "putative permease"  
"NT-P19\_00837" 23575 "s59E25H2" 0 "putative permease"  
"NT-P19\_00837" 23575 "s59E5H2" 0 "putative permease"  
"NT-P19\_00837" 23575 "s63E6H2" 0.002203669 "putative permease"  
"NT-P19\_00838" 23576 "s59E13H2" 0 "hypothetical protein"  
"NT-P19\_00838" 23576 "s59E25H2" 0 "hypothetical protein"  
"NT-P19\_00838" 23576 "s59E5H2" 0 "hypothetical protein"  
"NT-P19\_00838" 23576 "s63E6H2" 0.01864315 "hypothetical protein"  
"NT-P19\_00839" 23577 "s59E13H2" 0 "Tetrahydromethanopterin S-methyltransferase subunit A 1"  
"NT-P19\_00839" 23577 "s59E25H2" 0 "Tetrahydromethanopterin S-methyltransferase subunit A 1"  
"NT-P19\_00839" 23577 "s59E5H2" 0 "Tetrahydromethanopterin S-methyltransferase subunit A 1"  
"NT-P19\_00839" 23577 "s63E6H2" 0.02725504 "Tetrahydromethanopterin S-methyltransferase subunit A 1"  
"NT-P19\_00840" 23578 "s59E13H2" 0 "SoxR reducing system protein RseC"  
"NT-P19\_00840" 23578 "s59E25H2" 0 "SoxR reducing system protein RseC"  
"NT-P19\_00840" 23578 "s59E5H2" 0 "SoxR reducing system protein RseC"  
"NT-P19\_00840" 23578 "s63E6H2" 0.02327432 "SoxR reducing system protein RseC"  
"NT-P19\_00841" 23579 "s59E13H2" 0 "Thioredoxin"  
"NT-P19\_00841" 23579 "s59E25H2" 0 "Thioredoxin"  
"NT-P19\_00841" 23579 "s59E5H2" 0 "Thioredoxin"  
"NT-P19\_00841" 23579 "s63E6H2" 0.01222395 "Thioredoxin"  
"NT-P19\_00842" 23580 "s59E13H2" 0 "Thiol:disulfide interchange protein DsbD precursor"  
"NT-P19\_00842" 23580 "s59E25H2" 0 "Thiol:disulfide interchange protein DsbD precursor"  
"NT-P19\_00842" 23580 "s59E5H2" 0 "Thiol:disulfide interchange protein DsbD precursor"  
"NT-P19\_00842" 23580 "s63E6H2" 0.01063218 "Thiol:disulfide interchange protein DsbD precursor"  
"NT-P19\_00843" 23581 "s59E13H2" 0 "Sodium Bile acid symporter family protein"  
"NT-P19\_00843" 23581 "s59E25H2" 0 "Sodium Bile acid symporter family protein"  
"NT-P19\_00843" 23581 "s59E5H2" 0 "Sodium Bile acid symporter family protein"  
"NT-P19\_00843" 23581 "s63E6H2" 0.01971419 "Sodium Bile acid symporter family protein"  
"NT-P19\_00844" 23582 "s59E13H2" 0 "Intracellular protease 1"

"NT-P19\_00844" 23582 "s59E25H2" 0 "Intracellular protease 1"  
"NT-P19\_00844" 23582 "s59E5H2" 0.1409675 "Intracellular protease 1"  
"NT-P19\_00844" 23582 "s63E6H2" 0.01023696 "Intracellular protease 1"  
"NT-P19\_00845" 23583 "s59E13H2" 0 "VIT family protein"  
"NT-P19\_00845" 23583 "s59E25H2" 0 "VIT family protein"  
"NT-P19\_00845" 23583 "s59E5H2" 0.1065828 "VIT family protein"  
"NT-P19\_00845" 23583 "s63E6H2" 0.01896432 "VIT family protein"  
"NT-P19\_00846" 23584 "s59E13H2" 0 "Putative heat shock protein HspR"  
"NT-P19\_00846" 23584 "s59E25H2" 0 "Putative heat shock protein HspR"  
"NT-P19\_00846" 23584 "s59E5H2" 0 "Putative heat shock protein HspR"  
"NT-P19\_00846" 23584 "s63E6H2" 0 "Putative heat shock protein HspR"  
"NT-P19\_00847" 23585 "s59E13H2" 0 "Sulfhydrogenase 1 subunit alpha"  
"NT-P19\_00847" 23585 "s59E25H2" 0 "Sulfhydrogenase 1 subunit alpha"  
"NT-P19\_00847" 23585 "s59E5H2" 0 "Sulfhydrogenase 1 subunit alpha"  
"NT-P19\_00847" 23585 "s63E6H2" 0 "Sulfhydrogenase 1 subunit alpha"  
"NT-P19\_00848" 23586 "s59E13H2" 0 "Sulfhydrogenase 1 subunit delta"  
"NT-P19\_00848" 23586 "s59E25H2" 0 "Sulfhydrogenase 1 subunit delta"  
"NT-P19\_00848" 23586 "s59E5H2" 0 "Sulfhydrogenase 1 subunit delta"  
"NT-P19\_00848" 23586 "s63E6H2" 0 "Sulfhydrogenase 1 subunit delta"  
"NT-P19\_00849" 23587 "s59E13H2" 0 "Sulfhydrogenase 2 subunit gamma"  
"NT-P19\_00849" 23587 "s59E25H2" 0 "Sulfhydrogenase 2 subunit gamma"  
"NT-P19\_00849" 23587 "s59E5H2" 0 "Sulfhydrogenase 2 subunit gamma"  
"NT-P19\_00849" 23587 "s63E6H2" 0 "Sulfhydrogenase 2 subunit gamma"  
"NT-P19\_00850" 23588 "s59E13H2" 0 "Sulfhydrogenase 1 subunit beta"  
"NT-P19\_00850" 23588 "s59E25H2" 0 "Sulfhydrogenase 1 subunit beta"  
"NT-P19\_00850" 23588 "s59E5H2" 0 "Sulfhydrogenase 1 subunit beta"  
"NT-P19\_00850" 23588 "s63E6H2" 0 "Sulfhydrogenase 1 subunit beta"  
"NT-P19\_00851" 23589 "s59E13H2" 0 "Response regulator PleD"  
"NT-P19\_00851" 23589 "s59E25H2" 0 "Response regulator PleD"  
"NT-P19\_00851" 23589 "s59E5H2" 0 "Response regulator PleD"  
"NT-P19\_00851" 23589 "s63E6H2" 0 "Response regulator PleD"  
"NT-P19\_00852" 23590 "s59E13H2" 0 "Signal transduction histidine-protein kinase BaeS"  
"NT-P19\_00852" 23590 "s59E25H2" 0 "Signal transduction histidine-protein kinase BaeS"  
"NT-P19\_00852" 23590 "s59E5H2" 0 "Signal transduction histidine-protein kinase BaeS"  
"NT-P19\_00852" 23590 "s63E6H2" 0 "Signal transduction histidine-protein kinase BaeS"  
"NT-P19\_00853" 23591 "s59E13H2" 0 "Alkaline phosphatase synthesis transcriptional regulatory protein PhoP"  
"NT-P19\_00853" 23591 "s59E25H2" 0 "Alkaline phosphatase synthesis transcriptional regulatory protein PhoP"  
"NT-P19\_00853" 23591 "s59E5H2" 0 "Alkaline phosphatase synthesis transcriptional regulatory protein PhoP"  
"NT-P19\_00853" 23591 "s63E6H2" 0 "Alkaline phosphatase synthesis transcriptional regulatory protein PhoP"  
"NT-P19\_00854" 23592 "s59E13H2" 0 "Redox-sensing transcriptional repressor Rex"  
"NT-P19\_00854" 23592 "s59E25H2" 0 "Redox-sensing transcriptional repressor Rex"  
"NT-P19\_00854" 23592 "s59E5H2" 0 "Redox-sensing transcriptional repressor Rex"  
"NT-P19\_00854" 23592 "s63E6H2" 0 "Redox-sensing transcriptional repressor Rex"  
"NT-P19\_00856" 23594 "s59E13H2" 0 "RNA polymerase sigma factor"  
"NT-P19\_00856" 23594 "s59E25H2" 0 "RNA polymerase sigma factor"  
"NT-P19\_00856" 23594 "s59E5H2" 0 "RNA polymerase sigma factor"  
"NT-P19\_00856" 23594 "s63E6H2" 0 "RNA polymerase sigma factor"

"NT-P19\_00857" 23595 "s59E13H2" 0 "Bacterial extracellular solute-binding protein"  
"NT-P19\_00857" 23595 "s59E25H2" 0 "Bacterial extracellular solute-binding protein"  
"NT-P19\_00857" 23595 "s59E5H2" 0 "Bacterial extracellular solute-binding protein"  
"NT-P19\_00857" 23595 "s63E6H2" 0 "Bacterial extracellular solute-binding protein"  
"NT-P19\_00858" 23596 "s59E13H2" 0 "Putative endoglucanase"  
"NT-P19\_00858" 23596 "s59E25H2" 0 "Putative endoglucanase"  
"NT-P19\_00858" 23596 "s59E5H2" 0 "Putative endoglucanase"  
"NT-P19\_00858" 23596 "s63E6H2" 0 "Putative endoglucanase"  
"NT-P19\_00859" 23597 "s59E13H2" 0 "Lactose transport system permease protein LacF"  
"NT-P19\_00859" 23597 "s59E25H2" 0 "Lactose transport system permease protein LacF"  
"NT-P19\_00859" 23597 "s59E5H2" 0 "Lactose transport system permease protein LacF"  
"NT-P19\_00859" 23597 "s63E6H2" 0 "Lactose transport system permease protein LacF"  
"NT-P19\_00860" 23598 "s59E13H2" 0 "Trehalose/maltose transport system permease protein MalG"  
"NT-P19\_00860" 23598 "s59E25H2" 0 "Trehalose/maltose transport system permease protein MalG"  
"NT-P19\_00860" 23598 "s59E5H2" 0 "Trehalose/maltose transport system permease protein MalG"  
"NT-P19\_00860" 23598 "s63E6H2" 0 "Trehalose/maltose transport system permease protein MalG"  
"NT-P19\_00861" 23599 "s59E13H2" 0 "Beta-galactosidase"  
"NT-P19\_00861" 23599 "s59E25H2" 0 "Beta-galactosidase"  
"NT-P19\_00861" 23599 "s59E5H2" 0 "Beta-galactosidase"  
"NT-P19\_00861" 23599 "s63E6H2" 0 "Beta-galactosidase"  
"NT-P19\_00862" 23600 "s59E13H2" 0 "Taurine--pyruvate aminotransferase"  
"NT-P19\_00862" 23600 "s59E25H2" 0 "Taurine--pyruvate aminotransferase"  
"NT-P19\_00862" 23600 "s59E5H2" 0 "Taurine--pyruvate aminotransferase"  
"NT-P19\_00862" 23600 "s63E6H2" 0 "Taurine--pyruvate aminotransferase"  
"NT-P19\_00863" 23601 "s59E13H2" 0 "Xaa-Pro dipeptidase"  
"NT-P19\_00863" 23601 "s59E25H2" 0 "Xaa-Pro dipeptidase"  
"NT-P19\_00863" 23601 "s59E5H2" 0 "Xaa-Pro dipeptidase"  
"NT-P19\_00863" 23601 "s63E6H2" 0 "Xaa-Pro dipeptidase"  
"NT-P19\_00864" 23602 "s59E13H2" 0 "Prenyltransferase and squalene oxidase repeat protein"  
"NT-P19\_00864" 23602 "s59E25H2" 0 "Prenyltransferase and squalene oxidase repeat protein"  
"NT-P19\_00864" 23602 "s59E5H2" 0.0001244322 "Prenyltransferase and squalene oxidase repeat protein"  
"NT-P19\_00864" 23602 "s63E6H2" 0 "Prenyltransferase and squalene oxidase repeat protein"  
"NT-P19\_00865" 23603 "s59E13H2" 0 "hypothetical protein"  
"NT-P19\_00865" 23603 "s59E25H2" 0 "hypothetical protein"  
"NT-P19\_00865" 23603 "s59E5H2" 0.001855889 "hypothetical protein"  
"NT-P19\_00865" 23603 "s63E6H2" 0 "hypothetical protein"  
"NT-P19\_00866" 23604 "s59E13H2" 0 "putative oxidoreductase"  
"NT-P19\_00866" 23604 "s59E25H2" 0 "putative oxidoreductase"  
"NT-P19\_00866" 23604 "s59E5H2" 0 "putative oxidoreductase"  
"NT-P19\_00866" 23604 "s63E6H2" 0 "putative oxidoreductase"  
"NT-P19\_00867" 23605 "s59E13H2" 0 "Xylose isomerase-like TIM barrel"  
"NT-P19\_00867" 23605 "s59E25H2" 0 "Xylose isomerase-like TIM barrel"  
"NT-P19\_00867" 23605 "s59E5H2" 0 "Xylose isomerase-like TIM barrel"  
"NT-P19\_00867" 23605 "s63E6H2" 0 "Xylose isomerase-like TIM barrel"  
"NT-P19\_00868" 23606 "s59E13H2" 0 "D-threonine aldolase"  
"NT-P19\_00868" 23606 "s59E25H2" 0 "D-threonine aldolase"  
"NT-P19\_00868" 23606 "s59E5H2" 0 "D-threonine aldolase"



"NT-P19\_00868" 23606 "s63E6H2" 0 "D-threonine aldolase"  
"NT-P19\_00869" 23607 "s59E13H2" 0 "hypothetical protein"  
"NT-P19\_00869" 23607 "s59E25H2" 0 "hypothetical protein"  
"NT-P19\_00869" 23607 "s59E5H2" 0 "hypothetical protein"  
"NT-P19\_00869" 23607 "s63E6H2" 0 "hypothetical protein"  
"NT-P19\_00870" 23608 "s59E13H2" 0 "Xylulose kinase"  
"NT-P19\_00870" 23608 "s59E25H2" 0 "Xylulose kinase"  
"NT-P19\_00870" 23608 "s59E5H2" 0 "Xylulose kinase"  
"NT-P19\_00870" 23608 "s63E6H2" 0 "Xylulose kinase"  
"NT-P19\_00871" 23609 "s59E13H2" 0 "Amidohydrolase"  
"NT-P19\_00871" 23609 "s59E25H2" 0 "Amidohydrolase"  
"NT-P19\_00871" 23609 "s59E5H2" 0 "Amidohydrolase"  
"NT-P19\_00871" 23609 "s63E6H2" 0 "Amidohydrolase"  
"NT-P19\_00872" 23610 "s59E13H2" 0 "3-oxoacyl-[acyl-carrier-protein] reductase FabG"  
"NT-P19\_00872" 23610 "s59E25H2" 0 "3-oxoacyl-[acyl-carrier-protein] reductase FabG"  
"NT-P19\_00872" 23610 "s59E5H2" 0 "3-oxoacyl-[acyl-carrier-protein] reductase FabG"  
"NT-P19\_00872" 23610 "s63E6H2" 0 "3-oxoacyl-[acyl-carrier-protein] reductase FabG"  
"NT-P19\_00873" 23611 "s59E13H2" 0 "Transposase IS200 like protein"  
"NT-P19\_00873" 23611 "s59E25H2" 0 "Transposase IS200 like protein"  
"NT-P19\_00873" 23611 "s59E5H2" 0 "Transposase IS200 like protein"  
"NT-P19\_00873" 23611 "s63E6H2" 0 "Transposase IS200 like protein"  
"NT-P19\_00874" 23612 "s59E13H2" 0 "Oligopeptide transport ATP-binding protein OppF"  
"NT-P19\_00874" 23612 "s59E25H2" 0 "Oligopeptide transport ATP-binding protein OppF"  
"NT-P19\_00874" 23612 "s59E5H2" 0 "Oligopeptide transport ATP-binding protein OppF"  
"NT-P19\_00874" 23612 "s63E6H2" 0 "Oligopeptide transport ATP-binding protein OppF"  
"NT-P19\_00875" 23613 "s59E13H2" 0 "Oligopeptide transport ATP-binding protein OppD"  
"NT-P19\_00875" 23613 "s59E25H2" 0 "Oligopeptide transport ATP-binding protein OppD"  
"NT-P19\_00875" 23613 "s59E5H2" 0 "Oligopeptide transport ATP-binding protein OppD"  
"NT-P19\_00875" 23613 "s63E6H2" 0.002385467 "Oligopeptide transport ATP-binding protein OppD"  
"NT-P19\_00876" 23614 "s59E13H2" 0 "Oligopeptide transport system permease protein OppC"  
"NT-P19\_00876" 23614 "s59E25H2" 0 "Oligopeptide transport system permease protein OppC"  
"NT-P19\_00876" 23614 "s59E5H2" 0 "Oligopeptide transport system permease protein OppC"  
"NT-P19\_00876" 23614 "s63E6H2" 0.004102458 "Oligopeptide transport system permease protein OppC"  
"NT-P19\_00877" 23615 "s59E13H2" 0 "Inner membrane ABC transporter permease protein YejB"  
"NT-P19\_00877" 23615 "s59E25H2" 0 "Inner membrane ABC transporter permease protein YejB"  
"NT-P19\_00877" 23615 "s59E5H2" 0 "Inner membrane ABC transporter permease protein YejB"  
"NT-P19\_00877" 23615 "s63E6H2" 0.06510955 "Inner membrane ABC transporter permease protein YejB"  
"NT-P19\_00878" 23616 "s59E13H2" 0 "Oligopeptide-binding protein AppA precursor"  
"NT-P19\_00878" 23616 "s59E25H2" 0 "Oligopeptide-binding protein AppA precursor"  
"NT-P19\_00878" 23616 "s59E5H2" 0 "Oligopeptide-binding protein AppA precursor"  
"NT-P19\_00878" 23616 "s63E6H2" 0.12768 "Oligopeptide-binding protein AppA precursor"  
"NT-P19\_00879" 23617 "s59E13H2" 0 "Helix-turn-helix domain protein"  
"NT-P19\_00879" 23617 "s59E25H2" 0 "Helix-turn-helix domain protein"  
"NT-P19\_00879" 23617 "s59E5H2" 0 "Helix-turn-helix domain protein"  
"NT-P19\_00879" 23617 "s63E6H2" 0.06566675 "Helix-turn-helix domain protein"  
"NT-P19\_00881" 23619 "s59E13H2" 0 "hypothetical protein"  
"NT-P19\_00881" 23619 "s59E25H2" 0 "hypothetical protein"

"NT-P19\_00881" 23619 "s59E5H2" 0 "hypothetical protein"  
"NT-P19\_00881" 23619 "s63E6H2" 0.1107769 "hypothetical protein"  
"NT-P19\_00883" 23621 "s59E13H2" 0 "putative ABC transporter ATP-binding protein"  
"NT-P19\_00883" 23621 "s59E25H2" 0 "putative ABC transporter ATP-binding protein"  
"NT-P19\_00883" 23621 "s59E5H2" 0 "putative ABC transporter ATP-binding protein"  
"NT-P19\_00883" 23621 "s63E6H2" 0.08013671 "putative ABC transporter ATP-binding protein"  
"NT-P19\_00884" 23622 "s59E13H2" 0 "putative multidrug resistance ABC transporter ATP-binding/permease protein YheI"  
"NT-P19\_00884" 23622 "s59E25H2" 0 "putative multidrug resistance ABC transporter ATP-binding/permease protein YheI"  
"NT-P19\_00884" 23622 "s59E5H2" 0 "putative multidrug resistance ABC transporter ATP-binding/permease protein YheI"  
"NT-P19\_00884" 23622 "s63E6H2" 0.04590804 "putative multidrug resistance ABC transporter ATP-binding/permease protein YheI"  
"NT-P19\_00885" 23623 "s59E13H2" 0.02023897 "2-dehydro-3-deoxygluconokinase"  
"NT-P19\_00885" 23623 "s59E25H2" 0 "2-dehydro-3-deoxygluconokinase"  
"NT-P19\_00885" 23623 "s59E5H2" 0.002912027 "2-dehydro-3-deoxygluconokinase"  
"NT-P19\_00885" 23623 "s63E6H2" 0.002672932 "2-dehydro-3-deoxygluconokinase"  
"NT-P19\_00886" 23624 "s59E13H2" 0 "putative oxidoreductase YcjS"  
"NT-P19\_00886" 23624 "s59E25H2" 0 "putative oxidoreductase YcjS"  
"NT-P19\_00886" 23624 "s59E5H2" 0 "putative oxidoreductase YcjS"  
"NT-P19\_00886" 23624 "s63E6H2" 0 "putative oxidoreductase YcjS"  
"NT-P19\_00887" 23625 "s59E13H2" 0 "Pyrimidine-specific ribonucleoside hydrolase RihA"  
"NT-P19\_00887" 23625 "s59E25H2" 0 "Pyrimidine-specific ribonucleoside hydrolase RihA"  
"NT-P19\_00887" 23625 "s59E5H2" 0 "Pyrimidine-specific ribonucleoside hydrolase RihA"  
"NT-P19\_00887" 23625 "s63E6H2" 0.01458897 "Pyrimidine-specific ribonucleoside hydrolase RihA"  
"NT-P19\_00888" 23626 "s59E13H2" 0 "cell division protein MraZ"  
"NT-P19\_00888" 23626 "s59E25H2" 0 "cell division protein MraZ"  
"NT-P19\_00888" 23626 "s59E5H2" 0 "cell division protein MraZ"  
"NT-P19\_00888" 23626 "s63E6H2" 0.2333841 "cell division protein MraZ"  
"NT-P19\_00889" 23627 "s59E13H2" 0 "Ribosomal RNA small subunit methyltransferase H"  
"NT-P19\_00889" 23627 "s59E25H2" 0 "Ribosomal RNA small subunit methyltransferase H"  
"NT-P19\_00889" 23627 "s59E5H2" 0 "Ribosomal RNA small subunit methyltransferase H"  
"NT-P19\_00889" 23627 "s63E6H2" 0.2574127 "Ribosomal RNA small subunit methyltransferase H"  
"NT-P19\_00890" 23628 "s59E13H2" 0 "Cell division protein FtsL"  
"NT-P19\_00890" 23628 "s59E25H2" 0 "Cell division protein FtsL"  
"NT-P19\_00890" 23628 "s59E5H2" 0.001723661 "Cell division protein FtsL"  
"NT-P19\_00890" 23628 "s63E6H2" 0.2773239 "Cell division protein FtsL"  
"NT-P19\_00891" 23629 "s59E13H2" 0 "Stage V sporulation protein D"  
"NT-P19\_00891" 23629 "s59E25H2" 0 "Stage V sporulation protein D"  
"NT-P19\_00891" 23629 "s59E5H2" 0.005006425 "Stage V sporulation protein D"  
"NT-P19\_00891" 23629 "s63E6H2" 0.2692206 "Stage V sporulation protein D"  
"NT-P19\_00892" 23630 "s59E13H2" 0 "UDP-N-acetylmuramoyl-L-alanyl-D-glutamate--2,6-diaminopimelate ligase"  
"NT-P19\_00892" 23630 "s59E25H2" 0 "UDP-N-acetylmuramoyl-L-alanyl-D-glutamate--2,6-diaminopimelate ligase"  
"NT-P19\_00892" 23630 "s59E5H2" 0 "UDP-N-acetylmuramoyl-L-alanyl-D-glutamate--2,6-diaminopimelate ligase"  
"NT-P19\_00892" 23630 "s63E6H2" 0.08984376 "UDP-N-acetylmuramoyl-L-alanyl-D-glutamate--2,6-diaminopimelate ligase"  
"NT-P19\_00893" 23631 "s59E13H2" 0 "UDP-N-acetylmuramoyl-tripeptide--D-alanyl-D-alanine ligase"  
"NT-P19\_00893" 23631 "s59E25H2" 0 "UDP-N-acetylmuramoyl-tripeptide--D-alanyl-D-alanine ligase"  
"NT-P19\_00893" 23631 "s59E5H2" 0.01557801 "UDP-N-acetylmuramoyl-tripeptide--D-alanyl-D-alanine ligase"  
"NT-P19\_00893" 23631 "s63E6H2" 0.02575165 "UDP-N-acetylmuramoyl-tripeptide--D-alanyl-D-alanine ligase"  
"NT-P19\_00894" 23632 "s59E13H2" 0 "Phospho-N-acetylmuramoyl-pentapeptide-transferase"

"NT-P19\_00894" 23632 "s59E25H2" 0 "Phospho-N-acetylmuramoyl-pentapeptide-transferase"  
"NT-P19\_00894" 23632 "s59E5H2" 0.02292004 "Phospho-N-acetylmuramoyl-pentapeptide-transferase"  
"NT-P19\_00894" 23632 "s63E6H2" 0.01661323 "Phospho-N-acetylmuramoyl-pentapeptide-transferase"  
"NT-P19\_00895" 23633 "s59E13H2" 0.001700256 "UDP-N-acetylmuramoylalanine--D-glutamate ligase"  
"NT-P19\_00895" 23633 "s59E25H2" 0 "UDP-N-acetylmuramoylalanine--D-glutamate ligase"  
"NT-P19\_00895" 23633 "s59E5H2" 0.07295861 "UDP-N-acetylmuramoylalanine--D-glutamate ligase"  
"NT-P19\_00895" 23633 "s63E6H2" 0.01655571 "UDP-N-acetylmuramoylalanine--D-glutamate ligase"  
"NT-P19\_00896" 23634 "s59E13H2" 0.001074441 "Lipid II flippase FtsW"  
"NT-P19\_00896" 23634 "s59E25H2" 0 "Lipid II flippase FtsW"  
"NT-P19\_00896" 23634 "s59E5H2" 0.05522533 "Lipid II flippase FtsW"  
"NT-P19\_00896" 23634 "s63E6H2" 0.001180711 "Lipid II flippase FtsW"  
"NT-P19\_00897" 23635 "s59E13H2" 0.05834071 "CYTH domain protein"  
"NT-P19\_00897" 23635 "s59E25H2" 0 "CYTH domain protein"  
"NT-P19\_00897" 23635 "s59E5H2" 0 "CYTH domain protein"  
"NT-P19\_00897" 23635 "s63E6H2" 0.005608027 "CYTH domain protein"  
"NT-P19\_00899" 23637 "s59E13H2" 0.09108608 "putative permease YjgP/YjgQ family protein"  
"NT-P19\_00899" 23637 "s59E25H2" 0 "putative permease YjgP/YjgQ family protein"  
"NT-P19\_00899" 23637 "s59E5H2" 0 "putative permease YjgP/YjgQ family protein"  
"NT-P19\_00899" 23637 "s63E6H2" 0 "putative permease YjgP/YjgQ family protein"  
"NT-P19\_00900" 23638 "s59E13H2" 0.09824219 "putative permease YjgP/YjgQ family protein"  
"NT-P19\_00900" 23638 "s59E25H2" 0 "putative permease YjgP/YjgQ family protein"  
"NT-P19\_00900" 23638 "s59E5H2" 0.0183733 "putative permease YjgP/YjgQ family protein"  
"NT-P19\_00900" 23638 "s63E6H2" 0 "putative permease YjgP/YjgQ family protein"  
"NT-P19\_00901" 23639 "s59E13H2" 0 "Glucosyl-3-phosphoglycerate synthase"  
"NT-P19\_00901" 23639 "s59E25H2" 0 "Glucosyl-3-phosphoglycerate synthase"  
"NT-P19\_00901" 23639 "s59E5H2" 0 "Glucosyl-3-phosphoglycerate synthase"  
"NT-P19\_00901" 23639 "s63E6H2" 0.001661421 "Glucosyl-3-phosphoglycerate synthase"  
"NT-P19\_00902" 23640 "s59E13H2" 0 "Glucosyl-3-phosphoglycerate synthase"  
"NT-P19\_00902" 23640 "s59E25H2" 0 "Glucosyl-3-phosphoglycerate synthase"  
"NT-P19\_00902" 23640 "s59E5H2" 0 "Glucosyl-3-phosphoglycerate synthase"  
"NT-P19\_00902" 23640 "s63E6H2" 0.004467912 "Glucosyl-3-phosphoglycerate synthase"  
"NT-P19\_00903" 23641 "s59E13H2" 0 "Phosphoserine phosphatase 1"  
"NT-P19\_00903" 23641 "s59E25H2" 0 "Phosphoserine phosphatase 1"  
"NT-P19\_00903" 23641 "s59E5H2" 0 "Phosphoserine phosphatase 1"  
"NT-P19\_00903" 23641 "s63E6H2" 3.286102e-05 "Phosphoserine phosphatase 1"  
"NT-P19\_00904" 23642 "s59E13H2" 0 "D-arabitol-phosphate dehydrogenase"  
"NT-P19\_00904" 23642 "s59E25H2" 0 "D-arabitol-phosphate dehydrogenase"  
"NT-P19\_00904" 23642 "s59E5H2" 0.006671868 "D-arabitol-phosphate dehydrogenase"  
"NT-P19\_00904" 23642 "s63E6H2" 0.01921146 "D-arabitol-phosphate dehydrogenase"  
"NT-P19\_00905" 23643 "s59E13H2" 0 "1,3-propanediol dehydrogenase"  
"NT-P19\_00905" 23643 "s59E25H2" 0 "1,3-propanediol dehydrogenase"  
"NT-P19\_00905" 23643 "s59E5H2" 0.003636412 "1,3-propanediol dehydrogenase"  
"NT-P19\_00905" 23643 "s63E6H2" 0.02331753 "1,3-propanediol dehydrogenase"  
"NT-P19\_00906" 23644 "s59E13H2" 0 "Sulfide dehydrogenase subunit alpha precursor"  
"NT-P19\_00906" 23644 "s59E25H2" 0 "Sulfide dehydrogenase subunit alpha precursor"  
"NT-P19\_00906" 23644 "s59E5H2" 0.00292955 "Sulfide dehydrogenase subunit alpha precursor"  
"NT-P19\_00906" 23644 "s63E6H2" 0.05214884 "Sulfide dehydrogenase subunit alpha precursor"

"NT-P19\_00907" 23645 "s59E13H2" 0 "hypothetical protein"  
"NT-P19\_00907" 23645 "s59E25H2" 0 "hypothetical protein"  
"NT-P19\_00907" 23645 "s59E5H2" 0 "hypothetical protein"  
"NT-P19\_00907" 23645 "s63E6H2" 0.1185281 "hypothetical protein"  
"NT-P19\_00908" 23646 "s59E13H2" 0 "hypothetical protein"  
"NT-P19\_00908" 23646 "s59E25H2" 0 "hypothetical protein"  
"NT-P19\_00908" 23646 "s59E5H2" 0.01202635 "hypothetical protein"  
"NT-P19\_00908" 23646 "s63E6H2" 0.1795973 "hypothetical protein"  
"NT-P19\_00909" 23647 "s59E13H2" 0 "hypothetical protein"  
"NT-P19\_00909" 23647 "s59E25H2" 0 "hypothetical protein"  
"NT-P19\_00909" 23647 "s59E5H2" 0 "hypothetical protein"  
"NT-P19\_00909" 23647 "s63E6H2" 0.004335881 "hypothetical protein"  
"NT-P19\_00911" 23649 "s59E13H2" 0 "Valine--tRNA ligase"  
"NT-P19\_00911" 23649 "s59E25H2" 0 "Valine--tRNA ligase"  
"NT-P19\_00911" 23649 "s59E5H2" 0 "Valine--tRNA ligase"  
"NT-P19\_00911" 23649 "s63E6H2" 0.2920393 "Valine--tRNA ligase"  
"NT-P19\_00912" 23650 "s59E13H2" 0 "hypothetical protein"  
"NT-P19\_00912" 23650 "s59E25H2" 0 "hypothetical protein"  
"NT-P19\_00912" 23650 "s59E5H2" 0 "hypothetical protein"  
"NT-P19\_00912" 23650 "s63E6H2" 0.01816677 "hypothetical protein"  
"NT-P19\_00913" 23651 "s59E13H2" 0 "PTS system fructose-specific EIIABC component"  
"NT-P19\_00913" 23651 "s59E25H2" 0 "PTS system fructose-specific EIIABC component"  
"NT-P19\_00913" 23651 "s59E5H2" 0 "PTS system fructose-specific EIIABC component"  
"NT-P19\_00913" 23651 "s63E6H2" 0.01479947 "PTS system fructose-specific EIIABC component"  
"NT-P19\_00914" 23652 "s59E13H2" 0 "putative monovalent cation/H+ antiporter subunit E"  
"NT-P19\_00914" 23652 "s59E25H2" 0 "putative monovalent cation/H+ antiporter subunit E"  
"NT-P19\_00914" 23652 "s59E5H2" 0.01391577 "putative monovalent cation/H+ antiporter subunit E"  
"NT-P19\_00914" 23652 "s63E6H2" 0.003968863 "putative monovalent cation/H+ antiporter subunit E"  
"NT-P19\_00915" 23653 "s59E13H2" 0 "putative monovalent cation/H+ antiporter subunit F"  
"NT-P19\_00915" 23653 "s59E25H2" 0 "putative monovalent cation/H+ antiporter subunit F"  
"NT-P19\_00915" 23653 "s59E5H2" 0.0235807 "putative monovalent cation/H+ antiporter subunit F"  
"NT-P19\_00915" 23653 "s63E6H2" 0.007253698 "putative monovalent cation/H+ antiporter subunit F"  
"NT-P19\_00916" 23654 "s59E13H2" 0 "Na(+)/H(+) antiporter subunit G"  
"NT-P19\_00916" 23654 "s59E25H2" 0 "Na(+)/H(+) antiporter subunit G"  
"NT-P19\_00916" 23654 "s59E5H2" 0.006304563 "Na(+)/H(+) antiporter subunit G"  
"NT-P19\_00916" 23654 "s63E6H2" 0.009681831 "Na(+)/H(+) antiporter subunit G"  
"NT-P19\_00917" 23655 "s59E13H2" 0 "hypothetical protein"  
"NT-P19\_00917" 23655 "s59E25H2" 0 "hypothetical protein"  
"NT-P19\_00917" 23655 "s59E5H2" 0 "hypothetical protein"  
"NT-P19\_00917" 23655 "s63E6H2" 0.005868751 "hypothetical protein"  
"NT-P19\_00918" 23656 "s59E13H2" 0 "putative monovalent cation/H+ antiporter subunit B"  
"NT-P19\_00918" 23656 "s59E25H2" 0 "putative monovalent cation/H+ antiporter subunit B"  
"NT-P19\_00918" 23656 "s59E5H2" 0 "putative monovalent cation/H+ antiporter subunit B"  
"NT-P19\_00918" 23656 "s63E6H2" 0.004760889 "putative monovalent cation/H+ antiporter subunit B"  
"NT-P19\_00919" 23657 "s59E13H2" 0 "Na(+)/H(+) antiporter subunit B"  
"NT-P19\_00919" 23657 "s59E25H2" 0 "Na(+)/H(+) antiporter subunit B"  
"NT-P19\_00919" 23657 "s59E5H2" 0 "Na(+)/H(+) antiporter subunit B"

"NT-P19\_00919" 23657 "s63E6H2" 0.006607923 "Na(+)/H(+) antiporter subunit B"  
"NT-P19\_00920" 23658 "s59E13H2" 0 "Na(+)/H(+) antiporter subunit C1"  
"NT-P19\_00920" 23658 "s59E25H2" 0 "Na(+)/H(+) antiporter subunit C1"  
"NT-P19\_00920" 23658 "s59E5H2" 0.01949268 "Na(+)/H(+) antiporter subunit C1"  
"NT-P19\_00920" 23658 "s63E6H2" 0.01438403 "Na(+)/H(+) antiporter subunit C1"  
"NT-P19\_00921" 23659 "s59E13H2" 0 "Na(+)/H(+) antiporter subunit A"  
"NT-P19\_00921" 23659 "s59E25H2" 0 "Na(+)/H(+) antiporter subunit A"  
"NT-P19\_00921" 23659 "s59E5H2" 0.004927095 "Na(+)/H(+) antiporter subunit A"  
"NT-P19\_00921" 23659 "s63E6H2" 0.01099636 "Na(+)/H(+) antiporter subunit A"  
"NT-P19\_00922" 23660 "s59E13H2" 0 "Ribose-phosphate pyrophosphokinase"  
"NT-P19\_00922" 23660 "s59E25H2" 0 "Ribose-phosphate pyrophosphokinase"  
"NT-P19\_00922" 23660 "s59E5H2" 0.01128817 "Ribose-phosphate pyrophosphokinase"  
"NT-P19\_00922" 23660 "s63E6H2" 0.00461254 "Ribose-phosphate pyrophosphokinase"  
"NT-P19\_00923" 23661 "s59E13H2" 0 "50S ribosomal protein L25"  
"NT-P19\_00923" 23661 "s59E25H2" 0 "50S ribosomal protein L25"  
"NT-P19\_00923" 23661 "s59E5H2" 0.0145274 "50S ribosomal protein L25"  
"NT-P19\_00923" 23661 "s63E6H2" 0.02040466 "50S ribosomal protein L25"  
"NT-P19\_00924" 23662 "s59E13H2" 0 "Peptidyl-tRNA hydrolase"  
"NT-P19\_00924" 23662 "s59E25H2" 0 "Peptidyl-tRNA hydrolase"  
"NT-P19\_00924" 23662 "s59E5H2" 0.08012896 "Peptidyl-tRNA hydrolase"  
"NT-P19\_00924" 23662 "s63E6H2" 0.02745486 "Peptidyl-tRNA hydrolase"  
"NT-P19\_00925" 23663 "s59E13H2" 0 "Putative K(+)-stimulated pyrophosphate-energized sodium pump"  
"NT-P19\_00925" 23663 "s59E25H2" 0 "Putative K(+)-stimulated pyrophosphate-energized sodium pump"  
"NT-P19\_00925" 23663 "s59E5H2" 0.1097514 "Putative K(+)-stimulated pyrophosphate-energized sodium pump"  
"NT-P19\_00925" 23663 "s63E6H2" 0.02589027 "Putative K(+)-stimulated pyrophosphate-energized sodium pump"  
"NT-P19\_00926" 23664 "s59E13H2" 0 "hypothetical protein"  
"NT-P19\_00926" 23664 "s59E25H2" 0 "hypothetical protein"  
"NT-P19\_00926" 23664 "s59E5H2" 0.09901482 "hypothetical protein"  
"NT-P19\_00926" 23664 "s63E6H2" 0.02620138 "hypothetical protein"  
"NT-P19\_00927" 23665 "s59E13H2" 0 "Sulfide dehydrogenase subunit beta precursor"  
"NT-P19\_00927" 23665 "s59E25H2" 0 "Sulfide dehydrogenase subunit beta precursor"  
"NT-P19\_00927" 23665 "s59E5H2" 0.03782738 "Sulfide dehydrogenase subunit beta precursor"  
"NT-P19\_00927" 23665 "s63E6H2" 0.007771325 "Sulfide dehydrogenase subunit beta precursor"  
"NT-P19\_00928" 23666 "s59E13H2" 0 "UvrABC system protein A"  
"NT-P19\_00928" 23666 "s59E25H2" 0 "UvrABC system protein A"  
"NT-P19\_00928" 23666 "s59E5H2" 0.09781022 "UvrABC system protein A"  
"NT-P19\_00928" 23666 "s63E6H2" 0.02763914 "UvrABC system protein A"  
"NT-P19\_00929" 23667 "s59E13H2" 0 "Aspartate aminotransferase"  
"NT-P19\_00929" 23667 "s59E25H2" 0 "Aspartate aminotransferase"  
"NT-P19\_00929" 23667 "s59E5H2" 0.1355414 "Aspartate aminotransferase"  
"NT-P19\_00929" 23667 "s63E6H2" 0.01274332 "Aspartate aminotransferase"  
"NT-P19\_00930" 23668 "s59E13H2" 0 "Phosphoenolpyruvate carboxykinase [GTP]"  
"NT-P19\_00930" 23668 "s59E25H2" 0 "Phosphoenolpyruvate carboxykinase [GTP]"  
"NT-P19\_00930" 23668 "s59E5H2" 0.2041746 "Phosphoenolpyruvate carboxykinase [GTP]"  
"NT-P19\_00930" 23668 "s63E6H2" 0.01369621 "Phosphoenolpyruvate carboxykinase [GTP]"  
"NT-P19\_00931" 23669 "s59E13H2" 0.001568135 "Protein-L-isoaspartate O-methyltransferase"  
"NT-P19\_00931" 23669 "s59E25H2" 0 "Protein-L-isoaspartate O-methyltransferase"

"NT-P19\_00931" 23669 "s59E5H2" 0.2954213 "Protein-L-isoaspartate O-methyltransferase"  
"NT-P19\_00931" 23669 "s63E6H2" 0.01415138 "Protein-L-isoaspartate O-methyltransferase"  
"NT-P19\_00932" 23670 "s59E13H2" 0.001266497 "spermidine synthase"  
"NT-P19\_00932" 23670 "s59E25H2" 0 "spermidine synthase"  
"NT-P19\_00932" 23670 "s59E5H2" 0.2099554 "spermidine synthase"  
"NT-P19\_00932" 23670 "s63E6H2" 0.02108247 "spermidine synthase"  
"NT-P19\_00933" 23671 "s59E13H2" 0 "dTDP-3-amino-3,6-dideoxy-alpha-D-galactopyranose transaminase"  
"NT-P19\_00933" 23671 "s59E25H2" 0 "dTDP-3-amino-3,6-dideoxy-alpha-D-galactopyranose transaminase"  
"NT-P19\_00933" 23671 "s59E5H2" 0.148586 "dTDP-3-amino-3,6-dideoxy-alpha-D-galactopyranose transaminase"  
"NT-P19\_00933" 23671 "s63E6H2" 0.002596195 "dTDP-3-amino-3,6-dideoxy-alpha-D-galactopyranose transaminase"  
"NT-P19\_00934" 23672 "s59E13H2" 0 "UDP-glucose 6-dehydrogenase TuaD"  
"NT-P19\_00934" 23672 "s59E25H2" 0 "UDP-glucose 6-dehydrogenase TuaD"  
"NT-P19\_00934" 23672 "s59E5H2" 0.1815169 "UDP-glucose 6-dehydrogenase TuaD"  
"NT-P19\_00934" 23672 "s63E6H2" 0 "UDP-glucose 6-dehydrogenase TuaD"  
"NT-P19\_00935" 23673 "s59E13H2" 0 "UDP-glucose 4-epimerase"  
"NT-P19\_00935" 23673 "s59E25H2" 0 "UDP-glucose 4-epimerase"  
"NT-P19\_00935" 23673 "s59E5H2" 0.4313762 "UDP-glucose 4-epimerase"  
"NT-P19\_00935" 23673 "s63E6H2" 0 "UDP-glucose 4-epimerase"  
"NT-P19\_00936" 23674 "s59E13H2" 0 "dTDP-4-oxo-6-deoxy-D-allose reductase"  
"NT-P19\_00936" 23674 "s59E25H2" 0 "dTDP-4-oxo-6-deoxy-D-allose reductase"  
"NT-P19\_00936" 23674 "s59E5H2" 0.1644382 "dTDP-4-oxo-6-deoxy-D-allose reductase"  
"NT-P19\_00936" 23674 "s63E6H2" 0 "dTDP-4-oxo-6-deoxy-D-allose reductase"  
"NT-P19\_00937" 23675 "s59E13H2" 0 "hypothetical protein"  
"NT-P19\_00937" 23675 "s59E25H2" 0 "hypothetical protein"  
"NT-P19\_00937" 23675 "s59E5H2" 0.3328409 "hypothetical protein"  
"NT-P19\_00937" 23675 "s63E6H2" 0 "hypothetical protein"  
"NT-P19\_00938" 23676 "s59E13H2" 0.003579812 "hypothetical protein"  
"NT-P19\_00938" 23676 "s59E25H2" 0 "hypothetical protein"  
"NT-P19\_00938" 23676 "s59E5H2" 0.3887357 "hypothetical protein"  
"NT-P19\_00938" 23676 "s63E6H2" 0 "hypothetical protein"  
"NT-P19\_00939" 23677 "s59E13H2" 0 "Glucose-1-phosphate thymidyltransferase"  
"NT-P19\_00939" 23677 "s59E25H2" 0 "Glucose-1-phosphate thymidyltransferase"  
"NT-P19\_00939" 23677 "s59E5H2" 0.3119655 "Glucose-1-phosphate thymidyltransferase"  
"NT-P19\_00939" 23677 "s63E6H2" 0.005708253 "Glucose-1-phosphate thymidyltransferase"  
"NT-P19\_00940" 23678 "s59E13H2" 0 "hypothetical protein"  
"NT-P19\_00940" 23678 "s59E25H2" 0 "hypothetical protein"  
"NT-P19\_00940" 23678 "s59E5H2" 0.3340201 "hypothetical protein"  
"NT-P19\_00940" 23678 "s63E6H2" 0 "hypothetical protein"  
"NT-P19\_00941" 23679 "s59E13H2" 0.000563967 "hypothetical protein"  
"NT-P19\_00941" 23679 "s59E25H2" 0 "hypothetical protein"  
"NT-P19\_00941" 23679 "s59E5H2" 0.3395701 "hypothetical protein"  
"NT-P19\_00941" 23679 "s63E6H2" 0.005066075 "hypothetical protein"  
"NT-P19\_00942" 23680 "s59E13H2" 0.006469449 "dTDP-glucose 4,6-dehydratase 2"  
"NT-P19\_00942" 23680 "s59E25H2" 0 "dTDP-glucose 4,6-dehydratase 2"  
"NT-P19\_00942" 23680 "s59E5H2" 0.2000173 "dTDP-glucose 4,6-dehydratase 2"  
"NT-P19\_00942" 23680 "s63E6H2" 0.008051245 "dTDP-glucose 4,6-dehydratase 2"  
"NT-P19\_00943" 23681 "s59E13H2" 0 "dTDP-4-dehydrorhamnose reductase"

"NT-P19\_00943" 23681 "s59E25H2" 0 "dTDP-4-dehydrorhamnose reductase"  
"NT-P19\_00943" 23681 "s59E5H2" 0.2286243 "dTDP-4-dehydrorhamnose reductase"  
"NT-P19\_00943" 23681 "s63E6H2" 0.007933539 "dTDP-4-dehydrorhamnose reductase"  
"NT-P19\_00944" 23682 "s59E13H2" 0.001082998 "dTDP-4-dehydrorhamnose 3,5-epimerase"  
"NT-P19\_00944" 23682 "s59E25H2" 0 "dTDP-4-dehydrorhamnose 3,5-epimerase"  
"NT-P19\_00944" 23682 "s59E5H2" 0.07497926 "dTDP-4-dehydrorhamnose 3,5-epimerase"  
"NT-P19\_00944" 23682 "s63E6H2" 0 "dTDP-4-dehydrorhamnose 3,5-epimerase"  
"NT-P19\_00945" 23683 "s59E13H2" 0.001029047 "Chain length determinant protein"  
"NT-P19\_00945" 23683 "s59E25H2" 0 "Chain length determinant protein"  
"NT-P19\_00945" 23683 "s59E5H2" 0.02087538 "Chain length determinant protein"  
"NT-P19\_00945" 23683 "s63E6H2" 0 "Chain length determinant protein"  
"NT-P19\_00946" 23684 "s59E13H2" 0 "Extracellular serine protease precursor"  
"NT-P19\_00946" 23684 "s59E25H2" 0 "Extracellular serine protease precursor"  
"NT-P19\_00946" 23684 "s59E5H2" 0.001473168 "Extracellular serine protease precursor"  
"NT-P19\_00946" 23684 "s63E6H2" 0 "Extracellular serine protease precursor"  
"NT-P19\_00947" 23685 "s59E13H2" 0 "Undecaprenyl-phosphate 4-deoxy-4-formamido-L-arabinose transferase"  
"NT-P19\_00947" 23685 "s59E25H2" 0 "Undecaprenyl-phosphate 4-deoxy-4-formamido-L-arabinose transferase"  
"NT-P19\_00947" 23685 "s59E5H2" 0.009325041 "Undecaprenyl-phosphate 4-deoxy-4-formamido-L-arabinose transferase"  
"NT-P19\_00947" 23685 "s63E6H2" 0 "Undecaprenyl-phosphate 4-deoxy-4-formamido-L-arabinose transferase"  
"NT-P19\_00948" 23686 "s59E13H2" 0 "D-inositol 3-phosphate glycosyltransferase"  
"NT-P19\_00948" 23686 "s59E25H2" 0 "D-inositol 3-phosphate glycosyltransferase"  
"NT-P19\_00948" 23686 "s59E5H2" 0 "D-inositol 3-phosphate glycosyltransferase"  
"NT-P19\_00948" 23686 "s63E6H2" 0 "D-inositol 3-phosphate glycosyltransferase"  
"NT-P19\_00949" 23687 "s59E13H2" 0 "pyrroloquinoline quinone biosynthesis protein PqqE"  
"NT-P19\_00949" 23687 "s59E25H2" 0 "pyrroloquinoline quinone biosynthesis protein PqqE"  
"NT-P19\_00949" 23687 "s59E5H2" 0.00397022 "pyrroloquinoline quinone biosynthesis protein PqqE"  
"NT-P19\_00949" 23687 "s63E6H2" 0 "pyrroloquinoline quinone biosynthesis protein PqqE"  
"NT-P19\_00950" 23688 "s59E13H2" 0 "3 beta-hydroxysteroid dehydrogenase/Delta 5--"  
"NT-P19\_00950" 23688 "s59E25H2" 0 "3 beta-hydroxysteroid dehydrogenase/Delta 5--"  
"NT-P19\_00950" 23688 "s59E5H2" 0 "3 beta-hydroxysteroid dehydrogenase/Delta 5--"  
"NT-P19\_00950" 23688 "s63E6H2" 0 "3 beta-hydroxysteroid dehydrogenase/Delta 5--"  
"NT-P19\_00951" 23689 "s59E13H2" 0 "Asparagine synthetase [glutamine-hydrolyzing] 1"  
"NT-P19\_00951" 23689 "s59E25H2" 0 "Asparagine synthetase [glutamine-hydrolyzing] 1"  
"NT-P19\_00951" 23689 "s59E5H2" 0 "Asparagine synthetase [glutamine-hydrolyzing] 1"  
"NT-P19\_00951" 23689 "s63E6H2" 0 "Asparagine synthetase [glutamine-hydrolyzing] 1"  
"NT-P19\_00952" 23690 "s59E13H2" 0 "Putative acetyltransferase"  
"NT-P19\_00952" 23690 "s59E25H2" 0 "Putative acetyltransferase"  
"NT-P19\_00952" 23690 "s59E5H2" 0 "Putative acetyltransferase"  
"NT-P19\_00952" 23690 "s63E6H2" 0 "Putative acetyltransferase"  
"NT-P19\_00953" 23691 "s59E13H2" 0 "D-inositol 3-phosphate glycosyltransferase"  
"NT-P19\_00953" 23691 "s59E25H2" 0 "D-inositol 3-phosphate glycosyltransferase"  
"NT-P19\_00953" 23691 "s59E5H2" 0 "D-inositol 3-phosphate glycosyltransferase"  
"NT-P19\_00953" 23691 "s63E6H2" 0 "D-inositol 3-phosphate glycosyltransferase"  
"NT-P19\_00954" 23692 "s59E13H2" 0 "cobalt-precorrin-6Y C(15)-methyltransferase"  
"NT-P19\_00954" 23692 "s59E25H2" 0 "cobalt-precorrin-6Y C(15)-methyltransferase"  
"NT-P19\_00954" 23692 "s59E5H2" 0 "cobalt-precorrin-6Y C(15)-methyltransferase"  
"NT-P19\_00954" 23692 "s63E6H2" 0 "cobalt-precorrin-6Y C(15)-methyltransferase"

"NT-P19\_00955" 23693 "s59E13H2" 0 "putative flippase AgIR"  
"NT-P19\_00955" 23693 "s59E25H2" 0 "putative flippase AgIR"  
"NT-P19\_00955" 23693 "s59E5H2" 0 "putative flippase AgIR"  
"NT-P19\_00955" 23693 "s63E6H2" 4.195507e-06 "putative flippase AgIR"  
"NT-P19\_00957" 23695 "s59E13H2" 0 "hypothetical protein"  
"NT-P19\_00957" 23695 "s59E25H2" 0 "hypothetical protein"  
"NT-P19\_00957" 23695 "s59E5H2" 0 "hypothetical protein"  
"NT-P19\_00957" 23695 "s63E6H2" 0 "hypothetical protein"  
"NT-P19\_00958" 23696 "s59E13H2" 0 "Putative acetyltransferase EpsM"  
"NT-P19\_00958" 23696 "s59E25H2" 0 "Putative acetyltransferase EpsM"  
"NT-P19\_00958" 23696 "s59E5H2" 0 "Putative acetyltransferase EpsM"  
"NT-P19\_00958" 23696 "s63E6H2" 0 "Putative acetyltransferase EpsM"  
"NT-P19\_00959" 23697 "s59E13H2" 0 "N-acetylgalactosamine-N,N'-diacetylbaucillosaminyl-diphospho-undecaprenol 4-alpha-N-acetylgalactosaminyltransferase"  
"NT-P19\_00959" 23697 "s59E25H2" 0 "N-acetylgalactosamine-N,N'-diacetylbaucillosaminyl-diphospho-undecaprenol 4-alpha-N-acetylgalactosaminyltransferase"  
"NT-P19\_00959" 23697 "s59E5H2" 0 "N-acetylgalactosamine-N,N'-diacetylbaucillosaminyl-diphospho-undecaprenol 4-alpha-N-acetylgalactosaminyltransferase"  
"NT-P19\_00959" 23697 "s63E6H2" 0 "N-acetylgalactosamine-N,N'-diacetylbaucillosaminyl-diphospho-undecaprenol 4-alpha-N-acetylgalactosaminyltransferase"  
"NT-P19\_00960" 23698 "s59E13H2" 0 "FG-GAP repeat protein"  
"NT-P19\_00960" 23698 "s59E25H2" 0 "FG-GAP repeat protein"  
"NT-P19\_00960" 23698 "s59E5H2" 0.00280413 "FG-GAP repeat protein"  
"NT-P19\_00960" 23698 "s63E6H2" 0 "FG-GAP repeat protein"  
"NT-P19\_00961" 23699 "s59E13H2" 0 "bifunctional 3-demethylubiquinone-9 3-methyltransferase/ 2-octaprenyl-6-hydroxy phenol methylase"  
"NT-P19\_00961" 23699 "s59E25H2" 0 "bifunctional 3-demethylubiquinone-9 3-methyltransferase/ 2-octaprenyl-6-hydroxy phenol methylase"  
"NT-P19\_00961" 23699 "s59E5H2" 0 "bifunctional 3-demethylubiquinone-9 3-methyltransferase/ 2-octaprenyl-6-hydroxy phenol methylase"  
"NT-P19\_00961" 23699 "s63E6H2" 0 "bifunctional 3-demethylubiquinone-9 3-methyltransferase/ 2-octaprenyl-6-hydroxy phenol methylase"  
"NT-P19\_00962" 23700 "s59E13H2" 0 "hypothetical protein"  
"NT-P19\_00962" 23700 "s59E25H2" 0 "hypothetical protein"  
"NT-P19\_00962" 23700 "s59E5H2" 0.2575534 "hypothetical protein"  
"NT-P19\_00962" 23700 "s63E6H2" 0 "hypothetical protein"  
"NT-P19\_00963" 23701 "s59E13H2" 0.002230206 "hypothetical protein"  
"NT-P19\_00963" 23701 "s59E25H2" 0 "hypothetical protein"  
"NT-P19\_00963" 23701 "s59E5H2" 1.415036 "hypothetical protein"  
"NT-P19\_00963" 23701 "s63E6H2" 0.002309487 "hypothetical protein"  
"NT-P19\_00964" 23702 "s59E13H2" 0 "R-phenyllactate dehydratase activator"  
"NT-P19\_00964" 23702 "s59E25H2" 0 "R-phenyllactate dehydratase activator"  
"NT-P19\_00964" 23702 "s59E5H2" 0.001910628 "R-phenyllactate dehydratase activator"  
"NT-P19\_00964" 23702 "s63E6H2" 0.3647788 "R-phenyllactate dehydratase activator"  
"NT-P19\_00965" 23703 "s59E13H2" 0.008356719 "hypothetical protein"  
"NT-P19\_00965" 23703 "s59E25H2" 0 "hypothetical protein"  
"NT-P19\_00965" 23703 "s59E5H2" 0 "hypothetical protein"  
"NT-P19\_00965" 23703 "s63E6H2" 1.738298 "hypothetical protein"  
"NT-P19\_00966" 23704 "s59E13H2" 0 "TPR repeat-containing protein YrrB"  
"NT-P19\_00966" 23704 "s59E25H2" 0 "TPR repeat-containing protein YrrB"  
"NT-P19\_00966" 23704 "s59E5H2" 0 "TPR repeat-containing protein YrrB"  
"NT-P19\_00966" 23704 "s63E6H2" 1.70771 "TPR repeat-containing protein YrrB"  
"NT-P19\_00967" 23705 "s59E13H2" 0.001304902 "Alanine racemase"  
"NT-P19\_00967" 23705 "s59E25H2" 0.3433836 "Alanine racemase"  
"NT-P19\_00967" 23705 "s59E5H2" 0 "Alanine racemase"



"NT-P19\_00967" 23705 "s63E6H2" 2.437148 "Alanine racemase"  
"NT-P19\_00968" 23706 "s59E13H2" 0 "hypothetical protein"  
"NT-P19\_00968" 23706 "s59E25H2" 0 "hypothetical protein"  
"NT-P19\_00968" 23706 "s59E5H2" 0 "hypothetical protein"  
"NT-P19\_00968" 23706 "s63E6H2" 2.553841 "hypothetical protein"  
"NT-P19\_00969" 23707 "s59E13H2" 0 "Signal peptidase I S"  
"NT-P19\_00969" 23707 "s59E25H2" 0 "Signal peptidase I S"  
"NT-P19\_00969" 23707 "s59E5H2" 0 "Signal peptidase I S"  
"NT-P19\_00969" 23707 "s63E6H2" 2.384966 "Signal peptidase I S"  
"NT-P19\_00970" 23708 "s59E13H2" 0 "50S ribosomal protein L19"  
"NT-P19\_00970" 23708 "s59E25H2" 0.2367601 "50S ribosomal protein L19"  
"NT-P19\_00970" 23708 "s59E5H2" 0 "50S ribosomal protein L19"  
"NT-P19\_00970" 23708 "s63E6H2" 2.284317 "50S ribosomal protein L19"  
"NT-P19\_00971" 23709 "s59E13H2" 0 "tRNA (guanine-N(1)-)-methyltransferase"  
"NT-P19\_00971" 23709 "s59E25H2" 0.2069892 "tRNA (guanine-N(1)-)-methyltransferase"  
"NT-P19\_00971" 23709 "s59E5H2" 0 "tRNA (guanine-N(1)-)-methyltransferase"  
"NT-P19\_00971" 23709 "s63E6H2" 1.826328 "tRNA (guanine-N(1)-)-methyltransferase"  
"NT-P19\_00972" 23710 "s59E13H2" 0 "hypothetical protein"  
"NT-P19\_00972" 23710 "s59E25H2" 0 "hypothetical protein"  
"NT-P19\_00972" 23710 "s59E5H2" 0 "hypothetical protein"  
"NT-P19\_00972" 23710 "s63E6H2" 1.47425 "hypothetical protein"  
"NT-P19\_00973" 23711 "s59E13H2" 0 "30S ribosomal protein S16"  
"NT-P19\_00973" 23711 "s59E25H2" 0 "30S ribosomal protein S16"  
"NT-P19\_00973" 23711 "s59E5H2" 0 "30S ribosomal protein S16"  
"NT-P19\_00973" 23711 "s63E6H2" 1.333274 "30S ribosomal protein S16"  
"NT-P19\_00974" 23712 "s59E13H2" 0 "Ribulose-phosphate 3-epimerase"  
"NT-P19\_00974" 23712 "s59E25H2" 0 "Ribulose-phosphate 3-epimerase"  
"NT-P19\_00974" 23712 "s59E5H2" 0 "Ribulose-phosphate 3-epimerase"  
"NT-P19\_00974" 23712 "s63E6H2" 1.254176 "Ribulose-phosphate 3-epimerase"  
"NT-P19\_00975" 23713 "s59E13H2" 0 "Serine/threonine-protein kinase PrkC"  
"NT-P19\_00975" 23713 "s59E25H2" 0 "Serine/threonine-protein kinase PrkC"  
"NT-P19\_00975" 23713 "s59E5H2" 0 "Serine/threonine-protein kinase PrkC"  
"NT-P19\_00975" 23713 "s63E6H2" 1.014241 "Serine/threonine-protein kinase PrkC"  
"NT-P19\_00976" 23714 "s59E13H2" 0 "50S ribosomal protein L20"  
"NT-P19\_00976" 23714 "s59E25H2" 0 "50S ribosomal protein L20"  
"NT-P19\_00976" 23714 "s59E5H2" 0 "50S ribosomal protein L20"  
"NT-P19\_00976" 23714 "s63E6H2" 1.60424 "50S ribosomal protein L20"  
"NT-P19\_00977" 23715 "s59E13H2" 0 "50S ribosomal protein L35"  
"NT-P19\_00977" 23715 "s59E25H2" 0 "50S ribosomal protein L35"  
"NT-P19\_00977" 23715 "s59E5H2" 0 "50S ribosomal protein L35"  
"NT-P19\_00977" 23715 "s63E6H2" 0.294054 "50S ribosomal protein L35"  
"NT-P19\_00978" 23716 "s59E13H2" 0 "Translation initiation factor IF-3"  
"NT-P19\_00978" 23716 "s59E25H2" 0 "Translation initiation factor IF-3"  
"NT-P19\_00978" 23716 "s59E5H2" 0 "Translation initiation factor IF-3"  
"NT-P19\_00978" 23716 "s63E6H2" 0.5363767 "Translation initiation factor IF-3"  
"NT-P19\_00981" 23719 "s59E13H2" 0 "Polymer-forming cytoskeletal"  
"NT-P19\_00981" 23719 "s59E25H2" 0 "Polymer-forming cytoskeletal"

"NT-P19\_00981" 23719 "s59E5H2" 0 "Polymer-forming cytoskeletal"  
"NT-P19\_00981" 23719 "s63E6H2" 0.4059457 "Polymer-forming cytoskeletal"  
"NT-P19\_00982" 23720 "s59E13H2" 0 "Murein DD-endopeptidase MepM"  
"NT-P19\_00982" 23720 "s59E25H2" 0 "Murein DD-endopeptidase MepM"  
"NT-P19\_00982" 23720 "s59E5H2" 0 "Murein DD-endopeptidase MepM"  
"NT-P19\_00982" 23720 "s63E6H2" 0.3287277 "Murein DD-endopeptidase MepM"  
"NT-P19\_00983" 23721 "s59E13H2" 1.096937 "DNA polymerase I"  
"NT-P19\_00983" 23721 "s59E25H2" 0.0317092 "DNA polymerase I"  
"NT-P19\_00983" 23721 "s59E5H2" 0 "DNA polymerase I"  
"NT-P19\_00983" 23721 "s63E6H2" 0.2223666 "DNA polymerase I"  
"NT-P19\_00984" 23722 "s59E13H2" 0 "Glutamyl-tRNA(Gln) amidotransferase subunit A"  
"NT-P19\_00984" 23722 "s59E25H2" 0 "Glutamyl-tRNA(Gln) amidotransferase subunit A"  
"NT-P19\_00984" 23722 "s59E5H2" 0 "Glutamyl-tRNA(Gln) amidotransferase subunit A"  
"NT-P19\_00984" 23722 "s63E6H2" 0.469416 "Glutamyl-tRNA(Gln) amidotransferase subunit A"  
"NT-P19\_00985" 23723 "s59E13H2" 0 "Putative thymidylate synthase"  
"NT-P19\_00985" 23723 "s59E25H2" 0 "Putative thymidylate synthase"  
"NT-P19\_00985" 23723 "s59E5H2" 0 "Putative thymidylate synthase"  
"NT-P19\_00985" 23723 "s63E6H2" 0.4348362 "Putative thymidylate synthase"  
"NT-P19\_00986" 23724 "s59E13H2" 0 "UDP-glucose 4-epimerase"  
"NT-P19\_00986" 23724 "s59E25H2" 0 "UDP-glucose 4-epimerase"  
"NT-P19\_00986" 23724 "s59E5H2" 0 "UDP-glucose 4-epimerase"  
"NT-P19\_00986" 23724 "s63E6H2" 0.2459934 "UDP-glucose 4-epimerase"  
"NT-P19\_00987" 23725 "s59E13H2" 0 "Pyruvate synthase subunit PorB"  
"NT-P19\_00987" 23725 "s59E25H2" 0 "Pyruvate synthase subunit PorB"  
"NT-P19\_00987" 23725 "s59E5H2" 0.003957006 "Pyruvate synthase subunit PorB"  
"NT-P19\_00987" 23725 "s63E6H2" 0.05142515 "Pyruvate synthase subunit PorB"  
"NT-P19\_00988" 23726 "s59E13H2" 0 "Pyruvate synthase subunit PorA"  
"NT-P19\_00988" 23726 "s59E25H2" 0 "Pyruvate synthase subunit PorA"  
"NT-P19\_00988" 23726 "s59E5H2" 0.006610876 "Pyruvate synthase subunit PorA"  
"NT-P19\_00988" 23726 "s63E6H2" 0.207421 "Pyruvate synthase subunit PorA"  
"NT-P19\_00989" 23727 "s59E13H2" 0 "Pyruvate synthase subunit PorD"  
"NT-P19\_00989" 23727 "s59E25H2" 0 "Pyruvate synthase subunit PorD"  
"NT-P19\_00989" 23727 "s59E5H2" 0.005246515 "Pyruvate synthase subunit PorD"  
"NT-P19\_00989" 23727 "s63E6H2" 0.06396042 "Pyruvate synthase subunit PorD"  
"NT-P19\_00990" 23728 "s59E13H2" 0 "Pyruvate synthase subunit PorC"  
"NT-P19\_00990" 23728 "s59E25H2" 0 "Pyruvate synthase subunit PorC"  
"NT-P19\_00990" 23728 "s59E5H2" 0 "Pyruvate synthase subunit PorC"  
"NT-P19\_00990" 23728 "s63E6H2" 0.09675937 "Pyruvate synthase subunit PorC"  
"NT-P19\_00991" 23729 "s59E13H2" 0 "Putative nickel-responsive regulator"  
"NT-P19\_00991" 23729 "s59E25H2" 0 "Putative nickel-responsive regulator"  
"NT-P19\_00991" 23729 "s59E5H2" 0 "Putative nickel-responsive regulator"  
"NT-P19\_00991" 23729 "s63E6H2" 0 "Putative nickel-responsive regulator"  
"NT-P19\_00992" 23730 "s59E13H2" 0 "PIN domain protein"  
"NT-P19\_00992" 23730 "s59E25H2" 0 "PIN domain protein"  
"NT-P19\_00992" 23730 "s59E5H2" 0 "PIN domain protein"  
"NT-P19\_00992" 23730 "s63E6H2" 0 "PIN domain protein"  
"NT-P19\_00993" 23731 "s59E13H2" 0 "Alpha-L-fucosidase"

"NT-P19\_00993" 23731 "s59E25H2" 0 "Alpha-L-fucosidase"  
"NT-P19\_00993" 23731 "s59E5H2" 0.01060322 "Alpha-L-fucosidase"  
"NT-P19\_00993" 23731 "s63E6H2" 0.03527522 "Alpha-L-fucosidase"  
"NT-P19\_00994" 23732 "s59E13H2" 0 "Gluconate 5-dehydrogenase"  
"NT-P19\_00994" 23732 "s59E25H2" 0 "Gluconate 5-dehydrogenase"  
"NT-P19\_00994" 23732 "s59E5H2" 0 "Gluconate 5-dehydrogenase"  
"NT-P19\_00994" 23732 "s63E6H2" 0.1568583 "Gluconate 5-dehydrogenase"  
"NT-P19\_00995" 23733 "s59E13H2" 0 "D-tagatose 3-epimerase"  
"NT-P19\_00995" 23733 "s59E25H2" 0 "D-tagatose 3-epimerase"  
"NT-P19\_00995" 23733 "s59E5H2" 0 "D-tagatose 3-epimerase"  
"NT-P19\_00995" 23733 "s63E6H2" 0.136735 "D-tagatose 3-epimerase"  
"NT-P19\_00996" 23734 "s59E13H2" 0 "Creatinine amidohydrolase"  
"NT-P19\_00996" 23734 "s59E25H2" 0 "Creatinine amidohydrolase"  
"NT-P19\_00996" 23734 "s59E5H2" 0 "Creatinine amidohydrolase"  
"NT-P19\_00996" 23734 "s63E6H2" 0.1074171 "Creatinine amidohydrolase"  
"NT-P19\_00997" 23735 "s59E13H2" 0 "putative zinc-type alcohol dehydrogenase-like protein Yjmd"  
"NT-P19\_00997" 23735 "s59E25H2" 0 "putative zinc-type alcohol dehydrogenase-like protein Yjmd"  
"NT-P19\_00997" 23735 "s59E5H2" 0 "putative zinc-type alcohol dehydrogenase-like protein Yjmd"  
"NT-P19\_00997" 23735 "s63E6H2" 0.09336009 "putative zinc-type alcohol dehydrogenase-like protein Yjmd"  
"NT-P19\_00998" 23736 "s59E13H2" 0 "putative L-threonine 3-dehydrogenase"  
"NT-P19\_00998" 23736 "s59E25H2" 0 "putative L-threonine 3-dehydrogenase"  
"NT-P19\_00998" 23736 "s59E5H2" 0 "putative L-threonine 3-dehydrogenase"  
"NT-P19\_00998" 23736 "s63E6H2" 0.06825199 "putative L-threonine 3-dehydrogenase"  
"NT-P19\_00999" 23737 "s59E13H2" 0 "hypothetical protein"  
"NT-P19\_00999" 23737 "s59E25H2" 0 "hypothetical protein"  
"NT-P19\_00999" 23737 "s59E5H2" 0 "hypothetical protein"  
"NT-P19\_00999" 23737 "s63E6H2" 0 "hypothetical protein"  
"NT-P19\_01000" 23738 "s59E13H2" 0.001291753 "2,5-dihydroxypyridine 5,6-dioxygenase"  
"NT-P19\_01000" 23738 "s59E25H2" 0 "2,5-dihydroxypyridine 5,6-dioxygenase"  
"NT-P19\_01000" 23738 "s59E5H2" 0 "2,5-dihydroxypyridine 5,6-dioxygenase"  
"NT-P19\_01000" 23738 "s63E6H2" 0.2424826 "2,5-dihydroxypyridine 5,6-dioxygenase"  
"NT-P19\_01002" 23740 "s59E13H2" 0 "Peptidase T"  
"NT-P19\_01002" 23740 "s59E25H2" 0 "Peptidase T"  
"NT-P19\_01002" 23740 "s59E5H2" 0.001533923 "Peptidase T"  
"NT-P19\_01002" 23740 "s63E6H2" 0.1468634 "Peptidase T"  
"NT-P19\_01003" 23741 "s59E13H2" 0 "Xaa-Pro dipeptidase"  
"NT-P19\_01003" 23741 "s59E25H2" 0 "Xaa-Pro dipeptidase"  
"NT-P19\_01003" 23741 "s59E5H2" 0 "Xaa-Pro dipeptidase"  
"NT-P19\_01003" 23741 "s63E6H2" 0.07155252 "Xaa-Pro dipeptidase"  
"NT-P19\_01004" 23742 "s59E13H2" 0 "Acetophenone carboxylase delta subunit"  
"NT-P19\_01004" 23742 "s59E25H2" 0 "Acetophenone carboxylase delta subunit"  
"NT-P19\_01004" 23742 "s59E5H2" 0 "Acetophenone carboxylase delta subunit"  
"NT-P19\_01004" 23742 "s63E6H2" 0.03952058 "Acetophenone carboxylase delta subunit"  
"NT-P19\_01005" 23743 "s59E13H2" 0 "Acetophenone carboxylase gamma subunit"  
"NT-P19\_01005" 23743 "s59E25H2" 0 "Acetophenone carboxylase gamma subunit"  
"NT-P19\_01005" 23743 "s59E5H2" 0 "Acetophenone carboxylase gamma subunit"  
"NT-P19\_01005" 23743 "s63E6H2" 0.0178516 "Acetophenone carboxylase gamma subunit"

"NT-P19\_01006" 23744 "s59E13H2" 0 "Tungsten-containing aldehyde ferredoxin oxidoreductase"  
"NT-P19\_01006" 23744 "s59E25H2" 0 "Tungsten-containing aldehyde ferredoxin oxidoreductase"  
"NT-P19\_01006" 23744 "s59E5H2" 0 "Tungsten-containing aldehyde ferredoxin oxidoreductase"  
"NT-P19\_01006" 23744 "s63E6H2" 0.01184379 "Tungsten-containing aldehyde ferredoxin oxidoreductase"  
"NT-P19\_01007" 23745 "s59E13H2" 0 "Hydrogen cyanide synthase subunit HcnB"  
"NT-P19\_01007" 23745 "s59E25H2" 0 "Hydrogen cyanide synthase subunit HcnB"  
"NT-P19\_01007" 23745 "s59E5H2" 0 "Hydrogen cyanide synthase subunit HcnB"  
"NT-P19\_01007" 23745 "s63E6H2" 0 "Hydrogen cyanide synthase subunit HcnB"  
"NT-P19\_01008" 23746 "s59E13H2" 0 "Hydrogen cyanide synthase subunit HcnA"  
"NT-P19\_01008" 23746 "s59E25H2" 0 "Hydrogen cyanide synthase subunit HcnA"  
"NT-P19\_01008" 23746 "s59E5H2" 0 "Hydrogen cyanide synthase subunit HcnA"  
"NT-P19\_01008" 23746 "s63E6H2" 0.001023313 "Hydrogen cyanide synthase subunit HcnA"  
"NT-P19\_01009" 23747 "s59E13H2" 0 "Hydrogen cyanide synthase subunit HcnC precursor"  
"NT-P19\_01009" 23747 "s59E25H2" 0 "Hydrogen cyanide synthase subunit HcnC precursor"  
"NT-P19\_01009" 23747 "s59E5H2" 0 "Hydrogen cyanide synthase subunit HcnC precursor"  
"NT-P19\_01009" 23747 "s63E6H2" 0.01184484 "Hydrogen cyanide synthase subunit HcnC precursor"  
"NT-P19\_01010" 23748 "s59E13H2" 0 "Hydrogen cyanide synthase subunit HcnB"  
"NT-P19\_01010" 23748 "s59E25H2" 0 "Hydrogen cyanide synthase subunit HcnB"  
"NT-P19\_01010" 23748 "s59E5H2" 0 "Hydrogen cyanide synthase subunit HcnB"  
"NT-P19\_01010" 23748 "s63E6H2" 0.05286339 "Hydrogen cyanide synthase subunit HcnB"  
"NT-P19\_01011" 23749 "s59E13H2" 0 "4-hydroxy-tetrahydrodipicolinate synthase"  
"NT-P19\_01011" 23749 "s59E25H2" 0 "4-hydroxy-tetrahydrodipicolinate synthase"  
"NT-P19\_01011" 23749 "s59E5H2" 0 "4-hydroxy-tetrahydrodipicolinate synthase"  
"NT-P19\_01011" 23749 "s63E6H2" 0.0340413 "4-hydroxy-tetrahydrodipicolinate synthase"  
"NT-P19\_01012" 23750 "s59E13H2" 0 "Proline racemase"  
"NT-P19\_01012" 23750 "s59E25H2" 0 "Proline racemase"  
"NT-P19\_01012" 23750 "s59E5H2" 0 "Proline racemase"  
"NT-P19\_01012" 23750 "s63E6H2" 0.0259548 "Proline racemase"  
"NT-P19\_01013" 23751 "s59E13H2" 0 "Gamma-glutamyl phosphate reductase"  
"NT-P19\_01013" 23751 "s59E25H2" 0 "Gamma-glutamyl phosphate reductase"  
"NT-P19\_01013" 23751 "s59E5H2" 0 "Gamma-glutamyl phosphate reductase"  
"NT-P19\_01013" 23751 "s63E6H2" 0.02344662 "Gamma-glutamyl phosphate reductase"  
"NT-P19\_01014" 23752 "s59E13H2" 0 "Threonylcarbamoyl-AMP synthase"  
"NT-P19\_01014" 23752 "s59E25H2" 0 "Threonylcarbamoyl-AMP synthase"  
"NT-P19\_01014" 23752 "s59E5H2" 0 "Threonylcarbamoyl-AMP synthase"  
"NT-P19\_01014" 23752 "s63E6H2" 0.03717597 "Threonylcarbamoyl-AMP synthase"  
"NT-P19\_01015" 23753 "s59E13H2" 0 "tRNA-specific adenosine deaminase"  
"NT-P19\_01015" 23753 "s59E25H2" 0 "tRNA-specific adenosine deaminase"  
"NT-P19\_01015" 23753 "s59E5H2" 0 "tRNA-specific adenosine deaminase"  
"NT-P19\_01015" 23753 "s63E6H2" 0.02891369 "tRNA-specific adenosine deaminase"  
"NT-P19\_01016" 23754 "s59E13H2" 0 "hypothetical protein"  
"NT-P19\_01016" 23754 "s59E25H2" 0 "hypothetical protein"  
"NT-P19\_01016" 23754 "s59E5H2" 0 "hypothetical protein"  
"NT-P19\_01016" 23754 "s63E6H2" 0.03724771 "hypothetical protein"  
"NT-P19\_01017" 23755 "s59E13H2" 0 "V-type ATP synthase subunit I"  
"NT-P19\_01017" 23755 "s59E25H2" 0 "V-type ATP synthase subunit I"  
"NT-P19\_01017" 23755 "s59E5H2" 0 "V-type ATP synthase subunit I"

"NT-P19\_01017" 23755 "s63E6H2" 0.7347062 "V-type ATP synthase subunit I"  
"NT-P19\_01018" 23756 "s59E13H2" 0.0007748002 "NAD-dependent methanol dehydrogenase"  
"NT-P19\_01018" 23756 "s59E25H2" 0 "NAD-dependent methanol dehydrogenase"  
"NT-P19\_01018" 23756 "s59E5H2" 0 "NAD-dependent methanol dehydrogenase"  
"NT-P19\_01018" 23756 "s63E6H2" 1.699898 "NAD-dependent methanol dehydrogenase"  
"NT-P19\_01019" 23757 "s59E13H2" 0 "Glutamine--fructose-6-phosphate aminotransferase [isomerizing]"  
"NT-P19\_01019" 23757 "s59E25H2" 0 "Glutamine--fructose-6-phosphate aminotransferase [isomerizing]"  
"NT-P19\_01019" 23757 "s59E5H2" 0.01308083 "Glutamine--fructose-6-phosphate aminotransferase [isomerizing]"  
"NT-P19\_01019" 23757 "s63E6H2" 3.096537 "Glutamine--fructose-6-phosphate aminotransferase [isomerizing]"  
"NT-P19\_01020" 23758 "s59E13H2" 0 "hypothetical protein"  
"NT-P19\_01020" 23758 "s59E25H2" 0 "hypothetical protein"  
"NT-P19\_01020" 23758 "s59E5H2" 0.01901271 "hypothetical protein"  
"NT-P19\_01020" 23758 "s63E6H2" 3.674098 "hypothetical protein"  
"NT-P19\_01021" 23759 "s59E13H2" 0 "hypothetical protein"  
"NT-P19\_01021" 23759 "s59E25H2" 0 "hypothetical protein"  
"NT-P19\_01021" 23759 "s59E5H2" 0.01687344 "hypothetical protein"  
"NT-P19\_01021" 23759 "s63E6H2" 4.270329 "hypothetical protein"  
"NT-P19\_01022" 23760 "s59E13H2" 0 "L-aspartate oxidase"  
"NT-P19\_01022" 23760 "s59E25H2" 0.1826183 "L-aspartate oxidase"  
"NT-P19\_01022" 23760 "s59E5H2" 0.006688008 "L-aspartate oxidase"  
"NT-P19\_01022" 23760 "s63E6H2" 3.553893 "L-aspartate oxidase"  
"NT-P19\_01023" 23761 "s59E13H2" 0 "5-exo-hydroxycamphor dehydrogenase"  
"NT-P19\_01023" 23761 "s59E25H2" 0 "5-exo-hydroxycamphor dehydrogenase"  
"NT-P19\_01023" 23761 "s59E5H2" 0 "5-exo-hydroxycamphor dehydrogenase"  
"NT-P19\_01023" 23761 "s63E6H2" 0.342075 "5-exo-hydroxycamphor dehydrogenase"  
"NT-P19\_01024" 23762 "s59E13H2" 0 "Sulfide dehydrogenase subunit alpha precursor"  
"NT-P19\_01024" 23762 "s59E25H2" 0 "Sulfide dehydrogenase subunit alpha precursor"  
"NT-P19\_01024" 23762 "s59E5H2" 0 "Sulfide dehydrogenase subunit alpha precursor"  
"NT-P19\_01024" 23762 "s63E6H2" 0.1776139 "Sulfide dehydrogenase subunit alpha precursor"  
"NT-P19\_01025" 23763 "s59E13H2" 0 "Xylose isomerase-like TIM barrel"  
"NT-P19\_01025" 23763 "s59E25H2" 0 "Xylose isomerase-like TIM barrel"  
"NT-P19\_01025" 23763 "s59E5H2" 0 "Xylose isomerase-like TIM barrel"  
"NT-P19\_01025" 23763 "s63E6H2" 0 "Xylose isomerase-like TIM barrel"  
"NT-P19\_01026" 23764 "s59E13H2" 0 "Serine/threonine-protein kinase pkn1"  
"NT-P19\_01026" 23764 "s59E25H2" 0 "Serine/threonine-protein kinase pkn1"  
"NT-P19\_01026" 23764 "s59E5H2" 0 "Serine/threonine-protein kinase pkn1"  
"NT-P19\_01026" 23764 "s63E6H2" 0 "Serine/threonine-protein kinase pkn1"  
"NT-P19\_01027" 23765 "s59E13H2" 0 "4-hydroxy-tetrahydrodipicolinate synthase"  
"NT-P19\_01027" 23765 "s59E25H2" 0 "4-hydroxy-tetrahydrodipicolinate synthase"  
"NT-P19\_01027" 23765 "s59E5H2" 0 "4-hydroxy-tetrahydrodipicolinate synthase"  
"NT-P19\_01027" 23765 "s63E6H2" 0 "4-hydroxy-tetrahydrodipicolinate synthase"  
"NT-P19\_01028" 23766 "s59E13H2" 0 "Glyoxylate reductase"  
"NT-P19\_01028" 23766 "s59E25H2" 0 "Glyoxylate reductase"  
"NT-P19\_01028" 23766 "s59E5H2" 0 "Glyoxylate reductase"  
"NT-P19\_01028" 23766 "s63E6H2" 0 "Glyoxylate reductase"  
"NT-P19\_01029" 23767 "s59E13H2" 0 "Intracellular protease 1"  
"NT-P19\_01029" 23767 "s59E25H2" 0 "Intracellular protease 1"

"NT-P19\_01029" 23767 "s59E5H2" 0 "Intracellular protease 1"  
"NT-P19\_01029" 23767 "s63E6H2" 0 "Intracellular protease 1"  
"NT-P19\_01030" 23768 "s59E13H2" 0 "putative oxidoreductase YcjS"  
"NT-P19\_01030" 23768 "s59E25H2" 0 "putative oxidoreductase YcjS"  
"NT-P19\_01030" 23768 "s59E5H2" 0 "putative oxidoreductase YcjS"  
"NT-P19\_01030" 23768 "s63E6H2" 0 "putative oxidoreductase YcjS"  
"NT-P19\_01031" 23769 "s59E13H2" 0 "L-arabinose transport system permease protein AraQ"  
"NT-P19\_01031" 23769 "s59E25H2" 0 "L-arabinose transport system permease protein AraQ"  
"NT-P19\_01031" 23769 "s59E5H2" 0 "L-arabinose transport system permease protein AraQ"  
"NT-P19\_01031" 23769 "s63E6H2" 0 "L-arabinose transport system permease protein AraQ"  
"NT-P19\_01032" 23770 "s59E13H2" 0 "2-dehydro-3-deoxygluconokinase"  
"NT-P19\_01032" 23770 "s59E25H2" 0 "2-dehydro-3-deoxygluconokinase"  
"NT-P19\_01032" 23770 "s59E5H2" 0.09258473 "2-dehydro-3-deoxygluconokinase"  
"NT-P19\_01032" 23770 "s63E6H2" 0.6093526 "2-dehydro-3-deoxygluconokinase"  
"NT-P19\_01033" 23771 "s59E13H2" 0 "Glycine/sarcosine N-methyltransferase"  
"NT-P19\_01033" 23771 "s59E25H2" 0 "Glycine/sarcosine N-methyltransferase"  
"NT-P19\_01033" 23771 "s59E5H2" 0.08946724 "Glycine/sarcosine N-methyltransferase"  
"NT-P19\_01033" 23771 "s63E6H2" 0.3334864 "Glycine/sarcosine N-methyltransferase"  
"NT-P19\_01034" 23772 "s59E13H2" 0 "hypothetical protein"  
"NT-P19\_01034" 23772 "s59E25H2" 0 "hypothetical protein"  
"NT-P19\_01034" 23772 "s59E5H2" 0.03710246 "hypothetical protein"  
"NT-P19\_01034" 23772 "s63E6H2" 0.4669537 "hypothetical protein"  
"NT-P19\_01035" 23773 "s59E13H2" 0 "Chondroitin synthase"  
"NT-P19\_01035" 23773 "s59E25H2" 0 "Chondroitin synthase"  
"NT-P19\_01035" 23773 "s59E5H2" 0.05713473 "Chondroitin synthase"  
"NT-P19\_01035" 23773 "s63E6H2" 0.2716959 "Chondroitin synthase"  
"NT-P19\_01036" 23774 "s59E13H2" 0 "putative ABC transporter ATP-binding protein"  
"NT-P19\_01036" 23774 "s59E25H2" 0 "putative ABC transporter ATP-binding protein"  
"NT-P19\_01036" 23774 "s59E5H2" 0.01218675 "putative ABC transporter ATP-binding protein"  
"NT-P19\_01036" 23774 "s63E6H2" 0.1155135 "putative ABC transporter ATP-binding protein"  
"NT-P19\_01037" 23775 "s59E13H2" 0 "N-acetylgalactosamine-N,N'-diacetylbaucillosaminy-diphospho-undecaprenol 4-alpha-N-acetylgalactosaminytransferase"  
"NT-P19\_01037" 23775 "s59E25H2" 0 "N-acetylgalactosamine-N,N'-diacetylbaucillosaminy-diphospho-undecaprenol 4-alpha-N-acetylgalactosaminytransferase"  
"NT-P19\_01037" 23775 "s59E5H2" 0.04431517 "N-acetylgalactosamine-N,N'-diacetylbaucillosaminy-diphospho-undecaprenol 4-alpha-N-acetylgalactosaminytransferase"  
"NT-P19\_01037" 23775 "s63E6H2" 0.02274943 "N-acetylgalactosamine-N,N'-diacetylbaucillosaminy-diphospho-undecaprenol 4-alpha-N-acetylgalactosaminytransferase"  
"NT-P19\_01038" 23776 "s59E13H2" 0 "lipid-A-disaccharide synthase"  
"NT-P19\_01038" 23776 "s59E25H2" 0 "lipid-A-disaccharide synthase"  
"NT-P19\_01038" 23776 "s59E5H2" 0.04222133 "lipid-A-disaccharide synthase"  
"NT-P19\_01038" 23776 "s63E6H2" 0.03342134 "lipid-A-disaccharide synthase"  
"NT-P19\_01039" 23777 "s59E13H2" 0 "hypothetical protein"  
"NT-P19\_01039" 23777 "s59E25H2" 0 "hypothetical protein"  
"NT-P19\_01039" 23777 "s59E5H2" 0.04444787 "hypothetical protein"  
"NT-P19\_01039" 23777 "s63E6H2" 0.01821134 "hypothetical protein"  
"NT-P19\_01040" 23778 "s59E13H2" 0 "Lipid-A-disaccharide synthase"  
"NT-P19\_01040" 23778 "s59E25H2" 0 "Lipid-A-disaccharide synthase"  
"NT-P19\_01040" 23778 "s59E5H2" 0.009577537 "Lipid-A-disaccharide synthase"  
"NT-P19\_01040" 23778 "s63E6H2" 0.01921896 "Lipid-A-disaccharide synthase"  
"NT-P19\_01041" 23779 "s59E13H2" 0 "Pantothenate synthetase"

"NT-P19\_01041" 23779 "s59E25H2" 0 "Pantothenate synthetase"  
"NT-P19\_01041" 23779 "s59E5H2" 0.01757216 "Pantothenate synthetase"  
"NT-P19\_01041" 23779 "s63E6H2" 0.01351189 "Pantothenate synthetase"  
"NT-P19\_01042" 23780 "s59E13H2" 0 "3-phosphoshikimate 1-carboxyvinyltransferase 1"  
"NT-P19\_01042" 23780 "s59E25H2" 0 "3-phosphoshikimate 1-carboxyvinyltransferase 1"  
"NT-P19\_01042" 23780 "s59E5H2" 0.008105866 "3-phosphoshikimate 1-carboxyvinyltransferase 1"  
"NT-P19\_01042" 23780 "s63E6H2" 0.01591592 "3-phosphoshikimate 1-carboxyvinyltransferase 1"  
"NT-P19\_01043" 23781 "s59E13H2" 0 "Phospho-2-dehydro-3-deoxyheptonate aldolase"  
"NT-P19\_01043" 23781 "s59E25H2" 0 "Phospho-2-dehydro-3-deoxyheptonate aldolase"  
"NT-P19\_01043" 23781 "s59E5H2" 0.003980988 "Phospho-2-dehydro-3-deoxyheptonate aldolase"  
"NT-P19\_01043" 23781 "s63E6H2" 0.005341861 "Phospho-2-dehydro-3-deoxyheptonate aldolase"  
"NT-P19\_01044" 23782 "s59E13H2" 0 "P-protein"  
"NT-P19\_01044" 23782 "s59E25H2" 0 "P-protein"  
"NT-P19\_01044" 23782 "s59E5H2" 0.007586847 "P-protein"  
"NT-P19\_01044" 23782 "s63E6H2" 0.006331162 "P-protein"  
"NT-P19\_01045" 23783 "s59E13H2" 0 "3-dehydroquininate dehydratase"  
"NT-P19\_01045" 23783 "s59E25H2" 0 "3-dehydroquininate dehydratase"  
"NT-P19\_01045" 23783 "s59E5H2" 0 "3-dehydroquininate dehydratase"  
"NT-P19\_01045" 23783 "s63E6H2" 0.01466017 "3-dehydroquininate dehydratase"  
"NT-P19\_01046" 23784 "s59E13H2" 0 "3-dehydroquininate synthase"  
"NT-P19\_01046" 23784 "s59E25H2" 0 "3-dehydroquininate synthase"  
"NT-P19\_01046" 23784 "s59E5H2" 0 "3-dehydroquininate synthase"  
"NT-P19\_01046" 23784 "s63E6H2" 0.008345765 "3-dehydroquininate synthase"  
"NT-P19\_01047" 23785 "s59E13H2" 0 "Shikimate kinase"  
"NT-P19\_01047" 23785 "s59E25H2" 0 "Shikimate kinase"  
"NT-P19\_01047" 23785 "s59E5H2" 0 "Shikimate kinase"  
"NT-P19\_01047" 23785 "s63E6H2" 0.007237249 "Shikimate kinase"  
"NT-P19\_01048" 23786 "s59E13H2" 0 "Isopropylmalate/citramalate isomerase large subunit"  
"NT-P19\_01048" 23786 "s59E25H2" 0 "Isopropylmalate/citramalate isomerase large subunit"  
"NT-P19\_01048" 23786 "s59E5H2" 0 "Isopropylmalate/citramalate isomerase large subunit"  
"NT-P19\_01048" 23786 "s63E6H2" 0.02863181 "Isopropylmalate/citramalate isomerase large subunit"  
"NT-P19\_01049" 23787 "s59E13H2" 0 "Hydrogenase 2 maturation protease"  
"NT-P19\_01049" 23787 "s59E25H2" 0 "Hydrogenase 2 maturation protease"  
"NT-P19\_01049" 23787 "s59E5H2" 0 "Hydrogenase 2 maturation protease"  
"NT-P19\_01049" 23787 "s63E6H2" 0.06825215 "Hydrogenase 2 maturation protease"  
"NT-P19\_01050" 23788 "s59E13H2" 0 "hypothetical protein"  
"NT-P19\_01050" 23788 "s59E25H2" 0 "hypothetical protein"  
"NT-P19\_01050" 23788 "s59E5H2" 0 "hypothetical protein"  
"NT-P19\_01050" 23788 "s63E6H2" 0 "hypothetical protein"  
"NT-P19\_01051" 23789 "s59E13H2" 0 "mRNA interferase EndoA"  
"NT-P19\_01051" 23789 "s59E25H2" 0 "mRNA interferase EndoA"  
"NT-P19\_01051" 23789 "s59E5H2" 0 "mRNA interferase EndoA"  
"NT-P19\_01051" 23789 "s63E6H2" 0 "mRNA interferase EndoA"  
"NT-P19\_01054" 23792 "s59E13H2" 0 "Bifunctional homocysteine S-methyltransferase/5,10-methylenetetrahydrofolate reductase"  
"NT-P19\_01054" 23792 "s59E25H2" 0 "Bifunctional homocysteine S-methyltransferase/5,10-methylenetetrahydrofolate reductase"  
"NT-P19\_01054" 23792 "s59E5H2" 0 "Bifunctional homocysteine S-methyltransferase/5,10-methylenetetrahydrofolate reductase"  
"NT-P19\_01054" 23792 "s63E6H2" 0.005038315 "Bifunctional homocysteine S-methyltransferase/5,10-methylenetetrahydrofolate reductase"

"NT-P19\_01055" 23793 "s59E13H2" 0 "hypothetical protein"  
"NT-P19\_01055" 23793 "s59E25H2" 0 "hypothetical protein"  
"NT-P19\_01055" 23793 "s59E5H2" 0 "hypothetical protein"  
"NT-P19\_01055" 23793 "s63E6H2" 0 "hypothetical protein"  
"NT-P19\_01056" 23794 "s59E13H2" 0 "Electron transport complex protein RnfC"  
"NT-P19\_01056" 23794 "s59E25H2" 0 "Electron transport complex protein RnfC"  
"NT-P19\_01056" 23794 "s59E5H2" 0.004010903 "Electron transport complex protein RnfC"  
"NT-P19\_01056" 23794 "s63E6H2" 0.0001320932 "Electron transport complex protein RnfC"  
"NT-P19\_01057" 23795 "s59E13H2" 0 "Formate dehydrogenase subunit alpha"  
"NT-P19\_01057" 23795 "s59E25H2" 0 "Formate dehydrogenase subunit alpha"  
"NT-P19\_01057" 23795 "s59E5H2" 0.003978969 "Formate dehydrogenase subunit alpha"  
"NT-P19\_01057" 23795 "s63E6H2" 0.1005245 "Formate dehydrogenase subunit alpha"  
"NT-P19\_01058" 23796 "s59E13H2" 0 "Sulfide dehydrogenase subunit alpha precursor"  
"NT-P19\_01058" 23796 "s59E25H2" 0 "Sulfide dehydrogenase subunit alpha precursor"  
"NT-P19\_01058" 23796 "s59E5H2" 0 "Sulfide dehydrogenase subunit alpha precursor"  
"NT-P19\_01058" 23796 "s63E6H2" 0 "Sulfide dehydrogenase subunit alpha precursor"  
"NT-P19\_01059" 23797 "s59E13H2" 0 "30S ribosomal protein S20"  
"NT-P19\_01059" 23797 "s59E25H2" 0 "30S ribosomal protein S20"  
"NT-P19\_01059" 23797 "s59E5H2" 0 "30S ribosomal protein S20"  
"NT-P19\_01059" 23797 "s63E6H2" 0.005650163 "30S ribosomal protein S20"  
"NT-P19\_01060" 23798 "s59E13H2" 0 "putative peptidoglycan biosynthesis protein MurJ"  
"NT-P19\_01060" 23798 "s59E25H2" 0 "putative peptidoglycan biosynthesis protein MurJ"  
"NT-P19\_01060" 23798 "s59E5H2" 0 "putative peptidoglycan biosynthesis protein MurJ"  
"NT-P19\_01060" 23798 "s63E6H2" 0.007683221 "putative peptidoglycan biosynthesis protein MurJ"  
"NT-P19\_01061" 23799 "s59E13H2" 0 "Bifunctional protein GlmU"  
"NT-P19\_01061" 23799 "s59E25H2" 0 "Bifunctional protein GlmU"  
"NT-P19\_01061" 23799 "s59E5H2" 0 "Bifunctional protein GlmU"  
"NT-P19\_01061" 23799 "s63E6H2" 0.012046 "Bifunctional protein GlmU"  
"NT-P19\_01062" 23800 "s59E13H2" 0 "Glycerol kinase"  
"NT-P19\_01062" 23800 "s59E25H2" 0 "Glycerol kinase"  
"NT-P19\_01062" 23800 "s59E5H2" 0.4905272 "Glycerol kinase"  
"NT-P19\_01062" 23800 "s63E6H2" 0.004040628 "Glycerol kinase"  
"NT-P19\_01063" 23801 "s59E13H2" 0 "putative L-threonine 3-dehydrogenase"  
"NT-P19\_01063" 23801 "s59E25H2" 0 "putative L-threonine 3-dehydrogenase"  
"NT-P19\_01063" 23801 "s59E5H2" 0 "putative L-threonine 3-dehydrogenase"  
"NT-P19\_01063" 23801 "s63E6H2" 0.002674223 "putative L-threonine 3-dehydrogenase"  
"NT-P19\_01064" 23802 "s59E13H2" 0 "Sorbitol-6-phosphate 2-dehydrogenase"  
"NT-P19\_01064" 23802 "s59E25H2" 0 "Sorbitol-6-phosphate 2-dehydrogenase"  
"NT-P19\_01064" 23802 "s59E5H2" 0 "Sorbitol-6-phosphate 2-dehydrogenase"  
"NT-P19\_01064" 23802 "s63E6H2" 0.01568348 "Sorbitol-6-phosphate 2-dehydrogenase"  
"NT-P19\_01065" 23803 "s59E13H2" 0 "Ketoisovalerate oxidoreductase subunit VorA"  
"NT-P19\_01065" 23803 "s59E25H2" 0 "Ketoisovalerate oxidoreductase subunit VorA"  
"NT-P19\_01065" 23803 "s59E5H2" 0 "Ketoisovalerate oxidoreductase subunit VorA"  
"NT-P19\_01065" 23803 "s63E6H2" 0.06080944 "Ketoisovalerate oxidoreductase subunit VorA"  
"NT-P19\_01066" 23804 "s59E13H2" 0 "hypothetical protein"  
"NT-P19\_01066" 23804 "s59E25H2" 0 "hypothetical protein"  
"NT-P19\_01066" 23804 "s59E5H2" 0 "hypothetical protein"



"NT-P19\_01066" 23804 "s63E6H2" 0.04628414 "hypothetical protein"  
"NT-P19\_01067" 23805 "s59E13H2" 0 "Coenzyme A biosynthesis bifunctional protein CoaBC"  
"NT-P19\_01067" 23805 "s59E25H2" 0 "Coenzyme A biosynthesis bifunctional protein CoaBC"  
"NT-P19\_01067" 23805 "s59E5H2" 0 "Coenzyme A biosynthesis bifunctional protein CoaBC"  
"NT-P19\_01067" 23805 "s63E6H2" 0.01431041 "Coenzyme A biosynthesis bifunctional protein CoaBC"  
"NT-P19\_01068" 23806 "s59E13H2" 0 "putative metallo-hydrolase"  
"NT-P19\_01068" 23806 "s59E25H2" 0 "putative metallo-hydrolase"  
"NT-P19\_01068" 23806 "s59E5H2" 0 "putative metallo-hydrolase"  
"NT-P19\_01068" 23806 "s63E6H2" 0.0115863 "putative metallo-hydrolase"  
"NT-P19\_01069" 23807 "s59E13H2" 0 "Adenine phosphoribosyltransferase"  
"NT-P19\_01069" 23807 "s59E25H2" 0 "Adenine phosphoribosyltransferase"  
"NT-P19\_01069" 23807 "s59E5H2" 0 "Adenine phosphoribosyltransferase"  
"NT-P19\_01069" 23807 "s63E6H2" 0.004689064 "Adenine phosphoribosyltransferase"  
"NT-P19\_01070" 23808 "s59E13H2" 0 "Single-stranded-DNA-specific exonuclease RecJ"  
"NT-P19\_01070" 23808 "s59E25H2" 0 "Single-stranded-DNA-specific exonuclease RecJ"  
"NT-P19\_01070" 23808 "s59E5H2" 0 "Single-stranded-DNA-specific exonuclease RecJ"  
"NT-P19\_01070" 23808 "s63E6H2" 0.002599881 "Single-stranded-DNA-specific exonuclease RecJ"  
"NT-P19\_01071" 23809 "s59E13H2" 0 "Thiamine biosynthesis lipoprotein AppE precursor"  
"NT-P19\_01071" 23809 "s59E25H2" 0 "Thiamine biosynthesis lipoprotein AppE precursor"  
"NT-P19\_01071" 23809 "s59E5H2" 0 "Thiamine biosynthesis lipoprotein AppE precursor"  
"NT-P19\_01071" 23809 "s63E6H2" 0.00340781 "Thiamine biosynthesis lipoprotein AppE precursor"  
"NT-P19\_01072" 23810 "s59E13H2" 0 "hypothetical protein"  
"NT-P19\_01072" 23810 "s59E25H2" 0 "hypothetical protein"  
"NT-P19\_01072" 23810 "s59E5H2" 0 "hypothetical protein"  
"NT-P19\_01072" 23810 "s63E6H2" 0.005456175 "hypothetical protein"  
"NT-P19\_01073" 23811 "s59E13H2" 0 "Dihydrolipoyl dehydrogenase"  
"NT-P19\_01073" 23811 "s59E25H2" 0 "Dihydrolipoyl dehydrogenase"  
"NT-P19\_01073" 23811 "s59E5H2" 0 "Dihydrolipoyl dehydrogenase"  
"NT-P19\_01073" 23811 "s63E6H2" 0.002162402 "Dihydrolipoyl dehydrogenase"  
"NT-P19\_01074" 23812 "s59E13H2" 0.006248315 "Transposase DDE domain protein"  
"NT-P19\_01074" 23812 "s59E25H2" 0 "Transposase DDE domain protein"  
"NT-P19\_01074" 23812 "s59E5H2" 0.1233535 "Transposase DDE domain protein"  
"NT-P19\_01074" 23812 "s63E6H2" 0.3776512 "Transposase DDE domain protein"  
"NT-P19\_01075" 23813 "s59E13H2" 0 "tRNA N6-adenosine threonylcarbamoyltransferase"  
"NT-P19\_01075" 23813 "s59E25H2" 0 "tRNA N6-adenosine threonylcarbamoyltransferase"  
"NT-P19\_01075" 23813 "s59E5H2" 0.02014039 "tRNA N6-adenosine threonylcarbamoyltransferase"  
"NT-P19\_01075" 23813 "s63E6H2" 0.001467207 "tRNA N6-adenosine threonylcarbamoyltransferase"  
"NT-P19\_01076" 23814 "s59E13H2" 0 "Autoinducer 2 kinase LsrK"  
"NT-P19\_01076" 23814 "s59E25H2" 0 "Autoinducer 2 kinase LsrK"  
"NT-P19\_01076" 23814 "s59E5H2" 0 "Autoinducer 2 kinase LsrK"  
"NT-P19\_01076" 23814 "s63E6H2" 0.2293635 "Autoinducer 2 kinase LsrK"  
"NT-P19\_01077" 23815 "s59E13H2" 0 "putative L-threonine 3-dehydrogenase"  
"NT-P19\_01077" 23815 "s59E25H2" 0 "putative L-threonine 3-dehydrogenase"  
"NT-P19\_01077" 23815 "s59E5H2" 0.01159977 "putative L-threonine 3-dehydrogenase"  
"NT-P19\_01077" 23815 "s63E6H2" 0.1884289 "putative L-threonine 3-dehydrogenase"  
"NT-P19\_01078" 23816 "s59E13H2" 0 "Galactitol-1-phosphate 5-dehydrogenase"  
"NT-P19\_01078" 23816 "s59E25H2" 0 "Galactitol-1-phosphate 5-dehydrogenase"

"NT-P19\_01078" 23816 "s59E5H2" 0 "Galactitol-1-phosphate 5-dehydrogenase"  
"NT-P19\_01078" 23816 "s63E6H2" 0.1106338 "Galactitol-1-phosphate 5-dehydrogenase"  
"NT-P19\_01079" 23817 "s59E13H2" 0 "Ribulose biphosphate carboxylase"  
"NT-P19\_01079" 23817 "s59E25H2" 0 "Ribulose biphosphate carboxylase"  
"NT-P19\_01079" 23817 "s59E5H2" 0 "Ribulose biphosphate carboxylase"  
"NT-P19\_01079" 23817 "s63E6H2" 0.05691853 "Ribulose biphosphate carboxylase"  
"NT-P19\_01080" 23818 "s59E13H2" 0 "Glucose--fructose oxidoreductase precursor"  
"NT-P19\_01080" 23818 "s59E25H2" 0 "Glucose--fructose oxidoreductase precursor"  
"NT-P19\_01080" 23818 "s59E5H2" 0 "Glucose--fructose oxidoreductase precursor"  
"NT-P19\_01080" 23818 "s63E6H2" 0.007521661 "Glucose--fructose oxidoreductase precursor"  
"NT-P19\_01081" 23819 "s59E13H2" 0 "Inosose dehydratase"  
"NT-P19\_01081" 23819 "s59E25H2" 0 "Inosose dehydratase"  
"NT-P19\_01081" 23819 "s59E5H2" 0 "Inosose dehydratase"  
"NT-P19\_01081" 23819 "s63E6H2" 0.003159217 "Inosose dehydratase"  
"NT-P19\_01082" 23820 "s59E13H2" 0 "putative ABC transporter ATP-binding protein YxIF"  
"NT-P19\_01082" 23820 "s59E25H2" 0 "putative ABC transporter ATP-binding protein YxIF"  
"NT-P19\_01082" 23820 "s59E5H2" 0 "putative ABC transporter ATP-binding protein YxIF"  
"NT-P19\_01082" 23820 "s63E6H2" 0.003995508 "putative ABC transporter ATP-binding protein YxIF"  
"NT-P19\_01083" 23821 "s59E13H2" 0 "hypothetical protein"  
"NT-P19\_01083" 23821 "s59E25H2" 0 "hypothetical protein"  
"NT-P19\_01083" 23821 "s59E5H2" 0 "hypothetical protein"  
"NT-P19\_01083" 23821 "s63E6H2" 0.003141818 "hypothetical protein"  
"NT-P19\_01084" 23822 "s59E13H2" 0 "ABC-2 family transporter protein"  
"NT-P19\_01084" 23822 "s59E25H2" 0 "ABC-2 family transporter protein"  
"NT-P19\_01084" 23822 "s59E5H2" 0 "ABC-2 family transporter protein"  
"NT-P19\_01084" 23822 "s63E6H2" 0 "ABC-2 family transporter protein"  
"NT-P19\_01085" 23823 "s59E13H2" 0 "hypothetical protein"  
"NT-P19\_01085" 23823 "s59E25H2" 0 "hypothetical protein"  
"NT-P19\_01085" 23823 "s59E5H2" 0 "hypothetical protein"  
"NT-P19\_01085" 23823 "s63E6H2" 0.006921738 "hypothetical protein"  
"NT-P19\_01086" 23824 "s59E13H2" 0 "Phosphomethylpyrimidine synthase"  
"NT-P19\_01086" 23824 "s59E25H2" 0 "Phosphomethylpyrimidine synthase"  
"NT-P19\_01086" 23824 "s59E5H2" 0 "Phosphomethylpyrimidine synthase"  
"NT-P19\_01086" 23824 "s63E6H2" 0.005811293 "Phosphomethylpyrimidine synthase"  
"NT-P19\_01087" 23825 "s59E13H2" 0 "Glycerol dehydrogenase"  
"NT-P19\_01087" 23825 "s59E25H2" 0 "Glycerol dehydrogenase"  
"NT-P19\_01087" 23825 "s59E5H2" 0 "Glycerol dehydrogenase"  
"NT-P19\_01087" 23825 "s63E6H2" 0.008498825 "Glycerol dehydrogenase"  
"NT-P19\_01088" 23826 "s59E13H2" 0 "Pyrophosphate--fructose 6-phosphate 1-phosphotransferase"  
"NT-P19\_01088" 23826 "s59E25H2" 0 "Pyrophosphate--fructose 6-phosphate 1-phosphotransferase"  
"NT-P19\_01088" 23826 "s59E5H2" 0 "Pyrophosphate--fructose 6-phosphate 1-phosphotransferase"  
"NT-P19\_01088" 23826 "s63E6H2" 0.01043989 "Pyrophosphate--fructose 6-phosphate 1-phosphotransferase"  
"NT-P19\_01089" 23827 "s59E13H2" 0 "Cob(I)yrinic acid a,c-diamide adenosyltransferase"  
"NT-P19\_01089" 23827 "s59E25H2" 0 "Cob(I)yrinic acid a,c-diamide adenosyltransferase"  
"NT-P19\_01089" 23827 "s59E5H2" 0 "Cob(I)yrinic acid a,c-diamide adenosyltransferase"  
"NT-P19\_01089" 23827 "s63E6H2" 0.01516407 "Cob(I)yrinic acid a,c-diamide adenosyltransferase"  
"NT-P19\_01090" 23828 "s59E13H2" 0 "peptidase PmbA"

"NT-P19\_01090" 23828 "s59E25H2" 0 "peptidase PmbA"  
"NT-P19\_01090" 23828 "s59E5H2" 0 "peptidase PmbA"  
"NT-P19\_01090" 23828 "s63E6H2" 0.01115944 "peptidase PmbA"  
"NT-P19\_01091" 23829 "s59E13H2" 0 "protease TldD"  
"NT-P19\_01091" 23829 "s59E25H2" 0 "protease TldD"  
"NT-P19\_01091" 23829 "s59E5H2" 0 "protease TldD"  
"NT-P19\_01091" 23829 "s63E6H2" 0.009766142 "protease TldD"  
"NT-P19\_01092" 23830 "s59E13H2" 0 "putative transcriptional regulatory protein"  
"NT-P19\_01092" 23830 "s59E25H2" 0 "putative transcriptional regulatory protein"  
"NT-P19\_01092" 23830 "s59E5H2" 0 "putative transcriptional regulatory protein"  
"NT-P19\_01092" 23830 "s63E6H2" 0.002050943 "putative transcriptional regulatory protein"  
"NT-P19\_01093" 23831 "s59E13H2" 0 "hypothetical protein"  
"NT-P19\_01093" 23831 "s59E25H2" 0 "hypothetical protein"  
"NT-P19\_01093" 23831 "s59E5H2" 0 "hypothetical protein"  
"NT-P19\_01093" 23831 "s63E6H2" 0.001021131 "hypothetical protein"  
"NT-P19\_01094" 23832 "s59E13H2" 0 "N-acetylglucosamine-6-phosphate deacetylase"  
"NT-P19\_01094" 23832 "s59E25H2" 0 "N-acetylglucosamine-6-phosphate deacetylase"  
"NT-P19\_01094" 23832 "s59E5H2" 0 "N-acetylglucosamine-6-phosphate deacetylase"  
"NT-P19\_01094" 23832 "s63E6H2" 0.006105471 "N-acetylglucosamine-6-phosphate deacetylase"  
"NT-P19\_01095" 23833 "s59E13H2" 0 "putative oxidoreductase YcjS"  
"NT-P19\_01095" 23833 "s59E25H2" 0 "putative oxidoreductase YcjS"  
"NT-P19\_01095" 23833 "s59E5H2" 0 "putative oxidoreductase YcjS"  
"NT-P19\_01095" 23833 "s63E6H2" 0 "putative oxidoreductase YcjS"  
"NT-P19\_01096" 23834 "s59E13H2" 0 "L-ribulose-5-phosphate 3-epimerase UlaE"  
"NT-P19\_01096" 23834 "s59E25H2" 0 "L-ribulose-5-phosphate 3-epimerase UlaE"  
"NT-P19\_01096" 23834 "s59E5H2" 0 "L-ribulose-5-phosphate 3-epimerase UlaE"  
"NT-P19\_01096" 23834 "s63E6H2" 0.0013604 "L-ribulose-5-phosphate 3-epimerase UlaE"  
"NT-P19\_01097" 23835 "s59E13H2" 0 "Bifunctional protein GlmU"  
"NT-P19\_01097" 23835 "s59E25H2" 0 "Bifunctional protein GlmU"  
"NT-P19\_01097" 23835 "s59E5H2" 0 "Bifunctional protein GlmU"  
"NT-P19\_01097" 23835 "s63E6H2" 0.0003853071 "Bifunctional protein GlmU"  
"NT-P19\_01098" 23836 "s59E13H2" 0.007876186 "Transcriptional regulatory protein ZraR"  
"NT-P19\_01098" 23836 "s59E25H2" 0 "Transcriptional regulatory protein ZraR"  
"NT-P19\_01098" 23836 "s59E5H2" 0 "Transcriptional regulatory protein ZraR"  
"NT-P19\_01098" 23836 "s63E6H2" 0.02644789 "Transcriptional regulatory protein ZraR"  
"NT-P19\_01100" 23838 "s59E13H2" 0 "Tyrosine-protein kinase YwqD"  
"NT-P19\_01100" 23838 "s59E25H2" 0 "Tyrosine-protein kinase YwqD"  
"NT-P19\_01100" 23838 "s59E5H2" 0 "Tyrosine-protein kinase YwqD"  
"NT-P19\_01100" 23838 "s63E6H2" 0.03394113 "Tyrosine-protein kinase YwqD"  
"NT-P19\_01101" 23839 "s59E13H2" 0 "Coenzyme PQQ synthesis protein D"  
"NT-P19\_01101" 23839 "s59E25H2" 0 "Coenzyme PQQ synthesis protein D"  
"NT-P19\_01101" 23839 "s59E5H2" 0 "Coenzyme PQQ synthesis protein D"  
"NT-P19\_01101" 23839 "s63E6H2" 0 "Coenzyme PQQ synthesis protein D"  
"NT-P19\_01102" 23840 "s59E13H2" 0 "Antilisterial bacteriocin subtilisin biosynthesis protein Alba"  
"NT-P19\_01102" 23840 "s59E25H2" 0 "Antilisterial bacteriocin subtilisin biosynthesis protein Alba"  
"NT-P19\_01102" 23840 "s59E5H2" 0 "Antilisterial bacteriocin subtilisin biosynthesis protein Alba"  
"NT-P19\_01102" 23840 "s63E6H2" 0 "Antilisterial bacteriocin subtilisin biosynthesis protein Alba"

"NT-P19\_01104" 23842 "s59E13H2" 0 "hypothetical protein"  
"NT-P19\_01104" 23842 "s59E25H2" 0 "hypothetical protein"  
"NT-P19\_01104" 23842 "s59E5H2" 0 "hypothetical protein"  
"NT-P19\_01104" 23842 "s63E6H2" 0 "hypothetical protein"  
"NT-P19\_01105" 23843 "s59E13H2" 0 "Mycothiol acetyltransferase"  
"NT-P19\_01105" 23843 "s59E25H2" 0 "Mycothiol acetyltransferase"  
"NT-P19\_01105" 23843 "s59E5H2" 0 "Mycothiol acetyltransferase"  
"NT-P19\_01105" 23843 "s63E6H2" 0 "Mycothiol acetyltransferase"  
"NT-P19\_01106" 23844 "s59E13H2" 0 "Transposase IS200 like protein"  
"NT-P19\_01106" 23844 "s59E25H2" 0 "Transposase IS200 like protein"  
"NT-P19\_01106" 23844 "s59E5H2" 0 "Transposase IS200 like protein"  
"NT-P19\_01106" 23844 "s63E6H2" 0 "Transposase IS200 like protein"  
"NT-P19\_01107" 23845 "s59E13H2" 0 "hypothetical protein"  
"NT-P19\_01107" 23845 "s59E25H2" 0 "hypothetical protein"  
"NT-P19\_01107" 23845 "s59E5H2" 0 "hypothetical protein"  
"NT-P19\_01107" 23845 "s63E6H2" 0 "hypothetical protein"  
"NT-P19\_01108" 23846 "s59E13H2" 0 "tRNA(fMet)-specific endonuclease VapC"  
"NT-P19\_01108" 23846 "s59E25H2" 0 "tRNA(fMet)-specific endonuclease VapC"  
"NT-P19\_01108" 23846 "s59E5H2" 0 "tRNA(fMet)-specific endonuclease VapC"  
"NT-P19\_01108" 23846 "s63E6H2" 0 "tRNA(fMet)-specific endonuclease VapC"  
"NT-P19\_01109" 23847 "s59E13H2" 0 "SpoVT / AbrB like domain protein"  
"NT-P19\_01109" 23847 "s59E25H2" 0 "SpoVT / AbrB like domain protein"  
"NT-P19\_01109" 23847 "s59E5H2" 0 "SpoVT / AbrB like domain protein"  
"NT-P19\_01109" 23847 "s63E6H2" 0 "SpoVT / AbrB like domain protein"  
"NT-P19\_01110" 23848 "s59E13H2" 0 "hypothetical protein"  
"NT-P19\_01110" 23848 "s59E25H2" 0 "hypothetical protein"  
"NT-P19\_01110" 23848 "s59E5H2" 0.0817474 "hypothetical protein"  
"NT-P19\_01110" 23848 "s63E6H2" 0 "hypothetical protein"  
"NT-P19\_01111" 23849 "s59E13H2" 0 "Doxorubicin resistance ATP-binding protein DrrA"  
"NT-P19\_01111" 23849 "s59E25H2" 0 "Doxorubicin resistance ATP-binding protein DrrA"  
"NT-P19\_01111" 23849 "s59E5H2" 0.008470175 "Doxorubicin resistance ATP-binding protein DrrA"  
"NT-P19\_01111" 23849 "s63E6H2" 0 "Doxorubicin resistance ATP-binding protein DrrA"  
"NT-P19\_01112" 23850 "s59E13H2" 0 "hypothetical protein"  
"NT-P19\_01112" 23850 "s59E25H2" 0 "hypothetical protein"  
"NT-P19\_01112" 23850 "s59E5H2" 0 "hypothetical protein"  
"NT-P19\_01112" 23850 "s63E6H2" 0.005460103 "hypothetical protein"  
"NT-P19\_01117" 23855 "s59E13H2" 0 "Helix-turn-helix domain protein"  
"NT-P19\_01117" 23855 "s59E25H2" 0 "Helix-turn-helix domain protein"  
"NT-P19\_01117" 23855 "s59E5H2" 0 "Helix-turn-helix domain protein"  
"NT-P19\_01117" 23855 "s63E6H2" 0 "Helix-turn-helix domain protein"  
"NT-P19\_01118" 23856 "s59E13H2" 0 "LexA repressor"  
"NT-P19\_01118" 23856 "s59E25H2" 0 "LexA repressor"  
"NT-P19\_01118" 23856 "s59E5H2" 0 "LexA repressor"  
"NT-P19\_01118" 23856 "s63E6H2" 0 "LexA repressor"  
"NT-P19\_01120" 23858 "s59E13H2" 0 "hypothetical protein"  
"NT-P19\_01120" 23858 "s59E25H2" 0 "hypothetical protein"  
"NT-P19\_01120" 23858 "s59E5H2" 0 "hypothetical protein"

"NT-P19\_01120" 23858 "s63E6H2" 0 "hypothetical protein"  
"NT-P19\_01122" 23860 "s59E13H2" 0.00638075 "RNA polymerase sigma-54 factor"  
"NT-P19\_01122" 23860 "s59E25H2" 0 "RNA polymerase sigma-54 factor"  
"NT-P19\_01122" 23860 "s59E5H2" 0.006669289 "RNA polymerase sigma-54 factor"  
"NT-P19\_01122" 23860 "s63E6H2" 0 "RNA polymerase sigma-54 factor"  
"NT-P19\_01124" 23862 "s59E13H2" 0.03027091 "D-glycero-alpha-D-manno-heptose 7-phosphate kinase"  
"NT-P19\_01124" 23862 "s59E25H2" 0 "D-glycero-alpha-D-manno-heptose 7-phosphate kinase"  
"NT-P19\_01124" 23862 "s59E5H2" 0 "D-glycero-alpha-D-manno-heptose 7-phosphate kinase"  
"NT-P19\_01124" 23862 "s63E6H2" 0.03766887 "D-glycero-alpha-D-manno-heptose 7-phosphate kinase"  
"NT-P19\_01125" 23863 "s59E13H2" 0.04574479 "D-glycero-beta-D-manno-heptose-1,7-bisphosphate 7-phosphatase"  
"NT-P19\_01125" 23863 "s59E25H2" 0 "D-glycero-beta-D-manno-heptose-1,7-bisphosphate 7-phosphatase"  
"NT-P19\_01125" 23863 "s59E5H2" 0.003486842 "D-glycero-beta-D-manno-heptose-1,7-bisphosphate 7-phosphatase"  
"NT-P19\_01125" 23863 "s63E6H2" 0.4631877 "D-glycero-beta-D-manno-heptose-1,7-bisphosphate 7-phosphatase"  
"NT-P19\_01126" 23864 "s59E13H2" 0.05392071 "RNA polymerase sigma factor SigA"  
"NT-P19\_01126" 23864 "s59E25H2" 0 "RNA polymerase sigma factor SigA"  
"NT-P19\_01126" 23864 "s59E5H2" 0 "RNA polymerase sigma factor SigA"  
"NT-P19\_01126" 23864 "s63E6H2" 0.1544385 "RNA polymerase sigma factor SigA"  
"NT-P19\_01127" 23865 "s59E13H2" 0.01689555 "DNA primase"  
"NT-P19\_01127" 23865 "s59E25H2" 0 "DNA primase"  
"NT-P19\_01127" 23865 "s59E5H2" 0 "DNA primase"  
"NT-P19\_01127" 23865 "s63E6H2" 0.04682958 "DNA primase"  
"NT-P19\_01128" 23866 "s59E13H2" 0.005733575 "Deoxyguanosinetriphosphate triphosphohydrolase"  
"NT-P19\_01128" 23866 "s59E25H2" 0 "Deoxyguanosinetriphosphate triphosphohydrolase"  
"NT-P19\_01128" 23866 "s59E5H2" 0 "Deoxyguanosinetriphosphate triphosphohydrolase"  
"NT-P19\_01128" 23866 "s63E6H2" 0.02825455 "Deoxyguanosinetriphosphate triphosphohydrolase"  
"NT-P19\_01129" 23867 "s59E13H2" 0.006599909 "Colicin V production protein"  
"NT-P19\_01129" 23867 "s59E25H2" 0 "Colicin V production protein"  
"NT-P19\_01129" 23867 "s59E5H2" 0 "Colicin V production protein"  
"NT-P19\_01129" 23867 "s63E6H2" 0.05661338 "Colicin V production protein"  
"NT-P19\_01130" 23868 "s59E13H2" 0 "Cell division protein ZapA"  
"NT-P19\_01130" 23868 "s59E25H2" 0 "Cell division protein ZapA"  
"NT-P19\_01130" 23868 "s59E5H2" 0 "Cell division protein ZapA"  
"NT-P19\_01130" 23868 "s63E6H2" 0.007964341 "Cell division protein ZapA"  
"NT-P19\_01131" 23869 "s59E13H2" 0 "Oligopeptide-binding protein OppA precursor"  
"NT-P19\_01131" 23869 "s59E25H2" 0 "Oligopeptide-binding protein OppA precursor"  
"NT-P19\_01131" 23869 "s59E5H2" 0 "Oligopeptide-binding protein OppA precursor"  
"NT-P19\_01131" 23869 "s63E6H2" 0.3701295 "Oligopeptide-binding protein OppA precursor"  
"NT-P19\_01132" 23870 "s59E13H2" 0 "Dipeptide transport system permease protein DppB"  
"NT-P19\_01132" 23870 "s59E25H2" 0 "Dipeptide transport system permease protein DppB"  
"NT-P19\_01132" 23870 "s59E5H2" 0 "Dipeptide transport system permease protein DppB"  
"NT-P19\_01132" 23870 "s63E6H2" 0 "Dipeptide transport system permease protein DppB"  
"NT-P19\_01133" 23871 "s59E13H2" 0 "Oligopeptide transport system permease protein OppC"  
"NT-P19\_01133" 23871 "s59E25H2" 0 "Oligopeptide transport system permease protein OppC"  
"NT-P19\_01133" 23871 "s59E5H2" 0 "Oligopeptide transport system permease protein OppC"  
"NT-P19\_01133" 23871 "s63E6H2" 0 "Oligopeptide transport system permease protein OppC"  
"NT-P19\_01134" 23872 "s59E13H2" 0 "hypothetical protein"  
"NT-P19\_01134" 23872 "s59E25H2" 0 "hypothetical protein"

"NT-P19\_01134" 23872 "s59E5H2" 0 "hypothetical protein"  
"NT-P19\_01134" 23872 "s63E6H2" 0 "hypothetical protein"  
"NT-P19\_01135" 23873 "s59E13H2" 0 "Oligopeptide transport ATP-binding protein OppD"  
"NT-P19\_01135" 23873 "s59E25H2" 0 "Oligopeptide transport ATP-binding protein OppD"  
"NT-P19\_01135" 23873 "s59E5H2" 0 "Oligopeptide transport ATP-binding protein OppD"  
"NT-P19\_01135" 23873 "s63E6H2" 0 "Oligopeptide transport ATP-binding protein OppD"  
"NT-P19\_01136" 23874 "s59E13H2" 0 "Oligopeptide transport ATP-binding protein OppF"  
"NT-P19\_01136" 23874 "s59E25H2" 0 "Oligopeptide transport ATP-binding protein OppF"  
"NT-P19\_01136" 23874 "s59E5H2" 0 "Oligopeptide transport ATP-binding protein OppF"  
"NT-P19\_01136" 23874 "s63E6H2" 0.002833249 "Oligopeptide transport ATP-binding protein OppF"  
"NT-P19\_01137" 23875 "s59E13H2" 0 "Putative nicotinate phosphoribosyltransferase"  
"NT-P19\_01137" 23875 "s59E25H2" 0 "Putative nicotinate phosphoribosyltransferase"  
"NT-P19\_01137" 23875 "s59E5H2" 0 "Putative nicotinate phosphoribosyltransferase"  
"NT-P19\_01137" 23875 "s63E6H2" 0 "Putative nicotinate phosphoribosyltransferase"  
"NT-P19\_01138" 23876 "s59E13H2" 0 "Aspartokinase"  
"NT-P19\_01138" 23876 "s59E25H2" 0 "Aspartokinase"  
"NT-P19\_01138" 23876 "s59E5H2" 0 "Aspartokinase"  
"NT-P19\_01138" 23876 "s63E6H2" 0 "Aspartokinase"  
"NT-P19\_01139" 23877 "s59E13H2" 0 "Aspartokinase"  
"NT-P19\_01139" 23877 "s59E25H2" 0 "Aspartokinase"  
"NT-P19\_01139" 23877 "s59E5H2" 0 "Aspartokinase"  
"NT-P19\_01139" 23877 "s63E6H2" 0.002962617 "Aspartokinase"  
"NT-P19\_01140" 23878 "s59E13H2" 0 "Riboflavin biosynthesis protein RibD"  
"NT-P19\_01140" 23878 "s59E25H2" 0 "Riboflavin biosynthesis protein RibD"  
"NT-P19\_01140" 23878 "s59E5H2" 0 "Riboflavin biosynthesis protein RibD"  
"NT-P19\_01140" 23878 "s63E6H2" 0.003253546 "Riboflavin biosynthesis protein RibD"  
"NT-P19\_01141" 23879 "s59E13H2" 0.001580817 "transcriptional regulator PhoU"  
"NT-P19\_01141" 23879 "s59E25H2" 0 "transcriptional regulator PhoU"  
"NT-P19\_01141" 23879 "s59E5H2" 0 "transcriptional regulator PhoU"  
"NT-P19\_01141" 23879 "s63E6H2" 0.0150969 "transcriptional regulator PhoU"  
"NT-P19\_01142" 23880 "s59E13H2" 0.002234806 "Na+/Pi-cotransporter"  
"NT-P19\_01142" 23880 "s59E25H2" 0 "Na+/Pi-cotransporter"  
"NT-P19\_01142" 23880 "s59E5H2" 0 "Na+/Pi-cotransporter"  
"NT-P19\_01142" 23880 "s63E6H2" 0.002814486 "Na+/Pi-cotransporter"  
"NT-P19\_01143" 23881 "s59E13H2" 0 "Orotidine 5'-phosphate decarboxylase"  
"NT-P19\_01143" 23881 "s59E25H2" 0 "Orotidine 5'-phosphate decarboxylase"  
"NT-P19\_01143" 23881 "s59E5H2" 0 "Orotidine 5'-phosphate decarboxylase"  
"NT-P19\_01143" 23881 "s63E6H2" 0.004239393 "Orotidine 5'-phosphate decarboxylase"  
"NT-P19\_01144" 23882 "s59E13H2" 0 "ATP-dependent DNA helicase PcrA"  
"NT-P19\_01144" 23882 "s59E25H2" 0 "ATP-dependent DNA helicase PcrA"  
"NT-P19\_01144" 23882 "s59E5H2" 0.004066804 "ATP-dependent DNA helicase PcrA"  
"NT-P19\_01144" 23882 "s63E6H2" 0 "ATP-dependent DNA helicase PcrA"  
"NT-P19\_01145" 23883 "s59E13H2" 0 "hypothetical protein"  
"NT-P19\_01145" 23883 "s59E25H2" 0 "hypothetical protein"  
"NT-P19\_01145" 23883 "s59E5H2" 0 "hypothetical protein"  
"NT-P19\_01145" 23883 "s63E6H2" 0 "hypothetical protein"  
"NT-P19\_01146" 23884 "s59E13H2" 0 "hypothetical protein"

"NT-P19\_01146" 23884 "s59E25H2" 0 "hypothetical protein"  
"NT-P19\_01146" 23884 "s59E5H2" 0 "hypothetical protein"  
"NT-P19\_01146" 23884 "s63E6H2" 0 "hypothetical protein"  
"NT-P19\_01150" 23888 "s59E13H2" 0 "hypothetical protein"  
"NT-P19\_01150" 23888 "s59E25H2" 0 "hypothetical protein"  
"NT-P19\_01150" 23888 "s59E5H2" 0 "hypothetical protein"  
"NT-P19\_01150" 23888 "s63E6H2" 0 "hypothetical protein"  
"NT-P19\_01151" 23889 "s59E13H2" 0 "hypothetical protein"  
"NT-P19\_01151" 23889 "s59E25H2" 0 "hypothetical protein"  
"NT-P19\_01151" 23889 "s59E5H2" 0 "hypothetical protein"  
"NT-P19\_01151" 23889 "s63E6H2" 0 "hypothetical protein"  
"NT-P19\_01152" 23890 "s59E13H2" 0 "dTDP-glucose 4,6-dehydratase"  
"NT-P19\_01152" 23890 "s59E25H2" 0 "dTDP-glucose 4,6-dehydratase"  
"NT-P19\_01152" 23890 "s59E5H2" 0.0290272 "dTDP-glucose 4,6-dehydratase"  
"NT-P19\_01152" 23890 "s63E6H2" 0.006010278 "dTDP-glucose 4,6-dehydratase"  
"NT-P19\_01153" 23891 "s59E13H2" 0 "hypothetical protein"  
"NT-P19\_01153" 23891 "s59E25H2" 0 "hypothetical protein"  
"NT-P19\_01153" 23891 "s59E5H2" 0 "hypothetical protein"  
"NT-P19\_01153" 23891 "s63E6H2" 0 "hypothetical protein"  
"NT-P19\_01154" 23892 "s59E13H2" 0 "hypothetical protein"  
"NT-P19\_01154" 23892 "s59E25H2" 0 "hypothetical protein"  
"NT-P19\_01154" 23892 "s59E5H2" 0 "hypothetical protein"  
"NT-P19\_01154" 23892 "s63E6H2" 0 "hypothetical protein"  
"NT-P19\_01155" 23893 "s59E13H2" 0 "hypothetical protein"  
"NT-P19\_01155" 23893 "s59E25H2" 0 "hypothetical protein"  
"NT-P19\_01155" 23893 "s59E5H2" 0 "hypothetical protein"  
"NT-P19\_01155" 23893 "s63E6H2" 0.01013215 "hypothetical protein"  
"NT-P19\_01156" 23894 "s59E13H2" 0 "hypothetical protein"  
"NT-P19\_01156" 23894 "s59E25H2" 0 "hypothetical protein"  
"NT-P19\_01156" 23894 "s59E5H2" 0 "hypothetical protein"  
"NT-P19\_01156" 23894 "s63E6H2" 0.005641765 "hypothetical protein"  
"NT-P19\_01157" 23895 "s59E13H2" 0 "UDP-N-acetylglucosamine 2-epimerase"  
"NT-P19\_01157" 23895 "s59E25H2" 0 "UDP-N-acetylglucosamine 2-epimerase"  
"NT-P19\_01157" 23895 "s59E5H2" 0 "UDP-N-acetylglucosamine 2-epimerase"  
"NT-P19\_01157" 23895 "s63E6H2" 0 "UDP-N-acetylglucosamine 2-epimerase"  
"NT-P19\_01158" 23896 "s59E13H2" 0 "UDP-N-acetylglucosamine 4,6-dehydratase (inverting)"  
"NT-P19\_01158" 23896 "s59E25H2" 0 "UDP-N-acetylglucosamine 4,6-dehydratase (inverting)"  
"NT-P19\_01158" 23896 "s59E5H2" 0 "UDP-N-acetylglucosamine 4,6-dehydratase (inverting)"  
"NT-P19\_01158" 23896 "s63E6H2" 0.001563603 "UDP-N-acetylglucosamine 4,6-dehydratase (inverting)"  
"NT-P19\_01159" 23897 "s59E13H2" 0 "UDP-4-amino-4-deoxy-L-arabinose--oxoglutarate aminotransferase"  
"NT-P19\_01159" 23897 "s59E25H2" 0 "UDP-4-amino-4-deoxy-L-arabinose--oxoglutarate aminotransferase"  
"NT-P19\_01159" 23897 "s59E5H2" 0 "UDP-4-amino-4-deoxy-L-arabinose--oxoglutarate aminotransferase"  
"NT-P19\_01159" 23897 "s63E6H2" 0 "UDP-4-amino-4-deoxy-L-arabinose--oxoglutarate aminotransferase"  
"NT-P19\_01160" 23898 "s59E13H2" 0 "3-oxoacyl-[acyl-carrier-protein] synthase 3"  
"NT-P19\_01160" 23898 "s59E25H2" 0 "3-oxoacyl-[acyl-carrier-protein] synthase 3"  
"NT-P19\_01160" 23898 "s59E5H2" 0 "3-oxoacyl-[acyl-carrier-protein] synthase 3"  
"NT-P19\_01160" 23898 "s63E6H2" 0 "3-oxoacyl-[acyl-carrier-protein] synthase 3"

"NT-P19\_01161" 23899 "s59E13H2" 0 "acyl carrier protein"  
"NT-P19\_01161" 23899 "s59E25H2" 0 "acyl carrier protein"  
"NT-P19\_01161" 23899 "s59E5H2" 0 "acyl carrier protein"  
"NT-P19\_01161" 23899 "s63E6H2" 0 "acyl carrier protein"  
"NT-P19\_01163" 23901 "s59E13H2" 0 "UDP-4-amino-4,6-dideoxy-N-acetyl-beta-L-altrosamine transaminase"  
"NT-P19\_01163" 23901 "s59E25H2" 0 "UDP-4-amino-4,6-dideoxy-N-acetyl-beta-L-altrosamine transaminase"  
"NT-P19\_01163" 23901 "s59E5H2" 0 "UDP-4-amino-4,6-dideoxy-N-acetyl-beta-L-altrosamine transaminase"  
"NT-P19\_01163" 23901 "s63E6H2" 0 "UDP-4-amino-4,6-dideoxy-N-acetyl-beta-L-altrosamine transaminase"  
"NT-P19\_01164" 23902 "s59E13H2" 0 "hypothetical protein"  
"NT-P19\_01164" 23902 "s59E25H2" 0 "hypothetical protein"  
"NT-P19\_01164" 23902 "s59E5H2" 0 "hypothetical protein"  
"NT-P19\_01164" 23902 "s63E6H2" 0 "hypothetical protein"  
"NT-P19\_01165" 23903 "s59E13H2" 0 "Spermidine N(1)-acetyltransferase"  
"NT-P19\_01165" 23903 "s59E25H2" 0 "Spermidine N(1)-acetyltransferase"  
"NT-P19\_01165" 23903 "s59E5H2" 0 "Spermidine N(1)-acetyltransferase"  
"NT-P19\_01165" 23903 "s63E6H2" 0 "Spermidine N(1)-acetyltransferase"  
"NT-P19\_01166" 23904 "s59E13H2" 0 "3-deoxy-manno-octulosonate cytidyltransferase"  
"NT-P19\_01166" 23904 "s59E25H2" 0 "3-deoxy-manno-octulosonate cytidyltransferase"  
"NT-P19\_01166" 23904 "s59E5H2" 0 "3-deoxy-manno-octulosonate cytidyltransferase"  
"NT-P19\_01166" 23904 "s63E6H2" 0 "3-deoxy-manno-octulosonate cytidyltransferase"  
"NT-P19\_01167" 23905 "s59E13H2" 0 "Inositol 2-dehydrogenase/D-chiro-inositol 3-dehydrogenase"  
"NT-P19\_01167" 23905 "s59E25H2" 0 "Inositol 2-dehydrogenase/D-chiro-inositol 3-dehydrogenase"  
"NT-P19\_01167" 23905 "s59E5H2" 0 "Inositol 2-dehydrogenase/D-chiro-inositol 3-dehydrogenase"  
"NT-P19\_01167" 23905 "s63E6H2" 0 "Inositol 2-dehydrogenase/D-chiro-inositol 3-dehydrogenase"  
"NT-P19\_01168" 23906 "s59E13H2" 0 "L-glutamine:scyllo-inosose aminotransferase"  
"NT-P19\_01168" 23906 "s59E25H2" 0 "L-glutamine:scyllo-inosose aminotransferase"  
"NT-P19\_01168" 23906 "s59E5H2" 0 "L-glutamine:scyllo-inosose aminotransferase"  
"NT-P19\_01168" 23906 "s63E6H2" 0 "L-glutamine:scyllo-inosose aminotransferase"  
"NT-P19\_01169" 23907 "s59E13H2" 0 "N,N'-diacetyllegionaminic acid synthase"  
"NT-P19\_01169" 23907 "s59E25H2" 0 "N,N'-diacetyllegionaminic acid synthase"  
"NT-P19\_01169" 23907 "s59E5H2" 0 "N,N'-diacetyllegionaminic acid synthase"  
"NT-P19\_01169" 23907 "s63E6H2" 0 "N,N'-diacetyllegionaminic acid synthase"  
"NT-P19\_01170" 23908 "s59E13H2" 0 "Bifunctional polymyxin resistance protein ArnA"  
"NT-P19\_01170" 23908 "s59E25H2" 0 "Bifunctional polymyxin resistance protein ArnA"  
"NT-P19\_01170" 23908 "s59E5H2" 0 "Bifunctional polymyxin resistance protein ArnA"  
"NT-P19\_01170" 23908 "s63E6H2" 0 "Bifunctional polymyxin resistance protein ArnA"  
"NT-P19\_01171" 23909 "s59E13H2" 0 "UDP-2,4-diacetamido-2,4,6-trideoxy-beta-L-altropyranose hydrolase"  
"NT-P19\_01171" 23909 "s59E25H2" 0 "UDP-2,4-diacetamido-2,4,6-trideoxy-beta-L-altropyranose hydrolase"  
"NT-P19\_01171" 23909 "s59E5H2" 0 "UDP-2,4-diacetamido-2,4,6-trideoxy-beta-L-altropyranose hydrolase"  
"NT-P19\_01171" 23909 "s63E6H2" 0 "UDP-2,4-diacetamido-2,4,6-trideoxy-beta-L-altropyranose hydrolase"  
"NT-P19\_01172" 23910 "s59E13H2" 0 "CDP-Glycerol:Poly(glycerophosphate) glycerophosphotransferase"  
"NT-P19\_01172" 23910 "s59E25H2" 0 "CDP-Glycerol:Poly(glycerophosphate) glycerophosphotransferase"  
"NT-P19\_01172" 23910 "s59E5H2" 0 "CDP-Glycerol:Poly(glycerophosphate) glycerophosphotransferase"  
"NT-P19\_01172" 23910 "s63E6H2" 0 "CDP-Glycerol:Poly(glycerophosphate) glycerophosphotransferase"  
"NT-P19\_01173" 23911 "s59E13H2" 0 "Polysaccharide biosynthesis protein"  
"NT-P19\_01173" 23911 "s59E25H2" 0 "Polysaccharide biosynthesis protein"  
"NT-P19\_01173" 23911 "s59E5H2" 0 "Polysaccharide biosynthesis protein"



"NT-P19\_01173" 23911 "s63E6H2" 0 "Polysaccharide biosynthesis protein"  
"NT-P19\_01174" 23912 "s59E13H2" 0 "Ubiquinone biosynthesis O-methyltransferase"  
"NT-P19\_01174" 23912 "s59E25H2" 0 "Ubiquinone biosynthesis O-methyltransferase"  
"NT-P19\_01174" 23912 "s59E5H2" 0 "Ubiquinone biosynthesis O-methyltransferase"  
"NT-P19\_01174" 23912 "s63E6H2" 0 "Ubiquinone biosynthesis O-methyltransferase"  
"NT-P19\_01175" 23913 "s59E13H2" 0 "hypothetical protein"  
"NT-P19\_01175" 23913 "s59E25H2" 0 "hypothetical protein"  
"NT-P19\_01175" 23913 "s59E5H2" 0 "hypothetical protein"  
"NT-P19\_01175" 23913 "s63E6H2" 0 "hypothetical protein"  
"NT-P19\_01176" 23914 "s59E13H2" 0 "N-acetylglucosaminyl-diphospho-decaprenol L-rhamnosyltransferase"  
"NT-P19\_01176" 23914 "s59E25H2" 0 "N-acetylglucosaminyl-diphospho-decaprenol L-rhamnosyltransferase"  
"NT-P19\_01176" 23914 "s59E5H2" 0 "N-acetylglucosaminyl-diphospho-decaprenol L-rhamnosyltransferase"  
"NT-P19\_01176" 23914 "s63E6H2" 0 "N-acetylglucosaminyl-diphospho-decaprenol L-rhamnosyltransferase"  
"NT-P19\_01177" 23915 "s59E13H2" 0 "Thymidylate kinase"  
"NT-P19\_01177" 23915 "s59E25H2" 0 "Thymidylate kinase"  
"NT-P19\_01177" 23915 "s59E5H2" 0 "Thymidylate kinase"  
"NT-P19\_01177" 23915 "s63E6H2" 0 "Thymidylate kinase"  
"NT-P19\_01178" 23916 "s59E13H2" 0 "Type I phosphodiesterase / nucleotide pyrophosphatase"  
"NT-P19\_01178" 23916 "s59E25H2" 0 "Type I phosphodiesterase / nucleotide pyrophosphatase"  
"NT-P19\_01178" 23916 "s59E5H2" 0 "Type I phosphodiesterase / nucleotide pyrophosphatase"  
"NT-P19\_01178" 23916 "s63E6H2" 0 "Type I phosphodiesterase / nucleotide pyrophosphatase"  
"NT-P19\_01179" 23917 "s59E13H2" 0 "Alpha-D-kanosaminyltransferase"  
"NT-P19\_01179" 23917 "s59E25H2" 0 "Alpha-D-kanosaminyltransferase"  
"NT-P19\_01179" 23917 "s59E5H2" 0 "Alpha-D-kanosaminyltransferase"  
"NT-P19\_01179" 23917 "s63E6H2" 0 "Alpha-D-kanosaminyltransferase"  
"NT-P19\_01180" 23918 "s59E13H2" 0 "Glycosyl transferases group 1"  
"NT-P19\_01180" 23918 "s59E25H2" 0 "Glycosyl transferases group 1"  
"NT-P19\_01180" 23918 "s59E5H2" 0.009316038 "Glycosyl transferases group 1"  
"NT-P19\_01180" 23918 "s63E6H2" 0 "Glycosyl transferases group 1"  
"NT-P19\_01181" 23919 "s59E13H2" 0 "Ubiquinone biosynthesis O-methyltransferase"  
"NT-P19\_01181" 23919 "s59E25H2" 0 "Ubiquinone biosynthesis O-methyltransferase"  
"NT-P19\_01181" 23919 "s59E5H2" 0 "Ubiquinone biosynthesis O-methyltransferase"  
"NT-P19\_01181" 23919 "s63E6H2" 0 "Ubiquinone biosynthesis O-methyltransferase"  
"NT-P19\_01183" 23921 "s59E13H2" 0 "Antilisterial bacteriocin subtilisin biosynthesis protein Alba"  
"NT-P19\_01183" 23921 "s59E25H2" 0 "Antilisterial bacteriocin subtilisin biosynthesis protein Alba"  
"NT-P19\_01183" 23921 "s59E5H2" 0 "Antilisterial bacteriocin subtilisin biosynthesis protein Alba"  
"NT-P19\_01183" 23921 "s63E6H2" 0 "Antilisterial bacteriocin subtilisin biosynthesis protein Alba"  
"NT-P19\_01184" 23922 "s59E13H2" 0 "Putative glycosyltransferase EpsD"  
"NT-P19\_01184" 23922 "s59E25H2" 0 "Putative glycosyltransferase EpsD"  
"NT-P19\_01184" 23922 "s59E5H2" 0.01442975 "Putative glycosyltransferase EpsD"  
"NT-P19\_01184" 23922 "s63E6H2" 0 "Putative glycosyltransferase EpsD"  
"NT-P19\_01185" 23923 "s59E13H2" 0 "UDP-glucose:undecaprenyl-phosphate glucose-1-phosphate transferase"  
"NT-P19\_01185" 23923 "s59E25H2" 0 "UDP-glucose:undecaprenyl-phosphate glucose-1-phosphate transferase"  
"NT-P19\_01185" 23923 "s59E5H2" 0 "UDP-glucose:undecaprenyl-phosphate glucose-1-phosphate transferase"  
"NT-P19\_01185" 23923 "s63E6H2" 0 "UDP-glucose:undecaprenyl-phosphate glucose-1-phosphate transferase"  
"NT-P19\_01186" 23924 "s59E13H2" 0 "hypothetical protein"  
"NT-P19\_01186" 23924 "s59E25H2" 0 "hypothetical protein"

"NT-P19\_01186" 23924 "s59E5H2" 0 "hypothetical protein"  
"NT-P19\_01186" 23924 "s63E6H2" 0 "hypothetical protein"  
"NT-P19\_01188" 23926 "s59E13H2" 0 "hypothetical protein"  
"NT-P19\_01188" 23926 "s59E25H2" 0 "hypothetical protein"  
"NT-P19\_01188" 23926 "s59E5H2" 0 "hypothetical protein"  
"NT-P19\_01188" 23926 "s63E6H2" 0 "hypothetical protein"  
"NT-P19\_01189" 23927 "s59E13H2" 0 "hypothetical protein"  
"NT-P19\_01189" 23927 "s59E25H2" 0 "hypothetical protein"  
"NT-P19\_01189" 23927 "s59E5H2" 0 "hypothetical protein"  
"NT-P19\_01189" 23927 "s63E6H2" 0 "hypothetical protein"  
"OP8\_C16\_00001" 28731 "s59E13H2" 0 "Xaa-Pro aminopeptidase"  
"OP8\_C16\_00001" 28731 "s59E25H2" 0 "Xaa-Pro aminopeptidase"  
"OP8\_C16\_00001" 28731 "s59E5H2" 0 "Xaa-Pro aminopeptidase"  
"OP8\_C16\_00001" 28731 "s63E6H2" 0 "Xaa-Pro aminopeptidase"  
"OP8\_C16\_00002" 28732 "s59E13H2" 0 "Peptidase M16 inactive domain protein"  
"OP8\_C16\_00002" 28732 "s59E25H2" 0 "Peptidase M16 inactive domain protein"  
"OP8\_C16\_00002" 28732 "s59E5H2" 0 "Peptidase M16 inactive domain protein"  
"OP8\_C16\_00002" 28732 "s63E6H2" 0 "Peptidase M16 inactive domain protein"  
"OP8\_C16\_00003" 28733 "s59E13H2" 0 "Peptidase M16 inactive domain protein"  
"OP8\_C16\_00003" 28733 "s59E25H2" 0 "Peptidase M16 inactive domain protein"  
"OP8\_C16\_00003" 28733 "s59E5H2" 0 "Peptidase M16 inactive domain protein"  
"OP8\_C16\_00003" 28733 "s63E6H2" 0 "Peptidase M16 inactive domain protein"  
"OP8\_C16\_00004" 28734 "s59E13H2" 0 "Calcium-gated potassium channel MthK"  
"OP8\_C16\_00004" 28734 "s59E25H2" 0 "Calcium-gated potassium channel MthK"  
"OP8\_C16\_00004" 28734 "s59E5H2" 0 "Calcium-gated potassium channel MthK"  
"OP8\_C16\_00004" 28734 "s63E6H2" 0 "Calcium-gated potassium channel MthK"  
"OP8\_C16\_00005" 28735 "s59E13H2" 0 "Transcriptional regulatory protein ZraR"  
"OP8\_C16\_00005" 28735 "s59E25H2" 0 "Transcriptional regulatory protein ZraR"  
"OP8\_C16\_00005" 28735 "s59E5H2" 0 "Transcriptional regulatory protein ZraR"  
"OP8\_C16\_00005" 28735 "s63E6H2" 0 "Transcriptional regulatory protein ZraR"  
"OP8\_C16\_00008" 28738 "s59E13H2" 0 "putative enoyl-CoA hydratase"  
"OP8\_C16\_00008" 28738 "s59E25H2" 0 "putative enoyl-CoA hydratase"  
"OP8\_C16\_00008" 28738 "s59E5H2" 0 "putative enoyl-CoA hydratase"  
"OP8\_C16\_00008" 28738 "s63E6H2" 0 "putative enoyl-CoA hydratase"  
"OP8\_C16\_00009" 28739 "s59E13H2" 0 "hypothetical protein"  
"OP8\_C16\_00009" 28739 "s59E25H2" 0 "hypothetical protein"  
"OP8\_C16\_00009" 28739 "s59E5H2" 0 "hypothetical protein"  
"OP8\_C16\_00009" 28739 "s63E6H2" 0 "hypothetical protein"  
"OP8\_C16\_00010" 28740 "s59E13H2" 0 "Polyferredoxin protein MvhB"  
"OP8\_C16\_00010" 28740 "s59E25H2" 0 "Polyferredoxin protein MvhB"  
"OP8\_C16\_00010" 28740 "s59E5H2" 0 "Polyferredoxin protein MvhB"  
"OP8\_C16\_00010" 28740 "s63E6H2" 0 "Polyferredoxin protein MvhB"  
"OP8\_C16\_00011" 28741 "s59E13H2" 0 "Tungsten-containing aldehyde ferredoxin oxidoreductase"  
"OP8\_C16\_00011" 28741 "s59E25H2" 0 "Tungsten-containing aldehyde ferredoxin oxidoreductase"  
"OP8\_C16\_00011" 28741 "s59E5H2" 0 "Tungsten-containing aldehyde ferredoxin oxidoreductase"  
"OP8\_C16\_00011" 28741 "s63E6H2" 0 "Tungsten-containing aldehyde ferredoxin oxidoreductase"  
"OP8\_C16\_00012" 28742 "s59E13H2" 0 "Sodium:neurotransmitter symporter family protein"

"OP8\_C16\_00012" 28742 "s59E25H2" 0 "Sodium:neurotransmitter symporter family protein"  
"OP8\_C16\_00012" 28742 "s59E5H2" 0 "Sodium:neurotransmitter symporter family protein"  
"OP8\_C16\_00012" 28742 "s63E6H2" 0 "Sodium:neurotransmitter symporter family protein"  
"OP8\_C16\_00013" 28743 "s59E13H2" 0 "hypothetical protein"  
"OP8\_C16\_00013" 28743 "s59E25H2" 0 "hypothetical protein"  
"OP8\_C16\_00013" 28743 "s59E5H2" 0 "hypothetical protein"  
"OP8\_C16\_00013" 28743 "s63E6H2" 0 "hypothetical protein"  
"OP8\_C16\_00014" 28744 "s59E13H2" 0 "hypothetical protein"  
"OP8\_C16\_00014" 28744 "s59E25H2" 0 "hypothetical protein"  
"OP8\_C16\_00014" 28744 "s59E5H2" 0 "hypothetical protein"  
"OP8\_C16\_00014" 28744 "s63E6H2" 0 "hypothetical protein"  
"OP8\_C16\_00015" 28745 "s59E13H2" 0 "Indolepyruvate oxidoreductase subunit lorB"  
"OP8\_C16\_00015" 28745 "s59E25H2" 0 "Indolepyruvate oxidoreductase subunit lorB"  
"OP8\_C16\_00015" 28745 "s59E5H2" 0 "Indolepyruvate oxidoreductase subunit lorB"  
"OP8\_C16\_00015" 28745 "s63E6H2" 0 "Indolepyruvate oxidoreductase subunit lorB"  
"OP8\_C16\_00016" 28746 "s59E13H2" 0 "Indolepyruvate oxidoreductase subunit lorA"  
"OP8\_C16\_00016" 28746 "s59E25H2" 0 "Indolepyruvate oxidoreductase subunit lorA"  
"OP8\_C16\_00016" 28746 "s59E5H2" 0 "Indolepyruvate oxidoreductase subunit lorA"  
"OP8\_C16\_00016" 28746 "s63E6H2" 0 "Indolepyruvate oxidoreductase subunit lorA"  
"OP8\_C16\_00017" 28747 "s59E13H2" 0 "Histidinol-phosphate aminotransferase 2"  
"OP8\_C16\_00017" 28747 "s59E25H2" 0 "Histidinol-phosphate aminotransferase 2"  
"OP8\_C16\_00017" 28747 "s59E5H2" 0 "Histidinol-phosphate aminotransferase 2"  
"OP8\_C16\_00017" 28747 "s63E6H2" 0 "Histidinol-phosphate aminotransferase 2"  
"OP8\_C16\_00018" 28748 "s59E13H2" 0 "Glyoxalase-like domain protein"  
"OP8\_C16\_00018" 28748 "s59E25H2" 0 "Glyoxalase-like domain protein"  
"OP8\_C16\_00018" 28748 "s59E5H2" 0 "Glyoxalase-like domain protein"  
"OP8\_C16\_00018" 28748 "s63E6H2" 0 "Glyoxalase-like domain protein"  
"OP8\_C16\_00019" 28749 "s59E13H2" 0 "Acyl-CoA dehydrogenase"  
"OP8\_C16\_00019" 28749 "s59E25H2" 0 "Acyl-CoA dehydrogenase"  
"OP8\_C16\_00019" 28749 "s59E5H2" 0 "Acyl-CoA dehydrogenase"  
"OP8\_C16\_00019" 28749 "s63E6H2" 0 "Acyl-CoA dehydrogenase"  
"OP8\_C16\_00020" 28750 "s59E13H2" 0 "putative sugar kinase"  
"OP8\_C16\_00020" 28750 "s59E25H2" 0 "putative sugar kinase"  
"OP8\_C16\_00020" 28750 "s59E5H2" 0 "putative sugar kinase"  
"OP8\_C16\_00020" 28750 "s63E6H2" 0 "putative sugar kinase"  
"OP8\_C16\_00021" 28751 "s59E13H2" 0 "S-methyl-5'-thioadenosine phosphorylase"  
"OP8\_C16\_00021" 28751 "s59E25H2" 0 "S-methyl-5'-thioadenosine phosphorylase"  
"OP8\_C16\_00021" 28751 "s59E5H2" 0 "S-methyl-5'-thioadenosine phosphorylase"  
"OP8\_C16\_00021" 28751 "s63E6H2" 0 "S-methyl-5'-thioadenosine phosphorylase"  
"OP8\_C16\_00022" 28752 "s59E13H2" 0 "NAD-dependent protein deacylase 1"  
"OP8\_C16\_00022" 28752 "s59E25H2" 0 "NAD-dependent protein deacylase 1"  
"OP8\_C16\_00022" 28752 "s59E5H2" 0 "NAD-dependent protein deacylase 1"  
"OP8\_C16\_00022" 28752 "s63E6H2" 0 "NAD-dependent protein deacylase 1"  
"OP8\_C16\_00023" 28753 "s59E13H2" 0 "hypothetical protein"  
"OP8\_C16\_00023" 28753 "s59E25H2" 0 "hypothetical protein"  
"OP8\_C16\_00023" 28753 "s59E5H2" 0 "hypothetical protein"  
"OP8\_C16\_00023" 28753 "s63E6H2" 0 "hypothetical protein"

"OP8\_C16\_00024" 28754 "s59E13H2" 0 "GTP cyclohydrolase 1"  
"OP8\_C16\_00024" 28754 "s59E25H2" 0 "GTP cyclohydrolase 1"  
"OP8\_C16\_00024" 28754 "s59E5H2" 0 "GTP cyclohydrolase 1"  
"OP8\_C16\_00024" 28754 "s63E6H2" 0 "GTP cyclohydrolase 1"  
"OP8\_C16\_00025" 28755 "s59E13H2" 0 "Methionine--tRNA ligase"  
"OP8\_C16\_00025" 28755 "s59E25H2" 0 "Methionine--tRNA ligase"  
"OP8\_C16\_00025" 28755 "s59E5H2" 0 "Methionine--tRNA ligase"  
"OP8\_C16\_00025" 28755 "s63E6H2" 0 "Methionine--tRNA ligase"  
"OP8\_C16\_00026" 28756 "s59E13H2" 0 "Coenzyme PQQ synthesis protein B"  
"OP8\_C16\_00026" 28756 "s59E25H2" 0 "Coenzyme PQQ synthesis protein B"  
"OP8\_C16\_00026" 28756 "s59E5H2" 0 "Coenzyme PQQ synthesis protein B"  
"OP8\_C16\_00026" 28756 "s63E6H2" 0 "Coenzyme PQQ synthesis protein B"  
"OP8\_C16\_00027" 28757 "s59E13H2" 0 "Threonylcarbamoyl-AMP synthase"  
"OP8\_C16\_00027" 28757 "s59E25H2" 0 "Threonylcarbamoyl-AMP synthase"  
"OP8\_C16\_00027" 28757 "s59E5H2" 0 "Threonylcarbamoyl-AMP synthase"  
"OP8\_C16\_00027" 28757 "s63E6H2" 0 "Threonylcarbamoyl-AMP synthase"  
"OP8\_C16\_00028" 28758 "s59E13H2" 0 "hypothetical protein"  
"OP8\_C16\_00028" 28758 "s59E25H2" 0 "hypothetical protein"  
"OP8\_C16\_00028" 28758 "s59E5H2" 0 "hypothetical protein"  
"OP8\_C16\_00028" 28758 "s63E6H2" 0 "hypothetical protein"  
"OP8\_C16\_00029" 28759 "s59E13H2" 0 "NADH dehydrogenase"  
"OP8\_C16\_00029" 28759 "s59E25H2" 0 "NADH dehydrogenase"  
"OP8\_C16\_00029" 28759 "s59E5H2" 0 "NADH dehydrogenase"  
"OP8\_C16\_00029" 28759 "s63E6H2" 0 "NADH dehydrogenase"  
"OP8\_C16\_00030" 28760 "s59E13H2" 0 "PGL/p-HBAD biosynthesis glycosyltransferase/MT3031"  
"OP8\_C16\_00030" 28760 "s59E25H2" 0 "PGL/p-HBAD biosynthesis glycosyltransferase/MT3031"  
"OP8\_C16\_00030" 28760 "s59E5H2" 0 "PGL/p-HBAD biosynthesis glycosyltransferase/MT3031"  
"OP8\_C16\_00030" 28760 "s63E6H2" 0 "PGL/p-HBAD biosynthesis glycosyltransferase/MT3031"  
"OP8\_C16\_00031" 28761 "s59E13H2" 0 "Late embryogenesis abundant protein"  
"OP8\_C16\_00031" 28761 "s59E25H2" 0 "Late embryogenesis abundant protein"  
"OP8\_C16\_00031" 28761 "s59E5H2" 0 "Late embryogenesis abundant protein"  
"OP8\_C16\_00031" 28761 "s63E6H2" 0 "Late embryogenesis abundant protein"  
"OP8\_C16\_00032" 28762 "s59E13H2" 0 "Multifunctional CCA protein"  
"OP8\_C16\_00032" 28762 "s59E25H2" 0 "Multifunctional CCA protein"  
"OP8\_C16\_00032" 28762 "s59E5H2" 0 "Multifunctional CCA protein"  
"OP8\_C16\_00032" 28762 "s63E6H2" 0 "Multifunctional CCA protein"  
"OP8\_C16\_00033" 28763 "s59E13H2" 0 "UDP-glucose 4-epimerase"  
"OP8\_C16\_00033" 28763 "s59E25H2" 0 "UDP-glucose 4-epimerase"  
"OP8\_C16\_00033" 28763 "s59E5H2" 0 "UDP-glucose 4-epimerase"  
"OP8\_C16\_00033" 28763 "s63E6H2" 0 "UDP-glucose 4-epimerase"  
"OP8\_C16\_00035" 28765 "s59E13H2" 0 "Membrane-bound lytic murein transglycosylase D precursor"  
"OP8\_C16\_00035" 28765 "s59E25H2" 0 "Membrane-bound lytic murein transglycosylase D precursor"  
"OP8\_C16\_00035" 28765 "s59E5H2" 0 "Membrane-bound lytic murein transglycosylase D precursor"  
"OP8\_C16\_00035" 28765 "s63E6H2" 0 "Membrane-bound lytic murein transglycosylase D precursor"  
"OP8\_C16\_00036" 28766 "s59E13H2" 0 "50S ribosomal protein L17"  
"OP8\_C16\_00036" 28766 "s59E25H2" 0 "50S ribosomal protein L17"  
"OP8\_C16\_00036" 28766 "s59E5H2" 0 "50S ribosomal protein L17"

"OP8\_C16\_00036" 28766 "s63E6H2" 0 "50S ribosomal protein L17"  
"OP8\_C16\_00037" 28767 "s59E13H2" 0 "DNA-directed RNA polymerase subunit alpha"  
"OP8\_C16\_00037" 28767 "s59E25H2" 0 "DNA-directed RNA polymerase subunit alpha"  
"OP8\_C16\_00037" 28767 "s59E5H2" 0 "DNA-directed RNA polymerase subunit alpha"  
"OP8\_C16\_00037" 28767 "s63E6H2" 0 "DNA-directed RNA polymerase subunit alpha"  
"OP8\_C16\_00038" 28768 "s59E13H2" 0 "30S ribosomal protein S4"  
"OP8\_C16\_00038" 28768 "s59E25H2" 0 "30S ribosomal protein S4"  
"OP8\_C16\_00038" 28768 "s59E5H2" 0 "30S ribosomal protein S4"  
"OP8\_C16\_00038" 28768 "s63E6H2" 0 "30S ribosomal protein S4"  
"OP8\_C16\_00039" 28769 "s59E13H2" 0 "30S ribosomal protein S11"  
"OP8\_C16\_00039" 28769 "s59E25H2" 0 "30S ribosomal protein S11"  
"OP8\_C16\_00039" 28769 "s59E5H2" 0 "30S ribosomal protein S11"  
"OP8\_C16\_00039" 28769 "s63E6H2" 0 "30S ribosomal protein S11"  
"OP8\_C16\_00040" 28770 "s59E13H2" 0 "30S ribosomal protein S13"  
"OP8\_C16\_00040" 28770 "s59E25H2" 0 "30S ribosomal protein S13"  
"OP8\_C16\_00040" 28770 "s59E5H2" 0 "30S ribosomal protein S13"  
"OP8\_C16\_00040" 28770 "s63E6H2" 0 "30S ribosomal protein S13"  
"OP8\_C16\_00041" 28771 "s59E13H2" 0 "Translation initiation factor IF-1"  
"OP8\_C16\_00041" 28771 "s59E25H2" 0 "Translation initiation factor IF-1"  
"OP8\_C16\_00041" 28771 "s59E5H2" 0 "Translation initiation factor IF-1"  
"OP8\_C16\_00041" 28771 "s63E6H2" 0 "Translation initiation factor IF-1"  
"OP8\_C16\_00042" 28772 "s59E13H2" 0 "Methionine aminopeptidase 1"  
"OP8\_C16\_00042" 28772 "s59E25H2" 0 "Methionine aminopeptidase 1"  
"OP8\_C16\_00042" 28772 "s59E5H2" 0 "Methionine aminopeptidase 1"  
"OP8\_C16\_00042" 28772 "s63E6H2" 0 "Methionine aminopeptidase 1"  
"OP8\_C16\_00043" 28773 "s59E13H2" 0 "Adenylate kinase"  
"OP8\_C16\_00043" 28773 "s59E25H2" 0 "Adenylate kinase"  
"OP8\_C16\_00043" 28773 "s59E5H2" 0 "Adenylate kinase"  
"OP8\_C16\_00043" 28773 "s63E6H2" 0 "Adenylate kinase"  
"OP8\_C16\_00044" 28774 "s59E13H2" 0 "preprotein translocase subunit SecY"  
"OP8\_C16\_00044" 28774 "s59E25H2" 0 "preprotein translocase subunit SecY"  
"OP8\_C16\_00044" 28774 "s59E5H2" 0 "preprotein translocase subunit SecY"  
"OP8\_C16\_00044" 28774 "s63E6H2" 0 "preprotein translocase subunit SecY"  
"OP8\_C16\_00045" 28775 "s59E13H2" 0 "50S ribosomal protein L15"  
"OP8\_C16\_00045" 28775 "s59E25H2" 0 "50S ribosomal protein L15"  
"OP8\_C16\_00045" 28775 "s59E5H2" 0 "50S ribosomal protein L15"  
"OP8\_C16\_00045" 28775 "s63E6H2" 0 "50S ribosomal protein L15"  
"OP8\_C16\_00046" 28776 "s59E13H2" 0 "50S ribosomal protein L30"  
"OP8\_C16\_00046" 28776 "s59E25H2" 0 "50S ribosomal protein L30"  
"OP8\_C16\_00046" 28776 "s59E5H2" 0 "50S ribosomal protein L30"  
"OP8\_C16\_00046" 28776 "s63E6H2" 0 "50S ribosomal protein L30"  
"OP8\_C16\_00047" 28777 "s59E13H2" 0 "30S ribosomal protein S5"  
"OP8\_C16\_00047" 28777 "s59E25H2" 0 "30S ribosomal protein S5"  
"OP8\_C16\_00047" 28777 "s59E5H2" 0 "30S ribosomal protein S5"  
"OP8\_C16\_00047" 28777 "s63E6H2" 0 "30S ribosomal protein S5"  
"OP8\_C16\_00048" 28778 "s59E13H2" 0 "50S ribosomal protein L18"  
"OP8\_C16\_00048" 28778 "s59E25H2" 0 "50S ribosomal protein L18"

"OP8\_C16\_00048" 28778 "s59E5H2" 0 "50S ribosomal protein L18"  
"OP8\_C16\_00048" 28778 "s63E6H2" 0 "50S ribosomal protein L18"  
"OP8\_C16\_00049" 28779 "s59E13H2" 0 "50S ribosomal protein L6"  
"OP8\_C16\_00049" 28779 "s59E25H2" 0 "50S ribosomal protein L6"  
"OP8\_C16\_00049" 28779 "s59E5H2" 0 "50S ribosomal protein L6"  
"OP8\_C16\_00049" 28779 "s63E6H2" 0 "50S ribosomal protein L6"  
"OP8\_C16\_00051" 28781 "s59E13H2" 0 "30S ribosomal protein S8"  
"OP8\_C16\_00051" 28781 "s59E25H2" 0 "30S ribosomal protein S8"  
"OP8\_C16\_00051" 28781 "s59E5H2" 0 "30S ribosomal protein S8"  
"OP8\_C16\_00051" 28781 "s63E6H2" 0 "30S ribosomal protein S8"  
"OP8\_C16\_00052" 28782 "s59E13H2" 0 "50S ribosomal protein L5"  
"OP8\_C16\_00052" 28782 "s59E25H2" 0 "50S ribosomal protein L5"  
"OP8\_C16\_00052" 28782 "s59E5H2" 0 "50S ribosomal protein L5"  
"OP8\_C16\_00052" 28782 "s63E6H2" 0 "50S ribosomal protein L5"  
"OP8\_C16\_00053" 28783 "s59E13H2" 0 "50S ribosomal protein L24"  
"OP8\_C16\_00053" 28783 "s59E25H2" 0 "50S ribosomal protein L24"  
"OP8\_C16\_00053" 28783 "s59E5H2" 0 "50S ribosomal protein L24"  
"OP8\_C16\_00053" 28783 "s63E6H2" 0 "50S ribosomal protein L24"  
"OP8\_C16\_00054" 28784 "s59E13H2" 0 "50S ribosomal protein L14"  
"OP8\_C16\_00054" 28784 "s59E25H2" 0 "50S ribosomal protein L14"  
"OP8\_C16\_00054" 28784 "s59E5H2" 0 "50S ribosomal protein L14"  
"OP8\_C16\_00054" 28784 "s63E6H2" 0 "50S ribosomal protein L14"  
"OP8\_C16\_00055" 28785 "s59E13H2" 0 "30S ribosomal protein S17"  
"OP8\_C16\_00055" 28785 "s59E25H2" 0 "30S ribosomal protein S17"  
"OP8\_C16\_00055" 28785 "s59E5H2" 0 "30S ribosomal protein S17"  
"OP8\_C16\_00055" 28785 "s63E6H2" 0 "30S ribosomal protein S17"  
"OP8\_C16\_00056" 28786 "s59E13H2" 0 "50S ribosomal protein L29"  
"OP8\_C16\_00056" 28786 "s59E25H2" 0 "50S ribosomal protein L29"  
"OP8\_C16\_00056" 28786 "s59E5H2" 0 "50S ribosomal protein L29"  
"OP8\_C16\_00056" 28786 "s63E6H2" 0 "50S ribosomal protein L29"  
"OP8\_C16\_00057" 28787 "s59E13H2" 0 "50S ribosomal protein L16"  
"OP8\_C16\_00057" 28787 "s59E25H2" 0 "50S ribosomal protein L16"  
"OP8\_C16\_00057" 28787 "s59E5H2" 0 "50S ribosomal protein L16"  
"OP8\_C16\_00057" 28787 "s63E6H2" 0 "50S ribosomal protein L16"  
"OP8\_C16\_00058" 28788 "s59E13H2" 0 "30S ribosomal protein S3"  
"OP8\_C16\_00058" 28788 "s59E25H2" 0 "30S ribosomal protein S3"  
"OP8\_C16\_00058" 28788 "s59E5H2" 0 "30S ribosomal protein S3"  
"OP8\_C16\_00058" 28788 "s63E6H2" 0 "30S ribosomal protein S3"  
"OP8\_C16\_00059" 28789 "s59E13H2" 0 "50S ribosomal protein L22"  
"OP8\_C16\_00059" 28789 "s59E25H2" 0 "50S ribosomal protein L22"  
"OP8\_C16\_00059" 28789 "s59E5H2" 0 "50S ribosomal protein L22"  
"OP8\_C16\_00059" 28789 "s63E6H2" 0 "50S ribosomal protein L22"  
"OP8\_C16\_00060" 28790 "s59E13H2" 0 "30S ribosomal protein S19"  
"OP8\_C16\_00060" 28790 "s59E25H2" 0 "30S ribosomal protein S19"  
"OP8\_C16\_00060" 28790 "s59E5H2" 0 "30S ribosomal protein S19"  
"OP8\_C16\_00060" 28790 "s63E6H2" 0 "30S ribosomal protein S19"  
"OP8\_C16\_00061" 28791 "s59E13H2" 0 "50S ribosomal protein L2"

"OP8\_C16\_00061" 28791 "s59E25H2" 0 "50S ribosomal protein L2"  
"OP8\_C16\_00061" 28791 "s59E5H2" 0 "50S ribosomal protein L2"  
"OP8\_C16\_00061" 28791 "s63E6H2" 0 "50S ribosomal protein L2"  
"OP8\_C16\_00062" 28792 "s59E13H2" 0 "50S ribosomal protein L23"  
"OP8\_C16\_00062" 28792 "s59E25H2" 0 "50S ribosomal protein L23"  
"OP8\_C16\_00062" 28792 "s59E5H2" 0 "50S ribosomal protein L23"  
"OP8\_C16\_00062" 28792 "s63E6H2" 0 "50S ribosomal protein L23"  
"OP8\_C16\_00063" 28793 "s59E13H2" 0 "50S ribosomal protein L4"  
"OP8\_C16\_00063" 28793 "s59E25H2" 0 "50S ribosomal protein L4"  
"OP8\_C16\_00063" 28793 "s59E5H2" 0 "50S ribosomal protein L4"  
"OP8\_C16\_00063" 28793 "s63E6H2" 0 "50S ribosomal protein L4"  
"OP8\_C16\_00064" 28794 "s59E13H2" 0 "50S ribosomal protein L3"  
"OP8\_C16\_00064" 28794 "s59E25H2" 0 "50S ribosomal protein L3"  
"OP8\_C16\_00064" 28794 "s59E5H2" 0 "50S ribosomal protein L3"  
"OP8\_C16\_00064" 28794 "s63E6H2" 0 "50S ribosomal protein L3"  
"OP8\_C16\_00065" 28795 "s59E13H2" 0 "30S ribosomal protein S10"  
"OP8\_C16\_00065" 28795 "s59E25H2" 0 "30S ribosomal protein S10"  
"OP8\_C16\_00065" 28795 "s59E5H2" 0 "30S ribosomal protein S10"  
"OP8\_C16\_00065" 28795 "s63E6H2" 0 "30S ribosomal protein S10"  
"OP8\_C16\_00066" 28796 "s59E13H2" 0 "Elongation factor Tu"  
"OP8\_C16\_00066" 28796 "s59E25H2" 0 "Elongation factor Tu"  
"OP8\_C16\_00066" 28796 "s59E5H2" 0.03110281 "Elongation factor Tu"  
"OP8\_C16\_00066" 28796 "s63E6H2" 0.01575158 "Elongation factor Tu"  
"OP8\_C16\_00067" 28797 "s59E13H2" 0 "Elongation factor G"  
"OP8\_C16\_00067" 28797 "s59E25H2" 0 "Elongation factor G"  
"OP8\_C16\_00067" 28797 "s59E5H2" 0 "Elongation factor G"  
"OP8\_C16\_00067" 28797 "s63E6H2" 0 "Elongation factor G"  
"OP8\_C16\_00068" 28798 "s59E13H2" 0 "30S ribosomal protein S7"  
"OP8\_C16\_00068" 28798 "s59E25H2" 0 "30S ribosomal protein S7"  
"OP8\_C16\_00068" 28798 "s59E5H2" 0 "30S ribosomal protein S7"  
"OP8\_C16\_00068" 28798 "s63E6H2" 0 "30S ribosomal protein S7"  
"OP8\_C16\_00069" 28799 "s59E13H2" 0 "30S ribosomal protein S12"  
"OP8\_C16\_00069" 28799 "s59E25H2" 0 "30S ribosomal protein S12"  
"OP8\_C16\_00069" 28799 "s59E5H2" 0 "30S ribosomal protein S12"  
"OP8\_C16\_00069" 28799 "s63E6H2" 0 "30S ribosomal protein S12"  
"OP8\_C16\_00070" 28800 "s59E13H2" 0 "DNA-directed RNA polymerase subunit beta"  
"OP8\_C16\_00070" 28800 "s59E25H2" 0 "DNA-directed RNA polymerase subunit beta"  
"OP8\_C16\_00070" 28800 "s59E5H2" 0 "DNA-directed RNA polymerase subunit beta"  
"OP8\_C16\_00070" 28800 "s63E6H2" 0 "DNA-directed RNA polymerase subunit beta"  
"OP8\_C16\_00071" 28801 "s59E13H2" 0 "DNA-directed RNA polymerase subunit beta"  
"OP8\_C16\_00071" 28801 "s59E25H2" 0 "DNA-directed RNA polymerase subunit beta"  
"OP8\_C16\_00071" 28801 "s59E5H2" 0 "DNA-directed RNA polymerase subunit beta"  
"OP8\_C16\_00071" 28801 "s63E6H2" 0 "DNA-directed RNA polymerase subunit beta"  
"OP8\_C16\_00072" 28802 "s59E13H2" 0 "50S ribosomal protein L7/L12"  
"OP8\_C16\_00072" 28802 "s59E25H2" 0 "50S ribosomal protein L7/L12"  
"OP8\_C16\_00072" 28802 "s59E5H2" 0.01729977 "50S ribosomal protein L7/L12"  
"OP8\_C16\_00072" 28802 "s63E6H2" 0 "50S ribosomal protein L7/L12"

"OP8\_C16\_00073" 28803 "s59E13H2" 0 "50S ribosomal protein L10"  
"OP8\_C16\_00073" 28803 "s59E25H2" 0 "50S ribosomal protein L10"  
"OP8\_C16\_00073" 28803 "s59E5H2" 0.02013036 "50S ribosomal protein L10"  
"OP8\_C16\_00073" 28803 "s63E6H2" 0 "50S ribosomal protein L10"  
"OP8\_C16\_00074" 28804 "s59E13H2" 0 "50S ribosomal protein L1"  
"OP8\_C16\_00074" 28804 "s59E25H2" 0 "50S ribosomal protein L1"  
"OP8\_C16\_00074" 28804 "s59E5H2" 0 "50S ribosomal protein L1"  
"OP8\_C16\_00074" 28804 "s63E6H2" 0 "50S ribosomal protein L1"  
"OP8\_C16\_00075" 28805 "s59E13H2" 0 "50S ribosomal protein L11"  
"OP8\_C16\_00075" 28805 "s59E25H2" 0 "50S ribosomal protein L11"  
"OP8\_C16\_00075" 28805 "s59E5H2" 0 "50S ribosomal protein L11"  
"OP8\_C16\_00075" 28805 "s63E6H2" 0 "50S ribosomal protein L11"  
"OP8\_C16\_00076" 28806 "s59E13H2" 0 "hypothetical protein"  
"OP8\_C16\_00076" 28806 "s59E25H2" 0 "hypothetical protein"  
"OP8\_C16\_00076" 28806 "s59E5H2" 0 "hypothetical protein"  
"OP8\_C16\_00076" 28806 "s63E6H2" 0 "hypothetical protein"  
"OP8\_C16\_00077" 28807 "s59E13H2" 0 "preprotein translocase subunit SecE"  
"OP8\_C16\_00077" 28807 "s59E25H2" 0 "preprotein translocase subunit SecE"  
"OP8\_C16\_00077" 28807 "s59E5H2" 0 "preprotein translocase subunit SecE"  
"OP8\_C16\_00077" 28807 "s63E6H2" 0 "preprotein translocase subunit SecE"  
"OP8\_C16\_00084" 28814 "s59E13H2" 0 "hypothetical protein"  
"OP8\_C16\_00084" 28814 "s59E25H2" 0 "hypothetical protein"  
"OP8\_C16\_00084" 28814 "s59E5H2" 0 "hypothetical protein"  
"OP8\_C16\_00084" 28814 "s63E6H2" 0 "hypothetical protein"  
"OP8\_C16\_00085" 28815 "s59E13H2" 0 "hypothetical protein"  
"OP8\_C16\_00085" 28815 "s59E25H2" 0 "hypothetical protein"  
"OP8\_C16\_00085" 28815 "s59E5H2" 0 "hypothetical protein"  
"OP8\_C16\_00085" 28815 "s63E6H2" 0 "hypothetical protein"  
"OP8\_C16\_00086" 28816 "s59E13H2" 0 "ECF RNA polymerase sigma factor SigW"  
"OP8\_C16\_00086" 28816 "s59E25H2" 0 "ECF RNA polymerase sigma factor SigW"  
"OP8\_C16\_00086" 28816 "s59E5H2" 0 "ECF RNA polymerase sigma factor SigW"  
"OP8\_C16\_00086" 28816 "s63E6H2" 0 "ECF RNA polymerase sigma factor SigW"  
"OP8\_C16\_00087" 28817 "s59E13H2" 0 "Adenylosuccinate lyase"  
"OP8\_C16\_00087" 28817 "s59E25H2" 0 "Adenylosuccinate lyase"  
"OP8\_C16\_00087" 28817 "s59E5H2" 0 "Adenylosuccinate lyase"  
"OP8\_C16\_00087" 28817 "s63E6H2" 0 "Adenylosuccinate lyase"  
"OP8\_C16\_00088" 28818 "s59E13H2" 0 "phosphoribosylformylglycinamide synthase subunit PurS"  
"OP8\_C16\_00088" 28818 "s59E25H2" 0 "phosphoribosylformylglycinamide synthase subunit PurS"  
"OP8\_C16\_00088" 28818 "s59E5H2" 0 "phosphoribosylformylglycinamide synthase subunit PurS"  
"OP8\_C16\_00088" 28818 "s63E6H2" 0 "phosphoribosylformylglycinamide synthase subunit PurS"  
"OP8\_C16\_00089" 28819 "s59E13H2" 0 "Phosphoribosylformylglycinamide synthase 1"  
"OP8\_C16\_00089" 28819 "s59E25H2" 0 "Phosphoribosylformylglycinamide synthase 1"  
"OP8\_C16\_00089" 28819 "s59E5H2" 0 "Phosphoribosylformylglycinamide synthase 1"  
"OP8\_C16\_00089" 28819 "s63E6H2" 0 "Phosphoribosylformylglycinamide synthase 1"  
"OP8\_C16\_00090" 28820 "s59E13H2" 0 "Phosphoribosylformylglycinamide synthase 2"  
"OP8\_C16\_00090" 28820 "s59E25H2" 0 "Phosphoribosylformylglycinamide synthase 2"  
"OP8\_C16\_00090" 28820 "s59E5H2" 0 "Phosphoribosylformylglycinamide synthase 2"



"OP8\_C16\_00090" 28820 "s63E6H2" 0 "Phosphoribosylformylglycinamide synthase 2"  
"OP8\_C16\_00091" 28821 "s59E13H2" 0 "Phosphoribosylglycinamide formyltransferase"  
"OP8\_C16\_00091" 28821 "s59E25H2" 0 "Phosphoribosylglycinamide formyltransferase"  
"OP8\_C16\_00091" 28821 "s59E5H2" 0 "Phosphoribosylglycinamide formyltransferase"  
"OP8\_C16\_00091" 28821 "s63E6H2" 0 "Phosphoribosylglycinamide formyltransferase"  
"OP8\_C16\_00092" 28822 "s59E13H2" 0 "Tyrosine--tRNA ligase"  
"OP8\_C16\_00092" 28822 "s59E25H2" 0 "Tyrosine--tRNA ligase"  
"OP8\_C16\_00092" 28822 "s59E5H2" 0.002404551 "Tyrosine--tRNA ligase"  
"OP8\_C16\_00092" 28822 "s63E6H2" 0 "Tyrosine--tRNA ligase"  
"OP8\_C16\_00093" 28823 "s59E13H2" 0 "Thymidylate synthase ThyX"  
"OP8\_C16\_00093" 28823 "s59E25H2" 0 "Thymidylate synthase ThyX"  
"OP8\_C16\_00093" 28823 "s59E5H2" 0 "Thymidylate synthase ThyX"  
"OP8\_C16\_00093" 28823 "s63E6H2" 0 "Thymidylate synthase ThyX"  
"OP8\_C16\_00094" 28824 "s59E13H2" 0 "Lipoteichoic acid synthase 1"  
"OP8\_C16\_00094" 28824 "s59E25H2" 0 "Lipoteichoic acid synthase 1"  
"OP8\_C16\_00094" 28824 "s59E5H2" 0 "Lipoteichoic acid synthase 1"  
"OP8\_C16\_00094" 28824 "s63E6H2" 0 "Lipoteichoic acid synthase 1"  
"OP8\_C16\_00095" 28825 "s59E13H2" 0 "Rubrerythrin"  
"OP8\_C16\_00095" 28825 "s59E25H2" 0 "Rubrerythrin"  
"OP8\_C16\_00095" 28825 "s59E5H2" 0 "Rubrerythrin"  
"OP8\_C16\_00095" 28825 "s63E6H2" 0 "Rubrerythrin"  
"OP8\_C16\_00096" 28826 "s59E13H2" 0 "tRNA-splicing ligase RtcB"  
"OP8\_C16\_00096" 28826 "s59E25H2" 0 "tRNA-splicing ligase RtcB"  
"OP8\_C16\_00096" 28826 "s59E5H2" 0 "tRNA-splicing ligase RtcB"  
"OP8\_C16\_00096" 28826 "s63E6H2" 0 "tRNA-splicing ligase RtcB"  
"OP8\_C16\_00097" 28827 "s59E13H2" 0 "hypothetical protein"  
"OP8\_C16\_00097" 28827 "s59E25H2" 0 "hypothetical protein"  
"OP8\_C16\_00097" 28827 "s59E5H2" 0 "hypothetical protein"  
"OP8\_C16\_00097" 28827 "s63E6H2" 0 "hypothetical protein"  
"OP8\_C16\_00098" 28828 "s59E13H2" 0 "molybdenum cofactor biosynthesis protein A"  
"OP8\_C16\_00098" 28828 "s59E25H2" 0 "molybdenum cofactor biosynthesis protein A"  
"OP8\_C16\_00098" 28828 "s59E5H2" 0 "molybdenum cofactor biosynthesis protein A"  
"OP8\_C16\_00098" 28828 "s63E6H2" 0 "molybdenum cofactor biosynthesis protein A"  
"OP8\_C16\_00099" 28829 "s59E13H2" 0 "Ultraviolet N-glycosylase/AP lyase"  
"OP8\_C16\_00099" 28829 "s59E25H2" 0 "Ultraviolet N-glycosylase/AP lyase"  
"OP8\_C16\_00099" 28829 "s59E5H2" 0 "Ultraviolet N-glycosylase/AP lyase"  
"OP8\_C16\_00099" 28829 "s63E6H2" 0 "Ultraviolet N-glycosylase/AP lyase"  
"OP8\_C16\_00100" 28830 "s59E13H2" 0 "Ribonucleoside-diphosphate reductase NrdZ"  
"OP8\_C16\_00100" 28830 "s59E25H2" 0 "Ribonucleoside-diphosphate reductase NrdZ"  
"OP8\_C16\_00100" 28830 "s59E5H2" 0 "Ribonucleoside-diphosphate reductase NrdZ"  
"OP8\_C16\_00100" 28830 "s63E6H2" 0 "Ribonucleoside-diphosphate reductase NrdZ"  
"OP8\_C16\_00101" 28831 "s59E13H2" 0 "Putative zinc metalloprotease Rip3"  
"OP8\_C16\_00101" 28831 "s59E25H2" 0 "Putative zinc metalloprotease Rip3"  
"OP8\_C16\_00101" 28831 "s59E5H2" 0 "Putative zinc metalloprotease Rip3"  
"OP8\_C16\_00101" 28831 "s63E6H2" 0 "Putative zinc metalloprotease Rip3"  
"OP8\_C16\_00102" 28832 "s59E13H2" 0 "Rubrerythrin-2"  
"OP8\_C16\_00102" 28832 "s59E25H2" 0 "Rubrerythrin-2"

"OP8\_C16\_00102" 28832 "s59E5H2" 0 "Rubrerythrin-2"  
"OP8\_C16\_00102" 28832 "s63E6H2" 0 "Rubrerythrin-2"  
"OP8\_C16\_00103" 28833 "s59E13H2" 0 "Quinolate synthase A"  
"OP8\_C16\_00103" 28833 "s59E25H2" 0 "Quinolate synthase A"  
"OP8\_C16\_00103" 28833 "s59E5H2" 0 "Quinolate synthase A"  
"OP8\_C16\_00103" 28833 "s63E6H2" 0 "Quinolate synthase A"  
"OP8\_C16\_00105" 28835 "s59E13H2" 0 "Sulfurtransferase TusA"  
"OP8\_C16\_00105" 28835 "s59E25H2" 0 "Sulfurtransferase TusA"  
"OP8\_C16\_00105" 28835 "s59E5H2" 0 "Sulfurtransferase TusA"  
"OP8\_C16\_00105" 28835 "s63E6H2" 0 "Sulfurtransferase TusA"  
"OP8\_C16\_00106" 28836 "s59E13H2" 0 "NifU-like protein"  
"OP8\_C16\_00106" 28836 "s59E25H2" 0 "NifU-like protein"  
"OP8\_C16\_00106" 28836 "s59E5H2" 0 "NifU-like protein"  
"OP8\_C16\_00106" 28836 "s63E6H2" 0 "NifU-like protein"  
"OP8\_C16\_00107" 28837 "s59E13H2" 0 "putative cysteine desulfurase 2"  
"OP8\_C16\_00107" 28837 "s59E25H2" 0 "putative cysteine desulfurase 2"  
"OP8\_C16\_00107" 28837 "s59E5H2" 0 "putative cysteine desulfurase 2"  
"OP8\_C16\_00107" 28837 "s63E6H2" 0 "putative cysteine desulfurase 2"  
"OP8\_C16\_00108" 28838 "s59E13H2" 0 "Fe/S biogenesis protein NfuA"  
"OP8\_C16\_00108" 28838 "s59E25H2" 0 "Fe/S biogenesis protein NfuA"  
"OP8\_C16\_00108" 28838 "s59E5H2" 0 "Fe/S biogenesis protein NfuA"  
"OP8\_C16\_00108" 28838 "s63E6H2" 0 "Fe/S biogenesis protein NfuA"  
"OP8\_C16\_00109" 28839 "s59E13H2" 0 "2-oxoglutarate oxidoreductase subunit KorB"  
"OP8\_C16\_00109" 28839 "s59E25H2" 0 "2-oxoglutarate oxidoreductase subunit KorB"  
"OP8\_C16\_00109" 28839 "s59E5H2" 0 "2-oxoglutarate oxidoreductase subunit KorB"  
"OP8\_C16\_00109" 28839 "s63E6H2" 0 "2-oxoglutarate oxidoreductase subunit KorB"  
"OP8\_C16\_00110" 28840 "s59E13H2" 0 "2-oxoglutarate synthase subunit KorA"  
"OP8\_C16\_00110" 28840 "s59E25H2" 0 "2-oxoglutarate synthase subunit KorA"  
"OP8\_C16\_00110" 28840 "s59E5H2" 0 "2-oxoglutarate synthase subunit KorA"  
"OP8\_C16\_00110" 28840 "s63E6H2" 0 "2-oxoglutarate synthase subunit KorA"  
"OP8\_C16\_00111" 28841 "s59E13H2" 0 "hypothetical protein"  
"OP8\_C16\_00111" 28841 "s59E25H2" 0 "hypothetical protein"  
"OP8\_C16\_00111" 28841 "s59E5H2" 0 "hypothetical protein"  
"OP8\_C16\_00111" 28841 "s63E6H2" 0 "hypothetical protein"  
"OP8\_C16\_00112" 28842 "s59E13H2" 0 "Adenylosuccinate synthetase"  
"OP8\_C16\_00112" 28842 "s59E25H2" 0 "Adenylosuccinate synthetase"  
"OP8\_C16\_00112" 28842 "s59E5H2" 0 "Adenylosuccinate synthetase"  
"OP8\_C16\_00112" 28842 "s63E6H2" 0 "Adenylosuccinate synthetase"  
"OP8\_C16\_00113" 28843 "s59E13H2" 0 "Adenylosuccinate synthetase"  
"OP8\_C16\_00113" 28843 "s59E25H2" 0 "Adenylosuccinate synthetase"  
"OP8\_C16\_00113" 28843 "s59E5H2" 0 "Adenylosuccinate synthetase"  
"OP8\_C16\_00113" 28843 "s63E6H2" 0 "Adenylosuccinate synthetase"  
"OP8\_C16\_00114" 28844 "s59E13H2" 0 "hypothetical protein"  
"OP8\_C16\_00114" 28844 "s59E25H2" 0 "hypothetical protein"  
"OP8\_C16\_00114" 28844 "s59E5H2" 0 "hypothetical protein"  
"OP8\_C16\_00114" 28844 "s63E6H2" 0 "hypothetical protein"  
"OP8\_C16\_00115" 28845 "s59E13H2" 0 "Nitrite reductase [NAD(P)H]"

"OP8\_C16\_00115" 28845 "s59E25H2" 0 "Nitrite reductase [NAD(P)H]"  
"OP8\_C16\_00115" 28845 "s59E5H2" 0 "Nitrite reductase [NAD(P)H]"  
"OP8\_C16\_00115" 28845 "s63E6H2" 0 "Nitrite reductase [NAD(P)H]"  
"OP8\_C16\_00116" 28846 "s59E13H2" 0 "Rubredoxin"  
"OP8\_C16\_00116" 28846 "s59E25H2" 0 "Rubredoxin"  
"OP8\_C16\_00116" 28846 "s59E5H2" 0 "Rubredoxin"  
"OP8\_C16\_00116" 28846 "s63E6H2" 0 "Rubredoxin"  
"OP8\_C16\_00117" 28847 "s59E13H2" 0 "Rubrerythrin"  
"OP8\_C16\_00117" 28847 "s59E25H2" 0 "Rubrerythrin"  
"OP8\_C16\_00117" 28847 "s59E5H2" 0 "Rubrerythrin"  
"OP8\_C16\_00117" 28847 "s63E6H2" 0 "Rubrerythrin"  
"OP8\_C16\_00118" 28848 "s59E13H2" 0 "Glutamate dehydrogenase"  
"OP8\_C16\_00118" 28848 "s59E25H2" 0 "Glutamate dehydrogenase"  
"OP8\_C16\_00118" 28848 "s59E5H2" 0 "Glutamate dehydrogenase"  
"OP8\_C16\_00118" 28848 "s63E6H2" 0 "Glutamate dehydrogenase"  
"OP8\_C16\_00119" 28849 "s59E13H2" 0 "Formamidopyrimidine-DNA glycosylase"  
"OP8\_C16\_00119" 28849 "s59E25H2" 0 "Formamidopyrimidine-DNA glycosylase"  
"OP8\_C16\_00119" 28849 "s59E5H2" 0 "Formamidopyrimidine-DNA glycosylase"  
"OP8\_C16\_00119" 28849 "s63E6H2" 0 "Formamidopyrimidine-DNA glycosylase"  
"OP8\_C16\_00120" 28850 "s59E13H2" 0 "hypothetical protein"  
"OP8\_C16\_00120" 28850 "s59E25H2" 0 "hypothetical protein"  
"OP8\_C16\_00120" 28850 "s59E5H2" 0 "hypothetical protein"  
"OP8\_C16\_00120" 28850 "s63E6H2" 0 "hypothetical protein"  
"OP8\_C16\_00121" 28851 "s59E13H2" 0 "hypothetical protein"  
"OP8\_C16\_00121" 28851 "s59E25H2" 0 "hypothetical protein"  
"OP8\_C16\_00121" 28851 "s59E5H2" 0 "hypothetical protein"  
"OP8\_C16\_00121" 28851 "s63E6H2" 0 "hypothetical protein"  
"OP8\_C16\_00122" 28852 "s59E13H2" 0 "Cell division ATP-binding protein FtsE"  
"OP8\_C16\_00122" 28852 "s59E25H2" 0 "Cell division ATP-binding protein FtsE"  
"OP8\_C16\_00122" 28852 "s59E5H2" 0 "Cell division ATP-binding protein FtsE"  
"OP8\_C16\_00122" 28852 "s63E6H2" 0 "Cell division ATP-binding protein FtsE"  
"OP8\_C16\_00123" 28853 "s59E13H2" 0 "Cell division protein FtsX"  
"OP8\_C16\_00123" 28853 "s59E25H2" 0 "Cell division protein FtsX"  
"OP8\_C16\_00123" 28853 "s59E5H2" 0 "Cell division protein FtsX"  
"OP8\_C16\_00123" 28853 "s63E6H2" 0 "Cell division protein FtsX"  
"OP8\_C16\_00124" 28854 "s59E13H2" 0 "Helix-turn-helix domain protein"  
"OP8\_C16\_00124" 28854 "s59E25H2" 0 "Helix-turn-helix domain protein"  
"OP8\_C16\_00124" 28854 "s59E5H2" 0 "Helix-turn-helix domain protein"  
"OP8\_C16\_00124" 28854 "s63E6H2" 0 "Helix-turn-helix domain protein"  
"OP8\_C16\_00125" 28855 "s59E13H2" 0 "Alginate biosynthesis sensor protein KinB"  
"OP8\_C16\_00125" 28855 "s59E25H2" 0 "Alginate biosynthesis sensor protein KinB"  
"OP8\_C16\_00125" 28855 "s59E5H2" 0 "Alginate biosynthesis sensor protein KinB"  
"OP8\_C16\_00125" 28855 "s63E6H2" 0 "Alginate biosynthesis sensor protein KinB"  
"OP8\_C16\_00126" 28856 "s59E13H2" 0 "Transcriptional regulatory protein ZraR"  
"OP8\_C16\_00126" 28856 "s59E25H2" 0 "Transcriptional regulatory protein ZraR"  
"OP8\_C16\_00126" 28856 "s59E5H2" 0 "Transcriptional regulatory protein ZraR"  
"OP8\_C16\_00126" 28856 "s63E6H2" 0 "Transcriptional regulatory protein ZraR"

"OP8\_C16\_00127" 28857 "s59E13H2" 0 "Amino-acid carrier protein AlST"  
"OP8\_C16\_00127" 28857 "s59E25H2" 0 "Amino-acid carrier protein AlST"  
"OP8\_C16\_00127" 28857 "s59E5H2" 0 "Amino-acid carrier protein AlST"  
"OP8\_C16\_00127" 28857 "s63E6H2" 0 "Amino-acid carrier protein AlST"  
"OP8\_C16\_00128" 28858 "s59E13H2" 0 "Magnesium transporter MgtE"  
"OP8\_C16\_00128" 28858 "s59E25H2" 0 "Magnesium transporter MgtE"  
"OP8\_C16\_00128" 28858 "s59E5H2" 0 "Magnesium transporter MgtE"  
"OP8\_C16\_00128" 28858 "s63E6H2" 0 "Magnesium transporter MgtE"  
"OP8\_C16\_00129" 28859 "s59E13H2" 0 "DNA repair protein RecO"  
"OP8\_C16\_00129" 28859 "s59E25H2" 0 "DNA repair protein RecO"  
"OP8\_C16\_00129" 28859 "s59E5H2" 0 "DNA repair protein RecO"  
"OP8\_C16\_00129" 28859 "s63E6H2" 0 "DNA repair protein RecO"  
"OP8\_C16\_00130" 28860 "s59E13H2" 0 "DNA primase"  
"OP8\_C16\_00130" 28860 "s59E25H2" 0 "DNA primase"  
"OP8\_C16\_00130" 28860 "s59E5H2" 0 "DNA primase"  
"OP8\_C16\_00130" 28860 "s63E6H2" 0 "DNA primase"  
"OP8\_C16\_00131" 28861 "s59E13H2" 0 "Peptidase S46"  
"OP8\_C16\_00131" 28861 "s59E25H2" 0 "Peptidase S46"  
"OP8\_C16\_00131" 28861 "s59E5H2" 0 "Peptidase S46"  
"OP8\_C16\_00131" 28861 "s63E6H2" 0 "Peptidase S46"  
"OP8\_C16\_00132" 28862 "s59E13H2" 0 "Localisation of periplasmic protein complexes"  
"OP8\_C16\_00132" 28862 "s59E25H2" 0 "Localisation of periplasmic protein complexes"  
"OP8\_C16\_00132" 28862 "s59E5H2" 0 "Localisation of periplasmic protein complexes"  
"OP8\_C16\_00132" 28862 "s63E6H2" 0 "Localisation of periplasmic protein complexes"  
"OP8\_C16\_00133" 28863 "s59E13H2" 0 "Histidine ammonia-lyase"  
"OP8\_C16\_00133" 28863 "s59E25H2" 0 "Histidine ammonia-lyase"  
"OP8\_C16\_00133" 28863 "s59E5H2" 0 "Histidine ammonia-lyase"  
"OP8\_C16\_00133" 28863 "s63E6H2" 0 "Histidine ammonia-lyase"  
"OP8\_C16\_00134" 28864 "s59E13H2" 0 "putative epimerase/dehydratase"  
"OP8\_C16\_00134" 28864 "s59E25H2" 0 "putative epimerase/dehydratase"  
"OP8\_C16\_00134" 28864 "s59E5H2" 0 "putative epimerase/dehydratase"  
"OP8\_C16\_00134" 28864 "s63E6H2" 0 "putative epimerase/dehydratase"  
"OP8\_C16\_00135" 28865 "s59E13H2" 0 "Spermidine synthase"  
"OP8\_C16\_00135" 28865 "s59E25H2" 0 "Spermidine synthase"  
"OP8\_C16\_00135" 28865 "s59E5H2" 0 "Spermidine synthase"  
"OP8\_C16\_00135" 28865 "s63E6H2" 0 "Spermidine synthase"  
"OP8\_C16\_00136" 28866 "s59E13H2" 0 "Spermidine synthase"  
"OP8\_C16\_00136" 28866 "s59E25H2" 0 "Spermidine synthase"  
"OP8\_C16\_00136" 28866 "s59E5H2" 0 "Spermidine synthase"  
"OP8\_C16\_00136" 28866 "s63E6H2" 0 "Spermidine synthase"  
"OP8\_C16\_00137" 28867 "s59E13H2" 0 "2-amino-3-ketobutyrate coenzyme A ligase"  
"OP8\_C16\_00137" 28867 "s59E25H2" 0 "2-amino-3-ketobutyrate coenzyme A ligase"  
"OP8\_C16\_00137" 28867 "s59E5H2" 0 "2-amino-3-ketobutyrate coenzyme A ligase"  
"OP8\_C16\_00137" 28867 "s63E6H2" 0 "2-amino-3-ketobutyrate coenzyme A ligase"  
"OP8\_C16\_00138" 28868 "s59E13H2" 0 "Malate-2H(+)/Na(+)-lactate antiporter"  
"OP8\_C16\_00138" 28868 "s59E25H2" 0 "Malate-2H(+)/Na(+)-lactate antiporter"  
"OP8\_C16\_00138" 28868 "s59E5H2" 0 "Malate-2H(+)/Na(+)-lactate antiporter"

"OP8\_C16\_00138" 28868 "s63E6H2" 0 "Malate-2H(+)/Na(+)-lactate antiporter"  
"OP8\_C16\_00139" 28869 "s59E13H2" 0 "Orotate phosphoribosyltransferase"  
"OP8\_C16\_00139" 28869 "s59E25H2" 0 "Orotate phosphoribosyltransferase"  
"OP8\_C16\_00139" 28869 "s59E5H2" 0 "Orotate phosphoribosyltransferase"  
"OP8\_C16\_00139" 28869 "s63E6H2" 0 "Orotate phosphoribosyltransferase"  
"OP8\_C16\_00140" 28870 "s59E13H2" 0 "Amidase enhancer precursor"  
"OP8\_C16\_00140" 28870 "s59E25H2" 0 "Amidase enhancer precursor"  
"OP8\_C16\_00140" 28870 "s59E5H2" 0 "Amidase enhancer precursor"  
"OP8\_C16\_00140" 28870 "s63E6H2" 0.02286109 "Amidase enhancer precursor"  
"OP8\_C16\_00141" 28871 "s59E13H2" 0 "Zinc carboxypeptidase"  
"OP8\_C16\_00141" 28871 "s59E25H2" 0 "Zinc carboxypeptidase"  
"OP8\_C16\_00141" 28871 "s59E5H2" 0 "Zinc carboxypeptidase"  
"OP8\_C16\_00141" 28871 "s63E6H2" 0.07724645 "Zinc carboxypeptidase"  
"OP8\_C16\_00142" 28872 "s59E13H2" 0 "hypothetical protein"  
"OP8\_C16\_00142" 28872 "s59E25H2" 0 "hypothetical protein"  
"OP8\_C16\_00142" 28872 "s59E5H2" 0 "hypothetical protein"  
"OP8\_C16\_00142" 28872 "s63E6H2" 0.04736365 "hypothetical protein"  
"OP8\_C16\_00143" 28873 "s59E13H2" 0 "Inositol 2-dehydrogenase/D-chiro-inositol 3-dehydrogenase"  
"OP8\_C16\_00143" 28873 "s59E25H2" 0 "Inositol 2-dehydrogenase/D-chiro-inositol 3-dehydrogenase"  
"OP8\_C16\_00143" 28873 "s59E5H2" 0 "Inositol 2-dehydrogenase/D-chiro-inositol 3-dehydrogenase"  
"OP8\_C16\_00143" 28873 "s63E6H2" 0.06382922 "Inositol 2-dehydrogenase/D-chiro-inositol 3-dehydrogenase"  
"OP8\_C16\_00144" 28874 "s59E13H2" 0 "hypothetical protein"  
"OP8\_C16\_00144" 28874 "s59E25H2" 0 "hypothetical protein"  
"OP8\_C16\_00144" 28874 "s59E5H2" 0 "hypothetical protein"  
"OP8\_C16\_00144" 28874 "s63E6H2" 0.04263759 "hypothetical protein"  
"OP8\_C16\_00145" 28875 "s59E13H2" 0 "Acyl-[acyl-carrier-protein]--UDP-N-acetylglucosamine O-acyltransferase"  
"OP8\_C16\_00145" 28875 "s59E25H2" 0 "Acyl-[acyl-carrier-protein]--UDP-N-acetylglucosamine O-acyltransferase"  
"OP8\_C16\_00145" 28875 "s59E5H2" 0 "Acyl-[acyl-carrier-protein]--UDP-N-acetylglucosamine O-acyltransferase"  
"OP8\_C16\_00145" 28875 "s63E6H2" 0.03574622 "Acyl-[acyl-carrier-protein]--UDP-N-acetylglucosamine O-acyltransferase"  
"OP8\_C16\_00146" 28876 "s59E13H2" 0 "3-hydroxyacyl-[acyl-carrier-protein] dehydratase FabZ"  
"OP8\_C16\_00146" 28876 "s59E25H2" 0 "3-hydroxyacyl-[acyl-carrier-protein] dehydratase FabZ"  
"OP8\_C16\_00146" 28876 "s59E5H2" 0 "3-hydroxyacyl-[acyl-carrier-protein] dehydratase FabZ"  
"OP8\_C16\_00146" 28876 "s63E6H2" 0.02190055 "3-hydroxyacyl-[acyl-carrier-protein] dehydratase FabZ"  
"OP8\_C16\_00147" 28877 "s59E13H2" 0 "Chaperone protein Skp precursor"  
"OP8\_C16\_00147" 28877 "s59E25H2" 0 "Chaperone protein Skp precursor"  
"OP8\_C16\_00147" 28877 "s59E5H2" 0 "Chaperone protein Skp precursor"  
"OP8\_C16\_00147" 28877 "s63E6H2" 0.02247186 "Chaperone protein Skp precursor"  
"OP8\_C16\_00148" 28878 "s59E13H2" 0 "Outer membrane protein assembly factor BamA precursor"  
"OP8\_C16\_00148" 28878 "s59E25H2" 0 "Outer membrane protein assembly factor BamA precursor"  
"OP8\_C16\_00148" 28878 "s59E5H2" 0 "Outer membrane protein assembly factor BamA precursor"  
"OP8\_C16\_00148" 28878 "s63E6H2" 0.04187509 "Outer membrane protein assembly factor BamA precursor"  
"OP8\_C16\_00149" 28879 "s59E13H2" 0 "Lipoprotein-releasing system ATP-binding protein LolD"  
"OP8\_C16\_00149" 28879 "s59E25H2" 0 "Lipoprotein-releasing system ATP-binding protein LolD"  
"OP8\_C16\_00149" 28879 "s59E5H2" 0 "Lipoprotein-releasing system ATP-binding protein LolD"  
"OP8\_C16\_00149" 28879 "s63E6H2" 0.01279294 "Lipoprotein-releasing system ATP-binding protein LolD"  
"OP8\_C16\_00150" 28880 "s59E13H2" 0 "Lipoprotein-releasing system transmembrane protein LolC"  
"OP8\_C16\_00150" 28880 "s59E25H2" 0 "Lipoprotein-releasing system transmembrane protein LolC"

"OP8\_C16\_00150" 28880 "s59E5H2" 0 "Lipoprotein-releasing system transmembrane protein LolC"  
"OP8\_C16\_00150" 28880 "s63E6H2" 0.01383648 "Lipoprotein-releasing system transmembrane protein LolC"  
"OP8\_C16\_00151" 28881 "s59E13H2" 0 "Lysine--tRNA ligase"  
"OP8\_C16\_00151" 28881 "s59E25H2" 0 "Lysine--tRNA ligase"  
"OP8\_C16\_00151" 28881 "s59E5H2" 0 "Lysine--tRNA ligase"  
"OP8\_C16\_00151" 28881 "s63E6H2" 0.0391446 "Lysine--tRNA ligase"  
"OP8\_C16\_00152" 28882 "s59E13H2" 0 "hypothetical protein"  
"OP8\_C16\_00152" 28882 "s59E25H2" 0 "hypothetical protein"  
"OP8\_C16\_00152" 28882 "s59E5H2" 0 "hypothetical protein"  
"OP8\_C16\_00152" 28882 "s63E6H2" 0.007705948 "hypothetical protein"  
"OP8\_C16\_00153" 28883 "s59E13H2" 0 "6,7-dimethyl-8-ribityllumazine synthase"  
"OP8\_C16\_00153" 28883 "s59E25H2" 0 "6,7-dimethyl-8-ribityllumazine synthase"  
"OP8\_C16\_00153" 28883 "s59E5H2" 0 "6,7-dimethyl-8-ribityllumazine synthase"  
"OP8\_C16\_00153" 28883 "s63E6H2" 0.002220038 "6,7-dimethyl-8-ribityllumazine synthase"  
"OP8\_C16\_00155" 28885 "s59E13H2" 0 "Archaeal Lon protease"  
"OP8\_C16\_00155" 28885 "s59E25H2" 0 "Archaeal Lon protease"  
"OP8\_C16\_00155" 28885 "s59E5H2" 0 "Archaeal Lon protease"  
"OP8\_C16\_00155" 28885 "s63E6H2" 0 "Archaeal Lon protease"  
"OP8\_C16\_00156" 28886 "s59E13H2" 0 "Ribosomal large subunit pseudouridine synthase B"  
"OP8\_C16\_00156" 28886 "s59E25H2" 0 "Ribosomal large subunit pseudouridine synthase B"  
"OP8\_C16\_00156" 28886 "s59E5H2" 0 "Ribosomal large subunit pseudouridine synthase B"  
"OP8\_C16\_00156" 28886 "s63E6H2" 0 "Ribosomal large subunit pseudouridine synthase B"  
"OP8\_C16\_00157" 28887 "s59E13H2" 0 "Pyruvate kinase, alpha/beta domain"  
"OP8\_C16\_00157" 28887 "s59E25H2" 0 "Pyruvate kinase, alpha/beta domain"  
"OP8\_C16\_00157" 28887 "s59E5H2" 0 "Pyruvate kinase, alpha/beta domain"  
"OP8\_C16\_00157" 28887 "s63E6H2" 0 "Pyruvate kinase, alpha/beta domain"  
"OP8\_C16\_00158" 28888 "s59E13H2" 0 "Macrolide export ATP-binding/permease protein MacB"  
"OP8\_C16\_00158" 28888 "s59E25H2" 0 "Macrolide export ATP-binding/permease protein MacB"  
"OP8\_C16\_00158" 28888 "s59E5H2" 0 "Macrolide export ATP-binding/permease protein MacB"  
"OP8\_C16\_00158" 28888 "s63E6H2" 0 "Macrolide export ATP-binding/permease protein MacB"  
"OP8\_C16\_00159" 28889 "s59E13H2" 0 "Macrolide export ATP-binding/permease protein MacB"  
"OP8\_C16\_00159" 28889 "s59E25H2" 0 "Macrolide export ATP-binding/permease protein MacB"  
"OP8\_C16\_00159" 28889 "s59E5H2" 0 "Macrolide export ATP-binding/permease protein MacB"  
"OP8\_C16\_00159" 28889 "s63E6H2" 0 "Macrolide export ATP-binding/permease protein MacB"  
"OP8\_C16\_00160" 28890 "s59E13H2" 0 "Alanine--tRNA ligase"  
"OP8\_C16\_00160" 28890 "s59E25H2" 0 "Alanine--tRNA ligase"  
"OP8\_C16\_00160" 28890 "s59E5H2" 0 "Alanine--tRNA ligase"  
"OP8\_C16\_00160" 28890 "s63E6H2" 0 "Alanine--tRNA ligase"  
"OP8\_C16\_00161" 28891 "s59E13H2" 0 "Ribonuclease HIII"  
"OP8\_C16\_00161" 28891 "s59E25H2" 0 "Ribonuclease HIII"  
"OP8\_C16\_00161" 28891 "s59E5H2" 0 "Ribonuclease HIII"  
"OP8\_C16\_00161" 28891 "s63E6H2" 0 "Ribonuclease HIII"  
"OP8\_C16\_00162" 28892 "s59E13H2" 0 "Succinyl-CoA:coenzyme A transferase"  
"OP8\_C16\_00162" 28892 "s59E25H2" 0 "Succinyl-CoA:coenzyme A transferase"  
"OP8\_C16\_00162" 28892 "s59E5H2" 0 "Succinyl-CoA:coenzyme A transferase"  
"OP8\_C16\_00162" 28892 "s63E6H2" 0 "Succinyl-CoA:coenzyme A transferase"  
"OP8\_C16\_00163" 28893 "s59E13H2" 0 "Sulfide dehydrogenase subunit alpha precursor"

"OP8\_C16\_00163" 28893 "s59E25H2" 0 "Sulfide dehydrogenase subunit alpha precursor"  
"OP8\_C16\_00163" 28893 "s59E5H2" 0 "Sulfide dehydrogenase subunit alpha precursor"  
"OP8\_C16\_00163" 28893 "s63E6H2" 0 "Sulfide dehydrogenase subunit alpha precursor"  
"OP8\_C16\_00164" 28894 "s59E13H2" 0 "hypothetical protein"  
"OP8\_C16\_00164" 28894 "s59E25H2" 0 "hypothetical protein"  
"OP8\_C16\_00164" 28894 "s59E5H2" 0 "hypothetical protein"  
"OP8\_C16\_00164" 28894 "s63E6H2" 0 "hypothetical protein"  
"OP8\_C16\_00165" 28895 "s59E13H2" 0 "Nucleoid occlusion protein"  
"OP8\_C16\_00165" 28895 "s59E25H2" 0 "Nucleoid occlusion protein"  
"OP8\_C16\_00165" 28895 "s59E5H2" 0 "Nucleoid occlusion protein"  
"OP8\_C16\_00165" 28895 "s63E6H2" 0 "Nucleoid occlusion protein"  
"OP8\_C16\_00166" 28896 "s59E13H2" 0 "hypothetical protein"  
"OP8\_C16\_00166" 28896 "s59E25H2" 0 "hypothetical protein"  
"OP8\_C16\_00166" 28896 "s59E5H2" 0 "hypothetical protein"  
"OP8\_C16\_00166" 28896 "s63E6H2" 0 "hypothetical protein"  
"OP8\_C16\_00167" 28897 "s59E13H2" 0 "putative tyrosine recombinase XerC-like protein"  
"OP8\_C16\_00167" 28897 "s59E25H2" 0 "putative tyrosine recombinase XerC-like protein"  
"OP8\_C16\_00167" 28897 "s59E5H2" 0 "putative tyrosine recombinase XerC-like protein"  
"OP8\_C16\_00167" 28897 "s63E6H2" 0 "putative tyrosine recombinase XerC-like protein"  
"OP8\_C16\_00168" 28898 "s59E13H2" 0 "hypothetical protein"  
"OP8\_C16\_00168" 28898 "s59E25H2" 0 "hypothetical protein"  
"OP8\_C16\_00168" 28898 "s59E5H2" 0 "hypothetical protein"  
"OP8\_C16\_00168" 28898 "s63E6H2" 0 "hypothetical protein"  
"OP8\_C16\_00170" 28900 "s59E13H2" 0 "putative type I restriction enzymeP M protein"  
"OP8\_C16\_00170" 28900 "s59E25H2" 0 "putative type I restriction enzymeP M protein"  
"OP8\_C16\_00170" 28900 "s59E5H2" 0 "putative type I restriction enzymeP M protein"  
"OP8\_C16\_00170" 28900 "s63E6H2" 0 "putative type I restriction enzymeP M protein"  
"OP8\_C16\_00171" 28901 "s59E13H2" 0 "Nuclease precursor"  
"OP8\_C16\_00171" 28901 "s59E25H2" 0 "Nuclease precursor"  
"OP8\_C16\_00171" 28901 "s59E5H2" 0 "Nuclease precursor"  
"OP8\_C16\_00171" 28901 "s63E6H2" 0 "Nuclease precursor"  
"OP8\_C16\_00172" 28902 "s59E13H2" 0 "hypothetical protein"  
"OP8\_C16\_00172" 28902 "s59E25H2" 0 "hypothetical protein"  
"OP8\_C16\_00172" 28902 "s59E5H2" 0 "hypothetical protein"  
"OP8\_C16\_00172" 28902 "s63E6H2" 0 "hypothetical protein"  
"OP8\_C16\_00173" 28903 "s59E13H2" 0 "hypothetical protein"  
"OP8\_C16\_00173" 28903 "s59E25H2" 0 "hypothetical protein"  
"OP8\_C16\_00173" 28903 "s59E5H2" 0 "hypothetical protein"  
"OP8\_C16\_00173" 28903 "s63E6H2" 0 "hypothetical protein"  
"OP8\_C16\_00175" 28905 "s59E13H2" 0 "hypothetical protein"  
"OP8\_C16\_00175" 28905 "s59E25H2" 0 "hypothetical protein"  
"OP8\_C16\_00175" 28905 "s59E5H2" 0 "hypothetical protein"  
"OP8\_C16\_00175" 28905 "s63E6H2" 0 "hypothetical protein"  
"OP8\_C16\_00176" 28906 "s59E13H2" 0 "hypothetical protein"  
"OP8\_C16\_00176" 28906 "s59E25H2" 0 "hypothetical protein"  
"OP8\_C16\_00176" 28906 "s59E5H2" 0 "hypothetical protein"  
"OP8\_C16\_00176" 28906 "s63E6H2" 0 "hypothetical protein"

"OP8\_C16\_00178" 28908 "s59E13H2" 0 "hypothetical protein"  
"OP8\_C16\_00178" 28908 "s59E25H2" 0 "hypothetical protein"  
"OP8\_C16\_00178" 28908 "s59E5H2" 0 "hypothetical protein"  
"OP8\_C16\_00178" 28908 "s63E6H2" 0 "hypothetical protein"  
"OP8\_C16\_00179" 28909 "s59E13H2" 0 "hypothetical protein"  
"OP8\_C16\_00179" 28909 "s59E25H2" 0 "hypothetical protein"  
"OP8\_C16\_00179" 28909 "s59E5H2" 0 "hypothetical protein"  
"OP8\_C16\_00179" 28909 "s63E6H2" 0 "hypothetical protein"  
"OP8\_C16\_00180" 28910 "s59E13H2" 0 "hypothetical protein"  
"OP8\_C16\_00180" 28910 "s59E25H2" 0 "hypothetical protein"  
"OP8\_C16\_00180" 28910 "s59E5H2" 0 "hypothetical protein"  
"OP8\_C16\_00180" 28910 "s63E6H2" 0 "hypothetical protein"  
"OP8\_C16\_00186" 28916 "s59E13H2" 0 "High-affinity Na(+)/H(+) antiporter NhaS3"  
"OP8\_C16\_00186" 28916 "s59E25H2" 0 "High-affinity Na(+)/H(+) antiporter NhaS3"  
"OP8\_C16\_00186" 28916 "s59E5H2" 0 "High-affinity Na(+)/H(+) antiporter NhaS3"  
"OP8\_C16\_00186" 28916 "s63E6H2" 0 "High-affinity Na(+)/H(+) antiporter NhaS3"  
"OP8\_C16\_00187" 28917 "s59E13H2" 0 "Ycf48-like protein"  
"OP8\_C16\_00187" 28917 "s59E25H2" 0 "Ycf48-like protein"  
"OP8\_C16\_00187" 28917 "s59E5H2" 0 "Ycf48-like protein"  
"OP8\_C16\_00187" 28917 "s63E6H2" 0.002104959 "Ycf48-like protein"  
"OP8\_C16\_00188" 28918 "s59E13H2" 0 "putative FAD-linked oxidoreductase"  
"OP8\_C16\_00188" 28918 "s59E25H2" 0 "putative FAD-linked oxidoreductase"  
"OP8\_C16\_00188" 28918 "s59E5H2" 0 "putative FAD-linked oxidoreductase"  
"OP8\_C16\_00188" 28918 "s63E6H2" 0 "putative FAD-linked oxidoreductase"  
"OP8\_C16\_00189" 28919 "s59E13H2" 0 "Dispase autolysis-inducing protein precursor"  
"OP8\_C16\_00189" 28919 "s59E25H2" 0 "Dispase autolysis-inducing protein precursor"  
"OP8\_C16\_00189" 28919 "s59E5H2" 0 "Dispase autolysis-inducing protein precursor"  
"OP8\_C16\_00189" 28919 "s63E6H2" 0 "Dispase autolysis-inducing protein precursor"  
"OP8\_C16\_00190" 28920 "s59E13H2" 0 "NAD-dependent dihydropyrimidine dehydrogenase subunit PreA"  
"OP8\_C16\_00190" 28920 "s59E25H2" 0 "NAD-dependent dihydropyrimidine dehydrogenase subunit PreA"  
"OP8\_C16\_00190" 28920 "s59E5H2" 0 "NAD-dependent dihydropyrimidine dehydrogenase subunit PreA"  
"OP8\_C16\_00190" 28920 "s63E6H2" 0 "NAD-dependent dihydropyrimidine dehydrogenase subunit PreA"  
"OP8\_C16\_00191" 28921 "s59E13H2" 0 "hypothetical protein"  
"OP8\_C16\_00191" 28921 "s59E25H2" 0 "hypothetical protein"  
"OP8\_C16\_00191" 28921 "s59E5H2" 0 "hypothetical protein"  
"OP8\_C16\_00191" 28921 "s63E6H2" 0 "hypothetical protein"  
"OP8\_C16\_00192" 28922 "s59E13H2" 0 "Dipeptide and tripeptide permease A"  
"OP8\_C16\_00192" 28922 "s59E25H2" 0 "Dipeptide and tripeptide permease A"  
"OP8\_C16\_00192" 28922 "s59E5H2" 0 "Dipeptide and tripeptide permease A"  
"OP8\_C16\_00192" 28922 "s63E6H2" 0 "Dipeptide and tripeptide permease A"  
"OP8\_C16\_00193" 28923 "s59E13H2" 0 "hypothetical protein"  
"OP8\_C16\_00193" 28923 "s59E25H2" 0 "hypothetical protein"  
"OP8\_C16\_00193" 28923 "s59E5H2" 0 "hypothetical protein"  
"OP8\_C16\_00193" 28923 "s63E6H2" 0 "hypothetical protein"  
"OP8\_C16\_00194" 28924 "s59E13H2" 0 "hypothetical protein"  
"OP8\_C16\_00194" 28924 "s59E25H2" 0 "hypothetical protein"  
"OP8\_C16\_00194" 28924 "s59E5H2" 0 "hypothetical protein"



"OP8\_C16\_00194" 28924 "s63E6H2" 0 "hypothetical protein"  
"OP8\_C16\_00195" 28925 "s59E13H2" 0 "Zinc carboxypeptidase"  
"OP8\_C16\_00195" 28925 "s59E25H2" 0 "Zinc carboxypeptidase"  
"OP8\_C16\_00195" 28925 "s59E5H2" 0 "Zinc carboxypeptidase"  
"OP8\_C16\_00195" 28925 "s63E6H2" 0 "Zinc carboxypeptidase"  
"OP8\_C16\_00196" 28926 "s59E13H2" 0 "hypothetical protein"  
"OP8\_C16\_00196" 28926 "s59E25H2" 0 "hypothetical protein"  
"OP8\_C16\_00196" 28926 "s59E5H2" 0 "hypothetical protein"  
"OP8\_C16\_00196" 28926 "s63E6H2" 0 "hypothetical protein"  
"OP8\_C16\_00197" 28927 "s59E13H2" 0 "hypothetical protein"  
"OP8\_C16\_00197" 28927 "s59E25H2" 0 "hypothetical protein"  
"OP8\_C16\_00197" 28927 "s59E5H2" 0 "hypothetical protein"  
"OP8\_C16\_00197" 28927 "s63E6H2" 0 "hypothetical protein"  
"OP8\_C16\_00198" 28928 "s59E13H2" 0 "hypothetical protein"  
"OP8\_C16\_00198" 28928 "s59E25H2" 0 "hypothetical protein"  
"OP8\_C16\_00198" 28928 "s59E5H2" 0 "hypothetical protein"  
"OP8\_C16\_00198" 28928 "s63E6H2" 0 "hypothetical protein"  
"OP8\_C16\_00199" 28929 "s59E13H2" 0 "Serine/threonine-protein kinase PknB"  
"OP8\_C16\_00199" 28929 "s59E25H2" 0 "Serine/threonine-protein kinase PknB"  
"OP8\_C16\_00199" 28929 "s59E5H2" 0.002372837 "Serine/threonine-protein kinase PknB"  
"OP8\_C16\_00199" 28929 "s63E6H2" 0 "Serine/threonine-protein kinase PknB"  
"OP8\_C16\_00200" 28930 "s59E13H2" 0 "Serine/threonine-protein kinase PknB"  
"OP8\_C16\_00200" 28930 "s59E25H2" 0 "Serine/threonine-protein kinase PknB"  
"OP8\_C16\_00200" 28930 "s59E5H2" 0.002587713 "Serine/threonine-protein kinase PknB"  
"OP8\_C16\_00200" 28930 "s63E6H2" 0 "Serine/threonine-protein kinase PknB"  
"OP8\_C16\_00201" 28931 "s59E13H2" 0 "Enamine/imine deaminase"  
"OP8\_C16\_00201" 28931 "s59E25H2" 0 "Enamine/imine deaminase"  
"OP8\_C16\_00201" 28931 "s59E5H2" 0 "Enamine/imine deaminase"  
"OP8\_C16\_00201" 28931 "s63E6H2" 0 "Enamine/imine deaminase"  
"OP8\_C16\_00202" 28932 "s59E13H2" 0 "Pyrimidine-specific ribonucleoside hydrolase RihA"  
"OP8\_C16\_00202" 28932 "s59E25H2" 0 "Pyrimidine-specific ribonucleoside hydrolase RihA"  
"OP8\_C16\_00202" 28932 "s59E5H2" 0 "Pyrimidine-specific ribonucleoside hydrolase RihA"  
"OP8\_C16\_00202" 28932 "s63E6H2" 0 "Pyrimidine-specific ribonucleoside hydrolase RihA"  
"OP8\_C16\_00207" 28937 "s59E13H2" 0 "Transposase DDE domain protein"  
"OP8\_C16\_00207" 28937 "s59E25H2" 0 "Transposase DDE domain protein"  
"OP8\_C16\_00207" 28937 "s59E5H2" 0 "Transposase DDE domain protein"  
"OP8\_C16\_00207" 28937 "s63E6H2" 0 "Transposase DDE domain protein"  
"OP8\_C16\_00208" 28938 "s59E13H2" 0 "General stress protein 69"  
"OP8\_C16\_00208" 28938 "s59E25H2" 0 "General stress protein 69"  
"OP8\_C16\_00208" 28938 "s59E5H2" 0 "General stress protein 69"  
"OP8\_C16\_00208" 28938 "s63E6H2" 0 "General stress protein 69"  
"OP8\_C16\_00209" 28939 "s59E13H2" 0 "4-hydroxy-tetrahydrodipicolinate synthase"  
"OP8\_C16\_00209" 28939 "s59E25H2" 0 "4-hydroxy-tetrahydrodipicolinate synthase"  
"OP8\_C16\_00209" 28939 "s59E5H2" 0 "4-hydroxy-tetrahydrodipicolinate synthase"  
"OP8\_C16\_00209" 28939 "s63E6H2" 0 "4-hydroxy-tetrahydrodipicolinate synthase"  
"OP8\_C16\_00210" 28940 "s59E13H2" 0 "Possibl zinc metallo-peptidase"  
"OP8\_C16\_00210" 28940 "s59E25H2" 0 "Possibl zinc metallo-peptidase"

"OP8\_C16\_00210" 28940 "s59E5H2" 0 "Possibl zinc metallo-peptidase"  
"OP8\_C16\_00210" 28940 "s63E6H2" 0 "Possibl zinc metallo-peptidase"  
"OP8\_C16\_00211" 28941 "s59E13H2" 0 "Cob(I)yrinic acid a,c-diamide adenosyltransferase"  
"OP8\_C16\_00211" 28941 "s59E25H2" 0 "Cob(I)yrinic acid a,c-diamide adenosyltransferase"  
"OP8\_C16\_00211" 28941 "s59E5H2" 0 "Cob(I)yrinic acid a,c-diamide adenosyltransferase"  
"OP8\_C16\_00211" 28941 "s63E6H2" 0 "Cob(I)yrinic acid a,c-diamide adenosyltransferase"  
"OP8\_C16\_00214" 28944 "s59E13H2" 0 "Peptidase M16 inactive domain protein"  
"OP8\_C16\_00214" 28944 "s59E25H2" 0 "Peptidase M16 inactive domain protein"  
"OP8\_C16\_00214" 28944 "s59E5H2" 0 "Peptidase M16 inactive domain protein"  
"OP8\_C16\_00214" 28944 "s63E6H2" 0 "Peptidase M16 inactive domain protein"  
"OP8\_C16\_00215" 28945 "s59E13H2" 0 "Peptidase M16 inactive domain protein"  
"OP8\_C16\_00215" 28945 "s59E25H2" 0 "Peptidase M16 inactive domain protein"  
"OP8\_C16\_00215" 28945 "s59E5H2" 0 "Peptidase M16 inactive domain protein"  
"OP8\_C16\_00215" 28945 "s63E6H2" 0 "Peptidase M16 inactive domain protein"  
"OP8\_C16\_00216" 28946 "s59E13H2" 0 "hypothetical protein"  
"OP8\_C16\_00216" 28946 "s59E25H2" 0 "hypothetical protein"  
"OP8\_C16\_00216" 28946 "s59E5H2" 0 "hypothetical protein"  
"OP8\_C16\_00216" 28946 "s63E6H2" 0 "hypothetical protein"  
"OP8\_C16\_00217" 28947 "s59E13H2" 0 "Tetratricopeptide repeat protein"  
"OP8\_C16\_00217" 28947 "s59E25H2" 0 "Tetratricopeptide repeat protein"  
"OP8\_C16\_00217" 28947 "s59E5H2" 0 "Tetratricopeptide repeat protein"  
"OP8\_C16\_00217" 28947 "s63E6H2" 0 "Tetratricopeptide repeat protein"  
"OP8\_C16\_00218" 28948 "s59E13H2" 0 "Tetratricopeptide repeat protein"  
"OP8\_C16\_00218" 28948 "s59E25H2" 0 "Tetratricopeptide repeat protein"  
"OP8\_C16\_00218" 28948 "s59E5H2" 0 "Tetratricopeptide repeat protein"  
"OP8\_C16\_00218" 28948 "s63E6H2" 0 "Tetratricopeptide repeat protein"  
"OP8\_C16\_00219" 28949 "s59E13H2" 0 "hypothetical protein"  
"OP8\_C16\_00219" 28949 "s59E25H2" 0 "hypothetical protein"  
"OP8\_C16\_00219" 28949 "s59E5H2" 0 "hypothetical protein"  
"OP8\_C16\_00219" 28949 "s63E6H2" 0 "hypothetical protein"  
"OP8\_C16\_00220" 28950 "s59E13H2" 0 "tetratricopeptide repeat protein"  
"OP8\_C16\_00220" 28950 "s59E25H2" 0 "tetratricopeptide repeat protein"  
"OP8\_C16\_00220" 28950 "s59E5H2" 0 "tetratricopeptide repeat protein"  
"OP8\_C16\_00220" 28950 "s63E6H2" 0 "tetratricopeptide repeat protein"  
"OP8\_C16\_00221" 28951 "s59E13H2" 0 "bacteriophage N4 receptor, outer membrane subunit"  
"OP8\_C16\_00221" 28951 "s59E25H2" 0 "bacteriophage N4 receptor, outer membrane subunit"  
"OP8\_C16\_00221" 28951 "s59E5H2" 0 "bacteriophage N4 receptor, outer membrane subunit"  
"OP8\_C16\_00221" 28951 "s63E6H2" 0 "bacteriophage N4 receptor, outer membrane subunit"  
"OP8\_C16\_00222" 28952 "s59E13H2" 0 "Tetratricopeptide repeat protein"  
"OP8\_C16\_00222" 28952 "s59E25H2" 0 "Tetratricopeptide repeat protein"  
"OP8\_C16\_00222" 28952 "s59E5H2" 0 "Tetratricopeptide repeat protein"  
"OP8\_C16\_00222" 28952 "s63E6H2" 0 "Tetratricopeptide repeat protein"  
"OP8\_C16\_00223" 28953 "s59E13H2" 0 "Choline-sulfatase"  
"OP8\_C16\_00223" 28953 "s59E25H2" 0 "Choline-sulfatase"  
"OP8\_C16\_00223" 28953 "s59E5H2" 0 "Choline-sulfatase"  
"OP8\_C16\_00223" 28953 "s63E6H2" 0 "Choline-sulfatase"  
"OP8\_C16\_00224" 28954 "s59E13H2" 0 "hypothetical protein"

"OP8\_C16\_00224" 28954 "s59E25H2" 0 "hypothetical protein"  
"OP8\_C16\_00224" 28954 "s59E5H2" 0 "hypothetical protein"  
"OP8\_C16\_00224" 28954 "s63E6H2" 0 "hypothetical protein"  
"OP8\_C16\_00226" 28956 "s59E13H2" 0 "hypothetical protein"  
"OP8\_C16\_00226" 28956 "s59E25H2" 0 "hypothetical protein"  
"OP8\_C16\_00226" 28956 "s59E5H2" 0.001132556 "hypothetical protein"  
"OP8\_C16\_00226" 28956 "s63E6H2" 0 "hypothetical protein"  
"OP8\_C16\_00227" 28957 "s59E13H2" 0 "ECF RNA polymerase sigma factor SigW"  
"OP8\_C16\_00227" 28957 "s59E25H2" 0 "ECF RNA polymerase sigma factor SigW"  
"OP8\_C16\_00227" 28957 "s59E5H2" 0 "ECF RNA polymerase sigma factor SigW"  
"OP8\_C16\_00227" 28957 "s63E6H2" 0 "ECF RNA polymerase sigma factor SigW"  
"OP8\_C16\_00228" 28958 "s59E13H2" 0 "hypothetical protein"  
"OP8\_C16\_00228" 28958 "s59E25H2" 0 "hypothetical protein"  
"OP8\_C16\_00228" 28958 "s59E5H2" 0 "hypothetical protein"  
"OP8\_C16\_00228" 28958 "s63E6H2" 0 "hypothetical protein"  
"OP8\_C16\_00229" 28959 "s59E13H2" 0 "hypothetical protein"  
"OP8\_C16\_00229" 28959 "s59E25H2" 0 "hypothetical protein"  
"OP8\_C16\_00229" 28959 "s59E5H2" 0 "hypothetical protein"  
"OP8\_C16\_00229" 28959 "s63E6H2" 0 "hypothetical protein"  
"OP8\_C16\_00230" 28960 "s59E13H2" 0 "Ribosome-recycling factor"  
"OP8\_C16\_00230" 28960 "s59E25H2" 0 "Ribosome-recycling factor"  
"OP8\_C16\_00230" 28960 "s59E5H2" 0 "Ribosome-recycling factor"  
"OP8\_C16\_00230" 28960 "s63E6H2" 0 "Ribosome-recycling factor"  
"OP8\_C16\_00231" 28961 "s59E13H2" 0 "Uridylate kinase"  
"OP8\_C16\_00231" 28961 "s59E25H2" 0 "Uridylate kinase"  
"OP8\_C16\_00231" 28961 "s59E5H2" 0 "Uridylate kinase"  
"OP8\_C16\_00231" 28961 "s63E6H2" 0 "Uridylate kinase"  
"OP8\_C16\_00232" 28962 "s59E13H2" 0 "Elongation factor Ts"  
"OP8\_C16\_00232" 28962 "s59E25H2" 0 "Elongation factor Ts"  
"OP8\_C16\_00232" 28962 "s59E5H2" 0 "Elongation factor Ts"  
"OP8\_C16\_00232" 28962 "s63E6H2" 0 "Elongation factor Ts"  
"OP8\_C16\_00233" 28963 "s59E13H2" 0 "30S ribosomal protein S2"  
"OP8\_C16\_00233" 28963 "s59E25H2" 0 "30S ribosomal protein S2"  
"OP8\_C16\_00233" 28963 "s59E5H2" 0 "30S ribosomal protein S2"  
"OP8\_C16\_00233" 28963 "s63E6H2" 0 "30S ribosomal protein S2"  
"OP8\_C16\_00234" 28964 "s59E13H2" 0 "30S ribosomal protein S9"  
"OP8\_C16\_00234" 28964 "s59E25H2" 0 "30S ribosomal protein S9"  
"OP8\_C16\_00234" 28964 "s59E5H2" 0 "30S ribosomal protein S9"  
"OP8\_C16\_00234" 28964 "s63E6H2" 0 "30S ribosomal protein S9"  
"OP8\_C16\_00235" 28965 "s59E13H2" 0 "50S ribosomal protein L13"  
"OP8\_C16\_00235" 28965 "s59E25H2" 0 "50S ribosomal protein L13"  
"OP8\_C16\_00235" 28965 "s59E5H2" 0 "50S ribosomal protein L13"  
"OP8\_C16\_00235" 28965 "s63E6H2" 0 "50S ribosomal protein L13"  
"OP8\_C16\_00236" 28966 "s59E13H2" 0 "Rhomboid protease GluP"  
"OP8\_C16\_00236" 28966 "s59E25H2" 0 "Rhomboid protease GluP"  
"OP8\_C16\_00236" 28966 "s59E5H2" 0 "Rhomboid protease GluP"  
"OP8\_C16\_00236" 28966 "s63E6H2" 0 "Rhomboid protease GluP"

"OP8\_C16\_00237" 28967 "s59E13H2" 0 "Tetratricopeptide repeat protein"  
"OP8\_C16\_00237" 28967 "s59E25H2" 0 "Tetratricopeptide repeat protein"  
"OP8\_C16\_00237" 28967 "s59E5H2" 0 "Tetratricopeptide repeat protein"  
"OP8\_C16\_00237" 28967 "s63E6H2" 0 "Tetratricopeptide repeat protein"  
"OP8\_C16\_00238" 28968 "s59E13H2" 0 "GTPase Der"  
"OP8\_C16\_00238" 28968 "s59E25H2" 0 "GTPase Der"  
"OP8\_C16\_00238" 28968 "s59E5H2" 0 "GTPase Der"  
"OP8\_C16\_00238" 28968 "s63E6H2" 0 "GTPase Der"  
"OP8\_C16\_00239" 28969 "s59E13H2" 0 "Sporulation and spore germination"  
"OP8\_C16\_00239" 28969 "s59E25H2" 0 "Sporulation and spore germination"  
"OP8\_C16\_00239" 28969 "s59E5H2" 0 "Sporulation and spore germination"  
"OP8\_C16\_00239" 28969 "s63E6H2" 0 "Sporulation and spore germination"  
"OP8\_C16\_00240" 28970 "s59E13H2" 0 "N-acetylmuramoyl-L-alanine amidase AmiA precursor"  
"OP8\_C16\_00240" 28970 "s59E25H2" 0 "N-acetylmuramoyl-L-alanine amidase AmiA precursor"  
"OP8\_C16\_00240" 28970 "s59E5H2" 0 "N-acetylmuramoyl-L-alanine amidase AmiA precursor"  
"OP8\_C16\_00240" 28970 "s63E6H2" 0 "N-acetylmuramoyl-L-alanine amidase AmiA precursor"  
"OP8\_C16\_00242" 28972 "s59E13H2" 0 "PAAR motif protein"  
"OP8\_C16\_00242" 28972 "s59E25H2" 0 "PAAR motif protein"  
"OP8\_C16\_00242" 28972 "s59E5H2" 0 "PAAR motif protein"  
"OP8\_C16\_00242" 28972 "s63E6H2" 0 "PAAR motif protein"  
"OP8\_C16\_00243" 28973 "s59E13H2" 0 "hypothetical protein"  
"OP8\_C16\_00243" 28973 "s59E25H2" 0 "hypothetical protein"  
"OP8\_C16\_00243" 28973 "s59E5H2" 0 "hypothetical protein"  
"OP8\_C16\_00243" 28973 "s63E6H2" 0 "hypothetical protein"  
"OP8\_C16\_00245" 28975 "s59E13H2" 0 "hypothetical protein"  
"OP8\_C16\_00245" 28975 "s59E25H2" 0 "hypothetical protein"  
"OP8\_C16\_00245" 28975 "s59E5H2" 0 "hypothetical protein"  
"OP8\_C16\_00245" 28975 "s63E6H2" 0 "hypothetical protein"  
"OP8\_C16\_00246" 28976 "s59E13H2" 0 "hypothetical protein"  
"OP8\_C16\_00246" 28976 "s59E25H2" 0 "hypothetical protein"  
"OP8\_C16\_00246" 28976 "s59E5H2" 0 "hypothetical protein"  
"OP8\_C16\_00246" 28976 "s63E6H2" 0 "hypothetical protein"  
"OP8\_C16\_00247" 28977 "s59E13H2" 0 "hypothetical protein"  
"OP8\_C16\_00247" 28977 "s59E25H2" 0 "hypothetical protein"  
"OP8\_C16\_00247" 28977 "s59E5H2" 0 "hypothetical protein"  
"OP8\_C16\_00247" 28977 "s63E6H2" 0 "hypothetical protein"  
"OP8\_C16\_00249" 28979 "s59E13H2" 0 "hypothetical protein"  
"OP8\_C16\_00249" 28979 "s59E25H2" 0 "hypothetical protein"  
"OP8\_C16\_00249" 28979 "s59E5H2" 0 "hypothetical protein"  
"OP8\_C16\_00249" 28979 "s63E6H2" 0 "hypothetical protein"  
"OP8\_C16\_00252" 28982 "s59E13H2" 0 "Ribosomal protein L11 methyltransferase"  
"OP8\_C16\_00252" 28982 "s59E25H2" 0 "Ribosomal protein L11 methyltransferase"  
"OP8\_C16\_00252" 28982 "s59E5H2" 0 "Ribosomal protein L11 methyltransferase"  
"OP8\_C16\_00252" 28982 "s63E6H2" 0 "Ribosomal protein L11 methyltransferase"  
"OP8\_C16\_00253" 28983 "s59E13H2" 0 "hypothetical protein"  
"OP8\_C16\_00253" 28983 "s59E25H2" 0 "hypothetical protein"  
"OP8\_C16\_00253" 28983 "s59E5H2" 0 "hypothetical protein"

"OP8\_C16\_00253" 28983 "s63E6H2" 0 "hypothetical protein"  
"OP8\_C16\_00254" 28984 "s59E13H2" 0 "Formyl-coenzyme A transferase"  
"OP8\_C16\_00254" 28984 "s59E25H2" 0 "Formyl-coenzyme A transferase"  
"OP8\_C16\_00254" 28984 "s59E5H2" 0 "Formyl-coenzyme A transferase"  
"OP8\_C16\_00254" 28984 "s63E6H2" 0 "Formyl-coenzyme A transferase"  
"OP8\_C16\_00255" 28985 "s59E13H2" 0 "2,4-dienoyl-CoA reductase [NADPH]"  
"OP8\_C16\_00255" 28985 "s59E25H2" 0 "2,4-dienoyl-CoA reductase [NADPH]"  
"OP8\_C16\_00255" 28985 "s59E5H2" 0.003029707 "2,4-dienoyl-CoA reductase [NADPH]"  
"OP8\_C16\_00255" 28985 "s63E6H2" 0 "2,4-dienoyl-CoA reductase [NADPH]"  
"OP8\_C16\_00256" 28986 "s59E13H2" 0 "ferredoxin"  
"OP8\_C16\_00256" 28986 "s59E25H2" 0 "ferredoxin"  
"OP8\_C16\_00256" 28986 "s59E5H2" 0.02584701 "ferredoxin"  
"OP8\_C16\_00256" 28986 "s63E6H2" 0 "ferredoxin"  
"OP8\_C16\_00257" 28987 "s59E13H2" 0 "Glyoxalase/Bleomycin resistance protein/Dioxygenase superfamily protein"  
"OP8\_C16\_00257" 28987 "s59E25H2" 0 "Glyoxalase/Bleomycin resistance protein/Dioxygenase superfamily protein"  
"OP8\_C16\_00257" 28987 "s59E5H2" 0 "Glyoxalase/Bleomycin resistance protein/Dioxygenase superfamily protein"  
"OP8\_C16\_00257" 28987 "s63E6H2" 0 "Glyoxalase/Bleomycin resistance protein/Dioxygenase superfamily protein"  
"OP8\_C16\_00258" 28988 "s59E13H2" 0 "Methylmalonyl-CoA mutase"  
"OP8\_C16\_00258" 28988 "s59E25H2" 0 "Methylmalonyl-CoA mutase"  
"OP8\_C16\_00258" 28988 "s59E5H2" 0 "Methylmalonyl-CoA mutase"  
"OP8\_C16\_00258" 28988 "s63E6H2" 0 "Methylmalonyl-CoA mutase"  
"OP8\_C16\_00259" 28989 "s59E13H2" 0 "Methylmalonyl-CoA mutase"  
"OP8\_C16\_00259" 28989 "s59E25H2" 0 "Methylmalonyl-CoA mutase"  
"OP8\_C16\_00259" 28989 "s59E5H2" 0 "Methylmalonyl-CoA mutase"  
"OP8\_C16\_00259" 28989 "s63E6H2" 0 "Methylmalonyl-CoA mutase"  
"OP8\_C16\_00260" 28990 "s59E13H2" 0 "Acetophenone carboxylase gamma subunit"  
"OP8\_C16\_00260" 28990 "s59E25H2" 0 "Acetophenone carboxylase gamma subunit"  
"OP8\_C16\_00260" 28990 "s59E5H2" 0 "Acetophenone carboxylase gamma subunit"  
"OP8\_C16\_00260" 28990 "s63E6H2" 0 "Acetophenone carboxylase gamma subunit"  
"OP8\_C16\_00262" 28992 "s59E13H2" 0 "Acetophenone carboxylase delta subunit"  
"OP8\_C16\_00262" 28992 "s59E25H2" 0 "Acetophenone carboxylase delta subunit"  
"OP8\_C16\_00262" 28992 "s59E5H2" 0 "Acetophenone carboxylase delta subunit"  
"OP8\_C16\_00262" 28992 "s63E6H2" 0 "Acetophenone carboxylase delta subunit"  
"OP8\_C16\_00263" 28993 "s59E13H2" 0 "putative glycosyl transferase"  
"OP8\_C16\_00263" 28993 "s59E25H2" 0 "putative glycosyl transferase"  
"OP8\_C16\_00263" 28993 "s59E5H2" 0 "putative glycosyl transferase"  
"OP8\_C16\_00263" 28993 "s63E6H2" 0 "putative glycosyl transferase"  
"OP8\_C16\_00264" 28994 "s59E13H2" 0 "S-adenosylmethionine:tRNA ribosyltransferase-isomerase"  
"OP8\_C16\_00264" 28994 "s59E25H2" 0 "S-adenosylmethionine:tRNA ribosyltransferase-isomerase"  
"OP8\_C16\_00264" 28994 "s59E5H2" 0 "S-adenosylmethionine:tRNA ribosyltransferase-isomerase"  
"OP8\_C16\_00264" 28994 "s63E6H2" 0 "S-adenosylmethionine:tRNA ribosyltransferase-isomerase"  
"OP8\_C16\_00265" 28995 "s59E13H2" 0 "Holliday junction ATP-dependent DNA helicase RuvB"  
"OP8\_C16\_00265" 28995 "s59E25H2" 0 "Holliday junction ATP-dependent DNA helicase RuvB"  
"OP8\_C16\_00265" 28995 "s59E5H2" 0 "Holliday junction ATP-dependent DNA helicase RuvB"  
"OP8\_C16\_00265" 28995 "s63E6H2" 0 "Holliday junction ATP-dependent DNA helicase RuvB"  
"OP8\_C16\_00266" 28996 "s59E13H2" 0 "Holliday junction ATP-dependent DNA helicase RuvA"  
"OP8\_C16\_00266" 28996 "s59E25H2" 0 "Holliday junction ATP-dependent DNA helicase RuvA"

"OP8\_C16\_00266" 28996 "s59E5H2" 0 "Holliday junction ATP-dependent DNA helicase RuvA"  
"OP8\_C16\_00266" 28996 "s63E6H2" 0 "Holliday junction ATP-dependent DNA helicase RuvA"  
"OP8\_C16\_00267" 28997 "s59E13H2" 0 "Crossover junction endodeoxyribonuclease RuvC"  
"OP8\_C16\_00267" 28997 "s59E25H2" 0 "Crossover junction endodeoxyribonuclease RuvC"  
"OP8\_C16\_00267" 28997 "s59E5H2" 0 "Crossover junction endodeoxyribonuclease RuvC"  
"OP8\_C16\_00267" 28997 "s63E6H2" 0 "Crossover junction endodeoxyribonuclease RuvC"  
"OP8\_C16\_00268" 28998 "s59E13H2" 0 "putative transcriptional regulatory protein"  
"OP8\_C16\_00268" 28998 "s59E25H2" 0 "putative transcriptional regulatory protein"  
"OP8\_C16\_00268" 28998 "s59E5H2" 0 "putative transcriptional regulatory protein"  
"OP8\_C16\_00268" 28998 "s63E6H2" 0 "putative transcriptional regulatory protein"  
"OP8\_C16\_00269" 28999 "s59E13H2" 0 "ferrous iron efflux protein F"  
"OP8\_C16\_00269" 28999 "s59E25H2" 0 "ferrous iron efflux protein F"  
"OP8\_C16\_00269" 28999 "s59E5H2" 0 "ferrous iron efflux protein F"  
"OP8\_C16\_00269" 28999 "s63E6H2" 0 "ferrous iron efflux protein F"  
"OP8\_C16\_00270" 29000 "s59E13H2" 0 "High-affinity Na(+)/H(+) antiporter NhaS3"  
"OP8\_C16\_00270" 29000 "s59E25H2" 0 "High-affinity Na(+)/H(+) antiporter NhaS3"  
"OP8\_C16\_00270" 29000 "s59E5H2" 0 "High-affinity Na(+)/H(+) antiporter NhaS3"  
"OP8\_C16\_00270" 29000 "s63E6H2" 0 "High-affinity Na(+)/H(+) antiporter NhaS3"  
"OP8\_C16\_00271" 29001 "s59E13H2" 0 "hypothetical protein"  
"OP8\_C16\_00271" 29001 "s59E25H2" 0 "hypothetical protein"  
"OP8\_C16\_00271" 29001 "s59E5H2" 0 "hypothetical protein"  
"OP8\_C16\_00271" 29001 "s63E6H2" 0 "hypothetical protein"  
"OP8\_C16\_00272" 29002 "s59E13H2" 0 "Copper-sensing transcriptional repressor CsoR"  
"OP8\_C16\_00272" 29002 "s59E25H2" 0 "Copper-sensing transcriptional repressor CsoR"  
"OP8\_C16\_00272" 29002 "s59E5H2" 0 "Copper-sensing transcriptional repressor CsoR"  
"OP8\_C16\_00272" 29002 "s63E6H2" 0 "Copper-sensing transcriptional repressor CsoR"  
"OP8\_C16\_00273" 29003 "s59E13H2" 0 "Copper-exporting P-type ATPase A"  
"OP8\_C16\_00273" 29003 "s59E25H2" 0 "Copper-exporting P-type ATPase A"  
"OP8\_C16\_00273" 29003 "s59E5H2" 0 "Copper-exporting P-type ATPase A"  
"OP8\_C16\_00273" 29003 "s63E6H2" 0 "Copper-exporting P-type ATPase A"  
"OP8\_C16\_00274" 29004 "s59E13H2" 0 "hypothetical protein"  
"OP8\_C16\_00274" 29004 "s59E25H2" 0 "hypothetical protein"  
"OP8\_C16\_00274" 29004 "s59E5H2" 0 "hypothetical protein"  
"OP8\_C16\_00274" 29004 "s63E6H2" 0 "hypothetical protein"  
"OP8\_C16\_00275" 29005 "s59E13H2" 0 "Cobalt-zinc-cadmium resistance protein CzcC precursor"  
"OP8\_C16\_00275" 29005 "s59E25H2" 0 "Cobalt-zinc-cadmium resistance protein CzcC precursor"  
"OP8\_C16\_00275" 29005 "s59E5H2" 0 "Cobalt-zinc-cadmium resistance protein CzcC precursor"  
"OP8\_C16\_00275" 29005 "s63E6H2" 0 "Cobalt-zinc-cadmium resistance protein CzcC precursor"  
"OP8\_C16\_00276" 29006 "s59E13H2" 0 "Cation efflux system protein CusB precursor"  
"OP8\_C16\_00276" 29006 "s59E25H2" 0 "Cation efflux system protein CusB precursor"  
"OP8\_C16\_00276" 29006 "s59E5H2" 0 "Cation efflux system protein CusB precursor"  
"OP8\_C16\_00276" 29006 "s63E6H2" 0 "Cation efflux system protein CusB precursor"  
"OP8\_C16\_00277" 29007 "s59E13H2" 0 "Cation efflux system protein CusA"  
"OP8\_C16\_00277" 29007 "s59E25H2" 0 "Cation efflux system protein CusA"  
"OP8\_C16\_00277" 29007 "s59E5H2" 0 "Cation efflux system protein CusA"  
"OP8\_C16\_00277" 29007 "s63E6H2" 0 "Cation efflux system protein CusA"  
"OP8\_C16\_00278" 29008 "s59E13H2" 0 "Copper-transporting P-type ATPase"

"OP8\_C16\_00278" 29008 "s59E25H2" 0 "Copper-transporting P-type ATPase"  
"OP8\_C16\_00278" 29008 "s59E5H2" 0 "Copper-transporting P-type ATPase"  
"OP8\_C16\_00278" 29008 "s63E6H2" 0 "Copper-transporting P-type ATPase"  
"OP8\_C16\_00279" 29009 "s59E13H2" 0 "Alanine racemase"  
"OP8\_C16\_00279" 29009 "s59E25H2" 0 "Alanine racemase"  
"OP8\_C16\_00279" 29009 "s59E5H2" 0 "Alanine racemase"  
"OP8\_C16\_00279" 29009 "s63E6H2" 0 "Alanine racemase"  
"OP8\_C16\_00280" 29010 "s59E13H2" 0 "hypothetical protein"  
"OP8\_C16\_00280" 29010 "s59E25H2" 0 "hypothetical protein"  
"OP8\_C16\_00280" 29010 "s59E5H2" 0 "hypothetical protein"  
"OP8\_C16\_00280" 29010 "s63E6H2" 0 "hypothetical protein"  
"OP8\_C16\_00281" 29011 "s59E13H2" 0 "hypothetical protein"  
"OP8\_C16\_00281" 29011 "s59E25H2" 0 "hypothetical protein"  
"OP8\_C16\_00281" 29011 "s59E5H2" 0 "hypothetical protein"  
"OP8\_C16\_00281" 29011 "s63E6H2" 0 "hypothetical protein"  
"OP8\_C16\_00282" 29012 "s59E13H2" 0 "hypothetical protein"  
"OP8\_C16\_00282" 29012 "s59E25H2" 0 "hypothetical protein"  
"OP8\_C16\_00282" 29012 "s59E5H2" 0 "hypothetical protein"  
"OP8\_C16\_00282" 29012 "s63E6H2" 0 "hypothetical protein"  
"OP8\_C16\_00283" 29013 "s59E13H2" 0 "hypothetical protein"  
"OP8\_C16\_00283" 29013 "s59E25H2" 0 "hypothetical protein"  
"OP8\_C16\_00283" 29013 "s59E5H2" 0 "hypothetical protein"  
"OP8\_C16\_00283" 29013 "s63E6H2" 0 "hypothetical protein"  
"OP8\_C16\_00284" 29014 "s59E13H2" 0 "hypothetical protein"  
"OP8\_C16\_00284" 29014 "s59E25H2" 0 "hypothetical protein"  
"OP8\_C16\_00284" 29014 "s59E5H2" 0 "hypothetical protein"  
"OP8\_C16\_00284" 29014 "s63E6H2" 0 "hypothetical protein"  
"OP8\_C16\_00286" 29016 "s59E13H2" 0 "hypothetical protein"  
"OP8\_C16\_00286" 29016 "s59E25H2" 0 "hypothetical protein"  
"OP8\_C16\_00286" 29016 "s59E5H2" 0 "hypothetical protein"  
"OP8\_C16\_00286" 29016 "s63E6H2" 0 "hypothetical protein"  
"OP8\_C16\_00287" 29017 "s59E13H2" 0 "Serine/threonine-protein kinase StkP"  
"OP8\_C16\_00287" 29017 "s59E25H2" 0 "Serine/threonine-protein kinase StkP"  
"OP8\_C16\_00287" 29017 "s59E5H2" 0 "Serine/threonine-protein kinase StkP"  
"OP8\_C16\_00287" 29017 "s63E6H2" 0 "Serine/threonine-protein kinase StkP"  
"OP8\_C16\_00288" 29018 "s59E13H2" 0 "ComEC family competence protein"  
"OP8\_C16\_00288" 29018 "s59E25H2" 0 "ComEC family competence protein"  
"OP8\_C16\_00288" 29018 "s59E5H2" 0 "ComEC family competence protein"  
"OP8\_C16\_00288" 29018 "s63E6H2" 0 "ComEC family competence protein"  
"OP8\_C16\_00289" 29019 "s59E13H2" 0 "Thermostable carboxypeptidase 1"  
"OP8\_C16\_00289" 29019 "s59E25H2" 0 "Thermostable carboxypeptidase 1"  
"OP8\_C16\_00289" 29019 "s59E5H2" 0 "Thermostable carboxypeptidase 1"  
"OP8\_C16\_00289" 29019 "s63E6H2" 0 "Thermostable carboxypeptidase 1"  
"OP8\_C16\_00290" 29020 "s59E13H2" 0 "Methylmalonyl-CoA mutase"  
"OP8\_C16\_00290" 29020 "s59E25H2" 0 "Methylmalonyl-CoA mutase"  
"OP8\_C16\_00290" 29020 "s59E5H2" 0 "Methylmalonyl-CoA mutase"  
"OP8\_C16\_00290" 29020 "s63E6H2" 0 "Methylmalonyl-CoA mutase"

"OP8\_C16\_00291" 29021 "s59E13H2" 0 "Enolase"  
"OP8\_C16\_00291" 29021 "s59E25H2" 0 "Enolase"  
"OP8\_C16\_00291" 29021 "s59E5H2" 0 "Enolase"  
"OP8\_C16\_00291" 29021 "s63E6H2" 0 "Enolase"  
"OP8\_C16\_00293" 29023 "s59E13H2" 0 "Diacylglycerol kinase"  
"OP8\_C16\_00293" 29023 "s59E25H2" 0 "Diacylglycerol kinase"  
"OP8\_C16\_00293" 29023 "s59E5H2" 0 "Diacylglycerol kinase"  
"OP8\_C16\_00293" 29023 "s63E6H2" 0 "Diacylglycerol kinase"  
"OP8\_C16\_00294" 29024 "s59E13H2" 0 "hypothetical protein"  
"OP8\_C16\_00294" 29024 "s59E25H2" 0 "hypothetical protein"  
"OP8\_C16\_00294" 29024 "s59E5H2" 0 "hypothetical protein"  
"OP8\_C16\_00294" 29024 "s63E6H2" 0 "hypothetical protein"  
"OP8\_C16\_00295" 29025 "s59E13H2" 0 "hypothetical protein"  
"OP8\_C16\_00295" 29025 "s59E25H2" 0 "hypothetical protein"  
"OP8\_C16\_00295" 29025 "s59E5H2" 0 "hypothetical protein"  
"OP8\_C16\_00295" 29025 "s63E6H2" 0 "hypothetical protein"  
"OP8\_C16\_00296" 29026 "s59E13H2" 0 "TPR repeat-containing protein YrrB"  
"OP8\_C16\_00296" 29026 "s59E25H2" 0 "TPR repeat-containing protein YrrB"  
"OP8\_C16\_00296" 29026 "s59E5H2" 0 "TPR repeat-containing protein YrrB"  
"OP8\_C16\_00296" 29026 "s63E6H2" 0 "TPR repeat-containing protein YrrB"  
"OP8\_C16\_00298" 29028 "s59E13H2" 0 "Trigger factor"  
"OP8\_C16\_00298" 29028 "s59E25H2" 0 "Trigger factor"  
"OP8\_C16\_00298" 29028 "s59E5H2" 0 "Trigger factor"  
"OP8\_C16\_00298" 29028 "s63E6H2" 0 "Trigger factor"  
"OP8\_C16\_00299" 29029 "s59E13H2" 0 "Lon protease"  
"OP8\_C16\_00299" 29029 "s59E25H2" 0 "Lon protease"  
"OP8\_C16\_00299" 29029 "s59E5H2" 0 "Lon protease"  
"OP8\_C16\_00299" 29029 "s63E6H2" 0 "Lon protease"  
"OP8\_C16\_00300" 29030 "s59E13H2" 0 "hypothetical protein"  
"OP8\_C16\_00300" 29030 "s59E25H2" 0 "hypothetical protein"  
"OP8\_C16\_00300" 29030 "s59E5H2" 0 "hypothetical protein"  
"OP8\_C16\_00300" 29030 "s63E6H2" 0 "hypothetical protein"  
"OP8\_C16\_00301" 29031 "s59E13H2" 0 "Zinc carboxypeptidase"  
"OP8\_C16\_00301" 29031 "s59E25H2" 0 "Zinc carboxypeptidase"  
"OP8\_C16\_00301" 29031 "s59E5H2" 0 "Zinc carboxypeptidase"  
"OP8\_C16\_00301" 29031 "s63E6H2" 0 "Zinc carboxypeptidase"  
"OP8\_C16\_00302" 29032 "s59E13H2" 0 "DNA topoisomerase I"  
"OP8\_C16\_00302" 29032 "s59E25H2" 0 "DNA topoisomerase I"  
"OP8\_C16\_00302" 29032 "s59E5H2" 0 "DNA topoisomerase I"  
"OP8\_C16\_00302" 29032 "s63E6H2" 0 "DNA topoisomerase I"  
"OP8\_C16\_00303" 29033 "s59E13H2" 0 "Phd\_YefM"  
"OP8\_C16\_00303" 29033 "s59E25H2" 0 "Phd\_YefM"  
"OP8\_C16\_00303" 29033 "s59E5H2" 0 "Phd\_YefM"  
"OP8\_C16\_00303" 29033 "s63E6H2" 0 "Phd\_YefM"  
"OP8\_C16\_00304" 29034 "s59E13H2" 0 "HicB family protein"  
"OP8\_C16\_00304" 29034 "s59E25H2" 0 "HicB family protein"  
"OP8\_C16\_00304" 29034 "s59E5H2" 0 "HicB family protein"



"OP8\_C16\_00304" 29034 "s63E6H2" 0 "HicB family protein"  
"OP8\_C16\_00305" 29035 "s59E13H2" 0 "Chromosome-partitioning protein Spo0J"  
"OP8\_C16\_00305" 29035 "s59E25H2" 0 "Chromosome-partitioning protein Spo0J"  
"OP8\_C16\_00305" 29035 "s59E5H2" 0 "Chromosome-partitioning protein Spo0J"  
"OP8\_C16\_00305" 29035 "s63E6H2" 0 "Chromosome-partitioning protein Spo0J"  
"OP8\_C16\_00306" 29036 "s59E13H2" 0 "Sporulation initiation inhibitor protein Soj"  
"OP8\_C16\_00306" 29036 "s59E25H2" 0 "Sporulation initiation inhibitor protein Soj"  
"OP8\_C16\_00306" 29036 "s59E5H2" 0 "Sporulation initiation inhibitor protein Soj"  
"OP8\_C16\_00306" 29036 "s63E6H2" 0 "Sporulation initiation inhibitor protein Soj"  
"OP8\_C16\_00308" 29038 "s59E13H2" 0 "Serine/threonine exchanger SteT"  
"OP8\_C16\_00308" 29038 "s59E25H2" 0 "Serine/threonine exchanger SteT"  
"OP8\_C16\_00308" 29038 "s59E5H2" 0 "Serine/threonine exchanger SteT"  
"OP8\_C16\_00308" 29038 "s63E6H2" 0.002169014 "Serine/threonine exchanger SteT"  
"OP8\_C16\_00309" 29039 "s59E13H2" 0 "hypothetical protein"  
"OP8\_C16\_00309" 29039 "s59E25H2" 0 "hypothetical protein"  
"OP8\_C16\_00309" 29039 "s59E5H2" 0 "hypothetical protein"  
"OP8\_C16\_00309" 29039 "s63E6H2" 0 "hypothetical protein"  
"OP8\_C16\_00310" 29040 "s59E13H2" 0 "hypothetical protein"  
"OP8\_C16\_00310" 29040 "s59E25H2" 0 "hypothetical protein"  
"OP8\_C16\_00310" 29040 "s59E5H2" 0 "hypothetical protein"  
"OP8\_C16\_00310" 29040 "s63E6H2" 0 "hypothetical protein"  
"OP8\_C16\_00311" 29041 "s59E13H2" 0 "Bifunctional homocysteine S-methyltransferase/5,10-methylenetetrahydrofolate reductase"  
"OP8\_C16\_00311" 29041 "s59E25H2" 0 "Bifunctional homocysteine S-methyltransferase/5,10-methylenetetrahydrofolate reductase"  
"OP8\_C16\_00311" 29041 "s59E5H2" 0 "Bifunctional homocysteine S-methyltransferase/5,10-methylenetetrahydrofolate reductase"  
"OP8\_C16\_00311" 29041 "s63E6H2" 0 "Bifunctional homocysteine S-methyltransferase/5,10-methylenetetrahydrofolate reductase"  
"OP8\_C16\_00312" 29042 "s59E13H2" 0 "Outer membrane protein assembly factor BamA precursor"  
"OP8\_C16\_00312" 29042 "s59E25H2" 0 "Outer membrane protein assembly factor BamA precursor"  
"OP8\_C16\_00312" 29042 "s59E5H2" 0 "Outer membrane protein assembly factor BamA precursor"  
"OP8\_C16\_00312" 29042 "s63E6H2" 0 "Outer membrane protein assembly factor BamA precursor"  
"OP8\_C16\_00313" 29043 "s59E13H2" 0 "Plasmid stabilisation system protein"  
"OP8\_C16\_00313" 29043 "s59E25H2" 0 "Plasmid stabilisation system protein"  
"OP8\_C16\_00313" 29043 "s59E5H2" 0 "Plasmid stabilisation system protein"  
"OP8\_C16\_00313" 29043 "s63E6H2" 0 "Plasmid stabilisation system protein"  
"OP8\_C16\_00314" 29044 "s59E13H2" 0 "hypothetical protein"  
"OP8\_C16\_00314" 29044 "s59E25H2" 0 "hypothetical protein"  
"OP8\_C16\_00314" 29044 "s59E5H2" 0 "hypothetical protein"  
"OP8\_C16\_00314" 29044 "s63E6H2" 0 "hypothetical protein"  
"OP8\_C16\_00316" 29046 "s59E13H2" 0 "Putative esterase"  
"OP8\_C16\_00316" 29046 "s59E25H2" 0 "Putative esterase"  
"OP8\_C16\_00316" 29046 "s59E5H2" 0 "Putative esterase"  
"OP8\_C16\_00316" 29046 "s63E6H2" 0 "Putative esterase"  
"OP8\_C16\_00317" 29047 "s59E13H2" 0 "PilZ domain protein"  
"OP8\_C16\_00317" 29047 "s59E25H2" 0 "PilZ domain protein"  
"OP8\_C16\_00317" 29047 "s59E5H2" 0 "PilZ domain protein"  
"OP8\_C16\_00317" 29047 "s63E6H2" 0 "PilZ domain protein"  
"OP8\_C16\_00318" 29048 "s59E13H2" 0 "hypothetical protein"  
"OP8\_C16\_00318" 29048 "s59E25H2" 0 "hypothetical protein"

"OP8\_C16\_00318" 29048 "s59E5H2" 0 "hypothetical protein"  
"OP8\_C16\_00318" 29048 "s63E6H2" 0 "hypothetical protein"  
"OP8\_C16\_00319" 29049 "s59E13H2" 0 "Streptothricin hydrolase"  
"OP8\_C16\_00319" 29049 "s59E25H2" 0 "Streptothricin hydrolase"  
"OP8\_C16\_00319" 29049 "s59E5H2" 0 "Streptothricin hydrolase"  
"OP8\_C16\_00319" 29049 "s63E6H2" 0 "Streptothricin hydrolase"  
"OP8\_C16\_00322" 29052 "s59E13H2" 0 "Radical SAM superfamily protein"  
"OP8\_C16\_00322" 29052 "s59E25H2" 0 "Radical SAM superfamily protein"  
"OP8\_C16\_00322" 29052 "s59E5H2" 0 "Radical SAM superfamily protein"  
"OP8\_C16\_00322" 29052 "s63E6H2" 0 "Radical SAM superfamily protein"  
"OP8\_C16\_00323" 29053 "s59E13H2" 0 "Proline iminopeptidase"  
"OP8\_C16\_00323" 29053 "s59E25H2" 0 "Proline iminopeptidase"  
"OP8\_C16\_00323" 29053 "s59E5H2" 0 "Proline iminopeptidase"  
"OP8\_C16\_00323" 29053 "s63E6H2" 0 "Proline iminopeptidase"  
"OP8\_C16\_00324" 29054 "s59E13H2" 0 "Xyloglucanase precursor"  
"OP8\_C16\_00324" 29054 "s59E25H2" 0 "Xyloglucanase precursor"  
"OP8\_C16\_00324" 29054 "s59E5H2" 0 "Xyloglucanase precursor"  
"OP8\_C16\_00324" 29054 "s63E6H2" 0 "Xyloglucanase precursor"  
"OP8\_C16\_00325" 29055 "s59E13H2" 0 "hypothetical protein"  
"OP8\_C16\_00325" 29055 "s59E25H2" 0 "hypothetical protein"  
"OP8\_C16\_00325" 29055 "s59E5H2" 0 "hypothetical protein"  
"OP8\_C16\_00325" 29055 "s63E6H2" 0 "hypothetical protein"  
"OP8\_C16\_00326" 29056 "s59E13H2" 0 "Oxygen-independent coproporphyrinogen-III oxidase 1"  
"OP8\_C16\_00326" 29056 "s59E25H2" 0 "Oxygen-independent coproporphyrinogen-III oxidase 1"  
"OP8\_C16\_00326" 29056 "s59E5H2" 0 "Oxygen-independent coproporphyrinogen-III oxidase 1"  
"OP8\_C16\_00326" 29056 "s63E6H2" 0 "Oxygen-independent coproporphyrinogen-III oxidase 1"  
"OP8\_C16\_00327" 29057 "s59E13H2" 0 "Toxin RelG"  
"OP8\_C16\_00327" 29057 "s59E25H2" 0 "Toxin RelG"  
"OP8\_C16\_00327" 29057 "s59E5H2" 0 "Toxin RelG"  
"OP8\_C16\_00327" 29057 "s63E6H2" 0 "Toxin RelG"  
"OP8\_C16\_00328" 29058 "s59E13H2" 0 "Phd\_YefM"  
"OP8\_C16\_00328" 29058 "s59E25H2" 0 "Phd\_YefM"  
"OP8\_C16\_00328" 29058 "s59E5H2" 0 "Phd\_YefM"  
"OP8\_C16\_00328" 29058 "s63E6H2" 0 "Phd\_YefM"  
"OP8\_C16\_00330" 29060 "s59E13H2" 0 "Chromosome partition protein Smc"  
"OP8\_C16\_00330" 29060 "s59E25H2" 0 "Chromosome partition protein Smc"  
"OP8\_C16\_00330" 29060 "s59E5H2" 0 "Chromosome partition protein Smc"  
"OP8\_C16\_00330" 29060 "s63E6H2" 0 "Chromosome partition protein Smc"  
"OP8\_C16\_00331" 29061 "s59E13H2" 0 "hypothetical protein"  
"OP8\_C16\_00331" 29061 "s59E25H2" 0 "hypothetical protein"  
"OP8\_C16\_00331" 29061 "s59E5H2" 0 "hypothetical protein"  
"OP8\_C16\_00331" 29061 "s63E6H2" 0 "hypothetical protein"  
"OP8\_C16\_00333" 29063 "s59E13H2" 0 "Carbamoyltransferase HypF"  
"OP8\_C16\_00333" 29063 "s59E25H2" 0 "Carbamoyltransferase HypF"  
"OP8\_C16\_00333" 29063 "s59E5H2" 0 "Carbamoyltransferase HypF"  
"OP8\_C16\_00333" 29063 "s63E6H2" 0 "Carbamoyltransferase HypF"  
"OP8\_C16\_00334" 29064 "s59E13H2" 0 "hypothetical protein"

"OP8\_C16\_00334" 29064 "s59E25H2" 0 "hypothetical protein"  
"OP8\_C16\_00334" 29064 "s59E5H2" 0 "hypothetical protein"  
"OP8\_C16\_00334" 29064 "s63E6H2" 0 "hypothetical protein"  
"OP8\_C16\_00336" 29066 "s59E13H2" 0 "Peptidase family M50"  
"OP8\_C16\_00336" 29066 "s59E25H2" 0 "Peptidase family M50"  
"OP8\_C16\_00336" 29066 "s59E5H2" 0 "Peptidase family M50"  
"OP8\_C16\_00336" 29066 "s63E6H2" 0 "Peptidase family M50"  
"OP8\_C16\_00337" 29067 "s59E13H2" 0 "Ferredoxin"  
"OP8\_C16\_00337" 29067 "s59E25H2" 0 "Ferredoxin"  
"OP8\_C16\_00337" 29067 "s59E5H2" 0 "Ferredoxin"  
"OP8\_C16\_00337" 29067 "s63E6H2" 0 "Ferredoxin"  
"OP8\_C16\_00338" 29068 "s59E13H2" 0 "Tetratricopeptide repeat protein"  
"OP8\_C16\_00338" 29068 "s59E25H2" 0 "Tetratricopeptide repeat protein"  
"OP8\_C16\_00338" 29068 "s59E5H2" 0 "Tetratricopeptide repeat protein"  
"OP8\_C16\_00338" 29068 "s63E6H2" 0 "Tetratricopeptide repeat protein"  
"OP8\_C16\_00339" 29069 "s59E13H2" 0 "hypothetical protein"  
"OP8\_C16\_00339" 29069 "s59E25H2" 0 "hypothetical protein"  
"OP8\_C16\_00339" 29069 "s59E5H2" 0 "hypothetical protein"  
"OP8\_C16\_00339" 29069 "s63E6H2" 0 "hypothetical protein"  
"OP8\_C16\_00340" 29070 "s59E13H2" 0 "hypothetical protein"  
"OP8\_C16\_00340" 29070 "s59E25H2" 0 "hypothetical protein"  
"OP8\_C16\_00340" 29070 "s59E5H2" 0 "hypothetical protein"  
"OP8\_C16\_00340" 29070 "s63E6H2" 0 "hypothetical protein"  
"OP8\_C16\_00342" 29072 "s59E13H2" 0 "hypothetical protein"  
"OP8\_C16\_00342" 29072 "s59E25H2" 0 "hypothetical protein"  
"OP8\_C16\_00342" 29072 "s59E5H2" 0 "hypothetical protein"  
"OP8\_C16\_00342" 29072 "s63E6H2" 0 "hypothetical protein"  
"OP8\_C16\_00344" 29074 "s59E13H2" 0 "NADP-dependent malic enzyme"  
"OP8\_C16\_00344" 29074 "s59E25H2" 0 "NADP-dependent malic enzyme"  
"OP8\_C16\_00344" 29074 "s59E5H2" 0.001806101 "NADP-dependent malic enzyme"  
"OP8\_C16\_00344" 29074 "s63E6H2" 0 "NADP-dependent malic enzyme"  
"OP8\_C16\_00346" 29076 "s59E13H2" 0 "Hemolysin A"  
"OP8\_C16\_00346" 29076 "s59E25H2" 0 "Hemolysin A"  
"OP8\_C16\_00346" 29076 "s59E5H2" 0 "Hemolysin A"  
"OP8\_C16\_00346" 29076 "s63E6H2" 0 "Hemolysin A"  
"OP8\_C16\_00347" 29077 "s59E13H2" 0 "1-deoxy-D-xylulose-5-phosphate synthase"  
"OP8\_C16\_00347" 29077 "s59E25H2" 0 "1-deoxy-D-xylulose-5-phosphate synthase"  
"OP8\_C16\_00347" 29077 "s59E5H2" 0 "1-deoxy-D-xylulose-5-phosphate synthase"  
"OP8\_C16\_00347" 29077 "s63E6H2" 0 "1-deoxy-D-xylulose-5-phosphate synthase"  
"OP8\_C16\_00348" 29078 "s59E13H2" 0 "Farnesyl diphosphate synthase"  
"OP8\_C16\_00348" 29078 "s59E25H2" 0 "Farnesyl diphosphate synthase"  
"OP8\_C16\_00348" 29078 "s59E5H2" 0 "Farnesyl diphosphate synthase"  
"OP8\_C16\_00348" 29078 "s63E6H2" 0 "Farnesyl diphosphate synthase"  
"OP8\_C16\_00349" 29079 "s59E13H2" 0 "Succinylglutamate desuccinylase / Aspartoacylase family protein"  
"OP8\_C16\_00349" 29079 "s59E25H2" 0 "Succinylglutamate desuccinylase / Aspartoacylase family protein"  
"OP8\_C16\_00349" 29079 "s59E5H2" 0 "Succinylglutamate desuccinylase / Aspartoacylase family protein"  
"OP8\_C16\_00349" 29079 "s63E6H2" 0 "Succinylglutamate desuccinylase / Aspartoacylase family protein"

"OP8\_C16\_00350" 29080 "s59E13H2" 0 "hypothetical protein"  
"OP8\_C16\_00350" 29080 "s59E25H2" 0 "hypothetical protein"  
"OP8\_C16\_00350" 29080 "s59E5H2" 0 "hypothetical protein"  
"OP8\_C16\_00350" 29080 "s63E6H2" 0 "hypothetical protein"  
"OP8\_C16\_00351" 29081 "s59E13H2" 0 "hypothetical protein"  
"OP8\_C16\_00351" 29081 "s59E25H2" 0 "hypothetical protein"  
"OP8\_C16\_00351" 29081 "s59E5H2" 0 "hypothetical protein"  
"OP8\_C16\_00351" 29081 "s63E6H2" 0 "hypothetical protein"  
"OP8\_C16\_00352" 29082 "s59E13H2" 0 "hypothetical protein"  
"OP8\_C16\_00352" 29082 "s59E25H2" 0 "hypothetical protein"  
"OP8\_C16\_00352" 29082 "s59E5H2" 0 "hypothetical protein"  
"OP8\_C16\_00352" 29082 "s63E6H2" 0 "hypothetical protein"  
"OP8\_C16\_00353" 29083 "s59E13H2" 0 "hypothetical protein"  
"OP8\_C16\_00353" 29083 "s59E25H2" 0 "hypothetical protein"  
"OP8\_C16\_00353" 29083 "s59E5H2" 0 "hypothetical protein"  
"OP8\_C16\_00353" 29083 "s63E6H2" 0 "hypothetical protein"  
"OP8\_C16\_00354" 29084 "s59E13H2" 0 "NAD-dependent methanol dehydrogenase"  
"OP8\_C16\_00354" 29084 "s59E25H2" 0 "NAD-dependent methanol dehydrogenase"  
"OP8\_C16\_00354" 29084 "s59E5H2" 0 "NAD-dependent methanol dehydrogenase"  
"OP8\_C16\_00354" 29084 "s63E6H2" 0 "NAD-dependent methanol dehydrogenase"  
"OP8\_C16\_00355" 29085 "s59E13H2" 0 "PTS system fructose-specific EIIABC component"  
"OP8\_C16\_00355" 29085 "s59E25H2" 0 "PTS system fructose-specific EIIABC component"  
"OP8\_C16\_00355" 29085 "s59E5H2" 0 "PTS system fructose-specific EIIABC component"  
"OP8\_C16\_00355" 29085 "s63E6H2" 0 "PTS system fructose-specific EIIABC component"  
"OP8\_C16\_00356" 29086 "s59E13H2" 0 "Zinc carboxypeptidase"  
"OP8\_C16\_00356" 29086 "s59E25H2" 0 "Zinc carboxypeptidase"  
"OP8\_C16\_00356" 29086 "s59E5H2" 0 "Zinc carboxypeptidase"  
"OP8\_C16\_00356" 29086 "s63E6H2" 0 "Zinc carboxypeptidase"  
"OP8\_C16\_00357" 29087 "s59E13H2" 0 "Peptide chain release factor 2"  
"OP8\_C16\_00357" 29087 "s59E25H2" 0 "Peptide chain release factor 2"  
"OP8\_C16\_00357" 29087 "s59E5H2" 0 "Peptide chain release factor 2"  
"OP8\_C16\_00357" 29087 "s63E6H2" 0 "Peptide chain release factor 2"  
"OP8\_C16\_00358" 29088 "s59E13H2" 0 "putative hydrolase"  
"OP8\_C16\_00358" 29088 "s59E25H2" 0 "putative hydrolase"  
"OP8\_C16\_00358" 29088 "s59E5H2" 0 "putative hydrolase"  
"OP8\_C16\_00358" 29088 "s63E6H2" 0 "putative hydrolase"  
"OP8\_C16\_00359" 29089 "s59E13H2" 0 "Pyridoxine 5'-phosphate synthase"  
"OP8\_C16\_00359" 29089 "s59E25H2" 0 "Pyridoxine 5'-phosphate synthase"  
"OP8\_C16\_00359" 29089 "s59E5H2" 0 "Pyridoxine 5'-phosphate synthase"  
"OP8\_C16\_00359" 29089 "s63E6H2" 0 "Pyridoxine 5'-phosphate synthase"  
"OP8\_C16\_00360" 29090 "s59E13H2" 0 "Phosphoglucosamine mutase"  
"OP8\_C16\_00360" 29090 "s59E25H2" 0 "Phosphoglucosamine mutase"  
"OP8\_C16\_00360" 29090 "s59E5H2" 0 "Phosphoglucosamine mutase"  
"OP8\_C16\_00360" 29090 "s63E6H2" 0 "Phosphoglucosamine mutase"  
"OP8\_C16\_00361" 29091 "s59E13H2" 0 "YbbR-like protein"  
"OP8\_C16\_00361" 29091 "s59E25H2" 0 "YbbR-like protein"  
"OP8\_C16\_00361" 29091 "s59E5H2" 0 "YbbR-like protein"

"OP8\_C16\_00361" 29091 "s63E6H2" 0 "YbbR-like protein"  
"OP8\_C16\_00362" 29092 "s59E13H2" 0 "DisA bacterial checkpoint controller nucleotide-binding protein"  
"OP8\_C16\_00362" 29092 "s59E25H2" 0 "DisA bacterial checkpoint controller nucleotide-binding protein"  
"OP8\_C16\_00362" 29092 "s59E5H2" 0 "DisA bacterial checkpoint controller nucleotide-binding protein"  
"OP8\_C16\_00362" 29092 "s63E6H2" 0 "DisA bacterial checkpoint controller nucleotide-binding protein"  
"OP8\_C16\_00363" 29093 "s59E13H2" 0 "Dihydropteroate synthase"  
"OP8\_C16\_00363" 29093 "s59E25H2" 0 "Dihydropteroate synthase"  
"OP8\_C16\_00363" 29093 "s59E5H2" 0 "Dihydropteroate synthase"  
"OP8\_C16\_00363" 29093 "s63E6H2" 0 "Dihydropteroate synthase"  
"OP8\_C16\_00364" 29094 "s59E13H2" 0 "ATP-dependent zinc metalloprotease FtsH"  
"OP8\_C16\_00364" 29094 "s59E25H2" 0 "ATP-dependent zinc metalloprotease FtsH"  
"OP8\_C16\_00364" 29094 "s59E5H2" 0 "ATP-dependent zinc metalloprotease FtsH"  
"OP8\_C16\_00364" 29094 "s63E6H2" 0 "ATP-dependent zinc metalloprotease FtsH"  
"OP8\_C16\_00365" 29095 "s59E13H2" 0 "3-oxoacyl-[acyl-carrier-protein] reductase FabG"  
"OP8\_C16\_00365" 29095 "s59E25H2" 0 "3-oxoacyl-[acyl-carrier-protein] reductase FabG"  
"OP8\_C16\_00365" 29095 "s59E5H2" 0 "3-oxoacyl-[acyl-carrier-protein] reductase FabG"  
"OP8\_C16\_00365" 29095 "s63E6H2" 0 "3-oxoacyl-[acyl-carrier-protein] reductase FabG"  
"OP8\_C16\_00366" 29096 "s59E13H2" 0 "LexA repressor"  
"OP8\_C16\_00366" 29096 "s59E25H2" 0 "LexA repressor"  
"OP8\_C16\_00366" 29096 "s59E5H2" 0 "LexA repressor"  
"OP8\_C16\_00366" 29096 "s63E6H2" 0 "LexA repressor"  
"OP8\_C16\_00367" 29097 "s59E13H2" 0 "DNA polymerase IV"  
"OP8\_C16\_00367" 29097 "s59E25H2" 0 "DNA polymerase IV"  
"OP8\_C16\_00367" 29097 "s59E5H2" 0 "DNA polymerase IV"  
"OP8\_C16\_00367" 29097 "s63E6H2" 0 "DNA polymerase IV"  
"OP8\_C16\_00368" 29098 "s59E13H2" 0 "DNA polymerase III subunit alpha"  
"OP8\_C16\_00368" 29098 "s59E25H2" 0 "DNA polymerase III subunit alpha"  
"OP8\_C16\_00368" 29098 "s59E5H2" 0 "DNA polymerase III subunit alpha"  
"OP8\_C16\_00368" 29098 "s63E6H2" 0 "DNA polymerase III subunit alpha"  
"OP8\_C16\_00370" 29100 "s59E13H2" 0 "Transposase"  
"OP8\_C16\_00370" 29100 "s59E25H2" 0 "Transposase"  
"OP8\_C16\_00370" 29100 "s59E5H2" 0 "Transposase"  
"OP8\_C16\_00370" 29100 "s63E6H2" 0 "Transposase"  
"OP8\_C16\_00371" 29101 "s59E13H2" 0 "D-aminopeptidase"  
"OP8\_C16\_00371" 29101 "s59E25H2" 0 "D-aminopeptidase"  
"OP8\_C16\_00371" 29101 "s59E5H2" 0 "D-aminopeptidase"  
"OP8\_C16\_00371" 29101 "s63E6H2" 0 "D-aminopeptidase"  
"OP8\_C16\_00372" 29102 "s59E13H2" 0 "hypothetical protein"  
"OP8\_C16\_00372" 29102 "s59E25H2" 0 "hypothetical protein"  
"OP8\_C16\_00372" 29102 "s59E5H2" 0 "hypothetical protein"  
"OP8\_C16\_00372" 29102 "s63E6H2" 0 "hypothetical protein"  
"OP8\_C16\_00373" 29103 "s59E13H2" 0 "hypothetical protein"  
"OP8\_C16\_00373" 29103 "s59E25H2" 0 "hypothetical protein"  
"OP8\_C16\_00373" 29103 "s59E5H2" 0 "hypothetical protein"  
"OP8\_C16\_00373" 29103 "s63E6H2" 0 "hypothetical protein"  
"OP8\_C16\_00374" 29104 "s59E13H2" 0.3918521 "Tetratricopeptide repeat protein"  
"OP8\_C16\_00374" 29104 "s59E25H2" 0 "Tetratricopeptide repeat protein"

"OP8\_C16\_00374" 29104 "s59E5H2" 0.1693541 "Tetratricopeptide repeat protein"  
"OP8\_C16\_00374" 29104 "s63E6H2" 0 "Tetratricopeptide repeat protein"  
"OP8\_C16\_00375" 29105 "s59E13H2" 0 "Arylsulfatase"  
"OP8\_C16\_00375" 29105 "s59E25H2" 0 "Arylsulfatase"  
"OP8\_C16\_00375" 29105 "s59E5H2" 0.0409163 "Arylsulfatase"  
"OP8\_C16\_00375" 29105 "s63E6H2" 0 "Arylsulfatase"  
"OP8\_C16\_00376" 29106 "s59E13H2" 0 "Acyl-coenzyme A:6-aminopenicillanic acid acyl-transferase"  
"OP8\_C16\_00376" 29106 "s59E25H2" 0 "Acyl-coenzyme A:6-aminopenicillanic acid acyl-transferase"  
"OP8\_C16\_00376" 29106 "s59E5H2" 0 "Acyl-coenzyme A:6-aminopenicillanic acid acyl-transferase"  
"OP8\_C16\_00376" 29106 "s63E6H2" 0 "Acyl-coenzyme A:6-aminopenicillanic acid acyl-transferase"  
"OP8\_C16\_00377" 29107 "s59E13H2" 0 "Trimethylamine methyltransferase MttB"  
"OP8\_C16\_00377" 29107 "s59E25H2" 0 "Trimethylamine methyltransferase MttB"  
"OP8\_C16\_00377" 29107 "s59E5H2" 0 "Trimethylamine methyltransferase MttB"  
"OP8\_C16\_00377" 29107 "s63E6H2" 0 "Trimethylamine methyltransferase MttB"  
"OP8\_C16\_00378" 29108 "s59E13H2" 0 "hypothetical protein"  
"OP8\_C16\_00378" 29108 "s59E25H2" 0 "hypothetical protein"  
"OP8\_C16\_00378" 29108 "s59E5H2" 0 "hypothetical protein"  
"OP8\_C16\_00378" 29108 "s63E6H2" 0 "hypothetical protein"  
"OP8\_C16\_00379" 29109 "s59E13H2" 0 "Peptidase family S58"  
"OP8\_C16\_00379" 29109 "s59E25H2" 0 "Peptidase family S58"  
"OP8\_C16\_00379" 29109 "s59E5H2" 0 "Peptidase family S58"  
"OP8\_C16\_00379" 29109 "s63E6H2" 0 "Peptidase family S58"  
"OP8\_C16\_00380" 29110 "s59E13H2" 0 "Peptidase family S58"  
"OP8\_C16\_00380" 29110 "s59E25H2" 0 "Peptidase family S58"  
"OP8\_C16\_00380" 29110 "s59E5H2" 0 "Peptidase family S58"  
"OP8\_C16\_00380" 29110 "s63E6H2" 0 "Peptidase family S58"  
"OP8\_C16\_00381" 29111 "s59E13H2" 0 "Peptidase family M28"  
"OP8\_C16\_00381" 29111 "s59E25H2" 0 "Peptidase family M28"  
"OP8\_C16\_00381" 29111 "s59E5H2" 0 "Peptidase family M28"  
"OP8\_C16\_00381" 29111 "s63E6H2" 0 "Peptidase family M28"  
"OP8\_C16\_00382" 29112 "s59E13H2" 0 "Pca regulon regulatory protein"  
"OP8\_C16\_00382" 29112 "s59E25H2" 0 "Pca regulon regulatory protein"  
"OP8\_C16\_00382" 29112 "s59E5H2" 0 "Pca regulon regulatory protein"  
"OP8\_C16\_00382" 29112 "s63E6H2" 0 "Pca regulon regulatory protein"  
"OP8\_C16\_00383" 29113 "s59E13H2" 0 "Adenosylmethionine-8-amino-7-oxononanoate aminotransferase"  
"OP8\_C16\_00383" 29113 "s59E25H2" 0 "Adenosylmethionine-8-amino-7-oxononanoate aminotransferase"  
"OP8\_C16\_00383" 29113 "s59E5H2" 0 "Adenosylmethionine-8-amino-7-oxononanoate aminotransferase"  
"OP8\_C16\_00383" 29113 "s63E6H2" 0 "Adenosylmethionine-8-amino-7-oxononanoate aminotransferase"  
"OP8\_C16\_00384" 29114 "s59E13H2" 0 "1-pyrroline-5-carboxylate dehydrogenase 1"  
"OP8\_C16\_00384" 29114 "s59E25H2" 0 "1-pyrroline-5-carboxylate dehydrogenase 1"  
"OP8\_C16\_00384" 29114 "s59E5H2" 0 "1-pyrroline-5-carboxylate dehydrogenase 1"  
"OP8\_C16\_00384" 29114 "s63E6H2" 0 "1-pyrroline-5-carboxylate dehydrogenase 1"  
"OP8\_C16\_00385" 29115 "s59E13H2" 0 "Acetyl-CoA acetyltransferase"  
"OP8\_C16\_00385" 29115 "s59E25H2" 0 "Acetyl-CoA acetyltransferase"  
"OP8\_C16\_00385" 29115 "s59E5H2" 0 "Acetyl-CoA acetyltransferase"  
"OP8\_C16\_00385" 29115 "s63E6H2" 0 "Acetyl-CoA acetyltransferase"  
"OP8\_C16\_00386" 29116 "s59E13H2" 0 "5-aminovalerate aminotransferase DavT"

"OP8\_C16\_00386" 29116 "s59E25H2" 0 "5-aminovalerate aminotransferase DavT"  
"OP8\_C16\_00386" 29116 "s59E5H2" 0 "5-aminovalerate aminotransferase DavT"  
"OP8\_C16\_00386" 29116 "s63E6H2" 0 "5-aminovalerate aminotransferase DavT"  
"OP8\_C16\_00387" 29117 "s59E13H2" 0 "3-oxoadipate CoA-transferase subunit A"  
"OP8\_C16\_00387" 29117 "s59E25H2" 0 "3-oxoadipate CoA-transferase subunit A"  
"OP8\_C16\_00387" 29117 "s59E5H2" 0 "3-oxoadipate CoA-transferase subunit A"  
"OP8\_C16\_00387" 29117 "s63E6H2" 0 "3-oxoadipate CoA-transferase subunit A"  
"OP8\_C16\_00388" 29118 "s59E13H2" 0 "3-oxoadipate CoA-transferase subunit B"  
"OP8\_C16\_00388" 29118 "s59E25H2" 0 "3-oxoadipate CoA-transferase subunit B"  
"OP8\_C16\_00388" 29118 "s59E5H2" 0 "3-oxoadipate CoA-transferase subunit B"  
"OP8\_C16\_00388" 29118 "s63E6H2" 0 "3-oxoadipate CoA-transferase subunit B"  
"OP8\_C16\_00389" 29119 "s59E13H2" 0 "hypothetical protein"  
"OP8\_C16\_00389" 29119 "s59E25H2" 0 "hypothetical protein"  
"OP8\_C16\_00389" 29119 "s59E5H2" 0 "hypothetical protein"  
"OP8\_C16\_00389" 29119 "s63E6H2" 0 "hypothetical protein"  
"OP8\_C16\_00390" 29120 "s59E13H2" 0 "hypothetical protein"  
"OP8\_C16\_00390" 29120 "s59E25H2" 0 "hypothetical protein"  
"OP8\_C16\_00390" 29120 "s59E5H2" 0 "hypothetical protein"  
"OP8\_C16\_00390" 29120 "s63E6H2" 0 "hypothetical protein"  
"OP8\_C16\_00391" 29121 "s59E13H2" 0 "hypothetical protein"  
"OP8\_C16\_00391" 29121 "s59E25H2" 0 "hypothetical protein"  
"OP8\_C16\_00391" 29121 "s59E5H2" 0 "hypothetical protein"  
"OP8\_C16\_00391" 29121 "s63E6H2" 0 "hypothetical protein"  
"OP8\_C16\_00392" 29122 "s59E13H2" 0 "hypothetical protein"  
"OP8\_C16\_00392" 29122 "s59E25H2" 0 "hypothetical protein"  
"OP8\_C16\_00392" 29122 "s59E5H2" 0 "hypothetical protein"  
"OP8\_C16\_00392" 29122 "s63E6H2" 0 "hypothetical protein"  
"OP8\_C16\_00393" 29123 "s59E13H2" 0 "hypothetical protein"  
"OP8\_C16\_00393" 29123 "s59E25H2" 0 "hypothetical protein"  
"OP8\_C16\_00393" 29123 "s59E5H2" 0 "hypothetical protein"  
"OP8\_C16\_00393" 29123 "s63E6H2" 0 "hypothetical protein"  
"OP8\_C16\_00395" 29125 "s59E13H2" 0 "H(+)/Cl(-) exchange transporter ClcA"  
"OP8\_C16\_00395" 29125 "s59E25H2" 0 "H(+)/Cl(-) exchange transporter ClcA"  
"OP8\_C16\_00395" 29125 "s59E5H2" 0 "H(+)/Cl(-) exchange transporter ClcA"  
"OP8\_C16\_00395" 29125 "s63E6H2" 0 "H(+)/Cl(-) exchange transporter ClcA"  
"OP8\_C16\_00396" 29126 "s59E13H2" 0 "Phospholipase B"  
"OP8\_C16\_00396" 29126 "s59E25H2" 0 "Phospholipase B"  
"OP8\_C16\_00396" 29126 "s59E5H2" 0 "Phospholipase B"  
"OP8\_C16\_00396" 29126 "s63E6H2" 0 "Phospholipase B"  
"OP8\_C16\_00397" 29127 "s59E13H2" 0 "hypothetical protein"  
"OP8\_C16\_00397" 29127 "s59E25H2" 0 "hypothetical protein"  
"OP8\_C16\_00397" 29127 "s59E5H2" 0 "hypothetical protein"  
"OP8\_C16\_00397" 29127 "s63E6H2" 0 "hypothetical protein"  
"OP8\_C16\_00398" 29128 "s59E13H2" 0 "TPR repeat-containing protein YrrB"  
"OP8\_C16\_00398" 29128 "s59E25H2" 0 "TPR repeat-containing protein YrrB"  
"OP8\_C16\_00398" 29128 "s59E5H2" 0 "TPR repeat-containing protein YrrB"  
"OP8\_C16\_00398" 29128 "s63E6H2" 0 "TPR repeat-containing protein YrrB"

"OP8\_C16\_00399" 29129 "s59E13H2" 0 "hypothetical protein"  
"OP8\_C16\_00399" 29129 "s59E25H2" 0 "hypothetical protein"  
"OP8\_C16\_00399" 29129 "s59E5H2" 0 "hypothetical protein"  
"OP8\_C16\_00399" 29129 "s63E6H2" 0 "hypothetical protein"  
"OP8\_C16\_00400" 29130 "s59E13H2" 0 "hypothetical protein"  
"OP8\_C16\_00400" 29130 "s59E25H2" 0 "hypothetical protein"  
"OP8\_C16\_00400" 29130 "s59E5H2" 0 "hypothetical protein"  
"OP8\_C16\_00400" 29130 "s63E6H2" 0 "hypothetical protein"  
"OP8\_C16\_00401" 29131 "s59E13H2" 0 "hypothetical protein"  
"OP8\_C16\_00401" 29131 "s59E25H2" 0 "hypothetical protein"  
"OP8\_C16\_00401" 29131 "s59E5H2" 0 "hypothetical protein"  
"OP8\_C16\_00401" 29131 "s63E6H2" 0 "hypothetical protein"  
"OP8\_C16\_00402" 29132 "s59E13H2" 0 "Lipopolysaccharide export system permease protein LptG"  
"OP8\_C16\_00402" 29132 "s59E25H2" 0 "Lipopolysaccharide export system permease protein LptG"  
"OP8\_C16\_00402" 29132 "s59E5H2" 0 "Lipopolysaccharide export system permease protein LptG"  
"OP8\_C16\_00402" 29132 "s63E6H2" 0 "Lipopolysaccharide export system permease protein LptG"  
"OP8\_C16\_00403" 29133 "s59E13H2" 0 "Hydrogenase isoenzymes formation protein HypE"  
"OP8\_C16\_00403" 29133 "s59E25H2" 0 "Hydrogenase isoenzymes formation protein HypE"  
"OP8\_C16\_00403" 29133 "s59E5H2" 0 "Hydrogenase isoenzymes formation protein HypE"  
"OP8\_C16\_00403" 29133 "s63E6H2" 0 "Hydrogenase isoenzymes formation protein HypE"  
"OP8\_C16\_00404" 29134 "s59E13H2" 0 "Hydrogenase expression/formation protein HypD"  
"OP8\_C16\_00404" 29134 "s59E25H2" 0 "Hydrogenase expression/formation protein HypD"  
"OP8\_C16\_00404" 29134 "s59E5H2" 0 "Hydrogenase expression/formation protein HypD"  
"OP8\_C16\_00404" 29134 "s63E6H2" 0 "Hydrogenase expression/formation protein HypD"  
"OP8\_C16\_00405" 29135 "s59E13H2" 0 "Hydrogenase isoenzymes formation protein HypC"  
"OP8\_C16\_00405" 29135 "s59E25H2" 0 "Hydrogenase isoenzymes formation protein HypC"  
"OP8\_C16\_00405" 29135 "s59E5H2" 0 "Hydrogenase isoenzymes formation protein HypC"  
"OP8\_C16\_00405" 29135 "s63E6H2" 0 "Hydrogenase isoenzymes formation protein HypC"  
"OP8\_C16\_00406" 29136 "s59E13H2" 0 "Ditrans,polycis-undecaprenyl-diphosphate synthase ((2E,6E)-farnesyl-diphosphate specific)"  
"OP8\_C16\_00406" 29136 "s59E25H2" 0 "Ditrans,polycis-undecaprenyl-diphosphate synthase ((2E,6E)-farnesyl-diphosphate specific)"  
"OP8\_C16\_00406" 29136 "s59E5H2" 0 "Ditrans,polycis-undecaprenyl-diphosphate synthase ((2E,6E)-farnesyl-diphosphate specific)"  
"OP8\_C16\_00406" 29136 "s63E6H2" 0 "Ditrans,polycis-undecaprenyl-diphosphate synthase ((2E,6E)-farnesyl-diphosphate specific)"  
"OP8\_C16\_00407" 29137 "s59E13H2" 0 "Phosphatidate cytidyltransferase"  
"OP8\_C16\_00407" 29137 "s59E25H2" 0 "Phosphatidate cytidyltransferase"  
"OP8\_C16\_00407" 29137 "s59E5H2" 0 "Phosphatidate cytidyltransferase"  
"OP8\_C16\_00407" 29137 "s63E6H2" 0 "Phosphatidate cytidyltransferase"  
"OP8\_C16\_00408" 29138 "s59E13H2" 0 "1-deoxy-D-xylulose 5-phosphate reductoisomerase"  
"OP8\_C16\_00408" 29138 "s59E25H2" 0 "1-deoxy-D-xylulose 5-phosphate reductoisomerase"  
"OP8\_C16\_00408" 29138 "s59E5H2" 0 "1-deoxy-D-xylulose 5-phosphate reductoisomerase"  
"OP8\_C16\_00408" 29138 "s63E6H2" 0 "1-deoxy-D-xylulose 5-phosphate reductoisomerase"  
"OP8\_C16\_00409" 29139 "s59E13H2" 0 "Putative zinc metalloprotease"  
"OP8\_C16\_00409" 29139 "s59E25H2" 0 "Putative zinc metalloprotease"  
"OP8\_C16\_00409" 29139 "s59E5H2" 0 "Putative zinc metalloprotease"  
"OP8\_C16\_00409" 29139 "s63E6H2" 0 "Putative zinc metalloprotease"  
"OP8\_C16\_00410" 29140 "s59E13H2" 0 "4-hydroxy-3-methylbut-2-en-1-yl diphosphate synthase"  
"OP8\_C16\_00410" 29140 "s59E25H2" 0 "4-hydroxy-3-methylbut-2-en-1-yl diphosphate synthase"  
"OP8\_C16\_00410" 29140 "s59E5H2" 0 "4-hydroxy-3-methylbut-2-en-1-yl diphosphate synthase"



"OP8\_C16\_00410" 29140 "s63E6H2" 0 "4-hydroxy-3-methylbut-2-en-1-yl diphosphate synthase"  
"OP8\_C16\_00411" 29141 "s59E13H2" 0 "NH(3)-dependent NAD(+) synthetase"  
"OP8\_C16\_00411" 29141 "s59E25H2" 0 "NH(3)-dependent NAD(+) synthetase"  
"OP8\_C16\_00411" 29141 "s59E5H2" 0 "NH(3)-dependent NAD(+) synthetase"  
"OP8\_C16\_00411" 29141 "s63E6H2" 0 "NH(3)-dependent NAD(+) synthetase"  
"OP8\_C16\_00412" 29142 "s59E13H2" 0 "Glyoxylate reductase"  
"OP8\_C16\_00412" 29142 "s59E25H2" 0 "Glyoxylate reductase"  
"OP8\_C16\_00412" 29142 "s59E5H2" 0 "Glyoxylate reductase"  
"OP8\_C16\_00412" 29142 "s63E6H2" 0 "Glyoxylate reductase"  
"OP8\_C16\_00413" 29143 "s59E13H2" 0 "ParB-like nuclease domain protein"  
"OP8\_C16\_00413" 29143 "s59E25H2" 0 "ParB-like nuclease domain protein"  
"OP8\_C16\_00413" 29143 "s59E5H2" 0 "ParB-like nuclease domain protein"  
"OP8\_C16\_00413" 29143 "s63E6H2" 0 "ParB-like nuclease domain protein"  
"OP8\_C16\_00415" 29145 "s59E13H2" 0 "Biopolymer transport protein ExbD"  
"OP8\_C16\_00415" 29145 "s59E25H2" 0 "Biopolymer transport protein ExbD"  
"OP8\_C16\_00415" 29145 "s59E5H2" 0 "Biopolymer transport protein ExbD"  
"OP8\_C16\_00415" 29145 "s63E6H2" 0 "Biopolymer transport protein ExbD"  
"OP8\_C16\_00416" 29146 "s59E13H2" 0 "Biopolymer transport protein ExbB"  
"OP8\_C16\_00416" 29146 "s59E25H2" 0 "Biopolymer transport protein ExbB"  
"OP8\_C16\_00416" 29146 "s59E5H2" 0 "Biopolymer transport protein ExbB"  
"OP8\_C16\_00416" 29146 "s63E6H2" 0 "Biopolymer transport protein ExbB"  
"OP8\_C16\_00417" 29147 "s59E13H2" 0 "transport protein TonB"  
"OP8\_C16\_00417" 29147 "s59E25H2" 0 "transport protein TonB"  
"OP8\_C16\_00417" 29147 "s59E5H2" 0 "transport protein TonB"  
"OP8\_C16\_00417" 29147 "s63E6H2" 0 "transport protein TonB"  
"OP8\_C16\_00418" 29148 "s59E13H2" 0 "preprotein translocase subunit SecF"  
"OP8\_C16\_00418" 29148 "s59E25H2" 0 "preprotein translocase subunit SecF"  
"OP8\_C16\_00418" 29148 "s59E5H2" 0 "preprotein translocase subunit SecF"  
"OP8\_C16\_00418" 29148 "s63E6H2" 0 "preprotein translocase subunit SecF"  
"OP8\_C16\_00419" 29149 "s59E13H2" 0 "preprotein translocase subunit SecD"  
"OP8\_C16\_00419" 29149 "s59E25H2" 0 "preprotein translocase subunit SecD"  
"OP8\_C16\_00419" 29149 "s59E5H2" 0 "preprotein translocase subunit SecD"  
"OP8\_C16\_00419" 29149 "s63E6H2" 0 "preprotein translocase subunit SecD"  
"OP8\_C16\_00420" 29150 "s59E13H2" 0 "preprotein translocase subunit YajC"  
"OP8\_C16\_00420" 29150 "s59E25H2" 0 "preprotein translocase subunit YajC"  
"OP8\_C16\_00420" 29150 "s59E5H2" 0 "preprotein translocase subunit YajC"  
"OP8\_C16\_00420" 29150 "s63E6H2" 0 "preprotein translocase subunit YajC"  
"OP8\_C16\_00421" 29151 "s59E13H2" 0 "Queuine tRNA-ribosyltransferase"  
"OP8\_C16\_00421" 29151 "s59E25H2" 0 "Queuine tRNA-ribosyltransferase"  
"OP8\_C16\_00421" 29151 "s59E5H2" 0 "Queuine tRNA-ribosyltransferase"  
"OP8\_C16\_00421" 29151 "s63E6H2" 0 "Queuine tRNA-ribosyltransferase"  
"OP8\_C16\_00422" 29152 "s59E13H2" 0 "Ribosome-binding ATPase YchF"  
"OP8\_C16\_00422" 29152 "s59E25H2" 0 "Ribosome-binding ATPase YchF"  
"OP8\_C16\_00422" 29152 "s59E5H2" 0 "Ribosome-binding ATPase YchF"  
"OP8\_C16\_00422" 29152 "s63E6H2" 0 "Ribosome-binding ATPase YchF"  
"OP8\_C16\_00423" 29153 "s59E13H2" 0 "1,4-dihydroxy-2-naphthoate octaprenyltransferase"  
"OP8\_C16\_00423" 29153 "s59E25H2" 0 "1,4-dihydroxy-2-naphthoate octaprenyltransferase"

"OP8\_C16\_00423" 29153 "s59E5H2" 0 "1,4-dihydroxy-2-naphthoate octaprenyltransferase"  
"OP8\_C16\_00423" 29153 "s63E6H2" 0 "1,4-dihydroxy-2-naphthoate octaprenyltransferase"  
"OP8\_C16\_00424" 29154 "s59E13H2" 0 "Signal peptidase I"  
"OP8\_C16\_00424" 29154 "s59E25H2" 0 "Signal peptidase I"  
"OP8\_C16\_00424" 29154 "s59E5H2" 0 "Signal peptidase I"  
"OP8\_C16\_00424" 29154 "s63E6H2" 0 "Signal peptidase I"  
"OP8\_C16\_00425" 29155 "s59E13H2" 0 "Chlorinase"  
"OP8\_C16\_00425" 29155 "s59E25H2" 0 "Chlorinase"  
"OP8\_C16\_00425" 29155 "s59E5H2" 0 "Chlorinase"  
"OP8\_C16\_00425" 29155 "s63E6H2" 0 "Chlorinase"  
"OP8\_C16\_00426" 29156 "s59E13H2" 0 "ATP-dependent RecD-like DNA helicase"  
"OP8\_C16\_00426" 29156 "s59E25H2" 0 "ATP-dependent RecD-like DNA helicase"  
"OP8\_C16\_00426" 29156 "s59E5H2" 0 "ATP-dependent RecD-like DNA helicase"  
"OP8\_C16\_00426" 29156 "s63E6H2" 0 "ATP-dependent RecD-like DNA helicase"  
"OP8\_C16\_00427" 29157 "s59E13H2" 0 "Type II secretion system protein G precursor"  
"OP8\_C16\_00427" 29157 "s59E25H2" 0 "Type II secretion system protein G precursor"  
"OP8\_C16\_00427" 29157 "s59E5H2" 0 "Type II secretion system protein G precursor"  
"OP8\_C16\_00427" 29157 "s63E6H2" 0 "Type II secretion system protein G precursor"  
"OP8\_C16\_00428" 29158 "s59E13H2" 0 "Transcriptional regulatory protein ZraR"  
"OP8\_C16\_00428" 29158 "s59E25H2" 0 "Transcriptional regulatory protein ZraR"  
"OP8\_C16\_00428" 29158 "s59E5H2" 0.005937192 "Transcriptional regulatory protein ZraR"  
"OP8\_C16\_00428" 29158 "s63E6H2" 0 "Transcriptional regulatory protein ZraR"  
"OP8\_C16\_00429" 29159 "s59E13H2" 0 "Sporulation kinase E"  
"OP8\_C16\_00429" 29159 "s59E25H2" 0 "Sporulation kinase E"  
"OP8\_C16\_00429" 29159 "s59E5H2" 0 "Sporulation kinase E"  
"OP8\_C16\_00429" 29159 "s63E6H2" 0 "Sporulation kinase E"  
"OP8\_C16\_00430" 29160 "s59E13H2" 0 "Type II secretion system protein F"  
"OP8\_C16\_00430" 29160 "s59E25H2" 0 "Type II secretion system protein F"  
"OP8\_C16\_00430" 29160 "s59E5H2" 0 "Type II secretion system protein F"  
"OP8\_C16\_00430" 29160 "s63E6H2" 0 "Type II secretion system protein F"  
"OP8\_C16\_00431" 29161 "s59E13H2" 0 "Twitching mobility protein"  
"OP8\_C16\_00431" 29161 "s59E25H2" 0 "Twitching mobility protein"  
"OP8\_C16\_00431" 29161 "s59E5H2" 0 "Twitching mobility protein"  
"OP8\_C16\_00431" 29161 "s63E6H2" 0 "Twitching mobility protein"  
"OP8\_C16\_00432" 29162 "s59E13H2" 0 "Type II secretion system protein E"  
"OP8\_C16\_00432" 29162 "s59E25H2" 0 "Type II secretion system protein E"  
"OP8\_C16\_00432" 29162 "s59E5H2" 0 "Type II secretion system protein E"  
"OP8\_C16\_00432" 29162 "s63E6H2" 0 "Type II secretion system protein E"  
"OP8\_C16\_00435" 29165 "s59E13H2" 0 "Dipeptidase A"  
"OP8\_C16\_00435" 29165 "s59E25H2" 0 "Dipeptidase A"  
"OP8\_C16\_00435" 29165 "s59E5H2" 0 "Dipeptidase A"  
"OP8\_C16\_00435" 29165 "s63E6H2" 0 "Dipeptidase A"  
"OP8\_C16\_00436" 29166 "s59E13H2" 0 "hypothetical protein"  
"OP8\_C16\_00436" 29166 "s59E25H2" 0 "hypothetical protein"  
"OP8\_C16\_00436" 29166 "s59E5H2" 0.02391303 "hypothetical protein"  
"OP8\_C16\_00436" 29166 "s63E6H2" 0 "hypothetical protein"  
"OP8\_C16\_00437" 29167 "s59E13H2" 0 "Capsule biosynthesis protein CapC"

"OP8\_C16\_00437" 29167 "s59E25H2" 0 "Capsule biosynthesis protein CapC"  
"OP8\_C16\_00437" 29167 "s59E5H2" 0 "Capsule biosynthesis protein CapC"  
"OP8\_C16\_00437" 29167 "s63E6H2" 0 "Capsule biosynthesis protein CapC"  
"OP8\_C16\_00438" 29168 "s59E13H2" 0 "Capsule biosynthesis protein CapB"  
"OP8\_C16\_00438" 29168 "s59E25H2" 0 "Capsule biosynthesis protein CapB"  
"OP8\_C16\_00438" 29168 "s59E5H2" 0 "Capsule biosynthesis protein CapB"  
"OP8\_C16\_00438" 29168 "s63E6H2" 0 "Capsule biosynthesis protein CapB"  
"OP8\_C16\_00439" 29169 "s59E13H2" 0 "Aminopeptidase YwaD precursor"  
"OP8\_C16\_00439" 29169 "s59E25H2" 0 "Aminopeptidase YwaD precursor"  
"OP8\_C16\_00439" 29169 "s59E5H2" 0 "Aminopeptidase YwaD precursor"  
"OP8\_C16\_00439" 29169 "s63E6H2" 0 "Aminopeptidase YwaD precursor"  
"OP8\_C16\_00440" 29170 "s59E13H2" 0 "ADP-ribose pyrophosphatase"  
"OP8\_C16\_00440" 29170 "s59E25H2" 0 "ADP-ribose pyrophosphatase"  
"OP8\_C16\_00440" 29170 "s59E5H2" 0 "ADP-ribose pyrophosphatase"  
"OP8\_C16\_00440" 29170 "s63E6H2" 0 "ADP-ribose pyrophosphatase"  
"OP8\_C16\_00441" 29171 "s59E13H2" 0 "Transglutaminase-like superfamily protein"  
"OP8\_C16\_00441" 29171 "s59E25H2" 0 "Transglutaminase-like superfamily protein"  
"OP8\_C16\_00441" 29171 "s59E5H2" 0 "Transglutaminase-like superfamily protein"  
"OP8\_C16\_00441" 29171 "s63E6H2" 0 "Transglutaminase-like superfamily protein"  
"OP8\_C16\_00442" 29172 "s59E13H2" 0 "Sporulation initiation phosphotransferase F"  
"OP8\_C16\_00442" 29172 "s59E25H2" 0 "Sporulation initiation phosphotransferase F"  
"OP8\_C16\_00442" 29172 "s59E5H2" 0 "Sporulation initiation phosphotransferase F"  
"OP8\_C16\_00442" 29172 "s63E6H2" 0 "Sporulation initiation phosphotransferase F"  
"OP8\_C16\_00443" 29173 "s59E13H2" 0 "Transcriptional regulatory protein LiaR"  
"OP8\_C16\_00443" 29173 "s59E25H2" 0 "Transcriptional regulatory protein LiaR"  
"OP8\_C16\_00443" 29173 "s59E5H2" 0 "Transcriptional regulatory protein LiaR"  
"OP8\_C16\_00443" 29173 "s63E6H2" 0 "Transcriptional regulatory protein LiaR"  
"OP8\_C16\_00444" 29174 "s59E13H2" 0 "translocation protein TolB"  
"OP8\_C16\_00444" 29174 "s59E25H2" 0 "translocation protein TolB"  
"OP8\_C16\_00444" 29174 "s59E5H2" 0 "translocation protein TolB"  
"OP8\_C16\_00444" 29174 "s63E6H2" 0 "translocation protein TolB"  
"OP8\_C16\_00445" 29175 "s59E13H2" 0 "translocation protein TolB"  
"OP8\_C16\_00445" 29175 "s59E25H2" 0 "translocation protein TolB"  
"OP8\_C16\_00445" 29175 "s59E5H2" 0 "translocation protein TolB"  
"OP8\_C16\_00445" 29175 "s63E6H2" 0 "translocation protein TolB"  
"OP8\_C16\_00446" 29176 "s59E13H2" 0 "hypothetical protein"  
"OP8\_C16\_00446" 29176 "s59E25H2" 0 "hypothetical protein"  
"OP8\_C16\_00446" 29176 "s59E5H2" 0 "hypothetical protein"  
"OP8\_C16\_00446" 29176 "s63E6H2" 0 "hypothetical protein"  
"OP8\_C16\_00448" 29178 "s59E13H2" 0 "Nucleotidyltransferase domain protein"  
"OP8\_C16\_00448" 29178 "s59E25H2" 0 "Nucleotidyltransferase domain protein"  
"OP8\_C16\_00448" 29178 "s59E5H2" 0 "Nucleotidyltransferase domain protein"  
"OP8\_C16\_00448" 29178 "s63E6H2" 0 "Nucleotidyltransferase domain protein"  
"OP8\_C16\_00449" 29179 "s59E13H2" 0 "Transcriptional regulatory protein ZraR"  
"OP8\_C16\_00449" 29179 "s59E25H2" 0 "Transcriptional regulatory protein ZraR"  
"OP8\_C16\_00449" 29179 "s59E5H2" 0 "Transcriptional regulatory protein ZraR"  
"OP8\_C16\_00449" 29179 "s63E6H2" 0 "Transcriptional regulatory protein ZraR"

"OP8\_C16\_00450" 29180 "s59E13H2" 0 "Sensor protein ZraS"  
"OP8\_C16\_00450" 29180 "s59E25H2" 0 "Sensor protein ZraS"  
"OP8\_C16\_00450" 29180 "s59E5H2" 0 "Sensor protein ZraS"  
"OP8\_C16\_00450" 29180 "s63E6H2" 0 "Sensor protein ZraS"  
"OP8\_C16\_00451" 29181 "s59E13H2" 0 "Periplasmic dipeptide transport protein precursor"  
"OP8\_C16\_00451" 29181 "s59E25H2" 0 "Periplasmic dipeptide transport protein precursor"  
"OP8\_C16\_00451" 29181 "s59E5H2" 0 "Periplasmic dipeptide transport protein precursor"  
"OP8\_C16\_00451" 29181 "s63E6H2" 0 "Periplasmic dipeptide transport protein precursor"  
"OP8\_C16\_00452" 29182 "s59E13H2" 0 "Membrane dipeptidase (Peptidase family M19)"  
"OP8\_C16\_00452" 29182 "s59E25H2" 0 "Membrane dipeptidase (Peptidase family M19)"  
"OP8\_C16\_00452" 29182 "s59E5H2" 0 "Membrane dipeptidase (Peptidase family M19)"  
"OP8\_C16\_00452" 29182 "s63E6H2" 0 "Membrane dipeptidase (Peptidase family M19)"  
"OP8\_C16\_00453" 29183 "s59E13H2" 0 "Creatinine amidohydrolase"  
"OP8\_C16\_00453" 29183 "s59E25H2" 0 "Creatinine amidohydrolase"  
"OP8\_C16\_00453" 29183 "s59E5H2" 0 "Creatinine amidohydrolase"  
"OP8\_C16\_00453" 29183 "s63E6H2" 0 "Creatinine amidohydrolase"  
"OP8\_C16\_00454" 29184 "s59E13H2" 0 "Anaphase-promoting complex, cyclosome, subunit 3"  
"OP8\_C16\_00454" 29184 "s59E25H2" 0 "Anaphase-promoting complex, cyclosome, subunit 3"  
"OP8\_C16\_00454" 29184 "s59E5H2" 0 "Anaphase-promoting complex, cyclosome, subunit 3"  
"OP8\_C16\_00454" 29184 "s63E6H2" 0 "Anaphase-promoting complex, cyclosome, subunit 3"  
"OP8\_C16\_00455" 29185 "s59E13H2" 0 "hypothetical protein"  
"OP8\_C16\_00455" 29185 "s59E25H2" 0 "hypothetical protein"  
"OP8\_C16\_00455" 29185 "s59E5H2" 0 "hypothetical protein"  
"OP8\_C16\_00455" 29185 "s63E6H2" 0 "hypothetical protein"  
"OP8\_C16\_00456" 29186 "s59E13H2" 0 "hypothetical protein"  
"OP8\_C16\_00456" 29186 "s59E25H2" 0 "hypothetical protein"  
"OP8\_C16\_00456" 29186 "s59E5H2" 0 "hypothetical protein"  
"OP8\_C16\_00456" 29186 "s63E6H2" 0 "hypothetical protein"  
"OP8\_C16\_00457" 29187 "s59E13H2" 0 "hypothetical protein"  
"OP8\_C16\_00457" 29187 "s59E25H2" 0 "hypothetical protein"  
"OP8\_C16\_00457" 29187 "s59E5H2" 0 "hypothetical protein"  
"OP8\_C16\_00457" 29187 "s63E6H2" 0 "hypothetical protein"  
"OP8\_C16\_00459" 29189 "s59E13H2" 0 "hypothetical protein"  
"OP8\_C16\_00459" 29189 "s59E25H2" 0 "hypothetical protein"  
"OP8\_C16\_00459" 29189 "s59E5H2" 0 "hypothetical protein"  
"OP8\_C16\_00459" 29189 "s63E6H2" 0 "hypothetical protein"  
"OP8\_C16\_00460" 29190 "s59E13H2" 0 "Thermostable neutral protease NprT precursor"  
"OP8\_C16\_00460" 29190 "s59E25H2" 0 "Thermostable neutral protease NprT precursor"  
"OP8\_C16\_00460" 29190 "s59E5H2" 0 "Thermostable neutral protease NprT precursor"  
"OP8\_C16\_00460" 29190 "s63E6H2" 0 "Thermostable neutral protease NprT precursor"  
"OP8\_C16\_00461" 29191 "s59E13H2" 0 "hypothetical protein"  
"OP8\_C16\_00461" 29191 "s59E25H2" 0 "hypothetical protein"  
"OP8\_C16\_00461" 29191 "s59E5H2" 0 "hypothetical protein"  
"OP8\_C16\_00461" 29191 "s63E6H2" 0 "hypothetical protein"  
"OP8\_C16\_00462" 29192 "s59E13H2" 0 "RNA recognition motif. (a.k.a. RRM, RBD, or RNP domain)"  
"OP8\_C16\_00462" 29192 "s59E25H2" 0 "RNA recognition motif. (a.k.a. RRM, RBD, or RNP domain)"  
"OP8\_C16\_00462" 29192 "s59E5H2" 0 "RNA recognition motif. (a.k.a. RRM, RBD, or RNP domain)"

"OP8\_C16\_00462" 29192 "s63E6H2" 0 "RNA recognition motif. (a.k.a. RRM, RBD, or RNP domain)"  
"OP8\_C16\_00463" 29193 "s59E13H2" 0 "hypothetical protein"  
"OP8\_C16\_00463" 29193 "s59E25H2" 0 "hypothetical protein"  
"OP8\_C16\_00463" 29193 "s59E5H2" 0 "hypothetical protein"  
"OP8\_C16\_00463" 29193 "s63E6H2" 0 "hypothetical protein"  
"OP8\_C16\_00464" 29194 "s59E13H2" 0 "Chagasin family peptidase inhibitor I42"  
"OP8\_C16\_00464" 29194 "s59E25H2" 0 "Chagasin family peptidase inhibitor I42"  
"OP8\_C16\_00464" 29194 "s59E5H2" 0 "Chagasin family peptidase inhibitor I42"  
"OP8\_C16\_00464" 29194 "s63E6H2" 0 "Chagasin family peptidase inhibitor I42"  
"OP8\_C16\_00465" 29195 "s59E13H2" 0 "hypothetical protein"  
"OP8\_C16\_00465" 29195 "s59E25H2" 0 "hypothetical protein"  
"OP8\_C16\_00465" 29195 "s59E5H2" 0 "hypothetical protein"  
"OP8\_C16\_00465" 29195 "s63E6H2" 0 "hypothetical protein"  
"OP8\_C16\_00467" 29197 "s59E13H2" 0 "hypothetical protein"  
"OP8\_C16\_00467" 29197 "s59E25H2" 0 "hypothetical protein"  
"OP8\_C16\_00467" 29197 "s59E5H2" 0 "hypothetical protein"  
"OP8\_C16\_00467" 29197 "s63E6H2" 0 "hypothetical protein"  
"OP8\_C16\_00468" 29198 "s59E13H2" 0 "hypothetical protein"  
"OP8\_C16\_00468" 29198 "s59E25H2" 0 "hypothetical protein"  
"OP8\_C16\_00468" 29198 "s59E5H2" 0 "hypothetical protein"  
"OP8\_C16\_00468" 29198 "s63E6H2" 0 "hypothetical protein"  
"OP8\_C16\_00469" 29199 "s59E13H2" 0 "hypothetical protein"  
"OP8\_C16\_00469" 29199 "s59E25H2" 0 "hypothetical protein"  
"OP8\_C16\_00469" 29199 "s59E5H2" 0 "hypothetical protein"  
"OP8\_C16\_00469" 29199 "s63E6H2" 0 "hypothetical protein"  
"OP8\_C16\_00470" 29200 "s59E13H2" 0 "hypothetical protein"  
"OP8\_C16\_00470" 29200 "s59E25H2" 0 "hypothetical protein"  
"OP8\_C16\_00470" 29200 "s59E5H2" 0 "hypothetical protein"  
"OP8\_C16\_00470" 29200 "s63E6H2" 0 "hypothetical protein"  
"OP8\_C16\_00471" 29201 "s59E13H2" 0 "hypothetical protein"  
"OP8\_C16\_00471" 29201 "s59E25H2" 0 "hypothetical protein"  
"OP8\_C16\_00471" 29201 "s59E5H2" 0 "hypothetical protein"  
"OP8\_C16\_00471" 29201 "s63E6H2" 0 "hypothetical protein"  
"OP8\_C16\_00472" 29202 "s59E13H2" 0 "10 kDa chaperonin 1"  
"OP8\_C16\_00472" 29202 "s59E25H2" 0 "10 kDa chaperonin 1"  
"OP8\_C16\_00472" 29202 "s59E5H2" 0 "10 kDa chaperonin 1"  
"OP8\_C16\_00472" 29202 "s63E6H2" 0 "10 kDa chaperonin 1"  
"OP8\_C16\_00474" 29204 "s59E13H2" 0 "Transposase DDE domain protein"  
"OP8\_C16\_00474" 29204 "s59E25H2" 0 "Transposase DDE domain protein"  
"OP8\_C16\_00474" 29204 "s59E5H2" 0 "Transposase DDE domain protein"  
"OP8\_C16\_00474" 29204 "s63E6H2" 0 "Transposase DDE domain protein"  
"OP8\_C16\_00475" 29205 "s59E13H2" 0 "Sensor protein ZraS"  
"OP8\_C16\_00475" 29205 "s59E25H2" 0 "Sensor protein ZraS"  
"OP8\_C16\_00475" 29205 "s59E5H2" 0 "Sensor protein ZraS"  
"OP8\_C16\_00475" 29205 "s63E6H2" 0 "Sensor protein ZraS"  
"OP8\_C16\_00476" 29206 "s59E13H2" 0 "Transcriptional regulatory protein ZraR"  
"OP8\_C16\_00476" 29206 "s59E25H2" 0 "Transcriptional regulatory protein ZraR"

"OP8\_C16\_00476" 29206 "s59E5H2" 0 "Transcriptional regulatory protein ZraR"  
"OP8\_C16\_00476" 29206 "s63E6H2" 0 "Transcriptional regulatory protein ZraR"  
"OP8\_C16\_00477" 29207 "s59E13H2" 0 "Sulfhydrogenase 1 subunit beta"  
"OP8\_C16\_00477" 29207 "s59E25H2" 0 "Sulfhydrogenase 1 subunit beta"  
"OP8\_C16\_00477" 29207 "s59E5H2" 0 "Sulfhydrogenase 1 subunit beta"  
"OP8\_C16\_00477" 29207 "s63E6H2" 0 "Sulfhydrogenase 1 subunit beta"  
"OP8\_C16\_00478" 29208 "s59E13H2" 0 "Sulfhydrogenase 2 subunit gamma"  
"OP8\_C16\_00478" 29208 "s59E25H2" 0 "Sulfhydrogenase 2 subunit gamma"  
"OP8\_C16\_00478" 29208 "s59E5H2" 0 "Sulfhydrogenase 2 subunit gamma"  
"OP8\_C16\_00478" 29208 "s63E6H2" 0 "Sulfhydrogenase 2 subunit gamma"  
"OP8\_C16\_00479" 29209 "s59E13H2" 0 "Sulfhydrogenase 1 subunit delta"  
"OP8\_C16\_00479" 29209 "s59E25H2" 0 "Sulfhydrogenase 1 subunit delta"  
"OP8\_C16\_00479" 29209 "s59E5H2" 0 "Sulfhydrogenase 1 subunit delta"  
"OP8\_C16\_00479" 29209 "s63E6H2" 0 "Sulfhydrogenase 1 subunit delta"  
"OP8\_C16\_00480" 29210 "s59E13H2" 0 "Sulfhydrogenase 1 subunit alpha"  
"OP8\_C16\_00480" 29210 "s59E25H2" 0 "Sulfhydrogenase 1 subunit alpha"  
"OP8\_C16\_00480" 29210 "s59E5H2" 0 "Sulfhydrogenase 1 subunit alpha"  
"OP8\_C16\_00480" 29210 "s63E6H2" 0 "Sulfhydrogenase 1 subunit alpha"  
"OP8\_C16\_00481" 29211 "s59E13H2" 0 "Transcriptional regulatory protein ZraR"  
"OP8\_C16\_00481" 29211 "s59E25H2" 0 "Transcriptional regulatory protein ZraR"  
"OP8\_C16\_00481" 29211 "s59E5H2" 0 "Transcriptional regulatory protein ZraR"  
"OP8\_C16\_00481" 29211 "s63E6H2" 0 "Transcriptional regulatory protein ZraR"  
"OP8\_C16\_00482" 29212 "s59E13H2" 0 "Alkaline phosphatase synthesis transcriptional regulatory protein PhoP"  
"OP8\_C16\_00482" 29212 "s59E25H2" 0 "Alkaline phosphatase synthesis transcriptional regulatory protein PhoP"  
"OP8\_C16\_00482" 29212 "s59E5H2" 0 "Alkaline phosphatase synthesis transcriptional regulatory protein PhoP"  
"OP8\_C16\_00482" 29212 "s63E6H2" 0 "Alkaline phosphatase synthesis transcriptional regulatory protein PhoP"  
"OP8\_C16\_00484" 29214 "s59E13H2" 0 "Alkaline phosphatase synthesis sensor protein PhoR"  
"OP8\_C16\_00484" 29214 "s59E25H2" 0 "Alkaline phosphatase synthesis sensor protein PhoR"  
"OP8\_C16\_00484" 29214 "s59E5H2" 0 "Alkaline phosphatase synthesis sensor protein PhoR"  
"OP8\_C16\_00484" 29214 "s63E6H2" 0 "Alkaline phosphatase synthesis sensor protein PhoR"  
"OP8\_C16\_00485" 29215 "s59E13H2" 0 "hypothetical protein"  
"OP8\_C16\_00485" 29215 "s59E25H2" 0 "hypothetical protein"  
"OP8\_C16\_00485" 29215 "s59E5H2" 0 "hypothetical protein"  
"OP8\_C16\_00485" 29215 "s63E6H2" 0 "hypothetical protein"  
"OP8\_C16\_00486" 29216 "s59E13H2" 0 "hypothetical protein"  
"OP8\_C16\_00486" 29216 "s59E25H2" 0 "hypothetical protein"  
"OP8\_C16\_00486" 29216 "s59E5H2" 0 "hypothetical protein"  
"OP8\_C16\_00486" 29216 "s63E6H2" 0 "hypothetical protein"  
"OP8\_C16\_00487" 29217 "s59E13H2" 0 "hypothetical protein"  
"OP8\_C16\_00487" 29217 "s59E25H2" 0 "hypothetical protein"  
"OP8\_C16\_00487" 29217 "s59E5H2" 0 "hypothetical protein"  
"OP8\_C16\_00487" 29217 "s63E6H2" 0 "hypothetical protein"  
"OP8\_C16\_00488" 29218 "s59E13H2" 0 "Sulfite exporter TauE/SafE"  
"OP8\_C16\_00488" 29218 "s59E25H2" 0 "Sulfite exporter TauE/SafE"  
"OP8\_C16\_00488" 29218 "s59E5H2" 0 "Sulfite exporter TauE/SafE"  
"OP8\_C16\_00488" 29218 "s63E6H2" 0 "Sulfite exporter TauE/SafE"  
"OP8\_C16\_00489" 29219 "s59E13H2" 0 "putative lyase"

"OP8\_C16\_00489" 29219 "s59E25H2" 0 "putative lyase"  
"OP8\_C16\_00489" 29219 "s59E5H2" 0 "putative lyase"  
"OP8\_C16\_00489" 29219 "s63E6H2" 0 "putative lyase"  
"OP8\_C16\_00490" 29220 "s59E13H2" 0 "hypothetical protein"  
"OP8\_C16\_00490" 29220 "s59E25H2" 0 "hypothetical protein"  
"OP8\_C16\_00490" 29220 "s59E5H2" 0 "hypothetical protein"  
"OP8\_C16\_00490" 29220 "s63E6H2" 0 "hypothetical protein"  
"OP8\_C16\_00491" 29221 "s59E13H2" 0 "ECF RNA polymerase sigma factor SigW"  
"OP8\_C16\_00491" 29221 "s59E25H2" 0 "ECF RNA polymerase sigma factor SigW"  
"OP8\_C16\_00491" 29221 "s59E5H2" 0 "ECF RNA polymerase sigma factor SigW"  
"OP8\_C16\_00491" 29221 "s63E6H2" 0 "ECF RNA polymerase sigma factor SigW"  
"OP8\_C16\_00492" 29222 "s59E13H2" 0 "Bacterial leucyl aminopeptidase precursor"  
"OP8\_C16\_00492" 29222 "s59E25H2" 0 "Bacterial leucyl aminopeptidase precursor"  
"OP8\_C16\_00492" 29222 "s59E5H2" 0 "Bacterial leucyl aminopeptidase precursor"  
"OP8\_C16\_00492" 29222 "s63E6H2" 0 "Bacterial leucyl aminopeptidase precursor"  
"OP8\_C16\_00493" 29223 "s59E13H2" 0 "Protein-arginine deiminase (PAD)"  
"OP8\_C16\_00493" 29223 "s59E25H2" 0 "Protein-arginine deiminase (PAD)"  
"OP8\_C16\_00493" 29223 "s59E5H2" 0 "Protein-arginine deiminase (PAD)"  
"OP8\_C16\_00493" 29223 "s63E6H2" 0 "Protein-arginine deiminase (PAD)"  
"OP8\_C16\_00494" 29224 "s59E13H2" 0.134137 "hypothetical protein"  
"OP8\_C16\_00494" 29224 "s59E25H2" 0 "hypothetical protein"  
"OP8\_C16\_00494" 29224 "s59E5H2" 0.1785354 "hypothetical protein"  
"OP8\_C16\_00494" 29224 "s63E6H2" 0 "hypothetical protein"  
"OP8\_C16\_00495" 29225 "s59E13H2" 0 "Zinc carboxypeptidase"  
"OP8\_C16\_00495" 29225 "s59E25H2" 0 "Zinc carboxypeptidase"  
"OP8\_C16\_00495" 29225 "s59E5H2" 0 "Zinc carboxypeptidase"  
"OP8\_C16\_00495" 29225 "s63E6H2" 0 "Zinc carboxypeptidase"  
"OP8\_C16\_00496" 29226 "s59E13H2" 0 "N-substituted formamide deformylase precursor"  
"OP8\_C16\_00496" 29226 "s59E25H2" 0 "N-substituted formamide deformylase precursor"  
"OP8\_C16\_00496" 29226 "s59E5H2" 0 "N-substituted formamide deformylase precursor"  
"OP8\_C16\_00496" 29226 "s63E6H2" 0 "N-substituted formamide deformylase precursor"  
"OP8\_C16\_00497" 29227 "s59E13H2" 0 "GYD domain protein"  
"OP8\_C16\_00497" 29227 "s59E25H2" 0 "GYD domain protein"  
"OP8\_C16\_00497" 29227 "s59E5H2" 0 "GYD domain protein"  
"OP8\_C16\_00497" 29227 "s63E6H2" 0 "GYD domain protein"  
"OP8\_C16\_00498" 29228 "s59E13H2" 0 "Aspartate--ammonia ligase"  
"OP8\_C16\_00498" 29228 "s59E25H2" 0 "Aspartate--ammonia ligase"  
"OP8\_C16\_00498" 29228 "s59E5H2" 0 "Aspartate--ammonia ligase"  
"OP8\_C16\_00498" 29228 "s63E6H2" 0 "Aspartate--ammonia ligase"  
"OP8\_C16\_00499" 29229 "s59E13H2" 0 "ATP-dependent Clp protease proteolytic subunit 2"  
"OP8\_C16\_00499" 29229 "s59E25H2" 0 "ATP-dependent Clp protease proteolytic subunit 2"  
"OP8\_C16\_00499" 29229 "s59E5H2" 0 "ATP-dependent Clp protease proteolytic subunit 2"  
"OP8\_C16\_00499" 29229 "s63E6H2" 0 "ATP-dependent Clp protease proteolytic subunit 2"  
"OP8\_C16\_00500" 29230 "s59E13H2" 0 "hypothetical protein"  
"OP8\_C16\_00500" 29230 "s59E25H2" 0 "hypothetical protein"  
"OP8\_C16\_00500" 29230 "s59E5H2" 0 "hypothetical protein"  
"OP8\_C16\_00500" 29230 "s63E6H2" 0 "hypothetical protein"

"OP8\_C16\_00501" 29231 "s59E13H2" 0 "Trimethylamine corrinoid protein"  
"OP8\_C16\_00501" 29231 "s59E25H2" 0 "Trimethylamine corrinoid protein"  
"OP8\_C16\_00501" 29231 "s59E5H2" 0 "Trimethylamine corrinoid protein"  
"OP8\_C16\_00501" 29231 "s63E6H2" 0 "Trimethylamine corrinoid protein"  
"OP8\_C16\_00502" 29232 "s59E13H2" 0 "Vitamin B12 dependent methionine synthase, activation domain"  
"OP8\_C16\_00502" 29232 "s59E25H2" 0 "Vitamin B12 dependent methionine synthase, activation domain"  
"OP8\_C16\_00502" 29232 "s59E5H2" 0 "Vitamin B12 dependent methionine synthase, activation domain"  
"OP8\_C16\_00502" 29232 "s63E6H2" 0 "Vitamin B12 dependent methionine synthase, activation domain"  
"OP8\_C16\_00503" 29233 "s59E13H2" 0 "Trimethylamine methyltransferase MttB"  
"OP8\_C16\_00503" 29233 "s59E25H2" 0 "Trimethylamine methyltransferase MttB"  
"OP8\_C16\_00503" 29233 "s59E5H2" 0 "Trimethylamine methyltransferase MttB"  
"OP8\_C16\_00503" 29233 "s63E6H2" 0 "Trimethylamine methyltransferase MttB"  
"OP8\_C16\_00504" 29234 "s59E13H2" 0 "Ycf48-like protein"  
"OP8\_C16\_00504" 29234 "s59E25H2" 0 "Ycf48-like protein"  
"OP8\_C16\_00504" 29234 "s59E5H2" 0 "Ycf48-like protein"  
"OP8\_C16\_00504" 29234 "s63E6H2" 0 "Ycf48-like protein"  
"OP8\_C16\_00505" 29235 "s59E13H2" 0 "hypothetical protein"  
"OP8\_C16\_00505" 29235 "s59E25H2" 0 "hypothetical protein"  
"OP8\_C16\_00505" 29235 "s59E5H2" 0.0005733269 "hypothetical protein"  
"OP8\_C16\_00505" 29235 "s63E6H2" 0 "hypothetical protein"  
"OP8\_C16\_00506" 29236 "s59E13H2" 0 "peptidase PmbA"  
"OP8\_C16\_00506" 29236 "s59E25H2" 0 "peptidase PmbA"  
"OP8\_C16\_00506" 29236 "s59E5H2" 0 "peptidase PmbA"  
"OP8\_C16\_00506" 29236 "s63E6H2" 0 "peptidase PmbA"  
"OP8\_C16\_00507" 29237 "s59E13H2" 0 "protease TldD"  
"OP8\_C16\_00507" 29237 "s59E25H2" 0 "protease TldD"  
"OP8\_C16\_00507" 29237 "s59E5H2" 0 "protease TldD"  
"OP8\_C16\_00507" 29237 "s63E6H2" 0 "protease TldD"  
"OP8\_C16\_00508" 29238 "s59E13H2" 0 "hypothetical protein"  
"OP8\_C16\_00508" 29238 "s59E25H2" 0 "hypothetical protein"  
"OP8\_C16\_00508" 29238 "s59E5H2" 0 "hypothetical protein"  
"OP8\_C16\_00508" 29238 "s63E6H2" 0 "hypothetical protein"  
"OP8\_C16\_00509" 29239 "s59E13H2" 0 "hypothetical protein"  
"OP8\_C16\_00509" 29239 "s59E25H2" 0 "hypothetical protein"  
"OP8\_C16\_00509" 29239 "s59E5H2" 0 "hypothetical protein"  
"OP8\_C16\_00509" 29239 "s63E6H2" 0 "hypothetical protein"  
"OP8\_C16\_00510" 29240 "s59E13H2" 0 "hypothetical protein"  
"OP8\_C16\_00510" 29240 "s59E25H2" 0 "hypothetical protein"  
"OP8\_C16\_00510" 29240 "s59E5H2" 0 "hypothetical protein"  
"OP8\_C16\_00510" 29240 "s63E6H2" 0 "hypothetical protein"  
"OP8\_C16\_00511" 29241 "s59E13H2" 0 "Peptidase family M1"  
"OP8\_C16\_00511" 29241 "s59E25H2" 0 "Peptidase family M1"  
"OP8\_C16\_00511" 29241 "s59E5H2" 0 "Peptidase family M1"  
"OP8\_C16\_00511" 29241 "s63E6H2" 0 "Peptidase family M1"  
"OP8\_C16\_00512" 29242 "s59E13H2" 0 "putative permease"  
"OP8\_C16\_00512" 29242 "s59E25H2" 0 "putative permease"  
"OP8\_C16\_00512" 29242 "s59E5H2" 0 "putative permease"



"OP8\_C16\_00512" 29242 "s63E6H2" 0 "putative permease"  
"OP8\_C16\_00513" 29243 "s59E13H2" 0 "PD-(D/E)XK nuclease superfamily protein"  
"OP8\_C16\_00513" 29243 "s59E25H2" 0 "PD-(D/E)XK nuclease superfamily protein"  
"OP8\_C16\_00513" 29243 "s59E5H2" 0 "PD-(D/E)XK nuclease superfamily protein"  
"OP8\_C16\_00513" 29243 "s63E6H2" 0 "PD-(D/E)XK nuclease superfamily protein"  
"OP8\_C16\_00514" 29244 "s59E13H2" 0 "hypothetical protein"  
"OP8\_C16\_00514" 29244 "s59E25H2" 0 "hypothetical protein"  
"OP8\_C16\_00514" 29244 "s59E5H2" 0 "hypothetical protein"  
"OP8\_C16\_00514" 29244 "s63E6H2" 0 "hypothetical protein"  
"OP8\_C16\_00515" 29245 "s59E13H2" 0 "hypothetical protein"  
"OP8\_C16\_00515" 29245 "s59E25H2" 0 "hypothetical protein"  
"OP8\_C16\_00515" 29245 "s59E5H2" 0 "hypothetical protein"  
"OP8\_C16\_00515" 29245 "s63E6H2" 0 "hypothetical protein"  
"OP8\_C16\_00516" 29246 "s59E13H2" 0 "Putative DNA ligase-like protein/MT0965"  
"OP8\_C16\_00516" 29246 "s59E25H2" 0 "Putative DNA ligase-like protein/MT0965"  
"OP8\_C16\_00516" 29246 "s59E5H2" 0 "Putative DNA ligase-like protein/MT0965"  
"OP8\_C16\_00516" 29246 "s63E6H2" 0 "Putative DNA ligase-like protein/MT0965"  
"OP8\_C16\_00517" 29247 "s59E13H2" 0 "putative quorum-quenching lactonase YtnP"  
"OP8\_C16\_00517" 29247 "s59E25H2" 0 "putative quorum-quenching lactonase YtnP"  
"OP8\_C16\_00517" 29247 "s59E5H2" 0 "putative quorum-quenching lactonase YtnP"  
"OP8\_C16\_00517" 29247 "s63E6H2" 0 "putative quorum-quenching lactonase YtnP"  
"OP8\_C16\_00518" 29248 "s59E13H2" 0 "NADH-quinone oxidoreductase subunit I"  
"OP8\_C16\_00518" 29248 "s59E25H2" 0 "NADH-quinone oxidoreductase subunit I"  
"OP8\_C16\_00518" 29248 "s59E5H2" 0 "NADH-quinone oxidoreductase subunit I"  
"OP8\_C16\_00518" 29248 "s63E6H2" 0 "NADH-quinone oxidoreductase subunit I"  
"OP8\_C16\_00519" 29249 "s59E13H2" 0 "NADH-quinone oxidoreductase subunit H"  
"OP8\_C16\_00519" 29249 "s59E25H2" 0 "NADH-quinone oxidoreductase subunit H"  
"OP8\_C16\_00519" 29249 "s59E5H2" 0 "NADH-quinone oxidoreductase subunit H"  
"OP8\_C16\_00519" 29249 "s63E6H2" 0 "NADH-quinone oxidoreductase subunit H"  
"OP8\_C16\_00520" 29250 "s59E13H2" 0 "NADH-quinone oxidoreductase subunit 3"  
"OP8\_C16\_00520" 29250 "s59E25H2" 0 "NADH-quinone oxidoreductase subunit 3"  
"OP8\_C16\_00520" 29250 "s59E5H2" 0 "NADH-quinone oxidoreductase subunit 3"  
"OP8\_C16\_00520" 29250 "s63E6H2" 0 "NADH-quinone oxidoreductase subunit 3"  
"OP8\_C16\_00521" 29251 "s59E13H2" 0 "NADH-quinone oxidoreductase subunit 1"  
"OP8\_C16\_00521" 29251 "s59E25H2" 0 "NADH-quinone oxidoreductase subunit 1"  
"OP8\_C16\_00521" 29251 "s59E5H2" 0 "NADH-quinone oxidoreductase subunit 1"  
"OP8\_C16\_00521" 29251 "s63E6H2" 0 "NADH-quinone oxidoreductase subunit 1"  
"OP8\_C16\_00522" 29252 "s59E13H2" 0 "NADH-quinone oxidoreductase subunit 2"  
"OP8\_C16\_00522" 29252 "s59E25H2" 0 "NADH-quinone oxidoreductase subunit 2"  
"OP8\_C16\_00522" 29252 "s59E5H2" 0 "NADH-quinone oxidoreductase subunit 2"  
"OP8\_C16\_00522" 29252 "s63E6H2" 0 "NADH-quinone oxidoreductase subunit 2"  
"OP8\_C16\_00523" 29253 "s59E13H2" 0 "NADH-quinone oxidoreductase subunit 4"  
"OP8\_C16\_00523" 29253 "s59E25H2" 0 "NADH-quinone oxidoreductase subunit 4"  
"OP8\_C16\_00523" 29253 "s59E5H2" 0 "NADH-quinone oxidoreductase subunit 4"  
"OP8\_C16\_00523" 29253 "s63E6H2" 0 "NADH-quinone oxidoreductase subunit 4"  
"OP8\_C16\_00524" 29254 "s59E13H2" 0 "NADH-quinone oxidoreductase subunit C 1"  
"OP8\_C16\_00524" 29254 "s59E25H2" 0 "NADH-quinone oxidoreductase subunit C 1"

"OP8\_C16\_00524" 29254 "s59E5H2" 0 "NADH-quinone oxidoreductase subunit C 1"  
"OP8\_C16\_00524" 29254 "s63E6H2" 0 "NADH-quinone oxidoreductase subunit C 1"  
"OP8\_C16\_00525" 29255 "s59E13H2" 0 "NAD(P)H-quinone oxidoreductase subunit K"  
"OP8\_C16\_00525" 29255 "s59E25H2" 0 "NAD(P)H-quinone oxidoreductase subunit K"  
"OP8\_C16\_00525" 29255 "s59E5H2" 0 "NAD(P)H-quinone oxidoreductase subunit K"  
"OP8\_C16\_00525" 29255 "s63E6H2" 0 "NAD(P)H-quinone oxidoreductase subunit K"  
"OP8\_C16\_00526" 29256 "s59E13H2" 0 "NAD(P)H-quinone oxidoreductase subunit 3"  
"OP8\_C16\_00526" 29256 "s59E25H2" 0 "NAD(P)H-quinone oxidoreductase subunit 3"  
"OP8\_C16\_00526" 29256 "s59E5H2" 0 "NAD(P)H-quinone oxidoreductase subunit 3"  
"OP8\_C16\_00526" 29256 "s63E6H2" 0 "NAD(P)H-quinone oxidoreductase subunit 3"  
"OP8\_C16\_00527" 29257 "s59E13H2" 0 "Dihydrolipoyl dehydrogenase"  
"OP8\_C16\_00527" 29257 "s59E25H2" 0 "Dihydrolipoyl dehydrogenase"  
"OP8\_C16\_00527" 29257 "s59E5H2" 0 "Dihydrolipoyl dehydrogenase"  
"OP8\_C16\_00527" 29257 "s63E6H2" 0 "Dihydrolipoyl dehydrogenase"  
"OP8\_C16\_00528" 29258 "s59E13H2" 0 "hypothetical protein"  
"OP8\_C16\_00528" 29258 "s59E25H2" 0 "hypothetical protein"  
"OP8\_C16\_00528" 29258 "s59E5H2" 0 "hypothetical protein"  
"OP8\_C16\_00528" 29258 "s63E6H2" 0 "hypothetical protein"  
"OP8\_C16\_00529" 29259 "s59E13H2" 0 "CoB--CoM heterodisulfide reductase iron-sulfur subunit D"  
"OP8\_C16\_00529" 29259 "s59E25H2" 0 "CoB--CoM heterodisulfide reductase iron-sulfur subunit D"  
"OP8\_C16\_00529" 29259 "s59E5H2" 0 "CoB--CoM heterodisulfide reductase iron-sulfur subunit D"  
"OP8\_C16\_00529" 29259 "s63E6H2" 0 "CoB--CoM heterodisulfide reductase iron-sulfur subunit D"  
"OP8\_C16\_00530" 29260 "s59E13H2" 0 "L-allo-threonine aldolase"  
"OP8\_C16\_00530" 29260 "s59E25H2" 0 "L-allo-threonine aldolase"  
"OP8\_C16\_00530" 29260 "s59E5H2" 0 "L-allo-threonine aldolase"  
"OP8\_C16\_00530" 29260 "s63E6H2" 0 "L-allo-threonine aldolase"  
"OP8\_C16\_00531" 29261 "s59E13H2" 0 "Serine/threonine-protein kinase PK-1"  
"OP8\_C16\_00531" 29261 "s59E25H2" 0 "Serine/threonine-protein kinase PK-1"  
"OP8\_C16\_00531" 29261 "s59E5H2" 0 "Serine/threonine-protein kinase PK-1"  
"OP8\_C16\_00531" 29261 "s63E6H2" 0 "Serine/threonine-protein kinase PK-1"  
"OP8\_C16\_00533" 29263 "s59E13H2" 0 "dTDP-glucose 4,6-dehydratase"  
"OP8\_C16\_00533" 29263 "s59E25H2" 0 "dTDP-glucose 4,6-dehydratase"  
"OP8\_C16\_00533" 29263 "s59E5H2" 0 "dTDP-glucose 4,6-dehydratase"  
"OP8\_C16\_00533" 29263 "s63E6H2" 0 "dTDP-glucose 4,6-dehydratase"  
"OP8\_C16\_00534" 29264 "s59E13H2" 0 "Outer membrane protein assembly factor BamD precursor"  
"OP8\_C16\_00534" 29264 "s59E25H2" 0 "Outer membrane protein assembly factor BamD precursor"  
"OP8\_C16\_00534" 29264 "s59E5H2" 0 "Outer membrane protein assembly factor BamD precursor"  
"OP8\_C16\_00534" 29264 "s63E6H2" 0 "Outer membrane protein assembly factor BamD precursor"  
"OP8\_C16\_00535" 29265 "s59E13H2" 0 "hypothetical protein"  
"OP8\_C16\_00535" 29265 "s59E25H2" 0 "hypothetical protein"  
"OP8\_C16\_00535" 29265 "s59E5H2" 0 "hypothetical protein"  
"OP8\_C16\_00535" 29265 "s63E6H2" 0 "hypothetical protein"  
"OP8\_C16\_00536" 29266 "s59E13H2" 0 "Thermophilic serine proteinase precursor"  
"OP8\_C16\_00536" 29266 "s59E25H2" 0 "Thermophilic serine proteinase precursor"  
"OP8\_C16\_00536" 29266 "s59E5H2" 0 "Thermophilic serine proteinase precursor"  
"OP8\_C16\_00536" 29266 "s63E6H2" 0 "Thermophilic serine proteinase precursor"  
"OP8\_C16\_00537" 29267 "s59E13H2" 0 "DNA repair protein RecN"

"OP8\_C16\_00537" 29267 "s59E25H2" 0 "DNA repair protein RecN"  
"OP8\_C16\_00537" 29267 "s59E5H2" 3.839368e-05 "DNA repair protein RecN"  
"OP8\_C16\_00537" 29267 "s63E6H2" 0 "DNA repair protein RecN"  
"OP8\_C16\_00538" 29268 "s59E13H2" 0 "Putative redox-active protein (C\_GCAxxG\_C\_C)"  
"OP8\_C16\_00538" 29268 "s59E25H2" 0 "Putative redox-active protein (C\_GCAxxG\_C\_C)"  
"OP8\_C16\_00538" 29268 "s59E5H2" 0 "Putative redox-active protein (C\_GCAxxG\_C\_C)"  
"OP8\_C16\_00538" 29268 "s63E6H2" 0 "Putative redox-active protein (C\_GCAxxG\_C\_C)"  
"OP8\_C16\_00539" 29269 "s59E13H2" 0 "(Dimethylallyl)adenosine tRNA methylthiotransferase MiaB"  
"OP8\_C16\_00539" 29269 "s59E25H2" 0 "(Dimethylallyl)adenosine tRNA methylthiotransferase MiaB"  
"OP8\_C16\_00539" 29269 "s59E5H2" 0 "(Dimethylallyl)adenosine tRNA methylthiotransferase MiaB"  
"OP8\_C16\_00539" 29269 "s63E6H2" 0 "(Dimethylallyl)adenosine tRNA methylthiotransferase MiaB"  
"OP8\_C16\_00540" 29270 "s59E13H2" 0 "PilZ domain protein"  
"OP8\_C16\_00540" 29270 "s59E25H2" 0 "PilZ domain protein"  
"OP8\_C16\_00540" 29270 "s59E5H2" 0 "PilZ domain protein"  
"OP8\_C16\_00540" 29270 "s63E6H2" 0 "PilZ domain protein"  
"OP8\_C16\_00541" 29271 "s59E13H2" 0 "Outer membrane protein assembly factor BamA"  
"OP8\_C16\_00541" 29271 "s59E25H2" 0 "Outer membrane protein assembly factor BamA"  
"OP8\_C16\_00541" 29271 "s59E5H2" 0 "Outer membrane protein assembly factor BamA"  
"OP8\_C16\_00541" 29271 "s63E6H2" 0 "Outer membrane protein assembly factor BamA"  
"OP8\_C16\_00542" 29272 "s59E13H2" 0 "hypothetical protein"  
"OP8\_C16\_00542" 29272 "s59E25H2" 0 "hypothetical protein"  
"OP8\_C16\_00542" 29272 "s59E5H2" 0 "hypothetical protein"  
"OP8\_C16\_00542" 29272 "s63E6H2" 0 "hypothetical protein"  
"OP8\_C16\_00543" 29273 "s59E13H2" 0 "Septum site-determining protein MinD"  
"OP8\_C16\_00543" 29273 "s59E25H2" 0 "Septum site-determining protein MinD"  
"OP8\_C16\_00543" 29273 "s59E5H2" 0 "Septum site-determining protein MinD"  
"OP8\_C16\_00543" 29273 "s63E6H2" 0 "Septum site-determining protein MinD"  
"OP8\_C16\_00544" 29274 "s59E13H2" 0 "Putative K(+)-stimulated pyrophosphate-energized sodium pump"  
"OP8\_C16\_00544" 29274 "s59E25H2" 0 "Putative K(+)-stimulated pyrophosphate-energized sodium pump"  
"OP8\_C16\_00544" 29274 "s59E5H2" 0 "Putative K(+)-stimulated pyrophosphate-energized sodium pump"  
"OP8\_C16\_00544" 29274 "s63E6H2" 0 "Putative K(+)-stimulated pyrophosphate-energized sodium pump"  
"OP8\_C16\_00545" 29275 "s59E13H2" 0 "hypothetical protein"  
"OP8\_C16\_00545" 29275 "s59E25H2" 0 "hypothetical protein"  
"OP8\_C16\_00545" 29275 "s59E5H2" 0 "hypothetical protein"  
"OP8\_C16\_00545" 29275 "s63E6H2" 0 "hypothetical protein"  
"OP8\_C16\_00546" 29276 "s59E13H2" 0 "Translation initiation factor IF-2"  
"OP8\_C16\_00546" 29276 "s59E25H2" 0 "Translation initiation factor IF-2"  
"OP8\_C16\_00546" 29276 "s59E5H2" 0 "Translation initiation factor IF-2"  
"OP8\_C16\_00546" 29276 "s63E6H2" 0 "Translation initiation factor IF-2"  
"OP8\_C16\_00547" 29277 "s59E13H2" 0 "hypothetical protein"  
"OP8\_C16\_00547" 29277 "s59E25H2" 0 "hypothetical protein"  
"OP8\_C16\_00547" 29277 "s59E5H2" 0 "hypothetical protein"  
"OP8\_C16\_00547" 29277 "s63E6H2" 0 "hypothetical protein"  
"OP8\_C16\_00548" 29278 "s59E13H2" 0 "Ribosome-binding factor A"  
"OP8\_C16\_00548" 29278 "s59E25H2" 0 "Ribosome-binding factor A"  
"OP8\_C16\_00548" 29278 "s59E5H2" 0 "Ribosome-binding factor A"  
"OP8\_C16\_00548" 29278 "s63E6H2" 0 "Ribosome-binding factor A"

"OP8\_C16\_00549" 29279 "s59E13H2" 0 "Bifunctional oligoribonuclease and PAP phosphatase NrnA"  
"OP8\_C16\_00549" 29279 "s59E25H2" 0 "Bifunctional oligoribonuclease and PAP phosphatase NrnA"  
"OP8\_C16\_00549" 29279 "s59E5H2" 0 "Bifunctional oligoribonuclease and PAP phosphatase NrnA"  
"OP8\_C16\_00549" 29279 "s63E6H2" 0 "Bifunctional oligoribonuclease and PAP phosphatase NrnA"  
"OP8\_C16\_00550" 29280 "s59E13H2" 0 "tRNA pseudouridine synthase B"  
"OP8\_C16\_00550" 29280 "s59E25H2" 0 "tRNA pseudouridine synthase B"  
"OP8\_C16\_00550" 29280 "s59E5H2" 0 "tRNA pseudouridine synthase B"  
"OP8\_C16\_00550" 29280 "s63E6H2" 0 "tRNA pseudouridine synthase B"  
"OP8\_C16\_00551" 29281 "s59E13H2" 0 "Sodium:neurotransmitter symporter family protein"  
"OP8\_C16\_00551" 29281 "s59E25H2" 0 "Sodium:neurotransmitter symporter family protein"  
"OP8\_C16\_00551" 29281 "s59E5H2" 0 "Sodium:neurotransmitter symporter family protein"  
"OP8\_C16\_00551" 29281 "s63E6H2" 0 "Sodium:neurotransmitter symporter family protein"  
"OP8\_C16\_00552" 29282 "s59E13H2" 0 "hypothetical protein"  
"OP8\_C16\_00552" 29282 "s59E25H2" 0 "hypothetical protein"  
"OP8\_C16\_00552" 29282 "s59E5H2" 0 "hypothetical protein"  
"OP8\_C16\_00552" 29282 "s63E6H2" 0 "hypothetical protein"  
"OP8\_C16\_00553" 29283 "s59E13H2" 0 "hypothetical protein"  
"OP8\_C16\_00553" 29283 "s59E25H2" 0 "hypothetical protein"  
"OP8\_C16\_00553" 29283 "s59E5H2" 0 "hypothetical protein"  
"OP8\_C16\_00553" 29283 "s63E6H2" 0 "hypothetical protein"  
"OP8\_C16\_00554" 29284 "s59E13H2" 0 "acyl-CoA thioesterase YbgC"  
"OP8\_C16\_00554" 29284 "s59E25H2" 0 "acyl-CoA thioesterase YbgC"  
"OP8\_C16\_00554" 29284 "s59E5H2" 0 "acyl-CoA thioesterase YbgC"  
"OP8\_C16\_00554" 29284 "s63E6H2" 0 "acyl-CoA thioesterase YbgC"  
"OP8\_C16\_00555" 29285 "s59E13H2" 0 "Outer membrane porin F precursor"  
"OP8\_C16\_00555" 29285 "s59E25H2" 0 "Outer membrane porin F precursor"  
"OP8\_C16\_00555" 29285 "s59E5H2" 0 "Outer membrane porin F precursor"  
"OP8\_C16\_00555" 29285 "s63E6H2" 0 "Outer membrane porin F precursor"  
"OP8\_C16\_00556" 29286 "s59E13H2" 0 "von Willebrand factor type A domain protein"  
"OP8\_C16\_00556" 29286 "s59E25H2" 0 "von Willebrand factor type A domain protein"  
"OP8\_C16\_00556" 29286 "s59E5H2" 0 "von Willebrand factor type A domain protein"  
"OP8\_C16\_00556" 29286 "s63E6H2" 0 "von Willebrand factor type A domain protein"  
"OP8\_C16\_00557" 29287 "s59E13H2" 0 "dTDP-4-dehydrorhamnose reductase"  
"OP8\_C16\_00557" 29287 "s59E25H2" 0 "dTDP-4-dehydrorhamnose reductase"  
"OP8\_C16\_00557" 29287 "s59E5H2" 0 "dTDP-4-dehydrorhamnose reductase"  
"OP8\_C16\_00557" 29287 "s63E6H2" 0 "dTDP-4-dehydrorhamnose reductase"  
"OP8\_C16\_00558" 29288 "s59E13H2" 0 "GMP synthase [glutamine-hydrolyzing] subunit A"  
"OP8\_C16\_00558" 29288 "s59E25H2" 0 "GMP synthase [glutamine-hydrolyzing] subunit A"  
"OP8\_C16\_00558" 29288 "s59E5H2" 0 "GMP synthase [glutamine-hydrolyzing] subunit A"  
"OP8\_C16\_00558" 29288 "s63E6H2" 0 "GMP synthase [glutamine-hydrolyzing] subunit A"  
"OP8\_C16\_00559" 29289 "s59E13H2" 0 "hypothetical protein"  
"OP8\_C16\_00559" 29289 "s59E25H2" 0 "hypothetical protein"  
"OP8\_C16\_00559" 29289 "s59E5H2" 0 "hypothetical protein"  
"OP8\_C16\_00559" 29289 "s63E6H2" 0 "hypothetical protein"  
"OP8\_C16\_00560" 29290 "s59E13H2" 0 "Pyrimidine-nucleoside phosphorylase"  
"OP8\_C16\_00560" 29290 "s59E25H2" 0 "Pyrimidine-nucleoside phosphorylase"  
"OP8\_C16\_00560" 29290 "s59E5H2" 0 "Pyrimidine-nucleoside phosphorylase"

"OP8\_C16\_00560" 29290 "s63E6H2" 0 "Pyrimidine-nucleoside phosphorylase"  
"OP8\_C16\_00561" 29291 "s59E13H2" 0 "OPT oligopeptide transporter protein"  
"OP8\_C16\_00561" 29291 "s59E25H2" 0 "OPT oligopeptide transporter protein"  
"OP8\_C16\_00561" 29291 "s59E5H2" 0 "OPT oligopeptide transporter protein"  
"OP8\_C16\_00561" 29291 "s63E6H2" 0 "OPT oligopeptide transporter protein"  
"OP8\_C16\_00562" 29292 "s59E13H2" 0 "Carbon starvation protein A"  
"OP8\_C16\_00562" 29292 "s59E25H2" 0 "Carbon starvation protein A"  
"OP8\_C16\_00562" 29292 "s59E5H2" 0 "Carbon starvation protein A"  
"OP8\_C16\_00562" 29292 "s63E6H2" 0 "Carbon starvation protein A"  
"OP8\_C16\_00563" 29293 "s59E13H2" 0 "hypothetical protein"  
"OP8\_C16\_00563" 29293 "s59E25H2" 0 "hypothetical protein"  
"OP8\_C16\_00563" 29293 "s59E5H2" 0 "hypothetical protein"  
"OP8\_C16\_00563" 29293 "s63E6H2" 0 "hypothetical protein"  
"OP8\_C16\_00564" 29294 "s59E13H2" 0 "Biopolymer transport protein ExbD"  
"OP8\_C16\_00564" 29294 "s59E25H2" 0 "Biopolymer transport protein ExbD"  
"OP8\_C16\_00564" 29294 "s59E5H2" 0 "Biopolymer transport protein ExbD"  
"OP8\_C16\_00564" 29294 "s63E6H2" 0 "Biopolymer transport protein ExbD"  
"OP8\_C16\_00565" 29295 "s59E13H2" 0 "hypothetical protein"  
"OP8\_C16\_00565" 29295 "s59E25H2" 0 "hypothetical protein"  
"OP8\_C16\_00565" 29295 "s59E5H2" 0 "hypothetical protein"  
"OP8\_C16\_00565" 29295 "s63E6H2" 0 "hypothetical protein"  
"OP8\_C16\_00566" 29296 "s59E13H2" 0 "Acyl-CoA dehydrogenase"  
"OP8\_C16\_00566" 29296 "s59E25H2" 0 "Acyl-CoA dehydrogenase"  
"OP8\_C16\_00566" 29296 "s59E5H2" 0 "Acyl-CoA dehydrogenase"  
"OP8\_C16\_00566" 29296 "s63E6H2" 0 "Acyl-CoA dehydrogenase"  
"OP8\_C16\_00567" 29297 "s59E13H2" 0 "Radical SAM superfamily protein"  
"OP8\_C16\_00567" 29297 "s59E25H2" 0 "Radical SAM superfamily protein"  
"OP8\_C16\_00567" 29297 "s59E5H2" 0 "Radical SAM superfamily protein"  
"OP8\_C16\_00567" 29297 "s63E6H2" 0.006298879 "Radical SAM superfamily protein"  
"OP8\_C16\_00568" 29298 "s59E13H2" 0 "Putative prophage phiRv2 integrase"  
"OP8\_C16\_00568" 29298 "s59E25H2" 0 "Putative prophage phiRv2 integrase"  
"OP8\_C16\_00568" 29298 "s59E5H2" 0 "Putative prophage phiRv2 integrase"  
"OP8\_C16\_00568" 29298 "s63E6H2" 0 "Putative prophage phiRv2 integrase"  
"OP8\_C16\_00569" 29299 "s59E13H2" 0.001417871 "Integrase core domain protein"  
"OP8\_C16\_00569" 29299 "s59E25H2" 0 "Integrase core domain protein"  
"OP8\_C16\_00569" 29299 "s59E5H2" 0.001517252 "Integrase core domain protein"  
"OP8\_C16\_00569" 29299 "s63E6H2" 0 "Integrase core domain protein"  
"OP8\_C16\_00570" 29300 "s59E13H2" 0.01824908 "transposase/IS protein"  
"OP8\_C16\_00570" 29300 "s59E25H2" 0 "transposase/IS protein"  
"OP8\_C16\_00570" 29300 "s59E5H2" 0.1191911 "transposase/IS protein"  
"OP8\_C16\_00570" 29300 "s63E6H2" 0 "transposase/IS protein"  
"OP8\_C16\_00572" 29302 "s59E13H2" 0 "hypothetical protein"  
"OP8\_C16\_00572" 29302 "s59E25H2" 0 "hypothetical protein"  
"OP8\_C16\_00572" 29302 "s59E5H2" 0 "hypothetical protein"  
"OP8\_C16\_00572" 29302 "s63E6H2" 0 "hypothetical protein"  
"OP8\_C16\_00573" 29303 "s59E13H2" 0 "hypothetical protein"  
"OP8\_C16\_00573" 29303 "s59E25H2" 0 "hypothetical protein"

"OP8\_C16\_00573" 29303 "s59E5H2" 0 "hypothetical protein"  
"OP8\_C16\_00573" 29303 "s63E6H2" 0 "hypothetical protein"  
"OP8\_C16\_00574" 29304 "s59E13H2" 0 "hypothetical protein"  
"OP8\_C16\_00574" 29304 "s59E25H2" 0 "hypothetical protein"  
"OP8\_C16\_00574" 29304 "s59E5H2" 0 "hypothetical protein"  
"OP8\_C16\_00574" 29304 "s63E6H2" 0 "hypothetical protein"  
"OP8\_C16\_00575" 29305 "s59E13H2" 0 "hypothetical protein"  
"OP8\_C16\_00575" 29305 "s59E25H2" 0 "hypothetical protein"  
"OP8\_C16\_00575" 29305 "s59E5H2" 0 "hypothetical protein"  
"OP8\_C16\_00575" 29305 "s63E6H2" 0 "hypothetical protein"  
"OP8\_C16\_00576" 29306 "s59E13H2" 0 "hypothetical protein"  
"OP8\_C16\_00576" 29306 "s59E25H2" 0 "hypothetical protein"  
"OP8\_C16\_00576" 29306 "s59E5H2" 0 "hypothetical protein"  
"OP8\_C16\_00576" 29306 "s63E6H2" 0 "hypothetical protein"  
"OP8\_C16\_00578" 29308 "s59E13H2" 0 "hypothetical protein"  
"OP8\_C16\_00578" 29308 "s59E25H2" 0 "hypothetical protein"  
"OP8\_C16\_00578" 29308 "s59E5H2" 0 "hypothetical protein"  
"OP8\_C16\_00578" 29308 "s63E6H2" 0 "hypothetical protein"  
"OP8\_C16\_00579" 29309 "s59E13H2" 0 "hypothetical protein"  
"OP8\_C16\_00579" 29309 "s59E25H2" 0 "hypothetical protein"  
"OP8\_C16\_00579" 29309 "s59E5H2" 0 "hypothetical protein"  
"OP8\_C16\_00579" 29309 "s63E6H2" 0 "hypothetical protein"  
"OP8\_C16\_00580" 29310 "s59E13H2" 0 "hypothetical protein"  
"OP8\_C16\_00580" 29310 "s59E25H2" 0 "hypothetical protein"  
"OP8\_C16\_00580" 29310 "s59E5H2" 0 "hypothetical protein"  
"OP8\_C16\_00580" 29310 "s63E6H2" 0 "hypothetical protein"  
"OP8\_C16\_00582" 29312 "s59E13H2" 0 "Cyclic di-GMP phosphodiesterase response regulator RpfG"  
"OP8\_C16\_00582" 29312 "s59E25H2" 0 "Cyclic di-GMP phosphodiesterase response regulator RpfG"  
"OP8\_C16\_00582" 29312 "s59E5H2" 0 "Cyclic di-GMP phosphodiesterase response regulator RpfG"  
"OP8\_C16\_00582" 29312 "s63E6H2" 0 "Cyclic di-GMP phosphodiesterase response regulator RpfG"  
"OP8\_C16\_00583" 29313 "s59E13H2" 0 "Rod shape-determining protein MreB"  
"OP8\_C16\_00583" 29313 "s59E25H2" 0 "Rod shape-determining protein MreB"  
"OP8\_C16\_00583" 29313 "s59E5H2" 0 "Rod shape-determining protein MreB"  
"OP8\_C16\_00583" 29313 "s63E6H2" 0 "Rod shape-determining protein MreB"  
"OP8\_C16\_00584" 29314 "s59E13H2" 0 "hypothetical protein"  
"OP8\_C16\_00584" 29314 "s59E25H2" 0 "hypothetical protein"  
"OP8\_C16\_00584" 29314 "s59E5H2" 0 "hypothetical protein"  
"OP8\_C16\_00584" 29314 "s63E6H2" 0 "hypothetical protein"  
"OP8\_C16\_00585" 29315 "s59E13H2" 0 "hypothetical protein"  
"OP8\_C16\_00585" 29315 "s59E25H2" 0 "hypothetical protein"  
"OP8\_C16\_00585" 29315 "s59E5H2" 0 "hypothetical protein"  
"OP8\_C16\_00585" 29315 "s63E6H2" 0 "hypothetical protein"  
"OP8\_C16\_00586" 29316 "s59E13H2" 0 "Inosine-5'-monophosphate dehydrogenase"  
"OP8\_C16\_00586" 29316 "s59E25H2" 0 "Inosine-5'-monophosphate dehydrogenase"  
"OP8\_C16\_00586" 29316 "s59E5H2" 0 "Inosine-5'-monophosphate dehydrogenase"  
"OP8\_C16\_00586" 29316 "s63E6H2" 0 "Inosine-5'-monophosphate dehydrogenase"  
"OP8\_C16\_00587" 29317 "s59E13H2" 0 "hypothetical protein"

"OP8\_C16\_00587" 29317 "s59E25H2" 0 "hypothetical protein"  
"OP8\_C16\_00587" 29317 "s59E5H2" 0 "hypothetical protein"  
"OP8\_C16\_00587" 29317 "s63E6H2" 0 "hypothetical protein"  
"OP8\_C16\_00588" 29318 "s59E13H2" 0 "hypothetical protein"  
"OP8\_C16\_00588" 29318 "s59E25H2" 0 "hypothetical protein"  
"OP8\_C16\_00588" 29318 "s59E5H2" 0 "hypothetical protein"  
"OP8\_C16\_00588" 29318 "s63E6H2" 0 "hypothetical protein"  
"OP8\_C16\_00589" 29319 "s59E13H2" 0 "hypothetical protein"  
"OP8\_C16\_00589" 29319 "s59E25H2" 0 "hypothetical protein"  
"OP8\_C16\_00589" 29319 "s59E5H2" 0 "hypothetical protein"  
"OP8\_C16\_00589" 29319 "s63E6H2" 0 "hypothetical protein"  
"OP8\_C16\_00595" 29325 "s59E13H2" 0 "hypothetical protein"  
"OP8\_C16\_00595" 29325 "s59E25H2" 0 "hypothetical protein"  
"OP8\_C16\_00595" 29325 "s59E5H2" 0 "hypothetical protein"  
"OP8\_C16\_00595" 29325 "s63E6H2" 0 "hypothetical protein"  
"OP8\_C16\_00597" 29327 "s59E13H2" 0 "Helix-turn-helix domain protein"  
"OP8\_C16\_00597" 29327 "s59E25H2" 0 "Helix-turn-helix domain protein"  
"OP8\_C16\_00597" 29327 "s59E5H2" 0 "Helix-turn-helix domain protein"  
"OP8\_C16\_00597" 29327 "s63E6H2" 0 "Helix-turn-helix domain protein"  
"OP8\_C16\_00598" 29328 "s59E13H2" 0 "hypothetical protein"  
"OP8\_C16\_00598" 29328 "s59E25H2" 0 "hypothetical protein"  
"OP8\_C16\_00598" 29328 "s59E5H2" 0 "hypothetical protein"  
"OP8\_C16\_00598" 29328 "s63E6H2" 0 "hypothetical protein"  
"OP8\_C16\_00600" 29330 "s59E13H2" 0 "hypothetical protein"  
"OP8\_C16\_00600" 29330 "s59E25H2" 0 "hypothetical protein"  
"OP8\_C16\_00600" 29330 "s59E5H2" 0 "hypothetical protein"  
"OP8\_C16\_00600" 29330 "s63E6H2" 0 "hypothetical protein"  
"OP8\_C16\_00602" 29332 "s59E13H2" 0 "hypothetical protein"  
"OP8\_C16\_00602" 29332 "s59E25H2" 0 "hypothetical protein"  
"OP8\_C16\_00602" 29332 "s59E5H2" 0 "hypothetical protein"  
"OP8\_C16\_00602" 29332 "s63E6H2" 0 "hypothetical protein"  
"OP8\_C16\_00603" 29333 "s59E13H2" 0 "Rod shape-determining protein RodA"  
"OP8\_C16\_00603" 29333 "s59E25H2" 0 "Rod shape-determining protein RodA"  
"OP8\_C16\_00603" 29333 "s59E5H2" 0 "Rod shape-determining protein RodA"  
"OP8\_C16\_00603" 29333 "s63E6H2" 0.009675646 "Rod shape-determining protein RodA"  
"OP8\_C16\_00604" 29334 "s59E13H2" 0 "Stage V sporulation protein D"  
"OP8\_C16\_00604" 29334 "s59E25H2" 0 "Stage V sporulation protein D"  
"OP8\_C16\_00604" 29334 "s59E5H2" 0 "Stage V sporulation protein D"  
"OP8\_C16\_00604" 29334 "s63E6H2" 0.007404521 "Stage V sporulation protein D"  
"OP8\_C16\_00605" 29335 "s59E13H2" 0 "rod shape-determining protein MreD"  
"OP8\_C16\_00605" 29335 "s59E25H2" 0 "rod shape-determining protein MreD"  
"OP8\_C16\_00605" 29335 "s59E5H2" 0 "rod shape-determining protein MreD"  
"OP8\_C16\_00605" 29335 "s63E6H2" 0.003178962 "rod shape-determining protein MreD"  
"OP8\_C16\_00606" 29336 "s59E13H2" 0 "Cell shape-determining protein MreC precursor"  
"OP8\_C16\_00606" 29336 "s59E25H2" 0 "Cell shape-determining protein MreC precursor"  
"OP8\_C16\_00606" 29336 "s59E5H2" 0 "Cell shape-determining protein MreC precursor"  
"OP8\_C16\_00606" 29336 "s63E6H2" 0 "Cell shape-determining protein MreC precursor"

"OP8\_C16\_00607" 29337 "s59E13H2" 0 "Rod shape-determining protein MreB"  
"OP8\_C16\_00607" 29337 "s59E25H2" 0 "Rod shape-determining protein MreB"  
"OP8\_C16\_00607" 29337 "s59E5H2" 0 "Rod shape-determining protein MreB"  
"OP8\_C16\_00607" 29337 "s63E6H2" 0.001608184 "Rod shape-determining protein MreB"  
"OP8\_C16\_00608" 29338 "s59E13H2" 0 "OPT oligopeptide transporter protein"  
"OP8\_C16\_00608" 29338 "s59E25H2" 0 "OPT oligopeptide transporter protein"  
"OP8\_C16\_00608" 29338 "s59E5H2" 0 "OPT oligopeptide transporter protein"  
"OP8\_C16\_00608" 29338 "s63E6H2" 0.2845279 "OPT oligopeptide transporter protein"  
"OP8\_C16\_00609" 29339 "s59E13H2" 0 "Coenzyme PQQ synthesis protein D"  
"OP8\_C16\_00609" 29339 "s59E25H2" 0 "Coenzyme PQQ synthesis protein D"  
"OP8\_C16\_00609" 29339 "s59E5H2" 0 "Coenzyme PQQ synthesis protein D"  
"OP8\_C16\_00609" 29339 "s63E6H2" 0.00195944 "Coenzyme PQQ synthesis protein D"  
"OP8\_C16\_00610" 29340 "s59E13H2" 0 "Peptide deformylase"  
"OP8\_C16\_00610" 29340 "s59E25H2" 0 "Peptide deformylase"  
"OP8\_C16\_00610" 29340 "s59E5H2" 0 "Peptide deformylase"  
"OP8\_C16\_00610" 29340 "s63E6H2" 0.002156785 "Peptide deformylase"  
"OP8\_C16\_00611" 29341 "s59E13H2" 0 "Methionyl-tRNA formyltransferase"  
"OP8\_C16\_00611" 29341 "s59E25H2" 0 "Methionyl-tRNA formyltransferase"  
"OP8\_C16\_00611" 29341 "s59E5H2" 0 "Methionyl-tRNA formyltransferase"  
"OP8\_C16\_00611" 29341 "s63E6H2" 0 "Methionyl-tRNA formyltransferase"  
"OP8\_C16\_00612" 29342 "s59E13H2" 0 "Murein DD-endopeptidase MepM"  
"OP8\_C16\_00612" 29342 "s59E25H2" 0 "Murein DD-endopeptidase MepM"  
"OP8\_C16\_00612" 29342 "s59E5H2" 0 "Murein DD-endopeptidase MepM"  
"OP8\_C16\_00612" 29342 "s63E6H2" 0 "Murein DD-endopeptidase MepM"  
"OP8\_C16\_00613" 29343 "s59E13H2" 0 "Methylmalonyl-CoA mutase"  
"OP8\_C16\_00613" 29343 "s59E25H2" 0 "Methylmalonyl-CoA mutase"  
"OP8\_C16\_00613" 29343 "s59E5H2" 0 "Methylmalonyl-CoA mutase"  
"OP8\_C16\_00613" 29343 "s63E6H2" 0 "Methylmalonyl-CoA mutase"  
"OP8\_C16\_00614" 29344 "s59E13H2" 0 "Methylmalonyl-CoA mutase"  
"OP8\_C16\_00614" 29344 "s59E25H2" 0 "Methylmalonyl-CoA mutase"  
"OP8\_C16\_00614" 29344 "s59E5H2" 0 "Methylmalonyl-CoA mutase"  
"OP8\_C16\_00614" 29344 "s63E6H2" 0 "Methylmalonyl-CoA mutase"  
"OP8\_C16\_00615" 29345 "s59E13H2" 0 "hypothetical protein"  
"OP8\_C16\_00615" 29345 "s59E25H2" 0 "hypothetical protein"  
"OP8\_C16\_00615" 29345 "s59E5H2" 0 "hypothetical protein"  
"OP8\_C16\_00615" 29345 "s63E6H2" 0 "hypothetical protein"  
"OP8\_C16\_00616" 29346 "s59E13H2" 0 "3-oxoacyl-[acyl-carrier-protein] reductase FabG"  
"OP8\_C16\_00616" 29346 "s59E25H2" 0 "3-oxoacyl-[acyl-carrier-protein] reductase FabG"  
"OP8\_C16\_00616" 29346 "s59E5H2" 0 "3-oxoacyl-[acyl-carrier-protein] reductase FabG"  
"OP8\_C16\_00616" 29346 "s63E6H2" 0 "3-oxoacyl-[acyl-carrier-protein] reductase FabG"  
"OP8\_C16\_00617" 29347 "s59E13H2" 0 "Aconitate hydratase 2"  
"OP8\_C16\_00617" 29347 "s59E25H2" 0 "Aconitate hydratase 2"  
"OP8\_C16\_00617" 29347 "s59E5H2" 0 "Aconitate hydratase 2"  
"OP8\_C16\_00617" 29347 "s63E6H2" 0 "Aconitate hydratase 2"  
"OP8\_C16\_00618" 29348 "s59E13H2" 0 "Homoisocitrate dehydrogenase"  
"OP8\_C16\_00618" 29348 "s59E25H2" 0 "Homoisocitrate dehydrogenase"  
"OP8\_C16\_00618" 29348 "s59E5H2" 0 "Homoisocitrate dehydrogenase"



"OP8\_C16\_00618" 29348 "s63E6H2" 0 "Homocitrate dehydrogenase"  
"OP8\_C16\_00619" 29349 "s59E13H2" 0 "Malate dehydrogenase"  
"OP8\_C16\_00619" 29349 "s59E25H2" 0 "Malate dehydrogenase"  
"OP8\_C16\_00619" 29349 "s59E5H2" 0 "Malate dehydrogenase"  
"OP8\_C16\_00619" 29349 "s63E6H2" 0 "Malate dehydrogenase"  
"OP8\_C16\_00620" 29350 "s59E13H2" 0 "Fumarate hydratase class I, anaerobic"  
"OP8\_C16\_00620" 29350 "s59E25H2" 0 "Fumarate hydratase class I, anaerobic"  
"OP8\_C16\_00620" 29350 "s59E5H2" 0 "Fumarate hydratase class I, anaerobic"  
"OP8\_C16\_00620" 29350 "s63E6H2" 0 "Fumarate hydratase class I, anaerobic"  
"OP8\_C16\_00621" 29351 "s59E13H2" 0 "Succinyl-CoA ligase [ADP-forming] subunit beta"  
"OP8\_C16\_00621" 29351 "s59E25H2" 0 "Succinyl-CoA ligase [ADP-forming] subunit beta"  
"OP8\_C16\_00621" 29351 "s59E5H2" 0 "Succinyl-CoA ligase [ADP-forming] subunit beta"  
"OP8\_C16\_00621" 29351 "s63E6H2" 0.002356314 "Succinyl-CoA ligase [ADP-forming] subunit beta"  
"OP8\_C16\_00622" 29352 "s59E13H2" 0 "Succinyl-CoA ligase [ADP-forming] subunit alpha"  
"OP8\_C16\_00622" 29352 "s59E25H2" 0 "Succinyl-CoA ligase [ADP-forming] subunit alpha"  
"OP8\_C16\_00622" 29352 "s59E5H2" 0 "Succinyl-CoA ligase [ADP-forming] subunit alpha"  
"OP8\_C16\_00622" 29352 "s63E6H2" 0.01253591 "Succinyl-CoA ligase [ADP-forming] subunit alpha"  
"OP8\_C16\_00623" 29353 "s59E13H2" 0 "Zinc carboxypeptidase"  
"OP8\_C16\_00623" 29353 "s59E25H2" 0 "Zinc carboxypeptidase"  
"OP8\_C16\_00623" 29353 "s59E5H2" 0 "Zinc carboxypeptidase"  
"OP8\_C16\_00623" 29353 "s63E6H2" 0 "Zinc carboxypeptidase"  
"OP8\_C16\_00624" 29354 "s59E13H2" 0 "Extended-spectrum beta-lactamase PER-1 precursor"  
"OP8\_C16\_00624" 29354 "s59E25H2" 0 "Extended-spectrum beta-lactamase PER-1 precursor"  
"OP8\_C16\_00624" 29354 "s59E5H2" 0 "Extended-spectrum beta-lactamase PER-1 precursor"  
"OP8\_C16\_00624" 29354 "s63E6H2" 0 "Extended-spectrum beta-lactamase PER-1 precursor"  
"OP8\_C16\_00625" 29355 "s59E13H2" 0 "DNA polymerase III subunits gamma and tau"  
"OP8\_C16\_00625" 29355 "s59E25H2" 0 "DNA polymerase III subunits gamma and tau"  
"OP8\_C16\_00625" 29355 "s59E5H2" 0 "DNA polymerase III subunits gamma and tau"  
"OP8\_C16\_00625" 29355 "s63E6H2" 0.00200045 "DNA polymerase III subunits gamma and tau"  
"OP8\_C16\_00626" 29356 "s59E13H2" 0 "hypothetical protein"  
"OP8\_C16\_00626" 29356 "s59E25H2" 0 "hypothetical protein"  
"OP8\_C16\_00626" 29356 "s59E5H2" 0 "hypothetical protein"  
"OP8\_C16\_00626" 29356 "s63E6H2" 0 "hypothetical protein"  
"OP8\_C16\_00627" 29357 "s59E13H2" 0 "RNA polymerase sigma factor RpoD"  
"OP8\_C16\_00627" 29357 "s59E25H2" 0 "RNA polymerase sigma factor RpoD"  
"OP8\_C16\_00627" 29357 "s59E5H2" 0 "RNA polymerase sigma factor RpoD"  
"OP8\_C16\_00627" 29357 "s63E6H2" 0 "RNA polymerase sigma factor RpoD"  
"OP8\_C16\_00629" 29359 "s59E13H2" 0 "Chromosome partition protein Smc"  
"OP8\_C16\_00629" 29359 "s59E25H2" 0 "Chromosome partition protein Smc"  
"OP8\_C16\_00629" 29359 "s59E5H2" 0.004093175 "Chromosome partition protein Smc"  
"OP8\_C16\_00629" 29359 "s63E6H2" 0 "Chromosome partition protein Smc"  
"OP8\_C16\_00630" 29360 "s59E13H2" 0 "Long-chain-fatty-acid--CoA ligase FadD15"  
"OP8\_C16\_00630" 29360 "s59E25H2" 0 "Long-chain-fatty-acid--CoA ligase FadD15"  
"OP8\_C16\_00630" 29360 "s59E5H2" 0 "Long-chain-fatty-acid--CoA ligase FadD15"  
"OP8\_C16\_00630" 29360 "s63E6H2" 0 "Long-chain-fatty-acid--CoA ligase FadD15"  
"OP8\_C16\_00631" 29361 "s59E13H2" 0 "DNA gyrase subunit A"  
"OP8\_C16\_00631" 29361 "s59E25H2" 0 "DNA gyrase subunit A"

"OP8\_C16\_00631" 29361 "s59E5H2" 0 "DNA gyrase subunit A"  
"OP8\_C16\_00631" 29361 "s63E6H2" 0 "DNA gyrase subunit A"  
"OP8\_C16\_00632" 29362 "s59E13H2" 0 "DNA gyrase subunit B"  
"OP8\_C16\_00632" 29362 "s59E25H2" 0 "DNA gyrase subunit B"  
"OP8\_C16\_00632" 29362 "s59E5H2" 0 "DNA gyrase subunit B"  
"OP8\_C16\_00632" 29362 "s63E6H2" 0 "DNA gyrase subunit B"  
"OP8\_C16\_00633" 29363 "s59E13H2" 0 "GTPase ObgE"  
"OP8\_C16\_00633" 29363 "s59E25H2" 0 "GTPase ObgE"  
"OP8\_C16\_00633" 29363 "s59E5H2" 0 "GTPase ObgE"  
"OP8\_C16\_00633" 29363 "s63E6H2" 0 "GTPase ObgE"  
"OP8\_C16\_00635" 29365 "s59E13H2" 0 "Acetyl-CoA decarboxylase/synthase complex subunit alpha 1"  
"OP8\_C16\_00635" 29365 "s59E25H2" 0 "Acetyl-CoA decarboxylase/synthase complex subunit alpha 1"  
"OP8\_C16\_00635" 29365 "s59E5H2" 0 "Acetyl-CoA decarboxylase/synthase complex subunit alpha 1"  
"OP8\_C16\_00635" 29365 "s63E6H2" 0 "Acetyl-CoA decarboxylase/synthase complex subunit alpha 1"  
"OP8\_C16\_00636" 29366 "s59E13H2" 0 "Purine catabolism protein PucG"  
"OP8\_C16\_00636" 29366 "s59E25H2" 0 "Purine catabolism protein PucG"  
"OP8\_C16\_00636" 29366 "s59E5H2" 0 "Purine catabolism protein PucG"  
"OP8\_C16\_00636" 29366 "s63E6H2" 0 "Purine catabolism protein PucG"  
"OP8\_C16\_00637" 29367 "s59E13H2" 0 "NADH oxidase"  
"OP8\_C16\_00637" 29367 "s59E25H2" 0 "NADH oxidase"  
"OP8\_C16\_00637" 29367 "s59E5H2" 0 "NADH oxidase"  
"OP8\_C16\_00637" 29367 "s63E6H2" 0 "NADH oxidase"  
"OP8\_C16\_00638" 29368 "s59E13H2" 0 "Vault protein inter-alpha-trypsin"  
"OP8\_C16\_00638" 29368 "s59E25H2" 0 "Vault protein inter-alpha-trypsin"  
"OP8\_C16\_00638" 29368 "s59E5H2" 0 "Vault protein inter-alpha-trypsin"  
"OP8\_C16\_00638" 29368 "s63E6H2" 0 "Vault protein inter-alpha-trypsin"  
"OP8\_C16\_00639" 29369 "s59E13H2" 0 "Phosphoglycolate phosphatase"  
"OP8\_C16\_00639" 29369 "s59E25H2" 0 "Phosphoglycolate phosphatase"  
"OP8\_C16\_00639" 29369 "s59E5H2" 0 "Phosphoglycolate phosphatase"  
"OP8\_C16\_00639" 29369 "s63E6H2" 0 "Phosphoglycolate phosphatase"  
"OP8\_C16\_00640" 29370 "s59E13H2" 0 "aspartoacylase"  
"OP8\_C16\_00640" 29370 "s59E25H2" 0 "aspartoacylase"  
"OP8\_C16\_00640" 29370 "s59E5H2" 0 "aspartoacylase"  
"OP8\_C16\_00640" 29370 "s63E6H2" 0 "aspartoacylase"  
"OP8\_C16\_00641" 29371 "s59E13H2" 0 "hypothetical protein"  
"OP8\_C16\_00641" 29371 "s59E25H2" 0 "hypothetical protein"  
"OP8\_C16\_00641" 29371 "s59E5H2" 0 "hypothetical protein"  
"OP8\_C16\_00641" 29371 "s63E6H2" 0 "hypothetical protein"  
"OP8\_C16\_00643" 29373 "s59E13H2" 0 "hypothetical protein"  
"OP8\_C16\_00643" 29373 "s59E25H2" 0 "hypothetical protein"  
"OP8\_C16\_00643" 29373 "s59E5H2" 0 "hypothetical protein"  
"OP8\_C16\_00643" 29373 "s63E6H2" 0 "hypothetical protein"  
"OP8\_C16\_00644" 29374 "s59E13H2" 0 "Sensor protein ZraS"  
"OP8\_C16\_00644" 29374 "s59E25H2" 0 "Sensor protein ZraS"  
"OP8\_C16\_00644" 29374 "s59E5H2" 0 "Sensor protein ZraS"  
"OP8\_C16\_00644" 29374 "s63E6H2" 0 "Sensor protein ZraS"  
"OP8\_C16\_00645" 29375 "s59E13H2" 0 "flavodoxin"

"OP8\_C16\_00645" 29375 "s59E25H2" 0 "flavodoxin"  
"OP8\_C16\_00645" 29375 "s59E5H2" 0 "flavodoxin"  
"OP8\_C16\_00645" 29375 "s63E6H2" 0 "flavodoxin"  
"OP8\_C16\_00646" 29376 "s59E13H2" 0 "hypothetical protein"  
"OP8\_C16\_00646" 29376 "s59E25H2" 0 "hypothetical protein"  
"OP8\_C16\_00646" 29376 "s59E5H2" 0 "hypothetical protein"  
"OP8\_C16\_00646" 29376 "s63E6H2" 0 "hypothetical protein"  
"OP8\_C16\_00648" 29378 "s59E13H2" 0 "Bifunctional IPC transferase and DIPP synthase"  
"OP8\_C16\_00648" 29378 "s59E25H2" 0 "Bifunctional IPC transferase and DIPP synthase"  
"OP8\_C16\_00648" 29378 "s59E5H2" 0 "Bifunctional IPC transferase and DIPP synthase"  
"OP8\_C16\_00648" 29378 "s63E6H2" 0 "Bifunctional IPC transferase and DIPP synthase"  
"OP8\_C16\_00649" 29379 "s59E13H2" 0 "hypothetical protein"  
"OP8\_C16\_00649" 29379 "s59E25H2" 0 "hypothetical protein"  
"OP8\_C16\_00649" 29379 "s59E5H2" 0 "hypothetical protein"  
"OP8\_C16\_00649" 29379 "s63E6H2" 0 "hypothetical protein"  
"OP8\_C16\_00651" 29381 "s59E13H2" 0 "hypothetical protein"  
"OP8\_C16\_00651" 29381 "s59E25H2" 0 "hypothetical protein"  
"OP8\_C16\_00651" 29381 "s59E5H2" 0 "hypothetical protein"  
"OP8\_C16\_00651" 29381 "s63E6H2" 0 "hypothetical protein"  
"OP8\_C16\_00652" 29382 "s59E13H2" 0 "LemA family protein"  
"OP8\_C16\_00652" 29382 "s59E25H2" 0 "LemA family protein"  
"OP8\_C16\_00652" 29382 "s59E5H2" 0 "LemA family protein"  
"OP8\_C16\_00652" 29382 "s63E6H2" 0 "LemA family protein"  
"OP8\_C16\_00653" 29383 "s59E13H2" 0 "Citrate synthase 1"  
"OP8\_C16\_00653" 29383 "s59E25H2" 0 "Citrate synthase 1"  
"OP8\_C16\_00653" 29383 "s59E5H2" 0 "Citrate synthase 1"  
"OP8\_C16\_00653" 29383 "s63E6H2" 0.4010884 "Citrate synthase 1"  
"OP8\_C16\_00654" 29384 "s59E13H2" 0 "D-aminopeptidase"  
"OP8\_C16\_00654" 29384 "s59E25H2" 0 "D-aminopeptidase"  
"OP8\_C16\_00654" 29384 "s59E5H2" 0 "D-aminopeptidase"  
"OP8\_C16\_00654" 29384 "s63E6H2" 0.1774821 "D-aminopeptidase"  
"OP8\_C16\_00655" 29385 "s59E13H2" 0 "Homoserine dehydrogenase"  
"OP8\_C16\_00655" 29385 "s59E25H2" 0 "Homoserine dehydrogenase"  
"OP8\_C16\_00655" 29385 "s59E5H2" 0 "Homoserine dehydrogenase"  
"OP8\_C16\_00655" 29385 "s63E6H2" 0 "Homoserine dehydrogenase"  
"OP8\_C16\_00657" 29387 "s59E13H2" 0 "3-oxoacyl-[acyl-carrier-protein] reductase FabG"  
"OP8\_C16\_00657" 29387 "s59E25H2" 0 "3-oxoacyl-[acyl-carrier-protein] reductase FabG"  
"OP8\_C16\_00657" 29387 "s59E5H2" 0 "3-oxoacyl-[acyl-carrier-protein] reductase FabG"  
"OP8\_C16\_00657" 29387 "s63E6H2" 0 "3-oxoacyl-[acyl-carrier-protein] reductase FabG"  
"OP8\_C16\_00658" 29388 "s59E13H2" 0 "Cupin domain protein"  
"OP8\_C16\_00658" 29388 "s59E25H2" 0 "Cupin domain protein"  
"OP8\_C16\_00658" 29388 "s59E5H2" 0 "Cupin domain protein"  
"OP8\_C16\_00658" 29388 "s63E6H2" 0 "Cupin domain protein"  
"OP8\_C16\_00659" 29389 "s59E13H2" 0 "2-aminoadipate transaminase"  
"OP8\_C16\_00659" 29389 "s59E25H2" 0 "2-aminoadipate transaminase"  
"OP8\_C16\_00659" 29389 "s59E5H2" 0 "2-aminoadipate transaminase"  
"OP8\_C16\_00659" 29389 "s63E6H2" 0 "2-aminoadipate transaminase"

"OP8\_C16\_00660" 29390 "s59E13H2" 0 "O-succinylhomoserine sulfhydrylase"  
"OP8\_C16\_00660" 29390 "s59E25H2" 0 "O-succinylhomoserine sulfhydrylase"  
"OP8\_C16\_00660" 29390 "s59E5H2" 0 "O-succinylhomoserine sulfhydrylase"  
"OP8\_C16\_00660" 29390 "s63E6H2" 0 "O-succinylhomoserine sulfhydrylase"  
"OP8\_C16\_00661" 29391 "s59E13H2" 0 "Lactaldehyde dehydrogenase"  
"OP8\_C16\_00661" 29391 "s59E25H2" 0 "Lactaldehyde dehydrogenase"  
"OP8\_C16\_00661" 29391 "s59E5H2" 0 "Lactaldehyde dehydrogenase"  
"OP8\_C16\_00661" 29391 "s63E6H2" 0 "Lactaldehyde dehydrogenase"  
"OP8\_C16\_00662" 29392 "s59E13H2" 0 "UDP-N-acetylglucosamine 1-carboxyvinyltransferase"  
"OP8\_C16\_00662" 29392 "s59E25H2" 0 "UDP-N-acetylglucosamine 1-carboxyvinyltransferase"  
"OP8\_C16\_00662" 29392 "s59E5H2" 0 "UDP-N-acetylglucosamine 1-carboxyvinyltransferase"  
"OP8\_C16\_00662" 29392 "s63E6H2" 0 "UDP-N-acetylglucosamine 1-carboxyvinyltransferase"  
"OP8\_C16\_00663" 29393 "s59E13H2" 0 "HIT-like protein"  
"OP8\_C16\_00663" 29393 "s59E25H2" 0 "HIT-like protein"  
"OP8\_C16\_00663" 29393 "s59E5H2" 0 "HIT-like protein"  
"OP8\_C16\_00663" 29393 "s63E6H2" 0 "HIT-like protein"  
"OP8\_C16\_00664" 29394 "s59E13H2" 0 "metal-dependent hydrolase"  
"OP8\_C16\_00664" 29394 "s59E25H2" 0 "metal-dependent hydrolase"  
"OP8\_C16\_00664" 29394 "s59E5H2" 0 "metal-dependent hydrolase"  
"OP8\_C16\_00664" 29394 "s63E6H2" 0 "metal-dependent hydrolase"  
"OP8\_C16\_00665" 29395 "s59E13H2" 0 "YacP-like NYN domain protein"  
"OP8\_C16\_00665" 29395 "s59E25H2" 0 "YacP-like NYN domain protein"  
"OP8\_C16\_00665" 29395 "s59E5H2" 0 "YacP-like NYN domain protein"  
"OP8\_C16\_00665" 29395 "s63E6H2" 0 "YacP-like NYN domain protein"  
"OP8\_C16\_00666" 29396 "s59E13H2" 0 "Rossmann-like domain protein"  
"OP8\_C16\_00666" 29396 "s59E25H2" 0 "Rossmann-like domain protein"  
"OP8\_C16\_00666" 29396 "s59E5H2" 0 "Rossmann-like domain protein"  
"OP8\_C16\_00666" 29396 "s63E6H2" 0 "Rossmann-like domain protein"  
"OP8\_C16\_00667" 29397 "s59E13H2" 0 "UDP-N-acetylenolpyruvoylglucosamine reductase"  
"OP8\_C16\_00667" 29397 "s59E25H2" 0 "UDP-N-acetylenolpyruvoylglucosamine reductase"  
"OP8\_C16\_00667" 29397 "s59E5H2" 0 "UDP-N-acetylenolpyruvoylglucosamine reductase"  
"OP8\_C16\_00667" 29397 "s63E6H2" 0 "UDP-N-acetylenolpyruvoylglucosamine reductase"  
"OP8\_C16\_00669" 29399 "s59E13H2" 0 "hypothetical protein"  
"OP8\_C16\_00669" 29399 "s59E25H2" 0 "hypothetical protein"  
"OP8\_C16\_00669" 29399 "s59E5H2" 0 "hypothetical protein"  
"OP8\_C16\_00669" 29399 "s63E6H2" 0 "hypothetical protein"  
"OP8\_C16\_00670" 29400 "s59E13H2" 0 "DNA ligase"  
"OP8\_C16\_00670" 29400 "s59E25H2" 0 "DNA ligase"  
"OP8\_C16\_00670" 29400 "s59E5H2" 0 "DNA ligase"  
"OP8\_C16\_00670" 29400 "s63E6H2" 0 "DNA ligase"  
"OP8\_C16\_00671" 29401 "s59E13H2" 0 "lipoprotein Nlpl"  
"OP8\_C16\_00671" 29401 "s59E25H2" 0 "lipoprotein Nlpl"  
"OP8\_C16\_00671" 29401 "s59E5H2" 0 "lipoprotein Nlpl"  
"OP8\_C16\_00671" 29401 "s63E6H2" 0 "lipoprotein Nlpl"  
"OP8\_C16\_00673" 29403 "s59E13H2" 0 "(R)-stereoselective amidase"  
"OP8\_C16\_00673" 29403 "s59E25H2" 0 "(R)-stereoselective amidase"  
"OP8\_C16\_00673" 29403 "s59E5H2" 0 "(R)-stereoselective amidase"

"OP8\_C16\_00673" 29403 "s63E6H2" 0 "(R)-stereoselective amidase"  
"OP8\_C16\_00674" 29404 "s59E13H2" 0 "putative NH(3)-dependent NAD(+) synthetase"  
"OP8\_C16\_00674" 29404 "s59E25H2" 0 "putative NH(3)-dependent NAD(+) synthetase"  
"OP8\_C16\_00674" 29404 "s59E5H2" 0 "putative NH(3)-dependent NAD(+) synthetase"  
"OP8\_C16\_00674" 29404 "s63E6H2" 0 "putative NH(3)-dependent NAD(+) synthetase"  
"OP8\_C16\_00675" 29405 "s59E13H2" 0 "Ribosomal RNA small subunit methyltransferase I"  
"OP8\_C16\_00675" 29405 "s59E25H2" 0 "Ribosomal RNA small subunit methyltransferase I"  
"OP8\_C16\_00675" 29405 "s59E5H2" 0 "Ribosomal RNA small subunit methyltransferase I"  
"OP8\_C16\_00675" 29405 "s63E6H2" 0 "Ribosomal RNA small subunit methyltransferase I"  
"OP8\_C16\_00676" 29406 "s59E13H2" 0 "DNA utilization protein GntX"  
"OP8\_C16\_00676" 29406 "s59E25H2" 0 "DNA utilization protein GntX"  
"OP8\_C16\_00676" 29406 "s59E5H2" 0 "DNA utilization protein GntX"  
"OP8\_C16\_00676" 29406 "s63E6H2" 0 "DNA utilization protein GntX"  
"OP8\_C16\_00677" 29407 "s59E13H2" 0 "RNA polymerase-binding transcription factor DksA"  
"OP8\_C16\_00677" 29407 "s59E25H2" 0 "RNA polymerase-binding transcription factor DksA"  
"OP8\_C16\_00677" 29407 "s59E5H2" 0 "RNA polymerase-binding transcription factor DksA"  
"OP8\_C16\_00677" 29407 "s63E6H2" 0 "RNA polymerase-binding transcription factor DksA"  
"OP8\_C16\_00678" 29408 "s59E13H2" 0 "Ribosomal RNA large subunit methyltransferase H"  
"OP8\_C16\_00678" 29408 "s59E25H2" 0 "Ribosomal RNA large subunit methyltransferase H"  
"OP8\_C16\_00678" 29408 "s59E5H2" 0 "Ribosomal RNA large subunit methyltransferase H"  
"OP8\_C16\_00678" 29408 "s63E6H2" 0 "Ribosomal RNA large subunit methyltransferase H"  
"OP8\_C16\_00680" 29410 "s59E13H2" 0 "Ribosomal silencing factor RsfS"  
"OP8\_C16\_00680" 29410 "s59E25H2" 0 "Ribosomal silencing factor RsfS"  
"OP8\_C16\_00680" 29410 "s59E5H2" 0 "Ribosomal silencing factor RsfS"  
"OP8\_C16\_00680" 29410 "s63E6H2" 0 "Ribosomal silencing factor RsfS"  
"OP8\_C16\_00681" 29411 "s59E13H2" 0 "putative nicotinate-nucleotide adenylyltransferase"  
"OP8\_C16\_00681" 29411 "s59E25H2" 0 "putative nicotinate-nucleotide adenylyltransferase"  
"OP8\_C16\_00681" 29411 "s59E5H2" 0 "putative nicotinate-nucleotide adenylyltransferase"  
"OP8\_C16\_00681" 29411 "s63E6H2" 0 "putative nicotinate-nucleotide adenylyltransferase"  
"OP8\_C16\_00682" 29412 "s59E13H2" 0 "GTPase Obg"  
"OP8\_C16\_00682" 29412 "s59E25H2" 0 "GTPase Obg"  
"OP8\_C16\_00682" 29412 "s59E5H2" 0 "GTPase Obg"  
"OP8\_C16\_00682" 29412 "s63E6H2" 0 "GTPase Obg"  
"OP8\_C16\_00683" 29413 "s59E13H2" 0 "50S ribosomal protein L27"  
"OP8\_C16\_00683" 29413 "s59E25H2" 0 "50S ribosomal protein L27"  
"OP8\_C16\_00683" 29413 "s59E5H2" 0 "50S ribosomal protein L27"  
"OP8\_C16\_00683" 29413 "s63E6H2" 0 "50S ribosomal protein L27"  
"OP8\_C16\_00684" 29414 "s59E13H2" 0 "50S ribosomal protein L21"  
"OP8\_C16\_00684" 29414 "s59E25H2" 0 "50S ribosomal protein L21"  
"OP8\_C16\_00684" 29414 "s59E5H2" 0 "50S ribosomal protein L21"  
"OP8\_C16\_00684" 29414 "s63E6H2" 0 "50S ribosomal protein L21"  
"OP8\_C16\_00686" 29416 "s59E13H2" 0 "HTH-type transcriptional regulator Ptr1"  
"OP8\_C16\_00686" 29416 "s59E25H2" 0 "HTH-type transcriptional regulator Ptr1"  
"OP8\_C16\_00686" 29416 "s59E5H2" 0 "HTH-type transcriptional regulator Ptr1"  
"OP8\_C16\_00686" 29416 "s63E6H2" 0 "HTH-type transcriptional regulator Ptr1"  
"OP8\_C16\_00687" 29417 "s59E13H2" 0 "putative FAD-linked oxidoreductase"  
"OP8\_C16\_00687" 29417 "s59E25H2" 0 "putative FAD-linked oxidoreductase"

"OP8\_C16\_00687" 29417 "s59E5H2" 0 "putative FAD-linked oxidoreductase"  
"OP8\_C16\_00687" 29417 "s63E6H2" 0 "putative FAD-linked oxidoreductase"  
"OP8\_C16\_00688" 29418 "s59E13H2" 0 "Glutamate synthase [NADPH] large chain"  
"OP8\_C16\_00688" 29418 "s59E25H2" 0 "Glutamate synthase [NADPH] large chain"  
"OP8\_C16\_00688" 29418 "s59E5H2" 0 "Glutamate synthase [NADPH] large chain"  
"OP8\_C16\_00688" 29418 "s63E6H2" 0 "Glutamate synthase [NADPH] large chain"  
"OP8\_C16\_00689" 29419 "s59E13H2" 0 "Glutamate synthase [NADPH] large chain precursor"  
"OP8\_C16\_00689" 29419 "s59E25H2" 0 "Glutamate synthase [NADPH] large chain precursor"  
"OP8\_C16\_00689" 29419 "s59E5H2" 0 "Glutamate synthase [NADPH] large chain precursor"  
"OP8\_C16\_00689" 29419 "s63E6H2" 0 "Glutamate synthase [NADPH] large chain precursor"  
"OP8\_C16\_00690" 29420 "s59E13H2" 0 "glucosamine--fructose-6-phosphate aminotransferase"  
"OP8\_C16\_00690" 29420 "s59E25H2" 0 "glucosamine--fructose-6-phosphate aminotransferase"  
"OP8\_C16\_00690" 29420 "s59E5H2" 0.01990774 "glucosamine--fructose-6-phosphate aminotransferase"  
"OP8\_C16\_00690" 29420 "s63E6H2" 0 "glucosamine--fructose-6-phosphate aminotransferase"  
"OP8\_C16\_00694" 29424 "s59E13H2" 0 "hypothetical protein"  
"OP8\_C16\_00694" 29424 "s59E25H2" 0 "hypothetical protein"  
"OP8\_C16\_00694" 29424 "s59E5H2" 0 "hypothetical protein"  
"OP8\_C16\_00694" 29424 "s63E6H2" 0 "hypothetical protein"  
"OP8\_C16\_00695" 29425 "s59E13H2" 0 "Glutamyl-tRNA(Gln) amidotransferase subunit A"  
"OP8\_C16\_00695" 29425 "s59E25H2" 0 "Glutamyl-tRNA(Gln) amidotransferase subunit A"  
"OP8\_C16\_00695" 29425 "s59E5H2" 0 "Glutamyl-tRNA(Gln) amidotransferase subunit A"  
"OP8\_C16\_00695" 29425 "s63E6H2" 0 "Glutamyl-tRNA(Gln) amidotransferase subunit A"  
"OP8\_C16\_00696" 29426 "s59E13H2" 0 "F420-non-reducing hydrogenase subunit G"  
"OP8\_C16\_00696" 29426 "s59E25H2" 0 "F420-non-reducing hydrogenase subunit G"  
"OP8\_C16\_00696" 29426 "s59E5H2" 0 "F420-non-reducing hydrogenase subunit G"  
"OP8\_C16\_00696" 29426 "s63E6H2" 0 "F420-non-reducing hydrogenase subunit G"  
"OP8\_C16\_00697" 29427 "s59E13H2" 0 "F420-non-reducing hydrogenase subunit A"  
"OP8\_C16\_00697" 29427 "s59E25H2" 0 "F420-non-reducing hydrogenase subunit A"  
"OP8\_C16\_00697" 29427 "s59E5H2" 0 "F420-non-reducing hydrogenase subunit A"  
"OP8\_C16\_00697" 29427 "s63E6H2" 0 "F420-non-reducing hydrogenase subunit A"  
"OP8\_C16\_00698" 29428 "s59E13H2" 0 "Hydrogenase 2 maturation protease"  
"OP8\_C16\_00698" 29428 "s59E25H2" 0 "Hydrogenase 2 maturation protease"  
"OP8\_C16\_00698" 29428 "s59E5H2" 0 "Hydrogenase 2 maturation protease"  
"OP8\_C16\_00698" 29428 "s63E6H2" 0 "Hydrogenase 2 maturation protease"  
"OP8\_C16\_00700" 29430 "s59E13H2" 0 "hypothetical protein"  
"OP8\_C16\_00700" 29430 "s59E25H2" 0 "hypothetical protein"  
"OP8\_C16\_00700" 29430 "s59E5H2" 0 "hypothetical protein"  
"OP8\_C16\_00700" 29430 "s63E6H2" 0 "hypothetical protein"  
"OP8\_C16\_00701" 29431 "s59E13H2" 0 "Serine/threonine-protein kinase RsbT"  
"OP8\_C16\_00701" 29431 "s59E25H2" 0 "Serine/threonine-protein kinase RsbT"  
"OP8\_C16\_00701" 29431 "s59E5H2" 0 "Serine/threonine-protein kinase RsbT"  
"OP8\_C16\_00701" 29431 "s63E6H2" 0 "Serine/threonine-protein kinase RsbT"  
"OP8\_C16\_00702" 29432 "s59E13H2" 0 "Periplasmic [Fe] hydrogenase large subunit"  
"OP8\_C16\_00702" 29432 "s59E25H2" 0 "Periplasmic [Fe] hydrogenase large subunit"  
"OP8\_C16\_00702" 29432 "s59E5H2" 0 "Periplasmic [Fe] hydrogenase large subunit"  
"OP8\_C16\_00702" 29432 "s63E6H2" 0.00439722 "Periplasmic [Fe] hydrogenase large subunit"  
"OP8\_C16\_00703" 29433 "s59E13H2" 0 "DRTGG domain protein"

"OP8\_C16\_00703" 29433 "s59E25H2" 0 "DRTGG domain protein"  
"OP8\_C16\_00703" 29433 "s59E5H2" 0 "DRTGG domain protein"  
"OP8\_C16\_00703" 29433 "s63E6H2" 0.003448486 "DRTGG domain protein"  
"OP8\_C16\_00704" 29434 "s59E13H2" 0 "PHP domain protein"  
"OP8\_C16\_00704" 29434 "s59E25H2" 0 "PHP domain protein"  
"OP8\_C16\_00704" 29434 "s59E5H2" 0 "PHP domain protein"  
"OP8\_C16\_00704" 29434 "s63E6H2" 0.004617602 "PHP domain protein"  
"OP8\_C16\_00705" 29435 "s59E13H2" 0 "Signal-transduction histidine kinase senX3"  
"OP8\_C16\_00705" 29435 "s59E25H2" 0 "Signal-transduction histidine kinase senX3"  
"OP8\_C16\_00705" 29435 "s59E5H2" 0 "Signal-transduction histidine kinase senX3"  
"OP8\_C16\_00705" 29435 "s63E6H2" 0.004900068 "Signal-transduction histidine kinase senX3"  
"OP8\_C16\_00706" 29436 "s59E13H2" 0 "Nitrogen regulation protein NR(I)"  
"OP8\_C16\_00706" 29436 "s59E25H2" 0 "Nitrogen regulation protein NR(I)"  
"OP8\_C16\_00706" 29436 "s59E5H2" 0 "Nitrogen regulation protein NR(I)"  
"OP8\_C16\_00706" 29436 "s63E6H2" 0 "Nitrogen regulation protein NR(I)"  
"OP8\_C16\_00707" 29437 "s59E13H2" 0 "Transcriptional regulatory protein ZraR"  
"OP8\_C16\_00707" 29437 "s59E25H2" 0 "Transcriptional regulatory protein ZraR"  
"OP8\_C16\_00707" 29437 "s59E5H2" 0 "Transcriptional regulatory protein ZraR"  
"OP8\_C16\_00707" 29437 "s63E6H2" 0 "Transcriptional regulatory protein ZraR"  
"OP8\_C16\_00708" 29438 "s59E13H2" 0 "Sensor protein ZraS"  
"OP8\_C16\_00708" 29438 "s59E25H2" 0 "Sensor protein ZraS"  
"OP8\_C16\_00708" 29438 "s59E5H2" 0 "Sensor protein ZraS"  
"OP8\_C16\_00708" 29438 "s63E6H2" 0.001346956 "Sensor protein ZraS"  
"OP8\_C16\_00709" 29439 "s59E13H2" 0 "hypothetical protein"  
"OP8\_C16\_00709" 29439 "s59E25H2" 0 "hypothetical protein"  
"OP8\_C16\_00709" 29439 "s59E5H2" 0 "hypothetical protein"  
"OP8\_C16\_00709" 29439 "s63E6H2" 0 "hypothetical protein"  
"OP8\_C16\_00710" 29440 "s59E13H2" 0 "F420-non-reducing hydrogenase vhc iron-sulfur subunit D"  
"OP8\_C16\_00710" 29440 "s59E25H2" 0 "F420-non-reducing hydrogenase vhc iron-sulfur subunit D"  
"OP8\_C16\_00710" 29440 "s59E5H2" 0 "F420-non-reducing hydrogenase vhc iron-sulfur subunit D"  
"OP8\_C16\_00710" 29440 "s63E6H2" 0 "F420-non-reducing hydrogenase vhc iron-sulfur subunit D"  
"OP8\_C16\_00711" 29441 "s59E13H2" 0 "Heterodisulfide reductase subunit A-like protein"  
"OP8\_C16\_00711" 29441 "s59E25H2" 0 "Heterodisulfide reductase subunit A-like protein"  
"OP8\_C16\_00711" 29441 "s59E5H2" 0 "Heterodisulfide reductase subunit A-like protein"  
"OP8\_C16\_00711" 29441 "s63E6H2" 0 "Heterodisulfide reductase subunit A-like protein"  
"OP8\_C16\_00713" 29443 "s59E13H2" 0 "NADP-reducing hydrogenase subunit HndC"  
"OP8\_C16\_00713" 29443 "s59E25H2" 0 "NADP-reducing hydrogenase subunit HndC"  
"OP8\_C16\_00713" 29443 "s59E5H2" 0 "NADP-reducing hydrogenase subunit HndC"  
"OP8\_C16\_00713" 29443 "s63E6H2" 0 "NADP-reducing hydrogenase subunit HndC"  
"OP8\_C16\_00714" 29444 "s59E13H2" 0 "NADP-reducing hydrogenase subunit HndB"  
"OP8\_C16\_00714" 29444 "s59E25H2" 0 "NADP-reducing hydrogenase subunit HndB"  
"OP8\_C16\_00714" 29444 "s59E5H2" 0 "NADP-reducing hydrogenase subunit HndB"  
"OP8\_C16\_00714" 29444 "s63E6H2" 0 "NADP-reducing hydrogenase subunit HndB"  
"OP8\_C16\_00715" 29445 "s59E13H2" 0 "CoB--CoM heterodisulfide reductase iron-sulfur subunit A"  
"OP8\_C16\_00715" 29445 "s59E25H2" 0 "CoB--CoM heterodisulfide reductase iron-sulfur subunit A"  
"OP8\_C16\_00715" 29445 "s59E5H2" 0 "CoB--CoM heterodisulfide reductase iron-sulfur subunit A"  
"OP8\_C16\_00715" 29445 "s63E6H2" 0 "CoB--CoM heterodisulfide reductase iron-sulfur subunit A"

"OP8\_C16\_00716" 29446 "s59E13H2" 0 "Heterodisulfide reductase subunit C-like protein"  
"OP8\_C16\_00716" 29446 "s59E25H2" 0 "Heterodisulfide reductase subunit C-like protein"  
"OP8\_C16\_00716" 29446 "s59E5H2" 0 "Heterodisulfide reductase subunit C-like protein"  
"OP8\_C16\_00716" 29446 "s63E6H2" 0 "Heterodisulfide reductase subunit C-like protein"  
"OP8\_C16\_00717" 29447 "s59E13H2" 0 "Hydrogenase isoenzymes nickel incorporation protein HypB"  
"OP8\_C16\_00717" 29447 "s59E25H2" 0 "Hydrogenase isoenzymes nickel incorporation protein HypB"  
"OP8\_C16\_00717" 29447 "s59E5H2" 0 "Hydrogenase isoenzymes nickel incorporation protein HypB"  
"OP8\_C16\_00717" 29447 "s63E6H2" 0 "Hydrogenase isoenzymes nickel incorporation protein HypB"  
"OP8\_C16\_00718" 29448 "s59E13H2" 0 "Hydrogenase/urease nickel incorporation protein HypA"  
"OP8\_C16\_00718" 29448 "s59E25H2" 0 "Hydrogenase/urease nickel incorporation protein HypA"  
"OP8\_C16\_00718" 29448 "s59E5H2" 0 "Hydrogenase/urease nickel incorporation protein HypA"  
"OP8\_C16\_00718" 29448 "s63E6H2" 0 "Hydrogenase/urease nickel incorporation protein HypA"  
"OP8\_C16\_00719" 29449 "s59E13H2" 0 "Phosphate-selective porin O and P"  
"OP8\_C16\_00719" 29449 "s59E25H2" 0 "Phosphate-selective porin O and P"  
"OP8\_C16\_00719" 29449 "s59E5H2" 0 "Phosphate-selective porin O and P"  
"OP8\_C16\_00719" 29449 "s63E6H2" 0 "Phosphate-selective porin O and P"  
"OP8\_C16\_00720" 29450 "s59E13H2" 0 "Prolyl tripeptidyl peptidase precursor"  
"OP8\_C16\_00720" 29450 "s59E25H2" 0 "Prolyl tripeptidyl peptidase precursor"  
"OP8\_C16\_00720" 29450 "s59E5H2" 0 "Prolyl tripeptidyl peptidase precursor"  
"OP8\_C16\_00720" 29450 "s63E6H2" 0 "Prolyl tripeptidyl peptidase precursor"  
"OP8\_C16\_00721" 29451 "s59E13H2" 0 "putative Mg(2+) transport ATPase"  
"OP8\_C16\_00721" 29451 "s59E25H2" 0 "putative Mg(2+) transport ATPase"  
"OP8\_C16\_00721" 29451 "s59E5H2" 0 "putative Mg(2+) transport ATPase"  
"OP8\_C16\_00721" 29451 "s63E6H2" 0 "putative Mg(2+) transport ATPase"  
"OP8\_C16\_00722" 29452 "s59E13H2" 0 "dITP/XTP pyrophosphatase"  
"OP8\_C16\_00722" 29452 "s59E25H2" 0 "dITP/XTP pyrophosphatase"  
"OP8\_C16\_00722" 29452 "s59E5H2" 0 "dITP/XTP pyrophosphatase"  
"OP8\_C16\_00722" 29452 "s63E6H2" 0 "dITP/XTP pyrophosphatase"  
"OP8\_C16\_00723" 29453 "s59E13H2" 0 "ComE operon protein 1"  
"OP8\_C16\_00723" 29453 "s59E25H2" 0 "ComE operon protein 1"  
"OP8\_C16\_00723" 29453 "s59E5H2" 0 "ComE operon protein 1"  
"OP8\_C16\_00723" 29453 "s63E6H2" 0 "ComE operon protein 1"  
"OP8\_C16\_00724" 29454 "s59E13H2" 0 "Tyrosine recombinase XerD"  
"OP8\_C16\_00724" 29454 "s59E25H2" 0 "Tyrosine recombinase XerD"  
"OP8\_C16\_00724" 29454 "s59E5H2" 0 "Tyrosine recombinase XerD"  
"OP8\_C16\_00724" 29454 "s63E6H2" 0 "Tyrosine recombinase XerD"  
"OP8\_C16\_00725" 29455 "s59E13H2" 0 "DNA topoisomerase 1"  
"OP8\_C16\_00725" 29455 "s59E25H2" 0 "DNA topoisomerase 1"  
"OP8\_C16\_00725" 29455 "s59E5H2" 0 "DNA topoisomerase 1"  
"OP8\_C16\_00725" 29455 "s63E6H2" 0 "DNA topoisomerase 1"  
"OP8\_C16\_00726" 29456 "s59E13H2" 0 "Exodeoxyribonuclease 7 small subunit"  
"OP8\_C16\_00726" 29456 "s59E25H2" 0 "Exodeoxyribonuclease 7 small subunit"  
"OP8\_C16\_00726" 29456 "s59E5H2" 0 "Exodeoxyribonuclease 7 small subunit"  
"OP8\_C16\_00726" 29456 "s63E6H2" 0 "Exodeoxyribonuclease 7 small subunit"  
"OP8\_C16\_00727" 29457 "s59E13H2" 0 "Exodeoxyribonuclease 7 large subunit"  
"OP8\_C16\_00727" 29457 "s59E25H2" 0 "Exodeoxyribonuclease 7 large subunit"  
"OP8\_C16\_00727" 29457 "s59E5H2" 0 "Exodeoxyribonuclease 7 large subunit"



"OP8\_C16\_00727" 29457 "s63E6H2" 0 "Exodeoxyribonuclease 7 large subunit"  
"OP8\_C16\_00728" 29458 "s59E13H2" 0 "hypothetical protein"  
"OP8\_C16\_00728" 29458 "s59E25H2" 0 "hypothetical protein"  
"OP8\_C16\_00728" 29458 "s59E5H2" 0 "hypothetical protein"  
"OP8\_C16\_00728" 29458 "s63E6H2" 0 "hypothetical protein"  
"OP8\_C16\_00729" 29459 "s59E13H2" 0 "Ribonuclease Y"  
"OP8\_C16\_00729" 29459 "s59E25H2" 0 "Ribonuclease Y"  
"OP8\_C16\_00729" 29459 "s59E5H2" 0 "Ribonuclease Y"  
"OP8\_C16\_00729" 29459 "s63E6H2" 0 "Ribonuclease Y"  
"OP8\_C16\_00730" 29460 "s59E13H2" 0 "Cell division protein ZapA"  
"OP8\_C16\_00730" 29460 "s59E25H2" 0 "Cell division protein ZapA"  
"OP8\_C16\_00730" 29460 "s59E5H2" 0 "Cell division protein ZapA"  
"OP8\_C16\_00730" 29460 "s63E6H2" 0 "Cell division protein ZapA"  
"OP8\_C16\_00731" 29461 "s59E13H2" 0 "hypothetical protein"  
"OP8\_C16\_00731" 29461 "s59E25H2" 0 "hypothetical protein"  
"OP8\_C16\_00731" 29461 "s59E5H2" 0 "hypothetical protein"  
"OP8\_C16\_00731" 29461 "s63E6H2" 0 "hypothetical protein"  
"OP8\_C16\_00732" 29462 "s59E13H2" 0 "Phenylalanine--tRNA ligase beta subunit"  
"OP8\_C16\_00732" 29462 "s59E25H2" 0 "Phenylalanine--tRNA ligase beta subunit"  
"OP8\_C16\_00732" 29462 "s59E5H2" 0 "Phenylalanine--tRNA ligase beta subunit"  
"OP8\_C16\_00732" 29462 "s63E6H2" 0 "Phenylalanine--tRNA ligase beta subunit"  
"OP8\_C16\_00733" 29463 "s59E13H2" 0 "Phenylalanine--tRNA ligase alpha subunit"  
"OP8\_C16\_00733" 29463 "s59E25H2" 0 "Phenylalanine--tRNA ligase alpha subunit"  
"OP8\_C16\_00733" 29463 "s59E5H2" 0 "Phenylalanine--tRNA ligase alpha subunit"  
"OP8\_C16\_00733" 29463 "s63E6H2" 0 "Phenylalanine--tRNA ligase alpha subunit"  
"OP8\_C16\_00734" 29464 "s59E13H2" 0 "50S ribosomal protein L20"  
"OP8\_C16\_00734" 29464 "s59E25H2" 0 "50S ribosomal protein L20"  
"OP8\_C16\_00734" 29464 "s59E5H2" 0 "50S ribosomal protein L20"  
"OP8\_C16\_00734" 29464 "s63E6H2" 0 "50S ribosomal protein L20"  
"OP8\_C16\_00735" 29465 "s59E13H2" 0 "Translation initiation factor IF-3"  
"OP8\_C16\_00735" 29465 "s59E25H2" 0 "Translation initiation factor IF-3"  
"OP8\_C16\_00735" 29465 "s59E5H2" 0 "Translation initiation factor IF-3"  
"OP8\_C16\_00735" 29465 "s63E6H2" 0 "Translation initiation factor IF-3"  
"OP8\_C16\_00736" 29466 "s59E13H2" 0 "Threonine--tRNA ligase"  
"OP8\_C16\_00736" 29466 "s59E25H2" 0 "Threonine--tRNA ligase"  
"OP8\_C16\_00736" 29466 "s59E5H2" 0 "Threonine--tRNA ligase"  
"OP8\_C16\_00736" 29466 "s63E6H2" 0 "Threonine--tRNA ligase"  
"OP8\_C16\_00738" 29468 "s59E13H2" 0 "Phosphodiesterase"  
"OP8\_C16\_00738" 29468 "s59E25H2" 0 "Phosphodiesterase"  
"OP8\_C16\_00738" 29468 "s59E5H2" 0 "Phosphodiesterase"  
"OP8\_C16\_00738" 29468 "s63E6H2" 0 "Phosphodiesterase"  
"OP8\_C16\_00739" 29469 "s59E13H2" 0 "Cyclic 2,3-diphosphoglycerate synthetase"  
"OP8\_C16\_00739" 29469 "s59E25H2" 0 "Cyclic 2,3-diphosphoglycerate synthetase"  
"OP8\_C16\_00739" 29469 "s59E5H2" 0 "Cyclic 2,3-diphosphoglycerate synthetase"  
"OP8\_C16\_00739" 29469 "s63E6H2" 0 "Cyclic 2,3-diphosphoglycerate synthetase"  
"OP8\_C16\_00740" 29470 "s59E13H2" 0 "Carbamate kinase"  
"OP8\_C16\_00740" 29470 "s59E25H2" 0 "Carbamate kinase"

"OP8\_C16\_00740" 29470 "s59E5H2" 0 "Carbamate kinase"  
"OP8\_C16\_00740" 29470 "s63E6H2" 0 "Carbamate kinase"  
"OP8\_C16\_00741" 29471 "s59E13H2" 0 "Ornithine carbamoyltransferase"  
"OP8\_C16\_00741" 29471 "s59E25H2" 0 "Ornithine carbamoyltransferase"  
"OP8\_C16\_00741" 29471 "s59E5H2" 0 "Ornithine carbamoyltransferase"  
"OP8\_C16\_00741" 29471 "s63E6H2" 0 "Ornithine carbamoyltransferase"  
"OP8\_C16\_00743" 29473 "s59E13H2" 0 "Selenocysteine-specific elongation factor"  
"OP8\_C16\_00743" 29473 "s59E25H2" 0 "Selenocysteine-specific elongation factor"  
"OP8\_C16\_00743" 29473 "s59E5H2" 0 "Selenocysteine-specific elongation factor"  
"OP8\_C16\_00743" 29473 "s63E6H2" 0 "Selenocysteine-specific elongation factor"  
"OP8\_C16\_00744" 29474 "s59E13H2" 0 "Ribonuclease R"  
"OP8\_C16\_00744" 29474 "s59E25H2" 0 "Ribonuclease R"  
"OP8\_C16\_00744" 29474 "s59E5H2" 0 "Ribonuclease R"  
"OP8\_C16\_00744" 29474 "s63E6H2" 0 "Ribonuclease R"  
"OP8\_C16\_00746" 29476 "s59E13H2" 0 "Type III pantothenate kinase"  
"OP8\_C16\_00746" 29476 "s59E25H2" 0 "Type III pantothenate kinase"  
"OP8\_C16\_00746" 29476 "s59E5H2" 0 "Type III pantothenate kinase"  
"OP8\_C16\_00746" 29476 "s63E6H2" 0 "Type III pantothenate kinase"  
"OP8\_C16\_00747" 29477 "s59E13H2" 0 "Bifunctional ligase/repressor BirA"  
"OP8\_C16\_00747" 29477 "s59E25H2" 0 "Bifunctional ligase/repressor BirA"  
"OP8\_C16\_00747" 29477 "s59E5H2" 0 "Bifunctional ligase/repressor BirA"  
"OP8\_C16\_00747" 29477 "s63E6H2" 0 "Bifunctional ligase/repressor BirA"  
"OP8\_C16\_00748" 29478 "s59E13H2" 0 "Valine--tRNA ligase"  
"OP8\_C16\_00748" 29478 "s59E25H2" 0 "Valine--tRNA ligase"  
"OP8\_C16\_00748" 29478 "s59E5H2" 0 "Valine--tRNA ligase"  
"OP8\_C16\_00748" 29478 "s63E6H2" 0 "Valine--tRNA ligase"  
"OP8\_C16\_00749" 29479 "s59E13H2" 0 "DNA polymerase III subunit alpha"  
"OP8\_C16\_00749" 29479 "s59E25H2" 0 "DNA polymerase III subunit alpha"  
"OP8\_C16\_00749" 29479 "s59E5H2" 0 "DNA polymerase III subunit alpha"  
"OP8\_C16\_00749" 29479 "s63E6H2" 0 "DNA polymerase III subunit alpha"  
"OP8\_C16\_00750" 29480 "s59E13H2" 0 "hypothetical protein"  
"OP8\_C16\_00750" 29480 "s59E25H2" 0 "hypothetical protein"  
"OP8\_C16\_00750" 29480 "s59E5H2" 0 "hypothetical protein"  
"OP8\_C16\_00750" 29480 "s63E6H2" 0 "hypothetical protein"  
"OP8\_C16\_00751" 29481 "s59E13H2" 0 "UDP-glucose 6-dehydrogenase TuoD"  
"OP8\_C16\_00751" 29481 "s59E25H2" 0 "UDP-glucose 6-dehydrogenase TuoD"  
"OP8\_C16\_00751" 29481 "s59E5H2" 0 "UDP-glucose 6-dehydrogenase TuoD"  
"OP8\_C16\_00751" 29481 "s63E6H2" 0 "UDP-glucose 6-dehydrogenase TuoD"  
"OP8\_C16\_00752" 29482 "s59E13H2" 0 "UDP-N-acetyl-D-glucosamine 6-dehydrogenase"  
"OP8\_C16\_00752" 29482 "s59E25H2" 0 "UDP-N-acetyl-D-glucosamine 6-dehydrogenase"  
"OP8\_C16\_00752" 29482 "s59E5H2" 0 "UDP-N-acetyl-D-glucosamine 6-dehydrogenase"  
"OP8\_C16\_00752" 29482 "s63E6H2" 0 "UDP-N-acetyl-D-glucosamine 6-dehydrogenase"  
"OP8\_C16\_00753" 29483 "s59E13H2" 0 "UDP-glucose 4-epimerase"  
"OP8\_C16\_00753" 29483 "s59E25H2" 0 "UDP-glucose 4-epimerase"  
"OP8\_C16\_00753" 29483 "s59E5H2" 0 "UDP-glucose 4-epimerase"  
"OP8\_C16\_00753" 29483 "s63E6H2" 0 "UDP-glucose 4-epimerase"  
"OP8\_C16\_00754" 29484 "s59E13H2" 0 "putative adenylyl-sulfate kinase"

"OP8\_C16\_00754" 29484 "s59E25H2" 0 "putative adenylyl-sulfate kinase"  
"OP8\_C16\_00754" 29484 "s59E5H2" 0 "putative adenylyl-sulfate kinase"  
"OP8\_C16\_00754" 29484 "s63E6H2" 0 "putative adenylyl-sulfate kinase"  
"OP8\_C16\_00755" 29485 "s59E13H2" 0 "Sulfotransferase domain protein"  
"OP8\_C16\_00755" 29485 "s59E25H2" 0 "Sulfotransferase domain protein"  
"OP8\_C16\_00755" 29485 "s59E5H2" 0 "Sulfotransferase domain protein"  
"OP8\_C16\_00755" 29485 "s63E6H2" 0 "Sulfotransferase domain protein"  
"OP8\_C16\_00756" 29486 "s59E13H2" 0 "Sulfate adenylyltransferase"  
"OP8\_C16\_00756" 29486 "s59E25H2" 0 "Sulfate adenylyltransferase"  
"OP8\_C16\_00756" 29486 "s59E5H2" 0 "Sulfate adenylyltransferase"  
"OP8\_C16\_00756" 29486 "s63E6H2" 0 "Sulfate adenylyltransferase"  
"OP8\_C16\_00757" 29487 "s59E13H2" 0 "hypothetical protein"  
"OP8\_C16\_00757" 29487 "s59E25H2" 0 "hypothetical protein"  
"OP8\_C16\_00757" 29487 "s59E5H2" 0 "hypothetical protein"  
"OP8\_C16\_00757" 29487 "s63E6H2" 0 "hypothetical protein"  
"OP8\_C16\_00758" 29488 "s59E13H2" 0 "PhoH-like protein"  
"OP8\_C16\_00758" 29488 "s59E25H2" 0 "PhoH-like protein"  
"OP8\_C16\_00758" 29488 "s59E5H2" 0 "PhoH-like protein"  
"OP8\_C16\_00758" 29488 "s63E6H2" 0 "PhoH-like protein"  
"OP8\_C16\_00759" 29489 "s59E13H2" 0 "hypothetical protein"  
"OP8\_C16\_00759" 29489 "s59E25H2" 0 "hypothetical protein"  
"OP8\_C16\_00759" 29489 "s59E5H2" 0 "hypothetical protein"  
"OP8\_C16\_00759" 29489 "s63E6H2" 0 "hypothetical protein"  
"OP8\_C16\_00760" 29490 "s59E13H2" 0 "Endoribonuclease YbeY"  
"OP8\_C16\_00760" 29490 "s59E25H2" 0 "Endoribonuclease YbeY"  
"OP8\_C16\_00760" 29490 "s59E5H2" 0 "Endoribonuclease YbeY"  
"OP8\_C16\_00760" 29490 "s63E6H2" 0 "Endoribonuclease YbeY"  
"OP8\_C16\_00761" 29491 "s59E13H2" 0 "Magnesium and cobalt efflux protein CorC"  
"OP8\_C16\_00761" 29491 "s59E25H2" 0 "Magnesium and cobalt efflux protein CorC"  
"OP8\_C16\_00761" 29491 "s59E5H2" 0 "Magnesium and cobalt efflux protein CorC"  
"OP8\_C16\_00761" 29491 "s63E6H2" 0 "Magnesium and cobalt efflux protein CorC"  
"OP8\_C16\_00762" 29492 "s59E13H2" 0 "GTPase Era"  
"OP8\_C16\_00762" 29492 "s59E25H2" 0 "GTPase Era"  
"OP8\_C16\_00762" 29492 "s59E5H2" 0 "GTPase Era"  
"OP8\_C16\_00762" 29492 "s63E6H2" 0 "GTPase Era"  
"OP8\_C16\_00765" 29495 "s59E13H2" 0 "hypothetical protein"  
"OP8\_C16\_00765" 29495 "s59E25H2" 0 "hypothetical protein"  
"OP8\_C16\_00765" 29495 "s59E5H2" 0 "hypothetical protein"  
"OP8\_C16\_00765" 29495 "s63E6H2" 0 "hypothetical protein"  
"OP8\_C16\_00766" 29496 "s59E13H2" 0.004864775 "hypothetical protein"  
"OP8\_C16\_00766" 29496 "s59E25H2" 0 "hypothetical protein"  
"OP8\_C16\_00766" 29496 "s59E5H2" 0.04564375 "hypothetical protein"  
"OP8\_C16\_00766" 29496 "s63E6H2" 0 "hypothetical protein"  
"OP8\_C16\_00767" 29497 "s59E13H2" 0 "Molybdopterin molybdenumtransferase"  
"OP8\_C16\_00767" 29497 "s59E25H2" 0 "Molybdopterin molybdenumtransferase"  
"OP8\_C16\_00767" 29497 "s59E5H2" 0 "Molybdopterin molybdenumtransferase"  
"OP8\_C16\_00767" 29497 "s63E6H2" 0 "Molybdopterin molybdenumtransferase"

"OP8\_C16\_00768" 29498 "s59E13H2" 0 "Molybdopterin molybdenumtransferase"  
"OP8\_C16\_00768" 29498 "s59E25H2" 0 "Molybdopterin molybdenumtransferase"  
"OP8\_C16\_00768" 29498 "s59E5H2" 0 "Molybdopterin molybdenumtransferase"  
"OP8\_C16\_00768" 29498 "s63E6H2" 0 "Molybdopterin molybdenumtransferase"  
"OP8\_C16\_00769" 29499 "s59E13H2" 0 "Tellurite resistance protein TerB"  
"OP8\_C16\_00769" 29499 "s59E25H2" 0 "Tellurite resistance protein TerB"  
"OP8\_C16\_00769" 29499 "s59E5H2" 0 "Tellurite resistance protein TerB"  
"OP8\_C16\_00769" 29499 "s63E6H2" 0 "Tellurite resistance protein TerB"  
"OP8\_C16\_00770" 29500 "s59E13H2" 0 "p-aminobenzoyl-glutamate hydrolase subunit B"  
"OP8\_C16\_00770" 29500 "s59E25H2" 0 "p-aminobenzoyl-glutamate hydrolase subunit B"  
"OP8\_C16\_00770" 29500 "s59E5H2" 0 "p-aminobenzoyl-glutamate hydrolase subunit B"  
"OP8\_C16\_00770" 29500 "s63E6H2" 0 "p-aminobenzoyl-glutamate hydrolase subunit B"  
"OP8\_C16\_00771" 29501 "s59E13H2" 0 "Transcriptional regulatory protein DegU"  
"OP8\_C16\_00771" 29501 "s59E25H2" 0 "Transcriptional regulatory protein DegU"  
"OP8\_C16\_00771" 29501 "s59E5H2" 0 "Transcriptional regulatory protein DegU"  
"OP8\_C16\_00771" 29501 "s63E6H2" 0 "Transcriptional regulatory protein DegU"  
"OP8\_C16\_00772" 29502 "s59E13H2" 0 "hypothetical protein"  
"OP8\_C16\_00772" 29502 "s59E25H2" 0 "hypothetical protein"  
"OP8\_C16\_00772" 29502 "s59E5H2" 0 "hypothetical protein"  
"OP8\_C16\_00772" 29502 "s63E6H2" 0 "hypothetical protein"  
"OP8\_C16\_00773" 29503 "s59E13H2" 0 "hypothetical protein"  
"OP8\_C16\_00773" 29503 "s59E25H2" 0 "hypothetical protein"  
"OP8\_C16\_00773" 29503 "s59E5H2" 0 "hypothetical protein"  
"OP8\_C16\_00773" 29503 "s63E6H2" 0 "hypothetical protein"  
"OP8\_C16\_00774" 29504 "s59E13H2" 0 "hypothetical protein"  
"OP8\_C16\_00774" 29504 "s59E25H2" 0 "hypothetical protein"  
"OP8\_C16\_00774" 29504 "s59E5H2" 0 "hypothetical protein"  
"OP8\_C16\_00774" 29504 "s63E6H2" 0 "hypothetical protein"  
"OP8\_C16\_00775" 29505 "s59E13H2" 0 "hypothetical protein"  
"OP8\_C16\_00775" 29505 "s59E25H2" 0 "hypothetical protein"  
"OP8\_C16\_00775" 29505 "s59E5H2" 0 "hypothetical protein"  
"OP8\_C16\_00775" 29505 "s63E6H2" 0 "hypothetical protein"  
"OP8\_C16\_00776" 29506 "s59E13H2" 0 "Transposase"  
"OP8\_C16\_00776" 29506 "s59E25H2" 0 "Transposase"  
"OP8\_C16\_00776" 29506 "s59E5H2" 0 "Transposase"  
"OP8\_C16\_00776" 29506 "s63E6H2" 0.002495231 "Transposase"  
"OP8\_C16\_00777" 29507 "s59E13H2" 0 "hypothetical protein"  
"OP8\_C16\_00777" 29507 "s59E25H2" 0 "hypothetical protein"  
"OP8\_C16\_00777" 29507 "s59E5H2" 0 "hypothetical protein"  
"OP8\_C16\_00777" 29507 "s63E6H2" 0 "hypothetical protein"  
"OP8\_C16\_00778" 29508 "s59E13H2" 0 "hypothetical protein"  
"OP8\_C16\_00778" 29508 "s59E25H2" 0 "hypothetical protein"  
"OP8\_C16\_00778" 29508 "s59E5H2" 0 "hypothetical protein"  
"OP8\_C16\_00778" 29508 "s63E6H2" 0 "hypothetical protein"  
"OP8\_C16\_00779" 29509 "s59E13H2" 0 "Decarbamoylnovobiocin carbamoyltransferase"  
"OP8\_C16\_00779" 29509 "s59E25H2" 0 "Decarbamoylnovobiocin carbamoyltransferase"  
"OP8\_C16\_00779" 29509 "s59E5H2" 0 "Decarbamoylnovobiocin carbamoyltransferase"

"OP8\_C16\_00779" 29509 "s63E6H2" 0 "Decarbamoylnovobiocin carbamoyltransferase"  
"OP8\_C16\_00780" 29510 "s59E13H2" 0 "hypothetical protein"  
"OP8\_C16\_00780" 29510 "s59E25H2" 0 "hypothetical protein"  
"OP8\_C16\_00780" 29510 "s59E5H2" 0 "hypothetical protein"  
"OP8\_C16\_00780" 29510 "s63E6H2" 0 "hypothetical protein"  
"OP8\_C16\_00782" 29512 "s59E13H2" 0 "Chromosome partition protein Smc"  
"OP8\_C16\_00782" 29512 "s59E25H2" 0 "Chromosome partition protein Smc"  
"OP8\_C16\_00782" 29512 "s59E5H2" 0 "Chromosome partition protein Smc"  
"OP8\_C16\_00782" 29512 "s63E6H2" 0 "Chromosome partition protein Smc"  
"OP8\_C16\_00783" 29513 "s59E13H2" 0 "Sodium/proline symporter"  
"OP8\_C16\_00783" 29513 "s59E25H2" 0 "Sodium/proline symporter"  
"OP8\_C16\_00783" 29513 "s59E5H2" 0 "Sodium/proline symporter"  
"OP8\_C16\_00783" 29513 "s63E6H2" 0 "Sodium/proline symporter"  
"OP8\_C16\_00784" 29514 "s59E13H2" 0 "Sodium/proline symporter"  
"OP8\_C16\_00784" 29514 "s59E25H2" 0 "Sodium/proline symporter"  
"OP8\_C16\_00784" 29514 "s59E5H2" 0 "Sodium/proline symporter"  
"OP8\_C16\_00784" 29514 "s63E6H2" 0 "Sodium/proline symporter"  
"OP8\_C16\_00785" 29515 "s59E13H2" 0 "Histone deacetylase-like amidohydrolase"  
"OP8\_C16\_00785" 29515 "s59E25H2" 0 "Histone deacetylase-like amidohydrolase"  
"OP8\_C16\_00785" 29515 "s59E5H2" 0 "Histone deacetylase-like amidohydrolase"  
"OP8\_C16\_00785" 29515 "s63E6H2" 0 "Histone deacetylase-like amidohydrolase"  
"OP8\_C16\_00786" 29516 "s59E13H2" 0 "FecR protein"  
"OP8\_C16\_00786" 29516 "s59E25H2" 0 "FecR protein"  
"OP8\_C16\_00786" 29516 "s59E5H2" 0 "FecR protein"  
"OP8\_C16\_00786" 29516 "s63E6H2" 0 "FecR protein"  
"OP8\_C16\_00787" 29517 "s59E13H2" 0 "Penicillin-binding protein 1A"  
"OP8\_C16\_00787" 29517 "s59E25H2" 0 "Penicillin-binding protein 1A"  
"OP8\_C16\_00787" 29517 "s59E5H2" 0 "Penicillin-binding protein 1A"  
"OP8\_C16\_00787" 29517 "s63E6H2" 0 "Penicillin-binding protein 1A"  
"OP8\_C16\_00788" 29518 "s59E13H2" 0 "Thymidylate kinase"  
"OP8\_C16\_00788" 29518 "s59E25H2" 0 "Thymidylate kinase"  
"OP8\_C16\_00788" 29518 "s59E5H2" 0 "Thymidylate kinase"  
"OP8\_C16\_00788" 29518 "s63E6H2" 0 "Thymidylate kinase"  
"OP8\_C16\_00789" 29519 "s59E13H2" 0 "putative periplasmic serine endoprotease DegP-like precursor"  
"OP8\_C16\_00789" 29519 "s59E25H2" 0 "putative periplasmic serine endoprotease DegP-like precursor"  
"OP8\_C16\_00789" 29519 "s59E5H2" 0 "putative periplasmic serine endoprotease DegP-like precursor"  
"OP8\_C16\_00789" 29519 "s63E6H2" 0 "putative periplasmic serine endoprotease DegP-like precursor"  
"OP8\_C16\_00790" 29520 "s59E13H2" 0 "Diaminopimelate epimerase"  
"OP8\_C16\_00790" 29520 "s59E25H2" 0 "Diaminopimelate epimerase"  
"OP8\_C16\_00790" 29520 "s59E5H2" 0 "Diaminopimelate epimerase"  
"OP8\_C16\_00790" 29520 "s63E6H2" 0 "Diaminopimelate epimerase"  
"OP8\_C16\_00791" 29521 "s59E13H2" 0 "Lon protease 1"  
"OP8\_C16\_00791" 29521 "s59E25H2" 0 "Lon protease 1"  
"OP8\_C16\_00791" 29521 "s59E5H2" 0 "Lon protease 1"  
"OP8\_C16\_00791" 29521 "s63E6H2" 0 "Lon protease 1"  
"OP8\_C16\_00792" 29522 "s59E13H2" 0 "Transcriptional repressor NrdR"  
"OP8\_C16\_00792" 29522 "s59E25H2" 0 "Transcriptional repressor NrdR"

"OP8\_C16\_00792" 29522 "s59E5H2" 0 "Transcriptional repressor NrdR"  
"OP8\_C16\_00792" 29522 "s63E6H2" 0 "Transcriptional repressor NrdR"  
"OP8\_C16\_00793" 29523 "s59E13H2" 0 "hypothetical protein"  
"OP8\_C16\_00793" 29523 "s59E25H2" 0 "hypothetical protein"  
"OP8\_C16\_00793" 29523 "s59E5H2" 0 "hypothetical protein"  
"OP8\_C16\_00793" 29523 "s63E6H2" 0 "hypothetical protein"  
"OP8\_C16\_00794" 29524 "s59E13H2" 0 "Opine dehydrogenase"  
"OP8\_C16\_00794" 29524 "s59E25H2" 0 "Opine dehydrogenase"  
"OP8\_C16\_00794" 29524 "s59E5H2" 0 "Opine dehydrogenase"  
"OP8\_C16\_00794" 29524 "s63E6H2" 0 "Opine dehydrogenase"  
"OP8\_C16\_00795" 29525 "s59E13H2" 0 "Nicotinate-nucleotide pyrophosphorylase [carboxylating]"  
"OP8\_C16\_00795" 29525 "s59E25H2" 0 "Nicotinate-nucleotide pyrophosphorylase [carboxylating]"  
"OP8\_C16\_00795" 29525 "s59E5H2" 0 "Nicotinate-nucleotide pyrophosphorylase [carboxylating]"  
"OP8\_C16\_00795" 29525 "s63E6H2" 0 "Nicotinate-nucleotide pyrophosphorylase [carboxylating]"  
"OP8\_C16\_00796" 29526 "s59E13H2" 0 "L-aspartate oxidase"  
"OP8\_C16\_00796" 29526 "s59E25H2" 0 "L-aspartate oxidase"  
"OP8\_C16\_00796" 29526 "s59E5H2" 0.01093134 "L-aspartate oxidase"  
"OP8\_C16\_00796" 29526 "s63E6H2" 0 "L-aspartate oxidase"  
"OP8\_C16\_00797" 29527 "s59E13H2" 0 "Isoleucine--tRNA ligase"  
"OP8\_C16\_00797" 29527 "s59E25H2" 0 "Isoleucine--tRNA ligase"  
"OP8\_C16\_00797" 29527 "s59E5H2" 0.004452682 "Isoleucine--tRNA ligase"  
"OP8\_C16\_00797" 29527 "s63E6H2" 0 "Isoleucine--tRNA ligase"  
"OP8\_C16\_00798" 29528 "s59E13H2" 0 "Lipoprotein signal peptidase"  
"OP8\_C16\_00798" 29528 "s59E25H2" 0 "Lipoprotein signal peptidase"  
"OP8\_C16\_00798" 29528 "s59E5H2" 0 "Lipoprotein signal peptidase"  
"OP8\_C16\_00798" 29528 "s63E6H2" 0 "Lipoprotein signal peptidase"  
"OP8\_C16\_00799" 29529 "s59E13H2" 0 "Prolipoprotein diacylglyceryl transferase"  
"OP8\_C16\_00799" 29529 "s59E25H2" 0 "Prolipoprotein diacylglyceryl transferase"  
"OP8\_C16\_00799" 29529 "s59E5H2" 0 "Prolipoprotein diacylglyceryl transferase"  
"OP8\_C16\_00799" 29529 "s63E6H2" 0 "Prolipoprotein diacylglyceryl transferase"  
"OP8\_C16\_00800" 29530 "s59E13H2" 0 "Ribosomal large subunit pseudouridine synthase D"  
"OP8\_C16\_00800" 29530 "s59E25H2" 0 "Ribosomal large subunit pseudouridine synthase D"  
"OP8\_C16\_00800" 29530 "s59E5H2" 0 "Ribosomal large subunit pseudouridine synthase D"  
"OP8\_C16\_00800" 29530 "s63E6H2" 0 "Ribosomal large subunit pseudouridine synthase D"  
"OP8\_C16\_00801" 29531 "s59E13H2" 0 "Elongation factor G"  
"OP8\_C16\_00801" 29531 "s59E25H2" 0 "Elongation factor G"  
"OP8\_C16\_00801" 29531 "s59E5H2" 0 "Elongation factor G"  
"OP8\_C16\_00801" 29531 "s63E6H2" 0 "Elongation factor G"  
"OP8\_C16\_00802" 29532 "s59E13H2" 0 "multidrug resistance protein MdtH"  
"OP8\_C16\_00802" 29532 "s59E25H2" 0 "multidrug resistance protein MdtH"  
"OP8\_C16\_00802" 29532 "s59E5H2" 0 "multidrug resistance protein MdtH"  
"OP8\_C16\_00802" 29532 "s63E6H2" 0 "multidrug resistance protein MdtH"  
"OP8\_C16\_00803" 29533 "s59E13H2" 0 "hypothetical protein"  
"OP8\_C16\_00803" 29533 "s59E25H2" 0 "hypothetical protein"  
"OP8\_C16\_00803" 29533 "s59E5H2" 0 "hypothetical protein"  
"OP8\_C16\_00803" 29533 "s63E6H2" 0 "hypothetical protein"  
"OP8\_C16\_00804" 29534 "s59E13H2" 0 "hypothetical protein"

"OP8\_C16\_00804" 29534 "s59E25H2" 0 "hypothetical protein"  
"OP8\_C16\_00804" 29534 "s59E5H2" 0 "hypothetical protein"  
"OP8\_C16\_00804" 29534 "s63E6H2" 0 "hypothetical protein"  
"OP8\_C16\_00806" 29536 "s59E13H2" 0 "Ycf48-like protein"  
"OP8\_C16\_00806" 29536 "s59E25H2" 0 "Ycf48-like protein"  
"OP8\_C16\_00806" 29536 "s59E5H2" 0.3244212 "Ycf48-like protein"  
"OP8\_C16\_00806" 29536 "s63E6H2" 0 "Ycf48-like protein"  
"OP8\_C16\_00807" 29537 "s59E13H2" 0 "Tetraacyldisaccharide 4'-kinase"  
"OP8\_C16\_00807" 29537 "s59E25H2" 0 "Tetraacyldisaccharide 4'-kinase"  
"OP8\_C16\_00807" 29537 "s59E5H2" 0 "Tetraacyldisaccharide 4'-kinase"  
"OP8\_C16\_00807" 29537 "s63E6H2" 0 "Tetraacyldisaccharide 4'-kinase"  
"OP8\_C16\_00808" 29538 "s59E13H2" 0 "Lipid A biosynthesis lauroyl acyltransferase"  
"OP8\_C16\_00808" 29538 "s59E25H2" 0 "Lipid A biosynthesis lauroyl acyltransferase"  
"OP8\_C16\_00808" 29538 "s59E5H2" 0 "Lipid A biosynthesis lauroyl acyltransferase"  
"OP8\_C16\_00808" 29538 "s63E6H2" 0 "Lipid A biosynthesis lauroyl acyltransferase"  
"OP8\_C16\_00809" 29539 "s59E13H2" 0 "Ribonuclease PH"  
"OP8\_C16\_00809" 29539 "s59E25H2" 0 "Ribonuclease PH"  
"OP8\_C16\_00809" 29539 "s59E5H2" 0 "Ribonuclease PH"  
"OP8\_C16\_00809" 29539 "s63E6H2" 0 "Ribonuclease PH"  
"OP8\_C16\_00810" 29540 "s59E13H2" 0 "UDP-glucose 4-epimerase"  
"OP8\_C16\_00810" 29540 "s59E25H2" 0 "UDP-glucose 4-epimerase"  
"OP8\_C16\_00810" 29540 "s59E5H2" 0 "UDP-glucose 4-epimerase"  
"OP8\_C16\_00810" 29540 "s63E6H2" 0 "UDP-glucose 4-epimerase"  
"OP8\_C16\_00811" 29541 "s59E13H2" 0 "SPFH domain / Band 7 family protein"  
"OP8\_C16\_00811" 29541 "s59E25H2" 0 "SPFH domain / Band 7 family protein"  
"OP8\_C16\_00811" 29541 "s59E5H2" 0 "SPFH domain / Band 7 family protein"  
"OP8\_C16\_00811" 29541 "s63E6H2" 0 "SPFH domain / Band 7 family protein"  
"OP8\_C16\_00812" 29542 "s59E13H2" 0 "Aspartate aminotransferase"  
"OP8\_C16\_00812" 29542 "s59E25H2" 0 "Aspartate aminotransferase"  
"OP8\_C16\_00812" 29542 "s59E5H2" 0 "Aspartate aminotransferase"  
"OP8\_C16\_00812" 29542 "s63E6H2" 0 "Aspartate aminotransferase"  
"OP8\_C16\_00813" 29543 "s59E13H2" 0 "Phosphoenolpyruvate carboxykinase [ATP]"  
"OP8\_C16\_00813" 29543 "s59E25H2" 0 "Phosphoenolpyruvate carboxykinase [ATP]"  
"OP8\_C16\_00813" 29543 "s59E5H2" 0.008800149 "Phosphoenolpyruvate carboxykinase [ATP]"  
"OP8\_C16\_00813" 29543 "s63E6H2" 0 "Phosphoenolpyruvate carboxykinase [ATP]"  
"OP8\_C16\_00814" 29544 "s59E13H2" 0 "Phosphoheptose isomerase 1"  
"OP8\_C16\_00814" 29544 "s59E25H2" 0 "Phosphoheptose isomerase 1"  
"OP8\_C16\_00814" 29544 "s59E5H2" 0 "Phosphoheptose isomerase 1"  
"OP8\_C16\_00814" 29544 "s63E6H2" 0 "Phosphoheptose isomerase 1"  
"OP8\_C16\_00815" 29545 "s59E13H2" 0 "1-acyl-sn-glycerol-3-phosphate acyltransferase"  
"OP8\_C16\_00815" 29545 "s59E25H2" 0 "1-acyl-sn-glycerol-3-phosphate acyltransferase"  
"OP8\_C16\_00815" 29545 "s59E5H2" 0 "1-acyl-sn-glycerol-3-phosphate acyltransferase"  
"OP8\_C16\_00815" 29545 "s63E6H2" 0 "1-acyl-sn-glycerol-3-phosphate acyltransferase"  
"OP8\_C16\_00816" 29546 "s59E13H2" 0 "Type II secretion system protein G precursor"  
"OP8\_C16\_00816" 29546 "s59E25H2" 0 "Type II secretion system protein G precursor"  
"OP8\_C16\_00816" 29546 "s59E5H2" 0 "Type II secretion system protein G precursor"  
"OP8\_C16\_00816" 29546 "s63E6H2" 0 "Type II secretion system protein G precursor"

"OP8\_C16\_00817" 29547 "s59E13H2" 0 "D-glycero-alpha-D-manno-heptose 7-phosphate kinase"  
"OP8\_C16\_00817" 29547 "s59E25H2" 0 "D-glycero-alpha-D-manno-heptose 7-phosphate kinase"  
"OP8\_C16\_00817" 29547 "s59E5H2" 0 "D-glycero-alpha-D-manno-heptose 7-phosphate kinase"  
"OP8\_C16\_00817" 29547 "s63E6H2" 0 "D-glycero-alpha-D-manno-heptose 7-phosphate kinase"  
"OP8\_C16\_00818" 29548 "s59E13H2" 0 "Phosphoheptose isomerase 1"  
"OP8\_C16\_00818" 29548 "s59E25H2" 0 "Phosphoheptose isomerase 1"  
"OP8\_C16\_00818" 29548 "s59E5H2" 0 "Phosphoheptose isomerase 1"  
"OP8\_C16\_00818" 29548 "s63E6H2" 0 "Phosphoheptose isomerase 1"  
"OP8\_C16\_00819" 29549 "s59E13H2" 0 "Putative phosphoserine phosphatase 2"  
"OP8\_C16\_00819" 29549 "s59E25H2" 0 "Putative phosphoserine phosphatase 2"  
"OP8\_C16\_00819" 29549 "s59E5H2" 0 "Putative phosphoserine phosphatase 2"  
"OP8\_C16\_00819" 29549 "s63E6H2" 0 "Putative phosphoserine phosphatase 2"  
"OP8\_C16\_00820" 29550 "s59E13H2" 0 "hypothetical protein"  
"OP8\_C16\_00820" 29550 "s59E25H2" 0 "hypothetical protein"  
"OP8\_C16\_00820" 29550 "s59E5H2" 0 "hypothetical protein"  
"OP8\_C16\_00820" 29550 "s63E6H2" 0 "hypothetical protein"  
"OP8\_C16\_00821" 29551 "s59E13H2" 0 "Polysialic acid transport protein KpsD precursor"  
"OP8\_C16\_00821" 29551 "s59E25H2" 0 "Polysialic acid transport protein KpsD precursor"  
"OP8\_C16\_00821" 29551 "s59E5H2" 0 "Polysialic acid transport protein KpsD precursor"  
"OP8\_C16\_00821" 29551 "s63E6H2" 0 "Polysialic acid transport protein KpsD precursor"  
"OP8\_C16\_00822" 29552 "s59E13H2" 0 "Tyrosine-protein kinase YwqD"  
"OP8\_C16\_00822" 29552 "s59E25H2" 0 "Tyrosine-protein kinase YwqD"  
"OP8\_C16\_00822" 29552 "s59E5H2" 0 "Tyrosine-protein kinase YwqD"  
"OP8\_C16\_00822" 29552 "s63E6H2" 0 "Tyrosine-protein kinase YwqD"  
"OP8\_C16\_00823" 29553 "s59E13H2" 0 "putative transposase"  
"OP8\_C16\_00823" 29553 "s59E25H2" 0 "putative transposase"  
"OP8\_C16\_00823" 29553 "s59E5H2" 0 "putative transposase"  
"OP8\_C16\_00823" 29553 "s63E6H2" 0.007039707 "putative transposase"  
"OP8\_C16\_00824" 29554 "s59E13H2" 0 "Transposase IS200 like protein"  
"OP8\_C16\_00824" 29554 "s59E25H2" 0 "Transposase IS200 like protein"  
"OP8\_C16\_00824" 29554 "s59E5H2" 0 "Transposase IS200 like protein"  
"OP8\_C16\_00824" 29554 "s63E6H2" 0 "Transposase IS200 like protein"  
"OP8\_C16\_00825" 29555 "s59E13H2" 0 "Ribonuclease VapC11"  
"OP8\_C16\_00825" 29555 "s59E25H2" 0 "Ribonuclease VapC11"  
"OP8\_C16\_00825" 29555 "s59E5H2" 0 "Ribonuclease VapC11"  
"OP8\_C16\_00825" 29555 "s63E6H2" 0 "Ribonuclease VapC11"  
"OP8\_C16\_00826" 29556 "s59E13H2" 0 "hypothetical protein"  
"OP8\_C16\_00826" 29556 "s59E25H2" 0 "hypothetical protein"  
"OP8\_C16\_00826" 29556 "s59E5H2" 0 "hypothetical protein"  
"OP8\_C16\_00826" 29556 "s63E6H2" 0 "hypothetical protein"  
"OP8\_C16\_00827" 29557 "s59E13H2" 0 "Tyrosine-protein phosphatase YwqE"  
"OP8\_C16\_00827" 29557 "s59E25H2" 0 "Tyrosine-protein phosphatase YwqE"  
"OP8\_C16\_00827" 29557 "s59E5H2" 0 "Tyrosine-protein phosphatase YwqE"  
"OP8\_C16\_00827" 29557 "s63E6H2" 0 "Tyrosine-protein phosphatase YwqE"  
"OP8\_C16\_00828" 29558 "s59E13H2" 0 "O-Antigen ligase"  
"OP8\_C16\_00828" 29558 "s59E25H2" 0 "O-Antigen ligase"  
"OP8\_C16\_00828" 29558 "s59E5H2" 0 "O-Antigen ligase"



"OP8\_C16\_00828" 29558 "s63E6H2" 0 "O-Antigen ligase"  
"OP8\_C16\_00829" 29559 "s59E13H2" 0 "hypothetical protein"  
"OP8\_C16\_00829" 29559 "s59E25H2" 0 "hypothetical protein"  
"OP8\_C16\_00829" 29559 "s59E5H2" 0 "hypothetical protein"  
"OP8\_C16\_00829" 29559 "s63E6H2" 0 "hypothetical protein"  
"OP8\_C16\_00830" 29560 "s59E13H2" 0 "hypothetical protein"  
"OP8\_C16\_00830" 29560 "s59E25H2" 0 "hypothetical protein"  
"OP8\_C16\_00830" 29560 "s59E5H2" 0 "hypothetical protein"  
"OP8\_C16\_00830" 29560 "s63E6H2" 0 "hypothetical protein"  
"OP8\_C16\_00831" 29561 "s59E13H2" 0 "Asparagine--tRNA ligase"  
"OP8\_C16\_00831" 29561 "s59E25H2" 0 "Asparagine--tRNA ligase"  
"OP8\_C16\_00831" 29561 "s59E5H2" 0 "Asparagine--tRNA ligase"  
"OP8\_C16\_00831" 29561 "s63E6H2" 0 "Asparagine--tRNA ligase"  
"OP8\_C16\_00832" 29562 "s59E13H2" 0 "Rhamnulose-1-phosphate aldolase"  
"OP8\_C16\_00832" 29562 "s59E25H2" 0 "Rhamnulose-1-phosphate aldolase"  
"OP8\_C16\_00832" 29562 "s59E5H2" 0 "Rhamnulose-1-phosphate aldolase"  
"OP8\_C16\_00832" 29562 "s63E6H2" 0 "Rhamnulose-1-phosphate aldolase"  
"OP8\_C16\_00833" 29563 "s59E13H2" 0 "hypothetical protein"  
"OP8\_C16\_00833" 29563 "s59E25H2" 0 "hypothetical protein"  
"OP8\_C16\_00833" 29563 "s59E5H2" 0 "hypothetical protein"  
"OP8\_C16\_00833" 29563 "s63E6H2" 0.001403817 "hypothetical protein"  
"OP8\_C16\_00834" 29564 "s59E13H2" 0 "hypothetical protein"  
"OP8\_C16\_00834" 29564 "s59E25H2" 0 "hypothetical protein"  
"OP8\_C16\_00834" 29564 "s59E5H2" 0 "hypothetical protein"  
"OP8\_C16\_00834" 29564 "s63E6H2" 0 "hypothetical protein"  
"OP8\_C16\_00835" 29565 "s59E13H2" 0 "Prolyl-tRNA editing protein ProX"  
"OP8\_C16\_00835" 29565 "s59E25H2" 0 "Prolyl-tRNA editing protein ProX"  
"OP8\_C16\_00835" 29565 "s59E5H2" 0 "Prolyl-tRNA editing protein ProX"  
"OP8\_C16\_00835" 29565 "s63E6H2" 0 "Prolyl-tRNA editing protein ProX"  
"OP8\_C16\_00836" 29566 "s59E13H2" 0 "Protease PrsW"  
"OP8\_C16\_00836" 29566 "s59E25H2" 0 "Protease PrsW"  
"OP8\_C16\_00836" 29566 "s59E5H2" 0 "Protease PrsW"  
"OP8\_C16\_00836" 29566 "s63E6H2" 0 "Protease PrsW"  
"OP8\_C16\_00837" 29567 "s59E13H2" 0 "hypothetical protein"  
"OP8\_C16\_00837" 29567 "s59E25H2" 0 "hypothetical protein"  
"OP8\_C16\_00837" 29567 "s59E5H2" 0 "hypothetical protein"  
"OP8\_C16\_00837" 29567 "s63E6H2" 0 "hypothetical protein"  
"OP8\_C16\_00840" 29570 "s59E13H2" 0 "Peptidyl-dipeptidase dcp"  
"OP8\_C16\_00840" 29570 "s59E25H2" 0 "Peptidyl-dipeptidase dcp"  
"OP8\_C16\_00840" 29570 "s59E5H2" 0 "Peptidyl-dipeptidase dcp"  
"OP8\_C16\_00840" 29570 "s63E6H2" 0 "Peptidyl-dipeptidase dcp"  
"OP8\_C16\_00841" 29571 "s59E13H2" 0 "hypothetical protein"  
"OP8\_C16\_00841" 29571 "s59E25H2" 0 "hypothetical protein"  
"OP8\_C16\_00841" 29571 "s59E5H2" 0 "hypothetical protein"  
"OP8\_C16\_00841" 29571 "s63E6H2" 0 "hypothetical protein"  
"OP8\_C16\_00842" 29572 "s59E13H2" 0 "ATP-dependent protease subunit ClpQ"  
"OP8\_C16\_00842" 29572 "s59E25H2" 0 "ATP-dependent protease subunit ClpQ"

"OP8\_C16\_00842" 29572 "s59E5H2" 0 "ATP-dependent protease subunit ClpQ"  
"OP8\_C16\_00842" 29572 "s63E6H2" 0 "ATP-dependent protease subunit ClpQ"  
"OP8\_C16\_00843" 29573 "s59E13H2" 0 "ATP-dependent protease ATPase subunit HslU"  
"OP8\_C16\_00843" 29573 "s59E25H2" 0 "ATP-dependent protease ATPase subunit HslU"  
"OP8\_C16\_00843" 29573 "s59E5H2" 0 "ATP-dependent protease ATPase subunit HslU"  
"OP8\_C16\_00843" 29573 "s63E6H2" 0 "ATP-dependent protease ATPase subunit HslU"  
"OP8\_C16\_00844" 29574 "s59E13H2" 0 "Exoglucanase B precursor"  
"OP8\_C16\_00844" 29574 "s59E25H2" 0 "Exoglucanase B precursor"  
"OP8\_C16\_00844" 29574 "s59E5H2" 0 "Exoglucanase B precursor"  
"OP8\_C16\_00844" 29574 "s63E6H2" 0 "Exoglucanase B precursor"  
"OP8\_C16\_00845" 29575 "s59E13H2" 0 "Ureidoglycolate lyase"  
"OP8\_C16\_00845" 29575 "s59E25H2" 0 "Ureidoglycolate lyase"  
"OP8\_C16\_00845" 29575 "s59E5H2" 0 "Ureidoglycolate lyase"  
"OP8\_C16\_00845" 29575 "s63E6H2" 0 "Ureidoglycolate lyase"  
"OP8\_C16\_00846" 29576 "s59E13H2" 0 "Transaldolase"  
"OP8\_C16\_00846" 29576 "s59E25H2" 0 "Transaldolase"  
"OP8\_C16\_00846" 29576 "s59E5H2" 0 "Transaldolase"  
"OP8\_C16\_00846" 29576 "s63E6H2" 0 "Transaldolase"  
"OP8\_C16\_00847" 29577 "s59E13H2" 0 "putative propionyl-CoA carboxylase beta chain 5"  
"OP8\_C16\_00847" 29577 "s59E25H2" 0 "putative propionyl-CoA carboxylase beta chain 5"  
"OP8\_C16\_00847" 29577 "s59E5H2" 0 "putative propionyl-CoA carboxylase beta chain 5"  
"OP8\_C16\_00847" 29577 "s63E6H2" 0 "putative propionyl-CoA carboxylase beta chain 5"  
"OP8\_C16\_00848" 29578 "s59E13H2" 0 "Pyruvate carboxylase subunit A"  
"OP8\_C16\_00848" 29578 "s59E25H2" 0 "Pyruvate carboxylase subunit A"  
"OP8\_C16\_00848" 29578 "s59E5H2" 0 "Pyruvate carboxylase subunit A"  
"OP8\_C16\_00848" 29578 "s63E6H2" 0 "Pyruvate carboxylase subunit A"  
"OP8\_C16\_00849" 29579 "s59E13H2" 0 "2-oxoglutarate carboxylase large subunit"  
"OP8\_C16\_00849" 29579 "s59E25H2" 0 "2-oxoglutarate carboxylase large subunit"  
"OP8\_C16\_00849" 29579 "s59E5H2" 0 "2-oxoglutarate carboxylase large subunit"  
"OP8\_C16\_00849" 29579 "s63E6H2" 0 "2-oxoglutarate carboxylase large subunit"  
"OP8\_C16\_00850" 29580 "s59E13H2" 0 "hypothetical protein"  
"OP8\_C16\_00850" 29580 "s59E25H2" 0 "hypothetical protein"  
"OP8\_C16\_00850" 29580 "s59E5H2" 0 "hypothetical protein"  
"OP8\_C16\_00850" 29580 "s63E6H2" 0 "hypothetical protein"  
"OP8\_C16\_00851" 29581 "s59E13H2" 0 "Outer membrane protein assembly factor BamA precursor"  
"OP8\_C16\_00851" 29581 "s59E25H2" 0 "Outer membrane protein assembly factor BamA precursor"  
"OP8\_C16\_00851" 29581 "s59E5H2" 0 "Outer membrane protein assembly factor BamA precursor"  
"OP8\_C16\_00851" 29581 "s63E6H2" 0 "Outer membrane protein assembly factor BamA precursor"  
"OP8\_C16\_00852" 29582 "s59E13H2" 0 "peptidyl-prolyl cis-trans isomerase SurA"  
"OP8\_C16\_00852" 29582 "s59E25H2" 0 "peptidyl-prolyl cis-trans isomerase SurA"  
"OP8\_C16\_00852" 29582 "s59E5H2" 0 "peptidyl-prolyl cis-trans isomerase SurA"  
"OP8\_C16\_00852" 29582 "s63E6H2" 0 "peptidyl-prolyl cis-trans isomerase SurA"  
"OP8\_C16\_00853" 29583 "s59E13H2" 0 "Malonyl CoA-acyl carrier protein transacylase"  
"OP8\_C16\_00853" 29583 "s59E25H2" 0 "Malonyl CoA-acyl carrier protein transacylase"  
"OP8\_C16\_00853" 29583 "s59E5H2" 0 "Malonyl CoA-acyl carrier protein transacylase"  
"OP8\_C16\_00853" 29583 "s63E6H2" 0 "Malonyl CoA-acyl carrier protein transacylase"  
"OP8\_C16\_00854" 29584 "s59E13H2" 0 "CDP-diacylglycerol-glycerol-3-phosphate 3-phosphatidyltransferase"

"OP8\_C16\_00854" 29584 "s59E25H2" 0 "CDP-diacylglycerol--glycerol-3-phosphate 3-phosphatidyltransferase"  
"OP8\_C16\_00854" 29584 "s59E5H2" 0 "CDP-diacylglycerol--glycerol-3-phosphate 3-phosphatidyltransferase"  
"OP8\_C16\_00854" 29584 "s63E6H2" 0 "CDP-diacylglycerol--glycerol-3-phosphate 3-phosphatidyltransferase"  
"OP8\_C16\_00855" 29585 "s59E13H2" 0 "DNA mismatch repair protein MutS"  
"OP8\_C16\_00855" 29585 "s59E25H2" 0 "DNA mismatch repair protein MutS"  
"OP8\_C16\_00855" 29585 "s59E5H2" 0 "DNA mismatch repair protein MutS"  
"OP8\_C16\_00855" 29585 "s63E6H2" 0 "DNA mismatch repair protein MutS"  
"OP8\_C16\_00856" 29586 "s59E13H2" 0 "hypothetical protein"  
"OP8\_C16\_00856" 29586 "s59E25H2" 0 "hypothetical protein"  
"OP8\_C16\_00856" 29586 "s59E5H2" 0 "hypothetical protein"  
"OP8\_C16\_00856" 29586 "s63E6H2" 0 "hypothetical protein"  
"OP8\_C16\_00857" 29587 "s59E13H2" 0 "Fe/S biogenesis protein NfuA"  
"OP8\_C16\_00857" 29587 "s59E25H2" 0 "Fe/S biogenesis protein NfuA"  
"OP8\_C16\_00857" 29587 "s59E5H2" 0 "Fe/S biogenesis protein NfuA"  
"OP8\_C16\_00857" 29587 "s63E6H2" 0 "Fe/S biogenesis protein NfuA"  
"OP8\_C16\_00858" 29588 "s59E13H2" 0 "UTP--glucose-1-phosphate uridylyltransferase"  
"OP8\_C16\_00858" 29588 "s59E25H2" 0 "UTP--glucose-1-phosphate uridylyltransferase"  
"OP8\_C16\_00858" 29588 "s59E5H2" 0 "UTP--glucose-1-phosphate uridylyltransferase"  
"OP8\_C16\_00858" 29588 "s63E6H2" 0 "UTP--glucose-1-phosphate uridylyltransferase"  
"OP8\_C16\_00860" 29590 "s59E13H2" 0 "D-inositol 3-phosphate glycosyltransferase"  
"OP8\_C16\_00860" 29590 "s59E25H2" 0 "D-inositol 3-phosphate glycosyltransferase"  
"OP8\_C16\_00860" 29590 "s59E5H2" 0 "D-inositol 3-phosphate glycosyltransferase"  
"OP8\_C16\_00860" 29590 "s63E6H2" 0 "D-inositol 3-phosphate glycosyltransferase"  
"OP8\_C16\_00861" 29591 "s59E13H2" 0 "hypothetical protein"  
"OP8\_C16\_00861" 29591 "s59E25H2" 0 "hypothetical protein"  
"OP8\_C16\_00861" 29591 "s59E5H2" 0 "hypothetical protein"  
"OP8\_C16\_00861" 29591 "s63E6H2" 0 "hypothetical protein"  
"OP8\_C16\_00862" 29592 "s59E13H2" 0 "Aspartate-semialdehyde dehydrogenase"  
"OP8\_C16\_00862" 29592 "s59E25H2" 0 "Aspartate-semialdehyde dehydrogenase"  
"OP8\_C16\_00862" 29592 "s59E5H2" 0 "Aspartate-semialdehyde dehydrogenase"  
"OP8\_C16\_00862" 29592 "s63E6H2" 0 "Aspartate-semialdehyde dehydrogenase"  
"OP8\_C16\_00863" 29593 "s59E13H2" 0 "Lipid A export ATP-binding/permease protein MsbA"  
"OP8\_C16\_00863" 29593 "s59E25H2" 0 "Lipid A export ATP-binding/permease protein MsbA"  
"OP8\_C16\_00863" 29593 "s59E5H2" 0 "Lipid A export ATP-binding/permease protein MsbA"  
"OP8\_C16\_00863" 29593 "s63E6H2" 0 "Lipid A export ATP-binding/permease protein MsbA"  
"OP8\_C16\_00864" 29594 "s59E13H2" 0 "hypothetical protein"  
"OP8\_C16\_00864" 29594 "s59E25H2" 0 "hypothetical protein"  
"OP8\_C16\_00864" 29594 "s59E5H2" 0 "hypothetical protein"  
"OP8\_C16\_00864" 29594 "s63E6H2" 0 "hypothetical protein"  
"OP8\_C16\_00865" 29595 "s59E13H2" 0 "Guanylate kinase"  
"OP8\_C16\_00865" 29595 "s59E25H2" 0 "Guanylate kinase"  
"OP8\_C16\_00865" 29595 "s59E5H2" 0 "Guanylate kinase"  
"OP8\_C16\_00865" 29595 "s63E6H2" 0 "Guanylate kinase"  
"OP8\_C16\_00866" 29596 "s59E13H2" 0 "Coenzyme A biosynthesis bifunctional protein CoaBC"  
"OP8\_C16\_00866" 29596 "s59E25H2" 0 "Coenzyme A biosynthesis bifunctional protein CoaBC"  
"OP8\_C16\_00866" 29596 "s59E5H2" 0 "Coenzyme A biosynthesis bifunctional protein CoaBC"  
"OP8\_C16\_00866" 29596 "s63E6H2" 0 "Coenzyme A biosynthesis bifunctional protein CoaBC"

"OP8\_C16\_00867" 29597 "s59E13H2" 0 "Uracil DNA glycosylase superfamily protein"  
"OP8\_C16\_00867" 29597 "s59E25H2" 0 "Uracil DNA glycosylase superfamily protein"  
"OP8\_C16\_00867" 29597 "s59E5H2" 0 "Uracil DNA glycosylase superfamily protein"  
"OP8\_C16\_00867" 29597 "s63E6H2" 0 "Uracil DNA glycosylase superfamily protein"  
"OP8\_C16\_00868" 29598 "s59E13H2" 0 "Primosomal protein N"  
"OP8\_C16\_00868" 29598 "s59E25H2" 0 "Primosomal protein N"  
"OP8\_C16\_00868" 29598 "s59E5H2" 0 "Primosomal protein N"  
"OP8\_C16\_00868" 29598 "s63E6H2" 0 "Primosomal protein N"  
"OP8\_C16\_00869" 29599 "s59E13H2" 0 "hypothetical protein"  
"OP8\_C16\_00869" 29599 "s59E25H2" 0 "hypothetical protein"  
"OP8\_C16\_00869" 29599 "s59E5H2" 0 "hypothetical protein"  
"OP8\_C16\_00869" 29599 "s63E6H2" 0 "hypothetical protein"  
"OP8\_C16\_00870" 29600 "s59E13H2" 0 "Type IV pilus biogenesis and competence protein PilQ precursor"  
"OP8\_C16\_00870" 29600 "s59E25H2" 0 "Type IV pilus biogenesis and competence protein PilQ precursor"  
"OP8\_C16\_00870" 29600 "s59E5H2" 0 "Type IV pilus biogenesis and competence protein PilQ precursor"  
"OP8\_C16\_00870" 29600 "s63E6H2" 0 "Type IV pilus biogenesis and competence protein PilQ precursor"  
"OP8\_C16\_00871" 29601 "s59E13H2" 0 "hypothetical protein"  
"OP8\_C16\_00871" 29601 "s59E25H2" 0 "hypothetical protein"  
"OP8\_C16\_00871" 29601 "s59E5H2" 0 "hypothetical protein"  
"OP8\_C16\_00871" 29601 "s63E6H2" 0 "hypothetical protein"  
"OP8\_C16\_00872" 29602 "s59E13H2" 0 "Pilus assembly protein, PilO"  
"OP8\_C16\_00872" 29602 "s59E25H2" 0 "Pilus assembly protein, PilO"  
"OP8\_C16\_00872" 29602 "s59E5H2" 0 "Pilus assembly protein, PilO"  
"OP8\_C16\_00872" 29602 "s63E6H2" 0 "Pilus assembly protein, PilO"  
"OP8\_C16\_00873" 29603 "s59E13H2" 0 "Fimbrial assembly protein (PilN)"  
"OP8\_C16\_00873" 29603 "s59E25H2" 0 "Fimbrial assembly protein (PilN)"  
"OP8\_C16\_00873" 29603 "s59E5H2" 0 "Fimbrial assembly protein (PilN)"  
"OP8\_C16\_00873" 29603 "s63E6H2" 0 "Fimbrial assembly protein (PilN)"  
"OP8\_C16\_00874" 29604 "s59E13H2" 0 "Competence protein A"  
"OP8\_C16\_00874" 29604 "s59E25H2" 0 "Competence protein A"  
"OP8\_C16\_00874" 29604 "s59E5H2" 0 "Competence protein A"  
"OP8\_C16\_00874" 29604 "s63E6H2" 0 "Competence protein A"  
"OP8\_C16\_00875" 29605 "s59E13H2" 0 "Phosphopantetheine adenylyltransferase"  
"OP8\_C16\_00875" 29605 "s59E25H2" 0 "Phosphopantetheine adenylyltransferase"  
"OP8\_C16\_00875" 29605 "s59E5H2" 0 "Phosphopantetheine adenylyltransferase"  
"OP8\_C16\_00875" 29605 "s63E6H2" 0 "Phosphopantetheine adenylyltransferase"  
"OP8\_C16\_00877" 29607 "s59E13H2" 0 "Protein-L-isoaspartate O-methyltransferase"  
"OP8\_C16\_00877" 29607 "s59E25H2" 0 "Protein-L-isoaspartate O-methyltransferase"  
"OP8\_C16\_00877" 29607 "s59E5H2" 0 "Protein-L-isoaspartate O-methyltransferase"  
"OP8\_C16\_00877" 29607 "s63E6H2" 0 "Protein-L-isoaspartate O-methyltransferase"  
"OP8\_C16\_00878" 29608 "s59E13H2" 0 "spermidine synthase"  
"OP8\_C16\_00878" 29608 "s59E25H2" 0 "spermidine synthase"  
"OP8\_C16\_00878" 29608 "s59E5H2" 0 "spermidine synthase"  
"OP8\_C16\_00878" 29608 "s63E6H2" 0 "spermidine synthase"  
"OP8\_C16\_00879" 29609 "s59E13H2" 0 "hypothetical protein"  
"OP8\_C16\_00879" 29609 "s59E25H2" 0 "hypothetical protein"  
"OP8\_C16\_00879" 29609 "s59E5H2" 0 "hypothetical protein"

"OP8\_C16\_00879" 29609 "s63E6H2" 0 "hypothetical protein"  
"OP8\_C16\_00880" 29610 "s59E13H2" 0 "hypothetical protein"  
"OP8\_C16\_00880" 29610 "s59E25H2" 0 "hypothetical protein"  
"OP8\_C16\_00880" 29610 "s59E5H2" 0 "hypothetical protein"  
"OP8\_C16\_00880" 29610 "s63E6H2" 0 "hypothetical protein"  
"OP8\_C16\_00881" 29611 "s59E13H2" 0 "Phosphoglucomutase"  
"OP8\_C16\_00881" 29611 "s59E25H2" 0 "Phosphoglucomutase"  
"OP8\_C16\_00881" 29611 "s59E5H2" 0 "Phosphoglucomutase"  
"OP8\_C16\_00881" 29611 "s63E6H2" 0 "Phosphoglucomutase"  
"OP8\_C16\_00882" 29612 "s59E13H2" 0 "cell division protein FtsB"  
"OP8\_C16\_00882" 29612 "s59E25H2" 0 "cell division protein FtsB"  
"OP8\_C16\_00882" 29612 "s59E5H2" 0 "cell division protein FtsB"  
"OP8\_C16\_00882" 29612 "s63E6H2" 0 "cell division protein FtsB"  
"OP8\_C16\_00883" 29613 "s59E13H2" 0 "ATP-dependent DNA helicase PcrA"  
"OP8\_C16\_00883" 29613 "s59E25H2" 0 "ATP-dependent DNA helicase PcrA"  
"OP8\_C16\_00883" 29613 "s59E5H2" 0 "ATP-dependent DNA helicase PcrA"  
"OP8\_C16\_00883" 29613 "s63E6H2" 0 "ATP-dependent DNA helicase PcrA"  
"OP8\_C16\_00884" 29614 "s59E13H2" 0 "protease 4"  
"OP8\_C16\_00884" 29614 "s59E25H2" 0 "protease 4"  
"OP8\_C16\_00884" 29614 "s59E5H2" 0 "protease 4"  
"OP8\_C16\_00884" 29614 "s63E6H2" 0 "protease 4"  
"OP8\_C16\_00885" 29615 "s59E13H2" 0 "hypothetical protein"  
"OP8\_C16\_00885" 29615 "s59E25H2" 0 "hypothetical protein"  
"OP8\_C16\_00885" 29615 "s59E5H2" 0 "hypothetical protein"  
"OP8\_C16\_00885" 29615 "s63E6H2" 0 "hypothetical protein"  
"OP8\_C16\_00886" 29616 "s59E13H2" 0 "hypothetical protein"  
"OP8\_C16\_00886" 29616 "s59E25H2" 0 "hypothetical protein"  
"OP8\_C16\_00886" 29616 "s59E5H2" 0 "hypothetical protein"  
"OP8\_C16\_00886" 29616 "s63E6H2" 0 "hypothetical protein"  
"OP8\_C16\_00887" 29617 "s59E13H2" 0 "Protease 4"  
"OP8\_C16\_00887" 29617 "s59E25H2" 0 "Protease 4"  
"OP8\_C16\_00887" 29617 "s59E5H2" 0 "Protease 4"  
"OP8\_C16\_00887" 29617 "s63E6H2" 0 "Protease 4"  
"OP8\_C16\_00888" 29618 "s59E13H2" 0 "putative ABC transporter ATP-binding protein YbhF"  
"OP8\_C16\_00888" 29618 "s59E25H2" 0 "putative ABC transporter ATP-binding protein YbhF"  
"OP8\_C16\_00888" 29618 "s59E5H2" 0 "putative ABC transporter ATP-binding protein YbhF"  
"OP8\_C16\_00888" 29618 "s63E6H2" 0 "putative ABC transporter ATP-binding protein YbhF"  
"OP8\_C16\_00889" 29619 "s59E13H2" 0 "ABC-2 family transporter protein"  
"OP8\_C16\_00889" 29619 "s59E25H2" 0 "ABC-2 family transporter protein"  
"OP8\_C16\_00889" 29619 "s59E5H2" 0 "ABC-2 family transporter protein"  
"OP8\_C16\_00889" 29619 "s63E6H2" 0.002317903 "ABC-2 family transporter protein"  
"OP8\_C16\_00890" 29620 "s59E13H2" 0 "ECF RNA polymerase sigma factor SigW"  
"OP8\_C16\_00890" 29620 "s59E25H2" 0 "ECF RNA polymerase sigma factor SigW"  
"OP8\_C16\_00890" 29620 "s59E5H2" 0 "ECF RNA polymerase sigma factor SigW"  
"OP8\_C16\_00890" 29620 "s63E6H2" 0.004769757 "ECF RNA polymerase sigma factor SigW"  
"OP8\_C16\_00891" 29621 "s59E13H2" 0 "hypothetical protein"  
"OP8\_C16\_00891" 29621 "s59E25H2" 0 "hypothetical protein"

"OP8\_C16\_00891" 29621 "s59E5H2" 0 "hypothetical protein"  
"OP8\_C16\_00891" 29621 "s63E6H2" 0.004685648 "hypothetical protein"  
"OP8\_C16\_00892" 29622 "s59E13H2" 0 "Outer membrane protein assembly factor BamD"  
"OP8\_C16\_00892" 29622 "s59E25H2" 0 "Outer membrane protein assembly factor BamD"  
"OP8\_C16\_00892" 29622 "s59E5H2" 0 "Outer membrane protein assembly factor BamD"  
"OP8\_C16\_00892" 29622 "s63E6H2" 0 "Outer membrane protein assembly factor BamD"  
"OP8\_C16\_00893" 29623 "s59E13H2" 0 "hypothetical protein"  
"OP8\_C16\_00893" 29623 "s59E25H2" 0 "hypothetical protein"  
"OP8\_C16\_00893" 29623 "s59E5H2" 0 "hypothetical protein"  
"OP8\_C16\_00893" 29623 "s63E6H2" 0 "hypothetical protein"  
"OP8\_C16\_00895" 29625 "s59E13H2" 0 "hypothetical protein"  
"OP8\_C16\_00895" 29625 "s59E25H2" 0 "hypothetical protein"  
"OP8\_C16\_00895" 29625 "s59E5H2" 0 "hypothetical protein"  
"OP8\_C16\_00895" 29625 "s63E6H2" 0 "hypothetical protein"  
"OP8\_C16\_00896" 29626 "s59E13H2" 0 "hypothetical protein"  
"OP8\_C16\_00896" 29626 "s59E25H2" 0 "hypothetical protein"  
"OP8\_C16\_00896" 29626 "s59E5H2" 0 "hypothetical protein"  
"OP8\_C16\_00896" 29626 "s63E6H2" 0 "hypothetical protein"  
"OP8\_C16\_00897" 29627 "s59E13H2" 0 "Nucleotidyltransferase domain protein"  
"OP8\_C16\_00897" 29627 "s59E25H2" 0 "Nucleotidyltransferase domain protein"  
"OP8\_C16\_00897" 29627 "s59E5H2" 0 "Nucleotidyltransferase domain protein"  
"OP8\_C16\_00897" 29627 "s63E6H2" 0 "Nucleotidyltransferase domain protein"  
"OP8\_C16\_00899" 29629 "s59E13H2" 0 "Polymer-forming cytoskeletal"  
"OP8\_C16\_00899" 29629 "s59E25H2" 0 "Polymer-forming cytoskeletal"  
"OP8\_C16\_00899" 29629 "s59E5H2" 0 "Polymer-forming cytoskeletal"  
"OP8\_C16\_00899" 29629 "s63E6H2" 0 "Polymer-forming cytoskeletal"  
"OP8\_C16\_00900" 29630 "s59E13H2" 0 "Succinyl-CoA ligase [ADP-forming] subunit beta"  
"OP8\_C16\_00900" 29630 "s59E25H2" 0 "Succinyl-CoA ligase [ADP-forming] subunit beta"  
"OP8\_C16\_00900" 29630 "s59E5H2" 0 "Succinyl-CoA ligase [ADP-forming] subunit beta"  
"OP8\_C16\_00900" 29630 "s63E6H2" 0 "Succinyl-CoA ligase [ADP-forming] subunit beta"  
"OP8\_C16\_00901" 29631 "s59E13H2" 0 "Succinyl-CoA ligase [ADP-forming] subunit alpha"  
"OP8\_C16\_00901" 29631 "s59E25H2" 0 "Succinyl-CoA ligase [ADP-forming] subunit alpha"  
"OP8\_C16\_00901" 29631 "s59E5H2" 0 "Succinyl-CoA ligase [ADP-forming] subunit alpha"  
"OP8\_C16\_00901" 29631 "s63E6H2" 0 "Succinyl-CoA ligase [ADP-forming] subunit alpha"  
"OP8\_C16\_00902" 29632 "s59E13H2" 0 "Citrate synthase"  
"OP8\_C16\_00902" 29632 "s59E25H2" 0 "Citrate synthase"  
"OP8\_C16\_00902" 29632 "s59E5H2" 0 "Citrate synthase"  
"OP8\_C16\_00902" 29632 "s63E6H2" 0 "Citrate synthase"  
"OP8\_C16\_00903" 29633 "s59E13H2" 0 "Dihydroneopterin 2',3'-cyclic phosphate phosphodiesterase"  
"OP8\_C16\_00903" 29633 "s59E25H2" 0 "Dihydroneopterin 2',3'-cyclic phosphate phosphodiesterase"  
"OP8\_C16\_00903" 29633 "s59E5H2" 0 "Dihydroneopterin 2',3'-cyclic phosphate phosphodiesterase"  
"OP8\_C16\_00903" 29633 "s63E6H2" 0 "Dihydroneopterin 2',3'-cyclic phosphate phosphodiesterase"  
"OP8\_C16\_00904" 29634 "s59E13H2" 0 "Isopropylmalate/citramalate isomerase large subunit"  
"OP8\_C16\_00904" 29634 "s59E25H2" 0 "Isopropylmalate/citramalate isomerase large subunit"  
"OP8\_C16\_00904" 29634 "s59E5H2" 0 "Isopropylmalate/citramalate isomerase large subunit"  
"OP8\_C16\_00904" 29634 "s63E6H2" 0 "Isopropylmalate/citramalate isomerase large subunit"  
"OP8\_C16\_00905" 29635 "s59E13H2" 0 "Isopropylmalate/citramalate isomerase small subunit"

"OP8\_C16\_00905" 29635 "s59E25H2" 0 "Isopropylmalate/citramalate isomerase small subunit"  
"OP8\_C16\_00905" 29635 "s59E5H2" 0 "Isopropylmalate/citramalate isomerase small subunit"  
"OP8\_C16\_00905" 29635 "s63E6H2" 0 "Isopropylmalate/citramalate isomerase small subunit"  
"OP8\_C16\_00906" 29636 "s59E13H2" 0 "Homoisocitrate dehydrogenase"  
"OP8\_C16\_00906" 29636 "s59E25H2" 0 "Homoisocitrate dehydrogenase"  
"OP8\_C16\_00906" 29636 "s59E5H2" 0 "Homoisocitrate dehydrogenase"  
"OP8\_C16\_00906" 29636 "s63E6H2" 0 "Homoisocitrate dehydrogenase"  
"OP8\_C16\_00907" 29637 "s59E13H2" 0 "Isopropylmalate/citramalate isomerase large subunit"  
"OP8\_C16\_00907" 29637 "s59E25H2" 0 "Isopropylmalate/citramalate isomerase large subunit"  
"OP8\_C16\_00907" 29637 "s59E5H2" 0 "Isopropylmalate/citramalate isomerase large subunit"  
"OP8\_C16\_00907" 29637 "s63E6H2" 0 "Isopropylmalate/citramalate isomerase large subunit"  
"OP8\_C16\_00908" 29638 "s59E13H2" 0 "Isopropylmalate/citramalate isomerase small subunit"  
"OP8\_C16\_00908" 29638 "s59E25H2" 0 "Isopropylmalate/citramalate isomerase small subunit"  
"OP8\_C16\_00908" 29638 "s59E5H2" 0 "Isopropylmalate/citramalate isomerase small subunit"  
"OP8\_C16\_00908" 29638 "s63E6H2" 0 "Isopropylmalate/citramalate isomerase small subunit"  
"OP8\_C16\_00909" 29639 "s59E13H2" 0 "tRNA threonylcarbamoyladenine biosynthesis protein Tsab"  
"OP8\_C16\_00909" 29639 "s59E25H2" 0 "tRNA threonylcarbamoyladenine biosynthesis protein Tsab"  
"OP8\_C16\_00909" 29639 "s59E5H2" 0 "tRNA threonylcarbamoyladenine biosynthesis protein Tsab"  
"OP8\_C16\_00909" 29639 "s63E6H2" 0 "tRNA threonylcarbamoyladenine biosynthesis protein Tsab"  
"OP8\_C16\_00910" 29640 "s59E13H2" 0 "putative N-acetyltransferase"  
"OP8\_C16\_00910" 29640 "s59E25H2" 0 "putative N-acetyltransferase"  
"OP8\_C16\_00910" 29640 "s59E5H2" 0 "putative N-acetyltransferase"  
"OP8\_C16\_00910" 29640 "s63E6H2" 0 "putative N-acetyltransferase"  
"OP8\_C16\_00911" 29641 "s59E13H2" 0 "tRNA pseudouridine synthase A"  
"OP8\_C16\_00911" 29641 "s59E25H2" 0 "tRNA pseudouridine synthase A"  
"OP8\_C16\_00911" 29641 "s59E5H2" 0 "tRNA pseudouridine synthase A"  
"OP8\_C16\_00911" 29641 "s63E6H2" 0 "tRNA pseudouridine synthase A"  
"OP8\_C16\_00912" 29642 "s59E13H2" 0 "hypothetical protein"  
"OP8\_C16\_00912" 29642 "s59E25H2" 0 "hypothetical protein"  
"OP8\_C16\_00912" 29642 "s59E5H2" 0 "hypothetical protein"  
"OP8\_C16\_00912" 29642 "s63E6H2" 0 "hypothetical protein"  
"OP8\_C16\_00913" 29643 "s59E13H2" 0 "Competence protein ComM"  
"OP8\_C16\_00913" 29643 "s59E25H2" 0 "Competence protein ComM"  
"OP8\_C16\_00913" 29643 "s59E5H2" 0 "Competence protein ComM"  
"OP8\_C16\_00913" 29643 "s63E6H2" 0 "Competence protein ComM"  
"OP8\_C16\_00914" 29644 "s59E13H2" 0 "Melibiase"  
"OP8\_C16\_00914" 29644 "s59E25H2" 0 "Melibiase"  
"OP8\_C16\_00914" 29644 "s59E5H2" 0 "Melibiase"  
"OP8\_C16\_00914" 29644 "s63E6H2" 0 "Melibiase"  
"OP8\_C16\_00915" 29645 "s59E13H2" 0 "3-oxoacyl-[acyl-carrier-protein] reductase FabG"  
"OP8\_C16\_00915" 29645 "s59E25H2" 0 "3-oxoacyl-[acyl-carrier-protein] reductase FabG"  
"OP8\_C16\_00915" 29645 "s59E5H2" 0.1045878 "3-oxoacyl-[acyl-carrier-protein] reductase FabG"  
"OP8\_C16\_00915" 29645 "s63E6H2" 0 "3-oxoacyl-[acyl-carrier-protein] reductase FabG"  
"OP8\_C16\_00916" 29646 "s59E13H2" 0 "2-dehydro-3-deoxy-D-gluconate 5-dehydrogenase"  
"OP8\_C16\_00916" 29646 "s59E25H2" 0 "2-dehydro-3-deoxy-D-gluconate 5-dehydrogenase"  
"OP8\_C16\_00916" 29646 "s59E5H2" 0 "2-dehydro-3-deoxy-D-gluconate 5-dehydrogenase"  
"OP8\_C16\_00916" 29646 "s63E6H2" 0 "2-dehydro-3-deoxy-D-gluconate 5-dehydrogenase"

"OP8\_C16\_00917" 29647 "s59E13H2" 0 "putative glycine dehydrogenase (decarboxylating) subunit 1"  
"OP8\_C16\_00917" 29647 "s59E25H2" 0 "putative glycine dehydrogenase (decarboxylating) subunit 1"  
"OP8\_C16\_00917" 29647 "s59E5H2" 0 "putative glycine dehydrogenase (decarboxylating) subunit 1"  
"OP8\_C16\_00917" 29647 "s63E6H2" 0 "putative glycine dehydrogenase (decarboxylating) subunit 1"  
"OP8\_C16\_00918" 29648 "s59E13H2" 0 "putative glycine dehydrogenase (decarboxylating) subunit 2"  
"OP8\_C16\_00918" 29648 "s59E25H2" 0 "putative glycine dehydrogenase (decarboxylating) subunit 2"  
"OP8\_C16\_00918" 29648 "s59E5H2" 0 "putative glycine dehydrogenase (decarboxylating) subunit 2"  
"OP8\_C16\_00918" 29648 "s63E6H2" 0 "putative glycine dehydrogenase (decarboxylating) subunit 2"  
"OP8\_C16\_00919" 29649 "s59E13H2" 0 "ATP-NAD kinase"  
"OP8\_C16\_00919" 29649 "s59E25H2" 0 "ATP-NAD kinase"  
"OP8\_C16\_00919" 29649 "s59E5H2" 0 "ATP-NAD kinase"  
"OP8\_C16\_00919" 29649 "s63E6H2" 0 "ATP-NAD kinase"  
"OP8\_C16\_00920" 29650 "s59E13H2" 0 "UDP-glucose 4-epimerase"  
"OP8\_C16\_00920" 29650 "s59E25H2" 0 "UDP-glucose 4-epimerase"  
"OP8\_C16\_00920" 29650 "s59E5H2" 0 "UDP-glucose 4-epimerase"  
"OP8\_C16\_00920" 29650 "s63E6H2" 0 "UDP-glucose 4-epimerase"  
"OP8\_C16\_00921" 29651 "s59E13H2" 0 "D-alanine--D-alanine ligase"  
"OP8\_C16\_00921" 29651 "s59E25H2" 0 "D-alanine--D-alanine ligase"  
"OP8\_C16\_00921" 29651 "s59E5H2" 0 "D-alanine--D-alanine ligase"  
"OP8\_C16\_00921" 29651 "s63E6H2" 0 "D-alanine--D-alanine ligase"  
"OP8\_C16\_00922" 29652 "s59E13H2" 0 "NADH-dependent butanol dehydrogenase A"  
"OP8\_C16\_00922" 29652 "s59E25H2" 0 "NADH-dependent butanol dehydrogenase A"  
"OP8\_C16\_00922" 29652 "s59E5H2" 0 "NADH-dependent butanol dehydrogenase A"  
"OP8\_C16\_00922" 29652 "s63E6H2" 0 "NADH-dependent butanol dehydrogenase A"  
"OP8\_C16\_00923" 29653 "s59E13H2" 0 "Trehalose synthase"  
"OP8\_C16\_00923" 29653 "s59E25H2" 0 "Trehalose synthase"  
"OP8\_C16\_00923" 29653 "s59E5H2" 0 "Trehalose synthase"  
"OP8\_C16\_00923" 29653 "s63E6H2" 0 "Trehalose synthase"  
"OP8\_C16\_00924" 29654 "s59E13H2" 0 "Bifunctional trehalose-6-phosphate synthase/phosphatase"  
"OP8\_C16\_00924" 29654 "s59E25H2" 0 "Bifunctional trehalose-6-phosphate synthase/phosphatase"  
"OP8\_C16\_00924" 29654 "s59E5H2" 0 "Bifunctional trehalose-6-phosphate synthase/phosphatase"  
"OP8\_C16\_00924" 29654 "s63E6H2" 0 "Bifunctional trehalose-6-phosphate synthase/phosphatase"  
"OP8\_C16\_00925" 29655 "s59E13H2" 0 "Universal stress protein"  
"OP8\_C16\_00925" 29655 "s59E25H2" 0 "Universal stress protein"  
"OP8\_C16\_00925" 29655 "s59E5H2" 0 "Universal stress protein"  
"OP8\_C16\_00925" 29655 "s63E6H2" 0 "Universal stress protein"  
"OP8\_C16\_00926" 29656 "s59E13H2" 0 "hypothetical protein"  
"OP8\_C16\_00926" 29656 "s59E25H2" 0 "hypothetical protein"  
"OP8\_C16\_00926" 29656 "s59E5H2" 0 "hypothetical protein"  
"OP8\_C16\_00926" 29656 "s63E6H2" 0 "hypothetical protein"  
"OP8\_C16\_00927" 29657 "s59E13H2" 0 "lipopolysaccharide core biosynthesis protein"  
"OP8\_C16\_00927" 29657 "s59E25H2" 0 "lipopolysaccharide core biosynthesis protein"  
"OP8\_C16\_00927" 29657 "s59E5H2" 0 "lipopolysaccharide core biosynthesis protein"  
"OP8\_C16\_00927" 29657 "s63E6H2" 0 "lipopolysaccharide core biosynthesis protein"  
"OP8\_C16\_00928" 29658 "s59E13H2" 0 "Putative small multi-drug export protein"  
"OP8\_C16\_00928" 29658 "s59E25H2" 0 "Putative small multi-drug export protein"  
"OP8\_C16\_00928" 29658 "s59E5H2" 0 "Putative small multi-drug export protein"



"OP8\_C16\_00928" 29658 "s63E6H2" 0 "Putative small multi-drug export protein"  
"OP8\_C16\_00929" 29659 "s59E13H2" 0 "Arylsulfatase"  
"OP8\_C16\_00929" 29659 "s59E25H2" 0 "Arylsulfatase"  
"OP8\_C16\_00929" 29659 "s59E5H2" 0 "Arylsulfatase"  
"OP8\_C16\_00929" 29659 "s63E6H2" 0 "Arylsulfatase"  
"OP8\_C16\_00930" 29660 "s59E13H2" 0 "RNA polymerase sigma factor RpoD"  
"OP8\_C16\_00930" 29660 "s59E25H2" 0 "RNA polymerase sigma factor RpoD"  
"OP8\_C16\_00930" 29660 "s59E5H2" 0 "RNA polymerase sigma factor RpoD"  
"OP8\_C16\_00930" 29660 "s63E6H2" 0 "RNA polymerase sigma factor RpoD"  
"OP8\_C16\_00932" 29662 "s59E13H2" 0 "Universal stress protein"  
"OP8\_C16\_00932" 29662 "s59E25H2" 0 "Universal stress protein"  
"OP8\_C16\_00932" 29662 "s59E5H2" 0 "Universal stress protein"  
"OP8\_C16\_00932" 29662 "s63E6H2" 0 "Universal stress protein"  
"OP8\_C16\_00933" 29663 "s59E13H2" 0 "hypothetical protein"  
"OP8\_C16\_00933" 29663 "s59E25H2" 0 "hypothetical protein"  
"OP8\_C16\_00933" 29663 "s59E5H2" 0 "hypothetical protein"  
"OP8\_C16\_00933" 29663 "s63E6H2" 0 "hypothetical protein"  
"OP8\_C16\_00934" 29664 "s59E13H2" 0 "Outer membrane protein assembly factor BamD precursor"  
"OP8\_C16\_00934" 29664 "s59E25H2" 0 "Outer membrane protein assembly factor BamD precursor"  
"OP8\_C16\_00934" 29664 "s59E5H2" 0 "Outer membrane protein assembly factor BamD precursor"  
"OP8\_C16\_00934" 29664 "s63E6H2" 0 "Outer membrane protein assembly factor BamD precursor"  
"OP8\_C16\_00936" 29666 "s59E13H2" 0 "Imidazolonepropionase"  
"OP8\_C16\_00936" 29666 "s59E25H2" 0 "Imidazolonepropionase"  
"OP8\_C16\_00936" 29666 "s59E5H2" 0 "Imidazolonepropionase"  
"OP8\_C16\_00936" 29666 "s63E6H2" 0 "Imidazolonepropionase"  
"OP8\_C16\_00937" 29667 "s59E13H2" 0 "Cell division protein FtsZ"  
"OP8\_C16\_00937" 29667 "s59E25H2" 0 "Cell division protein FtsZ"  
"OP8\_C16\_00937" 29667 "s59E5H2" 0 "Cell division protein FtsZ"  
"OP8\_C16\_00937" 29667 "s63E6H2" 0 "Cell division protein FtsZ"  
"OP8\_C16\_00938" 29668 "s59E13H2" 0 "Cell division protein FtsA"  
"OP8\_C16\_00938" 29668 "s59E25H2" 0 "Cell division protein FtsA"  
"OP8\_C16\_00938" 29668 "s59E5H2" 0 "Cell division protein FtsA"  
"OP8\_C16\_00938" 29668 "s63E6H2" 0 "Cell division protein FtsA"  
"OP8\_C16\_00939" 29669 "s59E13H2" 0 "cell division protein FtsQ"  
"OP8\_C16\_00939" 29669 "s59E25H2" 0 "cell division protein FtsQ"  
"OP8\_C16\_00939" 29669 "s59E5H2" 0 "cell division protein FtsQ"  
"OP8\_C16\_00939" 29669 "s63E6H2" 0 "cell division protein FtsQ"  
"OP8\_C16\_00940" 29670 "s59E13H2" 0 "UDP-N-acetylmuramate--L-alanine ligase"  
"OP8\_C16\_00940" 29670 "s59E25H2" 0 "UDP-N-acetylmuramate--L-alanine ligase"  
"OP8\_C16\_00940" 29670 "s59E5H2" 0 "UDP-N-acetylmuramate--L-alanine ligase"  
"OP8\_C16\_00940" 29670 "s63E6H2" 0 "UDP-N-acetylmuramate--L-alanine ligase"  
"OP8\_C16\_00941" 29671 "s59E13H2" 0 "UDP-N-acetylglucosamine--N-acetylmuramyl-(pentapeptide) pyrophosphoryl-undecaprenol N-acetylglucosamine transferase"  
"OP8\_C16\_00941" 29671 "s59E25H2" 0 "UDP-N-acetylglucosamine--N-acetylmuramyl-(pentapeptide) pyrophosphoryl-undecaprenol N-acetylglucosamine transferase"  
"OP8\_C16\_00941" 29671 "s59E5H2" 0 "UDP-N-acetylglucosamine--N-acetylmuramyl-(pentapeptide) pyrophosphoryl-undecaprenol N-acetylglucosamine transferase"  
"OP8\_C16\_00941" 29671 "s63E6H2" 0 "UDP-N-acetylglucosamine--N-acetylmuramyl-(pentapeptide) pyrophosphoryl-undecaprenol N-acetylglucosamine transferase"  
"OP8\_C16\_00942" 29672 "s59E13H2" 0 "Lipid II flippase FtsW"  
"OP8\_C16\_00942" 29672 "s59E25H2" 0 "Lipid II flippase FtsW"

"OP8\_C16\_00942" 29672 "s59E5H2" 0 "Lipid II flippase FtsW"  
"OP8\_C16\_00942" 29672 "s63E6H2" 0 "Lipid II flippase FtsW"  
"OP8\_C16\_00943" 29673 "s59E13H2" 0 "UDP-N-acetylmuramoylalanine--D-glutamate ligase"  
"OP8\_C16\_00943" 29673 "s59E25H2" 0 "UDP-N-acetylmuramoylalanine--D-glutamate ligase"  
"OP8\_C16\_00943" 29673 "s59E5H2" 0 "UDP-N-acetylmuramoylalanine--D-glutamate ligase"  
"OP8\_C16\_00943" 29673 "s63E6H2" 0 "UDP-N-acetylmuramoylalanine--D-glutamate ligase"  
"OP8\_C16\_00944" 29674 "s59E13H2" 0 "Phospho-N-acetylmuramoyl-pentapeptide-transferase"  
"OP8\_C16\_00944" 29674 "s59E25H2" 0 "Phospho-N-acetylmuramoyl-pentapeptide-transferase"  
"OP8\_C16\_00944" 29674 "s59E5H2" 0 "Phospho-N-acetylmuramoyl-pentapeptide-transferase"  
"OP8\_C16\_00944" 29674 "s63E6H2" 0 "Phospho-N-acetylmuramoyl-pentapeptide-transferase"  
"OP8\_C16\_00945" 29675 "s59E13H2" 0 "UDP-N-acetylmuramoyl-tripeptide--D-alanyl-D-alanine ligase"  
"OP8\_C16\_00945" 29675 "s59E25H2" 0 "UDP-N-acetylmuramoyl-tripeptide--D-alanyl-D-alanine ligase"  
"OP8\_C16\_00945" 29675 "s59E5H2" 0 "UDP-N-acetylmuramoyl-tripeptide--D-alanyl-D-alanine ligase"  
"OP8\_C16\_00945" 29675 "s63E6H2" 0 "UDP-N-acetylmuramoyl-tripeptide--D-alanyl-D-alanine ligase"  
"OP8\_C16\_00946" 29676 "s59E13H2" 0 "UDP-N-acetylmuramoyl-L-alanyl-D-glutamate--2,6-diaminopimelate ligase"  
"OP8\_C16\_00946" 29676 "s59E25H2" 0 "UDP-N-acetylmuramoyl-L-alanyl-D-glutamate--2,6-diaminopimelate ligase"  
"OP8\_C16\_00946" 29676 "s59E5H2" 0 "UDP-N-acetylmuramoyl-L-alanyl-D-glutamate--2,6-diaminopimelate ligase"  
"OP8\_C16\_00946" 29676 "s63E6H2" 0 "UDP-N-acetylmuramoyl-L-alanyl-D-glutamate--2,6-diaminopimelate ligase"  
"OP8\_C16\_00947" 29677 "s59E13H2" 0 "Stage V sporulation protein D"  
"OP8\_C16\_00947" 29677 "s59E25H2" 0 "Stage V sporulation protein D"  
"OP8\_C16\_00947" 29677 "s59E5H2" 0 "Stage V sporulation protein D"  
"OP8\_C16\_00947" 29677 "s63E6H2" 0 "Stage V sporulation protein D"  
"OP8\_C16\_00948" 29678 "s59E13H2" 0 "Cell division protein FtsL"  
"OP8\_C16\_00948" 29678 "s59E25H2" 0 "Cell division protein FtsL"  
"OP8\_C16\_00948" 29678 "s59E5H2" 0 "Cell division protein FtsL"  
"OP8\_C16\_00948" 29678 "s63E6H2" 0 "Cell division protein FtsL"  
"OP8\_C16\_00949" 29679 "s59E13H2" 0 "Ribosomal RNA small subunit methyltransferase H"  
"OP8\_C16\_00949" 29679 "s59E25H2" 0 "Ribosomal RNA small subunit methyltransferase H"  
"OP8\_C16\_00949" 29679 "s59E5H2" 0 "Ribosomal RNA small subunit methyltransferase H"  
"OP8\_C16\_00949" 29679 "s63E6H2" 0 "Ribosomal RNA small subunit methyltransferase H"  
"OP8\_C16\_00950" 29680 "s59E13H2" 0 "cell division protein MraZ"  
"OP8\_C16\_00950" 29680 "s59E25H2" 0 "cell division protein MraZ"  
"OP8\_C16\_00950" 29680 "s59E5H2" 0 "cell division protein MraZ"  
"OP8\_C16\_00950" 29680 "s63E6H2" 0 "cell division protein MraZ"  
"OP8\_C16\_00951" 29681 "s59E13H2" 0 "hypothetical protein"  
"OP8\_C16\_00951" 29681 "s59E25H2" 0 "hypothetical protein"  
"OP8\_C16\_00951" 29681 "s59E5H2" 0 "hypothetical protein"  
"OP8\_C16\_00951" 29681 "s63E6H2" 0 "hypothetical protein"  
"OP8\_C16\_00952" 29682 "s59E13H2" 0 "ADP-ribose pyrophosphatase"  
"OP8\_C16\_00952" 29682 "s59E25H2" 0 "ADP-ribose pyrophosphatase"  
"OP8\_C16\_00952" 29682 "s59E5H2" 0 "ADP-ribose pyrophosphatase"  
"OP8\_C16\_00952" 29682 "s63E6H2" 0 "ADP-ribose pyrophosphatase"  
"OP8\_C16\_00953" 29683 "s59E13H2" 0 "Fructose-1,6-bisphosphatase"  
"OP8\_C16\_00953" 29683 "s59E25H2" 0 "Fructose-1,6-bisphosphatase"  
"OP8\_C16\_00953" 29683 "s59E5H2" 0 "Fructose-1,6-bisphosphatase"  
"OP8\_C16\_00953" 29683 "s63E6H2" 0 "Fructose-1,6-bisphosphatase"  
"OP8\_C16\_00954" 29684 "s59E13H2" 0 "Murein DD-endopeptidase MepM"

"OP8\_C16\_00954" 29684 "s59E25H2" 0 "Murein DD-endopeptidase MepM"  
"OP8\_C16\_00954" 29684 "s59E5H2" 0 "Murein DD-endopeptidase MepM"  
"OP8\_C16\_00954" 29684 "s63E6H2" 0 "Murein DD-endopeptidase MepM"  
"OP8\_C16\_00955" 29685 "s59E13H2" 0 "Amino-acid carrier protein AlsT"  
"OP8\_C16\_00955" 29685 "s59E25H2" 0 "Amino-acid carrier protein AlsT"  
"OP8\_C16\_00955" 29685 "s59E5H2" 0 "Amino-acid carrier protein AlsT"  
"OP8\_C16\_00955" 29685 "s63E6H2" 0 "Amino-acid carrier protein AlsT"  
"OP8\_C16\_00956" 29686 "s59E13H2" 0 "hypothetical protein"  
"OP8\_C16\_00956" 29686 "s59E25H2" 0 "hypothetical protein"  
"OP8\_C16\_00956" 29686 "s59E5H2" 0 "hypothetical protein"  
"OP8\_C16\_00956" 29686 "s63E6H2" 0 "hypothetical protein"  
"OP8\_C16\_00957" 29687 "s59E13H2" 0 "Peptidyl-prolyl cis-trans isomerase A precursor"  
"OP8\_C16\_00957" 29687 "s59E25H2" 0 "Peptidyl-prolyl cis-trans isomerase A precursor"  
"OP8\_C16\_00957" 29687 "s59E5H2" 0 "Peptidyl-prolyl cis-trans isomerase A precursor"  
"OP8\_C16\_00957" 29687 "s63E6H2" 0 "Peptidyl-prolyl cis-trans isomerase A precursor"  
"OP8\_C16\_00959" 29689 "s59E13H2" 0 "Alanine racemase"  
"OP8\_C16\_00959" 29689 "s59E25H2" 0 "Alanine racemase"  
"OP8\_C16\_00959" 29689 "s59E5H2" 0 "Alanine racemase"  
"OP8\_C16\_00959" 29689 "s63E6H2" 0 "Alanine racemase"  
"OP8\_C16\_00960" 29690 "s59E13H2" 0 "Cysteine-rich secretory protein family protein"  
"OP8\_C16\_00960" 29690 "s59E25H2" 0 "Cysteine-rich secretory protein family protein"  
"OP8\_C16\_00960" 29690 "s59E5H2" 0 "Cysteine-rich secretory protein family protein"  
"OP8\_C16\_00960" 29690 "s63E6H2" 0 "Cysteine-rich secretory protein family protein"  
"OP8\_C16\_00961" 29691 "s59E13H2" 0 "Aminopeptidase YwaD precursor"  
"OP8\_C16\_00961" 29691 "s59E25H2" 0 "Aminopeptidase YwaD precursor"  
"OP8\_C16\_00961" 29691 "s59E5H2" 0 "Aminopeptidase YwaD precursor"  
"OP8\_C16\_00961" 29691 "s63E6H2" 0 "Aminopeptidase YwaD precursor"  
"OP8\_C16\_00962" 29692 "s59E13H2" 0 "NAD-dependent methanol dehydrogenase"  
"OP8\_C16\_00962" 29692 "s59E25H2" 0 "NAD-dependent methanol dehydrogenase"  
"OP8\_C16\_00962" 29692 "s59E5H2" 0 "NAD-dependent methanol dehydrogenase"  
"OP8\_C16\_00962" 29692 "s63E6H2" 0 "NAD-dependent methanol dehydrogenase"  
"OP8\_C16\_00963" 29693 "s59E13H2" 0 "hypothetical protein"  
"OP8\_C16\_00963" 29693 "s59E25H2" 0 "hypothetical protein"  
"OP8\_C16\_00963" 29693 "s59E5H2" 0 "hypothetical protein"  
"OP8\_C16\_00963" 29693 "s63E6H2" 0 "hypothetical protein"  
"OP8\_C16\_00964" 29694 "s59E13H2" 0 "hypothetical protein"  
"OP8\_C16\_00964" 29694 "s59E25H2" 0 "hypothetical protein"  
"OP8\_C16\_00964" 29694 "s59E5H2" 0 "hypothetical protein"  
"OP8\_C16\_00964" 29694 "s63E6H2" 0 "hypothetical protein"  
"OP8\_C16\_00965" 29695 "s59E13H2" 0 "DNA mismatch repair protein Muts"  
"OP8\_C16\_00965" 29695 "s59E25H2" 0 "DNA mismatch repair protein Muts"  
"OP8\_C16\_00965" 29695 "s59E5H2" 0 "DNA mismatch repair protein Muts"  
"OP8\_C16\_00965" 29695 "s63E6H2" 0 "DNA mismatch repair protein Muts"  
"OP8\_C16\_00966" 29696 "s59E13H2" 0 "hypothetical protein"  
"OP8\_C16\_00966" 29696 "s59E25H2" 0 "hypothetical protein"  
"OP8\_C16\_00966" 29696 "s59E5H2" 0 "hypothetical protein"  
"OP8\_C16\_00966" 29696 "s63E6H2" 0 "hypothetical protein"

"OP8\_C16\_00967" 29697 "s59E13H2" 0 "hypothetical protein"  
"OP8\_C16\_00967" 29697 "s59E25H2" 0 "hypothetical protein"  
"OP8\_C16\_00967" 29697 "s59E5H2" 0 "hypothetical protein"  
"OP8\_C16\_00967" 29697 "s63E6H2" 0 "hypothetical protein"  
"OP8\_C16\_00968" 29698 "s59E13H2" 0 "hypothetical protein"  
"OP8\_C16\_00968" 29698 "s59E25H2" 0 "hypothetical protein"  
"OP8\_C16\_00968" 29698 "s59E5H2" 0 "hypothetical protein"  
"OP8\_C16\_00968" 29698 "s63E6H2" 0 "hypothetical protein"  
"OP8\_C16\_00969" 29699 "s59E13H2" 0 "hypothetical protein"  
"OP8\_C16\_00969" 29699 "s59E25H2" 0 "hypothetical protein"  
"OP8\_C16\_00969" 29699 "s59E5H2" 0 "hypothetical protein"  
"OP8\_C16\_00969" 29699 "s63E6H2" 0 "hypothetical protein"  
"OP8\_C16\_00970" 29700 "s59E13H2" 0 "Carboxymethylenebutenolidase"  
"OP8\_C16\_00970" 29700 "s59E25H2" 0 "Carboxymethylenebutenolidase"  
"OP8\_C16\_00970" 29700 "s59E5H2" 0 "Carboxymethylenebutenolidase"  
"OP8\_C16\_00970" 29700 "s63E6H2" 0.1005563 "Carboxymethylenebutenolidase"  
"OP8\_C16\_00971" 29701 "s59E13H2" 0 "Anaerobic sulfatase-maturing enzyme"  
"OP8\_C16\_00971" 29701 "s59E25H2" 0 "Anaerobic sulfatase-maturing enzyme"  
"OP8\_C16\_00971" 29701 "s59E5H2" 0.0007205214 "Anaerobic sulfatase-maturing enzyme"  
"OP8\_C16\_00971" 29701 "s63E6H2" 0.7432462 "Anaerobic sulfatase-maturing enzyme"  
"OP8\_C16\_00972" 29702 "s59E13H2" 0 "Ribbon-helix-helix protein, copG family"  
"OP8\_C16\_00972" 29702 "s59E25H2" 0 "Ribbon-helix-helix protein, copG family"  
"OP8\_C16\_00972" 29702 "s59E5H2" 0 "Ribbon-helix-helix protein, copG family"  
"OP8\_C16\_00972" 29702 "s63E6H2" 0.7756507 "Ribbon-helix-helix protein, copG family"  
"OP8\_C16\_00973" 29703 "s59E13H2" 0 "Toxin RelG"  
"OP8\_C16\_00973" 29703 "s59E25H2" 0 "Toxin RelG"  
"OP8\_C16\_00973" 29703 "s59E5H2" 0 "Toxin RelG"  
"OP8\_C16\_00973" 29703 "s63E6H2" 0.2257057 "Toxin RelG"  
"OP8\_C16\_00976" 29706 "s59E13H2" 0 "Fic/DOC family protein"  
"OP8\_C16\_00976" 29706 "s59E25H2" 0 "Fic/DOC family protein"  
"OP8\_C16\_00976" 29706 "s59E5H2" 0 "Fic/DOC family protein"  
"OP8\_C16\_00976" 29706 "s63E6H2" 6.695616 "Fic/DOC family protein"  
"OP8\_C16\_00977" 29707 "s59E13H2" 0 "anaerobic benzoate catabolism transcriptional regulator"  
"OP8\_C16\_00977" 29707 "s59E25H2" 0 "anaerobic benzoate catabolism transcriptional regulator"  
"OP8\_C16\_00977" 29707 "s59E5H2" 0 "anaerobic benzoate catabolism transcriptional regulator"  
"OP8\_C16\_00977" 29707 "s63E6H2" 4.286823 "anaerobic benzoate catabolism transcriptional regulator"  
"OP8\_C16\_00980" 29710 "s59E13H2" 0 "hypothetical protein"  
"OP8\_C16\_00980" 29710 "s59E25H2" 0 "hypothetical protein"  
"OP8\_C16\_00980" 29710 "s59E5H2" 0 "hypothetical protein"  
"OP8\_C16\_00980" 29710 "s63E6H2" 5.151047 "hypothetical protein"  
"OP8\_C16\_00981" 29711 "s59E13H2" 0 "hypothetical protein"  
"OP8\_C16\_00981" 29711 "s59E25H2" 0 "hypothetical protein"  
"OP8\_C16\_00981" 29711 "s59E5H2" 0 "hypothetical protein"  
"OP8\_C16\_00981" 29711 "s63E6H2" 5.30431 "hypothetical protein"  
"OP8\_C16\_00982" 29712 "s59E13H2" 0 "D-inositol 3-phosphate glycosyltransferase"  
"OP8\_C16\_00982" 29712 "s59E25H2" 0 "D-inositol 3-phosphate glycosyltransferase"  
"OP8\_C16\_00982" 29712 "s59E5H2" 0 "D-inositol 3-phosphate glycosyltransferase"

"OP8\_C16\_00982" 29712 "s63E6H2" 5.465225 "D-inositol 3-phosphate glycosyltransferase"  
"OP8\_C16\_00983" 29713 "s59E13H2" 0 "Diacetylchitobiose deacetylase"  
"OP8\_C16\_00983" 29713 "s59E25H2" 0 "Diacetylchitobiose deacetylase"  
"OP8\_C16\_00983" 29713 "s59E5H2" 0 "Diacetylchitobiose deacetylase"  
"OP8\_C16\_00983" 29713 "s63E6H2" 0.1166464 "Diacetylchitobiose deacetylase"  
"OP8\_C16\_00984" 29714 "s59E13H2" 0 "hypothetical protein"  
"OP8\_C16\_00984" 29714 "s59E25H2" 0 "hypothetical protein"  
"OP8\_C16\_00984" 29714 "s59E5H2" 0 "hypothetical protein"  
"OP8\_C16\_00984" 29714 "s63E6H2" 0.001738151 "hypothetical protein"  
"OP8\_C16\_00985" 29715 "s59E13H2" 0 "Urocanate hydratase"  
"OP8\_C16\_00985" 29715 "s59E25H2" 0 "Urocanate hydratase"  
"OP8\_C16\_00985" 29715 "s59E5H2" 0 "Urocanate hydratase"  
"OP8\_C16\_00985" 29715 "s63E6H2" 0.006318975 "Urocanate hydratase"  
"OP8\_C16\_00986" 29716 "s59E13H2" 0 "Aminopeptidase N"  
"OP8\_C16\_00986" 29716 "s59E25H2" 0 "Aminopeptidase N"  
"OP8\_C16\_00986" 29716 "s59E5H2" 0 "Aminopeptidase N"  
"OP8\_C16\_00986" 29716 "s63E6H2" 0 "Aminopeptidase N"  
"OP8\_C16\_00987" 29717 "s59E13H2" 0 "hypothetical protein"  
"OP8\_C16\_00987" 29717 "s59E25H2" 0 "hypothetical protein"  
"OP8\_C16\_00987" 29717 "s59E5H2" 0 "hypothetical protein"  
"OP8\_C16\_00987" 29717 "s63E6H2" 0 "hypothetical protein"  
"OP8\_C16\_00989" 29719 "s59E13H2" 0 "Glutamate--tRNA ligase 2"  
"OP8\_C16\_00989" 29719 "s59E25H2" 0 "Glutamate--tRNA ligase 2"  
"OP8\_C16\_00989" 29719 "s59E5H2" 0 "Glutamate--tRNA ligase 2"  
"OP8\_C16\_00989" 29719 "s63E6H2" 0.005757333 "Glutamate--tRNA ligase 2"  
"OP8\_C16\_00990" 29720 "s59E13H2" 0 "Glutamine--tRNA ligase"  
"OP8\_C16\_00990" 29720 "s59E25H2" 0 "Glutamine--tRNA ligase"  
"OP8\_C16\_00990" 29720 "s59E5H2" 0 "Glutamine--tRNA ligase"  
"OP8\_C16\_00990" 29720 "s63E6H2" 0.006420621 "Glutamine--tRNA ligase"  
"OP8\_C16\_00992" 29722 "s59E13H2" 0 "mRNA interferase EndoA"  
"OP8\_C16\_00992" 29722 "s59E25H2" 0 "mRNA interferase EndoA"  
"OP8\_C16\_00992" 29722 "s59E5H2" 0 "mRNA interferase EndoA"  
"OP8\_C16\_00992" 29722 "s63E6H2" 0 "mRNA interferase EndoA"  
"OP8\_C16\_00993" 29723 "s59E13H2" 0 "hypothetical protein"  
"OP8\_C16\_00993" 29723 "s59E25H2" 0 "hypothetical protein"  
"OP8\_C16\_00993" 29723 "s59E5H2" 0 "hypothetical protein"  
"OP8\_C16\_00993" 29723 "s63E6H2" 0 "hypothetical protein"  
"OP8\_C16\_00994" 29724 "s59E13H2" 0 "hypothetical protein"  
"OP8\_C16\_00994" 29724 "s59E25H2" 0 "hypothetical protein"  
"OP8\_C16\_00994" 29724 "s59E5H2" 0 "hypothetical protein"  
"OP8\_C16\_00994" 29724 "s63E6H2" 0 "hypothetical protein"  
"OP8\_C16\_00995" 29725 "s59E13H2" 0 "Cysteine--tRNA ligase"  
"OP8\_C16\_00995" 29725 "s59E25H2" 0 "Cysteine--tRNA ligase"  
"OP8\_C16\_00995" 29725 "s59E5H2" 0.0008313709 "Cysteine--tRNA ligase"  
"OP8\_C16\_00995" 29725 "s63E6H2" 0 "Cysteine--tRNA ligase"  
"OP8\_C16\_00996" 29726 "s59E13H2" 0 "hypothetical protein"  
"OP8\_C16\_00996" 29726 "s59E25H2" 0 "hypothetical protein"

"OP8\_C16\_00996" 29726 "s59E5H2" 0 "hypothetical protein"  
"OP8\_C16\_00996" 29726 "s63E6H2" 0 "hypothetical protein"  
"OP8\_C16\_00997" 29727 "s59E13H2" 0 "Lysine 6-dehydrogenase"  
"OP8\_C16\_00997" 29727 "s59E25H2" 0 "Lysine 6-dehydrogenase"  
"OP8\_C16\_00997" 29727 "s59E5H2" 0 "Lysine 6-dehydrogenase"  
"OP8\_C16\_00997" 29727 "s63E6H2" 0 "Lysine 6-dehydrogenase"  
"OP8\_C16\_00998" 29728 "s59E13H2" 0 "hypothetical protein"  
"OP8\_C16\_00998" 29728 "s59E25H2" 0 "hypothetical protein"  
"OP8\_C16\_00998" 29728 "s59E5H2" 0.01416267 "hypothetical protein"  
"OP8\_C16\_00998" 29728 "s63E6H2" 0 "hypothetical protein"  
"OP8\_C16\_00999" 29729 "s59E13H2" 0 "Heat-inducible transcription repressor HrcA"  
"OP8\_C16\_00999" 29729 "s59E25H2" 0 "Heat-inducible transcription repressor HrcA"  
"OP8\_C16\_00999" 29729 "s59E5H2" 0 "Heat-inducible transcription repressor HrcA"  
"OP8\_C16\_00999" 29729 "s63E6H2" 0 "Heat-inducible transcription repressor HrcA"  
"OP8\_C16\_01000" 29730 "s59E13H2" 0 "heat shock protein GrpE"  
"OP8\_C16\_01000" 29730 "s59E25H2" 0 "heat shock protein GrpE"  
"OP8\_C16\_01000" 29730 "s59E5H2" 0 "heat shock protein GrpE"  
"OP8\_C16\_01000" 29730 "s63E6H2" 0 "heat shock protein GrpE"  
"OP8\_C16\_01001" 29731 "s59E13H2" 0 "Chaperone protein DnaJ"  
"OP8\_C16\_01001" 29731 "s59E25H2" 0 "Chaperone protein DnaJ"  
"OP8\_C16\_01001" 29731 "s59E5H2" 0 "Chaperone protein DnaJ"  
"OP8\_C16\_01001" 29731 "s63E6H2" 0.002128287 "Chaperone protein DnaJ"  
"OP8\_C16\_01002" 29732 "s59E13H2" 0 "Ribosomal RNA small subunit methyltransferase E"  
"OP8\_C16\_01002" 29732 "s59E25H2" 0 "Ribosomal RNA small subunit methyltransferase E"  
"OP8\_C16\_01002" 29732 "s59E5H2" 0 "Ribosomal RNA small subunit methyltransferase E"  
"OP8\_C16\_01002" 29732 "s63E6H2" 0.0007427552 "Ribosomal RNA small subunit methyltransferase E"  
"OP8\_C16\_01003" 29733 "s59E13H2" 0 "Serine/threonine-protein kinase PrkC"  
"OP8\_C16\_01003" 29733 "s59E25H2" 0 "Serine/threonine-protein kinase PrkC"  
"OP8\_C16\_01003" 29733 "s59E5H2" 0 "Serine/threonine-protein kinase PrkC"  
"OP8\_C16\_01003" 29733 "s63E6H2" 0.005623984 "Serine/threonine-protein kinase PrkC"  
"OP8\_C16\_01004" 29734 "s59E13H2" 0 "Branched-chain-amino-acid aminotransferase"  
"OP8\_C16\_01004" 29734 "s59E25H2" 0 "Branched-chain-amino-acid aminotransferase"  
"OP8\_C16\_01004" 29734 "s59E5H2" 0 "Branched-chain-amino-acid aminotransferase"  
"OP8\_C16\_01004" 29734 "s63E6H2" 0.006912159 "Branched-chain-amino-acid aminotransferase"  
"OP8\_C16\_01005" 29735 "s59E13H2" 0 "Twitching mobility protein"  
"OP8\_C16\_01005" 29735 "s59E25H2" 0 "Twitching mobility protein"  
"OP8\_C16\_01005" 29735 "s59E5H2" 0 "Twitching mobility protein"  
"OP8\_C16\_01005" 29735 "s63E6H2" 0 "Twitching mobility protein"  
"OP8\_C16\_01006" 29736 "s59E13H2" 0 "Alanine--tRNA ligase"  
"OP8\_C16\_01006" 29736 "s59E25H2" 0 "Alanine--tRNA ligase"  
"OP8\_C16\_01006" 29736 "s59E5H2" 0 "Alanine--tRNA ligase"  
"OP8\_C16\_01006" 29736 "s63E6H2" 0 "Alanine--tRNA ligase"  
"OP8\_C16\_01007" 29737 "s59E13H2" 0 "Membrane-bound lytic murein transglycosylase C precursor"  
"OP8\_C16\_01007" 29737 "s59E25H2" 0 "Membrane-bound lytic murein transglycosylase C precursor"  
"OP8\_C16\_01007" 29737 "s59E5H2" 0 "Membrane-bound lytic murein transglycosylase C precursor"  
"OP8\_C16\_01007" 29737 "s63E6H2" 0 "Membrane-bound lytic murein transglycosylase C precursor"  
"OP8\_C16\_01008" 29738 "s59E13H2" 0 "NADH-quinone oxidoreductase subunit J"

"OP8\_C16\_01008" 29738 "s59E25H2" 0 "NADH-quinone oxidoreductase subunit J"  
"OP8\_C16\_01008" 29738 "s59E5H2" 0 "NADH-quinone oxidoreductase subunit J"  
"OP8\_C16\_01008" 29738 "s63E6H2" 0 "NADH-quinone oxidoreductase subunit J"  
"OP8\_C16\_01009" 29739 "s59E13H2" 0 "NADH-quinone oxidoreductase subunit K"  
"OP8\_C16\_01009" 29739 "s59E25H2" 0 "NADH-quinone oxidoreductase subunit K"  
"OP8\_C16\_01009" 29739 "s59E5H2" 0 "NADH-quinone oxidoreductase subunit K"  
"OP8\_C16\_01009" 29739 "s63E6H2" 0 "NADH-quinone oxidoreductase subunit K"  
"OP8\_C16\_01010" 29740 "s59E13H2" 0 "NADH-quinone oxidoreductase subunit 12"  
"OP8\_C16\_01010" 29740 "s59E25H2" 0 "NADH-quinone oxidoreductase subunit 12"  
"OP8\_C16\_01010" 29740 "s59E5H2" 0 "NADH-quinone oxidoreductase subunit 12"  
"OP8\_C16\_01010" 29740 "s63E6H2" 0 "NADH-quinone oxidoreductase subunit 12"  
"OP8\_C16\_01011" 29741 "s59E13H2" 0 "NADH-quinone oxidoreductase subunit M"  
"OP8\_C16\_01011" 29741 "s59E25H2" 0 "NADH-quinone oxidoreductase subunit M"  
"OP8\_C16\_01011" 29741 "s59E5H2" 0 "NADH-quinone oxidoreductase subunit M"  
"OP8\_C16\_01011" 29741 "s63E6H2" 0 "NADH-quinone oxidoreductase subunit M"  
"OP8\_C16\_01012" 29742 "s59E13H2" 0 "F(420)H(2) dehydrogenase subunit N"  
"OP8\_C16\_01012" 29742 "s59E25H2" 0 "F(420)H(2) dehydrogenase subunit N"  
"OP8\_C16\_01012" 29742 "s59E5H2" 0 "F(420)H(2) dehydrogenase subunit N"  
"OP8\_C16\_01012" 29742 "s63E6H2" 0 "F(420)H(2) dehydrogenase subunit N"  
"OP8\_C16\_01013" 29743 "s59E13H2" 0 "2,5-diamino-6-ribosylamino-4(3H)-pyrimidinone 5'-phosphate reductase"  
"OP8\_C16\_01013" 29743 "s59E25H2" 0 "2,5-diamino-6-ribosylamino-4(3H)-pyrimidinone 5'-phosphate reductase"  
"OP8\_C16\_01013" 29743 "s59E5H2" 0 "2,5-diamino-6-ribosylamino-4(3H)-pyrimidinone 5'-phosphate reductase"  
"OP8\_C16\_01013" 29743 "s63E6H2" 0 "2,5-diamino-6-ribosylamino-4(3H)-pyrimidinone 5'-phosphate reductase"  
"OP8\_C16\_01014" 29744 "s59E13H2" 0 "Riboflavin synthase"  
"OP8\_C16\_01014" 29744 "s59E25H2" 0 "Riboflavin synthase"  
"OP8\_C16\_01014" 29744 "s59E5H2" 0 "Riboflavin synthase"  
"OP8\_C16\_01014" 29744 "s63E6H2" 0 "Riboflavin synthase"  
"OP8\_C16\_01015" 29745 "s59E13H2" 0 "Riboflavin biosynthesis protein RibBA"  
"OP8\_C16\_01015" 29745 "s59E25H2" 0 "Riboflavin biosynthesis protein RibBA"  
"OP8\_C16\_01015" 29745 "s59E5H2" 0 "Riboflavin biosynthesis protein RibBA"  
"OP8\_C16\_01015" 29745 "s63E6H2" 0 "Riboflavin biosynthesis protein RibBA"  
"OP8\_C16\_01016" 29746 "s59E13H2" 0 "6,7-dimethyl-8-ribityllumazine synthase"  
"OP8\_C16\_01016" 29746 "s59E25H2" 0 "6,7-dimethyl-8-ribityllumazine synthase"  
"OP8\_C16\_01016" 29746 "s59E5H2" 0 "6,7-dimethyl-8-ribityllumazine synthase"  
"OP8\_C16\_01016" 29746 "s63E6H2" 0 "6,7-dimethyl-8-ribityllumazine synthase"  
"OP8\_C16\_01017" 29747 "s59E13H2" 0 "Phosphodiesterase YfcE"  
"OP8\_C16\_01017" 29747 "s59E25H2" 0 "Phosphodiesterase YfcE"  
"OP8\_C16\_01017" 29747 "s59E5H2" 0 "Phosphodiesterase YfcE"  
"OP8\_C16\_01017" 29747 "s63E6H2" 0 "Phosphodiesterase YfcE"  
"OP8\_C16\_01018" 29748 "s59E13H2" 0 "hypothetical protein"  
"OP8\_C16\_01018" 29748 "s59E25H2" 0 "hypothetical protein"  
"OP8\_C16\_01018" 29748 "s59E5H2" 0 "hypothetical protein"  
"OP8\_C16\_01018" 29748 "s63E6H2" 0 "hypothetical protein"  
"OP8\_C16\_01019" 29749 "s59E13H2" 0 "DAK2 domain protein"  
"OP8\_C16\_01019" 29749 "s59E25H2" 0 "DAK2 domain protein"  
"OP8\_C16\_01019" 29749 "s59E5H2" 0 "DAK2 domain protein"  
"OP8\_C16\_01019" 29749 "s63E6H2" 0 "DAK2 domain protein"

"OP8\_C16\_01020" 29750 "s59E13H2" 0 "ATP-dependent DNA helicase RecG"  
"OP8\_C16\_01020" 29750 "s59E25H2" 0 "ATP-dependent DNA helicase RecG"  
"OP8\_C16\_01020" 29750 "s59E5H2" 0 "ATP-dependent DNA helicase RecG"  
"OP8\_C16\_01020" 29750 "s63E6H2" 0 "ATP-dependent DNA helicase RecG"  
"OP8\_C16\_01021" 29751 "s59E13H2" 0 "Ribosomal RNA small subunit methyltransferase D"  
"OP8\_C16\_01021" 29751 "s59E25H2" 0 "Ribosomal RNA small subunit methyltransferase D"  
"OP8\_C16\_01021" 29751 "s59E5H2" 0 "Ribosomal RNA small subunit methyltransferase D"  
"OP8\_C16\_01021" 29751 "s63E6H2" 0 "Ribosomal RNA small subunit methyltransferase D"  
"OP8\_C16\_01022" 29752 "s59E13H2" 0 "Succinyl-CoA ligase [ADP-forming] subunit alpha"  
"OP8\_C16\_01022" 29752 "s59E25H2" 0 "Succinyl-CoA ligase [ADP-forming] subunit alpha"  
"OP8\_C16\_01022" 29752 "s59E5H2" 0 "Succinyl-CoA ligase [ADP-forming] subunit alpha"  
"OP8\_C16\_01022" 29752 "s63E6H2" 0 "Succinyl-CoA ligase [ADP-forming] subunit alpha"  
"OP8\_C16\_01023" 29753 "s59E13H2" 0 "hypothetical protein"  
"OP8\_C16\_01023" 29753 "s59E25H2" 0 "hypothetical protein"  
"OP8\_C16\_01023" 29753 "s59E5H2" 0 "hypothetical protein"  
"OP8\_C16\_01023" 29753 "s63E6H2" 0 "hypothetical protein"  
"OP8\_C16\_01024" 29754 "s59E13H2" 0 "Phosphopantetheine adenylyltransferase"  
"OP8\_C16\_01024" 29754 "s59E25H2" 0 "Phosphopantetheine adenylyltransferase"  
"OP8\_C16\_01024" 29754 "s59E5H2" 0 "Phosphopantetheine adenylyltransferase"  
"OP8\_C16\_01024" 29754 "s63E6H2" 0 "Phosphopantetheine adenylyltransferase"  
"OP8\_C16\_01026" 29756 "s59E13H2" 0 "Biotin carboxylase"  
"OP8\_C16\_01026" 29756 "s59E25H2" 0 "Biotin carboxylase"  
"OP8\_C16\_01026" 29756 "s59E5H2" 0 "Biotin carboxylase"  
"OP8\_C16\_01026" 29756 "s63E6H2" 0 "Biotin carboxylase"  
"OP8\_C16\_01027" 29757 "s59E13H2" 0 "Biotin carboxyl carrier protein of acetyl-CoA carboxylase"  
"OP8\_C16\_01027" 29757 "s59E25H2" 0 "Biotin carboxyl carrier protein of acetyl-CoA carboxylase"  
"OP8\_C16\_01027" 29757 "s59E5H2" 0 "Biotin carboxyl carrier protein of acetyl-CoA carboxylase"  
"OP8\_C16\_01027" 29757 "s63E6H2" 0 "Biotin carboxyl carrier protein of acetyl-CoA carboxylase"  
"OP8\_C16\_01028" 29758 "s59E13H2" 0 "Integrase core domain protein"  
"OP8\_C16\_01028" 29758 "s59E25H2" 0 "Integrase core domain protein"  
"OP8\_C16\_01028" 29758 "s59E5H2" 0.06288413 "Integrase core domain protein"  
"OP8\_C16\_01028" 29758 "s63E6H2" 0 "Integrase core domain protein"  
"OP8\_C16\_01029" 29759 "s59E13H2" 0 "Signal recognition particle protein"  
"OP8\_C16\_01029" 29759 "s59E25H2" 0 "Signal recognition particle protein"  
"OP8\_C16\_01029" 29759 "s59E5H2" 0 "Signal recognition particle protein"  
"OP8\_C16\_01029" 29759 "s63E6H2" 0 "Signal recognition particle protein"  
"OP8\_C16\_01030" 29760 "s59E13H2" 0 "30S ribosomal protein S16"  
"OP8\_C16\_01030" 29760 "s59E25H2" 0 "30S ribosomal protein S16"  
"OP8\_C16\_01030" 29760 "s59E5H2" 0 "30S ribosomal protein S16"  
"OP8\_C16\_01030" 29760 "s63E6H2" 0 "30S ribosomal protein S16"  
"OP8\_C16\_01031" 29761 "s59E13H2" 0 "hypothetical protein"  
"OP8\_C16\_01031" 29761 "s59E25H2" 0 "hypothetical protein"  
"OP8\_C16\_01031" 29761 "s59E5H2" 0 "hypothetical protein"  
"OP8\_C16\_01031" 29761 "s63E6H2" 0 "hypothetical protein"  
"OP8\_C16\_01032" 29762 "s59E13H2" 0 "tRNA (guanine-N(1)-)-methyltransferase"  
"OP8\_C16\_01032" 29762 "s59E25H2" 0 "tRNA (guanine-N(1)-)-methyltransferase"  
"OP8\_C16\_01032" 29762 "s59E5H2" 0 "tRNA (guanine-N(1)-)-methyltransferase"



"OP8\_C16\_01032" 29762 "s63E6H2" 0 "tRNA (guanine-N(1)-methyltransferase"  
"OP8\_C16\_01033" 29763 "s59E13H2" 0 "50S ribosomal protein L19"  
"OP8\_C16\_01033" 29763 "s59E25H2" 0 "50S ribosomal protein L19"  
"OP8\_C16\_01033" 29763 "s59E5H2" 0 "50S ribosomal protein L19"  
"OP8\_C16\_01033" 29763 "s63E6H2" 0 "50S ribosomal protein L19"  
"OP8\_C16\_01034" 29764 "s59E13H2" 0 "Ribonuclease HII"  
"OP8\_C16\_01034" 29764 "s59E25H2" 0 "Ribonuclease HII"  
"OP8\_C16\_01034" 29764 "s59E5H2" 0 "Ribonuclease HII"  
"OP8\_C16\_01034" 29764 "s63E6H2" 0 "Ribonuclease HII"  
"OP8\_C16\_01035" 29765 "s59E13H2" 0 "tetratricopeptide repeat protein"  
"OP8\_C16\_01035" 29765 "s59E25H2" 0 "tetratricopeptide repeat protein"  
"OP8\_C16\_01035" 29765 "s59E5H2" 0 "tetratricopeptide repeat protein"  
"OP8\_C16\_01035" 29765 "s63E6H2" 0 "tetratricopeptide repeat protein"  
"OP8\_C16\_01036" 29766 "s59E13H2" 0 "Transcriptional regulatory protein ZraR"  
"OP8\_C16\_01036" 29766 "s59E25H2" 0 "Transcriptional regulatory protein ZraR"  
"OP8\_C16\_01036" 29766 "s59E5H2" 0 "Transcriptional regulatory protein ZraR"  
"OP8\_C16\_01036" 29766 "s63E6H2" 0 "Transcriptional regulatory protein ZraR"  
"OP8\_C16\_01037" 29767 "s59E13H2" 0 "hypothetical protein"  
"OP8\_C16\_01037" 29767 "s59E25H2" 0 "hypothetical protein"  
"OP8\_C16\_01037" 29767 "s59E5H2" 0 "hypothetical protein"  
"OP8\_C16\_01037" 29767 "s63E6H2" 0 "hypothetical protein"  
"OP8\_C16\_01038" 29768 "s59E13H2" 0 "Malate-2H(+)/Na(+)-lactate antiporter"  
"OP8\_C16\_01038" 29768 "s59E25H2" 0 "Malate-2H(+)/Na(+)-lactate antiporter"  
"OP8\_C16\_01038" 29768 "s59E5H2" 0 "Malate-2H(+)/Na(+)-lactate antiporter"  
"OP8\_C16\_01038" 29768 "s63E6H2" 0 "Malate-2H(+)/Na(+)-lactate antiporter"  
"OP8\_C16\_01039" 29769 "s59E13H2" 0 "Isoaspartyl dipeptidase"  
"OP8\_C16\_01039" 29769 "s59E25H2" 0 "Isoaspartyl dipeptidase"  
"OP8\_C16\_01039" 29769 "s59E5H2" 0 "Isoaspartyl dipeptidase"  
"OP8\_C16\_01039" 29769 "s63E6H2" 0 "Isoaspartyl dipeptidase"  
"OP8\_C16\_01040" 29770 "s59E13H2" 0 "hypothetical protein"  
"OP8\_C16\_01040" 29770 "s59E25H2" 0 "hypothetical protein"  
"OP8\_C16\_01040" 29770 "s59E5H2" 0 "hypothetical protein"  
"OP8\_C16\_01040" 29770 "s63E6H2" 0 "hypothetical protein"  
"OP8\_C16\_01041" 29771 "s59E13H2" 0 "Peptidyl-prolyl cis-trans isomerase D"  
"OP8\_C16\_01041" 29771 "s59E25H2" 0 "Peptidyl-prolyl cis-trans isomerase D"  
"OP8\_C16\_01041" 29771 "s59E5H2" 0 "Peptidyl-prolyl cis-trans isomerase D"  
"OP8\_C16\_01041" 29771 "s63E6H2" 0 "Peptidyl-prolyl cis-trans isomerase D"  
"OP8\_C16\_01042" 29772 "s59E13H2" 0 "Acyl-CoA dehydrogenase"  
"OP8\_C16\_01042" 29772 "s59E25H2" 0 "Acyl-CoA dehydrogenase"  
"OP8\_C16\_01042" 29772 "s59E5H2" 0 "Acyl-CoA dehydrogenase"  
"OP8\_C16\_01042" 29772 "s63E6H2" 0 "Acyl-CoA dehydrogenase"  
"OP8\_C16\_01043" 29773 "s59E13H2" 0 "AP-4-A phosphorylase"  
"OP8\_C16\_01043" 29773 "s59E25H2" 0 "AP-4-A phosphorylase"  
"OP8\_C16\_01043" 29773 "s59E5H2" 0 "AP-4-A phosphorylase"  
"OP8\_C16\_01043" 29773 "s63E6H2" 0 "AP-4-A phosphorylase"  
"OP8\_C16\_01044" 29774 "s59E13H2" 0 "DNA-binding protein HU 1"  
"OP8\_C16\_01044" 29774 "s59E25H2" 0 "DNA-binding protein HU 1"

"OP8\_C16\_01044" 29774 "s59E5H2" 0 "DNA-binding protein HU 1"  
"OP8\_C16\_01044" 29774 "s63E6H2" 0 "DNA-binding protein HU 1"  
"OP8\_C16\_01045" 29775 "s59E13H2" 0 "30S ribosomal protein S1"  
"OP8\_C16\_01045" 29775 "s59E25H2" 0 "30S ribosomal protein S1"  
"OP8\_C16\_01045" 29775 "s59E5H2" 0 "30S ribosomal protein S1"  
"OP8\_C16\_01045" 29775 "s63E6H2" 0 "30S ribosomal protein S1"  
"OP8\_C16\_01046" 29776 "s59E13H2" 0 "4-hydroxy-3-methylbut-2-enyl diphosphate reductase"  
"OP8\_C16\_01046" 29776 "s59E25H2" 0 "4-hydroxy-3-methylbut-2-enyl diphosphate reductase"  
"OP8\_C16\_01046" 29776 "s59E5H2" 0 "4-hydroxy-3-methylbut-2-enyl diphosphate reductase"  
"OP8\_C16\_01046" 29776 "s63E6H2" 0 "4-hydroxy-3-methylbut-2-enyl diphosphate reductase"  
"OP8\_C16\_01047" 29777 "s59E13H2" 0 "Succinylglutamate desuccinylase / Aspartoacylase family protein"  
"OP8\_C16\_01047" 29777 "s59E25H2" 0 "Succinylglutamate desuccinylase / Aspartoacylase family protein"  
"OP8\_C16\_01047" 29777 "s59E5H2" 0 "Succinylglutamate desuccinylase / Aspartoacylase family protein"  
"OP8\_C16\_01047" 29777 "s63E6H2" 0 "Succinylglutamate desuccinylase / Aspartoacylase family protein"  
"OP8\_C16\_01048" 29778 "s59E13H2" 0 "hypothetical protein"  
"OP8\_C16\_01048" 29778 "s59E25H2" 0 "hypothetical protein"  
"OP8\_C16\_01048" 29778 "s59E5H2" 0 "hypothetical protein"  
"OP8\_C16\_01048" 29778 "s63E6H2" 0 "hypothetical protein"  
"OP8\_C16\_01049" 29779 "s59E13H2" 0 "Citrate transporter"  
"OP8\_C16\_01049" 29779 "s59E25H2" 0 "Citrate transporter"  
"OP8\_C16\_01049" 29779 "s59E5H2" 0 "Citrate transporter"  
"OP8\_C16\_01049" 29779 "s63E6H2" 0 "Citrate transporter"  
"OP8\_C16\_01050" 29780 "s59E13H2" 0 "hypothetical protein"  
"OP8\_C16\_01050" 29780 "s59E25H2" 0 "hypothetical protein"  
"OP8\_C16\_01050" 29780 "s59E5H2" 0 "hypothetical protein"  
"OP8\_C16\_01050" 29780 "s63E6H2" 0 "hypothetical protein"  
"OP8\_C16\_01051" 29781 "s59E13H2" 0 "Gamma-glutamyltranspeptidase precursor"  
"OP8\_C16\_01051" 29781 "s59E25H2" 0 "Gamma-glutamyltranspeptidase precursor"  
"OP8\_C16\_01051" 29781 "s59E5H2" 0 "Gamma-glutamyltranspeptidase precursor"  
"OP8\_C16\_01051" 29781 "s63E6H2" 0 "Gamma-glutamyltranspeptidase precursor"  
"OP8\_C16\_01052" 29782 "s59E13H2" 0 "hypothetical protein"  
"OP8\_C16\_01052" 29782 "s59E25H2" 0 "hypothetical protein"  
"OP8\_C16\_01052" 29782 "s59E5H2" 0 "hypothetical protein"  
"OP8\_C16\_01052" 29782 "s63E6H2" 0 "hypothetical protein"  
"OP8\_C16\_01053" 29783 "s59E13H2" 0 "Segregation and condensation protein A"  
"OP8\_C16\_01053" 29783 "s59E25H2" 0 "Segregation and condensation protein A"  
"OP8\_C16\_01053" 29783 "s59E5H2" 0 "Segregation and condensation protein A"  
"OP8\_C16\_01053" 29783 "s63E6H2" 0 "Segregation and condensation protein A"  
"OP8\_C16\_01054" 29784 "s59E13H2" 0 "Tryptophan--tRNA ligase"  
"OP8\_C16\_01054" 29784 "s59E25H2" 0 "Tryptophan--tRNA ligase"  
"OP8\_C16\_01054" 29784 "s59E5H2" 0 "Tryptophan--tRNA ligase"  
"OP8\_C16\_01054" 29784 "s63E6H2" 0 "Tryptophan--tRNA ligase"  
"OP8\_C16\_01055" 29785 "s59E13H2" 0 "Peptidase family M50"  
"OP8\_C16\_01055" 29785 "s59E25H2" 0 "Peptidase family M50"  
"OP8\_C16\_01055" 29785 "s59E5H2" 0 "Peptidase family M50"  
"OP8\_C16\_01055" 29785 "s63E6H2" 0 "Peptidase family M50"  
"OP8\_C16\_01056" 29786 "s59E13H2" 0 "Isopentenyl-diphosphate delta-isomerase"

"OP8\_C16\_01056" 29786 "s59E25H2" 0 "Isopentenyl-diphosphate delta-isomerase"  
"OP8\_C16\_01056" 29786 "s59E5H2" 0 "Isopentenyl-diphosphate delta-isomerase"  
"OP8\_C16\_01056" 29786 "s63E6H2" 0 "Isopentenyl-diphosphate delta-isomerase"  
"OP8\_C16\_01057" 29787 "s59E13H2" 0 "NADP-reducing hydrogenase subunit HndC"  
"OP8\_C16\_01057" 29787 "s59E25H2" 0 "NADP-reducing hydrogenase subunit HndC"  
"OP8\_C16\_01057" 29787 "s59E5H2" 0 "NADP-reducing hydrogenase subunit HndC"  
"OP8\_C16\_01057" 29787 "s63E6H2" 0 "NADP-reducing hydrogenase subunit HndC"  
"OP8\_C16\_01058" 29788 "s59E13H2" 0 "NADP-reducing hydrogenase subunit HndC"  
"OP8\_C16\_01058" 29788 "s59E25H2" 0 "NADP-reducing hydrogenase subunit HndC"  
"OP8\_C16\_01058" 29788 "s59E5H2" 0 "NADP-reducing hydrogenase subunit HndC"  
"OP8\_C16\_01058" 29788 "s63E6H2" 0 "NADP-reducing hydrogenase subunit HndC"  
"OP8\_C16\_01059" 29789 "s59E13H2" 0 "NADP-reducing hydrogenase subunit HndA"  
"OP8\_C16\_01059" 29789 "s59E25H2" 0 "NADP-reducing hydrogenase subunit HndA"  
"OP8\_C16\_01059" 29789 "s59E5H2" 0 "NADP-reducing hydrogenase subunit HndA"  
"OP8\_C16\_01059" 29789 "s63E6H2" 0 "NADP-reducing hydrogenase subunit HndA"  
"OP8\_C16\_01060" 29790 "s59E13H2" 0 "S-adenosylmethionine decarboxylase proenzyme precursor"  
"OP8\_C16\_01060" 29790 "s59E25H2" 0 "S-adenosylmethionine decarboxylase proenzyme precursor"  
"OP8\_C16\_01060" 29790 "s59E5H2" 0.3324337 "S-adenosylmethionine decarboxylase proenzyme precursor"  
"OP8\_C16\_01060" 29790 "s63E6H2" 0 "S-adenosylmethionine decarboxylase proenzyme precursor"  
"OP8\_C16\_01061" 29791 "s59E13H2" 0 "Tricorn protease-interacting factor F3"  
"OP8\_C16\_01061" 29791 "s59E25H2" 0 "Tricorn protease-interacting factor F3"  
"OP8\_C16\_01061" 29791 "s59E5H2" 3.494078 "Tricorn protease-interacting factor F3"  
"OP8\_C16\_01061" 29791 "s63E6H2" 0 "Tricorn protease-interacting factor F3"  
"OP8\_C16\_01062" 29792 "s59E13H2" 0 "Transposase IS116/IS110/IS902 family protein"  
"OP8\_C16\_01062" 29792 "s59E25H2" 0 "Transposase IS116/IS110/IS902 family protein"  
"OP8\_C16\_01062" 29792 "s59E5H2" 0 "Transposase IS116/IS110/IS902 family protein"  
"OP8\_C16\_01062" 29792 "s63E6H2" 0 "Transposase IS116/IS110/IS902 family protein"  
"OP8\_E21\_00002" 25984 "s59E13H2" 0.002427127 "hypothetical protein"  
"OP8\_E21\_00002" 25984 "s59E25H2" 0 "hypothetical protein"  
"OP8\_E21\_00002" 25984 "s59E5H2" 0.4576872 "hypothetical protein"  
"OP8\_E21\_00002" 25984 "s63E6H2" 0 "hypothetical protein"  
"OP8\_E21\_00003" 25985 "s59E13H2" 0.02024061 "Elongation factor Tu"  
"OP8\_E21\_00003" 25985 "s59E25H2" 0 "Elongation factor Tu"  
"OP8\_E21\_00003" 25985 "s59E5H2" 0.5997355 "Elongation factor Tu"  
"OP8\_E21\_00003" 25985 "s63E6H2" 0 "Elongation factor Tu"  
"OP8\_E21\_00004" 25986 "s59E13H2" 0.05737822 "30S ribosomal protein S10"  
"OP8\_E21\_00004" 25986 "s59E25H2" 0 "30S ribosomal protein S10"  
"OP8\_E21\_00004" 25986 "s59E5H2" 0.09777543 "30S ribosomal protein S10"  
"OP8\_E21\_00004" 25986 "s63E6H2" 0 "30S ribosomal protein S10"  
"OP8\_E21\_00005" 25987 "s59E13H2" 0.03680274 "50S ribosomal protein L3"  
"OP8\_E21\_00005" 25987 "s59E25H2" 0 "50S ribosomal protein L3"  
"OP8\_E21\_00005" 25987 "s59E5H2" 0.1698686 "50S ribosomal protein L3"  
"OP8\_E21\_00005" 25987 "s63E6H2" 0 "50S ribosomal protein L3"  
"OP8\_E21\_00006" 25988 "s59E13H2" 0.03254904 "50S ribosomal protein L4"  
"OP8\_E21\_00006" 25988 "s59E25H2" 0 "50S ribosomal protein L4"  
"OP8\_E21\_00006" 25988 "s59E5H2" 0.07889188 "50S ribosomal protein L4"  
"OP8\_E21\_00006" 25988 "s63E6H2" 0 "50S ribosomal protein L4"

"OP8\_E21\_00007" 25989 "s59E13H2" 0.03960238 "50S ribosomal protein L23"  
"OP8\_E21\_00007" 25989 "s59E25H2" 0 "50S ribosomal protein L23"  
"OP8\_E21\_00007" 25989 "s59E5H2" 0.1306764 "50S ribosomal protein L23"  
"OP8\_E21\_00007" 25989 "s63E6H2" 0 "50S ribosomal protein L23"  
"OP8\_E21\_00008" 25990 "s59E13H2" 0.06648135 "50S ribosomal protein L2"  
"OP8\_E21\_00008" 25990 "s59E25H2" 0 "50S ribosomal protein L2"  
"OP8\_E21\_00008" 25990 "s59E5H2" 0.08354525 "50S ribosomal protein L2"  
"OP8\_E21\_00008" 25990 "s63E6H2" 0 "50S ribosomal protein L2"  
"OP8\_E21\_00009" 25991 "s59E13H2" 0.01061174 "30S ribosomal protein S12"  
"OP8\_E21\_00009" 25991 "s59E25H2" 0 "30S ribosomal protein S12"  
"OP8\_E21\_00009" 25991 "s59E5H2" 0.1443814 "30S ribosomal protein S12"  
"OP8\_E21\_00009" 25991 "s63E6H2" 0 "30S ribosomal protein S12"  
"OP8\_E21\_00010" 25992 "s59E13H2" 0.01364537 "30S ribosomal protein S7"  
"OP8\_E21\_00010" 25992 "s59E25H2" 0 "30S ribosomal protein S7"  
"OP8\_E21\_00010" 25992 "s59E5H2" 0.1733726 "30S ribosomal protein S7"  
"OP8\_E21\_00010" 25992 "s63E6H2" 0 "30S ribosomal protein S7"  
"OP8\_E21\_00011" 25993 "s59E13H2" 0.03982332 "Transposase DDE domain protein"  
"OP8\_E21\_00011" 25993 "s59E25H2" 0 "Transposase DDE domain protein"  
"OP8\_E21\_00011" 25993 "s59E5H2" 1.093663 "Transposase DDE domain protein"  
"OP8\_E21\_00011" 25993 "s63E6H2" 0 "Transposase DDE domain protein"  
"OP8\_E21\_00012" 25994 "s59E13H2" 2.179835 "hypothetical protein"  
"OP8\_E21\_00012" 25994 "s59E25H2" 0 "hypothetical protein"  
"OP8\_E21\_00012" 25994 "s59E5H2" 0.835516 "hypothetical protein"  
"OP8\_E21\_00012" 25994 "s63E6H2" 0 "hypothetical protein"  
"OP8\_E21\_00013" 25995 "s59E13H2" 0.001764852 "hypothetical protein"  
"OP8\_E21\_00013" 25995 "s59E25H2" 0 "hypothetical protein"  
"OP8\_E21\_00013" 25995 "s59E5H2" 1.485652 "hypothetical protein"  
"OP8\_E21\_00013" 25995 "s63E6H2" 0 "hypothetical protein"  
"OP8\_E21\_00014" 25996 "s59E13H2" 0.002879599 "hypothetical protein"  
"OP8\_E21\_00014" 25996 "s59E25H2" 0 "hypothetical protein"  
"OP8\_E21\_00014" 25996 "s59E5H2" 1.742655 "hypothetical protein"  
"OP8\_E21\_00014" 25996 "s63E6H2" 0 "hypothetical protein"  
"OP8\_E21\_00015" 25997 "s59E13H2" 0.002390423 "hypothetical protein"  
"OP8\_E21\_00015" 25997 "s59E25H2" 0 "hypothetical protein"  
"OP8\_E21\_00015" 25997 "s59E5H2" 2.021775 "hypothetical protein"  
"OP8\_E21\_00015" 25997 "s63E6H2" 0 "hypothetical protein"  
"OP8\_E21\_00016" 25998 "s59E13H2" 0.000973783 "ECF RNA polymerase sigma factor SigW"  
"OP8\_E21\_00016" 25998 "s59E25H2" 0 "ECF RNA polymerase sigma factor SigW"  
"OP8\_E21\_00016" 25998 "s59E5H2" 0.2190745 "ECF RNA polymerase sigma factor SigW"  
"OP8\_E21\_00016" 25998 "s63E6H2" 0 "ECF RNA polymerase sigma factor SigW"  
"OP8\_E21\_00017" 25999 "s59E13H2" 0.002290256 "hypothetical protein"  
"OP8\_E21\_00017" 25999 "s59E25H2" 0 "hypothetical protein"  
"OP8\_E21\_00017" 25999 "s59E5H2" 0.2276233 "hypothetical protein"  
"OP8\_E21\_00017" 25999 "s63E6H2" 0 "hypothetical protein"  
"OP8\_E21\_00018" 26000 "s59E13H2" 0.01342591 "hypothetical protein"  
"OP8\_E21\_00018" 26000 "s59E25H2" 0 "hypothetical protein"  
"OP8\_E21\_00018" 26000 "s59E5H2" 0.3491806 "hypothetical protein"

"OP8\_E21\_00018" 26000 "s63E6H2" 0 "hypothetical protein"  
"OP8\_E21\_00019" 26001 "s59E13H2" 0.2270076 "citrate synthase"  
"OP8\_E21\_00019" 26001 "s59E25H2" 0 "citrate synthase"  
"OP8\_E21\_00019" 26001 "s59E5H2" 0.2374685 "citrate synthase"  
"OP8\_E21\_00019" 26001 "s63E6H2" 0 "citrate synthase"  
"OP8\_E21\_00020" 26002 "s59E13H2" 0.3952668 "hypothetical protein"  
"OP8\_E21\_00020" 26002 "s59E25H2" 0 "hypothetical protein"  
"OP8\_E21\_00020" 26002 "s59E5H2" 0.6360403 "hypothetical protein"  
"OP8\_E21\_00020" 26002 "s63E6H2" 0 "hypothetical protein"  
"OP8\_E21\_00021" 26003 "s59E13H2" 0.7459392 "hypothetical protein"  
"OP8\_E21\_00021" 26003 "s59E25H2" 0 "hypothetical protein"  
"OP8\_E21\_00021" 26003 "s59E5H2" 1.217485 "hypothetical protein"  
"OP8\_E21\_00021" 26003 "s63E6H2" 0 "hypothetical protein"  
"OP8\_E21\_00022" 26004 "s59E13H2" 0 "putative adenylyl-sulfate kinase"  
"OP8\_E21\_00022" 26004 "s59E25H2" 0 "putative adenylyl-sulfate kinase"  
"OP8\_E21\_00022" 26004 "s59E5H2" 1.25749 "putative adenylyl-sulfate kinase"  
"OP8\_E21\_00022" 26004 "s63E6H2" 0 "putative adenylyl-sulfate kinase"  
"OP8\_E21\_00024" 26006 "s59E13H2" 0.08413495 "hypothetical protein"  
"OP8\_E21\_00024" 26006 "s59E25H2" 0 "hypothetical protein"  
"OP8\_E21\_00024" 26006 "s59E5H2" 0.3326636 "hypothetical protein"  
"OP8\_E21\_00024" 26006 "s63E6H2" 0 "hypothetical protein"  
"OP8\_E21\_00025" 26007 "s59E13H2" 0.04176443 "DNA-directed RNA polymerase subunit beta"  
"OP8\_E21\_00025" 26007 "s59E25H2" 0 "DNA-directed RNA polymerase subunit beta"  
"OP8\_E21\_00025" 26007 "s59E5H2" 0.5415991 "DNA-directed RNA polymerase subunit beta"  
"OP8\_E21\_00025" 26007 "s63E6H2" 0 "DNA-directed RNA polymerase subunit beta"  
"OP8\_E21\_00026" 26008 "s59E13H2" 0.03525113 "50S ribosomal protein L7/L12"  
"OP8\_E21\_00026" 26008 "s59E25H2" 0 "50S ribosomal protein L7/L12"  
"OP8\_E21\_00026" 26008 "s59E5H2" 2.407424 "50S ribosomal protein L7/L12"  
"OP8\_E21\_00026" 26008 "s63E6H2" 0 "50S ribosomal protein L7/L12"  
"OP8\_E21\_00027" 26009 "s59E13H2" 0.07750326 "50S ribosomal protein L10"  
"OP8\_E21\_00027" 26009 "s59E25H2" 0 "50S ribosomal protein L10"  
"OP8\_E21\_00027" 26009 "s59E5H2" 2.246278 "50S ribosomal protein L10"  
"OP8\_E21\_00027" 26009 "s63E6H2" 0 "50S ribosomal protein L10"  
"OP8\_E21\_00028" 26010 "s59E13H2" 0.02050545 "50S ribosomal protein L1"  
"OP8\_E21\_00028" 26010 "s59E25H2" 0 "50S ribosomal protein L1"  
"OP8\_E21\_00028" 26010 "s59E5H2" 0.6009336 "50S ribosomal protein L1"  
"OP8\_E21\_00028" 26010 "s63E6H2" 0 "50S ribosomal protein L1"  
"OP8\_E21\_00029" 26011 "s59E13H2" 0.02828279 "50S ribosomal protein L11"  
"OP8\_E21\_00029" 26011 "s59E25H2" 0 "50S ribosomal protein L11"  
"OP8\_E21\_00029" 26011 "s59E5H2" 0.6589322 "50S ribosomal protein L11"  
"OP8\_E21\_00029" 26011 "s63E6H2" 0 "50S ribosomal protein L11"  
"OP8\_E21\_00030" 26012 "s59E13H2" 0.006785305 "hypothetical protein"  
"OP8\_E21\_00030" 26012 "s59E25H2" 0 "hypothetical protein"  
"OP8\_E21\_00030" 26012 "s59E5H2" 0.7257116 "hypothetical protein"  
"OP8\_E21\_00030" 26012 "s63E6H2" 0 "hypothetical protein"  
"OP8\_E21\_00031" 26013 "s59E13H2" 0.01335604 "preprotein translocase subunit SecE"  
"OP8\_E21\_00031" 26013 "s59E25H2" 0 "preprotein translocase subunit SecE"

"OP8\_E21\_00031" 26013 "s59E5H2" 0.8312889 "preprotein translocase subunit SecE"  
"OP8\_E21\_00031" 26013 "s63E6H2" 0 "preprotein translocase subunit SecE"  
"OP8\_E21\_00033" 26015 "s59E13H2" 0 "hypothetical protein"  
"OP8\_E21\_00033" 26015 "s59E25H2" 0 "hypothetical protein"  
"OP8\_E21\_00033" 26015 "s59E5H2" 0.8146742 "hypothetical protein"  
"OP8\_E21\_00033" 26015 "s63E6H2" 0.001183527 "hypothetical protein"  
"OP8\_E21\_00034" 26016 "s59E13H2" 0.0828528 "DNA-directed RNA polymerase subunit omega"  
"OP8\_E21\_00034" 26016 "s59E25H2" 0 "DNA-directed RNA polymerase subunit omega"  
"OP8\_E21\_00034" 26016 "s59E5H2" 0.4097273 "DNA-directed RNA polymerase subunit omega"  
"OP8\_E21\_00034" 26016 "s63E6H2" 0 "DNA-directed RNA polymerase subunit omega"  
"OP8\_E21\_00035" 26017 "s59E13H2" 0.1640488 "Flagellum site-determining protein YlxH"  
"OP8\_E21\_00035" 26017 "s59E25H2" 0 "Flagellum site-determining protein YlxH"  
"OP8\_E21\_00035" 26017 "s59E5H2" 0.8499217 "Flagellum site-determining protein YlxH"  
"OP8\_E21\_00035" 26017 "s63E6H2" 0 "Flagellum site-determining protein YlxH"  
"OP8\_E21\_00036" 26018 "s59E13H2" 0.2641101 "Chaperone protein DnaJ"  
"OP8\_E21\_00036" 26018 "s59E25H2" 0 "Chaperone protein DnaJ"  
"OP8\_E21\_00036" 26018 "s59E5H2" 1.124314 "Chaperone protein DnaJ"  
"OP8\_E21\_00036" 26018 "s63E6H2" 0 "Chaperone protein DnaJ"  
"OP8\_E21\_00037" 26019 "s59E13H2" 0.2854921 "hypothetical protein"  
"OP8\_E21\_00037" 26019 "s59E25H2" 0 "hypothetical protein"  
"OP8\_E21\_00037" 26019 "s59E5H2" 3.205463 "hypothetical protein"  
"OP8\_E21\_00037" 26019 "s63E6H2" 0 "hypothetical protein"  
"OP8\_E21\_00038" 26020 "s59E13H2" 0 "Nucleotidyltransferase domain protein"  
"OP8\_E21\_00038" 26020 "s59E25H2" 0 "Nucleotidyltransferase domain protein"  
"OP8\_E21\_00038" 26020 "s59E5H2" 0.2858775 "Nucleotidyltransferase domain protein"  
"OP8\_E21\_00038" 26020 "s63E6H2" 0 "Nucleotidyltransferase domain protein"  
"OP8\_E21\_00039" 26021 "s59E13H2" 0 "hypothetical protein"  
"OP8\_E21\_00039" 26021 "s59E25H2" 0 "hypothetical protein"  
"OP8\_E21\_00039" 26021 "s59E5H2" 0.377743 "hypothetical protein"  
"OP8\_E21\_00039" 26021 "s63E6H2" 0 "hypothetical protein"  
"OP8\_E21\_00043" 26025 "s59E13H2" 0 "hypothetical protein"  
"OP8\_E21\_00043" 26025 "s59E25H2" 0 "hypothetical protein"  
"OP8\_E21\_00043" 26025 "s59E5H2" 0.3662189 "hypothetical protein"  
"OP8\_E21\_00043" 26025 "s63E6H2" 0 "hypothetical protein"  
"OP8\_E21\_00044" 26026 "s59E13H2" 0 "hypothetical protein"  
"OP8\_E21\_00044" 26026 "s59E25H2" 0 "hypothetical protein"  
"OP8\_E21\_00044" 26026 "s59E5H2" 0.2731116 "hypothetical protein"  
"OP8\_E21\_00044" 26026 "s63E6H2" 0.0136426 "hypothetical protein"  
"OP8\_E21\_00045" 26027 "s59E13H2" 0 "hypothetical protein"  
"OP8\_E21\_00045" 26027 "s59E25H2" 0 "hypothetical protein"  
"OP8\_E21\_00045" 26027 "s59E5H2" 0.2854303 "hypothetical protein"  
"OP8\_E21\_00045" 26027 "s63E6H2" 0 "hypothetical protein"  
"OP8\_E21\_00046" 26028 "s59E13H2" 0.0007831054 "hypothetical protein"  
"OP8\_E21\_00046" 26028 "s59E25H2" 0 "hypothetical protein"  
"OP8\_E21\_00046" 26028 "s59E5H2" 0.2367272 "hypothetical protein"  
"OP8\_E21\_00046" 26028 "s63E6H2" 0 "hypothetical protein"  
"OP8\_E21\_00047" 26029 "s59E13H2" 0.1050352 "Protease 1 precursor"

"OP8\_E21\_00047" 26029 "s59E25H2" 0 "Protease 1 precursor"  
"OP8\_E21\_00047" 26029 "s59E5H2" 0.8928462 "Protease 1 precursor"  
"OP8\_E21\_00047" 26029 "s63E6H2" 0 "Protease 1 precursor"  
"OP8\_E21\_00048" 26030 "s59E13H2" 0.1758011 "Protease 1 precursor"  
"OP8\_E21\_00048" 26030 "s59E25H2" 0 "Protease 1 precursor"  
"OP8\_E21\_00048" 26030 "s59E5H2" 0.2480259 "Protease 1 precursor"  
"OP8\_E21\_00048" 26030 "s63E6H2" 0 "Protease 1 precursor"  
"OP8\_E21\_00049" 26031 "s59E13H2" 0.4512071 "Oxygen sensor histidine kinase NreB"  
"OP8\_E21\_00049" 26031 "s59E25H2" 0.1694102 "Oxygen sensor histidine kinase NreB"  
"OP8\_E21\_00049" 26031 "s59E5H2" 0.5333749 "Oxygen sensor histidine kinase NreB"  
"OP8\_E21\_00049" 26031 "s63E6H2" 0 "Oxygen sensor histidine kinase NreB"  
"OP8\_E21\_00050" 26032 "s59E13H2" 0.4884298 "Response regulator UvrY"  
"OP8\_E21\_00050" 26032 "s59E25H2" 0 "Response regulator UvrY"  
"OP8\_E21\_00050" 26032 "s59E5H2" 0.5747098 "Response regulator UvrY"  
"OP8\_E21\_00050" 26032 "s63E6H2" 0 "Response regulator UvrY"  
"OP8\_E21\_00051" 26033 "s59E13H2" 0.2790682 "Transcriptional regulatory protein DevR (DosR)"  
"OP8\_E21\_00051" 26033 "s59E25H2" 0 "Transcriptional regulatory protein DevR (DosR)"  
"OP8\_E21\_00051" 26033 "s59E5H2" 0.3721541 "Transcriptional regulatory protein DevR (DosR)"  
"OP8\_E21\_00051" 26033 "s63E6H2" 0 "Transcriptional regulatory protein DevR (DosR)"  
"OP8\_E21\_00052" 26034 "s59E13H2" 0.009814283 "Dihydropteroate synthase"  
"OP8\_E21\_00052" 26034 "s59E25H2" 0 "Dihydropteroate synthase"  
"OP8\_E21\_00052" 26034 "s59E5H2" 1.937118 "Dihydropteroate synthase"  
"OP8\_E21\_00052" 26034 "s63E6H2" 0 "Dihydropteroate synthase"  
"OP8\_E21\_00053" 26035 "s59E13H2" 0.02857408 "DisA bacterial checkpoint controller nucleotide-binding protein"  
"OP8\_E21\_00053" 26035 "s59E25H2" 0 "DisA bacterial checkpoint controller nucleotide-binding protein"  
"OP8\_E21\_00053" 26035 "s59E5H2" 1.982433 "DisA bacterial checkpoint controller nucleotide-binding protein"  
"OP8\_E21\_00053" 26035 "s63E6H2" 0 "DisA bacterial checkpoint controller nucleotide-binding protein"  
"OP8\_E21\_00054" 26036 "s59E13H2" 0.008966968 "YbbR-like protein"  
"OP8\_E21\_00054" 26036 "s59E25H2" 0 "YbbR-like protein"  
"OP8\_E21\_00054" 26036 "s59E5H2" 2.774654 "YbbR-like protein"  
"OP8\_E21\_00054" 26036 "s63E6H2" 0 "YbbR-like protein"  
"OP8\_E21\_00055" 26037 "s59E13H2" 0.01770943 "Pyridoxine 5'-phosphate synthase"  
"OP8\_E21\_00055" 26037 "s59E25H2" 0 "Pyridoxine 5'-phosphate synthase"  
"OP8\_E21\_00055" 26037 "s59E5H2" 3.716023 "Pyridoxine 5'-phosphate synthase"  
"OP8\_E21\_00055" 26037 "s63E6H2" 0 "Pyridoxine 5'-phosphate synthase"  
"OP8\_E21\_00056" 26038 "s59E13H2" 0.0192947 "N-carbamoyl-L-amino acid hydrolase"  
"OP8\_E21\_00056" 26038 "s59E25H2" 0 "N-carbamoyl-L-amino acid hydrolase"  
"OP8\_E21\_00056" 26038 "s59E5H2" 5.815425 "N-carbamoyl-L-amino acid hydrolase"  
"OP8\_E21\_00056" 26038 "s63E6H2" 0 "N-carbamoyl-L-amino acid hydrolase"  
"OP8\_E21\_00057" 26039 "s59E13H2" 0.04855853 "Peptide chain release factor 2"  
"OP8\_E21\_00057" 26039 "s59E25H2" 0 "Peptide chain release factor 2"  
"OP8\_E21\_00057" 26039 "s59E5H2" 4.725986 "Peptide chain release factor 2"  
"OP8\_E21\_00057" 26039 "s63E6H2" 0 "Peptide chain release factor 2"  
"OP8\_E21\_00058" 26040 "s59E13H2" 0.03044619 "PTS system fructose-specific EIIABC component"  
"OP8\_E21\_00058" 26040 "s59E25H2" 0 "PTS system fructose-specific EIIABC component"  
"OP8\_E21\_00058" 26040 "s59E5H2" 3.583139 "PTS system fructose-specific EIIABC component"  
"OP8\_E21\_00058" 26040 "s63E6H2" 0 "PTS system fructose-specific EIIABC component"

"OP8\_E21\_00059" 26041 "s59E13H2" 0.009031966 "Peptidase family M28"  
"OP8\_E21\_00059" 26041 "s59E25H2" 0 "Peptidase family M28"  
"OP8\_E21\_00059" 26041 "s59E5H2" 2.444825 "Peptidase family M28"  
"OP8\_E21\_00059" 26041 "s63E6H2" 0 "Peptidase family M28"  
"OP8\_E21\_00060" 26042 "s59E13H2" 0.041068 "Alcohol dehydrogenase 2"  
"OP8\_E21\_00060" 26042 "s59E25H2" 0 "Alcohol dehydrogenase 2"  
"OP8\_E21\_00060" 26042 "s59E5H2" 1.956152 "Alcohol dehydrogenase 2"  
"OP8\_E21\_00060" 26042 "s63E6H2" 0 "Alcohol dehydrogenase 2"  
"OP8\_E21\_00061" 26043 "s59E13H2" 0.04549776 "hypothetical protein"  
"OP8\_E21\_00061" 26043 "s59E25H2" 0 "hypothetical protein"  
"OP8\_E21\_00061" 26043 "s59E5H2" 1.941996 "hypothetical protein"  
"OP8\_E21\_00061" 26043 "s63E6H2" 0 "hypothetical protein"  
"OP8\_E21\_00062" 26044 "s59E13H2" 0 "HTH-type transcriptional repressor YtrA"  
"OP8\_E21\_00062" 26044 "s59E25H2" 0 "HTH-type transcriptional repressor YtrA"  
"OP8\_E21\_00062" 26044 "s59E5H2" 1.329762 "HTH-type transcriptional repressor YtrA"  
"OP8\_E21\_00062" 26044 "s63E6H2" 0 "HTH-type transcriptional repressor YtrA"  
"OP8\_E21\_00063" 26045 "s59E13H2" 0 "ABC transporter ATP-binding protein YtrB"  
"OP8\_E21\_00063" 26045 "s59E25H2" 0 "ABC transporter ATP-binding protein YtrB"  
"OP8\_E21\_00063" 26045 "s59E5H2" 2.358752 "ABC transporter ATP-binding protein YtrB"  
"OP8\_E21\_00063" 26045 "s63E6H2" 0 "ABC transporter ATP-binding protein YtrB"  
"OP8\_E21\_00064" 26046 "s59E13H2" 0 "ABC-2 family transporter protein"  
"OP8\_E21\_00064" 26046 "s59E25H2" 0 "ABC-2 family transporter protein"  
"OP8\_E21\_00064" 26046 "s59E5H2" 2.70991 "ABC-2 family transporter protein"  
"OP8\_E21\_00064" 26046 "s63E6H2" 0 "ABC-2 family transporter protein"  
"OP8\_E21\_00065" 26047 "s59E13H2" 0.05435274 "Ferredoxin"  
"OP8\_E21\_00065" 26047 "s59E25H2" 0 "Ferredoxin"  
"OP8\_E21\_00065" 26047 "s59E5H2" 4.89989 "Ferredoxin"  
"OP8\_E21\_00065" 26047 "s63E6H2" 0 "Ferredoxin"  
"OP8\_E21\_00066" 26048 "s59E13H2" 0.01447713 "hypothetical protein"  
"OP8\_E21\_00066" 26048 "s59E25H2" 0 "hypothetical protein"  
"OP8\_E21\_00066" 26048 "s59E5H2" 4.060571 "hypothetical protein"  
"OP8\_E21\_00066" 26048 "s63E6H2" 0 "hypothetical protein"  
"OP8\_E21\_00068" 26050 "s59E13H2" 0.02021669 "hypothetical protein"  
"OP8\_E21\_00068" 26050 "s59E25H2" 0 "hypothetical protein"  
"OP8\_E21\_00068" 26050 "s59E5H2" 2.696219 "hypothetical protein"  
"OP8\_E21\_00068" 26050 "s63E6H2" 0 "hypothetical protein"  
"OP8\_E21\_00069" 26051 "s59E13H2" 0.02043542 "Thiol-disulfide oxidoreductase ResA"  
"OP8\_E21\_00069" 26051 "s59E25H2" 0 "Thiol-disulfide oxidoreductase ResA"  
"OP8\_E21\_00069" 26051 "s59E5H2" 4.027484 "Thiol-disulfide oxidoreductase ResA"  
"OP8\_E21\_00069" 26051 "s63E6H2" 0 "Thiol-disulfide oxidoreductase ResA"  
"OP8\_E21\_00070" 26052 "s59E13H2" 0.003362637 "Methylamine utilisation protein MauE"  
"OP8\_E21\_00070" 26052 "s59E25H2" 0 "Methylamine utilisation protein MauE"  
"OP8\_E21\_00070" 26052 "s59E5H2" 4.369867 "Methylamine utilisation protein MauE"  
"OP8\_E21\_00070" 26052 "s63E6H2" 0 "Methylamine utilisation protein MauE"  
"OP8\_E21\_00071" 26053 "s59E13H2" 0 "Putative thiosulfate sulfurtransferase precursor"  
"OP8\_E21\_00071" 26053 "s59E25H2" 0 "Putative thiosulfate sulfurtransferase precursor"  
"OP8\_E21\_00071" 26053 "s59E5H2" 3.925394 "Putative thiosulfate sulfurtransferase precursor"



"OP8\_E21\_00071" 26053 "s63E6H2" 0 "Putative thiosulfate sulfurtransferase precursor"  
"OP8\_E21\_00072" 26054 "s59E13H2" 0.002555653 "hypothetical protein"  
"OP8\_E21\_00072" 26054 "s59E25H2" 0 "hypothetical protein"  
"OP8\_E21\_00072" 26054 "s59E5H2" 3.089379 "hypothetical protein"  
"OP8\_E21\_00072" 26054 "s63E6H2" 0 "hypothetical protein"  
"OP8\_E21\_00073" 26055 "s59E13H2" 0 "NPCBM-associated, NEW3 domain of alpha-galactosidase"  
"OP8\_E21\_00073" 26055 "s59E25H2" 0 "NPCBM-associated, NEW3 domain of alpha-galactosidase"  
"OP8\_E21\_00073" 26055 "s59E5H2" 1.200364 "NPCBM-associated, NEW3 domain of alpha-galactosidase"  
"OP8\_E21\_00073" 26055 "s63E6H2" 0 "NPCBM-associated, NEW3 domain of alpha-galactosidase"  
"OP8\_E21\_00074" 26056 "s59E13H2" 0 "Type I phosphodiesterase / nucleotide pyrophosphatase"  
"OP8\_E21\_00074" 26056 "s59E25H2" 0 "Type I phosphodiesterase / nucleotide pyrophosphatase"  
"OP8\_E21\_00074" 26056 "s59E5H2" 1.027556 "Type I phosphodiesterase / nucleotide pyrophosphatase"  
"OP8\_E21\_00074" 26056 "s63E6H2" 0.00283794 "Type I phosphodiesterase / nucleotide pyrophosphatase"  
"OP8\_E21\_00075" 26057 "s59E13H2" 11.4913 "2,3-bisphosphoglycerate-independent phosphoglycerate mutase"  
"OP8\_E21\_00075" 26057 "s59E25H2" 0.2313398 "2,3-bisphosphoglycerate-independent phosphoglycerate mutase"  
"OP8\_E21\_00075" 26057 "s59E5H2" 0.8451521 "2,3-bisphosphoglycerate-independent phosphoglycerate mutase"  
"OP8\_E21\_00075" 26057 "s63E6H2" 0.004185325 "2,3-bisphosphoglycerate-independent phosphoglycerate mutase"  
"OP8\_E21\_00076" 26058 "s59E13H2" 22.38541 "Type I phosphodiesterase / nucleotide pyrophosphatase"  
"OP8\_E21\_00076" 26058 "s59E25H2" 0.1037261 "Type I phosphodiesterase / nucleotide pyrophosphatase"  
"OP8\_E21\_00076" 26058 "s59E5H2" 1.81884 "Type I phosphodiesterase / nucleotide pyrophosphatase"  
"OP8\_E21\_00076" 26058 "s63E6H2" 0.003336569 "Type I phosphodiesterase / nucleotide pyrophosphatase"  
"OP8\_E21\_00078" 26060 "s59E13H2" 25.6286 "hypothetical protein"  
"OP8\_E21\_00078" 26060 "s59E25H2" 0 "hypothetical protein"  
"OP8\_E21\_00078" 26060 "s59E5H2" 1.55846 "hypothetical protein"  
"OP8\_E21\_00078" 26060 "s63E6H2" 0.001864903 "hypothetical protein"  
"OP8\_E21\_00079" 26061 "s59E13H2" 26.97767 "Capreomycin synthase"  
"OP8\_E21\_00079" 26061 "s59E25H2" 0 "Capreomycin synthase"  
"OP8\_E21\_00079" 26061 "s59E5H2" 1.464881 "Capreomycin synthase"  
"OP8\_E21\_00079" 26061 "s63E6H2" 0.00582871 "Capreomycin synthase"  
"OP8\_E21\_00080" 26062 "s59E13H2" 28.85466 "Putative NAD(P)H nitroreductase"  
"OP8\_E21\_00080" 26062 "s59E25H2" 0 "Putative NAD(P)H nitroreductase"  
"OP8\_E21\_00080" 26062 "s59E5H2" 1.276826 "Putative NAD(P)H nitroreductase"  
"OP8\_E21\_00080" 26062 "s63E6H2" 0.004942512 "Putative NAD(P)H nitroreductase"  
"OP8\_E21\_00081" 26063 "s59E13H2" 35.94857 "hypothetical protein"  
"OP8\_E21\_00081" 26063 "s59E25H2" 0.2567288 "hypothetical protein"  
"OP8\_E21\_00081" 26063 "s59E5H2" 1.585007 "hypothetical protein"  
"OP8\_E21\_00081" 26063 "s63E6H2" 0 "hypothetical protein"  
"OP8\_E21\_00082" 26064 "s59E13H2" 46.26033 "ABC-2 family transporter protein"  
"OP8\_E21\_00082" 26064 "s59E25H2" 0.4068627 "ABC-2 family transporter protein"  
"OP8\_E21\_00082" 26064 "s59E5H2" 2.3119 "ABC-2 family transporter protein"  
"OP8\_E21\_00082" 26064 "s63E6H2" 0.002823592 "ABC-2 family transporter protein"  
"OP8\_E21\_00083" 26065 "s59E13H2" 50.47922 "putative ABC transporter ATP-binding protein YxIF"  
"OP8\_E21\_00083" 26065 "s59E25H2" 0.4584682 "putative ABC transporter ATP-binding protein YxIF"  
"OP8\_E21\_00083" 26065 "s59E5H2" 2.591027 "putative ABC transporter ATP-binding protein YxIF"  
"OP8\_E21\_00083" 26065 "s63E6H2" 0.002387121 "putative ABC transporter ATP-binding protein YxIF"  
"OP8\_E21\_00084" 26066 "s59E13H2" 50.54898 "ABC-2 family transporter protein"  
"OP8\_E21\_00084" 26066 "s59E25H2" 0.7 "ABC-2 family transporter protein"

"OP8\_E21\_00084" 26066 "s59E5H2" 1.690567 "ABC-2 family transporter protein"  
"OP8\_E21\_00084" 26066 "s63E6H2" 0.001893664 "ABC-2 family transporter protein"  
"OP8\_E21\_00085" 26067 "s59E13H2" 51.97004 "putative ABC transporter ATP-binding protein YxIF"  
"OP8\_E21\_00085" 26067 "s59E25H2" 0 "putative ABC transporter ATP-binding protein YxIF"  
"OP8\_E21\_00085" 26067 "s59E5H2" 1.654326 "putative ABC transporter ATP-binding protein YxIF"  
"OP8\_E21\_00085" 26067 "s63E6H2" 0.004306163 "putative ABC transporter ATP-binding protein YxIF"  
"OP8\_E21\_00086" 26068 "s59E13H2" 47.47795 "2,3-bisphosphoglycerate-independent phosphoglycerate mutase"  
"OP8\_E21\_00086" 26068 "s59E25H2" 0.2934579 "2,3-bisphosphoglycerate-independent phosphoglycerate mutase"  
"OP8\_E21\_00086" 26068 "s59E5H2" 1.29412 "2,3-bisphosphoglycerate-independent phosphoglycerate mutase"  
"OP8\_E21\_00086" 26068 "s63E6H2" 0.001564328 "2,3-bisphosphoglycerate-independent phosphoglycerate mutase"  
"OP8\_E21\_00087" 26069 "s59E13H2" 37.62051 "Murein DD-endopeptidase MepM"  
"OP8\_E21\_00087" 26069 "s59E25H2" 0.2673378 "Murein DD-endopeptidase MepM"  
"OP8\_E21\_00087" 26069 "s59E5H2" 0.9937574 "Murein DD-endopeptidase MepM"  
"OP8\_E21\_00087" 26069 "s63E6H2" 0 "Murein DD-endopeptidase MepM"  
"OP8\_E21\_00088" 26070 "s59E13H2" 27.08778 "N-acyl-D-glutamate deacylase"  
"OP8\_E21\_00088" 26070 "s59E25H2" 0.1036116 "N-acyl-D-glutamate deacylase"  
"OP8\_E21\_00088" 26070 "s59E5H2" 1.031917 "N-acyl-D-glutamate deacylase"  
"OP8\_E21\_00088" 26070 "s63E6H2" 0 "N-acyl-D-glutamate deacylase"  
"OP8\_E21\_00089" 26071 "s59E13H2" 18.62896 "PAP2 superfamily protein"  
"OP8\_E21\_00089" 26071 "s59E25H2" 0 "PAP2 superfamily protein"  
"OP8\_E21\_00089" 26071 "s59E5H2" 0.8947688 "PAP2 superfamily protein"  
"OP8\_E21\_00089" 26071 "s63E6H2" 0 "PAP2 superfamily protein"  
"OP8\_E21\_00090" 26072 "s59E13H2" 8.843128 "3-deoxy-D-manno-octulosonic acid transferase"  
"OP8\_E21\_00090" 26072 "s59E25H2" 0 "3-deoxy-D-manno-octulosonic acid transferase"  
"OP8\_E21\_00090" 26072 "s59E5H2" 0.7491681 "3-deoxy-D-manno-octulosonic acid transferase"  
"OP8\_E21\_00090" 26072 "s63E6H2" 0 "3-deoxy-D-manno-octulosonic acid transferase"  
"OP8\_E21\_00091" 26073 "s59E13H2" 0.008114858 "Transcriptional regulatory protein LiaR"  
"OP8\_E21\_00091" 26073 "s59E25H2" 0 "Transcriptional regulatory protein LiaR"  
"OP8\_E21\_00091" 26073 "s59E5H2" 1.387254 "Transcriptional regulatory protein LiaR"  
"OP8\_E21\_00091" 26073 "s63E6H2" 0 "Transcriptional regulatory protein LiaR"  
"OP8\_E21\_00092" 26074 "s59E13H2" 0.007959136 "PilZ domain protein"  
"OP8\_E21\_00092" 26074 "s59E25H2" 0 "PilZ domain protein"  
"OP8\_E21\_00092" 26074 "s59E5H2" 0.7613062 "PilZ domain protein"  
"OP8\_E21\_00092" 26074 "s63E6H2" 0 "PilZ domain protein"  
"OP8\_E21\_00093" 26075 "s59E13H2" 0.01250038 "Dephospho-CoA kinase"  
"OP8\_E21\_00093" 26075 "s59E25H2" 0 "Dephospho-CoA kinase"  
"OP8\_E21\_00093" 26075 "s59E5H2" 1.001712 "Dephospho-CoA kinase"  
"OP8\_E21\_00093" 26075 "s63E6H2" 0 "Dephospho-CoA kinase"  
"OP8\_E21\_00094" 26076 "s59E13H2" 0.02915039 "hypothetical protein"  
"OP8\_E21\_00094" 26076 "s59E25H2" 0 "hypothetical protein"  
"OP8\_E21\_00094" 26076 "s59E5H2" 0.7054156 "hypothetical protein"  
"OP8\_E21\_00094" 26076 "s63E6H2" 0 "hypothetical protein"  
"OP8\_E21\_00095" 26077 "s59E13H2" 0.04634621 "Putative membrane protein YdgH"  
"OP8\_E21\_00095" 26077 "s59E25H2" 0 "Putative membrane protein YdgH"  
"OP8\_E21\_00095" 26077 "s59E5H2" 1.184321 "Putative membrane protein YdgH"  
"OP8\_E21\_00095" 26077 "s63E6H2" 0 "Putative membrane protein YdgH"  
"OP8\_E21\_00096" 26078 "s59E13H2" 0 "putative type I restriction enzyme P M protein"

"OP8\_E21\_00096" 26078 "s59E25H2" 0 "putative type I restriction enzyme P M protein"  
"OP8\_E21\_00096" 26078 "s59E5H2" 0.429221 "putative type I restriction enzyme P M protein"  
"OP8\_E21\_00096" 26078 "s63E6H2" 0 "putative type I restriction enzyme P M protein"  
"OP8\_E21\_00097" 26079 "s59E13H2" 0 "Adenosine monophosphate-protein transferase SoFic"  
"OP8\_E21\_00097" 26079 "s59E25H2" 0 "Adenosine monophosphate-protein transferase SoFic"  
"OP8\_E21\_00097" 26079 "s59E5H2" 0.3917054 "Adenosine monophosphate-protein transferase SoFic"  
"OP8\_E21\_00097" 26079 "s63E6H2" 0 "Adenosine monophosphate-protein transferase SoFic"  
"OP8\_E21\_00098" 26080 "s59E13H2" 0 "hypothetical protein"  
"OP8\_E21\_00098" 26080 "s59E25H2" 0 "hypothetical protein"  
"OP8\_E21\_00098" 26080 "s59E5H2" 0.5203244 "hypothetical protein"  
"OP8\_E21\_00098" 26080 "s63E6H2" 0 "hypothetical protein"  
"OP8\_E21\_00099" 26081 "s59E13H2" 0 "Type-1 restriction enzyme MjaXIP specificity protein"  
"OP8\_E21\_00099" 26081 "s59E25H2" 0 "Type-1 restriction enzyme MjaXIP specificity protein"  
"OP8\_E21\_00099" 26081 "s59E5H2" 0.5182865 "Type-1 restriction enzyme MjaXIP specificity protein"  
"OP8\_E21\_00099" 26081 "s63E6H2" 0 "Type-1 restriction enzyme MjaXIP specificity protein"  
"OP8\_E21\_00100" 26082 "s59E13H2" 0 "Type I restriction enzyme EcoR124II R protein"  
"OP8\_E21\_00100" 26082 "s59E25H2" 0 "Type I restriction enzyme EcoR124II R protein"  
"OP8\_E21\_00100" 26082 "s59E5H2" 1.022642 "Type I restriction enzyme EcoR124II R protein"  
"OP8\_E21\_00100" 26082 "s63E6H2" 0 "Type I restriction enzyme EcoR124II R protein"  
"OP8\_E21\_00101" 26083 "s59E13H2" 0 "hypothetical protein"  
"OP8\_E21\_00101" 26083 "s59E25H2" 0 "hypothetical protein"  
"OP8\_E21\_00101" 26083 "s59E5H2" 0.9137215 "hypothetical protein"  
"OP8\_E21\_00101" 26083 "s63E6H2" 0 "hypothetical protein"  
"OP8\_E21\_00102" 26084 "s59E13H2" 0 "heat shock protein 90"  
"OP8\_E21\_00102" 26084 "s59E25H2" 0 "heat shock protein 90"  
"OP8\_E21\_00102" 26084 "s59E5H2" 1.425119 "heat shock protein 90"  
"OP8\_E21\_00102" 26084 "s63E6H2" 0 "heat shock protein 90"  
"OP8\_E21\_00107" 26089 "s59E13H2" 0.02087851 "N-substituted formamide deformylase precursor"  
"OP8\_E21\_00107" 26089 "s59E25H2" 0 "N-substituted formamide deformylase precursor"  
"OP8\_E21\_00107" 26089 "s59E5H2" 3.528025 "N-substituted formamide deformylase precursor"  
"OP8\_E21\_00107" 26089 "s63E6H2" 0 "N-substituted formamide deformylase precursor"  
"OP8\_E21\_00108" 26090 "s59E13H2" 0 "hypothetical protein"  
"OP8\_E21\_00108" 26090 "s59E25H2" 0 "hypothetical protein"  
"OP8\_E21\_00108" 26090 "s59E5H2" 3.855471 "hypothetical protein"  
"OP8\_E21\_00108" 26090 "s63E6H2" 0 "hypothetical protein"  
"OP8\_E21\_00109" 26091 "s59E13H2" 0.007844653 "hypothetical protein"  
"OP8\_E21\_00109" 26091 "s59E25H2" 0.1547619 "hypothetical protein"  
"OP8\_E21\_00109" 26091 "s59E5H2" 2.741632 "hypothetical protein"  
"OP8\_E21\_00109" 26091 "s63E6H2" 0 "hypothetical protein"  
"OP8\_E21\_00110" 26092 "s59E13H2" 0.009865303 "hypothetical protein"  
"OP8\_E21\_00110" 26092 "s59E25H2" 0 "hypothetical protein"  
"OP8\_E21\_00110" 26092 "s59E5H2" 2.46752 "hypothetical protein"  
"OP8\_E21\_00110" 26092 "s63E6H2" 0 "hypothetical protein"  
"OP8\_E21\_00111" 26093 "s59E13H2" 0.03480929 "hypothetical protein"  
"OP8\_E21\_00111" 26093 "s59E25H2" 0 "hypothetical protein"  
"OP8\_E21\_00111" 26093 "s59E5H2" 1.576481 "hypothetical protein"  
"OP8\_E21\_00111" 26093 "s63E6H2" 0 "hypothetical protein"

"OP8\_E21\_00112" 26094 "s59E13H2" 0.04117593 "hypothetical protein"  
"OP8\_E21\_00112" 26094 "s59E25H2" 0 "hypothetical protein"  
"OP8\_E21\_00112" 26094 "s59E5H2" 0.5831663 "hypothetical protein"  
"OP8\_E21\_00112" 26094 "s63E6H2" 0 "hypothetical protein"  
"OP8\_E21\_00113" 26095 "s59E13H2" 0.03270761 "Sensor histidine kinase YehU"  
"OP8\_E21\_00113" 26095 "s59E25H2" 0 "Sensor histidine kinase YehU"  
"OP8\_E21\_00113" 26095 "s59E5H2" 0.7440196 "Sensor histidine kinase YehU"  
"OP8\_E21\_00113" 26095 "s63E6H2" 0 "Sensor histidine kinase YehU"  
"OP8\_E21\_00114" 26096 "s59E13H2" 0.02760501 "Transcriptional regulatory protein YehT"  
"OP8\_E21\_00114" 26096 "s59E25H2" 0 "Transcriptional regulatory protein YehT"  
"OP8\_E21\_00114" 26096 "s59E5H2" 0.7089931 "Transcriptional regulatory protein YehT"  
"OP8\_E21\_00114" 26096 "s63E6H2" 0 "Transcriptional regulatory protein YehT"  
"OP8\_E21\_00115" 26097 "s59E13H2" 0.01196942 "hypothetical protein"  
"OP8\_E21\_00115" 26097 "s59E25H2" 0 "hypothetical protein"  
"OP8\_E21\_00115" 26097 "s59E5H2" 0.007447265 "hypothetical protein"  
"OP8\_E21\_00115" 26097 "s63E6H2" 0 "hypothetical protein"  
"OP8\_E21\_00116" 26098 "s59E13H2" 0.01529544 "Cocaine esterase"  
"OP8\_E21\_00116" 26098 "s59E25H2" 0 "Cocaine esterase"  
"OP8\_E21\_00116" 26098 "s59E5H2" 0.004355126 "Cocaine esterase"  
"OP8\_E21\_00116" 26098 "s63E6H2" 0 "Cocaine esterase"  
"OP8\_E21\_00117" 26099 "s59E13H2" 0.01317974 "Proline racemase"  
"OP8\_E21\_00117" 26099 "s59E25H2" 0 "Proline racemase"  
"OP8\_E21\_00117" 26099 "s59E5H2" 0.01701589 "Proline racemase"  
"OP8\_E21\_00117" 26099 "s63E6H2" 0 "Proline racemase"  
"OP8\_E21\_00118" 26100 "s59E13H2" 0.01123369 "Opine dehydrogenase"  
"OP8\_E21\_00118" 26100 "s59E25H2" 0 "Opine dehydrogenase"  
"OP8\_E21\_00118" 26100 "s59E5H2" 0.01400354 "Opine dehydrogenase"  
"OP8\_E21\_00118" 26100 "s63E6H2" 0 "Opine dehydrogenase"  
"OP8\_E21\_00119" 26101 "s59E13H2" 0.00189171 "Transposase DDE domain protein"  
"OP8\_E21\_00119" 26101 "s59E25H2" 0.07727273 "Transposase DDE domain protein"  
"OP8\_E21\_00119" 26101 "s59E5H2" 8.784954 "Transposase DDE domain protein"  
"OP8\_E21\_00119" 26101 "s63E6H2" 0 "Transposase DDE domain protein"  
"OP8\_E21\_00120" 26102 "s59E13H2" 0.01542295 "UDP-N-acetyl-alpha-D-glucosamine C6 dehydratase"  
"OP8\_E21\_00120" 26102 "s59E25H2" 0 "UDP-N-acetyl-alpha-D-glucosamine C6 dehydratase"  
"OP8\_E21\_00120" 26102 "s59E5H2" 0.9025548 "UDP-N-acetyl-alpha-D-glucosamine C6 dehydratase"  
"OP8\_E21\_00120" 26102 "s63E6H2" 0 "UDP-N-acetyl-alpha-D-glucosamine C6 dehydratase"  
"OP8\_E21\_00121" 26103 "s59E13H2" 0.009495841 "hypothetical protein"  
"OP8\_E21\_00121" 26103 "s59E25H2" 0 "hypothetical protein"  
"OP8\_E21\_00121" 26103 "s59E5H2" 0.8379901 "hypothetical protein"  
"OP8\_E21\_00121" 26103 "s63E6H2" 0 "hypothetical protein"  
"OP8\_E21\_00122" 26104 "s59E13H2" 0.004425273 "hypothetical protein"  
"OP8\_E21\_00122" 26104 "s59E25H2" 0.2532051 "hypothetical protein"  
"OP8\_E21\_00122" 26104 "s59E5H2" 0.85904 "hypothetical protein"  
"OP8\_E21\_00122" 26104 "s63E6H2" 0.001393171 "hypothetical protein"  
"OP8\_E21\_00123" 26105 "s59E13H2" 0.007108463 "hypothetical protein"  
"OP8\_E21\_00123" 26105 "s59E25H2" 0 "hypothetical protein"  
"OP8\_E21\_00123" 26105 "s59E5H2" 2.480561 "hypothetical protein"

"OP8\_E21\_00123" 26105 "s63E6H2" 0 "hypothetical protein"  
"OP8\_E21\_00124" 26106 "s59E13H2" 0.003150272 "Polysaccharide biosynthesis protein"  
"OP8\_E21\_00124" 26106 "s59E25H2" 0 "Polysaccharide biosynthesis protein"  
"OP8\_E21\_00124" 26106 "s59E5H2" 0.45427 "Polysaccharide biosynthesis protein"  
"OP8\_E21\_00124" 26106 "s63E6H2" 0 "Polysaccharide biosynthesis protein"  
"OP8\_E21\_00125" 26107 "s59E13H2" 0.004749911 "hypothetical protein"  
"OP8\_E21\_00125" 26107 "s59E25H2" 0 "hypothetical protein"  
"OP8\_E21\_00125" 26107 "s59E5H2" 0.4858977 "hypothetical protein"  
"OP8\_E21\_00125" 26107 "s63E6H2" 0 "hypothetical protein"  
"OP8\_E21\_00126" 26108 "s59E13H2" 0.000218027 "dTDP-fucopyranose mutase"  
"OP8\_E21\_00126" 26108 "s59E25H2" 0 "dTDP-fucopyranose mutase"  
"OP8\_E21\_00126" 26108 "s59E5H2" 0.3061142 "dTDP-fucopyranose mutase"  
"OP8\_E21\_00126" 26108 "s63E6H2" 0 "dTDP-fucopyranose mutase"  
"OP8\_E21\_00127" 26109 "s59E13H2" 0.004992619 "Undecaprenyl-phosphate mannosyltransferase"  
"OP8\_E21\_00127" 26109 "s59E25H2" 0 "Undecaprenyl-phosphate mannosyltransferase"  
"OP8\_E21\_00127" 26109 "s59E5H2" 1.421626 "Undecaprenyl-phosphate mannosyltransferase"  
"OP8\_E21\_00127" 26109 "s63E6H2" 0 "Undecaprenyl-phosphate mannosyltransferase"  
"OP8\_E21\_00128" 26110 "s59E13H2" 0.01490484 "N-acetylglucosaminyl-diphospho-decaprenol L-rhamnosyltransferase"  
"OP8\_E21\_00128" 26110 "s59E25H2" 0 "N-acetylglucosaminyl-diphospho-decaprenol L-rhamnosyltransferase"  
"OP8\_E21\_00128" 26110 "s59E5H2" 1.999205 "N-acetylglucosaminyl-diphospho-decaprenol L-rhamnosyltransferase"  
"OP8\_E21\_00128" 26110 "s63E6H2" 0 "N-acetylglucosaminyl-diphospho-decaprenol L-rhamnosyltransferase"  
"OP8\_E21\_00129" 26111 "s59E13H2" 0.01590869 "putative glycosyl transferase"  
"OP8\_E21\_00129" 26111 "s59E25H2" 0 "putative glycosyl transferase"  
"OP8\_E21\_00129" 26111 "s59E5H2" 2.778026 "putative glycosyl transferase"  
"OP8\_E21\_00129" 26111 "s63E6H2" 0 "putative glycosyl transferase"  
"OP8\_E21\_00130" 26112 "s59E13H2" 0.007558928 "hypothetical protein"  
"OP8\_E21\_00130" 26112 "s59E25H2" 0 "hypothetical protein"  
"OP8\_E21\_00130" 26112 "s59E5H2" 2.489094 "hypothetical protein"  
"OP8\_E21\_00130" 26112 "s63E6H2" 0 "hypothetical protein"  
"OP8\_E21\_00132" 26114 "s59E13H2" 0.009641967 "hypothetical protein"  
"OP8\_E21\_00132" 26114 "s59E25H2" 0 "hypothetical protein"  
"OP8\_E21\_00132" 26114 "s59E5H2" 3.403503 "hypothetical protein"  
"OP8\_E21\_00132" 26114 "s63E6H2" 0 "hypothetical protein"  
"OP8\_E21\_00133" 26115 "s59E13H2" 0.0004549016 "hypothetical protein"  
"OP8\_E21\_00133" 26115 "s59E25H2" 0 "hypothetical protein"  
"OP8\_E21\_00133" 26115 "s59E5H2" 2.852341 "hypothetical protein"  
"OP8\_E21\_00133" 26115 "s63E6H2" 0 "hypothetical protein"  
"OP8\_E21\_00134" 26116 "s59E13H2" 0.007945799 "hypothetical protein"  
"OP8\_E21\_00134" 26116 "s59E25H2" 0 "hypothetical protein"  
"OP8\_E21\_00134" 26116 "s59E5H2" 2.000967 "hypothetical protein"  
"OP8\_E21\_00134" 26116 "s63E6H2" 0 "hypothetical protein"  
"OP8\_E21\_00135" 26117 "s59E13H2" 0.3669934 "translocation protein TolB"  
"OP8\_E21\_00135" 26117 "s59E25H2" 0 "translocation protein TolB"  
"OP8\_E21\_00135" 26117 "s59E5H2" 3.754184 "translocation protein TolB"  
"OP8\_E21\_00135" 26117 "s63E6H2" 0.003095934 "translocation protein TolB"  
"OP8\_E21\_00136" 26118 "s59E13H2" 0.01205839 "O-Antigen ligase"  
"OP8\_E21\_00136" 26118 "s59E25H2" 0 "O-Antigen ligase"

"OP8\_E21\_00136" 26118 "s59E5H2" 4.44557 "O-Antigen ligase"  
"OP8\_E21\_00136" 26118 "s63E6H2" 0 "O-Antigen ligase"  
"OP8\_E21\_00137" 26119 "s59E13H2" 0.010328 "hypothetical protein"  
"OP8\_E21\_00137" 26119 "s59E25H2" 0 "hypothetical protein"  
"OP8\_E21\_00137" 26119 "s59E5H2" 3.498342 "hypothetical protein"  
"OP8\_E21\_00137" 26119 "s63E6H2" 0 "hypothetical protein"  
"OP8\_E21\_00138" 26120 "s59E13H2" 0 "hypothetical protein"  
"OP8\_E21\_00138" 26120 "s59E25H2" 0 "hypothetical protein"  
"OP8\_E21\_00138" 26120 "s59E5H2" 3.38302 "hypothetical protein"  
"OP8\_E21\_00138" 26120 "s63E6H2" 0 "hypothetical protein"  
"OP8\_E21\_00141" 26123 "s59E13H2" 0.01955548 "hypothetical protein"  
"OP8\_E21\_00141" 26123 "s59E25H2" 0 "hypothetical protein"  
"OP8\_E21\_00141" 26123 "s59E5H2" 0.6291717 "hypothetical protein"  
"OP8\_E21\_00141" 26123 "s63E6H2" 0 "hypothetical protein"  
"OP8\_E21\_00143" 26125 "s59E13H2" 0.03557451 "hypothetical protein"  
"OP8\_E21\_00143" 26125 "s59E25H2" 0 "hypothetical protein"  
"OP8\_E21\_00143" 26125 "s59E5H2" 0.8243119 "hypothetical protein"  
"OP8\_E21\_00143" 26125 "s63E6H2" 0 "hypothetical protein"  
"OP8\_E21\_00144" 26126 "s59E13H2" 0.04629928 "Polysaccharide biosynthesis/export protein"  
"OP8\_E21\_00144" 26126 "s59E25H2" 0 "Polysaccharide biosynthesis/export protein"  
"OP8\_E21\_00144" 26126 "s59E5H2" 0.69195 "Polysaccharide biosynthesis/export protein"  
"OP8\_E21\_00144" 26126 "s63E6H2" 0 "Polysaccharide biosynthesis/export protein"  
"OP8\_E21\_00145" 26127 "s59E13H2" 0.01363397 "hypothetical protein"  
"OP8\_E21\_00145" 26127 "s59E25H2" 0 "hypothetical protein"  
"OP8\_E21\_00145" 26127 "s59E5H2" 0.674549 "hypothetical protein"  
"OP8\_E21\_00145" 26127 "s63E6H2" 0 "hypothetical protein"  
"OP8\_E21\_00146" 26128 "s59E13H2" 0.0312941 "Tyrosine-protein kinase YwqD"  
"OP8\_E21\_00146" 26128 "s59E25H2" 0 "Tyrosine-protein kinase YwqD"  
"OP8\_E21\_00146" 26128 "s59E5H2" 1.587038 "Tyrosine-protein kinase YwqD"  
"OP8\_E21\_00146" 26128 "s63E6H2" 0 "Tyrosine-protein kinase YwqD"  
"OP8\_E21\_00147" 26129 "s59E13H2" 0.01479644 "UDP-glucose:undecaprenyl-phosphate glucose-1-phosphate transferase"  
"OP8\_E21\_00147" 26129 "s59E25H2" 0 "UDP-glucose:undecaprenyl-phosphate glucose-1-phosphate transferase"  
"OP8\_E21\_00147" 26129 "s59E5H2" 0.5858494 "UDP-glucose:undecaprenyl-phosphate glucose-1-phosphate transferase"  
"OP8\_E21\_00147" 26129 "s63E6H2" 0 "UDP-glucose:undecaprenyl-phosphate glucose-1-phosphate transferase"  
"OP8\_E21\_00148" 26130 "s59E13H2" 0.02103989 "dTDP-3-amino-3,6-dideoxy-alpha-D-galactopyranose transaminase"  
"OP8\_E21\_00148" 26130 "s59E25H2" 0 "dTDP-3-amino-3,6-dideoxy-alpha-D-galactopyranose transaminase"  
"OP8\_E21\_00148" 26130 "s59E5H2" 0.2899667 "dTDP-3-amino-3,6-dideoxy-alpha-D-galactopyranose transaminase"  
"OP8\_E21\_00148" 26130 "s63E6H2" 0 "dTDP-3-amino-3,6-dideoxy-alpha-D-galactopyranose transaminase"  
"OP8\_E21\_00149" 26131 "s59E13H2" 0.001073394 "dTDP-3-amino-3,6-dideoxy-alpha-D-galactopyranose 3-N-acetyltransferase"  
"OP8\_E21\_00149" 26131 "s59E25H2" 0 "dTDP-3-amino-3,6-dideoxy-alpha-D-galactopyranose 3-N-acetyltransferase"  
"OP8\_E21\_00149" 26131 "s59E5H2" 0.4759778 "dTDP-3-amino-3,6-dideoxy-alpha-D-galactopyranose 3-N-acetyltransferase"  
"OP8\_E21\_00149" 26131 "s63E6H2" 0 "dTDP-3-amino-3,6-dideoxy-alpha-D-galactopyranose 3-N-acetyltransferase"  
"OP8\_E21\_00150" 26132 "s59E13H2" 0 "putative oxidoreductase YdgJ"  
"OP8\_E21\_00150" 26132 "s59E25H2" 0 "putative oxidoreductase YdgJ"  
"OP8\_E21\_00150" 26132 "s59E5H2" 0.3579769 "putative oxidoreductase YdgJ"  
"OP8\_E21\_00150" 26132 "s63E6H2" 0 "putative oxidoreductase YdgJ"  
"OP8\_E21\_00151" 26133 "s59E13H2" 0 "hypothetical protein"

"OP8\_E21\_00151" 26133 "s59E25H2" 0 "hypothetical protein"  
"OP8\_E21\_00151" 26133 "s59E5H2" 1.428451 "hypothetical protein"  
"OP8\_E21\_00151" 26133 "s63E6H2" 0 "hypothetical protein"  
"OP8\_E21\_00152" 26134 "s59E13H2" 0 "hypothetical protein"  
"OP8\_E21\_00152" 26134 "s59E25H2" 0 "hypothetical protein"  
"OP8\_E21\_00152" 26134 "s59E5H2" 0.3798855 "hypothetical protein"  
"OP8\_E21\_00152" 26134 "s63E6H2" 0 "hypothetical protein"  
"OP8\_E21\_00153" 26135 "s59E13H2" 0 "dTDP-3-amino-3,6-dideoxy-alpha-D-galactopyranose transaminase"  
"OP8\_E21\_00153" 26135 "s59E25H2" 0 "dTDP-3-amino-3,6-dideoxy-alpha-D-galactopyranose transaminase"  
"OP8\_E21\_00153" 26135 "s59E5H2" 0.1462287 "dTDP-3-amino-3,6-dideoxy-alpha-D-galactopyranose transaminase"  
"OP8\_E21\_00153" 26135 "s63E6H2" 0 "dTDP-3-amino-3,6-dideoxy-alpha-D-galactopyranose transaminase"  
"OP8\_E21\_00154" 26136 "s59E13H2" 0 "Maltose O-acetyltransferase"  
"OP8\_E21\_00154" 26136 "s59E25H2" 0 "Maltose O-acetyltransferase"  
"OP8\_E21\_00154" 26136 "s59E5H2" 0.0655051 "Maltose O-acetyltransferase"  
"OP8\_E21\_00154" 26136 "s63E6H2" 0 "Maltose O-acetyltransferase"  
"OP8\_E21\_00155" 26137 "s59E13H2" 0 "putative oxidoreductase YdgJ"  
"OP8\_E21\_00155" 26137 "s59E25H2" 0 "putative oxidoreductase YdgJ"  
"OP8\_E21\_00155" 26137 "s59E5H2" 0.2143336 "putative oxidoreductase YdgJ"  
"OP8\_E21\_00155" 26137 "s63E6H2" 0 "putative oxidoreductase YdgJ"  
"OP8\_E21\_00156" 26138 "s59E13H2" 0 "putative glycosyl transferase"  
"OP8\_E21\_00156" 26138 "s59E25H2" 0 "putative glycosyl transferase"  
"OP8\_E21\_00156" 26138 "s59E5H2" 0.9548981 "putative glycosyl transferase"  
"OP8\_E21\_00156" 26138 "s63E6H2" 0 "putative glycosyl transferase"  
"OP8\_E21\_00157" 26139 "s59E13H2" 0 "hypothetical protein"  
"OP8\_E21\_00157" 26139 "s59E25H2" 0 "hypothetical protein"  
"OP8\_E21\_00157" 26139 "s59E5H2" 0.450017 "hypothetical protein"  
"OP8\_E21\_00157" 26139 "s63E6H2" 0 "hypothetical protein"  
"OP8\_E21\_00158" 26140 "s59E13H2" 0 "N-glycosyltransferase"  
"OP8\_E21\_00158" 26140 "s59E25H2" 0 "N-glycosyltransferase"  
"OP8\_E21\_00158" 26140 "s59E5H2" 0.01492422 "N-glycosyltransferase"  
"OP8\_E21\_00158" 26140 "s63E6H2" 0 "N-glycosyltransferase"  
"OP8\_E21\_00159" 26141 "s59E13H2" 0 "Putative teichuronic acid biosynthesis glycosyltransferase TuaH"  
"OP8\_E21\_00159" 26141 "s59E25H2" 0 "Putative teichuronic acid biosynthesis glycosyltransferase TuaH"  
"OP8\_E21\_00159" 26141 "s59E5H2" 0.01842053 "Putative teichuronic acid biosynthesis glycosyltransferase TuaH"  
"OP8\_E21\_00159" 26141 "s63E6H2" 0 "Putative teichuronic acid biosynthesis glycosyltransferase TuaH"  
"OP8\_E21\_00160" 26142 "s59E13H2" 0 "O-Antigen ligase"  
"OP8\_E21\_00160" 26142 "s59E25H2" 0 "O-Antigen ligase"  
"OP8\_E21\_00160" 26142 "s59E5H2" 0.04252258 "O-Antigen ligase"  
"OP8\_E21\_00160" 26142 "s63E6H2" 0 "O-Antigen ligase"  
"OP8\_E21\_00161" 26143 "s59E13H2" 0.03181251 "Polysaccharide biosynthesis protein"  
"OP8\_E21\_00161" 26143 "s59E25H2" 0 "Polysaccharide biosynthesis protein"  
"OP8\_E21\_00161" 26143 "s59E5H2" 0.5647802 "Polysaccharide biosynthesis protein"  
"OP8\_E21\_00161" 26143 "s63E6H2" 0 "Polysaccharide biosynthesis protein"  
"OP8\_E21\_00162" 26144 "s59E13H2" 0.0007073484 "Capsule biosynthesis protein CapA"  
"OP8\_E21\_00162" 26144 "s59E25H2" 0 "Capsule biosynthesis protein CapA"  
"OP8\_E21\_00162" 26144 "s59E5H2" 0.4769486 "Capsule biosynthesis protein CapA"  
"OP8\_E21\_00162" 26144 "s63E6H2" 0 "Capsule biosynthesis protein CapA"

"OP8\_E21\_00163" 26145 "s59E13H2" 0.06552218 "Phenylacetate-coenzyme A ligase"  
"OP8\_E21\_00163" 26145 "s59E25H2" 0 "Phenylacetate-coenzyme A ligase"  
"OP8\_E21\_00163" 26145 "s59E5H2" 0.1152137 "Phenylacetate-coenzyme A ligase"  
"OP8\_E21\_00163" 26145 "s63E6H2" 0 "Phenylacetate-coenzyme A ligase"  
"OP8\_E21\_00164" 26146 "s59E13H2" 0.04316372 "Phenylacetate-coenzyme A ligase"  
"OP8\_E21\_00164" 26146 "s59E25H2" 0 "Phenylacetate-coenzyme A ligase"  
"OP8\_E21\_00164" 26146 "s59E5H2" 0.2284091 "Phenylacetate-coenzyme A ligase"  
"OP8\_E21\_00164" 26146 "s63E6H2" 0 "Phenylacetate-coenzyme A ligase"  
"OP8\_E21\_00165" 26147 "s59E13H2" 0 "hypothetical protein"  
"OP8\_E21\_00165" 26147 "s59E25H2" 0 "hypothetical protein"  
"OP8\_E21\_00165" 26147 "s59E5H2" 0.08325551 "hypothetical protein"  
"OP8\_E21\_00165" 26147 "s63E6H2" 0 "hypothetical protein"  
"OP8\_E21\_00166" 26148 "s59E13H2" 0 "molybdenum cofactor biosynthesis protein A"  
"OP8\_E21\_00166" 26148 "s59E25H2" 0 "molybdenum cofactor biosynthesis protein A"  
"OP8\_E21\_00166" 26148 "s59E5H2" 0.1275089 "molybdenum cofactor biosynthesis protein A"  
"OP8\_E21\_00166" 26148 "s63E6H2" 0 "molybdenum cofactor biosynthesis protein A"  
"OP8\_E21\_00167" 26149 "s59E13H2" 0.02130825 "Alcohol dehydrogenase"  
"OP8\_E21\_00167" 26149 "s59E25H2" 0 "Alcohol dehydrogenase"  
"OP8\_E21\_00167" 26149 "s59E5H2" 0.3566048 "Alcohol dehydrogenase"  
"OP8\_E21\_00167" 26149 "s63E6H2" 0 "Alcohol dehydrogenase"  
"OP8\_E21\_00168" 26150 "s59E13H2" 0.003085667 "Heparin-sulfate lyase precursor"  
"OP8\_E21\_00168" 26150 "s59E25H2" 0 "Heparin-sulfate lyase precursor"  
"OP8\_E21\_00168" 26150 "s59E5H2" 0.2027943 "Heparin-sulfate lyase precursor"  
"OP8\_E21\_00168" 26150 "s63E6H2" 0 "Heparin-sulfate lyase precursor"  
"OP8\_E21\_00169" 26151 "s59E13H2" 0 "Methionyl-tRNA formyltransferase"  
"OP8\_E21\_00169" 26151 "s59E25H2" 0 "Methionyl-tRNA formyltransferase"  
"OP8\_E21\_00169" 26151 "s59E5H2" 0.06788143 "Methionyl-tRNA formyltransferase"  
"OP8\_E21\_00169" 26151 "s63E6H2" 0 "Methionyl-tRNA formyltransferase"  
"OP8\_E21\_00170" 26152 "s59E13H2" 0 "hypothetical protein"  
"OP8\_E21\_00170" 26152 "s59E25H2" 0 "hypothetical protein"  
"OP8\_E21\_00170" 26152 "s59E5H2" 0.1137939 "hypothetical protein"  
"OP8\_E21\_00170" 26152 "s63E6H2" 0 "hypothetical protein"  
"OP8\_E21\_00171" 26153 "s59E13H2" 0.04619865 "UDP-N-acetylglucosamine 2-epimerase"  
"OP8\_E21\_00171" 26153 "s59E25H2" 0 "UDP-N-acetylglucosamine 2-epimerase"  
"OP8\_E21\_00171" 26153 "s59E5H2" 3.030502 "UDP-N-acetylglucosamine 2-epimerase"  
"OP8\_E21\_00171" 26153 "s63E6H2" 0 "UDP-N-acetylglucosamine 2-epimerase"  
"OP8\_E21\_00172" 26154 "s59E13H2" 0.1214178 "hypothetical protein"  
"OP8\_E21\_00172" 26154 "s59E25H2" 0 "hypothetical protein"  
"OP8\_E21\_00172" 26154 "s59E5H2" 2.150757 "hypothetical protein"  
"OP8\_E21\_00172" 26154 "s63E6H2" 0 "hypothetical protein"  
"OP8\_E21\_00173" 26155 "s59E13H2" 0.2566624 "Transcriptional regulatory protein ZraR"  
"OP8\_E21\_00173" 26155 "s59E25H2" 0 "Transcriptional regulatory protein ZraR"  
"OP8\_E21\_00173" 26155 "s59E5H2" 2.024991 "Transcriptional regulatory protein ZraR"  
"OP8\_E21\_00173" 26155 "s63E6H2" 0 "Transcriptional regulatory protein ZraR"  
"OP8\_E21\_00174" 26156 "s59E13H2" 0.1448032 "hypothetical protein"  
"OP8\_E21\_00174" 26156 "s59E25H2" 0 "hypothetical protein"  
"OP8\_E21\_00174" 26156 "s59E5H2" 2.308193 "hypothetical protein"



"OP8\_E21\_00174" 26156 "s63E6H2" 0 "hypothetical protein"  
"OP8\_E21\_00175" 26157 "s59E13H2" 0.35942 "Polyribonucleotide nucleotidyltransferase"  
"OP8\_E21\_00175" 26157 "s59E25H2" 0 "Polyribonucleotide nucleotidyltransferase"  
"OP8\_E21\_00175" 26157 "s59E5H2" 0.3457531 "Polyribonucleotide nucleotidyltransferase"  
"OP8\_E21\_00175" 26157 "s63E6H2" 0 "Polyribonucleotide nucleotidyltransferase"  
"OP8\_E21\_00176" 26158 "s59E13H2" 0.3580958 "30S ribosomal protein S15"  
"OP8\_E21\_00176" 26158 "s59E25H2" 0 "30S ribosomal protein S15"  
"OP8\_E21\_00176" 26158 "s59E5H2" 0.4306128 "30S ribosomal protein S15"  
"OP8\_E21\_00176" 26158 "s63E6H2" 0 "30S ribosomal protein S15"  
"OP8\_E21\_00177" 26159 "s59E13H2" 0.08266654 "30S ribosomal protein S3"  
"OP8\_E21\_00177" 26159 "s59E25H2" 0 "30S ribosomal protein S3"  
"OP8\_E21\_00177" 26159 "s59E5H2" 0.06504079 "30S ribosomal protein S3"  
"OP8\_E21\_00177" 26159 "s63E6H2" 0 "30S ribosomal protein S3"  
"OP8\_E21\_00178" 26160 "s59E13H2" 0.08598296 "50S ribosomal protein L16"  
"OP8\_E21\_00178" 26160 "s59E25H2" 0 "50S ribosomal protein L16"  
"OP8\_E21\_00178" 26160 "s59E5H2" 0.0833582 "50S ribosomal protein L16"  
"OP8\_E21\_00178" 26160 "s63E6H2" 0 "50S ribosomal protein L16"  
"OP8\_E21\_00179" 26161 "s59E13H2" 0.08097293 "50S ribosomal protein L29"  
"OP8\_E21\_00179" 26161 "s59E25H2" 0 "50S ribosomal protein L29"  
"OP8\_E21\_00179" 26161 "s59E5H2" 0.02710143 "50S ribosomal protein L29"  
"OP8\_E21\_00179" 26161 "s63E6H2" 0 "50S ribosomal protein L29"  
"OP8\_E21\_00180" 26162 "s59E13H2" 0.1087602 "30S ribosomal protein S17"  
"OP8\_E21\_00180" 26162 "s59E25H2" 0 "30S ribosomal protein S17"  
"OP8\_E21\_00180" 26162 "s59E5H2" 0.1003817 "30S ribosomal protein S17"  
"OP8\_E21\_00180" 26162 "s63E6H2" 0 "30S ribosomal protein S17"  
"OP8\_E21\_00181" 26163 "s59E13H2" 0.09801919 "50S ribosomal protein L14"  
"OP8\_E21\_00181" 26163 "s59E25H2" 0 "50S ribosomal protein L14"  
"OP8\_E21\_00181" 26163 "s59E5H2" 0.1473994 "50S ribosomal protein L14"  
"OP8\_E21\_00181" 26163 "s63E6H2" 0 "50S ribosomal protein L14"  
"OP8\_E21\_00182" 26164 "s59E13H2" 0.1143312 "50S ribosomal protein L24"  
"OP8\_E21\_00182" 26164 "s59E25H2" 0 "50S ribosomal protein L24"  
"OP8\_E21\_00182" 26164 "s59E5H2" 0.06261596 "50S ribosomal protein L24"  
"OP8\_E21\_00182" 26164 "s63E6H2" 0 "50S ribosomal protein L24"  
"OP8\_E21\_00183" 26165 "s59E13H2" 0.133583 "50S ribosomal protein L5"  
"OP8\_E21\_00183" 26165 "s59E25H2" 0 "50S ribosomal protein L5"  
"OP8\_E21\_00183" 26165 "s59E5H2" 0.09830961 "50S ribosomal protein L5"  
"OP8\_E21\_00183" 26165 "s63E6H2" 0 "50S ribosomal protein L5"  
"OP8\_E21\_00184" 26166 "s59E13H2" 0.01286411 "30S ribosomal protein S14"  
"OP8\_E21\_00184" 26166 "s59E25H2" 0 "30S ribosomal protein S14"  
"OP8\_E21\_00184" 26166 "s59E5H2" 0.1469515 "30S ribosomal protein S14"  
"OP8\_E21\_00184" 26166 "s63E6H2" 0 "30S ribosomal protein S14"  
"OP8\_E21\_00185" 26167 "s59E13H2" 0.01187158 "30S ribosomal protein S8"  
"OP8\_E21\_00185" 26167 "s59E25H2" 0 "30S ribosomal protein S8"  
"OP8\_E21\_00185" 26167 "s59E5H2" 0.1163263 "30S ribosomal protein S8"  
"OP8\_E21\_00185" 26167 "s63E6H2" 0 "30S ribosomal protein S8"  
"OP8\_E21\_00186" 26168 "s59E13H2" 0.01680298 "50S ribosomal protein L6"  
"OP8\_E21\_00186" 26168 "s59E25H2" 0 "50S ribosomal protein L6"

"OP8\_E21\_00186" 26168 "s59E5H2" 0.2163643 "50S ribosomal protein L6"  
"OP8\_E21\_00186" 26168 "s63E6H2" 0 "50S ribosomal protein L6"  
"OP8\_E21\_00187" 26169 "s59E13H2" 0.01491279 "50S ribosomal protein L18"  
"OP8\_E21\_00187" 26169 "s59E25H2" 0 "50S ribosomal protein L18"  
"OP8\_E21\_00187" 26169 "s59E5H2" 0.3099251 "50S ribosomal protein L18"  
"OP8\_E21\_00187" 26169 "s63E6H2" 0 "50S ribosomal protein L18"  
"OP8\_E21\_00188" 26170 "s59E13H2" 0.003417488 "30S ribosomal protein S5"  
"OP8\_E21\_00188" 26170 "s59E25H2" 0 "30S ribosomal protein S5"  
"OP8\_E21\_00188" 26170 "s59E5H2" 0.3712143 "30S ribosomal protein S5"  
"OP8\_E21\_00188" 26170 "s63E6H2" 0 "30S ribosomal protein S5"  
"OP8\_E21\_00189" 26171 "s59E13H2" 0.004583762 "50S ribosomal protein L30"  
"OP8\_E21\_00189" 26171 "s59E25H2" 0 "50S ribosomal protein L30"  
"OP8\_E21\_00189" 26171 "s59E5H2" 0.2346664 "50S ribosomal protein L30"  
"OP8\_E21\_00189" 26171 "s63E6H2" 0 "50S ribosomal protein L30"  
"OP8\_E21\_00190" 26172 "s59E13H2" 0.0276512 "50S ribosomal protein L15"  
"OP8\_E21\_00190" 26172 "s59E25H2" 0 "50S ribosomal protein L15"  
"OP8\_E21\_00190" 26172 "s59E5H2" 0.2959457 "50S ribosomal protein L15"  
"OP8\_E21\_00190" 26172 "s63E6H2" 0 "50S ribosomal protein L15"  
"OP8\_E21\_00191" 26173 "s59E13H2" 0.0154552 "preprotein translocase subunit SecY"  
"OP8\_E21\_00191" 26173 "s59E25H2" 0 "preprotein translocase subunit SecY"  
"OP8\_E21\_00191" 26173 "s59E5H2" 0.3308928 "preprotein translocase subunit SecY"  
"OP8\_E21\_00191" 26173 "s63E6H2" 0 "preprotein translocase subunit SecY"  
"OP8\_E21\_00192" 26174 "s59E13H2" 0.02925075 "Adenylate kinase"  
"OP8\_E21\_00192" 26174 "s59E25H2" 0 "Adenylate kinase"  
"OP8\_E21\_00192" 26174 "s59E5H2" 0.2283394 "Adenylate kinase"  
"OP8\_E21\_00192" 26174 "s63E6H2" 0 "Adenylate kinase"  
"OP8\_E21\_00193" 26175 "s59E13H2" 0.02349269 "Methionine aminopeptidase 1"  
"OP8\_E21\_00193" 26175 "s59E25H2" 0 "Methionine aminopeptidase 1"  
"OP8\_E21\_00193" 26175 "s59E5H2" 0.3256061 "Methionine aminopeptidase 1"  
"OP8\_E21\_00193" 26175 "s63E6H2" 0 "Methionine aminopeptidase 1"  
"OP8\_E21\_00194" 26176 "s59E13H2" 0.007559046 "Translation initiation factor IF-1"  
"OP8\_E21\_00194" 26176 "s59E25H2" 0 "Translation initiation factor IF-1"  
"OP8\_E21\_00194" 26176 "s59E5H2" 0.3503659 "Translation initiation factor IF-1"  
"OP8\_E21\_00194" 26176 "s63E6H2" 0 "Translation initiation factor IF-1"  
"OP8\_E21\_00195" 26177 "s59E13H2" 0.02304777 "30S ribosomal protein S13"  
"OP8\_E21\_00195" 26177 "s59E25H2" 0 "30S ribosomal protein S13"  
"OP8\_E21\_00195" 26177 "s59E5H2" 0.3833113 "30S ribosomal protein S13"  
"OP8\_E21\_00195" 26177 "s63E6H2" 0 "30S ribosomal protein S13"  
"OP8\_E21\_00196" 26178 "s59E13H2" 0.0356275 "30S ribosomal protein S11"  
"OP8\_E21\_00196" 26178 "s59E25H2" 0 "30S ribosomal protein S11"  
"OP8\_E21\_00196" 26178 "s59E5H2" 0.4724503 "30S ribosomal protein S11"  
"OP8\_E21\_00196" 26178 "s63E6H2" 0 "30S ribosomal protein S11"  
"OP8\_E21\_00197" 26179 "s59E13H2" 0.0291314 "30S ribosomal protein S4"  
"OP8\_E21\_00197" 26179 "s59E25H2" 0 "30S ribosomal protein S4"  
"OP8\_E21\_00197" 26179 "s59E5H2" 0.7479116 "30S ribosomal protein S4"  
"OP8\_E21\_00197" 26179 "s63E6H2" 0 "30S ribosomal protein S4"  
"OP8\_E21\_00198" 26180 "s59E13H2" 0.03106696 "DNA-directed RNA polymerase subunit alpha"

"OP8\_E21\_00198" 26180 "s59E25H2" 0 "DNA-directed RNA polymerase subunit alpha"  
"OP8\_E21\_00198" 26180 "s59E5H2" 0.8288622 "DNA-directed RNA polymerase subunit alpha"  
"OP8\_E21\_00198" 26180 "s63E6H2" 0 "DNA-directed RNA polymerase subunit alpha"  
"OP8\_E21\_00199" 26181 "s59E13H2" 0.1912706 "50S ribosomal protein L17"  
"OP8\_E21\_00199" 26181 "s59E25H2" 0 "50S ribosomal protein L17"  
"OP8\_E21\_00199" 26181 "s59E5H2" 0.911383 "50S ribosomal protein L17"  
"OP8\_E21\_00199" 26181 "s63E6H2" 0 "50S ribosomal protein L17"  
"OP8\_E21\_00200" 26182 "s59E13H2" 0.4854118 "Membrane-bound lytic murein transglycosylase D precursor"  
"OP8\_E21\_00200" 26182 "s59E25H2" 0 "Membrane-bound lytic murein transglycosylase D precursor"  
"OP8\_E21\_00200" 26182 "s59E5H2" 1.266443 "Membrane-bound lytic murein transglycosylase D precursor"  
"OP8\_E21\_00200" 26182 "s63E6H2" 0 "Membrane-bound lytic murein transglycosylase D precursor"  
"OP8\_E21\_00201" 26183 "s59E13H2" 0.5275891 "UDP-glucose 4-epimerase"  
"OP8\_E21\_00201" 26183 "s59E25H2" 0 "UDP-glucose 4-epimerase"  
"OP8\_E21\_00201" 26183 "s59E5H2" 2.37483 "UDP-glucose 4-epimerase"  
"OP8\_E21\_00201" 26183 "s63E6H2" 0 "UDP-glucose 4-epimerase"  
"OP8\_E21\_00202" 26184 "s59E13H2" 0.4565682 "Multifunctional CCA protein"  
"OP8\_E21\_00202" 26184 "s59E25H2" 0 "Multifunctional CCA protein"  
"OP8\_E21\_00202" 26184 "s59E5H2" 2.080103 "Multifunctional CCA protein"  
"OP8\_E21\_00202" 26184 "s63E6H2" 0 "Multifunctional CCA protein"  
"OP8\_E21\_00203" 26185 "s59E13H2" 0.04771757 "hypothetical protein"  
"OP8\_E21\_00203" 26185 "s59E25H2" 0 "hypothetical protein"  
"OP8\_E21\_00203" 26185 "s59E5H2" 0.6703423 "hypothetical protein"  
"OP8\_E21\_00203" 26185 "s63E6H2" 0 "hypothetical protein"  
"OP8\_E21\_00204" 26186 "s59E13H2" 0.05638078 "Outer membrane protein TolC precursor"  
"OP8\_E21\_00204" 26186 "s59E25H2" 0 "Outer membrane protein TolC precursor"  
"OP8\_E21\_00204" 26186 "s59E5H2" 1.213147 "Outer membrane protein TolC precursor"  
"OP8\_E21\_00204" 26186 "s63E6H2" 0 "Outer membrane protein TolC precursor"  
"OP8\_E21\_00205" 26187 "s59E13H2" 0.05165137 "Multidrug resistance protein MdtA precursor"  
"OP8\_E21\_00205" 26187 "s59E25H2" 0.1176999 "Multidrug resistance protein MdtA precursor"  
"OP8\_E21\_00205" 26187 "s59E5H2" 1.773269 "Multidrug resistance protein MdtA precursor"  
"OP8\_E21\_00205" 26187 "s63E6H2" 0 "Multidrug resistance protein MdtA precursor"  
"OP8\_E21\_00206" 26188 "s59E13H2" 0.033248 "Cobalt-zinc-cadmium resistance protein CzcA"  
"OP8\_E21\_00206" 26188 "s59E25H2" 0.119832 "Cobalt-zinc-cadmium resistance protein CzcA"  
"OP8\_E21\_00206" 26188 "s59E5H2" 2.345308 "Cobalt-zinc-cadmium resistance protein CzcA"  
"OP8\_E21\_00206" 26188 "s63E6H2" 0 "Cobalt-zinc-cadmium resistance protein CzcA"  
"OP8\_E21\_00207" 26189 "s59E13H2" 0 "Toxin MazF5"  
"OP8\_E21\_00207" 26189 "s59E25H2" 0 "Toxin MazF5"  
"OP8\_E21\_00207" 26189 "s59E5H2" 4.284993 "Toxin MazF5"  
"OP8\_E21\_00207" 26189 "s63E6H2" 0 "Toxin MazF5"  
"OP8\_E21\_00208" 26190 "s59E13H2" 0 "Ribbon-helix-helix protein, copG family"  
"OP8\_E21\_00208" 26190 "s59E25H2" 0 "Ribbon-helix-helix protein, copG family"  
"OP8\_E21\_00208" 26190 "s59E5H2" 4.629626 "Ribbon-helix-helix protein, copG family"  
"OP8\_E21\_00208" 26190 "s63E6H2" 0 "Ribbon-helix-helix protein, copG family"  
"OP8\_E21\_00209" 26191 "s59E13H2" 0.01224675 "Archaeal ATPase"  
"OP8\_E21\_00209" 26191 "s59E25H2" 0 "Archaeal ATPase"  
"OP8\_E21\_00209" 26191 "s59E5H2" 3.704633 "Archaeal ATPase"  
"OP8\_E21\_00209" 26191 "s63E6H2" 0 "Archaeal ATPase"

"OP8\_E21\_00210" 26192 "s59E13H2" 0.003395526 "hypothetical protein"  
"OP8\_E21\_00210" 26192 "s59E25H2" 0 "hypothetical protein"  
"OP8\_E21\_00210" 26192 "s59E5H2" 2.954649 "hypothetical protein"  
"OP8\_E21\_00210" 26192 "s63E6H2" 0 "hypothetical protein"  
"OP8\_E21\_00211" 26193 "s59E13H2" 0.001468582 "hypothetical protein"  
"OP8\_E21\_00211" 26193 "s59E25H2" 0 "hypothetical protein"  
"OP8\_E21\_00211" 26193 "s59E5H2" 2.923127 "hypothetical protein"  
"OP8\_E21\_00211" 26193 "s63E6H2" 0 "hypothetical protein"  
"OP8\_E21\_00212" 26194 "s59E13H2" 0 "Archaetidylserine synthase"  
"OP8\_E21\_00212" 26194 "s59E25H2" 0 "Archaetidylserine synthase"  
"OP8\_E21\_00212" 26194 "s59E5H2" 4.211148 "Archaetidylserine synthase"  
"OP8\_E21\_00212" 26194 "s63E6H2" 0 "Archaetidylserine synthase"  
"OP8\_E21\_00213" 26195 "s59E13H2" 0.002712244 "phosphatidylserine decarboxylase"  
"OP8\_E21\_00213" 26195 "s59E25H2" 0 "phosphatidylserine decarboxylase"  
"OP8\_E21\_00213" 26195 "s59E5H2" 5.330474 "phosphatidylserine decarboxylase"  
"OP8\_E21\_00213" 26195 "s63E6H2" 0 "phosphatidylserine decarboxylase"  
"OP8\_E21\_00214" 26196 "s59E13H2" 0.00433801 "D-alanine--D-alanine ligase"  
"OP8\_E21\_00214" 26196 "s59E25H2" 0 "D-alanine--D-alanine ligase"  
"OP8\_E21\_00214" 26196 "s59E5H2" 0.2929264 "D-alanine--D-alanine ligase"  
"OP8\_E21\_00214" 26196 "s63E6H2" 0 "D-alanine--D-alanine ligase"  
"OP8\_E21\_00215" 26197 "s59E13H2" 0.004594126 "Phosphate regulon transcriptional regulatory protein PhoB"  
"OP8\_E21\_00215" 26197 "s59E25H2" 0 "Phosphate regulon transcriptional regulatory protein PhoB"  
"OP8\_E21\_00215" 26197 "s59E5H2" 0.1427033 "Phosphate regulon transcriptional regulatory protein PhoB"  
"OP8\_E21\_00215" 26197 "s63E6H2" 0 "Phosphate regulon transcriptional regulatory protein PhoB"  
"OP8\_E21\_00218" 26200 "s59E13H2" 0 "RNA polymerase factor sigma-54"  
"OP8\_E21\_00218" 26200 "s59E25H2" 0 "RNA polymerase factor sigma-54"  
"OP8\_E21\_00218" 26200 "s59E5H2" 0.1043015 "RNA polymerase factor sigma-54"  
"OP8\_E21\_00218" 26200 "s63E6H2" 0 "RNA polymerase factor sigma-54"  
"OP8\_E21\_00219" 26201 "s59E13H2" 0 "putative sensor histidine kinase pdtaS"  
"OP8\_E21\_00219" 26201 "s59E25H2" 0 "putative sensor histidine kinase pdtaS"  
"OP8\_E21\_00219" 26201 "s59E5H2" 0.1701901 "putative sensor histidine kinase pdtaS"  
"OP8\_E21\_00219" 26201 "s63E6H2" 0 "putative sensor histidine kinase pdtaS"  
"OP8\_E21\_00220" 26202 "s59E13H2" 0 "putative transcriptional regulatory protein pdtaR"  
"OP8\_E21\_00220" 26202 "s59E25H2" 0 "putative transcriptional regulatory protein pdtaR"  
"OP8\_E21\_00220" 26202 "s59E5H2" 0.1771582 "putative transcriptional regulatory protein pdtaR"  
"OP8\_E21\_00220" 26202 "s63E6H2" 0 "putative transcriptional regulatory protein pdtaR"  
"OP8\_E21\_00221" 26203 "s59E13H2" 0 "hypothetical protein"  
"OP8\_E21\_00221" 26203 "s59E25H2" 0 "hypothetical protein"  
"OP8\_E21\_00221" 26203 "s59E5H2" 0.1678969 "hypothetical protein"  
"OP8\_E21\_00221" 26203 "s63E6H2" 0 "hypothetical protein"  
"OP8\_E21\_00223" 26205 "s59E13H2" 0 "Isoprenylcysteine carboxyl methyltransferase (ICMT) family protein"  
"OP8\_E21\_00223" 26205 "s59E25H2" 0 "Isoprenylcysteine carboxyl methyltransferase (ICMT) family protein"  
"OP8\_E21\_00223" 26205 "s59E5H2" 0.2021659 "Isoprenylcysteine carboxyl methyltransferase (ICMT) family protein"  
"OP8\_E21\_00223" 26205 "s63E6H2" 0 "Isoprenylcysteine carboxyl methyltransferase (ICMT) family protein"  
"OP8\_E21\_00224" 26206 "s59E13H2" 0 "hypothetical protein"  
"OP8\_E21\_00224" 26206 "s59E25H2" 0 "hypothetical protein"  
"OP8\_E21\_00224" 26206 "s59E5H2" 0.3196495 "hypothetical protein"

"OP8\_E21\_00224" 26206 "s63E6H2" 0 "hypothetical protein"  
"OP8\_E21\_00226" 26208 "s59E13H2" 0.0009369406 "putative diguanylate cyclase AdrA"  
"OP8\_E21\_00226" 26208 "s59E25H2" 0 "putative diguanylate cyclase AdrA"  
"OP8\_E21\_00226" 26208 "s59E5H2" 0.271528 "putative diguanylate cyclase AdrA"  
"OP8\_E21\_00226" 26208 "s63E6H2" 0 "putative diguanylate cyclase AdrA"  
"OP8\_E21\_00227" 26209 "s59E13H2" 0.6004609 "Transposase"  
"OP8\_E21\_00227" 26209 "s59E25H2" 0 "Transposase"  
"OP8\_E21\_00227" 26209 "s59E5H2" 1.305585 "Transposase"  
"OP8\_E21\_00227" 26209 "s63E6H2" 0 "Transposase"  
"OP8\_E21\_00228" 26210 "s59E13H2" 2.254423 "hypothetical protein"  
"OP8\_E21\_00228" 26210 "s59E25H2" 0 "hypothetical protein"  
"OP8\_E21\_00228" 26210 "s59E5H2" 1.631528 "hypothetical protein"  
"OP8\_E21\_00228" 26210 "s63E6H2" 0.001062813 "hypothetical protein"  
"OP8\_E21\_00229" 26211 "s59E13H2" 0.2100809 "hypothetical protein"  
"OP8\_E21\_00229" 26211 "s59E25H2" 0 "hypothetical protein"  
"OP8\_E21\_00229" 26211 "s59E5H2" 0.5963827 "hypothetical protein"  
"OP8\_E21\_00229" 26211 "s63E6H2" 0 "hypothetical protein"  
"OP8\_E21\_00230" 26212 "s59E13H2" 0.03895375 "Flavoredoxin"  
"OP8\_E21\_00230" 26212 "s59E25H2" 0 "Flavoredoxin"  
"OP8\_E21\_00230" 26212 "s59E5H2" 0.575955 "Flavoredoxin"  
"OP8\_E21\_00230" 26212 "s63E6H2" 0 "Flavoredoxin"  
"OP8\_E21\_00231" 26213 "s59E13H2" 0.02554524 "Putative lipid kinase YtlR"  
"OP8\_E21\_00231" 26213 "s59E25H2" 0 "Putative lipid kinase YtlR"  
"OP8\_E21\_00231" 26213 "s59E5H2" 0.4975619 "Putative lipid kinase YtlR"  
"OP8\_E21\_00231" 26213 "s63E6H2" 0 "Putative lipid kinase YtlR"  
"OP8\_E21\_00232" 26214 "s59E13H2" 0.01434522 "Zinc carboxypeptidase"  
"OP8\_E21\_00232" 26214 "s59E25H2" 0 "Zinc carboxypeptidase"  
"OP8\_E21\_00232" 26214 "s59E5H2" 0.3918476 "Zinc carboxypeptidase"  
"OP8\_E21\_00232" 26214 "s63E6H2" 0 "Zinc carboxypeptidase"  
"OP8\_E21\_00233" 26215 "s59E13H2" 0.001841406 "Prolyl oligopeptidase family protein"  
"OP8\_E21\_00233" 26215 "s59E25H2" 0 "Prolyl oligopeptidase family protein"  
"OP8\_E21\_00233" 26215 "s59E5H2" 0.1742863 "Prolyl oligopeptidase family protein"  
"OP8\_E21\_00233" 26215 "s63E6H2" 0 "Prolyl oligopeptidase family protein"  
"OP8\_E21\_00234" 26216 "s59E13H2" 0.01058284 "hypothetical protein"  
"OP8\_E21\_00234" 26216 "s59E25H2" 0 "hypothetical protein"  
"OP8\_E21\_00234" 26216 "s59E5H2" 0.396086 "hypothetical protein"  
"OP8\_E21\_00234" 26216 "s63E6H2" 0 "hypothetical protein"  
"OP8\_E21\_00235" 26217 "s59E13H2" 0.01345756 "Aminopeptidase YwaD precursor"  
"OP8\_E21\_00235" 26217 "s59E25H2" 0 "Aminopeptidase YwaD precursor"  
"OP8\_E21\_00235" 26217 "s59E5H2" 0.4281585 "Aminopeptidase YwaD precursor"  
"OP8\_E21\_00235" 26217 "s63E6H2" 0 "Aminopeptidase YwaD precursor"  
"OP8\_E21\_00236" 26218 "s59E13H2" 0.01804964 "hypothetical protein"  
"OP8\_E21\_00236" 26218 "s59E25H2" 0 "hypothetical protein"  
"OP8\_E21\_00236" 26218 "s59E5H2" 0.5585397 "hypothetical protein"  
"OP8\_E21\_00236" 26218 "s63E6H2" 0 "hypothetical protein"  
"OP8\_E21\_00237" 26219 "s59E13H2" 0.0223768 "Peptidyl-prolyl cis-trans isomerase cyp18"  
"OP8\_E21\_00237" 26219 "s59E25H2" 0 "Peptidyl-prolyl cis-trans isomerase cyp18"

"OP8\_E21\_00237" 26219 "s59E5H2" 0.5820428 "Peptidyl-prolyl cis-trans isomerase cyp18"  
"OP8\_E21\_00237" 26219 "s63E6H2" 0 "Peptidyl-prolyl cis-trans isomerase cyp18"  
"OP8\_E21\_00238" 26220 "s59E13H2" 0.018482 "hypothetical protein"  
"OP8\_E21\_00238" 26220 "s59E25H2" 0 "hypothetical protein"  
"OP8\_E21\_00238" 26220 "s59E5H2" 1.500743 "hypothetical protein"  
"OP8\_E21\_00238" 26220 "s63E6H2" 0 "hypothetical protein"  
"OP8\_E21\_00239" 26221 "s59E13H2" 0.001995953 "Amino-acid carrier protein AlsT"  
"OP8\_E21\_00239" 26221 "s59E25H2" 0 "Amino-acid carrier protein AlsT"  
"OP8\_E21\_00239" 26221 "s59E5H2" 0.7768474 "Amino-acid carrier protein AlsT"  
"OP8\_E21\_00239" 26221 "s63E6H2" 0 "Amino-acid carrier protein AlsT"  
"OP8\_E21\_00240" 26222 "s59E13H2" 0 "Murein DD-endopeptidase MepM"  
"OP8\_E21\_00240" 26222 "s59E25H2" 0 "Murein DD-endopeptidase MepM"  
"OP8\_E21\_00240" 26222 "s59E5H2" 1.280056 "Murein DD-endopeptidase MepM"  
"OP8\_E21\_00240" 26222 "s63E6H2" 0 "Murein DD-endopeptidase MepM"  
"OP8\_E21\_00241" 26223 "s59E13H2" 0.001701393 "FecR protein"  
"OP8\_E21\_00241" 26223 "s59E25H2" 0 "FecR protein"  
"OP8\_E21\_00241" 26223 "s59E5H2" 1.709527 "FecR protein"  
"OP8\_E21\_00241" 26223 "s63E6H2" 0 "FecR protein"  
"OP8\_E21\_00242" 26224 "s59E13H2" 0 "Fructose-1,6-bisphosphatase"  
"OP8\_E21\_00242" 26224 "s59E25H2" 0 "Fructose-1,6-bisphosphatase"  
"OP8\_E21\_00242" 26224 "s59E5H2" 1.660187 "Fructose-1,6-bisphosphatase"  
"OP8\_E21\_00242" 26224 "s63E6H2" 0 "Fructose-1,6-bisphosphatase"  
"OP8\_E21\_00243" 26225 "s59E13H2" 0 "ADP-ribose pyrophosphatase"  
"OP8\_E21\_00243" 26225 "s59E25H2" 0 "ADP-ribose pyrophosphatase"  
"OP8\_E21\_00243" 26225 "s59E5H2" 1.681791 "ADP-ribose pyrophosphatase"  
"OP8\_E21\_00243" 26225 "s63E6H2" 0.0013069 "ADP-ribose pyrophosphatase"  
"OP8\_E21\_00244" 26226 "s59E13H2" 0 "hypothetical protein"  
"OP8\_E21\_00244" 26226 "s59E25H2" 0 "hypothetical protein"  
"OP8\_E21\_00244" 26226 "s59E5H2" 1.6412 "hypothetical protein"  
"OP8\_E21\_00244" 26226 "s63E6H2" 0.003695254 "hypothetical protein"  
"OP8\_E21\_00245" 26227 "s59E13H2" 0.007208253 "cell division protein MraZ"  
"OP8\_E21\_00245" 26227 "s59E25H2" 0 "cell division protein MraZ"  
"OP8\_E21\_00245" 26227 "s59E5H2" 1.897362 "cell division protein MraZ"  
"OP8\_E21\_00245" 26227 "s63E6H2" 0 "cell division protein MraZ"  
"OP8\_E21\_00246" 26228 "s59E13H2" 0.00016284 "Ribosomal RNA small subunit methyltransferase H"  
"OP8\_E21\_00246" 26228 "s59E25H2" 0 "Ribosomal RNA small subunit methyltransferase H"  
"OP8\_E21\_00246" 26228 "s59E5H2" 0.7119969 "Ribosomal RNA small subunit methyltransferase H"  
"OP8\_E21\_00246" 26228 "s63E6H2" 0 "Ribosomal RNA small subunit methyltransferase H"  
"OP8\_E21\_00247" 26229 "s59E13H2" 0 "Cell division protein FtsL"  
"OP8\_E21\_00247" 26229 "s59E25H2" 0 "Cell division protein FtsL"  
"OP8\_E21\_00247" 26229 "s59E5H2" 0.7783286 "Cell division protein FtsL"  
"OP8\_E21\_00247" 26229 "s63E6H2" 0 "Cell division protein FtsL"  
"OP8\_E21\_00248" 26230 "s59E13H2" 0 "Penicillin-binding protein 2"  
"OP8\_E21\_00248" 26230 "s59E25H2" 0 "Penicillin-binding protein 2"  
"OP8\_E21\_00248" 26230 "s59E5H2" 0.867603 "Penicillin-binding protein 2"  
"OP8\_E21\_00248" 26230 "s63E6H2" 0 "Penicillin-binding protein 2"  
"OP8\_E21\_00249" 26231 "s59E13H2" 0.0005784474 "UDP-N-acetylmuramoyl-L-alanyl-D-glutamate--2,6-diaminopimelate ligase"

"OP8\_E21\_00249" 26231 "s59E25H2" 0 "UDP-N-acetylmuramoyl-L-alanyl-D-glutamate--2,6-diaminopimelate ligase"  
"OP8\_E21\_00249" 26231 "s59E5H2" 0.9865397 "UDP-N-acetylmuramoyl-L-alanyl-D-glutamate--2,6-diaminopimelate ligase"  
"OP8\_E21\_00249" 26231 "s63E6H2" 0 "UDP-N-acetylmuramoyl-L-alanyl-D-glutamate--2,6-diaminopimelate ligase"  
"OP8\_E21\_00250" 26232 "s59E13H2" 0.006724242 "UDP-N-acetylmuramoyl-tripeptide--D-alanyl-D-alanine ligase"  
"OP8\_E21\_00250" 26232 "s59E25H2" 0 "UDP-N-acetylmuramoyl-tripeptide--D-alanyl-D-alanine ligase"  
"OP8\_E21\_00250" 26232 "s59E5H2" 2.889932 "UDP-N-acetylmuramoyl-tripeptide--D-alanyl-D-alanine ligase"  
"OP8\_E21\_00250" 26232 "s63E6H2" 0 "UDP-N-acetylmuramoyl-tripeptide--D-alanyl-D-alanine ligase"  
"OP8\_E21\_00251" 26233 "s59E13H2" 0.007019464 "Phospho-N-acetylmuramoyl-pentapeptide-transferase"  
"OP8\_E21\_00251" 26233 "s59E25H2" 0 "Phospho-N-acetylmuramoyl-pentapeptide-transferase"  
"OP8\_E21\_00251" 26233 "s59E5H2" 1.266048 "Phospho-N-acetylmuramoyl-pentapeptide-transferase"  
"OP8\_E21\_00251" 26233 "s63E6H2" 0 "Phospho-N-acetylmuramoyl-pentapeptide-transferase"  
"OP8\_E21\_00252" 26234 "s59E13H2" 0.01375764 "UDP-N-acetylmuramoylalanine--D-glutamate ligase"  
"OP8\_E21\_00252" 26234 "s59E25H2" 0 "UDP-N-acetylmuramoylalanine--D-glutamate ligase"  
"OP8\_E21\_00252" 26234 "s59E5H2" 1.006965 "UDP-N-acetylmuramoylalanine--D-glutamate ligase"  
"OP8\_E21\_00252" 26234 "s63E6H2" 0 "UDP-N-acetylmuramoylalanine--D-glutamate ligase"  
"OP8\_E21\_00253" 26235 "s59E13H2" 0.04832668 "Lipid II flippase FtsW"  
"OP8\_E21\_00253" 26235 "s59E25H2" 0 "Lipid II flippase FtsW"  
"OP8\_E21\_00253" 26235 "s59E5H2" 1.391587 "Lipid II flippase FtsW"  
"OP8\_E21\_00253" 26235 "s63E6H2" 0 "Lipid II flippase FtsW"  
"OP8\_E21\_00254" 26236 "s59E13H2" 0.007340962 "UDP-N-acetylglucosamine--N-acetylmuramyl-(pentapeptide) pyrophosphoryl-undecaprenol N-acetylglucosamine transferase"  
"OP8\_E21\_00254" 26236 "s59E25H2" 0 "UDP-N-acetylglucosamine--N-acetylmuramyl-(pentapeptide) pyrophosphoryl-undecaprenol N-acetylglucosamine transferase"  
"OP8\_E21\_00254" 26236 "s59E5H2" 1.506292 "UDP-N-acetylglucosamine--N-acetylmuramyl-(pentapeptide) pyrophosphoryl-undecaprenol N-acetylglucosamine transferase"  
"OP8\_E21\_00254" 26236 "s63E6H2" 0 "UDP-N-acetylglucosamine--N-acetylmuramyl-(pentapeptide) pyrophosphoryl-undecaprenol N-acetylglucosamine transferase"  
"OP8\_E21\_00255" 26237 "s59E13H2" 0.02121026 "UDP-N-acetylmuramate--L-alanine ligase"  
"OP8\_E21\_00255" 26237 "s59E25H2" 0 "UDP-N-acetylmuramate--L-alanine ligase"  
"OP8\_E21\_00255" 26237 "s59E5H2" 1.959077 "UDP-N-acetylmuramate--L-alanine ligase"  
"OP8\_E21\_00255" 26237 "s63E6H2" 0 "UDP-N-acetylmuramate--L-alanine ligase"  
"OP8\_E21\_00256" 26238 "s59E13H2" 0.03343481 "cell division protein FtsQ"  
"OP8\_E21\_00256" 26238 "s59E25H2" 0 "cell division protein FtsQ"  
"OP8\_E21\_00256" 26238 "s59E5H2" 1.519393 "cell division protein FtsQ"  
"OP8\_E21\_00256" 26238 "s63E6H2" 0 "cell division protein FtsQ"  
"OP8\_E21\_00257" 26239 "s59E13H2" 0.05801442 "Cell division protein FtsA"  
"OP8\_E21\_00257" 26239 "s59E25H2" 0 "Cell division protein FtsA"  
"OP8\_E21\_00257" 26239 "s59E5H2" 1.506764 "Cell division protein FtsA"  
"OP8\_E21\_00257" 26239 "s63E6H2" 0 "Cell division protein FtsA"  
"OP8\_E21\_00258" 26240 "s59E13H2" 0.06039111 "Cell division protein FtsZ"  
"OP8\_E21\_00258" 26240 "s59E25H2" 0.2001654 "Cell division protein FtsZ"  
"OP8\_E21\_00258" 26240 "s59E5H2" 5.501905 "Cell division protein FtsZ"  
"OP8\_E21\_00258" 26240 "s63E6H2" 0 "Cell division protein FtsZ"  
"OP8\_E21\_00259" 26241 "s59E13H2" 0.05677679 "Imidazolonepropionase"  
"OP8\_E21\_00259" 26241 "s59E25H2" 0 "Imidazolonepropionase"  
"OP8\_E21\_00259" 26241 "s59E5H2" 6.005242 "Imidazolonepropionase"  
"OP8\_E21\_00259" 26241 "s63E6H2" 0 "Imidazolonepropionase"  
"OP8\_E21\_00260" 26242 "s59E13H2" 0.06365585 "Histidine ammonia-lyase"  
"OP8\_E21\_00260" 26242 "s59E25H2" 0 "Histidine ammonia-lyase"  
"OP8\_E21\_00260" 26242 "s59E5H2" 3.290036 "Histidine ammonia-lyase"  
"OP8\_E21\_00260" 26242 "s63E6H2" 0 "Histidine ammonia-lyase"

"OP8\_E21\_00261" 26243 "s59E13H2" 0.02793456 "Putative redox-active protein (C\_GCAxxG\_C\_C)"  
"OP8\_E21\_00261" 26243 "s59E25H2" 0 "Putative redox-active protein (C\_GCAxxG\_C\_C)"  
"OP8\_E21\_00261" 26243 "s59E5H2" 0.7598596 "Putative redox-active protein (C\_GCAxxG\_C\_C)"  
"OP8\_E21\_00261" 26243 "s63E6H2" 0 "Putative redox-active protein (C\_GCAxxG\_C\_C)"  
"OP8\_E21\_00262" 26244 "s59E13H2" 0.02753324 "p-aminobenzoyl-glutamate hydrolase subunit B"  
"OP8\_E21\_00262" 26244 "s59E25H2" 0 "p-aminobenzoyl-glutamate hydrolase subunit B"  
"OP8\_E21\_00262" 26244 "s59E5H2" 0.6493721 "p-aminobenzoyl-glutamate hydrolase subunit B"  
"OP8\_E21\_00262" 26244 "s63E6H2" 0 "p-aminobenzoyl-glutamate hydrolase subunit B"  
"OP8\_E21\_00264" 26246 "s59E13H2" 0.1110005 "Methylthioribose-1-phosphate isomerase"  
"OP8\_E21\_00264" 26246 "s59E25H2" 0 "Methylthioribose-1-phosphate isomerase"  
"OP8\_E21\_00264" 26246 "s59E5H2" 1.402354 "Methylthioribose-1-phosphate isomerase"  
"OP8\_E21\_00264" 26246 "s63E6H2" 0 "Methylthioribose-1-phosphate isomerase"  
"OP8\_E21\_00265" 26247 "s59E13H2" 0.09687999 "tRNA N6-adenosine threonylcarbamoyltransferase"  
"OP8\_E21\_00265" 26247 "s59E25H2" 0 "tRNA N6-adenosine threonylcarbamoyltransferase"  
"OP8\_E21\_00265" 26247 "s59E5H2" 0.6512922 "tRNA N6-adenosine threonylcarbamoyltransferase"  
"OP8\_E21\_00265" 26247 "s63E6H2" 0 "tRNA N6-adenosine threonylcarbamoyltransferase"  
"OP8\_E21\_00266" 26248 "s59E13H2" 0 "Transposase IS200 like protein"  
"OP8\_E21\_00266" 26248 "s59E25H2" 0 "Transposase IS200 like protein"  
"OP8\_E21\_00266" 26248 "s59E5H2" 0.1377273 "Transposase IS200 like protein"  
"OP8\_E21\_00266" 26248 "s63E6H2" 0 "Transposase IS200 like protein"  
"OP8\_E21\_00267" 26249 "s59E13H2" 0.05796035 "hypothetical protein"  
"OP8\_E21\_00267" 26249 "s59E25H2" 0 "hypothetical protein"  
"OP8\_E21\_00267" 26249 "s59E5H2" 0.3747234 "hypothetical protein"  
"OP8\_E21\_00267" 26249 "s63E6H2" 0 "hypothetical protein"  
"OP8\_E21\_00268" 26250 "s59E13H2" 0.1133127 "hypothetical protein"  
"OP8\_E21\_00268" 26250 "s59E25H2" 0.2089113 "hypothetical protein"  
"OP8\_E21\_00268" 26250 "s59E5H2" 3.120012 "hypothetical protein"  
"OP8\_E21\_00268" 26250 "s63E6H2" 0 "hypothetical protein"  
"OP8\_E21\_00269" 26251 "s59E13H2" 0.1632103 "outer membrane channel protein"  
"OP8\_E21\_00269" 26251 "s59E25H2" 0 "outer membrane channel protein"  
"OP8\_E21\_00269" 26251 "s59E5H2" 6.851345 "outer membrane channel protein"  
"OP8\_E21\_00269" 26251 "s63E6H2" 3.520824e-05 "outer membrane channel protein"  
"OP8\_E21\_00270" 26252 "s59E13H2" 0.1799288 "SPBc2 prophage-derived glycosyltransferase SunS"  
"OP8\_E21\_00270" 26252 "s59E25H2" 0 "SPBc2 prophage-derived glycosyltransferase SunS"  
"OP8\_E21\_00270" 26252 "s59E5H2" 7.082223 "SPBc2 prophage-derived glycosyltransferase SunS"  
"OP8\_E21\_00270" 26252 "s63E6H2" 0 "SPBc2 prophage-derived glycosyltransferase SunS"  
"OP8\_E21\_00271" 26253 "s59E13H2" 0.1702437 "Putative glycosyltransferase EpsD"  
"OP8\_E21\_00271" 26253 "s59E25H2" 0 "Putative glycosyltransferase EpsD"  
"OP8\_E21\_00271" 26253 "s59E5H2" 7.282671 "Putative glycosyltransferase EpsD"  
"OP8\_E21\_00271" 26253 "s63E6H2" 0 "Putative glycosyltransferase EpsD"  
"OP8\_E21\_00272" 26254 "s59E13H2" 0.2124397 "Phosphoribosylformylglycinamide cyclo-ligase"  
"OP8\_E21\_00272" 26254 "s59E25H2" 0 "Phosphoribosylformylglycinamide cyclo-ligase"  
"OP8\_E21\_00272" 26254 "s59E5H2" 8.283389 "Phosphoribosylformylglycinamide cyclo-ligase"  
"OP8\_E21\_00272" 26254 "s63E6H2" 0 "Phosphoribosylformylglycinamide cyclo-ligase"  
"OP8\_E21\_00273" 26255 "s59E13H2" 0.1777135 "CDP-alcohol phosphatidyltransferase"  
"OP8\_E21\_00273" 26255 "s59E25H2" 0 "CDP-alcohol phosphatidyltransferase"  
"OP8\_E21\_00273" 26255 "s59E5H2" 11.48826 "CDP-alcohol phosphatidyltransferase"



"OP8\_E21\_00273" 26255 "s63E6H2" 0 "CDP-alcohol phosphatidyltransferase"  
"OP8\_E21\_00274" 26256 "s59E13H2" 0.2280625 "hypothetical protein"  
"OP8\_E21\_00274" 26256 "s59E25H2" 0 "hypothetical protein"  
"OP8\_E21\_00274" 26256 "s59E5H2" 12.89656 "hypothetical protein"  
"OP8\_E21\_00274" 26256 "s63E6H2" 0 "hypothetical protein"  
"OP8\_E21\_00275" 26257 "s59E13H2" 0.2177564 "Lipopolysaccharide core heptosyltransferase RfaQ"  
"OP8\_E21\_00275" 26257 "s59E25H2" 0 "Lipopolysaccharide core heptosyltransferase RfaQ"  
"OP8\_E21\_00275" 26257 "s59E5H2" 10.90674 "Lipopolysaccharide core heptosyltransferase RfaQ"  
"OP8\_E21\_00275" 26257 "s63E6H2" 0 "Lipopolysaccharide core heptosyltransferase RfaQ"  
"OP8\_E21\_00276" 26258 "s59E13H2" 0.05645271 "O-Antigen ligase"  
"OP8\_E21\_00276" 26258 "s59E25H2" 0 "O-Antigen ligase"  
"OP8\_E21\_00276" 26258 "s59E5H2" 7.988481 "O-Antigen ligase"  
"OP8\_E21\_00276" 26258 "s63E6H2" 0 "O-Antigen ligase"  
"OP8\_E21\_00277" 26259 "s59E13H2" 0.2169346 "hypothetical protein"  
"OP8\_E21\_00277" 26259 "s59E25H2" 0 "hypothetical protein"  
"OP8\_E21\_00277" 26259 "s59E5H2" 5.667119 "hypothetical protein"  
"OP8\_E21\_00277" 26259 "s63E6H2" 0 "hypothetical protein"  
"OP8\_E21\_00278" 26260 "s59E13H2" 0.01535938 "Bifunctional protein HldE"  
"OP8\_E21\_00278" 26260 "s59E25H2" 0 "Bifunctional protein HldE"  
"OP8\_E21\_00278" 26260 "s59E5H2" 4.890905 "Bifunctional protein HldE"  
"OP8\_E21\_00278" 26260 "s63E6H2" 0 "Bifunctional protein HldE"  
"OP8\_E21\_00279" 26261 "s59E13H2" 0.1331779 "GDP-6-deoxy-D-mannose reductase"  
"OP8\_E21\_00279" 26261 "s59E25H2" 0 "GDP-6-deoxy-D-mannose reductase"  
"OP8\_E21\_00279" 26261 "s59E5H2" 1.321763 "GDP-6-deoxy-D-mannose reductase"  
"OP8\_E21\_00279" 26261 "s63E6H2" 0 "GDP-6-deoxy-D-mannose reductase"  
"OP8\_E21\_00280" 26262 "s59E13H2" 0.5409736 "GDP-6-deoxy-D-mannose reductase"  
"OP8\_E21\_00280" 26262 "s59E25H2" 0 "GDP-6-deoxy-D-mannose reductase"  
"OP8\_E21\_00280" 26262 "s59E5H2" 1.172581 "GDP-6-deoxy-D-mannose reductase"  
"OP8\_E21\_00280" 26262 "s63E6H2" 0 "GDP-6-deoxy-D-mannose reductase"  
"OP8\_E21\_00281" 26263 "s59E13H2" 0.1188231 "LPS-assembly protein LptD precursor"  
"OP8\_E21\_00281" 26263 "s59E25H2" 0 "LPS-assembly protein LptD precursor"  
"OP8\_E21\_00281" 26263 "s59E5H2" 2.012586 "LPS-assembly protein LptD precursor"  
"OP8\_E21\_00281" 26263 "s63E6H2" 0 "LPS-assembly protein LptD precursor"  
"OP8\_E21\_00282" 26264 "s59E13H2" 0.08629422 "Free methionine-R-sulfoxide reductase"  
"OP8\_E21\_00282" 26264 "s59E25H2" 0 "Free methionine-R-sulfoxide reductase"  
"OP8\_E21\_00282" 26264 "s59E5H2" 3.045051 "Free methionine-R-sulfoxide reductase"  
"OP8\_E21\_00282" 26264 "s63E6H2" 0 "Free methionine-R-sulfoxide reductase"  
"OP8\_E21\_00283" 26265 "s59E13H2" 0.0003983117 "Transposase DDE domain protein"  
"OP8\_E21\_00283" 26265 "s59E25H2" 0 "Transposase DDE domain protein"  
"OP8\_E21\_00283" 26265 "s59E5H2" 14.34859 "Transposase DDE domain protein"  
"OP8\_E21\_00283" 26265 "s63E6H2" 0 "Transposase DDE domain protein"  
"OP8\_E21\_00284" 26266 "s59E13H2" 0.08812907 "hypothetical protein"  
"OP8\_E21\_00284" 26266 "s59E25H2" 0 "hypothetical protein"  
"OP8\_E21\_00284" 26266 "s59E5H2" 3.951877 "hypothetical protein"  
"OP8\_E21\_00284" 26266 "s63E6H2" 0 "hypothetical protein"  
"OP8\_E21\_00285" 26267 "s59E13H2" 0.06347815 "Aspartate--tRNA ligase"  
"OP8\_E21\_00285" 26267 "s59E25H2" 0 "Aspartate--tRNA ligase"

"OP8\_E21\_00285" 26267 "s59E5H2" 1.898929 "Aspartate--tRNA ligase"  
"OP8\_E21\_00285" 26267 "s63E6H2" 0 "Aspartate--tRNA ligase"  
"OP8\_E21\_00286" 26268 "s59E13H2" 0.9963445 "Histidine--tRNA ligase"  
"OP8\_E21\_00286" 26268 "s59E25H2" 0 "Histidine--tRNA ligase"  
"OP8\_E21\_00286" 26268 "s59E5H2" 1.140122 "Histidine--tRNA ligase"  
"OP8\_E21\_00286" 26268 "s63E6H2" 0 "Histidine--tRNA ligase"  
"OP8\_E21\_00287" 26269 "s59E13H2" 0.9586507 "Acetyl-coenzyme A carboxylase carboxyl transferase subunit alpha"  
"OP8\_E21\_00287" 26269 "s59E25H2" 0 "Acetyl-coenzyme A carboxylase carboxyl transferase subunit alpha"  
"OP8\_E21\_00287" 26269 "s59E5H2" 1.114646 "Acetyl-coenzyme A carboxylase carboxyl transferase subunit alpha"  
"OP8\_E21\_00287" 26269 "s63E6H2" 0 "Acetyl-coenzyme A carboxylase carboxyl transferase subunit alpha"  
"OP8\_E21\_00288" 26270 "s59E13H2" 0 "Phosphate regulon transcriptional regulatory protein PhoB"  
"OP8\_E21\_00288" 26270 "s59E25H2" 0 "Phosphate regulon transcriptional regulatory protein PhoB"  
"OP8\_E21\_00288" 26270 "s59E5H2" 0.1840721 "Phosphate regulon transcriptional regulatory protein PhoB"  
"OP8\_E21\_00288" 26270 "s63E6H2" 0 "Phosphate regulon transcriptional regulatory protein PhoB"  
"OP8\_E21\_00289" 26271 "s59E13H2" 1.356132 "Alkaline phosphatase synthesis transcriptional regulatory protein PhoP"  
"OP8\_E21\_00289" 26271 "s59E25H2" 0 "Alkaline phosphatase synthesis transcriptional regulatory protein PhoP"  
"OP8\_E21\_00289" 26271 "s59E5H2" 0.5116411 "Alkaline phosphatase synthesis transcriptional regulatory protein PhoP"  
"OP8\_E21\_00289" 26271 "s63E6H2" 0 "Alkaline phosphatase synthesis transcriptional regulatory protein PhoP"  
"OP8\_E21\_00290" 26272 "s59E13H2" 0.3489389 "Acetyl-coenzyme A carboxylase carboxyl transferase subunit beta"  
"OP8\_E21\_00290" 26272 "s59E25H2" 0 "Acetyl-coenzyme A carboxylase carboxyl transferase subunit beta"  
"OP8\_E21\_00290" 26272 "s59E5H2" 0.5337181 "Acetyl-coenzyme A carboxylase carboxyl transferase subunit beta"  
"OP8\_E21\_00290" 26272 "s63E6H2" 0 "Acetyl-coenzyme A carboxylase carboxyl transferase subunit beta"  
"OP8\_E21\_00291" 26273 "s59E13H2" 0.0419419 "Folypolyglutamate synthase"  
"OP8\_E21\_00291" 26273 "s59E25H2" 0 "Folypolyglutamate synthase"  
"OP8\_E21\_00291" 26273 "s59E5H2" 0.4746352 "Folypolyglutamate synthase"  
"OP8\_E21\_00291" 26273 "s63E6H2" 0 "Folypolyglutamate synthase"  
"OP8\_E21\_00292" 26274 "s59E13H2" 0.07025649 "FOF1 ATP synthase subunit B"  
"OP8\_E21\_00292" 26274 "s59E25H2" 0 "FOF1 ATP synthase subunit B"  
"OP8\_E21\_00292" 26274 "s59E5H2" 0.2191111 "FOF1 ATP synthase subunit B"  
"OP8\_E21\_00292" 26274 "s63E6H2" 0 "FOF1 ATP synthase subunit B"  
"OP8\_E21\_00293" 26275 "s59E13H2" 0.07233586 "ATP synthase subunit b"  
"OP8\_E21\_00293" 26275 "s59E25H2" 0 "ATP synthase subunit b"  
"OP8\_E21\_00293" 26275 "s59E5H2" 0.1170847 "ATP synthase subunit b"  
"OP8\_E21\_00293" 26275 "s63E6H2" 0 "ATP synthase subunit b"  
"OP8\_E21\_00294" 26276 "s59E13H2" 0.07967548 "ATP synthase subunit delta"  
"OP8\_E21\_00294" 26276 "s59E25H2" 0 "ATP synthase subunit delta"  
"OP8\_E21\_00294" 26276 "s59E5H2" 0.09067225 "ATP synthase subunit delta"  
"OP8\_E21\_00294" 26276 "s63E6H2" 0 "ATP synthase subunit delta"  
"OP8\_E21\_00295" 26277 "s59E13H2" 0.01222059 "Glutamine amidotransferase class-I"  
"OP8\_E21\_00295" 26277 "s59E25H2" 0 "Glutamine amidotransferase class-I"  
"OP8\_E21\_00295" 26277 "s59E5H2" 0.5381395 "Glutamine amidotransferase class-I"  
"OP8\_E21\_00295" 26277 "s63E6H2" 0 "Glutamine amidotransferase class-I"  
"OP8\_E21\_00296" 26278 "s59E13H2" 0.01536205 "Bifunctional protein HldE"  
"OP8\_E21\_00296" 26278 "s59E25H2" 0 "Bifunctional protein HldE"  
"OP8\_E21\_00296" 26278 "s59E5H2" 0.8645594 "Bifunctional protein HldE"  
"OP8\_E21\_00296" 26278 "s63E6H2" 0 "Bifunctional protein HldE"  
"OP8\_E21\_00297" 26279 "s59E13H2" 0.06311208 "Teichoic acids export ATP-binding protein TagH"

"OP8\_E21\_00297" 26279 "s59E25H2" 0 "Teichoic acids export ATP-binding protein TagH"  
"OP8\_E21\_00297" 26279 "s59E5H2" 1.183323 "Teichoic acids export ATP-binding protein TagH"  
"OP8\_E21\_00297" 26279 "s63E6H2" 0 "Teichoic acids export ATP-binding protein TagH"  
"OP8\_E21\_00298" 26280 "s59E13H2" 0.07100289 "Teichoic acid translocation permease protein TagG"  
"OP8\_E21\_00298" 26280 "s59E25H2" 0 "Teichoic acid translocation permease protein TagG"  
"OP8\_E21\_00298" 26280 "s59E5H2" 1.832675 "Teichoic acid translocation permease protein TagG"  
"OP8\_E21\_00298" 26280 "s63E6H2" 0 "Teichoic acid translocation permease protein TagG"  
"OP8\_E21\_00299" 26281 "s59E13H2" 0.1079786 "tRNA1(Val) (adenine(37)-N6)-methyltransferase"  
"OP8\_E21\_00299" 26281 "s59E25H2" 0 "tRNA1(Val) (adenine(37)-N6)-methyltransferase"  
"OP8\_E21\_00299" 26281 "s59E5H2" 1.082101 "tRNA1(Val) (adenine(37)-N6)-methyltransferase"  
"OP8\_E21\_00299" 26281 "s63E6H2" 0 "tRNA1(Val) (adenine(37)-N6)-methyltransferase"  
"OP8\_E21\_00300" 26282 "s59E13H2" 0.07898916 "ATP synthase epsilon chain"  
"OP8\_E21\_00300" 26282 "s59E25H2" 0 "ATP synthase epsilon chain"  
"OP8\_E21\_00300" 26282 "s59E5H2" 1.019644 "ATP synthase epsilon chain"  
"OP8\_E21\_00300" 26282 "s63E6H2" 0 "ATP synthase epsilon chain"  
"OP8\_E21\_00301" 26283 "s59E13H2" 0.04191428 "ATP synthase subunit beta"  
"OP8\_E21\_00301" 26283 "s59E25H2" 0 "ATP synthase subunit beta"  
"OP8\_E21\_00301" 26283 "s59E5H2" 0.7759338 "ATP synthase subunit beta"  
"OP8\_E21\_00301" 26283 "s63E6H2" 0 "ATP synthase subunit beta"  
"OP8\_E21\_00302" 26284 "s59E13H2" 0.0335798 "ATP synthase gamma chain"  
"OP8\_E21\_00302" 26284 "s59E25H2" 0 "ATP synthase gamma chain"  
"OP8\_E21\_00302" 26284 "s59E5H2" 0.6838305 "ATP synthase gamma chain"  
"OP8\_E21\_00302" 26284 "s63E6H2" 0 "ATP synthase gamma chain"  
"OP8\_E21\_00303" 26285 "s59E13H2" 0.06441966 "ATP synthase subunit alpha"  
"OP8\_E21\_00303" 26285 "s59E25H2" 0 "ATP synthase subunit alpha"  
"OP8\_E21\_00303" 26285 "s59E5H2" 0.604876 "ATP synthase subunit alpha"  
"OP8\_E21\_00303" 26285 "s63E6H2" 0 "ATP synthase subunit alpha"  
"OP8\_E21\_00304" 26286 "s59E13H2" 0 "Alkaline phosphatase synthesis sensor protein PhoR"  
"OP8\_E21\_00304" 26286 "s59E25H2" 0 "Alkaline phosphatase synthesis sensor protein PhoR"  
"OP8\_E21\_00304" 26286 "s59E5H2" 0.1437332 "Alkaline phosphatase synthesis sensor protein PhoR"  
"OP8\_E21\_00304" 26286 "s63E6H2" 0 "Alkaline phosphatase synthesis sensor protein PhoR"  
"OP8\_E21\_00305" 26287 "s59E13H2" 0 "hypothetical protein"  
"OP8\_E21\_00305" 26287 "s59E25H2" 0 "hypothetical protein"  
"OP8\_E21\_00305" 26287 "s59E5H2" 0.1040319 "hypothetical protein"  
"OP8\_E21\_00305" 26287 "s63E6H2" 0 "hypothetical protein"  
"OP8\_E21\_00306" 26288 "s59E13H2" 0 "Chemoreceptor glutamine deamidase CheD"  
"OP8\_E21\_00306" 26288 "s59E25H2" 0 "Chemoreceptor glutamine deamidase CheD"  
"OP8\_E21\_00306" 26288 "s59E5H2" 0.09450173 "Chemoreceptor glutamine deamidase CheD"  
"OP8\_E21\_00306" 26288 "s63E6H2" 0 "Chemoreceptor glutamine deamidase CheD"  
"OP8\_E21\_00307" 26289 "s59E13H2" 0 "CheY-P phosphatase CheC"  
"OP8\_E21\_00307" 26289 "s59E25H2" 0 "CheY-P phosphatase CheC"  
"OP8\_E21\_00307" 26289 "s59E5H2" 0.1525135 "CheY-P phosphatase CheC"  
"OP8\_E21\_00307" 26289 "s63E6H2" 0 "CheY-P phosphatase CheC"  
"OP8\_E21\_00308" 26290 "s59E13H2" 0.003342617 "Chemotaxis protein CheA"  
"OP8\_E21\_00308" 26290 "s59E25H2" 0 "Chemotaxis protein CheA"  
"OP8\_E21\_00308" 26290 "s59E5H2" 0.02883359 "Chemotaxis protein CheA"  
"OP8\_E21\_00308" 26290 "s63E6H2" 0 "Chemotaxis protein CheA"

"OP8\_E21\_00309" 26291 "s59E13H2" 0.004001005 "Transposase IS116/IS110/IS902 family protein"  
"OP8\_E21\_00309" 26291 "s59E25H2" 0 "Transposase IS116/IS110/IS902 family protein"  
"OP8\_E21\_00309" 26291 "s59E5H2" 4.524317 "Transposase IS116/IS110/IS902 family protein"  
"OP8\_E21\_00309" 26291 "s63E6H2" 0 "Transposase IS116/IS110/IS902 family protein"  
"OP8\_E21\_00311" 26293 "s59E13H2" 0 "Flagellin N-methylase"  
"OP8\_E21\_00311" 26293 "s59E25H2" 0 "Flagellin N-methylase"  
"OP8\_E21\_00311" 26293 "s59E5H2" 1.213029 "Flagellin N-methylase"  
"OP8\_E21\_00311" 26293 "s63E6H2" 0 "Flagellin N-methylase"  
"OP8\_E21\_00312" 26294 "s59E13H2" 0 "hypothetical protein"  
"OP8\_E21\_00312" 26294 "s59E25H2" 0 "hypothetical protein"  
"OP8\_E21\_00312" 26294 "s59E5H2" 0.5983557 "hypothetical protein"  
"OP8\_E21\_00312" 26294 "s63E6H2" 0 "hypothetical protein"  
"OP8\_E21\_00314" 26296 "s59E13H2" 0.008796779 "FtsH protease regulator HflK"  
"OP8\_E21\_00314" 26296 "s59E25H2" 0 "FtsH protease regulator HflK"  
"OP8\_E21\_00314" 26296 "s59E5H2" 0.6108463 "FtsH protease regulator HflK"  
"OP8\_E21\_00314" 26296 "s63E6H2" 0 "FtsH protease regulator HflK"  
"OP8\_E21\_00315" 26297 "s59E13H2" 0.01299133 "Sporulation-specific N-acetylmuramoyl-L-alanine amidase"  
"OP8\_E21\_00315" 26297 "s59E25H2" 0 "Sporulation-specific N-acetylmuramoyl-L-alanine amidase"  
"OP8\_E21\_00315" 26297 "s59E5H2" 0.6903496 "Sporulation-specific N-acetylmuramoyl-L-alanine amidase"  
"OP8\_E21\_00315" 26297 "s63E6H2" 0 "Sporulation-specific N-acetylmuramoyl-L-alanine amidase"  
"OP8\_E21\_00316" 26298 "s59E13H2" 0.01794516 "Apolipoprotein N-acyltransferase"  
"OP8\_E21\_00316" 26298 "s59E25H2" 0 "Apolipoprotein N-acyltransferase"  
"OP8\_E21\_00316" 26298 "s59E5H2" 0.4282313 "Apolipoprotein N-acyltransferase"  
"OP8\_E21\_00316" 26298 "s63E6H2" 0 "Apolipoprotein N-acyltransferase"  
"OP8\_E21\_00317" 26299 "s59E13H2" 0.171743 "Peptide chain release factor 2"  
"OP8\_E21\_00317" 26299 "s59E25H2" 0 "Peptide chain release factor 2"  
"OP8\_E21\_00317" 26299 "s59E5H2" 0.5337555 "Peptide chain release factor 2"  
"OP8\_E21\_00317" 26299 "s63E6H2" 0 "Peptide chain release factor 2"  
"OP8\_E21\_00318" 26300 "s59E13H2" 0.6484581 "Nucleoside triphosphate pyrophosphohydrolase"  
"OP8\_E21\_00318" 26300 "s59E25H2" 0 "Nucleoside triphosphate pyrophosphohydrolase"  
"OP8\_E21\_00318" 26300 "s59E5H2" 0.4000745 "Nucleoside triphosphate pyrophosphohydrolase"  
"OP8\_E21\_00318" 26300 "s63E6H2" 0 "Nucleoside triphosphate pyrophosphohydrolase"  
"OP8\_E21\_00319" 26301 "s59E13H2" 0.4203993 "Riboflavin biosynthesis protein RibF"  
"OP8\_E21\_00319" 26301 "s59E25H2" 0 "Riboflavin biosynthesis protein RibF"  
"OP8\_E21\_00319" 26301 "s59E5H2" 0.3578161 "Riboflavin biosynthesis protein RibF"  
"OP8\_E21\_00319" 26301 "s63E6H2" 0 "Riboflavin biosynthesis protein RibF"  
"OP8\_E21\_00320" 26302 "s59E13H2" 0.8417144 "Bifunctional protein PyrR"  
"OP8\_E21\_00320" 26302 "s59E25H2" 0 "Bifunctional protein PyrR"  
"OP8\_E21\_00320" 26302 "s59E5H2" 0.6048291 "Bifunctional protein PyrR"  
"OP8\_E21\_00320" 26302 "s63E6H2" 0 "Bifunctional protein PyrR"  
"OP8\_E21\_00321" 26303 "s59E13H2" 0.842523 "Aspartate carbamoyltransferase"  
"OP8\_E21\_00321" 26303 "s59E25H2" 0 "Aspartate carbamoyltransferase"  
"OP8\_E21\_00321" 26303 "s59E5H2" 0.5941885 "Aspartate carbamoyltransferase"  
"OP8\_E21\_00321" 26303 "s63E6H2" 0 "Aspartate carbamoyltransferase"  
"OP8\_E21\_00322" 26304 "s59E13H2" 0.9546578 "Dihydroorotase"  
"OP8\_E21\_00322" 26304 "s59E25H2" 0 "Dihydroorotase"  
"OP8\_E21\_00322" 26304 "s59E5H2" 0.6164391 "Dihydroorotase"

"OP8\_E21\_00322" 26304 "s63E6H2" 0 "Dihydroorotase"  
"OP8\_E21\_00323" 26305 "s59E13H2" 0.7913888 "Ribonuclease 3"  
"OP8\_E21\_00323" 26305 "s59E25H2" 0 "Ribonuclease 3"  
"OP8\_E21\_00323" 26305 "s59E5H2" 0.5906923 "Ribonuclease 3"  
"OP8\_E21\_00323" 26305 "s63E6H2" 0 "Ribonuclease 3"  
"OP8\_E21\_00324" 26306 "s59E13H2" 0.7472235 "hypothetical protein"  
"OP8\_E21\_00324" 26306 "s59E25H2" 0 "hypothetical protein"  
"OP8\_E21\_00324" 26306 "s59E5H2" 0.6810841 "hypothetical protein"  
"OP8\_E21\_00324" 26306 "s63E6H2" 0 "hypothetical protein"  
"OP8\_E21\_00325" 26307 "s59E13H2" 0.9740835 "hypothetical protein"  
"OP8\_E21\_00325" 26307 "s59E25H2" 0 "hypothetical protein"  
"OP8\_E21\_00325" 26307 "s59E5H2" 0.8725815 "hypothetical protein"  
"OP8\_E21\_00325" 26307 "s63E6H2" 0 "hypothetical protein"  
"OP8\_E21\_00326" 26308 "s59E13H2" 0.9586065 "Al-2 transport protein TqsA"  
"OP8\_E21\_00326" 26308 "s59E25H2" 0 "Al-2 transport protein TqsA"  
"OP8\_E21\_00326" 26308 "s59E5H2" 0.7161856 "Al-2 transport protein TqsA"  
"OP8\_E21\_00326" 26308 "s63E6H2" 0 "Al-2 transport protein TqsA"  
"OP8\_E21\_00327" 26309 "s59E13H2" 1.378299 "Response regulator PleD"  
"OP8\_E21\_00327" 26309 "s59E25H2" 0 "Response regulator PleD"  
"OP8\_E21\_00327" 26309 "s59E5H2" 1.523412 "Response regulator PleD"  
"OP8\_E21\_00327" 26309 "s63E6H2" 0 "Response regulator PleD"  
"OP8\_E21\_00328" 26310 "s59E13H2" 1.325729 "Hpt domain protein"  
"OP8\_E21\_00328" 26310 "s59E25H2" 0 "Hpt domain protein"  
"OP8\_E21\_00328" 26310 "s59E5H2" 1.794267 "Hpt domain protein"  
"OP8\_E21\_00328" 26310 "s63E6H2" 0.00234306 "Hpt domain protein"  
"OP8\_E21\_00329" 26311 "s59E13H2" 1.071381 "hypothetical protein"  
"OP8\_E21\_00329" 26311 "s59E25H2" 0 "hypothetical protein"  
"OP8\_E21\_00329" 26311 "s59E5H2" 1.667601 "hypothetical protein"  
"OP8\_E21\_00329" 26311 "s63E6H2" 0 "hypothetical protein"  
"OP8\_E21\_00330" 26312 "s59E13H2" 1.17375 "hypothetical protein"  
"OP8\_E21\_00330" 26312 "s59E25H2" 0 "hypothetical protein"  
"OP8\_E21\_00330" 26312 "s59E5H2" 2.002429 "hypothetical protein"  
"OP8\_E21\_00330" 26312 "s63E6H2" 0 "hypothetical protein"  
"OP8\_E21\_00331" 26313 "s59E13H2" 1.035595 "Pyruvate formate-lyase 1-activating enzyme"  
"OP8\_E21\_00331" 26313 "s59E25H2" 0 "Pyruvate formate-lyase 1-activating enzyme"  
"OP8\_E21\_00331" 26313 "s59E5H2" 2.270395 "Pyruvate formate-lyase 1-activating enzyme"  
"OP8\_E21\_00331" 26313 "s63E6H2" 0 "Pyruvate formate-lyase 1-activating enzyme"  
"OP8\_E21\_00332" 26314 "s59E13H2" 0.7956963 "Spermidine synthase"  
"OP8\_E21\_00332" 26314 "s59E25H2" 0 "Spermidine synthase"  
"OP8\_E21\_00332" 26314 "s59E5H2" 0.9697474 "Spermidine synthase"  
"OP8\_E21\_00332" 26314 "s63E6H2" 0 "Spermidine synthase"  
"OP8\_E21\_00333" 26315 "s59E13H2" 0.01535243 "PilZ domain protein"  
"OP8\_E21\_00333" 26315 "s59E25H2" 0 "PilZ domain protein"  
"OP8\_E21\_00333" 26315 "s59E5H2" 0.5519292 "PilZ domain protein"  
"OP8\_E21\_00333" 26315 "s63E6H2" 0 "PilZ domain protein"  
"OP8\_E21\_00334" 26316 "s59E13H2" 0.01571748 "Glycine--tRNA ligase beta subunit"  
"OP8\_E21\_00334" 26316 "s59E25H2" 0 "Glycine--tRNA ligase beta subunit"

"OP8\_E21\_00334" 26316 "s59E5H2" 0.77067 "Glycine--tRNA ligase beta subunit"  
"OP8\_E21\_00334" 26316 "s63E6H2" 0 "Glycine--tRNA ligase beta subunit"  
"OP8\_E21\_00335" 26317 "s59E13H2" 0.005841387 "Glycine--tRNA ligase alpha subunit"  
"OP8\_E21\_00335" 26317 "s59E25H2" 0 "Glycine--tRNA ligase alpha subunit"  
"OP8\_E21\_00335" 26317 "s59E5H2" 0.4698729 "Glycine--tRNA ligase alpha subunit"  
"OP8\_E21\_00335" 26317 "s63E6H2" 0 "Glycine--tRNA ligase alpha subunit"  
"OP8\_E21\_00336" 26318 "s59E13H2" 0.01041908 "putative glycine dehydrogenase (decarboxylating) subunit 2"  
"OP8\_E21\_00336" 26318 "s59E25H2" 0 "putative glycine dehydrogenase (decarboxylating) subunit 2"  
"OP8\_E21\_00336" 26318 "s59E5H2" 0.5304283 "putative glycine dehydrogenase (decarboxylating) subunit 2"  
"OP8\_E21\_00336" 26318 "s63E6H2" 0 "putative glycine dehydrogenase (decarboxylating) subunit 2"  
"OP8\_E21\_00337" 26319 "s59E13H2" 0.02765713 "putative glycine dehydrogenase (decarboxylating) subunit 1"  
"OP8\_E21\_00337" 26319 "s59E25H2" 0 "putative glycine dehydrogenase (decarboxylating) subunit 1"  
"OP8\_E21\_00337" 26319 "s59E5H2" 1.645148 "putative glycine dehydrogenase (decarboxylating) subunit 1"  
"OP8\_E21\_00337" 26319 "s63E6H2" 0 "putative glycine dehydrogenase (decarboxylating) subunit 1"  
"OP8\_E21\_00338" 26320 "s59E13H2" 0.0384984 "Glycine cleavage system H protein"  
"OP8\_E21\_00338" 26320 "s59E25H2" 0 "Glycine cleavage system H protein"  
"OP8\_E21\_00338" 26320 "s59E5H2" 2.395441 "Glycine cleavage system H protein"  
"OP8\_E21\_00338" 26320 "s63E6H2" 0 "Glycine cleavage system H protein"  
"OP8\_E21\_00339" 26321 "s59E13H2" 0.05424209 "Aminomethyltransferase"  
"OP8\_E21\_00339" 26321 "s59E25H2" 0 "Aminomethyltransferase"  
"OP8\_E21\_00339" 26321 "s59E5H2" 2.125155 "Aminomethyltransferase"  
"OP8\_E21\_00339" 26321 "s63E6H2" 0 "Aminomethyltransferase"  
"OP8\_E21\_00340" 26322 "s59E13H2" 0.04859942 "Arginine--tRNA ligase"  
"OP8\_E21\_00340" 26322 "s59E25H2" 0 "Arginine--tRNA ligase"  
"OP8\_E21\_00340" 26322 "s59E5H2" 1.994286 "Arginine--tRNA ligase"  
"OP8\_E21\_00340" 26322 "s63E6H2" 0 "Arginine--tRNA ligase"  
"OP8\_E21\_00341" 26323 "s59E13H2" 0.0837497 "Response regulator PleD"  
"OP8\_E21\_00341" 26323 "s59E25H2" 0 "Response regulator PleD"  
"OP8\_E21\_00341" 26323 "s59E5H2" 2.871827 "Response regulator PleD"  
"OP8\_E21\_00341" 26323 "s63E6H2" 0 "Response regulator PleD"  
"OP8\_E21\_00342" 26324 "s59E13H2" 0.1027252 "hypothetical protein"  
"OP8\_E21\_00342" 26324 "s59E25H2" 0 "hypothetical protein"  
"OP8\_E21\_00342" 26324 "s59E5H2" 3.546753 "hypothetical protein"  
"OP8\_E21\_00342" 26324 "s63E6H2" 0 "hypothetical protein"  
"OP8\_E21\_00343" 26325 "s59E13H2" 0.006731023 "hypothetical protein"  
"OP8\_E21\_00343" 26325 "s59E25H2" 0 "hypothetical protein"  
"OP8\_E21\_00343" 26325 "s59E5H2" 3.573994 "hypothetical protein"  
"OP8\_E21\_00343" 26325 "s63E6H2" 0 "hypothetical protein"  
"OP8\_E21\_00344" 26326 "s59E13H2" 0 "hypothetical protein"  
"OP8\_E21\_00344" 26326 "s59E25H2" 0 "hypothetical protein"  
"OP8\_E21\_00344" 26326 "s59E5H2" 3.299388 "hypothetical protein"  
"OP8\_E21\_00344" 26326 "s63E6H2" 0 "hypothetical protein"  
"OP8\_E21\_00345" 26327 "s59E13H2" 0.003006845 "hypothetical protein"  
"OP8\_E21\_00345" 26327 "s59E25H2" 0 "hypothetical protein"  
"OP8\_E21\_00345" 26327 "s59E5H2" 3.187358 "hypothetical protein"  
"OP8\_E21\_00345" 26327 "s63E6H2" 0 "hypothetical protein"  
"OP8\_E21\_00346" 26328 "s59E13H2" 0.01243576 "Modification methylase Mjal"

"OP8\_E21\_00346" 26328 "s59E25H2" 0 "Modification methylase Mjal"  
"OP8\_E21\_00346" 26328 "s59E5H2" 5.019514 "Modification methylase Mjal"  
"OP8\_E21\_00346" 26328 "s63E6H2" 0 "Modification methylase Mjal"  
"OP8\_E21\_00349" 26331 "s59E13H2" 0.07765805 "Serine--tRNA ligase"  
"OP8\_E21\_00349" 26331 "s59E25H2" 0 "Serine--tRNA ligase"  
"OP8\_E21\_00349" 26331 "s59E5H2" 5.864802 "Serine--tRNA ligase"  
"OP8\_E21\_00349" 26331 "s63E6H2" 0 "Serine--tRNA ligase"  
"OP8\_E21\_00350" 26332 "s59E13H2" 0.004489853 "hypothetical protein"  
"OP8\_E21\_00350" 26332 "s59E25H2" 0 "hypothetical protein"  
"OP8\_E21\_00350" 26332 "s59E5H2" 0.8731605 "hypothetical protein"  
"OP8\_E21\_00350" 26332 "s63E6H2" 0 "hypothetical protein"  
"OP8\_E21\_00351" 26333 "s59E13H2" 0.01391119 "hypothetical protein"  
"OP8\_E21\_00351" 26333 "s59E25H2" 0 "hypothetical protein"  
"OP8\_E21\_00351" 26333 "s59E5H2" 0.7432834 "hypothetical protein"  
"OP8\_E21\_00351" 26333 "s63E6H2" 0 "hypothetical protein"  
"OP8\_E21\_00352" 26334 "s59E13H2" 0.007838842 "hypothetical protein"  
"OP8\_E21\_00352" 26334 "s59E25H2" 0 "hypothetical protein"  
"OP8\_E21\_00352" 26334 "s59E5H2" 0.7155035 "hypothetical protein"  
"OP8\_E21\_00352" 26334 "s63E6H2" 0 "hypothetical protein"  
"OP8\_E21\_00353" 26335 "s59E13H2" 0.005379422 "Adenylosuccinate lyase"  
"OP8\_E21\_00353" 26335 "s59E25H2" 0 "Adenylosuccinate lyase"  
"OP8\_E21\_00353" 26335 "s59E5H2" 2.434919 "Adenylosuccinate lyase"  
"OP8\_E21\_00353" 26335 "s63E6H2" 0 "Adenylosuccinate lyase"  
"OP8\_E21\_00354" 26336 "s59E13H2" 0 "Phosphoribosylglycinamide formyltransferase"  
"OP8\_E21\_00354" 26336 "s59E25H2" 0 "Phosphoribosylglycinamide formyltransferase"  
"OP8\_E21\_00354" 26336 "s59E5H2" 3.899264 "Phosphoribosylglycinamide formyltransferase"  
"OP8\_E21\_00354" 26336 "s63E6H2" 0.001750531 "Phosphoribosylglycinamide formyltransferase"  
"OP8\_E21\_00355" 26337 "s59E13H2" 0.3721758 "Thymidylate synthase ThyX"  
"OP8\_E21\_00355" 26337 "s59E25H2" 0.1592443 "Thymidylate synthase ThyX"  
"OP8\_E21\_00355" 26337 "s59E5H2" 3.526194 "Thymidylate synthase ThyX"  
"OP8\_E21\_00355" 26337 "s63E6H2" 0 "Thymidylate synthase ThyX"  
"OP8\_E21\_00356" 26338 "s59E13H2" 1.42514 "tRNA-splicing ligase RtcB"  
"OP8\_E21\_00356" 26338 "s59E25H2" 0 "tRNA-splicing ligase RtcB"  
"OP8\_E21\_00356" 26338 "s59E5H2" 1.878308 "tRNA-splicing ligase RtcB"  
"OP8\_E21\_00356" 26338 "s63E6H2" 0 "tRNA-splicing ligase RtcB"  
"OP8\_E21\_00357" 26339 "s59E13H2" 22.79568 "hypothetical protein"  
"OP8\_E21\_00357" 26339 "s59E25H2" 0.5678161 "hypothetical protein"  
"OP8\_E21\_00357" 26339 "s59E5H2" 2.035635 "hypothetical protein"  
"OP8\_E21\_00357" 26339 "s63E6H2" 0 "hypothetical protein"  
"OP8\_E21\_00358" 26340 "s59E13H2" 23.86548 "molybdenum cofactor biosynthesis protein A"  
"OP8\_E21\_00358" 26340 "s59E25H2" 0.2472799 "molybdenum cofactor biosynthesis protein A"  
"OP8\_E21\_00358" 26340 "s59E5H2" 2.947104 "molybdenum cofactor biosynthesis protein A"  
"OP8\_E21\_00358" 26340 "s63E6H2" 0.001112432 "molybdenum cofactor biosynthesis protein A"  
"OP8\_E21\_00359" 26341 "s59E13H2" 22.62861 "Ultraviolet N-glycosylase/AP lyase"  
"OP8\_E21\_00359" 26341 "s59E25H2" 0 "Ultraviolet N-glycosylase/AP lyase"  
"OP8\_E21\_00359" 26341 "s59E5H2" 3.127096 "Ultraviolet N-glycosylase/AP lyase"  
"OP8\_E21\_00359" 26341 "s63E6H2" 0 "Ultraviolet N-glycosylase/AP lyase"

"OP8\_E21\_00360" 26342 "s59E13H2" 21.22675 "Quinolinate synthase A"  
"OP8\_E21\_00360" 26342 "s59E25H2" 0 "Quinolinate synthase A"  
"OP8\_E21\_00360" 26342 "s59E5H2" 2.927151 "Quinolinate synthase A"  
"OP8\_E21\_00360" 26342 "s63E6H2" 0 "Quinolinate synthase A"  
"OP8\_E21\_00361" 26343 "s59E13H2" 0.002783414 "hypothetical protein"  
"OP8\_E21\_00361" 26343 "s59E25H2" 0 "hypothetical protein"  
"OP8\_E21\_00361" 26343 "s59E5H2" 0.6042094 "hypothetical protein"  
"OP8\_E21\_00361" 26343 "s63E6H2" 0 "hypothetical protein"  
"OP8\_E21\_00362" 26344 "s59E13H2" 0.007873174 "DNA ligase"  
"OP8\_E21\_00362" 26344 "s59E25H2" 0 "DNA ligase"  
"OP8\_E21\_00362" 26344 "s59E5H2" 0.6272356 "DNA ligase"  
"OP8\_E21\_00362" 26344 "s63E6H2" 0 "DNA ligase"  
"OP8\_E21\_00363" 26345 "s59E13H2" 0 "UDP-N-acetylenolpyruvoylglucosamine reductase"  
"OP8\_E21\_00363" 26345 "s59E25H2" 0 "UDP-N-acetylenolpyruvoylglucosamine reductase"  
"OP8\_E21\_00363" 26345 "s59E5H2" 2.338343 "UDP-N-acetylenolpyruvoylglucosamine reductase"  
"OP8\_E21\_00363" 26345 "s63E6H2" 0.0163214 "UDP-N-acetylenolpyruvoylglucosamine reductase"  
"OP8\_E21\_00364" 26346 "s59E13H2" 0 "prephenate dehydrogenase"  
"OP8\_E21\_00364" 26346 "s59E25H2" 0 "prephenate dehydrogenase"  
"OP8\_E21\_00364" 26346 "s59E5H2" 3.198711 "prephenate dehydrogenase"  
"OP8\_E21\_00364" 26346 "s63E6H2" 0.0126962 "prephenate dehydrogenase"  
"OP8\_E21\_00365" 26347 "s59E13H2" 0.007230918 "YacP-like NYN domain protein"  
"OP8\_E21\_00365" 26347 "s59E25H2" 0 "YacP-like NYN domain protein"  
"OP8\_E21\_00365" 26347 "s59E5H2" 3.372513 "YacP-like NYN domain protein"  
"OP8\_E21\_00365" 26347 "s63E6H2" 0 "YacP-like NYN domain protein"  
"OP8\_E21\_00366" 26348 "s59E13H2" 0.007318493 "HIT-like protein"  
"OP8\_E21\_00366" 26348 "s59E25H2" 1.069565 "HIT-like protein"  
"OP8\_E21\_00366" 26348 "s59E5H2" 1.861906 "HIT-like protein"  
"OP8\_E21\_00366" 26348 "s63E6H2" 0 "HIT-like protein"  
"OP8\_E21\_00367" 26349 "s59E13H2" 0.0458199 "UDP-N-acetylglucosamine 1-carboxyvinyltransferase 1"  
"OP8\_E21\_00367" 26349 "s59E25H2" 0 "UDP-N-acetylglucosamine 1-carboxyvinyltransferase 1"  
"OP8\_E21\_00367" 26349 "s59E5H2" 2.005891 "UDP-N-acetylglucosamine 1-carboxyvinyltransferase 1"  
"OP8\_E21\_00367" 26349 "s63E6H2" 0.0009771146 "UDP-N-acetylglucosamine 1-carboxyvinyltransferase 1"  
"OP8\_E21\_00368" 26350 "s59E13H2" 0.004229109 "Homoserine dehydrogenase"  
"OP8\_E21\_00368" 26350 "s59E25H2" 0 "Homoserine dehydrogenase"  
"OP8\_E21\_00368" 26350 "s59E5H2" 5.328716 "Homoserine dehydrogenase"  
"OP8\_E21\_00368" 26350 "s63E6H2" 0 "Homoserine dehydrogenase"  
"OP8\_E21\_00369" 26351 "s59E13H2" 0.02015834 "Citrate synthase"  
"OP8\_E21\_00369" 26351 "s59E25H2" 0 "Citrate synthase"  
"OP8\_E21\_00369" 26351 "s59E5H2" 4.254241 "Citrate synthase"  
"OP8\_E21\_00369" 26351 "s63E6H2" 0 "Citrate synthase"  
"OP8\_E21\_00370" 26352 "s59E13H2" 0.008797885 "LemA family protein"  
"OP8\_E21\_00370" 26352 "s59E25H2" 0 "LemA family protein"  
"OP8\_E21\_00370" 26352 "s59E5H2" 3.392108 "LemA family protein"  
"OP8\_E21\_00370" 26352 "s63E6H2" 0 "LemA family protein"  
"OP8\_E21\_00371" 26353 "s59E13H2" 0.01181678 "hypothetical protein"  
"OP8\_E21\_00371" 26353 "s59E25H2" 0 "hypothetical protein"  
"OP8\_E21\_00371" 26353 "s59E5H2" 2.911789 "hypothetical protein"



"OP8\_E21\_00371" 26353 "s63E6H2" 0 "hypothetical protein"  
"OP8\_E21\_00374" 26356 "s59E13H2" 0.03341613 "Putative membrane protein YdgH"  
"OP8\_E21\_00374" 26356 "s59E25H2" 0 "Putative membrane protein YdgH"  
"OP8\_E21\_00374" 26356 "s59E5H2" 2.163879 "Putative membrane protein YdgH"  
"OP8\_E21\_00374" 26356 "s63E6H2" 0 "Putative membrane protein YdgH"  
"OP8\_E21\_00376" 26358 "s59E13H2" 3.484342 "N-acetylmuramoyl-L-alanine amidase AmiA precursor"  
"OP8\_E21\_00376" 26358 "s59E25H2" 0 "N-acetylmuramoyl-L-alanine amidase AmiA precursor"  
"OP8\_E21\_00376" 26358 "s59E5H2" 3.52335 "N-acetylmuramoyl-L-alanine amidase AmiA precursor"  
"OP8\_E21\_00376" 26358 "s63E6H2" 0 "N-acetylmuramoyl-L-alanine amidase AmiA precursor"  
"OP8\_E21\_00377" 26359 "s59E13H2" 3.720033 "N-acetylmuramoyl-L-alanine amidase AmiA precursor"  
"OP8\_E21\_00377" 26359 "s59E25H2" 0 "N-acetylmuramoyl-L-alanine amidase AmiA precursor"  
"OP8\_E21\_00377" 26359 "s59E5H2" 5.043835 "N-acetylmuramoyl-L-alanine amidase AmiA precursor"  
"OP8\_E21\_00377" 26359 "s63E6H2" 0 "N-acetylmuramoyl-L-alanine amidase AmiA precursor"  
"OP8\_E21\_00378" 26360 "s59E13H2" 3.617545 "Sporulation and spore germination"  
"OP8\_E21\_00378" 26360 "s59E25H2" 0 "Sporulation and spore germination"  
"OP8\_E21\_00378" 26360 "s59E5H2" 5.292109 "Sporulation and spore germination"  
"OP8\_E21\_00378" 26360 "s63E6H2" 0 "Sporulation and spore germination"  
"OP8\_E21\_00379" 26361 "s59E13H2" 3.58931 "GTPase Der"  
"OP8\_E21\_00379" 26361 "s59E25H2" 0.1846743 "GTPase Der"  
"OP8\_E21\_00379" 26361 "s59E5H2" 3.798838 "GTPase Der"  
"OP8\_E21\_00379" 26361 "s63E6H2" 0 "GTPase Der"  
"OP8\_E21\_00380" 26362 "s59E13H2" 3.719521 "Tetratricopeptide repeat protein"  
"OP8\_E21\_00380" 26362 "s59E25H2" 0 "Tetratricopeptide repeat protein"  
"OP8\_E21\_00380" 26362 "s59E5H2" 2.835055 "Tetratricopeptide repeat protein"  
"OP8\_E21\_00380" 26362 "s63E6H2" 0 "Tetratricopeptide repeat protein"  
"OP8\_E21\_00381" 26363 "s59E13H2" 4.059472 "50S ribosomal protein L13"  
"OP8\_E21\_00381" 26363 "s59E25H2" 0 "50S ribosomal protein L13"  
"OP8\_E21\_00381" 26363 "s59E5H2" 3.273674 "50S ribosomal protein L13"  
"OP8\_E21\_00381" 26363 "s63E6H2" 0 "50S ribosomal protein L13"  
"OP8\_E21\_00382" 26364 "s59E13H2" 4.232865 "30S ribosomal protein S9"  
"OP8\_E21\_00382" 26364 "s59E25H2" 0.1160494 "30S ribosomal protein S9"  
"OP8\_E21\_00382" 26364 "s59E5H2" 3.729019 "30S ribosomal protein S9"  
"OP8\_E21\_00382" 26364 "s63E6H2" 0 "30S ribosomal protein S9"  
"OP8\_E21\_00383" 26365 "s59E13H2" 5.030187 "30S ribosomal protein S2"  
"OP8\_E21\_00383" 26365 "s59E25H2" 0.2536232 "30S ribosomal protein S2"  
"OP8\_E21\_00383" 26365 "s59E5H2" 4.534273 "30S ribosomal protein S2"  
"OP8\_E21\_00383" 26365 "s63E6H2" 0 "30S ribosomal protein S2"  
"OP8\_E21\_00384" 26366 "s59E13H2" 6.715677 "Elongation factor Ts"  
"OP8\_E21\_00384" 26366 "s59E25H2" 0 "Elongation factor Ts"  
"OP8\_E21\_00384" 26366 "s59E5H2" 6.64643 "Elongation factor Ts"  
"OP8\_E21\_00384" 26366 "s63E6H2" 0 "Elongation factor Ts"  
"OP8\_E21\_00385" 26367 "s59E13H2" 7.291895 "Uridylate kinase"  
"OP8\_E21\_00385" 26367 "s59E25H2" 0 "Uridylate kinase"  
"OP8\_E21\_00385" 26367 "s59E5H2" 7.093616 "Uridylate kinase"  
"OP8\_E21\_00385" 26367 "s63E6H2" 0 "Uridylate kinase"  
"OP8\_E21\_00386" 26368 "s59E13H2" 8.079419 "Ribosome-recycling factor"  
"OP8\_E21\_00386" 26368 "s59E25H2" 0 "Ribosome-recycling factor"

"OP8\_E21\_00386" 26368 "s59E5H2" 7.645401 "Ribosome-recycling factor"  
"OP8\_E21\_00386" 26368 "s63E6H2" 0 "Ribosome-recycling factor"  
"OP8\_E21\_00387" 26369 "s59E13H2" 6.952141 "hypothetical protein"  
"OP8\_E21\_00387" 26369 "s59E25H2" 0.2321619 "hypothetical protein"  
"OP8\_E21\_00387" 26369 "s59E5H2" 6.83757 "hypothetical protein"  
"OP8\_E21\_00387" 26369 "s63E6H2" 0 "hypothetical protein"  
"OP8\_E21\_00388" 26370 "s59E13H2" 5.710602 "hypothetical protein"  
"OP8\_E21\_00388" 26370 "s59E25H2" 0 "hypothetical protein"  
"OP8\_E21\_00388" 26370 "s59E5H2" 5.445266 "hypothetical protein"  
"OP8\_E21\_00388" 26370 "s63E6H2" 0 "hypothetical protein"  
"OP8\_E21\_00389" 26371 "s59E13H2" 0.002199519 "Transposase IS66 family protein"  
"OP8\_E21\_00389" 26371 "s59E25H2" 0 "Transposase IS66 family protein"  
"OP8\_E21\_00389" 26371 "s59E5H2" 17.8631 "Transposase IS66 family protein"  
"OP8\_E21\_00389" 26371 "s63E6H2" 0 "Transposase IS66 family protein"  
"OP8\_E21\_00390" 26372 "s59E13H2" 0.0005955131 "hypothetical protein"  
"OP8\_E21\_00390" 26372 "s59E25H2" 0 "hypothetical protein"  
"OP8\_E21\_00390" 26372 "s59E5H2" 13.79047 "hypothetical protein"  
"OP8\_E21\_00390" 26372 "s63E6H2" 0 "hypothetical protein"  
"OP8\_E21\_00391" 26373 "s59E13H2" 4.825103 "ECF RNA polymerase sigma-E factor"  
"OP8\_E21\_00391" 26373 "s59E25H2" 0 "ECF RNA polymerase sigma-E factor"  
"OP8\_E21\_00391" 26373 "s59E5H2" 3.741987 "ECF RNA polymerase sigma-E factor"  
"OP8\_E21\_00391" 26373 "s63E6H2" 0 "ECF RNA polymerase sigma-E factor"  
"OP8\_E21\_00392" 26374 "s59E13H2" 4.307226 "Outer-membrane lipoprotein carrier protein precursor"  
"OP8\_E21\_00392" 26374 "s59E25H2" 0 "Outer-membrane lipoprotein carrier protein precursor"  
"OP8\_E21\_00392" 26374 "s59E5H2" 3.677477 "Outer-membrane lipoprotein carrier protein precursor"  
"OP8\_E21\_00392" 26374 "s63E6H2" 0 "Outer-membrane lipoprotein carrier protein precursor"  
"OP8\_E21\_00393" 26375 "s59E13H2" 3.764908 "Sodium/pantothenate symporter"  
"OP8\_E21\_00393" 26375 "s59E25H2" 0 "Sodium/pantothenate symporter"  
"OP8\_E21\_00393" 26375 "s59E5H2" 2.9072 "Sodium/pantothenate symporter"  
"OP8\_E21\_00393" 26375 "s63E6H2" 0 "Sodium/pantothenate symporter"  
"OP8\_E21\_00394" 26376 "s59E13H2" 3.668437 "hypothetical protein"  
"OP8\_E21\_00394" 26376 "s59E25H2" 0 "hypothetical protein"  
"OP8\_E21\_00394" 26376 "s59E5H2" 1.500354 "hypothetical protein"  
"OP8\_E21\_00394" 26376 "s63E6H2" 0 "hypothetical protein"  
"OP8\_E21\_00395" 26377 "s59E13H2" 1.129355 "hypothetical protein"  
"OP8\_E21\_00395" 26377 "s59E25H2" 0.3320053 "hypothetical protein"  
"OP8\_E21\_00395" 26377 "s59E5H2" 2.047932 "hypothetical protein"  
"OP8\_E21\_00395" 26377 "s63E6H2" 0 "hypothetical protein"  
"OP8\_E21\_00396" 26378 "s59E13H2" 0.1888493 "hypothetical protein"  
"OP8\_E21\_00396" 26378 "s59E25H2" 0 "hypothetical protein"  
"OP8\_E21\_00396" 26378 "s59E5H2" 2.490197 "hypothetical protein"  
"OP8\_E21\_00396" 26378 "s63E6H2" 0 "hypothetical protein"  
"OP8\_E21\_00397" 26379 "s59E13H2" 0.1863742 "hypothetical protein"  
"OP8\_E21\_00397" 26379 "s59E25H2" 0 "hypothetical protein"  
"OP8\_E21\_00397" 26379 "s59E5H2" 2.047073 "hypothetical protein"  
"OP8\_E21\_00397" 26379 "s63E6H2" 0 "hypothetical protein"  
"OP8\_E21\_00399" 26381 "s59E13H2" 0.1018323 "Glycine/sarcosine/dimethylglycine N-methyltransferase"

"OP8\_E21\_00399" 26381 "s59E25H2" 0 "Glycine/sarcosine/dimethylglycine N-methyltransferase"  
"OP8\_E21\_00399" 26381 "s59E5H2" 2.101471 "Glycine/sarcosine/dimethylglycine N-methyltransferase"  
"OP8\_E21\_00399" 26381 "s63E6H2" 0 "Glycine/sarcosine/dimethylglycine N-methyltransferase"  
"OP8\_E21\_00400" 26382 "s59E13H2" 0.08110378 "putative metallo-hydrolase"  
"OP8\_E21\_00400" 26382 "s59E25H2" 0.08534622 "putative metallo-hydrolase"  
"OP8\_E21\_00400" 26382 "s59E5H2" 2.596227 "putative metallo-hydrolase"  
"OP8\_E21\_00400" 26382 "s63E6H2" 0 "putative metallo-hydrolase"  
"OP8\_E21\_00401" 26383 "s59E13H2" 0.07222108 "Tyrosine recombinase XerD"  
"OP8\_E21\_00401" 26383 "s59E25H2" 0.2236988 "Tyrosine recombinase XerD"  
"OP8\_E21\_00401" 26383 "s59E5H2" 2.00898 "Tyrosine recombinase XerD"  
"OP8\_E21\_00401" 26383 "s63E6H2" 0 "Tyrosine recombinase XerD"  
"OP8\_E21\_00402" 26384 "s59E13H2" 0 "UDP-glucose 6-dehydrogenase TuaD"  
"OP8\_E21\_00402" 26384 "s59E25H2" 0 "UDP-glucose 6-dehydrogenase TuaD"  
"OP8\_E21\_00402" 26384 "s59E5H2" 2.470805 "UDP-glucose 6-dehydrogenase TuaD"  
"OP8\_E21\_00402" 26384 "s63E6H2" 0 "UDP-glucose 6-dehydrogenase TuaD"  
"OP8\_E21\_00404" 26386 "s59E13H2" 0.01650209 "Elongation factor G"  
"OP8\_E21\_00404" 26386 "s59E25H2" 0 "Elongation factor G"  
"OP8\_E21\_00404" 26386 "s59E5H2" 0.3596001 "Elongation factor G"  
"OP8\_E21\_00404" 26386 "s63E6H2" 0 "Elongation factor G"  
"OP8\_E21\_00405" 26387 "s59E13H2" 0.1028434 "Single-stranded DNA-binding protein"  
"OP8\_E21\_00405" 26387 "s59E25H2" 0 "Single-stranded DNA-binding protein"  
"OP8\_E21\_00405" 26387 "s59E5H2" 1.039235 "Single-stranded DNA-binding protein"  
"OP8\_E21\_00405" 26387 "s63E6H2" 0 "Single-stranded DNA-binding protein"  
"OP8\_E21\_00406" 26388 "s59E13H2" 0.3448135 "tol-pal system protein YbgF"  
"OP8\_E21\_00406" 26388 "s59E25H2" 0 "tol-pal system protein YbgF"  
"OP8\_E21\_00406" 26388 "s59E5H2" 1.388041 "tol-pal system protein YbgF"  
"OP8\_E21\_00406" 26388 "s63E6H2" 0 "tol-pal system protein YbgF"  
"OP8\_E21\_00407" 26389 "s59E13H2" 0.7198975 "Outer membrane lipoprotein Omp16 precursor"  
"OP8\_E21\_00407" 26389 "s59E25H2" 0 "Outer membrane lipoprotein Omp16 precursor"  
"OP8\_E21\_00407" 26389 "s59E5H2" 1.828648 "Outer membrane lipoprotein Omp16 precursor"  
"OP8\_E21\_00407" 26389 "s63E6H2" 0 "Outer membrane lipoprotein Omp16 precursor"  
"OP8\_E21\_00408" 26390 "s59E13H2" 0.8471383 "translocation protein TolB"  
"OP8\_E21\_00408" 26390 "s59E25H2" 0 "translocation protein TolB"  
"OP8\_E21\_00408" 26390 "s59E5H2" 2.715086 "translocation protein TolB"  
"OP8\_E21\_00408" 26390 "s63E6H2" 0 "translocation protein TolB"  
"OP8\_E21\_00409" 26391 "s59E13H2" 0.02891088 "hypothetical protein"  
"OP8\_E21\_00409" 26391 "s59E25H2" 0 "hypothetical protein"  
"OP8\_E21\_00409" 26391 "s59E5H2" 0.4445922 "hypothetical protein"  
"OP8\_E21\_00409" 26391 "s63E6H2" 0 "hypothetical protein"  
"OP8\_E21\_00410" 26392 "s59E13H2" 0.0200632 "ATP-dependent protease subunit ClpQ"  
"OP8\_E21\_00410" 26392 "s59E25H2" 0 "ATP-dependent protease subunit ClpQ"  
"OP8\_E21\_00410" 26392 "s59E5H2" 0.3611716 "ATP-dependent protease subunit ClpQ"  
"OP8\_E21\_00410" 26392 "s63E6H2" 0 "ATP-dependent protease subunit ClpQ"  
"OP8\_E21\_00411" 26393 "s59E13H2" 0.01680478 "hypothetical protein"  
"OP8\_E21\_00411" 26393 "s59E25H2" 0 "hypothetical protein"  
"OP8\_E21\_00411" 26393 "s59E5H2" 1.130566 "hypothetical protein"  
"OP8\_E21\_00411" 26393 "s63E6H2" 0 "hypothetical protein"

"OP8\_E21\_00412" 26394 "s59E13H2" 0.08710551 "hypothetical protein"  
"OP8\_E21\_00412" 26394 "s59E25H2" 0 "hypothetical protein"  
"OP8\_E21\_00412" 26394 "s59E5H2" 1.931007 "hypothetical protein"  
"OP8\_E21\_00412" 26394 "s63E6H2" 0 "hypothetical protein"  
"OP8\_E21\_00414" 26396 "s59E13H2" 0.1206595 "putative deoxyribonuclease YcfH"  
"OP8\_E21\_00414" 26396 "s59E25H2" 0 "putative deoxyribonuclease YcfH"  
"OP8\_E21\_00414" 26396 "s59E5H2" 0.4626845 "putative deoxyribonuclease YcfH"  
"OP8\_E21\_00414" 26396 "s63E6H2" 0 "putative deoxyribonuclease YcfH"  
"OP8\_E21\_00415" 26397 "s59E13H2" 0.1444832 "Octaprenyl-diphosphate synthase"  
"OP8\_E21\_00415" 26397 "s59E25H2" 0 "Octaprenyl-diphosphate synthase"  
"OP8\_E21\_00415" 26397 "s59E5H2" 0.4990932 "Octaprenyl-diphosphate synthase"  
"OP8\_E21\_00415" 26397 "s63E6H2" 0 "Octaprenyl-diphosphate synthase"  
"OP8\_E21\_00418" 26400 "s59E13H2" 0.1760072 "Phosphoenolpyruvate-protein phosphotransferase"  
"OP8\_E21\_00418" 26400 "s59E25H2" 0 "Phosphoenolpyruvate-protein phosphotransferase"  
"OP8\_E21\_00418" 26400 "s59E5H2" 0.4966176 "Phosphoenolpyruvate-protein phosphotransferase"  
"OP8\_E21\_00418" 26400 "s63E6H2" 0 "Phosphoenolpyruvate-protein phosphotransferase"  
"OP8\_E21\_00419" 26401 "s59E13H2" 0.106163 "HPr-like protein Crh"  
"OP8\_E21\_00419" 26401 "s59E25H2" 0 "HPr-like protein Crh"  
"OP8\_E21\_00419" 26401 "s59E5H2" 0.2506214 "HPr-like protein Crh"  
"OP8\_E21\_00419" 26401 "s63E6H2" 0 "HPr-like protein Crh"  
"OP8\_E21\_00420" 26402 "s59E13H2" 0.09399496 "PTS system mannose-specific EIIAB component"  
"OP8\_E21\_00420" 26402 "s59E25H2" 0 "PTS system mannose-specific EIIAB component"  
"OP8\_E21\_00420" 26402 "s59E5H2" 0.2374518 "PTS system mannose-specific EIIAB component"  
"OP8\_E21\_00420" 26402 "s63E6H2" 0 "PTS system mannose-specific EIIAB component"  
"OP8\_E21\_00421" 26403 "s59E13H2" 0.103053 "glmZ(sRNA)-inactivating NTPase"  
"OP8\_E21\_00421" 26403 "s59E25H2" 0 "glmZ(sRNA)-inactivating NTPase"  
"OP8\_E21\_00421" 26403 "s59E5H2" 0.1510072 "glmZ(sRNA)-inactivating NTPase"  
"OP8\_E21\_00421" 26403 "s63E6H2" 0.002607434 "glmZ(sRNA)-inactivating NTPase"  
"OP8\_E21\_00422" 26404 "s59E13H2" 0.06972858 "HPr kinase/phosphorylase"  
"OP8\_E21\_00422" 26404 "s59E25H2" 0 "HPr kinase/phosphorylase"  
"OP8\_E21\_00422" 26404 "s59E5H2" 0.1655091 "HPr kinase/phosphorylase"  
"OP8\_E21\_00422" 26404 "s63E6H2" 0 "HPr kinase/phosphorylase"  
"OP8\_E21\_00423" 26405 "s59E13H2" 0.07451758 "PTS system fructose-specific EIIABC component"  
"OP8\_E21\_00423" 26405 "s59E25H2" 0 "PTS system fructose-specific EIIABC component"  
"OP8\_E21\_00423" 26405 "s59E5H2" 0.4039243 "PTS system fructose-specific EIIABC component"  
"OP8\_E21\_00423" 26405 "s63E6H2" 0.002431716 "PTS system fructose-specific EIIABC component"  
"OP8\_E21\_00424" 26406 "s59E13H2" 0.09252926 "Ribosome-associated factor Y"  
"OP8\_E21\_00424" 26406 "s59E25H2" 0 "Ribosome-associated factor Y"  
"OP8\_E21\_00424" 26406 "s59E5H2" 0.3427315 "Ribosome-associated factor Y"  
"OP8\_E21\_00424" 26406 "s63E6H2" 0.00492133 "Ribosome-associated factor Y"  
"OP8\_E21\_00425" 26407 "s59E13H2" 0.09555357 "RNA polymerase sigma-54 factor"  
"OP8\_E21\_00425" 26407 "s59E25H2" 0 "RNA polymerase sigma-54 factor"  
"OP8\_E21\_00425" 26407 "s59E5H2" 0.334045 "RNA polymerase sigma-54 factor"  
"OP8\_E21\_00425" 26407 "s63E6H2" 0.005195552 "RNA polymerase sigma-54 factor"  
"OP8\_E21\_00426" 26408 "s59E13H2" 0.3125246 "Lipopolysaccharide export system ATP-binding protein LptB"  
"OP8\_E21\_00426" 26408 "s59E25H2" 0 "Lipopolysaccharide export system ATP-binding protein LptB"  
"OP8\_E21\_00426" 26408 "s59E5H2" 0.3210546 "Lipopolysaccharide export system ATP-binding protein LptB"

"OP8\_E21\_00426" 26408 "s63E6H2" 0 "Lipopolysaccharide export system ATP-binding protein LptB"  
"OP8\_E21\_00427" 26409 "s59E13H2" 0.05949077 "LPS-assembly protein LptD"  
"OP8\_E21\_00427" 26409 "s59E25H2" 0 "LPS-assembly protein LptD"  
"OP8\_E21\_00427" 26409 "s59E5H2" 0.2122889 "LPS-assembly protein LptD"  
"OP8\_E21\_00427" 26409 "s63E6H2" 0 "LPS-assembly protein LptD"  
"OP8\_E21\_00428" 26410 "s59E13H2" 0.04957742 "hypothetical protein"  
"OP8\_E21\_00428" 26410 "s59E25H2" 0 "hypothetical protein"  
"OP8\_E21\_00428" 26410 "s59E5H2" 0.1774167 "hypothetical protein"  
"OP8\_E21\_00428" 26410 "s63E6H2" 0 "hypothetical protein"  
"OP8\_E21\_00430" 26412 "s59E13H2" 0 "hypothetical protein"  
"OP8\_E21\_00430" 26412 "s59E25H2" 0 "hypothetical protein"  
"OP8\_E21\_00430" 26412 "s59E5H2" 3.429488 "hypothetical protein"  
"OP8\_E21\_00430" 26412 "s63E6H2" 0 "hypothetical protein"  
"OP8\_E21\_00431" 26413 "s59E13H2" 0 "Tungsten-containing aldehyde ferredoxin oxidoreductase"  
"OP8\_E21\_00431" 26413 "s59E25H2" 0 "Tungsten-containing aldehyde ferredoxin oxidoreductase"  
"OP8\_E21\_00431" 26413 "s59E5H2" 1.580702 "Tungsten-containing aldehyde ferredoxin oxidoreductase"  
"OP8\_E21\_00431" 26413 "s63E6H2" 0 "Tungsten-containing aldehyde ferredoxin oxidoreductase"  
"OP8\_E21\_00432" 26414 "s59E13H2" 0.002635804 "N-substituted formamide deformylase precursor"  
"OP8\_E21\_00432" 26414 "s59E25H2" 0 "N-substituted formamide deformylase precursor"  
"OP8\_E21\_00432" 26414 "s59E5H2" 0.9520932 "N-substituted formamide deformylase precursor"  
"OP8\_E21\_00432" 26414 "s63E6H2" 0 "N-substituted formamide deformylase precursor"  
"OP8\_E21\_00433" 26415 "s59E13H2" 0.006461858 "Macrolide export ATP-binding/permease protein MacB"  
"OP8\_E21\_00433" 26415 "s59E25H2" 0 "Macrolide export ATP-binding/permease protein MacB"  
"OP8\_E21\_00433" 26415 "s59E5H2" 1.633314 "Macrolide export ATP-binding/permease protein MacB"  
"OP8\_E21\_00433" 26415 "s63E6H2" 0 "Macrolide export ATP-binding/permease protein MacB"  
"OP8\_E21\_00434" 26416 "s59E13H2" 0.01736722 "Macrolide export ATP-binding/permease protein MacB"  
"OP8\_E21\_00434" 26416 "s59E25H2" 0 "Macrolide export ATP-binding/permease protein MacB"  
"OP8\_E21\_00434" 26416 "s59E5H2" 1.729414 "Macrolide export ATP-binding/permease protein MacB"  
"OP8\_E21\_00434" 26416 "s63E6H2" 0 "Macrolide export ATP-binding/permease protein MacB"  
"OP8\_E21\_00436" 26418 "s59E13H2" 0.01400082 "Galactokinase"  
"OP8\_E21\_00436" 26418 "s59E25H2" 0 "Galactokinase"  
"OP8\_E21\_00436" 26418 "s59E5H2" 4.505761 "Galactokinase"  
"OP8\_E21\_00436" 26418 "s63E6H2" 0 "Galactokinase"  
"OP8\_E21\_00437" 26419 "s59E13H2" 0.02350127 "Sodium/glucose cotransporter"  
"OP8\_E21\_00437" 26419 "s59E25H2" 0 "Sodium/glucose cotransporter"  
"OP8\_E21\_00437" 26419 "s59E5H2" 2.989234 "Sodium/glucose cotransporter"  
"OP8\_E21\_00437" 26419 "s63E6H2" 0 "Sodium/glucose cotransporter"  
"OP8\_E21\_00438" 26420 "s59E13H2" 0.003617394 "hypothetical protein"  
"OP8\_E21\_00438" 26420 "s59E25H2" 0 "hypothetical protein"  
"OP8\_E21\_00438" 26420 "s59E5H2" 2.082401 "hypothetical protein"  
"OP8\_E21\_00438" 26420 "s63E6H2" 0 "hypothetical protein"  
"OP8\_E21\_00440" 26422 "s59E13H2" 0.006656427 "Dimethylamine corrinoid protein"  
"OP8\_E21\_00440" 26422 "s59E25H2" 0 "Dimethylamine corrinoid protein"  
"OP8\_E21\_00440" 26422 "s59E5H2" 1.965953 "Dimethylamine corrinoid protein"  
"OP8\_E21\_00440" 26422 "s63E6H2" 0 "Dimethylamine corrinoid protein"  
"OP8\_E21\_00441" 26423 "s59E13H2" 0.5945036 "Trimethylamine methyltransferase MttB"  
"OP8\_E21\_00441" 26423 "s59E25H2" 0 "Trimethylamine methyltransferase MttB"

"OP8\_E21\_00441" 26423 "s59E5H2" 2.905698 "Trimethylamine methyltransferase MttB"  
"OP8\_E21\_00441" 26423 "s63E6H2" 0 "Trimethylamine methyltransferase MttB"  
"OP8\_E21\_00442" 26424 "s59E13H2" 0.3192439 "aminotransferase"  
"OP8\_E21\_00442" 26424 "s59E25H2" 0 "aminotransferase"  
"OP8\_E21\_00442" 26424 "s59E5H2" 2.57276 "aminotransferase"  
"OP8\_E21\_00442" 26424 "s63E6H2" 0 "aminotransferase"  
"OP8\_E21\_00443" 26425 "s59E13H2" 0.6633625 "Vitamin B12 dependent methionine synthase, activation domain"  
"OP8\_E21\_00443" 26425 "s59E25H2" 0 "Vitamin B12 dependent methionine synthase, activation domain"  
"OP8\_E21\_00443" 26425 "s59E5H2" 2.235728 "Vitamin B12 dependent methionine synthase, activation domain"  
"OP8\_E21\_00443" 26425 "s63E6H2" 0 "Vitamin B12 dependent methionine synthase, activation domain"  
"OP8\_E21\_00444" 26426 "s59E13H2" 0.03113647 "Dispase autolysis-inducing protein precursor"  
"OP8\_E21\_00444" 26426 "s59E25H2" 0 "Dispase autolysis-inducing protein precursor"  
"OP8\_E21\_00444" 26426 "s59E5H2" 2.174532 "Dispase autolysis-inducing protein precursor"  
"OP8\_E21\_00444" 26426 "s63E6H2" 0 "Dispase autolysis-inducing protein precursor"  
"OP8\_E21\_00445" 26427 "s59E13H2" 0.03311152 "peptidase PmbA"  
"OP8\_E21\_00445" 26427 "s59E25H2" 0 "peptidase PmbA"  
"OP8\_E21\_00445" 26427 "s59E5H2" 1.119384 "peptidase PmbA"  
"OP8\_E21\_00445" 26427 "s63E6H2" 0 "peptidase PmbA"  
"OP8\_E21\_00446" 26428 "s59E13H2" 3.914984 "GDP-mannose-dependent alpha-(1-2)-phosphatidylinositol mannosyltransferase"  
"OP8\_E21\_00446" 26428 "s59E25H2" 0 "GDP-mannose-dependent alpha-(1-2)-phosphatidylinositol mannosyltransferase"  
"OP8\_E21\_00446" 26428 "s59E5H2" 1.626279 "GDP-mannose-dependent alpha-(1-2)-phosphatidylinositol mannosyltransferase"  
"OP8\_E21\_00446" 26428 "s63E6H2" 0 "GDP-mannose-dependent alpha-(1-2)-phosphatidylinositol mannosyltransferase"  
"OP8\_E21\_00447" 26429 "s59E13H2" 4.634743 "3 beta-hydroxysteroid dehydrogenase/Delta 5--"  
"OP8\_E21\_00447" 26429 "s59E25H2" 0 "3 beta-hydroxysteroid dehydrogenase/Delta 5--"  
"OP8\_E21\_00447" 26429 "s59E5H2" 2.515211 "3 beta-hydroxysteroid dehydrogenase/Delta 5--"  
"OP8\_E21\_00447" 26429 "s63E6H2" 0 "3 beta-hydroxysteroid dehydrogenase/Delta 5--"  
"OP8\_E21\_00448" 26430 "s59E13H2" 1.358444 "Demethylrebeccamycin-D-glucose O-methyltransferase"  
"OP8\_E21\_00448" 26430 "s59E25H2" 0 "Demethylrebeccamycin-D-glucose O-methyltransferase"  
"OP8\_E21\_00448" 26430 "s59E5H2" 2.920378 "Demethylrebeccamycin-D-glucose O-methyltransferase"  
"OP8\_E21\_00448" 26430 "s63E6H2" 0 "Demethylrebeccamycin-D-glucose O-methyltransferase"  
"OP8\_E21\_00449" 26431 "s59E13H2" 1.5173 "Proton/sodium-glutamate symport protein"  
"OP8\_E21\_00449" 26431 "s59E25H2" 0 "Proton/sodium-glutamate symport protein"  
"OP8\_E21\_00449" 26431 "s59E5H2" 3.675192 "Proton/sodium-glutamate symport protein"  
"OP8\_E21\_00449" 26431 "s63E6H2" 0 "Proton/sodium-glutamate symport protein"  
"OP8\_E21\_00450" 26432 "s59E13H2" 1.357337 "Malonyl CoA-acyl carrier protein transacylase"  
"OP8\_E21\_00450" 26432 "s59E25H2" 0 "Malonyl CoA-acyl carrier protein transacylase"  
"OP8\_E21\_00450" 26432 "s59E5H2" 2.812199 "Malonyl CoA-acyl carrier protein transacylase"  
"OP8\_E21\_00450" 26432 "s63E6H2" 0 "Malonyl CoA-acyl carrier protein transacylase"  
"OP8\_E21\_00451" 26433 "s59E13H2" 0.9351774 "peptidyl-prolyl cis-trans isomerase SurA"  
"OP8\_E21\_00451" 26433 "s59E25H2" 0 "peptidyl-prolyl cis-trans isomerase SurA"  
"OP8\_E21\_00451" 26433 "s59E5H2" 1.891765 "peptidyl-prolyl cis-trans isomerase SurA"  
"OP8\_E21\_00451" 26433 "s63E6H2" 0 "peptidyl-prolyl cis-trans isomerase SurA"  
"OP8\_E21\_00452" 26434 "s59E13H2" 0.6619303 "Outer membrane protein assembly factor BamA precursor"  
"OP8\_E21\_00452" 26434 "s59E25H2" 0 "Outer membrane protein assembly factor BamA precursor"  
"OP8\_E21\_00452" 26434 "s59E5H2" 1.457817 "Outer membrane protein assembly factor BamA precursor"  
"OP8\_E21\_00452" 26434 "s63E6H2" 0 "Outer membrane protein assembly factor BamA precursor"  
"OP8\_E21\_00453" 26435 "s59E13H2" 0.007856757 "putative ATP-dependent RNA helicase"

"OP8\_E21\_00453" 26435 "s59E25H2" 0 "putative ATP-dependent RNA helicase"  
"OP8\_E21\_00453" 26435 "s59E5H2" 0.08676846 "putative ATP-dependent RNA helicase"  
"OP8\_E21\_00453" 26435 "s63E6H2" 0 "putative ATP-dependent RNA helicase"  
"OP8\_E21\_00454" 26436 "s59E13H2" 0.00106212 "N-6 DNA Methylase"  
"OP8\_E21\_00454" 26436 "s59E25H2" 0 "N-6 DNA Methylase"  
"OP8\_E21\_00454" 26436 "s59E5H2" 0.01572367 "N-6 DNA Methylase"  
"OP8\_E21\_00454" 26436 "s63E6H2" 0 "N-6 DNA Methylase"  
"OP8\_E21\_00455" 26437 "s59E13H2" 0.0005924971 "hypothetical protein"  
"OP8\_E21\_00455" 26437 "s59E25H2" 0 "hypothetical protein"  
"OP8\_E21\_00455" 26437 "s59E5H2" 0.003395863 "hypothetical protein"  
"OP8\_E21\_00455" 26437 "s63E6H2" 0 "hypothetical protein"  
"OP8\_E21\_00456" 26438 "s59E13H2" 0.0002793913 "hypothetical protein"  
"OP8\_E21\_00456" 26438 "s59E25H2" 0 "hypothetical protein"  
"OP8\_E21\_00456" 26438 "s59E5H2" 0.05795597 "hypothetical protein"  
"OP8\_E21\_00456" 26438 "s63E6H2" 0 "hypothetical protein"  
"OP8\_E21\_00457" 26439 "s59E13H2" 0.02000993 "Low-affinity inorganic phosphate transporter 1"  
"OP8\_E21\_00457" 26439 "s59E25H2" 0 "Low-affinity inorganic phosphate transporter 1"  
"OP8\_E21\_00457" 26439 "s59E5H2" 2.754702 "Low-affinity inorganic phosphate transporter 1"  
"OP8\_E21\_00457" 26439 "s63E6H2" 0 "Low-affinity inorganic phosphate transporter 1"  
"OP8\_E21\_00458" 26440 "s59E13H2" 0.02526892 "hypothetical protein"  
"OP8\_E21\_00458" 26440 "s59E25H2" 0 "hypothetical protein"  
"OP8\_E21\_00458" 26440 "s59E5H2" 1.531735 "hypothetical protein"  
"OP8\_E21\_00458" 26440 "s63E6H2" 0 "hypothetical protein"  
"OP8\_E21\_00459" 26441 "s59E13H2" 0.07076036 "hypothetical protein"  
"OP8\_E21\_00459" 26441 "s59E25H2" 0 "hypothetical protein"  
"OP8\_E21\_00459" 26441 "s59E5H2" 1.455617 "hypothetical protein"  
"OP8\_E21\_00459" 26441 "s63E6H2" 0 "hypothetical protein"  
"OP8\_E21\_00460" 26442 "s59E13H2" 0.01633688 "hypothetical protein"  
"OP8\_E21\_00460" 26442 "s59E25H2" 0.1232493 "hypothetical protein"  
"OP8\_E21\_00460" 26442 "s59E5H2" 1.574332 "hypothetical protein"  
"OP8\_E21\_00460" 26442 "s63E6H2" 0 "hypothetical protein"  
"OP8\_E21\_00462" 26444 "s59E13H2" 0 "hypothetical protein"  
"OP8\_E21\_00462" 26444 "s59E25H2" 0 "hypothetical protein"  
"OP8\_E21\_00462" 26444 "s59E5H2" 0.3801724 "hypothetical protein"  
"OP8\_E21\_00462" 26444 "s63E6H2" 0 "hypothetical protein"  
"OP8\_E21\_00463" 26445 "s59E13H2" 0 "Aminopeptidase E"  
"OP8\_E21\_00463" 26445 "s59E25H2" 0 "Aminopeptidase E"  
"OP8\_E21\_00463" 26445 "s59E5H2" 1.711189 "Aminopeptidase E"  
"OP8\_E21\_00463" 26445 "s63E6H2" 0 "Aminopeptidase E"  
"OP8\_E21\_00464" 26446 "s59E13H2" 0.001377589 "Aminopeptidase C"  
"OP8\_E21\_00464" 26446 "s59E25H2" 0 "Aminopeptidase C"  
"OP8\_E21\_00464" 26446 "s59E5H2" 3.402772 "Aminopeptidase C"  
"OP8\_E21\_00464" 26446 "s63E6H2" 0 "Aminopeptidase C"  
"OP8\_E21\_00465" 26447 "s59E13H2" 0.01047336 "hypothetical protein"  
"OP8\_E21\_00465" 26447 "s59E25H2" 0 "hypothetical protein"  
"OP8\_E21\_00465" 26447 "s59E5H2" 3.741183 "hypothetical protein"  
"OP8\_E21\_00465" 26447 "s63E6H2" 0 "hypothetical protein"

"OP8\_E21\_00467" 26449 "s59E13H2" 0.00680748 "Outer membrane porin F precursor"  
"OP8\_E21\_00467" 26449 "s59E25H2" 0 "Outer membrane porin F precursor"  
"OP8\_E21\_00467" 26449 "s59E5H2" 1.446947 "Outer membrane porin F precursor"  
"OP8\_E21\_00467" 26449 "s63E6H2" 0.08164471 "Outer membrane porin F precursor"  
"OP8\_E21\_00468" 26450 "s59E13H2" 0.001519455 "hypothetical protein"  
"OP8\_E21\_00468" 26450 "s59E25H2" 0 "hypothetical protein"  
"OP8\_E21\_00468" 26450 "s59E5H2" 0.4243552 "hypothetical protein"  
"OP8\_E21\_00468" 26450 "s63E6H2" 0 "hypothetical protein"  
"OP8\_E21\_00469" 26451 "s59E13H2" 0.003297466 "hypothetical protein"  
"OP8\_E21\_00469" 26451 "s59E25H2" 0 "hypothetical protein"  
"OP8\_E21\_00469" 26451 "s59E5H2" 0.06993061 "hypothetical protein"  
"OP8\_E21\_00469" 26451 "s63E6H2" 0 "hypothetical protein"  
"OP8\_E21\_00470" 26452 "s59E13H2" 0.442286 "hypothetical protein"  
"OP8\_E21\_00470" 26452 "s59E25H2" 0.09944312 "hypothetical protein"  
"OP8\_E21\_00470" 26452 "s59E5H2" 0.3033993 "hypothetical protein"  
"OP8\_E21\_00470" 26452 "s63E6H2" 0 "hypothetical protein"  
"OP8\_E21\_00471" 26453 "s59E13H2" 10.04745 "Adenosylhomocysteinase"  
"OP8\_E21\_00471" 26453 "s59E25H2" 0 "Adenosylhomocysteinase"  
"OP8\_E21\_00471" 26453 "s59E5H2" 9.227409 "Adenosylhomocysteinase"  
"OP8\_E21\_00471" 26453 "s63E6H2" 0 "Adenosylhomocysteinase"  
"OP8\_E21\_00472" 26454 "s59E13H2" 8.903083 "Glycerol-3-phosphate acyltransferase"  
"OP8\_E21\_00472" 26454 "s59E25H2" 0 "Glycerol-3-phosphate acyltransferase"  
"OP8\_E21\_00472" 26454 "s59E5H2" 7.632863 "Glycerol-3-phosphate acyltransferase"  
"OP8\_E21\_00472" 26454 "s63E6H2" 0 "Glycerol-3-phosphate acyltransferase"  
"OP8\_E21\_00473" 26455 "s59E13H2" 5.376542 "2',5' RNA ligase family"  
"OP8\_E21\_00473" 26455 "s59E25H2" 0 "2',5' RNA ligase family"  
"OP8\_E21\_00473" 26455 "s59E5H2" 4.888755 "2',5' RNA ligase family"  
"OP8\_E21\_00473" 26455 "s63E6H2" 0 "2',5' RNA ligase family"  
"OP8\_E21\_00474" 26456 "s59E13H2" 0.101833 "Cob(I)yrinic acid a,c-diamide adenosyltransferase"  
"OP8\_E21\_00474" 26456 "s59E25H2" 0 "Cob(I)yrinic acid a,c-diamide adenosyltransferase"  
"OP8\_E21\_00474" 26456 "s59E5H2" 3.368913 "Cob(I)yrinic acid a,c-diamide adenosyltransferase"  
"OP8\_E21\_00474" 26456 "s63E6H2" 0 "Cob(I)yrinic acid a,c-diamide adenosyltransferase"  
"OP8\_E21\_00475" 26457 "s59E13H2" 0.1180313 "Possibl zinc metallo-peptidase"  
"OP8\_E21\_00475" 26457 "s59E25H2" 0 "Possibl zinc metallo-peptidase"  
"OP8\_E21\_00475" 26457 "s59E5H2" 2.120479 "Possibl zinc metallo-peptidase"  
"OP8\_E21\_00475" 26457 "s63E6H2" 0 "Possibl zinc metallo-peptidase"  
"OP8\_E21\_00476" 26458 "s59E13H2" 0.1070388 "4-hydroxy-tetrahydrodipicolinate synthase"  
"OP8\_E21\_00476" 26458 "s59E25H2" 0 "4-hydroxy-tetrahydrodipicolinate synthase"  
"OP8\_E21\_00476" 26458 "s59E5H2" 2.567092 "4-hydroxy-tetrahydrodipicolinate synthase"  
"OP8\_E21\_00476" 26458 "s63E6H2" 0 "4-hydroxy-tetrahydrodipicolinate synthase"  
"OP8\_E21\_00477" 26459 "s59E13H2" 0.1393805 "General stress protein 69"  
"OP8\_E21\_00477" 26459 "s59E25H2" 0 "General stress protein 69"  
"OP8\_E21\_00477" 26459 "s59E5H2" 2.632535 "General stress protein 69"  
"OP8\_E21\_00477" 26459 "s63E6H2" 0 "General stress protein 69"  
"OP8\_E21\_00481" 26463 "s59E13H2" 0.003745525 "Zinc carboxypeptidase"  
"OP8\_E21\_00481" 26463 "s59E25H2" 0 "Zinc carboxypeptidase"  
"OP8\_E21\_00481" 26463 "s59E5H2" 1.872181 "Zinc carboxypeptidase"



"OP8\_E21\_00481" 26463 "s63E6H2" 0 "Zinc carboxypeptidase"  
"OP8\_E21\_00482" 26464 "s59E13H2" 0.006452838 "putative FAD-linked oxidoreductase"  
"OP8\_E21\_00482" 26464 "s59E25H2" 0 "putative FAD-linked oxidoreductase"  
"OP8\_E21\_00482" 26464 "s59E5H2" 1.804189 "putative FAD-linked oxidoreductase"  
"OP8\_E21\_00482" 26464 "s63E6H2" 0 "putative FAD-linked oxidoreductase"  
"OP8\_E21\_00483" 26465 "s59E13H2" 0.06885905 "Ycf48-like protein"  
"OP8\_E21\_00483" 26465 "s59E25H2" 0 "Ycf48-like protein"  
"OP8\_E21\_00483" 26465 "s59E5H2" 1.187303 "Ycf48-like protein"  
"OP8\_E21\_00483" 26465 "s63E6H2" 0 "Ycf48-like protein"  
"OP8\_E21\_00484" 26466 "s59E13H2" 0.2685632 "Thermonuclease precursor"  
"OP8\_E21\_00484" 26466 "s59E25H2" 0 "Thermonuclease precursor"  
"OP8\_E21\_00484" 26466 "s59E5H2" 0.9491847 "Thermonuclease precursor"  
"OP8\_E21\_00484" 26466 "s63E6H2" 0 "Thermonuclease precursor"  
"OP8\_E21\_00485" 26467 "s59E13H2" 0.1849509 "1-deoxy-D-xylulose-5-phosphate synthase"  
"OP8\_E21\_00485" 26467 "s59E25H2" 0 "1-deoxy-D-xylulose-5-phosphate synthase"  
"OP8\_E21\_00485" 26467 "s59E5H2" 0.7929225 "1-deoxy-D-xylulose-5-phosphate synthase"  
"OP8\_E21\_00485" 26467 "s63E6H2" 0 "1-deoxy-D-xylulose-5-phosphate synthase"  
"OP8\_E21\_00486" 26468 "s59E13H2" 0 "Asparagine synthetase [glutamine-hydrolyzing] 1"  
"OP8\_E21\_00486" 26468 "s59E25H2" 0 "Asparagine synthetase [glutamine-hydrolyzing] 1"  
"OP8\_E21\_00486" 26468 "s59E5H2" 0.01348009 "Asparagine synthetase [glutamine-hydrolyzing] 1"  
"OP8\_E21\_00486" 26468 "s63E6H2" 0 "Asparagine synthetase [glutamine-hydrolyzing] 1"  
"OP8\_E21\_00488" 26470 "s59E13H2" 0.02306799 "Macrolide export ATP-binding/permease protein MacB"  
"OP8\_E21\_00488" 26470 "s59E25H2" 0 "Macrolide export ATP-binding/permease protein MacB"  
"OP8\_E21\_00488" 26470 "s59E5H2" 1.334363 "Macrolide export ATP-binding/permease protein MacB"  
"OP8\_E21\_00488" 26470 "s63E6H2" 0.1123873 "Macrolide export ATP-binding/permease protein MacB"  
"OP8\_E21\_00493" 26475 "s59E13H2" 0.001436836 "hypothetical protein"  
"OP8\_E21\_00493" 26475 "s59E25H2" 0 "hypothetical protein"  
"OP8\_E21\_00493" 26475 "s59E5H2" 0.8377584 "hypothetical protein"  
"OP8\_E21\_00493" 26475 "s63E6H2" 0 "hypothetical protein"  
"OP8\_E21\_00494" 26476 "s59E13H2" 0.033416 "Chromosome partition protein Smc"  
"OP8\_E21\_00494" 26476 "s59E25H2" 0 "Chromosome partition protein Smc"  
"OP8\_E21\_00494" 26476 "s59E5H2" 0.8014731 "Chromosome partition protein Smc"  
"OP8\_E21\_00494" 26476 "s63E6H2" 0 "Chromosome partition protein Smc"  
"OP8\_E21\_00495" 26477 "s59E13H2" 0.06937435 "hypothetical protein"  
"OP8\_E21\_00495" 26477 "s59E25H2" 0 "hypothetical protein"  
"OP8\_E21\_00495" 26477 "s59E5H2" 1.164803 "hypothetical protein"  
"OP8\_E21\_00495" 26477 "s63E6H2" 0 "hypothetical protein"  
"OP8\_E21\_00496" 26478 "s59E13H2" 0.07098562 "FecR protein"  
"OP8\_E21\_00496" 26478 "s59E25H2" 0 "FecR protein"  
"OP8\_E21\_00496" 26478 "s59E5H2" 1.517629 "FecR protein"  
"OP8\_E21\_00496" 26478 "s63E6H2" 0 "FecR protein"  
"OP8\_E21\_00497" 26479 "s59E13H2" 0.06051506 "Penicillin-binding protein 1A"  
"OP8\_E21\_00497" 26479 "s59E25H2" 0 "Penicillin-binding protein 1A"  
"OP8\_E21\_00497" 26479 "s59E5H2" 1.611499 "Penicillin-binding protein 1A"  
"OP8\_E21\_00497" 26479 "s63E6H2" 0 "Penicillin-binding protein 1A"  
"OP8\_E21\_00499" 26481 "s59E13H2" 0.02202604 "Thymidylate kinase"  
"OP8\_E21\_00499" 26481 "s59E25H2" 0 "Thymidylate kinase"

"OP8\_E21\_00499" 26481 "s59E5H2" 0.9836919 "Thymidylate kinase"  
"OP8\_E21\_00499" 26481 "s63E6H2" 0 "Thymidylate kinase"  
"OP8\_E21\_00500" 26482 "s59E13H2" 0.06427975 "putative periplasmic serine endoprotease DegP-like precursor"  
"OP8\_E21\_00500" 26482 "s59E25H2" 0 "putative periplasmic serine endoprotease DegP-like precursor"  
"OP8\_E21\_00500" 26482 "s59E5H2" 0.5101966 "putative periplasmic serine endoprotease DegP-like precursor"  
"OP8\_E21\_00500" 26482 "s63E6H2" 0 "putative periplasmic serine endoprotease DegP-like precursor"  
"OP8\_E21\_00501" 26483 "s59E13H2" 0.04868096 "Diaminopimelate epimerase"  
"OP8\_E21\_00501" 26483 "s59E25H2" 0 "Diaminopimelate epimerase"  
"OP8\_E21\_00501" 26483 "s59E5H2" 0.578524 "Diaminopimelate epimerase"  
"OP8\_E21\_00501" 26483 "s63E6H2" 0 "Diaminopimelate epimerase"  
"OP8\_E21\_00502" 26484 "s59E13H2" 0.03483469 "Thiamine-monophosphate kinase"  
"OP8\_E21\_00502" 26484 "s59E25H2" 0 "Thiamine-monophosphate kinase"  
"OP8\_E21\_00502" 26484 "s59E5H2" 0.2900099 "Thiamine-monophosphate kinase"  
"OP8\_E21\_00502" 26484 "s63E6H2" 0 "Thiamine-monophosphate kinase"  
"OP8\_E21\_00503" 26485 "s59E13H2" 0.01799375 "Lon protease"  
"OP8\_E21\_00503" 26485 "s59E25H2" 0 "Lon protease"  
"OP8\_E21\_00503" 26485 "s59E5H2" 0.1826683 "Lon protease"  
"OP8\_E21\_00503" 26485 "s63E6H2" 0 "Lon protease"  
"OP8\_E21\_00504" 26486 "s59E13H2" 0.0109475 "hypothetical protein"  
"OP8\_E21\_00504" 26486 "s59E25H2" 0 "hypothetical protein"  
"OP8\_E21\_00504" 26486 "s59E5H2" 0.2407325 "hypothetical protein"  
"OP8\_E21\_00504" 26486 "s63E6H2" 0 "hypothetical protein"  
"OP8\_E21\_00505" 26487 "s59E13H2" 0.02326214 "protease TldD"  
"OP8\_E21\_00505" 26487 "s59E25H2" 0 "protease TldD"  
"OP8\_E21\_00505" 26487 "s59E5H2" 1.08291 "protease TldD"  
"OP8\_E21\_00505" 26487 "s63E6H2" 0 "protease TldD"  
"OP8\_F13\_00003" 26490 "s59E13H2" 0.0294315 "hypothetical protein"  
"OP8\_F13\_00003" 26490 "s59E25H2" 0 "hypothetical protein"  
"OP8\_F13\_00003" 26490 "s59E5H2" 0.8647467 "hypothetical protein"  
"OP8\_F13\_00003" 26490 "s63E6H2" 0 "hypothetical protein"  
"OP8\_F13\_00004" 26491 "s59E13H2" 0.003153737 "Extended-spectrum beta-lactamase PER-1 precursor"  
"OP8\_F13\_00004" 26491 "s59E25H2" 0 "Extended-spectrum beta-lactamase PER-1 precursor"  
"OP8\_F13\_00004" 26491 "s59E5H2" 2.249475 "Extended-spectrum beta-lactamase PER-1 precursor"  
"OP8\_F13\_00004" 26491 "s63E6H2" 0 "Extended-spectrum beta-lactamase PER-1 precursor"  
"OP8\_F13\_00005" 26492 "s59E13H2" 0 "hypothetical protein"  
"OP8\_F13\_00005" 26492 "s59E25H2" 0 "hypothetical protein"  
"OP8\_F13\_00005" 26492 "s59E5H2" 0.1132945 "hypothetical protein"  
"OP8\_F13\_00005" 26492 "s63E6H2" 0 "hypothetical protein"  
"OP8\_F13\_00006" 26493 "s59E13H2" 0.06869996 "Peptide methionine sulfoxide reductase MsrB"  
"OP8\_F13\_00006" 26493 "s59E25H2" 0 "Peptide methionine sulfoxide reductase MsrB"  
"OP8\_F13\_00006" 26493 "s59E5H2" 12.42579 "Peptide methionine sulfoxide reductase MsrB"  
"OP8\_F13\_00006" 26493 "s63E6H2" 0 "Peptide methionine sulfoxide reductase MsrB"  
"OP8\_F13\_00007" 26494 "s59E13H2" 0.1005863 "TspO/MBR family protein"  
"OP8\_F13\_00007" 26494 "s59E25H2" 0 "TspO/MBR family protein"  
"OP8\_F13\_00007" 26494 "s59E5H2" 11.82906 "TspO/MBR family protein"  
"OP8\_F13\_00007" 26494 "s63E6H2" 0 "TspO/MBR family protein"  
"OP8\_F13\_00008" 26495 "s59E13H2" 0.02757233 "ATP-dependent helicase/nuclease subunit A"

"OP8\_F13\_00008" 26495 "s59E25H2" 0 "ATP-dependent helicase/nuclease subunit A"  
"OP8\_F13\_00008" 26495 "s59E5H2" 6.113403 "ATP-dependent helicase/nuclease subunit A"  
"OP8\_F13\_00008" 26495 "s63E6H2" 0 "ATP-dependent helicase/nuclease subunit A"  
"OP8\_F13\_00009" 26496 "s59E13H2" 0.006916626 "ATP-dependent helicase/deoxyribonuclease subunit B"  
"OP8\_F13\_00009" 26496 "s59E25H2" 0 "ATP-dependent helicase/deoxyribonuclease subunit B"  
"OP8\_F13\_00009" 26496 "s59E5H2" 4.396811 "ATP-dependent helicase/deoxyribonuclease subunit B"  
"OP8\_F13\_00009" 26496 "s63E6H2" 0.0001702882 "ATP-dependent helicase/deoxyribonuclease subunit B"  
"OP8\_F13\_00010" 26497 "s59E13H2" 0 "hypothetical protein"  
"OP8\_F13\_00010" 26497 "s59E25H2" 0 "hypothetical protein"  
"OP8\_F13\_00010" 26497 "s59E5H2" 6.707186 "hypothetical protein"  
"OP8\_F13\_00010" 26497 "s63E6H2" 0.0005863274 "hypothetical protein"  
"OP8\_F13\_00011" 26498 "s59E13H2" 0.005220988 "Plasmid pRiA4b ORF-3-like protein"  
"OP8\_F13\_00011" 26498 "s59E25H2" 0 "Plasmid pRiA4b ORF-3-like protein"  
"OP8\_F13\_00011" 26498 "s59E5H2" 2.464944 "Plasmid pRiA4b ORF-3-like protein"  
"OP8\_F13\_00011" 26498 "s63E6H2" 0 "Plasmid pRiA4b ORF-3-like protein"  
"OP8\_F13\_00013" 26500 "s59E13H2" 0.01598918 "Extended-spectrum beta-lactamase PER-1 precursor"  
"OP8\_F13\_00013" 26500 "s59E25H2" 0 "Extended-spectrum beta-lactamase PER-1 precursor"  
"OP8\_F13\_00013" 26500 "s59E5H2" 0.9271678 "Extended-spectrum beta-lactamase PER-1 precursor"  
"OP8\_F13\_00013" 26500 "s63E6H2" 0 "Extended-spectrum beta-lactamase PER-1 precursor"  
"OP8\_F13\_00014" 26501 "s59E13H2" 0.04542213 "putative regulator PrIF"  
"OP8\_F13\_00014" 26501 "s59E25H2" 0 "putative regulator PrIF"  
"OP8\_F13\_00014" 26501 "s59E5H2" 1.784826 "putative regulator PrIF"  
"OP8\_F13\_00014" 26501 "s63E6H2" 0 "putative regulator PrIF"  
"OP8\_F13\_00015" 26502 "s59E13H2" 0.03152698 "hypothetical protein"  
"OP8\_F13\_00015" 26502 "s59E25H2" 0 "hypothetical protein"  
"OP8\_F13\_00015" 26502 "s59E5H2" 0.3404464 "hypothetical protein"  
"OP8\_F13\_00015" 26502 "s63E6H2" 0 "hypothetical protein"  
"OP8\_F13\_00016" 26503 "s59E13H2" 0.7613364 "hypothetical protein"  
"OP8\_F13\_00016" 26503 "s59E25H2" 0 "hypothetical protein"  
"OP8\_F13\_00016" 26503 "s59E5H2" 0.0481575 "hypothetical protein"  
"OP8\_F13\_00016" 26503 "s63E6H2" 0.2194702 "hypothetical protein"  
"OP8\_F13\_00017" 26504 "s59E13H2" 0.2424326 "hypothetical protein"  
"OP8\_F13\_00017" 26504 "s59E25H2" 0 "hypothetical protein"  
"OP8\_F13\_00017" 26504 "s59E5H2" 0.4155199 "hypothetical protein"  
"OP8\_F13\_00017" 26504 "s63E6H2" 0.1047034 "hypothetical protein"  
"OP8\_F13\_00018" 26505 "s59E13H2" 0.04723128 "Chromosome partition protein Smc"  
"OP8\_F13\_00018" 26505 "s59E25H2" 0 "Chromosome partition protein Smc"  
"OP8\_F13\_00018" 26505 "s59E5H2" 0.1893416 "Chromosome partition protein Smc"  
"OP8\_F13\_00018" 26505 "s63E6H2" 0 "Chromosome partition protein Smc"  
"OP8\_F13\_00019" 26506 "s59E13H2" 0.02554124 "hypothetical protein"  
"OP8\_F13\_00019" 26506 "s59E25H2" 0 "hypothetical protein"  
"OP8\_F13\_00019" 26506 "s59E5H2" 0.2159821 "hypothetical protein"  
"OP8\_F13\_00019" 26506 "s63E6H2" 0 "hypothetical protein"  
"OP8\_F13\_00020" 26507 "s59E13H2" 0.0256223 "Nuclease-related domain protein"  
"OP8\_F13\_00020" 26507 "s59E25H2" 0.2506083 "Nuclease-related domain protein"  
"OP8\_F13\_00020" 26507 "s59E5H2" 0.3377543 "Nuclease-related domain protein"  
"OP8\_F13\_00020" 26507 "s63E6H2" 0 "Nuclease-related domain protein"

"OP8\_F13\_00022" 26509 "s59E13H2" 0.0214474 "hypothetical protein"  
"OP8\_F13\_00022" 26509 "s59E25H2" 0 "hypothetical protein"  
"OP8\_F13\_00022" 26509 "s59E5H2" 0.5901664 "hypothetical protein"  
"OP8\_F13\_00022" 26509 "s63E6H2" 0 "hypothetical protein"  
"OP8\_F13\_00023" 26510 "s59E13H2" 0.01369226 "hypothetical protein"  
"OP8\_F13\_00023" 26510 "s59E25H2" 0 "hypothetical protein"  
"OP8\_F13\_00023" 26510 "s59E5H2" 0.2373786 "hypothetical protein"  
"OP8\_F13\_00023" 26510 "s63E6H2" 0 "hypothetical protein"  
"OP8\_F13\_00024" 26511 "s59E13H2" 0 "hypothetical protein"  
"OP8\_F13\_00024" 26511 "s59E25H2" 0 "hypothetical protein"  
"OP8\_F13\_00024" 26511 "s59E5H2" 0.01711791 "hypothetical protein"  
"OP8\_F13\_00024" 26511 "s63E6H2" 0 "hypothetical protein"  
"OP8\_F13\_00025" 26512 "s59E13H2" 0.7814239 "hypothetical protein"  
"OP8\_F13\_00025" 26512 "s59E25H2" 0 "hypothetical protein"  
"OP8\_F13\_00025" 26512 "s59E5H2" 1.554208 "hypothetical protein"  
"OP8\_F13\_00025" 26512 "s63E6H2" 0 "hypothetical protein"  
"OP8\_F13\_00026" 26513 "s59E13H2" 0.703943 "Lipid-A-disaccharide synthase"  
"OP8\_F13\_00026" 26513 "s59E25H2" 0 "Lipid-A-disaccharide synthase"  
"OP8\_F13\_00026" 26513 "s59E5H2" 1.971926 "Lipid-A-disaccharide synthase"  
"OP8\_F13\_00026" 26513 "s63E6H2" 0 "Lipid-A-disaccharide synthase"  
"OP8\_F13\_00027" 26514 "s59E13H2" 0.06074551 "hypothetical protein"  
"OP8\_F13\_00027" 26514 "s59E25H2" 0 "hypothetical protein"  
"OP8\_F13\_00027" 26514 "s59E5H2" 2.014614 "hypothetical protein"  
"OP8\_F13\_00027" 26514 "s63E6H2" 0 "hypothetical protein"  
"OP8\_F13\_00028" 26515 "s59E13H2" 0.05964448 "Protein-L-isoaspartate O-methyltransferase"  
"OP8\_F13\_00028" 26515 "s59E25H2" 0 "Protein-L-isoaspartate O-methyltransferase"  
"OP8\_F13\_00028" 26515 "s59E5H2" 1.608957 "Protein-L-isoaspartate O-methyltransferase"  
"OP8\_F13\_00028" 26515 "s63E6H2" 0 "Protein-L-isoaspartate O-methyltransferase"  
"OP8\_F13\_00030" 26517 "s59E13H2" 0.2280625 "hypothetical protein"  
"OP8\_F13\_00030" 26517 "s59E25H2" 0 "hypothetical protein"  
"OP8\_F13\_00030" 26517 "s59E5H2" 12.89047 "hypothetical protein"  
"OP8\_F13\_00030" 26517 "s63E6H2" 0 "hypothetical protein"  
"OP8\_F13\_00031" 26518 "s59E13H2" 0.2161003 "Lipopolysaccharide core heptosyltransferase RfaQ"  
"OP8\_F13\_00031" 26518 "s59E25H2" 0 "Lipopolysaccharide core heptosyltransferase RfaQ"  
"OP8\_F13\_00031" 26518 "s59E5H2" 10.90313 "Lipopolysaccharide core heptosyltransferase RfaQ"  
"OP8\_F13\_00031" 26518 "s63E6H2" 0 "Lipopolysaccharide core heptosyltransferase RfaQ"  
"OP8\_F13\_00032" 26519 "s59E13H2" 0.05645271 "O-Antigen ligase"  
"OP8\_F13\_00032" 26519 "s59E25H2" 0 "O-Antigen ligase"  
"OP8\_F13\_00032" 26519 "s59E5H2" 7.985384 "O-Antigen ligase"  
"OP8\_F13\_00032" 26519 "s63E6H2" 0 "O-Antigen ligase"  
"OP8\_F13\_00033" 26520 "s59E13H2" 0.2169346 "hypothetical protein"  
"OP8\_F13\_00033" 26520 "s59E25H2" 0 "hypothetical protein"  
"OP8\_F13\_00033" 26520 "s59E5H2" 5.667119 "hypothetical protein"  
"OP8\_F13\_00033" 26520 "s63E6H2" 0 "hypothetical protein"  
"OP8\_F13\_00034" 26521 "s59E13H2" 0.01535938 "Bifunctional protein HldE"  
"OP8\_F13\_00034" 26521 "s59E25H2" 0 "Bifunctional protein HldE"  
"OP8\_F13\_00034" 26521 "s59E5H2" 4.872299 "Bifunctional protein HldE"

"OP8\_F13\_00034" 26521 "s63E6H2" 0 "Bifunctional protein HldE"  
"OP8\_F13\_00035" 26522 "s59E13H2" 0.1331779 "GDP-6-deoxy-D-mannose reductase"  
"OP8\_F13\_00035" 26522 "s59E25H2" 0 "GDP-6-deoxy-D-mannose reductase"  
"OP8\_F13\_00035" 26522 "s59E5H2" 1.312154 "GDP-6-deoxy-D-mannose reductase"  
"OP8\_F13\_00035" 26522 "s63E6H2" 0 "GDP-6-deoxy-D-mannose reductase"  
"OP8\_F13\_00036" 26523 "s59E13H2" 0.5409736 "GDP-6-deoxy-D-mannose reductase"  
"OP8\_F13\_00036" 26523 "s59E25H2" 0 "GDP-6-deoxy-D-mannose reductase"  
"OP8\_F13\_00036" 26523 "s59E5H2" 1.169413 "GDP-6-deoxy-D-mannose reductase"  
"OP8\_F13\_00036" 26523 "s63E6H2" 0 "GDP-6-deoxy-D-mannose reductase"  
"OP8\_F13\_00037" 26524 "s59E13H2" 0.1188231 "LPS-assembly protein LptD precursor"  
"OP8\_F13\_00037" 26524 "s59E25H2" 0 "LPS-assembly protein LptD precursor"  
"OP8\_F13\_00037" 26524 "s59E5H2" 2.012586 "LPS-assembly protein LptD precursor"  
"OP8\_F13\_00037" 26524 "s63E6H2" 0 "LPS-assembly protein LptD precursor"  
"OP8\_F13\_00038" 26525 "s59E13H2" 0.08629422 "Free methionine-R-sulfoxide reductase"  
"OP8\_F13\_00038" 26525 "s59E25H2" 0 "Free methionine-R-sulfoxide reductase"  
"OP8\_F13\_00038" 26525 "s59E5H2" 3.045051 "Free methionine-R-sulfoxide reductase"  
"OP8\_F13\_00038" 26525 "s63E6H2" 0 "Free methionine-R-sulfoxide reductase"  
"OP8\_F13\_00039" 26526 "s59E13H2" 0 "hypothetical protein"  
"OP8\_F13\_00039" 26526 "s59E25H2" 0 "hypothetical protein"  
"OP8\_F13\_00039" 26526 "s59E5H2" 0.2513348 "hypothetical protein"  
"OP8\_F13\_00039" 26526 "s63E6H2" 0 "hypothetical protein"  
"OP8\_F13\_00040" 26527 "s59E13H2" 0 "hypothetical protein"  
"OP8\_F13\_00040" 26527 "s59E25H2" 0 "hypothetical protein"  
"OP8\_F13\_00040" 26527 "s59E5H2" 0.560539 "hypothetical protein"  
"OP8\_F13\_00040" 26527 "s63E6H2" 0 "hypothetical protein"  
"OP8\_F13\_00041" 26528 "s59E13H2" 0 "hypothetical protein"  
"OP8\_F13\_00041" 26528 "s59E25H2" 0 "hypothetical protein"  
"OP8\_F13\_00041" 26528 "s59E5H2" 0.4388934 "hypothetical protein"  
"OP8\_F13\_00041" 26528 "s63E6H2" 0 "hypothetical protein"  
"OP8\_F13\_00042" 26529 "s59E13H2" 4.849207 "hypothetical protein"  
"OP8\_F13\_00042" 26529 "s59E25H2" 0 "hypothetical protein"  
"OP8\_F13\_00042" 26529 "s59E5H2" 0.5774854 "hypothetical protein"  
"OP8\_F13\_00042" 26529 "s63E6H2" 0 "hypothetical protein"  
"OP8\_F13\_00043" 26530 "s59E13H2" 0 "hypothetical protein"  
"OP8\_F13\_00043" 26530 "s59E25H2" 0 "hypothetical protein"  
"OP8\_F13\_00043" 26530 "s59E5H2" 0.2226338 "hypothetical protein"  
"OP8\_F13\_00043" 26530 "s63E6H2" 0 "hypothetical protein"  
"OP8\_F13\_00044" 26531 "s59E13H2" 0 "FRG domain protein"  
"OP8\_F13\_00044" 26531 "s59E25H2" 0 "FRG domain protein"  
"OP8\_F13\_00044" 26531 "s59E5H2" 0.2530466 "FRG domain protein"  
"OP8\_F13\_00044" 26531 "s63E6H2" 0 "FRG domain protein"  
"OP8\_F13\_00045" 26532 "s59E13H2" 0 "hypothetical protein"  
"OP8\_F13\_00045" 26532 "s59E25H2" 0 "hypothetical protein"  
"OP8\_F13\_00045" 26532 "s59E5H2" 0.5099594 "hypothetical protein"  
"OP8\_F13\_00045" 26532 "s63E6H2" 0 "hypothetical protein"  
"OP8\_F13\_00047" 26534 "s59E13H2" 0.005102952 "ATP-dependent zinc metalloprotease FtsH"  
"OP8\_F13\_00047" 26534 "s59E25H2" 0 "ATP-dependent zinc metalloprotease FtsH"

"OP8\_F13\_00047" 26534 "s59E5H2" 1.346066 "ATP-dependent zinc metalloprotease FtsH"  
"OP8\_F13\_00047" 26534 "s63E6H2" 0 "ATP-dependent zinc metalloprotease FtsH"  
"OP8\_F13\_00048" 26535 "s59E13H2" 0.00909696 "Dihydropteroate synthase"  
"OP8\_F13\_00048" 26535 "s59E25H2" 0 "Dihydropteroate synthase"  
"OP8\_F13\_00048" 26535 "s59E5H2" 1.895408 "Dihydropteroate synthase"  
"OP8\_F13\_00048" 26535 "s63E6H2" 0 "Dihydropteroate synthase"  
"OP8\_F13\_00049" 26536 "s59E13H2" 0.02857408 "DisA bacterial checkpoint controller nucleotide-binding protein"  
"OP8\_F13\_00049" 26536 "s59E25H2" 0 "DisA bacterial checkpoint controller nucleotide-binding protein"  
"OP8\_F13\_00049" 26536 "s59E5H2" 1.982433 "DisA bacterial checkpoint controller nucleotide-binding protein"  
"OP8\_F13\_00049" 26536 "s63E6H2" 0 "DisA bacterial checkpoint controller nucleotide-binding protein"  
"OP8\_F13\_00050" 26537 "s59E13H2" 0.008966968 "YbbR-like protein"  
"OP8\_F13\_00050" 26537 "s59E25H2" 0 "YbbR-like protein"  
"OP8\_F13\_00050" 26537 "s59E5H2" 2.774654 "YbbR-like protein"  
"OP8\_F13\_00050" 26537 "s63E6H2" 0 "YbbR-like protein"  
"OP8\_F13\_00051" 26538 "s59E13H2" 0.01770943 "Pyridoxine 5'-phosphate synthase"  
"OP8\_F13\_00051" 26538 "s59E25H2" 0 "Pyridoxine 5'-phosphate synthase"  
"OP8\_F13\_00051" 26538 "s59E5H2" 3.716023 "Pyridoxine 5'-phosphate synthase"  
"OP8\_F13\_00051" 26538 "s63E6H2" 0 "Pyridoxine 5'-phosphate synthase"  
"OP8\_F13\_00052" 26539 "s59E13H2" 0.0192947 "N-carbamoyl-L-amino acid hydrolase"  
"OP8\_F13\_00052" 26539 "s59E25H2" 0 "N-carbamoyl-L-amino acid hydrolase"  
"OP8\_F13\_00052" 26539 "s59E5H2" 5.815425 "N-carbamoyl-L-amino acid hydrolase"  
"OP8\_F13\_00052" 26539 "s63E6H2" 0 "N-carbamoyl-L-amino acid hydrolase"  
"OP8\_F13\_00053" 26540 "s59E13H2" 0.04855853 "Peptide chain release factor 2"  
"OP8\_F13\_00053" 26540 "s59E25H2" 0 "Peptide chain release factor 2"  
"OP8\_F13\_00053" 26540 "s59E5H2" 4.725986 "Peptide chain release factor 2"  
"OP8\_F13\_00053" 26540 "s63E6H2" 0 "Peptide chain release factor 2"  
"OP8\_F13\_00054" 26541 "s59E13H2" 0.03033683 "PTS system fructose-specific EIIABC component"  
"OP8\_F13\_00054" 26541 "s59E25H2" 0 "PTS system fructose-specific EIIABC component"  
"OP8\_F13\_00054" 26541 "s59E5H2" 3.572727 "PTS system fructose-specific EIIABC component"  
"OP8\_F13\_00054" 26541 "s63E6H2" 0 "PTS system fructose-specific EIIABC component"  
"OP8\_F13\_00055" 26542 "s59E13H2" 0.01169177 "Peptidase family M28"  
"OP8\_F13\_00055" 26542 "s59E25H2" 0 "Peptidase family M28"  
"OP8\_F13\_00055" 26542 "s59E5H2" 2.378655 "Peptidase family M28"  
"OP8\_F13\_00055" 26542 "s63E6H2" 0 "Peptidase family M28"  
"OP8\_F13\_00056" 26543 "s59E13H2" 0.041068 "Alcohol dehydrogenase 2"  
"OP8\_F13\_00056" 26543 "s59E25H2" 0 "Alcohol dehydrogenase 2"  
"OP8\_F13\_00056" 26543 "s59E5H2" 1.956152 "Alcohol dehydrogenase 2"  
"OP8\_F13\_00056" 26543 "s63E6H2" 0 "Alcohol dehydrogenase 2"  
"OP8\_F13\_00057" 26544 "s59E13H2" 0.04549776 "hypothetical protein"  
"OP8\_F13\_00057" 26544 "s59E25H2" 0 "hypothetical protein"  
"OP8\_F13\_00057" 26544 "s59E5H2" 1.941996 "hypothetical protein"  
"OP8\_F13\_00057" 26544 "s63E6H2" 0 "hypothetical protein"  
"OP8\_F13\_00058" 26545 "s59E13H2" 0 "HTH-type transcriptional repressor YtrA"  
"OP8\_F13\_00058" 26545 "s59E25H2" 0 "HTH-type transcriptional repressor YtrA"  
"OP8\_F13\_00058" 26545 "s59E5H2" 1.329762 "HTH-type transcriptional repressor YtrA"  
"OP8\_F13\_00058" 26545 "s63E6H2" 0 "HTH-type transcriptional repressor YtrA"  
"OP8\_F13\_00059" 26546 "s59E13H2" 0 "ABC transporter ATP-binding protein YtrB"

"OP8\_F13\_00059" 26546 "s59E25H2" 0 "ABC transporter ATP-binding protein YtrB"  
"OP8\_F13\_00059" 26546 "s59E5H2" 2.358752 "ABC transporter ATP-binding protein YtrB"  
"OP8\_F13\_00059" 26546 "s63E6H2" 0 "ABC transporter ATP-binding protein YtrB"  
"OP8\_F13\_00060" 26547 "s59E13H2" 0 "ABC-2 family transporter protein"  
"OP8\_F13\_00060" 26547 "s59E25H2" 0 "ABC-2 family transporter protein"  
"OP8\_F13\_00060" 26547 "s59E5H2" 2.70991 "ABC-2 family transporter protein"  
"OP8\_F13\_00060" 26547 "s63E6H2" 0 "ABC-2 family transporter protein"  
"OP8\_F13\_00061" 26548 "s59E13H2" 0.05435274 "Ferredoxin"  
"OP8\_F13\_00061" 26548 "s59E25H2" 0 "Ferredoxin"  
"OP8\_F13\_00061" 26548 "s59E5H2" 4.903313 "Ferredoxin"  
"OP8\_F13\_00061" 26548 "s63E6H2" 0 "Ferredoxin"  
"OP8\_F13\_00062" 26549 "s59E13H2" 0.01447713 "hypothetical protein"  
"OP8\_F13\_00062" 26549 "s59E25H2" 0 "hypothetical protein"  
"OP8\_F13\_00062" 26549 "s59E5H2" 4.060571 "hypothetical protein"  
"OP8\_F13\_00062" 26549 "s63E6H2" 0 "hypothetical protein"  
"OP8\_F13\_00064" 26551 "s59E13H2" 0.02021669 "hypothetical protein"  
"OP8\_F13\_00064" 26551 "s59E25H2" 0 "hypothetical protein"  
"OP8\_F13\_00064" 26551 "s59E5H2" 2.696219 "hypothetical protein"  
"OP8\_F13\_00064" 26551 "s63E6H2" 0 "hypothetical protein"  
"OP8\_F13\_00065" 26552 "s59E13H2" 0.02043542 "Thiol-disulfide oxidoreductase ResA"  
"OP8\_F13\_00065" 26552 "s59E25H2" 0 "Thiol-disulfide oxidoreductase ResA"  
"OP8\_F13\_00065" 26552 "s59E5H2" 4.027484 "Thiol-disulfide oxidoreductase ResA"  
"OP8\_F13\_00065" 26552 "s63E6H2" 0 "Thiol-disulfide oxidoreductase ResA"  
"OP8\_F13\_00066" 26553 "s59E13H2" 0.003362637 "Methylamine utilisation protein MauE"  
"OP8\_F13\_00066" 26553 "s59E25H2" 0 "Methylamine utilisation protein MauE"  
"OP8\_F13\_00066" 26553 "s59E5H2" 4.369867 "Methylamine utilisation protein MauE"  
"OP8\_F13\_00066" 26553 "s63E6H2" 0 "Methylamine utilisation protein MauE"  
"OP8\_F13\_00067" 26554 "s59E13H2" 0 "Putative thiosulfate sulfurtransferase precursor"  
"OP8\_F13\_00067" 26554 "s59E25H2" 0 "Putative thiosulfate sulfurtransferase precursor"  
"OP8\_F13\_00067" 26554 "s59E5H2" 3.925394 "Putative thiosulfate sulfurtransferase precursor"  
"OP8\_F13\_00067" 26554 "s63E6H2" 0 "Putative thiosulfate sulfurtransferase precursor"  
"OP8\_F13\_00068" 26555 "s59E13H2" 0.002555653 "hypothetical protein"  
"OP8\_F13\_00068" 26555 "s59E25H2" 0 "hypothetical protein"  
"OP8\_F13\_00068" 26555 "s59E5H2" 3.094374 "hypothetical protein"  
"OP8\_F13\_00068" 26555 "s63E6H2" 0 "hypothetical protein"  
"OP8\_F13\_00069" 26556 "s59E13H2" 0 "NPCBM-associated, NEW3 domain of alpha-galactosidase"  
"OP8\_F13\_00069" 26556 "s59E25H2" 0 "NPCBM-associated, NEW3 domain of alpha-galactosidase"  
"OP8\_F13\_00069" 26556 "s59E5H2" 1.087907 "NPCBM-associated, NEW3 domain of alpha-galactosidase"  
"OP8\_F13\_00069" 26556 "s63E6H2" 0 "NPCBM-associated, NEW3 domain of alpha-galactosidase"  
"OP8\_F13\_00070" 26557 "s59E13H2" 0.007728436 "hypothetical protein"  
"OP8\_F13\_00070" 26557 "s59E25H2" 0 "hypothetical protein"  
"OP8\_F13\_00070" 26557 "s59E5H2" 0.7701602 "hypothetical protein"  
"OP8\_F13\_00070" 26557 "s63E6H2" 0 "hypothetical protein"  
"OP8\_F13\_00071" 26558 "s59E13H2" 0.007914566 "hypothetical protein"  
"OP8\_F13\_00071" 26558 "s59E25H2" 0 "hypothetical protein"  
"OP8\_F13\_00071" 26558 "s59E5H2" 0.7757583 "hypothetical protein"  
"OP8\_F13\_00071" 26558 "s63E6H2" 0 "hypothetical protein"

"OP8\_F13\_00072" 26559 "s59E13H2" 0.003356195 "hypothetical protein"  
"OP8\_F13\_00072" 26559 "s59E25H2" 0 "hypothetical protein"  
"OP8\_F13\_00072" 26559 "s59E5H2" 1.005417 "hypothetical protein"  
"OP8\_F13\_00072" 26559 "s63E6H2" 0 "hypothetical protein"  
"OP8\_F13\_00073" 26560 "s59E13H2" 0.02600735 "Prolyl tripeptidyl peptidase precursor"  
"OP8\_F13\_00073" 26560 "s59E25H2" 0.08652189 "Prolyl tripeptidyl peptidase precursor"  
"OP8\_F13\_00073" 26560 "s59E5H2" 4.928713 "Prolyl tripeptidyl peptidase precursor"  
"OP8\_F13\_00073" 26560 "s63E6H2" 0 "Prolyl tripeptidyl peptidase precursor"  
"OP8\_F13\_00076" 26563 "s59E13H2" 0.001922892 "hypothetical protein"  
"OP8\_F13\_00076" 26563 "s59E25H2" 0 "hypothetical protein"  
"OP8\_F13\_00076" 26563 "s59E5H2" 14.21269 "hypothetical protein"  
"OP8\_F13\_00076" 26563 "s63E6H2" 0.07117045 "hypothetical protein"  
"OP8\_F13\_00077" 26564 "s59E13H2" 0.07592052 "Translation initiation factor IF-2"  
"OP8\_F13\_00077" 26564 "s59E25H2" 0 "Translation initiation factor IF-2"  
"OP8\_F13\_00077" 26564 "s59E5H2" 2.999859 "Translation initiation factor IF-2"  
"OP8\_F13\_00077" 26564 "s63E6H2" 0 "Translation initiation factor IF-2"  
"OP8\_F13\_00078" 26565 "s59E13H2" 0.09168063 "hypothetical protein"  
"OP8\_F13\_00078" 26565 "s59E25H2" 0 "hypothetical protein"  
"OP8\_F13\_00078" 26565 "s59E5H2" 4.069835 "hypothetical protein"  
"OP8\_F13\_00078" 26565 "s63E6H2" 0 "hypothetical protein"  
"OP8\_F13\_00079" 26566 "s59E13H2" 0.09593169 "Ribosome-binding factor A"  
"OP8\_F13\_00079" 26566 "s59E25H2" 0 "Ribosome-binding factor A"  
"OP8\_F13\_00079" 26566 "s59E5H2" 4.461275 "Ribosome-binding factor A"  
"OP8\_F13\_00079" 26566 "s63E6H2" 0 "Ribosome-binding factor A"  
"OP8\_F13\_00080" 26567 "s59E13H2" 0.06884575 "Bifunctional oligoribonuclease and PAP phosphatase NrnA"  
"OP8\_F13\_00080" 26567 "s59E25H2" 0 "Bifunctional oligoribonuclease and PAP phosphatase NrnA"  
"OP8\_F13\_00080" 26567 "s59E5H2" 3.658724 "Bifunctional oligoribonuclease and PAP phosphatase NrnA"  
"OP8\_F13\_00080" 26567 "s63E6H2" 0 "Bifunctional oligoribonuclease and PAP phosphatase NrnA"  
"OP8\_F13\_00081" 26568 "s59E13H2" 0.05929136 "tRNA pseudouridine synthase B"  
"OP8\_F13\_00081" 26568 "s59E25H2" 0 "tRNA pseudouridine synthase B"  
"OP8\_F13\_00081" 26568 "s59E5H2" 4.287925 "tRNA pseudouridine synthase B"  
"OP8\_F13\_00081" 26568 "s63E6H2" 0 "tRNA pseudouridine synthase B"  
"OP8\_F13\_00082" 26569 "s59E13H2" 0.049429 "Sodium:neurotransmitter symporter family protein"  
"OP8\_F13\_00082" 26569 "s59E25H2" 0 "Sodium:neurotransmitter symporter family protein"  
"OP8\_F13\_00082" 26569 "s59E5H2" 4.535111 "Sodium:neurotransmitter symporter family protein"  
"OP8\_F13\_00082" 26569 "s63E6H2" 0 "Sodium:neurotransmitter symporter family protein"  
"OP8\_F13\_00083" 26570 "s59E13H2" 0.0145392 "Prolyl tripeptidyl peptidase precursor"  
"OP8\_F13\_00083" 26570 "s59E25H2" 0 "Prolyl tripeptidyl peptidase precursor"  
"OP8\_F13\_00083" 26570 "s59E5H2" 2.266568 "Prolyl tripeptidyl peptidase precursor"  
"OP8\_F13\_00083" 26570 "s63E6H2" 0 "Prolyl tripeptidyl peptidase precursor"  
"OP8\_F13\_00084" 26571 "s59E13H2" 0.01841312 "S-adenosyl-L-methionine-dependent 2-deoxy-scylo-inosamine dehydrogenase"  
"OP8\_F13\_00084" 26571 "s59E25H2" 0 "S-adenosyl-L-methionine-dependent 2-deoxy-scylo-inosamine dehydrogenase"  
"OP8\_F13\_00084" 26571 "s59E5H2" 0.9812905 "S-adenosyl-L-methionine-dependent 2-deoxy-scylo-inosamine dehydrogenase"  
"OP8\_F13\_00084" 26571 "s63E6H2" 0 "S-adenosyl-L-methionine-dependent 2-deoxy-scylo-inosamine dehydrogenase"  
"OP8\_F13\_00085" 26572 "s59E13H2" 0.01178257 "GDP-mannose 4,6-dehydratase"  
"OP8\_F13\_00085" 26572 "s59E25H2" 0 "GDP-mannose 4,6-dehydratase"  
"OP8\_F13\_00085" 26572 "s59E5H2" 0.2234416 "GDP-mannose 4,6-dehydratase"



"OP8\_F13\_00085" 26572 "s63E6H2" 0 "GDP-mannose 4,6-dehydratase"  
"OP8\_F13\_00086" 26573 "s59E13H2" 0 "Nucleotidyltransferase domain protein"  
"OP8\_F13\_00086" 26573 "s59E25H2" 0 "Nucleotidyltransferase domain protein"  
"OP8\_F13\_00086" 26573 "s59E5H2" 0.1555013 "Nucleotidyltransferase domain protein"  
"OP8\_F13\_00086" 26573 "s63E6H2" 0 "Nucleotidyltransferase domain protein"  
"OP8\_F13\_00088" 26575 "s59E13H2" 0 "hypothetical protein"  
"OP8\_F13\_00088" 26575 "s59E25H2" 0 "hypothetical protein"  
"OP8\_F13\_00088" 26575 "s59E5H2" 0.3115772 "hypothetical protein"  
"OP8\_F13\_00088" 26575 "s63E6H2" 0 "hypothetical protein"  
"OP8\_F13\_00089" 26576 "s59E13H2" 0 "hypothetical protein"  
"OP8\_F13\_00089" 26576 "s59E25H2" 0 "hypothetical protein"  
"OP8\_F13\_00089" 26576 "s59E5H2" 0.1942526 "hypothetical protein"  
"OP8\_F13\_00089" 26576 "s63E6H2" 0 "hypothetical protein"  
"OP8\_F13\_00090" 26577 "s59E13H2" 0.003060706 "Archaeal ATPase"  
"OP8\_F13\_00090" 26577 "s59E25H2" 0 "Archaeal ATPase"  
"OP8\_F13\_00090" 26577 "s59E5H2" 0.355057 "Archaeal ATPase"  
"OP8\_F13\_00090" 26577 "s63E6H2" 0 "Archaeal ATPase"  
"OP8\_F13\_00091" 26578 "s59E13H2" 0 "hypothetical protein"  
"OP8\_F13\_00091" 26578 "s59E25H2" 0 "hypothetical protein"  
"OP8\_F13\_00091" 26578 "s59E5H2" 0 "hypothetical protein"  
"OP8\_F13\_00091" 26578 "s63E6H2" 0 "hypothetical protein"  
"OP8\_F13\_00092" 26579 "s59E13H2" 0 "HEPN domain protein"  
"OP8\_F13\_00092" 26579 "s59E25H2" 0 "HEPN domain protein"  
"OP8\_F13\_00092" 26579 "s59E5H2" 0.02291732 "HEPN domain protein"  
"OP8\_F13\_00092" 26579 "s63E6H2" 0 "HEPN domain protein"  
"OP8\_F13\_00093" 26580 "s59E13H2" 0.01426462 "Nucleotidyltransferase domain protein"  
"OP8\_F13\_00093" 26580 "s59E25H2" 0 "Nucleotidyltransferase domain protein"  
"OP8\_F13\_00093" 26580 "s59E5H2" 0.05944302 "Nucleotidyltransferase domain protein"  
"OP8\_F13\_00093" 26580 "s63E6H2" 0 "Nucleotidyltransferase domain protein"  
"OP8\_F13\_00094" 26581 "s59E13H2" 0 "GDP-mannose 4,6-dehydratase"  
"OP8\_F13\_00094" 26581 "s59E25H2" 0 "GDP-mannose 4,6-dehydratase"  
"OP8\_F13\_00094" 26581 "s59E5H2" 0.03393068 "GDP-mannose 4,6-dehydratase"  
"OP8\_F13\_00094" 26581 "s63E6H2" 0 "GDP-mannose 4,6-dehydratase"  
"OP8\_F13\_00095" 26582 "s59E13H2" 0.007315905 "hypothetical protein"  
"OP8\_F13\_00095" 26582 "s59E25H2" 0 "hypothetical protein"  
"OP8\_F13\_00095" 26582 "s59E5H2" 0.280054 "hypothetical protein"  
"OP8\_F13\_00095" 26582 "s63E6H2" 0 "hypothetical protein"  
"OP8\_F13\_00096" 26583 "s59E13H2" 0.002885654 "Nucleotidyltransferase domain protein"  
"OP8\_F13\_00096" 26583 "s59E25H2" 0 "Nucleotidyltransferase domain protein"  
"OP8\_F13\_00096" 26583 "s59E5H2" 0.53316 "Nucleotidyltransferase domain protein"  
"OP8\_F13\_00096" 26583 "s63E6H2" 0 "Nucleotidyltransferase domain protein"  
"OP8\_F13\_00097" 26584 "s59E13H2" 0 "hypothetical protein"  
"OP8\_F13\_00097" 26584 "s59E25H2" 0 "hypothetical protein"  
"OP8\_F13\_00097" 26584 "s59E5H2" 0.01992532 "hypothetical protein"  
"OP8\_F13\_00097" 26584 "s63E6H2" 0 "hypothetical protein"  
"OP8\_F13\_00098" 26585 "s59E13H2" 0 "Zinc transporter ZupT"  
"OP8\_F13\_00098" 26585 "s59E25H2" 0 "Zinc transporter ZupT"

"OP8\_F13\_00098" 26585 "s59E5H2" 0.9453211 "Zinc transporter ZupT"  
"OP8\_F13\_00098" 26585 "s63E6H2" 0 "Zinc transporter ZupT"  
"OP8\_F13\_00099" 26586 "s59E13H2" 0 "hypothetical protein"  
"OP8\_F13\_00099" 26586 "s59E25H2" 0 "hypothetical protein"  
"OP8\_F13\_00099" 26586 "s59E5H2" 0.1082471 "hypothetical protein"  
"OP8\_F13\_00099" 26586 "s63E6H2" 0 "hypothetical protein"  
"OP8\_F13\_00100" 26587 "s59E13H2" 0.003142472 "Capsule biosynthesis protein CapB"  
"OP8\_F13\_00100" 26587 "s59E25H2" 0 "Capsule biosynthesis protein CapB"  
"OP8\_F13\_00100" 26587 "s59E5H2" 0.3080378 "Capsule biosynthesis protein CapB"  
"OP8\_F13\_00100" 26587 "s63E6H2" 0 "Capsule biosynthesis protein CapB"  
"OP8\_F13\_00101" 26588 "s59E13H2" 0 "Capsule biosynthesis protein CapC"  
"OP8\_F13\_00101" 26588 "s59E25H2" 0 "Capsule biosynthesis protein CapC"  
"OP8\_F13\_00101" 26588 "s59E5H2" 1.38046 "Capsule biosynthesis protein CapC"  
"OP8\_F13\_00101" 26588 "s63E6H2" 0 "Capsule biosynthesis protein CapC"  
"OP8\_F13\_00102" 26589 "s59E13H2" 0.002815803 "hypothetical protein"  
"OP8\_F13\_00102" 26589 "s59E25H2" 0 "hypothetical protein"  
"OP8\_F13\_00102" 26589 "s59E5H2" 2.289954 "hypothetical protein"  
"OP8\_F13\_00102" 26589 "s63E6H2" 0 "hypothetical protein"  
"OP8\_F13\_00103" 26590 "s59E13H2" 0 "Succinylglutamate desuccinylase / Aspartoacylase family protein"  
"OP8\_F13\_00103" 26590 "s59E25H2" 0 "Succinylglutamate desuccinylase / Aspartoacylase family protein"  
"OP8\_F13\_00103" 26590 "s59E5H2" 2.414152 "Succinylglutamate desuccinylase / Aspartoacylase family protein"  
"OP8\_F13\_00103" 26590 "s63E6H2" 0 "Succinylglutamate desuccinylase / Aspartoacylase family protein"  
"OP8\_F13\_00105" 26592 "s59E13H2" 1.331823 "UvrABC system protein C"  
"OP8\_F13\_00105" 26592 "s59E25H2" 0 "UvrABC system protein C"  
"OP8\_F13\_00105" 26592 "s59E5H2" 0.8173057 "UvrABC system protein C"  
"OP8\_F13\_00105" 26592 "s63E6H2" 0 "UvrABC system protein C"  
"OP8\_F13\_00106" 26593 "s59E13H2" 1.325791 "UvrABC system protein B"  
"OP8\_F13\_00106" 26593 "s59E25H2" 0 "UvrABC system protein B"  
"OP8\_F13\_00106" 26593 "s59E5H2" 0.5679007 "UvrABC system protein B"  
"OP8\_F13\_00106" 26593 "s63E6H2" 0 "UvrABC system protein B"  
"OP8\_F13\_00109" 26596 "s59E13H2" 0.1026809 "Dispase autolysis-inducing protein precursor"  
"OP8\_F13\_00109" 26596 "s59E25H2" 0.09537211 "Dispase autolysis-inducing protein precursor"  
"OP8\_F13\_00109" 26596 "s59E5H2" 3.634084 "Dispase autolysis-inducing protein precursor"  
"OP8\_F13\_00109" 26596 "s63E6H2" 0 "Dispase autolysis-inducing protein precursor"  
"OP8\_F13\_00110" 26597 "s59E13H2" 0.2541959 "putative sensor histidine kinase pdtaS"  
"OP8\_F13\_00110" 26597 "s59E25H2" 0 "putative sensor histidine kinase pdtaS"  
"OP8\_F13\_00110" 26597 "s59E5H2" 0.3498516 "putative sensor histidine kinase pdtaS"  
"OP8\_F13\_00110" 26597 "s63E6H2" 0 "putative sensor histidine kinase pdtaS"  
"OP8\_F13\_00111" 26598 "s59E13H2" 0.003544421 "hypothetical protein"  
"OP8\_F13\_00111" 26598 "s59E25H2" 0 "hypothetical protein"  
"OP8\_F13\_00111" 26598 "s59E5H2" 0.460202 "hypothetical protein"  
"OP8\_F13\_00111" 26598 "s63E6H2" 0 "hypothetical protein"  
"OP8\_F13\_00112" 26599 "s59E13H2" 0.5788166 "putative sensor histidine kinase pdtaS"  
"OP8\_F13\_00112" 26599 "s59E25H2" 0 "putative sensor histidine kinase pdtaS"  
"OP8\_F13\_00112" 26599 "s59E5H2" 1.097115 "putative sensor histidine kinase pdtaS"  
"OP8\_F13\_00112" 26599 "s63E6H2" 0 "putative sensor histidine kinase pdtaS"  
"OP8\_F13\_00113" 26600 "s59E13H2" 0.6447862 "Dipeptidase A"

"OP8\_F13\_00113" 26600 "s59E25H2" 0.1435106 "Dipeptidase A"  
"OP8\_F13\_00113" 26600 "s59E5H2" 1.48564 "Dipeptidase A"  
"OP8\_F13\_00113" 26600 "s63E6H2" 0 "Dipeptidase A"  
"OP8\_F13\_00114" 26601 "s59E13H2" 0.4648773 "Dipeptidase A"  
"OP8\_F13\_00114" 26601 "s59E25H2" 0 "Dipeptidase A"  
"OP8\_F13\_00114" 26601 "s59E5H2" 3.418516 "Dipeptidase A"  
"OP8\_F13\_00114" 26601 "s63E6H2" 0 "Dipeptidase A"  
"OP8\_F13\_00115" 26602 "s59E13H2" 0.3265377 "Aspartate racemase"  
"OP8\_F13\_00115" 26602 "s59E25H2" 0 "Aspartate racemase"  
"OP8\_F13\_00115" 26602 "s59E5H2" 3.676184 "Aspartate racemase"  
"OP8\_F13\_00115" 26602 "s63E6H2" 0 "Aspartate racemase"  
"OP8\_F13\_00116" 26603 "s59E13H2" 0.2602872 "Peptidase family S58"  
"OP8\_F13\_00116" 26603 "s59E25H2" 0 "Peptidase family S58"  
"OP8\_F13\_00116" 26603 "s59E5H2" 2.684133 "Peptidase family S58"  
"OP8\_F13\_00116" 26603 "s63E6H2" 0 "Peptidase family S58"  
"OP8\_F13\_00118" 26605 "s59E13H2" 0 "FG-GAP repeat protein"  
"OP8\_F13\_00118" 26605 "s59E25H2" 0 "FG-GAP repeat protein"  
"OP8\_F13\_00118" 26605 "s59E5H2" 0.2729261 "FG-GAP repeat protein"  
"OP8\_F13\_00118" 26605 "s63E6H2" 0 "FG-GAP repeat protein"  
"OP8\_F13\_00119" 26606 "s59E13H2" 0 "hypothetical protein"  
"OP8\_F13\_00119" 26606 "s59E25H2" 0 "hypothetical protein"  
"OP8\_F13\_00119" 26606 "s59E5H2" 7.129092 "hypothetical protein"  
"OP8\_F13\_00119" 26606 "s63E6H2" 0 "hypothetical protein"  
"OP8\_F13\_00120" 26607 "s59E13H2" 0 "hypothetical protein"  
"OP8\_F13\_00120" 26607 "s59E25H2" 0 "hypothetical protein"  
"OP8\_F13\_00120" 26607 "s59E5H2" 5.681837 "hypothetical protein"  
"OP8\_F13\_00120" 26607 "s63E6H2" 0 "hypothetical protein"  
"OP8\_F13\_00121" 26608 "s59E13H2" 0 "Pyruvate kinase"  
"OP8\_F13\_00121" 26608 "s59E25H2" 0 "Pyruvate kinase"  
"OP8\_F13\_00121" 26608 "s59E5H2" 6.686515 "Pyruvate kinase"  
"OP8\_F13\_00121" 26608 "s63E6H2" 0 "Pyruvate kinase"  
"OP8\_F13\_00123" 26610 "s59E13H2" 0 "Capsule biosynthesis protein CapB"  
"OP8\_F13\_00123" 26610 "s59E25H2" 0 "Capsule biosynthesis protein CapB"  
"OP8\_F13\_00123" 26610 "s59E5H2" 1.460626 "Capsule biosynthesis protein CapB"  
"OP8\_F13\_00123" 26610 "s63E6H2" 0 "Capsule biosynthesis protein CapB"  
"OP8\_F13\_00124" 26611 "s59E13H2" 0 "hypothetical protein"  
"OP8\_F13\_00124" 26611 "s59E25H2" 0 "hypothetical protein"  
"OP8\_F13\_00124" 26611 "s59E5H2" 1.289286 "hypothetical protein"  
"OP8\_F13\_00124" 26611 "s63E6H2" 0 "hypothetical protein"  
"OP8\_F13\_00125" 26613 "s59E13H2" 0.0005955131 "hypothetical protein"  
"OP8\_F13\_00125" 26613 "s59E25H2" 0 "hypothetical protein"  
"OP8\_F13\_00125" 26613 "s59E5H2" 13.81008 "hypothetical protein"  
"OP8\_F13\_00125" 26613 "s63E6H2" 0 "hypothetical protein"  
"OP8\_F13\_00126" 26614 "s59E13H2" 0.002199519 "Transposase IS66 family protein"  
"OP8\_F13\_00126" 26614 "s59E25H2" 0 "Transposase IS66 family protein"  
"OP8\_F13\_00126" 26614 "s59E5H2" 17.86796 "Transposase IS66 family protein"  
"OP8\_F13\_00126" 26614 "s63E6H2" 0 "Transposase IS66 family protein"

"OP8\_F13\_00127" 26615 "s59E13H2" 0 "hypothetical protein"  
"OP8\_F13\_00127" 26615 "s59E25H2" 0 "hypothetical protein"  
"OP8\_F13\_00127" 26615 "s59E5H2" 0.4523667 "hypothetical protein"  
"OP8\_F13\_00127" 26615 "s63E6H2" 0 "hypothetical protein"  
"OP8\_F13\_00128" 26616 "s59E13H2" 0 "Type-1 restriction enzyme MjaXIP specificity protein"  
"OP8\_F13\_00128" 26616 "s59E25H2" 0 "Type-1 restriction enzyme MjaXIP specificity protein"  
"OP8\_F13\_00128" 26616 "s59E5H2" 0.5182865 "Type-1 restriction enzyme MjaXIP specificity protein"  
"OP8\_F13\_00128" 26616 "s63E6H2" 0 "Type-1 restriction enzyme MjaXIP specificity protein"  
"OP8\_F13\_00129" 26617 "s59E13H2" 0 "Type I restriction enzyme EcoR124II R protein"  
"OP8\_F13\_00129" 26617 "s59E25H2" 0 "Type I restriction enzyme EcoR124II R protein"  
"OP8\_F13\_00129" 26617 "s59E5H2" 1.022642 "Type I restriction enzyme EcoR124II R protein"  
"OP8\_F13\_00129" 26617 "s63E6H2" 0 "Type I restriction enzyme EcoR124II R protein"  
"OP8\_F13\_00130" 26618 "s59E13H2" 0 "hypothetical protein"  
"OP8\_F13\_00130" 26618 "s59E25H2" 0 "hypothetical protein"  
"OP8\_F13\_00130" 26618 "s59E5H2" 0.9137215 "hypothetical protein"  
"OP8\_F13\_00130" 26618 "s63E6H2" 0 "hypothetical protein"  
"OP8\_F13\_00131" 26619 "s59E13H2" 0 "heat shock protein 90"  
"OP8\_F13\_00131" 26619 "s59E25H2" 0 "heat shock protein 90"  
"OP8\_F13\_00131" 26619 "s59E5H2" 1.427709 "heat shock protein 90"  
"OP8\_F13\_00131" 26619 "s63E6H2" 0 "heat shock protein 90"  
"OP8\_F13\_00138" 26626 "s59E13H2" 0.05171332 "N-substituted formamide deformylase precursor"  
"OP8\_F13\_00138" 26626 "s59E25H2" 0 "N-substituted formamide deformylase precursor"  
"OP8\_F13\_00138" 26626 "s59E5H2" 2.194105 "N-substituted formamide deformylase precursor"  
"OP8\_F13\_00138" 26626 "s63E6H2" 0 "N-substituted formamide deformylase precursor"  
"OP8\_F13\_00139" 26627 "s59E13H2" 0.002829088 "N-substituted formamide deformylase precursor"  
"OP8\_F13\_00139" 26627 "s59E25H2" 0 "N-substituted formamide deformylase precursor"  
"OP8\_F13\_00139" 26627 "s59E5H2" 4.076845 "N-substituted formamide deformylase precursor"  
"OP8\_F13\_00139" 26627 "s63E6H2" 0 "N-substituted formamide deformylase precursor"  
"OP8\_F13\_00140" 26628 "s59E13H2" 0 "hypothetical protein"  
"OP8\_F13\_00140" 26628 "s59E25H2" 0 "hypothetical protein"  
"OP8\_F13\_00140" 26628 "s59E5H2" 3.855471 "hypothetical protein"  
"OP8\_F13\_00140" 26628 "s63E6H2" 0 "hypothetical protein"  
"OP8\_F13\_00141" 26629 "s59E13H2" 0.007844653 "hypothetical protein"  
"OP8\_F13\_00141" 26629 "s59E25H2" 0.1547619 "hypothetical protein"  
"OP8\_F13\_00141" 26629 "s59E5H2" 2.746731 "hypothetical protein"  
"OP8\_F13\_00141" 26629 "s63E6H2" 0 "hypothetical protein"  
"OP8\_F13\_00142" 26630 "s59E13H2" 0.009865303 "hypothetical protein"  
"OP8\_F13\_00142" 26630 "s59E25H2" 0 "hypothetical protein"  
"OP8\_F13\_00142" 26630 "s59E5H2" 2.46752 "hypothetical protein"  
"OP8\_F13\_00142" 26630 "s63E6H2" 0 "hypothetical protein"  
"OP8\_F13\_00143" 26631 "s59E13H2" 0.03482496 "hypothetical protein"  
"OP8\_F13\_00143" 26631 "s59E25H2" 0 "hypothetical protein"  
"OP8\_F13\_00143" 26631 "s59E5H2" 1.699676 "hypothetical protein"  
"OP8\_F13\_00143" 26631 "s63E6H2" 0 "hypothetical protein"  
"OP8\_F13\_00144" 26632 "s59E13H2" 0.03095018 "DNA polymerase I"  
"OP8\_F13\_00144" 26632 "s59E25H2" 0 "DNA polymerase I"  
"OP8\_F13\_00144" 26632 "s59E5H2" 3.107922 "DNA polymerase I"

"OP8\_F13\_00144" 26632 "s63E6H2" 0 "DNA polymerase I"  
"OP8\_F13\_00149" 26637 "s59E13H2" 0 "hypothetical protein"  
"OP8\_F13\_00149" 26637 "s59E25H2" 0 "hypothetical protein"  
"OP8\_F13\_00149" 26637 "s59E5H2" 0.3209923 "hypothetical protein"  
"OP8\_F13\_00149" 26637 "s63E6H2" 0 "hypothetical protein"  
"OP8\_F13\_00150" 26638 "s59E13H2" 0 "hypothetical protein"  
"OP8\_F13\_00150" 26638 "s59E25H2" 0 "hypothetical protein"  
"OP8\_F13\_00150" 26638 "s59E5H2" 0.3662189 "hypothetical protein"  
"OP8\_F13\_00150" 26638 "s63E6H2" 0 "hypothetical protein"  
"OP8\_F13\_00151" 26639 "s59E13H2" 0 "hypothetical protein"  
"OP8\_F13\_00151" 26639 "s59E25H2" 0 "hypothetical protein"  
"OP8\_F13\_00151" 26639 "s59E5H2" 0.2731116 "hypothetical protein"  
"OP8\_F13\_00151" 26639 "s63E6H2" 0.0136426 "hypothetical protein"  
"OP8\_F13\_00152" 26640 "s59E13H2" 0 "hypothetical protein"  
"OP8\_F13\_00152" 26640 "s59E25H2" 0 "hypothetical protein"  
"OP8\_F13\_00152" 26640 "s59E5H2" 0.2839614 "hypothetical protein"  
"OP8\_F13\_00152" 26640 "s63E6H2" 0 "hypothetical protein"  
"OP8\_F13\_00153" 26641 "s59E13H2" 0.0008478365 "hypothetical protein"  
"OP8\_F13\_00153" 26641 "s59E25H2" 0 "hypothetical protein"  
"OP8\_F13\_00153" 26641 "s59E5H2" 0.1960022 "hypothetical protein"  
"OP8\_F13\_00153" 26641 "s63E6H2" 0 "hypothetical protein"  
"OP8\_F13\_00154" 26642 "s59E13H2" 0 "ECF RNA polymerase sigma-E factor"  
"OP8\_F13\_00154" 26642 "s59E25H2" 0 "ECF RNA polymerase sigma-E factor"  
"OP8\_F13\_00154" 26642 "s59E5H2" 0.7092843 "ECF RNA polymerase sigma-E factor"  
"OP8\_F13\_00154" 26642 "s63E6H2" 0 "ECF RNA polymerase sigma-E factor"  
"OP8\_F13\_00155" 26643 "s59E13H2" 0 "hypothetical protein"  
"OP8\_F13\_00155" 26643 "s59E25H2" 0 "hypothetical protein"  
"OP8\_F13\_00155" 26643 "s59E5H2" 0.7415952 "hypothetical protein"  
"OP8\_F13\_00155" 26643 "s63E6H2" 0 "hypothetical protein"  
"OP8\_F13\_00156" 26644 "s59E13H2" 0 "Outer membrane protein assembly factor BamD"  
"OP8\_F13\_00156" 26644 "s59E25H2" 0 "Outer membrane protein assembly factor BamD"  
"OP8\_F13\_00156" 26644 "s59E5H2" 0.9784456 "Outer membrane protein assembly factor BamD"  
"OP8\_F13\_00156" 26644 "s63E6H2" 0 "Outer membrane protein assembly factor BamD"  
"OP8\_F13\_00157" 26645 "s59E13H2" 0.0006323266 "putative lyase"  
"OP8\_F13\_00157" 26645 "s59E25H2" 0 "putative lyase"  
"OP8\_F13\_00157" 26645 "s59E5H2" 1.467133 "putative lyase"  
"OP8\_F13\_00157" 26645 "s63E6H2" 0 "putative lyase"  
"OP8\_F13\_00158" 26646 "s59E13H2" 0.3622998 "Tyrosine--tRNA ligase"  
"OP8\_F13\_00158" 26646 "s59E25H2" 0 "Tyrosine--tRNA ligase"  
"OP8\_F13\_00158" 26646 "s59E5H2" 3.499338 "Tyrosine--tRNA ligase"  
"OP8\_F13\_00158" 26646 "s63E6H2" 0 "Tyrosine--tRNA ligase"  
"OP8\_F13\_00159" 26647 "s59E13H2" 0 "hypothetical protein"  
"OP8\_F13\_00159" 26647 "s59E25H2" 0 "hypothetical protein"  
"OP8\_F13\_00159" 26647 "s59E5H2" 4.349829 "hypothetical protein"  
"OP8\_F13\_00159" 26647 "s63E6H2" 0 "hypothetical protein"  
"OP8\_F13\_00160" 26648 "s59E13H2" 0.004791235 "hypothetical protein"  
"OP8\_F13\_00160" 26648 "s59E25H2" 0 "hypothetical protein"

"OP8\_F13\_00160" 26648 "s59E5H2" 4.575032 "hypothetical protein"  
"OP8\_F13\_00160" 26648 "s63E6H2" 0 "hypothetical protein"  
"OP8\_F13\_00161" 26649 "s59E13H2" 0.007890288 "Indolepyruvate oxidoreductase subunit lorB"  
"OP8\_F13\_00161" 26649 "s59E25H2" 0.4066318 "Indolepyruvate oxidoreductase subunit lorB"  
"OP8\_F13\_00161" 26649 "s59E5H2" 2.124076 "Indolepyruvate oxidoreductase subunit lorB"  
"OP8\_F13\_00161" 26649 "s63E6H2" 0 "Indolepyruvate oxidoreductase subunit lorB"  
"OP8\_F13\_00162" 26650 "s59E13H2" 0 "Indolepyruvate oxidoreductase subunit lorA"  
"OP8\_F13\_00162" 26650 "s59E25H2" 0.1632399 "Indolepyruvate oxidoreductase subunit lorA"  
"OP8\_F13\_00162" 26650 "s59E5H2" 2.057648 "Indolepyruvate oxidoreductase subunit lorA"  
"OP8\_F13\_00162" 26650 "s63E6H2" 0 "Indolepyruvate oxidoreductase subunit lorA"  
"OP8\_F13\_00163" 26651 "s59E13H2" 0.0006323266 "Aminopeptidase C"  
"OP8\_F13\_00163" 26651 "s59E25H2" 0 "Aminopeptidase C"  
"OP8\_F13\_00163" 26651 "s59E5H2" 0.9673647 "Aminopeptidase C"  
"OP8\_F13\_00163" 26651 "s63E6H2" 0 "Aminopeptidase C"  
"OP8\_F13\_00164" 26652 "s59E13H2" 0 "Late embryogenesis abundant protein"  
"OP8\_F13\_00164" 26652 "s59E25H2" 0 "Late embryogenesis abundant protein"  
"OP8\_F13\_00164" 26652 "s59E5H2" 1.424863 "Late embryogenesis abundant protein"  
"OP8\_F13\_00164" 26652 "s63E6H2" 0 "Late embryogenesis abundant protein"  
"OP8\_F13\_00165" 26653 "s59E13H2" 0 "UDP-Glc:alpha-D-GlcNAc-diphosphoundecaprenol beta-1,3-glucosyltransferase WfgD"  
"OP8\_F13\_00165" 26653 "s59E25H2" 0 "UDP-Glc:alpha-D-GlcNAc-diphosphoundecaprenol beta-1,3-glucosyltransferase WfgD"  
"OP8\_F13\_00165" 26653 "s59E5H2" 1.713474 "UDP-Glc:alpha-D-GlcNAc-diphosphoundecaprenol beta-1,3-glucosyltransferase WfgD"  
"OP8\_F13\_00165" 26653 "s63E6H2" 0 "UDP-Glc:alpha-D-GlcNAc-diphosphoundecaprenol beta-1,3-glucosyltransferase WfgD"  
"OP8\_F13\_00166" 26654 "s59E13H2" 0.004246147 "NADH dehydrogenase"  
"OP8\_F13\_00166" 26654 "s59E25H2" 0 "NADH dehydrogenase"  
"OP8\_F13\_00166" 26654 "s59E5H2" 1.997279 "NADH dehydrogenase"  
"OP8\_F13\_00166" 26654 "s63E6H2" 0 "NADH dehydrogenase"  
"OP8\_F13\_00167" 26655 "s59E13H2" 0.000124844 "Putative ribose 1,5-bisphosphate isomerase"  
"OP8\_F13\_00167" 26655 "s59E25H2" 0 "Putative ribose 1,5-bisphosphate isomerase"  
"OP8\_F13\_00167" 26655 "s59E5H2" 2.627589 "Putative ribose 1,5-bisphosphate isomerase"  
"OP8\_F13\_00167" 26655 "s63E6H2" 0 "Putative ribose 1,5-bisphosphate isomerase"  
"OP8\_F13\_00168" 26656 "s59E13H2" 0 "hypothetical protein"  
"OP8\_F13\_00168" 26656 "s59E25H2" 0 "hypothetical protein"  
"OP8\_F13\_00168" 26656 "s59E5H2" 2.860356 "hypothetical protein"  
"OP8\_F13\_00168" 26656 "s63E6H2" 0 "hypothetical protein"  
"OP8\_F13\_00169" 26657 "s59E13H2" 0 "Threonylcarbamoyl-AMP synthase"  
"OP8\_F13\_00169" 26657 "s59E25H2" 0 "Threonylcarbamoyl-AMP synthase"  
"OP8\_F13\_00169" 26657 "s59E5H2" 1.959751 "Threonylcarbamoyl-AMP synthase"  
"OP8\_F13\_00169" 26657 "s63E6H2" 0 "Threonylcarbamoyl-AMP synthase"  
"OP8\_F13\_00170" 26658 "s59E13H2" 0.001792901 "Methionine--tRNA ligase"  
"OP8\_F13\_00170" 26658 "s59E25H2" 0 "Methionine--tRNA ligase"  
"OP8\_F13\_00170" 26658 "s59E5H2" 1.471525 "Methionine--tRNA ligase"  
"OP8\_F13\_00170" 26658 "s63E6H2" 0 "Methionine--tRNA ligase"  
"OP8\_F13\_00171" 26659 "s59E13H2" 0 "GTP cyclohydrolase 1"  
"OP8\_F13\_00171" 26659 "s59E25H2" 0 "GTP cyclohydrolase 1"  
"OP8\_F13\_00171" 26659 "s59E5H2" 1.062481 "GTP cyclohydrolase 1"  
"OP8\_F13\_00171" 26659 "s63E6H2" 0 "GTP cyclohydrolase 1"  
"OP8\_F13\_00172" 26660 "s59E13H2" 0.00513389 "hypothetical protein"

"OP8\_F13\_00172" 26660 "s59E25H2" 0 "hypothetical protein"  
"OP8\_F13\_00172" 26660 "s59E5H2" 0.6408266 "hypothetical protein"  
"OP8\_F13\_00172" 26660 "s63E6H2" 0 "hypothetical protein"  
"OP8\_F13\_00173" 26661 "s59E13H2" 0.003126673 "2,3-bisphosphoglycerate-independent phosphoglycerate mutase 1"  
"OP8\_F13\_00173" 26661 "s59E25H2" 0 "2,3-bisphosphoglycerate-independent phosphoglycerate mutase 1"  
"OP8\_F13\_00173" 26661 "s59E5H2" 3.398865 "2,3-bisphosphoglycerate-independent phosphoglycerate mutase 1"  
"OP8\_F13\_00173" 26661 "s63E6H2" 0 "2,3-bisphosphoglycerate-independent phosphoglycerate mutase 1"  
"OP8\_F13\_00174" 26662 "s59E13H2" 0.009262324 "N-acetylmuramoyl-L-alanine amidase AmiC precursor"  
"OP8\_F13\_00174" 26662 "s59E25H2" 0 "N-acetylmuramoyl-L-alanine amidase AmiC precursor"  
"OP8\_F13\_00174" 26662 "s59E5H2" 2.818229 "N-acetylmuramoyl-L-alanine amidase AmiC precursor"  
"OP8\_F13\_00174" 26662 "s63E6H2" 0 "N-acetylmuramoyl-L-alanine amidase AmiC precursor"  
"OP8\_F13\_00175" 26663 "s59E13H2" 0.01324539 "hypothetical protein"  
"OP8\_F13\_00175" 26663 "s59E25H2" 0 "hypothetical protein"  
"OP8\_F13\_00175" 26663 "s59E5H2" 4.652347 "hypothetical protein"  
"OP8\_F13\_00175" 26663 "s63E6H2" 0 "hypothetical protein"  
"OP8\_F13\_00176" 26664 "s59E13H2" 0.01681374 "Putative electron transport protein YccM"  
"OP8\_F13\_00176" 26664 "s59E25H2" 0 "Putative electron transport protein YccM"  
"OP8\_F13\_00176" 26664 "s59E5H2" 6.510996 "Putative electron transport protein YccM"  
"OP8\_F13\_00176" 26664 "s63E6H2" 0 "Putative electron transport protein YccM"  
"OP8\_F13\_00177" 26665 "s59E13H2" 0.02760236 "Divergent PAP2 family protein"  
"OP8\_F13\_00177" 26665 "s59E25H2" 0 "Divergent PAP2 family protein"  
"OP8\_F13\_00177" 26665 "s59E5H2" 7.604801 "Divergent PAP2 family protein"  
"OP8\_F13\_00177" 26665 "s63E6H2" 0 "Divergent PAP2 family protein"  
"OP8\_F13\_00178" 26666 "s59E13H2" 0.04549314 "Acryloyl-CoA reductase electron transfer subunit beta"  
"OP8\_F13\_00178" 26666 "s59E25H2" 0 "Acryloyl-CoA reductase electron transfer subunit beta"  
"OP8\_F13\_00178" 26666 "s59E5H2" 7.757605 "Acryloyl-CoA reductase electron transfer subunit beta"  
"OP8\_F13\_00178" 26666 "s63E6H2" 0 "Acryloyl-CoA reductase electron transfer subunit beta"  
"OP8\_F13\_00179" 26667 "s59E13H2" 0.0930788 "Electron transfer flavoprotein subunit beta"  
"OP8\_F13\_00179" 26667 "s59E25H2" 0 "Electron transfer flavoprotein subunit beta"  
"OP8\_F13\_00179" 26667 "s59E5H2" 6.323963 "Electron transfer flavoprotein subunit beta"  
"OP8\_F13\_00179" 26667 "s63E6H2" 0 "Electron transfer flavoprotein subunit beta"  
"OP8\_F13\_00180" 26668 "s59E13H2" 0.07584908 "3-oxoacyl-[acyl-carrier-protein] synthase 2"  
"OP8\_F13\_00180" 26668 "s59E25H2" 0 "3-oxoacyl-[acyl-carrier-protein] synthase 2"  
"OP8\_F13\_00180" 26668 "s59E5H2" 4.897448 "3-oxoacyl-[acyl-carrier-protein] synthase 2"  
"OP8\_F13\_00180" 26668 "s63E6H2" 0 "3-oxoacyl-[acyl-carrier-protein] synthase 2"  
"OP8\_F13\_00181" 26669 "s59E13H2" 0.02743129 "Acyl carrier protein"  
"OP8\_F13\_00181" 26669 "s59E25H2" 0 "Acyl carrier protein"  
"OP8\_F13\_00181" 26669 "s59E5H2" 4.155152 "Acyl carrier protein"  
"OP8\_F13\_00181" 26669 "s63E6H2" 0 "Acyl carrier protein"  
"OP8\_F13\_00182" 26670 "s59E13H2" 0.002337304 "3-oxoacyl-[acyl-carrier-protein] reductase FabG"  
"OP8\_F13\_00182" 26670 "s59E25H2" 0 "3-oxoacyl-[acyl-carrier-protein] reductase FabG"  
"OP8\_F13\_00182" 26670 "s59E5H2" 5.368928 "3-oxoacyl-[acyl-carrier-protein] reductase FabG"  
"OP8\_F13\_00182" 26670 "s63E6H2" 0 "3-oxoacyl-[acyl-carrier-protein] reductase FabG"  
"OP8\_F13\_00183" 26671 "s59E13H2" 0.03278183 "Phosphate acyltransferase"  
"OP8\_F13\_00183" 26671 "s59E25H2" 0 "Phosphate acyltransferase"  
"OP8\_F13\_00183" 26671 "s59E5H2" 3.786527 "Phosphate acyltransferase"  
"OP8\_F13\_00183" 26671 "s63E6H2" 0 "Phosphate acyltransferase"

"OP8\_F13\_00184" 26672 "s59E13H2" 0.2408726 "hypothetical protein"  
"OP8\_F13\_00184" 26672 "s59E25H2" 0 "hypothetical protein"  
"OP8\_F13\_00184" 26672 "s59E5H2" 2.761929 "hypothetical protein"  
"OP8\_F13\_00184" 26672 "s63E6H2" 0 "hypothetical protein"  
"OP8\_F13\_00185" 26673 "s59E13H2" 0.02870963 "hypothetical protein"  
"OP8\_F13\_00185" 26673 "s59E25H2" 0 "hypothetical protein"  
"OP8\_F13\_00185" 26673 "s59E5H2" 1.168543 "hypothetical protein"  
"OP8\_F13\_00185" 26673 "s63E6H2" 0 "hypothetical protein"  
"OP8\_F13\_00186" 26674 "s59E13H2" 0.007071519 "hypothetical protein"  
"OP8\_F13\_00186" 26674 "s59E25H2" 0 "hypothetical protein"  
"OP8\_F13\_00186" 26674 "s59E5H2" 2.109146 "hypothetical protein"  
"OP8\_F13\_00186" 26674 "s63E6H2" 0 "hypothetical protein"  
"OP8\_F13\_00187" 26675 "s59E13H2" 0.009515843 "Serine/threonine exchanger SteT"  
"OP8\_F13\_00187" 26675 "s59E25H2" 0 "Serine/threonine exchanger SteT"  
"OP8\_F13\_00187" 26675 "s59E5H2" 0.5909119 "Serine/threonine exchanger SteT"  
"OP8\_F13\_00187" 26675 "s63E6H2" 0 "Serine/threonine exchanger SteT"  
"OP8\_F13\_00188" 26676 "s59E13H2" 0.02112113 "Aspartate racemase"  
"OP8\_F13\_00188" 26676 "s59E25H2" 0 "Aspartate racemase"  
"OP8\_F13\_00188" 26676 "s59E5H2" 1.611209 "Aspartate racemase"  
"OP8\_F13\_00188" 26676 "s63E6H2" 0 "Aspartate racemase"  
"OP8\_F13\_00189" 26677 "s59E13H2" 0.03500809 "Divalent metal cation transporter MntH"  
"OP8\_F13\_00189" 26677 "s59E25H2" 0 "Divalent metal cation transporter MntH"  
"OP8\_F13\_00189" 26677 "s59E5H2" 2.590659 "Divalent metal cation transporter MntH"  
"OP8\_F13\_00189" 26677 "s63E6H2" 0 "Divalent metal cation transporter MntH"  
"OP8\_F13\_00190" 26678 "s59E13H2" 0.122398 "Acetophenone carboxylase delta subunit"  
"OP8\_F13\_00190" 26678 "s59E25H2" 0 "Acetophenone carboxylase delta subunit"  
"OP8\_F13\_00190" 26678 "s59E5H2" 3.020175 "Acetophenone carboxylase delta subunit"  
"OP8\_F13\_00190" 26678 "s63E6H2" 0 "Acetophenone carboxylase delta subunit"  
"OP8\_F13\_00191" 26679 "s59E13H2" 0.06886523 "Acetophenone carboxylase gamma subunit"  
"OP8\_F13\_00191" 26679 "s59E25H2" 0 "Acetophenone carboxylase gamma subunit"  
"OP8\_F13\_00191" 26679 "s59E5H2" 2.029808 "Acetophenone carboxylase gamma subunit"  
"OP8\_F13\_00191" 26679 "s63E6H2" 0 "Acetophenone carboxylase gamma subunit"  
"OP8\_F13\_00192" 26680 "s59E13H2" 0.003833791 "RutC family protein"  
"OP8\_F13\_00192" 26680 "s59E25H2" 0 "RutC family protein"  
"OP8\_F13\_00192" 26680 "s59E5H2" 0.3984852 "RutC family protein"  
"OP8\_F13\_00192" 26680 "s63E6H2" 0 "RutC family protein"  
"OP8\_F13\_00193" 26681 "s59E13H2" 0.01353086 "UDP-glucose 4-epimerase"  
"OP8\_F13\_00193" 26681 "s59E25H2" 0 "UDP-glucose 4-epimerase"  
"OP8\_F13\_00193" 26681 "s59E5H2" 0.5743488 "UDP-glucose 4-epimerase"  
"OP8\_F13\_00193" 26681 "s63E6H2" 0 "UDP-glucose 4-epimerase"  
"OP8\_F13\_00194" 26682 "s59E13H2" 0.008766584 "Cyclic di-GMP phosphodiesterase response regulator RpfG"  
"OP8\_F13\_00194" 26682 "s59E25H2" 0 "Cyclic di-GMP phosphodiesterase response regulator RpfG"  
"OP8\_F13\_00194" 26682 "s59E5H2" 0.5485507 "Cyclic di-GMP phosphodiesterase response regulator RpfG"  
"OP8\_F13\_00194" 26682 "s63E6H2" 0 "Cyclic di-GMP phosphodiesterase response regulator RpfG"  
"OP8\_F13\_00195" 26683 "s59E13H2" 0.01650209 "Elongation factor G"  
"OP8\_F13\_00195" 26683 "s59E25H2" 0 "Elongation factor G"  
"OP8\_F13\_00195" 26683 "s59E5H2" 0.3647098 "Elongation factor G"



"OP8\_F13\_00195" 26683 "s63E6H2" 0 "Elongation factor G"  
"OP8\_F13\_00196" 26684 "s59E13H2" 0.01814952 "30S ribosomal protein S7"  
"OP8\_F13\_00196" 26684 "s59E25H2" 0 "30S ribosomal protein S7"  
"OP8\_F13\_00196" 26684 "s59E5H2" 0.3568991 "30S ribosomal protein S7"  
"OP8\_F13\_00196" 26684 "s63E6H2" 0 "30S ribosomal protein S7"  
"OP8\_F13\_00197" 26685 "s59E13H2" 0.01648733 "30S ribosomal protein S12"  
"OP8\_F13\_00197" 26685 "s59E25H2" 0 "30S ribosomal protein S12"  
"OP8\_F13\_00197" 26685 "s59E5H2" 0.2206597 "30S ribosomal protein S12"  
"OP8\_F13\_00197" 26685 "s63E6H2" 0 "30S ribosomal protein S12"  
"OP8\_F13\_00198" 26686 "s59E13H2" 0.09861542 "DNA-directed RNA polymerase subunit beta"  
"OP8\_F13\_00198" 26686 "s59E25H2" 0 "DNA-directed RNA polymerase subunit beta"  
"OP8\_F13\_00198" 26686 "s59E5H2" 0.307839 "DNA-directed RNA polymerase subunit beta"  
"OP8\_F13\_00198" 26686 "s63E6H2" 0 "DNA-directed RNA polymerase subunit beta"  
"OP8\_F13\_00200" 26688 "s59E13H2" 0 "Transposase IS116/IS110/IS902 family protein"  
"OP8\_F13\_00200" 26688 "s59E25H2" 0 "Transposase IS116/IS110/IS902 family protein"  
"OP8\_F13\_00200" 26688 "s59E5H2" 4.598441 "Transposase IS116/IS110/IS902 family protein"  
"OP8\_F13\_00200" 26688 "s63E6H2" 0 "Transposase IS116/IS110/IS902 family protein"  
"OP8\_F13\_00202" 26690 "s59E13H2" 0 "Flagellin N-methylase"  
"OP8\_F13\_00202" 26690 "s59E25H2" 0 "Flagellin N-methylase"  
"OP8\_F13\_00202" 26690 "s59E5H2" 1.213029 "Flagellin N-methylase"  
"OP8\_F13\_00202" 26690 "s63E6H2" 0 "Flagellin N-methylase"  
"OP8\_F13\_00203" 26691 "s59E13H2" 0 "hypothetical protein"  
"OP8\_F13\_00203" 26691 "s59E25H2" 0 "hypothetical protein"  
"OP8\_F13\_00203" 26691 "s59E5H2" 0.5983557 "hypothetical protein"  
"OP8\_F13\_00203" 26691 "s63E6H2" 0 "hypothetical protein"  
"OP8\_F13\_00205" 26693 "s59E13H2" 0.001107358 "Aminopeptidase C"  
"OP8\_F13\_00205" 26693 "s59E25H2" 0 "Aminopeptidase C"  
"OP8\_F13\_00205" 26693 "s59E5H2" 3.159168 "Aminopeptidase C"  
"OP8\_F13\_00205" 26693 "s63E6H2" 0 "Aminopeptidase C"  
"OP8\_F13\_00206" 26694 "s59E13H2" 0.01529563 "hypothetical protein"  
"OP8\_F13\_00206" 26694 "s59E25H2" 0 "hypothetical protein"  
"OP8\_F13\_00206" 26694 "s59E5H2" 4.113776 "hypothetical protein"  
"OP8\_F13\_00206" 26694 "s63E6H2" 0 "hypothetical protein"  
"OP8\_F13\_00207" 26695 "s59E13H2" 0.003734546 "hypothetical protein"  
"OP8\_F13\_00207" 26695 "s59E25H2" 0 "hypothetical protein"  
"OP8\_F13\_00207" 26695 "s59E5H2" 2.708194 "hypothetical protein"  
"OP8\_F13\_00207" 26695 "s63E6H2" 0 "hypothetical protein"  
"OP8\_F13\_00208" 26696 "s59E13H2" 0.5859912 "Diguanilate cyclase DosC"  
"OP8\_F13\_00208" 26696 "s59E25H2" 0 "Diguanilate cyclase DosC"  
"OP8\_F13\_00208" 26696 "s59E5H2" 0.3074358 "Diguanilate cyclase DosC"  
"OP8\_F13\_00208" 26696 "s63E6H2" 0 "Diguanilate cyclase DosC"  
"OP8\_F13\_00209" 26697 "s59E13H2" 0.02179266 "Bifunctional protein FOLD protein"  
"OP8\_F13\_00209" 26697 "s59E25H2" 0 "Bifunctional protein FOLD protein"  
"OP8\_F13\_00209" 26697 "s59E5H2" 0.3795044 "Bifunctional protein FOLD protein"  
"OP8\_F13\_00209" 26697 "s63E6H2" 0 "Bifunctional protein FOLD protein"  
"OP8\_F13\_00210" 26698 "s59E13H2" 0.03673201 "Epoxyqueuosine reductase"  
"OP8\_F13\_00210" 26698 "s59E25H2" 0 "Epoxyqueuosine reductase"

"OP8\_F13\_00210" 26698 "s59E5H2" 1.175811 "Epoxyqueuosine reductase"  
"OP8\_F13\_00210" 26698 "s63E6H2" 0 "Epoxyqueuosine reductase"  
"OP8\_F13\_00211" 26699 "s59E13H2" 0.03883962 "Nucleoside diphosphate kinase"  
"OP8\_F13\_00211" 26699 "s59E25H2" 0 "Nucleoside diphosphate kinase"  
"OP8\_F13\_00211" 26699 "s59E5H2" 1.834529 "Nucleoside diphosphate kinase"  
"OP8\_F13\_00211" 26699 "s63E6H2" 0 "Nucleoside diphosphate kinase"  
"OP8\_F13\_00212" 26700 "s59E13H2" 0.03231935 "Sodium/proline symporter"  
"OP8\_F13\_00212" 26700 "s59E25H2" 0 "Sodium/proline symporter"  
"OP8\_F13\_00212" 26700 "s59E5H2" 1.235469 "Sodium/proline symporter"  
"OP8\_F13\_00212" 26700 "s63E6H2" 0 "Sodium/proline symporter"  
"OP8\_F13\_00214" 26702 "s59E13H2" 0 "Reverse transcriptase (RNA-dependent DNA polymerase)"  
"OP8\_F13\_00214" 26702 "s59E25H2" 0 "Reverse transcriptase (RNA-dependent DNA polymerase)"  
"OP8\_F13\_00214" 26702 "s59E5H2" 1.295121 "Reverse transcriptase (RNA-dependent DNA polymerase)"  
"OP8\_F13\_00214" 26702 "s63E6H2" 0 "Reverse transcriptase (RNA-dependent DNA polymerase)"  
"OP8\_F13\_00215" 26703 "s59E13H2" 0 "Group II intron-encoded protein LtrA"  
"OP8\_F13\_00215" 26703 "s59E25H2" 0 "Group II intron-encoded protein LtrA"  
"OP8\_F13\_00215" 26703 "s59E5H2" 0.9530269 "Group II intron-encoded protein LtrA"  
"OP8\_F13\_00215" 26703 "s63E6H2" 0 "Group II intron-encoded protein LtrA"  
"OP8\_F13\_00217" 26705 "s59E13H2" 0.03263197 "Bifunctional IPC transferase and DIPP synthase"  
"OP8\_F13\_00217" 26705 "s59E25H2" 0 "Bifunctional IPC transferase and DIPP synthase"  
"OP8\_F13\_00217" 26705 "s59E5H2" 6.425325 "Bifunctional IPC transferase and DIPP synthase"  
"OP8\_F13\_00217" 26705 "s63E6H2" 0 "Bifunctional IPC transferase and DIPP synthase"  
"OP8\_F13\_00218" 26706 "s59E13H2" 0.03562788 "Inositol-3-phosphate synthase"  
"OP8\_F13\_00218" 26706 "s59E25H2" 0 "Inositol-3-phosphate synthase"  
"OP8\_F13\_00218" 26706 "s59E5H2" 8.507343 "Inositol-3-phosphate synthase"  
"OP8\_F13\_00218" 26706 "s63E6H2" 0 "Inositol-3-phosphate synthase"  
"OP8\_F13\_00219" 26707 "s59E13H2" 0.0969462 "catecholate siderophore receptor CirA"  
"OP8\_F13\_00219" 26707 "s59E25H2" 0.1778488 "catecholate siderophore receptor CirA"  
"OP8\_F13\_00219" 26707 "s59E5H2" 11.88609 "catecholate siderophore receptor CirA"  
"OP8\_F13\_00219" 26707 "s63E6H2" 0 "catecholate siderophore receptor CirA"  
"OP8\_F13\_00220" 26708 "s59E13H2" 0.06227776 "Bifunctional protein GlmU"  
"OP8\_F13\_00220" 26708 "s59E25H2" 0 "Bifunctional protein GlmU"  
"OP8\_F13\_00220" 26708 "s59E5H2" 6.17667 "Bifunctional protein GlmU"  
"OP8\_F13\_00220" 26708 "s63E6H2" 0 "Bifunctional protein GlmU"  
"OP8\_F13\_00221" 26709 "s59E13H2" 0 "Tetratricopeptide repeat protein"  
"OP8\_F13\_00221" 26709 "s59E25H2" 0 "Tetratricopeptide repeat protein"  
"OP8\_F13\_00221" 26709 "s59E5H2" 4.558973 "Tetratricopeptide repeat protein"  
"OP8\_F13\_00221" 26709 "s63E6H2" 0 "Tetratricopeptide repeat protein"  
"OP8\_F13\_00222" 26710 "s59E13H2" 0.00209335 "UDP-3-O-[3-hydroxymyristoyl] N-acetylglucosamine deacetylase"  
"OP8\_F13\_00222" 26710 "s59E25H2" 0 "UDP-3-O-[3-hydroxymyristoyl] N-acetylglucosamine deacetylase"  
"OP8\_F13\_00222" 26710 "s59E5H2" 3.854893 "UDP-3-O-[3-hydroxymyristoyl] N-acetylglucosamine deacetylase"  
"OP8\_F13\_00222" 26710 "s63E6H2" 0 "UDP-3-O-[3-hydroxymyristoyl] N-acetylglucosamine deacetylase"  
"OP8\_F13\_00223" 26711 "s59E13H2" 0.002216516 "N5-carboxyaminoimidazole ribonucleotide mutase"  
"OP8\_F13\_00223" 26711 "s59E25H2" 0 "N5-carboxyaminoimidazole ribonucleotide mutase"  
"OP8\_F13\_00223" 26711 "s59E5H2" 3.688515 "N5-carboxyaminoimidazole ribonucleotide mutase"  
"OP8\_F13\_00223" 26711 "s63E6H2" 0.00151577 "N5-carboxyaminoimidazole ribonucleotide mutase"  
"OP8\_F13\_00224" 26712 "s59E13H2" 0.002012614 "DNA primase"

"OP8\_F13\_00224" 26712 "s59E25H2" 0 "DNA primase"  
"OP8\_F13\_00224" 26712 "s59E5H2" 4.806253 "DNA primase"  
"OP8\_F13\_00224" 26712 "s63E6H2" 0.0004467996 "DNA primase"  
"OP8\_F13\_00225" 26713 "s59E13H2" 0.004435264 "RNA polymerase sigma factor RpoD"  
"OP8\_F13\_00225" 26713 "s59E25H2" 0 "RNA polymerase sigma factor RpoD"  
"OP8\_F13\_00225" 26713 "s59E5H2" 8.514182 "RNA polymerase sigma factor RpoD"  
"OP8\_F13\_00225" 26713 "s63E6H2" 0 "RNA polymerase sigma factor RpoD"  
"OP8\_F13\_00227" 26715 "s59E13H2" 0.01772994 "Putative zinc ribbon domain protein"  
"OP8\_F13\_00227" 26715 "s59E25H2" 0 "Putative zinc ribbon domain protein"  
"OP8\_F13\_00227" 26715 "s59E5H2" 11.28005 "Putative zinc ribbon domain protein"  
"OP8\_F13\_00227" 26715 "s63E6H2" 0 "Putative zinc ribbon domain protein"  
"OP8\_F13\_00228" 26716 "s59E13H2" 0.0261255 "Long-chain-fatty-acid--CoA ligase FadD15"  
"OP8\_F13\_00228" 26716 "s59E25H2" 0 "Long-chain-fatty-acid--CoA ligase FadD15"  
"OP8\_F13\_00228" 26716 "s59E5H2" 10.38829 "Long-chain-fatty-acid--CoA ligase FadD15"  
"OP8\_F13\_00228" 26716 "s63E6H2" 0 "Long-chain-fatty-acid--CoA ligase FadD15"  
"OP8\_F13\_00229" 26717 "s59E13H2" 0.0171889 "DNA gyrase subunit A"  
"OP8\_F13\_00229" 26717 "s59E25H2" 0 "DNA gyrase subunit A"  
"OP8\_F13\_00229" 26717 "s59E5H2" 5.939482 "DNA gyrase subunit A"  
"OP8\_F13\_00229" 26717 "s63E6H2" 0 "DNA gyrase subunit A"  
"OP8\_F13\_00230" 26718 "s59E13H2" 0.009930024 "Tricorn protease-interacting factor F3"  
"OP8\_F13\_00230" 26718 "s59E25H2" 0 "Tricorn protease-interacting factor F3"  
"OP8\_F13\_00230" 26718 "s59E5H2" 0.3888185 "Tricorn protease-interacting factor F3"  
"OP8\_F13\_00230" 26718 "s63E6H2" 0 "Tricorn protease-interacting factor F3"  
"OP8\_F13\_00231" 26719 "s59E13H2" 0.005816401 "Transcriptional regulatory protein ZraR"  
"OP8\_F13\_00231" 26719 "s59E25H2" 0 "Transcriptional regulatory protein ZraR"  
"OP8\_F13\_00231" 26719 "s59E5H2" 0.4512032 "Transcriptional regulatory protein ZraR"  
"OP8\_F13\_00231" 26719 "s63E6H2" 0 "Transcriptional regulatory protein ZraR"  
"OP8\_F13\_00232" 26720 "s59E13H2" 0.009661362 "Sporulation kinase E"  
"OP8\_F13\_00232" 26720 "s59E25H2" 0 "Sporulation kinase E"  
"OP8\_F13\_00232" 26720 "s59E5H2" 0.9097821 "Sporulation kinase E"  
"OP8\_F13\_00232" 26720 "s63E6H2" 0 "Sporulation kinase E"  
"OP8\_F13\_00233" 26721 "s59E13H2" 0.007809788 "hypothetical protein"  
"OP8\_F13\_00233" 26721 "s59E25H2" 0 "hypothetical protein"  
"OP8\_F13\_00233" 26721 "s59E5H2" 0.9869817 "hypothetical protein"  
"OP8\_F13\_00233" 26721 "s63E6H2" 0 "hypothetical protein"  
"OP8\_F13\_00234" 26722 "s59E13H2" 0.05419494 "Type II secretion system protein F"  
"OP8\_F13\_00234" 26722 "s59E25H2" 0 "Type II secretion system protein F"  
"OP8\_F13\_00234" 26722 "s59E5H2" 1.67717 "Type II secretion system protein F"  
"OP8\_F13\_00234" 26722 "s63E6H2" 0 "Type II secretion system protein F"  
"OP8\_F13\_00235" 26723 "s59E13H2" 0.03332996 "Type II secretion system protein E"  
"OP8\_F13\_00235" 26723 "s59E25H2" 0 "Type II secretion system protein E"  
"OP8\_F13\_00235" 26723 "s59E5H2" 1.13896 "Type II secretion system protein E"  
"OP8\_F13\_00235" 26723 "s63E6H2" 0 "Type II secretion system protein E"  
"OP8\_F13\_00236" 26724 "s59E13H2" 0.001676925 "Competence protein A"  
"OP8\_F13\_00236" 26724 "s59E25H2" 0 "Competence protein A"  
"OP8\_F13\_00236" 26724 "s59E5H2" 0.8463408 "Competence protein A"  
"OP8\_F13\_00236" 26724 "s63E6H2" 0 "Competence protein A"

"OP8\_F13\_00237" 26725 "s59E13H2" 0.006280888 "hypothetical protein"  
"OP8\_F13\_00237" 26725 "s59E25H2" 0 "hypothetical protein"  
"OP8\_F13\_00237" 26725 "s59E5H2" 0.6666539 "hypothetical protein"  
"OP8\_F13\_00237" 26725 "s63E6H2" 0 "hypothetical protein"  
"OP8\_F13\_00238" 26726 "s59E13H2" 0.002231274 "hypothetical protein"  
"OP8\_F13\_00238" 26726 "s59E25H2" 0 "hypothetical protein"  
"OP8\_F13\_00238" 26726 "s59E5H2" 0.5222328 "hypothetical protein"  
"OP8\_F13\_00238" 26726 "s63E6H2" 0 "hypothetical protein"  
"OP8\_F13\_00239" 26727 "s59E13H2" 0.005937047 "hypothetical protein"  
"OP8\_F13\_00239" 26727 "s59E25H2" 0 "hypothetical protein"  
"OP8\_F13\_00239" 26727 "s59E5H2" 0.4808544 "hypothetical protein"  
"OP8\_F13\_00239" 26727 "s63E6H2" 0 "hypothetical protein"  
"OP8\_F13\_00240" 26728 "s59E13H2" 0.3436776 "Type IV pilus biogenesis and competence protein PilQ precursor"  
"OP8\_F13\_00240" 26728 "s59E25H2" 0 "Type IV pilus biogenesis and competence protein PilQ precursor"  
"OP8\_F13\_00240" 26728 "s59E5H2" 0.4983162 "Type IV pilus biogenesis and competence protein PilQ precursor"  
"OP8\_F13\_00240" 26728 "s63E6H2" 0 "Type IV pilus biogenesis and competence protein PilQ precursor"  
"OP8\_F13\_00242" 26730 "s59E13H2" 1.040673 "tRNA(Ile)-lysidine synthase"  
"OP8\_F13\_00242" 26730 "s59E25H2" 0 "tRNA(Ile)-lysidine synthase"  
"OP8\_F13\_00242" 26730 "s59E5H2" 0.5446378 "tRNA(Ile)-lysidine synthase"  
"OP8\_F13\_00242" 26730 "s63E6H2" 0 "tRNA(Ile)-lysidine synthase"  
"OP8\_F13\_00243" 26731 "s59E13H2" 0.4029299 "Asparagine synthetase [glutamine-hydrolyzing] 1"  
"OP8\_F13\_00243" 26731 "s59E25H2" 0 "Asparagine synthetase [glutamine-hydrolyzing] 1"  
"OP8\_F13\_00243" 26731 "s59E5H2" 0.5311797 "Asparagine synthetase [glutamine-hydrolyzing] 1"  
"OP8\_F13\_00243" 26731 "s63E6H2" 0 "Asparagine synthetase [glutamine-hydrolyzing] 1"  
"OP8\_F13\_00244" 26732 "s59E13H2" 0.08871068 "hypothetical protein"  
"OP8\_F13\_00244" 26732 "s59E25H2" 0 "hypothetical protein"  
"OP8\_F13\_00244" 26732 "s59E5H2" 0.364934 "hypothetical protein"  
"OP8\_F13\_00244" 26732 "s63E6H2" 0 "hypothetical protein"  
"OP8\_F13\_00246" 26734 "s59E13H2" 0.2955354 "hypothetical protein"  
"OP8\_F13\_00246" 26734 "s59E25H2" 0 "hypothetical protein"  
"OP8\_F13\_00246" 26734 "s59E5H2" 0.2990764 "hypothetical protein"  
"OP8\_F13\_00246" 26734 "s63E6H2" 0 "hypothetical protein"  
"OP8\_F13\_00247" 26735 "s59E13H2" 0.3089955 "hypothetical protein"  
"OP8\_F13\_00247" 26735 "s59E25H2" 0 "hypothetical protein"  
"OP8\_F13\_00247" 26735 "s59E5H2" 0.2556748 "hypothetical protein"  
"OP8\_F13\_00247" 26735 "s63E6H2" 0 "hypothetical protein"  
"OP8\_F13\_00248" 26736 "s59E13H2" 0.1785455 "hypothetical protein"  
"OP8\_F13\_00248" 26736 "s59E25H2" 0 "hypothetical protein"  
"OP8\_F13\_00248" 26736 "s59E5H2" 0.3190764 "hypothetical protein"  
"OP8\_F13\_00248" 26736 "s63E6H2" 0.001338311 "hypothetical protein"  
"OP8\_F13\_00249" 26737 "s59E13H2" 0.001658101 "Zinc carboxypeptidase"  
"OP8\_F13\_00249" 26737 "s59E25H2" 0 "Zinc carboxypeptidase"  
"OP8\_F13\_00249" 26737 "s59E5H2" 1.385202 "Zinc carboxypeptidase"  
"OP8\_F13\_00249" 26737 "s63E6H2" 0 "Zinc carboxypeptidase"  
"OP8\_F13\_00250" 26738 "s59E13H2" 0.004196934 "Carboxypeptidase T precursor"  
"OP8\_F13\_00250" 26738 "s59E25H2" 0 "Carboxypeptidase T precursor"  
"OP8\_F13\_00250" 26738 "s59E5H2" 2.217078 "Carboxypeptidase T precursor"

"OP8\_F13\_00250" 26738 "s63E6H2" 0 "Carboxypeptidase T precursor"  
"OP8\_F13\_00251" 26739 "s59E13H2" 0.002635804 "N-substituted formamide deformylase precursor"  
"OP8\_F13\_00251" 26739 "s59E25H2" 0 "N-substituted formamide deformylase precursor"  
"OP8\_F13\_00251" 26739 "s59E5H2" 0.9688643 "N-substituted formamide deformylase precursor"  
"OP8\_F13\_00251" 26739 "s63E6H2" 0 "N-substituted formamide deformylase precursor"  
"OP8\_F13\_00252" 26740 "s59E13H2" 0.006461858 "Macrolide export ATP-binding/permease protein MacB"  
"OP8\_F13\_00252" 26740 "s59E25H2" 0 "Macrolide export ATP-binding/permease protein MacB"  
"OP8\_F13\_00252" 26740 "s59E5H2" 1.634989 "Macrolide export ATP-binding/permease protein MacB"  
"OP8\_F13\_00252" 26740 "s63E6H2" 0 "Macrolide export ATP-binding/permease protein MacB"  
"OP8\_F13\_00253" 26741 "s59E13H2" 0.01736722 "Macrolide export ATP-binding/permease protein MacB"  
"OP8\_F13\_00253" 26741 "s59E25H2" 0 "Macrolide export ATP-binding/permease protein MacB"  
"OP8\_F13\_00253" 26741 "s59E5H2" 1.729414 "Macrolide export ATP-binding/permease protein MacB"  
"OP8\_F13\_00253" 26741 "s63E6H2" 0 "Macrolide export ATP-binding/permease protein MacB"  
"OP8\_F13\_00255" 26743 "s59E13H2" 0.01400082 "Galactokinase"  
"OP8\_F13\_00255" 26743 "s59E25H2" 0 "Galactokinase"  
"OP8\_F13\_00255" 26743 "s59E5H2" 4.505761 "Galactokinase"  
"OP8\_F13\_00255" 26743 "s63E6H2" 0 "Galactokinase"  
"OP8\_F13\_00256" 26744 "s59E13H2" 0.02350127 "Sodium/glucose cotransporter"  
"OP8\_F13\_00256" 26744 "s59E25H2" 0 "Sodium/glucose cotransporter"  
"OP8\_F13\_00256" 26744 "s59E5H2" 2.989234 "Sodium/glucose cotransporter"  
"OP8\_F13\_00256" 26744 "s63E6H2" 0 "Sodium/glucose cotransporter"  
"OP8\_F13\_00257" 26745 "s59E13H2" 0.003881585 "hypothetical protein"  
"OP8\_F13\_00257" 26745 "s59E25H2" 0 "hypothetical protein"  
"OP8\_F13\_00257" 26745 "s59E5H2" 2.13075 "hypothetical protein"  
"OP8\_F13\_00257" 26745 "s63E6H2" 0 "hypothetical protein"  
"OP8\_F13\_00259" 26747 "s59E13H2" 0.006656427 "Dimethylamine corrinoid protein"  
"OP8\_F13\_00259" 26747 "s59E25H2" 0 "Dimethylamine corrinoid protein"  
"OP8\_F13\_00259" 26747 "s59E5H2" 1.965953 "Dimethylamine corrinoid protein"  
"OP8\_F13\_00259" 26747 "s63E6H2" 0 "Dimethylamine corrinoid protein"  
"OP8\_F13\_00260" 26748 "s59E13H2" 0.5945036 "Trimethylamine methyltransferase MttB"  
"OP8\_F13\_00260" 26748 "s59E25H2" 0 "Trimethylamine methyltransferase MttB"  
"OP8\_F13\_00260" 26748 "s59E5H2" 2.905698 "Trimethylamine methyltransferase MttB"  
"OP8\_F13\_00260" 26748 "s63E6H2" 0 "Trimethylamine methyltransferase MttB"  
"OP8\_F13\_00261" 26749 "s59E13H2" 0.3192439 "aminotransferase"  
"OP8\_F13\_00261" 26749 "s59E25H2" 0 "aminotransferase"  
"OP8\_F13\_00261" 26749 "s59E5H2" 2.57276 "aminotransferase"  
"OP8\_F13\_00261" 26749 "s63E6H2" 0 "aminotransferase"  
"OP8\_F13\_00262" 26750 "s59E13H2" 0.6633625 "Vitamin B12 dependent methionine synthase, activation domain"  
"OP8\_F13\_00262" 26750 "s59E25H2" 0 "Vitamin B12 dependent methionine synthase, activation domain"  
"OP8\_F13\_00262" 26750 "s59E5H2" 2.235728 "Vitamin B12 dependent methionine synthase, activation domain"  
"OP8\_F13\_00262" 26750 "s63E6H2" 0 "Vitamin B12 dependent methionine synthase, activation domain"  
"OP8\_F13\_00263" 26751 "s59E13H2" 0.03113647 "Dispase autolysis-inducing protein precursor"  
"OP8\_F13\_00263" 26751 "s59E25H2" 0 "Dispase autolysis-inducing protein precursor"  
"OP8\_F13\_00263" 26751 "s59E5H2" 2.174532 "Dispase autolysis-inducing protein precursor"  
"OP8\_F13\_00263" 26751 "s63E6H2" 0 "Dispase autolysis-inducing protein precursor"  
"OP8\_F13\_00264" 26752 "s59E13H2" 0.03442888 "peptidase PmbA"  
"OP8\_F13\_00264" 26752 "s59E25H2" 0 "peptidase PmbA"

"OP8\_F13\_00264" 26752 "s59E5H2" 1.15379 "peptidase PmbA"  
"OP8\_F13\_00264" 26752 "s63E6H2" 0 "peptidase PmbA"  
"OP8\_F13\_00265" 26753 "s59E13H2" 0.02315819 "protease TldD"  
"OP8\_F13\_00265" 26753 "s59E25H2" 0 "protease TldD"  
"OP8\_F13\_00265" 26753 "s59E5H2" 1.082836 "protease TldD"  
"OP8\_F13\_00265" 26753 "s63E6H2" 0 "protease TldD"  
"OP8\_F13\_00266" 26754 "s59E13H2" 0.0515546 "Anaerobic ribonucleoside-triphosphate reductase"  
"OP8\_F13\_00266" 26754 "s59E25H2" 0 "Anaerobic ribonucleoside-triphosphate reductase"  
"OP8\_F13\_00266" 26754 "s59E5H2" 2.256887 "Anaerobic ribonucleoside-triphosphate reductase"  
"OP8\_F13\_00266" 26754 "s63E6H2" 0 "Anaerobic ribonucleoside-triphosphate reductase"  
"OP8\_F13\_00267" 26755 "s59E13H2" 0.02836944 "hypothetical protein"  
"OP8\_F13\_00267" 26755 "s59E25H2" 0 "hypothetical protein"  
"OP8\_F13\_00267" 26755 "s59E5H2" 2.700437 "hypothetical protein"  
"OP8\_F13\_00267" 26755 "s63E6H2" 0 "hypothetical protein"  
"OP8\_F13\_00268" 26756 "s59E13H2" 0.03827069 "pyruvate formate lyase-activating enzyme 1"  
"OP8\_F13\_00268" 26756 "s59E25H2" 0 "pyruvate formate lyase-activating enzyme 1"  
"OP8\_F13\_00268" 26756 "s59E5H2" 3.067566 "pyruvate formate lyase-activating enzyme 1"  
"OP8\_F13\_00268" 26756 "s63E6H2" 0.002139492 "pyruvate formate lyase-activating enzyme 1"  
"OP8\_F13\_00269" 26757 "s59E13H2" 0.03614277 "Deoxyuridine 5'-triphosphate nucleotidohydrolase"  
"OP8\_F13\_00269" 26757 "s59E25H2" 0 "Deoxyuridine 5'-triphosphate nucleotidohydrolase"  
"OP8\_F13\_00269" 26757 "s59E5H2" 3.508326 "Deoxyuridine 5'-triphosphate nucleotidohydrolase"  
"OP8\_F13\_00269" 26757 "s63E6H2" 0 "Deoxyuridine 5'-triphosphate nucleotidohydrolase"  
"OP8\_F13\_00270" 26758 "s59E13H2" 0.02666311 "hypothetical protein"  
"OP8\_F13\_00270" 26758 "s59E25H2" 0 "hypothetical protein"  
"OP8\_F13\_00270" 26758 "s59E5H2" 3.277267 "hypothetical protein"  
"OP8\_F13\_00270" 26758 "s63E6H2" 0 "hypothetical protein"  
"OP8\_F13\_00271" 26759 "s59E13H2" 0.02094462 "putative nitrate transporter NarT"  
"OP8\_F13\_00271" 26759 "s59E25H2" 0 "putative nitrate transporter NarT"  
"OP8\_F13\_00271" 26759 "s59E5H2" 2.439224 "putative nitrate transporter NarT"  
"OP8\_F13\_00271" 26759 "s63E6H2" 0 "putative nitrate transporter NarT"  
"OP8\_F13\_00272" 26760 "s59E13H2" 0.05435551 "SNARE associated Golgi protein"  
"OP8\_F13\_00272" 26760 "s59E25H2" 0 "SNARE associated Golgi protein"  
"OP8\_F13\_00272" 26760 "s59E5H2" 2.459046 "SNARE associated Golgi protein"  
"OP8\_F13\_00272" 26760 "s63E6H2" 0 "SNARE associated Golgi protein"  
"OP8\_F13\_00273" 26761 "s59E13H2" 0.01372114 "TPR repeat-containing protein YrrB"  
"OP8\_F13\_00273" 26761 "s59E25H2" 0 "TPR repeat-containing protein YrrB"  
"OP8\_F13\_00273" 26761 "s59E5H2" 2.129779 "TPR repeat-containing protein YrrB"  
"OP8\_F13\_00273" 26761 "s63E6H2" 0 "TPR repeat-containing protein YrrB"  
"OP8\_F13\_00274" 26762 "s59E13H2" 0.01337223 "Anaphase-promoting complex, cyclosome, subunit 3"  
"OP8\_F13\_00274" 26762 "s59E25H2" 0 "Anaphase-promoting complex, cyclosome, subunit 3"  
"OP8\_F13\_00274" 26762 "s59E5H2" 2.250334 "Anaphase-promoting complex, cyclosome, subunit 3"  
"OP8\_F13\_00274" 26762 "s63E6H2" 0 "Anaphase-promoting complex, cyclosome, subunit 3"  
"OP8\_F13\_00275" 26763 "s59E13H2" 0.08812907 "hypothetical protein"  
"OP8\_F13\_00275" 26763 "s59E25H2" 0 "hypothetical protein"  
"OP8\_F13\_00275" 26763 "s59E5H2" 3.951877 "hypothetical protein"  
"OP8\_F13\_00275" 26763 "s63E6H2" 0 "hypothetical protein"  
"OP8\_F13\_00276" 26764 "s59E13H2" 0.06347815 "Aspartate--tRNA ligase"

"OP8\_F13\_00276" 26764 "s59E25H2" 0 "Aspartate--tRNA ligase"  
"OP8\_F13\_00276" 26764 "s59E5H2" 1.898929 "Aspartate--tRNA ligase"  
"OP8\_F13\_00276" 26764 "s63E6H2" 0 "Aspartate--tRNA ligase"  
"OP8\_F13\_00277" 26765 "s59E13H2" 0.9977356 "Histidine--tRNA ligase"  
"OP8\_F13\_00277" 26765 "s59E25H2" 0 "Histidine--tRNA ligase"  
"OP8\_F13\_00277" 26765 "s59E5H2" 1.143879 "Histidine--tRNA ligase"  
"OP8\_F13\_00277" 26765 "s63E6H2" 0 "Histidine--tRNA ligase"  
"OP8\_F13\_00278" 26766 "s59E13H2" 0.989424 "Acetyl-coenzyme A carboxylase carboxyl transferase subunit alpha"  
"OP8\_F13\_00278" 26766 "s59E25H2" 0 "Acetyl-coenzyme A carboxylase carboxyl transferase subunit alpha"  
"OP8\_F13\_00278" 26766 "s59E5H2" 1.13909 "Acetyl-coenzyme A carboxylase carboxyl transferase subunit alpha"  
"OP8\_F13\_00278" 26766 "s63E6H2" 0 "Acetyl-coenzyme A carboxylase carboxyl transferase subunit alpha"  
"OP8\_F13\_00279" 26767 "s59E13H2" 0.9229111 "Ribosomal protein S12 methylthiotransferase RimO"  
"OP8\_F13\_00279" 26767 "s59E25H2" 0 "Ribosomal protein S12 methylthiotransferase RimO"  
"OP8\_F13\_00279" 26767 "s59E5H2" 0.7983317 "Ribosomal protein S12 methylthiotransferase RimO"  
"OP8\_F13\_00279" 26767 "s63E6H2" 0 "Ribosomal protein S12 methylthiotransferase RimO"  
"OP8\_F13\_00280" 26768 "s59E13H2" 0.8302572 "HTH-type transcriptional regulator ZntR"  
"OP8\_F13\_00280" 26768 "s59E25H2" 0 "HTH-type transcriptional regulator ZntR"  
"OP8\_F13\_00280" 26768 "s59E5H2" 0.8738508 "HTH-type transcriptional regulator ZntR"  
"OP8\_F13\_00280" 26768 "s63E6H2" 0 "HTH-type transcriptional regulator ZntR"  
"OP8\_F13\_00281" 26769 "s59E13H2" 1.234806 "hypothetical protein"  
"OP8\_F13\_00281" 26769 "s59E25H2" 0 "hypothetical protein"  
"OP8\_F13\_00281" 26769 "s59E5H2" 1.248936 "hypothetical protein"  
"OP8\_F13\_00281" 26769 "s63E6H2" 0 "hypothetical protein"  
"OP8\_F13\_00282" 26770 "s59E13H2" 0.9306583 "hypothetical protein"  
"OP8\_F13\_00282" 26770 "s59E25H2" 0 "hypothetical protein"  
"OP8\_F13\_00282" 26770 "s59E5H2" 0.8887632 "hypothetical protein"  
"OP8\_F13\_00282" 26770 "s63E6H2" 0 "hypothetical protein"  
"OP8\_F13\_00283" 26771 "s59E13H2" 0.8869548 "hypothetical protein"  
"OP8\_F13\_00283" 26771 "s59E25H2" 0 "hypothetical protein"  
"OP8\_F13\_00283" 26771 "s59E5H2" 0.7104148 "hypothetical protein"  
"OP8\_F13\_00283" 26771 "s63E6H2" 0 "hypothetical protein"  
"OP8\_F13\_00284" 26772 "s59E13H2" 0.9235752 "ECF RNA polymerase sigma factor SigW"  
"OP8\_F13\_00284" 26772 "s59E25H2" 0 "ECF RNA polymerase sigma factor SigW"  
"OP8\_F13\_00284" 26772 "s59E5H2" 1.088591 "ECF RNA polymerase sigma factor SigW"  
"OP8\_F13\_00284" 26772 "s63E6H2" 0 "ECF RNA polymerase sigma factor SigW"  
"OP8\_F13\_00285" 26773 "s59E13H2" 0.8661812 "1-acyl-sn-glycerol-3-phosphate acyltransferase"  
"OP8\_F13\_00285" 26773 "s59E25H2" 0 "1-acyl-sn-glycerol-3-phosphate acyltransferase"  
"OP8\_F13\_00285" 26773 "s59E5H2" 1.130013 "1-acyl-sn-glycerol-3-phosphate acyltransferase"  
"OP8\_F13\_00285" 26773 "s63E6H2" 0 "1-acyl-sn-glycerol-3-phosphate acyltransferase"  
"OP8\_F13\_00286" 26774 "s59E13H2" 0.8838142 "Diacylglycerol kinase"  
"OP8\_F13\_00286" 26774 "s59E25H2" 0 "Diacylglycerol kinase"  
"OP8\_F13\_00286" 26774 "s59E5H2" 1.189756 "Diacylglycerol kinase"  
"OP8\_F13\_00286" 26774 "s63E6H2" 0 "Diacylglycerol kinase"  
"OP8\_F13\_00287" 26775 "s59E13H2" 0.7217323 "Putative TrmH family tRNA/rRNA methyltransferase"  
"OP8\_F13\_00287" 26775 "s59E25H2" 0 "Putative TrmH family tRNA/rRNA methyltransferase"  
"OP8\_F13\_00287" 26775 "s59E5H2" 0.5843034 "Putative TrmH family tRNA/rRNA methyltransferase"  
"OP8\_F13\_00287" 26775 "s63E6H2" 0 "Putative TrmH family tRNA/rRNA methyltransferase"

"OP8\_F13\_00289" 26777 "s59E13H2" 0 "hypothetical protein"  
"OP8\_F13\_00289" 26777 "s59E25H2" 0 "hypothetical protein"  
"OP8\_F13\_00289" 26777 "s59E5H2" 0.1535575 "hypothetical protein"  
"OP8\_F13\_00289" 26777 "s63E6H2" 0 "hypothetical protein"  
"OP8\_F13\_00290" 26778 "s59E13H2" 0 "Tetratricopeptide repeat protein"  
"OP8\_F13\_00290" 26778 "s59E25H2" 0 "Tetratricopeptide repeat protein"  
"OP8\_F13\_00290" 26778 "s59E5H2" 0.01585854 "Tetratricopeptide repeat protein"  
"OP8\_F13\_00290" 26778 "s63E6H2" 0 "Tetratricopeptide repeat protein"  
"OP8\_F13\_00291" 26779 "s59E13H2" 0 "Co-chaperone protein HscB"  
"OP8\_F13\_00291" 26779 "s59E25H2" 0 "Co-chaperone protein HscB"  
"OP8\_F13\_00291" 26779 "s59E5H2" 0.009288461 "Co-chaperone protein HscB"  
"OP8\_F13\_00291" 26779 "s63E6H2" 0 "Co-chaperone protein HscB"  
"OP8\_F13\_00292" 26780 "s59E13H2" 0 "hypothetical protein"  
"OP8\_F13\_00292" 26780 "s59E25H2" 0 "hypothetical protein"  
"OP8\_F13\_00292" 26780 "s59E5H2" 0 "hypothetical protein"  
"OP8\_F13\_00292" 26780 "s63E6H2" 0 "hypothetical protein"  
"OP8\_F13\_00293" 26781 "s59E13H2" 0 "hypothetical protein"  
"OP8\_F13\_00293" 26781 "s59E25H2" 0 "hypothetical protein"  
"OP8\_F13\_00293" 26781 "s59E5H2" 0 "hypothetical protein"  
"OP8\_F13\_00293" 26781 "s63E6H2" 0 "hypothetical protein"  
"OP8\_F13\_00296" 26784 "s59E13H2" 0 "hypothetical protein"  
"OP8\_F13\_00296" 26784 "s59E25H2" 0 "hypothetical protein"  
"OP8\_F13\_00296" 26784 "s59E5H2" 0 "hypothetical protein"  
"OP8\_F13\_00296" 26784 "s63E6H2" 0 "hypothetical protein"  
"OP8\_F13\_00297" 26785 "s59E13H2" 0 "hypothetical protein"  
"OP8\_F13\_00297" 26785 "s59E25H2" 0 "hypothetical protein"  
"OP8\_F13\_00297" 26785 "s59E5H2" 0.01549121 "hypothetical protein"  
"OP8\_F13\_00297" 26785 "s63E6H2" 0 "hypothetical protein"  
"OP8\_F13\_00298" 26786 "s59E13H2" 0 "hypothetical protein"  
"OP8\_F13\_00298" 26786 "s59E25H2" 0 "hypothetical protein"  
"OP8\_F13\_00298" 26786 "s59E5H2" 0 "hypothetical protein"  
"OP8\_F13\_00298" 26786 "s63E6H2" 0 "hypothetical protein"  
"OP8\_F13\_00299" 26787 "s59E13H2" 0 "hypothetical protein"  
"OP8\_F13\_00299" 26787 "s59E25H2" 0 "hypothetical protein"  
"OP8\_F13\_00299" 26787 "s59E5H2" 0.04554725 "hypothetical protein"  
"OP8\_F13\_00299" 26787 "s63E6H2" 0 "hypothetical protein"  
"OP8\_F13\_00301" 26789 "s59E13H2" 1.083832 "Glutamine--tRNA ligase"  
"OP8\_F13\_00301" 26789 "s59E25H2" 0 "Glutamine--tRNA ligase"  
"OP8\_F13\_00301" 26789 "s59E5H2" 0.9732397 "Glutamine--tRNA ligase"  
"OP8\_F13\_00301" 26789 "s63E6H2" 0 "Glutamine--tRNA ligase"  
"OP8\_F13\_00302" 26790 "s59E13H2" 0.8478825 "Glutamate--tRNA ligase 1"  
"OP8\_F13\_00302" 26790 "s59E25H2" 0 "Glutamate--tRNA ligase 1"  
"OP8\_F13\_00302" 26790 "s59E5H2" 2.484472 "Glutamate--tRNA ligase 1"  
"OP8\_F13\_00302" 26790 "s63E6H2" 0 "Glutamate--tRNA ligase 1"  
"OP8\_F13\_00303" 26791 "s59E13H2" 0.5530611 "Phosphoglycolate phosphatase"  
"OP8\_F13\_00303" 26791 "s59E25H2" 0 "Phosphoglycolate phosphatase"  
"OP8\_F13\_00303" 26791 "s59E5H2" 1.617737 "Phosphoglycolate phosphatase"



"OP8\_F13\_00303" 26791 "s63E6H2" 0 "Phosphoglycolate phosphatase"  
"OP8\_F13\_00304" 26792 "s59E13H2" 0.006855602 "Phosphoserine aminotransferase"  
"OP8\_F13\_00304" 26792 "s59E25H2" 0 "Phosphoserine aminotransferase"  
"OP8\_F13\_00304" 26792 "s59E5H2" 1.516518 "Phosphoserine aminotransferase"  
"OP8\_F13\_00304" 26792 "s63E6H2" 0 "Phosphoserine aminotransferase"  
"OP8\_F13\_00305" 26793 "s59E13H2" 0.9806106 "Peptidase M16 inactive domain protein"  
"OP8\_F13\_00305" 26793 "s59E25H2" 0 "Peptidase M16 inactive domain protein"  
"OP8\_F13\_00305" 26793 "s59E5H2" 0.739395 "Peptidase M16 inactive domain protein"  
"OP8\_F13\_00305" 26793 "s63E6H2" 0 "Peptidase M16 inactive domain protein"  
"OP8\_F13\_00306" 26794 "s59E13H2" 1.773115 "hypothetical protein"  
"OP8\_F13\_00306" 26794 "s59E25H2" 0 "hypothetical protein"  
"OP8\_F13\_00306" 26794 "s59E5H2" 0.7630845 "hypothetical protein"  
"OP8\_F13\_00306" 26794 "s63E6H2" 0 "hypothetical protein"  
"OP8\_F13\_00307" 26795 "s59E13H2" 0.02191012 "2-C-methyl-D-erythritol 2,4-cyclodiphosphate synthase"  
"OP8\_F13\_00307" 26795 "s59E25H2" 0 "2-C-methyl-D-erythritol 2,4-cyclodiphosphate synthase"  
"OP8\_F13\_00307" 26795 "s59E5H2" 0.5186403 "2-C-methyl-D-erythritol 2,4-cyclodiphosphate synthase"  
"OP8\_F13\_00307" 26795 "s63E6H2" 0 "2-C-methyl-D-erythritol 2,4-cyclodiphosphate synthase"  
"OP8\_F13\_00308" 26796 "s59E13H2" 0.007394234 "2-C-methyl-D-erythritol 4-phosphate cytidylyltransferase"  
"OP8\_F13\_00308" 26796 "s59E25H2" 0 "2-C-methyl-D-erythritol 4-phosphate cytidylyltransferase"  
"OP8\_F13\_00308" 26796 "s59E5H2" 0.2434194 "2-C-methyl-D-erythritol 4-phosphate cytidylyltransferase"  
"OP8\_F13\_00308" 26796 "s63E6H2" 0 "2-C-methyl-D-erythritol 4-phosphate cytidylyltransferase"  
"OP8\_F13\_00309" 26797 "s59E13H2" 0.004363054 "putative PIN and TRAM-domain containing protein precursor"  
"OP8\_F13\_00309" 26797 "s59E25H2" 0 "putative PIN and TRAM-domain containing protein precursor"  
"OP8\_F13\_00309" 26797 "s59E5H2" 0.1888094 "putative PIN and TRAM-domain containing protein precursor"  
"OP8\_F13\_00309" 26797 "s63E6H2" 0 "putative PIN and TRAM-domain containing protein precursor"  
"OP8\_F13\_00310" 26798 "s59E13H2" 0.001858956 "hypothetical protein"  
"OP8\_F13\_00310" 26798 "s59E25H2" 0 "hypothetical protein"  
"OP8\_F13\_00310" 26798 "s59E5H2" 0.2402032 "hypothetical protein"  
"OP8\_F13\_00310" 26798 "s63E6H2" 0 "hypothetical protein"  
"OP8\_F13\_00311" 26799 "s59E13H2" 0.003121508 "putative phospholipid ABC transporter-binding protein MlaD"  
"OP8\_F13\_00311" 26799 "s59E25H2" 0 "putative phospholipid ABC transporter-binding protein MlaD"  
"OP8\_F13\_00311" 26799 "s59E5H2" 0.3858095 "putative phospholipid ABC transporter-binding protein MlaD"  
"OP8\_F13\_00311" 26799 "s63E6H2" 0 "putative phospholipid ABC transporter-binding protein MlaD"  
"OP8\_F13\_00312" 26800 "s59E13H2" 0.007393227 "putative ABC transporter ATP-binding protein"  
"OP8\_F13\_00312" 26800 "s59E25H2" 0 "putative ABC transporter ATP-binding protein"  
"OP8\_F13\_00312" 26800 "s59E5H2" 0.3034871 "putative ABC transporter ATP-binding protein"  
"OP8\_F13\_00312" 26800 "s63E6H2" 0 "putative ABC transporter ATP-binding protein"  
"OP8\_F13\_00313" 26801 "s59E13H2" 0.01771957 "putative phospholipid ABC transporter permease protein MlaE"  
"OP8\_F13\_00313" 26801 "s59E25H2" 0 "putative phospholipid ABC transporter permease protein MlaE"  
"OP8\_F13\_00313" 26801 "s59E5H2" 1.004306 "putative phospholipid ABC transporter permease protein MlaE"  
"OP8\_F13\_00313" 26801 "s63E6H2" 0 "putative phospholipid ABC transporter permease protein MlaE"  
"OP8\_F13\_00314" 26802 "s59E13H2" 0.007755794 "Replicative DNA helicase"  
"OP8\_F13\_00314" 26802 "s59E25H2" 0 "Replicative DNA helicase"  
"OP8\_F13\_00314" 26802 "s59E5H2" 0.293748 "Replicative DNA helicase"  
"OP8\_F13\_00314" 26802 "s63E6H2" 0 "Replicative DNA helicase"  
"OP8\_F13\_00315" 26803 "s59E13H2" 0.006591902 "50S ribosomal protein L9"  
"OP8\_F13\_00315" 26803 "s59E25H2" 0 "50S ribosomal protein L9"

"OP8\_F13\_00315" 26803 "s59E5H2" 0.1336673 "50S ribosomal protein L9"  
"OP8\_F13\_00315" 26803 "s63E6H2" 0 "50S ribosomal protein L9"  
"OP8\_F13\_00316" 26804 "s59E13H2" 0.0174429 "30S ribosomal protein S18"  
"OP8\_F13\_00316" 26804 "s59E25H2" 0 "30S ribosomal protein S18"  
"OP8\_F13\_00316" 26804 "s59E5H2" 0.04876087 "30S ribosomal protein S18"  
"OP8\_F13\_00316" 26804 "s63E6H2" 0 "30S ribosomal protein S18"  
"OP8\_F13\_00317" 26805 "s59E13H2" 0.008984307 "30S ribosomal protein S6"  
"OP8\_F13\_00317" 26805 "s59E25H2" 0 "30S ribosomal protein S6"  
"OP8\_F13\_00317" 26805 "s59E5H2" 0.05396405 "30S ribosomal protein S6"  
"OP8\_F13\_00317" 26805 "s63E6H2" 0 "30S ribosomal protein S6"  
"OP8\_F13\_00318" 26806 "s59E13H2" 0.02172593 "Peptidyl-tRNA hydrolase"  
"OP8\_F13\_00318" 26806 "s59E25H2" 0 "Peptidyl-tRNA hydrolase"  
"OP8\_F13\_00318" 26806 "s59E5H2" 0.1149085 "Peptidyl-tRNA hydrolase"  
"OP8\_F13\_00318" 26806 "s63E6H2" 0 "Peptidyl-tRNA hydrolase"  
"OP8\_F13\_00319" 26807 "s59E13H2" 0.01331589 "50S ribosomal protein L25"  
"OP8\_F13\_00319" 26807 "s59E25H2" 0 "50S ribosomal protein L25"  
"OP8\_F13\_00319" 26807 "s59E5H2" 0.1185209 "50S ribosomal protein L25"  
"OP8\_F13\_00319" 26807 "s63E6H2" 0 "50S ribosomal protein L25"  
"OP8\_F13\_00320" 26808 "s59E13H2" 0.003514598 "hypothetical protein"  
"OP8\_F13\_00320" 26808 "s59E25H2" 0 "hypothetical protein"  
"OP8\_F13\_00320" 26808 "s59E5H2" 0.8726887 "hypothetical protein"  
"OP8\_F13\_00320" 26808 "s63E6H2" 0 "hypothetical protein"  
"OP8\_F13\_00321" 26809 "s59E13H2" 0.01391119 "hypothetical protein"  
"OP8\_F13\_00321" 26809 "s59E25H2" 0 "hypothetical protein"  
"OP8\_F13\_00321" 26809 "s59E5H2" 0.7432834 "hypothetical protein"  
"OP8\_F13\_00321" 26809 "s63E6H2" 0 "hypothetical protein"  
"OP8\_F13\_00322" 26810 "s59E13H2" 0.007838842 "hypothetical protein"  
"OP8\_F13\_00322" 26810 "s59E25H2" 0 "hypothetical protein"  
"OP8\_F13\_00322" 26810 "s59E5H2" 0.7155035 "hypothetical protein"  
"OP8\_F13\_00322" 26810 "s63E6H2" 0 "hypothetical protein"  
"OP8\_F13\_00323" 26811 "s59E13H2" 0.005379422 "Adenylosuccinate lyase"  
"OP8\_F13\_00323" 26811 "s59E25H2" 0 "Adenylosuccinate lyase"  
"OP8\_F13\_00323" 26811 "s59E5H2" 2.434919 "Adenylosuccinate lyase"  
"OP8\_F13\_00323" 26811 "s63E6H2" 0 "Adenylosuccinate lyase"  
"OP8\_F13\_00324" 26812 "s59E13H2" 0 "Phosphoribosylglycinamide formyltransferase"  
"OP8\_F13\_00324" 26812 "s59E25H2" 0 "Phosphoribosylglycinamide formyltransferase"  
"OP8\_F13\_00324" 26812 "s59E5H2" 3.899264 "Phosphoribosylglycinamide formyltransferase"  
"OP8\_F13\_00324" 26812 "s63E6H2" 0.001750531 "Phosphoribosylglycinamide formyltransferase"  
"OP8\_F13\_00325" 26813 "s59E13H2" 0.3721758 "Thymidylate synthase ThyX"  
"OP8\_F13\_00325" 26813 "s59E25H2" 0.1592443 "Thymidylate synthase ThyX"  
"OP8\_F13\_00325" 26813 "s59E5H2" 3.526194 "Thymidylate synthase ThyX"  
"OP8\_F13\_00325" 26813 "s63E6H2" 0 "Thymidylate synthase ThyX"  
"OP8\_F13\_00326" 26814 "s59E13H2" 1.519165 "tRNA-splicing ligase RtcB"  
"OP8\_F13\_00326" 26814 "s59E25H2" 0 "tRNA-splicing ligase RtcB"  
"OP8\_F13\_00326" 26814 "s59E5H2" 1.878308 "tRNA-splicing ligase RtcB"  
"OP8\_F13\_00326" 26814 "s63E6H2" 0 "tRNA-splicing ligase RtcB"  
"OP8\_F13\_00327" 26815 "s59E13H2" 23.04944 "hypothetical protein"

"OP8\_F13\_00327" 26815 "s59E25H2" 0.5678161 "hypothetical protein"  
"OP8\_F13\_00327" 26815 "s59E5H2" 2.035635 "hypothetical protein"  
"OP8\_F13\_00327" 26815 "s63E6H2" 0 "hypothetical protein"  
"OP8\_F13\_00328" 26816 "s59E13H2" 23.89787 "molybdenum cofactor biosynthesis protein A"  
"OP8\_F13\_00328" 26816 "s59E25H2" 0.2472799 "molybdenum cofactor biosynthesis protein A"  
"OP8\_F13\_00328" 26816 "s59E5H2" 2.964871 "molybdenum cofactor biosynthesis protein A"  
"OP8\_F13\_00328" 26816 "s63E6H2" 0.001112432 "molybdenum cofactor biosynthesis protein A"  
"OP8\_F13\_00329" 26817 "s59E13H2" 22.66792 "Ultraviolet N-glycosylase/AP lyase"  
"OP8\_F13\_00329" 26817 "s59E25H2" 0 "Ultraviolet N-glycosylase/AP lyase"  
"OP8\_F13\_00329" 26817 "s59E5H2" 3.136356 "Ultraviolet N-glycosylase/AP lyase"  
"OP8\_F13\_00329" 26817 "s63E6H2" 0 "Ultraviolet N-glycosylase/AP lyase"  
"OP8\_F13\_00330" 26818 "s59E13H2" 23.0055 "Quinolate synthase A"  
"OP8\_F13\_00330" 26818 "s59E25H2" 0 "Quinolate synthase A"  
"OP8\_F13\_00330" 26818 "s59E5H2" 3.124406 "Quinolate synthase A"  
"OP8\_F13\_00330" 26818 "s63E6H2" 0 "Quinolate synthase A"  
"OP8\_F13\_00331" 26819 "s59E13H2" 15.70074 "Adenylosuccinate synthetase"  
"OP8\_F13\_00331" 26819 "s59E25H2" 0 "Adenylosuccinate synthetase"  
"OP8\_F13\_00331" 26819 "s59E5H2" 2.398324 "Adenylosuccinate synthetase"  
"OP8\_F13\_00331" 26819 "s63E6H2" 0 "Adenylosuccinate synthetase"  
"OP8\_F13\_00332" 26820 "s59E13H2" 7.876955 "hypothetical protein"  
"OP8\_F13\_00332" 26820 "s59E25H2" 0 "hypothetical protein"  
"OP8\_F13\_00332" 26820 "s59E5H2" 2.054542 "hypothetical protein"  
"OP8\_F13\_00332" 26820 "s63E6H2" 0 "hypothetical protein"  
"OP8\_F13\_00333" 26821 "s59E13H2" 12.86818 "hypothetical protein"  
"OP8\_F13\_00333" 26821 "s59E25H2" 0 "hypothetical protein"  
"OP8\_F13\_00333" 26821 "s59E5H2" 4.278238 "hypothetical protein"  
"OP8\_F13\_00333" 26821 "s63E6H2" 0 "hypothetical protein"  
"OP8\_F13\_00334" 26822 "s59E13H2" 12.11962 "hypothetical protein"  
"OP8\_F13\_00334" 26822 "s59E25H2" 0 "hypothetical protein"  
"OP8\_F13\_00334" 26822 "s59E5H2" 3.834888 "hypothetical protein"  
"OP8\_F13\_00334" 26822 "s63E6H2" 0 "hypothetical protein"  
"OP8\_F13\_00335" 26823 "s59E13H2" 13.57736 "hypothetical protein"  
"OP8\_F13\_00335" 26823 "s59E25H2" 0 "hypothetical protein"  
"OP8\_F13\_00335" 26823 "s59E5H2" 4.54991 "hypothetical protein"  
"OP8\_F13\_00335" 26823 "s63E6H2" 0 "hypothetical protein"  
"OP8\_F13\_00336" 26824 "s59E13H2" 15.21566 "Cell division ATP-binding protein FtsE"  
"OP8\_F13\_00336" 26824 "s59E25H2" 0 "Cell division ATP-binding protein FtsE"  
"OP8\_F13\_00336" 26824 "s59E5H2" 3.911531 "Cell division ATP-binding protein FtsE"  
"OP8\_F13\_00336" 26824 "s63E6H2" 0 "Cell division ATP-binding protein FtsE"  
"OP8\_F13\_00337" 26825 "s59E13H2" 16.3584 "Cell division protein FtsX"  
"OP8\_F13\_00337" 26825 "s59E25H2" 0 "Cell division protein FtsX"  
"OP8\_F13\_00337" 26825 "s59E5H2" 4.591114 "Cell division protein FtsX"  
"OP8\_F13\_00337" 26825 "s63E6H2" 0 "Cell division protein FtsX"  
"OP8\_F13\_00338" 26826 "s59E13H2" 15.62597 "cytoskeletal protein RodZ"  
"OP8\_F13\_00338" 26826 "s59E25H2" 0 "cytoskeletal protein RodZ"  
"OP8\_F13\_00338" 26826 "s59E5H2" 4.87564 "cytoskeletal protein RodZ"  
"OP8\_F13\_00338" 26826 "s63E6H2" 0 "cytoskeletal protein RodZ"

"OP8\_F13\_00339" 26827 "s59E13H2" 16.2373 "Alginate biosynthesis sensor protein KinB"  
"OP8\_F13\_00339" 26827 "s59E25H2" 0 "Alginate biosynthesis sensor protein KinB"  
"OP8\_F13\_00339" 26827 "s59E5H2" 5.035696 "Alginate biosynthesis sensor protein KinB"  
"OP8\_F13\_00339" 26827 "s63E6H2" 0 "Alginate biosynthesis sensor protein KinB"  
"OP8\_F13\_00340" 26828 "s59E13H2" 20.00452 "Transcriptional regulatory protein ZraR"  
"OP8\_F13\_00340" 26828 "s59E25H2" 0 "Transcriptional regulatory protein ZraR"  
"OP8\_F13\_00340" 26828 "s59E5H2" 4.0501 "Transcriptional regulatory protein ZraR"  
"OP8\_F13\_00340" 26828 "s63E6H2" 0.0006873793 "Transcriptional regulatory protein ZraR"  
"OP8\_F13\_00341" 26829 "s59E13H2" 25.44164 "Magnesium transporter MgtE"  
"OP8\_F13\_00341" 26829 "s59E25H2" 0 "Magnesium transporter MgtE"  
"OP8\_F13\_00341" 26829 "s59E5H2" 3.857631 "Magnesium transporter MgtE"  
"OP8\_F13\_00341" 26829 "s63E6H2" 0.002593295 "Magnesium transporter MgtE"  
"OP8\_F13\_00342" 26830 "s59E13H2" 0.2684735 "DNA repair protein RecO"  
"OP8\_F13\_00342" 26830 "s59E25H2" 0 "DNA repair protein RecO"  
"OP8\_F13\_00342" 26830 "s59E5H2" 3.277713 "DNA repair protein RecO"  
"OP8\_F13\_00342" 26830 "s63E6H2" 0 "DNA repair protein RecO"  
"OP8\_F13\_00343" 26831 "s59E13H2" 0 "DNA repair protein RecO"  
"OP8\_F13\_00343" 26831 "s59E25H2" 0 "DNA repair protein RecO"  
"OP8\_F13\_00343" 26831 "s59E5H2" 2.680265 "DNA repair protein RecO"  
"OP8\_F13\_00343" 26831 "s63E6H2" 0 "DNA repair protein RecO"  
"OP8\_F13\_00344" 26832 "s59E13H2" 0.001591599 "Heterodisulfide reductase subunit A-like protein"  
"OP8\_F13\_00344" 26832 "s59E25H2" 0 "Heterodisulfide reductase subunit A-like protein"  
"OP8\_F13\_00344" 26832 "s59E5H2" 2.248036 "Heterodisulfide reductase subunit A-like protein"  
"OP8\_F13\_00344" 26832 "s63E6H2" 0 "Heterodisulfide reductase subunit A-like protein"  
"OP8\_F13\_00345" 26833 "s59E13H2" 0.005173543 "photosystem I assembly protein Ycf3"  
"OP8\_F13\_00345" 26833 "s59E25H2" 0 "photosystem I assembly protein Ycf3"  
"OP8\_F13\_00345" 26833 "s59E5H2" 1.551243 "photosystem I assembly protein Ycf3"  
"OP8\_F13\_00345" 26833 "s63E6H2" 0 "photosystem I assembly protein Ycf3"  
"OP8\_F13\_00347" 26835 "s59E13H2" 0 "hypothetical protein"  
"OP8\_F13\_00347" 26835 "s59E25H2" 0 "hypothetical protein"  
"OP8\_F13\_00347" 26835 "s59E5H2" 0.01785221 "hypothetical protein"  
"OP8\_F13\_00347" 26835 "s63E6H2" 0 "hypothetical protein"  
"OP8\_F13\_00348" 26836 "s59E13H2" 0 "hypothetical protein"  
"OP8\_F13\_00348" 26836 "s59E25H2" 0 "hypothetical protein"  
"OP8\_F13\_00348" 26836 "s59E5H2" 0 "hypothetical protein"  
"OP8\_F13\_00348" 26836 "s63E6H2" 0 "hypothetical protein"  
"OP8\_F13\_00349" 26837 "s59E13H2" 0 "hypothetical protein"  
"OP8\_F13\_00349" 26837 "s59E25H2" 0 "hypothetical protein"  
"OP8\_F13\_00349" 26837 "s59E5H2" 0.001877148 "hypothetical protein"  
"OP8\_F13\_00349" 26837 "s63E6H2" 0 "hypothetical protein"  
"OP8\_F13\_00350" 26838 "s59E13H2" 0 "hypothetical protein"  
"OP8\_F13\_00350" 26838 "s59E25H2" 0 "hypothetical protein"  
"OP8\_F13\_00350" 26838 "s59E5H2" 0.07867458 "hypothetical protein"  
"OP8\_F13\_00350" 26838 "s63E6H2" 0 "hypothetical protein"  
"OP8\_F13\_00351" 26839 "s59E13H2" 0 "NHL repeat protein"  
"OP8\_F13\_00351" 26839 "s59E25H2" 0 "NHL repeat protein"  
"OP8\_F13\_00351" 26839 "s59E5H2" 11.93452 "NHL repeat protein"

"OP8\_F13\_00351" 26839 "s63E6H2" 0 "NHL repeat protein"  
"OP8\_F13\_00352" 26840 "s59E13H2" 0 "Fe/S biogenesis protein NfuA"  
"OP8\_F13\_00352" 26840 "s59E25H2" 0 "Fe/S biogenesis protein NfuA"  
"OP8\_F13\_00352" 26840 "s59E5H2" 10.82085 "Fe/S biogenesis protein NfuA"  
"OP8\_F13\_00352" 26840 "s63E6H2" 0 "Fe/S biogenesis protein NfuA"  
"OP8\_F13\_00353" 26841 "s59E13H2" 0.001777184 "Colicin I receptor precursor"  
"OP8\_F13\_00353" 26841 "s59E25H2" 0 "Colicin I receptor precursor"  
"OP8\_F13\_00353" 26841 "s59E5H2" 4.600089 "Colicin I receptor precursor"  
"OP8\_F13\_00353" 26841 "s63E6H2" 0 "Colicin I receptor precursor"  
"OP8\_F13\_00355" 26843 "s59E13H2" 0.006296775 "NTPase"  
"OP8\_F13\_00355" 26843 "s59E25H2" 0 "NTPase"  
"OP8\_F13\_00355" 26843 "s59E5H2" 3.226194 "NTPase"  
"OP8\_F13\_00355" 26843 "s63E6H2" 0 "NTPase"  
"OP8\_F13\_00356" 26844 "s59E13H2" 0.01159909 "Tungsten-containing aldehyde ferredoxin oxidoreductase"  
"OP8\_F13\_00356" 26844 "s59E25H2" 0 "Tungsten-containing aldehyde ferredoxin oxidoreductase"  
"OP8\_F13\_00356" 26844 "s59E5H2" 2.849467 "Tungsten-containing aldehyde ferredoxin oxidoreductase"  
"OP8\_F13\_00356" 26844 "s63E6H2" 0 "Tungsten-containing aldehyde ferredoxin oxidoreductase"  
"OP8\_F13\_00357" 26845 "s59E13H2" 0.01633276 "Deoxyguanosine kinase"  
"OP8\_F13\_00357" 26845 "s59E25H2" 0 "Deoxyguanosine kinase"  
"OP8\_F13\_00357" 26845 "s59E5H2" 3.843333 "Deoxyguanosine kinase"  
"OP8\_F13\_00357" 26845 "s63E6H2" 0 "Deoxyguanosine kinase"  
"OP8\_F13\_00358" 26846 "s59E13H2" 0.01290622 "3-methyl-2-oxobutanoate hydroxymethyltransferase"  
"OP8\_F13\_00358" 26846 "s59E25H2" 0 "3-methyl-2-oxobutanoate hydroxymethyltransferase"  
"OP8\_F13\_00358" 26846 "s59E5H2" 2.839967 "3-methyl-2-oxobutanoate hydroxymethyltransferase"  
"OP8\_F13\_00358" 26846 "s63E6H2" 0 "3-methyl-2-oxobutanoate hydroxymethyltransferase"  
"OP8\_F13\_00359" 26847 "s59E13H2" 0.03018172 "Pantothenate synthetase"  
"OP8\_F13\_00359" 26847 "s59E25H2" 0.4706573 "Pantothenate synthetase"  
"OP8\_F13\_00359" 26847 "s59E5H2" 3.924495 "Pantothenate synthetase"  
"OP8\_F13\_00359" 26847 "s63E6H2" 0 "Pantothenate synthetase"  
"OP8\_F13\_00360" 26848 "s59E13H2" 0.05007247 "Aspartate 1-decarboxylase precursor"  
"OP8\_F13\_00360" 26848 "s59E25H2" 0.2464986 "Aspartate 1-decarboxylase precursor"  
"OP8\_F13\_00360" 26848 "s59E5H2" 4.729058 "Aspartate 1-decarboxylase precursor"  
"OP8\_F13\_00360" 26848 "s63E6H2" 0 "Aspartate 1-decarboxylase precursor"  
"OP8\_F13\_00361" 26849 "s59E13H2" 0.03025493 "Inosine-5'-monophosphate dehydrogenase"  
"OP8\_F13\_00361" 26849 "s59E25H2" 0 "Inosine-5'-monophosphate dehydrogenase"  
"OP8\_F13\_00361" 26849 "s59E5H2" 4.89292 "Inosine-5'-monophosphate dehydrogenase"  
"OP8\_F13\_00361" 26849 "s63E6H2" 0.001586263 "Inosine-5'-monophosphate dehydrogenase"  
"OP8\_F13\_00362" 26850 "s59E13H2" 0.002419337 "Alpha-L-fucosidase"  
"OP8\_F13\_00362" 26850 "s59E25H2" 0 "Alpha-L-fucosidase"  
"OP8\_F13\_00362" 26850 "s59E5H2" 0.484813 "Alpha-L-fucosidase"  
"OP8\_F13\_00362" 26850 "s63E6H2" 0 "Alpha-L-fucosidase"  
"OP8\_F13\_00363" 26851 "s59E13H2" 0.002578992 "Dipeptidase A"  
"OP8\_F13\_00363" 26851 "s59E25H2" 0 "Dipeptidase A"  
"OP8\_F13\_00363" 26851 "s59E5H2" 1.336727 "Dipeptidase A"  
"OP8\_F13\_00363" 26851 "s63E6H2" 0 "Dipeptidase A"  
"OP8\_F13\_00364" 26852 "s59E13H2" 0.0004270978 "Beta-glucuronidase"  
"OP8\_F13\_00364" 26852 "s59E25H2" 0 "Beta-glucuronidase"

"OP8\_F13\_00364" 26852 "s59E5H2" 2.331485 "Beta-glucuronidase"  
"OP8\_F13\_00364" 26852 "s63E6H2" 0 "Beta-glucuronidase"  
"OP8\_F13\_00365" 26853 "s59E13H2" 0.002214937 "ABC-2 family transporter protein"  
"OP8\_F13\_00365" 26853 "s59E25H2" 0 "ABC-2 family transporter protein"  
"OP8\_F13\_00365" 26853 "s59E5H2" 0.821314 "ABC-2 family transporter protein"  
"OP8\_F13\_00365" 26853 "s63E6H2" 0 "ABC-2 family transporter protein"  
"OP8\_F13\_00366" 26854 "s59E13H2" 0 "putative ABC transporter ATP-binding protein YbhF"  
"OP8\_F13\_00366" 26854 "s59E25H2" 0 "putative ABC transporter ATP-binding protein YbhF"  
"OP8\_F13\_00366" 26854 "s59E5H2" 0.6186234 "putative ABC transporter ATP-binding protein YbhF"  
"OP8\_F13\_00366" 26854 "s63E6H2" 0 "putative ABC transporter ATP-binding protein YbhF"  
"OP8\_F13\_00367" 26855 "s59E13H2" 0.002859216 "putative amino acid permease YhdG"  
"OP8\_F13\_00367" 26855 "s59E25H2" 0 "putative amino acid permease YhdG"  
"OP8\_F13\_00367" 26855 "s59E5H2" 1.432428 "putative amino acid permease YhdG"  
"OP8\_F13\_00367" 26855 "s63E6H2" 0 "putative amino acid permease YhdG"  
"OP8\_F13\_00368" 26856 "s59E13H2" 0 "putative glycine dehydrogenase (decarboxylating) subunit 2"  
"OP8\_F13\_00368" 26856 "s59E25H2" 0 "putative glycine dehydrogenase (decarboxylating) subunit 2"  
"OP8\_F13\_00368" 26856 "s59E5H2" 2.341729 "putative glycine dehydrogenase (decarboxylating) subunit 2"  
"OP8\_F13\_00368" 26856 "s63E6H2" 0 "putative glycine dehydrogenase (decarboxylating) subunit 2"  
"OP8\_F13\_00369" 26857 "s59E13H2" 0.006718806 "putative glycine dehydrogenase (decarboxylating) subunit 1"  
"OP8\_F13\_00369" 26857 "s59E25H2" 0 "putative glycine dehydrogenase (decarboxylating) subunit 1"  
"OP8\_F13\_00369" 26857 "s59E5H2" 3.413432 "putative glycine dehydrogenase (decarboxylating) subunit 1"  
"OP8\_F13\_00369" 26857 "s63E6H2" 0 "putative glycine dehydrogenase (decarboxylating) subunit 1"  
"OP8\_F13\_00370" 26858 "s59E13H2" 0 "2-dehydro-3-deoxy-D-gluconate 5-dehydrogenase"  
"OP8\_F13\_00370" 26858 "s59E25H2" 0 "2-dehydro-3-deoxy-D-gluconate 5-dehydrogenase"  
"OP8\_F13\_00370" 26858 "s59E5H2" 1.733366 "2-dehydro-3-deoxy-D-gluconate 5-dehydrogenase"  
"OP8\_F13\_00370" 26858 "s63E6H2" 0 "2-dehydro-3-deoxy-D-gluconate 5-dehydrogenase"  
"OP8\_F13\_00371" 26859 "s59E13H2" 0 "Glucose 1-dehydrogenase 4"  
"OP8\_F13\_00371" 26859 "s59E25H2" 0 "Glucose 1-dehydrogenase 4"  
"OP8\_F13\_00371" 26859 "s59E5H2" 1.358844 "Glucose 1-dehydrogenase 4"  
"OP8\_F13\_00371" 26859 "s63E6H2" 0 "Glucose 1-dehydrogenase 4"  
"OP8\_F13\_00372" 26860 "s59E13H2" 0 "Bifunctional homocysteine S-methyltransferase/5,10-methylenetetrahydrofolate reductase"  
"OP8\_F13\_00372" 26860 "s59E25H2" 0 "Bifunctional homocysteine S-methyltransferase/5,10-methylenetetrahydrofolate reductase"  
"OP8\_F13\_00372" 26860 "s59E5H2" 1.607444 "Bifunctional homocysteine S-methyltransferase/5,10-methylenetetrahydrofolate reductase"  
"OP8\_F13\_00372" 26860 "s63E6H2" 0 "Bifunctional homocysteine S-methyltransferase/5,10-methylenetetrahydrofolate reductase"  
"OP8\_F13\_00373" 26861 "s59E13H2" 0.000987387 "Alanine dehydrogenase"  
"OP8\_F13\_00373" 26861 "s59E25H2" 0 "Alanine dehydrogenase"  
"OP8\_F13\_00373" 26861 "s59E5H2" 2.571324 "Alanine dehydrogenase"  
"OP8\_F13\_00373" 26861 "s63E6H2" 0 "Alanine dehydrogenase"  
"OP8\_F13\_00374" 26862 "s59E13H2" 0.008144207 "Methylated-DNA--protein-cysteine methyltransferase"  
"OP8\_F13\_00374" 26862 "s59E25H2" 0 "Methylated-DNA--protein-cysteine methyltransferase"  
"OP8\_F13\_00374" 26862 "s59E5H2" 3.390886 "Methylated-DNA--protein-cysteine methyltransferase"  
"OP8\_F13\_00374" 26862 "s63E6H2" 0 "Methylated-DNA--protein-cysteine methyltransferase"  
"OP8\_F13\_00375" 26863 "s59E13H2" 0.001338058 "Long-chain-fatty-acid--CoA ligase FadD15"  
"OP8\_F13\_00375" 26863 "s59E25H2" 0 "Long-chain-fatty-acid--CoA ligase FadD15"  
"OP8\_F13\_00375" 26863 "s59E5H2" 2.244303 "Long-chain-fatty-acid--CoA ligase FadD15"  
"OP8\_F13\_00375" 26863 "s63E6H2" 0 "Long-chain-fatty-acid--CoA ligase FadD15"  
"OP8\_F13\_00376" 26864 "s59E13H2" 0.004911851 "Long-chain-fatty-acid--CoA ligase FadD15"

"OP8\_F13\_00376" 26864 "s59E25H2" 0 "Long-chain-fatty-acid--CoA ligase FadD15"  
"OP8\_F13\_00376" 26864 "s59E5H2" 1.815234 "Long-chain-fatty-acid--CoA ligase FadD15"  
"OP8\_F13\_00376" 26864 "s63E6H2" 0 "Long-chain-fatty-acid--CoA ligase FadD15"  
"OP8\_F13\_00377" 26865 "s59E13H2" 0.003169886 "Prolyl tripeptidyl peptidase precursor"  
"OP8\_F13\_00377" 26865 "s59E25H2" 0 "Prolyl tripeptidyl peptidase precursor"  
"OP8\_F13\_00377" 26865 "s59E5H2" 2.096563 "Prolyl tripeptidyl peptidase precursor"  
"OP8\_F13\_00377" 26865 "s63E6H2" 0 "Prolyl tripeptidyl peptidase precursor"  
"OP8\_F13\_00378" 26866 "s59E13H2" 0.001520414 "Tungsten-containing aldehyde ferredoxin oxidoreductase"  
"OP8\_F13\_00378" 26866 "s59E25H2" 0 "Tungsten-containing aldehyde ferredoxin oxidoreductase"  
"OP8\_F13\_00378" 26866 "s59E5H2" 1.721578 "Tungsten-containing aldehyde ferredoxin oxidoreductase"  
"OP8\_F13\_00378" 26866 "s63E6H2" 0 "Tungsten-containing aldehyde ferredoxin oxidoreductase"  
"OP8\_F13\_00379" 26867 "s59E13H2" 0.001623367 "hypothetical protein"  
"OP8\_F13\_00379" 26867 "s59E25H2" 0 "hypothetical protein"  
"OP8\_F13\_00379" 26867 "s59E5H2" 4.136036 "hypothetical protein"  
"OP8\_F13\_00379" 26867 "s63E6H2" 0 "hypothetical protein"  
"OP8\_F13\_00380" 26868 "s59E13H2" 0.001300353 "BNR/Asp-box repeat protein"  
"OP8\_F13\_00380" 26868 "s59E25H2" 0.08451657 "BNR/Asp-box repeat protein"  
"OP8\_F13\_00380" 26868 "s59E5H2" 5.446567 "BNR/Asp-box repeat protein"  
"OP8\_F13\_00380" 26868 "s63E6H2" 0.0005138007 "BNR/Asp-box repeat protein"  
"OP8\_F13\_00381" 26869 "s59E13H2" 0.006425772 "Dipeptidase"  
"OP8\_F13\_00381" 26869 "s59E25H2" 0 "Dipeptidase"  
"OP8\_F13\_00381" 26869 "s59E5H2" 2.740448 "Dipeptidase"  
"OP8\_F13\_00381" 26869 "s63E6H2" 0 "Dipeptidase"  
"OP8\_F13\_00382" 26870 "s59E13H2" 0 "hypothetical protein"  
"OP8\_F13\_00382" 26870 "s59E25H2" 0 "hypothetical protein"  
"OP8\_F13\_00382" 26870 "s59E5H2" 0.1446637 "hypothetical protein"  
"OP8\_F13\_00382" 26870 "s63E6H2" 0 "hypothetical protein"  
"OP8\_F13\_00383" 26871 "s59E13H2" 0 "Phosphosulfolactate synthase"  
"OP8\_F13\_00383" 26871 "s59E25H2" 0 "Phosphosulfolactate synthase"  
"OP8\_F13\_00383" 26871 "s59E5H2" 0.1474672 "Phosphosulfolactate synthase"  
"OP8\_F13\_00383" 26871 "s63E6H2" 0 "Phosphosulfolactate synthase"  
"OP8\_F13\_00384" 26872 "s59E13H2" 0.006353707 "hypothetical protein"  
"OP8\_F13\_00384" 26872 "s59E25H2" 0 "hypothetical protein"  
"OP8\_F13\_00384" 26872 "s59E5H2" 0.3507998 "hypothetical protein"  
"OP8\_F13\_00384" 26872 "s63E6H2" 0 "hypothetical protein"  
"OP8\_F13\_00385" 26873 "s59E13H2" 0.02261775 "5,6-dimethylbenzimidazole synthase"  
"OP8\_F13\_00385" 26873 "s59E25H2" 0 "5,6-dimethylbenzimidazole synthase"  
"OP8\_F13\_00385" 26873 "s59E5H2" 0.9760251 "5,6-dimethylbenzimidazole synthase"  
"OP8\_F13\_00385" 26873 "s63E6H2" 0 "5,6-dimethylbenzimidazole synthase"  
"OP8\_F13\_00386" 26874 "s59E13H2" 0.01247245 "peptidase PmbA"  
"OP8\_F13\_00386" 26874 "s59E25H2" 0 "peptidase PmbA"  
"OP8\_F13\_00386" 26874 "s59E5H2" 0.8636728 "peptidase PmbA"  
"OP8\_F13\_00386" 26874 "s63E6H2" 0 "peptidase PmbA"  
"OP8\_F13\_00387" 26875 "s59E13H2" 0.01165086 "protease TldD"  
"OP8\_F13\_00387" 26875 "s59E25H2" 0 "protease TldD"  
"OP8\_F13\_00387" 26875 "s59E5H2" 3.592685 "protease TldD"  
"OP8\_F13\_00387" 26875 "s63E6H2" 0 "protease TldD"

"OP8\_F13\_00388" 26876 "s59E13H2" 0.008578129 "hypothetical protein"  
"OP8\_F13\_00388" 26876 "s59E25H2" 0 "hypothetical protein"  
"OP8\_F13\_00388" 26876 "s59E5H2" 3.210106 "hypothetical protein"  
"OP8\_F13\_00388" 26876 "s63E6H2" 0 "hypothetical protein"  
"OP8\_F13\_00389" 26877 "s59E13H2" 0 "Opine dehydrogenase"  
"OP8\_F13\_00389" 26877 "s59E25H2" 0 "Opine dehydrogenase"  
"OP8\_F13\_00389" 26877 "s59E5H2" 3.175754 "Opine dehydrogenase"  
"OP8\_F13\_00389" 26877 "s63E6H2" 0 "Opine dehydrogenase"  
"OP8\_F13\_00391" 26879 "s59E13H2" 0.3080565 "Sulfhydrogenase 2 subunit gamma"  
"OP8\_F13\_00391" 26879 "s59E25H2" 0 "Sulfhydrogenase 2 subunit gamma"  
"OP8\_F13\_00391" 26879 "s59E5H2" 2.058474 "Sulfhydrogenase 2 subunit gamma"  
"OP8\_F13\_00391" 26879 "s63E6H2" 0 "Sulfhydrogenase 2 subunit gamma"  
"OP8\_F13\_00392" 26880 "s59E13H2" 0.03773222 "Formate dehydrogenase subunit alpha"  
"OP8\_F13\_00392" 26880 "s59E25H2" 0 "Formate dehydrogenase subunit alpha"  
"OP8\_F13\_00392" 26880 "s59E5H2" 2.821879 "Formate dehydrogenase subunit alpha"  
"OP8\_F13\_00392" 26880 "s63E6H2" 0 "Formate dehydrogenase subunit alpha"  
"OP8\_F13\_00393" 26881 "s59E13H2" 0.009323304 "Sulfhydrogenase 1 subunit beta"  
"OP8\_F13\_00393" 26881 "s59E25H2" 0 "Sulfhydrogenase 1 subunit beta"  
"OP8\_F13\_00393" 26881 "s59E5H2" 1.903339 "Sulfhydrogenase 1 subunit beta"  
"OP8\_F13\_00393" 26881 "s63E6H2" 0 "Sulfhydrogenase 1 subunit beta"  
"OP8\_F13\_00394" 26882 "s59E13H2" 0.01076386 "Molybdenum cofactor guanylyltransferase"  
"OP8\_F13\_00394" 26882 "s59E25H2" 0 "Molybdenum cofactor guanylyltransferase"  
"OP8\_F13\_00394" 26882 "s59E5H2" 1.733384 "Molybdenum cofactor guanylyltransferase"  
"OP8\_F13\_00394" 26882 "s63E6H2" 0 "Molybdenum cofactor guanylyltransferase"  
"OP8\_F13\_00395" 26883 "s59E13H2" 0.1740815 "hypothetical protein"  
"OP8\_F13\_00395" 26883 "s59E25H2" 0 "hypothetical protein"  
"OP8\_F13\_00395" 26883 "s59E5H2" 3.236078 "hypothetical protein"  
"OP8\_F13\_00395" 26883 "s63E6H2" 0 "hypothetical protein"  
"OP8\_F13\_00396" 26884 "s59E13H2" 0.03749372 "putative formate transporter 1"  
"OP8\_F13\_00396" 26884 "s59E25H2" 0 "putative formate transporter 1"  
"OP8\_F13\_00396" 26884 "s59E5H2" 2.978443 "putative formate transporter 1"  
"OP8\_F13\_00396" 26884 "s63E6H2" 0 "putative formate transporter 1"  
"OP8\_F13\_00397" 26885 "s59E13H2" 0.01217509 "hypothetical protein"  
"OP8\_F13\_00397" 26885 "s59E25H2" 0 "hypothetical protein"  
"OP8\_F13\_00397" 26885 "s59E5H2" 2.370516 "hypothetical protein"  
"OP8\_F13\_00397" 26885 "s63E6H2" 0 "hypothetical protein"  
"OP8\_F13\_00399" 26887 "s59E13H2" 0.003857192 "Molybdopterin-guanine dinucleotide biosynthesis adapter protein"  
"OP8\_F13\_00399" 26887 "s59E25H2" 0 "Molybdopterin-guanine dinucleotide biosynthesis adapter protein"  
"OP8\_F13\_00399" 26887 "s59E5H2" 1.235629 "Molybdopterin-guanine dinucleotide biosynthesis adapter protein"  
"OP8\_F13\_00399" 26887 "s63E6H2" 0 "Molybdopterin-guanine dinucleotide biosynthesis adapter protein"  
"OP8\_F13\_00400" 26888 "s59E13H2" 0.003348989 "phosphodiesterase"  
"OP8\_F13\_00400" 26888 "s59E25H2" 0 "phosphodiesterase"  
"OP8\_F13\_00400" 26888 "s59E5H2" 1.849374 "phosphodiesterase"  
"OP8\_F13\_00400" 26888 "s63E6H2" 0 "phosphodiesterase"  
"OP8\_F13\_00401" 26889 "s59E13H2" 0.01384347 "Alpha-2-macroglobulin family protein"  
"OP8\_F13\_00401" 26889 "s59E25H2" 0.2229949 "Alpha-2-macroglobulin family protein"  
"OP8\_F13\_00401" 26889 "s59E5H2" 7.047872 "Alpha-2-macroglobulin family protein"



"OP8\_F13\_00401" 26889 "s63E6H2" 0 "Alpha-2-macroglobulin family protein"  
"OP8\_F13\_00402" 26890 "s59E13H2" 0.02797612 "Penicillin-binding protein 2D"  
"OP8\_F13\_00402" 26890 "s59E25H2" 0 "Penicillin-binding protein 2D"  
"OP8\_F13\_00402" 26890 "s59E5H2" 6.848102 "Penicillin-binding protein 2D"  
"OP8\_F13\_00402" 26890 "s63E6H2" 0 "Penicillin-binding protein 2D"  
"OP8\_F13\_00403" 26891 "s59E13H2" 0.05512103 "Signal transduction histidine-protein kinase BarA"  
"OP8\_F13\_00403" 26891 "s59E25H2" 0.004621606 "Signal transduction histidine-protein kinase BarA"  
"OP8\_F13\_00403" 26891 "s59E5H2" 6.28788 "Signal transduction histidine-protein kinase BarA"  
"OP8\_F13\_00403" 26891 "s63E6H2" 0.0002692541 "Signal transduction histidine-protein kinase BarA"  
"OP8\_F13\_00404" 26892 "s59E13H2" 0.03306757 "hypothetical protein"  
"OP8\_F13\_00404" 26892 "s59E25H2" 0 "hypothetical protein"  
"OP8\_F13\_00404" 26892 "s59E5H2" 3.064283 "hypothetical protein"  
"OP8\_F13\_00404" 26892 "s63E6H2" 0 "hypothetical protein"  
"OP8\_F13\_00405" 26893 "s59E13H2" 0.02507911 "Xaa-Pro aminopeptidase"  
"OP8\_F13\_00405" 26893 "s59E25H2" 0 "Xaa-Pro aminopeptidase"  
"OP8\_F13\_00405" 26893 "s59E5H2" 2.598338 "Xaa-Pro aminopeptidase"  
"OP8\_F13\_00405" 26893 "s63E6H2" 0 "Xaa-Pro aminopeptidase"  
"OP8\_F13\_00406" 26894 "s59E13H2" 0.007482264 "Benzylsuccinate synthase alpha subunit"  
"OP8\_F13\_00406" 26894 "s59E25H2" 0 "Benzylsuccinate synthase alpha subunit"  
"OP8\_F13\_00406" 26894 "s59E5H2" 1.116525 "Benzylsuccinate synthase alpha subunit"  
"OP8\_F13\_00406" 26894 "s63E6H2" 0 "Benzylsuccinate synthase alpha subunit"  
"OP8\_F13\_00407" 26895 "s59E13H2" 0.01129423 "Benzylsuccinate synthase activating enzyme"  
"OP8\_F13\_00407" 26895 "s59E25H2" 0 "Benzylsuccinate synthase activating enzyme"  
"OP8\_F13\_00407" 26895 "s59E5H2" 1.064125 "Benzylsuccinate synthase activating enzyme"  
"OP8\_F13\_00407" 26895 "s63E6H2" 0 "Benzylsuccinate synthase activating enzyme"  
"OP8\_F13\_00408" 26896 "s59E13H2" 0.02176002 "Dispase autolysis-inducing protein precursor"  
"OP8\_F13\_00408" 26896 "s59E25H2" 0 "Dispase autolysis-inducing protein precursor"  
"OP8\_F13\_00408" 26896 "s59E5H2" 1.04457 "Dispase autolysis-inducing protein precursor"  
"OP8\_F13\_00408" 26896 "s63E6H2" 0 "Dispase autolysis-inducing protein precursor"  
"OP8\_F13\_00409" 26897 "s59E13H2" 0.05118542 "Pyruvate-flavodoxin oxidoreductase"  
"OP8\_F13\_00409" 26897 "s59E25H2" 0 "Pyruvate-flavodoxin oxidoreductase"  
"OP8\_F13\_00409" 26897 "s59E5H2" 1.02052 "Pyruvate-flavodoxin oxidoreductase"  
"OP8\_F13\_00409" 26897 "s63E6H2" 0 "Pyruvate-flavodoxin oxidoreductase"  
"OP8\_F13\_00410" 26898 "s59E13H2" 0 "CRISPR-associated protein (cas\_TM1802)"  
"OP8\_F13\_00410" 26898 "s59E25H2" 0 "CRISPR-associated protein (cas\_TM1802)"  
"OP8\_F13\_00410" 26898 "s59E5H2" 0.9799092 "CRISPR-associated protein (cas\_TM1802)"  
"OP8\_F13\_00410" 26898 "s63E6H2" 0 "CRISPR-associated protein (cas\_TM1802)"  
"OP8\_F13\_00411" 26899 "s59E13H2" 0.005156242 "hypothetical protein"  
"OP8\_F13\_00411" 26899 "s59E25H2" 0 "hypothetical protein"  
"OP8\_F13\_00411" 26899 "s59E5H2" 0.340695 "hypothetical protein"  
"OP8\_F13\_00411" 26899 "s63E6H2" 0 "hypothetical protein"  
"OP8\_F13\_00412" 26900 "s59E13H2" 0.00739374 "CRISPR-associated protein (Cas\_Cas5)"  
"OP8\_F13\_00412" 26900 "s59E25H2" 0 "CRISPR-associated protein (Cas\_Cas5)"  
"OP8\_F13\_00412" 26900 "s59E5H2" 0.1825203 "CRISPR-associated protein (Cas\_Cas5)"  
"OP8\_F13\_00412" 26900 "s63E6H2" 0 "CRISPR-associated protein (Cas\_Cas5)"  
"OP8\_F13\_00413" 26901 "s59E13H2" 0.004756746 "CRISPR-associated nuclease/helicase Cas3"  
"OP8\_F13\_00413" 26901 "s59E25H2" 0 "CRISPR-associated nuclease/helicase Cas3"

"OP8\_F13\_00413" 26901 "s59E5H2" 0.488885 "CRISPR-associated nuclease/helicase Cas3"  
"OP8\_F13\_00413" 26901 "s63E6H2" 0 "CRISPR-associated nuclease/helicase Cas3"  
"OP8\_F13\_00414" 26902 "s59E13H2" 0 "hypothetical protein"  
"OP8\_F13\_00414" 26902 "s59E25H2" 0 "hypothetical protein"  
"OP8\_F13\_00414" 26902 "s59E5H2" 0.7100259 "hypothetical protein"  
"OP8\_F13\_00414" 26902 "s63E6H2" 0 "hypothetical protein"  
"OP8\_F13\_00415" 26903 "s59E13H2" 0 "CRISPR-associated endonuclease Cas1 2"  
"OP8\_F13\_00415" 26903 "s59E25H2" 0 "CRISPR-associated endonuclease Cas1 2"  
"OP8\_F13\_00415" 26903 "s59E5H2" 0.6847034 "CRISPR-associated endonuclease Cas1 2"  
"OP8\_F13\_00415" 26903 "s63E6H2" 0 "CRISPR-associated endonuclease Cas1 2"  
"OP8\_F13\_00416" 26904 "s59E13H2" 0 "CRISPR-associated endoribonuclease Cas2 1"  
"OP8\_F13\_00416" 26904 "s59E25H2" 0 "CRISPR-associated endoribonuclease Cas2 1"  
"OP8\_F13\_00416" 26904 "s59E5H2" 0.5731488 "CRISPR-associated endoribonuclease Cas2 1"  
"OP8\_F13\_00416" 26904 "s63E6H2" 0 "CRISPR-associated endoribonuclease Cas2 1"  
"OP8\_F13\_00418" 26906 "s59E13H2" 0.008957306 "Sodium/pantothenate symporter"  
"OP8\_F13\_00418" 26906 "s59E25H2" 0 "Sodium/pantothenate symporter"  
"OP8\_F13\_00418" 26906 "s59E5H2" 3.114342 "Sodium/pantothenate symporter"  
"OP8\_F13\_00418" 26906 "s63E6H2" 0 "Sodium/pantothenate symporter"  
"OP8\_F13\_00419" 26907 "s59E13H2" 0.01465541 "Penicillin-binding protein 4\*"  
"OP8\_F13\_00419" 26907 "s59E25H2" 0 "Penicillin-binding protein 4\*"  
"OP8\_F13\_00419" 26907 "s59E5H2" 3.593401 "Penicillin-binding protein 4\*"  
"OP8\_F13\_00419" 26907 "s63E6H2" 0 "Penicillin-binding protein 4\*"  
"OP8\_F13\_00420" 26908 "s59E13H2" 0 "Sodium/glucose cotransporter"  
"OP8\_F13\_00420" 26908 "s59E25H2" 0 "Sodium/glucose cotransporter"  
"OP8\_F13\_00420" 26908 "s59E5H2" 3.18046 "Sodium/glucose cotransporter"  
"OP8\_F13\_00420" 26908 "s63E6H2" 0 "Sodium/glucose cotransporter"  
"OP8\_F13\_00421" 26909 "s59E13H2" 0 "hypothetical protein"  
"OP8\_F13\_00421" 26909 "s59E25H2" 0 "hypothetical protein"  
"OP8\_F13\_00421" 26909 "s59E5H2" 2.416774 "hypothetical protein"  
"OP8\_F13\_00421" 26909 "s63E6H2" 0 "hypothetical protein"  
"OP8\_F13\_00422" 26910 "s59E13H2" 0 "hypothetical protein"  
"OP8\_F13\_00422" 26910 "s59E25H2" 0 "hypothetical protein"  
"OP8\_F13\_00422" 26910 "s59E5H2" 2.814151 "hypothetical protein"  
"OP8\_F13\_00422" 26910 "s63E6H2" 0 "hypothetical protein"  
"OP8\_F13\_00423" 26911 "s59E13H2" 0 "methylcobalamin:coenzyme M methyltransferase"  
"OP8\_F13\_00423" 26911 "s59E25H2" 0 "methylcobalamin:coenzyme M methyltransferase"  
"OP8\_F13\_00423" 26911 "s59E5H2" 1.760814 "methylcobalamin:coenzyme M methyltransferase"  
"OP8\_F13\_00423" 26911 "s63E6H2" 0 "methylcobalamin:coenzyme M methyltransferase"  
"OP8\_F13\_00424" 26912 "s59E13H2" 0.01437489 "Exo-beta-D-glucosaminidase precursor"  
"OP8\_F13\_00424" 26912 "s59E25H2" 0 "Exo-beta-D-glucosaminidase precursor"  
"OP8\_F13\_00424" 26912 "s59E5H2" 4.100035 "Exo-beta-D-glucosaminidase precursor"  
"OP8\_F13\_00424" 26912 "s63E6H2" 0 "Exo-beta-D-glucosaminidase precursor"  
"OP8\_F13\_00425" 26913 "s59E13H2" 0.02719305 "4-methylaminobutanoate oxidase (formaldehyde-forming)"  
"OP8\_F13\_00425" 26913 "s59E25H2" 0 "4-methylaminobutanoate oxidase (formaldehyde-forming)"  
"OP8\_F13\_00425" 26913 "s59E5H2" 3.523183 "4-methylaminobutanoate oxidase (formaldehyde-forming)"  
"OP8\_F13\_00425" 26913 "s63E6H2" 0 "4-methylaminobutanoate oxidase (formaldehyde-forming)"  
"OP8\_F13\_00426" 26914 "s59E13H2" 0.03311586 "Glucose-6-phosphate isomerase"

"OP8\_F13\_00426" 26914 "s59E25H2" 0 "Glucose-6-phosphate isomerase"  
"OP8\_F13\_00426" 26914 "s59E5H2" 3.744106 "Glucose-6-phosphate isomerase"  
"OP8\_F13\_00426" 26914 "s63E6H2" 0 "Glucose-6-phosphate isomerase"  
"OP8\_F13\_00427" 26915 "s59E13H2" 0.0280086 "hypothetical protein"  
"OP8\_F13\_00427" 26915 "s59E25H2" 0 "hypothetical protein"  
"OP8\_F13\_00427" 26915 "s59E5H2" 4.127069 "hypothetical protein"  
"OP8\_F13\_00427" 26915 "s63E6H2" 0 "hypothetical protein"  
"OP8\_F13\_00428" 26916 "s59E13H2" 0.02940247 "hypothetical protein"  
"OP8\_F13\_00428" 26916 "s59E25H2" 0 "hypothetical protein"  
"OP8\_F13\_00428" 26916 "s59E5H2" 5.966399 "hypothetical protein"  
"OP8\_F13\_00428" 26916 "s63E6H2" 0 "hypothetical protein"  
"OP8\_F13\_00429" 26917 "s59E13H2" 0.02517617 "Amidophosphoribosyltransferase precursor"  
"OP8\_F13\_00429" 26917 "s59E25H2" 0 "Amidophosphoribosyltransferase precursor"  
"OP8\_F13\_00429" 26917 "s59E5H2" 5.915824 "Amidophosphoribosyltransferase precursor"  
"OP8\_F13\_00429" 26917 "s63E6H2" 0 "Amidophosphoribosyltransferase precursor"  
"OP8\_F13\_00430" 26918 "s59E13H2" 0.01112036 "YGGT family protein"  
"OP8\_F13\_00430" 26918 "s59E25H2" 0 "YGGT family protein"  
"OP8\_F13\_00430" 26918 "s59E5H2" 1.61702 "YGGT family protein"  
"OP8\_F13\_00430" 26918 "s63E6H2" 0 "YGGT family protein"  
"OP8\_F13\_00431" 26919 "s59E13H2" 0.01402104 "hypothetical protein"  
"OP8\_F13\_00431" 26919 "s59E25H2" 0 "hypothetical protein"  
"OP8\_F13\_00431" 26919 "s59E5H2" 2.407692 "hypothetical protein"  
"OP8\_F13\_00431" 26919 "s63E6H2" 0 "hypothetical protein"  
"OP8\_F13\_00432" 26920 "s59E13H2" 0.02754329 "Mg-protoporphyrin IX methyl transferase"  
"OP8\_F13\_00432" 26920 "s59E25H2" 0 "Mg-protoporphyrin IX methyl transferase"  
"OP8\_F13\_00432" 26920 "s59E5H2" 2.602233 "Mg-protoporphyrin IX methyl transferase"  
"OP8\_F13\_00432" 26920 "s63E6H2" 0 "Mg-protoporphyrin IX methyl transferase"  
"OP8\_F13\_00433" 26921 "s59E13H2" 0.0110265 "hypothetical protein"  
"OP8\_F13\_00433" 26921 "s59E25H2" 0 "hypothetical protein"  
"OP8\_F13\_00433" 26921 "s59E5H2" 1.632207 "hypothetical protein"  
"OP8\_F13\_00433" 26921 "s63E6H2" 0 "hypothetical protein"  
"OP8\_F13\_00434" 26922 "s59E13H2" 0.03663279 "3-deoxy-D-manno-octulosonic-acid kinase"  
"OP8\_F13\_00434" 26922 "s59E25H2" 0 "3-deoxy-D-manno-octulosonic-acid kinase"  
"OP8\_F13\_00434" 26922 "s59E5H2" 1.254867 "3-deoxy-D-manno-octulosonic-acid kinase"  
"OP8\_F13\_00434" 26922 "s63E6H2" 0 "3-deoxy-D-manno-octulosonic-acid kinase"  
"OP8\_F13\_00435" 26923 "s59E13H2" 0.01784234 "Capreomycinid synthase"  
"OP8\_F13\_00435" 26923 "s59E25H2" 0 "Capreomycinid synthase"  
"OP8\_F13\_00435" 26923 "s59E5H2" 2.790432 "Capreomycinid synthase"  
"OP8\_F13\_00435" 26923 "s63E6H2" 0 "Capreomycinid synthase"  
"OP8\_F13\_00437" 26925 "s59E13H2" 0.01886198 "Lipid A biosynthesis lauroyl acyltransferase"  
"OP8\_F13\_00437" 26925 "s59E25H2" 0 "Lipid A biosynthesis lauroyl acyltransferase"  
"OP8\_F13\_00437" 26925 "s59E5H2" 3.11251 "Lipid A biosynthesis lauroyl acyltransferase"  
"OP8\_F13\_00437" 26925 "s63E6H2" 0 "Lipid A biosynthesis lauroyl acyltransferase"  
"OP8\_F13\_00438" 26926 "s59E13H2" 0.01442718 "Tetraacyldisaccharide 4'-kinase"  
"OP8\_F13\_00438" 26926 "s59E25H2" 0 "Tetraacyldisaccharide 4'-kinase"  
"OP8\_F13\_00438" 26926 "s59E5H2" 2.977571 "Tetraacyldisaccharide 4'-kinase"  
"OP8\_F13\_00438" 26926 "s63E6H2" 0 "Tetraacyldisaccharide 4'-kinase"

"OP8\_F13\_00439" 26927 "s59E13H2" 0.0151429 "hypothetical protein"  
"OP8\_F13\_00439" 26927 "s59E25H2" 0 "hypothetical protein"  
"OP8\_F13\_00439" 26927 "s59E5H2" 3.217616 "hypothetical protein"  
"OP8\_F13\_00439" 26927 "s63E6H2" 0 "hypothetical protein"  
"OP8\_F13\_00440" 26928 "s59E13H2" 0.006332901 "hypothetical protein"  
"OP8\_F13\_00440" 26928 "s59E25H2" 0 "hypothetical protein"  
"OP8\_F13\_00440" 26928 "s59E5H2" 3.302623 "hypothetical protein"  
"OP8\_F13\_00440" 26928 "s63E6H2" 0 "hypothetical protein"  
"OP8\_F13\_00441" 26929 "s59E13H2" 0.0165601 "ComEC family competence protein"  
"OP8\_F13\_00441" 26929 "s59E25H2" 0 "ComEC family competence protein"  
"OP8\_F13\_00441" 26929 "s59E5H2" 4.221395 "ComEC family competence protein"  
"OP8\_F13\_00441" 26929 "s63E6H2" 0 "ComEC family competence protein"  
"OP8\_F13\_00442" 26930 "s59E13H2" 0.0193725 "Thermostable carboxypeptidase 1"  
"OP8\_F13\_00442" 26930 "s59E25H2" 0 "Thermostable carboxypeptidase 1"  
"OP8\_F13\_00442" 26930 "s59E5H2" 7.456195 "Thermostable carboxypeptidase 1"  
"OP8\_F13\_00442" 26930 "s63E6H2" 0 "Thermostable carboxypeptidase 1"  
"OP8\_F13\_00443" 26931 "s59E13H2" 0.03198823 "Enolase"  
"OP8\_F13\_00443" 26931 "s59E25H2" 0.2032333 "Enolase"  
"OP8\_F13\_00443" 26931 "s59E5H2" 5.545735 "Enolase"  
"OP8\_F13\_00443" 26931 "s63E6H2" 0 "Enolase"  
"OP8\_F13\_00444" 26932 "s59E13H2" 0.1183317 "YtxH-like protein"  
"OP8\_F13\_00444" 26932 "s59E25H2" 0 "YtxH-like protein"  
"OP8\_F13\_00444" 26932 "s59E5H2" 3.299517 "YtxH-like protein"  
"OP8\_F13\_00444" 26932 "s63E6H2" 0 "YtxH-like protein"  
"OP8\_F13\_00445" 26933 "s59E13H2" 0.9273937 "hypothetical protein"  
"OP8\_F13\_00445" 26933 "s59E25H2" 0 "hypothetical protein"  
"OP8\_F13\_00445" 26933 "s59E5H2" 3.412439 "hypothetical protein"  
"OP8\_F13\_00445" 26933 "s63E6H2" 0 "hypothetical protein"  
"OP8\_F13\_00446" 26934 "s59E13H2" 1.082951 "hypothetical protein"  
"OP8\_F13\_00446" 26934 "s59E25H2" 0.315 "hypothetical protein"  
"OP8\_F13\_00446" 26934 "s59E5H2" 2.66864 "hypothetical protein"  
"OP8\_F13\_00446" 26934 "s63E6H2" 0.002999116 "hypothetical protein"  
"OP8\_F13\_00447" 26935 "s59E13H2" 1.750685 "Leucine--tRNA ligase"  
"OP8\_F13\_00447" 26935 "s59E25H2" 0 "Leucine--tRNA ligase"  
"OP8\_F13\_00447" 26935 "s59E5H2" 5.123353 "Leucine--tRNA ligase"  
"OP8\_F13\_00447" 26935 "s63E6H2" 0.001844665 "Leucine--tRNA ligase"  
"OP8\_F13\_00448" 26936 "s59E13H2" 1.886275 "hypothetical protein"  
"OP8\_F13\_00448" 26936 "s59E25H2" 0 "hypothetical protein"  
"OP8\_F13\_00448" 26936 "s59E5H2" 6.193613 "hypothetical protein"  
"OP8\_F13\_00448" 26936 "s63E6H2" 0 "hypothetical protein"  
"OP8\_F13\_00449" 26937 "s59E13H2" 1.991537 "DNA polymerase III subunit delta"  
"OP8\_F13\_00449" 26937 "s59E25H2" 0 "DNA polymerase III subunit delta"  
"OP8\_F13\_00449" 26937 "s59E5H2" 6.882815 "DNA polymerase III subunit delta"  
"OP8\_F13\_00449" 26937 "s63E6H2" 0 "DNA polymerase III subunit delta"  
"OP8\_F13\_00450" 26938 "s59E13H2" 2.478859 "30S ribosomal protein S20"  
"OP8\_F13\_00450" 26938 "s59E25H2" 0 "30S ribosomal protein S20"  
"OP8\_F13\_00450" 26938 "s59E5H2" 8.050549 "30S ribosomal protein S20"

"OP8\_F13\_00450" 26938 "s63E6H2" 0 "30S ribosomal protein S20"  
"OP8\_F13\_00451" 26939 "s59E13H2" 1.571422 "putative peptidoglycan biosynthesis protein MurJ"  
"OP8\_F13\_00451" 26939 "s59E25H2" 0 "putative peptidoglycan biosynthesis protein MurJ"  
"OP8\_F13\_00451" 26939 "s59E5H2" 7.192626 "putative peptidoglycan biosynthesis protein MurJ"  
"OP8\_F13\_00451" 26939 "s63E6H2" 0.003210455 "putative peptidoglycan biosynthesis protein MurJ"  
"OP8\_F13\_00452" 26940 "s59E13H2" 0.8162465 "D-tyrosyl-tRNA(Tyr) deacylase"  
"OP8\_F13\_00452" 26940 "s59E25H2" 0 "D-tyrosyl-tRNA(Tyr) deacylase"  
"OP8\_F13\_00452" 26940 "s59E5H2" 6.095611 "D-tyrosyl-tRNA(Tyr) deacylase"  
"OP8\_F13\_00452" 26940 "s63E6H2" 0.00490396 "D-tyrosyl-tRNA(Tyr) deacylase"  
"OP8\_F13\_00453" 26941 "s59E13H2" 0.04504574 "HEAT repeat protein"  
"OP8\_F13\_00453" 26941 "s59E25H2" 0 "HEAT repeat protein"  
"OP8\_F13\_00453" 26941 "s59E5H2" 6.913693 "HEAT repeat protein"  
"OP8\_F13\_00453" 26941 "s63E6H2" 0.008781196 "HEAT repeat protein"  
"OP8\_F13\_00454" 26942 "s59E13H2" 0.04113965 "Riboflavin biosynthesis protein RibBA"  
"OP8\_F13\_00454" 26942 "s59E25H2" 0 "Riboflavin biosynthesis protein RibBA"  
"OP8\_F13\_00454" 26942 "s59E5H2" 6.210238 "Riboflavin biosynthesis protein RibBA"  
"OP8\_F13\_00454" 26942 "s63E6H2" 0.005160908 "Riboflavin biosynthesis protein RibBA"  
"OP8\_F13\_00455" 26943 "s59E13H2" 0.03203475 "Riboflavin synthase"  
"OP8\_F13\_00455" 26943 "s59E25H2" 0 "Riboflavin synthase"  
"OP8\_F13\_00455" 26943 "s59E5H2" 5.76402 "Riboflavin synthase"  
"OP8\_F13\_00455" 26943 "s63E6H2" 0.003681682 "Riboflavin synthase"  
"OP8\_F13\_00456" 26944 "s59E13H2" 0.04063431 "Riboflavin biosynthesis protein RibD"  
"OP8\_F13\_00456" 26944 "s59E25H2" 0 "Riboflavin biosynthesis protein RibD"  
"OP8\_F13\_00456" 26944 "s59E5H2" 4.576582 "Riboflavin biosynthesis protein RibD"  
"OP8\_F13\_00456" 26944 "s63E6H2" 0.005344916 "Riboflavin biosynthesis protein RibD"  
"OP8\_F13\_00457" 26945 "s59E13H2" 0.3215522 "Signal recognition particle receptor FtsY"  
"OP8\_F13\_00457" 26945 "s59E25H2" 0 "Signal recognition particle receptor FtsY"  
"OP8\_F13\_00457" 26945 "s59E5H2" 4.2445 "Signal recognition particle receptor FtsY"  
"OP8\_F13\_00457" 26945 "s63E6H2" 0 "Signal recognition particle receptor FtsY"  
"OP8\_F13\_00458" 26946 "s59E13H2" 0.05046923 "Single-stranded-DNA-specific exonuclease RecJ"  
"OP8\_F13\_00458" 26946 "s59E25H2" 0 "Single-stranded-DNA-specific exonuclease RecJ"  
"OP8\_F13\_00458" 26946 "s59E5H2" 0.3400249 "Single-stranded-DNA-specific exonuclease RecJ"  
"OP8\_F13\_00458" 26946 "s63E6H2" 0 "Single-stranded-DNA-specific exonuclease RecJ"  
"OP8\_F13\_00459" 26947 "s59E13H2" 0.0560964 "hypothetical protein"  
"OP8\_F13\_00459" 26947 "s59E25H2" 0 "hypothetical protein"  
"OP8\_F13\_00459" 26947 "s59E5H2" 0.1906809 "hypothetical protein"  
"OP8\_F13\_00459" 26947 "s63E6H2" 0 "hypothetical protein"  
"OP8\_F13\_00460" 26948 "s59E13H2" 0.06747159 "LPS-assembly protein LptD"  
"OP8\_F13\_00460" 26948 "s59E25H2" 0 "LPS-assembly protein LptD"  
"OP8\_F13\_00460" 26948 "s59E5H2" 0.2325319 "LPS-assembly protein LptD"  
"OP8\_F13\_00460" 26948 "s63E6H2" 0 "LPS-assembly protein LptD"  
"OP8\_F13\_00461" 26949 "s59E13H2" 0.3187455 "Lipopolysaccharide export system ATP-binding protein LptB"  
"OP8\_F13\_00461" 26949 "s59E25H2" 0 "Lipopolysaccharide export system ATP-binding protein LptB"  
"OP8\_F13\_00461" 26949 "s59E5H2" 0.3222999 "Lipopolysaccharide export system ATP-binding protein LptB"  
"OP8\_F13\_00461" 26949 "s63E6H2" 0 "Lipopolysaccharide export system ATP-binding protein LptB"  
"OP8\_F13\_00462" 26950 "s59E13H2" 0.09571817 "RNA polymerase sigma-54 factor"  
"OP8\_F13\_00462" 26950 "s59E25H2" 0 "RNA polymerase sigma-54 factor"

"OP8\_F13\_00462" 26950 "s59E5H2" 0.3337929 "RNA polymerase sigma-54 factor"  
"OP8\_F13\_00462" 26950 "s63E6H2" 0.005195552 "RNA polymerase sigma-54 factor"  
"OP8\_F13\_00463" 26951 "s59E13H2" 0.09286047 "Ribosome-associated factor Y"  
"OP8\_F13\_00463" 26951 "s59E25H2" 0 "Ribosome-associated factor Y"  
"OP8\_F13\_00463" 26951 "s59E5H2" 0.3425771 "Ribosome-associated factor Y"  
"OP8\_F13\_00463" 26951 "s63E6H2" 0.005361354 "Ribosome-associated factor Y"  
"OP8\_F13\_00464" 26952 "s59E13H2" 0.07451758 "PTS system fructose-specific EIIABC component"  
"OP8\_F13\_00464" 26952 "s59E25H2" 0 "PTS system fructose-specific EIIABC component"  
"OP8\_F13\_00464" 26952 "s59E5H2" 0.4025914 "PTS system fructose-specific EIIABC component"  
"OP8\_F13\_00464" 26952 "s63E6H2" 0.002431716 "PTS system fructose-specific EIIABC component"  
"OP8\_F13\_00465" 26953 "s59E13H2" 0.06993824 "HPr kinase/phosphorylase"  
"OP8\_F13\_00465" 26953 "s59E25H2" 0 "HPr kinase/phosphorylase"  
"OP8\_F13\_00465" 26953 "s59E5H2" 0.1655091 "HPr kinase/phosphorylase"  
"OP8\_F13\_00465" 26953 "s63E6H2" 0 "HPr kinase/phosphorylase"  
"OP8\_F13\_00466" 26954 "s59E13H2" 0.1013915 "glmZ(sRNA)-inactivating NTPase"  
"OP8\_F13\_00466" 26954 "s59E25H2" 0 "glmZ(sRNA)-inactivating NTPase"  
"OP8\_F13\_00466" 26954 "s59E5H2" 0.1507003 "glmZ(sRNA)-inactivating NTPase"  
"OP8\_F13\_00466" 26954 "s63E6H2" 0.002711732 "glmZ(sRNA)-inactivating NTPase"  
"OP8\_F13\_00467" 26955 "s59E13H2" 0.09399496 "PTS system mannose-specific EIIAB component"  
"OP8\_F13\_00467" 26955 "s59E25H2" 0 "PTS system mannose-specific EIIAB component"  
"OP8\_F13\_00467" 26955 "s59E5H2" 0.2358107 "PTS system mannose-specific EIIAB component"  
"OP8\_F13\_00467" 26955 "s63E6H2" 0 "PTS system mannose-specific EIIAB component"  
"OP8\_F13\_00468" 26956 "s59E13H2" 0.106163 "HPr-like protein Crh"  
"OP8\_F13\_00468" 26956 "s59E25H2" 0 "HPr-like protein Crh"  
"OP8\_F13\_00468" 26956 "s59E5H2" 0.2506214 "HPr-like protein Crh"  
"OP8\_F13\_00468" 26956 "s63E6H2" 0 "HPr-like protein Crh"  
"OP8\_F13\_00469" 26957 "s59E13H2" 0.1759757 "Phosphoenolpyruvate-protein phosphotransferase"  
"OP8\_F13\_00469" 26957 "s59E25H2" 0 "Phosphoenolpyruvate-protein phosphotransferase"  
"OP8\_F13\_00469" 26957 "s59E5H2" 0.4994758 "Phosphoenolpyruvate-protein phosphotransferase"  
"OP8\_F13\_00469" 26957 "s63E6H2" 0 "Phosphoenolpyruvate-protein phosphotransferase"  
"OP8\_F13\_00470" 26958 "s59E13H2" 0.150363 "Alginate biosynthesis protein AlgA"  
"OP8\_F13\_00470" 26958 "s59E25H2" 0 "Alginate biosynthesis protein AlgA"  
"OP8\_F13\_00470" 26958 "s59E5H2" 1.276747 "Alginate biosynthesis protein AlgA"  
"OP8\_F13\_00470" 26958 "s63E6H2" 0 "Alginate biosynthesis protein AlgA"  
"OP8\_F13\_00471" 26959 "s59E13H2" 0.1031746 "Single-stranded DNA-binding protein"  
"OP8\_F13\_00471" 26959 "s59E25H2" 0 "Single-stranded DNA-binding protein"  
"OP8\_F13\_00471" 26959 "s59E5H2" 1.049692 "Single-stranded DNA-binding protein"  
"OP8\_F13\_00471" 26959 "s63E6H2" 0 "Single-stranded DNA-binding protein"  
"OP8\_F13\_00472" 26960 "s59E13H2" 0.356678 "tol-pal system protein YbgF"  
"OP8\_F13\_00472" 26960 "s59E25H2" 0 "tol-pal system protein YbgF"  
"OP8\_F13\_00472" 26960 "s59E5H2" 1.392588 "tol-pal system protein YbgF"  
"OP8\_F13\_00472" 26960 "s63E6H2" 0 "tol-pal system protein YbgF"  
"OP8\_F13\_00473" 26961 "s59E13H2" 0.7228242 "Outer membrane lipoprotein Omp16 precursor"  
"OP8\_F13\_00473" 26961 "s59E25H2" 0 "Outer membrane lipoprotein Omp16 precursor"  
"OP8\_F13\_00473" 26961 "s59E5H2" 1.853246 "Outer membrane lipoprotein Omp16 precursor"  
"OP8\_F13\_00473" 26961 "s63E6H2" 0 "Outer membrane lipoprotein Omp16 precursor"  
"OP8\_F13\_00474" 26962 "s59E13H2" 0.8554972 "translocation protein TolB"

"OP8\_F13\_00474" 26962 "s59E25H2" 0 "translocation protein TolB"  
"OP8\_F13\_00474" 26962 "s59E5H2" 2.761446 "translocation protein TolB"  
"OP8\_F13\_00474" 26962 "s63E6H2" 0 "translocation protein TolB"  
"OP8\_F13\_00475" 26963 "s59E13H2" 0.01335604 "preprotein translocase subunit SecE"  
"OP8\_F13\_00475" 26963 "s59E25H2" 0 "preprotein translocase subunit SecE"  
"OP8\_F13\_00475" 26963 "s59E5H2" 0.8316695 "preprotein translocase subunit SecE"  
"OP8\_F13\_00475" 26963 "s63E6H2" 0 "preprotein translocase subunit SecE"  
"OP8\_F13\_00476" 26964 "s59E13H2" 0.006785305 "hypothetical protein"  
"OP8\_F13\_00476" 26964 "s59E25H2" 0 "hypothetical protein"  
"OP8\_F13\_00476" 26964 "s59E5H2" 0.7258032 "hypothetical protein"  
"OP8\_F13\_00476" 26964 "s63E6H2" 0 "hypothetical protein"  
"OP8\_F13\_00477" 26965 "s59E13H2" 0.02828279 "50S ribosomal protein L11"  
"OP8\_F13\_00477" 26965 "s59E25H2" 0 "50S ribosomal protein L11"  
"OP8\_F13\_00477" 26965 "s59E5H2" 0.6589705 "50S ribosomal protein L11"  
"OP8\_F13\_00477" 26965 "s63E6H2" 0 "50S ribosomal protein L11"  
"OP8\_F13\_00478" 26966 "s59E13H2" 0.02050545 "50S ribosomal protein L1"  
"OP8\_F13\_00478" 26966 "s59E25H2" 0 "50S ribosomal protein L1"  
"OP8\_F13\_00478" 26966 "s59E5H2" 0.5995066 "50S ribosomal protein L1"  
"OP8\_F13\_00478" 26966 "s63E6H2" 0 "50S ribosomal protein L1"  
"OP8\_F13\_00479" 26967 "s59E13H2" 0.07487927 "50S ribosomal protein L10"  
"OP8\_F13\_00479" 26967 "s59E25H2" 0 "50S ribosomal protein L10"  
"OP8\_F13\_00479" 26967 "s59E5H2" 0.6438436 "50S ribosomal protein L10"  
"OP8\_F13\_00479" 26967 "s63E6H2" 0 "50S ribosomal protein L10"  
"OP8\_F13\_00480" 26968 "s59E13H2" 0.03525113 "50S ribosomal protein L7/L12"  
"OP8\_F13\_00480" 26968 "s59E25H2" 0 "50S ribosomal protein L7/L12"  
"OP8\_F13\_00480" 26968 "s59E5H2" 2.416357 "50S ribosomal protein L7/L12"  
"OP8\_F13\_00480" 26968 "s63E6H2" 0 "50S ribosomal protein L7/L12"  
"OP8\_F13\_00481" 26969 "s59E13H2" 0.04187816 "DNA-directed RNA polymerase subunit beta"  
"OP8\_F13\_00481" 26969 "s59E25H2" 0 "DNA-directed RNA polymerase subunit beta"  
"OP8\_F13\_00481" 26969 "s59E5H2" 0.5416143 "DNA-directed RNA polymerase subunit beta"  
"OP8\_F13\_00481" 26969 "s63E6H2" 0 "DNA-directed RNA polymerase subunit beta"  
"OP8\_F13\_00482" 26970 "s59E13H2" 0.06660189 "DNA-directed RNA polymerase subunit beta"  
"OP8\_F13\_00482" 26970 "s59E25H2" 0 "DNA-directed RNA polymerase subunit beta"  
"OP8\_F13\_00482" 26970 "s59E5H2" 0.2964989 "DNA-directed RNA polymerase subunit beta"  
"OP8\_F13\_00482" 26970 "s63E6H2" 0 "DNA-directed RNA polymerase subunit beta"  
"OP8\_F13\_00483" 26971 "s59E13H2" 0.01098314 "Adenylate kinase"  
"OP8\_F13\_00483" 26971 "s59E25H2" 0 "Adenylate kinase"  
"OP8\_F13\_00483" 26971 "s59E5H2" 0.1940673 "Adenylate kinase"  
"OP8\_F13\_00483" 26971 "s63E6H2" 0 "Adenylate kinase"  
"OP8\_F13\_00484" 26972 "s59E13H2" 0.0154552 "preprotein translocase subunit SecY"  
"OP8\_F13\_00484" 26972 "s59E25H2" 0 "preprotein translocase subunit SecY"  
"OP8\_F13\_00484" 26972 "s59E5H2" 0.3278216 "preprotein translocase subunit SecY"  
"OP8\_F13\_00484" 26972 "s63E6H2" 0 "preprotein translocase subunit SecY"  
"OP8\_F13\_00485" 26973 "s59E13H2" 0.0276512 "50S ribosomal protein L15"  
"OP8\_F13\_00485" 26973 "s59E25H2" 0 "50S ribosomal protein L15"  
"OP8\_F13\_00485" 26973 "s59E5H2" 0.2972514 "50S ribosomal protein L15"  
"OP8\_F13\_00485" 26973 "s63E6H2" 0 "50S ribosomal protein L15"

"OP8\_F13\_00486" 26974 "s59E13H2" 0.004583762 "50S ribosomal protein L30"  
"OP8\_F13\_00486" 26974 "s59E25H2" 0 "50S ribosomal protein L30"  
"OP8\_F13\_00486" 26974 "s59E5H2" 0.2345422 "50S ribosomal protein L30"  
"OP8\_F13\_00486" 26974 "s63E6H2" 0 "50S ribosomal protein L30"  
"OP8\_F13\_00487" 26975 "s59E13H2" 0.003417488 "30S ribosomal protein S5"  
"OP8\_F13\_00487" 26975 "s59E25H2" 0 "30S ribosomal protein S5"  
"OP8\_F13\_00487" 26975 "s59E5H2" 0.3635614 "30S ribosomal protein S5"  
"OP8\_F13\_00487" 26975 "s63E6H2" 0 "30S ribosomal protein S5"  
"OP8\_F13\_00488" 26976 "s59E13H2" 0.01491279 "50S ribosomal protein L18"  
"OP8\_F13\_00488" 26976 "s59E25H2" 0 "50S ribosomal protein L18"  
"OP8\_F13\_00488" 26976 "s59E5H2" 0.3088443 "50S ribosomal protein L18"  
"OP8\_F13\_00488" 26976 "s63E6H2" 0 "50S ribosomal protein L18"  
"OP8\_F13\_00489" 26977 "s59E13H2" 0.01680298 "50S ribosomal protein L6"  
"OP8\_F13\_00489" 26977 "s59E25H2" 0 "50S ribosomal protein L6"  
"OP8\_F13\_00489" 26977 "s59E5H2" 0.2163643 "50S ribosomal protein L6"  
"OP8\_F13\_00489" 26977 "s63E6H2" 0 "50S ribosomal protein L6"  
"OP8\_F13\_00490" 26978 "s59E13H2" 0.01091278 "30S ribosomal protein S8"  
"OP8\_F13\_00490" 26978 "s59E25H2" 0 "30S ribosomal protein S8"  
"OP8\_F13\_00490" 26978 "s59E5H2" 0.1163263 "30S ribosomal protein S8"  
"OP8\_F13\_00490" 26978 "s63E6H2" 0 "30S ribosomal protein S8"  
"OP8\_F13\_00491" 26979 "s59E13H2" 0.006768614 "30S ribosomal protein S14"  
"OP8\_F13\_00491" 26979 "s59E25H2" 0 "30S ribosomal protein S14"  
"OP8\_F13\_00491" 26979 "s59E5H2" 0.1469515 "30S ribosomal protein S14"  
"OP8\_F13\_00491" 26979 "s63E6H2" 0 "30S ribosomal protein S14"  
"OP8\_F13\_00492" 26980 "s59E13H2" 0.133634 "50S ribosomal protein L5"  
"OP8\_F13\_00492" 26980 "s59E25H2" 0 "50S ribosomal protein L5"  
"OP8\_F13\_00492" 26980 "s59E5H2" 0.09830961 "50S ribosomal protein L5"  
"OP8\_F13\_00492" 26980 "s63E6H2" 0 "50S ribosomal protein L5"  
"OP8\_F13\_00493" 26981 "s59E13H2" 0.1169478 "50S ribosomal protein L24"  
"OP8\_F13\_00493" 26981 "s59E25H2" 0 "50S ribosomal protein L24"  
"OP8\_F13\_00493" 26981 "s59E5H2" 0.0685782 "50S ribosomal protein L24"  
"OP8\_F13\_00493" 26981 "s63E6H2" 0 "50S ribosomal protein L24"  
"OP8\_F13\_00494" 26982 "s59E13H2" 0.09801919 "50S ribosomal protein L14"  
"OP8\_F13\_00494" 26982 "s59E25H2" 0 "50S ribosomal protein L14"  
"OP8\_F13\_00494" 26982 "s59E5H2" 0.1473994 "50S ribosomal protein L14"  
"OP8\_F13\_00494" 26982 "s63E6H2" 0 "50S ribosomal protein L14"  
"OP8\_F13\_00495" 26983 "s59E13H2" 0.1087602 "30S ribosomal protein S17"  
"OP8\_F13\_00495" 26983 "s59E25H2" 0 "30S ribosomal protein S17"  
"OP8\_F13\_00495" 26983 "s59E5H2" 0.1003817 "30S ribosomal protein S17"  
"OP8\_F13\_00495" 26983 "s63E6H2" 0 "30S ribosomal protein S17"  
"OP8\_F13\_00496" 26984 "s59E13H2" 0.08097293 "50S ribosomal protein L29"  
"OP8\_F13\_00496" 26984 "s59E25H2" 0 "50S ribosomal protein L29"  
"OP8\_F13\_00496" 26984 "s59E5H2" 0.02710143 "50S ribosomal protein L29"  
"OP8\_F13\_00496" 26984 "s63E6H2" 0 "50S ribosomal protein L29"  
"OP8\_F13\_00497" 26985 "s59E13H2" 0.0865256 "50S ribosomal protein L16"  
"OP8\_F13\_00497" 26985 "s59E25H2" 0 "50S ribosomal protein L16"  
"OP8\_F13\_00497" 26985 "s59E5H2" 0.0833582 "50S ribosomal protein L16"



"OP8\_F13\_00497" 26985 "s63E6H2" 0 "50S ribosomal protein L16"  
"OP8\_F13\_00498" 26986 "s59E13H2" 0.08591041 "30S ribosomal protein S3"  
"OP8\_F13\_00498" 26986 "s59E25H2" 0 "30S ribosomal protein S3"  
"OP8\_F13\_00498" 26986 "s59E5H2" 0.06741561 "30S ribosomal protein S3"  
"OP8\_F13\_00498" 26986 "s63E6H2" 0 "30S ribosomal protein S3"  
"OP8\_F13\_00499" 26987 "s59E13H2" 0.07769011 "50S ribosomal protein L22"  
"OP8\_F13\_00499" 26987 "s59E25H2" 0 "50S ribosomal protein L22"  
"OP8\_F13\_00499" 26987 "s59E5H2" 0.08434604 "50S ribosomal protein L22"  
"OP8\_F13\_00499" 26987 "s63E6H2" 0 "50S ribosomal protein L22"  
"OP8\_F13\_00500" 26988 "s59E13H2" 0.05495157 "30S ribosomal protein S19"  
"OP8\_F13\_00500" 26988 "s59E25H2" 0 "30S ribosomal protein S19"  
"OP8\_F13\_00500" 26988 "s59E5H2" 0.1129807 "30S ribosomal protein S19"  
"OP8\_F13\_00500" 26988 "s63E6H2" 0 "30S ribosomal protein S19"  
"OP8\_F13\_00501" 26989 "s59E13H2" 0.07119402 "50S ribosomal protein L2"  
"OP8\_F13\_00501" 26989 "s59E25H2" 0 "50S ribosomal protein L2"  
"OP8\_F13\_00501" 26989 "s59E5H2" 0.0895757 "50S ribosomal protein L2"  
"OP8\_F13\_00501" 26989 "s63E6H2" 0 "50S ribosomal protein L2"  
"OP8\_F13\_00502" 26990 "s59E13H2" 0.03960238 "50S ribosomal protein L23"  
"OP8\_F13\_00502" 26990 "s59E25H2" 0 "50S ribosomal protein L23"  
"OP8\_F13\_00502" 26990 "s59E5H2" 0.1306764 "50S ribosomal protein L23"  
"OP8\_F13\_00502" 26990 "s63E6H2" 0 "50S ribosomal protein L23"  
"OP8\_F13\_00503" 26991 "s59E13H2" 0.03254904 "50S ribosomal protein L4"  
"OP8\_F13\_00503" 26991 "s59E25H2" 0 "50S ribosomal protein L4"  
"OP8\_F13\_00503" 26991 "s59E5H2" 0.07907462 "50S ribosomal protein L4"  
"OP8\_F13\_00503" 26991 "s63E6H2" 0 "50S ribosomal protein L4"  
"OP8\_F13\_00504" 26992 "s59E13H2" 0.03680274 "50S ribosomal protein L3"  
"OP8\_F13\_00504" 26992 "s59E25H2" 0 "50S ribosomal protein L3"  
"OP8\_F13\_00504" 26992 "s59E5H2" 0.1698686 "50S ribosomal protein L3"  
"OP8\_F13\_00504" 26992 "s63E6H2" 0 "50S ribosomal protein L3"  
"OP8\_F13\_00505" 26993 "s59E13H2" 0.05737822 "30S ribosomal protein S10"  
"OP8\_F13\_00505" 26993 "s59E25H2" 0 "30S ribosomal protein S10"  
"OP8\_F13\_00505" 26993 "s59E5H2" 0.09777543 "30S ribosomal protein S10"  
"OP8\_F13\_00505" 26993 "s63E6H2" 0 "30S ribosomal protein S10"  
"OP8\_F13\_00506" 26994 "s59E13H2" 0.05863397 "Ycf48-like protein"  
"OP8\_F13\_00506" 26994 "s59E25H2" 0 "Ycf48-like protein"  
"OP8\_F13\_00506" 26994 "s59E5H2" 1.092084 "Ycf48-like protein"  
"OP8\_F13\_00506" 26994 "s63E6H2" 0 "Ycf48-like protein"  
"OP8\_F13\_00507" 26995 "s59E13H2" 0.1107123 "Yip1 domain protein"  
"OP8\_F13\_00507" 26995 "s59E25H2" 0 "Yip1 domain protein"  
"OP8\_F13\_00507" 26995 "s59E5H2" 4.140988 "Yip1 domain protein"  
"OP8\_F13\_00507" 26995 "s63E6H2" 0 "Yip1 domain protein"  
"OP8\_F13\_00509" 26997 "s59E13H2" 0.1083701 "GTPase Era"  
"OP8\_F13\_00509" 26997 "s59E25H2" 0 "GTPase Era"  
"OP8\_F13\_00509" 26997 "s59E5H2" 3.947727 "GTPase Era"  
"OP8\_F13\_00509" 26997 "s63E6H2" 0.003366163 "GTPase Era"  
"OP8\_F13\_00510" 26998 "s59E13H2" 0.04786753 "Magnesium and cobalt efflux protein CorC"  
"OP8\_F13\_00510" 26998 "s59E25H2" 0.381877 "Magnesium and cobalt efflux protein CorC"

"OP8\_F13\_00510" 26998 "s59E5H2" 3.039359 "Magnesium and cobalt efflux protein CorC"  
"OP8\_F13\_00510" 26998 "s63E6H2" 0 "Magnesium and cobalt efflux protein CorC"  
"OP8\_F13\_00511" 26999 "s59E13H2" 0.02712028 "Endoribonuclease YbeY"  
"OP8\_F13\_00511" 26999 "s59E25H2" 0 "Endoribonuclease YbeY"  
"OP8\_F13\_00511" 26999 "s59E5H2" 1.456164 "Endoribonuclease YbeY"  
"OP8\_F13\_00511" 26999 "s63E6H2" 0.002739961 "Endoribonuclease YbeY"  
"OP8\_F13\_00512" 27000 "s59E13H2" 0.02655557 "hypothetical protein"  
"OP8\_F13\_00512" 27000 "s59E25H2" 0 "hypothetical protein"  
"OP8\_F13\_00512" 27000 "s59E5H2" 1.986339 "hypothetical protein"  
"OP8\_F13\_00512" 27000 "s63E6H2" 0.0007698888 "hypothetical protein"  
"OP8\_F13\_00514" 27002 "s59E13H2" 0.01346178 "Alkaline phosphatase synthesis transcriptional regulatory protein PhoP"  
"OP8\_F13\_00514" 27002 "s59E25H2" 0 "Alkaline phosphatase synthesis transcriptional regulatory protein PhoP"  
"OP8\_F13\_00514" 27002 "s59E5H2" 1.940242 "Alkaline phosphatase synthesis transcriptional regulatory protein PhoP"  
"OP8\_F13\_00514" 27002 "s63E6H2" 0 "Alkaline phosphatase synthesis transcriptional regulatory protein PhoP"  
"OP8\_F13\_00515" 27003 "s59E13H2" 0.0130669 "Alkaline phosphatase synthesis sensor protein PhoR"  
"OP8\_F13\_00515" 27003 "s59E25H2" 0 "Alkaline phosphatase synthesis sensor protein PhoR"  
"OP8\_F13\_00515" 27003 "s59E5H2" 1.442072 "Alkaline phosphatase synthesis sensor protein PhoR"  
"OP8\_F13\_00515" 27003 "s63E6H2" 0 "Alkaline phosphatase synthesis sensor protein PhoR"  
"OP8\_F13\_00518" 27006 "s59E13H2" 0 "Serine/threonine-protein kinase PrkC"  
"OP8\_F13\_00518" 27006 "s59E25H2" 0 "Serine/threonine-protein kinase PrkC"  
"OP8\_F13\_00518" 27006 "s59E5H2" 0.149038 "Serine/threonine-protein kinase PrkC"  
"OP8\_F13\_00518" 27006 "s63E6H2" 0 "Serine/threonine-protein kinase PrkC"  
"OP8\_F13\_00519" 27007 "s59E13H2" 0 "Helix-turn-helix domain protein"  
"OP8\_F13\_00519" 27007 "s59E25H2" 0 "Helix-turn-helix domain protein"  
"OP8\_F13\_00519" 27007 "s59E5H2" 0.1883987 "Helix-turn-helix domain protein"  
"OP8\_F13\_00519" 27007 "s63E6H2" 0 "Helix-turn-helix domain protein"  
"OP8\_F13\_00520" 27008 "s59E13H2" 0 "TIR domain protein"  
"OP8\_F13\_00520" 27008 "s59E25H2" 0 "TIR domain protein"  
"OP8\_F13\_00520" 27008 "s59E5H2" 0.1643086 "TIR domain protein"  
"OP8\_F13\_00520" 27008 "s63E6H2" 0 "TIR domain protein"  
"OP8\_F13\_00522" 27010 "s59E13H2" 0 "hypothetical protein"  
"OP8\_F13\_00522" 27010 "s59E25H2" 0 "hypothetical protein"  
"OP8\_F13\_00522" 27010 "s59E5H2" 0.1913258 "hypothetical protein"  
"OP8\_F13\_00522" 27010 "s63E6H2" 0 "hypothetical protein"  
"OP8\_F13\_00523" 27011 "s59E13H2" 0 "hypothetical protein"  
"OP8\_F13\_00523" 27011 "s59E25H2" 0 "hypothetical protein"  
"OP8\_F13\_00523" 27011 "s59E5H2" 0.1206117 "hypothetical protein"  
"OP8\_F13\_00523" 27011 "s63E6H2" 0 "hypothetical protein"  
"OP8\_F13\_00525" 27013 "s59E13H2" 0 "hypothetical protein"  
"OP8\_F13\_00525" 27013 "s59E25H2" 0 "hypothetical protein"  
"OP8\_F13\_00525" 27013 "s59E5H2" 0.04542206 "hypothetical protein"  
"OP8\_F13\_00525" 27013 "s63E6H2" 0 "hypothetical protein"  
"OP8\_F13\_00526" 27014 "s59E13H2" 0 "hypothetical protein"  
"OP8\_F13\_00526" 27014 "s59E25H2" 0 "hypothetical protein"  
"OP8\_F13\_00526" 27014 "s59E5H2" 0 "hypothetical protein"  
"OP8\_F13\_00526" 27014 "s63E6H2" 0 "hypothetical protein"  
"OP8\_F13\_00528" 27016 "s59E13H2" 0 "putative type I restriction enzyme P M protein"

"OP8\_F13\_00528" 27016 "s59E25H2" 0 "putative type I restriction enzymeP M protein"  
"OP8\_F13\_00528" 27016 "s59E5H2" 0.2004261 "putative type I restriction enzymeP M protein"  
"OP8\_F13\_00528" 27016 "s63E6H2" 0 "putative type I restriction enzymeP M protein"  
"OP8\_F13\_00529" 27017 "s59E13H2" 1.724976 "hypothetical protein"  
"OP8\_F13\_00529" 27017 "s59E25H2" 0 "hypothetical protein"  
"OP8\_F13\_00529" 27017 "s59E5H2" 0.7828916 "hypothetical protein"  
"OP8\_F13\_00529" 27017 "s63E6H2" 0 "hypothetical protein"  
"OP8\_F13\_00530" 27018 "s59E13H2" 2.066451 "6-phosphofructokinase isozyme 1"  
"OP8\_F13\_00530" 27018 "s59E25H2" 0 "6-phosphofructokinase isozyme 1"  
"OP8\_F13\_00530" 27018 "s59E5H2" 0.9277787 "6-phosphofructokinase isozyme 1"  
"OP8\_F13\_00530" 27018 "s63E6H2" 0 "6-phosphofructokinase isozyme 1"  
"OP8\_F13\_00531" 27019 "s59E13H2" 1.671339 "hypothetical protein"  
"OP8\_F13\_00531" 27019 "s59E25H2" 0 "hypothetical protein"  
"OP8\_F13\_00531" 27019 "s59E5H2" 0.6037699 "hypothetical protein"  
"OP8\_F13\_00531" 27019 "s63E6H2" 0 "hypothetical protein"  
"OP8\_F13\_00532" 27020 "s59E13H2" 0.0770792 "hypothetical protein"  
"OP8\_F13\_00532" 27020 "s59E25H2" 0 "hypothetical protein"  
"OP8\_F13\_00532" 27020 "s59E5H2" 1.953402 "hypothetical protein"  
"OP8\_F13\_00532" 27020 "s63E6H2" 0 "hypothetical protein"  
"OP8\_F13\_00533" 27021 "s59E13H2" 0.04154671 "Dipeptidase A"  
"OP8\_F13\_00533" 27021 "s59E25H2" 0 "Dipeptidase A"  
"OP8\_F13\_00533" 27021 "s59E5H2" 1.565788 "Dipeptidase A"  
"OP8\_F13\_00533" 27021 "s63E6H2" 0 "Dipeptidase A"  
"OP8\_F13\_00534" 27022 "s59E13H2" 0.04936455 "nitroreductase A"  
"OP8\_F13\_00534" 27022 "s59E25H2" 0 "nitroreductase A"  
"OP8\_F13\_00534" 27022 "s59E5H2" 0.1056112 "nitroreductase A"  
"OP8\_F13\_00534" 27022 "s63E6H2" 0 "nitroreductase A"  
"OP8\_F13\_00535" 27023 "s59E13H2" 0.02255298 "hypothetical protein"  
"OP8\_F13\_00535" 27023 "s59E25H2" 0 "hypothetical protein"  
"OP8\_F13\_00535" 27023 "s59E5H2" 0.1457418 "hypothetical protein"  
"OP8\_F13\_00535" 27023 "s63E6H2" 0 "hypothetical protein"  
"OP8\_F13\_00536" 27024 "s59E13H2" 0.0005564474 "PTS system fructose-specific EIIABC component"  
"OP8\_F13\_00536" 27024 "s59E25H2" 0 "PTS system fructose-specific EIIABC component"  
"OP8\_F13\_00536" 27024 "s59E5H2" 0.05342667 "PTS system fructose-specific EIIABC component"  
"OP8\_F13\_00536" 27024 "s63E6H2" 0 "PTS system fructose-specific EIIABC component"  
"OP8\_F13\_00537" 27025 "s59E13H2" 0 "High-affinity Na(+)/H(+) antiporter NhaS3"  
"OP8\_F13\_00537" 27025 "s59E25H2" 0 "High-affinity Na(+)/H(+) antiporter NhaS3"  
"OP8\_F13\_00537" 27025 "s59E5H2" 0.1008978 "High-affinity Na(+)/H(+) antiporter NhaS3"  
"OP8\_F13\_00537" 27025 "s63E6H2" 0 "High-affinity Na(+)/H(+) antiporter NhaS3"  
"OP8\_F13\_00539" 27027 "s59E13H2" 0.0563185 "hypothetical protein"  
"OP8\_F13\_00539" 27027 "s59E25H2" 0 "hypothetical protein"  
"OP8\_F13\_00539" 27027 "s59E5H2" 0.3095471 "hypothetical protein"  
"OP8\_F13\_00539" 27027 "s63E6H2" 0.002736546 "hypothetical protein"  
"OP8\_F13\_00540" 27028 "s59E13H2" 0.02269908 "hypothetical protein"  
"OP8\_F13\_00540" 27028 "s59E25H2" 0 "hypothetical protein"  
"OP8\_F13\_00540" 27028 "s59E5H2" 0.5545271 "hypothetical protein"  
"OP8\_F13\_00540" 27028 "s63E6H2" 0 "hypothetical protein"

"OP8\_F13\_00541" 27029 "s59E13H2" 0 "macrolide transporter ATP-binding /permease protein"  
"OP8\_F13\_00541" 27029 "s59E25H2" 0 "macrolide transporter ATP-binding /permease protein"  
"OP8\_F13\_00541" 27029 "s59E5H2" 0.6976393 "macrolide transporter ATP-binding /permease protein"  
"OP8\_F13\_00541" 27029 "s63E6H2" 0 "macrolide transporter ATP-binding /permease protein"  
"OP8\_F13\_00542" 27030 "s59E13H2" 0.001227458 "putative ABC transporter ATP-binding protein"  
"OP8\_F13\_00542" 27030 "s59E25H2" 0 "putative ABC transporter ATP-binding protein"  
"OP8\_F13\_00542" 27030 "s59E5H2" 0.8401247 "putative ABC transporter ATP-binding protein"  
"OP8\_F13\_00542" 27030 "s63E6H2" 0 "putative ABC transporter ATP-binding protein"  
"OP8\_F13\_00543" 27031 "s59E13H2" 0.01328512 "Serine/threonine-protein kinase AfsK"  
"OP8\_F13\_00543" 27031 "s59E25H2" 0 "Serine/threonine-protein kinase AfsK"  
"OP8\_F13\_00543" 27031 "s59E5H2" 1.167391 "Serine/threonine-protein kinase AfsK"  
"OP8\_F13\_00543" 27031 "s63E6H2" 0 "Serine/threonine-protein kinase AfsK"  
"OP8\_F13\_00544" 27032 "s59E13H2" 0.05461796 "1,4-dihydroxy-2-naphthoyl-CoA hydrolase"  
"OP8\_F13\_00544" 27032 "s59E25H2" 0 "1,4-dihydroxy-2-naphthoyl-CoA hydrolase"  
"OP8\_F13\_00544" 27032 "s59E5H2" 1.838603 "1,4-dihydroxy-2-naphthoyl-CoA hydrolase"  
"OP8\_F13\_00544" 27032 "s63E6H2" 0 "1,4-dihydroxy-2-naphthoyl-CoA hydrolase"  
"OP8\_F13\_00545" 27033 "s59E13H2" 0.10593 "hypothetical protein"  
"OP8\_F13\_00545" 27033 "s59E25H2" 0 "hypothetical protein"  
"OP8\_F13\_00545" 27033 "s59E5H2" 1.283546 "hypothetical protein"  
"OP8\_F13\_00545" 27033 "s63E6H2" 0 "hypothetical protein"  
"OP8\_F13\_00547" 27035 "s59E13H2" 0.007802748 "hypothetical protein"  
"OP8\_F13\_00547" 27035 "s59E25H2" 0 "hypothetical protein"  
"OP8\_F13\_00547" 27035 "s59E5H2" 5.391891 "hypothetical protein"  
"OP8\_F13\_00547" 27035 "s63E6H2" 0 "hypothetical protein"  
"OP8\_F13\_00549" 27037 "s59E13H2" 0.002573814 "hypothetical protein"  
"OP8\_F13\_00549" 27037 "s59E25H2" 0.4856712 "hypothetical protein"  
"OP8\_F13\_00549" 27037 "s59E5H2" 7.50494 "hypothetical protein"  
"OP8\_F13\_00549" 27037 "s63E6H2" 0.0007366057 "hypothetical protein"  
"OP8\_F13\_00550" 27038 "s59E13H2" 0.001898797 "Gram-negative bacterial tonB protein"  
"OP8\_F13\_00550" 27038 "s59E25H2" 0 "Gram-negative bacterial tonB protein"  
"OP8\_F13\_00550" 27038 "s59E5H2" 6.613492 "Gram-negative bacterial tonB protein"  
"OP8\_F13\_00550" 27038 "s63E6H2" 0 "Gram-negative bacterial tonB protein"  
"OP8\_F13\_00551" 27039 "s59E13H2" 0 "hypothetical protein"  
"OP8\_F13\_00551" 27039 "s59E25H2" 0 "hypothetical protein"  
"OP8\_F13\_00551" 27039 "s59E5H2" 4.593426 "hypothetical protein"  
"OP8\_F13\_00551" 27039 "s63E6H2" 0 "hypothetical protein"  
"OP8\_F13\_00552" 27040 "s59E13H2" 0 "ECF RNA polymerase sigma factor SigW"  
"OP8\_F13\_00552" 27040 "s59E25H2" 0 "ECF RNA polymerase sigma factor SigW"  
"OP8\_F13\_00552" 27040 "s59E5H2" 0.1738015 "ECF RNA polymerase sigma factor SigW"  
"OP8\_F13\_00552" 27040 "s63E6H2" 0 "ECF RNA polymerase sigma factor SigW"  
"OP8\_F13\_00553" 27041 "s59E13H2" 0.06224636 "Fluoroacetyl-CoA thioesterase"  
"OP8\_F13\_00553" 27041 "s59E25H2" 0 "Fluoroacetyl-CoA thioesterase"  
"OP8\_F13\_00553" 27041 "s59E5H2" 1.354402 "Fluoroacetyl-CoA thioesterase"  
"OP8\_F13\_00553" 27041 "s63E6H2" 0 "Fluoroacetyl-CoA thioesterase"  
"OP8\_F13\_00554" 27042 "s59E13H2" 0.2367907 "Xaa-Pro aminopeptidase 1"  
"OP8\_F13\_00554" 27042 "s59E25H2" 0 "Xaa-Pro aminopeptidase 1"  
"OP8\_F13\_00554" 27042 "s59E5H2" 0.2261637 "Xaa-Pro aminopeptidase 1"

"OP8\_F13\_00554" 27042 "s63E6H2" 0 "Xaa-Pro aminopeptidase 1"  
"OP8\_F13\_00555" 27043 "s59E13H2" 0.2401957 "Choline-sulfatase"  
"OP8\_F13\_00555" 27043 "s59E25H2" 0 "Choline-sulfatase"  
"OP8\_F13\_00555" 27043 "s59E5H2" 0.5136251 "Choline-sulfatase"  
"OP8\_F13\_00555" 27043 "s63E6H2" 0 "Choline-sulfatase"  
"OP8\_F13\_00556" 27044 "s59E13H2" 0.04762974 "preprotein translocase subunit SecA"  
"OP8\_F13\_00556" 27044 "s59E25H2" 0 "preprotein translocase subunit SecA"  
"OP8\_F13\_00556" 27044 "s59E5H2" 2.451487 "preprotein translocase subunit SecA"  
"OP8\_F13\_00556" 27044 "s63E6H2" 0 "preprotein translocase subunit SecA"  
"OP8\_F13\_00557" 27045 "s59E13H2" 0.03770839 "Bacterial leucyl aminopeptidase precursor"  
"OP8\_F13\_00557" 27045 "s59E25H2" 0 "Bacterial leucyl aminopeptidase precursor"  
"OP8\_F13\_00557" 27045 "s59E5H2" 2.439211 "Bacterial leucyl aminopeptidase precursor"  
"OP8\_F13\_00557" 27045 "s63E6H2" 0 "Bacterial leucyl aminopeptidase precursor"  
"OP8\_F13\_00558" 27046 "s59E13H2" 0.0755066 "hypothetical protein"  
"OP8\_F13\_00558" 27046 "s59E25H2" 0 "hypothetical protein"  
"OP8\_F13\_00558" 27046 "s59E5H2" 3.926087 "hypothetical protein"  
"OP8\_F13\_00558" 27046 "s63E6H2" 0 "hypothetical protein"  
"OP8\_F13\_00559" 27047 "s59E13H2" 0.04568321 "Leupeptin-inactivating enzyme 1 precursor"  
"OP8\_F13\_00559" 27047 "s59E25H2" 0 "Leupeptin-inactivating enzyme 1 precursor"  
"OP8\_F13\_00559" 27047 "s59E5H2" 3.357177 "Leupeptin-inactivating enzyme 1 precursor"  
"OP8\_F13\_00559" 27047 "s63E6H2" 0 "Leupeptin-inactivating enzyme 1 precursor"  
"OP8\_F13\_00560" 27048 "s59E13H2" 0.07997426 "GMP synthase [glutamine-hydrolyzing] subunit A"  
"OP8\_F13\_00560" 27048 "s59E25H2" 0 "GMP synthase [glutamine-hydrolyzing] subunit A"  
"OP8\_F13\_00560" 27048 "s59E5H2" 4.704093 "GMP synthase [glutamine-hydrolyzing] subunit A"  
"OP8\_F13\_00560" 27048 "s63E6H2" 0 "GMP synthase [glutamine-hydrolyzing] subunit A"  
"OP8\_F13\_00561" 27049 "s59E13H2" 0.06173507 "hypothetical protein"  
"OP8\_F13\_00561" 27049 "s59E25H2" 0 "hypothetical protein"  
"OP8\_F13\_00561" 27049 "s59E5H2" 6.43647 "hypothetical protein"  
"OP8\_F13\_00561" 27049 "s63E6H2" 0 "hypothetical protein"  
"OP8\_F13\_00562" 27050 "s59E13H2" 0.06424263 "hypothetical protein"  
"OP8\_F13\_00562" 27050 "s59E25H2" 0 "hypothetical protein"  
"OP8\_F13\_00562" 27050 "s59E5H2" 6.476756 "hypothetical protein"  
"OP8\_F13\_00562" 27050 "s63E6H2" 0 "hypothetical protein"  
"OP8\_F13\_00563" 27051 "s59E13H2" 0.0462709 "hypothetical protein"  
"OP8\_F13\_00563" 27051 "s59E25H2" 0 "hypothetical protein"  
"OP8\_F13\_00563" 27051 "s59E5H2" 4.386697 "hypothetical protein"  
"OP8\_F13\_00563" 27051 "s63E6H2" 0 "hypothetical protein"  
"OP8\_F13\_00564" 27052 "s59E13H2" 0.00876189 "Outer membrane porin F precursor"  
"OP8\_F13\_00564" 27052 "s59E25H2" 0.1317829 "Outer membrane porin F precursor"  
"OP8\_F13\_00564" 27052 "s59E5H2" 6.813955 "Outer membrane porin F precursor"  
"OP8\_F13\_00564" 27052 "s63E6H2" 0 "Outer membrane porin F precursor"  
"OP8\_F13\_00565" 27053 "s59E13H2" 0.04202337 "Arylsulfotransferase (ASST)"  
"OP8\_F13\_00565" 27053 "s59E25H2" 0 "Arylsulfotransferase (ASST)"  
"OP8\_F13\_00565" 27053 "s59E5H2" 9.19617 "Arylsulfotransferase (ASST)"  
"OP8\_F13\_00565" 27053 "s63E6H2" 0 "Arylsulfotransferase (ASST)"  
"OP8\_F13\_00566" 27054 "s59E13H2" 0.00611249 "anaerobic benzoate catabolism transcriptional regulator"  
"OP8\_F13\_00566" 27054 "s59E25H2" 0 "anaerobic benzoate catabolism transcriptional regulator"

"OP8\_F13\_00566" 27054 "s59E5H2" 0.4396051 "anaerobic benzoate catabolism transcriptional regulator"  
"OP8\_F13\_00566" 27054 "s63E6H2" 0 "anaerobic benzoate catabolism transcriptional regulator"  
"OP8\_F13\_00567" 27055 "s59E13H2" 0.01164508 "5'-nucleotidase"  
"OP8\_F13\_00567" 27055 "s59E25H2" 0 "5'-nucleotidase"  
"OP8\_F13\_00567" 27055 "s59E5H2" 1.044394 "5'-nucleotidase"  
"OP8\_F13\_00567" 27055 "s63E6H2" 0 "5'-nucleotidase"  
"OP8\_F13\_00568" 27056 "s59E13H2" 0.03453812 "hypothetical protein"  
"OP8\_F13\_00568" 27056 "s59E25H2" 0 "hypothetical protein"  
"OP8\_F13\_00568" 27056 "s59E5H2" 2.167217 "hypothetical protein"  
"OP8\_F13\_00568" 27056 "s63E6H2" 0 "hypothetical protein"  
"OP8\_F13\_00569" 27057 "s59E13H2" 0.4313877 "ADP-ribosyl-[dinitrogen reductase] glycohydrolase"  
"OP8\_F13\_00569" 27057 "s59E25H2" 0 "ADP-ribosyl-[dinitrogen reductase] glycohydrolase"  
"OP8\_F13\_00569" 27057 "s59E5H2" 3.615643 "ADP-ribosyl-[dinitrogen reductase] glycohydrolase"  
"OP8\_F13\_00569" 27057 "s63E6H2" 0.003079681 "ADP-ribosyl-[dinitrogen reductase] glycohydrolase"  
"OP8\_F13\_00570" 27058 "s59E13H2" 2.350145 "hypothetical protein"  
"OP8\_F13\_00570" 27058 "s59E25H2" 0 "hypothetical protein"  
"OP8\_F13\_00570" 27058 "s59E5H2" 6.321368 "hypothetical protein"  
"OP8\_F13\_00570" 27058 "s63E6H2" 0 "hypothetical protein"  
"OP8\_F13\_00571" 27059 "s59E13H2" 3.834253 "Cytosol non-specific dipeptidase"  
"OP8\_F13\_00571" 27059 "s59E25H2" 0 "Cytosol non-specific dipeptidase"  
"OP8\_F13\_00571" 27059 "s59E5H2" 4.41309 "Cytosol non-specific dipeptidase"  
"OP8\_F13\_00571" 27059 "s63E6H2" 0 "Cytosol non-specific dipeptidase"  
"OP8\_F13\_00572" 27060 "s59E13H2" 2.993569 "O-acetyl-ADP-ribose deacetylase"  
"OP8\_F13\_00572" 27060 "s59E25H2" 0 "O-acetyl-ADP-ribose deacetylase"  
"OP8\_F13\_00572" 27060 "s59E5H2" 3.39676 "O-acetyl-ADP-ribose deacetylase"  
"OP8\_F13\_00572" 27060 "s63E6H2" 0 "O-acetyl-ADP-ribose deacetylase"  
"OP8\_F13\_00573" 27061 "s59E13H2" 2.928121 "Methenyltetrahydrofolate cyclohydrolase"  
"OP8\_F13\_00573" 27061 "s59E25H2" 0.1466188 "Methenyltetrahydrofolate cyclohydrolase"  
"OP8\_F13\_00573" 27061 "s59E5H2" 4.631171 "Methenyltetrahydrofolate cyclohydrolase"  
"OP8\_F13\_00573" 27061 "s63E6H2" 0 "Methenyltetrahydrofolate cyclohydrolase"  
"OP8\_F13\_00575" 27063 "s59E13H2" 0.01787709 "hypothetical protein"  
"OP8\_F13\_00575" 27063 "s59E25H2" 0 "hypothetical protein"  
"OP8\_F13\_00575" 27063 "s59E5H2" 1.585906 "hypothetical protein"  
"OP8\_F13\_00575" 27063 "s63E6H2" 0 "hypothetical protein"  
"OP8\_F13\_00577" 27065 "s59E13H2" 0 "Calcineurin-like phosphoesterase superfamily domain protein"  
"OP8\_F13\_00577" 27065 "s59E25H2" 0 "Calcineurin-like phosphoesterase superfamily domain protein"  
"OP8\_F13\_00577" 27065 "s59E5H2" 1.037465 "Calcineurin-like phosphoesterase superfamily domain protein"  
"OP8\_F13\_00577" 27065 "s63E6H2" 0.004386119 "Calcineurin-like phosphoesterase superfamily domain protein"  
"OP8\_F13\_00578" 27066 "s59E13H2" 0.0003829946 "DNA double-strand break repair Rad50 ATPase"  
"OP8\_F13\_00578" 27066 "s59E25H2" 0 "DNA double-strand break repair Rad50 ATPase"  
"OP8\_F13\_00578" 27066 "s59E5H2" 0.1468102 "DNA double-strand break repair Rad50 ATPase"  
"OP8\_F13\_00578" 27066 "s63E6H2" 0.0003032905 "DNA double-strand break repair Rad50 ATPase"  
"OP8\_F13\_00579" 27067 "s59E13H2" 0.02748581 "Transcriptional regulatory protein YehT"  
"OP8\_F13\_00579" 27067 "s59E25H2" 0 "Transcriptional regulatory protein YehT"  
"OP8\_F13\_00579" 27067 "s59E5H2" 1.090043 "Transcriptional regulatory protein YehT"  
"OP8\_F13\_00579" 27067 "s63E6H2" 0 "Transcriptional regulatory protein YehT"  
"OP8\_F13\_00580" 27068 "s59E13H2" 0.03270761 "Sensor histidine kinase YehU"

"OP8\_F13\_00580" 27068 "s59E25H2" 0 "Sensor histidine kinase YehU"  
"OP8\_F13\_00580" 27068 "s59E5H2" 0.7517373 "Sensor histidine kinase YehU"  
"OP8\_F13\_00580" 27068 "s63E6H2" 0 "Sensor histidine kinase YehU"  
"OP8\_F13\_00581" 27069 "s59E13H2" 0.04117593 "hypothetical protein"  
"OP8\_F13\_00581" 27069 "s59E25H2" 0 "hypothetical protein"  
"OP8\_F13\_00581" 27069 "s59E5H2" 0.5672054 "hypothetical protein"  
"OP8\_F13\_00581" 27069 "s63E6H2" 0 "hypothetical protein"  
"OP8\_F13\_00582" 27070 "s59E13H2" 0.04201905 "D-aminoacylase"  
"OP8\_F13\_00582" 27070 "s59E25H2" 0 "D-aminoacylase"  
"OP8\_F13\_00582" 27070 "s59E5H2" 0.5035013 "D-aminoacylase"  
"OP8\_F13\_00582" 27070 "s63E6H2" 0 "D-aminoacylase"  
"OP8\_F13\_00583" 27071 "s59E13H2" 0.03572778 "Beta-galactosidase"  
"OP8\_F13\_00583" 27071 "s59E25H2" 0 "Beta-galactosidase"  
"OP8\_F13\_00583" 27071 "s59E5H2" 0.820439 "Beta-galactosidase"  
"OP8\_F13\_00583" 27071 "s63E6H2" 0 "Beta-galactosidase"  
"OP8\_F13\_00584" 27072 "s59E13H2" 1.306215e-05 "Zinc carboxypeptidase"  
"OP8\_F13\_00584" 27072 "s59E25H2" 0 "Zinc carboxypeptidase"  
"OP8\_F13\_00584" 27072 "s59E5H2" 1.046433 "Zinc carboxypeptidase"  
"OP8\_F13\_00584" 27072 "s63E6H2" 0 "Zinc carboxypeptidase"  
"OP8\_F13\_00585" 27073 "s59E13H2" 0.0003054572 "Carboxypeptidase T precursor"  
"OP8\_F13\_00585" 27073 "s59E25H2" 0.1328042 "Carboxypeptidase T precursor"  
"OP8\_F13\_00585" 27073 "s59E5H2" 2.068643 "Carboxypeptidase T precursor"  
"OP8\_F13\_00585" 27073 "s63E6H2" 0 "Carboxypeptidase T precursor"  
"OP8\_F13\_00586" 27074 "s59E13H2" 0.0479706 "putative tRNA/rRNA methyltransferase"  
"OP8\_F13\_00586" 27074 "s59E25H2" 0 "putative tRNA/rRNA methyltransferase"  
"OP8\_F13\_00586" 27074 "s59E5H2" 1.888086 "putative tRNA/rRNA methyltransferase"  
"OP8\_F13\_00586" 27074 "s63E6H2" 0 "putative tRNA/rRNA methyltransferase"  
"OP8\_F13\_00587" 27075 "s59E13H2" 0.04033959 "D-alanine--D-alanine ligase B"  
"OP8\_F13\_00587" 27075 "s59E25H2" 0 "D-alanine--D-alanine ligase B"  
"OP8\_F13\_00587" 27075 "s59E5H2" 0.8436566 "D-alanine--D-alanine ligase B"  
"OP8\_F13\_00587" 27075 "s63E6H2" 0 "D-alanine--D-alanine ligase B"  
"OP8\_F13\_00588" 27076 "s59E13H2" 0.03911151 "Diaminopimelate epimerase"  
"OP8\_F13\_00588" 27076 "s59E25H2" 0 "Diaminopimelate epimerase"  
"OP8\_F13\_00588" 27076 "s59E5H2" 0.8601847 "Diaminopimelate epimerase"  
"OP8\_F13\_00588" 27076 "s63E6H2" 0 "Diaminopimelate epimerase"  
"OP8\_F13\_00589" 27077 "s59E13H2" 0.03120458 "hypothetical protein"  
"OP8\_F13\_00589" 27077 "s59E25H2" 0 "hypothetical protein"  
"OP8\_F13\_00589" 27077 "s59E5H2" 1.731594 "hypothetical protein"  
"OP8\_F13\_00589" 27077 "s63E6H2" 0 "hypothetical protein"  
"OP8\_F13\_00590" 27078 "s59E13H2" 0.03511268 "hypothetical protein"  
"OP8\_F13\_00590" 27078 "s59E25H2" 0 "hypothetical protein"  
"OP8\_F13\_00590" 27078 "s59E5H2" 1.242265 "hypothetical protein"  
"OP8\_F13\_00590" 27078 "s63E6H2" 0 "hypothetical protein"  
"OP8\_F13\_00591" 27079 "s59E13H2" 0.0005166715 "hypothetical protein"  
"OP8\_F13\_00591" 27079 "s59E25H2" 0 "hypothetical protein"  
"OP8\_F13\_00591" 27079 "s59E5H2" 0.7973401 "hypothetical protein"  
"OP8\_F13\_00591" 27079 "s63E6H2" 0 "hypothetical protein"

"OP8\_F13\_00592" 27080 "s59E13H2" 0 "hypothetical protein"  
"OP8\_F13\_00592" 27080 "s59E25H2" 0 "hypothetical protein"  
"OP8\_F13\_00592" 27080 "s59E5H2" 0.001697096 "hypothetical protein"  
"OP8\_F13\_00592" 27080 "s63E6H2" 0 "hypothetical protein"  
"OP8\_F13\_00593" 27081 "s59E13H2" 0 "NADH-plastoquinone oxidoreductase subunit"  
"OP8\_F13\_00593" 27081 "s59E25H2" 0 "NADH-plastoquinone oxidoreductase subunit"  
"OP8\_F13\_00593" 27081 "s59E5H2" 0.1774249 "NADH-plastoquinone oxidoreductase subunit"  
"OP8\_F13\_00593" 27081 "s63E6H2" 0 "NADH-plastoquinone oxidoreductase subunit"  
"OP8\_F13\_00594" 27082 "s59E13H2" 0.01808099 "hypothetical protein"  
"OP8\_F13\_00594" 27082 "s59E25H2" 0.2800454 "hypothetical protein"  
"OP8\_F13\_00594" 27082 "s59E5H2" 4.236193 "hypothetical protein"  
"OP8\_F13\_00594" 27082 "s63E6H2" 0.002583009 "hypothetical protein"  
"OP8\_F13\_00595" 27083 "s59E13H2" 0.03595479 "Sporulation protein YtfJ (Spore\_Ytfj)"  
"OP8\_F13\_00595" 27083 "s59E25H2" 0 "Sporulation protein YtfJ (Spore\_Ytfj)"  
"OP8\_F13\_00595" 27083 "s59E5H2" 9.372838 "Sporulation protein YtfJ (Spore\_Ytfj)"  
"OP8\_F13\_00595" 27083 "s63E6H2" 0 "Sporulation protein YtfJ (Spore\_Ytfj)"  
"OP8\_F13\_00596" 27084 "s59E13H2" 0.04141072 "Tetratricopeptide repeat protein"  
"OP8\_F13\_00596" 27084 "s59E25H2" 0 "Tetratricopeptide repeat protein"  
"OP8\_F13\_00596" 27084 "s59E5H2" 10.50792 "Tetratricopeptide repeat protein"  
"OP8\_F13\_00596" 27084 "s63E6H2" 0 "Tetratricopeptide repeat protein"  
"OP8\_F13\_00599" 27087 "s59E13H2" 0.0123948 "hypothetical protein"  
"OP8\_F13\_00599" 27087 "s59E25H2" 0 "hypothetical protein"  
"OP8\_F13\_00599" 27087 "s59E5H2" 2.180465 "hypothetical protein"  
"OP8\_F13\_00599" 27087 "s63E6H2" 0 "hypothetical protein"  
"OP8\_F13\_00600" 27088 "s59E13H2" 0.009893277 "ECF RNA polymerase sigma factor SigR"  
"OP8\_F13\_00600" 27088 "s59E25H2" 0 "ECF RNA polymerase sigma factor SigR"  
"OP8\_F13\_00600" 27088 "s59E5H2" 1.872394 "ECF RNA polymerase sigma factor SigR"  
"OP8\_F13\_00600" 27088 "s63E6H2" 0 "ECF RNA polymerase sigma factor SigR"  
"OP8\_F13\_00601" 27089 "s59E13H2" 0.01284708 "hypothetical protein"  
"OP8\_F13\_00601" 27089 "s59E25H2" 0 "hypothetical protein"  
"OP8\_F13\_00601" 27089 "s59E5H2" 2.255649 "hypothetical protein"  
"OP8\_F13\_00601" 27089 "s63E6H2" 0 "hypothetical protein"  
"OP8\_F13\_00602" 27090 "s59E13H2" 0.007991956 "Peptidase S46"  
"OP8\_F13\_00602" 27090 "s59E25H2" 0 "Peptidase S46"  
"OP8\_F13\_00602" 27090 "s59E5H2" 1.234492 "Peptidase S46"  
"OP8\_F13\_00602" 27090 "s63E6H2" 0 "Peptidase S46"  
"OP8\_F13\_00603" 27091 "s59E13H2" 0 "Proline iminopeptidase"  
"OP8\_F13\_00603" 27091 "s59E25H2" 0 "Proline iminopeptidase"  
"OP8\_F13\_00603" 27091 "s59E5H2" 1.619084 "Proline iminopeptidase"  
"OP8\_F13\_00603" 27091 "s63E6H2" 0.005896675 "Proline iminopeptidase"  
"OP8\_F13\_00604" 27092 "s59E13H2" 0.005812428 "General stress protein 26"  
"OP8\_F13\_00604" 27092 "s59E25H2" 0 "General stress protein 26"  
"OP8\_F13\_00604" 27092 "s59E5H2" 1.642639 "General stress protein 26"  
"OP8\_F13\_00604" 27092 "s63E6H2" 0 "General stress protein 26"  
"OP8\_F13\_00605" 27093 "s59E13H2" 0 "SnoaL-like polyketide cyclase"  
"OP8\_F13\_00605" 27093 "s59E25H2" 0 "SnoaL-like polyketide cyclase"  
"OP8\_F13\_00605" 27093 "s59E5H2" 1.494079 "SnoaL-like polyketide cyclase"



"OP8\_F13\_00605" 27093 "s63E6H2" 0 "SnoaL-like polyketide cyclase"  
"OP8\_F13\_00606" 27094 "s59E13H2" 0 "site-specific tyrosine recombinase XerD"  
"OP8\_F13\_00606" 27094 "s59E25H2" 0 "site-specific tyrosine recombinase XerD"  
"OP8\_F13\_00606" 27094 "s59E5H2" 1.304531 "site-specific tyrosine recombinase XerD"  
"OP8\_F13\_00606" 27094 "s63E6H2" 0 "site-specific tyrosine recombinase XerD"  
"OP8\_F13\_00607" 27095 "s59E13H2" 0 "hypothetical protein"  
"OP8\_F13\_00607" 27095 "s59E25H2" 0 "hypothetical protein"  
"OP8\_F13\_00607" 27095 "s59E5H2" 0.898502 "hypothetical protein"  
"OP8\_F13\_00607" 27095 "s63E6H2" 0 "hypothetical protein"  
"OP8\_F13\_00609" 27097 "s59E13H2" 0 "Helix-turn-helix domain protein"  
"OP8\_F13\_00609" 27097 "s59E25H2" 0 "Helix-turn-helix domain protein"  
"OP8\_F13\_00609" 27097 "s59E5H2" 0.7123502 "Helix-turn-helix domain protein"  
"OP8\_F13\_00609" 27097 "s63E6H2" 0 "Helix-turn-helix domain protein"  
"OP8\_F13\_00612" 27100 "s59E13H2" 0.007340183 "putative S-adenosyl-L-methionine-dependent methyltransferase TehB"  
"OP8\_F13\_00612" 27100 "s59E25H2" 0 "putative S-adenosyl-L-methionine-dependent methyltransferase TehB"  
"OP8\_F13\_00612" 27100 "s59E5H2" 0.8039278 "putative S-adenosyl-L-methionine-dependent methyltransferase TehB"  
"OP8\_F13\_00612" 27100 "s63E6H2" 0 "putative S-adenosyl-L-methionine-dependent methyltransferase TehB"  
"OP8\_F13\_00613" 27101 "s59E13H2" 0 "Riboflavin biosynthesis protein RibD"  
"OP8\_F13\_00613" 27101 "s59E25H2" 0 "Riboflavin biosynthesis protein RibD"  
"OP8\_F13\_00613" 27101 "s59E5H2" 0.2634725 "Riboflavin biosynthesis protein RibD"  
"OP8\_F13\_00613" 27101 "s63E6H2" 0 "Riboflavin biosynthesis protein RibD"  
"OP8\_F13\_00614" 27102 "s59E13H2" 0 "hypothetical protein"  
"OP8\_F13\_00614" 27102 "s59E25H2" 0 "hypothetical protein"  
"OP8\_F13\_00614" 27102 "s59E5H2" 0.3002792 "hypothetical protein"  
"OP8\_F13\_00614" 27102 "s63E6H2" 0 "hypothetical protein"  
"OP8\_F13\_00616" 27104 "s59E13H2" 0.004691402 "SMP-30/Gluconolactonase/LRE-like region"  
"OP8\_F13\_00616" 27104 "s59E25H2" 0 "SMP-30/Gluconolactonase/LRE-like region"  
"OP8\_F13\_00616" 27104 "s59E5H2" 0.555674 "SMP-30/Gluconolactonase/LRE-like region"  
"OP8\_F13\_00616" 27104 "s63E6H2" 0 "SMP-30/Gluconolactonase/LRE-like region"  
"OP8\_F13\_00618" 27106 "s59E13H2" 0.002857589 "Alpha-D-kanosaminyltransferase"  
"OP8\_F13\_00618" 27106 "s59E25H2" 0 "Alpha-D-kanosaminyltransferase"  
"OP8\_F13\_00618" 27106 "s59E5H2" 0.1430415 "Alpha-D-kanosaminyltransferase"  
"OP8\_F13\_00618" 27106 "s63E6H2" 0 "Alpha-D-kanosaminyltransferase"  
"OP8\_F13\_00619" 27107 "s59E13H2" 0 "hypothetical protein"  
"OP8\_F13\_00619" 27107 "s59E25H2" 0 "hypothetical protein"  
"OP8\_F13\_00619" 27107 "s59E5H2" 0.03096777 "hypothetical protein"  
"OP8\_F13\_00619" 27107 "s63E6H2" 0 "hypothetical protein"  
"OP8\_F13\_00621" 27109 "s59E13H2" 0 "Asparagine synthetase [glutamine-hydrolyzing] 1"  
"OP8\_F13\_00621" 27109 "s59E25H2" 0 "Asparagine synthetase [glutamine-hydrolyzing] 1"  
"OP8\_F13\_00621" 27109 "s59E5H2" 0.01852769 "Asparagine synthetase [glutamine-hydrolyzing] 1"  
"OP8\_F13\_00621" 27109 "s63E6H2" 0 "Asparagine synthetase [glutamine-hydrolyzing] 1"  
"OP8\_F13\_00622" 27110 "s59E13H2" 0 "Prenyltransferase and squalene oxidase repeat protein"  
"OP8\_F13\_00622" 27110 "s59E25H2" 0 "Prenyltransferase and squalene oxidase repeat protein"  
"OP8\_F13\_00622" 27110 "s59E5H2" 0.02938839 "Prenyltransferase and squalene oxidase repeat protein"  
"OP8\_F13\_00622" 27110 "s63E6H2" 0 "Prenyltransferase and squalene oxidase repeat protein"  
"OP8\_F13\_00624" 27112 "s59E13H2" 0 "hypothetical protein"  
"OP8\_F13\_00624" 27112 "s59E25H2" 0 "hypothetical protein"

"OP8\_F13\_00624" 27112 "s59E5H2" 0.000977303 "hypothetical protein"  
"OP8\_F13\_00624" 27112 "s63E6H2" 0 "hypothetical protein"  
"OP8\_F13\_00625" 27113 "s59E13H2" 0 "Antilisterial bacteriocin subtilisin biosynthesis protein Alba"  
"OP8\_F13\_00625" 27113 "s59E25H2" 0 "Antilisterial bacteriocin subtilisin biosynthesis protein Alba"  
"OP8\_F13\_00625" 27113 "s59E5H2" 0.01103174 "Antilisterial bacteriocin subtilisin biosynthesis protein Alba"  
"OP8\_F13\_00625" 27113 "s63E6H2" 0 "Antilisterial bacteriocin subtilisin biosynthesis protein Alba"  
"OP8\_F13\_00626" 27114 "s59E13H2" 0.02967555 "hypothetical protein"  
"OP8\_F13\_00626" 27114 "s59E25H2" 0 "hypothetical protein"  
"OP8\_F13\_00626" 27114 "s59E5H2" 1.034239 "hypothetical protein"  
"OP8\_F13\_00626" 27114 "s63E6H2" 0 "hypothetical protein"  
"OP8\_F13\_00627" 27115 "s59E13H2" 0.04711321 "Polysialic acid transport protein KpsD precursor"  
"OP8\_F13\_00627" 27115 "s59E25H2" 0 "Polysialic acid transport protein KpsD precursor"  
"OP8\_F13\_00627" 27115 "s59E5H2" 1.033916 "Polysialic acid transport protein KpsD precursor"  
"OP8\_F13\_00627" 27115 "s63E6H2" 0 "Polysialic acid transport protein KpsD precursor"  
"OP8\_F13\_00628" 27116 "s59E13H2" 0.07235288 "Tyrosine-protein phosphatase YwqE"  
"OP8\_F13\_00628" 27116 "s59E25H2" 0 "Tyrosine-protein phosphatase YwqE"  
"OP8\_F13\_00628" 27116 "s59E5H2" 1.130447 "Tyrosine-protein phosphatase YwqE"  
"OP8\_F13\_00628" 27116 "s63E6H2" 0 "Tyrosine-protein phosphatase YwqE"  
"OP8\_F13\_00629" 27117 "s59E13H2" 0.05063214 "Tyrosine-protein phosphatase YwqE"  
"OP8\_F13\_00629" 27117 "s59E25H2" 0 "Tyrosine-protein phosphatase YwqE"  
"OP8\_F13\_00629" 27117 "s59E5H2" 1.062706 "Tyrosine-protein phosphatase YwqE"  
"OP8\_F13\_00629" 27117 "s63E6H2" 0 "Tyrosine-protein phosphatase YwqE"  
"OP8\_F13\_00630" 27118 "s59E13H2" 0.04864456 "FemAB family protein"  
"OP8\_F13\_00630" 27118 "s59E25H2" 0 "FemAB family protein"  
"OP8\_F13\_00630" 27118 "s59E5H2" 0.7461405 "FemAB family protein"  
"OP8\_F13\_00630" 27118 "s63E6H2" 0 "FemAB family protein"  
"OP8\_F13\_00631" 27119 "s59E13H2" 0 "Transposase DDE domain protein"  
"OP8\_F13\_00631" 27119 "s59E25H2" 0 "Transposase DDE domain protein"  
"OP8\_F13\_00631" 27119 "s59E5H2" 3.909846 "Transposase DDE domain protein"  
"OP8\_F13\_00631" 27119 "s63E6H2" 0 "Transposase DDE domain protein"  
"OP8\_F13\_00632" 27120 "s59E13H2" 0.00189171 "Transposase DDE domain protein"  
"OP8\_F13\_00632" 27120 "s59E25H2" 0.07727273 "Transposase DDE domain protein"  
"OP8\_F13\_00632" 27120 "s59E5H2" 4.890785 "Transposase DDE domain protein"  
"OP8\_F13\_00632" 27120 "s63E6H2" 0 "Transposase DDE domain protein"  
"OP8\_F13\_00633" 27121 "s59E13H2" 0.01123369 "Opine dehydrogenase"  
"OP8\_F13\_00633" 27121 "s59E25H2" 0 "Opine dehydrogenase"  
"OP8\_F13\_00633" 27121 "s59E5H2" 0.01400354 "Opine dehydrogenase"  
"OP8\_F13\_00633" 27121 "s63E6H2" 0 "Opine dehydrogenase"  
"OP8\_F13\_00634" 27122 "s59E13H2" 0.01295203 "Proline racemase"  
"OP8\_F13\_00634" 27122 "s59E25H2" 0 "Proline racemase"  
"OP8\_F13\_00634" 27122 "s59E5H2" 0.01701589 "Proline racemase"  
"OP8\_F13\_00634" 27122 "s63E6H2" 0 "Proline racemase"  
"OP8\_F13\_00635" 27123 "s59E13H2" 0.01529544 "Cocaine esterase"  
"OP8\_F13\_00635" 27123 "s59E25H2" 0 "Cocaine esterase"  
"OP8\_F13\_00635" 27123 "s59E5H2" 0.004355126 "Cocaine esterase"  
"OP8\_F13\_00635" 27123 "s63E6H2" 0 "Cocaine esterase"  
"OP8\_F13\_00636" 27124 "s59E13H2" 0.01196942 "hypothetical protein"

"OP8\_F13\_00636" 27124 "s59E25H2" 0 "hypothetical protein"  
"OP8\_F13\_00636" 27124 "s59E5H2" 0.007447265 "hypothetical protein"  
"OP8\_F13\_00636" 27124 "s63E6H2" 0 "hypothetical protein"  
"OP8\_F13\_00638" 27126 "s59E13H2" 0.7359409 "Alanine dehydrogenase"  
"OP8\_F13\_00638" 27126 "s59E25H2" 0 "Alanine dehydrogenase"  
"OP8\_F13\_00638" 27126 "s59E5H2" 17.41837 "Alanine dehydrogenase"  
"OP8\_F13\_00638" 27126 "s63E6H2" 0 "Alanine dehydrogenase"  
"OP8\_F13\_00639" 27127 "s59E13H2" 0.7327504 "Proline racemase"  
"OP8\_F13\_00639" 27127 "s59E25H2" 0.2400389 "Proline racemase"  
"OP8\_F13\_00639" 27127 "s59E5H2" 19.8263 "Proline racemase"  
"OP8\_F13\_00639" 27127 "s63E6H2" 0 "Proline racemase"  
"OP8\_F13\_00640" 27128 "s59E13H2" 0.5398388 "Selenocysteine-specific elongation factor"  
"OP8\_F13\_00640" 27128 "s59E25H2" 0 "Selenocysteine-specific elongation factor"  
"OP8\_F13\_00640" 27128 "s59E5H2" 15.91518 "Selenocysteine-specific elongation factor"  
"OP8\_F13\_00640" 27128 "s63E6H2" 0 "Selenocysteine-specific elongation factor"  
"OP8\_F13\_00641" 27129 "s59E13H2" 0.3941612 "hypothetical protein"  
"OP8\_F13\_00641" 27129 "s59E25H2" 0.3807267 "hypothetical protein"  
"OP8\_F13\_00641" 27129 "s59E5H2" 12.80806 "hypothetical protein"  
"OP8\_F13\_00641" 27129 "s63E6H2" 0 "hypothetical protein"  
"OP8\_F13\_00642" 27130 "s59E13H2" 0.2972701 "Type III pantothenate kinase"  
"OP8\_F13\_00642" 27130 "s59E25H2" 0.3411458 "Type III pantothenate kinase"  
"OP8\_F13\_00642" 27130 "s59E5H2" 5.545025 "Type III pantothenate kinase"  
"OP8\_F13\_00642" 27130 "s63E6H2" 0.001986851 "Type III pantothenate kinase"  
"OP8\_F13\_00643" 27131 "s59E13H2" 0.1850868 "Bifunctional ligase/repressor BirA"  
"OP8\_F13\_00643" 27131 "s59E25H2" 0 "Bifunctional ligase/repressor BirA"  
"OP8\_F13\_00643" 27131 "s59E5H2" 1.417261 "Bifunctional ligase/repressor BirA"  
"OP8\_F13\_00643" 27131 "s63E6H2" 0 "Bifunctional ligase/repressor BirA"  
"OP8\_F13\_00644" 27132 "s59E13H2" 0.007693831 "hypothetical protein"  
"OP8\_F13\_00644" 27132 "s59E25H2" 0 "hypothetical protein"  
"OP8\_F13\_00644" 27132 "s59E5H2" 2.365811 "hypothetical protein"  
"OP8\_F13\_00644" 27132 "s63E6H2" 0 "hypothetical protein"  
"OP8\_F13\_00645" 27133 "s59E13H2" 0.009885517 "Valine--tRNA ligase"  
"OP8\_F13\_00645" 27133 "s59E25H2" 0 "Valine--tRNA ligase"  
"OP8\_F13\_00645" 27133 "s59E5H2" 1.80936 "Valine--tRNA ligase"  
"OP8\_F13\_00645" 27133 "s63E6H2" 0 "Valine--tRNA ligase"  
"OP8\_F13\_00646" 27134 "s59E13H2" 0.01024641 "Response regulator MprA"  
"OP8\_F13\_00646" 27134 "s59E25H2" 0 "Response regulator MprA"  
"OP8\_F13\_00646" 27134 "s59E5H2" 1.937825 "Response regulator MprA"  
"OP8\_F13\_00646" 27134 "s63E6H2" 0 "Response regulator MprA"  
"OP8\_F13\_00647" 27135 "s59E13H2" 0.03025415 "Putative K(+)-stimulated pyrophosphate-energized sodium pump"  
"OP8\_F13\_00647" 27135 "s59E25H2" 0 "Putative K(+)-stimulated pyrophosphate-energized sodium pump"  
"OP8\_F13\_00647" 27135 "s59E5H2" 5.844546 "Putative K(+)-stimulated pyrophosphate-energized sodium pump"  
"OP8\_F13\_00647" 27135 "s63E6H2" 0 "Putative K(+)-stimulated pyrophosphate-energized sodium pump"  
"OP8\_F13\_00648" 27136 "s59E13H2" 0.02743231 "Phosphoribosylformylglycinamide synthase 2"  
"OP8\_F13\_00648" 27136 "s59E25H2" 0 "Phosphoribosylformylglycinamide synthase 2"  
"OP8\_F13\_00648" 27136 "s59E5H2" 4.695409 "Phosphoribosylformylglycinamide synthase 2"  
"OP8\_F13\_00648" 27136 "s63E6H2" 0 "Phosphoribosylformylglycinamide synthase 2"

"OP8\_F13\_00649" 27137 "s59E13H2" 0.01232395 "Phosphoribosylaminoimidazole-succinocarboxamide synthase"  
"OP8\_F13\_00649" 27137 "s59E25H2" 0 "Phosphoribosylaminoimidazole-succinocarboxamide synthase"  
"OP8\_F13\_00649" 27137 "s59E5H2" 2.914412 "Phosphoribosylaminoimidazole-succinocarboxamide synthase"  
"OP8\_F13\_00649" 27137 "s63E6H2" 0 "Phosphoribosylaminoimidazole-succinocarboxamide synthase"  
"OP8\_F13\_00650" 27138 "s59E13H2" 0.01513527 "Zinc carboxypeptidase"  
"OP8\_F13\_00650" 27138 "s59E25H2" 0 "Zinc carboxypeptidase"  
"OP8\_F13\_00650" 27138 "s59E5H2" 1.399328 "Zinc carboxypeptidase"  
"OP8\_F13\_00650" 27138 "s63E6H2" 0 "Zinc carboxypeptidase"  
"OP8\_F13\_00651" 27139 "s59E13H2" 18.27815 "PAP2 superfamily protein"  
"OP8\_F13\_00651" 27139 "s59E25H2" 0 "PAP2 superfamily protein"  
"OP8\_F13\_00651" 27139 "s59E5H2" 0.9613137 "PAP2 superfamily protein"  
"OP8\_F13\_00651" 27139 "s63E6H2" 0 "PAP2 superfamily protein"  
"OP8\_F13\_00652" 27140 "s59E13H2" 27.08665 "N-acyl-D-glutamate deacylase"  
"OP8\_F13\_00652" 27140 "s59E25H2" 0.1036116 "N-acyl-D-glutamate deacylase"  
"OP8\_F13\_00652" 27140 "s59E5H2" 1.027021 "N-acyl-D-glutamate deacylase"  
"OP8\_F13\_00652" 27140 "s63E6H2" 0 "N-acyl-D-glutamate deacylase"  
"OP8\_F13\_00653" 27141 "s59E13H2" 37.612 "Murein DD-endopeptidase MepM"  
"OP8\_F13\_00653" 27141 "s59E25H2" 0.2673378 "Murein DD-endopeptidase MepM"  
"OP8\_F13\_00653" 27141 "s59E5H2" 0.9928689 "Murein DD-endopeptidase MepM"  
"OP8\_F13\_00653" 27141 "s63E6H2" 0 "Murein DD-endopeptidase MepM"  
"OP8\_F13\_00654" 27142 "s59E13H2" 48.10268 "2,3-bisphosphoglycerate-independent phosphoglycerate mutase"  
"OP8\_F13\_00654" 27142 "s59E25H2" 0.2934579 "2,3-bisphosphoglycerate-independent phosphoglycerate mutase"  
"OP8\_F13\_00654" 27142 "s59E5H2" 1.294656 "2,3-bisphosphoglycerate-independent phosphoglycerate mutase"  
"OP8\_F13\_00654" 27142 "s63E6H2" 0.001564328 "2,3-bisphosphoglycerate-independent phosphoglycerate mutase"  
"OP8\_F13\_00655" 27143 "s59E13H2" 51.90243 "putative ABC transporter ATP-binding protein YxIF"  
"OP8\_F13\_00655" 27143 "s59E25H2" 0 "putative ABC transporter ATP-binding protein YxIF"  
"OP8\_F13\_00655" 27143 "s59E5H2" 1.65477 "putative ABC transporter ATP-binding protein YxIF"  
"OP8\_F13\_00655" 27143 "s63E6H2" 0.004306163 "putative ABC transporter ATP-binding protein YxIF"  
"OP8\_F13\_00656" 27144 "s59E13H2" 49.64641 "ABC-2 family transporter protein"  
"OP8\_F13\_00656" 27144 "s59E25H2" 0.7 "ABC-2 family transporter protein"  
"OP8\_F13\_00656" 27144 "s59E5H2" 1.691704 "ABC-2 family transporter protein"  
"OP8\_F13\_00656" 27144 "s63E6H2" 0.001893664 "ABC-2 family transporter protein"  
"OP8\_F13\_00657" 27145 "s59E13H2" 50.62397 "putative ABC transporter ATP-binding protein YxIF"  
"OP8\_F13\_00657" 27145 "s59E25H2" 0.4584682 "putative ABC transporter ATP-binding protein YxIF"  
"OP8\_F13\_00657" 27145 "s59E5H2" 2.59302 "putative ABC transporter ATP-binding protein YxIF"  
"OP8\_F13\_00657" 27145 "s63E6H2" 0.002387121 "putative ABC transporter ATP-binding protein YxIF"  
"OP8\_F13\_00658" 27146 "s59E13H2" 46.04325 "ABC-2 family transporter protein"  
"OP8\_F13\_00658" 27146 "s59E25H2" 0.4068627 "ABC-2 family transporter protein"  
"OP8\_F13\_00658" 27146 "s59E5H2" 2.301927 "ABC-2 family transporter protein"  
"OP8\_F13\_00658" 27146 "s63E6H2" 0.002823592 "ABC-2 family transporter protein"  
"OP8\_F13\_00659" 27147 "s59E13H2" 35.93822 "hypothetical protein"  
"OP8\_F13\_00659" 27147 "s59E25H2" 0.2567288 "hypothetical protein"  
"OP8\_F13\_00659" 27147 "s59E5H2" 1.585947 "hypothetical protein"  
"OP8\_F13\_00659" 27147 "s63E6H2" 0 "hypothetical protein"  
"OP8\_F13\_00660" 27148 "s59E13H2" 28.88318 "Putative NAD(P)H nitroreductase"  
"OP8\_F13\_00660" 27148 "s59E25H2" 0 "Putative NAD(P)H nitroreductase"  
"OP8\_F13\_00660" 27148 "s59E5H2" 1.292468 "Putative NAD(P)H nitroreductase"

"OP8\_F13\_00660" 27148 "s63E6H2" 0.00530479 "Putative NAD(P)H nitroreductase"  
"OP8\_F13\_00661" 27149 "s59E13H2" 0.05098581 "hypothetical protein"  
"OP8\_F13\_00661" 27149 "s59E25H2" 0 "hypothetical protein"  
"OP8\_F13\_00661" 27149 "s59E5H2" 0.1951016 "hypothetical protein"  
"OP8\_F13\_00661" 27149 "s63E6H2" 0 "hypothetical protein"  
"OP8\_F13\_00662" 27150 "s59E13H2" 0.07052007 "ATP synthase subunit b"  
"OP8\_F13\_00662" 27150 "s59E25H2" 0 "ATP synthase subunit b"  
"OP8\_F13\_00662" 27150 "s59E5H2" 0.1162911 "ATP synthase subunit b"  
"OP8\_F13\_00662" 27150 "s63E6H2" 0 "ATP synthase subunit b"  
"OP8\_F13\_00663" 27151 "s59E13H2" 0.07967548 "ATP synthase subunit delta"  
"OP8\_F13\_00663" 27151 "s59E25H2" 0 "ATP synthase subunit delta"  
"OP8\_F13\_00663" 27151 "s59E5H2" 0.09067225 "ATP synthase subunit delta"  
"OP8\_F13\_00663" 27151 "s63E6H2" 0 "ATP synthase subunit delta"  
"OP8\_F13\_00664" 27152 "s59E13H2" 0.08333881 "ATP synthase subunit alpha"  
"OP8\_F13\_00664" 27152 "s59E25H2" 0.1653491 "ATP synthase subunit alpha"  
"OP8\_F13\_00664" 27152 "s59E5H2" 0.3846816 "ATP synthase subunit alpha"  
"OP8\_F13\_00664" 27152 "s63E6H2" 0 "ATP synthase subunit alpha"  
"OP8\_F13\_00665" 27153 "s59E13H2" 0.0335798 "ATP synthase gamma chain"  
"OP8\_F13\_00665" 27153 "s59E25H2" 0 "ATP synthase gamma chain"  
"OP8\_F13\_00665" 27153 "s59E5H2" 0.6837942 "ATP synthase gamma chain"  
"OP8\_F13\_00665" 27153 "s63E6H2" 0 "ATP synthase gamma chain"  
"OP8\_F13\_00666" 27154 "s59E13H2" 0.04200684 "ATP synthase subunit beta"  
"OP8\_F13\_00666" 27154 "s59E25H2" 0 "ATP synthase subunit beta"  
"OP8\_F13\_00666" 27154 "s59E5H2" 0.7763653 "ATP synthase subunit beta"  
"OP8\_F13\_00666" 27154 "s63E6H2" 0 "ATP synthase subunit beta"  
"OP8\_F13\_00667" 27155 "s59E13H2" 0.07898916 "ATP synthase epsilon chain"  
"OP8\_F13\_00667" 27155 "s59E25H2" 0 "ATP synthase epsilon chain"  
"OP8\_F13\_00667" 27155 "s59E5H2" 1.021127 "ATP synthase epsilon chain"  
"OP8\_F13\_00667" 27155 "s63E6H2" 0 "ATP synthase epsilon chain"  
"OP8\_F13\_00668" 27156 "s59E13H2" 0.1079786 "tRNA1(Val) (adenine(37)-N6)-methyltransferase"  
"OP8\_F13\_00668" 27156 "s59E25H2" 0 "tRNA1(Val) (adenine(37)-N6)-methyltransferase"  
"OP8\_F13\_00668" 27156 "s59E5H2" 1.086402 "tRNA1(Val) (adenine(37)-N6)-methyltransferase"  
"OP8\_F13\_00668" 27156 "s63E6H2" 0 "tRNA1(Val) (adenine(37)-N6)-methyltransferase"  
"OP8\_F13\_00669" 27157 "s59E13H2" 0.07100289 "Teichoic acid translocation permease protein TagG"  
"OP8\_F13\_00669" 27157 "s59E25H2" 0 "Teichoic acid translocation permease protein TagG"  
"OP8\_F13\_00669" 27157 "s59E5H2" 1.835298 "Teichoic acid translocation permease protein TagG"  
"OP8\_F13\_00669" 27157 "s63E6H2" 0 "Teichoic acid translocation permease protein TagG"  
"OP8\_F13\_00670" 27158 "s59E13H2" 0.06311208 "Teichoic acids export ATP-binding protein TagH"  
"OP8\_F13\_00670" 27158 "s59E25H2" 0 "Teichoic acids export ATP-binding protein TagH"  
"OP8\_F13\_00670" 27158 "s59E5H2" 1.1874 "Teichoic acids export ATP-binding protein TagH"  
"OP8\_F13\_00670" 27158 "s63E6H2" 0 "Teichoic acids export ATP-binding protein TagH"  
"OP8\_F13\_00671" 27159 "s59E13H2" 0.01536205 "Bifunctional protein HldE"  
"OP8\_F13\_00671" 27159 "s59E25H2" 0 "Bifunctional protein HldE"  
"OP8\_F13\_00671" 27159 "s59E5H2" 0.872715 "Bifunctional protein HldE"  
"OP8\_F13\_00671" 27159 "s63E6H2" 0 "Bifunctional protein HldE"  
"OP8\_F13\_00672" 27160 "s59E13H2" 0.02927596 "GMP synthase subunit A"  
"OP8\_F13\_00672" 27160 "s59E25H2" 0 "GMP synthase subunit A"

"OP8\_F13\_00672" 27160 "s59E5H2" 1.171669 "GMP synthase subunit A"  
"OP8\_F13\_00672" 27160 "s63E6H2" 0 "GMP synthase subunit A"  
"OP8\_F13\_00674" 27162 "s59E13H2" 0.0375526 "Transcription-repair-coupling factor"  
"OP8\_F13\_00674" 27162 "s59E25H2" 0 "Transcription-repair-coupling factor"  
"OP8\_F13\_00674" 27162 "s59E5H2" 0.9174526 "Transcription-repair-coupling factor"  
"OP8\_F13\_00674" 27162 "s63E6H2" 0.0003619249 "Transcription-repair-coupling factor"  
"OP8\_F13\_00675" 27163 "s59E13H2" 0.06799145 "Peptidyl-prolyl cis-trans isomerase D"  
"OP8\_F13\_00675" 27163 "s59E25H2" 0 "Peptidyl-prolyl cis-trans isomerase D"  
"OP8\_F13\_00675" 27163 "s59E5H2" 0.4034537 "Peptidyl-prolyl cis-trans isomerase D"  
"OP8\_F13\_00675" 27163 "s63E6H2" 0 "Peptidyl-prolyl cis-trans isomerase D"  
"OP8\_F13\_00676" 27164 "s59E13H2" 0.1244302 "Foldase protein PrsA 2 precursor"  
"OP8\_F13\_00676" 27164 "s59E25H2" 0 "Foldase protein PrsA 2 precursor"  
"OP8\_F13\_00676" 27164 "s59E5H2" 0.4471612 "Foldase protein PrsA 2 precursor"  
"OP8\_F13\_00676" 27164 "s63E6H2" 0 "Foldase protein PrsA 2 precursor"  
"OP8\_F13\_00677" 27165 "s59E13H2" 0.9266563 "Pyruvoyl-dependent arginine decarboxylase"  
"OP8\_F13\_00677" 27165 "s59E25H2" 0 "Pyruvoyl-dependent arginine decarboxylase"  
"OP8\_F13\_00677" 27165 "s59E5H2" 0.9268882 "Pyruvoyl-dependent arginine decarboxylase"  
"OP8\_F13\_00677" 27165 "s63E6H2" 0 "Pyruvoyl-dependent arginine decarboxylase"  
"OP8\_F13\_00678" 27166 "s59E13H2" 1.332424 "hypothetical protein"  
"OP8\_F13\_00678" 27166 "s59E25H2" 0 "hypothetical protein"  
"OP8\_F13\_00678" 27166 "s59E5H2" 0.7877284 "hypothetical protein"  
"OP8\_F13\_00678" 27166 "s63E6H2" 0 "hypothetical protein"  
"OP8\_F13\_00679" 27167 "s59E13H2" 1.223983 "Divergent polysaccharide deacetylase"  
"OP8\_F13\_00679" 27167 "s59E25H2" 0 "Divergent polysaccharide deacetylase"  
"OP8\_F13\_00679" 27167 "s59E5H2" 0.92798 "Divergent polysaccharide deacetylase"  
"OP8\_F13\_00679" 27167 "s63E6H2" 0 "Divergent polysaccharide deacetylase"  
"OP8\_F13\_00680" 27168 "s59E13H2" 1.048651 "putative CtpA-like serine protease"  
"OP8\_F13\_00680" 27168 "s59E25H2" 0 "putative CtpA-like serine protease"  
"OP8\_F13\_00680" 27168 "s59E5H2" 0.7115435 "putative CtpA-like serine protease"  
"OP8\_F13\_00680" 27168 "s63E6H2" 0 "putative CtpA-like serine protease"  
"OP8\_F13\_00681" 27169 "s59E13H2" 1.001499 "Murein hydrolase activator EnvC precursor"  
"OP8\_F13\_00681" 27169 "s59E25H2" 0 "Murein hydrolase activator EnvC precursor"  
"OP8\_F13\_00681" 27169 "s59E5H2" 0.7301361 "Murein hydrolase activator EnvC precursor"  
"OP8\_F13\_00681" 27169 "s63E6H2" 0 "Murein hydrolase activator EnvC precursor"  
"OP8\_F13\_00682" 27170 "s59E13H2" 0.8920456 "hypothetical protein"  
"OP8\_F13\_00682" 27170 "s59E25H2" 0 "hypothetical protein"  
"OP8\_F13\_00682" 27170 "s59E5H2" 0.4454367 "hypothetical protein"  
"OP8\_F13\_00682" 27170 "s63E6H2" 0 "hypothetical protein"  
"OP8\_F13\_00683" 27171 "s59E13H2" 1.034589 "Sodium:neurotransmitter symporter family protein"  
"OP8\_F13\_00683" 27171 "s59E25H2" 0 "Sodium:neurotransmitter symporter family protein"  
"OP8\_F13\_00683" 27171 "s59E5H2" 0.683816 "Sodium:neurotransmitter symporter family protein"  
"OP8\_F13\_00683" 27171 "s63E6H2" 0 "Sodium:neurotransmitter symporter family protein"  
"OP8\_F13\_00684" 27172 "s59E13H2" 0.9444503 "Glycerate 2-kinase"  
"OP8\_F13\_00684" 27172 "s59E25H2" 0 "Glycerate 2-kinase"  
"OP8\_F13\_00684" 27172 "s59E5H2" 0.6595244 "Glycerate 2-kinase"  
"OP8\_F13\_00684" 27172 "s63E6H2" 0 "Glycerate 2-kinase"  
"OP8\_F13\_00685" 27173 "s59E13H2" 1.23653 "hypothetical protein"

"OP8\_F13\_00685" 27173 "s59E25H2" 0 "hypothetical protein"  
"OP8\_F13\_00685" 27173 "s59E5H2" 1.558432 "hypothetical protein"  
"OP8\_F13\_00685" 27173 "s63E6H2" 0 "hypothetical protein"  
"OP8\_F13\_00686" 27174 "s59E13H2" 1.398692 "Amino-acid carrier protein Alst"  
"OP8\_F13\_00686" 27174 "s59E25H2" 0 "Amino-acid carrier protein Alst"  
"OP8\_F13\_00686" 27174 "s59E5H2" 2.115146 "Amino-acid carrier protein Alst"  
"OP8\_F13\_00686" 27174 "s63E6H2" 0 "Amino-acid carrier protein Alst"  
"OP8\_F13\_00687" 27175 "s59E13H2" 1.204673 "Laccase domain protein YfiH"  
"OP8\_F13\_00687" 27175 "s59E25H2" 0 "Laccase domain protein YfiH"  
"OP8\_F13\_00687" 27175 "s59E5H2" 0.7055767 "Laccase domain protein YfiH"  
"OP8\_F13\_00687" 27175 "s63E6H2" 0 "Laccase domain protein YfiH"  
"OP8\_F13\_00688" 27176 "s59E13H2" 1.234965 "DNA polymerase III PolC"  
"OP8\_F13\_00688" 27176 "s59E25H2" 0 "DNA polymerase III PolC"  
"OP8\_F13\_00688" 27176 "s59E5H2" 0.8460061 "DNA polymerase III PolC"  
"OP8\_F13\_00688" 27176 "s63E6H2" 0 "DNA polymerase III PolC"  
"OP8\_F13\_00689" 27177 "s59E13H2" 1.331355 "colicin V production protein"  
"OP8\_F13\_00689" 27177 "s59E25H2" 0 "colicin V production protein"  
"OP8\_F13\_00689" 27177 "s59E5H2" 0.9445976 "colicin V production protein"  
"OP8\_F13\_00689" 27177 "s63E6H2" 0 "colicin V production protein"  
"OP8\_F13\_00690" 27178 "s59E13H2" 1.353259 "Bacterial regulatory protein, Fis family"  
"OP8\_F13\_00690" 27178 "s59E25H2" 0 "Bacterial regulatory protein, Fis family"  
"OP8\_F13\_00690" 27178 "s59E5H2" 1.11861 "Bacterial regulatory protein, Fis family"  
"OP8\_F13\_00690" 27178 "s63E6H2" 0 "Bacterial regulatory protein, Fis family"  
"OP8\_F13\_00691" 27179 "s59E13H2" 1.554245 "10 kDa chaperonin 1"  
"OP8\_F13\_00691" 27179 "s59E25H2" 0 "10 kDa chaperonin 1"  
"OP8\_F13\_00691" 27179 "s59E5H2" 1.179133 "10 kDa chaperonin 1"  
"OP8\_F13\_00691" 27179 "s63E6H2" 0 "10 kDa chaperonin 1"  
"OP8\_F13\_00692" 27180 "s59E13H2" 2.054635 "60 kDa chaperonin"  
"OP8\_F13\_00692" 27180 "s59E25H2" 0 "60 kDa chaperonin"  
"OP8\_F13\_00692" 27180 "s59E5H2" 2.661106 "60 kDa chaperonin"  
"OP8\_F13\_00692" 27180 "s63E6H2" 0 "60 kDa chaperonin"  
"OP8\_F13\_00693" 27181 "s59E13H2" 2.477564 "putative permease YjgP/YjgQ family protein"  
"OP8\_F13\_00693" 27181 "s59E25H2" 0 "putative permease YjgP/YjgQ family protein"  
"OP8\_F13\_00693" 27181 "s59E5H2" 3.280037 "putative permease YjgP/YjgQ family protein"  
"OP8\_F13\_00693" 27181 "s63E6H2" 0 "putative permease YjgP/YjgQ family protein"  
"OP8\_F13\_00694" 27182 "s59E13H2" 3.322984 "hypothetical protein"  
"OP8\_F13\_00694" 27182 "s59E25H2" 0 "hypothetical protein"  
"OP8\_F13\_00694" 27182 "s59E5H2" 3.250853 "hypothetical protein"  
"OP8\_F13\_00694" 27182 "s63E6H2" 0 "hypothetical protein"  
"OP8\_F13\_00695" 27183 "s59E13H2" 3.347382 "H(+)/Cl(-) exchange transporter ClcA"  
"OP8\_F13\_00695" 27183 "s59E25H2" 0 "H(+)/Cl(-) exchange transporter ClcA"  
"OP8\_F13\_00695" 27183 "s59E5H2" 1.923285 "H(+)/Cl(-) exchange transporter ClcA"  
"OP8\_F13\_00695" 27183 "s63E6H2" 0 "H(+)/Cl(-) exchange transporter ClcA"  
"OP8\_F13\_00696" 27184 "s59E13H2" 5.211708 "hypothetical protein"  
"OP8\_F13\_00696" 27184 "s59E25H2" 1.170147 "hypothetical protein"  
"OP8\_F13\_00696" 27184 "s59E5H2" 1.787365 "hypothetical protein"  
"OP8\_F13\_00696" 27184 "s63E6H2" 0.002835121 "hypothetical protein"

"OP8\_F13\_00697" 27185 "s59E13H2" 6.394931 "hypothetical protein"  
"OP8\_F13\_00697" 27185 "s59E25H2" 0 "hypothetical protein"  
"OP8\_F13\_00697" 27185 "s59E5H2" 1.706387 "hypothetical protein"  
"OP8\_F13\_00697" 27185 "s63E6H2" 0 "hypothetical protein"  
"OP8\_F13\_00698" 27186 "s59E13H2" 6.699773 "hypothetical protein"  
"OP8\_F13\_00698" 27186 "s59E25H2" 0 "hypothetical protein"  
"OP8\_F13\_00698" 27186 "s59E5H2" 1.87968 "hypothetical protein"  
"OP8\_F13\_00698" 27186 "s63E6H2" 0 "hypothetical protein"  
"OP8\_F13\_00699" 27187 "s59E13H2" 7.948208 "putative aminodeoxychorismate lyase"  
"OP8\_F13\_00699" 27187 "s59E25H2" 0 "putative aminodeoxychorismate lyase"  
"OP8\_F13\_00699" 27187 "s59E5H2" 2.780594 "putative aminodeoxychorismate lyase"  
"OP8\_F13\_00699" 27187 "s63E6H2" 0 "putative aminodeoxychorismate lyase"  
"OP8\_F13\_00700" 27188 "s59E13H2" 6.536526 "Putative Holliday junction resolvase"  
"OP8\_F13\_00700" 27188 "s59E25H2" 0 "Putative Holliday junction resolvase"  
"OP8\_F13\_00700" 27188 "s59E5H2" 2.568893 "Putative Holliday junction resolvase"  
"OP8\_F13\_00700" 27188 "s63E6H2" 0 "Putative Holliday junction resolvase"  
"OP8\_F13\_00701" 27189 "s59E13H2" 6.047131 "D-alanine--D-alanine ligase"  
"OP8\_F13\_00701" 27189 "s59E25H2" 0 "D-alanine--D-alanine ligase"  
"OP8\_F13\_00701" 27189 "s59E5H2" 1.99863 "D-alanine--D-alanine ligase"  
"OP8\_F13\_00701" 27189 "s63E6H2" 0 "D-alanine--D-alanine ligase"  
"OP8\_F13\_00702" 27190 "s59E13H2" 6.469378 "hypothetical protein"  
"OP8\_F13\_00702" 27190 "s59E25H2" 0 "hypothetical protein"  
"OP8\_F13\_00702" 27190 "s59E5H2" 2.788655 "hypothetical protein"  
"OP8\_F13\_00702" 27190 "s63E6H2" 0 "hypothetical protein"  
"OP8\_F13\_00704" 27192 "s59E13H2" 4.952575 "hypothetical protein"  
"OP8\_F13\_00704" 27192 "s59E25H2" 0 "hypothetical protein"  
"OP8\_F13\_00704" 27192 "s59E5H2" 3.050057 "hypothetical protein"  
"OP8\_F13\_00704" 27192 "s63E6H2" 0 "hypothetical protein"  
"OP8\_F13\_00707" 27195 "s59E13H2" 12.67067 "Inner membrane protein YohC"  
"OP8\_F13\_00707" 27195 "s59E25H2" 0 "Inner membrane protein YohC"  
"OP8\_F13\_00707" 27195 "s59E5H2" 2.694977 "Inner membrane protein YohC"  
"OP8\_F13\_00707" 27195 "s63E6H2" 0 "Inner membrane protein YohC"  
"OP8\_F13\_00708" 27196 "s59E13H2" 11.83127 "Orotidine 5'-phosphate decarboxylase"  
"OP8\_F13\_00708" 27196 "s59E25H2" 0 "Orotidine 5'-phosphate decarboxylase"  
"OP8\_F13\_00708" 27196 "s59E5H2" 2.539137 "Orotidine 5'-phosphate decarboxylase"  
"OP8\_F13\_00708" 27196 "s63E6H2" 0.001967078 "Orotidine 5'-phosphate decarboxylase"  
"OP8\_F13\_00709" 27197 "s59E13H2" 7.531565 "Dihydroorotate dehydrogenase B (NAD(+) ), catalytic subunit"  
"OP8\_F13\_00709" 27197 "s59E25H2" 0 "Dihydroorotate dehydrogenase B (NAD(+) ), catalytic subunit"  
"OP8\_F13\_00709" 27197 "s59E5H2" 1.704774 "Dihydroorotate dehydrogenase B (NAD(+) ), catalytic subunit"  
"OP8\_F13\_00709" 27197 "s63E6H2" 6.665888e-06 "Dihydroorotate dehydrogenase B (NAD(+) ), catalytic subunit"  
"OP8\_F13\_00710" 27198 "s59E13H2" 5.274614 "Dihydroorotate dehydrogenase B (NAD(+) ), electron transfer subunit"  
"OP8\_F13\_00710" 27198 "s59E25H2" 0 "Dihydroorotate dehydrogenase B (NAD(+) ), electron transfer subunit"  
"OP8\_F13\_00710" 27198 "s59E5H2" 1.13155 "Dihydroorotate dehydrogenase B (NAD(+) ), electron transfer subunit"  
"OP8\_F13\_00710" 27198 "s63E6H2" 0 "Dihydroorotate dehydrogenase B (NAD(+) ), electron transfer subunit"  
"OP8\_F13\_00711" 27199 "s59E13H2" 5.42671 "Putative N-acetyl-LL-diaminopimelate aminotransferase"  
"OP8\_F13\_00711" 27199 "s59E25H2" 0 "Putative N-acetyl-LL-diaminopimelate aminotransferase"  
"OP8\_F13\_00711" 27199 "s59E5H2" 1.152117 "Putative N-acetyl-LL-diaminopimelate aminotransferase"



"OP8\_F13\_00711" 27199 "s63E6H2" 0 "Putative N-acetyl-LL-diaminopimelate aminotransferase"  
"OP8\_F13\_00712" 27200 "s59E13H2" 8.124242 "Pyruvate, phosphate dikinase"  
"OP8\_F13\_00712" 27200 "s59E25H2" 0 "Pyruvate, phosphate dikinase"  
"OP8\_F13\_00712" 27200 "s59E5H2" 1.235289 "Pyruvate, phosphate dikinase"  
"OP8\_F13\_00712" 27200 "s63E6H2" 0 "Pyruvate, phosphate dikinase"  
"OP8\_F13\_00713" 27201 "s59E13H2" 11.90561 "Acetoin utilization protein AcuC"  
"OP8\_F13\_00713" 27201 "s59E25H2" 0 "Acetoin utilization protein AcuC"  
"OP8\_F13\_00713" 27201 "s59E5H2" 2.126701 "Acetoin utilization protein AcuC"  
"OP8\_F13\_00713" 27201 "s63E6H2" 0 "Acetoin utilization protein AcuC"  
"OP8\_F13\_00714" 27202 "s59E13H2" 10.83198 "putative metallohydrolase"  
"OP8\_F13\_00714" 27202 "s59E25H2" 0 "putative metallohydrolase"  
"OP8\_F13\_00714" 27202 "s59E5H2" 1.813737 "putative metallohydrolase"  
"OP8\_F13\_00714" 27202 "s63E6H2" 0.008426983 "putative metallohydrolase"  
"OP8\_F13\_00715" 27203 "s59E13H2" 7.312211 "D-inositol 3-phosphate glycosyltransferase"  
"OP8\_F13\_00715" 27203 "s59E25H2" 0 "D-inositol 3-phosphate glycosyltransferase"  
"OP8\_F13\_00715" 27203 "s59E5H2" 1.001897 "D-inositol 3-phosphate glycosyltransferase"  
"OP8\_F13\_00715" 27203 "s63E6H2" 0.003409549 "D-inositol 3-phosphate glycosyltransferase"  
"OP8\_F13\_00716" 27204 "s59E13H2" 7.425117 "D-inositol 3-phosphate glycosyltransferase"  
"OP8\_F13\_00716" 27204 "s59E25H2" 0.03869833 "D-inositol 3-phosphate glycosyltransferase"  
"OP8\_F13\_00716" 27204 "s59E5H2" 1.044851 "D-inositol 3-phosphate glycosyltransferase"  
"OP8\_F13\_00716" 27204 "s63E6H2" 0.0002085244 "D-inositol 3-phosphate glycosyltransferase"  
"OP8\_F13\_00717" 27205 "s59E13H2" 9.03897 "Alpha-D-kanosaminytransferase"  
"OP8\_F13\_00717" 27205 "s59E25H2" 0.6368421 "Alpha-D-kanosaminytransferase"  
"OP8\_F13\_00717" 27205 "s59E5H2" 1.406268 "Alpha-D-kanosaminytransferase"  
"OP8\_F13\_00717" 27205 "s63E6H2" 0 "Alpha-D-kanosaminytransferase"  
"OP8\_F13\_00719" 27207 "s59E13H2" 11.25855 "GDP-mannose-dependent alpha-(1-6)-phosphatidylinositol monomannoside mannosyltransferase"  
"OP8\_F13\_00719" 27207 "s59E25H2" 0 "GDP-mannose-dependent alpha-(1-6)-phosphatidylinositol monomannoside mannosyltransferase"  
"OP8\_F13\_00719" 27207 "s59E5H2" 1.943616 "GDP-mannose-dependent alpha-(1-6)-phosphatidylinositol monomannoside mannosyltransferase"  
"OP8\_F13\_00719" 27207 "s63E6H2" 0 "GDP-mannose-dependent alpha-(1-6)-phosphatidylinositol monomannoside mannosyltransferase"  
"OP8\_F13\_00720" 27208 "s59E13H2" 10.8717 "UDP-glucose:undecaprenyl-phosphate glucose-1-phosphate transferase"  
"OP8\_F13\_00720" 27208 "s59E25H2" 0.136646 "UDP-glucose:undecaprenyl-phosphate glucose-1-phosphate transferase"  
"OP8\_F13\_00720" 27208 "s59E5H2" 1.458441 "UDP-glucose:undecaprenyl-phosphate glucose-1-phosphate transferase"  
"OP8\_F13\_00720" 27208 "s63E6H2" 0.0007845598 "UDP-glucose:undecaprenyl-phosphate glucose-1-phosphate transferase"  
"OP8\_F13\_00721" 27209 "s59E13H2" 14.65839 "CDP-diacylglycerol-glycerol-3-phosphate 3-phosphatidyltransferase"  
"OP8\_F13\_00721" 27209 "s59E25H2" 0 "CDP-diacylglycerol-glycerol-3-phosphate 3-phosphatidyltransferase"  
"OP8\_F13\_00721" 27209 "s59E5H2" 1.665714 "CDP-diacylglycerol-glycerol-3-phosphate 3-phosphatidyltransferase"  
"OP8\_F13\_00721" 27209 "s63E6H2" 0 "CDP-diacylglycerol-glycerol-3-phosphate 3-phosphatidyltransferase"  
"OP8\_F13\_00722" 27210 "s59E13H2" 15.02882 "cellulose synthase subunit BcsC"  
"OP8\_F13\_00722" 27210 "s59E25H2" 0.07331822 "cellulose synthase subunit BcsC"  
"OP8\_F13\_00722" 27210 "s59E5H2" 2.243174 "cellulose synthase subunit BcsC"  
"OP8\_F13\_00722" 27210 "s63E6H2" 0.009185563 "cellulose synthase subunit BcsC"  
"OP8\_F13\_00723" 27211 "s59E13H2" 11.98878 "GTPase HflX"  
"OP8\_F13\_00723" 27211 "s59E25H2" 0 "GTPase HflX"  
"OP8\_F13\_00723" 27211 "s59E5H2" 1.604756 "GTPase HflX"  
"OP8\_F13\_00723" 27211 "s63E6H2" 0.003614843 "GTPase HflX"  
"OP8\_F13\_00724" 27212 "s59E13H2" 9.081046 "tRNA dimethylallyltransferase"  
"OP8\_F13\_00724" 27212 "s59E25H2" 0 "tRNA dimethylallyltransferase"

"OP8\_F13\_00724" 27212 "s59E5H2" 1.302448 "tRNA dimethylallyltransferase"  
"OP8\_F13\_00724" 27212 "s63E6H2" 0.004191025 "tRNA dimethylallyltransferase"  
"OP8\_F13\_00725" 27213 "s59E13H2" 7.268856 "hypothetical protein"  
"OP8\_F13\_00725" 27213 "s59E25H2" 0 "hypothetical protein"  
"OP8\_F13\_00725" 27213 "s59E5H2" 1.044012 "hypothetical protein"  
"OP8\_F13\_00725" 27213 "s63E6H2" 0 "hypothetical protein"  
"OP8\_F13\_00726" 27214 "s59E13H2" 6.655155 "putative ABC transporter ATP-binding protein"  
"OP8\_F13\_00726" 27214 "s59E25H2" 0 "putative ABC transporter ATP-binding protein"  
"OP8\_F13\_00726" 27214 "s59E5H2" 1.402038 "putative ABC transporter ATP-binding protein"  
"OP8\_F13\_00726" 27214 "s63E6H2" 0 "putative ABC transporter ATP-binding protein"  
"OP8\_F13\_00727" 27215 "s59E13H2" 3.311559 "Macrolide export protein MacA"  
"OP8\_F13\_00727" 27215 "s59E25H2" 0 "Macrolide export protein MacA"  
"OP8\_F13\_00727" 27215 "s59E5H2" 1.452556 "Macrolide export protein MacA"  
"OP8\_F13\_00727" 27215 "s63E6H2" 0 "Macrolide export protein MacA"  
"OP8\_F13\_00728" 27216 "s59E13H2" 0.2130212 "hypothetical protein"  
"OP8\_F13\_00728" 27216 "s59E25H2" 0 "hypothetical protein"  
"OP8\_F13\_00728" 27216 "s59E5H2" 1.81261 "hypothetical protein"  
"OP8\_F13\_00728" 27216 "s63E6H2" 0 "hypothetical protein"  
"OP8\_F13\_00729" 27217 "s59E13H2" 0.1534878 "Biotin carboxylase"  
"OP8\_F13\_00729" 27217 "s59E25H2" 0.2635486 "Biotin carboxylase"  
"OP8\_F13\_00729" 27217 "s59E5H2" 1.522651 "Biotin carboxylase"  
"OP8\_F13\_00729" 27217 "s63E6H2" 0 "Biotin carboxylase"  
"OP8\_F13\_00730" 27218 "s59E13H2" 0.08258105 "Biotin carboxyl carrier protein of acetyl-CoA carboxylase"  
"OP8\_F13\_00730" 27218 "s59E25H2" 0 "Biotin carboxyl carrier protein of acetyl-CoA carboxylase"  
"OP8\_F13\_00730" 27218 "s59E5H2" 0.9452025 "Biotin carboxyl carrier protein of acetyl-CoA carboxylase"  
"OP8\_F13\_00730" 27218 "s63E6H2" 0 "Biotin carboxyl carrier protein of acetyl-CoA carboxylase"  
"OP8\_F13\_00731" 27219 "s59E13H2" 0.01612528 "Signal recognition particle protein"  
"OP8\_F13\_00731" 27219 "s59E25H2" 0 "Signal recognition particle protein"  
"OP8\_F13\_00731" 27219 "s59E5H2" 0.8207737 "Signal recognition particle protein"  
"OP8\_F13\_00731" 27219 "s63E6H2" 0 "Signal recognition particle protein"  
"OP8\_F13\_00732" 27220 "s59E13H2" 0.009274123 "30S ribosomal protein S16"  
"OP8\_F13\_00732" 27220 "s59E25H2" 0 "30S ribosomal protein S16"  
"OP8\_F13\_00732" 27220 "s59E5H2" 0.7927219 "30S ribosomal protein S16"  
"OP8\_F13\_00732" 27220 "s63E6H2" 0 "30S ribosomal protein S16"  
"OP8\_F13\_00733" 27221 "s59E13H2" 0.1686071 "hypothetical protein"  
"OP8\_F13\_00733" 27221 "s59E25H2" 0 "hypothetical protein"  
"OP8\_F13\_00733" 27221 "s59E5H2" 0.9313196 "hypothetical protein"  
"OP8\_F13\_00733" 27221 "s63E6H2" 0 "hypothetical protein"  
"OP8\_F13\_00734" 27222 "s59E13H2" 0.02176998 "tRNA (guanine-N(1)-)-methyltransferase"  
"OP8\_F13\_00734" 27222 "s59E25H2" 0 "tRNA (guanine-N(1)-)-methyltransferase"  
"OP8\_F13\_00734" 27222 "s59E5H2" 0.604435 "tRNA (guanine-N(1)-)-methyltransferase"  
"OP8\_F13\_00734" 27222 "s63E6H2" 0 "tRNA (guanine-N(1)-)-methyltransferase"  
"OP8\_F13\_00735" 27223 "s59E13H2" 0.01106387 "50S ribosomal protein L19"  
"OP8\_F13\_00735" 27223 "s59E25H2" 0 "50S ribosomal protein L19"  
"OP8\_F13\_00735" 27223 "s59E5H2" 0.3304444 "50S ribosomal protein L19"  
"OP8\_F13\_00735" 27223 "s63E6H2" 0 "50S ribosomal protein L19"  
"OP8\_F13\_00736" 27224 "s59E13H2" 0.002797843 "Ribonuclease HII"

"OP8\_F13\_00736" 27224 "s59E25H2" 0 "Ribonuclease HII"  
"OP8\_F13\_00736" 27224 "s59E5H2" 0.4483168 "Ribonuclease HII"  
"OP8\_F13\_00736" 27224 "s63E6H2" 0 "Ribonuclease HII"  
"OP8\_F13\_00737" 27225 "s59E13H2" 0.009621739 "tetratricopeptide repeat protein"  
"OP8\_F13\_00737" 27225 "s59E25H2" 0 "tetratricopeptide repeat protein"  
"OP8\_F13\_00737" 27225 "s59E5H2" 0.7165418 "tetratricopeptide repeat protein"  
"OP8\_F13\_00737" 27225 "s63E6H2" 0 "tetratricopeptide repeat protein"  
"OP8\_F13\_00738" 27226 "s59E13H2" 0.01495526 "Nif-specific regulatory protein"  
"OP8\_F13\_00738" 27226 "s59E25H2" 0.1508104 "Nif-specific regulatory protein"  
"OP8\_F13\_00738" 27226 "s59E5H2" 0.8744396 "Nif-specific regulatory protein"  
"OP8\_F13\_00738" 27226 "s63E6H2" 0 "Nif-specific regulatory protein"  
"OP8\_F13\_00739" 27227 "s59E13H2" 0.02946778 "hypothetical protein"  
"OP8\_F13\_00739" 27227 "s59E25H2" 0 "hypothetical protein"  
"OP8\_F13\_00739" 27227 "s59E5H2" 1.163991 "hypothetical protein"  
"OP8\_F13\_00739" 27227 "s63E6H2" 0 "hypothetical protein"  
"OP8\_F13\_00740" 27228 "s59E13H2" 0.03117027 "Malate-2H(+)/Na(+)-lactate antiporter"  
"OP8\_F13\_00740" 27228 "s59E25H2" 0 "Malate-2H(+)/Na(+)-lactate antiporter"  
"OP8\_F13\_00740" 27228 "s59E5H2" 1.686077 "Malate-2H(+)/Na(+)-lactate antiporter"  
"OP8\_F13\_00740" 27228 "s63E6H2" 0.002064988 "Malate-2H(+)/Na(+)-lactate antiporter"  
"OP8\_F13\_00741" 27229 "s59E13H2" 0.03367446 "Isoaspartyl dipeptidase"  
"OP8\_F13\_00741" 27229 "s59E25H2" 0 "Isoaspartyl dipeptidase"  
"OP8\_F13\_00741" 27229 "s59E5H2" 1.941933 "Isoaspartyl dipeptidase"  
"OP8\_F13\_00741" 27229 "s63E6H2" 0 "Isoaspartyl dipeptidase"  
"OP8\_F13\_00742" 27230 "s59E13H2" 0.03961273 "hypothetical protein"  
"OP8\_F13\_00742" 27230 "s59E25H2" 0 "hypothetical protein"  
"OP8\_F13\_00742" 27230 "s59E5H2" 1.663001 "hypothetical protein"  
"OP8\_F13\_00742" 27230 "s63E6H2" 0 "hypothetical protein"  
"OP8\_F13\_00743" 27231 "s59E13H2" 0.03286328 "Peptidyl-prolyl cis-trans isomerase D"  
"OP8\_F13\_00743" 27231 "s59E25H2" 0 "Peptidyl-prolyl cis-trans isomerase D"  
"OP8\_F13\_00743" 27231 "s59E5H2" 1.178095 "Peptidyl-prolyl cis-trans isomerase D"  
"OP8\_F13\_00743" 27231 "s63E6H2" 0 "Peptidyl-prolyl cis-trans isomerase D"  
"OP8\_F13\_00744" 27232 "s59E13H2" 0.002723575 "AP-4-A phosphorylase"  
"OP8\_F13\_00744" 27232 "s59E25H2" 0.4036145 "AP-4-A phosphorylase"  
"OP8\_F13\_00744" 27232 "s59E5H2" 1.545714 "AP-4-A phosphorylase"  
"OP8\_F13\_00744" 27232 "s63E6H2" 0 "AP-4-A phosphorylase"  
"OP8\_F13\_00745" 27233 "s59E13H2" 0.009248922 "DNA-binding protein HU 1"  
"OP8\_F13\_00745" 27233 "s59E25H2" 0 "DNA-binding protein HU 1"  
"OP8\_F13\_00745" 27233 "s59E5H2" 0.6585723 "DNA-binding protein HU 1"  
"OP8\_F13\_00745" 27233 "s63E6H2" 0 "DNA-binding protein HU 1"  
"OP8\_F13\_00746" 27234 "s59E13H2" 0.01552191 "30S ribosomal protein S1"  
"OP8\_F13\_00746" 27234 "s59E25H2" 0 "30S ribosomal protein S1"  
"OP8\_F13\_00746" 27234 "s59E5H2" 0.4322059 "30S ribosomal protein S1"  
"OP8\_F13\_00746" 27234 "s63E6H2" 0 "30S ribosomal protein S1"  
"OP8\_F13\_00747" 27235 "s59E13H2" 0.02218826 "4-hydroxy-3-methylbut-2-enyl diphosphate reductase"  
"OP8\_F13\_00747" 27235 "s59E25H2" 0 "4-hydroxy-3-methylbut-2-enyl diphosphate reductase"  
"OP8\_F13\_00747" 27235 "s59E5H2" 0.7254151 "4-hydroxy-3-methylbut-2-enyl diphosphate reductase"  
"OP8\_F13\_00747" 27235 "s63E6H2" 0 "4-hydroxy-3-methylbut-2-enyl diphosphate reductase"

"OP8\_F13\_00748" 27236 "s59E13H2" 0.00326123 "Segregation and condensation protein B"  
"OP8\_F13\_00748" 27236 "s59E25H2" 0 "Segregation and condensation protein B"  
"OP8\_F13\_00748" 27236 "s59E5H2" 0.4032446 "Segregation and condensation protein B"  
"OP8\_F13\_00748" 27236 "s63E6H2" 0 "Segregation and condensation protein B"  
"OP8\_F13\_00749" 27237 "s59E13H2" 0.011381 "Segregation and condensation protein A"  
"OP8\_F13\_00749" 27237 "s59E25H2" 0 "Segregation and condensation protein A"  
"OP8\_F13\_00749" 27237 "s59E5H2" 0.4833697 "Segregation and condensation protein A"  
"OP8\_F13\_00749" 27237 "s63E6H2" 0 "Segregation and condensation protein A"  
"OP8\_F13\_00750" 27238 "s59E13H2" 0.01357598 "Tryptophan--tRNA ligase"  
"OP8\_F13\_00750" 27238 "s59E25H2" 0 "Tryptophan--tRNA ligase"  
"OP8\_F13\_00750" 27238 "s59E5H2" 0.4453669 "Tryptophan--tRNA ligase"  
"OP8\_F13\_00750" 27238 "s63E6H2" 0 "Tryptophan--tRNA ligase"  
"OP8\_F13\_00751" 27239 "s59E13H2" 0.002469505 "Peptidase family M50"  
"OP8\_F13\_00751" 27239 "s59E25H2" 0 "Peptidase family M50"  
"OP8\_F13\_00751" 27239 "s59E5H2" 0.3950636 "Peptidase family M50"  
"OP8\_F13\_00751" 27239 "s63E6H2" 0 "Peptidase family M50"  
"OP8\_F13\_00752" 27240 "s59E13H2" 0 "hypothetical protein"  
"OP8\_F13\_00752" 27240 "s59E25H2" 0 "hypothetical protein"  
"OP8\_F13\_00752" 27240 "s59E5H2" 0.02650596 "hypothetical protein"  
"OP8\_F13\_00752" 27240 "s63E6H2" 0 "hypothetical protein"  
"OP8\_F13\_00754" 27242 "s59E13H2" 0 "hypothetical protein"  
"OP8\_F13\_00754" 27242 "s59E25H2" 0 "hypothetical protein"  
"OP8\_F13\_00754" 27242 "s59E5H2" 0.3482417 "hypothetical protein"  
"OP8\_F13\_00754" 27242 "s63E6H2" 0 "hypothetical protein"  
"OP8\_F13\_00755" 27243 "s59E13H2" 0 "hypothetical protein"  
"OP8\_F13\_00755" 27243 "s59E25H2" 0 "hypothetical protein"  
"OP8\_F13\_00755" 27243 "s59E5H2" 0.3787317 "hypothetical protein"  
"OP8\_F13\_00755" 27243 "s63E6H2" 0 "hypothetical protein"  
"OP8\_F13\_00756" 27244 "s59E13H2" 0.3584079 "Transposase IS116/IS110/IS902 family protein"  
"OP8\_F13\_00756" 27244 "s59E25H2" 0 "Transposase IS116/IS110/IS902 family protein"  
"OP8\_F13\_00756" 27244 "s59E5H2" 0.6169863 "Transposase IS116/IS110/IS902 family protein"  
"OP8\_F13\_00756" 27244 "s63E6H2" 0 "Transposase IS116/IS110/IS902 family protein"  
"OP8\_F13\_00759" 27247 "s59E13H2" 0 "hypothetical protein"  
"OP8\_F13\_00759" 27247 "s59E25H2" 0 "hypothetical protein"  
"OP8\_F13\_00759" 27247 "s59E5H2" 1.276854 "hypothetical protein"  
"OP8\_F13\_00759" 27247 "s63E6H2" 0 "hypothetical protein"  
"OP8\_F13\_00761" 27249 "s59E13H2" 0 "putative BsuMI modification methylase subunit YdiO"  
"OP8\_F13\_00761" 27249 "s59E25H2" 0 "putative BsuMI modification methylase subunit YdiO"  
"OP8\_F13\_00761" 27249 "s59E5H2" 1.058317 "putative BsuMI modification methylase subunit YdiO"  
"OP8\_F13\_00761" 27249 "s63E6H2" 0 "putative BsuMI modification methylase subunit YdiO"  
"OP8\_F13\_00762" 27250 "s59E13H2" 0 "DNA mismatch repair protein MutL"  
"OP8\_F13\_00762" 27250 "s59E25H2" 0 "DNA mismatch repair protein MutL"  
"OP8\_F13\_00762" 27250 "s59E5H2" 0.2167185 "DNA mismatch repair protein MutL"  
"OP8\_F13\_00762" 27250 "s63E6H2" 0 "DNA mismatch repair protein MutL"  
"OP8\_F13\_00763" 27251 "s59E13H2" 0 "Very short patch repair protein"  
"OP8\_F13\_00763" 27251 "s59E25H2" 0 "Very short patch repair protein"  
"OP8\_F13\_00763" 27251 "s59E5H2" 0.5234472 "Very short patch repair protein"

"OP8\_F13\_00763" 27251 "s63E6H2" 0 "Very short patch repair protein"  
"OP8\_F13\_00764" 27252 "s59E13H2" 0 "Ribose-5-phosphate isomerase B"  
"OP8\_F13\_00764" 27252 "s59E25H2" 0 "Ribose-5-phosphate isomerase B"  
"OP8\_F13\_00764" 27252 "s59E5H2" 0.6254579 "Ribose-5-phosphate isomerase B"  
"OP8\_F13\_00764" 27252 "s63E6H2" 0 "Ribose-5-phosphate isomerase B"  
"OP8\_F13\_00765" 27253 "s59E13H2" 0 "Serine hydroxymethyltransferase"  
"OP8\_F13\_00765" 27253 "s59E25H2" 0.1739736 "Serine hydroxymethyltransferase"  
"OP8\_F13\_00765" 27253 "s59E5H2" 1.25558 "Serine hydroxymethyltransferase"  
"OP8\_F13\_00765" 27253 "s63E6H2" 0.001061866 "Serine hydroxymethyltransferase"  
"OP8\_F13\_00766" 27254 "s59E13H2" 0.001366083 "Phosphoribosylamine--glycine ligase"  
"OP8\_F13\_00766" 27254 "s59E25H2" 0 "Phosphoribosylamine--glycine ligase"  
"OP8\_F13\_00766" 27254 "s59E5H2" 1.130851 "Phosphoribosylamine--glycine ligase"  
"OP8\_F13\_00766" 27254 "s63E6H2" 0 "Phosphoribosylamine--glycine ligase"  
"OP8\_F13\_00767" 27255 "s59E13H2" 0 "N5-carboxyaminoimidazole ribonucleotide mutase"  
"OP8\_F13\_00767" 27255 "s59E25H2" 0 "N5-carboxyaminoimidazole ribonucleotide mutase"  
"OP8\_F13\_00767" 27255 "s59E5H2" 1.520245 "N5-carboxyaminoimidazole ribonucleotide mutase"  
"OP8\_F13\_00767" 27255 "s63E6H2" 0 "N5-carboxyaminoimidazole ribonucleotide mutase"  
"OP8\_F13\_00768" 27256 "s59E13H2" 0 "Threonylcarbamoyladenosine tRNA methylthiotransferase MtaB"  
"OP8\_F13\_00768" 27256 "s59E25H2" 0 "Threonylcarbamoyladenosine tRNA methylthiotransferase MtaB"  
"OP8\_F13\_00768" 27256 "s59E5H2" 1.66894 "Threonylcarbamoyladenosine tRNA methylthiotransferase MtaB"  
"OP8\_F13\_00768" 27256 "s63E6H2" 0 "Threonylcarbamoyladenosine tRNA methylthiotransferase MtaB"  
"OP8\_F13\_00769" 27257 "s59E13H2" 0 "DNA mismatch repair protein MutL"  
"OP8\_F13\_00769" 27257 "s59E25H2" 0 "DNA mismatch repair protein MutL"  
"OP8\_F13\_00769" 27257 "s59E5H2" 1.902787 "DNA mismatch repair protein MutL"  
"OP8\_F13\_00769" 27257 "s63E6H2" 0 "DNA mismatch repair protein MutL"  
"OP8\_F13\_00772" 27260 "s59E13H2" 0 "Undecaprenyl-phosphate mannosyltransferase"  
"OP8\_F13\_00772" 27260 "s59E25H2" 0 "Undecaprenyl-phosphate mannosyltransferase"  
"OP8\_F13\_00772" 27260 "s59E5H2" 2.571287 "Undecaprenyl-phosphate mannosyltransferase"  
"OP8\_F13\_00772" 27260 "s63E6H2" 0 "Undecaprenyl-phosphate mannosyltransferase"  
"OP8\_F13\_00773" 27261 "s59E13H2" 0 "hypothetical protein"  
"OP8\_F13\_00773" 27261 "s59E25H2" 0 "hypothetical protein"  
"OP8\_F13\_00773" 27261 "s59E5H2" 1.557153 "hypothetical protein"  
"OP8\_F13\_00773" 27261 "s63E6H2" 0 "hypothetical protein"  
"OP8\_F13\_00774" 27262 "s59E13H2" 0 "hypothetical protein"  
"OP8\_F13\_00774" 27262 "s59E25H2" 0 "hypothetical protein"  
"OP8\_F13\_00774" 27262 "s59E5H2" 1.32575 "hypothetical protein"  
"OP8\_F13\_00774" 27262 "s63E6H2" 0 "hypothetical protein"  
"OP8\_F13\_00775" 27263 "s59E13H2" 0.002960339 "Type II secretion system protein E"  
"OP8\_F13\_00775" 27263 "s59E25H2" 0 "Type II secretion system protein E"  
"OP8\_F13\_00775" 27263 "s59E5H2" 1.837778 "Type II secretion system protein E"  
"OP8\_F13\_00775" 27263 "s63E6H2" 0 "Type II secretion system protein E"  
"OP8\_F13\_00776" 27264 "s59E13H2" 0.002169349 "Twitching mobility protein"  
"OP8\_F13\_00776" 27264 "s59E25H2" 0 "Twitching mobility protein"  
"OP8\_F13\_00776" 27264 "s59E5H2" 1.914274 "Twitching mobility protein"  
"OP8\_F13\_00776" 27264 "s63E6H2" 0 "Twitching mobility protein"  
"OP8\_F13\_00777" 27265 "s59E13H2" 0.002312749 "Type II secretion system protein F"  
"OP8\_F13\_00777" 27265 "s59E25H2" 0 "Type II secretion system protein F"

"OP8\_F13\_00777" 27265 "s59E5H2" 1.182688 "Type II secretion system protein F"  
"OP8\_F13\_00777" 27265 "s63E6H2" 0 "Type II secretion system protein F"  
"OP8\_F13\_00778" 27266 "s59E13H2" 0 "Sporulation kinase D"  
"OP8\_F13\_00778" 27266 "s59E25H2" 0 "Sporulation kinase D"  
"OP8\_F13\_00778" 27266 "s59E5H2" 0.3185517 "Sporulation kinase D"  
"OP8\_F13\_00778" 27266 "s63E6H2" 0 "Sporulation kinase D"  
"OP8\_F13\_00779" 27267 "s59E13H2" 0.004854579 "Transcriptional regulatory protein ZraR"  
"OP8\_F13\_00779" 27267 "s59E25H2" 0 "Transcriptional regulatory protein ZraR"  
"OP8\_F13\_00779" 27267 "s59E5H2" 1.4687 "Transcriptional regulatory protein ZraR"  
"OP8\_F13\_00779" 27267 "s63E6H2" 0 "Transcriptional regulatory protein ZraR"  
"OP8\_F13\_00780" 27268 "s59E13H2" 0 "Type II secretion system protein G precursor"  
"OP8\_F13\_00780" 27268 "s59E25H2" 0 "Type II secretion system protein G precursor"  
"OP8\_F13\_00780" 27268 "s59E5H2" 0.6213597 "Type II secretion system protein G precursor"  
"OP8\_F13\_00780" 27268 "s63E6H2" 0 "Type II secretion system protein G precursor"  
"OP8\_F13\_00781" 27269 "s59E13H2" 0.002865824 "1-acyl-sn-glycerol-3-phosphate acyltransferase"  
"OP8\_F13\_00781" 27269 "s59E25H2" 0 "1-acyl-sn-glycerol-3-phosphate acyltransferase"  
"OP8\_F13\_00781" 27269 "s59E5H2" 2.630615 "1-acyl-sn-glycerol-3-phosphate acyltransferase"  
"OP8\_F13\_00781" 27269 "s63E6H2" 0 "1-acyl-sn-glycerol-3-phosphate acyltransferase"  
"OP8\_F13\_00782" 27270 "s59E13H2" 0.0112331 "Phosphoheptose isomerase 1"  
"OP8\_F13\_00782" 27270 "s59E25H2" 0 "Phosphoheptose isomerase 1"  
"OP8\_F13\_00782" 27270 "s59E5H2" 3.006857 "Phosphoheptose isomerase 1"  
"OP8\_F13\_00782" 27270 "s63E6H2" 0 "Phosphoheptose isomerase 1"  
"OP8\_F13\_00783" 27271 "s59E13H2" 0.005461851 "Phosphoenolpyruvate carboxykinase [ATP]"  
"OP8\_F13\_00783" 27271 "s59E25H2" 0 "Phosphoenolpyruvate carboxykinase [ATP]"  
"OP8\_F13\_00783" 27271 "s59E5H2" 2.401781 "Phosphoenolpyruvate carboxykinase [ATP]"  
"OP8\_F13\_00783" 27271 "s63E6H2" 0 "Phosphoenolpyruvate carboxykinase [ATP]"  
"OP8\_F13\_00784" 27272 "s59E13H2" 0.006559313 "Aspartate aminotransferase"  
"OP8\_F13\_00784" 27272 "s59E25H2" 0 "Aspartate aminotransferase"  
"OP8\_F13\_00784" 27272 "s59E5H2" 0.2886819 "Aspartate aminotransferase"  
"OP8\_F13\_00784" 27272 "s63E6H2" 0 "Aspartate aminotransferase"  
"OP8\_F13\_00785" 27273 "s59E13H2" 0.5299104 "SPFH domain / Band 7 family protein"  
"OP8\_F13\_00785" 27273 "s59E25H2" 0 "SPFH domain / Band 7 family protein"  
"OP8\_F13\_00785" 27273 "s59E5H2" 0.1606655 "SPFH domain / Band 7 family protein"  
"OP8\_F13\_00785" 27273 "s63E6H2" 0 "SPFH domain / Band 7 family protein"  
"OP8\_F13\_00786" 27274 "s59E13H2" 1.754626 "UDP-glucose 4-epimerase"  
"OP8\_F13\_00786" 27274 "s59E25H2" 0 "UDP-glucose 4-epimerase"  
"OP8\_F13\_00786" 27274 "s59E5H2" 0.8691003 "UDP-glucose 4-epimerase"  
"OP8\_F13\_00786" 27274 "s63E6H2" 0 "UDP-glucose 4-epimerase"  
"OP8\_F13\_00787" 27275 "s59E13H2" 2.088566 "Ribonuclease PH"  
"OP8\_F13\_00787" 27275 "s59E25H2" 0 "Ribonuclease PH"  
"OP8\_F13\_00787" 27275 "s59E5H2" 0.6840741 "Ribonuclease PH"  
"OP8\_F13\_00787" 27275 "s63E6H2" 0 "Ribonuclease PH"  
"OP8\_F13\_00788" 27276 "s59E13H2" 0.2689373 "hypothetical protein"  
"OP8\_F13\_00788" 27276 "s59E25H2" 0 "hypothetical protein"  
"OP8\_F13\_00788" 27276 "s59E5H2" 1.83327 "hypothetical protein"  
"OP8\_F13\_00788" 27276 "s63E6H2" 0 "hypothetical protein"  
"OP8\_F13\_00789" 27277 "s59E13H2" 0.008757723 "Electron transport complex protein RnfC"

"OP8\_F13\_00789" 27277 "s59E25H2" 0 "Electron transport complex protein RnfC"  
"OP8\_F13\_00789" 27277 "s59E5H2" 4.918062 "Electron transport complex protein RnfC"  
"OP8\_F13\_00789" 27277 "s63E6H2" 0 "Electron transport complex protein RnfC"  
"OP8\_F13\_00790" 27278 "s59E13H2" 0.01514536 "Electron transport complex protein RnfD"  
"OP8\_F13\_00790" 27278 "s59E25H2" 0 "Electron transport complex protein RnfD"  
"OP8\_F13\_00790" 27278 "s59E5H2" 5.071745 "Electron transport complex protein RnfD"  
"OP8\_F13\_00790" 27278 "s63E6H2" 0 "Electron transport complex protein RnfD"  
"OP8\_F13\_00791" 27279 "s59E13H2" 0.1038059 "electron transport complex protein RnfG"  
"OP8\_F13\_00791" 27279 "s59E25H2" 0 "electron transport complex protein RnfG"  
"OP8\_F13\_00791" 27279 "s59E5H2" 4.501966 "electron transport complex protein RnfG"  
"OP8\_F13\_00791" 27279 "s63E6H2" 0 "electron transport complex protein RnfG"  
"OP8\_F13\_00792" 27280 "s59E13H2" 0.04848947 "Electron transport complex protein RnfE"  
"OP8\_F13\_00792" 27280 "s59E25H2" 0 "Electron transport complex protein RnfE"  
"OP8\_F13\_00792" 27280 "s59E5H2" 5.009089 "Electron transport complex protein RnfE"  
"OP8\_F13\_00792" 27280 "s63E6H2" 0 "Electron transport complex protein RnfE"  
"OP8\_F13\_00793" 27281 "s59E13H2" 0.007853872 "Electron transport complex protein RnfA"  
"OP8\_F13\_00793" 27281 "s59E25H2" 0 "Electron transport complex protein RnfA"  
"OP8\_F13\_00793" 27281 "s59E5H2" 4.964864 "Electron transport complex protein RnfA"  
"OP8\_F13\_00793" 27281 "s63E6H2" 0 "Electron transport complex protein RnfA"  
"OP8\_F13\_00794" 27282 "s59E13H2" 0.00224067 "Electron transport complex protein rnfB"  
"OP8\_F13\_00794" 27282 "s59E25H2" 0 "Electron transport complex protein rnfB"  
"OP8\_F13\_00794" 27282 "s59E5H2" 4.559792 "Electron transport complex protein rnfB"  
"OP8\_F13\_00794" 27282 "s63E6H2" 0 "Electron transport complex protein rnfB"  
"OP8\_F13\_00795" 27283 "s59E13H2" 0.01205005 "Positive regulator of sigma(E), RseC/MucC"  
"OP8\_F13\_00795" 27283 "s59E25H2" 0 "Positive regulator of sigma(E), RseC/MucC"  
"OP8\_F13\_00795" 27283 "s59E5H2" 2.644828 "Positive regulator of sigma(E), RseC/MucC"  
"OP8\_F13\_00795" 27283 "s63E6H2" 0 "Positive regulator of sigma(E), RseC/MucC"  
"OP8\_F13\_00796" 27284 "s59E13H2" 0.01118573 "hypothetical protein"  
"OP8\_F13\_00796" 27284 "s59E25H2" 0 "hypothetical protein"  
"OP8\_F13\_00796" 27284 "s59E5H2" 1.889582 "hypothetical protein"  
"OP8\_F13\_00796" 27284 "s63E6H2" 0 "hypothetical protein"  
"OP8\_F13\_00797" 27285 "s59E13H2" 0.003541805 "Thiamine biosynthesis lipoprotein ApbE precursor"  
"OP8\_F13\_00797" 27285 "s59E25H2" 0.50409 "Thiamine biosynthesis lipoprotein ApbE precursor"  
"OP8\_F13\_00797" 27285 "s59E5H2" 1.940302 "Thiamine biosynthesis lipoprotein ApbE precursor"  
"OP8\_F13\_00797" 27285 "s63E6H2" 0 "Thiamine biosynthesis lipoprotein ApbE precursor"  
"OP8\_F13\_00798" 27286 "s59E13H2" 0.003618429 "Inosose dehydratase"  
"OP8\_F13\_00798" 27286 "s59E25H2" 0 "Inosose dehydratase"  
"OP8\_F13\_00798" 27286 "s59E5H2" 2.117553 "Inosose dehydratase"  
"OP8\_F13\_00798" 27286 "s63E6H2" 0 "Inosose dehydratase"  
"OP8\_F13\_00799" 27287 "s59E13H2" 0.01215456 "putative oxidoreductase YcjS"  
"OP8\_F13\_00799" 27287 "s59E25H2" 0 "putative oxidoreductase YcjS"  
"OP8\_F13\_00799" 27287 "s59E5H2" 1.628726 "putative oxidoreductase YcjS"  
"OP8\_F13\_00799" 27287 "s63E6H2" 0 "putative oxidoreductase YcjS"  
"OP8\_F13\_00800" 27288 "s59E13H2" 0.006846485 "hypothetical protein"  
"OP8\_F13\_00800" 27288 "s59E25H2" 0 "hypothetical protein"  
"OP8\_F13\_00800" 27288 "s59E5H2" 1.646158 "hypothetical protein"  
"OP8\_F13\_00800" 27288 "s63E6H2" 0 "hypothetical protein"

"OP8\_F13\_00801" 27289 "s59E13H2" 0.1228821 "Ribosomal silencing factor RsfS"  
"OP8\_F13\_00801" 27289 "s59E25H2" 0 "Ribosomal silencing factor RsfS"  
"OP8\_F13\_00801" 27289 "s59E5H2" 0.2030825 "Ribosomal silencing factor RsfS"  
"OP8\_F13\_00801" 27289 "s63E6H2" 0 "Ribosomal silencing factor RsfS"  
"OP8\_F13\_00802" 27290 "s59E13H2" 0.3809378 "putative nicotinate-nucleotide adenyltransferase"  
"OP8\_F13\_00802" 27290 "s59E25H2" 0 "putative nicotinate-nucleotide adenyltransferase"  
"OP8\_F13\_00802" 27290 "s59E5H2" 0.2461864 "putative nicotinate-nucleotide adenyltransferase"  
"OP8\_F13\_00802" 27290 "s63E6H2" 0 "putative nicotinate-nucleotide adenyltransferase"  
"OP8\_F13\_00803" 27291 "s59E13H2" 0.3791864 "GTPase Obg"  
"OP8\_F13\_00803" 27291 "s59E25H2" 0 "GTPase Obg"  
"OP8\_F13\_00803" 27291 "s59E5H2" 1.188668 "GTPase Obg"  
"OP8\_F13\_00803" 27291 "s63E6H2" 0 "GTPase Obg"  
"OP8\_F13\_00804" 27292 "s59E13H2" 0 "50S ribosomal protein L27"  
"OP8\_F13\_00804" 27292 "s59E25H2" 0 "50S ribosomal protein L27"  
"OP8\_F13\_00804" 27292 "s59E5H2" 3.471829 "50S ribosomal protein L27"  
"OP8\_F13\_00804" 27292 "s63E6H2" 0 "50S ribosomal protein L27"  
"OP8\_F13\_00805" 27293 "s59E13H2" 0 "50S ribosomal protein L21"  
"OP8\_F13\_00805" 27293 "s59E25H2" 0 "50S ribosomal protein L21"  
"OP8\_F13\_00805" 27293 "s59E5H2" 2.429262 "50S ribosomal protein L21"  
"OP8\_F13\_00805" 27293 "s63E6H2" 0 "50S ribosomal protein L21"  
"OP8\_F13\_00807" 27295 "s59E13H2" 0.002531612 "Cyclic di-GMP phosphodiesterase response regulator RpfG"  
"OP8\_F13\_00807" 27295 "s59E25H2" 0 "Cyclic di-GMP phosphodiesterase response regulator RpfG"  
"OP8\_F13\_00807" 27295 "s59E5H2" 3.337583 "Cyclic di-GMP phosphodiesterase response regulator RpfG"  
"OP8\_F13\_00807" 27295 "s63E6H2" 0 "Cyclic di-GMP phosphodiesterase response regulator RpfG"  
"OP8\_F13\_00808" 27296 "s59E13H2" 0.003339439 "Mannosylglycerate hydrolase"  
"OP8\_F13\_00808" 27296 "s59E25H2" 0.1509946 "Mannosylglycerate hydrolase"  
"OP8\_F13\_00808" 27296 "s59E5H2" 4.431476 "Mannosylglycerate hydrolase"  
"OP8\_F13\_00808" 27296 "s63E6H2" 0.0002803289 "Mannosylglycerate hydrolase"  
"OP8\_F13\_00811" 27299 "s59E13H2" 0.004999962 "hypothetical protein"  
"OP8\_F13\_00811" 27299 "s59E25H2" 0 "hypothetical protein"  
"OP8\_F13\_00811" 27299 "s59E5H2" 4.186316 "hypothetical protein"  
"OP8\_F13\_00811" 27299 "s63E6H2" 0 "hypothetical protein"  
"OP8\_F13\_00812" 27300 "s59E13H2" 0.01292013 "Sulfite exporter TauE/SafE"  
"OP8\_F13\_00812" 27300 "s59E25H2" 0 "Sulfite exporter TauE/SafE"  
"OP8\_F13\_00812" 27300 "s59E5H2" 3.613881 "Sulfite exporter TauE/SafE"  
"OP8\_F13\_00812" 27300 "s63E6H2" 0 "Sulfite exporter TauE/SafE"  
"OP8\_F13\_00813" 27301 "s59E13H2" 0.004433407 "HTH-type transcriptional regulator CymR"  
"OP8\_F13\_00813" 27301 "s59E25H2" 0 "HTH-type transcriptional regulator CymR"  
"OP8\_F13\_00813" 27301 "s59E5H2" 3.470005 "HTH-type transcriptional regulator CymR"  
"OP8\_F13\_00813" 27301 "s63E6H2" 0 "HTH-type transcriptional regulator CymR"  
"OP8\_F13\_00814" 27302 "s59E13H2" 0.0022128 "Ubiquinone biosynthesis O-methyltransferase"  
"OP8\_F13\_00814" 27302 "s59E25H2" 0 "Ubiquinone biosynthesis O-methyltransferase"  
"OP8\_F13\_00814" 27302 "s59E5H2" 2.631476 "Ubiquinone biosynthesis O-methyltransferase"  
"OP8\_F13\_00814" 27302 "s63E6H2" 0 "Ubiquinone biosynthesis O-methyltransferase"  
"OP8\_F13\_00815" 27303 "s59E13H2" 0.009281904 "Decaprenyl-phosphate phosphoribosyltransferase"  
"OP8\_F13\_00815" 27303 "s59E25H2" 0 "Decaprenyl-phosphate phosphoribosyltransferase"  
"OP8\_F13\_00815" 27303 "s59E5H2" 2.380767 "Decaprenyl-phosphate phosphoribosyltransferase"



"OP8\_F13\_00815" 27303 "s63E6H2" 0 "Decaprenyl-phosphate phosphoribosyltransferase"  
"OP8\_F13\_00816" 27304 "s59E13H2" 0.01531309 "putative Mg(2+) transport ATPase"  
"OP8\_F13\_00816" 27304 "s59E25H2" 0 "putative Mg(2+) transport ATPase"  
"OP8\_F13\_00816" 27304 "s59E5H2" 2.860252 "putative Mg(2+) transport ATPase"  
"OP8\_F13\_00816" 27304 "s63E6H2" 0 "putative Mg(2+) transport ATPase"  
"OP8\_F13\_00817" 27305 "s59E13H2" 0.002760156 "Non-canonical purine NTP pyrophosphatase"  
"OP8\_F13\_00817" 27305 "s59E25H2" 0 "Non-canonical purine NTP pyrophosphatase"  
"OP8\_F13\_00817" 27305 "s59E5H2" 3.401762 "Non-canonical purine NTP pyrophosphatase"  
"OP8\_F13\_00817" 27305 "s63E6H2" 0 "Non-canonical purine NTP pyrophosphatase"  
"OP8\_F13\_00818" 27306 "s59E13H2" 0.00693372 "ComE operon protein 1"  
"OP8\_F13\_00818" 27306 "s59E25H2" 0 "ComE operon protein 1"  
"OP8\_F13\_00818" 27306 "s59E5H2" 4.410305 "ComE operon protein 1"  
"OP8\_F13\_00818" 27306 "s63E6H2" 0 "ComE operon protein 1"  
"OP8\_F13\_00819" 27307 "s59E13H2" 0.00932128 "Tyrosine recombinase XerC"  
"OP8\_F13\_00819" 27307 "s59E25H2" 0 "Tyrosine recombinase XerC"  
"OP8\_F13\_00819" 27307 "s59E5H2" 3.765244 "Tyrosine recombinase XerC"  
"OP8\_F13\_00819" 27307 "s63E6H2" 0 "Tyrosine recombinase XerC"  
"OP8\_F13\_00820" 27308 "s59E13H2" 0.008428468 "DNA topoisomerase 1"  
"OP8\_F13\_00820" 27308 "s59E25H2" 0 "DNA topoisomerase 1"  
"OP8\_F13\_00820" 27308 "s59E5H2" 3.090804 "DNA topoisomerase 1"  
"OP8\_F13\_00820" 27308 "s63E6H2" 0 "DNA topoisomerase 1"  
"OP8\_F13\_00821" 27309 "s59E13H2" 0.009489506 "hypothetical protein"  
"OP8\_F13\_00821" 27309 "s59E25H2" 0 "hypothetical protein"  
"OP8\_F13\_00821" 27309 "s59E5H2" 2.403352 "hypothetical protein"  
"OP8\_F13\_00821" 27309 "s63E6H2" 0 "hypothetical protein"  
"OP8\_F13\_00822" 27310 "s59E13H2" 0.004186016 "Universal stress protein"  
"OP8\_F13\_00822" 27310 "s59E25H2" 0 "Universal stress protein"  
"OP8\_F13\_00822" 27310 "s59E5H2" 1.927038 "Universal stress protein"  
"OP8\_F13\_00822" 27310 "s63E6H2" 0 "Universal stress protein"  
"OP8\_F13\_00823" 27311 "s59E13H2" 0.01594697 "hypothetical protein"  
"OP8\_F13\_00823" 27311 "s59E25H2" 0 "hypothetical protein"  
"OP8\_F13\_00823" 27311 "s59E5H2" 1.626643 "hypothetical protein"  
"OP8\_F13\_00823" 27311 "s63E6H2" 0 "hypothetical protein"  
"OP8\_F13\_00825" 27313 "s59E13H2" 0.01496506 "hypothetical protein"  
"OP8\_F13\_00825" 27313 "s59E25H2" 0 "hypothetical protein"  
"OP8\_F13\_00825" 27313 "s59E5H2" 1.361982 "hypothetical protein"  
"OP8\_F13\_00825" 27313 "s63E6H2" 0 "hypothetical protein"  
"OP8\_F13\_00826" 27314 "s59E13H2" 0.006732909 "YHS domain protein"  
"OP8\_F13\_00826" 27314 "s59E25H2" 0 "YHS domain protein"  
"OP8\_F13\_00826" 27314 "s59E5H2" 1.558677 "YHS domain protein"  
"OP8\_F13\_00826" 27314 "s63E6H2" 0 "YHS domain protein"  
"OP8\_F13\_00827" 27315 "s59E13H2" 0.007391697 "hypothetical protein"  
"OP8\_F13\_00827" 27315 "s59E25H2" 0 "hypothetical protein"  
"OP8\_F13\_00827" 27315 "s59E5H2" 1.992229 "hypothetical protein"  
"OP8\_F13\_00827" 27315 "s63E6H2" 0 "hypothetical protein"  
"OP8\_F13\_00828" 27316 "s59E13H2" 0.00680748 "Outer membrane porin F precursor"  
"OP8\_F13\_00828" 27316 "s59E25H2" 0 "Outer membrane porin F precursor"

"OP8\_F13\_00828" 27316 "s59E5H2" 1.446947 "Outer membrane porin F precursor"  
"OP8\_F13\_00828" 27316 "s63E6H2" 0.08164471 "Outer membrane porin F precursor"  
"OP8\_F13\_00829" 27317 "s59E13H2" 0.001519455 "hypothetical protein"  
"OP8\_F13\_00829" 27317 "s59E25H2" 0 "hypothetical protein"  
"OP8\_F13\_00829" 27317 "s59E5H2" 0.4243552 "hypothetical protein"  
"OP8\_F13\_00829" 27317 "s63E6H2" 0 "hypothetical protein"  
"OP8\_F13\_00830" 27318 "s59E13H2" 0 "hypothetical protein"  
"OP8\_F13\_00830" 27318 "s59E25H2" 0 "hypothetical protein"  
"OP8\_F13\_00830" 27318 "s59E5H2" 0.194203 "hypothetical protein"  
"OP8\_F13\_00830" 27318 "s63E6H2" 0 "hypothetical protein"  
"OP8\_F13\_00831" 27319 "s59E13H2" 0.003297466 "hypothetical protein"  
"OP8\_F13\_00831" 27319 "s59E25H2" 0 "hypothetical protein"  
"OP8\_F13\_00831" 27319 "s59E5H2" 0.06993061 "hypothetical protein"  
"OP8\_F13\_00831" 27319 "s63E6H2" 0 "hypothetical protein"  
"OP8\_F13\_00832" 27320 "s59E13H2" 0.442286 "hypothetical protein"  
"OP8\_F13\_00832" 27320 "s59E25H2" 0.09944312 "hypothetical protein"  
"OP8\_F13\_00832" 27320 "s59E5H2" 0.3033993 "hypothetical protein"  
"OP8\_F13\_00832" 27320 "s63E6H2" 0 "hypothetical protein"  
"OP8\_F13\_00833" 27321 "s59E13H2" 23.94624 "hypothetical protein"  
"OP8\_F13\_00833" 27321 "s59E25H2" 0.5306122 "hypothetical protein"  
"OP8\_F13\_00833" 27321 "s59E5H2" 8.803247 "hypothetical protein"  
"OP8\_F13\_00833" 27321 "s63E6H2" 0 "hypothetical protein"  
"OP8\_F13\_00834" 27322 "s59E13H2" 0.6317567 "Type II secretion system protein G precursor"  
"OP8\_F13\_00834" 27322 "s59E25H2" 0 "Type II secretion system protein G precursor"  
"OP8\_F13\_00834" 27322 "s59E5H2" 1.74154 "Type II secretion system protein G precursor"  
"OP8\_F13\_00834" 27322 "s63E6H2" 0 "Type II secretion system protein G precursor"  
"OP8\_F13\_00835" 27323 "s59E13H2" 0.7063504 "hypothetical protein"  
"OP8\_F13\_00835" 27323 "s59E25H2" 0 "hypothetical protein"  
"OP8\_F13\_00835" 27323 "s59E5H2" 1.425632 "hypothetical protein"  
"OP8\_F13\_00835" 27323 "s63E6H2" 0 "hypothetical protein"  
"OP8\_F13\_00836" 27324 "s59E13H2" 0.4764549 "Polyribonucleotide nucleotidyltransferase"  
"OP8\_F13\_00836" 27324 "s59E25H2" 0 "Polyribonucleotide nucleotidyltransferase"  
"OP8\_F13\_00836" 27324 "s59E5H2" 0.4511218 "Polyribonucleotide nucleotidyltransferase"  
"OP8\_F13\_00836" 27324 "s63E6H2" 0 "Polyribonucleotide nucleotidyltransferase"  
"OP8\_F13\_00837" 27325 "s59E13H2" 0.3580958 "30S ribosomal protein S15"  
"OP8\_F13\_00837" 27325 "s59E25H2" 0 "30S ribosomal protein S15"  
"OP8\_F13\_00837" 27325 "s59E5H2" 0.4306128 "30S ribosomal protein S15"  
"OP8\_F13\_00837" 27325 "s63E6H2" 0 "30S ribosomal protein S15"  
"OP8\_F13\_00838" 27326 "s59E13H2" 0.2842752 "hypothetical protein"  
"OP8\_F13\_00838" 27326 "s59E25H2" 0 "hypothetical protein"  
"OP8\_F13\_00838" 27326 "s59E5H2" 0.2610191 "hypothetical protein"  
"OP8\_F13\_00838" 27326 "s63E6H2" 0 "hypothetical protein"  
"OP8\_F13\_00839" 27327 "s59E13H2" 0.1447713 "hypothetical protein"  
"OP8\_F13\_00839" 27327 "s59E25H2" 0 "hypothetical protein"  
"OP8\_F13\_00839" 27327 "s59E5H2" 2.312119 "hypothetical protein"  
"OP8\_F13\_00839" 27327 "s63E6H2" 0 "hypothetical protein"  
"OP8\_F13\_00840" 27328 "s59E13H2" 0.2500132 "Transcriptional regulatory protein ZraR"

"OP8\_F13\_00840" 27328 "s59E25H2" 0 "Transcriptional regulatory protein ZraR"  
"OP8\_F13\_00840" 27328 "s59E5H2" 1.97482 "Transcriptional regulatory protein ZraR"  
"OP8\_F13\_00840" 27328 "s63E6H2" 0 "Transcriptional regulatory protein ZraR"  
"OP8\_F13\_00841" 27329 "s59E13H2" 0.003355051 "Sporulation initiation inhibitor protein Soj"  
"OP8\_F13\_00841" 27329 "s59E25H2" 0 "Sporulation initiation inhibitor protein Soj"  
"OP8\_F13\_00841" 27329 "s59E5H2" 0.3726791 "Sporulation initiation inhibitor protein Soj"  
"OP8\_F13\_00841" 27329 "s63E6H2" 0 "Sporulation initiation inhibitor protein Soj"  
"OP8\_F13\_00842" 27330 "s59E13H2" 0.005426349 "Chromosome-partitioning protein Spo0J"  
"OP8\_F13\_00842" 27330 "s59E25H2" 0 "Chromosome-partitioning protein Spo0J"  
"OP8\_F13\_00842" 27330 "s59E5H2" 0.4188414 "Chromosome-partitioning protein Spo0J"  
"OP8\_F13\_00842" 27330 "s63E6H2" 0 "Chromosome-partitioning protein Spo0J"  
"OP8\_F13\_00843" 27331 "s59E13H2" 0.0009206484 "hypothetical protein"  
"OP8\_F13\_00843" 27331 "s59E25H2" 0 "hypothetical protein"  
"OP8\_F13\_00843" 27331 "s59E5H2" 0.1723996 "hypothetical protein"  
"OP8\_F13\_00843" 27331 "s63E6H2" 0 "hypothetical protein"  
"OP8\_F13\_00844" 27332 "s59E13H2" 0.00245578 "Cyclic di-GMP phosphodiesterase response regulator RpfG"  
"OP8\_F13\_00844" 27332 "s59E25H2" 0 "Cyclic di-GMP phosphodiesterase response regulator RpfG"  
"OP8\_F13\_00844" 27332 "s59E5H2" 0.6901354 "Cyclic di-GMP phosphodiesterase response regulator RpfG"  
"OP8\_F13\_00844" 27332 "s63E6H2" 0 "Cyclic di-GMP phosphodiesterase response regulator RpfG"  
"OP8\_F13\_00845" 27333 "s59E13H2" 0 "Type I phosphodiesterase / nucleotide pyrophosphatase"  
"OP8\_F13\_00845" 27333 "s59E25H2" 0 "Type I phosphodiesterase / nucleotide pyrophosphatase"  
"OP8\_F13\_00845" 27333 "s59E5H2" 1.049947 "Type I phosphodiesterase / nucleotide pyrophosphatase"  
"OP8\_F13\_00845" 27333 "s63E6H2" 0.00283794 "Type I phosphodiesterase / nucleotide pyrophosphatase"  
"OP8\_F13\_00846" 27334 "s59E13H2" 11.38117 "2,3-bisphosphoglycerate-independent phosphoglycerate mutase"  
"OP8\_F13\_00846" 27334 "s59E25H2" 0.2313398 "2,3-bisphosphoglycerate-independent phosphoglycerate mutase"  
"OP8\_F13\_00846" 27334 "s59E5H2" 0.8473242 "2,3-bisphosphoglycerate-independent phosphoglycerate mutase"  
"OP8\_F13\_00846" 27334 "s63E6H2" 0.004185325 "2,3-bisphosphoglycerate-independent phosphoglycerate mutase"  
"OP8\_F13\_00847" 27335 "s59E13H2" 22.37934 "Type I phosphodiesterase / nucleotide pyrophosphatase"  
"OP8\_F13\_00847" 27335 "s59E25H2" 0.1037261 "Type I phosphodiesterase / nucleotide pyrophosphatase"  
"OP8\_F13\_00847" 27335 "s59E5H2" 1.81884 "Type I phosphodiesterase / nucleotide pyrophosphatase"  
"OP8\_F13\_00847" 27335 "s63E6H2" 0.003336569 "Type I phosphodiesterase / nucleotide pyrophosphatase"  
"OP8\_F13\_00849" 27337 "s59E13H2" 25.62531 "hypothetical protein"  
"OP8\_F13\_00849" 27337 "s59E25H2" 0 "hypothetical protein"  
"OP8\_F13\_00849" 27337 "s59E5H2" 1.55846 "hypothetical protein"  
"OP8\_F13\_00849" 27337 "s63E6H2" 0.001864903 "hypothetical protein"  
"OP8\_F13\_00850" 27338 "s59E13H2" 26.98338 "Capreomycin synthase"  
"OP8\_F13\_00850" 27338 "s59E25H2" 0 "Capreomycin synthase"  
"OP8\_F13\_00850" 27338 "s59E5H2" 1.457763 "Capreomycin synthase"  
"OP8\_F13\_00850" 27338 "s63E6H2" 0.00582871 "Capreomycin synthase"  
"OP8\_F13\_00851" 27339 "s59E13H2" 0 "hypothetical protein"  
"OP8\_F13\_00851" 27339 "s59E25H2" 0 "hypothetical protein"  
"OP8\_F13\_00851" 27339 "s59E5H2" 0.2673977 "hypothetical protein"  
"OP8\_F13\_00851" 27339 "s63E6H2" 0 "hypothetical protein"  
"OP8\_F13\_00852" 27340 "s59E13H2" 0 "ABC-2 family transporter protein"  
"OP8\_F13\_00852" 27340 "s59E25H2" 0 "ABC-2 family transporter protein"  
"OP8\_F13\_00852" 27340 "s59E5H2" 0.4203514 "ABC-2 family transporter protein"  
"OP8\_F13\_00852" 27340 "s63E6H2" 0 "ABC-2 family transporter protein"

"OP8\_F13\_00853" 27341 "s59E13H2" 0 "putative ABC transporter ATP-binding protein YxIF"  
"OP8\_F13\_00853" 27341 "s59E25H2" 0 "putative ABC transporter ATP-binding protein YxIF"  
"OP8\_F13\_00853" 27341 "s59E5H2" 0.6047483 "putative ABC transporter ATP-binding protein YxIF"  
"OP8\_F13\_00853" 27341 "s63E6H2" 0 "putative ABC transporter ATP-binding protein YxIF"  
"OP8\_F13\_00854" 27342 "s59E13H2" 0 "hypothetical protein"  
"OP8\_F13\_00854" 27342 "s59E25H2" 0 "hypothetical protein"  
"OP8\_F13\_00854" 27342 "s59E5H2" 0.6449975 "hypothetical protein"  
"OP8\_F13\_00854" 27342 "s63E6H2" 0 "hypothetical protein"  
"OP8\_F13\_00855" 27343 "s59E13H2" 0 "hypothetical protein"  
"OP8\_F13\_00855" 27343 "s59E25H2" 0 "hypothetical protein"  
"OP8\_F13\_00855" 27343 "s59E5H2" 0.5175848 "hypothetical protein"  
"OP8\_F13\_00855" 27343 "s63E6H2" 0 "hypothetical protein"  
"OP8\_F13\_00857" 27345 "s59E13H2" 0.03551216 "hypothetical protein"  
"OP8\_F13\_00857" 27345 "s59E25H2" 0 "hypothetical protein"  
"OP8\_F13\_00857" 27345 "s59E5H2" 2.72141 "hypothetical protein"  
"OP8\_F13\_00857" 27345 "s63E6H2" 0 "hypothetical protein"  
"OP8\_F13\_00858" 27346 "s59E13H2" 0.1950371 "transposase/IS protein"  
"OP8\_F13\_00858" 27346 "s59E25H2" 0 "transposase/IS protein"  
"OP8\_F13\_00858" 27346 "s59E5H2" 1.461889 "transposase/IS protein"  
"OP8\_F13\_00858" 27346 "s63E6H2" 0 "transposase/IS protein"  
"OP8\_F13\_00859" 27347 "s59E13H2" 0.09394233 "Integrase core domain protein"  
"OP8\_F13\_00859" 27347 "s59E25H2" 0 "Integrase core domain protein"  
"OP8\_F13\_00859" 27347 "s59E5H2" 1.652678 "Integrase core domain protein"  
"OP8\_F13\_00859" 27347 "s63E6H2" 0 "Integrase core domain protein"  
"OP8\_F13\_00862" 27350 "s59E13H2" 0 "hypothetical protein"  
"OP8\_F13\_00862" 27350 "s59E25H2" 0 "hypothetical protein"  
"OP8\_F13\_00862" 27350 "s59E5H2" 0.3555847 "hypothetical protein"  
"OP8\_F13\_00862" 27350 "s63E6H2" 0 "hypothetical protein"  
"OP8\_F13\_00865" 27353 "s59E13H2" 0.1866324 "hypothetical protein"  
"OP8\_F13\_00865" 27353 "s59E25H2" 0 "hypothetical protein"  
"OP8\_F13\_00865" 27353 "s59E5H2" 1.356817 "hypothetical protein"  
"OP8\_F13\_00865" 27353 "s63E6H2" 0 "hypothetical protein"  
"OP8\_F13\_00869" 27357 "s59E13H2" 0.1138847 "Transcriptional regulatory protein ZraR"  
"OP8\_F13\_00869" 27357 "s59E25H2" 0 "Transcriptional regulatory protein ZraR"  
"OP8\_F13\_00869" 27357 "s59E5H2" 1.082194 "Transcriptional regulatory protein ZraR"  
"OP8\_F13\_00869" 27357 "s63E6H2" 0 "Transcriptional regulatory protein ZraR"  
"OP8\_F13\_00870" 27358 "s59E13H2" 0 "Peptidase M16 inactive domain protein"  
"OP8\_F13\_00870" 27358 "s59E25H2" 0 "Peptidase M16 inactive domain protein"  
"OP8\_F13\_00870" 27358 "s59E5H2" 0.8838185 "Peptidase M16 inactive domain protein"  
"OP8\_F13\_00870" 27358 "s63E6H2" 0 "Peptidase M16 inactive domain protein"  
"OP8\_F13\_00871" 27359 "s59E13H2" 0.04020723 "Peptidase M16 inactive domain protein"  
"OP8\_F13\_00871" 27359 "s59E25H2" 0 "Peptidase M16 inactive domain protein"  
"OP8\_F13\_00871" 27359 "s59E5H2" 3.821968 "Peptidase M16 inactive domain protein"  
"OP8\_F13\_00871" 27359 "s63E6H2" 0 "Peptidase M16 inactive domain protein"  
"OP8\_F13\_00873" 27361 "s59E13H2" 0.001919467 "translocation protein TolB"  
"OP8\_F13\_00873" 27361 "s59E25H2" 0 "translocation protein TolB"  
"OP8\_F13\_00873" 27361 "s59E5H2" 0.1299937 "translocation protein TolB"

"OP8\_F13\_00873" 27361 "s63E6H2" 0 "translocation protein TolB"  
"OP8\_F13\_00874" 27362 "s59E13H2" 0.009523428 "Toxin RelG"  
"OP8\_F13\_00874" 27362 "s59E25H2" 0 "Toxin RelG"  
"OP8\_F13\_00874" 27362 "s59E5H2" 0.07617771 "Toxin RelG"  
"OP8\_F13\_00874" 27362 "s63E6H2" 0 "Toxin RelG"  
"OP8\_F13\_00875" 27363 "s59E13H2" 0.01784487 "Antitoxin RelB"  
"OP8\_F13\_00875" 27363 "s59E25H2" 0 "Antitoxin RelB"  
"OP8\_F13\_00875" 27363 "s59E5H2" 0.09490239 "Antitoxin RelB"  
"OP8\_F13\_00875" 27363 "s63E6H2" 0 "Antitoxin RelB"  
"OP8\_F13\_00876" 27364 "s59E13H2" 0.1296804 "Lipoprotein-releasing system transmembrane protein LolE"  
"OP8\_F13\_00876" 27364 "s59E25H2" 0 "Lipoprotein-releasing system transmembrane protein LolE"  
"OP8\_F13\_00876" 27364 "s59E5H2" 2.939532 "Lipoprotein-releasing system transmembrane protein LolE"  
"OP8\_F13\_00876" 27364 "s63E6H2" 0 "Lipoprotein-releasing system transmembrane protein LolE"  
"OP8\_F13\_00877" 27365 "s59E13H2" 0.1313362 "Lipoprotein-releasing system ATP-binding protein LolD"  
"OP8\_F13\_00877" 27365 "s59E25H2" 0 "Lipoprotein-releasing system ATP-binding protein LolD"  
"OP8\_F13\_00877" 27365 "s59E5H2" 3.158928 "Lipoprotein-releasing system ATP-binding protein LolD"  
"OP8\_F13\_00877" 27365 "s63E6H2" 0 "Lipoprotein-releasing system ATP-binding protein LolD"  
"OP8\_F13\_00878" 27366 "s59E13H2" 0.3162933 "Outer membrane protein assembly factor BamA precursor"  
"OP8\_F13\_00878" 27366 "s59E25H2" 0 "Outer membrane protein assembly factor BamA precursor"  
"OP8\_F13\_00878" 27366 "s59E5H2" 4.5443 "Outer membrane protein assembly factor BamA precursor"  
"OP8\_F13\_00878" 27366 "s63E6H2" 0 "Outer membrane protein assembly factor BamA precursor"  
"OP8\_F13\_00879" 27367 "s59E13H2" 0.4674802 "periplasmic chaperone"  
"OP8\_F13\_00879" 27367 "s59E25H2" 0 "periplasmic chaperone"  
"OP8\_F13\_00879" 27367 "s59E5H2" 5.645436 "periplasmic chaperone"  
"OP8\_F13\_00879" 27367 "s63E6H2" 0 "periplasmic chaperone"  
"OP8\_F13\_00880" 27368 "s59E13H2" 0.4175094 "3-hydroxyacyl-[acyl-carrier-protein] dehydratase FabZ"  
"OP8\_F13\_00880" 27368 "s59E25H2" 0 "3-hydroxyacyl-[acyl-carrier-protein] dehydratase FabZ"  
"OP8\_F13\_00880" 27368 "s59E5H2" 5.623512 "3-hydroxyacyl-[acyl-carrier-protein] dehydratase FabZ"  
"OP8\_F13\_00880" 27368 "s63E6H2" 0 "3-hydroxyacyl-[acyl-carrier-protein] dehydratase FabZ"  
"OP8\_F13\_00881" 27369 "s59E13H2" 0.5892778 "Acyl-[acyl-carrier-protein]--UDP-N-acetylglucosamine O-acyltransferase"  
"OP8\_F13\_00881" 27369 "s59E25H2" 0 "Acyl-[acyl-carrier-protein]--UDP-N-acetylglucosamine O-acyltransferase"  
"OP8\_F13\_00881" 27369 "s59E5H2" 6.299781 "Acyl-[acyl-carrier-protein]--UDP-N-acetylglucosamine O-acyltransferase"  
"OP8\_F13\_00881" 27369 "s63E6H2" 0 "Acyl-[acyl-carrier-protein]--UDP-N-acetylglucosamine O-acyltransferase"  
"OP8\_F13\_00882" 27370 "s59E13H2" 0.9349735 "hypothetical protein"  
"OP8\_F13\_00882" 27370 "s59E25H2" 0 "hypothetical protein"  
"OP8\_F13\_00882" 27370 "s59E5H2" 7.329901 "hypothetical protein"  
"OP8\_F13\_00882" 27370 "s63E6H2" 0 "hypothetical protein"  
"OP8\_F13\_00883" 27371 "s59E13H2" 1.234249 "Putative oxidoreductase YceM"  
"OP8\_F13\_00883" 27371 "s59E25H2" 0 "Putative oxidoreductase YceM"  
"OP8\_F13\_00883" 27371 "s59E5H2" 10.21832 "Putative oxidoreductase YceM"  
"OP8\_F13\_00883" 27371 "s63E6H2" 0 "Putative oxidoreductase YceM"  
"OP8\_F13\_00884" 27372 "s59E13H2" 0.601436 "hypothetical protein"  
"OP8\_F13\_00884" 27372 "s59E25H2" 0 "hypothetical protein"  
"OP8\_F13\_00884" 27372 "s59E5H2" 7.688536 "hypothetical protein"  
"OP8\_F13\_00884" 27372 "s63E6H2" 0 "hypothetical protein"  
"OP8\_F13\_00885" 27373 "s59E13H2" 5.035015 "S-adenosylmethionine synthase"  
"OP8\_F13\_00885" 27373 "s59E25H2" 0 "S-adenosylmethionine synthase"

"OP8\_F13\_00885" 27373 "s59E5H2" 5.136716 "S-adenosylmethionine synthase"  
"OP8\_F13\_00885" 27373 "s63E6H2" 0 "S-adenosylmethionine synthase"  
"OP8\_F13\_00886" 27374 "s59E13H2" 9.484003 "Adenosylhomocysteinase"  
"OP8\_F13\_00886" 27374 "s59E25H2" 0.1567224 "Adenosylhomocysteinase"  
"OP8\_F13\_00886" 27374 "s59E5H2" 9.150652 "Adenosylhomocysteinase"  
"OP8\_F13\_00886" 27374 "s63E6H2" 0 "Adenosylhomocysteinase"  
"OP8\_F13\_00887" 27375 "s59E13H2" 10.62408 "Cellulose synthase operon protein C precursor"  
"OP8\_F13\_00887" 27375 "s59E25H2" 0 "Cellulose synthase operon protein C precursor"  
"OP8\_F13\_00887" 27375 "s59E5H2" 9.572825 "Cellulose synthase operon protein C precursor"  
"OP8\_F13\_00887" 27375 "s63E6H2" 0 "Cellulose synthase operon protein C precursor"  
"OP8\_F13\_00888" 27376 "s59E13H2" 9.002675 "Glycerol-3-phosphate dehydrogenase [NAD(P)+]"  
"OP8\_F13\_00888" 27376 "s59E25H2" 0.1147705 "Glycerol-3-phosphate dehydrogenase [NAD(P)+]"  
"OP8\_F13\_00888" 27376 "s59E5H2" 7.347264 "Glycerol-3-phosphate dehydrogenase [NAD(P)+]"  
"OP8\_F13\_00888" 27376 "s63E6H2" 0 "Glycerol-3-phosphate dehydrogenase [NAD(P)+]"  
"OP8\_F13\_00889" 27377 "s59E13H2" 9.435503 "putative glycerol-3-phosphate acyltransferase"  
"OP8\_F13\_00889" 27377 "s59E25H2" 0.2368866 "putative glycerol-3-phosphate acyltransferase"  
"OP8\_F13\_00889" 27377 "s59E5H2" 7.43836 "putative glycerol-3-phosphate acyltransferase"  
"OP8\_F13\_00889" 27377 "s63E6H2" 0 "putative glycerol-3-phosphate acyltransferase"  
"OP8\_F13\_00890" 27378 "s59E13H2" 8.710234 "2'-5'-RNA ligase"  
"OP8\_F13\_00890" 27378 "s59E25H2" 0 "2'-5'-RNA ligase"  
"OP8\_F13\_00890" 27378 "s59E5H2" 9.408238 "2'-5'-RNA ligase"  
"OP8\_F13\_00890" 27378 "s63E6H2" 0 "2'-5'-RNA ligase"  
"OP8\_F13\_00891" 27379 "s59E13H2" 7.752016 "Putative competence-damage inducible protein"  
"OP8\_F13\_00891" 27379 "s59E25H2" 0 "Putative competence-damage inducible protein"  
"OP8\_F13\_00891" 27379 "s59E5H2" 12.43988 "Putative competence-damage inducible protein"  
"OP8\_F13\_00891" 27379 "s63E6H2" 0 "Putative competence-damage inducible protein"  
"OP8\_F13\_00892" 27380 "s59E13H2" 7.919925 "Phosphatidylglycerophosphatase A"  
"OP8\_F13\_00892" 27380 "s59E25H2" 0 "Phosphatidylglycerophosphatase A"  
"OP8\_F13\_00892" 27380 "s59E5H2" 14.31534 "Phosphatidylglycerophosphatase A"  
"OP8\_F13\_00892" 27380 "s63E6H2" 0 "Phosphatidylglycerophosphatase A"  
"OP8\_F13\_00893" 27381 "s59E13H2" 5.986293 "Ribosomal protein S12 methylthiotransferase RimO"  
"OP8\_F13\_00893" 27381 "s59E25H2" 0 "Ribosomal protein S12 methylthiotransferase RimO"  
"OP8\_F13\_00893" 27381 "s59E5H2" 10.53131 "Ribosomal protein S12 methylthiotransferase RimO"  
"OP8\_F13\_00893" 27381 "s63E6H2" 0 "Ribosomal protein S12 methylthiotransferase RimO"  
"OP8\_F13\_00894" 27382 "s59E13H2" 0 "GalNAc(5)-diNAcBac-PP-undecaprenol beta-1,3-glucosyltransferase"  
"OP8\_F13\_00894" 27382 "s59E25H2" 0 "GalNAc(5)-diNAcBac-PP-undecaprenol beta-1,3-glucosyltransferase"  
"OP8\_F13\_00894" 27382 "s59E5H2" 0.001309318 "GalNAc(5)-diNAcBac-PP-undecaprenol beta-1,3-glucosyltransferase"  
"OP8\_F13\_00894" 27382 "s63E6H2" 0 "GalNAc(5)-diNAcBac-PP-undecaprenol beta-1,3-glucosyltransferase"  
"OP8\_F13\_00895" 27383 "s59E13H2" 0 "hypothetical protein"  
"OP8\_F13\_00895" 27383 "s59E25H2" 0 "hypothetical protein"  
"OP8\_F13\_00895" 27383 "s59E5H2" 2.633209 "hypothetical protein"  
"OP8\_F13\_00895" 27383 "s63E6H2" 0 "hypothetical protein"  
"OP8\_F13\_00897" 27385 "s59E13H2" 0.570512 "6-phosphofructokinase 1"  
"OP8\_F13\_00897" 27385 "s59E25H2" 0 "6-phosphofructokinase 1"  
"OP8\_F13\_00897" 27385 "s59E5H2" 1.529527 "6-phosphofructokinase 1"  
"OP8\_F13\_00897" 27385 "s63E6H2" 0 "6-phosphofructokinase 1"  
"OP8\_F13\_00899" 27387 "s59E13H2" 0.01965692 "hypothetical protein"

"OP8\_F13\_00899" 27387 "s59E25H2" 0 "hypothetical protein"  
"OP8\_F13\_00899" 27387 "s59E5H2" 1.050451 "hypothetical protein"  
"OP8\_F13\_00899" 27387 "s63E6H2" 0 "hypothetical protein"  
"OP8\_F13\_00900" 27388 "s59E13H2" 0.001556103 "Sensor protein ZraS"  
"OP8\_F13\_00900" 27388 "s59E25H2" 0 "Sensor protein ZraS"  
"OP8\_F13\_00900" 27388 "s59E5H2" 0.7872158 "Sensor protein ZraS"  
"OP8\_F13\_00900" 27388 "s63E6H2" 0 "Sensor protein ZraS"  
"OP8\_F13\_00901" 27389 "s59E13H2" 0 "Transcriptional regulatory protein ZraR"  
"OP8\_F13\_00901" 27389 "s59E25H2" 0 "Transcriptional regulatory protein ZraR"  
"OP8\_F13\_00901" 27389 "s59E5H2" 0.613889 "Transcriptional regulatory protein ZraR"  
"OP8\_F13\_00901" 27389 "s63E6H2" 0 "Transcriptional regulatory protein ZraR"  
"OP8\_F13\_00902" 27390 "s59E13H2" 0 "Glutamate dehydrogenase"  
"OP8\_F13\_00902" 27390 "s59E25H2" 0 "Glutamate dehydrogenase"  
"OP8\_F13\_00902" 27390 "s59E5H2" 0.6022612 "Glutamate dehydrogenase"  
"OP8\_F13\_00902" 27390 "s63E6H2" 0.000225591 "Glutamate dehydrogenase"  
"OP8\_F13\_00903" 27391 "s59E13H2" 0.008638155 "Putative zinc metalloprotease"  
"OP8\_F13\_00903" 27391 "s59E25H2" 0 "Putative zinc metalloprotease"  
"OP8\_F13\_00903" 27391 "s59E5H2" 0.5629054 "Putative zinc metalloprotease"  
"OP8\_F13\_00903" 27391 "s63E6H2" 0.001094185 "Putative zinc metalloprotease"  
"OP8\_F13\_00904" 27392 "s59E13H2" 0.009688576 "1-deoxy-D-xylulose 5-phosphate reductoisomerase"  
"OP8\_F13\_00904" 27392 "s59E25H2" 0 "1-deoxy-D-xylulose 5-phosphate reductoisomerase"  
"OP8\_F13\_00904" 27392 "s59E5H2" 0.4568825 "1-deoxy-D-xylulose 5-phosphate reductoisomerase"  
"OP8\_F13\_00904" 27392 "s63E6H2" 0 "1-deoxy-D-xylulose 5-phosphate reductoisomerase"  
"OP8\_F13\_00905" 27393 "s59E13H2" 0.009050858 "Phosphatidate cytidyltransferase"  
"OP8\_F13\_00905" 27393 "s59E25H2" 0 "Phosphatidate cytidyltransferase"  
"OP8\_F13\_00905" 27393 "s59E5H2" 0.3706482 "Phosphatidate cytidyltransferase"  
"OP8\_F13\_00905" 27393 "s63E6H2" 0 "Phosphatidate cytidyltransferase"  
"OP8\_F13\_00906" 27394 "s59E13H2" 0.005689318 "Ditran,polycis-undecaprenyl-diphosphate synthase ((2E,6E)-farnesyl-diphosphate specific)"  
"OP8\_F13\_00906" 27394 "s59E25H2" 0 "Ditran,polycis-undecaprenyl-diphosphate synthase ((2E,6E)-farnesyl-diphosphate specific)"  
"OP8\_F13\_00906" 27394 "s59E5H2" 0.7961208 "Ditran,polycis-undecaprenyl-diphosphate synthase ((2E,6E)-farnesyl-diphosphate specific)"  
"OP8\_F13\_00906" 27394 "s63E6H2" 0 "Ditran,polycis-undecaprenyl-diphosphate synthase ((2E,6E)-farnesyl-diphosphate specific)"  
"OP8\_F13\_00907" 27395 "s59E13H2" 0.06286799 "Bacterial alpha-L-rhamnosidase"  
"OP8\_F13\_00907" 27395 "s59E25H2" 0 "Bacterial alpha-L-rhamnosidase"  
"OP8\_F13\_00907" 27395 "s59E5H2" 1.554237 "Bacterial alpha-L-rhamnosidase"  
"OP8\_F13\_00907" 27395 "s63E6H2" 0 "Bacterial alpha-L-rhamnosidase"  
"OP8\_F13\_00908" 27396 "s59E13H2" 0 "UDP-glucose 6-dehydrogenase TuaD"  
"OP8\_F13\_00908" 27396 "s59E25H2" 0 "UDP-glucose 6-dehydrogenase TuaD"  
"OP8\_F13\_00908" 27396 "s59E5H2" 2.560982 "UDP-glucose 6-dehydrogenase TuaD"  
"OP8\_F13\_00908" 27396 "s63E6H2" 0 "UDP-glucose 6-dehydrogenase TuaD"  
"OP8\_F13\_00909" 27397 "s59E13H2" 0 "putative adenylyl-sulfate kinase"  
"OP8\_F13\_00909" 27397 "s59E25H2" 0 "putative adenylyl-sulfate kinase"  
"OP8\_F13\_00909" 27397 "s59E5H2" 1.330923 "putative adenylyl-sulfate kinase"  
"OP8\_F13\_00909" 27397 "s63E6H2" 0 "putative adenylyl-sulfate kinase"  
"OP8\_F13\_00910" 27398 "s59E13H2" 0.00275439 "Sulfate adenylyltransferase"  
"OP8\_F13\_00910" 27398 "s59E25H2" 0 "Sulfate adenylyltransferase"  
"OP8\_F13\_00910" 27398 "s59E5H2" 0.9064179 "Sulfate adenylyltransferase"  
"OP8\_F13\_00910" 27398 "s63E6H2" 0.0002063466 "Sulfate adenylyltransferase"

"OP8\_F13\_00911" 27399 "s59E13H2" 0 "hypothetical protein"  
"OP8\_F13\_00911" 27399 "s59E25H2" 0 "hypothetical protein"  
"OP8\_F13\_00911" 27399 "s59E5H2" 0.8051827 "hypothetical protein"  
"OP8\_F13\_00911" 27399 "s63E6H2" 0.002223444 "hypothetical protein"  
"OP8\_F13\_00912" 27400 "s59E13H2" 0 "Sulfotransferase domain protein"  
"OP8\_F13\_00912" 27400 "s59E25H2" 0 "Sulfotransferase domain protein"  
"OP8\_F13\_00912" 27400 "s59E5H2" 1.079065 "Sulfotransferase domain protein"  
"OP8\_F13\_00912" 27400 "s63E6H2" 0 "Sulfotransferase domain protein"  
"OP8\_F13\_00913" 27401 "s59E13H2" 0.01070141 "translocation protein TolB"  
"OP8\_F13\_00913" 27401 "s59E25H2" 0 "translocation protein TolB"  
"OP8\_F13\_00913" 27401 "s59E5H2" 0.8906669 "translocation protein TolB"  
"OP8\_F13\_00913" 27401 "s63E6H2" 0 "translocation protein TolB"  
"OP8\_F13\_00914" 27402 "s59E13H2" 3.866336 "Ferredoxin"  
"OP8\_F13\_00914" 27402 "s59E25H2" 0 "Ferredoxin"  
"OP8\_F13\_00914" 27402 "s59E5H2" 5.187287 "Ferredoxin"  
"OP8\_F13\_00914" 27402 "s63E6H2" 0 "Ferredoxin"  
"OP8\_F13\_00915" 27403 "s59E13H2" 3.87317 "Peptidase family M50"  
"OP8\_F13\_00915" 27403 "s59E25H2" 0 "Peptidase family M50"  
"OP8\_F13\_00915" 27403 "s59E5H2" 8.06048 "Peptidase family M50"  
"OP8\_F13\_00915" 27403 "s63E6H2" 0 "Peptidase family M50"  
"OP8\_F13\_00916" 27404 "s59E13H2" 2.521604 "hypothetical protein"  
"OP8\_F13\_00916" 27404 "s59E25H2" 0 "hypothetical protein"  
"OP8\_F13\_00916" 27404 "s59E5H2" 3.44356 "hypothetical protein"  
"OP8\_F13\_00916" 27404 "s63E6H2" 0 "hypothetical protein"  
"OP8\_F13\_00917" 27405 "s59E13H2" 2.473019 "hypothetical protein"  
"OP8\_F13\_00917" 27405 "s59E25H2" 0 "hypothetical protein"  
"OP8\_F13\_00917" 27405 "s59E5H2" 2.100233 "hypothetical protein"  
"OP8\_F13\_00917" 27405 "s63E6H2" 0 "hypothetical protein"  
"OP8\_F13\_00918" 27406 "s59E13H2" 3.130348 "hypothetical protein"  
"OP8\_F13\_00918" 27406 "s59E25H2" 0 "hypothetical protein"  
"OP8\_F13\_00918" 27406 "s59E5H2" 1.851938 "hypothetical protein"  
"OP8\_F13\_00918" 27406 "s63E6H2" 0 "hypothetical protein"  
"OP8\_F13\_00919" 27407 "s59E13H2" 0.02609149 "hypothetical protein"  
"OP8\_F13\_00919" 27407 "s59E25H2" 0 "hypothetical protein"  
"OP8\_F13\_00919" 27407 "s59E5H2" 1.546029 "hypothetical protein"  
"OP8\_F13\_00919" 27407 "s63E6H2" 0 "hypothetical protein"  
"OP8\_F13\_00920" 27408 "s59E13H2" 0 "hypothetical protein"  
"OP8\_F13\_00920" 27408 "s59E25H2" 0 "hypothetical protein"  
"OP8\_F13\_00920" 27408 "s59E5H2" 1.280534 "hypothetical protein"  
"OP8\_F13\_00920" 27408 "s63E6H2" 0 "hypothetical protein"  
"OP8\_F13\_00921" 27409 "s59E13H2" 0 "hypothetical protein"  
"OP8\_F13\_00921" 27409 "s59E25H2" 0 "hypothetical protein"  
"OP8\_F13\_00921" 27409 "s59E5H2" 0.02867075 "hypothetical protein"  
"OP8\_F13\_00921" 27409 "s63E6H2" 0 "hypothetical protein"  
"OP8\_F13\_00924" 27412 "s59E13H2" 0 "molybdenum cofactor biosynthesis protein A"  
"OP8\_F13\_00924" 27412 "s59E25H2" 0 "molybdenum cofactor biosynthesis protein A"  
"OP8\_F13\_00924" 27412 "s59E5H2" 1.031166 "molybdenum cofactor biosynthesis protein A"



"OP8\_F13\_00924" 27412 "s63E6H2" 0 "molybdenum cofactor biosynthesis protein A"  
"OP8\_F13\_00925" 27413 "s59E13H2" 0.005195993 "hypothetical protein"  
"OP8\_F13\_00925" 27413 "s59E25H2" 0 "hypothetical protein"  
"OP8\_F13\_00925" 27413 "s59E5H2" 2.126294 "hypothetical protein"  
"OP8\_F13\_00925" 27413 "s63E6H2" 0 "hypothetical protein"  
"OP8\_F13\_00926" 27414 "s59E13H2" 0.01699542 "UvrABC system protein A"  
"OP8\_F13\_00926" 27414 "s59E25H2" 0 "UvrABC system protein A"  
"OP8\_F13\_00926" 27414 "s59E5H2" 2.354913 "UvrABC system protein A"  
"OP8\_F13\_00926" 27414 "s63E6H2" 0 "UvrABC system protein A"  
"OP8\_F13\_00927" 27415 "s59E13H2" 0.01255969 "Putative ski2-type helicase"  
"OP8\_F13\_00927" 27415 "s59E25H2" 0 "Putative ski2-type helicase"  
"OP8\_F13\_00927" 27415 "s59E5H2" 2.833021 "Putative ski2-type helicase"  
"OP8\_F13\_00927" 27415 "s63E6H2" 0 "Putative ski2-type helicase"  
"OP8\_F13\_00928" 27416 "s59E13H2" 0.1381823 "Ktr system potassium uptake protein A"  
"OP8\_F13\_00928" 27416 "s59E25H2" 0 "Ktr system potassium uptake protein A"  
"OP8\_F13\_00928" 27416 "s59E5H2" 3.559758 "Ktr system potassium uptake protein A"  
"OP8\_F13\_00928" 27416 "s63E6H2" 0 "Ktr system potassium uptake protein A"  
"OP8\_F13\_00929" 27417 "s59E13H2" 0.2307404 "Ktr system potassium uptake protein B"  
"OP8\_F13\_00929" 27417 "s59E25H2" 0 "Ktr system potassium uptake protein B"  
"OP8\_F13\_00929" 27417 "s59E5H2" 1.652885 "Ktr system potassium uptake protein B"  
"OP8\_F13\_00929" 27417 "s63E6H2" 0 "Ktr system potassium uptake protein B"  
"OP8\_F13\_00930" 27418 "s59E13H2" 0.7622092 "Biopolymer transport protein ExbB"  
"OP8\_F13\_00930" 27418 "s59E25H2" 0 "Biopolymer transport protein ExbB"  
"OP8\_F13\_00930" 27418 "s59E5H2" 1.356039 "Biopolymer transport protein ExbB"  
"OP8\_F13\_00930" 27418 "s63E6H2" 0 "Biopolymer transport protein ExbB"  
"OP8\_F13\_00931" 27419 "s59E13H2" 0.672246 "Biopolymer transport protein ExbD"  
"OP8\_F13\_00931" 27419 "s59E25H2" 0 "Biopolymer transport protein ExbD"  
"OP8\_F13\_00931" 27419 "s59E5H2" 1.47374 "Biopolymer transport protein ExbD"  
"OP8\_F13\_00931" 27419 "s63E6H2" 0 "Biopolymer transport protein ExbD"  
"OP8\_F13\_00932" 27420 "s59E13H2" 0.6591905 "Gram-negative bacterial tonB protein"  
"OP8\_F13\_00932" 27420 "s59E25H2" 0 "Gram-negative bacterial tonB protein"  
"OP8\_F13\_00932" 27420 "s59E5H2" 2.273133 "Gram-negative bacterial tonB protein"  
"OP8\_F13\_00932" 27420 "s63E6H2" 0.001752788 "Gram-negative bacterial tonB protein"  
"OP8\_F13\_00934" 27422 "s59E13H2" 0.03873399 "Glutamate-1-semialdehyde 2,1-aminomutase"  
"OP8\_F13\_00934" 27422 "s59E25H2" 0 "Glutamate-1-semialdehyde 2,1-aminomutase"  
"OP8\_F13\_00934" 27422 "s59E5H2" 2.843403 "Glutamate-1-semialdehyde 2,1-aminomutase"  
"OP8\_F13\_00934" 27422 "s63E6H2" 0 "Glutamate-1-semialdehyde 2,1-aminomutase"  
"OP8\_F13\_00935" 27423 "s59E13H2" 0 "DNA adenine methyltransferase YhdJ"  
"OP8\_F13\_00935" 27423 "s59E25H2" 0 "DNA adenine methyltransferase YhdJ"  
"OP8\_F13\_00935" 27423 "s59E5H2" 0.1104161 "DNA adenine methyltransferase YhdJ"  
"OP8\_F13\_00935" 27423 "s63E6H2" 0 "DNA adenine methyltransferase YhdJ"  
"OP8\_F13\_00939" 27427 "s59E13H2" 0.001359515 "Gingipain R1 precursor"  
"OP8\_F13\_00939" 27427 "s59E25H2" 0 "Gingipain R1 precursor"  
"OP8\_F13\_00939" 27427 "s59E5H2" 1.185508 "Gingipain R1 precursor"  
"OP8\_F13\_00939" 27427 "s63E6H2" 0 "Gingipain R1 precursor"  
"OP8\_F13\_00940" 27428 "s59E13H2" 0 "heat shock protein HtpX"  
"OP8\_F13\_00940" 27428 "s59E25H2" 0 "heat shock protein HtpX"

"OP8\_F13\_00940" 27428 "s59E5H2" 0.8342941 "heat shock protein HtpX"  
"OP8\_F13\_00940" 27428 "s63E6H2" 0 "heat shock protein HtpX"  
"OP8\_F13\_00941" 27429 "s59E13H2" 0.0009784626 "Phosphorylated carbohydrates phosphatase"  
"OP8\_F13\_00941" 27429 "s59E25H2" 0 "Phosphorylated carbohydrates phosphatase"  
"OP8\_F13\_00941" 27429 "s59E5H2" 0.4544491 "Phosphorylated carbohydrates phosphatase"  
"OP8\_F13\_00941" 27429 "s63E6H2" 0 "Phosphorylated carbohydrates phosphatase"  
"OP8\_F13\_00943" 27431 "s59E13H2" 0.001165079 "RNA polymerase-associated protein RapA"  
"OP8\_F13\_00943" 27431 "s59E25H2" 0 "RNA polymerase-associated protein RapA"  
"OP8\_F13\_00943" 27431 "s59E5H2" 0.02085682 "RNA polymerase-associated protein RapA"  
"OP8\_F13\_00943" 27431 "s63E6H2" 0 "RNA polymerase-associated protein RapA"  
"OP8\_F13\_00944" 27432 "s59E13H2" 0 "hypothetical protein"  
"OP8\_F13\_00944" 27432 "s59E25H2" 0 "hypothetical protein"  
"OP8\_F13\_00944" 27432 "s59E5H2" 0 "hypothetical protein"  
"OP8\_F13\_00944" 27432 "s63E6H2" 0 "hypothetical protein"  
"OP8\_F13\_00945" 27433 "s59E13H2" 0.203797 "Phosphoribosylformylglycinamide cyclo-ligase"  
"OP8\_F13\_00945" 27433 "s59E25H2" 0 "Phosphoribosylformylglycinamide cyclo-ligase"  
"OP8\_F13\_00945" 27433 "s59E5H2" 8.098763 "Phosphoribosylformylglycinamide cyclo-ligase"  
"OP8\_F13\_00945" 27433 "s63E6H2" 0 "Phosphoribosylformylglycinamide cyclo-ligase"  
"OP8\_F13\_00947" 27435 "s59E13H2" 0 "hypothetical protein"  
"OP8\_F13\_00947" 27435 "s59E25H2" 0 "hypothetical protein"  
"OP8\_F13\_00947" 27435 "s59E5H2" 0.1230835 "hypothetical protein"  
"OP8\_F13\_00947" 27435 "s63E6H2" 0 "hypothetical protein"  
"OP8\_F13\_00948" 27436 "s59E13H2" 0 "Transposase DDE domain protein"  
"OP8\_F13\_00948" 27436 "s59E25H2" 0 "Transposase DDE domain protein"  
"OP8\_F13\_00948" 27436 "s59E5H2" 2.419788 "Transposase DDE domain protein"  
"OP8\_F13\_00948" 27436 "s63E6H2" 0 "Transposase DDE domain protein"  
"OP8\_F13\_00949" 27437 "s59E13H2" 0 "hypothetical protein"  
"OP8\_F13\_00949" 27437 "s59E25H2" 0 "hypothetical protein"  
"OP8\_F13\_00949" 27437 "s59E5H2" 0.004795019 "hypothetical protein"  
"OP8\_F13\_00949" 27437 "s63E6H2" 0 "hypothetical protein"  
"OP8\_F13\_00950" 27438 "s59E13H2" 0 "hypothetical protein"  
"OP8\_F13\_00950" 27438 "s59E25H2" 0 "hypothetical protein"  
"OP8\_F13\_00950" 27438 "s59E5H2" 0.006231537 "hypothetical protein"  
"OP8\_F13\_00950" 27438 "s63E6H2" 0 "hypothetical protein"  
"OP8\_F13\_00951" 27439 "s59E13H2" 0 "hypothetical protein"  
"OP8\_F13\_00951" 27439 "s59E25H2" 0 "hypothetical protein"  
"OP8\_F13\_00951" 27439 "s59E5H2" 0.05078992 "hypothetical protein"  
"OP8\_F13\_00951" 27439 "s63E6H2" 0 "hypothetical protein"  
"OP8\_F13\_00952" 27440 "s59E13H2" 0.02758216 "Virginiamycin A acetyltransferase"  
"OP8\_F13\_00952" 27440 "s59E25H2" 0 "Virginiamycin A acetyltransferase"  
"OP8\_F13\_00952" 27440 "s59E5H2" 6.233679 "Virginiamycin A acetyltransferase"  
"OP8\_F13\_00952" 27440 "s63E6H2" 0 "Virginiamycin A acetyltransferase"  
"OP8\_F13\_00953" 27441 "s59E13H2" 0.03175046 "FG-GAP repeat protein"  
"OP8\_F13\_00953" 27441 "s59E25H2" 0 "FG-GAP repeat protein"  
"OP8\_F13\_00953" 27441 "s59E5H2" 10.87499 "FG-GAP repeat protein"  
"OP8\_F13\_00953" 27441 "s63E6H2" 0 "FG-GAP repeat protein"  
"OP8\_F13\_00954" 27442 "s59E13H2" 0 "Transposase DDE domain protein"

"OP8\_F13\_00954" 27442 "s59E25H2" 0 "Transposase DDE domain protein"  
"OP8\_F13\_00954" 27442 "s59E5H2" 14.25615 "Transposase DDE domain protein"  
"OP8\_F13\_00954" 27442 "s63E6H2" 0 "Transposase DDE domain protein"  
"OP8\_F13\_00955" 27443 "s59E13H2" 0 "DNA-binding transcriptional activator FearR"  
"OP8\_F13\_00955" 27443 "s59E25H2" 0 "DNA-binding transcriptional activator FearR"  
"OP8\_F13\_00955" 27443 "s59E5H2" 0.0487298 "DNA-binding transcriptional activator FearR"  
"OP8\_F13\_00955" 27443 "s63E6H2" 0 "DNA-binding transcriptional activator FearR"  
"OP8\_F13\_00956" 27444 "s59E13H2" 0 "Membrane dipeptidase (Peptidase family M19)"  
"OP8\_F13\_00956" 27444 "s59E25H2" 0 "Membrane dipeptidase (Peptidase family M19)"  
"OP8\_F13\_00956" 27444 "s59E5H2" 0.07333405 "Membrane dipeptidase (Peptidase family M19)"  
"OP8\_F13\_00956" 27444 "s63E6H2" 0 "Membrane dipeptidase (Peptidase family M19)"  
"OP8\_F13\_00957" 27445 "s59E13H2" 0 "hypothetical protein"  
"OP8\_F13\_00957" 27445 "s59E25H2" 0 "hypothetical protein"  
"OP8\_F13\_00957" 27445 "s59E5H2" 0.02898832 "hypothetical protein"  
"OP8\_F13\_00957" 27445 "s63E6H2" 0 "hypothetical protein"  
"OP8\_F13\_00958" 27446 "s59E13H2" 0 "Alanine dehydrogenase"  
"OP8\_F13\_00958" 27446 "s59E25H2" 0 "Alanine dehydrogenase"  
"OP8\_F13\_00958" 27446 "s59E5H2" 0.2380674 "Alanine dehydrogenase"  
"OP8\_F13\_00958" 27446 "s63E6H2" 0 "Alanine dehydrogenase"  
"OP8\_F13\_00959" 27447 "s59E13H2" 0.002858138 "Transposase DDE domain protein"  
"OP8\_F13\_00959" 27447 "s59E25H2" 0 "Transposase DDE domain protein"  
"OP8\_F13\_00959" 27447 "s59E5H2" 10.3903 "Transposase DDE domain protein"  
"OP8\_F13\_00959" 27447 "s63E6H2" 0 "Transposase DDE domain protein"  
"OP8\_F13\_00960" 27448 "s59E13H2" 0 "Alanine dehydrogenase"  
"OP8\_F13\_00960" 27448 "s59E25H2" 0 "Alanine dehydrogenase"  
"OP8\_F13\_00960" 27448 "s59E5H2" 0.09443501 "Alanine dehydrogenase"  
"OP8\_F13\_00960" 27448 "s63E6H2" 0 "Alanine dehydrogenase"  
"OP8\_F13\_00961" 27449 "s59E13H2" 0 "Membrane dipeptidase (Peptidase family M19)"  
"OP8\_F13\_00961" 27449 "s59E25H2" 0 "Membrane dipeptidase (Peptidase family M19)"  
"OP8\_F13\_00961" 27449 "s59E5H2" 0.04612856 "Membrane dipeptidase (Peptidase family M19)"  
"OP8\_F13\_00961" 27449 "s63E6H2" 0 "Membrane dipeptidase (Peptidase family M19)"  
"OP8\_F13\_00962" 27450 "s59E13H2" 0 "2,5-dihydroxypyridine 5,6-dioxygenase"  
"OP8\_F13\_00962" 27450 "s59E25H2" 0 "2,5-dihydroxypyridine 5,6-dioxygenase"  
"OP8\_F13\_00962" 27450 "s59E5H2" 0.02407621 "2,5-dihydroxypyridine 5,6-dioxygenase"  
"OP8\_F13\_00962" 27450 "s63E6H2" 0 "2,5-dihydroxypyridine 5,6-dioxygenase"  
"OP8\_F13\_00963" 27451 "s59E13H2" 0 "Transposase DDE domain protein"  
"OP8\_F13\_00963" 27451 "s59E25H2" 0 "Transposase DDE domain protein"  
"OP8\_F13\_00963" 27451 "s59E5H2" 3.646365 "Transposase DDE domain protein"  
"OP8\_F13\_00963" 27451 "s63E6H2" 0 "Transposase DDE domain protein"  
"OP8\_F13\_00964" 27452 "s59E13H2" 0.01077627 "Response regulator PleD"  
"OP8\_F13\_00964" 27452 "s59E25H2" 0 "Response regulator PleD"  
"OP8\_F13\_00964" 27452 "s59E5H2" 0.4061686 "Response regulator PleD"  
"OP8\_F13\_00964" 27452 "s63E6H2" 0 "Response regulator PleD"  
"OP8\_F13\_00965" 27453 "s59E13H2" 0.03127285 "Tyrosine-protein kinase YwqD"  
"OP8\_F13\_00965" 27453 "s59E25H2" 0 "Tyrosine-protein kinase YwqD"  
"OP8\_F13\_00965" 27453 "s59E5H2" 1.59409 "Tyrosine-protein kinase YwqD"  
"OP8\_F13\_00965" 27453 "s63E6H2" 0 "Tyrosine-protein kinase YwqD"

"OP8\_F13\_00966" 27454 "s59E13H2" 0.01479644 "UDP-glucose:undecaprenyl-phosphate glucose-1-phosphate transferase"  
"OP8\_F13\_00966" 27454 "s59E25H2" 0 "UDP-glucose:undecaprenyl-phosphate glucose-1-phosphate transferase"  
"OP8\_F13\_00966" 27454 "s59E5H2" 0.5858494 "UDP-glucose:undecaprenyl-phosphate glucose-1-phosphate transferase"  
"OP8\_F13\_00966" 27454 "s63E6H2" 0 "UDP-glucose:undecaprenyl-phosphate glucose-1-phosphate transferase"  
"OP8\_F13\_00967" 27455 "s59E13H2" 0.02103989 "dTDP-3-amino-3,6-dideoxy-alpha-D-galactopyranose transaminase"  
"OP8\_F13\_00967" 27455 "s59E25H2" 0 "dTDP-3-amino-3,6-dideoxy-alpha-D-galactopyranose transaminase"  
"OP8\_F13\_00967" 27455 "s59E5H2" 0.2899667 "dTDP-3-amino-3,6-dideoxy-alpha-D-galactopyranose transaminase"  
"OP8\_F13\_00967" 27455 "s63E6H2" 0 "dTDP-3-amino-3,6-dideoxy-alpha-D-galactopyranose transaminase"  
"OP8\_F13\_00968" 27456 "s59E13H2" 0.001073394 "dTDP-3-amino-3,6-dideoxy-alpha-D-galactopyranose 3-N-acetyltransferase"  
"OP8\_F13\_00968" 27456 "s59E25H2" 0 "dTDP-3-amino-3,6-dideoxy-alpha-D-galactopyranose 3-N-acetyltransferase"  
"OP8\_F13\_00968" 27456 "s59E5H2" 0.4759778 "dTDP-3-amino-3,6-dideoxy-alpha-D-galactopyranose 3-N-acetyltransferase"  
"OP8\_F13\_00968" 27456 "s63E6H2" 0 "dTDP-3-amino-3,6-dideoxy-alpha-D-galactopyranose 3-N-acetyltransferase"  
"OP8\_F13\_00969" 27457 "s59E13H2" 0 "putative oxidoreductase YdgJ"  
"OP8\_F13\_00969" 27457 "s59E25H2" 0 "putative oxidoreductase YdgJ"  
"OP8\_F13\_00969" 27457 "s59E5H2" 0.3579769 "putative oxidoreductase YdgJ"  
"OP8\_F13\_00969" 27457 "s63E6H2" 0 "putative oxidoreductase YdgJ"  
"OP8\_F13\_00970" 27458 "s59E13H2" 0 "hypothetical protein"  
"OP8\_F13\_00970" 27458 "s59E25H2" 0 "hypothetical protein"  
"OP8\_F13\_00970" 27458 "s59E5H2" 1.433496 "hypothetical protein"  
"OP8\_F13\_00970" 27458 "s63E6H2" 0 "hypothetical protein"  
"OP8\_F13\_00971" 27459 "s59E13H2" 0 "hypothetical protein"  
"OP8\_F13\_00971" 27459 "s59E25H2" 0 "hypothetical protein"  
"OP8\_F13\_00971" 27459 "s59E5H2" 0.3799396 "hypothetical protein"  
"OP8\_F13\_00971" 27459 "s63E6H2" 0 "hypothetical protein"  
"OP8\_F13\_00972" 27460 "s59E13H2" 0 "dTDP-3-amino-3,6-dideoxy-alpha-D-galactopyranose transaminase"  
"OP8\_F13\_00972" 27460 "s59E25H2" 0 "dTDP-3-amino-3,6-dideoxy-alpha-D-galactopyranose transaminase"  
"OP8\_F13\_00972" 27460 "s59E5H2" 0.1496942 "dTDP-3-amino-3,6-dideoxy-alpha-D-galactopyranose transaminase"  
"OP8\_F13\_00972" 27460 "s63E6H2" 0 "dTDP-3-amino-3,6-dideoxy-alpha-D-galactopyranose transaminase"  
"OP8\_F13\_00973" 27461 "s59E13H2" 0 "Maltose O-acetyltransferase"  
"OP8\_F13\_00973" 27461 "s59E25H2" 0 "Maltose O-acetyltransferase"  
"OP8\_F13\_00973" 27461 "s59E5H2" 0.0655051 "Maltose O-acetyltransferase"  
"OP8\_F13\_00973" 27461 "s63E6H2" 0 "Maltose O-acetyltransferase"  
"OP8\_F13\_00974" 27462 "s59E13H2" 0 "putative oxidoreductase YdgJ"  
"OP8\_F13\_00974" 27462 "s59E25H2" 0 "putative oxidoreductase YdgJ"  
"OP8\_F13\_00974" 27462 "s59E5H2" 0.2143336 "putative oxidoreductase YdgJ"  
"OP8\_F13\_00974" 27462 "s63E6H2" 0 "putative oxidoreductase YdgJ"  
"OP8\_F13\_00975" 27463 "s59E13H2" 0 "putative glycosyl transferase"  
"OP8\_F13\_00975" 27463 "s59E25H2" 0 "putative glycosyl transferase"  
"OP8\_F13\_00975" 27463 "s59E5H2" 0.9548981 "putative glycosyl transferase"  
"OP8\_F13\_00975" 27463 "s63E6H2" 0 "putative glycosyl transferase"  
"OP8\_F13\_00976" 27464 "s59E13H2" 0 "hypothetical protein"  
"OP8\_F13\_00976" 27464 "s59E25H2" 0 "hypothetical protein"  
"OP8\_F13\_00976" 27464 "s59E5H2" 0.5235423 "hypothetical protein"  
"OP8\_F13\_00976" 27464 "s63E6H2" 0 "hypothetical protein"  
"OP8\_F13\_00977" 27465 "s59E13H2" 0.4853283 "Bifunctional NAD(P)H-hydrate repair enzyme Nnr"  
"OP8\_F13\_00977" 27465 "s59E25H2" 0 "Bifunctional NAD(P)H-hydrate repair enzyme Nnr"  
"OP8\_F13\_00977" 27465 "s59E5H2" 1.466766 "Bifunctional NAD(P)H-hydrate repair enzyme Nnr"

"OP8\_F13\_00977" 27465 "s63E6H2" 0 "Bifunctional NAD(P)H-hydrate repair enzyme Nnr"  
"OP8\_F13\_00979" 27467 "s59E13H2" 0.003859031 "(R)-stereoselective amidase"  
"OP8\_F13\_00979" 27467 "s59E25H2" 0 "(R)-stereoselective amidase"  
"OP8\_F13\_00979" 27467 "s59E5H2" 0.2056932 "(R)-stereoselective amidase"  
"OP8\_F13\_00979" 27467 "s63E6H2" 0 "(R)-stereoselective amidase"  
"OP8\_F13\_00980" 27468 "s59E13H2" 0 "putative NH(3)-dependent NAD(+) synthetase"  
"OP8\_F13\_00980" 27468 "s59E25H2" 0 "putative NH(3)-dependent NAD(+) synthetase"  
"OP8\_F13\_00980" 27468 "s59E5H2" 0.3720124 "putative NH(3)-dependent NAD(+) synthetase"  
"OP8\_F13\_00980" 27468 "s63E6H2" 0 "putative NH(3)-dependent NAD(+) synthetase"  
"OP8\_F13\_00981" 27469 "s59E13H2" 0.005443075 "Ribosomal RNA small subunit methyltransferase I"  
"OP8\_F13\_00981" 27469 "s59E25H2" 0 "Ribosomal RNA small subunit methyltransferase I"  
"OP8\_F13\_00981" 27469 "s59E5H2" 0.3937665 "Ribosomal RNA small subunit methyltransferase I"  
"OP8\_F13\_00981" 27469 "s63E6H2" 0 "Ribosomal RNA small subunit methyltransferase I"  
"OP8\_F13\_00982" 27470 "s59E13H2" 0.008881469 "DNA utilization protein GntX"  
"OP8\_F13\_00982" 27470 "s59E25H2" 0 "DNA utilization protein GntX"  
"OP8\_F13\_00982" 27470 "s59E5H2" 0.8729931 "DNA utilization protein GntX"  
"OP8\_F13\_00982" 27470 "s63E6H2" 0 "DNA utilization protein GntX"  
"OP8\_F13\_00983" 27471 "s59E13H2" 0 "RNA polymerase-binding transcription factor DksA"  
"OP8\_F13\_00983" 27471 "s59E25H2" 0 "RNA polymerase-binding transcription factor DksA"  
"OP8\_F13\_00983" 27471 "s59E5H2" 0.7524519 "RNA polymerase-binding transcription factor DksA"  
"OP8\_F13\_00983" 27471 "s63E6H2" 0 "RNA polymerase-binding transcription factor DksA"  
"OP8\_F13\_00984" 27472 "s59E13H2" 0.03562107 "hypothetical protein"  
"OP8\_F13\_00984" 27472 "s59E25H2" 0 "hypothetical protein"  
"OP8\_F13\_00984" 27472 "s59E5H2" 4.747663 "hypothetical protein"  
"OP8\_F13\_00984" 27472 "s63E6H2" 0 "hypothetical protein"  
"OP8\_F13\_00985" 27473 "s59E13H2" 0.07656573 "OPT oligopeptide transporter protein"  
"OP8\_F13\_00985" 27473 "s59E25H2" 0 "OPT oligopeptide transporter protein"  
"OP8\_F13\_00985" 27473 "s59E5H2" 6.610447 "OPT oligopeptide transporter protein"  
"OP8\_F13\_00985" 27473 "s63E6H2" 0 "OPT oligopeptide transporter protein"  
"OP8\_F13\_00986" 27474 "s59E13H2" 0.02018289 "Inner membrane protein YjiY"  
"OP8\_F13\_00986" 27474 "s59E25H2" 0 "Inner membrane protein YjiY"  
"OP8\_F13\_00986" 27474 "s59E5H2" 7.98976 "Inner membrane protein YjiY"  
"OP8\_F13\_00986" 27474 "s63E6H2" 0 "Inner membrane protein YjiY"  
"OP8\_M19\_00001" 27475 "s59E13H2" 0 "Ubiquinone biosynthesis O-methyltransferase"  
"OP8\_M19\_00001" 27475 "s59E25H2" 0 "Ubiquinone biosynthesis O-methyltransferase"  
"OP8\_M19\_00001" 27475 "s59E5H2" 1.209038 "Ubiquinone biosynthesis O-methyltransferase"  
"OP8\_M19\_00001" 27475 "s63E6H2" 0.00244921 "Ubiquinone biosynthesis O-methyltransferase"  
"OP8\_M19\_00002" 27476 "s59E13H2" 0 "hypothetical protein"  
"OP8\_M19\_00002" 27476 "s59E25H2" 0 "hypothetical protein"  
"OP8\_M19\_00002" 27476 "s59E5H2" 11.07052 "hypothetical protein"  
"OP8\_M19\_00002" 27476 "s63E6H2" 0.07241496 "hypothetical protein"  
"OP8\_M19\_00003" 27477 "s59E13H2" 0 "hypothetical protein"  
"OP8\_M19\_00003" 27477 "s59E25H2" 0 "hypothetical protein"  
"OP8\_M19\_00003" 27477 "s59E5H2" 1.088718 "hypothetical protein"  
"OP8\_M19\_00003" 27477 "s63E6H2" 0.0003286102 "hypothetical protein"  
"OP8\_M19\_00004" 27478 "s59E13H2" 0.450425 "hypothetical protein"  
"OP8\_M19\_00004" 27478 "s59E25H2" 0.02495974 "hypothetical protein"

"OP8\_M19\_00004" 27478 "s59E5H2" 1.43325 "hypothetical protein"  
"OP8\_M19\_00004" 27478 "s63E6H2" 0 "hypothetical protein"  
"OP8\_M19\_00006" 27480 "s59E13H2" 0.0334972 "hypothetical protein"  
"OP8\_M19\_00006" 27480 "s59E25H2" 0 "hypothetical protein"  
"OP8\_M19\_00006" 27480 "s59E5H2" 1.717818 "hypothetical protein"  
"OP8\_M19\_00006" 27480 "s63E6H2" 0 "hypothetical protein"  
"OP8\_M19\_00007" 27481 "s59E13H2" 0.005491557 "putative glycosyl transferase"  
"OP8\_M19\_00007" 27481 "s59E25H2" 0 "putative glycosyl transferase"  
"OP8\_M19\_00007" 27481 "s59E5H2" 1.282055 "putative glycosyl transferase"  
"OP8\_M19\_00007" 27481 "s63E6H2" 0 "putative glycosyl transferase"  
"OP8\_M19\_00008" 27482 "s59E13H2" 0.006734461 "Poly-beta-1,6-N-acetyl-D-glucosamine synthase"  
"OP8\_M19\_00008" 27482 "s59E25H2" 0 "Poly-beta-1,6-N-acetyl-D-glucosamine synthase"  
"OP8\_M19\_00008" 27482 "s59E5H2" 0.9930701 "Poly-beta-1,6-N-acetyl-D-glucosamine synthase"  
"OP8\_M19\_00008" 27482 "s63E6H2" 0 "Poly-beta-1,6-N-acetyl-D-glucosamine synthase"  
"OP8\_M19\_00009" 27483 "s59E13H2" 0.001907958 "N-acetylglucosaminyl-diphospho-decaprenol L-rhamnosyltransferase"  
"OP8\_M19\_00009" 27483 "s59E25H2" 0 "N-acetylglucosaminyl-diphospho-decaprenol L-rhamnosyltransferase"  
"OP8\_M19\_00009" 27483 "s59E5H2" 0.8841023 "N-acetylglucosaminyl-diphospho-decaprenol L-rhamnosyltransferase"  
"OP8\_M19\_00009" 27483 "s63E6H2" 0 "N-acetylglucosaminyl-diphospho-decaprenol L-rhamnosyltransferase"  
"OP8\_M19\_00010" 27484 "s59E13H2" 0.0009510942 "Hyaluronan synthase"  
"OP8\_M19\_00010" 27484 "s59E25H2" 0 "Hyaluronan synthase"  
"OP8\_M19\_00010" 27484 "s59E5H2" 0.7894784 "Hyaluronan synthase"  
"OP8\_M19\_00010" 27484 "s63E6H2" 0 "Hyaluronan synthase"  
"OP8\_M19\_00011" 27485 "s59E13H2" 0.001211819 "Teichoic acids export ATP-binding protein TagH"  
"OP8\_M19\_00011" 27485 "s59E25H2" 0 "Teichoic acids export ATP-binding protein TagH"  
"OP8\_M19\_00011" 27485 "s59E5H2" 0.6282227 "Teichoic acids export ATP-binding protein TagH"  
"OP8\_M19\_00011" 27485 "s63E6H2" 0 "Teichoic acids export ATP-binding protein TagH"  
"OP8\_M19\_00012" 27486 "s59E13H2" 0 "hypothetical protein"  
"OP8\_M19\_00012" 27486 "s59E25H2" 0 "hypothetical protein"  
"OP8\_M19\_00012" 27486 "s59E5H2" 0.08929963 "hypothetical protein"  
"OP8\_M19\_00012" 27486 "s63E6H2" 0 "hypothetical protein"  
"OP8\_M19\_00013" 27487 "s59E13H2" 0.008589103 "Putative transposase"  
"OP8\_M19\_00013" 27487 "s59E25H2" 0 "Putative transposase"  
"OP8\_M19\_00013" 27487 "s59E5H2" 0.1359575 "Putative transposase"  
"OP8\_M19\_00013" 27487 "s63E6H2" 0 "Putative transposase"  
"OP8\_M19\_00014" 27488 "s59E13H2" 0.0005436307 "hypothetical protein"  
"OP8\_M19\_00014" 27488 "s59E25H2" 0 "hypothetical protein"  
"OP8\_M19\_00014" 27488 "s59E5H2" 0.07661134 "hypothetical protein"  
"OP8\_M19\_00014" 27488 "s63E6H2" 0 "hypothetical protein"  
"OP8\_M19\_00016" 27490 "s59E13H2" 0.03047718 "hypothetical protein"  
"OP8\_M19\_00016" 27490 "s59E25H2" 0 "hypothetical protein"  
"OP8\_M19\_00016" 27490 "s59E5H2" 0.3483666 "hypothetical protein"  
"OP8\_M19\_00016" 27490 "s63E6H2" 0 "hypothetical protein"  
"OP8\_M19\_00017" 27491 "s59E13H2" 0.08591041 "30S ribosomal protein S3"  
"OP8\_M19\_00017" 27491 "s59E25H2" 0 "30S ribosomal protein S3"  
"OP8\_M19\_00017" 27491 "s59E5H2" 0.06741561 "30S ribosomal protein S3"  
"OP8\_M19\_00017" 27491 "s63E6H2" 0 "30S ribosomal protein S3"  
"OP8\_M19\_00018" 27492 "s59E13H2" 0.07769011 "50S ribosomal protein L22"

"OP8\_M19\_00018" 27492 "s59E25H2" 0 "50S ribosomal protein L22"  
"OP8\_M19\_00018" 27492 "s59E5H2" 0.08434604 "50S ribosomal protein L22"  
"OP8\_M19\_00018" 27492 "s63E6H2" 0 "50S ribosomal protein L22"  
"OP8\_M19\_00019" 27493 "s59E13H2" 0.05495157 "30S ribosomal protein S19"  
"OP8\_M19\_00019" 27493 "s59E25H2" 0 "30S ribosomal protein S19"  
"OP8\_M19\_00019" 27493 "s59E5H2" 0.1129807 "30S ribosomal protein S19"  
"OP8\_M19\_00019" 27493 "s63E6H2" 0 "30S ribosomal protein S19"  
"OP8\_M19\_00020" 27494 "s59E13H2" 0.06801487 "50S ribosomal protein L2"  
"OP8\_M19\_00020" 27494 "s59E25H2" 0 "50S ribosomal protein L2"  
"OP8\_M19\_00020" 27494 "s59E5H2" 0.09409924 "50S ribosomal protein L2"  
"OP8\_M19\_00020" 27494 "s63E6H2" 0 "50S ribosomal protein L2"  
"OP8\_M19\_00021" 27495 "s59E13H2" 1.364599 "Alkaline phosphatase synthesis transcriptional regulatory protein PhoP"  
"OP8\_M19\_00021" 27495 "s59E25H2" 0 "Alkaline phosphatase synthesis transcriptional regulatory protein PhoP"  
"OP8\_M19\_00021" 27495 "s59E5H2" 0.5278528 "Alkaline phosphatase synthesis transcriptional regulatory protein PhoP"  
"OP8\_M19\_00021" 27495 "s63E6H2" 0 "Alkaline phosphatase synthesis transcriptional regulatory protein PhoP"  
"OP8\_M19\_00022" 27496 "s59E13H2" 0.3470595 "Acetyl-coenzyme A carboxylase carboxyl transferase subunit beta"  
"OP8\_M19\_00022" 27496 "s59E25H2" 0 "Acetyl-coenzyme A carboxylase carboxyl transferase subunit beta"  
"OP8\_M19\_00022" 27496 "s59E5H2" 0.5337181 "Acetyl-coenzyme A carboxylase carboxyl transferase subunit beta"  
"OP8\_M19\_00022" 27496 "s63E6H2" 0 "Acetyl-coenzyme A carboxylase carboxyl transferase subunit beta"  
"OP8\_M19\_00023" 27497 "s59E13H2" 0.0419419 "Folypolyglutamate synthase"  
"OP8\_M19\_00023" 27497 "s59E25H2" 0 "Folypolyglutamate synthase"  
"OP8\_M19\_00023" 27497 "s59E5H2" 0.4746352 "Folypolyglutamate synthase"  
"OP8\_M19\_00023" 27497 "s63E6H2" 0 "Folypolyglutamate synthase"  
"OP8\_M19\_00024" 27498 "s59E13H2" 0.07025649 "FOF1 ATP synthase subunit B"  
"OP8\_M19\_00024" 27498 "s59E25H2" 0 "FOF1 ATP synthase subunit B"  
"OP8\_M19\_00024" 27498 "s59E5H2" 0.2191111 "FOF1 ATP synthase subunit B"  
"OP8\_M19\_00024" 27498 "s63E6H2" 0 "FOF1 ATP synthase subunit B"  
"OP8\_M19\_00025" 27499 "s59E13H2" 0.07228766 "ATP synthase subunit b"  
"OP8\_M19\_00025" 27499 "s59E25H2" 0 "ATP synthase subunit b"  
"OP8\_M19\_00025" 27499 "s59E5H2" 0.1177892 "ATP synthase subunit b"  
"OP8\_M19\_00025" 27499 "s63E6H2" 0 "ATP synthase subunit b"  
"OP8\_M19\_00026" 27500 "s59E13H2" 0.07967548 "ATP synthase subunit delta"  
"OP8\_M19\_00026" 27500 "s59E25H2" 0 "ATP synthase subunit delta"  
"OP8\_M19\_00026" 27500 "s59E5H2" 0.09067225 "ATP synthase subunit delta"  
"OP8\_M19\_00026" 27500 "s63E6H2" 0 "ATP synthase subunit delta"  
"OP8\_M19\_00027" 27501 "s59E13H2" 0.08333881 "ATP synthase subunit alpha"  
"OP8\_M19\_00027" 27501 "s59E25H2" 0.1653491 "ATP synthase subunit alpha"  
"OP8\_M19\_00027" 27501 "s59E5H2" 0.3872233 "ATP synthase subunit alpha"  
"OP8\_M19\_00027" 27501 "s63E6H2" 0 "ATP synthase subunit alpha"  
"OP8\_M19\_00028" 27502 "s59E13H2" 0.0335798 "ATP synthase gamma chain"  
"OP8\_M19\_00028" 27502 "s59E25H2" 0 "ATP synthase gamma chain"  
"OP8\_M19\_00028" 27502 "s59E5H2" 0.6837942 "ATP synthase gamma chain"  
"OP8\_M19\_00028" 27502 "s63E6H2" 0 "ATP synthase gamma chain"  
"OP8\_M19\_00029" 27503 "s59E13H2" 0.04200684 "ATP synthase subunit beta"  
"OP8\_M19\_00029" 27503 "s59E25H2" 0 "ATP synthase subunit beta"  
"OP8\_M19\_00029" 27503 "s59E5H2" 0.7763653 "ATP synthase subunit beta"  
"OP8\_M19\_00029" 27503 "s63E6H2" 0 "ATP synthase subunit beta"

"OP8\_M19\_00030" 27504 "s59E13H2" 0.07898916 "ATP synthase epsilon chain"  
"OP8\_M19\_00030" 27504 "s59E25H2" 0 "ATP synthase epsilon chain"  
"OP8\_M19\_00030" 27504 "s59E5H2" 1.021127 "ATP synthase epsilon chain"  
"OP8\_M19\_00030" 27504 "s63E6H2" 0 "ATP synthase epsilon chain"  
"OP8\_M19\_00031" 27505 "s59E13H2" 0.1079786 "tRNA1(Val) (adenine(37)-N6)-methyltransferase"  
"OP8\_M19\_00031" 27505 "s59E25H2" 0 "tRNA1(Val) (adenine(37)-N6)-methyltransferase"  
"OP8\_M19\_00031" 27505 "s59E5H2" 1.086402 "tRNA1(Val) (adenine(37)-N6)-methyltransferase"  
"OP8\_M19\_00031" 27505 "s63E6H2" 0 "tRNA1(Val) (adenine(37)-N6)-methyltransferase"  
"OP8\_M19\_00032" 27506 "s59E13H2" 0.07100289 "Teichoic acid translocation permease protein TagG"  
"OP8\_M19\_00032" 27506 "s59E25H2" 0 "Teichoic acid translocation permease protein TagG"  
"OP8\_M19\_00032" 27506 "s59E5H2" 1.835298 "Teichoic acid translocation permease protein TagG"  
"OP8\_M19\_00032" 27506 "s63E6H2" 0 "Teichoic acid translocation permease protein TagG"  
"OP8\_M19\_00033" 27507 "s59E13H2" 0.06311208 "Teichoic acids export ATP-binding protein TagH"  
"OP8\_M19\_00033" 27507 "s59E25H2" 0 "Teichoic acids export ATP-binding protein TagH"  
"OP8\_M19\_00033" 27507 "s59E5H2" 1.1874 "Teichoic acids export ATP-binding protein TagH"  
"OP8\_M19\_00033" 27507 "s63E6H2" 0 "Teichoic acids export ATP-binding protein TagH"  
"OP8\_M19\_00034" 27508 "s59E13H2" 0.01536205 "Bifunctional protein HldE"  
"OP8\_M19\_00034" 27508 "s59E25H2" 0 "Bifunctional protein HldE"  
"OP8\_M19\_00034" 27508 "s59E5H2" 0.872715 "Bifunctional protein HldE"  
"OP8\_M19\_00034" 27508 "s63E6H2" 0 "Bifunctional protein HldE"  
"OP8\_M19\_00035" 27509 "s59E13H2" 0.02927596 "GMP synthase subunit A"  
"OP8\_M19\_00035" 27509 "s59E25H2" 0 "GMP synthase subunit A"  
"OP8\_M19\_00035" 27509 "s59E5H2" 1.171669 "GMP synthase subunit A"  
"OP8\_M19\_00035" 27509 "s63E6H2" 0 "GMP synthase subunit A"  
"OP8\_M19\_00037" 27511 "s59E13H2" 0.0375526 "Transcription-repair-coupling factor"  
"OP8\_M19\_00037" 27511 "s59E25H2" 0 "Transcription-repair-coupling factor"  
"OP8\_M19\_00037" 27511 "s59E5H2" 0.9174526 "Transcription-repair-coupling factor"  
"OP8\_M19\_00037" 27511 "s63E6H2" 0.0003619249 "Transcription-repair-coupling factor"  
"OP8\_M19\_00038" 27512 "s59E13H2" 0.06799145 "Peptidyl-prolyl cis-trans isomerase D"  
"OP8\_M19\_00038" 27512 "s59E25H2" 0 "Peptidyl-prolyl cis-trans isomerase D"  
"OP8\_M19\_00038" 27512 "s59E5H2" 0.4034537 "Peptidyl-prolyl cis-trans isomerase D"  
"OP8\_M19\_00038" 27512 "s63E6H2" 0 "Peptidyl-prolyl cis-trans isomerase D"  
"OP8\_M19\_00039" 27513 "s59E13H2" 0.1244302 "Foldase protein PrsA 2 precursor"  
"OP8\_M19\_00039" 27513 "s59E25H2" 0 "Foldase protein PrsA 2 precursor"  
"OP8\_M19\_00039" 27513 "s59E5H2" 0.4471612 "Foldase protein PrsA 2 precursor"  
"OP8\_M19\_00039" 27513 "s63E6H2" 0 "Foldase protein PrsA 2 precursor"  
"OP8\_M19\_00040" 27514 "s59E13H2" 0.9266563 "Pyruvoyl-dependent arginine decarboxylase"  
"OP8\_M19\_00040" 27514 "s59E25H2" 0 "Pyruvoyl-dependent arginine decarboxylase"  
"OP8\_M19\_00040" 27514 "s59E5H2" 0.9268882 "Pyruvoyl-dependent arginine decarboxylase"  
"OP8\_M19\_00040" 27514 "s63E6H2" 0 "Pyruvoyl-dependent arginine decarboxylase"  
"OP8\_M19\_00041" 27515 "s59E13H2" 1.332424 "hypothetical protein"  
"OP8\_M19\_00041" 27515 "s59E25H2" 0 "hypothetical protein"  
"OP8\_M19\_00041" 27515 "s59E5H2" 0.7877284 "hypothetical protein"  
"OP8\_M19\_00041" 27515 "s63E6H2" 0 "hypothetical protein"  
"OP8\_M19\_00042" 27516 "s59E13H2" 1.223983 "Divergent polysaccharide deacetylase"  
"OP8\_M19\_00042" 27516 "s59E25H2" 0 "Divergent polysaccharide deacetylase"  
"OP8\_M19\_00042" 27516 "s59E5H2" 0.92798 "Divergent polysaccharide deacetylase"



"OP8\_M19\_00042" 27516 "s63E6H2" 0 "Divergent polysaccharide deacetylase"  
"OP8\_M19\_00043" 27517 "s59E13H2" 1.048651 "putative CtpA-like serine protease"  
"OP8\_M19\_00043" 27517 "s59E25H2" 0 "putative CtpA-like serine protease"  
"OP8\_M19\_00043" 27517 "s59E5H2" 0.7115435 "putative CtpA-like serine protease"  
"OP8\_M19\_00043" 27517 "s63E6H2" 0 "putative CtpA-like serine protease"  
"OP8\_M19\_00044" 27518 "s59E13H2" 1.001499 "Murein hydrolase activator EnvC precursor"  
"OP8\_M19\_00044" 27518 "s59E25H2" 0 "Murein hydrolase activator EnvC precursor"  
"OP8\_M19\_00044" 27518 "s59E5H2" 0.7301361 "Murein hydrolase activator EnvC precursor"  
"OP8\_M19\_00044" 27518 "s63E6H2" 0 "Murein hydrolase activator EnvC precursor"  
"OP8\_M19\_00045" 27519 "s59E13H2" 0.8920456 "hypothetical protein"  
"OP8\_M19\_00045" 27519 "s59E25H2" 0 "hypothetical protein"  
"OP8\_M19\_00045" 27519 "s59E5H2" 0.4454367 "hypothetical protein"  
"OP8\_M19\_00045" 27519 "s63E6H2" 0 "hypothetical protein"  
"OP8\_M19\_00046" 27520 "s59E13H2" 1.034589 "Sodium:neurotransmitter symporter family protein"  
"OP8\_M19\_00046" 27520 "s59E25H2" 0 "Sodium:neurotransmitter symporter family protein"  
"OP8\_M19\_00046" 27520 "s59E5H2" 0.683816 "Sodium:neurotransmitter symporter family protein"  
"OP8\_M19\_00046" 27520 "s63E6H2" 0 "Sodium:neurotransmitter symporter family protein"  
"OP8\_M19\_00047" 27521 "s59E13H2" 0.9430662 "Glycerate 2-kinase"  
"OP8\_M19\_00047" 27521 "s59E25H2" 0 "Glycerate 2-kinase"  
"OP8\_M19\_00047" 27521 "s59E5H2" 0.6550034 "Glycerate 2-kinase"  
"OP8\_M19\_00047" 27521 "s63E6H2" 0 "Glycerate 2-kinase"  
"OP8\_M19\_00048" 27522 "s59E13H2" 1.232947 "hypothetical protein"  
"OP8\_M19\_00048" 27522 "s59E25H2" 0 "hypothetical protein"  
"OP8\_M19\_00048" 27522 "s59E5H2" 1.525763 "hypothetical protein"  
"OP8\_M19\_00048" 27522 "s63E6H2" 0 "hypothetical protein"  
"OP8\_M19\_00049" 27523 "s59E13H2" 1.533096 "hypothetical protein"  
"OP8\_M19\_00049" 27523 "s59E25H2" 0 "hypothetical protein"  
"OP8\_M19\_00049" 27523 "s59E5H2" 2.539399 "hypothetical protein"  
"OP8\_M19\_00049" 27523 "s63E6H2" 0 "hypothetical protein"  
"OP8\_M19\_00050" 27524 "s59E13H2" 1.570753 "Amino-acid carrier protein AlsT"  
"OP8\_M19\_00050" 27524 "s59E25H2" 0 "Amino-acid carrier protein AlsT"  
"OP8\_M19\_00050" 27524 "s59E5H2" 2.039573 "Amino-acid carrier protein AlsT"  
"OP8\_M19\_00050" 27524 "s63E6H2" 0 "Amino-acid carrier protein AlsT"  
"OP8\_M19\_00052" 27526 "s59E13H2" 0.004248353 "CoA binding domain protein"  
"OP8\_M19\_00052" 27526 "s59E25H2" 0 "CoA binding domain protein"  
"OP8\_M19\_00052" 27526 "s59E5H2" 5.163687 "CoA binding domain protein"  
"OP8\_M19\_00052" 27526 "s63E6H2" 0 "CoA binding domain protein"  
"OP8\_M19\_00053" 27527 "s59E13H2" 0 "hypothetical protein"  
"OP8\_M19\_00053" 27527 "s59E25H2" 0 "hypothetical protein"  
"OP8\_M19\_00053" 27527 "s59E5H2" 4.203162 "hypothetical protein"  
"OP8\_M19\_00053" 27527 "s63E6H2" 0 "hypothetical protein"  
"OP8\_M19\_00054" 27528 "s59E13H2" 0.7637791 "hypothetical protein"  
"OP8\_M19\_00054" 27528 "s59E25H2" 0 "hypothetical protein"  
"OP8\_M19\_00054" 27528 "s59E5H2" 3.422576 "hypothetical protein"  
"OP8\_M19\_00054" 27528 "s63E6H2" 0 "hypothetical protein"  
"OP8\_M19\_00055" 27529 "s59E13H2" 0.5753052 "Elongation factor G"  
"OP8\_M19\_00055" 27529 "s59E25H2" 0 "Elongation factor G"

"OP8\_M19\_00055" 27529 "s59E5H2" 2.672495 "Elongation factor G"  
"OP8\_M19\_00055" 27529 "s63E6H2" 0 "Elongation factor G"  
"OP8\_M19\_00058" 27532 "s59E13H2" 0 "Serine/threonine-protein kinase PrkC"  
"OP8\_M19\_00058" 27532 "s59E25H2" 0 "Serine/threonine-protein kinase PrkC"  
"OP8\_M19\_00058" 27532 "s59E5H2" 0.1444951 "Serine/threonine-protein kinase PrkC"  
"OP8\_M19\_00058" 27532 "s63E6H2" 0 "Serine/threonine-protein kinase PrkC"  
"OP8\_M19\_00059" 27533 "s59E13H2" 0.3622942 "Tyrosine--tRNA ligase"  
"OP8\_M19\_00059" 27533 "s59E25H2" 0 "Tyrosine--tRNA ligase"  
"OP8\_M19\_00059" 27533 "s59E5H2" 3.489781 "Tyrosine--tRNA ligase"  
"OP8\_M19\_00059" 27533 "s63E6H2" 0 "Tyrosine--tRNA ligase"  
"OP8\_M19\_00060" 27534 "s59E13H2" 0.0006323266 "putative lyase"  
"OP8\_M19\_00060" 27534 "s59E25H2" 0 "putative lyase"  
"OP8\_M19\_00060" 27534 "s59E5H2" 1.467624 "putative lyase"  
"OP8\_M19\_00060" 27534 "s63E6H2" 0 "putative lyase"  
"OP8\_M19\_00061" 27535 "s59E13H2" 0 "Outer membrane protein assembly factor BamD"  
"OP8\_M19\_00061" 27535 "s59E25H2" 0 "Outer membrane protein assembly factor BamD"  
"OP8\_M19\_00061" 27535 "s59E5H2" 0.9784051 "Outer membrane protein assembly factor BamD"  
"OP8\_M19\_00061" 27535 "s63E6H2" 0 "Outer membrane protein assembly factor BamD"  
"OP8\_M19\_00062" 27536 "s59E13H2" 0 "hypothetical protein"  
"OP8\_M19\_00062" 27536 "s59E25H2" 0 "hypothetical protein"  
"OP8\_M19\_00062" 27536 "s59E5H2" 0.7407937 "hypothetical protein"  
"OP8\_M19\_00062" 27536 "s63E6H2" 0 "hypothetical protein"  
"OP8\_M19\_00063" 27537 "s59E13H2" 0 "ECF RNA polymerase sigma-E factor"  
"OP8\_M19\_00063" 27537 "s59E25H2" 0 "ECF RNA polymerase sigma-E factor"  
"OP8\_M19\_00063" 27537 "s59E5H2" 0.7992188 "ECF RNA polymerase sigma-E factor"  
"OP8\_M19\_00063" 27537 "s63E6H2" 0 "ECF RNA polymerase sigma-E factor"  
"OP8\_M19\_00064" 27538 "s59E13H2" 0 "hypothetical protein"  
"OP8\_M19\_00064" 27538 "s59E25H2" 0 "hypothetical protein"  
"OP8\_M19\_00064" 27538 "s59E5H2" 1.353448 "hypothetical protein"  
"OP8\_M19\_00064" 27538 "s63E6H2" 0 "hypothetical protein"  
"OP8\_M19\_00065" 27539 "s59E13H2" 0.02784908 "hypothetical protein"  
"OP8\_M19\_00065" 27539 "s59E25H2" 0 "hypothetical protein"  
"OP8\_M19\_00065" 27539 "s59E5H2" 1.548395 "hypothetical protein"  
"OP8\_M19\_00065" 27539 "s63E6H2" 0 "hypothetical protein"  
"OP8\_M19\_00068" 27542 "s59E13H2" 0 "hypothetical protein"  
"OP8\_M19\_00068" 27542 "s59E25H2" 0 "hypothetical protein"  
"OP8\_M19\_00068" 27542 "s59E5H2" 0.02867075 "hypothetical protein"  
"OP8\_M19\_00068" 27542 "s63E6H2" 0 "hypothetical protein"  
"OP8\_M19\_00071" 27545 "s59E13H2" 0 "Transposase DDE domain protein"  
"OP8\_M19\_00071" 27545 "s59E25H2" 0 "Transposase DDE domain protein"  
"OP8\_M19\_00071" 27545 "s59E5H2" 4.514496 "Transposase DDE domain protein"  
"OP8\_M19\_00071" 27545 "s63E6H2" 0 "Transposase DDE domain protein"  
"OP8\_M19\_00072" 27546 "s59E13H2" 0 "hypothetical protein"  
"OP8\_M19\_00072" 27546 "s59E25H2" 0 "hypothetical protein"  
"OP8\_M19\_00072" 27546 "s59E5H2" 0.004795019 "hypothetical protein"  
"OP8\_M19\_00072" 27546 "s63E6H2" 0 "hypothetical protein"  
"OP8\_M19\_00073" 27547 "s59E13H2" 0 "hypothetical protein"

"OP8\_M19\_00073" 27547 "s59E25H2" 0 "hypothetical protein"  
"OP8\_M19\_00073" 27547 "s59E5H2" 0.006231537 "hypothetical protein"  
"OP8\_M19\_00073" 27547 "s63E6H2" 0 "hypothetical protein"  
"OP8\_M19\_00076" 27550 "s59E13H2" 0.001922892 "hypothetical protein"  
"OP8\_M19\_00076" 27550 "s59E25H2" 0 "hypothetical protein"  
"OP8\_M19\_00076" 27550 "s59E5H2" 14.22385 "hypothetical protein"  
"OP8\_M19\_00076" 27550 "s63E6H2" 0.07117045 "hypothetical protein"  
"OP8\_M19\_00078" 27552 "s59E13H2" 0.01217229 "hypothetical protein"  
"OP8\_M19\_00078" 27552 "s59E25H2" 0 "hypothetical protein"  
"OP8\_M19\_00078" 27552 "s59E5H2" 2.689565 "hypothetical protein"  
"OP8\_M19\_00078" 27552 "s63E6H2" 0 "hypothetical protein"  
"OP8\_M19\_00079" 27553 "s59E13H2" 0.004338229 "Transposase IS200 like protein"  
"OP8\_M19\_00079" 27553 "s59E25H2" 0.07555556 "Transposase IS200 like protein"  
"OP8\_M19\_00079" 27553 "s59E5H2" 2.588713 "Transposase IS200 like protein"  
"OP8\_M19\_00079" 27553 "s63E6H2" 0 "Transposase IS200 like protein"  
"OP8\_M19\_00080" 27554 "s59E13H2" 0.003645585 "hypothetical protein"  
"OP8\_M19\_00080" 27554 "s59E25H2" 0.3859649 "hypothetical protein"  
"OP8\_M19\_00080" 27554 "s59E5H2" 1.9565 "hypothetical protein"  
"OP8\_M19\_00080" 27554 "s63E6H2" 0 "hypothetical protein"  
"OP8\_M19\_00081" 27555 "s59E13H2" 0.003729106 "L(+)-tartrate dehydratase subunit alpha"  
"OP8\_M19\_00081" 27555 "s59E25H2" 0 "L(+)-tartrate dehydratase subunit alpha"  
"OP8\_M19\_00081" 27555 "s59E5H2" 1.991568 "L(+)-tartrate dehydratase subunit alpha"  
"OP8\_M19\_00081" 27555 "s63E6H2" 0 "L(+)-tartrate dehydratase subunit alpha"  
"OP8\_M19\_00082" 27556 "s59E13H2" 0.0005955131 "hypothetical protein"  
"OP8\_M19\_00082" 27556 "s59E25H2" 0 "hypothetical protein"  
"OP8\_M19\_00082" 27556 "s59E5H2" 13.82489 "hypothetical protein"  
"OP8\_M19\_00082" 27556 "s63E6H2" 0 "hypothetical protein"  
"OP8\_M19\_00083" 27557 "s59E13H2" 0.002199519 "Transposase IS66 family protein"  
"OP8\_M19\_00083" 27557 "s59E25H2" 0 "Transposase IS66 family protein"  
"OP8\_M19\_00083" 27557 "s59E5H2" 17.91378 "Transposase IS66 family protein"  
"OP8\_M19\_00083" 27557 "s63E6H2" 0 "Transposase IS66 family protein"  
"OP8\_M19\_00084" 27558 "s59E13H2" 0.001885738 "2-oxoglutarate-acceptor oxidoreductase subunit OorD"  
"OP8\_M19\_00084" 27558 "s59E25H2" 0 "2-oxoglutarate-acceptor oxidoreductase subunit OorD"  
"OP8\_M19\_00084" 27558 "s59E5H2" 2.181955 "2-oxoglutarate-acceptor oxidoreductase subunit OorD"  
"OP8\_M19\_00084" 27558 "s63E6H2" 0 "2-oxoglutarate-acceptor oxidoreductase subunit OorD"  
"OP8\_M19\_00085" 27559 "s59E13H2" 0.004995262 "Ketoisovalerate oxidoreductase subunit VorB"  
"OP8\_M19\_00085" 27559 "s59E25H2" 0 "Ketoisovalerate oxidoreductase subunit VorB"  
"OP8\_M19\_00085" 27559 "s59E5H2" 2.403526 "Ketoisovalerate oxidoreductase subunit VorB"  
"OP8\_M19\_00085" 27559 "s63E6H2" 0 "Ketoisovalerate oxidoreductase subunit VorB"  
"OP8\_M19\_00086" 27560 "s59E13H2" 0.008694491 "Ketoisovalerate oxidoreductase subunit VorA"  
"OP8\_M19\_00086" 27560 "s59E25H2" 0 "Ketoisovalerate oxidoreductase subunit VorA"  
"OP8\_M19\_00086" 27560 "s59E5H2" 3.331554 "Ketoisovalerate oxidoreductase subunit VorA"  
"OP8\_M19\_00086" 27560 "s63E6H2" 0 "Ketoisovalerate oxidoreductase subunit VorA"  
"OP8\_M19\_00087" 27561 "s59E13H2" 0.00407031 "Ketoisovalerate oxidoreductase subunit VorA"  
"OP8\_M19\_00087" 27561 "s59E25H2" 0 "Ketoisovalerate oxidoreductase subunit VorA"  
"OP8\_M19\_00087" 27561 "s59E5H2" 3.389903 "Ketoisovalerate oxidoreductase subunit VorA"  
"OP8\_M19\_00087" 27561 "s63E6H2" 0 "Ketoisovalerate oxidoreductase subunit VorA"

"OP8\_M19\_00088" 27562 "s59E13H2" 0.1800493 "3-oxoacyl-[acyl-carrier-protein] synthase 3"  
"OP8\_M19\_00088" 27562 "s59E25H2" 0 "3-oxoacyl-[acyl-carrier-protein] synthase 3"  
"OP8\_M19\_00088" 27562 "s59E5H2" 2.715937 "3-oxoacyl-[acyl-carrier-protein] synthase 3"  
"OP8\_M19\_00088" 27562 "s63E6H2" 0 "3-oxoacyl-[acyl-carrier-protein] synthase 3"  
"OP8\_M19\_00089" 27563 "s59E13H2" 0.9737662 "Outer membrane protein transport protein (OMPP1/FadL/TodX)"  
"OP8\_M19\_00089" 27563 "s59E25H2" 0 "Outer membrane protein transport protein (OMPP1/FadL/TodX)"  
"OP8\_M19\_00089" 27563 "s59E5H2" 1.535101 "Outer membrane protein transport protein (OMPP1/FadL/TodX)"  
"OP8\_M19\_00089" 27563 "s63E6H2" 0 "Outer membrane protein transport protein (OMPP1/FadL/TodX)"  
"OP8\_M19\_00090" 27564 "s59E13H2" 0.9722286 "Carboxypeptidase T precursor"  
"OP8\_M19\_00090" 27564 "s59E25H2" 0 "Carboxypeptidase T precursor"  
"OP8\_M19\_00090" 27564 "s59E5H2" 1.081376 "Carboxypeptidase T precursor"  
"OP8\_M19\_00090" 27564 "s63E6H2" 0 "Carboxypeptidase T precursor"  
"OP8\_M19\_00091" 27565 "s59E13H2" 2.264772 "Chromosome partition protein Smc"  
"OP8\_M19\_00091" 27565 "s59E25H2" 0 "Chromosome partition protein Smc"  
"OP8\_M19\_00091" 27565 "s59E5H2" 0.9794278 "Chromosome partition protein Smc"  
"OP8\_M19\_00091" 27565 "s63E6H2" 0 "Chromosome partition protein Smc"  
"OP8\_M19\_00093" 27567 "s59E13H2" 3.134055 "hypothetical protein"  
"OP8\_M19\_00093" 27567 "s59E25H2" 0 "hypothetical protein"  
"OP8\_M19\_00093" 27567 "s59E5H2" 1.863488 "hypothetical protein"  
"OP8\_M19\_00093" 27567 "s63E6H2" 0 "hypothetical protein"  
"OP8\_M19\_00094" 27568 "s59E13H2" 2.475053 "hypothetical protein"  
"OP8\_M19\_00094" 27568 "s59E25H2" 0 "hypothetical protein"  
"OP8\_M19\_00094" 27568 "s59E5H2" 2.101197 "hypothetical protein"  
"OP8\_M19\_00094" 27568 "s63E6H2" 0 "hypothetical protein"  
"OP8\_M19\_00095" 27569 "s59E13H2" 2.523106 "hypothetical protein"  
"OP8\_M19\_00095" 27569 "s59E25H2" 0 "hypothetical protein"  
"OP8\_M19\_00095" 27569 "s59E5H2" 3.455094 "hypothetical protein"  
"OP8\_M19\_00095" 27569 "s63E6H2" 0 "hypothetical protein"  
"OP8\_M19\_00096" 27570 "s59E13H2" 3.875894 "Peptidase family M50"  
"OP8\_M19\_00096" 27570 "s59E25H2" 0 "Peptidase family M50"  
"OP8\_M19\_00096" 27570 "s59E5H2" 8.066564 "Peptidase family M50"  
"OP8\_M19\_00096" 27570 "s63E6H2" 0 "Peptidase family M50"  
"OP8\_M19\_00097" 27571 "s59E13H2" 3.911333 "Ferredoxin"  
"OP8\_M19\_00097" 27571 "s59E25H2" 0 "Ferredoxin"  
"OP8\_M19\_00097" 27571 "s59E5H2" 5.245863 "Ferredoxin"  
"OP8\_M19\_00097" 27571 "s63E6H2" 0 "Ferredoxin"  
"OP8\_M19\_00098" 27572 "s59E13H2" 2.786027 "Tetratricopeptide repeat protein"  
"OP8\_M19\_00098" 27572 "s59E25H2" 0 "Tetratricopeptide repeat protein"  
"OP8\_M19\_00098" 27572 "s59E5H2" 3.362812 "Tetratricopeptide repeat protein"  
"OP8\_M19\_00098" 27572 "s63E6H2" 0 "Tetratricopeptide repeat protein"  
"OP8\_M19\_00099" 27573 "s59E13H2" 2.1638 "hypothetical protein"  
"OP8\_M19\_00099" 27573 "s59E25H2" 1.494309 "hypothetical protein"  
"OP8\_M19\_00099" 27573 "s59E5H2" 1.51813 "hypothetical protein"  
"OP8\_M19\_00099" 27573 "s63E6H2" 0.002906197 "hypothetical protein"  
"OP8\_M19\_00100" 27574 "s59E13H2" 0.1763365 "hypothetical protein"  
"OP8\_M19\_00100" 27574 "s59E25H2" 0 "hypothetical protein"  
"OP8\_M19\_00100" 27574 "s59E5H2" 1.312053 "hypothetical protein"

"OP8\_M19\_00100" 27574 "s63E6H2" 0 "hypothetical protein"  
"OP8\_M19\_00101" 27575 "s59E13H2" 5.037399 "S-adenosylmethionine synthase"  
"OP8\_M19\_00101" 27575 "s59E25H2" 0 "S-adenosylmethionine synthase"  
"OP8\_M19\_00101" 27575 "s59E5H2" 5.142953 "S-adenosylmethionine synthase"  
"OP8\_M19\_00101" 27575 "s63E6H2" 0 "S-adenosylmethionine synthase"  
"OP8\_M19\_00102" 27576 "s59E13H2" 3.043338 "Peptidase M16 inactive domain protein"  
"OP8\_M19\_00102" 27576 "s59E25H2" 0 "Peptidase M16 inactive domain protein"  
"OP8\_M19\_00102" 27576 "s59E5H2" 3.072282 "Peptidase M16 inactive domain protein"  
"OP8\_M19\_00102" 27576 "s63E6H2" 0 "Peptidase M16 inactive domain protein"  
"OP8\_M19\_00103" 27577 "s59E13H2" 2.35998 "Peptidase M16 inactive domain protein"  
"OP8\_M19\_00103" 27577 "s59E25H2" 0 "Peptidase M16 inactive domain protein"  
"OP8\_M19\_00103" 27577 "s59E5H2" 2.779279 "Peptidase M16 inactive domain protein"  
"OP8\_M19\_00103" 27577 "s63E6H2" 0 "Peptidase M16 inactive domain protein"  
"OP8\_M19\_00104" 27578 "s59E13H2" 2.932313 "Methenyltetrahydrofolate cyclohydrolase"  
"OP8\_M19\_00104" 27578 "s59E25H2" 0.1466188 "Methenyltetrahydrofolate cyclohydrolase"  
"OP8\_M19\_00104" 27578 "s59E5H2" 4.634732 "Methenyltetrahydrofolate cyclohydrolase"  
"OP8\_M19\_00104" 27578 "s63E6H2" 0 "Methenyltetrahydrofolate cyclohydrolase"  
"OP8\_M19\_00105" 27579 "s59E13H2" 2.992496 "O-acetyl-ADP-ribose deacetylase"  
"OP8\_M19\_00105" 27579 "s59E25H2" 0 "O-acetyl-ADP-ribose deacetylase"  
"OP8\_M19\_00105" 27579 "s59E5H2" 3.39837 "O-acetyl-ADP-ribose deacetylase"  
"OP8\_M19\_00105" 27579 "s63E6H2" 0 "O-acetyl-ADP-ribose deacetylase"  
"OP8\_M19\_00106" 27580 "s59E13H2" 3.844483 "Cytosol non-specific dipeptidase"  
"OP8\_M19\_00106" 27580 "s59E25H2" 0 "Cytosol non-specific dipeptidase"  
"OP8\_M19\_00106" 27580 "s59E5H2" 4.413658 "Cytosol non-specific dipeptidase"  
"OP8\_M19\_00106" 27580 "s63E6H2" 0 "Cytosol non-specific dipeptidase"  
"OP8\_M19\_00107" 27581 "s59E13H2" 2.486829 "hypothetical protein"  
"OP8\_M19\_00107" 27581 "s59E25H2" 0 "hypothetical protein"  
"OP8\_M19\_00107" 27581 "s59E5H2" 6.282841 "hypothetical protein"  
"OP8\_M19\_00107" 27581 "s63E6H2" 0 "hypothetical protein"  
"OP8\_M19\_00108" 27582 "s59E13H2" 0.4595272 "ADP-ribosyl-[dinitrogen reductase] glycohydrolase"  
"OP8\_M19\_00108" 27582 "s59E25H2" 0 "ADP-ribosyl-[dinitrogen reductase] glycohydrolase"  
"OP8\_M19\_00108" 27582 "s59E5H2" 3.613492 "ADP-ribosyl-[dinitrogen reductase] glycohydrolase"  
"OP8\_M19\_00108" 27582 "s63E6H2" 0.003079681 "ADP-ribosyl-[dinitrogen reductase] glycohydrolase"  
"OP8\_M19\_00109" 27583 "s59E13H2" 0.03448482 "hypothetical protein"  
"OP8\_M19\_00109" 27583 "s59E25H2" 0 "hypothetical protein"  
"OP8\_M19\_00109" 27583 "s59E5H2" 2.153986 "hypothetical protein"  
"OP8\_M19\_00109" 27583 "s63E6H2" 0 "hypothetical protein"  
"OP8\_M19\_00110" 27584 "s59E13H2" 0.0128338 "5'-nucleotidase"  
"OP8\_M19\_00110" 27584 "s59E25H2" 0 "5'-nucleotidase"  
"OP8\_M19\_00110" 27584 "s59E5H2" 1.174959 "5'-nucleotidase"  
"OP8\_M19\_00110" 27584 "s63E6H2" 0 "5'-nucleotidase"  
"OP8\_M19\_00111" 27585 "s59E13H2" 0.2240672 "L-aspartate oxidase"  
"OP8\_M19\_00111" 27585 "s59E25H2" 0 "L-aspartate oxidase"  
"OP8\_M19\_00111" 27585 "s59E5H2" 4.376386 "L-aspartate oxidase"  
"OP8\_M19\_00111" 27585 "s63E6H2" 0 "L-aspartate oxidase"  
"OP8\_M19\_00112" 27586 "s59E13H2" 0.1292769 "putative nicotinate-nucleotide pyrophosphorylase [carboxylating]"  
"OP8\_M19\_00112" 27586 "s59E25H2" 0 "putative nicotinate-nucleotide pyrophosphorylase [carboxylating]"

"OP8\_M19\_00112" 27586 "s59E5H2" 2.515101 "putative nicotinate-nucleotide pyrophosphorylase [carboxylating]"  
"OP8\_M19\_00112" 27586 "s63E6H2" 0 "putative nicotinate-nucleotide pyrophosphorylase [carboxylating]"  
"OP8\_M19\_00113" 27587 "s59E13H2" 0.02877451 "Acyl-CoA dehydrogenase"  
"OP8\_M19\_00113" 27587 "s59E25H2" 0 "Acyl-CoA dehydrogenase"  
"OP8\_M19\_00113" 27587 "s59E5H2" 0.3325495 "Acyl-CoA dehydrogenase"  
"OP8\_M19\_00113" 27587 "s63E6H2" 0.0926808 "Acyl-CoA dehydrogenase"  
"OP8\_M19\_00114" 27588 "s59E13H2" 0.002308707 "L-ribulose-5-phosphate 4-epimerase UlaF"  
"OP8\_M19\_00114" 27588 "s59E25H2" 0 "L-ribulose-5-phosphate 4-epimerase UlaF"  
"OP8\_M19\_00114" 27588 "s59E5H2" 0.5129365 "L-ribulose-5-phosphate 4-epimerase UlaF"  
"OP8\_M19\_00114" 27588 "s63E6H2" 0 "L-ribulose-5-phosphate 4-epimerase UlaF"  
"OP8\_M19\_00115" 27589 "s59E13H2" 0.2676337 "hypothetical protein"  
"OP8\_M19\_00115" 27589 "s59E25H2" 0 "hypothetical protein"  
"OP8\_M19\_00115" 27589 "s59E5H2" 0.6628116 "hypothetical protein"  
"OP8\_M19\_00115" 27589 "s63E6H2" 0 "hypothetical protein"  
"OP8\_M19\_00116" 27590 "s59E13H2" 0.5827957 "hypothetical protein"  
"OP8\_M19\_00116" 27590 "s59E25H2" 0 "hypothetical protein"  
"OP8\_M19\_00116" 27590 "s59E5H2" 1.441484 "hypothetical protein"  
"OP8\_M19\_00116" 27590 "s63E6H2" 0 "hypothetical protein"  
"OP8\_M19\_00117" 27591 "s59E13H2" 0.6617194 "Sorbitol dehydrogenase"  
"OP8\_M19\_00117" 27591 "s59E25H2" 0.2418112 "Sorbitol dehydrogenase"  
"OP8\_M19\_00117" 27591 "s59E5H2" 1.777965 "Sorbitol dehydrogenase"  
"OP8\_M19\_00117" 27591 "s63E6H2" 0 "Sorbitol dehydrogenase"  
"OP8\_M19\_00119" 27593 "s59E13H2" 0.008103603 "hypothetical protein"  
"OP8\_M19\_00119" 27593 "s59E25H2" 0 "hypothetical protein"  
"OP8\_M19\_00119" 27593 "s59E5H2" 0.2023056 "hypothetical protein"  
"OP8\_M19\_00119" 27593 "s63E6H2" 0 "hypothetical protein"  
"OP8\_M19\_00120" 27594 "s59E13H2" 0.004363054 "putative PIN and TRAM-domain containing protein precursor"  
"OP8\_M19\_00120" 27594 "s59E25H2" 0 "putative PIN and TRAM-domain containing protein precursor"  
"OP8\_M19\_00120" 27594 "s59E5H2" 0.187352 "putative PIN and TRAM-domain containing protein precursor"  
"OP8\_M19\_00120" 27594 "s63E6H2" 0 "putative PIN and TRAM-domain containing protein precursor"  
"OP8\_M19\_00121" 27595 "s59E13H2" 0.007394234 "2-C-methyl-D-erythritol 4-phosphate cytidylyltransferase"  
"OP8\_M19\_00121" 27595 "s59E25H2" 0 "2-C-methyl-D-erythritol 4-phosphate cytidylyltransferase"  
"OP8\_M19\_00121" 27595 "s59E5H2" 0.2428839 "2-C-methyl-D-erythritol 4-phosphate cytidylyltransferase"  
"OP8\_M19\_00121" 27595 "s63E6H2" 0 "2-C-methyl-D-erythritol 4-phosphate cytidylyltransferase"  
"OP8\_M19\_00122" 27596 "s59E13H2" 0.02191012 "2-C-methyl-D-erythritol 2,4-cyclodiphosphate synthase"  
"OP8\_M19\_00122" 27596 "s59E25H2" 0 "2-C-methyl-D-erythritol 2,4-cyclodiphosphate synthase"  
"OP8\_M19\_00122" 27596 "s59E5H2" 0.5186403 "2-C-methyl-D-erythritol 2,4-cyclodiphosphate synthase"  
"OP8\_M19\_00122" 27596 "s63E6H2" 0 "2-C-methyl-D-erythritol 2,4-cyclodiphosphate synthase"  
"OP8\_M19\_00123" 27597 "s59E13H2" 1.773975 "hypothetical protein"  
"OP8\_M19\_00123" 27597 "s59E25H2" 0 "hypothetical protein"  
"OP8\_M19\_00123" 27597 "s59E5H2" 0.7630845 "hypothetical protein"  
"OP8\_M19\_00123" 27597 "s63E6H2" 0 "hypothetical protein"  
"OP8\_M19\_00124" 27598 "s59E13H2" 0.9806524 "Peptidase M16 inactive domain protein"  
"OP8\_M19\_00124" 27598 "s59E25H2" 0 "Peptidase M16 inactive domain protein"  
"OP8\_M19\_00124" 27598 "s59E5H2" 0.7396474 "Peptidase M16 inactive domain protein"  
"OP8\_M19\_00124" 27598 "s63E6H2" 0 "Peptidase M16 inactive domain protein"  
"OP8\_M19\_00125" 27599 "s59E13H2" 0.006855602 "Phosphoserine aminotransferase"

"OP8\_M19\_00125" 27599 "s59E25H2" 0 "Phosphoserine aminotransferase"  
"OP8\_M19\_00125" 27599 "s59E5H2" 1.517698 "Phosphoserine aminotransferase"  
"OP8\_M19\_00125" 27599 "s63E6H2" 0 "Phosphoserine aminotransferase"  
"OP8\_M19\_00126" 27600 "s59E13H2" 0.5538035 "Phosphoglycolate phosphatase"  
"OP8\_M19\_00126" 27600 "s59E25H2" 0 "Phosphoglycolate phosphatase"  
"OP8\_M19\_00126" 27600 "s59E5H2" 1.616907 "Phosphoglycolate phosphatase"  
"OP8\_M19\_00126" 27600 "s63E6H2" 0 "Phosphoglycolate phosphatase"  
"OP8\_M19\_00127" 27601 "s59E13H2" 0.8478825 "Glutamate--tRNA ligase 1"  
"OP8\_M19\_00127" 27601 "s59E25H2" 0 "Glutamate--tRNA ligase 1"  
"OP8\_M19\_00127" 27601 "s59E5H2" 2.485288 "Glutamate--tRNA ligase 1"  
"OP8\_M19\_00127" 27601 "s63E6H2" 0 "Glutamate--tRNA ligase 1"  
"OP8\_M19\_00128" 27602 "s59E13H2" 1.218099 "Glutamine--tRNA ligase"  
"OP8\_M19\_00128" 27602 "s59E25H2" 0 "Glutamine--tRNA ligase"  
"OP8\_M19\_00128" 27602 "s59E5H2" 0.9540438 "Glutamine--tRNA ligase"  
"OP8\_M19\_00128" 27602 "s63E6H2" 0 "Glutamine--tRNA ligase"  
"OP8\_M19\_00129" 27603 "s59E13H2" 0.6447129 "Glutamine--tRNA ligase"  
"OP8\_M19\_00129" 27603 "s59E25H2" 0 "Glutamine--tRNA ligase"  
"OP8\_M19\_00129" 27603 "s59E5H2" 0.9653264 "Glutamine--tRNA ligase"  
"OP8\_M19\_00129" 27603 "s63E6H2" 0 "Glutamine--tRNA ligase"  
"OP8\_M19\_00131" 27605 "s59E13H2" 0 "hypothetical protein"  
"OP8\_M19\_00131" 27605 "s59E25H2" 0 "hypothetical protein"  
"OP8\_M19\_00131" 27605 "s59E5H2" 0.04554725 "hypothetical protein"  
"OP8\_M19\_00131" 27605 "s63E6H2" 0 "hypothetical protein"  
"OP8\_M19\_00132" 27606 "s59E13H2" 0.02827652 "Opine dehydrogenase"  
"OP8\_M19\_00132" 27606 "s59E25H2" 0 "Opine dehydrogenase"  
"OP8\_M19\_00132" 27606 "s59E5H2" 2.353849 "Opine dehydrogenase"  
"OP8\_M19\_00132" 27606 "s63E6H2" 0 "Opine dehydrogenase"  
"OP8\_M19\_00133" 27607 "s59E13H2" 0.008578129 "hypothetical protein"  
"OP8\_M19\_00133" 27607 "s59E25H2" 0 "hypothetical protein"  
"OP8\_M19\_00133" 27607 "s59E5H2" 3.216452 "hypothetical protein"  
"OP8\_M19\_00133" 27607 "s63E6H2" 0 "hypothetical protein"  
"OP8\_M19\_00134" 27608 "s59E13H2" 0.01165086 "protease TldD"  
"OP8\_M19\_00134" 27608 "s59E25H2" 0 "protease TldD"  
"OP8\_M19\_00134" 27608 "s59E5H2" 3.606398 "protease TldD"  
"OP8\_M19\_00134" 27608 "s63E6H2" 0 "protease TldD"  
"OP8\_M19\_00135" 27609 "s59E13H2" 0.01247245 "peptidase PmbA"  
"OP8\_M19\_00135" 27609 "s59E25H2" 0 "peptidase PmbA"  
"OP8\_M19\_00135" 27609 "s59E5H2" 0.8639382 "peptidase PmbA"  
"OP8\_M19\_00135" 27609 "s63E6H2" 0 "peptidase PmbA"  
"OP8\_M19\_00136" 27610 "s59E13H2" 0.02261775 "5,6-dimethylbenzimidazole synthase"  
"OP8\_M19\_00136" 27610 "s59E25H2" 0 "5,6-dimethylbenzimidazole synthase"  
"OP8\_M19\_00136" 27610 "s59E5H2" 0.9758562 "5,6-dimethylbenzimidazole synthase"  
"OP8\_M19\_00136" 27610 "s63E6H2" 0 "5,6-dimethylbenzimidazole synthase"  
"OP8\_M19\_00137" 27611 "s59E13H2" 0.006328275 "hypothetical protein"  
"OP8\_M19\_00137" 27611 "s59E25H2" 0 "hypothetical protein"  
"OP8\_M19\_00137" 27611 "s59E5H2" 0.3504194 "hypothetical protein"  
"OP8\_M19\_00137" 27611 "s63E6H2" 0 "hypothetical protein"

"OP8\_M19\_00138" 27612 "s59E13H2" 0 "Phosphosulfolactate synthase"  
"OP8\_M19\_00138" 27612 "s59E25H2" 0 "Phosphosulfolactate synthase"  
"OP8\_M19\_00138" 27612 "s59E5H2" 0.1471179 "Phosphosulfolactate synthase"  
"OP8\_M19\_00138" 27612 "s63E6H2" 0 "Phosphosulfolactate synthase"  
"OP8\_M19\_00139" 27613 "s59E13H2" 0 "hypothetical protein"  
"OP8\_M19\_00139" 27613 "s59E25H2" 0 "hypothetical protein"  
"OP8\_M19\_00139" 27613 "s59E5H2" 0.1446637 "hypothetical protein"  
"OP8\_M19\_00139" 27613 "s63E6H2" 0 "hypothetical protein"  
"OP8\_M19\_00140" 27614 "s59E13H2" 0.5706143 "D-beta-D-heptose 1-phosphate adenylyltransferase"  
"OP8\_M19\_00140" 27614 "s59E25H2" 0 "D-beta-D-heptose 1-phosphate adenylyltransferase"  
"OP8\_M19\_00140" 27614 "s59E5H2" 2.202809 "D-beta-D-heptose 1-phosphate adenylyltransferase"  
"OP8\_M19\_00140" 27614 "s63E6H2" 0 "D-beta-D-heptose 1-phosphate adenylyltransferase"  
"OP8\_M19\_00141" 27615 "s59E13H2" 0.800727 "Lipopolysaccharide heptosyltransferase 1"  
"OP8\_M19\_00141" 27615 "s59E25H2" 0 "Lipopolysaccharide heptosyltransferase 1"  
"OP8\_M19\_00141" 27615 "s59E5H2" 3.865534 "Lipopolysaccharide heptosyltransferase 1"  
"OP8\_M19\_00141" 27615 "s63E6H2" 0 "Lipopolysaccharide heptosyltransferase 1"  
"OP8\_M19\_00142" 27616 "s59E13H2" 0.8165891 "hypothetical protein"  
"OP8\_M19\_00142" 27616 "s59E25H2" 0 "hypothetical protein"  
"OP8\_M19\_00142" 27616 "s59E5H2" 4.042566 "hypothetical protein"  
"OP8\_M19\_00142" 27616 "s63E6H2" 0 "hypothetical protein"  
"OP8\_M19\_00143" 27617 "s59E13H2" 0.8353284 "tRNA (guanosine(18)-2'-O)-methyltransferase"  
"OP8\_M19\_00143" 27617 "s59E25H2" 0 "tRNA (guanosine(18)-2'-O)-methyltransferase"  
"OP8\_M19\_00143" 27617 "s59E5H2" 3.776303 "tRNA (guanosine(18)-2'-O)-methyltransferase"  
"OP8\_M19\_00143" 27617 "s63E6H2" 0 "tRNA (guanosine(18)-2'-O)-methyltransferase"  
"OP8\_M19\_00144" 27618 "s59E13H2" 0.7049446 "putative periplasmic serine endoprotease DegP-like precursor"  
"OP8\_M19\_00144" 27618 "s59E25H2" 0 "putative periplasmic serine endoprotease DegP-like precursor"  
"OP8\_M19\_00144" 27618 "s59E5H2" 2.480265 "putative periplasmic serine endoprotease DegP-like precursor"  
"OP8\_M19\_00144" 27618 "s63E6H2" 0 "putative periplasmic serine endoprotease DegP-like precursor"  
"OP8\_M19\_00145" 27619 "s59E13H2" 0.3360998 "hypothetical protein"  
"OP8\_M19\_00145" 27619 "s59E25H2" 0 "hypothetical protein"  
"OP8\_M19\_00145" 27619 "s59E5H2" 1.101138 "hypothetical protein"  
"OP8\_M19\_00145" 27619 "s63E6H2" 0 "hypothetical protein"  
"OP8\_M19\_00146" 27620 "s59E13H2" 0 "ECF RNA polymerase sigma factor SigW"  
"OP8\_M19\_00146" 27620 "s59E25H2" 0 "ECF RNA polymerase sigma factor SigW"  
"OP8\_M19\_00146" 27620 "s59E5H2" 1.022974 "ECF RNA polymerase sigma factor SigW"  
"OP8\_M19\_00146" 27620 "s63E6H2" 0 "ECF RNA polymerase sigma factor SigW"  
"OP8\_M19\_00147" 27621 "s59E13H2" 0.006113745 "ECF RNA polymerase sigma factor SigW"  
"OP8\_M19\_00147" 27621 "s59E25H2" 0 "ECF RNA polymerase sigma factor SigW"  
"OP8\_M19\_00147" 27621 "s59E5H2" 0.9128106 "ECF RNA polymerase sigma factor SigW"  
"OP8\_M19\_00147" 27621 "s63E6H2" 0 "ECF RNA polymerase sigma factor SigW"  
"OP8\_M19\_00148" 27622 "s59E13H2" 0.0005726492 "Anti-sigma-W factor RsiW"  
"OP8\_M19\_00148" 27622 "s59E25H2" 0 "Anti-sigma-W factor RsiW"  
"OP8\_M19\_00148" 27622 "s59E5H2" 1.861485 "Anti-sigma-W factor RsiW"  
"OP8\_M19\_00148" 27622 "s63E6H2" 0 "Anti-sigma-W factor RsiW"  
"OP8\_M19\_00149" 27623 "s59E13H2" 0 "hypothetical protein"  
"OP8\_M19\_00149" 27623 "s59E25H2" 0 "hypothetical protein"  
"OP8\_M19\_00149" 27623 "s59E5H2" 1.624612 "hypothetical protein"



"OP8\_M19\_00149" 27623 "s63E6H2" 0 "hypothetical protein"  
"OP8\_M19\_00150" 27624 "s59E13H2" 0.001075261 "hypothetical protein"  
"OP8\_M19\_00150" 27624 "s59E25H2" 0 "hypothetical protein"  
"OP8\_M19\_00150" 27624 "s59E5H2" 1.409559 "hypothetical protein"  
"OP8\_M19\_00150" 27624 "s63E6H2" 0 "hypothetical protein"  
"OP8\_M19\_00151" 27625 "s59E13H2" 0.009006395 "hypothetical protein"  
"OP8\_M19\_00151" 27625 "s59E25H2" 0 "hypothetical protein"  
"OP8\_M19\_00151" 27625 "s59E5H2" 1.666738 "hypothetical protein"  
"OP8\_M19\_00151" 27625 "s63E6H2" 0 "hypothetical protein"  
"OP8\_M19\_00152" 27626 "s59E13H2" 0.01320555 "hypothetical protein"  
"OP8\_M19\_00152" 27626 "s59E25H2" 0 "hypothetical protein"  
"OP8\_M19\_00152" 27626 "s59E5H2" 1.430898 "hypothetical protein"  
"OP8\_M19\_00152" 27626 "s63E6H2" 0 "hypothetical protein"  
"OP8\_M19\_00153" 27627 "s59E13H2" 0.002858138 "Transposase DDE domain protein"  
"OP8\_M19\_00153" 27627 "s59E25H2" 0 "Transposase DDE domain protein"  
"OP8\_M19\_00153" 27627 "s59E5H2" 10.30527 "Transposase DDE domain protein"  
"OP8\_M19\_00153" 27627 "s63E6H2" 0 "Transposase DDE domain protein"  
"OP8\_M19\_00154" 27628 "s59E13H2" 0.007805131 "Octanoyltransferase LipM"  
"OP8\_M19\_00154" 27628 "s59E25H2" 0 "Octanoyltransferase LipM"  
"OP8\_M19\_00154" 27628 "s59E5H2" 0.2300993 "Octanoyltransferase LipM"  
"OP8\_M19\_00154" 27628 "s63E6H2" 0 "Octanoyltransferase LipM"  
"OP8\_M19\_00156" 27630 "s59E13H2" 0 "PBS lyase HEAT-like repeat protein"  
"OP8\_M19\_00156" 27630 "s59E25H2" 0 "PBS lyase HEAT-like repeat protein"  
"OP8\_M19\_00156" 27630 "s59E5H2" 0.1533462 "PBS lyase HEAT-like repeat protein"  
"OP8\_M19\_00156" 27630 "s63E6H2" 0 "PBS lyase HEAT-like repeat protein"  
"OP8\_M19\_00158" 27632 "s59E13H2" 0 "hypothetical protein"  
"OP8\_M19\_00158" 27632 "s59E25H2" 0 "hypothetical protein"  
"OP8\_M19\_00158" 27632 "s59E5H2" 0.7144718 "hypothetical protein"  
"OP8\_M19\_00158" 27632 "s63E6H2" 0 "hypothetical protein"  
"OP8\_M19\_00159" 27633 "s59E13H2" 0.02065002 "Elongation factor 4"  
"OP8\_M19\_00159" 27633 "s59E25H2" 0 "Elongation factor 4"  
"OP8\_M19\_00159" 27633 "s59E5H2" 1.022232 "Elongation factor 4"  
"OP8\_M19\_00159" 27633 "s63E6H2" 0 "Elongation factor 4"  
"OP8\_M19\_00160" 27634 "s59E13H2" 0.04892573 "putative HTH-type transcriptional regulator YbaQ"  
"OP8\_M19\_00160" 27634 "s59E25H2" 0 "putative HTH-type transcriptional regulator YbaQ"  
"OP8\_M19\_00160" 27634 "s59E5H2" 1.172152 "putative HTH-type transcriptional regulator YbaQ"  
"OP8\_M19\_00160" 27634 "s63E6H2" 0 "putative HTH-type transcriptional regulator YbaQ"  
"OP8\_M19\_00161" 27635 "s59E13H2" 0.04412688 "Plasmid maintenance system killer protein"  
"OP8\_M19\_00161" 27635 "s59E25H2" 0 "Plasmid maintenance system killer protein"  
"OP8\_M19\_00161" 27635 "s59E5H2" 2.677667 "Plasmid maintenance system killer protein"  
"OP8\_M19\_00161" 27635 "s63E6H2" 0 "Plasmid maintenance system killer protein"  
"OP8\_M19\_00162" 27636 "s59E13H2" 0.03532519 "hypothetical protein"  
"OP8\_M19\_00162" 27636 "s59E25H2" 0 "hypothetical protein"  
"OP8\_M19\_00162" 27636 "s59E5H2" 1.259648 "hypothetical protein"  
"OP8\_M19\_00162" 27636 "s63E6H2" 0 "hypothetical protein"  
"OP8\_M19\_00163" 27637 "s59E13H2" 0.04067523 "Chain length determinant protein"  
"OP8\_M19\_00163" 27637 "s59E25H2" 0 "Chain length determinant protein"

"OP8\_M19\_00163" 27637 "s59E5H2" 1.105577 "Chain length determinant protein"  
"OP8\_M19\_00163" 27637 "s63E6H2" 0 "Chain length determinant protein"  
"OP8\_M19\_00164" 27638 "s59E13H2" 0.02070725 "hypothetical protein"  
"OP8\_M19\_00164" 27638 "s59E25H2" 0 "hypothetical protein"  
"OP8\_M19\_00164" 27638 "s59E5H2" 1.218173 "hypothetical protein"  
"OP8\_M19\_00164" 27638 "s63E6H2" 0 "hypothetical protein"  
"OP8\_M19\_00165" 27639 "s59E13H2" 0.002885654 "Nucleotidyltransferase domain protein"  
"OP8\_M19\_00165" 27639 "s59E25H2" 0 "Nucleotidyltransferase domain protein"  
"OP8\_M19\_00165" 27639 "s59E5H2" 0.53316 "Nucleotidyltransferase domain protein"  
"OP8\_M19\_00165" 27639 "s63E6H2" 0 "Nucleotidyltransferase domain protein"  
"OP8\_M19\_00166" 27640 "s59E13H2" 0.007315905 "hypothetical protein"  
"OP8\_M19\_00166" 27640 "s59E25H2" 0 "hypothetical protein"  
"OP8\_M19\_00166" 27640 "s59E5H2" 0.2790317 "hypothetical protein"  
"OP8\_M19\_00166" 27640 "s63E6H2" 0 "hypothetical protein"  
"OP8\_M19\_00167" 27641 "s59E13H2" 0 "GDP-mannose 4,6-dehydratase"  
"OP8\_M19\_00167" 27641 "s59E25H2" 0 "GDP-mannose 4,6-dehydratase"  
"OP8\_M19\_00167" 27641 "s59E5H2" 0.03393068 "GDP-mannose 4,6-dehydratase"  
"OP8\_M19\_00167" 27641 "s63E6H2" 0 "GDP-mannose 4,6-dehydratase"  
"OP8\_M19\_00168" 27642 "s59E13H2" 0.01426462 "Nucleotidyltransferase domain protein"  
"OP8\_M19\_00168" 27642 "s59E25H2" 0 "Nucleotidyltransferase domain protein"  
"OP8\_M19\_00168" 27642 "s59E5H2" 0.05944302 "Nucleotidyltransferase domain protein"  
"OP8\_M19\_00168" 27642 "s63E6H2" 0 "Nucleotidyltransferase domain protein"  
"OP8\_M19\_00169" 27643 "s59E13H2" 0 "HEPN domain protein"  
"OP8\_M19\_00169" 27643 "s59E25H2" 0 "HEPN domain protein"  
"OP8\_M19\_00169" 27643 "s59E5H2" 0.02291732 "HEPN domain protein"  
"OP8\_M19\_00169" 27643 "s63E6H2" 0 "HEPN domain protein"  
"OP8\_M19\_00170" 27644 "s59E13H2" 0 "hypothetical protein"  
"OP8\_M19\_00170" 27644 "s59E25H2" 0 "hypothetical protein"  
"OP8\_M19\_00170" 27644 "s59E5H2" 0 "hypothetical protein"  
"OP8\_M19\_00170" 27644 "s63E6H2" 0 "hypothetical protein"  
"OP8\_M19\_00171" 27645 "s59E13H2" 0.003060706 "Archaeal ATPase"  
"OP8\_M19\_00171" 27645 "s59E25H2" 0 "Archaeal ATPase"  
"OP8\_M19\_00171" 27645 "s59E5H2" 0.3651929 "Archaeal ATPase"  
"OP8\_M19\_00171" 27645 "s63E6H2" 0 "Archaeal ATPase"  
"OP8\_M19\_00172" 27646 "s59E13H2" 0 "hypothetical protein"  
"OP8\_M19\_00172" 27646 "s59E25H2" 0 "hypothetical protein"  
"OP8\_M19\_00172" 27646 "s59E5H2" 0.1942526 "hypothetical protein"  
"OP8\_M19\_00172" 27646 "s63E6H2" 0 "hypothetical protein"  
"OP8\_M19\_00173" 27647 "s59E13H2" 0 "hypothetical protein"  
"OP8\_M19\_00173" 27647 "s59E25H2" 0 "hypothetical protein"  
"OP8\_M19\_00173" 27647 "s59E5H2" 0.3115772 "hypothetical protein"  
"OP8\_M19\_00173" 27647 "s63E6H2" 0 "hypothetical protein"  
"OP8\_M19\_00175" 27649 "s59E13H2" 0 "Nucleotidyltransferase domain protein"  
"OP8\_M19\_00175" 27649 "s59E25H2" 0 "Nucleotidyltransferase domain protein"  
"OP8\_M19\_00175" 27649 "s59E5H2" 0.1555013 "Nucleotidyltransferase domain protein"  
"OP8\_M19\_00175" 27649 "s63E6H2" 0 "Nucleotidyltransferase domain protein"  
"OP8\_M19\_00176" 27650 "s59E13H2" 0.01178257 "GDP-mannose 4,6-dehydratase"

"OP8\_M19\_00176" 27650 "s59E25H2" 0 "GDP-mannose 4,6-dehydratase"  
"OP8\_M19\_00176" 27650 "s59E5H2" 0.2360568 "GDP-mannose 4,6-dehydratase"  
"OP8\_M19\_00176" 27650 "s63E6H2" 0 "GDP-mannose 4,6-dehydratase"  
"OP8\_M19\_00177" 27651 "s59E13H2" 0 "putative membrane protein EpsK"  
"OP8\_M19\_00177" 27651 "s59E25H2" 0 "putative membrane protein EpsK"  
"OP8\_M19\_00177" 27651 "s59E5H2" 0.01477351 "putative membrane protein EpsK"  
"OP8\_M19\_00177" 27651 "s63E6H2" 0 "putative membrane protein EpsK"  
"OP8\_M19\_00178" 27652 "s59E13H2" 0 "Polysaccharide pyruvyl transferase"  
"OP8\_M19\_00178" 27652 "s59E25H2" 0 "Polysaccharide pyruvyl transferase"  
"OP8\_M19\_00178" 27652 "s59E5H2" 0 "Polysaccharide pyruvyl transferase"  
"OP8\_M19\_00178" 27652 "s63E6H2" 0 "Polysaccharide pyruvyl transferase"  
"OP8\_M19\_00179" 27653 "s59E13H2" 0 "hypothetical protein"  
"OP8\_M19\_00179" 27653 "s59E25H2" 0 "hypothetical protein"  
"OP8\_M19\_00179" 27653 "s59E5H2" 0.05190599 "hypothetical protein"  
"OP8\_M19\_00179" 27653 "s63E6H2" 0 "hypothetical protein"  
"OP8\_M19\_00180" 27654 "s59E13H2" 0.02287861 "Chromosome partition protein Smc"  
"OP8\_M19\_00180" 27654 "s59E25H2" 0 "Chromosome partition protein Smc"  
"OP8\_M19\_00180" 27654 "s59E5H2" 0.6988883 "Chromosome partition protein Smc"  
"OP8\_M19\_00180" 27654 "s63E6H2" 0 "Chromosome partition protein Smc"  
"OP8\_M19\_00181" 27655 "s59E13H2" 0.001436836 "hypothetical protein"  
"OP8\_M19\_00181" 27655 "s59E25H2" 0 "hypothetical protein"  
"OP8\_M19\_00181" 27655 "s59E5H2" 0.8351706 "hypothetical protein"  
"OP8\_M19\_00181" 27655 "s63E6H2" 0 "hypothetical protein"  
"OP8\_M19\_00186" 27660 "s59E13H2" 0.02238609 "Macrolide export ATP-binding/permease protein MacB"  
"OP8\_M19\_00186" 27660 "s59E25H2" 0 "Macrolide export ATP-binding/permease protein MacB"  
"OP8\_M19\_00186" 27660 "s59E5H2" 0.6026375 "Macrolide export ATP-binding/permease protein MacB"  
"OP8\_M19\_00186" 27660 "s63E6H2" 0.1165439 "Macrolide export ATP-binding/permease protein MacB"  
"OP8\_M19\_00187" 27661 "s59E13H2" 0.01215843 "DNA gyrase subunit B"  
"OP8\_M19\_00187" 27661 "s59E25H2" 0 "DNA gyrase subunit B"  
"OP8\_M19\_00187" 27661 "s59E5H2" 2.060426 "DNA gyrase subunit B"  
"OP8\_M19\_00187" 27661 "s63E6H2" 0.0006193993 "DNA gyrase subunit B"  
"OP8\_M19\_00188" 27662 "s59E13H2" 0.01920617 "DNA gyrase subunit A"  
"OP8\_M19\_00188" 27662 "s59E25H2" 0 "DNA gyrase subunit A"  
"OP8\_M19\_00188" 27662 "s59E5H2" 5.862239 "DNA gyrase subunit A"  
"OP8\_M19\_00188" 27662 "s63E6H2" 0 "DNA gyrase subunit A"  
"OP8\_M19\_00189" 27663 "s59E13H2" 0.0261255 "Long-chain-fatty-acid--CoA ligase FadD15"  
"OP8\_M19\_00189" 27663 "s59E25H2" 0 "Long-chain-fatty-acid--CoA ligase FadD15"  
"OP8\_M19\_00189" 27663 "s59E5H2" 10.39493 "Long-chain-fatty-acid--CoA ligase FadD15"  
"OP8\_M19\_00189" 27663 "s63E6H2" 0 "Long-chain-fatty-acid--CoA ligase FadD15"  
"OP8\_M19\_00190" 27664 "s59E13H2" 0.01772994 "Putative zinc ribbon domain protein"  
"OP8\_M19\_00190" 27664 "s59E25H2" 0 "Putative zinc ribbon domain protein"  
"OP8\_M19\_00190" 27664 "s59E5H2" 11.2808 "Putative zinc ribbon domain protein"  
"OP8\_M19\_00190" 27664 "s63E6H2" 0 "Putative zinc ribbon domain protein"  
"OP8\_M19\_00192" 27666 "s59E13H2" 0.004435264 "RNA polymerase sigma factor RpoD"  
"OP8\_M19\_00192" 27666 "s59E25H2" 0 "RNA polymerase sigma factor RpoD"  
"OP8\_M19\_00192" 27666 "s59E5H2" 8.515523 "RNA polymerase sigma factor RpoD"  
"OP8\_M19\_00192" 27666 "s63E6H2" 0 "RNA polymerase sigma factor RpoD"

"OP8\_M19\_00193" 27667 "s59E13H2" 0.002012614 "DNA primase"  
"OP8\_M19\_00193" 27667 "s59E25H2" 0 "DNA primase"  
"OP8\_M19\_00193" 27667 "s59E5H2" 4.812811 "DNA primase"  
"OP8\_M19\_00193" 27667 "s63E6H2" 0.0004467996 "DNA primase"  
"OP8\_M19\_00194" 27668 "s59E13H2" 0.002216516 "N5-carboxyaminoimidazole ribonucleotide mutase"  
"OP8\_M19\_00194" 27668 "s59E25H2" 0 "N5-carboxyaminoimidazole ribonucleotide mutase"  
"OP8\_M19\_00194" 27668 "s59E5H2" 3.690374 "N5-carboxyaminoimidazole ribonucleotide mutase"  
"OP8\_M19\_00194" 27668 "s63E6H2" 0.00151577 "N5-carboxyaminoimidazole ribonucleotide mutase"  
"OP8\_M19\_00195" 27669 "s59E13H2" 0.002179593 "UDP-3-O-[3-hydroxymyristoyl] N-acetylglucosamine deacetylase"  
"OP8\_M19\_00195" 27669 "s59E25H2" 0 "UDP-3-O-[3-hydroxymyristoyl] N-acetylglucosamine deacetylase"  
"OP8\_M19\_00195" 27669 "s59E5H2" 3.869929 "UDP-3-O-[3-hydroxymyristoyl] N-acetylglucosamine deacetylase"  
"OP8\_M19\_00195" 27669 "s63E6H2" 0 "UDP-3-O-[3-hydroxymyristoyl] N-acetylglucosamine deacetylase"  
"OP8\_M19\_00196" 27670 "s59E13H2" 0 "Tetratricopeptide repeat protein"  
"OP8\_M19\_00196" 27670 "s59E25H2" 0 "Tetratricopeptide repeat protein"  
"OP8\_M19\_00196" 27670 "s59E5H2" 4.559099 "Tetratricopeptide repeat protein"  
"OP8\_M19\_00196" 27670 "s63E6H2" 0 "Tetratricopeptide repeat protein"  
"OP8\_M19\_00197" 27671 "s59E13H2" 0.06233824 "Bifunctional protein GlmU"  
"OP8\_M19\_00197" 27671 "s59E25H2" 0 "Bifunctional protein GlmU"  
"OP8\_M19\_00197" 27671 "s59E5H2" 6.175989 "Bifunctional protein GlmU"  
"OP8\_M19\_00197" 27671 "s63E6H2" 0 "Bifunctional protein GlmU"  
"OP8\_M19\_00198" 27672 "s59E13H2" 0.09693138 "catecholate siderophore receptor CirA"  
"OP8\_M19\_00198" 27672 "s59E25H2" 0.1778488 "catecholate siderophore receptor CirA"  
"OP8\_M19\_00198" 27672 "s59E5H2" 11.8873 "catecholate siderophore receptor CirA"  
"OP8\_M19\_00198" 27672 "s63E6H2" 0 "catecholate siderophore receptor CirA"  
"OP8\_M19\_00199" 27673 "s59E13H2" 0.03562788 "Inositol-3-phosphate synthase"  
"OP8\_M19\_00199" 27673 "s59E25H2" 0 "Inositol-3-phosphate synthase"  
"OP8\_M19\_00199" 27673 "s59E5H2" 8.511087 "Inositol-3-phosphate synthase"  
"OP8\_M19\_00199" 27673 "s63E6H2" 0 "Inositol-3-phosphate synthase"  
"OP8\_M19\_00200" 27674 "s59E13H2" 0.03263197 "Bifunctional IPC transferase and DIPP synthase"  
"OP8\_M19\_00200" 27674 "s59E25H2" 0 "Bifunctional IPC transferase and DIPP synthase"  
"OP8\_M19\_00200" 27674 "s59E5H2" 6.423868 "Bifunctional IPC transferase and DIPP synthase"  
"OP8\_M19\_00200" 27674 "s63E6H2" 0 "Bifunctional IPC transferase and DIPP synthase"  
"OP8\_M19\_00201" 27675 "s59E13H2" 0.00189171 "hypothetical protein"  
"OP8\_M19\_00201" 27675 "s59E25H2" 0.07727273 "hypothetical protein"  
"OP8\_M19\_00201" 27675 "s59E5H2" 8.598126 "hypothetical protein"  
"OP8\_M19\_00201" 27675 "s63E6H2" 0 "hypothetical protein"  
"OP8\_M19\_00202" 27676 "s59E13H2" 0.07213673 "Pyruvate-flavodoxin oxidoreductase"  
"OP8\_M19\_00202" 27676 "s59E25H2" 0 "Pyruvate-flavodoxin oxidoreductase"  
"OP8\_M19\_00202" 27676 "s59E5H2" 0.8126651 "Pyruvate-flavodoxin oxidoreductase"  
"OP8\_M19\_00202" 27676 "s63E6H2" 0 "Pyruvate-flavodoxin oxidoreductase"  
"OP8\_M19\_00203" 27677 "s59E13H2" 0.01981867 "Xaa-Pro aminopeptidase 1"  
"OP8\_M19\_00203" 27677 "s59E25H2" 0 "Xaa-Pro aminopeptidase 1"  
"OP8\_M19\_00203" 27677 "s59E5H2" 0.5322482 "Xaa-Pro aminopeptidase 1"  
"OP8\_M19\_00203" 27677 "s63E6H2" 0 "Xaa-Pro aminopeptidase 1"  
"OP8\_M19\_00204" 27678 "s59E13H2" 0.02186009 "Dispase autolysis-inducing protein precursor"  
"OP8\_M19\_00204" 27678 "s59E25H2" 0 "Dispase autolysis-inducing protein precursor"  
"OP8\_M19\_00204" 27678 "s59E5H2" 1.044314 "Dispase autolysis-inducing protein precursor"

"OP8\_M19\_00204" 27678 "s63E6H2" 0 "Dispase autolysis-inducing protein precursor"  
"OP8\_M19\_00205" 27679 "s59E13H2" 0.01129423 "Benzylsuccinate synthase activating enzyme"  
"OP8\_M19\_00205" 27679 "s59E25H2" 0 "Benzylsuccinate synthase activating enzyme"  
"OP8\_M19\_00205" 27679 "s59E5H2" 1.063411 "Benzylsuccinate synthase activating enzyme"  
"OP8\_M19\_00205" 27679 "s63E6H2" 0 "Benzylsuccinate synthase activating enzyme"  
"OP8\_M19\_00206" 27680 "s59E13H2" 0.007279262 "Benzylsuccinate synthase alpha subunit"  
"OP8\_M19\_00206" 27680 "s59E25H2" 0 "Benzylsuccinate synthase alpha subunit"  
"OP8\_M19\_00206" 27680 "s59E5H2" 0.8319405 "Benzylsuccinate synthase alpha subunit"  
"OP8\_M19\_00206" 27680 "s63E6H2" 0 "Benzylsuccinate synthase alpha subunit"  
"OP8\_M19\_00207" 27681 "s59E13H2" 0.006796262 "4-hydroxyphenylacetate decarboxylase large subunit"  
"OP8\_M19\_00207" 27681 "s59E25H2" 0 "4-hydroxyphenylacetate decarboxylase large subunit"  
"OP8\_M19\_00207" 27681 "s59E5H2" 1.361414 "4-hydroxyphenylacetate decarboxylase large subunit"  
"OP8\_M19\_00207" 27681 "s63E6H2" 0 "4-hydroxyphenylacetate decarboxylase large subunit"  
"OP8\_M19\_00208" 27682 "s59E13H2" 0.02507911 "Xaa-Pro aminopeptidase"  
"OP8\_M19\_00208" 27682 "s59E25H2" 0 "Xaa-Pro aminopeptidase"  
"OP8\_M19\_00208" 27682 "s59E5H2" 2.599398 "Xaa-Pro aminopeptidase"  
"OP8\_M19\_00208" 27682 "s63E6H2" 0 "Xaa-Pro aminopeptidase"  
"OP8\_M19\_00209" 27683 "s59E13H2" 0.03306757 "hypothetical protein"  
"OP8\_M19\_00209" 27683 "s59E25H2" 0 "hypothetical protein"  
"OP8\_M19\_00209" 27683 "s59E5H2" 3.064726 "hypothetical protein"  
"OP8\_M19\_00209" 27683 "s63E6H2" 0 "hypothetical protein"  
"OP8\_M19\_00210" 27684 "s59E13H2" 0.05516389 "Signal transduction histidine-protein kinase BarA"  
"OP8\_M19\_00210" 27684 "s59E25H2" 0.004621606 "Signal transduction histidine-protein kinase BarA"  
"OP8\_M19\_00210" 27684 "s59E5H2" 6.289428 "Signal transduction histidine-protein kinase BarA"  
"OP8\_M19\_00210" 27684 "s63E6H2" 0.0002692541 "Signal transduction histidine-protein kinase BarA"  
"OP8\_M19\_00211" 27685 "s59E13H2" 0.02800072 "Penicillin-binding protein 2D"  
"OP8\_M19\_00211" 27685 "s59E25H2" 0 "Penicillin-binding protein 2D"  
"OP8\_M19\_00211" 27685 "s59E5H2" 6.848497 "Penicillin-binding protein 2D"  
"OP8\_M19\_00211" 27685 "s63E6H2" 0 "Penicillin-binding protein 2D"  
"OP8\_M19\_00212" 27686 "s59E13H2" 0.01330395 "hypothetical protein"  
"OP8\_M19\_00212" 27686 "s59E25H2" 0.1416226 "hypothetical protein"  
"OP8\_M19\_00212" 27686 "s59E5H2" 6.74748 "hypothetical protein"  
"OP8\_M19\_00212" 27686 "s63E6H2" 0 "hypothetical protein"  
"OP8\_M19\_00213" 27687 "s59E13H2" 0.04020723 "Peptidase M16 inactive domain protein"  
"OP8\_M19\_00213" 27687 "s59E25H2" 0 "Peptidase M16 inactive domain protein"  
"OP8\_M19\_00213" 27687 "s59E5H2" 3.824049 "Peptidase M16 inactive domain protein"  
"OP8\_M19\_00213" 27687 "s63E6H2" 0 "Peptidase M16 inactive domain protein"  
"OP8\_M19\_00214" 27688 "s59E13H2" 0 "Peptidase M16 inactive domain protein"  
"OP8\_M19\_00214" 27688 "s59E25H2" 0 "Peptidase M16 inactive domain protein"  
"OP8\_M19\_00214" 27688 "s59E5H2" 0.8831891 "Peptidase M16 inactive domain protein"  
"OP8\_M19\_00214" 27688 "s63E6H2" 0 "Peptidase M16 inactive domain protein"  
"OP8\_M19\_00215" 27689 "s59E13H2" 0.1148961 "Transcriptional regulatory protein ZraR"  
"OP8\_M19\_00215" 27689 "s59E25H2" 0 "Transcriptional regulatory protein ZraR"  
"OP8\_M19\_00215" 27689 "s59E5H2" 1.081616 "Transcriptional regulatory protein ZraR"  
"OP8\_M19\_00215" 27689 "s63E6H2" 0 "Transcriptional regulatory protein ZraR"  
"OP8\_M19\_00220" 27694 "s59E13H2" 0.2149575 "hypothetical protein"  
"OP8\_M19\_00220" 27694 "s59E25H2" 0 "hypothetical protein"

"OP8\_M19\_00220" 27694 "s59E5H2" 1.486767 "hypothetical protein"  
"OP8\_M19\_00220" 27694 "s63E6H2" 0 "hypothetical protein"  
"OP8\_M19\_00221" 27695 "s59E13H2" 0.2654845 "High molecular weight rubredoxin"  
"OP8\_M19\_00221" 27695 "s59E25H2" 0 "High molecular weight rubredoxin"  
"OP8\_M19\_00221" 27695 "s59E5H2" 1.194086 "High molecular weight rubredoxin"  
"OP8\_M19\_00221" 27695 "s63E6H2" 0 "High molecular weight rubredoxin"  
"OP8\_M19\_00222" 27696 "s59E13H2" 0.2462836 "Desulfoferrodoxin"  
"OP8\_M19\_00222" 27696 "s59E25H2" 0 "Desulfoferrodoxin"  
"OP8\_M19\_00222" 27696 "s59E5H2" 1.234124 "Desulfoferrodoxin"  
"OP8\_M19\_00222" 27696 "s63E6H2" 0 "Desulfoferrodoxin"  
"OP8\_M19\_00223" 27697 "s59E13H2" 0.2688587 "Rubrerythrin"  
"OP8\_M19\_00223" 27697 "s59E25H2" 0 "Rubrerythrin"  
"OP8\_M19\_00223" 27697 "s59E5H2" 2.740101 "Rubrerythrin"  
"OP8\_M19\_00223" 27697 "s63E6H2" 0 "Rubrerythrin"  
"OP8\_M19\_00224" 27698 "s59E13H2" 0.3276177 "hypothetical protein"  
"OP8\_M19\_00224" 27698 "s59E25H2" 0 "hypothetical protein"  
"OP8\_M19\_00224" 27698 "s59E5H2" 2.648975 "hypothetical protein"  
"OP8\_M19\_00224" 27698 "s63E6H2" 0 "hypothetical protein"  
"OP8\_M19\_00231" 27705 "s59E13H2" 0.0001318596 "hypothetical protein"  
"OP8\_M19\_00231" 27705 "s59E25H2" 0 "hypothetical protein"  
"OP8\_M19\_00231" 27705 "s59E5H2" 0.03419062 "hypothetical protein"  
"OP8\_M19\_00231" 27705 "s63E6H2" 0 "hypothetical protein"  
"OP8\_M19\_00232" 27706 "s59E13H2" 0 "O-Antigen ligase"  
"OP8\_M19\_00232" 27706 "s59E25H2" 0 "O-Antigen ligase"  
"OP8\_M19\_00232" 27706 "s59E5H2" 0.02115574 "O-Antigen ligase"  
"OP8\_M19\_00232" 27706 "s63E6H2" 0 "O-Antigen ligase"  
"OP8\_M19\_00233" 27707 "s59E13H2" 0 "GalNAc(5)-diNAcBac-PP-undecaprenol beta-1,3-glucosyltransferase"  
"OP8\_M19\_00233" 27707 "s59E25H2" 0 "GalNAc(5)-diNAcBac-PP-undecaprenol beta-1,3-glucosyltransferase"  
"OP8\_M19\_00233" 27707 "s59E5H2" 0.001309318 "GalNAc(5)-diNAcBac-PP-undecaprenol beta-1,3-glucosyltransferase"  
"OP8\_M19\_00233" 27707 "s63E6H2" 0 "GalNAc(5)-diNAcBac-PP-undecaprenol beta-1,3-glucosyltransferase"  
"OP8\_M19\_00234" 27708 "s59E13H2" 0.05579249 "Cell division protein FtsA"  
"OP8\_M19\_00234" 27708 "s59E25H2" 0 "Cell division protein FtsA"  
"OP8\_M19\_00234" 27708 "s59E5H2" 1.403706 "Cell division protein FtsA"  
"OP8\_M19\_00234" 27708 "s63E6H2" 0 "Cell division protein FtsA"  
"OP8\_M19\_00235" 27709 "s59E13H2" 0.06039111 "Cell division protein FtsZ"  
"OP8\_M19\_00235" 27709 "s59E25H2" 0.2001654 "Cell division protein FtsZ"  
"OP8\_M19\_00235" 27709 "s59E5H2" 5.500243 "Cell division protein FtsZ"  
"OP8\_M19\_00235" 27709 "s63E6H2" 0 "Cell division protein FtsZ"  
"OP8\_M19\_00236" 27710 "s59E13H2" 0.05677679 "Imidazolonepropionase"  
"OP8\_M19\_00236" 27710 "s59E25H2" 0 "Imidazolonepropionase"  
"OP8\_M19\_00236" 27710 "s59E5H2" 6.001487 "Imidazolonepropionase"  
"OP8\_M19\_00236" 27710 "s63E6H2" 0 "Imidazolonepropionase"  
"OP8\_M19\_00237" 27711 "s59E13H2" 0.06370096 "Histidine ammonia-lyase"  
"OP8\_M19\_00237" 27711 "s59E25H2" 0 "Histidine ammonia-lyase"  
"OP8\_M19\_00237" 27711 "s59E5H2" 3.285862 "Histidine ammonia-lyase"  
"OP8\_M19\_00237" 27711 "s63E6H2" 0 "Histidine ammonia-lyase"  
"OP8\_M19\_00238" 27712 "s59E13H2" 0.03765743 "Putative redox-active protein (C\_GCAxxG\_C\_C)"

"OP8\_M19\_00238" 27712 "s59E25H2" 0 "Putative redox-active protein (C\_GCAxxG\_C\_C)"  
"OP8\_M19\_00238" 27712 "s59E5H2" 0.7570995 "Putative redox-active protein (C\_GCAxxG\_C\_C)"  
"OP8\_M19\_00238" 27712 "s63E6H2" 0 "Putative redox-active protein (C\_GCAxxG\_C\_C)"  
"OP8\_M19\_00239" 27713 "s59E13H2" 0.02642497 "p-aminobenzoyl-glutamate hydrolase subunit B"  
"OP8\_M19\_00239" 27713 "s59E25H2" 0 "p-aminobenzoyl-glutamate hydrolase subunit B"  
"OP8\_M19\_00239" 27713 "s59E5H2" 0.6681942 "p-aminobenzoyl-glutamate hydrolase subunit B"  
"OP8\_M19\_00239" 27713 "s63E6H2" 0 "p-aminobenzoyl-glutamate hydrolase subunit B"  
"OP8\_M19\_00240" 27714 "s59E13H2" 7.261707 "Dihydroorotate dehydrogenase B (NAD(+)), catalytic subunit"  
"OP8\_M19\_00240" 27714 "s59E25H2" 0 "Dihydroorotate dehydrogenase B (NAD(+)), catalytic subunit"  
"OP8\_M19\_00240" 27714 "s59E5H2" 1.647144 "Dihydroorotate dehydrogenase B (NAD(+)), catalytic subunit"  
"OP8\_M19\_00240" 27714 "s63E6H2" 6.665888e-06 "Dihydroorotate dehydrogenase B (NAD(+)), catalytic subunit"  
"OP8\_M19\_00241" 27715 "s59E13H2" 11.82521 "Orotidine 5'-phosphate decarboxylase"  
"OP8\_M19\_00241" 27715 "s59E25H2" 0 "Orotidine 5'-phosphate decarboxylase"  
"OP8\_M19\_00241" 27715 "s59E5H2" 2.539318 "Orotidine 5'-phosphate decarboxylase"  
"OP8\_M19\_00241" 27715 "s63E6H2" 0.001967078 "Orotidine 5'-phosphate decarboxylase"  
"OP8\_M19\_00242" 27716 "s59E13H2" 12.66878 "Inner membrane protein YohC"  
"OP8\_M19\_00242" 27716 "s59E25H2" 0 "Inner membrane protein YohC"  
"OP8\_M19\_00242" 27716 "s59E5H2" 2.69647 "Inner membrane protein YohC"  
"OP8\_M19\_00242" 27716 "s63E6H2" 0 "Inner membrane protein YohC"  
"OP8\_M19\_00245" 27719 "s59E13H2" 4.962352 "hypothetical protein"  
"OP8\_M19\_00245" 27719 "s59E25H2" 0 "hypothetical protein"  
"OP8\_M19\_00245" 27719 "s59E5H2" 3.047445 "hypothetical protein"  
"OP8\_M19\_00245" 27719 "s63E6H2" 0 "hypothetical protein"  
"OP8\_M19\_00247" 27721 "s59E13H2" 6.467542 "hypothetical protein"  
"OP8\_M19\_00247" 27721 "s59E25H2" 0 "hypothetical protein"  
"OP8\_M19\_00247" 27721 "s59E5H2" 2.785499 "hypothetical protein"  
"OP8\_M19\_00247" 27721 "s63E6H2" 0 "hypothetical protein"  
"OP8\_M19\_00248" 27722 "s59E13H2" 6.04958 "D-alanine--D-alanine ligase"  
"OP8\_M19\_00248" 27722 "s59E25H2" 0 "D-alanine--D-alanine ligase"  
"OP8\_M19\_00248" 27722 "s59E5H2" 1.991984 "D-alanine--D-alanine ligase"  
"OP8\_M19\_00248" 27722 "s63E6H2" 0 "D-alanine--D-alanine ligase"  
"OP8\_M19\_00249" 27723 "s59E13H2" 6.536367 "Putative Holliday junction resolvase"  
"OP8\_M19\_00249" 27723 "s59E25H2" 0 "Putative Holliday junction resolvase"  
"OP8\_M19\_00249" 27723 "s59E5H2" 2.570337 "Putative Holliday junction resolvase"  
"OP8\_M19\_00249" 27723 "s63E6H2" 0 "Putative Holliday junction resolvase"  
"OP8\_M19\_00250" 27724 "s59E13H2" 7.947432 "putative aminodeoxychorismate lyase"  
"OP8\_M19\_00250" 27724 "s59E25H2" 0 "putative aminodeoxychorismate lyase"  
"OP8\_M19\_00250" 27724 "s59E5H2" 2.780369 "putative aminodeoxychorismate lyase"  
"OP8\_M19\_00250" 27724 "s63E6H2" 0 "putative aminodeoxychorismate lyase"  
"OP8\_M19\_00251" 27725 "s59E13H2" 6.698345 "hypothetical protein"  
"OP8\_M19\_00251" 27725 "s59E25H2" 0 "hypothetical protein"  
"OP8\_M19\_00251" 27725 "s59E5H2" 1.878187 "hypothetical protein"  
"OP8\_M19\_00251" 27725 "s63E6H2" 0 "hypothetical protein"  
"OP8\_M19\_00252" 27726 "s59E13H2" 6.392009 "hypothetical protein"  
"OP8\_M19\_00252" 27726 "s59E25H2" 0 "hypothetical protein"  
"OP8\_M19\_00252" 27726 "s59E5H2" 1.708293 "hypothetical protein"  
"OP8\_M19\_00252" 27726 "s63E6H2" 0 "hypothetical protein"

"OP8\_M19\_00253" 27727 "s59E13H2" 5.211982 "hypothetical protein"  
"OP8\_M19\_00253" 27727 "s59E25H2" 1.170147 "hypothetical protein"  
"OP8\_M19\_00253" 27727 "s59E5H2" 1.785171 "hypothetical protein"  
"OP8\_M19\_00253" 27727 "s63E6H2" 0.002835121 "hypothetical protein"  
"OP8\_M19\_00254" 27728 "s59E13H2" 3.335696 "H(+)/Cl(-) exchange transporter ClcA"  
"OP8\_M19\_00254" 27728 "s59E25H2" 0 "H(+)/Cl(-) exchange transporter ClcA"  
"OP8\_M19\_00254" 27728 "s59E5H2" 1.923293 "H(+)/Cl(-) exchange transporter ClcA"  
"OP8\_M19\_00254" 27728 "s63E6H2" 0 "H(+)/Cl(-) exchange transporter ClcA"  
"OP8\_M19\_00255" 27729 "s59E13H2" 3.315685 "hypothetical protein"  
"OP8\_M19\_00255" 27729 "s59E25H2" 0 "hypothetical protein"  
"OP8\_M19\_00255" 27729 "s59E5H2" 3.247617 "hypothetical protein"  
"OP8\_M19\_00255" 27729 "s63E6H2" 0 "hypothetical protein"  
"OP8\_M19\_00256" 27730 "s59E13H2" 2.308764 "putative permease YjgP/YjgQ family protein"  
"OP8\_M19\_00256" 27730 "s59E25H2" 0 "putative permease YjgP/YjgQ family protein"  
"OP8\_M19\_00256" 27730 "s59E5H2" 2.746315 "putative permease YjgP/YjgQ family protein"  
"OP8\_M19\_00256" 27730 "s63E6H2" 0 "putative permease YjgP/YjgQ family protein"  
"OP8\_M19\_00258" 27732 "s59E13H2" 0 "FRG domain protein"  
"OP8\_M19\_00258" 27732 "s59E25H2" 0 "FRG domain protein"  
"OP8\_M19\_00258" 27732 "s59E5H2" 0.2530466 "FRG domain protein"  
"OP8\_M19\_00258" 27732 "s63E6H2" 0 "FRG domain protein"  
"OP8\_M19\_00259" 27733 "s59E13H2" 0 "hypothetical protein"  
"OP8\_M19\_00259" 27733 "s59E25H2" 0 "hypothetical protein"  
"OP8\_M19\_00259" 27733 "s59E5H2" 0.2203527 "hypothetical protein"  
"OP8\_M19\_00259" 27733 "s63E6H2" 0 "hypothetical protein"  
"OP8\_M19\_00261" 27735 "s59E13H2" 0.005102952 "ATP-dependent zinc metalloprotease FtsH"  
"OP8\_M19\_00261" 27735 "s59E25H2" 0 "ATP-dependent zinc metalloprotease FtsH"  
"OP8\_M19\_00261" 27735 "s59E5H2" 1.339474 "ATP-dependent zinc metalloprotease FtsH"  
"OP8\_M19\_00261" 27735 "s63E6H2" 0 "ATP-dependent zinc metalloprotease FtsH"  
"OP8\_M19\_00262" 27736 "s59E13H2" 0.00909696 "Dihydropteroate synthase"  
"OP8\_M19\_00262" 27736 "s59E25H2" 0 "Dihydropteroate synthase"  
"OP8\_M19\_00262" 27736 "s59E5H2" 1.895408 "Dihydropteroate synthase"  
"OP8\_M19\_00262" 27736 "s63E6H2" 0 "Dihydropteroate synthase"  
"OP8\_M19\_00263" 27737 "s59E13H2" 0.02857408 "DisA bacterial checkpoint controller nucleotide-binding protein"  
"OP8\_M19\_00263" 27737 "s59E25H2" 0 "DisA bacterial checkpoint controller nucleotide-binding protein"  
"OP8\_M19\_00263" 27737 "s59E5H2" 1.978148 "DisA bacterial checkpoint controller nucleotide-binding protein"  
"OP8\_M19\_00263" 27737 "s63E6H2" 0 "DisA bacterial checkpoint controller nucleotide-binding protein"  
"OP8\_M19\_00264" 27738 "s59E13H2" 0.008966968 "YbbR-like protein"  
"OP8\_M19\_00264" 27738 "s59E25H2" 0 "YbbR-like protein"  
"OP8\_M19\_00264" 27738 "s59E5H2" 2.774654 "YbbR-like protein"  
"OP8\_M19\_00264" 27738 "s63E6H2" 0 "YbbR-like protein"  
"OP8\_M19\_00265" 27739 "s59E13H2" 0.01770943 "Pyridoxine 5'-phosphate synthase"  
"OP8\_M19\_00265" 27739 "s59E25H2" 0 "Pyridoxine 5'-phosphate synthase"  
"OP8\_M19\_00265" 27739 "s59E5H2" 3.716023 "Pyridoxine 5'-phosphate synthase"  
"OP8\_M19\_00265" 27739 "s63E6H2" 0 "Pyridoxine 5'-phosphate synthase"  
"OP8\_M19\_00266" 27740 "s59E13H2" 0.0192947 "N-carbamoyl-L-amino acid hydrolase"  
"OP8\_M19\_00266" 27740 "s59E25H2" 0 "N-carbamoyl-L-amino acid hydrolase"  
"OP8\_M19\_00266" 27740 "s59E5H2" 5.815425 "N-carbamoyl-L-amino acid hydrolase"



"OP8\_M19\_00266" 27740 "s63E6H2" 0 "N-carbamoyl-L-amino acid hydrolase"  
"OP8\_M19\_00267" 27741 "s59E13H2" 0.04855853 "Peptide chain release factor 2"  
"OP8\_M19\_00267" 27741 "s59E25H2" 0 "Peptide chain release factor 2"  
"OP8\_M19\_00267" 27741 "s59E5H2" 4.723551 "Peptide chain release factor 2"  
"OP8\_M19\_00267" 27741 "s63E6H2" 0 "Peptide chain release factor 2"  
"OP8\_M19\_00268" 27742 "s59E13H2" 0.03044619 "PTS system fructose-specific EIIABC component"  
"OP8\_M19\_00268" 27742 "s59E25H2" 0 "PTS system fructose-specific EIIABC component"  
"OP8\_M19\_00268" 27742 "s59E5H2" 3.57587 "PTS system fructose-specific EIIABC component"  
"OP8\_M19\_00268" 27742 "s63E6H2" 0 "PTS system fructose-specific EIIABC component"  
"OP8\_M19\_00269" 27743 "s59E13H2" 0.01069627 "Peptidase family M28"  
"OP8\_M19\_00269" 27743 "s59E25H2" 0 "Peptidase family M28"  
"OP8\_M19\_00269" 27743 "s59E5H2" 2.378655 "Peptidase family M28"  
"OP8\_M19\_00269" 27743 "s63E6H2" 0 "Peptidase family M28"  
"OP8\_M19\_00270" 27744 "s59E13H2" 0.041068 "Alcohol dehydrogenase 2"  
"OP8\_M19\_00270" 27744 "s59E25H2" 0 "Alcohol dehydrogenase 2"  
"OP8\_M19\_00270" 27744 "s59E5H2" 1.956152 "Alcohol dehydrogenase 2"  
"OP8\_M19\_00270" 27744 "s63E6H2" 0 "Alcohol dehydrogenase 2"  
"OP8\_M19\_00271" 27745 "s59E13H2" 0.04549776 "hypothetical protein"  
"OP8\_M19\_00271" 27745 "s59E25H2" 0 "hypothetical protein"  
"OP8\_M19\_00271" 27745 "s59E5H2" 1.941996 "hypothetical protein"  
"OP8\_M19\_00271" 27745 "s63E6H2" 0 "hypothetical protein"  
"OP8\_M19\_00272" 27746 "s59E13H2" 0 "HTH-type transcriptional repressor YtrA"  
"OP8\_M19\_00272" 27746 "s59E25H2" 0 "HTH-type transcriptional repressor YtrA"  
"OP8\_M19\_00272" 27746 "s59E5H2" 1.329762 "HTH-type transcriptional repressor YtrA"  
"OP8\_M19\_00272" 27746 "s63E6H2" 0 "HTH-type transcriptional repressor YtrA"  
"OP8\_M19\_00273" 27747 "s59E13H2" 0 "ABC transporter ATP-binding protein YtrB"  
"OP8\_M19\_00273" 27747 "s59E25H2" 0 "ABC transporter ATP-binding protein YtrB"  
"OP8\_M19\_00273" 27747 "s59E5H2" 2.358752 "ABC transporter ATP-binding protein YtrB"  
"OP8\_M19\_00273" 27747 "s63E6H2" 0 "ABC transporter ATP-binding protein YtrB"  
"OP8\_M19\_00274" 27748 "s59E13H2" 0 "ABC-2 family transporter protein"  
"OP8\_M19\_00274" 27748 "s59E25H2" 0 "ABC-2 family transporter protein"  
"OP8\_M19\_00274" 27748 "s59E5H2" 2.70991 "ABC-2 family transporter protein"  
"OP8\_M19\_00274" 27748 "s63E6H2" 0 "ABC-2 family transporter protein"  
"OP8\_M19\_00275" 27749 "s59E13H2" 0.05435274 "Ferredoxin"  
"OP8\_M19\_00275" 27749 "s59E25H2" 0 "Ferredoxin"  
"OP8\_M19\_00275" 27749 "s59E5H2" 4.903313 "Ferredoxin"  
"OP8\_M19\_00275" 27749 "s63E6H2" 0 "Ferredoxin"  
"OP8\_M19\_00276" 27750 "s59E13H2" 0.01447713 "hypothetical protein"  
"OP8\_M19\_00276" 27750 "s59E25H2" 0 "hypothetical protein"  
"OP8\_M19\_00276" 27750 "s59E5H2" 4.060571 "hypothetical protein"  
"OP8\_M19\_00276" 27750 "s63E6H2" 0 "hypothetical protein"  
"OP8\_M19\_00278" 27752 "s59E13H2" 0.02021669 "hypothetical protein"  
"OP8\_M19\_00278" 27752 "s59E25H2" 0 "hypothetical protein"  
"OP8\_M19\_00278" 27752 "s59E5H2" 2.696219 "hypothetical protein"  
"OP8\_M19\_00278" 27752 "s63E6H2" 0 "hypothetical protein"  
"OP8\_M19\_00279" 27753 "s59E13H2" 0.02043542 "Thiol-disulfide oxidoreductase ResA"  
"OP8\_M19\_00279" 27753 "s59E25H2" 0 "Thiol-disulfide oxidoreductase ResA"

"OP8\_M19\_00279" 27753 "s59E5H2" 4.027484 "Thiol-disulfide oxidoreductase ResA"  
"OP8\_M19\_00279" 27753 "s63E6H2" 0 "Thiol-disulfide oxidoreductase ResA"  
"OP8\_M19\_00280" 27754 "s59E13H2" 0.003362637 "Methylamine utilisation protein MauE"  
"OP8\_M19\_00280" 27754 "s59E25H2" 0 "Methylamine utilisation protein MauE"  
"OP8\_M19\_00280" 27754 "s59E5H2" 4.369867 "Methylamine utilisation protein MauE"  
"OP8\_M19\_00280" 27754 "s63E6H2" 0 "Methylamine utilisation protein MauE"  
"OP8\_M19\_00281" 27755 "s59E13H2" 0 "Putative thiosulfate sulfurtransferase precursor"  
"OP8\_M19\_00281" 27755 "s59E25H2" 0 "Putative thiosulfate sulfurtransferase precursor"  
"OP8\_M19\_00281" 27755 "s59E5H2" 3.925394 "Putative thiosulfate sulfurtransferase precursor"  
"OP8\_M19\_00281" 27755 "s63E6H2" 0 "Putative thiosulfate sulfurtransferase precursor"  
"OP8\_M19\_00282" 27756 "s59E13H2" 0.002555653 "hypothetical protein"  
"OP8\_M19\_00282" 27756 "s59E25H2" 0 "hypothetical protein"  
"OP8\_M19\_00282" 27756 "s59E5H2" 3.094374 "hypothetical protein"  
"OP8\_M19\_00282" 27756 "s63E6H2" 0 "hypothetical protein"  
"OP8\_M19\_00283" 27757 "s59E13H2" 0 "NPCBM-associated, NEW3 domain of alpha-galactosidase"  
"OP8\_M19\_00283" 27757 "s59E25H2" 0 "NPCBM-associated, NEW3 domain of alpha-galactosidase"  
"OP8\_M19\_00283" 27757 "s59E5H2" 1.087907 "NPCBM-associated, NEW3 domain of alpha-galactosidase"  
"OP8\_M19\_00283" 27757 "s63E6H2" 0 "NPCBM-associated, NEW3 domain of alpha-galactosidase"  
"OP8\_M19\_00284" 27758 "s59E13H2" 0.007728436 "hypothetical protein"  
"OP8\_M19\_00284" 27758 "s59E25H2" 0 "hypothetical protein"  
"OP8\_M19\_00284" 27758 "s59E5H2" 0.7701602 "hypothetical protein"  
"OP8\_M19\_00284" 27758 "s63E6H2" 0 "hypothetical protein"  
"OP8\_M19\_00285" 27759 "s59E13H2" 0.007914566 "hypothetical protein"  
"OP8\_M19\_00285" 27759 "s59E25H2" 0 "hypothetical protein"  
"OP8\_M19\_00285" 27759 "s59E5H2" 0.7757583 "hypothetical protein"  
"OP8\_M19\_00285" 27759 "s63E6H2" 0 "hypothetical protein"  
"OP8\_M19\_00286" 27760 "s59E13H2" 0.003356195 "hypothetical protein"  
"OP8\_M19\_00286" 27760 "s59E25H2" 0 "hypothetical protein"  
"OP8\_M19\_00286" 27760 "s59E5H2" 1.174122 "hypothetical protein"  
"OP8\_M19\_00286" 27760 "s63E6H2" 0 "hypothetical protein"  
"OP8\_M19\_00287" 27761 "s59E13H2" 0 "Succinylglutamate desuccinylase / Aspartoacylase family protein"  
"OP8\_M19\_00287" 27761 "s59E25H2" 0 "Succinylglutamate desuccinylase / Aspartoacylase family protein"  
"OP8\_M19\_00287" 27761 "s59E5H2" 2.417635 "Succinylglutamate desuccinylase / Aspartoacylase family protein"  
"OP8\_M19\_00287" 27761 "s63E6H2" 0 "Succinylglutamate desuccinylase / Aspartoacylase family protein"  
"OP8\_M19\_00288" 27762 "s59E13H2" 0.002815803 "hypothetical protein"  
"OP8\_M19\_00288" 27762 "s59E25H2" 0 "hypothetical protein"  
"OP8\_M19\_00288" 27762 "s59E5H2" 2.28881 "hypothetical protein"  
"OP8\_M19\_00288" 27762 "s63E6H2" 0 "hypothetical protein"  
"OP8\_M19\_00289" 27763 "s59E13H2" 0 "Capsule biosynthesis protein CapC"  
"OP8\_M19\_00289" 27763 "s59E25H2" 0 "Capsule biosynthesis protein CapC"  
"OP8\_M19\_00289" 27763 "s59E5H2" 1.377041 "Capsule biosynthesis protein CapC"  
"OP8\_M19\_00289" 27763 "s63E6H2" 0 "Capsule biosynthesis protein CapC"  
"OP8\_M19\_00290" 27764 "s59E13H2" 0.003142472 "Capsule biosynthesis protein CapB"  
"OP8\_M19\_00290" 27764 "s59E25H2" 0 "Capsule biosynthesis protein CapB"  
"OP8\_M19\_00290" 27764 "s59E5H2" 0.304063 "Capsule biosynthesis protein CapB"  
"OP8\_M19\_00290" 27764 "s63E6H2" 0 "Capsule biosynthesis protein CapB"  
"OP8\_M19\_00291" 27765 "s59E13H2" 0 "CRISPR-associated protein (cas\_TM1802)"

"OP8\_M19\_00291" 27765 "s59E25H2" 0 "CRISPR-associated protein (cas\_TM1802)"  
"OP8\_M19\_00291" 27765 "s59E5H2" 0.2385121 "CRISPR-associated protein (cas\_TM1802)"  
"OP8\_M19\_00291" 27765 "s63E6H2" 0 "CRISPR-associated protein (cas\_TM1802)"  
"OP8\_M19\_00292" 27766 "s59E13H2" 0.005156242 "hypothetical protein"  
"OP8\_M19\_00292" 27766 "s59E25H2" 0 "hypothetical protein"  
"OP8\_M19\_00292" 27766 "s59E5H2" 0.340695 "hypothetical protein"  
"OP8\_M19\_00292" 27766 "s63E6H2" 0 "hypothetical protein"  
"OP8\_M19\_00293" 27767 "s59E13H2" 0.00739374 "CRISPR-associated protein (Cas\_Cas5)"  
"OP8\_M19\_00293" 27767 "s59E25H2" 0 "CRISPR-associated protein (Cas\_Cas5)"  
"OP8\_M19\_00293" 27767 "s59E5H2" 0.1825203 "CRISPR-associated protein (Cas\_Cas5)"  
"OP8\_M19\_00293" 27767 "s63E6H2" 0 "CRISPR-associated protein (Cas\_Cas5)"  
"OP8\_M19\_00294" 27768 "s59E13H2" 0.004756746 "CRISPR-associated nuclease/helicase Cas3"  
"OP8\_M19\_00294" 27768 "s59E25H2" 0 "CRISPR-associated nuclease/helicase Cas3"  
"OP8\_M19\_00294" 27768 "s59E5H2" 0.4888885 "CRISPR-associated nuclease/helicase Cas3"  
"OP8\_M19\_00294" 27768 "s63E6H2" 0 "CRISPR-associated nuclease/helicase Cas3"  
"OP8\_M19\_00295" 27769 "s59E13H2" 0 "hypothetical protein"  
"OP8\_M19\_00295" 27769 "s59E25H2" 0 "hypothetical protein"  
"OP8\_M19\_00295" 27769 "s59E5H2" 0.7100259 "hypothetical protein"  
"OP8\_M19\_00295" 27769 "s63E6H2" 0 "hypothetical protein"  
"OP8\_M19\_00296" 27770 "s59E13H2" 0 "CRISPR-associated endonuclease Cas1 2"  
"OP8\_M19\_00296" 27770 "s59E25H2" 0 "CRISPR-associated endonuclease Cas1 2"  
"OP8\_M19\_00296" 27770 "s59E5H2" 0.6847034 "CRISPR-associated endonuclease Cas1 2"  
"OP8\_M19\_00296" 27770 "s63E6H2" 0 "CRISPR-associated endonuclease Cas1 2"  
"OP8\_M19\_00297" 27771 "s59E13H2" 0 "CRISPR-associated endoribonuclease Cas2 1"  
"OP8\_M19\_00297" 27771 "s59E25H2" 0 "CRISPR-associated endoribonuclease Cas2 1"  
"OP8\_M19\_00297" 27771 "s59E5H2" 0.5731488 "CRISPR-associated endoribonuclease Cas2 1"  
"OP8\_M19\_00297" 27771 "s63E6H2" 0 "CRISPR-associated endoribonuclease Cas2 1"  
"OP8\_M19\_00298" 27772 "s59E13H2" 0 "CRISPR-associated exonuclease Cas4"  
"OP8\_M19\_00298" 27772 "s59E25H2" 0 "CRISPR-associated exonuclease Cas4"  
"OP8\_M19\_00298" 27772 "s59E5H2" 0.4616707 "CRISPR-associated exonuclease Cas4"  
"OP8\_M19\_00298" 27772 "s63E6H2" 0 "CRISPR-associated exonuclease Cas4"  
"OP8\_M19\_00299" 27774 "s59E13H2" 0 "hypothetical protein"  
"OP8\_M19\_00299" 27774 "s59E25H2" 0 "hypothetical protein"  
"OP8\_M19\_00299" 27774 "s59E5H2" 1.292565 "hypothetical protein"  
"OP8\_M19\_00299" 27774 "s63E6H2" 0 "hypothetical protein"  
"OP8\_M19\_00300" 27775 "s59E13H2" 0 "Capsule biosynthesis protein CapB"  
"OP8\_M19\_00300" 27775 "s59E25H2" 0 "Capsule biosynthesis protein CapB"  
"OP8\_M19\_00300" 27775 "s59E5H2" 1.467033 "Capsule biosynthesis protein CapB"  
"OP8\_M19\_00300" 27775 "s63E6H2" 0 "Capsule biosynthesis protein CapB"  
"OP8\_M19\_00302" 27777 "s59E13H2" 0 "Pyruvate kinase"  
"OP8\_M19\_00302" 27777 "s59E25H2" 0 "Pyruvate kinase"  
"OP8\_M19\_00302" 27777 "s59E5H2" 6.696556 "Pyruvate kinase"  
"OP8\_M19\_00302" 27777 "s63E6H2" 0 "Pyruvate kinase"  
"OP8\_M19\_00303" 27778 "s59E13H2" 0 "hypothetical protein"  
"OP8\_M19\_00303" 27778 "s59E25H2" 0 "hypothetical protein"  
"OP8\_M19\_00303" 27778 "s59E5H2" 5.760119 "hypothetical protein"  
"OP8\_M19\_00303" 27778 "s63E6H2" 0 "hypothetical protein"

"OP8\_M19\_00304" 27779 "s59E13H2" 0 "Transposon gamma-delta resolvase"  
"OP8\_M19\_00304" 27779 "s59E25H2" 0 "Transposon gamma-delta resolvase"  
"OP8\_M19\_00304" 27779 "s59E5H2" 7.577412 "Transposon gamma-delta resolvase"  
"OP8\_M19\_00304" 27779 "s63E6H2" 0 "Transposon gamma-delta resolvase"  
"OP8\_M19\_00306" 27781 "s59E13H2" 0 "hypothetical protein"  
"OP8\_M19\_00306" 27781 "s59E25H2" 0 "hypothetical protein"  
"OP8\_M19\_00306" 27781 "s59E5H2" 6.330708 "hypothetical protein"  
"OP8\_M19\_00306" 27781 "s63E6H2" 0 "hypothetical protein"  
"OP8\_M19\_00307" 27782 "s59E13H2" 0.01234707 "hypothetical protein"  
"OP8\_M19\_00307" 27782 "s59E25H2" 0 "hypothetical protein"  
"OP8\_M19\_00307" 27782 "s59E5H2" 10.77508 "hypothetical protein"  
"OP8\_M19\_00307" 27782 "s63E6H2" 0 "hypothetical protein"  
"OP8\_M19\_00308" 27783 "s59E13H2" 0.002729973 "Acyl-coenzyme A:6-aminopenicillanic acid acyl-transferase"  
"OP8\_M19\_00308" 27783 "s59E25H2" 0 "Acyl-coenzyme A:6-aminopenicillanic acid acyl-transferase"  
"OP8\_M19\_00308" 27783 "s59E5H2" 13.65395 "Acyl-coenzyme A:6-aminopenicillanic acid acyl-transferase"  
"OP8\_M19\_00308" 27783 "s63E6H2" 0 "Acyl-coenzyme A:6-aminopenicillanic acid acyl-transferase"  
"OP8\_M19\_00309" 27784 "s59E13H2" 0.002610374 "hypothetical protein"  
"OP8\_M19\_00309" 27784 "s59E25H2" 0 "hypothetical protein"  
"OP8\_M19\_00309" 27784 "s59E5H2" 8.52518 "hypothetical protein"  
"OP8\_M19\_00309" 27784 "s63E6H2" 0 "hypothetical protein"  
"OP8\_M19\_00310" 27785 "s59E13H2" 0.002657828 "ADP-ribose pyrophosphatase"  
"OP8\_M19\_00310" 27785 "s59E25H2" 0 "ADP-ribose pyrophosphatase"  
"OP8\_M19\_00310" 27785 "s59E5H2" 6.195551 "ADP-ribose pyrophosphatase"  
"OP8\_M19\_00310" 27785 "s63E6H2" 0 "ADP-ribose pyrophosphatase"  
"OP8\_M19\_00311" 27786 "s59E13H2" 0 "Arsenical pump membrane protein"  
"OP8\_M19\_00311" 27786 "s59E25H2" 0 "Arsenical pump membrane protein"  
"OP8\_M19\_00311" 27786 "s59E5H2" 5.739876 "Arsenical pump membrane protein"  
"OP8\_M19\_00311" 27786 "s63E6H2" 0 "Arsenical pump membrane protein"  
"OP8\_M19\_00312" 27787 "s59E13H2" 0 "Universal stress protein"  
"OP8\_M19\_00312" 27787 "s59E25H2" 0 "Universal stress protein"  
"OP8\_M19\_00312" 27787 "s59E5H2" 7.836671 "Universal stress protein"  
"OP8\_M19\_00312" 27787 "s63E6H2" 0 "Universal stress protein"  
"OP8\_M19\_00313" 27788 "s59E13H2" 0 "hypothetical protein"  
"OP8\_M19\_00313" 27788 "s59E25H2" 0 "hypothetical protein"  
"OP8\_M19\_00313" 27788 "s59E5H2" 7.678219 "hypothetical protein"  
"OP8\_M19\_00313" 27788 "s63E6H2" 0 "hypothetical protein"  
"OP8\_M19\_00314" 27789 "s59E13H2" 0 "Transglutaminase-like superfamily protein"  
"OP8\_M19\_00314" 27789 "s59E25H2" 0 "Transglutaminase-like superfamily protein"  
"OP8\_M19\_00314" 27789 "s59E5H2" 1.945533 "Transglutaminase-like superfamily protein"  
"OP8\_M19\_00314" 27789 "s63E6H2" 0 "Transglutaminase-like superfamily protein"  
"OP8\_M19\_00315" 27790 "s59E13H2" 0.01936228 "Transcriptional regulatory protein ZraR"  
"OP8\_M19\_00315" 27790 "s59E25H2" 0 "Transcriptional regulatory protein ZraR"  
"OP8\_M19\_00315" 27790 "s59E5H2" 0.4342271 "Transcriptional regulatory protein ZraR"  
"OP8\_M19\_00315" 27790 "s63E6H2" 0 "Transcriptional regulatory protein ZraR"  
"OP8\_M19\_00316" 27791 "s59E13H2" 4.463665 "HlyD family secretion protein"  
"OP8\_M19\_00316" 27791 "s59E25H2" 0 "HlyD family secretion protein"  
"OP8\_M19\_00316" 27791 "s59E5H2" 1.392944 "HlyD family secretion protein"

"OP8\_M19\_00316" 27791 "s63E6H2" 0 "HlyD family secretion protein"  
"OP8\_M19\_00317" 27792 "s59E13H2" 6.662279 "putative ABC transporter ATP-binding protein"  
"OP8\_M19\_00317" 27792 "s59E25H2" 0 "putative ABC transporter ATP-binding protein"  
"OP8\_M19\_00317" 27792 "s59E5H2" 1.362802 "putative ABC transporter ATP-binding protein"  
"OP8\_M19\_00317" 27792 "s63E6H2" 0 "putative ABC transporter ATP-binding protein"  
"OP8\_M19\_00318" 27793 "s59E13H2" 7.265152 "hypothetical protein"  
"OP8\_M19\_00318" 27793 "s59E25H2" 0 "hypothetical protein"  
"OP8\_M19\_00318" 27793 "s59E5H2" 1.040826 "hypothetical protein"  
"OP8\_M19\_00318" 27793 "s63E6H2" 0 "hypothetical protein"  
"OP8\_M19\_00319" 27794 "s59E13H2" 9.0796 "tRNA dimethylallyltransferase"  
"OP8\_M19\_00319" 27794 "s59E25H2" 0 "tRNA dimethylallyltransferase"  
"OP8\_M19\_00319" 27794 "s59E5H2" 1.302325 "tRNA dimethylallyltransferase"  
"OP8\_M19\_00319" 27794 "s63E6H2" 0.004191025 "tRNA dimethylallyltransferase"  
"OP8\_M19\_00320" 27795 "s59E13H2" 11.99066 "GTPase HflX"  
"OP8\_M19\_00320" 27795 "s59E25H2" 0 "GTPase HflX"  
"OP8\_M19\_00320" 27795 "s59E5H2" 1.604936 "GTPase HflX"  
"OP8\_M19\_00320" 27795 "s63E6H2" 0.003614843 "GTPase HflX"  
"OP8\_M19\_00321" 27796 "s59E13H2" 15.03146 "cellulose synthase subunit BcsC"  
"OP8\_M19\_00321" 27796 "s59E25H2" 0.07331822 "cellulose synthase subunit BcsC"  
"OP8\_M19\_00321" 27796 "s59E5H2" 2.232636 "cellulose synthase subunit BcsC"  
"OP8\_M19\_00321" 27796 "s63E6H2" 0.009061496 "cellulose synthase subunit BcsC"  
"OP8\_M19\_00322" 27797 "s59E13H2" 14.64827 "CDP-diacylglycerol--glycerol-3-phosphate 3-phosphatidyltransferase"  
"OP8\_M19\_00322" 27797 "s59E25H2" 0 "CDP-diacylglycerol--glycerol-3-phosphate 3-phosphatidyltransferase"  
"OP8\_M19\_00322" 27797 "s59E5H2" 1.665435 "CDP-diacylglycerol--glycerol-3-phosphate 3-phosphatidyltransferase"  
"OP8\_M19\_00322" 27797 "s63E6H2" 0 "CDP-diacylglycerol--glycerol-3-phosphate 3-phosphatidyltransferase"  
"OP8\_M19\_00323" 27798 "s59E13H2" 10.86869 "UDP-glucose:undecaprenyl-phosphate glucose-1-phosphate transferase"  
"OP8\_M19\_00323" 27798 "s59E25H2" 0.136646 "UDP-glucose:undecaprenyl-phosphate glucose-1-phosphate transferase"  
"OP8\_M19\_00323" 27798 "s59E5H2" 1.458217 "UDP-glucose:undecaprenyl-phosphate glucose-1-phosphate transferase"  
"OP8\_M19\_00323" 27798 "s63E6H2" 0.0007845598 "UDP-glucose:undecaprenyl-phosphate glucose-1-phosphate transferase"  
"OP8\_M19\_00324" 27799 "s59E13H2" 11.26471 "GDP-mannose-dependent alpha-(1-6)-phosphatidylinositol monomannoside mannosyltransferase"  
"OP8\_M19\_00324" 27799 "s59E25H2" 0 "GDP-mannose-dependent alpha-(1-6)-phosphatidylinositol monomannoside mannosyltransferase"  
"OP8\_M19\_00324" 27799 "s59E5H2" 1.945641 "GDP-mannose-dependent alpha-(1-6)-phosphatidylinositol monomannoside mannosyltransferase"  
"OP8\_M19\_00324" 27799 "s63E6H2" 0 "GDP-mannose-dependent alpha-(1-6)-phosphatidylinositol monomannoside mannosyltransferase"  
"OP8\_M19\_00326" 27801 "s59E13H2" 9.058164 "Alpha-D-kanosaminyltransferase"  
"OP8\_M19\_00326" 27801 "s59E25H2" 0.6290323 "Alpha-D-kanosaminyltransferase"  
"OP8\_M19\_00326" 27801 "s59E5H2" 1.410813 "Alpha-D-kanosaminyltransferase"  
"OP8\_M19\_00326" 27801 "s63E6H2" 0 "Alpha-D-kanosaminyltransferase"  
"OP8\_M19\_00327" 27802 "s59E13H2" 7.426101 "D-inositol 3-phosphate glycosyltransferase"  
"OP8\_M19\_00327" 27802 "s59E25H2" 0.03869833 "D-inositol 3-phosphate glycosyltransferase"  
"OP8\_M19\_00327" 27802 "s59E5H2" 1.043696 "D-inositol 3-phosphate glycosyltransferase"  
"OP8\_M19\_00327" 27802 "s63E6H2" 0.0002085244 "D-inositol 3-phosphate glycosyltransferase"  
"OP8\_M19\_00328" 27803 "s59E13H2" 7.309764 "D-inositol 3-phosphate glycosyltransferase"  
"OP8\_M19\_00328" 27803 "s59E25H2" 0 "D-inositol 3-phosphate glycosyltransferase"  
"OP8\_M19\_00328" 27803 "s59E5H2" 1.002668 "D-inositol 3-phosphate glycosyltransferase"  
"OP8\_M19\_00328" 27803 "s63E6H2" 0.003409549 "D-inositol 3-phosphate glycosyltransferase"  
"OP8\_M19\_00329" 27804 "s59E13H2" 10.83344 "putative metallohydrolase"  
"OP8\_M19\_00329" 27804 "s59E25H2" 0 "putative metallohydrolase"

"OP8\_M19\_00329" 27804 "s59E5H2" 1.810996 "putative metallohydrolase"  
"OP8\_M19\_00329" 27804 "s63E6H2" 0.008426983 "putative metallohydrolase"  
"OP8\_M19\_00330" 27805 "s59E13H2" 11.90425 "Acetoin utilization protein AcuC"  
"OP8\_M19\_00330" 27805 "s59E25H2" 0 "Acetoin utilization protein AcuC"  
"OP8\_M19\_00330" 27805 "s59E5H2" 2.12477 "Acetoin utilization protein AcuC"  
"OP8\_M19\_00330" 27805 "s63E6H2" 0 "Acetoin utilization protein AcuC"  
"OP8\_M19\_00331" 27806 "s59E13H2" 8.064273 "Pyruvate, phosphate dikinase"  
"OP8\_M19\_00331" 27806 "s59E25H2" 0 "Pyruvate, phosphate dikinase"  
"OP8\_M19\_00331" 27806 "s59E5H2" 1.218795 "Pyruvate, phosphate dikinase"  
"OP8\_M19\_00331" 27806 "s63E6H2" 0 "Pyruvate, phosphate dikinase"  
"OP8\_M19\_00332" 27807 "s59E13H2" 0.020485 "hypothetical protein"  
"OP8\_M19\_00332" 27807 "s59E25H2" 0 "hypothetical protein"  
"OP8\_M19\_00332" 27807 "s59E5H2" 0.570386 "hypothetical protein"  
"OP8\_M19\_00332" 27807 "s63E6H2" 0 "hypothetical protein"  
"OP8\_M19\_00333" 27808 "s59E13H2" 0.01369226 "hypothetical protein"  
"OP8\_M19\_00333" 27808 "s59E25H2" 0 "hypothetical protein"  
"OP8\_M19\_00333" 27808 "s59E5H2" 0.2359523 "hypothetical protein"  
"OP8\_M19\_00333" 27808 "s63E6H2" 0 "hypothetical protein"  
"OP8\_M19\_00334" 27809 "s59E13H2" 0 "hypothetical protein"  
"OP8\_M19\_00334" 27809 "s59E25H2" 0 "hypothetical protein"  
"OP8\_M19\_00334" 27809 "s59E5H2" 0.01349782 "hypothetical protein"  
"OP8\_M19\_00334" 27809 "s63E6H2" 0 "hypothetical protein"  
"OP8\_M19\_00335" 27810 "s59E13H2" 0.001092741 "RNA polymerase-associated protein RapA"  
"OP8\_M19\_00335" 27810 "s59E25H2" 0 "RNA polymerase-associated protein RapA"  
"OP8\_M19\_00335" 27810 "s59E5H2" 0.02415746 "RNA polymerase-associated protein RapA"  
"OP8\_M19\_00335" 27810 "s63E6H2" 0 "RNA polymerase-associated protein RapA"  
"OP8\_M19\_00337" 27812 "s59E13H2" 0.01597818 "Outer membrane porin F precursor"  
"OP8\_M19\_00337" 27812 "s59E25H2" 0.05345912 "Outer membrane porin F precursor"  
"OP8\_M19\_00337" 27812 "s59E5H2" 6.62522 "Outer membrane porin F precursor"  
"OP8\_M19\_00337" 27812 "s63E6H2" 0 "Outer membrane porin F precursor"  
"OP8\_M19\_00338" 27813 "s59E13H2" 0.04202337 "Arylsulfotransferase (ASST)"  
"OP8\_M19\_00338" 27813 "s59E25H2" 0 "Arylsulfotransferase (ASST)"  
"OP8\_M19\_00338" 27813 "s59E5H2" 9.206887 "Arylsulfotransferase (ASST)"  
"OP8\_M19\_00338" 27813 "s63E6H2" 0 "Arylsulfotransferase (ASST)"  
"OP8\_M19\_00339" 27814 "s59E13H2" 0.02646473 "Prolyl tripeptidyl peptidase precursor"  
"OP8\_M19\_00339" 27814 "s59E25H2" 0.03475936 "Prolyl tripeptidyl peptidase precursor"  
"OP8\_M19\_00339" 27814 "s59E5H2" 7.518169 "Prolyl tripeptidyl peptidase precursor"  
"OP8\_M19\_00339" 27814 "s63E6H2" 0 "Prolyl tripeptidyl peptidase precursor"  
"OP8\_M19\_00340" 27815 "s59E13H2" 0.05501077 "Aminomethyltransferase"  
"OP8\_M19\_00340" 27815 "s59E25H2" 0 "Aminomethyltransferase"  
"OP8\_M19\_00340" 27815 "s59E5H2" 2.073244 "Aminomethyltransferase"  
"OP8\_M19\_00340" 27815 "s63E6H2" 0 "Aminomethyltransferase"  
"OP8\_M19\_00341" 27816 "s59E13H2" 0.03882191 "Glycine cleavage system H protein"  
"OP8\_M19\_00341" 27816 "s59E25H2" 0 "Glycine cleavage system H protein"  
"OP8\_M19\_00341" 27816 "s59E5H2" 2.384758 "Glycine cleavage system H protein"  
"OP8\_M19\_00341" 27816 "s63E6H2" 0 "Glycine cleavage system H protein"  
"OP8\_M19\_00342" 27817 "s59E13H2" 0.02765713 "putative glycine dehydrogenase (decarboxylating) subunit 1"

"OP8\_M19\_00342" 27817 "s59E25H2" 0 "putative glycine dehydrogenase (decarboxylating) subunit 1"  
"OP8\_M19\_00342" 27817 "s59E5H2" 1.624194 "putative glycine dehydrogenase (decarboxylating) subunit 1"  
"OP8\_M19\_00342" 27817 "s63E6H2" 0 "putative glycine dehydrogenase (decarboxylating) subunit 1"  
"OP8\_M19\_00343" 27818 "s59E13H2" 0.01041908 "putative glycine dehydrogenase (decarboxylating) subunit 2"  
"OP8\_M19\_00343" 27818 "s59E25H2" 0 "putative glycine dehydrogenase (decarboxylating) subunit 2"  
"OP8\_M19\_00343" 27818 "s59E5H2" 0.5307397 "putative glycine dehydrogenase (decarboxylating) subunit 2"  
"OP8\_M19\_00343" 27818 "s63E6H2" 0 "putative glycine dehydrogenase (decarboxylating) subunit 2"  
"OP8\_M19\_00344" 27819 "s59E13H2" 0.005841387 "Glycine--tRNA ligase alpha subunit"  
"OP8\_M19\_00344" 27819 "s59E25H2" 0 "Glycine--tRNA ligase alpha subunit"  
"OP8\_M19\_00344" 27819 "s59E5H2" 0.4692237 "Glycine--tRNA ligase alpha subunit"  
"OP8\_M19\_00344" 27819 "s63E6H2" 0 "Glycine--tRNA ligase alpha subunit"  
"OP8\_M19\_00345" 27820 "s59E13H2" 0.01571748 "Glycine--tRNA ligase beta subunit"  
"OP8\_M19\_00345" 27820 "s59E25H2" 0 "Glycine--tRNA ligase beta subunit"  
"OP8\_M19\_00345" 27820 "s59E5H2" 0.7686513 "Glycine--tRNA ligase beta subunit"  
"OP8\_M19\_00345" 27820 "s63E6H2" 0 "Glycine--tRNA ligase beta subunit"  
"OP8\_M19\_00346" 27821 "s59E13H2" 0.01535243 "PilZ domain protein"  
"OP8\_M19\_00346" 27821 "s59E25H2" 0 "PilZ domain protein"  
"OP8\_M19\_00346" 27821 "s59E5H2" 0.5516005 "PilZ domain protein"  
"OP8\_M19\_00346" 27821 "s63E6H2" 0 "PilZ domain protein"  
"OP8\_M19\_00347" 27822 "s59E13H2" 0.7960485 "Spermidine synthase"  
"OP8\_M19\_00347" 27822 "s59E25H2" 0 "Spermidine synthase"  
"OP8\_M19\_00347" 27822 "s59E5H2" 0.9706442 "Spermidine synthase"  
"OP8\_M19\_00347" 27822 "s63E6H2" 0 "Spermidine synthase"  
"OP8\_M19\_00348" 27823 "s59E13H2" 1.03514 "Pyruvate formate-lyase 1-activating enzyme"  
"OP8\_M19\_00348" 27823 "s59E25H2" 0 "Pyruvate formate-lyase 1-activating enzyme"  
"OP8\_M19\_00348" 27823 "s59E5H2" 2.270478 "Pyruvate formate-lyase 1-activating enzyme"  
"OP8\_M19\_00348" 27823 "s63E6H2" 0 "Pyruvate formate-lyase 1-activating enzyme"  
"OP8\_M19\_00349" 27824 "s59E13H2" 1.173983 "hypothetical protein"  
"OP8\_M19\_00349" 27824 "s59E25H2" 0 "hypothetical protein"  
"OP8\_M19\_00349" 27824 "s59E5H2" 2.000351 "hypothetical protein"  
"OP8\_M19\_00349" 27824 "s63E6H2" 0 "hypothetical protein"  
"OP8\_M19\_00350" 27825 "s59E13H2" 1.071487 "hypothetical protein"  
"OP8\_M19\_00350" 27825 "s59E25H2" 0 "hypothetical protein"  
"OP8\_M19\_00350" 27825 "s59E5H2" 1.666877 "hypothetical protein"  
"OP8\_M19\_00350" 27825 "s63E6H2" 0 "hypothetical protein"  
"OP8\_M19\_00351" 27826 "s59E13H2" 1.325475 "Hpt domain protein"  
"OP8\_M19\_00351" 27826 "s59E25H2" 0 "Hpt domain protein"  
"OP8\_M19\_00351" 27826 "s59E5H2" 1.795872 "Hpt domain protein"  
"OP8\_M19\_00351" 27826 "s63E6H2" 0.00234306 "Hpt domain protein"  
"OP8\_M19\_00352" 27827 "s59E13H2" 1.378442 "Response regulator PleD"  
"OP8\_M19\_00352" 27827 "s59E25H2" 0 "Response regulator PleD"  
"OP8\_M19\_00352" 27827 "s59E5H2" 1.521955 "Response regulator PleD"  
"OP8\_M19\_00352" 27827 "s63E6H2" 0 "Response regulator PleD"  
"OP8\_M19\_00353" 27828 "s59E13H2" 0.9578063 "AI-2 transport protein TqsA"  
"OP8\_M19\_00353" 27828 "s59E25H2" 0 "AI-2 transport protein TqsA"  
"OP8\_M19\_00353" 27828 "s59E5H2" 0.7158508 "AI-2 transport protein TqsA"  
"OP8\_M19\_00353" 27828 "s63E6H2" 0 "AI-2 transport protein TqsA"

"OP8\_M19\_00354" 27829 "s59E13H2" 0.9731282 "hypothetical protein"  
"OP8\_M19\_00354" 27829 "s59E25H2" 0 "hypothetical protein"  
"OP8\_M19\_00354" 27829 "s59E5H2" 0.8728817 "hypothetical protein"  
"OP8\_M19\_00354" 27829 "s63E6H2" 0 "hypothetical protein"  
"OP8\_M19\_00355" 27830 "s59E13H2" 0.7464438 "hypothetical protein"  
"OP8\_M19\_00355" 27830 "s59E25H2" 0 "hypothetical protein"  
"OP8\_M19\_00355" 27830 "s59E5H2" 0.6793625 "hypothetical protein"  
"OP8\_M19\_00355" 27830 "s63E6H2" 0 "hypothetical protein"  
"OP8\_M19\_00356" 27831 "s59E13H2" 0.792067 "Ribonuclease 3"  
"OP8\_M19\_00356" 27831 "s59E25H2" 0 "Ribonuclease 3"  
"OP8\_M19\_00356" 27831 "s59E5H2" 0.5911195 "Ribonuclease 3"  
"OP8\_M19\_00356" 27831 "s63E6H2" 0 "Ribonuclease 3"  
"OP8\_M19\_00357" 27832 "s59E13H2" 0.9552021 "Dihydroorotase"  
"OP8\_M19\_00357" 27832 "s59E25H2" 0 "Dihydroorotase"  
"OP8\_M19\_00357" 27832 "s59E5H2" 0.6157668 "Dihydroorotase"  
"OP8\_M19\_00357" 27832 "s63E6H2" 0 "Dihydroorotase"  
"OP8\_M19\_00358" 27833 "s59E13H2" 0.8432045 "Aspartate carbamoyltransferase"  
"OP8\_M19\_00358" 27833 "s59E25H2" 0 "Aspartate carbamoyltransferase"  
"OP8\_M19\_00358" 27833 "s59E5H2" 0.5942058 "Aspartate carbamoyltransferase"  
"OP8\_M19\_00358" 27833 "s63E6H2" 0 "Aspartate carbamoyltransferase"  
"OP8\_M19\_00359" 27834 "s59E13H2" 0.8408246 "Bifunctional protein PyrR"  
"OP8\_M19\_00359" 27834 "s59E25H2" 0 "Bifunctional protein PyrR"  
"OP8\_M19\_00359" 27834 "s59E5H2" 0.6050335 "Bifunctional protein PyrR"  
"OP8\_M19\_00359" 27834 "s63E6H2" 0 "Bifunctional protein PyrR"  
"OP8\_M19\_00360" 27835 "s59E13H2" 0.415288 "Riboflavin biosynthesis protein RibF"  
"OP8\_M19\_00360" 27835 "s59E25H2" 0 "Riboflavin biosynthesis protein RibF"  
"OP8\_M19\_00360" 27835 "s59E5H2" 0.3400428 "Riboflavin biosynthesis protein RibF"  
"OP8\_M19\_00360" 27835 "s63E6H2" 0 "Riboflavin biosynthesis protein RibF"  
"OP8\_M19\_00361" 27836 "s59E13H2" 0.6484581 "Nucleoside triphosphate pyrophosphohydrolase"  
"OP8\_M19\_00361" 27836 "s59E25H2" 0 "Nucleoside triphosphate pyrophosphohydrolase"  
"OP8\_M19\_00361" 27836 "s59E5H2" 0.4000745 "Nucleoside triphosphate pyrophosphohydrolase"  
"OP8\_M19\_00361" 27836 "s63E6H2" 0 "Nucleoside triphosphate pyrophosphohydrolase"  
"OP8\_M19\_00362" 27837 "s59E13H2" 0.1716307 "Peptide chain release factor 2"  
"OP8\_M19\_00362" 27837 "s59E25H2" 0 "Peptide chain release factor 2"  
"OP8\_M19\_00362" 27837 "s59E5H2" 0.5343098 "Peptide chain release factor 2"  
"OP8\_M19\_00362" 27837 "s63E6H2" 0 "Peptide chain release factor 2"  
"OP8\_M19\_00363" 27838 "s59E13H2" 0.01794516 "Apolipoprotein N-acyltransferase"  
"OP8\_M19\_00363" 27838 "s59E25H2" 0 "Apolipoprotein N-acyltransferase"  
"OP8\_M19\_00363" 27838 "s59E5H2" 0.4278981 "Apolipoprotein N-acyltransferase"  
"OP8\_M19\_00363" 27838 "s63E6H2" 0 "Apolipoprotein N-acyltransferase"  
"OP8\_M19\_00364" 27839 "s59E13H2" 0.01299133 "Sporulation-specific N-acetylmuramoyl-L-alanine amidase"  
"OP8\_M19\_00364" 27839 "s59E25H2" 0 "Sporulation-specific N-acetylmuramoyl-L-alanine amidase"  
"OP8\_M19\_00364" 27839 "s59E5H2" 0.6896154 "Sporulation-specific N-acetylmuramoyl-L-alanine amidase"  
"OP8\_M19\_00364" 27839 "s63E6H2" 0 "Sporulation-specific N-acetylmuramoyl-L-alanine amidase"  
"OP8\_M19\_00365" 27840 "s59E13H2" 0.008374534 "FtsH protease regulator HflK"  
"OP8\_M19\_00365" 27840 "s59E25H2" 0 "FtsH protease regulator HflK"  
"OP8\_M19\_00365" 27840 "s59E5H2" 0.683357 "FtsH protease regulator HflK"



"OP8\_M19\_00365" 27840 "s63E6H2" 0 "FtsH protease regulator HflK"  
"OP8\_M19\_00366" 27841 "s59E13H2" 0.004012633 "hypothetical protein"  
"OP8\_M19\_00366" 27841 "s59E25H2" 0 "hypothetical protein"  
"OP8\_M19\_00366" 27841 "s59E5H2" 0.5043481 "hypothetical protein"  
"OP8\_M19\_00366" 27841 "s63E6H2" 0 "hypothetical protein"  
"OP8\_M19\_00367" 27842 "s59E13H2" 0.007685018 "DNA-binding protein HU 1"  
"OP8\_M19\_00367" 27842 "s59E25H2" 0 "DNA-binding protein HU 1"  
"OP8\_M19\_00367" 27842 "s59E5H2" 0.4083292 "DNA-binding protein HU 1"  
"OP8\_M19\_00367" 27842 "s63E6H2" 0 "DNA-binding protein HU 1"  
"OP8\_M19\_00368" 27843 "s59E13H2" 0.0293705 "hypothetical protein"  
"OP8\_M19\_00368" 27843 "s59E25H2" 0 "hypothetical protein"  
"OP8\_M19\_00368" 27843 "s59E5H2" 0.7230467 "hypothetical protein"  
"OP8\_M19\_00368" 27843 "s63E6H2" 0 "hypothetical protein"  
"OP8\_M19\_00369" 27844 "s59E13H2" 0.01250038 "Dephospho-CoA kinase"  
"OP8\_M19\_00369" 27844 "s59E25H2" 0 "Dephospho-CoA kinase"  
"OP8\_M19\_00369" 27844 "s59E5H2" 0.9997745 "Dephospho-CoA kinase"  
"OP8\_M19\_00369" 27844 "s63E6H2" 0 "Dephospho-CoA kinase"  
"OP8\_M19\_00370" 27845 "s59E13H2" 0.007959136 "PilZ domain protein"  
"OP8\_M19\_00370" 27845 "s59E25H2" 0 "PilZ domain protein"  
"OP8\_M19\_00370" 27845 "s59E5H2" 0.7726383 "PilZ domain protein"  
"OP8\_M19\_00370" 27845 "s63E6H2" 0 "PilZ domain protein"  
"OP8\_M19\_00371" 27846 "s59E13H2" 0.008114858 "Transcriptional regulatory protein LiaR"  
"OP8\_M19\_00371" 27846 "s59E25H2" 0 "Transcriptional regulatory protein LiaR"  
"OP8\_M19\_00371" 27846 "s59E5H2" 1.409739 "Transcriptional regulatory protein LiaR"  
"OP8\_M19\_00371" 27846 "s63E6H2" 0 "Transcriptional regulatory protein LiaR"  
"OP8\_M19\_00372" 27847 "s59E13H2" 8.660205 "3-deoxy-D-manno-octulosonic acid transferase"  
"OP8\_M19\_00372" 27847 "s59E25H2" 0 "3-deoxy-D-manno-octulosonic acid transferase"  
"OP8\_M19\_00372" 27847 "s59E5H2" 0.7502515 "3-deoxy-D-manno-octulosonic acid transferase"  
"OP8\_M19\_00372" 27847 "s63E6H2" 0 "3-deoxy-D-manno-octulosonic acid transferase"  
"OP8\_M19\_00373" 27848 "s59E13H2" 18.58959 "PAP2 superfamily protein"  
"OP8\_M19\_00373" 27848 "s59E25H2" 0 "PAP2 superfamily protein"  
"OP8\_M19\_00373" 27848 "s59E5H2" 0.8950563 "PAP2 superfamily protein"  
"OP8\_M19\_00373" 27848 "s63E6H2" 0 "PAP2 superfamily protein"  
"OP8\_M19\_00374" 27849 "s59E13H2" 27.08046 "N-acyl-D-glutamate deacylase"  
"OP8\_M19\_00374" 27849 "s59E25H2" 0.1036116 "N-acyl-D-glutamate deacylase"  
"OP8\_M19\_00374" 27849 "s59E5H2" 1.031523 "N-acyl-D-glutamate deacylase"  
"OP8\_M19\_00374" 27849 "s63E6H2" 0 "N-acyl-D-glutamate deacylase"  
"OP8\_M19\_00375" 27850 "s59E13H2" 37.60571 "Murein DD-endopeptidase MepM"  
"OP8\_M19\_00375" 27850 "s59E25H2" 0.2673378 "Murein DD-endopeptidase MepM"  
"OP8\_M19\_00375" 27850 "s59E5H2" 0.9928689 "Murein DD-endopeptidase MepM"  
"OP8\_M19\_00375" 27850 "s63E6H2" 0 "Murein DD-endopeptidase MepM"  
"OP8\_M19\_00376" 27851 "s59E13H2" 48.09771 "2,3-bisphosphoglycerate-independent phosphoglycerate mutase"  
"OP8\_M19\_00376" 27851 "s59E25H2" 0.2934579 "2,3-bisphosphoglycerate-independent phosphoglycerate mutase"  
"OP8\_M19\_00376" 27851 "s59E5H2" 1.294656 "2,3-bisphosphoglycerate-independent phosphoglycerate mutase"  
"OP8\_M19\_00376" 27851 "s63E6H2" 0.001564328 "2,3-bisphosphoglycerate-independent phosphoglycerate mutase"  
"OP8\_M19\_00377" 27852 "s59E13H2" 51.90256 "putative ABC transporter ATP-binding protein YxIF"  
"OP8\_M19\_00377" 27852 "s59E25H2" 0 "putative ABC transporter ATP-binding protein YxIF"

"OP8\_M19\_00377" 27852 "s59E5H2" 1.650539 "putative ABC transporter ATP-binding protein YxIF"  
"OP8\_M19\_00377" 27852 "s63E6H2" 0.004306163 "putative ABC transporter ATP-binding protein YxIF"  
"OP8\_M19\_00378" 27853 "s59E13H2" 49.63877 "ABC-2 family transporter protein"  
"OP8\_M19\_00378" 27853 "s59E25H2" 0.7 "ABC-2 family transporter protein"  
"OP8\_M19\_00378" 27853 "s59E5H2" 1.68738 "ABC-2 family transporter protein"  
"OP8\_M19\_00378" 27853 "s63E6H2" 0.001893664 "ABC-2 family transporter protein"  
"OP8\_M19\_00379" 27854 "s59E13H2" 50.61958 "putative ABC transporter ATP-binding protein YxIF"  
"OP8\_M19\_00379" 27854 "s59E25H2" 0.4584682 "putative ABC transporter ATP-binding protein YxIF"  
"OP8\_M19\_00379" 27854 "s59E5H2" 2.59302 "putative ABC transporter ATP-binding protein YxIF"  
"OP8\_M19\_00379" 27854 "s63E6H2" 0.002387121 "putative ABC transporter ATP-binding protein YxIF"  
"OP8\_M19\_00380" 27855 "s59E13H2" 46.03717 "ABC-2 family transporter protein"  
"OP8\_M19\_00380" 27855 "s59E25H2" 0.4068627 "ABC-2 family transporter protein"  
"OP8\_M19\_00380" 27855 "s59E5H2" 2.304907 "ABC-2 family transporter protein"  
"OP8\_M19\_00380" 27855 "s63E6H2" 0.002823592 "ABC-2 family transporter protein"  
"OP8\_M19\_00381" 27856 "s59E13H2" 35.91595 "hypothetical protein"  
"OP8\_M19\_00381" 27856 "s59E25H2" 0.2567288 "hypothetical protein"  
"OP8\_M19\_00381" 27856 "s59E5H2" 1.576062 "hypothetical protein"  
"OP8\_M19\_00381" 27856 "s63E6H2" 0 "hypothetical protein"  
"OP8\_M19\_00382" 27857 "s59E13H2" 28.46826 "Putative NAD(P)H nitroreductase"  
"OP8\_M19\_00382" 27857 "s59E25H2" 0 "Putative NAD(P)H nitroreductase"  
"OP8\_M19\_00382" 27857 "s59E5H2" 1.259085 "Putative NAD(P)H nitroreductase"  
"OP8\_M19\_00382" 27857 "s63E6H2" 0.004918519 "Putative NAD(P)H nitroreductase"  
"OP8\_M19\_00383" 27858 "s59E13H2" 14.8054 "Asparagine--tRNA ligase"  
"OP8\_M19\_00383" 27858 "s59E25H2" 0 "Asparagine--tRNA ligase"  
"OP8\_M19\_00383" 27858 "s59E5H2" 10.36954 "Asparagine--tRNA ligase"  
"OP8\_M19\_00383" 27858 "s63E6H2" 0 "Asparagine--tRNA ligase"  
"OP8\_M19\_00384" 27859 "s59E13H2" 6.544069 "Ribosomal protein S12 methylthiotransferase RimO"  
"OP8\_M19\_00384" 27859 "s59E25H2" 0 "Ribosomal protein S12 methylthiotransferase RimO"  
"OP8\_M19\_00384" 27859 "s59E5H2" 10.82071 "Ribosomal protein S12 methylthiotransferase RimO"  
"OP8\_M19\_00384" 27859 "s63E6H2" 0 "Ribosomal protein S12 methylthiotransferase RimO"  
"OP8\_M19\_00385" 27860 "s59E13H2" 7.934673 "Phosphatidylglycerophosphatase A"  
"OP8\_M19\_00385" 27860 "s59E25H2" 0 "Phosphatidylglycerophosphatase A"  
"OP8\_M19\_00385" 27860 "s59E5H2" 14.344 "Phosphatidylglycerophosphatase A"  
"OP8\_M19\_00385" 27860 "s63E6H2" 0 "Phosphatidylglycerophosphatase A"  
"OP8\_M19\_00386" 27861 "s59E13H2" 7.756768 "Putative competence-damage inducible protein"  
"OP8\_M19\_00386" 27861 "s59E25H2" 0 "Putative competence-damage inducible protein"  
"OP8\_M19\_00386" 27861 "s59E5H2" 12.44416 "Putative competence-damage inducible protein"  
"OP8\_M19\_00386" 27861 "s63E6H2" 0 "Putative competence-damage inducible protein"  
"OP8\_M19\_00387" 27862 "s59E13H2" 8.714535 "2'-5'-RNA ligase"  
"OP8\_M19\_00387" 27862 "s59E25H2" 0 "2'-5'-RNA ligase"  
"OP8\_M19\_00387" 27862 "s59E5H2" 9.407453 "2'-5'-RNA ligase"  
"OP8\_M19\_00387" 27862 "s63E6H2" 0 "2'-5'-RNA ligase"  
"OP8\_M19\_00388" 27863 "s59E13H2" 9.431737 "putative glycerol-3-phosphate acyltransferase"  
"OP8\_M19\_00388" 27863 "s59E25H2" 0.2368866 "putative glycerol-3-phosphate acyltransferase"  
"OP8\_M19\_00388" 27863 "s59E5H2" 7.441377 "putative glycerol-3-phosphate acyltransferase"  
"OP8\_M19\_00388" 27863 "s63E6H2" 0 "putative glycerol-3-phosphate acyltransferase"  
"OP8\_M19\_00389" 27864 "s59E13H2" 8.999857 "Glycerol-3-phosphate dehydrogenase [NAD(P)+]"

"OP8\_M19\_00389" 27864 "s59E25H2" 0.1147705 "Glycerol-3-phosphate dehydrogenase [NAD(P)+]"  
"OP8\_M19\_00389" 27864 "s59E5H2" 7.358525 "Glycerol-3-phosphate dehydrogenase [NAD(P)+]"  
"OP8\_M19\_00389" 27864 "s63E6H2" 0 "Glycerol-3-phosphate dehydrogenase [NAD(P)+]"  
"OP8\_M19\_00390" 27865 "s59E13H2" 10.63125 "Cellulose synthase operon protein C precursor"  
"OP8\_M19\_00390" 27865 "s59E25H2" 0 "Cellulose synthase operon protein C precursor"  
"OP8\_M19\_00390" 27865 "s59E5H2" 9.579981 "Cellulose synthase operon protein C precursor"  
"OP8\_M19\_00390" 27865 "s63E6H2" 0 "Cellulose synthase operon protein C precursor"  
"OP8\_M19\_00391" 27866 "s59E13H2" 8.714454 "Adenosylhomocysteinase"  
"OP8\_M19\_00391" 27866 "s59E25H2" 0 "Adenosylhomocysteinase"  
"OP8\_M19\_00391" 27866 "s59E5H2" 8.72031 "Adenosylhomocysteinase"  
"OP8\_M19\_00391" 27866 "s63E6H2" 0 "Adenosylhomocysteinase"  
"OP8\_M19\_00393" 27868 "s59E13H2" 0 "hypothetical protein"  
"OP8\_M19\_00393" 27868 "s59E25H2" 0 "hypothetical protein"  
"OP8\_M19\_00393" 27868 "s59E5H2" 0.3002792 "hypothetical protein"  
"OP8\_M19\_00393" 27868 "s63E6H2" 0 "hypothetical protein"  
"OP8\_M19\_00394" 27869 "s59E13H2" 0 "Riboflavin biosynthesis protein RibD"  
"OP8\_M19\_00394" 27869 "s59E25H2" 0 "Riboflavin biosynthesis protein RibD"  
"OP8\_M19\_00394" 27869 "s59E5H2" 0.2632063 "Riboflavin biosynthesis protein RibD"  
"OP8\_M19\_00394" 27869 "s63E6H2" 0 "Riboflavin biosynthesis protein RibD"  
"OP8\_M19\_00395" 27870 "s59E13H2" 0.007340183 "putative S-adenosyl-L-methionine-dependent methyltransferase TehB"  
"OP8\_M19\_00395" 27870 "s59E25H2" 0 "putative S-adenosyl-L-methionine-dependent methyltransferase TehB"  
"OP8\_M19\_00395" 27870 "s59E5H2" 0.7867941 "putative S-adenosyl-L-methionine-dependent methyltransferase TehB"  
"OP8\_M19\_00395" 27870 "s63E6H2" 0 "putative S-adenosyl-L-methionine-dependent methyltransferase TehB"  
"OP8\_M19\_00397" 27872 "s59E13H2" 0.4015916 "Isoleucine--tRNA ligase"  
"OP8\_M19\_00397" 27872 "s59E25H2" 0 "Isoleucine--tRNA ligase"  
"OP8\_M19\_00397" 27872 "s59E5H2" 1.639731 "Isoleucine--tRNA ligase"  
"OP8\_M19\_00397" 27872 "s63E6H2" 0 "Isoleucine--tRNA ligase"  
"OP8\_M19\_00398" 27873 "s59E13H2" 0.5031777 "Lipoprotein signal peptidase"  
"OP8\_M19\_00398" 27873 "s59E25H2" 0.4634146 "Lipoprotein signal peptidase"  
"OP8\_M19\_00398" 27873 "s59E5H2" 2.639118 "Lipoprotein signal peptidase"  
"OP8\_M19\_00398" 27873 "s63E6H2" 0 "Lipoprotein signal peptidase"  
"OP8\_M19\_00399" 27874 "s59E13H2" 0.4692759 "Prolipoprotein diacylglycerol transferase"  
"OP8\_M19\_00399" 27874 "s59E25H2" 0.3609023 "Prolipoprotein diacylglycerol transferase"  
"OP8\_M19\_00399" 27874 "s59E5H2" 2.513123 "Prolipoprotein diacylglycerol transferase"  
"OP8\_M19\_00399" 27874 "s63E6H2" 0 "Prolipoprotein diacylglycerol transferase"  
"OP8\_M19\_00400" 27875 "s59E13H2" 0.09551587 "Ribosomal large subunit pseudouridine synthase D"  
"OP8\_M19\_00400" 27875 "s59E25H2" 0 "Ribosomal large subunit pseudouridine synthase D"  
"OP8\_M19\_00400" 27875 "s59E5H2" 2.404032 "Ribosomal large subunit pseudouridine synthase D"  
"OP8\_M19\_00400" 27875 "s63E6H2" 0 "Ribosomal large subunit pseudouridine synthase D"  
"OP8\_M19\_00401" 27876 "s59E13H2" 0.1080482 "Elongation factor G"  
"OP8\_M19\_00401" 27876 "s59E25H2" 0 "Elongation factor G"  
"OP8\_M19\_00401" 27876 "s59E5H2" 1.795511 "Elongation factor G"  
"OP8\_M19\_00401" 27876 "s63E6H2" 0 "Elongation factor G"  
"OP8\_M19\_00402" 27877 "s59E13H2" 0.2183472 "hypothetical protein"  
"OP8\_M19\_00402" 27877 "s59E25H2" 0 "hypothetical protein"  
"OP8\_M19\_00402" 27877 "s59E5H2" 3.255252 "hypothetical protein"  
"OP8\_M19\_00402" 27877 "s63E6H2" 0 "hypothetical protein"

"OP8\_M19\_00403" 27878 "s59E13H2" 0.1996586 "Major Facilitator Superfamily protein"  
"OP8\_M19\_00403" 27878 "s59E25H2" 0 "Major Facilitator Superfamily protein"  
"OP8\_M19\_00403" 27878 "s59E5H2" 2.550286 "Major Facilitator Superfamily protein"  
"OP8\_M19\_00403" 27878 "s63E6H2" 0 "Major Facilitator Superfamily protein"  
"OP8\_M19\_00404" 27879 "s59E13H2" 0.07997426 "GMP synthase [glutamine-hydrolyzing] subunit A"  
"OP8\_M19\_00404" 27879 "s59E25H2" 0 "GMP synthase [glutamine-hydrolyzing] subunit A"  
"OP8\_M19\_00404" 27879 "s59E5H2" 4.704139 "GMP synthase [glutamine-hydrolyzing] subunit A"  
"OP8\_M19\_00404" 27879 "s63E6H2" 0 "GMP synthase [glutamine-hydrolyzing] subunit A"  
"OP8\_M19\_00405" 27880 "s59E13H2" 0.06173507 "hypothetical protein"  
"OP8\_M19\_00405" 27880 "s59E25H2" 0 "hypothetical protein"  
"OP8\_M19\_00405" 27880 "s59E5H2" 6.437484 "hypothetical protein"  
"OP8\_M19\_00405" 27880 "s63E6H2" 0 "hypothetical protein"  
"OP8\_M19\_00406" 27881 "s59E13H2" 0.06424263 "hypothetical protein"  
"OP8\_M19\_00406" 27881 "s59E25H2" 0 "hypothetical protein"  
"OP8\_M19\_00406" 27881 "s59E5H2" 6.476306 "hypothetical protein"  
"OP8\_M19\_00406" 27881 "s63E6H2" 0 "hypothetical protein"  
"OP8\_M19\_00407" 27882 "s59E13H2" 0.06147846 "hypothetical protein"  
"OP8\_M19\_00407" 27882 "s59E25H2" 0 "hypothetical protein"  
"OP8\_M19\_00407" 27882 "s59E5H2" 5.886253 "hypothetical protein"  
"OP8\_M19\_00407" 27882 "s63E6H2" 0 "hypothetical protein"  
"OP8\_M19\_00408" 27883 "s59E13H2" 0.05015001 "Sodium:neurotransmitter symporter family protein"  
"OP8\_M19\_00408" 27883 "s59E25H2" 0 "Sodium:neurotransmitter symporter family protein"  
"OP8\_M19\_00408" 27883 "s59E5H2" 4.705433 "Sodium:neurotransmitter symporter family protein"  
"OP8\_M19\_00408" 27883 "s63E6H2" 0 "Sodium:neurotransmitter symporter family protein"  
"OP8\_M19\_00409" 27884 "s59E13H2" 0.05929136 "tRNA pseudouridine synthase B"  
"OP8\_M19\_00409" 27884 "s59E25H2" 0 "tRNA pseudouridine synthase B"  
"OP8\_M19\_00409" 27884 "s59E5H2" 4.29861 "tRNA pseudouridine synthase B"  
"OP8\_M19\_00409" 27884 "s63E6H2" 0 "tRNA pseudouridine synthase B"  
"OP8\_M19\_00410" 27885 "s59E13H2" 0.0670614 "Bifunctional oligoribonuclease and PAP phosphatase NrnA"  
"OP8\_M19\_00410" 27885 "s59E25H2" 0 "Bifunctional oligoribonuclease and PAP phosphatase NrnA"  
"OP8\_M19\_00410" 27885 "s59E5H2" 3.651207 "Bifunctional oligoribonuclease and PAP phosphatase NrnA"  
"OP8\_M19\_00410" 27885 "s63E6H2" 0 "Bifunctional oligoribonuclease and PAP phosphatase NrnA"  
"OP8\_M19\_00411" 27886 "s59E13H2" 0.09593169 "Ribosome-binding factor A"  
"OP8\_M19\_00411" 27886 "s59E25H2" 0 "Ribosome-binding factor A"  
"OP8\_M19\_00411" 27886 "s59E5H2" 4.46848 "Ribosome-binding factor A"  
"OP8\_M19\_00411" 27886 "s63E6H2" 0 "Ribosome-binding factor A"  
"OP8\_M19\_00412" 27887 "s59E13H2" 0.09168063 "hypothetical protein"  
"OP8\_M19\_00412" 27887 "s59E25H2" 0 "hypothetical protein"  
"OP8\_M19\_00412" 27887 "s59E5H2" 4.062994 "hypothetical protein"  
"OP8\_M19\_00412" 27887 "s63E6H2" 0 "hypothetical protein"  
"OP8\_M19\_00413" 27888 "s59E13H2" 0.06333595 "Translation initiation factor IF-2"  
"OP8\_M19\_00413" 27888 "s59E25H2" 0 "Translation initiation factor IF-2"  
"OP8\_M19\_00413" 27888 "s59E5H2" 3.204869 "Translation initiation factor IF-2"  
"OP8\_M19\_00413" 27888 "s63E6H2" 0 "Translation initiation factor IF-2"  
"OP8\_M19\_00414" 27889 "s59E13H2" 0.03376403 "hypothetical protein"  
"OP8\_M19\_00414" 27889 "s59E25H2" 0 "hypothetical protein"  
"OP8\_M19\_00414" 27889 "s59E5H2" 2.330567 "hypothetical protein"

"OP8\_M19\_00414" 27889 "s63E6H2" 0 "hypothetical protein"  
"OP8\_M19\_00415" 27890 "s59E13H2" 0.03581766 "(Dimethylallyl)adenosine tRNA methylthiotransferase MiaB"  
"OP8\_M19\_00415" 27890 "s59E25H2" 0 "(Dimethylallyl)adenosine tRNA methylthiotransferase MiaB"  
"OP8\_M19\_00415" 27890 "s59E5H2" 0.7445038 "(Dimethylallyl)adenosine tRNA methylthiotransferase MiaB"  
"OP8\_M19\_00415" 27890 "s63E6H2" 0 "(Dimethylallyl)adenosine tRNA methylthiotransferase MiaB"  
"OP8\_M19\_00416" 27891 "s59E13H2" 0.03848761 "hypothetical protein"  
"OP8\_M19\_00416" 27891 "s59E25H2" 0 "hypothetical protein"  
"OP8\_M19\_00416" 27891 "s59E5H2" 0.3049157 "hypothetical protein"  
"OP8\_M19\_00416" 27891 "s63E6H2" 0 "hypothetical protein"  
"OP8\_M19\_00418" 27893 "s59E13H2" 0.003767613 "hypothetical protein"  
"OP8\_M19\_00418" 27893 "s59E25H2" 0 "hypothetical protein"  
"OP8\_M19\_00418" 27893 "s59E5H2" 0.1442844 "hypothetical protein"  
"OP8\_M19\_00418" 27893 "s63E6H2" 0 "hypothetical protein"  
"OP8\_M19\_00419" 27894 "s59E13H2" 0.0257063 "Magnesium transport protein CorA"  
"OP8\_M19\_00419" 27894 "s59E25H2" 0 "Magnesium transport protein CorA"  
"OP8\_M19\_00419" 27894 "s59E5H2" 0.1937188 "Magnesium transport protein CorA"  
"OP8\_M19\_00419" 27894 "s63E6H2" 0 "Magnesium transport protein CorA"  
"OP8\_M19\_00420" 27895 "s59E13H2" 0.01188401 "DNA repair protein RecN"  
"OP8\_M19\_00420" 27895 "s59E25H2" 0 "DNA repair protein RecN"  
"OP8\_M19\_00420" 27895 "s59E5H2" 0.2811564 "DNA repair protein RecN"  
"OP8\_M19\_00420" 27895 "s63E6H2" 0 "DNA repair protein RecN"  
"OP8\_M19\_00421" 27896 "s59E13H2" 0.01276502 "Thermophilic serine proteinase precursor"  
"OP8\_M19\_00421" 27896 "s59E25H2" 0 "Thermophilic serine proteinase precursor"  
"OP8\_M19\_00421" 27896 "s59E5H2" 0.7205214 "Thermophilic serine proteinase precursor"  
"OP8\_M19\_00421" 27896 "s63E6H2" 0 "Thermophilic serine proteinase precursor"  
"OP8\_M19\_00422" 27897 "s59E13H2" 0.02413317 "Chaperone protein DnaK"  
"OP8\_M19\_00422" 27897 "s59E25H2" 0 "Chaperone protein DnaK"  
"OP8\_M19\_00422" 27897 "s59E5H2" 0.9601526 "Chaperone protein DnaK"  
"OP8\_M19\_00422" 27897 "s63E6H2" 0.001019306 "Chaperone protein DnaK"  
"OP8\_M19\_00423" 27898 "s59E13H2" 0.01849304 "Chaperone protein DnaJ"  
"OP8\_M19\_00423" 27898 "s59E25H2" 0 "Chaperone protein DnaJ"  
"OP8\_M19\_00423" 27898 "s59E5H2" 0.6890701 "Chaperone protein DnaJ"  
"OP8\_M19\_00423" 27898 "s63E6H2" 0 "Chaperone protein DnaJ"  
"OP8\_M19\_00424" 27899 "s59E13H2" 0.048541 "Serine/threonine-protein kinase PrkC"  
"OP8\_M19\_00424" 27899 "s59E25H2" 0 "Serine/threonine-protein kinase PrkC"  
"OP8\_M19\_00424" 27899 "s59E5H2" 0.7572209 "Serine/threonine-protein kinase PrkC"  
"OP8\_M19\_00424" 27899 "s63E6H2" 0 "Serine/threonine-protein kinase PrkC"  
"OP8\_M19\_00425" 27900 "s59E13H2" 0.02200375 "Branched-chain-amino-acid aminotransferase"  
"OP8\_M19\_00425" 27900 "s59E25H2" 0 "Branched-chain-amino-acid aminotransferase"  
"OP8\_M19\_00425" 27900 "s59E5H2" 1.122974 "Branched-chain-amino-acid aminotransferase"  
"OP8\_M19\_00425" 27900 "s63E6H2" 0 "Branched-chain-amino-acid aminotransferase"  
"OP8\_M19\_00426" 27901 "s59E13H2" 0.04039502 "Twitching mobility protein"  
"OP8\_M19\_00426" 27901 "s59E25H2" 0 "Twitching mobility protein"  
"OP8\_M19\_00426" 27901 "s59E5H2" 1.25751 "Twitching mobility protein"  
"OP8\_M19\_00426" 27901 "s63E6H2" 0 "Twitching mobility protein"  
"OP8\_M19\_00427" 27902 "s59E13H2" 0.03964161 "Alanine--tRNA ligase"  
"OP8\_M19\_00427" 27902 "s59E25H2" 0 "Alanine--tRNA ligase"

"OP8\_M19\_00427" 27902 "s59E5H2" 1.171089 "Alanine--tRNA ligase"  
"OP8\_M19\_00427" 27902 "s63E6H2" 0 "Alanine--tRNA ligase"  
"OP8\_M19\_00428" 27903 "s59E13H2" 0.04888922 "Membrane-bound lytic murein transglycosylase C precursor"  
"OP8\_M19\_00428" 27903 "s59E25H2" 0 "Membrane-bound lytic murein transglycosylase C precursor"  
"OP8\_M19\_00428" 27903 "s59E5H2" 1.107089 "Membrane-bound lytic murein transglycosylase C precursor"  
"OP8\_M19\_00428" 27903 "s63E6H2" 0 "Membrane-bound lytic murein transglycosylase C precursor"  
"OP8\_M19\_00429" 27904 "s59E13H2" 0.02880131 "hypothetical protein"  
"OP8\_M19\_00429" 27904 "s59E25H2" 0 "hypothetical protein"  
"OP8\_M19\_00429" 27904 "s59E5H2" 1.073877 "hypothetical protein"  
"OP8\_M19\_00429" 27904 "s63E6H2" 0 "hypothetical protein"  
"OP8\_M19\_00430" 27905 "s59E13H2" 0.0266271 "hypothetical protein"  
"OP8\_M19\_00430" 27905 "s59E25H2" 0 "hypothetical protein"  
"OP8\_M19\_00430" 27905 "s59E5H2" 0.8913768 "hypothetical protein"  
"OP8\_M19\_00430" 27905 "s63E6H2" 0 "hypothetical protein"  
"OP8\_M19\_00431" 27906 "s59E13H2" 0.02199195 "TPR repeat-containing protein YrrB"  
"OP8\_M19\_00431" 27906 "s59E25H2" 0 "TPR repeat-containing protein YrrB"  
"OP8\_M19\_00431" 27906 "s59E5H2" 1.198441 "TPR repeat-containing protein YrrB"  
"OP8\_M19\_00431" 27906 "s63E6H2" 0 "TPR repeat-containing protein YrrB"  
"OP8\_M19\_00433" 27908 "s59E13H2" 0.006758271 "Trigger factor"  
"OP8\_M19\_00433" 27908 "s59E25H2" 0 "Trigger factor"  
"OP8\_M19\_00433" 27908 "s59E5H2" 0.3881618 "Trigger factor"  
"OP8\_M19\_00433" 27908 "s63E6H2" 0 "Trigger factor"  
"OP8\_M19\_00434" 27909 "s59E13H2" 0.002851592 "Lon protease"  
"OP8\_M19\_00434" 27909 "s59E25H2" 0 "Lon protease"  
"OP8\_M19\_00434" 27909 "s59E5H2" 0.5210666 "Lon protease"  
"OP8\_M19\_00434" 27909 "s63E6H2" 0 "Lon protease"  
"OP8\_M19\_00435" 27910 "s59E13H2" 0.008003547 "hypothetical protein"  
"OP8\_M19\_00435" 27910 "s59E25H2" 0 "hypothetical protein"  
"OP8\_M19\_00435" 27910 "s59E5H2" 0.3948525 "hypothetical protein"  
"OP8\_M19\_00435" 27910 "s63E6H2" 0 "hypothetical protein"  
"OP8\_M19\_00436" 27911 "s59E13H2" 0 "hypothetical protein"  
"OP8\_M19\_00436" 27911 "s59E25H2" 0 "hypothetical protein"  
"OP8\_M19\_00436" 27911 "s59E5H2" 0.4044995 "hypothetical protein"  
"OP8\_M19\_00436" 27911 "s63E6H2" 0 "hypothetical protein"  
"OP8\_M19\_00437" 27912 "s59E13H2" 0 "Type-1 restriction enzyme R protein"  
"OP8\_M19\_00437" 27912 "s59E25H2" 0 "Type-1 restriction enzyme R protein"  
"OP8\_M19\_00437" 27912 "s59E5H2" 0.2049161 "Type-1 restriction enzyme R protein"  
"OP8\_M19\_00437" 27912 "s63E6H2" 0 "Type-1 restriction enzyme R protein"  
"OP8\_M19\_00438" 27913 "s59E13H2" 0 "Type-1 restriction enzyme MjaXIP specificity protein"  
"OP8\_M19\_00438" 27913 "s59E25H2" 0 "Type-1 restriction enzyme MjaXIP specificity protein"  
"OP8\_M19\_00438" 27913 "s59E5H2" 0.05665596 "Type-1 restriction enzyme MjaXIP specificity protein"  
"OP8\_M19\_00438" 27913 "s63E6H2" 0 "Type-1 restriction enzyme MjaXIP specificity protein"  
"OP8\_M19\_00439" 27914 "s59E13H2" 0 "putative type I restriction enzymeP M protein"  
"OP8\_M19\_00439" 27914 "s59E25H2" 0 "putative type I restriction enzymeP M protein"  
"OP8\_M19\_00439" 27914 "s59E5H2" 0.2178141 "putative type I restriction enzymeP M protein"  
"OP8\_M19\_00439" 27914 "s63E6H2" 0 "putative type I restriction enzymeP M protein"  
"OP8\_M19\_00441" 27916 "s59E13H2" 0 "hypothetical protein"

"OP8\_M19\_00441" 27916 "s59E25H2" 0 "hypothetical protein"  
"OP8\_M19\_00441" 27916 "s59E5H2" 0 "hypothetical protein"  
"OP8\_M19\_00441" 27916 "s63E6H2" 0 "hypothetical protein"  
"OP8\_M19\_00442" 27917 "s59E13H2" 0 "hypothetical protein"  
"OP8\_M19\_00442" 27917 "s59E25H2" 0 "hypothetical protein"  
"OP8\_M19\_00442" 27917 "s59E5H2" 0.04542206 "hypothetical protein"  
"OP8\_M19\_00442" 27917 "s63E6H2" 0 "hypothetical protein"  
"OP8\_M19\_00444" 27919 "s59E13H2" 0 "hypothetical protein"  
"OP8\_M19\_00444" 27919 "s59E25H2" 0 "hypothetical protein"  
"OP8\_M19\_00444" 27919 "s59E5H2" 0.1214064 "hypothetical protein"  
"OP8\_M19\_00444" 27919 "s63E6H2" 0 "hypothetical protein"  
"OP8\_M19\_00447" 27922 "s59E13H2" 0 "TIR domain protein"  
"OP8\_M19\_00447" 27922 "s59E25H2" 0 "TIR domain protein"  
"OP8\_M19\_00447" 27922 "s59E5H2" 0.1590161 "TIR domain protein"  
"OP8\_M19\_00447" 27922 "s63E6H2" 0 "TIR domain protein"  
"OP8\_M19\_00448" 27923 "s59E13H2" 4.915597 "Undecaprenyl-phosphate 4-deoxy-4-formamido-L-arabinose transferase"  
"OP8\_M19\_00448" 27923 "s59E25H2" 0 "Undecaprenyl-phosphate 4-deoxy-4-formamido-L-arabinose transferase"  
"OP8\_M19\_00448" 27923 "s59E5H2" 1.756982 "Undecaprenyl-phosphate 4-deoxy-4-formamido-L-arabinose transferase"  
"OP8\_M19\_00448" 27923 "s63E6H2" 0.001468697 "Undecaprenyl-phosphate 4-deoxy-4-formamido-L-arabinose transferase"  
"OP8\_M19\_00449" 27924 "s59E13H2" 0.01350884 "hypothetical protein"  
"OP8\_M19\_00449" 27924 "s59E25H2" 0 "hypothetical protein"  
"OP8\_M19\_00449" 27924 "s59E5H2" 0.0823481 "hypothetical protein"  
"OP8\_M19\_00449" 27924 "s63E6H2" 0 "hypothetical protein"  
"OP8\_M19\_00450" 27925 "s59E13H2" 0.002058288 "hypothetical protein"  
"OP8\_M19\_00450" 27925 "s59E25H2" 0 "hypothetical protein"  
"OP8\_M19\_00450" 27925 "s59E5H2" 0.01607388 "hypothetical protein"  
"OP8\_M19\_00450" 27925 "s63E6H2" 0 "hypothetical protein"  
"OP8\_M19\_00451" 27926 "s59E13H2" 0 "hypothetical protein"  
"OP8\_M19\_00451" 27926 "s59E25H2" 0 "hypothetical protein"  
"OP8\_M19\_00451" 27926 "s59E5H2" 0.04625683 "hypothetical protein"  
"OP8\_M19\_00451" 27926 "s63E6H2" 0 "hypothetical protein"  
"OP8\_M19\_00452" 27927 "s59E13H2" 0.0137342 "Biopolymer transport protein ExbD"  
"OP8\_M19\_00452" 27927 "s59E25H2" 0 "Biopolymer transport protein ExbD"  
"OP8\_M19\_00452" 27927 "s59E5H2" 5.572175 "Biopolymer transport protein ExbD"  
"OP8\_M19\_00452" 27927 "s63E6H2" 0 "Biopolymer transport protein ExbD"  
"OP8\_M19\_00453" 27928 "s59E13H2" 0.0368422 "hypothetical protein"  
"OP8\_M19\_00453" 27928 "s59E25H2" 0 "hypothetical protein"  
"OP8\_M19\_00453" 27928 "s59E5H2" 6.751577 "hypothetical protein"  
"OP8\_M19\_00453" 27928 "s63E6H2" 0 "hypothetical protein"  
"OP8\_M19\_00454" 27929 "s59E13H2" 0.02145656 "Radical SAM superfamily protein"  
"OP8\_M19\_00454" 27929 "s59E25H2" 0 "Radical SAM superfamily protein"  
"OP8\_M19\_00454" 27929 "s59E5H2" 5.846552 "Radical SAM superfamily protein"  
"OP8\_M19\_00454" 27929 "s63E6H2" 0 "Radical SAM superfamily protein"  
"OP8\_M19\_00455" 27930 "s59E13H2" 0.03900737 "Rod shape-determining protein RodA"  
"OP8\_M19\_00455" 27930 "s59E25H2" 0 "Rod shape-determining protein RodA"  
"OP8\_M19\_00455" 27930 "s59E5H2" 4.069575 "Rod shape-determining protein RodA"  
"OP8\_M19\_00455" 27930 "s63E6H2" 0 "Rod shape-determining protein RodA"

"OP8\_M19\_00456" 27931 "s59E13H2" 0.04035242 "Stage V sporulation protein D"  
"OP8\_M19\_00456" 27931 "s59E25H2" 0 "Stage V sporulation protein D"  
"OP8\_M19\_00456" 27931 "s59E5H2" 4.879318 "Stage V sporulation protein D"  
"OP8\_M19\_00456" 27931 "s63E6H2" 0 "Stage V sporulation protein D"  
"OP8\_M19\_00457" 27932 "s59E13H2" 0.007844653 "hypothetical protein"  
"OP8\_M19\_00457" 27932 "s59E25H2" 0.1547619 "hypothetical protein"  
"OP8\_M19\_00457" 27932 "s59E5H2" 2.71384 "hypothetical protein"  
"OP8\_M19\_00457" 27932 "s63E6H2" 0 "hypothetical protein"  
"OP8\_M19\_00458" 27933 "s59E13H2" 0.009865303 "hypothetical protein"  
"OP8\_M19\_00458" 27933 "s59E25H2" 0 "hypothetical protein"  
"OP8\_M19\_00458" 27933 "s59E5H2" 2.463193 "hypothetical protein"  
"OP8\_M19\_00458" 27933 "s63E6H2" 0 "hypothetical protein"  
"OP8\_M19\_00459" 27934 "s59E13H2" 0.03482496 "hypothetical protein"  
"OP8\_M19\_00459" 27934 "s59E25H2" 0 "hypothetical protein"  
"OP8\_M19\_00459" 27934 "s59E5H2" 1.699676 "hypothetical protein"  
"OP8\_M19\_00459" 27934 "s63E6H2" 0 "hypothetical protein"  
"OP8\_M19\_00460" 27935 "s59E13H2" 0.01335104 "Prolyl tripeptidyl peptidase precursor"  
"OP8\_M19\_00460" 27935 "s59E25H2" 0 "Prolyl tripeptidyl peptidase precursor"  
"OP8\_M19\_00460" 27935 "s59E5H2" 2.422937 "Prolyl tripeptidyl peptidase precursor"  
"OP8\_M19\_00460" 27935 "s63E6H2" 0 "Prolyl tripeptidyl peptidase precursor"  
"OP8\_M19\_00461" 27936 "s59E13H2" 0.4658095 "Bifunctional protein HldE"  
"OP8\_M19\_00461" 27936 "s59E25H2" 0 "Bifunctional protein HldE"  
"OP8\_M19\_00461" 27936 "s59E5H2" 1.370166 "Bifunctional protein HldE"  
"OP8\_M19\_00461" 27936 "s63E6H2" 0 "Bifunctional protein HldE"  
"OP8\_M19\_00462" 27937 "s59E13H2" 0.457203 "hypothetical protein"  
"OP8\_M19\_00462" 27937 "s59E25H2" 0 "hypothetical protein"  
"OP8\_M19\_00462" 27937 "s59E5H2" 1.426072 "hypothetical protein"  
"OP8\_M19\_00462" 27937 "s63E6H2" 0 "hypothetical protein"  
"OP8\_M19\_00464" 27939 "s59E13H2" 0.5940141 "Glutamine synthetase"  
"OP8\_M19\_00464" 27939 "s59E25H2" 0 "Glutamine synthetase"  
"OP8\_M19\_00464" 27939 "s59E5H2" 1.996428 "Glutamine synthetase"  
"OP8\_M19\_00464" 27939 "s63E6H2" 0 "Glutamine synthetase"  
"OP8\_M19\_00465" 27940 "s59E13H2" 0.5324173 "NIF3 (NGG1p interacting factor 3)"  
"OP8\_M19\_00465" 27940 "s59E25H2" 0 "NIF3 (NGG1p interacting factor 3)"  
"OP8\_M19\_00465" 27940 "s59E5H2" 1.339645 "NIF3 (NGG1p interacting factor 3)"  
"OP8\_M19\_00465" 27940 "s63E6H2" 0 "NIF3 (NGG1p interacting factor 3)"  
"OP8\_M19\_00466" 27941 "s59E13H2" 0.1133127 "hypothetical protein"  
"OP8\_M19\_00466" 27941 "s59E25H2" 0.2089113 "hypothetical protein"  
"OP8\_M19\_00466" 27941 "s59E5H2" 3.120012 "hypothetical protein"  
"OP8\_M19\_00466" 27941 "s63E6H2" 0 "hypothetical protein"  
"OP8\_M19\_00467" 27942 "s59E13H2" 0.1615497 "outer membrane channel protein"  
"OP8\_M19\_00467" 27942 "s59E25H2" 0 "outer membrane channel protein"  
"OP8\_M19\_00467" 27942 "s59E5H2" 6.850761 "outer membrane channel protein"  
"OP8\_M19\_00467" 27942 "s63E6H2" 4.303229e-05 "outer membrane channel protein"  
"OP8\_M19\_00468" 27943 "s59E13H2" 0.1799288 "SPBc2 prophage-derived glycosyltransferase SunS"  
"OP8\_M19\_00468" 27943 "s59E25H2" 0 "SPBc2 prophage-derived glycosyltransferase SunS"  
"OP8\_M19\_00468" 27943 "s59E5H2" 7.081993 "SPBc2 prophage-derived glycosyltransferase SunS"



"OP8\_M19\_00468" 27943 "s63E6H2" 0 "SPBc2 prophage-derived glycosyltransferase SunS"  
"OP8\_M19\_00469" 27944 "s59E13H2" 0.1702437 "Putative glycosyltransferase EpsD"  
"OP8\_M19\_00469" 27944 "s59E25H2" 0 "Putative glycosyltransferase EpsD"  
"OP8\_M19\_00469" 27944 "s59E5H2" 7.282671 "Putative glycosyltransferase EpsD"  
"OP8\_M19\_00469" 27944 "s63E6H2" 0 "Putative glycosyltransferase EpsD"  
"OP8\_M19\_00470" 27945 "s59E13H2" 0.2124397 "Phosphoribosylformylglycinamide cyclo-ligase"  
"OP8\_M19\_00470" 27945 "s59E25H2" 0 "Phosphoribosylformylglycinamide cyclo-ligase"  
"OP8\_M19\_00470" 27945 "s59E5H2" 8.283389 "Phosphoribosylformylglycinamide cyclo-ligase"  
"OP8\_M19\_00470" 27945 "s63E6H2" 0 "Phosphoribosylformylglycinamide cyclo-ligase"  
"OP8\_M19\_00471" 27946 "s59E13H2" 0.1777135 "CDP-alcohol phosphatidyltransferase"  
"OP8\_M19\_00471" 27946 "s59E25H2" 0 "CDP-alcohol phosphatidyltransferase"  
"OP8\_M19\_00471" 27946 "s59E5H2" 11.48826 "CDP-alcohol phosphatidyltransferase"  
"OP8\_M19\_00471" 27946 "s63E6H2" 0 "CDP-alcohol phosphatidyltransferase"  
"OP8\_M19\_00472" 27947 "s59E13H2" 0.2280625 "hypothetical protein"  
"OP8\_M19\_00472" 27947 "s59E25H2" 0 "hypothetical protein"  
"OP8\_M19\_00472" 27947 "s59E5H2" 12.89656 "hypothetical protein"  
"OP8\_M19\_00472" 27947 "s63E6H2" 0 "hypothetical protein"  
"OP8\_M19\_00473" 27948 "s59E13H2" 0.2177564 "Lipopolysaccharide core heptosyltransferase RfaQ"  
"OP8\_M19\_00473" 27948 "s59E25H2" 0 "Lipopolysaccharide core heptosyltransferase RfaQ"  
"OP8\_M19\_00473" 27948 "s59E5H2" 10.90674 "Lipopolysaccharide core heptosyltransferase RfaQ"  
"OP8\_M19\_00473" 27948 "s63E6H2" 0 "Lipopolysaccharide core heptosyltransferase RfaQ"  
"OP8\_M19\_00474" 27949 "s59E13H2" 0.05645271 "O-Antigen ligase"  
"OP8\_M19\_00474" 27949 "s59E25H2" 0 "O-Antigen ligase"  
"OP8\_M19\_00474" 27949 "s59E5H2" 7.988481 "O-Antigen ligase"  
"OP8\_M19\_00474" 27949 "s63E6H2" 0 "O-Antigen ligase"  
"OP8\_M19\_00475" 27950 "s59E13H2" 0.2169346 "hypothetical protein"  
"OP8\_M19\_00475" 27950 "s59E25H2" 0 "hypothetical protein"  
"OP8\_M19\_00475" 27950 "s59E5H2" 5.667119 "hypothetical protein"  
"OP8\_M19\_00475" 27950 "s63E6H2" 0 "hypothetical protein"  
"OP8\_M19\_00476" 27951 "s59E13H2" 0.01540678 "Bifunctional protein HldE"  
"OP8\_M19\_00476" 27951 "s59E25H2" 0 "Bifunctional protein HldE"  
"OP8\_M19\_00476" 27951 "s59E5H2" 4.888021 "Bifunctional protein HldE"  
"OP8\_M19\_00476" 27951 "s63E6H2" 0 "Bifunctional protein HldE"  
"OP8\_M19\_00477" 27952 "s59E13H2" 0.1331779 "GDP-6-deoxy-D-mannose reductase"  
"OP8\_M19\_00477" 27952 "s59E25H2" 0 "GDP-6-deoxy-D-mannose reductase"  
"OP8\_M19\_00477" 27952 "s59E5H2" 1.321763 "GDP-6-deoxy-D-mannose reductase"  
"OP8\_M19\_00477" 27952 "s63E6H2" 0 "GDP-6-deoxy-D-mannose reductase"  
"OP8\_M19\_00478" 27953 "s59E13H2" 0.5409736 "GDP-6-deoxy-D-mannose reductase"  
"OP8\_M19\_00478" 27953 "s59E25H2" 0 "GDP-6-deoxy-D-mannose reductase"  
"OP8\_M19\_00478" 27953 "s59E5H2" 1.172581 "GDP-6-deoxy-D-mannose reductase"  
"OP8\_M19\_00478" 27953 "s63E6H2" 0 "GDP-6-deoxy-D-mannose reductase"  
"OP8\_M19\_00479" 27954 "s59E13H2" 0.1188231 "LPS-assembly protein LptD precursor"  
"OP8\_M19\_00479" 27954 "s59E25H2" 0 "LPS-assembly protein LptD precursor"  
"OP8\_M19\_00479" 27954 "s59E5H2" 2.012586 "LPS-assembly protein LptD precursor"  
"OP8\_M19\_00479" 27954 "s63E6H2" 0 "LPS-assembly protein LptD precursor"  
"OP8\_M19\_00480" 27955 "s59E13H2" 0.08629422 "Free methionine-R-sulfoxide reductase"  
"OP8\_M19\_00480" 27955 "s59E25H2" 0 "Free methionine-R-sulfoxide reductase"

"OP8\_M19\_00480" 27955 "s59E5H2" 3.045051 "Free methionine-R-sulfoxide reductase"  
"OP8\_M19\_00480" 27955 "s63E6H2" 0 "Free methionine-R-sulfoxide reductase"  
"OP8\_M19\_00481" 27956 "s59E13H2" 0.0003983117 "Transposase DDE domain protein"  
"OP8\_M19\_00481" 27956 "s59E25H2" 0 "Transposase DDE domain protein"  
"OP8\_M19\_00481" 27956 "s59E5H2" 14.42851 "Transposase DDE domain protein"  
"OP8\_M19\_00481" 27956 "s63E6H2" 0 "Transposase DDE domain protein"  
"OP8\_M19\_00482" 27957 "s59E13H2" 0.08812907 "hypothetical protein"  
"OP8\_M19\_00482" 27957 "s59E25H2" 0 "hypothetical protein"  
"OP8\_M19\_00482" 27957 "s59E5H2" 3.951877 "hypothetical protein"  
"OP8\_M19\_00482" 27957 "s63E6H2" 0 "hypothetical protein"  
"OP8\_M19\_00483" 27958 "s59E13H2" 0.06347815 "Aspartate--tRNA ligase"  
"OP8\_M19\_00483" 27958 "s59E25H2" 0 "Aspartate--tRNA ligase"  
"OP8\_M19\_00483" 27958 "s59E5H2" 1.898929 "Aspartate--tRNA ligase"  
"OP8\_M19\_00483" 27958 "s63E6H2" 0 "Aspartate--tRNA ligase"  
"OP8\_M19\_00484" 27959 "s59E13H2" 0.9977356 "Histidine--tRNA ligase"  
"OP8\_M19\_00484" 27959 "s59E25H2" 0 "Histidine--tRNA ligase"  
"OP8\_M19\_00484" 27959 "s59E5H2" 1.143879 "Histidine--tRNA ligase"  
"OP8\_M19\_00484" 27959 "s63E6H2" 0 "Histidine--tRNA ligase"  
"OP8\_M19\_00485" 27960 "s59E13H2" 0.989424 "Acetyl-coenzyme A carboxylase carboxyl transferase subunit alpha"  
"OP8\_M19\_00485" 27960 "s59E25H2" 0 "Acetyl-coenzyme A carboxylase carboxyl transferase subunit alpha"  
"OP8\_M19\_00485" 27960 "s59E5H2" 1.13909 "Acetyl-coenzyme A carboxylase carboxyl transferase subunit alpha"  
"OP8\_M19\_00485" 27960 "s63E6H2" 0 "Acetyl-coenzyme A carboxylase carboxyl transferase subunit alpha"  
"OP8\_M19\_00486" 27961 "s59E13H2" 0.9229111 "Ribosomal protein S12 methylthiotransferase RimO"  
"OP8\_M19\_00486" 27961 "s59E25H2" 0 "Ribosomal protein S12 methylthiotransferase RimO"  
"OP8\_M19\_00486" 27961 "s59E5H2" 0.7983317 "Ribosomal protein S12 methylthiotransferase RimO"  
"OP8\_M19\_00486" 27961 "s63E6H2" 0 "Ribosomal protein S12 methylthiotransferase RimO"  
"OP8\_M19\_00487" 27962 "s59E13H2" 0.8302572 "HTH-type transcriptional regulator ZntR"  
"OP8\_M19\_00487" 27962 "s59E25H2" 0 "HTH-type transcriptional regulator ZntR"  
"OP8\_M19\_00487" 27962 "s59E5H2" 0.8738508 "HTH-type transcriptional regulator ZntR"  
"OP8\_M19\_00487" 27962 "s63E6H2" 0 "HTH-type transcriptional regulator ZntR"  
"OP8\_M19\_00488" 27963 "s59E13H2" 1.234806 "hypothetical protein"  
"OP8\_M19\_00488" 27963 "s59E25H2" 0 "hypothetical protein"  
"OP8\_M19\_00488" 27963 "s59E5H2" 1.248936 "hypothetical protein"  
"OP8\_M19\_00488" 27963 "s63E6H2" 0 "hypothetical protein"  
"OP8\_M19\_00489" 27964 "s59E13H2" 0.9306583 "hypothetical protein"  
"OP8\_M19\_00489" 27964 "s59E25H2" 0 "hypothetical protein"  
"OP8\_M19\_00489" 27964 "s59E5H2" 0.8887632 "hypothetical protein"  
"OP8\_M19\_00489" 27964 "s63E6H2" 0 "hypothetical protein"  
"OP8\_M19\_00490" 27965 "s59E13H2" 0.8869548 "hypothetical protein"  
"OP8\_M19\_00490" 27965 "s59E25H2" 0 "hypothetical protein"  
"OP8\_M19\_00490" 27965 "s59E5H2" 0.7104148 "hypothetical protein"  
"OP8\_M19\_00490" 27965 "s63E6H2" 0 "hypothetical protein"  
"OP8\_M19\_00491" 27966 "s59E13H2" 0.9235752 "ECF RNA polymerase sigma factor SigW"  
"OP8\_M19\_00491" 27966 "s59E25H2" 0 "ECF RNA polymerase sigma factor SigW"  
"OP8\_M19\_00491" 27966 "s59E5H2" 1.088591 "ECF RNA polymerase sigma factor SigW"  
"OP8\_M19\_00491" 27966 "s63E6H2" 0 "ECF RNA polymerase sigma factor SigW"  
"OP8\_M19\_00492" 27967 "s59E13H2" 0.8661812 "1-acyl-sn-glycerol-3-phosphate acyltransferase"

"OP8\_M19\_00492" 27967 "s59E25H2" 0 "1-acyl-sn-glycerol-3-phosphate acyltransferase"  
"OP8\_M19\_00492" 27967 "s59E5H2" 1.130013 "1-acyl-sn-glycerol-3-phosphate acyltransferase"  
"OP8\_M19\_00492" 27967 "s63E6H2" 0 "1-acyl-sn-glycerol-3-phosphate acyltransferase"  
"OP8\_M19\_00493" 27968 "s59E13H2" 0.8838142 "Diacylglycerol kinase"  
"OP8\_M19\_00493" 27968 "s59E25H2" 0 "Diacylglycerol kinase"  
"OP8\_M19\_00493" 27968 "s59E5H2" 1.189756 "Diacylglycerol kinase"  
"OP8\_M19\_00493" 27968 "s63E6H2" 0 "Diacylglycerol kinase"  
"OP8\_M19\_00494" 27969 "s59E13H2" 0.7217323 "Putative TrmH family tRNA/rRNA methyltransferase"  
"OP8\_M19\_00494" 27969 "s59E25H2" 0 "Putative TrmH family tRNA/rRNA methyltransferase"  
"OP8\_M19\_00494" 27969 "s59E5H2" 0.5843034 "Putative TrmH family tRNA/rRNA methyltransferase"  
"OP8\_M19\_00494" 27969 "s63E6H2" 0 "Putative TrmH family tRNA/rRNA methyltransferase"  
"OP8\_M19\_00496" 27971 "s59E13H2" 0 "hypothetical protein"  
"OP8\_M19\_00496" 27971 "s59E25H2" 0 "hypothetical protein"  
"OP8\_M19\_00496" 27971 "s59E5H2" 0.1535575 "hypothetical protein"  
"OP8\_M19\_00496" 27971 "s63E6H2" 0 "hypothetical protein"  
"OP8\_M19\_00497" 27972 "s59E13H2" 0 "Tetratricopeptide repeat protein"  
"OP8\_M19\_00497" 27972 "s59E25H2" 0 "Tetratricopeptide repeat protein"  
"OP8\_M19\_00497" 27972 "s59E5H2" 0.01585854 "Tetratricopeptide repeat protein"  
"OP8\_M19\_00497" 27972 "s63E6H2" 0 "Tetratricopeptide repeat protein"  
"OP8\_M19\_00498" 27973 "s59E13H2" 0 "Co-chaperone protein HscB"  
"OP8\_M19\_00498" 27973 "s59E25H2" 0 "Co-chaperone protein HscB"  
"OP8\_M19\_00498" 27973 "s59E5H2" 0.009288461 "Co-chaperone protein HscB"  
"OP8\_M19\_00498" 27973 "s63E6H2" 0 "Co-chaperone protein HscB"  
"OP8\_M19\_00499" 27974 "s59E13H2" 0 "hypothetical protein"  
"OP8\_M19\_00499" 27974 "s59E25H2" 0 "hypothetical protein"  
"OP8\_M19\_00499" 27974 "s59E5H2" 0 "hypothetical protein"  
"OP8\_M19\_00499" 27974 "s63E6H2" 0 "hypothetical protein"  
"OP8\_M19\_00500" 27975 "s59E13H2" 0 "hypothetical protein"  
"OP8\_M19\_00500" 27975 "s59E25H2" 0 "hypothetical protein"  
"OP8\_M19\_00500" 27975 "s59E5H2" 0 "hypothetical protein"  
"OP8\_M19\_00500" 27975 "s63E6H2" 0 "hypothetical protein"  
"OP8\_M19\_00503" 27978 "s59E13H2" 0 "hypothetical protein"  
"OP8\_M19\_00503" 27978 "s59E25H2" 0 "hypothetical protein"  
"OP8\_M19\_00503" 27978 "s59E5H2" 0 "hypothetical protein"  
"OP8\_M19\_00503" 27978 "s63E6H2" 0 "hypothetical protein"  
"OP8\_M19\_00504" 27979 "s59E13H2" 0 "hypothetical protein"  
"OP8\_M19\_00504" 27979 "s59E25H2" 0 "hypothetical protein"  
"OP8\_M19\_00504" 27979 "s59E5H2" 0.01549121 "hypothetical protein"  
"OP8\_M19\_00504" 27979 "s63E6H2" 0 "hypothetical protein"  
"OP8\_M19\_00505" 27980 "s59E13H2" 0.01077627 "Response regulator PleD"  
"OP8\_M19\_00505" 27980 "s59E25H2" 0 "Response regulator PleD"  
"OP8\_M19\_00505" 27980 "s59E5H2" 0.4011643 "Response regulator PleD"  
"OP8\_M19\_00505" 27980 "s63E6H2" 0 "Response regulator PleD"  
"OP8\_M19\_00507" 27982 "s59E13H2" 0.00611249 "anaerobic benzoate catabolism transcriptional regulator"  
"OP8\_M19\_00507" 27982 "s59E25H2" 0 "anaerobic benzoate catabolism transcriptional regulator"  
"OP8\_M19\_00507" 27982 "s59E5H2" 0.4307009 "anaerobic benzoate catabolism transcriptional regulator"  
"OP8\_M19\_00507" 27982 "s63E6H2" 0 "anaerobic benzoate catabolism transcriptional regulator"

"OP8\_M19\_00509" 27984 "s59E13H2" 0.03562107 "hypothetical protein"  
"OP8\_M19\_00509" 27984 "s59E25H2" 0 "hypothetical protein"  
"OP8\_M19\_00509" 27984 "s59E5H2" 4.747663 "hypothetical protein"  
"OP8\_M19\_00509" 27984 "s63E6H2" 0 "hypothetical protein"  
"OP8\_M19\_00510" 27985 "s59E13H2" 0.07656573 "OPT oligopeptide transporter protein"  
"OP8\_M19\_00510" 27985 "s59E25H2" 0 "OPT oligopeptide transporter protein"  
"OP8\_M19\_00510" 27985 "s59E5H2" 6.615212 "OPT oligopeptide transporter protein"  
"OP8\_M19\_00510" 27985 "s63E6H2" 0 "OPT oligopeptide transporter protein"  
"OP8\_M19\_00511" 27986 "s59E13H2" 0.02018289 "Inner membrane protein YjiY"  
"OP8\_M19\_00511" 27986 "s59E25H2" 0 "Inner membrane protein YjiY"  
"OP8\_M19\_00511" 27986 "s59E5H2" 8.046414 "Inner membrane protein YjiY"  
"OP8\_M19\_00511" 27986 "s63E6H2" 0 "Inner membrane protein YjiY"  
"OP8\_M19\_00512" 27987 "s59E13H2" 0.01348667 "Glucose-1-phosphate thymidyltransferase"  
"OP8\_M19\_00512" 27987 "s59E25H2" 0 "Glucose-1-phosphate thymidyltransferase"  
"OP8\_M19\_00512" 27987 "s59E5H2" 0.864778 "Glucose-1-phosphate thymidyltransferase"  
"OP8\_M19\_00512" 27987 "s63E6H2" 0 "Glucose-1-phosphate thymidyltransferase"  
"OP8\_M19\_00513" 27988 "s59E13H2" 0.01464335 "dTDP-4-dehydrorhamnose 3,5-epimerase"  
"OP8\_M19\_00513" 27988 "s59E25H2" 0 "dTDP-4-dehydrorhamnose 3,5-epimerase"  
"OP8\_M19\_00513" 27988 "s59E5H2" 1.327584 "dTDP-4-dehydrorhamnose 3,5-epimerase"  
"OP8\_M19\_00513" 27988 "s63E6H2" 0 "dTDP-4-dehydrorhamnose 3,5-epimerase"  
"OP8\_M19\_00514" 27989 "s59E13H2" 0.02838898 "dTDP-glucose 4,6-dehydratase"  
"OP8\_M19\_00514" 27989 "s59E25H2" 0 "dTDP-glucose 4,6-dehydratase"  
"OP8\_M19\_00514" 27989 "s59E5H2" 1.427741 "dTDP-glucose 4,6-dehydratase"  
"OP8\_M19\_00514" 27989 "s63E6H2" 0.001405978 "dTDP-glucose 4,6-dehydratase"  
"OP8\_M19\_00515" 27990 "s59E13H2" 0.01570022 "dTDP-4-dehydrorhamnose reductase"  
"OP8\_M19\_00515" 27990 "s59E25H2" 0 "dTDP-4-dehydrorhamnose reductase"  
"OP8\_M19\_00515" 27990 "s59E5H2" 1.708664 "dTDP-4-dehydrorhamnose reductase"  
"OP8\_M19\_00515" 27990 "s63E6H2" 0 "dTDP-4-dehydrorhamnose reductase"  
"OP8\_M19\_00516" 27991 "s59E13H2" 0.008316168 "hypothetical protein"  
"OP8\_M19\_00516" 27991 "s59E25H2" 0 "hypothetical protein"  
"OP8\_M19\_00516" 27991 "s59E5H2" 0.9055757 "hypothetical protein"  
"OP8\_M19\_00516" 27991 "s63E6H2" 0 "hypothetical protein"  
"OP8\_M19\_00517" 27992 "s59E13H2" 0.02022604 "putative permease"  
"OP8\_M19\_00517" 27992 "s59E25H2" 0 "putative permease"  
"OP8\_M19\_00517" 27992 "s59E5H2" 1.424862 "putative permease"  
"OP8\_M19\_00517" 27992 "s63E6H2" 0 "putative permease"  
"OP8\_M19\_00518" 27993 "s59E13H2" 0.0235236 "putative adenylyltransferase/sulfurtransferase MoeZ"  
"OP8\_M19\_00518" 27993 "s59E25H2" 0 "putative adenylyltransferase/sulfurtransferase MoeZ"  
"OP8\_M19\_00518" 27993 "s59E5H2" 2.066352 "putative adenylyltransferase/sulfurtransferase MoeZ"  
"OP8\_M19\_00518" 27993 "s63E6H2" 0 "putative adenylyltransferase/sulfurtransferase MoeZ"  
"OP8\_M19\_00519" 27994 "s59E13H2" 0.03068009 "NifU-like protein"  
"OP8\_M19\_00519" 27994 "s59E25H2" 0 "NifU-like protein"  
"OP8\_M19\_00519" 27994 "s59E5H2" 1.882739 "NifU-like protein"  
"OP8\_M19\_00519" 27994 "s63E6H2" 0 "NifU-like protein"  
"OP8\_M19\_00520" 27995 "s59E13H2" 0.01978126 "putative cysteine desulfurase 2"  
"OP8\_M19\_00520" 27995 "s59E25H2" 0 "putative cysteine desulfurase 2"  
"OP8\_M19\_00520" 27995 "s59E5H2" 1.429905 "putative cysteine desulfurase 2"

"OP8\_M19\_00520" 27995 "s63E6H2" 0 "putative cysteine desulfurase 2"  
"OP8\_M19\_00521" 27996 "s59E13H2" 0.01532162 "DsrE/DsrF-like family protein"  
"OP8\_M19\_00521" 27996 "s59E25H2" 0 "DsrE/DsrF-like family protein"  
"OP8\_M19\_00521" 27996 "s59E5H2" 1.046783 "DsrE/DsrF-like family protein"  
"OP8\_M19\_00521" 27996 "s63E6H2" 0 "DsrE/DsrF-like family protein"  
"OP8\_M19\_00522" 27997 "s59E13H2" 0 "Sulfurtransferase TusA"  
"OP8\_M19\_00522" 27997 "s59E25H2" 0 "Sulfurtransferase TusA"  
"OP8\_M19\_00522" 27997 "s59E5H2" 0.6404715 "Sulfurtransferase TusA"  
"OP8\_M19\_00522" 27997 "s63E6H2" 0 "Sulfurtransferase TusA"  
"OP8\_M19\_00523" 27998 "s59E13H2" 0.002994769 "Rubrerythrin"  
"OP8\_M19\_00523" 27998 "s59E25H2" 0 "Rubrerythrin"  
"OP8\_M19\_00523" 27998 "s59E5H2" 0.3201817 "Rubrerythrin"  
"OP8\_M19\_00523" 27998 "s63E6H2" 0 "Rubrerythrin"  
"OP8\_M19\_00524" 27999 "s59E13H2" 0.005782471 "Putative acetyltransferase"  
"OP8\_M19\_00524" 27999 "s59E25H2" 0 "Putative acetyltransferase"  
"OP8\_M19\_00524" 27999 "s59E5H2" 0.5988868 "Putative acetyltransferase"  
"OP8\_M19\_00524" 27999 "s63E6H2" 0 "Putative acetyltransferase"  
"OP8\_M19\_00525" 28000 "s59E13H2" 0 "purine-binding chemotaxis protein"  
"OP8\_M19\_00525" 28000 "s59E25H2" 0 "purine-binding chemotaxis protein"  
"OP8\_M19\_00525" 28000 "s59E5H2" 0.08556901 "purine-binding chemotaxis protein"  
"OP8\_M19\_00525" 28000 "s63E6H2" 0 "purine-binding chemotaxis protein"  
"OP8\_M19\_00526" 28001 "s59E13H2" 0 "Chemotaxis protein CheY"  
"OP8\_M19\_00526" 28001 "s59E25H2" 0 "Chemotaxis protein CheY"  
"OP8\_M19\_00526" 28001 "s59E5H2" 0.07901041 "Chemotaxis protein CheY"  
"OP8\_M19\_00526" 28001 "s63E6H2" 0 "Chemotaxis protein CheY"  
"OP8\_M19\_00527" 28002 "s59E13H2" 0 "Chemotaxis response regulator protein-glutamate methylesterase"  
"OP8\_M19\_00527" 28002 "s59E25H2" 0 "Chemotaxis response regulator protein-glutamate methylesterase"  
"OP8\_M19\_00527" 28002 "s59E5H2" 0.110953 "Chemotaxis response regulator protein-glutamate methylesterase"  
"OP8\_M19\_00527" 28002 "s63E6H2" 0 "Chemotaxis response regulator protein-glutamate methylesterase"  
"OP8\_M19\_00528" 28003 "s59E13H2" 0.005835037 "Chemotaxis protein CheA"  
"OP8\_M19\_00528" 28003 "s59E25H2" 0 "Chemotaxis protein CheA"  
"OP8\_M19\_00528" 28003 "s59E5H2" 0.05174078 "Chemotaxis protein CheA"  
"OP8\_M19\_00528" 28003 "s63E6H2" 0 "Chemotaxis protein CheA"  
"OP8\_M19\_00529" 28004 "s59E13H2" 0 "CheY-P phosphatase CheC"  
"OP8\_M19\_00529" 28004 "s59E25H2" 0 "CheY-P phosphatase CheC"  
"OP8\_M19\_00529" 28004 "s59E5H2" 0.1525135 "CheY-P phosphatase CheC"  
"OP8\_M19\_00529" 28004 "s63E6H2" 0 "CheY-P phosphatase CheC"  
"OP8\_M19\_00530" 28005 "s59E13H2" 0 "hypothetical protein"  
"OP8\_M19\_00530" 28005 "s59E25H2" 0 "hypothetical protein"  
"OP8\_M19\_00530" 28005 "s59E5H2" 0.09554008 "hypothetical protein"  
"OP8\_M19\_00530" 28005 "s63E6H2" 0 "hypothetical protein"  
"OP8\_M19\_00531" 28006 "s59E13H2" 0 "Alkaline phosphatase synthesis sensor protein PhoR"  
"OP8\_M19\_00531" 28006 "s59E25H2" 0 "Alkaline phosphatase synthesis sensor protein PhoR"  
"OP8\_M19\_00531" 28006 "s59E5H2" 0.1432607 "Alkaline phosphatase synthesis sensor protein PhoR"  
"OP8\_M19\_00531" 28006 "s63E6H2" 0 "Alkaline phosphatase synthesis sensor protein PhoR"  
"OP8\_M19\_00532" 28007 "s59E13H2" 0.005831036 "Phosphate regulon transcriptional regulatory protein PhoB"  
"OP8\_M19\_00532" 28007 "s59E25H2" 0 "Phosphate regulon transcriptional regulatory protein PhoB"

"OP8\_M19\_00532" 28007 "s59E5H2" 0.7488623 "Phosphate regulon transcriptional regulatory protein PhoB"  
"OP8\_M19\_00532" 28007 "s63E6H2" 0 "Phosphate regulon transcriptional regulatory protein PhoB"  
"OP8\_M19\_00533" 28008 "s59E13H2" 0.01471911 "Elongation factor G"  
"OP8\_M19\_00533" 28008 "s59E25H2" 0 "Elongation factor G"  
"OP8\_M19\_00533" 28008 "s59E5H2" 0.3166233 "Elongation factor G"  
"OP8\_M19\_00533" 28008 "s63E6H2" 0 "Elongation factor G"  
"OP8\_M19\_00534" 28009 "s59E13H2" 0.02537632 "Elongation factor Tu"  
"OP8\_M19\_00534" 28009 "s59E25H2" 0 "Elongation factor Tu"  
"OP8\_M19\_00534" 28009 "s59E5H2" 0.6592771 "Elongation factor Tu"  
"OP8\_M19\_00534" 28009 "s63E6H2" 0 "Elongation factor Tu"  
"OP8\_M19\_00535" 28010 "s59E13H2" 0.05737822 "30S ribosomal protein S10"  
"OP8\_M19\_00535" 28010 "s59E25H2" 0 "30S ribosomal protein S10"  
"OP8\_M19\_00535" 28010 "s59E5H2" 0.09777543 "30S ribosomal protein S10"  
"OP8\_M19\_00535" 28010 "s63E6H2" 0 "30S ribosomal protein S10"  
"OP8\_M19\_00536" 28011 "s59E13H2" 0.02833475 "50S ribosomal protein L3"  
"OP8\_M19\_00536" 28011 "s59E25H2" 0 "50S ribosomal protein L3"  
"OP8\_M19\_00536" 28011 "s59E5H2" 0.1395164 "50S ribosomal protein L3"  
"OP8\_M19\_00536" 28011 "s63E6H2" 0 "50S ribosomal protein L3"  
"OP8\_M19\_00537" 28012 "s59E13H2" 0 "50S ribosomal protein L16"  
"OP8\_M19\_00537" 28012 "s59E25H2" 0 "50S ribosomal protein L16"  
"OP8\_M19\_00537" 28012 "s59E5H2" 0.01131051 "50S ribosomal protein L16"  
"OP8\_M19\_00537" 28012 "s63E6H2" 0 "50S ribosomal protein L16"  
"OP8\_M19\_00540" 28015 "s59E13H2" 0.008275479 "von Willebrand factor type A domain protein"  
"OP8\_M19\_00540" 28015 "s59E25H2" 0 "von Willebrand factor type A domain protein"  
"OP8\_M19\_00540" 28015 "s59E5H2" 4.647754 "von Willebrand factor type A domain protein"  
"OP8\_M19\_00540" 28015 "s63E6H2" 0 "von Willebrand factor type A domain protein"  
"OP8\_M19\_00541" 28016 "s59E13H2" 0.205594 "outer membrane channel protein"  
"OP8\_M19\_00541" 28016 "s59E25H2" 0 "outer membrane channel protein"  
"OP8\_M19\_00541" 28016 "s59E5H2" 4.602085 "outer membrane channel protein"  
"OP8\_M19\_00541" 28016 "s63E6H2" 0 "outer membrane channel protein"  
"OP8\_M19\_00542" 28017 "s59E13H2" 0.08924434 "Macrolide export protein MacA"  
"OP8\_M19\_00542" 28017 "s59E25H2" 0 "Macrolide export protein MacA"  
"OP8\_M19\_00542" 28017 "s59E5H2" 5.170347 "Macrolide export protein MacA"  
"OP8\_M19\_00542" 28017 "s63E6H2" 0 "Macrolide export protein MacA"  
"OP8\_M19\_00543" 28018 "s59E13H2" 0.04462778 "Swarming motility protein SwrC"  
"OP8\_M19\_00543" 28018 "s59E25H2" 0 "Swarming motility protein SwrC"  
"OP8\_M19\_00543" 28018 "s59E5H2" 7.128492 "Swarming motility protein SwrC"  
"OP8\_M19\_00543" 28018 "s63E6H2" 0.0004913748 "Swarming motility protein SwrC"  
"OP8\_M19\_00547" 28022 "s59E13H2" 0 "Colicin I receptor precursor"  
"OP8\_M19\_00547" 28022 "s59E25H2" 0 "Colicin I receptor precursor"  
"OP8\_M19\_00547" 28022 "s59E5H2" 3.446057 "Colicin I receptor precursor"  
"OP8\_M19\_00547" 28022 "s63E6H2" 0 "Colicin I receptor precursor"  
"OP8\_M19\_00548" 28023 "s59E13H2" 0.01159909 "Tungsten-containing aldehyde ferredoxin oxidoreductase"  
"OP8\_M19\_00548" 28023 "s59E25H2" 0 "Tungsten-containing aldehyde ferredoxin oxidoreductase"  
"OP8\_M19\_00548" 28023 "s59E5H2" 2.820271 "Tungsten-containing aldehyde ferredoxin oxidoreductase"  
"OP8\_M19\_00548" 28023 "s63E6H2" 0 "Tungsten-containing aldehyde ferredoxin oxidoreductase"  
"OP8\_M19\_00549" 28024 "s59E13H2" 0.01633276 "Deoxyguanosine kinase"

"OP8\_M19\_00549" 28024 "s59E25H2" 0 "Deoxyguanosine kinase"  
"OP8\_M19\_00549" 28024 "s59E5H2" 3.834399 "Deoxyguanosine kinase"  
"OP8\_M19\_00549" 28024 "s63E6H2" 0 "Deoxyguanosine kinase"  
"OP8\_M19\_00550" 28025 "s59E13H2" 0.01290622 "3-methyl-2-oxobutanoate hydroxymethyltransferase"  
"OP8\_M19\_00550" 28025 "s59E25H2" 0 "3-methyl-2-oxobutanoate hydroxymethyltransferase"  
"OP8\_M19\_00550" 28025 "s59E5H2" 2.836002 "3-methyl-2-oxobutanoate hydroxymethyltransferase"  
"OP8\_M19\_00550" 28025 "s63E6H2" 0 "3-methyl-2-oxobutanoate hydroxymethyltransferase"  
"OP8\_M19\_00551" 28026 "s59E13H2" 0.03018172 "Pantothenate synthetase"  
"OP8\_M19\_00551" 28026 "s59E25H2" 0.4706573 "Pantothenate synthetase"  
"OP8\_M19\_00551" 28026 "s59E5H2" 3.924495 "Pantothenate synthetase"  
"OP8\_M19\_00551" 28026 "s63E6H2" 0 "Pantothenate synthetase"  
"OP8\_M19\_00552" 28027 "s59E13H2" 0.05007247 "Aspartate 1-decarboxylase precursor"  
"OP8\_M19\_00552" 28027 "s59E25H2" 0.2464986 "Aspartate 1-decarboxylase precursor"  
"OP8\_M19\_00552" 28027 "s59E5H2" 4.729058 "Aspartate 1-decarboxylase precursor"  
"OP8\_M19\_00552" 28027 "s63E6H2" 0 "Aspartate 1-decarboxylase precursor"  
"OP8\_M19\_00553" 28028 "s59E13H2" 0.03095334 "Inosine-5'-monophosphate dehydrogenase"  
"OP8\_M19\_00553" 28028 "s59E25H2" 0 "Inosine-5'-monophosphate dehydrogenase"  
"OP8\_M19\_00553" 28028 "s59E5H2" 5.121014 "Inosine-5'-monophosphate dehydrogenase"  
"OP8\_M19\_00553" 28028 "s63E6H2" 0.001586263 "Inosine-5'-monophosphate dehydrogenase"  
"OP8\_M19\_00554" 28029 "s59E13H2" 1.123455 "preprotein translocase subunit SecA"  
"OP8\_M19\_00554" 28029 "s59E25H2" 0 "preprotein translocase subunit SecA"  
"OP8\_M19\_00554" 28029 "s59E5H2" 2.503764 "preprotein translocase subunit SecA"  
"OP8\_M19\_00554" 28029 "s63E6H2" 0.0001632337 "preprotein translocase subunit SecA"  
"OP8\_M19\_00555" 28030 "s59E13H2" 1.331823 "UvrABC system protein C"  
"OP8\_M19\_00555" 28030 "s59E25H2" 0 "UvrABC system protein C"  
"OP8\_M19\_00555" 28030 "s59E5H2" 0.8173057 "UvrABC system protein C"  
"OP8\_M19\_00555" 28030 "s63E6H2" 0 "UvrABC system protein C"  
"OP8\_M19\_00556" 28031 "s59E13H2" 1.277312 "UvrABC system protein B"  
"OP8\_M19\_00556" 28031 "s59E25H2" 0 "UvrABC system protein B"  
"OP8\_M19\_00556" 28031 "s59E5H2" 0.5613125 "UvrABC system protein B"  
"OP8\_M19\_00556" 28031 "s63E6H2" 0 "UvrABC system protein B"  
"OP8\_M19\_00557" 28032 "s59E13H2" 0.45456 "Multifunctional CCA protein"  
"OP8\_M19\_00557" 28032 "s59E25H2" 0 "Multifunctional CCA protein"  
"OP8\_M19\_00557" 28032 "s59E5H2" 2.065774 "Multifunctional CCA protein"  
"OP8\_M19\_00557" 28032 "s63E6H2" 0 "Multifunctional CCA protein"  
"OP8\_M19\_00558" 28033 "s59E13H2" 0.5292311 "UDP-glucose 4-epimerase"  
"OP8\_M19\_00558" 28033 "s59E25H2" 0 "UDP-glucose 4-epimerase"  
"OP8\_M19\_00558" 28033 "s59E5H2" 2.376357 "UDP-glucose 4-epimerase"  
"OP8\_M19\_00558" 28033 "s63E6H2" 0 "UDP-glucose 4-epimerase"  
"OP8\_M19\_00559" 28034 "s59E13H2" 0.4868371 "Membrane-bound lytic murein transglycosylase D precursor"  
"OP8\_M19\_00559" 28034 "s59E25H2" 0 "Membrane-bound lytic murein transglycosylase D precursor"  
"OP8\_M19\_00559" 28034 "s59E5H2" 1.26752 "Membrane-bound lytic murein transglycosylase D precursor"  
"OP8\_M19\_00559" 28034 "s63E6H2" 0 "Membrane-bound lytic murein transglycosylase D precursor"  
"OP8\_M19\_00560" 28035 "s59E13H2" 0.1905142 "50S ribosomal protein L17"  
"OP8\_M19\_00560" 28035 "s59E25H2" 0 "50S ribosomal protein L17"  
"OP8\_M19\_00560" 28035 "s59E5H2" 0.911498 "50S ribosomal protein L17"  
"OP8\_M19\_00560" 28035 "s63E6H2" 0 "50S ribosomal protein L17"

"OP8\_M19\_00561" 28036 "s59E13H2" 0.03100613 "DNA-directed RNA polymerase subunit alpha"  
"OP8\_M19\_00561" 28036 "s59E25H2" 0 "DNA-directed RNA polymerase subunit alpha"  
"OP8\_M19\_00561" 28036 "s59E5H2" 0.8294767 "DNA-directed RNA polymerase subunit alpha"  
"OP8\_M19\_00561" 28036 "s63E6H2" 0 "DNA-directed RNA polymerase subunit alpha"  
"OP8\_M19\_00562" 28037 "s59E13H2" 0.02742301 "30S ribosomal protein S4"  
"OP8\_M19\_00562" 28037 "s59E25H2" 0 "30S ribosomal protein S4"  
"OP8\_M19\_00562" 28037 "s59E5H2" 0.7486614 "30S ribosomal protein S4"  
"OP8\_M19\_00562" 28037 "s63E6H2" 0 "30S ribosomal protein S4"  
"OP8\_M19\_00563" 28038 "s59E13H2" 0.0356275 "30S ribosomal protein S11"  
"OP8\_M19\_00563" 28038 "s59E25H2" 0 "30S ribosomal protein S11"  
"OP8\_M19\_00563" 28038 "s59E5H2" 0.4656851 "30S ribosomal protein S11"  
"OP8\_M19\_00563" 28038 "s63E6H2" 0 "30S ribosomal protein S11"  
"OP8\_M19\_00564" 28039 "s59E13H2" 0.007546372 "hypothetical protein"  
"OP8\_M19\_00564" 28039 "s59E25H2" 0 "hypothetical protein"  
"OP8\_M19\_00564" 28039 "s59E5H2" 3.330862 "hypothetical protein"  
"OP8\_M19\_00564" 28039 "s63E6H2" 0 "hypothetical protein"  
"OP8\_M19\_00565" 28040 "s59E13H2" 0.0004549016 "hypothetical protein"  
"OP8\_M19\_00565" 28040 "s59E25H2" 0 "hypothetical protein"  
"OP8\_M19\_00565" 28040 "s59E5H2" 2.811915 "hypothetical protein"  
"OP8\_M19\_00565" 28040 "s63E6H2" 0 "hypothetical protein"  
"OP8\_M19\_00566" 28041 "s59E13H2" 5.275204 "Putative N-acetyl-L-lysine aminotransferase"  
"OP8\_M19\_00566" 28041 "s59E25H2" 0 "Putative N-acetyl-L-lysine aminotransferase"  
"OP8\_M19\_00566" 28041 "s59E5H2" 1.112556 "Putative N-acetyl-L-lysine aminotransferase"  
"OP8\_M19\_00566" 28041 "s63E6H2" 0 "Putative N-acetyl-L-lysine aminotransferase"  
"OP8\_M19\_00567" 28042 "s59E13H2" 5.043932 "hypothetical protein"  
"OP8\_M19\_00567" 28042 "s59E25H2" 0 "hypothetical protein"  
"OP8\_M19\_00567" 28042 "s59E5H2" 0.8311515 "hypothetical protein"  
"OP8\_M19\_00567" 28042 "s63E6H2" 0 "hypothetical protein"  
"OP8\_M19\_00568" 28043 "s59E13H2" 0 "Rubredoxin"  
"OP8\_M19\_00568" 28043 "s59E25H2" 0 "Rubredoxin"  
"OP8\_M19\_00568" 28043 "s59E5H2" 1.212778 "Rubredoxin"  
"OP8\_M19\_00568" 28043 "s63E6H2" 0 "Rubredoxin"  
"OP8\_M19\_00569" 28044 "s59E13H2" 0.005420868 "Lipid A export ATP-binding/permease protein MsbA"  
"OP8\_M19\_00569" 28044 "s59E25H2" 0 "Lipid A export ATP-binding/permease protein MsbA"  
"OP8\_M19\_00569" 28044 "s59E5H2" 0.2094622 "Lipid A export ATP-binding/permease protein MsbA"  
"OP8\_M19\_00569" 28044 "s63E6H2" 0 "Lipid A export ATP-binding/permease protein MsbA"  
"OP8\_M19\_00570" 28045 "s59E13H2" 0.01034295 "Putative multidrug export ATP-binding/permease protein"  
"OP8\_M19\_00570" 28045 "s59E25H2" 0 "Putative multidrug export ATP-binding/permease protein"  
"OP8\_M19\_00570" 28045 "s59E5H2" 0.1859175 "Putative multidrug export ATP-binding/permease protein"  
"OP8\_M19\_00570" 28045 "s63E6H2" 0 "Putative multidrug export ATP-binding/permease protein"  
"OP8\_M19\_00571" 28046 "s59E13H2" 0.01084091 "hypothetical protein"  
"OP8\_M19\_00571" 28046 "s59E25H2" 0 "hypothetical protein"  
"OP8\_M19\_00571" 28046 "s59E5H2" 0.1977499 "hypothetical protein"  
"OP8\_M19\_00571" 28046 "s63E6H2" 0 "hypothetical protein"  
"OP8\_M19\_00572" 28047 "s59E13H2" 0.006967014 "Guanylate kinase"  
"OP8\_M19\_00572" 28047 "s59E25H2" 0 "Guanylate kinase"  
"OP8\_M19\_00572" 28047 "s59E5H2" 0.2794061 "Guanylate kinase"



"OP8\_M19\_00572" 28047 "s63E6H2" 0 "Guanylate kinase"  
"OP8\_M19\_00573" 28048 "s59E13H2" 0.02384941 "Coenzyme A biosynthesis bifunctional protein CoaBC"  
"OP8\_M19\_00573" 28048 "s59E25H2" 0 "Coenzyme A biosynthesis bifunctional protein CoaBC"  
"OP8\_M19\_00573" 28048 "s59E5H2" 0.4176626 "Coenzyme A biosynthesis bifunctional protein CoaBC"  
"OP8\_M19\_00573" 28048 "s63E6H2" 0.002265732 "Coenzyme A biosynthesis bifunctional protein CoaBC"  
"OP8\_M19\_00574" 28049 "s59E13H2" 0.05283159 "Uracil DNA glycosylase superfamily protein"  
"OP8\_M19\_00574" 28049 "s59E25H2" 0 "Uracil DNA glycosylase superfamily protein"  
"OP8\_M19\_00574" 28049 "s59E5H2" 0.5051096 "Uracil DNA glycosylase superfamily protein"  
"OP8\_M19\_00574" 28049 "s63E6H2" 0.00182829 "Uracil DNA glycosylase superfamily protein"  
"OP8\_M19\_00575" 28050 "s59E13H2" 0.032304 "Primosomal protein N"  
"OP8\_M19\_00575" 28050 "s59E25H2" 0 "Primosomal protein N"  
"OP8\_M19\_00575" 28050 "s59E5H2" 0.8020657 "Primosomal protein N"  
"OP8\_M19\_00575" 28050 "s63E6H2" 0.0007641565 "Primosomal protein N"  
"OP8\_M19\_00576" 28051 "s59E13H2" 0.2064329 "Bacterial Ig-like domain (group 1)"  
"OP8\_M19\_00576" 28051 "s59E25H2" 0 "Bacterial Ig-like domain (group 1)"  
"OP8\_M19\_00576" 28051 "s59E5H2" 10.80327 "Bacterial Ig-like domain (group 1)"  
"OP8\_M19\_00576" 28051 "s63E6H2" 0.0009087598 "Bacterial Ig-like domain (group 1)"  
"OP8\_M19\_00577" 28052 "s59E13H2" 0.2054884 "hypothetical protein"  
"OP8\_M19\_00577" 28052 "s59E25H2" 0 "hypothetical protein"  
"OP8\_M19\_00577" 28052 "s59E5H2" 10.3093 "hypothetical protein"  
"OP8\_M19\_00577" 28052 "s63E6H2" 0.002397608 "hypothetical protein"  
"OP8\_M19\_00578" 28053 "s59E13H2" 0.08299029 "Type IV pilus biogenesis and competence protein PilQ precursor"  
"OP8\_M19\_00578" 28053 "s59E25H2" 0 "Type IV pilus biogenesis and competence protein PilQ precursor"  
"OP8\_M19\_00578" 28053 "s59E5H2" 10.45821 "Type IV pilus biogenesis and competence protein PilQ precursor"  
"OP8\_M19\_00578" 28053 "s63E6H2" 0 "Type IV pilus biogenesis and competence protein PilQ precursor"  
"OP8\_M19\_00579" 28054 "s59E13H2" 0.001705242 "hypothetical protein"  
"OP8\_M19\_00579" 28054 "s59E25H2" 0 "hypothetical protein"  
"OP8\_M19\_00579" 28054 "s59E5H2" 9.621193 "hypothetical protein"  
"OP8\_M19\_00579" 28054 "s63E6H2" 0 "hypothetical protein"  
"OP8\_M19\_00580" 28055 "s59E13H2" 0.01132134 "Pilus assembly protein, PilO"  
"OP8\_M19\_00580" 28055 "s59E25H2" 0 "Pilus assembly protein, PilO"  
"OP8\_M19\_00580" 28055 "s59E5H2" 8.057231 "Pilus assembly protein, PilO"  
"OP8\_M19\_00580" 28055 "s63E6H2" 0 "Pilus assembly protein, PilO"  
"OP8\_M19\_00581" 28056 "s59E13H2" 0.01101865 "Fimbrial assembly protein (PilN)"  
"OP8\_M19\_00581" 28056 "s59E25H2" 0 "Fimbrial assembly protein (PilN)"  
"OP8\_M19\_00581" 28056 "s59E5H2" 7.659965 "Fimbrial assembly protein (PilN)"  
"OP8\_M19\_00581" 28056 "s63E6H2" 0 "Fimbrial assembly protein (PilN)"  
"OP8\_M19\_00582" 28057 "s59E13H2" 0.008990748 "Competence protein A"  
"OP8\_M19\_00582" 28057 "s59E25H2" 0 "Competence protein A"  
"OP8\_M19\_00582" 28057 "s59E5H2" 2.795068 "Competence protein A"  
"OP8\_M19\_00582" 28057 "s63E6H2" 0.001407243 "Competence protein A"  
"OP8\_M19\_00583" 28058 "s59E13H2" 0.008593836 "Phosphopantetheine adenyltransferase"  
"OP8\_M19\_00583" 28058 "s59E25H2" 0 "Phosphopantetheine adenyltransferase"  
"OP8\_M19\_00583" 28058 "s59E5H2" 1.505911 "Phosphopantetheine adenyltransferase"  
"OP8\_M19\_00583" 28058 "s63E6H2" 0 "Phosphopantetheine adenyltransferase"  
"OP8\_M19\_00584" 28059 "s59E13H2" 0.09144286 "hypothetical protein"  
"OP8\_M19\_00584" 28059 "s59E25H2" 0 "hypothetical protein"

"OP8\_M19\_00584" 28059 "s59E5H2" 1.079161 "hypothetical protein"  
"OP8\_M19\_00584" 28059 "s63E6H2" 0 "hypothetical protein"  
"OP8\_M19\_00585" 28060 "s59E13H2" 0 "site-specific tyrosine recombinase XerD"  
"OP8\_M19\_00585" 28060 "s59E25H2" 0 "site-specific tyrosine recombinase XerD"  
"OP8\_M19\_00585" 28060 "s59E5H2" 1.231476 "site-specific tyrosine recombinase XerD"  
"OP8\_M19\_00585" 28060 "s63E6H2" 0 "site-specific tyrosine recombinase XerD"  
"OP8\_M19\_00586" 28061 "s59E13H2" 0 "SnoaL-like polyketide cyclase"  
"OP8\_M19\_00586" 28061 "s59E25H2" 0 "SnoaL-like polyketide cyclase"  
"OP8\_M19\_00586" 28061 "s59E5H2" 1.495926 "SnoaL-like polyketide cyclase"  
"OP8\_M19\_00586" 28061 "s63E6H2" 0 "SnoaL-like polyketide cyclase"  
"OP8\_M19\_00587" 28062 "s59E13H2" 0.005812428 "General stress protein 26"  
"OP8\_M19\_00587" 28062 "s59E25H2" 0 "General stress protein 26"  
"OP8\_M19\_00587" 28062 "s59E5H2" 1.632356 "General stress protein 26"  
"OP8\_M19\_00587" 28062 "s63E6H2" 0 "General stress protein 26"  
"OP8\_M19\_00591" 28066 "s59E13H2" 0 "heat shock protein 90"  
"OP8\_M19\_00591" 28066 "s59E25H2" 0 "heat shock protein 90"  
"OP8\_M19\_00591" 28066 "s59E5H2" 1.428242 "heat shock protein 90"  
"OP8\_M19\_00591" 28066 "s63E6H2" 0 "heat shock protein 90"  
"OP8\_M19\_00592" 28067 "s59E13H2" 0 "hypothetical protein"  
"OP8\_M19\_00592" 28067 "s59E25H2" 0 "hypothetical protein"  
"OP8\_M19\_00592" 28067 "s59E5H2" 0.9124319 "hypothetical protein"  
"OP8\_M19\_00592" 28067 "s63E6H2" 0 "hypothetical protein"  
"OP8\_M19\_00593" 28068 "s59E13H2" 0 "Type-1 restriction enzyme R protein"  
"OP8\_M19\_00593" 28068 "s59E25H2" 0 "Type-1 restriction enzyme R protein"  
"OP8\_M19\_00593" 28068 "s59E5H2" 1.075661 "Type-1 restriction enzyme R protein"  
"OP8\_M19\_00593" 28068 "s63E6H2" 0 "Type-1 restriction enzyme R protein"  
"OP8\_M19\_00594" 28069 "s59E13H2" 0 "Arylsulfatase"  
"OP8\_M19\_00594" 28069 "s59E25H2" 0.1344086 "Arylsulfatase"  
"OP8\_M19\_00594" 28069 "s59E5H2" 5.629655 "Arylsulfatase"  
"OP8\_M19\_00594" 28069 "s63E6H2" 0 "Arylsulfatase"  
"OP8\_M19\_00595" 28070 "s59E13H2" 0.03175046 "FG-GAP repeat protein"  
"OP8\_M19\_00595" 28070 "s59E25H2" 0 "FG-GAP repeat protein"  
"OP8\_M19\_00595" 28070 "s59E5H2" 10.88595 "FG-GAP repeat protein"  
"OP8\_M19\_00595" 28070 "s63E6H2" 0 "FG-GAP repeat protein"  
"OP8\_M19\_00596" 28071 "s59E13H2" 0.02917035 "Virginiamycin A acetyltransferase"  
"OP8\_M19\_00596" 28071 "s59E25H2" 0 "Virginiamycin A acetyltransferase"  
"OP8\_M19\_00596" 28071 "s59E5H2" 6.358539 "Virginiamycin A acetyltransferase"  
"OP8\_M19\_00596" 28071 "s63E6H2" 0 "Virginiamycin A acetyltransferase"  
"OP8\_M19\_00597" 28072 "s59E13H2" 0.0274665 "hypothetical protein"  
"OP8\_M19\_00597" 28072 "s59E25H2" 0 "hypothetical protein"  
"OP8\_M19\_00597" 28072 "s59E5H2" 4.583748 "hypothetical protein"  
"OP8\_M19\_00597" 28072 "s63E6H2" 0 "hypothetical protein"  
"OP8\_M19\_00598" 28073 "s59E13H2" 0.06180324 "Arylesterase precursor"  
"OP8\_M19\_00598" 28073 "s59E25H2" 0 "Arylesterase precursor"  
"OP8\_M19\_00598" 28073 "s59E5H2" 5.66188 "Arylesterase precursor"  
"OP8\_M19\_00598" 28073 "s63E6H2" 0 "Arylesterase precursor"  
"OP8\_M19\_00599" 28074 "s59E13H2" 0.01079773 "translocation protein TolB"

"OP8\_M19\_00599" 28074 "s59E25H2" 0 "translocation protein TolB"  
"OP8\_M19\_00599" 28074 "s59E5H2" 3.511444 "translocation protein TolB"  
"OP8\_M19\_00599" 28074 "s63E6H2" 0.002946365 "translocation protein TolB"  
"OP8\_M19\_00600" 28075 "s59E13H2" 0.02704094 "Ribosomal RNA small subunit methyltransferase A"  
"OP8\_M19\_00600" 28075 "s59E25H2" 0 "Ribosomal RNA small subunit methyltransferase A"  
"OP8\_M19\_00600" 28075 "s59E5H2" 4.584398 "Ribosomal RNA small subunit methyltransferase A"  
"OP8\_M19\_00600" 28075 "s63E6H2" 0 "Ribosomal RNA small subunit methyltransferase A"  
"OP8\_M19\_00601" 28076 "s59E13H2" 0.01864282 "DNA translocase FtsK"  
"OP8\_M19\_00601" 28076 "s59E25H2" 0 "DNA translocase FtsK"  
"OP8\_M19\_00601" 28076 "s59E5H2" 2.861264 "DNA translocase FtsK"  
"OP8\_M19\_00601" 28076 "s63E6H2" 0 "DNA translocase FtsK"  
"OP8\_M19\_00602" 28077 "s59E13H2" 0.01135562 "Cyclic di-GMP phosphodiesterase response regulator RpfG"  
"OP8\_M19\_00602" 28077 "s59E25H2" 0 "Cyclic di-GMP phosphodiesterase response regulator RpfG"  
"OP8\_M19\_00602" 28077 "s59E5H2" 1.433331 "Cyclic di-GMP phosphodiesterase response regulator RpfG"  
"OP8\_M19\_00602" 28077 "s63E6H2" 0 "Cyclic di-GMP phosphodiesterase response regulator RpfG"  
"OP8\_M19\_00604" 28079 "s59E13H2" 0.01161993 "RNA polymerase sigma factor YlaC"  
"OP8\_M19\_00604" 28079 "s59E25H2" 0 "RNA polymerase sigma factor YlaC"  
"OP8\_M19\_00604" 28079 "s59E5H2" 0.8339824 "RNA polymerase sigma factor YlaC"  
"OP8\_M19\_00604" 28079 "s63E6H2" 0 "RNA polymerase sigma factor YlaC"  
"OP8\_M19\_00605" 28080 "s59E13H2" 0.0198197 "hypothetical protein"  
"OP8\_M19\_00605" 28080 "s59E25H2" 0 "hypothetical protein"  
"OP8\_M19\_00605" 28080 "s59E5H2" 0.8472685 "hypothetical protein"  
"OP8\_M19\_00605" 28080 "s63E6H2" 0 "hypothetical protein"  
"OP8\_M19\_00606" 28081 "s59E13H2" 0.005311172 "hypothetical protein"  
"OP8\_M19\_00606" 28081 "s59E25H2" 0 "hypothetical protein"  
"OP8\_M19\_00606" 28081 "s59E5H2" 0.76188 "hypothetical protein"  
"OP8\_M19\_00606" 28081 "s63E6H2" 0 "hypothetical protein"  
"OP8\_M19\_00607" 28082 "s59E13H2" 0.002981966 "DNA polymerase III subunit tau"  
"OP8\_M19\_00607" 28082 "s59E25H2" 0 "DNA polymerase III subunit tau"  
"OP8\_M19\_00607" 28082 "s59E5H2" 0.5767535 "DNA polymerase III subunit tau"  
"OP8\_M19\_00607" 28082 "s63E6H2" 0 "DNA polymerase III subunit tau"  
"OP8\_M19\_00608" 28083 "s59E13H2" 0.01699542 "UvrABC system protein A"  
"OP8\_M19\_00608" 28083 "s59E25H2" 0 "UvrABC system protein A"  
"OP8\_M19\_00608" 28083 "s59E5H2" 2.360648 "UvrABC system protein A"  
"OP8\_M19\_00608" 28083 "s63E6H2" 0 "UvrABC system protein A"  
"OP8\_M19\_00609" 28084 "s59E13H2" 0.01255969 "Putative ski2-type helicase"  
"OP8\_M19\_00609" 28084 "s59E25H2" 0 "Putative ski2-type helicase"  
"OP8\_M19\_00609" 28084 "s59E5H2" 2.833021 "Putative ski2-type helicase"  
"OP8\_M19\_00609" 28084 "s63E6H2" 0 "Putative ski2-type helicase"  
"OP8\_M19\_00610" 28085 "s59E13H2" 0.1381823 "Ktr system potassium uptake protein A"  
"OP8\_M19\_00610" 28085 "s59E25H2" 0 "Ktr system potassium uptake protein A"  
"OP8\_M19\_00610" 28085 "s59E5H2" 3.559758 "Ktr system potassium uptake protein A"  
"OP8\_M19\_00610" 28085 "s63E6H2" 0 "Ktr system potassium uptake protein A"  
"OP8\_M19\_00611" 28086 "s59E13H2" 0.2307404 "Ktr system potassium uptake protein B"  
"OP8\_M19\_00611" 28086 "s59E25H2" 0 "Ktr system potassium uptake protein B"  
"OP8\_M19\_00611" 28086 "s59E5H2" 1.652885 "Ktr system potassium uptake protein B"  
"OP8\_M19\_00611" 28086 "s63E6H2" 0 "Ktr system potassium uptake protein B"

"OP8\_M19\_00612" 28087 "s59E13H2" 0.7622092 "Biopolymer transport protein ExbB"  
"OP8\_M19\_00612" 28087 "s59E25H2" 0 "Biopolymer transport protein ExbB"  
"OP8\_M19\_00612" 28087 "s59E5H2" 1.356039 "Biopolymer transport protein ExbB"  
"OP8\_M19\_00612" 28087 "s63E6H2" 0 "Biopolymer transport protein ExbB"  
"OP8\_M19\_00613" 28088 "s59E13H2" 0.672246 "Biopolymer transport protein ExbD"  
"OP8\_M19\_00613" 28088 "s59E25H2" 0 "Biopolymer transport protein ExbD"  
"OP8\_M19\_00613" 28088 "s59E5H2" 1.47374 "Biopolymer transport protein ExbD"  
"OP8\_M19\_00613" 28088 "s63E6H2" 0 "Biopolymer transport protein ExbD"  
"OP8\_M19\_00614" 28089 "s59E13H2" 0.6591905 "Gram-negative bacterial tonB protein"  
"OP8\_M19\_00614" 28089 "s59E25H2" 0 "Gram-negative bacterial tonB protein"  
"OP8\_M19\_00614" 28089 "s59E5H2" 2.273133 "Gram-negative bacterial tonB protein"  
"OP8\_M19\_00614" 28089 "s63E6H2" 0.001752788 "Gram-negative bacterial tonB protein"  
"OP8\_M19\_00615" 28090 "s59E13H2" 0.7724904 "translocation protein TolB"  
"OP8\_M19\_00615" 28090 "s59E25H2" 0 "translocation protein TolB"  
"OP8\_M19\_00615" 28090 "s59E5H2" 2.422294 "translocation protein TolB"  
"OP8\_M19\_00615" 28090 "s63E6H2" 6.582371e-05 "translocation protein TolB"  
"OP8\_M19\_00616" 28091 "s59E13H2" 0.7218359 "Outer membrane lipoprotein Omp16 precursor"  
"OP8\_M19\_00616" 28091 "s59E25H2" 0 "Outer membrane lipoprotein Omp16 precursor"  
"OP8\_M19\_00616" 28091 "s59E5H2" 1.858709 "Outer membrane lipoprotein Omp16 precursor"  
"OP8\_M19\_00616" 28091 "s63E6H2" 0 "Outer membrane lipoprotein Omp16 precursor"  
"OP8\_M19\_00617" 28092 "s59E13H2" 0.356622 "tol-pal system protein YbgF"  
"OP8\_M19\_00617" 28092 "s59E25H2" 0 "tol-pal system protein YbgF"  
"OP8\_M19\_00617" 28092 "s59E5H2" 1.395849 "tol-pal system protein YbgF"  
"OP8\_M19\_00617" 28092 "s63E6H2" 0 "tol-pal system protein YbgF"  
"OP8\_M19\_00618" 28093 "s59E13H2" 0.1031746 "Single-stranded DNA-binding protein"  
"OP8\_M19\_00618" 28093 "s59E25H2" 0 "Single-stranded DNA-binding protein"  
"OP8\_M19\_00618" 28093 "s59E5H2" 1.049131 "Single-stranded DNA-binding protein"  
"OP8\_M19\_00618" 28093 "s63E6H2" 0 "Single-stranded DNA-binding protein"  
"OP8\_M19\_00619" 28094 "s59E13H2" 0.150363 "Alginate biosynthesis protein AlgA"  
"OP8\_M19\_00619" 28094 "s59E25H2" 0 "Alginate biosynthesis protein AlgA"  
"OP8\_M19\_00619" 28094 "s59E5H2" 1.274066 "Alginate biosynthesis protein AlgA"  
"OP8\_M19\_00619" 28094 "s63E6H2" 0 "Alginate biosynthesis protein AlgA"  
"OP8\_M19\_00620" 28095 "s59E13H2" 0.1760072 "Phosphoenolpyruvate-protein phosphotransferase"  
"OP8\_M19\_00620" 28095 "s59E25H2" 0 "Phosphoenolpyruvate-protein phosphotransferase"  
"OP8\_M19\_00620" 28095 "s59E5H2" 0.498134 "Phosphoenolpyruvate-protein phosphotransferase"  
"OP8\_M19\_00620" 28095 "s63E6H2" 0 "Phosphoenolpyruvate-protein phosphotransferase"  
"OP8\_M19\_00621" 28096 "s59E13H2" 0.106163 "HPr-like protein Crh"  
"OP8\_M19\_00621" 28096 "s59E25H2" 0 "HPr-like protein Crh"  
"OP8\_M19\_00621" 28096 "s59E5H2" 0.2506214 "HPr-like protein Crh"  
"OP8\_M19\_00621" 28096 "s63E6H2" 0 "HPr-like protein Crh"  
"OP8\_M19\_00622" 28097 "s59E13H2" 0.09399496 "PTS system mannose-specific EIIAB component"  
"OP8\_M19\_00622" 28097 "s59E25H2" 0 "PTS system mannose-specific EIIAB component"  
"OP8\_M19\_00622" 28097 "s59E5H2" 0.2374518 "PTS system mannose-specific EIIAB component"  
"OP8\_M19\_00622" 28097 "s63E6H2" 0 "PTS system mannose-specific EIIAB component"  
"OP8\_M19\_00623" 28098 "s59E13H2" 0.1013915 "glmZ(sRNA)-inactivating NTPase"  
"OP8\_M19\_00623" 28098 "s59E25H2" 0 "glmZ(sRNA)-inactivating NTPase"  
"OP8\_M19\_00623" 28098 "s59E5H2" 0.1507003 "glmZ(sRNA)-inactivating NTPase"

"OP8\_M19\_00623" 28098 "s63E6H2" 0.002711732 "glmZ(sRNA)-inactivating NTPase"  
"OP8\_M19\_00624" 28099 "s59E13H2" 0.06972858 "HPr kinase/phosphorylase"  
"OP8\_M19\_00624" 28099 "s59E25H2" 0 "HPr kinase/phosphorylase"  
"OP8\_M19\_00624" 28099 "s59E5H2" 0.1655091 "HPr kinase/phosphorylase"  
"OP8\_M19\_00624" 28099 "s63E6H2" 0 "HPr kinase/phosphorylase"  
"OP8\_M19\_00625" 28100 "s59E13H2" 0.07451758 "PTS system fructose-specific EIIABC component"  
"OP8\_M19\_00625" 28100 "s59E25H2" 0 "PTS system fructose-specific EIIABC component"  
"OP8\_M19\_00625" 28100 "s59E5H2" 0.4039243 "PTS system fructose-specific EIIABC component"  
"OP8\_M19\_00625" 28100 "s63E6H2" 0.002431716 "PTS system fructose-specific EIIABC component"  
"OP8\_M19\_00626" 28101 "s59E13H2" 0.09252926 "Ribosome-associated factor Y"  
"OP8\_M19\_00626" 28101 "s59E25H2" 0 "Ribosome-associated factor Y"  
"OP8\_M19\_00626" 28101 "s59E5H2" 0.3427315 "Ribosome-associated factor Y"  
"OP8\_M19\_00626" 28101 "s63E6H2" 0.00492133 "Ribosome-associated factor Y"  
"OP8\_M19\_00627" 28102 "s59E13H2" 0.09555357 "RNA polymerase sigma-54 factor"  
"OP8\_M19\_00627" 28102 "s59E25H2" 0 "RNA polymerase sigma-54 factor"  
"OP8\_M19\_00627" 28102 "s59E5H2" 0.334045 "RNA polymerase sigma-54 factor"  
"OP8\_M19\_00627" 28102 "s63E6H2" 0.005195552 "RNA polymerase sigma-54 factor"  
"OP8\_M19\_00628" 28103 "s59E13H2" 0.3190222 "Lipopolysaccharide export system ATP-binding protein LptB"  
"OP8\_M19\_00628" 28103 "s59E25H2" 0 "Lipopolysaccharide export system ATP-binding protein LptB"  
"OP8\_M19\_00628" 28103 "s59E5H2" 0.3210546 "Lipopolysaccharide export system ATP-binding protein LptB"  
"OP8\_M19\_00628" 28103 "s63E6H2" 0 "Lipopolysaccharide export system ATP-binding protein LptB"  
"OP8\_M19\_00629" 28104 "s59E13H2" 0.06478291 "LPS-assembly protein LptD"  
"OP8\_M19\_00629" 28104 "s59E25H2" 0 "LPS-assembly protein LptD"  
"OP8\_M19\_00629" 28104 "s59E5H2" 0.2238983 "LPS-assembly protein LptD"  
"OP8\_M19\_00629" 28104 "s63E6H2" 0 "LPS-assembly protein LptD"  
"OP8\_M19\_00630" 28105 "s59E13H2" 0.05051343 "Single-stranded-DNA-specific exonuclease RecJ"  
"OP8\_M19\_00630" 28105 "s59E25H2" 0 "Single-stranded-DNA-specific exonuclease RecJ"  
"OP8\_M19\_00630" 28105 "s59E5H2" 0.3399032 "Single-stranded-DNA-specific exonuclease RecJ"  
"OP8\_M19\_00630" 28105 "s63E6H2" 0 "Single-stranded-DNA-specific exonuclease RecJ"  
"OP8\_M19\_00631" 28106 "s59E13H2" 0.3219257 "Signal recognition particle receptor FtsY"  
"OP8\_M19\_00631" 28106 "s59E25H2" 0 "Signal recognition particle receptor FtsY"  
"OP8\_M19\_00631" 28106 "s59E5H2" 4.242378 "Signal recognition particle receptor FtsY"  
"OP8\_M19\_00631" 28106 "s63E6H2" 0 "Signal recognition particle receptor FtsY"  
"OP8\_M19\_00632" 28107 "s59E13H2" 0.04063431 "Riboflavin biosynthesis protein RibD"  
"OP8\_M19\_00632" 28107 "s59E25H2" 0 "Riboflavin biosynthesis protein RibD"  
"OP8\_M19\_00632" 28107 "s59E5H2" 4.579086 "Riboflavin biosynthesis protein RibD"  
"OP8\_M19\_00632" 28107 "s63E6H2" 0.005344916 "Riboflavin biosynthesis protein RibD"  
"OP8\_M19\_00633" 28108 "s59E13H2" 0.03197736 "Riboflavin synthase"  
"OP8\_M19\_00633" 28108 "s59E25H2" 0 "Riboflavin synthase"  
"OP8\_M19\_00633" 28108 "s59E5H2" 5.76913 "Riboflavin synthase"  
"OP8\_M19\_00633" 28108 "s63E6H2" 0.003681682 "Riboflavin synthase"  
"OP8\_M19\_00634" 28109 "s59E13H2" 0.04113965 "Riboflavin biosynthesis protein RibBA"  
"OP8\_M19\_00634" 28109 "s59E25H2" 0 "Riboflavin biosynthesis protein RibBA"  
"OP8\_M19\_00634" 28109 "s59E5H2" 6.20715 "Riboflavin biosynthesis protein RibBA"  
"OP8\_M19\_00634" 28109 "s63E6H2" 0.005160908 "Riboflavin biosynthesis protein RibBA"  
"OP8\_M19\_00635" 28110 "s59E13H2" 0.04504574 "HEAT repeat protein"  
"OP8\_M19\_00635" 28110 "s59E25H2" 0 "HEAT repeat protein"

"OP8\_M19\_00635" 28110 "s59E5H2" 6.908578 "HEAT repeat protein"  
"OP8\_M19\_00635" 28110 "s63E6H2" 0.008781196 "HEAT repeat protein"  
"OP8\_M19\_00636" 28111 "s59E13H2" 0.7690412 "D-tyrosyl-tRNA(Tyr) deacylase"  
"OP8\_M19\_00636" 28111 "s59E25H2" 0 "D-tyrosyl-tRNA(Tyr) deacylase"  
"OP8\_M19\_00636" 28111 "s59E5H2" 6.097233 "D-tyrosyl-tRNA(Tyr) deacylase"  
"OP8\_M19\_00636" 28111 "s63E6H2" 0.004768865 "D-tyrosyl-tRNA(Tyr) deacylase"  
"OP8\_M19\_00637" 28112 "s59E13H2" 1.572306 "putative peptidoglycan biosynthesis protein MurJ"  
"OP8\_M19\_00637" 28112 "s59E25H2" 0 "putative peptidoglycan biosynthesis protein MurJ"  
"OP8\_M19\_00637" 28112 "s59E5H2" 7.193444 "putative peptidoglycan biosynthesis protein MurJ"  
"OP8\_M19\_00637" 28112 "s63E6H2" 0.00312505 "putative peptidoglycan biosynthesis protein MurJ"  
"OP8\_M19\_00638" 28113 "s59E13H2" 2.478609 "30S ribosomal protein S20"  
"OP8\_M19\_00638" 28113 "s59E25H2" 0 "30S ribosomal protein S20"  
"OP8\_M19\_00638" 28113 "s59E5H2" 8.046598 "30S ribosomal protein S20"  
"OP8\_M19\_00638" 28113 "s63E6H2" 0 "30S ribosomal protein S20"  
"OP8\_M19\_00639" 28114 "s59E13H2" 1.991543 "DNA polymerase III subunit delta"  
"OP8\_M19\_00639" 28114 "s59E25H2" 0 "DNA polymerase III subunit delta"  
"OP8\_M19\_00639" 28114 "s59E5H2" 6.886364 "DNA polymerase III subunit delta"  
"OP8\_M19\_00639" 28114 "s63E6H2" 0 "DNA polymerase III subunit delta"  
"OP8\_M19\_00640" 28115 "s59E13H2" 1.885457 "hypothetical protein"  
"OP8\_M19\_00640" 28115 "s59E25H2" 0 "hypothetical protein"  
"OP8\_M19\_00640" 28115 "s59E5H2" 6.193931 "hypothetical protein"  
"OP8\_M19\_00640" 28115 "s63E6H2" 0 "hypothetical protein"  
"OP8\_M19\_00641" 28116 "s59E13H2" 1.750092 "Leucine--tRNA ligase"  
"OP8\_M19\_00641" 28116 "s59E25H2" 0 "Leucine--tRNA ligase"  
"OP8\_M19\_00641" 28116 "s59E5H2" 5.124407 "Leucine--tRNA ligase"  
"OP8\_M19\_00641" 28116 "s63E6H2" 0.001844665 "Leucine--tRNA ligase"  
"OP8\_M19\_00642" 28117 "s59E13H2" 1.077201 "hypothetical protein"  
"OP8\_M19\_00642" 28117 "s59E25H2" 0.315 "hypothetical protein"  
"OP8\_M19\_00642" 28117 "s59E5H2" 2.6681 "hypothetical protein"  
"OP8\_M19\_00642" 28117 "s63E6H2" 0.002999116 "hypothetical protein"  
"OP8\_M19\_00643" 28118 "s59E13H2" 0.9272254 "hypothetical protein"  
"OP8\_M19\_00643" 28118 "s59E25H2" 0 "hypothetical protein"  
"OP8\_M19\_00643" 28118 "s59E5H2" 3.417407 "hypothetical protein"  
"OP8\_M19\_00643" 28118 "s63E6H2" 0 "hypothetical protein"  
"OP8\_M19\_00644" 28119 "s59E13H2" 0.1183317 "YtxH-like protein"  
"OP8\_M19\_00644" 28119 "s59E25H2" 0 "YtxH-like protein"  
"OP8\_M19\_00644" 28119 "s59E5H2" 3.30179 "YtxH-like protein"  
"OP8\_M19\_00644" 28119 "s63E6H2" 0 "YtxH-like protein"  
"OP8\_M19\_00645" 28120 "s59E13H2" 0.03198823 "Enolase"  
"OP8\_M19\_00645" 28120 "s59E25H2" 0.2032333 "Enolase"  
"OP8\_M19\_00645" 28120 "s59E5H2" 5.545049 "Enolase"  
"OP8\_M19\_00645" 28120 "s63E6H2" 0 "Enolase"  
"OP8\_M19\_00646" 28121 "s59E13H2" 0.0193725 "Thermostable carboxypeptidase 1"  
"OP8\_M19\_00646" 28121 "s59E25H2" 0 "Thermostable carboxypeptidase 1"  
"OP8\_M19\_00646" 28121 "s59E5H2" 7.452191 "Thermostable carboxypeptidase 1"  
"OP8\_M19\_00646" 28121 "s63E6H2" 0 "Thermostable carboxypeptidase 1"  
"OP8\_M19\_00647" 28122 "s59E13H2" 0.01670629 "ComEC family competence protein"

"OP8\_M19\_00647" 28122 "s59E25H2" 0 "ComEC family competence protein"  
"OP8\_M19\_00647" 28122 "s59E5H2" 4.220713 "ComEC family competence protein"  
"OP8\_M19\_00647" 28122 "s63E6H2" 0 "ComEC family competence protein"  
"OP8\_M19\_00648" 28123 "s59E13H2" 0.006332901 "hypothetical protein"  
"OP8\_M19\_00648" 28123 "s59E25H2" 0 "hypothetical protein"  
"OP8\_M19\_00648" 28123 "s59E5H2" 3.304939 "hypothetical protein"  
"OP8\_M19\_00648" 28123 "s63E6H2" 0 "hypothetical protein"  
"OP8\_M19\_00649" 28124 "s59E13H2" 0.0151429 "hypothetical protein"  
"OP8\_M19\_00649" 28124 "s59E25H2" 0 "hypothetical protein"  
"OP8\_M19\_00649" 28124 "s59E5H2" 3.211049 "hypothetical protein"  
"OP8\_M19\_00649" 28124 "s63E6H2" 0 "hypothetical protein"  
"OP8\_M19\_00650" 28125 "s59E13H2" 0.01442718 "Tetraacyldisaccharide 4'-kinase"  
"OP8\_M19\_00650" 28125 "s59E25H2" 0 "Tetraacyldisaccharide 4'-kinase"  
"OP8\_M19\_00650" 28125 "s59E5H2" 2.976064 "Tetraacyldisaccharide 4'-kinase"  
"OP8\_M19\_00650" 28125 "s63E6H2" 0 "Tetraacyldisaccharide 4'-kinase"  
"OP8\_M19\_00651" 28126 "s59E13H2" 0.0189691 "Lipid A biosynthesis lauroyl acyltransferase"  
"OP8\_M19\_00651" 28126 "s59E25H2" 0 "Lipid A biosynthesis lauroyl acyltransferase"  
"OP8\_M19\_00651" 28126 "s59E5H2" 3.069225 "Lipid A biosynthesis lauroyl acyltransferase"  
"OP8\_M19\_00651" 28126 "s63E6H2" 0 "Lipid A biosynthesis lauroyl acyltransferase"  
"OP8\_M19\_00653" 28128 "s59E13H2" 0.01784234 "Capreomycin synthase"  
"OP8\_M19\_00653" 28128 "s59E25H2" 0 "Capreomycin synthase"  
"OP8\_M19\_00653" 28128 "s59E5H2" 2.766746 "Capreomycin synthase"  
"OP8\_M19\_00653" 28128 "s63E6H2" 0 "Capreomycin synthase"  
"OP8\_M19\_00654" 28129 "s59E13H2" 0.04970812 "Chromosome partition protein Smc"  
"OP8\_M19\_00654" 28129 "s59E25H2" 0 "Chromosome partition protein Smc"  
"OP8\_M19\_00654" 28129 "s59E5H2" 1.017587 "Chromosome partition protein Smc"  
"OP8\_M19\_00654" 28129 "s63E6H2" 0 "Chromosome partition protein Smc"  
"OP8\_M19\_00655" 28130 "s59E13H2" 0.06910898 "hypothetical protein"  
"OP8\_M19\_00655" 28130 "s59E25H2" 0 "hypothetical protein"  
"OP8\_M19\_00655" 28130 "s59E5H2" 1.166431 "hypothetical protein"  
"OP8\_M19\_00655" 28130 "s63E6H2" 0 "hypothetical protein"  
"OP8\_M19\_00656" 28131 "s59E13H2" 0.07098562 "FecR protein"  
"OP8\_M19\_00656" 28131 "s59E25H2" 0 "FecR protein"  
"OP8\_M19\_00656" 28131 "s59E5H2" 1.512802 "FecR protein"  
"OP8\_M19\_00656" 28131 "s63E6H2" 0 "FecR protein"  
"OP8\_M19\_00657" 28132 "s59E13H2" 0.06314057 "Penicillin-binding protein 1A"  
"OP8\_M19\_00657" 28132 "s59E25H2" 0 "Penicillin-binding protein 1A"  
"OP8\_M19\_00657" 28132 "s59E5H2" 1.616924 "Penicillin-binding protein 1A"  
"OP8\_M19\_00657" 28132 "s63E6H2" 0 "Penicillin-binding protein 1A"  
"OP8\_M19\_00658" 28133 "s59E13H2" 0.0005564474 "PTS system fructose-specific EIIABC component"  
"OP8\_M19\_00658" 28133 "s59E25H2" 0 "PTS system fructose-specific EIIABC component"  
"OP8\_M19\_00658" 28133 "s59E5H2" 0.05148126 "PTS system fructose-specific EIIABC component"  
"OP8\_M19\_00658" 28133 "s63E6H2" 0 "PTS system fructose-specific EIIABC component"  
"OP8\_M19\_00659" 28134 "s59E13H2" 0.02255298 "hypothetical protein"  
"OP8\_M19\_00659" 28134 "s59E25H2" 0 "hypothetical protein"  
"OP8\_M19\_00659" 28134 "s59E5H2" 0.1457418 "hypothetical protein"  
"OP8\_M19\_00659" 28134 "s63E6H2" 0 "hypothetical protein"

"OP8\_M19\_00660" 28135 "s59E13H2" 0.04936455 "nitroreductase A"  
"OP8\_M19\_00660" 28135 "s59E25H2" 0 "nitroreductase A"  
"OP8\_M19\_00660" 28135 "s59E5H2" 0.1056112 "nitroreductase A"  
"OP8\_M19\_00660" 28135 "s63E6H2" 0 "nitroreductase A"  
"OP8\_M19\_00661" 28136 "s59E13H2" 0.04149151 "Dipeptidase A"  
"OP8\_M19\_00661" 28136 "s59E25H2" 0 "Dipeptidase A"  
"OP8\_M19\_00661" 28136 "s59E5H2" 1.565392 "Dipeptidase A"  
"OP8\_M19\_00661" 28136 "s63E6H2" 0 "Dipeptidase A"  
"OP8\_M19\_00662" 28137 "s59E13H2" 0.07680731 "hypothetical protein"  
"OP8\_M19\_00662" 28137 "s59E25H2" 0 "hypothetical protein"  
"OP8\_M19\_00662" 28137 "s59E5H2" 1.952163 "hypothetical protein"  
"OP8\_M19\_00662" 28137 "s63E6H2" 0 "hypothetical protein"  
"OP8\_M19\_00663" 28138 "s59E13H2" 1.66244 "hypothetical protein"  
"OP8\_M19\_00663" 28138 "s59E25H2" 0 "hypothetical protein"  
"OP8\_M19\_00663" 28138 "s59E5H2" 0.6042072 "hypothetical protein"  
"OP8\_M19\_00663" 28138 "s63E6H2" 0 "hypothetical protein"  
"OP8\_M19\_00664" 28139 "s59E13H2" 2.066313 "6-phosphofructokinase isozyme 1"  
"OP8\_M19\_00664" 28139 "s59E25H2" 0 "6-phosphofructokinase isozyme 1"  
"OP8\_M19\_00664" 28139 "s59E5H2" 0.9282699 "6-phosphofructokinase isozyme 1"  
"OP8\_M19\_00664" 28139 "s63E6H2" 0 "6-phosphofructokinase isozyme 1"  
"OP8\_M19\_00665" 28140 "s59E13H2" 1.723031 "hypothetical protein"  
"OP8\_M19\_00665" 28140 "s59E25H2" 0 "hypothetical protein"  
"OP8\_M19\_00665" 28140 "s59E5H2" 0.7804502 "hypothetical protein"  
"OP8\_M19\_00665" 28140 "s63E6H2" 0 "hypothetical protein"  
"OP8\_M19\_00666" 28141 "s59E13H2" 0.9682929 "hypothetical protein"  
"OP8\_M19\_00666" 28141 "s59E25H2" 0 "hypothetical protein"  
"OP8\_M19\_00666" 28141 "s59E5H2" 0.6789555 "hypothetical protein"  
"OP8\_M19\_00666" 28141 "s63E6H2" 0 "hypothetical protein"  
"OP8\_M19\_00667" 28142 "s59E13H2" 0.02153214 "hypothetical protein"  
"OP8\_M19\_00667" 28142 "s59E25H2" 0 "hypothetical protein"  
"OP8\_M19\_00667" 28142 "s59E5H2" 0.551175 "hypothetical protein"  
"OP8\_M19\_00667" 28142 "s63E6H2" 0 "hypothetical protein"  
"OP8\_M19\_00668" 28143 "s59E13H2" 0.0563185 "hypothetical protein"  
"OP8\_M19\_00668" 28143 "s59E25H2" 0 "hypothetical protein"  
"OP8\_M19\_00668" 28143 "s59E5H2" 0.3022495 "hypothetical protein"  
"OP8\_M19\_00668" 28143 "s63E6H2" 0.002736546 "hypothetical protein"  
"OP8\_M19\_00669" 28144 "s59E13H2" 0.002024389 "High-affinity Na(+)/H(+) antiporter NhaS3"  
"OP8\_M19\_00669" 28144 "s59E25H2" 0 "High-affinity Na(+)/H(+) antiporter NhaS3"  
"OP8\_M19\_00669" 28144 "s59E5H2" 0.1071608 "High-affinity Na(+)/H(+) antiporter NhaS3"  
"OP8\_M19\_00669" 28144 "s63E6H2" 0 "High-affinity Na(+)/H(+) antiporter NhaS3"  
"OP8\_M21\_00003" 28147 "s59E13H2" 0.004583762 "50S ribosomal protein L30"  
"OP8\_M21\_00003" 28147 "s59E25H2" 0 "50S ribosomal protein L30"  
"OP8\_M21\_00003" 28147 "s59E5H2" 0.2356602 "50S ribosomal protein L30"  
"OP8\_M21\_00003" 28147 "s63E6H2" 0 "50S ribosomal protein L30"  
"OP8\_M21\_00004" 28148 "s59E13H2" 0.003323674 "30S ribosomal protein S5"  
"OP8\_M21\_00004" 28148 "s59E25H2" 0 "30S ribosomal protein S5"  
"OP8\_M21\_00004" 28148 "s59E5H2" 0.3226416 "30S ribosomal protein S5"



"OP8\_M21\_00004" 28148 "s63E6H2" 0 "30S ribosomal protein S5"  
"OP8\_M21\_00005" 28149 "s59E13H2" 0 "Methyl-accepting chemotaxis protein McpB"  
"OP8\_M21\_00005" 28149 "s59E25H2" 0 "Methyl-accepting chemotaxis protein McpB"  
"OP8\_M21\_00005" 28149 "s59E5H2" 0.08492193 "Methyl-accepting chemotaxis protein McpB"  
"OP8\_M21\_00005" 28149 "s63E6H2" 0 "Methyl-accepting chemotaxis protein McpB"  
"OP8\_M21\_00006" 28150 "s59E13H2" 0 "Chemotaxis protein CheW"  
"OP8\_M21\_00006" 28150 "s59E25H2" 0 "Chemotaxis protein CheW"  
"OP8\_M21\_00006" 28150 "s59E5H2" 0.1404127 "Chemotaxis protein CheW"  
"OP8\_M21\_00006" 28150 "s63E6H2" 0 "Chemotaxis protein CheW"  
"OP8\_M21\_00007" 28151 "s59E13H2" 0 "Chemotaxis protein CheY"  
"OP8\_M21\_00007" 28151 "s59E25H2" 0 "Chemotaxis protein CheY"  
"OP8\_M21\_00007" 28151 "s59E5H2" 0.07901041 "Chemotaxis protein CheY"  
"OP8\_M21\_00007" 28151 "s63E6H2" 0 "Chemotaxis protein CheY"  
"OP8\_M21\_00008" 28152 "s59E13H2" 0 "Chemotaxis response regulator protein-glutamate methylesterase"  
"OP8\_M21\_00008" 28152 "s59E25H2" 0 "Chemotaxis response regulator protein-glutamate methylesterase"  
"OP8\_M21\_00008" 28152 "s59E5H2" 0.110953 "Chemotaxis response regulator protein-glutamate methylesterase"  
"OP8\_M21\_00008" 28152 "s63E6H2" 0 "Chemotaxis response regulator protein-glutamate methylesterase"  
"OP8\_M21\_00009" 28153 "s59E13H2" 0.005835037 "Chemotaxis protein CheA"  
"OP8\_M21\_00009" 28153 "s59E25H2" 0 "Chemotaxis protein CheA"  
"OP8\_M21\_00009" 28153 "s59E5H2" 0.05174078 "Chemotaxis protein CheA"  
"OP8\_M21\_00009" 28153 "s63E6H2" 0 "Chemotaxis protein CheA"  
"OP8\_M21\_00010" 28154 "s59E13H2" 0 "CheY-P phosphatase CheC"  
"OP8\_M21\_00010" 28154 "s59E25H2" 0 "CheY-P phosphatase CheC"  
"OP8\_M21\_00010" 28154 "s59E5H2" 0.1525135 "CheY-P phosphatase CheC"  
"OP8\_M21\_00010" 28154 "s63E6H2" 0 "CheY-P phosphatase CheC"  
"OP8\_M21\_00011" 28155 "s59E13H2" 0 "Chemoreceptor glutamine deamidase CheD"  
"OP8\_M21\_00011" 28155 "s59E25H2" 0 "Chemoreceptor glutamine deamidase CheD"  
"OP8\_M21\_00011" 28155 "s59E5H2" 0.09450173 "Chemoreceptor glutamine deamidase CheD"  
"OP8\_M21\_00011" 28155 "s63E6H2" 0 "Chemoreceptor glutamine deamidase CheD"  
"OP8\_M21\_00012" 28156 "s59E13H2" 0 "hypothetical protein"  
"OP8\_M21\_00012" 28156 "s59E25H2" 0 "hypothetical protein"  
"OP8\_M21\_00012" 28156 "s59E5H2" 0.1040319 "hypothetical protein"  
"OP8\_M21\_00012" 28156 "s63E6H2" 0 "hypothetical protein"  
"OP8\_M21\_00013" 28157 "s59E13H2" 0 "Alkaline phosphatase synthesis sensor protein PhoR"  
"OP8\_M21\_00013" 28157 "s59E25H2" 0 "Alkaline phosphatase synthesis sensor protein PhoR"  
"OP8\_M21\_00013" 28157 "s59E5H2" 0.1434022 "Alkaline phosphatase synthesis sensor protein PhoR"  
"OP8\_M21\_00013" 28157 "s63E6H2" 0 "Alkaline phosphatase synthesis sensor protein PhoR"  
"OP8\_M21\_00014" 28158 "s59E13H2" 0.01822945 "Elongation factor Tu"  
"OP8\_M21\_00014" 28158 "s59E25H2" 0 "Elongation factor Tu"  
"OP8\_M21\_00014" 28158 "s59E5H2" 0.6359457 "Elongation factor Tu"  
"OP8\_M21\_00014" 28158 "s63E6H2" 0 "Elongation factor Tu"  
"OP8\_M21\_00015" 28159 "s59E13H2" 0.006955593 "hypothetical protein"  
"OP8\_M21\_00015" 28159 "s59E25H2" 0 "hypothetical protein"  
"OP8\_M21\_00015" 28159 "s59E5H2" 0.1644333 "hypothetical protein"  
"OP8\_M21\_00015" 28159 "s63E6H2" 0 "hypothetical protein"  
"OP8\_M21\_00018" 28162 "s59E13H2" 0 "RNA polymerase factor sigma-54"  
"OP8\_M21\_00018" 28162 "s59E25H2" 0 "RNA polymerase factor sigma-54"

"OP8\_M21\_00018" 28162 "s59E5H2" 0.1043015 "RNA polymerase factor sigma-54"  
"OP8\_M21\_00018" 28162 "s63E6H2" 0 "RNA polymerase factor sigma-54"  
"OP8\_M21\_00019" 28163 "s59E13H2" 0 "putative sensor histidine kinase pdtaS"  
"OP8\_M21\_00019" 28163 "s59E25H2" 0 "putative sensor histidine kinase pdtaS"  
"OP8\_M21\_00019" 28163 "s59E5H2" 0.1701901 "putative sensor histidine kinase pdtaS"  
"OP8\_M21\_00019" 28163 "s63E6H2" 0 "putative sensor histidine kinase pdtaS"  
"OP8\_M21\_00020" 28164 "s59E13H2" 0 "putative transcriptional regulatory protein pdtaR"  
"OP8\_M21\_00020" 28164 "s59E25H2" 0 "putative transcriptional regulatory protein pdtaR"  
"OP8\_M21\_00020" 28164 "s59E5H2" 0.1771582 "putative transcriptional regulatory protein pdtaR"  
"OP8\_M21\_00020" 28164 "s63E6H2" 0 "putative transcriptional regulatory protein pdtaR"  
"OP8\_M21\_00021" 28165 "s59E13H2" 0 "hypothetical protein"  
"OP8\_M21\_00021" 28165 "s59E25H2" 0 "hypothetical protein"  
"OP8\_M21\_00021" 28165 "s59E5H2" 0.1678969 "hypothetical protein"  
"OP8\_M21\_00021" 28165 "s63E6H2" 0 "hypothetical protein"  
"OP8\_M21\_00023" 28167 "s59E13H2" 0 "Isoprenylcysteine carboxyl methyltransferase (ICMT) family protein"  
"OP8\_M21\_00023" 28167 "s59E25H2" 0 "Isoprenylcysteine carboxyl methyltransferase (ICMT) family protein"  
"OP8\_M21\_00023" 28167 "s59E5H2" 0.1983489 "Isoprenylcysteine carboxyl methyltransferase (ICMT) family protein"  
"OP8\_M21\_00023" 28167 "s63E6H2" 0 "Isoprenylcysteine carboxyl methyltransferase (ICMT) family protein"  
"OP8\_M21\_00024" 28168 "s59E13H2" 0 "hypothetical protein"  
"OP8\_M21\_00024" 28168 "s59E25H2" 0 "hypothetical protein"  
"OP8\_M21\_00024" 28168 "s59E5H2" 0.3196495 "hypothetical protein"  
"OP8\_M21\_00024" 28168 "s63E6H2" 0 "hypothetical protein"  
"OP8\_M21\_00026" 28170 "s59E13H2" 0.04964197 "putative diguanylate cyclase AdrA"  
"OP8\_M21\_00026" 28170 "s59E25H2" 0 "putative diguanylate cyclase AdrA"  
"OP8\_M21\_00026" 28170 "s59E5H2" 1.108135 "putative diguanylate cyclase AdrA"  
"OP8\_M21\_00026" 28170 "s63E6H2" 0 "putative diguanylate cyclase AdrA"  
"OP8\_M21\_00027" 28171 "s59E13H2" 0.003415133 "hypothetical protein"  
"OP8\_M21\_00027" 28171 "s59E25H2" 0 "hypothetical protein"  
"OP8\_M21\_00027" 28171 "s59E5H2" 0.66176 "hypothetical protein"  
"OP8\_M21\_00027" 28171 "s63E6H2" 0 "hypothetical protein"  
"OP8\_M21\_00028" 28172 "s59E13H2" 0.004749911 "hypothetical protein"  
"OP8\_M21\_00028" 28172 "s59E25H2" 0 "hypothetical protein"  
"OP8\_M21\_00028" 28172 "s59E5H2" 0.4858977 "hypothetical protein"  
"OP8\_M21\_00028" 28172 "s63E6H2" 0 "hypothetical protein"  
"OP8\_M21\_00029" 28173 "s59E13H2" 0 "hypothetical protein"  
"OP8\_M21\_00029" 28173 "s59E25H2" 0 "hypothetical protein"  
"OP8\_M21\_00029" 28173 "s59E5H2" 0.2895846 "hypothetical protein"  
"OP8\_M21\_00029" 28173 "s63E6H2" 0 "hypothetical protein"  
"OP8\_M21\_00030" 28174 "s59E13H2" 0 "hypothetical protein"  
"OP8\_M21\_00030" 28174 "s59E25H2" 0 "hypothetical protein"  
"OP8\_M21\_00030" 28174 "s59E5H2" 0.246914 "hypothetical protein"  
"OP8\_M21\_00030" 28174 "s63E6H2" 0 "hypothetical protein"  
"OP8\_M21\_00031" 28175 "s59E13H2" 0 "hypothetical protein"  
"OP8\_M21\_00031" 28175 "s59E25H2" 0 "hypothetical protein"  
"OP8\_M21\_00031" 28175 "s59E5H2" 0.5037452 "hypothetical protein"  
"OP8\_M21\_00031" 28175 "s63E6H2" 0 "hypothetical protein"  
"OP8\_M21\_00032" 28176 "s59E13H2" 0 "ATPase family associated with various cellular activities (AAA)"

"OP8\_M21\_00032" 28176 "s59E25H2" 0 "ATPase family associated with various cellular activities (AAA)"  
"OP8\_M21\_00032" 28176 "s59E5H2" 0.3902268 "ATPase family associated with various cellular activities (AAA)"  
"OP8\_M21\_00032" 28176 "s63E6H2" 0 "ATPase family associated with various cellular activities (AAA)"  
"OP8\_M21\_00033" 28177 "s59E13H2" 0.0007831054 "hypothetical protein"  
"OP8\_M21\_00033" 28177 "s59E25H2" 0 "hypothetical protein"  
"OP8\_M21\_00033" 28177 "s59E5H2" 0.2359782 "hypothetical protein"  
"OP8\_M21\_00033" 28177 "s63E6H2" 0 "hypothetical protein"  
"OP8\_M21\_00034" 28178 "s59E13H2" 0 "hypothetical protein"  
"OP8\_M21\_00034" 28178 "s59E25H2" 0 "hypothetical protein"  
"OP8\_M21\_00034" 28178 "s59E5H2" 0.2842848 "hypothetical protein"  
"OP8\_M21\_00034" 28178 "s63E6H2" 0 "hypothetical protein"  
"OP8\_M21\_00035" 28179 "s59E13H2" 0 "hypothetical protein"  
"OP8\_M21\_00035" 28179 "s59E25H2" 0 "hypothetical protein"  
"OP8\_M21\_00035" 28179 "s59E5H2" 0.2732736 "hypothetical protein"  
"OP8\_M21\_00035" 28179 "s63E6H2" 0.0136426 "hypothetical protein"  
"OP8\_M21\_00036" 28180 "s59E13H2" 0 "hypothetical protein"  
"OP8\_M21\_00036" 28180 "s59E25H2" 0 "hypothetical protein"  
"OP8\_M21\_00036" 28180 "s59E5H2" 0.3662189 "hypothetical protein"  
"OP8\_M21\_00036" 28180 "s63E6H2" 0 "hypothetical protein"  
"OP8\_M21\_00038" 28182 "s59E13H2" 0.004993759 "putative chromosome-partitioning protein ParB"  
"OP8\_M21\_00038" 28182 "s59E25H2" 0 "putative chromosome-partitioning protein ParB"  
"OP8\_M21\_00038" 28182 "s59E5H2" 0.4285077 "putative chromosome-partitioning protein ParB"  
"OP8\_M21\_00038" 28182 "s63E6H2" 0 "putative chromosome-partitioning protein ParB"  
"OP8\_M21\_00039" 28183 "s59E13H2" 0.5592251 "Transposase"  
"OP8\_M21\_00039" 28183 "s59E25H2" 0 "Transposase"  
"OP8\_M21\_00039" 28183 "s59E5H2" 0.7701911 "Transposase"  
"OP8\_M21\_00039" 28183 "s63E6H2" 0 "Transposase"  
"OP8\_M21\_00040" 28184 "s59E13H2" 0.06075151 "Integrase core domain protein"  
"OP8\_M21\_00040" 28184 "s59E25H2" 0 "Integrase core domain protein"  
"OP8\_M21\_00040" 28184 "s59E5H2" 1.329013 "Integrase core domain protein"  
"OP8\_M21\_00040" 28184 "s63E6H2" 0 "Integrase core domain protein"  
"OP8\_M21\_00041" 28185 "s59E13H2" 0 "DNA-binding transcriptional activator FeaR"  
"OP8\_M21\_00041" 28185 "s59E25H2" 0 "DNA-binding transcriptional activator FeaR"  
"OP8\_M21\_00041" 28185 "s59E5H2" 0.0487298 "DNA-binding transcriptional activator FeaR"  
"OP8\_M21\_00041" 28185 "s63E6H2" 0 "DNA-binding transcriptional activator FeaR"  
"OP8\_M21\_00042" 28186 "s59E13H2" 0 "Membrane dipeptidase (Peptidase family M19)"  
"OP8\_M21\_00042" 28186 "s59E25H2" 0 "Membrane dipeptidase (Peptidase family M19)"  
"OP8\_M21\_00042" 28186 "s59E5H2" 0.07333405 "Membrane dipeptidase (Peptidase family M19)"  
"OP8\_M21\_00042" 28186 "s63E6H2" 0 "Membrane dipeptidase (Peptidase family M19)"  
"OP8\_M21\_00043" 28187 "s59E13H2" 0 "hypothetical protein"  
"OP8\_M21\_00043" 28187 "s59E25H2" 0 "hypothetical protein"  
"OP8\_M21\_00043" 28187 "s59E5H2" 0.02898832 "hypothetical protein"  
"OP8\_M21\_00043" 28187 "s63E6H2" 0 "hypothetical protein"  
"OP8\_M21\_00044" 28188 "s59E13H2" 0 "Alanine dehydrogenase"  
"OP8\_M21\_00044" 28188 "s59E25H2" 0 "Alanine dehydrogenase"  
"OP8\_M21\_00044" 28188 "s59E5H2" 0.2235093 "Alanine dehydrogenase"  
"OP8\_M21\_00044" 28188 "s63E6H2" 0 "Alanine dehydrogenase"

"OP8\_M21\_00045" 28189 "s59E13H2" 0.002858138 "Transposase DDE domain protein"  
"OP8\_M21\_00045" 28189 "s59E25H2" 0 "Transposase DDE domain protein"  
"OP8\_M21\_00045" 28189 "s59E5H2" 10.28548 "Transposase DDE domain protein"  
"OP8\_M21\_00045" 28189 "s63E6H2" 0 "Transposase DDE domain protein"  
"OP8\_M21\_00046" 28190 "s59E13H2" 0 "Alanine dehydrogenase"  
"OP8\_M21\_00046" 28190 "s59E25H2" 0 "Alanine dehydrogenase"  
"OP8\_M21\_00046" 28190 "s59E5H2" 0.09403472 "Alanine dehydrogenase"  
"OP8\_M21\_00046" 28190 "s63E6H2" 0 "Alanine dehydrogenase"  
"OP8\_M21\_00047" 28191 "s59E13H2" 0 "Membrane dipeptidase (Peptidase family M19)"  
"OP8\_M21\_00047" 28191 "s59E25H2" 0 "Membrane dipeptidase (Peptidase family M19)"  
"OP8\_M21\_00047" 28191 "s59E5H2" 0.04612856 "Membrane dipeptidase (Peptidase family M19)"  
"OP8\_M21\_00047" 28191 "s63E6H2" 0 "Membrane dipeptidase (Peptidase family M19)"  
"OP8\_M21\_00048" 28192 "s59E13H2" 0 "2,5-dihydroxypyridine 5,6-dioxygenase"  
"OP8\_M21\_00048" 28192 "s59E25H2" 0 "2,5-dihydroxypyridine 5,6-dioxygenase"  
"OP8\_M21\_00048" 28192 "s59E5H2" 0.02407621 "2,5-dihydroxypyridine 5,6-dioxygenase"  
"OP8\_M21\_00048" 28192 "s63E6H2" 0 "2,5-dihydroxypyridine 5,6-dioxygenase"  
"OP8\_M21\_00049" 28193 "s59E13H2" 0 "Transposase DDE domain protein"  
"OP8\_M21\_00049" 28193 "s59E25H2" 0 "Transposase DDE domain protein"  
"OP8\_M21\_00049" 28193 "s59E5H2" 5.824191 "Transposase DDE domain protein"  
"OP8\_M21\_00049" 28193 "s63E6H2" 0 "Transposase DDE domain protein"  
"OP8\_M21\_00050" 28194 "s59E13H2" 0 "hypothetical protein"  
"OP8\_M21\_00050" 28194 "s59E25H2" 0 "hypothetical protein"  
"OP8\_M21\_00050" 28194 "s59E5H2" 0.1263258 "hypothetical protein"  
"OP8\_M21\_00050" 28194 "s63E6H2" 0 "hypothetical protein"  
"OP8\_M21\_00051" 28195 "s59E13H2" 0 "hypothetical protein"  
"OP8\_M21\_00051" 28195 "s59E25H2" 0 "hypothetical protein"  
"OP8\_M21\_00051" 28195 "s59E5H2" 0.1831013 "hypothetical protein"  
"OP8\_M21\_00051" 28195 "s63E6H2" 0 "hypothetical protein"  
"OP8\_M21\_00053" 28197 "s59E13H2" 0.03562107 "hypothetical protein"  
"OP8\_M21\_00053" 28197 "s59E25H2" 0 "hypothetical protein"  
"OP8\_M21\_00053" 28197 "s59E5H2" 4.747663 "hypothetical protein"  
"OP8\_M21\_00053" 28197 "s63E6H2" 0 "hypothetical protein"  
"OP8\_M21\_00054" 28198 "s59E13H2" 0.07656573 "OPT oligopeptide transporter protein"  
"OP8\_M21\_00054" 28198 "s59E25H2" 0 "OPT oligopeptide transporter protein"  
"OP8\_M21\_00054" 28198 "s59E5H2" 6.610432 "OPT oligopeptide transporter protein"  
"OP8\_M21\_00054" 28198 "s63E6H2" 0 "OPT oligopeptide transporter protein"  
"OP8\_M21\_00055" 28199 "s59E13H2" 0.02018289 "Inner membrane protein YjiY"  
"OP8\_M21\_00055" 28199 "s59E25H2" 0 "Inner membrane protein YjiY"  
"OP8\_M21\_00055" 28199 "s59E5H2" 7.992501 "Inner membrane protein YjiY"  
"OP8\_M21\_00055" 28199 "s63E6H2" 0 "Inner membrane protein YjiY"  
"OP8\_M21\_00056" 28200 "s59E13H2" 0.6939614 "Bacillolysin precursor"  
"OP8\_M21\_00056" 28200 "s59E25H2" 0 "Bacillolysin precursor"  
"OP8\_M21\_00056" 28200 "s59E5H2" 3.619269 "Bacillolysin precursor"  
"OP8\_M21\_00056" 28200 "s63E6H2" 0 "Bacillolysin precursor"  
"OP8\_M21\_00057" 28201 "s59E13H2" 0.9511222 "Bacterial SH3 domain protein"  
"OP8\_M21\_00057" 28201 "s59E25H2" 0 "Bacterial SH3 domain protein"  
"OP8\_M21\_00057" 28201 "s59E5H2" 3.577827 "Bacterial SH3 domain protein"

"OP8\_M21\_00057" 28201 "s63E6H2" 0 "Bacterial SH3 domain protein"  
"OP8\_M21\_00058" 28202 "s59E13H2" 1.177964 "hypothetical protein"  
"OP8\_M21\_00058" 28202 "s59E25H2" 0 "hypothetical protein"  
"OP8\_M21\_00058" 28202 "s59E5H2" 5.113631 "hypothetical protein"  
"OP8\_M21\_00058" 28202 "s63E6H2" 0 "hypothetical protein"  
"OP8\_M21\_00059" 28203 "s59E13H2" 1.086617 "Adenylate cyclase 1"  
"OP8\_M21\_00059" 28203 "s59E25H2" 0 "Adenylate cyclase 1"  
"OP8\_M21\_00059" 28203 "s59E5H2" 4.27279 "Adenylate cyclase 1"  
"OP8\_M21\_00059" 28203 "s63E6H2" 0 "Adenylate cyclase 1"  
"OP8\_M21\_00060" 28204 "s59E13H2" 0.7637791 "hypothetical protein"  
"OP8\_M21\_00060" 28204 "s59E25H2" 0 "hypothetical protein"  
"OP8\_M21\_00060" 28204 "s59E5H2" 3.459808 "hypothetical protein"  
"OP8\_M21\_00060" 28204 "s63E6H2" 0 "hypothetical protein"  
"OP8\_M21\_00061" 28205 "s59E13H2" 0.5758684 "Elongation factor G"  
"OP8\_M21\_00061" 28205 "s59E25H2" 0 "Elongation factor G"  
"OP8\_M21\_00061" 28205 "s59E5H2" 2.675051 "Elongation factor G"  
"OP8\_M21\_00061" 28205 "s63E6H2" 0 "Elongation factor G"  
"OP8\_M21\_00062" 28206 "s59E13H2" 0.4608116 "Multifunctional CCA protein"  
"OP8\_M21\_00062" 28206 "s59E25H2" 0 "Multifunctional CCA protein"  
"OP8\_M21\_00062" 28206 "s59E5H2" 2.08488 "Multifunctional CCA protein"  
"OP8\_M21\_00062" 28206 "s63E6H2" 0 "Multifunctional CCA protein"  
"OP8\_M21\_00063" 28207 "s59E13H2" 0.5309224 "UDP-glucose 4-epimerase"  
"OP8\_M21\_00063" 28207 "s59E25H2" 0 "UDP-glucose 4-epimerase"  
"OP8\_M21\_00063" 28207 "s59E5H2" 2.38048 "UDP-glucose 4-epimerase"  
"OP8\_M21\_00063" 28207 "s63E6H2" 0 "UDP-glucose 4-epimerase"  
"OP8\_M21\_00064" 28208 "s59E13H2" 0.4877964 "Membrane-bound lytic murein transglycosylase D precursor"  
"OP8\_M21\_00064" 28208 "s59E25H2" 0 "Membrane-bound lytic murein transglycosylase D precursor"  
"OP8\_M21\_00064" 28208 "s59E5H2" 1.26752 "Membrane-bound lytic murein transglycosylase D precursor"  
"OP8\_M21\_00064" 28208 "s63E6H2" 0 "Membrane-bound lytic murein transglycosylase D precursor"  
"OP8\_M21\_00065" 28209 "s59E13H2" 0.1905142 "50S ribosomal protein L17"  
"OP8\_M21\_00065" 28209 "s59E25H2" 0 "50S ribosomal protein L17"  
"OP8\_M21\_00065" 28209 "s59E5H2" 0.911498 "50S ribosomal protein L17"  
"OP8\_M21\_00065" 28209 "s63E6H2" 0 "50S ribosomal protein L17"  
"OP8\_M21\_00066" 28210 "s59E13H2" 0.03108048 "DNA-directed RNA polymerase subunit alpha"  
"OP8\_M21\_00066" 28210 "s59E25H2" 0 "DNA-directed RNA polymerase subunit alpha"  
"OP8\_M21\_00066" 28210 "s59E5H2" 0.8294767 "DNA-directed RNA polymerase subunit alpha"  
"OP8\_M21\_00066" 28210 "s63E6H2" 0 "DNA-directed RNA polymerase subunit alpha"  
"OP8\_M21\_00067" 28211 "s59E13H2" 0.0291203 "30S ribosomal protein S4"  
"OP8\_M21\_00067" 28211 "s59E25H2" 0 "30S ribosomal protein S4"  
"OP8\_M21\_00067" 28211 "s59E5H2" 0.7486614 "30S ribosomal protein S4"  
"OP8\_M21\_00067" 28211 "s63E6H2" 0 "30S ribosomal protein S4"  
"OP8\_M21\_00068" 28212 "s59E13H2" 0.0356275 "30S ribosomal protein S11"  
"OP8\_M21\_00068" 28212 "s59E25H2" 0 "30S ribosomal protein S11"  
"OP8\_M21\_00068" 28212 "s59E5H2" 0.4724503 "30S ribosomal protein S11"  
"OP8\_M21\_00068" 28212 "s63E6H2" 0 "30S ribosomal protein S11"  
"OP8\_M21\_00069" 28213 "s59E13H2" 0.02304777 "30S ribosomal protein S13"  
"OP8\_M21\_00069" 28213 "s59E25H2" 0 "30S ribosomal protein S13"

"OP8\_M21\_00069" 28213 "s59E5H2" 0.3833113 "30S ribosomal protein S13"  
"OP8\_M21\_00069" 28213 "s63E6H2" 0 "30S ribosomal protein S13"  
"OP8\_M21\_00070" 28214 "s59E13H2" 0.007559046 "Translation initiation factor IF-1"  
"OP8\_M21\_00070" 28214 "s59E25H2" 0 "Translation initiation factor IF-1"  
"OP8\_M21\_00070" 28214 "s59E5H2" 0.3503659 "Translation initiation factor IF-1"  
"OP8\_M21\_00070" 28214 "s63E6H2" 0 "Translation initiation factor IF-1"  
"OP8\_M21\_00071" 28215 "s59E13H2" 0.02349269 "Methionine aminopeptidase 1"  
"OP8\_M21\_00071" 28215 "s59E25H2" 0 "Methionine aminopeptidase 1"  
"OP8\_M21\_00071" 28215 "s59E5H2" 0.3256061 "Methionine aminopeptidase 1"  
"OP8\_M21\_00071" 28215 "s63E6H2" 0 "Methionine aminopeptidase 1"  
"OP8\_M21\_00072" 28216 "s59E13H2" 0.02925075 "Adenylate kinase"  
"OP8\_M21\_00072" 28216 "s59E25H2" 0 "Adenylate kinase"  
"OP8\_M21\_00072" 28216 "s59E5H2" 0.22846 "Adenylate kinase"  
"OP8\_M21\_00072" 28216 "s63E6H2" 0 "Adenylate kinase"  
"OP8\_M21\_00073" 28217 "s59E13H2" 0.0154552 "preprotein translocase subunit SecY"  
"OP8\_M21\_00073" 28217 "s59E25H2" 0 "preprotein translocase subunit SecY"  
"OP8\_M21\_00073" 28217 "s59E5H2" 0.3280092 "preprotein translocase subunit SecY"  
"OP8\_M21\_00073" 28217 "s63E6H2" 0 "preprotein translocase subunit SecY"  
"OP8\_M21\_00074" 28218 "s59E13H2" 0.01903636 "50S ribosomal protein L15"  
"OP8\_M21\_00074" 28218 "s59E25H2" 0 "50S ribosomal protein L15"  
"OP8\_M21\_00074" 28218 "s59E5H2" 0.2856678 "50S ribosomal protein L15"  
"OP8\_M21\_00074" 28218 "s63E6H2" 0 "50S ribosomal protein L15"  
"OP8\_M21\_00076" 28220 "s59E13H2" 0.00106212 "N-6 DNA Methylase"  
"OP8\_M21\_00076" 28220 "s59E25H2" 0 "N-6 DNA Methylase"  
"OP8\_M21\_00076" 28220 "s59E5H2" 0.01572367 "N-6 DNA Methylase"  
"OP8\_M21\_00076" 28220 "s63E6H2" 0 "N-6 DNA Methylase"  
"OP8\_M21\_00077" 28221 "s59E13H2" 0 "putative ATP-dependent RNA helicase"  
"OP8\_M21\_00077" 28221 "s59E25H2" 0 "putative ATP-dependent RNA helicase"  
"OP8\_M21\_00077" 28221 "s59E5H2" 0.04851097 "putative ATP-dependent RNA helicase"  
"OP8\_M21\_00077" 28221 "s63E6H2" 0 "putative ATP-dependent RNA helicase"  
"OP8\_M21\_00078" 28222 "s59E13H2" 0 "hypothetical protein"  
"OP8\_M21\_00078" 28222 "s59E25H2" 0 "hypothetical protein"  
"OP8\_M21\_00078" 28222 "s59E5H2" 0.4867538 "hypothetical protein"  
"OP8\_M21\_00078" 28222 "s63E6H2" 0 "hypothetical protein"  
"OP8\_M21\_00079" 28223 "s59E13H2" 0 "putative glycosyl transferase"  
"OP8\_M21\_00079" 28223 "s59E25H2" 0 "putative glycosyl transferase"  
"OP8\_M21\_00079" 28223 "s59E5H2" 0.9555736 "putative glycosyl transferase"  
"OP8\_M21\_00079" 28223 "s63E6H2" 0 "putative glycosyl transferase"  
"OP8\_M21\_00080" 28224 "s59E13H2" 0 "putative oxidoreductase YdgJ"  
"OP8\_M21\_00080" 28224 "s59E25H2" 0 "putative oxidoreductase YdgJ"  
"OP8\_M21\_00080" 28224 "s59E5H2" 0.2142691 "putative oxidoreductase YdgJ"  
"OP8\_M21\_00080" 28224 "s63E6H2" 0 "putative oxidoreductase YdgJ"  
"OP8\_M21\_00081" 28225 "s59E13H2" 0 "Maltose O-acetyltransferase"  
"OP8\_M21\_00081" 28225 "s59E25H2" 0 "Maltose O-acetyltransferase"  
"OP8\_M21\_00081" 28225 "s59E5H2" 0.0655051 "Maltose O-acetyltransferase"  
"OP8\_M21\_00081" 28225 "s63E6H2" 0 "Maltose O-acetyltransferase"  
"OP8\_M21\_00082" 28226 "s59E13H2" 0 "dTDP-3-amino-3,6-dideoxy-alpha-D-galactopyranose transaminase"

"OP8\_M21\_00082" 28226 "s59E25H2" 0 "dTDP-3-amino-3,6-dideoxy-alpha-D-galactopyranose transaminase"  
"OP8\_M21\_00082" 28226 "s59E5H2" 0.1498704 "dTDP-3-amino-3,6-dideoxy-alpha-D-galactopyranose transaminase"  
"OP8\_M21\_00082" 28226 "s63E6H2" 0 "dTDP-3-amino-3,6-dideoxy-alpha-D-galactopyranose transaminase"  
"OP8\_M21\_00083" 28227 "s59E13H2" 0 "hypothetical protein"  
"OP8\_M21\_00083" 28227 "s59E25H2" 0 "hypothetical protein"  
"OP8\_M21\_00083" 28227 "s59E5H2" 0.3799803 "hypothetical protein"  
"OP8\_M21\_00083" 28227 "s63E6H2" 0 "hypothetical protein"  
"OP8\_M21\_00084" 28228 "s59E13H2" 0 "hypothetical protein"  
"OP8\_M21\_00084" 28228 "s59E25H2" 0 "hypothetical protein"  
"OP8\_M21\_00084" 28228 "s59E5H2" 1.434546 "hypothetical protein"  
"OP8\_M21\_00084" 28228 "s63E6H2" 0 "hypothetical protein"  
"OP8\_M21\_00085" 28229 "s59E13H2" 0.04535785 "FemAB family protein"  
"OP8\_M21\_00085" 28229 "s59E25H2" 0 "FemAB family protein"  
"OP8\_M21\_00085" 28229 "s59E5H2" 0.6746723 "FemAB family protein"  
"OP8\_M21\_00085" 28229 "s63E6H2" 0 "FemAB family protein"  
"OP8\_M21\_00086" 28230 "s59E13H2" 0.06085928 "Tyrosine-protein phosphatase YwqE"  
"OP8\_M21\_00086" 28230 "s59E25H2" 0 "Tyrosine-protein phosphatase YwqE"  
"OP8\_M21\_00086" 28230 "s59E5H2" 1.095728 "Tyrosine-protein phosphatase YwqE"  
"OP8\_M21\_00086" 28230 "s63E6H2" 0 "Tyrosine-protein phosphatase YwqE"  
"OP8\_M21\_00087" 28231 "s59E13H2" 0.04692343 "Polysialic acid transport protein KpsD precursor"  
"OP8\_M21\_00087" 28231 "s59E25H2" 0 "Polysialic acid transport protein KpsD precursor"  
"OP8\_M21\_00087" 28231 "s59E5H2" 1.03357 "Polysialic acid transport protein KpsD precursor"  
"OP8\_M21\_00087" 28231 "s63E6H2" 0 "Polysialic acid transport protein KpsD precursor"  
"OP8\_M21\_00088" 28232 "s59E13H2" 0.02961789 "hypothetical protein"  
"OP8\_M21\_00088" 28232 "s59E25H2" 0 "hypothetical protein"  
"OP8\_M21\_00088" 28232 "s59E5H2" 1.036946 "hypothetical protein"  
"OP8\_M21\_00088" 28232 "s63E6H2" 0 "hypothetical protein"  
"OP8\_M21\_00089" 28233 "s59E13H2" 0.0364327 "O-Antigen ligase"  
"OP8\_M21\_00089" 28233 "s59E25H2" 0 "O-Antigen ligase"  
"OP8\_M21\_00089" 28233 "s59E5H2" 0.9178913 "O-Antigen ligase"  
"OP8\_M21\_00089" 28233 "s63E6H2" 0 "O-Antigen ligase"  
"OP8\_M21\_00090" 28234 "s59E13H2" 0.03127285 "Tyrosine-protein kinase YwqD"  
"OP8\_M21\_00090" 28234 "s59E25H2" 0 "Tyrosine-protein kinase YwqD"  
"OP8\_M21\_00090" 28234 "s59E5H2" 1.59409 "Tyrosine-protein kinase YwqD"  
"OP8\_M21\_00090" 28234 "s63E6H2" 0 "Tyrosine-protein kinase YwqD"  
"OP8\_M21\_00091" 28235 "s59E13H2" 0.01479644 "UDP-glucose:undecaprenyl-phosphate glucose-1-phosphate transferase"  
"OP8\_M21\_00091" 28235 "s59E25H2" 0 "UDP-glucose:undecaprenyl-phosphate glucose-1-phosphate transferase"  
"OP8\_M21\_00091" 28235 "s59E5H2" 0.5858494 "UDP-glucose:undecaprenyl-phosphate glucose-1-phosphate transferase"  
"OP8\_M21\_00091" 28235 "s63E6H2" 0 "UDP-glucose:undecaprenyl-phosphate glucose-1-phosphate transferase"  
"OP8\_M21\_00092" 28236 "s59E13H2" 0.02103989 "dTDP-3-amino-3,6-dideoxy-alpha-D-galactopyranose transaminase"  
"OP8\_M21\_00092" 28236 "s59E25H2" 0 "dTDP-3-amino-3,6-dideoxy-alpha-D-galactopyranose transaminase"  
"OP8\_M21\_00092" 28236 "s59E5H2" 0.2899667 "dTDP-3-amino-3,6-dideoxy-alpha-D-galactopyranose transaminase"  
"OP8\_M21\_00092" 28236 "s63E6H2" 0 "dTDP-3-amino-3,6-dideoxy-alpha-D-galactopyranose transaminase"  
"OP8\_M21\_00093" 28237 "s59E13H2" 0.001073394 "dTDP-3-amino-3,6-dideoxy-alpha-D-galactopyranose 3-N-acetyltransferase"  
"OP8\_M21\_00093" 28237 "s59E25H2" 0 "dTDP-3-amino-3,6-dideoxy-alpha-D-galactopyranose 3-N-acetyltransferase"  
"OP8\_M21\_00093" 28237 "s59E5H2" 0.4759778 "dTDP-3-amino-3,6-dideoxy-alpha-D-galactopyranose 3-N-acetyltransferase"  
"OP8\_M21\_00093" 28237 "s63E6H2" 0 "dTDP-3-amino-3,6-dideoxy-alpha-D-galactopyranose 3-N-acetyltransferase"

"OP8\_M21\_00094" 28238 "s59E13H2" 0 "putative oxidoreductase YdgJ"  
"OP8\_M21\_00094" 28238 "s59E25H2" 0 "putative oxidoreductase YdgJ"  
"OP8\_M21\_00094" 28238 "s59E5H2" 0.3557735 "putative oxidoreductase YdgJ"  
"OP8\_M21\_00094" 28238 "s63E6H2" 0 "putative oxidoreductase YdgJ"  
"OP8\_M21\_00096" 28240 "s59E13H2" 0 "hypothetical protein"  
"OP8\_M21\_00096" 28240 "s59E25H2" 0 "hypothetical protein"  
"OP8\_M21\_00096" 28240 "s59E5H2" 0.3002792 "hypothetical protein"  
"OP8\_M21\_00096" 28240 "s63E6H2" 0 "hypothetical protein"  
"OP8\_M21\_00097" 28241 "s59E13H2" 0 "Riboflavin biosynthesis protein RibD"  
"OP8\_M21\_00097" 28241 "s59E25H2" 0 "Riboflavin biosynthesis protein RibD"  
"OP8\_M21\_00097" 28241 "s59E5H2" 0.2632063 "Riboflavin biosynthesis protein RibD"  
"OP8\_M21\_00097" 28241 "s63E6H2" 0 "Riboflavin biosynthesis protein RibD"  
"OP8\_M21\_00098" 28242 "s59E13H2" 0.007340183 "putative S-adenosyl-L-methionine-dependent methyltransferase TehB"  
"OP8\_M21\_00098" 28242 "s59E25H2" 0 "putative S-adenosyl-L-methionine-dependent methyltransferase TehB"  
"OP8\_M21\_00098" 28242 "s59E5H2" 0.7974482 "putative S-adenosyl-L-methionine-dependent methyltransferase TehB"  
"OP8\_M21\_00098" 28242 "s63E6H2" 0 "putative S-adenosyl-L-methionine-dependent methyltransferase TehB"  
"OP8\_M21\_00100" 28244 "s59E13H2" 0 "Helix-turn-helix domain protein"  
"OP8\_M21\_00100" 28244 "s59E25H2" 0 "Helix-turn-helix domain protein"  
"OP8\_M21\_00100" 28244 "s59E5H2" 0.35533 "Helix-turn-helix domain protein"  
"OP8\_M21\_00100" 28244 "s63E6H2" 0 "Helix-turn-helix domain protein"  
"OP8\_M21\_00101" 28245 "s59E13H2" 0.007546372 "hypothetical protein"  
"OP8\_M21\_00101" 28245 "s59E25H2" 0 "hypothetical protein"  
"OP8\_M21\_00101" 28245 "s59E5H2" 3.322834 "hypothetical protein"  
"OP8\_M21\_00101" 28245 "s63E6H2" 0 "hypothetical protein"  
"OP8\_M21\_00102" 28246 "s59E13H2" 0.0004549016 "hypothetical protein"  
"OP8\_M21\_00102" 28246 "s59E25H2" 0 "hypothetical protein"  
"OP8\_M21\_00102" 28246 "s59E5H2" 2.813249 "hypothetical protein"  
"OP8\_M21\_00102" 28246 "s63E6H2" 0 "hypothetical protein"  
"OP8\_M21\_00103" 28247 "s59E13H2" 0.003514598 "hypothetical protein"  
"OP8\_M21\_00103" 28247 "s59E25H2" 0 "hypothetical protein"  
"OP8\_M21\_00103" 28247 "s59E5H2" 0.8729032 "hypothetical protein"  
"OP8\_M21\_00103" 28247 "s63E6H2" 0 "hypothetical protein"  
"OP8\_M21\_00104" 28248 "s59E13H2" 0.01391119 "hypothetical protein"  
"OP8\_M21\_00104" 28248 "s59E25H2" 0 "hypothetical protein"  
"OP8\_M21\_00104" 28248 "s59E5H2" 0.7432834 "hypothetical protein"  
"OP8\_M21\_00104" 28248 "s63E6H2" 0 "hypothetical protein"  
"OP8\_M21\_00105" 28249 "s59E13H2" 0.007838842 "hypothetical protein"  
"OP8\_M21\_00105" 28249 "s59E25H2" 0 "hypothetical protein"  
"OP8\_M21\_00105" 28249 "s59E5H2" 0.7155035 "hypothetical protein"  
"OP8\_M21\_00105" 28249 "s63E6H2" 0 "hypothetical protein"  
"OP8\_M21\_00106" 28250 "s59E13H2" 0.005379422 "Adenylosuccinate lyase"  
"OP8\_M21\_00106" 28250 "s59E25H2" 0 "Adenylosuccinate lyase"  
"OP8\_M21\_00106" 28250 "s59E5H2" 2.434443 "Adenylosuccinate lyase"  
"OP8\_M21\_00106" 28250 "s63E6H2" 0 "Adenylosuccinate lyase"  
"OP8\_M21\_00107" 28251 "s59E13H2" 0 "Phosphoribosylglycinamide formyltransferase"  
"OP8\_M21\_00107" 28251 "s59E25H2" 0 "Phosphoribosylglycinamide formyltransferase"  
"OP8\_M21\_00107" 28251 "s59E5H2" 3.894977 "Phosphoribosylglycinamide formyltransferase"



"OP8\_M21\_00107" 28251 "s63E6H2" 0.001750531 "Phosphoribosylglycinamide formyltransferase"  
"OP8\_M21\_00108" 28252 "s59E13H2" 0.3689656 "Thymidylate synthase ThyX"  
"OP8\_M21\_00108" 28252 "s59E25H2" 0.1592443 "Thymidylate synthase ThyX"  
"OP8\_M21\_00108" 28252 "s59E5H2" 3.524302 "Thymidylate synthase ThyX"  
"OP8\_M21\_00108" 28252 "s63E6H2" 0 "Thymidylate synthase ThyX"  
"OP8\_M21\_00109" 28253 "s59E13H2" 0.2750387 "tRNA-splicing ligase RtcB"  
"OP8\_M21\_00109" 28253 "s59E25H2" 0 "tRNA-splicing ligase RtcB"  
"OP8\_M21\_00109" 28253 "s59E5H2" 1.725287 "tRNA-splicing ligase RtcB"  
"OP8\_M21\_00109" 28253 "s63E6H2" 0 "tRNA-splicing ligase RtcB"  
"OP8\_M21\_00110" 28254 "s59E13H2" 0.01491279 "50S ribosomal protein L18"  
"OP8\_M21\_00110" 28254 "s59E25H2" 0 "50S ribosomal protein L18"  
"OP8\_M21\_00110" 28254 "s59E5H2" 0.2604685 "50S ribosomal protein L18"  
"OP8\_M21\_00110" 28254 "s63E6H2" 0 "50S ribosomal protein L18"  
"OP8\_M21\_00111" 28255 "s59E13H2" 0.01680298 "50S ribosomal protein L6"  
"OP8\_M21\_00111" 28255 "s59E25H2" 0 "50S ribosomal protein L6"  
"OP8\_M21\_00111" 28255 "s59E5H2" 0.2163643 "50S ribosomal protein L6"  
"OP8\_M21\_00111" 28255 "s63E6H2" 0 "50S ribosomal protein L6"  
"OP8\_M21\_00112" 28256 "s59E13H2" 0.01187158 "30S ribosomal protein S8"  
"OP8\_M21\_00112" 28256 "s59E25H2" 0 "30S ribosomal protein S8"  
"OP8\_M21\_00112" 28256 "s59E5H2" 0.1163263 "30S ribosomal protein S8"  
"OP8\_M21\_00112" 28256 "s63E6H2" 0 "30S ribosomal protein S8"  
"OP8\_M21\_00113" 28257 "s59E13H2" 0.01286411 "30S ribosomal protein S14"  
"OP8\_M21\_00113" 28257 "s59E25H2" 0 "30S ribosomal protein S14"  
"OP8\_M21\_00113" 28257 "s59E5H2" 0.1469515 "30S ribosomal protein S14"  
"OP8\_M21\_00113" 28257 "s63E6H2" 0 "30S ribosomal protein S14"  
"OP8\_M21\_00114" 28258 "s59E13H2" 0.133634 "50S ribosomal protein L5"  
"OP8\_M21\_00114" 28258 "s59E25H2" 0 "50S ribosomal protein L5"  
"OP8\_M21\_00114" 28258 "s59E5H2" 0.09830961 "50S ribosomal protein L5"  
"OP8\_M21\_00114" 28258 "s63E6H2" 0 "50S ribosomal protein L5"  
"OP8\_M21\_00115" 28259 "s59E13H2" 0.114395 "50S ribosomal protein L24"  
"OP8\_M21\_00115" 28259 "s59E25H2" 0 "50S ribosomal protein L24"  
"OP8\_M21\_00115" 28259 "s59E5H2" 0.06261596 "50S ribosomal protein L24"  
"OP8\_M21\_00115" 28259 "s63E6H2" 0 "50S ribosomal protein L24"  
"OP8\_M21\_00116" 28260 "s59E13H2" 0.09801919 "50S ribosomal protein L14"  
"OP8\_M21\_00116" 28260 "s59E25H2" 0 "50S ribosomal protein L14"  
"OP8\_M21\_00116" 28260 "s59E5H2" 0.1473994 "50S ribosomal protein L14"  
"OP8\_M21\_00116" 28260 "s63E6H2" 0 "50S ribosomal protein L14"  
"OP8\_M21\_00117" 28261 "s59E13H2" 0.1087602 "30S ribosomal protein S17"  
"OP8\_M21\_00117" 28261 "s59E25H2" 0 "30S ribosomal protein S17"  
"OP8\_M21\_00117" 28261 "s59E5H2" 0.1003817 "30S ribosomal protein S17"  
"OP8\_M21\_00117" 28261 "s63E6H2" 0 "30S ribosomal protein S17"  
"OP8\_M21\_00118" 28262 "s59E13H2" 0.08097293 "50S ribosomal protein L29"  
"OP8\_M21\_00118" 28262 "s59E25H2" 0 "50S ribosomal protein L29"  
"OP8\_M21\_00118" 28262 "s59E5H2" 0.02710143 "50S ribosomal protein L29"  
"OP8\_M21\_00118" 28262 "s63E6H2" 0 "50S ribosomal protein L29"  
"OP8\_M21\_00119" 28263 "s59E13H2" 0.0865256 "50S ribosomal protein L16"  
"OP8\_M21\_00119" 28263 "s59E25H2" 0 "50S ribosomal protein L16"

"OP8\_M21\_00119" 28263 "s59E5H2" 0.0833582 "50S ribosomal protein L16"  
"OP8\_M21\_00119" 28263 "s63E6H2" 0 "50S ribosomal protein L16"  
"OP8\_M21\_00120" 28264 "s59E13H2" 0.08591041 "30S ribosomal protein S3"  
"OP8\_M21\_00120" 28264 "s59E25H2" 0 "30S ribosomal protein S3"  
"OP8\_M21\_00120" 28264 "s59E5H2" 0.06741561 "30S ribosomal protein S3"  
"OP8\_M21\_00120" 28264 "s63E6H2" 0 "30S ribosomal protein S3"  
"OP8\_M21\_00121" 28265 "s59E13H2" 0.07769011 "50S ribosomal protein L22"  
"OP8\_M21\_00121" 28265 "s59E25H2" 0 "50S ribosomal protein L22"  
"OP8\_M21\_00121" 28265 "s59E5H2" 0.08434604 "50S ribosomal protein L22"  
"OP8\_M21\_00121" 28265 "s63E6H2" 0 "50S ribosomal protein L22"  
"OP8\_M21\_00122" 28266 "s59E13H2" 0.05495157 "30S ribosomal protein S19"  
"OP8\_M21\_00122" 28266 "s59E25H2" 0 "30S ribosomal protein S19"  
"OP8\_M21\_00122" 28266 "s59E5H2" 0.1129807 "30S ribosomal protein S19"  
"OP8\_M21\_00122" 28266 "s63E6H2" 0 "30S ribosomal protein S19"  
"OP8\_M21\_00123" 28267 "s59E13H2" 0.07119402 "50S ribosomal protein L2"  
"OP8\_M21\_00123" 28267 "s59E25H2" 0 "50S ribosomal protein L2"  
"OP8\_M21\_00123" 28267 "s59E5H2" 0.0895757 "50S ribosomal protein L2"  
"OP8\_M21\_00123" 28267 "s63E6H2" 0 "50S ribosomal protein L2"  
"OP8\_M21\_00124" 28268 "s59E13H2" 0.03960238 "50S ribosomal protein L23"  
"OP8\_M21\_00124" 28268 "s59E25H2" 0 "50S ribosomal protein L23"  
"OP8\_M21\_00124" 28268 "s59E5H2" 0.1306764 "50S ribosomal protein L23"  
"OP8\_M21\_00124" 28268 "s63E6H2" 0 "50S ribosomal protein L23"  
"OP8\_M21\_00125" 28269 "s59E13H2" 0.03254904 "50S ribosomal protein L4"  
"OP8\_M21\_00125" 28269 "s59E25H2" 0 "50S ribosomal protein L4"  
"OP8\_M21\_00125" 28269 "s59E5H2" 0.07907462 "50S ribosomal protein L4"  
"OP8\_M21\_00125" 28269 "s63E6H2" 0 "50S ribosomal protein L4"  
"OP8\_M21\_00126" 28270 "s59E13H2" 0.03680274 "50S ribosomal protein L3"  
"OP8\_M21\_00126" 28270 "s59E25H2" 0 "50S ribosomal protein L3"  
"OP8\_M21\_00126" 28270 "s59E5H2" 0.1698686 "50S ribosomal protein L3"  
"OP8\_M21\_00126" 28270 "s63E6H2" 0 "50S ribosomal protein L3"  
"OP8\_M21\_00127" 28271 "s59E13H2" 0.05737822 "30S ribosomal protein S10"  
"OP8\_M21\_00127" 28271 "s59E25H2" 0 "30S ribosomal protein S10"  
"OP8\_M21\_00127" 28271 "s59E5H2" 0.09777543 "30S ribosomal protein S10"  
"OP8\_M21\_00127" 28271 "s63E6H2" 0 "30S ribosomal protein S10"  
"OP8\_M21\_00128" 28272 "s59E13H2" 0.005564474 "hypothetical protein"  
"OP8\_M21\_00128" 28272 "s59E25H2" 0 "hypothetical protein"  
"OP8\_M21\_00128" 28272 "s59E5H2" 0.1820037 "hypothetical protein"  
"OP8\_M21\_00128" 28272 "s63E6H2" 0 "hypothetical protein"  
"OP8\_M21\_00129" 28273 "s59E13H2" 0.004363054 "putative PIN and TRAM-domain containing protein precursor"  
"OP8\_M21\_00129" 28273 "s59E25H2" 0 "putative PIN and TRAM-domain containing protein precursor"  
"OP8\_M21\_00129" 28273 "s59E5H2" 0.1884491 "putative PIN and TRAM-domain containing protein precursor"  
"OP8\_M21\_00129" 28273 "s63E6H2" 0 "putative PIN and TRAM-domain containing protein precursor"  
"OP8\_M21\_00130" 28274 "s59E13H2" 0.007394234 "2-C-methyl-D-erythritol 4-phosphate cytidyltransferase"  
"OP8\_M21\_00130" 28274 "s59E25H2" 0 "2-C-methyl-D-erythritol 4-phosphate cytidyltransferase"  
"OP8\_M21\_00130" 28274 "s59E5H2" 0.2428839 "2-C-methyl-D-erythritol 4-phosphate cytidyltransferase"  
"OP8\_M21\_00130" 28274 "s63E6H2" 0 "2-C-methyl-D-erythritol 4-phosphate cytidyltransferase"  
"OP8\_M21\_00131" 28275 "s59E13H2" 0.02191012 "2-C-methyl-D-erythritol 2,4-cyclodiphosphate synthase"

"OP8\_M21\_00131" 28275 "s59E25H2" 0 "2-C-methyl-D-erythritol 2,4-cyclodiphosphate synthase"  
"OP8\_M21\_00131" 28275 "s59E5H2" 0.5186403 "2-C-methyl-D-erythritol 2,4-cyclodiphosphate synthase"  
"OP8\_M21\_00131" 28275 "s63E6H2" 0 "2-C-methyl-D-erythritol 2,4-cyclodiphosphate synthase"  
"OP8\_M21\_00132" 28276 "s59E13H2" 1.773975 "hypothetical protein"  
"OP8\_M21\_00132" 28276 "s59E25H2" 0 "hypothetical protein"  
"OP8\_M21\_00132" 28276 "s59E5H2" 0.7630845 "hypothetical protein"  
"OP8\_M21\_00132" 28276 "s63E6H2" 0 "hypothetical protein"  
"OP8\_M21\_00133" 28277 "s59E13H2" 0.9806524 "Peptidase M16 inactive domain protein"  
"OP8\_M21\_00133" 28277 "s59E25H2" 0 "Peptidase M16 inactive domain protein"  
"OP8\_M21\_00133" 28277 "s59E5H2" 0.7396474 "Peptidase M16 inactive domain protein"  
"OP8\_M21\_00133" 28277 "s63E6H2" 0 "Peptidase M16 inactive domain protein"  
"OP8\_M21\_00134" 28278 "s59E13H2" 0.006855602 "Phosphoserine aminotransferase"  
"OP8\_M21\_00134" 28278 "s59E25H2" 0 "Phosphoserine aminotransferase"  
"OP8\_M21\_00134" 28278 "s59E5H2" 1.517698 "Phosphoserine aminotransferase"  
"OP8\_M21\_00134" 28278 "s63E6H2" 0 "Phosphoserine aminotransferase"  
"OP8\_M21\_00135" 28279 "s59E13H2" 0.5538035 "Phosphoglycolate phosphatase"  
"OP8\_M21\_00135" 28279 "s59E25H2" 0 "Phosphoglycolate phosphatase"  
"OP8\_M21\_00135" 28279 "s59E5H2" 1.616907 "Phosphoglycolate phosphatase"  
"OP8\_M21\_00135" 28279 "s63E6H2" 0 "Phosphoglycolate phosphatase"  
"OP8\_M21\_00136" 28280 "s59E13H2" 0.8478825 "Glutamate--tRNA ligase 1"  
"OP8\_M21\_00136" 28280 "s59E25H2" 0 "Glutamate--tRNA ligase 1"  
"OP8\_M21\_00136" 28280 "s59E5H2" 2.485288 "Glutamate--tRNA ligase 1"  
"OP8\_M21\_00136" 28280 "s63E6H2" 0 "Glutamate--tRNA ligase 1"  
"OP8\_M21\_00137" 28281 "s59E13H2" 1.08359 "Glutamine--tRNA ligase"  
"OP8\_M21\_00137" 28281 "s59E25H2" 0 "Glutamine--tRNA ligase"  
"OP8\_M21\_00137" 28281 "s59E5H2" 0.971032 "Glutamine--tRNA ligase"  
"OP8\_M21\_00137" 28281 "s63E6H2" 0 "Glutamine--tRNA ligase"  
"OP8\_M21\_00139" 28283 "s59E13H2" 0 "hypothetical protein"  
"OP8\_M21\_00139" 28283 "s59E25H2" 0 "hypothetical protein"  
"OP8\_M21\_00139" 28283 "s59E5H2" 0.04554725 "hypothetical protein"  
"OP8\_M21\_00139" 28283 "s63E6H2" 0 "hypothetical protein"  
"OP8\_M21\_00140" 28284 "s59E13H2" 0 "hypothetical protein"  
"OP8\_M21\_00140" 28284 "s59E25H2" 0 "hypothetical protein"  
"OP8\_M21\_00140" 28284 "s59E5H2" 0 "hypothetical protein"  
"OP8\_M21\_00140" 28284 "s63E6H2" 0 "hypothetical protein"  
"OP8\_M21\_00141" 28285 "s59E13H2" 0 "hypothetical protein"  
"OP8\_M21\_00141" 28285 "s59E25H2" 0 "hypothetical protein"  
"OP8\_M21\_00141" 28285 "s59E5H2" 0.01549121 "hypothetical protein"  
"OP8\_M21\_00141" 28285 "s63E6H2" 0 "hypothetical protein"  
"OP8\_M21\_00142" 28286 "s59E13H2" 0 "hypothetical protein"  
"OP8\_M21\_00142" 28286 "s59E25H2" 0 "hypothetical protein"  
"OP8\_M21\_00142" 28286 "s59E5H2" 0 "hypothetical protein"  
"OP8\_M21\_00142" 28286 "s63E6H2" 0 "hypothetical protein"  
"OP8\_M21\_00145" 28289 "s59E13H2" 0 "hypothetical protein"  
"OP8\_M21\_00145" 28289 "s59E25H2" 0 "hypothetical protein"  
"OP8\_M21\_00145" 28289 "s59E5H2" 0 "hypothetical protein"  
"OP8\_M21\_00145" 28289 "s63E6H2" 0 "hypothetical protein"

"OP8\_M21\_00146" 28290 "s59E13H2" 0 "hypothetical protein"  
"OP8\_M21\_00146" 28290 "s59E25H2" 0 "hypothetical protein"  
"OP8\_M21\_00146" 28290 "s59E5H2" 0 "hypothetical protein"  
"OP8\_M21\_00146" 28290 "s63E6H2" 0 "hypothetical protein"  
"OP8\_M21\_00147" 28291 "s59E13H2" 0 "Co-chaperone protein HscB"  
"OP8\_M21\_00147" 28291 "s59E25H2" 0 "Co-chaperone protein HscB"  
"OP8\_M21\_00147" 28291 "s59E5H2" 0.009288461 "Co-chaperone protein HscB"  
"OP8\_M21\_00147" 28291 "s63E6H2" 0 "Co-chaperone protein HscB"  
"OP8\_M21\_00148" 28292 "s59E13H2" 0 "Tetratricopeptide repeat protein"  
"OP8\_M21\_00148" 28292 "s59E25H2" 0 "Tetratricopeptide repeat protein"  
"OP8\_M21\_00148" 28292 "s59E5H2" 0.01585854 "Tetratricopeptide repeat protein"  
"OP8\_M21\_00148" 28292 "s63E6H2" 0 "Tetratricopeptide repeat protein"  
"OP8\_M21\_00149" 28293 "s59E13H2" 0 "hypothetical protein"  
"OP8\_M21\_00149" 28293 "s59E25H2" 0 "hypothetical protein"  
"OP8\_M21\_00149" 28293 "s59E5H2" 0.1535575 "hypothetical protein"  
"OP8\_M21\_00149" 28293 "s63E6H2" 0 "hypothetical protein"  
"OP8\_M21\_00151" 28295 "s59E13H2" 0.7220056 "Putative TrmH family tRNA/rRNA methyltransferase"  
"OP8\_M21\_00151" 28295 "s59E25H2" 0 "Putative TrmH family tRNA/rRNA methyltransferase"  
"OP8\_M21\_00151" 28295 "s59E5H2" 0.5843473 "Putative TrmH family tRNA/rRNA methyltransferase"  
"OP8\_M21\_00151" 28295 "s63E6H2" 0 "Putative TrmH family tRNA/rRNA methyltransferase"  
"OP8\_M21\_00152" 28296 "s59E13H2" 0.883486 "Diacylglycerol kinase"  
"OP8\_M21\_00152" 28296 "s59E25H2" 0 "Diacylglycerol kinase"  
"OP8\_M21\_00152" 28296 "s59E5H2" 1.189186 "Diacylglycerol kinase"  
"OP8\_M21\_00152" 28296 "s63E6H2" 0 "Diacylglycerol kinase"  
"OP8\_M21\_00153" 28297 "s59E13H2" 0.866592 "1-acyl-sn-glycerol-3-phosphate acyltransferase"  
"OP8\_M21\_00153" 28297 "s59E25H2" 0 "1-acyl-sn-glycerol-3-phosphate acyltransferase"  
"OP8\_M21\_00153" 28297 "s59E5H2" 1.129949 "1-acyl-sn-glycerol-3-phosphate acyltransferase"  
"OP8\_M21\_00153" 28297 "s63E6H2" 0 "1-acyl-sn-glycerol-3-phosphate acyltransferase"  
"OP8\_M21\_00154" 28298 "s59E13H2" 0.9231463 "ECF RNA polymerase sigma factor SigW"  
"OP8\_M21\_00154" 28298 "s59E25H2" 0 "ECF RNA polymerase sigma factor SigW"  
"OP8\_M21\_00154" 28298 "s59E5H2" 1.089645 "ECF RNA polymerase sigma factor SigW"  
"OP8\_M21\_00154" 28298 "s63E6H2" 0 "ECF RNA polymerase sigma factor SigW"  
"OP8\_M21\_00155" 28299 "s59E13H2" 0.8865969 "hypothetical protein"  
"OP8\_M21\_00155" 28299 "s59E25H2" 0 "hypothetical protein"  
"OP8\_M21\_00155" 28299 "s59E5H2" 0.7111039 "hypothetical protein"  
"OP8\_M21\_00155" 28299 "s63E6H2" 0 "hypothetical protein"  
"OP8\_M21\_00156" 28300 "s59E13H2" 0.9301063 "hypothetical protein"  
"OP8\_M21\_00156" 28300 "s59E25H2" 0 "hypothetical protein"  
"OP8\_M21\_00156" 28300 "s59E5H2" 0.8964316 "hypothetical protein"  
"OP8\_M21\_00156" 28300 "s63E6H2" 0 "hypothetical protein"  
"OP8\_M21\_00157" 28301 "s59E13H2" 1.23515 "hypothetical protein"  
"OP8\_M21\_00157" 28301 "s59E25H2" 0 "hypothetical protein"  
"OP8\_M21\_00157" 28301 "s59E5H2" 1.249277 "hypothetical protein"  
"OP8\_M21\_00157" 28301 "s63E6H2" 0 "hypothetical protein"  
"OP8\_M21\_00158" 28302 "s59E13H2" 0.8288214 "HTH-type transcriptional regulator ZntR"  
"OP8\_M21\_00158" 28302 "s59E25H2" 0 "HTH-type transcriptional regulator ZntR"  
"OP8\_M21\_00158" 28302 "s59E5H2" 0.8739639 "HTH-type transcriptional regulator ZntR"

"OP8\_M21\_00158" 28302 "s63E6H2" 0 "HTH-type transcriptional regulator ZntR"  
"OP8\_M21\_00159" 28303 "s59E13H2" 0.9234253 "Ribosomal protein S12 methylthiotransferase RimO"  
"OP8\_M21\_00159" 28303 "s59E25H2" 0 "Ribosomal protein S12 methylthiotransferase RimO"  
"OP8\_M21\_00159" 28303 "s59E5H2" 0.7991909 "Ribosomal protein S12 methylthiotransferase RimO"  
"OP8\_M21\_00159" 28303 "s63E6H2" 0 "Ribosomal protein S12 methylthiotransferase RimO"  
"OP8\_M21\_00160" 28304 "s59E13H2" 0.9898164 "Acetyl-coenzyme A carboxylase carboxyl transferase subunit alpha"  
"OP8\_M21\_00160" 28304 "s59E25H2" 0 "Acetyl-coenzyme A carboxylase carboxyl transferase subunit alpha"  
"OP8\_M21\_00160" 28304 "s59E5H2" 1.13865 "Acetyl-coenzyme A carboxylase carboxyl transferase subunit alpha"  
"OP8\_M21\_00160" 28304 "s63E6H2" 0 "Acetyl-coenzyme A carboxylase carboxyl transferase subunit alpha"  
"OP8\_M21\_00161" 28305 "s59E13H2" 0.9959084 "Histidine--tRNA ligase"  
"OP8\_M21\_00161" 28305 "s59E25H2" 0 "Histidine--tRNA ligase"  
"OP8\_M21\_00161" 28305 "s59E5H2" 1.144407 "Histidine--tRNA ligase"  
"OP8\_M21\_00161" 28305 "s63E6H2" 0 "Histidine--tRNA ligase"  
"OP8\_M21\_00162" 28306 "s59E13H2" 0.06352538 "Aspartate--tRNA ligase"  
"OP8\_M21\_00162" 28306 "s59E25H2" 0 "Aspartate--tRNA ligase"  
"OP8\_M21\_00162" 28306 "s59E5H2" 1.899773 "Aspartate--tRNA ligase"  
"OP8\_M21\_00162" 28306 "s63E6H2" 0 "Aspartate--tRNA ligase"  
"OP8\_M21\_00163" 28307 "s59E13H2" 0.08812907 "hypothetical protein"  
"OP8\_M21\_00163" 28307 "s59E25H2" 0 "hypothetical protein"  
"OP8\_M21\_00163" 28307 "s59E5H2" 3.952348 "hypothetical protein"  
"OP8\_M21\_00163" 28307 "s63E6H2" 0 "hypothetical protein"  
"OP8\_M21\_00164" 28308 "s59E13H2" 0.0003983117 "Transposase DDE domain protein"  
"OP8\_M21\_00164" 28308 "s59E25H2" 0 "Transposase DDE domain protein"  
"OP8\_M21\_00164" 28308 "s59E5H2" 14.51441 "Transposase DDE domain protein"  
"OP8\_M21\_00164" 28308 "s63E6H2" 0 "Transposase DDE domain protein"  
"OP8\_M21\_00165" 28309 "s59E13H2" 0.08629422 "Free methionine-R-sulfoxide reductase"  
"OP8\_M21\_00165" 28309 "s59E25H2" 0 "Free methionine-R-sulfoxide reductase"  
"OP8\_M21\_00165" 28309 "s59E5H2" 3.044982 "Free methionine-R-sulfoxide reductase"  
"OP8\_M21\_00165" 28309 "s63E6H2" 0 "Free methionine-R-sulfoxide reductase"  
"OP8\_M21\_00166" 28310 "s59E13H2" 0.1192257 "LPS-assembly protein LptD precursor"  
"OP8\_M21\_00166" 28310 "s59E25H2" 0 "LPS-assembly protein LptD precursor"  
"OP8\_M21\_00166" 28310 "s59E5H2" 2.012548 "LPS-assembly protein LptD precursor"  
"OP8\_M21\_00166" 28310 "s63E6H2" 0 "LPS-assembly protein LptD precursor"  
"OP8\_M21\_00167" 28311 "s59E13H2" 0.5411625 "GDP-6-deoxy-D-mannose reductase"  
"OP8\_M21\_00167" 28311 "s59E25H2" 0 "GDP-6-deoxy-D-mannose reductase"  
"OP8\_M21\_00167" 28311 "s59E5H2" 1.171802 "GDP-6-deoxy-D-mannose reductase"  
"OP8\_M21\_00167" 28311 "s63E6H2" 0 "GDP-6-deoxy-D-mannose reductase"  
"OP8\_M21\_00168" 28312 "s59E13H2" 0.1331779 "GDP-6-deoxy-D-mannose reductase"  
"OP8\_M21\_00168" 28312 "s59E25H2" 0 "GDP-6-deoxy-D-mannose reductase"  
"OP8\_M21\_00168" 28312 "s59E5H2" 1.321999 "GDP-6-deoxy-D-mannose reductase"  
"OP8\_M21\_00168" 28312 "s63E6H2" 0 "GDP-6-deoxy-D-mannose reductase"  
"OP8\_M21\_00169" 28313 "s59E13H2" 0.01535938 "Bifunctional protein HldE"  
"OP8\_M21\_00169" 28313 "s59E25H2" 0 "Bifunctional protein HldE"  
"OP8\_M21\_00169" 28313 "s59E5H2" 4.889708 "Bifunctional protein HldE"  
"OP8\_M21\_00169" 28313 "s63E6H2" 0 "Bifunctional protein HldE"  
"OP8\_M21\_00170" 28314 "s59E13H2" 0.2169704 "hypothetical protein"  
"OP8\_M21\_00170" 28314 "s59E25H2" 0 "hypothetical protein"

"OP8\_M21\_00170" 28314 "s59E5H2" 5.667452 "hypothetical protein"  
"OP8\_M21\_00170" 28314 "s63E6H2" 0 "hypothetical protein"  
"OP8\_M21\_00171" 28315 "s59E13H2" 0.05644686 "O-Antigen ligase"  
"OP8\_M21\_00171" 28315 "s59E25H2" 0 "O-Antigen ligase"  
"OP8\_M21\_00171" 28315 "s59E5H2" 7.988945 "O-Antigen ligase"  
"OP8\_M21\_00171" 28315 "s63E6H2" 0 "O-Antigen ligase"  
"OP8\_M21\_00172" 28316 "s59E13H2" 0.2173921 "Lipopolysaccharide core heptosyltransferase RfaQ"  
"OP8\_M21\_00172" 28316 "s59E25H2" 0 "Lipopolysaccharide core heptosyltransferase RfaQ"  
"OP8\_M21\_00172" 28316 "s59E5H2" 10.9065 "Lipopolysaccharide core heptosyltransferase RfaQ"  
"OP8\_M21\_00172" 28316 "s63E6H2" 0 "Lipopolysaccharide core heptosyltransferase RfaQ"  
"OP8\_M21\_00173" 28317 "s59E13H2" 0.2285041 "hypothetical protein"  
"OP8\_M21\_00173" 28317 "s59E25H2" 0 "hypothetical protein"  
"OP8\_M21\_00173" 28317 "s59E5H2" 12.90042 "hypothetical protein"  
"OP8\_M21\_00173" 28317 "s63E6H2" 0 "hypothetical protein"  
"OP8\_M21\_00174" 28318 "s59E13H2" 0.1777042 "CDP-alcohol phosphatidyltransferase"  
"OP8\_M21\_00174" 28318 "s59E25H2" 0 "CDP-alcohol phosphatidyltransferase"  
"OP8\_M21\_00174" 28318 "s59E5H2" 11.48717 "CDP-alcohol phosphatidyltransferase"  
"OP8\_M21\_00174" 28318 "s63E6H2" 0 "CDP-alcohol phosphatidyltransferase"  
"OP8\_M21\_00175" 28319 "s59E13H2" 0.2121006 "Phosphoribosylformylglycinamide cyclo-ligase"  
"OP8\_M21\_00175" 28319 "s59E25H2" 0 "Phosphoribosylformylglycinamide cyclo-ligase"  
"OP8\_M21\_00175" 28319 "s59E5H2" 8.281953 "Phosphoribosylformylglycinamide cyclo-ligase"  
"OP8\_M21\_00175" 28319 "s63E6H2" 0 "Phosphoribosylformylglycinamide cyclo-ligase"  
"OP8\_M21\_00176" 28320 "s59E13H2" 0.1703933 "Putative glycosyltransferase EpsD"  
"OP8\_M21\_00176" 28320 "s59E25H2" 0 "Putative glycosyltransferase EpsD"  
"OP8\_M21\_00176" 28320 "s59E5H2" 7.28299 "Putative glycosyltransferase EpsD"  
"OP8\_M21\_00176" 28320 "s63E6H2" 0 "Putative glycosyltransferase EpsD"  
"OP8\_M21\_00177" 28321 "s59E13H2" 0.1796951 "SPBc2 prophage-derived glycosyltransferase SunS"  
"OP8\_M21\_00177" 28321 "s59E25H2" 0 "SPBc2 prophage-derived glycosyltransferase SunS"  
"OP8\_M21\_00177" 28321 "s59E5H2" 7.081071 "SPBc2 prophage-derived glycosyltransferase SunS"  
"OP8\_M21\_00177" 28321 "s63E6H2" 0 "SPBc2 prophage-derived glycosyltransferase SunS"  
"OP8\_M21\_00178" 28322 "s59E13H2" 0.1634296 "outer membrane channel protein"  
"OP8\_M21\_00178" 28322 "s59E25H2" 0 "outer membrane channel protein"  
"OP8\_M21\_00178" 28322 "s59E5H2" 6.853567 "outer membrane channel protein"  
"OP8\_M21\_00178" 28322 "s63E6H2" 3.520824e-05 "outer membrane channel protein"  
"OP8\_M21\_00179" 28323 "s59E13H2" 0.1132075 "hypothetical protein"  
"OP8\_M21\_00179" 28323 "s59E25H2" 0.2089113 "hypothetical protein"  
"OP8\_M21\_00179" 28323 "s59E5H2" 3.118629 "hypothetical protein"  
"OP8\_M21\_00179" 28323 "s63E6H2" 0 "hypothetical protein"  
"OP8\_M21\_00180" 28324 "s59E13H2" 0.07655758 "hypothetical protein"  
"OP8\_M21\_00180" 28324 "s59E25H2" 0 "hypothetical protein"  
"OP8\_M21\_00180" 28324 "s59E5H2" 0.4081563 "hypothetical protein"  
"OP8\_M21\_00180" 28324 "s63E6H2" 0 "hypothetical protein"  
"OP8\_M21\_00181" 28325 "s59E13H2" 0.0533958 "hypothetical protein"  
"OP8\_M21\_00181" 28325 "s59E25H2" 0 "hypothetical protein"  
"OP8\_M21\_00181" 28325 "s59E5H2" 0.3638036 "hypothetical protein"  
"OP8\_M21\_00181" 28325 "s63E6H2" 0 "hypothetical protein"  
"OP8\_M21\_00182" 28326 "s59E13H2" 0 "Transposase IS200 like protein"

"OP8\_M21\_00182" 28326 "s59E25H2" 0 "Transposase IS200 like protein"  
"OP8\_M21\_00182" 28326 "s59E5H2" 0.1378205 "Transposase IS200 like protein"  
"OP8\_M21\_00182" 28326 "s63E6H2" 0 "Transposase IS200 like protein"  
"OP8\_M21\_00183" 28327 "s59E13H2" 0.05868091 "tRNA N6-adenosine threonylcarbamoyltransferase"  
"OP8\_M21\_00183" 28327 "s59E25H2" 0 "tRNA N6-adenosine threonylcarbamoyltransferase"  
"OP8\_M21\_00183" 28327 "s59E5H2" 0.3256928 "tRNA N6-adenosine threonylcarbamoyltransferase"  
"OP8\_M21\_00183" 28327 "s63E6H2" 0 "tRNA N6-adenosine threonylcarbamoyltransferase"  
"OP8\_M21\_00184" 28328 "s59E13H2" 0 "L-serine dehydratase, alpha chain"  
"OP8\_M21\_00184" 28328 "s59E25H2" 0 "L-serine dehydratase, alpha chain"  
"OP8\_M21\_00184" 28328 "s59E5H2" 1.340723 "L-serine dehydratase, alpha chain"  
"OP8\_M21\_00184" 28328 "s63E6H2" 0.001623585 "L-serine dehydratase, alpha chain"  
"OP8\_M21\_00185" 28329 "s59E13H2" 0 "hypothetical protein"  
"OP8\_M21\_00185" 28329 "s59E25H2" 0 "hypothetical protein"  
"OP8\_M21\_00185" 28329 "s59E5H2" 1.872666 "hypothetical protein"  
"OP8\_M21\_00185" 28329 "s63E6H2" 0 "hypothetical protein"  
"OP8\_M21\_00186" 28330 "s59E13H2" 0.00592779 "ECF RNA polymerase sigma-E factor"  
"OP8\_M21\_00186" 28330 "s59E25H2" 0 "ECF RNA polymerase sigma-E factor"  
"OP8\_M21\_00186" 28330 "s59E5H2" 1.682594 "ECF RNA polymerase sigma-E factor"  
"OP8\_M21\_00186" 28330 "s63E6H2" 0 "ECF RNA polymerase sigma-E factor"  
"OP8\_M21\_00187" 28331 "s59E13H2" 0.001764852 "hypothetical protein"  
"OP8\_M21\_00187" 28331 "s59E25H2" 0 "hypothetical protein"  
"OP8\_M21\_00187" 28331 "s59E5H2" 1.507187 "hypothetical protein"  
"OP8\_M21\_00187" 28331 "s63E6H2" 0 "hypothetical protein"  
"OP8\_M21\_00188" 28332 "s59E13H2" 0.002879599 "hypothetical protein"  
"OP8\_M21\_00188" 28332 "s59E25H2" 0 "hypothetical protein"  
"OP8\_M21\_00188" 28332 "s59E5H2" 1.746117 "hypothetical protein"  
"OP8\_M21\_00188" 28332 "s63E6H2" 0 "hypothetical protein"  
"OP8\_M21\_00189" 28333 "s59E13H2" 0.002390423 "hypothetical protein"  
"OP8\_M21\_00189" 28333 "s59E25H2" 0 "hypothetical protein"  
"OP8\_M21\_00189" 28333 "s59E5H2" 2.021775 "hypothetical protein"  
"OP8\_M21\_00189" 28333 "s63E6H2" 0 "hypothetical protein"  
"OP8\_M21\_00190" 28334 "s59E13H2" 0.000973783 "ECF RNA polymerase sigma factor SigW"  
"OP8\_M21\_00190" 28334 "s59E25H2" 0 "ECF RNA polymerase sigma factor SigW"  
"OP8\_M21\_00190" 28334 "s59E5H2" 0.2190745 "ECF RNA polymerase sigma factor SigW"  
"OP8\_M21\_00190" 28334 "s63E6H2" 0 "ECF RNA polymerase sigma factor SigW"  
"OP8\_M21\_00191" 28335 "s59E13H2" 0.002290256 "hypothetical protein"  
"OP8\_M21\_00191" 28335 "s59E25H2" 0 "hypothetical protein"  
"OP8\_M21\_00191" 28335 "s59E5H2" 0.2276233 "hypothetical protein"  
"OP8\_M21\_00191" 28335 "s63E6H2" 0 "hypothetical protein"  
"OP8\_M21\_00192" 28336 "s59E13H2" 0.3281554 "Double zinc ribbon"  
"OP8\_M21\_00192" 28336 "s59E25H2" 0 "Double zinc ribbon"  
"OP8\_M21\_00192" 28336 "s59E5H2" 0.4576306 "Double zinc ribbon"  
"OP8\_M21\_00192" 28336 "s63E6H2" 0 "Double zinc ribbon"  
"OP8\_M21\_00193" 28337 "s59E13H2" 0.747792 "hypothetical protein"  
"OP8\_M21\_00193" 28337 "s59E25H2" 0 "hypothetical protein"  
"OP8\_M21\_00193" 28337 "s59E5H2" 1.217485 "hypothetical protein"  
"OP8\_M21\_00193" 28337 "s63E6H2" 0 "hypothetical protein"

"OP8\_M21\_00194" 28338 "s59E13H2" 0.3966823 "hypothetical protein"  
"OP8\_M21\_00194" 28338 "s59E25H2" 0 "hypothetical protein"  
"OP8\_M21\_00194" 28338 "s59E5H2" 0.6426388 "hypothetical protein"  
"OP8\_M21\_00194" 28338 "s63E6H2" 0 "hypothetical protein"  
"OP8\_M21\_00195" 28339 "s59E13H2" 0.3668739 "Citrate synthase"  
"OP8\_M21\_00195" 28339 "s59E25H2" 0 "Citrate synthase"  
"OP8\_M21\_00195" 28339 "s59E5H2" 0.4581223 "Citrate synthase"  
"OP8\_M21\_00195" 28339 "s63E6H2" 0 "Citrate synthase"  
"OP8\_M21\_00196" 28340 "s59E13H2" 0.4296186 "Dihydroneopterin 2',3'-cyclic phosphate phosphodiesterase"  
"OP8\_M21\_00196" 28340 "s59E25H2" 0 "Dihydroneopterin 2',3'-cyclic phosphate phosphodiesterase"  
"OP8\_M21\_00196" 28340 "s59E5H2" 0.4733583 "Dihydroneopterin 2',3'-cyclic phosphate phosphodiesterase"  
"OP8\_M21\_00196" 28340 "s63E6H2" 0 "Dihydroneopterin 2',3'-cyclic phosphate phosphodiesterase"  
"OP8\_M21\_00197" 28341 "s59E13H2" 0.5104096 "Isopropylmalate/citramalate isomerase large subunit"  
"OP8\_M21\_00197" 28341 "s59E25H2" 0 "Isopropylmalate/citramalate isomerase large subunit"  
"OP8\_M21\_00197" 28341 "s59E5H2" 0.556926 "Isopropylmalate/citramalate isomerase large subunit"  
"OP8\_M21\_00197" 28341 "s63E6H2" 0 "Isopropylmalate/citramalate isomerase large subunit"  
"OP8\_M21\_00198" 28342 "s59E13H2" 0.4825043 "Isopropylmalate/citramalate isomerase small subunit"  
"OP8\_M21\_00198" 28342 "s59E25H2" 0 "Isopropylmalate/citramalate isomerase small subunit"  
"OP8\_M21\_00198" 28342 "s59E5H2" 0.5198756 "Isopropylmalate/citramalate isomerase small subunit"  
"OP8\_M21\_00198" 28342 "s63E6H2" 0 "Isopropylmalate/citramalate isomerase small subunit"  
"OP8\_M21\_00199" 28343 "s59E13H2" 0.5466186 "3-isopropylmalate/3-methylmalate dehydrogenase"  
"OP8\_M21\_00199" 28343 "s59E25H2" 0 "3-isopropylmalate/3-methylmalate dehydrogenase"  
"OP8\_M21\_00199" 28343 "s59E5H2" 0.8501427 "3-isopropylmalate/3-methylmalate dehydrogenase"  
"OP8\_M21\_00199" 28343 "s63E6H2" 0 "3-isopropylmalate/3-methylmalate dehydrogenase"  
"OP8\_M21\_00200" 28344 "s59E13H2" 0.8057872 "Homoaconitase large subunit"  
"OP8\_M21\_00200" 28344 "s59E25H2" 0 "Homoaconitase large subunit"  
"OP8\_M21\_00200" 28344 "s59E5H2" 1.107815 "Homoaconitase large subunit"  
"OP8\_M21\_00200" 28344 "s63E6H2" 0 "Homoaconitase large subunit"  
"OP8\_M21\_00201" 28345 "s59E13H2" 1.008701 "Isopropylmalate/citramalate isomerase small subunit"  
"OP8\_M21\_00201" 28345 "s59E25H2" 0 "Isopropylmalate/citramalate isomerase small subunit"  
"OP8\_M21\_00201" 28345 "s59E5H2" 1.340081 "Isopropylmalate/citramalate isomerase small subunit"  
"OP8\_M21\_00201" 28345 "s63E6H2" 0 "Isopropylmalate/citramalate isomerase small subunit"  
"OP8\_M21\_00202" 28346 "s59E13H2" 0.8372961 "tRNA threonylcarbamoyladenosine biosynthesis protein Tsab"  
"OP8\_M21\_00202" 28346 "s59E25H2" 0 "tRNA threonylcarbamoyladenosine biosynthesis protein Tsab"  
"OP8\_M21\_00202" 28346 "s59E5H2" 1.455128 "tRNA threonylcarbamoyladenosine biosynthesis protein Tsab"  
"OP8\_M21\_00202" 28346 "s63E6H2" 0 "tRNA threonylcarbamoyladenosine biosynthesis protein Tsab"  
"OP8\_M21\_00203" 28347 "s59E13H2" 0.9674392 "putative N-acetyltransferase"  
"OP8\_M21\_00203" 28347 "s59E25H2" 0 "putative N-acetyltransferase"  
"OP8\_M21\_00203" 28347 "s59E5H2" 1.306283 "putative N-acetyltransferase"  
"OP8\_M21\_00203" 28347 "s63E6H2" 0 "putative N-acetyltransferase"  
"OP8\_M21\_00204" 28348 "s59E13H2" 0.9102704 "tRNA pseudouridine synthase A"  
"OP8\_M21\_00204" 28348 "s59E25H2" 0 "tRNA pseudouridine synthase A"  
"OP8\_M21\_00204" 28348 "s59E5H2" 1.365063 "tRNA pseudouridine synthase A"  
"OP8\_M21\_00204" 28348 "s63E6H2" 0 "tRNA pseudouridine synthase A"  
"OP8\_M21\_00205" 28349 "s59E13H2" 0.6382084 "hypothetical protein"  
"OP8\_M21\_00205" 28349 "s59E25H2" 0 "hypothetical protein"  
"OP8\_M21\_00205" 28349 "s59E5H2" 0.9682177 "hypothetical protein"



"OP8\_M21\_00205" 28349 "s63E6H2" 0 "hypothetical protein"  
"OP8\_M21\_00206" 28350 "s59E13H2" 0.7383378 "hypothetical protein"  
"OP8\_M21\_00206" 28350 "s59E25H2" 0 "hypothetical protein"  
"OP8\_M21\_00206" 28350 "s59E5H2" 1.12858 "hypothetical protein"  
"OP8\_M21\_00206" 28350 "s63E6H2" 0 "hypothetical protein"  
"OP8\_M21\_00207" 28351 "s59E13H2" 0.7437317 "hypothetical protein"  
"OP8\_M21\_00207" 28351 "s59E25H2" 0 "hypothetical protein"  
"OP8\_M21\_00207" 28351 "s59E5H2" 1.533198 "hypothetical protein"  
"OP8\_M21\_00207" 28351 "s63E6H2" 0 "hypothetical protein"  
"OP8\_M21\_00208" 28352 "s59E13H2" 0.7208318 "D-inositol-3-phosphate glycosyltransferase"  
"OP8\_M21\_00208" 28352 "s59E25H2" 0 "D-inositol-3-phosphate glycosyltransferase"  
"OP8\_M21\_00208" 28352 "s59E5H2" 1.819542 "D-inositol-3-phosphate glycosyltransferase"  
"OP8\_M21\_00208" 28352 "s63E6H2" 0 "D-inositol-3-phosphate glycosyltransferase"  
"OP8\_M21\_00209" 28353 "s59E13H2" 0.6394717 "Glycogen synthase"  
"OP8\_M21\_00209" 28353 "s59E25H2" 0.4597378 "Glycogen synthase"  
"OP8\_M21\_00209" 28353 "s59E5H2" 1.144506 "Glycogen synthase"  
"OP8\_M21\_00209" 28353 "s63E6H2" 0 "Glycogen synthase"  
"OP8\_M21\_00210" 28354 "s59E13H2" 0.6500573 "GDP-mannose-dependent alpha-(1-6)-phosphatidylinositol monomannoside mannosyltransferase"  
"OP8\_M21\_00210" 28354 "s59E25H2" 0 "GDP-mannose-dependent alpha-(1-6)-phosphatidylinositol monomannoside mannosyltransferase"  
"OP8\_M21\_00210" 28354 "s59E5H2" 3.212998 "GDP-mannose-dependent alpha-(1-6)-phosphatidylinositol monomannoside mannosyltransferase"  
"OP8\_M21\_00210" 28354 "s63E6H2" 0 "GDP-mannose-dependent alpha-(1-6)-phosphatidylinositol monomannoside mannosyltransferase"  
"OP8\_M21\_00211" 28355 "s59E13H2" 0.7166561 "D-inositol-3-phosphate glycosyltransferase"  
"OP8\_M21\_00211" 28355 "s59E25H2" 0 "D-inositol-3-phosphate glycosyltransferase"  
"OP8\_M21\_00211" 28355 "s59E5H2" 0.4280365 "D-inositol-3-phosphate glycosyltransferase"  
"OP8\_M21\_00211" 28355 "s63E6H2" 0 "D-inositol-3-phosphate glycosyltransferase"  
"OP8\_M21\_00212" 28356 "s59E13H2" 0.00765737 "Mutual gliding-motility protein MglA"  
"OP8\_M21\_00212" 28356 "s59E25H2" 0 "Mutual gliding-motility protein MglA"  
"OP8\_M21\_00212" 28356 "s59E5H2" 0.3295972 "Mutual gliding-motility protein MglA"  
"OP8\_M21\_00212" 28356 "s63E6H2" 0 "Mutual gliding-motility protein MglA"  
"OP8\_M21\_00213" 28357 "s59E13H2" 0.01308804 "Competence protein ComM"  
"OP8\_M21\_00213" 28357 "s59E25H2" 0 "Competence protein ComM"  
"OP8\_M21\_00213" 28357 "s59E5H2" 0.7091167 "Competence protein ComM"  
"OP8\_M21\_00213" 28357 "s63E6H2" 0 "Competence protein ComM"  
"OP8\_M21\_00214" 28358 "s59E13H2" 0.0243516 "p-aminobenzoyl-glutamate hydrolase subunit B"  
"OP8\_M21\_00214" 28358 "s59E25H2" 0 "p-aminobenzoyl-glutamate hydrolase subunit B"  
"OP8\_M21\_00214" 28358 "s59E5H2" 0.7024102 "p-aminobenzoyl-glutamate hydrolase subunit B"  
"OP8\_M21\_00214" 28358 "s63E6H2" 0 "p-aminobenzoyl-glutamate hydrolase subunit B"  
"OP8\_M21\_00215" 28359 "s59E13H2" 0.03794413 "Putative redox-active protein (C\_GCAxxG\_C\_C)"  
"OP8\_M21\_00215" 28359 "s59E25H2" 0 "Putative redox-active protein (C\_GCAxxG\_C\_C)"  
"OP8\_M21\_00215" 28359 "s59E5H2" 0.7588427 "Putative redox-active protein (C\_GCAxxG\_C\_C)"  
"OP8\_M21\_00215" 28359 "s63E6H2" 0 "Putative redox-active protein (C\_GCAxxG\_C\_C)"  
"OP8\_M21\_00216" 28360 "s59E13H2" 0.06365134 "Histidine ammonia-lyase"  
"OP8\_M21\_00216" 28360 "s59E25H2" 0 "Histidine ammonia-lyase"  
"OP8\_M21\_00216" 28360 "s59E5H2" 3.286987 "Histidine ammonia-lyase"  
"OP8\_M21\_00216" 28360 "s63E6H2" 0 "Histidine ammonia-lyase"  
"OP8\_M21\_00217" 28361 "s59E13H2" 0.05596041 "Imidazolonepropionase"  
"OP8\_M21\_00217" 28361 "s59E25H2" 0 "Imidazolonepropionase"

"OP8\_M21\_00217" 28361 "s59E5H2" 6.002882 "Imidazolonepropionase"  
"OP8\_M21\_00217" 28361 "s63E6H2" 0 "Imidazolonepropionase"  
"OP8\_M21\_00218" 28362 "s59E13H2" 0.06039111 "Cell division protein FtsZ"  
"OP8\_M21\_00218" 28362 "s59E25H2" 0.2001654 "Cell division protein FtsZ"  
"OP8\_M21\_00218" 28362 "s59E5H2" 5.498835 "Cell division protein FtsZ"  
"OP8\_M21\_00218" 28362 "s63E6H2" 0 "Cell division protein FtsZ"  
"OP8\_M21\_00219" 28363 "s59E13H2" 0.05586068 "Cell division protein FtsA"  
"OP8\_M21\_00219" 28363 "s59E25H2" 0 "Cell division protein FtsA"  
"OP8\_M21\_00219" 28363 "s59E5H2" 1.40511 "Cell division protein FtsA"  
"OP8\_M21\_00219" 28363 "s63E6H2" 0 "Cell division protein FtsA"  
"OP8\_M21\_00220" 28364 "s59E13H2" 0.01404643 "UDP-N-acetylmuramoylalanine--D-glutamate ligase"  
"OP8\_M21\_00220" 28364 "s59E25H2" 0 "UDP-N-acetylmuramoylalanine--D-glutamate ligase"  
"OP8\_M21\_00220" 28364 "s59E5H2" 0.9011922 "UDP-N-acetylmuramoylalanine--D-glutamate ligase"  
"OP8\_M21\_00220" 28364 "s63E6H2" 0 "UDP-N-acetylmuramoylalanine--D-glutamate ligase"  
"OP8\_M21\_00221" 28365 "s59E13H2" 0 "CRISPR-associated protein (cas\_TM1802)"  
"OP8\_M21\_00221" 28365 "s59E25H2" 0 "CRISPR-associated protein (cas\_TM1802)"  
"OP8\_M21\_00221" 28365 "s59E5H2" 0.4483389 "CRISPR-associated protein (cas\_TM1802)"  
"OP8\_M21\_00221" 28365 "s63E6H2" 0 "CRISPR-associated protein (cas\_TM1802)"  
"OP8\_M21\_00222" 28366 "s59E13H2" 0.005156242 "hypothetical protein"  
"OP8\_M21\_00222" 28366 "s59E25H2" 0 "hypothetical protein"  
"OP8\_M21\_00222" 28366 "s59E5H2" 0.340695 "hypothetical protein"  
"OP8\_M21\_00222" 28366 "s63E6H2" 0 "hypothetical protein"  
"OP8\_M21\_00223" 28367 "s59E13H2" 0.00739374 "CRISPR-associated protein (Cas\_Cas5)"  
"OP8\_M21\_00223" 28367 "s59E25H2" 0 "CRISPR-associated protein (Cas\_Cas5)"  
"OP8\_M21\_00223" 28367 "s59E5H2" 0.1825203 "CRISPR-associated protein (Cas\_Cas5)"  
"OP8\_M21\_00223" 28367 "s63E6H2" 0 "CRISPR-associated protein (Cas\_Cas5)"  
"OP8\_M21\_00224" 28368 "s59E13H2" 0.004756746 "CRISPR-associated nuclease/helicase Cas3"  
"OP8\_M21\_00224" 28368 "s59E25H2" 0 "CRISPR-associated nuclease/helicase Cas3"  
"OP8\_M21\_00224" 28368 "s59E5H2" 0.4872537 "CRISPR-associated nuclease/helicase Cas3"  
"OP8\_M21\_00224" 28368 "s63E6H2" 0 "CRISPR-associated nuclease/helicase Cas3"  
"OP8\_M21\_00225" 28369 "s59E13H2" 0 "hypothetical protein"  
"OP8\_M21\_00225" 28369 "s59E25H2" 0 "hypothetical protein"  
"OP8\_M21\_00225" 28369 "s59E5H2" 0.7100259 "hypothetical protein"  
"OP8\_M21\_00225" 28369 "s63E6H2" 0 "hypothetical protein"  
"OP8\_M21\_00226" 28370 "s59E13H2" 0 "CRISPR-associated endonuclease Cas1 2"  
"OP8\_M21\_00226" 28370 "s59E25H2" 0 "CRISPR-associated endonuclease Cas1 2"  
"OP8\_M21\_00226" 28370 "s59E5H2" 0.6847034 "CRISPR-associated endonuclease Cas1 2"  
"OP8\_M21\_00226" 28370 "s63E6H2" 0 "CRISPR-associated endonuclease Cas1 2"  
"OP8\_M21\_00227" 28371 "s59E13H2" 0 "CRISPR-associated endoribonuclease Cas2 1"  
"OP8\_M21\_00227" 28371 "s59E25H2" 0 "CRISPR-associated endoribonuclease Cas2 1"  
"OP8\_M21\_00227" 28371 "s59E5H2" 0.5731488 "CRISPR-associated endoribonuclease Cas2 1"  
"OP8\_M21\_00227" 28371 "s63E6H2" 0 "CRISPR-associated endoribonuclease Cas2 1"  
"OP8\_M21\_00228" 28372 "s59E13H2" 0 "CRISPR-associated exonuclease Cas4"  
"OP8\_M21\_00228" 28372 "s59E25H2" 0 "CRISPR-associated exonuclease Cas4"  
"OP8\_M21\_00228" 28372 "s59E5H2" 0.4616707 "CRISPR-associated exonuclease Cas4"  
"OP8\_M21\_00228" 28372 "s63E6H2" 0 "CRISPR-associated exonuclease Cas4"  
"OP8\_M21\_00229" 28374 "s59E13H2" 0 "hypothetical protein"

"OP8\_M21\_00229" 28374 "s59E25H2" 0 "hypothetical protein"  
"OP8\_M21\_00229" 28374 "s59E5H2" 1.292565 "hypothetical protein"  
"OP8\_M21\_00229" 28374 "s63E6H2" 0 "hypothetical protein"  
"OP8\_M21\_00230" 28375 "s59E13H2" 0.002738075 "Capsule biosynthesis protein CapB"  
"OP8\_M21\_00230" 28375 "s59E25H2" 0 "Capsule biosynthesis protein CapB"  
"OP8\_M21\_00230" 28375 "s59E5H2" 1.549121 "Capsule biosynthesis protein CapB"  
"OP8\_M21\_00230" 28375 "s63E6H2" 0 "Capsule biosynthesis protein CapB"  
"OP8\_M21\_00232" 28377 "s59E13H2" 0 "Pyruvate kinase"  
"OP8\_M21\_00232" 28377 "s59E25H2" 0 "Pyruvate kinase"  
"OP8\_M21\_00232" 28377 "s59E5H2" 6.696556 "Pyruvate kinase"  
"OP8\_M21\_00232" 28377 "s63E6H2" 0 "Pyruvate kinase"  
"OP8\_M21\_00233" 28378 "s59E13H2" 0 "hypothetical protein"  
"OP8\_M21\_00233" 28378 "s59E25H2" 0 "hypothetical protein"  
"OP8\_M21\_00233" 28378 "s59E5H2" 5.760119 "hypothetical protein"  
"OP8\_M21\_00233" 28378 "s63E6H2" 0 "hypothetical protein"  
"OP8\_M21\_00234" 28379 "s59E13H2" 0 "Transposon gamma-delta resolvase"  
"OP8\_M21\_00234" 28379 "s59E25H2" 0 "Transposon gamma-delta resolvase"  
"OP8\_M21\_00234" 28379 "s59E5H2" 7.577412 "Transposon gamma-delta resolvase"  
"OP8\_M21\_00234" 28379 "s63E6H2" 0 "Transposon gamma-delta resolvase"  
"OP8\_M21\_00236" 28381 "s59E13H2" 0 "hypothetical protein"  
"OP8\_M21\_00236" 28381 "s59E25H2" 0 "hypothetical protein"  
"OP8\_M21\_00236" 28381 "s59E5H2" 6.330708 "hypothetical protein"  
"OP8\_M21\_00236" 28381 "s63E6H2" 0 "hypothetical protein"  
"OP8\_M21\_00237" 28382 "s59E13H2" 0.01234707 "hypothetical protein"  
"OP8\_M21\_00237" 28382 "s59E25H2" 0 "hypothetical protein"  
"OP8\_M21\_00237" 28382 "s59E5H2" 10.77508 "hypothetical protein"  
"OP8\_M21\_00237" 28382 "s63E6H2" 0 "hypothetical protein"  
"OP8\_M21\_00238" 28383 "s59E13H2" 0.002729973 "Acyl-coenzyme A:6-aminopenicillanic acid acyl-transferase"  
"OP8\_M21\_00238" 28383 "s59E25H2" 0 "Acyl-coenzyme A:6-aminopenicillanic acid acyl-transferase"  
"OP8\_M21\_00238" 28383 "s59E5H2" 13.65395 "Acyl-coenzyme A:6-aminopenicillanic acid acyl-transferase"  
"OP8\_M21\_00238" 28383 "s63E6H2" 0 "Acyl-coenzyme A:6-aminopenicillanic acid acyl-transferase"  
"OP8\_M21\_00239" 28384 "s59E13H2" 0.002610374 "hypothetical protein"  
"OP8\_M21\_00239" 28384 "s59E25H2" 0 "hypothetical protein"  
"OP8\_M21\_00239" 28384 "s59E5H2" 8.52518 "hypothetical protein"  
"OP8\_M21\_00239" 28384 "s63E6H2" 0 "hypothetical protein"  
"OP8\_M21\_00240" 28385 "s59E13H2" 0.002657828 "ADP-ribose pyrophosphatase"  
"OP8\_M21\_00240" 28385 "s59E25H2" 0 "ADP-ribose pyrophosphatase"  
"OP8\_M21\_00240" 28385 "s59E5H2" 6.195551 "ADP-ribose pyrophosphatase"  
"OP8\_M21\_00240" 28385 "s63E6H2" 0 "ADP-ribose pyrophosphatase"  
"OP8\_M21\_00241" 28386 "s59E13H2" 0 "Arsenical pump membrane protein"  
"OP8\_M21\_00241" 28386 "s59E25H2" 0 "Arsenical pump membrane protein"  
"OP8\_M21\_00241" 28386 "s59E5H2" 5.739876 "Arsenical pump membrane protein"  
"OP8\_M21\_00241" 28386 "s63E6H2" 0 "Arsenical pump membrane protein"  
"OP8\_M21\_00242" 28387 "s59E13H2" 0 "Universal stress protein"  
"OP8\_M21\_00242" 28387 "s59E25H2" 0 "Universal stress protein"  
"OP8\_M21\_00242" 28387 "s59E5H2" 7.838746 "Universal stress protein"  
"OP8\_M21\_00242" 28387 "s63E6H2" 0 "Universal stress protein"

"OP8\_M21\_00243" 28388 "s59E13H2" 0 "hypothetical protein"  
"OP8\_M21\_00243" 28388 "s59E25H2" 0 "hypothetical protein"  
"OP8\_M21\_00243" 28388 "s59E5H2" 7.682314 "hypothetical protein"  
"OP8\_M21\_00243" 28388 "s63E6H2" 0 "hypothetical protein"  
"OP8\_M21\_00244" 28389 "s59E13H2" 0 "Transglutaminase-like superfamily protein"  
"OP8\_M21\_00244" 28389 "s59E25H2" 0 "Transglutaminase-like superfamily protein"  
"OP8\_M21\_00244" 28389 "s59E5H2" 1.945533 "Transglutaminase-like superfamily protein"  
"OP8\_M21\_00244" 28389 "s63E6H2" 0 "Transglutaminase-like superfamily protein"  
"OP8\_M21\_00245" 28390 "s59E13H2" 0.02405476 "Transcriptional regulatory protein ZraR"  
"OP8\_M21\_00245" 28390 "s59E25H2" 0 "Transcriptional regulatory protein ZraR"  
"OP8\_M21\_00245" 28390 "s59E5H2" 0.4803932 "Transcriptional regulatory protein ZraR"  
"OP8\_M21\_00245" 28390 "s63E6H2" 0 "Transcriptional regulatory protein ZraR"  
"OP8\_M21\_00246" 28391 "s59E13H2" 0.0270717 "Sensor protein ZraS"  
"OP8\_M21\_00246" 28391 "s59E25H2" 0 "Sensor protein ZraS"  
"OP8\_M21\_00246" 28391 "s59E5H2" 0.3338244 "Sensor protein ZraS"  
"OP8\_M21\_00246" 28391 "s63E6H2" 0 "Sensor protein ZraS"  
"OP8\_M21\_00247" 28392 "s59E13H2" 0.03782294 "Periplasmic dipeptide transport protein precursor"  
"OP8\_M21\_00247" 28392 "s59E25H2" 0 "Periplasmic dipeptide transport protein precursor"  
"OP8\_M21\_00247" 28392 "s59E5H2" 0.3238697 "Periplasmic dipeptide transport protein precursor"  
"OP8\_M21\_00247" 28392 "s63E6H2" 0 "Periplasmic dipeptide transport protein precursor"  
"OP8\_M21\_00248" 28393 "s59E13H2" 0.03837967 "Membrane dipeptidase (Peptidase family M19)"  
"OP8\_M21\_00248" 28393 "s59E25H2" 0 "Membrane dipeptidase (Peptidase family M19)"  
"OP8\_M21\_00248" 28393 "s59E5H2" 0.7726566 "Membrane dipeptidase (Peptidase family M19)"  
"OP8\_M21\_00248" 28393 "s63E6H2" 0 "Membrane dipeptidase (Peptidase family M19)"  
"OP8\_M21\_00249" 28394 "s59E13H2" 0.01457791 "Arylsulfatase"  
"OP8\_M21\_00249" 28394 "s59E25H2" 0 "Arylsulfatase"  
"OP8\_M21\_00249" 28394 "s59E5H2" 2.118172 "Arylsulfatase"  
"OP8\_M21\_00249" 28394 "s63E6H2" 0 "Arylsulfatase"  
"OP8\_M21\_00250" 28395 "s59E13H2" 0.01946903 "hypothetical protein"  
"OP8\_M21\_00250" 28395 "s59E25H2" 0 "hypothetical protein"  
"OP8\_M21\_00250" 28395 "s59E5H2" 1.910297 "hypothetical protein"  
"OP8\_M21\_00250" 28395 "s63E6H2" 0 "hypothetical protein"  
"OP8\_M21\_00251" 28396 "s59E13H2" 0.02546853 "hypothetical protein"  
"OP8\_M21\_00251" 28396 "s59E25H2" 0 "hypothetical protein"  
"OP8\_M21\_00251" 28396 "s59E5H2" 3.874659 "hypothetical protein"  
"OP8\_M21\_00251" 28396 "s63E6H2" 0 "hypothetical protein"  
"OP8\_M21\_00252" 28397 "s59E13H2" 0.02917035 "Virginiamycin A acetyltransferase"  
"OP8\_M21\_00252" 28397 "s59E25H2" 0 "Virginiamycin A acetyltransferase"  
"OP8\_M21\_00252" 28397 "s59E5H2" 6.352528 "Virginiamycin A acetyltransferase"  
"OP8\_M21\_00252" 28397 "s63E6H2" 0 "Virginiamycin A acetyltransferase"  
"OP8\_M21\_00253" 28398 "s59E13H2" 0.03175046 "FG-GAP repeat protein"  
"OP8\_M21\_00253" 28398 "s59E25H2" 0 "FG-GAP repeat protein"  
"OP8\_M21\_00253" 28398 "s59E5H2" 10.87636 "FG-GAP repeat protein"  
"OP8\_M21\_00253" 28398 "s63E6H2" 0 "FG-GAP repeat protein"  
"OP8\_M21\_00254" 28399 "s59E13H2" 0 "Arylsulfatase"  
"OP8\_M21\_00254" 28399 "s59E25H2" 0.1344086 "Arylsulfatase"  
"OP8\_M21\_00254" 28399 "s59E5H2" 5.629908 "Arylsulfatase"

"OP8\_M21\_00254" 28399 "s63E6H2" 0 "Arylsulfatase"  
"OP8\_M21\_00255" 28400 "s59E13H2" 0.01841312 "S-adenosyl-L-methionine-dependent 2-deoxy-scyllo-inosamine dehydrogenase"  
"OP8\_M21\_00255" 28400 "s59E25H2" 0 "S-adenosyl-L-methionine-dependent 2-deoxy-scyllo-inosamine dehydrogenase"  
"OP8\_M21\_00255" 28400 "s59E5H2" 0.9945682 "S-adenosyl-L-methionine-dependent 2-deoxy-scyllo-inosamine dehydrogenase"  
"OP8\_M21\_00255" 28400 "s63E6H2" 0 "S-adenosyl-L-methionine-dependent 2-deoxy-scyllo-inosamine dehydrogenase"  
"OP8\_M21\_00256" 28401 "s59E13H2" 0.01335104 "Prolyl tripeptidyl peptidase precursor"  
"OP8\_M21\_00256" 28401 "s59E25H2" 0 "Prolyl tripeptidyl peptidase precursor"  
"OP8\_M21\_00256" 28401 "s59E5H2" 2.424028 "Prolyl tripeptidyl peptidase precursor"  
"OP8\_M21\_00256" 28401 "s63E6H2" 0 "Prolyl tripeptidyl peptidase precursor"  
"OP8\_M21\_00257" 28402 "s59E13H2" 0.03482496 "hypothetical protein"  
"OP8\_M21\_00257" 28402 "s59E25H2" 0 "hypothetical protein"  
"OP8\_M21\_00257" 28402 "s59E5H2" 1.700735 "hypothetical protein"  
"OP8\_M21\_00257" 28402 "s63E6H2" 0 "hypothetical protein"  
"OP8\_M21\_00258" 28403 "s59E13H2" 0.01010547 "hypothetical protein"  
"OP8\_M21\_00258" 28403 "s59E25H2" 0 "hypothetical protein"  
"OP8\_M21\_00258" 28403 "s59E5H2" 2.467133 "hypothetical protein"  
"OP8\_M21\_00258" 28403 "s63E6H2" 0 "hypothetical protein"  
"OP8\_M21\_00259" 28404 "s59E13H2" 0.007844653 "hypothetical protein"  
"OP8\_M21\_00259" 28404 "s59E25H2" 0.1547619 "hypothetical protein"  
"OP8\_M21\_00259" 28404 "s59E5H2" 2.745837 "hypothetical protein"  
"OP8\_M21\_00259" 28404 "s63E6H2" 0 "hypothetical protein"  
"OP8\_M21\_00260" 28405 "s59E13H2" 0 "hypothetical protein"  
"OP8\_M21\_00260" 28405 "s59E25H2" 0 "hypothetical protein"  
"OP8\_M21\_00260" 28405 "s59E5H2" 3.855983 "hypothetical protein"  
"OP8\_M21\_00260" 28405 "s63E6H2" 0 "hypothetical protein"  
"OP8\_M21\_00261" 28406 "s59E13H2" 0.02093325 "N-substituted formamide deformylase precursor"  
"OP8\_M21\_00261" 28406 "s59E25H2" 0 "N-substituted formamide deformylase precursor"  
"OP8\_M21\_00261" 28406 "s59E5H2" 3.527952 "N-substituted formamide deformylase precursor"  
"OP8\_M21\_00261" 28406 "s63E6H2" 0 "N-substituted formamide deformylase precursor"  
"OP8\_M21\_00268" 28413 "s59E13H2" 0 "heat shock protein 90"  
"OP8\_M21\_00268" 28413 "s59E25H2" 0 "heat shock protein 90"  
"OP8\_M21\_00268" 28413 "s59E5H2" 1.428242 "heat shock protein 90"  
"OP8\_M21\_00268" 28413 "s63E6H2" 0 "heat shock protein 90"  
"OP8\_M21\_00269" 28414 "s59E13H2" 0 "hypothetical protein"  
"OP8\_M21\_00269" 28414 "s59E25H2" 0 "hypothetical protein"  
"OP8\_M21\_00269" 28414 "s59E5H2" 0.9124319 "hypothetical protein"  
"OP8\_M21\_00269" 28414 "s63E6H2" 0 "hypothetical protein"  
"OP8\_M21\_00270" 28415 "s59E13H2" 0 "Type I restriction enzyme EcoR124II R protein"  
"OP8\_M21\_00270" 28415 "s59E25H2" 0 "Type I restriction enzyme EcoR124II R protein"  
"OP8\_M21\_00270" 28415 "s59E5H2" 1.022235 "Type I restriction enzyme EcoR124II R protein"  
"OP8\_M21\_00270" 28415 "s63E6H2" 0 "Type I restriction enzyme EcoR124II R protein"  
"OP8\_M21\_00271" 28416 "s59E13H2" 0 "Type-1 restriction enzyme MjaXIP specificity protein"  
"OP8\_M21\_00271" 28416 "s59E25H2" 0 "Type-1 restriction enzyme MjaXIP specificity protein"  
"OP8\_M21\_00271" 28416 "s59E5H2" 0.5179229 "Type-1 restriction enzyme MjaXIP specificity protein"  
"OP8\_M21\_00271" 28416 "s63E6H2" 0 "Type-1 restriction enzyme MjaXIP specificity protein"  
"OP8\_M21\_00272" 28417 "s59E13H2" 0 "hypothetical protein"  
"OP8\_M21\_00272" 28417 "s59E25H2" 0 "hypothetical protein"

"OP8\_M21\_00272" 28417 "s59E5H2" 0.5153398 "hypothetical protein"  
"OP8\_M21\_00272" 28417 "s63E6H2" 0 "hypothetical protein"  
"OP8\_M21\_00273" 28418 "s59E13H2" 0 "Adenosine monophosphate-protein transferase SoFic"  
"OP8\_M21\_00273" 28418 "s59E25H2" 0 "Adenosine monophosphate-protein transferase SoFic"  
"OP8\_M21\_00273" 28418 "s59E5H2" 0.3917054 "Adenosine monophosphate-protein transferase SoFic"  
"OP8\_M21\_00273" 28418 "s63E6H2" 0 "Adenosine monophosphate-protein transferase SoFic"  
"OP8\_M21\_00274" 28419 "s59E13H2" 0 "putative type I restriction enzymeP M protein"  
"OP8\_M21\_00274" 28419 "s59E25H2" 0 "putative type I restriction enzymeP M protein"  
"OP8\_M21\_00274" 28419 "s59E5H2" 0.427331 "putative type I restriction enzymeP M protein"  
"OP8\_M21\_00274" 28419 "s63E6H2" 0 "putative type I restriction enzymeP M protein"  
"OP8\_M21\_00275" 28420 "s59E13H2" 0.04776174 "Putative membrane protein YdgH"  
"OP8\_M21\_00275" 28420 "s59E25H2" 0 "Putative membrane protein YdgH"  
"OP8\_M21\_00275" 28420 "s59E5H2" 1.229043 "Putative membrane protein YdgH"  
"OP8\_M21\_00275" 28420 "s63E6H2" 0 "Putative membrane protein YdgH"  
"OP8\_M21\_00277" 28422 "s59E13H2" 0.1751704 "Ribonuclease Y"  
"OP8\_M21\_00277" 28422 "s59E25H2" 0 "Ribonuclease Y"  
"OP8\_M21\_00277" 28422 "s59E5H2" 0.2195182 "Ribonuclease Y"  
"OP8\_M21\_00277" 28422 "s63E6H2" 0 "Ribonuclease Y"  
"OP8\_M21\_00278" 28423 "s59E13H2" 0.2421547 "hypothetical protein"  
"OP8\_M21\_00278" 28423 "s59E25H2" 0 "hypothetical protein"  
"OP8\_M21\_00278" 28423 "s59E5H2" 0.305935 "hypothetical protein"  
"OP8\_M21\_00278" 28423 "s63E6H2" 0 "hypothetical protein"  
"OP8\_M21\_00279" 28424 "s59E13H2" 0.0458291 "Exodeoxyribonuclease 7 large subunit"  
"OP8\_M21\_00279" 28424 "s59E25H2" 0 "Exodeoxyribonuclease 7 large subunit"  
"OP8\_M21\_00279" 28424 "s59E5H2" 0.2777194 "Exodeoxyribonuclease 7 large subunit"  
"OP8\_M21\_00279" 28424 "s63E6H2" 0 "Exodeoxyribonuclease 7 large subunit"  
"OP8\_M21\_00280" 28425 "s59E13H2" 0.005377018 "Exodeoxyribonuclease 7 small subunit"  
"OP8\_M21\_00280" 28425 "s59E25H2" 0 "Exodeoxyribonuclease 7 small subunit"  
"OP8\_M21\_00280" 28425 "s59E5H2" 0.4731871 "Exodeoxyribonuclease 7 small subunit"  
"OP8\_M21\_00280" 28425 "s63E6H2" 0 "Exodeoxyribonuclease 7 small subunit"  
"OP8\_M21\_00281" 28426 "s59E13H2" 0 "Farnesyl diphosphate synthase"  
"OP8\_M21\_00281" 28426 "s59E25H2" 0 "Farnesyl diphosphate synthase"  
"OP8\_M21\_00281" 28426 "s59E5H2" 0.5776967 "Farnesyl diphosphate synthase"  
"OP8\_M21\_00281" 28426 "s63E6H2" 0 "Farnesyl diphosphate synthase"  
"OP8\_M21\_00282" 28427 "s59E13H2" 0.004511736 "1-deoxy-D-xylulose-5-phosphate synthase"  
"OP8\_M21\_00282" 28427 "s59E25H2" 0 "1-deoxy-D-xylulose-5-phosphate synthase"  
"OP8\_M21\_00282" 28427 "s59E5H2" 0.7277324 "1-deoxy-D-xylulose-5-phosphate synthase"  
"OP8\_M21\_00282" 28427 "s63E6H2" 0 "1-deoxy-D-xylulose-5-phosphate synthase"  
"OP8\_M21\_00283" 28428 "s59E13H2" 0.00624152 "Hemolysin A"  
"OP8\_M21\_00283" 28428 "s59E25H2" 0 "Hemolysin A"  
"OP8\_M21\_00283" 28428 "s59E5H2" 0.7030221 "Hemolysin A"  
"OP8\_M21\_00283" 28428 "s63E6H2" 0 "Hemolysin A"  
"OP8\_M21\_00284" 28429 "s59E13H2" 0.02366217 "putative inorganic polyphosphate/ATP-NAD kinase"  
"OP8\_M21\_00284" 28429 "s59E25H2" 0 "putative inorganic polyphosphate/ATP-NAD kinase"  
"OP8\_M21\_00284" 28429 "s59E5H2" 1.040387 "putative inorganic polyphosphate/ATP-NAD kinase"  
"OP8\_M21\_00284" 28429 "s63E6H2" 0 "putative inorganic polyphosphate/ATP-NAD kinase"  
"OP8\_M21\_00285" 28430 "s59E13H2" 0.01835681 "Thioredoxin-1"

"OP8\_M21\_00285" 28430 "s59E25H2" 0 "Thioredoxin-1"  
"OP8\_M21\_00285" 28430 "s59E5H2" 1.155644 "Thioredoxin-1"  
"OP8\_M21\_00285" 28430 "s63E6H2" 0 "Thioredoxin-1"  
"OP8\_M21\_00286" 28431 "s59E13H2" 0.01589633 "Thioredoxin reductase"  
"OP8\_M21\_00286" 28431 "s59E25H2" 0 "Thioredoxin reductase"  
"OP8\_M21\_00286" 28431 "s59E5H2" 1.638709 "Thioredoxin reductase"  
"OP8\_M21\_00286" 28431 "s63E6H2" 0 "Thioredoxin reductase"  
"OP8\_M21\_00287" 28432 "s59E13H2" 0.0130734 "UDP-3-O-acylglucosamine N-acyltransferase"  
"OP8\_M21\_00287" 28432 "s59E25H2" 0 "UDP-3-O-acylglucosamine N-acyltransferase"  
"OP8\_M21\_00287" 28432 "s59E5H2" 1.499956 "UDP-3-O-acylglucosamine N-acyltransferase"  
"OP8\_M21\_00287" 28432 "s63E6H2" 0 "UDP-3-O-acylglucosamine N-acyltransferase"  
"OP8\_M21\_00288" 28433 "s59E13H2" 0.1061807 "hypothetical protein"  
"OP8\_M21\_00288" 28433 "s59E25H2" 0 "hypothetical protein"  
"OP8\_M21\_00288" 28433 "s59E5H2" 1.093807 "hypothetical protein"  
"OP8\_M21\_00288" 28433 "s63E6H2" 0 "hypothetical protein"  
"OP8\_M21\_00289" 28434 "s59E13H2" 0.1263499 "F0F1 ATP synthase subunit C"  
"OP8\_M21\_00289" 28434 "s59E25H2" 0 "F0F1 ATP synthase subunit C"  
"OP8\_M21\_00289" 28434 "s59E5H2" 1.690202 "F0F1 ATP synthase subunit C"  
"OP8\_M21\_00289" 28434 "s63E6H2" 0 "F0F1 ATP synthase subunit C"  
"OP8\_M21\_00290" 28435 "s59E13H2" 0.08349505 "ATP synthase subunit a"  
"OP8\_M21\_00290" 28435 "s59E25H2" 0.3360107 "ATP synthase subunit a"  
"OP8\_M21\_00290" 28435 "s59E5H2" 2.610046 "ATP synthase subunit a"  
"OP8\_M21\_00290" 28435 "s63E6H2" 0 "ATP synthase subunit a"  
"OP8\_M21\_00291" 28436 "s59E13H2" 0.06908888 "ATP synthase I chain"  
"OP8\_M21\_00291" 28436 "s59E25H2" 0.58753 "ATP synthase I chain"  
"OP8\_M21\_00291" 28436 "s59E5H2" 3.00613 "ATP synthase I chain"  
"OP8\_M21\_00291" 28436 "s63E6H2" 0 "ATP synthase I chain"  
"OP8\_M21\_00292" 28437 "s59E13H2" 0.1443465 "ATP synthase protein I"  
"OP8\_M21\_00292" 28437 "s59E25H2" 0 "ATP synthase protein I"  
"OP8\_M21\_00292" 28437 "s59E5H2" 3.150201 "ATP synthase protein I"  
"OP8\_M21\_00292" 28437 "s63E6H2" 0 "ATP synthase protein I"  
"OP8\_M21\_00293" 28438 "s59E13H2" 0.07852005 "Alginate biosynthesis protein AlgA"  
"OP8\_M21\_00293" 28438 "s59E25H2" 0 "Alginate biosynthesis protein AlgA"  
"OP8\_M21\_00293" 28438 "s59E5H2" 2.875227 "Alginate biosynthesis protein AlgA"  
"OP8\_M21\_00293" 28438 "s63E6H2" 0 "Alginate biosynthesis protein AlgA"  
"OP8\_M21\_00294" 28439 "s59E13H2" 0.09025928 "Phosphomannomutase/phosphoglucomutase"  
"OP8\_M21\_00294" 28439 "s59E25H2" 0 "Phosphomannomutase/phosphoglucomutase"  
"OP8\_M21\_00294" 28439 "s59E5H2" 2.475324 "Phosphomannomutase/phosphoglucomutase"  
"OP8\_M21\_00294" 28439 "s63E6H2" 0 "Phosphomannomutase/phosphoglucomutase"  
"OP8\_M21\_00295" 28440 "s59E13H2" 0.05976929 "3-deoxy-D-manno-octulosonate 8-phosphate phosphatase KdsC"  
"OP8\_M21\_00295" 28440 "s59E25H2" 0 "3-deoxy-D-manno-octulosonate 8-phosphate phosphatase KdsC"  
"OP8\_M21\_00295" 28440 "s59E5H2" 1.600496 "3-deoxy-D-manno-octulosonate 8-phosphate phosphatase KdsC"  
"OP8\_M21\_00295" 28440 "s63E6H2" 0 "3-deoxy-D-manno-octulosonate 8-phosphate phosphatase KdsC"  
"OP8\_M21\_00296" 28441 "s59E13H2" 0.04472475 "Arabinose 5-phosphate isomerase KdsD"  
"OP8\_M21\_00296" 28441 "s59E25H2" 0 "Arabinose 5-phosphate isomerase KdsD"  
"OP8\_M21\_00296" 28441 "s59E5H2" 1.34077 "Arabinose 5-phosphate isomerase KdsD"  
"OP8\_M21\_00296" 28441 "s63E6H2" 0 "Arabinose 5-phosphate isomerase KdsD"

"OP8\_M21\_00297" 28442 "s59E13H2" 0.02734869 "2-dehydro-3-deoxyphosphooctonate aldolase"  
"OP8\_M21\_00297" 28442 "s59E25H2" 0 "2-dehydro-3-deoxyphosphooctonate aldolase"  
"OP8\_M21\_00297" 28442 "s59E5H2" 0.9614119 "2-dehydro-3-deoxyphosphooctonate aldolase"  
"OP8\_M21\_00297" 28442 "s63E6H2" 0 "2-dehydro-3-deoxyphosphooctonate aldolase"  
"OP8\_M21\_00298" 28443 "s59E13H2" 0.1187202 "3-deoxy-manno-octulosonate cytidyltransferase"  
"OP8\_M21\_00298" 28443 "s59E25H2" 0 "3-deoxy-manno-octulosonate cytidyltransferase"  
"OP8\_M21\_00298" 28443 "s59E5H2" 1.119562 "3-deoxy-manno-octulosonate cytidyltransferase"  
"OP8\_M21\_00298" 28443 "s63E6H2" 0 "3-deoxy-manno-octulosonate cytidyltransferase"  
"OP8\_M21\_00299" 28444 "s59E13H2" 0.2125376 "Polymer-forming cytoskeletal"  
"OP8\_M21\_00299" 28444 "s59E25H2" 0 "Polymer-forming cytoskeletal"  
"OP8\_M21\_00299" 28444 "s59E5H2" 1.162618 "Polymer-forming cytoskeletal"  
"OP8\_M21\_00299" 28444 "s63E6H2" 0 "Polymer-forming cytoskeletal"  
"OP8\_M21\_00300" 28445 "s59E13H2" 0.1468539 "putative chromosome-partitioning protein ParB"  
"OP8\_M21\_00300" 28445 "s59E25H2" 0 "putative chromosome-partitioning protein ParB"  
"OP8\_M21\_00300" 28445 "s59E5H2" 0.4669132 "putative chromosome-partitioning protein ParB"  
"OP8\_M21\_00300" 28445 "s63E6H2" 0 "putative chromosome-partitioning protein ParB"  
"OP8\_M21\_00301" 28446 "s59E13H2" 0.1231735 "Sporulation initiation inhibitor protein Soj"  
"OP8\_M21\_00301" 28446 "s59E25H2" 0 "Sporulation initiation inhibitor protein Soj"  
"OP8\_M21\_00301" 28446 "s59E5H2" 0.3418343 "Sporulation initiation inhibitor protein Soj"  
"OP8\_M21\_00301" 28446 "s63E6H2" 0 "Sporulation initiation inhibitor protein Soj"  
"OP8\_M21\_00302" 28447 "s59E13H2" 0.2761093 "hypothetical protein"  
"OP8\_M21\_00302" 28447 "s59E25H2" 0 "hypothetical protein"  
"OP8\_M21\_00302" 28447 "s59E5H2" 0.2499394 "hypothetical protein"  
"OP8\_M21\_00302" 28447 "s63E6H2" 0 "hypothetical protein"  
"OP8\_M21\_00303" 28448 "s59E13H2" 0.3580958 "30S ribosomal protein S15"  
"OP8\_M21\_00303" 28448 "s59E25H2" 0 "30S ribosomal protein S15"  
"OP8\_M21\_00303" 28448 "s59E5H2" 0.4306128 "30S ribosomal protein S15"  
"OP8\_M21\_00303" 28448 "s63E6H2" 0 "30S ribosomal protein S15"  
"OP8\_M21\_00304" 28449 "s59E13H2" 0.4739181 "Polyribonucleotide nucleotidyltransferase"  
"OP8\_M21\_00304" 28449 "s59E25H2" 0 "Polyribonucleotide nucleotidyltransferase"  
"OP8\_M21\_00304" 28449 "s59E5H2" 0.4478161 "Polyribonucleotide nucleotidyltransferase"  
"OP8\_M21\_00304" 28449 "s63E6H2" 0 "Polyribonucleotide nucleotidyltransferase"  
"OP8\_M21\_00305" 28450 "s59E13H2" 0.7019853 "hypothetical protein"  
"OP8\_M21\_00305" 28450 "s59E25H2" 0 "hypothetical protein"  
"OP8\_M21\_00305" 28450 "s59E5H2" 1.429668 "hypothetical protein"  
"OP8\_M21\_00305" 28450 "s63E6H2" 0 "hypothetical protein"  
"OP8\_M21\_00306" 28451 "s59E13H2" 0.7607186 "Type II secretion system protein G precursor"  
"OP8\_M21\_00306" 28451 "s59E25H2" 0 "Type II secretion system protein G precursor"  
"OP8\_M21\_00306" 28451 "s59E5H2" 1.997325 "Type II secretion system protein G precursor"  
"OP8\_M21\_00306" 28451 "s63E6H2" 0 "Type II secretion system protein G precursor"  
"OP8\_M21\_00307" 28452 "s59E13H2" 0.9381882 "hypothetical protein"  
"OP8\_M21\_00307" 28452 "s59E25H2" 0 "hypothetical protein"  
"OP8\_M21\_00307" 28452 "s59E5H2" 1.791458 "hypothetical protein"  
"OP8\_M21\_00307" 28452 "s63E6H2" 0 "hypothetical protein"  
"OP8\_M21\_00308" 28453 "s59E13H2" 0.6981228 "Lipid-A-disaccharide synthase"  
"OP8\_M21\_00308" 28453 "s59E25H2" 0 "Lipid-A-disaccharide synthase"  
"OP8\_M21\_00308" 28453 "s59E5H2" 1.971926 "Lipid-A-disaccharide synthase"



"OP8\_M21\_00308" 28453 "s63E6H2" 0 "Lipid-A-disaccharide synthase"  
"OP8\_M21\_00309" 28454 "s59E13H2" 0.06074551 "hypothetical protein"  
"OP8\_M21\_00309" 28454 "s59E25H2" 0 "hypothetical protein"  
"OP8\_M21\_00309" 28454 "s59E5H2" 2.014614 "hypothetical protein"  
"OP8\_M21\_00309" 28454 "s63E6H2" 0 "hypothetical protein"  
"OP8\_M21\_00310" 28455 "s59E13H2" 0.06269923 "Protein-L-isoaspartate O-methyltransferase"  
"OP8\_M21\_00310" 28455 "s59E25H2" 0 "Protein-L-isoaspartate O-methyltransferase"  
"OP8\_M21\_00310" 28455 "s59E5H2" 1.855616 "Protein-L-isoaspartate O-methyltransferase"  
"OP8\_M21\_00310" 28455 "s63E6H2" 0 "Protein-L-isoaspartate O-methyltransferase"  
"OP8\_M21\_00311" 28456 "s59E13H2" 0.06294931 "Proline--tRNA ligase"  
"OP8\_M21\_00311" 28456 "s59E25H2" 0 "Proline--tRNA ligase"  
"OP8\_M21\_00311" 28456 "s59E5H2" 1.588382 "Proline--tRNA ligase"  
"OP8\_M21\_00311" 28456 "s63E6H2" 0 "Proline--tRNA ligase"  
"OP8\_M21\_00314" 28459 "s59E13H2" 0.01305994 "Amidase enhancer precursor"  
"OP8\_M21\_00314" 28459 "s59E25H2" 0 "Amidase enhancer precursor"  
"OP8\_M21\_00314" 28459 "s59E5H2" 2.619578 "Amidase enhancer precursor"  
"OP8\_M21\_00314" 28459 "s63E6H2" 0 "Amidase enhancer precursor"  
"OP8\_M21\_00315" 28460 "s59E13H2" 0.01270152 "Orotate phosphoribosyltransferase"  
"OP8\_M21\_00315" 28460 "s59E25H2" 0 "Orotate phosphoribosyltransferase"  
"OP8\_M21\_00315" 28460 "s59E5H2" 3.568637 "Orotate phosphoribosyltransferase"  
"OP8\_M21\_00315" 28460 "s63E6H2" 0 "Orotate phosphoribosyltransferase"  
"OP8\_M21\_00316" 28461 "s59E13H2" 0.01075837 "Malate-2H(+)/Na(+)-lactate antiporter"  
"OP8\_M21\_00316" 28461 "s59E25H2" 0 "Malate-2H(+)/Na(+)-lactate antiporter"  
"OP8\_M21\_00316" 28461 "s59E5H2" 3.715991 "Malate-2H(+)/Na(+)-lactate antiporter"  
"OP8\_M21\_00316" 28461 "s63E6H2" 0 "Malate-2H(+)/Na(+)-lactate antiporter"  
"OP8\_M21\_00317" 28462 "s59E13H2" 0.007097182 "Holo-[acyl-carrier-protein] synthase"  
"OP8\_M21\_00317" 28462 "s59E25H2" 0 "Holo-[acyl-carrier-protein] synthase"  
"OP8\_M21\_00317" 28462 "s59E5H2" 3.961768 "Holo-[acyl-carrier-protein] synthase"  
"OP8\_M21\_00317" 28462 "s63E6H2" 0 "Holo-[acyl-carrier-protein] synthase"  
"OP8\_M21\_00318" 28463 "s59E13H2" 0.007400797 "2-amino-3-ketobutyrate coenzyme A ligase"  
"OP8\_M21\_00318" 28463 "s59E25H2" 0.2493766 "2-amino-3-ketobutyrate coenzyme A ligase"  
"OP8\_M21\_00318" 28463 "s59E5H2" 3.87234 "2-amino-3-ketobutyrate coenzyme A ligase"  
"OP8\_M21\_00318" 28463 "s63E6H2" 0 "2-amino-3-ketobutyrate coenzyme A ligase"  
"OP8\_M21\_00319" 28464 "s59E13H2" 0.004941945 "putative epimerase/dehydratase"  
"OP8\_M21\_00319" 28464 "s59E25H2" 0 "putative epimerase/dehydratase"  
"OP8\_M21\_00319" 28464 "s59E5H2" 5.352235 "putative epimerase/dehydratase"  
"OP8\_M21\_00319" 28464 "s63E6H2" 0 "putative epimerase/dehydratase"  
"OP8\_M21\_00320" 28465 "s59E13H2" 0.005762374 "3-oxoacyl-[acyl-carrier-protein] reductase FabG"  
"OP8\_M21\_00320" 28465 "s59E25H2" 0 "3-oxoacyl-[acyl-carrier-protein] reductase FabG"  
"OP8\_M21\_00320" 28465 "s59E5H2" 1.451436 "3-oxoacyl-[acyl-carrier-protein] reductase FabG"  
"OP8\_M21\_00320" 28465 "s63E6H2" 0 "3-oxoacyl-[acyl-carrier-protein] reductase FabG"  
"OP8\_M21\_00321" 28466 "s59E13H2" 0.0007756236 "Sulfide dehydrogenase subunit beta precursor"  
"OP8\_M21\_00321" 28466 "s59E25H2" 0 "Sulfide dehydrogenase subunit beta precursor"  
"OP8\_M21\_00321" 28466 "s59E5H2" 1.392246 "Sulfide dehydrogenase subunit beta precursor"  
"OP8\_M21\_00321" 28466 "s63E6H2" 0 "Sulfide dehydrogenase subunit beta precursor"  
"OP8\_M21\_00322" 28467 "s59E13H2" 0.003279631 "Sulfide dehydrogenase subunit alpha precursor"  
"OP8\_M21\_00322" 28467 "s59E25H2" 0 "Sulfide dehydrogenase subunit alpha precursor"

"OP8\_M21\_00322" 28467 "s59E5H2" 1.503292 "Sulfide dehydrogenase subunit alpha precursor"  
"OP8\_M21\_00322" 28467 "s63E6H2" 0 "Sulfide dehydrogenase subunit alpha precursor"  
"OP8\_M21\_00324" 28469 "s59E13H2" 0 "hypothetical protein"  
"OP8\_M21\_00324" 28469 "s59E25H2" 0 "hypothetical protein"  
"OP8\_M21\_00324" 28469 "s59E5H2" 2.787658 "hypothetical protein"  
"OP8\_M21\_00324" 28469 "s63E6H2" 0 "hypothetical protein"  
"OP8\_M21\_00325" 28470 "s59E13H2" 0.002908702 "NADP-reducing hydrogenase subunit HndA"  
"OP8\_M21\_00325" 28470 "s59E25H2" 0 "NADP-reducing hydrogenase subunit HndA"  
"OP8\_M21\_00325" 28470 "s59E5H2" 2.935437 "NADP-reducing hydrogenase subunit HndA"  
"OP8\_M21\_00325" 28470 "s63E6H2" 0 "NADP-reducing hydrogenase subunit HndA"  
"OP8\_M21\_00326" 28471 "s59E13H2" 0.1994885 "NADP-reducing hydrogenase subunit HndC"  
"OP8\_M21\_00326" 28471 "s59E25H2" 0.07928957 "NADP-reducing hydrogenase subunit HndC"  
"OP8\_M21\_00326" 28471 "s59E5H2" 1.36087 "NADP-reducing hydrogenase subunit HndC"  
"OP8\_M21\_00326" 28471 "s63E6H2" 0 "NADP-reducing hydrogenase subunit HndC"  
"OP8\_M21\_00327" 28472 "s59E13H2" 0.1063046 "NADP-reducing hydrogenase subunit HndC"  
"OP8\_M21\_00327" 28472 "s59E25H2" 0 "NADP-reducing hydrogenase subunit HndC"  
"OP8\_M21\_00327" 28472 "s59E5H2" 0.9560419 "NADP-reducing hydrogenase subunit HndC"  
"OP8\_M21\_00327" 28472 "s63E6H2" 0 "NADP-reducing hydrogenase subunit HndC"  
"OP8\_M21\_00328" 28473 "s59E13H2" 0.01965692 "hypothetical protein"  
"OP8\_M21\_00328" 28473 "s59E25H2" 0 "hypothetical protein"  
"OP8\_M21\_00328" 28473 "s59E5H2" 1.096163 "hypothetical protein"  
"OP8\_M21\_00328" 28473 "s63E6H2" 0 "hypothetical protein"  
"OP8\_M21\_00329" 28474 "s59E13H2" 0.001556103 "Sensor protein ZraS"  
"OP8\_M21\_00329" 28474 "s59E25H2" 0 "Sensor protein ZraS"  
"OP8\_M21\_00329" 28474 "s59E5H2" 0.7872158 "Sensor protein ZraS"  
"OP8\_M21\_00329" 28474 "s63E6H2" 0 "Sensor protein ZraS"  
"OP8\_M21\_00330" 28475 "s59E13H2" 0 "Transcriptional regulatory protein ZraR"  
"OP8\_M21\_00330" 28475 "s59E25H2" 0 "Transcriptional regulatory protein ZraR"  
"OP8\_M21\_00330" 28475 "s59E5H2" 0.613889 "Transcriptional regulatory protein ZraR"  
"OP8\_M21\_00330" 28475 "s63E6H2" 0 "Transcriptional regulatory protein ZraR"  
"OP8\_M21\_00331" 28476 "s59E13H2" 0 "Glutamate dehydrogenase"  
"OP8\_M21\_00331" 28476 "s59E25H2" 0 "Glutamate dehydrogenase"  
"OP8\_M21\_00331" 28476 "s59E5H2" 0.6043875 "Glutamate dehydrogenase"  
"OP8\_M21\_00331" 28476 "s63E6H2" 0.000225591 "Glutamate dehydrogenase"  
"OP8\_M21\_00332" 28477 "s59E13H2" 0.00814619 "Putative zinc metalloprotease"  
"OP8\_M21\_00332" 28477 "s59E25H2" 0 "Putative zinc metalloprotease"  
"OP8\_M21\_00332" 28477 "s59E5H2" 0.5740438 "Putative zinc metalloprotease"  
"OP8\_M21\_00332" 28477 "s63E6H2" 0.001141008 "Putative zinc metalloprotease"  
"OP8\_M21\_00333" 28478 "s59E13H2" 0.009688576 "1-deoxy-D-xylulose 5-phosphate reductoisomerase"  
"OP8\_M21\_00333" 28478 "s59E25H2" 0 "1-deoxy-D-xylulose 5-phosphate reductoisomerase"  
"OP8\_M21\_00333" 28478 "s59E5H2" 0.4568825 "1-deoxy-D-xylulose 5-phosphate reductoisomerase"  
"OP8\_M21\_00333" 28478 "s63E6H2" 0 "1-deoxy-D-xylulose 5-phosphate reductoisomerase"  
"OP8\_M21\_00334" 28479 "s59E13H2" 0.009050858 "Phosphatidate cytidyltransferase"  
"OP8\_M21\_00334" 28479 "s59E25H2" 0 "Phosphatidate cytidyltransferase"  
"OP8\_M21\_00334" 28479 "s59E5H2" 0.3706482 "Phosphatidate cytidyltransferase"  
"OP8\_M21\_00334" 28479 "s63E6H2" 0 "Phosphatidate cytidyltransferase"  
"OP8\_M21\_00335" 28480 "s59E13H2" 0.005689318 "Ditrans, polycis-undecaprenyl-diphosphate synthase ((2E,6E)-farnesyl-diphosphate specific)"

"OP8\_M21\_00335" 28480 "s59E25H2" 0 "Ditrans, polycis-undecaprenyl-diphosphate synthase ((2E,6E)-farnesyl-diphosphate specific)"  
"OP8\_M21\_00335" 28480 "s59E5H2" 0.7961208 "Ditrans, polycis-undecaprenyl-diphosphate synthase ((2E,6E)-farnesyl-diphosphate specific)"  
"OP8\_M21\_00335" 28480 "s63E6H2" 0 "Ditrans, polycis-undecaprenyl-diphosphate synthase ((2E,6E)-farnesyl-diphosphate specific)"  
"OP8\_M21\_00336" 28481 "s59E13H2" 0.06286799 "Bacterial alpha-L-rhamnosidase"  
"OP8\_M21\_00336" 28481 "s59E25H2" 0 "Bacterial alpha-L-rhamnosidase"  
"OP8\_M21\_00336" 28481 "s59E5H2" 1.554237 "Bacterial alpha-L-rhamnosidase"  
"OP8\_M21\_00336" 28481 "s63E6H2" 0 "Bacterial alpha-L-rhamnosidase"  
"OP8\_M21\_00337" 28482 "s59E13H2" 0 "UDP-glucose 6-dehydrogenase TuaD"  
"OP8\_M21\_00337" 28482 "s59E25H2" 0 "UDP-glucose 6-dehydrogenase TuaD"  
"OP8\_M21\_00337" 28482 "s59E5H2" 2.558944 "UDP-glucose 6-dehydrogenase TuaD"  
"OP8\_M21\_00337" 28482 "s63E6H2" 0 "UDP-glucose 6-dehydrogenase TuaD"  
"OP8\_M21\_00338" 28483 "s59E13H2" 0 "putative adenylyl-sulfate kinase"  
"OP8\_M21\_00338" 28483 "s59E25H2" 0 "putative adenylyl-sulfate kinase"  
"OP8\_M21\_00338" 28483 "s59E5H2" 1.330923 "putative adenylyl-sulfate kinase"  
"OP8\_M21\_00338" 28483 "s63E6H2" 0 "putative adenylyl-sulfate kinase"  
"OP8\_M21\_00339" 28484 "s59E13H2" 0.00275439 "Sulfate adenylyltransferase"  
"OP8\_M21\_00339" 28484 "s59E25H2" 0 "Sulfate adenylyltransferase"  
"OP8\_M21\_00339" 28484 "s59E5H2" 0.9028905 "Sulfate adenylyltransferase"  
"OP8\_M21\_00339" 28484 "s63E6H2" 0.0002063466 "Sulfate adenylyltransferase"  
"OP8\_M21\_00340" 28485 "s59E13H2" 0 "hypothetical protein"  
"OP8\_M21\_00340" 28485 "s59E25H2" 0 "hypothetical protein"  
"OP8\_M21\_00340" 28485 "s59E5H2" 0.7883706 "hypothetical protein"  
"OP8\_M21\_00340" 28485 "s63E6H2" 0.002223444 "hypothetical protein"  
"OP8\_M21\_00341" 28486 "s59E13H2" 0.007945799 "hypothetical protein"  
"OP8\_M21\_00341" 28486 "s59E25H2" 0 "hypothetical protein"  
"OP8\_M21\_00341" 28486 "s59E5H2" 2.000967 "hypothetical protein"  
"OP8\_M21\_00341" 28486 "s63E6H2" 0 "hypothetical protein"  
"OP8\_M21\_00342" 28487 "s59E13H2" 0.3669934 "translocation protein TolB"  
"OP8\_M21\_00342" 28487 "s59E25H2" 0 "translocation protein TolB"  
"OP8\_M21\_00342" 28487 "s59E5H2" 3.754184 "translocation protein TolB"  
"OP8\_M21\_00342" 28487 "s63E6H2" 0.003095934 "translocation protein TolB"  
"OP8\_M21\_00343" 28488 "s59E13H2" 0.01205839 "O-Antigen ligase"  
"OP8\_M21\_00343" 28488 "s59E25H2" 0 "O-Antigen ligase"  
"OP8\_M21\_00343" 28488 "s59E5H2" 4.44557 "O-Antigen ligase"  
"OP8\_M21\_00343" 28488 "s63E6H2" 0 "O-Antigen ligase"  
"OP8\_M21\_00344" 28489 "s59E13H2" 0.010328 "hypothetical protein"  
"OP8\_M21\_00344" 28489 "s59E25H2" 0 "hypothetical protein"  
"OP8\_M21\_00344" 28489 "s59E5H2" 3.498342 "hypothetical protein"  
"OP8\_M21\_00344" 28489 "s63E6H2" 0 "hypothetical protein"  
"OP8\_M21\_00345" 28490 "s59E13H2" 0 "hypothetical protein"  
"OP8\_M21\_00345" 28490 "s59E25H2" 0 "hypothetical protein"  
"OP8\_M21\_00345" 28490 "s59E5H2" 3.795718 "hypothetical protein"  
"OP8\_M21\_00345" 28490 "s63E6H2" 0 "hypothetical protein"  
"OP8\_M21\_00346" 28491 "s59E13H2" 0.008774748 "hypothetical protein"  
"OP8\_M21\_00346" 28491 "s59E25H2" 0 "hypothetical protein"  
"OP8\_M21\_00346" 28491 "s59E5H2" 4.030724 "hypothetical protein"  
"OP8\_M21\_00346" 28491 "s63E6H2" 0 "hypothetical protein"

"OP8\_M21\_00347" 28492 "s59E13H2" 0.005016052 "hypothetical protein"  
"OP8\_M21\_00347" 28492 "s59E25H2" 0.2532051 "hypothetical protein"  
"OP8\_M21\_00347" 28492 "s59E5H2" 1.596323 "hypothetical protein"  
"OP8\_M21\_00347" 28492 "s63E6H2" 0.001393171 "hypothetical protein"  
"OP8\_M21\_00348" 28493 "s59E13H2" 0.02632185 "hypothetical protein"  
"OP8\_M21\_00348" 28493 "s59E25H2" 0 "hypothetical protein"  
"OP8\_M21\_00348" 28493 "s59E5H2" 1.368406 "hypothetical protein"  
"OP8\_M21\_00348" 28493 "s63E6H2" 0 "hypothetical protein"  
"OP8\_M21\_00349" 28494 "s59E13H2" 0.03595258 "UDP-N-acetyl-alpha-D-glucosamine C6 dehydratase"  
"OP8\_M21\_00349" 28494 "s59E25H2" 0 "UDP-N-acetyl-alpha-D-glucosamine C6 dehydratase"  
"OP8\_M21\_00349" 28494 "s59E5H2" 1.811733 "UDP-N-acetyl-alpha-D-glucosamine C6 dehydratase"  
"OP8\_M21\_00349" 28494 "s63E6H2" 0 "UDP-N-acetyl-alpha-D-glucosamine C6 dehydratase"  
"OP8\_M21\_00350" 28495 "s59E13H2" 0.02526892 "hypothetical protein"  
"OP8\_M21\_00350" 28495 "s59E25H2" 0 "hypothetical protein"  
"OP8\_M21\_00350" 28495 "s59E5H2" 1.525855 "hypothetical protein"  
"OP8\_M21\_00350" 28495 "s63E6H2" 0 "hypothetical protein"  
"OP8\_M21\_00351" 28496 "s59E13H2" 0.07076036 "hypothetical protein"  
"OP8\_M21\_00351" 28496 "s59E25H2" 0 "hypothetical protein"  
"OP8\_M21\_00351" 28496 "s59E5H2" 1.455617 "hypothetical protein"  
"OP8\_M21\_00351" 28496 "s63E6H2" 0 "hypothetical protein"  
"OP8\_M21\_00352" 28497 "s59E13H2" 0.01633688 "hypothetical protein"  
"OP8\_M21\_00352" 28497 "s59E25H2" 0.1232493 "hypothetical protein"  
"OP8\_M21\_00352" 28497 "s59E5H2" 1.574332 "hypothetical protein"  
"OP8\_M21\_00352" 28497 "s63E6H2" 0 "hypothetical protein"  
"OP8\_M21\_00354" 28499 "s59E13H2" 0 "hypothetical protein"  
"OP8\_M21\_00354" 28499 "s59E25H2" 0 "hypothetical protein"  
"OP8\_M21\_00354" 28499 "s59E5H2" 0.3884974 "hypothetical protein"  
"OP8\_M21\_00354" 28499 "s63E6H2" 0 "hypothetical protein"  
"OP8\_M21\_00355" 28500 "s59E13H2" 0 "hypothetical protein"  
"OP8\_M21\_00355" 28500 "s59E25H2" 0 "hypothetical protein"  
"OP8\_M21\_00355" 28500 "s59E5H2" 0.03390725 "hypothetical protein"  
"OP8\_M21\_00355" 28500 "s63E6H2" 0 "hypothetical protein"  
"OP8\_M21\_00356" 28501 "s59E13H2" 0 "hypothetical protein"  
"OP8\_M21\_00356" 28501 "s59E25H2" 0 "hypothetical protein"  
"OP8\_M21\_00356" 28501 "s59E5H2" 0.0002760062 "hypothetical protein"  
"OP8\_M21\_00356" 28501 "s63E6H2" 0 "hypothetical protein"  
"OP8\_M21\_00359" 28504 "s59E13H2" 0.001639936 "hypothetical protein"  
"OP8\_M21\_00359" 28504 "s59E25H2" 0 "hypothetical protein"  
"OP8\_M21\_00359" 28504 "s59E5H2" 1.049874 "hypothetical protein"  
"OP8\_M21\_00359" 28504 "s63E6H2" 0 "hypothetical protein"  
"OP8\_M21\_00360" 28505 "s59E13H2" 0.02188789 "Phosphorylated carbohydrates phosphatase"  
"OP8\_M21\_00360" 28505 "s59E25H2" 0 "Phosphorylated carbohydrates phosphatase"  
"OP8\_M21\_00360" 28505 "s59E5H2" 0.3673539 "Phosphorylated carbohydrates phosphatase"  
"OP8\_M21\_00360" 28505 "s63E6H2" 0 "Phosphorylated carbohydrates phosphatase"  
"OP8\_M21\_00361" 28506 "s59E13H2" 0.04325327 "Ferredoxin"  
"OP8\_M21\_00361" 28506 "s59E25H2" 0 "Ferredoxin"  
"OP8\_M21\_00361" 28506 "s59E5H2" 0.5262834 "Ferredoxin"

"OP8\_M21\_00361" 28506 "s63E6H2" 0 "Ferredoxin"  
"OP8\_M21\_00366" 28511 "s59E13H2" 0.01215843 "DNA gyrase subunit B"  
"OP8\_M21\_00366" 28511 "s59E25H2" 0 "DNA gyrase subunit B"  
"OP8\_M21\_00366" 28511 "s59E5H2" 2.076624 "DNA gyrase subunit B"  
"OP8\_M21\_00366" 28511 "s63E6H2" 0.0006193993 "DNA gyrase subunit B"  
"OP8\_M21\_00367" 28512 "s59E13H2" 0.01920617 "DNA gyrase subunit A"  
"OP8\_M21\_00367" 28512 "s59E25H2" 0 "DNA gyrase subunit A"  
"OP8\_M21\_00367" 28512 "s59E5H2" 5.862239 "DNA gyrase subunit A"  
"OP8\_M21\_00367" 28512 "s63E6H2" 0 "DNA gyrase subunit A"  
"OP8\_M21\_00368" 28513 "s59E13H2" 0.0261255 "Long-chain-fatty-acid--CoA ligase FadD15"  
"OP8\_M21\_00368" 28513 "s59E25H2" 0 "Long-chain-fatty-acid--CoA ligase FadD15"  
"OP8\_M21\_00368" 28513 "s59E5H2" 10.39493 "Long-chain-fatty-acid--CoA ligase FadD15"  
"OP8\_M21\_00368" 28513 "s63E6H2" 0 "Long-chain-fatty-acid--CoA ligase FadD15"  
"OP8\_M21\_00369" 28514 "s59E13H2" 0.01772994 "Putative zinc ribbon domain protein"  
"OP8\_M21\_00369" 28514 "s59E25H2" 0 "Putative zinc ribbon domain protein"  
"OP8\_M21\_00369" 28514 "s59E5H2" 11.2751 "Putative zinc ribbon domain protein"  
"OP8\_M21\_00369" 28514 "s63E6H2" 0 "Putative zinc ribbon domain protein"  
"OP8\_M21\_00371" 28516 "s59E13H2" 0.004435264 "RNA polymerase sigma factor RpoD"  
"OP8\_M21\_00371" 28516 "s59E25H2" 0 "RNA polymerase sigma factor RpoD"  
"OP8\_M21\_00371" 28516 "s59E5H2" 8.504945 "RNA polymerase sigma factor RpoD"  
"OP8\_M21\_00371" 28516 "s63E6H2" 0 "RNA polymerase sigma factor RpoD"  
"OP8\_M21\_00372" 28517 "s59E13H2" 0 "hypothetical protein"  
"OP8\_M21\_00372" 28517 "s59E25H2" 0 "hypothetical protein"  
"OP8\_M21\_00372" 28517 "s59E5H2" 5.566166 "hypothetical protein"  
"OP8\_M21\_00372" 28517 "s63E6H2" 0 "hypothetical protein"  
"OP8\_M21\_00374" 28519 "s59E13H2" 0.00209335 "UDP-3-O-[3-hydroxymyristoyl] N-acetylglucosamine deacetylase"  
"OP8\_M21\_00374" 28519 "s59E25H2" 0 "UDP-3-O-[3-hydroxymyristoyl] N-acetylglucosamine deacetylase"  
"OP8\_M21\_00374" 28519 "s59E5H2" 3.833958 "UDP-3-O-[3-hydroxymyristoyl] N-acetylglucosamine deacetylase"  
"OP8\_M21\_00374" 28519 "s63E6H2" 0 "UDP-3-O-[3-hydroxymyristoyl] N-acetylglucosamine deacetylase"  
"OP8\_M21\_00375" 28520 "s59E13H2" 0.002225417 "N5-carboxyaminoimidazole ribonucleotide mutase"  
"OP8\_M21\_00375" 28520 "s59E25H2" 0 "N5-carboxyaminoimidazole ribonucleotide mutase"  
"OP8\_M21\_00375" 28520 "s59E5H2" 3.689135 "N5-carboxyaminoimidazole ribonucleotide mutase"  
"OP8\_M21\_00375" 28520 "s63E6H2" 0.001521857 "N5-carboxyaminoimidazole ribonucleotide mutase"  
"OP8\_M21\_00376" 28521 "s59E13H2" 0.006548152 "Phosphate regulon transcriptional regulatory protein PhoB"  
"OP8\_M21\_00376" 28521 "s59E25H2" 0 "Phosphate regulon transcriptional regulatory protein PhoB"  
"OP8\_M21\_00376" 28521 "s59E5H2" 0.426909 "Phosphate regulon transcriptional regulatory protein PhoB"  
"OP8\_M21\_00376" 28521 "s63E6H2" 0 "Phosphate regulon transcriptional regulatory protein PhoB"  
"OP8\_M21\_00377" 28522 "s59E13H2" 0.03396463 "Transposase DDE domain protein"  
"OP8\_M21\_00377" 28522 "s59E25H2" 0 "Transposase DDE domain protein"  
"OP8\_M21\_00377" 28522 "s59E5H2" 1.086285 "Transposase DDE domain protein"  
"OP8\_M21\_00377" 28522 "s63E6H2" 0 "Transposase DDE domain protein"  
"OP8\_M21\_00378" 28523 "s59E13H2" 0 "hypothetical protein"  
"OP8\_M21\_00378" 28523 "s59E25H2" 0 "hypothetical protein"  
"OP8\_M21\_00378" 28523 "s59E5H2" 0.8146742 "hypothetical protein"  
"OP8\_M21\_00378" 28523 "s63E6H2" 0.001183527 "hypothetical protein"  
"OP8\_M21\_00382" 28527 "s59E13H2" 0 "Serine/threonine-protein kinase PrkC"  
"OP8\_M21\_00382" 28527 "s59E25H2" 0 "Serine/threonine-protein kinase PrkC"

"OP8\_M21\_00382" 28527 "s59E5H2" 0.149038 "Serine/threonine-protein kinase PrkC"  
"OP8\_M21\_00382" 28527 "s63E6H2" 0 "Serine/threonine-protein kinase PrkC"  
"OP8\_M21\_00383" 28528 "s59E13H2" 0 "Helix-turn-helix domain protein"  
"OP8\_M21\_00383" 28528 "s59E25H2" 0 "Helix-turn-helix domain protein"  
"OP8\_M21\_00383" 28528 "s59E5H2" 0.1883987 "Helix-turn-helix domain protein"  
"OP8\_M21\_00383" 28528 "s63E6H2" 0 "Helix-turn-helix domain protein"  
"OP8\_M21\_00384" 28529 "s59E13H2" 0 "TIR domain protein"  
"OP8\_M21\_00384" 28529 "s59E25H2" 0 "TIR domain protein"  
"OP8\_M21\_00384" 28529 "s59E5H2" 0.1643086 "TIR domain protein"  
"OP8\_M21\_00384" 28529 "s63E6H2" 0 "TIR domain protein"  
"OP8\_M21\_00387" 28532 "s59E13H2" 0 "hypothetical protein"  
"OP8\_M21\_00387" 28532 "s59E25H2" 0 "hypothetical protein"  
"OP8\_M21\_00387" 28532 "s59E5H2" 0.1206117 "hypothetical protein"  
"OP8\_M21\_00387" 28532 "s63E6H2" 0 "hypothetical protein"  
"OP8\_M21\_00389" 28534 "s59E13H2" 0 "hypothetical protein"  
"OP8\_M21\_00389" 28534 "s59E25H2" 0 "hypothetical protein"  
"OP8\_M21\_00389" 28534 "s59E5H2" 0.04542206 "hypothetical protein"  
"OP8\_M21\_00389" 28534 "s63E6H2" 0 "hypothetical protein"  
"OP8\_M21\_00390" 28535 "s59E13H2" 0 "hypothetical protein"  
"OP8\_M21\_00390" 28535 "s59E25H2" 0 "hypothetical protein"  
"OP8\_M21\_00390" 28535 "s59E5H2" 0 "hypothetical protein"  
"OP8\_M21\_00390" 28535 "s63E6H2" 0 "hypothetical protein"  
"OP8\_M21\_00392" 28537 "s59E13H2" 0 "putative type I restriction enzyme P M protein"  
"OP8\_M21\_00392" 28537 "s59E25H2" 0 "putative type I restriction enzyme P M protein"  
"OP8\_M21\_00392" 28537 "s59E5H2" 0.2178141 "putative type I restriction enzyme P M protein"  
"OP8\_M21\_00392" 28537 "s63E6H2" 0 "putative type I restriction enzyme P M protein"  
"OP8\_M21\_00393" 28538 "s59E13H2" 0 "Type-1 restriction enzyme MjaXIP specificity protein"  
"OP8\_M21\_00393" 28538 "s59E25H2" 0 "Type-1 restriction enzyme MjaXIP specificity protein"  
"OP8\_M21\_00393" 28538 "s59E5H2" 0.05665596 "Type-1 restriction enzyme MjaXIP specificity protein"  
"OP8\_M21\_00393" 28538 "s63E6H2" 0 "Type-1 restriction enzyme MjaXIP specificity protein"  
"OP8\_M21\_00394" 28539 "s59E13H2" 0 "Type-1 restriction enzyme R protein"  
"OP8\_M21\_00394" 28539 "s59E25H2" 0 "Type-1 restriction enzyme R protein"  
"OP8\_M21\_00394" 28539 "s59E5H2" 0.2033873 "Type-1 restriction enzyme R protein"  
"OP8\_M21\_00394" 28539 "s63E6H2" 0 "Type-1 restriction enzyme R protein"  
"OP8\_M21\_00395" 28540 "s59E13H2" 0 "hypothetical protein"  
"OP8\_M21\_00395" 28540 "s59E25H2" 0 "hypothetical protein"  
"OP8\_M21\_00395" 28540 "s59E5H2" 0.4044995 "hypothetical protein"  
"OP8\_M21\_00395" 28540 "s63E6H2" 0 "hypothetical protein"  
"OP8\_M21\_00396" 28541 "s59E13H2" 0.00633552 "hypothetical protein"  
"OP8\_M21\_00396" 28541 "s59E25H2" 0 "hypothetical protein"  
"OP8\_M21\_00396" 28541 "s59E5H2" 0.2459408 "hypothetical protein"  
"OP8\_M21\_00396" 28541 "s63E6H2" 0 "hypothetical protein"  
"OP8\_M21\_00397" 28542 "s59E13H2" 0.004992619 "Undecaprenyl-phosphate mannosyltransferase"  
"OP8\_M21\_00397" 28542 "s59E25H2" 0 "Undecaprenyl-phosphate mannosyltransferase"  
"OP8\_M21\_00397" 28542 "s59E5H2" 1.421626 "Undecaprenyl-phosphate mannosyltransferase"  
"OP8\_M21\_00397" 28542 "s63E6H2" 0 "Undecaprenyl-phosphate mannosyltransferase"  
"OP8\_M21\_00398" 28543 "s59E13H2" 0.0151294 "Chondroitin synthase"

"OP8\_M21\_00398" 28543 "s59E25H2" 0 "Chondroitin synthase"  
"OP8\_M21\_00398" 28543 "s59E5H2" 2.222664 "Chondroitin synthase"  
"OP8\_M21\_00398" 28543 "s63E6H2" 0 "Chondroitin synthase"  
"OP8\_M21\_00399" 28544 "s59E13H2" 0.007558928 "hypothetical protein"  
"OP8\_M21\_00399" 28544 "s59E25H2" 0 "hypothetical protein"  
"OP8\_M21\_00399" 28544 "s59E5H2" 2.489094 "hypothetical protein"  
"OP8\_M21\_00399" 28544 "s63E6H2" 0 "hypothetical protein"  
"OP8\_M21\_00401" 28546 "s59E13H2" 0.0008059655 "Ketoisovalerate oxidoreductase subunit VorB"  
"OP8\_M21\_00401" 28546 "s59E25H2" 0 "Ketoisovalerate oxidoreductase subunit VorB"  
"OP8\_M21\_00401" 28546 "s59E5H2" 2.05907 "Ketoisovalerate oxidoreductase subunit VorB"  
"OP8\_M21\_00401" 28546 "s63E6H2" 0 "Ketoisovalerate oxidoreductase subunit VorB"  
"OP8\_M21\_00402" 28547 "s59E13H2" 0.008694491 "Ketoisovalerate oxidoreductase subunit VorA"  
"OP8\_M21\_00402" 28547 "s59E25H2" 0 "Ketoisovalerate oxidoreductase subunit VorA"  
"OP8\_M21\_00402" 28547 "s59E5H2" 3.309831 "Ketoisovalerate oxidoreductase subunit VorA"  
"OP8\_M21\_00402" 28547 "s63E6H2" 0 "Ketoisovalerate oxidoreductase subunit VorA"  
"OP8\_M21\_00403" 28548 "s59E13H2" 0.00407031 "Ketoisovalerate oxidoreductase subunit VorA"  
"OP8\_M21\_00403" 28548 "s59E25H2" 0 "Ketoisovalerate oxidoreductase subunit VorA"  
"OP8\_M21\_00403" 28548 "s59E5H2" 3.314429 "Ketoisovalerate oxidoreductase subunit VorA"  
"OP8\_M21\_00403" 28548 "s63E6H2" 0 "Ketoisovalerate oxidoreductase subunit VorA"  
"OP8\_M21\_00404" 28549 "s59E13H2" 0.1800493 "3-oxoacyl-[acyl-carrier-protein] synthase 3"  
"OP8\_M21\_00404" 28549 "s59E25H2" 0 "3-oxoacyl-[acyl-carrier-protein] synthase 3"  
"OP8\_M21\_00404" 28549 "s59E5H2" 2.676743 "3-oxoacyl-[acyl-carrier-protein] synthase 3"  
"OP8\_M21\_00404" 28549 "s63E6H2" 0 "3-oxoacyl-[acyl-carrier-protein] synthase 3"  
"OP8\_M21\_00405" 28550 "s59E13H2" 0.9737662 "Outer membrane protein transport protein (OMPP1/FadL/TodX)"  
"OP8\_M21\_00405" 28550 "s59E25H2" 0 "Outer membrane protein transport protein (OMPP1/FadL/TodX)"  
"OP8\_M21\_00405" 28550 "s59E5H2" 1.53195 "Outer membrane protein transport protein (OMPP1/FadL/TodX)"  
"OP8\_M21\_00405" 28550 "s63E6H2" 0 "Outer membrane protein transport protein (OMPP1/FadL/TodX)"  
"OP8\_M21\_00406" 28551 "s59E13H2" 0.9722286 "Carboxypeptidase T precursor"  
"OP8\_M21\_00406" 28551 "s59E25H2" 0 "Carboxypeptidase T precursor"  
"OP8\_M21\_00406" 28551 "s59E5H2" 1.077305 "Carboxypeptidase T precursor"  
"OP8\_M21\_00406" 28551 "s63E6H2" 0 "Carboxypeptidase T precursor"  
"OP8\_M21\_00407" 28552 "s59E13H2" 2.264772 "Chromosome partition protein Smc"  
"OP8\_M21\_00407" 28552 "s59E25H2" 0 "Chromosome partition protein Smc"  
"OP8\_M21\_00407" 28552 "s59E5H2" 0.9790706 "Chromosome partition protein Smc"  
"OP8\_M21\_00407" 28552 "s63E6H2" 0 "Chromosome partition protein Smc"  
"OP8\_M21\_00409" 28554 "s59E13H2" 3.134182 "hypothetical protein"  
"OP8\_M21\_00409" 28554 "s59E25H2" 0 "hypothetical protein"  
"OP8\_M21\_00409" 28554 "s59E5H2" 1.863399 "hypothetical protein"  
"OP8\_M21\_00409" 28554 "s63E6H2" 0 "hypothetical protein"  
"OP8\_M21\_00410" 28555 "s59E13H2" 2.475053 "hypothetical protein"  
"OP8\_M21\_00410" 28555 "s59E25H2" 0 "hypothetical protein"  
"OP8\_M21\_00410" 28555 "s59E5H2" 2.101197 "hypothetical protein"  
"OP8\_M21\_00410" 28555 "s63E6H2" 0 "hypothetical protein"  
"OP8\_M21\_00411" 28556 "s59E13H2" 2.523106 "hypothetical protein"  
"OP8\_M21\_00411" 28556 "s59E25H2" 0 "hypothetical protein"  
"OP8\_M21\_00411" 28556 "s59E5H2" 3.455094 "hypothetical protein"  
"OP8\_M21\_00411" 28556 "s63E6H2" 0 "hypothetical protein"

"OP8\_M21\_00412" 28557 "s59E13H2" 3.875915 "Peptidase family M50"  
"OP8\_M21\_00412" 28557 "s59E25H2" 0 "Peptidase family M50"  
"OP8\_M21\_00412" 28557 "s59E5H2" 8.066365 "Peptidase family M50"  
"OP8\_M21\_00412" 28557 "s63E6H2" 0 "Peptidase family M50"  
"OP8\_M21\_00413" 28558 "s59E13H2" 3.911333 "Ferredoxin"  
"OP8\_M21\_00413" 28558 "s59E25H2" 0 "Ferredoxin"  
"OP8\_M21\_00413" 28558 "s59E5H2" 5.245863 "Ferredoxin"  
"OP8\_M21\_00413" 28558 "s63E6H2" 0 "Ferredoxin"  
"OP8\_M21\_00414" 28559 "s59E13H2" 2.863152 "Tetratricopeptide repeat protein"  
"OP8\_M21\_00414" 28559 "s59E25H2" 0 "Tetratricopeptide repeat protein"  
"OP8\_M21\_00414" 28559 "s59E5H2" 4.269784 "Tetratricopeptide repeat protein"  
"OP8\_M21\_00414" 28559 "s63E6H2" 0 "Tetratricopeptide repeat protein"  
"OP8\_M21\_00415" 28560 "s59E13H2" 2.706218 "hypothetical protein"  
"OP8\_M21\_00415" 28560 "s59E25H2" 0 "hypothetical protein"  
"OP8\_M21\_00415" 28560 "s59E5H2" 2.477334 "hypothetical protein"  
"OP8\_M21\_00415" 28560 "s63E6H2" 0 "hypothetical protein"  
"OP8\_M21\_00416" 28561 "s59E13H2" 2.163823 "hypothetical protein"  
"OP8\_M21\_00416" 28561 "s59E25H2" 1.494309 "hypothetical protein"  
"OP8\_M21\_00416" 28561 "s59E5H2" 1.511487 "hypothetical protein"  
"OP8\_M21\_00416" 28561 "s63E6H2" 0.002906197 "hypothetical protein"  
"OP8\_M21\_00417" 28562 "s59E13H2" 0.1763365 "hypothetical protein"  
"OP8\_M21\_00417" 28562 "s59E25H2" 0 "hypothetical protein"  
"OP8\_M21\_00417" 28562 "s59E5H2" 1.312527 "hypothetical protein"  
"OP8\_M21\_00417" 28562 "s63E6H2" 0 "hypothetical protein"  
"OP8\_M21\_00418" 28563 "s59E13H2" 0.1444472 "hypothetical protein"  
"OP8\_M21\_00418" 28563 "s59E25H2" 0 "hypothetical protein"  
"OP8\_M21\_00418" 28563 "s59E5H2" 2.303119 "hypothetical protein"  
"OP8\_M21\_00418" 28563 "s63E6H2" 0 "hypothetical protein"  
"OP8\_M21\_00419" 28564 "s59E13H2" 0.02661629 "Cyclic di-GMP phosphodiesterase response regulator RpfG"  
"OP8\_M21\_00419" 28564 "s59E25H2" 0 "Cyclic di-GMP phosphodiesterase response regulator RpfG"  
"OP8\_M21\_00419" 28564 "s59E5H2" 0.9492014 "Cyclic di-GMP phosphodiesterase response regulator RpfG"  
"OP8\_M21\_00419" 28564 "s63E6H2" 0 "Cyclic di-GMP phosphodiesterase response regulator RpfG"  
"OP8\_M21\_00421" 28566 "s59E13H2" 0.02598118 "Glutamine--fructose-6-phosphate aminotransferase [isomerizing]"  
"OP8\_M21\_00421" 28566 "s59E25H2" 0 "Glutamine--fructose-6-phosphate aminotransferase [isomerizing]"  
"OP8\_M21\_00421" 28566 "s59E5H2" 1.183156 "Glutamine--fructose-6-phosphate aminotransferase [isomerizing]"  
"OP8\_M21\_00421" 28566 "s63E6H2" 0 "Glutamine--fructose-6-phosphate aminotransferase [isomerizing]"  
"OP8\_M21\_00422" 28567 "s59E13H2" 0.01463251 "Phosphoglucosamine mutase"  
"OP8\_M21\_00422" 28567 "s59E25H2" 0 "Phosphoglucosamine mutase"  
"OP8\_M21\_00422" 28567 "s59E5H2" 0.9570206 "Phosphoglucosamine mutase"  
"OP8\_M21\_00422" 28567 "s63E6H2" 0 "Phosphoglucosamine mutase"  
"OP8\_M21\_00423" 28568 "s59E13H2" 0.004239965 "Mechanosensitive channel MscK precursor"  
"OP8\_M21\_00423" 28568 "s59E25H2" 0 "Mechanosensitive channel MscK precursor"  
"OP8\_M21\_00423" 28568 "s59E5H2" 0.6282569 "Mechanosensitive channel MscK precursor"  
"OP8\_M21\_00423" 28568 "s63E6H2" 0.0009143192 "Mechanosensitive channel MscK precursor"  
"OP8\_M21\_00424" 28569 "s59E13H2" 0 "ribonuclease Z"  
"OP8\_M21\_00424" 28569 "s59E25H2" 0 "ribonuclease Z"  
"OP8\_M21\_00424" 28569 "s59E5H2" 0.9560403 "ribonuclease Z"



"OP8\_M21\_00424" 28569 "s63E6H2" 0 "ribonuclease Z"  
"OP8\_M21\_00425" 28570 "s59E13H2" 0.00134775 "Adenylate cyclase 1"  
"OP8\_M21\_00425" 28570 "s59E25H2" 0 "Adenylate cyclase 1"  
"OP8\_M21\_00425" 28570 "s59E5H2" 0.7985892 "Adenylate cyclase 1"  
"OP8\_M21\_00425" 28570 "s63E6H2" 0 "Adenylate cyclase 1"  
"OP8\_M21\_00426" 28571 "s59E13H2" 0 "TPR repeat-containing protein YfgC precursor"  
"OP8\_M21\_00426" 28571 "s59E25H2" 0 "TPR repeat-containing protein YfgC precursor"  
"OP8\_M21\_00426" 28571 "s59E5H2" 0.4145065 "TPR repeat-containing protein YfgC precursor"  
"OP8\_M21\_00426" 28571 "s63E6H2" 0 "TPR repeat-containing protein YfgC precursor"  
"OP8\_M21\_00427" 28572 "s59E13H2" 0 "Bacterial SH3 domain protein"  
"OP8\_M21\_00427" 28572 "s59E25H2" 0 "Bacterial SH3 domain protein"  
"OP8\_M21\_00427" 28572 "s59E5H2" 0.2546469 "Bacterial SH3 domain protein"  
"OP8\_M21\_00427" 28572 "s63E6H2" 0 "Bacterial SH3 domain protein"  
"OP8\_M21\_00428" 28573 "s59E13H2" 0.001594791 "ATP-dependent RecD-like DNA helicase"  
"OP8\_M21\_00428" 28573 "s59E25H2" 0 "ATP-dependent RecD-like DNA helicase"  
"OP8\_M21\_00428" 28573 "s59E5H2" 0.179486 "ATP-dependent RecD-like DNA helicase"  
"OP8\_M21\_00428" 28573 "s63E6H2" 0 "ATP-dependent RecD-like DNA helicase"  
"OP8\_M21\_00429" 28574 "s59E13H2" 0.001146619 "Type I phosphodiesterase / nucleotide pyrophosphatase"  
"OP8\_M21\_00429" 28574 "s59E25H2" 0 "Type I phosphodiesterase / nucleotide pyrophosphatase"  
"OP8\_M21\_00429" 28574 "s59E5H2" 0.1891565 "Type I phosphodiesterase / nucleotide pyrophosphatase"  
"OP8\_M21\_00429" 28574 "s63E6H2" 0 "Type I phosphodiesterase / nucleotide pyrophosphatase"  
"OP8\_M21\_00430" 28575 "s59E13H2" 0.001545687 "Signal peptidase I P"  
"OP8\_M21\_00430" 28575 "s59E25H2" 0 "Signal peptidase I P"  
"OP8\_M21\_00430" 28575 "s59E5H2" 0.157591 "Signal peptidase I P"  
"OP8\_M21\_00430" 28575 "s63E6H2" 0 "Signal peptidase I P"  
"OP8\_M21\_00431" 28576 "s59E13H2" 0.003451015 "1,4-dihydroxy-2-naphthoate octaprenyltransferase"  
"OP8\_M21\_00431" 28576 "s59E25H2" 0 "1,4-dihydroxy-2-naphthoate octaprenyltransferase"  
"OP8\_M21\_00431" 28576 "s59E5H2" 0.5443326 "1,4-dihydroxy-2-naphthoate octaprenyltransferase"  
"OP8\_M21\_00431" 28576 "s63E6H2" 0 "1,4-dihydroxy-2-naphthoate octaprenyltransferase"  
"OP8\_M21\_00432" 28577 "s59E13H2" 0.01410548 "Ribosome-binding ATPase YchF"  
"OP8\_M21\_00432" 28577 "s59E25H2" 0 "Ribosome-binding ATPase YchF"  
"OP8\_M21\_00432" 28577 "s59E5H2" 0.7030971 "Ribosome-binding ATPase YchF"  
"OP8\_M21\_00432" 28577 "s63E6H2" 0 "Ribosome-binding ATPase YchF"  
"OP8\_M21\_00433" 28578 "s59E13H2" 0.006542254 "Prolyl tripeptidyl peptidase precursor"  
"OP8\_M21\_00433" 28578 "s59E25H2" 0 "Prolyl tripeptidyl peptidase precursor"  
"OP8\_M21\_00433" 28578 "s59E5H2" 1.609402 "Prolyl tripeptidyl peptidase precursor"  
"OP8\_M21\_00433" 28578 "s63E6H2" 0 "Prolyl tripeptidyl peptidase precursor"  
"OP8\_M21\_00434" 28579 "s59E13H2" 0.02288642 "Ycf48-like protein"  
"OP8\_M21\_00434" 28579 "s59E25H2" 0 "Ycf48-like protein"  
"OP8\_M21\_00434" 28579 "s59E5H2" 3.56299 "Ycf48-like protein"  
"OP8\_M21\_00434" 28579 "s63E6H2" 0 "Ycf48-like protein"  
"OP8\_M21\_00435" 28580 "s59E13H2" 0.01643208 "BNR/Asp-box repeat protein"  
"OP8\_M21\_00435" 28580 "s59E25H2" 0 "BNR/Asp-box repeat protein"  
"OP8\_M21\_00435" 28580 "s59E5H2" 4.623551 "BNR/Asp-box repeat protein"  
"OP8\_M21\_00435" 28580 "s63E6H2" 0 "BNR/Asp-box repeat protein"  
"OP8\_M21\_00436" 28581 "s59E13H2" 0.05264237 "Xylose isomerase-like TIM barrel"  
"OP8\_M21\_00436" 28581 "s59E25H2" 0 "Xylose isomerase-like TIM barrel"

"OP8\_M21\_00436" 28581 "s59E5H2" 4.815325 "Xylose isomerase-like TIM barrel"  
"OP8\_M21\_00436" 28581 "s63E6H2" 0 "Xylose isomerase-like TIM barrel"  
"OP8\_M21\_00437" 28582 "s59E13H2" 0 "Prolyl-tRNA editing protein ProX"  
"OP8\_M21\_00437" 28582 "s59E25H2" 0 "Prolyl-tRNA editing protein ProX"  
"OP8\_M21\_00437" 28582 "s59E5H2" 3.863959 "Prolyl-tRNA editing protein ProX"  
"OP8\_M21\_00437" 28582 "s63E6H2" 0 "Prolyl-tRNA editing protein ProX"  
"OP8\_M21\_00438" 28583 "s59E13H2" 0 "hypothetical protein"  
"OP8\_M21\_00438" 28583 "s59E25H2" 0 "hypothetical protein"  
"OP8\_M21\_00438" 28583 "s59E5H2" 3.208496 "hypothetical protein"  
"OP8\_M21\_00438" 28583 "s63E6H2" 0 "hypothetical protein"  
"OP8\_M21\_00440" 28585 "s59E13H2" 0.001634862 "Sodium/pantothenate symporter"  
"OP8\_M21\_00440" 28585 "s59E25H2" 0 "Sodium/pantothenate symporter"  
"OP8\_M21\_00440" 28585 "s59E5H2" 3.032218 "Sodium/pantothenate symporter"  
"OP8\_M21\_00440" 28585 "s63E6H2" 0 "Sodium/pantothenate symporter"  
"OP8\_M21\_00441" 28586 "s59E13H2" 0 "hypothetical protein"  
"OP8\_M21\_00441" 28586 "s59E25H2" 0 "hypothetical protein"  
"OP8\_M21\_00441" 28586 "s59E5H2" 2.372847 "hypothetical protein"  
"OP8\_M21\_00441" 28586 "s63E6H2" 0 "hypothetical protein"  
"OP8\_M21\_00442" 28587 "s59E13H2" 0 "Ferrous-iron efflux pump FieF"  
"OP8\_M21\_00442" 28587 "s59E25H2" 0 "Ferrous-iron efflux pump FieF"  
"OP8\_M21\_00442" 28587 "s59E5H2" 2.161047 "Ferrous-iron efflux pump FieF"  
"OP8\_M21\_00442" 28587 "s63E6H2" 0 "Ferrous-iron efflux pump FieF"  
"OP8\_M21\_00443" 28588 "s59E13H2" 0.01335604 "preprotein translocase subunit SecE"  
"OP8\_M21\_00443" 28588 "s59E25H2" 0 "preprotein translocase subunit SecE"  
"OP8\_M21\_00443" 28588 "s59E5H2" 0.8316695 "preprotein translocase subunit SecE"  
"OP8\_M21\_00443" 28588 "s63E6H2" 0 "preprotein translocase subunit SecE"  
"OP8\_M21\_00444" 28589 "s59E13H2" 0.006785305 "hypothetical protein"  
"OP8\_M21\_00444" 28589 "s59E25H2" 0 "hypothetical protein"  
"OP8\_M21\_00444" 28589 "s59E5H2" 0.7258032 "hypothetical protein"  
"OP8\_M21\_00444" 28589 "s63E6H2" 0 "hypothetical protein"  
"OP8\_M21\_00445" 28590 "s59E13H2" 0.02828279 "50S ribosomal protein L11"  
"OP8\_M21\_00445" 28590 "s59E25H2" 0 "50S ribosomal protein L11"  
"OP8\_M21\_00445" 28590 "s59E5H2" 0.6589705 "50S ribosomal protein L11"  
"OP8\_M21\_00445" 28590 "s63E6H2" 0 "50S ribosomal protein L11"  
"OP8\_M21\_00446" 28591 "s59E13H2" 0.02050545 "50S ribosomal protein L1"  
"OP8\_M21\_00446" 28591 "s59E25H2" 0 "50S ribosomal protein L1"  
"OP8\_M21\_00446" 28591 "s59E5H2" 0.5999277 "50S ribosomal protein L1"  
"OP8\_M21\_00446" 28591 "s63E6H2" 0 "50S ribosomal protein L1"  
"OP8\_M21\_00447" 28592 "s59E13H2" 0.07750326 "50S ribosomal protein L10"  
"OP8\_M21\_00447" 28592 "s59E25H2" 0 "50S ribosomal protein L10"  
"OP8\_M21\_00447" 28592 "s59E5H2" 2.247496 "50S ribosomal protein L10"  
"OP8\_M21\_00447" 28592 "s63E6H2" 0 "50S ribosomal protein L10"  
"OP8\_M21\_00448" 28593 "s59E13H2" 0.03525113 "50S ribosomal protein L7/L12"  
"OP8\_M21\_00448" 28593 "s59E25H2" 0 "50S ribosomal protein L7/L12"  
"OP8\_M21\_00448" 28593 "s59E5H2" 2.416357 "50S ribosomal protein L7/L12"  
"OP8\_M21\_00448" 28593 "s63E6H2" 0 "50S ribosomal protein L7/L12"  
"OP8\_M21\_00449" 28594 "s59E13H2" 0.04187816 "DNA-directed RNA polymerase subunit beta"

"OP8\_M21\_00449" 28594 "s59E25H2" 0 "DNA-directed RNA polymerase subunit beta"  
"OP8\_M21\_00449" 28594 "s59E5H2" 0.5416143 "DNA-directed RNA polymerase subunit beta"  
"OP8\_M21\_00449" 28594 "s63E6H2" 0 "DNA-directed RNA polymerase subunit beta"  
"OP8\_M21\_00450" 28595 "s59E13H2" 0.09598248 "DNA-directed RNA polymerase subunit beta"  
"OP8\_M21\_00450" 28595 "s59E25H2" 0 "DNA-directed RNA polymerase subunit beta"  
"OP8\_M21\_00450" 28595 "s59E5H2" 0.3347218 "DNA-directed RNA polymerase subunit beta"  
"OP8\_M21\_00450" 28595 "s63E6H2" 0 "DNA-directed RNA polymerase subunit beta"  
"OP8\_M21\_00451" 28596 "s59E13H2" 0.01648733 "30S ribosomal protein S12"  
"OP8\_M21\_00451" 28596 "s59E25H2" 0 "30S ribosomal protein S12"  
"OP8\_M21\_00451" 28596 "s59E5H2" 0.2206597 "30S ribosomal protein S12"  
"OP8\_M21\_00451" 28596 "s63E6H2" 0 "30S ribosomal protein S12"  
"OP8\_M21\_00452" 28597 "s59E13H2" 0.01772126 "30S ribosomal protein S7"  
"OP8\_M21\_00452" 28597 "s59E25H2" 0 "30S ribosomal protein S7"  
"OP8\_M21\_00452" 28597 "s59E5H2" 0.3573809 "30S ribosomal protein S7"  
"OP8\_M21\_00452" 28597 "s63E6H2" 0 "30S ribosomal protein S7"  
"OP8\_M21\_00453" 28598 "s59E13H2" 0.04201905 "D-aminoacylase"  
"OP8\_M21\_00453" 28598 "s59E25H2" 0 "D-aminoacylase"  
"OP8\_M21\_00453" 28598 "s59E5H2" 0.5013236 "D-aminoacylase"  
"OP8\_M21\_00453" 28598 "s63E6H2" 0 "D-aminoacylase"  
"OP8\_M21\_00454" 28599 "s59E13H2" 0.03572778 "Beta-galactosidase"  
"OP8\_M21\_00454" 28599 "s59E25H2" 0 "Beta-galactosidase"  
"OP8\_M21\_00454" 28599 "s59E5H2" 0.820439 "Beta-galactosidase"  
"OP8\_M21\_00454" 28599 "s63E6H2" 0 "Beta-galactosidase"  
"OP8\_M21\_00455" 28600 "s59E13H2" 1.306215e-05 "Zinc carboxypeptidase"  
"OP8\_M21\_00455" 28600 "s59E25H2" 0 "Zinc carboxypeptidase"  
"OP8\_M21\_00455" 28600 "s59E5H2" 1.046433 "Zinc carboxypeptidase"  
"OP8\_M21\_00455" 28600 "s63E6H2" 0 "Zinc carboxypeptidase"  
"OP8\_M21\_00456" 28601 "s59E13H2" 0.0003054572 "Carboxypeptidase T precursor"  
"OP8\_M21\_00456" 28601 "s59E25H2" 0.1328042 "Carboxypeptidase T precursor"  
"OP8\_M21\_00456" 28601 "s59E5H2" 2.068643 "Carboxypeptidase T precursor"  
"OP8\_M21\_00456" 28601 "s63E6H2" 0 "Carboxypeptidase T precursor"  
"OP8\_M21\_00457" 28602 "s59E13H2" 0.0479706 "putative tRNA/rRNA methyltransferase"  
"OP8\_M21\_00457" 28602 "s59E25H2" 0 "putative tRNA/rRNA methyltransferase"  
"OP8\_M21\_00457" 28602 "s59E5H2" 1.888086 "putative tRNA/rRNA methyltransferase"  
"OP8\_M21\_00457" 28602 "s63E6H2" 0 "putative tRNA/rRNA methyltransferase"  
"OP8\_M21\_00458" 28603 "s59E13H2" 0.04033959 "D-alanine--D-alanine ligase B"  
"OP8\_M21\_00458" 28603 "s59E25H2" 0 "D-alanine--D-alanine ligase B"  
"OP8\_M21\_00458" 28603 "s59E5H2" 0.8436566 "D-alanine--D-alanine ligase B"  
"OP8\_M21\_00458" 28603 "s63E6H2" 0 "D-alanine--D-alanine ligase B"  
"OP8\_M21\_00459" 28604 "s59E13H2" 0.03958586 "Diaminopimelate epimerase"  
"OP8\_M21\_00459" 28604 "s59E25H2" 0 "Diaminopimelate epimerase"  
"OP8\_M21\_00459" 28604 "s59E5H2" 0.8519597 "Diaminopimelate epimerase"  
"OP8\_M21\_00459" 28604 "s63E6H2" 0 "Diaminopimelate epimerase"  
"OP8\_M21\_00460" 28605 "s59E13H2" 0.070839 "hypothetical protein"  
"OP8\_M21\_00460" 28605 "s59E25H2" 0 "hypothetical protein"  
"OP8\_M21\_00460" 28605 "s59E5H2" 2.769845 "hypothetical protein"  
"OP8\_M21\_00460" 28605 "s63E6H2" 0 "hypothetical protein"

"OP8\_M21\_00461" 28606 "s59E13H2" 0.03120458 "hypothetical protein"  
"OP8\_M21\_00461" 28606 "s59E25H2" 0 "hypothetical protein"  
"OP8\_M21\_00461" 28606 "s59E5H2" 1.731594 "hypothetical protein"  
"OP8\_M21\_00461" 28606 "s63E6H2" 0 "hypothetical protein"  
"OP8\_M21\_00462" 28607 "s59E13H2" 0.03511268 "hypothetical protein"  
"OP8\_M21\_00462" 28607 "s59E25H2" 0 "hypothetical protein"  
"OP8\_M21\_00462" 28607 "s59E5H2" 1.242265 "hypothetical protein"  
"OP8\_M21\_00462" 28607 "s63E6H2" 0 "hypothetical protein"  
"OP8\_M21\_00463" 28608 "s59E13H2" 0.0005166715 "hypothetical protein"  
"OP8\_M21\_00463" 28608 "s59E25H2" 0 "hypothetical protein"  
"OP8\_M21\_00463" 28608 "s59E5H2" 0.7973401 "hypothetical protein"  
"OP8\_M21\_00463" 28608 "s63E6H2" 0 "hypothetical protein"  
"OP8\_M21\_00464" 28609 "s59E13H2" 0 "hypothetical protein"  
"OP8\_M21\_00464" 28609 "s59E25H2" 0 "hypothetical protein"  
"OP8\_M21\_00464" 28609 "s59E5H2" 0.001697096 "hypothetical protein"  
"OP8\_M21\_00464" 28609 "s63E6H2" 0 "hypothetical protein"  
"OP8\_M21\_00465" 28610 "s59E13H2" 0 "NADH-plastoquinone oxidoreductase subunit"  
"OP8\_M21\_00465" 28610 "s59E25H2" 0 "NADH-plastoquinone oxidoreductase subunit"  
"OP8\_M21\_00465" 28610 "s59E5H2" 0.1774249 "NADH-plastoquinone oxidoreductase subunit"  
"OP8\_M21\_00465" 28610 "s63E6H2" 0 "NADH-plastoquinone oxidoreductase subunit"  
"OP8\_M21\_00466" 28611 "s59E13H2" 0.01808099 "hypothetical protein"  
"OP8\_M21\_00466" 28611 "s59E25H2" 0.2800454 "hypothetical protein"  
"OP8\_M21\_00466" 28611 "s59E5H2" 4.230504 "hypothetical protein"  
"OP8\_M21\_00466" 28611 "s63E6H2" 0.002583009 "hypothetical protein"  
"OP8\_M21\_00467" 28612 "s59E13H2" 0.03595479 "Sporulation protein YtfJ (Spore\_YtfJ)"  
"OP8\_M21\_00467" 28612 "s59E25H2" 0 "Sporulation protein YtfJ (Spore\_YtfJ)"  
"OP8\_M21\_00467" 28612 "s59E5H2" 9.35855 "Sporulation protein YtfJ (Spore\_YtfJ)"  
"OP8\_M21\_00467" 28612 "s63E6H2" 0 "Sporulation protein YtfJ (Spore\_YtfJ)"  
"OP8\_M21\_00468" 28613 "s59E13H2" 0.04141072 "Tetratricopeptide repeat protein"  
"OP8\_M21\_00468" 28613 "s59E25H2" 0 "Tetratricopeptide repeat protein"  
"OP8\_M21\_00468" 28613 "s59E5H2" 10.50792 "Tetratricopeptide repeat protein"  
"OP8\_M21\_00468" 28613 "s63E6H2" 0 "Tetratricopeptide repeat protein"  
"OP8\_M21\_00471" 28616 "s59E13H2" 0.0123948 "hypothetical protein"  
"OP8\_M21\_00471" 28616 "s59E25H2" 0 "hypothetical protein"  
"OP8\_M21\_00471" 28616 "s59E5H2" 2.180465 "hypothetical protein"  
"OP8\_M21\_00471" 28616 "s63E6H2" 0 "hypothetical protein"  
"OP8\_M21\_00472" 28617 "s59E13H2" 0.009893277 "ECF RNA polymerase sigma factor SigR"  
"OP8\_M21\_00472" 28617 "s59E25H2" 0 "ECF RNA polymerase sigma factor SigR"  
"OP8\_M21\_00472" 28617 "s59E5H2" 1.872394 "ECF RNA polymerase sigma factor SigR"  
"OP8\_M21\_00472" 28617 "s63E6H2" 0 "ECF RNA polymerase sigma factor SigR"  
"OP8\_M21\_00473" 28618 "s59E13H2" 0.01284708 "hypothetical protein"  
"OP8\_M21\_00473" 28618 "s59E25H2" 0 "hypothetical protein"  
"OP8\_M21\_00473" 28618 "s59E5H2" 2.255649 "hypothetical protein"  
"OP8\_M21\_00473" 28618 "s63E6H2" 0 "hypothetical protein"  
"OP8\_M21\_00474" 28619 "s59E13H2" 0.007991956 "Peptidase S46"  
"OP8\_M21\_00474" 28619 "s59E25H2" 0 "Peptidase S46"  
"OP8\_M21\_00474" 28619 "s59E5H2" 1.234492 "Peptidase S46"

"OP8\_M21\_00474" 28619 "s63E6H2" 0 "Peptidase S46"  
"OP8\_M21\_00475" 28620 "s59E13H2" 0 "Proline iminopeptidase"  
"OP8\_M21\_00475" 28620 "s59E25H2" 0 "Proline iminopeptidase"  
"OP8\_M21\_00475" 28620 "s59E5H2" 1.619084 "Proline iminopeptidase"  
"OP8\_M21\_00475" 28620 "s63E6H2" 0.005896675 "Proline iminopeptidase"  
"OP8\_M21\_00476" 28621 "s59E13H2" 0.005812428 "General stress protein 26"  
"OP8\_M21\_00476" 28621 "s59E25H2" 0 "General stress protein 26"  
"OP8\_M21\_00476" 28621 "s59E5H2" 1.642639 "General stress protein 26"  
"OP8\_M21\_00476" 28621 "s63E6H2" 0 "General stress protein 26"  
"OP8\_M21\_00477" 28622 "s59E13H2" 0 "SnoaL-like polyketide cyclase"  
"OP8\_M21\_00477" 28622 "s59E25H2" 0 "SnoaL-like polyketide cyclase"  
"OP8\_M21\_00477" 28622 "s59E5H2" 1.494079 "SnoaL-like polyketide cyclase"  
"OP8\_M21\_00477" 28622 "s63E6H2" 0 "SnoaL-like polyketide cyclase"  
"OP8\_M21\_00478" 28623 "s59E13H2" 0 "site-specific tyrosine recombinase XerD"  
"OP8\_M21\_00478" 28623 "s59E25H2" 0 "site-specific tyrosine recombinase XerD"  
"OP8\_M21\_00478" 28623 "s59E5H2" 1.304531 "site-specific tyrosine recombinase XerD"  
"OP8\_M21\_00478" 28623 "s63E6H2" 0 "site-specific tyrosine recombinase XerD"  
"OP8\_M21\_00479" 28624 "s59E13H2" 0 "hypothetical protein"  
"OP8\_M21\_00479" 28624 "s59E25H2" 0 "hypothetical protein"  
"OP8\_M21\_00479" 28624 "s59E5H2" 0.898502 "hypothetical protein"  
"OP8\_M21\_00479" 28624 "s63E6H2" 0 "hypothetical protein"  
"OP8\_M21\_00481" 28626 "s59E13H2" 0 "hypothetical protein"  
"OP8\_M21\_00481" 28626 "s59E25H2" 0 "hypothetical protein"  
"OP8\_M21\_00481" 28626 "s59E5H2" 0.755426 "hypothetical protein"  
"OP8\_M21\_00481" 28626 "s63E6H2" 0 "hypothetical protein"  
"OP8\_M21\_00482" 28627 "s59E13H2" 0.006201645 "DNA polymerase IV"  
"OP8\_M21\_00482" 28627 "s59E25H2" 0 "DNA polymerase IV"  
"OP8\_M21\_00482" 28627 "s59E5H2" 8.612222 "DNA polymerase IV"  
"OP8\_M21\_00482" 28627 "s63E6H2" 0 "DNA polymerase IV"  
"OP8\_M21\_00483" 28628 "s59E13H2" 0.004220627 "LexA repressor"  
"OP8\_M21\_00483" 28628 "s59E25H2" 0 "LexA repressor"  
"OP8\_M21\_00483" 28628 "s59E5H2" 3.477574 "LexA repressor"  
"OP8\_M21\_00483" 28628 "s63E6H2" 0 "LexA repressor"  
"OP8\_M21\_00484" 28629 "s59E13H2" 0.0072599 "hypothetical protein"  
"OP8\_M21\_00484" 28629 "s59E25H2" 0 "hypothetical protein"  
"OP8\_M21\_00484" 28629 "s59E5H2" 3.946814 "hypothetical protein"  
"OP8\_M21\_00484" 28629 "s63E6H2" 0 "hypothetical protein"  
"OP8\_M21\_00487" 28632 "s59E13H2" 3.147942 "putative ABC transporter ATP-binding protein YxIF"  
"OP8\_M21\_00487" 28632 "s59E25H2" 0 "putative ABC transporter ATP-binding protein YxIF"  
"OP8\_M21\_00487" 28632 "s59E5H2" 1.418849 "putative ABC transporter ATP-binding protein YxIF"  
"OP8\_M21\_00487" 28632 "s63E6H2" 0.001776907 "putative ABC transporter ATP-binding protein YxIF"  
"OP8\_M21\_00488" 28633 "s59E13H2" 0.02954964 "Queuine tRNA-ribosyltransferase"  
"OP8\_M21\_00488" 28633 "s59E25H2" 0 "Queuine tRNA-ribosyltransferase"  
"OP8\_M21\_00488" 28633 "s59E5H2" 3.497739 "Queuine tRNA-ribosyltransferase"  
"OP8\_M21\_00488" 28633 "s63E6H2" 0 "Queuine tRNA-ribosyltransferase"  
"OP8\_M21\_00489" 28634 "s59E13H2" 0.02231039 "preprotein translocase subunit YajC"  
"OP8\_M21\_00489" 28634 "s59E25H2" 0 "preprotein translocase subunit YajC"

"OP8\_M21\_00489" 28634 "s59E5H2" 4.688351 "preprotein translocase subunit YajC"  
"OP8\_M21\_00489" 28634 "s63E6H2" 0 "preprotein translocase subunit YajC"  
"OP8\_M21\_00490" 28635 "s59E13H2" 0.01408575 "preprotein translocase subunit SecD"  
"OP8\_M21\_00490" 28635 "s59E25H2" 0 "preprotein translocase subunit SecD"  
"OP8\_M21\_00490" 28635 "s59E5H2" 5.020129 "preprotein translocase subunit SecD"  
"OP8\_M21\_00490" 28635 "s63E6H2" 0 "preprotein translocase subunit SecD"  
"OP8\_M21\_00491" 28636 "s59E13H2" 0.0328788 "preprotein translocase subunit SecF"  
"OP8\_M21\_00491" 28636 "s59E25H2" 0 "preprotein translocase subunit SecF"  
"OP8\_M21\_00491" 28636 "s59E5H2" 5.442618 "preprotein translocase subunit SecF"  
"OP8\_M21\_00491" 28636 "s63E6H2" 0 "preprotein translocase subunit SecF"  
"OP8\_M21\_00492" 28637 "s59E13H2" 0.02352548 "transport protein TonB"  
"OP8\_M21\_00492" 28637 "s59E25H2" 0.5791506 "transport protein TonB"  
"OP8\_M21\_00492" 28637 "s59E5H2" 5.333618 "transport protein TonB"  
"OP8\_M21\_00492" 28637 "s63E6H2" 0.000727637 "transport protein TonB"  
"OP8\_M21\_00493" 28638 "s59E13H2" 0.04819889 "Biopolymer transport protein ExbB"  
"OP8\_M21\_00493" 28638 "s59E25H2" 0 "Biopolymer transport protein ExbB"  
"OP8\_M21\_00493" 28638 "s59E5H2" 8.276149 "Biopolymer transport protein ExbB"  
"OP8\_M21\_00493" 28638 "s63E6H2" 0 "Biopolymer transport protein ExbB"  
"OP8\_M21\_00494" 28639 "s59E13H2" 0.04039212 "Biopolymer transport protein ExbD"  
"OP8\_M21\_00494" 28639 "s59E25H2" 0 "Biopolymer transport protein ExbD"  
"OP8\_M21\_00494" 28639 "s59E5H2" 8.736117 "Biopolymer transport protein ExbD"  
"OP8\_M21\_00494" 28639 "s63E6H2" 0 "Biopolymer transport protein ExbD"  
"OP8\_M21\_00495" 28640 "s59E13H2" 0.03108826 "Spore photoproduct lyase"  
"OP8\_M21\_00495" 28640 "s59E25H2" 0 "Spore photoproduct lyase"  
"OP8\_M21\_00495" 28640 "s59E5H2" 6.345034 "Spore photoproduct lyase"  
"OP8\_M21\_00495" 28640 "s63E6H2" 0 "Spore photoproduct lyase"  
"OP8\_M21\_00496" 28641 "s59E13H2" 0.03099854 "hypothetical protein"  
"OP8\_M21\_00496" 28641 "s59E25H2" 0 "hypothetical protein"  
"OP8\_M21\_00496" 28641 "s59E5H2" 4.915933 "hypothetical protein"  
"OP8\_M21\_00496" 28641 "s63E6H2" 0 "hypothetical protein"  
"OP8\_M21\_00497" 28642 "s59E13H2" 0.0255638 "Purine nucleoside phosphorylase DeoD-type"  
"OP8\_M21\_00497" 28642 "s59E25H2" 0 "Purine nucleoside phosphorylase DeoD-type"  
"OP8\_M21\_00497" 28642 "s59E5H2" 5.054613 "Purine nucleoside phosphorylase DeoD-type"  
"OP8\_M21\_00497" 28642 "s63E6H2" 0 "Purine nucleoside phosphorylase DeoD-type"  
"OP8\_M21\_00498" 28643 "s59E13H2" 0.01494728 "Glyoxylate reductase"  
"OP8\_M21\_00498" 28643 "s59E25H2" 0 "Glyoxylate reductase"  
"OP8\_M21\_00498" 28643 "s59E5H2" 5.370964 "Glyoxylate reductase"  
"OP8\_M21\_00498" 28643 "s63E6H2" 0 "Glyoxylate reductase"  
"OP8\_M21\_00499" 28644 "s59E13H2" 0.02929406 "GMP synthase subunit B"  
"OP8\_M21\_00499" 28644 "s59E25H2" 0 "GMP synthase subunit B"  
"OP8\_M21\_00499" 28644 "s59E5H2" 5.78481 "GMP synthase subunit B"  
"OP8\_M21\_00499" 28644 "s63E6H2" 0 "GMP synthase subunit B"  
"OP8\_M21\_00500" 28645 "s59E13H2" 0.02140613 "4-hydroxy-3-methylbut-2-en-1-yl diphosphate synthase"  
"OP8\_M21\_00500" 28645 "s59E25H2" 0 "4-hydroxy-3-methylbut-2-en-1-yl diphosphate synthase"  
"OP8\_M21\_00500" 28645 "s59E5H2" 4.903812 "4-hydroxy-3-methylbut-2-en-1-yl diphosphate synthase"  
"OP8\_M21\_00500" 28645 "s63E6H2" 0 "4-hydroxy-3-methylbut-2-en-1-yl diphosphate synthase"  
"OP8\_M21\_00501" 28646 "s59E13H2" 0.0257063 "Magnesium transport protein CorA"

"OP8\_M21\_00501" 28646 "s59E25H2" 0 "Magnesium transport protein CorA"  
"OP8\_M21\_00501" 28646 "s59E5H2" 0.1932317 "Magnesium transport protein CorA"  
"OP8\_M21\_00501" 28646 "s63E6H2" 0 "Magnesium transport protein CorA"  
"OP8\_M21\_00502" 28647 "s59E13H2" 0.003767613 "hypothetical protein"  
"OP8\_M21\_00502" 28647 "s59E25H2" 0 "hypothetical protein"  
"OP8\_M21\_00502" 28647 "s59E5H2" 0.1442844 "hypothetical protein"  
"OP8\_M21\_00502" 28647 "s63E6H2" 0 "hypothetical protein"  
"OP8\_M21\_00504" 28649 "s59E13H2" 0.03848761 "hypothetical protein"  
"OP8\_M21\_00504" 28649 "s59E25H2" 0 "hypothetical protein"  
"OP8\_M21\_00504" 28649 "s59E5H2" 0.3049157 "hypothetical protein"  
"OP8\_M21\_00504" 28649 "s63E6H2" 0 "hypothetical protein"  
"OP8\_M21\_00505" 28650 "s59E13H2" 0.03581766 "(Dimethylallyl)adenosine tRNA methylthiotransferase MiaB"  
"OP8\_M21\_00505" 28650 "s59E25H2" 0 "(Dimethylallyl)adenosine tRNA methylthiotransferase MiaB"  
"OP8\_M21\_00505" 28650 "s59E5H2" 0.7358891 "(Dimethylallyl)adenosine tRNA methylthiotransferase MiaB"  
"OP8\_M21\_00505" 28650 "s63E6H2" 0 "(Dimethylallyl)adenosine tRNA methylthiotransferase MiaB"  
"OP8\_M21\_00506" 28651 "s59E13H2" 0.03373699 "hypothetical protein"  
"OP8\_M21\_00506" 28651 "s59E25H2" 0 "hypothetical protein"  
"OP8\_M21\_00506" 28651 "s59E5H2" 2.332205 "hypothetical protein"  
"OP8\_M21\_00506" 28651 "s63E6H2" 0 "hypothetical protein"  
"OP8\_M21\_00507" 28652 "s59E13H2" 0.06341683 "Translation initiation factor IF-2"  
"OP8\_M21\_00507" 28652 "s59E25H2" 0 "Translation initiation factor IF-2"  
"OP8\_M21\_00507" 28652 "s59E5H2" 3.206386 "Translation initiation factor IF-2"  
"OP8\_M21\_00507" 28652 "s63E6H2" 0 "Translation initiation factor IF-2"  
"OP8\_M21\_00508" 28653 "s59E13H2" 0.09168063 "hypothetical protein"  
"OP8\_M21\_00508" 28653 "s59E25H2" 0 "hypothetical protein"  
"OP8\_M21\_00508" 28653 "s59E5H2" 4.069835 "hypothetical protein"  
"OP8\_M21\_00508" 28653 "s63E6H2" 0 "hypothetical protein"  
"OP8\_M21\_00509" 28654 "s59E13H2" 0.09593169 "Ribosome-binding factor A"  
"OP8\_M21\_00509" 28654 "s59E25H2" 0 "Ribosome-binding factor A"  
"OP8\_M21\_00509" 28654 "s59E5H2" 4.464 "Ribosome-binding factor A"  
"OP8\_M21\_00509" 28654 "s63E6H2" 0 "Ribosome-binding factor A"  
"OP8\_M21\_00510" 28655 "s59E13H2" 0.06884575 "Bifunctional oligoribonuclease and PAP phosphatase NrnA"  
"OP8\_M21\_00510" 28655 "s59E25H2" 0 "Bifunctional oligoribonuclease and PAP phosphatase NrnA"  
"OP8\_M21\_00510" 28655 "s59E5H2" 3.662018 "Bifunctional oligoribonuclease and PAP phosphatase NrnA"  
"OP8\_M21\_00510" 28655 "s63E6H2" 0 "Bifunctional oligoribonuclease and PAP phosphatase NrnA"  
"OP8\_M21\_00511" 28656 "s59E13H2" 0.05929136 "tRNA pseudouridine synthase B"  
"OP8\_M21\_00511" 28656 "s59E25H2" 0 "tRNA pseudouridine synthase B"  
"OP8\_M21\_00511" 28656 "s59E5H2" 4.291387 "tRNA pseudouridine synthase B"  
"OP8\_M21\_00511" 28656 "s63E6H2" 0 "tRNA pseudouridine synthase B"  
"OP8\_M21\_00512" 28657 "s59E13H2" 0.05015001 "Sodium:neurotransmitter symporter family protein"  
"OP8\_M21\_00512" 28657 "s59E25H2" 0 "Sodium:neurotransmitter symporter family protein"  
"OP8\_M21\_00512" 28657 "s59E5H2" 4.702413 "Sodium:neurotransmitter symporter family protein"  
"OP8\_M21\_00512" 28657 "s63E6H2" 0 "Sodium:neurotransmitter symporter family protein"  
"OP8\_M21\_00513" 28658 "s59E13H2" 0.06147846 "hypothetical protein"  
"OP8\_M21\_00513" 28658 "s59E25H2" 0 "hypothetical protein"  
"OP8\_M21\_00513" 28658 "s59E5H2" 5.88852 "hypothetical protein"  
"OP8\_M21\_00513" 28658 "s63E6H2" 0 "hypothetical protein"

"OP8\_M21\_00514" 28659 "s59E13H2" 0.06424263 "hypothetical protein"  
"OP8\_M21\_00514" 28659 "s59E25H2" 0 "hypothetical protein"  
"OP8\_M21\_00514" 28659 "s59E5H2" 6.469495 "hypothetical protein"  
"OP8\_M21\_00514" 28659 "s63E6H2" 0 "hypothetical protein"  
"OP8\_M21\_00515" 28660 "s59E13H2" 0.06174463 "hypothetical protein"  
"OP8\_M21\_00515" 28660 "s59E25H2" 0 "hypothetical protein"  
"OP8\_M21\_00515" 28660 "s59E5H2" 6.437161 "hypothetical protein"  
"OP8\_M21\_00515" 28660 "s63E6H2" 0 "hypothetical protein"  
"OP8\_M21\_00516" 28661 "s59E13H2" 0.07997426 "GMP synthase [glutamine-hydrolyzing] subunit A"  
"OP8\_M21\_00516" 28661 "s59E25H2" 0 "GMP synthase [glutamine-hydrolyzing] subunit A"  
"OP8\_M21\_00516" 28661 "s59E5H2" 4.703625 "GMP synthase [glutamine-hydrolyzing] subunit A"  
"OP8\_M21\_00516" 28661 "s63E6H2" 0 "GMP synthase [glutamine-hydrolyzing] subunit A"  
"OP8\_M21\_00517" 28662 "s59E13H2" 0.04079572 "hypothetical protein"  
"OP8\_M21\_00517" 28662 "s59E25H2" 0 "hypothetical protein"  
"OP8\_M21\_00517" 28662 "s59E5H2" 0.7926141 "hypothetical protein"  
"OP8\_M21\_00517" 28662 "s63E6H2" 0 "hypothetical protein"  
"OP8\_M21\_00518" 28663 "s59E13H2" 0.01259938 "Anaphase-promoting complex, cyclosome, subunit 3"  
"OP8\_M21\_00518" 28663 "s59E25H2" 0 "Anaphase-promoting complex, cyclosome, subunit 3"  
"OP8\_M21\_00518" 28663 "s59E5H2" 2.237045 "Anaphase-promoting complex, cyclosome, subunit 3"  
"OP8\_M21\_00518" 28663 "s63E6H2" 0 "Anaphase-promoting complex, cyclosome, subunit 3"  
"OP8\_M21\_00519" 28664 "s59E13H2" 0.01372114 "TPR repeat-containing protein YrrB"  
"OP8\_M21\_00519" 28664 "s59E25H2" 0 "TPR repeat-containing protein YrrB"  
"OP8\_M21\_00519" 28664 "s59E5H2" 2.147496 "TPR repeat-containing protein YrrB"  
"OP8\_M21\_00519" 28664 "s63E6H2" 0 "TPR repeat-containing protein YrrB"  
"OP8\_M21\_00520" 28665 "s59E13H2" 0.05435551 "SNARE associated Golgi protein"  
"OP8\_M21\_00520" 28665 "s59E25H2" 0 "SNARE associated Golgi protein"  
"OP8\_M21\_00520" 28665 "s59E5H2" 2.460597 "SNARE associated Golgi protein"  
"OP8\_M21\_00520" 28665 "s63E6H2" 0 "SNARE associated Golgi protein"  
"OP8\_M21\_00521" 28666 "s59E13H2" 0.02094462 "putative nitrate transporter NarT"  
"OP8\_M21\_00521" 28666 "s59E25H2" 0 "putative nitrate transporter NarT"  
"OP8\_M21\_00521" 28666 "s59E5H2" 2.440909 "putative nitrate transporter NarT"  
"OP8\_M21\_00521" 28666 "s63E6H2" 0 "putative nitrate transporter NarT"  
"OP8\_M21\_00522" 28667 "s59E13H2" 0.02659707 "hypothetical protein"  
"OP8\_M21\_00522" 28667 "s59E25H2" 0 "hypothetical protein"  
"OP8\_M21\_00522" 28667 "s59E5H2" 3.278327 "hypothetical protein"  
"OP8\_M21\_00522" 28667 "s63E6H2" 0 "hypothetical protein"  
"OP8\_M21\_00523" 28668 "s59E13H2" 0.03614277 "Deoxyuridine 5'-triphosphate nucleotidohydrolase"  
"OP8\_M21\_00523" 28668 "s59E25H2" 0 "Deoxyuridine 5'-triphosphate nucleotidohydrolase"  
"OP8\_M21\_00523" 28668 "s59E5H2" 3.507368 "Deoxyuridine 5'-triphosphate nucleotidohydrolase"  
"OP8\_M21\_00523" 28668 "s63E6H2" 0 "Deoxyuridine 5'-triphosphate nucleotidohydrolase"  
"OP8\_M21\_00524" 28669 "s59E13H2" 0.03802192 "pyruvate formate lyase-activating enzyme 1"  
"OP8\_M21\_00524" 28669 "s59E25H2" 0 "pyruvate formate lyase-activating enzyme 1"  
"OP8\_M21\_00524" 28669 "s59E5H2" 3.06687 "pyruvate formate lyase-activating enzyme 1"  
"OP8\_M21\_00524" 28669 "s63E6H2" 0.002139492 "pyruvate formate lyase-activating enzyme 1"  
"OP8\_M21\_00525" 28670 "s59E13H2" 0.02836944 "hypothetical protein"  
"OP8\_M21\_00525" 28670 "s59E25H2" 0 "hypothetical protein"  
"OP8\_M21\_00525" 28670 "s59E5H2" 2.699952 "hypothetical protein"



"OP8\_M21\_00525" 28670 "s63E6H2" 0 "hypothetical protein"  
"OP8\_M21\_00526" 28671 "s59E13H2" 0.05151433 "Anaerobic ribonucleoside-triphosphate reductase"  
"OP8\_M21\_00526" 28671 "s59E25H2" 0 "Anaerobic ribonucleoside-triphosphate reductase"  
"OP8\_M21\_00526" 28671 "s59E5H2" 2.265959 "Anaerobic ribonucleoside-triphosphate reductase"  
"OP8\_M21\_00526" 28671 "s63E6H2" 0 "Anaerobic ribonucleoside-triphosphate reductase"  
"OP8\_M21\_00527" 28672 "s59E13H2" 0.02301483 "Alpha-D-glucose-1-phosphate phosphatase YihX"  
"OP8\_M21\_00527" 28672 "s59E25H2" 0 "Alpha-D-glucose-1-phosphate phosphatase YihX"  
"OP8\_M21\_00527" 28672 "s59E5H2" 1.431904 "Alpha-D-glucose-1-phosphate phosphatase YihX"  
"OP8\_M21\_00527" 28672 "s63E6H2" 0 "Alpha-D-glucose-1-phosphate phosphatase YihX"  
"OP8\_M21\_00528" 28673 "s59E13H2" 0.02316727 "hypothetical protein"  
"OP8\_M21\_00528" 28673 "s59E25H2" 0 "hypothetical protein"  
"OP8\_M21\_00528" 28673 "s59E5H2" 1.300156 "hypothetical protein"  
"OP8\_M21\_00528" 28673 "s63E6H2" 0 "hypothetical protein"  
"OP8\_M21\_00529" 28674 "s59E13H2" 0.01495816 "FecR protein"  
"OP8\_M21\_00529" 28674 "s59E25H2" 0 "FecR protein"  
"OP8\_M21\_00529" 28674 "s59E5H2" 1.443383 "FecR protein"  
"OP8\_M21\_00529" 28674 "s63E6H2" 0 "FecR protein"  
"OP8\_M21\_00530" 28675 "s59E13H2" 1.520929 "hypothetical protein"  
"OP8\_M21\_00530" 28675 "s59E25H2" 0 "hypothetical protein"  
"OP8\_M21\_00530" 28675 "s59E5H2" 4.105339 "hypothetical protein"  
"OP8\_M21\_00530" 28675 "s63E6H2" 0 "hypothetical protein"  
"OP8\_M21\_00532" 28677 "s59E13H2" 0.0253497 "hypothetical protein"  
"OP8\_M21\_00532" 28677 "s59E25H2" 0 "hypothetical protein"  
"OP8\_M21\_00532" 28677 "s59E5H2" 3.2357 "hypothetical protein"  
"OP8\_M21\_00532" 28677 "s63E6H2" 0 "hypothetical protein"  
"OP8\_M21\_00533" 28678 "s59E13H2" 0.03456581 "putative ABC transporter ATP-binding protein YxIF"  
"OP8\_M21\_00533" 28678 "s59E25H2" 0 "putative ABC transporter ATP-binding protein YxIF"  
"OP8\_M21\_00533" 28678 "s59E5H2" 3.792857 "putative ABC transporter ATP-binding protein YxIF"  
"OP8\_M21\_00533" 28678 "s63E6H2" 0 "putative ABC transporter ATP-binding protein YxIF"  
"OP8\_M21\_00534" 28679 "s59E13H2" 0.06726467 "ABC-2 family transporter protein"  
"OP8\_M21\_00534" 28679 "s59E25H2" 0 "ABC-2 family transporter protein"  
"OP8\_M21\_00534" 28679 "s59E5H2" 3.44511 "ABC-2 family transporter protein"  
"OP8\_M21\_00534" 28679 "s63E6H2" 0 "ABC-2 family transporter protein"  
"OP8\_M21\_00535" 28680 "s59E13H2" 0.05453118 "hypothetical protein"  
"OP8\_M21\_00535" 28680 "s59E25H2" 0 "hypothetical protein"  
"OP8\_M21\_00535" 28680 "s59E5H2" 3.201246 "hypothetical protein"  
"OP8\_M21\_00535" 28680 "s63E6H2" 0 "hypothetical protein"  
"OP8\_M21\_00536" 28681 "s59E13H2" 0.07704173 "Type 4 prepilin-like proteins leader peptide-processing enzyme"  
"OP8\_M21\_00536" 28681 "s59E25H2" 0 "Type 4 prepilin-like proteins leader peptide-processing enzyme"  
"OP8\_M21\_00536" 28681 "s59E5H2" 2.448076 "Type 4 prepilin-like proteins leader peptide-processing enzyme"  
"OP8\_M21\_00536" 28681 "s63E6H2" 0 "Type 4 prepilin-like proteins leader peptide-processing enzyme"  
"OP8\_M21\_00537" 28682 "s59E13H2" 0.1154237 "PQQ enzyme repeat protein"  
"OP8\_M21\_00537" 28682 "s59E25H2" 0 "PQQ enzyme repeat protein"  
"OP8\_M21\_00537" 28682 "s59E5H2" 0.8886928 "PQQ enzyme repeat protein"  
"OP8\_M21\_00537" 28682 "s63E6H2" 0 "PQQ enzyme repeat protein"  
"OP8\_M21\_00538" 28683 "s59E13H2" 0.1480416 "hypothetical protein"  
"OP8\_M21\_00538" 28683 "s59E25H2" 0 "hypothetical protein"

"OP8\_M21\_00538" 28683 "s59E5H2" 0.246734 "hypothetical protein"  
"OP8\_M21\_00538" 28683 "s63E6H2" 0 "hypothetical protein"  
"OP8\_M21\_00539" 28684 "s59E13H2" 0.1799279 "hypothetical protein"  
"OP8\_M21\_00539" 28684 "s59E25H2" 0 "hypothetical protein"  
"OP8\_M21\_00539" 28684 "s59E5H2" 0.3191197 "hypothetical protein"  
"OP8\_M21\_00539" 28684 "s63E6H2" 0.001338311 "hypothetical protein"  
"OP8\_M21\_00540" 28685 "s59E13H2" 0.3092794 "hypothetical protein"  
"OP8\_M21\_00540" 28685 "s59E25H2" 0 "hypothetical protein"  
"OP8\_M21\_00540" 28685 "s59E5H2" 0.2551602 "hypothetical protein"  
"OP8\_M21\_00540" 28685 "s63E6H2" 0 "hypothetical protein"  
"OP8\_M21\_00541" 28686 "s59E13H2" 0.2840844 "hypothetical protein"  
"OP8\_M21\_00541" 28686 "s59E25H2" 0 "hypothetical protein"  
"OP8\_M21\_00541" 28686 "s59E5H2" 0.2547944 "hypothetical protein"  
"OP8\_M21\_00541" 28686 "s63E6H2" 0 "hypothetical protein"  
"OP8\_M21\_00543" 28688 "s59E13H2" 0.01164418 "Tungsten-containing aldehyde ferredoxin oxidoreductase"  
"OP8\_M21\_00543" 28688 "s59E25H2" 0 "Tungsten-containing aldehyde ferredoxin oxidoreductase"  
"OP8\_M21\_00543" 28688 "s59E5H2" 2.831492 "Tungsten-containing aldehyde ferredoxin oxidoreductase"  
"OP8\_M21\_00543" 28688 "s63E6H2" 0 "Tungsten-containing aldehyde ferredoxin oxidoreductase"  
"OP8\_M21\_00544" 28689 "s59E13H2" 0.0126132 "Deoxyguanosine kinase"  
"OP8\_M21\_00544" 28689 "s59E25H2" 0 "Deoxyguanosine kinase"  
"OP8\_M21\_00544" 28689 "s59E5H2" 3.372017 "Deoxyguanosine kinase"  
"OP8\_M21\_00544" 28689 "s63E6H2" 0 "Deoxyguanosine kinase"  
"OP8\_M21\_00545" 28690 "s59E13H2" 0.01290622 "3-methyl-2-oxobutanoate hydroxymethyltransferase"  
"OP8\_M21\_00545" 28690 "s59E25H2" 0 "3-methyl-2-oxobutanoate hydroxymethyltransferase"  
"OP8\_M21\_00545" 28690 "s59E5H2" 2.836002 "3-methyl-2-oxobutanoate hydroxymethyltransferase"  
"OP8\_M21\_00545" 28690 "s63E6H2" 0 "3-methyl-2-oxobutanoate hydroxymethyltransferase"  
"OP8\_M21\_00546" 28691 "s59E13H2" 0.03018172 "Pantothenate synthetase"  
"OP8\_M21\_00546" 28691 "s59E25H2" 0.4706573 "Pantothenate synthetase"  
"OP8\_M21\_00546" 28691 "s59E5H2" 3.924495 "Pantothenate synthetase"  
"OP8\_M21\_00546" 28691 "s63E6H2" 0 "Pantothenate synthetase"  
"OP8\_M21\_00547" 28692 "s59E13H2" 0.05007247 "Aspartate 1-decarboxylase precursor"  
"OP8\_M21\_00547" 28692 "s59E25H2" 0.2464986 "Aspartate 1-decarboxylase precursor"  
"OP8\_M21\_00547" 28692 "s59E5H2" 4.729058 "Aspartate 1-decarboxylase precursor"  
"OP8\_M21\_00547" 28692 "s63E6H2" 0 "Aspartate 1-decarboxylase precursor"  
"OP8\_M21\_00548" 28693 "s59E13H2" 0.03095334 "Inosine-5'-monophosphate dehydrogenase"  
"OP8\_M21\_00548" 28693 "s59E25H2" 0 "Inosine-5'-monophosphate dehydrogenase"  
"OP8\_M21\_00548" 28693 "s59E5H2" 5.121014 "Inosine-5'-monophosphate dehydrogenase"  
"OP8\_M21\_00548" 28693 "s63E6H2" 0.001586263 "Inosine-5'-monophosphate dehydrogenase"  
"OP8\_M21\_00549" 28694 "s59E13H2" 1.123455 "preprotein translocase subunit SecA"  
"OP8\_M21\_00549" 28694 "s59E25H2" 0 "preprotein translocase subunit SecA"  
"OP8\_M21\_00549" 28694 "s59E5H2" 2.504392 "preprotein translocase subunit SecA"  
"OP8\_M21\_00549" 28694 "s63E6H2" 0.0001632337 "preprotein translocase subunit SecA"  
"OP8\_M21\_00550" 28695 "s59E13H2" 1.271482 "UvrABC system protein C"  
"OP8\_M21\_00550" 28695 "s59E25H2" 0 "UvrABC system protein C"  
"OP8\_M21\_00550" 28695 "s59E5H2" 0.8051268 "UvrABC system protein C"  
"OP8\_M21\_00550" 28695 "s63E6H2" 0 "UvrABC system protein C"  
"OP8\_M21\_00551" 28696 "s59E13H2" 1.277668 "UvrABC system protein B"

"OP8\_M21\_00551" 28696 "s59E25H2" 0 "UvrABC system protein B"  
"OP8\_M21\_00551" 28696 "s59E5H2" 0.5541391 "UvrABC system protein B"  
"OP8\_M21\_00551" 28696 "s63E6H2" 0 "UvrABC system protein B"  
"OP8\_M21\_00552" 28697 "s59E13H2" 0.01140172 "Sensor histidine kinase YehU"  
"OP8\_M21\_00552" 28697 "s59E25H2" 0 "Sensor histidine kinase YehU"  
"OP8\_M21\_00552" 28697 "s59E5H2" 0.1678073 "Sensor histidine kinase YehU"  
"OP8\_M21\_00552" 28697 "s63E6H2" 0 "Sensor histidine kinase YehU"  
"OP8\_M21\_00553" 28698 "s59E13H2" 0.02424314 "Transcriptional regulatory protein YehT"  
"OP8\_M21\_00553" 28698 "s59E25H2" 0 "Transcriptional regulatory protein YehT"  
"OP8\_M21\_00553" 28698 "s59E5H2" 0.3591237 "Transcriptional regulatory protein YehT"  
"OP8\_M21\_00553" 28698 "s63E6H2" 0 "Transcriptional regulatory protein YehT"  
"OP8\_M21\_00554" 28699 "s59E13H2" 0.01196942 "hypothetical protein"  
"OP8\_M21\_00554" 28699 "s59E25H2" 0 "hypothetical protein"  
"OP8\_M21\_00554" 28699 "s59E5H2" 0.007447265 "hypothetical protein"  
"OP8\_M21\_00554" 28699 "s63E6H2" 0 "hypothetical protein"  
"OP8\_M21\_00555" 28700 "s59E13H2" 0.01529544 "Cocaine esterase"  
"OP8\_M21\_00555" 28700 "s59E25H2" 0 "Cocaine esterase"  
"OP8\_M21\_00555" 28700 "s59E5H2" 0.004355126 "Cocaine esterase"  
"OP8\_M21\_00555" 28700 "s63E6H2" 0 "Cocaine esterase"  
"OP8\_M21\_00556" 28701 "s59E13H2" 0.01317974 "Proline racemase"  
"OP8\_M21\_00556" 28701 "s59E25H2" 0 "Proline racemase"  
"OP8\_M21\_00556" 28701 "s59E5H2" 0.01701589 "Proline racemase"  
"OP8\_M21\_00556" 28701 "s63E6H2" 0 "Proline racemase"  
"OP8\_M21\_00557" 28702 "s59E13H2" 0.01123369 "Opine dehydrogenase"  
"OP8\_M21\_00557" 28702 "s59E25H2" 0 "Opine dehydrogenase"  
"OP8\_M21\_00557" 28702 "s59E5H2" 0.01400354 "Opine dehydrogenase"  
"OP8\_M21\_00557" 28702 "s63E6H2" 0 "Opine dehydrogenase"  
"OP8\_M21\_00558" 28703 "s59E13H2" 0.00189171 "Transposase DDE domain protein"  
"OP8\_M21\_00558" 28703 "s59E25H2" 0.07727273 "Transposase DDE domain protein"  
"OP8\_M21\_00558" 28703 "s59E5H2" 8.754274 "Transposase DDE domain protein"  
"OP8\_M21\_00558" 28703 "s63E6H2" 0 "Transposase DDE domain protein"  
"OP8\_M21\_00559" 28704 "s59E13H2" 0.2668629 "Peptide chain release factor 2"  
"OP8\_M21\_00559" 28704 "s59E25H2" 0 "Peptide chain release factor 2"  
"OP8\_M21\_00559" 28704 "s59E5H2" 0.5744357 "Peptide chain release factor 2"  
"OP8\_M21\_00559" 28704 "s63E6H2" 0 "Peptide chain release factor 2"  
"OP8\_M21\_00560" 28705 "s59E13H2" 0.6484581 "Nucleoside triphosphate pyrophosphohydrolase"  
"OP8\_M21\_00560" 28705 "s59E25H2" 0 "Nucleoside triphosphate pyrophosphohydrolase"  
"OP8\_M21\_00560" 28705 "s59E5H2" 0.4000745 "Nucleoside triphosphate pyrophosphohydrolase"  
"OP8\_M21\_00560" 28705 "s63E6H2" 0 "Nucleoside triphosphate pyrophosphohydrolase"  
"OP8\_M21\_00561" 28706 "s59E13H2" 0.4171022 "Riboflavin biosynthesis protein RibF"  
"OP8\_M21\_00561" 28706 "s59E25H2" 0 "Riboflavin biosynthesis protein RibF"  
"OP8\_M21\_00561" 28706 "s59E5H2" 0.3475522 "Riboflavin biosynthesis protein RibF"  
"OP8\_M21\_00561" 28706 "s63E6H2" 0 "Riboflavin biosynthesis protein RibF"  
"OP8\_M21\_00562" 28707 "s59E13H2" 0.8417144 "Bifunctional protein PyrR"  
"OP8\_M21\_00562" 28707 "s59E25H2" 0 "Bifunctional protein PyrR"  
"OP8\_M21\_00562" 28707 "s59E5H2" 0.6048291 "Bifunctional protein PyrR"  
"OP8\_M21\_00562" 28707 "s63E6H2" 0 "Bifunctional protein PyrR"

"OP8\_M21\_00563" 28708 "s59E13H2" 0.842523 "Aspartate carbamoyltransferase"  
"OP8\_M21\_00563" 28708 "s59E25H2" 0 "Aspartate carbamoyltransferase"  
"OP8\_M21\_00563" 28708 "s59E5H2" 0.5941885 "Aspartate carbamoyltransferase"  
"OP8\_M21\_00563" 28708 "s63E6H2" 0 "Aspartate carbamoyltransferase"  
"OP8\_M21\_00564" 28709 "s59E13H2" 0.9546578 "Dihydroorotase"  
"OP8\_M21\_00564" 28709 "s59E25H2" 0 "Dihydroorotase"  
"OP8\_M21\_00564" 28709 "s59E5H2" 0.6164391 "Dihydroorotase"  
"OP8\_M21\_00564" 28709 "s63E6H2" 0 "Dihydroorotase"  
"OP8\_M21\_00565" 28710 "s59E13H2" 0.7913888 "Ribonuclease 3"  
"OP8\_M21\_00565" 28710 "s59E25H2" 0 "Ribonuclease 3"  
"OP8\_M21\_00565" 28710 "s59E5H2" 0.5804612 "Ribonuclease 3"  
"OP8\_M21\_00565" 28710 "s63E6H2" 0 "Ribonuclease 3"  
"OP8\_M21\_00566" 28711 "s59E13H2" 0.7503217 "hypothetical protein"  
"OP8\_M21\_00566" 28711 "s59E25H2" 0 "hypothetical protein"  
"OP8\_M21\_00566" 28711 "s59E5H2" 0.6816579 "hypothetical protein"  
"OP8\_M21\_00566" 28711 "s63E6H2" 0 "hypothetical protein"  
"OP8\_M21\_00567" 28712 "s59E13H2" 0.9740835 "hypothetical protein"  
"OP8\_M21\_00567" 28712 "s59E25H2" 0 "hypothetical protein"  
"OP8\_M21\_00567" 28712 "s59E5H2" 0.8725815 "hypothetical protein"  
"OP8\_M21\_00567" 28712 "s63E6H2" 0 "hypothetical protein"  
"OP8\_M21\_00568" 28713 "s59E13H2" 0.9586065 "Al-2 transport protein TqsA"  
"OP8\_M21\_00568" 28713 "s59E25H2" 0 "Al-2 transport protein TqsA"  
"OP8\_M21\_00568" 28713 "s59E5H2" 0.7161856 "Al-2 transport protein TqsA"  
"OP8\_M21\_00568" 28713 "s63E6H2" 0 "Al-2 transport protein TqsA"  
"OP8\_M21\_00569" 28714 "s59E13H2" 1.378299 "Response regulator PleD"  
"OP8\_M21\_00569" 28714 "s59E25H2" 0 "Response regulator PleD"  
"OP8\_M21\_00569" 28714 "s59E5H2" 1.523412 "Response regulator PleD"  
"OP8\_M21\_00569" 28714 "s63E6H2" 0 "Response regulator PleD"  
"OP8\_M21\_00570" 28715 "s59E13H2" 1.325729 "Hpt domain protein"  
"OP8\_M21\_00570" 28715 "s59E25H2" 0 "Hpt domain protein"  
"OP8\_M21\_00570" 28715 "s59E5H2" 1.794267 "Hpt domain protein"  
"OP8\_M21\_00570" 28715 "s63E6H2" 0.00234306 "Hpt domain protein"  
"OP8\_M21\_00571" 28716 "s59E13H2" 1.071381 "hypothetical protein"  
"OP8\_M21\_00571" 28716 "s59E25H2" 0 "hypothetical protein"  
"OP8\_M21\_00571" 28716 "s59E5H2" 1.667601 "hypothetical protein"  
"OP8\_M21\_00571" 28716 "s63E6H2" 0 "hypothetical protein"  
"OP8\_M21\_00572" 28717 "s59E13H2" 1.17375 "hypothetical protein"  
"OP8\_M21\_00572" 28717 "s59E25H2" 0 "hypothetical protein"  
"OP8\_M21\_00572" 28717 "s59E5H2" 2.002429 "hypothetical protein"  
"OP8\_M21\_00572" 28717 "s63E6H2" 0 "hypothetical protein"  
"OP8\_M21\_00573" 28718 "s59E13H2" 1.035595 "Pyruvate formate-lyase 1-activating enzyme"  
"OP8\_M21\_00573" 28718 "s59E25H2" 0 "Pyruvate formate-lyase 1-activating enzyme"  
"OP8\_M21\_00573" 28718 "s59E5H2" 2.270395 "Pyruvate formate-lyase 1-activating enzyme"  
"OP8\_M21\_00573" 28718 "s63E6H2" 0 "Pyruvate formate-lyase 1-activating enzyme"  
"OP8\_M21\_00574" 28719 "s59E13H2" 0.7956963 "Spermidine synthase"  
"OP8\_M21\_00574" 28719 "s59E25H2" 0 "Spermidine synthase"  
"OP8\_M21\_00574" 28719 "s59E5H2" 0.9697474 "Spermidine synthase"

"OP8\_M21\_00574" 28719 "s63E6H2" 0 "Spermidine synthase"  
"OP8\_M21\_00575" 28720 "s59E13H2" 0.01535243 "PilZ domain protein"  
"OP8\_M21\_00575" 28720 "s59E25H2" 0 "PilZ domain protein"  
"OP8\_M21\_00575" 28720 "s59E5H2" 0.5519292 "PilZ domain protein"  
"OP8\_M21\_00575" 28720 "s63E6H2" 0 "PilZ domain protein"  
"OP8\_M21\_00576" 28721 "s59E13H2" 0.01571748 "Glycine--tRNA ligase beta subunit"  
"OP8\_M21\_00576" 28721 "s59E25H2" 0 "Glycine--tRNA ligase beta subunit"  
"OP8\_M21\_00576" 28721 "s59E5H2" 0.7688477 "Glycine--tRNA ligase beta subunit"  
"OP8\_M21\_00576" 28721 "s63E6H2" 0 "Glycine--tRNA ligase beta subunit"  
"OP8\_M21\_00577" 28722 "s59E13H2" 0.005841387 "Glycine--tRNA ligase alpha subunit"  
"OP8\_M21\_00577" 28722 "s59E25H2" 0 "Glycine--tRNA ligase alpha subunit"  
"OP8\_M21\_00577" 28722 "s59E5H2" 0.4698729 "Glycine--tRNA ligase alpha subunit"  
"OP8\_M21\_00577" 28722 "s63E6H2" 0 "Glycine--tRNA ligase alpha subunit"  
"OP8\_M21\_00578" 28723 "s59E13H2" 0.01041908 "putative glycine dehydrogenase (decarboxylating) subunit 2"  
"OP8\_M21\_00578" 28723 "s59E25H2" 0 "putative glycine dehydrogenase (decarboxylating) subunit 2"  
"OP8\_M21\_00578" 28723 "s59E5H2" 0.5304283 "putative glycine dehydrogenase (decarboxylating) subunit 2"  
"OP8\_M21\_00578" 28723 "s63E6H2" 0 "putative glycine dehydrogenase (decarboxylating) subunit 2"  
"OP8\_M21\_00579" 28724 "s59E13H2" 0.02765713 "putative glycine dehydrogenase (decarboxylating) subunit 1"  
"OP8\_M21\_00579" 28724 "s59E25H2" 0 "putative glycine dehydrogenase (decarboxylating) subunit 1"  
"OP8\_M21\_00579" 28724 "s59E5H2" 1.625205 "putative glycine dehydrogenase (decarboxylating) subunit 1"  
"OP8\_M21\_00579" 28724 "s63E6H2" 0 "putative glycine dehydrogenase (decarboxylating) subunit 1"  
"OP8\_M21\_00580" 28725 "s59E13H2" 0.0384984 "Glycine cleavage system H protein"  
"OP8\_M21\_00580" 28725 "s59E25H2" 0 "Glycine cleavage system H protein"  
"OP8\_M21\_00580" 28725 "s59E5H2" 2.384088 "Glycine cleavage system H protein"  
"OP8\_M21\_00580" 28725 "s63E6H2" 0 "Glycine cleavage system H protein"  
"OP8\_M21\_00581" 28726 "s59E13H2" 0.05501077 "Aminomethyltransferase"  
"OP8\_M21\_00581" 28726 "s59E25H2" 0 "Aminomethyltransferase"  
"OP8\_M21\_00581" 28726 "s59E5H2" 2.034615 "Aminomethyltransferase"  
"OP8\_M21\_00581" 28726 "s63E6H2" 0 "Aminomethyltransferase"  
"OP8\_M21\_00582" 28727 "s59E13H2" 0 "Calcineurin-like phosphoesterase superfamily domain protein"  
"OP8\_M21\_00582" 28727 "s59E25H2" 0 "Calcineurin-like phosphoesterase superfamily domain protein"  
"OP8\_M21\_00582" 28727 "s59E5H2" 0.9348766 "Calcineurin-like phosphoesterase superfamily domain protein"  
"OP8\_M21\_00582" 28727 "s63E6H2" 0.004386119 "Calcineurin-like phosphoesterase superfamily domain protein"  
"OP8\_M21\_00583" 28728 "s59E13H2" 0.0003829946 "DNA double-strand break repair Rad50 ATPase"  
"OP8\_M21\_00583" 28728 "s59E25H2" 0 "DNA double-strand break repair Rad50 ATPase"  
"OP8\_M21\_00583" 28728 "s59E5H2" 0.1468102 "DNA double-strand break repair Rad50 ATPase"  
"OP8\_M21\_00583" 28728 "s63E6H2" 0.0003032905 "DNA double-strand break repair Rad50 ATPase"  
"OP8\_M21\_00584" 28729 "s59E13H2" 0.01672521 "Transcriptional regulatory protein YehT"  
"OP8\_M21\_00584" 28729 "s59E25H2" 0 "Transcriptional regulatory protein YehT"  
"OP8\_M21\_00584" 28729 "s59E5H2" 0.8588514 "Transcriptional regulatory protein YehT"  
"OP8\_M21\_00584" 28729 "s63E6H2" 0 "Transcriptional regulatory protein YehT"  
"OP8\_M21\_00585" 28730 "s59E13H2" 0.02373085 "Sensor histidine kinase YehU"  
"OP8\_M21\_00585" 28730 "s59E25H2" 0 "Sensor histidine kinase YehU"  
"OP8\_M21\_00585" 28730 "s59E5H2" 0.4816156 "Sensor histidine kinase YehU"  
"OP8\_M21\_00585" 28730 "s63E6H2" 0 "Sensor histidine kinase YehU"  
"OP8\_P22\_00001" 29793 "s59E13H2" 0 "anaerobic benzoate catabolism transcriptional regulator"  
"OP8\_P22\_00001" 29793 "s59E25H2" 0 "anaerobic benzoate catabolism transcriptional regulator"

"OP8\_P22\_00001" 29793 "s59E5H2" 0 "anaerobic benzoate catabolism transcriptional regulator"  
"OP8\_P22\_00001" 29793 "s63E6H2" 3.22351 "anaerobic benzoate catabolism transcriptional regulator"  
"OP8\_P22\_00002" 29794 "s59E13H2" 0 "Fic/DOC family protein"  
"OP8\_P22\_00002" 29794 "s59E25H2" 0 "Fic/DOC family protein"  
"OP8\_P22\_00002" 29794 "s59E5H2" 0 "Fic/DOC family protein"  
"OP8\_P22\_00002" 29794 "s63E6H2" 5.844544 "Fic/DOC family protein"  
"OP8\_P22\_00005" 29797 "s59E13H2" 0 "putative lyase"  
"OP8\_P22\_00005" 29797 "s59E25H2" 0 "putative lyase"  
"OP8\_P22\_00005" 29797 "s59E5H2" 0.006804925 "putative lyase"  
"OP8\_P22\_00005" 29797 "s63E6H2" 0 "putative lyase"  
"OP8\_P22\_00006" 29798 "s59E13H2" 0 "hypothetical protein"  
"OP8\_P22\_00006" 29798 "s59E25H2" 0 "hypothetical protein"  
"OP8\_P22\_00006" 29798 "s59E5H2" 10.55857 "hypothetical protein"  
"OP8\_P22\_00006" 29798 "s63E6H2" 0.07161744 "hypothetical protein"  
"OP8\_P22\_00007" 29799 "s59E13H2" 0 "hypothetical protein"  
"OP8\_P22\_00007" 29799 "s59E25H2" 0 "hypothetical protein"  
"OP8\_P22\_00007" 29799 "s59E5H2" 1.030706 "hypothetical protein"  
"OP8\_P22\_00007" 29799 "s63E6H2" 0.008060688 "hypothetical protein"  
"OP8\_P22\_00008" 29800 "s59E13H2" 0 "KAP family P-loop domain protein"  
"OP8\_P22\_00008" 29800 "s59E25H2" 0 "KAP family P-loop domain protein"  
"OP8\_P22\_00008" 29800 "s59E5H2" 0 "KAP family P-loop domain protein"  
"OP8\_P22\_00008" 29800 "s63E6H2" 0 "KAP family P-loop domain protein"  
"OP8\_P22\_00009" 29801 "s59E13H2" 0 "Integrase core domain protein"  
"OP8\_P22\_00009" 29801 "s59E25H2" 0 "Integrase core domain protein"  
"OP8\_P22\_00009" 29801 "s59E5H2" 0 "Integrase core domain protein"  
"OP8\_P22\_00009" 29801 "s63E6H2" 0 "Integrase core domain protein"  
"OP8\_P22\_00011" 29803 "s59E13H2" 0 "hypothetical protein"  
"OP8\_P22\_00011" 29803 "s59E25H2" 0 "hypothetical protein"  
"OP8\_P22\_00011" 29803 "s59E5H2" 0 "hypothetical protein"  
"OP8\_P22\_00011" 29803 "s63E6H2" 0 "hypothetical protein"  
"OP8\_P22\_00012" 29804 "s59E13H2" 0 "hypothetical protein"  
"OP8\_P22\_00012" 29804 "s59E25H2" 0 "hypothetical protein"  
"OP8\_P22\_00012" 29804 "s59E5H2" 0 "hypothetical protein"  
"OP8\_P22\_00012" 29804 "s63E6H2" 0 "hypothetical protein"  
"OP8\_P22\_00014" 29806 "s59E13H2" 0 "hypothetical protein"  
"OP8\_P22\_00014" 29806 "s59E25H2" 0 "hypothetical protein"  
"OP8\_P22\_00014" 29806 "s59E5H2" 0 "hypothetical protein"  
"OP8\_P22\_00014" 29806 "s63E6H2" 0 "hypothetical protein"  
"OP8\_P22\_00015" 29807 "s59E13H2" 0 "hypothetical protein"  
"OP8\_P22\_00015" 29807 "s59E25H2" 0 "hypothetical protein"  
"OP8\_P22\_00015" 29807 "s59E5H2" 0 "hypothetical protein"  
"OP8\_P22\_00015" 29807 "s63E6H2" 0 "hypothetical protein"  
"OP8\_P22\_00016" 29808 "s59E13H2" 0 "Putative pit accessory protein"  
"OP8\_P22\_00016" 29808 "s59E25H2" 0 "Putative pit accessory protein"  
"OP8\_P22\_00016" 29808 "s59E5H2" 0 "Putative pit accessory protein"  
"OP8\_P22\_00016" 29808 "s63E6H2" 0 "Putative pit accessory protein"  
"OP8\_P22\_00017" 29809 "s59E13H2" 0 "Sulfate permease CysP"

"OP8\_P22\_00017" 29809 "s59E25H2" 0 "Sulfate permease CysP"  
"OP8\_P22\_00017" 29809 "s59E5H2" 0 "Sulfate permease CysP"  
"OP8\_P22\_00017" 29809 "s63E6H2" 0 "Sulfate permease CysP"  
"OP8\_P22\_00018" 29810 "s59E13H2" 0 "hypothetical protein"  
"OP8\_P22\_00018" 29810 "s59E25H2" 0 "hypothetical protein"  
"OP8\_P22\_00018" 29810 "s59E5H2" 0 "hypothetical protein"  
"OP8\_P22\_00018" 29810 "s63E6H2" 0 "hypothetical protein"  
"OP8\_P22\_00019" 29811 "s59E13H2" 0 "Inner membrane transport permease YbhR"  
"OP8\_P22\_00019" 29811 "s59E25H2" 0 "Inner membrane transport permease YbhR"  
"OP8\_P22\_00019" 29811 "s59E5H2" 0 "Inner membrane transport permease YbhR"  
"OP8\_P22\_00019" 29811 "s63E6H2" 0 "Inner membrane transport permease YbhR"  
"OP8\_P22\_00020" 29812 "s59E13H2" 0 "Inner membrane transport permease YbhS"  
"OP8\_P22\_00020" 29812 "s59E25H2" 0 "Inner membrane transport permease YbhS"  
"OP8\_P22\_00020" 29812 "s59E5H2" 0 "Inner membrane transport permease YbhS"  
"OP8\_P22\_00020" 29812 "s63E6H2" 0 "Inner membrane transport permease YbhS"  
"OP8\_P22\_00021" 29813 "s59E13H2" 0 "putative ABC transporter ATP-binding protein YbhF"  
"OP8\_P22\_00021" 29813 "s59E25H2" 0 "putative ABC transporter ATP-binding protein YbhF"  
"OP8\_P22\_00021" 29813 "s59E5H2" 0 "putative ABC transporter ATP-binding protein YbhF"  
"OP8\_P22\_00021" 29813 "s63E6H2" 0 "putative ABC transporter ATP-binding protein YbhF"  
"OP8\_P22\_00022" 29814 "s59E13H2" 0 "putative ABC transporter ATP-binding protein YbhF"  
"OP8\_P22\_00022" 29814 "s59E25H2" 0 "putative ABC transporter ATP-binding protein YbhF"  
"OP8\_P22\_00022" 29814 "s59E5H2" 0 "putative ABC transporter ATP-binding protein YbhF"  
"OP8\_P22\_00022" 29814 "s63E6H2" 0 "putative ABC transporter ATP-binding protein YbhF"  
"OP8\_P22\_00023" 29815 "s59E13H2" 0 "Phosphorylated carbohydrates phosphatase"  
"OP8\_P22\_00023" 29815 "s59E25H2" 0 "Phosphorylated carbohydrates phosphatase"  
"OP8\_P22\_00023" 29815 "s59E5H2" 0 "Phosphorylated carbohydrates phosphatase"  
"OP8\_P22\_00023" 29815 "s63E6H2" 0 "Phosphorylated carbohydrates phosphatase"  
"OP8\_P22\_00024" 29816 "s59E13H2" 0 "putative propionyl-CoA carboxylase beta chain 5"  
"OP8\_P22\_00024" 29816 "s59E25H2" 0 "putative propionyl-CoA carboxylase beta chain 5"  
"OP8\_P22\_00024" 29816 "s59E5H2" 0 "putative propionyl-CoA carboxylase beta chain 5"  
"OP8\_P22\_00024" 29816 "s63E6H2" 0 "putative propionyl-CoA carboxylase beta chain 5"  
"OP8\_P22\_00025" 29817 "s59E13H2" 0 "Pyruvate carboxylase subunit A"  
"OP8\_P22\_00025" 29817 "s59E25H2" 0 "Pyruvate carboxylase subunit A"  
"OP8\_P22\_00025" 29817 "s59E5H2" 0 "Pyruvate carboxylase subunit A"  
"OP8\_P22\_00025" 29817 "s63E6H2" 0 "Pyruvate carboxylase subunit A"  
"OP8\_P22\_00026" 29818 "s59E13H2" 0 "2-oxoglutarate carboxylase large subunit"  
"OP8\_P22\_00026" 29818 "s59E25H2" 0 "2-oxoglutarate carboxylase large subunit"  
"OP8\_P22\_00026" 29818 "s59E5H2" 0 "2-oxoglutarate carboxylase large subunit"  
"OP8\_P22\_00026" 29818 "s63E6H2" 0 "2-oxoglutarate carboxylase large subunit"  
"OP8\_P22\_00027" 29819 "s59E13H2" 0 "2-aminoadipate transaminase"  
"OP8\_P22\_00027" 29819 "s59E25H2" 0 "2-aminoadipate transaminase"  
"OP8\_P22\_00027" 29819 "s59E5H2" 0 "2-aminoadipate transaminase"  
"OP8\_P22\_00027" 29819 "s63E6H2" 0 "2-aminoadipate transaminase"  
"OP8\_P22\_00028" 29820 "s59E13H2" 0 "O-succinylhomoserine sulfhydrylase"  
"OP8\_P22\_00028" 29820 "s59E25H2" 0 "O-succinylhomoserine sulfhydrylase"  
"OP8\_P22\_00028" 29820 "s59E5H2" 0 "O-succinylhomoserine sulfhydrylase"  
"OP8\_P22\_00028" 29820 "s63E6H2" 0 "O-succinylhomoserine sulfhydrylase"

"OP8\_P22\_00029" 29821 "s59E13H2" 0 "UDP-N-acetylglucosamine 1-carboxyvinyltransferase"  
"OP8\_P22\_00029" 29821 "s59E25H2" 0 "UDP-N-acetylglucosamine 1-carboxyvinyltransferase"  
"OP8\_P22\_00029" 29821 "s59E5H2" 0 "UDP-N-acetylglucosamine 1-carboxyvinyltransferase"  
"OP8\_P22\_00029" 29821 "s63E6H2" 0 "UDP-N-acetylglucosamine 1-carboxyvinyltransferase"  
"OP8\_P22\_00030" 29822 "s59E13H2" 0 "HIT-like protein"  
"OP8\_P22\_00030" 29822 "s59E25H2" 0 "HIT-like protein"  
"OP8\_P22\_00030" 29822 "s59E5H2" 0 "HIT-like protein"  
"OP8\_P22\_00030" 29822 "s63E6H2" 0 "HIT-like protein"  
"OP8\_P22\_00031" 29823 "s59E13H2" 0 "YacP-like NYN domain protein"  
"OP8\_P22\_00031" 29823 "s59E25H2" 0 "YacP-like NYN domain protein"  
"OP8\_P22\_00031" 29823 "s59E5H2" 0 "YacP-like NYN domain protein"  
"OP8\_P22\_00031" 29823 "s63E6H2" 0 "YacP-like NYN domain protein"  
"OP8\_P22\_00032" 29824 "s59E13H2" 0 "Rossmann-like domain protein"  
"OP8\_P22\_00032" 29824 "s59E25H2" 0 "Rossmann-like domain protein"  
"OP8\_P22\_00032" 29824 "s59E5H2" 0 "Rossmann-like domain protein"  
"OP8\_P22\_00032" 29824 "s63E6H2" 0 "Rossmann-like domain protein"  
"OP8\_P22\_00033" 29825 "s59E13H2" 0 "UDP-N-acetylenolpyruvoylglucosamine reductase"  
"OP8\_P22\_00033" 29825 "s59E25H2" 0 "UDP-N-acetylenolpyruvoylglucosamine reductase"  
"OP8\_P22\_00033" 29825 "s59E5H2" 0 "UDP-N-acetylenolpyruvoylglucosamine reductase"  
"OP8\_P22\_00033" 29825 "s63E6H2" 0 "UDP-N-acetylenolpyruvoylglucosamine reductase"  
"OP8\_P22\_00034" 29826 "s59E13H2" 0 "hypothetical protein"  
"OP8\_P22\_00034" 29826 "s59E25H2" 0 "hypothetical protein"  
"OP8\_P22\_00034" 29826 "s59E5H2" 0 "hypothetical protein"  
"OP8\_P22\_00034" 29826 "s63E6H2" 0 "hypothetical protein"  
"OP8\_P22\_00035" 29827 "s59E13H2" 0 "DNA ligase"  
"OP8\_P22\_00035" 29827 "s59E25H2" 0 "DNA ligase"  
"OP8\_P22\_00035" 29827 "s59E5H2" 0 "DNA ligase"  
"OP8\_P22\_00035" 29827 "s63E6H2" 0 "DNA ligase"  
"OP8\_P22\_00036" 29828 "s59E13H2" 0 "Chaperone protein DnaJ"  
"OP8\_P22\_00036" 29828 "s59E25H2" 0 "Chaperone protein DnaJ"  
"OP8\_P22\_00036" 29828 "s59E5H2" 0 "Chaperone protein DnaJ"  
"OP8\_P22\_00036" 29828 "s63E6H2" 0 "Chaperone protein DnaJ"  
"OP8\_P22\_00037" 29829 "s59E13H2" 0 "(R)-stereoselective amidase"  
"OP8\_P22\_00037" 29829 "s59E25H2" 0 "(R)-stereoselective amidase"  
"OP8\_P22\_00037" 29829 "s59E5H2" 0 "(R)-stereoselective amidase"  
"OP8\_P22\_00037" 29829 "s63E6H2" 0 "(R)-stereoselective amidase"  
"OP8\_P22\_00038" 29830 "s59E13H2" 0 "putative NH(3)-dependent NAD(+) synthetase"  
"OP8\_P22\_00038" 29830 "s59E25H2" 0 "putative NH(3)-dependent NAD(+) synthetase"  
"OP8\_P22\_00038" 29830 "s59E5H2" 0 "putative NH(3)-dependent NAD(+) synthetase"  
"OP8\_P22\_00038" 29830 "s63E6H2" 0 "putative NH(3)-dependent NAD(+) synthetase"  
"OP8\_P22\_00039" 29831 "s59E13H2" 0 "Ribosomal RNA small subunit methyltransferase I"  
"OP8\_P22\_00039" 29831 "s59E25H2" 0 "Ribosomal RNA small subunit methyltransferase I"  
"OP8\_P22\_00039" 29831 "s59E5H2" 0 "Ribosomal RNA small subunit methyltransferase I"  
"OP8\_P22\_00039" 29831 "s63E6H2" 0 "Ribosomal RNA small subunit methyltransferase I"  
"OP8\_P22\_00040" 29832 "s59E13H2" 0 "DNA utilization protein GntX"  
"OP8\_P22\_00040" 29832 "s59E25H2" 0 "DNA utilization protein GntX"  
"OP8\_P22\_00040" 29832 "s59E5H2" 0 "DNA utilization protein GntX"



"OP8\_P22\_00040" 29832 "s63E6H2" 0 "DNA utilization protein GntX"  
"OP8\_P22\_00041" 29833 "s59E13H2" 0 "RNA polymerase-binding transcription factor DksA"  
"OP8\_P22\_00041" 29833 "s59E25H2" 0 "RNA polymerase-binding transcription factor DksA"  
"OP8\_P22\_00041" 29833 "s59E5H2" 0 "RNA polymerase-binding transcription factor DksA"  
"OP8\_P22\_00041" 29833 "s63E6H2" 0 "RNA polymerase-binding transcription factor DksA"  
"OP8\_P22\_00042" 29834 "s59E13H2" 0 "Ribosomal RNA large subunit methyltransferase H"  
"OP8\_P22\_00042" 29834 "s59E25H2" 0 "Ribosomal RNA large subunit methyltransferase H"  
"OP8\_P22\_00042" 29834 "s59E5H2" 0 "Ribosomal RNA large subunit methyltransferase H"  
"OP8\_P22\_00042" 29834 "s63E6H2" 0 "Ribosomal RNA large subunit methyltransferase H"  
"OP8\_P22\_00043" 29835 "s59E13H2" 0 "Ribosomal silencing factor RsfS"  
"OP8\_P22\_00043" 29835 "s59E25H2" 0 "Ribosomal silencing factor RsfS"  
"OP8\_P22\_00043" 29835 "s59E5H2" 0 "Ribosomal silencing factor RsfS"  
"OP8\_P22\_00043" 29835 "s63E6H2" 0 "Ribosomal silencing factor RsfS"  
"OP8\_P22\_00044" 29836 "s59E13H2" 0 "putative nicotinate-nucleotide adenylyltransferase"  
"OP8\_P22\_00044" 29836 "s59E25H2" 0 "putative nicotinate-nucleotide adenylyltransferase"  
"OP8\_P22\_00044" 29836 "s59E5H2" 0 "putative nicotinate-nucleotide adenylyltransferase"  
"OP8\_P22\_00044" 29836 "s63E6H2" 0 "putative nicotinate-nucleotide adenylyltransferase"  
"OP8\_P22\_00045" 29837 "s59E13H2" 0 "GTPase ObgE"  
"OP8\_P22\_00045" 29837 "s59E25H2" 0 "GTPase ObgE"  
"OP8\_P22\_00045" 29837 "s59E5H2" 0 "GTPase ObgE"  
"OP8\_P22\_00045" 29837 "s63E6H2" 0 "GTPase ObgE"  
"OP8\_P22\_00046" 29838 "s59E13H2" 0 "50S ribosomal protein L27"  
"OP8\_P22\_00046" 29838 "s59E25H2" 0 "50S ribosomal protein L27"  
"OP8\_P22\_00046" 29838 "s59E5H2" 0 "50S ribosomal protein L27"  
"OP8\_P22\_00046" 29838 "s63E6H2" 0 "50S ribosomal protein L27"  
"OP8\_P22\_00047" 29839 "s59E13H2" 0 "50S ribosomal protein L21"  
"OP8\_P22\_00047" 29839 "s59E25H2" 0 "50S ribosomal protein L21"  
"OP8\_P22\_00047" 29839 "s59E5H2" 0 "50S ribosomal protein L21"  
"OP8\_P22\_00047" 29839 "s63E6H2" 0 "50S ribosomal protein L21"  
"OP8\_P22\_00048" 29840 "s59E13H2" 0 "putative sensor histidine kinase pdtaS"  
"OP8\_P22\_00048" 29840 "s59E25H2" 0 "putative sensor histidine kinase pdtaS"  
"OP8\_P22\_00048" 29840 "s59E5H2" 0 "putative sensor histidine kinase pdtaS"  
"OP8\_P22\_00048" 29840 "s63E6H2" 0 "putative sensor histidine kinase pdtaS"  
"OP8\_P22\_00049" 29841 "s59E13H2" 0 "hypothetical protein"  
"OP8\_P22\_00049" 29841 "s59E25H2" 0 "hypothetical protein"  
"OP8\_P22\_00049" 29841 "s59E5H2" 0 "hypothetical protein"  
"OP8\_P22\_00049" 29841 "s63E6H2" 0 "hypothetical protein"  
"OP8\_P22\_00050" 29842 "s59E13H2" 0 "hypothetical protein"  
"OP8\_P22\_00050" 29842 "s59E25H2" 0 "hypothetical protein"  
"OP8\_P22\_00050" 29842 "s59E5H2" 0 "hypothetical protein"  
"OP8\_P22\_00050" 29842 "s63E6H2" 0 "hypothetical protein"  
"OP8\_P22\_00052" 29844 "s59E13H2" 0 "hypothetical protein"  
"OP8\_P22\_00052" 29844 "s59E25H2" 0 "hypothetical protein"  
"OP8\_P22\_00052" 29844 "s59E5H2" 1.484317 "hypothetical protein"  
"OP8\_P22\_00052" 29844 "s63E6H2" 0 "hypothetical protein"  
"OP8\_P22\_00053" 29845 "s59E13H2" 0 "hypothetical protein"  
"OP8\_P22\_00053" 29845 "s59E25H2" 0 "hypothetical protein"

"OP8\_P22\_00053" 29845 "s59E5H2" 0 "hypothetical protein"  
"OP8\_P22\_00053" 29845 "s63E6H2" 0 "hypothetical protein"  
"OP8\_P22\_00056" 29848 "s59E13H2" 0 "hypothetical protein"  
"OP8\_P22\_00056" 29848 "s59E25H2" 0 "hypothetical protein"  
"OP8\_P22\_00056" 29848 "s59E5H2" 0 "hypothetical protein"  
"OP8\_P22\_00056" 29848 "s63E6H2" 0 "hypothetical protein"  
"OP8\_P22\_00057" 29849 "s59E13H2" 0 "Nucleotidyltransferase domain protein"  
"OP8\_P22\_00057" 29849 "s59E25H2" 0 "Nucleotidyltransferase domain protein"  
"OP8\_P22\_00057" 29849 "s59E5H2" 0 "Nucleotidyltransferase domain protein"  
"OP8\_P22\_00057" 29849 "s63E6H2" 0 "Nucleotidyltransferase domain protein"  
"OP8\_P22\_00058" 29850 "s59E13H2" 0 "hypothetical protein"  
"OP8\_P22\_00058" 29850 "s59E25H2" 0 "hypothetical protein"  
"OP8\_P22\_00058" 29850 "s59E5H2" 0 "hypothetical protein"  
"OP8\_P22\_00058" 29850 "s63E6H2" 0 "hypothetical protein"  
"OP8\_P22\_00059" 29851 "s59E13H2" 0.006896896 "hypothetical protein"  
"OP8\_P22\_00059" 29851 "s59E25H2" 0 "hypothetical protein"  
"OP8\_P22\_00059" 29851 "s59E5H2" 0.2678698 "hypothetical protein"  
"OP8\_P22\_00059" 29851 "s63E6H2" 0 "hypothetical protein"  
"OP8\_P22\_00060" 29852 "s59E13H2" 0 "Multidrug resistance protein MdtC"  
"OP8\_P22\_00060" 29852 "s59E25H2" 0 "Multidrug resistance protein MdtC"  
"OP8\_P22\_00060" 29852 "s59E5H2" 0 "Multidrug resistance protein MdtC"  
"OP8\_P22\_00060" 29852 "s63E6H2" 0 "Multidrug resistance protein MdtC"  
"OP8\_P22\_00061" 29853 "s59E13H2" 0 "Cobalt-zinc-cadmium resistance protein CzcB"  
"OP8\_P22\_00061" 29853 "s59E25H2" 0 "Cobalt-zinc-cadmium resistance protein CzcB"  
"OP8\_P22\_00061" 29853 "s59E5H2" 0 "Cobalt-zinc-cadmium resistance protein CzcB"  
"OP8\_P22\_00061" 29853 "s63E6H2" 0 "Cobalt-zinc-cadmium resistance protein CzcB"  
"OP8\_P22\_00062" 29854 "s59E13H2" 0 "outer membrane channel protein"  
"OP8\_P22\_00062" 29854 "s59E25H2" 0 "outer membrane channel protein"  
"OP8\_P22\_00062" 29854 "s59E5H2" 0 "outer membrane channel protein"  
"OP8\_P22\_00062" 29854 "s63E6H2" 0 "outer membrane channel protein"  
"OP8\_P22\_00063" 29855 "s59E13H2" 0 "hypothetical protein"  
"OP8\_P22\_00063" 29855 "s59E25H2" 0 "hypothetical protein"  
"OP8\_P22\_00063" 29855 "s59E5H2" 0 "hypothetical protein"  
"OP8\_P22\_00063" 29855 "s63E6H2" 0 "hypothetical protein"  
"OP8\_P22\_00065" 29857 "s59E13H2" 0 "hypothetical protein"  
"OP8\_P22\_00065" 29857 "s59E25H2" 0 "hypothetical protein"  
"OP8\_P22\_00065" 29857 "s59E5H2" 0 "hypothetical protein"  
"OP8\_P22\_00065" 29857 "s63E6H2" 0 "hypothetical protein"  
"OP8\_P22\_00066" 29858 "s59E13H2" 0 "Serine/threonine-protein kinase PrkC"  
"OP8\_P22\_00066" 29858 "s59E25H2" 0 "Serine/threonine-protein kinase PrkC"  
"OP8\_P22\_00066" 29858 "s59E5H2" 0 "Serine/threonine-protein kinase PrkC"  
"OP8\_P22\_00066" 29858 "s63E6H2" 0 "Serine/threonine-protein kinase PrkC"  
"OP8\_P22\_00067" 29859 "s59E13H2" 0 "OmpW family protein"  
"OP8\_P22\_00067" 29859 "s59E25H2" 0 "OmpW family protein"  
"OP8\_P22\_00067" 29859 "s59E5H2" 0 "OmpW family protein"  
"OP8\_P22\_00067" 29859 "s63E6H2" 0 "OmpW family protein"  
"OP8\_P22\_00068" 29860 "s59E13H2" 0 "hypothetical protein"

"OP8\_P22\_00068" 29860 "s59E25H2" 0 "hypothetical protein"  
"OP8\_P22\_00068" 29860 "s59E5H2" 0 "hypothetical protein"  
"OP8\_P22\_00068" 29860 "s63E6H2" 0 "hypothetical protein"  
"OP8\_P22\_00069" 29861 "s59E13H2" 0 "hypothetical protein"  
"OP8\_P22\_00069" 29861 "s59E25H2" 0 "hypothetical protein"  
"OP8\_P22\_00069" 29861 "s59E5H2" 0 "hypothetical protein"  
"OP8\_P22\_00069" 29861 "s63E6H2" 0 "hypothetical protein"  
"OP8\_P22\_00070" 29862 "s59E13H2" 0 "Phosphoribosylformylglycinamide cyclo-ligase"  
"OP8\_P22\_00070" 29862 "s59E25H2" 0 "Phosphoribosylformylglycinamide cyclo-ligase"  
"OP8\_P22\_00070" 29862 "s59E5H2" 0 "Phosphoribosylformylglycinamide cyclo-ligase"  
"OP8\_P22\_00070" 29862 "s63E6H2" 0 "Phosphoribosylformylglycinamide cyclo-ligase"  
"OP8\_P22\_00071" 29863 "s59E13H2" 0 "Putative glycosyltransferase EpsF"  
"OP8\_P22\_00071" 29863 "s59E25H2" 0 "Putative glycosyltransferase EpsF"  
"OP8\_P22\_00071" 29863 "s59E5H2" 0 "Putative glycosyltransferase EpsF"  
"OP8\_P22\_00071" 29863 "s63E6H2" 0 "Putative glycosyltransferase EpsF"  
"OP8\_P22\_00072" 29864 "s59E13H2" 0 "SPBc2 prophage-derived glycosyltransferase SunS"  
"OP8\_P22\_00072" 29864 "s59E25H2" 0 "SPBc2 prophage-derived glycosyltransferase SunS"  
"OP8\_P22\_00072" 29864 "s59E5H2" 0 "SPBc2 prophage-derived glycosyltransferase SunS"  
"OP8\_P22\_00072" 29864 "s63E6H2" 0 "SPBc2 prophage-derived glycosyltransferase SunS"  
"OP8\_P22\_00073" 29865 "s59E13H2" 0 "outer membrane channel protein"  
"OP8\_P22\_00073" 29865 "s59E25H2" 0 "outer membrane channel protein"  
"OP8\_P22\_00073" 29865 "s59E5H2" 0 "outer membrane channel protein"  
"OP8\_P22\_00073" 29865 "s63E6H2" 0 "outer membrane channel protein"  
"OP8\_P22\_00074" 29866 "s59E13H2" 0 "hypothetical protein"  
"OP8\_P22\_00074" 29866 "s59E25H2" 0 "hypothetical protein"  
"OP8\_P22\_00074" 29866 "s59E5H2" 0 "hypothetical protein"  
"OP8\_P22\_00074" 29866 "s63E6H2" 0 "hypothetical protein"  
"OP8\_P22\_00075" 29867 "s59E13H2" 0 "Glycosyltransferase AglD"  
"OP8\_P22\_00075" 29867 "s59E25H2" 0 "Glycosyltransferase AglD"  
"OP8\_P22\_00075" 29867 "s59E5H2" 0 "Glycosyltransferase AglD"  
"OP8\_P22\_00075" 29867 "s63E6H2" 0 "Glycosyltransferase AglD"  
"OP8\_P22\_00076" 29868 "s59E13H2" 0 "hypothetical protein"  
"OP8\_P22\_00076" 29868 "s59E25H2" 0 "hypothetical protein"  
"OP8\_P22\_00076" 29868 "s59E5H2" 0 "hypothetical protein"  
"OP8\_P22\_00076" 29868 "s63E6H2" 0 "hypothetical protein"  
"OP8\_P22\_00077" 29869 "s59E13H2" 0 "tRNA N6-adenosine threonylcarbamoyltransferase"  
"OP8\_P22\_00077" 29869 "s59E25H2" 0 "tRNA N6-adenosine threonylcarbamoyltransferase"  
"OP8\_P22\_00077" 29869 "s59E5H2" 0 "tRNA N6-adenosine threonylcarbamoyltransferase"  
"OP8\_P22\_00077" 29869 "s63E6H2" 0 "tRNA N6-adenosine threonylcarbamoyltransferase"  
"OP8\_P22\_00078" 29870 "s59E13H2" 0 "Methylthioribose-1-phosphate isomerase"  
"OP8\_P22\_00078" 29870 "s59E25H2" 0 "Methylthioribose-1-phosphate isomerase"  
"OP8\_P22\_00078" 29870 "s59E5H2" 0 "Methylthioribose-1-phosphate isomerase"  
"OP8\_P22\_00078" 29870 "s63E6H2" 0 "Methylthioribose-1-phosphate isomerase"  
"OP8\_P22\_00079" 29871 "s59E13H2" 0 "Sporulation initiation inhibitor protein Soj"  
"OP8\_P22\_00079" 29871 "s59E25H2" 0 "Sporulation initiation inhibitor protein Soj"  
"OP8\_P22\_00079" 29871 "s59E5H2" 0 "Sporulation initiation inhibitor protein Soj"  
"OP8\_P22\_00079" 29871 "s63E6H2" 0 "Sporulation initiation inhibitor protein Soj"

"OP8\_P22\_00080" 29872 "s59E13H2" 0 "3-oxoacyl-[acyl-carrier-protein] reductase FabG"  
"OP8\_P22\_00080" 29872 "s59E25H2" 0 "3-oxoacyl-[acyl-carrier-protein] reductase FabG"  
"OP8\_P22\_00080" 29872 "s59E5H2" 0 "3-oxoacyl-[acyl-carrier-protein] reductase FabG"  
"OP8\_P22\_00080" 29872 "s63E6H2" 0 "3-oxoacyl-[acyl-carrier-protein] reductase FabG"  
"OP8\_P22\_00081" 29873 "s59E13H2" 0 "putative ABC transporter ATP-binding protein YxIF"  
"OP8\_P22\_00081" 29873 "s59E25H2" 0 "putative ABC transporter ATP-binding protein YxIF"  
"OP8\_P22\_00081" 29873 "s59E5H2" 0 "putative ABC transporter ATP-binding protein YxIF"  
"OP8\_P22\_00081" 29873 "s63E6H2" 0 "putative ABC transporter ATP-binding protein YxIF"  
"OP8\_P22\_00082" 29874 "s59E13H2" 0 "ABC-2 family transporter protein"  
"OP8\_P22\_00082" 29874 "s59E25H2" 0 "ABC-2 family transporter protein"  
"OP8\_P22\_00082" 29874 "s59E5H2" 0 "ABC-2 family transporter protein"  
"OP8\_P22\_00082" 29874 "s63E6H2" 0 "ABC-2 family transporter protein"  
"OP8\_P22\_00083" 29875 "s59E13H2" 0 "ECF RNA polymerase sigma factor SigW"  
"OP8\_P22\_00083" 29875 "s59E25H2" 0 "ECF RNA polymerase sigma factor SigW"  
"OP8\_P22\_00083" 29875 "s59E5H2" 0 "ECF RNA polymerase sigma factor SigW"  
"OP8\_P22\_00083" 29875 "s63E6H2" 0 "ECF RNA polymerase sigma factor SigW"  
"OP8\_P22\_00084" 29876 "s59E13H2" 0 "hypothetical protein"  
"OP8\_P22\_00084" 29876 "s59E25H2" 0 "hypothetical protein"  
"OP8\_P22\_00084" 29876 "s59E5H2" 0 "hypothetical protein"  
"OP8\_P22\_00084" 29876 "s63E6H2" 0 "hypothetical protein"  
"OP8\_P22\_00085" 29877 "s59E13H2" 0 "hypothetical protein"  
"OP8\_P22\_00085" 29877 "s59E25H2" 0 "hypothetical protein"  
"OP8\_P22\_00085" 29877 "s59E5H2" 0 "hypothetical protein"  
"OP8\_P22\_00085" 29877 "s63E6H2" 0 "hypothetical protein"  
"OP8\_P22\_00086" 29878 "s59E13H2" 0 "hypothetical protein"  
"OP8\_P22\_00086" 29878 "s59E25H2" 0 "hypothetical protein"  
"OP8\_P22\_00086" 29878 "s59E5H2" 0 "hypothetical protein"  
"OP8\_P22\_00086" 29878 "s63E6H2" 0 "hypothetical protein"  
"OP8\_P22\_00087" 29879 "s59E13H2" 0 "tRNA threonylcarbamoyladenosine biosynthesis protein TsaB"  
"OP8\_P22\_00087" 29879 "s59E25H2" 0 "tRNA threonylcarbamoyladenosine biosynthesis protein TsaB"  
"OP8\_P22\_00087" 29879 "s59E5H2" 0 "tRNA threonylcarbamoyladenosine biosynthesis protein TsaB"  
"OP8\_P22\_00087" 29879 "s63E6H2" 0 "tRNA threonylcarbamoyladenosine biosynthesis protein TsaB"  
"OP8\_P22\_00088" 29880 "s59E13H2" 0 "putative N-acetyltransferase"  
"OP8\_P22\_00088" 29880 "s59E25H2" 0 "putative N-acetyltransferase"  
"OP8\_P22\_00088" 29880 "s59E5H2" 0 "putative N-acetyltransferase"  
"OP8\_P22\_00088" 29880 "s63E6H2" 0 "putative N-acetyltransferase"  
"OP8\_P22\_00089" 29881 "s59E13H2" 0 "tRNA pseudouridine synthase A"  
"OP8\_P22\_00089" 29881 "s59E25H2" 0 "tRNA pseudouridine synthase A"  
"OP8\_P22\_00089" 29881 "s59E5H2" 0 "tRNA pseudouridine synthase A"  
"OP8\_P22\_00089" 29881 "s63E6H2" 0 "tRNA pseudouridine synthase A"  
"OP8\_P22\_00090" 29882 "s59E13H2" 0 "hypothetical protein"  
"OP8\_P22\_00090" 29882 "s59E25H2" 0 "hypothetical protein"  
"OP8\_P22\_00090" 29882 "s59E5H2" 0 "hypothetical protein"  
"OP8\_P22\_00090" 29882 "s63E6H2" 0 "hypothetical protein"  
"OP8\_P22\_00091" 29883 "s59E13H2" 0.07030542 "Choline-sulfatase"  
"OP8\_P22\_00091" 29883 "s59E25H2" 0 "Choline-sulfatase"  
"OP8\_P22\_00091" 29883 "s59E5H2" 0.03952528 "Choline-sulfatase"

"OP8\_P22\_00091" 29883 "s63E6H2" 0 "Choline-sulfatase"  
"OP8\_P22\_00092" 29884 "s59E13H2" 0 "hypothetical protein"  
"OP8\_P22\_00092" 29884 "s59E25H2" 0 "hypothetical protein"  
"OP8\_P22\_00092" 29884 "s59E5H2" 0 "hypothetical protein"  
"OP8\_P22\_00092" 29884 "s63E6H2" 0 "hypothetical protein"  
"OP8\_P22\_00093" 29885 "s59E13H2" 0 "hypothetical protein"  
"OP8\_P22\_00093" 29885 "s59E25H2" 0 "hypothetical protein"  
"OP8\_P22\_00093" 29885 "s59E5H2" 0 "hypothetical protein"  
"OP8\_P22\_00093" 29885 "s63E6H2" 0 "hypothetical protein"  
"OP8\_P22\_00094" 29886 "s59E13H2" 0 "Mannosylfructose-phosphate synthase"  
"OP8\_P22\_00094" 29886 "s59E25H2" 0 "Mannosylfructose-phosphate synthase"  
"OP8\_P22\_00094" 29886 "s59E5H2" 0 "Mannosylfructose-phosphate synthase"  
"OP8\_P22\_00094" 29886 "s63E6H2" 0 "Mannosylfructose-phosphate synthase"  
"OP8\_P22\_00095" 29887 "s59E13H2" 0 "D-inositol-3-phosphate glycosyltransferase"  
"OP8\_P22\_00095" 29887 "s59E25H2" 0 "D-inositol-3-phosphate glycosyltransferase"  
"OP8\_P22\_00095" 29887 "s59E5H2" 0 "D-inositol-3-phosphate glycosyltransferase"  
"OP8\_P22\_00095" 29887 "s63E6H2" 0 "D-inositol-3-phosphate glycosyltransferase"  
"OP8\_P22\_00096" 29888 "s59E13H2" 0 "D-inositol 3-phosphate glycosyltransferase"  
"OP8\_P22\_00096" 29888 "s59E25H2" 0 "D-inositol 3-phosphate glycosyltransferase"  
"OP8\_P22\_00096" 29888 "s59E5H2" 0 "D-inositol 3-phosphate glycosyltransferase"  
"OP8\_P22\_00096" 29888 "s63E6H2" 0 "D-inositol 3-phosphate glycosyltransferase"  
"OP8\_P22\_00097" 29889 "s59E13H2" 0 "D-inositol 3-phosphate glycosyltransferase"  
"OP8\_P22\_00097" 29889 "s59E25H2" 0 "D-inositol 3-phosphate glycosyltransferase"  
"OP8\_P22\_00097" 29889 "s59E5H2" 0 "D-inositol 3-phosphate glycosyltransferase"  
"OP8\_P22\_00097" 29889 "s63E6H2" 0 "D-inositol 3-phosphate glycosyltransferase"  
"OP8\_P22\_00098" 29890 "s59E13H2" 0 "Mutual gliding-motility protein MglA"  
"OP8\_P22\_00098" 29890 "s59E25H2" 0 "Mutual gliding-motility protein MglA"  
"OP8\_P22\_00098" 29890 "s59E5H2" 0 "Mutual gliding-motility protein MglA"  
"OP8\_P22\_00098" 29890 "s63E6H2" 0 "Mutual gliding-motility protein MglA"  
"OP8\_P22\_00099" 29891 "s59E13H2" 0 "Competence protein ComM"  
"OP8\_P22\_00099" 29891 "s59E25H2" 0 "Competence protein ComM"  
"OP8\_P22\_00099" 29891 "s59E5H2" 0 "Competence protein ComM"  
"OP8\_P22\_00099" 29891 "s63E6H2" 0 "Competence protein ComM"  
"OP8\_P22\_00100" 29892 "s59E13H2" 0 "General stress protein 69"  
"OP8\_P22\_00100" 29892 "s59E25H2" 0 "General stress protein 69"  
"OP8\_P22\_00100" 29892 "s59E5H2" 0 "General stress protein 69"  
"OP8\_P22\_00100" 29892 "s63E6H2" 0 "General stress protein 69"  
"OP8\_P22\_00101" 29893 "s59E13H2" 0 "Aldo/keto reductase family protein"  
"OP8\_P22\_00101" 29893 "s59E25H2" 0 "Aldo/keto reductase family protein"  
"OP8\_P22\_00101" 29893 "s59E5H2" 0 "Aldo/keto reductase family protein"  
"OP8\_P22\_00101" 29893 "s63E6H2" 0 "Aldo/keto reductase family protein"  
"OP8\_P22\_00102" 29894 "s59E13H2" 0 "Putative redox-active protein (C\_GCAxxG\_C\_C)"  
"OP8\_P22\_00102" 29894 "s59E25H2" 0 "Putative redox-active protein (C\_GCAxxG\_C\_C)"  
"OP8\_P22\_00102" 29894 "s59E5H2" 0 "Putative redox-active protein (C\_GCAxxG\_C\_C)"  
"OP8\_P22\_00102" 29894 "s63E6H2" 0 "Putative redox-active protein (C\_GCAxxG\_C\_C)"  
"OP8\_P22\_00103" 29895 "s59E13H2" 0 "Imidazolonepropionase"  
"OP8\_P22\_00103" 29895 "s59E25H2" 0 "Imidazolonepropionase"

"OP8\_P22\_00103" 29895 "s59E5H2" 0 "Imidazolonepropionase"  
"OP8\_P22\_00103" 29895 "s63E6H2" 0 "Imidazolonepropionase"  
"OP8\_P22\_00104" 29896 "s59E13H2" 0 "Cell division protein FtsZ"  
"OP8\_P22\_00104" 29896 "s59E25H2" 0 "Cell division protein FtsZ"  
"OP8\_P22\_00104" 29896 "s59E5H2" 0 "Cell division protein FtsZ"  
"OP8\_P22\_00104" 29896 "s63E6H2" 0 "Cell division protein FtsZ"  
"OP8\_P22\_00105" 29897 "s59E13H2" 0 "Cell division protein FtsA"  
"OP8\_P22\_00105" 29897 "s59E25H2" 0 "Cell division protein FtsA"  
"OP8\_P22\_00105" 29897 "s59E5H2" 0 "Cell division protein FtsA"  
"OP8\_P22\_00105" 29897 "s63E6H2" 0 "Cell division protein FtsA"  
"OP8\_P22\_00106" 29898 "s59E13H2" 0 "cell division protein FtsQ"  
"OP8\_P22\_00106" 29898 "s59E25H2" 0 "cell division protein FtsQ"  
"OP8\_P22\_00106" 29898 "s59E5H2" 0 "cell division protein FtsQ"  
"OP8\_P22\_00106" 29898 "s63E6H2" 0 "cell division protein FtsQ"  
"OP8\_P22\_00107" 29899 "s59E13H2" 0 "UDP-N-acetylmuramate--L-alanine ligase"  
"OP8\_P22\_00107" 29899 "s59E25H2" 0 "UDP-N-acetylmuramate--L-alanine ligase"  
"OP8\_P22\_00107" 29899 "s59E5H2" 0 "UDP-N-acetylmuramate--L-alanine ligase"  
"OP8\_P22\_00107" 29899 "s63E6H2" 0 "UDP-N-acetylmuramate--L-alanine ligase"  
"OP8\_P22\_00108" 29900 "s59E13H2" 0 "UDP-N-acetylglucosamine--N-acetylmuramyl-(pentapeptide) pyrophosphoryl-undecaprenol N-acetylglucosamine transferase"  
"OP8\_P22\_00108" 29900 "s59E25H2" 0 "UDP-N-acetylglucosamine--N-acetylmuramyl-(pentapeptide) pyrophosphoryl-undecaprenol N-acetylglucosamine transferase"  
"OP8\_P22\_00108" 29900 "s59E5H2" 0 "UDP-N-acetylglucosamine--N-acetylmuramyl-(pentapeptide) pyrophosphoryl-undecaprenol N-acetylglucosamine transferase"  
"OP8\_P22\_00108" 29900 "s63E6H2" 0 "UDP-N-acetylglucosamine--N-acetylmuramyl-(pentapeptide) pyrophosphoryl-undecaprenol N-acetylglucosamine transferase"  
"OP8\_P22\_00109" 29901 "s59E13H2" 0 "Lipid II flippase FtsW"  
"OP8\_P22\_00109" 29901 "s59E25H2" 0 "Lipid II flippase FtsW"  
"OP8\_P22\_00109" 29901 "s59E5H2" 0 "Lipid II flippase FtsW"  
"OP8\_P22\_00109" 29901 "s63E6H2" 0 "Lipid II flippase FtsW"  
"OP8\_P22\_00110" 29902 "s59E13H2" 0 "UDP-N-acetylmuramoylalanine--D-glutamate ligase"  
"OP8\_P22\_00110" 29902 "s59E25H2" 0 "UDP-N-acetylmuramoylalanine--D-glutamate ligase"  
"OP8\_P22\_00110" 29902 "s59E5H2" 0 "UDP-N-acetylmuramoylalanine--D-glutamate ligase"  
"OP8\_P22\_00110" 29902 "s63E6H2" 0 "UDP-N-acetylmuramoylalanine--D-glutamate ligase"  
"OP8\_P22\_00111" 29903 "s59E13H2" 0.0007931816 "DNA polymerase III subunits gamma and tau"  
"OP8\_P22\_00111" 29903 "s59E25H2" 0.2095517 "DNA polymerase III subunits gamma and tau"  
"OP8\_P22\_00111" 29903 "s59E5H2" 0.002338535 "DNA polymerase III subunits gamma and tau"  
"OP8\_P22\_00111" 29903 "s63E6H2" 0.002802635 "DNA polymerase III subunits gamma and tau"  
"OP8\_P22\_00113" 29905 "s59E13H2" 0 "AAA-like domain protein"  
"OP8\_P22\_00113" 29905 "s59E25H2" 0 "AAA-like domain protein"  
"OP8\_P22\_00113" 29905 "s59E5H2" 0 "AAA-like domain protein"  
"OP8\_P22\_00113" 29905 "s63E6H2" 0 "AAA-like domain protein"  
"OP8\_P22\_00115" 29907 "s59E13H2" 0 "PD-(D/E)XK nuclease superfamily protein"  
"OP8\_P22\_00115" 29907 "s59E25H2" 0 "PD-(D/E)XK nuclease superfamily protein"  
"OP8\_P22\_00115" 29907 "s59E5H2" 0 "PD-(D/E)XK nuclease superfamily protein"  
"OP8\_P22\_00115" 29907 "s63E6H2" 0 "PD-(D/E)XK nuclease superfamily protein"  
"OP8\_P22\_00117" 29909 "s59E13H2" 0 "Divalent-cation tolerance protein CutA"  
"OP8\_P22\_00117" 29909 "s59E25H2" 0 "Divalent-cation tolerance protein CutA"  
"OP8\_P22\_00117" 29909 "s59E5H2" 0 "Divalent-cation tolerance protein CutA"  
"OP8\_P22\_00117" 29909 "s63E6H2" 0 "Divalent-cation tolerance protein CutA"  
"OP8\_P22\_00118" 29910 "s59E13H2" 0 "hypothetical protein"

"OP8\_P22\_00118" 29910 "s59E25H2" 0 "hypothetical protein"  
"OP8\_P22\_00118" 29910 "s59E5H2" 0 "hypothetical protein"  
"OP8\_P22\_00118" 29910 "s63E6H2" 0 "hypothetical protein"  
"OP8\_P22\_00119" 29911 "s59E13H2" 0 "D-aminopeptidase"  
"OP8\_P22\_00119" 29911 "s59E25H2" 0 "D-aminopeptidase"  
"OP8\_P22\_00119" 29911 "s59E5H2" 0 "D-aminopeptidase"  
"OP8\_P22\_00119" 29911 "s63E6H2" 0 "D-aminopeptidase"  
"OP8\_P22\_00121" 29913 "s59E13H2" 0 "Chromosome partition protein Smc"  
"OP8\_P22\_00121" 29913 "s59E25H2" 0 "Chromosome partition protein Smc"  
"OP8\_P22\_00121" 29913 "s59E5H2" 0 "Chromosome partition protein Smc"  
"OP8\_P22\_00121" 29913 "s63E6H2" 0 "Chromosome partition protein Smc"  
"OP8\_P22\_00122" 29914 "s59E13H2" 0 "hypothetical protein"  
"OP8\_P22\_00122" 29914 "s59E25H2" 0 "hypothetical protein"  
"OP8\_P22\_00122" 29914 "s59E5H2" 0 "hypothetical protein"  
"OP8\_P22\_00122" 29914 "s63E6H2" 0 "hypothetical protein"  
"OP8\_P22\_00123" 29915 "s59E13H2" 0 "Sodium/proline symporter"  
"OP8\_P22\_00123" 29915 "s59E25H2" 0 "Sodium/proline symporter"  
"OP8\_P22\_00123" 29915 "s59E5H2" 0 "Sodium/proline symporter"  
"OP8\_P22\_00123" 29915 "s63E6H2" 0 "Sodium/proline symporter"  
"OP8\_P22\_00124" 29916 "s59E13H2" 0 "Histone deacetylase-like amidohydrolase"  
"OP8\_P22\_00124" 29916 "s59E25H2" 0 "Histone deacetylase-like amidohydrolase"  
"OP8\_P22\_00124" 29916 "s59E5H2" 0 "Histone deacetylase-like amidohydrolase"  
"OP8\_P22\_00124" 29916 "s63E6H2" 0 "Histone deacetylase-like amidohydrolase"  
"OP8\_P22\_00125" 29917 "s59E13H2" 0 "hypothetical protein"  
"OP8\_P22\_00125" 29917 "s59E25H2" 0 "hypothetical protein"  
"OP8\_P22\_00125" 29917 "s59E5H2" 0 "hypothetical protein"  
"OP8\_P22\_00125" 29917 "s63E6H2" 0 "hypothetical protein"  
"OP8\_P22\_00126" 29918 "s59E13H2" 0 "FecR protein"  
"OP8\_P22\_00126" 29918 "s59E25H2" 0 "FecR protein"  
"OP8\_P22\_00126" 29918 "s59E5H2" 0 "FecR protein"  
"OP8\_P22\_00126" 29918 "s63E6H2" 0 "FecR protein"  
"OP8\_P22\_00127" 29919 "s59E13H2" 0 "hypothetical protein"  
"OP8\_P22\_00127" 29919 "s59E25H2" 0 "hypothetical protein"  
"OP8\_P22\_00127" 29919 "s59E5H2" 0 "hypothetical protein"  
"OP8\_P22\_00127" 29919 "s63E6H2" 0 "hypothetical protein"  
"OP8\_P22\_00128" 29920 "s59E13H2" 0 "Penicillin-binding protein 1A"  
"OP8\_P22\_00128" 29920 "s59E25H2" 0 "Penicillin-binding protein 1A"  
"OP8\_P22\_00128" 29920 "s59E5H2" 0 "Penicillin-binding protein 1A"  
"OP8\_P22\_00128" 29920 "s63E6H2" 0 "Penicillin-binding protein 1A"  
"OP8\_P22\_00129" 29921 "s59E13H2" 0 "Thymidylate kinase"  
"OP8\_P22\_00129" 29921 "s59E25H2" 0 "Thymidylate kinase"  
"OP8\_P22\_00129" 29921 "s59E5H2" 0 "Thymidylate kinase"  
"OP8\_P22\_00129" 29921 "s63E6H2" 0 "Thymidylate kinase"  
"OP8\_P22\_00130" 29922 "s59E13H2" 0 "putative periplasmic serine endoprotease DegP-like precursor"  
"OP8\_P22\_00130" 29922 "s59E25H2" 0 "putative periplasmic serine endoprotease DegP-like precursor"  
"OP8\_P22\_00130" 29922 "s59E5H2" 0 "putative periplasmic serine endoprotease DegP-like precursor"  
"OP8\_P22\_00130" 29922 "s63E6H2" 0 "putative periplasmic serine endoprotease DegP-like precursor"

"OP8\_P22\_00131" 29923 "s59E13H2" 0 "Diaminopimelate epimerase"  
"OP8\_P22\_00131" 29923 "s59E25H2" 0 "Diaminopimelate epimerase"  
"OP8\_P22\_00131" 29923 "s59E5H2" 0 "Diaminopimelate epimerase"  
"OP8\_P22\_00131" 29923 "s63E6H2" 0 "Diaminopimelate epimerase"  
"OP8\_P22\_00132" 29924 "s59E13H2" 0 "Thiamine-monophosphate kinase"  
"OP8\_P22\_00132" 29924 "s59E25H2" 0 "Thiamine-monophosphate kinase"  
"OP8\_P22\_00132" 29924 "s59E5H2" 0 "Thiamine-monophosphate kinase"  
"OP8\_P22\_00132" 29924 "s63E6H2" 0 "Thiamine-monophosphate kinase"  
"OP8\_P22\_00134" 29926 "s59E13H2" 0 "Purine catabolism protein PucG"  
"OP8\_P22\_00134" 29926 "s59E25H2" 0 "Purine catabolism protein PucG"  
"OP8\_P22\_00134" 29926 "s59E5H2" 0 "Purine catabolism protein PucG"  
"OP8\_P22\_00134" 29926 "s63E6H2" 0 "Purine catabolism protein PucG"  
"OP8\_P22\_00135" 29927 "s59E13H2" 0 "2-oxoglutarate-acceptor oxidoreductase subunit OorD"  
"OP8\_P22\_00135" 29927 "s59E25H2" 0 "2-oxoglutarate-acceptor oxidoreductase subunit OorD"  
"OP8\_P22\_00135" 29927 "s59E5H2" 0 "2-oxoglutarate-acceptor oxidoreductase subunit OorD"  
"OP8\_P22\_00135" 29927 "s63E6H2" 0 "2-oxoglutarate-acceptor oxidoreductase subunit OorD"  
"OP8\_P22\_00137" 29929 "s59E13H2" 0 "hypothetical protein"  
"OP8\_P22\_00137" 29929 "s59E25H2" 0 "hypothetical protein"  
"OP8\_P22\_00137" 29929 "s59E5H2" 0 "hypothetical protein"  
"OP8\_P22\_00137" 29929 "s63E6H2" 0 "hypothetical protein"  
"OP8\_P22\_00138" 29930 "s59E13H2" 0 "GTPase ObgE/CgtA"  
"OP8\_P22\_00138" 29930 "s59E25H2" 0 "GTPase ObgE/CgtA"  
"OP8\_P22\_00138" 29930 "s59E5H2" 0 "GTPase ObgE/CgtA"  
"OP8\_P22\_00138" 29930 "s63E6H2" 0 "GTPase ObgE/CgtA"  
"OP8\_P22\_00139" 29931 "s59E13H2" 0 "DNA gyrase subunit B"  
"OP8\_P22\_00139" 29931 "s59E25H2" 0 "DNA gyrase subunit B"  
"OP8\_P22\_00139" 29931 "s59E5H2" 0 "DNA gyrase subunit B"  
"OP8\_P22\_00139" 29931 "s63E6H2" 0 "DNA gyrase subunit B"  
"OP8\_P22\_00140" 29932 "s59E13H2" 0 "DNA gyrase subunit A"  
"OP8\_P22\_00140" 29932 "s59E25H2" 0 "DNA gyrase subunit A"  
"OP8\_P22\_00140" 29932 "s59E5H2" 0 "DNA gyrase subunit A"  
"OP8\_P22\_00140" 29932 "s63E6H2" 0 "DNA gyrase subunit A"  
"OP8\_P22\_00141" 29933 "s59E13H2" 0 "Long-chain-fatty-acid--CoA ligase FadD15"  
"OP8\_P22\_00141" 29933 "s59E25H2" 0 "Long-chain-fatty-acid--CoA ligase FadD15"  
"OP8\_P22\_00141" 29933 "s59E5H2" 0 "Long-chain-fatty-acid--CoA ligase FadD15"  
"OP8\_P22\_00141" 29933 "s63E6H2" 0 "Long-chain-fatty-acid--CoA ligase FadD15"  
"OP8\_P22\_00142" 29934 "s59E13H2" 0 "Putative zinc ribbon domain protein"  
"OP8\_P22\_00142" 29934 "s59E25H2" 0 "Putative zinc ribbon domain protein"  
"OP8\_P22\_00142" 29934 "s59E5H2" 0.001929968 "Putative zinc ribbon domain protein"  
"OP8\_P22\_00142" 29934 "s63E6H2" 0 "Putative zinc ribbon domain protein"  
"OP8\_P22\_00144" 29936 "s59E13H2" 0 "RNA polymerase sigma factor RpoD"  
"OP8\_P22\_00144" 29936 "s59E25H2" 0 "RNA polymerase sigma factor RpoD"  
"OP8\_P22\_00144" 29936 "s59E5H2" 0.001890871 "RNA polymerase sigma factor RpoD"  
"OP8\_P22\_00144" 29936 "s63E6H2" 0 "RNA polymerase sigma factor RpoD"  
"OP8\_P22\_00145" 29937 "s59E13H2" 0 "DNA primase"  
"OP8\_P22\_00145" 29937 "s59E25H2" 0 "DNA primase"  
"OP8\_P22\_00145" 29937 "s59E5H2" 0 "DNA primase"



"OP8\_P22\_00145" 29937 "s63E6H2" 0 "DNA primase"  
"OP8\_P22\_00146" 29938 "s59E13H2" 0 "N5-carboxyaminoimidazole ribonucleotide mutase"  
"OP8\_P22\_00146" 29938 "s59E25H2" 0 "N5-carboxyaminoimidazole ribonucleotide mutase"  
"OP8\_P22\_00146" 29938 "s59E5H2" 0 "N5-carboxyaminoimidazole ribonucleotide mutase"  
"OP8\_P22\_00146" 29938 "s63E6H2" 0 "N5-carboxyaminoimidazole ribonucleotide mutase"  
"OP8\_P22\_00147" 29939 "s59E13H2" 0 "UDP-3-O-[3-hydroxymyristoyl] N-acetylglucosamine deacetylase"  
"OP8\_P22\_00147" 29939 "s59E25H2" 0 "UDP-3-O-[3-hydroxymyristoyl] N-acetylglucosamine deacetylase"  
"OP8\_P22\_00147" 29939 "s59E5H2" 0 "UDP-3-O-[3-hydroxymyristoyl] N-acetylglucosamine deacetylase"  
"OP8\_P22\_00147" 29939 "s63E6H2" 0 "UDP-3-O-[3-hydroxymyristoyl] N-acetylglucosamine deacetylase"  
"OP8\_P22\_00148" 29940 "s59E13H2" 0 "Photosystem I assembly protein Ycf3"  
"OP8\_P22\_00148" 29940 "s59E25H2" 0 "Photosystem I assembly protein Ycf3"  
"OP8\_P22\_00148" 29940 "s59E5H2" 0 "Photosystem I assembly protein Ycf3"  
"OP8\_P22\_00148" 29940 "s63E6H2" 0 "Photosystem I assembly protein Ycf3"  
"OP8\_P22\_00149" 29941 "s59E13H2" 0 "Bifunctional protein GlmU"  
"OP8\_P22\_00149" 29941 "s59E25H2" 0 "Bifunctional protein GlmU"  
"OP8\_P22\_00149" 29941 "s59E5H2" 0 "Bifunctional protein GlmU"  
"OP8\_P22\_00149" 29941 "s63E6H2" 0 "Bifunctional protein GlmU"  
"OP8\_P22\_00150" 29942 "s59E13H2" 0 "Colicin I receptor precursor"  
"OP8\_P22\_00150" 29942 "s59E25H2" 0 "Colicin I receptor precursor"  
"OP8\_P22\_00150" 29942 "s59E5H2" 0 "Colicin I receptor precursor"  
"OP8\_P22\_00150" 29942 "s63E6H2" 0 "Colicin I receptor precursor"  
"OP8\_P22\_00151" 29943 "s59E13H2" 0 "Archaetidylinositol phosphate synthase"  
"OP8\_P22\_00151" 29943 "s59E25H2" 0 "Archaetidylinositol phosphate synthase"  
"OP8\_P22\_00151" 29943 "s59E5H2" 0 "Archaetidylinositol phosphate synthase"  
"OP8\_P22\_00151" 29943 "s63E6H2" 0 "Archaetidylinositol phosphate synthase"  
"OP8\_P22\_00152" 29944 "s59E13H2" 0 "hypothetical protein"  
"OP8\_P22\_00152" 29944 "s59E25H2" 0 "hypothetical protein"  
"OP8\_P22\_00152" 29944 "s59E5H2" 0 "hypothetical protein"  
"OP8\_P22\_00152" 29944 "s63E6H2" 0 "hypothetical protein"  
"OP8\_P22\_00153" 29945 "s59E13H2" 0 "Putative arsenical pump-driving ATPase"  
"OP8\_P22\_00153" 29945 "s59E25H2" 0 "Putative arsenical pump-driving ATPase"  
"OP8\_P22\_00153" 29945 "s59E5H2" 0 "Putative arsenical pump-driving ATPase"  
"OP8\_P22\_00153" 29945 "s63E6H2" 0 "Putative arsenical pump-driving ATPase"  
"OP8\_P22\_00155" 29947 "s59E13H2" 0 "ISXO2-like transposase domain protein"  
"OP8\_P22\_00155" 29947 "s59E25H2" 0 "ISXO2-like transposase domain protein"  
"OP8\_P22\_00155" 29947 "s59E5H2" 0 "ISXO2-like transposase domain protein"  
"OP8\_P22\_00155" 29947 "s63E6H2" 0 "ISXO2-like transposase domain protein"  
"OP8\_P22\_00156" 29948 "s59E13H2" 0 "Trehalose synthase"  
"OP8\_P22\_00156" 29948 "s59E25H2" 0 "Trehalose synthase"  
"OP8\_P22\_00156" 29948 "s59E5H2" 0 "Trehalose synthase"  
"OP8\_P22\_00156" 29948 "s63E6H2" 0 "Trehalose synthase"  
"OP8\_P22\_00157" 29949 "s59E13H2" 0 "Integrase core domain protein"  
"OP8\_P22\_00157" 29949 "s59E25H2" 0 "Integrase core domain protein"  
"OP8\_P22\_00157" 29949 "s59E5H2" 0 "Integrase core domain protein"  
"OP8\_P22\_00157" 29949 "s63E6H2" 0 "Integrase core domain protein"  
"OP8\_P22\_00158" 29950 "s59E13H2" 0 "Bifunctional trehalose-6-phosphate synthase/phosphatase"  
"OP8\_P22\_00158" 29950 "s59E25H2" 0 "Bifunctional trehalose-6-phosphate synthase/phosphatase"

"OP8\_P22\_00158" 29950 "s59E5H2" 0 "Bifunctional trehalose-6-phosphate synthase/phosphatase"  
"OP8\_P22\_00158" 29950 "s63E6H2" 0 "Bifunctional trehalose-6-phosphate synthase/phosphatase"  
"OP8\_P22\_00159" 29951 "s59E13H2" 0 "hypothetical protein"  
"OP8\_P22\_00159" 29951 "s59E25H2" 0 "hypothetical protein"  
"OP8\_P22\_00159" 29951 "s59E5H2" 0 "hypothetical protein"  
"OP8\_P22\_00159" 29951 "s63E6H2" 0 "hypothetical protein"  
"OP8\_P22\_00160" 29952 "s59E13H2" 0 "Translocation and assembly module TamA precursor"  
"OP8\_P22\_00160" 29952 "s59E25H2" 0 "Translocation and assembly module TamA precursor"  
"OP8\_P22\_00160" 29952 "s59E5H2" 0 "Translocation and assembly module TamA precursor"  
"OP8\_P22\_00160" 29952 "s63E6H2" 0 "Translocation and assembly module TamA precursor"  
"OP8\_P22\_00161" 29953 "s59E13H2" 0 "FKBP-type peptidyl-prolyl cis-trans isomerase"  
"OP8\_P22\_00161" 29953 "s59E25H2" 0 "FKBP-type peptidyl-prolyl cis-trans isomerase"  
"OP8\_P22\_00161" 29953 "s59E5H2" 0 "FKBP-type peptidyl-prolyl cis-trans isomerase"  
"OP8\_P22\_00161" 29953 "s63E6H2" 0 "FKBP-type peptidyl-prolyl cis-trans isomerase"  
"OP8\_P22\_00162" 29954 "s59E13H2" 0 "hypothetical protein"  
"OP8\_P22\_00162" 29954 "s59E25H2" 0 "hypothetical protein"  
"OP8\_P22\_00162" 29954 "s59E5H2" 0 "hypothetical protein"  
"OP8\_P22\_00162" 29954 "s63E6H2" 0 "hypothetical protein"  
"OP8\_P22\_00163" 29955 "s59E13H2" 0 "RNA polymerase sigma factor RpoD"  
"OP8\_P22\_00163" 29955 "s59E25H2" 0 "RNA polymerase sigma factor RpoD"  
"OP8\_P22\_00163" 29955 "s59E5H2" 0 "RNA polymerase sigma factor RpoD"  
"OP8\_P22\_00163" 29955 "s63E6H2" 0 "RNA polymerase sigma factor RpoD"  
"OP8\_P22\_00164" 29956 "s59E13H2" 0 "RNA polymerase sigma factor RpoD"  
"OP8\_P22\_00164" 29956 "s59E25H2" 0 "RNA polymerase sigma factor RpoD"  
"OP8\_P22\_00164" 29956 "s59E5H2" 0 "RNA polymerase sigma factor RpoD"  
"OP8\_P22\_00164" 29956 "s63E6H2" 0 "RNA polymerase sigma factor RpoD"  
"OP8\_P22\_00165" 29957 "s59E13H2" 0 "Arylsulfatase"  
"OP8\_P22\_00165" 29957 "s59E25H2" 0 "Arylsulfatase"  
"OP8\_P22\_00165" 29957 "s59E5H2" 0 "Arylsulfatase"  
"OP8\_P22\_00165" 29957 "s63E6H2" 0 "Arylsulfatase"  
"OP8\_P22\_00166" 29958 "s59E13H2" 0 "Putative small multi-drug export protein"  
"OP8\_P22\_00166" 29958 "s59E25H2" 0 "Putative small multi-drug export protein"  
"OP8\_P22\_00166" 29958 "s59E5H2" 0 "Putative small multi-drug export protein"  
"OP8\_P22\_00166" 29958 "s63E6H2" 0 "Putative small multi-drug export protein"  
"OP8\_P22\_00167" 29959 "s59E13H2" 0 "lipopolysaccharide core biosynthesis protein"  
"OP8\_P22\_00167" 29959 "s59E25H2" 0 "lipopolysaccharide core biosynthesis protein"  
"OP8\_P22\_00167" 29959 "s59E5H2" 0 "lipopolysaccharide core biosynthesis protein"  
"OP8\_P22\_00167" 29959 "s63E6H2" 0 "lipopolysaccharide core biosynthesis protein"  
"OP8\_P22\_00168" 29960 "s59E13H2" 0 "hypothetical protein"  
"OP8\_P22\_00168" 29960 "s59E25H2" 0 "hypothetical protein"  
"OP8\_P22\_00168" 29960 "s59E5H2" 0 "hypothetical protein"  
"OP8\_P22\_00168" 29960 "s63E6H2" 0 "hypothetical protein"  
"OP8\_P22\_00169" 29961 "s59E13H2" 0 "ECF RNA polymerase sigma factor SigW"  
"OP8\_P22\_00169" 29961 "s59E25H2" 0 "ECF RNA polymerase sigma factor SigW"  
"OP8\_P22\_00169" 29961 "s59E5H2" 0 "ECF RNA polymerase sigma factor SigW"  
"OP8\_P22\_00169" 29961 "s63E6H2" 0 "ECF RNA polymerase sigma factor SigW"  
"OP8\_P22\_00170" 29962 "s59E13H2" 0 "hypothetical protein"

"OP8\_P22\_00170" 29962 "s59E25H2" 0 "hypothetical protein"  
"OP8\_P22\_00170" 29962 "s59E5H2" 0 "hypothetical protein"  
"OP8\_P22\_00170" 29962 "s63E6H2" 0 "hypothetical protein"  
"OP8\_P22\_00171" 29963 "s59E13H2" 0 "hypothetical protein"  
"OP8\_P22\_00171" 29963 "s59E25H2" 0 "hypothetical protein"  
"OP8\_P22\_00171" 29963 "s59E5H2" 0 "hypothetical protein"  
"OP8\_P22\_00171" 29963 "s63E6H2" 0 "hypothetical protein"  
"OP8\_P22\_00172" 29964 "s59E13H2" 0 "hypothetical protein"  
"OP8\_P22\_00172" 29964 "s59E25H2" 0 "hypothetical protein"  
"OP8\_P22\_00172" 29964 "s59E5H2" 0 "hypothetical protein"  
"OP8\_P22\_00172" 29964 "s63E6H2" 0 "hypothetical protein"  
"OP8\_P22\_00173" 29965 "s59E13H2" 0 "Carboxymuconolactone decarboxylase family protein"  
"OP8\_P22\_00173" 29965 "s59E25H2" 0 "Carboxymuconolactone decarboxylase family protein"  
"OP8\_P22\_00173" 29965 "s59E5H2" 0 "Carboxymuconolactone decarboxylase family protein"  
"OP8\_P22\_00173" 29965 "s63E6H2" 0 "Carboxymuconolactone decarboxylase family protein"  
"OP8\_P22\_00174" 29966 "s59E13H2" 0 "Arsenate-mycothioli transferase ArsC1"  
"OP8\_P22\_00174" 29966 "s59E25H2" 0 "Arsenate-mycothioli transferase ArsC1"  
"OP8\_P22\_00174" 29966 "s59E5H2" 0 "Arsenate-mycothioli transferase ArsC1"  
"OP8\_P22\_00174" 29966 "s63E6H2" 0 "Arsenate-mycothioli transferase ArsC1"  
"OP8\_P22\_00175" 29967 "s59E13H2" 0.0009227402 "Sodium Bile acid symporter family protein"  
"OP8\_P22\_00175" 29967 "s59E25H2" 0 "Sodium Bile acid symporter family protein"  
"OP8\_P22\_00175" 29967 "s59E5H2" 0.2192463 "Sodium Bile acid symporter family protein"  
"OP8\_P22\_00175" 29967 "s63E6H2" 0 "Sodium Bile acid symporter family protein"  
"OP8\_P22\_00176" 29968 "s59E13H2" 0.01072694 "Thiol:disulfide interchange protein DsbD precursor"  
"OP8\_P22\_00176" 29968 "s59E25H2" 0 "Thiol:disulfide interchange protein DsbD precursor"  
"OP8\_P22\_00176" 29968 "s59E5H2" 0.3799204 "Thiol:disulfide interchange protein DsbD precursor"  
"OP8\_P22\_00176" 29968 "s63E6H2" 0 "Thiol:disulfide interchange protein DsbD precursor"  
"OP8\_P22\_00177" 29969 "s59E13H2" 0.03922181 "Thioredoxin-1"  
"OP8\_P22\_00177" 29969 "s59E25H2" 0 "Thioredoxin-1"  
"OP8\_P22\_00177" 29969 "s59E5H2" 0.3205945 "Thioredoxin-1"  
"OP8\_P22\_00177" 29969 "s63E6H2" 0 "Thioredoxin-1"  
"OP8\_P22\_00178" 29970 "s59E13H2" 0 "DGC domain protein"  
"OP8\_P22\_00178" 29970 "s59E25H2" 0 "DGC domain protein"  
"OP8\_P22\_00178" 29970 "s59E5H2" 0 "DGC domain protein"  
"OP8\_P22\_00178" 29970 "s63E6H2" 0 "DGC domain protein"  
"OP8\_P22\_00179" 29971 "s59E13H2" 0.007490638 "hypothetical protein"  
"OP8\_P22\_00179" 29971 "s59E25H2" 0 "hypothetical protein"  
"OP8\_P22\_00179" 29971 "s59E5H2" 0.1667591 "hypothetical protein"  
"OP8\_P22\_00179" 29971 "s63E6H2" 0 "hypothetical protein"  
"OP8\_P22\_00180" 29972 "s59E13H2" 0.4562667 "putative permease"  
"OP8\_P22\_00180" 29972 "s59E25H2" 0 "putative permease"  
"OP8\_P22\_00180" 29972 "s59E5H2" 0.2727364 "putative permease"  
"OP8\_P22\_00180" 29972 "s63E6H2" 0.001222365 "putative permease"  
"OP8\_P22\_00181" 29973 "s59E13H2" 0.09548518 "HTH-type transcriptional repressor AseR"  
"OP8\_P22\_00181" 29973 "s59E25H2" 0 "HTH-type transcriptional repressor AseR"  
"OP8\_P22\_00181" 29973 "s59E5H2" 0.1394606 "HTH-type transcriptional repressor AseR"  
"OP8\_P22\_00181" 29973 "s63E6H2" 0.01046679 "HTH-type transcriptional repressor AseR"

"OP8\_P22\_00182" 29974 "s59E13H2" 0 "Ribosomal protein S12 methylthiotransferase RimO"  
"OP8\_P22\_00182" 29974 "s59E25H2" 0 "Ribosomal protein S12 methylthiotransferase RimO"  
"OP8\_P22\_00182" 29974 "s59E5H2" 0 "Ribosomal protein S12 methylthiotransferase RimO"  
"OP8\_P22\_00182" 29974 "s63E6H2" 0 "Ribosomal protein S12 methylthiotransferase RimO"  
"OP8\_P22\_00183" 29975 "s59E13H2" 0 "hypothetical protein"  
"OP8\_P22\_00183" 29975 "s59E25H2" 0 "hypothetical protein"  
"OP8\_P22\_00183" 29975 "s59E5H2" 0 "hypothetical protein"  
"OP8\_P22\_00183" 29975 "s63E6H2" 0 "hypothetical protein"  
"OP8\_P22\_00184" 29976 "s59E13H2" 0 "GMP synthase [glutamine-hydrolyzing] subunit B"  
"OP8\_P22\_00184" 29976 "s59E25H2" 0 "GMP synthase [glutamine-hydrolyzing] subunit B"  
"OP8\_P22\_00184" 29976 "s59E5H2" 0 "GMP synthase [glutamine-hydrolyzing] subunit B"  
"OP8\_P22\_00184" 29976 "s63E6H2" 0 "GMP synthase [glutamine-hydrolyzing] subunit B"  
"OP8\_P22\_00186" 29978 "s59E13H2" 0 "Transposase DDE domain protein"  
"OP8\_P22\_00186" 29978 "s59E25H2" 0 "Transposase DDE domain protein"  
"OP8\_P22\_00186" 29978 "s59E5H2" 0.1744208 "Transposase DDE domain protein"  
"OP8\_P22\_00186" 29978 "s63E6H2" 0 "Transposase DDE domain protein"  
"OP8\_P22\_00187" 29979 "s59E13H2" 0 "Serine/threonine-protein kinase PrkC"  
"OP8\_P22\_00187" 29979 "s59E25H2" 0 "Serine/threonine-protein kinase PrkC"  
"OP8\_P22\_00187" 29979 "s59E5H2" 0.0005493602 "Serine/threonine-protein kinase PrkC"  
"OP8\_P22\_00187" 29979 "s63E6H2" 0 "Serine/threonine-protein kinase PrkC"  
"OP8\_P22\_00188" 29980 "s59E13H2" 0.01193449 "Snoal-like polyketide cyclase"  
"OP8\_P22\_00188" 29980 "s59E25H2" 0 "Snoal-like polyketide cyclase"  
"OP8\_P22\_00188" 29980 "s59E5H2" 0.1888944 "Snoal-like polyketide cyclase"  
"OP8\_P22\_00188" 29980 "s63E6H2" 0.004130799 "Snoal-like polyketide cyclase"  
"OP8\_P22\_00189" 29981 "s59E13H2" 0.00025632 "photosystem I assembly protein Ycf3"  
"OP8\_P22\_00189" 29981 "s59E25H2" 0 "photosystem I assembly protein Ycf3"  
"OP8\_P22\_00189" 29981 "s59E5H2" 0.001344189 "photosystem I assembly protein Ycf3"  
"OP8\_P22\_00189" 29981 "s63E6H2" 0 "photosystem I assembly protein Ycf3"  
"OP8\_P22\_00191" 29983 "s59E13H2" 0 "hypothetical protein"  
"OP8\_P22\_00191" 29983 "s59E25H2" 0 "hypothetical protein"  
"OP8\_P22\_00191" 29983 "s59E5H2" 0 "hypothetical protein"  
"OP8\_P22\_00191" 29983 "s63E6H2" 0 "hypothetical protein"  
"OP8\_P22\_00192" 29984 "s59E13H2" 0 "Arylsulfatase"  
"OP8\_P22\_00192" 29984 "s59E25H2" 0 "Arylsulfatase"  
"OP8\_P22\_00192" 29984 "s59E5H2" 0 "Arylsulfatase"  
"OP8\_P22\_00192" 29984 "s63E6H2" 0 "Arylsulfatase"  
"OP8\_P22\_00193" 29985 "s59E13H2" 0 "Demethylrebeccamycin-D-glucose O-methyltransferase"  
"OP8\_P22\_00193" 29985 "s59E25H2" 0 "Demethylrebeccamycin-D-glucose O-methyltransferase"  
"OP8\_P22\_00193" 29985 "s59E5H2" 0 "Demethylrebeccamycin-D-glucose O-methyltransferase"  
"OP8\_P22\_00193" 29985 "s63E6H2" 0 "Demethylrebeccamycin-D-glucose O-methyltransferase"  
"OP8\_P22\_00194" 29986 "s59E13H2" 0 "3-oxoacyl-[acyl-carrier-protein] synthase 2"  
"OP8\_P22\_00194" 29986 "s59E25H2" 0 "3-oxoacyl-[acyl-carrier-protein] synthase 2"  
"OP8\_P22\_00194" 29986 "s59E5H2" 0 "3-oxoacyl-[acyl-carrier-protein] synthase 2"  
"OP8\_P22\_00194" 29986 "s63E6H2" 0 "3-oxoacyl-[acyl-carrier-protein] synthase 2"  
"OP8\_P22\_00195" 29987 "s59E13H2" 0 "Nitronate monooxygenase"  
"OP8\_P22\_00195" 29987 "s59E25H2" 0 "Nitronate monooxygenase"  
"OP8\_P22\_00195" 29987 "s59E5H2" 0 "Nitronate monooxygenase"

"OP8\_P22\_00195" 29987 "s63E6H2" 0 "Nitronate monooxygenase"  
"OP8\_P22\_00196" 29988 "s59E13H2" 0 "hypothetical protein"  
"OP8\_P22\_00196" 29988 "s59E25H2" 0 "hypothetical protein"  
"OP8\_P22\_00196" 29988 "s59E5H2" 0 "hypothetical protein"  
"OP8\_P22\_00196" 29988 "s63E6H2" 0 "hypothetical protein"  
"OP8\_P22\_00197" 29989 "s59E13H2" 0 "formate dehydrogenase accessory protein"  
"OP8\_P22\_00197" 29989 "s59E25H2" 0 "formate dehydrogenase accessory protein"  
"OP8\_P22\_00197" 29989 "s59E5H2" 0 "formate dehydrogenase accessory protein"  
"OP8\_P22\_00197" 29989 "s63E6H2" 0 "formate dehydrogenase accessory protein"  
"OP8\_P22\_00198" 29990 "s59E13H2" 0 "NADP-reducing hydrogenase subunit HndC"  
"OP8\_P22\_00198" 29990 "s59E25H2" 0 "NADP-reducing hydrogenase subunit HndC"  
"OP8\_P22\_00198" 29990 "s59E5H2" 0 "NADP-reducing hydrogenase subunit HndC"  
"OP8\_P22\_00198" 29990 "s63E6H2" 0 "NADP-reducing hydrogenase subunit HndC"  
"OP8\_P22\_00199" 29991 "s59E13H2" 0 "NADP-reducing hydrogenase subunit HndC"  
"OP8\_P22\_00199" 29991 "s59E25H2" 0 "NADP-reducing hydrogenase subunit HndC"  
"OP8\_P22\_00199" 29991 "s59E5H2" 0 "NADP-reducing hydrogenase subunit HndC"  
"OP8\_P22\_00199" 29991 "s63E6H2" 0.004516872 "NADP-reducing hydrogenase subunit HndC"  
"OP8\_P22\_00200" 29992 "s59E13H2" 0 "NADP-reducing hydrogenase subunit HndA"  
"OP8\_P22\_00200" 29992 "s59E25H2" 0 "NADP-reducing hydrogenase subunit HndA"  
"OP8\_P22\_00200" 29992 "s59E5H2" 0 "NADP-reducing hydrogenase subunit HndA"  
"OP8\_P22\_00200" 29992 "s63E6H2" 0 "NADP-reducing hydrogenase subunit HndA"  
"OP8\_P22\_00201" 29993 "s59E13H2" 0 "F420-non-reducing hydrogenase iron-sulfur subunit D"  
"OP8\_P22\_00201" 29993 "s59E25H2" 0 "F420-non-reducing hydrogenase iron-sulfur subunit D"  
"OP8\_P22\_00201" 29993 "s59E5H2" 0 "F420-non-reducing hydrogenase iron-sulfur subunit D"  
"OP8\_P22\_00201" 29993 "s63E6H2" 0.001956013 "F420-non-reducing hydrogenase iron-sulfur subunit D"  
"OP8\_P22\_00202" 29994 "s59E13H2" 0 "CoB--CoM heterodisulfide reductase iron-sulfur subunit A"  
"OP8\_P22\_00202" 29994 "s59E25H2" 0 "CoB--CoM heterodisulfide reductase iron-sulfur subunit A"  
"OP8\_P22\_00202" 29994 "s59E5H2" 0.003339086 "CoB--CoM heterodisulfide reductase iron-sulfur subunit A"  
"OP8\_P22\_00202" 29994 "s63E6H2" 0 "CoB--CoM heterodisulfide reductase iron-sulfur subunit A"  
"OP8\_P22\_00203" 29995 "s59E13H2" 0 "CoB--CoM heterodisulfide reductase iron-sulfur subunit D"  
"OP8\_P22\_00203" 29995 "s59E25H2" 0 "CoB--CoM heterodisulfide reductase iron-sulfur subunit D"  
"OP8\_P22\_00203" 29995 "s59E5H2" 0 "CoB--CoM heterodisulfide reductase iron-sulfur subunit D"  
"OP8\_P22\_00203" 29995 "s63E6H2" 0.004756335 "CoB--CoM heterodisulfide reductase iron-sulfur subunit D"  
"OP8\_P22\_00204" 29996 "s59E13H2" 0 "hydrogenase 2 protein HybA"  
"OP8\_P22\_00204" 29996 "s59E25H2" 0 "hydrogenase 2 protein HybA"  
"OP8\_P22\_00204" 29996 "s59E5H2" 0 "hydrogenase 2 protein HybA"  
"OP8\_P22\_00204" 29996 "s63E6H2" 0 "hydrogenase 2 protein HybA"  
"OP8\_P22\_00205" 29997 "s59E13H2" 0 "Tungsten-containing aldehyde ferredoxin oxidoreductase"  
"OP8\_P22\_00205" 29997 "s59E25H2" 0 "Tungsten-containing aldehyde ferredoxin oxidoreductase"  
"OP8\_P22\_00205" 29997 "s59E5H2" 0.01203562 "Tungsten-containing aldehyde ferredoxin oxidoreductase"  
"OP8\_P22\_00205" 29997 "s63E6H2" 0.001514522 "Tungsten-containing aldehyde ferredoxin oxidoreductase"  
"OP8\_P22\_00206" 29998 "s59E13H2" 0 "putative acetyltransferase"  
"OP8\_P22\_00206" 29998 "s59E25H2" 0 "putative acetyltransferase"  
"OP8\_P22\_00206" 29998 "s59E5H2" 0 "putative acetyltransferase"  
"OP8\_P22\_00206" 29998 "s63E6H2" 0 "putative acetyltransferase"  
"OP8\_P22\_00207" 29999 "s59E13H2" 0 "Putative ankyrin repeat protein"  
"OP8\_P22\_00207" 29999 "s59E25H2" 0 "Putative ankyrin repeat protein"

"OP8\_P22\_00207" 29999 "s59E5H2" 0 "Putative ankyrin repeat protein"  
"OP8\_P22\_00207" 29999 "s63E6H2" 0 "Putative ankyrin repeat protein"  
"OP8\_P22\_00208" 30000 "s59E13H2" 0 "glucans biosynthesis protein"  
"OP8\_P22\_00208" 30000 "s59E25H2" 0 "glucans biosynthesis protein"  
"OP8\_P22\_00208" 30000 "s59E5H2" 0 "glucans biosynthesis protein"  
"OP8\_P22\_00208" 30000 "s63E6H2" 0 "glucans biosynthesis protein"  
"OP8\_P22\_00209" 30001 "s59E13H2" 0 "Serine/threonine-protein kinase PknB"  
"OP8\_P22\_00209" 30001 "s59E25H2" 0 "Serine/threonine-protein kinase PknB"  
"OP8\_P22\_00209" 30001 "s59E5H2" 0 "Serine/threonine-protein kinase PknB"  
"OP8\_P22\_00209" 30001 "s63E6H2" 0 "Serine/threonine-protein kinase PknB"  
"OP8\_P22\_00210" 30002 "s59E13H2" 0 "putative cysteine desulfurase"  
"OP8\_P22\_00210" 30002 "s59E25H2" 0 "putative cysteine desulfurase"  
"OP8\_P22\_00210" 30002 "s59E5H2" 0 "putative cysteine desulfurase"  
"OP8\_P22\_00210" 30002 "s63E6H2" 0 "putative cysteine desulfurase"  
"OP8\_P22\_00211" 30003 "s59E13H2" 0 "Hdr-like menaquinol oxidoreductase iron-sulfur subunit"  
"OP8\_P22\_00211" 30003 "s59E25H2" 0 "Hdr-like menaquinol oxidoreductase iron-sulfur subunit"  
"OP8\_P22\_00211" 30003 "s59E5H2" 0 "Hdr-like menaquinol oxidoreductase iron-sulfur subunit"  
"OP8\_P22\_00211" 30003 "s63E6H2" 0 "Hdr-like menaquinol oxidoreductase iron-sulfur subunit"  
"OP8\_P22\_00214" 30006 "s59E13H2" 0 "Dispase autolysis-inducing protein precursor"  
"OP8\_P22\_00214" 30006 "s59E25H2" 0 "Dispase autolysis-inducing protein precursor"  
"OP8\_P22\_00214" 30006 "s59E5H2" 0 "Dispase autolysis-inducing protein precursor"  
"OP8\_P22\_00214" 30006 "s63E6H2" 0 "Dispase autolysis-inducing protein precursor"  
"OP8\_P22\_00215" 30007 "s59E13H2" 0 "Trimethylamine methyltransferase MttB"  
"OP8\_P22\_00215" 30007 "s59E25H2" 0 "Trimethylamine methyltransferase MttB"  
"OP8\_P22\_00215" 30007 "s59E5H2" 0 "Trimethylamine methyltransferase MttB"  
"OP8\_P22\_00215" 30007 "s63E6H2" 0 "Trimethylamine methyltransferase MttB"  
"OP8\_P22\_00216" 30008 "s59E13H2" 0 "Dimethylamine corrinoid protein"  
"OP8\_P22\_00216" 30008 "s59E25H2" 0 "Dimethylamine corrinoid protein"  
"OP8\_P22\_00216" 30008 "s59E5H2" 0 "Dimethylamine corrinoid protein"  
"OP8\_P22\_00216" 30008 "s63E6H2" 0 "Dimethylamine corrinoid protein"  
"OP8\_P22\_00217" 30009 "s59E13H2" 0 "Vitamin B12 dependent methionine synthase, activation domain"  
"OP8\_P22\_00217" 30009 "s59E25H2" 0 "Vitamin B12 dependent methionine synthase, activation domain"  
"OP8\_P22\_00217" 30009 "s59E5H2" 0 "Vitamin B12 dependent methionine synthase, activation domain"  
"OP8\_P22\_00217" 30009 "s63E6H2" 0 "Vitamin B12 dependent methionine synthase, activation domain"  
"OP8\_P22\_00218" 30010 "s59E13H2" 0 "Na(+)-translocating NADH-quinone reductase subunit F"  
"OP8\_P22\_00218" 30010 "s59E25H2" 0 "Na(+)-translocating NADH-quinone reductase subunit F"  
"OP8\_P22\_00218" 30010 "s59E5H2" 0 "Na(+)-translocating NADH-quinone reductase subunit F"  
"OP8\_P22\_00218" 30010 "s63E6H2" 0 "Na(+)-translocating NADH-quinone reductase subunit F"  
"OP8\_P22\_00219" 30011 "s59E13H2" 0 "Acyl-homoserine lactone acylase QuiP precursor"  
"OP8\_P22\_00219" 30011 "s59E25H2" 0 "Acyl-homoserine lactone acylase QuiP precursor"  
"OP8\_P22\_00219" 30011 "s59E5H2" 0 "Acyl-homoserine lactone acylase QuiP precursor"  
"OP8\_P22\_00219" 30011 "s63E6H2" 0 "Acyl-homoserine lactone acylase QuiP precursor"  
"OP8\_P22\_00220" 30012 "s59E13H2" 0 "hypothetical protein"  
"OP8\_P22\_00220" 30012 "s59E25H2" 0 "hypothetical protein"  
"OP8\_P22\_00220" 30012 "s59E5H2" 0 "hypothetical protein"  
"OP8\_P22\_00220" 30012 "s63E6H2" 0 "hypothetical protein"  
"OP8\_P22\_00221" 30013 "s59E13H2" 0 "hypothetical protein"

"OP8\_P22\_00221" 30013 "s59E25H2" 0 "hypothetical protein"  
"OP8\_P22\_00221" 30013 "s59E5H2" 0 "hypothetical protein"  
"OP8\_P22\_00221" 30013 "s63E6H2" 0 "hypothetical protein"  
"OP8\_P22\_00222" 30014 "s59E13H2" 0 "Oxygen-independent coproporphyrinogen-III oxidase 1"  
"OP8\_P22\_00222" 30014 "s59E25H2" 0 "Oxygen-independent coproporphyrinogen-III oxidase 1"  
"OP8\_P22\_00222" 30014 "s59E5H2" 0 "Oxygen-independent coproporphyrinogen-III oxidase 1"  
"OP8\_P22\_00222" 30014 "s63E6H2" 0 "Oxygen-independent coproporphyrinogen-III oxidase 1"  
"OP8\_P22\_00223" 30015 "s59E13H2" 0 "hypothetical protein"  
"OP8\_P22\_00223" 30015 "s59E25H2" 0 "hypothetical protein"  
"OP8\_P22\_00223" 30015 "s59E5H2" 0 "hypothetical protein"  
"OP8\_P22\_00223" 30015 "s63E6H2" 0 "hypothetical protein"  
"OP8\_P22\_00224" 30016 "s59E13H2" 0 "hypothetical protein"  
"OP8\_P22\_00224" 30016 "s59E25H2" 0 "hypothetical protein"  
"OP8\_P22\_00224" 30016 "s59E5H2" 0 "hypothetical protein"  
"OP8\_P22\_00224" 30016 "s63E6H2" 0 "hypothetical protein"  
"OP8\_P22\_00225" 30017 "s59E13H2" 0 "2-oxoglutarate synthase subunit KorC"  
"OP8\_P22\_00225" 30017 "s59E25H2" 0 "2-oxoglutarate synthase subunit KorC"  
"OP8\_P22\_00225" 30017 "s59E5H2" 0 "2-oxoglutarate synthase subunit KorC"  
"OP8\_P22\_00225" 30017 "s63E6H2" 0 "2-oxoglutarate synthase subunit KorC"  
"OP8\_P22\_00226" 30018 "s59E13H2" 0 "Isopropylmalate/citramalate isomerase small subunit"  
"OP8\_P22\_00226" 30018 "s59E25H2" 0 "Isopropylmalate/citramalate isomerase small subunit"  
"OP8\_P22\_00226" 30018 "s59E5H2" 0 "Isopropylmalate/citramalate isomerase small subunit"  
"OP8\_P22\_00226" 30018 "s63E6H2" 0 "Isopropylmalate/citramalate isomerase small subunit"  
"OP8\_P22\_00227" 30019 "s59E13H2" 0 "Isopropylmalate/citramalate isomerase large subunit"  
"OP8\_P22\_00227" 30019 "s59E25H2" 0 "Isopropylmalate/citramalate isomerase large subunit"  
"OP8\_P22\_00227" 30019 "s59E5H2" 0 "Isopropylmalate/citramalate isomerase large subunit"  
"OP8\_P22\_00227" 30019 "s63E6H2" 0 "Isopropylmalate/citramalate isomerase large subunit"  
"OP8\_P22\_00228" 30020 "s59E13H2" 0 "Citrate lyase alpha chain"  
"OP8\_P22\_00228" 30020 "s59E25H2" 0 "Citrate lyase alpha chain"  
"OP8\_P22\_00228" 30020 "s59E5H2" 0 "Citrate lyase alpha chain"  
"OP8\_P22\_00228" 30020 "s63E6H2" 0 "Citrate lyase alpha chain"  
"OP8\_P22\_00229" 30021 "s59E13H2" 0 "Citrate lyase subunit beta"  
"OP8\_P22\_00229" 30021 "s59E25H2" 0 "Citrate lyase subunit beta"  
"OP8\_P22\_00229" 30021 "s59E5H2" 0 "Citrate lyase subunit beta"  
"OP8\_P22\_00229" 30021 "s63E6H2" 0 "Citrate lyase subunit beta"  
"OP8\_P22\_00230" 30022 "s59E13H2" 0 "Isopropylmalate/citramalate isomerase large subunit"  
"OP8\_P22\_00230" 30022 "s59E25H2" 0 "Isopropylmalate/citramalate isomerase large subunit"  
"OP8\_P22\_00230" 30022 "s59E5H2" 0 "Isopropylmalate/citramalate isomerase large subunit"  
"OP8\_P22\_00230" 30022 "s63E6H2" 0 "Isopropylmalate/citramalate isomerase large subunit"  
"OP8\_P22\_00231" 30023 "s59E13H2" 0 "Dihydroneopterin 2',3'-cyclic phosphate phosphodiesterase"  
"OP8\_P22\_00231" 30023 "s59E25H2" 0 "Dihydroneopterin 2',3'-cyclic phosphate phosphodiesterase"  
"OP8\_P22\_00231" 30023 "s59E5H2" 0 "Dihydroneopterin 2',3'-cyclic phosphate phosphodiesterase"  
"OP8\_P22\_00231" 30023 "s63E6H2" 0 "Dihydroneopterin 2',3'-cyclic phosphate phosphodiesterase"  
"OP8\_P22\_00232" 30024 "s59E13H2" 0 "Homocitrate dehydrogenase"  
"OP8\_P22\_00232" 30024 "s59E25H2" 0 "Homocitrate dehydrogenase"  
"OP8\_P22\_00232" 30024 "s59E5H2" 0 "Homocitrate dehydrogenase"  
"OP8\_P22\_00232" 30024 "s63E6H2" 0 "Homocitrate dehydrogenase"

"OP8\_P22\_00233" 30025 "s59E13H2" 0 "Transposase IS116/IS110/IS902 family protein"  
"OP8\_P22\_00233" 30025 "s59E25H2" 0 "Transposase IS116/IS110/IS902 family protein"  
"OP8\_P22\_00233" 30025 "s59E5H2" 0 "Transposase IS116/IS110/IS902 family protein"  
"OP8\_P22\_00233" 30025 "s63E6H2" 0 "Transposase IS116/IS110/IS902 family protein"  
"OP8\_P22\_00234" 30026 "s59E13H2" 0 "D-aminopeptidase"  
"OP8\_P22\_00234" 30026 "s59E25H2" 0 "D-aminopeptidase"  
"OP8\_P22\_00234" 30026 "s59E5H2" 0 "D-aminopeptidase"  
"OP8\_P22\_00234" 30026 "s63E6H2" 0 "D-aminopeptidase"  
"OP8\_P22\_00235" 30027 "s59E13H2" 0 "Dipeptidase"  
"OP8\_P22\_00235" 30027 "s59E25H2" 0 "Dipeptidase"  
"OP8\_P22\_00235" 30027 "s59E5H2" 0 "Dipeptidase"  
"OP8\_P22\_00235" 30027 "s63E6H2" 0 "Dipeptidase"  
"OP8\_P22\_00236" 30028 "s59E13H2" 0 "hypothetical protein"  
"OP8\_P22\_00236" 30028 "s59E25H2" 0 "hypothetical protein"  
"OP8\_P22\_00236" 30028 "s59E5H2" 0 "hypothetical protein"  
"OP8\_P22\_00236" 30028 "s63E6H2" 0 "hypothetical protein"  
"OP8\_P22\_00237" 30029 "s59E13H2" 0 "hypothetical protein"  
"OP8\_P22\_00237" 30029 "s59E25H2" 0 "hypothetical protein"  
"OP8\_P22\_00237" 30029 "s59E5H2" 0 "hypothetical protein"  
"OP8\_P22\_00237" 30029 "s63E6H2" 0 "hypothetical protein"  
"OP8\_P22\_00238" 30030 "s59E13H2" 0 "N-substituted formamide deformylase precursor"  
"OP8\_P22\_00238" 30030 "s59E25H2" 0 "N-substituted formamide deformylase precursor"  
"OP8\_P22\_00238" 30030 "s59E5H2" 0 "N-substituted formamide deformylase precursor"  
"OP8\_P22\_00238" 30030 "s63E6H2" 0 "N-substituted formamide deformylase precursor"  
"OP8\_P22\_00239" 30031 "s59E13H2" 0 "Quinoprotein ethanol dehydrogenase precursor"  
"OP8\_P22\_00239" 30031 "s59E25H2" 0 "Quinoprotein ethanol dehydrogenase precursor"  
"OP8\_P22\_00239" 30031 "s59E5H2" 0 "Quinoprotein ethanol dehydrogenase precursor"  
"OP8\_P22\_00239" 30031 "s63E6H2" 0 "Quinoprotein ethanol dehydrogenase precursor"  
"OP8\_P22\_00240" 30032 "s59E13H2" 0 "N-substituted formamide deformylase precursor"  
"OP8\_P22\_00240" 30032 "s59E25H2" 0 "N-substituted formamide deformylase precursor"  
"OP8\_P22\_00240" 30032 "s59E5H2" 0 "N-substituted formamide deformylase precursor"  
"OP8\_P22\_00240" 30032 "s63E6H2" 0 "N-substituted formamide deformylase precursor"  
"OP8\_P22\_00241" 30033 "s59E13H2" 0 "hypothetical protein"  
"OP8\_P22\_00241" 30033 "s59E25H2" 0 "hypothetical protein"  
"OP8\_P22\_00241" 30033 "s59E5H2" 0 "hypothetical protein"  
"OP8\_P22\_00241" 30033 "s63E6H2" 0 "hypothetical protein"  
"OP8\_P22\_00242" 30034 "s59E13H2" 0.0668309 "Creatinine amidohydrolase"  
"OP8\_P22\_00242" 30034 "s59E25H2" 0 "Creatinine amidohydrolase"  
"OP8\_P22\_00242" 30034 "s59E5H2" 0.1209564 "Creatinine amidohydrolase"  
"OP8\_P22\_00242" 30034 "s63E6H2" 0 "Creatinine amidohydrolase"  
"OP8\_P22\_00244" 30036 "s59E13H2" 0 "photosystem I assembly protein Ycf3"  
"OP8\_P22\_00244" 30036 "s59E25H2" 0 "photosystem I assembly protein Ycf3"  
"OP8\_P22\_00244" 30036 "s59E5H2" 0 "photosystem I assembly protein Ycf3"  
"OP8\_P22\_00244" 30036 "s63E6H2" 0 "photosystem I assembly protein Ycf3"  
"OP8\_P22\_00245" 30037 "s59E13H2" 0.02336729 "Homoserine O-acetyltransferase"  
"OP8\_P22\_00245" 30037 "s59E25H2" 0 "Homoserine O-acetyltransferase"  
"OP8\_P22\_00245" 30037 "s59E5H2" 0.21413 "Homoserine O-acetyltransferase"



"OP8\_P22\_00245" 30037 "s63E6H2" 0 "Homoserine O-acetyltransferase"  
"OP8\_P22\_00246" 30038 "s59E13H2" 0 "hypothetical protein"  
"OP8\_P22\_00246" 30038 "s59E25H2" 0 "hypothetical protein"  
"OP8\_P22\_00246" 30038 "s59E5H2" 0.3790569 "hypothetical protein"  
"OP8\_P22\_00246" 30038 "s63E6H2" 0 "hypothetical protein"  
"OP8\_P22\_00247" 30039 "s59E13H2" 0 "hypothetical protein"  
"OP8\_P22\_00247" 30039 "s59E25H2" 0 "hypothetical protein"  
"OP8\_P22\_00247" 30039 "s59E5H2" 0 "hypothetical protein"  
"OP8\_P22\_00247" 30039 "s63E6H2" 0 "hypothetical protein"  
"OP8\_P22\_00248" 30040 "s59E13H2" 0 "Putative transposase"  
"OP8\_P22\_00248" 30040 "s59E25H2" 0 "Putative transposase"  
"OP8\_P22\_00248" 30040 "s59E5H2" 0 "Putative transposase"  
"OP8\_P22\_00248" 30040 "s63E6H2" 0 "Putative transposase"  
"OP8\_P22\_00250" 30042 "s59E13H2" 0 "OsmC-like protein"  
"OP8\_P22\_00250" 30042 "s59E25H2" 0 "OsmC-like protein"  
"OP8\_P22\_00250" 30042 "s59E5H2" 0 "OsmC-like protein"  
"OP8\_P22\_00250" 30042 "s63E6H2" 0 "OsmC-like protein"  
"OP8\_P22\_00251" 30043 "s59E13H2" 0 "Serine/threonine-protein kinase PrkC"  
"OP8\_P22\_00251" 30043 "s59E25H2" 0 "Serine/threonine-protein kinase PrkC"  
"OP8\_P22\_00251" 30043 "s59E5H2" 0 "Serine/threonine-protein kinase PrkC"  
"OP8\_P22\_00251" 30043 "s63E6H2" 0 "Serine/threonine-protein kinase PrkC"  
"OP8\_P22\_00252" 30044 "s59E13H2" 0 "Peptidase family S58"  
"OP8\_P22\_00252" 30044 "s59E25H2" 0 "Peptidase family S58"  
"OP8\_P22\_00252" 30044 "s59E5H2" 0 "Peptidase family S58"  
"OP8\_P22\_00252" 30044 "s63E6H2" 0 "Peptidase family S58"  
"OP8\_P22\_00253" 30045 "s59E13H2" 0 "photosystem I assembly protein Ycf3"  
"OP8\_P22\_00253" 30045 "s59E25H2" 0 "photosystem I assembly protein Ycf3"  
"OP8\_P22\_00253" 30045 "s59E5H2" 0 "photosystem I assembly protein Ycf3"  
"OP8\_P22\_00253" 30045 "s63E6H2" 0 "photosystem I assembly protein Ycf3"  
"OP8\_P22\_00254" 30046 "s59E13H2" 0 "hypothetical protein"  
"OP8\_P22\_00254" 30046 "s59E25H2" 0 "hypothetical protein"  
"OP8\_P22\_00254" 30046 "s59E5H2" 0 "hypothetical protein"  
"OP8\_P22\_00254" 30046 "s63E6H2" 0 "hypothetical protein"  
"OP8\_P22\_00255" 30047 "s59E13H2" 0 "RNA polymerase sigma factor"  
"OP8\_P22\_00255" 30047 "s59E25H2" 0 "RNA polymerase sigma factor"  
"OP8\_P22\_00255" 30047 "s59E5H2" 0 "RNA polymerase sigma factor"  
"OP8\_P22\_00255" 30047 "s63E6H2" 0 "RNA polymerase sigma factor"  
"OP8\_P22\_00256" 30048 "s59E13H2" 0 "Nif-specific regulatory protein"  
"OP8\_P22\_00256" 30048 "s59E25H2" 0 "Nif-specific regulatory protein"  
"OP8\_P22\_00256" 30048 "s59E5H2" 0 "Nif-specific regulatory protein"  
"OP8\_P22\_00256" 30048 "s63E6H2" 0 "Nif-specific regulatory protein"  
"OP8\_P22\_00257" 30049 "s59E13H2" 0 "photosystem I assembly protein Ycf3"  
"OP8\_P22\_00257" 30049 "s59E25H2" 0 "photosystem I assembly protein Ycf3"  
"OP8\_P22\_00257" 30049 "s59E5H2" 0 "photosystem I assembly protein Ycf3"  
"OP8\_P22\_00257" 30049 "s63E6H2" 0 "photosystem I assembly protein Ycf3"  
"OP8\_P22\_00258" 30050 "s59E13H2" 0 "hypothetical protein"  
"OP8\_P22\_00258" 30050 "s59E25H2" 0 "hypothetical protein"

"OP8\_P22\_00258" 30050 "s59E5H2" 0 "hypothetical protein"  
"OP8\_P22\_00258" 30050 "s63E6H2" 0 "hypothetical protein"  
"OP8\_P22\_00259" 30051 "s59E13H2" 0 "Sodium/proline symporter"  
"OP8\_P22\_00259" 30051 "s59E25H2" 0 "Sodium/proline symporter"  
"OP8\_P22\_00259" 30051 "s59E5H2" 0 "Sodium/proline symporter"  
"OP8\_P22\_00259" 30051 "s63E6H2" 0 "Sodium/proline symporter"  
"OP8\_P22\_00260" 30052 "s59E13H2" 0 "Nucleoside diphosphate kinase"  
"OP8\_P22\_00260" 30052 "s59E25H2" 0 "Nucleoside diphosphate kinase"  
"OP8\_P22\_00260" 30052 "s59E5H2" 0 "Nucleoside diphosphate kinase"  
"OP8\_P22\_00260" 30052 "s63E6H2" 0 "Nucleoside diphosphate kinase"  
"OP8\_P22\_00261" 30053 "s59E13H2" 0 "hypothetical protein"  
"OP8\_P22\_00261" 30053 "s59E25H2" 0 "hypothetical protein"  
"OP8\_P22\_00261" 30053 "s59E5H2" 0 "hypothetical protein"  
"OP8\_P22\_00261" 30053 "s63E6H2" 0 "hypothetical protein"  
"OP8\_P22\_00263" 30055 "s59E13H2" 0 "SnoaL-like polyketide cyclase"  
"OP8\_P22\_00263" 30055 "s59E25H2" 0 "SnoaL-like polyketide cyclase"  
"OP8\_P22\_00263" 30055 "s59E5H2" 0 "SnoaL-like polyketide cyclase"  
"OP8\_P22\_00263" 30055 "s63E6H2" 0 "SnoaL-like polyketide cyclase"  
"OP8\_P22\_00264" 30056 "s59E13H2" 0 "NHL repeat protein"  
"OP8\_P22\_00264" 30056 "s59E25H2" 0 "NHL repeat protein"  
"OP8\_P22\_00264" 30056 "s59E5H2" 0 "NHL repeat protein"  
"OP8\_P22\_00264" 30056 "s63E6H2" 0 "NHL repeat protein"  
"OP8\_P22\_00265" 30057 "s59E13H2" 0 "Transposase DDE domain protein"  
"OP8\_P22\_00265" 30057 "s59E25H2" 0 "Transposase DDE domain protein"  
"OP8\_P22\_00265" 30057 "s59E5H2" 0 "Transposase DDE domain protein"  
"OP8\_P22\_00265" 30057 "s63E6H2" 0 "Transposase DDE domain protein"  
"OP8\_P22\_00266" 30058 "s59E13H2" 0 "hypothetical protein"  
"OP8\_P22\_00266" 30058 "s59E25H2" 0 "hypothetical protein"  
"OP8\_P22\_00266" 30058 "s59E5H2" 0 "hypothetical protein"  
"OP8\_P22\_00266" 30058 "s63E6H2" 0 "hypothetical protein"  
"OP8\_P22\_00268" 30060 "s59E13H2" 0.01184624 "L-threonine dehydratase catabolic TdcB"  
"OP8\_P22\_00268" 30060 "s59E25H2" 0 "L-threonine dehydratase catabolic TdcB"  
"OP8\_P22\_00268" 30060 "s59E5H2" 0 "L-threonine dehydratase catabolic TdcB"  
"OP8\_P22\_00268" 30060 "s63E6H2" 0 "L-threonine dehydratase catabolic TdcB"  
"OP8\_P22\_00269" 30061 "s59E13H2" 0 "hypothetical protein"  
"OP8\_P22\_00269" 30061 "s59E25H2" 0 "hypothetical protein"  
"OP8\_P22\_00269" 30061 "s59E5H2" 0 "hypothetical protein"  
"OP8\_P22\_00269" 30061 "s63E6H2" 0 "hypothetical protein"  
"OP8\_P22\_00270" 30062 "s59E13H2" 0 "hypothetical protein"  
"OP8\_P22\_00270" 30062 "s59E25H2" 0 "hypothetical protein"  
"OP8\_P22\_00270" 30062 "s59E5H2" 0 "hypothetical protein"  
"OP8\_P22\_00270" 30062 "s63E6H2" 0 "hypothetical protein"  
"OP8\_P22\_00271" 30063 "s59E13H2" 0.03961664 "Toxin HigB-1"  
"OP8\_P22\_00271" 30063 "s59E25H2" 0 "Toxin HigB-1"  
"OP8\_P22\_00271" 30063 "s59E5H2" 0.06743141 "Toxin HigB-1"  
"OP8\_P22\_00271" 30063 "s63E6H2" 0 "Toxin HigB-1"  
"OP8\_P22\_00272" 30064 "s59E13H2" 0.04189267 "putative HTH-type transcriptional regulator YbaQ"

"OP8\_P22\_00272" 30064 "s59E25H2" 0 "putative HTH-type transcriptional regulator YbaQ"  
"OP8\_P22\_00272" 30064 "s59E5H2" 0.06712505 "putative HTH-type transcriptional regulator YbaQ"  
"OP8\_P22\_00272" 30064 "s63E6H2" 0 "putative HTH-type transcriptional regulator YbaQ"  
"OP8\_P22\_00273" 30065 "s59E13H2" 0 "Transposase IS116/IS110/IS902 family protein"  
"OP8\_P22\_00273" 30065 "s59E25H2" 0 "Transposase IS116/IS110/IS902 family protein"  
"OP8\_P22\_00273" 30065 "s59E5H2" 0 "Transposase IS116/IS110/IS902 family protein"  
"OP8\_P22\_00273" 30065 "s63E6H2" 0 "Transposase IS116/IS110/IS902 family protein"  
"OP8\_P22\_00274" 30066 "s59E13H2" 0 "Serine/threonine-protein kinase PknB"  
"OP8\_P22\_00274" 30066 "s59E25H2" 0 "Serine/threonine-protein kinase PknB"  
"OP8\_P22\_00274" 30066 "s59E5H2" 0 "Serine/threonine-protein kinase PknB"  
"OP8\_P22\_00274" 30066 "s63E6H2" 0 "Serine/threonine-protein kinase PknB"  
"OP8\_P22\_00275" 30067 "s59E13H2" 0 "hypothetical protein"  
"OP8\_P22\_00275" 30067 "s59E25H2" 0 "hypothetical protein"  
"OP8\_P22\_00275" 30067 "s59E5H2" 0 "hypothetical protein"  
"OP8\_P22\_00275" 30067 "s63E6H2" 0 "hypothetical protein"  
"OP8\_P22\_00276" 30068 "s59E13H2" 0 "Decarbamoylnovobiocin carbamoyltransferase"  
"OP8\_P22\_00276" 30068 "s59E25H2" 0 "Decarbamoylnovobiocin carbamoyltransferase"  
"OP8\_P22\_00276" 30068 "s59E5H2" 0 "Decarbamoylnovobiocin carbamoyltransferase"  
"OP8\_P22\_00276" 30068 "s63E6H2" 0 "Decarbamoylnovobiocin carbamoyltransferase"  
"OP8\_P22\_00277" 30069 "s59E13H2" 0 "Decarbamoylnovobiocin carbamoyltransferase"  
"OP8\_P22\_00277" 30069 "s59E25H2" 0 "Decarbamoylnovobiocin carbamoyltransferase"  
"OP8\_P22\_00277" 30069 "s59E5H2" 0 "Decarbamoylnovobiocin carbamoyltransferase"  
"OP8\_P22\_00277" 30069 "s63E6H2" 0 "Decarbamoylnovobiocin carbamoyltransferase"  
"OP8\_P22\_00278" 30070 "s59E13H2" 0 "hypothetical protein"  
"OP8\_P22\_00278" 30070 "s59E25H2" 0 "hypothetical protein"  
"OP8\_P22\_00278" 30070 "s59E5H2" 0 "hypothetical protein"  
"OP8\_P22\_00278" 30070 "s63E6H2" 0 "hypothetical protein"  
"OP8\_P22\_00279" 30071 "s59E13H2" 0 "hypothetical protein"  
"OP8\_P22\_00279" 30071 "s59E25H2" 0 "hypothetical protein"  
"OP8\_P22\_00279" 30071 "s59E5H2" 0 "hypothetical protein"  
"OP8\_P22\_00279" 30071 "s63E6H2" 0 "hypothetical protein"  
"OP8\_P22\_00280" 30072 "s59E13H2" 0 "HEPN domain protein"  
"OP8\_P22\_00280" 30072 "s59E25H2" 0 "HEPN domain protein"  
"OP8\_P22\_00280" 30072 "s59E5H2" 0 "HEPN domain protein"  
"OP8\_P22\_00280" 30072 "s63E6H2" 0 "HEPN domain protein"  
"OP8\_P22\_00281" 30073 "s59E13H2" 0 "Nucleotidyltransferase domain protein"  
"OP8\_P22\_00281" 30073 "s59E25H2" 0 "Nucleotidyltransferase domain protein"  
"OP8\_P22\_00281" 30073 "s59E5H2" 0 "Nucleotidyltransferase domain protein"  
"OP8\_P22\_00281" 30073 "s63E6H2" 0 "Nucleotidyltransferase domain protein"  
"OP8\_P22\_00282" 30074 "s59E13H2" 0 "hypothetical protein"  
"OP8\_P22\_00282" 30074 "s59E25H2" 0 "hypothetical protein"  
"OP8\_P22\_00282" 30074 "s59E5H2" 0 "hypothetical protein"  
"OP8\_P22\_00282" 30074 "s63E6H2" 0 "hypothetical protein"  
"OP8\_P22\_00284" 30076 "s59E13H2" 0 "hypothetical protein"  
"OP8\_P22\_00284" 30076 "s59E25H2" 0 "hypothetical protein"  
"OP8\_P22\_00284" 30076 "s59E5H2" 0 "hypothetical protein"  
"OP8\_P22\_00284" 30076 "s63E6H2" 0 "hypothetical protein"

"OP8\_P22\_00285" 30077 "s59E13H2" 0 "hypothetical protein"  
"OP8\_P22\_00285" 30077 "s59E25H2" 0 "hypothetical protein"  
"OP8\_P22\_00285" 30077 "s59E5H2" 0 "hypothetical protein"  
"OP8\_P22\_00285" 30077 "s63E6H2" 0 "hypothetical protein"  
"OP8\_P22\_00286" 30078 "s59E13H2" 0 "hypothetical protein"  
"OP8\_P22\_00286" 30078 "s59E25H2" 0 "hypothetical protein"  
"OP8\_P22\_00286" 30078 "s59E5H2" 0 "hypothetical protein"  
"OP8\_P22\_00286" 30078 "s63E6H2" 0 "hypothetical protein"  
"OP8\_P22\_00287" 30079 "s59E13H2" 0 "Cyclic pyranopterin monophosphate synthase"  
"OP8\_P22\_00287" 30079 "s59E25H2" 0 "Cyclic pyranopterin monophosphate synthase"  
"OP8\_P22\_00287" 30079 "s59E5H2" 0 "Cyclic pyranopterin monophosphate synthase"  
"OP8\_P22\_00287" 30079 "s63E6H2" 0 "Cyclic pyranopterin monophosphate synthase"  
"OP8\_P22\_00288" 30080 "s59E13H2" 0 "putative cyclic pyranopterin monophosphate synthase accessory protein"  
"OP8\_P22\_00288" 30080 "s59E25H2" 0 "putative cyclic pyranopterin monophosphate synthase accessory protein"  
"OP8\_P22\_00288" 30080 "s59E5H2" 0 "putative cyclic pyranopterin monophosphate synthase accessory protein"  
"OP8\_P22\_00288" 30080 "s63E6H2" 0 "putative cyclic pyranopterin monophosphate synthase accessory protein"  
"OP8\_P22\_00289" 30081 "s59E13H2" 0 "Molybdenum cofactor biosynthesis protein B"  
"OP8\_P22\_00289" 30081 "s59E25H2" 0 "Molybdenum cofactor biosynthesis protein B"  
"OP8\_P22\_00289" 30081 "s59E5H2" 0 "Molybdenum cofactor biosynthesis protein B"  
"OP8\_P22\_00289" 30081 "s63E6H2" 0 "Molybdenum cofactor biosynthesis protein B"  
"OP8\_P22\_00290" 30082 "s59E13H2" 0 "Sulfite exporter TauE/SafE"  
"OP8\_P22\_00290" 30082 "s59E25H2" 0 "Sulfite exporter TauE/SafE"  
"OP8\_P22\_00290" 30082 "s59E5H2" 0 "Sulfite exporter TauE/SafE"  
"OP8\_P22\_00290" 30082 "s63E6H2" 0 "Sulfite exporter TauE/SafE"  
"OP8\_P22\_00291" 30083 "s59E13H2" 0 "Sulfite exporter TauE/SafE"  
"OP8\_P22\_00291" 30083 "s59E25H2" 0 "Sulfite exporter TauE/SafE"  
"OP8\_P22\_00291" 30083 "s59E5H2" 0 "Sulfite exporter TauE/SafE"  
"OP8\_P22\_00291" 30083 "s63E6H2" 0 "Sulfite exporter TauE/SafE"  
"OP8\_P22\_00292" 30084 "s59E13H2" 0 "Molybdopterin molybdenumtransferase"  
"OP8\_P22\_00292" 30084 "s59E25H2" 0 "Molybdopterin molybdenumtransferase"  
"OP8\_P22\_00292" 30084 "s59E5H2" 0 "Molybdopterin molybdenumtransferase"  
"OP8\_P22\_00292" 30084 "s63E6H2" 0 "Molybdopterin molybdenumtransferase"  
"OP8\_P22\_00293" 30085 "s59E13H2" 0 "Cysteine desulfurase"  
"OP8\_P22\_00293" 30085 "s59E25H2" 0 "Cysteine desulfurase"  
"OP8\_P22\_00293" 30085 "s59E5H2" 0 "Cysteine desulfurase"  
"OP8\_P22\_00293" 30085 "s63E6H2" 0 "Cysteine desulfurase"  
"OP8\_P22\_00294" 30086 "s59E13H2" 0 "Quinolate synthase A"  
"OP8\_P22\_00294" 30086 "s59E25H2" 0 "Quinolate synthase A"  
"OP8\_P22\_00294" 30086 "s59E5H2" 0 "Quinolate synthase A"  
"OP8\_P22\_00294" 30086 "s63E6H2" 0 "Quinolate synthase A"  
"OP8\_P22\_00295" 30087 "s59E13H2" 0 "HTH-type transcriptional regulator CymR"  
"OP8\_P22\_00295" 30087 "s59E25H2" 0 "HTH-type transcriptional regulator CymR"  
"OP8\_P22\_00295" 30087 "s59E5H2" 0 "HTH-type transcriptional regulator CymR"  
"OP8\_P22\_00295" 30087 "s63E6H2" 0 "HTH-type transcriptional regulator CymR"  
"OP8\_P22\_00296" 30088 "s59E13H2" 0 "Demethylmenaquinone methyltransferase"  
"OP8\_P22\_00296" 30088 "s59E25H2" 0 "Demethylmenaquinone methyltransferase"  
"OP8\_P22\_00296" 30088 "s59E5H2" 0 "Demethylmenaquinone methyltransferase"

"OP8\_P22\_00296" 30088 "s63E6H2" 0 "Demethylmenaquinone methyltransferase"  
"OP8\_P22\_00297" 30089 "s59E13H2" 0 "Ferrous-iron efflux pump FieF"  
"OP8\_P22\_00297" 30089 "s59E25H2" 0 "Ferrous-iron efflux pump FieF"  
"OP8\_P22\_00297" 30089 "s59E5H2" 0 "Ferrous-iron efflux pump FieF"  
"OP8\_P22\_00297" 30089 "s63E6H2" 0 "Ferrous-iron efflux pump FieF"  
"OP8\_P22\_00298" 30090 "s59E13H2" 0 "hypothetical protein"  
"OP8\_P22\_00298" 30090 "s59E25H2" 0 "hypothetical protein"  
"OP8\_P22\_00298" 30090 "s59E5H2" 0 "hypothetical protein"  
"OP8\_P22\_00298" 30090 "s63E6H2" 0 "hypothetical protein"  
"OP8\_P22\_00299" 30091 "s59E13H2" 0 "Heterodisulfide reductase subunit A-like protein"  
"OP8\_P22\_00299" 30091 "s59E25H2" 0 "Heterodisulfide reductase subunit A-like protein"  
"OP8\_P22\_00299" 30091 "s59E5H2" 0 "Heterodisulfide reductase subunit A-like protein"  
"OP8\_P22\_00299" 30091 "s63E6H2" 0 "Heterodisulfide reductase subunit A-like protein"  
"OP8\_P22\_00300" 30092 "s59E13H2" 0 "Transcriptional regulator"  
"OP8\_P22\_00300" 30092 "s59E25H2" 0 "Transcriptional regulator"  
"OP8\_P22\_00300" 30092 "s59E5H2" 0 "Transcriptional regulator"  
"OP8\_P22\_00300" 30092 "s63E6H2" 0 "Transcriptional regulator"  
"OP8\_P22\_00301" 30093 "s59E13H2" 0 "Copper-transporting P-type ATPase"  
"OP8\_P22\_00301" 30093 "s59E25H2" 0 "Copper-transporting P-type ATPase"  
"OP8\_P22\_00301" 30093 "s59E5H2" 0 "Copper-transporting P-type ATPase"  
"OP8\_P22\_00301" 30093 "s63E6H2" 0 "Copper-transporting P-type ATPase"  
"OP8\_P22\_00302" 30094 "s59E13H2" 0 "tRNA-specific 2-thiouridylase MnmA"  
"OP8\_P22\_00302" 30094 "s59E25H2" 0 "tRNA-specific 2-thiouridylase MnmA"  
"OP8\_P22\_00302" 30094 "s59E5H2" 0 "tRNA-specific 2-thiouridylase MnmA"  
"OP8\_P22\_00302" 30094 "s63E6H2" 0 "tRNA-specific 2-thiouridylase MnmA"  
"OP8\_P22\_00303" 30095 "s59E13H2" 0 "Phosphate-import protein PhnD precursor"  
"OP8\_P22\_00303" 30095 "s59E25H2" 0 "Phosphate-import protein PhnD precursor"  
"OP8\_P22\_00303" 30095 "s59E5H2" 0 "Phosphate-import protein PhnD precursor"  
"OP8\_P22\_00303" 30095 "s63E6H2" 0 "Phosphate-import protein PhnD precursor"  
"OP8\_P22\_00304" 30096 "s59E13H2" 0 "ABC transporter, phosphonate, periplasmic substrate-binding protein"  
"OP8\_P22\_00304" 30096 "s59E25H2" 0 "ABC transporter, phosphonate, periplasmic substrate-binding protein"  
"OP8\_P22\_00304" 30096 "s59E5H2" 0 "ABC transporter, phosphonate, periplasmic substrate-binding protein"  
"OP8\_P22\_00304" 30096 "s63E6H2" 0 "ABC transporter, phosphonate, periplasmic substrate-binding protein"  
"OP8\_P22\_00305" 30097 "s59E13H2" 0 "Prenyltransferase and squalene oxidase repeat protein"  
"OP8\_P22\_00305" 30097 "s59E25H2" 0 "Prenyltransferase and squalene oxidase repeat protein"  
"OP8\_P22\_00305" 30097 "s59E5H2" 0 "Prenyltransferase and squalene oxidase repeat protein"  
"OP8\_P22\_00305" 30097 "s63E6H2" 0 "Prenyltransferase and squalene oxidase repeat protein"  
"OP8\_P22\_00306" 30098 "s59E13H2" 0 "Bifunctional folate synthesis protein"  
"OP8\_P22\_00306" 30098 "s59E25H2" 0 "Bifunctional folate synthesis protein"  
"OP8\_P22\_00306" 30098 "s59E5H2" 0 "Bifunctional folate synthesis protein"  
"OP8\_P22\_00306" 30098 "s63E6H2" 0 "Bifunctional folate synthesis protein"  
"OP8\_P22\_00307" 30099 "s59E13H2" 0 "Ferric enterobactin receptor precursor"  
"OP8\_P22\_00307" 30099 "s59E25H2" 0 "Ferric enterobactin receptor precursor"  
"OP8\_P22\_00307" 30099 "s59E5H2" 0 "Ferric enterobactin receptor precursor"  
"OP8\_P22\_00307" 30099 "s63E6H2" 0 "Ferric enterobactin receptor precursor"  
"OP8\_P22\_00308" 30100 "s59E13H2" 0 "hypothetical protein"  
"OP8\_P22\_00308" 30100 "s59E25H2" 0 "hypothetical protein"

"OP8\_P22\_00308" 30100 "s59E5H2" 0 "hypothetical protein"  
"OP8\_P22\_00308" 30100 "s63E6H2" 0 "hypothetical protein"  
"OP8\_P22\_00309" 30101 "s59E13H2" 0 "Cysteine--tRNA ligase"  
"OP8\_P22\_00309" 30101 "s59E25H2" 0 "Cysteine--tRNA ligase"  
"OP8\_P22\_00309" 30101 "s59E5H2" 0 "Cysteine--tRNA ligase"  
"OP8\_P22\_00309" 30101 "s63E6H2" 0 "Cysteine--tRNA ligase"  
"OP8\_P22\_00310" 30102 "s59E13H2" 0 "hypothetical protein"  
"OP8\_P22\_00310" 30102 "s59E25H2" 0 "hypothetical protein"  
"OP8\_P22\_00310" 30102 "s59E5H2" 0 "hypothetical protein"  
"OP8\_P22\_00310" 30102 "s63E6H2" 0 "hypothetical protein"  
"OP8\_P22\_00311" 30103 "s59E13H2" 0 "Lysine 6-dehydrogenase"  
"OP8\_P22\_00311" 30103 "s59E25H2" 0 "Lysine 6-dehydrogenase"  
"OP8\_P22\_00311" 30103 "s59E5H2" 0 "Lysine 6-dehydrogenase"  
"OP8\_P22\_00311" 30103 "s63E6H2" 0 "Lysine 6-dehydrogenase"  
"OP8\_P22\_00312" 30104 "s59E13H2" 0 "hypothetical protein"  
"OP8\_P22\_00312" 30104 "s59E25H2" 0 "hypothetical protein"  
"OP8\_P22\_00312" 30104 "s59E5H2" 0 "hypothetical protein"  
"OP8\_P22\_00312" 30104 "s63E6H2" 0 "hypothetical protein"  
"OP8\_P22\_00313" 30105 "s59E13H2" 0 "Heat-inducible transcription repressor HrcA"  
"OP8\_P22\_00313" 30105 "s59E25H2" 0 "Heat-inducible transcription repressor HrcA"  
"OP8\_P22\_00313" 30105 "s59E5H2" 0 "Heat-inducible transcription repressor HrcA"  
"OP8\_P22\_00313" 30105 "s63E6H2" 0 "Heat-inducible transcription repressor HrcA"  
"OP8\_P22\_00314" 30106 "s59E13H2" 0 "heat shock protein GrpE"  
"OP8\_P22\_00314" 30106 "s59E25H2" 0 "heat shock protein GrpE"  
"OP8\_P22\_00314" 30106 "s59E5H2" 0 "heat shock protein GrpE"  
"OP8\_P22\_00314" 30106 "s63E6H2" 0 "heat shock protein GrpE"  
"OP8\_P22\_00315" 30107 "s59E13H2" 0 "Chaperone protein DnaK"  
"OP8\_P22\_00315" 30107 "s59E25H2" 0 "Chaperone protein DnaK"  
"OP8\_P22\_00315" 30107 "s59E5H2" 0 "Chaperone protein DnaK"  
"OP8\_P22\_00315" 30107 "s63E6H2" 0 "Chaperone protein DnaK"  
"OP8\_P22\_00316" 30108 "s59E13H2" 0 "Chaperone protein DnaJ"  
"OP8\_P22\_00316" 30108 "s59E25H2" 0 "Chaperone protein DnaJ"  
"OP8\_P22\_00316" 30108 "s59E5H2" 0 "Chaperone protein DnaJ"  
"OP8\_P22\_00316" 30108 "s63E6H2" 0 "Chaperone protein DnaJ"  
"OP8\_P22\_00317" 30109 "s59E13H2" 0 "16S ribosomal RNA methyltransferase RsmE"  
"OP8\_P22\_00317" 30109 "s59E25H2" 0 "16S ribosomal RNA methyltransferase RsmE"  
"OP8\_P22\_00317" 30109 "s59E5H2" 0 "16S ribosomal RNA methyltransferase RsmE"  
"OP8\_P22\_00317" 30109 "s63E6H2" 0 "16S ribosomal RNA methyltransferase RsmE"  
"OP8\_P22\_00318" 30110 "s59E13H2" 0 "Serine/threonine-protein kinase PrkC"  
"OP8\_P22\_00318" 30110 "s59E25H2" 0 "Serine/threonine-protein kinase PrkC"  
"OP8\_P22\_00318" 30110 "s59E5H2" 0 "Serine/threonine-protein kinase PrkC"  
"OP8\_P22\_00318" 30110 "s63E6H2" 0 "Serine/threonine-protein kinase PrkC"  
"OP8\_P22\_00319" 30111 "s59E13H2" 0 "Branched-chain-amino-acid aminotransferase"  
"OP8\_P22\_00319" 30111 "s59E25H2" 0 "Branched-chain-amino-acid aminotransferase"  
"OP8\_P22\_00319" 30111 "s59E5H2" 0 "Branched-chain-amino-acid aminotransferase"  
"OP8\_P22\_00319" 30111 "s63E6H2" 0 "Branched-chain-amino-acid aminotransferase"  
"OP8\_P22\_00320" 30112 "s59E13H2" 0 "Twitching mobility protein"

"OP8\_P22\_00320" 30112 "s59E25H2" 0 "Twitching mobility protein"  
"OP8\_P22\_00320" 30112 "s59E5H2" 0 "Twitching mobility protein"  
"OP8\_P22\_00320" 30112 "s63E6H2" 0 "Twitching mobility protein"  
"OP8\_P22\_00321" 30113 "s59E13H2" 0 "Alanine--tRNA ligase"  
"OP8\_P22\_00321" 30113 "s59E25H2" 0 "Alanine--tRNA ligase"  
"OP8\_P22\_00321" 30113 "s59E5H2" 0 "Alanine--tRNA ligase"  
"OP8\_P22\_00321" 30113 "s63E6H2" 0 "Alanine--tRNA ligase"  
"OP8\_P22\_00322" 30114 "s59E13H2" 0 "Soluble lytic murein transglycosylase precursor"  
"OP8\_P22\_00322" 30114 "s59E25H2" 0 "Soluble lytic murein transglycosylase precursor"  
"OP8\_P22\_00322" 30114 "s59E5H2" 0 "Soluble lytic murein transglycosylase precursor"  
"OP8\_P22\_00322" 30114 "s63E6H2" 0 "Soluble lytic murein transglycosylase precursor"  
"OP8\_P22\_00323" 30115 "s59E13H2" 0 "hypothetical protein"  
"OP8\_P22\_00323" 30115 "s59E25H2" 0 "hypothetical protein"  
"OP8\_P22\_00323" 30115 "s59E5H2" 0 "hypothetical protein"  
"OP8\_P22\_00323" 30115 "s63E6H2" 0 "hypothetical protein"  
"OP8\_P22\_00325" 30117 "s59E13H2" 0 "TPR repeat-containing protein YrrB"  
"OP8\_P22\_00325" 30117 "s59E25H2" 0 "TPR repeat-containing protein YrrB"  
"OP8\_P22\_00325" 30117 "s59E5H2" 0 "TPR repeat-containing protein YrrB"  
"OP8\_P22\_00325" 30117 "s63E6H2" 0 "TPR repeat-containing protein YrrB"  
"OP8\_P22\_00326" 30118 "s59E13H2" 0 "hypothetical protein"  
"OP8\_P22\_00326" 30118 "s59E25H2" 0 "hypothetical protein"  
"OP8\_P22\_00326" 30118 "s59E5H2" 0 "hypothetical protein"  
"OP8\_P22\_00326" 30118 "s63E6H2" 0 "hypothetical protein"  
"OP8\_P22\_00327" 30119 "s59E13H2" 0 "o-succinylbenzoate synthase"  
"OP8\_P22\_00327" 30119 "s59E25H2" 0 "o-succinylbenzoate synthase"  
"OP8\_P22\_00327" 30119 "s59E5H2" 0 "o-succinylbenzoate synthase"  
"OP8\_P22\_00327" 30119 "s63E6H2" 0 "o-succinylbenzoate synthase"  
"OP8\_P22\_00328" 30120 "s59E13H2" 0 "Glutamate-1-semialdehyde 2,1-aminomutase"  
"OP8\_P22\_00328" 30120 "s59E25H2" 0 "Glutamate-1-semialdehyde 2,1-aminomutase"  
"OP8\_P22\_00328" 30120 "s59E5H2" 0 "Glutamate-1-semialdehyde 2,1-aminomutase"  
"OP8\_P22\_00328" 30120 "s63E6H2" 0 "Glutamate-1-semialdehyde 2,1-aminomutase"  
"OP8\_P22\_00330" 30122 "s59E13H2" 0 "Trigger factor"  
"OP8\_P22\_00330" 30122 "s59E25H2" 0 "Trigger factor"  
"OP8\_P22\_00330" 30122 "s59E5H2" 0 "Trigger factor"  
"OP8\_P22\_00330" 30122 "s63E6H2" 0 "Trigger factor"  
"OP8\_P22\_00331" 30123 "s59E13H2" 0 "Lon protease"  
"OP8\_P22\_00331" 30123 "s59E25H2" 0 "Lon protease"  
"OP8\_P22\_00331" 30123 "s59E5H2" 0 "Lon protease"  
"OP8\_P22\_00331" 30123 "s63E6H2" 0 "Lon protease"  
"OP8\_P22\_00332" 30124 "s59E13H2" 0 "hypothetical protein"  
"OP8\_P22\_00332" 30124 "s59E25H2" 0 "hypothetical protein"  
"OP8\_P22\_00332" 30124 "s59E5H2" 0 "hypothetical protein"  
"OP8\_P22\_00332" 30124 "s63E6H2" 0 "hypothetical protein"  
"OP8\_P22\_00333" 30125 "s59E13H2" 0 "putative chromosome-partitioning protein ParB"  
"OP8\_P22\_00333" 30125 "s59E25H2" 0 "putative chromosome-partitioning protein ParB"  
"OP8\_P22\_00333" 30125 "s59E5H2" 0 "putative chromosome-partitioning protein ParB"  
"OP8\_P22\_00333" 30125 "s63E6H2" 0 "putative chromosome-partitioning protein ParB"

"OP8\_P22\_00334" 30126 "s59E13H2" 0 "4-hydroxyphenylacetate decarboxylase activating enzyme"  
"OP8\_P22\_00334" 30126 "s59E25H2" 0 "4-hydroxyphenylacetate decarboxylase activating enzyme"  
"OP8\_P22\_00334" 30126 "s59E5H2" 0 "4-hydroxyphenylacetate decarboxylase activating enzyme"  
"OP8\_P22\_00334" 30126 "s63E6H2" 0 "4-hydroxyphenylacetate decarboxylase activating enzyme"  
"OP8\_P22\_00335" 30127 "s59E13H2" 0 "Benzylsuccinate synthase alpha subunit"  
"OP8\_P22\_00335" 30127 "s59E25H2" 0 "Benzylsuccinate synthase alpha subunit"  
"OP8\_P22\_00335" 30127 "s59E5H2" 0 "Benzylsuccinate synthase alpha subunit"  
"OP8\_P22\_00335" 30127 "s63E6H2" 0 "Benzylsuccinate synthase alpha subunit"  
"OP8\_P22\_00336" 30128 "s59E13H2" 0 "Xaa-Pro aminopeptidase"  
"OP8\_P22\_00336" 30128 "s59E25H2" 0 "Xaa-Pro aminopeptidase"  
"OP8\_P22\_00336" 30128 "s59E5H2" 0 "Xaa-Pro aminopeptidase"  
"OP8\_P22\_00336" 30128 "s63E6H2" 0 "Xaa-Pro aminopeptidase"  
"OP8\_P22\_00337" 30129 "s59E13H2" 0 "Peptidase M16 inactive domain protein"  
"OP8\_P22\_00337" 30129 "s59E25H2" 0 "Peptidase M16 inactive domain protein"  
"OP8\_P22\_00337" 30129 "s59E5H2" 0 "Peptidase M16 inactive domain protein"  
"OP8\_P22\_00337" 30129 "s63E6H2" 0 "Peptidase M16 inactive domain protein"  
"OP8\_P22\_00338" 30130 "s59E13H2" 0 "Peptidase M16 inactive domain protein"  
"OP8\_P22\_00338" 30130 "s59E25H2" 0 "Peptidase M16 inactive domain protein"  
"OP8\_P22\_00338" 30130 "s59E5H2" 0 "Peptidase M16 inactive domain protein"  
"OP8\_P22\_00338" 30130 "s63E6H2" 0 "Peptidase M16 inactive domain protein"  
"OP8\_P22\_00339" 30131 "s59E13H2" 0.002814677 "Transcriptional regulatory protein ZraR"  
"OP8\_P22\_00339" 30131 "s59E25H2" 0 "Transcriptional regulatory protein ZraR"  
"OP8\_P22\_00339" 30131 "s59E5H2" 0.02030358 "Transcriptional regulatory protein ZraR"  
"OP8\_P22\_00339" 30131 "s63E6H2" 0 "Transcriptional regulatory protein ZraR"  
"OP8\_P22\_00342" 30134 "s59E13H2" 0 "F(420)H(2) dehydrogenase subunit N"  
"OP8\_P22\_00342" 30134 "s59E25H2" 0 "F(420)H(2) dehydrogenase subunit N"  
"OP8\_P22\_00342" 30134 "s59E5H2" 0 "F(420)H(2) dehydrogenase subunit N"  
"OP8\_P22\_00342" 30134 "s63E6H2" 0 "F(420)H(2) dehydrogenase subunit N"  
"OP8\_P22\_00343" 30135 "s59E13H2" 0 "NADH-quinone oxidoreductase subunit M"  
"OP8\_P22\_00343" 30135 "s59E25H2" 0 "NADH-quinone oxidoreductase subunit M"  
"OP8\_P22\_00343" 30135 "s59E5H2" 0 "NADH-quinone oxidoreductase subunit M"  
"OP8\_P22\_00343" 30135 "s63E6H2" 0 "NADH-quinone oxidoreductase subunit M"  
"OP8\_P22\_00344" 30136 "s59E13H2" 0 "NADH-quinone oxidoreductase subunit 12"  
"OP8\_P22\_00344" 30136 "s59E25H2" 0 "NADH-quinone oxidoreductase subunit 12"  
"OP8\_P22\_00344" 30136 "s59E5H2" 0 "NADH-quinone oxidoreductase subunit 12"  
"OP8\_P22\_00344" 30136 "s63E6H2" 0 "NADH-quinone oxidoreductase subunit 12"  
"OP8\_P22\_00345" 30137 "s59E13H2" 0 "NADH-quinone oxidoreductase subunit K"  
"OP8\_P22\_00345" 30137 "s59E25H2" 0 "NADH-quinone oxidoreductase subunit K"  
"OP8\_P22\_00345" 30137 "s59E5H2" 0 "NADH-quinone oxidoreductase subunit K"  
"OP8\_P22\_00345" 30137 "s63E6H2" 0 "NADH-quinone oxidoreductase subunit K"  
"OP8\_P22\_00346" 30138 "s59E13H2" 0 "NADH-quinone oxidoreductase subunit J"  
"OP8\_P22\_00346" 30138 "s59E25H2" 0 "NADH-quinone oxidoreductase subunit J"  
"OP8\_P22\_00346" 30138 "s59E5H2" 0 "NADH-quinone oxidoreductase subunit J"  
"OP8\_P22\_00346" 30138 "s63E6H2" 0 "NADH-quinone oxidoreductase subunit J"  
"OP8\_P22\_00348" 30140 "s59E13H2" 0 "hypothetical protein"  
"OP8\_P22\_00348" 30140 "s59E25H2" 0 "hypothetical protein"  
"OP8\_P22\_00348" 30140 "s59E5H2" 0 "hypothetical protein"



"OP8\_P22\_00348" 30140 "s63E6H2" 0 "hypothetical protein"  
"OP8\_P22\_00349" 30141 "s59E13H2" 0 "hypothetical protein"  
"OP8\_P22\_00349" 30141 "s59E25H2" 0 "hypothetical protein"  
"OP8\_P22\_00349" 30141 "s59E5H2" 0 "hypothetical protein"  
"OP8\_P22\_00349" 30141 "s63E6H2" 0 "hypothetical protein"  
"OP8\_P22\_00350" 30142 "s59E13H2" 0 "ATP-dependent RNA helicase RhlB"  
"OP8\_P22\_00350" 30142 "s59E25H2" 0 "ATP-dependent RNA helicase RhlB"  
"OP8\_P22\_00350" 30142 "s59E5H2" 0 "ATP-dependent RNA helicase RhlB"  
"OP8\_P22\_00350" 30142 "s63E6H2" 0 "ATP-dependent RNA helicase RhlB"  
"OP8\_P22\_00351" 30143 "s59E13H2" 0 "hypothetical protein"  
"OP8\_P22\_00351" 30143 "s59E25H2" 0 "hypothetical protein"  
"OP8\_P22\_00351" 30143 "s59E5H2" 0 "hypothetical protein"  
"OP8\_P22\_00351" 30143 "s63E6H2" 0 "hypothetical protein"  
"OP8\_P22\_00352" 30144 "s59E13H2" 0 "invasion protein regulator"  
"OP8\_P22\_00352" 30144 "s59E25H2" 0 "invasion protein regulator"  
"OP8\_P22\_00352" 30144 "s59E5H2" 0 "invasion protein regulator"  
"OP8\_P22\_00352" 30144 "s63E6H2" 0 "invasion protein regulator"  
"OP8\_P22\_00354" 30146 "s59E13H2" 0 "hypothetical protein"  
"OP8\_P22\_00354" 30146 "s59E25H2" 0 "hypothetical protein"  
"OP8\_P22\_00354" 30146 "s59E5H2" 0 "hypothetical protein"  
"OP8\_P22\_00354" 30146 "s63E6H2" 0 "hypothetical protein"  
"OP8\_P22\_00355" 30147 "s59E13H2" 0 "hypothetical protein"  
"OP8\_P22\_00355" 30147 "s59E25H2" 0 "hypothetical protein"  
"OP8\_P22\_00355" 30147 "s59E5H2" 0 "hypothetical protein"  
"OP8\_P22\_00355" 30147 "s63E6H2" 0 "hypothetical protein"  
"OP8\_P22\_00356" 30148 "s59E13H2" 0 "Elongation factor 4"  
"OP8\_P22\_00356" 30148 "s59E25H2" 0 "Elongation factor 4"  
"OP8\_P22\_00356" 30148 "s59E5H2" 0 "Elongation factor 4"  
"OP8\_P22\_00356" 30148 "s63E6H2" 0 "Elongation factor 4"  
"OP8\_P22\_00357" 30149 "s59E13H2" 0 "hypothetical protein"  
"OP8\_P22\_00357" 30149 "s59E25H2" 0 "hypothetical protein"  
"OP8\_P22\_00357" 30149 "s59E5H2" 0 "hypothetical protein"  
"OP8\_P22\_00357" 30149 "s63E6H2" 0 "hypothetical protein"  
"OP8\_P22\_00358" 30150 "s59E13H2" 0 "DAK2 domain protein"  
"OP8\_P22\_00358" 30150 "s59E25H2" 0 "DAK2 domain protein"  
"OP8\_P22\_00358" 30150 "s59E5H2" 0 "DAK2 domain protein"  
"OP8\_P22\_00358" 30150 "s63E6H2" 0 "DAK2 domain protein"  
"OP8\_P22\_00359" 30151 "s59E13H2" 0 "ATP-dependent DNA helicase RecG"  
"OP8\_P22\_00359" 30151 "s59E25H2" 0 "ATP-dependent DNA helicase RecG"  
"OP8\_P22\_00359" 30151 "s59E5H2" 0 "ATP-dependent DNA helicase RecG"  
"OP8\_P22\_00359" 30151 "s63E6H2" 0 "ATP-dependent DNA helicase RecG"  
"OP8\_P22\_00360" 30152 "s59E13H2" 0 "Ribosomal RNA small subunit methyltransferase D"  
"OP8\_P22\_00360" 30152 "s59E25H2" 0 "Ribosomal RNA small subunit methyltransferase D"  
"OP8\_P22\_00360" 30152 "s59E5H2" 0 "Ribosomal RNA small subunit methyltransferase D"  
"OP8\_P22\_00360" 30152 "s63E6H2" 0 "Ribosomal RNA small subunit methyltransferase D"  
"OP8\_P22\_00361" 30153 "s59E13H2" 0 "Succinyl-CoA ligase [ADP-forming] subunit alpha"  
"OP8\_P22\_00361" 30153 "s59E25H2" 0 "Succinyl-CoA ligase [ADP-forming] subunit alpha"

"OP8\_P22\_00361" 30153 "s59E5H2" 0 "Succinyl-CoA ligase [ADP-forming] subunit alpha"  
"OP8\_P22\_00361" 30153 "s63E6H2" 0 "Succinyl-CoA ligase [ADP-forming] subunit alpha"  
"OP8\_P22\_00362" 30154 "s59E13H2" 0 "hypothetical protein"  
"OP8\_P22\_00362" 30154 "s59E25H2" 0 "hypothetical protein"  
"OP8\_P22\_00362" 30154 "s59E5H2" 0 "hypothetical protein"  
"OP8\_P22\_00362" 30154 "s63E6H2" 0 "hypothetical protein"  
"OP8\_P22\_00363" 30155 "s59E13H2" 0 "Phosphopantetheine adenyltransferase"  
"OP8\_P22\_00363" 30155 "s59E25H2" 0 "Phosphopantetheine adenyltransferase"  
"OP8\_P22\_00363" 30155 "s59E5H2" 0 "Phosphopantetheine adenyltransferase"  
"OP8\_P22\_00363" 30155 "s63E6H2" 0 "Phosphopantetheine adenyltransferase"  
"OP8\_P22\_00365" 30157 "s59E13H2" 0 "SnoaL-like polyketide cyclase"  
"OP8\_P22\_00365" 30157 "s59E25H2" 0 "SnoaL-like polyketide cyclase"  
"OP8\_P22\_00365" 30157 "s59E5H2" 0 "SnoaL-like polyketide cyclase"  
"OP8\_P22\_00365" 30157 "s63E6H2" 0.0004400248 "SnoaL-like polyketide cyclase"  
"OP8\_P22\_00366" 30158 "s59E13H2" 0 "HEPN domain protein"  
"OP8\_P22\_00366" 30158 "s59E25H2" 0 "HEPN domain protein"  
"OP8\_P22\_00366" 30158 "s59E5H2" 0 "HEPN domain protein"  
"OP8\_P22\_00366" 30158 "s63E6H2" 0 "HEPN domain protein"  
"OP8\_P22\_00367" 30159 "s59E13H2" 0 "hypothetical protein"  
"OP8\_P22\_00367" 30159 "s59E25H2" 0 "hypothetical protein"  
"OP8\_P22\_00367" 30159 "s59E5H2" 0 "hypothetical protein"  
"OP8\_P22\_00367" 30159 "s63E6H2" 0 "hypothetical protein"  
"OP8\_P22\_00370" 30162 "s59E13H2" 0 "hypothetical protein"  
"OP8\_P22\_00370" 30162 "s59E25H2" 0 "hypothetical protein"  
"OP8\_P22\_00370" 30162 "s59E5H2" 0 "hypothetical protein"  
"OP8\_P22\_00370" 30162 "s63E6H2" 0 "hypothetical protein"  
"OP8\_P22\_00372" 30164 "s59E13H2" 0 "hypothetical protein"  
"OP8\_P22\_00372" 30164 "s59E25H2" 0 "hypothetical protein"  
"OP8\_P22\_00372" 30164 "s59E5H2" 0 "hypothetical protein"  
"OP8\_P22\_00372" 30164 "s63E6H2" 0 "hypothetical protein"  
"OP8\_P22\_00373" 30165 "s59E13H2" 0 "hypothetical protein"  
"OP8\_P22\_00373" 30165 "s59E25H2" 0 "hypothetical protein"  
"OP8\_P22\_00373" 30165 "s59E5H2" 0 "hypothetical protein"  
"OP8\_P22\_00373" 30165 "s63E6H2" 0 "hypothetical protein"  
"OP8\_P22\_00374" 30166 "s59E13H2" 0 "TPR repeat-containing protein YrrB"  
"OP8\_P22\_00374" 30166 "s59E25H2" 0 "TPR repeat-containing protein YrrB"  
"OP8\_P22\_00374" 30166 "s59E5H2" 0 "TPR repeat-containing protein YrrB"  
"OP8\_P22\_00374" 30166 "s63E6H2" 0 "TPR repeat-containing protein YrrB"  
"OP8\_P22\_00375" 30167 "s59E13H2" 2.327159 "hypothetical protein"  
"OP8\_P22\_00375" 30167 "s59E25H2" 0 "hypothetical protein"  
"OP8\_P22\_00375" 30167 "s59E5H2" 3.087223 "hypothetical protein"  
"OP8\_P22\_00375" 30167 "s63E6H2" 0 "hypothetical protein"  
"OP8\_P22\_00376" 30168 "s59E13H2" 0 "Dipeptidase A"  
"OP8\_P22\_00376" 30168 "s59E25H2" 0 "Dipeptidase A"  
"OP8\_P22\_00376" 30168 "s59E5H2" 0 "Dipeptidase A"  
"OP8\_P22\_00376" 30168 "s63E6H2" 0 "Dipeptidase A"  
"OP8\_P22\_00377" 30169 "s59E13H2" 0 "Xaa-Pro dipeptidase"

"OP8\_P22\_00377" 30169 "s59E25H2" 0 "Xaa-Pro dipeptidase"  
"OP8\_P22\_00377" 30169 "s59E5H2" 0 "Xaa-Pro dipeptidase"  
"OP8\_P22\_00377" 30169 "s63E6H2" 0 "Xaa-Pro dipeptidase"  
"OP8\_P22\_00378" 30170 "s59E13H2" 0 "Dipeptidase A"  
"OP8\_P22\_00378" 30170 "s59E25H2" 0 "Dipeptidase A"  
"OP8\_P22\_00378" 30170 "s59E5H2" 2.186431 "Dipeptidase A"  
"OP8\_P22\_00378" 30170 "s63E6H2" 0 "Dipeptidase A"  
"OP8\_P22\_00379" 30171 "s59E13H2" 0 "hypothetical protein"  
"OP8\_P22\_00379" 30171 "s59E25H2" 0 "hypothetical protein"  
"OP8\_P22\_00379" 30171 "s59E5H2" 0 "hypothetical protein"  
"OP8\_P22\_00379" 30171 "s63E6H2" 0 "hypothetical protein"  
"OP8\_P22\_00380" 30172 "s59E13H2" 0 "carboxy-terminal protease"  
"OP8\_P22\_00380" 30172 "s59E25H2" 0 "carboxy-terminal protease"  
"OP8\_P22\_00380" 30172 "s59E5H2" 0 "carboxy-terminal protease"  
"OP8\_P22\_00380" 30172 "s63E6H2" 0 "carboxy-terminal protease"  
"OP8\_P22\_00381" 30173 "s59E13H2" 0.001959863 "Carboxy-terminal processing protease CtpB precursor"  
"OP8\_P22\_00381" 30173 "s59E25H2" 0 "Carboxy-terminal processing protease CtpB precursor"  
"OP8\_P22\_00381" 30173 "s59E5H2" 0.005583046 "Carboxy-terminal processing protease CtpB precursor"  
"OP8\_P22\_00381" 30173 "s63E6H2" 0 "Carboxy-terminal processing protease CtpB precursor"  
"OP8\_P22\_00382" 30174 "s59E13H2" 0 "hypothetical protein"  
"OP8\_P22\_00382" 30174 "s59E25H2" 0 "hypothetical protein"  
"OP8\_P22\_00382" 30174 "s59E5H2" 0 "hypothetical protein"  
"OP8\_P22\_00382" 30174 "s63E6H2" 0 "hypothetical protein"  
"OP8\_P22\_00383" 30175 "s59E13H2" 0 "hypothetical protein"  
"OP8\_P22\_00383" 30175 "s59E25H2" 0 "hypothetical protein"  
"OP8\_P22\_00383" 30175 "s59E5H2" 0 "hypothetical protein"  
"OP8\_P22\_00383" 30175 "s63E6H2" 0 "hypothetical protein"  
"OP8\_P22\_00384" 30176 "s59E13H2" 0 "Helix-turn-helix domain protein"  
"OP8\_P22\_00384" 30176 "s59E25H2" 0 "Helix-turn-helix domain protein"  
"OP8\_P22\_00384" 30176 "s59E5H2" 0 "Helix-turn-helix domain protein"  
"OP8\_P22\_00384" 30176 "s63E6H2" 0 "Helix-turn-helix domain protein"  
"OP8\_P22\_00385" 30177 "s59E13H2" 0 "dihydroorotase"  
"OP8\_P22\_00385" 30177 "s59E25H2" 0 "dihydroorotase"  
"OP8\_P22\_00385" 30177 "s59E5H2" 0 "dihydroorotase"  
"OP8\_P22\_00385" 30177 "s63E6H2" 0 "dihydroorotase"  
"OP8\_P22\_00386" 30178 "s59E13H2" 0 "Adenine deaminase"  
"OP8\_P22\_00386" 30178 "s59E25H2" 0 "Adenine deaminase"  
"OP8\_P22\_00386" 30178 "s59E5H2" 0 "Adenine deaminase"  
"OP8\_P22\_00386" 30178 "s63E6H2" 0 "Adenine deaminase"  
"OP8\_P22\_00388" 30180 "s59E13H2" 0.004696511 "hypothetical protein"  
"OP8\_P22\_00388" 30180 "s59E25H2" 0 "hypothetical protein"  
"OP8\_P22\_00388" 30180 "s59E5H2" 4.643449 "hypothetical protein"  
"OP8\_P22\_00388" 30180 "s63E6H2" 0 "hypothetical protein"  
"OP8\_P22\_00389" 30181 "s59E13H2" 0 "Antitoxin igA-2"  
"OP8\_P22\_00389" 30181 "s59E25H2" 0 "Antitoxin igA-2"  
"OP8\_P22\_00389" 30181 "s59E5H2" 0 "Antitoxin igA-2"  
"OP8\_P22\_00389" 30181 "s63E6H2" 0 "Antitoxin igA-2"

"OP8\_P22\_00390" 30182 "s59E13H2" 0 "Toxin HigB-2"  
"OP8\_P22\_00390" 30182 "s59E25H2" 0 "Toxin HigB-2"  
"OP8\_P22\_00390" 30182 "s59E5H2" 0 "Toxin HigB-2"  
"OP8\_P22\_00390" 30182 "s63E6H2" 0 "Toxin HigB-2"  
"OP8\_P22\_00391" 30183 "s59E13H2" 0 "Penicillinase repressor"  
"OP8\_P22\_00391" 30183 "s59E25H2" 0 "Penicillinase repressor"  
"OP8\_P22\_00391" 30183 "s59E5H2" 0 "Penicillinase repressor"  
"OP8\_P22\_00391" 30183 "s63E6H2" 0 "Penicillinase repressor"  
"OP8\_P22\_00392" 30184 "s59E13H2" 0 "Regulatory protein BlaR1"  
"OP8\_P22\_00392" 30184 "s59E25H2" 0 "Regulatory protein BlaR1"  
"OP8\_P22\_00392" 30184 "s59E5H2" 0 "Regulatory protein BlaR1"  
"OP8\_P22\_00392" 30184 "s63E6H2" 0 "Regulatory protein BlaR1"  
"OP8\_P22\_00393" 30185 "s59E13H2" 0 "ABC-2 family transporter protein"  
"OP8\_P22\_00393" 30185 "s59E25H2" 0 "ABC-2 family transporter protein"  
"OP8\_P22\_00393" 30185 "s59E5H2" 0 "ABC-2 family transporter protein"  
"OP8\_P22\_00393" 30185 "s63E6H2" 0 "ABC-2 family transporter protein"  
"OP8\_P22\_00394" 30186 "s59E13H2" 0 "Daunorubicin/doxorubicin resistance ATP-binding protein DrrA"  
"OP8\_P22\_00394" 30186 "s59E25H2" 0 "Daunorubicin/doxorubicin resistance ATP-binding protein DrrA"  
"OP8\_P22\_00394" 30186 "s59E5H2" 0 "Daunorubicin/doxorubicin resistance ATP-binding protein DrrA"  
"OP8\_P22\_00394" 30186 "s63E6H2" 0 "Daunorubicin/doxorubicin resistance ATP-binding protein DrrA"  
"OP8\_P22\_00395" 30187 "s59E13H2" 0 "HTH-type transcriptional repressor AseR"  
"OP8\_P22\_00395" 30187 "s59E25H2" 0 "HTH-type transcriptional repressor AseR"  
"OP8\_P22\_00395" 30187 "s59E5H2" 0 "HTH-type transcriptional repressor AseR"  
"OP8\_P22\_00395" 30187 "s63E6H2" 0 "HTH-type transcriptional repressor AseR"  
"OP8\_P22\_00396" 30188 "s59E13H2" 0 "Demethylrebeccamycin-D-glucose O-methyltransferase"  
"OP8\_P22\_00396" 30188 "s59E25H2" 0 "Demethylrebeccamycin-D-glucose O-methyltransferase"  
"OP8\_P22\_00396" 30188 "s59E5H2" 0 "Demethylrebeccamycin-D-glucose O-methyltransferase"  
"OP8\_P22\_00396" 30188 "s63E6H2" 0 "Demethylrebeccamycin-D-glucose O-methyltransferase"  
"OP8\_P22\_00397" 30189 "s59E13H2" 0 "Sodium Bile acid symporter family protein"  
"OP8\_P22\_00397" 30189 "s59E25H2" 0 "Sodium Bile acid symporter family protein"  
"OP8\_P22\_00397" 30189 "s59E5H2" 0 "Sodium Bile acid symporter family protein"  
"OP8\_P22\_00397" 30189 "s63E6H2" 0 "Sodium Bile acid symporter family protein"  
"OP8\_P22\_00398" 30190 "s59E13H2" 0 "Demethylrebeccamycin-D-glucose O-methyltransferase"  
"OP8\_P22\_00398" 30190 "s59E25H2" 0 "Demethylrebeccamycin-D-glucose O-methyltransferase"  
"OP8\_P22\_00398" 30190 "s59E5H2" 0 "Demethylrebeccamycin-D-glucose O-methyltransferase"  
"OP8\_P22\_00398" 30190 "s63E6H2" 0 "Demethylrebeccamycin-D-glucose O-methyltransferase"  
"OP8\_P22\_00399" 30191 "s59E13H2" 0 "Serine/threonine-protein kinase PrkC"  
"OP8\_P22\_00399" 30191 "s59E25H2" 0 "Serine/threonine-protein kinase PrkC"  
"OP8\_P22\_00399" 30191 "s59E5H2" 0 "Serine/threonine-protein kinase PrkC"  
"OP8\_P22\_00399" 30191 "s63E6H2" 0.000603823 "Serine/threonine-protein kinase PrkC"  
"OP8\_P22\_00400" 30192 "s59E13H2" 0 "Serine/threonine-protein kinase PrkC"  
"OP8\_P22\_00400" 30192 "s59E25H2" 0 "Serine/threonine-protein kinase PrkC"  
"OP8\_P22\_00400" 30192 "s59E5H2" 0 "Serine/threonine-protein kinase PrkC"  
"OP8\_P22\_00400" 30192 "s63E6H2" 0 "Serine/threonine-protein kinase PrkC"  
"OP8\_P22\_00401" 30193 "s59E13H2" 0 "Helix-turn-helix"  
"OP8\_P22\_00401" 30193 "s59E25H2" 0 "Helix-turn-helix"  
"OP8\_P22\_00401" 30193 "s59E5H2" 0 "Helix-turn-helix"

"OP8\_P22\_00401" 30193 "s63E6H2" 0 "Helix-turn-helix"  
"OP8\_P22\_00402" 30194 "s59E13H2" 0 "hypothetical protein"  
"OP8\_P22\_00402" 30194 "s59E25H2" 0 "hypothetical protein"  
"OP8\_P22\_00402" 30194 "s59E5H2" 0 "hypothetical protein"  
"OP8\_P22\_00402" 30194 "s63E6H2" 0 "hypothetical protein"  
"OP8\_P22\_00403" 30195 "s59E13H2" 0 "Serine/threonine-protein kinase PrkC"  
"OP8\_P22\_00403" 30195 "s59E25H2" 0 "Serine/threonine-protein kinase PrkC"  
"OP8\_P22\_00403" 30195 "s59E5H2" 0 "Serine/threonine-protein kinase PrkC"  
"OP8\_P22\_00403" 30195 "s63E6H2" 0 "Serine/threonine-protein kinase PrkC"  
"OP8\_P22\_00404" 30196 "s59E13H2" 0 "Helix-turn-helix"  
"OP8\_P22\_00404" 30196 "s59E25H2" 0 "Helix-turn-helix"  
"OP8\_P22\_00404" 30196 "s59E5H2" 0 "Helix-turn-helix"  
"OP8\_P22\_00404" 30196 "s63E6H2" 0 "Helix-turn-helix"  
"OP8\_P22\_00406" 30198 "s59E13H2" 0 "hypothetical protein"  
"OP8\_P22\_00406" 30198 "s59E25H2" 0 "hypothetical protein"  
"OP8\_P22\_00406" 30198 "s59E5H2" 0.1857455 "hypothetical protein"  
"OP8\_P22\_00406" 30198 "s63E6H2" 0 "hypothetical protein"  
"OP8\_P22\_00407" 30199 "s59E13H2" 0 "Epoxyqueuosine reductase"  
"OP8\_P22\_00407" 30199 "s59E25H2" 0 "Epoxyqueuosine reductase"  
"OP8\_P22\_00407" 30199 "s59E5H2" 0 "Epoxyqueuosine reductase"  
"OP8\_P22\_00407" 30199 "s63E6H2" 0 "Epoxyqueuosine reductase"  
"OP8\_P22\_00409" 30201 "s59E13H2" 0 "Response regulator PleD"  
"OP8\_P22\_00409" 30201 "s59E25H2" 0 "Response regulator PleD"  
"OP8\_P22\_00409" 30201 "s59E5H2" 0 "Response regulator PleD"  
"OP8\_P22\_00409" 30201 "s63E6H2" 0 "Response regulator PleD"  
"OP8\_P22\_00410" 30202 "s59E13H2" 0 "DNA gyrase inhibitor"  
"OP8\_P22\_00410" 30202 "s59E25H2" 0 "DNA gyrase inhibitor"  
"OP8\_P22\_00410" 30202 "s59E5H2" 0 "DNA gyrase inhibitor"  
"OP8\_P22\_00410" 30202 "s63E6H2" 0 "DNA gyrase inhibitor"  
"OP8\_P22\_00411" 30203 "s59E13H2" 0 "hypothetical protein"  
"OP8\_P22\_00411" 30203 "s59E25H2" 0 "hypothetical protein"  
"OP8\_P22\_00411" 30203 "s59E5H2" 0 "hypothetical protein"  
"OP8\_P22\_00411" 30203 "s63E6H2" 0 "hypothetical protein"  
"OP8\_P22\_00412" 30204 "s59E13H2" 0 "Prolyl tripeptidyl peptidase precursor"  
"OP8\_P22\_00412" 30204 "s59E25H2" 0 "Prolyl tripeptidyl peptidase precursor"  
"OP8\_P22\_00412" 30204 "s59E5H2" 0 "Prolyl tripeptidyl peptidase precursor"  
"OP8\_P22\_00412" 30204 "s63E6H2" 0 "Prolyl tripeptidyl peptidase precursor"  
"OP8\_P22\_00413" 30205 "s59E13H2" 0 "Prolyl oligopeptidase family protein"  
"OP8\_P22\_00413" 30205 "s59E25H2" 0 "Prolyl oligopeptidase family protein"  
"OP8\_P22\_00413" 30205 "s59E5H2" 0 "Prolyl oligopeptidase family protein"  
"OP8\_P22\_00413" 30205 "s63E6H2" 0 "Prolyl oligopeptidase family protein"  
"OP8\_P22\_00414" 30206 "s59E13H2" 0 "hypothetical protein"  
"OP8\_P22\_00414" 30206 "s59E25H2" 0 "hypothetical protein"  
"OP8\_P22\_00414" 30206 "s59E5H2" 0 "hypothetical protein"  
"OP8\_P22\_00414" 30206 "s63E6H2" 0 "hypothetical protein"  
"OP8\_P22\_00415" 30207 "s59E13H2" 0 "hypothetical protein"  
"OP8\_P22\_00415" 30207 "s59E25H2" 0 "hypothetical protein"

"OP8\_P22\_00415" 30207 "s59E5H2" 0 "hypothetical protein"  
"OP8\_P22\_00415" 30207 "s63E6H2" 0 "hypothetical protein"  
"OP8\_P22\_00416" 30208 "s59E13H2" 0 "hypothetical protein"  
"OP8\_P22\_00416" 30208 "s59E25H2" 0 "hypothetical protein"  
"OP8\_P22\_00416" 30208 "s59E5H2" 0 "hypothetical protein"  
"OP8\_P22\_00416" 30208 "s63E6H2" 0 "hypothetical protein"  
"OP8\_P22\_00417" 30209 "s59E13H2" 0 "hypothetical protein"  
"OP8\_P22\_00417" 30209 "s59E25H2" 0 "hypothetical protein"  
"OP8\_P22\_00417" 30209 "s59E5H2" 0 "hypothetical protein"  
"OP8\_P22\_00417" 30209 "s63E6H2" 0 "hypothetical protein"  
"OP8\_P22\_00418" 30210 "s59E13H2" 0 "hypothetical protein"  
"OP8\_P22\_00418" 30210 "s59E25H2" 0 "hypothetical protein"  
"OP8\_P22\_00418" 30210 "s59E5H2" 0 "hypothetical protein"  
"OP8\_P22\_00418" 30210 "s63E6H2" 0 "hypothetical protein"  
"OP8\_P22\_00424" 30216 "s59E13H2" 0 "Signal transduction histidine-protein kinase BarA"  
"OP8\_P22\_00424" 30216 "s59E25H2" 0 "Signal transduction histidine-protein kinase BarA"  
"OP8\_P22\_00424" 30216 "s59E5H2" 0 "Signal transduction histidine-protein kinase BarA"  
"OP8\_P22\_00424" 30216 "s63E6H2" 0 "Signal transduction histidine-protein kinase BarA"  
"OP8\_P22\_00425" 30217 "s59E13H2" 0 "hypothetical protein"  
"OP8\_P22\_00425" 30217 "s59E25H2" 0 "hypothetical protein"  
"OP8\_P22\_00425" 30217 "s59E5H2" 0 "hypothetical protein"  
"OP8\_P22\_00425" 30217 "s63E6H2" 0 "hypothetical protein"  
"OP8\_P22\_00426" 30218 "s59E13H2" 0 "3-oxoacyl-[acyl-carrier-protein] reductase FabG"  
"OP8\_P22\_00426" 30218 "s59E25H2" 0 "3-oxoacyl-[acyl-carrier-protein] reductase FabG"  
"OP8\_P22\_00426" 30218 "s59E5H2" 0 "3-oxoacyl-[acyl-carrier-protein] reductase FabG"  
"OP8\_P22\_00426" 30218 "s63E6H2" 0 "3-oxoacyl-[acyl-carrier-protein] reductase FabG"  
"OP8\_P22\_00427" 30219 "s59E13H2" 0 "7,8-dihydropterin-6-methyl-4-(beta-D-ribofuranosyl)-aminobenzene-5'-phosphate synthase"  
"OP8\_P22\_00427" 30219 "s59E25H2" 0 "7,8-dihydropterin-6-methyl-4-(beta-D-ribofuranosyl)-aminobenzene-5'-phosphate synthase"  
"OP8\_P22\_00427" 30219 "s59E5H2" 0 "7,8-dihydropterin-6-methyl-4-(beta-D-ribofuranosyl)-aminobenzene-5'-phosphate synthase"  
"OP8\_P22\_00427" 30219 "s63E6H2" 0 "7,8-dihydropterin-6-methyl-4-(beta-D-ribofuranosyl)-aminobenzene-5'-phosphate synthase"  
"OP8\_P22\_00428" 30220 "s59E13H2" 0 "hypothetical protein"  
"OP8\_P22\_00428" 30220 "s59E25H2" 0 "hypothetical protein"  
"OP8\_P22\_00428" 30220 "s59E5H2" 0 "hypothetical protein"  
"OP8\_P22\_00428" 30220 "s63E6H2" 0 "hypothetical protein"  
"OP8\_P22\_00429" 30221 "s59E13H2" 0 "Putative phosphoribosyl transferase/MT0597"  
"OP8\_P22\_00429" 30221 "s59E25H2" 0 "Putative phosphoribosyl transferase/MT0597"  
"OP8\_P22\_00429" 30221 "s59E5H2" 0 "Putative phosphoribosyl transferase/MT0597"  
"OP8\_P22\_00429" 30221 "s63E6H2" 0 "Putative phosphoribosyl transferase/MT0597"  
"OP8\_P22\_00430" 30222 "s59E13H2" 0 "LexA repressor"  
"OP8\_P22\_00430" 30222 "s59E25H2" 0 "LexA repressor"  
"OP8\_P22\_00430" 30222 "s59E5H2" 0.01312378 "LexA repressor"  
"OP8\_P22\_00430" 30222 "s63E6H2" 0 "LexA repressor"  
"OP8\_P22\_00431" 30223 "s59E13H2" 0 "DNA polymerase IV"  
"OP8\_P22\_00431" 30223 "s59E25H2" 0 "DNA polymerase IV"  
"OP8\_P22\_00431" 30223 "s59E5H2" 0 "DNA polymerase IV"  
"OP8\_P22\_00431" 30223 "s63E6H2" 0 "DNA polymerase IV"  
"OP8\_P22\_00432" 30224 "s59E13H2" 0 "DNA polymerase III subunit alpha"

"OP8\_P22\_00432" 30224 "s59E25H2" 0 "DNA polymerase III subunit alpha"  
"OP8\_P22\_00432" 30224 "s59E5H2" 0.0009730515 "DNA polymerase III subunit alpha"  
"OP8\_P22\_00432" 30224 "s63E6H2" 0 "DNA polymerase III subunit alpha"  
"OP8\_P22\_00433" 30225 "s59E13H2" 0 "hypothetical protein"  
"OP8\_P22\_00433" 30225 "s59E25H2" 0 "hypothetical protein"  
"OP8\_P22\_00433" 30225 "s59E5H2" 0 "hypothetical protein"  
"OP8\_P22\_00433" 30225 "s63E6H2" 0 "hypothetical protein"  
"OP8\_P22\_00434" 30226 "s59E13H2" 0 "ABC transporter substrate binding protein"  
"OP8\_P22\_00434" 30226 "s59E25H2" 0 "ABC transporter substrate binding protein"  
"OP8\_P22\_00434" 30226 "s59E5H2" 0 "ABC transporter substrate binding protein"  
"OP8\_P22\_00434" 30226 "s63E6H2" 0 "ABC transporter substrate binding protein"  
"OP8\_P22\_00435" 30227 "s59E13H2" 0 "Acyl-homoserine lactone acylase QuiP precursor"  
"OP8\_P22\_00435" 30227 "s59E25H2" 0 "Acyl-homoserine lactone acylase QuiP precursor"  
"OP8\_P22\_00435" 30227 "s59E5H2" 0 "Acyl-homoserine lactone acylase QuiP precursor"  
"OP8\_P22\_00435" 30227 "s63E6H2" 0 "Acyl-homoserine lactone acylase QuiP precursor"  
"OP8\_P22\_00436" 30228 "s59E13H2" 0 "Hydroxymethylpyrimidine/phosphomethylpyrimidine kinase"  
"OP8\_P22\_00436" 30228 "s59E25H2" 0 "Hydroxymethylpyrimidine/phosphomethylpyrimidine kinase"  
"OP8\_P22\_00436" 30228 "s59E5H2" 0 "Hydroxymethylpyrimidine/phosphomethylpyrimidine kinase"  
"OP8\_P22\_00436" 30228 "s63E6H2" 0 "Hydroxymethylpyrimidine/phosphomethylpyrimidine kinase"  
"OP8\_P22\_00437" 30229 "s59E13H2" 0 "Acylphosphatase"  
"OP8\_P22\_00437" 30229 "s59E25H2" 0 "Acylphosphatase"  
"OP8\_P22\_00437" 30229 "s59E5H2" 0 "Acylphosphatase"  
"OP8\_P22\_00437" 30229 "s63E6H2" 0 "Acylphosphatase"  
"OP8\_P22\_00438" 30230 "s59E13H2" 0 "Cupin domain protein"  
"OP8\_P22\_00438" 30230 "s59E25H2" 0 "Cupin domain protein"  
"OP8\_P22\_00438" 30230 "s59E5H2" 0 "Cupin domain protein"  
"OP8\_P22\_00438" 30230 "s63E6H2" 0 "Cupin domain protein"  
"OP8\_P22\_00439" 30231 "s59E13H2" 0 "PhoH-like protein"  
"OP8\_P22\_00439" 30231 "s59E25H2" 0 "PhoH-like protein"  
"OP8\_P22\_00439" 30231 "s59E5H2" 0 "PhoH-like protein"  
"OP8\_P22\_00439" 30231 "s63E6H2" 0 "PhoH-like protein"  
"OP8\_P22\_00440" 30232 "s59E13H2" 0 "Sulfotransferase domain protein"  
"OP8\_P22\_00440" 30232 "s59E25H2" 0 "Sulfotransferase domain protein"  
"OP8\_P22\_00440" 30232 "s59E5H2" 0 "Sulfotransferase domain protein"  
"OP8\_P22\_00440" 30232 "s63E6H2" 0 "Sulfotransferase domain protein"  
"OP8\_P22\_00442" 30234 "s59E13H2" 0 "putative adenylyl-sulfate kinase"  
"OP8\_P22\_00442" 30234 "s59E25H2" 0 "putative adenylyl-sulfate kinase"  
"OP8\_P22\_00442" 30234 "s59E5H2" 0 "putative adenylyl-sulfate kinase"  
"OP8\_P22\_00442" 30234 "s63E6H2" 0 "putative adenylyl-sulfate kinase"  
"OP8\_P22\_00443" 30235 "s59E13H2" 0 "UDP-glucose 4-epimerase"  
"OP8\_P22\_00443" 30235 "s59E25H2" 0 "UDP-glucose 4-epimerase"  
"OP8\_P22\_00443" 30235 "s59E5H2" 0 "UDP-glucose 4-epimerase"  
"OP8\_P22\_00443" 30235 "s63E6H2" 0 "UDP-glucose 4-epimerase"  
"OP8\_P22\_00444" 30236 "s59E13H2" 0 "UDP-N-acetyl-D-glucosamine 6-dehydrogenase"  
"OP8\_P22\_00444" 30236 "s59E25H2" 0 "UDP-N-acetyl-D-glucosamine 6-dehydrogenase"  
"OP8\_P22\_00444" 30236 "s59E5H2" 0 "UDP-N-acetyl-D-glucosamine 6-dehydrogenase"  
"OP8\_P22\_00444" 30236 "s63E6H2" 0 "UDP-N-acetyl-D-glucosamine 6-dehydrogenase"

"OP8\_P22\_00445" 30237 "s59E13H2" 0 "hypothetical protein"  
"OP8\_P22\_00445" 30237 "s59E25H2" 0 "hypothetical protein"  
"OP8\_P22\_00445" 30237 "s59E5H2" 0 "hypothetical protein"  
"OP8\_P22\_00445" 30237 "s63E6H2" 0 "hypothetical protein"  
"OP8\_P22\_00447" 30239 "s59E13H2" 0.01426462 "Nucleotidyltransferase domain protein"  
"OP8\_P22\_00447" 30239 "s59E25H2" 0 "Nucleotidyltransferase domain protein"  
"OP8\_P22\_00447" 30239 "s59E5H2" 0.04550488 "Nucleotidyltransferase domain protein"  
"OP8\_P22\_00447" 30239 "s63E6H2" 0 "Nucleotidyltransferase domain protein"  
"OP8\_P22\_00448" 30240 "s59E13H2" 0 "Glucose-1-phosphate thymidyltransferase"  
"OP8\_P22\_00448" 30240 "s59E25H2" 0 "Glucose-1-phosphate thymidyltransferase"  
"OP8\_P22\_00448" 30240 "s59E5H2" 0 "Glucose-1-phosphate thymidyltransferase"  
"OP8\_P22\_00448" 30240 "s63E6H2" 0 "Glucose-1-phosphate thymidyltransferase"  
"OP8\_P22\_00449" 30241 "s59E13H2" 0 "dTDP-4-dehydrorhamnose reductase"  
"OP8\_P22\_00449" 30241 "s59E25H2" 0 "dTDP-4-dehydrorhamnose reductase"  
"OP8\_P22\_00449" 30241 "s59E5H2" 0 "dTDP-4-dehydrorhamnose reductase"  
"OP8\_P22\_00449" 30241 "s63E6H2" 0 "dTDP-4-dehydrorhamnose reductase"  
"OP8\_P22\_00450" 30242 "s59E13H2" 0 "UDP-glucose 6-dehydrogenase TuaD"  
"OP8\_P22\_00450" 30242 "s59E25H2" 0 "UDP-glucose 6-dehydrogenase TuaD"  
"OP8\_P22\_00450" 30242 "s59E5H2" 0 "UDP-glucose 6-dehydrogenase TuaD"  
"OP8\_P22\_00450" 30242 "s63E6H2" 0 "UDP-glucose 6-dehydrogenase TuaD"  
"OP8\_P22\_00452" 30244 "s59E13H2" 0 "hypothetical protein"  
"OP8\_P22\_00452" 30244 "s59E25H2" 0 "hypothetical protein"  
"OP8\_P22\_00452" 30244 "s59E5H2" 0 "hypothetical protein"  
"OP8\_P22\_00452" 30244 "s63E6H2" 0 "hypothetical protein"  
"OP8\_P22\_00453" 30245 "s59E13H2" 0 "Outer membrane protein assembly factor BamA precursor"  
"OP8\_P22\_00453" 30245 "s59E25H2" 0 "Outer membrane protein assembly factor BamA precursor"  
"OP8\_P22\_00453" 30245 "s59E5H2" 0 "Outer membrane protein assembly factor BamA precursor"  
"OP8\_P22\_00453" 30245 "s63E6H2" 0 "Outer membrane protein assembly factor BamA precursor"  
"OP8\_P22\_00454" 30246 "s59E13H2" 0 "peptidyl-prolyl cis-trans isomerase SurA"  
"OP8\_P22\_00454" 30246 "s59E25H2" 0 "peptidyl-prolyl cis-trans isomerase SurA"  
"OP8\_P22\_00454" 30246 "s59E5H2" 0 "peptidyl-prolyl cis-trans isomerase SurA"  
"OP8\_P22\_00454" 30246 "s63E6H2" 0 "peptidyl-prolyl cis-trans isomerase SurA"  
"OP8\_P22\_00455" 30247 "s59E13H2" 0 "Malonyl CoA-acyl carrier protein transacylase"  
"OP8\_P22\_00455" 30247 "s59E25H2" 0 "Malonyl CoA-acyl carrier protein transacylase"  
"OP8\_P22\_00455" 30247 "s59E5H2" 0 "Malonyl CoA-acyl carrier protein transacylase"  
"OP8\_P22\_00455" 30247 "s63E6H2" 0 "Malonyl CoA-acyl carrier protein transacylase"  
"OP8\_P22\_00456" 30248 "s59E13H2" 0 "CDP-diacylglycerol--glycerol-3-phosphate 3-phosphatidyltransferase"  
"OP8\_P22\_00456" 30248 "s59E25H2" 0 "CDP-diacylglycerol--glycerol-3-phosphate 3-phosphatidyltransferase"  
"OP8\_P22\_00456" 30248 "s59E5H2" 0 "CDP-diacylglycerol--glycerol-3-phosphate 3-phosphatidyltransferase"  
"OP8\_P22\_00456" 30248 "s63E6H2" 0 "CDP-diacylglycerol--glycerol-3-phosphate 3-phosphatidyltransferase"  
"OP8\_P22\_00457" 30249 "s59E13H2" 0 "Cupin domain protein"  
"OP8\_P22\_00457" 30249 "s59E25H2" 0 "Cupin domain protein"  
"OP8\_P22\_00457" 30249 "s59E5H2" 0.004949801 "Cupin domain protein"  
"OP8\_P22\_00457" 30249 "s63E6H2" 0 "Cupin domain protein"  
"OP8\_P22\_00459" 30251 "s59E13H2" 0 "Competence protein A"  
"OP8\_P22\_00459" 30251 "s59E25H2" 0 "Competence protein A"  
"OP8\_P22\_00459" 30251 "s59E5H2" 0 "Competence protein A"



"OP8\_P22\_00459" 30251 "s63E6H2" 0 "Competence protein A"  
"OP8\_P22\_00460" 30252 "s59E13H2" 0 "Fimbrial assembly protein (PilN)"  
"OP8\_P22\_00460" 30252 "s59E25H2" 0 "Fimbrial assembly protein (PilN)"  
"OP8\_P22\_00460" 30252 "s59E5H2" 0 "Fimbrial assembly protein (PilN)"  
"OP8\_P22\_00460" 30252 "s63E6H2" 0 "Fimbrial assembly protein (PilN)"  
"OP8\_P22\_00461" 30253 "s59E13H2" 0 "Pilus assembly protein, PilO"  
"OP8\_P22\_00461" 30253 "s59E25H2" 0 "Pilus assembly protein, PilO"  
"OP8\_P22\_00461" 30253 "s59E5H2" 0 "Pilus assembly protein, PilO"  
"OP8\_P22\_00461" 30253 "s63E6H2" 0 "Pilus assembly protein, PilO"  
"OP8\_P22\_00462" 30254 "s59E13H2" 0 "hypothetical protein"  
"OP8\_P22\_00462" 30254 "s59E25H2" 0 "hypothetical protein"  
"OP8\_P22\_00462" 30254 "s59E5H2" 0 "hypothetical protein"  
"OP8\_P22\_00462" 30254 "s63E6H2" 0 "hypothetical protein"  
"OP8\_P22\_00463" 30255 "s59E13H2" 0 "Type IV pilus biogenesis and competence protein PilQ precursor"  
"OP8\_P22\_00463" 30255 "s59E25H2" 0 "Type IV pilus biogenesis and competence protein PilQ precursor"  
"OP8\_P22\_00463" 30255 "s59E5H2" 0 "Type IV pilus biogenesis and competence protein PilQ precursor"  
"OP8\_P22\_00463" 30255 "s63E6H2" 0 "Type IV pilus biogenesis and competence protein PilQ precursor"  
"OP8\_P22\_00464" 30256 "s59E13H2" 0 "hypothetical protein"  
"OP8\_P22\_00464" 30256 "s59E25H2" 0 "hypothetical protein"  
"OP8\_P22\_00464" 30256 "s59E5H2" 0 "hypothetical protein"  
"OP8\_P22\_00464" 30256 "s63E6H2" 0 "hypothetical protein"  
"OP8\_P22\_00465" 30257 "s59E13H2" 0 "Bacterial Ig-like domain (group 1)"  
"OP8\_P22\_00465" 30257 "s59E25H2" 0 "Bacterial Ig-like domain (group 1)"  
"OP8\_P22\_00465" 30257 "s59E5H2" 0 "Bacterial Ig-like domain (group 1)"  
"OP8\_P22\_00465" 30257 "s63E6H2" 0 "Bacterial Ig-like domain (group 1)"  
"OP8\_P22\_00466" 30258 "s59E13H2" 0 "Primosomal protein N"  
"OP8\_P22\_00466" 30258 "s59E25H2" 0 "Primosomal protein N"  
"OP8\_P22\_00466" 30258 "s59E5H2" 0 "Primosomal protein N"  
"OP8\_P22\_00466" 30258 "s63E6H2" 0 "Primosomal protein N"  
"OP8\_P22\_00467" 30259 "s59E13H2" 0 "Uracil DNA glycosylase superfamily protein"  
"OP8\_P22\_00467" 30259 "s59E25H2" 0 "Uracil DNA glycosylase superfamily protein"  
"OP8\_P22\_00467" 30259 "s59E5H2" 0 "Uracil DNA glycosylase superfamily protein"  
"OP8\_P22\_00467" 30259 "s63E6H2" 0 "Uracil DNA glycosylase superfamily protein"  
"OP8\_P22\_00468" 30260 "s59E13H2" 0 "Coenzyme A biosynthesis bifunctional protein CoaBC"  
"OP8\_P22\_00468" 30260 "s59E25H2" 0 "Coenzyme A biosynthesis bifunctional protein CoaBC"  
"OP8\_P22\_00468" 30260 "s59E5H2" 0 "Coenzyme A biosynthesis bifunctional protein CoaBC"  
"OP8\_P22\_00468" 30260 "s63E6H2" 0 "Coenzyme A biosynthesis bifunctional protein CoaBC"  
"OP8\_P22\_00469" 30261 "s59E13H2" 0 "Guanylate kinase"  
"OP8\_P22\_00469" 30261 "s59E25H2" 0 "Guanylate kinase"  
"OP8\_P22\_00469" 30261 "s59E5H2" 0 "Guanylate kinase"  
"OP8\_P22\_00469" 30261 "s63E6H2" 0 "Guanylate kinase"  
"OP8\_P22\_00470" 30262 "s59E13H2" 0 "hypothetical protein"  
"OP8\_P22\_00470" 30262 "s59E25H2" 0 "hypothetical protein"  
"OP8\_P22\_00470" 30262 "s59E5H2" 0 "hypothetical protein"  
"OP8\_P22\_00470" 30262 "s63E6H2" 0 "hypothetical protein"  
"OP8\_P22\_00471" 30263 "s59E13H2" 0 "Lipid A export ATP-binding/permease protein MsbA"  
"OP8\_P22\_00471" 30263 "s59E25H2" 0 "Lipid A export ATP-binding/permease protein MsbA"

"OP8\_P22\_00471" 30263 "s59E5H2" 0 "Lipid A export ATP-binding/permease protein MsbA"  
"OP8\_P22\_00471" 30263 "s63E6H2" 0 "Lipid A export ATP-binding/permease protein MsbA"  
"OP8\_P22\_00472" 30264 "s59E13H2" 0 "Aspartate-semialdehyde dehydrogenase"  
"OP8\_P22\_00472" 30264 "s59E25H2" 0 "Aspartate-semialdehyde dehydrogenase"  
"OP8\_P22\_00472" 30264 "s59E5H2" 0 "Aspartate-semialdehyde dehydrogenase"  
"OP8\_P22\_00472" 30264 "s63E6H2" 0 "Aspartate-semialdehyde dehydrogenase"  
"OP8\_P22\_00473" 30265 "s59E13H2" 0 "hypothetical protein"  
"OP8\_P22\_00473" 30265 "s59E25H2" 0 "hypothetical protein"  
"OP8\_P22\_00473" 30265 "s59E5H2" 0 "hypothetical protein"  
"OP8\_P22\_00473" 30265 "s63E6H2" 0 "hypothetical protein"  
"OP8\_P22\_00474" 30266 "s59E13H2" 0 "Transposase"  
"OP8\_P22\_00474" 30266 "s59E25H2" 0 "Transposase"  
"OP8\_P22\_00474" 30266 "s59E5H2" 0.03112599 "Transposase"  
"OP8\_P22\_00474" 30266 "s63E6H2" 0 "Transposase"  
"OP8\_P22\_00476" 30268 "s59E13H2" 0 "UTP--glucose-1-phosphate uridylyltransferase"  
"OP8\_P22\_00476" 30268 "s59E25H2" 0 "UTP--glucose-1-phosphate uridylyltransferase"  
"OP8\_P22\_00476" 30268 "s59E5H2" 0 "UTP--glucose-1-phosphate uridylyltransferase"  
"OP8\_P22\_00476" 30268 "s63E6H2" 0 "UTP--glucose-1-phosphate uridylyltransferase"  
"OP8\_P22\_00477" 30269 "s59E13H2" 0 "Putative outer membrane protein precursor"  
"OP8\_P22\_00477" 30269 "s59E25H2" 0 "Putative outer membrane protein precursor"  
"OP8\_P22\_00477" 30269 "s59E5H2" 0 "Putative outer membrane protein precursor"  
"OP8\_P22\_00477" 30269 "s63E6H2" 0 "Putative outer membrane protein precursor"  
"OP8\_P22\_00478" 30270 "s59E13H2" 0 "Fe/S biogenesis protein NfuA"  
"OP8\_P22\_00478" 30270 "s59E25H2" 0 "Fe/S biogenesis protein NfuA"  
"OP8\_P22\_00478" 30270 "s59E5H2" 0 "Fe/S biogenesis protein NfuA"  
"OP8\_P22\_00478" 30270 "s63E6H2" 0 "Fe/S biogenesis protein NfuA"  
"OP8\_P22\_00479" 30271 "s59E13H2" 0 "Chaperone protein ClpB"  
"OP8\_P22\_00479" 30271 "s59E25H2" 0 "Chaperone protein ClpB"  
"OP8\_P22\_00479" 30271 "s59E5H2" 0 "Chaperone protein ClpB"  
"OP8\_P22\_00479" 30271 "s63E6H2" 0 "Chaperone protein ClpB"  
"OPBA10\_00002" 32458 "s59E13H2" 3.512476 "Nicotinate-nucleotide--dimethylbenzimidazole phosphoribosyltransferase"  
"OPBA10\_00002" 32458 "s59E25H2" 0 "Nicotinate-nucleotide--dimethylbenzimidazole phosphoribosyltransferase"  
"OPBA10\_00002" 32458 "s59E5H2" 0.09188179 "Nicotinate-nucleotide--dimethylbenzimidazole phosphoribosyltransferase"  
"OPBA10\_00002" 32458 "s63E6H2" 0.007037969 "Nicotinate-nucleotide--dimethylbenzimidazole phosphoribosyltransferase"  
"OPBA10\_00003" 32459 "s59E13H2" 9.360276 "Sodium/hydrogen exchanger family protein"  
"OPBA10\_00003" 32459 "s59E25H2" 0 "Sodium/hydrogen exchanger family protein"  
"OPBA10\_00003" 32459 "s59E5H2" 0.09234597 "Sodium/hydrogen exchanger family protein"  
"OPBA10\_00003" 32459 "s63E6H2" 0.0624743 "Sodium/hydrogen exchanger family protein"  
"OPBA10\_00004" 32460 "s59E13H2" 8.236355 "Inosine-5'-monophosphate dehydrogenase"  
"OPBA10\_00004" 32460 "s59E25H2" 0 "Inosine-5'-monophosphate dehydrogenase"  
"OPBA10\_00004" 32460 "s59E5H2" 0.1198686 "Inosine-5'-monophosphate dehydrogenase"  
"OPBA10\_00004" 32460 "s63E6H2" 0.05200293 "Inosine-5'-monophosphate dehydrogenase"  
"OPBA10\_00006" 32462 "s59E13H2" 10.60232 "Cobalamin-binding protein precursor"  
"OPBA10\_00006" 32462 "s59E25H2" 0 "Cobalamin-binding protein precursor"  
"OPBA10\_00006" 32462 "s59E5H2" 0.03223886 "Cobalamin-binding protein precursor"  
"OPBA10\_00006" 32462 "s63E6H2" 0.0590119 "Cobalamin-binding protein precursor"  
"OPBA10\_00007" 32463 "s59E13H2" 12.12208 "Bifunctional adenosylcobalamin biosynthesis protein CobU"

"OPBA10\_00007" 32463 "s59E25H2" 0 "Bifunctional adenosylcobalamin biosynthesis protein CobU"  
"OPBA10\_00007" 32463 "s59E5H2" 0.158524 "Bifunctional adenosylcobalamin biosynthesis protein CobU"  
"OPBA10\_00007" 32463 "s63E6H2" 0.1389567 "Bifunctional adenosylcobalamin biosynthesis protein CobU"  
"OPBA10\_00008" 32464 "s59E13H2" 10.51354 "Cobalamin synthase"  
"OPBA10\_00008" 32464 "s59E25H2" 0 "Cobalamin synthase"  
"OPBA10\_00008" 32464 "s59E5H2" 0.2085872 "Cobalamin synthase"  
"OPBA10\_00008" 32464 "s63E6H2" 0.07007776 "Cobalamin synthase"  
"OPBA10\_00009" 32465 "s59E13H2" 12.43525 "Hemin transport system permease protein HmuU"  
"OPBA10\_00009" 32465 "s59E25H2" 0 "Hemin transport system permease protein HmuU"  
"OPBA10\_00009" 32465 "s59E5H2" 0.5056694 "Hemin transport system permease protein HmuU"  
"OPBA10\_00009" 32465 "s63E6H2" 0.03956779 "Hemin transport system permease protein HmuU"  
"OPBA10\_00010" 32466 "s59E13H2" 15.57083 "Cobalamin import ATP-binding protein BtuD"  
"OPBA10\_00010" 32466 "s59E25H2" 0 "Cobalamin import ATP-binding protein BtuD"  
"OPBA10\_00010" 32466 "s59E5H2" 0.3819866 "Cobalamin import ATP-binding protein BtuD"  
"OPBA10\_00010" 32466 "s63E6H2" 0.06009199 "Cobalamin import ATP-binding protein BtuD"  
"OPBA10\_00011" 32467 "s59E13H2" 14.74137 "Cob(II)yrinic acid a,c-diamide adenosyltransferase"  
"OPBA10\_00011" 32467 "s59E25H2" 0 "Cob(II)yrinic acid a,c-diamide adenosyltransferase"  
"OPBA10\_00011" 32467 "s59E5H2" 0.4466679 "Cob(II)yrinic acid a,c-diamide adenosyltransferase"  
"OPBA10\_00011" 32467 "s63E6H2" 0.1028283 "Cob(II)yrinic acid a,c-diamide adenosyltransferase"  
"OPBA10\_00013" 32469 "s59E13H2" 4.360622 "Methylated-DNA--protein-cysteine methyltransferase, inducible"  
"OPBA10\_00013" 32469 "s59E25H2" 0 "Methylated-DNA--protein-cysteine methyltransferase, inducible"  
"OPBA10\_00013" 32469 "s59E5H2" 0.2181086 "Methylated-DNA--protein-cysteine methyltransferase, inducible"  
"OPBA10\_00013" 32469 "s63E6H2" 0.01267845 "Methylated-DNA--protein-cysteine methyltransferase, inducible"  
"OPBA10\_00015" 32471 "s59E13H2" 0 "hypothetical protein"  
"OPBA10\_00015" 32471 "s59E25H2" 0 "hypothetical protein"  
"OPBA10\_00015" 32471 "s59E5H2" 0.02907819 "hypothetical protein"  
"OPBA10\_00015" 32471 "s63E6H2" 0.000115796 "hypothetical protein"  
"OPBA10\_00017" 32473 "s59E13H2" 12.42075 "Bifunctional protein GlmU"  
"OPBA10\_00017" 32473 "s59E25H2" 0.3568879 "Bifunctional protein GlmU"  
"OPBA10\_00017" 32473 "s59E5H2" 0.1157733 "Bifunctional protein GlmU"  
"OPBA10\_00017" 32473 "s63E6H2" 0.5646232 "Bifunctional protein GlmU"  
"OPBA10\_00018" 32474 "s59E13H2" 2.008867 "Ribose-phosphate pyrophosphokinase"  
"OPBA10\_00018" 32474 "s59E25H2" 0 "Ribose-phosphate pyrophosphokinase"  
"OPBA10\_00018" 32474 "s59E5H2" 0.2064528 "Ribose-phosphate pyrophosphokinase"  
"OPBA10\_00018" 32474 "s63E6H2" 0.02781165 "Ribose-phosphate pyrophosphokinase"  
"OPBA10\_00019" 32475 "s59E13H2" 0.005733271 "50S ribosomal protein L25"  
"OPBA10\_00019" 32475 "s59E25H2" 0 "50S ribosomal protein L25"  
"OPBA10\_00019" 32475 "s59E5H2" 0.03995276 "50S ribosomal protein L25"  
"OPBA10\_00019" 32475 "s63E6H2" 0.006528665 "50S ribosomal protein L25"  
"OPBA10\_00020" 32476 "s59E13H2" 0.02367145 "Peptidyl-tRNA hydrolase"  
"OPBA10\_00020" 32476 "s59E25H2" 0 "Peptidyl-tRNA hydrolase"  
"OPBA10\_00020" 32476 "s59E5H2" 0.05941397 "Peptidyl-tRNA hydrolase"  
"OPBA10\_00020" 32476 "s63E6H2" 0.01762776 "Peptidyl-tRNA hydrolase"  
"OPBA10\_00021" 32477 "s59E13H2" 0.1323543 "Transcription-repair-coupling factor"  
"OPBA10\_00021" 32477 "s59E25H2" 0 "Transcription-repair-coupling factor"  
"OPBA10\_00021" 32477 "s59E5H2" 0.02688975 "Transcription-repair-coupling factor"  
"OPBA10\_00021" 32477 "s63E6H2" 0.02960138 "Transcription-repair-coupling factor"

"OPBA10\_00022" 32478 "s59E13H2" 0.0043107 "Foldase protein PrsA 3 precursor"  
"OPBA10\_00022" 32478 "s59E25H2" 0 "Foldase protein PrsA 3 precursor"  
"OPBA10\_00022" 32478 "s59E5H2" 0.05047348 "Foldase protein PrsA 3 precursor"  
"OPBA10\_00022" 32478 "s63E6H2" 0.013668 "Foldase protein PrsA 3 precursor"  
"OPBA10\_00023" 32479 "s59E13H2" 0.02265536 "Nucleoside triphosphate pyrophosphohydrolase"  
"OPBA10\_00023" 32479 "s59E25H2" 0 "Nucleoside triphosphate pyrophosphohydrolase"  
"OPBA10\_00023" 32479 "s59E5H2" 0.0666418 "Nucleoside triphosphate pyrophosphohydrolase"  
"OPBA10\_00023" 32479 "s63E6H2" 0.03662048 "Nucleoside triphosphate pyrophosphohydrolase"  
"OPBA10\_00024" 32480 "s59E13H2" 0.03968779 "Pyruvate kinase"  
"OPBA10\_00024" 32480 "s59E25H2" 0 "Pyruvate kinase"  
"OPBA10\_00024" 32480 "s59E5H2" 0.4883917 "Pyruvate kinase"  
"OPBA10\_00024" 32480 "s63E6H2" 0.06159254 "Pyruvate kinase"  
"OPBA10\_00025" 32481 "s59E13H2" 4.32695 "hypothetical protein"  
"OPBA10\_00025" 32481 "s59E25H2" 0 "hypothetical protein"  
"OPBA10\_00025" 32481 "s59E5H2" 0.0551916 "hypothetical protein"  
"OPBA10\_00025" 32481 "s63E6H2" 0.006127309 "hypothetical protein"  
"OPBA10\_00026" 32482 "s59E13H2" 3.68052 "Enolase"  
"OPBA10\_00026" 32482 "s59E25H2" 0 "Enolase"  
"OPBA10\_00026" 32482 "s59E5H2" 0.08305222 "Enolase"  
"OPBA10\_00026" 32482 "s63E6H2" 0.01213037 "Enolase"  
"OPBA10\_00027" 32483 "s59E13H2" 0.2017979 "Macrolide export protein MacA"  
"OPBA10\_00027" 32483 "s59E25H2" 0 "Macrolide export protein MacA"  
"OPBA10\_00027" 32483 "s59E5H2" 0.05029506 "Macrolide export protein MacA"  
"OPBA10\_00027" 32483 "s63E6H2" 0 "Macrolide export protein MacA"  
"OPBA10\_00028" 32484 "s59E13H2" 1.038149 "putative ABC transporter ATP-binding protein"  
"OPBA10\_00028" 32484 "s59E25H2" 0 "putative ABC transporter ATP-binding protein"  
"OPBA10\_00028" 32484 "s59E5H2" 0.1833952 "putative ABC transporter ATP-binding protein"  
"OPBA10\_00028" 32484 "s63E6H2" 0.00197102 "putative ABC transporter ATP-binding protein"  
"OPBA10\_00029" 32485 "s59E13H2" 0.003192916 "Macrolide export ATP-binding/permease protein MacB"  
"OPBA10\_00029" 32485 "s59E25H2" 0 "Macrolide export ATP-binding/permease protein MacB"  
"OPBA10\_00029" 32485 "s59E5H2" 0.2306195 "Macrolide export ATP-binding/permease protein MacB"  
"OPBA10\_00029" 32485 "s63E6H2" 0 "Macrolide export ATP-binding/permease protein MacB"  
"OPBA10\_00030" 32486 "s59E13H2" 0.005855777 "YtxH-like protein"  
"OPBA10\_00030" 32486 "s59E25H2" 0 "YtxH-like protein"  
"OPBA10\_00030" 32486 "s59E5H2" 0.01392546 "YtxH-like protein"  
"OPBA10\_00030" 32486 "s63E6H2" 0 "YtxH-like protein"  
"OPBA10\_00031" 32487 "s59E13H2" 0.001748157 "hypothetical protein"  
"OPBA10\_00031" 32487 "s59E25H2" 0 "hypothetical protein"  
"OPBA10\_00031" 32487 "s59E5H2" 0.07788192 "hypothetical protein"  
"OPBA10\_00031" 32487 "s63E6H2" 0.005043415 "hypothetical protein"  
"OPBA10\_00032" 32488 "s59E13H2" 0.0008049785 "Sulfide dehydrogenase subunit alpha precursor"  
"OPBA10\_00032" 32488 "s59E25H2" 0 "Sulfide dehydrogenase subunit alpha precursor"  
"OPBA10\_00032" 32488 "s59E5H2" 0.08465378 "Sulfide dehydrogenase subunit alpha precursor"  
"OPBA10\_00032" 32488 "s63E6H2" 0.03610078 "Sulfide dehydrogenase subunit alpha precursor"  
"OPBA10\_00033" 32489 "s59E13H2" 0.005973437 "Sulfide dehydrogenase subunit beta precursor"  
"OPBA10\_00033" 32489 "s59E25H2" 0 "Sulfide dehydrogenase subunit beta precursor"  
"OPBA10\_00033" 32489 "s59E5H2" 0.1353229 "Sulfide dehydrogenase subunit beta precursor"

"OPBA10\_00033" 32489 "s63E6H2" 0.01324919 "Sulfide dehydrogenase subunit beta precursor"  
"OPBA10\_00034" 32490 "s59E13H2" 0.002007617 "Light-independent protochlorophyllide reductase iron-sulfur ATP-binding protein"  
"OPBA10\_00034" 32490 "s59E25H2" 0 "Light-independent protochlorophyllide reductase iron-sulfur ATP-binding protein"  
"OPBA10\_00034" 32490 "s59E5H2" 0.01037302 "Light-independent protochlorophyllide reductase iron-sulfur ATP-binding protein"  
"OPBA10\_00034" 32490 "s63E6H2" 0.01115701 "Light-independent protochlorophyllide reductase iron-sulfur ATP-binding protein"  
"OPBA10\_00035" 32491 "s59E13H2" 0.002629815 "heat shock protein GrpE"  
"OPBA10\_00035" 32491 "s59E25H2" 0 "heat shock protein GrpE"  
"OPBA10\_00035" 32491 "s59E5H2" 0.07833169 "heat shock protein GrpE"  
"OPBA10\_00035" 32491 "s63E6H2" 0.007983758 "heat shock protein GrpE"  
"OPBA10\_00036" 32492 "s59E13H2" 0.0002477819 "hypothetical protein"  
"OPBA10\_00036" 32492 "s59E25H2" 0 "hypothetical protein"  
"OPBA10\_00036" 32492 "s59E5H2" 0.07536599 "hypothetical protein"  
"OPBA10\_00036" 32492 "s63E6H2" 0.0003403165 "hypothetical protein"  
"OPBA10\_00037" 32493 "s59E13H2" 0.01233511 "Histone deacetylase-like amidohydrolase"  
"OPBA10\_00037" 32493 "s59E25H2" 0 "Histone deacetylase-like amidohydrolase"  
"OPBA10\_00037" 32493 "s59E5H2" 0.06407277 "Histone deacetylase-like amidohydrolase"  
"OPBA10\_00037" 32493 "s63E6H2" 0 "Histone deacetylase-like amidohydrolase"  
"OPBA10\_00038" 32494 "s59E13H2" 0.006454113 "N-acetylmuramoyl-L-alanine amidase LytC precursor"  
"OPBA10\_00038" 32494 "s59E25H2" 0 "N-acetylmuramoyl-L-alanine amidase LytC precursor"  
"OPBA10\_00038" 32494 "s59E5H2" 0.08980207 "N-acetylmuramoyl-L-alanine amidase LytC precursor"  
"OPBA10\_00038" 32494 "s63E6H2" 0.003267334 "N-acetylmuramoyl-L-alanine amidase LytC precursor"  
"OPBA10\_00039" 32495 "s59E13H2" 0 "Thioredoxin reductase"  
"OPBA10\_00039" 32495 "s59E25H2" 0 "Thioredoxin reductase"  
"OPBA10\_00039" 32495 "s59E5H2" 0.05492857 "Thioredoxin reductase"  
"OPBA10\_00039" 32495 "s63E6H2" 0.004719945 "Thioredoxin reductase"  
"OPBA10\_00041" 32497 "s59E13H2" 0.003126704 "putative lysine decarboxylase"  
"OPBA10\_00041" 32497 "s59E25H2" 0 "putative lysine decarboxylase"  
"OPBA10\_00041" 32497 "s59E5H2" 0.02312874 "putative lysine decarboxylase"  
"OPBA10\_00041" 32497 "s63E6H2" 0 "putative lysine decarboxylase"  
"OPBA10\_00042" 32498 "s59E13H2" 0.004539096 "hypothetical protein"  
"OPBA10\_00042" 32498 "s59E25H2" 0 "hypothetical protein"  
"OPBA10\_00042" 32498 "s59E5H2" 0.03409792 "hypothetical protein"  
"OPBA10\_00042" 32498 "s63E6H2" 0 "hypothetical protein"  
"OPBA10\_00043" 32499 "s59E13H2" 0.004237315 "Adenine phosphoribosyltransferase"  
"OPBA10\_00043" 32499 "s59E25H2" 0 "Adenine phosphoribosyltransferase"  
"OPBA10\_00043" 32499 "s59E5H2" 0.09699088 "Adenine phosphoribosyltransferase"  
"OPBA10\_00043" 32499 "s63E6H2" 0.002876599 "Adenine phosphoribosyltransferase"  
"OPBA10\_00044" 32500 "s59E13H2" 0.009566844 "hypothetical protein"  
"OPBA10\_00044" 32500 "s59E25H2" 0 "hypothetical protein"  
"OPBA10\_00044" 32500 "s59E5H2" 0.06282182 "hypothetical protein"  
"OPBA10\_00044" 32500 "s63E6H2" 0.01187025 "hypothetical protein"  
"OPBA10\_00045" 32501 "s59E13H2" 0 "tRNA(fMet)-specific endonuclease VapC"  
"OPBA10\_00045" 32501 "s59E25H2" 0 "tRNA(fMet)-specific endonuclease VapC"  
"OPBA10\_00045" 32501 "s59E5H2" 0.005696894 "tRNA(fMet)-specific endonuclease VapC"  
"OPBA10\_00045" 32501 "s63E6H2" 0 "tRNA(fMet)-specific endonuclease VapC"  
"OPBA10\_00046" 32502 "s59E13H2" 0 "Ribbon-helix-helix protein, copG family"  
"OPBA10\_00046" 32502 "s59E25H2" 0 "Ribbon-helix-helix protein, copG family"

"OPBA10\_00046" 32502 "s59E5H2" 0 "Ribbon-helix-helix protein, copG family"  
"OPBA10\_00046" 32502 "s63E6H2" 0 "Ribbon-helix-helix protein, copG family"  
"OPBA10\_00047" 32503 "s59E13H2" 0.006702308 "3'-5' exoribonuclease YhaM"  
"OPBA10\_00047" 32503 "s59E25H2" 0 "3'-5' exoribonuclease YhaM"  
"OPBA10\_00047" 32503 "s59E5H2" 0.7332365 "3'-5' exoribonuclease YhaM"  
"OPBA10\_00047" 32503 "s63E6H2" 0.007594855 "3'-5' exoribonuclease YhaM"  
"OPBA10\_00048" 32504 "s59E13H2" 0.009891802 "5'-nucleotidase SurE"  
"OPBA10\_00048" 32504 "s59E25H2" 0 "5'-nucleotidase SurE"  
"OPBA10\_00048" 32504 "s59E5H2" 0.03108814 "5'-nucleotidase SurE"  
"OPBA10\_00048" 32504 "s63E6H2" 0.005336004 "5'-nucleotidase SurE"  
"OPBA10\_00049" 32505 "s59E13H2" 0.08508355 "hypothetical protein"  
"OPBA10\_00049" 32505 "s59E25H2" 0 "hypothetical protein"  
"OPBA10\_00049" 32505 "s59E5H2" 0.04593324 "hypothetical protein"  
"OPBA10\_00049" 32505 "s63E6H2" 0.009775383 "hypothetical protein"  
"OPBA10\_00050" 32506 "s59E13H2" 0.02299304 "PBP superfamily domain protein"  
"OPBA10\_00050" 32506 "s59E25H2" 0 "PBP superfamily domain protein"  
"OPBA10\_00050" 32506 "s59E5H2" 0.01412925 "PBP superfamily domain protein"  
"OPBA10\_00050" 32506 "s63E6H2" 0.6137018 "PBP superfamily domain protein"  
"OPBA10\_00051" 32507 "s59E13H2" 0.02114929 "Sulfate transport system permease protein CysW"  
"OPBA10\_00051" 32507 "s59E25H2" 0 "Sulfate transport system permease protein CysW"  
"OPBA10\_00051" 32507 "s59E5H2" 0.02481712 "Sulfate transport system permease protein CysW"  
"OPBA10\_00051" 32507 "s63E6H2" 0.8329648 "Sulfate transport system permease protein CysW"  
"OPBA10\_00052" 32508 "s59E13H2" 7.560427e-05 "Fe(3+) ions import ATP-binding protein FbpC"  
"OPBA10\_00052" 32508 "s59E25H2" 0 "Fe(3+) ions import ATP-binding protein FbpC"  
"OPBA10\_00052" 32508 "s59E5H2" 0.03718126 "Fe(3+) ions import ATP-binding protein FbpC"  
"OPBA10\_00052" 32508 "s63E6H2" 0.8689419 "Fe(3+) ions import ATP-binding protein FbpC"  
"OPBA10\_00053" 32509 "s59E13H2" 0.005782769 "Cyclic pyranopterin monophosphate synthase"  
"OPBA10\_00053" 32509 "s59E25H2" 0 "Cyclic pyranopterin monophosphate synthase"  
"OPBA10\_00053" 32509 "s59E5H2" 0.008816907 "Cyclic pyranopterin monophosphate synthase"  
"OPBA10\_00053" 32509 "s63E6H2" 0.6556093 "Cyclic pyranopterin monophosphate synthase"  
"OPBA10\_00054" 32510 "s59E13H2" 0.003484738 "Cyclic pyranopterin monophosphate synthase accessory protein"  
"OPBA10\_00054" 32510 "s59E25H2" 0 "Cyclic pyranopterin monophosphate synthase accessory protein"  
"OPBA10\_00054" 32510 "s59E5H2" 0.0210979 "Cyclic pyranopterin monophosphate synthase accessory protein"  
"OPBA10\_00054" 32510 "s63E6H2" 0.7043482 "Cyclic pyranopterin monophosphate synthase accessory protein"  
"OPBA10\_00055" 32511 "s59E13H2" 0.003879675 "MOSC domain protein"  
"OPBA10\_00055" 32511 "s59E25H2" 0 "MOSC domain protein"  
"OPBA10\_00055" 32511 "s59E5H2" 0.01242899 "MOSC domain protein"  
"OPBA10\_00055" 32511 "s63E6H2" 0.5909745 "MOSC domain protein"  
"OPBA10\_00056" 32512 "s59E13H2" 0.2025712 "hypothetical protein"  
"OPBA10\_00056" 32512 "s59E25H2" 0 "hypothetical protein"  
"OPBA10\_00056" 32512 "s59E5H2" 0.0597346 "hypothetical protein"  
"OPBA10\_00056" 32512 "s63E6H2" 0.7475704 "hypothetical protein"  
"OPBA10\_00057" 32513 "s59E13H2" 0.1670876 "Inner membrane transport permease YbhR"  
"OPBA10\_00057" 32513 "s59E25H2" 0 "Inner membrane transport permease YbhR"  
"OPBA10\_00057" 32513 "s59E5H2" 0.03347481 "Inner membrane transport permease YbhR"  
"OPBA10\_00057" 32513 "s63E6H2" 0.7435657 "Inner membrane transport permease YbhR"  
"OPBA10\_00058" 32514 "s59E13H2" 0.06665078 "Daunorubicin/doxorubicin resistance ATP-binding protein DrrA"

"OPBA10\_00058" 32514 "s59E25H2" 0 "Daunorubicin/doxorubicin resistance ATP-binding protein DrrA"  
"OPBA10\_00058" 32514 "s59E5H2" 0.08411871 "Daunorubicin/doxorubicin resistance ATP-binding protein DrrA"  
"OPBA10\_00058" 32514 "s63E6H2" 0.7043003 "Daunorubicin/doxorubicin resistance ATP-binding protein DrrA"  
"OPBA10\_00059" 32515 "s59E13H2" 0.0296509 "hypothetical protein"  
"OPBA10\_00059" 32515 "s59E25H2" 0 "hypothetical protein"  
"OPBA10\_00059" 32515 "s59E5H2" 0.4327586 "hypothetical protein"  
"OPBA10\_00059" 32515 "s63E6H2" 0.5373382 "hypothetical protein"  
"OPBA10\_00060" 32516 "s59E13H2" 0 "hypothetical protein"  
"OPBA10\_00060" 32516 "s59E25H2" 0 "hypothetical protein"  
"OPBA10\_00060" 32516 "s59E5H2" 0 "hypothetical protein"  
"OPBA10\_00060" 32516 "s63E6H2" 0 "hypothetical protein"  
"OPBA10\_00062" 32518 "s59E13H2" 0.2242866 "hypothetical protein"  
"OPBA10\_00062" 32518 "s59E25H2" 0 "hypothetical protein"  
"OPBA10\_00062" 32518 "s59E5H2" 0.5734941 "hypothetical protein"  
"OPBA10\_00062" 32518 "s63E6H2" 1.885587 "hypothetical protein"  
"OPBA10\_00063" 32519 "s59E13H2" 0.01321451 "Cyclic di-GMP phosphodiesterase response regulator RpfG"  
"OPBA10\_00063" 32519 "s59E25H2" 0 "Cyclic di-GMP phosphodiesterase response regulator RpfG"  
"OPBA10\_00063" 32519 "s59E5H2" 0.2752357 "Cyclic di-GMP phosphodiesterase response regulator RpfG"  
"OPBA10\_00063" 32519 "s63E6H2" 0.01815019 "Cyclic di-GMP phosphodiesterase response regulator RpfG"  
"OPBA10\_00064" 32520 "s59E13H2" 0.0146489 "hypothetical protein"  
"OPBA10\_00064" 32520 "s59E25H2" 0 "hypothetical protein"  
"OPBA10\_00064" 32520 "s59E5H2" 0.7572844 "hypothetical protein"  
"OPBA10\_00064" 32520 "s63E6H2" 0 "hypothetical protein"  
"OPBA10\_00065" 32521 "s59E13H2" 0.4451579 "3-isopropylmalate dehydrogenase"  
"OPBA10\_00065" 32521 "s59E25H2" 0 "3-isopropylmalate dehydrogenase"  
"OPBA10\_00065" 32521 "s59E5H2" 0.8313467 "3-isopropylmalate dehydrogenase"  
"OPBA10\_00065" 32521 "s63E6H2" 0.02953522 "3-isopropylmalate dehydrogenase"  
"OPBA10\_00066" 32522 "s59E13H2" 0.01406749 "NAD(P)-specific glutamate dehydrogenase"  
"OPBA10\_00066" 32522 "s59E25H2" 0 "NAD(P)-specific glutamate dehydrogenase"  
"OPBA10\_00066" 32522 "s59E5H2" 0.5700215 "NAD(P)-specific glutamate dehydrogenase"  
"OPBA10\_00066" 32522 "s63E6H2" 0.02746837 "NAD(P)-specific glutamate dehydrogenase"  
"OPBA10\_00068" 32524 "s59E13H2" 0.01489702 "hypothetical protein"  
"OPBA10\_00068" 32524 "s59E25H2" 0 "hypothetical protein"  
"OPBA10\_00068" 32524 "s59E5H2" 0.1128864 "hypothetical protein"  
"OPBA10\_00068" 32524 "s63E6H2" 0.02190778 "hypothetical protein"  
"OPBA10\_00069" 32525 "s59E13H2" 0.01635047 "Glutaredoxin"  
"OPBA10\_00069" 32525 "s59E25H2" 0 "Glutaredoxin"  
"OPBA10\_00069" 32525 "s59E5H2" 0.1613855 "Glutaredoxin"  
"OPBA10\_00069" 32525 "s63E6H2" 0.01982102 "Glutaredoxin"  
"OPBA10\_00070" 32526 "s59E13H2" 0.004397214 "Ferredoxin thioredoxin reductase catalytic beta chain"  
"OPBA10\_00070" 32526 "s59E25H2" 0 "Ferredoxin thioredoxin reductase catalytic beta chain"  
"OPBA10\_00070" 32526 "s59E5H2" 0.05695846 "Ferredoxin thioredoxin reductase catalytic beta chain"  
"OPBA10\_00070" 32526 "s63E6H2" 0.06316871 "Ferredoxin thioredoxin reductase catalytic beta chain"  
"OPBA10\_00071" 32527 "s59E13H2" 0.002348256 "DNA polymerase IV"  
"OPBA10\_00071" 32527 "s59E25H2" 0 "DNA polymerase IV"  
"OPBA10\_00071" 32527 "s59E5H2" 0.8817935 "DNA polymerase IV"  
"OPBA10\_00071" 32527 "s63E6H2" 0.06153592 "DNA polymerase IV"

"OPBA10\_00072" 32528 "s59E13H2" 0 "DNA polymerase III subunit alpha"  
"OPBA10\_00072" 32528 "s59E25H2" 0 "DNA polymerase III subunit alpha"  
"OPBA10\_00072" 32528 "s59E5H2" 0.09196656 "DNA polymerase III subunit alpha"  
"OPBA10\_00072" 32528 "s63E6H2" 0 "DNA polymerase III subunit alpha"  
"OPBA10\_00073" 32529 "s59E13H2" 0.03531895 "hypothetical protein"  
"OPBA10\_00073" 32529 "s59E25H2" 0 "hypothetical protein"  
"OPBA10\_00073" 32529 "s59E5H2" 0.1124414 "hypothetical protein"  
"OPBA10\_00073" 32529 "s63E6H2" 0.04489668 "hypothetical protein"  
"OPBA10\_00074" 32530 "s59E13H2" 0.01547105 "3 beta-hydroxysteroid dehydrogenase/Delta 5--"  
"OPBA10\_00074" 32530 "s59E25H2" 0 "3 beta-hydroxysteroid dehydrogenase/Delta 5--"  
"OPBA10\_00074" 32530 "s59E5H2" 0.5855889 "3 beta-hydroxysteroid dehydrogenase/Delta 5--"  
"OPBA10\_00074" 32530 "s63E6H2" 0.02480672 "3 beta-hydroxysteroid dehydrogenase/Delta 5--"  
"OPBA10\_00075" 32531 "s59E13H2" 0 "hypothetical protein"  
"OPBA10\_00075" 32531 "s59E25H2" 0 "hypothetical protein"  
"OPBA10\_00075" 32531 "s59E5H2" 0 "hypothetical protein"  
"OPBA10\_00075" 32531 "s63E6H2" 0 "hypothetical protein"  
"OPBA10\_00079" 32535 "s59E13H2" 0 "L-fucose isomerase"  
"OPBA10\_00079" 32535 "s59E25H2" 0 "L-fucose isomerase"  
"OPBA10\_00079" 32535 "s59E5H2" 0.005243625 "L-fucose isomerase"  
"OPBA10\_00079" 32535 "s63E6H2" 0 "L-fucose isomerase"  
"OPBA10\_00080" 32536 "s59E13H2" 0 "PTS-dependent dihydroxyacetone kinase, ADP-binding subunit DhaL"  
"OPBA10\_00080" 32536 "s59E25H2" 0 "PTS-dependent dihydroxyacetone kinase, ADP-binding subunit DhaL"  
"OPBA10\_00080" 32536 "s59E5H2" 0 "PTS-dependent dihydroxyacetone kinase, ADP-binding subunit DhaL"  
"OPBA10\_00080" 32536 "s63E6H2" 0 "PTS-dependent dihydroxyacetone kinase, ADP-binding subunit DhaL"  
"OPBA10\_00081" 32537 "s59E13H2" 0 "PTS-dependent dihydroxyacetone kinase, dihydroxyacetone-binding subunit DhaK"  
"OPBA10\_00081" 32537 "s59E25H2" 0 "PTS-dependent dihydroxyacetone kinase, dihydroxyacetone-binding subunit DhaK"  
"OPBA10\_00081" 32537 "s59E5H2" 0 "PTS-dependent dihydroxyacetone kinase, dihydroxyacetone-binding subunit DhaK"  
"OPBA10\_00081" 32537 "s63E6H2" 0 "PTS-dependent dihydroxyacetone kinase, dihydroxyacetone-binding subunit DhaK"  
"OPBA10\_00082" 32538 "s59E13H2" 0 "D-tagatose 3-epimerase"  
"OPBA10\_00082" 32538 "s59E25H2" 0 "D-tagatose 3-epimerase"  
"OPBA10\_00082" 32538 "s59E5H2" 0.007456029 "D-tagatose 3-epimerase"  
"OPBA10\_00082" 32538 "s63E6H2" 0 "D-tagatose 3-epimerase"  
"OPBA10\_00083" 32539 "s59E13H2" 0.04564608 "10 kDa chaperonin 5"  
"OPBA10\_00083" 32539 "s59E25H2" 0 "10 kDa chaperonin 5"  
"OPBA10\_00083" 32539 "s59E5H2" 0.009287972 "10 kDa chaperonin 5"  
"OPBA10\_00083" 32539 "s63E6H2" 0.2550346 "10 kDa chaperonin 5"  
"OPBA10\_00084" 32540 "s59E13H2" 0.02927571 "60 kDa chaperonin"  
"OPBA10\_00084" 32540 "s59E25H2" 0 "60 kDa chaperonin"  
"OPBA10\_00084" 32540 "s59E5H2" 0.06925748 "60 kDa chaperonin"  
"OPBA10\_00084" 32540 "s63E6H2" 0.3664374 "60 kDa chaperonin"  
"OPBA10\_00085" 32541 "s59E13H2" 0.1564528 "Ultraviolet N-glycosylase/AP lyase"  
"OPBA10\_00085" 32541 "s59E25H2" 0 "Ultraviolet N-glycosylase/AP lyase"  
"OPBA10\_00085" 32541 "s59E5H2" 0.1956614 "Ultraviolet N-glycosylase/AP lyase"  
"OPBA10\_00085" 32541 "s63E6H2" 0.2361304 "Ultraviolet N-glycosylase/AP lyase"  
"OPBA10\_00086" 32542 "s59E13H2" 0.1574599 "Putative nickel-responsive regulator"  
"OPBA10\_00086" 32542 "s59E25H2" 0 "Putative nickel-responsive regulator"  
"OPBA10\_00086" 32542 "s59E5H2" 0.2656858 "Putative nickel-responsive regulator"



"OPBA10\_00086" 32542 "s63E6H2" 0.1915486 "Putative nickel-responsive regulator"  
"OPBA10\_00087" 32543 "s59E13H2" 0.07936157 "Glycine/sarcosine N-methyltransferase"  
"OPBA10\_00087" 32543 "s59E25H2" 0 "Glycine/sarcosine N-methyltransferase"  
"OPBA10\_00087" 32543 "s59E5H2" 0.0874451 "Glycine/sarcosine N-methyltransferase"  
"OPBA10\_00087" 32543 "s63E6H2" 0.1645253 "Glycine/sarcosine N-methyltransferase"  
"OPBA10\_00088" 32544 "s59E13H2" 0.0213542 "putative transporter"  
"OPBA10\_00088" 32544 "s59E25H2" 0 "putative transporter"  
"OPBA10\_00088" 32544 "s59E5H2" 0.3726549 "putative transporter"  
"OPBA10\_00088" 32544 "s63E6H2" 0.07517364 "putative transporter"  
"OPBA10\_00089" 32545 "s59E13H2" 0 "putative lipoprotein YbbD precursor"  
"OPBA10\_00089" 32545 "s59E25H2" 0 "putative lipoprotein YbbD precursor"  
"OPBA10\_00089" 32545 "s59E5H2" 0.3711136 "putative lipoprotein YbbD precursor"  
"OPBA10\_00089" 32545 "s63E6H2" 0.05467814 "putative lipoprotein YbbD precursor"  
"OPBA10\_00090" 32546 "s59E13H2" 0.007696234 "Copper-exporting P-type ATPase A"  
"OPBA10\_00090" 32546 "s59E25H2" 0 "Copper-exporting P-type ATPase A"  
"OPBA10\_00090" 32546 "s59E5H2" 0.2302666 "Copper-exporting P-type ATPase A"  
"OPBA10\_00090" 32546 "s63E6H2" 0 "Copper-exporting P-type ATPase A"  
"OPBA10\_00091" 32547 "s59E13H2" 0.006562911 "putative copper-transporting ATPase PacS"  
"OPBA10\_00091" 32547 "s59E25H2" 0 "putative copper-transporting ATPase PacS"  
"OPBA10\_00091" 32547 "s59E5H2" 1.030229 "putative copper-transporting ATPase PacS"  
"OPBA10\_00091" 32547 "s63E6H2" 5.371979e-05 "putative copper-transporting ATPase PacS"  
"OPBA10\_00092" 32548 "s59E13H2" 0.01935329 "N-glycosylase/DNA lyase"  
"OPBA10\_00092" 32548 "s59E25H2" 0 "N-glycosylase/DNA lyase"  
"OPBA10\_00092" 32548 "s59E5H2" 1.121086 "N-glycosylase/DNA lyase"  
"OPBA10\_00092" 32548 "s63E6H2" 0.0447128 "N-glycosylase/DNA lyase"  
"OPBA10\_00093" 32549 "s59E13H2" 0.005688883 "Rubrerythrin"  
"OPBA10\_00093" 32549 "s59E25H2" 0 "Rubrerythrin"  
"OPBA10\_00093" 32549 "s59E5H2" 0.9317397 "Rubrerythrin"  
"OPBA10\_00093" 32549 "s63E6H2" 0.029833 "Rubrerythrin"  
"OPBA10\_00094" 32550 "s59E13H2" 0.02384253 "Desulfoferrodoxin"  
"OPBA10\_00094" 32550 "s59E25H2" 0 "Desulfoferrodoxin"  
"OPBA10\_00094" 32550 "s59E5H2" 0.6429803 "Desulfoferrodoxin"  
"OPBA10\_00094" 32550 "s63E6H2" 0.02669462 "Desulfoferrodoxin"  
"OPBA10\_00096" 32552 "s59E13H2" 0.005216694 "HTH-type transcriptional regulator CymR"  
"OPBA10\_00096" 32552 "s59E25H2" 0 "HTH-type transcriptional regulator CymR"  
"OPBA10\_00096" 32552 "s59E5H2" 0.4823785 "HTH-type transcriptional regulator CymR"  
"OPBA10\_00096" 32552 "s63E6H2" 0.02087521 "HTH-type transcriptional regulator CymR"  
"OPBA10\_00098" 32554 "s59E13H2" 0 "Copper-exporting P-type ATPase B"  
"OPBA10\_00098" 32554 "s59E25H2" 0 "Copper-exporting P-type ATPase B"  
"OPBA10\_00098" 32554 "s59E5H2" 0.001836677 "Copper-exporting P-type ATPase B"  
"OPBA10\_00098" 32554 "s63E6H2" 0 "Copper-exporting P-type ATPase B"  
"OPBA10\_00099" 32555 "s59E13H2" 1.844978 "hypothetical protein"  
"OPBA10\_00099" 32555 "s59E25H2" 0 "hypothetical protein"  
"OPBA10\_00099" 32555 "s59E5H2" 0.007805649 "hypothetical protein"  
"OPBA10\_00099" 32555 "s63E6H2" 0 "hypothetical protein"  
"OPBA10\_00100" 32556 "s59E13H2" 2.952197 "Sodium Bile acid symporter family protein"  
"OPBA10\_00100" 32556 "s59E25H2" 0 "Sodium Bile acid symporter family protein"

"OPBA10\_00100" 32556 "s59E5H2" 0.006679588 "Sodium Bile acid symporter family protein"  
"OPBA10\_00100" 32556 "s63E6H2" 0 "Sodium Bile acid symporter family protein"  
"OPBA10\_00101" 32557 "s59E13H2" 2.038553 "TMAO/DMSO reductase"  
"OPBA10\_00101" 32557 "s59E25H2" 0 "TMAO/DMSO reductase"  
"OPBA10\_00101" 32557 "s59E5H2" 0.006630745 "TMAO/DMSO reductase"  
"OPBA10\_00101" 32557 "s63E6H2" 0 "TMAO/DMSO reductase"  
"OPBA10\_00103" 32559 "s59E13H2" 0.4866033 "Adenosine monophosphate-protein transferase SoFic"  
"OPBA10\_00103" 32559 "s59E25H2" 0 "Adenosine monophosphate-protein transferase SoFic"  
"OPBA10\_00103" 32559 "s59E5H2" 0.004747945 "Adenosine monophosphate-protein transferase SoFic"  
"OPBA10\_00103" 32559 "s63E6H2" 0.001464183 "Adenosine monophosphate-protein transferase SoFic"  
"OPBA10\_00104" 32560 "s59E13H2" 0.008214795 "RNA recognition motif. (a.k.a. RRM, RBD, or RNP domain)"  
"OPBA10\_00104" 32560 "s59E25H2" 0 "RNA recognition motif. (a.k.a. RRM, RBD, or RNP domain)"  
"OPBA10\_00104" 32560 "s59E5H2" 0.05361984 "RNA recognition motif. (a.k.a. RRM, RBD, or RNP domain)"  
"OPBA10\_00104" 32560 "s63E6H2" 0.0148139 "RNA recognition motif. (a.k.a. RRM, RBD, or RNP domain)"  
"OPBA10\_00105" 32561 "s59E13H2" 0.05063843 "RNA polymerase sigma factor SigA"  
"OPBA10\_00105" 32561 "s59E25H2" 0 "RNA polymerase sigma factor SigA"  
"OPBA10\_00105" 32561 "s59E5H2" 0.1319955 "RNA polymerase sigma factor SigA"  
"OPBA10\_00105" 32561 "s63E6H2" 0.04208219 "RNA polymerase sigma factor SigA"  
"OPBA10\_00106" 32562 "s59E13H2" 0.003412323 "putative sugar kinase"  
"OPBA10\_00106" 32562 "s59E25H2" 0 "putative sugar kinase"  
"OPBA10\_00106" 32562 "s59E5H2" 0.1368572 "putative sugar kinase"  
"OPBA10\_00106" 32562 "s63E6H2" 0.001871586 "putative sugar kinase"  
"OPBA10\_00107" 32563 "s59E13H2" 0.04571194 "ABC-2 family transporter protein"  
"OPBA10\_00107" 32563 "s59E25H2" 0 "ABC-2 family transporter protein"  
"OPBA10\_00107" 32563 "s59E5H2" 0.3442332 "ABC-2 family transporter protein"  
"OPBA10\_00107" 32563 "s63E6H2" 0.001143705 "ABC-2 family transporter protein"  
"OPBA10\_00108" 32564 "s59E13H2" 0.02662547 "Fluoroquinolones export ATP-binding protein/MT2762"  
"OPBA10\_00108" 32564 "s59E25H2" 0 "Fluoroquinolones export ATP-binding protein/MT2762"  
"OPBA10\_00108" 32564 "s59E5H2" 0.1474847 "Fluoroquinolones export ATP-binding protein/MT2762"  
"OPBA10\_00108" 32564 "s63E6H2" 0.0116125 "Fluoroquinolones export ATP-binding protein/MT2762"  
"OPBA10\_00109" 32565 "s59E13H2" 0 "hypothetical protein"  
"OPBA10\_00109" 32565 "s59E25H2" 0 "hypothetical protein"  
"OPBA10\_00109" 32565 "s59E5H2" 0.008423743 "hypothetical protein"  
"OPBA10\_00109" 32565 "s63E6H2" 1.071966 "hypothetical protein"  
"OPBA10\_00110" 32566 "s59E13H2" 0.006245412 "hypothetical protein"  
"OPBA10\_00110" 32566 "s59E25H2" 0 "hypothetical protein"  
"OPBA10\_00110" 32566 "s59E5H2" 0.0006328905 "hypothetical protein"  
"OPBA10\_00110" 32566 "s63E6H2" 1.337188 "hypothetical protein"  
"OPBA10\_00111" 32567 "s59E13H2" 0.007037483 "Trehalose/maltose-binding protein MalE precursor"  
"OPBA10\_00111" 32567 "s59E25H2" 0 "Trehalose/maltose-binding protein MalE precursor"  
"OPBA10\_00111" 32567 "s59E5H2" 0.02259383 "Trehalose/maltose-binding protein MalE precursor"  
"OPBA10\_00111" 32567 "s63E6H2" 1.61591 "Trehalose/maltose-binding protein MalE precursor"  
"OPBA10\_00112" 32568 "s59E13H2" 0.00988343 "Trehalose/maltose transport system permease protein MalF"  
"OPBA10\_00112" 32568 "s59E25H2" 0 "Trehalose/maltose transport system permease protein MalF"  
"OPBA10\_00112" 32568 "s59E5H2" 0.03124309 "Trehalose/maltose transport system permease protein MalF"  
"OPBA10\_00112" 32568 "s63E6H2" 1.435964 "Trehalose/maltose transport system permease protein MalF"  
"OPBA10\_00113" 32569 "s59E13H2" 0 "Trehalose transport system permease protein SugB"

"OPBA10\_00113" 32569 "s59E25H2" 0 "Trehalose transport system permease protein SugB"  
"OPBA10\_00113" 32569 "s59E5H2" 0.02003633 "Trehalose transport system permease protein SugB"  
"OPBA10\_00113" 32569 "s63E6H2" 1.402668 "Trehalose transport system permease protein SugB"  
"OPBA10\_00114" 32570 "s59E13H2" 0.09478324 "30S ribosomal protein S18"  
"OPBA10\_00114" 32570 "s59E25H2" 0 "30S ribosomal protein S18"  
"OPBA10\_00114" 32570 "s59E5H2" 0.03470401 "30S ribosomal protein S18"  
"OPBA10\_00114" 32570 "s63E6H2" 0.01221435 "30S ribosomal protein S18"  
"OPBA10\_00115" 32571 "s59E13H2" 0.1029791 "Single-stranded DNA-binding protein"  
"OPBA10\_00115" 32571 "s59E25H2" 0 "Single-stranded DNA-binding protein"  
"OPBA10\_00115" 32571 "s59E5H2" 0.03470222 "Single-stranded DNA-binding protein"  
"OPBA10\_00115" 32571 "s63E6H2" 0.006372267 "Single-stranded DNA-binding protein"  
"OPBA10\_00116" 32572 "s59E13H2" 0.1228821 "30S ribosomal protein S6"  
"OPBA10\_00116" 32572 "s59E25H2" 0 "30S ribosomal protein S6"  
"OPBA10\_00116" 32572 "s59E5H2" 0.02328696 "30S ribosomal protein S6"  
"OPBA10\_00116" 32572 "s63E6H2" 0.01251373 "30S ribosomal protein S6"  
"OPBA10\_00117" 32573 "s59E13H2" 0.05572671 "Aminodeoxychorismate/anthranilate synthase component 2"  
"OPBA10\_00117" 32573 "s59E25H2" 0 "Aminodeoxychorismate/anthranilate synthase component 2"  
"OPBA10\_00117" 32573 "s59E5H2" 0.3235523 "Aminodeoxychorismate/anthranilate synthase component 2"  
"OPBA10\_00117" 32573 "s63E6H2" 0.001013215 "Aminodeoxychorismate/anthranilate synthase component 2"  
"OPBA10\_00118" 32574 "s59E13H2" 0.08682093 "Aminodeoxychorismate synthase component 1"  
"OPBA10\_00118" 32574 "s59E25H2" 0 "Aminodeoxychorismate synthase component 1"  
"OPBA10\_00118" 32574 "s59E5H2" 0.3169855 "Aminodeoxychorismate synthase component 1"  
"OPBA10\_00118" 32574 "s63E6H2" 0.01393408 "Aminodeoxychorismate synthase component 1"  
"OPBA10\_00119" 32575 "s59E13H2" 0.6075882 "Branched-chain-amino-acid aminotransferase"  
"OPBA10\_00119" 32575 "s59E25H2" 0 "Branched-chain-amino-acid aminotransferase"  
"OPBA10\_00119" 32575 "s59E5H2" 0.2139839 "Branched-chain-amino-acid aminotransferase"  
"OPBA10\_00119" 32575 "s63E6H2" 0.01456154 "Branched-chain-amino-acid aminotransferase"  
"OPBA10\_00120" 32576 "s59E13H2" 0.2882707 "NADH dehydrogenase"  
"OPBA10\_00120" 32576 "s59E25H2" 0 "NADH dehydrogenase"  
"OPBA10\_00120" 32576 "s59E5H2" 0.136109 "NADH dehydrogenase"  
"OPBA10\_00120" 32576 "s63E6H2" 0.009551476 "NADH dehydrogenase"  
"OPBA10\_00121" 32577 "s59E13H2" 0.4443291 "Multifunctional CCA protein"  
"OPBA10\_00121" 32577 "s59E25H2" 0 "Multifunctional CCA protein"  
"OPBA10\_00121" 32577 "s59E5H2" 0.09147508 "Multifunctional CCA protein"  
"OPBA10\_00121" 32577 "s63E6H2" 0.02237358 "Multifunctional CCA protein"  
"OPBA10\_00122" 32578 "s59E13H2" 0.3201249 "hypothetical protein"  
"OPBA10\_00122" 32578 "s59E25H2" 0 "hypothetical protein"  
"OPBA10\_00122" 32578 "s59E5H2" 0.8487395 "hypothetical protein"  
"OPBA10\_00122" 32578 "s63E6H2" 0.009814757 "hypothetical protein"  
"OPBA10\_00123" 32579 "s59E13H2" 0.3552687 "Alpha/beta hydrolase family protein"  
"OPBA10\_00123" 32579 "s59E25H2" 0 "Alpha/beta hydrolase family protein"  
"OPBA10\_00123" 32579 "s59E5H2" 0.3520194 "Alpha/beta hydrolase family protein"  
"OPBA10\_00123" 32579 "s63E6H2" 0.3557281 "Alpha/beta hydrolase family protein"  
"OPBA10\_00124" 32580 "s59E13H2" 0.1355337 "ribosomal-protein-alanine N-acetyltransferase"  
"OPBA10\_00124" 32580 "s59E25H2" 0 "ribosomal-protein-alanine N-acetyltransferase"  
"OPBA10\_00124" 32580 "s59E5H2" 0.2940975 "ribosomal-protein-alanine N-acetyltransferase"  
"OPBA10\_00124" 32580 "s63E6H2" 0.1359169 "ribosomal-protein-alanine N-acetyltransferase"

"OPBA10\_00125" 32581 "s59E13H2" 0 "hypothetical protein"  
"OPBA10\_00125" 32581 "s59E25H2" 0 "hypothetical protein"  
"OPBA10\_00125" 32581 "s59E5H2" 0.5299253 "hypothetical protein"  
"OPBA10\_00125" 32581 "s63E6H2" 1.010522 "hypothetical protein"  
"OPBA10\_00126" 32582 "s59E13H2" 0.00149905 "hypothetical protein"  
"OPBA10\_00126" 32582 "s59E25H2" 0 "hypothetical protein"  
"OPBA10\_00126" 32582 "s59E5H2" 0.6242915 "hypothetical protein"  
"OPBA10\_00126" 32582 "s63E6H2" 1.252657 "hypothetical protein"  
"OPBA10\_00127" 32583 "s59E13H2" 0 "Creatinine amidohydrolase"  
"OPBA10\_00127" 32583 "s59E25H2" 0 "Creatinine amidohydrolase"  
"OPBA10\_00127" 32583 "s59E5H2" 0 "Creatinine amidohydrolase"  
"OPBA10\_00127" 32583 "s63E6H2" 0 "Creatinine amidohydrolase"  
"OPBA10\_00128" 32584 "s59E13H2" 0 "Catabolite control protein A"  
"OPBA10\_00128" 32584 "s59E25H2" 0 "Catabolite control protein A"  
"OPBA10\_00128" 32584 "s59E5H2" 0 "Catabolite control protein A"  
"OPBA10\_00128" 32584 "s63E6H2" 0 "Catabolite control protein A"  
"OPBA10\_00129" 32585 "s59E13H2" 0.0008541956 "hypothetical protein"  
"OPBA10\_00129" 32585 "s59E25H2" 0 "hypothetical protein"  
"OPBA10\_00129" 32585 "s59E5H2" 0.00504839 "hypothetical protein"  
"OPBA10\_00129" 32585 "s63E6H2" 0.005311379 "hypothetical protein"  
"OPBA10\_00131" 32587 "s59E13H2" 0.007950395 "D-ribose-binding periplasmic protein precursor"  
"OPBA10\_00131" 32587 "s59E25H2" 0 "D-ribose-binding periplasmic protein precursor"  
"OPBA10\_00131" 32587 "s59E5H2" 0 "D-ribose-binding periplasmic protein precursor"  
"OPBA10\_00131" 32587 "s63E6H2" 1.161523 "D-ribose-binding periplasmic protein precursor"  
"OPBA10\_00132" 32588 "s59E13H2" 0.04706228 "hypothetical protein"  
"OPBA10\_00132" 32588 "s59E25H2" 0 "hypothetical protein"  
"OPBA10\_00132" 32588 "s59E5H2" 0.6575288 "hypothetical protein"  
"OPBA10\_00132" 32588 "s63E6H2" 0.001464479 "hypothetical protein"  
"OPBA10\_00133" 32589 "s59E13H2" 0.01150718 "hypothetical protein"  
"OPBA10\_00133" 32589 "s59E25H2" 0 "hypothetical protein"  
"OPBA10\_00133" 32589 "s59E5H2" 0.3169381 "hypothetical protein"  
"OPBA10\_00133" 32589 "s63E6H2" 0.004463749 "hypothetical protein"  
"OPBA10\_00134" 32590 "s59E13H2" 0.005000334 "DNA polymerase I"  
"OPBA10\_00134" 32590 "s59E25H2" 0 "DNA polymerase I"  
"OPBA10\_00134" 32590 "s59E5H2" 0.5179038 "DNA polymerase I"  
"OPBA10\_00134" 32590 "s63E6H2" 0.008806098 "DNA polymerase I"  
"OPBA10\_00135" 32591 "s59E13H2" 0.006751341 "hypothetical protein"  
"OPBA10\_00135" 32591 "s59E25H2" 0 "hypothetical protein"  
"OPBA10\_00135" 32591 "s59E5H2" 0.6410968 "hypothetical protein"  
"OPBA10\_00135" 32591 "s63E6H2" 0.004009436 "hypothetical protein"  
"OPBA10\_00136" 32592 "s59E13H2" 0 "dephospho-CoA kinase"  
"OPBA10\_00136" 32592 "s59E25H2" 0 "dephospho-CoA kinase"  
"OPBA10\_00136" 32592 "s59E5H2" 0.01011909 "dephospho-CoA kinase"  
"OPBA10\_00136" 32592 "s63E6H2" 0.0004370731 "dephospho-CoA kinase"  
"OPBA10\_00137" 32593 "s59E13H2" 0.003087264 "UvrABC system protein B"  
"OPBA10\_00137" 32593 "s59E25H2" 0 "UvrABC system protein B"  
"OPBA10\_00137" 32593 "s59E5H2" 0.02899332 "UvrABC system protein B"

"OPBA10\_00137" 32593 "s63E6H2" 0.04036691 "UvrABC system protein B"  
"OPBA10\_00139" 32595 "s59E13H2" 0.03438742 "Long-chain-fatty-acid--CoA ligase"  
"OPBA10\_00139" 32595 "s59E25H2" 0 "Long-chain-fatty-acid--CoA ligase"  
"OPBA10\_00139" 32595 "s59E5H2" 0.02765418 "Long-chain-fatty-acid--CoA ligase"  
"OPBA10\_00139" 32595 "s63E6H2" 0.2122223 "Long-chain-fatty-acid--CoA ligase"  
"OPBA10\_00140" 32596 "s59E13H2" 0.7274308 "Putative transcriptional regulator YwtF"  
"OPBA10\_00140" 32596 "s59E25H2" 0 "Putative transcriptional regulator YwtF"  
"OPBA10\_00140" 32596 "s59E5H2" 0.127709 "Putative transcriptional regulator YwtF"  
"OPBA10\_00140" 32596 "s63E6H2" 0.7705235 "Putative transcriptional regulator YwtF"  
"OPBA10\_00141" 32597 "s59E13H2" 0.05442121 "Multidrug export protein MepA"  
"OPBA10\_00141" 32597 "s59E25H2" 0 "Multidrug export protein MepA"  
"OPBA10\_00141" 32597 "s59E5H2" 0.2915476 "Multidrug export protein MepA"  
"OPBA10\_00141" 32597 "s63E6H2" 0.8010599 "Multidrug export protein MepA"  
"OPBA10\_00142" 32598 "s59E13H2" 0.01239959 "Beta-glucosidase A"  
"OPBA10\_00142" 32598 "s59E25H2" 0 "Beta-glucosidase A"  
"OPBA10\_00142" 32598 "s59E5H2" 0.3734394 "Beta-glucosidase A"  
"OPBA10\_00142" 32598 "s63E6H2" 0.01481578 "Beta-glucosidase A"  
"OPBA10\_00143" 32599 "s59E13H2" 0.00616621 "Ribonuclease Y"  
"OPBA10\_00143" 32599 "s59E25H2" 0 "Ribonuclease Y"  
"OPBA10\_00143" 32599 "s59E5H2" 0.05523764 "Ribonuclease Y"  
"OPBA10\_00143" 32599 "s63E6H2" 0.02564183 "Ribonuclease Y"  
"OPBA10\_00144" 32600 "s59E13H2" 0.007070912 "DNA mismatch repair protein"  
"OPBA10\_00144" 32600 "s59E25H2" 0 "DNA mismatch repair protein"  
"OPBA10\_00144" 32600 "s59E5H2" 0.07979964 "DNA mismatch repair protein"  
"OPBA10\_00144" 32600 "s63E6H2" 0.06077168 "DNA mismatch repair protein"  
"OPBA10\_00145" 32601 "s59E13H2" 0 "Stage V sporulation protein S"  
"OPBA10\_00145" 32601 "s59E25H2" 0 "Stage V sporulation protein S"  
"OPBA10\_00145" 32601 "s59E5H2" 0.07702058 "Stage V sporulation protein S"  
"OPBA10\_00145" 32601 "s63E6H2" 0.03790092 "Stage V sporulation protein S"  
"OPBA10\_00146" 32602 "s59E13H2" 0 "Transposase"  
"OPBA10\_00146" 32602 "s59E25H2" 0 "Transposase"  
"OPBA10\_00146" 32602 "s59E5H2" 0.02433732 "Transposase"  
"OPBA10\_00146" 32602 "s63E6H2" 0 "Transposase"  
"OPBA10\_00147" 32603 "s59E13H2" 0.01207322 "IS2 transposase TnpB"  
"OPBA10\_00147" 32603 "s59E25H2" 0 "IS2 transposase TnpB"  
"OPBA10\_00147" 32603 "s59E5H2" 0.01200651 "IS2 transposase TnpB"  
"OPBA10\_00147" 32603 "s63E6H2" 0 "IS2 transposase TnpB"  
"OPBA10\_00148" 32604 "s59E13H2" 0 "Helix-turn-helix"  
"OPBA10\_00148" 32604 "s59E25H2" 0 "Helix-turn-helix"  
"OPBA10\_00148" 32604 "s59E5H2" 0 "Helix-turn-helix"  
"OPBA10\_00148" 32604 "s63E6H2" 0.0438539 "Helix-turn-helix"  
"OPBA10\_00151" 32607 "s59E13H2" 0 "Molybdopterin-synthase adenylyltransferase"  
"OPBA10\_00151" 32607 "s59E25H2" 0 "Molybdopterin-synthase adenylyltransferase"  
"OPBA10\_00151" 32607 "s59E5H2" 0 "Molybdopterin-synthase adenylyltransferase"  
"OPBA10\_00151" 32607 "s63E6H2" 0 "Molybdopterin-synthase adenylyltransferase"  
"OPBA10\_00152" 32608 "s59E13H2" 0 "hypothetical protein"  
"OPBA10\_00152" 32608 "s59E25H2" 0 "hypothetical protein"

"OPBA10\_00152" 32608 "s59E5H2" 0 "hypothetical protein"  
"OPBA10\_00152" 32608 "s63E6H2" 0 "hypothetical protein"  
"OPBA10\_00153" 32609 "s59E13H2" 0 "hypothetical protein"  
"OPBA10\_00153" 32609 "s59E25H2" 0 "hypothetical protein"  
"OPBA10\_00153" 32609 "s59E5H2" 0 "hypothetical protein"  
"OPBA10\_00153" 32609 "s63E6H2" 0 "hypothetical protein"  
"OPBA10\_00154" 32610 "s59E13H2" 0 "hypothetical protein"  
"OPBA10\_00154" 32610 "s59E25H2" 0 "hypothetical protein"  
"OPBA10\_00154" 32610 "s59E5H2" 0 "hypothetical protein"  
"OPBA10\_00154" 32610 "s63E6H2" 0 "hypothetical protein"  
"OPBA10\_00155" 32611 "s59E13H2" 0 "Type-1 restriction enzyme R protein"  
"OPBA10\_00155" 32611 "s59E25H2" 0 "Type-1 restriction enzyme R protein"  
"OPBA10\_00155" 32611 "s59E5H2" 0 "Type-1 restriction enzyme R protein"  
"OPBA10\_00155" 32611 "s63E6H2" 0 "Type-1 restriction enzyme R protein"  
"OPBA10\_00156" 32612 "s59E13H2" 0 "type I restriction enzyme EcoKI subunit R"  
"OPBA10\_00156" 32612 "s59E25H2" 0 "type I restriction enzyme EcoKI subunit R"  
"OPBA10\_00156" 32612 "s59E5H2" 0 "type I restriction enzyme EcoKI subunit R"  
"OPBA10\_00156" 32612 "s63E6H2" 0 "type I restriction enzyme EcoKI subunit R"  
"OPBA10\_00157" 32613 "s59E13H2" 0 "Type-1 restriction enzyme EcoKI specificity protein"  
"OPBA10\_00157" 32613 "s59E25H2" 0 "Type-1 restriction enzyme EcoKI specificity protein"  
"OPBA10\_00157" 32613 "s59E5H2" 0 "Type-1 restriction enzyme EcoKI specificity protein"  
"OPBA10\_00157" 32613 "s63E6H2" 0 "Type-1 restriction enzyme EcoKI specificity protein"  
"OPBA10\_00158" 32614 "s59E13H2" 0 "putative type I restriction enzymeP M protein"  
"OPBA10\_00158" 32614 "s59E25H2" 0 "putative type I restriction enzymeP M protein"  
"OPBA10\_00158" 32614 "s59E5H2" 0 "putative type I restriction enzymeP M protein"  
"OPBA10\_00158" 32614 "s63E6H2" 0 "putative type I restriction enzymeP M protein"  
"OPBA10\_00159" 32615 "s59E13H2" 0 "hypothetical protein"  
"OPBA10\_00159" 32615 "s59E25H2" 0 "hypothetical protein"  
"OPBA10\_00159" 32615 "s59E5H2" 0 "hypothetical protein"  
"OPBA10\_00159" 32615 "s63E6H2" 0 "hypothetical protein"  
"OPBA10\_00160" 32616 "s59E13H2" 0.01229875 "(Dimethylallyl)adenosine tRNA methylthiotransferase MiaB"  
"OPBA10\_00160" 32616 "s59E25H2" 0 "(Dimethylallyl)adenosine tRNA methylthiotransferase MiaB"  
"OPBA10\_00160" 32616 "s59E5H2" 0.06758573 "(Dimethylallyl)adenosine tRNA methylthiotransferase MiaB"  
"OPBA10\_00160" 32616 "s63E6H2" 0.03630073 "(Dimethylallyl)adenosine tRNA methylthiotransferase MiaB"  
"OPBA10\_00161" 32617 "s59E13H2" 0.008974538 "tRNA dimethylallyltransferase"  
"OPBA10\_00161" 32617 "s59E25H2" 0 "tRNA dimethylallyltransferase"  
"OPBA10\_00161" 32617 "s59E5H2" 0.07682358 "tRNA dimethylallyltransferase"  
"OPBA10\_00161" 32617 "s63E6H2" 0.03232611 "tRNA dimethylallyltransferase"  
"OPBA10\_00162" 32618 "s59E13H2" 0.004393859 "Diaminopimelate epimerase"  
"OPBA10\_00162" 32618 "s59E25H2" 0 "Diaminopimelate epimerase"  
"OPBA10\_00162" 32618 "s59E5H2" 0.3198888 "Diaminopimelate epimerase"  
"OPBA10\_00162" 32618 "s63E6H2" 0.1128353 "Diaminopimelate epimerase"  
"OPBA10\_00163" 32619 "s59E13H2" 0.01435338 "LL-diaminopimelate aminotransferase"  
"OPBA10\_00163" 32619 "s59E25H2" 0 "LL-diaminopimelate aminotransferase"  
"OPBA10\_00163" 32619 "s59E5H2" 0.7227452 "LL-diaminopimelate aminotransferase"  
"OPBA10\_00163" 32619 "s63E6H2" 0.1611325 "LL-diaminopimelate aminotransferase"  
"OPBA10\_00164" 32620 "s59E13H2" 0.01037742 "GTPase HflX"

"OPBA10\_00164" 32620 "s59E25H2" 0 "GTPase HflX"  
"OPBA10\_00164" 32620 "s59E5H2" 0.9411377 "GTPase HflX"  
"OPBA10\_00164" 32620 "s63E6H2" 0.195236 "GTPase HflX"  
"OPBA10\_00165" 32621 "s59E13H2" 0.01882426 "LexA repressor"  
"OPBA10\_00165" 32621 "s59E25H2" 0 "LexA repressor"  
"OPBA10\_00165" 32621 "s59E5H2" 0.6985455 "LexA repressor"  
"OPBA10\_00165" 32621 "s63E6H2" 0.1554561 "LexA repressor"  
"OPBA10\_00166" 32622 "s59E13H2" 0.05153525 "Ketol-acid reductoisomerase"  
"OPBA10\_00166" 32622 "s59E25H2" 0 "Ketol-acid reductoisomerase"  
"OPBA10\_00166" 32622 "s59E5H2" 0.4184957 "Ketol-acid reductoisomerase"  
"OPBA10\_00166" 32622 "s63E6H2" 0.1039728 "Ketol-acid reductoisomerase"  
"OPBA10\_00167" 32623 "s59E13H2" 0.01033209 "hypothetical protein"  
"OPBA10\_00167" 32623 "s59E25H2" 0 "hypothetical protein"  
"OPBA10\_00167" 32623 "s59E5H2" 0 "hypothetical protein"  
"OPBA10\_00167" 32623 "s63E6H2" 0 "hypothetical protein"  
"OPBA10\_00168" 32624 "s59E13H2" 0 "Periplasmic binding proteins and sugar binding domain of LacI family protein"  
"OPBA10\_00168" 32624 "s59E25H2" 0 "Periplasmic binding proteins and sugar binding domain of LacI family protein"  
"OPBA10\_00168" 32624 "s59E5H2" 0 "Periplasmic binding proteins and sugar binding domain of LacI family protein"  
"OPBA10\_00168" 32624 "s63E6H2" 0.001443326 "Periplasmic binding proteins and sugar binding domain of LacI family protein"  
"OPBA10\_00169" 32625 "s59E13H2" 0.001082907 "Ribose transport system permease protein RbsC"  
"OPBA10\_00169" 32625 "s59E25H2" 0 "Ribose transport system permease protein RbsC"  
"OPBA10\_00169" 32625 "s59E5H2" 0 "Ribose transport system permease protein RbsC"  
"OPBA10\_00169" 32625 "s63E6H2" 0 "Ribose transport system permease protein RbsC"  
"OPBA10\_00170" 32626 "s59E13H2" 0.002224282 "Xylose import ATP-binding protein XylG"  
"OPBA10\_00170" 32626 "s59E25H2" 0 "Xylose import ATP-binding protein XylG"  
"OPBA10\_00170" 32626 "s59E5H2" 0 "Xylose import ATP-binding protein XylG"  
"OPBA10\_00170" 32626 "s63E6H2" 0 "Xylose import ATP-binding protein XylG"  
"OPBA10\_00171" 32627 "s59E13H2" 0.002966218 "Xylulose kinase"  
"OPBA10\_00171" 32627 "s59E25H2" 0 "Xylulose kinase"  
"OPBA10\_00171" 32627 "s59E5H2" 0.005480484 "Xylulose kinase"  
"OPBA10\_00171" 32627 "s63E6H2" 0 "Xylulose kinase"  
"OPBA10\_00172" 32628 "s59E13H2" 0.009898805 "methylcobalamin:coenzyme M methyltransferase"  
"OPBA10\_00172" 32628 "s59E25H2" 0 "methylcobalamin:coenzyme M methyltransferase"  
"OPBA10\_00172" 32628 "s59E5H2" 0.006999885 "methylcobalamin:coenzyme M methyltransferase"  
"OPBA10\_00172" 32628 "s63E6H2" 0 "methylcobalamin:coenzyme M methyltransferase"  
"OPBA10\_00173" 32629 "s59E13H2" 0 "2-dehydro-3-deoxy-D-gluconate 5-dehydrogenase"  
"OPBA10\_00173" 32629 "s59E25H2" 0 "2-dehydro-3-deoxy-D-gluconate 5-dehydrogenase"  
"OPBA10\_00173" 32629 "s59E5H2" 0 "2-dehydro-3-deoxy-D-gluconate 5-dehydrogenase"  
"OPBA10\_00173" 32629 "s63E6H2" 0 "2-dehydro-3-deoxy-D-gluconate 5-dehydrogenase"  
"OPBA10\_00174" 32630 "s59E13H2" 0.005871997 "N-acetylglucosamine-6-phosphate deacetylase"  
"OPBA10\_00174" 32630 "s59E25H2" 0 "N-acetylglucosamine-6-phosphate deacetylase"  
"OPBA10\_00174" 32630 "s59E5H2" 0.00616582 "N-acetylglucosamine-6-phosphate deacetylase"  
"OPBA10\_00174" 32630 "s63E6H2" 0 "N-acetylglucosamine-6-phosphate deacetylase"  
"OPBA10\_00175" 32631 "s59E13H2" 0 "hypothetical protein"  
"OPBA10\_00175" 32631 "s59E25H2" 0 "hypothetical protein"  
"OPBA10\_00175" 32631 "s59E5H2" 0 "hypothetical protein"  
"OPBA10\_00175" 32631 "s63E6H2" 0 "hypothetical protein"

"OPBA10\_00176" 32632 "s59E13H2" 0.005541854 "Transposase IS200 like protein"  
"OPBA10\_00176" 32632 "s59E25H2" 0 "Transposase IS200 like protein"  
"OPBA10\_00176" 32632 "s59E5H2" 0.03024872 "Transposase IS200 like protein"  
"OPBA10\_00176" 32632 "s63E6H2" 0.2815502 "Transposase IS200 like protein"  
"OPBA10\_00177" 32633 "s59E13H2" 0.03353431 "HTH-type transcriptional repressor GlcR"  
"OPBA10\_00177" 32633 "s59E25H2" 0 "HTH-type transcriptional repressor GlcR"  
"OPBA10\_00177" 32633 "s59E5H2" 0 "HTH-type transcriptional repressor GlcR"  
"OPBA10\_00177" 32633 "s63E6H2" 0.01920838 "HTH-type transcriptional repressor GlcR"  
"OPBA10\_00178" 32634 "s59E13H2" 0.04262811 "Holo-[acyl-carrier-protein] synthase"  
"OPBA10\_00178" 32634 "s59E25H2" 0 "Holo-[acyl-carrier-protein] synthase"  
"OPBA10\_00178" 32634 "s59E5H2" 0 "Holo-[acyl-carrier-protein] synthase"  
"OPBA10\_00178" 32634 "s63E6H2" 0.0118235 "Holo-[acyl-carrier-protein] synthase"  
"OPBA10\_00179" 32635 "s59E13H2" 0.08839453 "Bifunctional NAD(P)H-hydrate repair enzyme Nnr"  
"OPBA10\_00179" 32635 "s59E25H2" 0 "Bifunctional NAD(P)H-hydrate repair enzyme Nnr"  
"OPBA10\_00179" 32635 "s59E5H2" 0.03056492 "Bifunctional NAD(P)H-hydrate repair enzyme Nnr"  
"OPBA10\_00179" 32635 "s63E6H2" 0.02969951 "Bifunctional NAD(P)H-hydrate repair enzyme Nnr"  
"OPBA10\_00180" 32636 "s59E13H2" 0.08749403 "Inosine-5'-monophosphate dehydrogenase"  
"OPBA10\_00180" 32636 "s59E25H2" 0 "Inosine-5'-monophosphate dehydrogenase"  
"OPBA10\_00180" 32636 "s59E5H2" 0.02509974 "Inosine-5'-monophosphate dehydrogenase"  
"OPBA10\_00180" 32636 "s63E6H2" 0.04406152 "Inosine-5'-monophosphate dehydrogenase"  
"OPBA10\_00181" 32637 "s59E13H2" 0.08884162 "Alanine racemase"  
"OPBA10\_00181" 32637 "s59E25H2" 0 "Alanine racemase"  
"OPBA10\_00181" 32637 "s59E5H2" 0.03674109 "Alanine racemase"  
"OPBA10\_00181" 32637 "s63E6H2" 0.04300878 "Alanine racemase"  
"OPBA10\_00182" 32638 "s59E13H2" 0.03394567 "hypothetical protein"  
"OPBA10\_00182" 32638 "s59E25H2" 0 "hypothetical protein"  
"OPBA10\_00182" 32638 "s59E5H2" 0.1106832 "hypothetical protein"  
"OPBA10\_00182" 32638 "s63E6H2" 0 "hypothetical protein"  
"OPBA10\_00183" 32639 "s59E13H2" 0.05519958 "hypothetical protein"  
"OPBA10\_00183" 32639 "s59E25H2" 0 "hypothetical protein"  
"OPBA10\_00183" 32639 "s59E5H2" 0.1690343 "hypothetical protein"  
"OPBA10\_00183" 32639 "s63E6H2" 0.00393938 "hypothetical protein"  
"OPBA10\_00184" 32640 "s59E13H2" 0.07682296 "hypothetical protein"  
"OPBA10\_00184" 32640 "s59E25H2" 0 "hypothetical protein"  
"OPBA10\_00184" 32640 "s59E5H2" 0.2898755 "hypothetical protein"  
"OPBA10\_00184" 32640 "s63E6H2" 0.01684659 "hypothetical protein"  
"OPBA10\_00186" 32642 "s59E13H2" 0 "2-dehydro-3-deoxygluconokinase"  
"OPBA10\_00186" 32642 "s59E25H2" 0 "2-dehydro-3-deoxygluconokinase"  
"OPBA10\_00186" 32642 "s59E5H2" 0 "2-dehydro-3-deoxygluconokinase"  
"OPBA10\_00186" 32642 "s63E6H2" 0 "2-dehydro-3-deoxygluconokinase"  
"OPBA10\_00187" 32643 "s59E13H2" 0 "6-phosphogluconate dehydrogenase, NADP(+)-dependent, decarboxylating"  
"OPBA10\_00187" 32643 "s59E25H2" 0 "6-phosphogluconate dehydrogenase, NADP(+)-dependent, decarboxylating"  
"OPBA10\_00187" 32643 "s59E5H2" 0 "6-phosphogluconate dehydrogenase, NADP(+)-dependent, decarboxylating"  
"OPBA10\_00187" 32643 "s63E6H2" 0 "6-phosphogluconate dehydrogenase, NADP(+)-dependent, decarboxylating"  
"OPBA10\_00188" 32644 "s59E13H2" 0 "putative oxidoreductase UxuB"  
"OPBA10\_00188" 32644 "s59E25H2" 0 "putative oxidoreductase UxuB"  
"OPBA10\_00188" 32644 "s59E5H2" 0 "putative oxidoreductase UxuB"



"OPBA10\_00188" 32644 "s63E6H2" 0 "putative oxidoreductase UxB"  
"OPBA10\_00189" 32645 "s59E13H2" 0 "hypothetical protein"  
"OPBA10\_00189" 32645 "s59E25H2" 0 "hypothetical protein"  
"OPBA10\_00189" 32645 "s59E5H2" 0 "hypothetical protein"  
"OPBA10\_00189" 32645 "s63E6H2" 0 "hypothetical protein"  
"OPBA10\_00190" 32646 "s59E13H2" 0.363822 "Penicillinase repressor"  
"OPBA10\_00190" 32646 "s59E25H2" 0 "Penicillinase repressor"  
"OPBA10\_00190" 32646 "s59E5H2" 0 "Penicillinase repressor"  
"OPBA10\_00190" 32646 "s63E6H2" 0.01226092 "Penicillinase repressor"  
"OPBA10\_00191" 32647 "s59E13H2" 0 "Methicillin resistance mecR1 protein"  
"OPBA10\_00191" 32647 "s59E25H2" 0 "Methicillin resistance mecR1 protein"  
"OPBA10\_00191" 32647 "s59E5H2" 0 "Methicillin resistance mecR1 protein"  
"OPBA10\_00191" 32647 "s63E6H2" 0 "Methicillin resistance mecR1 protein"  
"OPBA10\_00192" 32648 "s59E13H2" 0 "hypothetical protein"  
"OPBA10\_00192" 32648 "s59E25H2" 0 "hypothetical protein"  
"OPBA10\_00192" 32648 "s59E5H2" 0.2355469 "hypothetical protein"  
"OPBA10\_00192" 32648 "s63E6H2" 0 "hypothetical protein"  
"OPBA10\_00193" 32649 "s59E13H2" 0.01695238 "Bifunctional protein FOLD protein"  
"OPBA10\_00193" 32649 "s59E25H2" 0 "Bifunctional protein FOLD protein"  
"OPBA10\_00193" 32649 "s59E5H2" 0.5112486 "Bifunctional protein FOLD protein"  
"OPBA10\_00193" 32649 "s63E6H2" 0.02646202 "Bifunctional protein FOLD protein"  
"OPBA10\_00194" 32650 "s59E13H2" 0.002015401 "Formate--tetrahydrofolate ligase"  
"OPBA10\_00194" 32650 "s59E25H2" 0 "Formate--tetrahydrofolate ligase"  
"OPBA10\_00194" 32650 "s59E5H2" 0.06461779 "Formate--tetrahydrofolate ligase"  
"OPBA10\_00194" 32650 "s63E6H2" 0.003369029 "Formate--tetrahydrofolate ligase"  
"OPBA10\_00195" 32651 "s59E13H2" 0.02080495 "Corrinoid/iron-sulfur protein large subunit"  
"OPBA10\_00195" 32651 "s59E25H2" 0 "Corrinoid/iron-sulfur protein large subunit"  
"OPBA10\_00195" 32651 "s59E5H2" 0 "Corrinoid/iron-sulfur protein large subunit"  
"OPBA10\_00195" 32651 "s63E6H2" 0.009830436 "Corrinoid/iron-sulfur protein large subunit"  
"OPBA10\_00196" 32652 "s59E13H2" 0.02317574 "Carbon monoxide dehydrogenase/acetyl-CoA synthase subunit alpha"  
"OPBA10\_00196" 32652 "s59E25H2" 0 "Carbon monoxide dehydrogenase/acetyl-CoA synthase subunit alpha"  
"OPBA10\_00196" 32652 "s59E5H2" 0.006682415 "Carbon monoxide dehydrogenase/acetyl-CoA synthase subunit alpha"  
"OPBA10\_00196" 32652 "s63E6H2" 0.002962992 "Carbon monoxide dehydrogenase/acetyl-CoA synthase subunit alpha"  
"OPBA10\_00197" 32653 "s59E13H2" 0 "Carbon monoxide dehydrogenase 2"  
"OPBA10\_00197" 32653 "s59E25H2" 0 "Carbon monoxide dehydrogenase 2"  
"OPBA10\_00197" 32653 "s59E5H2" 0.02998139 "Carbon monoxide dehydrogenase 2"  
"OPBA10\_00197" 32653 "s63E6H2" 0 "Carbon monoxide dehydrogenase 2"  
"OPBA10\_00198" 32654 "s59E13H2" 0.003949268 "Corrinoid/iron-sulfur protein small subunit"  
"OPBA10\_00198" 32654 "s59E25H2" 0 "Corrinoid/iron-sulfur protein small subunit"  
"OPBA10\_00198" 32654 "s59E5H2" 0.01290216 "Corrinoid/iron-sulfur protein small subunit"  
"OPBA10\_00198" 32654 "s63E6H2" 0 "Corrinoid/iron-sulfur protein small subunit"  
"OPBA10\_00199" 32655 "s59E13H2" 0.02411272 "Virus attachment protein p12 family protein"  
"OPBA10\_00199" 32655 "s59E25H2" 0 "Virus attachment protein p12 family protein"  
"OPBA10\_00199" 32655 "s59E5H2" 0.35374 "Virus attachment protein p12 family protein"  
"OPBA10\_00199" 32655 "s63E6H2" 0.0416634 "Virus attachment protein p12 family protein"  
"OPBA10\_00200" 32656 "s59E13H2" 0.06957536 "hypothetical protein"  
"OPBA10\_00200" 32656 "s59E25H2" 0 "hypothetical protein"

"OPBA10\_00200" 32656 "s59E5H2" 1.183539 "hypothetical protein"  
"OPBA10\_00200" 32656 "s63E6H2" 0.01305859 "hypothetical protein"  
"OPBA10\_00201" 32657 "s59E13H2" 0.02304189 "FeoA domain protein"  
"OPBA10\_00201" 32657 "s59E25H2" 0 "FeoA domain protein"  
"OPBA10\_00201" 32657 "s59E5H2" 0.520391 "FeoA domain protein"  
"OPBA10\_00201" 32657 "s63E6H2" 0.01176165 "FeoA domain protein"  
"OPBA10\_00202" 32658 "s59E13H2" 0.05224032 "Transcriptional regulator MntR"  
"OPBA10\_00202" 32658 "s59E25H2" 0 "Transcriptional regulator MntR"  
"OPBA10\_00202" 32658 "s59E5H2" 0.5056761 "Transcriptional regulator MntR"  
"OPBA10\_00202" 32658 "s63E6H2" 0.004040034 "Transcriptional regulator MntR"  
"OPBA10\_00203" 32659 "s59E13H2" 0.03652075 "Putative sugar phosphate isomerase YwIF"  
"OPBA10\_00203" 32659 "s59E25H2" 0 "Putative sugar phosphate isomerase YwIF"  
"OPBA10\_00203" 32659 "s59E5H2" 0.01951211 "Putative sugar phosphate isomerase YwIF"  
"OPBA10\_00203" 32659 "s63E6H2" 0.0008704128 "Putative sugar phosphate isomerase YwIF"  
"OPBA10\_00204" 32660 "s59E13H2" 0.1403939 "Serine hydroxymethyltransferase"  
"OPBA10\_00204" 32660 "s59E25H2" 0 "Serine hydroxymethyltransferase"  
"OPBA10\_00204" 32660 "s59E5H2" 0.0236882 "Serine hydroxymethyltransferase"  
"OPBA10\_00204" 32660 "s63E6H2" 0.1255957 "Serine hydroxymethyltransferase"  
"OPBA10\_00205" 32661 "s59E13H2" 0.1644365 "V-type sodium ATPase subunit D"  
"OPBA10\_00205" 32661 "s59E25H2" 0 "V-type sodium ATPase subunit D"  
"OPBA10\_00205" 32661 "s59E5H2" 0.02341695 "V-type sodium ATPase subunit D"  
"OPBA10\_00205" 32661 "s63E6H2" 0.2605969 "V-type sodium ATPase subunit D"  
"OPBA10\_00206" 32662 "s59E13H2" 0.1227583 "V-type sodium ATPase subunit B"  
"OPBA10\_00206" 32662 "s59E25H2" 0 "V-type sodium ATPase subunit B"  
"OPBA10\_00206" 32662 "s59E5H2" 0.03072608 "V-type sodium ATPase subunit B"  
"OPBA10\_00206" 32662 "s63E6H2" 0.1897873 "V-type sodium ATPase subunit B"  
"OPBA10\_00207" 32663 "s59E13H2" 0.09528885 "V-type sodium ATPase catalytic subunit A"  
"OPBA10\_00207" 32663 "s59E25H2" 0 "V-type sodium ATPase catalytic subunit A"  
"OPBA10\_00207" 32663 "s59E5H2" 0.03134637 "V-type sodium ATPase catalytic subunit A"  
"OPBA10\_00207" 32663 "s63E6H2" 0.005992985 "V-type sodium ATPase catalytic subunit A"  
"OPBA10\_00208" 32664 "s59E13H2" 0.04797575 "V-type sodium ATPase subunit G"  
"OPBA10\_00208" 32664 "s59E25H2" 0 "V-type sodium ATPase subunit G"  
"OPBA10\_00208" 32664 "s59E5H2" 0.007805649 "V-type sodium ATPase subunit G"  
"OPBA10\_00208" 32664 "s63E6H2" 0 "V-type sodium ATPase subunit G"  
"OPBA10\_00209" 32665 "s59E13H2" 0.04324626 "V-type ATP synthase subunit C"  
"OPBA10\_00209" 32665 "s59E25H2" 0 "V-type ATP synthase subunit C"  
"OPBA10\_00209" 32665 "s59E5H2" 0 "V-type ATP synthase subunit C"  
"OPBA10\_00209" 32665 "s63E6H2" 0.009452554 "V-type ATP synthase subunit C"  
"OPBA10\_00210" 32666 "s59E13H2" 0.01719745 "V-type proton ATPase subunit E"  
"OPBA10\_00210" 32666 "s59E25H2" 0 "V-type proton ATPase subunit E"  
"OPBA10\_00210" 32666 "s59E5H2" 0.01207657 "V-type proton ATPase subunit E"  
"OPBA10\_00210" 32666 "s63E6H2" 0.0196828 "V-type proton ATPase subunit E"  
"OPBA10\_00211" 32667 "s59E13H2" 0 "hypothetical protein"  
"OPBA10\_00211" 32667 "s59E25H2" 0 "hypothetical protein"  
"OPBA10\_00211" 32667 "s59E5H2" 0 "hypothetical protein"  
"OPBA10\_00211" 32667 "s63E6H2" 0.0001855182 "hypothetical protein"  
"OPBA10\_00212" 32668 "s59E13H2" 0.01125208 "Fructose-bisphosphate aldolase class 1"

"OPBA10\_00212" 32668 "s59E25H2" 0 "Fructose-bisphosphate aldolase class 1"  
"OPBA10\_00212" 32668 "s59E5H2" 0.0228674 "Fructose-bisphosphate aldolase class 1"  
"OPBA10\_00212" 32668 "s63E6H2" 0.02819829 "Fructose-bisphosphate aldolase class 1"  
"OPBA10\_00213" 32669 "s59E13H2" 0.0001715078 "Putative transposase DNA-binding domain protein"  
"OPBA10\_00213" 32669 "s59E25H2" 0 "Putative transposase DNA-binding domain protein"  
"OPBA10\_00213" 32669 "s59E5H2" 0.06930331 "Putative transposase DNA-binding domain protein"  
"OPBA10\_00213" 32669 "s63E6H2" 0.00274262 "Putative transposase DNA-binding domain protein"  
"OPBA10\_00214" 32670 "s59E13H2" 0.02874103 "Murein hydrolase activator NlpD precursor"  
"OPBA10\_00214" 32670 "s59E25H2" 0 "Murein hydrolase activator NlpD precursor"  
"OPBA10\_00214" 32670 "s59E5H2" 0.09439001 "Murein hydrolase activator NlpD precursor"  
"OPBA10\_00214" 32670 "s63E6H2" 0.02743327 "Murein hydrolase activator NlpD precursor"  
"OPBA10\_00215" 32671 "s59E13H2" 0.03843483 "hypothetical protein"  
"OPBA10\_00215" 32671 "s59E25H2" 0 "hypothetical protein"  
"OPBA10\_00215" 32671 "s59E5H2" 0.05592828 "hypothetical protein"  
"OPBA10\_00215" 32671 "s63E6H2" 0.09988816 "hypothetical protein"  
"OPBA10\_00216" 32672 "s59E13H2" 0.01429761 "hypothetical protein"  
"OPBA10\_00216" 32672 "s59E25H2" 0 "hypothetical protein"  
"OPBA10\_00216" 32672 "s59E5H2" 0.0402837 "hypothetical protein"  
"OPBA10\_00216" 32672 "s63E6H2" 0.03512478 "hypothetical protein"  
"OPBA10\_00217" 32673 "s59E13H2" 0.008220246 "Dihydrolipoyl dehydrogenase"  
"OPBA10\_00217" 32673 "s59E25H2" 0 "Dihydrolipoyl dehydrogenase"  
"OPBA10\_00217" 32673 "s59E5H2" 0.02308944 "Dihydrolipoyl dehydrogenase"  
"OPBA10\_00217" 32673 "s63E6H2" 0.04973964 "Dihydrolipoyl dehydrogenase"  
"OPBA10\_00218" 32674 "s59E13H2" 0.3641818 "Octanoyltransferase"  
"OPBA10\_00218" 32674 "s59E25H2" 0 "Octanoyltransferase"  
"OPBA10\_00218" 32674 "s59E5H2" 0.2103729 "Octanoyltransferase"  
"OPBA10\_00218" 32674 "s63E6H2" 0.5500836 "Octanoyltransferase"  
"OPBA10\_00220" 32676 "s59E13H2" 0.358926 "Dihydrolipoyllysine-residue succinyltransferase component of 2-oxoglutarate dehydrogenase complex"  
"OPBA10\_00220" 32676 "s59E25H2" 0 "Dihydrolipoyllysine-residue succinyltransferase component of 2-oxoglutarate dehydrogenase complex"  
"OPBA10\_00220" 32676 "s59E5H2" 0.08572683 "Dihydrolipoyllysine-residue succinyltransferase component of 2-oxoglutarate dehydrogenase complex"  
"OPBA10\_00220" 32676 "s63E6H2" 0.1766895 "Dihydrolipoyllysine-residue succinyltransferase component of 2-oxoglutarate dehydrogenase complex"  
"OPBA10\_00221" 32677 "s59E13H2" 0.3874042 "Dihydrolipoyllysine-residue acetyltransferase component of pyruvate dehydrogenase complex"  
"OPBA10\_00221" 32677 "s59E25H2" 0 "Dihydrolipoyllysine-residue acetyltransferase component of pyruvate dehydrogenase complex"  
"OPBA10\_00221" 32677 "s59E5H2" 0.03053535 "Dihydrolipoyllysine-residue acetyltransferase component of pyruvate dehydrogenase complex"  
"OPBA10\_00221" 32677 "s63E6H2" 0.01229286 "Dihydrolipoyllysine-residue acetyltransferase component of pyruvate dehydrogenase complex"  
"OPBA10\_00222" 32678 "s59E13H2" 0.5855866 "2-oxoisovalerate dehydrogenase subunit beta"  
"OPBA10\_00222" 32678 "s59E25H2" 0 "2-oxoisovalerate dehydrogenase subunit beta"  
"OPBA10\_00222" 32678 "s59E5H2" 0.04633323 "2-oxoisovalerate dehydrogenase subunit beta"  
"OPBA10\_00222" 32678 "s63E6H2" 0.1327158 "2-oxoisovalerate dehydrogenase subunit beta"  
"OPBA10\_00223" 32679 "s59E13H2" 0.4413117 "Acetoin:2,6-dichlorophenolindophenol oxidoreductase subunit alpha"  
"OPBA10\_00223" 32679 "s59E25H2" 0 "Acetoin:2,6-dichlorophenolindophenol oxidoreductase subunit alpha"  
"OPBA10\_00223" 32679 "s59E5H2" 0.03491273 "Acetoin:2,6-dichlorophenolindophenol oxidoreductase subunit alpha"  
"OPBA10\_00223" 32679 "s63E6H2" 0.1848718 "Acetoin:2,6-dichlorophenolindophenol oxidoreductase subunit alpha"  
"OPBA10\_00224" 32680 "s59E13H2" 0.3851521 "Sorbitol operon regulator"  
"OPBA10\_00224" 32680 "s59E25H2" 0 "Sorbitol operon regulator"  
"OPBA10\_00224" 32680 "s59E5H2" 0.02972151 "Sorbitol operon regulator"  
"OPBA10\_00224" 32680 "s63E6H2" 0.1393205 "Sorbitol operon regulator"

"OPBA10\_00225" 32681 "s59E13H2" 0.00568414 "hypothetical protein"  
"OPBA10\_00225" 32681 "s59E25H2" 0 "hypothetical protein"  
"OPBA10\_00225" 32681 "s59E5H2" 0 "hypothetical protein"  
"OPBA10\_00225" 32681 "s63E6H2" 0.02830465 "hypothetical protein"  
"OPBA10\_00226" 32682 "s59E13H2" 0.08884994 "4-diphosphocytidyl-2-C-methyl-D-erythritol kinase"  
"OPBA10\_00226" 32682 "s59E25H2" 0.1995754 "4-diphosphocytidyl-2-C-methyl-D-erythritol kinase"  
"OPBA10\_00226" 32682 "s59E5H2" 0.1715484 "4-diphosphocytidyl-2-C-methyl-D-erythritol kinase"  
"OPBA10\_00226" 32682 "s63E6H2" 3.752961 "4-diphosphocytidyl-2-C-methyl-D-erythritol kinase"  
"OPBA10\_00227" 32683 "s59E13H2" 0.0814364 "Ribosomal RNA small subunit methyltransferase A"  
"OPBA10\_00227" 32683 "s59E25H2" 0.1022989 "Ribosomal RNA small subunit methyltransferase A"  
"OPBA10\_00227" 32683 "s59E5H2" 0.1556885 "Ribosomal RNA small subunit methyltransferase A"  
"OPBA10\_00227" 32683 "s63E6H2" 3.066205 "Ribosomal RNA small subunit methyltransferase A"  
"OPBA10\_00228" 32684 "s59E13H2" 0.04527146 "putative deoxyribonuclease YcfH"  
"OPBA10\_00228" 32684 "s59E25H2" 0.5061728 "putative deoxyribonuclease YcfH"  
"OPBA10\_00228" 32684 "s59E5H2" 0.1565533 "putative deoxyribonuclease YcfH"  
"OPBA10\_00228" 32684 "s63E6H2" 3.325521 "putative deoxyribonuclease YcfH"  
"OPBA10\_00229" 32685 "s59E13H2" 0.0462076 "Methionine--tRNA ligase"  
"OPBA10\_00229" 32685 "s59E25H2" 0 "Methionine--tRNA ligase"  
"OPBA10\_00229" 32685 "s59E5H2" 0.1616951 "Methionine--tRNA ligase"  
"OPBA10\_00229" 32685 "s63E6H2" 3.632178 "Methionine--tRNA ligase"  
"OPBA10\_00230" 32686 "s59E13H2" 0.03260023 "Ribosomal RNA small subunit methyltransferase I"  
"OPBA10\_00230" 32686 "s59E25H2" 0 "Ribosomal RNA small subunit methyltransferase I"  
"OPBA10\_00230" 32686 "s59E5H2" 0.1061748 "Ribosomal RNA small subunit methyltransferase I"  
"OPBA10\_00230" 32686 "s63E6H2" 2.43581 "Ribosomal RNA small subunit methyltransferase I"  
"OPBA10\_00231" 32687 "s59E13H2" 0 "hypothetical protein"  
"OPBA10\_00231" 32687 "s59E25H2" 0 "hypothetical protein"  
"OPBA10\_00231" 32687 "s59E5H2" 0 "hypothetical protein"  
"OPBA10\_00231" 32687 "s63E6H2" 0 "hypothetical protein"  
"OPBA10\_00232" 32688 "s59E13H2" 0.009193923 "Modulator of FtsH protease HflK"  
"OPBA10\_00232" 32688 "s59E25H2" 0 "Modulator of FtsH protease HflK"  
"OPBA10\_00232" 32688 "s59E5H2" 0.0408692 "Modulator of FtsH protease HflK"  
"OPBA10\_00232" 32688 "s63E6H2" 0 "Modulator of FtsH protease HflK"  
"OPBA10\_00233" 32689 "s59E13H2" 0.1064928 "Methionine import ATP-binding protein MetN 2"  
"OPBA10\_00233" 32689 "s59E25H2" 0 "Methionine import ATP-binding protein MetN 2"  
"OPBA10\_00233" 32689 "s59E5H2" 0.1054937 "Methionine import ATP-binding protein MetN 2"  
"OPBA10\_00233" 32689 "s63E6H2" 0.1664903 "Methionine import ATP-binding protein MetN 2"  
"OPBA10\_00234" 32690 "s59E13H2" 0.6499385 "Autoinducer 2 import system permease protein LsrC"  
"OPBA10\_00234" 32690 "s59E25H2" 0 "Autoinducer 2 import system permease protein LsrC"  
"OPBA10\_00234" 32690 "s59E5H2" 0.0938818 "Autoinducer 2 import system permease protein LsrC"  
"OPBA10\_00234" 32690 "s63E6H2" 0.1681469 "Autoinducer 2 import system permease protein LsrC"  
"OPBA10\_00235" 32691 "s59E13H2" 0.218761 "ABC transporter substrate binding protein"  
"OPBA10\_00235" 32691 "s59E25H2" 0 "ABC transporter substrate binding protein"  
"OPBA10\_00235" 32691 "s59E5H2" 0.06817988 "ABC transporter substrate binding protein"  
"OPBA10\_00235" 32691 "s63E6H2" 0.1243585 "ABC transporter substrate binding protein"  
"OPBA10\_00236" 32692 "s59E13H2" 0 "Ribosomal protein S12 methylthiotransferase RimO"  
"OPBA10\_00236" 32692 "s59E25H2" 0 "Ribosomal protein S12 methylthiotransferase RimO"  
"OPBA10\_00236" 32692 "s59E5H2" 0.06460518 "Ribosomal protein S12 methylthiotransferase RimO"

"OPBA10\_00236" 32692 "s63E6H2" 0.2874384 "Ribosomal protein S12 methylthiotransferase RimO"  
"OPBA10\_00237" 32693 "s59E13H2" 0 "Teichoic acid translocation permease protein TagG"  
"OPBA10\_00237" 32693 "s59E25H2" 0 "Teichoic acid translocation permease protein TagG"  
"OPBA10\_00237" 32693 "s59E5H2" 0.151493 "Teichoic acid translocation permease protein TagG"  
"OPBA10\_00237" 32693 "s63E6H2" 0.02216838 "Teichoic acid translocation permease protein TagG"  
"OPBA10\_00238" 32694 "s59E13H2" 0 "Teichoic acids export ATP-binding protein TagH"  
"OPBA10\_00238" 32694 "s59E25H2" 0 "Teichoic acids export ATP-binding protein TagH"  
"OPBA10\_00238" 32694 "s59E5H2" 0.2754457 "Teichoic acids export ATP-binding protein TagH"  
"OPBA10\_00238" 32694 "s63E6H2" 0.08973049 "Teichoic acids export ATP-binding protein TagH"  
"OPBA10\_00239" 32695 "s59E13H2" 0 "haloacid dehalogenase-like hydrolase"  
"OPBA10\_00239" 32695 "s59E25H2" 0 "haloacid dehalogenase-like hydrolase"  
"OPBA10\_00239" 32695 "s59E5H2" 0.3337993 "haloacid dehalogenase-like hydrolase"  
"OPBA10\_00239" 32695 "s63E6H2" 0.002387953 "haloacid dehalogenase-like hydrolase"  
"OPBA10\_00240" 32696 "s59E13H2" 0 "Decaprenyl-phosphate phosphoribosyltransferase"  
"OPBA10\_00240" 32696 "s59E25H2" 0 "Decaprenyl-phosphate phosphoribosyltransferase"  
"OPBA10\_00240" 32696 "s59E5H2" 0.4421228 "Decaprenyl-phosphate phosphoribosyltransferase"  
"OPBA10\_00240" 32696 "s63E6H2" 0.002878451 "Decaprenyl-phosphate phosphoribosyltransferase"  
"OPBA10\_00241" 32697 "s59E13H2" 0 "D-inositol-3-phosphate glycosyltransferase"  
"OPBA10\_00241" 32697 "s59E25H2" 0 "D-inositol-3-phosphate glycosyltransferase"  
"OPBA10\_00241" 32697 "s59E5H2" 0.2311673 "D-inositol-3-phosphate glycosyltransferase"  
"OPBA10\_00241" 32697 "s63E6H2" 0 "D-inositol-3-phosphate glycosyltransferase"  
"OPBA10\_00242" 32698 "s59E13H2" 0 "hypothetical protein"  
"OPBA10\_00242" 32698 "s59E25H2" 0 "hypothetical protein"  
"OPBA10\_00242" 32698 "s59E5H2" 0.2955889 "hypothetical protein"  
"OPBA10\_00242" 32698 "s63E6H2" 0 "hypothetical protein"  
"OPBA10\_00243" 32699 "s59E13H2" 0.119009 "D-inositol 3-phosphate glycosyltransferase"  
"OPBA10\_00243" 32699 "s59E25H2" 0 "D-inositol 3-phosphate glycosyltransferase"  
"OPBA10\_00243" 32699 "s59E5H2" 0.314164 "D-inositol 3-phosphate glycosyltransferase"  
"OPBA10\_00243" 32699 "s63E6H2" 0.002602802 "D-inositol 3-phosphate glycosyltransferase"  
"OPBA10\_00244" 32700 "s59E13H2" 0.01843651 "Hydrogenase 2 maturation protease"  
"OPBA10\_00244" 32700 "s59E25H2" 0 "Hydrogenase 2 maturation protease"  
"OPBA10\_00244" 32700 "s59E5H2" 0.0292332 "Hydrogenase 2 maturation protease"  
"OPBA10\_00244" 32700 "s63E6H2" 0.2601277 "Hydrogenase 2 maturation protease"  
"OPBA10\_00245" 32701 "s59E13H2" 0.04106354 "F420-non-reducing hydrogenase subunit A"  
"OPBA10\_00245" 32701 "s59E25H2" 0 "F420-non-reducing hydrogenase subunit A"  
"OPBA10\_00245" 32701 "s59E5H2" 0.05063498 "F420-non-reducing hydrogenase subunit A"  
"OPBA10\_00245" 32701 "s63E6H2" 0.445962 "F420-non-reducing hydrogenase subunit A"  
"OPBA10\_00246" 32702 "s59E13H2" 0.06431109 "F420-non-reducing hydrogenase subunit G"  
"OPBA10\_00246" 32702 "s59E25H2" 0 "F420-non-reducing hydrogenase subunit G"  
"OPBA10\_00246" 32702 "s59E5H2" 0.02476355 "F420-non-reducing hydrogenase subunit G"  
"OPBA10\_00246" 32702 "s63E6H2" 0.3179331 "F420-non-reducing hydrogenase subunit G"  
"OPBA10\_00248" 32704 "s59E13H2" 0.0575487 "F420-non-reducing hydrogenase iron-sulfur subunit D"  
"OPBA10\_00248" 32704 "s59E25H2" 0 "F420-non-reducing hydrogenase iron-sulfur subunit D"  
"OPBA10\_00248" 32704 "s59E5H2" 0.02694798 "F420-non-reducing hydrogenase iron-sulfur subunit D"  
"OPBA10\_00248" 32704 "s63E6H2" 0.006522152 "F420-non-reducing hydrogenase iron-sulfur subunit D"  
"OPBA10\_00249" 32705 "s59E13H2" 0.1105004 "CoB--CoM heterodisulfide reductase iron-sulfur subunit A"  
"OPBA10\_00249" 32705 "s59E25H2" 0 "CoB--CoM heterodisulfide reductase iron-sulfur subunit A"

"OPBA10\_00249" 32705 "s59E5H2" 0.0385791 "CoB--CoM heterodisulfide reductase iron-sulfur subunit A"  
"OPBA10\_00249" 32705 "s63E6H2" 0.04501582 "CoB--CoM heterodisulfide reductase iron-sulfur subunit A"  
"OPBA10\_00250" 32706 "s59E13H2" 0.0480898 "Globin-coupled histidine kinase"  
"OPBA10\_00250" 32706 "s59E25H2" 0 "Globin-coupled histidine kinase"  
"OPBA10\_00250" 32706 "s59E5H2" 0.0652513 "Globin-coupled histidine kinase"  
"OPBA10\_00250" 32706 "s63E6H2" 0.0370685 "Globin-coupled histidine kinase"  
"OPBA10\_00251" 32707 "s59E13H2" 0.002559658 "hypothetical protein"  
"OPBA10\_00251" 32707 "s59E25H2" 0 "hypothetical protein"  
"OPBA10\_00251" 32707 "s59E5H2" 0.01104559 "hypothetical protein"  
"OPBA10\_00251" 32707 "s63E6H2" 0.02785125 "hypothetical protein"  
"OPBA10\_00252" 32708 "s59E13H2" 0.006422125 "DRTGG domain protein"  
"OPBA10\_00252" 32708 "s59E25H2" 0 "DRTGG domain protein"  
"OPBA10\_00252" 32708 "s59E5H2" 0.03510151 "DRTGG domain protein"  
"OPBA10\_00252" 32708 "s63E6H2" 0.029177 "DRTGG domain protein"  
"OPBA10\_00253" 32709 "s59E13H2" 0.003689949 "Serine/threonine-protein kinase RsbT"  
"OPBA10\_00253" 32709 "s59E25H2" 0 "Serine/threonine-protein kinase RsbT"  
"OPBA10\_00253" 32709 "s59E5H2" 0.008741621 "Serine/threonine-protein kinase RsbT"  
"OPBA10\_00253" 32709 "s63E6H2" 0.02345626 "Serine/threonine-protein kinase RsbT"  
"OPBA10\_00254" 32710 "s59E13H2" 0 "DRTGG domain protein"  
"OPBA10\_00254" 32710 "s59E25H2" 0 "DRTGG domain protein"  
"OPBA10\_00254" 32710 "s59E5H2" 0 "DRTGG domain protein"  
"OPBA10\_00254" 32710 "s63E6H2" 0.0128227 "DRTGG domain protein"  
"OPBA10\_00255" 32711 "s59E13H2" 0 "NADP-reducing hydrogenase subunit HndC"  
"OPBA10\_00255" 32711 "s59E25H2" 0 "NADP-reducing hydrogenase subunit HndC"  
"OPBA10\_00255" 32711 "s59E5H2" 0 "NADP-reducing hydrogenase subunit HndC"  
"OPBA10\_00255" 32711 "s63E6H2" 0 "NADP-reducing hydrogenase subunit HndC"  
"OPBA10\_00256" 32712 "s59E13H2" 0 "NADP-reducing hydrogenase subunit HndB"  
"OPBA10\_00256" 32712 "s59E25H2" 0 "NADP-reducing hydrogenase subunit HndB"  
"OPBA10\_00256" 32712 "s59E5H2" 0 "NADP-reducing hydrogenase subunit HndB"  
"OPBA10\_00256" 32712 "s63E6H2" 0 "NADP-reducing hydrogenase subunit HndB"  
"OPBA10\_00257" 32713 "s59E13H2" 0 "CoB--CoM heterodisulfide reductase iron-sulfur subunit A"  
"OPBA10\_00257" 32713 "s59E25H2" 0 "CoB--CoM heterodisulfide reductase iron-sulfur subunit A"  
"OPBA10\_00257" 32713 "s59E5H2" 0 "CoB--CoM heterodisulfide reductase iron-sulfur subunit A"  
"OPBA10\_00257" 32713 "s63E6H2" 0 "CoB--CoM heterodisulfide reductase iron-sulfur subunit A"  
"OPBA10\_00258" 32714 "s59E13H2" 0 "Sulfhydrogenase 1 subunit gamma"  
"OPBA10\_00258" 32714 "s59E25H2" 0 "Sulfhydrogenase 1 subunit gamma"  
"OPBA10\_00258" 32714 "s59E5H2" 0 "Sulfhydrogenase 1 subunit gamma"  
"OPBA10\_00258" 32714 "s63E6H2" 0.006934414 "Sulfhydrogenase 1 subunit gamma"  
"OPBA10\_00259" 32715 "s59E13H2" 0.0008419597 "Sulfhydrogenase 2 subunit beta"  
"OPBA10\_00259" 32715 "s59E25H2" 0 "Sulfhydrogenase 2 subunit beta"  
"OPBA10\_00259" 32715 "s59E5H2" 0.006765872 "Sulfhydrogenase 2 subunit beta"  
"OPBA10\_00259" 32715 "s63E6H2" 0.04747008 "Sulfhydrogenase 2 subunit beta"  
"OPBA10\_00260" 32716 "s59E13H2" 0 "Formate dehydrogenase subunit beta"  
"OPBA10\_00260" 32716 "s59E25H2" 0 "Formate dehydrogenase subunit beta"  
"OPBA10\_00260" 32716 "s59E5H2" 0.008089687 "Formate dehydrogenase subunit beta"  
"OPBA10\_00260" 32716 "s63E6H2" 0.06198206 "Formate dehydrogenase subunit beta"  
"OPBA10\_00261" 32717 "s59E13H2" 0 "F420-non-reducing hydrogenase vhc iron-sulfur subunit D"

"OPBA10\_00261" 32717 "s59E25H2" 0 "F420-non-reducing hydrogenase vhc iron-sulfur subunit D"  
"OPBA10\_00261" 32717 "s59E5H2" 0 "F420-non-reducing hydrogenase vhc iron-sulfur subunit D"  
"OPBA10\_00261" 32717 "s63E6H2" 0.05443019 "F420-non-reducing hydrogenase vhc iron-sulfur subunit D"  
"OPBA10\_00262" 32718 "s59E13H2" 0.1334856 "CoB--CoM heterodisulfide reductase iron-sulfur subunit A"  
"OPBA10\_00262" 32718 "s59E25H2" 0 "CoB--CoM heterodisulfide reductase iron-sulfur subunit A"  
"OPBA10\_00262" 32718 "s59E5H2" 0.04465174 "CoB--CoM heterodisulfide reductase iron-sulfur subunit A"  
"OPBA10\_00262" 32718 "s63E6H2" 0.4815666 "CoB--CoM heterodisulfide reductase iron-sulfur subunit A"  
"OPBA10\_00263" 32719 "s59E13H2" 0.02103643 "CoB--CoM heterodisulfide reductase iron-sulfur subunit C"  
"OPBA10\_00263" 32719 "s59E25H2" 0 "CoB--CoM heterodisulfide reductase iron-sulfur subunit C"  
"OPBA10\_00263" 32719 "s59E5H2" 0.02636054 "CoB--CoM heterodisulfide reductase iron-sulfur subunit C"  
"OPBA10\_00263" 32719 "s63E6H2" 0.02449015 "CoB--CoM heterodisulfide reductase iron-sulfur subunit C"  
"OPBA10\_00264" 32720 "s59E13H2" 0 "hypothetical protein"  
"OPBA10\_00264" 32720 "s59E25H2" 0 "hypothetical protein"  
"OPBA10\_00264" 32720 "s59E5H2" 0.1044558 "hypothetical protein"  
"OPBA10\_00264" 32720 "s63E6H2" 0.005233088 "hypothetical protein"  
"OPBA10\_00265" 32721 "s59E13H2" 0 "Hydrogenase 2 maturation protease"  
"OPBA10\_00265" 32721 "s59E25H2" 0 "Hydrogenase 2 maturation protease"  
"OPBA10\_00265" 32721 "s59E5H2" 0.01408877 "Hydrogenase 2 maturation protease"  
"OPBA10\_00265" 32721 "s63E6H2" 0 "Hydrogenase 2 maturation protease"  
"OPBA10\_00266" 32722 "s59E13H2" 0.006079466 "Sulphydrogenase 1 subunit alpha"  
"OPBA10\_00266" 32722 "s59E25H2" 0 "Sulphydrogenase 1 subunit alpha"  
"OPBA10\_00266" 32722 "s59E5H2" 0.0007719873 "Sulphydrogenase 1 subunit alpha"  
"OPBA10\_00266" 32722 "s63E6H2" 0 "Sulphydrogenase 1 subunit alpha"  
"OPBA10\_00267" 32723 "s59E13H2" 0.003082174 "Sulphydrogenase 1 subunit delta"  
"OPBA10\_00267" 32723 "s59E25H2" 0 "Sulphydrogenase 1 subunit delta"  
"OPBA10\_00267" 32723 "s59E5H2" 0.009371068 "Sulphydrogenase 1 subunit delta"  
"OPBA10\_00267" 32723 "s63E6H2" 0 "Sulphydrogenase 1 subunit delta"  
"OPBA10\_00268" 32724 "s59E13H2" 0.0006971806 "Sulphydrogenase 2 subunit gamma"  
"OPBA10\_00268" 32724 "s59E25H2" 0 "Sulphydrogenase 2 subunit gamma"  
"OPBA10\_00268" 32724 "s59E5H2" 0.04699135 "Sulphydrogenase 2 subunit gamma"  
"OPBA10\_00268" 32724 "s63E6H2" 0 "Sulphydrogenase 2 subunit gamma"  
"OPBA10\_00269" 32725 "s59E13H2" 0.009328043 "Sulphydrogenase 1 subunit beta"  
"OPBA10\_00269" 32725 "s59E25H2" 0 "Sulphydrogenase 1 subunit beta"  
"OPBA10\_00269" 32725 "s59E5H2" 0.0130228 "Sulphydrogenase 1 subunit beta"  
"OPBA10\_00269" 32725 "s63E6H2" 0.001443242 "Sulphydrogenase 1 subunit beta"  
"OPBA10\_00270" 32726 "s59E13H2" 0.4778598 "Hydrogenase isoenzymes nickel incorporation protein HypB"  
"OPBA10\_00270" 32726 "s59E25H2" 0 "Hydrogenase isoenzymes nickel incorporation protein HypB"  
"OPBA10\_00270" 32726 "s59E5H2" 0.1041481 "Hydrogenase isoenzymes nickel incorporation protein HypB"  
"OPBA10\_00270" 32726 "s63E6H2" 0.01494031 "Hydrogenase isoenzymes nickel incorporation protein HypB"  
"OPBA10\_00271" 32727 "s59E13H2" 0.2299193 "hypothetical protein"  
"OPBA10\_00271" 32727 "s59E25H2" 0 "hypothetical protein"  
"OPBA10\_00271" 32727 "s59E5H2" 0.3442618 "hypothetical protein"  
"OPBA10\_00271" 32727 "s63E6H2" 0.2386684 "hypothetical protein"  
"OPBA10\_00272" 32728 "s59E13H2" 0.260794 "hypothetical protein"  
"OPBA10\_00272" 32728 "s59E25H2" 0 "hypothetical protein"  
"OPBA10\_00272" 32728 "s59E5H2" 0.4371005 "hypothetical protein"  
"OPBA10\_00272" 32728 "s63E6H2" 0.02932991 "hypothetical protein"

"OPBA10\_00273" 32729 "s59E13H2" 0.06448921 "Ferredoxin"  
"OPBA10\_00273" 32729 "s59E25H2" 0 "Ferredoxin"  
"OPBA10\_00273" 32729 "s59E5H2" 1.425782 "Ferredoxin"  
"OPBA10\_00273" 32729 "s63E6H2" 0.03088534 "Ferredoxin"  
"OPBA10\_00274" 32730 "s59E13H2" 0 "Electron transport complex protein RnfA"  
"OPBA10\_00274" 32730 "s59E25H2" 0 "Electron transport complex protein RnfA"  
"OPBA10\_00274" 32730 "s59E5H2" 0.04977888 "Electron transport complex protein RnfA"  
"OPBA10\_00274" 32730 "s63E6H2" 0 "Electron transport complex protein RnfA"  
"OPBA10\_00275" 32731 "s59E13H2" 0.03750565 "Electron transport complex protein RnfE"  
"OPBA10\_00275" 32731 "s59E25H2" 0 "Electron transport complex protein RnfE"  
"OPBA10\_00275" 32731 "s59E5H2" 0.4299899 "Electron transport complex protein RnfE"  
"OPBA10\_00275" 32731 "s63E6H2" 0.03856635 "Electron transport complex protein RnfE"  
"OPBA10\_00276" 32732 "s59E13H2" 0.2055371 "Electron transport complex protein RnfG"  
"OPBA10\_00276" 32732 "s59E25H2" 0 "Electron transport complex protein RnfG"  
"OPBA10\_00276" 32732 "s59E5H2" 1.61464 "Electron transport complex protein RnfG"  
"OPBA10\_00276" 32732 "s63E6H2" 0.1096905 "Electron transport complex protein RnfG"  
"OPBA10\_00277" 32733 "s59E13H2" 0.1374537 "Electron transport complex protein RnfD"  
"OPBA10\_00277" 32733 "s59E25H2" 0 "Electron transport complex protein RnfD"  
"OPBA10\_00277" 32733 "s59E5H2" 1.570623 "Electron transport complex protein RnfD"  
"OPBA10\_00277" 32733 "s63E6H2" 0.3827644 "Electron transport complex protein RnfD"  
"OPBA10\_00278" 32734 "s59E13H2" 0.1399698 "Electron transport complex protein RnfC"  
"OPBA10\_00278" 32734 "s59E25H2" 0 "Electron transport complex protein RnfC"  
"OPBA10\_00278" 32734 "s59E5H2" 1.589262 "Electron transport complex protein RnfC"  
"OPBA10\_00278" 32734 "s63E6H2" 0.3333566 "Electron transport complex protein RnfC"  
"OPBA10\_00279" 32735 "s59E13H2" 0.07351226 "Thiamine biosynthesis lipoprotein ApbE precursor"  
"OPBA10\_00279" 32735 "s59E25H2" 0 "Thiamine biosynthesis lipoprotein ApbE precursor"  
"OPBA10\_00279" 32735 "s59E5H2" 1.25721 "Thiamine biosynthesis lipoprotein ApbE precursor"  
"OPBA10\_00279" 32735 "s63E6H2" 0.07971999 "Thiamine biosynthesis lipoprotein ApbE precursor"  
"OPBA10\_00280" 32736 "s59E13H2" 0.08034368 "hypothetical protein"  
"OPBA10\_00280" 32736 "s59E25H2" 0 "hypothetical protein"  
"OPBA10\_00280" 32736 "s59E5H2" 0.3753358 "hypothetical protein"  
"OPBA10\_00280" 32736 "s63E6H2" 0.09129111 "hypothetical protein"  
"OPBA10\_00281" 32737 "s59E13H2" 0.005549553 "Alpha-monoglucosyldiacylglycerol synthase"  
"OPBA10\_00281" 32737 "s59E25H2" 0 "Alpha-monoglucosyldiacylglycerol synthase"  
"OPBA10\_00281" 32737 "s59E5H2" 0.290808 "Alpha-monoglucosyldiacylglycerol synthase"  
"OPBA10\_00281" 32737 "s63E6H2" 0.0160409 "Alpha-monoglucosyldiacylglycerol synthase"  
"OPBA10\_00282" 32738 "s59E13H2" 0.02869628 "NAD-dependent protein deacetylase"  
"OPBA10\_00282" 32738 "s59E25H2" 0 "NAD-dependent protein deacetylase"  
"OPBA10\_00282" 32738 "s59E5H2" 0.3020994 "NAD-dependent protein deacetylase"  
"OPBA10\_00282" 32738 "s63E6H2" 0.05525139 "NAD-dependent protein deacetylase"  
"OPBA10\_00283" 32739 "s59E13H2" 0 "hypothetical protein"  
"OPBA10\_00283" 32739 "s59E25H2" 0 "hypothetical protein"  
"OPBA10\_00283" 32739 "s59E5H2" 0 "hypothetical protein"  
"OPBA10\_00283" 32739 "s63E6H2" 0 "hypothetical protein"  
"OPBA10\_00284" 32740 "s59E13H2" 0 "putative regulator PrIF"  
"OPBA10\_00284" 32740 "s59E25H2" 0 "putative regulator PrIF"  
"OPBA10\_00284" 32740 "s59E5H2" 0.03632991 "putative regulator PrIF"



"OPBA10\_00284" 32740 "s63E6H2" 0.02580646 "putative regulator PrIF"  
"OPBA10\_00285" 32741 "s59E13H2" 0 "tRNA(fMet)-specific endonuclease VapC"  
"OPBA10\_00285" 32741 "s59E25H2" 0 "tRNA(fMet)-specific endonuclease VapC"  
"OPBA10\_00285" 32741 "s59E5H2" 0.05624801 "tRNA(fMet)-specific endonuclease VapC"  
"OPBA10\_00285" 32741 "s63E6H2" 0.01377085 "tRNA(fMet)-specific endonuclease VapC"  
"OPBA10\_00286" 32742 "s59E13H2" 0.0222579 "Aminodeoxychorismate/anthranilate synthase component 2"  
"OPBA10\_00286" 32742 "s59E25H2" 0 "Aminodeoxychorismate/anthranilate synthase component 2"  
"OPBA10\_00286" 32742 "s59E5H2" 0.4830114 "Aminodeoxychorismate/anthranilate synthase component 2"  
"OPBA10\_00286" 32742 "s63E6H2" 0.02538564 "Aminodeoxychorismate/anthranilate synthase component 2"  
"OPBA10\_00287" 32743 "s59E13H2" 0.03286989 "Transcriptional regulatory protein LiaR"  
"OPBA10\_00287" 32743 "s59E25H2" 0 "Transcriptional regulatory protein LiaR"  
"OPBA10\_00287" 32743 "s59E5H2" 0.150508 "Transcriptional regulatory protein LiaR"  
"OPBA10\_00287" 32743 "s63E6H2" 0.1297303 "Transcriptional regulatory protein LiaR"  
"OPBA10\_00288" 32744 "s59E13H2" 0.0347889 "Putative phosphoribosyl transferase/MT0597"  
"OPBA10\_00288" 32744 "s59E25H2" 0 "Putative phosphoribosyl transferase/MT0597"  
"OPBA10\_00288" 32744 "s59E5H2" 0.03752149 "Putative phosphoribosyl transferase/MT0597"  
"OPBA10\_00288" 32744 "s63E6H2" 0.04542262 "Putative phosphoribosyl transferase/MT0597"  
"OPBA10\_00289" 32745 "s59E13H2" 0.1350429 "Quinohemoprotein alcohol dehydrogenase ADH IIB precursor"  
"OPBA10\_00289" 32745 "s59E25H2" 0 "Quinohemoprotein alcohol dehydrogenase ADH IIB precursor"  
"OPBA10\_00289" 32745 "s59E5H2" 0.2665852 "Quinohemoprotein alcohol dehydrogenase ADH IIB precursor"  
"OPBA10\_00289" 32745 "s63E6H2" 0.02664957 "Quinohemoprotein alcohol dehydrogenase ADH IIB precursor"  
"OPBA10\_00290" 32746 "s59E13H2" 0.062793 "Sensor histidine kinase LiaS"  
"OPBA10\_00290" 32746 "s59E25H2" 0 "Sensor histidine kinase LiaS"  
"OPBA10\_00290" 32746 "s59E5H2" 0.3221492 "Sensor histidine kinase LiaS"  
"OPBA10\_00290" 32746 "s63E6H2" 0.006941236 "Sensor histidine kinase LiaS"  
"OPBA10\_00291" 32747 "s59E13H2" 0.1469388 "Putative peroxiredoxin bcp"  
"OPBA10\_00291" 32747 "s59E25H2" 0 "Putative peroxiredoxin bcp"  
"OPBA10\_00291" 32747 "s59E5H2" 0.4647001 "Putative peroxiredoxin bcp"  
"OPBA10\_00291" 32747 "s63E6H2" 0.013437 "Putative peroxiredoxin bcp"  
"OPBA10\_00292" 32748 "s59E13H2" 0.04335043 "Double zinc ribbon"  
"OPBA10\_00292" 32748 "s59E25H2" 0 "Double zinc ribbon"  
"OPBA10\_00292" 32748 "s59E5H2" 0.3457081 "Double zinc ribbon"  
"OPBA10\_00292" 32748 "s63E6H2" 0.001573149 "Double zinc ribbon"  
"OPBA10\_00293" 32749 "s59E13H2" 0 "hypothetical protein"  
"OPBA10\_00293" 32749 "s59E25H2" 0 "hypothetical protein"  
"OPBA10\_00293" 32749 "s59E5H2" 0 "hypothetical protein"  
"OPBA10\_00293" 32749 "s63E6H2" 0 "hypothetical protein"  
"OPBA10\_00298" 32754 "s59E13H2" 0 "Plasmid pRiA4b ORF-3-like protein"  
"OPBA10\_00298" 32754 "s59E25H2" 0 "Plasmid pRiA4b ORF-3-like protein"  
"OPBA10\_00298" 32754 "s59E5H2" 0 "Plasmid pRiA4b ORF-3-like protein"  
"OPBA10\_00298" 32754 "s63E6H2" 0 "Plasmid pRiA4b ORF-3-like protein"  
"OPBA10\_00299" 32755 "s59E13H2" 0 "Autoinducer 2 import system permease protein LsrC"  
"OPBA10\_00299" 32755 "s59E25H2" 0 "Autoinducer 2 import system permease protein LsrC"  
"OPBA10\_00299" 32755 "s59E5H2" 0 "Autoinducer 2 import system permease protein LsrC"  
"OPBA10\_00299" 32755 "s63E6H2" 0 "Autoinducer 2 import system permease protein LsrC"  
"OPBA10\_00300" 32756 "s59E13H2" 0.06955593 "hypothetical protein"  
"OPBA10\_00300" 32756 "s59E25H2" 0 "hypothetical protein"

"OPBA10\_00300" 32756 "s59E5H2" 0.6362117 "hypothetical protein"  
"OPBA10\_00300" 32756 "s63E6H2" 0 "hypothetical protein"  
"OPBA10\_00302" 32758 "s59E13H2" 0.05896682 "Putative superoxide reductase"  
"OPBA10\_00302" 32758 "s59E25H2" 0 "Putative superoxide reductase"  
"OPBA10\_00302" 32758 "s59E5H2" 0.6725449 "Putative superoxide reductase"  
"OPBA10\_00302" 32758 "s63E6H2" 0.007152995 "Putative superoxide reductase"  
"OPBA10\_00303" 32759 "s59E13H2" 0 "Amicyanin precursor"  
"OPBA10\_00303" 32759 "s59E25H2" 0 "Amicyanin precursor"  
"OPBA10\_00303" 32759 "s59E5H2" 0.3832043 "Amicyanin precursor"  
"OPBA10\_00303" 32759 "s63E6H2" 0 "Amicyanin precursor"  
"OPBA10\_00305" 32761 "s59E13H2" 0 "Thiosulfate sulfurtransferase PspE precursor"  
"OPBA10\_00305" 32761 "s59E25H2" 0 "Thiosulfate sulfurtransferase PspE precursor"  
"OPBA10\_00305" 32761 "s59E5H2" 0.1214641 "Thiosulfate sulfurtransferase PspE precursor"  
"OPBA10\_00305" 32761 "s63E6H2" 0 "Thiosulfate sulfurtransferase PspE precursor"  
"OPBA10\_00306" 32762 "s59E13H2" 0.0008605192 "DNA ligase"  
"OPBA10\_00306" 32762 "s59E25H2" 0 "DNA ligase"  
"OPBA10\_00306" 32762 "s59E5H2" 0.07625266 "DNA ligase"  
"OPBA10\_00306" 32762 "s63E6H2" 0.2417809 "DNA ligase"  
"OPBA10\_00307" 32763 "s59E13H2" 0.005167268 "CAAX amino terminal protease self- immunity"  
"OPBA10\_00307" 32763 "s59E25H2" 0 "CAAX amino terminal protease self- immunity"  
"OPBA10\_00307" 32763 "s59E5H2" 0.04329412 "CAAX amino terminal protease self- immunity"  
"OPBA10\_00307" 32763 "s63E6H2" 0.2645826 "CAAX amino terminal protease self- immunity"  
"OPBA10\_00308" 32764 "s59E13H2" 0 "Aspartyl/glutamyl-tRNA(Asn/Gln) amidotransferase subunit C"  
"OPBA10\_00308" 32764 "s59E25H2" 0 "Aspartyl/glutamyl-tRNA(Asn/Gln) amidotransferase subunit C"  
"OPBA10\_00308" 32764 "s59E5H2" 0.01953289 "Aspartyl/glutamyl-tRNA(Asn/Gln) amidotransferase subunit C"  
"OPBA10\_00308" 32764 "s63E6H2" 0.241124 "Aspartyl/glutamyl-tRNA(Asn/Gln) amidotransferase subunit C"  
"OPBA10\_00309" 32765 "s59E13H2" 0.002900549 "Glutamyl-tRNA(Gln) amidotransferase subunit A"  
"OPBA10\_00309" 32765 "s59E25H2" 0 "Glutamyl-tRNA(Gln) amidotransferase subunit A"  
"OPBA10\_00309" 32765 "s59E5H2" 0.1196755 "Glutamyl-tRNA(Gln) amidotransferase subunit A"  
"OPBA10\_00309" 32765 "s63E6H2" 0.4238866 "Glutamyl-tRNA(Gln) amidotransferase subunit A"  
"OPBA10\_00310" 32766 "s59E13H2" 0.01739856 "Aspartyl/glutamyl-tRNA(Asn/Gln) amidotransferase subunit B"  
"OPBA10\_00310" 32766 "s59E25H2" 0 "Aspartyl/glutamyl-tRNA(Asn/Gln) amidotransferase subunit B"  
"OPBA10\_00310" 32766 "s59E5H2" 0.1438512 "Aspartyl/glutamyl-tRNA(Asn/Gln) amidotransferase subunit B"  
"OPBA10\_00310" 32766 "s63E6H2" 0.02520895 "Aspartyl/glutamyl-tRNA(Asn/Gln) amidotransferase subunit B"  
"OPBA10\_00311" 32767 "s59E13H2" 0.02196538 "6-phosphofructokinase 1"  
"OPBA10\_00311" 32767 "s59E25H2" 0 "6-phosphofructokinase 1"  
"OPBA10\_00311" 32767 "s59E5H2" 0.08837908 "6-phosphofructokinase 1"  
"OPBA10\_00311" 32767 "s63E6H2" 0.01143401 "6-phosphofructokinase 1"  
"OPBA10\_00313" 32769 "s59E13H2" 0.0008565273 "Replicative DNA helicase"  
"OPBA10\_00313" 32769 "s59E25H2" 0 "Replicative DNA helicase"  
"OPBA10\_00313" 32769 "s59E5H2" 0.0144678 "Replicative DNA helicase"  
"OPBA10\_00313" 32769 "s63E6H2" 0.0109453 "Replicative DNA helicase"  
"OPBA10\_00314" 32770 "s59E13H2" 0.002611618 "Adenylosuccinate synthetase"  
"OPBA10\_00314" 32770 "s59E25H2" 78.91272 "Adenylosuccinate synthetase"  
"OPBA10\_00314" 32770 "s59E5H2" 0.01776094 "Adenylosuccinate synthetase"  
"OPBA10\_00314" 32770 "s63E6H2" 0.01863126 "Adenylosuccinate synthetase"  
"OPBA10\_00315" 32771 "s59E13H2" 0.002690574 "Phosphoribosylamine--glycine ligase"

"OPBA10\_00315" 32771 "s59E25H2" 0 "Phosphoribosylamine--glycine ligase"  
"OPBA10\_00315" 32771 "s59E5H2" 0.003066405 "Phosphoribosylamine--glycine ligase"  
"OPBA10\_00315" 32771 "s63E6H2" 0.02051407 "Phosphoribosylamine--glycine ligase"  
"OPBA10\_00316" 32772 "s59E13H2" 0.003658461 "N5-carboxyaminoimidazole ribonucleotide mutase"  
"OPBA10\_00316" 32772 "s59E25H2" 0 "N5-carboxyaminoimidazole ribonucleotide mutase"  
"OPBA10\_00316" 32772 "s59E5H2" 0 "N5-carboxyaminoimidazole ribonucleotide mutase"  
"OPBA10\_00316" 32772 "s63E6H2" 0.01230332 "N5-carboxyaminoimidazole ribonucleotide mutase"  
"OPBA10\_00317" 32773 "s59E13H2" 0.01664586 "Transcription elongation factor GreA"  
"OPBA10\_00317" 32773 "s59E25H2" 0 "Transcription elongation factor GreA"  
"OPBA10\_00317" 32773 "s59E5H2" 0.02833589 "Transcription elongation factor GreA"  
"OPBA10\_00317" 32773 "s63E6H2" 0.01036597 "Transcription elongation factor GreA"  
"OPBA10\_00318" 32774 "s59E13H2" 0.7502268 "Lysine--tRNA ligase"  
"OPBA10\_00318" 32774 "s59E25H2" 0 "Lysine--tRNA ligase"  
"OPBA10\_00318" 32774 "s59E5H2" 0.02498015 "Lysine--tRNA ligase"  
"OPBA10\_00318" 32774 "s63E6H2" 0.01560196 "Lysine--tRNA ligase"  
"OPBA10\_00320" 32776 "s59E13H2" 2.374463 "ATP-dependent Clp protease ATP-binding subunit ClpC1"  
"OPBA10\_00320" 32776 "s59E25H2" 0 "ATP-dependent Clp protease ATP-binding subunit ClpC1"  
"OPBA10\_00320" 32776 "s59E5H2" 0.01869017 "ATP-dependent Clp protease ATP-binding subunit ClpC1"  
"OPBA10\_00320" 32776 "s63E6H2" 0.1631794 "ATP-dependent Clp protease ATP-binding subunit ClpC1"  
"OPBA10\_00321" 32777 "s59E13H2" 2.731436 "DNA integrity scanning protein DisA"  
"OPBA10\_00321" 32777 "s59E25H2" 0 "DNA integrity scanning protein DisA"  
"OPBA10\_00321" 32777 "s59E5H2" 0.04019341 "DNA integrity scanning protein DisA"  
"OPBA10\_00321" 32777 "s63E6H2" 0.4329002 "DNA integrity scanning protein DisA"  
"OPBA10\_00322" 32778 "s59E13H2" 2.492871 "2-C-methyl-D-erythritol 4-phosphate cytidyltransferase"  
"OPBA10\_00322" 32778 "s59E25H2" 0 "2-C-methyl-D-erythritol 4-phosphate cytidyltransferase"  
"OPBA10\_00322" 32778 "s59E5H2" 0.05305865 "2-C-methyl-D-erythritol 4-phosphate cytidyltransferase"  
"OPBA10\_00322" 32778 "s63E6H2" 0.4065856 "2-C-methyl-D-erythritol 4-phosphate cytidyltransferase"  
"OPBA10\_00323" 32779 "s59E13H2" 3.070102 "2-C-methyl-D-erythritol 2,4-cyclodiphosphate synthase"  
"OPBA10\_00323" 32779 "s59E25H2" 0 "2-C-methyl-D-erythritol 2,4-cyclodiphosphate synthase"  
"OPBA10\_00323" 32779 "s59E5H2" 0.01374919 "2-C-methyl-D-erythritol 2,4-cyclodiphosphate synthase"  
"OPBA10\_00323" 32779 "s63E6H2" 0.5597435 "2-C-methyl-D-erythritol 2,4-cyclodiphosphate synthase"  
"OPBA10\_00324" 32780 "s59E13H2" 3.891283 "Glutamate--tRNA ligase 1"  
"OPBA10\_00324" 32780 "s59E25H2" 0 "Glutamate--tRNA ligase 1"  
"OPBA10\_00324" 32780 "s59E5H2" 0.02542121 "Glutamate--tRNA ligase 1"  
"OPBA10\_00324" 32780 "s63E6H2" 0.6820914 "Glutamate--tRNA ligase 1"  
"OPBA10\_00325" 32781 "s59E13H2" 6.784117 "Serine acetyltransferase"  
"OPBA10\_00325" 32781 "s59E25H2" 0 "Serine acetyltransferase"  
"OPBA10\_00325" 32781 "s59E5H2" 0.02456548 "Serine acetyltransferase"  
"OPBA10\_00325" 32781 "s63E6H2" 0.8186312 "Serine acetyltransferase"  
"OPBA10\_00326" 32782 "s59E13H2" 5.085109 "Cysteine--tRNA ligase"  
"OPBA10\_00326" 32782 "s59E25H2" 0 "Cysteine--tRNA ligase"  
"OPBA10\_00326" 32782 "s59E5H2" 0.05155331 "Cysteine--tRNA ligase"  
"OPBA10\_00326" 32782 "s63E6H2" 0.7998845 "Cysteine--tRNA ligase"  
"OPBA10\_00327" 32783 "s59E13H2" 4.485243 "Putative TrmH family tRNA/rRNA methyltransferase"  
"OPBA10\_00327" 32783 "s59E25H2" 0 "Putative TrmH family tRNA/rRNA methyltransferase"  
"OPBA10\_00327" 32783 "s59E5H2" 0.06547529 "Putative TrmH family tRNA/rRNA methyltransferase"  
"OPBA10\_00327" 32783 "s63E6H2" 0.856418 "Putative TrmH family tRNA/rRNA methyltransferase"

"OPBA10\_00328" 32784 "s59E13H2" 6.093332 "YacP-like NYN domain protein"  
"OPBA10\_00328" 32784 "s59E25H2" 0 "YacP-like NYN domain protein"  
"OPBA10\_00328" 32784 "s59E5H2" 0.2040203 "YacP-like NYN domain protein"  
"OPBA10\_00328" 32784 "s63E6H2" 0.9719958 "YacP-like NYN domain protein"  
"OPBA10\_00329" 32785 "s59E13H2" 7.006481 "Thermonuclease precursor"  
"OPBA10\_00329" 32785 "s59E25H2" 0 "Thermonuclease precursor"  
"OPBA10\_00329" 32785 "s59E5H2" 0.345593 "Thermonuclease precursor"  
"OPBA10\_00329" 32785 "s63E6H2" 1.143471 "Thermonuclease precursor"  
"OPBA10\_00330" 32786 "s59E13H2" 7.730293 "Pyruvate carboxylase subunit A"  
"OPBA10\_00330" 32786 "s59E25H2" 0 "Pyruvate carboxylase subunit A"  
"OPBA10\_00330" 32786 "s59E5H2" 0.3940382 "Pyruvate carboxylase subunit A"  
"OPBA10\_00330" 32786 "s63E6H2" 0.902813 "Pyruvate carboxylase subunit A"  
"OPBA10\_00331" 32787 "s59E13H2" 6.310366 "Pyruvate carboxylase subunit B"  
"OPBA10\_00331" 32787 "s59E25H2" 0 "Pyruvate carboxylase subunit B"  
"OPBA10\_00331" 32787 "s59E5H2" 0.3876126 "Pyruvate carboxylase subunit B"  
"OPBA10\_00331" 32787 "s63E6H2" 0.6144804 "Pyruvate carboxylase subunit B"  
"OPBA10\_00332" 32788 "s59E13H2" 4.16911 "Biotin transporter BioY"  
"OPBA10\_00332" 32788 "s59E25H2" 0 "Biotin transporter BioY"  
"OPBA10\_00332" 32788 "s59E5H2" 0.1009745 "Biotin transporter BioY"  
"OPBA10\_00332" 32788 "s63E6H2" 0.4490302 "Biotin transporter BioY"  
"OPBA10\_00333" 32789 "s59E13H2" 5.109813 "Acyl-CoA dehydrogenase"  
"OPBA10\_00333" 32789 "s59E25H2" 0 "Acyl-CoA dehydrogenase"  
"OPBA10\_00333" 32789 "s59E5H2" 0.08670181 "Acyl-CoA dehydrogenase"  
"OPBA10\_00333" 32789 "s63E6H2" 0.5113886 "Acyl-CoA dehydrogenase"  
"OPBA10\_00334" 32790 "s59E13H2" 4.879132 "Acryloyl-CoA reductase electron transfer subunit gamma"  
"OPBA10\_00334" 32790 "s59E25H2" 0 "Acryloyl-CoA reductase electron transfer subunit gamma"  
"OPBA10\_00334" 32790 "s59E5H2" 0.04367489 "Acryloyl-CoA reductase electron transfer subunit gamma"  
"OPBA10\_00334" 32790 "s63E6H2" 0.4107604 "Acryloyl-CoA reductase electron transfer subunit gamma"  
"OPBA10\_00335" 32791 "s59E13H2" 7.406184 "Acryloyl-CoA reductase electron transfer subunit beta"  
"OPBA10\_00335" 32791 "s59E25H2" 0 "Acryloyl-CoA reductase electron transfer subunit beta"  
"OPBA10\_00335" 32791 "s59E5H2" 0.04410505 "Acryloyl-CoA reductase electron transfer subunit beta"  
"OPBA10\_00335" 32791 "s63E6H2" 0.619523 "Acryloyl-CoA reductase electron transfer subunit beta"  
"OPBA10\_00336" 32792 "s59E13H2" 0.005921171 "Nucleotidyltransferase domain protein"  
"OPBA10\_00336" 32792 "s59E25H2" 0 "Nucleotidyltransferase domain protein"  
"OPBA10\_00336" 32792 "s59E5H2" 0 "Nucleotidyltransferase domain protein"  
"OPBA10\_00336" 32792 "s63E6H2" 0 "Nucleotidyltransferase domain protein"  
"OPBA10\_00337" 32793 "s59E13H2" 0 "hypothetical protein"  
"OPBA10\_00337" 32793 "s59E25H2" 0 "hypothetical protein"  
"OPBA10\_00337" 32793 "s59E5H2" 0 "hypothetical protein"  
"OPBA10\_00337" 32793 "s63E6H2" 0 "hypothetical protein"  
"OPBA10\_00338" 32794 "s59E13H2" 0 "Xylose isomerase-like TIM barrel"  
"OPBA10\_00338" 32794 "s59E25H2" 0 "Xylose isomerase-like TIM barrel"  
"OPBA10\_00338" 32794 "s59E5H2" 0 "Xylose isomerase-like TIM barrel"  
"OPBA10\_00338" 32794 "s63E6H2" 0 "Xylose isomerase-like TIM barrel"  
"OPBA10\_00339" 32795 "s59E13H2" 0 "hypothetical protein"  
"OPBA10\_00339" 32795 "s59E25H2" 0 "hypothetical protein"  
"OPBA10\_00339" 32795 "s59E5H2" 0 "hypothetical protein"

"OPBA10\_00339" 32795 "s63E6H2" 0 "hypothetical protein"  
"OPBA10\_00340" 32796 "s59E13H2" 0 "Transposase IS200 like protein"  
"OPBA10\_00340" 32796 "s59E25H2" 0 "Transposase IS200 like protein"  
"OPBA10\_00340" 32796 "s59E5H2" 0 "Transposase IS200 like protein"  
"OPBA10\_00340" 32796 "s63E6H2" 0 "Transposase IS200 like protein"  
"OPBA10\_00341" 32797 "s59E13H2" 0 "hypothetical protein"  
"OPBA10\_00341" 32797 "s59E25H2" 0 "hypothetical protein"  
"OPBA10\_00341" 32797 "s59E5H2" 0 "hypothetical protein"  
"OPBA10\_00341" 32797 "s63E6H2" 0 "hypothetical protein"  
"OPBA10\_00342" 32798 "s59E13H2" 0 "hypothetical protein"  
"OPBA10\_00342" 32798 "s59E25H2" 0 "hypothetical protein"  
"OPBA10\_00342" 32798 "s59E5H2" 0.7043469 "hypothetical protein"  
"OPBA10\_00342" 32798 "s63E6H2" 0 "hypothetical protein"  
"OPBA10\_00343" 32799 "s59E13H2" 0.0009902059 "Phd\_YefM"  
"OPBA10\_00343" 32799 "s59E25H2" 0 "Phd\_YefM"  
"OPBA10\_00343" 32799 "s59E5H2" 0 "Phd\_YefM"  
"OPBA10\_00343" 32799 "s63E6H2" 0.009161152 "Phd\_YefM"  
"OPBA10\_00344" 32800 "s59E13H2" 0.05512011 "hypothetical protein"  
"OPBA10\_00344" 32800 "s59E25H2" 0 "hypothetical protein"  
"OPBA10\_00344" 32800 "s59E5H2" 0 "hypothetical protein"  
"OPBA10\_00344" 32800 "s63E6H2" 0.7783561 "hypothetical protein"  
"OPBA10\_00345" 32801 "s59E13H2" 0.9175011 "ABC-2 family transporter protein"  
"OPBA10\_00345" 32801 "s59E25H2" 0 "ABC-2 family transporter protein"  
"OPBA10\_00345" 32801 "s59E5H2" 0.01823246 "ABC-2 family transporter protein"  
"OPBA10\_00345" 32801 "s63E6H2" 0.08864626 "ABC-2 family transporter protein"  
"OPBA10\_00346" 32802 "s59E13H2" 0.8998643 "ABC-2 family transporter protein"  
"OPBA10\_00346" 32802 "s59E25H2" 0 "ABC-2 family transporter protein"  
"OPBA10\_00346" 32802 "s59E5H2" 0.02599966 "ABC-2 family transporter protein"  
"OPBA10\_00346" 32802 "s63E6H2" 0.1459315 "ABC-2 family transporter protein"  
"OPBA10\_00347" 32803 "s59E13H2" 0.7603327 "Fluoroquinolones export ATP-binding protein/MT2762"  
"OPBA10\_00347" 32803 "s59E25H2" 0 "Fluoroquinolones export ATP-binding protein/MT2762"  
"OPBA10\_00347" 32803 "s59E5H2" 0.04445517 "Fluoroquinolones export ATP-binding protein/MT2762"  
"OPBA10\_00347" 32803 "s63E6H2" 0.1289431 "Fluoroquinolones export ATP-binding protein/MT2762"  
"OPBA10\_00348" 32804 "s59E13H2" 0.0386592 "Cell division ATP-binding protein FtsE"  
"OPBA10\_00348" 32804 "s59E25H2" 0.4537445 "Cell division ATP-binding protein FtsE"  
"OPBA10\_00348" 32804 "s59E5H2" 0.1734965 "Cell division ATP-binding protein FtsE"  
"OPBA10\_00348" 32804 "s63E6H2" 0.4963414 "Cell division ATP-binding protein FtsE"  
"OPBA10\_00349" 32805 "s59E13H2" 0.01368163 "Cell division protein FtsX"  
"OPBA10\_00349" 32805 "s59E25H2" 0 "Cell division protein FtsX"  
"OPBA10\_00349" 32805 "s59E5H2" 0.06108381 "Cell division protein FtsX"  
"OPBA10\_00349" 32805 "s63E6H2" 0.1401179 "Cell division protein FtsX"  
"OPBA10\_00350" 32806 "s59E13H2" 0.03265362 "Murein DD-endopeptidase MepM"  
"OPBA10\_00350" 32806 "s59E25H2" 0 "Murein DD-endopeptidase MepM"  
"OPBA10\_00350" 32806 "s59E5H2" 0.1396376 "Murein DD-endopeptidase MepM"  
"OPBA10\_00350" 32806 "s63E6H2" 0.4395861 "Murein DD-endopeptidase MepM"  
"OPBA10\_00351" 32807 "s59E13H2" 0.03320824 "putative CtpA-like serine protease"  
"OPBA10\_00351" 32807 "s59E25H2" 0 "putative CtpA-like serine protease"

"OPBA10\_00351" 32807 "s59E5H2" 0.137929 "putative CtpA-like serine protease"  
"OPBA10\_00351" 32807 "s63E6H2" 0.07907924 "putative CtpA-like serine protease"  
"OPBA10\_00352" 32808 "s59E13H2" 0.05205894 "SsrA-binding protein"  
"OPBA10\_00352" 32808 "s59E25H2" 0 "SsrA-binding protein"  
"OPBA10\_00352" 32808 "s59E5H2" 0.421203 "SsrA-binding protein"  
"OPBA10\_00352" 32808 "s63E6H2" 0.004367523 "SsrA-binding protein"  
"OPBA10\_00354" 32810 "s59E13H2" 0.00217146 "Glutamate racemase 1"  
"OPBA10\_00354" 32810 "s59E25H2" 0.2686567 "Glutamate racemase 1"  
"OPBA10\_00354" 32810 "s59E5H2" 0.02393449 "Glutamate racemase 1"  
"OPBA10\_00354" 32810 "s63E6H2" 1.173333 "Glutamate racemase 1"  
"OPBA10\_00355" 32811 "s59E13H2" 0 "Ribonuclease PH"  
"OPBA10\_00355" 32811 "s59E25H2" 0 "Ribonuclease PH"  
"OPBA10\_00355" 32811 "s59E5H2" 0.08497261 "Ribonuclease PH"  
"OPBA10\_00355" 32811 "s63E6H2" 1.553413 "Ribonuclease PH"  
"OPBA10\_00356" 32812 "s59E13H2" 0 "Non-canonical purine NTP pyrophosphatase"  
"OPBA10\_00356" 32812 "s59E25H2" 0 "Non-canonical purine NTP pyrophosphatase"  
"OPBA10\_00356" 32812 "s59E5H2" 0.0606107 "Non-canonical purine NTP pyrophosphatase"  
"OPBA10\_00356" 32812 "s63E6H2" 0.2797491 "Non-canonical purine NTP pyrophosphatase"  
"OPBA10\_00364" 32820 "s59E13H2" 0.007761184 "Trigger factor"  
"OPBA10\_00364" 32820 "s59E25H2" 0 "Trigger factor"  
"OPBA10\_00364" 32820 "s59E5H2" 0.07033098 "Trigger factor"  
"OPBA10\_00364" 32820 "s63E6H2" 0.09783535 "Trigger factor"  
"OPBA10\_00365" 32821 "s59E13H2" 0.003624911 "ATP-dependent Clp protease proteolytic subunit precursor"  
"OPBA10\_00365" 32821 "s59E25H2" 0 "ATP-dependent Clp protease proteolytic subunit precursor"  
"OPBA10\_00365" 32821 "s59E5H2" 0.05206408 "ATP-dependent Clp protease proteolytic subunit precursor"  
"OPBA10\_00365" 32821 "s63E6H2" 0.07498819 "ATP-dependent Clp protease proteolytic subunit precursor"  
"OPBA10\_00366" 32822 "s59E13H2" 0.002171926 "ATP-dependent Clp protease ATP-binding subunit ClpX"  
"OPBA10\_00366" 32822 "s59E25H2" 0 "ATP-dependent Clp protease ATP-binding subunit ClpX"  
"OPBA10\_00366" 32822 "s59E5H2" 0.1006241 "ATP-dependent Clp protease ATP-binding subunit ClpX"  
"OPBA10\_00366" 32822 "s63E6H2" 0.08713648 "ATP-dependent Clp protease ATP-binding subunit ClpX"  
"OPBA10\_00367" 32823 "s59E13H2" 0.007321676 "Valine--tRNA ligase"  
"OPBA10\_00367" 32823 "s59E25H2" 0 "Valine--tRNA ligase"  
"OPBA10\_00367" 32823 "s59E5H2" 0.07492858 "Valine--tRNA ligase"  
"OPBA10\_00367" 32823 "s63E6H2" 0.08377347 "Valine--tRNA ligase"  
"OPBA10\_00368" 32824 "s59E13H2" 0.02583657 "Folylpolyglutamate synthase"  
"OPBA10\_00368" 32824 "s59E25H2" 0 "Folylpolyglutamate synthase"  
"OPBA10\_00368" 32824 "s59E5H2" 0.1537099 "Folylpolyglutamate synthase"  
"OPBA10\_00368" 32824 "s63E6H2" 0.1033064 "Folylpolyglutamate synthase"  
"OPBA10\_00369" 32825 "s59E13H2" 0.007645282 "Double zinc ribbon"  
"OPBA10\_00369" 32825 "s59E25H2" 0 "Double zinc ribbon"  
"OPBA10\_00369" 32825 "s59E5H2" 0.03721174 "Double zinc ribbon"  
"OPBA10\_00369" 32825 "s63E6H2" 0.06923208 "Double zinc ribbon"  
"OPBA10\_00370" 32826 "s59E13H2" 0.03124261 "Nucleoside diphosphate kinase"  
"OPBA10\_00370" 32826 "s59E25H2" 0 "Nucleoside diphosphate kinase"  
"OPBA10\_00370" 32826 "s59E5H2" 0.06833456 "Nucleoside diphosphate kinase"  
"OPBA10\_00370" 32826 "s63E6H2" 0.1049719 "Nucleoside diphosphate kinase"  
"OPBA10\_00371" 32827 "s59E13H2" 0.02446732 "hypothetical protein"

"OPBA10\_00371" 32827 "s59E25H2" 0 "hypothetical protein"  
"OPBA10\_00371" 32827 "s59E5H2" 0.09746112 "hypothetical protein"  
"OPBA10\_00371" 32827 "s63E6H2" 0.07113961 "hypothetical protein"  
"OPBA10\_00372" 32828 "s59E13H2" 0.03432492 "Maf-like protein"  
"OPBA10\_00372" 32828 "s59E25H2" 0 "Maf-like protein"  
"OPBA10\_00372" 32828 "s59E5H2" 0.1321784 "Maf-like protein"  
"OPBA10\_00372" 32828 "s63E6H2" 0.04616533 "Maf-like protein"  
"OPBA10\_00373" 32829 "s59E13H2" 0.04440827 "Rod shape-determining protein MreB"  
"OPBA10\_00373" 32829 "s59E25H2" 0 "Rod shape-determining protein MreB"  
"OPBA10\_00373" 32829 "s59E5H2" 0.1352074 "Rod shape-determining protein MreB"  
"OPBA10\_00373" 32829 "s63E6H2" 0.08713061 "Rod shape-determining protein MreB"  
"OPBA10\_00374" 32830 "s59E13H2" 0.04358838 "Cell shape-determining protein MreC precursor"  
"OPBA10\_00374" 32830 "s59E25H2" 0 "Cell shape-determining protein MreC precursor"  
"OPBA10\_00374" 32830 "s59E5H2" 0.1120811 "Cell shape-determining protein MreC precursor"  
"OPBA10\_00374" 32830 "s63E6H2" 0.08321872 "Cell shape-determining protein MreC precursor"  
"OPBA10\_00375" 32831 "s59E13H2" 0.06580339 "hypothetical protein"  
"OPBA10\_00375" 32831 "s59E25H2" 0 "hypothetical protein"  
"OPBA10\_00375" 32831 "s59E5H2" 0.09692679 "hypothetical protein"  
"OPBA10\_00375" 32831 "s63E6H2" 0.09869768 "hypothetical protein"  
"OPBA10\_00376" 32832 "s59E13H2" 0.008279931 "Stage V sporulation protein D"  
"OPBA10\_00376" 32832 "s59E25H2" 0 "Stage V sporulation protein D"  
"OPBA10\_00376" 32832 "s59E5H2" 0.05461623 "Stage V sporulation protein D"  
"OPBA10\_00376" 32832 "s63E6H2" 0.01187986 "Stage V sporulation protein D"  
"OPBA10\_00377" 32833 "s59E13H2" 0.0688993 "Rod shape-determining protein RodA"  
"OPBA10\_00377" 32833 "s59E25H2" 0 "Rod shape-determining protein RodA"  
"OPBA10\_00377" 32833 "s59E5H2" 0.1729116 "Rod shape-determining protein RodA"  
"OPBA10\_00377" 32833 "s63E6H2" 0.05771008 "Rod shape-determining protein RodA"  
"OPBA10\_00378" 32834 "s59E13H2" 0.0482886 "Radical SAM superfamily protein"  
"OPBA10\_00378" 32834 "s59E25H2" 0 "Radical SAM superfamily protein"  
"OPBA10\_00378" 32834 "s59E5H2" 0.1458697 "Radical SAM superfamily protein"  
"OPBA10\_00378" 32834 "s63E6H2" 0.04270987 "Radical SAM superfamily protein"  
"OPBA10\_00379" 32835 "s59E13H2" 0.05620473 "hypothetical protein"  
"OPBA10\_00379" 32835 "s59E25H2" 0 "hypothetical protein"  
"OPBA10\_00379" 32835 "s59E5H2" 0.1329225 "hypothetical protein"  
"OPBA10\_00379" 32835 "s63E6H2" 0.02434292 "hypothetical protein"  
"OPBA10\_00380" 32836 "s59E13H2" 0.03767405 "Ribonuclease G"  
"OPBA10\_00380" 32836 "s59E25H2" 0 "Ribonuclease G"  
"OPBA10\_00380" 32836 "s59E5H2" 0.1361824 "Ribonuclease G"  
"OPBA10\_00380" 32836 "s63E6H2" 0.07080883 "Ribonuclease G"  
"OPBA10\_00381" 32837 "s59E13H2" 0.0136161 "50S ribosomal protein L21"  
"OPBA10\_00381" 32837 "s59E25H2" 0 "50S ribosomal protein L21"  
"OPBA10\_00381" 32837 "s59E5H2" 0.2395406 "50S ribosomal protein L21"  
"OPBA10\_00381" 32837 "s63E6H2" 0.09255258 "50S ribosomal protein L21"  
"OPBA10\_00382" 32838 "s59E13H2" 0.02476737 "50S ribosomal protein L27"  
"OPBA10\_00382" 32838 "s59E25H2" 0 "50S ribosomal protein L27"  
"OPBA10\_00382" 32838 "s59E5H2" 0.05111464 "50S ribosomal protein L27"  
"OPBA10\_00382" 32838 "s63E6H2" 0.04055244 "50S ribosomal protein L27"

"OPBA10\_00383" 32839 "s59E13H2" 0 "Ribbon-helix-helix protein, copG family"  
"OPBA10\_00383" 32839 "s59E25H2" 0 "Ribbon-helix-helix protein, copG family"  
"OPBA10\_00383" 32839 "s59E5H2" 0 "Ribbon-helix-helix protein, copG family"  
"OPBA10\_00383" 32839 "s63E6H2" 0 "Ribbon-helix-helix protein, copG family"  
"OPBA10\_00384" 32840 "s59E13H2" 0 "PIN domain protein"  
"OPBA10\_00384" 32840 "s59E25H2" 0 "PIN domain protein"  
"OPBA10\_00384" 32840 "s59E5H2" 0.005828504 "PIN domain protein"  
"OPBA10\_00384" 32840 "s63E6H2" 0 "PIN domain protein"  
"OPBA10\_00385" 32841 "s59E13H2" 0.01054864 "Sorbitol dehydrogenase"  
"OPBA10\_00385" 32841 "s59E25H2" 0 "Sorbitol dehydrogenase"  
"OPBA10\_00385" 32841 "s59E5H2" 0.06588979 "Sorbitol dehydrogenase"  
"OPBA10\_00385" 32841 "s63E6H2" 0.06172316 "Sorbitol dehydrogenase"  
"OPBA10\_00386" 32842 "s59E13H2" 0.02608518 "Sorbitol dehydrogenase"  
"OPBA10\_00386" 32842 "s59E25H2" 0 "Sorbitol dehydrogenase"  
"OPBA10\_00386" 32842 "s59E5H2" 0.04759905 "Sorbitol dehydrogenase"  
"OPBA10\_00386" 32842 "s63E6H2" 0.1274379 "Sorbitol dehydrogenase"  
"OPBA10\_00387" 32843 "s59E13H2" 0.02649294 "GTPase Obg"  
"OPBA10\_00387" 32843 "s59E25H2" 0 "GTPase Obg"  
"OPBA10\_00387" 32843 "s59E5H2" 0.03519979 "GTPase Obg"  
"OPBA10\_00387" 32843 "s63E6H2" 0.07706476 "GTPase Obg"  
"OPBA10\_00388" 32844 "s59E13H2" 0 "Glutamate 5-kinase 1"  
"OPBA10\_00388" 32844 "s59E25H2" 0 "Glutamate 5-kinase 1"  
"OPBA10\_00388" 32844 "s59E5H2" 0.0523994 "Glutamate 5-kinase 1"  
"OPBA10\_00388" 32844 "s63E6H2" 0.1348725 "Glutamate 5-kinase 1"  
"OPBA10\_00389" 32845 "s59E13H2" 0.08416433 "Gamma-glutamyl phosphate reductase"  
"OPBA10\_00389" 32845 "s59E25H2" 0 "Gamma-glutamyl phosphate reductase"  
"OPBA10\_00389" 32845 "s59E5H2" 0.07034112 "Gamma-glutamyl phosphate reductase"  
"OPBA10\_00389" 32845 "s63E6H2" 0.2031508 "Gamma-glutamyl phosphate reductase"  
"OPBA10\_00390" 32846 "s59E13H2" 1.567196 "Nicotinate-nucleotide adenyltransferase"  
"OPBA10\_00390" 32846 "s59E25H2" 0 "Nicotinate-nucleotide adenyltransferase"  
"OPBA10\_00390" 32846 "s59E5H2" 0.124137 "Nicotinate-nucleotide adenyltransferase"  
"OPBA10\_00390" 32846 "s63E6H2" 0.183889 "Nicotinate-nucleotide adenyltransferase"  
"OPBA10\_00391" 32847 "s59E13H2" 1.274146 "putative nicotinate-nucleotide adenyltransferase"  
"OPBA10\_00391" 32847 "s59E25H2" 0 "putative nicotinate-nucleotide adenyltransferase"  
"OPBA10\_00391" 32847 "s59E5H2" 0.04278096 "putative nicotinate-nucleotide adenyltransferase"  
"OPBA10\_00391" 32847 "s63E6H2" 0.1492803 "putative nicotinate-nucleotide adenyltransferase"  
"OPBA10\_00392" 32848 "s59E13H2" 1.069461 "membrane-bound transcriptional regulator LytR"  
"OPBA10\_00392" 32848 "s59E25H2" 0 "membrane-bound transcriptional regulator LytR"  
"OPBA10\_00392" 32848 "s59E5H2" 0.08459093 "membrane-bound transcriptional regulator LytR"  
"OPBA10\_00392" 32848 "s63E6H2" 0.1047998 "membrane-bound transcriptional regulator LytR"  
"OPBA10\_00393" 32849 "s59E13H2" 2.247382 "Ribosomal silencing factor RsfS"  
"OPBA10\_00393" 32849 "s59E25H2" 0 "Ribosomal silencing factor RsfS"  
"OPBA10\_00393" 32849 "s59E5H2" 0.1934683 "Ribosomal silencing factor RsfS"  
"OPBA10\_00393" 32849 "s63E6H2" 0.1345333 "Ribosomal silencing factor RsfS"  
"OPBA10\_00394" 32850 "s59E13H2" 1.65705 "Leucine--tRNA ligase"  
"OPBA10\_00394" 32850 "s59E25H2" 0 "Leucine--tRNA ligase"  
"OPBA10\_00394" 32850 "s59E5H2" 0.27187 "Leucine--tRNA ligase"



"OPBA10\_00394" 32850 "s63E6H2" 0.1891882 "Leucine--tRNA ligase"  
"OPBA10\_00395" 32851 "s59E13H2" 1.465047 "Intracellular protease 1"  
"OPBA10\_00395" 32851 "s59E25H2" 0 "Intracellular protease 1"  
"OPBA10\_00395" 32851 "s59E5H2" 0.1907735 "Intracellular protease 1"  
"OPBA10\_00395" 32851 "s63E6H2" 0.1605511 "Intracellular protease 1"  
"OPBA10\_00396" 32852 "s59E13H2" 0.4497863 "ComE operon protein 1"  
"OPBA10\_00396" 32852 "s59E25H2" 0 "ComE operon protein 1"  
"OPBA10\_00396" 32852 "s59E5H2" 0.08433744 "ComE operon protein 1"  
"OPBA10\_00396" 32852 "s63E6H2" 0.06242466 "ComE operon protein 1"  
"OPBA10\_00397" 32853 "s59E13H2" 0.8983903 "ComEC family competence protein"  
"OPBA10\_00397" 32853 "s59E25H2" 0.2259001 "ComEC family competence protein"  
"OPBA10\_00397" 32853 "s59E5H2" 0.0708063 "ComEC family competence protein"  
"OPBA10\_00397" 32853 "s63E6H2" 0.1366181 "ComEC family competence protein"  
"OPBA10\_00398" 32854 "s59E13H2" 0.01108014 "hypothetical protein"  
"OPBA10\_00398" 32854 "s59E25H2" 0.3122807 "hypothetical protein"  
"OPBA10\_00398" 32854 "s59E5H2" 0.0267067 "hypothetical protein"  
"OPBA10\_00398" 32854 "s63E6H2" 0.04424016 "hypothetical protein"  
"OPBA10\_00400" 32856 "s59E13H2" 0.1178966 "DNA polymerase III subunit delta"  
"OPBA10\_00400" 32856 "s59E25H2" 0 "DNA polymerase III subunit delta"  
"OPBA10\_00400" 32856 "s59E5H2" 0.255327 "DNA polymerase III subunit delta"  
"OPBA10\_00400" 32856 "s63E6H2" 0.09521878 "DNA polymerase III subunit delta"  
"OPBA10\_00401" 32857 "s59E13H2" 0.07555835 "30S ribosomal protein S20"  
"OPBA10\_00401" 32857 "s59E25H2" 0 "30S ribosomal protein S20"  
"OPBA10\_00401" 32857 "s59E5H2" 0.0444922 "30S ribosomal protein S20"  
"OPBA10\_00401" 32857 "s63E6H2" 0.01310425 "30S ribosomal protein S20"  
"OPBA10\_00402" 32858 "s59E13H2" 0.09222453 "putative peptidoglycan biosynthesis protein MurJ"  
"OPBA10\_00402" 32858 "s59E25H2" 0 "putative peptidoglycan biosynthesis protein MurJ"  
"OPBA10\_00402" 32858 "s59E5H2" 0.3313472 "putative peptidoglycan biosynthesis protein MurJ"  
"OPBA10\_00402" 32858 "s63E6H2" 0.01567106 "putative peptidoglycan biosynthesis protein MurJ"  
"OPBA10\_00403" 32859 "s59E13H2" 0.1064183 "Elongation factor 4"  
"OPBA10\_00403" 32859 "s59E25H2" 0 "Elongation factor 4"  
"OPBA10\_00403" 32859 "s59E5H2" 0.1925456 "Elongation factor 4"  
"OPBA10\_00403" 32859 "s63E6H2" 0.03707964 "Elongation factor 4"  
"OPBA10\_00404" 32860 "s59E13H2" 0.03062015 "hypothetical protein"  
"OPBA10\_00404" 32860 "s59E25H2" 0 "hypothetical protein"  
"OPBA10\_00404" 32860 "s59E5H2" 0.01732874 "hypothetical protein"  
"OPBA10\_00404" 32860 "s63E6H2" 0.00189058 "hypothetical protein"  
"OPBA10\_00405" 32861 "s59E13H2" 0.008444032 "CDP-6-deoxy-L-threo-D-glycero-4-hexulose-3-dehydrase reductase"  
"OPBA10\_00405" 32861 "s59E25H2" 0 "CDP-6-deoxy-L-threo-D-glycero-4-hexulose-3-dehydrase reductase"  
"OPBA10\_00405" 32861 "s59E5H2" 0.02172406 "CDP-6-deoxy-L-threo-D-glycero-4-hexulose-3-dehydrase reductase"  
"OPBA10\_00405" 32861 "s63E6H2" 0.008327751 "CDP-6-deoxy-L-threo-D-glycero-4-hexulose-3-dehydrase reductase"  
"OPBA10\_00406" 32862 "s59E13H2" 0.01703936 "Septum site-determining protein MinD"  
"OPBA10\_00406" 32862 "s59E25H2" 0 "Septum site-determining protein MinD"  
"OPBA10\_00406" 32862 "s59E5H2" 0.005125138 "Septum site-determining protein MinD"  
"OPBA10\_00406" 32862 "s63E6H2" 0.006987966 "Septum site-determining protein MinD"  
"OPBA10\_00407" 32863 "s59E13H2" 0.004880081 "Hydrogenase isoenzymes formation protein HypE"  
"OPBA10\_00407" 32863 "s59E25H2" 0 "Hydrogenase isoenzymes formation protein HypE"

"OPBA10\_00407" 32863 "s59E5H2" 0.01947245 "Hydrogenase isoenzymes formation protein HypE"  
"OPBA10\_00407" 32863 "s63E6H2" 0.007973686 "Hydrogenase isoenzymes formation protein HypE"  
"OPBA10\_00408" 32864 "s59E13H2" 0 "Hydrogenase isoenzymes formation protein HypD"  
"OPBA10\_00408" 32864 "s59E25H2" 0 "Hydrogenase isoenzymes formation protein HypD"  
"OPBA10\_00408" 32864 "s59E5H2" 0.02175188 "Hydrogenase isoenzymes formation protein HypD"  
"OPBA10\_00408" 32864 "s63E6H2" 0 "Hydrogenase isoenzymes formation protein HypD"  
"OPBA10\_00409" 32865 "s59E13H2" 0 "Hydrogenase isoenzymes formation protein HypC"  
"OPBA10\_00409" 32865 "s59E25H2" 0 "Hydrogenase isoenzymes formation protein HypC"  
"OPBA10\_00409" 32865 "s59E5H2" 0 "Hydrogenase isoenzymes formation protein HypC"  
"OPBA10\_00409" 32865 "s63E6H2" 0 "Hydrogenase isoenzymes formation protein HypC"  
"OPBA10\_00410" 32866 "s59E13H2" 0.001474091 "Carbamoyltransferase HypF"  
"OPBA10\_00410" 32866 "s59E25H2" 0 "Carbamoyltransferase HypF"  
"OPBA10\_00410" 32866 "s59E5H2" 0.0324509 "Carbamoyltransferase HypF"  
"OPBA10\_00410" 32866 "s63E6H2" 0.0009617827 "Carbamoyltransferase HypF"  
"OPBA10\_00411" 32867 "s59E13H2" 0 "hypothetical protein"  
"OPBA10\_00411" 32867 "s59E25H2" 0 "hypothetical protein"  
"OPBA10\_00411" 32867 "s59E5H2" 0 "hypothetical protein"  
"OPBA10\_00411" 32867 "s63E6H2" 0.001088379 "hypothetical protein"  
"OPBA10\_00412" 32868 "s59E13H2" 0.01131566 "Lactose phosphotransferase system repressor"  
"OPBA10\_00412" 32868 "s59E25H2" 0 "Lactose phosphotransferase system repressor"  
"OPBA10\_00412" 32868 "s59E5H2" 0.04323129 "Lactose phosphotransferase system repressor"  
"OPBA10\_00412" 32868 "s63E6H2" 0.4294148 "Lactose phosphotransferase system repressor"  
"OPBA10\_00413" 32869 "s59E13H2" 0.01894674 "Sorbitol-6-phosphate 2-dehydrogenase"  
"OPBA10\_00413" 32869 "s59E25H2" 0 "Sorbitol-6-phosphate 2-dehydrogenase"  
"OPBA10\_00413" 32869 "s59E5H2" 0.02570476 "Sorbitol-6-phosphate 2-dehydrogenase"  
"OPBA10\_00413" 32869 "s63E6H2" 0.1347847 "Sorbitol-6-phosphate 2-dehydrogenase"  
"OPBA10\_00414" 32870 "s59E13H2" 0.09883202 "hypothetical protein"  
"OPBA10\_00414" 32870 "s59E25H2" 0 "hypothetical protein"  
"OPBA10\_00414" 32870 "s59E5H2" 0.03028416 "hypothetical protein"  
"OPBA10\_00414" 32870 "s63E6H2" 0.4840802 "hypothetical protein"  
"OPBA10\_00415" 32871 "s59E13H2" 0.2938586 "Sorbitol dehydrogenase"  
"OPBA10\_00415" 32871 "s59E25H2" 0 "Sorbitol dehydrogenase"  
"OPBA10\_00415" 32871 "s59E5H2" 0.1037012 "Sorbitol dehydrogenase"  
"OPBA10\_00415" 32871 "s63E6H2" 0.9142087 "Sorbitol dehydrogenase"  
"OPBA10\_00416" 32872 "s59E13H2" 0.1817051 "Dihydrolipoyllysine-residue acetyltransferase component of pyruvate dehydrogenase complex"  
"OPBA10\_00416" 32872 "s59E25H2" 0 "Dihydrolipoyllysine-residue acetyltransferase component of pyruvate dehydrogenase complex"  
"OPBA10\_00416" 32872 "s59E5H2" 0.03661301 "Dihydrolipoyllysine-residue acetyltransferase component of pyruvate dehydrogenase complex"  
"OPBA10\_00416" 32872 "s63E6H2" 0.265986 "Dihydrolipoyllysine-residue acetyltransferase component of pyruvate dehydrogenase complex"  
"OPBA10\_00417" 32873 "s59E13H2" 0.1396744 "Aspartokinase"  
"OPBA10\_00417" 32873 "s59E25H2" 0 "Aspartokinase"  
"OPBA10\_00417" 32873 "s59E5H2" 0.041377 "Aspartokinase"  
"OPBA10\_00417" 32873 "s63E6H2" 0.4757839 "Aspartokinase"  
"OPBA10\_00418" 32874 "s59E13H2" 0.04400868 "Pyruvate-flavodoxin oxidoreductase"  
"OPBA10\_00418" 32874 "s59E25H2" 0 "Pyruvate-flavodoxin oxidoreductase"  
"OPBA10\_00418" 32874 "s59E5H2" 0.0416676 "Pyruvate-flavodoxin oxidoreductase"  
"OPBA10\_00418" 32874 "s63E6H2" 0.2142411 "Pyruvate-flavodoxin oxidoreductase"  
"OPBA10\_00419" 32875 "s59E13H2" 0.05664171 "Recombination protein RecR"

"OPBA10\_00419" 32875 "s59E25H2" 0 "Recombination protein RecR"  
"OPBA10\_00419" 32875 "s59E5H2" 0.008295003 "Recombination protein RecR"  
"OPBA10\_00419" 32875 "s63E6H2" 0.03279777 "Recombination protein RecR"  
"OPBA10\_00420" 32876 "s59E13H2" 0.05820617 "Nucleoid-associated protein"  
"OPBA10\_00420" 32876 "s59E25H2" 0 "Nucleoid-associated protein"  
"OPBA10\_00420" 32876 "s59E5H2" 0 "Nucleoid-associated protein"  
"OPBA10\_00420" 32876 "s63E6H2" 0.0346809 "Nucleoid-associated protein"  
"OPBA10\_00422" 32878 "s59E13H2" 0.02656611 "hypothetical protein"  
"OPBA10\_00422" 32878 "s59E25H2" 0.3320053 "hypothetical protein"  
"OPBA10\_00422" 32878 "s59E5H2" 0.1960909 "hypothetical protein"  
"OPBA10\_00422" 32878 "s63E6H2" 0.01017252 "hypothetical protein"  
"OPBA10\_00423" 32879 "s59E13H2" 0.005833129 "4-amino-4-deoxy-L-arabinose-phosphoundecaprenol flippase subunit ArnF"  
"OPBA10\_00423" 32879 "s59E25H2" 0 "4-amino-4-deoxy-L-arabinose-phosphoundecaprenol flippase subunit ArnF"  
"OPBA10\_00423" 32879 "s59E5H2" 0.2373003 "4-amino-4-deoxy-L-arabinose-phosphoundecaprenol flippase subunit ArnF"  
"OPBA10\_00423" 32879 "s63E6H2" 0.01037339 "4-amino-4-deoxy-L-arabinose-phosphoundecaprenol flippase subunit ArnF"  
"OPBA10\_00424" 32880 "s59E13H2" 0.007251575 "Glycosyltransferase AgIE"  
"OPBA10\_00424" 32880 "s59E25H2" 0 "Glycosyltransferase AgIE"  
"OPBA10\_00424" 32880 "s59E5H2" 0.2744842 "Glycosyltransferase AgIE"  
"OPBA10\_00424" 32880 "s63E6H2" 0.005342014 "Glycosyltransferase AgIE"  
"OPBA10\_00425" 32881 "s59E13H2" 0.01094672 "Glycosyl transferases group 1"  
"OPBA10\_00425" 32881 "s59E25H2" 0 "Glycosyl transferases group 1"  
"OPBA10\_00425" 32881 "s59E5H2" 0.1853482 "Glycosyl transferases group 1"  
"OPBA10\_00425" 32881 "s63E6H2" 0.002800362 "Glycosyl transferases group 1"  
"OPBA10\_00426" 32882 "s59E13H2" 0.01235078 "N-acetylglucosaminyl-diphospho-decaprenol L-rhamnosyltransferase"  
"OPBA10\_00426" 32882 "s59E25H2" 0 "N-acetylglucosaminyl-diphospho-decaprenol L-rhamnosyltransferase"  
"OPBA10\_00426" 32882 "s59E5H2" 0.2523712 "N-acetylglucosaminyl-diphospho-decaprenol L-rhamnosyltransferase"  
"OPBA10\_00426" 32882 "s63E6H2" 0.008408076 "N-acetylglucosaminyl-diphospho-decaprenol L-rhamnosyltransferase"  
"OPBA10\_00427" 32883 "s59E13H2" 0.00652883 "Glycosyltransferase AgII"  
"OPBA10\_00427" 32883 "s59E25H2" 0 "Glycosyltransferase AgII"  
"OPBA10\_00427" 32883 "s59E5H2" 0.3748147 "Glycosyltransferase AgII"  
"OPBA10\_00427" 32883 "s63E6H2" 0.01159073 "Glycosyltransferase AgII"  
"OPBA10\_00429" 32885 "s59E13H2" 0.02604499 "Anthranilate synthase component 1"  
"OPBA10\_00429" 32885 "s59E25H2" 0 "Anthranilate synthase component 1"  
"OPBA10\_00429" 32885 "s59E5H2" 0.155811 "Anthranilate synthase component 1"  
"OPBA10\_00429" 32885 "s63E6H2" 0.1403415 "Anthranilate synthase component 1"  
"OPBA10\_00430" 32886 "s59E13H2" 0.02895436 "Anthranilate phosphoribosyltransferase"  
"OPBA10\_00430" 32886 "s59E25H2" 0 "Anthranilate phosphoribosyltransferase"  
"OPBA10\_00430" 32886 "s59E5H2" 0.2056665 "Anthranilate phosphoribosyltransferase"  
"OPBA10\_00430" 32886 "s63E6H2" 0.008522926 "Anthranilate phosphoribosyltransferase"  
"OPBA10\_00431" 32887 "s59E13H2" 0.01680293 "Indole-3-glycerol phosphate synthase"  
"OPBA10\_00431" 32887 "s59E25H2" 0 "Indole-3-glycerol phosphate synthase"  
"OPBA10\_00431" 32887 "s59E5H2" 0.1943015 "Indole-3-glycerol phosphate synthase"  
"OPBA10\_00431" 32887 "s63E6H2" 0.006169021 "Indole-3-glycerol phosphate synthase"  
"OPBA10\_00432" 32888 "s59E13H2" 0.01524062 "N-(5'-phosphoribosyl)anthranilate isomerase"  
"OPBA10\_00432" 32888 "s59E25H2" 0 "N-(5'-phosphoribosyl)anthranilate isomerase"  
"OPBA10\_00432" 32888 "s59E5H2" 0.05304757 "N-(5'-phosphoribosyl)anthranilate isomerase"  
"OPBA10\_00432" 32888 "s63E6H2" 0.02144483 "N-(5'-phosphoribosyl)anthranilate isomerase"

"OPBA10\_00433" 32889 "s59E13H2" 0.004943926 "Tryptophan synthase beta chain 1"  
"OPBA10\_00433" 32889 "s59E25H2" 0 "Tryptophan synthase beta chain 1"  
"OPBA10\_00433" 32889 "s59E5H2" 0.1174953 "Tryptophan synthase beta chain 1"  
"OPBA10\_00433" 32889 "s63E6H2" 0.03799059 "Tryptophan synthase beta chain 1"  
"OPBA10\_00434" 32890 "s59E13H2" 0.005270905 "Tryptophan synthase alpha chain"  
"OPBA10\_00434" 32890 "s59E25H2" 0 "Tryptophan synthase alpha chain"  
"OPBA10\_00434" 32890 "s59E5H2" 0.07958133 "Tryptophan synthase alpha chain"  
"OPBA10\_00434" 32890 "s63E6H2" 0.03174497 "Tryptophan synthase alpha chain"  
"OPBA10\_00435" 32891 "s59E13H2" 0 "hypothetical protein"  
"OPBA10\_00435" 32891 "s59E25H2" 0 "hypothetical protein"  
"OPBA10\_00435" 32891 "s59E5H2" 0.01665589 "hypothetical protein"  
"OPBA10\_00435" 32891 "s63E6H2" 0 "hypothetical protein"  
"OPBA10\_00436" 32892 "s59E13H2" 0 "YcfA-like protein"  
"OPBA10\_00436" 32892 "s59E25H2" 0 "YcfA-like protein"  
"OPBA10\_00436" 32892 "s59E5H2" 0.03611185 "YcfA-like protein"  
"OPBA10\_00436" 32892 "s63E6H2" 0 "YcfA-like protein"  
"OPBA10\_00437" 32893 "s59E13H2" 0.00375871 "N-acetylglucosaminyl-diphospho-decaprenol L-rhamnosyltransferase"  
"OPBA10\_00437" 32893 "s59E25H2" 0 "N-acetylglucosaminyl-diphospho-decaprenol L-rhamnosyltransferase"  
"OPBA10\_00437" 32893 "s59E5H2" 0.08594616 "N-acetylglucosaminyl-diphospho-decaprenol L-rhamnosyltransferase"  
"OPBA10\_00437" 32893 "s63E6H2" 0.0203058 "N-acetylglucosaminyl-diphospho-decaprenol L-rhamnosyltransferase"  
"OPBA10\_00438" 32894 "s59E13H2" 0.01903787 "GDP-6-deoxy-D-mannose reductase"  
"OPBA10\_00438" 32894 "s59E25H2" 0 "GDP-6-deoxy-D-mannose reductase"  
"OPBA10\_00438" 32894 "s59E5H2" 0.06128908 "GDP-6-deoxy-D-mannose reductase"  
"OPBA10\_00438" 32894 "s63E6H2" 0.125733 "GDP-6-deoxy-D-mannose reductase"  
"OPBA10\_00439" 32895 "s59E13H2" 0.004387757 "D-glycero-alpha-D-manno-heptose 1-phosphate guanylyltransferase"  
"OPBA10\_00439" 32895 "s59E25H2" 0 "D-glycero-alpha-D-manno-heptose 1-phosphate guanylyltransferase"  
"OPBA10\_00439" 32895 "s59E5H2" 0.0659219 "D-glycero-alpha-D-manno-heptose 1-phosphate guanylyltransferase"  
"OPBA10\_00439" 32895 "s63E6H2" 0.1327529 "D-glycero-alpha-D-manno-heptose 1-phosphate guanylyltransferase"  
"OPBA10\_00440" 32896 "s59E13H2" 0.008104024 "GDP-mannose 4,6-dehydratase"  
"OPBA10\_00440" 32896 "s59E25H2" 0 "GDP-mannose 4,6-dehydratase"  
"OPBA10\_00440" 32896 "s59E5H2" 0.06982998 "GDP-mannose 4,6-dehydratase"  
"OPBA10\_00440" 32896 "s63E6H2" 0.1944804 "GDP-mannose 4,6-dehydratase"  
"OPBA10\_00441" 32897 "s59E13H2" 0.01157341 "Phosphoglucomutase"  
"OPBA10\_00441" 32897 "s59E25H2" 0 "Phosphoglucomutase"  
"OPBA10\_00441" 32897 "s59E5H2" 0.04996936 "Phosphoglucomutase"  
"OPBA10\_00441" 32897 "s63E6H2" 0.1935367 "Phosphoglucomutase"  
"OPBA10\_00442" 32898 "s59E13H2" 0.03375508 "Bifunctional phosphoglucose/phosphomannose isomerase"  
"OPBA10\_00442" 32898 "s59E25H2" 0 "Bifunctional phosphoglucose/phosphomannose isomerase"  
"OPBA10\_00442" 32898 "s59E5H2" 0.06594505 "Bifunctional phosphoglucose/phosphomannose isomerase"  
"OPBA10\_00442" 32898 "s63E6H2" 0.1509311 "Bifunctional phosphoglucose/phosphomannose isomerase"  
"OPBA10\_00443" 32899 "s59E13H2" 0.0482022 "Adenosylhomocysteinase"  
"OPBA10\_00443" 32899 "s59E25H2" 0 "Adenosylhomocysteinase"  
"OPBA10\_00443" 32899 "s59E5H2" 0.06219011 "Adenosylhomocysteinase"  
"OPBA10\_00443" 32899 "s63E6H2" 0.3871932 "Adenosylhomocysteinase"  
"OPBA10\_00444" 32900 "s59E13H2" 0.03708375 "Methylthioribose-1-phosphate isomerase"  
"OPBA10\_00444" 32900 "s59E25H2" 0 "Methylthioribose-1-phosphate isomerase"  
"OPBA10\_00444" 32900 "s59E5H2" 0.07972253 "Methylthioribose-1-phosphate isomerase"

"OPBA10\_00444" 32900 "s63E6H2" 0.4974106 "Methylthioribose-1-phosphate isomerase"  
"OPBA10\_00445" 32901 "s59E13H2" 0.04577722 "Bifunctional protein GlmU"  
"OPBA10\_00445" 32901 "s59E25H2" 0.4195251 "Bifunctional protein GlmU"  
"OPBA10\_00445" 32901 "s59E5H2" 0.02379717 "Bifunctional protein GlmU"  
"OPBA10\_00445" 32901 "s63E6H2" 0.2828928 "Bifunctional protein GlmU"  
"OPBA10\_00446" 32902 "s59E13H2" 0.04127609 "DNA utilization protein GntX"  
"OPBA10\_00446" 32902 "s59E25H2" 0 "DNA utilization protein GntX"  
"OPBA10\_00446" 32902 "s59E5H2" 0.02844929 "DNA utilization protein GntX"  
"OPBA10\_00446" 32902 "s63E6H2" 0.2447164 "DNA utilization protein GntX"  
"OPBA10\_00447" 32903 "s59E13H2" 0.05062126 "Cold shock-like protein CspE"  
"OPBA10\_00447" 32903 "s59E25H2" 0 "Cold shock-like protein CspE"  
"OPBA10\_00447" 32903 "s59E5H2" 0.0103575 "Cold shock-like protein CspE"  
"OPBA10\_00447" 32903 "s63E6H2" 0.1848273 "Cold shock-like protein CspE"  
"OPBA10\_00448" 32904 "s59E13H2" 0.08006905 "Putative sigma-54 modulation protein"  
"OPBA10\_00448" 32904 "s59E25H2" 0 "Putative sigma-54 modulation protein"  
"OPBA10\_00448" 32904 "s59E5H2" 0.06001486 "Putative sigma-54 modulation protein"  
"OPBA10\_00448" 32904 "s63E6H2" 0.1925001 "Putative sigma-54 modulation protein"  
"OPBA10\_00449" 32905 "s59E13H2" 0.125588 "preprotein translocase subunit SecA"  
"OPBA10\_00449" 32905 "s59E25H2" 0 "preprotein translocase subunit SecA"  
"OPBA10\_00449" 32905 "s59E5H2" 0.05300283 "preprotein translocase subunit SecA"  
"OPBA10\_00449" 32905 "s63E6H2" 0.384316 "preprotein translocase subunit SecA"  
"OPBA10\_00450" 32906 "s59E13H2" 0.04078507 "F(420)H(2) dehydrogenase subunit B"  
"OPBA10\_00450" 32906 "s59E25H2" 0 "F(420)H(2) dehydrogenase subunit B"  
"OPBA10\_00450" 32906 "s59E5H2" 0.06865423 "F(420)H(2) dehydrogenase subunit B"  
"OPBA10\_00450" 32906 "s63E6H2" 0.02829326 "F(420)H(2) dehydrogenase subunit B"  
"OPBA10\_00451" 32907 "s59E13H2" 0.03570889 "hypothetical protein"  
"OPBA10\_00451" 32907 "s59E25H2" 0 "hypothetical protein"  
"OPBA10\_00451" 32907 "s59E5H2" 0.05039556 "hypothetical protein"  
"OPBA10\_00451" 32907 "s63E6H2" 0.04729871 "hypothetical protein"  
"OPBA10\_00452" 32908 "s59E13H2" 0.02638915 "N,N'-diacetylchitobiose phosphorylase"  
"OPBA10\_00452" 32908 "s59E25H2" 0 "N,N'-diacetylchitobiose phosphorylase"  
"OPBA10\_00452" 32908 "s59E5H2" 0 "N,N'-diacetylchitobiose phosphorylase"  
"OPBA10\_00452" 32908 "s63E6H2" 0.1243633 "N,N'-diacetylchitobiose phosphorylase"  
"OPBA10\_00453" 32909 "s59E13H2" 0.02943115 "hypothetical protein"  
"OPBA10\_00453" 32909 "s59E25H2" 0 "hypothetical protein"  
"OPBA10\_00453" 32909 "s59E5H2" 0.03177752 "hypothetical protein"  
"OPBA10\_00453" 32909 "s63E6H2" 0.01489987 "hypothetical protein"  
"OPBA10\_00454" 32910 "s59E13H2" 0.06353523 "RNA polymerase sigma factor SigM"  
"OPBA10\_00454" 32910 "s59E25H2" 0 "RNA polymerase sigma factor SigM"  
"OPBA10\_00454" 32910 "s59E5H2" 0 "RNA polymerase sigma factor SigM"  
"OPBA10\_00454" 32910 "s63E6H2" 0.1818666 "RNA polymerase sigma factor SigM"  
"OPBA10\_00455" 32911 "s59E13H2" 0.06921244 "hypothetical protein"  
"OPBA10\_00455" 32911 "s59E25H2" 0 "hypothetical protein"  
"OPBA10\_00455" 32911 "s59E5H2" 0 "hypothetical protein"  
"OPBA10\_00455" 32911 "s63E6H2" 0.3373169 "hypothetical protein"  
"OPBA10\_00456" 32912 "s59E13H2" 0.2142518 "2,3-bisphosphoglycerate-independent phosphoglycerate mutase 1"  
"OPBA10\_00456" 32912 "s59E25H2" 0 "2,3-bisphosphoglycerate-independent phosphoglycerate mutase 1"

"OPBA10\_00456" 32912 "s59E5H2" 0.07627005 "2,3-bisphosphoglycerate-independent phosphoglycerate mutase 1"  
"OPBA10\_00456" 32912 "s63E6H2" 0.5353888 "2,3-bisphosphoglycerate-independent phosphoglycerate mutase 1"  
"OPBA10\_00457" 32913 "s59E13H2" 0.1336397 "Threonine synthase"  
"OPBA10\_00457" 32913 "s59E25H2" 0 "Threonine synthase"  
"OPBA10\_00457" 32913 "s59E5H2" 0.1013152 "Threonine synthase"  
"OPBA10\_00457" 32913 "s63E6H2" 0.528625 "Threonine synthase"  
"OPBA10\_00458" 32914 "s59E13H2" 0.08201738 "Homoserine dehydrogenase"  
"OPBA10\_00458" 32914 "s59E25H2" 0 "Homoserine dehydrogenase"  
"OPBA10\_00458" 32914 "s59E5H2" 0.1895272 "Homoserine dehydrogenase"  
"OPBA10\_00458" 32914 "s63E6H2" 0.2431121 "Homoserine dehydrogenase"  
"OPBA10\_00459" 32915 "s59E13H2" 0.381134 "Diaminopimelate decarboxylase"  
"OPBA10\_00459" 32915 "s59E25H2" 0 "Diaminopimelate decarboxylase"  
"OPBA10\_00459" 32915 "s59E5H2" 0.1399406 "Diaminopimelate decarboxylase"  
"OPBA10\_00459" 32915 "s63E6H2" 0.05460382 "Diaminopimelate decarboxylase"  
"OPBA10\_00460" 32916 "s59E13H2" 0.04158703 "Arginine--tRNA ligase"  
"OPBA10\_00460" 32916 "s59E25H2" 0 "Arginine--tRNA ligase"  
"OPBA10\_00460" 32916 "s59E5H2" 0.1238279 "Arginine--tRNA ligase"  
"OPBA10\_00460" 32916 "s63E6H2" 0.04584703 "Arginine--tRNA ligase"  
"OPBA10\_00461" 32917 "s59E13H2" 0.003514716 "Cell wall-binding protein YocH precursor"  
"OPBA10\_00461" 32917 "s59E25H2" 0 "Cell wall-binding protein YocH precursor"  
"OPBA10\_00461" 32917 "s59E5H2" 0.05531264 "Cell wall-binding protein YocH precursor"  
"OPBA10\_00461" 32917 "s63E6H2" 0.008789801 "Cell wall-binding protein YocH precursor"  
"OPBA10\_00462" 32918 "s59E13H2" 0 "hypothetical protein"  
"OPBA10\_00462" 32918 "s59E25H2" 0 "hypothetical protein"  
"OPBA10\_00462" 32918 "s59E5H2" 0.007925736 "hypothetical protein"  
"OPBA10\_00462" 32918 "s63E6H2" 0.001773126 "hypothetical protein"  
"OPBA10\_00463" 32919 "s59E13H2" 0.00090225 "Threonine--tRNA ligase 2"  
"OPBA10\_00463" 32919 "s59E25H2" 0 "Threonine--tRNA ligase 2"  
"OPBA10\_00463" 32919 "s59E5H2" 0.09406156 "Threonine--tRNA ligase 2"  
"OPBA10\_00463" 32919 "s63E6H2" 0.01645964 "Threonine--tRNA ligase 2"  
"OPBA10\_00464" 32920 "s59E13H2" 0.002587646 "pyrroloquinoline quinone biosynthesis protein PqqE"  
"OPBA10\_00464" 32920 "s59E25H2" 0 "pyrroloquinoline quinone biosynthesis protein PqqE"  
"OPBA10\_00464" 32920 "s59E5H2" 0.06327883 "pyrroloquinoline quinone biosynthesis protein PqqE"  
"OPBA10\_00464" 32920 "s63E6H2" 0.01440665 "pyrroloquinoline quinone biosynthesis protein PqqE"  
"OPBA10\_00465" 32921 "s59E13H2" 0 "Translation initiation factor IF-3"  
"OPBA10\_00465" 32921 "s59E25H2" 0 "Translation initiation factor IF-3"  
"OPBA10\_00465" 32921 "s59E5H2" 0.2114136 "Translation initiation factor IF-3"  
"OPBA10\_00465" 32921 "s63E6H2" 0.06653804 "Translation initiation factor IF-3"  
"OPBA10\_00466" 32922 "s59E13H2" 0.01037988 "50S ribosomal protein L35"  
"OPBA10\_00466" 32922 "s59E25H2" 0 "50S ribosomal protein L35"  
"OPBA10\_00466" 32922 "s59E5H2" 0.1129833 "50S ribosomal protein L35"  
"OPBA10\_00466" 32922 "s63E6H2" 0.07781491 "50S ribosomal protein L35"  
"OPBA10\_00467" 32923 "s59E13H2" 0.003437822 "50S ribosomal protein L20"  
"OPBA10\_00467" 32923 "s59E25H2" 0 "50S ribosomal protein L20"  
"OPBA10\_00467" 32923 "s59E5H2" 0.1159977 "50S ribosomal protein L20"  
"OPBA10\_00467" 32923 "s63E6H2" 0.05967487 "50S ribosomal protein L20"  
"OPBA10\_00468" 32924 "s59E13H2" 0.006065383 "Phenylalanine--tRNA ligase alpha subunit"

"OPBA10\_00468" 32924 "s59E25H2" 0 "Phenylalanine--tRNA ligase alpha subunit"  
"OPBA10\_00468" 32924 "s59E5H2" 0.03843125 "Phenylalanine--tRNA ligase alpha subunit"  
"OPBA10\_00468" 32924 "s63E6H2" 0.05111364 "Phenylalanine--tRNA ligase alpha subunit"  
"OPBA10\_00469" 32925 "s59E13H2" 0.01106072 "Phenylalanine--tRNA ligase beta subunit"  
"OPBA10\_00469" 32925 "s59E25H2" 0 "Phenylalanine--tRNA ligase beta subunit"  
"OPBA10\_00469" 32925 "s59E5H2" 0.1279689 "Phenylalanine--tRNA ligase beta subunit"  
"OPBA10\_00469" 32925 "s63E6H2" 0.1018597 "Phenylalanine--tRNA ligase beta subunit"  
"OPBA10\_00470" 32926 "s59E13H2" 0.005400364 "ribonuclease Z"  
"OPBA10\_00470" 32926 "s59E25H2" 0 "ribonuclease Z"  
"OPBA10\_00470" 32926 "s59E5H2" 0.04803476 "ribonuclease Z"  
"OPBA10\_00470" 32926 "s63E6H2" 0.05136958 "ribonuclease Z"  
"OPBA10\_00471" 32927 "s59E13H2" 0.02635719 "hypothetical protein"  
"OPBA10\_00471" 32927 "s59E25H2" 0 "hypothetical protein"  
"OPBA10\_00471" 32927 "s59E5H2" 0.2328935 "hypothetical protein"  
"OPBA10\_00471" 32927 "s63E6H2" 0.9494809 "hypothetical protein"  
"OPBA10\_00472" 32928 "s59E13H2" 0.001260497 "N-acetyl-gamma-glutamyl-phosphate reductase"  
"OPBA10\_00472" 32928 "s59E25H2" 0 "N-acetyl-gamma-glutamyl-phosphate reductase"  
"OPBA10\_00472" 32928 "s59E5H2" 0.1196776 "N-acetyl-gamma-glutamyl-phosphate reductase"  
"OPBA10\_00472" 32928 "s63E6H2" 1.298154 "N-acetyl-gamma-glutamyl-phosphate reductase"  
"OPBA10\_00473" 32929 "s59E13H2" 0.003843733 "Arginine biosynthesis bifunctional protein ArgJ"  
"OPBA10\_00473" 32929 "s59E25H2" 0 "Arginine biosynthesis bifunctional protein ArgJ"  
"OPBA10\_00473" 32929 "s59E5H2" 0.1425591 "Arginine biosynthesis bifunctional protein ArgJ"  
"OPBA10\_00473" 32929 "s63E6H2" 0.1564257 "Arginine biosynthesis bifunctional protein ArgJ"  
"OPBA10\_00474" 32930 "s59E13H2" 0.01466809 "Acetylglutamate kinase"  
"OPBA10\_00474" 32930 "s59E25H2" 0 "Acetylglutamate kinase"  
"OPBA10\_00474" 32930 "s59E5H2" 0.3476516 "Acetylglutamate kinase"  
"OPBA10\_00474" 32930 "s63E6H2" 0.06348784 "Acetylglutamate kinase"  
"OPBA10\_00475" 32931 "s59E13H2" 0.01552031 "Acetylornithine aminotransferase"  
"OPBA10\_00475" 32931 "s59E25H2" 0 "Acetylornithine aminotransferase"  
"OPBA10\_00475" 32931 "s59E5H2" 0.2863132 "Acetylornithine aminotransferase"  
"OPBA10\_00475" 32931 "s63E6H2" 0.0465726 "Acetylornithine aminotransferase"  
"OPBA10\_00476" 32932 "s59E13H2" 0.01562521 "Ornithine carbamoyltransferase"  
"OPBA10\_00476" 32932 "s59E25H2" 0 "Ornithine carbamoyltransferase"  
"OPBA10\_00476" 32932 "s59E5H2" 0.2448881 "Ornithine carbamoyltransferase"  
"OPBA10\_00476" 32932 "s63E6H2" 0.01439902 "Ornithine carbamoyltransferase"  
"OPBA10\_00477" 32933 "s59E13H2" 0.01741171 "Arginine repressor"  
"OPBA10\_00477" 32933 "s59E25H2" 0 "Arginine repressor"  
"OPBA10\_00477" 32933 "s59E5H2" 0.2668049 "Arginine repressor"  
"OPBA10\_00477" 32933 "s63E6H2" 0.03007858 "Arginine repressor"  
"OPBA10\_00478" 32934 "s59E13H2" 0.0328188 "Argininosuccinate synthase"  
"OPBA10\_00478" 32934 "s59E25H2" 0 "Argininosuccinate synthase"  
"OPBA10\_00478" 32934 "s59E5H2" 0.3893248 "Argininosuccinate synthase"  
"OPBA10\_00478" 32934 "s63E6H2" 0.03808675 "Argininosuccinate synthase"  
"OPBA10\_00479" 32935 "s59E13H2" 0.0514397 "Argininosuccinate lyase"  
"OPBA10\_00479" 32935 "s59E25H2" 0 "Argininosuccinate lyase"  
"OPBA10\_00479" 32935 "s59E5H2" 0.5838014 "Argininosuccinate lyase"  
"OPBA10\_00479" 32935 "s63E6H2" 0.03264524 "Argininosuccinate lyase"

"OPBA10\_00480" 32936 "s59E13H2" 0.08623255 "putative protease YhbU precursor"  
"OPBA10\_00480" 32936 "s59E25H2" 0 "putative protease YhbU precursor"  
"OPBA10\_00480" 32936 "s59E5H2" 0.4743977 "putative protease YhbU precursor"  
"OPBA10\_00480" 32936 "s63E6H2" 0.01943328 "putative protease YhbU precursor"  
"OPBA10\_00481" 32937 "s59E13H2" 1.101628 "Penicillin-binding protein 2D"  
"OPBA10\_00481" 32937 "s59E25H2" 0 "Penicillin-binding protein 2D"  
"OPBA10\_00481" 32937 "s59E5H2" 0.3429964 "Penicillin-binding protein 2D"  
"OPBA10\_00481" 32937 "s63E6H2" 0.03928319 "Penicillin-binding protein 2D"  
"OPBA10\_00482" 32938 "s59E13H2" 1.156497 "Tyrosine--tRNA ligase"  
"OPBA10\_00482" 32938 "s59E25H2" 0 "Tyrosine--tRNA ligase"  
"OPBA10\_00482" 32938 "s59E5H2" 0.3096756 "Tyrosine--tRNA ligase"  
"OPBA10\_00482" 32938 "s63E6H2" 0.08052108 "Tyrosine--tRNA ligase"  
"OPBA10\_00483" 32939 "s59E13H2" 2.033799e-05 "Hydrogenase/urease nickel incorporation protein HypA"  
"OPBA10\_00483" 32939 "s59E25H2" 0 "Hydrogenase/urease nickel incorporation protein HypA"  
"OPBA10\_00483" 32939 "s59E5H2" 0.02668774 "Hydrogenase/urease nickel incorporation protein HypA"  
"OPBA10\_00483" 32939 "s63E6H2" 0 "Hydrogenase/urease nickel incorporation protein HypA"  
"OPBA10\_00484" 32940 "s59E13H2" 0 "30S ribosomal protein S3"  
"OPBA10\_00484" 32940 "s59E25H2" 0 "30S ribosomal protein S3"  
"OPBA10\_00484" 32940 "s59E5H2" 0 "30S ribosomal protein S3"  
"OPBA10\_00484" 32940 "s63E6H2" 0.01399285 "30S ribosomal protein S3"  
"OPBA10\_00485" 32941 "s59E13H2" 0 "50S ribosomal protein L16"  
"OPBA10\_00485" 32941 "s59E25H2" 0 "50S ribosomal protein L16"  
"OPBA10\_00485" 32941 "s59E5H2" 0 "50S ribosomal protein L16"  
"OPBA10\_00485" 32941 "s63E6H2" 0.01703649 "50S ribosomal protein L16"  
"OPBA10\_00486" 32942 "s59E13H2" 0 "50S ribosomal protein L29"  
"OPBA10\_00486" 32942 "s59E25H2" 0 "50S ribosomal protein L29"  
"OPBA10\_00486" 32942 "s59E5H2" 0 "50S ribosomal protein L29"  
"OPBA10\_00486" 32942 "s63E6H2" 0.02876321 "50S ribosomal protein L29"  
"OPBA10\_00487" 32943 "s59E13H2" 0.002045763 "30S ribosomal protein S17"  
"OPBA10\_00487" 32943 "s59E25H2" 0 "30S ribosomal protein S17"  
"OPBA10\_00487" 32943 "s59E5H2" 0.0219971 "30S ribosomal protein S17"  
"OPBA10\_00487" 32943 "s63E6H2" 0.01311219 "30S ribosomal protein S17"  
"OPBA10\_00488" 32944 "s59E13H2" 0.006409082 "50S ribosomal protein L14"  
"OPBA10\_00488" 32944 "s59E25H2" 0 "50S ribosomal protein L14"  
"OPBA10\_00488" 32944 "s59E5H2" 0.03562721 "50S ribosomal protein L14"  
"OPBA10\_00488" 32944 "s63E6H2" 0.006151662 "50S ribosomal protein L14"  
"OPBA10\_00489" 32945 "s59E13H2" 0 "50S ribosomal protein L24"  
"OPBA10\_00489" 32945 "s59E25H2" 0 "50S ribosomal protein L24"  
"OPBA10\_00489" 32945 "s59E5H2" 0.004520579 "50S ribosomal protein L24"  
"OPBA10\_00489" 32945 "s63E6H2" 0.008748721 "50S ribosomal protein L24"  
"OPBA10\_00490" 32946 "s59E13H2" 0.00175491 "50S ribosomal protein L5"  
"OPBA10\_00490" 32946 "s59E25H2" 0 "50S ribosomal protein L5"  
"OPBA10\_00490" 32946 "s59E5H2" 0.01594303 "50S ribosomal protein L5"  
"OPBA10\_00490" 32946 "s63E6H2" 0.0126176 "50S ribosomal protein L5"  
"OPBA10\_00491" 32947 "s59E13H2" 0.008900167 "30S ribosomal protein S14 type Z"  
"OPBA10\_00491" 32947 "s59E25H2" 0 "30S ribosomal protein S14 type Z"  
"OPBA10\_00491" 32947 "s59E5H2" 0.01856505 "30S ribosomal protein S14 type Z"



"OPBA10\_00491" 32947 "s63E6H2" 0.008105719 "30S ribosomal protein S14 type Z"  
"OPBA10\_00492" 32948 "s59E13H2" 0.009016509 "30S ribosomal protein S8"  
"OPBA10\_00492" 32948 "s59E25H2" 0 "30S ribosomal protein S8"  
"OPBA10\_00492" 32948 "s59E5H2" 0.0274999 "30S ribosomal protein S8"  
"OPBA10\_00492" 32948 "s63E6H2" 0.01834294 "30S ribosomal protein S8"  
"OPBA10\_00493" 32949 "s59E13H2" 0.01536027 "50S ribosomal protein L6"  
"OPBA10\_00493" 32949 "s59E25H2" 0 "50S ribosomal protein L6"  
"OPBA10\_00493" 32949 "s59E5H2" 0.02522804 "50S ribosomal protein L6"  
"OPBA10\_00493" 32949 "s63E6H2" 0.01131056 "50S ribosomal protein L6"  
"OPBA10\_00494" 32950 "s59E13H2" 0.005325901 "50S ribosomal protein L18"  
"OPBA10\_00494" 32950 "s59E25H2" 0 "50S ribosomal protein L18"  
"OPBA10\_00494" 32950 "s59E5H2" 0.0158593 "50S ribosomal protein L18"  
"OPBA10\_00494" 32950 "s63E6H2" 0.01082231 "50S ribosomal protein L18"  
"OPBA10\_00495" 32951 "s59E13H2" 0.005423957 "30S ribosomal protein S5"  
"OPBA10\_00495" 32951 "s59E25H2" 0 "30S ribosomal protein S5"  
"OPBA10\_00495" 32951 "s59E5H2" 0.008908265 "30S ribosomal protein S5"  
"OPBA10\_00495" 32951 "s63E6H2" 0.01876597 "30S ribosomal protein S5"  
"OPBA10\_00496" 32952 "s59E13H2" 0.0008674775 "50S ribosomal protein L15"  
"OPBA10\_00496" 32952 "s59E25H2" 0 "50S ribosomal protein L15"  
"OPBA10\_00496" 32952 "s59E5H2" 0.04297396 "50S ribosomal protein L15"  
"OPBA10\_00496" 32952 "s63E6H2" 0.02569568 "50S ribosomal protein L15"  
"OPBA10\_00497" 32953 "s59E13H2" 0.02477689 "preprotein translocase subunit SecY"  
"OPBA10\_00497" 32953 "s59E25H2" 0 "preprotein translocase subunit SecY"  
"OPBA10\_00497" 32953 "s59E5H2" 0.03122973 "preprotein translocase subunit SecY"  
"OPBA10\_00497" 32953 "s63E6H2" 0.01459896 "preprotein translocase subunit SecY"  
"OPBA10\_00498" 32954 "s59E13H2" 0.03097207 "Adenylate kinase"  
"OPBA10\_00498" 32954 "s59E25H2" 0 "Adenylate kinase"  
"OPBA10\_00498" 32954 "s59E5H2" 0.05837243 "Adenylate kinase"  
"OPBA10\_00498" 32954 "s63E6H2" 0.004769757 "Adenylate kinase"  
"OPBA10\_00499" 32955 "s59E13H2" 0.03627819 "Methionine aminopeptidase 1"  
"OPBA10\_00499" 32955 "s59E25H2" 0 "Methionine aminopeptidase 1"  
"OPBA10\_00499" 32955 "s59E5H2" 0.132364 "Methionine aminopeptidase 1"  
"OPBA10\_00499" 32955 "s63E6H2" 0.0005642216 "Methionine aminopeptidase 1"  
"OPBA10\_00500" 32956 "s59E13H2" 0.03040338 "Translation initiation factor IF-1"  
"OPBA10\_00500" 32956 "s59E25H2" 0 "Translation initiation factor IF-1"  
"OPBA10\_00500" 32956 "s59E5H2" 0.2390976 "Translation initiation factor IF-1"  
"OPBA10\_00500" 32956 "s63E6H2" 0.01345855 "Translation initiation factor IF-1"  
"OPBA10\_00501" 32957 "s59E13H2" 0.01641276 "50S ribosomal protein L36"  
"OPBA10\_00501" 32957 "s59E25H2" 0 "50S ribosomal protein L36"  
"OPBA10\_00501" 32957 "s59E5H2" 0 "50S ribosomal protein L36"  
"OPBA10\_00501" 32957 "s63E6H2" 0.003572916 "50S ribosomal protein L36"  
"OPBA10\_00502" 32958 "s59E13H2" 0.01858505 "30S ribosomal protein S13"  
"OPBA10\_00502" 32958 "s59E25H2" 0 "30S ribosomal protein S13"  
"OPBA10\_00502" 32958 "s59E5H2" 0 "30S ribosomal protein S13"  
"OPBA10\_00502" 32958 "s63E6H2" 0.004776585 "30S ribosomal protein S13"  
"OPBA10\_00503" 32959 "s59E13H2" 0.02308071 "30S ribosomal protein S11"  
"OPBA10\_00503" 32959 "s59E25H2" 0 "30S ribosomal protein S11"

"OPBA10\_00503" 32959 "s59E5H2" 0.02823848 "30S ribosomal protein S11"  
"OPBA10\_00503" 32959 "s63E6H2" 0.01089396 "30S ribosomal protein S11"  
"OPBA10\_00504" 32960 "s59E13H2" 0.03130571 "30S ribosomal protein S4"  
"OPBA10\_00504" 32960 "s59E25H2" 0 "30S ribosomal protein S4"  
"OPBA10\_00504" 32960 "s59E5H2" 0.02474422 "30S ribosomal protein S4"  
"OPBA10\_00504" 32960 "s63E6H2" 0.07329083 "30S ribosomal protein S4"  
"OPBA10\_00505" 32961 "s59E13H2" 0.03757952 "DNA-directed RNA polymerase subunit alpha"  
"OPBA10\_00505" 32961 "s59E25H2" 0 "DNA-directed RNA polymerase subunit alpha"  
"OPBA10\_00505" 32961 "s59E5H2" 0.009526125 "DNA-directed RNA polymerase subunit alpha"  
"OPBA10\_00505" 32961 "s63E6H2" 0.0114896 "DNA-directed RNA polymerase subunit alpha"  
"OPBA10\_00506" 32962 "s59E13H2" 0.05924918 "50S ribosomal protein L17"  
"OPBA10\_00506" 32962 "s59E25H2" 0 "50S ribosomal protein L17"  
"OPBA10\_00506" 32962 "s59E5H2" 0.04146026 "50S ribosomal protein L17"  
"OPBA10\_00506" 32962 "s63E6H2" 0.0104557 "50S ribosomal protein L17"  
"OPBA10\_00507" 32963 "s59E13H2" 0.07783772 "tRNA pseudouridine synthase A"  
"OPBA10\_00507" 32963 "s59E25H2" 0 "tRNA pseudouridine synthase A"  
"OPBA10\_00507" 32963 "s59E5H2" 0.02353944 "tRNA pseudouridine synthase A"  
"OPBA10\_00507" 32963 "s63E6H2" 0.01198025 "tRNA pseudouridine synthase A"  
"OPBA10\_00508" 32964 "s59E13H2" 0.03914871 "50S ribosomal protein L13"  
"OPBA10\_00508" 32964 "s59E25H2" 0 "50S ribosomal protein L13"  
"OPBA10\_00508" 32964 "s59E5H2" 0.03764481 "50S ribosomal protein L13"  
"OPBA10\_00508" 32964 "s63E6H2" 0.01701927 "50S ribosomal protein L13"  
"OPBA10\_00509" 32965 "s59E13H2" 0.03753561 "30S ribosomal protein S9"  
"OPBA10\_00509" 32965 "s59E25H2" 0 "30S ribosomal protein S9"  
"OPBA10\_00509" 32965 "s59E5H2" 0.0248498 "30S ribosomal protein S9"  
"OPBA10\_00509" 32965 "s63E6H2" 0.03547787 "30S ribosomal protein S9"  
"OPBA10\_00510" 32966 "s59E13H2" 0.03788493 "alanine racemase"  
"OPBA10\_00510" 32966 "s59E25H2" 0 "alanine racemase"  
"OPBA10\_00510" 32966 "s59E5H2" 0 "alanine racemase"  
"OPBA10\_00510" 32966 "s63E6H2" 0.02598736 "alanine racemase"  
"OPBA10\_00511" 32967 "s59E13H2" 0 "hypothetical protein"  
"OPBA10\_00511" 32967 "s59E25H2" 0 "hypothetical protein"  
"OPBA10\_00511" 32967 "s59E5H2" 0 "hypothetical protein"  
"OPBA10\_00511" 32967 "s63E6H2" 0 "hypothetical protein"  
"OPBA10\_00512" 32968 "s59E13H2" 0.005473645 "Phd\_YefM"  
"OPBA10\_00512" 32968 "s59E25H2" 0 "Phd\_YefM"  
"OPBA10\_00512" 32968 "s59E5H2" 0.01080782 "Phd\_YefM"  
"OPBA10\_00512" 32968 "s63E6H2" 0.002068212 "Phd\_YefM"  
"OPBA10\_00513" 32969 "s59E13H2" 0 "Toxin RelG"  
"OPBA10\_00513" 32969 "s59E25H2" 0 "Toxin RelG"  
"OPBA10\_00513" 32969 "s59E5H2" 0 "Toxin RelG"  
"OPBA10\_00513" 32969 "s63E6H2" 0.003943912 "Toxin RelG"  
"OPBA10\_00514" 32970 "s59E13H2" 0 "N-acetylglucosamine repressor"  
"OPBA10\_00514" 32970 "s59E25H2" 0 "N-acetylglucosamine repressor"  
"OPBA10\_00514" 32970 "s59E5H2" 0 "N-acetylglucosamine repressor"  
"OPBA10\_00514" 32970 "s63E6H2" 0 "N-acetylglucosamine repressor"  
"OPBA10\_00515" 32971 "s59E13H2" 0 "L-fucose isomerase"

"OPBA10\_00515" 32971 "s59E25H2" 0 "L-fucose isomerase"  
"OPBA10\_00515" 32971 "s59E5H2" 0 "L-fucose isomerase"  
"OPBA10\_00515" 32971 "s63E6H2" 0 "L-fucose isomerase"  
"OPBA10\_00516" 32972 "s59E13H2" 0.0004063942 "Putative ABC transporter substrate-binding protein YesO"  
"OPBA10\_00516" 32972 "s59E25H2" 0 "Putative ABC transporter substrate-binding protein YesO"  
"OPBA10\_00516" 32972 "s59E5H2" 0.01220434 "Putative ABC transporter substrate-binding protein YesO"  
"OPBA10\_00516" 32972 "s63E6H2" 0.002295103 "Putative ABC transporter substrate-binding protein YesO"  
"OPBA10\_00517" 32973 "s59E13H2" 0 "Lactose transport system permease protein LacF"  
"OPBA10\_00517" 32973 "s59E25H2" 0 "Lactose transport system permease protein LacF"  
"OPBA10\_00517" 32973 "s59E5H2" 0 "Lactose transport system permease protein LacF"  
"OPBA10\_00517" 32973 "s63E6H2" 0.0008267336 "Lactose transport system permease protein LacF"  
"OPBA10\_00518" 32974 "s59E13H2" 0 "L-arabinose transport system permease protein AraQ"  
"OPBA10\_00518" 32974 "s59E25H2" 0 "L-arabinose transport system permease protein AraQ"  
"OPBA10\_00518" 32974 "s59E5H2" 0 "L-arabinose transport system permease protein AraQ"  
"OPBA10\_00518" 32974 "s63E6H2" 0.001608821 "L-arabinose transport system permease protein AraQ"  
"OPBA10\_00519" 32975 "s59E13H2" 0 "Alpha-galactosidase"  
"OPBA10\_00519" 32975 "s59E25H2" 0 "Alpha-galactosidase"  
"OPBA10\_00519" 32975 "s59E5H2" 0 "Alpha-galactosidase"  
"OPBA10\_00519" 32975 "s63E6H2" 0.0008905387 "Alpha-galactosidase"  
"OPBA10\_00523" 32979 "s59E13H2" 0 "Ribose transport system permease protein RbsC"  
"OPBA10\_00523" 32979 "s59E25H2" 0 "Ribose transport system permease protein RbsC"  
"OPBA10\_00523" 32979 "s59E5H2" 0 "Ribose transport system permease protein RbsC"  
"OPBA10\_00523" 32979 "s63E6H2" 0 "Ribose transport system permease protein RbsC"  
"OPBA10\_00524" 32980 "s59E13H2" 0 "hypothetical protein"  
"OPBA10\_00524" 32980 "s59E25H2" 0 "hypothetical protein"  
"OPBA10\_00524" 32980 "s59E5H2" 0 "hypothetical protein"  
"OPBA10\_00524" 32980 "s63E6H2" 0 "hypothetical protein"  
"OPBA10\_00525" 32981 "s59E13H2" 0 "hypothetical protein"  
"OPBA10\_00525" 32981 "s59E25H2" 0 "hypothetical protein"  
"OPBA10\_00525" 32981 "s59E5H2" 0 "hypothetical protein"  
"OPBA10\_00525" 32981 "s63E6H2" 0 "hypothetical protein"  
"OPBA10\_00528" 32984 "s59E13H2" 0 "Ribose import ATP-binding protein RbsA"  
"OPBA10\_00528" 32984 "s59E25H2" 0 "Ribose import ATP-binding protein RbsA"  
"OPBA10\_00528" 32984 "s59E5H2" 0 "Ribose import ATP-binding protein RbsA"  
"OPBA10\_00528" 32984 "s63E6H2" 0 "Ribose import ATP-binding protein RbsA"  
"OPBA10\_00529" 32985 "s59E13H2" 0.02146788 "tRNA(fMet)-specific endonuclease VapC"  
"OPBA10\_00529" 32985 "s59E25H2" 0 "tRNA(fMet)-specific endonuclease VapC"  
"OPBA10\_00529" 32985 "s59E5H2" 0.9671399 "tRNA(fMet)-specific endonuclease VapC"  
"OPBA10\_00529" 32985 "s63E6H2" 0.03531992 "tRNA(fMet)-specific endonuclease VapC"  
"OPBA10\_00530" 32986 "s59E13H2" 0 "Phd\_YefM"  
"OPBA10\_00530" 32986 "s59E25H2" 0 "Phd\_YefM"  
"OPBA10\_00530" 32986 "s59E5H2" 0.8925897 "Phd\_YefM"  
"OPBA10\_00530" 32986 "s63E6H2" 0 "Phd\_YefM"  
"OPBA10\_00531" 32987 "s59E13H2" 0.00974662 "Dimethylamine corrinoid protein"  
"OPBA10\_00531" 32987 "s59E25H2" 0 "Dimethylamine corrinoid protein"  
"OPBA10\_00531" 32987 "s59E5H2" 0.2460956 "Dimethylamine corrinoid protein"  
"OPBA10\_00531" 32987 "s63E6H2" 0.1537494 "Dimethylamine corrinoid protein"

"OPBA10\_00532" 32988 "s59E13H2" 0.03243756 "Uracil DNA glycosylase superfamily protein"  
"OPBA10\_00532" 32988 "s59E25H2" 0 "Uracil DNA glycosylase superfamily protein"  
"OPBA10\_00532" 32988 "s59E5H2" 0.4012149 "Uracil DNA glycosylase superfamily protein"  
"OPBA10\_00532" 32988 "s63E6H2" 0.006528545 "Uracil DNA glycosylase superfamily protein"  
"OPBA10\_00533" 32989 "s59E13H2" 0.02914142 "Cell wall-binding protein YocH precursor"  
"OPBA10\_00533" 32989 "s59E25H2" 0 "Cell wall-binding protein YocH precursor"  
"OPBA10\_00533" 32989 "s59E5H2" 0.2061251 "Cell wall-binding protein YocH precursor"  
"OPBA10\_00533" 32989 "s63E6H2" 0.005912896 "Cell wall-binding protein YocH precursor"  
"OPBA10\_00534" 32990 "s59E13H2" 0.04945598 "hypothetical protein"  
"OPBA10\_00534" 32990 "s59E25H2" 0 "hypothetical protein"  
"OPBA10\_00534" 32990 "s59E5H2" 0.1120102 "hypothetical protein"  
"OPBA10\_00534" 32990 "s63E6H2" 0.00473885 "hypothetical protein"  
"OPBA10\_00535" 32991 "s59E13H2" 0.02313721 "putative monovalent cation/H+ antiporter subunit D"  
"OPBA10\_00535" 32991 "s59E25H2" 0 "putative monovalent cation/H+ antiporter subunit D"  
"OPBA10\_00535" 32991 "s59E5H2" 0.02648141 "putative monovalent cation/H+ antiporter subunit D"  
"OPBA10\_00535" 32991 "s63E6H2" 0.02594839 "putative monovalent cation/H+ antiporter subunit D"  
"OPBA10\_00536" 32992 "s59E13H2" 0.01686618 "hypothetical protein"  
"OPBA10\_00536" 32992 "s59E25H2" 0 "hypothetical protein"  
"OPBA10\_00536" 32992 "s59E5H2" 0.07787989 "hypothetical protein"  
"OPBA10\_00536" 32992 "s63E6H2" 0.00607929 "hypothetical protein"  
"OPBA10\_00537" 32993 "s59E13H2" 0.01723587 "Pyruvate kinase"  
"OPBA10\_00537" 32993 "s59E25H2" 0 "Pyruvate kinase"  
"OPBA10\_00537" 32993 "s59E5H2" 0.6504575 "Pyruvate kinase"  
"OPBA10\_00537" 32993 "s63E6H2" 0.07633523 "Pyruvate kinase"  
"OPBA10\_00538" 32994 "s59E13H2" 0.03858623 "Ktr system potassium uptake protein A"  
"OPBA10\_00538" 32994 "s59E25H2" 0 "Ktr system potassium uptake protein A"  
"OPBA10\_00538" 32994 "s59E5H2" 0.9578126 "Ktr system potassium uptake protein A"  
"OPBA10\_00538" 32994 "s63E6H2" 0.1087028 "Ktr system potassium uptake protein A"  
"OPBA10\_00539" 32995 "s59E13H2" 0.008060639 "Ktr system potassium uptake protein B"  
"OPBA10\_00539" 32995 "s59E25H2" 0 "Ktr system potassium uptake protein B"  
"OPBA10\_00539" 32995 "s59E5H2" 0.5086296 "Ktr system potassium uptake protein B"  
"OPBA10\_00539" 32995 "s63E6H2" 0.02971947 "Ktr system potassium uptake protein B"  
"OPBA10\_00540" 32996 "s59E13H2" 0.008275867 "Cell division protein FtsL"  
"OPBA10\_00540" 32996 "s59E25H2" 0 "Cell division protein FtsL"  
"OPBA10\_00540" 32996 "s59E5H2" 0.07876951 "Cell division protein FtsL"  
"OPBA10\_00540" 32996 "s63E6H2" 0.01721058 "Cell division protein FtsL"  
"OPBA10\_00541" 32997 "s59E13H2" 0.01790789 "Exopolyphosphatase"  
"OPBA10\_00541" 32997 "s59E25H2" 0 "Exopolyphosphatase"  
"OPBA10\_00541" 32997 "s59E5H2" 0.09323891 "Exopolyphosphatase"  
"OPBA10\_00541" 32997 "s63E6H2" 0.02972097 "Exopolyphosphatase"  
"OPBA10\_00543" 32999 "s59E13H2" 0.002483235 "hypothetical protein"  
"OPBA10\_00543" 32999 "s59E25H2" 0 "hypothetical protein"  
"OPBA10\_00543" 32999 "s59E5H2" 0.1650112 "hypothetical protein"  
"OPBA10\_00543" 32999 "s63E6H2" 0.008316114 "hypothetical protein"  
"OPBA10\_00544" 33000 "s59E13H2" 0 "HNH endonuclease"  
"OPBA10\_00544" 33000 "s59E25H2" 0 "HNH endonuclease"  
"OPBA10\_00544" 33000 "s59E5H2" 0.06017388 "HNH endonuclease"

"OPBA10\_00544" 33000 "s63E6H2" 0 "HNH endonuclease"  
"OPBA10\_00546" 33002 "s59E13H2" 0.04927272 "putative kinase inhibitor protein"  
"OPBA10\_00546" 33002 "s59E25H2" 0 "putative kinase inhibitor protein"  
"OPBA10\_00546" 33002 "s59E5H2" 0.8108072 "putative kinase inhibitor protein"  
"OPBA10\_00546" 33002 "s63E6H2" 0.04076295 "putative kinase inhibitor protein"  
"OPBA10\_00547" 33003 "s59E13H2" 0.1352395 "Hydrogenase 2 maturation protease"  
"OPBA10\_00547" 33003 "s59E25H2" 0 "Hydrogenase 2 maturation protease"  
"OPBA10\_00547" 33003 "s59E5H2" 1.235062 "Hydrogenase 2 maturation protease"  
"OPBA10\_00547" 33003 "s63E6H2" 0.04126066 "Hydrogenase 2 maturation protease"  
"OPBA10\_00548" 33004 "s59E13H2" 0.07076526 "Bifunctional homocysteine S-methyltransferase/5,10-methylenetetrahydrofolate reductase"  
"OPBA10\_00548" 33004 "s59E25H2" 0 "Bifunctional homocysteine S-methyltransferase/5,10-methylenetetrahydrofolate reductase"  
"OPBA10\_00548" 33004 "s59E5H2" 1.994115 "Bifunctional homocysteine S-methyltransferase/5,10-methylenetetrahydrofolate reductase"  
"OPBA10\_00548" 33004 "s63E6H2" 0 "Bifunctional homocysteine S-methyltransferase/5,10-methylenetetrahydrofolate reductase"  
"OPBA10\_00549" 33005 "s59E13H2" 0.05431107 "hypothetical protein"  
"OPBA10\_00549" 33005 "s59E25H2" 0 "hypothetical protein"  
"OPBA10\_00549" 33005 "s59E5H2" 1.096444 "hypothetical protein"  
"OPBA10\_00549" 33005 "s63E6H2" 0 "hypothetical protein"  
"OPBA10\_00550" 33006 "s59E13H2" 0.02962069 "Periplasmic [NiFe] hydrogenase large subunit precursor"  
"OPBA10\_00550" 33006 "s59E25H2" 0 "Periplasmic [NiFe] hydrogenase large subunit precursor"  
"OPBA10\_00550" 33006 "s59E5H2" 0.5098177 "Periplasmic [NiFe] hydrogenase large subunit precursor"  
"OPBA10\_00550" 33006 "s63E6H2" 0 "Periplasmic [NiFe] hydrogenase large subunit precursor"  
"OPBA10\_00551" 33007 "s59E13H2" 0.05561588 "Periplasmic [NiFeSe] hydrogenase small subunit precursor"  
"OPBA10\_00551" 33007 "s59E25H2" 0 "Periplasmic [NiFeSe] hydrogenase small subunit precursor"  
"OPBA10\_00551" 33007 "s59E5H2" 0.2271661 "Periplasmic [NiFeSe] hydrogenase small subunit precursor"  
"OPBA10\_00551" 33007 "s63E6H2" 0.00122763 "Periplasmic [NiFeSe] hydrogenase small subunit precursor"  
"OPBA10\_00554" 33010 "s59E13H2" 0 "hypothetical protein"  
"OPBA10\_00554" 33010 "s59E25H2" 0 "hypothetical protein"  
"OPBA10\_00554" 33010 "s59E5H2" 0 "hypothetical protein"  
"OPBA10\_00554" 33010 "s63E6H2" 0 "hypothetical protein"  
"OPBA10\_00556" 33012 "s59E13H2" 0.03848159 "NPCBM-associated, NEW3 domain of alpha-galactosidase"  
"OPBA10\_00556" 33012 "s59E25H2" 0 "NPCBM-associated, NEW3 domain of alpha-galactosidase"  
"OPBA10\_00556" 33012 "s59E5H2" 0.4328919 "NPCBM-associated, NEW3 domain of alpha-galactosidase"  
"OPBA10\_00556" 33012 "s63E6H2" 3.110182 "NPCBM-associated, NEW3 domain of alpha-galactosidase"  
"OPBA10\_00557" 33013 "s59E13H2" 0.06491886 "putative ABC transporter ATP-binding protein YxIF"  
"OPBA10\_00557" 33013 "s59E25H2" 0 "putative ABC transporter ATP-binding protein YxIF"  
"OPBA10\_00557" 33013 "s59E5H2" 0.687467 "putative ABC transporter ATP-binding protein YxIF"  
"OPBA10\_00557" 33013 "s63E6H2" 4.221679 "putative ABC transporter ATP-binding protein YxIF"  
"OPBA10\_00558" 33014 "s59E13H2" 0.05888474 "ABC-2 family transporter protein"  
"OPBA10\_00558" 33014 "s59E25H2" 0 "ABC-2 family transporter protein"  
"OPBA10\_00558" 33014 "s59E5H2" 0.7910321 "ABC-2 family transporter protein"  
"OPBA10\_00558" 33014 "s63E6H2" 3.920265 "ABC-2 family transporter protein"  
"OPBA10\_00559" 33015 "s59E13H2" 0.002608347 "hypothetical protein"  
"OPBA10\_00559" 33015 "s59E25H2" 0 "hypothetical protein"  
"OPBA10\_00559" 33015 "s59E5H2" 0.4620344 "hypothetical protein"  
"OPBA10\_00559" 33015 "s63E6H2" 0.003292949 "hypothetical protein"  
"OPBA10\_00560" 33016 "s59E13H2" 0.1012521 "Ribosomal large subunit pseudouridine synthase D"  
"OPBA10\_00560" 33016 "s59E25H2" 0 "Ribosomal large subunit pseudouridine synthase D"

"OPBA10\_00560" 33016 "s59E5H2" 0.8435136 "Ribosomal large subunit pseudouridine synthase D"  
"OPBA10\_00560" 33016 "s63E6H2" 3.484333 "Ribosomal large subunit pseudouridine synthase D"  
"OPBA10\_00561" 33017 "s59E13H2" 0.04042675 "Lipoprotein signal peptidase"  
"OPBA10\_00561" 33017 "s59E25H2" 0 "Lipoprotein signal peptidase"  
"OPBA10\_00561" 33017 "s59E5H2" 0.2231324 "Lipoprotein signal peptidase"  
"OPBA10\_00561" 33017 "s63E6H2" 0.8305292 "Lipoprotein signal peptidase"  
"OPBA10\_00562" 33018 "s59E13H2" 0.09648094 "Isoleucine--tRNA ligase"  
"OPBA10\_00562" 33018 "s59E25H2" 0 "Isoleucine--tRNA ligase"  
"OPBA10\_00562" 33018 "s59E5H2" 0.1452926 "Isoleucine--tRNA ligase"  
"OPBA10\_00562" 33018 "s63E6H2" 1.273485 "Isoleucine--tRNA ligase"  
"OPBA10\_00563" 33019 "s59E13H2" 0.01406749 "hypothetical protein"  
"OPBA10\_00563" 33019 "s59E25H2" 0 "hypothetical protein"  
"OPBA10\_00563" 33019 "s59E5H2" 0.07585715 "hypothetical protein"  
"OPBA10\_00563" 33019 "s63E6H2" 0.06790437 "hypothetical protein"  
"OPBA10\_00564" 33020 "s59E13H2" 0.01465567 "Thioredoxin-1"  
"OPBA10\_00564" 33020 "s59E25H2" 0 "Thioredoxin-1"  
"OPBA10\_00564" 33020 "s59E5H2" 0.03594344 "Thioredoxin-1"  
"OPBA10\_00564" 33020 "s63E6H2" 0.07079491 "Thioredoxin-1"  
"OPBA10\_00565" 33021 "s59E13H2" 0 "hypothetical protein"  
"OPBA10\_00565" 33021 "s59E25H2" 0 "hypothetical protein"  
"OPBA10\_00565" 33021 "s59E5H2" 0 "hypothetical protein"  
"OPBA10\_00565" 33021 "s63E6H2" 0.02440101 "hypothetical protein"  
"OPBA10\_00566" 33022 "s59E13H2" 0 "Peptide methionine sulfoxide reductase MsrB"  
"OPBA10\_00566" 33022 "s59E25H2" 0 "Peptide methionine sulfoxide reductase MsrB"  
"OPBA10\_00566" 33022 "s59E5H2" 0.01159864 "Peptide methionine sulfoxide reductase MsrB"  
"OPBA10\_00566" 33022 "s63E6H2" 0.07802579 "Peptide methionine sulfoxide reductase MsrB"  
"OPBA10\_00567" 33023 "s59E13H2" 0.005251612 "putative permease"  
"OPBA10\_00567" 33023 "s59E25H2" 0 "putative permease"  
"OPBA10\_00567" 33023 "s59E5H2" 0.18497 "putative permease"  
"OPBA10\_00567" 33023 "s63E6H2" 1.03625 "putative permease"  
"OPBA10\_00568" 33024 "s59E13H2" 0 "hypothetical protein"  
"OPBA10\_00568" 33024 "s59E25H2" 0 "hypothetical protein"  
"OPBA10\_00568" 33024 "s59E5H2" 0.02084366 "hypothetical protein"  
"OPBA10\_00568" 33024 "s63E6H2" 0 "hypothetical protein"  
"OPBA10\_00569" 33025 "s59E13H2" 0 "hypothetical protein"  
"OPBA10\_00569" 33025 "s59E25H2" 0 "hypothetical protein"  
"OPBA10\_00569" 33025 "s59E5H2" 0.01504181 "hypothetical protein"  
"OPBA10\_00569" 33025 "s63E6H2" 0 "hypothetical protein"  
"OPBA10\_00570" 33026 "s59E13H2" 0 "hypothetical protein"  
"OPBA10\_00570" 33026 "s59E25H2" 0 "hypothetical protein"  
"OPBA10\_00570" 33026 "s59E5H2" 0.00759925 "hypothetical protein"  
"OPBA10\_00570" 33026 "s63E6H2" 0.005990633 "hypothetical protein"  
"OPBA10\_00571" 33027 "s59E13H2" 0 "hypothetical protein"  
"OPBA10\_00571" 33027 "s59E25H2" 0 "hypothetical protein"  
"OPBA10\_00571" 33027 "s59E5H2" 7.018066e-05 "hypothetical protein"  
"OPBA10\_00571" 33027 "s63E6H2" 0.1030058 "hypothetical protein"  
"OPBA10\_00572" 33028 "s59E13H2" 0 "hypothetical protein"

"OPBA10\_00572" 33028 "s59E25H2" 0 "hypothetical protein"  
"OPBA10\_00572" 33028 "s59E5H2" 0.07905721 "hypothetical protein"  
"OPBA10\_00572" 33028 "s63E6H2" 0.008030666 "hypothetical protein"  
"OPBA10\_00573" 33029 "s59E13H2" 0.00859718 "PAS fold protein"  
"OPBA10\_00573" 33029 "s59E25H2" 0 "PAS fold protein"  
"OPBA10\_00573" 33029 "s59E5H2" 0.0522641 "PAS fold protein"  
"OPBA10\_00573" 33029 "s63E6H2" 0.1162017 "PAS fold protein"  
"OPBA10\_00574" 33030 "s59E13H2" 0.001495826 "DsrE/DsrF-like family protein"  
"OPBA10\_00574" 33030 "s59E25H2" 0 "DsrE/DsrF-like family protein"  
"OPBA10\_00574" 33030 "s59E5H2" 0.04802508 "DsrE/DsrF-like family protein"  
"OPBA10\_00574" 33030 "s63E6H2" 0.05530192 "DsrE/DsrF-like family protein"  
"OPBA10\_00575" 33031 "s59E13H2" 0.0141294 "Sulfurtransferase TusA"  
"OPBA10\_00575" 33031 "s59E25H2" 0 "Sulfurtransferase TusA"  
"OPBA10\_00575" 33031 "s59E5H2" 0.0413876 "Sulfurtransferase TusA"  
"OPBA10\_00575" 33031 "s63E6H2" 0.04441457 "Sulfurtransferase TusA"  
"OPBA10\_00576" 33032 "s59E13H2" 0.0180709 "Double zinc ribbon"  
"OPBA10\_00576" 33032 "s59E25H2" 0 "Double zinc ribbon"  
"OPBA10\_00576" 33032 "s59E5H2" 0.01621173 "Double zinc ribbon"  
"OPBA10\_00576" 33032 "s63E6H2" 0.05072035 "Double zinc ribbon"  
"OPBA10\_00577" 33033 "s59E13H2" 0.005401123 "NifU-like protein"  
"OPBA10\_00577" 33033 "s59E25H2" 0 "NifU-like protein"  
"OPBA10\_00577" 33033 "s59E5H2" 0.2280082 "NifU-like protein"  
"OPBA10\_00577" 33033 "s63E6H2" 0.04204842 "NifU-like protein"  
"OPBA10\_00578" 33034 "s59E13H2" 0.002403701 "putative cysteine desulfurase 2"  
"OPBA10\_00578" 33034 "s59E25H2" 0 "putative cysteine desulfurase 2"  
"OPBA10\_00578" 33034 "s59E5H2" 0.4136749 "putative cysteine desulfurase 2"  
"OPBA10\_00578" 33034 "s63E6H2" 0 "putative cysteine desulfurase 2"  
"OPBA10\_00579" 33035 "s59E13H2" 0.008577249 "2-isopropylmalate synthase"  
"OPBA10\_00579" 33035 "s59E25H2" 0 "2-isopropylmalate synthase"  
"OPBA10\_00579" 33035 "s59E5H2" 0.01914353 "2-isopropylmalate synthase"  
"OPBA10\_00579" 33035 "s63E6H2" 0.5769541 "2-isopropylmalate synthase"  
"OPBA10\_00581" 33037 "s59E13H2" 0.002247659 "Glucokinase"  
"OPBA10\_00581" 33037 "s59E25H2" 0 "Glucokinase"  
"OPBA10\_00581" 33037 "s59E5H2" 0 "Glucokinase"  
"OPBA10\_00581" 33037 "s63E6H2" 0.09011861 "Glucokinase"  
"OPBA10\_00582" 33038 "s59E13H2" 0.0523552 "hypothetical protein"  
"OPBA10\_00582" 33038 "s59E25H2" 0 "hypothetical protein"  
"OPBA10\_00582" 33038 "s59E5H2" 0 "hypothetical protein"  
"OPBA10\_00582" 33038 "s63E6H2" 0.0922372 "hypothetical protein"  
"OPBA10\_00584" 33040 "s59E13H2" 0.1598032 "Glycosyl hydrolase family 109 protein 1 precursor"  
"OPBA10\_00584" 33040 "s59E25H2" 0 "Glycosyl hydrolase family 109 protein 1 precursor"  
"OPBA10\_00584" 33040 "s59E5H2" 0.002833402 "Glycosyl hydrolase family 109 protein 1 precursor"  
"OPBA10\_00584" 33040 "s63E6H2" 0.1394512 "Glycosyl hydrolase family 109 protein 1 precursor"  
"OPBA10\_00585" 33041 "s59E13H2" 0.2248326 "glucose-6-phosphate isomerase"  
"OPBA10\_00585" 33041 "s59E25H2" 0 "glucose-6-phosphate isomerase"  
"OPBA10\_00585" 33041 "s59E5H2" 0 "glucose-6-phosphate isomerase"  
"OPBA10\_00585" 33041 "s63E6H2" 0.06332948 "glucose-6-phosphate isomerase"

"OPBA10\_00586" 33042 "s59E13H2" 0.127446 "High-affinity branched-chain amino acid transport system permease protein LivH"  
"OPBA10\_00586" 33042 "s59E25H2" 0 "High-affinity branched-chain amino acid transport system permease protein LivH"  
"OPBA10\_00586" 33042 "s59E5H2" 0.004759234 "High-affinity branched-chain amino acid transport system permease protein LivH"  
"OPBA10\_00586" 33042 "s63E6H2" 0.04449613 "High-affinity branched-chain amino acid transport system permease protein LivH"  
"OPBA10\_00587" 33043 "s59E13H2" 0.08629422 "leucine/isoleucine/valine transporter permease subunit"  
"OPBA10\_00587" 33043 "s59E25H2" 0 "leucine/isoleucine/valine transporter permease subunit"  
"OPBA10\_00587" 33043 "s59E5H2" 0 "leucine/isoleucine/valine transporter permease subunit"  
"OPBA10\_00587" 33043 "s63E6H2" 0.02443482 "leucine/isoleucine/valine transporter permease subunit"  
"OPBA10\_00588" 33044 "s59E13H2" 0.08992263 "Lipopolysaccharide export system ATP-binding protein LptB"  
"OPBA10\_00588" 33044 "s59E25H2" 0 "Lipopolysaccharide export system ATP-binding protein LptB"  
"OPBA10\_00588" 33044 "s59E5H2" 0.005001267 "Lipopolysaccharide export system ATP-binding protein LptB"  
"OPBA10\_00588" 33044 "s63E6H2" 0.01831734 "Lipopolysaccharide export system ATP-binding protein LptB"  
"OPBA10\_00589" 33045 "s59E13H2" 0.04541593 "High-affinity branched-chain amino acid transport ATP-binding protein LivF"  
"OPBA10\_00589" 33045 "s59E25H2" 0 "High-affinity branched-chain amino acid transport ATP-binding protein LivF"  
"OPBA10\_00589" 33045 "s59E5H2" 0.01042183 "High-affinity branched-chain amino acid transport ATP-binding protein LivF"  
"OPBA10\_00589" 33045 "s63E6H2" 0.006692327 "High-affinity branched-chain amino acid transport ATP-binding protein LivF"  
"OPBA10\_00590" 33046 "s59E13H2" 0.004693611 "Xylose isomerase"  
"OPBA10\_00590" 33046 "s59E25H2" 0 "Xylose isomerase"  
"OPBA10\_00590" 33046 "s59E5H2" 0.1283758 "Xylose isomerase"  
"OPBA10\_00590" 33046 "s63E6H2" 0.0368931 "Xylose isomerase"  
"OPBA10\_00591" 33047 "s59E13H2" 0 "Xylulose kinase"  
"OPBA10\_00591" 33047 "s59E25H2" 0 "Xylulose kinase"  
"OPBA10\_00591" 33047 "s59E5H2" 0.07378621 "Xylulose kinase"  
"OPBA10\_00591" 33047 "s63E6H2" 0.003873706 "Xylulose kinase"  
"OPBA10\_00592" 33048 "s59E13H2" 0.02146613 "Deoxyuridine 5'-triphosphate nucleotidohydrolase"  
"OPBA10\_00592" 33048 "s59E25H2" 0 "Deoxyuridine 5'-triphosphate nucleotidohydrolase"  
"OPBA10\_00592" 33048 "s59E5H2" 0 "Deoxyuridine 5'-triphosphate nucleotidohydrolase"  
"OPBA10\_00592" 33048 "s63E6H2" 0.04751771 "Deoxyuridine 5'-triphosphate nucleotidohydrolase"  
"OPBA10\_00593" 33049 "s59E13H2" 0.01034421 "Serine acetyltransferase"  
"OPBA10\_00593" 33049 "s59E25H2" 0 "Serine acetyltransferase"  
"OPBA10\_00593" 33049 "s59E5H2" 0.4359986 "Serine acetyltransferase"  
"OPBA10\_00593" 33049 "s63E6H2" 0.04936175 "Serine acetyltransferase"  
"OPBA10\_00594" 33050 "s59E13H2" 0.005221119 "hypothetical protein"  
"OPBA10\_00594" 33050 "s59E25H2" 0 "hypothetical protein"  
"OPBA10\_00594" 33050 "s59E5H2" 0.150567 "hypothetical protein"  
"OPBA10\_00594" 33050 "s63E6H2" 0.04390082 "hypothetical protein"  
"OPBA10\_00595" 33051 "s59E13H2" 0.01972131 "HTH-type transcriptional regulator HmrR"  
"OPBA10\_00595" 33051 "s59E25H2" 0 "HTH-type transcriptional regulator HmrR"  
"OPBA10\_00595" 33051 "s59E5H2" 0.2061528 "HTH-type transcriptional regulator HmrR"  
"OPBA10\_00595" 33051 "s63E6H2" 0.0440266 "HTH-type transcriptional regulator HmrR"  
"OPBA10\_00596" 33052 "s59E13H2" 0.001278164 "hypothetical protein"  
"OPBA10\_00596" 33052 "s59E25H2" 0 "hypothetical protein"  
"OPBA10\_00596" 33052 "s59E5H2" 0.1545657 "hypothetical protein"  
"OPBA10\_00596" 33052 "s63E6H2" 0.04287978 "hypothetical protein"  
"OPBA10\_00597" 33053 "s59E13H2" 0.02176651 "Hypoxanthine-guanine phosphoribosyltransferase"  
"OPBA10\_00597" 33053 "s59E25H2" 0 "Hypoxanthine-guanine phosphoribosyltransferase"  
"OPBA10\_00597" 33053 "s59E5H2" 0.178114 "Hypoxanthine-guanine phosphoribosyltransferase"



"OPBA10\_00597" 33053 "s63E6H2" 0.1414166 "Hypoxanthine-guanine phosphoribosyltransferase"  
"OPBA10\_00598" 33054 "s59E13H2" 0.00939488 "Putative lipoprotein YerB precursor"  
"OPBA10\_00598" 33054 "s59E25H2" 0 "Putative lipoprotein YerB precursor"  
"OPBA10\_00598" 33054 "s59E5H2" 0.05920378 "Putative lipoprotein YerB precursor"  
"OPBA10\_00598" 33054 "s63E6H2" 0.05375844 "Putative lipoprotein YerB precursor"  
"OPBA10\_00599" 33055 "s59E13H2" 0 "Xylulose kinase"  
"OPBA10\_00599" 33055 "s59E25H2" 0 "Xylulose kinase"  
"OPBA10\_00599" 33055 "s59E5H2" 1.390433 "Xylulose kinase"  
"OPBA10\_00599" 33055 "s63E6H2" 0 "Xylulose kinase"  
"OPBA10\_00600" 33056 "s59E13H2" 0 "D-ribose-binding periplasmic protein precursor"  
"OPBA10\_00600" 33056 "s59E25H2" 0 "D-ribose-binding periplasmic protein precursor"  
"OPBA10\_00600" 33056 "s59E5H2" 1.209081 "D-ribose-binding periplasmic protein precursor"  
"OPBA10\_00600" 33056 "s63E6H2" 0 "D-ribose-binding periplasmic protein precursor"  
"OPBA10\_00601" 33057 "s59E13H2" 0 "hypothetical protein"  
"OPBA10\_00601" 33057 "s59E25H2" 0 "hypothetical protein"  
"OPBA10\_00601" 33057 "s59E5H2" 0.06977542 "hypothetical protein"  
"OPBA10\_00601" 33057 "s63E6H2" 0.001865979 "hypothetical protein"  
"OPBA10\_00602" 33058 "s59E13H2" 0 "TadE-like protein"  
"OPBA10\_00602" 33058 "s59E25H2" 0 "TadE-like protein"  
"OPBA10\_00602" 33058 "s59E5H2" 0 "TadE-like protein"  
"OPBA10\_00602" 33058 "s63E6H2" 0 "TadE-like protein"  
"OPBA10\_00603" 33059 "s59E13H2" 0 "hypothetical protein"  
"OPBA10\_00603" 33059 "s59E25H2" 0 "hypothetical protein"  
"OPBA10\_00603" 33059 "s59E5H2" 0 "hypothetical protein"  
"OPBA10\_00603" 33059 "s63E6H2" 0.02020623 "hypothetical protein"  
"OPBA10\_00604" 33060 "s59E13H2" 0.5137984 "hypothetical protein"  
"OPBA10\_00604" 33060 "s59E25H2" 0 "hypothetical protein"  
"OPBA10\_00604" 33060 "s59E5H2" 0.1178292 "hypothetical protein"  
"OPBA10\_00604" 33060 "s63E6H2" 0.04263728 "hypothetical protein"  
"OPBA10\_00605" 33061 "s59E13H2" 0.5776336 "Septum site-determining protein MinD"  
"OPBA10\_00605" 33061 "s59E25H2" 0 "Septum site-determining protein MinD"  
"OPBA10\_00605" 33061 "s59E5H2" 0.09520257 "Septum site-determining protein MinD"  
"OPBA10\_00605" 33061 "s63E6H2" 0.07178318 "Septum site-determining protein MinD"  
"OPBA10\_00606" 33062 "s59E13H2" 0.4678156 "Putative conjugal transfer protein/MT3759"  
"OPBA10\_00606" 33062 "s59E25H2" 0 "Putative conjugal transfer protein/MT3759"  
"OPBA10\_00606" 33062 "s59E5H2" 0.08258406 "Putative conjugal transfer protein/MT3759"  
"OPBA10\_00606" 33062 "s63E6H2" 0.0891097 "Putative conjugal transfer protein/MT3759"  
"OPBA10\_00607" 33063 "s59E13H2" 0.5134799 "Bacterial type II secretion system protein F domain protein"  
"OPBA10\_00607" 33063 "s59E25H2" 0 "Bacterial type II secretion system protein F domain protein"  
"OPBA10\_00607" 33063 "s59E5H2" 0.0450464 "Bacterial type II secretion system protein F domain protein"  
"OPBA10\_00607" 33063 "s63E6H2" 0.1120411 "Bacterial type II secretion system protein F domain protein"  
"OPBA10\_00608" 33064 "s59E13H2" 0.3894833 "Bacterial type II secretion system protein F domain protein"  
"OPBA10\_00608" 33064 "s59E25H2" 0 "Bacterial type II secretion system protein F domain protein"  
"OPBA10\_00608" 33064 "s59E5H2" 0.0396403 "Bacterial type II secretion system protein F domain protein"  
"OPBA10\_00608" 33064 "s63E6H2" 0.1935698 "Bacterial type II secretion system protein F domain protein"  
"OPBA10\_00609" 33065 "s59E13H2" 0.3336108 "Flp/Fap pilin component"  
"OPBA10\_00609" 33065 "s59E25H2" 0 "Flp/Fap pilin component"

"OPBA10\_00609" 33065 "s59E5H2" 0.00950688 "Flp/Fap pilin component"  
"OPBA10\_00609" 33065 "s63E6H2" 0.1018093 "Flp/Fap pilin component"  
"OPBA10\_00610" 33066 "s59E13H2" 0.3490603 "hypothetical protein"  
"OPBA10\_00610" 33066 "s59E25H2" 0 "hypothetical protein"  
"OPBA10\_00610" 33066 "s59E5H2" 0.2645858 "hypothetical protein"  
"OPBA10\_00610" 33066 "s63E6H2" 0.04128127 "hypothetical protein"  
"OPBA10\_00612" 33068 "s59E13H2" 0.0006326099 "hypothetical protein"  
"OPBA10\_00612" 33068 "s59E25H2" 0 "hypothetical protein"  
"OPBA10\_00612" 33068 "s59E5H2" 0.162909 "hypothetical protein"  
"OPBA10\_00612" 33068 "s63E6H2" 0 "hypothetical protein"  
"OPBA10\_00613" 33069 "s59E13H2" 0 "Sortase family protein"  
"OPBA10\_00613" 33069 "s59E25H2" 0 "Sortase family protein"  
"OPBA10\_00613" 33069 "s59E5H2" 0.6119147 "Sortase family protein"  
"OPBA10\_00613" 33069 "s63E6H2" 0.007824053 "Sortase family protein"  
"OPBA10\_00614" 33070 "s59E13H2" 0 "hypothetical protein"  
"OPBA10\_00614" 33070 "s59E25H2" 0 "hypothetical protein"  
"OPBA10\_00614" 33070 "s59E5H2" 0.3774482 "hypothetical protein"  
"OPBA10\_00614" 33070 "s63E6H2" 0 "hypothetical protein"  
"OPBA10\_00615" 33071 "s59E13H2" 0 "hypothetical protein"  
"OPBA10\_00615" 33071 "s59E25H2" 0 "hypothetical protein"  
"OPBA10\_00615" 33071 "s59E5H2" 0.67506 "hypothetical protein"  
"OPBA10\_00615" 33071 "s63E6H2" 0 "hypothetical protein"  
"OPBA10\_00616" 33072 "s59E13H2" 0 "Cysteine-rich secretory protein family protein"  
"OPBA10\_00616" 33072 "s59E25H2" 0 "Cysteine-rich secretory protein family protein"  
"OPBA10\_00616" 33072 "s59E5H2" 0.8475608 "Cysteine-rich secretory protein family protein"  
"OPBA10\_00616" 33072 "s63E6H2" 0 "Cysteine-rich secretory protein family protein"  
"OPBA10\_00618" 33074 "s59E13H2" 0.002273247 "ABC-2 family transporter protein"  
"OPBA10\_00618" 33074 "s59E25H2" 0 "ABC-2 family transporter protein"  
"OPBA10\_00618" 33074 "s59E5H2" 0.003504098 "ABC-2 family transporter protein"  
"OPBA10\_00618" 33074 "s63E6H2" 0.01774709 "ABC-2 family transporter protein"  
"OPBA10\_00619" 33075 "s59E13H2" 0.002040907 "putative ABC transporter ATP-binding protein YxIF"  
"OPBA10\_00619" 33075 "s59E25H2" 0 "putative ABC transporter ATP-binding protein YxIF"  
"OPBA10\_00619" 33075 "s59E5H2" 0.03254588 "putative ABC transporter ATP-binding protein YxIF"  
"OPBA10\_00619" 33075 "s63E6H2" 0.06487855 "putative ABC transporter ATP-binding protein YxIF"  
"OPBA10\_00620" 33076 "s59E13H2" 8.48243e-05 "Negative regulatory protein YxIE"  
"OPBA10\_00620" 33076 "s59E25H2" 0 "Negative regulatory protein YxIE"  
"OPBA10\_00620" 33076 "s59E5H2" 0.06293579 "Negative regulatory protein YxIE"  
"OPBA10\_00620" 33076 "s63E6H2" 0.02468785 "Negative regulatory protein YxIE"  
"OPBA10\_00621" 33077 "s59E13H2" 0 "acyltransferase PapA5"  
"OPBA10\_00621" 33077 "s59E25H2" 0 "acyltransferase PapA5"  
"OPBA10\_00621" 33077 "s59E5H2" 0.0274773 "acyltransferase PapA5"  
"OPBA10\_00621" 33077 "s63E6H2" 0.0006246172 "acyltransferase PapA5"  
"OPBA10\_00622" 33078 "s59E13H2" 0 "Multidrug resistance protein NorM"  
"OPBA10\_00622" 33078 "s59E25H2" 0 "Multidrug resistance protein NorM"  
"OPBA10\_00622" 33078 "s59E5H2" 0.01108099 "Multidrug resistance protein NorM"  
"OPBA10\_00622" 33078 "s63E6H2" 0 "Multidrug resistance protein NorM"  
"OPBA10\_00623" 33079 "s59E13H2" 4.493277e-05 "Glucosamine-6-phosphate deaminase 1"

"OPBA10\_00623" 33079 "s59E25H2" 0 "Glucosamine-6-phosphate deaminase 1"  
"OPBA10\_00623" 33079 "s59E5H2" 1.142634 "Glucosamine-6-phosphate deaminase 1"  
"OPBA10\_00623" 33079 "s63E6H2" 0.09472381 "Glucosamine-6-phosphate deaminase 1"  
"OPBA10\_00624" 33080 "s59E13H2" 0.03668946 "Phosphoglucosamine mutase"  
"OPBA10\_00624" 33080 "s59E25H2" 0 "Phosphoglucosamine mutase"  
"OPBA10\_00624" 33080 "s59E5H2" 2.295906 "Phosphoglucosamine mutase"  
"OPBA10\_00624" 33080 "s63E6H2" 0.1649829 "Phosphoglucosamine mutase"  
"OPBA10\_00625" 33081 "s59E13H2" 0.01489506 "Bifunctional protein GlmU"  
"OPBA10\_00625" 33081 "s59E25H2" 0 "Bifunctional protein GlmU"  
"OPBA10\_00625" 33081 "s59E5H2" 0.7793995 "Bifunctional protein GlmU"  
"OPBA10\_00625" 33081 "s63E6H2" 0.02899814 "Bifunctional protein GlmU"  
"OPBA10\_00626" 33082 "s59E13H2" 0 "Nucleoside-triphosphatase THEP1"  
"OPBA10\_00626" 33082 "s59E25H2" 0 "Nucleoside-triphosphatase THEP1"  
"OPBA10\_00626" 33082 "s59E5H2" 0.3712983 "Nucleoside-triphosphatase THEP1"  
"OPBA10\_00626" 33082 "s63E6H2" 0.0003928793 "Nucleoside-triphosphatase THEP1"  
"OPBA10\_00627" 33083 "s59E13H2" 0.004989135 "IS2 transposase TnpB"  
"OPBA10\_00627" 33083 "s59E25H2" 0 "IS2 transposase TnpB"  
"OPBA10\_00627" 33083 "s59E5H2" 0.2752192 "IS2 transposase TnpB"  
"OPBA10\_00627" 33083 "s63E6H2" 0.001726218 "IS2 transposase TnpB"  
"OPBA10\_00628" 33084 "s59E13H2" 0 "Transposase"  
"OPBA10\_00628" 33084 "s59E25H2" 0 "Transposase"  
"OPBA10\_00628" 33084 "s59E5H2" 0.2509294 "Transposase"  
"OPBA10\_00628" 33084 "s63E6H2" 0 "Transposase"  
"OPBA10\_00629" 33085 "s59E13H2" 0 "succinyl-CoA synthetase subunit alpha"  
"OPBA10\_00629" 33085 "s59E25H2" 0 "succinyl-CoA synthetase subunit alpha"  
"OPBA10\_00629" 33085 "s59E5H2" 0.007533452 "succinyl-CoA synthetase subunit alpha"  
"OPBA10\_00629" 33085 "s63E6H2" 0 "succinyl-CoA synthetase subunit alpha"  
"OPBA10\_00630" 33086 "s59E13H2" 0 "hypothetical protein"  
"OPBA10\_00630" 33086 "s59E25H2" 0 "hypothetical protein"  
"OPBA10\_00630" 33086 "s59E5H2" 0.01621173 "hypothetical protein"  
"OPBA10\_00630" 33086 "s63E6H2" 0.00607929 "hypothetical protein"  
"OPBA10\_00632" 33088 "s59E13H2" 0 "Arabinose 5-phosphate isomerase KdsD"  
"OPBA10\_00632" 33088 "s59E25H2" 0 "Arabinose 5-phosphate isomerase KdsD"  
"OPBA10\_00632" 33088 "s59E5H2" 0.02723044 "Arabinose 5-phosphate isomerase KdsD"  
"OPBA10\_00632" 33088 "s63E6H2" 0 "Arabinose 5-phosphate isomerase KdsD"  
"OPBA10\_00634" 33090 "s59E13H2" 0.0002039448 "ATP phosphoribosyltransferase"  
"OPBA10\_00634" 33090 "s59E25H2" 0 "ATP phosphoribosyltransferase"  
"OPBA10\_00634" 33090 "s59E5H2" 0.07565475 "ATP phosphoribosyltransferase"  
"OPBA10\_00634" 33090 "s63E6H2" 0.06794169 "ATP phosphoribosyltransferase"  
"OPBA10\_00635" 33091 "s59E13H2" 0 "Imidazoleglycerol-phosphate dehydratase"  
"OPBA10\_00635" 33091 "s59E25H2" 0 "Imidazoleglycerol-phosphate dehydratase"  
"OPBA10\_00635" 33091 "s59E5H2" 0.02873772 "Imidazoleglycerol-phosphate dehydratase"  
"OPBA10\_00635" 33091 "s63E6H2" 0.1260959 "Imidazoleglycerol-phosphate dehydratase"  
"OPBA10\_00636" 33092 "s59E13H2" 0 "imidazole glycerol phosphate synthase subunit HisH"  
"OPBA10\_00636" 33092 "s59E25H2" 0 "imidazole glycerol phosphate synthase subunit HisH"  
"OPBA10\_00636" 33092 "s59E5H2" 0 "imidazole glycerol phosphate synthase subunit HisH"  
"OPBA10\_00636" 33092 "s63E6H2" 0.03356991 "imidazole glycerol phosphate synthase subunit HisH"

"OPBA10\_00637" 33093 "s59E13H2" 0 "Phosphoribosyl isomerase A"  
"OPBA10\_00637" 33093 "s59E25H2" 0 "Phosphoribosyl isomerase A"  
"OPBA10\_00637" 33093 "s59E5H2" 0.01911139 "Phosphoribosyl isomerase A"  
"OPBA10\_00637" 33093 "s63E6H2" 0.1244524 "Phosphoribosyl isomerase A"  
"OPBA10\_00638" 33094 "s59E13H2" 0 "Imidazole glycerol phosphate synthase subunit HisF"  
"OPBA10\_00638" 33094 "s59E25H2" 0 "Imidazole glycerol phosphate synthase subunit HisF"  
"OPBA10\_00638" 33094 "s59E5H2" 0.04703325 "Imidazole glycerol phosphate synthase subunit HisF"  
"OPBA10\_00638" 33094 "s63E6H2" 0.1091629 "Imidazole glycerol phosphate synthase subunit HisF"  
"OPBA10\_00639" 33095 "s59E13H2" 0 "Phosphoribosyl-AMP cyclohydrolase"  
"OPBA10\_00639" 33095 "s59E25H2" 0 "Phosphoribosyl-AMP cyclohydrolase"  
"OPBA10\_00639" 33095 "s59E5H2" 0.02603254 "Phosphoribosyl-AMP cyclohydrolase"  
"OPBA10\_00639" 33095 "s63E6H2" 0.1752445 "Phosphoribosyl-AMP cyclohydrolase"  
"OPBA10\_00640" 33096 "s59E13H2" 0.03412273 "6-phosphofructokinase"  
"OPBA10\_00640" 33096 "s59E25H2" 0 "6-phosphofructokinase"  
"OPBA10\_00640" 33096 "s59E5H2" 0.03480656 "6-phosphofructokinase"  
"OPBA10\_00640" 33096 "s63E6H2" 0.1155191 "6-phosphofructokinase"  
"OPBA10\_00642" 33098 "s59E13H2" 0 "Tautomerase enzyme"  
"OPBA10\_00642" 33098 "s59E25H2" 0 "Tautomerase enzyme"  
"OPBA10\_00642" 33098 "s59E5H2" 0 "Tautomerase enzyme"  
"OPBA10\_00642" 33098 "s63E6H2" 0 "Tautomerase enzyme"  
"OPBA10\_00643" 33099 "s59E13H2" 0 "putative S-adenosyl-L-methionine-dependent methyltransferase"  
"OPBA10\_00643" 33099 "s59E25H2" 0 "putative S-adenosyl-L-methionine-dependent methyltransferase"  
"OPBA10\_00643" 33099 "s59E5H2" 0 "putative S-adenosyl-L-methionine-dependent methyltransferase"  
"OPBA10\_00643" 33099 "s63E6H2" 0 "putative S-adenosyl-L-methionine-dependent methyltransferase"  
"OPBA10\_00644" 33100 "s59E13H2" 0 "Phosphoribosylformylglycinamidine cyclo-ligase"  
"OPBA10\_00644" 33100 "s59E25H2" 0 "Phosphoribosylformylglycinamidine cyclo-ligase"  
"OPBA10\_00644" 33100 "s59E5H2" 0 "Phosphoribosylformylglycinamidine cyclo-ligase"  
"OPBA10\_00644" 33100 "s63E6H2" 0 "Phosphoribosylformylglycinamidine cyclo-ligase"  
"OPBA10\_00645" 33101 "s59E13H2" 0 "Phosphoribosylformylglycinamidine cyclo-ligase"  
"OPBA10\_00645" 33101 "s59E25H2" 0 "Phosphoribosylformylglycinamidine cyclo-ligase"  
"OPBA10\_00645" 33101 "s59E5H2" 0 "Phosphoribosylformylglycinamidine cyclo-ligase"  
"OPBA10\_00645" 33101 "s63E6H2" 0 "Phosphoribosylformylglycinamidine cyclo-ligase"  
"OPBA10\_00647" 33103 "s59E13H2" 0 "endonuclease IV"  
"OPBA10\_00647" 33103 "s59E25H2" 0 "endonuclease IV"  
"OPBA10\_00647" 33103 "s59E5H2" 0 "endonuclease IV"  
"OPBA10\_00647" 33103 "s63E6H2" 0 "endonuclease IV"  
"OPBA10\_00648" 33104 "s59E13H2" 0 "hypothetical protein"  
"OPBA10\_00648" 33104 "s59E25H2" 0 "hypothetical protein"  
"OPBA10\_00648" 33104 "s59E5H2" 0 "hypothetical protein"  
"OPBA10\_00648" 33104 "s63E6H2" 0 "hypothetical protein"  
"OPBA10\_00649" 33105 "s59E13H2" 0 "Glycine/sarcosine N-methyltransferase"  
"OPBA10\_00649" 33105 "s59E25H2" 0 "Glycine/sarcosine N-methyltransferase"  
"OPBA10\_00649" 33105 "s59E5H2" 0 "Glycine/sarcosine N-methyltransferase"  
"OPBA10\_00649" 33105 "s63E6H2" 0 "Glycine/sarcosine N-methyltransferase"  
"OPBA10\_00650" 33106 "s59E13H2" 0 "ubiquinone/menaquinone biosynthesis methyltransferase"  
"OPBA10\_00650" 33106 "s59E25H2" 6.935262 "ubiquinone/menaquinone biosynthesis methyltransferase"  
"OPBA10\_00650" 33106 "s59E5H2" 0 "ubiquinone/menaquinone biosynthesis methyltransferase"

"OPBA10\_00650" 33106 "s63E6H2" 0 "ubiquinone/menaquinone biosynthesis methyltransferase"  
"OPBA10\_00651" 33107 "s59E13H2" 0.01948472 "DNA polymerase I"  
"OPBA10\_00651" 33107 "s59E25H2" 0 "DNA polymerase I"  
"OPBA10\_00651" 33107 "s59E5H2" 0.2587716 "DNA polymerase I"  
"OPBA10\_00651" 33107 "s63E6H2" 0.001577579 "DNA polymerase I"  
"OPBA10\_00652" 33108 "s59E13H2" 0.03430829 "DNA polymerase I, thermostable"  
"OPBA10\_00652" 33108 "s59E25H2" 0 "DNA polymerase I, thermostable"  
"OPBA10\_00652" 33108 "s59E5H2" 1.329136 "DNA polymerase I, thermostable"  
"OPBA10\_00652" 33108 "s63E6H2" 0.004828246 "DNA polymerase I, thermostable"  
"OPBA10\_00653" 33109 "s59E13H2" 0.005973627 "hypothetical protein"  
"OPBA10\_00653" 33109 "s59E25H2" 0 "hypothetical protein"  
"OPBA10\_00653" 33109 "s59E5H2" 0.07495542 "hypothetical protein"  
"OPBA10\_00653" 33109 "s63E6H2" 0.001692665 "hypothetical protein"  
"OPBA10\_00654" 33110 "s59E13H2" 0.01060221 "putative ABC transporter ATP-binding protein YxIF"  
"OPBA10\_00654" 33110 "s59E25H2" 0 "putative ABC transporter ATP-binding protein YxIF"  
"OPBA10\_00654" 33110 "s59E5H2" 0.1515019 "putative ABC transporter ATP-binding protein YxIF"  
"OPBA10\_00654" 33110 "s63E6H2" 0 "putative ABC transporter ATP-binding protein YxIF"  
"OPBA10\_00655" 33111 "s59E13H2" 0.001135799 "ABC-2 family transporter protein"  
"OPBA10\_00655" 33111 "s59E25H2" 0 "ABC-2 family transporter protein"  
"OPBA10\_00655" 33111 "s59E5H2" 0.1302189 "ABC-2 family transporter protein"  
"OPBA10\_00655" 33111 "s63E6H2" 0 "ABC-2 family transporter protein"  
"OPBA10\_00657" 33113 "s59E13H2" 0 "hypothetical protein"  
"OPBA10\_00657" 33113 "s59E25H2" 0 "hypothetical protein"  
"OPBA10\_00657" 33113 "s59E5H2" 0.09622448 "hypothetical protein"  
"OPBA10\_00657" 33113 "s63E6H2" 0 "hypothetical protein"  
"OPBA10\_00658" 33114 "s59E13H2" 0.007808859 "translocation protein TolB"  
"OPBA10\_00658" 33114 "s59E25H2" 0 "translocation protein TolB"  
"OPBA10\_00658" 33114 "s59E5H2" 0.1194484 "translocation protein TolB"  
"OPBA10\_00658" 33114 "s63E6H2" 0.00247389 "translocation protein TolB"  
"OPBA10\_00659" 33115 "s59E13H2" 0.02225906 "GDP-mannose-dependent alpha-(1-6)-phosphatidylinositol monomannoside mannosyltransferase"  
"OPBA10\_00659" 33115 "s59E25H2" 0 "GDP-mannose-dependent alpha-(1-6)-phosphatidylinositol monomannoside mannosyltransferase"  
"OPBA10\_00659" 33115 "s59E5H2" 0.1209634 "GDP-mannose-dependent alpha-(1-6)-phosphatidylinositol monomannoside mannosyltransferase"  
"OPBA10\_00659" 33115 "s63E6H2" 0.5117805 "GDP-mannose-dependent alpha-(1-6)-phosphatidylinositol monomannoside mannosyltransferase"  
"OPBA10\_00660" 33116 "s59E13H2" 0 "hypothetical protein"  
"OPBA10\_00660" 33116 "s59E25H2" 0 "hypothetical protein"  
"OPBA10\_00660" 33116 "s59E5H2" 0.01169707 "hypothetical protein"  
"OPBA10\_00660" 33116 "s63E6H2" 0 "hypothetical protein"  
"OPBA10\_00662" 33118 "s59E13H2" 0.01491539 "UDP-glucose 4-epimerase"  
"OPBA10\_00662" 33118 "s59E25H2" 0 "UDP-glucose 4-epimerase"  
"OPBA10\_00662" 33118 "s59E5H2" 0.117165 "UDP-glucose 4-epimerase"  
"OPBA10\_00662" 33118 "s63E6H2" 0.2360533 "UDP-glucose 4-epimerase"  
"OPBA10\_00663" 33119 "s59E13H2" 0 "hypothetical protein"  
"OPBA10\_00663" 33119 "s59E25H2" 0 "hypothetical protein"  
"OPBA10\_00663" 33119 "s59E5H2" 0 "hypothetical protein"  
"OPBA10\_00663" 33119 "s63E6H2" 0 "hypothetical protein"  
"OPBA10\_00665" 33121 "s59E13H2" 0 "hypothetical protein"  
"OPBA10\_00665" 33121 "s59E25H2" 0 "hypothetical protein"

"OPBA10\_00665" 33121 "s59E5H2" 0 "hypothetical protein"  
"OPBA10\_00665" 33121 "s63E6H2" 0.03667344 "hypothetical protein"  
"OPBA10\_00666" 33122 "s59E13H2" 0 "RNA polymerase sigma factor SigA"  
"OPBA10\_00666" 33122 "s59E25H2" 0 "RNA polymerase sigma factor SigA"  
"OPBA10\_00666" 33122 "s59E5H2" 0 "RNA polymerase sigma factor SigA"  
"OPBA10\_00666" 33122 "s63E6H2" 0.0102596 "RNA polymerase sigma factor SigA"  
"OPBA10\_00667" 33123 "s59E13H2" 0 "recombinase A"  
"OPBA10\_00667" 33123 "s59E25H2" 0 "recombinase A"  
"OPBA10\_00667" 33123 "s59E5H2" 0 "recombinase A"  
"OPBA10\_00667" 33123 "s63E6H2" 0 "recombinase A"  
"OPBA10\_00668" 33124 "s59E13H2" 0 "recombinase A"  
"OPBA10\_00668" 33124 "s59E25H2" 0 "recombinase A"  
"OPBA10\_00668" 33124 "s59E5H2" 0 "recombinase A"  
"OPBA10\_00668" 33124 "s63E6H2" 0 "recombinase A"  
"OPBA10\_00670" 33126 "s59E13H2" 0 "HIRAN domain protein"  
"OPBA10\_00670" 33126 "s59E25H2" 0 "HIRAN domain protein"  
"OPBA10\_00670" 33126 "s59E5H2" 0 "HIRAN domain protein"  
"OPBA10\_00670" 33126 "s63E6H2" 0 "HIRAN domain protein"  
"OPBA10\_00671" 33127 "s59E13H2" 0.1711695 "UDP-N-acetylglucosamine 1-carboxyvinyltransferase 1"  
"OPBA10\_00671" 33127 "s59E25H2" 0 "UDP-N-acetylglucosamine 1-carboxyvinyltransferase 1"  
"OPBA10\_00671" 33127 "s59E5H2" 0.04882503 "UDP-N-acetylglucosamine 1-carboxyvinyltransferase 1"  
"OPBA10\_00671" 33127 "s63E6H2" 0.07428503 "UDP-N-acetylglucosamine 1-carboxyvinyltransferase 1"  
"OPBA10\_00672" 33128 "s59E13H2" 0.06440025 "tRNA-specific adenosine deaminase"  
"OPBA10\_00672" 33128 "s59E25H2" 0 "tRNA-specific adenosine deaminase"  
"OPBA10\_00672" 33128 "s59E5H2" 0.1405017 "tRNA-specific adenosine deaminase"  
"OPBA10\_00672" 33128 "s63E6H2" 0.003439598 "tRNA-specific adenosine deaminase"  
"OPBA10\_00676" 33132 "s59E13H2" 0 "putative N-acetyltransferase YvbK"  
"OPBA10\_00676" 33132 "s59E25H2" 0 "putative N-acetyltransferase YvbK"  
"OPBA10\_00676" 33132 "s59E5H2" 0 "putative N-acetyltransferase YvbK"  
"OPBA10\_00676" 33132 "s63E6H2" 0 "putative N-acetyltransferase YvbK"  
"OPBA10\_00677" 33133 "s59E13H2" 0.08325072 "hypothetical protein"  
"OPBA10\_00677" 33133 "s59E25H2" 0 "hypothetical protein"  
"OPBA10\_00677" 33133 "s59E5H2" 0 "hypothetical protein"  
"OPBA10\_00677" 33133 "s63E6H2" 0 "hypothetical protein"  
"OPBA10\_00678" 33134 "s59E13H2" 0.008694491 "hypothetical protein"  
"OPBA10\_00678" 33134 "s59E25H2" 0 "hypothetical protein"  
"OPBA10\_00678" 33134 "s59E5H2" 0.002541125 "hypothetical protein"  
"OPBA10\_00678" 33134 "s63E6H2" 0 "hypothetical protein"  
"OPBA10\_00679" 33135 "s59E13H2" 0 "Sporulation and spore germination"  
"OPBA10\_00679" 33135 "s59E25H2" 0 "Sporulation and spore germination"  
"OPBA10\_00679" 33135 "s59E5H2" 0 "Sporulation and spore germination"  
"OPBA10\_00679" 33135 "s63E6H2" 0.004866754 "Sporulation and spore germination"  
"OPBA10\_00680" 33136 "s59E13H2" 0.0001273918 "B12 binding domain protein"  
"OPBA10\_00680" 33136 "s59E25H2" 0 "B12 binding domain protein"  
"OPBA10\_00680" 33136 "s59E5H2" 0.1398979 "B12 binding domain protein"  
"OPBA10\_00680" 33136 "s63E6H2" 0.03462746 "B12 binding domain protein"  
"OPBA10\_00681" 33137 "s59E13H2" 0.002921984 "Opine dehydrogenase"

"OPBA10\_00681" 33137 "s59E25H2" 0 "Opine dehydrogenase"  
"OPBA10\_00681" 33137 "s59E5H2" 0.05273625 "Opine dehydrogenase"  
"OPBA10\_00681" 33137 "s63E6H2" 0.04345443 "Opine dehydrogenase"  
"OPBA10\_00682" 33138 "s59E13H2" 1.846869 "putative ABC transporter ATP-binding protein YbhF"  
"OPBA10\_00682" 33138 "s59E25H2" 0.2189542 "putative ABC transporter ATP-binding protein YbhF"  
"OPBA10\_00682" 33138 "s59E5H2" 0 "putative ABC transporter ATP-binding protein YbhF"  
"OPBA10\_00682" 33138 "s63E6H2" 0 "putative ABC transporter ATP-binding protein YbhF"  
"OPBA10\_00683" 33139 "s59E13H2" 1.741961 "ABC-2 type transporter"  
"OPBA10\_00683" 33139 "s59E25H2" 0 "ABC-2 type transporter"  
"OPBA10\_00683" 33139 "s59E5H2" 0 "ABC-2 type transporter"  
"OPBA10\_00683" 33139 "s63E6H2" 0.003170503 "ABC-2 type transporter"  
"OPBA10\_00684" 33140 "s59E13H2" 0 "Zinc transporter ZupT"  
"OPBA10\_00684" 33140 "s59E25H2" 0 "Zinc transporter ZupT"  
"OPBA10\_00684" 33140 "s59E5H2" 0.3125333 "Zinc transporter ZupT"  
"OPBA10\_00684" 33140 "s63E6H2" 0.002281728 "Zinc transporter ZupT"  
"OPBA10\_00685" 33141 "s59E13H2" 0.007161032 "Cytochrome b5-like Heme/Steroid binding domain protein"  
"OPBA10\_00685" 33141 "s59E25H2" 0 "Cytochrome b5-like Heme/Steroid binding domain protein"  
"OPBA10\_00685" 33141 "s59E5H2" 0.3929806 "Cytochrome b5-like Heme/Steroid binding domain protein"  
"OPBA10\_00685" 33141 "s63E6H2" 0 "Cytochrome b5-like Heme/Steroid binding domain protein"  
"OPBA10\_00686" 33142 "s59E13H2" 0.0002252824 "hypothetical protein"  
"OPBA10\_00686" 33142 "s59E25H2" 0 "hypothetical protein"  
"OPBA10\_00686" 33142 "s59E5H2" 0.3370334 "hypothetical protein"  
"OPBA10\_00686" 33142 "s63E6H2" 0 "hypothetical protein"  
"OPBA10\_00687" 33143 "s59E13H2" 0 "DNA protection during starvation protein"  
"OPBA10\_00687" 33143 "s59E25H2" 0 "DNA protection during starvation protein"  
"OPBA10\_00687" 33143 "s59E5H2" 0.3530457 "DNA protection during starvation protein"  
"OPBA10\_00687" 33143 "s63E6H2" 0 "DNA protection during starvation protein"  
"OPBA10\_00688" 33144 "s59E13H2" 0 "Peroxide operon regulator"  
"OPBA10\_00688" 33144 "s59E25H2" 0 "Peroxide operon regulator"  
"OPBA10\_00688" 33144 "s59E5H2" 0.2327958 "Peroxide operon regulator"  
"OPBA10\_00688" 33144 "s63E6H2" 0 "Peroxide operon regulator"  
"OPBA10\_00689" 33145 "s59E13H2" 0 "hypothetical protein"  
"OPBA10\_00689" 33145 "s59E25H2" 0 "hypothetical protein"  
"OPBA10\_00689" 33145 "s59E5H2" 0.1895077 "hypothetical protein"  
"OPBA10\_00689" 33145 "s63E6H2" 0 "hypothetical protein"  
"OPBA10\_00690" 33146 "s59E13H2" 0 "TMAO/DMSO reductase"  
"OPBA10\_00690" 33146 "s59E25H2" 0 "TMAO/DMSO reductase"  
"OPBA10\_00690" 33146 "s59E5H2" 0.3783282 "TMAO/DMSO reductase"  
"OPBA10\_00690" 33146 "s63E6H2" 0 "TMAO/DMSO reductase"  
"OPBA10\_00691" 33147 "s59E13H2" 0 "hypothetical protein"  
"OPBA10\_00691" 33147 "s59E25H2" 0 "hypothetical protein"  
"OPBA10\_00691" 33147 "s59E5H2" 0.3815992 "hypothetical protein"  
"OPBA10\_00691" 33147 "s63E6H2" 0 "hypothetical protein"  
"OPBA10\_00692" 33148 "s59E13H2" 0 "DOMON domain protein"  
"OPBA10\_00692" 33148 "s59E25H2" 0 "DOMON domain protein"  
"OPBA10\_00692" 33148 "s59E5H2" 0.368648 "DOMON domain protein"  
"OPBA10\_00692" 33148 "s63E6H2" 0 "DOMON domain protein"

"OPBA10\_00693" 33149 "s59E13H2" 0.001704057 "Quinoprotein glucose dehydrogenase B precursor"  
"OPBA10\_00693" 33149 "s59E25H2" 0 "Quinoprotein glucose dehydrogenase B precursor"  
"OPBA10\_00693" 33149 "s59E5H2" 0.3714377 "Quinoprotein glucose dehydrogenase B precursor"  
"OPBA10\_00693" 33149 "s63E6H2" 0.02993137 "Quinoprotein glucose dehydrogenase B precursor"  
"OPBA10\_00694" 33150 "s59E13H2" 0.01149866 "hypothetical protein"  
"OPBA10\_00694" 33150 "s59E25H2" 0 "hypothetical protein"  
"OPBA10\_00694" 33150 "s59E5H2" 0.009201254 "hypothetical protein"  
"OPBA10\_00694" 33150 "s63E6H2" 0.02757588 "hypothetical protein"  
"OPBA10\_00695" 33151 "s59E13H2" 0 "hypothetical protein"  
"OPBA10\_00695" 33151 "s59E25H2" 0 "hypothetical protein"  
"OPBA10\_00695" 33151 "s59E5H2" 0.03028565 "hypothetical protein"  
"OPBA10\_00695" 33151 "s63E6H2" 0 "hypothetical protein"  
"OPBA10\_00696" 33152 "s59E13H2" 0.001558279 "hypothetical protein"  
"OPBA10\_00696" 33152 "s59E25H2" 0 "hypothetical protein"  
"OPBA10\_00696" 33152 "s59E5H2" 0.006350421 "hypothetical protein"  
"OPBA10\_00696" 33152 "s63E6H2" 0.1575333 "hypothetical protein"  
"OPBA10\_00697" 33153 "s59E13H2" 0 "hypothetical protein"  
"OPBA10\_00697" 33153 "s59E25H2" 0 "hypothetical protein"  
"OPBA10\_00697" 33153 "s59E5H2" 0 "hypothetical protein"  
"OPBA10\_00697" 33153 "s63E6H2" 0 "hypothetical protein"  
"OPBA10\_00698" 33154 "s59E13H2" 0 "Transcriptional regulatory protein CusR"  
"OPBA10\_00698" 33154 "s59E25H2" 0 "Transcriptional regulatory protein CusR"  
"OPBA10\_00698" 33154 "s59E5H2" 0 "Transcriptional regulatory protein CusR"  
"OPBA10\_00698" 33154 "s63E6H2" 0.001871253 "Transcriptional regulatory protein CusR"  
"OPBA10\_00699" 33155 "s59E13H2" 0.0005287877 "Signal-transduction histidine kinase senX3"  
"OPBA10\_00699" 33155 "s59E25H2" 0 "Signal-transduction histidine kinase senX3"  
"OPBA10\_00699" 33155 "s59E5H2" 0 "Signal-transduction histidine kinase senX3"  
"OPBA10\_00699" 33155 "s63E6H2" 0.003507738 "Signal-transduction histidine kinase senX3"  
"OPBA10\_00701" 33157 "s59E13H2" 2.632651 "RNA polymerase sigma factor SigA"  
"OPBA10\_00701" 33157 "s59E25H2" 0 "RNA polymerase sigma factor SigA"  
"OPBA10\_00701" 33157 "s59E5H2" 1.056148 "RNA polymerase sigma factor SigA"  
"OPBA10\_00701" 33157 "s63E6H2" 0.1443514 "RNA polymerase sigma factor SigA"  
"OPBA10\_00702" 33158 "s59E13H2" 0.9333867 "DNA primase"  
"OPBA10\_00702" 33158 "s59E25H2" 0 "DNA primase"  
"OPBA10\_00702" 33158 "s59E5H2" 0.6032899 "DNA primase"  
"OPBA10\_00702" 33158 "s63E6H2" 0.07705198 "DNA primase"  
"OPBA10\_00703" 33159 "s59E13H2" 0.04298954 "Pyruvate, phosphate dikinase"  
"OPBA10\_00703" 33159 "s59E25H2" 0 "Pyruvate, phosphate dikinase"  
"OPBA10\_00703" 33159 "s59E5H2" 0.1452201 "Pyruvate, phosphate dikinase"  
"OPBA10\_00703" 33159 "s63E6H2" 0.03440762 "Pyruvate, phosphate dikinase"  
"OPBA10\_00704" 33160 "s59E13H2" 0.01287128 "Glycine--tRNA ligase beta subunit"  
"OPBA10\_00704" 33160 "s59E25H2" 0 "Glycine--tRNA ligase beta subunit"  
"OPBA10\_00704" 33160 "s59E5H2" 0.08466381 "Glycine--tRNA ligase beta subunit"  
"OPBA10\_00704" 33160 "s63E6H2" 0.002066444 "Glycine--tRNA ligase beta subunit"  
"OPBA10\_00705" 33161 "s59E13H2" 0.009887618 "Glycine--tRNA ligase alpha subunit"  
"OPBA10\_00705" 33161 "s59E25H2" 0 "Glycine--tRNA ligase alpha subunit"  
"OPBA10\_00705" 33161 "s59E5H2" 0.03444761 "Glycine--tRNA ligase alpha subunit"



"OPBA10\_00705" 33161 "s63E6H2" 0.01433125 "Glycine--tRNA ligase alpha subunit"  
"OPBA10\_00706" 33162 "s59E13H2" 0.01915231 "DNA repair protein RecO"  
"OPBA10\_00706" 33162 "s59E25H2" 0 "DNA repair protein RecO"  
"OPBA10\_00706" 33162 "s59E5H2" 0.1432761 "DNA repair protein RecO"  
"OPBA10\_00706" 33162 "s63E6H2" 0.07948885 "DNA repair protein RecO"  
"OPBA10\_00707" 33163 "s59E13H2" 0.08388777 "Deoxyribose-phosphate aldolase 2"  
"OPBA10\_00707" 33163 "s59E25H2" 0.2151899 "Deoxyribose-phosphate aldolase 2"  
"OPBA10\_00707" 33163 "s59E5H2" 0.0868958 "Deoxyribose-phosphate aldolase 2"  
"OPBA10\_00707" 33163 "s63E6H2" 0.02683951 "Deoxyribose-phosphate aldolase 2"  
"OPBA10\_00708" 33164 "s59E13H2" 0.06008859 "putative N-acetyltransferase"  
"OPBA10\_00708" 33164 "s59E25H2" 0 "putative N-acetyltransferase"  
"OPBA10\_00708" 33164 "s59E5H2" 0.09152008 "putative N-acetyltransferase"  
"OPBA10\_00708" 33164 "s63E6H2" 0.01357448 "putative N-acetyltransferase"  
"OPBA10\_00709" 33165 "s59E13H2" 0.02969157 "Mannosylfructose-phosphate synthase"  
"OPBA10\_00709" 33165 "s59E25H2" 0 "Mannosylfructose-phosphate synthase"  
"OPBA10\_00709" 33165 "s59E5H2" 0.04412496 "Mannosylfructose-phosphate synthase"  
"OPBA10\_00709" 33165 "s63E6H2" 0 "Mannosylfructose-phosphate synthase"  
"OPBA10\_00710" 33166 "s59E13H2" 0.04653052 "Beta-1,4-mannooligosaccharide phosphorylase"  
"OPBA10\_00710" 33166 "s59E25H2" 0 "Beta-1,4-mannooligosaccharide phosphorylase"  
"OPBA10\_00710" 33166 "s59E5H2" 0.1061993 "Beta-1,4-mannooligosaccharide phosphorylase"  
"OPBA10\_00710" 33166 "s63E6H2" 0 "Beta-1,4-mannooligosaccharide phosphorylase"  
"OPBA10\_00711" 33167 "s59E13H2" 0.1070563 "Endoribonuclease YbeY"  
"OPBA10\_00711" 33167 "s59E25H2" 0 "Endoribonuclease YbeY"  
"OPBA10\_00711" 33167 "s59E5H2" 0.1441973 "Endoribonuclease YbeY"  
"OPBA10\_00711" 33167 "s63E6H2" 0.008471784 "Endoribonuclease YbeY"  
"OPBA10\_00712" 33168 "s59E13H2" 0.1026751 "hypothetical protein"  
"OPBA10\_00712" 33168 "s59E25H2" 0 "hypothetical protein"  
"OPBA10\_00712" 33168 "s59E5H2" 0.1911181 "hypothetical protein"  
"OPBA10\_00712" 33168 "s63E6H2" 0.00518389 "hypothetical protein"  
"OPBA10\_00713" 33169 "s59E13H2" 0.1102089 "PhoH-like protein"  
"OPBA10\_00713" 33169 "s59E25H2" 0 "PhoH-like protein"  
"OPBA10\_00713" 33169 "s59E5H2" 0.2004284 "PhoH-like protein"  
"OPBA10\_00713" 33169 "s63E6H2" 0.04513185 "PhoH-like protein"  
"OPBA10\_00714" 33170 "s59E13H2" 0.06560434 "HIT-like protein"  
"OPBA10\_00714" 33170 "s59E25H2" 0 "HIT-like protein"  
"OPBA10\_00714" 33170 "s59E5H2" 0.08890608 "HIT-like protein"  
"OPBA10\_00714" 33170 "s63E6H2" 0.07857261 "HIT-like protein"  
"OPBA10\_00715" 33171 "s59E13H2" 0.03303906 "Threonylcarbamoyladenine tRNA methylthiotransferase MtaB"  
"OPBA10\_00715" 33171 "s59E25H2" 0 "Threonylcarbamoyladenine tRNA methylthiotransferase MtaB"  
"OPBA10\_00715" 33171 "s59E5H2" 0.1267831 "Threonylcarbamoyladenine tRNA methylthiotransferase MtaB"  
"OPBA10\_00715" 33171 "s63E6H2" 0.2951403 "Threonylcarbamoyladenine tRNA methylthiotransferase MtaB"  
"OPBA10\_00716" 33172 "s59E13H2" 0.02058894 "Ribosomal RNA small subunit methyltransferase E"  
"OPBA10\_00716" 33172 "s59E25H2" 0 "Ribosomal RNA small subunit methyltransferase E"  
"OPBA10\_00716" 33172 "s59E5H2" 0.1452357 "Ribosomal RNA small subunit methyltransferase E"  
"OPBA10\_00716" 33172 "s63E6H2" 0.3022311 "Ribosomal RNA small subunit methyltransferase E"  
"OPBA10\_00717" 33173 "s59E13H2" 0.009898108 "Chaperone protein DnaJ"  
"OPBA10\_00717" 33173 "s59E25H2" 0 "Chaperone protein DnaJ"

"OPBA10\_00717" 33173 "s59E5H2" 0.07652451 "Chaperone protein DnaJ"  
"OPBA10\_00717" 33173 "s63E6H2" 0.2260351 "Chaperone protein DnaJ"  
"OPBA10\_00718" 33174 "s59E13H2" 0.003133692 "Heat-inducible transcription repressor HrcA"  
"OPBA10\_00718" 33174 "s59E25H2" 0 "Heat-inducible transcription repressor HrcA"  
"OPBA10\_00718" 33174 "s59E5H2" 0.03617661 "Heat-inducible transcription repressor HrcA"  
"OPBA10\_00718" 33174 "s63E6H2" 0.1440809 "Heat-inducible transcription repressor HrcA"  
"OPBA10\_00720" 33176 "s59E13H2" 0.007594282 "Hydroxyethylthiazole kinase"  
"OPBA10\_00720" 33176 "s59E25H2" 0 "Hydroxyethylthiazole kinase"  
"OPBA10\_00720" 33176 "s59E5H2" 0.08287356 "Hydroxyethylthiazole kinase"  
"OPBA10\_00720" 33176 "s63E6H2" 0.2298048 "Hydroxyethylthiazole kinase"  
"OPBA10\_00721" 33177 "s59E13H2" 0.0110076 "Thiamine-phosphate synthase"  
"OPBA10\_00721" 33177 "s59E25H2" 5.866044 "Thiamine-phosphate synthase"  
"OPBA10\_00721" 33177 "s59E5H2" 0.1294666 "Thiamine-phosphate synthase"  
"OPBA10\_00721" 33177 "s63E6H2" 0.1922268 "Thiamine-phosphate synthase"  
"OPBA10\_00722" 33178 "s59E13H2" 0.01629901 "Phosphomethylpyrimidine synthase"  
"OPBA10\_00722" 33178 "s59E25H2" 0 "Phosphomethylpyrimidine synthase"  
"OPBA10\_00722" 33178 "s59E5H2" 0.1416818 "Phosphomethylpyrimidine synthase"  
"OPBA10\_00722" 33178 "s63E6H2" 0.4396374 "Phosphomethylpyrimidine synthase"  
"OPBA10\_00723" 33179 "s59E13H2" 0.006294194 "Thiamine-monophosphate kinase"  
"OPBA10\_00723" 33179 "s59E25H2" 0 "Thiamine-monophosphate kinase"  
"OPBA10\_00723" 33179 "s59E5H2" 0.2310638 "Thiamine-monophosphate kinase"  
"OPBA10\_00723" 33179 "s63E6H2" 0.5852761 "Thiamine-monophosphate kinase"  
"OPBA10\_00724" 33180 "s59E13H2" 0.01954924 "ATP-binding region"  
"OPBA10\_00724" 33180 "s59E25H2" 0 "ATP-binding region"  
"OPBA10\_00724" 33180 "s59E5H2" 0.1080583 "ATP-binding region"  
"OPBA10\_00724" 33180 "s63E6H2" 0 "ATP-binding region"  
"OPBA10\_00725" 33181 "s59E13H2" 0 "Low specificity L-threonine aldolase"  
"OPBA10\_00725" 33181 "s59E25H2" 0 "Low specificity L-threonine aldolase"  
"OPBA10\_00725" 33181 "s59E5H2" 0 "Low specificity L-threonine aldolase"  
"OPBA10\_00725" 33181 "s63E6H2" 0 "Low specificity L-threonine aldolase"  
"OPBA10\_00726" 33182 "s59E13H2" 0.004984841 "tRNA(fMet)-specific endonuclease VapC"  
"OPBA10\_00726" 33182 "s59E25H2" 0 "tRNA(fMet)-specific endonuclease VapC"  
"OPBA10\_00726" 33182 "s59E5H2" 0.07453537 "tRNA(fMet)-specific endonuclease VapC"  
"OPBA10\_00726" 33182 "s63E6H2" 0 "tRNA(fMet)-specific endonuclease VapC"  
"OPBA10\_00727" 33183 "s59E13H2" 0 "Ribbon-helix-helix protein, copG family"  
"OPBA10\_00727" 33183 "s59E25H2" 0 "Ribbon-helix-helix protein, copG family"  
"OPBA10\_00727" 33183 "s59E5H2" 0.1729251 "Ribbon-helix-helix protein, copG family"  
"OPBA10\_00727" 33183 "s63E6H2" 0 "Ribbon-helix-helix protein, copG family"  
"OPBA10\_00728" 33184 "s59E13H2" 0 "aminoalkylphosphonic acid N-acetyltransferase"  
"OPBA10\_00728" 33184 "s59E25H2" 0 "aminoalkylphosphonic acid N-acetyltransferase"  
"OPBA10\_00728" 33184 "s59E5H2" 0 "aminoalkylphosphonic acid N-acetyltransferase"  
"OPBA10\_00728" 33184 "s63E6H2" 0 "aminoalkylphosphonic acid N-acetyltransferase"  
"OPBA10\_00729" 33185 "s59E13H2" 0.002053556 "Erythromycin 3'-O-methyltransferase"  
"OPBA10\_00729" 33185 "s59E25H2" 0 "Erythromycin 3'-O-methyltransferase"  
"OPBA10\_00729" 33185 "s59E5H2" 0 "Erythromycin 3'-O-methyltransferase"  
"OPBA10\_00729" 33185 "s63E6H2" 0 "Erythromycin 3'-O-methyltransferase"  
"OPBA10\_00730" 33186 "s59E13H2" 0 "hypothetical protein"

"OPBA10\_00730" 33186 "s59E25H2" 0 "hypothetical protein"  
"OPBA10\_00730" 33186 "s59E5H2" 0 "hypothetical protein"  
"OPBA10\_00730" 33186 "s63E6H2" 0 "hypothetical protein"  
"OPBA10\_00732" 33188 "s59E13H2" 1.732992 "Aminopeptidase PepS"  
"OPBA10\_00732" 33188 "s59E25H2" 0 "Aminopeptidase PepS"  
"OPBA10\_00732" 33188 "s59E5H2" 0.9961258 "Aminopeptidase PepS"  
"OPBA10\_00732" 33188 "s63E6H2" 0.2074769 "Aminopeptidase PepS"  
"OPBA10\_00733" 33189 "s59E13H2" 0.02104153 "ATP-dependent DNA helicase PcrA"  
"OPBA10\_00733" 33189 "s59E25H2" 0 "ATP-dependent DNA helicase PcrA"  
"OPBA10\_00733" 33189 "s59E5H2" 0.2600132 "ATP-dependent DNA helicase PcrA"  
"OPBA10\_00733" 33189 "s63E6H2" 0.509493 "ATP-dependent DNA helicase PcrA"  
"OPBA10\_00734" 33190 "s59E13H2" 0.01780088 "Phospho-2-dehydro-3-deoxyheptonate aldolase"  
"OPBA10\_00734" 33190 "s59E25H2" 0 "Phospho-2-dehydro-3-deoxyheptonate aldolase"  
"OPBA10\_00734" 33190 "s59E5H2" 0.04695266 "Phospho-2-dehydro-3-deoxyheptonate aldolase"  
"OPBA10\_00734" 33190 "s63E6H2" 0.2670434 "Phospho-2-dehydro-3-deoxyheptonate aldolase"  
"OPBA10\_00735" 33191 "s59E13H2" 0.0144237 "bifunctional 3-deoxy-7-phosphoheptulonate synthase/chorismate mutase"  
"OPBA10\_00735" 33191 "s59E25H2" 0 "bifunctional 3-deoxy-7-phosphoheptulonate synthase/chorismate mutase"  
"OPBA10\_00735" 33191 "s59E5H2" 0.03048943 "bifunctional 3-deoxy-7-phosphoheptulonate synthase/chorismate mutase"  
"OPBA10\_00735" 33191 "s63E6H2" 0.4140316 "bifunctional 3-deoxy-7-phosphoheptulonate synthase/chorismate mutase"  
"OPBA10\_00736" 33192 "s59E13H2" 0.01436491 "GMP synthase [glutamine-hydrolyzing]"  
"OPBA10\_00736" 33192 "s59E25H2" 0 "GMP synthase [glutamine-hydrolyzing]"  
"OPBA10\_00736" 33192 "s59E5H2" 0.04513482 "GMP synthase [glutamine-hydrolyzing]"  
"OPBA10\_00736" 33192 "s63E6H2" 0.6289229 "GMP synthase [glutamine-hydrolyzing]"  
"OPBA10\_00737" 33193 "s59E13H2" 0.01899158 "putative oxidoreductase/MSMEI\_1564"  
"OPBA10\_00737" 33193 "s59E25H2" 0 "putative oxidoreductase/MSMEI\_1564"  
"OPBA10\_00737" 33193 "s59E5H2" 0.04316147 "putative oxidoreductase/MSMEI\_1564"  
"OPBA10\_00737" 33193 "s63E6H2" 0.5385538 "putative oxidoreductase/MSMEI\_1564"  
"OPBA10\_00738" 33194 "s59E13H2" 0.01819888 "Glycerol-3-phosphate acyltransferase"  
"OPBA10\_00738" 33194 "s59E25H2" 0 "Glycerol-3-phosphate acyltransferase"  
"OPBA10\_00738" 33194 "s59E5H2" 0.01749485 "Glycerol-3-phosphate acyltransferase"  
"OPBA10\_00738" 33194 "s63E6H2" 0.3365447 "Glycerol-3-phosphate acyltransferase"  
"OPBA10\_00739" 33195 "s59E13H2" 0.001045085 "Formate dehydrogenase subunit alpha"  
"OPBA10\_00739" 33195 "s59E25H2" 0 "Formate dehydrogenase subunit alpha"  
"OPBA10\_00739" 33195 "s59E5H2" 0.02000637 "Formate dehydrogenase subunit alpha"  
"OPBA10\_00739" 33195 "s63E6H2" 0.04862023 "Formate dehydrogenase subunit alpha"  
"OPBA10\_00740" 33196 "s59E13H2" 0.06418757 "formate dehydrogenase accessory protein"  
"OPBA10\_00740" 33196 "s59E25H2" 0 "formate dehydrogenase accessory protein"  
"OPBA10\_00740" 33196 "s59E5H2" 0.05188917 "formate dehydrogenase accessory protein"  
"OPBA10\_00740" 33196 "s63E6H2" 0.2352838 "formate dehydrogenase accessory protein"  
"OPBA10\_00741" 33197 "s59E13H2" 1.179742 "Phosphoenolpyruvate carboxykinase [GTP]"  
"OPBA10\_00741" 33197 "s59E25H2" 0 "Phosphoenolpyruvate carboxykinase [GTP]"  
"OPBA10\_00741" 33197 "s59E5H2" 0.1758782 "Phosphoenolpyruvate carboxykinase [GTP]"  
"OPBA10\_00741" 33197 "s63E6H2" 0.008638307 "Phosphoenolpyruvate carboxykinase [GTP]"  
"OPBA10\_00742" 33198 "s59E13H2" 0.9622108 "hypothetical protein"  
"OPBA10\_00742" 33198 "s59E25H2" 0 "hypothetical protein"  
"OPBA10\_00742" 33198 "s59E5H2" 0.01953355 "hypothetical protein"  
"OPBA10\_00742" 33198 "s63E6H2" 0 "hypothetical protein"

"OPBA10\_00743" 33199 "s59E13H2" 0.03302189 "UDP-N-acetyl-alpha-D-glucosamine C6 dehydratase"  
"OPBA10\_00743" 33199 "s59E25H2" 0 "UDP-N-acetyl-alpha-D-glucosamine C6 dehydratase"  
"OPBA10\_00743" 33199 "s59E5H2" 0.06261532 "UDP-N-acetyl-alpha-D-glucosamine C6 dehydratase"  
"OPBA10\_00743" 33199 "s63E6H2" 0.02815236 "UDP-N-acetyl-alpha-D-glucosamine C6 dehydratase"  
"OPBA10\_00744" 33200 "s59E13H2" 0.04467117 "Undecaprenyl phosphate N,N'-diacetylbacillosamine 1-phosphate transferase"  
"OPBA10\_00744" 33200 "s59E25H2" 0 "Undecaprenyl phosphate N,N'-diacetylbacillosamine 1-phosphate transferase"  
"OPBA10\_00744" 33200 "s59E5H2" 0.04139226 "Undecaprenyl phosphate N,N'-diacetylbacillosamine 1-phosphate transferase"  
"OPBA10\_00744" 33200 "s63E6H2" 0.004339318 "Undecaprenyl phosphate N,N'-diacetylbacillosamine 1-phosphate transferase"  
"OPBA10\_00745" 33201 "s59E13H2" 0.0518172 "NAD dependent epimerase/dehydratase family protein"  
"OPBA10\_00745" 33201 "s59E25H2" 0 "NAD dependent epimerase/dehydratase family protein"  
"OPBA10\_00745" 33201 "s59E5H2" 0.01831834 "NAD dependent epimerase/dehydratase family protein"  
"OPBA10\_00745" 33201 "s63E6H2" 0.3575859 "NAD dependent epimerase/dehydratase family protein"  
"OPBA10\_00746" 33202 "s59E13H2" 0.01799267 "Glycosyl transferases group 1"  
"OPBA10\_00746" 33202 "s59E25H2" 0 "Glycosyl transferases group 1"  
"OPBA10\_00746" 33202 "s59E5H2" 0.2676159 "Glycosyl transferases group 1"  
"OPBA10\_00746" 33202 "s63E6H2" 0 "Glycosyl transferases group 1"  
"OPBA10\_00747" 33203 "s59E13H2" 0.1555984 "Beta-1,4-mannooligosaccharide phosphorylase"  
"OPBA10\_00747" 33203 "s59E25H2" 0 "Beta-1,4-mannooligosaccharide phosphorylase"  
"OPBA10\_00747" 33203 "s59E5H2" 0.224895 "Beta-1,4-mannooligosaccharide phosphorylase"  
"OPBA10\_00747" 33203 "s63E6H2" 2.043372 "Beta-1,4-mannooligosaccharide phosphorylase"  
"OPBA10\_00748" 33204 "s59E13H2" 0.0732383 "RNA polymerase sigma factor SigI"  
"OPBA10\_00748" 33204 "s59E25H2" 0 "RNA polymerase sigma factor SigI"  
"OPBA10\_00748" 33204 "s59E5H2" 0.2686379 "RNA polymerase sigma factor SigI"  
"OPBA10\_00748" 33204 "s63E6H2" 1.24356 "RNA polymerase sigma factor SigI"  
"OPBA10\_00749" 33205 "s59E13H2" 0.004449606 "hypothetical protein"  
"OPBA10\_00749" 33205 "s59E25H2" 0 "hypothetical protein"  
"OPBA10\_00749" 33205 "s59E5H2" 0.2487639 "hypothetical protein"  
"OPBA10\_00749" 33205 "s63E6H2" 0.06037036 "hypothetical protein"  
"OPBA10\_00750" 33206 "s59E13H2" 0 "Serp (serine protease inhibitor)"  
"OPBA10\_00750" 33206 "s59E25H2" 0 "Serp (serine protease inhibitor)"  
"OPBA10\_00750" 33206 "s59E5H2" 0.113245 "Serp (serine protease inhibitor)"  
"OPBA10\_00750" 33206 "s63E6H2" 0.1183613 "Serp (serine protease inhibitor)"  
"OPBA10\_00751" 33207 "s59E13H2" 0 "Ribose transport system permease protein RbsC"  
"OPBA10\_00751" 33207 "s59E25H2" 0 "Ribose transport system permease protein RbsC"  
"OPBA10\_00751" 33207 "s59E5H2" 0 "Ribose transport system permease protein RbsC"  
"OPBA10\_00751" 33207 "s63E6H2" 0 "Ribose transport system permease protein RbsC"  
"OPBA10\_00757" 33213 "s59E13H2" 0 "D-tagatose 3-epimerase"  
"OPBA10\_00757" 33213 "s59E25H2" 0 "D-tagatose 3-epimerase"  
"OPBA10\_00757" 33213 "s59E5H2" 0.001410455 "D-tagatose 3-epimerase"  
"OPBA10\_00757" 33213 "s63E6H2" 0 "D-tagatose 3-epimerase"  
"OPBA10\_00758" 33214 "s59E13H2" 0 "Ribose transport system permease protein RbsC"  
"OPBA10\_00758" 33214 "s59E25H2" 0 "Ribose transport system permease protein RbsC"  
"OPBA10\_00758" 33214 "s59E5H2" 0 "Ribose transport system permease protein RbsC"  
"OPBA10\_00758" 33214 "s63E6H2" 0 "Ribose transport system permease protein RbsC"  
"OPBA10\_00759" 33215 "s59E13H2" 0.06059489 "hypothetical protein"  
"OPBA10\_00759" 33215 "s59E25H2" 0 "hypothetical protein"  
"OPBA10\_00759" 33215 "s59E5H2" 0.03624959 "hypothetical protein"

"OPBA10\_00759" 33215 "s63E6H2" 0.01259493 "hypothetical protein"  
"OPBA10\_00761" 33217 "s59E13H2" 1.286785 "hypothetical protein"  
"OPBA10\_00761" 33217 "s59E25H2" 0 "hypothetical protein"  
"OPBA10\_00761" 33217 "s59E5H2" 0.0896363 "hypothetical protein"  
"OPBA10\_00761" 33217 "s63E6H2" 0 "hypothetical protein"  
"OPBA10\_00762" 33218 "s59E13H2" 1.120495 "HTH-type transcriptional regulator CymR"  
"OPBA10\_00762" 33218 "s59E25H2" 0 "HTH-type transcriptional regulator CymR"  
"OPBA10\_00762" 33218 "s59E5H2" 0.03847155 "HTH-type transcriptional regulator CymR"  
"OPBA10\_00762" 33218 "s63E6H2" 0 "HTH-type transcriptional regulator CymR"  
"OPBA10\_00763" 33219 "s59E13H2" 1.123344 "Sulfhydrogenase 1 subunit alpha"  
"OPBA10\_00763" 33219 "s59E25H2" 0 "Sulfhydrogenase 1 subunit alpha"  
"OPBA10\_00763" 33219 "s59E5H2" 0.6835574 "Sulfhydrogenase 1 subunit alpha"  
"OPBA10\_00763" 33219 "s63E6H2" 0.06791808 "Sulfhydrogenase 1 subunit alpha"  
"OPBA10\_00764" 33220 "s59E13H2" 1.022273 "Sulfhydrogenase 1 subunit delta"  
"OPBA10\_00764" 33220 "s59E25H2" 0 "Sulfhydrogenase 1 subunit delta"  
"OPBA10\_00764" 33220 "s59E5H2" 1.011059 "Sulfhydrogenase 1 subunit delta"  
"OPBA10\_00764" 33220 "s63E6H2" 0.05979551 "Sulfhydrogenase 1 subunit delta"  
"OPBA10\_00765" 33221 "s59E13H2" 0.9121245 "Sulfhydrogenase 2 subunit gamma"  
"OPBA10\_00765" 33221 "s59E25H2" 0 "Sulfhydrogenase 2 subunit gamma"  
"OPBA10\_00765" 33221 "s59E5H2" 0.5239917 "Sulfhydrogenase 2 subunit gamma"  
"OPBA10\_00765" 33221 "s63E6H2" 0.1766371 "Sulfhydrogenase 2 subunit gamma"  
"OPBA10\_00766" 33222 "s59E13H2" 0.8765674 "Sulfhydrogenase 1 subunit beta"  
"OPBA10\_00766" 33222 "s59E25H2" 0 "Sulfhydrogenase 1 subunit beta"  
"OPBA10\_00766" 33222 "s59E5H2" 0.6533992 "Sulfhydrogenase 1 subunit beta"  
"OPBA10\_00766" 33222 "s63E6H2" 0.1400014 "Sulfhydrogenase 1 subunit beta"  
"OPBA10\_00767" 33223 "s59E13H2" 0.765728 "Alkaline phosphatase synthesis sensor protein PhoR"  
"OPBA10\_00767" 33223 "s59E25H2" 0 "Alkaline phosphatase synthesis sensor protein PhoR"  
"OPBA10\_00767" 33223 "s59E5H2" 0.1476578 "Alkaline phosphatase synthesis sensor protein PhoR"  
"OPBA10\_00767" 33223 "s63E6H2" 0.06757343 "Alkaline phosphatase synthesis sensor protein PhoR"  
"OPBA10\_00768" 33224 "s59E13H2" 0.6472595 "Response regulator MprA"  
"OPBA10\_00768" 33224 "s59E25H2" 0 "Response regulator MprA"  
"OPBA10\_00768" 33224 "s59E5H2" 0.1258162 "Response regulator MprA"  
"OPBA10\_00768" 33224 "s63E6H2" 0.07788606 "Response regulator MprA"  
"OPBA10\_00769" 33225 "s59E13H2" 0.3953943 "Sensor protein ZraS"  
"OPBA10\_00769" 33225 "s59E25H2" 0 "Sensor protein ZraS"  
"OPBA10\_00769" 33225 "s59E5H2" 0.05075306 "Sensor protein ZraS"  
"OPBA10\_00769" 33225 "s63E6H2" 0.09165262 "Sensor protein ZraS"  
"OPBA10\_00773" 33229 "s59E13H2" 0 "Ribosome-recycling factor"  
"OPBA10\_00773" 33229 "s59E25H2" 0 "Ribosome-recycling factor"  
"OPBA10\_00773" 33229 "s59E5H2" 0.01118551 "Ribosome-recycling factor"  
"OPBA10\_00773" 33229 "s63E6H2" 0.01226753 "Ribosome-recycling factor"  
"OPBA10\_00774" 33230 "s59E13H2" 0.005216694 "Uridylate kinase"  
"OPBA10\_00774" 33230 "s59E25H2" 0 "Uridylate kinase"  
"OPBA10\_00774" 33230 "s59E5H2" 0.01855343 "Uridylate kinase"  
"OPBA10\_00774" 33230 "s63E6H2" 0.005513578 "Uridylate kinase"  
"OPBA10\_00775" 33231 "s59E13H2" 0.0007107054 "Elongation factor Ts"  
"OPBA10\_00775" 33231 "s59E25H2" 0 "Elongation factor Ts"

"OPBA10\_00775" 33231 "s59E5H2" 0.01270869 "Elongation factor Ts"  
"OPBA10\_00775" 33231 "s63E6H2" 0.020081 "Elongation factor Ts"  
"OPBA10\_00776" 33232 "s59E13H2" 0.008977567 "30S ribosomal protein S2"  
"OPBA10\_00776" 33232 "s59E25H2" 0 "30S ribosomal protein S2"  
"OPBA10\_00776" 33232 "s59E5H2" 0.03994286 "30S ribosomal protein S2"  
"OPBA10\_00776" 33232 "s63E6H2" 0.202965 "30S ribosomal protein S2"  
"OPBA10\_00777" 33233 "s59E13H2" 0.04821784 "Tyrosine recombinase XerC"  
"OPBA10\_00777" 33233 "s59E25H2" 0 "Tyrosine recombinase XerC"  
"OPBA10\_00777" 33233 "s59E5H2" 0.01330602 "Tyrosine recombinase XerC"  
"OPBA10\_00777" 33233 "s63E6H2" 0.02233059 "Tyrosine recombinase XerC"  
"OPBA10\_00779" 33235 "s59E13H2" 0.07879518 "hypothetical protein"  
"OPBA10\_00779" 33235 "s59E25H2" 0 "hypothetical protein"  
"OPBA10\_00779" 33235 "s59E5H2" 0.008992974 "hypothetical protein"  
"OPBA10\_00779" 33235 "s63E6H2" 0.07744111 "hypothetical protein"  
"OPBA10\_00780" 33236 "s59E13H2" 0.1129552 "Competence protein ComM"  
"OPBA10\_00780" 33236 "s59E25H2" 0 "Competence protein ComM"  
"OPBA10\_00780" 33236 "s59E5H2" 0.03004155 "Competence protein ComM"  
"OPBA10\_00780" 33236 "s63E6H2" 0.06972886 "Competence protein ComM"  
"OPBA10\_00781" 33237 "s59E13H2" 0.01718962 "hypothetical protein"  
"OPBA10\_00781" 33237 "s59E25H2" 0 "hypothetical protein"  
"OPBA10\_00781" 33237 "s59E5H2" 0 "hypothetical protein"  
"OPBA10\_00781" 33237 "s63E6H2" 0.004891827 "hypothetical protein"  
"OPBA10\_00782" 33238 "s59E13H2" 0.02634694 "DNA polymerase/3'-5' exonuclease PolX"  
"OPBA10\_00782" 33238 "s59E25H2" 0 "DNA polymerase/3'-5' exonuclease PolX"  
"OPBA10\_00782" 33238 "s59E5H2" 0.1790168 "DNA polymerase/3'-5' exonuclease PolX"  
"OPBA10\_00782" 33238 "s63E6H2" 0 "DNA polymerase/3'-5' exonuclease PolX"  
"OPBA10\_00783" 33239 "s59E13H2" 0.03921971 "Inositol-3-phosphate synthase"  
"OPBA10\_00783" 33239 "s59E25H2" 0 "Inositol-3-phosphate synthase"  
"OPBA10\_00783" 33239 "s59E5H2" 0.2884778 "Inositol-3-phosphate synthase"  
"OPBA10\_00783" 33239 "s63E6H2" 0 "Inositol-3-phosphate synthase"  
"OPBA10\_00784" 33240 "s59E13H2" 0.06777051 "Bifunctional IPC transferase and DIPP synthase"  
"OPBA10\_00784" 33240 "s59E25H2" 0 "Bifunctional IPC transferase and DIPP synthase"  
"OPBA10\_00784" 33240 "s59E5H2" 0.4935142 "Bifunctional IPC transferase and DIPP synthase"  
"OPBA10\_00784" 33240 "s63E6H2" 0 "Bifunctional IPC transferase and DIPP synthase"  
"OPBA10\_00785" 33241 "s59E13H2" 0.07028741 "hypothetical protein"  
"OPBA10\_00785" 33241 "s59E25H2" 0 "hypothetical protein"  
"OPBA10\_00785" 33241 "s59E5H2" 0.09355616 "hypothetical protein"  
"OPBA10\_00785" 33241 "s63E6H2" 0 "hypothetical protein"  
"OPBA10\_00786" 33242 "s59E13H2" 0.03530222 "Beta-1,4-mannooligosaccharide phosphorylase"  
"OPBA10\_00786" 33242 "s59E25H2" 0 "Beta-1,4-mannooligosaccharide phosphorylase"  
"OPBA10\_00786" 33242 "s59E5H2" 0.09073063 "Beta-1,4-mannooligosaccharide phosphorylase"  
"OPBA10\_00786" 33242 "s63E6H2" 0 "Beta-1,4-mannooligosaccharide phosphorylase"  
"OPBA10\_00788" 33244 "s59E13H2" 0.03655874 "Helix-turn-helix"  
"OPBA10\_00788" 33244 "s59E25H2" 0 "Helix-turn-helix"  
"OPBA10\_00788" 33244 "s59E5H2" 0.01769113 "Helix-turn-helix"  
"OPBA10\_00788" 33244 "s63E6H2" 0.06743465 "Helix-turn-helix"  
"OPBA10\_00789" 33245 "s59E13H2" 0.04479256 "NYN domain protein"

"OPBA10\_00789" 33245 "s59E25H2" 0 "NYN domain protein"  
"OPBA10\_00789" 33245 "s59E5H2" 0.01174148 "NYN domain protein"  
"OPBA10\_00789" 33245 "s63E6H2" 0 "NYN domain protein"  
"OPBA10\_00791" 33247 "s59E13H2" 0.01415252 "Sarcosine/dimethylglycine N-methyltransferase"  
"OPBA10\_00791" 33247 "s59E25H2" 0 "Sarcosine/dimethylglycine N-methyltransferase"  
"OPBA10\_00791" 33247 "s59E5H2" 0.0462848 "Sarcosine/dimethylglycine N-methyltransferase"  
"OPBA10\_00791" 33247 "s63E6H2" 0.001883299 "Sarcosine/dimethylglycine N-methyltransferase"  
"OPBA10\_00792" 33248 "s59E13H2" 0.03757875 "hypothetical protein"  
"OPBA10\_00792" 33248 "s59E25H2" 0 "hypothetical protein"  
"OPBA10\_00792" 33248 "s59E5H2" 0.01262354 "hypothetical protein"  
"OPBA10\_00792" 33248 "s63E6H2" 0.03410887 "hypothetical protein"  
"OPBA10\_00793" 33249 "s59E13H2" 0.0355025 "Ribonuclease HII"  
"OPBA10\_00793" 33249 "s59E25H2" 0 "Ribonuclease HII"  
"OPBA10\_00793" 33249 "s59E5H2" 0.01712104 "Ribonuclease HII"  
"OPBA10\_00793" 33249 "s63E6H2" 0.04944294 "Ribonuclease HII"  
"OPBA10\_00794" 33250 "s59E13H2" 0.03910928 "Signal peptidase I"  
"OPBA10\_00794" 33250 "s59E25H2" 0 "Signal peptidase I"  
"OPBA10\_00794" 33250 "s59E5H2" 0.01793386 "Signal peptidase I"  
"OPBA10\_00794" 33250 "s63E6H2" 0.03469426 "Signal peptidase I"  
"OPBA10\_00795" 33251 "s59E13H2" 0.004413344 "50S ribosomal protein L19"  
"OPBA10\_00795" 33251 "s59E25H2" 0 "50S ribosomal protein L19"  
"OPBA10\_00795" 33251 "s59E5H2" 0.01592732 "50S ribosomal protein L19"  
"OPBA10\_00795" 33251 "s63E6H2" 0.02652135 "50S ribosomal protein L19"  
"OPBA10\_00796" 33252 "s59E13H2" 0.009769536 "tRNA (guanine-N(1)-)-methyltransferase"  
"OPBA10\_00796" 33252 "s59E25H2" 0 "tRNA (guanine-N(1)-)-methyltransferase"  
"OPBA10\_00796" 33252 "s59E5H2" 0.0163272 "tRNA (guanine-N(1)-)-methyltransferase"  
"OPBA10\_00796" 33252 "s63E6H2" 0.04612293 "tRNA (guanine-N(1)-)-methyltransferase"  
"OPBA10\_00797" 33253 "s59E13H2" 0.002935161 "Ribosome maturation factor RimM"  
"OPBA10\_00797" 33253 "s59E25H2" 0 "Ribosome maturation factor RimM"  
"OPBA10\_00797" 33253 "s59E5H2" 0.03618896 "Ribosome maturation factor RimM"  
"OPBA10\_00797" 33253 "s63E6H2" 0.01174898 "Ribosome maturation factor RimM"  
"OPBA10\_00798" 33254 "s59E13H2" 0.006955593 "hypothetical protein"  
"OPBA10\_00798" 33254 "s59E25H2" 0 "hypothetical protein"  
"OPBA10\_00798" 33254 "s59E5H2" 0.02469382 "hypothetical protein"  
"OPBA10\_00798" 33254 "s63E6H2" 0.02485583 "hypothetical protein"  
"OPBA10\_00799" 33255 "s59E13H2" 0.003760544 "30S ribosomal protein S16"  
"OPBA10\_00799" 33255 "s59E25H2" 0 "30S ribosomal protein S16"  
"OPBA10\_00799" 33255 "s59E5H2" 0.05502763 "30S ribosomal protein S16"  
"OPBA10\_00799" 33255 "s63E6H2" 0.03509183 "30S ribosomal protein S16"  
"OPBA10\_00800" 33256 "s59E13H2" 0.01390072 "Signal recognition particle protein"  
"OPBA10\_00800" 33256 "s59E25H2" 0 "Signal recognition particle protein"  
"OPBA10\_00800" 33256 "s59E5H2" 0.02866634 "Signal recognition particle protein"  
"OPBA10\_00800" 33256 "s63E6H2" 0.03283914 "Signal recognition particle protein"  
"OPBA10\_00801" 33257 "s59E13H2" 0 "Signal recognition particle receptor FtsY"  
"OPBA10\_00801" 33257 "s59E25H2" 0 "Signal recognition particle receptor FtsY"  
"OPBA10\_00801" 33257 "s59E5H2" 0.03184779 "Signal recognition particle receptor FtsY"  
"OPBA10\_00801" 33257 "s63E6H2" 0.01693566 "Signal recognition particle receptor FtsY"

"OPBA10\_00802" 33258 "s59E13H2" 0.01064485 "Chromosome partition protein Smc"  
"OPBA10\_00802" 33258 "s59E25H2" 0 "Chromosome partition protein Smc"  
"OPBA10\_00802" 33258 "s59E5H2" 0.0301864 "Chromosome partition protein Smc"  
"OPBA10\_00802" 33258 "s63E6H2" 0.02529498 "Chromosome partition protein Smc"  
"OPBA10\_00803" 33259 "s59E13H2" 0.005190017 "Ribonuclease 3"  
"OPBA10\_00803" 33259 "s59E25H2" 0 "Ribonuclease 3"  
"OPBA10\_00803" 33259 "s59E5H2" 0.03095378 "Ribonuclease 3"  
"OPBA10\_00803" 33259 "s63E6H2" 0 "Ribonuclease 3"  
"OPBA10\_00804" 33260 "s59E13H2" 0.03002351 "Acyl carrier protein"  
"OPBA10\_00804" 33260 "s59E25H2" 0 "Acyl carrier protein"  
"OPBA10\_00804" 33260 "s59E5H2" 0.02701955 "Acyl carrier protein"  
"OPBA10\_00804" 33260 "s63E6H2" 0 "Acyl carrier protein"  
"OPBA10\_00805" 33261 "s59E13H2" 0.1408985 "Phosphate acyltransferase"  
"OPBA10\_00805" 33261 "s59E25H2" 0 "Phosphate acyltransferase"  
"OPBA10\_00805" 33261 "s59E5H2" 0.008868771 "Phosphate acyltransferase"  
"OPBA10\_00805" 33261 "s63E6H2" 0.01382144 "Phosphate acyltransferase"  
"OPBA10\_00806" 33262 "s59E13H2" 0.1488432 "Phosphate acetyltransferase"  
"OPBA10\_00806" 33262 "s59E25H2" 0 "Phosphate acetyltransferase"  
"OPBA10\_00806" 33262 "s59E5H2" 0.01178205 "Phosphate acetyltransferase"  
"OPBA10\_00806" 33262 "s63E6H2" 0.004703601 "Phosphate acetyltransferase"  
"OPBA10\_00807" 33263 "s59E13H2" 0.1787088 "Succinyl-CoA ligase [ADP-forming] subunit alpha"  
"OPBA10\_00807" 33263 "s59E25H2" 0 "Succinyl-CoA ligase [ADP-forming] subunit alpha"  
"OPBA10\_00807" 33263 "s59E5H2" 0.03823595 "Succinyl-CoA ligase [ADP-forming] subunit alpha"  
"OPBA10\_00807" 33263 "s63E6H2" 0.03707702 "Succinyl-CoA ligase [ADP-forming] subunit alpha"  
"OPBA10\_00808" 33264 "s59E13H2" 0.1544451 "50S ribosomal protein L32"  
"OPBA10\_00808" 33264 "s59E25H2" 0 "50S ribosomal protein L32"  
"OPBA10\_00808" 33264 "s59E5H2" 0 "50S ribosomal protein L32"  
"OPBA10\_00808" 33264 "s63E6H2" 0.008456967 "50S ribosomal protein L32"  
"OPBA10\_00809" 33265 "s59E13H2" 0.141611 "hypothetical protein"  
"OPBA10\_00809" 33265 "s59E25H2" 0 "hypothetical protein"  
"OPBA10\_00809" 33265 "s59E5H2" 0.03294982 "hypothetical protein"  
"OPBA10\_00809" 33265 "s63E6H2" 0.02397503 "hypothetical protein"  
"OPBA10\_00810" 33266 "s59E13H2" 0.1895575 "Phosphopantetheine adenylyltransferase"  
"OPBA10\_00810" 33266 "s59E25H2" 0 "Phosphopantetheine adenylyltransferase"  
"OPBA10\_00810" 33266 "s59E5H2" 0.03261997 "Phosphopantetheine adenylyltransferase"  
"OPBA10\_00810" 33266 "s63E6H2" 0.0780851 "Phosphopantetheine adenylyltransferase"  
"OPBA10\_00811" 33267 "s59E13H2" 0.1282866 "Ribosomal RNA small subunit methyltransferase D"  
"OPBA10\_00811" 33267 "s59E25H2" 0 "Ribosomal RNA small subunit methyltransferase D"  
"OPBA10\_00811" 33267 "s59E5H2" 0.04521018 "Ribosomal RNA small subunit methyltransferase D"  
"OPBA10\_00811" 33267 "s63E6H2" 0.08677972 "Ribosomal RNA small subunit methyltransferase D"  
"OPBA10\_00812" 33268 "s59E13H2" 0.106629 "DAK2 domain protein"  
"OPBA10\_00812" 33268 "s59E25H2" 0 "DAK2 domain protein"  
"OPBA10\_00812" 33268 "s59E5H2" 0.02256178 "DAK2 domain protein"  
"OPBA10\_00812" 33268 "s63E6H2" 0.06382913 "DAK2 domain protein"  
"OPBA10\_00814" 33270 "s59E13H2" 0.0672374 "50S ribosomal protein L28"  
"OPBA10\_00814" 33270 "s59E25H2" 0 "50S ribosomal protein L28"  
"OPBA10\_00814" 33270 "s59E5H2" 0 "50S ribosomal protein L28"



"OPBA10\_00814" 33270 "s63E6H2" 0.005984301 "50S ribosomal protein L28"  
"OPBA10\_00815" 33271 "s59E13H2" 0 "Ribonuclease VapC19"  
"OPBA10\_00815" 33271 "s59E25H2" 0 "Ribonuclease VapC19"  
"OPBA10\_00815" 33271 "s59E5H2" 0.01701388 "Ribonuclease VapC19"  
"OPBA10\_00815" 33271 "s63E6H2" 0 "Ribonuclease VapC19"  
"OPBA10\_00817" 33273 "s59E13H2" 0.1617653 "Ribosomal RNA small subunit methyltransferase B"  
"OPBA10\_00817" 33273 "s59E25H2" 0 "Ribosomal RNA small subunit methyltransferase B"  
"OPBA10\_00817" 33273 "s59E5H2" 0.04724713 "Ribosomal RNA small subunit methyltransferase B"  
"OPBA10\_00817" 33273 "s63E6H2" 0.04455364 "Ribosomal RNA small subunit methyltransferase B"  
"OPBA10\_00818" 33274 "s59E13H2" 0.1292348 "Methionyl-tRNA formyltransferase"  
"OPBA10\_00818" 33274 "s59E25H2" 0 "Methionyl-tRNA formyltransferase"  
"OPBA10\_00818" 33274 "s59E5H2" 0.009603235 "Methionyl-tRNA formyltransferase"  
"OPBA10\_00818" 33274 "s63E6H2" 0.0189719 "Methionyl-tRNA formyltransferase"  
"OPBA10\_00819" 33275 "s59E13H2" 0.08950088 "Peptide deformylase"  
"OPBA10\_00819" 33275 "s59E25H2" 0 "Peptide deformylase"  
"OPBA10\_00819" 33275 "s59E5H2" 0.01158911 "Peptide deformylase"  
"OPBA10\_00819" 33275 "s63E6H2" 0.01322062 "Peptide deformylase"  
"OPBA10\_00820" 33276 "s59E13H2" 0.1688031 "Primosomal protein N"  
"OPBA10\_00820" 33276 "s59E25H2" 0 "Primosomal protein N"  
"OPBA10\_00820" 33276 "s59E5H2" 0.01268279 "Primosomal protein N"  
"OPBA10\_00820" 33276 "s63E6H2" 0.04009283 "Primosomal protein N"  
"OPBA10\_00821" 33277 "s59E13H2" 0.1211959 "S-adenosylmethionine synthase"  
"OPBA10\_00821" 33277 "s59E25H2" 0 "S-adenosylmethionine synthase"  
"OPBA10\_00821" 33277 "s59E5H2" 0.0356366 "S-adenosylmethionine synthase"  
"OPBA10\_00821" 33277 "s63E6H2" 0.03849719 "S-adenosylmethionine synthase"  
"OPBA10\_00822" 33278 "s59E13H2" 0.08943392 "Coenzyme A biosynthesis bifunctional protein CoaBC"  
"OPBA10\_00822" 33278 "s59E25H2" 0 "Coenzyme A biosynthesis bifunctional protein CoaBC"  
"OPBA10\_00822" 33278 "s59E5H2" 0.06618466 "Coenzyme A biosynthesis bifunctional protein CoaBC"  
"OPBA10\_00822" 33278 "s63E6H2" 0.01264035 "Coenzyme A biosynthesis bifunctional protein CoaBC"  
"OPBA10\_00823" 33279 "s59E13H2" 0.05422464 "DNA-directed RNA polymerase subunit omega"  
"OPBA10\_00823" 33279 "s59E25H2" 0 "DNA-directed RNA polymerase subunit omega"  
"OPBA10\_00823" 33279 "s59E5H2" 0.06011851 "DNA-directed RNA polymerase subunit omega"  
"OPBA10\_00823" 33279 "s63E6H2" 0.01327312 "DNA-directed RNA polymerase subunit omega"  
"OPBA10\_00824" 33280 "s59E13H2" 0 "30S ribosomal protein S12"  
"OPBA10\_00824" 33280 "s59E25H2" 0 "30S ribosomal protein S12"  
"OPBA10\_00824" 33280 "s59E5H2" 0 "30S ribosomal protein S12"  
"OPBA10\_00824" 33280 "s63E6H2" 0.01532896 "30S ribosomal protein S12"  
"OPBA10\_00825" 33281 "s59E13H2" 0.01907988 "30S ribosomal protein S7"  
"OPBA10\_00825" 33281 "s59E25H2" 0 "30S ribosomal protein S7"  
"OPBA10\_00825" 33281 "s59E5H2" 0.01431864 "30S ribosomal protein S7"  
"OPBA10\_00825" 33281 "s63E6H2" 0.02817641 "30S ribosomal protein S7"  
"OPBA10\_00826" 33282 "s59E13H2" 0.006965572 "Elongation factor G"  
"OPBA10\_00826" 33282 "s59E25H2" 0 "Elongation factor G"  
"OPBA10\_00826" 33282 "s59E5H2" 0.01705682 "Elongation factor G"  
"OPBA10\_00826" 33282 "s63E6H2" 0.02119175 "Elongation factor G"  
"OPBA10\_00827" 33283 "s59E13H2" 0.04885024 "Elongation factor Tu"  
"OPBA10\_00827" 33283 "s59E25H2" 0 "Elongation factor Tu"

"OPBA10\_00827" 33283 "s59E5H2" 0.0669924 "Elongation factor Tu"  
"OPBA10\_00827" 33283 "s63E6H2" 0.009297441 "Elongation factor Tu"  
"OPBA10\_00828" 33284 "s59E13H2" 0 "30S ribosomal protein S10"  
"OPBA10\_00828" 33284 "s59E25H2" 0 "30S ribosomal protein S10"  
"OPBA10\_00828" 33284 "s59E5H2" 0.0210601 "30S ribosomal protein S10"  
"OPBA10\_00828" 33284 "s63E6H2" 0.01939312 "30S ribosomal protein S10"  
"OPBA10\_00829" 33285 "s59E13H2" 0 "50S ribosomal protein L3"  
"OPBA10\_00829" 33285 "s59E25H2" 0 "50S ribosomal protein L3"  
"OPBA10\_00829" 33285 "s59E5H2" 0.01353412 "50S ribosomal protein L3"  
"OPBA10\_00829" 33285 "s63E6H2" 0.02736593 "50S ribosomal protein L3"  
"OPBA10\_00830" 33286 "s59E13H2" 0.000759285 "DNA-directed RNA polymerase subunit beta"  
"OPBA10\_00830" 33286 "s59E25H2" 0 "DNA-directed RNA polymerase subunit beta"  
"OPBA10\_00830" 33286 "s59E5H2" 0.022619 "DNA-directed RNA polymerase subunit beta"  
"OPBA10\_00830" 33286 "s63E6H2" 0.007175458 "DNA-directed RNA polymerase subunit beta"  
"OPBA10\_00831" 33287 "s59E13H2" 0.02107189 "DNA-directed RNA polymerase subunit beta"  
"OPBA10\_00831" 33287 "s59E25H2" 1.111015 "DNA-directed RNA polymerase subunit beta"  
"OPBA10\_00831" 33287 "s59E5H2" 0.01099998 "DNA-directed RNA polymerase subunit beta"  
"OPBA10\_00831" 33287 "s63E6H2" 0.002641565 "DNA-directed RNA polymerase subunit beta"  
"OPBA10\_00833" 33289 "s59E13H2" 0.003230014 "Alcohol dehydrogenase 2"  
"OPBA10\_00833" 33289 "s59E25H2" 0 "Alcohol dehydrogenase 2"  
"OPBA10\_00833" 33289 "s59E5H2" 0 "Alcohol dehydrogenase 2"  
"OPBA10\_00833" 33289 "s63E6H2" 0.01751083 "Alcohol dehydrogenase 2"  
"OPBA10\_00834" 33290 "s59E13H2" 0.01138451 "N-acetylglucosamine-6-phosphate deacetylase"  
"OPBA10\_00834" 33290 "s59E25H2" 0 "N-acetylglucosamine-6-phosphate deacetylase"  
"OPBA10\_00834" 33290 "s59E5H2" 0.006306809 "N-acetylglucosamine-6-phosphate deacetylase"  
"OPBA10\_00834" 33290 "s63E6H2" 0.03317079 "N-acetylglucosamine-6-phosphate deacetylase"  
"OPBA10\_00835" 33291 "s59E13H2" 0.01541711 "Glucosamine-6-phosphate deaminase"  
"OPBA10\_00835" 33291 "s59E25H2" 0 "Glucosamine-6-phosphate deaminase"  
"OPBA10\_00835" 33291 "s59E5H2" 0.02689792 "Glucosamine-6-phosphate deaminase"  
"OPBA10\_00835" 33291 "s63E6H2" 0.02873491 "Glucosamine-6-phosphate deaminase"  
"OPBA10\_00836" 33292 "s59E13H2" 0.007827398 "Xylulose kinase"  
"OPBA10\_00836" 33292 "s59E25H2" 0 "Xylulose kinase"  
"OPBA10\_00836" 33292 "s59E5H2" 0.003657525 "Xylulose kinase"  
"OPBA10\_00836" 33292 "s63E6H2" 0.01971238 "Xylulose kinase"  
"OPBA10\_00837" 33293 "s59E13H2" 0.002805528 "Neutral/alkaline non-lysosomal ceramidase"  
"OPBA10\_00837" 33293 "s59E25H2" 0 "Neutral/alkaline non-lysosomal ceramidase"  
"OPBA10\_00837" 33293 "s59E5H2" 0.006181186 "Neutral/alkaline non-lysosomal ceramidase"  
"OPBA10\_00837" 33293 "s63E6H2" 0.02991529 "Neutral/alkaline non-lysosomal ceramidase"  
"OPBA10\_00839" 33295 "s59E13H2" 0 "Xaa-Pro dipeptidase"  
"OPBA10\_00839" 33295 "s59E25H2" 0 "Xaa-Pro dipeptidase"  
"OPBA10\_00839" 33295 "s59E5H2" 0 "Xaa-Pro dipeptidase"  
"OPBA10\_00839" 33295 "s63E6H2" 0.03772194 "Xaa-Pro dipeptidase"  
"OPBA10\_00841" 33297 "s59E13H2" 0 "HTH-type transcriptional regulator KdGR"  
"OPBA10\_00841" 33297 "s59E25H2" 0 "HTH-type transcriptional regulator KdGR"  
"OPBA10\_00841" 33297 "s59E5H2" 0 "HTH-type transcriptional regulator KdGR"  
"OPBA10\_00841" 33297 "s63E6H2" 0.01653894 "HTH-type transcriptional regulator KdGR"  
"OPBA10\_00842" 33298 "s59E13H2" 0.01103732 "hypothetical protein"

"OPBA10\_00842" 33298 "s59E25H2" 0 "hypothetical protein"  
"OPBA10\_00842" 33298 "s59E5H2" 0.04015721 "hypothetical protein"  
"OPBA10\_00842" 33298 "s63E6H2" 0.03526231 "hypothetical protein"  
"OPBA10\_00843" 33299 "s59E13H2" 0.06060878 "Triosephosphate isomerase"  
"OPBA10\_00843" 33299 "s59E25H2" 0 "Triosephosphate isomerase"  
"OPBA10\_00843" 33299 "s59E5H2" 0.01080782 "Triosephosphate isomerase"  
"OPBA10\_00843" 33299 "s63E6H2" 0.02762526 "Triosephosphate isomerase"  
"OPBA10\_00844" 33300 "s59E13H2" 0 "Ribulose-phosphate 3-epimerase"  
"OPBA10\_00844" 33300 "s59E25H2" 0 "Ribulose-phosphate 3-epimerase"  
"OPBA10\_00844" 33300 "s59E5H2" 0 "Ribulose-phosphate 3-epimerase"  
"OPBA10\_00844" 33300 "s63E6H2" 0.01692393 "Ribulose-phosphate 3-epimerase"  
"OPBA10\_00845" 33301 "s59E13H2" 0 "Arabinose 5-phosphate isomerase KpsF"  
"OPBA10\_00845" 33301 "s59E25H2" 0 "Arabinose 5-phosphate isomerase KpsF"  
"OPBA10\_00845" 33301 "s59E5H2" 0 "Arabinose 5-phosphate isomerase KpsF"  
"OPBA10\_00845" 33301 "s63E6H2" 0.08078086 "Arabinose 5-phosphate isomerase KpsF"  
"OPBA10\_00846" 33302 "s59E13H2" 0 "HTH-type transcriptional repressor GlcR"  
"OPBA10\_00846" 33302 "s59E25H2" 0 "HTH-type transcriptional repressor GlcR"  
"OPBA10\_00846" 33302 "s59E5H2" 0 "HTH-type transcriptional repressor GlcR"  
"OPBA10\_00846" 33302 "s63E6H2" 0.0681329 "HTH-type transcriptional repressor GlcR"  
"OPBA10\_00848" 33304 "s59E13H2" 0 "S-methyl-5'-thioadenosine phosphorylase"  
"OPBA10\_00848" 33304 "s59E25H2" 0 "S-methyl-5'-thioadenosine phosphorylase"  
"OPBA10\_00848" 33304 "s59E5H2" 0 "S-methyl-5'-thioadenosine phosphorylase"  
"OPBA10\_00848" 33304 "s63E6H2" 0.0415697 "S-methyl-5'-thioadenosine phosphorylase"  
"OPBA10\_00849" 33305 "s59E13H2" 0 "Glycerate 2-kinase"  
"OPBA10\_00849" 33305 "s59E25H2" 0 "Glycerate 2-kinase"  
"OPBA10\_00849" 33305 "s59E5H2" 0 "Glycerate 2-kinase"  
"OPBA10\_00849" 33305 "s63E6H2" 0.03508092 "Glycerate 2-kinase"  
"OPBA10\_00850" 33306 "s59E13H2" 0 "Phosphoribosylaminoimidazole-succinocarboxamide synthase"  
"OPBA10\_00850" 33306 "s59E25H2" 0 "Phosphoribosylaminoimidazole-succinocarboxamide synthase"  
"OPBA10\_00850" 33306 "s59E5H2" 0 "Phosphoribosylaminoimidazole-succinocarboxamide synthase"  
"OPBA10\_00850" 33306 "s63E6H2" 0.01944347 "Phosphoribosylaminoimidazole-succinocarboxamide synthase"  
"OPBA10\_00851" 33307 "s59E13H2" 0 "Phosphoribosylaminoimidazole-succinocarboxamide synthase"  
"OPBA10\_00851" 33307 "s59E25H2" 0 "Phosphoribosylaminoimidazole-succinocarboxamide synthase"  
"OPBA10\_00851" 33307 "s59E5H2" 0 "Phosphoribosylaminoimidazole-succinocarboxamide synthase"  
"OPBA10\_00851" 33307 "s63E6H2" 0.05111527 "Phosphoribosylaminoimidazole-succinocarboxamide synthase"  
"OPBA10\_00852" 33308 "s59E13H2" 0.00728434 "putative 2-phosphosulfolactate phosphatase"  
"OPBA10\_00852" 33308 "s59E25H2" 0 "putative 2-phosphosulfolactate phosphatase"  
"OPBA10\_00852" 33308 "s59E5H2" 0 "putative 2-phosphosulfolactate phosphatase"  
"OPBA10\_00852" 33308 "s63E6H2" 0.0253833 "putative 2-phosphosulfolactate phosphatase"  
"OPBA10\_00853" 33309 "s59E13H2" 0 "hypothetical protein"  
"OPBA10\_00853" 33309 "s59E25H2" 0 "hypothetical protein"  
"OPBA10\_00853" 33309 "s59E5H2" 0 "hypothetical protein"  
"OPBA10\_00853" 33309 "s63E6H2" 0.03327778 "hypothetical protein"  
"OPBA10\_00855" 33311 "s59E13H2" 0 "Putative phosphatase YwpJ"  
"OPBA10\_00855" 33311 "s59E25H2" 0 "Putative phosphatase YwpJ"  
"OPBA10\_00855" 33311 "s59E5H2" 0 "Putative phosphatase YwpJ"  
"OPBA10\_00855" 33311 "s63E6H2" 0.02433849 "Putative phosphatase YwpJ"

"OPBA10\_00856" 33312 "s59E13H2" 0 "Sugar phosphatase YidA"  
"OPBA10\_00856" 33312 "s59E25H2" 0 "Sugar phosphatase YidA"  
"OPBA10\_00856" 33312 "s59E5H2" 0 "Sugar phosphatase YidA"  
"OPBA10\_00856" 33312 "s63E6H2" 0.01140721 "Sugar phosphatase YidA"  
"OPBA10\_00857" 33313 "s59E13H2" 0.00678461 "Methylcobamide:CoM methyltransferase MtaA"  
"OPBA10\_00857" 33313 "s59E25H2" 0 "Methylcobamide:CoM methyltransferase MtaA"  
"OPBA10\_00857" 33313 "s59E5H2" 0 "Methylcobamide:CoM methyltransferase MtaA"  
"OPBA10\_00857" 33313 "s63E6H2" 0.01150104 "Methylcobamide:CoM methyltransferase MtaA"  
"OPBA10\_00860" 33316 "s59E13H2" 0.01223669 "Galactose/methyl galactoside import ATP-binding protein MglA"  
"OPBA10\_00860" 33316 "s59E25H2" 0 "Galactose/methyl galactoside import ATP-binding protein MglA"  
"OPBA10\_00860" 33316 "s59E5H2" 0 "Galactose/methyl galactoside import ATP-binding protein MglA"  
"OPBA10\_00860" 33316 "s63E6H2" 0.02897044 "Galactose/methyl galactoside import ATP-binding protein MglA"  
"OPBA10\_00861" 33317 "s59E13H2" 0.001865064 "Ribose transport system permease protein RbsC"  
"OPBA10\_00861" 33317 "s59E25H2" 0.232387 "Ribose transport system permease protein RbsC"  
"OPBA10\_00861" 33317 "s59E5H2" 0 "Ribose transport system permease protein RbsC"  
"OPBA10\_00861" 33317 "s63E6H2" 0.02572351 "Ribose transport system permease protein RbsC"  
"OPBA10\_00865" 33321 "s59E13H2" 0.01097893 "T-protein"  
"OPBA10\_00865" 33321 "s59E25H2" 0 "T-protein"  
"OPBA10\_00865" 33321 "s59E5H2" 0.1425101 "T-protein"  
"OPBA10\_00865" 33321 "s63E6H2" 0.02147799 "T-protein"  
"OPBA10\_00866" 33322 "s59E13H2" 0.02493769 "3-phosphoshikimate 1-carboxyvinyltransferase 1"  
"OPBA10\_00866" 33322 "s59E25H2" 0 "3-phosphoshikimate 1-carboxyvinyltransferase 1"  
"OPBA10\_00866" 33322 "s59E5H2" 0.09068516 "3-phosphoshikimate 1-carboxyvinyltransferase 1"  
"OPBA10\_00866" 33322 "s63E6H2" 0.03429379 "3-phosphoshikimate 1-carboxyvinyltransferase 1"  
"OPBA10\_00867" 33323 "s59E13H2" 0.007761606 "Cytidylate kinase"  
"OPBA10\_00867" 33323 "s59E25H2" 0 "Cytidylate kinase"  
"OPBA10\_00867" 33323 "s59E5H2" 0.08648577 "Cytidylate kinase"  
"OPBA10\_00867" 33323 "s63E6H2" 0.05808809 "Cytidylate kinase"  
"OPBA10\_00868" 33324 "s59E13H2" 0.01538173 "1-acyl-sn-glycerol-3-phosphate acyltransferase"  
"OPBA10\_00868" 33324 "s59E25H2" 0 "1-acyl-sn-glycerol-3-phosphate acyltransferase"  
"OPBA10\_00868" 33324 "s59E5H2" 0.07280269 "1-acyl-sn-glycerol-3-phosphate acyltransferase"  
"OPBA10\_00868" 33324 "s63E6H2" 0.04752729 "1-acyl-sn-glycerol-3-phosphate acyltransferase"  
"OPBA10\_00869" 33325 "s59E13H2" 0.03166474 "4-hydroxy-3-methylbut-2-enyl diphosphate reductase"  
"OPBA10\_00869" 33325 "s59E25H2" 0 "4-hydroxy-3-methylbut-2-enyl diphosphate reductase"  
"OPBA10\_00869" 33325 "s59E5H2" 0.06135253 "4-hydroxy-3-methylbut-2-enyl diphosphate reductase"  
"OPBA10\_00869" 33325 "s63E6H2" 0.03167102 "4-hydroxy-3-methylbut-2-enyl diphosphate reductase"  
"OPBA10\_00870" 33326 "s59E13H2" 0.003365609 "GTPase Der"  
"OPBA10\_00870" 33326 "s59E25H2" 0 "GTPase Der"  
"OPBA10\_00870" 33326 "s59E5H2" 0.02027919 "GTPase Der"  
"OPBA10\_00870" 33326 "s63E6H2" 0.01098194 "GTPase Der"  
"OPBA10\_00871" 33327 "s59E13H2" 0.01417725 "Transketolase"  
"OPBA10\_00871" 33327 "s59E25H2" 0 "Transketolase"  
"OPBA10\_00871" 33327 "s59E5H2" 0.01653065 "Transketolase"  
"OPBA10\_00871" 33327 "s63E6H2" 0.01196258 "Transketolase"  
"OPBA10\_00872" 33328 "s59E13H2" 0.008624535 "Ferrous-iron efflux pump FieF"  
"OPBA10\_00872" 33328 "s59E25H2" 0 "Ferrous-iron efflux pump FieF"  
"OPBA10\_00872" 33328 "s59E5H2" 0.1764191 "Ferrous-iron efflux pump FieF"

"OPBA10\_00872" 33328 "s63E6H2" 0.01956553 "Ferrous-iron efflux pump FieF"  
"OPBA10\_00873" 33329 "s59E13H2" 0.01351779 "LVIVD repeat protein"  
"OPBA10\_00873" 33329 "s59E25H2" 0 "LVIVD repeat protein"  
"OPBA10\_00873" 33329 "s59E5H2" 0.2280242 "LVIVD repeat protein"  
"OPBA10\_00873" 33329 "s63E6H2" 0.1140604 "LVIVD repeat protein"  
"OPBA10\_00874" 33330 "s59E13H2" 0 "Segregation and condensation protein B"  
"OPBA10\_00874" 33330 "s59E25H2" 0 "Segregation and condensation protein B"  
"OPBA10\_00874" 33330 "s59E5H2" 0.02970765 "Segregation and condensation protein B"  
"OPBA10\_00874" 33330 "s63E6H2" 0.1039818 "Segregation and condensation protein B"  
"OPBA10\_00875" 33331 "s59E13H2" 0.002579249 "Segregation and condensation protein A"  
"OPBA10\_00875" 33331 "s59E25H2" 0 "Segregation and condensation protein A"  
"OPBA10\_00875" 33331 "s59E5H2" 0.0256306 "Segregation and condensation protein A"  
"OPBA10\_00875" 33331 "s63E6H2" 0.06724655 "Segregation and condensation protein A"  
"OPBA10\_00876" 33332 "s59E13H2" 0.004243614 "Tryptophan--tRNA ligase"  
"OPBA10\_00876" 33332 "s59E25H2" 0 "Tryptophan--tRNA ligase"  
"OPBA10\_00876" 33332 "s59E5H2" 0.008204119 "Tryptophan--tRNA ligase"  
"OPBA10\_00876" 33332 "s63E6H2" 0.05150816 "Tryptophan--tRNA ligase"  
"OPBA10\_00877" 33333 "s59E13H2" 0.01224347 "Peptidase family M50"  
"OPBA10\_00877" 33333 "s59E25H2" 0 "Peptidase family M50"  
"OPBA10\_00877" 33333 "s59E5H2" 0.02391468 "Peptidase family M50"  
"OPBA10\_00877" 33333 "s63E6H2" 0.05822431 "Peptidase family M50"  
"OPBA10\_00878" 33334 "s59E13H2" 0.01624487 "Tyrosine recombinase XerD"  
"OPBA10\_00878" 33334 "s59E25H2" 0.1100218 "Tyrosine recombinase XerD"  
"OPBA10\_00878" 33334 "s59E5H2" 0.02385844 "Tyrosine recombinase XerD"  
"OPBA10\_00878" 33334 "s63E6H2" 0.09381178 "Tyrosine recombinase XerD"  
"OPBA10\_00879" 33335 "s59E13H2" 0.02648709 "ADP-ribose pyrophosphatase"  
"OPBA10\_00879" 33335 "s59E25H2" 0.3019197 "ADP-ribose pyrophosphatase"  
"OPBA10\_00879" 33335 "s59E5H2" 0.01086441 "ADP-ribose pyrophosphatase"  
"OPBA10\_00879" 33335 "s63E6H2" 0.1328744 "ADP-ribose pyrophosphatase"  
"OPBA10\_00880" 33336 "s59E13H2" 0.006114739 "Peptidase T"  
"OPBA10\_00880" 33336 "s59E25H2" 0 "Peptidase T"  
"OPBA10\_00880" 33336 "s59E5H2" 0.03975837 "Peptidase T"  
"OPBA10\_00880" 33336 "s63E6H2" 0.1323934 "Peptidase T"  
"OPBA10\_00881" 33337 "s59E13H2" 0.002275595 "hypothetical protein"  
"OPBA10\_00881" 33337 "s59E25H2" 0 "hypothetical protein"  
"OPBA10\_00881" 33337 "s59E5H2" 0.2175574 "hypothetical protein"  
"OPBA10\_00881" 33337 "s63E6H2" 0.04364329 "hypothetical protein"  
"OPBA10\_00882" 33338 "s59E13H2" 0.01111395 "GDSL-like Lipase/Acylhydrolase"  
"OPBA10\_00882" 33338 "s59E25H2" 0 "GDSL-like Lipase/Acylhydrolase"  
"OPBA10\_00882" 33338 "s59E5H2" 0.4883684 "GDSL-like Lipase/Acylhydrolase"  
"OPBA10\_00882" 33338 "s63E6H2" 0.04503009 "GDSL-like Lipase/Acylhydrolase"  
"OPBA10\_00883" 33339 "s59E13H2" 0 "Nucleotidyltransferase domain protein"  
"OPBA10\_00883" 33339 "s59E25H2" 0 "Nucleotidyltransferase domain protein"  
"OPBA10\_00883" 33339 "s59E5H2" 0 "Nucleotidyltransferase domain protein"  
"OPBA10\_00883" 33339 "s63E6H2" 0 "Nucleotidyltransferase domain protein"  
"OPBA10\_00884" 33340 "s59E13H2" 0 "hypothetical protein"  
"OPBA10\_00884" 33340 "s59E25H2" 0 "hypothetical protein"

"OPBA10\_00884" 33340 "s59E5H2" 0 "hypothetical protein"  
"OPBA10\_00884" 33340 "s63E6H2" 0 "hypothetical protein"  
"OPBA10\_00885" 33341 "s59E13H2" 0.03797567 "hypothetical protein"  
"OPBA10\_00885" 33341 "s59E25H2" 0.50783 "hypothetical protein"  
"OPBA10\_00885" 33341 "s59E5H2" 0.1107258 "hypothetical protein"  
"OPBA10\_00885" 33341 "s63E6H2" 0.9928282 "hypothetical protein"  
"OPBA10\_00887" 33343 "s59E13H2" 0.2054387 "Glucose-1-phosphate thymidyltransferase"  
"OPBA10\_00887" 33343 "s59E25H2" 0 "Glucose-1-phosphate thymidyltransferase"  
"OPBA10\_00887" 33343 "s59E5H2" 0.5108337 "Glucose-1-phosphate thymidyltransferase"  
"OPBA10\_00887" 33343 "s63E6H2" 0.1088529 "Glucose-1-phosphate thymidyltransferase"  
"OPBA10\_00889" 33345 "s59E13H2" 0.1340848 "hypothetical protein"  
"OPBA10\_00889" 33345 "s59E25H2" 0 "hypothetical protein"  
"OPBA10\_00889" 33345 "s59E5H2" 0.04823117 "hypothetical protein"  
"OPBA10\_00889" 33345 "s63E6H2" 0.02647616 "hypothetical protein"  
"OPBA10\_00890" 33346 "s59E13H2" 0.1028749 "Orotate phosphoribosyltransferase"  
"OPBA10\_00890" 33346 "s59E25H2" 0 "Orotate phosphoribosyltransferase"  
"OPBA10\_00890" 33346 "s59E5H2" 0.03155357 "Orotate phosphoribosyltransferase"  
"OPBA10\_00890" 33346 "s63E6H2" 0.03250196 "Orotate phosphoribosyltransferase"  
"OPBA10\_00891" 33347 "s59E13H2" 0.03745175 "Orotidine 5'-phosphate decarboxylase"  
"OPBA10\_00891" 33347 "s59E25H2" 0 "Orotidine 5'-phosphate decarboxylase"  
"OPBA10\_00891" 33347 "s59E5H2" 0.03205304 "Orotidine 5'-phosphate decarboxylase"  
"OPBA10\_00891" 33347 "s63E6H2" 0.01443831 "Orotidine 5'-phosphate decarboxylase"  
"OPBA10\_00892" 33348 "s59E13H2" 0.2819463 "Dihydroorotate dehydrogenase B (NAD(+) , catalytic subunit"  
"OPBA10\_00892" 33348 "s59E25H2" 0 "Dihydroorotate dehydrogenase B (NAD(+) , catalytic subunit"  
"OPBA10\_00892" 33348 "s59E5H2" 0.06300087 "Dihydroorotate dehydrogenase B (NAD(+) , catalytic subunit"  
"OPBA10\_00892" 33348 "s63E6H2" 0.01412837 "Dihydroorotate dehydrogenase B (NAD(+) , catalytic subunit"  
"OPBA10\_00893" 33349 "s59E13H2" 0.1438627 "Dihydroorotate dehydrogenase B (NAD(+) , electron transfer subunit"  
"OPBA10\_00893" 33349 "s59E25H2" 0.1056604 "Dihydroorotate dehydrogenase B (NAD(+) , electron transfer subunit"  
"OPBA10\_00893" 33349 "s59E5H2" 0.03374895 "Dihydroorotate dehydrogenase B (NAD(+) , electron transfer subunit"  
"OPBA10\_00893" 33349 "s63E6H2" 0.01332091 "Dihydroorotate dehydrogenase B (NAD(+) , electron transfer subunit"  
"OPBA10\_00894" 33350 "s59E13H2" 0.1101791 "Carbamoyl-phosphate synthase large chain"  
"OPBA10\_00894" 33350 "s59E25H2" 0 "Carbamoyl-phosphate synthase large chain"  
"OPBA10\_00894" 33350 "s59E5H2" 0.3206353 "Carbamoyl-phosphate synthase large chain"  
"OPBA10\_00894" 33350 "s63E6H2" 0.009704554 "Carbamoyl-phosphate synthase large chain"  
"OPBA10\_00895" 33351 "s59E13H2" 0.02742491 "Chaperone protein DnaJ"  
"OPBA10\_00895" 33351 "s59E25H2" 0 "Chaperone protein DnaJ"  
"OPBA10\_00895" 33351 "s59E5H2" 0.1253707 "Chaperone protein DnaJ"  
"OPBA10\_00895" 33351 "s63E6H2" 0.9294655 "Chaperone protein DnaJ"  
"OPBA10\_00896" 33352 "s59E13H2" 0.05394025 "hypothetical protein"  
"OPBA10\_00896" 33352 "s59E25H2" 0 "hypothetical protein"  
"OPBA10\_00896" 33352 "s59E5H2" 0.13379 "hypothetical protein"  
"OPBA10\_00896" 33352 "s63E6H2" 0.6770126 "hypothetical protein"  
"OPBA10\_00897" 33353 "s59E13H2" 0 "RNA recognition motif. (a.k.a. RRM, RBD, or RNP domain)"  
"OPBA10\_00897" 33353 "s59E25H2" 0 "RNA recognition motif. (a.k.a. RRM, RBD, or RNP domain)"  
"OPBA10\_00897" 33353 "s59E5H2" 0.6454878 "RNA recognition motif. (a.k.a. RRM, RBD, or RNP domain)"  
"OPBA10\_00897" 33353 "s63E6H2" 0.004705044 "RNA recognition motif. (a.k.a. RRM, RBD, or RNP domain)"  
"OPBA10\_00899" 33355 "s59E13H2" 0.004688872 "Bifunctional protein PyrR"

"OPBA10\_00899" 33355 "s59E25H2" 0 "Bifunctional protein PyrR"  
"OPBA10\_00899" 33355 "s59E5H2" 0.6216913 "Bifunctional protein PyrR"  
"OPBA10\_00899" 33355 "s63E6H2" 0.03430214 "Bifunctional protein PyrR"  
"OPBA10\_00900" 33356 "s59E13H2" 0.017861 "Aspartate carbamoyltransferase"  
"OPBA10\_00900" 33356 "s59E25H2" 0 "Aspartate carbamoyltransferase"  
"OPBA10\_00900" 33356 "s59E5H2" 0.498832 "Aspartate carbamoyltransferase"  
"OPBA10\_00900" 33356 "s63E6H2" 0.02687825 "Aspartate carbamoyltransferase"  
"OPBA10\_00901" 33357 "s59E13H2" 0.01055387 "Dihydroorotase"  
"OPBA10\_00901" 33357 "s59E25H2" 0 "Dihydroorotase"  
"OPBA10\_00901" 33357 "s59E5H2" 0.2170425 "Dihydroorotase"  
"OPBA10\_00901" 33357 "s63E6H2" 0.06310948 "Dihydroorotase"  
"OPBA10\_00902" 33358 "s59E13H2" 0.01006191 "Carbamoyl-phosphate synthase small chain"  
"OPBA10\_00902" 33358 "s59E25H2" 0 "Carbamoyl-phosphate synthase small chain"  
"OPBA10\_00902" 33358 "s59E5H2" 0.1968248 "Carbamoyl-phosphate synthase small chain"  
"OPBA10\_00902" 33358 "s63E6H2" 0.05879445 "Carbamoyl-phosphate synthase small chain"  
"OPBA10\_00903" 33359 "s59E13H2" 0.009112182 "Carbamoyl-phosphate synthase large chain"  
"OPBA10\_00903" 33359 "s59E25H2" 0 "Carbamoyl-phosphate synthase large chain"  
"OPBA10\_00903" 33359 "s59E5H2" 0.1572842 "Carbamoyl-phosphate synthase large chain"  
"OPBA10\_00903" 33359 "s63E6H2" 0.007991797 "Carbamoyl-phosphate synthase large chain"  
"OPBA10\_00904" 33360 "s59E13H2" 0 "hypothetical protein"  
"OPBA10\_00904" 33360 "s59E25H2" 0 "hypothetical protein"  
"OPBA10\_00904" 33360 "s59E5H2" 0 "hypothetical protein"  
"OPBA10\_00904" 33360 "s63E6H2" 0 "hypothetical protein"  
"OPBA10\_00905" 33361 "s59E13H2" 0 "D-ribose-binding periplasmic protein precursor"  
"OPBA10\_00905" 33361 "s59E25H2" 0 "D-ribose-binding periplasmic protein precursor"  
"OPBA10\_00905" 33361 "s59E5H2" 0 "D-ribose-binding periplasmic protein precursor"  
"OPBA10\_00905" 33361 "s63E6H2" 0.001573463 "D-ribose-binding periplasmic protein precursor"  
"OPBA10\_00906" 33362 "s59E13H2" 0.01379229 "Fosmidomycin resistance protein"  
"OPBA10\_00906" 33362 "s59E25H2" 0 "Fosmidomycin resistance protein"  
"OPBA10\_00906" 33362 "s59E5H2" 0.02268257 "Fosmidomycin resistance protein"  
"OPBA10\_00906" 33362 "s63E6H2" 0.1066214 "Fosmidomycin resistance protein"  
"OPBA10\_00907" 33363 "s59E13H2" 0.001499874 "NADH-dependent butanol dehydrogenase A"  
"OPBA10\_00907" 33363 "s59E25H2" 0 "NADH-dependent butanol dehydrogenase A"  
"OPBA10\_00907" 33363 "s59E5H2" 0.01477719 "NADH-dependent butanol dehydrogenase A"  
"OPBA10\_00907" 33363 "s63E6H2" 0.01612265 "NADH-dependent butanol dehydrogenase A"  
"OPBA10\_00908" 33364 "s59E13H2" 0.0228082 "putative adenylyltransferase/sulfurtransferase MoeZ"  
"OPBA10\_00908" 33364 "s59E25H2" 0 "putative adenylyltransferase/sulfurtransferase MoeZ"  
"OPBA10\_00908" 33364 "s59E5H2" 0.01087293 "putative adenylyltransferase/sulfurtransferase MoeZ"  
"OPBA10\_00908" 33364 "s63E6H2" 0.4777369 "putative adenylyltransferase/sulfurtransferase MoeZ"  
"OPBA10\_00910" 33366 "s59E13H2" 0 "Glycerol-3-phosphate dehydrogenase [NAD(P)+]"  
"OPBA10\_00910" 33366 "s59E25H2" 0 "Glycerol-3-phosphate dehydrogenase [NAD(P)+]"  
"OPBA10\_00910" 33366 "s59E5H2" 0.003162516 "Glycerol-3-phosphate dehydrogenase [NAD(P)+]"  
"OPBA10\_00910" 33366 "s63E6H2" 0 "Glycerol-3-phosphate dehydrogenase [NAD(P)+]"  
"OPBA10\_00911" 33367 "s59E13H2" 0 "Bifunctional PGK/TIM"  
"OPBA10\_00911" 33367 "s59E25H2" 0 "Bifunctional PGK/TIM"  
"OPBA10\_00911" 33367 "s59E5H2" 0.008877854 "Bifunctional PGK/TIM"  
"OPBA10\_00911" 33367 "s63E6H2" 0 "Bifunctional PGK/TIM"

"OPBA10\_00912" 33368 "s59E13H2" 0 "Putative peroxiredoxin bcp"  
"OPBA10\_00912" 33368 "s59E25H2" 0 "Putative peroxiredoxin bcp"  
"OPBA10\_00912" 33368 "s59E5H2" 0.08401132 "Putative peroxiredoxin bcp"  
"OPBA10\_00912" 33368 "s63E6H2" 0 "Putative peroxiredoxin bcp"  
"OPBA10\_00914" 33370 "s59E13H2" 0 "Ribulokinase"  
"OPBA10\_00914" 33370 "s59E25H2" 0 "Ribulokinase"  
"OPBA10\_00914" 33370 "s59E5H2" 0.01691477 "Ribulokinase"  
"OPBA10\_00914" 33370 "s63E6H2" 0 "Ribulokinase"  
"OPBA10\_00915" 33371 "s59E13H2" 0 "NADH-dependent butanol dehydrogenase A"  
"OPBA10\_00915" 33371 "s59E25H2" 0 "NADH-dependent butanol dehydrogenase A"  
"OPBA10\_00915" 33371 "s59E5H2" 0 "NADH-dependent butanol dehydrogenase A"  
"OPBA10\_00915" 33371 "s63E6H2" 0 "NADH-dependent butanol dehydrogenase A"  
"OPBA10\_00916" 33372 "s59E13H2" 0 "putative aldolase LsrF"  
"OPBA10\_00916" 33372 "s59E25H2" 0 "putative aldolase LsrF"  
"OPBA10\_00916" 33372 "s59E5H2" 0.1167041 "putative aldolase LsrF"  
"OPBA10\_00916" 33372 "s63E6H2" 0 "putative aldolase LsrF"  
"OPBA10\_00917" 33373 "s59E13H2" 0 "Xylulose kinase"  
"OPBA10\_00917" 33373 "s59E25H2" 0 "Xylulose kinase"  
"OPBA10\_00917" 33373 "s59E5H2" 0.2768851 "Xylulose kinase"  
"OPBA10\_00917" 33373 "s63E6H2" 0 "Xylulose kinase"  
"OPBA10\_00918" 33374 "s59E13H2" 0 "hypothetical protein"  
"OPBA10\_00918" 33374 "s59E25H2" 0 "hypothetical protein"  
"OPBA10\_00918" 33374 "s59E5H2" 0.1854996 "hypothetical protein"  
"OPBA10\_00918" 33374 "s63E6H2" 0 "hypothetical protein"  
"OPBA10\_00919" 33375 "s59E13H2" 0 "Xylose isomerase-like TIM barrel"  
"OPBA10\_00919" 33375 "s59E25H2" 0 "Xylose isomerase-like TIM barrel"  
"OPBA10\_00919" 33375 "s59E5H2" 0.2811274 "Xylose isomerase-like TIM barrel"  
"OPBA10\_00919" 33375 "s63E6H2" 0 "Xylose isomerase-like TIM barrel"  
"OPBA10\_00920" 33376 "s59E13H2" 0 "Xylulose kinase"  
"OPBA10\_00920" 33376 "s59E25H2" 0 "Xylulose kinase"  
"OPBA10\_00920" 33376 "s59E5H2" 0.1580644 "Xylulose kinase"  
"OPBA10\_00920" 33376 "s63E6H2" 0 "Xylulose kinase"  
"OPBA10\_00921" 33377 "s59E13H2" 0.002059959 "Putative sgc region protein SgcQ"  
"OPBA10\_00921" 33377 "s59E25H2" 0 "Putative sgc region protein SgcQ"  
"OPBA10\_00921" 33377 "s59E5H2" 0.1302965 "Putative sgc region protein SgcQ"  
"OPBA10\_00921" 33377 "s63E6H2" 0 "Putative sgc region protein SgcQ"  
"OPBA10\_00922" 33378 "s59E13H2" 0 "Glycerol-3-phosphate regulon repressor"  
"OPBA10\_00922" 33378 "s59E25H2" 0 "Glycerol-3-phosphate regulon repressor"  
"OPBA10\_00922" 33378 "s59E5H2" 0.07165338 "Glycerol-3-phosphate regulon repressor"  
"OPBA10\_00922" 33378 "s63E6H2" 0 "Glycerol-3-phosphate regulon repressor"  
"OPBA10\_00923" 33379 "s59E13H2" 0 "Uroporphyrinogen decarboxylase (URO-D)"  
"OPBA10\_00923" 33379 "s59E25H2" 0 "Uroporphyrinogen decarboxylase (URO-D)"  
"OPBA10\_00923" 33379 "s59E5H2" 0.5768507 "Uroporphyrinogen decarboxylase (URO-D)"  
"OPBA10\_00923" 33379 "s63E6H2" 0 "Uroporphyrinogen decarboxylase (URO-D)"  
"OPBA10\_00924" 33380 "s59E13H2" 0 "putative ABC transporter-binding protein precursor"  
"OPBA10\_00924" 33380 "s59E25H2" 0 "putative ABC transporter-binding protein precursor"  
"OPBA10\_00924" 33380 "s59E5H2" 0.4199766 "putative ABC transporter-binding protein precursor"



"OPBA10\_00924" 33380 "s63E6H2" 0 "putative ABC transporter-binding protein precursor"  
"OPBA10\_00925" 33381 "s59E13H2" 0 "Glutathione transport system permease protein GsiC"  
"OPBA10\_00925" 33381 "s59E25H2" 0 "Glutathione transport system permease protein GsiC"  
"OPBA10\_00925" 33381 "s59E5H2" 1.409391 "Glutathione transport system permease protein GsiC"  
"OPBA10\_00925" 33381 "s63E6H2" 0 "Glutathione transport system permease protein GsiC"  
"OPBA10\_00926" 33382 "s59E13H2" 0 "Oligopeptide transport system permease protein OppC"  
"OPBA10\_00926" 33382 "s59E25H2" 0 "Oligopeptide transport system permease protein OppC"  
"OPBA10\_00926" 33382 "s59E5H2" 2.174836 "Oligopeptide transport system permease protein OppC"  
"OPBA10\_00926" 33382 "s63E6H2" 0 "Oligopeptide transport system permease protein OppC"  
"OPBA10\_00927" 33383 "s59E13H2" 0 "Oligopeptide transport ATP-binding protein OppD"  
"OPBA10\_00927" 33383 "s59E25H2" 0 "Oligopeptide transport ATP-binding protein OppD"  
"OPBA10\_00927" 33383 "s59E5H2" 4.245918 "Oligopeptide transport ATP-binding protein OppD"  
"OPBA10\_00927" 33383 "s63E6H2" 0 "Oligopeptide transport ATP-binding protein OppD"  
"OPBA10\_00928" 33384 "s59E13H2" 0 "Oligopeptide transport ATP-binding protein OppF"  
"OPBA10\_00928" 33384 "s59E25H2" 0 "Oligopeptide transport ATP-binding protein OppF"  
"OPBA10\_00928" 33384 "s59E5H2" 4.04803 "Oligopeptide transport ATP-binding protein OppF"  
"OPBA10\_00928" 33384 "s63E6H2" 0 "Oligopeptide transport ATP-binding protein OppF"  
"OPBA10\_00929" 33385 "s59E13H2" 0 "N-formyl-4-amino-5-aminomethyl-2-methylpyrimidine deformylase"  
"OPBA10\_00929" 33385 "s59E25H2" 0 "N-formyl-4-amino-5-aminomethyl-2-methylpyrimidine deformylase"  
"OPBA10\_00929" 33385 "s59E5H2" 3.175355 "N-formyl-4-amino-5-aminomethyl-2-methylpyrimidine deformylase"  
"OPBA10\_00929" 33385 "s63E6H2" 0 "N-formyl-4-amino-5-aminomethyl-2-methylpyrimidine deformylase"  
"OPBA10\_00930" 33386 "s59E13H2" 0 "hypothetical protein"  
"OPBA10\_00930" 33386 "s59E25H2" 0 "hypothetical protein"  
"OPBA10\_00930" 33386 "s59E5H2" 2.219987 "hypothetical protein"  
"OPBA10\_00930" 33386 "s63E6H2" 0.00417095 "hypothetical protein"  
"OPBA10\_00931" 33387 "s59E13H2" 0 "Sorbitol dehydrogenase"  
"OPBA10\_00931" 33387 "s59E25H2" 0 "Sorbitol dehydrogenase"  
"OPBA10\_00931" 33387 "s59E5H2" 1.274813 "Sorbitol dehydrogenase"  
"OPBA10\_00931" 33387 "s63E6H2" 0 "Sorbitol dehydrogenase"  
"OPBA10\_00932" 33388 "s59E13H2" 0.06932407 "hypothetical protein"  
"OPBA10\_00932" 33388 "s59E25H2" 0 "hypothetical protein"  
"OPBA10\_00932" 33388 "s59E5H2" 0.03984156 "hypothetical protein"  
"OPBA10\_00932" 33388 "s63E6H2" 0.0045871 "hypothetical protein"  
"OPBA10\_00933" 33389 "s59E13H2" 0.0504367 "hypothetical protein"  
"OPBA10\_00933" 33389 "s59E25H2" 0 "hypothetical protein"  
"OPBA10\_00933" 33389 "s59E5H2" 0.05202272 "hypothetical protein"  
"OPBA10\_00933" 33389 "s63E6H2" 0.003085013 "hypothetical protein"  
"OPBA10\_00934" 33390 "s59E13H2" 0.01382918 "molybdenum cofactor biosynthesis protein A"  
"OPBA10\_00934" 33390 "s59E25H2" 0 "molybdenum cofactor biosynthesis protein A"  
"OPBA10\_00934" 33390 "s59E5H2" 0 "molybdenum cofactor biosynthesis protein A"  
"OPBA10\_00934" 33390 "s63E6H2" 0.01071206 "molybdenum cofactor biosynthesis protein A"  
"OPBA10\_00935" 33391 "s59E13H2" 0.006572214 "Dinitrogenase iron-molybdenum cofactor"  
"OPBA10\_00935" 33391 "s59E25H2" 0 "Dinitrogenase iron-molybdenum cofactor"  
"OPBA10\_00935" 33391 "s59E5H2" 0.02872157 "Dinitrogenase iron-molybdenum cofactor"  
"OPBA10\_00935" 33391 "s63E6H2" 0.01496686 "Dinitrogenase iron-molybdenum cofactor"  
"OPBA10\_00937" 33393 "s59E13H2" 0.0001270428 "hypothetical protein"  
"OPBA10\_00937" 33393 "s59E25H2" 0 "hypothetical protein"

"OPBA10\_00937" 33393 "s59E5H2" 0.001850654 "hypothetical protein"  
"OPBA10\_00937" 33393 "s63E6H2" 0 "hypothetical protein"  
"OPBA10\_00938" 33394 "s59E13H2" 0.003664775 "Dinitrogenase iron-molybdenum cofactor"  
"OPBA10\_00938" 33394 "s59E25H2" 0 "Dinitrogenase iron-molybdenum cofactor"  
"OPBA10\_00938" 33394 "s59E5H2" 0 "Dinitrogenase iron-molybdenum cofactor"  
"OPBA10\_00938" 33394 "s63E6H2" 0 "Dinitrogenase iron-molybdenum cofactor"  
"OPBA10\_00939" 33395 "s59E13H2" 0 "CobQ/CobB/MinD/ParA nucleotide binding domain protein"  
"OPBA10\_00939" 33395 "s59E25H2" 0 "CobQ/CobB/MinD/ParA nucleotide binding domain protein"  
"OPBA10\_00939" 33395 "s59E5H2" 0 "CobQ/CobB/MinD/ParA nucleotide binding domain protein"  
"OPBA10\_00939" 33395 "s63E6H2" 0 "CobQ/CobB/MinD/ParA nucleotide binding domain protein"  
"OPBA10\_00940" 33396 "s59E13H2" 0 "ferredoxin"  
"OPBA10\_00940" 33396 "s59E25H2" 0 "ferredoxin"  
"OPBA10\_00940" 33396 "s59E5H2" 0 "ferredoxin"  
"OPBA10\_00940" 33396 "s63E6H2" 0 "ferredoxin"  
"OPBA10\_00941" 33397 "s59E13H2" 0.1829914 "Fused nickel transport protein NikMN"  
"OPBA10\_00941" 33397 "s59E25H2" 0 "Fused nickel transport protein NikMN"  
"OPBA10\_00941" 33397 "s59E5H2" 0.2733625 "Fused nickel transport protein NikMN"  
"OPBA10\_00941" 33397 "s63E6H2" 0.06142439 "Fused nickel transport protein NikMN"  
"OPBA10\_00942" 33398 "s59E13H2" 0.08337794 "cobalt transport protein CbiN"  
"OPBA10\_00942" 33398 "s59E25H2" 0 "cobalt transport protein CbiN"  
"OPBA10\_00942" 33398 "s59E5H2" 0.09326942 "cobalt transport protein CbiN"  
"OPBA10\_00942" 33398 "s63E6H2" 0.04520497 "cobalt transport protein CbiN"  
"OPBA10\_00943" 33399 "s59E13H2" 0 "Cobalt transport protein CbiQ"  
"OPBA10\_00943" 33399 "s59E25H2" 0 "Cobalt transport protein CbiQ"  
"OPBA10\_00943" 33399 "s59E5H2" 0.218074 "Cobalt transport protein CbiQ"  
"OPBA10\_00943" 33399 "s63E6H2" 0.08011752 "Cobalt transport protein CbiQ"  
"OPBA10\_00944" 33400 "s59E13H2" 0 "Energy-coupling factor transporter ATP-binding protein EcfA3"  
"OPBA10\_00944" 33400 "s59E25H2" 0 "Energy-coupling factor transporter ATP-binding protein EcfA3"  
"OPBA10\_00944" 33400 "s59E5H2" 0.1493058 "Energy-coupling factor transporter ATP-binding protein EcfA3"  
"OPBA10\_00944" 33400 "s63E6H2" 0.01303898 "Energy-coupling factor transporter ATP-binding protein EcfA3"  
"OPBA10\_00945" 33401 "s59E13H2" 0 "hypothetical protein"  
"OPBA10\_00945" 33401 "s59E25H2" 0 "hypothetical protein"  
"OPBA10\_00945" 33401 "s59E5H2" 0.001247056 "hypothetical protein"  
"OPBA10\_00945" 33401 "s63E6H2" 0.005559692 "hypothetical protein"  
"OPBA10\_00946" 33402 "s59E13H2" 0 "Type III pantothenate kinase"  
"OPBA10\_00946" 33402 "s59E25H2" 0 "Type III pantothenate kinase"  
"OPBA10\_00946" 33402 "s59E5H2" 0.1074547 "Type III pantothenate kinase"  
"OPBA10\_00946" 33402 "s63E6H2" 0.01766112 "Type III pantothenate kinase"  
"OPBA10\_00948" 33404 "s59E13H2" 0 "Aspartate-semialdehyde dehydrogenase 2"  
"OPBA10\_00948" 33404 "s59E25H2" 0 "Aspartate-semialdehyde dehydrogenase 2"  
"OPBA10\_00948" 33404 "s59E5H2" 0.1338082 "Aspartate-semialdehyde dehydrogenase 2"  
"OPBA10\_00948" 33404 "s63E6H2" 0 "Aspartate-semialdehyde dehydrogenase 2"  
"OPBA10\_00949" 33405 "s59E13H2" 0 "hypothetical protein"  
"OPBA10\_00949" 33405 "s59E25H2" 0 "hypothetical protein"  
"OPBA10\_00949" 33405 "s59E5H2" 0 "hypothetical protein"  
"OPBA10\_00949" 33405 "s63E6H2" 0.004668484 "hypothetical protein"  
"OPBA10\_00950" 33406 "s59E13H2" 0.06430514 "putative acetyltransferase"

"OPBA10\_00950" 33406 "s59E25H2" 0 "putative acetyltransferase"  
"OPBA10\_00950" 33406 "s59E5H2" 0 "putative acetyltransferase"  
"OPBA10\_00950" 33406 "s63E6H2" 0.1372757 "putative acetyltransferase"  
"OPBA10\_00951" 33407 "s59E13H2" 0.07238151 "putative NH(3)-dependent NAD(+) synthetase"  
"OPBA10\_00951" 33407 "s59E25H2" 0 "putative NH(3)-dependent NAD(+) synthetase"  
"OPBA10\_00951" 33407 "s59E5H2" 0.05098982 "putative NH(3)-dependent NAD(+) synthetase"  
"OPBA10\_00951" 33407 "s63E6H2" 0 "putative NH(3)-dependent NAD(+) synthetase"  
"OPBA10\_00952" 33408 "s59E13H2" 0.0009120287 "hypothetical protein"  
"OPBA10\_00952" 33408 "s59E25H2" 0 "hypothetical protein"  
"OPBA10\_00952" 33408 "s59E5H2" 0.06717753 "hypothetical protein"  
"OPBA10\_00952" 33408 "s63E6H2" 0.001411778 "hypothetical protein"  
"OPBA10\_00953" 33409 "s59E13H2" 0.1029192 "hypothetical protein"  
"OPBA10\_00953" 33409 "s59E25H2" 0 "hypothetical protein"  
"OPBA10\_00953" 33409 "s59E5H2" 0.03063743 "hypothetical protein"  
"OPBA10\_00953" 33409 "s63E6H2" 0.02314939 "hypothetical protein"  
"OPBA10\_00954" 33410 "s59E13H2" 0.1783683 "Tetratricopeptide repeat protein"  
"OPBA10\_00954" 33410 "s59E25H2" 0 "Tetratricopeptide repeat protein"  
"OPBA10\_00954" 33410 "s59E5H2" 0.006697154 "Tetratricopeptide repeat protein"  
"OPBA10\_00954" 33410 "s63E6H2" 0.01950222 "Tetratricopeptide repeat protein"  
"OPBA10\_00955" 33411 "s59E13H2" 0.235589 "SAF domain protein"  
"OPBA10\_00955" 33411 "s59E25H2" 0 "SAF domain protein"  
"OPBA10\_00955" 33411 "s59E5H2" 0.03795865 "SAF domain protein"  
"OPBA10\_00955" 33411 "s63E6H2" 0.02664714 "SAF domain protein"  
"OPBA10\_00956" 33412 "s59E13H2" 0.3049233 "cell division inhibitor MinD"  
"OPBA10\_00956" 33412 "s59E25H2" 0 "cell division inhibitor MinD"  
"OPBA10\_00956" 33412 "s59E5H2" 0.03476374 "cell division inhibitor MinD"  
"OPBA10\_00956" 33412 "s63E6H2" 0.04610527 "cell division inhibitor MinD"  
"OPBA10\_00957" 33413 "s59E13H2" 0.1530177 "Putative conjugal transfer protein/MT3759"  
"OPBA10\_00957" 33413 "s59E25H2" 0 "Putative conjugal transfer protein/MT3759"  
"OPBA10\_00957" 33413 "s59E5H2" 0.03140946 "Putative conjugal transfer protein/MT3759"  
"OPBA10\_00957" 33413 "s63E6H2" 0.1260838 "Putative conjugal transfer protein/MT3759"  
"OPBA10\_00958" 33414 "s59E13H2" 0.1839126 "Bacterial type II secretion system protein F domain protein"  
"OPBA10\_00958" 33414 "s59E25H2" 0 "Bacterial type II secretion system protein F domain protein"  
"OPBA10\_00958" 33414 "s59E5H2" 0.005797946 "Bacterial type II secretion system protein F domain protein"  
"OPBA10\_00958" 33414 "s63E6H2" 0.08917699 "Bacterial type II secretion system protein F domain protein"  
"OPBA10\_00959" 33415 "s59E13H2" 0.2094119 "Bacterial type II secretion system protein F domain protein"  
"OPBA10\_00959" 33415 "s59E25H2" 0 "Bacterial type II secretion system protein F domain protein"  
"OPBA10\_00959" 33415 "s59E5H2" 0.04330431 "Bacterial type II secretion system protein F domain protein"  
"OPBA10\_00959" 33415 "s63E6H2" 0.09042259 "Bacterial type II secretion system protein F domain protein"  
"OPBA10\_00960" 33416 "s59E13H2" 0.2565599 "hypothetical protein"  
"OPBA10\_00960" 33416 "s59E25H2" 0 "hypothetical protein"  
"OPBA10\_00960" 33416 "s59E5H2" 0.08249408 "hypothetical protein"  
"OPBA10\_00960" 33416 "s63E6H2" 0.02346226 "hypothetical protein"  
"OPBA10\_00961" 33417 "s59E13H2" 0.2666462 "TadE-like protein"  
"OPBA10\_00961" 33417 "s59E25H2" 0 "TadE-like protein"  
"OPBA10\_00961" 33417 "s59E5H2" 0.134462 "TadE-like protein"  
"OPBA10\_00961" 33417 "s63E6H2" 0.03924387 "TadE-like protein"

"OPBA10\_00962" 33418 "s59E13H2" 0.2269728 "hypothetical protein"  
"OPBA10\_00962" 33418 "s59E25H2" 0 "hypothetical protein"  
"OPBA10\_00962" 33418 "s59E5H2" 0.1024098 "hypothetical protein"  
"OPBA10\_00962" 33418 "s63E6H2" 0.04127965 "hypothetical protein"  
"OPBA10\_00963" 33419 "s59E13H2" 0.1835945 "Single-stranded DNA-binding protein"  
"OPBA10\_00963" 33419 "s59E25H2" 0 "Single-stranded DNA-binding protein"  
"OPBA10\_00963" 33419 "s59E5H2" 0.0790901 "Single-stranded DNA-binding protein"  
"OPBA10\_00963" 33419 "s63E6H2" 0.03494144 "Single-stranded DNA-binding protein"  
"OPBA10\_00964" 33420 "s59E13H2" 0.318366 "hypothetical protein"  
"OPBA10\_00964" 33420 "s59E25H2" 0 "hypothetical protein"  
"OPBA10\_00964" 33420 "s59E5H2" 0.0211793 "hypothetical protein"  
"OPBA10\_00964" 33420 "s63E6H2" 0.01619885 "hypothetical protein"  
"OPBA10\_00965" 33421 "s59E13H2" 0.006524238 "Redox-sensing transcriptional repressor Rex"  
"OPBA10\_00965" 33421 "s59E25H2" 0 "Redox-sensing transcriptional repressor Rex"  
"OPBA10\_00965" 33421 "s59E5H2" 0.1013422 "Redox-sensing transcriptional repressor Rex"  
"OPBA10\_00965" 33421 "s63E6H2" 0.1167506 "Redox-sensing transcriptional repressor Rex"  
"OPBA10\_00966" 33422 "s59E13H2" 0.006938792 "Transcriptional regulator LytR"  
"OPBA10\_00966" 33422 "s59E25H2" 0 "Transcriptional regulator LytR"  
"OPBA10\_00966" 33422 "s59E5H2" 0.03635892 "Transcriptional regulator LytR"  
"OPBA10\_00966" 33422 "s63E6H2" 0.1042437 "Transcriptional regulator LytR"  
"OPBA10\_00968" 33424 "s59E13H2" 0.01985242 "Adenylosuccinate lyase"  
"OPBA10\_00968" 33424 "s59E25H2" 0 "Adenylosuccinate lyase"  
"OPBA10\_00968" 33424 "s59E5H2" 0.844999 "Adenylosuccinate lyase"  
"OPBA10\_00968" 33424 "s63E6H2" 0.1417187 "Adenylosuccinate lyase"  
"OPBA10\_00969" 33425 "s59E13H2" 0.01904586 "Phosphoribosylformylglycinamide synthase"  
"OPBA10\_00969" 33425 "s59E25H2" 0 "Phosphoribosylformylglycinamide synthase"  
"OPBA10\_00969" 33425 "s59E5H2" 0.1322301 "Phosphoribosylformylglycinamide synthase"  
"OPBA10\_00969" 33425 "s63E6H2" 0.0616707 "Phosphoribosylformylglycinamide synthase"  
"OPBA10\_00970" 33426 "s59E13H2" 0.01715713 "Amidophosphoribosyltransferase precursor"  
"OPBA10\_00970" 33426 "s59E25H2" 0 "Amidophosphoribosyltransferase precursor"  
"OPBA10\_00970" 33426 "s59E5H2" 0.1729251 "Amidophosphoribosyltransferase precursor"  
"OPBA10\_00970" 33426 "s63E6H2" 0.1273231 "Amidophosphoribosyltransferase precursor"  
"OPBA10\_00971" 33427 "s59E13H2" 0.01733037 "Phosphoribosylformylglycinamide cyclo-ligase"  
"OPBA10\_00971" 33427 "s59E25H2" 0 "Phosphoribosylformylglycinamide cyclo-ligase"  
"OPBA10\_00971" 33427 "s59E5H2" 0.3335852 "Phosphoribosylformylglycinamide cyclo-ligase"  
"OPBA10\_00971" 33427 "s63E6H2" 0.06741864 "Phosphoribosylformylglycinamide cyclo-ligase"  
"OPBA10\_00972" 33428 "s59E13H2" 0.06034966 "Phosphoribosylglycinamide formyltransferase"  
"OPBA10\_00972" 33428 "s59E25H2" 0 "Phosphoribosylglycinamide formyltransferase"  
"OPBA10\_00972" 33428 "s59E5H2" 0.4381122 "Phosphoribosylglycinamide formyltransferase"  
"OPBA10\_00972" 33428 "s63E6H2" 0.2170158 "Phosphoribosylglycinamide formyltransferase"  
"OPBA10\_00973" 33429 "s59E13H2" 0.04931544 "Bifunctional purine biosynthesis protein PurH"  
"OPBA10\_00973" 33429 "s59E25H2" 0 "Bifunctional purine biosynthesis protein PurH"  
"OPBA10\_00973" 33429 "s59E5H2" 0.6908402 "Bifunctional purine biosynthesis protein PurH"  
"OPBA10\_00973" 33429 "s63E6H2" 0.4042383 "Bifunctional purine biosynthesis protein PurH"  
"OPBA10\_00974" 33430 "s59E13H2" 0 "Archaeal ATPase"  
"OPBA10\_00974" 33430 "s59E25H2" 0 "Archaeal ATPase"  
"OPBA10\_00974" 33430 "s59E5H2" 0.0005303573 "Archaeal ATPase"

"OPBA10\_00974" 33430 "s63E6H2" 0.0001075029 "Archaeal ATPase"  
"OPBA10\_00975" 33431 "s59E13H2" 0.03947171 "Lon protease 2"  
"OPBA10\_00975" 33431 "s59E25H2" 0 "Lon protease 2"  
"OPBA10\_00975" 33431 "s59E5H2" 0.7911246 "Lon protease 2"  
"OPBA10\_00975" 33431 "s63E6H2" 1.034567 "Lon protease 2"  
"OPBA10\_00976" 33432 "s59E13H2" 0.01361848 "hypothetical protein"  
"OPBA10\_00976" 33432 "s59E25H2" 0 "hypothetical protein"  
"OPBA10\_00976" 33432 "s59E5H2" 0.2915419 "hypothetical protein"  
"OPBA10\_00976" 33432 "s63E6H2" 0.6247126 "hypothetical protein"  
"OPBA10\_00977" 33433 "s59E13H2" 0.006464202 "Galactose-1-phosphate uridylyltransferase"  
"OPBA10\_00977" 33433 "s59E25H2" 0 "Galactose-1-phosphate uridylyltransferase"  
"OPBA10\_00977" 33433 "s59E5H2" 0.6882324 "Galactose-1-phosphate uridylyltransferase"  
"OPBA10\_00977" 33433 "s63E6H2" 0.01114234 "Galactose-1-phosphate uridylyltransferase"  
"OPBA10\_00978" 33434 "s59E13H2" 0.007059478 "biotin synthase"  
"OPBA10\_00978" 33434 "s59E25H2" 0 "biotin synthase"  
"OPBA10\_00978" 33434 "s59E5H2" 0.6428123 "biotin synthase"  
"OPBA10\_00978" 33434 "s63E6H2" 0.3400853 "biotin synthase"  
"OPBA10\_00979" 33435 "s59E13H2" 0 "Flavoredoxin"  
"OPBA10\_00979" 33435 "s59E25H2" 0 "Flavoredoxin"  
"OPBA10\_00979" 33435 "s59E5H2" 0.277761 "Flavoredoxin"  
"OPBA10\_00979" 33435 "s63E6H2" 0.05160641 "Flavoredoxin"  
"OPBA10\_00980" 33436 "s59E13H2" 0.003399605 "Inositol 2-dehydrogenase/D-chiro-inositol 3-dehydrogenase"  
"OPBA10\_00980" 33436 "s59E25H2" 0 "Inositol 2-dehydrogenase/D-chiro-inositol 3-dehydrogenase"  
"OPBA10\_00980" 33436 "s59E5H2" 0 "Inositol 2-dehydrogenase/D-chiro-inositol 3-dehydrogenase"  
"OPBA10\_00980" 33436 "s63E6H2" 0.02604646 "Inositol 2-dehydrogenase/D-chiro-inositol 3-dehydrogenase"  
"OPBA10\_00981" 33437 "s59E13H2" 0 "putative L-threonine 3-dehydrogenase"  
"OPBA10\_00981" 33437 "s59E25H2" 0 "putative L-threonine 3-dehydrogenase"  
"OPBA10\_00981" 33437 "s59E5H2" 0 "putative L-threonine 3-dehydrogenase"  
"OPBA10\_00981" 33437 "s63E6H2" 0 "putative L-threonine 3-dehydrogenase"  
"OPBA10\_00982" 33438 "s59E13H2" 0 "Xylulose kinase"  
"OPBA10\_00982" 33438 "s59E25H2" 0 "Xylulose kinase"  
"OPBA10\_00982" 33438 "s59E5H2" 0.007435614 "Xylulose kinase"  
"OPBA10\_00982" 33438 "s63E6H2" 0.000973943 "Xylulose kinase"  
"OPBA10\_00983" 33439 "s59E13H2" 0 "hypothetical protein"  
"OPBA10\_00983" 33439 "s59E25H2" 0 "hypothetical protein"  
"OPBA10\_00983" 33439 "s59E5H2" 0 "hypothetical protein"  
"OPBA10\_00983" 33439 "s63E6H2" 0 "hypothetical protein"  
"OPBA10\_00984" 33440 "s59E13H2" 0 "Glucose-6-phosphate isomerase"  
"OPBA10\_00984" 33440 "s59E25H2" 0 "Glucose-6-phosphate isomerase"  
"OPBA10\_00984" 33440 "s59E5H2" 0 "Glucose-6-phosphate isomerase"  
"OPBA10\_00984" 33440 "s63E6H2" 0 "Glucose-6-phosphate isomerase"  
"OPBA10\_00985" 33441 "s59E13H2" 0.01705578 "Glyoxylate reductase"  
"OPBA10\_00985" 33441 "s59E25H2" 0 "Glyoxylate reductase"  
"OPBA10\_00985" 33441 "s59E5H2" 0.03849073 "Glyoxylate reductase"  
"OPBA10\_00985" 33441 "s63E6H2" 0.07576663 "Glyoxylate reductase"  
"OPBA10\_00986" 33442 "s59E13H2" 0 "KHG/KDPG aldolase"  
"OPBA10\_00986" 33442 "s59E25H2" 0 "KHG/KDPG aldolase"

"OPBA10\_00986" 33442 "s59E5H2" 0 "KHG/KDPG aldolase"  
"OPBA10\_00986" 33442 "s63E6H2" 0 "KHG/KDPG aldolase"  
"OPBA10\_00987" 33443 "s59E13H2" 0 "Tungsten-containing aldehyde ferredoxin oxidoreductase"  
"OPBA10\_00987" 33443 "s59E25H2" 0 "Tungsten-containing aldehyde ferredoxin oxidoreductase"  
"OPBA10\_00987" 33443 "s59E5H2" 0 "Tungsten-containing aldehyde ferredoxin oxidoreductase"  
"OPBA10\_00987" 33443 "s63E6H2" 0 "Tungsten-containing aldehyde ferredoxin oxidoreductase"  
"OPBA10\_00988" 33444 "s59E13H2" 0 "ThiS family protein"  
"OPBA10\_00988" 33444 "s59E25H2" 0 "ThiS family protein"  
"OPBA10\_00988" 33444 "s59E5H2" 0 "ThiS family protein"  
"OPBA10\_00988" 33444 "s63E6H2" 0 "ThiS family protein"  
"OPBA10\_00989" 33445 "s59E13H2" 0 "putative adenyltransferase"  
"OPBA10\_00989" 33445 "s59E25H2" 0 "putative adenyltransferase"  
"OPBA10\_00989" 33445 "s59E5H2" 0 "putative adenyltransferase"  
"OPBA10\_00989" 33445 "s63E6H2" 0 "putative adenyltransferase"  
"OPBA10\_00990" 33446 "s59E13H2" 0.003641129 "D-tagatose 3-epimerase"  
"OPBA10\_00990" 33446 "s59E25H2" 0 "D-tagatose 3-epimerase"  
"OPBA10\_00990" 33446 "s59E5H2" 0 "D-tagatose 3-epimerase"  
"OPBA10\_00990" 33446 "s63E6H2" 0.003377383 "D-tagatose 3-epimerase"  
"OPBA10\_00991" 33447 "s59E13H2" 0 "Ribose transport system permease protein RbsC"  
"OPBA10\_00991" 33447 "s59E25H2" 0 "Ribose transport system permease protein RbsC"  
"OPBA10\_00991" 33447 "s59E5H2" 0 "Ribose transport system permease protein RbsC"  
"OPBA10\_00991" 33447 "s63E6H2" 0 "Ribose transport system permease protein RbsC"  
"OPBA10\_00992" 33448 "s59E13H2" 0 "Ribose import ATP-binding protein RbsA"  
"OPBA10\_00992" 33448 "s59E25H2" 0 "Ribose import ATP-binding protein RbsA"  
"OPBA10\_00992" 33448 "s59E5H2" 0 "Ribose import ATP-binding protein RbsA"  
"OPBA10\_00992" 33448 "s63E6H2" 0 "Ribose import ATP-binding protein RbsA"  
"OPBA10\_00993" 33449 "s59E13H2" 0 "Cyclopentanol dehydrogenase"  
"OPBA10\_00993" 33449 "s59E25H2" 0 "Cyclopentanol dehydrogenase"  
"OPBA10\_00993" 33449 "s59E5H2" 0 "Cyclopentanol dehydrogenase"  
"OPBA10\_00993" 33449 "s63E6H2" 0 "Cyclopentanol dehydrogenase"  
"OPBA10\_00994" 33450 "s59E13H2" 0 "D-ribose-binding periplasmic protein precursor"  
"OPBA10\_00994" 33450 "s59E25H2" 0 "D-ribose-binding periplasmic protein precursor"  
"OPBA10\_00994" 33450 "s59E5H2" 0 "D-ribose-binding periplasmic protein precursor"  
"OPBA10\_00994" 33450 "s63E6H2" 0 "D-ribose-binding periplasmic protein precursor"  
"OPBA10\_00995" 33451 "s59E13H2" 0.1738898 "HTH-type transcriptional repressor YvoA"  
"OPBA10\_00995" 33451 "s59E25H2" 0 "HTH-type transcriptional repressor YvoA"  
"OPBA10\_00995" 33451 "s59E5H2" 0 "HTH-type transcriptional repressor YvoA"  
"OPBA10\_00995" 33451 "s63E6H2" 0 "HTH-type transcriptional repressor YvoA"  
"OPBA10\_00996" 33452 "s59E13H2" 0.9741548 "Na(+)-translocating NADH-quinone reductase subunit F"  
"OPBA10\_00996" 33452 "s59E25H2" 0 "Na(+)-translocating NADH-quinone reductase subunit F"  
"OPBA10\_00996" 33452 "s59E5H2" 0.009567301 "Na(+)-translocating NADH-quinone reductase subunit F"  
"OPBA10\_00996" 33452 "s63E6H2" 0.02420245 "Na(+)-translocating NADH-quinone reductase subunit F"  
"OPBA10\_00997" 33453 "s59E13H2" 0.008077744 "Periplasmic oligopeptide-binding protein precursor"  
"OPBA10\_00997" 33453 "s59E25H2" 0 "Periplasmic oligopeptide-binding protein precursor"  
"OPBA10\_00997" 33453 "s59E5H2" 0.3610138 "Periplasmic oligopeptide-binding protein precursor"  
"OPBA10\_00997" 33453 "s63E6H2" 0 "Periplasmic oligopeptide-binding protein precursor"  
"OPBA10\_00998" 33454 "s59E13H2" 0 "preprotein translocase subunit SecG"

"OPBA10\_00998" 33454 "s59E25H2" 0 "preprotein translocase subunit SecG"  
"OPBA10\_00998" 33454 "s59E5H2" 0.1574755 "preprotein translocase subunit SecG"  
"OPBA10\_00998" 33454 "s63E6H2" 0 "preprotein translocase subunit SecG"  
"OPBA10\_00999" 33455 "s59E13H2" 0.01455561 "dTDP-glucose 4,6-dehydratase"  
"OPBA10\_00999" 33455 "s59E25H2" 0 "dTDP-glucose 4,6-dehydratase"  
"OPBA10\_00999" 33455 "s59E5H2" 0.1874553 "dTDP-glucose 4,6-dehydratase"  
"OPBA10\_00999" 33455 "s63E6H2" 0.005381365 "dTDP-glucose 4,6-dehydratase"  
"OPBA10\_01000" 33456 "s59E13H2" 0.04853661 "dTDP-4-dehydrorhamnose 3,5-epimerase"  
"OPBA10\_01000" 33456 "s59E25H2" 0 "dTDP-4-dehydrorhamnose 3,5-epimerase"  
"OPBA10\_01000" 33456 "s59E5H2" 0.2714754 "dTDP-4-dehydrorhamnose 3,5-epimerase"  
"OPBA10\_01000" 33456 "s63E6H2" 0.03248954 "dTDP-4-dehydrorhamnose 3,5-epimerase"  
"OPBA10\_01001" 33457 "s59E13H2" 0.04003088 "UDP-glucose 6-dehydrogenase TuaD"  
"OPBA10\_01001" 33457 "s59E25H2" 0 "UDP-glucose 6-dehydrogenase TuaD"  
"OPBA10\_01001" 33457 "s59E5H2" 0.3909955 "UDP-glucose 6-dehydrogenase TuaD"  
"OPBA10\_01001" 33457 "s63E6H2" 0.02531982 "UDP-glucose 6-dehydrogenase TuaD"  
"OPBA10\_01002" 33458 "s59E13H2" 0.004105945 "hypothetical protein"  
"OPBA10\_01002" 33458 "s59E25H2" 0 "hypothetical protein"  
"OPBA10\_01002" 33458 "s59E5H2" 0 "hypothetical protein"  
"OPBA10\_01002" 33458 "s63E6H2" 0.001794328 "hypothetical protein"  
"OPBA10\_01003" 33459 "s59E13H2" 0.007795061 "hypothetical protein"  
"OPBA10\_01003" 33459 "s59E25H2" 0 "hypothetical protein"  
"OPBA10\_01003" 33459 "s59E5H2" 0 "hypothetical protein"  
"OPBA10\_01003" 33459 "s63E6H2" 0.002905714 "hypothetical protein"  
"OPBA10\_01005" 33461 "s59E13H2" 0.004720439 "ATP-dependent RecD-like DNA helicase"  
"OPBA10\_01005" 33461 "s59E25H2" 0 "ATP-dependent RecD-like DNA helicase"  
"OPBA10\_01005" 33461 "s59E5H2" 0.01365553 "ATP-dependent RecD-like DNA helicase"  
"OPBA10\_01005" 33461 "s63E6H2" 0.005106715 "ATP-dependent RecD-like DNA helicase"  
"OPBA10\_01006" 33462 "s59E13H2" 0.006116807 "Proline--tRNA ligase"  
"OPBA10\_01006" 33462 "s59E25H2" 0 "Proline--tRNA ligase"  
"OPBA10\_01006" 33462 "s59E5H2" 0.006731834 "Proline--tRNA ligase"  
"OPBA10\_01006" 33462 "s63E6H2" 0.004723726 "Proline--tRNA ligase"  
"OPBA10\_01007" 33463 "s59E13H2" 0.001933198 "4-hydroxy-3-methylbut-2-en-1-yl diphosphate synthase"  
"OPBA10\_01007" 33463 "s59E25H2" 0 "4-hydroxy-3-methylbut-2-en-1-yl diphosphate synthase"  
"OPBA10\_01007" 33463 "s59E5H2" 0 "4-hydroxy-3-methylbut-2-en-1-yl diphosphate synthase"  
"OPBA10\_01007" 33463 "s63E6H2" 0.004800641 "4-hydroxy-3-methylbut-2-en-1-yl diphosphate synthase"  
"OPBA10\_01008" 33464 "s59E13H2" 0.0005094237 "Metalloprotease MmpA"  
"OPBA10\_01008" 33464 "s59E25H2" 0 "Metalloprotease MmpA"  
"OPBA10\_01008" 33464 "s59E5H2" 0.003029235 "Metalloprotease MmpA"  
"OPBA10\_01008" 33464 "s63E6H2" 0.002237635 "Metalloprotease MmpA"  
"OPBA10\_01009" 33465 "s59E13H2" 0.009137739 "hypothetical protein"  
"OPBA10\_01009" 33465 "s59E25H2" 0 "hypothetical protein"  
"OPBA10\_01009" 33465 "s59E5H2" 0.2498161 "hypothetical protein"  
"OPBA10\_01009" 33465 "s63E6H2" 0.01880739 "hypothetical protein"  
"OPBA10\_01010" 33466 "s59E13H2" 0.01748519 "tRNA-splicing ligase RtcB"  
"OPBA10\_01010" 33466 "s59E25H2" 0 "tRNA-splicing ligase RtcB"  
"OPBA10\_01010" 33466 "s59E5H2" 0.4451724 "tRNA-splicing ligase RtcB"  
"OPBA10\_01010" 33466 "s63E6H2" 0.0372325 "tRNA-splicing ligase RtcB"

"OPBA10\_01011" 33467 "s59E13H2" 0.00486809 "Chromosome partitioning protein ParA"  
"OPBA10\_01011" 33467 "s59E25H2" 0 "Chromosome partitioning protein ParA"  
"OPBA10\_01011" 33467 "s59E5H2" 0.3707737 "Chromosome partitioning protein ParA"  
"OPBA10\_01011" 33467 "s63E6H2" 0.04593001 "Chromosome partitioning protein ParA"  
"OPBA10\_01012" 33468 "s59E13H2" 0.006754564 "Polymer-forming cytoskeletal"  
"OPBA10\_01012" 33468 "s59E25H2" 0 "Polymer-forming cytoskeletal"  
"OPBA10\_01012" 33468 "s59E5H2" 0.439997 "Polymer-forming cytoskeletal"  
"OPBA10\_01012" 33468 "s63E6H2" 0.04382008 "Polymer-forming cytoskeletal"  
"OPBA10\_01013" 33469 "s59E13H2" 0 "Polymer-forming cytoskeletal"  
"OPBA10\_01013" 33469 "s59E25H2" 0 "Polymer-forming cytoskeletal"  
"OPBA10\_01013" 33469 "s59E5H2" 0.6636077 "Polymer-forming cytoskeletal"  
"OPBA10\_01013" 33469 "s63E6H2" 0.03344997 "Polymer-forming cytoskeletal"  
"OPBA10\_01014" 33470 "s59E13H2" 0 "hypothetical protein"  
"OPBA10\_01014" 33470 "s59E25H2" 0 "hypothetical protein"  
"OPBA10\_01014" 33470 "s59E5H2" 0.1242198 "hypothetical protein"  
"OPBA10\_01014" 33470 "s63E6H2" 0.01194804 "hypothetical protein"  
"OPBA10\_01015" 33471 "s59E13H2" 0.01442847 "Lipopolysaccharide export system ATP-binding protein LptB"  
"OPBA10\_01015" 33471 "s59E25H2" 0 "Lipopolysaccharide export system ATP-binding protein LptB"  
"OPBA10\_01015" 33471 "s59E5H2" 0.0248666 "Lipopolysaccharide export system ATP-binding protein LptB"  
"OPBA10\_01015" 33471 "s63E6H2" 0 "Lipopolysaccharide export system ATP-binding protein LptB"  
"OPBA10\_01016" 33472 "s59E13H2" 0.01512601 "FeS cluster assembly protein SufB"  
"OPBA10\_01016" 33472 "s59E25H2" 0 "FeS cluster assembly protein SufB"  
"OPBA10\_01016" 33472 "s59E5H2" 0.02032078 "FeS cluster assembly protein SufB"  
"OPBA10\_01016" 33472 "s63E6H2" 0 "FeS cluster assembly protein SufB"  
"OPBA10\_01017" 33473 "s59E13H2" 0 "Cadmium resistance transcriptional regulatory protein CadC"  
"OPBA10\_01017" 33473 "s59E25H2" 0 "Cadmium resistance transcriptional regulatory protein CadC"  
"OPBA10\_01017" 33473 "s59E5H2" 0 "Cadmium resistance transcriptional regulatory protein CadC"  
"OPBA10\_01017" 33473 "s63E6H2" 0 "Cadmium resistance transcriptional regulatory protein CadC"  
"OPBA10\_01018" 33474 "s59E13H2" 0.01223225 "hypothetical protein"  
"OPBA10\_01018" 33474 "s59E25H2" 0 "hypothetical protein"  
"OPBA10\_01018" 33474 "s59E5H2" 0 "hypothetical protein"  
"OPBA10\_01018" 33474 "s63E6H2" 0 "hypothetical protein"  
"OPBA10\_01019" 33475 "s59E13H2" 0 "DNA alkylation repair enzyme"  
"OPBA10\_01019" 33475 "s59E25H2" 0 "DNA alkylation repair enzyme"  
"OPBA10\_01019" 33475 "s59E5H2" 0.06217976 "DNA alkylation repair enzyme"  
"OPBA10\_01019" 33475 "s63E6H2" 0 "DNA alkylation repair enzyme"  
"OPBA10\_01020" 33476 "s59E13H2" 0 "FMN reductase [NAD(P)H]"  
"OPBA10\_01020" 33476 "s59E25H2" 0 "FMN reductase [NAD(P)H]"  
"OPBA10\_01020" 33476 "s59E5H2" 0.5904012 "FMN reductase [NAD(P)H]"  
"OPBA10\_01020" 33476 "s63E6H2" 0 "FMN reductase [NAD(P)H]"  
"OPBA10\_01023" 33479 "s59E13H2" 0.1721901 "hypothetical protein"  
"OPBA10\_01023" 33479 "s59E25H2" 0 "hypothetical protein"  
"OPBA10\_01023" 33479 "s59E5H2" 0.8186252 "hypothetical protein"  
"OPBA10\_01023" 33479 "s63E6H2" 0.03888438 "hypothetical protein"  
"OPBA10\_01024" 33480 "s59E13H2" 0.1036186 "ECF RNA polymerase sigma factor SigE"  
"OPBA10\_01024" 33480 "s59E25H2" 0 "ECF RNA polymerase sigma factor SigE"  
"OPBA10\_01024" 33480 "s59E5H2" 0.6465147 "ECF RNA polymerase sigma factor SigE"



"OPBA10\_01024" 33480 "s63E6H2" 0.03020243 "ECF RNA polymerase sigma factor SigE"  
"OPBA10\_01025" 33481 "s59E13H2" 0.09354768 "hypothetical protein"  
"OPBA10\_01025" 33481 "s59E25H2" 0 "hypothetical protein"  
"OPBA10\_01025" 33481 "s59E5H2" 0.4669684 "hypothetical protein"  
"OPBA10\_01025" 33481 "s63E6H2" 0.005264312 "hypothetical protein"  
"OPBA10\_01026" 33482 "s59E13H2" 0.05421115 "hypothetical protein"  
"OPBA10\_01026" 33482 "s59E25H2" 0 "hypothetical protein"  
"OPBA10\_01026" 33482 "s59E5H2" 0.511309 "hypothetical protein"  
"OPBA10\_01026" 33482 "s63E6H2" 0 "hypothetical protein"  
"OPBA10\_01027" 33483 "s59E13H2" 0.005953758 "hypothetical protein"  
"OPBA10\_01027" 33483 "s59E25H2" 328.251 "hypothetical protein"  
"OPBA10\_01027" 33483 "s59E5H2" 0 "hypothetical protein"  
"OPBA10\_01027" 33483 "s63E6H2" 0.09599273 "hypothetical protein"  
"OPBA10\_01028" 33484 "s59E13H2" 0 "hypothetical protein"  
"OPBA10\_01028" 33484 "s59E25H2" 0 "hypothetical protein"  
"OPBA10\_01028" 33484 "s59E5H2" 0 "hypothetical protein"  
"OPBA10\_01028" 33484 "s63E6H2" 0.001151381 "hypothetical protein"  
"OPBA10\_01029" 33485 "s59E13H2" 0 "hypothetical protein"  
"OPBA10\_01029" 33485 "s59E25H2" 0 "hypothetical protein"  
"OPBA10\_01029" 33485 "s59E5H2" 0 "hypothetical protein"  
"OPBA10\_01029" 33485 "s63E6H2" 0 "hypothetical protein"  
"OPBA10\_01030" 33486 "s59E13H2" 0 "Transposase"  
"OPBA10\_01030" 33486 "s59E25H2" 0 "Transposase"  
"OPBA10\_01030" 33486 "s59E5H2" 0 "Transposase"  
"OPBA10\_01030" 33486 "s63E6H2" 0 "Transposase"  
"OPBA10\_01031" 33487 "s59E13H2" 0.07348777 "Transposase DDE domain protein"  
"OPBA10\_01031" 33487 "s59E25H2" 0 "Transposase DDE domain protein"  
"OPBA10\_01031" 33487 "s59E5H2" 0.0422856 "Transposase DDE domain protein"  
"OPBA10\_01031" 33487 "s63E6H2" 0.1071981 "Transposase DDE domain protein"  
"OPBA10\_01033" 33489 "s59E13H2" 0 "Putative sugar phosphate isomerase YwLF"  
"OPBA10\_01033" 33489 "s59E25H2" 0 "Putative sugar phosphate isomerase YwLF"  
"OPBA10\_01033" 33489 "s59E5H2" 0.03608776 "Putative sugar phosphate isomerase YwLF"  
"OPBA10\_01033" 33489 "s63E6H2" 0 "Putative sugar phosphate isomerase YwLF"  
"OPBA10\_01035" 33491 "s59E13H2" 0 "2-dehydro-3-deoxy-D-gluconate 5-dehydrogenase"  
"OPBA10\_01035" 33491 "s59E25H2" 0 "2-dehydro-3-deoxy-D-gluconate 5-dehydrogenase"  
"OPBA10\_01035" 33491 "s59E5H2" 0.01248345 "2-dehydro-3-deoxy-D-gluconate 5-dehydrogenase"  
"OPBA10\_01035" 33491 "s63E6H2" 0 "2-dehydro-3-deoxy-D-gluconate 5-dehydrogenase"  
"OPBA10\_01036" 33492 "s59E13H2" 0.004222638 "hypothetical protein"  
"OPBA10\_01036" 33492 "s59E25H2" 0 "hypothetical protein"  
"OPBA10\_01036" 33492 "s59E5H2" 0.2430194 "hypothetical protein"  
"OPBA10\_01036" 33492 "s63E6H2" 0.002359273 "hypothetical protein"  
"OPBA10\_01037" 33493 "s59E13H2" 0.01080337 "dTDP-4-dehydrorhamnose reductase"  
"OPBA10\_01037" 33493 "s59E25H2" 0 "dTDP-4-dehydrorhamnose reductase"  
"OPBA10\_01037" 33493 "s59E5H2" 0.3529597 "dTDP-4-dehydrorhamnose reductase"  
"OPBA10\_01037" 33493 "s63E6H2" 0.004519945 "dTDP-4-dehydrorhamnose reductase"  
"OPBA10\_01038" 33494 "s59E13H2" 0.00125617 "hypothetical protein"  
"OPBA10\_01038" 33494 "s59E25H2" 0 "hypothetical protein"

"OPBA10\_01038" 33494 "s59E5H2" 0.2614288 "hypothetical protein"  
"OPBA10\_01038" 33494 "s63E6H2" 0.01554014 "hypothetical protein"  
"OPBB05\_00001" 30274 "s59E13H2" 2.745818 "DNA-directed RNA polymerase subunit beta"  
"OPBB05\_00001" 30274 "s59E25H2" 0.113071 "DNA-directed RNA polymerase subunit beta"  
"OPBB05\_00001" 30274 "s59E5H2" 0.03985843 "DNA-directed RNA polymerase subunit beta"  
"OPBB05\_00001" 30274 "s63E6H2" 0.1517911 "DNA-directed RNA polymerase subunit beta"  
"OPBB05\_00002" 30275 "s59E13H2" 0.01311044 "DNA-directed RNA polymerase subunit beta"  
"OPBB05\_00002" 30275 "s59E25H2" 3.248696 "DNA-directed RNA polymerase subunit beta"  
"OPBB05\_00002" 30275 "s59E5H2" 0.01125652 "DNA-directed RNA polymerase subunit beta"  
"OPBB05\_00002" 30275 "s63E6H2" 0.003665131 "DNA-directed RNA polymerase subunit beta"  
"OPBB05\_00004" 30277 "s59E13H2" 0.00223145 "Non-canonical purine NTP pyrophosphatase"  
"OPBB05\_00004" 30277 "s59E25H2" 0 "Non-canonical purine NTP pyrophosphatase"  
"OPBB05\_00004" 30277 "s59E5H2" 0.01550136 "Non-canonical purine NTP pyrophosphatase"  
"OPBB05\_00004" 30277 "s63E6H2" 1.140176 "Non-canonical purine NTP pyrophosphatase"  
"OPBB05\_00005" 30278 "s59E13H2" 0.005180915 "Ribonuclease PH"  
"OPBB05\_00005" 30278 "s59E25H2" 0 "Ribonuclease PH"  
"OPBB05\_00005" 30278 "s59E5H2" 0.2381724 "Ribonuclease PH"  
"OPBB05\_00005" 30278 "s63E6H2" 0.09691839 "Ribonuclease PH"  
"OPBB05\_00006" 30279 "s59E13H2" 0 "Glutamate racemase 1"  
"OPBB05\_00006" 30279 "s59E25H2" 0 "Glutamate racemase 1"  
"OPBB05\_00006" 30279 "s59E5H2" 0.1931293 "Glutamate racemase 1"  
"OPBB05\_00006" 30279 "s63E6H2" 0 "Glutamate racemase 1"  
"OPBB05\_00008" 30281 "s59E13H2" 0 "Toxin RelG"  
"OPBB05\_00008" 30281 "s59E25H2" 0 "Toxin RelG"  
"OPBB05\_00008" 30281 "s59E5H2" 0.1129031 "Toxin RelG"  
"OPBB05\_00008" 30281 "s63E6H2" 0.002050554 "Toxin RelG"  
"OPBB05\_00009" 30282 "s59E13H2" 0 "hypothetical protein"  
"OPBB05\_00009" 30282 "s59E25H2" 0 "hypothetical protein"  
"OPBB05\_00009" 30282 "s59E5H2" 0.1376147 "hypothetical protein"  
"OPBB05\_00009" 30282 "s63E6H2" 0 "hypothetical protein"  
"OPBB05\_00011" 30284 "s59E13H2" 0.09091233 "SsrA-binding protein"  
"OPBB05\_00011" 30284 "s59E25H2" 0 "SsrA-binding protein"  
"OPBB05\_00011" 30284 "s59E5H2" 0.5693574 "SsrA-binding protein"  
"OPBB05\_00011" 30284 "s63E6H2" 0.01607299 "SsrA-binding protein"  
"OPBB05\_00012" 30285 "s59E13H2" 0.04199425 "putative CtpA-like serine protease"  
"OPBB05\_00012" 30285 "s59E25H2" 0 "putative CtpA-like serine protease"  
"OPBB05\_00012" 30285 "s59E5H2" 0.02809258 "putative CtpA-like serine protease"  
"OPBB05\_00012" 30285 "s63E6H2" 0.0685932 "putative CtpA-like serine protease"  
"OPBB05\_00013" 30286 "s59E13H2" 0.03910314 "Murein DD-endopeptidase MepM"  
"OPBB05\_00013" 30286 "s59E25H2" 0 "Murein DD-endopeptidase MepM"  
"OPBB05\_00013" 30286 "s59E5H2" 0.1004661 "Murein DD-endopeptidase MepM"  
"OPBB05\_00013" 30286 "s63E6H2" 0.622042 "Murein DD-endopeptidase MepM"  
"OPBB05\_00014" 30287 "s59E13H2" 0.04760258 "Cell division protein FtsX"  
"OPBB05\_00014" 30287 "s59E25H2" 0 "Cell division protein FtsX"  
"OPBB05\_00014" 30287 "s59E5H2" 0.09637866 "Cell division protein FtsX"  
"OPBB05\_00014" 30287 "s63E6H2" 0.5085871 "Cell division protein FtsX"  
"OPBB05\_00015" 30288 "s59E13H2" 0.03006362 "Cell division ATP-binding protein FtsE"

"OPBB05\_00015" 30288 "s59E25H2" 0 "Cell division ATP-binding protein FtsE"  
"OPBB05\_00015" 30288 "s59E5H2" 0.1514124 "Cell division ATP-binding protein FtsE"  
"OPBB05\_00015" 30288 "s63E6H2" 0.4345052 "Cell division ATP-binding protein FtsE"  
"OPBB05\_00016" 30289 "s59E13H2" 0 "putative cation-transporting ATPase F"  
"OPBB05\_00016" 30289 "s59E25H2" 0 "putative cation-transporting ATPase F"  
"OPBB05\_00016" 30289 "s59E5H2" 0 "putative cation-transporting ATPase F"  
"OPBB05\_00016" 30289 "s63E6H2" 0 "putative cation-transporting ATPase F"  
"OPBB05\_00017" 30290 "s59E13H2" 0 "hypothetical protein"  
"OPBB05\_00017" 30290 "s59E25H2" 0 "hypothetical protein"  
"OPBB05\_00017" 30290 "s59E5H2" 0.002753916 "hypothetical protein"  
"OPBB05\_00017" 30290 "s63E6H2" 0 "hypothetical protein"  
"OPBB05\_00018" 30291 "s59E13H2" 0 "hypothetical protein"  
"OPBB05\_00018" 30291 "s59E25H2" 0 "hypothetical protein"  
"OPBB05\_00018" 30291 "s59E5H2" 0.01350978 "hypothetical protein"  
"OPBB05\_00018" 30291 "s63E6H2" 0.01200467 "hypothetical protein"  
"OPBB05\_00019" 30292 "s59E13H2" 0.007101872 "Modulator of FtsH protease HflK"  
"OPBB05\_00019" 30292 "s59E25H2" 0 "Modulator of FtsH protease HflK"  
"OPBB05\_00019" 30292 "s59E5H2" 0.3776601 "Modulator of FtsH protease HflK"  
"OPBB05\_00019" 30292 "s63E6H2" 0 "Modulator of FtsH protease HflK"  
"OPBB05\_00020" 30293 "s59E13H2" 0.001108121 "hypothetical protein"  
"OPBB05\_00020" 30293 "s59E25H2" 0 "hypothetical protein"  
"OPBB05\_00020" 30293 "s59E5H2" 0.004092668 "hypothetical protein"  
"OPBB05\_00020" 30293 "s63E6H2" 0.004589268 "hypothetical protein"  
"OPBB05\_00021" 30294 "s59E13H2" 0.0003032678 "Uracil DNA glycosylase superfamily protein"  
"OPBB05\_00021" 30294 "s59E25H2" 0 "Uracil DNA glycosylase superfamily protein"  
"OPBB05\_00021" 30294 "s59E5H2" 0.005700328 "Uracil DNA glycosylase superfamily protein"  
"OPBB05\_00021" 30294 "s63E6H2" 0.1454669 "Uracil DNA glycosylase superfamily protein"  
"OPBB05\_00022" 30295 "s59E13H2" 0.006431163 "tRNA threonylcarbamoyladenosine biosynthesis protein TsaE"  
"OPBB05\_00022" 30295 "s59E25H2" 0 "tRNA threonylcarbamoyladenosine biosynthesis protein TsaE"  
"OPBB05\_00022" 30295 "s59E5H2" 0.0303005 "tRNA threonylcarbamoyladenosine biosynthesis protein TsaE"  
"OPBB05\_00022" 30295 "s63E6H2" 0.2097837 "tRNA threonylcarbamoyladenosine biosynthesis protein TsaE"  
"OPBB05\_00023" 30296 "s59E13H2" 0.003934733 "tRNA threonylcarbamoyladenosine biosynthesis protein TsaB"  
"OPBB05\_00023" 30296 "s59E25H2" 0 "tRNA threonylcarbamoyladenosine biosynthesis protein TsaB"  
"OPBB05\_00023" 30296 "s59E5H2" 0.06662194 "tRNA threonylcarbamoyladenosine biosynthesis protein TsaB"  
"OPBB05\_00023" 30296 "s63E6H2" 0.204307 "tRNA threonylcarbamoyladenosine biosynthesis protein TsaB"  
"OPBB05\_00024" 30297 "s59E13H2" 0.016223 "tRNA N6-adenosine threonylcarbamoyltransferase"  
"OPBB05\_00024" 30297 "s59E25H2" 0 "tRNA N6-adenosine threonylcarbamoyltransferase"  
"OPBB05\_00024" 30297 "s59E5H2" 0.0878253 "tRNA N6-adenosine threonylcarbamoyltransferase"  
"OPBB05\_00024" 30297 "s63E6H2" 0.2660438 "tRNA N6-adenosine threonylcarbamoyltransferase"  
"OPBB05\_00025" 30298 "s59E13H2" 0 "Daunorubicin/doxorubicin resistance ATP-binding protein DrrA"  
"OPBB05\_00025" 30298 "s59E25H2" 0 "Daunorubicin/doxorubicin resistance ATP-binding protein DrrA"  
"OPBB05\_00025" 30298 "s59E5H2" 0.05484619 "Daunorubicin/doxorubicin resistance ATP-binding protein DrrA"  
"OPBB05\_00025" 30298 "s63E6H2" 0.001032953 "Daunorubicin/doxorubicin resistance ATP-binding protein DrrA"  
"OPBB05\_00026" 30299 "s59E13H2" 0.003202919 "ABC-2 type transporter"  
"OPBB05\_00026" 30299 "s59E25H2" 0 "ABC-2 type transporter"  
"OPBB05\_00026" 30299 "s59E5H2" 0.1127579 "ABC-2 type transporter"  
"OPBB05\_00026" 30299 "s63E6H2" 0 "ABC-2 type transporter"

"OPBB05\_00027" 30300 "s59E13H2" 0.04564608 "10 kDa chaperonin 5"  
"OPBB05\_00027" 30300 "s59E25H2" 0 "10 kDa chaperonin 5"  
"OPBB05\_00027" 30300 "s59E5H2" 0.02172822 "10 kDa chaperonin 5"  
"OPBB05\_00027" 30300 "s63E6H2" 0.2835524 "10 kDa chaperonin 5"  
"OPBB05\_00028" 30301 "s59E13H2" 0.03251225 "60 kDa chaperonin"  
"OPBB05\_00028" 30301 "s59E25H2" 0 "60 kDa chaperonin"  
"OPBB05\_00028" 30301 "s59E5H2" 0.08997081 "60 kDa chaperonin"  
"OPBB05\_00028" 30301 "s63E6H2" 0.2253538 "60 kDa chaperonin"  
"OPBB05\_00032" 30305 "s59E13H2" 0 "hypothetical protein"  
"OPBB05\_00032" 30305 "s59E25H2" 0 "hypothetical protein"  
"OPBB05\_00032" 30305 "s59E5H2" 0 "hypothetical protein"  
"OPBB05\_00032" 30305 "s63E6H2" 0 "hypothetical protein"  
"OPBB05\_00034" 30307 "s59E13H2" 0.001676046 "tRNA(fMet)-specific endonuclease VapC"  
"OPBB05\_00034" 30307 "s59E25H2" 0 "tRNA(fMet)-specific endonuclease VapC"  
"OPBB05\_00034" 30307 "s59E5H2" 0.07067404 "tRNA(fMet)-specific endonuclease VapC"  
"OPBB05\_00034" 30307 "s63E6H2" 1.894407 "tRNA(fMet)-specific endonuclease VapC"  
"OPBB05\_00035" 30308 "s59E13H2" 0.0278036 "Ribosomal RNA small subunit methyltransferase I"  
"OPBB05\_00035" 30308 "s59E25H2" 0 "Ribosomal RNA small subunit methyltransferase I"  
"OPBB05\_00035" 30308 "s59E5H2" 0.08742521 "Ribosomal RNA small subunit methyltransferase I"  
"OPBB05\_00035" 30308 "s63E6H2" 2.60009 "Ribosomal RNA small subunit methyltransferase I"  
"OPBB05\_00036" 30309 "s59E13H2" 0.04565513 "Methionine--tRNA ligase"  
"OPBB05\_00036" 30309 "s59E25H2" 0 "Methionine--tRNA ligase"  
"OPBB05\_00036" 30309 "s59E5H2" 0.1372087 "Methionine--tRNA ligase"  
"OPBB05\_00036" 30309 "s63E6H2" 3.703657 "Methionine--tRNA ligase"  
"OPBB05\_00037" 30310 "s59E13H2" 0.04055712 "putative deoxyribonuclease YcfH"  
"OPBB05\_00037" 30310 "s59E25H2" 0.5061728 "putative deoxyribonuclease YcfH"  
"OPBB05\_00037" 30310 "s59E5H2" 0.127152 "putative deoxyribonuclease YcfH"  
"OPBB05\_00037" 30310 "s63E6H2" 4.509602 "putative deoxyribonuclease YcfH"  
"OPBB05\_00038" 30311 "s59E13H2" 0.05117557 "Ribosomal RNA small subunit methyltransferase A"  
"OPBB05\_00038" 30311 "s59E25H2" 0.3724138 "Ribosomal RNA small subunit methyltransferase A"  
"OPBB05\_00038" 30311 "s59E5H2" 0.117358 "Ribosomal RNA small subunit methyltransferase A"  
"OPBB05\_00038" 30311 "s63E6H2" 5.067849 "Ribosomal RNA small subunit methyltransferase A"  
"OPBB05\_00039" 30312 "s59E13H2" 0.1033888 "4-diphosphocytidyl-2-C-methyl-D-erythritol kinase"  
"OPBB05\_00039" 30312 "s59E25H2" 0.1995754 "4-diphosphocytidyl-2-C-methyl-D-erythritol kinase"  
"OPBB05\_00039" 30312 "s59E5H2" 0.1720302 "4-diphosphocytidyl-2-C-methyl-D-erythritol kinase"  
"OPBB05\_00039" 30312 "s63E6H2" 4.374636 "4-diphosphocytidyl-2-C-methyl-D-erythritol kinase"  
"OPBB05\_00041" 30314 "s59E13H2" 0.006350242 "hypothetical protein"  
"OPBB05\_00041" 30314 "s59E25H2" 0 "hypothetical protein"  
"OPBB05\_00041" 30314 "s59E5H2" 0 "hypothetical protein"  
"OPBB05\_00041" 30314 "s63E6H2" 0.009513154 "hypothetical protein"  
"OPBB05\_00042" 30315 "s59E13H2" 0.0002440559 "hypothetical protein"  
"OPBB05\_00042" 30315 "s59E25H2" 0 "hypothetical protein"  
"OPBB05\_00042" 30315 "s59E5H2" 0 "hypothetical protein"  
"OPBB05\_00042" 30315 "s63E6H2" 0.001990878 "hypothetical protein"  
"OPBB05\_00044" 30317 "s59E13H2" 0.0364589 "putative N-acetyltransferase Yjcf"  
"OPBB05\_00044" 30317 "s59E25H2" 0 "putative N-acetyltransferase Yjcf"  
"OPBB05\_00044" 30317 "s59E5H2" 0.03333538 "putative N-acetyltransferase Yjcf"

"OPBB05\_00044" 30317 "s63E6H2" 0.02384855 "putative N-acetyltransferase YjcF"  
"OPBB05\_00045" 30318 "s59E13H2" 0.1283172 "Methionine import ATP-binding protein MetN 2"  
"OPBB05\_00045" 30318 "s59E25H2" 0 "Methionine import ATP-binding protein MetN 2"  
"OPBB05\_00045" 30318 "s59E5H2" 0.09777946 "Methionine import ATP-binding protein MetN 2"  
"OPBB05\_00045" 30318 "s63E6H2" 0.1549191 "Methionine import ATP-binding protein MetN 2"  
"OPBB05\_00046" 30319 "s59E13H2" 0.6636049 "Autoinducer 2 import system permease protein LsrC"  
"OPBB05\_00046" 30319 "s59E25H2" 0 "Autoinducer 2 import system permease protein LsrC"  
"OPBB05\_00046" 30319 "s59E5H2" 0.0863199 "Autoinducer 2 import system permease protein LsrC"  
"OPBB05\_00046" 30319 "s63E6H2" 0.1585899 "Autoinducer 2 import system permease protein LsrC"  
"OPBB05\_00047" 30320 "s59E13H2" 0.2272646 "ABC transporter substrate binding protein"  
"OPBB05\_00047" 30320 "s59E25H2" 0 "ABC transporter substrate binding protein"  
"OPBB05\_00047" 30320 "s59E5H2" 0.06855201 "ABC transporter substrate binding protein"  
"OPBB05\_00047" 30320 "s63E6H2" 0.1301283 "ABC transporter substrate binding protein"  
"OPBB05\_00049" 30322 "s59E13H2" 0 "hypothetical protein"  
"OPBB05\_00049" 30322 "s59E25H2" 0 "hypothetical protein"  
"OPBB05\_00049" 30322 "s59E5H2" 0.005383519 "hypothetical protein"  
"OPBB05\_00049" 30322 "s63E6H2" 0.00331111 "hypothetical protein"  
"OPBB05\_00050" 30323 "s59E13H2" 0 "hypothetical protein"  
"OPBB05\_00050" 30323 "s59E25H2" 0 "hypothetical protein"  
"OPBB05\_00050" 30323 "s59E5H2" 0 "hypothetical protein"  
"OPBB05\_00050" 30323 "s63E6H2" 0 "hypothetical protein"  
"OPBB05\_00052" 30325 "s59E13H2" 0 "ATP-dependent RecD-like DNA helicase"  
"OPBB05\_00052" 30325 "s59E25H2" 0 "ATP-dependent RecD-like DNA helicase"  
"OPBB05\_00052" 30325 "s59E5H2" 0 "ATP-dependent RecD-like DNA helicase"  
"OPBB05\_00052" 30325 "s63E6H2" 0.005371647 "ATP-dependent RecD-like DNA helicase"  
"OPBB05\_00053" 30326 "s59E13H2" 0.01437982 "putative transposase"  
"OPBB05\_00053" 30326 "s59E25H2" 0 "putative transposase"  
"OPBB05\_00053" 30326 "s59E5H2" 0.2897272 "putative transposase"  
"OPBB05\_00053" 30326 "s63E6H2" 0.3555091 "putative transposase"  
"OPBB05\_00054" 30327 "s59E13H2" 0.01663294 "Transposase IS200 like protein"  
"OPBB05\_00054" 30327 "s59E25H2" 0.9855072 "Transposase IS200 like protein"  
"OPBB05\_00054" 30327 "s59E5H2" 0.2766567 "Transposase IS200 like protein"  
"OPBB05\_00054" 30327 "s63E6H2" 0.2796914 "Transposase IS200 like protein"  
"OPBB05\_00055" 30328 "s59E13H2" 0.08662054 "Glycosyl transferases group 1"  
"OPBB05\_00055" 30328 "s59E25H2" 4.323601 "Glycosyl transferases group 1"  
"OPBB05\_00055" 30328 "s59E5H2" 0.06305877 "Glycosyl transferases group 1"  
"OPBB05\_00055" 30328 "s63E6H2" 0.4098664 "Glycosyl transferases group 1"  
"OPBB05\_00056" 30329 "s59E13H2" 0.009866701 "D-inositol 3-phosphate glycosyltransferase"  
"OPBB05\_00056" 30329 "s59E25H2" 0 "D-inositol 3-phosphate glycosyltransferase"  
"OPBB05\_00056" 30329 "s59E5H2" 0.1424862 "D-inositol 3-phosphate glycosyltransferase"  
"OPBB05\_00056" 30329 "s63E6H2" 0.1984644 "D-inositol 3-phosphate glycosyltransferase"  
"OPBB05\_00057" 30330 "s59E13H2" 0 "hypothetical protein"  
"OPBB05\_00057" 30330 "s59E25H2" 0 "hypothetical protein"  
"OPBB05\_00057" 30330 "s59E5H2" 0.04246164 "hypothetical protein"  
"OPBB05\_00057" 30330 "s63E6H2" 0.223288 "hypothetical protein"  
"OPBB05\_00059" 30332 "s59E13H2" 0.007546591 "ABC-2 family transporter protein"  
"OPBB05\_00059" 30332 "s59E25H2" 0 "ABC-2 family transporter protein"

"OPBB05\_00059" 30332 "s59E5H2" 0.0195671 "ABC-2 family transporter protein"  
"OPBB05\_00059" 30332 "s63E6H2" 0.384929 "ABC-2 family transporter protein"  
"OPBB05\_00060" 30333 "s59E13H2" 0 "putative ABC transporter ATP-binding protein YxIF"  
"OPBB05\_00060" 30333 "s59E25H2" 0 "putative ABC transporter ATP-binding protein YxIF"  
"OPBB05\_00060" 30333 "s59E5H2" 0.02184299 "putative ABC transporter ATP-binding protein YxIF"  
"OPBB05\_00060" 30333 "s63E6H2" 0.3067516 "putative ABC transporter ATP-binding protein YxIF"  
"OPBB05\_00061" 30334 "s59E13H2" 0 "hypothetical protein"  
"OPBB05\_00061" 30334 "s59E25H2" 0 "hypothetical protein"  
"OPBB05\_00061" 30334 "s59E5H2" 0 "hypothetical protein"  
"OPBB05\_00061" 30334 "s63E6H2" 0.2766508 "hypothetical protein"  
"OPBB05\_00062" 30335 "s59E13H2" 0.02921943 "hypothetical protein"  
"OPBB05\_00062" 30335 "s59E25H2" 0 "hypothetical protein"  
"OPBB05\_00062" 30335 "s59E5H2" 0 "hypothetical protein"  
"OPBB05\_00062" 30335 "s63E6H2" 0.2289606 "hypothetical protein"  
"OPBB05\_00063" 30336 "s59E13H2" 0.030568 "hypothetical protein"  
"OPBB05\_00063" 30336 "s59E25H2" 0 "hypothetical protein"  
"OPBB05\_00063" 30336 "s59E5H2" 0 "hypothetical protein"  
"OPBB05\_00063" 30336 "s63E6H2" 0.2153082 "hypothetical protein"  
"OPBB05\_00065" 30338 "s59E13H2" 0 "ferredoxin"  
"OPBB05\_00065" 30338 "s59E25H2" 0 "ferredoxin"  
"OPBB05\_00065" 30338 "s59E5H2" 0 "ferredoxin"  
"OPBB05\_00065" 30338 "s63E6H2" 2.067348 "ferredoxin"  
"OPBB05\_00067" 30340 "s59E13H2" 0.09600573 "hypothetical protein"  
"OPBB05\_00067" 30340 "s59E25H2" 0 "hypothetical protein"  
"OPBB05\_00067" 30340 "s59E5H2" 0.1676509 "hypothetical protein"  
"OPBB05\_00067" 30340 "s63E6H2" 0.1295456 "hypothetical protein"  
"OPBB05\_00069" 30342 "s59E13H2" 0 "Peptide methionine sulfoxide reductase MsrB"  
"OPBB05\_00069" 30342 "s59E25H2" 0 "Peptide methionine sulfoxide reductase MsrB"  
"OPBB05\_00069" 30342 "s59E5H2" 0.02952381 "Peptide methionine sulfoxide reductase MsrB"  
"OPBB05\_00069" 30342 "s63E6H2" 0.08458285 "Peptide methionine sulfoxide reductase MsrB"  
"OPBB05\_00070" 30343 "s59E13H2" 0 "hypothetical protein"  
"OPBB05\_00070" 30343 "s59E25H2" 0 "hypothetical protein"  
"OPBB05\_00070" 30343 "s59E5H2" 0.03491254 "hypothetical protein"  
"OPBB05\_00070" 30343 "s63E6H2" 0.1096483 "hypothetical protein"  
"OPBB05\_00072" 30345 "s59E13H2" 0 "High molecular weight rubredoxin"  
"OPBB05\_00072" 30345 "s59E25H2" 0 "High molecular weight rubredoxin"  
"OPBB05\_00072" 30345 "s59E5H2" 0.03134268 "High molecular weight rubredoxin"  
"OPBB05\_00072" 30345 "s63E6H2" 0.08986295 "High molecular weight rubredoxin"  
"OPBB05\_00074" 30347 "s59E13H2" 0 "Alkaline phosphatase synthesis sensor protein PhoR"  
"OPBB05\_00074" 30347 "s59E25H2" 34.57364 "Alkaline phosphatase synthesis sensor protein PhoR"  
"OPBB05\_00074" 30347 "s59E5H2" 0 "Alkaline phosphatase synthesis sensor protein PhoR"  
"OPBB05\_00074" 30347 "s63E6H2" 0 "Alkaline phosphatase synthesis sensor protein PhoR"  
"OPBB05\_00075" 30348 "s59E13H2" 0 "Transcriptional regulatory protein TcrA"  
"OPBB05\_00075" 30348 "s59E25H2" 0 "Transcriptional regulatory protein TcrA"  
"OPBB05\_00075" 30348 "s59E5H2" 0 "Transcriptional regulatory protein TcrA"  
"OPBB05\_00075" 30348 "s63E6H2" 0 "Transcriptional regulatory protein TcrA"  
"OPBB05\_00076" 30349 "s59E13H2" 0 "hypothetical protein"

"OPBB05\_00076" 30349 "s59E25H2" 0 "hypothetical protein"  
"OPBB05\_00076" 30349 "s59E5H2" 0 "hypothetical protein"  
"OPBB05\_00076" 30349 "s63E6H2" 0 "hypothetical protein"  
"OPBB05\_00078" 30351 "s59E13H2" 0 "Asparagine synthetase B [glutamine-hydrolyzing]"  
"OPBB05\_00078" 30351 "s59E25H2" 0 "Asparagine synthetase B [glutamine-hydrolyzing]"  
"OPBB05\_00078" 30351 "s59E5H2" 0.04737633 "Asparagine synthetase B [glutamine-hydrolyzing]"  
"OPBB05\_00078" 30351 "s63E6H2" 0.01327926 "Asparagine synthetase B [glutamine-hydrolyzing]"  
"OPBB05\_00079" 30352 "s59E13H2" 0 "putative MscS family protein YkuT"  
"OPBB05\_00079" 30352 "s59E25H2" 0 "putative MscS family protein YkuT"  
"OPBB05\_00079" 30352 "s59E5H2" 0 "putative MscS family protein YkuT"  
"OPBB05\_00079" 30352 "s63E6H2" 0.003469914 "putative MscS family protein YkuT"  
"OPBB05\_00080" 30353 "s59E13H2" 0 "hypothetical protein"  
"OPBB05\_00080" 30353 "s59E25H2" 0 "hypothetical protein"  
"OPBB05\_00080" 30353 "s59E5H2" 0 "hypothetical protein"  
"OPBB05\_00080" 30353 "s63E6H2" 0 "hypothetical protein"  
"OPBB05\_00081" 30354 "s59E13H2" 0.007316253 "hypothetical protein"  
"OPBB05\_00081" 30354 "s59E25H2" 0 "hypothetical protein"  
"OPBB05\_00081" 30354 "s59E5H2" 0 "hypothetical protein"  
"OPBB05\_00081" 30354 "s63E6H2" 0.08525158 "hypothetical protein"  
"OPBB05\_00082" 30355 "s59E13H2" 0.02300696 "YtxH-like protein"  
"OPBB05\_00082" 30355 "s59E25H2" 0 "YtxH-like protein"  
"OPBB05\_00082" 30355 "s59E5H2" 0 "YtxH-like protein"  
"OPBB05\_00082" 30355 "s63E6H2" 0.06539133 "YtxH-like protein"  
"OPBB05\_00083" 30356 "s59E13H2" 0 "Transposase, Mutator family"  
"OPBB05\_00083" 30356 "s59E25H2" 0 "Transposase, Mutator family"  
"OPBB05\_00083" 30356 "s59E5H2" 0 "Transposase, Mutator family"  
"OPBB05\_00083" 30356 "s63E6H2" 0 "Transposase, Mutator family"  
"OPBB05\_00086" 30359 "s59E13H2" 0 "hypothetical protein"  
"OPBB05\_00086" 30359 "s59E25H2" 0 "hypothetical protein"  
"OPBB05\_00086" 30359 "s59E5H2" 0 "hypothetical protein"  
"OPBB05\_00086" 30359 "s63E6H2" 0.002761011 "hypothetical protein"  
"OPBB05\_00087" 30360 "s59E13H2" 0 "UDP-N-acetylmuramoylalanine--D-glutamate ligase"  
"OPBB05\_00087" 30360 "s59E25H2" 0 "UDP-N-acetylmuramoylalanine--D-glutamate ligase"  
"OPBB05\_00087" 30360 "s59E5H2" 0.01529582 "UDP-N-acetylmuramoylalanine--D-glutamate ligase"  
"OPBB05\_00087" 30360 "s63E6H2" 0.0317474 "UDP-N-acetylmuramoylalanine--D-glutamate ligase"  
"OPBB05\_00088" 30361 "s59E13H2" 0 "Lipid II flippase FtsW"  
"OPBB05\_00088" 30361 "s59E25H2" 0 "Lipid II flippase FtsW"  
"OPBB05\_00088" 30361 "s59E5H2" 0.03154789 "Lipid II flippase FtsW"  
"OPBB05\_00088" 30361 "s63E6H2" 0.01101967 "Lipid II flippase FtsW"  
"OPBB05\_00089" 30362 "s59E13H2" 0.01176717 "UDP-N-acetylglucosamine--N-acetylmuramyl-(pentapeptide) pyrophosphoryl-undecaprenol N-acetylglucosamine transferase"  
"OPBB05\_00089" 30362 "s59E25H2" 0 "UDP-N-acetylglucosamine--N-acetylmuramyl-(pentapeptide) pyrophosphoryl-undecaprenol N-acetylglucosamine transferase"  
"OPBB05\_00089" 30362 "s59E5H2" 0.1783872 "UDP-N-acetylglucosamine--N-acetylmuramyl-(pentapeptide) pyrophosphoryl-undecaprenol N-acetylglucosamine transferase"  
"OPBB05\_00089" 30362 "s63E6H2" 0.03261898 "UDP-N-acetylglucosamine--N-acetylmuramyl-(pentapeptide) pyrophosphoryl-undecaprenol N-acetylglucosamine transferase"  
"OPBB05\_00090" 30363 "s59E13H2" 0.004243813 "UDP-N-acetylglucosamine--N-acetylmuramyl-(pentapeptide) pyrophosphoryl-undecaprenol N-acetylglucosamine transferase"  
"OPBB05\_00090" 30363 "s59E25H2" 0 "UDP-N-acetylglucosamine--N-acetylmuramyl-(pentapeptide) pyrophosphoryl-undecaprenol N-acetylglucosamine transferase"  
"OPBB05\_00090" 30363 "s59E5H2" 0.03517316 "UDP-N-acetylglucosamine--N-acetylmuramyl-(pentapeptide) pyrophosphoryl-undecaprenol N-acetylglucosamine transferase"  
"OPBB05\_00090" 30363 "s63E6H2" 0.03689105 "UDP-N-acetylglucosamine--N-acetylmuramyl-(pentapeptide) pyrophosphoryl-undecaprenol N-acetylglucosamine transferase"

"OPBB05\_00091" 30364 "s59E13H2" 0.001648955 "UDP-N-acetylmuramate--L-alanine ligase"  
"OPBB05\_00091" 30364 "s59E25H2" 0 "UDP-N-acetylmuramate--L-alanine ligase"  
"OPBB05\_00091" 30364 "s59E5H2" 0.04026147 "UDP-N-acetylmuramate--L-alanine ligase"  
"OPBB05\_00091" 30364 "s63E6H2" 0.02127315 "UDP-N-acetylmuramate--L-alanine ligase"  
"OPBB05\_00092" 30365 "s59E13H2" 0 "UDP-N-acetylenolpyruvoylglucosamine reductase"  
"OPBB05\_00092" 30365 "s59E25H2" 0 "UDP-N-acetylenolpyruvoylglucosamine reductase"  
"OPBB05\_00092" 30365 "s59E5H2" 0.04917212 "UDP-N-acetylenolpyruvoylglucosamine reductase"  
"OPBB05\_00092" 30365 "s63E6H2" 0.01730259 "UDP-N-acetylenolpyruvoylglucosamine reductase"  
"OPBB05\_00093" 30366 "s59E13H2" 0.009715071 "D-alanine--D-alanine ligase B"  
"OPBB05\_00093" 30366 "s59E25H2" 0 "D-alanine--D-alanine ligase B"  
"OPBB05\_00093" 30366 "s59E5H2" 0.09957452 "D-alanine--D-alanine ligase B"  
"OPBB05\_00093" 30366 "s63E6H2" 0.03340501 "D-alanine--D-alanine ligase B"  
"OPBB05\_00094" 30367 "s59E13H2" 0.006452422 "cell division protein FtsQ"  
"OPBB05\_00094" 30367 "s59E25H2" 0 "cell division protein FtsQ"  
"OPBB05\_00094" 30367 "s59E5H2" 0.08177152 "cell division protein FtsQ"  
"OPBB05\_00094" 30367 "s63E6H2" 0.0228771 "cell division protein FtsQ"  
"OPBB05\_00095" 30368 "s59E13H2" 0.01914175 "Cell division protein FtsA"  
"OPBB05\_00095" 30368 "s59E25H2" 0 "Cell division protein FtsA"  
"OPBB05\_00095" 30368 "s59E5H2" 0.03895211 "Cell division protein FtsA"  
"OPBB05\_00095" 30368 "s63E6H2" 0.02459349 "Cell division protein FtsA"  
"OPBB05\_00096" 30369 "s59E13H2" 0.01562726 "Cell division protein FtsZ"  
"OPBB05\_00096" 30369 "s59E25H2" 0 "Cell division protein FtsZ"  
"OPBB05\_00096" 30369 "s59E5H2" 0.04856428 "Cell division protein FtsZ"  
"OPBB05\_00096" 30369 "s63E6H2" 0.02935398 "Cell division protein FtsZ"  
"OPBB05\_00097" 30370 "s59E13H2" 0.02501834 "hypothetical protein"  
"OPBB05\_00097" 30370 "s59E25H2" 0 "hypothetical protein"  
"OPBB05\_00097" 30370 "s59E5H2" 0.3806986 "hypothetical protein"  
"OPBB05\_00097" 30370 "s63E6H2" 0.01398583 "hypothetical protein"  
"OPBB05\_00098" 30371 "s59E13H2" 0.4909006 "Phosphoenolpyruvate carboxykinase [GTP]"  
"OPBB05\_00098" 30371 "s59E25H2" 0 "Phosphoenolpyruvate carboxykinase [GTP]"  
"OPBB05\_00098" 30371 "s59E5H2" 0.2761104 "Phosphoenolpyruvate carboxykinase [GTP]"  
"OPBB05\_00098" 30371 "s63E6H2" 0.01351927 "Phosphoenolpyruvate carboxykinase [GTP]"  
"OPBB05\_00099" 30372 "s59E13H2" 0.009853756 "Ribonuclease 3"  
"OPBB05\_00099" 30372 "s59E25H2" 0 "Ribonuclease 3"  
"OPBB05\_00099" 30372 "s59E5H2" 0 "Ribonuclease 3"  
"OPBB05\_00099" 30372 "s63E6H2" 0 "Ribonuclease 3"  
"OPBB05\_00100" 30373 "s59E13H2" 0.01102877 "Chromosome partition protein Smc"  
"OPBB05\_00100" 30373 "s59E25H2" 0 "Chromosome partition protein Smc"  
"OPBB05\_00100" 30373 "s59E5H2" 0.0273691 "Chromosome partition protein Smc"  
"OPBB05\_00100" 30373 "s63E6H2" 0.02657166 "Chromosome partition protein Smc"  
"OPBB05\_00101" 30374 "s59E13H2" 0 "Signal recognition particle receptor FtsY"  
"OPBB05\_00101" 30374 "s59E25H2" 0 "Signal recognition particle receptor FtsY"  
"OPBB05\_00101" 30374 "s59E5H2" 0.03184779 "Signal recognition particle receptor FtsY"  
"OPBB05\_00101" 30374 "s63E6H2" 0.0138229 "Signal recognition particle receptor FtsY"  
"OPBB05\_00102" 30375 "s59E13H2" 0.01390069 "Signal recognition particle protein"  
"OPBB05\_00102" 30375 "s59E25H2" 0 "Signal recognition particle protein"  
"OPBB05\_00102" 30375 "s59E5H2" 0.02887791 "Signal recognition particle protein"



"OPBB05\_00102" 30375 "s63E6H2" 0.033106 "Signal recognition particle protein"  
"OPBB05\_00103" 30376 "s59E13H2" 0.003760544 "30S ribosomal protein S16"  
"OPBB05\_00103" 30376 "s59E25H2" 0 "30S ribosomal protein S16"  
"OPBB05\_00103" 30376 "s59E5H2" 0.05502763 "30S ribosomal protein S16"  
"OPBB05\_00103" 30376 "s63E6H2" 0.03509183 "30S ribosomal protein S16"  
"OPBB05\_00104" 30377 "s59E13H2" 0.006955593 "hypothetical protein"  
"OPBB05\_00104" 30377 "s59E25H2" 0 "hypothetical protein"  
"OPBB05\_00104" 30377 "s59E5H2" 0.02459472 "hypothetical protein"  
"OPBB05\_00104" 30377 "s63E6H2" 0.02475882 "hypothetical protein"  
"OPBB05\_00105" 30378 "s59E13H2" 0.002982759 "Ribosome maturation factor RimM"  
"OPBB05\_00105" 30378 "s59E25H2" 0 "Ribosome maturation factor RimM"  
"OPBB05\_00105" 30378 "s59E5H2" 0.03598713 "Ribosome maturation factor RimM"  
"OPBB05\_00105" 30378 "s63E6H2" 0.01190664 "Ribosome maturation factor RimM"  
"OPBB05\_00106" 30379 "s59E13H2" 0.009769536 "tRNA (guanine-N(1)-)-methyltransferase"  
"OPBB05\_00106" 30379 "s59E25H2" 0 "tRNA (guanine-N(1)-)-methyltransferase"  
"OPBB05\_00106" 30379 "s59E5H2" 0.0163272 "tRNA (guanine-N(1)-)-methyltransferase"  
"OPBB05\_00106" 30379 "s63E6H2" 0.04612293 "tRNA (guanine-N(1)-)-methyltransferase"  
"OPBB05\_00107" 30380 "s59E13H2" 0.004413344 "50S ribosomal protein L19"  
"OPBB05\_00107" 30380 "s59E25H2" 0 "50S ribosomal protein L19"  
"OPBB05\_00107" 30380 "s59E5H2" 0.01592732 "50S ribosomal protein L19"  
"OPBB05\_00107" 30380 "s63E6H2" 0.02652135 "50S ribosomal protein L19"  
"OPBB05\_00108" 30381 "s59E13H2" 0.03589289 "Signal peptidase I"  
"OPBB05\_00108" 30381 "s59E25H2" 0 "Signal peptidase I"  
"OPBB05\_00108" 30381 "s59E5H2" 0.0182788 "Signal peptidase I"  
"OPBB05\_00108" 30381 "s63E6H2" 0.03567845 "Signal peptidase I"  
"OPBB05\_00109" 30382 "s59E13H2" 0.0303304 "Ribonuclease HII"  
"OPBB05\_00109" 30382 "s59E25H2" 0 "Ribonuclease HII"  
"OPBB05\_00109" 30382 "s59E5H2" 0.01696516 "Ribonuclease HII"  
"OPBB05\_00109" 30382 "s63E6H2" 0.04941371 "Ribonuclease HII"  
"OPBB05\_00110" 30383 "s59E13H2" 0.004111009 "hypothetical protein"  
"OPBB05\_00110" 30383 "s59E25H2" 0 "hypothetical protein"  
"OPBB05\_00110" 30383 "s59E5H2" 0.001952674 "hypothetical protein"  
"OPBB05\_00110" 30383 "s63E6H2" 0.001004701 "hypothetical protein"  
"OPBB05\_00113" 30386 "s59E13H2" 0 "Histidine kinase-, DNA gyrase B-, and HSP90-like ATPase"  
"OPBB05\_00113" 30386 "s59E25H2" 0 "Histidine kinase-, DNA gyrase B-, and HSP90-like ATPase"  
"OPBB05\_00113" 30386 "s59E5H2" 0 "Histidine kinase-, DNA gyrase B-, and HSP90-like ATPase"  
"OPBB05\_00113" 30386 "s63E6H2" 0 "Histidine kinase-, DNA gyrase B-, and HSP90-like ATPase"  
"OPBB05\_00118" 30391 "s59E13H2" 0 "putative methyltransferase YcgJ"  
"OPBB05\_00118" 30391 "s59E25H2" 0 "putative methyltransferase YcgJ"  
"OPBB05\_00118" 30391 "s59E5H2" 0.01219598 "putative methyltransferase YcgJ"  
"OPBB05\_00118" 30391 "s63E6H2" 0.001970657 "putative methyltransferase YcgJ"  
"OPBB05\_00119" 30392 "s59E13H2" 0.03649051 "Helix-turn-helix"  
"OPBB05\_00119" 30392 "s59E25H2" 0 "Helix-turn-helix"  
"OPBB05\_00119" 30392 "s59E5H2" 0.01762412 "Helix-turn-helix"  
"OPBB05\_00119" 30392 "s63E6H2" 0.06726365 "Helix-turn-helix"  
"OPBB05\_00120" 30393 "s59E13H2" 0.01832302 "hypothetical protein"  
"OPBB05\_00120" 30393 "s59E25H2" 0 "hypothetical protein"

"OPBB05\_00120" 30393 "s59E5H2" 0.07670465 "hypothetical protein"  
"OPBB05\_00120" 30393 "s63E6H2" 0 "hypothetical protein"  
"OPBB05\_00121" 30394 "s59E13H2" 0.01567684 "preprotein translocase subunit SecE"  
"OPBB05\_00121" 30394 "s59E25H2" 0 "preprotein translocase subunit SecE"  
"OPBB05\_00121" 30394 "s59E5H2" 0.02078427 "preprotein translocase subunit SecE"  
"OPBB05\_00121" 30394 "s63E6H2" 0.00397492 "preprotein translocase subunit SecE"  
"OPBB05\_00122" 30395 "s59E13H2" 0.100882 "Elongation factor Tu"  
"OPBB05\_00122" 30395 "s59E25H2" 0 "Elongation factor Tu"  
"OPBB05\_00122" 30395 "s59E5H2" 0.07356292 "Elongation factor Tu"  
"OPBB05\_00122" 30395 "s63E6H2" 0.008804662 "Elongation factor Tu"  
"OPBB05\_00127" 30400 "s59E13H2" 0.02037458 "Acyltransferase"  
"OPBB05\_00127" 30400 "s59E25H2" 0 "Acyltransferase"  
"OPBB05\_00127" 30400 "s59E5H2" 0.002626482 "Acyltransferase"  
"OPBB05\_00127" 30400 "s63E6H2" 0.4399391 "Acyltransferase"  
"OPBB05\_00128" 30401 "s59E13H2" 0.02081897 "SpoVT / AbrB like domain protein"  
"OPBB05\_00128" 30401 "s59E25H2" 0 "SpoVT / AbrB like domain protein"  
"OPBB05\_00128" 30401 "s59E5H2" 0.4274104 "SpoVT / AbrB like domain protein"  
"OPBB05\_00128" 30401 "s63E6H2" 0.7663456 "SpoVT / AbrB like domain protein"  
"OPBB05\_00129" 30402 "s59E13H2" 0.001601617 "hypothetical protein"  
"OPBB05\_00129" 30402 "s59E25H2" 0 "hypothetical protein"  
"OPBB05\_00129" 30402 "s59E5H2" 0.06690895 "hypothetical protein"  
"OPBB05\_00129" 30402 "s63E6H2" 0.1290782 "hypothetical protein"  
"OPBB05\_00130" 30403 "s59E13H2" 0.002600705 "putative type I restriction enzymeP M protein"  
"OPBB05\_00130" 30403 "s59E25H2" 0 "putative type I restriction enzymeP M protein"  
"OPBB05\_00130" 30403 "s59E5H2" 0.0005261414 "putative type I restriction enzymeP M protein"  
"OPBB05\_00130" 30403 "s63E6H2" 0 "putative type I restriction enzymeP M protein"  
"OPBB05\_00131" 30404 "s59E13H2" 0 "Type-1 restriction enzyme EcoKI specificity protein"  
"OPBB05\_00131" 30404 "s59E25H2" 0 "Type-1 restriction enzyme EcoKI specificity protein"  
"OPBB05\_00131" 30404 "s59E5H2" 0 "Type-1 restriction enzyme EcoKI specificity protein"  
"OPBB05\_00131" 30404 "s63E6H2" 0 "Type-1 restriction enzyme EcoKI specificity protein"  
"OPBB05\_00132" 30405 "s59E13H2" 0 "type I restriction enzyme EcoKI subunit R"  
"OPBB05\_00132" 30405 "s59E25H2" 0 "type I restriction enzyme EcoKI subunit R"  
"OPBB05\_00132" 30405 "s59E5H2" 0 "type I restriction enzyme EcoKI subunit R"  
"OPBB05\_00132" 30405 "s63E6H2" 0 "type I restriction enzyme EcoKI subunit R"  
"OPBB05\_00133" 30406 "s59E13H2" 0 "Very short patch repair protein"  
"OPBB05\_00133" 30406 "s59E25H2" 0 "Very short patch repair protein"  
"OPBB05\_00133" 30406 "s59E5H2" 0 "Very short patch repair protein"  
"OPBB05\_00133" 30406 "s63E6H2" 0 "Very short patch repair protein"  
"OPBB05\_00134" 30407 "s59E13H2" 0 "DNA mismatch repair protein MutL"  
"OPBB05\_00134" 30407 "s59E25H2" 0 "DNA mismatch repair protein MutL"  
"OPBB05\_00134" 30407 "s59E5H2" 0 "DNA mismatch repair protein MutL"  
"OPBB05\_00134" 30407 "s63E6H2" 0 "DNA mismatch repair protein MutL"  
"OPBB05\_00135" 30408 "s59E13H2" 0 "putative BsuMI modification methylase subunit YdiO"  
"OPBB05\_00135" 30408 "s59E25H2" 0 "putative BsuMI modification methylase subunit YdiO"  
"OPBB05\_00135" 30408 "s59E5H2" 0 "putative BsuMI modification methylase subunit YdiO"  
"OPBB05\_00135" 30408 "s63E6H2" 0 "putative BsuMI modification methylase subunit YdiO"  
"OPBB05\_00136" 30409 "s59E13H2" 0.02697635 "Chaperone protein ClpB 1"

"OPBB05\_00136" 30409 "s59E25H2" 0 "Chaperone protein ClpB 1"  
"OPBB05\_00136" 30409 "s59E5H2" 0.1534436 "Chaperone protein ClpB 1"  
"OPBB05\_00136" 30409 "s63E6H2" 0.2277277 "Chaperone protein ClpB 1"  
"OPBB05\_00137" 30410 "s59E13H2" 0.006192174 "Curved DNA-binding protein"  
"OPBB05\_00137" 30410 "s59E25H2" 0 "Curved DNA-binding protein"  
"OPBB05\_00137" 30410 "s59E5H2" 0.06369366 "Curved DNA-binding protein"  
"OPBB05\_00137" 30410 "s63E6H2" 1.301481 "Curved DNA-binding protein"  
"OPBB05\_00138" 30411 "s59E13H2" 0.04143925 "Chaperone protein dnaK2"  
"OPBB05\_00138" 30411 "s59E25H2" 0 "Chaperone protein dnaK2"  
"OPBB05\_00138" 30411 "s59E5H2" 0.06532375 "Chaperone protein dnaK2"  
"OPBB05\_00138" 30411 "s63E6H2" 0.8721491 "Chaperone protein dnaK2"  
"OPBB05\_00139" 30412 "s59E13H2" 0.1336419 "Competence protein ComM"  
"OPBB05\_00139" 30412 "s59E25H2" 0 "Competence protein ComM"  
"OPBB05\_00139" 30412 "s59E5H2" 0.03004155 "Competence protein ComM"  
"OPBB05\_00139" 30412 "s63E6H2" 0.07733879 "Competence protein ComM"  
"OPBB05\_00140" 30413 "s59E13H2" 0.09877678 "hypothetical protein"  
"OPBB05\_00140" 30413 "s59E25H2" 0 "hypothetical protein"  
"OPBB05\_00140" 30413 "s59E5H2" 0.008363195 "hypothetical protein"  
"OPBB05\_00140" 30413 "s63E6H2" 0.0928137 "hypothetical protein"  
"OPBB05\_00142" 30415 "s59E13H2" 0.04733604 "Tyrosine recombinase XerC"  
"OPBB05\_00142" 30415 "s59E25H2" 0 "Tyrosine recombinase XerC"  
"OPBB05\_00142" 30415 "s59E5H2" 0.01330602 "Tyrosine recombinase XerC"  
"OPBB05\_00142" 30415 "s63E6H2" 0.02514766 "Tyrosine recombinase XerC"  
"OPBB05\_00143" 30416 "s59E13H2" 0.008806891 "30S ribosomal protein S2"  
"OPBB05\_00143" 30416 "s59E25H2" 0 "30S ribosomal protein S2"  
"OPBB05\_00143" 30416 "s59E5H2" 0.03386177 "30S ribosomal protein S2"  
"OPBB05\_00143" 30416 "s63E6H2" 0.2048158 "30S ribosomal protein S2"  
"OPBB05\_00144" 30417 "s59E13H2" 0.0007107054 "Elongation factor Ts"  
"OPBB05\_00144" 30417 "s59E25H2" 0 "Elongation factor Ts"  
"OPBB05\_00144" 30417 "s59E5H2" 0.009450055 "Elongation factor Ts"  
"OPBB05\_00144" 30417 "s63E6H2" 0.02117059 "Elongation factor Ts"  
"OPBB05\_00145" 30418 "s59E13H2" 0.005216694 "Uridylate kinase"  
"OPBB05\_00145" 30418 "s59E25H2" 0 "Uridylate kinase"  
"OPBB05\_00145" 30418 "s59E5H2" 0.02355204 "Uridylate kinase"  
"OPBB05\_00145" 30418 "s63E6H2" 0.005513578 "Uridylate kinase"  
"OPBB05\_00146" 30419 "s59E13H2" 0 "Ribosome-recycling factor"  
"OPBB05\_00146" 30419 "s59E25H2" 0 "Ribosome-recycling factor"  
"OPBB05\_00146" 30419 "s59E5H2" 0.01258866 "Ribosome-recycling factor"  
"OPBB05\_00146" 30419 "s63E6H2" 0.006378648 "Ribosome-recycling factor"  
"OPBB05\_00147" 30420 "s59E13H2" 0 "Transposase DDE domain protein"  
"OPBB05\_00147" 30420 "s59E25H2" 0 "Transposase DDE domain protein"  
"OPBB05\_00147" 30420 "s59E5H2" 5.469545e-05 "Transposase DDE domain protein"  
"OPBB05\_00147" 30420 "s63E6H2" 0.0002379209 "Transposase DDE domain protein"  
"OPBB05\_00149" 30422 "s59E13H2" 0.002255134 "Radical SAM superfamily protein"  
"OPBB05\_00149" 30422 "s59E25H2" 0 "Radical SAM superfamily protein"  
"OPBB05\_00149" 30422 "s59E5H2" 0.01057562 "Radical SAM superfamily protein"  
"OPBB05\_00149" 30422 "s63E6H2" 0.01021131 "Radical SAM superfamily protein"

"OPBB05\_00150" 30423 "s59E13H2" 0.02061747 "Carboxymuconolactone decarboxylase family protein"  
"OPBB05\_00150" 30423 "s59E25H2" 0 "Carboxymuconolactone decarboxylase family protein"  
"OPBB05\_00150" 30423 "s59E5H2" 0 "Carboxymuconolactone decarboxylase family protein"  
"OPBB05\_00150" 30423 "s63E6H2" 0.08001129 "Carboxymuconolactone decarboxylase family protein"  
"OPBB05\_00151" 30424 "s59E13H2" 0 "Glyoxalase-like domain protein"  
"OPBB05\_00151" 30424 "s59E25H2" 0 "Glyoxalase-like domain protein"  
"OPBB05\_00151" 30424 "s59E5H2" 0.004136787 "Glyoxalase-like domain protein"  
"OPBB05\_00151" 30424 "s63E6H2" 0 "Glyoxalase-like domain protein"  
"OPBB05\_00152" 30425 "s59E13H2" 0.005427775 "hypothetical protein"  
"OPBB05\_00152" 30425 "s59E25H2" 0 "hypothetical protein"  
"OPBB05\_00152" 30425 "s59E5H2" 0.01318179 "hypothetical protein"  
"OPBB05\_00152" 30425 "s63E6H2" 0.004919656 "hypothetical protein"  
"OPBB05\_00155" 30428 "s59E13H2" 0.008247055 "Multidrug export protein MepA"  
"OPBB05\_00155" 30428 "s59E25H2" 0 "Multidrug export protein MepA"  
"OPBB05\_00155" 30428 "s59E5H2" 0.3274936 "Multidrug export protein MepA"  
"OPBB05\_00155" 30428 "s63E6H2" 0.007230266 "Multidrug export protein MepA"  
"OPBB05\_00156" 30429 "s59E13H2" 0.006152441 "Double zinc ribbon"  
"OPBB05\_00156" 30429 "s59E25H2" 0 "Double zinc ribbon"  
"OPBB05\_00156" 30429 "s59E5H2" 0.1169788 "Double zinc ribbon"  
"OPBB05\_00156" 30429 "s63E6H2" 0.003893924 "Double zinc ribbon"  
"OPBB05\_00157" 30430 "s59E13H2" 0.008409684 "L-2-hydroxyglutarate oxidase LhgO"  
"OPBB05\_00157" 30430 "s59E25H2" 0 "L-2-hydroxyglutarate oxidase LhgO"  
"OPBB05\_00157" 30430 "s59E5H2" 0.04743433 "L-2-hydroxyglutarate oxidase LhgO"  
"OPBB05\_00157" 30430 "s63E6H2" 0.00650459 "L-2-hydroxyglutarate oxidase LhgO"  
"OPBB05\_00158" 30431 "s59E13H2" 0 "hypothetical protein"  
"OPBB05\_00158" 30431 "s59E25H2" 0 "hypothetical protein"  
"OPBB05\_00158" 30431 "s59E5H2" 0 "hypothetical protein"  
"OPBB05\_00158" 30431 "s63E6H2" 0 "hypothetical protein"  
"OPBB05\_00159" 30432 "s59E13H2" 0 "Desulfoferrodoxin"  
"OPBB05\_00159" 30432 "s59E25H2" 0 "Desulfoferrodoxin"  
"OPBB05\_00159" 30432 "s59E5H2" 0 "Desulfoferrodoxin"  
"OPBB05\_00159" 30432 "s63E6H2" 0 "Desulfoferrodoxin"  
"OPBB05\_00160" 30433 "s59E13H2" 0 "Type A flavoprotein FprA"  
"OPBB05\_00160" 30433 "s59E25H2" 0 "Type A flavoprotein FprA"  
"OPBB05\_00160" 30433 "s59E5H2" 0 "Type A flavoprotein FprA"  
"OPBB05\_00160" 30433 "s63E6H2" 0.002091799 "Type A flavoprotein FprA"  
"OPBB05\_00161" 30434 "s59E13H2" 0 "NADP-reducing hydrogenase subunit HndC"  
"OPBB05\_00161" 30434 "s59E25H2" 0 "NADP-reducing hydrogenase subunit HndC"  
"OPBB05\_00161" 30434 "s59E5H2" 0 "NADP-reducing hydrogenase subunit HndC"  
"OPBB05\_00161" 30434 "s63E6H2" 0.00285114 "NADP-reducing hydrogenase subunit HndC"  
"OPBB05\_00162" 30435 "s59E13H2" 0.01859017 "Phosphoribosylformylglycinamide synthase"  
"OPBB05\_00162" 30435 "s59E25H2" 0 "Phosphoribosylformylglycinamide synthase"  
"OPBB05\_00162" 30435 "s59E5H2" 0.1302207 "Phosphoribosylformylglycinamide synthase"  
"OPBB05\_00162" 30435 "s63E6H2" 0.06143651 "Phosphoribosylformylglycinamide synthase"  
"OPBB05\_00163" 30436 "s59E13H2" 0.01971471 "Amidophosphoribosyltransferase precursor"  
"OPBB05\_00163" 30436 "s59E25H2" 0 "Amidophosphoribosyltransferase precursor"  
"OPBB05\_00163" 30436 "s59E5H2" 0.1699155 "Amidophosphoribosyltransferase precursor"

"OPBB05\_00163" 30436 "s63E6H2" 0.1344744 "Amidophosphoribosyltransferase precursor"  
"OPBB05\_00164" 30437 "s59E13H2" 0.0351036 "Phosphoribosylformylglycinamide cyclo-ligase"  
"OPBB05\_00164" 30437 "s59E25H2" 0 "Phosphoribosylformylglycinamide cyclo-ligase"  
"OPBB05\_00164" 30437 "s59E5H2" 0.1508997 "Phosphoribosylformylglycinamide cyclo-ligase"  
"OPBB05\_00164" 30437 "s63E6H2" 0.1361066 "Phosphoribosylformylglycinamide cyclo-ligase"  
"OPBB05\_00165" 30438 "s59E13H2" 0.03133975 "Phosphoribosylglycinamide formyltransferase"  
"OPBB05\_00165" 30438 "s59E25H2" 0 "Phosphoribosylglycinamide formyltransferase"  
"OPBB05\_00165" 30438 "s59E5H2" 0.2002347 "Phosphoribosylglycinamide formyltransferase"  
"OPBB05\_00165" 30438 "s63E6H2" 0.1293356 "Phosphoribosylglycinamide formyltransferase"  
"OPBB05\_00166" 30439 "s59E13H2" 0.0493818 "Bifunctional purine biosynthesis protein PurH"  
"OPBB05\_00166" 30439 "s59E25H2" 0 "Bifunctional purine biosynthesis protein PurH"  
"OPBB05\_00166" 30439 "s59E5H2" 0.6219621 "Bifunctional purine biosynthesis protein PurH"  
"OPBB05\_00166" 30439 "s63E6H2" 0.4697837 "Bifunctional purine biosynthesis protein PurH"  
"OPBB05\_00167" 30440 "s59E13H2" 0.03715035 "Lon protease 2"  
"OPBB05\_00167" 30440 "s59E25H2" 0 "Lon protease 2"  
"OPBB05\_00167" 30440 "s59E5H2" 0.7780178 "Lon protease 2"  
"OPBB05\_00167" 30440 "s63E6H2" 1.051402 "Lon protease 2"  
"OPBB05\_00168" 30441 "s59E13H2" 0.004466894 "RNA recognition motif. (a.k.a. RRM, RBD, or RNP domain)"  
"OPBB05\_00168" 30441 "s59E25H2" 0 "RNA recognition motif. (a.k.a. RRM, RBD, or RNP domain)"  
"OPBB05\_00168" 30441 "s59E5H2" 0.02414408 "RNA recognition motif. (a.k.a. RRM, RBD, or RNP domain)"  
"OPBB05\_00168" 30441 "s63E6H2" 0.3594217 "RNA recognition motif. (a.k.a. RRM, RBD, or RNP domain)"  
"OPBB05\_00169" 30442 "s59E13H2" 0.002537851 "PBS lyase HEAT-like repeat protein"  
"OPBB05\_00169" 30442 "s59E25H2" 0 "PBS lyase HEAT-like repeat protein"  
"OPBB05\_00169" 30442 "s59E5H2" 0 "PBS lyase HEAT-like repeat protein"  
"OPBB05\_00169" 30442 "s63E6H2" 0 "PBS lyase HEAT-like repeat protein"  
"OPBB05\_00170" 30443 "s59E13H2" 0.1156637 "DNA polymerase III subunit delta"  
"OPBB05\_00170" 30443 "s59E25H2" 0 "DNA polymerase III subunit delta"  
"OPBB05\_00170" 30443 "s59E5H2" 0.2631893 "DNA polymerase III subunit delta"  
"OPBB05\_00170" 30443 "s63E6H2" 0.07746382 "DNA polymerase III subunit delta"  
"OPBB05\_00171" 30444 "s59E13H2" 0.1639459 "30S ribosomal protein S20"  
"OPBB05\_00171" 30444 "s59E25H2" 0 "30S ribosomal protein S20"  
"OPBB05\_00171" 30444 "s59E5H2" 0.2719968 "30S ribosomal protein S20"  
"OPBB05\_00171" 30444 "s63E6H2" 0.03397647 "30S ribosomal protein S20"  
"OPBB05\_00172" 30445 "s59E13H2" 0.07080098 "putative peptidoglycan biosynthesis protein MurJ"  
"OPBB05\_00172" 30445 "s59E25H2" 0 "putative peptidoglycan biosynthesis protein MurJ"  
"OPBB05\_00172" 30445 "s59E5H2" 0.200765 "putative peptidoglycan biosynthesis protein MurJ"  
"OPBB05\_00172" 30445 "s63E6H2" 0.01729964 "putative peptidoglycan biosynthesis protein MurJ"  
"OPBB05\_00173" 30446 "s59E13H2" 0.101273 "Elongation factor 4"  
"OPBB05\_00173" 30446 "s59E25H2" 0 "Elongation factor 4"  
"OPBB05\_00173" 30446 "s59E5H2" 0.3452646 "Elongation factor 4"  
"OPBB05\_00173" 30446 "s63E6H2" 0.02338879 "Elongation factor 4"  
"OPBB05\_00174" 30447 "s59E13H2" 0.01527972 "Carbon monoxide dehydrogenase/acetyl-CoA synthase subunit alpha"  
"OPBB05\_00174" 30447 "s59E25H2" 0 "Carbon monoxide dehydrogenase/acetyl-CoA synthase subunit alpha"  
"OPBB05\_00174" 30447 "s59E5H2" 0.03418864 "Carbon monoxide dehydrogenase/acetyl-CoA synthase subunit alpha"  
"OPBB05\_00174" 30447 "s63E6H2" 0.01147343 "Carbon monoxide dehydrogenase/acetyl-CoA synthase subunit alpha"  
"OPBB05\_00175" 30448 "s59E13H2" 0.07537526 "Carbon monoxide dehydrogenase 2"  
"OPBB05\_00175" 30448 "s59E25H2" 0 "Carbon monoxide dehydrogenase 2"

"OPBB05\_00175" 30448 "s59E5H2" 0.005989678 "Carbon monoxide dehydrogenase 2"  
"OPBB05\_00175" 30448 "s63E6H2" 0.03211659 "Carbon monoxide dehydrogenase 2"  
"OPBB05\_00176" 30449 "s59E13H2" 0.03621782 "Corrinoid/iron-sulfur protein small subunit"  
"OPBB05\_00176" 30449 "s59E25H2" 0 "Corrinoid/iron-sulfur protein small subunit"  
"OPBB05\_00176" 30449 "s59E5H2" 0 "Corrinoid/iron-sulfur protein small subunit"  
"OPBB05\_00176" 30449 "s63E6H2" 0.02547235 "Corrinoid/iron-sulfur protein small subunit"  
"OPBB05\_00177" 30450 "s59E13H2" 0.02140961 "Septum site-determining protein MinD"  
"OPBB05\_00177" 30450 "s59E25H2" 0 "Septum site-determining protein MinD"  
"OPBB05\_00177" 30450 "s59E5H2" 0 "Septum site-determining protein MinD"  
"OPBB05\_00177" 30450 "s63E6H2" 0.02710752 "Septum site-determining protein MinD"  
"OPBB05\_00178" 30451 "s59E13H2" 0.04108952 "Ferredoxin"  
"OPBB05\_00178" 30451 "s59E25H2" 0 "Ferredoxin"  
"OPBB05\_00178" 30451 "s59E5H2" 0.10365 "Ferredoxin"  
"OPBB05\_00178" 30451 "s63E6H2" 0.03215394 "Ferredoxin"  
"OPBB05\_00179" 30452 "s59E13H2" 0.002917856 "UvrABC system protein B"  
"OPBB05\_00179" 30452 "s59E25H2" 0 "UvrABC system protein B"  
"OPBB05\_00179" 30452 "s59E5H2" 0.02932639 "UvrABC system protein B"  
"OPBB05\_00179" 30452 "s63E6H2" 0.04072016 "UvrABC system protein B"  
"OPBB05\_00180" 30453 "s59E13H2" 0.001812185 "UvrABC system protein A"  
"OPBB05\_00180" 30453 "s59E25H2" 0 "UvrABC system protein A"  
"OPBB05\_00180" 30453 "s59E5H2" 0.04172926 "UvrABC system protein A"  
"OPBB05\_00180" 30453 "s63E6H2" 0.0200462 "UvrABC system protein A"  
"OPBB05\_00181" 30454 "s59E13H2" 0.002764544 "UvrABC system protein C"  
"OPBB05\_00181" 30454 "s59E25H2" 0 "UvrABC system protein C"  
"OPBB05\_00181" 30454 "s59E5H2" 0.03320527 "UvrABC system protein C"  
"OPBB05\_00181" 30454 "s63E6H2" 0.008753275 "UvrABC system protein C"  
"OPBB05\_00182" 30455 "s59E13H2" 0 "Phosphoglycerate kinase"  
"OPBB05\_00182" 30455 "s59E25H2" 0 "Phosphoglycerate kinase"  
"OPBB05\_00182" 30455 "s59E5H2" 0.02717849 "Phosphoglycerate kinase"  
"OPBB05\_00182" 30455 "s63E6H2" 0.008065985 "Phosphoglycerate kinase"  
"OPBB05\_00183" 30456 "s59E13H2" 0.02071587 "Glyceraldehyde-3-phosphate dehydrogenase"  
"OPBB05\_00183" 30456 "s59E25H2" 0 "Glyceraldehyde-3-phosphate dehydrogenase"  
"OPBB05\_00183" 30456 "s59E5H2" 0.03421411 "Glyceraldehyde-3-phosphate dehydrogenase"  
"OPBB05\_00183" 30456 "s63E6H2" 0.01224251 "Glyceraldehyde-3-phosphate dehydrogenase"  
"OPBB05\_00184" 30457 "s59E13H2" 0.008894164 "glmZ(sRNA)-inactivating NTPase"  
"OPBB05\_00184" 30457 "s59E25H2" 0 "glmZ(sRNA)-inactivating NTPase"  
"OPBB05\_00184" 30457 "s59E5H2" 0.008964347 "glmZ(sRNA)-inactivating NTPase"  
"OPBB05\_00184" 30457 "s63E6H2" 0.0005557433 "glmZ(sRNA)-inactivating NTPase"  
"OPBB05\_00185" 30458 "s59E13H2" 0 "Membrane protein of unknown function"  
"OPBB05\_00185" 30458 "s59E25H2" 0 "Membrane protein of unknown function"  
"OPBB05\_00185" 30458 "s59E5H2" 0 "Membrane protein of unknown function"  
"OPBB05\_00185" 30458 "s63E6H2" 0.01392521 "Membrane protein of unknown function"  
"OPBB05\_00188" 30461 "s59E13H2" 0 "hypothetical protein"  
"OPBB05\_00188" 30461 "s59E25H2" 0 "hypothetical protein"  
"OPBB05\_00188" 30461 "s59E5H2" 0 "hypothetical protein"  
"OPBB05\_00188" 30461 "s63E6H2" 0.01128512 "hypothetical protein"  
"OPBB05\_00189" 30462 "s59E13H2" 0 "hypothetical protein"

"OPBB05\_00189" 30462 "s59E25H2" 0 "hypothetical protein"  
"OPBB05\_00189" 30462 "s59E5H2" 0 "hypothetical protein"  
"OPBB05\_00189" 30462 "s63E6H2" 0.003151534 "hypothetical protein"  
"OPBB05\_00190" 30463 "s59E13H2" 0 "hypothetical protein"  
"OPBB05\_00190" 30463 "s59E25H2" 0 "hypothetical protein"  
"OPBB05\_00190" 30463 "s59E5H2" 0 "hypothetical protein"  
"OPBB05\_00190" 30463 "s63E6H2" 0 "hypothetical protein"  
"OPBB05\_00191" 30464 "s59E13H2" 0 "D-inositol 3-phosphate glycosyltransferase"  
"OPBB05\_00191" 30464 "s59E25H2" 0 "D-inositol 3-phosphate glycosyltransferase"  
"OPBB05\_00191" 30464 "s59E5H2" 0.163729 "D-inositol 3-phosphate glycosyltransferase"  
"OPBB05\_00191" 30464 "s63E6H2" 0.1058568 "D-inositol 3-phosphate glycosyltransferase"  
"OPBB05\_00192" 30465 "s59E13H2" 0 "Mannosylfructose-phosphate synthase"  
"OPBB05\_00192" 30465 "s59E25H2" 0 "Mannosylfructose-phosphate synthase"  
"OPBB05\_00192" 30465 "s59E5H2" 0.1191311 "Mannosylfructose-phosphate synthase"  
"OPBB05\_00192" 30465 "s63E6H2" 0.1106121 "Mannosylfructose-phosphate synthase"  
"OPBB05\_00193" 30466 "s59E13H2" 0 "N-acetylglucosaminyl-diphospho-decaprenol L-rhamnosyltransferase"  
"OPBB05\_00193" 30466 "s59E25H2" 0 "N-acetylglucosaminyl-diphospho-decaprenol L-rhamnosyltransferase"  
"OPBB05\_00193" 30466 "s59E5H2" 0.1213077 "N-acetylglucosaminyl-diphospho-decaprenol L-rhamnosyltransferase"  
"OPBB05\_00193" 30466 "s63E6H2" 0.002598203 "N-acetylglucosaminyl-diphospho-decaprenol L-rhamnosyltransferase"  
"OPBB05\_00194" 30467 "s59E13H2" 0 "Teichoic acids export ATP-binding protein TagH"  
"OPBB05\_00194" 30467 "s59E25H2" 0 "Teichoic acids export ATP-binding protein TagH"  
"OPBB05\_00194" 30467 "s59E5H2" 0.04413397 "Teichoic acids export ATP-binding protein TagH"  
"OPBB05\_00194" 30467 "s63E6H2" 0.003110547 "Teichoic acids export ATP-binding protein TagH"  
"OPBB05\_00195" 30468 "s59E13H2" 0 "Teichoic acid translocation permease protein TagG"  
"OPBB05\_00195" 30468 "s59E25H2" 0 "Teichoic acid translocation permease protein TagG"  
"OPBB05\_00195" 30468 "s59E5H2" 0.03299444 "Teichoic acid translocation permease protein TagG"  
"OPBB05\_00195" 30468 "s63E6H2" 0.01922432 "Teichoic acid translocation permease protein TagG"  
"OPBB05\_00196" 30469 "s59E13H2" 0 "bifunctional 3-demethylubiquinone-9 3-methyltransferase/ 2-octaprenyl-6-hydroxy phenol methylase"  
"OPBB05\_00196" 30469 "s59E25H2" 0 "bifunctional 3-demethylubiquinone-9 3-methyltransferase/ 2-octaprenyl-6-hydroxy phenol methylase"  
"OPBB05\_00196" 30469 "s59E5H2" 0.05690383 "bifunctional 3-demethylubiquinone-9 3-methyltransferase/ 2-octaprenyl-6-hydroxy phenol methylase"  
"OPBB05\_00196" 30469 "s63E6H2" 0.002606282 "bifunctional 3-demethylubiquinone-9 3-methyltransferase/ 2-octaprenyl-6-hydroxy phenol methylase"  
"OPBB05\_00197" 30470 "s59E13H2" 0 "N-acetylmuramoyl-L-alanine amidase LytC precursor"  
"OPBB05\_00197" 30470 "s59E25H2" 72.37094 "N-acetylmuramoyl-L-alanine amidase LytC precursor"  
"OPBB05\_00197" 30470 "s59E5H2" 0.03163406 "N-acetylmuramoyl-L-alanine amidase LytC precursor"  
"OPBB05\_00197" 30470 "s63E6H2" 0.005434298 "N-acetylmuramoyl-L-alanine amidase LytC precursor"  
"OPBB05\_00198" 30471 "s59E13H2" 0 "Sporulation and spore germination"  
"OPBB05\_00198" 30471 "s59E25H2" 0 "Sporulation and spore germination"  
"OPBB05\_00198" 30471 "s59E5H2" 0.01011271 "Sporulation and spore germination"  
"OPBB05\_00198" 30471 "s63E6H2" 0.004195803 "Sporulation and spore germination"  
"OPBB05\_00199" 30472 "s59E13H2" 0 "UDP-glucose:undecaprenyl-phosphate glucose-1-phosphate transferase"  
"OPBB05\_00199" 30472 "s59E25H2" 0 "UDP-glucose:undecaprenyl-phosphate glucose-1-phosphate transferase"  
"OPBB05\_00199" 30472 "s59E5H2" 0 "UDP-glucose:undecaprenyl-phosphate glucose-1-phosphate transferase"  
"OPBB05\_00199" 30472 "s63E6H2" 0 "UDP-glucose:undecaprenyl-phosphate glucose-1-phosphate transferase"  
"OPBB05\_00200" 30473 "s59E13H2" 0.01657771 "Dihydroxy-acid dehydratase"  
"OPBB05\_00200" 30473 "s59E25H2" 0 "Dihydroxy-acid dehydratase"  
"OPBB05\_00200" 30473 "s59E5H2" 0.6955508 "Dihydroxy-acid dehydratase"  
"OPBB05\_00200" 30473 "s63E6H2" 0.01541259 "Dihydroxy-acid dehydratase"

"OPBB05\_00201" 30474 "s59E13H2" 0.008171804 "Acetolactate synthase large subunit llvB1"  
"OPBB05\_00201" 30474 "s59E25H2" 0 "Acetolactate synthase large subunit llvB1"  
"OPBB05\_00201" 30474 "s59E5H2" 0.3592463 "Acetolactate synthase large subunit llvB1"  
"OPBB05\_00201" 30474 "s63E6H2" 0.04830369 "Acetolactate synthase large subunit llvB1"  
"OPBB05\_00202" 30475 "s59E13H2" 0.007099601 "Putative acetolactate synthase small subunit"  
"OPBB05\_00202" 30475 "s59E25H2" 0 "Putative acetolactate synthase small subunit"  
"OPBB05\_00202" 30475 "s59E5H2" 0.01416429 "Putative acetolactate synthase small subunit"  
"OPBB05\_00202" 30475 "s63E6H2" 0.2417619 "Putative acetolactate synthase small subunit"  
"OPBB05\_00203" 30476 "s59E13H2" 0.005224032 "Soluble hydrogenase 42 kDa subunit"  
"OPBB05\_00203" 30476 "s59E25H2" 0 "Soluble hydrogenase 42 kDa subunit"  
"OPBB05\_00203" 30476 "s59E5H2" 0.03492705 "Soluble hydrogenase 42 kDa subunit"  
"OPBB05\_00203" 30476 "s63E6H2" 0.2625022 "Soluble hydrogenase 42 kDa subunit"  
"OPBB05\_00204" 30477 "s59E13H2" 0.006661 "D-3-phosphoglycerate dehydrogenase"  
"OPBB05\_00204" 30477 "s59E25H2" 0 "D-3-phosphoglycerate dehydrogenase"  
"OPBB05\_00204" 30477 "s59E5H2" 0.0519999 "D-3-phosphoglycerate dehydrogenase"  
"OPBB05\_00204" 30477 "s63E6H2" 0.3395073 "D-3-phosphoglycerate dehydrogenase"  
"OPBB05\_00205" 30478 "s59E13H2" 0.01350636 "2-isopropylmalate synthase"  
"OPBB05\_00205" 30478 "s59E25H2" 0 "2-isopropylmalate synthase"  
"OPBB05\_00205" 30478 "s59E5H2" 0.02780226 "2-isopropylmalate synthase"  
"OPBB05\_00205" 30478 "s63E6H2" 0.5363606 "2-isopropylmalate synthase"  
"OPBB05\_00206" 30479 "s59E13H2" 0.0008674775 "50S ribosomal protein L15"  
"OPBB05\_00206" 30479 "s59E25H2" 0 "50S ribosomal protein L15"  
"OPBB05\_00206" 30479 "s59E5H2" 0.01334435 "50S ribosomal protein L15"  
"OPBB05\_00206" 30479 "s63E6H2" 0.02153254 "50S ribosomal protein L15"  
"OPBB05\_00207" 30480 "s59E13H2" 0.005414618 "30S ribosomal protein S5"  
"OPBB05\_00207" 30480 "s59E25H2" 0 "30S ribosomal protein S5"  
"OPBB05\_00207" 30480 "s59E5H2" 0.001515731 "30S ribosomal protein S5"  
"OPBB05\_00207" 30480 "s63E6H2" 0.01500052 "30S ribosomal protein S5"  
"OPBB05\_00208" 30481 "s59E13H2" 0.002701759 "50S ribosomal protein L18"  
"OPBB05\_00208" 30481 "s59E25H2" 0 "50S ribosomal protein L18"  
"OPBB05\_00208" 30481 "s59E5H2" 0.01808747 "50S ribosomal protein L18"  
"OPBB05\_00208" 30481 "s63E6H2" 0.009445508 "50S ribosomal protein L18"  
"OPBB05\_00209" 30482 "s59E13H2" 0.01360877 "50S ribosomal protein L6"  
"OPBB05\_00209" 30482 "s59E25H2" 0 "50S ribosomal protein L6"  
"OPBB05\_00209" 30482 "s59E5H2" 0.02907539 "50S ribosomal protein L6"  
"OPBB05\_00209" 30482 "s63E6H2" 0.01294052 "50S ribosomal protein L6"  
"OPBB05\_00210" 30483 "s59E13H2" 0.009016509 "30S ribosomal protein S8"  
"OPBB05\_00210" 30483 "s59E25H2" 0 "30S ribosomal protein S8"  
"OPBB05\_00210" 30483 "s59E5H2" 0.02838054 "30S ribosomal protein S8"  
"OPBB05\_00210" 30483 "s63E6H2" 0.01834294 "30S ribosomal protein S8"  
"OPBB05\_00211" 30484 "s59E13H2" 0.008900167 "30S ribosomal protein S14 type Z"  
"OPBB05\_00211" 30484 "s59E25H2" 0 "30S ribosomal protein S14 type Z"  
"OPBB05\_00211" 30484 "s59E5H2" 0.01856505 "30S ribosomal protein S14 type Z"  
"OPBB05\_00211" 30484 "s63E6H2" 0.008105719 "30S ribosomal protein S14 type Z"  
"OPBB05\_00212" 30485 "s59E13H2" 0.00175491 "50S ribosomal protein L5"  
"OPBB05\_00212" 30485 "s59E25H2" 0 "50S ribosomal protein L5"  
"OPBB05\_00212" 30485 "s59E5H2" 0.01594303 "50S ribosomal protein L5"



"OPBB05\_00212" 30485 "s63E6H2" 0.0126176 "50S ribosomal protein L5"  
"OPBB05\_00213" 30486 "s59E13H2" 0 "50S ribosomal protein L24"  
"OPBB05\_00213" 30486 "s59E25H2" 0 "50S ribosomal protein L24"  
"OPBB05\_00213" 30486 "s59E5H2" 0.004520579 "50S ribosomal protein L24"  
"OPBB05\_00213" 30486 "s63E6H2" 0.008748721 "50S ribosomal protein L24"  
"OPBB05\_00214" 30487 "s59E13H2" 0.006409082 "50S ribosomal protein L14"  
"OPBB05\_00214" 30487 "s59E25H2" 0 "50S ribosomal protein L14"  
"OPBB05\_00214" 30487 "s59E5H2" 0.03562721 "50S ribosomal protein L14"  
"OPBB05\_00214" 30487 "s63E6H2" 0.006151662 "50S ribosomal protein L14"  
"OPBB05\_00215" 30488 "s59E13H2" 0.001738898 "30S ribosomal protein S17"  
"OPBB05\_00215" 30488 "s59E25H2" 0 "30S ribosomal protein S17"  
"OPBB05\_00215" 30488 "s59E5H2" 0.01869753 "30S ribosomal protein S17"  
"OPBB05\_00215" 30488 "s63E6H2" 0.01661672 "30S ribosomal protein S17"  
"OPBB05\_00216" 30489 "s59E13H2" 0 "50S ribosomal protein L29"  
"OPBB05\_00216" 30489 "s59E25H2" 0 "50S ribosomal protein L29"  
"OPBB05\_00216" 30489 "s59E5H2" 0 "50S ribosomal protein L29"  
"OPBB05\_00216" 30489 "s63E6H2" 0.02876321 "50S ribosomal protein L29"  
"OPBB05\_00217" 30490 "s59E13H2" 0 "50S ribosomal protein L16"  
"OPBB05\_00217" 30490 "s59E25H2" 0 "50S ribosomal protein L16"  
"OPBB05\_00217" 30490 "s59E5H2" 0 "50S ribosomal protein L16"  
"OPBB05\_00217" 30490 "s63E6H2" 0.01703649 "50S ribosomal protein L16"  
"OPBB05\_00218" 30491 "s59E13H2" 0 "30S ribosomal protein S3"  
"OPBB05\_00218" 30491 "s59E25H2" 0 "30S ribosomal protein S3"  
"OPBB05\_00218" 30491 "s59E5H2" 0 "30S ribosomal protein S3"  
"OPBB05\_00218" 30491 "s63E6H2" 0.01786228 "30S ribosomal protein S3"  
"OPBB05\_00219" 30492 "s59E13H2" 0.007800427 "2-isopropylmalate synthase"  
"OPBB05\_00219" 30492 "s59E25H2" 0 "2-isopropylmalate synthase"  
"OPBB05\_00219" 30492 "s59E5H2" 0.02583514 "2-isopropylmalate synthase"  
"OPBB05\_00219" 30492 "s63E6H2" 0.7380202 "2-isopropylmalate synthase"  
"OPBB05\_00220" 30493 "s59E13H2" 0 "2,3-dimethylmalate dehydratase small subunit"  
"OPBB05\_00220" 30493 "s59E25H2" 0 "2,3-dimethylmalate dehydratase small subunit"  
"OPBB05\_00220" 30493 "s59E5H2" 0.0135589 "2,3-dimethylmalate dehydratase small subunit"  
"OPBB05\_00220" 30493 "s63E6H2" 0.5771149 "2,3-dimethylmalate dehydratase small subunit"  
"OPBB05\_00221" 30494 "s59E13H2" 0.007481126 "2,3-dimethylmalate dehydratase large subunit"  
"OPBB05\_00221" 30494 "s59E25H2" 0 "2,3-dimethylmalate dehydratase large subunit"  
"OPBB05\_00221" 30494 "s59E5H2" 0.04578914 "2,3-dimethylmalate dehydratase large subunit"  
"OPBB05\_00221" 30494 "s63E6H2" 0.6057404 "2,3-dimethylmalate dehydratase large subunit"  
"OPBB05\_00222" 30495 "s59E13H2" 2.534698 "RNA polymerase sigma factor SigA"  
"OPBB05\_00222" 30495 "s59E25H2" 0 "RNA polymerase sigma factor SigA"  
"OPBB05\_00222" 30495 "s59E5H2" 1.012931 "RNA polymerase sigma factor SigA"  
"OPBB05\_00222" 30495 "s63E6H2" 0.1440863 "RNA polymerase sigma factor SigA"  
"OPBB05\_00223" 30496 "s59E13H2" 0 "hypothetical protein"  
"OPBB05\_00223" 30496 "s59E25H2" 0 "hypothetical protein"  
"OPBB05\_00223" 30496 "s59E5H2" 0 "hypothetical protein"  
"OPBB05\_00223" 30496 "s63E6H2" 0.01055273 "hypothetical protein"  
"OPBB05\_00224" 30497 "s59E13H2" 0 "Rubrerythrin"  
"OPBB05\_00224" 30497 "s59E25H2" 0 "Rubrerythrin"

"OPBB05\_00224" 30497 "s59E5H2" 0 "Rubrerythrin"  
"OPBB05\_00224" 30497 "s63E6H2" 0 "Rubrerythrin"  
"OPBB05\_00225" 30498 "s59E13H2" 0 "Bacterial extracellular solute-binding protein"  
"OPBB05\_00225" 30498 "s59E25H2" 0 "Bacterial extracellular solute-binding protein"  
"OPBB05\_00225" 30498 "s59E5H2" 0 "Bacterial extracellular solute-binding protein"  
"OPBB05\_00225" 30498 "s63E6H2" 0.0145653 "Bacterial extracellular solute-binding protein"  
"OPBB05\_00226" 30499 "s59E13H2" 0.008319927 "tRNA dimethylallyltransferase"  
"OPBB05\_00226" 30499 "s59E25H2" 0 "tRNA dimethylallyltransferase"  
"OPBB05\_00226" 30499 "s59E5H2" 0.06490546 "tRNA dimethylallyltransferase"  
"OPBB05\_00226" 30499 "s63E6H2" 0.04169178 "tRNA dimethylallyltransferase"  
"OPBB05\_00227" 30500 "s59E13H2" 0.0003485903 "Diaminopimelate epimerase"  
"OPBB05\_00227" 30500 "s59E25H2" 0 "Diaminopimelate epimerase"  
"OPBB05\_00227" 30500 "s59E5H2" 0.3056611 "Diaminopimelate epimerase"  
"OPBB05\_00227" 30500 "s63E6H2" 0.1332413 "Diaminopimelate epimerase"  
"OPBB05\_00228" 30501 "s59E13H2" 0.01435338 "LL-diaminopimelate aminotransferase"  
"OPBB05\_00228" 30501 "s59E25H2" 0 "LL-diaminopimelate aminotransferase"  
"OPBB05\_00228" 30501 "s59E5H2" 0.7554472 "LL-diaminopimelate aminotransferase"  
"OPBB05\_00228" 30501 "s63E6H2" 0.1728576 "LL-diaminopimelate aminotransferase"  
"OPBB05\_00229" 30502 "s59E13H2" 0.01037742 "GTPase HflX"  
"OPBB05\_00229" 30502 "s59E25H2" 0 "GTPase HflX"  
"OPBB05\_00229" 30502 "s59E5H2" 0.9515231 "GTPase HflX"  
"OPBB05\_00229" 30502 "s63E6H2" 0.1963028 "GTPase HflX"  
"OPBB05\_00230" 30503 "s59E13H2" 0.0240244 "LexA repressor"  
"OPBB05\_00230" 30503 "s59E25H2" 0 "LexA repressor"  
"OPBB05\_00230" 30503 "s59E5H2" 0.7235322 "LexA repressor"  
"OPBB05\_00230" 30503 "s63E6H2" 0.1728641 "LexA repressor"  
"OPBB05\_00231" 30504 "s59E13H2" 0.05663046 "Ketol-acid reductoisomerase"  
"OPBB05\_00231" 30504 "s59E25H2" 0 "Ketol-acid reductoisomerase"  
"OPBB05\_00231" 30504 "s59E5H2" 0.4324908 "Ketol-acid reductoisomerase"  
"OPBB05\_00231" 30504 "s63E6H2" 0.1098519 "Ketol-acid reductoisomerase"  
"OPBB05\_00232" 30505 "s59E13H2" 0 "Glycerol kinase"  
"OPBB05\_00232" 30505 "s59E25H2" 0 "Glycerol kinase"  
"OPBB05\_00232" 30505 "s59E5H2" 0 "Glycerol kinase"  
"OPBB05\_00232" 30505 "s63E6H2" 0 "Glycerol kinase"  
"OPBB05\_00233" 30506 "s59E13H2" 0 "L-xylulose/3-keto-L-gulonate kinase"  
"OPBB05\_00233" 30506 "s59E25H2" 0 "L-xylulose/3-keto-L-gulonate kinase"  
"OPBB05\_00233" 30506 "s59E5H2" 0 "L-xylulose/3-keto-L-gulonate kinase"  
"OPBB05\_00233" 30506 "s63E6H2" 0.00818743 "L-xylulose/3-keto-L-gulonate kinase"  
"OPBB05\_00234" 30507 "s59E13H2" 0 "putative transposase"  
"OPBB05\_00234" 30507 "s59E25H2" 0 "putative transposase"  
"OPBB05\_00234" 30507 "s59E5H2" 0.2545721 "putative transposase"  
"OPBB05\_00234" 30507 "s63E6H2" 0 "putative transposase"  
"OPBB05\_00235" 30508 "s59E13H2" 0.5576312 "2-oxoisovalerate dehydrogenase subunit beta"  
"OPBB05\_00235" 30508 "s59E25H2" 0 "2-oxoisovalerate dehydrogenase subunit beta"  
"OPBB05\_00235" 30508 "s59E5H2" 0.04150073 "2-oxoisovalerate dehydrogenase subunit beta"  
"OPBB05\_00235" 30508 "s63E6H2" 0.08405704 "2-oxoisovalerate dehydrogenase subunit beta"  
"OPBB05\_00236" 30509 "s59E13H2" 0.562673 "Acetoin:2,6-dichlorophenolindophenol oxidoreductase subunit alpha"

"OPBB05\_00236" 30509 "s59E25H2" 0 "Acetoin:2,6-dichlorophenolindophenol oxidoreductase subunit alpha"  
"OPBB05\_00236" 30509 "s59E5H2" 0.02902042 "Acetoin:2,6-dichlorophenolindophenol oxidoreductase subunit alpha"  
"OPBB05\_00236" 30509 "s63E6H2" 0.1822014 "Acetoin:2,6-dichlorophenolindophenol oxidoreductase subunit alpha"  
"OPBB05\_00237" 30510 "s59E13H2" 0.3569105 "Sorbitol operon regulator"  
"OPBB05\_00237" 30510 "s59E25H2" 0 "Sorbitol operon regulator"  
"OPBB05\_00237" 30510 "s59E5H2" 0.03054566 "Sorbitol operon regulator"  
"OPBB05\_00237" 30510 "s63E6H2" 0.132383 "Sorbitol operon regulator"  
"OPBB05\_00238" 30511 "s59E13H2" 0 "4-carboxy-2-hydroxymuconate-6-semialdehyde dehydrogenase"  
"OPBB05\_00238" 30511 "s59E25H2" 0 "4-carboxy-2-hydroxymuconate-6-semialdehyde dehydrogenase"  
"OPBB05\_00238" 30511 "s59E5H2" 0.01621993 "4-carboxy-2-hydroxymuconate-6-semialdehyde dehydrogenase"  
"OPBB05\_00238" 30511 "s63E6H2" 0 "4-carboxy-2-hydroxymuconate-6-semialdehyde dehydrogenase"  
"OPBB05\_00239" 30512 "s59E13H2" 0 "Asparagine synthetase [glutamine-hydrolyzing] 1"  
"OPBB05\_00239" 30512 "s59E25H2" 0 "Asparagine synthetase [glutamine-hydrolyzing] 1"  
"OPBB05\_00239" 30512 "s59E5H2" 0 "Asparagine synthetase [glutamine-hydrolyzing] 1"  
"OPBB05\_00239" 30512 "s63E6H2" 0 "Asparagine synthetase [glutamine-hydrolyzing] 1"  
"OPBB05\_00240" 30513 "s59E13H2" 0 "Phthiotriol/phenolphthiotriol dimycocerosates methyltransferase"  
"OPBB05\_00240" 30513 "s59E25H2" 0 "Phthiotriol/phenolphthiotriol dimycocerosates methyltransferase"  
"OPBB05\_00240" 30513 "s59E5H2" 0 "Phthiotriol/phenolphthiotriol dimycocerosates methyltransferase"  
"OPBB05\_00240" 30513 "s63E6H2" 0 "Phthiotriol/phenolphthiotriol dimycocerosates methyltransferase"  
"OPBB05\_00241" 30514 "s59E13H2" 0 "Undecaprenyl-phosphate mannosyltransferase"  
"OPBB05\_00241" 30514 "s59E25H2" 0 "Undecaprenyl-phosphate mannosyltransferase"  
"OPBB05\_00241" 30514 "s59E5H2" 0 "Undecaprenyl-phosphate mannosyltransferase"  
"OPBB05\_00241" 30514 "s63E6H2" 0 "Undecaprenyl-phosphate mannosyltransferase"  
"OPBB05\_00242" 30515 "s59E13H2" 0 "hypothetical protein"  
"OPBB05\_00242" 30515 "s59E25H2" 0 "hypothetical protein"  
"OPBB05\_00242" 30515 "s59E5H2" 0 "hypothetical protein"  
"OPBB05\_00242" 30515 "s63E6H2" 0 "hypothetical protein"  
"OPBB05\_00243" 30516 "s59E13H2" 0 "hypothetical protein"  
"OPBB05\_00243" 30516 "s59E25H2" 0 "hypothetical protein"  
"OPBB05\_00243" 30516 "s59E5H2" 0 "hypothetical protein"  
"OPBB05\_00243" 30516 "s63E6H2" 0 "hypothetical protein"  
"OPBB05\_00244" 30517 "s59E13H2" 0 "Transposase DDE domain protein"  
"OPBB05\_00244" 30517 "s59E25H2" 0 "Transposase DDE domain protein"  
"OPBB05\_00244" 30517 "s59E5H2" 0.01539524 "Transposase DDE domain protein"  
"OPBB05\_00244" 30517 "s63E6H2" 0 "Transposase DDE domain protein"  
"OPBB05\_00246" 30519 "s59E13H2" 0 "Dolichyl-phosphate-mannose-protein mannosyltransferase"  
"OPBB05\_00246" 30519 "s59E25H2" 0 "Dolichyl-phosphate-mannose-protein mannosyltransferase"  
"OPBB05\_00246" 30519 "s59E5H2" 0 "Dolichyl-phosphate-mannose-protein mannosyltransferase"  
"OPBB05\_00246" 30519 "s63E6H2" 0 "Dolichyl-phosphate-mannose-protein mannosyltransferase"  
"OPBB05\_00247" 30520 "s59E13H2" 0 "hypothetical protein"  
"OPBB05\_00247" 30520 "s59E25H2" 0 "hypothetical protein"  
"OPBB05\_00247" 30520 "s59E5H2" 0 "hypothetical protein"  
"OPBB05\_00247" 30520 "s63E6H2" 0 "hypothetical protein"  
"OPBB05\_00248" 30521 "s59E13H2" 0 "Heparin-sulfate lyase precursor"  
"OPBB05\_00248" 30521 "s59E25H2" 0 "Heparin-sulfate lyase precursor"  
"OPBB05\_00248" 30521 "s59E5H2" 0 "Heparin-sulfate lyase precursor"  
"OPBB05\_00248" 30521 "s63E6H2" 0 "Heparin-sulfate lyase precursor"

"OPBB05\_00250" 30523 "s59E13H2" 0 "Putative teichuronic acid biosynthesis glycosyltransferase TuaH"  
"OPBB05\_00250" 30523 "s59E25H2" 0 "Putative teichuronic acid biosynthesis glycosyltransferase TuaH"  
"OPBB05\_00250" 30523 "s59E5H2" 0 "Putative teichuronic acid biosynthesis glycosyltransferase TuaH"  
"OPBB05\_00250" 30523 "s63E6H2" 0 "Putative teichuronic acid biosynthesis glycosyltransferase TuaH"  
"OPBB05\_00251" 30524 "s59E13H2" 0 "Alpha-D-kanosaminyltransferase"  
"OPBB05\_00251" 30524 "s59E25H2" 0 "Alpha-D-kanosaminyltransferase"  
"OPBB05\_00251" 30524 "s59E5H2" 0 "Alpha-D-kanosaminyltransferase"  
"OPBB05\_00251" 30524 "s63E6H2" 0 "Alpha-D-kanosaminyltransferase"  
"OPBB05\_00252" 30525 "s59E13H2" 0 "O-Antigen ligase"  
"OPBB05\_00252" 30525 "s59E25H2" 0 "O-Antigen ligase"  
"OPBB05\_00252" 30525 "s59E5H2" 0 "O-Antigen ligase"  
"OPBB05\_00252" 30525 "s63E6H2" 0 "O-Antigen ligase"  
"OPBB05\_00253" 30526 "s59E13H2" 0 "hypothetical protein"  
"OPBB05\_00253" 30526 "s59E25H2" 0 "hypothetical protein"  
"OPBB05\_00253" 30526 "s59E5H2" 0 "hypothetical protein"  
"OPBB05\_00253" 30526 "s63E6H2" 0 "hypothetical protein"  
"OPBB05\_00254" 30527 "s59E13H2" 0 "hypothetical protein"  
"OPBB05\_00254" 30527 "s59E25H2" 0 "hypothetical protein"  
"OPBB05\_00254" 30527 "s59E5H2" 0 "hypothetical protein"  
"OPBB05\_00254" 30527 "s63E6H2" 0 "hypothetical protein"  
"OPBB05\_00255" 30528 "s59E13H2" 0 "hypothetical protein"  
"OPBB05\_00255" 30528 "s59E25H2" 0 "hypothetical protein"  
"OPBB05\_00255" 30528 "s59E5H2" 0 "hypothetical protein"  
"OPBB05\_00255" 30528 "s63E6H2" 0 "hypothetical protein"  
"OPBB05\_00256" 30529 "s59E13H2" 0 "Threonine--tRNA ligase 2"  
"OPBB05\_00256" 30529 "s59E25H2" 0 "Threonine--tRNA ligase 2"  
"OPBB05\_00256" 30529 "s59E5H2" 0.08431777 "Threonine--tRNA ligase 2"  
"OPBB05\_00256" 30529 "s63E6H2" 0.01748385 "Threonine--tRNA ligase 2"  
"OPBB05\_00257" 30530 "s59E13H2" 0.003743857 "Aspartate--tRNA ligase"  
"OPBB05\_00257" 30530 "s59E25H2" 0 "Aspartate--tRNA ligase"  
"OPBB05\_00257" 30530 "s59E5H2" 0.05660818 "Aspartate--tRNA ligase"  
"OPBB05\_00257" 30530 "s63E6H2" 0.01381959 "Aspartate--tRNA ligase"  
"OPBB05\_00258" 30531 "s59E13H2" 0.01218995 "Histidine--tRNA ligase"  
"OPBB05\_00258" 30531 "s59E25H2" 0 "Histidine--tRNA ligase"  
"OPBB05\_00258" 30531 "s59E5H2" 0.100369 "Histidine--tRNA ligase"  
"OPBB05\_00258" 30531 "s63E6H2" 0.02185288 "Histidine--tRNA ligase"  
"OPBB05\_00259" 30532 "s59E13H2" 0.01405609 "putative metallo-hydrolase"  
"OPBB05\_00259" 30532 "s59E25H2" 0 "putative metallo-hydrolase"  
"OPBB05\_00259" 30532 "s59E5H2" 0.06495951 "putative metallo-hydrolase"  
"OPBB05\_00259" 30532 "s63E6H2" 0.02381055 "putative metallo-hydrolase"  
"OPBB05\_00260" 30533 "s59E13H2" 0.01637313 "putative metallo-hydrolase YfIN"  
"OPBB05\_00260" 30533 "s59E25H2" 0 "putative metallo-hydrolase YfIN"  
"OPBB05\_00260" 30533 "s59E5H2" 0.08161577 "putative metallo-hydrolase YfIN"  
"OPBB05\_00260" 30533 "s63E6H2" 0.009881457 "putative metallo-hydrolase YfIN"  
"OPBB05\_00261" 30534 "s59E13H2" 0.002346844 "Bifunctional (p)ppGpp synthase/hydrolase relA"  
"OPBB05\_00261" 30534 "s59E25H2" 0 "Bifunctional (p)ppGpp synthase/hydrolase relA"  
"OPBB05\_00261" 30534 "s59E5H2" 0.1149926 "Bifunctional (p)ppGpp synthase/hydrolase relA"

"OPBB05\_00261" 30534 "s63E6H2" 0.01380557 "Bifunctional (p)ppGpp synthase/hydrolase relA"  
"OPBB05\_00262" 30535 "s59E13H2" 0.003801266 "Single-stranded-DNA-specific exonuclease RecJ"  
"OPBB05\_00262" 30535 "s59E25H2" 0 "Single-stranded-DNA-specific exonuclease RecJ"  
"OPBB05\_00262" 30535 "s59E5H2" 0.08738976 "Single-stranded-DNA-specific exonuclease RecJ"  
"OPBB05\_00262" 30535 "s63E6H2" 0.007016996 "Single-stranded-DNA-specific exonuclease RecJ"  
"OPBB05\_00263" 30536 "s59E13H2" 0.0004262005 "preprotein translocase subunit SecF"  
"OPBB05\_00263" 30536 "s59E25H2" 0 "preprotein translocase subunit SecF"  
"OPBB05\_00263" 30536 "s59E5H2" 0.01311243 "preprotein translocase subunit SecF"  
"OPBB05\_00263" 30536 "s63E6H2" 0.0002384035 "preprotein translocase subunit SecF"  
"OPBB05\_00264" 30537 "s59E13H2" 0.0002815673 "preprotein translocase subunit SecD"  
"OPBB05\_00264" 30537 "s59E25H2" 0 "preprotein translocase subunit SecD"  
"OPBB05\_00264" 30537 "s59E5H2" 0.1032178 "preprotein translocase subunit SecD"  
"OPBB05\_00264" 30537 "s63E6H2" 0 "preprotein translocase subunit SecD"  
"OPBB05\_00265" 30538 "s59E13H2" 0.007137763 "preprotein translocase subunit YajC"  
"OPBB05\_00265" 30538 "s59E25H2" 0 "preprotein translocase subunit YajC"  
"OPBB05\_00265" 30538 "s59E5H2" 0.1781747 "preprotein translocase subunit YajC"  
"OPBB05\_00265" 30538 "s63E6H2" 0.003633099 "preprotein translocase subunit YajC"  
"OPBB05\_00266" 30539 "s59E13H2" 0.01082803 "Queuine tRNA-ribosyltransferase"  
"OPBB05\_00266" 30539 "s59E25H2" 0.1906028 "Queuine tRNA-ribosyltransferase"  
"OPBB05\_00266" 30539 "s59E5H2" 1.192655 "Queuine tRNA-ribosyltransferase"  
"OPBB05\_00266" 30539 "s63E6H2" 0.01941816 "Queuine tRNA-ribosyltransferase"  
"OPBB05\_00267" 30540 "s59E13H2" 0.009344703 "Vancomycin B-type resistance protein VanB"  
"OPBB05\_00267" 30540 "s59E25H2" 0 "Vancomycin B-type resistance protein VanB"  
"OPBB05\_00267" 30540 "s59E5H2" 0.8428703 "Vancomycin B-type resistance protein VanB"  
"OPBB05\_00267" 30540 "s63E6H2" 0.002652557 "Vancomycin B-type resistance protein VanB"  
"OPBB05\_00268" 30541 "s59E13H2" 0 "hypothetical protein"  
"OPBB05\_00268" 30541 "s59E25H2" 0 "hypothetical protein"  
"OPBB05\_00268" 30541 "s59E5H2" 0.4800834 "hypothetical protein"  
"OPBB05\_00268" 30541 "s63E6H2" 0.002721206 "hypothetical protein"  
"OPBB05\_00269" 30542 "s59E13H2" 0.01659327 "S-adenosylmethionine:tRNA ribosyltransferase-isomerase"  
"OPBB05\_00269" 30542 "s59E25H2" 0 "S-adenosylmethionine:tRNA ribosyltransferase-isomerase"  
"OPBB05\_00269" 30542 "s59E5H2" 0.04129675 "S-adenosylmethionine:tRNA ribosyltransferase-isomerase"  
"OPBB05\_00269" 30542 "s63E6H2" 0.01333367 "S-adenosylmethionine:tRNA ribosyltransferase-isomerase"  
"OPBB05\_00270" 30543 "s59E13H2" 0 "Holliday junction ATP-dependent DNA helicase RuvB"  
"OPBB05\_00270" 30543 "s59E25H2" 0 "Holliday junction ATP-dependent DNA helicase RuvB"  
"OPBB05\_00270" 30543 "s59E5H2" 0.4465174 "Holliday junction ATP-dependent DNA helicase RuvB"  
"OPBB05\_00270" 30543 "s63E6H2" 0.04683948 "Holliday junction ATP-dependent DNA helicase RuvB"  
"OPBB05\_00271" 30544 "s59E13H2" 0 "Holliday junction ATP-dependent DNA helicase RuvA"  
"OPBB05\_00271" 30544 "s59E25H2" 0 "Holliday junction ATP-dependent DNA helicase RuvA"  
"OPBB05\_00271" 30544 "s59E5H2" 0.04238093 "Holliday junction ATP-dependent DNA helicase RuvA"  
"OPBB05\_00271" 30544 "s63E6H2" 0.05238887 "Holliday junction ATP-dependent DNA helicase RuvA"  
"OPBB05\_00272" 30545 "s59E13H2" 0 "Crossover junction endodeoxyribonuclease RuvC"  
"OPBB05\_00272" 30545 "s59E25H2" 0 "Crossover junction endodeoxyribonuclease RuvC"  
"OPBB05\_00272" 30545 "s59E5H2" 0.03348551 "Crossover junction endodeoxyribonuclease RuvC"  
"OPBB05\_00272" 30545 "s63E6H2" 0.006290132 "Crossover junction endodeoxyribonuclease RuvC"  
"OPBB05\_00273" 30546 "s59E13H2" 0 "putative transcriptional regulatory protein"  
"OPBB05\_00273" 30546 "s59E25H2" 0 "putative transcriptional regulatory protein"

"OPBB05\_00273" 30546 "s59E5H2" 0.01720605 "putative transcriptional regulatory protein"  
"OPBB05\_00273" 30546 "s63E6H2" 0.001418501 "putative transcriptional regulatory protein"  
"OPBB05\_00274" 30547 "s59E13H2" 0.002831171 "Glutamine amidotransferase subunit PdxT"  
"OPBB05\_00274" 30547 "s59E25H2" 0 "Glutamine amidotransferase subunit PdxT"  
"OPBB05\_00274" 30547 "s59E5H2" 0 "Glutamine amidotransferase subunit PdxT"  
"OPBB05\_00274" 30547 "s63E6H2" 0.002851258 "Glutamine amidotransferase subunit PdxT"  
"OPBB05\_00275" 30548 "s59E13H2" 0.07406681 "Pyridoxal biosynthesis lyase PdxS"  
"OPBB05\_00275" 30548 "s59E25H2" 0 "Pyridoxal biosynthesis lyase PdxS"  
"OPBB05\_00275" 30548 "s59E5H2" 0.02685413 "Pyridoxal biosynthesis lyase PdxS"  
"OPBB05\_00275" 30548 "s63E6H2" 0.01464681 "Pyridoxal biosynthesis lyase PdxS"  
"OPBB05\_00276" 30549 "s59E13H2" 0.02513582 "hypothetical protein"  
"OPBB05\_00276" 30549 "s59E25H2" 0 "hypothetical protein"  
"OPBB05\_00276" 30549 "s59E5H2" 0.02640196 "hypothetical protein"  
"OPBB05\_00276" 30549 "s63E6H2" 0.006613238 "hypothetical protein"  
"OPBB05\_00277" 30550 "s59E13H2" 0.008944648 "LemA family protein"  
"OPBB05\_00277" 30550 "s59E25H2" 0 "LemA family protein"  
"OPBB05\_00277" 30550 "s59E5H2" 0 "LemA family protein"  
"OPBB05\_00277" 30550 "s63E6H2" 0.1055237 "LemA family protein"  
"OPBB05\_00278" 30551 "s59E13H2" 0.06374289 "Elongation factor G"  
"OPBB05\_00278" 30551 "s59E25H2" 0 "Elongation factor G"  
"OPBB05\_00278" 30551 "s59E5H2" 0.02979938 "Elongation factor G"  
"OPBB05\_00278" 30551 "s63E6H2" 0.3998345 "Elongation factor G"  
"OPBB05\_00279" 30552 "s59E13H2" 0.03606793 "hypothetical protein"  
"OPBB05\_00279" 30552 "s59E25H2" 0.3357843 "hypothetical protein"  
"OPBB05\_00279" 30552 "s59E5H2" 0.02274146 "hypothetical protein"  
"OPBB05\_00279" 30552 "s63E6H2" 0.2340526 "hypothetical protein"  
"OPBB05\_00280" 30553 "s59E13H2" 0.002213143 "Carbamoyltransferase HypF"  
"OPBB05\_00280" 30553 "s59E25H2" 0 "Carbamoyltransferase HypF"  
"OPBB05\_00280" 30553 "s59E5H2" 0.17648 "Carbamoyltransferase HypF"  
"OPBB05\_00280" 30553 "s63E6H2" 0.00126396 "Carbamoyltransferase HypF"  
"OPBB05\_00281" 30554 "s59E13H2" 0.009821554 "Hydrogenase isoenzymes formation protein HypC"  
"OPBB05\_00281" 30554 "s59E25H2" 0 "Hydrogenase isoenzymes formation protein HypC"  
"OPBB05\_00281" 30554 "s59E5H2" 0.06597275 "Hydrogenase isoenzymes formation protein HypC"  
"OPBB05\_00281" 30554 "s63E6H2" 0 "Hydrogenase isoenzymes formation protein HypC"  
"OPBB05\_00282" 30555 "s59E13H2" 0.004175953 "Hydrogenase expression/formation protein HypD"  
"OPBB05\_00282" 30555 "s59E25H2" 0 "Hydrogenase expression/formation protein HypD"  
"OPBB05\_00282" 30555 "s59E5H2" 0.1573794 "Hydrogenase expression/formation protein HypD"  
"OPBB05\_00282" 30555 "s63E6H2" 0.002713259 "Hydrogenase expression/formation protein HypD"  
"OPBB05\_00283" 30556 "s59E13H2" 0.02182301 "Hydrogenase isoenzymes formation protein HypE"  
"OPBB05\_00283" 30556 "s59E25H2" 0 "Hydrogenase isoenzymes formation protein HypE"  
"OPBB05\_00283" 30556 "s59E5H2" 0.08968355 "Hydrogenase isoenzymes formation protein HypE"  
"OPBB05\_00283" 30556 "s63E6H2" 0 "Hydrogenase isoenzymes formation protein HypE"  
"OPBB05\_00284" 30557 "s59E13H2" 0.05719715 "Hydrogenase/urease nickel incorporation protein HypA"  
"OPBB05\_00284" 30557 "s59E25H2" 0 "Hydrogenase/urease nickel incorporation protein HypA"  
"OPBB05\_00284" 30557 "s59E5H2" 0.02523391 "Hydrogenase/urease nickel incorporation protein HypA"  
"OPBB05\_00284" 30557 "s63E6H2" 0.1322113 "Hydrogenase/urease nickel incorporation protein HypA"  
"OPBB05\_00285" 30558 "s59E13H2" 0.013143 "Hydrogenase 2 maturation protease"

"OPBB05\_00285" 30558 "s59E25H2" 0 "Hydrogenase 2 maturation protease"  
"OPBB05\_00285" 30558 "s59E5H2" 0.03590671 "Hydrogenase 2 maturation protease"  
"OPBB05\_00285" 30558 "s63E6H2" 0.2284494 "Hydrogenase 2 maturation protease"  
"OPBB05\_00286" 30559 "s59E13H2" 0.04081771 "F420-non-reducing hydrogenase subunit A"  
"OPBB05\_00286" 30559 "s59E25H2" 0 "F420-non-reducing hydrogenase subunit A"  
"OPBB05\_00286" 30559 "s59E5H2" 0.04372562 "F420-non-reducing hydrogenase subunit A"  
"OPBB05\_00286" 30559 "s63E6H2" 0.4760341 "F420-non-reducing hydrogenase subunit A"  
"OPBB05\_00287" 30560 "s59E13H2" 0.03746416 "F420-non-reducing hydrogenase subunit G"  
"OPBB05\_00287" 30560 "s59E25H2" 0 "F420-non-reducing hydrogenase subunit G"  
"OPBB05\_00287" 30560 "s59E5H2" 0.02927556 "F420-non-reducing hydrogenase subunit G"  
"OPBB05\_00287" 30560 "s63E6H2" 0.3971999 "F420-non-reducing hydrogenase subunit G"  
"OPBB05\_00289" 30562 "s59E13H2" 0.021221 "F420-non-reducing hydrogenase vhc iron-sulfur subunit D"  
"OPBB05\_00289" 30562 "s59E25H2" 0 "F420-non-reducing hydrogenase vhc iron-sulfur subunit D"  
"OPBB05\_00289" 30562 "s59E5H2" 0.002739483 "F420-non-reducing hydrogenase vhc iron-sulfur subunit D"  
"OPBB05\_00289" 30562 "s63E6H2" 0.01030102 "F420-non-reducing hydrogenase vhc iron-sulfur subunit D"  
"OPBB05\_00290" 30563 "s59E13H2" 0.0981559 "CoB--CoM heterodisulfide reductase iron-sulfur subunit A"  
"OPBB05\_00290" 30563 "s59E25H2" 0 "CoB--CoM heterodisulfide reductase iron-sulfur subunit A"  
"OPBB05\_00290" 30563 "s59E5H2" 0.05560891 "CoB--CoM heterodisulfide reductase iron-sulfur subunit A"  
"OPBB05\_00290" 30563 "s63E6H2" 0.05100146 "CoB--CoM heterodisulfide reductase iron-sulfur subunit A"  
"OPBB05\_00291" 30564 "s59E13H2" 0.1716975 "Globin-coupled histidine kinase"  
"OPBB05\_00291" 30564 "s59E25H2" 0 "Globin-coupled histidine kinase"  
"OPBB05\_00291" 30564 "s59E5H2" 0.1186655 "Globin-coupled histidine kinase"  
"OPBB05\_00291" 30564 "s63E6H2" 0.0436992 "Globin-coupled histidine kinase"  
"OPBB05\_00292" 30565 "s59E13H2" 0.01234386 "hypothetical protein"  
"OPBB05\_00292" 30565 "s59E25H2" 0 "hypothetical protein"  
"OPBB05\_00292" 30565 "s59E5H2" 0.01104559 "hypothetical protein"  
"OPBB05\_00292" 30565 "s63E6H2" 0.02785125 "hypothetical protein"  
"OPBB05\_00293" 30566 "s59E13H2" 0 "DRTGG domain protein"  
"OPBB05\_00293" 30566 "s59E25H2" 0 "DRTGG domain protein"  
"OPBB05\_00293" 30566 "s59E5H2" 0.03356836 "DRTGG domain protein"  
"OPBB05\_00293" 30566 "s63E6H2" 0.02957214 "DRTGG domain protein"  
"OPBB05\_00294" 30567 "s59E13H2" 0.003689949 "Serine/threonine-protein kinase RsbT"  
"OPBB05\_00294" 30567 "s59E25H2" 0 "Serine/threonine-protein kinase RsbT"  
"OPBB05\_00294" 30567 "s59E5H2" 0.02753169 "Serine/threonine-protein kinase RsbT"  
"OPBB05\_00294" 30567 "s63E6H2" 0.02437676 "Serine/threonine-protein kinase RsbT"  
"OPBB05\_00295" 30568 "s59E13H2" 0 "DRTGG domain protein"  
"OPBB05\_00295" 30568 "s59E25H2" 0 "DRTGG domain protein"  
"OPBB05\_00295" 30568 "s59E5H2" 0.01067159 "DRTGG domain protein"  
"OPBB05\_00295" 30568 "s63E6H2" 0.01709694 "DRTGG domain protein"  
"OPBB05\_00296" 30569 "s59E13H2" 0.001934694 "NADP-reducing hydrogenase subunit HndC"  
"OPBB05\_00296" 30569 "s59E25H2" 136.6343 "NADP-reducing hydrogenase subunit HndC"  
"OPBB05\_00296" 30569 "s59E5H2" 0.01602196 "NADP-reducing hydrogenase subunit HndC"  
"OPBB05\_00296" 30569 "s63E6H2" 0.2291526 "NADP-reducing hydrogenase subunit HndC"  
"OPBB05\_00297" 30570 "s59E13H2" 0.003459683 "NADP-reducing hydrogenase subunit HndB"  
"OPBB05\_00297" 30570 "s59E25H2" 0 "NADP-reducing hydrogenase subunit HndB"  
"OPBB05\_00297" 30570 "s59E5H2" 0 "NADP-reducing hydrogenase subunit HndB"  
"OPBB05\_00297" 30570 "s63E6H2" 0.4893986 "NADP-reducing hydrogenase subunit HndB"

"OPBB05\_00298" 30571 "s59E13H2" 0.004306847 "CoB--CoM heterodisulfide reductase iron-sulfur subunit A"  
"OPBB05\_00298" 30571 "s59E25H2" 0 "CoB--CoM heterodisulfide reductase iron-sulfur subunit A"  
"OPBB05\_00298" 30571 "s59E5H2" 0 "CoB--CoM heterodisulfide reductase iron-sulfur subunit A"  
"OPBB05\_00298" 30571 "s63E6H2" 0.3864893 "CoB--CoM heterodisulfide reductase iron-sulfur subunit A"  
"OPBB05\_00299" 30572 "s59E13H2" 0 "Sulfhydrogenase 1 subunit gamma"  
"OPBB05\_00299" 30572 "s59E25H2" 0 "Sulfhydrogenase 1 subunit gamma"  
"OPBB05\_00299" 30572 "s59E5H2" 0.009485588 "Sulfhydrogenase 1 subunit gamma"  
"OPBB05\_00299" 30572 "s63E6H2" 0.1344342 "Sulfhydrogenase 1 subunit gamma"  
"OPBB05\_00300" 30573 "s59E13H2" 0.02080913 "Sulfhydrogenase 2 subunit beta"  
"OPBB05\_00300" 30573 "s59E25H2" 0 "Sulfhydrogenase 2 subunit beta"  
"OPBB05\_00300" 30573 "s59E5H2" 0.00295573 "Sulfhydrogenase 2 subunit beta"  
"OPBB05\_00300" 30573 "s63E6H2" 0.1096455 "Sulfhydrogenase 2 subunit beta"  
"OPBB05\_00301" 30574 "s59E13H2" 0 "Formate dehydrogenase subunit beta"  
"OPBB05\_00301" 30574 "s59E25H2" 0 "Formate dehydrogenase subunit beta"  
"OPBB05\_00301" 30574 "s59E5H2" 0 "Formate dehydrogenase subunit beta"  
"OPBB05\_00301" 30574 "s63E6H2" 0.1365667 "Formate dehydrogenase subunit beta"  
"OPBB05\_00302" 30575 "s59E13H2" 0 "F420-non-reducing hydrogenase iron-sulfur subunit D"  
"OPBB05\_00302" 30575 "s59E25H2" 0 "F420-non-reducing hydrogenase iron-sulfur subunit D"  
"OPBB05\_00302" 30575 "s59E5H2" 0 "F420-non-reducing hydrogenase iron-sulfur subunit D"  
"OPBB05\_00302" 30575 "s63E6H2" 0.06464736 "F420-non-reducing hydrogenase iron-sulfur subunit D"  
"OPBB05\_00303" 30576 "s59E13H2" 0.1027181 "CoB--CoM heterodisulfide reductase iron-sulfur subunit A"  
"OPBB05\_00303" 30576 "s59E25H2" 0 "CoB--CoM heterodisulfide reductase iron-sulfur subunit A"  
"OPBB05\_00303" 30576 "s59E5H2" 0.05482153 "CoB--CoM heterodisulfide reductase iron-sulfur subunit A"  
"OPBB05\_00303" 30576 "s63E6H2" 0.5491508 "CoB--CoM heterodisulfide reductase iron-sulfur subunit A"  
"OPBB05\_00304" 30577 "s59E13H2" 0.03108811 "CoB--CoM heterodisulfide reductase iron-sulfur subunit C"  
"OPBB05\_00304" 30577 "s59E25H2" 0 "CoB--CoM heterodisulfide reductase iron-sulfur subunit C"  
"OPBB05\_00304" 30577 "s59E5H2" 0.01252126 "CoB--CoM heterodisulfide reductase iron-sulfur subunit C"  
"OPBB05\_00304" 30577 "s63E6H2" 0.03155794 "CoB--CoM heterodisulfide reductase iron-sulfur subunit C"  
"OPBB05\_00305" 30578 "s59E13H2" 0.3702476 "Sensor protein ZraS"  
"OPBB05\_00305" 30578 "s59E25H2" 0 "Sensor protein ZraS"  
"OPBB05\_00305" 30578 "s59E5H2" 0.05077987 "Sensor protein ZraS"  
"OPBB05\_00305" 30578 "s63E6H2" 0.105729 "Sensor protein ZraS"  
"OPBB05\_00306" 30579 "s59E13H2" 0.3334968 "Response regulator MprA"  
"OPBB05\_00306" 30579 "s59E25H2" 0 "Response regulator MprA"  
"OPBB05\_00306" 30579 "s59E5H2" 0.0990442 "Response regulator MprA"  
"OPBB05\_00306" 30579 "s63E6H2" 0.1313003 "Response regulator MprA"  
"OPBB05\_00307" 30580 "s59E13H2" 0.3689117 "Alkaline phosphatase synthesis sensor protein PhoR"  
"OPBB05\_00307" 30580 "s59E25H2" 0 "Alkaline phosphatase synthesis sensor protein PhoR"  
"OPBB05\_00307" 30580 "s59E5H2" 0.2768069 "Alkaline phosphatase synthesis sensor protein PhoR"  
"OPBB05\_00307" 30580 "s63E6H2" 0.1609107 "Alkaline phosphatase synthesis sensor protein PhoR"  
"OPBB05\_00308" 30581 "s59E13H2" 0.709762 "Sulfhydrogenase 1 subunit beta"  
"OPBB05\_00308" 30581 "s59E25H2" 0 "Sulfhydrogenase 1 subunit beta"  
"OPBB05\_00308" 30581 "s59E5H2" 0.712463 "Sulfhydrogenase 1 subunit beta"  
"OPBB05\_00308" 30581 "s63E6H2" 0.1709193 "Sulfhydrogenase 1 subunit beta"  
"OPBB05\_00309" 30582 "s59E13H2" 0.5052385 "Sulfhydrogenase 2 subunit gamma"  
"OPBB05\_00309" 30582 "s59E25H2" 0 "Sulfhydrogenase 2 subunit gamma"  
"OPBB05\_00309" 30582 "s59E5H2" 0.8995635 "Sulfhydrogenase 2 subunit gamma"



"OPBB05\_00309" 30582 "s63E6H2" 0.223048 "Sulfhydrogenase 2 subunit gamma"  
"OPBB05\_00310" 30583 "s59E13H2" 0.1669976 "Sulfhydrogenase 1 subunit delta"  
"OPBB05\_00310" 30583 "s59E25H2" 0 "Sulfhydrogenase 1 subunit delta"  
"OPBB05\_00310" 30583 "s59E5H2" 0.9413782 "Sulfhydrogenase 1 subunit delta"  
"OPBB05\_00310" 30583 "s63E6H2" 0.2017881 "Sulfhydrogenase 1 subunit delta"  
"OPBB05\_00311" 30584 "s59E13H2" 0.7631248 "Sulfhydrogenase 1 subunit alpha"  
"OPBB05\_00311" 30584 "s59E25H2" 0 "Sulfhydrogenase 1 subunit alpha"  
"OPBB05\_00311" 30584 "s59E5H2" 1.609626 "Sulfhydrogenase 1 subunit alpha"  
"OPBB05\_00311" 30584 "s63E6H2" 0.08927105 "Sulfhydrogenase 1 subunit alpha"  
"OPBB05\_00312" 30585 "s59E13H2" 0.003592449 "hypothetical protein"  
"OPBB05\_00312" 30585 "s59E25H2" 0 "hypothetical protein"  
"OPBB05\_00312" 30585 "s59E5H2" 0.9693191 "hypothetical protein"  
"OPBB05\_00312" 30585 "s63E6H2" 0.03640893 "hypothetical protein"  
"OPBB05\_00313" 30586 "s59E13H2" 1.352751 "Sporulation initiation inhibitor protein Soj"  
"OPBB05\_00313" 30586 "s59E25H2" 0 "Sporulation initiation inhibitor protein Soj"  
"OPBB05\_00313" 30586 "s59E5H2" 0.0342648 "Sporulation initiation inhibitor protein Soj"  
"OPBB05\_00313" 30586 "s63E6H2" 0.03661834 "Sporulation initiation inhibitor protein Soj"  
"OPBB05\_00314" 30587 "s59E13H2" 1.887728 "putative chromosome-partitioning protein ParB"  
"OPBB05\_00314" 30587 "s59E25H2" 0 "putative chromosome-partitioning protein ParB"  
"OPBB05\_00314" 30587 "s59E5H2" 0.05499939 "putative chromosome-partitioning protein ParB"  
"OPBB05\_00314" 30587 "s63E6H2" 0.030693 "putative chromosome-partitioning protein ParB"  
"OPBB05\_00315" 30588 "s59E13H2" 1.894463 "Lipoyl synthase"  
"OPBB05\_00315" 30588 "s59E25H2" 0 "Lipoyl synthase"  
"OPBB05\_00315" 30588 "s59E5H2" 0.05312917 "Lipoyl synthase"  
"OPBB05\_00315" 30588 "s63E6H2" 0.02204004 "Lipoyl synthase"  
"OPBB05\_00316" 30589 "s59E13H2" 0.3495519 "Trehalose/maltose import ATP-binding protein Malk"  
"OPBB05\_00316" 30589 "s59E25H2" 0 "Trehalose/maltose import ATP-binding protein Malk"  
"OPBB05\_00316" 30589 "s59E5H2" 0.01009717 "Trehalose/maltose import ATP-binding protein Malk"  
"OPBB05\_00316" 30589 "s63E6H2" 0.006595613 "Trehalose/maltose import ATP-binding protein Malk"  
"OPBB05\_00317" 30590 "s59E13H2" 1.751868 "putative glutamine synthetase 2"  
"OPBB05\_00317" 30590 "s59E25H2" 0 "putative glutamine synthetase 2"  
"OPBB05\_00317" 30590 "s59E5H2" 0.1539509 "putative glutamine synthetase 2"  
"OPBB05\_00317" 30590 "s63E6H2" 0.0223816 "putative glutamine synthetase 2"  
"OPBB05\_00318" 30591 "s59E13H2" 0.001252144 "Ribose operon repressor"  
"OPBB05\_00318" 30591 "s59E25H2" 0 "Ribose operon repressor"  
"OPBB05\_00318" 30591 "s59E5H2" 0.04985388 "Ribose operon repressor"  
"OPBB05\_00318" 30591 "s63E6H2" 0.01343337 "Ribose operon repressor"  
"OPBB05\_00319" 30592 "s59E13H2" 0 "hypothetical protein"  
"OPBB05\_00319" 30592 "s59E25H2" 0 "hypothetical protein"  
"OPBB05\_00319" 30592 "s59E5H2" 0 "hypothetical protein"  
"OPBB05\_00319" 30592 "s63E6H2" 0 "hypothetical protein"  
"OPBB05\_00320" 30593 "s59E13H2" 0 "hypothetical protein"  
"OPBB05\_00320" 30593 "s59E25H2" 0 "hypothetical protein"  
"OPBB05\_00320" 30593 "s59E5H2" 0 "hypothetical protein"  
"OPBB05\_00320" 30593 "s63E6H2" 0 "hypothetical protein"  
"OPBB05\_00321" 30594 "s59E13H2" 0 "L-arabinose transport system permease protein AraP"  
"OPBB05\_00321" 30594 "s59E25H2" 0 "L-arabinose transport system permease protein AraP"

"OPBB05\_00321" 30594 "s59E5H2" 0 "L-arabinose transport system permease protein AraP"  
"OPBB05\_00321" 30594 "s63E6H2" 0 "L-arabinose transport system permease protein AraP"  
"OPBB05\_00322" 30595 "s59E13H2" 0 "Trehalose/maltose transport system permease protein MalG"  
"OPBB05\_00322" 30595 "s59E25H2" 0 "Trehalose/maltose transport system permease protein MalG"  
"OPBB05\_00322" 30595 "s59E5H2" 0 "Trehalose/maltose transport system permease protein MalG"  
"OPBB05\_00322" 30595 "s63E6H2" 0 "Trehalose/maltose transport system permease protein MalG"  
"OPBB05\_00323" 30596 "s59E13H2" 0 "Glucose--fructose oxidoreductase precursor"  
"OPBB05\_00323" 30596 "s59E25H2" 0 "Glucose--fructose oxidoreductase precursor"  
"OPBB05\_00323" 30596 "s59E5H2" 0 "Glucose--fructose oxidoreductase precursor"  
"OPBB05\_00323" 30596 "s63E6H2" 0 "Glucose--fructose oxidoreductase precursor"  
"OPBB05\_00325" 30598 "s59E13H2" 0.000225994 "Inositol 2-dehydrogenase/D-chiro-inositol 3-dehydrogenase"  
"OPBB05\_00325" 30598 "s59E25H2" 0 "Inositol 2-dehydrogenase/D-chiro-inositol 3-dehydrogenase"  
"OPBB05\_00325" 30598 "s59E5H2" 0 "Inositol 2-dehydrogenase/D-chiro-inositol 3-dehydrogenase"  
"OPBB05\_00325" 30598 "s63E6H2" 0 "Inositol 2-dehydrogenase/D-chiro-inositol 3-dehydrogenase"  
"OPBB05\_00326" 30599 "s59E13H2" 0 "L-glutamine:2-deoxy-scyllo-inosose aminotransferase"  
"OPBB05\_00326" 30599 "s59E25H2" 0 "L-glutamine:2-deoxy-scyllo-inosose aminotransferase"  
"OPBB05\_00326" 30599 "s59E5H2" 0 "L-glutamine:2-deoxy-scyllo-inosose aminotransferase"  
"OPBB05\_00326" 30599 "s63E6H2" 0 "L-glutamine:2-deoxy-scyllo-inosose aminotransferase"  
"OPBB05\_00327" 30600 "s59E13H2" 0 "Inositol-3-phosphate synthase"  
"OPBB05\_00327" 30600 "s59E25H2" 0 "Inositol-3-phosphate synthase"  
"OPBB05\_00327" 30600 "s59E5H2" 0 "Inositol-3-phosphate synthase"  
"OPBB05\_00327" 30600 "s63E6H2" 0 "Inositol-3-phosphate synthase"  
"OPBB05\_00328" 30601 "s59E13H2" 0.006944552 "30S ribosomal protein S1"  
"OPBB05\_00328" 30601 "s59E25H2" 0 "30S ribosomal protein S1"  
"OPBB05\_00328" 30601 "s59E5H2" 0.5397092 "30S ribosomal protein S1"  
"OPBB05\_00328" 30601 "s63E6H2" 0.003898465 "30S ribosomal protein S1"  
"OPBB05\_00329" 30602 "s59E13H2" 0 "UvrABC system protein B"  
"OPBB05\_00329" 30602 "s59E25H2" 0 "UvrABC system protein B"  
"OPBB05\_00329" 30602 "s59E5H2" 0 "UvrABC system protein B"  
"OPBB05\_00329" 30602 "s63E6H2" 0.001344976 "UvrABC system protein B"  
"OPBB05\_00331" 30604 "s59E13H2" 0.1408906 "hypothetical protein"  
"OPBB05\_00331" 30604 "s59E25H2" 0 "hypothetical protein"  
"OPBB05\_00331" 30604 "s59E5H2" 0.05047088 "hypothetical protein"  
"OPBB05\_00331" 30604 "s63E6H2" 0.1635994 "hypothetical protein"  
"OPBB05\_00332" 30605 "s59E13H2" 0.2531622 "tRNA(Ile)-lysine synthase"  
"OPBB05\_00332" 30605 "s59E25H2" 0 "tRNA(Ile)-lysine synthase"  
"OPBB05\_00332" 30605 "s59E5H2" 0.138581 "tRNA(Ile)-lysine synthase"  
"OPBB05\_00332" 30605 "s63E6H2" 0.2299754 "tRNA(Ile)-lysine synthase"  
"OPBB05\_00333" 30606 "s59E13H2" 0.2073343 "Hypoxanthine phosphoribosyltransferase"  
"OPBB05\_00333" 30606 "s59E25H2" 0 "Hypoxanthine phosphoribosyltransferase"  
"OPBB05\_00333" 30606 "s59E5H2" 0.05840704 "Hypoxanthine phosphoribosyltransferase"  
"OPBB05\_00333" 30606 "s63E6H2" 0.2279576 "Hypoxanthine phosphoribosyltransferase"  
"OPBB05\_00334" 30607 "s59E13H2" 0.124847 "hypothetical protein"  
"OPBB05\_00334" 30607 "s59E25H2" 0 "hypothetical protein"  
"OPBB05\_00334" 30607 "s59E5H2" 0.004213219 "hypothetical protein"  
"OPBB05\_00334" 30607 "s63E6H2" 0.2342416 "hypothetical protein"  
"OPBB05\_00335" 30608 "s59E13H2" 0 "hypothetical protein"

"OPBB05\_00335" 30608 "s59E25H2" 0 "hypothetical protein"  
"OPBB05\_00335" 30608 "s59E5H2" 0 "hypothetical protein"  
"OPBB05\_00335" 30608 "s63E6H2" 0 "hypothetical protein"  
"OPBB05\_00336" 30609 "s59E13H2" 0 "hypothetical protein"  
"OPBB05\_00336" 30609 "s59E25H2" 0 "hypothetical protein"  
"OPBB05\_00336" 30609 "s59E5H2" 0 "hypothetical protein"  
"OPBB05\_00336" 30609 "s63E6H2" 0 "hypothetical protein"  
"OPBB05\_00337" 30610 "s59E13H2" 0 "hypothetical protein"  
"OPBB05\_00337" 30610 "s59E25H2" 0 "hypothetical protein"  
"OPBB05\_00337" 30610 "s59E5H2" 0 "hypothetical protein"  
"OPBB05\_00337" 30610 "s63E6H2" 0 "hypothetical protein"  
"OPBB05\_00338" 30611 "s59E13H2" 0 "hypothetical protein"  
"OPBB05\_00338" 30611 "s59E25H2" 0 "hypothetical protein"  
"OPBB05\_00338" 30611 "s59E5H2" 0 "hypothetical protein"  
"OPBB05\_00338" 30611 "s63E6H2" 0 "hypothetical protein"  
"OPBB05\_00339" 30612 "s59E13H2" 0 "Poly(hydroxyalcanoate) granule associated protein (phasin)"  
"OPBB05\_00339" 30612 "s59E25H2" 0 "Poly(hydroxyalcanoate) granule associated protein (phasin)"  
"OPBB05\_00339" 30612 "s59E5H2" 0 "Poly(hydroxyalcanoate) granule associated protein (phasin)"  
"OPBB05\_00339" 30612 "s63E6H2" 0 "Poly(hydroxyalcanoate) granule associated protein (phasin)"  
"OPBB05\_00340" 30613 "s59E13H2" 0 "hypothetical protein"  
"OPBB05\_00340" 30613 "s59E25H2" 0 "hypothetical protein"  
"OPBB05\_00340" 30613 "s59E5H2" 0 "hypothetical protein"  
"OPBB05\_00340" 30613 "s63E6H2" 0 "hypothetical protein"  
"OPBB05\_00341" 30614 "s59E13H2" 0 "SpoVT / AbrB like domain protein"  
"OPBB05\_00341" 30614 "s59E25H2" 0 "SpoVT / AbrB like domain protein"  
"OPBB05\_00341" 30614 "s59E5H2" 0 "SpoVT / AbrB like domain protein"  
"OPBB05\_00341" 30614 "s63E6H2" 0 "SpoVT / AbrB like domain protein"  
"OPBB05\_00342" 30615 "s59E13H2" 0 "Putative transposase"  
"OPBB05\_00342" 30615 "s59E25H2" 0 "Putative transposase"  
"OPBB05\_00342" 30615 "s59E5H2" 0 "Putative transposase"  
"OPBB05\_00342" 30615 "s63E6H2" 0 "Putative transposase"  
"OPBB05\_00343" 30616 "s59E13H2" 0 "CTP synthase"  
"OPBB05\_00343" 30616 "s59E25H2" 0 "CTP synthase"  
"OPBB05\_00343" 30616 "s59E5H2" 0 "CTP synthase"  
"OPBB05\_00343" 30616 "s63E6H2" 0 "CTP synthase"  
"OPBB05\_00344" 30617 "s59E13H2" 0 "Glutamine--fructose-6-phosphate aminotransferase [isomerizing]"  
"OPBB05\_00344" 30617 "s59E25H2" 0 "Glutamine--fructose-6-phosphate aminotransferase [isomerizing]"  
"OPBB05\_00344" 30617 "s59E5H2" 0 "Glutamine--fructose-6-phosphate aminotransferase [isomerizing]"  
"OPBB05\_00344" 30617 "s63E6H2" 0.001657081 "Glutamine--fructose-6-phosphate aminotransferase [isomerizing]"  
"OPBB05\_00345" 30618 "s59E13H2" 0 "GMP synthase [glutamine-hydrolyzing]"  
"OPBB05\_00345" 30618 "s59E25H2" 0 "GMP synthase [glutamine-hydrolyzing]"  
"OPBB05\_00345" 30618 "s59E5H2" 0 "GMP synthase [glutamine-hydrolyzing]"  
"OPBB05\_00345" 30618 "s63E6H2" 0 "GMP synthase [glutamine-hydrolyzing]"  
"OPBB05\_00346" 30619 "s59E13H2" 0 "GMP synthase [glutamine-hydrolyzing]"  
"OPBB05\_00346" 30619 "s59E25H2" 0 "GMP synthase [glutamine-hydrolyzing]"  
"OPBB05\_00346" 30619 "s59E5H2" 0 "GMP synthase [glutamine-hydrolyzing]"  
"OPBB05\_00346" 30619 "s63E6H2" 0 "GMP synthase [glutamine-hydrolyzing]"

"OPBB05\_00347" 30620 "s59E13H2" 0 "hypothetical protein"  
"OPBB05\_00347" 30620 "s59E25H2" 0 "hypothetical protein"  
"OPBB05\_00347" 30620 "s59E5H2" 0 "hypothetical protein"  
"OPBB05\_00347" 30620 "s63E6H2" 0 "hypothetical protein"  
"OPBB05\_00349" 30622 "s59E13H2" 0 "hypothetical protein"  
"OPBB05\_00349" 30622 "s59E25H2" 0 "hypothetical protein"  
"OPBB05\_00349" 30622 "s59E5H2" 0 "hypothetical protein"  
"OPBB05\_00349" 30622 "s63E6H2" 0.001378128 "hypothetical protein"  
"OPBB05\_00350" 30623 "s59E13H2" 0 "putative transcriptional regulatory protein pdtaR"  
"OPBB05\_00350" 30623 "s59E25H2" 0 "putative transcriptional regulatory protein pdtaR"  
"OPBB05\_00350" 30623 "s59E5H2" 0 "putative transcriptional regulatory protein pdtaR"  
"OPBB05\_00350" 30623 "s63E6H2" 0.04077004 "putative transcriptional regulatory protein pdtaR"  
"OPBB05\_00351" 30624 "s59E13H2" 0 "putative transcriptional regulatory protein pdtaR"  
"OPBB05\_00351" 30624 "s59E25H2" 0 "putative transcriptional regulatory protein pdtaR"  
"OPBB05\_00351" 30624 "s59E5H2" 0 "putative transcriptional regulatory protein pdtaR"  
"OPBB05\_00351" 30624 "s63E6H2" 0.07427645 "putative transcriptional regulatory protein pdtaR"  
"OPBB05\_00352" 30625 "s59E13H2" 0 "Amidophosphoribosyltransferase precursor"  
"OPBB05\_00352" 30625 "s59E25H2" 0 "Amidophosphoribosyltransferase precursor"  
"OPBB05\_00352" 30625 "s59E5H2" 0 "Amidophosphoribosyltransferase precursor"  
"OPBB05\_00352" 30625 "s63E6H2" 0.07225515 "Amidophosphoribosyltransferase precursor"  
"OPBB05\_00353" 30626 "s59E13H2" 0 "hypothetical protein"  
"OPBB05\_00353" 30626 "s59E25H2" 0 "hypothetical protein"  
"OPBB05\_00353" 30626 "s59E5H2" 0 "hypothetical protein"  
"OPBB05\_00353" 30626 "s63E6H2" 0 "hypothetical protein"  
"OPBB05\_00354" 30627 "s59E13H2" 0 "Fluoroquinolones export ATP-binding protein/MT2762"  
"OPBB05\_00354" 30627 "s59E25H2" 0 "Fluoroquinolones export ATP-binding protein/MT2762"  
"OPBB05\_00354" 30627 "s59E5H2" 0 "Fluoroquinolones export ATP-binding protein/MT2762"  
"OPBB05\_00354" 30627 "s63E6H2" 0.204438 "Fluoroquinolones export ATP-binding protein/MT2762"  
"OPBB05\_00355" 30628 "s59E13H2" 0 "ABC-2 family transporter protein"  
"OPBB05\_00355" 30628 "s59E25H2" 0 "ABC-2 family transporter protein"  
"OPBB05\_00355" 30628 "s59E5H2" 0 "ABC-2 family transporter protein"  
"OPBB05\_00355" 30628 "s63E6H2" 0.4344907 "ABC-2 family transporter protein"  
"OPBB05\_00356" 30629 "s59E13H2" 0 "ABC-2 family transporter protein"  
"OPBB05\_00356" 30629 "s59E25H2" 0 "ABC-2 family transporter protein"  
"OPBB05\_00356" 30629 "s59E5H2" 0 "ABC-2 family transporter protein"  
"OPBB05\_00356" 30629 "s63E6H2" 0.06079859 "ABC-2 family transporter protein"  
"OPBB05\_00357" 30630 "s59E13H2" 0 "SpoVT / AbrB like domain protein"  
"OPBB05\_00357" 30630 "s59E25H2" 0 "SpoVT / AbrB like domain protein"  
"OPBB05\_00357" 30630 "s59E5H2" 0 "SpoVT / AbrB like domain protein"  
"OPBB05\_00357" 30630 "s63E6H2" 0 "SpoVT / AbrB like domain protein"  
"OPBB05\_00358" 30631 "s59E13H2" 0.01193237 "putative methyltransferase YcgJ"  
"OPBB05\_00358" 30631 "s59E25H2" 0 "putative methyltransferase YcgJ"  
"OPBB05\_00358" 30631 "s59E5H2" 0 "putative methyltransferase YcgJ"  
"OPBB05\_00358" 30631 "s63E6H2" 0 "putative methyltransferase YcgJ"  
"OPBB05\_00360" 30633 "s59E13H2" 0.002695966 "Phycocyanobilin lyase subunit alpha"  
"OPBB05\_00360" 30633 "s59E25H2" 0 "Phycocyanobilin lyase subunit alpha"  
"OPBB05\_00360" 30633 "s59E5H2" 0.183733 "Phycocyanobilin lyase subunit alpha"

"OPBB05\_00360" 30633 "s63E6H2" 0 "Phycocyanobilin lyase subunit alpha"  
"OPBB05\_00361" 30634 "s59E13H2" 0 "translocation protein TolB"  
"OPBB05\_00361" 30634 "s59E25H2" 0 "translocation protein TolB"  
"OPBB05\_00361" 30634 "s59E5H2" 0 "translocation protein TolB"  
"OPBB05\_00361" 30634 "s63E6H2" 0 "translocation protein TolB"  
"OPBB05\_00362" 30635 "s59E13H2" 0 "hypothetical protein"  
"OPBB05\_00362" 30635 "s59E25H2" 0 "hypothetical protein"  
"OPBB05\_00362" 30635 "s59E5H2" 0 "hypothetical protein"  
"OPBB05\_00362" 30635 "s63E6H2" 0 "hypothetical protein"  
"OPBB05\_00363" 30636 "s59E13H2" 0 "hypothetical protein"  
"OPBB05\_00363" 30636 "s59E25H2" 0 "hypothetical protein"  
"OPBB05\_00363" 30636 "s59E5H2" 0 "hypothetical protein"  
"OPBB05\_00363" 30636 "s63E6H2" 0 "hypothetical protein"  
"OPBB05\_00364" 30637 "s59E13H2" 0 "hypothetical protein"  
"OPBB05\_00364" 30637 "s59E25H2" 0 "hypothetical protein"  
"OPBB05\_00364" 30637 "s59E5H2" 0 "hypothetical protein"  
"OPBB05\_00364" 30637 "s63E6H2" 0 "hypothetical protein"  
"OPBB05\_00365" 30638 "s59E13H2" 0 "Endonuclease/Exonuclease/phosphatase family protein"  
"OPBB05\_00365" 30638 "s59E25H2" 0 "Endonuclease/Exonuclease/phosphatase family protein"  
"OPBB05\_00365" 30638 "s59E5H2" 0 "Endonuclease/Exonuclease/phosphatase family protein"  
"OPBB05\_00365" 30638 "s63E6H2" 0 "Endonuclease/Exonuclease/phosphatase family protein"  
"OPBB05\_00367" 30640 "s59E13H2" 0 "hypothetical protein"  
"OPBB05\_00367" 30640 "s59E25H2" 0 "hypothetical protein"  
"OPBB05\_00367" 30640 "s59E5H2" 0 "hypothetical protein"  
"OPBB05\_00367" 30640 "s63E6H2" 0 "hypothetical protein"  
"OPBB05\_00368" 30641 "s59E13H2" 0.01242683 "Tyrosine recombinase XerD"  
"OPBB05\_00368" 30641 "s59E25H2" 0 "Tyrosine recombinase XerD"  
"OPBB05\_00368" 30641 "s59E5H2" 0.03305249 "Tyrosine recombinase XerD"  
"OPBB05\_00368" 30641 "s63E6H2" 0 "Tyrosine recombinase XerD"  
"OPBB05\_00369" 30642 "s59E13H2" 0.004263105 "Alpha-monoglucosyldiacylglycerol synthase"  
"OPBB05\_00369" 30642 "s59E25H2" 0 "Alpha-monoglucosyldiacylglycerol synthase"  
"OPBB05\_00369" 30642 "s59E5H2" 0.2650598 "Alpha-monoglucosyldiacylglycerol synthase"  
"OPBB05\_00369" 30642 "s63E6H2" 0.0160807 "Alpha-monoglucosyldiacylglycerol synthase"  
"OPBB05\_00371" 30644 "s59E13H2" 0 "enterobactin exporter EntS"  
"OPBB05\_00371" 30644 "s59E25H2" 0 "enterobactin exporter EntS"  
"OPBB05\_00371" 30644 "s59E5H2" 0 "enterobactin exporter EntS"  
"OPBB05\_00371" 30644 "s63E6H2" 0 "enterobactin exporter EntS"  
"OPBB05\_00372" 30645 "s59E13H2" 0 "hypothetical protein"  
"OPBB05\_00372" 30645 "s59E25H2" 0 "hypothetical protein"  
"OPBB05\_00372" 30645 "s59E5H2" 0 "hypothetical protein"  
"OPBB05\_00372" 30645 "s63E6H2" 0 "hypothetical protein"  
"OPBB05\_00373" 30646 "s59E13H2" 0 "hypothetical protein"  
"OPBB05\_00373" 30646 "s59E25H2" 0 "hypothetical protein"  
"OPBB05\_00373" 30646 "s59E5H2" 0.02231043 "hypothetical protein"  
"OPBB05\_00373" 30646 "s63E6H2" 0 "hypothetical protein"  
"OPBB05\_00374" 30647 "s59E13H2" 0 "YcfA-like protein"  
"OPBB05\_00374" 30647 "s59E25H2" 0 "YcfA-like protein"

"OPBB05\_00374" 30647 "s59E5H2" 0.05036445 "YcfA-like protein"  
"OPBB05\_00374" 30647 "s63E6H2" 0 "YcfA-like protein"  
"OPBB05\_00378" 30651 "s59E13H2" 0 "hypothetical protein"  
"OPBB05\_00378" 30651 "s59E25H2" 0.4180479 "hypothetical protein"  
"OPBB05\_00378" 30651 "s59E5H2" 0 "hypothetical protein"  
"OPBB05\_00378" 30651 "s63E6H2" 0 "hypothetical protein"  
"OPBB05\_00379" 30652 "s59E13H2" 0.01438853 "antitoxin HipB"  
"OPBB05\_00379" 30652 "s59E25H2" 0 "antitoxin HipB"  
"OPBB05\_00379" 30652 "s59E5H2" 0.07115149 "antitoxin HipB"  
"OPBB05\_00379" 30652 "s63E6H2" 0.0001788026 "antitoxin HipB"  
"OPBB05\_00380" 30653 "s59E13H2" 0.01157267 "hypothetical protein"  
"OPBB05\_00380" 30653 "s59E25H2" 0 "hypothetical protein"  
"OPBB05\_00380" 30653 "s59E5H2" 0.01001587 "hypothetical protein"  
"OPBB05\_00380" 30653 "s63E6H2" 0 "hypothetical protein"  
"OPBB05\_00381" 30654 "s59E13H2" 5.503563 "hypothetical protein"  
"OPBB05\_00381" 30654 "s59E25H2" 0 "hypothetical protein"  
"OPBB05\_00381" 30654 "s59E5H2" 0.09608941 "hypothetical protein"  
"OPBB05\_00381" 30654 "s63E6H2" 0.05986691 "hypothetical protein"  
"OPBB05\_00382" 30655 "s59E13H2" 1.890785 "hypothetical protein"  
"OPBB05\_00382" 30655 "s59E25H2" 0 "hypothetical protein"  
"OPBB05\_00382" 30655 "s59E5H2" 0.02260786 "hypothetical protein"  
"OPBB05\_00382" 30655 "s63E6H2" 0.01784427 "hypothetical protein"  
"OPBB05\_00383" 30656 "s59E13H2" 0.0007468345 "hypothetical protein"  
"OPBB05\_00383" 30656 "s59E25H2" 0 "hypothetical protein"  
"OPBB05\_00383" 30656 "s59E5H2" 0 "hypothetical protein"  
"OPBB05\_00383" 30656 "s63E6H2" 0 "hypothetical protein"  
"OPBB05\_00385" 30658 "s59E13H2" 3.186804 "TadE-like protein"  
"OPBB05\_00385" 30658 "s59E25H2" 0 "TadE-like protein"  
"OPBB05\_00385" 30658 "s59E5H2" 0.09338871 "TadE-like protein"  
"OPBB05\_00385" 30658 "s63E6H2" 0.01242972 "TadE-like protein"  
"OPBB05\_00386" 30659 "s59E13H2" 2.568241 "hypothetical protein"  
"OPBB05\_00386" 30659 "s59E25H2" 0 "hypothetical protein"  
"OPBB05\_00386" 30659 "s59E5H2" 0.04645467 "hypothetical protein"  
"OPBB05\_00386" 30659 "s63E6H2" 0.004337271 "hypothetical protein"  
"OPBB05\_00387" 30660 "s59E13H2" 2.030235 "Bacterial type II secretion system protein F domain protein"  
"OPBB05\_00387" 30660 "s59E25H2" 0 "Bacterial type II secretion system protein F domain protein"  
"OPBB05\_00387" 30660 "s59E5H2" 0.05086262 "Bacterial type II secretion system protein F domain protein"  
"OPBB05\_00387" 30660 "s63E6H2" 0.03493594 "Bacterial type II secretion system protein F domain protein"  
"OPBB05\_00388" 30661 "s59E13H2" 2.170828 "Bacterial type II secretion system protein F domain protein"  
"OPBB05\_00388" 30661 "s59E25H2" 0 "Bacterial type II secretion system protein F domain protein"  
"OPBB05\_00388" 30661 "s59E5H2" 0.01935785 "Bacterial type II secretion system protein F domain protein"  
"OPBB05\_00388" 30661 "s63E6H2" 0.05333952 "Bacterial type II secretion system protein F domain protein"  
"OPBB05\_00389" 30662 "s59E13H2" 2.246042 "hypothetical protein"  
"OPBB05\_00389" 30662 "s59E25H2" 0 "hypothetical protein"  
"OPBB05\_00389" 30662 "s59E5H2" 0 "hypothetical protein"  
"OPBB05\_00389" 30662 "s63E6H2" 0.05361494 "hypothetical protein"  
"OPBB05\_00390" 30663 "s59E13H2" 2.503438 "Putative conjugal transfer protein/MT3759"

"OPBB05\_00390" 30663 "s59E25H2" 0 "Putative conjugal transfer protein/MT3759"  
"OPBB05\_00390" 30663 "s59E5H2" 0.005937462 "Putative conjugal transfer protein/MT3759"  
"OPBB05\_00390" 30663 "s63E6H2" 0.01712974 "Putative conjugal transfer protein/MT3759"  
"OPBB05\_00391" 30664 "s59E13H2" 1.845331 "hypothetical protein"  
"OPBB05\_00391" 30664 "s59E25H2" 0 "hypothetical protein"  
"OPBB05\_00391" 30664 "s59E5H2" 0.1238031 "hypothetical protein"  
"OPBB05\_00391" 30664 "s63E6H2" 0 "hypothetical protein"  
"OPBB05\_00392" 30665 "s59E13H2" 0 "UDP-N-acetylmuramoyl-L-alanyl-D-glutamate--2,6-diaminopimelate ligase"  
"OPBB05\_00392" 30665 "s59E25H2" 0 "UDP-N-acetylmuramoyl-L-alanyl-D-glutamate--2,6-diaminopimelate ligase"  
"OPBB05\_00392" 30665 "s59E5H2" 0 "UDP-N-acetylmuramoyl-L-alanyl-D-glutamate--2,6-diaminopimelate ligase"  
"OPBB05\_00392" 30665 "s63E6H2" 0.02238284 "UDP-N-acetylmuramoyl-L-alanyl-D-glutamate--2,6-diaminopimelate ligase"  
"OPBB05\_00393" 30666 "s59E13H2" 0.00579226 "Stage V sporulation protein D"  
"OPBB05\_00393" 30666 "s59E25H2" 0 "Stage V sporulation protein D"  
"OPBB05\_00393" 30666 "s59E5H2" 0.004740273 "Stage V sporulation protein D"  
"OPBB05\_00393" 30666 "s63E6H2" 0.0454098 "Stage V sporulation protein D"  
"OPBB05\_00394" 30667 "s59E13H2" 0 "Cell division protein FtsL"  
"OPBB05\_00394" 30667 "s59E25H2" 0 "Cell division protein FtsL"  
"OPBB05\_00394" 30667 "s59E5H2" 0.01509472 "Cell division protein FtsL"  
"OPBB05\_00394" 30667 "s63E6H2" 0.03302288 "Cell division protein FtsL"  
"OPBB05\_00395" 30668 "s59E13H2" 0 "Ribosomal RNA small subunit methyltransferase H"  
"OPBB05\_00395" 30668 "s59E25H2" 0 "Ribosomal RNA small subunit methyltransferase H"  
"OPBB05\_00395" 30668 "s59E5H2" 0 "Ribosomal RNA small subunit methyltransferase H"  
"OPBB05\_00395" 30668 "s63E6H2" 0.03560083 "Ribosomal RNA small subunit methyltransferase H"  
"OPBB05\_00396" 30669 "s59E13H2" 0.00727539 "cell division protein MraZ"  
"OPBB05\_00396" 30669 "s59E25H2" 0 "cell division protein MraZ"  
"OPBB05\_00396" 30669 "s59E5H2" 0.02608785 "cell division protein MraZ"  
"OPBB05\_00396" 30669 "s63E6H2" 0.0239538 "cell division protein MraZ"  
"OPBB05\_00397" 30670 "s59E13H2" 0.009388619 "Exodeoxyribonuclease 7 small subunit"  
"OPBB05\_00397" 30670 "s59E25H2" 0 "Exodeoxyribonuclease 7 small subunit"  
"OPBB05\_00397" 30670 "s59E5H2" 0.02154893 "Exodeoxyribonuclease 7 small subunit"  
"OPBB05\_00397" 30670 "s63E6H2" 0.01873822 "Exodeoxyribonuclease 7 small subunit"  
"OPBB05\_00398" 30671 "s59E13H2" 0 "Exodeoxyribonuclease 7 large subunit"  
"OPBB05\_00398" 30671 "s59E25H2" 0 "Exodeoxyribonuclease 7 large subunit"  
"OPBB05\_00398" 30671 "s59E5H2" 0.05215184 "Exodeoxyribonuclease 7 large subunit"  
"OPBB05\_00398" 30671 "s63E6H2" 0.01567956 "Exodeoxyribonuclease 7 large subunit"  
"OPBB05\_00399" 30672 "s59E13H2" 0 "hypothetical protein"  
"OPBB05\_00399" 30672 "s59E25H2" 0 "hypothetical protein"  
"OPBB05\_00399" 30672 "s59E5H2" 0 "hypothetical protein"  
"OPBB05\_00399" 30672 "s63E6H2" 0 "hypothetical protein"  
"OPBB05\_00400" 30673 "s59E13H2" 0.03002351 "Acyl carrier protein"  
"OPBB05\_00400" 30673 "s59E25H2" 0 "Acyl carrier protein"  
"OPBB05\_00400" 30673 "s59E5H2" 0.02701955 "Acyl carrier protein"  
"OPBB05\_00400" 30673 "s63E6H2" 0 "Acyl carrier protein"  
"OPBB05\_00401" 30674 "s59E13H2" 0.1366706 "Phosphate acyltransferase"  
"OPBB05\_00401" 30674 "s59E25H2" 0 "Phosphate acyltransferase"  
"OPBB05\_00401" 30674 "s59E5H2" 0.008868771 "Phosphate acyltransferase"  
"OPBB05\_00401" 30674 "s63E6H2" 0.01382144 "Phosphate acyltransferase"

"OPBB05\_00402" 30675 "s59E13H2" 0.1453882 "Phosphate acetyltransferase"  
"OPBB05\_00402" 30675 "s59E25H2" 0 "Phosphate acetyltransferase"  
"OPBB05\_00402" 30675 "s59E5H2" 0.01178205 "Phosphate acetyltransferase"  
"OPBB05\_00402" 30675 "s63E6H2" 0.005400007 "Phosphate acetyltransferase"  
"OPBB05\_00403" 30676 "s59E13H2" 0.1492591 "succinyl-CoA synthetase subunit beta"  
"OPBB05\_00403" 30676 "s59E25H2" 0 "succinyl-CoA synthetase subunit beta"  
"OPBB05\_00403" 30676 "s59E5H2" 0.03455111 "succinyl-CoA synthetase subunit beta"  
"OPBB05\_00403" 30676 "s63E6H2" 0.04187859 "succinyl-CoA synthetase subunit beta"  
"OPBB05\_00404" 30677 "s59E13H2" 0.06062185 "50S ribosomal protein L32"  
"OPBB05\_00404" 30677 "s59E25H2" 0 "50S ribosomal protein L32"  
"OPBB05\_00404" 30677 "s59E5H2" 0 "50S ribosomal protein L32"  
"OPBB05\_00404" 30677 "s63E6H2" 0.008402929 "50S ribosomal protein L32"  
"OPBB05\_00405" 30678 "s59E13H2" 0.127474 "hypothetical protein"  
"OPBB05\_00405" 30678 "s59E25H2" 0 "hypothetical protein"  
"OPBB05\_00405" 30678 "s59E5H2" 0.03294982 "hypothetical protein"  
"OPBB05\_00405" 30678 "s63E6H2" 0.02397503 "hypothetical protein"  
"OPBB05\_00406" 30679 "s59E13H2" 0.1838696 "Phosphopantetheine adenylyltransferase"  
"OPBB05\_00406" 30679 "s59E25H2" 0 "Phosphopantetheine adenylyltransferase"  
"OPBB05\_00406" 30679 "s59E5H2" 0.04828277 "Phosphopantetheine adenylyltransferase"  
"OPBB05\_00406" 30679 "s63E6H2" 0.06726866 "Phosphopantetheine adenylyltransferase"  
"OPBB05\_00407" 30680 "s59E13H2" 0.002315324 "ATP-dependent RecD-like DNA helicase"  
"OPBB05\_00407" 30680 "s59E25H2" 0 "ATP-dependent RecD-like DNA helicase"  
"OPBB05\_00407" 30680 "s59E5H2" 0.01265397 "ATP-dependent RecD-like DNA helicase"  
"OPBB05\_00407" 30680 "s63E6H2" 0.005106715 "ATP-dependent RecD-like DNA helicase"  
"OPBB05\_00408" 30681 "s59E13H2" 0.008047357 "Proline--tRNA ligase"  
"OPBB05\_00408" 30681 "s59E25H2" 0 "Proline--tRNA ligase"  
"OPBB05\_00408" 30681 "s59E5H2" 0.013243 "Proline--tRNA ligase"  
"OPBB05\_00408" 30681 "s63E6H2" 0.007561918 "Proline--tRNA ligase"  
"OPBB05\_00409" 30682 "s59E13H2" 0.006740914 "Proline--tRNA ligase"  
"OPBB05\_00409" 30682 "s59E25H2" 0 "Proline--tRNA ligase"  
"OPBB05\_00409" 30682 "s59E5H2" 0 "Proline--tRNA ligase"  
"OPBB05\_00409" 30682 "s63E6H2" 0.004615757 "Proline--tRNA ligase"  
"OPBB05\_00410" 30683 "s59E13H2" 0.00146296 "4-hydroxy-3-methylbut-2-en-1-yl diphosphate synthase"  
"OPBB05\_00410" 30683 "s59E25H2" 0 "4-hydroxy-3-methylbut-2-en-1-yl diphosphate synthase"  
"OPBB05\_00410" 30683 "s59E5H2" 0 "4-hydroxy-3-methylbut-2-en-1-yl diphosphate synthase"  
"OPBB05\_00410" 30683 "s63E6H2" 0.004800641 "4-hydroxy-3-methylbut-2-en-1-yl diphosphate synthase"  
"OPBB05\_00411" 30684 "s59E13H2" 0 "Regulator of sigma-W protease RasP"  
"OPBB05\_00411" 30684 "s59E25H2" 0 "Regulator of sigma-W protease RasP"  
"OPBB05\_00411" 30684 "s59E5H2" 0.01008462 "Regulator of sigma-W protease RasP"  
"OPBB05\_00411" 30684 "s63E6H2" 0.0001657303 "Regulator of sigma-W protease RasP"  
"OPBB05\_00412" 30685 "s59E13H2" 0.007157204 "(Dimethylallyl)adenosine tRNA methylthiotransferase MiaB"  
"OPBB05\_00412" 30685 "s59E25H2" 0 "(Dimethylallyl)adenosine tRNA methylthiotransferase MiaB"  
"OPBB05\_00412" 30685 "s59E5H2" 0.04905476 "(Dimethylallyl)adenosine tRNA methylthiotransferase MiaB"  
"OPBB05\_00412" 30685 "s63E6H2" 0.02708619 "(Dimethylallyl)adenosine tRNA methylthiotransferase MiaB"  
"OPBB05\_00413" 30686 "s59E13H2" 0 "Stage V sporulation protein S"  
"OPBB05\_00413" 30686 "s59E25H2" 0 "Stage V sporulation protein S"  
"OPBB05\_00413" 30686 "s59E5H2" 0.08675949 "Stage V sporulation protein S"



"OPBB05\_00413" 30686 "s63E6H2" 0.04943598 "Stage V sporulation protein S"  
"OPBB05\_00414" 30687 "s59E13H2" 0.01011778 "DNA mismatch repair protein"  
"OPBB05\_00414" 30687 "s59E25H2" 0 "DNA mismatch repair protein"  
"OPBB05\_00414" 30687 "s59E5H2" 0.07235865 "DNA mismatch repair protein"  
"OPBB05\_00414" 30687 "s63E6H2" 0.06188568 "DNA mismatch repair protein"  
"OPBB05\_00415" 30688 "s59E13H2" 0.00852793 "Ribonuclease Y"  
"OPBB05\_00415" 30688 "s59E25H2" 0 "Ribonuclease Y"  
"OPBB05\_00415" 30688 "s59E5H2" 0.05074707 "Ribonuclease Y"  
"OPBB05\_00415" 30688 "s63E6H2" 0.02555165 "Ribonuclease Y"  
"OPBB05\_00416" 30689 "s59E13H2" 0.002759196 "D-inositol 3-phosphate glycosyltransferase"  
"OPBB05\_00416" 30689 "s59E25H2" 0 "D-inositol 3-phosphate glycosyltransferase"  
"OPBB05\_00416" 30689 "s59E5H2" 0.0273552 "D-inositol 3-phosphate glycosyltransferase"  
"OPBB05\_00416" 30689 "s63E6H2" 0.299597 "D-inositol 3-phosphate glycosyltransferase"  
"OPBB05\_00417" 30690 "s59E13H2" 0.14365 "Elongation factor 4"  
"OPBB05\_00417" 30690 "s59E25H2" 0 "Elongation factor 4"  
"OPBB05\_00417" 30690 "s59E5H2" 0.09473416 "Elongation factor 4"  
"OPBB05\_00417" 30690 "s63E6H2" 0.06524023 "Elongation factor 4"  
"OPBB05\_00418" 30691 "s59E13H2" 0.4427318 "L-arabinose isomerase"  
"OPBB05\_00418" 30691 "s59E25H2" 0 "L-arabinose isomerase"  
"OPBB05\_00418" 30691 "s59E5H2" 0.006768816 "L-arabinose isomerase"  
"OPBB05\_00418" 30691 "s63E6H2" 1.19128 "L-arabinose isomerase"  
"OPBB05\_00419" 30692 "s59E13H2" 0.01917653 "N-acetylglucosamine repressor"  
"OPBB05\_00419" 30692 "s59E25H2" 0 "N-acetylglucosamine repressor"  
"OPBB05\_00419" 30692 "s59E5H2" 0 "N-acetylglucosamine repressor"  
"OPBB05\_00419" 30692 "s63E6H2" 1.098733 "N-acetylglucosamine repressor"  
"OPBB05\_00420" 30693 "s59E13H2" 0.01834736 "Ribulokinase"  
"OPBB05\_00420" 30693 "s59E25H2" 0 "Ribulokinase"  
"OPBB05\_00420" 30693 "s59E5H2" 0 "Ribulokinase"  
"OPBB05\_00420" 30693 "s63E6H2" 0.663696 "Ribulokinase"  
"OPBB05\_00421" 30694 "s59E13H2" 0.01423132 "L-ribulose-5-phosphate 4-epimerase UlaF"  
"OPBB05\_00421" 30694 "s59E25H2" 0 "L-ribulose-5-phosphate 4-epimerase UlaF"  
"OPBB05\_00421" 30694 "s59E5H2" 0.005652626 "L-ribulose-5-phosphate 4-epimerase UlaF"  
"OPBB05\_00421" 30694 "s63E6H2" 0.2860488 "L-ribulose-5-phosphate 4-epimerase UlaF"  
"OPBB05\_00422" 30695 "s59E13H2" 0.1164808 "Maltotriose-binding protein precursor"  
"OPBB05\_00422" 30695 "s59E25H2" 0 "Maltotriose-binding protein precursor"  
"OPBB05\_00422" 30695 "s59E5H2" 0.165637 "Maltotriose-binding protein precursor"  
"OPBB05\_00422" 30695 "s63E6H2" 0.4165691 "Maltotriose-binding protein precursor"  
"OPBB05\_00423" 30696 "s59E13H2" 0 "putative periplasmic serine endoprotease DegP-like precursor"  
"OPBB05\_00423" 30696 "s59E25H2" 0 "putative periplasmic serine endoprotease DegP-like precursor"  
"OPBB05\_00423" 30696 "s59E5H2" 0.004532789 "putative periplasmic serine endoprotease DegP-like precursor"  
"OPBB05\_00423" 30696 "s63E6H2" 0.07770196 "putative periplasmic serine endoprotease DegP-like precursor"  
"OPBB05\_00424" 30697 "s59E13H2" 0.2076724 "ECF RNA polymerase sigma factor SigE"  
"OPBB05\_00424" 30697 "s59E25H2" 0 "ECF RNA polymerase sigma factor SigE"  
"OPBB05\_00424" 30697 "s59E5H2" 0.2241258 "ECF RNA polymerase sigma factor SigE"  
"OPBB05\_00424" 30697 "s63E6H2" 0.2178412 "ECF RNA polymerase sigma factor SigE"  
"OPBB05\_00425" 30698 "s59E13H2" 0.2388087 "hypothetical protein"  
"OPBB05\_00425" 30698 "s59E25H2" 0 "hypothetical protein"

"OPBB05\_00425" 30698 "s59E5H2" 0.1436031 "hypothetical protein"  
"OPBB05\_00425" 30698 "s63E6H2" 0.2196474 "hypothetical protein"  
"OPBB05\_00426" 30699 "s59E13H2" 0.2159348 "hypothetical protein"  
"OPBB05\_00426" 30699 "s59E25H2" 0 "hypothetical protein"  
"OPBB05\_00426" 30699 "s59E5H2" 0.1804261 "hypothetical protein"  
"OPBB05\_00426" 30699 "s63E6H2" 0.2560863 "hypothetical protein"  
"OPBB05\_00427" 30700 "s59E13H2" 0.1643465 "Transglutaminase-like superfamily protein"  
"OPBB05\_00427" 30700 "s59E25H2" 0 "Transglutaminase-like superfamily protein"  
"OPBB05\_00427" 30700 "s59E5H2" 0.002912556 "Transglutaminase-like superfamily protein"  
"OPBB05\_00427" 30700 "s63E6H2" 0.4919721 "Transglutaminase-like superfamily protein"  
"OPBB05\_00428" 30701 "s59E13H2" 0.3196476 "Alpha/beta hydrolase family protein"  
"OPBB05\_00428" 30701 "s59E25H2" 0 "Alpha/beta hydrolase family protein"  
"OPBB05\_00428" 30701 "s59E5H2" 0.2794622 "Alpha/beta hydrolase family protein"  
"OPBB05\_00428" 30701 "s63E6H2" 0.4203781 "Alpha/beta hydrolase family protein"  
"OPBB05\_00429" 30702 "s59E13H2" 0.06295196 "putative acetyltransferase"  
"OPBB05\_00429" 30702 "s59E25H2" 0 "putative acetyltransferase"  
"OPBB05\_00429" 30702 "s59E5H2" 0.044896 "putative acetyltransferase"  
"OPBB05\_00429" 30702 "s63E6H2" 0.1345415 "putative acetyltransferase"  
"OPBB05\_00430" 30703 "s59E13H2" 0.0456596 "hypothetical protein"  
"OPBB05\_00430" 30703 "s59E25H2" 0 "hypothetical protein"  
"OPBB05\_00430" 30703 "s59E5H2" 0.03876405 "hypothetical protein"  
"OPBB05\_00430" 30703 "s63E6H2" 0.04982316 "hypothetical protein"  
"OPBB05\_00431" 30704 "s59E13H2" 0.220868 "5'-nucleotidase"  
"OPBB05\_00431" 30704 "s59E25H2" 0 "5'-nucleotidase"  
"OPBB05\_00431" 30704 "s59E5H2" 0.1093064 "5'-nucleotidase"  
"OPBB05\_00431" 30704 "s63E6H2" 0.2416111 "5'-nucleotidase"  
"OPBB05\_00432" 30705 "s59E13H2" 0.1684671 "hypothetical protein"  
"OPBB05\_00432" 30705 "s59E25H2" 0 "hypothetical protein"  
"OPBB05\_00432" 30705 "s59E5H2" 0.01210297 "hypothetical protein"  
"OPBB05\_00432" 30705 "s63E6H2" 0.05698287 "hypothetical protein"  
"OPBB05\_00433" 30706 "s59E13H2" 0 "hypothetical protein"  
"OPBB05\_00433" 30706 "s59E25H2" 0 "hypothetical protein"  
"OPBB05\_00433" 30706 "s59E5H2" 0 "hypothetical protein"  
"OPBB05\_00433" 30706 "s63E6H2" 0 "hypothetical protein"  
"OPBB05\_00435" 30708 "s59E13H2" 0.9637068 "Na(+)-translocating NADH-quinone reductase subunit F"  
"OPBB05\_00435" 30708 "s59E25H2" 0 "Na(+)-translocating NADH-quinone reductase subunit F"  
"OPBB05\_00435" 30708 "s59E5H2" 0.008190833 "Na(+)-translocating NADH-quinone reductase subunit F"  
"OPBB05\_00435" 30708 "s63E6H2" 0.02252969 "Na(+)-translocating NADH-quinone reductase subunit F"  
"OPBB05\_00436" 30709 "s59E13H2" 0.03113787 "Argininosuccinate synthase"  
"OPBB05\_00436" 30709 "s59E25H2" 0 "Argininosuccinate synthase"  
"OPBB05\_00436" 30709 "s59E5H2" 0.3706678 "Argininosuccinate synthase"  
"OPBB05\_00436" 30709 "s63E6H2" 0.03961164 "Argininosuccinate synthase"  
"OPBB05\_00437" 30710 "s59E13H2" 0.04797901 "Argininosuccinate lyase"  
"OPBB05\_00437" 30710 "s59E25H2" 0 "Argininosuccinate lyase"  
"OPBB05\_00437" 30710 "s59E5H2" 0.5740532 "Argininosuccinate lyase"  
"OPBB05\_00437" 30710 "s63E6H2" 0.03300244 "Argininosuccinate lyase"  
"OPBB05\_00438" 30711 "s59E13H2" 0 "Phosphate import ATP-binding protein PstB 3"

"OPBB05\_00438" 30711 "s59E25H2" 0 "Phosphate import ATP-binding protein PstB 3"  
"OPBB05\_00438" 30711 "s59E5H2" 0 "Phosphate import ATP-binding protein PstB 3"  
"OPBB05\_00438" 30711 "s63E6H2" 0.0001708102 "Phosphate import ATP-binding protein PstB 3"  
"OPBB05\_00439" 30712 "s59E13H2" 0.01980412 "hypothetical protein"  
"OPBB05\_00439" 30712 "s59E25H2" 0 "hypothetical protein"  
"OPBB05\_00439" 30712 "s59E5H2" 0.06989058 "hypothetical protein"  
"OPBB05\_00439" 30712 "s63E6H2" 0.002110864 "hypothetical protein"  
"OPBB05\_00440" 30713 "s59E13H2" 0.0212871 "Cell wall-binding protein YocH precursor"  
"OPBB05\_00440" 30713 "s59E25H2" 0 "Cell wall-binding protein YocH precursor"  
"OPBB05\_00440" 30713 "s59E5H2" 0.1597946 "Cell wall-binding protein YocH precursor"  
"OPBB05\_00440" 30713 "s63E6H2" 0.005913383 "Cell wall-binding protein YocH precursor"  
"OPBB05\_00441" 30714 "s59E13H2" 0.03232819 "Uracil DNA glycosylase superfamily protein"  
"OPBB05\_00441" 30714 "s59E25H2" 0 "Uracil DNA glycosylase superfamily protein"  
"OPBB05\_00441" 30714 "s59E5H2" 0.3556895 "Uracil DNA glycosylase superfamily protein"  
"OPBB05\_00441" 30714 "s63E6H2" 0.008650561 "Uracil DNA glycosylase superfamily protein"  
"OPBB05\_00442" 30715 "s59E13H2" 0.008131341 "Dimethylamine corrinoid protein"  
"OPBB05\_00442" 30715 "s59E25H2" 0 "Dimethylamine corrinoid protein"  
"OPBB05\_00442" 30715 "s59E5H2" 0.1308976 "Dimethylamine corrinoid protein"  
"OPBB05\_00442" 30715 "s63E6H2" 0.7528619 "Dimethylamine corrinoid protein"  
"OPBB05\_00445" 30718 "s59E13H2" 0.8974078 "D-allose-binding periplasmic protein precursor"  
"OPBB05\_00445" 30718 "s59E25H2" 0 "D-allose-binding periplasmic protein precursor"  
"OPBB05\_00445" 30718 "s59E5H2" 0.2347901 "D-allose-binding periplasmic protein precursor"  
"OPBB05\_00445" 30718 "s63E6H2" 0.01587086 "D-allose-binding periplasmic protein precursor"  
"OPBB05\_00446" 30719 "s59E13H2" 0.02790916 "Methylated-thiol--coenzyme M methyltransferase"  
"OPBB05\_00446" 30719 "s59E25H2" 0 "Methylated-thiol--coenzyme M methyltransferase"  
"OPBB05\_00446" 30719 "s59E5H2" 0.02477997 "Methylated-thiol--coenzyme M methyltransferase"  
"OPBB05\_00446" 30719 "s63E6H2" 0.01630897 "Methylated-thiol--coenzyme M methyltransferase"  
"OPBB05\_00447" 30720 "s59E13H2" 0.08059454 "methylcobalamin:coenzyme M methyltransferase"  
"OPBB05\_00447" 30720 "s59E25H2" 0 "methylcobalamin:coenzyme M methyltransferase"  
"OPBB05\_00447" 30720 "s59E5H2" 0.01129909 "methylcobalamin:coenzyme M methyltransferase"  
"OPBB05\_00447" 30720 "s63E6H2" 0.01193225 "methylcobalamin:coenzyme M methyltransferase"  
"OPBB05\_00448" 30721 "s59E13H2" 0.02462674 "Ribose transport system permease protein RbsC"  
"OPBB05\_00448" 30721 "s59E25H2" 0 "Ribose transport system permease protein RbsC"  
"OPBB05\_00448" 30721 "s59E5H2" 0 "Ribose transport system permease protein RbsC"  
"OPBB05\_00448" 30721 "s63E6H2" 0.004379703 "Ribose transport system permease protein RbsC"  
"OPBB05\_00449" 30722 "s59E13H2" 0.01881845 "Ribose import ATP-binding protein RbsA"  
"OPBB05\_00449" 30722 "s59E25H2" 0 "Ribose import ATP-binding protein RbsA"  
"OPBB05\_00449" 30722 "s59E5H2" 0 "Ribose import ATP-binding protein RbsA"  
"OPBB05\_00449" 30722 "s63E6H2" 0.01079493 "Ribose import ATP-binding protein RbsA"  
"OPBB05\_00450" 30723 "s59E13H2" 0.001699803 "hypothetical protein"  
"OPBB05\_00450" 30723 "s59E25H2" 0 "hypothetical protein"  
"OPBB05\_00450" 30723 "s59E5H2" 0 "hypothetical protein"  
"OPBB05\_00450" 30723 "s63E6H2" 0.006346707 "hypothetical protein"  
"OPBB05\_00451" 30724 "s59E13H2" 0 "Inner membrane ABC transporter permease protein YcjP"  
"OPBB05\_00451" 30724 "s59E25H2" 0 "Inner membrane ABC transporter permease protein YcjP"  
"OPBB05\_00451" 30724 "s59E5H2" 0.004923136 "Inner membrane ABC transporter permease protein YcjP"  
"OPBB05\_00451" 30724 "s63E6H2" 0.01202877 "Inner membrane ABC transporter permease protein YcjP"

"OPBB05\_00452" 30725 "s59E13H2" 0 "hypothetical protein"  
"OPBB05\_00452" 30725 "s59E25H2" 0 "hypothetical protein"  
"OPBB05\_00452" 30725 "s59E5H2" 0.007841765 "hypothetical protein"  
"OPBB05\_00452" 30725 "s63E6H2" 0 "hypothetical protein"  
"OPBB05\_00453" 30726 "s59E13H2" 0 "hypothetical protein"  
"OPBB05\_00453" 30726 "s59E25H2" 0 "hypothetical protein"  
"OPBB05\_00453" 30726 "s59E5H2" 0 "hypothetical protein"  
"OPBB05\_00453" 30726 "s63E6H2" 0 "hypothetical protein"  
"OPBB05\_00454" 30727 "s59E13H2" 0 "hypothetical protein"  
"OPBB05\_00454" 30727 "s59E25H2" 0 "hypothetical protein"  
"OPBB05\_00454" 30727 "s59E5H2" 0 "hypothetical protein"  
"OPBB05\_00454" 30727 "s63E6H2" 0.5730636 "hypothetical protein"  
"OPBB05\_00456" 30729 "s59E13H2" 0.09477639 "Na+/Pi-cotransporter"  
"OPBB05\_00456" 30729 "s59E25H2" 0 "Na+/Pi-cotransporter"  
"OPBB05\_00456" 30729 "s59E5H2" 0.03294384 "Na+/Pi-cotransporter"  
"OPBB05\_00456" 30729 "s63E6H2" 0.7409603 "Na+/Pi-cotransporter"  
"OPBB05\_00457" 30730 "s59E13H2" 0.1772217 "Cadmium, cobalt and zinc/H(+)-K(+) antiporter"  
"OPBB05\_00457" 30730 "s59E25H2" 0 "Cadmium, cobalt and zinc/H(+)-K(+) antiporter"  
"OPBB05\_00457" 30730 "s59E5H2" 0.01290514 "Cadmium, cobalt and zinc/H(+)-K(+) antiporter"  
"OPBB05\_00457" 30730 "s63E6H2" 0.05677546 "Cadmium, cobalt and zinc/H(+)-K(+) antiporter"  
"OPBB05\_00458" 30731 "s59E13H2" 0 "Translation initiation factor IF-3"  
"OPBB05\_00458" 30731 "s59E25H2" 0 "Translation initiation factor IF-3"  
"OPBB05\_00458" 30731 "s59E5H2" 0.01268265 "Translation initiation factor IF-3"  
"OPBB05\_00458" 30731 "s63E6H2" 0.03027238 "Translation initiation factor IF-3"  
"OPBB05\_00459" 30732 "s59E13H2" 0 "hypothetical protein"  
"OPBB05\_00459" 30732 "s59E25H2" 0 "hypothetical protein"  
"OPBB05\_00459" 30732 "s59E5H2" 0 "hypothetical protein"  
"OPBB05\_00459" 30732 "s63E6H2" 0.003971803 "hypothetical protein"  
"OPBB05\_00460" 30733 "s59E13H2" 0.001825615 "hypothetical protein"  
"OPBB05\_00460" 30733 "s59E25H2" 0 "hypothetical protein"  
"OPBB05\_00460" 30733 "s59E5H2" 0 "hypothetical protein"  
"OPBB05\_00460" 30733 "s63E6H2" 0.03872236 "hypothetical protein"  
"OPBB05\_00461" 30734 "s59E13H2" 0 "Phosphoribosylaminoimidazole-succinocarboxamide synthase"  
"OPBB05\_00461" 30734 "s59E25H2" 0 "Phosphoribosylaminoimidazole-succinocarboxamide synthase"  
"OPBB05\_00461" 30734 "s59E5H2" 0 "Phosphoribosylaminoimidazole-succinocarboxamide synthase"  
"OPBB05\_00461" 30734 "s63E6H2" 0.06591818 "Phosphoribosylaminoimidazole-succinocarboxamide synthase"  
"OPBB05\_00462" 30735 "s59E13H2" 0 "hypothetical protein"  
"OPBB05\_00462" 30735 "s59E25H2" 0 "hypothetical protein"  
"OPBB05\_00462" 30735 "s59E5H2" 0 "hypothetical protein"  
"OPBB05\_00462" 30735 "s63E6H2" 0.007157873 "hypothetical protein"  
"OPBB05\_00463" 30736 "s59E13H2" 0 "Carbonic anhydrase precursor"  
"OPBB05\_00463" 30736 "s59E25H2" 0 "Carbonic anhydrase precursor"  
"OPBB05\_00463" 30736 "s59E5H2" 0 "Carbonic anhydrase precursor"  
"OPBB05\_00463" 30736 "s63E6H2" 0.02038544 "Carbonic anhydrase precursor"  
"OPBB05\_00464" 30737 "s59E13H2" 0 "N5-carboxyaminoimidazole ribonucleotide mutase"  
"OPBB05\_00464" 30737 "s59E25H2" 0 "N5-carboxyaminoimidazole ribonucleotide mutase"  
"OPBB05\_00464" 30737 "s59E5H2" 0 "N5-carboxyaminoimidazole ribonucleotide mutase"

"OPBB05\_00464" 30737 "s63E6H2" 0.001707114 "N5-carboxyaminoimidazole ribonucleotide mutase"  
"OPBB05\_00466" 30739 "s59E13H2" 0 "Calcineurin-like phosphoesterase"  
"OPBB05\_00466" 30739 "s59E25H2" 0 "Calcineurin-like phosphoesterase"  
"OPBB05\_00466" 30739 "s59E5H2" 0 "Calcineurin-like phosphoesterase"  
"OPBB05\_00466" 30739 "s63E6H2" 0.004284063 "Calcineurin-like phosphoesterase"  
"OPBB05\_00467" 30740 "s59E13H2" 0 "hypothetical protein"  
"OPBB05\_00467" 30740 "s59E25H2" 0 "hypothetical protein"  
"OPBB05\_00467" 30740 "s59E5H2" 0 "hypothetical protein"  
"OPBB05\_00467" 30740 "s63E6H2" 0.01013215 "hypothetical protein"  
"OPBB05\_00468" 30741 "s59E13H2" 0 "hypothetical protein"  
"OPBB05\_00468" 30741 "s59E25H2" 0 "hypothetical protein"  
"OPBB05\_00468" 30741 "s59E5H2" 0 "hypothetical protein"  
"OPBB05\_00468" 30741 "s63E6H2" 0.006116134 "hypothetical protein"  
"OPBB05\_00469" 30742 "s59E13H2" 0 "hypothetical protein"  
"OPBB05\_00469" 30742 "s59E25H2" 0 "hypothetical protein"  
"OPBB05\_00469" 30742 "s59E5H2" 0 "hypothetical protein"  
"OPBB05\_00469" 30742 "s63E6H2" 0.003552212 "hypothetical protein"  
"OPBB05\_00470" 30743 "s59E13H2" 0 "Calcium-transporting ATPase 1"  
"OPBB05\_00470" 30743 "s59E25H2" 0.04518519 "Calcium-transporting ATPase 1"  
"OPBB05\_00470" 30743 "s59E5H2" 0.007667549 "Calcium-transporting ATPase 1"  
"OPBB05\_00470" 30743 "s63E6H2" 0.0427329 "Calcium-transporting ATPase 1"  
"OPBB05\_00471" 30744 "s59E13H2" 0 "Threonylcarbamoyl-AMP synthase"  
"OPBB05\_00471" 30744 "s59E25H2" 0.1577909 "Threonylcarbamoyl-AMP synthase"  
"OPBB05\_00471" 30744 "s59E5H2" 0 "Threonylcarbamoyl-AMP synthase"  
"OPBB05\_00471" 30744 "s63E6H2" 0.1777263 "Threonylcarbamoyl-AMP synthase"  
"OPBB05\_00472" 30745 "s59E13H2" 0 "nitroreductase A"  
"OPBB05\_00472" 30745 "s59E25H2" 0 "nitroreductase A"  
"OPBB05\_00472" 30745 "s59E5H2" 0 "nitroreductase A"  
"OPBB05\_00472" 30745 "s63E6H2" 0.3002023 "nitroreductase A"  
"OPBB05\_00474" 30747 "s59E13H2" 0 "putative amino acid permease YhdG"  
"OPBB05\_00474" 30747 "s59E25H2" 0 "putative amino acid permease YhdG"  
"OPBB05\_00474" 30747 "s59E5H2" 0 "putative amino acid permease YhdG"  
"OPBB05\_00474" 30747 "s63E6H2" 0.2044145 "putative amino acid permease YhdG"  
"OPBB05\_00476" 30749 "s59E13H2" 0.4930992 "Galactitol permease IIC component"  
"OPBB05\_00476" 30749 "s59E25H2" 0 "Galactitol permease IIC component"  
"OPBB05\_00476" 30749 "s59E5H2" 0.01963587 "Galactitol permease IIC component"  
"OPBB05\_00476" 30749 "s63E6H2" 0.03201199 "Galactitol permease IIC component"  
"OPBB05\_00477" 30750 "s59E13H2" 0.4241183 "hypothetical protein"  
"OPBB05\_00477" 30750 "s59E25H2" 0 "hypothetical protein"  
"OPBB05\_00477" 30750 "s59E5H2" 0.05796617 "hypothetical protein"  
"OPBB05\_00477" 30750 "s63E6H2" 0.022039 "hypothetical protein"  
"OPBB05\_00480" 30753 "s59E13H2" 0.2176433 "hypothetical protein"  
"OPBB05\_00480" 30753 "s59E25H2" 0 "hypothetical protein"  
"OPBB05\_00480" 30753 "s59E5H2" 0.03635358 "hypothetical protein"  
"OPBB05\_00480" 30753 "s63E6H2" 0.01902081 "hypothetical protein"  
"OPBB05\_00481" 30754 "s59E13H2" 0.2010042 "Chloroplast import component protein (Tic20)"  
"OPBB05\_00481" 30754 "s59E25H2" 0 "Chloroplast import component protein (Tic20)"

"OPBB05\_00481" 30754 "s59E5H2" 0.08217245 "Chloroplast import component protein (Tic20)"  
"OPBB05\_00481" 30754 "s63E6H2" 0.0006961019 "Chloroplast import component protein (Tic20)"  
"OPBB05\_00482" 30755 "s59E13H2" 0.6171266 "DNA gyrase subunit A"  
"OPBB05\_00482" 30755 "s59E25H2" 0.0945335 "DNA gyrase subunit A"  
"OPBB05\_00482" 30755 "s59E5H2" 0.03365617 "DNA gyrase subunit A"  
"OPBB05\_00482" 30755 "s63E6H2" 0.03261028 "DNA gyrase subunit A"  
"OPBB05\_00483" 30756 "s59E13H2" 0.4245019 "DNA gyrase subunit B"  
"OPBB05\_00483" 30756 "s59E25H2" 0 "DNA gyrase subunit B"  
"OPBB05\_00483" 30756 "s59E5H2" 0.01847506 "DNA gyrase subunit B"  
"OPBB05\_00483" 30756 "s63E6H2" 0.03658759 "DNA gyrase subunit B"  
"OPBB05\_00484" 30757 "s59E13H2" 0 "Multiple sugar-binding protein precursor"  
"OPBB05\_00484" 30757 "s59E25H2" 0 "Multiple sugar-binding protein precursor"  
"OPBB05\_00484" 30757 "s59E5H2" 0 "Multiple sugar-binding protein precursor"  
"OPBB05\_00484" 30757 "s63E6H2" 0 "Multiple sugar-binding protein precursor"  
"OPBB05\_00485" 30758 "s59E13H2" 0 "Lactose transport system permease protein LacF"  
"OPBB05\_00485" 30758 "s59E25H2" 0 "Lactose transport system permease protein LacF"  
"OPBB05\_00485" 30758 "s59E5H2" 0 "Lactose transport system permease protein LacF"  
"OPBB05\_00485" 30758 "s63E6H2" 0 "Lactose transport system permease protein LacF"  
"OPBB05\_00486" 30759 "s59E13H2" 0.002263762 "Isoprenyl transferase"  
"OPBB05\_00486" 30759 "s59E25H2" 0 "Isoprenyl transferase"  
"OPBB05\_00486" 30759 "s59E5H2" 0.02131779 "Isoprenyl transferase"  
"OPBB05\_00486" 30759 "s63E6H2" 0.009326364 "Isoprenyl transferase"  
"OPBB05\_00487" 30760 "s59E13H2" 0 "Ribosome-recycling factor"  
"OPBB05\_00487" 30760 "s59E25H2" 0 "Ribosome-recycling factor"  
"OPBB05\_00487" 30760 "s59E5H2" 0 "Ribosome-recycling factor"  
"OPBB05\_00487" 30760 "s63E6H2" 0.01558099 "Ribosome-recycling factor"  
"OPBB05\_00488" 30761 "s59E13H2" 0.01412507 "Indole-3-glycerol phosphate synthase"  
"OPBB05\_00488" 30761 "s59E25H2" 0 "Indole-3-glycerol phosphate synthase"  
"OPBB05\_00488" 30761 "s59E5H2" 0.1762353 "Indole-3-glycerol phosphate synthase"  
"OPBB05\_00488" 30761 "s63E6H2" 0.006602722 "Indole-3-glycerol phosphate synthase"  
"OPBB05\_00489" 30762 "s59E13H2" 0.3052655 "Hydrogenase isoenzymes nickel incorporation protein HypB"  
"OPBB05\_00489" 30762 "s59E25H2" 0 "Hydrogenase isoenzymes nickel incorporation protein HypB"  
"OPBB05\_00489" 30762 "s59E5H2" 0.1098976 "Hydrogenase isoenzymes nickel incorporation protein HypB"  
"OPBB05\_00489" 30762 "s63E6H2" 0.0178611 "Hydrogenase isoenzymes nickel incorporation protein HypB"  
"OPBB05\_00490" 30763 "s59E13H2" 0.01000767 "Sulfhydrogenase 2 subunit beta"  
"OPBB05\_00490" 30763 "s59E25H2" 0 "Sulfhydrogenase 2 subunit beta"  
"OPBB05\_00490" 30763 "s59E5H2" 0.02665319 "Sulfhydrogenase 2 subunit beta"  
"OPBB05\_00490" 30763 "s63E6H2" 0.0009159005 "Sulfhydrogenase 2 subunit beta"  
"OPBB05\_00491" 30764 "s59E13H2" 0 "Ribonuclease J 1"  
"OPBB05\_00491" 30764 "s59E25H2" 0 "Ribonuclease J 1"  
"OPBB05\_00491" 30764 "s59E5H2" 0.07497926 "Ribonuclease J 1"  
"OPBB05\_00491" 30764 "s63E6H2" 0.104986 "Ribonuclease J 1"  
"OPBB05\_00492" 30765 "s59E13H2" 0 "DNA translocase SpoIIIE"  
"OPBB05\_00492" 30765 "s59E25H2" 0 "DNA translocase SpoIIIE"  
"OPBB05\_00492" 30765 "s59E5H2" 0.3958662 "DNA translocase SpoIIIE"  
"OPBB05\_00492" 30765 "s63E6H2" 0.1123687 "DNA translocase SpoIIIE"  
"OPBB05\_00493" 30766 "s59E13H2" 0 "Nicotinamide-nucleotide amidohydrolase PncC"

"OPBB05\_00493" 30766 "s59E25H2" 0 "Nicotinamide-nucleotide amidohydrolase PncC"  
"OPBB05\_00493" 30766 "s59E5H2" 0.3893914 "Nicotinamide-nucleotide amidohydrolase PncC"  
"OPBB05\_00493" 30766 "s63E6H2" 0.1304816 "Nicotinamide-nucleotide amidohydrolase PncC"  
"OPBB05\_00494" 30767 "s59E13H2" 0 "2'-5'-RNA ligase"  
"OPBB05\_00494" 30767 "s59E25H2" 0 "2'-5'-RNA ligase"  
"OPBB05\_00494" 30767 "s59E5H2" 0.3022463 "2'-5'-RNA ligase"  
"OPBB05\_00494" 30767 "s63E6H2" 0.09605078 "2'-5'-RNA ligase"  
"OPBB05\_00495" 30768 "s59E13H2" 0 "DNA repair and recombination protein RadA"  
"OPBB05\_00495" 30768 "s59E25H2" 0 "DNA repair and recombination protein RadA"  
"OPBB05\_00495" 30768 "s59E5H2" 0.6042297 "DNA repair and recombination protein RadA"  
"OPBB05\_00495" 30768 "s63E6H2" 0.154883 "DNA repair and recombination protein RadA"  
"OPBB05\_00498" 30771 "s59E13H2" 0 "Riboflavin biosynthesis protein RibF"  
"OPBB05\_00498" 30771 "s59E25H2" 0 "Riboflavin biosynthesis protein RibF"  
"OPBB05\_00498" 30771 "s59E5H2" 0.01559804 "Riboflavin biosynthesis protein RibF"  
"OPBB05\_00498" 30771 "s63E6H2" 0.004768822 "Riboflavin biosynthesis protein RibF"  
"OPBB05\_00499" 30772 "s59E13H2" 0 "tRNA pseudouridine synthase B"  
"OPBB05\_00499" 30772 "s59E25H2" 0 "tRNA pseudouridine synthase B"  
"OPBB05\_00499" 30772 "s59E5H2" 0.02988755 "tRNA pseudouridine synthase B"  
"OPBB05\_00499" 30772 "s63E6H2" 0.01356236 "tRNA pseudouridine synthase B"  
"OPBB05\_00501" 30774 "s59E13H2" 0.006751224 "Bifunctional oligoribonuclease and PAP phosphatase NrnA"  
"OPBB05\_00501" 30774 "s59E25H2" 0 "Bifunctional oligoribonuclease and PAP phosphatase NrnA"  
"OPBB05\_00501" 30774 "s59E5H2" 0.02741376 "Bifunctional oligoribonuclease and PAP phosphatase NrnA"  
"OPBB05\_00501" 30774 "s63E6H2" 0.0183241 "Bifunctional oligoribonuclease and PAP phosphatase NrnA"  
"OPBB05\_00502" 30775 "s59E13H2" 0 "Ribosome-binding factor A"  
"OPBB05\_00502" 30775 "s59E25H2" 0 "Ribosome-binding factor A"  
"OPBB05\_00502" 30775 "s59E5H2" 0.001861852 "Ribosome-binding factor A"  
"OPBB05\_00502" 30775 "s63E6H2" 0.003559024 "Ribosome-binding factor A"  
"OPBB05\_00503" 30776 "s59E13H2" 0.0006609145 "Arsenical pump membrane protein"  
"OPBB05\_00503" 30776 "s59E25H2" 0 "Arsenical pump membrane protein"  
"OPBB05\_00503" 30776 "s59E5H2" 0.009242551 "Arsenical pump membrane protein"  
"OPBB05\_00503" 30776 "s63E6H2" 0.04594173 "Arsenical pump membrane protein"  
"OPBB05\_00504" 30777 "s59E13H2" 0 "GDP-mannose-dependent alpha-(1-6)-phosphatidylinositol monomannoside mannosyltransferase"  
"OPBB05\_00504" 30777 "s59E25H2" 0 "GDP-mannose-dependent alpha-(1-6)-phosphatidylinositol monomannoside mannosyltransferase"  
"OPBB05\_00504" 30777 "s59E5H2" 0 "GDP-mannose-dependent alpha-(1-6)-phosphatidylinositol monomannoside mannosyltransferase"  
"OPBB05\_00504" 30777 "s63E6H2" 0 "GDP-mannose-dependent alpha-(1-6)-phosphatidylinositol monomannoside mannosyltransferase"  
"OPBB05\_00505" 30778 "s59E13H2" 0.01262989 "30S ribosomal protein S11"  
"OPBB05\_00505" 30778 "s59E25H2" 0 "30S ribosomal protein S11"  
"OPBB05\_00505" 30778 "s59E5H2" 0.04019751 "30S ribosomal protein S11"  
"OPBB05\_00505" 30778 "s63E6H2" 0.01450497 "30S ribosomal protein S11"  
"OPBB05\_00506" 30779 "s59E13H2" 0.02596976 "30S ribosomal protein S4"  
"OPBB05\_00506" 30779 "s59E25H2" 0 "30S ribosomal protein S4"  
"OPBB05\_00506" 30779 "s59E5H2" 0.04439481 "30S ribosomal protein S4"  
"OPBB05\_00506" 30779 "s63E6H2" 0.1090685 "30S ribosomal protein S4"  
"OPBB05\_00507" 30780 "s59E13H2" 0.03281613 "DNA-directed RNA polymerase subunit alpha"  
"OPBB05\_00507" 30780 "s59E25H2" 0 "DNA-directed RNA polymerase subunit alpha"  
"OPBB05\_00507" 30780 "s59E5H2" 0.009526125 "DNA-directed RNA polymerase subunit alpha"  
"OPBB05\_00507" 30780 "s63E6H2" 0.0179391 "DNA-directed RNA polymerase subunit alpha"

"OPBB05\_00508" 30781 "s59E13H2" 0.05794379 "50S ribosomal protein L17"  
"OPBB05\_00508" 30781 "s59E25H2" 0 "50S ribosomal protein L17"  
"OPBB05\_00508" 30781 "s59E5H2" 0.04146026 "50S ribosomal protein L17"  
"OPBB05\_00508" 30781 "s63E6H2" 0.0104557 "50S ribosomal protein L17"  
"OPBB05\_00509" 30782 "s59E13H2" 0.139455 "tRNA pseudouridine synthase A"  
"OPBB05\_00509" 30782 "s59E25H2" 0 "tRNA pseudouridine synthase A"  
"OPBB05\_00509" 30782 "s59E5H2" 0.02083748 "tRNA pseudouridine synthase A"  
"OPBB05\_00509" 30782 "s63E6H2" 0.017711 "tRNA pseudouridine synthase A"  
"OPBB05\_00510" 30783 "s59E13H2" 0.02862132 "50S ribosomal protein L13"  
"OPBB05\_00510" 30783 "s59E25H2" 0 "50S ribosomal protein L13"  
"OPBB05\_00510" 30783 "s59E5H2" 0.04330431 "50S ribosomal protein L13"  
"OPBB05\_00510" 30783 "s63E6H2" 0.01373317 "50S ribosomal protein L13"  
"OPBB05\_00511" 30784 "s59E13H2" 0.03753561 "30S ribosomal protein S9"  
"OPBB05\_00511" 30784 "s59E25H2" 0 "30S ribosomal protein S9"  
"OPBB05\_00511" 30784 "s59E5H2" 0.0248498 "30S ribosomal protein S9"  
"OPBB05\_00511" 30784 "s63E6H2" 0.03753501 "30S ribosomal protein S9"  
"OPBB05\_00512" 30785 "s59E13H2" 0.03538599 "hypothetical protein"  
"OPBB05\_00512" 30785 "s59E25H2" 0 "hypothetical protein"  
"OPBB05\_00512" 30785 "s59E5H2" 0 "hypothetical protein"  
"OPBB05\_00512" 30785 "s63E6H2" 0.02939199 "hypothetical protein"  
"OPBB05\_00513" 30786 "s59E13H2" 0 "hypothetical protein"  
"OPBB05\_00513" 30786 "s59E25H2" 0 "hypothetical protein"  
"OPBB05\_00513" 30786 "s59E5H2" 0 "hypothetical protein"  
"OPBB05\_00513" 30786 "s63E6H2" 0 "hypothetical protein"  
"OPBB05\_00514" 30787 "s59E13H2" 0.002475996 "D-tagatose-1,6-bisphosphate aldolase subunit KbaZ"  
"OPBB05\_00514" 30787 "s59E25H2" 0 "D-tagatose-1,6-bisphosphate aldolase subunit KbaZ"  
"OPBB05\_00514" 30787 "s59E5H2" 0.06250566 "D-tagatose-1,6-bisphosphate aldolase subunit KbaZ"  
"OPBB05\_00514" 30787 "s63E6H2" 0.002344394 "D-tagatose-1,6-bisphosphate aldolase subunit KbaZ"  
"OPBB05\_00515" 30788 "s59E13H2" 0.02392336 "2-dehydro-3-deoxygluconokinase"  
"OPBB05\_00515" 30788 "s59E25H2" 0 "2-dehydro-3-deoxygluconokinase"  
"OPBB05\_00515" 30788 "s59E5H2" 0.1314141 "2-dehydro-3-deoxygluconokinase"  
"OPBB05\_00515" 30788 "s63E6H2" 0 "2-dehydro-3-deoxygluconokinase"  
"OPBB05\_00516" 30789 "s59E13H2" 0.02871311 "Glutamine--fructose-6-phosphate aminotransferase [isomerizing]"  
"OPBB05\_00516" 30789 "s59E25H2" 0 "Glutamine--fructose-6-phosphate aminotransferase [isomerizing]"  
"OPBB05\_00516" 30789 "s59E5H2" 0.1475848 "Glutamine--fructose-6-phosphate aminotransferase [isomerizing]"  
"OPBB05\_00516" 30789 "s63E6H2" 0 "Glutamine--fructose-6-phosphate aminotransferase [isomerizing]"  
"OPBB05\_00517" 30790 "s59E13H2" 0 "Bacterial extracellular solute-binding protein"  
"OPBB05\_00517" 30790 "s59E25H2" 0 "Bacterial extracellular solute-binding protein"  
"OPBB05\_00517" 30790 "s59E5H2" 0 "Bacterial extracellular solute-binding protein"  
"OPBB05\_00517" 30790 "s63E6H2" 0 "Bacterial extracellular solute-binding protein"  
"OPBB05\_00518" 30791 "s59E13H2" 0 "Integrase core domain protein"  
"OPBB05\_00518" 30791 "s59E25H2" 0 "Integrase core domain protein"  
"OPBB05\_00518" 30791 "s59E5H2" 0 "Integrase core domain protein"  
"OPBB05\_00518" 30791 "s63E6H2" 0 "Integrase core domain protein"  
"OPBB05\_00519" 30792 "s59E13H2" 0 "transposase/IS protein"  
"OPBB05\_00519" 30792 "s59E25H2" 0 "transposase/IS protein"  
"OPBB05\_00519" 30792 "s59E5H2" 0 "transposase/IS protein"



"OPBB05\_00519" 30792 "s63E6H2" 0 "transposase/IS protein"  
"OPBB05\_00521" 30794 "s59E13H2" 0 "Lactose transport system permease protein LacF"  
"OPBB05\_00521" 30794 "s59E25H2" 0 "Lactose transport system permease protein LacF"  
"OPBB05\_00521" 30794 "s59E5H2" 0 "Lactose transport system permease protein LacF"  
"OPBB05\_00521" 30794 "s63E6H2" 0 "Lactose transport system permease protein LacF"  
"OPBB05\_00522" 30795 "s59E13H2" 0 "Trehalose/maltose transport system permease protein MalG"  
"OPBB05\_00522" 30795 "s59E25H2" 0 "Trehalose/maltose transport system permease protein MalG"  
"OPBB05\_00522" 30795 "s59E5H2" 0 "Trehalose/maltose transport system permease protein MalG"  
"OPBB05\_00522" 30795 "s63E6H2" 0 "Trehalose/maltose transport system permease protein MalG"  
"OPBB05\_00523" 30796 "s59E13H2" 0 "N-acyl homoserine lactonase AttM"  
"OPBB05\_00523" 30796 "s59E25H2" 0 "N-acyl homoserine lactonase AttM"  
"OPBB05\_00523" 30796 "s59E5H2" 0 "N-acyl homoserine lactonase AttM"  
"OPBB05\_00523" 30796 "s63E6H2" 0 "N-acyl homoserine lactonase AttM"  
"OPBB05\_00524" 30797 "s59E13H2" 0 "methylcobalamin:coenzyme M methyltransferase"  
"OPBB05\_00524" 30797 "s59E25H2" 0 "methylcobalamin:coenzyme M methyltransferase"  
"OPBB05\_00524" 30797 "s59E5H2" 0 "methylcobalamin:coenzyme M methyltransferase"  
"OPBB05\_00524" 30797 "s63E6H2" 0 "methylcobalamin:coenzyme M methyltransferase"  
"OPBB05\_00528" 30801 "s59E13H2" 0.003584538 "Acetoin:2,6-dichlorophenolindophenol oxidoreductase subunit alpha"  
"OPBB05\_00528" 30801 "s59E25H2" 0 "Acetoin:2,6-dichlorophenolindophenol oxidoreductase subunit alpha"  
"OPBB05\_00528" 30801 "s59E5H2" 0 "Acetoin:2,6-dichlorophenolindophenol oxidoreductase subunit alpha"  
"OPBB05\_00528" 30801 "s63E6H2" 0.01176371 "Acetoin:2,6-dichlorophenolindophenol oxidoreductase subunit alpha"  
"OPBB05\_00529" 30802 "s59E13H2" 0.0001571885 "2-oxoisovalerate dehydrogenase subunit beta"  
"OPBB05\_00529" 30802 "s59E25H2" 0 "2-oxoisovalerate dehydrogenase subunit beta"  
"OPBB05\_00529" 30802 "s59E5H2" 0 "2-oxoisovalerate dehydrogenase subunit beta"  
"OPBB05\_00529" 30802 "s63E6H2" 0.01619427 "2-oxoisovalerate dehydrogenase subunit beta"  
"OPBB05\_00530" 30803 "s59E13H2" 0 "Pyruvate dehydrogenase E1 component subunit beta"  
"OPBB05\_00530" 30803 "s59E25H2" 0 "Pyruvate dehydrogenase E1 component subunit beta"  
"OPBB05\_00530" 30803 "s59E5H2" 0 "Pyruvate dehydrogenase E1 component subunit beta"  
"OPBB05\_00530" 30803 "s63E6H2" 0.009048497 "Pyruvate dehydrogenase E1 component subunit beta"  
"OPBB05\_00532" 30805 "s59E13H2" 0 "Cupin domain protein"  
"OPBB05\_00532" 30805 "s59E25H2" 0 "Cupin domain protein"  
"OPBB05\_00532" 30805 "s59E5H2" 0.001064407 "Cupin domain protein"  
"OPBB05\_00532" 30805 "s63E6H2" 0.0005526627 "Cupin domain protein"  
"OPBB05\_00534" 30807 "s59E13H2" 0 "hypothetical protein"  
"OPBB05\_00534" 30807 "s59E25H2" 0 "hypothetical protein"  
"OPBB05\_00534" 30807 "s59E5H2" 0.0828857 "hypothetical protein"  
"OPBB05\_00534" 30807 "s63E6H2" 0.007483316 "hypothetical protein"  
"OPBB05\_00535" 30808 "s59E13H2" 0 "hypothetical protein"  
"OPBB05\_00535" 30808 "s59E25H2" 0 "hypothetical protein"  
"OPBB05\_00535" 30808 "s59E5H2" 0.006166426 "hypothetical protein"  
"OPBB05\_00535" 30808 "s63E6H2" 0.000149185 "hypothetical protein"  
"OPBB05\_00537" 30810 "s59E13H2" 0 "D-allulose-6-phosphate 3-epimerase"  
"OPBB05\_00537" 30810 "s59E25H2" 0 "D-allulose-6-phosphate 3-epimerase"  
"OPBB05\_00537" 30810 "s59E5H2" 0 "D-allulose-6-phosphate 3-epimerase"  
"OPBB05\_00537" 30810 "s63E6H2" 0 "D-allulose-6-phosphate 3-epimerase"  
"OPBB05\_00538" 30811 "s59E13H2" 0.0003622704 "Cell cycle protein GpsB"  
"OPBB05\_00538" 30811 "s59E25H2" 0.8113426 "Cell cycle protein GpsB"

"OPBB05\_00538" 30811 "s59E5H2" 0.0277701 "Cell cycle protein GpsB"  
"OPBB05\_00538" 30811 "s63E6H2" 0.02666725 "Cell cycle protein GpsB"  
"OPBB05\_00539" 30812 "s59E13H2" 0.02103584 "hypothetical protein"  
"OPBB05\_00539" 30812 "s59E25H2" 0 "hypothetical protein"  
"OPBB05\_00539" 30812 "s59E5H2" 0.09014962 "hypothetical protein"  
"OPBB05\_00539" 30812 "s63E6H2" 0.2170813 "hypothetical protein"  
"OPBB05\_00540" 30813 "s59E13H2" 0.02058894 "Ribosomal RNA small subunit methyltransferase E"  
"OPBB05\_00540" 30813 "s59E25H2" 0 "Ribosomal RNA small subunit methyltransferase E"  
"OPBB05\_00540" 30813 "s59E5H2" 0.1451464 "Ribosomal RNA small subunit methyltransferase E"  
"OPBB05\_00540" 30813 "s63E6H2" 0.2932043 "Ribosomal RNA small subunit methyltransferase E"  
"OPBB05\_00541" 30814 "s59E13H2" 0.01262591 "N-(5'-phosphoribosyl)anthranilate isomerase"  
"OPBB05\_00541" 30814 "s59E25H2" 0 "N-(5'-phosphoribosyl)anthranilate isomerase"  
"OPBB05\_00541" 30814 "s59E5H2" 0.0928063 "N-(5'-phosphoribosyl)anthranilate isomerase"  
"OPBB05\_00541" 30814 "s63E6H2" 0.02596914 "N-(5'-phosphoribosyl)anthranilate isomerase"  
"OPBB05\_00542" 30815 "s59E13H2" 0.004943926 "Tryptophan synthase beta chain 1"  
"OPBB05\_00542" 30815 "s59E25H2" 0 "Tryptophan synthase beta chain 1"  
"OPBB05\_00542" 30815 "s59E5H2" 0.1178 "Tryptophan synthase beta chain 1"  
"OPBB05\_00542" 30815 "s63E6H2" 0.04037463 "Tryptophan synthase beta chain 1"  
"OPBB05\_00543" 30816 "s59E13H2" 0.005347852 "Tryptophan synthase alpha chain"  
"OPBB05\_00543" 30816 "s59E25H2" 0 "Tryptophan synthase alpha chain"  
"OPBB05\_00543" 30816 "s59E5H2" 0.06356498 "Tryptophan synthase alpha chain"  
"OPBB05\_00543" 30816 "s63E6H2" 0.0403585 "Tryptophan synthase alpha chain"  
"OPBB05\_00544" 30817 "s59E13H2" 0.003708088 "N-acetylglucosaminyl-diphospho-decaprenol L-rhamnosyltransferase"  
"OPBB05\_00544" 30817 "s59E25H2" 0 "N-acetylglucosaminyl-diphospho-decaprenol L-rhamnosyltransferase"  
"OPBB05\_00544" 30817 "s59E5H2" 0.08859139 "N-acetylglucosaminyl-diphospho-decaprenol L-rhamnosyltransferase"  
"OPBB05\_00544" 30817 "s63E6H2" 0.02602291 "N-acetylglucosaminyl-diphospho-decaprenol L-rhamnosyltransferase"  
"OPBB05\_00545" 30818 "s59E13H2" 0.01578775 "GDP-6-deoxy-D-mannose reductase"  
"OPBB05\_00545" 30818 "s59E25H2" 0 "GDP-6-deoxy-D-mannose reductase"  
"OPBB05\_00545" 30818 "s59E5H2" 0.05645398 "GDP-6-deoxy-D-mannose reductase"  
"OPBB05\_00545" 30818 "s63E6H2" 0.1276524 "GDP-6-deoxy-D-mannose reductase"  
"OPBB05\_00546" 30819 "s59E13H2" 0.004387757 "D-glycero-alpha-D-manno-heptose 1-phosphate guanylyltransferase"  
"OPBB05\_00546" 30819 "s59E25H2" 0 "D-glycero-alpha-D-manno-heptose 1-phosphate guanylyltransferase"  
"OPBB05\_00546" 30819 "s59E5H2" 0.06595096 "D-glycero-alpha-D-manno-heptose 1-phosphate guanylyltransferase"  
"OPBB05\_00546" 30819 "s63E6H2" 0.1413707 "D-glycero-alpha-D-manno-heptose 1-phosphate guanylyltransferase"  
"OPBB05\_00547" 30820 "s59E13H2" 0.008104024 "GDP-mannose 4,6-dehydratase"  
"OPBB05\_00547" 30820 "s59E25H2" 0 "GDP-mannose 4,6-dehydratase"  
"OPBB05\_00547" 30820 "s59E5H2" 0.06982998 "GDP-mannose 4,6-dehydratase"  
"OPBB05\_00547" 30820 "s63E6H2" 0.1969551 "GDP-mannose 4,6-dehydratase"  
"OPBB05\_00548" 30821 "s59E13H2" 0.01381017 "Phosphoglucomutase"  
"OPBB05\_00548" 30821 "s59E25H2" 0 "Phosphoglucomutase"  
"OPBB05\_00548" 30821 "s59E5H2" 0.04882579 "Phosphoglucomutase"  
"OPBB05\_00548" 30821 "s63E6H2" 0.2065277 "Phosphoglucomutase"  
"OPBB05\_00549" 30822 "s59E13H2" 0.0296733 "Bifunctional phosphoglucose/phosphomannose isomerase"  
"OPBB05\_00549" 30822 "s59E25H2" 0 "Bifunctional phosphoglucose/phosphomannose isomerase"  
"OPBB05\_00549" 30822 "s59E5H2" 0.04837787 "Bifunctional phosphoglucose/phosphomannose isomerase"  
"OPBB05\_00549" 30822 "s63E6H2" 0.1724452 "Bifunctional phosphoglucose/phosphomannose isomerase"  
"OPBB05\_00550" 30823 "s59E13H2" 0.03401988 "Adenosylhomocysteinase"

"OPBB05\_00550" 30823 "s59E25H2" 0 "Adenosylhomocysteinase"  
"OPBB05\_00550" 30823 "s59E5H2" 0.04980884 "Adenosylhomocysteinase"  
"OPBB05\_00550" 30823 "s63E6H2" 0.3830871 "Adenosylhomocysteinase"  
"OPBB05\_00551" 30824 "s59E13H2" 0.02702942 "Methylthioribose-1-phosphate isomerase"  
"OPBB05\_00551" 30824 "s59E25H2" 0 "Methylthioribose-1-phosphate isomerase"  
"OPBB05\_00551" 30824 "s59E5H2" 0.05932249 "Methylthioribose-1-phosphate isomerase"  
"OPBB05\_00551" 30824 "s63E6H2" 0.4283903 "Methylthioribose-1-phosphate isomerase"  
"OPBB05\_00552" 30825 "s59E13H2" 0 "Trehalose/maltose-binding protein MalE precursor"  
"OPBB05\_00552" 30825 "s59E25H2" 0 "Trehalose/maltose-binding protein MalE precursor"  
"OPBB05\_00552" 30825 "s59E5H2" 0 "Trehalose/maltose-binding protein MalE precursor"  
"OPBB05\_00552" 30825 "s63E6H2" 0.0001098667 "Trehalose/maltose-binding protein MalE precursor"  
"OPBB05\_00553" 30826 "s59E13H2" 0 "Trehalose transport system permease protein SugA"  
"OPBB05\_00553" 30826 "s59E25H2" 0 "Trehalose transport system permease protein SugA"  
"OPBB05\_00553" 30826 "s59E5H2" 0 "Trehalose transport system permease protein SugA"  
"OPBB05\_00553" 30826 "s63E6H2" 0 "Trehalose transport system permease protein SugA"  
"OPBB05\_00554" 30827 "s59E13H2" 0 "Trehalose transport system permease protein SugB"  
"OPBB05\_00554" 30827 "s59E25H2" 0 "Trehalose transport system permease protein SugB"  
"OPBB05\_00554" 30827 "s59E5H2" 0 "Trehalose transport system permease protein SugB"  
"OPBB05\_00554" 30827 "s63E6H2" 0 "Trehalose transport system permease protein SugB"  
"OPBB05\_00555" 30828 "s59E13H2" 0 "hypothetical protein"  
"OPBB05\_00555" 30828 "s59E25H2" 0 "hypothetical protein"  
"OPBB05\_00555" 30828 "s59E5H2" 0 "hypothetical protein"  
"OPBB05\_00555" 30828 "s63E6H2" 0 "hypothetical protein"  
"OPBB05\_00556" 30829 "s59E13H2" 0 "Ribulokinase"  
"OPBB05\_00556" 30829 "s59E25H2" 0 "Ribulokinase"  
"OPBB05\_00556" 30829 "s59E5H2" 0 "Ribulokinase"  
"OPBB05\_00556" 30829 "s63E6H2" 0 "Ribulokinase"  
"OPBB05\_00557" 30830 "s59E13H2" 0 "HTH-type transcriptional repressor YvoA"  
"OPBB05\_00557" 30830 "s59E25H2" 0 "HTH-type transcriptional repressor YvoA"  
"OPBB05\_00557" 30830 "s59E5H2" 0 "HTH-type transcriptional repressor YvoA"  
"OPBB05\_00557" 30830 "s63E6H2" 0 "HTH-type transcriptional repressor YvoA"  
"OPBB05\_00558" 30831 "s59E13H2" 0 "Sorbitol dehydrogenase"  
"OPBB05\_00558" 30831 "s59E25H2" 0 "Sorbitol dehydrogenase"  
"OPBB05\_00558" 30831 "s59E5H2" 0 "Sorbitol dehydrogenase"  
"OPBB05\_00558" 30831 "s63E6H2" 0 "Sorbitol dehydrogenase"  
"OPBB05\_00561" 30834 "s59E13H2" 2.123152 "Putative cysteine protease YraA"  
"OPBB05\_00561" 30834 "s59E25H2" 0 "Putative cysteine protease YraA"  
"OPBB05\_00561" 30834 "s59E5H2" 0.1879017 "Putative cysteine protease YraA"  
"OPBB05\_00561" 30834 "s63E6H2" 0.2118256 "Putative cysteine protease YraA"  
"OPBB05\_00562" 30835 "s59E13H2" 2.723647 "Leucine--tRNA ligase"  
"OPBB05\_00562" 30835 "s59E25H2" 0 "Leucine--tRNA ligase"  
"OPBB05\_00562" 30835 "s59E5H2" 0.2319913 "Leucine--tRNA ligase"  
"OPBB05\_00562" 30835 "s63E6H2" 0.3229317 "Leucine--tRNA ligase"  
"OPBB05\_00564" 30837 "s59E13H2" 0 "Glycosyl transferases group 1"  
"OPBB05\_00564" 30837 "s59E25H2" 0 "Glycosyl transferases group 1"  
"OPBB05\_00564" 30837 "s59E5H2" 0 "Glycosyl transferases group 1"  
"OPBB05\_00564" 30837 "s63E6H2" 0 "Glycosyl transferases group 1"

"OPBB05\_00565" 30838 "s59E13H2" 0 "hypothetical protein"  
"OPBB05\_00565" 30838 "s59E25H2" 0 "hypothetical protein"  
"OPBB05\_00565" 30838 "s59E5H2" 0 "hypothetical protein"  
"OPBB05\_00565" 30838 "s63E6H2" 0 "hypothetical protein"  
"OPBB05\_00566" 30839 "s59E13H2" 0 "putative methyltransferase YcgJ"  
"OPBB05\_00566" 30839 "s59E25H2" 0 "putative methyltransferase YcgJ"  
"OPBB05\_00566" 30839 "s59E5H2" 0 "putative methyltransferase YcgJ"  
"OPBB05\_00566" 30839 "s63E6H2" 0 "putative methyltransferase YcgJ"  
"OPBB05\_00567" 30840 "s59E13H2" 0 "bifunctional 3-demethylubiquinone-9 3-methyltransferase/ 2-octaprenyl-6-hydroxy phenol methylase"  
"OPBB05\_00567" 30840 "s59E25H2" 0 "bifunctional 3-demethylubiquinone-9 3-methyltransferase/ 2-octaprenyl-6-hydroxy phenol methylase"  
"OPBB05\_00567" 30840 "s59E5H2" 0 "bifunctional 3-demethylubiquinone-9 3-methyltransferase/ 2-octaprenyl-6-hydroxy phenol methylase"  
"OPBB05\_00567" 30840 "s63E6H2" 0 "bifunctional 3-demethylubiquinone-9 3-methyltransferase/ 2-octaprenyl-6-hydroxy phenol methylase"  
"OPBB05\_00568" 30841 "s59E13H2" 0.02608347 "Transcription elongation factor GreA"  
"OPBB05\_00568" 30841 "s59E25H2" 0 "Transcription elongation factor GreA"  
"OPBB05\_00568" 30841 "s59E5H2" 0.01001313 "Transcription elongation factor GreA"  
"OPBB05\_00568" 30841 "s63E6H2" 0.005483281 "Transcription elongation factor GreA"  
"OPBB05\_00569" 30842 "s59E13H2" 0.963163 "Lysine--tRNA ligase"  
"OPBB05\_00569" 30842 "s59E25H2" 0 "Lysine--tRNA ligase"  
"OPBB05\_00569" 30842 "s59E5H2" 0.02265088 "Lysine--tRNA ligase"  
"OPBB05\_00569" 30842 "s63E6H2" 0.01718195 "Lysine--tRNA ligase"  
"OPBB05\_00570" 30843 "s59E13H2" 1.504224 "hypothetical protein"  
"OPBB05\_00570" 30843 "s59E25H2" 0 "hypothetical protein"  
"OPBB05\_00570" 30843 "s59E5H2" 0 "hypothetical protein"  
"OPBB05\_00570" 30843 "s63E6H2" 0.02503767 "hypothetical protein"  
"OPBB05\_00571" 30844 "s59E13H2" 1.731628 "Putative ATP:guanido phosphotransferase"  
"OPBB05\_00571" 30844 "s59E25H2" 0 "Putative ATP:guanido phosphotransferase"  
"OPBB05\_00571" 30844 "s59E5H2" 0 "Putative ATP:guanido phosphotransferase"  
"OPBB05\_00571" 30844 "s63E6H2" 0.02990247 "Putative ATP:guanido phosphotransferase"  
"OPBB05\_00572" 30845 "s59E13H2" 2.406502 "ATP-dependent Clp protease ATP-binding subunit ClpC1"  
"OPBB05\_00572" 30845 "s59E25H2" 0 "ATP-dependent Clp protease ATP-binding subunit ClpC1"  
"OPBB05\_00572" 30845 "s59E5H2" 0.01869017 "ATP-dependent Clp protease ATP-binding subunit ClpC1"  
"OPBB05\_00572" 30845 "s63E6H2" 0.1707107 "ATP-dependent Clp protease ATP-binding subunit ClpC1"  
"OPBB05\_00573" 30846 "s59E13H2" 2.792144 "DNA integrity scanning protein DisA"  
"OPBB05\_00573" 30846 "s59E25H2" 0 "DNA integrity scanning protein DisA"  
"OPBB05\_00573" 30846 "s59E5H2" 0.04019341 "DNA integrity scanning protein DisA"  
"OPBB05\_00573" 30846 "s63E6H2" 0.4375993 "DNA integrity scanning protein DisA"  
"OPBB05\_00574" 30847 "s59E13H2" 2.738919 "2-C-methyl-D-erythritol 4-phosphate cytidylyltransferase"  
"OPBB05\_00574" 30847 "s59E25H2" 0 "2-C-methyl-D-erythritol 4-phosphate cytidylyltransferase"  
"OPBB05\_00574" 30847 "s59E5H2" 0.05305865 "2-C-methyl-D-erythritol 4-phosphate cytidylyltransferase"  
"OPBB05\_00574" 30847 "s63E6H2" 0.4722522 "2-C-methyl-D-erythritol 4-phosphate cytidylyltransferase"  
"OPBB05\_00575" 30848 "s59E13H2" 3.286577 "2-C-methyl-D-erythritol 2,4-cyclodiphosphate synthase"  
"OPBB05\_00575" 30848 "s59E25H2" 0 "2-C-methyl-D-erythritol 2,4-cyclodiphosphate synthase"  
"OPBB05\_00575" 30848 "s59E5H2" 0.01350978 "2-C-methyl-D-erythritol 2,4-cyclodiphosphate synthase"  
"OPBB05\_00575" 30848 "s63E6H2" 0.6181001 "2-C-methyl-D-erythritol 2,4-cyclodiphosphate synthase"  
"OPBB05\_00576" 30849 "s59E13H2" 3.909226 "Glutamate--tRNA ligase"  
"OPBB05\_00576" 30849 "s59E25H2" 0 "Glutamate--tRNA ligase"  
"OPBB05\_00576" 30849 "s59E5H2" 0.02545842 "Glutamate--tRNA ligase"

"OPBB05\_00576" 30849 "s63E6H2" 0.6863907 "Glutamate--tRNA ligase"  
"OPBB05\_00577" 30850 "s59E13H2" 6.880751 "Serine acetyltransferase"  
"OPBB05\_00577" 30850 "s59E25H2" 0 "Serine acetyltransferase"  
"OPBB05\_00577" 30850 "s59E5H2" 0.02957278 "Serine acetyltransferase"  
"OPBB05\_00577" 30850 "s63E6H2" 0.8220426 "Serine acetyltransferase"  
"OPBB05\_00578" 30851 "s59E13H2" 4.85095 "Cysteine--tRNA ligase"  
"OPBB05\_00578" 30851 "s59E25H2" 0 "Cysteine--tRNA ligase"  
"OPBB05\_00578" 30851 "s59E5H2" 0.05013449 "Cysteine--tRNA ligase"  
"OPBB05\_00578" 30851 "s63E6H2" 0.7592236 "Cysteine--tRNA ligase"  
"OPBB05\_00579" 30852 "s59E13H2" 0 "Anaerobic sulfatase-maturing enzyme"  
"OPBB05\_00579" 30852 "s59E25H2" 0 "Anaerobic sulfatase-maturing enzyme"  
"OPBB05\_00579" 30852 "s59E5H2" 0 "Anaerobic sulfatase-maturing enzyme"  
"OPBB05\_00579" 30852 "s63E6H2" 0.0008375129 "Anaerobic sulfatase-maturing enzyme"  
"OPBB05\_00580" 30853 "s59E13H2" 0 "Ribokinase"  
"OPBB05\_00580" 30853 "s59E25H2" 0 "Ribokinase"  
"OPBB05\_00580" 30853 "s59E5H2" 0 "Ribokinase"  
"OPBB05\_00580" 30853 "s63E6H2" 0 "Ribokinase"  
"OPBB05\_00582" 30855 "s59E13H2" 0 "5-methyltetrahydrofolate:corrinoid/iron-sulfur protein co-methyltransferase"  
"OPBB05\_00582" 30855 "s59E25H2" 0 "5-methyltetrahydrofolate:corrinoid/iron-sulfur protein co-methyltransferase"  
"OPBB05\_00582" 30855 "s59E5H2" 0.02889563 "5-methyltetrahydrofolate:corrinoid/iron-sulfur protein co-methyltransferase"  
"OPBB05\_00582" 30855 "s63E6H2" 0.1228781 "5-methyltetrahydrofolate:corrinoid/iron-sulfur protein co-methyltransferase"  
"OPBB05\_00583" 30856 "s59E13H2" 0 "Cystine-binding periplasmic protein precursor"  
"OPBB05\_00583" 30856 "s59E25H2" 0 "Cystine-binding periplasmic protein precursor"  
"OPBB05\_00583" 30856 "s59E5H2" 0.01070103 "Cystine-binding periplasmic protein precursor"  
"OPBB05\_00583" 30856 "s63E6H2" 0.07967153 "Cystine-binding periplasmic protein precursor"  
"OPBB05\_00584" 30857 "s59E13H2" 0.00715747 "Putative lipoprotein YerB precursor"  
"OPBB05\_00584" 30857 "s59E25H2" 0 "Putative lipoprotein YerB precursor"  
"OPBB05\_00584" 30857 "s59E5H2" 0.04900591 "Putative lipoprotein YerB precursor"  
"OPBB05\_00584" 30857 "s63E6H2" 0.01120151 "Putative lipoprotein YerB precursor"  
"OPBB05\_00586" 30859 "s59E13H2" 0.002949785 "DNA polymerase IV"  
"OPBB05\_00586" 30859 "s59E25H2" 0 "DNA polymerase IV"  
"OPBB05\_00586" 30859 "s59E5H2" 1.291645 "DNA polymerase IV"  
"OPBB05\_00586" 30859 "s63E6H2" 0.05085669 "DNA polymerase IV"  
"OPBB07\_00003" 33497 "s59E13H2" 0.0027917 "Aspartate aminotransferase"  
"OPBB07\_00003" 33497 "s59E25H2" 0 "Aspartate aminotransferase"  
"OPBB07\_00003" 33497 "s59E5H2" 0 "Aspartate aminotransferase"  
"OPBB07\_00003" 33497 "s63E6H2" 0.4452769 "Aspartate aminotransferase"  
"OPBB07\_00004" 33498 "s59E13H2" 0.06811444 "putative permease"  
"OPBB07\_00004" 33498 "s59E25H2" 0 "putative permease"  
"OPBB07\_00004" 33498 "s59E5H2" 0 "putative permease"  
"OPBB07\_00004" 33498 "s63E6H2" 0.5261356 "putative permease"  
"OPBB07\_00005" 33499 "s59E13H2" 0.07525747 "Flavodoxin"  
"OPBB07\_00005" 33499 "s59E25H2" 0 "Flavodoxin"  
"OPBB07\_00005" 33499 "s59E5H2" 0 "Flavodoxin"  
"OPBB07\_00005" 33499 "s63E6H2" 0.7230021 "Flavodoxin"  
"OPBB07\_00007" 33501 "s59E13H2" 0.0150857 "Major Facilitator Superfamily protein"  
"OPBB07\_00007" 33501 "s59E25H2" 0 "Major Facilitator Superfamily protein"

"OPBB07\_00007" 33501 "s59E5H2" 0.2602054 "Major Facilitator Superfamily protein"  
"OPBB07\_00007" 33501 "s63E6H2" 0.1109604 "Major Facilitator Superfamily protein"  
"OPBB07\_00008" 33502 "s59E13H2" 9.796609e-05 "putative dual-specificity RNA methyltransferase RlmN"  
"OPBB07\_00008" 33502 "s59E25H2" 0 "putative dual-specificity RNA methyltransferase RlmN"  
"OPBB07\_00008" 33502 "s59E5H2" 0.02105242 "putative dual-specificity RNA methyltransferase RlmN"  
"OPBB07\_00008" 33502 "s63E6H2" 0.09696039 "putative dual-specificity RNA methyltransferase RlmN"  
"OPBB07\_00010" 33504 "s59E13H2" 0.001477745 "DNA-binding protein HU"  
"OPBB07\_00010" 33504 "s59E25H2" 0 "DNA-binding protein HU"  
"OPBB07\_00010" 33504 "s59E5H2" 0 "DNA-binding protein HU"  
"OPBB07\_00010" 33504 "s63E6H2" 0.04153068 "DNA-binding protein HU"  
"OPBB07\_00011" 33505 "s59E13H2" 0.002378236 "Calcium-gated potassium channel MthK"  
"OPBB07\_00011" 33505 "s59E25H2" 0 "Calcium-gated potassium channel MthK"  
"OPBB07\_00011" 33505 "s59E5H2" 0.1263309 "Calcium-gated potassium channel MthK"  
"OPBB07\_00011" 33505 "s63E6H2" 2.632324 "Calcium-gated potassium channel MthK"  
"OPBB07\_00013" 33507 "s59E13H2" 0.0304753 "YtxH-like protein"  
"OPBB07\_00013" 33507 "s59E25H2" 0 "YtxH-like protein"  
"OPBB07\_00013" 33507 "s59E5H2" 0.2897328 "YtxH-like protein"  
"OPBB07\_00013" 33507 "s63E6H2" 3.190575 "YtxH-like protein"  
"OPBB07\_00014" 33508 "s59E13H2" 0.003096779 "phosphoglycolate phosphatase"  
"OPBB07\_00014" 33508 "s59E25H2" 0 "phosphoglycolate phosphatase"  
"OPBB07\_00014" 33508 "s59E5H2" 0.05766691 "phosphoglycolate phosphatase"  
"OPBB07\_00014" 33508 "s63E6H2" 0.5773058 "phosphoglycolate phosphatase"  
"OPBB07\_00015" 33509 "s59E13H2" 0.02459461 "Fructose-bisphosphate aldolase class 1"  
"OPBB07\_00015" 33509 "s59E25H2" 0 "Fructose-bisphosphate aldolase class 1"  
"OPBB07\_00015" 33509 "s59E5H2" 0.01762452 "Fructose-bisphosphate aldolase class 1"  
"OPBB07\_00015" 33509 "s63E6H2" 0.07830893 "Fructose-bisphosphate aldolase class 1"  
"OPBB07\_00016" 33510 "s59E13H2" 0.0109883 "Murein hydrolase activator NlpD precursor"  
"OPBB07\_00016" 33510 "s59E25H2" 0 "Murein hydrolase activator NlpD precursor"  
"OPBB07\_00016" 33510 "s59E5H2" 0.04369228 "Murein hydrolase activator NlpD precursor"  
"OPBB07\_00016" 33510 "s63E6H2" 0.06827436 "Murein hydrolase activator NlpD precursor"  
"OPBB07\_00017" 33511 "s59E13H2" 0.005825623 "Glucosamine-6-phosphate deaminase 1"  
"OPBB07\_00017" 33511 "s59E25H2" 0 "Glucosamine-6-phosphate deaminase 1"  
"OPBB07\_00017" 33511 "s59E5H2" 0.8121083 "Glucosamine-6-phosphate deaminase 1"  
"OPBB07\_00017" 33511 "s63E6H2" 0.136795 "Glucosamine-6-phosphate deaminase 1"  
"OPBB07\_00018" 33512 "s59E13H2" 0.04278462 "Phosphoglucosamine mutase"  
"OPBB07\_00018" 33512 "s59E25H2" 0 "Phosphoglucosamine mutase"  
"OPBB07\_00018" 33512 "s59E5H2" 2.088924 "Phosphoglucosamine mutase"  
"OPBB07\_00018" 33512 "s63E6H2" 0.1866432 "Phosphoglucosamine mutase"  
"OPBB07\_00019" 33513 "s59E13H2" 0.03113052 "Bifunctional protein GlmU"  
"OPBB07\_00019" 33513 "s59E25H2" 0 "Bifunctional protein GlmU"  
"OPBB07\_00019" 33513 "s59E5H2" 0.6791793 "Bifunctional protein GlmU"  
"OPBB07\_00019" 33513 "s63E6H2" 0.06508052 "Bifunctional protein GlmU"  
"OPBB07\_00020" 33514 "s59E13H2" 0 "D-inositol 3-phosphate glycosyltransferase"  
"OPBB07\_00020" 33514 "s59E25H2" 0 "D-inositol 3-phosphate glycosyltransferase"  
"OPBB07\_00020" 33514 "s59E5H2" 0.1799432 "D-inositol 3-phosphate glycosyltransferase"  
"OPBB07\_00020" 33514 "s63E6H2" 0 "D-inositol 3-phosphate glycosyltransferase"  
"OPBB07\_00021" 33515 "s59E13H2" 0.04819358 "Signal peptidase IB"

"OPBB07\_00021" 33515 "s59E25H2" 0 "Signal peptidase IB"  
"OPBB07\_00021" 33515 "s59E5H2" 0 "Signal peptidase IB"  
"OPBB07\_00021" 33515 "s63E6H2" 0.0393839 "Signal peptidase IB"  
"OPBB07\_00022" 33516 "s59E13H2" 0.03581461 "Ribonuclease HII"  
"OPBB07\_00022" 33516 "s59E25H2" 0 "Ribonuclease HII"  
"OPBB07\_00022" 33516 "s59E5H2" 0.009560765 "Ribonuclease HII"  
"OPBB07\_00022" 33516 "s63E6H2" 0.04977418 "Ribonuclease HII"  
"OPBB07\_00023" 33517 "s59E13H2" 0.02498558 "hypothetical protein"  
"OPBB07\_00023" 33517 "s59E25H2" 0 "hypothetical protein"  
"OPBB07\_00023" 33517 "s59E5H2" 0.004323129 "hypothetical protein"  
"OPBB07\_00023" 33517 "s63E6H2" 0.02455556 "hypothetical protein"  
"OPBB07\_00024" 33518 "s59E13H2" 0.03223904 "Helix-turn-helix"  
"OPBB07\_00024" 33518 "s59E25H2" 0 "Helix-turn-helix"  
"OPBB07\_00024" 33518 "s59E5H2" 0.01769113 "Helix-turn-helix"  
"OPBB07\_00024" 33518 "s63E6H2" 0.06039223 "Helix-turn-helix"  
"OPBB07\_00026" 33520 "s59E13H2" 0 "hypothetical protein"  
"OPBB07\_00026" 33520 "s59E25H2" 0 "hypothetical protein"  
"OPBB07\_00026" 33520 "s59E5H2" 0.04918342 "hypothetical protein"  
"OPBB07\_00026" 33520 "s63E6H2" 0.02076356 "hypothetical protein"  
"OPBB07\_00027" 33521 "s59E13H2" 0 "Phospho-N-acetylmuramoyl-pentapeptide-transferase"  
"OPBB07\_00027" 33521 "s59E25H2" 0 "Phospho-N-acetylmuramoyl-pentapeptide-transferase"  
"OPBB07\_00027" 33521 "s59E5H2" 0.003805121 "Phospho-N-acetylmuramoyl-pentapeptide-transferase"  
"OPBB07\_00027" 33521 "s63E6H2" 0.02158328 "Phospho-N-acetylmuramoyl-pentapeptide-transferase"  
"OPBB07\_00028" 33522 "s59E13H2" 0 "hypothetical protein"  
"OPBB07\_00028" 33522 "s59E25H2" 0 "hypothetical protein"  
"OPBB07\_00028" 33522 "s59E5H2" 0.007898024 "hypothetical protein"  
"OPBB07\_00028" 33522 "s63E6H2" 0.02720092 "hypothetical protein"  
"OPBB07\_00029" 33523 "s59E13H2" 0 "hypothetical protein"  
"OPBB07\_00029" 33523 "s59E25H2" 0 "hypothetical protein"  
"OPBB07\_00029" 33523 "s59E5H2" 0 "hypothetical protein"  
"OPBB07\_00029" 33523 "s63E6H2" 0 "hypothetical protein"  
"OPBB07\_00030" 33524 "s59E13H2" 0 "N-acetylmuramoyl-L-alanine amidase LytC precursor"  
"OPBB07\_00030" 33524 "s59E25H2" 0 "N-acetylmuramoyl-L-alanine amidase LytC precursor"  
"OPBB07\_00030" 33524 "s59E5H2" 0.04722951 "N-acetylmuramoyl-L-alanine amidase LytC precursor"  
"OPBB07\_00030" 33524 "s63E6H2" 0.001739194 "N-acetylmuramoyl-L-alanine amidase LytC precursor"  
"OPBB07\_00031" 33525 "s59E13H2" 0 "Sporulation and spore germination"  
"OPBB07\_00031" 33525 "s59E25H2" 0 "Sporulation and spore germination"  
"OPBB07\_00031" 33525 "s59E5H2" 0 "Sporulation and spore germination"  
"OPBB07\_00031" 33525 "s63E6H2" 0.00205938 "Sporulation and spore germination"  
"OPBB07\_00032" 33526 "s59E13H2" 0 "hypothetical protein"  
"OPBB07\_00032" 33526 "s59E25H2" 0 "hypothetical protein"  
"OPBB07\_00032" 33526 "s59E5H2" 0 "hypothetical protein"  
"OPBB07\_00032" 33526 "s63E6H2" 0 "hypothetical protein"  
"OPBB07\_00034" 33528 "s59E13H2" 0.02842285 "Cyclic di-GMP phosphodiesterase response regulator RpfG"  
"OPBB07\_00034" 33528 "s59E25H2" 0 "Cyclic di-GMP phosphodiesterase response regulator RpfG"  
"OPBB07\_00034" 33528 "s59E5H2" 0 "Cyclic di-GMP phosphodiesterase response regulator RpfG"  
"OPBB07\_00034" 33528 "s63E6H2" 0.05760018 "Cyclic di-GMP phosphodiesterase response regulator RpfG"

"OPBB07\_00035" 33529 "s59E13H2" 0.04249235 "hypothetical protein"  
"OPBB07\_00035" 33529 "s59E25H2" 0 "hypothetical protein"  
"OPBB07\_00035" 33529 "s59E5H2" 0.01483619 "hypothetical protein"  
"OPBB07\_00035" 33529 "s63E6H2" 0.04623944 "hypothetical protein"  
"OPBB07\_00036" 33530 "s59E13H2" 0.04069112 "Helix-turn-helix domain protein"  
"OPBB07\_00036" 33530 "s59E25H2" 0 "Helix-turn-helix domain protein"  
"OPBB07\_00036" 33530 "s59E5H2" 0.6461234 "Helix-turn-helix domain protein"  
"OPBB07\_00036" 33530 "s63E6H2" 0.0419738 "Helix-turn-helix domain protein"  
"OPBB07\_00037" 33531 "s59E13H2" 0.02581942 "CobQ/CobB/MinD/ParA nucleotide binding domain protein"  
"OPBB07\_00037" 33531 "s59E25H2" 0 "CobQ/CobB/MinD/ParA nucleotide binding domain protein"  
"OPBB07\_00037" 33531 "s59E5H2" 0.09540905 "CobQ/CobB/MinD/ParA nucleotide binding domain protein"  
"OPBB07\_00037" 33531 "s63E6H2" 0.03100438 "CobQ/CobB/MinD/ParA nucleotide binding domain protein"  
"OPBB07\_00038" 33532 "s59E13H2" 0 "Teichoic acid translocation permease protein TagG"  
"OPBB07\_00038" 33532 "s59E25H2" 0 "Teichoic acid translocation permease protein TagG"  
"OPBB07\_00038" 33532 "s59E5H2" 0.05669008 "Teichoic acid translocation permease protein TagG"  
"OPBB07\_00038" 33532 "s63E6H2" 0.06957919 "Teichoic acid translocation permease protein TagG"  
"OPBB07\_00039" 33533 "s59E13H2" 0 "putative sugar transferase EpsL"  
"OPBB07\_00039" 33533 "s59E25H2" 0 "putative sugar transferase EpsL"  
"OPBB07\_00039" 33533 "s59E5H2" 0 "putative sugar transferase EpsL"  
"OPBB07\_00039" 33533 "s63E6H2" 0.008523872 "putative sugar transferase EpsL"  
"OPBB07\_00040" 33534 "s59E13H2" 0.03875928 "putative ATP-dependent protease"  
"OPBB07\_00040" 33534 "s59E25H2" 0 "putative ATP-dependent protease"  
"OPBB07\_00040" 33534 "s59E5H2" 0.01304581 "putative ATP-dependent protease"  
"OPBB07\_00040" 33534 "s63E6H2" 0 "putative ATP-dependent protease"  
"OPBB07\_00042" 33536 "s59E13H2" 0.0002786015 "HNH endonuclease"  
"OPBB07\_00042" 33536 "s59E25H2" 0 "HNH endonuclease"  
"OPBB07\_00042" 33536 "s59E5H2" 0.05657047 "HNH endonuclease"  
"OPBB07\_00042" 33536 "s63E6H2" 0.0001981031 "HNH endonuclease"  
"OPBB07\_00043" 33537 "s59E13H2" 0.09612703 "hypothetical protein"  
"OPBB07\_00043" 33537 "s59E25H2" 0 "hypothetical protein"  
"OPBB07\_00043" 33537 "s59E5H2" 0.007133734 "hypothetical protein"  
"OPBB07\_00043" 33537 "s63E6H2" 0.08835341 "hypothetical protein"  
"OPBB07\_00044" 33538 "s59E13H2" 5.882122 "hypothetical protein"  
"OPBB07\_00044" 33538 "s59E25H2" 0 "hypothetical protein"  
"OPBB07\_00044" 33538 "s59E5H2" 0.03655192 "hypothetical protein"  
"OPBB07\_00044" 33538 "s63E6H2" 0.173887 "hypothetical protein"  
"OPBB07\_00045" 33539 "s59E13H2" 7.278977 "50S ribosomal protein L31"  
"OPBB07\_00045" 33539 "s59E25H2" 0 "50S ribosomal protein L31"  
"OPBB07\_00045" 33539 "s59E5H2" 0.03156197 "50S ribosomal protein L31"  
"OPBB07\_00045" 33539 "s63E6H2" 0.189016 "50S ribosomal protein L31"  
"OPBB07\_00046" 33540 "s59E13H2" 8.849283 "Thymidylate synthase ThyX"  
"OPBB07\_00046" 33540 "s59E25H2" 0 "Thymidylate synthase ThyX"  
"OPBB07\_00046" 33540 "s59E5H2" 0.04723682 "Thymidylate synthase ThyX"  
"OPBB07\_00046" 33540 "s63E6H2" 0.1865026 "Thymidylate synthase ThyX"  
"OPBB07\_00047" 33541 "s59E13H2" 0.001218805 "Replicative DNA helicase"  
"OPBB07\_00047" 33541 "s59E25H2" 0 "Replicative DNA helicase"  
"OPBB07\_00047" 33541 "s59E5H2" 0.02053813 "Replicative DNA helicase"



"OPBB07\_00047" 33541 "s63E6H2" 0.008681201 "Replicative DNA helicase"  
"OPBB07\_00048" 33542 "s59E13H2" 0.06468701 "Response regulator PleD"  
"OPBB07\_00048" 33542 "s59E25H2" 0 "Response regulator PleD"  
"OPBB07\_00048" 33542 "s59E5H2" 0.005370136 "Response regulator PleD"  
"OPBB07\_00048" 33542 "s63E6H2" 1.0408 "Response regulator PleD"  
"OPBB07\_00049" 33543 "s59E13H2" 0.05804056 "O-acetyl-ADP-ribose deacetylase"  
"OPBB07\_00049" 33543 "s59E25H2" 0 "O-acetyl-ADP-ribose deacetylase"  
"OPBB07\_00049" 33543 "s59E5H2" 0 "O-acetyl-ADP-ribose deacetylase"  
"OPBB07\_00049" 33543 "s63E6H2" 1.317303 "O-acetyl-ADP-ribose deacetylase"  
"OPBB07\_00050" 33544 "s59E13H2" 0.2074266 "Ribonucleoside-diphosphate reductase NrdZ"  
"OPBB07\_00050" 33544 "s59E25H2" 0 "Ribonucleoside-diphosphate reductase NrdZ"  
"OPBB07\_00050" 33544 "s59E5H2" 0.04135901 "Ribonucleoside-diphosphate reductase NrdZ"  
"OPBB07\_00050" 33544 "s63E6H2" 0.8714474 "Ribonucleoside-diphosphate reductase NrdZ"  
"OPBB07\_00051" 33545 "s59E13H2" 10.31722 "hypothetical protein"  
"OPBB07\_00051" 33545 "s59E25H2" 0 "hypothetical protein"  
"OPBB07\_00051" 33545 "s59E5H2" 0.04002897 "hypothetical protein"  
"OPBB07\_00051" 33545 "s63E6H2" 0.1868283 "hypothetical protein"  
"OPBB07\_00052" 33546 "s59E13H2" 11.68748 "Peptide chain release factor 1"  
"OPBB07\_00052" 33546 "s59E25H2" 0 "Peptide chain release factor 1"  
"OPBB07\_00052" 33546 "s59E5H2" 0.02686945 "Peptide chain release factor 1"  
"OPBB07\_00052" 33546 "s63E6H2" 0.2155052 "Peptide chain release factor 1"  
"OPBB07\_00053" 33547 "s59E13H2" 5.242017 "Release factor glutamine methyltransferase"  
"OPBB07\_00053" 33547 "s59E25H2" 0 "Release factor glutamine methyltransferase"  
"OPBB07\_00053" 33547 "s59E5H2" 0.003626077 "Release factor glutamine methyltransferase"  
"OPBB07\_00053" 33547 "s63E6H2" 0.2503202 "Release factor glutamine methyltransferase"  
"OPBB07\_00054" 33548 "s59E13H2" 0.8045142 "Inner membrane protein YbiR"  
"OPBB07\_00054" 33548 "s59E25H2" 0 "Inner membrane protein YbiR"  
"OPBB07\_00054" 33548 "s59E5H2" 0.09016456 "Inner membrane protein YbiR"  
"OPBB07\_00054" 33548 "s63E6H2" 0.1899254 "Inner membrane protein YbiR"  
"OPBB07\_00056" 33550 "s59E13H2" 0.1479311 "hypothetical protein"  
"OPBB07\_00056" 33550 "s59E25H2" 0 "hypothetical protein"  
"OPBB07\_00056" 33550 "s59E5H2" 0.05752771 "hypothetical protein"  
"OPBB07\_00056" 33550 "s63E6H2" 0.2125699 "hypothetical protein"  
"OPBB07\_00057" 33551 "s59E13H2" 0.2607069 "hypothetical protein"  
"OPBB07\_00057" 33551 "s59E25H2" 0 "hypothetical protein"  
"OPBB07\_00057" 33551 "s59E5H2" 0.04164915 "hypothetical protein"  
"OPBB07\_00057" 33551 "s63E6H2" 0.2637056 "hypothetical protein"  
"OPBB07\_00058" 33552 "s59E13H2" 0.2553177 "tRNA(Ile)-lysidine synthase"  
"OPBB07\_00058" 33552 "s59E25H2" 0 "tRNA(Ile)-lysidine synthase"  
"OPBB07\_00058" 33552 "s59E5H2" 0.1408815 "tRNA(Ile)-lysidine synthase"  
"OPBB07\_00058" 33552 "s63E6H2" 0.2307892 "tRNA(Ile)-lysidine synthase"  
"OPBB07\_00059" 33553 "s59E13H2" 0.1317015 "Hypoxanthine phosphoribosyltransferase"  
"OPBB07\_00059" 33553 "s59E25H2" 0 "Hypoxanthine phosphoribosyltransferase"  
"OPBB07\_00059" 33553 "s59E5H2" 0.0537897 "Hypoxanthine phosphoribosyltransferase"  
"OPBB07\_00059" 33553 "s63E6H2" 0.3433474 "Hypoxanthine phosphoribosyltransferase"  
"OPBB07\_00060" 33554 "s59E13H2" 0.08804983 "NifU-like protein"  
"OPBB07\_00060" 33554 "s59E25H2" 0 "NifU-like protein"

"OPBB07\_00060" 33554 "s59E5H2" 0.04703091 "NifU-like protein"  
"OPBB07\_00060" 33554 "s63E6H2" 1.425989 "NifU-like protein"  
"OPBB07\_00063" 33557 "s59E13H2" 0 "hypothetical protein"  
"OPBB07\_00063" 33557 "s59E25H2" 0 "hypothetical protein"  
"OPBB07\_00063" 33557 "s59E5H2" 0 "hypothetical protein"  
"OPBB07\_00063" 33557 "s63E6H2" 0 "hypothetical protein"  
"OPBB07\_00064" 33558 "s59E13H2" 0 "Putative transposase"  
"OPBB07\_00064" 33558 "s59E25H2" 0 "Putative transposase"  
"OPBB07\_00064" 33558 "s59E5H2" 0 "Putative transposase"  
"OPBB07\_00064" 33558 "s63E6H2" 0.2404031 "Putative transposase"  
"OPBB07\_00065" 33559 "s59E13H2" 0.008221264 "tRNA-dihydrouridine synthase C"  
"OPBB07\_00065" 33559 "s59E25H2" 0 "tRNA-dihydrouridine synthase C"  
"OPBB07\_00065" 33559 "s59E5H2" 0.03295864 "tRNA-dihydrouridine synthase C"  
"OPBB07\_00065" 33559 "s63E6H2" 0.9462546 "tRNA-dihydrouridine synthase C"  
"OPBB07\_00066" 33560 "s59E13H2" 0 "Type III pantothenate kinase"  
"OPBB07\_00066" 33560 "s59E25H2" 0 "Type III pantothenate kinase"  
"OPBB07\_00066" 33560 "s59E5H2" 0.1116531 "Type III pantothenate kinase"  
"OPBB07\_00066" 33560 "s63E6H2" 0.02214264 "Type III pantothenate kinase"  
"OPBB07\_00067" 33561 "s59E13H2" 0.002699185 "Energy-coupling factor transporter ATP-binding protein EcfA3"  
"OPBB07\_00067" 33561 "s59E25H2" 0 "Energy-coupling factor transporter ATP-binding protein EcfA3"  
"OPBB07\_00067" 33561 "s59E5H2" 0.1484059 "Energy-coupling factor transporter ATP-binding protein EcfA3"  
"OPBB07\_00067" 33561 "s63E6H2" 0.02523208 "Energy-coupling factor transporter ATP-binding protein EcfA3"  
"OPBB07\_00068" 33562 "s59E13H2" 0.003010351 "Cobalt transport protein CbiQ"  
"OPBB07\_00068" 33562 "s59E25H2" 0 "Cobalt transport protein CbiQ"  
"OPBB07\_00068" 33562 "s59E5H2" 0.2230856 "Cobalt transport protein CbiQ"  
"OPBB07\_00068" 33562 "s63E6H2" 0.08736527 "Cobalt transport protein CbiQ"  
"OPBB07\_00069" 33563 "s59E13H2" 0.1225895 "cobalt transport protein CbiN"  
"OPBB07\_00069" 33563 "s59E25H2" 0 "cobalt transport protein CbiN"  
"OPBB07\_00069" 33563 "s59E5H2" 0.07444805 "cobalt transport protein CbiN"  
"OPBB07\_00069" 33563 "s63E6H2" 0.04676528 "cobalt transport protein CbiN"  
"OPBB07\_00070" 33564 "s59E13H2" 0.2034544 "Fused nickel transport protein NikMN"  
"OPBB07\_00070" 33564 "s59E25H2" 0 "Fused nickel transport protein NikMN"  
"OPBB07\_00070" 33564 "s59E5H2" 0.2058172 "Fused nickel transport protein NikMN"  
"OPBB07\_00070" 33564 "s63E6H2" 0.08220511 "Fused nickel transport protein NikMN"  
"OPBB07\_00071" 33565 "s59E13H2" 0.276302 "Bifunctional folate synthesis protein"  
"OPBB07\_00071" 33565 "s59E25H2" 0 "Bifunctional folate synthesis protein"  
"OPBB07\_00071" 33565 "s59E5H2" 0.01151504 "Bifunctional folate synthesis protein"  
"OPBB07\_00071" 33565 "s63E6H2" 0.03330689 "Bifunctional folate synthesis protein"  
"OPBB07\_00072" 33566 "s59E13H2" 0.3734729 "Dihydropteroate synthase"  
"OPBB07\_00072" 33566 "s59E25H2" 0 "Dihydropteroate synthase"  
"OPBB07\_00072" 33566 "s59E5H2" 0.01116897 "Dihydropteroate synthase"  
"OPBB07\_00072" 33566 "s63E6H2" 0.03378219 "Dihydropteroate synthase"  
"OPBB07\_00073" 33567 "s59E13H2" 0.2697592 "GTP cyclohydrolase 1"  
"OPBB07\_00073" 33567 "s59E25H2" 0 "GTP cyclohydrolase 1"  
"OPBB07\_00073" 33567 "s59E5H2" 0.01555411 "GTP cyclohydrolase 1"  
"OPBB07\_00073" 33567 "s63E6H2" 0.05909884 "GTP cyclohydrolase 1"  
"OPBB07\_00074" 33568 "s59E13H2" 0.3025298 "ATP-dependent zinc metalloprotease FtsH"

"OPBB07\_00074" 33568 "s59E25H2" 0 "ATP-dependent zinc metalloprotease FtsH"  
"OPBB07\_00074" 33568 "s59E5H2" 0.03318326 "ATP-dependent zinc metalloprotease FtsH"  
"OPBB07\_00074" 33568 "s63E6H2" 0.1698071 "ATP-dependent zinc metalloprotease FtsH"  
"OPBB07\_00075" 33569 "s59E13H2" 0.1734752 "Elongation factor 4"  
"OPBB07\_00075" 33569 "s59E25H2" 0 "Elongation factor 4"  
"OPBB07\_00075" 33569 "s59E5H2" 0.2125687 "Elongation factor 4"  
"OPBB07\_00075" 33569 "s63E6H2" 0.05862891 "Elongation factor 4"  
"OPBB07\_00076" 33570 "s59E13H2" 0.1377428 "putative peptidoglycan biosynthesis protein MurJ"  
"OPBB07\_00076" 33570 "s59E25H2" 0 "putative peptidoglycan biosynthesis protein MurJ"  
"OPBB07\_00076" 33570 "s59E5H2" 0.2244733 "putative peptidoglycan biosynthesis protein MurJ"  
"OPBB07\_00076" 33570 "s63E6H2" 0.03810846 "putative peptidoglycan biosynthesis protein MurJ"  
"OPBB07\_00077" 33571 "s59E13H2" 0.1633019 "30S ribosomal protein S20"  
"OPBB07\_00077" 33571 "s59E25H2" 0 "30S ribosomal protein S20"  
"OPBB07\_00077" 33571 "s59E5H2" 0.3429682 "30S ribosomal protein S20"  
"OPBB07\_00077" 33571 "s63E6H2" 0.04266761 "30S ribosomal protein S20"  
"OPBB07\_00078" 33572 "s59E13H2" 0.1614126 "DNA polymerase III subunit delta"  
"OPBB07\_00078" 33572 "s59E25H2" 0 "DNA polymerase III subunit delta"  
"OPBB07\_00078" 33572 "s59E5H2" 0.291327 "DNA polymerase III subunit delta"  
"OPBB07\_00078" 33572 "s63E6H2" 0.2068715 "DNA polymerase III subunit delta"  
"OPBB07\_00080" 33574 "s59E13H2" 0.01108014 "hypothetical protein"  
"OPBB07\_00080" 33574 "s59E25H2" 1.017544 "hypothetical protein"  
"OPBB07\_00080" 33574 "s59E5H2" 0.0267067 "hypothetical protein"  
"OPBB07\_00080" 33574 "s63E6H2" 0.04579731 "hypothetical protein"  
"OPBB07\_00081" 33575 "s59E13H2" 1.04016 "ComEC family competence protein"  
"OPBB07\_00081" 33575 "s59E25H2" 0.1428571 "ComEC family competence protein"  
"OPBB07\_00081" 33575 "s59E5H2" 0.08278151 "ComEC family competence protein"  
"OPBB07\_00081" 33575 "s63E6H2" 0.1537757 "ComEC family competence protein"  
"OPBB07\_00082" 33576 "s59E13H2" 1.637237 "ComE operon protein 1"  
"OPBB07\_00082" 33576 "s59E25H2" 0 "ComE operon protein 1"  
"OPBB07\_00082" 33576 "s59E5H2" 0.07909923 "ComE operon protein 1"  
"OPBB07\_00082" 33576 "s63E6H2" 0.2003613 "ComE operon protein 1"  
"OPBB07\_00083" 33577 "s59E13H2" 0.2149972 "R-phenyllactate dehydratase activator"  
"OPBB07\_00083" 33577 "s59E25H2" 0 "R-phenyllactate dehydratase activator"  
"OPBB07\_00083" 33577 "s59E5H2" 0.03309402 "R-phenyllactate dehydratase activator"  
"OPBB07\_00083" 33577 "s63E6H2" 0.007410521 "R-phenyllactate dehydratase activator"  
"OPBB07\_00084" 33578 "s59E13H2" 0 "Ribosomal protein S12 methylthiotransferase RimO"  
"OPBB07\_00084" 33578 "s59E25H2" 0 "Ribosomal protein S12 methylthiotransferase RimO"  
"OPBB07\_00084" 33578 "s59E5H2" 0.03767932 "Ribosomal protein S12 methylthiotransferase RimO"  
"OPBB07\_00084" 33578 "s63E6H2" 0.2048082 "Ribosomal protein S12 methylthiotransferase RimO"  
"OPBB07\_00085" 33579 "s59E13H2" 0.03343345 "hypothetical protein"  
"OPBB07\_00085" 33579 "s59E25H2" 0.4304124 "hypothetical protein"  
"OPBB07\_00085" 33579 "s59E5H2" 0.1174654 "hypothetical protein"  
"OPBB07\_00085" 33579 "s63E6H2" 1.036127 "hypothetical protein"  
"OPBB07\_00086" 33580 "s59E13H2" 0 "hypothetical protein"  
"OPBB07\_00086" 33580 "s59E25H2" 0 "hypothetical protein"  
"OPBB07\_00086" 33580 "s59E5H2" 0 "hypothetical protein"  
"OPBB07\_00086" 33580 "s63E6H2" 0.00471669 "hypothetical protein"

"OPBB07\_00087" 33581 "s59E13H2" 0.01480124 "hypothetical protein"  
"OPBB07\_00087" 33581 "s59E25H2" 0 "hypothetical protein"  
"OPBB07\_00087" 33581 "s59E5H2" 0.06459082 "hypothetical protein"  
"OPBB07\_00087" 33581 "s63E6H2" 0 "hypothetical protein"  
"OPBB07\_00088" 33582 "s59E13H2" 1.048876 "hypothetical protein"  
"OPBB07\_00088" 33582 "s59E25H2" 0 "hypothetical protein"  
"OPBB07\_00088" 33582 "s59E5H2" 0 "hypothetical protein"  
"OPBB07\_00088" 33582 "s63E6H2" 0.002980044 "hypothetical protein"  
"OPBB07\_00089" 33583 "s59E13H2" 0.5060805 "hypothetical protein"  
"OPBB07\_00089" 33583 "s59E25H2" 0 "hypothetical protein"  
"OPBB07\_00089" 33583 "s59E5H2" 0.03584504 "hypothetical protein"  
"OPBB07\_00089" 33583 "s63E6H2" 0 "hypothetical protein"  
"OPBB07\_00090" 33584 "s59E13H2" 0.004681649 "hypothetical protein"  
"OPBB07\_00090" 33584 "s59E25H2" 0 "hypothetical protein"  
"OPBB07\_00090" 33584 "s59E5H2" 0.04530971 "hypothetical protein"  
"OPBB07\_00090" 33584 "s63E6H2" 0.004189254 "hypothetical protein"  
"OPBB07\_00091" 33585 "s59E13H2" 0.001093647 "NADP-reducing hydrogenase subunit HndA"  
"OPBB07\_00091" 33585 "s59E25H2" 0 "NADP-reducing hydrogenase subunit HndA"  
"OPBB07\_00091" 33585 "s59E5H2" 0.004231364 "NADP-reducing hydrogenase subunit HndA"  
"OPBB07\_00091" 33585 "s63E6H2" 0.01133016 "NADP-reducing hydrogenase subunit HndA"  
"OPBB07\_00092" 33586 "s59E13H2" 0 "NADP-reducing hydrogenase subunit HndC"  
"OPBB07\_00092" 33586 "s59E25H2" 0 "NADP-reducing hydrogenase subunit HndC"  
"OPBB07\_00092" 33586 "s59E5H2" 0 "NADP-reducing hydrogenase subunit HndC"  
"OPBB07\_00092" 33586 "s63E6H2" 0 "NADP-reducing hydrogenase subunit HndC"  
"OPBB07\_00093" 33587 "s59E13H2" 0.007765953 "NADH-quinone oxidoreductase chain 3"  
"OPBB07\_00093" 33587 "s59E25H2" 0 "NADH-quinone oxidoreductase chain 3"  
"OPBB07\_00093" 33587 "s59E5H2" 0.01314252 "NADH-quinone oxidoreductase chain 3"  
"OPBB07\_00093" 33587 "s63E6H2" 0.007308919 "NADH-quinone oxidoreductase chain 3"  
"OPBB07\_00094" 33588 "s59E13H2" 0.009804506 "molybdopterin-guanine dinucleotide biosynthesis protein MobA"  
"OPBB07\_00094" 33588 "s59E25H2" 0 "molybdopterin-guanine dinucleotide biosynthesis protein MobA"  
"OPBB07\_00094" 33588 "s59E5H2" 0.04865286 "molybdopterin-guanine dinucleotide biosynthesis protein MobA"  
"OPBB07\_00094" 33588 "s63E6H2" 0.04090607 "molybdopterin-guanine dinucleotide biosynthesis protein MobA"  
"OPBB07\_00095" 33589 "s59E13H2" 0.09073849 "formate dehydrogenase accessory protein"  
"OPBB07\_00095" 33589 "s59E25H2" 0 "formate dehydrogenase accessory protein"  
"OPBB07\_00095" 33589 "s59E5H2" 0.04119756 "formate dehydrogenase accessory protein"  
"OPBB07\_00095" 33589 "s63E6H2" 0.4146845 "formate dehydrogenase accessory protein"  
"OPBB07\_00096" 33590 "s59E13H2" 0.01128758 "hypothetical protein"  
"OPBB07\_00096" 33590 "s59E25H2" 0 "hypothetical protein"  
"OPBB07\_00096" 33590 "s59E5H2" 0.007394825 "hypothetical protein"  
"OPBB07\_00096" 33590 "s63E6H2" 0.4190977 "hypothetical protein"  
"OPBB07\_00097" 33591 "s59E13H2" 0.02798413 "NADP-reducing hydrogenase subunit HndC"  
"OPBB07\_00097" 33591 "s59E25H2" 0 "NADP-reducing hydrogenase subunit HndC"  
"OPBB07\_00097" 33591 "s59E5H2" 0.2371311 "NADP-reducing hydrogenase subunit HndC"  
"OPBB07\_00097" 33591 "s63E6H2" 0.3924818 "NADP-reducing hydrogenase subunit HndC"  
"OPBB07\_00098" 33592 "s59E13H2" 0.01287896 "NADH-quinone oxidoreductase subunit E"  
"OPBB07\_00098" 33592 "s59E25H2" 0 "NADH-quinone oxidoreductase subunit E"  
"OPBB07\_00098" 33592 "s59E5H2" 0.05851769 "NADH-quinone oxidoreductase subunit E"

"OPBB07\_00098" 33592 "s63E6H2" 0.3150404 "NADH-quinone oxidoreductase subunit E"  
"OPBB07\_00099" 33593 "s59E13H2" 0.01145292 "Formate dehydrogenase subunit alpha"  
"OPBB07\_00099" 33593 "s59E25H2" 0 "Formate dehydrogenase subunit alpha"  
"OPBB07\_00099" 33593 "s59E5H2" 0.04361728 "Formate dehydrogenase subunit alpha"  
"OPBB07\_00099" 33593 "s63E6H2" 0.05013152 "Formate dehydrogenase subunit alpha"  
"OPBB07\_00100" 33594 "s59E13H2" 0 "FMN reductase (NADH) NtaB"  
"OPBB07\_00100" 33594 "s59E25H2" 0 "FMN reductase (NADH) NtaB"  
"OPBB07\_00100" 33594 "s59E5H2" 0 "FMN reductase (NADH) NtaB"  
"OPBB07\_00100" 33594 "s63E6H2" 0.01164253 "FMN reductase (NADH) NtaB"  
"OPBB07\_00101" 33595 "s59E13H2" 0 "Demethylmenaquinone methyltransferase"  
"OPBB07\_00101" 33595 "s59E25H2" 0 "Demethylmenaquinone methyltransferase"  
"OPBB07\_00101" 33595 "s59E5H2" 0.01924515 "Demethylmenaquinone methyltransferase"  
"OPBB07\_00101" 33595 "s63E6H2" 0.01188738 "Demethylmenaquinone methyltransferase"  
"OPBB07\_00103" 33597 "s59E13H2" 0.1908195 "hypothetical protein"  
"OPBB07\_00103" 33597 "s59E25H2" 0 "hypothetical protein"  
"OPBB07\_00103" 33597 "s59E5H2" 0.005633322 "hypothetical protein"  
"OPBB07\_00103" 33597 "s63E6H2" 0.06647072 "hypothetical protein"  
"OPBB07\_00104" 33598 "s59E13H2" 0.3087183 "hypothetical protein"  
"OPBB07\_00104" 33598 "s59E25H2" 0 "hypothetical protein"  
"OPBB07\_00104" 33598 "s59E5H2" 0.01277704 "hypothetical protein"  
"OPBB07\_00104" 33598 "s63E6H2" 0.03621814 "hypothetical protein"  
"OPBB07\_00105" 33599 "s59E13H2" 0.2376868 "Tetratricopeptide repeat protein"  
"OPBB07\_00105" 33599 "s59E25H2" 0 "Tetratricopeptide repeat protein"  
"OPBB07\_00105" 33599 "s59E5H2" 0.01109835 "Tetratricopeptide repeat protein"  
"OPBB07\_00105" 33599 "s63E6H2" 0.01359669 "Tetratricopeptide repeat protein"  
"OPBB07\_00106" 33600 "s59E13H2" 0.02883147 "Tyrosine recombinase XerC"  
"OPBB07\_00106" 33600 "s59E25H2" 0 "Tyrosine recombinase XerC"  
"OPBB07\_00106" 33600 "s59E5H2" 0.007027884 "Tyrosine recombinase XerC"  
"OPBB07\_00106" 33600 "s63E6H2" 0.03264337 "Tyrosine recombinase XerC"  
"OPBB07\_00107" 33601 "s59E13H2" 0.008806891 "30S ribosomal protein S2"  
"OPBB07\_00107" 33601 "s59E25H2" 0 "30S ribosomal protein S2"  
"OPBB07\_00107" 33601 "s59E5H2" 0.03386177 "30S ribosomal protein S2"  
"OPBB07\_00107" 33601 "s63E6H2" 0.2035368 "30S ribosomal protein S2"  
"OPBB07\_00108" 33602 "s59E13H2" 0.0007107054 "Elongation factor Ts"  
"OPBB07\_00108" 33602 "s59E25H2" 0 "Elongation factor Ts"  
"OPBB07\_00108" 33602 "s59E5H2" 0.009450055 "Elongation factor Ts"  
"OPBB07\_00108" 33602 "s63E6H2" 0.020081 "Elongation factor Ts"  
"OPBB07\_00109" 33603 "s59E13H2" 0.005216694 "Uridylate kinase"  
"OPBB07\_00109" 33603 "s59E25H2" 0 "Uridylate kinase"  
"OPBB07\_00109" 33603 "s59E5H2" 0.02355204 "Uridylate kinase"  
"OPBB07\_00109" 33603 "s63E6H2" 0.005513578 "Uridylate kinase"  
"OPBB07\_00110" 33604 "s59E13H2" 0 "Ribosome-recycling factor"  
"OPBB07\_00110" 33604 "s59E25H2" 0 "Ribosome-recycling factor"  
"OPBB07\_00110" 33604 "s59E5H2" 0.01191185 "Ribosome-recycling factor"  
"OPBB07\_00110" 33604 "s63E6H2" 0.01226753 "Ribosome-recycling factor"  
"OPBB07\_00111" 33605 "s59E13H2" 0.004208042 "Isoprenyl transferase"  
"OPBB07\_00111" 33605 "s59E25H2" 0 "Isoprenyl transferase"

"OPBB07\_00111" 33605 "s59E5H2" 0.01636066 "Isoprenyl transferase"  
"OPBB07\_00111" 33605 "s63E6H2" 0.009908763 "Isoprenyl transferase"  
"OPBB07\_00112" 33606 "s59E13H2" 0.0005094237 "Metalloprotease MmpA"  
"OPBB07\_00112" 33606 "s59E25H2" 0 "Metalloprotease MmpA"  
"OPBB07\_00112" 33606 "s59E5H2" 0.003029235 "Metalloprotease MmpA"  
"OPBB07\_00112" 33606 "s63E6H2" 0.01010361 "Metalloprotease MmpA"  
"OPBB07\_00113" 33607 "s59E13H2" 0.001933198 "4-hydroxy-3-methylbut-2-en-1-yl diphosphate synthase"  
"OPBB07\_00113" 33607 "s59E25H2" 0 "4-hydroxy-3-methylbut-2-en-1-yl diphosphate synthase"  
"OPBB07\_00113" 33607 "s59E5H2" 0 "4-hydroxy-3-methylbut-2-en-1-yl diphosphate synthase"  
"OPBB07\_00113" 33607 "s63E6H2" 0.004800641 "4-hydroxy-3-methylbut-2-en-1-yl diphosphate synthase"  
"OPBB07\_00114" 33608 "s59E13H2" 0.006636859 "Proline--tRNA ligase"  
"OPBB07\_00114" 33608 "s59E25H2" 0 "Proline--tRNA ligase"  
"OPBB07\_00114" 33608 "s59E5H2" 0.005859229 "Proline--tRNA ligase"  
"OPBB07\_00114" 33608 "s63E6H2" 0.007202588 "Proline--tRNA ligase"  
"OPBB07\_00115" 33609 "s59E13H2" 0.002315324 "ATP-dependent RecD-like DNA helicase"  
"OPBB07\_00115" 33609 "s59E25H2" 0 "ATP-dependent RecD-like DNA helicase"  
"OPBB07\_00115" 33609 "s59E5H2" 0.01265397 "ATP-dependent RecD-like DNA helicase"  
"OPBB07\_00115" 33609 "s63E6H2" 0.005106715 "ATP-dependent RecD-like DNA helicase"  
"OPBB07\_00116" 33610 "s59E13H2" 0.007688462 "hypothetical protein"  
"OPBB07\_00116" 33610 "s59E25H2" 0 "hypothetical protein"  
"OPBB07\_00116" 33610 "s59E5H2" 0 "hypothetical protein"  
"OPBB07\_00116" 33610 "s63E6H2" 0.002905714 "hypothetical protein"  
"OPBB07\_00117" 33611 "s59E13H2" 0 "Translation initiation factor IF-2"  
"OPBB07\_00117" 33611 "s59E25H2" 0 "Translation initiation factor IF-2"  
"OPBB07\_00117" 33611 "s59E5H2" 0.008742679 "Translation initiation factor IF-2"  
"OPBB07\_00117" 33611 "s63E6H2" 0.01018342 "Translation initiation factor IF-2"  
"OPBB07\_00118" 33612 "s59E13H2" 0 "Ribosome-binding factor A"  
"OPBB07\_00118" 33612 "s59E25H2" 0 "Ribosome-binding factor A"  
"OPBB07\_00118" 33612 "s59E5H2" 0.001861852 "Ribosome-binding factor A"  
"OPBB07\_00118" 33612 "s63E6H2" 0.00982563 "Ribosome-binding factor A"  
"OPBB07\_00119" 33613 "s59E13H2" 0.006751224 "Bifunctional oligoribonuclease and PAP phosphatase NrnA"  
"OPBB07\_00119" 33613 "s59E25H2" 0 "Bifunctional oligoribonuclease and PAP phosphatase NrnA"  
"OPBB07\_00119" 33613 "s59E5H2" 0.02741376 "Bifunctional oligoribonuclease and PAP phosphatase NrnA"  
"OPBB07\_00119" 33613 "s63E6H2" 0.01834874 "Bifunctional oligoribonuclease and PAP phosphatase NrnA"  
"OPBB07\_00121" 33615 "s59E13H2" 0 "tRNA pseudouridine synthase B"  
"OPBB07\_00121" 33615 "s59E25H2" 0 "tRNA pseudouridine synthase B"  
"OPBB07\_00121" 33615 "s59E5H2" 0.0120829 "tRNA pseudouridine synthase B"  
"OPBB07\_00121" 33615 "s63E6H2" 0.01363856 "tRNA pseudouridine synthase B"  
"OPBB07\_00122" 33616 "s59E13H2" 0 "Riboflavin biosynthesis protein RibF"  
"OPBB07\_00122" 33616 "s59E25H2" 0 "Riboflavin biosynthesis protein RibF"  
"OPBB07\_00122" 33616 "s59E5H2" 0.009733858 "Riboflavin biosynthesis protein RibF"  
"OPBB07\_00122" 33616 "s63E6H2" 0.004768822 "Riboflavin biosynthesis protein RibF"  
"OPBB07\_00123" 33617 "s59E13H2" 0 "30S ribosomal protein S15"  
"OPBB07\_00123" 33617 "s59E25H2" 0 "30S ribosomal protein S15"  
"OPBB07\_00123" 33617 "s59E5H2" 0 "30S ribosomal protein S15"  
"OPBB07\_00123" 33617 "s63E6H2" 0 "30S ribosomal protein S15"  
"OPBB07\_00124" 33618 "s59E13H2" 0.00162135 "Polyribonucleotide nucleotidyltransferase"

"OPBB07\_00124" 33618 "s59E25H2" 0 "Polyribonucleotide nucleotidyltransferase"  
"OPBB07\_00124" 33618 "s59E5H2" 0.01791982 "Polyribonucleotide nucleotidyltransferase"  
"OPBB07\_00124" 33618 "s63E6H2" 0.03600243 "Polyribonucleotide nucleotidyltransferase"  
"OPBB07\_00125" 33619 "s59E13H2" 0.005119531 "Peptidase M16 inactive domain protein"  
"OPBB07\_00125" 33619 "s59E25H2" 0 "Peptidase M16 inactive domain protein"  
"OPBB07\_00125" 33619 "s59E5H2" 0.02249026 "Peptidase M16 inactive domain protein"  
"OPBB07\_00125" 33619 "s63E6H2" 0.09244268 "Peptidase M16 inactive domain protein"  
"OPBB07\_00126" 33620 "s59E13H2" 0.0818023 "4-hydroxy-tetrahydrodipicolinate reductase"  
"OPBB07\_00126" 33620 "s59E25H2" 0 "4-hydroxy-tetrahydrodipicolinate reductase"  
"OPBB07\_00126" 33620 "s59E5H2" 0.01082814 "4-hydroxy-tetrahydrodipicolinate reductase"  
"OPBB07\_00126" 33620 "s63E6H2" 0.1001864 "4-hydroxy-tetrahydrodipicolinate reductase"  
"OPBB07\_00127" 33621 "s59E13H2" 0.005375848 "4-hydroxy-tetrahydrodipicolinate synthase"  
"OPBB07\_00127" 33621 "s59E25H2" 0 "4-hydroxy-tetrahydrodipicolinate synthase"  
"OPBB07\_00127" 33621 "s59E5H2" 0.0764974 "4-hydroxy-tetrahydrodipicolinate synthase"  
"OPBB07\_00127" 33621 "s63E6H2" 0.1160423 "4-hydroxy-tetrahydrodipicolinate synthase"  
"OPBB07\_00128" 33622 "s59E13H2" 0 "Ribonuclease J 1"  
"OPBB07\_00128" 33622 "s59E25H2" 0 "Ribonuclease J 1"  
"OPBB07\_00128" 33622 "s59E5H2" 0.1366763 "Ribonuclease J 1"  
"OPBB07\_00128" 33622 "s63E6H2" 0.1412581 "Ribonuclease J 1"  
"OPBB07\_00129" 33623 "s59E13H2" 0.001472131 "DNA translocase SpoIIIE"  
"OPBB07\_00129" 33623 "s59E25H2" 0 "DNA translocase SpoIIIE"  
"OPBB07\_00129" 33623 "s59E5H2" 0.3266442 "DNA translocase SpoIIIE"  
"OPBB07\_00129" 33623 "s63E6H2" 0.1122489 "DNA translocase SpoIIIE"  
"OPBB07\_00130" 33624 "s59E13H2" 0 "Nicotinamide-nucleotide amidohydrolase PncC"  
"OPBB07\_00130" 33624 "s59E25H2" 0 "Nicotinamide-nucleotide amidohydrolase PncC"  
"OPBB07\_00130" 33624 "s59E5H2" 0.3518987 "Nicotinamide-nucleotide amidohydrolase PncC"  
"OPBB07\_00130" 33624 "s63E6H2" 0.1305699 "Nicotinamide-nucleotide amidohydrolase PncC"  
"OPBB07\_00131" 33625 "s59E13H2" 0 "2'-5'-RNA ligase"  
"OPBB07\_00131" 33625 "s59E25H2" 0 "2'-5'-RNA ligase"  
"OPBB07\_00131" 33625 "s59E5H2" 0.3294256 "2'-5'-RNA ligase"  
"OPBB07\_00131" 33625 "s63E6H2" 0.09786758 "2'-5'-RNA ligase"  
"OPBB07\_00132" 33626 "s59E13H2" 0 "DNA repair and recombination protein RadA"  
"OPBB07\_00132" 33626 "s59E25H2" 0 "DNA repair and recombination protein RadA"  
"OPBB07\_00132" 33626 "s59E5H2" 0.5522387 "DNA repair and recombination protein RadA"  
"OPBB07\_00132" 33626 "s63E6H2" 0.1597394 "DNA repair and recombination protein RadA"  
"OPBB07\_00136" 33630 "s59E13H2" 0.0002459048 "Endoglucanase C307 precursor"  
"OPBB07\_00136" 33630 "s59E25H2" 0 "Endoglucanase C307 precursor"  
"OPBB07\_00136" 33630 "s59E5H2" 0.003664015 "Endoglucanase C307 precursor"  
"OPBB07\_00136" 33630 "s63E6H2" 0.0009671597 "Endoglucanase C307 precursor"  
"OPBB07\_00137" 33631 "s59E13H2" 0.06216032 "hypothetical protein"  
"OPBB07\_00137" 33631 "s59E25H2" 0 "hypothetical protein"  
"OPBB07\_00137" 33631 "s59E5H2" 0.04463157 "hypothetical protein"  
"OPBB07\_00137" 33631 "s63E6H2" 0.01259493 "hypothetical protein"  
"OPBB07\_00138" 33632 "s59E13H2" 0.09056429 "hypothetical protein"  
"OPBB07\_00138" 33632 "s59E25H2" 0 "hypothetical protein"  
"OPBB07\_00138" 33632 "s59E5H2" 0.02272943 "hypothetical protein"  
"OPBB07\_00138" 33632 "s63E6H2" 0.003387696 "hypothetical protein"

"OPBB07\_00140" 33634 "s59E13H2" 0.7994696 "Phosphoenolpyruvate carboxykinase [GTP]"  
"OPBB07\_00140" 33634 "s59E25H2" 0 "Phosphoenolpyruvate carboxykinase [GTP]"  
"OPBB07\_00140" 33634 "s59E5H2" 0.2078947 "Phosphoenolpyruvate carboxykinase [GTP]"  
"OPBB07\_00140" 33634 "s63E6H2" 0.01429542 "Phosphoenolpyruvate carboxykinase [GTP]"  
"OPBB07\_00141" 33635 "s59E13H2" 0.1516844 "hypothetical protein"  
"OPBB07\_00141" 33635 "s59E25H2" 0 "hypothetical protein"  
"OPBB07\_00141" 33635 "s59E5H2" 0 "hypothetical protein"  
"OPBB07\_00141" 33635 "s63E6H2" 0.002293189 "hypothetical protein"  
"OPBB07\_00142" 33636 "s59E13H2" 0.2841092 "Hydrogenase isoenzymes nickel incorporation protein HypB"  
"OPBB07\_00142" 33636 "s59E25H2" 0 "Hydrogenase isoenzymes nickel incorporation protein HypB"  
"OPBB07\_00142" 33636 "s59E5H2" 0.1027477 "Hydrogenase isoenzymes nickel incorporation protein HypB"  
"OPBB07\_00142" 33636 "s63E6H2" 0.01734844 "Hydrogenase isoenzymes nickel incorporation protein HypB"  
"OPBB07\_00143" 33637 "s59E13H2" 0.003599115 "Sulfhydrogenase 2 subunit beta"  
"OPBB07\_00143" 33637 "s59E25H2" 0 "Sulfhydrogenase 2 subunit beta"  
"OPBB07\_00143" 33637 "s59E5H2" 0.4544155 "Sulfhydrogenase 2 subunit beta"  
"OPBB07\_00143" 33637 "s63E6H2" 0.003440218 "Sulfhydrogenase 2 subunit beta"  
"OPBB07\_00144" 33638 "s59E13H2" 0.0152603 "Sulfhydrogenase 2 subunit gamma"  
"OPBB07\_00144" 33638 "s59E25H2" 0 "Sulfhydrogenase 2 subunit gamma"  
"OPBB07\_00144" 33638 "s59E5H2" 0.9043172 "Sulfhydrogenase 2 subunit gamma"  
"OPBB07\_00144" 33638 "s63E6H2" 0.02007366 "Sulfhydrogenase 2 subunit gamma"  
"OPBB07\_00145" 33639 "s59E13H2" 0.001453682 "Sulfhydrogenase 1 subunit delta"  
"OPBB07\_00145" 33639 "s59E25H2" 0 "Sulfhydrogenase 1 subunit delta"  
"OPBB07\_00145" 33639 "s59E5H2" 0.8007867 "Sulfhydrogenase 1 subunit delta"  
"OPBB07\_00145" 33639 "s63E6H2" 0.01700754 "Sulfhydrogenase 1 subunit delta"  
"OPBB07\_00146" 33640 "s59E13H2" 0.004738564 "Sulfhydrogenase 1 subunit alpha"  
"OPBB07\_00146" 33640 "s59E25H2" 0 "Sulfhydrogenase 1 subunit alpha"  
"OPBB07\_00146" 33640 "s59E5H2" 0.5037715 "Sulfhydrogenase 1 subunit alpha"  
"OPBB07\_00146" 33640 "s63E6H2" 0.01579121 "Sulfhydrogenase 1 subunit alpha"  
"OPBB07\_00147" 33641 "s59E13H2" 0.003560601 "Hydrogenase 2 maturation protease"  
"OPBB07\_00147" 33641 "s59E25H2" 0 "Hydrogenase 2 maturation protease"  
"OPBB07\_00147" 33641 "s59E5H2" 1.044756 "Hydrogenase 2 maturation protease"  
"OPBB07\_00147" 33641 "s63E6H2" 0.02691051 "Hydrogenase 2 maturation protease"  
"OPBB07\_00148" 33642 "s59E13H2" 0.005987415 "hypothetical protein"  
"OPBB07\_00148" 33642 "s59E25H2" 0 "hypothetical protein"  
"OPBB07\_00148" 33642 "s59E5H2" 1.126626 "hypothetical protein"  
"OPBB07\_00148" 33642 "s63E6H2" 0.03801226 "hypothetical protein"  
"OPBB07\_00149" 33643 "s59E13H2" 0.6500816 "Sulfhydrogenase 1 subunit alpha"  
"OPBB07\_00149" 33643 "s59E25H2" 0 "Sulfhydrogenase 1 subunit alpha"  
"OPBB07\_00149" 33643 "s59E5H2" 1.554408 "Sulfhydrogenase 1 subunit alpha"  
"OPBB07\_00149" 33643 "s63E6H2" 0.08927105 "Sulfhydrogenase 1 subunit alpha"  
"OPBB07\_00150" 33644 "s59E13H2" 0.3294759 "Sulfhydrogenase 1 subunit delta"  
"OPBB07\_00150" 33644 "s59E25H2" 0 "Sulfhydrogenase 1 subunit delta"  
"OPBB07\_00150" 33644 "s59E5H2" 0.9794377 "Sulfhydrogenase 1 subunit delta"  
"OPBB07\_00150" 33644 "s63E6H2" 0.1704417 "Sulfhydrogenase 1 subunit delta"  
"OPBB07\_00151" 33645 "s59E13H2" 0.6203761 "Sulfhydrogenase 2 subunit gamma"  
"OPBB07\_00151" 33645 "s59E25H2" 0 "Sulfhydrogenase 2 subunit gamma"  
"OPBB07\_00151" 33645 "s59E5H2" 0.8677968 "Sulfhydrogenase 2 subunit gamma"



"OPBB07\_00151" 33645 "s63E6H2" 0.2228158 "Sulfhydrogenase 2 subunit gamma"  
"OPBB07\_00152" 33646 "s59E13H2" 0.6764348 "Sulfhydrogenase 1 subunit beta"  
"OPBB07\_00152" 33646 "s59E25H2" 0 "Sulfhydrogenase 1 subunit beta"  
"OPBB07\_00152" 33646 "s59E5H2" 0.7105827 "Sulfhydrogenase 1 subunit beta"  
"OPBB07\_00152" 33646 "s63E6H2" 0.1708423 "Sulfhydrogenase 1 subunit beta"  
"OPBB07\_00153" 33647 "s59E13H2" 0.2004234 "Alkaline phosphatase synthesis sensor protein PhoR"  
"OPBB07\_00153" 33647 "s59E25H2" 0 "Alkaline phosphatase synthesis sensor protein PhoR"  
"OPBB07\_00153" 33647 "s59E5H2" 0.2205738 "Alkaline phosphatase synthesis sensor protein PhoR"  
"OPBB07\_00153" 33647 "s63E6H2" 0.1611536 "Alkaline phosphatase synthesis sensor protein PhoR"  
"OPBB07\_00154" 33648 "s59E13H2" 0.4636354 "Response regulator MprA"  
"OPBB07\_00154" 33648 "s59E25H2" 0 "Response regulator MprA"  
"OPBB07\_00154" 33648 "s59E5H2" 0.1201648 "Response regulator MprA"  
"OPBB07\_00154" 33648 "s63E6H2" 0.1308671 "Response regulator MprA"  
"OPBB07\_00155" 33649 "s59E13H2" 0.3605007 "Sensor protein ZraS"  
"OPBB07\_00155" 33649 "s59E25H2" 0 "Sensor protein ZraS"  
"OPBB07\_00155" 33649 "s59E5H2" 0.04606432 "Sensor protein ZraS"  
"OPBB07\_00155" 33649 "s63E6H2" 0.1063892 "Sensor protein ZraS"  
"OPBB07\_00156" 33650 "s59E13H2" 0.03108811 "CoB--CoM heterodisulfide reductase iron-sulfur subunit C"  
"OPBB07\_00156" 33650 "s59E25H2" 0 "CoB--CoM heterodisulfide reductase iron-sulfur subunit C"  
"OPBB07\_00156" 33650 "s59E5H2" 0.01252126 "CoB--CoM heterodisulfide reductase iron-sulfur subunit C"  
"OPBB07\_00156" 33650 "s63E6H2" 0.03155794 "CoB--CoM heterodisulfide reductase iron-sulfur subunit C"  
"OPBB07\_00157" 33651 "s59E13H2" 0.001680361 "CoB--CoM heterodisulfide reductase iron-sulfur subunit A"  
"OPBB07\_00157" 33651 "s59E25H2" 0 "CoB--CoM heterodisulfide reductase iron-sulfur subunit A"  
"OPBB07\_00157" 33651 "s59E5H2" 0.05904709 "CoB--CoM heterodisulfide reductase iron-sulfur subunit A"  
"OPBB07\_00157" 33651 "s63E6H2" 0.5356115 "CoB--CoM heterodisulfide reductase iron-sulfur subunit A"  
"OPBB07\_00158" 33652 "s59E13H2" 0 "F420-non-reducing hydrogenase vhc iron-sulfur subunit D"  
"OPBB07\_00158" 33652 "s59E25H2" 0 "F420-non-reducing hydrogenase vhc iron-sulfur subunit D"  
"OPBB07\_00158" 33652 "s59E5H2" 0 "F420-non-reducing hydrogenase vhc iron-sulfur subunit D"  
"OPBB07\_00158" 33652 "s63E6H2" 0.09008402 "F420-non-reducing hydrogenase vhc iron-sulfur subunit D"  
"OPBB07\_00159" 33653 "s59E13H2" 0 "Formate dehydrogenase subunit beta"  
"OPBB07\_00159" 33653 "s59E25H2" 0 "Formate dehydrogenase subunit beta"  
"OPBB07\_00159" 33653 "s59E5H2" 0.00409783 "Formate dehydrogenase subunit beta"  
"OPBB07\_00159" 33653 "s63E6H2" 0.1417766 "Formate dehydrogenase subunit beta"  
"OPBB07\_00160" 33654 "s59E13H2" 0.05447301 "Sulfhydrogenase 2 subunit beta"  
"OPBB07\_00160" 33654 "s59E25H2" 0 "Sulfhydrogenase 2 subunit beta"  
"OPBB07\_00160" 33654 "s59E5H2" 0 "Sulfhydrogenase 2 subunit beta"  
"OPBB07\_00160" 33654 "s63E6H2" 0.1424547 "Sulfhydrogenase 2 subunit beta"  
"OPBB07\_00161" 33655 "s59E13H2" 0 "Sulfhydrogenase 1 subunit gamma"  
"OPBB07\_00161" 33655 "s59E25H2" 0 "Sulfhydrogenase 1 subunit gamma"  
"OPBB07\_00161" 33655 "s59E5H2" 0.004752376 "Sulfhydrogenase 1 subunit gamma"  
"OPBB07\_00161" 33655 "s63E6H2" 0.1699902 "Sulfhydrogenase 1 subunit gamma"  
"OPBB07\_00162" 33656 "s59E13H2" 0.004306847 "CoB--CoM heterodisulfide reductase iron-sulfur subunit A"  
"OPBB07\_00162" 33656 "s59E25H2" 0 "CoB--CoM heterodisulfide reductase iron-sulfur subunit A"  
"OPBB07\_00162" 33656 "s59E5H2" 0 "CoB--CoM heterodisulfide reductase iron-sulfur subunit A"  
"OPBB07\_00162" 33656 "s63E6H2" 0.4582925 "CoB--CoM heterodisulfide reductase iron-sulfur subunit A"  
"OPBB07\_00163" 33657 "s59E13H2" 0.003459683 "NADP-reducing hydrogenase subunit HndB"  
"OPBB07\_00163" 33657 "s59E25H2" 0 "NADP-reducing hydrogenase subunit HndB"

"OPBB07\_00163" 33657 "s59E5H2" 0 "NADP-reducing hydrogenase subunit HndB"  
"OPBB07\_00163" 33657 "s63E6H2" 0.4886387 "NADP-reducing hydrogenase subunit HndB"  
"OPBB07\_00164" 33658 "s59E13H2" 0.001807668 "NADP-reducing hydrogenase subunit HndC"  
"OPBB07\_00164" 33658 "s59E25H2" 150.7616 "NADP-reducing hydrogenase subunit HndC"  
"OPBB07\_00164" 33658 "s59E5H2" 0.01762224 "NADP-reducing hydrogenase subunit HndC"  
"OPBB07\_00164" 33658 "s63E6H2" 0.2140356 "NADP-reducing hydrogenase subunit HndC"  
"OPBB07\_00165" 33659 "s59E13H2" 0 "DRTGG domain protein"  
"OPBB07\_00165" 33659 "s59E25H2" 0 "DRTGG domain protein"  
"OPBB07\_00165" 33659 "s59E5H2" 0.01067159 "DRTGG domain protein"  
"OPBB07\_00165" 33659 "s63E6H2" 0.01709694 "DRTGG domain protein"  
"OPBB07\_00166" 33660 "s59E13H2" 0.003689949 "Serine/threonine-protein kinase RsbT"  
"OPBB07\_00166" 33660 "s59E25H2" 0 "Serine/threonine-protein kinase RsbT"  
"OPBB07\_00166" 33660 "s59E5H2" 0.0575181 "Serine/threonine-protein kinase RsbT"  
"OPBB07\_00166" 33660 "s63E6H2" 0.02838988 "Serine/threonine-protein kinase RsbT"  
"OPBB07\_00167" 33661 "s59E13H2" 0 "DRTGG domain protein"  
"OPBB07\_00167" 33661 "s59E25H2" 0 "DRTGG domain protein"  
"OPBB07\_00167" 33661 "s59E5H2" 0.01227329 "DRTGG domain protein"  
"OPBB07\_00167" 33661 "s63E6H2" 0.02957214 "DRTGG domain protein"  
"OPBB07\_00168" 33662 "s59E13H2" 0.01017371 "hypothetical protein"  
"OPBB07\_00168" 33662 "s59E25H2" 0 "hypothetical protein"  
"OPBB07\_00168" 33662 "s59E5H2" 0.01104559 "hypothetical protein"  
"OPBB07\_00168" 33662 "s63E6H2" 0.02779451 "hypothetical protein"  
"OPBB07\_00169" 33663 "s59E13H2" 0.02757001 "Globin-coupled histidine kinase"  
"OPBB07\_00169" 33663 "s59E25H2" 0 "Globin-coupled histidine kinase"  
"OPBB07\_00169" 33663 "s59E5H2" 0.06767755 "Globin-coupled histidine kinase"  
"OPBB07\_00169" 33663 "s63E6H2" 0.04419547 "Globin-coupled histidine kinase"  
"OPBB07\_00170" 33664 "s59E13H2" 0.04747004 "CoB--CoM heterodisulfide reductase iron-sulfur subunit A"  
"OPBB07\_00170" 33664 "s59E25H2" 0 "CoB--CoM heterodisulfide reductase iron-sulfur subunit A"  
"OPBB07\_00170" 33664 "s59E5H2" 0.02829607 "CoB--CoM heterodisulfide reductase iron-sulfur subunit A"  
"OPBB07\_00170" 33664 "s63E6H2" 0.04990372 "CoB--CoM heterodisulfide reductase iron-sulfur subunit A"  
"OPBB07\_00171" 33665 "s59E13H2" 0.01838724 "F420-non-reducing hydrogenase vhc iron-sulfur subunit D"  
"OPBB07\_00171" 33665 "s59E25H2" 0 "F420-non-reducing hydrogenase vhc iron-sulfur subunit D"  
"OPBB07\_00171" 33665 "s59E5H2" 0.002739483 "F420-non-reducing hydrogenase vhc iron-sulfur subunit D"  
"OPBB07\_00171" 33665 "s63E6H2" 0.0135236 "F420-non-reducing hydrogenase vhc iron-sulfur subunit D"  
"OPBB07\_00173" 33667 "s59E13H2" 0.0321518 "F420-non-reducing hydrogenase subunit G"  
"OPBB07\_00173" 33667 "s59E25H2" 0 "F420-non-reducing hydrogenase subunit G"  
"OPBB07\_00173" 33667 "s59E5H2" 0.03280821 "F420-non-reducing hydrogenase subunit G"  
"OPBB07\_00173" 33667 "s63E6H2" 0.3974491 "F420-non-reducing hydrogenase subunit G"  
"OPBB07\_00174" 33668 "s59E13H2" 0.04582593 "F420-non-reducing hydrogenase subunit A"  
"OPBB07\_00174" 33668 "s59E25H2" 0 "F420-non-reducing hydrogenase subunit A"  
"OPBB07\_00174" 33668 "s59E5H2" 0.04930928 "F420-non-reducing hydrogenase subunit A"  
"OPBB07\_00174" 33668 "s63E6H2" 0.473679 "F420-non-reducing hydrogenase subunit A"  
"OPBB07\_00175" 33669 "s59E13H2" 0.04299059 "Hydrogenase 2 maturation protease"  
"OPBB07\_00175" 33669 "s59E25H2" 0 "Hydrogenase 2 maturation protease"  
"OPBB07\_00175" 33669 "s59E5H2" 0.02210395 "Hydrogenase 2 maturation protease"  
"OPBB07\_00175" 33669 "s63E6H2" 0.351024 "Hydrogenase 2 maturation protease"  
"OPBB07\_00176" 33670 "s59E13H2" 0.08909207 "Hydrogenase/urease nickel incorporation protein HypA"

"OPBB07\_00176" 33670 "s59E25H2" 0 "Hydrogenase/urease nickel incorporation protein HypA"  
"OPBB07\_00176" 33670 "s59E5H2" 0.02476401 "Hydrogenase/urease nickel incorporation protein HypA"  
"OPBB07\_00176" 33670 "s63E6H2" 0.2102377 "Hydrogenase/urease nickel incorporation protein HypA"  
"OPBB07\_00177" 33671 "s59E13H2" 0.09414283 "Hydrogenase isoenzymes formation protein HypE"  
"OPBB07\_00177" 33671 "s59E25H2" 0 "Hydrogenase isoenzymes formation protein HypE"  
"OPBB07\_00177" 33671 "s59E5H2" 0.04110941 "Hydrogenase isoenzymes formation protein HypE"  
"OPBB07\_00177" 33671 "s63E6H2" 0.02477511 "Hydrogenase isoenzymes formation protein HypE"  
"OPBB07\_00178" 33672 "s59E13H2" 0.05706703 "Hydrogenase expression/formation protein HypD"  
"OPBB07\_00178" 33672 "s59E25H2" 0 "Hydrogenase expression/formation protein HypD"  
"OPBB07\_00178" 33672 "s59E5H2" 0.01622687 "Hydrogenase expression/formation protein HypD"  
"OPBB07\_00178" 33672 "s63E6H2" 0.004932682 "Hydrogenase expression/formation protein HypD"  
"OPBB07\_00179" 33673 "s59E13H2" 0.02227897 "LVIVD repeat protein"  
"OPBB07\_00179" 33673 "s59E25H2" 0 "LVIVD repeat protein"  
"OPBB07\_00179" 33673 "s59E5H2" 0.01788203 "LVIVD repeat protein"  
"OPBB07\_00179" 33673 "s63E6H2" 0.1794312 "LVIVD repeat protein"  
"OPBB07\_00180" 33674 "s59E13H2" 0 "Segregation and condensation protein B"  
"OPBB07\_00180" 33674 "s59E25H2" 0 "Segregation and condensation protein B"  
"OPBB07\_00180" 33674 "s59E5H2" 0.02803613 "Segregation and condensation protein B"  
"OPBB07\_00180" 33674 "s63E6H2" 0.1589544 "Segregation and condensation protein B"  
"OPBB07\_00181" 33675 "s59E13H2" 0.004916403 "Segregation and condensation protein A"  
"OPBB07\_00181" 33675 "s59E25H2" 0 "Segregation and condensation protein A"  
"OPBB07\_00181" 33675 "s59E5H2" 0.02163735 "Segregation and condensation protein A"  
"OPBB07\_00181" 33675 "s63E6H2" 0.08143155 "Segregation and condensation protein A"  
"OPBB07\_00182" 33676 "s59E13H2" 0.003779134 "Tryptophan--tRNA ligase"  
"OPBB07\_00182" 33676 "s59E25H2" 0 "Tryptophan--tRNA ligase"  
"OPBB07\_00182" 33676 "s59E5H2" 3.305144e-05 "Tryptophan--tRNA ligase"  
"OPBB07\_00182" 33676 "s63E6H2" 0.1070909 "Tryptophan--tRNA ligase"  
"OPBB07\_00183" 33677 "s59E13H2" 0.01023452 "Peptidase family M50"  
"OPBB07\_00183" 33677 "s59E25H2" 0 "Peptidase family M50"  
"OPBB07\_00183" 33677 "s59E5H2" 0.02894145 "Peptidase family M50"  
"OPBB07\_00183" 33677 "s63E6H2" 0.11153 "Peptidase family M50"  
"OPBB07\_00184" 33678 "s59E13H2" 0.01621451 "Tyrosine recombinase XerD"  
"OPBB07\_00184" 33678 "s59E25H2" 0.1071038 "Tyrosine recombinase XerD"  
"OPBB07\_00184" 33678 "s59E5H2" 0.03327392 "Tyrosine recombinase XerD"  
"OPBB07\_00184" 33678 "s63E6H2" 0.09894293 "Tyrosine recombinase XerD"  
"OPBB07\_00185" 33679 "s59E13H2" 0.02648709 "ADP-ribose pyrophosphatase"  
"OPBB07\_00185" 33679 "s59E25H2" 0.3019197 "ADP-ribose pyrophosphatase"  
"OPBB07\_00185" 33679 "s59E5H2" 0.01086441 "ADP-ribose pyrophosphatase"  
"OPBB07\_00185" 33679 "s63E6H2" 0.1306464 "ADP-ribose pyrophosphatase"  
"OPBB07\_00186" 33680 "s59E13H2" 0.006306404 "Peptidase T"  
"OPBB07\_00186" 33680 "s59E25H2" 0 "Peptidase T"  
"OPBB07\_00186" 33680 "s59E5H2" 0.04233784 "Peptidase T"  
"OPBB07\_00186" 33680 "s63E6H2" 0.1372244 "Peptidase T"  
"OPBB07\_00187" 33681 "s59E13H2" 0.01019188 "hypothetical protein"  
"OPBB07\_00187" 33681 "s59E25H2" 0 "hypothetical protein"  
"OPBB07\_00187" 33681 "s59E5H2" 0.005629074 "hypothetical protein"  
"OPBB07\_00187" 33681 "s63E6H2" 0.06565633 "hypothetical protein"

"OPBB07\_00188" 33682 "s59E13H2" 0.02066535 "CTP synthase"  
"OPBB07\_00188" 33682 "s59E25H2" 0 "CTP synthase"  
"OPBB07\_00188" 33682 "s59E5H2" 0.04202265 "CTP synthase"  
"OPBB07\_00188" 33682 "s63E6H2" 0.2283835 "CTP synthase"  
"OPBB07\_00189" 33683 "s59E13H2" 0.01983109 "DNA repair protein RecN"  
"OPBB07\_00189" 33683 "s59E25H2" 51.39594 "DNA repair protein RecN"  
"OPBB07\_00189" 33683 "s59E5H2" 0.03049415 "DNA repair protein RecN"  
"OPBB07\_00189" 33683 "s63E6H2" 0.2393827 "DNA repair protein RecN"  
"OPBB07\_00190" 33684 "s59E13H2" 0.01574203 "putative inorganic polyphosphate/ATP-NAD kinase"  
"OPBB07\_00190" 33684 "s59E25H2" 0 "putative inorganic polyphosphate/ATP-NAD kinase"  
"OPBB07\_00190" 33684 "s59E5H2" 0.03693294 "putative inorganic polyphosphate/ATP-NAD kinase"  
"OPBB07\_00190" 33684 "s63E6H2" 0.2186727 "putative inorganic polyphosphate/ATP-NAD kinase"  
"OPBB07\_00191" 33685 "s59E13H2" 0.1137599 "Farnesyl diphosphate synthase"  
"OPBB07\_00191" 33685 "s59E25H2" 0 "Farnesyl diphosphate synthase"  
"OPBB07\_00191" 33685 "s59E5H2" 0.08152452 "Farnesyl diphosphate synthase"  
"OPBB07\_00191" 33685 "s63E6H2" 0.2331373 "Farnesyl diphosphate synthase"  
"OPBB07\_00192" 33686 "s59E13H2" 0.02483897 "hypothetical protein"  
"OPBB07\_00192" 33686 "s59E25H2" 0 "hypothetical protein"  
"OPBB07\_00192" 33686 "s59E5H2" 0.1041048 "hypothetical protein"  
"OPBB07\_00192" 33686 "s63E6H2" 0.276712 "hypothetical protein"  
"OPBB07\_00193" 33687 "s59E13H2" 0.02137512 "Elongation factor P"  
"OPBB07\_00193" 33687 "s59E25H2" 0 "Elongation factor P"  
"OPBB07\_00193" 33687 "s59E5H2" 0.08793637 "Elongation factor P"  
"OPBB07\_00193" 33687 "s63E6H2" 0.2293333 "Elongation factor P"  
"OPBB07\_00194" 33688 "s59E13H2" 0.01438599 "Xaa-Pro dipeptidase"  
"OPBB07\_00194" 33688 "s59E25H2" 0 "Xaa-Pro dipeptidase"  
"OPBB07\_00194" 33688 "s59E5H2" 0.09969928 "Xaa-Pro dipeptidase"  
"OPBB07\_00194" 33688 "s63E6H2" 0.1111411 "Xaa-Pro dipeptidase"  
"OPBB07\_00196" 33690 "s59E13H2" 0.03667197 "3-dehydroquininate dehydratase"  
"OPBB07\_00196" 33690 "s59E25H2" 11.4554 "3-dehydroquininate dehydratase"  
"OPBB07\_00196" 33690 "s59E5H2" 0.03786543 "3-dehydroquininate dehydratase"  
"OPBB07\_00196" 33690 "s63E6H2" 0.06367556 "3-dehydroquininate dehydratase"  
"OPBB07\_00197" 33691 "s59E13H2" 0.04981725 "3-dehydroquininate synthase"  
"OPBB07\_00197" 33691 "s59E25H2" 0 "3-dehydroquininate synthase"  
"OPBB07\_00197" 33691 "s59E5H2" 0.09188101 "3-dehydroquininate synthase"  
"OPBB07\_00197" 33691 "s63E6H2" 0.1687548 "3-dehydroquininate synthase"  
"OPBB07\_00198" 33692 "s59E13H2" 0.05457259 "Shikimate kinase 1"  
"OPBB07\_00198" 33692 "s59E25H2" 0 "Shikimate kinase 1"  
"OPBB07\_00198" 33692 "s59E5H2" 0.06637752 "Shikimate kinase 1"  
"OPBB07\_00198" 33692 "s63E6H2" 0.1104346 "Shikimate kinase 1"  
"OPBB07\_00199" 33693 "s59E13H2" 0.02412557 "Chorismate synthase"  
"OPBB07\_00199" 33693 "s59E25H2" 0 "Chorismate synthase"  
"OPBB07\_00199" 33693 "s59E5H2" 0.06614006 "Chorismate synthase"  
"OPBB07\_00199" 33693 "s63E6H2" 0.2309415 "Chorismate synthase"  
"OPBB07\_00201" 33695 "s59E13H2" 0 "Competence protein A"  
"OPBB07\_00201" 33695 "s59E25H2" 0 "Competence protein A"  
"OPBB07\_00201" 33695 "s59E5H2" 0 "Competence protein A"

"OPBB07\_00201" 33695 "s63E6H2" 0.1495142 "Competence protein A"  
"OPBB07\_00202" 33696 "s59E13H2" 0.02376038 "Type 4 prepilin-like proteins leader peptide-processing enzyme"  
"OPBB07\_00202" 33696 "s59E25H2" 0 "Type 4 prepilin-like proteins leader peptide-processing enzyme"  
"OPBB07\_00202" 33696 "s59E5H2" 0.02206242 "Type 4 prepilin-like proteins leader peptide-processing enzyme"  
"OPBB07\_00202" 33696 "s63E6H2" 0.1485676 "Type 4 prepilin-like proteins leader peptide-processing enzyme"  
"OPBB07\_00203" 33697 "s59E13H2" 0.03056675 "Shikimate dehydrogenase"  
"OPBB07\_00203" 33697 "s59E25H2" 0 "Shikimate dehydrogenase"  
"OPBB07\_00203" 33697 "s59E5H2" 0.04876386 "Shikimate dehydrogenase"  
"OPBB07\_00203" 33697 "s63E6H2" 0.1409196 "Shikimate dehydrogenase"  
"OPBB07\_00204" 33698 "s59E13H2" 0.005247201 "Acylphosphatase"  
"OPBB07\_00204" 33698 "s59E25H2" 0 "Acylphosphatase"  
"OPBB07\_00204" 33698 "s59E5H2" 0.07053526 "Acylphosphatase"  
"OPBB07\_00204" 33698 "s63E6H2" 0.1223964 "Acylphosphatase"  
"OPBB07\_00205" 33699 "s59E13H2" 0.03031055 "putative protease YhbU precursor"  
"OPBB07\_00205" 33699 "s59E25H2" 0 "putative protease YhbU precursor"  
"OPBB07\_00205" 33699 "s59E5H2" 0.09545152 "putative protease YhbU precursor"  
"OPBB07\_00205" 33699 "s63E6H2" 0.1918337 "putative protease YhbU precursor"  
"OPBB07\_00206" 33700 "s59E13H2" 0.03410385 "Putative O-methyltransferase/MSMEI\_4947"  
"OPBB07\_00206" 33700 "s59E25H2" 0 "Putative O-methyltransferase/MSMEI\_4947"  
"OPBB07\_00206" 33700 "s59E5H2" 0.02704336 "Putative O-methyltransferase/MSMEI\_4947"  
"OPBB07\_00206" 33700 "s63E6H2" 0.1424571 "Putative O-methyltransferase/MSMEI\_4947"  
"OPBB07\_00207" 33701 "s59E13H2" 0.00717127 "putative aminodeoxychorismate lyase"  
"OPBB07\_00207" 33701 "s59E25H2" 0 "putative aminodeoxychorismate lyase"  
"OPBB07\_00207" 33701 "s59E5H2" 0.05149424 "putative aminodeoxychorismate lyase"  
"OPBB07\_00207" 33701 "s63E6H2" 0.07081901 "putative aminodeoxychorismate lyase"  
"OPBB07\_00208" 33702 "s59E13H2" 0.0122696 "Putative Holliday junction resolvase"  
"OPBB07\_00208" 33702 "s59E25H2" 0 "Putative Holliday junction resolvase"  
"OPBB07\_00208" 33702 "s59E5H2" 0.06413693 "Putative Holliday junction resolvase"  
"OPBB07\_00208" 33702 "s63E6H2" 0.1185831 "Putative Holliday junction resolvase"  
"OPBB07\_00209" 33703 "s59E13H2" 0.009556871 "Alanine--tRNA ligase"  
"OPBB07\_00209" 33703 "s59E25H2" 0 "Alanine--tRNA ligase"  
"OPBB07\_00209" 33703 "s59E5H2" 0.04472904 "Alanine--tRNA ligase"  
"OPBB07\_00209" 33703 "s63E6H2" 0.1154144 "Alanine--tRNA ligase"  
"OPBB07\_00211" 33705 "s59E13H2" 0.005465385 "Aspartate--tRNA ligase"  
"OPBB07\_00211" 33705 "s59E25H2" 0 "Aspartate--tRNA ligase"  
"OPBB07\_00211" 33705 "s59E5H2" 0.08258331 "Aspartate--tRNA ligase"  
"OPBB07\_00211" 33705 "s63E6H2" 0.05064045 "Aspartate--tRNA ligase"  
"OPBB07\_00212" 33706 "s59E13H2" 0.01398161 "Histidine--tRNA ligase"  
"OPBB07\_00212" 33706 "s59E25H2" 0 "Histidine--tRNA ligase"  
"OPBB07\_00212" 33706 "s59E5H2" 0.135325 "Histidine--tRNA ligase"  
"OPBB07\_00212" 33706 "s63E6H2" 0.02412304 "Histidine--tRNA ligase"  
"OPBB07\_00213" 33707 "s59E13H2" 0.01313132 "putative metallo-hydrolase"  
"OPBB07\_00213" 33707 "s59E25H2" 0 "putative metallo-hydrolase"  
"OPBB07\_00213" 33707 "s59E5H2" 0.07069298 "putative metallo-hydrolase"  
"OPBB07\_00213" 33707 "s63E6H2" 0.01878132 "putative metallo-hydrolase"  
"OPBB07\_00214" 33708 "s59E13H2" 0.003136466 "Bifunctional (p)ppGpp synthase/hydrolase relA"  
"OPBB07\_00214" 33708 "s59E25H2" 0 "Bifunctional (p)ppGpp synthase/hydrolase relA"

"OPBB07\_00214" 33708 "s59E5H2" 0.1349658 "Bifunctional (p)ppGpp synthase/hydrolase relA"  
"OPBB07\_00214" 33708 "s63E6H2" 0.0170913 "Bifunctional (p)ppGpp synthase/hydrolase relA"  
"OPBB07\_00216" 33710 "s59E13H2" 0.003151753 "Dihydrolipoyl dehydrogenase"  
"OPBB07\_00216" 33710 "s59E25H2" 0 "Dihydrolipoyl dehydrogenase"  
"OPBB07\_00216" 33710 "s59E5H2" 0.02625963 "Dihydrolipoyl dehydrogenase"  
"OPBB07\_00216" 33710 "s63E6H2" 0 "Dihydrolipoyl dehydrogenase"  
"OPBB07\_00218" 33712 "s59E13H2" 0.4284109 "Octanoyltransferase"  
"OPBB07\_00218" 33712 "s59E25H2" 0 "Octanoyltransferase"  
"OPBB07\_00218" 33712 "s59E5H2" 0.2314526 "Octanoyltransferase"  
"OPBB07\_00218" 33712 "s63E6H2" 0.8129668 "Octanoyltransferase"  
"OPBB07\_00220" 33714 "s59E13H2" 0.5120569 "Dihydrolipoyllysine-residue acetyltransferase component of pyruvate dehydrogenase complex"  
"OPBB07\_00220" 33714 "s59E25H2" 0 "Dihydrolipoyllysine-residue acetyltransferase component of pyruvate dehydrogenase complex"  
"OPBB07\_00220" 33714 "s59E5H2" 0.07132899 "Dihydrolipoyllysine-residue acetyltransferase component of pyruvate dehydrogenase complex"  
"OPBB07\_00220" 33714 "s63E6H2" 0.3156399 "Dihydrolipoyllysine-residue acetyltransferase component of pyruvate dehydrogenase complex"  
"OPBB07\_00221" 33715 "s59E13H2" 0.4081036 "2-oxoisovalerate dehydrogenase subunit beta"  
"OPBB07\_00221" 33715 "s59E25H2" 0 "2-oxoisovalerate dehydrogenase subunit beta"  
"OPBB07\_00221" 33715 "s59E5H2" 0.0351418 "2-oxoisovalerate dehydrogenase subunit beta"  
"OPBB07\_00221" 33715 "s63E6H2" 0.3580272 "2-oxoisovalerate dehydrogenase subunit beta"  
"OPBB07\_00222" 33716 "s59E13H2" 0.09660095 "Acetoin:2,6-dichlorophenolindophenol oxidoreductase subunit alpha"  
"OPBB07\_00222" 33716 "s59E25H2" 0 "Acetoin:2,6-dichlorophenolindophenol oxidoreductase subunit alpha"  
"OPBB07\_00222" 33716 "s59E5H2" 0.003907201 "Acetoin:2,6-dichlorophenolindophenol oxidoreductase subunit alpha"  
"OPBB07\_00222" 33716 "s63E6H2" 0.09717411 "Acetoin:2,6-dichlorophenolindophenol oxidoreductase subunit alpha"  
"OPBB07\_00223" 33717 "s59E13H2" 0.2582475 "Sorbitol operon regulator"  
"OPBB07\_00223" 33717 "s59E25H2" 0 "Sorbitol operon regulator"  
"OPBB07\_00223" 33717 "s59E5H2" 0.02770577 "Sorbitol operon regulator"  
"OPBB07\_00223" 33717 "s63E6H2" 0.1317051 "Sorbitol operon regulator"  
"OPBB07\_00224" 33718 "s59E13H2" 0 "Tyrosine recombinase XerC"  
"OPBB07\_00224" 33718 "s59E25H2" 0 "Tyrosine recombinase XerC"  
"OPBB07\_00224" 33718 "s59E5H2" 0 "Tyrosine recombinase XerC"  
"OPBB07\_00224" 33718 "s63E6H2" 0 "Tyrosine recombinase XerC"  
"OPBB07\_00226" 33720 "s59E13H2" 0.007827398 "Xylulose kinase"  
"OPBB07\_00226" 33720 "s59E25H2" 0 "Xylulose kinase"  
"OPBB07\_00226" 33720 "s59E5H2" 0.003657525 "Xylulose kinase"  
"OPBB07\_00226" 33720 "s63E6H2" 0.01966296 "Xylulose kinase"  
"OPBB07\_00227" 33721 "s59E13H2" 0.0137262 "glucosamine-6-phosphate deaminase"  
"OPBB07\_00227" 33721 "s59E25H2" 0 "glucosamine-6-phosphate deaminase"  
"OPBB07\_00227" 33721 "s59E5H2" 0.02296662 "glucosamine-6-phosphate deaminase"  
"OPBB07\_00227" 33721 "s63E6H2" 0.01013215 "glucosamine-6-phosphate deaminase"  
"OPBB07\_00228" 33722 "s59E13H2" 0.001605137 "Putative GTP cyclohydrolase 1 type 2"  
"OPBB07\_00228" 33722 "s59E25H2" 0 "Putative GTP cyclohydrolase 1 type 2"  
"OPBB07\_00228" 33722 "s59E5H2" 0.02671854 "Putative GTP cyclohydrolase 1 type 2"  
"OPBB07\_00228" 33722 "s63E6H2" 0.02177471 "Putative GTP cyclohydrolase 1 type 2"  
"OPBB07\_00229" 33723 "s59E13H2" 0.001347013 "Bifunctional phosphoglucose/phosphomannose isomerase"  
"OPBB07\_00229" 33723 "s59E25H2" 0 "Bifunctional phosphoglucose/phosphomannose isomerase"  
"OPBB07\_00229" 33723 "s59E5H2" 0.007640491 "Bifunctional phosphoglucose/phosphomannose isomerase"  
"OPBB07\_00229" 33723 "s63E6H2" 0.01880569 "Bifunctional phosphoglucose/phosphomannose isomerase"  
"OPBB07\_00231" 33725 "s59E13H2" 0.03049673 "putative NH(3)-dependent NAD(+) synthetase"

"OPBB07\_00231" 33725 "s59E25H2" 0.26979 "putative NH(3)-dependent NAD(+) synthetase"  
"OPBB07\_00231" 33725 "s59E5H2" 0 "putative NH(3)-dependent NAD(+) synthetase"  
"OPBB07\_00231" 33725 "s63E6H2" 0.03910126 "putative NH(3)-dependent NAD(+) synthetase"  
"OPBB07\_00232" 33726 "s59E13H2" 0.007268908 "hypothetical protein"  
"OPBB07\_00232" 33726 "s59E25H2" 0 "hypothetical protein"  
"OPBB07\_00232" 33726 "s59E5H2" 0 "hypothetical protein"  
"OPBB07\_00232" 33726 "s63E6H2" 0.02114059 "hypothetical protein"  
"OPBB07\_00233" 33727 "s59E13H2" 0.01529557 "hypothetical protein"  
"OPBB07\_00233" 33727 "s59E25H2" 0 "hypothetical protein"  
"OPBB07\_00233" 33727 "s59E5H2" 0 "hypothetical protein"  
"OPBB07\_00233" 33727 "s63E6H2" 0.002909085 "hypothetical protein"  
"OPBB07\_00235" 33729 "s59E13H2" 0.01402809 "hypothetical protein"  
"OPBB07\_00235" 33729 "s59E25H2" 0 "hypothetical protein"  
"OPBB07\_00235" 33729 "s59E5H2" 0 "hypothetical protein"  
"OPBB07\_00235" 33729 "s63E6H2" 0 "hypothetical protein"  
"OPBB07\_00237" 33731 "s59E13H2" 0.004466894 "RNA recognition motif. (a.k.a. RRM, RBD, or RNP domain)"  
"OPBB07\_00237" 33731 "s59E25H2" 0 "RNA recognition motif. (a.k.a. RRM, RBD, or RNP domain)"  
"OPBB07\_00237" 33731 "s59E5H2" 0.02414408 "RNA recognition motif. (a.k.a. RRM, RBD, or RNP domain)"  
"OPBB07\_00237" 33731 "s63E6H2" 0.3469099 "RNA recognition motif. (a.k.a. RRM, RBD, or RNP domain)"  
"OPBB07\_00238" 33732 "s59E13H2" 0 "Serine dehydrogenase proteinase"  
"OPBB07\_00238" 33732 "s59E25H2" 0 "Serine dehydrogenase proteinase"  
"OPBB07\_00238" 33732 "s59E5H2" 0 "Serine dehydrogenase proteinase"  
"OPBB07\_00238" 33732 "s63E6H2" 0 "Serine dehydrogenase proteinase"  
"OPBB07\_00240" 33734 "s59E13H2" 0 "Type I restriction modification DNA specificity domain protein"  
"OPBB07\_00240" 33734 "s59E25H2" 0 "Type I restriction modification DNA specificity domain protein"  
"OPBB07\_00240" 33734 "s59E5H2" 0 "Type I restriction modification DNA specificity domain protein"  
"OPBB07\_00240" 33734 "s63E6H2" 0 "Type I restriction modification DNA specificity domain protein"  
"OPBB07\_00241" 33735 "s59E13H2" 0 "hypothetical protein"  
"OPBB07\_00241" 33735 "s59E25H2" 0 "hypothetical protein"  
"OPBB07\_00241" 33735 "s59E5H2" 0 "hypothetical protein"  
"OPBB07\_00241" 33735 "s63E6H2" 0 "hypothetical protein"  
"OPBB07\_00242" 33736 "s59E13H2" 0.00174412 "Type I restriction enzyme EcoKI M protein"  
"OPBB07\_00242" 33736 "s59E25H2" 0 "Type I restriction enzyme EcoKI M protein"  
"OPBB07\_00242" 33736 "s59E5H2" 0 "Type I restriction enzyme EcoKI M protein"  
"OPBB07\_00242" 33736 "s63E6H2" 0.001512216 "Type I restriction enzyme EcoKI M protein"  
"OPBB07\_00243" 33737 "s59E13H2" 0 "Tyrosine recombinase XerD"  
"OPBB07\_00243" 33737 "s59E25H2" 0 "Tyrosine recombinase XerD"  
"OPBB07\_00243" 33737 "s59E5H2" 0 "Tyrosine recombinase XerD"  
"OPBB07\_00243" 33737 "s63E6H2" 0 "Tyrosine recombinase XerD"  
"OPBB07\_00246" 33740 "s59E13H2" 0 "Glucose 1-dehydrogenase"  
"OPBB07\_00246" 33740 "s59E25H2" 0 "Glucose 1-dehydrogenase"  
"OPBB07\_00246" 33740 "s59E5H2" 0 "Glucose 1-dehydrogenase"  
"OPBB07\_00246" 33740 "s63E6H2" 0 "Glucose 1-dehydrogenase"  
"OPBB07\_00247" 33741 "s59E13H2" 0 "Receptor family ligand binding region"  
"OPBB07\_00247" 33741 "s59E25H2" 0 "Receptor family ligand binding region"  
"OPBB07\_00247" 33741 "s59E5H2" 0 "Receptor family ligand binding region"  
"OPBB07\_00247" 33741 "s63E6H2" 0 "Receptor family ligand binding region"

"OPBB07\_00248" 33742 "s59E13H2" 0 "High-affinity branched-chain amino acid transport system permease protein LivH"  
"OPBB07\_00248" 33742 "s59E25H2" 0 "High-affinity branched-chain amino acid transport system permease protein LivH"  
"OPBB07\_00248" 33742 "s59E5H2" 0 "High-affinity branched-chain amino acid transport system permease protein LivH"  
"OPBB07\_00248" 33742 "s63E6H2" 0 "High-affinity branched-chain amino acid transport system permease protein LivH"  
"OPBB07\_00249" 33743 "s59E13H2" 0 "leucine/isoleucine/valine transporter permease subunit"  
"OPBB07\_00249" 33743 "s59E25H2" 0 "leucine/isoleucine/valine transporter permease subunit"  
"OPBB07\_00249" 33743 "s59E5H2" 0 "leucine/isoleucine/valine transporter permease subunit"  
"OPBB07\_00249" 33743 "s63E6H2" 0 "leucine/isoleucine/valine transporter permease subunit"  
"OPBB07\_00250" 33744 "s59E13H2" 0 "putative branched-chain amino acid transport ATP-binding protein LivG"  
"OPBB07\_00250" 33744 "s59E25H2" 0 "putative branched-chain amino acid transport ATP-binding protein LivG"  
"OPBB07\_00250" 33744 "s59E5H2" 0 "putative branched-chain amino acid transport ATP-binding protein LivG"  
"OPBB07\_00250" 33744 "s63E6H2" 0 "putative branched-chain amino acid transport ATP-binding protein LivG"  
"OPBB07\_00251" 33745 "s59E13H2" 0 "High-affinity branched-chain amino acid transport ATP-binding protein LivF"  
"OPBB07\_00251" 33745 "s59E25H2" 0 "High-affinity branched-chain amino acid transport ATP-binding protein LivF"  
"OPBB07\_00251" 33745 "s59E5H2" 0 "High-affinity branched-chain amino acid transport ATP-binding protein LivF"  
"OPBB07\_00251" 33745 "s63E6H2" 0 "High-affinity branched-chain amino acid transport ATP-binding protein LivF"  
"OPBB07\_00252" 33746 "s59E13H2" 0 "transcriptional regulator NanR"  
"OPBB07\_00252" 33746 "s59E25H2" 0 "transcriptional regulator NanR"  
"OPBB07\_00252" 33746 "s59E5H2" 0 "transcriptional regulator NanR"  
"OPBB07\_00252" 33746 "s63E6H2" 0 "transcriptional regulator NanR"  
"OPBB07\_00253" 33747 "s59E13H2" 0.001672017 "hypothetical protein"  
"OPBB07\_00253" 33747 "s59E25H2" 0 "hypothetical protein"  
"OPBB07\_00253" 33747 "s59E5H2" 0 "hypothetical protein"  
"OPBB07\_00253" 33747 "s63E6H2" 0.002815568 "hypothetical protein"  
"OPBB07\_00254" 33748 "s59E13H2" 0.008532194 "hypothetical protein"  
"OPBB07\_00254" 33748 "s59E25H2" 0 "hypothetical protein"  
"OPBB07\_00254" 33748 "s59E5H2" 0 "hypothetical protein"  
"OPBB07\_00254" 33748 "s63E6H2" 0.02646517 "hypothetical protein"  
"OPBB07\_00255" 33749 "s59E13H2" 0.003427393 "hypothetical protein"  
"OPBB07\_00255" 33749 "s59E25H2" 0 "hypothetical protein"  
"OPBB07\_00255" 33749 "s59E5H2" 0 "hypothetical protein"  
"OPBB07\_00255" 33749 "s63E6H2" 0.01989719 "hypothetical protein"  
"OPBB07\_00256" 33750 "s59E13H2" 0 "hypothetical protein"  
"OPBB07\_00256" 33750 "s59E25H2" 0 "hypothetical protein"  
"OPBB07\_00256" 33750 "s59E5H2" 0 "hypothetical protein"  
"OPBB07\_00256" 33750 "s63E6H2" 0.01156191 "hypothetical protein"  
"OPBB07\_00258" 33752 "s59E13H2" 0.005557818 "hypothetical protein"  
"OPBB07\_00258" 33752 "s59E25H2" 0 "hypothetical protein"  
"OPBB07\_00258" 33752 "s59E5H2" 0 "hypothetical protein"  
"OPBB07\_00258" 33752 "s63E6H2" 0 "hypothetical protein"  
"OPBB07\_00259" 33753 "s59E13H2" 0 "hypothetical protein"  
"OPBB07\_00259" 33753 "s59E25H2" 0 "hypothetical protein"  
"OPBB07\_00259" 33753 "s59E5H2" 0 "hypothetical protein"  
"OPBB07\_00259" 33753 "s63E6H2" 0 "hypothetical protein"  
"OPBB07\_00261" 33755 "s59E13H2" 0 "hypothetical protein"  
"OPBB07\_00261" 33755 "s59E25H2" 0 "hypothetical protein"  
"OPBB07\_00261" 33755 "s59E5H2" 0 "hypothetical protein"



"OPBB07\_00261" 33755 "s63E6H2" 0 "hypothetical protein"  
"OPBB07\_00262" 33756 "s59E13H2" 0 "hypothetical protein"  
"OPBB07\_00262" 33756 "s59E25H2" 0 "hypothetical protein"  
"OPBB07\_00262" 33756 "s59E5H2" 0 "hypothetical protein"  
"OPBB07\_00262" 33756 "s63E6H2" 0 "hypothetical protein"  
"OPBB07\_00263" 33757 "s59E13H2" 0 "methylcobalamin:coenzyme M methyltransferase"  
"OPBB07\_00263" 33757 "s59E25H2" 0 "methylcobalamin:coenzyme M methyltransferase"  
"OPBB07\_00263" 33757 "s59E5H2" 0 "methylcobalamin:coenzyme M methyltransferase"  
"OPBB07\_00263" 33757 "s63E6H2" 0 "methylcobalamin:coenzyme M methyltransferase"  
"OPBB07\_00264" 33758 "s59E13H2" 0 "hypothetical protein"  
"OPBB07\_00264" 33758 "s59E25H2" 0 "hypothetical protein"  
"OPBB07\_00264" 33758 "s59E5H2" 0 "hypothetical protein"  
"OPBB07\_00264" 33758 "s63E6H2" 0 "hypothetical protein"  
"OPBB07\_00265" 33759 "s59E13H2" 0 "D-ribose-binding periplasmic protein precursor"  
"OPBB07\_00265" 33759 "s59E25H2" 0 "D-ribose-binding periplasmic protein precursor"  
"OPBB07\_00265" 33759 "s59E5H2" 0 "D-ribose-binding periplasmic protein precursor"  
"OPBB07\_00265" 33759 "s63E6H2" 0 "D-ribose-binding periplasmic protein precursor"  
"OPBB07\_00266" 33760 "s59E13H2" 0 "Ribose import ATP-binding protein RbsA"  
"OPBB07\_00266" 33760 "s59E25H2" 0 "Ribose import ATP-binding protein RbsA"  
"OPBB07\_00266" 33760 "s59E5H2" 0 "Ribose import ATP-binding protein RbsA"  
"OPBB07\_00266" 33760 "s63E6H2" 0 "Ribose import ATP-binding protein RbsA"  
"OPBB07\_00267" 33761 "s59E13H2" 0 "D-allose transport system permease protein AlsC"  
"OPBB07\_00267" 33761 "s59E25H2" 0 "D-allose transport system permease protein AlsC"  
"OPBB07\_00267" 33761 "s59E5H2" 0 "D-allose transport system permease protein AlsC"  
"OPBB07\_00267" 33761 "s63E6H2" 0 "D-allose transport system permease protein AlsC"  
"OPBB07\_00268" 33762 "s59E13H2" 0 "Uroporphyrinogen decarboxylase"  
"OPBB07\_00268" 33762 "s59E25H2" 0 "Uroporphyrinogen decarboxylase"  
"OPBB07\_00268" 33762 "s59E5H2" 0 "Uroporphyrinogen decarboxylase"  
"OPBB07\_00268" 33762 "s63E6H2" 0 "Uroporphyrinogen decarboxylase"  
"OPBB07\_00269" 33763 "s59E13H2" 0 "methylcobalamin:coenzyme M methyltransferase"  
"OPBB07\_00269" 33763 "s59E25H2" 0 "methylcobalamin:coenzyme M methyltransferase"  
"OPBB07\_00269" 33763 "s59E5H2" 0 "methylcobalamin:coenzyme M methyltransferase"  
"OPBB07\_00269" 33763 "s63E6H2" 0 "methylcobalamin:coenzyme M methyltransferase"  
"OPBB07\_00270" 33764 "s59E13H2" 0 "methylcobalamin:coenzyme M methyltransferase"  
"OPBB07\_00270" 33764 "s59E25H2" 0 "methylcobalamin:coenzyme M methyltransferase"  
"OPBB07\_00270" 33764 "s59E5H2" 0 "methylcobalamin:coenzyme M methyltransferase"  
"OPBB07\_00270" 33764 "s63E6H2" 0 "methylcobalamin:coenzyme M methyltransferase"  
"OPBB07\_00271" 33765 "s59E13H2" 0 "putative oxidoreductase"  
"OPBB07\_00271" 33765 "s59E25H2" 0 "putative oxidoreductase"  
"OPBB07\_00271" 33765 "s59E5H2" 0 "putative oxidoreductase"  
"OPBB07\_00271" 33765 "s63E6H2" 0 "putative oxidoreductase"  
"OPBB07\_00273" 33767 "s59E13H2" 0 "putative adenylyltransferase/sulfurtransferase MoeZ"  
"OPBB07\_00273" 33767 "s59E25H2" 0 "putative adenylyltransferase/sulfurtransferase MoeZ"  
"OPBB07\_00273" 33767 "s59E5H2" 0 "putative adenylyltransferase/sulfurtransferase MoeZ"  
"OPBB07\_00273" 33767 "s63E6H2" 0 "putative adenylyltransferase/sulfurtransferase MoeZ"  
"OPBB07\_00274" 33768 "s59E13H2" 0 "1-deoxy-D-xylulose-5-phosphate synthase"  
"OPBB07\_00274" 33768 "s59E25H2" 0 "1-deoxy-D-xylulose-5-phosphate synthase"

"OPBB07\_00274" 33768 "s59E5H2" 0 "1-deoxy-D-xylulose-5-phosphate synthase"  
"OPBB07\_00274" 33768 "s63E6H2" 0 "1-deoxy-D-xylulose-5-phosphate synthase"  
"OPBB07\_00275" 33769 "s59E13H2" 0 "Transketolase 1"  
"OPBB07\_00275" 33769 "s59E25H2" 0 "Transketolase 1"  
"OPBB07\_00275" 33769 "s59E5H2" 0 "Transketolase 1"  
"OPBB07\_00275" 33769 "s63E6H2" 0 "Transketolase 1"  
"OPBB07\_00276" 33770 "s59E13H2" 0.002620948 "hypothetical protein"  
"OPBB07\_00276" 33770 "s59E25H2" 0 "hypothetical protein"  
"OPBB07\_00276" 33770 "s59E5H2" 0 "hypothetical protein"  
"OPBB07\_00276" 33770 "s63E6H2" 0 "hypothetical protein"  
"OPBB07\_00277" 33771 "s59E13H2" 0.007154975 "NAD-dependent malic enzyme"  
"OPBB07\_00277" 33771 "s59E25H2" 0 "NAD-dependent malic enzyme"  
"OPBB07\_00277" 33771 "s59E5H2" 0.001327742 "NAD-dependent malic enzyme"  
"OPBB07\_00277" 33771 "s63E6H2" 0 "NAD-dependent malic enzyme"  
"OPBB07\_00278" 33772 "s59E13H2" 0 "Phosphoglycerate kinase"  
"OPBB07\_00278" 33772 "s59E25H2" 0 "Phosphoglycerate kinase"  
"OPBB07\_00278" 33772 "s59E5H2" 0.001935535 "Phosphoglycerate kinase"  
"OPBB07\_00278" 33772 "s63E6H2" 0 "Phosphoglycerate kinase"  
"OPBB07\_00279" 33773 "s59E13H2" 0 "Glyceraldehyde-3-phosphate dehydrogenase"  
"OPBB07\_00279" 33773 "s59E25H2" 0 "Glyceraldehyde-3-phosphate dehydrogenase"  
"OPBB07\_00279" 33773 "s59E5H2" 0 "Glyceraldehyde-3-phosphate dehydrogenase"  
"OPBB07\_00279" 33773 "s63E6H2" 0 "Glyceraldehyde-3-phosphate dehydrogenase"  
"OPBB07\_00280" 33774 "s59E13H2" 0 "D-tagatose 3-epimerase"  
"OPBB07\_00280" 33774 "s59E25H2" 0 "D-tagatose 3-epimerase"  
"OPBB07\_00280" 33774 "s59E5H2" 0 "D-tagatose 3-epimerase"  
"OPBB07\_00280" 33774 "s63E6H2" 0 "D-tagatose 3-epimerase"  
"OPBB07\_00282" 33776 "s59E13H2" 0 "methylcobalamin:coenzyme M methyltransferase"  
"OPBB07\_00282" 33776 "s59E25H2" 0 "methylcobalamin:coenzyme M methyltransferase"  
"OPBB07\_00282" 33776 "s59E5H2" 0 "methylcobalamin:coenzyme M methyltransferase"  
"OPBB07\_00282" 33776 "s63E6H2" 0 "methylcobalamin:coenzyme M methyltransferase"  
"OPBB07\_00283" 33777 "s59E13H2" 0 "putative kinase inhibitor protein"  
"OPBB07\_00283" 33777 "s59E25H2" 0 "putative kinase inhibitor protein"  
"OPBB07\_00283" 33777 "s59E5H2" 0 "putative kinase inhibitor protein"  
"OPBB07\_00283" 33777 "s63E6H2" 0 "putative kinase inhibitor protein"  
"OPBB07\_00284" 33778 "s59E13H2" 0 "NADH-dependent butanol dehydrogenase A"  
"OPBB07\_00284" 33778 "s59E25H2" 0 "NADH-dependent butanol dehydrogenase A"  
"OPBB07\_00284" 33778 "s59E5H2" 0 "NADH-dependent butanol dehydrogenase A"  
"OPBB07\_00284" 33778 "s63E6H2" 0 "NADH-dependent butanol dehydrogenase A"  
"OPBB07\_00285" 33779 "s59E13H2" 0 "Methylcobamide:CoM methyltransferase MtbA"  
"OPBB07\_00285" 33779 "s59E25H2" 0 "Methylcobamide:CoM methyltransferase MtbA"  
"OPBB07\_00285" 33779 "s59E5H2" 0 "Methylcobamide:CoM methyltransferase MtbA"  
"OPBB07\_00285" 33779 "s63E6H2" 0 "Methylcobamide:CoM methyltransferase MtbA"  
"OPBB07\_00286" 33780 "s59E13H2" 0 "hypothetical protein"  
"OPBB07\_00286" 33780 "s59E25H2" 0 "hypothetical protein"  
"OPBB07\_00286" 33780 "s59E5H2" 0 "hypothetical protein"  
"OPBB07\_00286" 33780 "s63E6H2" 0 "hypothetical protein"  
"OPBB07\_00287" 33781 "s59E13H2" 0 "Autoinducer 2-binding protein LsrB precursor"

"OPBB07\_00287" 33781 "s59E25H2" 0 "Autoinducer 2-binding protein LsrB precursor"  
"OPBB07\_00287" 33781 "s59E5H2" 0 "Autoinducer 2-binding protein LsrB precursor"  
"OPBB07\_00287" 33781 "s63E6H2" 0 "Autoinducer 2-binding protein LsrB precursor"  
"OPBB07\_00288" 33782 "s59E13H2" 0 "Xylose import ATP-binding protein XylG"  
"OPBB07\_00288" 33782 "s59E25H2" 0 "Xylose import ATP-binding protein XylG"  
"OPBB07\_00288" 33782 "s59E5H2" 0 "Xylose import ATP-binding protein XylG"  
"OPBB07\_00288" 33782 "s63E6H2" 0 "Xylose import ATP-binding protein XylG"  
"OPBB07\_00289" 33783 "s59E13H2" 0 "Ribose transport system permease protein RbsC"  
"OPBB07\_00289" 33783 "s59E25H2" 0 "Ribose transport system permease protein RbsC"  
"OPBB07\_00289" 33783 "s59E5H2" 0 "Ribose transport system permease protein RbsC"  
"OPBB07\_00289" 33783 "s63E6H2" 0 "Ribose transport system permease protein RbsC"  
"OPBB07\_00290" 33784 "s59E13H2" 0 "N-acetylglucosamine repressor"  
"OPBB07\_00290" 33784 "s59E25H2" 0 "N-acetylglucosamine repressor"  
"OPBB07\_00290" 33784 "s59E5H2" 0 "N-acetylglucosamine repressor"  
"OPBB07\_00290" 33784 "s63E6H2" 0 "N-acetylglucosamine repressor"  
"OPBB07\_00291" 33785 "s59E13H2" 0 "Deoxycytidine triphosphate deaminase"  
"OPBB07\_00291" 33785 "s59E25H2" 0 "Deoxycytidine triphosphate deaminase"  
"OPBB07\_00291" 33785 "s59E5H2" 0 "Deoxycytidine triphosphate deaminase"  
"OPBB07\_00291" 33785 "s63E6H2" 0 "Deoxycytidine triphosphate deaminase"  
"OPBB07\_00292" 33786 "s59E13H2" 0 "hypothetical protein"  
"OPBB07\_00292" 33786 "s59E25H2" 0 "hypothetical protein"  
"OPBB07\_00292" 33786 "s59E5H2" 0 "hypothetical protein"  
"OPBB07\_00292" 33786 "s63E6H2" 0 "hypothetical protein"  
"OPBB07\_00294" 33788 "s59E13H2" 0 "hypothetical protein"  
"OPBB07\_00294" 33788 "s59E25H2" 0 "hypothetical protein"  
"OPBB07\_00294" 33788 "s59E5H2" 0 "hypothetical protein"  
"OPBB07\_00294" 33788 "s63E6H2" 0 "hypothetical protein"  
"OPBB07\_00295" 33789 "s59E13H2" 0.01242885 "ISXO2-like transposase domain protein"  
"OPBB07\_00295" 33789 "s59E25H2" 0 "ISXO2-like transposase domain protein"  
"OPBB07\_00295" 33789 "s59E5H2" 0.008876588 "ISXO2-like transposase domain protein"  
"OPBB07\_00295" 33789 "s63E6H2" 0 "ISXO2-like transposase domain protein"  
"OPBB07\_00296" 33790 "s59E13H2" 0 "hypothetical protein"  
"OPBB07\_00296" 33790 "s59E25H2" 0 "hypothetical protein"  
"OPBB07\_00296" 33790 "s59E5H2" 0 "hypothetical protein"  
"OPBB07\_00296" 33790 "s63E6H2" 0.004165439 "hypothetical protein"  
"OPBB07\_00297" 33791 "s59E13H2" 12.21746 "GIY-YIG catalytic domain protein"  
"OPBB07\_00297" 33791 "s59E25H2" 0 "GIY-YIG catalytic domain protein"  
"OPBB07\_00297" 33791 "s59E5H2" 0 "GIY-YIG catalytic domain protein"  
"OPBB07\_00297" 33791 "s63E6H2" 0.009185375 "GIY-YIG catalytic domain protein"  
"OPBB07\_00298" 33792 "s59E13H2" 0 "hypothetical protein"  
"OPBB07\_00298" 33792 "s59E25H2" 0 "hypothetical protein"  
"OPBB07\_00298" 33792 "s59E5H2" 0 "hypothetical protein"  
"OPBB07\_00298" 33792 "s63E6H2" 0 "hypothetical protein"  
"OPBB07\_00299" 33793 "s59E13H2" 0 "hypothetical protein"  
"OPBB07\_00299" 33793 "s59E25H2" 0 "hypothetical protein"  
"OPBB07\_00299" 33793 "s59E5H2" 0.009530534 "hypothetical protein"  
"OPBB07\_00299" 33793 "s63E6H2" 0 "hypothetical protein"

"OPBB07\_00300" 33794 "s59E13H2" 0 "hypothetical protein"  
"OPBB07\_00300" 33794 "s59E25H2" 0 "hypothetical protein"  
"OPBB07\_00300" 33794 "s59E5H2" 0.2209486 "hypothetical protein"  
"OPBB07\_00300" 33794 "s63E6H2" 0.00607929 "hypothetical protein"  
"OPBB07\_00301" 33795 "s59E13H2" 8.943508 "Acryloyl-CoA reductase electron transfer subunit beta"  
"OPBB07\_00301" 33795 "s59E25H2" 0 "Acryloyl-CoA reductase electron transfer subunit beta"  
"OPBB07\_00301" 33795 "s59E5H2" 0.01697796 "Acryloyl-CoA reductase electron transfer subunit beta"  
"OPBB07\_00301" 33795 "s63E6H2" 0.7526019 "Acryloyl-CoA reductase electron transfer subunit beta"  
"OPBB07\_00302" 33796 "s59E13H2" 7.081347 "Acryloyl-CoA reductase electron transfer subunit gamma"  
"OPBB07\_00302" 33796 "s59E25H2" 0 "Acryloyl-CoA reductase electron transfer subunit gamma"  
"OPBB07\_00302" 33796 "s59E5H2" 0.03266543 "Acryloyl-CoA reductase electron transfer subunit gamma"  
"OPBB07\_00302" 33796 "s63E6H2" 0.6343708 "Acryloyl-CoA reductase electron transfer subunit gamma"  
"OPBB07\_00303" 33797 "s59E13H2" 5.76743 "Acyl-CoA dehydrogenase"  
"OPBB07\_00303" 33797 "s59E25H2" 0 "Acyl-CoA dehydrogenase"  
"OPBB07\_00303" 33797 "s59E5H2" 0.08163564 "Acyl-CoA dehydrogenase"  
"OPBB07\_00303" 33797 "s63E6H2" 0.5862768 "Acyl-CoA dehydrogenase"  
"OPBB07\_00304" 33798 "s59E13H2" 4.209189 "Biotin transporter BioY"  
"OPBB07\_00304" 33798 "s59E25H2" 0 "Biotin transporter BioY"  
"OPBB07\_00304" 33798 "s59E5H2" 0.08970999 "Biotin transporter BioY"  
"OPBB07\_00304" 33798 "s63E6H2" 0.4505334 "Biotin transporter BioY"  
"OPBB07\_00305" 33799 "s59E13H2" 6.531977 "Pyruvate carboxylase subunit B"  
"OPBB07\_00305" 33799 "s59E25H2" 0 "Pyruvate carboxylase subunit B"  
"OPBB07\_00305" 33799 "s59E5H2" 0.4104349 "Pyruvate carboxylase subunit B"  
"OPBB07\_00305" 33799 "s63E6H2" 0.6403781 "Pyruvate carboxylase subunit B"  
"OPBB07\_00306" 33800 "s59E13H2" 12.08987 "Pyruvate carboxylase subunit A"  
"OPBB07\_00306" 33800 "s59E25H2" 0 "Pyruvate carboxylase subunit A"  
"OPBB07\_00306" 33800 "s59E5H2" 0.8129924 "Pyruvate carboxylase subunit A"  
"OPBB07\_00306" 33800 "s63E6H2" 1.440035 "Pyruvate carboxylase subunit A"  
"OPBB07\_00307" 33801 "s59E13H2" 7.967848 "Thermonuclease precursor"  
"OPBB07\_00307" 33801 "s59E25H2" 0 "Thermonuclease precursor"  
"OPBB07\_00307" 33801 "s59E5H2" 0.4058872 "Thermonuclease precursor"  
"OPBB07\_00307" 33801 "s63E6H2" 1.36453 "Thermonuclease precursor"  
"OPBB07\_00308" 33802 "s59E13H2" 6.065121 "YacP-like NYN domain protein"  
"OPBB07\_00308" 33802 "s59E25H2" 0 "YacP-like NYN domain protein"  
"OPBB07\_00308" 33802 "s59E5H2" 0.2059826 "YacP-like NYN domain protein"  
"OPBB07\_00308" 33802 "s63E6H2" 1.004362 "YacP-like NYN domain protein"  
"OPBB07\_00309" 33803 "s59E13H2" 4.467333 "Putative TrmH family tRNA/rRNA methyltransferase"  
"OPBB07\_00309" 33803 "s59E25H2" 0 "Putative TrmH family tRNA/rRNA methyltransferase"  
"OPBB07\_00309" 33803 "s59E5H2" 0.06476474 "Putative TrmH family tRNA/rRNA methyltransferase"  
"OPBB07\_00309" 33803 "s63E6H2" 0.8541826 "Putative TrmH family tRNA/rRNA methyltransferase"  
"OPBB07\_00310" 33804 "s59E13H2" 5.208377 "Cysteine--tRNA ligase"  
"OPBB07\_00310" 33804 "s59E25H2" 0 "Cysteine--tRNA ligase"  
"OPBB07\_00310" 33804 "s59E5H2" 0.05033543 "Cysteine--tRNA ligase"  
"OPBB07\_00310" 33804 "s63E6H2" 0.8111039 "Cysteine--tRNA ligase"  
"OPBB07\_00311" 33805 "s59E13H2" 6.969068 "Serine acetyltransferase"  
"OPBB07\_00311" 33805 "s59E25H2" 0 "Serine acetyltransferase"  
"OPBB07\_00311" 33805 "s59E5H2" 0.02954799 "Serine acetyltransferase"

"OPBB07\_00311" 33805 "s63E6H2" 0.8296371 "Serine acetyltransferase"  
"OPBB07\_00312" 33806 "s59E13H2" 3.926875 "Glutamate--tRNA ligase"  
"OPBB07\_00312" 33806 "s59E25H2" 0 "Glutamate--tRNA ligase"  
"OPBB07\_00312" 33806 "s59E5H2" 0.02545842 "Glutamate--tRNA ligase"  
"OPBB07\_00312" 33806 "s63E6H2" 0.6916307 "Glutamate--tRNA ligase"  
"OPBB07\_00313" 33807 "s59E13H2" 3.345789 "2-C-methyl-D-erythritol 2,4-cyclodiphosphate synthase"  
"OPBB07\_00313" 33807 "s59E25H2" 0 "2-C-methyl-D-erythritol 2,4-cyclodiphosphate synthase"  
"OPBB07\_00313" 33807 "s59E5H2" 0.01350978 "2-C-methyl-D-erythritol 2,4-cyclodiphosphate synthase"  
"OPBB07\_00313" 33807 "s63E6H2" 0.6206461 "2-C-methyl-D-erythritol 2,4-cyclodiphosphate synthase"  
"OPBB07\_00314" 33808 "s59E13H2" 2.742421 "2-C-methyl-D-erythritol 4-phosphate cytidylyltransferase"  
"OPBB07\_00314" 33808 "s59E25H2" 0 "2-C-methyl-D-erythritol 4-phosphate cytidylyltransferase"  
"OPBB07\_00314" 33808 "s59E5H2" 0.04247884 "2-C-methyl-D-erythritol 4-phosphate cytidylyltransferase"  
"OPBB07\_00314" 33808 "s63E6H2" 0.4727139 "2-C-methyl-D-erythritol 4-phosphate cytidylyltransferase"  
"OPBB07\_00315" 33809 "s59E13H2" 2.803098 "DNA integrity scanning protein DisA"  
"OPBB07\_00315" 33809 "s59E25H2" 0 "DNA integrity scanning protein DisA"  
"OPBB07\_00315" 33809 "s59E5H2" 0.04019341 "DNA integrity scanning protein DisA"  
"OPBB07\_00315" 33809 "s63E6H2" 0.4399215 "DNA integrity scanning protein DisA"  
"OPBB07\_00316" 33810 "s59E13H2" 2.416702 "ATP-dependent Clp protease ATP-binding subunit ClpC1"  
"OPBB07\_00316" 33810 "s59E25H2" 0 "ATP-dependent Clp protease ATP-binding subunit ClpC1"  
"OPBB07\_00316" 33810 "s59E5H2" 0.01869017 "ATP-dependent Clp protease ATP-binding subunit ClpC1"  
"OPBB07\_00316" 33810 "s63E6H2" 0.1718102 "ATP-dependent Clp protease ATP-binding subunit ClpC1"  
"OPBB07\_00317" 33811 "s59E13H2" 1.737819 "Putative ATP:guanido phosphotransferase"  
"OPBB07\_00317" 33811 "s59E25H2" 0 "Putative ATP:guanido phosphotransferase"  
"OPBB07\_00317" 33811 "s59E5H2" 0 "Putative ATP:guanido phosphotransferase"  
"OPBB07\_00317" 33811 "s63E6H2" 0.03272039 "Putative ATP:guanido phosphotransferase"  
"OPBB07\_00318" 33812 "s59E13H2" 1.509879 "hypothetical protein"  
"OPBB07\_00318" 33812 "s59E25H2" 0 "hypothetical protein"  
"OPBB07\_00318" 33812 "s59E5H2" 0 "hypothetical protein"  
"OPBB07\_00318" 33812 "s63E6H2" 0.02503767 "hypothetical protein"  
"OPBB07\_00319" 33813 "s59E13H2" 0.9717576 "Lysine--tRNA ligase"  
"OPBB07\_00319" 33813 "s59E25H2" 0 "Lysine--tRNA ligase"  
"OPBB07\_00319" 33813 "s59E5H2" 0.02239207 "Lysine--tRNA ligase"  
"OPBB07\_00319" 33813 "s63E6H2" 0.01842421 "Lysine--tRNA ligase"  
"OPBB07\_00320" 33814 "s59E13H2" 0.0337025 "DNA polymerase I"  
"OPBB07\_00320" 33814 "s59E25H2" 0 "DNA polymerase I"  
"OPBB07\_00320" 33814 "s59E5H2" 0.6935562 "DNA polymerase I"  
"OPBB07\_00320" 33814 "s63E6H2" 0.009790342 "DNA polymerase I"  
"OPBB07\_00321" 33815 "s59E13H2" 0.005406416 "hypothetical protein"  
"OPBB07\_00321" 33815 "s59E25H2" 0 "hypothetical protein"  
"OPBB07\_00321" 33815 "s59E5H2" 0.4989042 "hypothetical protein"  
"OPBB07\_00321" 33815 "s63E6H2" 0.003801271 "hypothetical protein"  
"OPBB07\_00322" 33816 "s59E13H2" 0.001738898 "Dephospho-CoA kinase"  
"OPBB07\_00322" 33816 "s59E25H2" 0 "Dephospho-CoA kinase"  
"OPBB07\_00322" 33816 "s59E5H2" 0 "Dephospho-CoA kinase"  
"OPBB07\_00322" 33816 "s63E6H2" 0.007648537 "Dephospho-CoA kinase"  
"OPBB07\_00323" 33817 "s59E13H2" 0.002917856 "UvrABC system protein B"  
"OPBB07\_00323" 33817 "s59E25H2" 0 "UvrABC system protein B"

"OPBB07\_00323" 33817 "s59E5H2" 0.02932639 "UvrABC system protein B"  
"OPBB07\_00323" 33817 "s63E6H2" 0.0425221 "UvrABC system protein B"  
"OPBB07\_00324" 33818 "s59E13H2" 0.001206508 "UvrABC system protein A"  
"OPBB07\_00324" 33818 "s59E25H2" 0 "UvrABC system protein A"  
"OPBB07\_00324" 33818 "s59E5H2" 0.04210194 "UvrABC system protein A"  
"OPBB07\_00324" 33818 "s63E6H2" 0.02044852 "UvrABC system protein A"  
"OPBB07\_00325" 33819 "s59E13H2" 0.002764544 "UvrABC system protein C"  
"OPBB07\_00325" 33819 "s59E25H2" 0 "UvrABC system protein C"  
"OPBB07\_00325" 33819 "s59E5H2" 0.03320527 "UvrABC system protein C"  
"OPBB07\_00325" 33819 "s63E6H2" 0.009336397 "UvrABC system protein C"  
"OPBB07\_00326" 33820 "s59E13H2" 0 "Membrane protein of unknown function"  
"OPBB07\_00326" 33820 "s59E25H2" 0 "Membrane protein of unknown function"  
"OPBB07\_00326" 33820 "s59E5H2" 0 "Membrane protein of unknown function"  
"OPBB07\_00326" 33820 "s63E6H2" 0.02344643 "Membrane protein of unknown function"  
"OPBB07\_00327" 33821 "s59E13H2" 0.008141998 "glmZ(sRNA)-inactivating NTPase"  
"OPBB07\_00327" 33821 "s59E25H2" 0 "glmZ(sRNA)-inactivating NTPase"  
"OPBB07\_00327" 33821 "s59E5H2" 0.008964347 "glmZ(sRNA)-inactivating NTPase"  
"OPBB07\_00327" 33821 "s63E6H2" 0.0005557433 "glmZ(sRNA)-inactivating NTPase"  
"OPBB07\_00328" 33822 "s59E13H2" 0.02071587 "Glyceraldehyde-3-phosphate dehydrogenase"  
"OPBB07\_00328" 33822 "s59E25H2" 0 "Glyceraldehyde-3-phosphate dehydrogenase"  
"OPBB07\_00328" 33822 "s59E5H2" 0.03421411 "Glyceraldehyde-3-phosphate dehydrogenase"  
"OPBB07\_00328" 33822 "s63E6H2" 0.01224251 "Glyceraldehyde-3-phosphate dehydrogenase"  
"OPBB07\_00329" 33823 "s59E13H2" 0.08948244 "Phosphoglycerate kinase"  
"OPBB07\_00329" 33823 "s59E25H2" 0 "Phosphoglycerate kinase"  
"OPBB07\_00329" 33823 "s59E5H2" 0.1987605 "Phosphoglycerate kinase"  
"OPBB07\_00329" 33823 "s63E6H2" 0.005737298 "Phosphoglycerate kinase"  
"OPBB07\_00330" 33824 "s59E13H2" 0.004361046 "Triosephosphate isomerase"  
"OPBB07\_00330" 33824 "s59E25H2" 0 "Triosephosphate isomerase"  
"OPBB07\_00330" 33824 "s59E5H2" 0.1836901 "Triosephosphate isomerase"  
"OPBB07\_00330" 33824 "s63E6H2" 0.01456295 "Triosephosphate isomerase"  
"OPBB07\_00331" 33825 "s59E13H2" 0.01740015 "2,3-bisphosphoglycerate-independent phosphoglycerate mutase"  
"OPBB07\_00331" 33825 "s59E25H2" 0 "2,3-bisphosphoglycerate-independent phosphoglycerate mutase"  
"OPBB07\_00331" 33825 "s59E5H2" 0.1190526 "2,3-bisphosphoglycerate-independent phosphoglycerate mutase"  
"OPBB07\_00331" 33825 "s63E6H2" 0.01185403 "2,3-bisphosphoglycerate-independent phosphoglycerate mutase"  
"OPBB07\_00332" 33826 "s59E13H2" 0.01067119 "preprotein translocase subunit SecG"  
"OPBB07\_00332" 33826 "s59E25H2" 0 "preprotein translocase subunit SecG"  
"OPBB07\_00332" 33826 "s59E5H2" 0.1755578 "preprotein translocase subunit SecG"  
"OPBB07\_00332" 33826 "s63E6H2" 0.001402913 "preprotein translocase subunit SecG"  
"OPBB07\_00333" 33827 "s59E13H2" 0.0111202 "Oligopeptide-binding protein OppA precursor"  
"OPBB07\_00333" 33827 "s59E25H2" 0 "Oligopeptide-binding protein OppA precursor"  
"OPBB07\_00333" 33827 "s59E5H2" 0 "Oligopeptide-binding protein OppA precursor"  
"OPBB07\_00333" 33827 "s63E6H2" 0.009696276 "Oligopeptide-binding protein OppA precursor"  
"OPBB07\_00334" 33828 "s59E13H2" 0.02327363 "Glutathione transport system permease protein GsiC"  
"OPBB07\_00334" 33828 "s59E25H2" 0 "Glutathione transport system permease protein GsiC"  
"OPBB07\_00334" 33828 "s59E5H2" 0 "Glutathione transport system permease protein GsiC"  
"OPBB07\_00334" 33828 "s63E6H2" 0.00268904 "Glutathione transport system permease protein GsiC"  
"OPBB07\_00335" 33829 "s59E13H2" 0.01416622 "Glutathione transport system permease protein GsiD"

"OPBB07\_00335" 33829 "s59E25H2" 0 "Glutathione transport system permease protein GsiD"  
"OPBB07\_00335" 33829 "s59E5H2" 0 "Glutathione transport system permease protein GsiD"  
"OPBB07\_00335" 33829 "s63E6H2" 0.004106898 "Glutathione transport system permease protein GsiD"  
"OPBB07\_00336" 33830 "s59E13H2" 0.01056295 "Oligopeptide transport ATP-binding protein OppD"  
"OPBB07\_00336" 33830 "s59E25H2" 0 "Oligopeptide transport ATP-binding protein OppD"  
"OPBB07\_00336" 33830 "s59E5H2" 0 "Oligopeptide transport ATP-binding protein OppD"  
"OPBB07\_00336" 33830 "s63E6H2" 0.008868611 "Oligopeptide transport ATP-binding protein OppD"  
"OPBB07\_00337" 33831 "s59E13H2" 0.002116617 "Oligopeptide transport ATP-binding protein OppF"  
"OPBB07\_00337" 33831 "s59E25H2" 0 "Oligopeptide transport ATP-binding protein OppF"  
"OPBB07\_00337" 33831 "s59E5H2" 0.008049068 "Oligopeptide transport ATP-binding protein OppF"  
"OPBB07\_00337" 33831 "s63E6H2" 0 "Oligopeptide transport ATP-binding protein OppF"  
"OPBB07\_00338" 33832 "s59E13H2" 0.004040655 "Glutathione-binding protein GsiB precursor"  
"OPBB07\_00338" 33832 "s59E25H2" 0 "Glutathione-binding protein GsiB precursor"  
"OPBB07\_00338" 33832 "s59E5H2" 0 "Glutathione-binding protein GsiB precursor"  
"OPBB07\_00338" 33832 "s63E6H2" 0.003036387 "Glutathione-binding protein GsiB precursor"  
"OPBB07\_00339" 33833 "s59E13H2" 0.00271339 "Oligopeptide-binding protein AppA precursor"  
"OPBB07\_00339" 33833 "s59E25H2" 0 "Oligopeptide-binding protein AppA precursor"  
"OPBB07\_00339" 33833 "s59E5H2" 0.07237465 "Oligopeptide-binding protein AppA precursor"  
"OPBB07\_00339" 33833 "s63E6H2" 0.002929032 "Oligopeptide-binding protein AppA precursor"  
"OPBB07\_00341" 33835 "s59E13H2" 0.00278067 "hypothetical protein"  
"OPBB07\_00341" 33835 "s59E25H2" 0 "hypothetical protein"  
"OPBB07\_00341" 33835 "s59E5H2" 0.004564114 "hypothetical protein"  
"OPBB07\_00341" 33835 "s63E6H2" 0 "hypothetical protein"  
"OPBB07\_00342" 33836 "s59E13H2" 0.02160213 "hypothetical protein"  
"OPBB07\_00342" 33836 "s59E25H2" 0 "hypothetical protein"  
"OPBB07\_00342" 33836 "s59E5H2" 0 "hypothetical protein"  
"OPBB07\_00342" 33836 "s63E6H2" 0.02646457 "hypothetical protein"  
"OPBB07\_00343" 33837 "s59E13H2" 0.01775507 "hypothetical protein"  
"OPBB07\_00343" 33837 "s59E25H2" 0 "hypothetical protein"  
"OPBB07\_00343" 33837 "s59E5H2" 0 "hypothetical protein"  
"OPBB07\_00343" 33837 "s63E6H2" 0.008958953 "hypothetical protein"  
"OPBB07\_00344" 33838 "s59E13H2" 0.06082371 "Benzylsuccinate synthase activating enzyme"  
"OPBB07\_00344" 33838 "s59E25H2" 0 "Benzylsuccinate synthase activating enzyme"  
"OPBB07\_00344" 33838 "s59E5H2" 0.4276604 "Benzylsuccinate synthase activating enzyme"  
"OPBB07\_00344" 33838 "s63E6H2" 0.02515051 "Benzylsuccinate synthase activating enzyme"  
"OPBB07\_00346" 33840 "s59E13H2" 0.01450515 "NAD-specific glutamate dehydrogenase"  
"OPBB07\_00346" 33840 "s59E25H2" 0 "NAD-specific glutamate dehydrogenase"  
"OPBB07\_00346" 33840 "s59E5H2" 0.4592838 "NAD-specific glutamate dehydrogenase"  
"OPBB07\_00346" 33840 "s63E6H2" 0.03369793 "NAD-specific glutamate dehydrogenase"  
"OPBB07\_00347" 33841 "s59E13H2" 0.00448429 "putative ABC transporter ATP-binding protein YbhF"  
"OPBB07\_00347" 33841 "s59E25H2" 0 "putative ABC transporter ATP-binding protein YbhF"  
"OPBB07\_00347" 33841 "s59E5H2" 0 "putative ABC transporter ATP-binding protein YbhF"  
"OPBB07\_00347" 33841 "s63E6H2" 0.04722838 "putative ABC transporter ATP-binding protein YbhF"  
"OPBB07\_00348" 33842 "s59E13H2" 0.00607853 "hypothetical protein"  
"OPBB07\_00348" 33842 "s59E25H2" 0 "hypothetical protein"  
"OPBB07\_00348" 33842 "s59E5H2" 0 "hypothetical protein"  
"OPBB07\_00348" 33842 "s63E6H2" 0.01982068 "hypothetical protein"

"OPBB07\_00349" 33843 "s59E13H2" 0 "hypothetical protein"  
"OPBB07\_00349" 33843 "s59E25H2" 0 "hypothetical protein"  
"OPBB07\_00349" 33843 "s59E5H2" 0 "hypothetical protein"  
"OPBB07\_00349" 33843 "s63E6H2" 0.01274518 "hypothetical protein"  
"OPBB07\_00350" 33844 "s59E13H2" 0.001278442 "Cyclic di-GMP phosphodiesterase response regulator RpfG"  
"OPBB07\_00350" 33844 "s59E25H2" 0 "Cyclic di-GMP phosphodiesterase response regulator RpfG"  
"OPBB07\_00350" 33844 "s59E5H2" 0.03962026 "Cyclic di-GMP phosphodiesterase response regulator RpfG"  
"OPBB07\_00350" 33844 "s63E6H2" 0.04380497 "Cyclic di-GMP phosphodiesterase response regulator RpfG"  
"OPBB07\_00351" 33845 "s59E13H2" 0.01489702 "hypothetical protein"  
"OPBB07\_00351" 33845 "s59E25H2" 0 "hypothetical protein"  
"OPBB07\_00351" 33845 "s59E5H2" 0.05054997 "hypothetical protein"  
"OPBB07\_00351" 33845 "s63E6H2" 0.02190778 "hypothetical protein"  
"OPBB07\_00352" 33846 "s59E13H2" 0.01635047 "Glutaredoxin"  
"OPBB07\_00352" 33846 "s59E25H2" 0 "Glutaredoxin"  
"OPBB07\_00352" 33846 "s59E5H2" 0.1613855 "Glutaredoxin"  
"OPBB07\_00352" 33846 "s63E6H2" 0.01982102 "Glutaredoxin"  
"OPBB07\_00353" 33847 "s59E13H2" 0.004397214 "Ferredoxin thioredoxin reductase catalytic beta chain"  
"OPBB07\_00353" 33847 "s59E25H2" 0 "Ferredoxin thioredoxin reductase catalytic beta chain"  
"OPBB07\_00353" 33847 "s59E5H2" 0.05379065 "Ferredoxin thioredoxin reductase catalytic beta chain"  
"OPBB07\_00353" 33847 "s63E6H2" 0.06316871 "Ferredoxin thioredoxin reductase catalytic beta chain"  
"OPBB07\_00354" 33848 "s59E13H2" 0.005280115 "DNA polymerase IV"  
"OPBB07\_00354" 33848 "s59E25H2" 0 "DNA polymerase IV"  
"OPBB07\_00354" 33848 "s59E5H2" 0.7491361 "DNA polymerase IV"  
"OPBB07\_00354" 33848 "s63E6H2" 0.07086317 "DNA polymerase IV"  
"OPBB07\_00355" 33849 "s59E13H2" 1.315972 "L-fucose isomerase"  
"OPBB07\_00355" 33849 "s59E25H2" 0 "L-fucose isomerase"  
"OPBB07\_00355" 33849 "s59E5H2" 0.2284723 "L-fucose isomerase"  
"OPBB07\_00355" 33849 "s63E6H2" 0.03816503 "L-fucose isomerase"  
"OPBB07\_00356" 33850 "s59E13H2" 0.02177217 "D-allose transporter subunit"  
"OPBB07\_00356" 33850 "s59E25H2" 0 "D-allose transporter subunit"  
"OPBB07\_00356" 33850 "s59E5H2" 0.001668226 "D-allose transporter subunit"  
"OPBB07\_00356" 33850 "s63E6H2" 0 "D-allose transporter subunit"  
"OPBB07\_00357" 33851 "s59E13H2" 0 "Galactose/methyl galactoside import ATP-binding protein MglA"  
"OPBB07\_00357" 33851 "s59E25H2" 0 "Galactose/methyl galactoside import ATP-binding protein MglA"  
"OPBB07\_00357" 33851 "s59E5H2" 0 "Galactose/methyl galactoside import ATP-binding protein MglA"  
"OPBB07\_00357" 33851 "s63E6H2" 0 "Galactose/methyl galactoside import ATP-binding protein MglA"  
"OPBB07\_00358" 33852 "s59E13H2" 0 "Ribose transport system permease protein RbsC"  
"OPBB07\_00358" 33852 "s59E25H2" 0 "Ribose transport system permease protein RbsC"  
"OPBB07\_00358" 33852 "s59E5H2" 0 "Ribose transport system permease protein RbsC"  
"OPBB07\_00358" 33852 "s63E6H2" 0 "Ribose transport system permease protein RbsC"  
"OPBB07\_00359" 33853 "s59E13H2" 0 "L-rhamnose mutarotase"  
"OPBB07\_00359" 33853 "s59E25H2" 0 "L-rhamnose mutarotase"  
"OPBB07\_00359" 33853 "s59E5H2" 0 "L-rhamnose mutarotase"  
"OPBB07\_00359" 33853 "s63E6H2" 0.003846464 "L-rhamnose mutarotase"  
"OPBB07\_00360" 33854 "s59E13H2" 0 "Methylated-thiol--coenzyme M methyltransferase"  
"OPBB07\_00360" 33854 "s59E25H2" 0 "Methylated-thiol--coenzyme M methyltransferase"  
"OPBB07\_00360" 33854 "s59E5H2" 0 "Methylated-thiol--coenzyme M methyltransferase"



"OPBB07\_00360" 33854 "s63E6H2" 0.001163223 "Methylated-thiol--coenzyme M methyltransferase"  
"OPBB07\_00361" 33855 "s59E13H2" 0.01333821 "D-arabitol-phosphate dehydrogenase"  
"OPBB07\_00361" 33855 "s59E25H2" 0 "D-arabitol-phosphate dehydrogenase"  
"OPBB07\_00361" 33855 "s59E5H2" 0.007624483 "D-arabitol-phosphate dehydrogenase"  
"OPBB07\_00361" 33855 "s63E6H2" 0.01569901 "D-arabitol-phosphate dehydrogenase"  
"OPBB07\_00362" 33856 "s59E13H2" 0.01789144 "Sorbitol dehydrogenase"  
"OPBB07\_00362" 33856 "s59E25H2" 0 "Sorbitol dehydrogenase"  
"OPBB07\_00362" 33856 "s59E5H2" 0.007593031 "Sorbitol dehydrogenase"  
"OPBB07\_00362" 33856 "s63E6H2" 0.01273264 "Sorbitol dehydrogenase"  
"OPBB07\_00363" 33857 "s59E13H2" 0.001743852 "methylcobalamin:coenzyme M methyltransferase"  
"OPBB07\_00363" 33857 "s59E25H2" 0 "methylcobalamin:coenzyme M methyltransferase"  
"OPBB07\_00363" 33857 "s59E5H2" 0 "methylcobalamin:coenzyme M methyltransferase"  
"OPBB07\_00363" 33857 "s63E6H2" 0.01244724 "methylcobalamin:coenzyme M methyltransferase"  
"OPBB07\_00364" 33858 "s59E13H2" 0.0008378327 "hypothetical protein"  
"OPBB07\_00364" 33858 "s59E25H2" 0 "hypothetical protein"  
"OPBB07\_00364" 33858 "s59E5H2" 0 "hypothetical protein"  
"OPBB07\_00364" 33858 "s63E6H2" 0.007433313 "hypothetical protein"  
"OPBB07\_00365" 33859 "s59E13H2" 0.2705932 "short chain dehydrogenase"  
"OPBB07\_00365" 33859 "s59E25H2" 0 "short chain dehydrogenase"  
"OPBB07\_00365" 33859 "s59E5H2" 0.01104087 "short chain dehydrogenase"  
"OPBB07\_00365" 33859 "s63E6H2" 0.0128468 "short chain dehydrogenase"  
"OPBB07\_00366" 33860 "s59E13H2" 0.02979144 "2-oxoisovalerate dehydrogenase subunit beta"  
"OPBB07\_00366" 33860 "s59E25H2" 0 "2-oxoisovalerate dehydrogenase subunit beta"  
"OPBB07\_00366" 33860 "s59E5H2" 0 "2-oxoisovalerate dehydrogenase subunit beta"  
"OPBB07\_00366" 33860 "s63E6H2" 0 "2-oxoisovalerate dehydrogenase subunit beta"  
"OPBB07\_00367" 33861 "s59E13H2" 0.03044053 "Acetoin:2,6-dichlorophenolindophenol oxidoreductase subunit alpha"  
"OPBB07\_00367" 33861 "s59E25H2" 0 "Acetoin:2,6-dichlorophenolindophenol oxidoreductase subunit alpha"  
"OPBB07\_00367" 33861 "s59E5H2" 0 "Acetoin:2,6-dichlorophenolindophenol oxidoreductase subunit alpha"  
"OPBB07\_00367" 33861 "s63E6H2" 0 "Acetoin:2,6-dichlorophenolindophenol oxidoreductase subunit alpha"  
"OPBB07\_00368" 33862 "s59E13H2" 0.01882983 "Dihydropyridoxyllysine-residue acetyltransferase component of pyruvate dehydrogenase complex"  
"OPBB07\_00368" 33862 "s59E25H2" 0 "Dihydropyridoxyllysine-residue acetyltransferase component of pyruvate dehydrogenase complex"  
"OPBB07\_00368" 33862 "s59E5H2" 0 "Dihydropyridoxyllysine-residue acetyltransferase component of pyruvate dehydrogenase complex"  
"OPBB07\_00368" 33862 "s63E6H2" 0 "Dihydropyridoxyllysine-residue acetyltransferase component of pyruvate dehydrogenase complex"  
"OPBB07\_00369" 33863 "s59E13H2" 0.02256464 "2,3-diketo-5-methylthiopentyl-1-phosphate enolase"  
"OPBB07\_00369" 33863 "s59E25H2" 0 "2,3-diketo-5-methylthiopentyl-1-phosphate enolase"  
"OPBB07\_00369" 33863 "s59E5H2" 0 "2,3-diketo-5-methylthiopentyl-1-phosphate enolase"  
"OPBB07\_00369" 33863 "s63E6H2" 0 "2,3-diketo-5-methylthiopentyl-1-phosphate enolase"  
"OPBB07\_00370" 33864 "s59E13H2" 0 "methylcobalamin:coenzyme M methyltransferase"  
"OPBB07\_00370" 33864 "s59E25H2" 0 "methylcobalamin:coenzyme M methyltransferase"  
"OPBB07\_00370" 33864 "s59E5H2" 0 "methylcobalamin:coenzyme M methyltransferase"  
"OPBB07\_00370" 33864 "s63E6H2" 0 "methylcobalamin:coenzyme M methyltransferase"  
"OPBB07\_00371" 33865 "s59E13H2" 0 "L-rhamnose mutarotase"  
"OPBB07\_00371" 33865 "s59E25H2" 0 "L-rhamnose mutarotase"  
"OPBB07\_00371" 33865 "s59E5H2" 0 "L-rhamnose mutarotase"  
"OPBB07\_00371" 33865 "s63E6H2" 0 "L-rhamnose mutarotase"  
"OPBB07\_00372" 33866 "s59E13H2" 0 "Xylose isomerase"  
"OPBB07\_00372" 33866 "s59E25H2" 0 "Xylose isomerase"

"OPBB07\_00372" 33866 "s59E5H2" 0 "Xylose isomerase"  
"OPBB07\_00372" 33866 "s63E6H2" 0 "Xylose isomerase"  
"OPBB07\_00373" 33867 "s59E13H2" 0 "Rhamnulokinase"  
"OPBB07\_00373" 33867 "s59E25H2" 0 "Rhamnulokinase"  
"OPBB07\_00373" 33867 "s59E5H2" 0 "Rhamnulokinase"  
"OPBB07\_00373" 33867 "s63E6H2" 0 "Rhamnulokinase"  
"OPBB07\_00374" 33868 "s59E13H2" 0 "methylcobalamin:coenzyme M methyltransferase"  
"OPBB07\_00374" 33868 "s59E25H2" 0 "methylcobalamin:coenzyme M methyltransferase"  
"OPBB07\_00374" 33868 "s59E5H2" 0 "methylcobalamin:coenzyme M methyltransferase"  
"OPBB07\_00374" 33868 "s63E6H2" 0 "methylcobalamin:coenzyme M methyltransferase"  
"OPBB07\_00375" 33869 "s59E13H2" 0 "Ribose transport system permease protein RbsC"  
"OPBB07\_00375" 33869 "s59E25H2" 0 "Ribose transport system permease protein RbsC"  
"OPBB07\_00375" 33869 "s59E5H2" 0 "Ribose transport system permease protein RbsC"  
"OPBB07\_00375" 33869 "s63E6H2" 0 "Ribose transport system permease protein RbsC"  
"OPBB07\_00376" 33870 "s59E13H2" 0 "Ribose transport system permease protein RbsC"  
"OPBB07\_00376" 33870 "s59E25H2" 0 "Ribose transport system permease protein RbsC"  
"OPBB07\_00376" 33870 "s59E5H2" 0 "Ribose transport system permease protein RbsC"  
"OPBB07\_00376" 33870 "s63E6H2" 0 "Ribose transport system permease protein RbsC"  
"OPBB07\_00377" 33871 "s59E13H2" 0 "Ribose import ATP-binding protein RbsA"  
"OPBB07\_00377" 33871 "s59E25H2" 0 "Ribose import ATP-binding protein RbsA"  
"OPBB07\_00377" 33871 "s59E5H2" 0 "Ribose import ATP-binding protein RbsA"  
"OPBB07\_00377" 33871 "s63E6H2" 0 "Ribose import ATP-binding protein RbsA"  
"OPBB07\_00378" 33872 "s59E13H2" 0 "hypothetical protein"  
"OPBB07\_00378" 33872 "s59E25H2" 0 "hypothetical protein"  
"OPBB07\_00378" 33872 "s59E5H2" 0 "hypothetical protein"  
"OPBB07\_00378" 33872 "s63E6H2" 0 "hypothetical protein"  
"OPBB07\_00379" 33873 "s59E13H2" 0 "Trimethylamine corrinoid protein"  
"OPBB07\_00379" 33873 "s59E25H2" 0 "Trimethylamine corrinoid protein"  
"OPBB07\_00379" 33873 "s59E5H2" 0 "Trimethylamine corrinoid protein"  
"OPBB07\_00379" 33873 "s63E6H2" 0 "Trimethylamine corrinoid protein"  
"OPBB07\_00380" 33874 "s59E13H2" 0 "Methylcobamide:CoM methyltransferase MtaA"  
"OPBB07\_00380" 33874 "s59E25H2" 0 "Methylcobamide:CoM methyltransferase MtaA"  
"OPBB07\_00380" 33874 "s59E5H2" 0 "Methylcobamide:CoM methyltransferase MtaA"  
"OPBB07\_00380" 33874 "s63E6H2" 0 "Methylcobamide:CoM methyltransferase MtaA"  
"OPBB07\_00381" 33875 "s59E13H2" 0 "Trimethylamine methyltransferase MttB"  
"OPBB07\_00381" 33875 "s59E25H2" 0 "Trimethylamine methyltransferase MttB"  
"OPBB07\_00381" 33875 "s59E5H2" 0 "Trimethylamine methyltransferase MttB"  
"OPBB07\_00381" 33875 "s63E6H2" 0 "Trimethylamine methyltransferase MttB"  
"OPBB07\_00382" 33876 "s59E13H2" 0 "Trimethylamine corrinoid protein"  
"OPBB07\_00382" 33876 "s59E25H2" 0 "Trimethylamine corrinoid protein"  
"OPBB07\_00382" 33876 "s59E5H2" 0 "Trimethylamine corrinoid protein"  
"OPBB07\_00382" 33876 "s63E6H2" 0 "Trimethylamine corrinoid protein"  
"OPBB07\_00383" 33877 "s59E13H2" 0 "Catabolite control protein A"  
"OPBB07\_00383" 33877 "s59E25H2" 0 "Catabolite control protein A"  
"OPBB07\_00383" 33877 "s59E5H2" 0 "Catabolite control protein A"  
"OPBB07\_00383" 33877 "s63E6H2" 0 "Catabolite control protein A"  
"OPBB07\_00384" 33878 "s59E13H2" 0.3832825 "short chain dehydrogenase"

"OPBB07\_00384" 33878 "s59E25H2" 0 "short chain dehydrogenase"  
"OPBB07\_00384" 33878 "s59E5H2" 0.03146212 "short chain dehydrogenase"  
"OPBB07\_00384" 33878 "s63E6H2" 0.09346703 "short chain dehydrogenase"  
"OPBB07\_00385" 33879 "s59E13H2" 0.6806145 "Acetoin:2,6-dichlorophenolindophenol oxidoreductase subunit beta"  
"OPBB07\_00385" 33879 "s59E25H2" 0 "Acetoin:2,6-dichlorophenolindophenol oxidoreductase subunit beta"  
"OPBB07\_00385" 33879 "s59E5H2" 0.7328453 "Acetoin:2,6-dichlorophenolindophenol oxidoreductase subunit beta"  
"OPBB07\_00385" 33879 "s63E6H2" 3.379695 "Acetoin:2,6-dichlorophenolindophenol oxidoreductase subunit beta"  
"OPBB07\_00386" 33880 "s59E13H2" 0.6713389 "Dihydrolipoamide dehydrogenase"  
"OPBB07\_00386" 33880 "s59E25H2" 0 "Dihydrolipoamide dehydrogenase"  
"OPBB07\_00386" 33880 "s59E5H2" 0.2062171 "Dihydrolipoamide dehydrogenase"  
"OPBB07\_00386" 33880 "s63E6H2" 1.72641 "Dihydrolipoamide dehydrogenase"  
"OPBB07\_00387" 33881 "s59E13H2" 1.234678 "Dihydrolipoyllysine-residue acetyltransferase component of pyruvate dehydrogenase complex"  
"OPBB07\_00387" 33881 "s59E25H2" 0 "Dihydrolipoyllysine-residue acetyltransferase component of pyruvate dehydrogenase complex"  
"OPBB07\_00387" 33881 "s59E5H2" 0.249744 "Dihydrolipoyllysine-residue acetyltransferase component of pyruvate dehydrogenase complex"  
"OPBB07\_00387" 33881 "s63E6H2" 1.792853 "Dihydrolipoyllysine-residue acetyltransferase component of pyruvate dehydrogenase complex"  
"OPBB07\_00388" 33882 "s59E13H2" 0.4560402 "putative zinc-type alcohol dehydrogenase-like protein YjmD"  
"OPBB07\_00388" 33882 "s59E25H2" 0 "putative zinc-type alcohol dehydrogenase-like protein YjmD"  
"OPBB07\_00388" 33882 "s59E5H2" 0.245756 "putative zinc-type alcohol dehydrogenase-like protein YjmD"  
"OPBB07\_00388" 33882 "s63E6H2" 1.949531 "putative zinc-type alcohol dehydrogenase-like protein YjmD"  
"OPBB07\_00389" 33883 "s59E13H2" 0.4310865 "hypothetical protein"  
"OPBB07\_00389" 33883 "s59E25H2" 0.1920123 "hypothetical protein"  
"OPBB07\_00389" 33883 "s59E5H2" 2.977107 "hypothetical protein"  
"OPBB07\_00389" 33883 "s63E6H2" 2.402328 "hypothetical protein"  
"OPBB07\_00390" 33884 "s59E13H2" 0.1921741 "Sorbitol-6-phosphate 2-dehydrogenase"  
"OPBB07\_00390" 33884 "s59E25H2" 0 "Sorbitol-6-phosphate 2-dehydrogenase"  
"OPBB07\_00390" 33884 "s59E5H2" 0.1580885 "Sorbitol-6-phosphate 2-dehydrogenase"  
"OPBB07\_00390" 33884 "s63E6H2" 1.10127 "Sorbitol-6-phosphate 2-dehydrogenase"  
"OPBB07\_00391" 33885 "s59E13H2" 0 "hypothetical protein"  
"OPBB07\_00391" 33885 "s59E25H2" 0 "hypothetical protein"  
"OPBB07\_00391" 33885 "s59E5H2" 0 "hypothetical protein"  
"OPBB07\_00391" 33885 "s63E6H2" 0.01312574 "hypothetical protein"  
"OPBB07\_00392" 33886 "s59E13H2" 0.1033086 "Penicillin-binding protein 2D"  
"OPBB07\_00392" 33886 "s59E25H2" 0 "Penicillin-binding protein 2D"  
"OPBB07\_00392" 33886 "s59E5H2" 0.09528968 "Penicillin-binding protein 2D"  
"OPBB07\_00392" 33886 "s63E6H2" 0.2763749 "Penicillin-binding protein 2D"  
"OPBB07\_00393" 33887 "s59E13H2" 0.4207644 "Glutamate--tRNA ligase 1"  
"OPBB07\_00393" 33887 "s59E25H2" 0.167002 "Glutamate--tRNA ligase 1"  
"OPBB07\_00393" 33887 "s59E5H2" 1.270854 "Glutamate--tRNA ligase 1"  
"OPBB07\_00393" 33887 "s63E6H2" 2.552445 "Glutamate--tRNA ligase 1"  
"OPBB07\_00394" 33888 "s59E13H2" 0.7740972 "Acetate kinase"  
"OPBB07\_00394" 33888 "s59E25H2" 0 "Acetate kinase"  
"OPBB07\_00394" 33888 "s59E5H2" 1.358353 "Acetate kinase"  
"OPBB07\_00394" 33888 "s63E6H2" 1.24601 "Acetate kinase"  
"OPBB07\_00395" 33889 "s59E13H2" 0.02240915 "hypothetical protein"  
"OPBB07\_00395" 33889 "s59E25H2" 0 "hypothetical protein"  
"OPBB07\_00395" 33889 "s59E5H2" 0.001136445 "hypothetical protein"  
"OPBB07\_00395" 33889 "s63E6H2" 0.02797865 "hypothetical protein"

"OPBB07\_00396" 33890 "s59E13H2" 0.01350452 "GTPase Der"  
"OPBB07\_00396" 33890 "s59E25H2" 0 "GTPase Der"  
"OPBB07\_00396" 33890 "s59E5H2" 0.1463118 "GTPase Der"  
"OPBB07\_00396" 33890 "s63E6H2" 0.0474203 "GTPase Der"  
"OPBB07\_00397" 33891 "s59E13H2" 0.02084144 "Glycerol-3-phosphate dehydrogenase [NAD(P)+]"  
"OPBB07\_00397" 33891 "s59E25H2" 0 "Glycerol-3-phosphate dehydrogenase [NAD(P)+]"  
"OPBB07\_00397" 33891 "s59E5H2" 0.1600946 "Glycerol-3-phosphate dehydrogenase [NAD(P)+]"  
"OPBB07\_00397" 33891 "s63E6H2" 0.04071131 "Glycerol-3-phosphate dehydrogenase [NAD(P)+]"  
"OPBB07\_00399" 33893 "s59E13H2" 0.01496964 "Glycogen accumulation regulator GarA"  
"OPBB07\_00399" 33893 "s59E25H2" 0 "Glycogen accumulation regulator GarA"  
"OPBB07\_00399" 33893 "s59E5H2" 0.1822449 "Glycogen accumulation regulator GarA"  
"OPBB07\_00399" 33893 "s63E6H2" 0.06690155 "Glycogen accumulation regulator GarA"  
"OPBB07\_00400" 33894 "s59E13H2" 0.03566305 "MerR family regulatory protein"  
"OPBB07\_00400" 33894 "s59E25H2" 0 "MerR family regulatory protein"  
"OPBB07\_00400" 33894 "s59E5H2" 0.2000344 "MerR family regulatory protein"  
"OPBB07\_00400" 33894 "s63E6H2" 0.09652869 "MerR family regulatory protein"  
"OPBB07\_00401" 33895 "s59E13H2" 0.02569125 "D-alanyl-D-alanine carboxypeptidase DacF precursor"  
"OPBB07\_00401" 33895 "s59E25H2" 0 "D-alanyl-D-alanine carboxypeptidase DacF precursor"  
"OPBB07\_00401" 33895 "s59E5H2" 0.06592022 "D-alanyl-D-alanine carboxypeptidase DacF precursor"  
"OPBB07\_00401" 33895 "s63E6H2" 0.07812285 "D-alanyl-D-alanine carboxypeptidase DacF precursor"  
"OPBB07\_00402" 33896 "s59E13H2" 0.0115505 "Putative lipoprotein YerB precursor"  
"OPBB07\_00402" 33896 "s59E25H2" 0 "Putative lipoprotein YerB precursor"  
"OPBB07\_00402" 33896 "s59E5H2" 0.05840435 "Putative lipoprotein YerB precursor"  
"OPBB07\_00402" 33896 "s63E6H2" 0.03260184 "Putative lipoprotein YerB precursor"  
"OPBB07\_00403" 33897 "s59E13H2" 0.02325452 "Hypoxanthine-guanine phosphoribosyltransferase"  
"OPBB07\_00403" 33897 "s59E25H2" 0 "Hypoxanthine-guanine phosphoribosyltransferase"  
"OPBB07\_00403" 33897 "s59E5H2" 0.1822005 "Hypoxanthine-guanine phosphoribosyltransferase"  
"OPBB07\_00403" 33897 "s63E6H2" 0.1423239 "Hypoxanthine-guanine phosphoribosyltransferase"  
"OPBB07\_00404" 33898 "s59E13H2" 0.001619999 "hypothetical protein"  
"OPBB07\_00404" 33898 "s59E25H2" 0 "hypothetical protein"  
"OPBB07\_00404" 33898 "s59E5H2" 0.1642304 "hypothetical protein"  
"OPBB07\_00404" 33898 "s63E6H2" 0.04936175 "hypothetical protein"  
"OPBB07\_00405" 33899 "s59E13H2" 0.01972131 "hypothetical protein"  
"OPBB07\_00405" 33899 "s59E25H2" 0 "hypothetical protein"  
"OPBB07\_00405" 33899 "s59E5H2" 0.2027432 "hypothetical protein"  
"OPBB07\_00405" 33899 "s63E6H2" 0.0440266 "hypothetical protein"  
"OPBB07\_00406" 33900 "s59E13H2" 0.005221119 "hypothetical protein"  
"OPBB07\_00406" 33900 "s59E25H2" 0 "hypothetical protein"  
"OPBB07\_00406" 33900 "s59E5H2" 0.1631486 "hypothetical protein"  
"OPBB07\_00406" 33900 "s63E6H2" 0.05488376 "hypothetical protein"  
"OPBB07\_00407" 33901 "s59E13H2" 0.02360113 "Serine acetyltransferase"  
"OPBB07\_00407" 33901 "s59E25H2" 0 "Serine acetyltransferase"  
"OPBB07\_00407" 33901 "s59E5H2" 0.5693784 "Serine acetyltransferase"  
"OPBB07\_00407" 33901 "s63E6H2" 0.08199332 "Serine acetyltransferase"  
"OPBB07\_00408" 33902 "s59E13H2" 0.07160263 "Deoxyuridine 5'-triphosphate nucleotidohydrolase"  
"OPBB07\_00408" 33902 "s59E25H2" 0 "Deoxyuridine 5'-triphosphate nucleotidohydrolase"  
"OPBB07\_00408" 33902 "s59E5H2" 0.04263499 "Deoxyuridine 5'-triphosphate nucleotidohydrolase"

"OPBB07\_00408" 33902 "s63E6H2" 0.1095809 "Deoxyuridine 5'-triphosphate nucleotidohydrolase"  
"OPBB07\_00409" 33903 "s59E13H2" 0.06269058 "Ketol-acid reductoisomerase"  
"OPBB07\_00409" 33903 "s59E25H2" 0 "Ketol-acid reductoisomerase"  
"OPBB07\_00409" 33903 "s59E5H2" 0.4663057 "Ketol-acid reductoisomerase"  
"OPBB07\_00409" 33903 "s63E6H2" 0.1214402 "Ketol-acid reductoisomerase"  
"OPBB07\_00410" 33904 "s59E13H2" 0.02510638 "LexA repressor"  
"OPBB07\_00410" 33904 "s59E25H2" 0 "LexA repressor"  
"OPBB07\_00410" 33904 "s59E5H2" 0.7380456 "LexA repressor"  
"OPBB07\_00410" 33904 "s63E6H2" 0.172536 "LexA repressor"  
"OPBB07\_00411" 33905 "s59E13H2" 0.01037742 "GTPase HflX"  
"OPBB07\_00411" 33905 "s59E25H2" 0 "GTPase HflX"  
"OPBB07\_00411" 33905 "s59E5H2" 0.9554487 "GTPase HflX"  
"OPBB07\_00411" 33905 "s63E6H2" 0.1962795 "GTPase HflX"  
"OPBB07\_00412" 33906 "s59E13H2" 0.01435338 "LL-diaminopimelate aminotransferase"  
"OPBB07\_00412" 33906 "s59E25H2" 0 "LL-diaminopimelate aminotransferase"  
"OPBB07\_00412" 33906 "s59E5H2" 0.7214221 "LL-diaminopimelate aminotransferase"  
"OPBB07\_00412" 33906 "s63E6H2" 0.1726748 "LL-diaminopimelate aminotransferase"  
"OPBB07\_00413" 33907 "s59E13H2" 0.0003485903 "Diaminopimelate epimerase"  
"OPBB07\_00413" 33907 "s59E25H2" 0 "Diaminopimelate epimerase"  
"OPBB07\_00413" 33907 "s59E5H2" 0.3092322 "Diaminopimelate epimerase"  
"OPBB07\_00413" 33907 "s63E6H2" 0.1332413 "Diaminopimelate epimerase"  
"OPBB07\_00414" 33908 "s59E13H2" 0.00910238 "tRNA dimethylallyltransferase"  
"OPBB07\_00414" 33908 "s59E25H2" 0 "tRNA dimethylallyltransferase"  
"OPBB07\_00414" 33908 "s59E5H2" 0.0606131 "tRNA dimethylallyltransferase"  
"OPBB07\_00414" 33908 "s63E6H2" 0.04679841 "tRNA dimethylallyltransferase"  
"OPBB07\_00415" 33909 "s59E13H2" 0.005764711 "(Dimethylallyl)adenosine tRNA methylthiotransferase MiaB"  
"OPBB07\_00415" 33909 "s59E25H2" 0 "(Dimethylallyl)adenosine tRNA methylthiotransferase MiaB"  
"OPBB07\_00415" 33909 "s59E5H2" 0.06839632 "(Dimethylallyl)adenosine tRNA methylthiotransferase MiaB"  
"OPBB07\_00415" 33909 "s63E6H2" 0.04699475 "(Dimethylallyl)adenosine tRNA methylthiotransferase MiaB"  
"OPBB07\_00416" 33910 "s59E13H2" 0 "Stage V sporulation protein S"  
"OPBB07\_00416" 33910 "s59E25H2" 0 "Stage V sporulation protein S"  
"OPBB07\_00416" 33910 "s59E5H2" 0.08675949 "Stage V sporulation protein S"  
"OPBB07\_00416" 33910 "s63E6H2" 0.04943598 "Stage V sporulation protein S"  
"OPBB07\_00417" 33911 "s59E13H2" 0.01011778 "DNA mismatch repair protein MutL"  
"OPBB07\_00417" 33911 "s59E25H2" 0 "DNA mismatch repair protein MutL"  
"OPBB07\_00417" 33911 "s59E5H2" 0.07235865 "DNA mismatch repair protein MutL"  
"OPBB07\_00417" 33911 "s63E6H2" 0.06194403 "DNA mismatch repair protein MutL"  
"OPBB07\_00418" 33912 "s59E13H2" 0.008254692 "Ribonuclease Y"  
"OPBB07\_00418" 33912 "s59E25H2" 0 "Ribonuclease Y"  
"OPBB07\_00418" 33912 "s59E5H2" 0.05475402 "Ribonuclease Y"  
"OPBB07\_00418" 33912 "s63E6H2" 0.02907966 "Ribonuclease Y"  
"OPBB07\_00419" 33913 "s59E13H2" 1.19464 "Tyrosine--tRNA ligase"  
"OPBB07\_00419" 33913 "s59E25H2" 0 "Tyrosine--tRNA ligase"  
"OPBB07\_00419" 33913 "s59E5H2" 0.2729106 "Tyrosine--tRNA ligase"  
"OPBB07\_00419" 33913 "s63E6H2" 0.08082602 "Tyrosine--tRNA ligase"  
"OPBB07\_00420" 33914 "s59E13H2" 1.256725 "Penicillin-binding protein 2D"  
"OPBB07\_00420" 33914 "s59E25H2" 0 "Penicillin-binding protein 2D"

"OPBB07\_00420" 33914 "s59E5H2" 0.2511611 "Penicillin-binding protein 2D"  
"OPBB07\_00420" 33914 "s63E6H2" 0.04971436 "Penicillin-binding protein 2D"  
"OPBB07\_00421" 33915 "s59E13H2" 0.06417298 "putative protease YhbU precursor"  
"OPBB07\_00421" 33915 "s59E25H2" 0 "putative protease YhbU precursor"  
"OPBB07\_00421" 33915 "s59E5H2" 0.2962237 "putative protease YhbU precursor"  
"OPBB07\_00421" 33915 "s63E6H2" 0.02614985 "putative protease YhbU precursor"  
"OPBB07\_00422" 33916 "s59E13H2" 0.05023484 "Argininosuccinate lyase"  
"OPBB07\_00422" 33916 "s59E25H2" 0 "Argininosuccinate lyase"  
"OPBB07\_00422" 33916 "s59E5H2" 0.5808701 "Argininosuccinate lyase"  
"OPBB07\_00422" 33916 "s63E6H2" 0.03263685 "Argininosuccinate lyase"  
"OPBB07\_00423" 33917 "s59E13H2" 0.03281301 "Argininosuccinate synthase"  
"OPBB07\_00423" 33917 "s59E25H2" 0 "Argininosuccinate synthase"  
"OPBB07\_00423" 33917 "s59E5H2" 0.3811108 "Argininosuccinate synthase"  
"OPBB07\_00423" 33917 "s63E6H2" 0.03931274 "Argininosuccinate synthase"  
"OPBB07\_00424" 33918 "s59E13H2" 0.01741171 "Arginine repressor"  
"OPBB07\_00424" 33918 "s59E25H2" 0 "Arginine repressor"  
"OPBB07\_00424" 33918 "s59E5H2" 0.2599175 "Arginine repressor"  
"OPBB07\_00424" 33918 "s63E6H2" 0.03006533 "Arginine repressor"  
"OPBB07\_00425" 33919 "s59E13H2" 0.01899971 "Ornithine carbamoyltransferase"  
"OPBB07\_00425" 33919 "s59E25H2" 0 "Ornithine carbamoyltransferase"  
"OPBB07\_00425" 33919 "s59E5H2" 0.2462971 "Ornithine carbamoyltransferase"  
"OPBB07\_00425" 33919 "s63E6H2" 0.02171557 "Ornithine carbamoyltransferase"  
"OPBB07\_00426" 33920 "s59E13H2" 0.0111947 "Acetylornithine aminotransferase"  
"OPBB07\_00426" 33920 "s59E25H2" 0 "Acetylornithine aminotransferase"  
"OPBB07\_00426" 33920 "s59E5H2" 0.2087227 "Acetylornithine aminotransferase"  
"OPBB07\_00426" 33920 "s63E6H2" 0.05080693 "Acetylornithine aminotransferase"  
"OPBB07\_00427" 33921 "s59E13H2" 0.01396797 "Acetylglutamate kinase"  
"OPBB07\_00427" 33921 "s59E25H2" 0 "Acetylglutamate kinase"  
"OPBB07\_00427" 33921 "s59E5H2" 0.2929802 "Acetylglutamate kinase"  
"OPBB07\_00427" 33921 "s63E6H2" 0.07157019 "Acetylglutamate kinase"  
"OPBB07\_00428" 33922 "s59E13H2" 0.4390952 "6-phosphofructokinase"  
"OPBB07\_00428" 33922 "s59E25H2" 0 "6-phosphofructokinase"  
"OPBB07\_00428" 33922 "s59E5H2" 0.01995419 "6-phosphofructokinase"  
"OPBB07\_00428" 33922 "s63E6H2" 0.2640841 "6-phosphofructokinase"  
"OPBB07\_00429" 33923 "s59E13H2" 0 "Phosphoribosyl-AMP cyclohydrolase"  
"OPBB07\_00429" 33923 "s59E25H2" 0 "Phosphoribosyl-AMP cyclohydrolase"  
"OPBB07\_00429" 33923 "s59E5H2" 0.02238058 "Phosphoribosyl-AMP cyclohydrolase"  
"OPBB07\_00429" 33923 "s63E6H2" 0.1971466 "Phosphoribosyl-AMP cyclohydrolase"  
"OPBB07\_00430" 33924 "s59E13H2" 0 "Imidazole glycerol phosphate synthase subunit HisF"  
"OPBB07\_00430" 33924 "s59E25H2" 0 "Imidazole glycerol phosphate synthase subunit HisF"  
"OPBB07\_00430" 33924 "s59E5H2" 0.03994195 "Imidazole glycerol phosphate synthase subunit HisF"  
"OPBB07\_00430" 33924 "s63E6H2" 0.1339686 "Imidazole glycerol phosphate synthase subunit HisF"  
"OPBB07\_00431" 33925 "s59E13H2" 0 "Phosphoribosyl isomerase A"  
"OPBB07\_00431" 33925 "s59E25H2" 0 "Phosphoribosyl isomerase A"  
"OPBB07\_00431" 33925 "s59E5H2" 0.02089512 "Phosphoribosyl isomerase A"  
"OPBB07\_00431" 33925 "s63E6H2" 0.1364643 "Phosphoribosyl isomerase A"  
"OPBB07\_00432" 33926 "s59E13H2" 0.4624445 "putative sugar-binding periplasmic protein precursor"

"OPBB07\_00432" 33926 "s59E25H2" 0 "putative sugar-binding periplasmic protein precursor"  
"OPBB07\_00432" 33926 "s59E5H2" 0.1237483 "putative sugar-binding periplasmic protein precursor"  
"OPBB07\_00432" 33926 "s63E6H2" 0.1661189 "putative sugar-binding periplasmic protein precursor"  
"OPBB07\_00433" 33927 "s59E13H2" 0.6347418 "Trehalose/maltose transport system permease protein MalF"  
"OPBB07\_00433" 33927 "s59E25H2" 0 "Trehalose/maltose transport system permease protein MalF"  
"OPBB07\_00433" 33927 "s59E5H2" 0.2026377 "Trehalose/maltose transport system permease protein MalF"  
"OPBB07\_00433" 33927 "s63E6H2" 0.199901 "Trehalose/maltose transport system permease protein MalF"  
"OPBB07\_00434" 33928 "s59E13H2" 0.7682379 "L-arabinose transport system permease protein AraQ"  
"OPBB07\_00434" 33928 "s59E25H2" 0 "L-arabinose transport system permease protein AraQ"  
"OPBB07\_00434" 33928 "s59E5H2" 0.194142 "L-arabinose transport system permease protein AraQ"  
"OPBB07\_00434" 33928 "s63E6H2" 0.1599534 "L-arabinose transport system permease protein AraQ"  
"OPBB07\_00435" 33929 "s59E13H2" 0.4348654 "Glycerol-3-phosphate acyltransferase"  
"OPBB07\_00435" 33929 "s59E25H2" 0 "Glycerol-3-phosphate acyltransferase"  
"OPBB07\_00435" 33929 "s59E5H2" 0.1209062 "Glycerol-3-phosphate acyltransferase"  
"OPBB07\_00435" 33929 "s63E6H2" 0.06996865 "Glycerol-3-phosphate acyltransferase"  
"OPBB07\_00436" 33930 "s59E13H2" 0.7802031 "4,4'-diaponeurosporenoate glycosyltransferase"  
"OPBB07\_00436" 33930 "s59E25H2" 0 "4,4'-diaponeurosporenoate glycosyltransferase"  
"OPBB07\_00436" 33930 "s59E5H2" 0.2941601 "4,4'-diaponeurosporenoate glycosyltransferase"  
"OPBB07\_00436" 33930 "s63E6H2" 0.1068102 "4,4'-diaponeurosporenoate glycosyltransferase"  
"OPBB07\_00437" 33931 "s59E13H2" 0.5963693 "hypothetical protein"  
"OPBB07\_00437" 33931 "s59E25H2" 0 "hypothetical protein"  
"OPBB07\_00437" 33931 "s59E5H2" 0.554962 "hypothetical protein"  
"OPBB07\_00437" 33931 "s63E6H2" 0.109017 "hypothetical protein"  
"OPBB07\_00438" 33932 "s59E13H2" 0.4435539 "Fructose-bisphosphate aldolase"  
"OPBB07\_00438" 33932 "s59E25H2" 0 "Fructose-bisphosphate aldolase"  
"OPBB07\_00438" 33932 "s59E5H2" 0.287697 "Fructose-bisphosphate aldolase"  
"OPBB07\_00438" 33932 "s63E6H2" 0.05022607 "Fructose-bisphosphate aldolase"  
"OPBB07\_00440" 33934 "s59E13H2" 0.5879169 "RNA recognition motif. (a.k.a. RRM, RBD, or RNP domain)"  
"OPBB07\_00440" 33934 "s59E25H2" 0 "RNA recognition motif. (a.k.a. RRM, RBD, or RNP domain)"  
"OPBB07\_00440" 33934 "s59E5H2" 0.4063255 "RNA recognition motif. (a.k.a. RRM, RBD, or RNP domain)"  
"OPBB07\_00440" 33934 "s63E6H2" 0.02393009 "RNA recognition motif. (a.k.a. RRM, RBD, or RNP domain)"  
"OPBB07\_00441" 33935 "s59E13H2" 0.008007762 "hypothetical protein"  
"OPBB07\_00441" 33935 "s59E25H2" 0 "hypothetical protein"  
"OPBB07\_00441" 33935 "s59E5H2" 0.351841 "hypothetical protein"  
"OPBB07\_00441" 33935 "s63E6H2" 0.05263463 "hypothetical protein"  
"OPBB07\_00442" 33936 "s59E13H2" 0.3394973 "3-isopropylmalate dehydrogenase"  
"OPBB07\_00442" 33936 "s59E25H2" 0 "3-isopropylmalate dehydrogenase"  
"OPBB07\_00442" 33936 "s59E5H2" 0.7068766 "3-isopropylmalate dehydrogenase"  
"OPBB07\_00442" 33936 "s63E6H2" 0.03623932 "3-isopropylmalate dehydrogenase"  
"OPBB07\_00443" 33937 "s59E13H2" 0 "hypothetical protein"  
"OPBB07\_00443" 33937 "s59E25H2" 0 "hypothetical protein"  
"OPBB07\_00443" 33937 "s59E5H2" 0.07707683 "hypothetical protein"  
"OPBB07\_00443" 33937 "s63E6H2" 0.05730239 "hypothetical protein"  
"OPBB07\_00444" 33938 "s59E13H2" 0 "Helix-turn-helix"  
"OPBB07\_00444" 33938 "s59E25H2" 0 "Helix-turn-helix"  
"OPBB07\_00444" 33938 "s59E5H2" 0.01876764 "Helix-turn-helix"  
"OPBB07\_00444" 33938 "s63E6H2" 0.4301782 "Helix-turn-helix"

"OPBB07\_00445" 33939 "s59E13H2" 0 "Flavoredoxin"  
"OPBB07\_00445" 33939 "s59E25H2" 0 "Flavoredoxin"  
"OPBB07\_00445" 33939 "s59E5H2" 0.1163985 "Flavoredoxin"  
"OPBB07\_00445" 33939 "s63E6H2" 0.3562121 "Flavoredoxin"  
"OPBB07\_00446" 33940 "s59E13H2" 0.001936822 "biotin synthase"  
"OPBB07\_00446" 33940 "s59E25H2" 0 "biotin synthase"  
"OPBB07\_00446" 33940 "s59E5H2" 0.382118 "biotin synthase"  
"OPBB07\_00446" 33940 "s63E6H2" 0.662103 "biotin synthase"  
"OPBB07\_00447" 33941 "s59E13H2" 0 "hypothetical protein"  
"OPBB07\_00447" 33941 "s59E25H2" 0 "hypothetical protein"  
"OPBB07\_00447" 33941 "s59E5H2" 0.04779459 "hypothetical protein"  
"OPBB07\_00447" 33941 "s63E6H2" 0.5344371 "hypothetical protein"  
"OPBB07\_00448" 33942 "s59E13H2" 0 "Possibl zinc metallo-peptidase"  
"OPBB07\_00448" 33942 "s59E25H2" 0 "Possibl zinc metallo-peptidase"  
"OPBB07\_00448" 33942 "s59E5H2" 0.5357017 "Possibl zinc metallo-peptidase"  
"OPBB07\_00448" 33942 "s63E6H2" 0.6841629 "Possibl zinc metallo-peptidase"  
"OPBB07\_00449" 33943 "s59E13H2" 0.01321794 "hypothetical protein"  
"OPBB07\_00449" 33943 "s59E25H2" 0 "hypothetical protein"  
"OPBB07\_00449" 33943 "s59E5H2" 0.2387775 "hypothetical protein"  
"OPBB07\_00449" 33943 "s63E6H2" 0.7167839 "hypothetical protein"  
"OPBB07\_00450" 33944 "s59E13H2" 0.03849952 "Lon protease 2"  
"OPBB07\_00450" 33944 "s59E25H2" 0 "Lon protease 2"  
"OPBB07\_00450" 33944 "s59E5H2" 0.7715371 "Lon protease 2"  
"OPBB07\_00450" 33944 "s63E6H2" 1.12423 "Lon protease 2"  
"OPBB07\_00451" 33945 "s59E13H2" 0.05187039 "Bifunctional purine biosynthesis protein PurH"  
"OPBB07\_00451" 33945 "s59E25H2" 0 "Bifunctional purine biosynthesis protein PurH"  
"OPBB07\_00451" 33945 "s59E5H2" 0.6054024 "Bifunctional purine biosynthesis protein PurH"  
"OPBB07\_00451" 33945 "s63E6H2" 0.5036566 "Bifunctional purine biosynthesis protein PurH"  
"OPBB07\_00452" 33946 "s59E13H2" 0.06038359 "Phosphoribosylglycinamide formyltransferase"  
"OPBB07\_00452" 33946 "s59E25H2" 0 "Phosphoribosylglycinamide formyltransferase"  
"OPBB07\_00452" 33946 "s59E5H2" 0.4155476 "Phosphoribosylglycinamide formyltransferase"  
"OPBB07\_00452" 33946 "s63E6H2" 0.2256652 "Phosphoribosylglycinamide formyltransferase"  
"OPBB07\_00453" 33947 "s59E13H2" 0.0365364 "Phosphoribosylformylglycinamide cyclo-ligase"  
"OPBB07\_00453" 33947 "s59E25H2" 0 "Phosphoribosylformylglycinamide cyclo-ligase"  
"OPBB07\_00453" 33947 "s59E5H2" 0.1375872 "Phosphoribosylformylglycinamide cyclo-ligase"  
"OPBB07\_00453" 33947 "s63E6H2" 0.1359302 "Phosphoribosylformylglycinamide cyclo-ligase"  
"OPBB07\_00454" 33948 "s59E13H2" 0.01971471 "Amidophosphoribosyltransferase precursor"  
"OPBB07\_00454" 33948 "s59E25H2" 0 "Amidophosphoribosyltransferase precursor"  
"OPBB07\_00454" 33948 "s59E5H2" 0.1746705 "Amidophosphoribosyltransferase precursor"  
"OPBB07\_00454" 33948 "s63E6H2" 0.138607 "Amidophosphoribosyltransferase precursor"  
"OPBB07\_00455" 33949 "s59E13H2" 0.01949425 "Phosphoribosylformylglycinamide synthase"  
"OPBB07\_00455" 33949 "s59E25H2" 0 "Phosphoribosylformylglycinamide synthase"  
"OPBB07\_00455" 33949 "s59E5H2" 0.1338912 "Phosphoribosylformylglycinamide synthase"  
"OPBB07\_00455" 33949 "s63E6H2" 0.06337213 "Phosphoribosylformylglycinamide synthase"  
"OPBB07\_00456" 33950 "s59E13H2" 0.01984705 "Adenylosuccinate lyase"  
"OPBB07\_00456" 33950 "s59E25H2" 0 "Adenylosuccinate lyase"  
"OPBB07\_00456" 33950 "s59E5H2" 0.8041194 "Adenylosuccinate lyase"



"OPBB07\_00456" 33950 "s63E6H2" 0.1449742 "Adenylosuccinate lyase"  
"OPBB07\_00458" 33952 "s59E13H2" 0.007400818 "Transcriptional regulator LytR"  
"OPBB07\_00458" 33952 "s59E25H2" 0.06884058 "Transcriptional regulator LytR"  
"OPBB07\_00458" 33952 "s59E5H2" 0.05074977 "Transcriptional regulator LytR"  
"OPBB07\_00458" 33952 "s63E6H2" 0.2982156 "Transcriptional regulator LytR"  
"OPBB07\_00459" 33953 "s59E13H2" 0.006524238 "Redox-sensing transcriptional repressor Rex"  
"OPBB07\_00459" 33953 "s59E25H2" 0.03565891 "Redox-sensing transcriptional repressor Rex"  
"OPBB07\_00459" 33953 "s59E5H2" 0.1098376 "Redox-sensing transcriptional repressor Rex"  
"OPBB07\_00459" 33953 "s63E6H2" 0.1380706 "Redox-sensing transcriptional repressor Rex"  
"OPBB07\_00460" 33954 "s59E13H2" 0.3270785 "hypothetical protein"  
"OPBB07\_00460" 33954 "s59E25H2" 0 "hypothetical protein"  
"OPBB07\_00460" 33954 "s59E5H2" 0.0211793 "hypothetical protein"  
"OPBB07\_00460" 33954 "s63E6H2" 0.02578349 "hypothetical protein"  
"OPBB07\_00461" 33955 "s59E13H2" 0.2448865 "Single-stranded DNA-binding protein"  
"OPBB07\_00461" 33955 "s59E25H2" 0 "Single-stranded DNA-binding protein"  
"OPBB07\_00461" 33955 "s59E5H2" 0.09271567 "Single-stranded DNA-binding protein"  
"OPBB07\_00461" 33955 "s63E6H2" 0.03494144 "Single-stranded DNA-binding protein"  
"OPBB07\_00462" 33956 "s59E13H2" 0.2068194 "hypothetical protein"  
"OPBB07\_00462" 33956 "s59E25H2" 0 "hypothetical protein"  
"OPBB07\_00462" 33956 "s59E5H2" 0.09118627 "hypothetical protein"  
"OPBB07\_00462" 33956 "s63E6H2" 0.04127965 "hypothetical protein"  
"OPBB07\_00463" 33957 "s59E13H2" 0.1748251 "TadE-like protein"  
"OPBB07\_00463" 33957 "s59E25H2" 0 "TadE-like protein"  
"OPBB07\_00463" 33957 "s59E5H2" 0.09143663 "TadE-like protein"  
"OPBB07\_00463" 33957 "s63E6H2" 0.02987833 "TadE-like protein"  
"OPBB07\_00464" 33958 "s59E13H2" 0.01601235 "hypothetical protein"  
"OPBB07\_00464" 33958 "s59E25H2" 0 "hypothetical protein"  
"OPBB07\_00464" 33958 "s59E5H2" 0 "hypothetical protein"  
"OPBB07\_00464" 33958 "s63E6H2" 0.06468744 "hypothetical protein"  
"OPBB07\_00465" 33959 "s59E13H2" 0.2202918 "Bacterial type II secretion system protein F domain protein"  
"OPBB07\_00465" 33959 "s59E25H2" 0 "Bacterial type II secretion system protein F domain protein"  
"OPBB07\_00465" 33959 "s59E5H2" 0.04295744 "Bacterial type II secretion system protein F domain protein"  
"OPBB07\_00465" 33959 "s63E6H2" 0.09734394 "Bacterial type II secretion system protein F domain protein"  
"OPBB07\_00466" 33960 "s59E13H2" 0.2027185 "Bacterial type II secretion system protein F domain protein"  
"OPBB07\_00466" 33960 "s59E25H2" 0 "Bacterial type II secretion system protein F domain protein"  
"OPBB07\_00466" 33960 "s59E5H2" 0.005797946 "Bacterial type II secretion system protein F domain protein"  
"OPBB07\_00466" 33960 "s63E6H2" 0.09256844 "Bacterial type II secretion system protein F domain protein"  
"OPBB07\_00467" 33961 "s59E13H2" 0.1531245 "Putative conjugal transfer protein/MT3759"  
"OPBB07\_00467" 33961 "s59E25H2" 0 "Putative conjugal transfer protein/MT3759"  
"OPBB07\_00467" 33961 "s59E5H2" 0.03031918 "Putative conjugal transfer protein/MT3759"  
"OPBB07\_00467" 33961 "s63E6H2" 0.1389412 "Putative conjugal transfer protein/MT3759"  
"OPBB07\_00468" 33962 "s59E13H2" 0.003749396 "putative lysine decarboxylase"  
"OPBB07\_00468" 33962 "s59E25H2" 0 "putative lysine decarboxylase"  
"OPBB07\_00468" 33962 "s59E5H2" 0.01130189 "putative lysine decarboxylase"  
"OPBB07\_00468" 33962 "s63E6H2" 0.01087324 "putative lysine decarboxylase"  
"OPBB07\_00469" 33963 "s59E13H2" 0.01138656 "hypothetical protein"  
"OPBB07\_00469" 33963 "s59E25H2" 0 "hypothetical protein"

"OPBB07\_00469" 33963 "s59E5H2" 0.003522549 "hypothetical protein"  
"OPBB07\_00469" 33963 "s63E6H2" 0.02413703 "hypothetical protein"  
"OPBB07\_00470" 33964 "s59E13H2" 0.006462572 "Adenine phosphoribosyltransferase"  
"OPBB07\_00470" 33964 "s59E25H2" 0 "Adenine phosphoribosyltransferase"  
"OPBB07\_00470" 33964 "s59E5H2" 0.04410088 "Adenine phosphoribosyltransferase"  
"OPBB07\_00470" 33964 "s63E6H2" 0.009107288 "Adenine phosphoribosyltransferase"  
"OPBB07\_00471" 33965 "s59E13H2" 0.008391316 "hypothetical protein"  
"OPBB07\_00471" 33965 "s59E25H2" 0 "hypothetical protein"  
"OPBB07\_00471" 33965 "s59E5H2" 0.09833168 "hypothetical protein"  
"OPBB07\_00471" 33965 "s63E6H2" 0.01615459 "hypothetical protein"  
"OPBB07\_00472" 33966 "s59E13H2" 0 "tRNA(fMet)-specific endonuclease VapC"  
"OPBB07\_00472" 33966 "s59E25H2" 0 "tRNA(fMet)-specific endonuclease VapC"  
"OPBB07\_00472" 33966 "s59E5H2" 0 "tRNA(fMet)-specific endonuclease VapC"  
"OPBB07\_00472" 33966 "s63E6H2" 0.001586963 "tRNA(fMet)-specific endonuclease VapC"  
"OPBB07\_00473" 33967 "s59E13H2" 0 "Ribbon-helix-helix protein, copG family"  
"OPBB07\_00473" 33967 "s59E25H2" 0 "Ribbon-helix-helix protein, copG family"  
"OPBB07\_00473" 33967 "s59E5H2" 0 "Ribbon-helix-helix protein, copG family"  
"OPBB07\_00473" 33967 "s63E6H2" 0 "Ribbon-helix-helix protein, copG family"  
"OPBB07\_00474" 33968 "s59E13H2" 0.01025599 "3'-5' exoribonuclease YhaM"  
"OPBB07\_00474" 33968 "s59E25H2" 0 "3'-5' exoribonuclease YhaM"  
"OPBB07\_00474" 33968 "s59E5H2" 0.7212202 "3'-5' exoribonuclease YhaM"  
"OPBB07\_00474" 33968 "s63E6H2" 0.009728306 "3'-5' exoribonuclease YhaM"  
"OPBB07\_00475" 33969 "s59E13H2" 0.02088677 "hypothetical protein"  
"OPBB07\_00475" 33969 "s59E25H2" 0 "hypothetical protein"  
"OPBB07\_00475" 33969 "s59E5H2" 0.09568649 "hypothetical protein"  
"OPBB07\_00475" 33969 "s63E6H2" 0 "hypothetical protein"  
"OPBB07\_00476" 33970 "s59E13H2" 0.01098251 "50S ribosomal protein L11"  
"OPBB07\_00476" 33970 "s59E25H2" 0 "50S ribosomal protein L11"  
"OPBB07\_00476" 33970 "s59E5H2" 0.04042268 "50S ribosomal protein L11"  
"OPBB07\_00476" 33970 "s63E6H2" 0.0004666121 "50S ribosomal protein L11"  
"OPBB07\_00477" 33971 "s59E13H2" 0.0164655 "50S ribosomal protein L1"  
"OPBB07\_00477" 33971 "s59E25H2" 0 "50S ribosomal protein L1"  
"OPBB07\_00477" 33971 "s59E5H2" 0.02795837 "50S ribosomal protein L1"  
"OPBB07\_00477" 33971 "s63E6H2" 0.003219963 "50S ribosomal protein L1"  
"OPBB07\_00479" 33973 "s59E13H2" 0.003983117 "hypothetical protein"  
"OPBB07\_00479" 33973 "s59E25H2" 0 "hypothetical protein"  
"OPBB07\_00479" 33973 "s59E5H2" 0.02909798 "hypothetical protein"  
"OPBB07\_00479" 33973 "s63E6H2" 0.008157679 "hypothetical protein"  
"OPBB07\_00480" 33974 "s59E13H2" 0.004629966 "DNA-directed RNA polymerase subunit beta"  
"OPBB07\_00480" 33974 "s59E25H2" 0 "DNA-directed RNA polymerase subunit beta"  
"OPBB07\_00480" 33974 "s59E5H2" 0.02832609 "DNA-directed RNA polymerase subunit beta"  
"OPBB07\_00480" 33974 "s63E6H2" 0.01592461 "DNA-directed RNA polymerase subunit beta"  
"OPBB07\_00481" 33975 "s59E13H2" 0.01252272 "DNA-directed RNA polymerase subunit beta"  
"OPBB07\_00481" 33975 "s59E25H2" 2.65181 "DNA-directed RNA polymerase subunit beta"  
"OPBB07\_00481" 33975 "s59E5H2" 0.01069666 "DNA-directed RNA polymerase subunit beta"  
"OPBB07\_00481" 33975 "s63E6H2" 0.003480827 "DNA-directed RNA polymerase subunit beta"  
"OPBB07\_00482" 33976 "s59E13H2" 0.03532182 "preprotein translocase subunit SecY"

"OPBB07\_00482" 33976 "s59E25H2" 0 "preprotein translocase subunit SecY"  
"OPBB07\_00482" 33976 "s59E5H2" 0.0385946 "preprotein translocase subunit SecY"  
"OPBB07\_00482" 33976 "s63E6H2" 0.003852718 "preprotein translocase subunit SecY"  
"OPBB07\_00483" 33977 "s59E13H2" 0.03097207 "Adenylate kinase"  
"OPBB07\_00483" 33977 "s59E25H2" 0 "Adenylate kinase"  
"OPBB07\_00483" 33977 "s59E5H2" 0.05669008 "Adenylate kinase"  
"OPBB07\_00483" 33977 "s63E6H2" 0.004769757 "Adenylate kinase"  
"OPBB07\_00484" 33978 "s59E13H2" 0.03525985 "Methionine aminopeptidase 1"  
"OPBB07\_00484" 33978 "s59E25H2" 0 "Methionine aminopeptidase 1"  
"OPBB07\_00484" 33978 "s59E5H2" 0.10562 "Methionine aminopeptidase 1"  
"OPBB07\_00484" 33978 "s63E6H2" 0.0005642216 "Methionine aminopeptidase 1"  
"OPBB07\_00485" 33979 "s59E13H2" 0.03040338 "Translation initiation factor IF-1"  
"OPBB07\_00485" 33979 "s59E25H2" 0 "Translation initiation factor IF-1"  
"OPBB07\_00485" 33979 "s59E5H2" 0.2100388 "Translation initiation factor IF-1"  
"OPBB07\_00485" 33979 "s63E6H2" 0.01345855 "Translation initiation factor IF-1"  
"OPBB07\_00486" 33980 "s59E13H2" 0.01641276 "50S ribosomal protein L36"  
"OPBB07\_00486" 33980 "s59E25H2" 0 "50S ribosomal protein L36"  
"OPBB07\_00486" 33980 "s59E5H2" 0 "50S ribosomal protein L36"  
"OPBB07\_00486" 33980 "s63E6H2" 0.003572916 "50S ribosomal protein L36"  
"OPBB07\_00487" 33981 "s59E13H2" 0.01845551 "30S ribosomal protein S13"  
"OPBB07\_00487" 33981 "s59E25H2" 0 "30S ribosomal protein S13"  
"OPBB07\_00487" 33981 "s59E5H2" 0 "30S ribosomal protein S13"  
"OPBB07\_00487" 33981 "s63E6H2" 0.004717529 "30S ribosomal protein S13"  
"OPBB07\_00488" 33982 "s59E13H2" 0.02308071 "30S ribosomal protein S11"  
"OPBB07\_00488" 33982 "s59E25H2" 0 "30S ribosomal protein S11"  
"OPBB07\_00488" 33982 "s59E5H2" 0.03445501 "30S ribosomal protein S11"  
"OPBB07\_00488" 33982 "s63E6H2" 0.01089396 "30S ribosomal protein S11"  
"OPBB07\_00489" 33983 "s59E13H2" 0.02750066 "30S ribosomal protein S4"  
"OPBB07\_00489" 33983 "s59E25H2" 0 "30S ribosomal protein S4"  
"OPBB07\_00489" 33983 "s59E5H2" 0.03826693 "30S ribosomal protein S4"  
"OPBB07\_00489" 33983 "s63E6H2" 0.1012439 "30S ribosomal protein S4"  
"OPBB07\_00490" 33984 "s59E13H2" 0.03281613 "DNA-directed RNA polymerase subunit alpha"  
"OPBB07\_00490" 33984 "s59E25H2" 0 "DNA-directed RNA polymerase subunit alpha"  
"OPBB07\_00490" 33984 "s59E5H2" 0.009526125 "DNA-directed RNA polymerase subunit alpha"  
"OPBB07\_00490" 33984 "s63E6H2" 0.01791962 "DNA-directed RNA polymerase subunit alpha"  
"OPBB07\_00491" 33985 "s59E13H2" 0.08075561 "50S ribosomal protein L17"  
"OPBB07\_00491" 33985 "s59E25H2" 0 "50S ribosomal protein L17"  
"OPBB07\_00491" 33985 "s59E5H2" 0.0452463 "50S ribosomal protein L17"  
"OPBB07\_00491" 33985 "s63E6H2" 0.002782048 "50S ribosomal protein L17"  
"OPBB07\_00492" 33986 "s59E13H2" 0.1456037 "tRNA pseudouridine synthase A"  
"OPBB07\_00492" 33986 "s59E25H2" 0 "tRNA pseudouridine synthase A"  
"OPBB07\_00492" 33986 "s59E5H2" 0.02083748 "tRNA pseudouridine synthase A"  
"OPBB07\_00492" 33986 "s63E6H2" 0.01775153 "tRNA pseudouridine synthase A"  
"OPBB07\_00493" 33987 "s59E13H2" 0.039885 "50S ribosomal protein L13"  
"OPBB07\_00493" 33987 "s59E25H2" 0 "50S ribosomal protein L13"  
"OPBB07\_00493" 33987 "s59E5H2" 0.03556358 "50S ribosomal protein L13"  
"OPBB07\_00493" 33987 "s63E6H2" 0.01716989 "50S ribosomal protein L13"

"OPBB07\_00494" 33988 "s59E13H2" 0.03753561 "30S ribosomal protein S9"  
"OPBB07\_00494" 33988 "s59E25H2" 0 "30S ribosomal protein S9"  
"OPBB07\_00494" 33988 "s59E5H2" 0.0248498 "30S ribosomal protein S9"  
"OPBB07\_00494" 33988 "s63E6H2" 0.03753501 "30S ribosomal protein S9"  
"OPBB07\_00495" 33989 "s59E13H2" 0.02986695 "alanine racemase"  
"OPBB07\_00495" 33989 "s59E25H2" 0 "alanine racemase"  
"OPBB07\_00495" 33989 "s59E5H2" 0 "alanine racemase"  
"OPBB07\_00495" 33989 "s63E6H2" 0.02940951 "alanine racemase"  
"OPBB07\_00497" 33991 "s59E13H2" 0.02888339 "Glutamine--fructose-6-phosphate aminotransferase [isomerizing]"  
"OPBB07\_00497" 33991 "s59E25H2" 0 "Glutamine--fructose-6-phosphate aminotransferase [isomerizing]"  
"OPBB07\_00497" 33991 "s59E5H2" 0.1448981 "Glutamine--fructose-6-phosphate aminotransferase [isomerizing]"  
"OPBB07\_00497" 33991 "s63E6H2" 0 "Glutamine--fructose-6-phosphate aminotransferase [isomerizing]"  
"OPBB07\_00498" 33992 "s59E13H2" 0.02392336 "2-dehydro-3-deoxygluconokinase"  
"OPBB07\_00498" 33992 "s59E25H2" 0 "2-dehydro-3-deoxygluconokinase"  
"OPBB07\_00498" 33992 "s59E5H2" 0.1314141 "2-dehydro-3-deoxygluconokinase"  
"OPBB07\_00498" 33992 "s63E6H2" 0 "2-dehydro-3-deoxygluconokinase"  
"OPBB07\_00499" 33993 "s59E13H2" 0.00908951 "D-tagatose-1,6-bisphosphate aldolase subunit KbaZ"  
"OPBB07\_00499" 33993 "s59E25H2" 0 "D-tagatose-1,6-bisphosphate aldolase subunit KbaZ"  
"OPBB07\_00499" 33993 "s59E5H2" 0.1234673 "D-tagatose-1,6-bisphosphate aldolase subunit KbaZ"  
"OPBB07\_00499" 33993 "s63E6H2" 0.002344394 "D-tagatose-1,6-bisphosphate aldolase subunit KbaZ"  
"OPBB07\_00500" 33994 "s59E13H2" 0 "hypothetical protein"  
"OPBB07\_00500" 33994 "s59E25H2" 0 "hypothetical protein"  
"OPBB07\_00500" 33994 "s59E5H2" 0 "hypothetical protein"  
"OPBB07\_00500" 33994 "s63E6H2" 0 "hypothetical protein"  
"OPBB07\_00501" 33995 "s59E13H2" 0.3173233 "DNA gyrase subunit B"  
"OPBB07\_00501" 33995 "s59E25H2" 0 "DNA gyrase subunit B"  
"OPBB07\_00501" 33995 "s59E5H2" 0.01210122 "DNA gyrase subunit B"  
"OPBB07\_00501" 33995 "s63E6H2" 0.02414441 "DNA gyrase subunit B"  
"OPBB07\_00502" 33996 "s59E13H2" 0.6045905 "DNA gyrase subunit A"  
"OPBB07\_00502" 33996 "s59E25H2" 0.0945335 "DNA gyrase subunit A"  
"OPBB07\_00502" 33996 "s59E5H2" 0.04388429 "DNA gyrase subunit A"  
"OPBB07\_00502" 33996 "s63E6H2" 0.03387461 "DNA gyrase subunit A"  
"OPBB07\_00503" 33997 "s59E13H2" 0.002088448 "Chloroplast import component protein (Tic20)"  
"OPBB07\_00503" 33997 "s59E25H2" 0 "Chloroplast import component protein (Tic20)"  
"OPBB07\_00503" 33997 "s59E5H2" 0 "Chloroplast import component protein (Tic20)"  
"OPBB07\_00503" 33997 "s63E6H2" 0.008306815 "Chloroplast import component protein (Tic20)"  
"OPBB07\_00504" 33998 "s59E13H2" 0.04926878 "Glycerol-3-phosphate acyltransferase"  
"OPBB07\_00504" 33998 "s59E25H2" 0 "Glycerol-3-phosphate acyltransferase"  
"OPBB07\_00504" 33998 "s59E5H2" 0.8291751 "Glycerol-3-phosphate acyltransferase"  
"OPBB07\_00504" 33998 "s63E6H2" 0.1631557 "Glycerol-3-phosphate acyltransferase"  
"OPBB07\_00505" 33999 "s59E13H2" 0.07896733 "Transcriptional repressor NrdR"  
"OPBB07\_00505" 33999 "s59E25H2" 0 "Transcriptional repressor NrdR"  
"OPBB07\_00505" 33999 "s59E5H2" 1.213534 "Transcriptional repressor NrdR"  
"OPBB07\_00505" 33999 "s63E6H2" 0.2271601 "Transcriptional repressor NrdR"  
"OPBB07\_00506" 34000 "s59E13H2" 0.04370371 "Peptide chain release factor subunit 1"  
"OPBB07\_00506" 34000 "s59E25H2" 0 "Peptide chain release factor subunit 1"  
"OPBB07\_00506" 34000 "s59E5H2" 0.487052 "Peptide chain release factor subunit 1"

"OPBB07\_00506" 34000 "s63E6H2" 0.04123207 "Peptide chain release factor subunit 1"  
"OPBB07\_00507" 34001 "s59E13H2" 0.04616865 "lipid A biosynthesis lauroyl acyltransferase"  
"OPBB07\_00507" 34001 "s59E25H2" 0 "lipid A biosynthesis lauroyl acyltransferase"  
"OPBB07\_00507" 34001 "s59E5H2" 0.2768045 "lipid A biosynthesis lauroyl acyltransferase"  
"OPBB07\_00507" 34001 "s63E6H2" 0.05244711 "lipid A biosynthesis lauroyl acyltransferase"  
"OPBB07\_00508" 34002 "s59E13H2" 0 "Transposase IS200 like protein"  
"OPBB07\_00508" 34002 "s59E25H2" 0 "Transposase IS200 like protein"  
"OPBB07\_00508" 34002 "s59E5H2" 0.07266182 "Transposase IS200 like protein"  
"OPBB07\_00508" 34002 "s63E6H2" 0.1203388 "Transposase IS200 like protein"  
"OPBB07\_00509" 34003 "s59E13H2" 0 "putative transposase"  
"OPBB07\_00509" 34003 "s59E25H2" 0 "putative transposase"  
"OPBB07\_00509" 34003 "s59E5H2" 0.09886833 "putative transposase"  
"OPBB07\_00509" 34003 "s63E6H2" 0.08615595 "putative transposase"  
"OPBB07\_00510" 34004 "s59E13H2" 0.03934589 "Calcium-transporting ATPase 1"  
"OPBB07\_00510" 34004 "s59E25H2" 0 "Calcium-transporting ATPase 1"  
"OPBB07\_00510" 34004 "s59E5H2" 0.05634445 "Calcium-transporting ATPase 1"  
"OPBB07\_00510" 34004 "s63E6H2" 0.8403386 "Calcium-transporting ATPase 1"  
"OPBB07\_00511" 34005 "s59E13H2" 0.02283666 "Ribonuclease VapC20"  
"OPBB07\_00511" 34005 "s59E25H2" 0 "Ribonuclease VapC20"  
"OPBB07\_00511" 34005 "s59E5H2" 0.008776276 "Ribonuclease VapC20"  
"OPBB07\_00511" 34005 "s63E6H2" 1.063495 "Ribonuclease VapC20"  
"OPBB07\_00512" 34006 "s59E13H2" 0.03863287 "hypothetical protein"  
"OPBB07\_00512" 34006 "s59E25H2" 0 "hypothetical protein"  
"OPBB07\_00512" 34006 "s59E5H2" 0 "hypothetical protein"  
"OPBB07\_00512" 34006 "s63E6H2" 0.8500995 "hypothetical protein"  
"OPBB07\_00513" 34007 "s59E13H2" 0.01516445 "hypothetical protein"  
"OPBB07\_00513" 34007 "s59E25H2" 0 "hypothetical protein"  
"OPBB07\_00513" 34007 "s59E5H2" 0 "hypothetical protein"  
"OPBB07\_00513" 34007 "s63E6H2" 0.6161716 "hypothetical protein"  
"OPBB07\_00514" 34008 "s59E13H2" 0.02743595 "2-hydroxy-6-oxononadienedioate/2-hydroxy-6-oxononatrienedioate hydrolase"  
"OPBB07\_00514" 34008 "s59E25H2" 0 "2-hydroxy-6-oxononadienedioate/2-hydroxy-6-oxononatrienedioate hydrolase"  
"OPBB07\_00514" 34008 "s59E5H2" 0 "2-hydroxy-6-oxononadienedioate/2-hydroxy-6-oxononatrienedioate hydrolase"  
"OPBB07\_00514" 34008 "s63E6H2" 0.4005057 "2-hydroxy-6-oxononadienedioate/2-hydroxy-6-oxononatrienedioate hydrolase"  
"OPBB07\_00515" 34009 "s59E13H2" 0.04120304 "RNA polymerase sigma factor SigA"  
"OPBB07\_00515" 34009 "s59E25H2" 0 "RNA polymerase sigma factor SigA"  
"OPBB07\_00515" 34009 "s59E5H2" 0.1168252 "RNA polymerase sigma factor SigA"  
"OPBB07\_00515" 34009 "s63E6H2" 0.05333403 "RNA polymerase sigma factor SigA"  
"OPBB07\_00516" 34010 "s59E13H2" 0 "hypothetical protein"  
"OPBB07\_00516" 34010 "s59E25H2" 0 "hypothetical protein"  
"OPBB07\_00516" 34010 "s59E5H2" 0 "hypothetical protein"  
"OPBB07\_00516" 34010 "s63E6H2" 0.01067773 "hypothetical protein"  
"OPBB07\_00517" 34011 "s59E13H2" 0.01103732 "hypothetical protein"  
"OPBB07\_00517" 34011 "s59E25H2" 0 "hypothetical protein"  
"OPBB07\_00517" 34011 "s59E5H2" 0.04015721 "hypothetical protein"  
"OPBB07\_00517" 34011 "s63E6H2" 0.03526231 "hypothetical protein"  
"OPBB07\_00518" 34012 "s59E13H2" 0.05989538 "Triosephosphate isomerase"  
"OPBB07\_00518" 34012 "s59E25H2" 0 "Triosephosphate isomerase"

"OPBB07\_00518" 34012 "s59E5H2" 0.02023003 "Triosephosphate isomerase"  
"OPBB07\_00518" 34012 "s63E6H2" 0.02762526 "Triosephosphate isomerase"  
"OPBB07\_00519" 34013 "s59E13H2" 0 "Ribulose-phosphate 3-epimerase"  
"OPBB07\_00519" 34013 "s59E25H2" 0 "Ribulose-phosphate 3-epimerase"  
"OPBB07\_00519" 34013 "s59E5H2" 0 "Ribulose-phosphate 3-epimerase"  
"OPBB07\_00519" 34013 "s63E6H2" 0.01564404 "Ribulose-phosphate 3-epimerase"  
"OPBB07\_00520" 34014 "s59E13H2" 0 "Arabinose 5-phosphate isomerase KpsF"  
"OPBB07\_00520" 34014 "s59E25H2" 0 "Arabinose 5-phosphate isomerase KpsF"  
"OPBB07\_00520" 34014 "s59E5H2" 0 "Arabinose 5-phosphate isomerase KpsF"  
"OPBB07\_00520" 34014 "s63E6H2" 0.08078086 "Arabinose 5-phosphate isomerase KpsF"  
"OPBB07\_00521" 34015 "s59E13H2" 0 "HTH-type transcriptional repressor GlcR"  
"OPBB07\_00521" 34015 "s59E25H2" 0 "HTH-type transcriptional repressor GlcR"  
"OPBB07\_00521" 34015 "s59E5H2" 0 "HTH-type transcriptional repressor GlcR"  
"OPBB07\_00521" 34015 "s63E6H2" 0.0681329 "HTH-type transcriptional repressor GlcR"  
"OPBB07\_00522" 34016 "s59E13H2" 0.004306966 "preprotein translocase subunit SecF"  
"OPBB07\_00522" 34016 "s59E25H2" 0 "preprotein translocase subunit SecF"  
"OPBB07\_00522" 34016 "s59E5H2" 0.1084079 "preprotein translocase subunit SecF"  
"OPBB07\_00522" 34016 "s63E6H2" 0.01232344 "preprotein translocase subunit SecF"  
"OPBB07\_00523" 34017 "s59E13H2" 0.002403615 "preprotein translocase subunit SecD"  
"OPBB07\_00523" 34017 "s59E25H2" 0 "preprotein translocase subunit SecD"  
"OPBB07\_00523" 34017 "s59E5H2" 0.1021587 "preprotein translocase subunit SecD"  
"OPBB07\_00523" 34017 "s63E6H2" 0.005900815 "preprotein translocase subunit SecD"  
"OPBB07\_00524" 34018 "s59E13H2" 0.00904227 "preprotein translocase subunit YajC"  
"OPBB07\_00524" 34018 "s59E25H2" 0 "preprotein translocase subunit YajC"  
"OPBB07\_00524" 34018 "s59E5H2" 0.2180864 "preprotein translocase subunit YajC"  
"OPBB07\_00524" 34018 "s63E6H2" 0.003633099 "preprotein translocase subunit YajC"  
"OPBB07\_00525" 34019 "s59E13H2" 0.008763918 "Queuine tRNA-ribosyltransferase"  
"OPBB07\_00525" 34019 "s59E25H2" 0 "Queuine tRNA-ribosyltransferase"  
"OPBB07\_00525" 34019 "s59E5H2" 1.108434 "Queuine tRNA-ribosyltransferase"  
"OPBB07\_00525" 34019 "s63E6H2" 0.02030946 "Queuine tRNA-ribosyltransferase"  
"OPBB07\_00526" 34020 "s59E13H2" 0.004783804 "hypothetical protein"  
"OPBB07\_00526" 34020 "s59E25H2" 0 "hypothetical protein"  
"OPBB07\_00526" 34020 "s59E5H2" 0.006293162 "hypothetical protein"  
"OPBB07\_00526" 34020 "s63E6H2" 0 "hypothetical protein"  
"OPBB07\_00527" 34021 "s59E13H2" 0 "Thioredoxin reductase"  
"OPBB07\_00527" 34021 "s59E25H2" 0 "Thioredoxin reductase"  
"OPBB07\_00527" 34021 "s59E5H2" 0.03665653 "Thioredoxin reductase"  
"OPBB07\_00527" 34021 "s63E6H2" 0.009659316 "Thioredoxin reductase"  
"OPBB07\_00528" 34022 "s59E13H2" 0.007847335 "hypothetical protein"  
"OPBB07\_00528" 34022 "s59E25H2" 0 "hypothetical protein"  
"OPBB07\_00528" 34022 "s59E5H2" 0.04911027 "hypothetical protein"  
"OPBB07\_00528" 34022 "s63E6H2" 0.122187 "hypothetical protein"  
"OPBB07\_00529" 34023 "s59E13H2" 0.02868296 "Sulfoxide reductase catalytic subunit YedY precursor"  
"OPBB07\_00529" 34023 "s59E25H2" 0 "Sulfoxide reductase catalytic subunit YedY precursor"  
"OPBB07\_00529" 34023 "s59E5H2" 0.05328398 "Sulfoxide reductase catalytic subunit YedY precursor"  
"OPBB07\_00529" 34023 "s63E6H2" 0.2031208 "Sulfoxide reductase catalytic subunit YedY precursor"  
"OPBB07\_00530" 34024 "s59E13H2" 0 "YtxH-like protein"

"OPBB07\_00530" 34024 "s59E25H2" 0 "YtxH-like protein"  
"OPBB07\_00530" 34024 "s59E5H2" 0 "YtxH-like protein"  
"OPBB07\_00530" 34024 "s63E6H2" 0.1406921 "YtxH-like protein"  
"OPBB07\_00531" 34025 "s59E13H2" 0.01072697 "hypothetical protein"  
"OPBB07\_00531" 34025 "s59E25H2" 0 "hypothetical protein"  
"OPBB07\_00531" 34025 "s59E5H2" 0.008772583 "hypothetical protein"  
"OPBB07\_00531" 34025 "s63E6H2" 0.1117431 "hypothetical protein"  
"OPBB07\_00532" 34026 "s59E13H2" 0 "Sulfide dehydrogenase subunit alpha precursor"  
"OPBB07\_00532" 34026 "s59E25H2" 0 "Sulfide dehydrogenase subunit alpha precursor"  
"OPBB07\_00532" 34026 "s59E5H2" 0.0872153 "Sulfide dehydrogenase subunit alpha precursor"  
"OPBB07\_00532" 34026 "s63E6H2" 0.0526619 "Sulfide dehydrogenase subunit alpha precursor"  
"OPBB07\_00533" 34027 "s59E13H2" 0.003869548 "Sulfide dehydrogenase subunit beta precursor"  
"OPBB07\_00533" 34027 "s59E25H2" 0 "Sulfide dehydrogenase subunit beta precursor"  
"OPBB07\_00533" 34027 "s59E5H2" 0.1090658 "Sulfide dehydrogenase subunit beta precursor"  
"OPBB07\_00533" 34027 "s63E6H2" 0.01332552 "Sulfide dehydrogenase subunit beta precursor"  
"OPBB07\_00534" 34028 "s59E13H2" 0.002007617 "protochlorophyllide reductase iron-sulfur ATP-binding protein"  
"OPBB07\_00534" 34028 "s59E25H2" 0 "protochlorophyllide reductase iron-sulfur ATP-binding protein"  
"OPBB07\_00534" 34028 "s59E5H2" 0 "protochlorophyllide reductase iron-sulfur ATP-binding protein"  
"OPBB07\_00534" 34028 "s63E6H2" 0.001933261 "protochlorophyllide reductase iron-sulfur ATP-binding protein"  
"OPBB07\_00535" 34029 "s59E13H2" 0.002558739 "heat shock protein GrpE"  
"OPBB07\_00535" 34029 "s59E25H2" 0 "heat shock protein GrpE"  
"OPBB07\_00535" 34029 "s59E5H2" 0.07046992 "heat shock protein GrpE"  
"OPBB07\_00535" 34029 "s63E6H2" 0.007767981 "heat shock protein GrpE"  
"OPBB07\_00536" 34030 "s59E13H2" 0.00164598 "hypothetical protein"  
"OPBB07\_00536" 34030 "s59E25H2" 0 "hypothetical protein"  
"OPBB07\_00536" 34030 "s59E5H2" 0.08489503 "hypothetical protein"  
"OPBB07\_00536" 34030 "s63E6H2" 0 "hypothetical protein"  
"OPBB07\_00537" 34031 "s59E13H2" 0.01525917 "Histone deacetylase-like amidohydrolase"  
"OPBB07\_00537" 34031 "s59E25H2" 0 "Histone deacetylase-like amidohydrolase"  
"OPBB07\_00537" 34031 "s59E5H2" 0.06743219 "Histone deacetylase-like amidohydrolase"  
"OPBB07\_00537" 34031 "s63E6H2" 0 "Histone deacetylase-like amidohydrolase"  
"OPBB07\_00540" 34034 "s59E13H2" 0 "ATP-dependent helicase HepA"  
"OPBB07\_00540" 34034 "s59E25H2" 0 "ATP-dependent helicase HepA"  
"OPBB07\_00540" 34034 "s59E5H2" 0 "ATP-dependent helicase HepA"  
"OPBB07\_00540" 34034 "s63E6H2" 0 "ATP-dependent helicase HepA"  
"OPBB07\_00541" 34035 "s59E13H2" 0 "N-6 DNA Methylase"  
"OPBB07\_00541" 34035 "s59E25H2" 0 "N-6 DNA Methylase"  
"OPBB07\_00541" 34035 "s59E5H2" 0 "N-6 DNA Methylase"  
"OPBB07\_00541" 34035 "s63E6H2" 0 "N-6 DNA Methylase"  
"OPBB07\_00542" 34036 "s59E13H2" 0.02320793 "PBP superfamily domain protein"  
"OPBB07\_00542" 34036 "s59E25H2" 0 "PBP superfamily domain protein"  
"OPBB07\_00542" 34036 "s59E5H2" 0.01523639 "PBP superfamily domain protein"  
"OPBB07\_00542" 34036 "s63E6H2" 0.6396203 "PBP superfamily domain protein"  
"OPBB07\_00543" 34037 "s59E13H2" 0.02114929 "Sulfate transport system permease protein CysW"  
"OPBB07\_00543" 34037 "s59E25H2" 0 "Sulfate transport system permease protein CysW"  
"OPBB07\_00543" 34037 "s59E5H2" 0.02749637 "Sulfate transport system permease protein CysW"  
"OPBB07\_00543" 34037 "s63E6H2" 0.8320283 "Sulfate transport system permease protein CysW"

"OPBB07\_00544" 34038 "s59E13H2" 7.560427e-05 "Fe(3+) ions import ATP-binding protein FbpC"  
"OPBB07\_00544" 34038 "s59E25H2" 0 "Fe(3+) ions import ATP-binding protein FbpC"  
"OPBB07\_00544" 34038 "s59E5H2" 0.03718126 "Fe(3+) ions import ATP-binding protein FbpC"  
"OPBB07\_00544" 34038 "s63E6H2" 0.8686556 "Fe(3+) ions import ATP-binding protein FbpC"  
"OPBB07\_00545" 34039 "s59E13H2" 0.003389665 "Cyclic pyranopterin monophosphate synthase"  
"OPBB07\_00545" 34039 "s59E25H2" 0 "Cyclic pyranopterin monophosphate synthase"  
"OPBB07\_00545" 34039 "s59E5H2" 0.00486668 "Cyclic pyranopterin monophosphate synthase"  
"OPBB07\_00545" 34039 "s63E6H2" 0.803438 "Cyclic pyranopterin monophosphate synthase"  
"OPBB07\_00546" 34040 "s59E13H2" 0.003484738 "Cyclic pyranopterin monophosphate synthase accessory protein"  
"OPBB07\_00546" 34040 "s59E25H2" 0 "Cyclic pyranopterin monophosphate synthase accessory protein"  
"OPBB07\_00546" 34040 "s59E5H2" 0.0210979 "Cyclic pyranopterin monophosphate synthase accessory protein"  
"OPBB07\_00546" 34040 "s63E6H2" 0.7668399 "Cyclic pyranopterin monophosphate synthase accessory protein"  
"OPBB07\_00547" 34041 "s59E13H2" 0.01115696 "MOSC domain protein"  
"OPBB07\_00547" 34041 "s59E25H2" 0 "MOSC domain protein"  
"OPBB07\_00547" 34041 "s59E5H2" 0.0130927 "MOSC domain protein"  
"OPBB07\_00547" 34041 "s63E6H2" 0.7352948 "MOSC domain protein"  
"OPBB07\_00548" 34042 "s59E13H2" 0.009843344 "Molybdopterin adenyltransferase"  
"OPBB07\_00548" 34042 "s59E25H2" 0 "Molybdopterin adenyltransferase"  
"OPBB07\_00548" 34042 "s59E5H2" 0.002718135 "Molybdopterin adenyltransferase"  
"OPBB07\_00548" 34042 "s63E6H2" 0.1639952 "Molybdopterin adenyltransferase"  
"OPBB07\_00549" 34043 "s59E13H2" 0.02292547 "Transposase"  
"OPBB07\_00549" 34043 "s59E25H2" 0 "Transposase"  
"OPBB07\_00549" 34043 "s59E5H2" 0.03875908 "Transposase"  
"OPBB07\_00549" 34043 "s63E6H2" 0 "Transposase"  
"OPBB07\_00550" 34044 "s59E13H2" 0.02100468 "IS2 transposase TnpB"  
"OPBB07\_00550" 34044 "s59E25H2" 0 "IS2 transposase TnpB"  
"OPBB07\_00550" 34044 "s59E5H2" 0.01006453 "IS2 transposase TnpB"  
"OPBB07\_00550" 34044 "s63E6H2" 0 "IS2 transposase TnpB"  
"OPBB07\_00551" 34045 "s59E13H2" 0.004575818 "Putative L,D-transpeptidase YciB precursor"  
"OPBB07\_00551" 34045 "s59E25H2" 0 "Putative L,D-transpeptidase YciB precursor"  
"OPBB07\_00551" 34045 "s59E5H2" 0 "Putative L,D-transpeptidase YciB precursor"  
"OPBB07\_00551" 34045 "s63E6H2" 0.4329525 "Putative L,D-transpeptidase YciB precursor"  
"OPBB07\_00552" 34046 "s59E13H2" 0 "Transaldolase"  
"OPBB07\_00552" 34046 "s59E25H2" 0 "Transaldolase"  
"OPBB07\_00552" 34046 "s59E5H2" 0 "Transaldolase"  
"OPBB07\_00552" 34046 "s63E6H2" 0 "Transaldolase"  
"OPBB07\_00555" 34049 "s59E13H2" 0 "Methylcobamide:CoM methyltransferase MtaA"  
"OPBB07\_00555" 34049 "s59E25H2" 0 "Methylcobamide:CoM methyltransferase MtaA"  
"OPBB07\_00555" 34049 "s59E5H2" 0 "Methylcobamide:CoM methyltransferase MtaA"  
"OPBB07\_00555" 34049 "s63E6H2" 0 "Methylcobamide:CoM methyltransferase MtaA"  
"OPBB07\_00557" 34051 "s59E13H2" 0.01453994 "Transposase"  
"OPBB07\_00557" 34051 "s59E25H2" 0 "Transposase"  
"OPBB07\_00557" 34051 "s59E5H2" 0.02015018 "Transposase"  
"OPBB07\_00557" 34051 "s63E6H2" 0 "Transposase"  
"OPBB07\_00558" 34052 "s59E13H2" 0 "IS2 transposase TnpB"  
"OPBB07\_00558" 34052 "s59E25H2" 0 "IS2 transposase TnpB"  
"OPBB07\_00558" 34052 "s59E5H2" 0.001248557 "IS2 transposase TnpB"



"OPBB07\_00558" 34052 "s63E6H2" 0 "IS2 transposase TnpB"  
"OPBB07\_00559" 34053 "s59E13H2" 0.9364325 "Pyrophosphate--fructose 6-phosphate 1-phosphotransferase"  
"OPBB07\_00559" 34053 "s59E25H2" 0 "Pyrophosphate--fructose 6-phosphate 1-phosphotransferase"  
"OPBB07\_00559" 34053 "s59E5H2" 0.09555727 "Pyrophosphate--fructose 6-phosphate 1-phosphotransferase"  
"OPBB07\_00559" 34053 "s63E6H2" 1.957692 "Pyrophosphate--fructose 6-phosphate 1-phosphotransferase"  
"OPBB07\_00560" 34054 "s59E13H2" 0.9957138 "ABC-2 family transporter protein"  
"OPBB07\_00560" 34054 "s59E25H2" 0 "ABC-2 family transporter protein"  
"OPBB07\_00560" 34054 "s59E5H2" 0.01982455 "ABC-2 family transporter protein"  
"OPBB07\_00560" 34054 "s63E6H2" 0.0996108 "ABC-2 family transporter protein"  
"OPBB07\_00561" 34055 "s59E13H2" 0.8988258 "ABC-2 family transporter protein"  
"OPBB07\_00561" 34055 "s59E25H2" 0 "ABC-2 family transporter protein"  
"OPBB07\_00561" 34055 "s59E5H2" 0.02599966 "ABC-2 family transporter protein"  
"OPBB07\_00561" 34055 "s63E6H2" 0.1459201 "ABC-2 family transporter protein"  
"OPBB07\_00562" 34056 "s59E13H2" 0.7918186 "Fluoroquinolones export ATP-binding protein/MT2762"  
"OPBB07\_00562" 34056 "s59E25H2" 0 "Fluoroquinolones export ATP-binding protein/MT2762"  
"OPBB07\_00562" 34056 "s59E5H2" 0.04337226 "Fluoroquinolones export ATP-binding protein/MT2762"  
"OPBB07\_00562" 34056 "s63E6H2" 0.1378765 "Fluoroquinolones export ATP-binding protein/MT2762"  
"OPBB07\_00563" 34057 "s59E13H2" 0.1909353 "2-oxoisovalerate dehydrogenase subunit beta"  
"OPBB07\_00563" 34057 "s59E25H2" 0 "2-oxoisovalerate dehydrogenase subunit beta"  
"OPBB07\_00563" 34057 "s59E5H2" 0.01983102 "2-oxoisovalerate dehydrogenase subunit beta"  
"OPBB07\_00563" 34057 "s63E6H2" 1.72209 "2-oxoisovalerate dehydrogenase subunit beta"  
"OPBB07\_00564" 34058 "s59E13H2" 0.2898886 "Acetoin:2,6-dichlorophenolindophenol oxidoreductase subunit alpha"  
"OPBB07\_00564" 34058 "s59E25H2" 0 "Acetoin:2,6-dichlorophenolindophenol oxidoreductase subunit alpha"  
"OPBB07\_00564" 34058 "s59E5H2" 0.004674663 "Acetoin:2,6-dichlorophenolindophenol oxidoreductase subunit alpha"  
"OPBB07\_00564" 34058 "s63E6H2" 1.229166 "Acetoin:2,6-dichlorophenolindophenol oxidoreductase subunit alpha"  
"OPBB07\_00565" 34059 "s59E13H2" 0.05211425 "Bifunctional ligase/repressor BirA"  
"OPBB07\_00565" 34059 "s59E25H2" 0 "Bifunctional ligase/repressor BirA"  
"OPBB07\_00565" 34059 "s59E5H2" 0.4192698 "Bifunctional ligase/repressor BirA"  
"OPBB07\_00565" 34059 "s63E6H2" 0.007534635 "Bifunctional ligase/repressor BirA"  
"OPBB07\_00566" 34060 "s59E13H2" 0 "hypothetical protein"  
"OPBB07\_00566" 34060 "s59E25H2" 0 "hypothetical protein"  
"OPBB07\_00566" 34060 "s59E5H2" 0.05343867 "hypothetical protein"  
"OPBB07\_00566" 34060 "s63E6H2" 0.01337444 "hypothetical protein"  
"OPBB07\_00567" 34061 "s59E13H2" 1.294622 "hypothetical protein"  
"OPBB07\_00567" 34061 "s59E25H2" 0 "hypothetical protein"  
"OPBB07\_00567" 34061 "s59E5H2" 0.00863451 "hypothetical protein"  
"OPBB07\_00567" 34061 "s63E6H2" 0.02128632 "hypothetical protein"  
"OPBB07\_00568" 34062 "s59E13H2" 1.773649 "Adenosine monophosphate-protein transferase SoFic"  
"OPBB07\_00568" 34062 "s59E25H2" 0 "Adenosine monophosphate-protein transferase SoFic"  
"OPBB07\_00568" 34062 "s59E5H2" 0.0122447 "Adenosine monophosphate-protein transferase SoFic"  
"OPBB07\_00568" 34062 "s63E6H2" 0.006588825 "Adenosine monophosphate-protein transferase SoFic"  
"OPBB07\_00569" 34063 "s59E13H2" 0 "putative permease"  
"OPBB07\_00569" 34063 "s59E25H2" 0 "putative permease"  
"OPBB07\_00569" 34063 "s59E5H2" 0.1668755 "putative permease"  
"OPBB07\_00569" 34063 "s63E6H2" 0.7718404 "putative permease"  
"OPBB07\_00570" 34064 "s59E13H2" 0.01256238 "Na+/Pi-cotransporter"  
"OPBB07\_00570" 34064 "s59E25H2" 0 "Na+/Pi-cotransporter"

"OPBB07\_00570" 34064 "s59E5H2" 0.04271761 "Na+/Pi-cotransporter"  
"OPBB07\_00570" 34064 "s63E6H2" 0.2313674 "Na+/Pi-cotransporter"  
"OPBB07\_00571" 34065 "s59E13H2" 0.01614617 "LysE type translocator"  
"OPBB07\_00571" 34065 "s59E25H2" 0 "LysE type translocator"  
"OPBB07\_00571" 34065 "s59E5H2" 0.03514976 "LysE type translocator"  
"OPBB07\_00571" 34065 "s63E6H2" 0.002720163 "LysE type translocator"  
"OPBB07\_00572" 34066 "s59E13H2" 0 "hypothetical protein"  
"OPBB07\_00572" 34066 "s59E25H2" 0 "hypothetical protein"  
"OPBB07\_00572" 34066 "s59E5H2" 0 "hypothetical protein"  
"OPBB07\_00572" 34066 "s63E6H2" 0 "hypothetical protein"  
"OPBB07\_00574" 34068 "s59E13H2" 0 "chromosome segregation protein"  
"OPBB07\_00574" 34068 "s59E25H2" 0 "chromosome segregation protein"  
"OPBB07\_00574" 34068 "s59E5H2" 0.01310237 "chromosome segregation protein"  
"OPBB07\_00574" 34068 "s63E6H2" 0 "chromosome segregation protein"  
"OPBB07\_00576" 34070 "s59E13H2" 0 "Tyrosine recombinase XerD"  
"OPBB07\_00576" 34070 "s59E25H2" 0 "Tyrosine recombinase XerD"  
"OPBB07\_00576" 34070 "s59E5H2" 0 "Tyrosine recombinase XerD"  
"OPBB07\_00576" 34070 "s63E6H2" 0.001107031 "Tyrosine recombinase XerD"  
"OPBB07\_00578" 34072 "s59E13H2" 0 "Mrr restriction system protein"  
"OPBB07\_00578" 34072 "s59E25H2" 0 "Mrr restriction system protein"  
"OPBB07\_00578" 34072 "s59E5H2" 0 "Mrr restriction system protein"  
"OPBB07\_00578" 34072 "s63E6H2" 0 "Mrr restriction system protein"  
"OPBB07\_00579" 34073 "s59E13H2" 0 "hypothetical protein"  
"OPBB07\_00579" 34073 "s59E25H2" 0 "hypothetical protein"  
"OPBB07\_00579" 34073 "s59E5H2" 0 "hypothetical protein"  
"OPBB07\_00579" 34073 "s63E6H2" 0 "hypothetical protein"  
"OPBB07\_00582" 34076 "s59E13H2" 0 "hypothetical protein"  
"OPBB07\_00582" 34076 "s59E25H2" 0 "hypothetical protein"  
"OPBB07\_00582" 34076 "s59E5H2" 0.008313709 "hypothetical protein"  
"OPBB07\_00582" 34076 "s63E6H2" 0 "hypothetical protein"  
"OPBB07\_00583" 34077 "s59E13H2" 0 "hypothetical protein"  
"OPBB07\_00583" 34077 "s59E25H2" 0 "hypothetical protein"  
"OPBB07\_00583" 34077 "s59E5H2" 0.02613642 "hypothetical protein"  
"OPBB07\_00583" 34077 "s63E6H2" 0 "hypothetical protein"  
"OPBB07\_00584" 34078 "s59E13H2" 0 "Plasmid pRiA4b ORF-3-like protein"  
"OPBB07\_00584" 34078 "s59E25H2" 0 "Plasmid pRiA4b ORF-3-like protein"  
"OPBB07\_00584" 34078 "s59E5H2" 0 "Plasmid pRiA4b ORF-3-like protein"  
"OPBB07\_00584" 34078 "s63E6H2" 0 "Plasmid pRiA4b ORF-3-like protein"  
"OPBB07\_00588" 34082 "s59E13H2" 0 "mRNA interferase MazF9"  
"OPBB07\_00588" 34082 "s59E25H2" 0 "mRNA interferase MazF9"  
"OPBB07\_00588" 34082 "s59E5H2" 0 "mRNA interferase MazF9"  
"OPBB07\_00588" 34082 "s63E6H2" 0.00216266 "mRNA interferase MazF9"  
"OPBB07\_00589" 34083 "s59E13H2" 0 "Ribbon-helix-helix protein, copG family"  
"OPBB07\_00589" 34083 "s59E25H2" 0 "Ribbon-helix-helix protein, copG family"  
"OPBB07\_00589" 34083 "s59E5H2" 0 "Ribbon-helix-helix protein, copG family"  
"OPBB07\_00589" 34083 "s63E6H2" 0 "Ribbon-helix-helix protein, copG family"  
"OPBB07\_00590" 34084 "s59E13H2" 0 "Plasmid stabilisation system protein"

"OPBB07\_00590" 34084 "s59E25H2" 0 "Plasmid stabilisation system protein"  
"OPBB07\_00590" 34084 "s59E5H2" 0 "Plasmid stabilisation system protein"  
"OPBB07\_00590" 34084 "s63E6H2" 0 "Plasmid stabilisation system protein"  
"OPBB07\_00591" 34085 "s59E13H2" 0 "hypothetical protein"  
"OPBB07\_00591" 34085 "s59E25H2" 0 "hypothetical protein"  
"OPBB07\_00591" 34085 "s59E5H2" 0.01032719 "hypothetical protein"  
"OPBB07\_00591" 34085 "s63E6H2" 0 "hypothetical protein"  
"OPBB07\_00592" 34086 "s59E13H2" 0 "SpoVT / AbrB like domain protein"  
"OPBB07\_00592" 34086 "s59E25H2" 0 "SpoVT / AbrB like domain protein"  
"OPBB07\_00592" 34086 "s59E5H2" 0.2781461 "SpoVT / AbrB like domain protein"  
"OPBB07\_00592" 34086 "s63E6H2" 0.001304369 "SpoVT / AbrB like domain protein"  
"OPBB07\_00593" 34087 "s59E13H2" 0 "hypothetical protein"  
"OPBB07\_00593" 34087 "s59E25H2" 0 "hypothetical protein"  
"OPBB07\_00593" 34087 "s59E5H2" 0.2057989 "hypothetical protein"  
"OPBB07\_00593" 34087 "s63E6H2" 0.002927065 "hypothetical protein"  
"OPBB07\_00595" 34089 "s59E13H2" 0 "Oxygen-independent coproporphyrinogen-III oxidase 1"  
"OPBB07\_00595" 34089 "s59E25H2" 0 "Oxygen-independent coproporphyrinogen-III oxidase 1"  
"OPBB07\_00595" 34089 "s59E5H2" 0.002624387 "Oxygen-independent coproporphyrinogen-III oxidase 1"  
"OPBB07\_00595" 34089 "s63E6H2" 0.001997342 "Oxygen-independent coproporphyrinogen-III oxidase 1"  
"OPBB07\_00597" 34091 "s59E13H2" 0 "zinc transporter ZupT"  
"OPBB07\_00597" 34091 "s59E25H2" 2.306011 "zinc transporter ZupT"  
"OPBB07\_00597" 34091 "s59E5H2" 0.02772826 "zinc transporter ZupT"  
"OPBB07\_00597" 34091 "s63E6H2" 0.02797968 "zinc transporter ZupT"  
"OPBB07\_00598" 34092 "s59E13H2" 0.03531837 "hypothetical protein"  
"OPBB07\_00598" 34092 "s59E25H2" 0 "hypothetical protein"  
"OPBB07\_00598" 34092 "s59E5H2" 0.1975475 "hypothetical protein"  
"OPBB07\_00598" 34092 "s63E6H2" 0.04525185 "hypothetical protein"  
"OPBB07\_00599" 34093 "s59E13H2" 0 "putative transporter"  
"OPBB07\_00599" 34093 "s59E25H2" 0 "putative transporter"  
"OPBB07\_00599" 34093 "s59E5H2" 0.02091258 "putative transporter"  
"OPBB07\_00599" 34093 "s63E6H2" 0.01111952 "putative transporter"  
"OPBB07\_00601" 34095 "s59E13H2" 0.006317781 "IS2 transposase TnpB"  
"OPBB07\_00601" 34095 "s59E25H2" 0 "IS2 transposase TnpB"  
"OPBB07\_00601" 34095 "s59E5H2" 0.1961479 "IS2 transposase TnpB"  
"OPBB07\_00601" 34095 "s63E6H2" 0.01274617 "IS2 transposase TnpB"  
"OPBB07\_00602" 34096 "s59E13H2" 0.01246719 "Transposase"  
"OPBB07\_00602" 34096 "s59E25H2" 0 "Transposase"  
"OPBB07\_00602" 34096 "s59E5H2" 0.2748884 "Transposase"  
"OPBB07\_00602" 34096 "s63E6H2" 0.01180307 "Transposase"  
"OPBB07\_00603" 34097 "s59E13H2" 0.01082952 "UDP-glucose 6-dehydrogenase TuaD"  
"OPBB07\_00603" 34097 "s59E25H2" 0 "UDP-glucose 6-dehydrogenase TuaD"  
"OPBB07\_00603" 34097 "s59E5H2" 0.1933867 "UDP-glucose 6-dehydrogenase TuaD"  
"OPBB07\_00603" 34097 "s63E6H2" 0.03160823 "UDP-glucose 6-dehydrogenase TuaD"  
"OPBB07\_00604" 34098 "s59E13H2" 0.04858237 "dTDP-4-dehydrorhamnose 3,5-epimerase"  
"OPBB07\_00604" 34098 "s59E25H2" 0 "dTDP-4-dehydrorhamnose 3,5-epimerase"  
"OPBB07\_00604" 34098 "s59E5H2" 0.2358167 "dTDP-4-dehydrorhamnose 3,5-epimerase"  
"OPBB07\_00604" 34098 "s63E6H2" 0.03875547 "dTDP-4-dehydrorhamnose 3,5-epimerase"

"OPBB07\_00605" 34099 "s59E13H2" 0.03910589 "dTDP-glucose 4,6-dehydratase 2"  
"OPBB07\_00605" 34099 "s59E25H2" 0 "dTDP-glucose 4,6-dehydratase 2"  
"OPBB07\_00605" 34099 "s59E5H2" 0.003586232 "dTDP-glucose 4,6-dehydratase 2"  
"OPBB07\_00605" 34099 "s63E6H2" 0.04095845 "dTDP-glucose 4,6-dehydratase 2"  
"OPBB07\_00606" 34100 "s59E13H2" 0.006055524 "hypothetical protein"  
"OPBB07\_00606" 34100 "s59E25H2" 0 "hypothetical protein"  
"OPBB07\_00606" 34100 "s59E5H2" 0.01059538 "hypothetical protein"  
"OPBB07\_00606" 34100 "s63E6H2" 0.02488476 "hypothetical protein"  
"OPBB07\_00607" 34101 "s59E13H2" 0.02144429 "Phospho-2-dehydro-3-deoxyheptonate aldolase"  
"OPBB07\_00607" 34101 "s59E25H2" 0 "Phospho-2-dehydro-3-deoxyheptonate aldolase"  
"OPBB07\_00607" 34101 "s59E5H2" 0.03277977 "Phospho-2-dehydro-3-deoxyheptonate aldolase"  
"OPBB07\_00607" 34101 "s63E6H2" 0.4396462 "Phospho-2-dehydro-3-deoxyheptonate aldolase"  
"OPBB07\_00608" 34102 "s59E13H2" 0.02578018 "ATP-dependent DNA helicase PcrA"  
"OPBB07\_00608" 34102 "s59E25H2" 0 "ATP-dependent DNA helicase PcrA"  
"OPBB07\_00608" 34102 "s59E5H2" 0.2784742 "ATP-dependent DNA helicase PcrA"  
"OPBB07\_00608" 34102 "s63E6H2" 0.5264535 "ATP-dependent DNA helicase PcrA"  
"OPBB07\_00609" 34103 "s59E13H2" 0.01856646 "ATP-dependent DNA helicase PcrA"  
"OPBB07\_00609" 34103 "s59E25H2" 0 "ATP-dependent DNA helicase PcrA"  
"OPBB07\_00609" 34103 "s59E5H2" 0.3763923 "ATP-dependent DNA helicase PcrA"  
"OPBB07\_00609" 34103 "s63E6H2" 0.6051492 "ATP-dependent DNA helicase PcrA"  
"OPBB07\_00610" 34104 "s59E13H2" 2.150128 "Aminopeptidase PepS"  
"OPBB07\_00610" 34104 "s59E25H2" 0 "Aminopeptidase PepS"  
"OPBB07\_00610" 34104 "s59E5H2" 1.218575 "Aminopeptidase PepS"  
"OPBB07\_00610" 34104 "s63E6H2" 0.2209901 "Aminopeptidase PepS"  
"OPBB07\_00611" 34105 "s59E13H2" 0 "putative N-acetyltransferase"  
"OPBB07\_00611" 34105 "s59E25H2" 0 "putative N-acetyltransferase"  
"OPBB07\_00611" 34105 "s59E5H2" 0 "putative N-acetyltransferase"  
"OPBB07\_00611" 34105 "s63E6H2" 0.1924442 "putative N-acetyltransferase"  
"OPBB07\_00612" 34106 "s59E13H2" 0.002868286 "methylcobalamin:coenzyme M methyltransferase"  
"OPBB07\_00612" 34106 "s59E25H2" 0 "methylcobalamin:coenzyme M methyltransferase"  
"OPBB07\_00612" 34106 "s59E5H2" 0.1578276 "methylcobalamin:coenzyme M methyltransferase"  
"OPBB07\_00612" 34106 "s63E6H2" 0.09978078 "methylcobalamin:coenzyme M methyltransferase"  
"OPBB07\_00613" 34107 "s59E13H2" 0.0006902496 "Sugar-binding cellulase-like protein"  
"OPBB07\_00613" 34107 "s59E25H2" 0 "Sugar-binding cellulase-like protein"  
"OPBB07\_00613" 34107 "s59E5H2" 0.02077687 "Sugar-binding cellulase-like protein"  
"OPBB07\_00613" 34107 "s63E6H2" 0.2520611 "Sugar-binding cellulase-like protein"  
"OPBB07\_00615" 34109 "s59E13H2" 1.948944 "Putative cysteine protease YraA"  
"OPBB07\_00615" 34109 "s59E25H2" 0 "Putative cysteine protease YraA"  
"OPBB07\_00615" 34109 "s59E5H2" 0.1266134 "Putative cysteine protease YraA"  
"OPBB07\_00615" 34109 "s63E6H2" 0.1932842 "Putative cysteine protease YraA"  
"OPBB07\_00616" 34110 "s59E13H2" 2.800671 "Leucine--tRNA ligase"  
"OPBB07\_00616" 34110 "s59E25H2" 0 "Leucine--tRNA ligase"  
"OPBB07\_00616" 34110 "s59E5H2" 0.2339512 "Leucine--tRNA ligase"  
"OPBB07\_00616" 34110 "s63E6H2" 0.3278191 "Leucine--tRNA ligase"  
"OPBB07\_00617" 34111 "s59E13H2" 2.333575 "Ribosomal silencing factor RsfS"  
"OPBB07\_00617" 34111 "s59E25H2" 0 "Ribosomal silencing factor RsfS"  
"OPBB07\_00617" 34111 "s59E5H2" 0.1841455 "Ribosomal silencing factor RsfS"

"OPBB07\_00617" 34111 "s63E6H2" 0.1405816 "Ribosomal silencing factor RsfS"  
"OPBB07\_00618" 34112 "s59E13H2" 1.115084 "membrane-bound transcriptional regulator LytR"  
"OPBB07\_00618" 34112 "s59E25H2" 0 "membrane-bound transcriptional regulator LytR"  
"OPBB07\_00618" 34112 "s59E5H2" 0.08502031 "membrane-bound transcriptional regulator LytR"  
"OPBB07\_00618" 34112 "s63E6H2" 0.1136136 "membrane-bound transcriptional regulator LytR"  
"OPBB07\_00619" 34113 "s59E13H2" 1.286262 "putative nicotinate-nucleotide adenyltransferase"  
"OPBB07\_00619" 34113 "s59E25H2" 0 "putative nicotinate-nucleotide adenyltransferase"  
"OPBB07\_00619" 34113 "s59E5H2" 0.04278096 "putative nicotinate-nucleotide adenyltransferase"  
"OPBB07\_00619" 34113 "s63E6H2" 0.1516246 "putative nicotinate-nucleotide adenyltransferase"  
"OPBB07\_00620" 34114 "s59E13H2" 1.581927 "Nicotinate-nucleotide adenyltransferase"  
"OPBB07\_00620" 34114 "s59E25H2" 0 "Nicotinate-nucleotide adenyltransferase"  
"OPBB07\_00620" 34114 "s59E5H2" 0.1177645 "Nicotinate-nucleotide adenyltransferase"  
"OPBB07\_00620" 34114 "s63E6H2" 0.1847683 "Nicotinate-nucleotide adenyltransferase"  
"OPBB07\_00621" 34115 "s59E13H2" 0.09070491 "Gamma-glutamyl phosphate reductase"  
"OPBB07\_00621" 34115 "s59E25H2" 0 "Gamma-glutamyl phosphate reductase"  
"OPBB07\_00621" 34115 "s59E5H2" 0.07092149 "Gamma-glutamyl phosphate reductase"  
"OPBB07\_00621" 34115 "s63E6H2" 0.2067249 "Gamma-glutamyl phosphate reductase"  
"OPBB07\_00622" 34116 "s59E13H2" 0 "Glutamate 5-kinase 1"  
"OPBB07\_00622" 34116 "s59E25H2" 0 "Glutamate 5-kinase 1"  
"OPBB07\_00622" 34116 "s59E5H2" 0.0523994 "Glutamate 5-kinase 1"  
"OPBB07\_00622" 34116 "s63E6H2" 0.1384335 "Glutamate 5-kinase 1"  
"OPBB07\_00623" 34117 "s59E13H2" 0.04155275 "GTPase Obg"  
"OPBB07\_00623" 34117 "s59E25H2" 0 "GTPase Obg"  
"OPBB07\_00623" 34117 "s59E5H2" 0.03828596 "GTPase Obg"  
"OPBB07\_00623" 34117 "s63E6H2" 0.08760591 "GTPase Obg"  
"OPBB07\_00624" 34118 "s59E13H2" 0.04242433 "Sorbitol dehydrogenase"  
"OPBB07\_00624" 34118 "s59E25H2" 0 "Sorbitol dehydrogenase"  
"OPBB07\_00624" 34118 "s59E5H2" 0.02880492 "Sorbitol dehydrogenase"  
"OPBB07\_00624" 34118 "s63E6H2" 0.1835563 "Sorbitol dehydrogenase"  
"OPBB07\_00625" 34119 "s59E13H2" 0.0413516 "Sorbitol dehydrogenase"  
"OPBB07\_00625" 34119 "s59E25H2" 0 "Sorbitol dehydrogenase"  
"OPBB07\_00625" 34119 "s59E5H2" 0.03225166 "Sorbitol dehydrogenase"  
"OPBB07\_00625" 34119 "s63E6H2" 0.1403391 "Sorbitol dehydrogenase"  
"OPBB07\_00626" 34120 "s59E13H2" 0 "putative transporter"  
"OPBB07\_00626" 34120 "s59E25H2" 0 "putative transporter"  
"OPBB07\_00626" 34120 "s59E5H2" 0 "putative transporter"  
"OPBB07\_00626" 34120 "s63E6H2" 0.03820958 "putative transporter"  
"OPBB07\_00627" 34121 "s59E13H2" 0.02476737 "50S ribosomal protein L27"  
"OPBB07\_00627" 34121 "s59E25H2" 0 "50S ribosomal protein L27"  
"OPBB07\_00627" 34121 "s59E5H2" 0.0486352 "50S ribosomal protein L27"  
"OPBB07\_00627" 34121 "s63E6H2" 0.06117434 "50S ribosomal protein L27"  
"OPBB07\_00628" 34122 "s59E13H2" 0.01368499 "50S ribosomal protein L21"  
"OPBB07\_00628" 34122 "s59E25H2" 0 "50S ribosomal protein L21"  
"OPBB07\_00628" 34122 "s59E5H2" 0.2199348 "50S ribosomal protein L21"  
"OPBB07\_00628" 34122 "s63E6H2" 0.1051931 "50S ribosomal protein L21"  
"OPBB07\_00629" 34123 "s59E13H2" 0.03891642 "Ribonuclease G"  
"OPBB07\_00629" 34123 "s59E25H2" 0 "Ribonuclease G"

"OPBB07\_00629" 34123 "s59E5H2" 0.1222369 "Ribonuclease G"  
"OPBB07\_00629" 34123 "s63E6H2" 0.07579501 "Ribonuclease G"  
"OPBB07\_00630" 34124 "s59E13H2" 0.0610088 "hypothetical protein"  
"OPBB07\_00630" 34124 "s59E25H2" 0 "hypothetical protein"  
"OPBB07\_00630" 34124 "s59E5H2" 0.1331057 "hypothetical protein"  
"OPBB07\_00630" 34124 "s63E6H2" 0.02434292 "hypothetical protein"  
"OPBB07\_00631" 34125 "s59E13H2" 0.05196282 "Radical SAM superfamily protein"  
"OPBB07\_00631" 34125 "s59E25H2" 0 "Radical SAM superfamily protein"  
"OPBB07\_00631" 34125 "s59E5H2" 0.1458517 "Radical SAM superfamily protein"  
"OPBB07\_00631" 34125 "s63E6H2" 0.04270987 "Radical SAM superfamily protein"  
"OPBB07\_00632" 34126 "s59E13H2" 0.0718107 "Rod shape-determining protein RodA"  
"OPBB07\_00632" 34126 "s59E25H2" 0 "Rod shape-determining protein RodA"  
"OPBB07\_00632" 34126 "s59E5H2" 0.1670889 "Rod shape-determining protein RodA"  
"OPBB07\_00632" 34126 "s63E6H2" 0.0578799 "Rod shape-determining protein RodA"  
"OPBB07\_00633" 34127 "s59E13H2" 0.06824982 "Stage V sporulation protein D"  
"OPBB07\_00633" 34127 "s59E25H2" 0 "Stage V sporulation protein D"  
"OPBB07\_00633" 34127 "s59E5H2" 0.01723848 "Stage V sporulation protein D"  
"OPBB07\_00633" 34127 "s63E6H2" 0.09815013 "Stage V sporulation protein D"  
"OPBB07\_00634" 34128 "s59E13H2" 0.06678173 "hypothetical protein"  
"OPBB07\_00634" 34128 "s59E25H2" 0 "hypothetical protein"  
"OPBB07\_00634" 34128 "s59E5H2" 0.09130423 "hypothetical protein"  
"OPBB07\_00634" 34128 "s63E6H2" 0.1197233 "hypothetical protein"  
"OPBB07\_00635" 34129 "s59E13H2" 0.04359528 "Cell shape-determining protein MreC precursor"  
"OPBB07\_00635" 34129 "s59E25H2" 0 "Cell shape-determining protein MreC precursor"  
"OPBB07\_00635" 34129 "s59E5H2" 0.1120759 "Cell shape-determining protein MreC precursor"  
"OPBB07\_00635" 34129 "s63E6H2" 0.08373148 "Cell shape-determining protein MreC precursor"  
"OPBB07\_00636" 34130 "s59E13H2" 0.04528192 "Rod shape-determining protein MreB"  
"OPBB07\_00636" 34130 "s59E25H2" 0 "Rod shape-determining protein MreB"  
"OPBB07\_00636" 34130 "s59E5H2" 0.1298505 "Rod shape-determining protein MreB"  
"OPBB07\_00636" 34130 "s63E6H2" 0.09885453 "Rod shape-determining protein MreB"  
"OPBB07\_00637" 34131 "s59E13H2" 0.03829951 "Septum formation protein Maf"  
"OPBB07\_00637" 34131 "s59E25H2" 0 "Septum formation protein Maf"  
"OPBB07\_00637" 34131 "s59E5H2" 0.03012935 "Septum formation protein Maf"  
"OPBB07\_00637" 34131 "s63E6H2" 0.1113007 "Septum formation protein Maf"  
"OPBB07\_00638" 34132 "s59E13H2" 0.02446732 "hypothetical protein"  
"OPBB07\_00638" 34132 "s59E25H2" 0 "hypothetical protein"  
"OPBB07\_00638" 34132 "s59E5H2" 0.09638034 "hypothetical protein"  
"OPBB07\_00638" 34132 "s63E6H2" 0.08003206 "hypothetical protein"  
"OPBB07\_00639" 34133 "s59E13H2" 0.0303697 "Nucleoside diphosphate kinase"  
"OPBB07\_00639" 34133 "s59E25H2" 0 "Nucleoside diphosphate kinase"  
"OPBB07\_00639" 34133 "s59E5H2" 0.06573573 "Nucleoside diphosphate kinase"  
"OPBB07\_00639" 34133 "s63E6H2" 0.1108137 "Nucleoside diphosphate kinase"  
"OPBB07\_00640" 34134 "s59E13H2" 0.01198665 "Double zinc ribbon"  
"OPBB07\_00640" 34134 "s59E25H2" 0 "Double zinc ribbon"  
"OPBB07\_00640" 34134 "s59E5H2" 0.01638833 "Double zinc ribbon"  
"OPBB07\_00640" 34134 "s63E6H2" 0.1057187 "Double zinc ribbon"  
"OPBB07\_00641" 34135 "s59E13H2" 0.03024653 "Folylpolyglutamate synthase"

"OPBB07\_00641" 34135 "s59E25H2" 0 "Folypolyglutamate synthase"  
"OPBB07\_00641" 34135 "s59E5H2" 0.1266903 "Folypolyglutamate synthase"  
"OPBB07\_00641" 34135 "s63E6H2" 0.1249093 "Folypolyglutamate synthase"  
"OPBB07\_00642" 34136 "s59E13H2" 0.009271547 "Valine--tRNA ligase"  
"OPBB07\_00642" 34136 "s59E25H2" 0 "Valine--tRNA ligase"  
"OPBB07\_00642" 34136 "s59E5H2" 0.0563748 "Valine--tRNA ligase"  
"OPBB07\_00642" 34136 "s63E6H2" 0.1085018 "Valine--tRNA ligase"  
"OPBB07\_00643" 34137 "s59E13H2" 0.001006029 "hypothetical protein"  
"OPBB07\_00643" 34137 "s59E25H2" 0 "hypothetical protein"  
"OPBB07\_00643" 34137 "s59E5H2" 0.0008695949 "hypothetical protein"  
"OPBB07\_00643" 34137 "s63E6H2" 0.06844442 "hypothetical protein"  
"OPBB07\_00644" 34138 "s59E13H2" 0.04134153 "hypothetical protein"  
"OPBB07\_00644" 34138 "s59E25H2" 0 "hypothetical protein"  
"OPBB07\_00644" 34138 "s59E5H2" 0.0004829582 "hypothetical protein"  
"OPBB07\_00644" 34138 "s63E6H2" 2.546772 "hypothetical protein"  
"OPBB07\_00645" 34139 "s59E13H2" 0.03057173 "NAD-dependent malic enzyme"  
"OPBB07\_00645" 34139 "s59E25H2" 0 "NAD-dependent malic enzyme"  
"OPBB07\_00645" 34139 "s59E5H2" 0.3803878 "NAD-dependent malic enzyme"  
"OPBB07\_00645" 34139 "s63E6H2" 2.43622 "NAD-dependent malic enzyme"  
"OPBB07\_00646" 34140 "s59E13H2" 0.0149559 "Putative protein phosphatase 2C-type"  
"OPBB07\_00646" 34140 "s59E25H2" 0 "Putative protein phosphatase 2C-type"  
"OPBB07\_00646" 34140 "s59E5H2" 0.2797432 "Putative protein phosphatase 2C-type"  
"OPBB07\_00646" 34140 "s63E6H2" 2.940053 "Putative protein phosphatase 2C-type"  
"OPBB07\_00647" 34141 "s59E13H2" 0.01024176 "Serine/threonine-protein kinase PrkC"  
"OPBB07\_00647" 34141 "s59E25H2" 0 "Serine/threonine-protein kinase PrkC"  
"OPBB07\_00647" 34141 "s59E5H2" 0.2296618 "Serine/threonine-protein kinase PrkC"  
"OPBB07\_00647" 34141 "s63E6H2" 4.828216 "Serine/threonine-protein kinase PrkC"  
"OPBB07\_00648" 34142 "s59E13H2" 0.009402534 "Acetyl-coenzyme A carboxylase carboxyl transferase subunit alpha"  
"OPBB07\_00648" 34142 "s59E25H2" 0.2574359 "Acetyl-coenzyme A carboxylase carboxyl transferase subunit alpha"  
"OPBB07\_00648" 34142 "s59E5H2" 0.4227687 "Acetyl-coenzyme A carboxylase carboxyl transferase subunit alpha"  
"OPBB07\_00648" 34142 "s63E6H2" 6.685629 "Acetyl-coenzyme A carboxylase carboxyl transferase subunit alpha"  
"OPBB07\_00649" 34143 "s59E13H2" 0.01089441 "Acetyl-coenzyme A carboxylase carboxyl transferase subunit beta"  
"OPBB07\_00649" 34143 "s59E25H2" 0 "Acetyl-coenzyme A carboxylase carboxyl transferase subunit beta"  
"OPBB07\_00649" 34143 "s59E5H2" 0.2396082 "Acetyl-coenzyme A carboxylase carboxyl transferase subunit beta"  
"OPBB07\_00649" 34143 "s63E6H2" 5.808092 "Acetyl-coenzyme A carboxylase carboxyl transferase subunit beta"  
"OPBB07\_00650" 34144 "s59E13H2" 0.002984138 "3-oxoacyl-[acyl-carrier-protein] synthase 2"  
"OPBB07\_00650" 34144 "s59E25H2" 0 "3-oxoacyl-[acyl-carrier-protein] synthase 2"  
"OPBB07\_00650" 34144 "s59E5H2" 2.772271 "3-oxoacyl-[acyl-carrier-protein] synthase 2"  
"OPBB07\_00650" 34144 "s63E6H2" 4.980649 "3-oxoacyl-[acyl-carrier-protein] synthase 2"  
"OPBB07\_00651" 34145 "s59E13H2" 0.003973289 "3-oxoacyl-[acyl-carrier-protein] reductase FabG"  
"OPBB07\_00651" 34145 "s59E25H2" 0 "3-oxoacyl-[acyl-carrier-protein] reductase FabG"  
"OPBB07\_00651" 34145 "s59E5H2" 1.902547 "3-oxoacyl-[acyl-carrier-protein] reductase FabG"  
"OPBB07\_00651" 34145 "s63E6H2" 3.639378 "3-oxoacyl-[acyl-carrier-protein] reductase FabG"  
"OPBB07\_00652" 34146 "s59E13H2" 0 "Polyketide biosynthesis protein BaeE"  
"OPBB07\_00652" 34146 "s59E25H2" 0 "Polyketide biosynthesis protein BaeE"  
"OPBB07\_00652" 34146 "s59E5H2" 1.225565 "Polyketide biosynthesis protein BaeE"  
"OPBB07\_00652" 34146 "s63E6H2" 1.808622 "Polyketide biosynthesis protein BaeE"

"OPBB07\_00653" 34147 "s59E13H2" 0 "3-hydroxyacyl-[acyl-carrier-protein] dehydratase FabZ"  
"OPBB07\_00653" 34147 "s59E25H2" 0 "3-hydroxyacyl-[acyl-carrier-protein] dehydratase FabZ"  
"OPBB07\_00653" 34147 "s59E5H2" 0.6412893 "3-hydroxyacyl-[acyl-carrier-protein] dehydratase FabZ"  
"OPBB07\_00653" 34147 "s63E6H2" 0.01568712 "3-hydroxyacyl-[acyl-carrier-protein] dehydratase FabZ"  
"OPBB07\_00654" 34148 "s59E13H2" 0.01135042 "hypothetical protein"  
"OPBB07\_00654" 34148 "s59E25H2" 0 "hypothetical protein"  
"OPBB07\_00654" 34148 "s59E5H2" 0.09767367 "hypothetical protein"  
"OPBB07\_00654" 34148 "s63E6H2" 0.00411335 "hypothetical protein"  
"OPBB07\_00655" 34149 "s59E13H2" 0.0334167 "ABC-2 family transporter protein"  
"OPBB07\_00655" 34149 "s59E25H2" 0 "ABC-2 family transporter protein"  
"OPBB07\_00655" 34149 "s59E5H2" 0.1959736 "ABC-2 family transporter protein"  
"OPBB07\_00655" 34149 "s63E6H2" 0.006992718 "ABC-2 family transporter protein"  
"OPBB07\_00656" 34150 "s59E13H2" 0.002944703 "1-deoxy-D-xylulose-5-phosphate synthase"  
"OPBB07\_00656" 34150 "s59E25H2" 0 "1-deoxy-D-xylulose-5-phosphate synthase"  
"OPBB07\_00656" 34150 "s59E5H2" 0 "1-deoxy-D-xylulose-5-phosphate synthase"  
"OPBB07\_00656" 34150 "s63E6H2" 0.006404702 "1-deoxy-D-xylulose-5-phosphate synthase"  
"OPBB07\_00657" 34151 "s59E13H2" 0.001009912 "putative sugar kinase"  
"OPBB07\_00657" 34151 "s59E25H2" 0 "putative sugar kinase"  
"OPBB07\_00657" 34151 "s59E5H2" 0 "putative sugar kinase"  
"OPBB07\_00657" 34151 "s63E6H2" 0.02056888 "putative sugar kinase"  
"OPBB07\_00659" 34153 "s59E13H2" 0.005181494 "Xylulose kinase"  
"OPBB07\_00659" 34153 "s59E25H2" 0 "Xylulose kinase"  
"OPBB07\_00659" 34153 "s59E5H2" 0 "Xylulose kinase"  
"OPBB07\_00659" 34153 "s63E6H2" 0.0336535 "Xylulose kinase"  
"OPBB07\_00660" 34154 "s59E13H2" 0 "D-lyxose ketol-isomerase"  
"OPBB07\_00660" 34154 "s59E25H2" 0 "D-lyxose ketol-isomerase"  
"OPBB07\_00660" 34154 "s59E5H2" 0 "D-lyxose ketol-isomerase"  
"OPBB07\_00660" 34154 "s63E6H2" 0.0140848 "D-lyxose ketol-isomerase"  
"OPBB07\_00661" 34155 "s59E13H2" 0 "Uroporphyrinogen decarboxylase (URO-D)"  
"OPBB07\_00661" 34155 "s59E25H2" 0 "Uroporphyrinogen decarboxylase (URO-D)"  
"OPBB07\_00661" 34155 "s59E5H2" 0 "Uroporphyrinogen decarboxylase (URO-D)"  
"OPBB07\_00661" 34155 "s63E6H2" 0 "Uroporphyrinogen decarboxylase (URO-D)"  
"OPBB07\_00662" 34156 "s59E13H2" 0 "Uroporphyrinogen decarboxylase (URO-D)"  
"OPBB07\_00662" 34156 "s59E25H2" 0 "Uroporphyrinogen decarboxylase (URO-D)"  
"OPBB07\_00662" 34156 "s59E5H2" 0 "Uroporphyrinogen decarboxylase (URO-D)"  
"OPBB07\_00662" 34156 "s63E6H2" 0 "Uroporphyrinogen decarboxylase (URO-D)"  
"OPBB07\_00663" 34157 "s59E13H2" 0.006821912 "Transposase DDE domain protein"  
"OPBB07\_00663" 34157 "s59E25H2" 0 "Transposase DDE domain protein"  
"OPBB07\_00663" 34157 "s59E5H2" 0 "Transposase DDE domain protein"  
"OPBB07\_00663" 34157 "s63E6H2" 0 "Transposase DDE domain protein"  
"OPBB07\_00665" 34159 "s59E13H2" 0.004553259 "tRNA(fMet)-specific endonuclease VapC"  
"OPBB07\_00665" 34159 "s59E25H2" 0 "tRNA(fMet)-specific endonuclease VapC"  
"OPBB07\_00665" 34159 "s59E5H2" 0.07135767 "tRNA(fMet)-specific endonuclease VapC"  
"OPBB07\_00665" 34159 "s63E6H2" 1.772443 "tRNA(fMet)-specific endonuclease VapC"  
"OPBB07\_00666" 34160 "s59E13H2" 0.03314467 "Ribosomal RNA small subunit methyltransferase I"  
"OPBB07\_00666" 34160 "s59E25H2" 0 "Ribosomal RNA small subunit methyltransferase I"  
"OPBB07\_00666" 34160 "s59E5H2" 0.09619836 "Ribosomal RNA small subunit methyltransferase I"



"OPBB07\_00666" 34160 "s63E6H2" 2.677701 "Ribosomal RNA small subunit methyltransferase I"  
"OPBB07\_00667" 34161 "s59E13H2" 0.04532818 "Methionine--tRNA ligase"  
"OPBB07\_00667" 34161 "s59E25H2" 0 "Methionine--tRNA ligase"  
"OPBB07\_00667" 34161 "s59E5H2" 0.1730089 "Methionine--tRNA ligase"  
"OPBB07\_00667" 34161 "s63E6H2" 2.709792 "Methionine--tRNA ligase"  
"OPBB07\_00668" 34162 "s59E13H2" 0.0384503 "putative ABC transporter ATP-binding protein"  
"OPBB07\_00668" 34162 "s59E25H2" 0 "putative ABC transporter ATP-binding protein"  
"OPBB07\_00668" 34162 "s59E5H2" 1.184276 "putative ABC transporter ATP-binding protein"  
"OPBB07\_00668" 34162 "s63E6H2" 0.1457772 "putative ABC transporter ATP-binding protein"  
"OPBB07\_00669" 34163 "s59E13H2" 0.02474051 "Anthranilate synthase component 1"  
"OPBB07\_00669" 34163 "s59E25H2" 0 "Anthranilate synthase component 1"  
"OPBB07\_00669" 34163 "s59E5H2" 0.1258529 "Anthranilate synthase component 1"  
"OPBB07\_00669" 34163 "s63E6H2" 0.2262743 "Anthranilate synthase component 1"  
"OPBB07\_00670" 34164 "s59E13H2" 0.02797239 "Anthranilate phosphoribosyltransferase"  
"OPBB07\_00670" 34164 "s59E25H2" 0 "Anthranilate phosphoribosyltransferase"  
"OPBB07\_00670" 34164 "s59E5H2" 0.1756589 "Anthranilate phosphoribosyltransferase"  
"OPBB07\_00670" 34164 "s63E6H2" 0.01033479 "Anthranilate phosphoribosyltransferase"  
"OPBB07\_00671" 34165 "s59E13H2" 0 "Glycerate 2-kinase"  
"OPBB07\_00671" 34165 "s59E25H2" 0 "Glycerate 2-kinase"  
"OPBB07\_00671" 34165 "s59E5H2" 0 "Glycerate 2-kinase"  
"OPBB07\_00671" 34165 "s63E6H2" 0.03278079 "Glycerate 2-kinase"  
"OPBB07\_00672" 34166 "s59E13H2" 0 "Phosphoribosylaminoimidazole-succinocarboxamide synthase"  
"OPBB07\_00672" 34166 "s59E25H2" 0 "Phosphoribosylaminoimidazole-succinocarboxamide synthase"  
"OPBB07\_00672" 34166 "s59E5H2" 0 "Phosphoribosylaminoimidazole-succinocarboxamide synthase"  
"OPBB07\_00672" 34166 "s63E6H2" 0.04381305 "Phosphoribosylaminoimidazole-succinocarboxamide synthase"  
"OPBB07\_00673" 34167 "s59E13H2" 0.007249735 "putative 2-phosphosulfolactate phosphatase"  
"OPBB07\_00673" 34167 "s59E25H2" 0 "putative 2-phosphosulfolactate phosphatase"  
"OPBB07\_00673" 34167 "s59E5H2" 0 "putative 2-phosphosulfolactate phosphatase"  
"OPBB07\_00673" 34167 "s63E6H2" 0.0253833 "putative 2-phosphosulfolactate phosphatase"  
"OPBB07\_00674" 34168 "s59E13H2" 0.0009779585 "hypothetical protein"  
"OPBB07\_00674" 34168 "s59E25H2" 0 "hypothetical protein"  
"OPBB07\_00674" 34168 "s59E5H2" 0 "hypothetical protein"  
"OPBB07\_00674" 34168 "s63E6H2" 0.03377703 "hypothetical protein"  
"OPBB07\_00676" 34170 "s59E13H2" 0 "Putative phosphatase YwpJ"  
"OPBB07\_00676" 34170 "s59E25H2" 0 "Putative phosphatase YwpJ"  
"OPBB07\_00676" 34170 "s59E5H2" 0 "Putative phosphatase YwpJ"  
"OPBB07\_00676" 34170 "s63E6H2" 0.02433849 "Putative phosphatase YwpJ"  
"OPBB07\_00677" 34171 "s59E13H2" 0 "Sugar phosphatase YidA"  
"OPBB07\_00677" 34171 "s59E25H2" 0 "Sugar phosphatase YidA"  
"OPBB07\_00677" 34171 "s59E5H2" 0 "Sugar phosphatase YidA"  
"OPBB07\_00677" 34171 "s63E6H2" 0.01140721 "Sugar phosphatase YidA"  
"OPBB07\_00678" 34172 "s59E13H2" 0 "UDP-N-acetylmuramoyl-L-alanyl-D-glutamate--L-lysine ligase"  
"OPBB07\_00678" 34172 "s59E25H2" 0 "UDP-N-acetylmuramoyl-L-alanyl-D-glutamate--L-lysine ligase"  
"OPBB07\_00678" 34172 "s59E5H2" 0.007565475 "UDP-N-acetylmuramoyl-L-alanyl-D-glutamate--L-lysine ligase"  
"OPBB07\_00678" 34172 "s63E6H2" 0.05397526 "UDP-N-acetylmuramoyl-L-alanyl-D-glutamate--L-lysine ligase"  
"OPBB07\_00679" 34173 "s59E13H2" 0.00579226 "Stage V sporulation protein D"  
"OPBB07\_00679" 34173 "s59E25H2" 0 "Stage V sporulation protein D"

"OPBB07\_00679" 34173 "s59E5H2" 0.004740273 "Stage V sporulation protein D"  
"OPBB07\_00679" 34173 "s63E6H2" 0.04718737 "Stage V sporulation protein D"  
"OPBB07\_00681" 34175 "s59E13H2" 0 "B12 binding domain protein"  
"OPBB07\_00681" 34175 "s59E25H2" 0 "B12 binding domain protein"  
"OPBB07\_00681" 34175 "s59E5H2" 0.1236672 "B12 binding domain protein"  
"OPBB07\_00681" 34175 "s63E6H2" 0.03245301 "B12 binding domain protein"  
"OPBB07\_00682" 34176 "s59E13H2" 0.007461054 "ATP phosphoribosyltransferase regulatory subunit"  
"OPBB07\_00682" 34176 "s59E25H2" 0 "ATP phosphoribosyltransferase regulatory subunit"  
"OPBB07\_00682" 34176 "s59E5H2" 0.05654898 "ATP phosphoribosyltransferase regulatory subunit"  
"OPBB07\_00682" 34176 "s63E6H2" 0.08850985 "ATP phosphoribosyltransferase regulatory subunit"  
"OPBB07\_00684" 34178 "s59E13H2" 0.002264861 "ATP phosphoribosyltransferase"  
"OPBB07\_00684" 34178 "s59E25H2" 0 "ATP phosphoribosyltransferase"  
"OPBB07\_00684" 34178 "s59E5H2" 0.07565475 "ATP phosphoribosyltransferase"  
"OPBB07\_00684" 34178 "s63E6H2" 0.07041844 "ATP phosphoribosyltransferase"  
"OPBB07\_00685" 34179 "s59E13H2" 0 "Imidazoleglycerol-phosphate dehydratase"  
"OPBB07\_00685" 34179 "s59E25H2" 0 "Imidazoleglycerol-phosphate dehydratase"  
"OPBB07\_00685" 34179 "s59E5H2" 0.01978663 "Imidazoleglycerol-phosphate dehydratase"  
"OPBB07\_00685" 34179 "s63E6H2" 0.1406342 "Imidazoleglycerol-phosphate dehydratase"  
"OPBB07\_00686" 34180 "s59E13H2" 0 "Imidazole glycerol phosphate synthase subunit HisH 1"  
"OPBB07\_00686" 34180 "s59E25H2" 0 "Imidazole glycerol phosphate synthase subunit HisH 1"  
"OPBB07\_00686" 34180 "s59E5H2" 0.01754959 "Imidazole glycerol phosphate synthase subunit HisH 1"  
"OPBB07\_00686" 34180 "s63E6H2" 0.1096731 "Imidazole glycerol phosphate synthase subunit HisH 1"  
"OPBB07\_00687" 34181 "s59E13H2" 0.01674745 "Xylose isomerase"  
"OPBB07\_00687" 34181 "s59E25H2" 4.813376 "Xylose isomerase"  
"OPBB07\_00687" 34181 "s59E5H2" 0.1788362 "Xylose isomerase"  
"OPBB07\_00687" 34181 "s63E6H2" 0.2124603 "Xylose isomerase"  
"OPBB07\_00688" 34182 "s59E13H2" 0.005575406 "Xylulose kinase"  
"OPBB07\_00688" 34182 "s59E25H2" 0 "Xylulose kinase"  
"OPBB07\_00688" 34182 "s59E5H2" 0.574269 "Xylulose kinase"  
"OPBB07\_00688" 34182 "s63E6H2" 0.08524541 "Xylulose kinase"  
"OPBB07\_00689" 34183 "s59E13H2" 0 "Fructose-bisphosphate aldolase"  
"OPBB07\_00689" 34183 "s59E25H2" 0 "Fructose-bisphosphate aldolase"  
"OPBB07\_00689" 34183 "s59E5H2" 0 "Fructose-bisphosphate aldolase"  
"OPBB07\_00689" 34183 "s63E6H2" 0 "Fructose-bisphosphate aldolase"  
"OPBB07\_00691" 34185 "s59E13H2" 0 "putative ABC transporter ATP-binding protein YxIF"  
"OPBB07\_00691" 34185 "s59E25H2" 0 "putative ABC transporter ATP-binding protein YxIF"  
"OPBB07\_00691" 34185 "s59E5H2" 0.03990849 "putative ABC transporter ATP-binding protein YxIF"  
"OPBB07\_00691" 34185 "s63E6H2" 0.08601506 "putative ABC transporter ATP-binding protein YxIF"  
"OPBB07\_00692" 34186 "s59E13H2" 0.007073331 "ABC-2 family transporter protein"  
"OPBB07\_00692" 34186 "s59E25H2" 0 "ABC-2 family transporter protein"  
"OPBB07\_00692" 34186 "s59E5H2" 0 "ABC-2 family transporter protein"  
"OPBB07\_00692" 34186 "s63E6H2" 0.02706392 "ABC-2 family transporter protein"  
"OPBB07\_00693" 34187 "s59E13H2" 3.182014 "RNA recognition motif. (a.k.a. RRM, RBD, or RNP domain)"  
"OPBB07\_00693" 34187 "s59E25H2" 0 "RNA recognition motif. (a.k.a. RRM, RBD, or RNP domain)"  
"OPBB07\_00693" 34187 "s59E5H2" 0.08536965 "RNA recognition motif. (a.k.a. RRM, RBD, or RNP domain)"  
"OPBB07\_00693" 34187 "s63E6H2" 0.005100228 "RNA recognition motif. (a.k.a. RRM, RBD, or RNP domain)"  
"OPBB07\_00694" 34188 "s59E13H2" 0.03668216 "hypothetical protein"

"OPBB07\_00694" 34188 "s59E25H2" 0 "hypothetical protein"  
"OPBB07\_00694" 34188 "s59E5H2" 0 "hypothetical protein"  
"OPBB07\_00694" 34188 "s63E6H2" 0.01059445 "hypothetical protein"  
"OPBB07\_00695" 34189 "s59E13H2" 0.2116677 "nitroreductase A"  
"OPBB07\_00695" 34189 "s59E25H2" 0 "nitroreductase A"  
"OPBB07\_00695" 34189 "s59E5H2" 0.01823304 "nitroreductase A"  
"OPBB07\_00695" 34189 "s63E6H2" 0.01218178 "nitroreductase A"  
"OPBB07\_00698" 34192 "s59E13H2" 0 "hypothetical protein"  
"OPBB07\_00698" 34192 "s59E25H2" 0 "hypothetical protein"  
"OPBB07\_00698" 34192 "s59E5H2" 0 "hypothetical protein"  
"OPBB07\_00698" 34192 "s63E6H2" 0 "hypothetical protein"  
"OPBB07\_00699" 34193 "s59E13H2" 0 "hypothetical protein"  
"OPBB07\_00699" 34193 "s59E25H2" 0 "hypothetical protein"  
"OPBB07\_00699" 34193 "s59E5H2" 0 "hypothetical protein"  
"OPBB07\_00699" 34193 "s63E6H2" 0 "hypothetical protein"  
"OPBB07\_00700" 34194 "s59E13H2" 0 "hypothetical protein"  
"OPBB07\_00700" 34194 "s59E25H2" 0 "hypothetical protein"  
"OPBB07\_00700" 34194 "s59E5H2" 0 "hypothetical protein"  
"OPBB07\_00700" 34194 "s63E6H2" 0 "hypothetical protein"  
"OPBB07\_00701" 34195 "s59E13H2" 0.01221829 "Tyrosine recombinase XerD"  
"OPBB07\_00701" 34195 "s59E25H2" 0 "Tyrosine recombinase XerD"  
"OPBB07\_00701" 34195 "s59E5H2" 0.02547558 "Tyrosine recombinase XerD"  
"OPBB07\_00701" 34195 "s63E6H2" 0 "Tyrosine recombinase XerD"  
"OPBB07\_00702" 34196 "s59E13H2" 0 "Nuclease-related domain protein"  
"OPBB07\_00702" 34196 "s59E25H2" 0 "Nuclease-related domain protein"  
"OPBB07\_00702" 34196 "s59E5H2" 0 "Nuclease-related domain protein"  
"OPBB07\_00702" 34196 "s63E6H2" 0 "Nuclease-related domain protein"  
"OPBB07\_00703" 34197 "s59E13H2" 0 "Amidohydrolase"  
"OPBB07\_00703" 34197 "s59E25H2" 0 "Amidohydrolase"  
"OPBB07\_00703" 34197 "s59E5H2" 0 "Amidohydrolase"  
"OPBB07\_00703" 34197 "s63E6H2" 0 "Amidohydrolase"  
"OPBB07\_00704" 34198 "s59E13H2" 0 "anaerobic benzoate catabolism transcriptional regulator"  
"OPBB07\_00704" 34198 "s59E25H2" 0 "anaerobic benzoate catabolism transcriptional regulator"  
"OPBB07\_00704" 34198 "s59E5H2" 0 "anaerobic benzoate catabolism transcriptional regulator"  
"OPBB07\_00704" 34198 "s63E6H2" 0 "anaerobic benzoate catabolism transcriptional regulator"  
"OPBB07\_00705" 34199 "s59E13H2" 0 "Tyrosine recombinase XerD"  
"OPBB07\_00705" 34199 "s59E25H2" 0 "Tyrosine recombinase XerD"  
"OPBB07\_00705" 34199 "s59E5H2" 0 "Tyrosine recombinase XerD"  
"OPBB07\_00705" 34199 "s63E6H2" 0.03733684 "Tyrosine recombinase XerD"  
"OPBB07\_00706" 34200 "s59E13H2" 0 "5-methylcytosine-specific restriction enzyme B"  
"OPBB07\_00706" 34200 "s59E25H2" 0 "5-methylcytosine-specific restriction enzyme B"  
"OPBB07\_00706" 34200 "s59E5H2" 0 "5-methylcytosine-specific restriction enzyme B"  
"OPBB07\_00706" 34200 "s63E6H2" 0 "5-methylcytosine-specific restriction enzyme B"  
"OPBB07\_00708" 34202 "s59E13H2" 0 "Helix-turn-helix domain protein"  
"OPBB07\_00708" 34202 "s59E25H2" 0 "Helix-turn-helix domain protein"  
"OPBB07\_00708" 34202 "s59E5H2" 0 "Helix-turn-helix domain protein"  
"OPBB07\_00708" 34202 "s63E6H2" 0 "Helix-turn-helix domain protein"

"OPBB07\_00709" 34203 "s59E13H2" 0 "vitamin B12-transporter ATPase"  
"OPBB07\_00709" 34203 "s59E25H2" 0 "vitamin B12-transporter ATPase"  
"OPBB07\_00709" 34203 "s59E5H2" 0 "vitamin B12-transporter ATPase"  
"OPBB07\_00709" 34203 "s63E6H2" 0 "vitamin B12-transporter ATPase"  
"OPBB07\_00710" 34204 "s59E13H2" 0 "hypothetical protein"  
"OPBB07\_00710" 34204 "s59E25H2" 0 "hypothetical protein"  
"OPBB07\_00710" 34204 "s59E5H2" 0 "hypothetical protein"  
"OPBB07\_00710" 34204 "s63E6H2" 0 "hypothetical protein"  
"OPBB07\_00711" 34205 "s59E13H2" 0 "hypothetical protein"  
"OPBB07\_00711" 34205 "s59E25H2" 0 "hypothetical protein"  
"OPBB07\_00711" 34205 "s59E5H2" 0 "hypothetical protein"  
"OPBB07\_00711" 34205 "s63E6H2" 0 "hypothetical protein"  
"OPBB07\_00713" 34207 "s59E13H2" 0.09421012 "SsrA-binding protein"  
"OPBB07\_00713" 34207 "s59E25H2" 0 "SsrA-binding protein"  
"OPBB07\_00713" 34207 "s59E5H2" 0.5592544 "SsrA-binding protein"  
"OPBB07\_00713" 34207 "s63E6H2" 0.01607299 "SsrA-binding protein"  
"OPBB07\_00714" 34208 "s59E13H2" 0.08202918 "putative CtpA-like serine protease"  
"OPBB07\_00714" 34208 "s59E25H2" 0 "putative CtpA-like serine protease"  
"OPBB07\_00714" 34208 "s59E5H2" 0.02799382 "putative CtpA-like serine protease"  
"OPBB07\_00714" 34208 "s63E6H2" 0.1605215 "putative CtpA-like serine protease"  
"OPBB07\_00715" 34209 "s59E13H2" 0.04564681 "Murein DD-endopeptidase MepM"  
"OPBB07\_00715" 34209 "s59E25H2" 0 "Murein DD-endopeptidase MepM"  
"OPBB07\_00715" 34209 "s59E5H2" 0.1152377 "Murein DD-endopeptidase MepM"  
"OPBB07\_00715" 34209 "s63E6H2" 0.6864917 "Murein DD-endopeptidase MepM"  
"OPBB07\_00716" 34210 "s59E13H2" 0.04952321 "Cell division protein FtsX"  
"OPBB07\_00716" 34210 "s59E25H2" 0 "Cell division protein FtsX"  
"OPBB07\_00716" 34210 "s59E5H2" 0.09637866 "Cell division protein FtsX"  
"OPBB07\_00716" 34210 "s63E6H2" 0.5082928 "Cell division protein FtsX"  
"OPBB07\_00717" 34211 "s59E13H2" 0.03869618 "Cell division ATP-binding protein FtsE"  
"OPBB07\_00717" 34211 "s59E25H2" 0.4672489 "Cell division ATP-binding protein FtsE"  
"OPBB07\_00717" 34211 "s59E5H2" 0.176984 "Cell division ATP-binding protein FtsE"  
"OPBB07\_00717" 34211 "s63E6H2" 0.5138106 "Cell division ATP-binding protein FtsE"  
"OPBB07\_00718" 34212 "s59E13H2" 0.1317856 "Peptide chain release factor 2"  
"OPBB07\_00718" 34212 "s59E25H2" 0.08956916 "Peptide chain release factor 2"  
"OPBB07\_00718" 34212 "s59E5H2" 0.1314216 "Peptide chain release factor 2"  
"OPBB07\_00718" 34212 "s63E6H2" 0.3246423 "Peptide chain release factor 2"  
"OPBB07\_00719" 34213 "s59E13H2" 0.1270309 "preprotein translocase subunit SecA"  
"OPBB07\_00719" 34213 "s59E25H2" 0 "preprotein translocase subunit SecA"  
"OPBB07\_00719" 34213 "s59E5H2" 0.05604809 "preprotein translocase subunit SecA"  
"OPBB07\_00719" 34213 "s63E6H2" 0.4059797 "preprotein translocase subunit SecA"  
"OPBB07\_00720" 34214 "s59E13H2" 0.07003435 "Putative sigma-54 modulation protein"  
"OPBB07\_00720" 34214 "s59E25H2" 0 "Putative sigma-54 modulation protein"  
"OPBB07\_00720" 34214 "s59E5H2" 0.06001486 "Putative sigma-54 modulation protein"  
"OPBB07\_00720" 34214 "s63E6H2" 0.2014529 "Putative sigma-54 modulation protein"  
"OPBB07\_00721" 34215 "s59E13H2" 0.04534016 "Cold shock-like protein CspE"  
"OPBB07\_00721" 34215 "s59E25H2" 0 "Cold shock-like protein CspE"  
"OPBB07\_00721" 34215 "s59E5H2" 0.0103575 "Cold shock-like protein CspE"

"OPBB07\_00721" 34215 "s63E6H2" 0.1891616 "Cold shock-like protein CspE"  
"OPBB07\_00722" 34216 "s59E13H2" 0.04157703 "DNA utilization protein GntX"  
"OPBB07\_00722" 34216 "s59E25H2" 0 "DNA utilization protein GntX"  
"OPBB07\_00722" 34216 "s59E5H2" 0.02772639 "DNA utilization protein GntX"  
"OPBB07\_00722" 34216 "s63E6H2" 0.2523461 "DNA utilization protein GntX"  
"OPBB07\_00723" 34217 "s59E13H2" 0.03460667 "Bifunctional protein GlmU"  
"OPBB07\_00723" 34217 "s59E25H2" 0.4195251 "Bifunctional protein GlmU"  
"OPBB07\_00723" 34217 "s59E5H2" 0.01306064 "Bifunctional protein GlmU"  
"OPBB07\_00723" 34217 "s63E6H2" 0.3369862 "Bifunctional protein GlmU"  
"OPBB07\_00724" 34218 "s59E13H2" 0.03707102 "Methylthioribose-1-phosphate isomerase"  
"OPBB07\_00724" 34218 "s59E25H2" 0 "Methylthioribose-1-phosphate isomerase"  
"OPBB07\_00724" 34218 "s59E5H2" 0.07289341 "Methylthioribose-1-phosphate isomerase"  
"OPBB07\_00724" 34218 "s63E6H2" 0.5003333 "Methylthioribose-1-phosphate isomerase"  
"OPBB07\_00725" 34219 "s59E13H2" 0.04187189 "Adenosylhomocysteinase"  
"OPBB07\_00725" 34219 "s59E25H2" 0 "Adenosylhomocysteinase"  
"OPBB07\_00725" 34219 "s59E5H2" 0.06216432 "Adenosylhomocysteinase"  
"OPBB07\_00725" 34219 "s63E6H2" 0.3872996 "Adenosylhomocysteinase"  
"OPBB07\_00726" 34220 "s59E13H2" 0.02643255 "Bifunctional phosphoglucose/phosphomannose isomerase"  
"OPBB07\_00726" 34220 "s59E25H2" 0 "Bifunctional phosphoglucose/phosphomannose isomerase"  
"OPBB07\_00726" 34220 "s59E5H2" 0.04298909 "Bifunctional phosphoglucose/phosphomannose isomerase"  
"OPBB07\_00726" 34220 "s63E6H2" 0.172502 "Bifunctional phosphoglucose/phosphomannose isomerase"  
"OPBB07\_00727" 34221 "s59E13H2" 0.01378131 "Phosphoglucomutase"  
"OPBB07\_00727" 34221 "s59E25H2" 0 "Phosphoglucomutase"  
"OPBB07\_00727" 34221 "s59E5H2" 0.04995815 "Phosphoglucomutase"  
"OPBB07\_00727" 34221 "s63E6H2" 0.2065445 "Phosphoglucomutase"  
"OPBB07\_00728" 34222 "s59E13H2" 0.008104024 "GDP-mannose 4,6-dehydratase"  
"OPBB07\_00728" 34222 "s59E25H2" 0 "GDP-mannose 4,6-dehydratase"  
"OPBB07\_00728" 34222 "s59E5H2" 0.06982998 "GDP-mannose 4,6-dehydratase"  
"OPBB07\_00728" 34222 "s63E6H2" 0.1968415 "GDP-mannose 4,6-dehydratase"  
"OPBB07\_00729" 34223 "s59E13H2" 0.004387757 "D-glycero-alpha-D-manno-heptose 1-phosphate guanylyltransferase"  
"OPBB07\_00729" 34223 "s59E25H2" 0 "D-glycero-alpha-D-manno-heptose 1-phosphate guanylyltransferase"  
"OPBB07\_00729" 34223 "s59E5H2" 0.06595096 "D-glycero-alpha-D-manno-heptose 1-phosphate guanylyltransferase"  
"OPBB07\_00729" 34223 "s63E6H2" 0.1402322 "D-glycero-alpha-D-manno-heptose 1-phosphate guanylyltransferase"  
"OPBB07\_00730" 34224 "s59E13H2" 0.01578775 "GDP-6-deoxy-D-mannose reductase"  
"OPBB07\_00730" 34224 "s59E25H2" 0 "GDP-6-deoxy-D-mannose reductase"  
"OPBB07\_00730" 34224 "s59E5H2" 0.06030427 "GDP-6-deoxy-D-mannose reductase"  
"OPBB07\_00730" 34224 "s63E6H2" 0.1276524 "GDP-6-deoxy-D-mannose reductase"  
"OPBB07\_00731" 34225 "s59E13H2" 0.003708088 "N-acetylglucosaminyl-diphospho-decaprenol L-rhamnosyltransferase"  
"OPBB07\_00731" 34225 "s59E25H2" 0 "N-acetylglucosaminyl-diphospho-decaprenol L-rhamnosyltransferase"  
"OPBB07\_00731" 34225 "s59E5H2" 0.08859139 "N-acetylglucosaminyl-diphospho-decaprenol L-rhamnosyltransferase"  
"OPBB07\_00731" 34225 "s63E6H2" 0.02602291 "N-acetylglucosaminyl-diphospho-decaprenol L-rhamnosyltransferase"  
"OPBB07\_00732" 34226 "s59E13H2" 0.004230896 "Tryptophan synthase alpha chain"  
"OPBB07\_00732" 34226 "s59E25H2" 0 "Tryptophan synthase alpha chain"  
"OPBB07\_00732" 34226 "s59E5H2" 0.07344585 "Tryptophan synthase alpha chain"  
"OPBB07\_00732" 34226 "s63E6H2" 0.0403585 "Tryptophan synthase alpha chain"  
"OPBB07\_00733" 34227 "s59E13H2" 0.001426351 "Tryptophan synthase beta chain 1"  
"OPBB07\_00733" 34227 "s59E25H2" 0 "Tryptophan synthase beta chain 1"

"OPBB07\_00733" 34227 "s59E5H2" 0.1074027 "Tryptophan synthase beta chain 1"  
"OPBB07\_00733" 34227 "s63E6H2" 0.04037463 "Tryptophan synthase beta chain 1"  
"OPBB07\_00734" 34228 "s59E13H2" 0.01524062 "N-(5'-phosphoribosyl)anthranilate isomerase"  
"OPBB07\_00734" 34228 "s59E25H2" 0 "N-(5'-phosphoribosyl)anthranilate isomerase"  
"OPBB07\_00734" 34228 "s59E5H2" 0.05304757 "N-(5'-phosphoribosyl)anthranilate isomerase"  
"OPBB07\_00734" 34228 "s63E6H2" 0.02144483 "N-(5'-phosphoribosyl)anthranilate isomerase"  
"OPBB07\_00735" 34229 "s59E13H2" 0.05131087 "Peptide methionine sulfoxide reductase MsrB"  
"OPBB07\_00735" 34229 "s59E25H2" 0 "Peptide methionine sulfoxide reductase MsrB"  
"OPBB07\_00735" 34229 "s59E5H2" 0.03142582 "Peptide methionine sulfoxide reductase MsrB"  
"OPBB07\_00735" 34229 "s63E6H2" 0.007622494 "Peptide methionine sulfoxide reductase MsrB"  
"OPBB07\_00736" 34230 "s59E13H2" 0.03045087 "Peptide methionine sulfoxide reductase MsrA"  
"OPBB07\_00736" 34230 "s59E25H2" 0 "Peptide methionine sulfoxide reductase MsrA"  
"OPBB07\_00736" 34230 "s59E5H2" 0.04213317 "Peptide methionine sulfoxide reductase MsrA"  
"OPBB07\_00736" 34230 "s63E6H2" 0.02144548 "Peptide methionine sulfoxide reductase MsrA"  
"OPBB07\_00737" 34231 "s59E13H2" 0 "hypothetical protein"  
"OPBB07\_00737" 34231 "s59E25H2" 0 "hypothetical protein"  
"OPBB07\_00737" 34231 "s59E5H2" 0.4564831 "hypothetical protein"  
"OPBB07\_00737" 34231 "s63E6H2" 0.004789743 "hypothetical protein"  
"OPBB07\_00738" 34232 "s59E13H2" 0 "hypothetical protein"  
"OPBB07\_00738" 34232 "s59E25H2" 0 "hypothetical protein"  
"OPBB07\_00738" 34232 "s59E5H2" 0.2132955 "hypothetical protein"  
"OPBB07\_00738" 34232 "s63E6H2" 0.0002384035 "hypothetical protein"  
"OPBB07\_00739" 34233 "s59E13H2" 0.07027022 "Aminodeoxychorismate/anthranilate synthase component 2"  
"OPBB07\_00739" 34233 "s59E25H2" 0 "Aminodeoxychorismate/anthranilate synthase component 2"  
"OPBB07\_00739" 34233 "s59E5H2" 0.4094964 "Aminodeoxychorismate/anthranilate synthase component 2"  
"OPBB07\_00739" 34233 "s63E6H2" 0.0035309 "Aminodeoxychorismate/anthranilate synthase component 2"  
"OPBB07\_00740" 34234 "s59E13H2" 0.08388906 "Aminodeoxychorismate synthase component 1"  
"OPBB07\_00740" 34234 "s59E25H2" 0 "Aminodeoxychorismate synthase component 1"  
"OPBB07\_00740" 34234 "s59E5H2" 0.3395846 "Aminodeoxychorismate synthase component 1"  
"OPBB07\_00740" 34234 "s63E6H2" 0.01490357 "Aminodeoxychorismate synthase component 1"  
"OPBB07\_00741" 34235 "s59E13H2" 2.469228 "D-alanine aminotransferase"  
"OPBB07\_00741" 34235 "s59E25H2" 0 "D-alanine aminotransferase"  
"OPBB07\_00741" 34235 "s59E5H2" 0.2075561 "D-alanine aminotransferase"  
"OPBB07\_00741" 34235 "s63E6H2" 0.01408567 "D-alanine aminotransferase"  
"OPBB07\_00742" 34236 "s59E13H2" 0.001484425 "General stress protein 69"  
"OPBB07\_00742" 34236 "s59E25H2" 0 "General stress protein 69"  
"OPBB07\_00742" 34236 "s59E5H2" 0.0157669 "General stress protein 69"  
"OPBB07\_00742" 34236 "s63E6H2" 0.004503864 "General stress protein 69"  
"OPBB07\_00743" 34237 "s59E13H2" 0.2779796 "NADH dehydrogenase"  
"OPBB07\_00743" 34237 "s59E25H2" 0 "NADH dehydrogenase"  
"OPBB07\_00743" 34237 "s59E5H2" 0.1395852 "NADH dehydrogenase"  
"OPBB07\_00743" 34237 "s63E6H2" 0.0127511 "NADH dehydrogenase"  
"OPBB07\_00744" 34238 "s59E13H2" 0.3647027 "CCA-adding enzyme"  
"OPBB07\_00744" 34238 "s59E25H2" 0 "CCA-adding enzyme"  
"OPBB07\_00744" 34238 "s59E5H2" 0.09229577 "CCA-adding enzyme"  
"OPBB07\_00744" 34238 "s63E6H2" 0.03103799 "CCA-adding enzyme"  
"OPBB07\_00745" 34239 "s59E13H2" 0.3619143 "hypothetical protein"

"OPBB07\_00745" 34239 "s59E25H2" 0 "hypothetical protein"  
"OPBB07\_00745" 34239 "s59E5H2" 0.9628076 "hypothetical protein"  
"OPBB07\_00745" 34239 "s63E6H2" 0.01386762 "hypothetical protein"  
"OPBB07\_00746" 34240 "s59E13H2" 0.05477273 "Vitamin B12 dependent methionine synthase, activation domain"  
"OPBB07\_00746" 34240 "s59E25H2" 0 "Vitamin B12 dependent methionine synthase, activation domain"  
"OPBB07\_00746" 34240 "s59E5H2" 0.1718731 "Vitamin B12 dependent methionine synthase, activation domain"  
"OPBB07\_00746" 34240 "s63E6H2" 0.02329498 "Vitamin B12 dependent methionine synthase, activation domain"  
"OPBB07\_00747" 34241 "s59E13H2" 0.1591791 "hypothetical protein"  
"OPBB07\_00747" 34241 "s59E25H2" 0 "hypothetical protein"  
"OPBB07\_00747" 34241 "s59E5H2" 0.521819 "hypothetical protein"  
"OPBB07\_00747" 34241 "s63E6H2" 0.03440272 "hypothetical protein"  
"OPBB07\_00748" 34242 "s59E13H2" 0.02222365 "putative transporter"  
"OPBB07\_00748" 34242 "s59E25H2" 0 "putative transporter"  
"OPBB07\_00748" 34242 "s59E5H2" 0.2958948 "putative transporter"  
"OPBB07\_00748" 34242 "s63E6H2" 0.09521918 "putative transporter"  
"OPBB07\_00749" 34243 "s59E13H2" 0.030568 "hypothetical protein"  
"OPBB07\_00749" 34243 "s59E25H2" 0 "hypothetical protein"  
"OPBB07\_00749" 34243 "s59E5H2" 0.0004266245 "hypothetical protein"  
"OPBB07\_00749" 34243 "s63E6H2" 0.2038695 "hypothetical protein"  
"OPBB07\_00750" 34244 "s59E13H2" 0.02921943 "hypothetical protein"  
"OPBB07\_00750" 34244 "s59E25H2" 0 "hypothetical protein"  
"OPBB07\_00750" 34244 "s59E5H2" 0 "hypothetical protein"  
"OPBB07\_00750" 34244 "s63E6H2" 0.1975769 "hypothetical protein"  
"OPBB07\_00751" 34245 "s59E13H2" 0 "Nucleotidyltransferase domain protein"  
"OPBB07\_00751" 34245 "s59E25H2" 0 "Nucleotidyltransferase domain protein"  
"OPBB07\_00751" 34245 "s59E5H2" 0.1960528 "Nucleotidyltransferase domain protein"  
"OPBB07\_00751" 34245 "s63E6H2" 0 "Nucleotidyltransferase domain protein"  
"OPBB07\_00752" 34246 "s59E13H2" 0 "hypothetical protein"  
"OPBB07\_00752" 34246 "s59E25H2" 0 "hypothetical protein"  
"OPBB07\_00752" 34246 "s59E5H2" 0.005546119 "hypothetical protein"  
"OPBB07\_00752" 34246 "s63E6H2" 0 "hypothetical protein"  
"OPBB07\_00753" 34247 "s59E13H2" 0 "UvrABC system protein B"  
"OPBB07\_00753" 34247 "s59E25H2" 0 "UvrABC system protein B"  
"OPBB07\_00753" 34247 "s59E5H2" 0.05086741 "UvrABC system protein B"  
"OPBB07\_00753" 34247 "s63E6H2" 0 "UvrABC system protein B"  
"OPBB07\_00754" 34248 "s59E13H2" 0 "hypothetical protein"  
"OPBB07\_00754" 34248 "s59E25H2" 0 "hypothetical protein"  
"OPBB07\_00754" 34248 "s59E5H2" 0.007368969 "hypothetical protein"  
"OPBB07\_00754" 34248 "s63E6H2" 0 "hypothetical protein"  
"OPBB07\_00755" 34249 "s59E13H2" 0 "Fructose-bisphosphate aldolase"  
"OPBB07\_00755" 34249 "s59E25H2" 0 "Fructose-bisphosphate aldolase"  
"OPBB07\_00755" 34249 "s59E5H2" 0 "Fructose-bisphosphate aldolase"  
"OPBB07\_00755" 34249 "s63E6H2" 0 "Fructose-bisphosphate aldolase"  
"OPBB07\_00756" 34250 "s59E13H2" 0 "Glutamine--fructose-6-phosphate aminotransferase [isomerizing]"  
"OPBB07\_00756" 34250 "s59E25H2" 0 "Glutamine--fructose-6-phosphate aminotransferase [isomerizing]"  
"OPBB07\_00756" 34250 "s59E5H2" 0 "Glutamine--fructose-6-phosphate aminotransferase [isomerizing]"  
"OPBB07\_00756" 34250 "s63E6H2" 0 "Glutamine--fructose-6-phosphate aminotransferase [isomerizing]"

"OPBB07\_00757" 34251 "s59E13H2" 0 "2-dehydro-3-deoxygluconokinase"  
"OPBB07\_00757" 34251 "s59E25H2" 0 "2-dehydro-3-deoxygluconokinase"  
"OPBB07\_00757" 34251 "s59E5H2" 0 "2-dehydro-3-deoxygluconokinase"  
"OPBB07\_00757" 34251 "s63E6H2" 0 "2-dehydro-3-deoxygluconokinase"  
"OPBB07\_00758" 34252 "s59E13H2" 0 "hypothetical protein"  
"OPBB07\_00758" 34252 "s59E25H2" 0 "hypothetical protein"  
"OPBB07\_00758" 34252 "s59E5H2" 0 "hypothetical protein"  
"OPBB07\_00758" 34252 "s63E6H2" 0 "hypothetical protein"  
"OPBB07\_00759" 34253 "s59E13H2" 0 "D-tagatose-1,6-bisphosphate aldolase subunit KbaZ"  
"OPBB07\_00759" 34253 "s59E25H2" 0 "D-tagatose-1,6-bisphosphate aldolase subunit KbaZ"  
"OPBB07\_00759" 34253 "s59E5H2" 0 "D-tagatose-1,6-bisphosphate aldolase subunit KbaZ"  
"OPBB07\_00759" 34253 "s63E6H2" 0 "D-tagatose-1,6-bisphosphate aldolase subunit KbaZ"  
"OPBB07\_00762" 34256 "s59E13H2" 0 "High molecular weight rubredoxin"  
"OPBB07\_00762" 34256 "s59E25H2" 0 "High molecular weight rubredoxin"  
"OPBB07\_00762" 34256 "s59E5H2" 0.03134268 "High molecular weight rubredoxin"  
"OPBB07\_00762" 34256 "s63E6H2" 0.08300994 "High molecular weight rubredoxin"  
"OPBB07\_00763" 34257 "s59E13H2" 0.0009407011 "Copper-exporting P-type ATPase B"  
"OPBB07\_00763" 34257 "s59E25H2" 0 "Copper-exporting P-type ATPase B"  
"OPBB07\_00763" 34257 "s59E5H2" 0 "Copper-exporting P-type ATPase B"  
"OPBB07\_00763" 34257 "s63E6H2" 0.02510878 "Copper-exporting P-type ATPase B"  
"OPBB07\_00764" 34258 "s59E13H2" 0 "hypothetical protein"  
"OPBB07\_00764" 34258 "s59E25H2" 0 "hypothetical protein"  
"OPBB07\_00764" 34258 "s59E5H2" 0 "hypothetical protein"  
"OPBB07\_00764" 34258 "s63E6H2" 0.01407928 "hypothetical protein"  
"OPBB07\_00765" 34259 "s59E13H2" 0 "hypothetical protein"  
"OPBB07\_00765" 34259 "s59E25H2" 0 "hypothetical protein"  
"OPBB07\_00765" 34259 "s59E5H2" 0 "hypothetical protein"  
"OPBB07\_00765" 34259 "s63E6H2" 0.003766775 "hypothetical protein"  
"OPBB07\_00766" 34260 "s59E13H2" 0 "hypothetical protein"  
"OPBB07\_00766" 34260 "s59E25H2" 0 "hypothetical protein"  
"OPBB07\_00766" 34260 "s59E5H2" 0 "hypothetical protein"  
"OPBB07\_00766" 34260 "s63E6H2" 0.001104055 "hypothetical protein"  
"OPBB07\_00767" 34261 "s59E13H2" 0.01557042 "Dimethylamine corrinoid protein"  
"OPBB07\_00767" 34261 "s59E25H2" 0 "Dimethylamine corrinoid protein"  
"OPBB07\_00767" 34261 "s59E5H2" 0.1524108 "Dimethylamine corrinoid protein"  
"OPBB07\_00767" 34261 "s63E6H2" 0.7696688 "Dimethylamine corrinoid protein"  
"OPBB07\_00768" 34262 "s59E13H2" 0.0353576 "Uracil DNA glycosylase superfamily protein"  
"OPBB07\_00768" 34262 "s59E25H2" 0 "Uracil DNA glycosylase superfamily protein"  
"OPBB07\_00768" 34262 "s59E5H2" 0.3503875 "Uracil DNA glycosylase superfamily protein"  
"OPBB07\_00768" 34262 "s63E6H2" 0.01191961 "Uracil DNA glycosylase superfamily protein"  
"OPBB07\_00769" 34263 "s59E13H2" 0.02439881 "Cell wall-binding protein YocH precursor"  
"OPBB07\_00769" 34263 "s59E25H2" 0 "Cell wall-binding protein YocH precursor"  
"OPBB07\_00769" 34263 "s59E5H2" 0.1616117 "Cell wall-binding protein YocH precursor"  
"OPBB07\_00769" 34263 "s63E6H2" 0.005913383 "Cell wall-binding protein YocH precursor"  
"OPBB07\_00770" 34264 "s59E13H2" 0.007575719 "Calcineurin-like phosphoesterase superfamily domain protein"  
"OPBB07\_00770" 34264 "s59E25H2" 0 "Calcineurin-like phosphoesterase superfamily domain protein"  
"OPBB07\_00770" 34264 "s59E5H2" 0 "Calcineurin-like phosphoesterase superfamily domain protein"



"OPBB07\_00770" 34264 "s63E6H2" 0.006936625 "Calcineurin-like phosphoesterase superfamily domain protein"  
"OPBB07\_00771" 34265 "s59E13H2" 0.04181504 "hypothetical protein"  
"OPBB07\_00771" 34265 "s59E25H2" 0 "hypothetical protein"  
"OPBB07\_00771" 34265 "s59E5H2" 0 "hypothetical protein"  
"OPBB07\_00771" 34265 "s63E6H2" 0.01132988 "hypothetical protein"  
"OPBB07\_00772" 34266 "s59E13H2" 0.05826098 "hypothetical protein"  
"OPBB07\_00772" 34266 "s59E25H2" 0 "hypothetical protein"  
"OPBB07\_00772" 34266 "s59E5H2" 0.05624693 "hypothetical protein"  
"OPBB07\_00772" 34266 "s63E6H2" 0.006229103 "hypothetical protein"  
"OPBB07\_00773" 34267 "s59E13H2" 0.02796148 "NADH:ubiquinone oxidoreductase subunit N"  
"OPBB07\_00773" 34267 "s59E25H2" 0 "NADH:ubiquinone oxidoreductase subunit N"  
"OPBB07\_00773" 34267 "s59E5H2" 0.04063741 "NADH:ubiquinone oxidoreductase subunit N"  
"OPBB07\_00773" 34267 "s63E6H2" 0.03248772 "NADH:ubiquinone oxidoreductase subunit N"  
"OPBB07\_00774" 34268 "s59E13H2" 0.04559777 "NADH:ubiquinone oxidoreductase subunit K"  
"OPBB07\_00774" 34268 "s59E25H2" 0 "NADH:ubiquinone oxidoreductase subunit K"  
"OPBB07\_00774" 34268 "s59E5H2" 0.04328587 "NADH:ubiquinone oxidoreductase subunit K"  
"OPBB07\_00774" 34268 "s63E6H2" 0.04400832 "NADH:ubiquinone oxidoreductase subunit K"  
"OPBB07\_00775" 34269 "s59E13H2" 0.03256305 "hypothetical protein"  
"OPBB07\_00775" 34269 "s59E25H2" 0 "hypothetical protein"  
"OPBB07\_00775" 34269 "s59E5H2" 0.03985007 "hypothetical protein"  
"OPBB07\_00775" 34269 "s63E6H2" 0.06346461 "hypothetical protein"  
"OPBB07\_00776" 34270 "s59E13H2" 0.03147282 "NADH-quinone oxidoreductase subunit I"  
"OPBB07\_00776" 34270 "s59E25H2" 0 "NADH-quinone oxidoreductase subunit I"  
"OPBB07\_00776" 34270 "s59E5H2" 0.1394669 "NADH-quinone oxidoreductase subunit I"  
"OPBB07\_00776" 34270 "s63E6H2" 0.08801317 "NADH-quinone oxidoreductase subunit I"  
"OPBB07\_00777" 34271 "s59E13H2" 0.07742556 "NADH-quinone oxidoreductase subunit H"  
"OPBB07\_00777" 34271 "s59E25H2" 0 "NADH-quinone oxidoreductase subunit H"  
"OPBB07\_00777" 34271 "s59E5H2" 0.1209298 "NADH-quinone oxidoreductase subunit H"  
"OPBB07\_00777" 34271 "s63E6H2" 0.1442727 "NADH-quinone oxidoreductase subunit H"  
"OPBB07\_00778" 34272 "s59E13H2" 0.05682255 "NADH-quinone oxidoreductase subunit 4"  
"OPBB07\_00778" 34272 "s59E25H2" 0 "NADH-quinone oxidoreductase subunit 4"  
"OPBB07\_00778" 34272 "s59E5H2" 0.06291233 "NADH-quinone oxidoreductase subunit 4"  
"OPBB07\_00778" 34272 "s63E6H2" 0.08037631 "NADH-quinone oxidoreductase subunit 4"  
"OPBB07\_00779" 34273 "s59E13H2" 0.04078507 "F(420)H(2) dehydrogenase subunit B"  
"OPBB07\_00779" 34273 "s59E25H2" 0 "F(420)H(2) dehydrogenase subunit B"  
"OPBB07\_00779" 34273 "s59E5H2" 0.07459035 "F(420)H(2) dehydrogenase subunit B"  
"OPBB07\_00779" 34273 "s63E6H2" 0.03249964 "F(420)H(2) dehydrogenase subunit B"  
"OPBB07\_00780" 34274 "s59E13H2" 0.03570889 "hypothetical protein"  
"OPBB07\_00780" 34274 "s59E25H2" 0 "hypothetical protein"  
"OPBB07\_00780" 34274 "s59E5H2" 0.05039556 "hypothetical protein"  
"OPBB07\_00780" 34274 "s63E6H2" 0.05896604 "hypothetical protein"  
"OPBB07\_00781" 34275 "s59E13H2" 0.05854002 "N,N'-diacetylchitobiose phosphorylase"  
"OPBB07\_00781" 34275 "s59E25H2" 0 "N,N'-diacetylchitobiose phosphorylase"  
"OPBB07\_00781" 34275 "s59E5H2" 0 "N,N'-diacetylchitobiose phosphorylase"  
"OPBB07\_00781" 34275 "s63E6H2" 0.3166725 "N,N'-diacetylchitobiose phosphorylase"  
"OPBB07\_00782" 34276 "s59E13H2" 0.07532075 "AI-2 transport protein TqsA"  
"OPBB07\_00782" 34276 "s59E25H2" 0 "AI-2 transport protein TqsA"

"OPBB07\_00782" 34276 "s59E5H2" 0.04207121 "AI-2 transport protein TqsA"  
"OPBB07\_00782" 34276 "s63E6H2" 0.05623343 "AI-2 transport protein TqsA"  
"OPBB07\_00783" 34277 "s59E13H2" 0.2593206 "hypothetical protein"  
"OPBB07\_00783" 34277 "s59E25H2" 0 "hypothetical protein"  
"OPBB07\_00783" 34277 "s59E5H2" 0.06570163 "hypothetical protein"  
"OPBB07\_00783" 34277 "s63E6H2" 0.2106815 "hypothetical protein"  
"OPBB07\_00784" 34278 "s59E13H2" 0.09574795 "GMP synthase subunit B"  
"OPBB07\_00784" 34278 "s59E25H2" 0 "GMP synthase subunit B"  
"OPBB07\_00784" 34278 "s59E5H2" 0.02621756 "GMP synthase subunit B"  
"OPBB07\_00784" 34278 "s63E6H2" 0.2303184 "GMP synthase subunit B"  
"OPBB07\_00785" 34279 "s59E13H2" 0.01776482 "hypothetical protein"  
"OPBB07\_00785" 34279 "s59E25H2" 0 "hypothetical protein"  
"OPBB07\_00785" 34279 "s59E5H2" 0.5470534 "hypothetical protein"  
"OPBB07\_00785" 34279 "s63E6H2" 0.2819976 "hypothetical protein"  
"OPBB07\_00787" 34281 "s59E13H2" 0.01860142 "hypothetical protein"  
"OPBB07\_00787" 34281 "s59E25H2" 0 "hypothetical protein"  
"OPBB07\_00787" 34281 "s59E5H2" 0.4703633 "hypothetical protein"  
"OPBB07\_00787" 34281 "s63E6H2" 0.1381783 "hypothetical protein"  
"OPBB07\_00788" 34282 "s59E13H2" 0.0511136 "hypothetical protein"  
"OPBB07\_00788" 34282 "s59E25H2" 0 "hypothetical protein"  
"OPBB07\_00788" 34282 "s59E5H2" 0.03601693 "hypothetical protein"  
"OPBB07\_00788" 34282 "s63E6H2" 0.01653032 "hypothetical protein"  
"OPBB07\_00789" 34283 "s59E13H2" 0.02570938 "Cyclic di-GMP phosphodiesterase Gmr"  
"OPBB07\_00789" 34283 "s59E25H2" 0 "Cyclic di-GMP phosphodiesterase Gmr"  
"OPBB07\_00789" 34283 "s59E5H2" 0 "Cyclic di-GMP phosphodiesterase Gmr"  
"OPBB07\_00789" 34283 "s63E6H2" 0.003521102 "Cyclic di-GMP phosphodiesterase Gmr"  
"OPBB07\_00790" 34284 "s59E13H2" 0.1630562 "putative cysteine desulfurase 2"  
"OPBB07\_00790" 34284 "s59E25H2" 0 "putative cysteine desulfurase 2"  
"OPBB07\_00790" 34284 "s59E5H2" 0.1064335 "putative cysteine desulfurase 2"  
"OPBB07\_00790" 34284 "s63E6H2" 0.01732053 "putative cysteine desulfurase 2"  
"OPBB07\_00791" 34285 "s59E13H2" 0.7567557 "Glutamine-dependent NAD(+) synthetase"  
"OPBB07\_00791" 34285 "s59E25H2" 0 "Glutamine-dependent NAD(+) synthetase"  
"OPBB07\_00791" 34285 "s59E5H2" 0.7829325 "Glutamine-dependent NAD(+) synthetase"  
"OPBB07\_00791" 34285 "s63E6H2" 0.01099849 "Glutamine-dependent NAD(+) synthetase"  
"OPBB07\_00792" 34286 "s59E13H2" 1.011811 "Galactose-1-phosphate uridylyltransferase"  
"OPBB07\_00792" 34286 "s59E25H2" 0 "Galactose-1-phosphate uridylyltransferase"  
"OPBB07\_00792" 34286 "s59E5H2" 0.3763488 "Galactose-1-phosphate uridylyltransferase"  
"OPBB07\_00792" 34286 "s63E6H2" 0.00165558 "Galactose-1-phosphate uridylyltransferase"  
"OPBB07\_00794" 34288 "s59E13H2" 0.6629916 "Galactokinase"  
"OPBB07\_00794" 34288 "s59E25H2" 0 "Galactokinase"  
"OPBB07\_00794" 34288 "s59E5H2" 0.045754 "Galactokinase"  
"OPBB07\_00794" 34288 "s63E6H2" 0.005611269 "Galactokinase"  
"OPBB07\_00795" 34289 "s59E13H2" 0 "L-arabinose isomerase"  
"OPBB07\_00795" 34289 "s59E25H2" 0 "L-arabinose isomerase"  
"OPBB07\_00795" 34289 "s59E5H2" 0 "L-arabinose isomerase"  
"OPBB07\_00795" 34289 "s63E6H2" 0 "L-arabinose isomerase"  
"OPBB07\_00796" 34290 "s59E13H2" 0 "hypothetical protein"

"OPBB07\_00796" 34290 "s59E25H2" 0 "hypothetical protein"  
"OPBB07\_00796" 34290 "s59E5H2" 0 "hypothetical protein"  
"OPBB07\_00796" 34290 "s63E6H2" 0 "hypothetical protein"  
"OPBB07\_00798" 34292 "s59E13H2" 0.0728997 "Transposase DDE domain protein"  
"OPBB07\_00798" 34292 "s59E25H2" 0 "Transposase DDE domain protein"  
"OPBB07\_00798" 34292 "s59E5H2" 0.252094 "Transposase DDE domain protein"  
"OPBB07\_00798" 34292 "s63E6H2" 0.01072368 "Transposase DDE domain protein"  
"OPBB07\_00799" 34293 "s59E13H2" 0.002745629 "hypothetical protein"  
"OPBB07\_00799" 34293 "s59E25H2" 0 "hypothetical protein"  
"OPBB07\_00799" 34293 "s59E5H2" 0.01033379 "hypothetical protein"  
"OPBB07\_00799" 34293 "s63E6H2" 0 "hypothetical protein"  
"OPBB07\_00803" 34297 "s59E13H2" 0 "Alpha-galactosidase"  
"OPBB07\_00803" 34297 "s59E25H2" 0 "Alpha-galactosidase"  
"OPBB07\_00803" 34297 "s59E5H2" 0 "Alpha-galactosidase"  
"OPBB07\_00803" 34297 "s63E6H2" 0 "Alpha-galactosidase"  
"OPBB07\_00804" 34298 "s59E13H2" 0 "L-arabinose transport system permease protein AraQ"  
"OPBB07\_00804" 34298 "s59E25H2" 0 "L-arabinose transport system permease protein AraQ"  
"OPBB07\_00804" 34298 "s59E5H2" 0 "L-arabinose transport system permease protein AraQ"  
"OPBB07\_00804" 34298 "s63E6H2" 0 "L-arabinose transport system permease protein AraQ"  
"OPBB07\_00805" 34299 "s59E13H2" 0 "Trehalose/maltose transport system permease protein MalF"  
"OPBB07\_00805" 34299 "s59E25H2" 0 "Trehalose/maltose transport system permease protein MalF"  
"OPBB07\_00805" 34299 "s59E5H2" 0 "Trehalose/maltose transport system permease protein MalF"  
"OPBB07\_00805" 34299 "s63E6H2" 0 "Trehalose/maltose transport system permease protein MalF"  
"OPBB07\_00806" 34300 "s59E13H2" 0 "putative arabinose-binding protein precursor"  
"OPBB07\_00806" 34300 "s59E25H2" 0 "putative arabinose-binding protein precursor"  
"OPBB07\_00806" 34300 "s59E5H2" 0 "putative arabinose-binding protein precursor"  
"OPBB07\_00806" 34300 "s63E6H2" 0 "putative arabinose-binding protein precursor"  
"OPBB07\_00808" 34302 "s59E13H2" 0.002958363 "Ribose operon repressor"  
"OPBB07\_00808" 34302 "s59E25H2" 0 "Ribose operon repressor"  
"OPBB07\_00808" 34302 "s59E5H2" 0.04174 "Ribose operon repressor"  
"OPBB07\_00808" 34302 "s63E6H2" 0.006945182 "Ribose operon repressor"  
"OPBB07\_00809" 34303 "s59E13H2" 1.731059 "putative glutamine synthetase 2"  
"OPBB07\_00809" 34303 "s59E25H2" 0 "putative glutamine synthetase 2"  
"OPBB07\_00809" 34303 "s59E5H2" 0.1507522 "putative glutamine synthetase 2"  
"OPBB07\_00809" 34303 "s63E6H2" 0.02283596 "putative glutamine synthetase 2"  
"OPBB07\_00810" 34304 "s59E13H2" 1.119266 "Trehalose/maltose import ATP-binding protein MalK"  
"OPBB07\_00810" 34304 "s59E25H2" 0 "Trehalose/maltose import ATP-binding protein MalK"  
"OPBB07\_00810" 34304 "s59E5H2" 0.02762657 "Trehalose/maltose import ATP-binding protein MalK"  
"OPBB07\_00810" 34304 "s63E6H2" 0.007489463 "Trehalose/maltose import ATP-binding protein MalK"  
"OPBB07\_00812" 34306 "s59E13H2" 2.81061 "SPFH domain / Band 7 family protein"  
"OPBB07\_00812" 34306 "s59E25H2" 0 "SPFH domain / Band 7 family protein"  
"OPBB07\_00812" 34306 "s59E5H2" 0.07861531 "SPFH domain / Band 7 family protein"  
"OPBB07\_00812" 34306 "s63E6H2" 0.02649741 "SPFH domain / Band 7 family protein"  
"OPBB07\_00813" 34307 "s59E13H2" 2.33209 "AsnC family protein"  
"OPBB07\_00813" 34307 "s59E25H2" 0 "AsnC family protein"  
"OPBB07\_00813" 34307 "s59E5H2" 0.0521922 "AsnC family protein"  
"OPBB07\_00813" 34307 "s63E6H2" 0.04860867 "AsnC family protein"

"OPBB07\_00814" 34308 "s59E13H2" 2.275674 "Lipoyl synthase"  
"OPBB07\_00814" 34308 "s59E25H2" 0 "Lipoyl synthase"  
"OPBB07\_00814" 34308 "s59E5H2" 0.07049061 "Lipoyl synthase"  
"OPBB07\_00814" 34308 "s63E6H2" 0.02727727 "Lipoyl synthase"  
"OPBB07\_00815" 34309 "s59E13H2" 1.843402 "putative chromosome-partitioning protein ParB"  
"OPBB07\_00815" 34309 "s59E25H2" 0 "putative chromosome-partitioning protein ParB"  
"OPBB07\_00815" 34309 "s59E5H2" 0.0507817 "putative chromosome-partitioning protein ParB"  
"OPBB07\_00815" 34309 "s63E6H2" 0.030693 "putative chromosome-partitioning protein ParB"  
"OPBB07\_00816" 34310 "s59E13H2" 1.725967 "Sporulation initiation inhibitor protein Soj"  
"OPBB07\_00816" 34310 "s59E25H2" 0 "Sporulation initiation inhibitor protein Soj"  
"OPBB07\_00816" 34310 "s59E5H2" 0.04602734 "Sporulation initiation inhibitor protein Soj"  
"OPBB07\_00816" 34310 "s63E6H2" 0.03677819 "Sporulation initiation inhibitor protein Soj"  
"OPBB07\_00817" 34311 "s59E13H2" 0 "hypothetical protein"  
"OPBB07\_00817" 34311 "s59E25H2" 0 "hypothetical protein"  
"OPBB07\_00817" 34311 "s59E5H2" 0 "hypothetical protein"  
"OPBB07\_00817" 34311 "s63E6H2" 0.1276651 "hypothetical protein"  
"OPBB07\_00818" 34312 "s59E13H2" 0.001979032 "putative ABC transporter-binding protein precursor"  
"OPBB07\_00818" 34312 "s59E25H2" 0 "putative ABC transporter-binding protein precursor"  
"OPBB07\_00818" 34312 "s59E5H2" 0 "putative ABC transporter-binding protein precursor"  
"OPBB07\_00818" 34312 "s63E6H2" 1.636827 "putative ABC transporter-binding protein precursor"  
"OPBB07\_00819" 34313 "s59E13H2" 0 "Transposase"  
"OPBB07\_00819" 34313 "s59E25H2" 0 "Transposase"  
"OPBB07\_00819" 34313 "s59E5H2" 0 "Transposase"  
"OPBB07\_00819" 34313 "s63E6H2" 0.005011601 "Transposase"  
"OPBB07\_00822" 34316 "s59E13H2" 0 "L-arabinose isomerase"  
"OPBB07\_00822" 34316 "s59E25H2" 0 "L-arabinose isomerase"  
"OPBB07\_00822" 34316 "s59E5H2" 0 "L-arabinose isomerase"  
"OPBB07\_00822" 34316 "s63E6H2" 0 "L-arabinose isomerase"  
"OPBB07\_00823" 34317 "s59E13H2" 0 "NAD/NADP-dependent betaine aldehyde dehydrogenase"  
"OPBB07\_00823" 34317 "s59E25H2" 0 "NAD/NADP-dependent betaine aldehyde dehydrogenase"  
"OPBB07\_00823" 34317 "s59E5H2" 0 "NAD/NADP-dependent betaine aldehyde dehydrogenase"  
"OPBB07\_00823" 34317 "s63E6H2" 0 "NAD/NADP-dependent betaine aldehyde dehydrogenase"  
"OPBB07\_00824" 34318 "s59E13H2" 0 "Transaldolase"  
"OPBB07\_00824" 34318 "s59E25H2" 0 "Transaldolase"  
"OPBB07\_00824" 34318 "s59E5H2" 0 "Transaldolase"  
"OPBB07\_00824" 34318 "s63E6H2" 0 "Transaldolase"  
"OPBB07\_00825" 34319 "s59E13H2" 0 "4-hydroxy-tetrahydrodipicolinate synthase"  
"OPBB07\_00825" 34319 "s59E25H2" 0 "4-hydroxy-tetrahydrodipicolinate synthase"  
"OPBB07\_00825" 34319 "s59E5H2" 0 "4-hydroxy-tetrahydrodipicolinate synthase"  
"OPBB07\_00825" 34319 "s63E6H2" 0 "4-hydroxy-tetrahydrodipicolinate synthase"  
"OPBB07\_00826" 34320 "s59E13H2" 0 "Glyoxylate reductase"  
"OPBB07\_00826" 34320 "s59E25H2" 0 "Glyoxylate reductase"  
"OPBB07\_00826" 34320 "s59E5H2" 0 "Glyoxylate reductase"  
"OPBB07\_00826" 34320 "s63E6H2" 0 "Glyoxylate reductase"  
"OPBB07\_00827" 34321 "s59E13H2" 0 "5-dehydro-2-deoxygluconokinase"  
"OPBB07\_00827" 34321 "s59E25H2" 0 "5-dehydro-2-deoxygluconokinase"  
"OPBB07\_00827" 34321 "s59E5H2" 0 "5-dehydro-2-deoxygluconokinase"

"OPBB07\_00827" 34321 "s63E6H2" 0 "5-dehydro-2-deoxygluconokinase"  
"OPBB07\_00828" 34322 "s59E13H2" 0 "Ferredoxin fas2"  
"OPBB07\_00828" 34322 "s59E25H2" 0 "Ferredoxin fas2"  
"OPBB07\_00828" 34322 "s59E5H2" 0 "Ferredoxin fas2"  
"OPBB07\_00828" 34322 "s63E6H2" 0 "Ferredoxin fas2"  
"OPBB07\_00829" 34323 "s59E13H2" 0 "1-deoxy-D-xylulose-5-phosphate synthase"  
"OPBB07\_00829" 34323 "s59E25H2" 0 "1-deoxy-D-xylulose-5-phosphate synthase"  
"OPBB07\_00829" 34323 "s59E5H2" 0 "1-deoxy-D-xylulose-5-phosphate synthase"  
"OPBB07\_00829" 34323 "s63E6H2" 0 "1-deoxy-D-xylulose-5-phosphate synthase"  
"OPBB07\_00830" 34324 "s59E13H2" 0 "Putative sugar phosphate isomerase YwIF"  
"OPBB07\_00830" 34324 "s59E25H2" 0 "Putative sugar phosphate isomerase YwIF"  
"OPBB07\_00830" 34324 "s59E5H2" 0 "Putative sugar phosphate isomerase YwIF"  
"OPBB07\_00830" 34324 "s63E6H2" 0 "Putative sugar phosphate isomerase YwIF"  
"OPBB07\_00831" 34325 "s59E13H2" 0.002578659 "Prenyltransferase and squalene oxidase repeat protein"  
"OPBB07\_00831" 34325 "s59E25H2" 0 "Prenyltransferase and squalene oxidase repeat protein"  
"OPBB07\_00831" 34325 "s59E5H2" 0 "Prenyltransferase and squalene oxidase repeat protein"  
"OPBB07\_00831" 34325 "s63E6H2" 0 "Prenyltransferase and squalene oxidase repeat protein"  
"OPBB07\_00832" 34326 "s59E13H2" 0 "3-oxoacyl-[acyl-carrier-protein] reductase FabG"  
"OPBB07\_00832" 34326 "s59E25H2" 0 "3-oxoacyl-[acyl-carrier-protein] reductase FabG"  
"OPBB07\_00832" 34326 "s59E5H2" 0 "3-oxoacyl-[acyl-carrier-protein] reductase FabG"  
"OPBB07\_00832" 34326 "s63E6H2" 0 "3-oxoacyl-[acyl-carrier-protein] reductase FabG"  
"OPBB07\_00833" 34327 "s59E13H2" 0 "Succinate-semialdehyde dehydrogenase (acetylating)"  
"OPBB07\_00833" 34327 "s59E25H2" 0 "Succinate-semialdehyde dehydrogenase (acetylating)"  
"OPBB07\_00833" 34327 "s59E5H2" 0 "Succinate-semialdehyde dehydrogenase (acetylating)"  
"OPBB07\_00833" 34327 "s63E6H2" 0 "Succinate-semialdehyde dehydrogenase (acetylating)"  
"OPBB07\_00834" 34328 "s59E13H2" 0 "Succinyl-CoA ligase [ADP-forming] subunit beta"  
"OPBB07\_00834" 34328 "s59E25H2" 0 "Succinyl-CoA ligase [ADP-forming] subunit beta"  
"OPBB07\_00834" 34328 "s59E5H2" 0 "Succinyl-CoA ligase [ADP-forming] subunit beta"  
"OPBB07\_00834" 34328 "s63E6H2" 0 "Succinyl-CoA ligase [ADP-forming] subunit beta"  
"OPBB07\_00835" 34329 "s59E13H2" 0 "Succinyl-CoA ligase [ADP-forming] subunit alpha"  
"OPBB07\_00835" 34329 "s59E25H2" 0 "Succinyl-CoA ligase [ADP-forming] subunit alpha"  
"OPBB07\_00835" 34329 "s59E5H2" 0 "Succinyl-CoA ligase [ADP-forming] subunit alpha"  
"OPBB07\_00835" 34329 "s63E6H2" 0 "Succinyl-CoA ligase [ADP-forming] subunit alpha"  
"OPBB07\_00836" 34330 "s59E13H2" 0 "Acetoin:2,6-dichlorophenolindophenol oxidoreductase subunit alpha"  
"OPBB07\_00836" 34330 "s59E25H2" 0 "Acetoin:2,6-dichlorophenolindophenol oxidoreductase subunit alpha"  
"OPBB07\_00836" 34330 "s59E5H2" 0 "Acetoin:2,6-dichlorophenolindophenol oxidoreductase subunit alpha"  
"OPBB07\_00836" 34330 "s63E6H2" 0 "Acetoin:2,6-dichlorophenolindophenol oxidoreductase subunit alpha"  
"OPBB07\_00837" 34331 "s59E13H2" 0 "2-oxoisovalerate dehydrogenase subunit beta"  
"OPBB07\_00837" 34331 "s59E25H2" 0 "2-oxoisovalerate dehydrogenase subunit beta"  
"OPBB07\_00837" 34331 "s59E5H2" 0 "2-oxoisovalerate dehydrogenase subunit beta"  
"OPBB07\_00837" 34331 "s63E6H2" 0 "2-oxoisovalerate dehydrogenase subunit beta"  
"OPBB07\_00838" 34332 "s59E13H2" 0 "Mannosylglycerate hydrolase"  
"OPBB07\_00838" 34332 "s59E25H2" 0 "Mannosylglycerate hydrolase"  
"OPBB07\_00838" 34332 "s59E5H2" 0 "Mannosylglycerate hydrolase"  
"OPBB07\_00838" 34332 "s63E6H2" 0 "Mannosylglycerate hydrolase"  
"OPBB07\_00839" 34333 "s59E13H2" 0 "alpha-mannosidase"  
"OPBB07\_00839" 34333 "s59E25H2" 0 "alpha-mannosidase"

"OPBB07\_00839" 34333 "s59E5H2" 0 "alpha-mannosidase"  
"OPBB07\_00839" 34333 "s63E6H2" 0 "alpha-mannosidase"  
"OPBB07\_00841" 34335 "s59E13H2" 0 "Glycerate 2-kinase"  
"OPBB07\_00841" 34335 "s59E25H2" 0 "Glycerate 2-kinase"  
"OPBB07\_00841" 34335 "s59E5H2" 0 "Glycerate 2-kinase"  
"OPBB07\_00841" 34335 "s63E6H2" 0 "Glycerate 2-kinase"  
"OPBB07\_00842" 34336 "s59E13H2" 0.5215018 "Plasmid stabilisation system protein"  
"OPBB07\_00842" 34336 "s59E25H2" 0 "Plasmid stabilisation system protein"  
"OPBB07\_00842" 34336 "s59E5H2" 0.2640755 "Plasmid stabilisation system protein"  
"OPBB07\_00842" 34336 "s63E6H2" 0.00871609 "Plasmid stabilisation system protein"  
"OPBB07\_00843" 34337 "s59E13H2" 0.5254767 "Phd\_YefM"  
"OPBB07\_00843" 34337 "s59E25H2" 0 "Phd\_YefM"  
"OPBB07\_00843" 34337 "s59E5H2" 0.3795252 "Phd\_YefM"  
"OPBB07\_00843" 34337 "s63E6H2" 0.02734614 "Phd\_YefM"  
"OPBB07\_00845" 34339 "s59E13H2" 0 "hypothetical protein"  
"OPBB07\_00845" 34339 "s59E25H2" 0 "hypothetical protein"  
"OPBB07\_00845" 34339 "s59E5H2" 0 "hypothetical protein"  
"OPBB07\_00845" 34339 "s63E6H2" 0 "hypothetical protein"  
"OPBB07\_00846" 34340 "s59E13H2" 0.01709993 "Cell division protein FtsZ"  
"OPBB07\_00846" 34340 "s59E25H2" 0 "Cell division protein FtsZ"  
"OPBB07\_00846" 34340 "s59E5H2" 0.04856428 "Cell division protein FtsZ"  
"OPBB07\_00846" 34340 "s63E6H2" 0.02848703 "Cell division protein FtsZ"  
"OPBB07\_00847" 34341 "s59E13H2" 0.02044731 "Cell division protein FtsA"  
"OPBB07\_00847" 34341 "s59E25H2" 0 "Cell division protein FtsA"  
"OPBB07\_00847" 34341 "s59E5H2" 0.03466324 "Cell division protein FtsA"  
"OPBB07\_00847" 34341 "s63E6H2" 0.02864332 "Cell division protein FtsA"  
"OPBB07\_00848" 34342 "s59E13H2" 0.006391626 "5'-nucleotidase SurE"  
"OPBB07\_00848" 34342 "s59E25H2" 0 "5'-nucleotidase SurE"  
"OPBB07\_00848" 34342 "s59E5H2" 0.024641 "5'-nucleotidase SurE"  
"OPBB07\_00848" 34342 "s63E6H2" 0.005336004 "5'-nucleotidase SurE"  
"OPBB07\_00850" 34344 "s59E13H2" 0 "Pyruvate dehydrogenase complex repressor"  
"OPBB07\_00850" 34344 "s59E25H2" 0 "Pyruvate dehydrogenase complex repressor"  
"OPBB07\_00850" 34344 "s59E5H2" 0 "Pyruvate dehydrogenase complex repressor"  
"OPBB07\_00850" 34344 "s63E6H2" 0 "Pyruvate dehydrogenase complex repressor"  
"OPBB07\_00851" 34345 "s59E13H2" 0 "2-dehydro-3-deoxygluconokinase"  
"OPBB07\_00851" 34345 "s59E25H2" 0 "2-dehydro-3-deoxygluconokinase"  
"OPBB07\_00851" 34345 "s59E5H2" 0 "2-dehydro-3-deoxygluconokinase"  
"OPBB07\_00851" 34345 "s63E6H2" 0 "2-dehydro-3-deoxygluconokinase"  
"OPBB07\_00852" 34346 "s59E13H2" 0 "Putative KHG/KDPG aldolase"  
"OPBB07\_00852" 34346 "s59E25H2" 0 "Putative KHG/KDPG aldolase"  
"OPBB07\_00852" 34346 "s59E5H2" 0 "Putative KHG/KDPG aldolase"  
"OPBB07\_00852" 34346 "s63E6H2" 0 "Putative KHG/KDPG aldolase"  
"OPBB07\_00853" 34347 "s59E13H2" 0 "Putative 2-hydroxyacid dehydrogenase"  
"OPBB07\_00853" 34347 "s59E25H2" 0 "Putative 2-hydroxyacid dehydrogenase"  
"OPBB07\_00853" 34347 "s59E5H2" 0 "Putative 2-hydroxyacid dehydrogenase"  
"OPBB07\_00853" 34347 "s63E6H2" 0 "Putative 2-hydroxyacid dehydrogenase"  
"OPBB07\_00854" 34348 "s59E13H2" 0 "putative zinc-type alcohol dehydrogenase-like protein YjmD"

"OPBB07\_00854" 34348 "s59E25H2" 0 "putative zinc-type alcohol dehydrogenase-like protein YjmD"  
"OPBB07\_00854" 34348 "s59E5H2" 0 "putative zinc-type alcohol dehydrogenase-like protein YjmD"  
"OPBB07\_00854" 34348 "s63E6H2" 0 "putative zinc-type alcohol dehydrogenase-like protein YjmD"  
"OPBB07\_00855" 34349 "s59E13H2" 0 "D-arabitol-phosphate dehydrogenase"  
"OPBB07\_00855" 34349 "s59E25H2" 0 "D-arabitol-phosphate dehydrogenase"  
"OPBB07\_00855" 34349 "s59E5H2" 0 "D-arabitol-phosphate dehydrogenase"  
"OPBB07\_00855" 34349 "s63E6H2" 0 "D-arabitol-phosphate dehydrogenase"  
"OPBB07\_00856" 34350 "s59E13H2" 0 "Glucose 1-dehydrogenase"  
"OPBB07\_00856" 34350 "s59E25H2" 0 "Glucose 1-dehydrogenase"  
"OPBB07\_00856" 34350 "s59E5H2" 0 "Glucose 1-dehydrogenase"  
"OPBB07\_00856" 34350 "s63E6H2" 0 "Glucose 1-dehydrogenase"  
"OPBB07\_00857" 34351 "s59E13H2" 0 "Trehalose/maltose import ATP-binding protein MalK"  
"OPBB07\_00857" 34351 "s59E25H2" 0 "Trehalose/maltose import ATP-binding protein MalK"  
"OPBB07\_00857" 34351 "s59E5H2" 0 "Trehalose/maltose import ATP-binding protein MalK"  
"OPBB07\_00857" 34351 "s63E6H2" 0 "Trehalose/maltose import ATP-binding protein MalK"  
"OPBB07\_00858" 34352 "s59E13H2" 0 "Trehalose/maltose import ATP-binding protein MalK"  
"OPBB07\_00858" 34352 "s59E25H2" 0 "Trehalose/maltose import ATP-binding protein MalK"  
"OPBB07\_00858" 34352 "s59E5H2" 0 "Trehalose/maltose import ATP-binding protein MalK"  
"OPBB07\_00858" 34352 "s63E6H2" 0 "Trehalose/maltose import ATP-binding protein MalK"  
"OPBB07\_00859" 34353 "s59E13H2" 0 "hypothetical protein"  
"OPBB07\_00859" 34353 "s59E25H2" 0 "hypothetical protein"  
"OPBB07\_00859" 34353 "s59E5H2" 0 "hypothetical protein"  
"OPBB07\_00859" 34353 "s63E6H2" 0 "hypothetical protein"  
"OPBB07\_00860" 34354 "s59E13H2" 0 "Trehalose transport system permease protein SugB"  
"OPBB07\_00860" 34354 "s59E25H2" 0 "Trehalose transport system permease protein SugB"  
"OPBB07\_00860" 34354 "s59E5H2" 0 "Trehalose transport system permease protein SugB"  
"OPBB07\_00860" 34354 "s63E6H2" 0 "Trehalose transport system permease protein SugB"  
"OPBB07\_00861" 34355 "s59E13H2" 0 "Trehalose/maltose transport system permease protein MalF"  
"OPBB07\_00861" 34355 "s59E25H2" 0 "Trehalose/maltose transport system permease protein MalF"  
"OPBB07\_00861" 34355 "s59E5H2" 0 "Trehalose/maltose transport system permease protein MalF"  
"OPBB07\_00861" 34355 "s63E6H2" 0 "Trehalose/maltose transport system permease protein MalF"  
"OPBB07\_00862" 34356 "s59E13H2" 0 "Bacterial extracellular solute-binding protein"  
"OPBB07\_00862" 34356 "s59E25H2" 0 "Bacterial extracellular solute-binding protein"  
"OPBB07\_00862" 34356 "s59E5H2" 0 "Bacterial extracellular solute-binding protein"  
"OPBB07\_00862" 34356 "s63E6H2" 0 "Bacterial extracellular solute-binding protein"  
"OPBB07\_00863" 34357 "s59E13H2" 0 "hypothetical protein"  
"OPBB07\_00863" 34357 "s59E25H2" 0 "hypothetical protein"  
"OPBB07\_00863" 34357 "s59E5H2" 0 "hypothetical protein"  
"OPBB07\_00863" 34357 "s63E6H2" 0 "hypothetical protein"  
"OPBB07\_00864" 34358 "s59E13H2" 0 "Glycosyl transferases group 1"  
"OPBB07\_00864" 34358 "s59E25H2" 0 "Glycosyl transferases group 1"  
"OPBB07\_00864" 34358 "s59E5H2" 0 "Glycosyl transferases group 1"  
"OPBB07\_00864" 34358 "s63E6H2" 0 "Glycosyl transferases group 1"  
"OPBB07\_00865" 34359 "s59E13H2" 0 "Lipid II flippase FtsW"  
"OPBB07\_00865" 34359 "s59E25H2" 0 "Lipid II flippase FtsW"  
"OPBB07\_00865" 34359 "s59E5H2" 0.0118998 "Lipid II flippase FtsW"  
"OPBB07\_00865" 34359 "s63E6H2" 0.0229837 "Lipid II flippase FtsW"

"OPBB07\_00866" 34360 "s59E13H2" 0 "UDP-N-acetylmuramoylalanine--D-glutamate ligase"  
"OPBB07\_00866" 34360 "s59E25H2" 0 "UDP-N-acetylmuramoylalanine--D-glutamate ligase"  
"OPBB07\_00866" 34360 "s59E5H2" 0.01611523 "UDP-N-acetylmuramoylalanine--D-glutamate ligase"  
"OPBB07\_00866" 34360 "s63E6H2" 0.0275498 "UDP-N-acetylmuramoylalanine--D-glutamate ligase"  
"OPBB07\_00867" 34361 "s59E13H2" 0 "putative regulator PrIF"  
"OPBB07\_00867" 34361 "s59E25H2" 0 "putative regulator PrIF"  
"OPBB07\_00867" 34361 "s59E5H2" 0.03125153 "putative regulator PrIF"  
"OPBB07\_00867" 34361 "s63E6H2" 0.006811734 "putative regulator PrIF"  
"OPBB07\_00868" 34362 "s59E13H2" 0.001555112 "AAA-like domain protein"  
"OPBB07\_00868" 34362 "s59E25H2" 0.2258356 "AAA-like domain protein"  
"OPBB07\_00868" 34362 "s59E5H2" 0 "AAA-like domain protein"  
"OPBB07\_00868" 34362 "s63E6H2" 8.568061 "AAA-like domain protein"  
"OPBB07\_00870" 34364 "s59E13H2" 0.001453682 "putative ABC transporter permease YknZ"  
"OPBB07\_00870" 34364 "s59E25H2" 0 "putative ABC transporter permease YknZ"  
"OPBB07\_00870" 34364 "s59E5H2" 0 "putative ABC transporter permease YknZ"  
"OPBB07\_00870" 34364 "s63E6H2" 0.01061463 "putative ABC transporter permease YknZ"  
"OPBB07\_00871" 34365 "s59E13H2" 0 "hypothetical protein"  
"OPBB07\_00871" 34365 "s59E25H2" 0 "hypothetical protein"  
"OPBB07\_00871" 34365 "s59E5H2" 0 "hypothetical protein"  
"OPBB07\_00871" 34365 "s63E6H2" 0.01239421 "hypothetical protein"  
"OPBB07\_00872" 34366 "s59E13H2" 0 "hypothetical protein"  
"OPBB07\_00872" 34366 "s59E25H2" 0 "hypothetical protein"  
"OPBB07\_00872" 34366 "s59E5H2" 0 "hypothetical protein"  
"OPBB07\_00872" 34366 "s63E6H2" 0.00426177 "hypothetical protein"  
"OPBB07\_00873" 34367 "s59E13H2" 0 "hypothetical protein"  
"OPBB07\_00873" 34367 "s59E25H2" 0 "hypothetical protein"  
"OPBB07\_00873" 34367 "s59E5H2" 0 "hypothetical protein"  
"OPBB07\_00873" 34367 "s63E6H2" 0.002579093 "hypothetical protein"  
"OPBB07\_00874" 34368 "s59E13H2" 0.01578456 "hypothetical protein"  
"OPBB07\_00874" 34368 "s59E25H2" 0 "hypothetical protein"  
"OPBB07\_00874" 34368 "s59E5H2" 0.1313799 "hypothetical protein"  
"OPBB07\_00874" 34368 "s63E6H2" 0.1340524 "hypothetical protein"  
"OPBB07\_00876" 34370 "s59E13H2" 0 "hypothetical protein"  
"OPBB07\_00876" 34370 "s59E25H2" 0 "hypothetical protein"  
"OPBB07\_00876" 34370 "s59E5H2" 0.01965906 "hypothetical protein"  
"OPBB07\_00876" 34370 "s63E6H2" 0.04758616 "hypothetical protein"  
"OPBB07\_00877" 34371 "s59E13H2" 0 "Peptide methionine sulfoxide reductase MsrB"  
"OPBB07\_00877" 34371 "s59E25H2" 0 "Peptide methionine sulfoxide reductase MsrB"  
"OPBB07\_00877" 34371 "s59E5H2" 0.01159864 "Peptide methionine sulfoxide reductase MsrB"  
"OPBB07\_00877" 34371 "s63E6H2" 0.09390772 "Peptide methionine sulfoxide reductase MsrB"  
"OPBB07\_00878" 34372 "s59E13H2" 0 "hypothetical protein"  
"OPBB07\_00878" 34372 "s59E25H2" 0 "hypothetical protein"  
"OPBB07\_00878" 34372 "s59E5H2" 0 "hypothetical protein"  
"OPBB07\_00878" 34372 "s63E6H2" 0.02725199 "hypothetical protein"  
"OPBB07\_00879" 34373 "s59E13H2" 0 "hypothetical protein"  
"OPBB07\_00879" 34373 "s59E25H2" 0 "hypothetical protein"  
"OPBB07\_00879" 34373 "s59E5H2" 0.01214542 "hypothetical protein"



"OPBB07\_00879" 34373 "s63E6H2" 0.08298331 "hypothetical protein"  
"OPBB07\_00880" 34374 "s59E13H2" 0 "hypothetical protein"  
"OPBB07\_00880" 34374 "s59E25H2" 0 "hypothetical protein"  
"OPBB07\_00880" 34374 "s59E5H2" 0 "hypothetical protein"  
"OPBB07\_00880" 34374 "s63E6H2" 0.03374006 "hypothetical protein"  
"OPBB07\_00881" 34375 "s59E13H2" 0.01813606 "hypothetical protein"  
"OPBB07\_00881" 34375 "s59E25H2" 0 "hypothetical protein"  
"OPBB07\_00881" 34375 "s59E5H2" 0.0601035 "hypothetical protein"  
"OPBB07\_00881" 34375 "s63E6H2" 0.01157317 "hypothetical protein"  
"OPBB07\_00882" 34376 "s59E13H2" 0.004387498 "Cell cycle protein GpsB"  
"OPBB07\_00882" 34376 "s59E25H2" 0.3391204 "Cell cycle protein GpsB"  
"OPBB07\_00882" 34376 "s59E5H2" 0.03456251 "Cell cycle protein GpsB"  
"OPBB07\_00882" 34376 "s63E6H2" 0.03442116 "Cell cycle protein GpsB"  
"OPBB07\_00883" 34377 "s59E13H2" 0.002904265 "YGGT family protein"  
"OPBB07\_00883" 34377 "s59E25H2" 0 "YGGT family protein"  
"OPBB07\_00883" 34377 "s59E5H2" 0.04891961 "YGGT family protein"  
"OPBB07\_00883" 34377 "s63E6H2" 0.01676604 "YGGT family protein"  
"OPBB07\_00884" 34378 "s59E13H2" 0.03816268 "Pyrroline-5-carboxylate reductase"  
"OPBB07\_00884" 34378 "s59E25H2" 0 "Pyrroline-5-carboxylate reductase"  
"OPBB07\_00884" 34378 "s59E5H2" 0.02552066 "Pyrroline-5-carboxylate reductase"  
"OPBB07\_00884" 34378 "s63E6H2" 0.03841342 "Pyrroline-5-carboxylate reductase"  
"OPBB07\_00885" 34379 "s59E13H2" 0.02486658 "Cell division protein SepF"  
"OPBB07\_00885" 34379 "s59E25H2" 0 "Cell division protein SepF"  
"OPBB07\_00885" 34379 "s59E5H2" 0 "Cell division protein SepF"  
"OPBB07\_00885" 34379 "s63E6H2" 0.02059611 "Cell division protein SepF"  
"OPBB07\_00886" 34380 "s59E13H2" 0.01488315 "hypothetical protein"  
"OPBB07\_00886" 34380 "s59E25H2" 0 "hypothetical protein"  
"OPBB07\_00886" 34380 "s59E5H2" 0.02357427 "hypothetical protein"  
"OPBB07\_00886" 34380 "s63E6H2" 0.02144122 "hypothetical protein"  
"OPBB07\_00887" 34381 "s59E13H2" 0 "Glucokinase"  
"OPBB07\_00887" 34381 "s59E25H2" 0 "Glucokinase"  
"OPBB07\_00887" 34381 "s59E5H2" 0 "Glucokinase"  
"OPBB07\_00887" 34381 "s63E6H2" 0.1438116 "Glucokinase"  
"OPBB07\_00888" 34382 "s59E13H2" 0 "D-allose-binding periplasmic protein precursor"  
"OPBB07\_00888" 34382 "s59E25H2" 0 "D-allose-binding periplasmic protein precursor"  
"OPBB07\_00888" 34382 "s59E5H2" 0 "D-allose-binding periplasmic protein precursor"  
"OPBB07\_00888" 34382 "s63E6H2" 0 "D-allose-binding periplasmic protein precursor"  
"OPBB07\_00889" 34383 "s59E13H2" 0 "Ribose import ATP-binding protein RbsA"  
"OPBB07\_00889" 34383 "s59E25H2" 0 "Ribose import ATP-binding protein RbsA"  
"OPBB07\_00889" 34383 "s59E5H2" 0 "Ribose import ATP-binding protein RbsA"  
"OPBB07\_00889" 34383 "s63E6H2" 0 "Ribose import ATP-binding protein RbsA"  
"OPBB07\_00890" 34384 "s59E13H2" 0 "Ribose transport system permease protein RbsC"  
"OPBB07\_00890" 34384 "s59E25H2" 0 "Ribose transport system permease protein RbsC"  
"OPBB07\_00890" 34384 "s59E5H2" 0 "Ribose transport system permease protein RbsC"  
"OPBB07\_00890" 34384 "s63E6H2" 0 "Ribose transport system permease protein RbsC"  
"OPBB07\_00891" 34385 "s59E13H2" 0 "Trimethylamine corrinoid protein"  
"OPBB07\_00891" 34385 "s59E25H2" 0 "Trimethylamine corrinoid protein"

"OPBB07\_00891" 34385 "s59E5H2" 0 "Trimethylamine corrinoid protein"  
"OPBB07\_00891" 34385 "s63E6H2" 0 "Trimethylamine corrinoid protein"  
"OPBB07\_00892" 34386 "s59E13H2" 0 "Trimethylamine methyltransferase MttB"  
"OPBB07\_00892" 34386 "s59E25H2" 0 "Trimethylamine methyltransferase MttB"  
"OPBB07\_00892" 34386 "s59E5H2" 0 "Trimethylamine methyltransferase MttB"  
"OPBB07\_00892" 34386 "s63E6H2" 0 "Trimethylamine methyltransferase MttB"  
"OPBB07\_00894" 34388 "s59E13H2" 0.05984901 "Hydrogenase isoenzymes formation protein HypC"  
"OPBB07\_00894" 34388 "s59E25H2" 0 "Hydrogenase isoenzymes formation protein HypC"  
"OPBB07\_00894" 34388 "s59E5H2" 0.03840379 "Hydrogenase isoenzymes formation protein HypC"  
"OPBB07\_00894" 34388 "s63E6H2" 0.02361466 "Hydrogenase isoenzymes formation protein HypC"  
"OPBB07\_00895" 34389 "s59E13H2" 0.05329675 "Carbamoyltransferase HypF"  
"OPBB07\_00895" 34389 "s59E25H2" 0 "Carbamoyltransferase HypF"  
"OPBB07\_00895" 34389 "s59E5H2" 0.007353988 "Carbamoyltransferase HypF"  
"OPBB07\_00895" 34389 "s63E6H2" 0.01687833 "Carbamoyltransferase HypF"  
"OPBB07\_00896" 34390 "s59E13H2" 0.02782987 "1,4-dihydroxy-2-naphthoate octaprenyltransferase"  
"OPBB07\_00896" 34390 "s59E25H2" 0 "1,4-dihydroxy-2-naphthoate octaprenyltransferase"  
"OPBB07\_00896" 34390 "s59E5H2" 0 "1,4-dihydroxy-2-naphthoate octaprenyltransferase"  
"OPBB07\_00896" 34390 "s63E6H2" 0.01026987 "1,4-dihydroxy-2-naphthoate octaprenyltransferase"  
"OPBB07\_00897" 34391 "s59E13H2" 0.04685985 "Naphthalene 1,2-dioxygenase/salicylate 5-hydroxylase systems, ferredoxin component"  
"OPBB07\_00897" 34391 "s59E25H2" 0 "Naphthalene 1,2-dioxygenase/salicylate 5-hydroxylase systems, ferredoxin component"  
"OPBB07\_00897" 34391 "s59E5H2" 0 "Naphthalene 1,2-dioxygenase/salicylate 5-hydroxylase systems, ferredoxin component"  
"OPBB07\_00897" 34391 "s63E6H2" 0.006265201 "Naphthalene 1,2-dioxygenase/salicylate 5-hydroxylase systems, ferredoxin component"  
"OPBB07\_00898" 34392 "s59E13H2" 0.04626194 "hypothetical protein"  
"OPBB07\_00898" 34392 "s59E25H2" 0 "hypothetical protein"  
"OPBB07\_00898" 34392 "s59E5H2" 0 "hypothetical protein"  
"OPBB07\_00898" 34392 "s63E6H2" 0.08732646 "hypothetical protein"  
"OPBB07\_00899" 34393 "s59E13H2" 0.07099139 "Cyclic di-GMP phosphodiesterase response regulator RpfG"  
"OPBB07\_00899" 34393 "s59E25H2" 0 "Cyclic di-GMP phosphodiesterase response regulator RpfG"  
"OPBB07\_00899" 34393 "s59E5H2" 0 "Cyclic di-GMP phosphodiesterase response regulator RpfG"  
"OPBB07\_00899" 34393 "s63E6H2" 0.3360753 "Cyclic di-GMP phosphodiesterase response regulator RpfG"  
"OPBB07\_00900" 34394 "s59E13H2" 0.0567138 "Low specificity L-threonine aldolase"  
"OPBB07\_00900" 34394 "s59E25H2" 0 "Low specificity L-threonine aldolase"  
"OPBB07\_00900" 34394 "s59E5H2" 0 "Low specificity L-threonine aldolase"  
"OPBB07\_00900" 34394 "s63E6H2" 0.5691582 "Low specificity L-threonine aldolase"  
"OPBB07\_00901" 34395 "s59E13H2" 0.02270971 "hypothetical protein"  
"OPBB07\_00901" 34395 "s59E25H2" 0 "hypothetical protein"  
"OPBB07\_00901" 34395 "s59E5H2" 0 "hypothetical protein"  
"OPBB07\_00901" 34395 "s63E6H2" 0.1088037 "hypothetical protein"  
"OPBB07\_00902" 34396 "s59E13H2" 0.06118345 "hypothetical protein"  
"OPBB07\_00902" 34396 "s59E25H2" 0 "hypothetical protein"  
"OPBB07\_00902" 34396 "s59E5H2" 0 "hypothetical protein"  
"OPBB07\_00902" 34396 "s63E6H2" 0.5309344 "hypothetical protein"  
"OPBB07\_00903" 34397 "s59E13H2" 0.06656255 "Elongation factor G"  
"OPBB07\_00903" 34397 "s59E25H2" 0 "Elongation factor G"  
"OPBB07\_00903" 34397 "s59E5H2" 0.02311067 "Elongation factor G"  
"OPBB07\_00903" 34397 "s63E6H2" 0.4228377 "Elongation factor G"  
"OPBB07\_00904" 34398 "s59E13H2" 0.008944648 "LemA family protein"

"OPBB07\_00904" 34398 "s59E25H2" 0 "LemA family protein"  
"OPBB07\_00904" 34398 "s59E5H2" 0 "LemA family protein"  
"OPBB07\_00904" 34398 "s63E6H2" 0.1568243 "LemA family protein"  
"OPBB07\_00905" 34399 "s59E13H2" 0.02498125 "hypothetical protein"  
"OPBB07\_00905" 34399 "s59E25H2" 0 "hypothetical protein"  
"OPBB07\_00905" 34399 "s59E5H2" 0.02640196 "hypothetical protein"  
"OPBB07\_00905" 34399 "s63E6H2" 0.006613238 "hypothetical protein"  
"OPBB07\_00906" 34400 "s59E13H2" 0.06835723 "Pyridoxal biosynthesis lyase PdxS"  
"OPBB07\_00906" 34400 "s59E25H2" 0 "Pyridoxal biosynthesis lyase PdxS"  
"OPBB07\_00906" 34400 "s59E5H2" 0.02229573 "Pyridoxal biosynthesis lyase PdxS"  
"OPBB07\_00906" 34400 "s63E6H2" 0.01464681 "Pyridoxal biosynthesis lyase PdxS"  
"OPBB07\_00907" 34401 "s59E13H2" 0 "Glutamine amidotransferase subunit PdxT"  
"OPBB07\_00907" 34401 "s59E25H2" 0 "Glutamine amidotransferase subunit PdxT"  
"OPBB07\_00907" 34401 "s59E5H2" 0 "Glutamine amidotransferase subunit PdxT"  
"OPBB07\_00907" 34401 "s63E6H2" 0.0002953089 "Glutamine amidotransferase subunit PdxT"  
"OPBB07\_00908" 34402 "s59E13H2" 0 "putative transcriptional regulatory protein"  
"OPBB07\_00908" 34402 "s59E25H2" 0 "putative transcriptional regulatory protein"  
"OPBB07\_00908" 34402 "s59E5H2" 0.01301262 "putative transcriptional regulatory protein"  
"OPBB07\_00908" 34402 "s63E6H2" 0.001418501 "putative transcriptional regulatory protein"  
"OPBB07\_00909" 34403 "s59E13H2" 0 "Crossover junction endodeoxyribonuclease RuvC"  
"OPBB07\_00909" 34403 "s59E25H2" 0 "Crossover junction endodeoxyribonuclease RuvC"  
"OPBB07\_00909" 34403 "s59E5H2" 0.03348551 "Crossover junction endodeoxyribonuclease RuvC"  
"OPBB07\_00909" 34403 "s63E6H2" 0.006290132 "Crossover junction endodeoxyribonuclease RuvC"  
"OPBB07\_00910" 34404 "s59E13H2" 0 "Holliday junction ATP-dependent DNA helicase RuvA"  
"OPBB07\_00910" 34404 "s59E25H2" 0 "Holliday junction ATP-dependent DNA helicase RuvA"  
"OPBB07\_00910" 34404 "s59E5H2" 0.04238093 "Holliday junction ATP-dependent DNA helicase RuvA"  
"OPBB07\_00910" 34404 "s63E6H2" 0.04519864 "Holliday junction ATP-dependent DNA helicase RuvA"  
"OPBB07\_00911" 34405 "s59E13H2" 0 "Holliday junction ATP-dependent DNA helicase RuvB"  
"OPBB07\_00911" 34405 "s59E25H2" 0 "Holliday junction ATP-dependent DNA helicase RuvB"  
"OPBB07\_00911" 34405 "s59E5H2" 0.4610926 "Holliday junction ATP-dependent DNA helicase RuvB"  
"OPBB07\_00911" 34405 "s63E6H2" 0.04082388 "Holliday junction ATP-dependent DNA helicase RuvB"  
"OPBB07\_00912" 34406 "s59E13H2" 0.01659327 "S-adenosylmethionine:tRNA ribosyltransferase-isomerase"  
"OPBB07\_00912" 34406 "s59E25H2" 0 "S-adenosylmethionine:tRNA ribosyltransferase-isomerase"  
"OPBB07\_00912" 34406 "s59E5H2" 0.04129675 "S-adenosylmethionine:tRNA ribosyltransferase-isomerase"  
"OPBB07\_00912" 34406 "s63E6H2" 0.01333367 "S-adenosylmethionine:tRNA ribosyltransferase-isomerase"  
"OPBB07\_00913" 34407 "s59E13H2" 0 "hypothetical protein"  
"OPBB07\_00913" 34407 "s59E25H2" 0 "hypothetical protein"  
"OPBB07\_00913" 34407 "s59E5H2" 0.4840051 "hypothetical protein"  
"OPBB07\_00913" 34407 "s63E6H2" 0.002721206 "hypothetical protein"  
"OPBB07\_00914" 34408 "s59E13H2" 0.007841271 "Vancomycin B-type resistance protein VanB"  
"OPBB07\_00914" 34408 "s59E25H2" 0 "Vancomycin B-type resistance protein VanB"  
"OPBB07\_00914" 34408 "s59E5H2" 0.8157203 "Vancomycin B-type resistance protein VanB"  
"OPBB07\_00914" 34408 "s63E6H2" 0.003485459 "Vancomycin B-type resistance protein VanB"  
"OPBC09\_00001" 34410 "s59E13H2" 0 "Cystine-binding periplasmic protein precursor"  
"OPBC09\_00001" 34410 "s59E25H2" 0 "Cystine-binding periplasmic protein precursor"  
"OPBC09\_00001" 34410 "s59E5H2" 0.01220884 "Cystine-binding periplasmic protein precursor"  
"OPBC09\_00001" 34410 "s63E6H2" 0.01107031 "Cystine-binding periplasmic protein precursor"

"OPBC09\_00002" 34411 "s59E13H2" 0.003399605 "Inositol 2-dehydrogenase/D-chiro-inositol 3-dehydrogenase"  
"OPBC09\_00002" 34411 "s59E25H2" 0 "Inositol 2-dehydrogenase/D-chiro-inositol 3-dehydrogenase"  
"OPBC09\_00002" 34411 "s59E5H2" 0 "Inositol 2-dehydrogenase/D-chiro-inositol 3-dehydrogenase"  
"OPBC09\_00002" 34411 "s63E6H2" 0.02879194 "Inositol 2-dehydrogenase/D-chiro-inositol 3-dehydrogenase"  
"OPBC09\_00003" 34412 "s59E13H2" 0 "putative L-threonine 3-dehydrogenase"  
"OPBC09\_00003" 34412 "s59E25H2" 0 "putative L-threonine 3-dehydrogenase"  
"OPBC09\_00003" 34412 "s59E5H2" 0 "putative L-threonine 3-dehydrogenase"  
"OPBC09\_00003" 34412 "s63E6H2" 0 "putative L-threonine 3-dehydrogenase"  
"OPBC09\_00004" 34413 "s59E13H2" 0 "Xylulose kinase"  
"OPBC09\_00004" 34413 "s59E25H2" 0 "Xylulose kinase"  
"OPBC09\_00004" 34413 "s59E5H2" 0.007435614 "Xylulose kinase"  
"OPBC09\_00004" 34413 "s63E6H2" 0.000973943 "Xylulose kinase"  
"OPBC09\_00005" 34414 "s59E13H2" 0 "hypothetical protein"  
"OPBC09\_00005" 34414 "s59E25H2" 0 "hypothetical protein"  
"OPBC09\_00005" 34414 "s59E5H2" 0 "hypothetical protein"  
"OPBC09\_00005" 34414 "s63E6H2" 0 "hypothetical protein"  
"OPBC09\_00006" 34415 "s59E13H2" 0 "Glucose-6-phosphate isomerase"  
"OPBC09\_00006" 34415 "s59E25H2" 0 "Glucose-6-phosphate isomerase"  
"OPBC09\_00006" 34415 "s59E5H2" 0 "Glucose-6-phosphate isomerase"  
"OPBC09\_00006" 34415 "s63E6H2" 0 "Glucose-6-phosphate isomerase"  
"OPBC09\_00007" 34416 "s59E13H2" 0.01705578 "Glyoxylate reductase"  
"OPBC09\_00007" 34416 "s59E25H2" 0 "Glyoxylate reductase"  
"OPBC09\_00007" 34416 "s59E5H2" 0.03849073 "Glyoxylate reductase"  
"OPBC09\_00007" 34416 "s63E6H2" 0.07576663 "Glyoxylate reductase"  
"OPBC09\_00008" 34417 "s59E13H2" 0 "KHG/KDPG aldolase"  
"OPBC09\_00008" 34417 "s59E25H2" 0 "KHG/KDPG aldolase"  
"OPBC09\_00008" 34417 "s59E5H2" 0 "KHG/KDPG aldolase"  
"OPBC09\_00008" 34417 "s63E6H2" 0 "KHG/KDPG aldolase"  
"OPBC09\_00009" 34418 "s59E13H2" 0 "Tungsten-containing aldehyde ferredoxin oxidoreductase"  
"OPBC09\_00009" 34418 "s59E25H2" 0 "Tungsten-containing aldehyde ferredoxin oxidoreductase"  
"OPBC09\_00009" 34418 "s59E5H2" 0 "Tungsten-containing aldehyde ferredoxin oxidoreductase"  
"OPBC09\_00009" 34418 "s63E6H2" 0 "Tungsten-containing aldehyde ferredoxin oxidoreductase"  
"OPBC09\_00010" 34419 "s59E13H2" 0 "ThiS family protein"  
"OPBC09\_00010" 34419 "s59E25H2" 0 "ThiS family protein"  
"OPBC09\_00010" 34419 "s59E5H2" 0 "ThiS family protein"  
"OPBC09\_00010" 34419 "s63E6H2" 0 "ThiS family protein"  
"OPBC09\_00011" 34420 "s59E13H2" 0 "putative adenylyltransferase"  
"OPBC09\_00011" 34420 "s59E25H2" 0 "putative adenylyltransferase"  
"OPBC09\_00011" 34420 "s59E5H2" 0 "putative adenylyltransferase"  
"OPBC09\_00011" 34420 "s63E6H2" 0 "putative adenylyltransferase"  
"OPBC09\_00012" 34421 "s59E13H2" 0.003641129 "D-tagatose 3-epimerase"  
"OPBC09\_00012" 34421 "s59E25H2" 0 "D-tagatose 3-epimerase"  
"OPBC09\_00012" 34421 "s59E5H2" 0 "D-tagatose 3-epimerase"  
"OPBC09\_00012" 34421 "s63E6H2" 0.003377383 "D-tagatose 3-epimerase"  
"OPBC09\_00013" 34422 "s59E13H2" 0 "Ribose transport system permease protein RbsC"  
"OPBC09\_00013" 34422 "s59E25H2" 0 "Ribose transport system permease protein RbsC"  
"OPBC09\_00013" 34422 "s59E5H2" 0 "Ribose transport system permease protein RbsC"

"OPBC09\_00013" 34422 "s63E6H2" 0 "Ribose transport system permease protein RbsC"  
"OPBC09\_00014" 34423 "s59E13H2" 0 "Ribose import ATP-binding protein RbsA"  
"OPBC09\_00014" 34423 "s59E25H2" 0 "Ribose import ATP-binding protein RbsA"  
"OPBC09\_00014" 34423 "s59E5H2" 0 "Ribose import ATP-binding protein RbsA"  
"OPBC09\_00014" 34423 "s63E6H2" 0 "Ribose import ATP-binding protein RbsA"  
"OPBC09\_00015" 34424 "s59E13H2" 0 "Cyclopentanol dehydrogenase"  
"OPBC09\_00015" 34424 "s59E25H2" 0 "Cyclopentanol dehydrogenase"  
"OPBC09\_00015" 34424 "s59E5H2" 0 "Cyclopentanol dehydrogenase"  
"OPBC09\_00015" 34424 "s63E6H2" 0 "Cyclopentanol dehydrogenase"  
"OPBC09\_00016" 34425 "s59E13H2" 0 "D-ribose-binding periplasmic protein precursor"  
"OPBC09\_00016" 34425 "s59E25H2" 0 "D-ribose-binding periplasmic protein precursor"  
"OPBC09\_00016" 34425 "s59E5H2" 0 "D-ribose-binding periplasmic protein precursor"  
"OPBC09\_00016" 34425 "s63E6H2" 0 "D-ribose-binding periplasmic protein precursor"  
"OPBC09\_00017" 34426 "s59E13H2" 0.1738898 "HTH-type transcriptional repressor YvoA"  
"OPBC09\_00017" 34426 "s59E25H2" 0 "HTH-type transcriptional repressor YvoA"  
"OPBC09\_00017" 34426 "s59E5H2" 0 "HTH-type transcriptional repressor YvoA"  
"OPBC09\_00017" 34426 "s63E6H2" 0 "HTH-type transcriptional repressor YvoA"  
"OPBC09\_00018" 34427 "s59E13H2" 0.9801954 "Na(+)-translocating NADH-quinone reductase subunit F"  
"OPBC09\_00018" 34427 "s59E25H2" 0 "Na(+)-translocating NADH-quinone reductase subunit F"  
"OPBC09\_00018" 34427 "s59E5H2" 0.009567301 "Na(+)-translocating NADH-quinone reductase subunit F"  
"OPBC09\_00018" 34427 "s63E6H2" 0.02431079 "Na(+)-translocating NADH-quinone reductase subunit F"  
"OPBC09\_00019" 34428 "s59E13H2" 0.5500676 "Penicillinase repressor"  
"OPBC09\_00019" 34428 "s59E25H2" 0 "Penicillinase repressor"  
"OPBC09\_00019" 34428 "s59E5H2" 0.01233107 "Penicillinase repressor"  
"OPBC09\_00019" 34428 "s63E6H2" 0.009860145 "Penicillinase repressor"  
"OPBC09\_00020" 34429 "s59E13H2" 0 "Methicillin resistance mecR1 protein"  
"OPBC09\_00020" 34429 "s59E25H2" 0 "Methicillin resistance mecR1 protein"  
"OPBC09\_00020" 34429 "s59E5H2" 0 "Methicillin resistance mecR1 protein"  
"OPBC09\_00020" 34429 "s63E6H2" 0 "Methicillin resistance mecR1 protein"  
"OPBC09\_00021" 34430 "s59E13H2" 0 "hypothetical protein"  
"OPBC09\_00021" 34430 "s59E25H2" 0 "hypothetical protein"  
"OPBC09\_00021" 34430 "s59E5H2" 0.2355469 "hypothetical protein"  
"OPBC09\_00021" 34430 "s63E6H2" 0 "hypothetical protein"  
"OPBC09\_00022" 34431 "s59E13H2" 0.01695238 "Bifunctional protein FOLD protein"  
"OPBC09\_00022" 34431 "s59E25H2" 0 "Bifunctional protein FOLD protein"  
"OPBC09\_00022" 34431 "s59E5H2" 0.5112486 "Bifunctional protein FOLD protein"  
"OPBC09\_00022" 34431 "s63E6H2" 0.02646202 "Bifunctional protein FOLD protein"  
"OPBC09\_00023" 34432 "s59E13H2" 0.002015401 "Formate--tetrahydrofolate ligase"  
"OPBC09\_00023" 34432 "s59E25H2" 0 "Formate--tetrahydrofolate ligase"  
"OPBC09\_00023" 34432 "s59E5H2" 0.06461779 "Formate--tetrahydrofolate ligase"  
"OPBC09\_00023" 34432 "s63E6H2" 0.003369029 "Formate--tetrahydrofolate ligase"  
"OPBC09\_00024" 34433 "s59E13H2" 0.02080495 "Corrinoid/iron-sulfur protein large subunit"  
"OPBC09\_00024" 34433 "s59E25H2" 0 "Corrinoid/iron-sulfur protein large subunit"  
"OPBC09\_00024" 34433 "s59E5H2" 0 "Corrinoid/iron-sulfur protein large subunit"  
"OPBC09\_00024" 34433 "s63E6H2" 0.009830436 "Corrinoid/iron-sulfur protein large subunit"  
"OPBC09\_00025" 34434 "s59E13H2" 0.02317574 "Carbon monoxide dehydrogenase/acetyl-CoA synthase subunit alpha"  
"OPBC09\_00025" 34434 "s59E25H2" 0 "Carbon monoxide dehydrogenase/acetyl-CoA synthase subunit alpha"

"OPBC09\_00025" 34434 "s59E5H2" 0.006682415 "Carbon monoxide dehydrogenase/acetyl-CoA synthase subunit alpha"  
"OPBC09\_00025" 34434 "s63E6H2" 0.002962992 "Carbon monoxide dehydrogenase/acetyl-CoA synthase subunit alpha"  
"OPBC09\_00026" 34435 "s59E13H2" 0 "Carbon monoxide dehydrogenase 2"  
"OPBC09\_00026" 34435 "s59E25H2" 0 "Carbon monoxide dehydrogenase 2"  
"OPBC09\_00026" 34435 "s59E5H2" 0.02998139 "Carbon monoxide dehydrogenase 2"  
"OPBC09\_00026" 34435 "s63E6H2" 0 "Carbon monoxide dehydrogenase 2"  
"OPBC09\_00027" 34436 "s59E13H2" 0.003949268 "Corrinoid/iron-sulfur protein small subunit"  
"OPBC09\_00027" 34436 "s59E25H2" 0 "Corrinoid/iron-sulfur protein small subunit"  
"OPBC09\_00027" 34436 "s59E5H2" 0.01290216 "Corrinoid/iron-sulfur protein small subunit"  
"OPBC09\_00027" 34436 "s63E6H2" 0 "Corrinoid/iron-sulfur protein small subunit"  
"OPBC09\_00028" 34437 "s59E13H2" 0 "O-Antigen ligase"  
"OPBC09\_00028" 34437 "s59E25H2" 0 "O-Antigen ligase"  
"OPBC09\_00028" 34437 "s59E5H2" 0 "O-Antigen ligase"  
"OPBC09\_00028" 34437 "s63E6H2" 0.0008485887 "O-Antigen ligase"  
"OPBC09\_00029" 34438 "s59E13H2" 0 "haloacid dehalogenase-like hydrolase"  
"OPBC09\_00029" 34438 "s59E25H2" 0 "haloacid dehalogenase-like hydrolase"  
"OPBC09\_00029" 34438 "s59E5H2" 0.3173846 "haloacid dehalogenase-like hydrolase"  
"OPBC09\_00029" 34438 "s63E6H2" 0.002387953 "haloacid dehalogenase-like hydrolase"  
"OPBC09\_00030" 34439 "s59E13H2" 0 "Teichoic acids export ATP-binding protein TagH"  
"OPBC09\_00030" 34439 "s59E25H2" 0 "Teichoic acids export ATP-binding protein TagH"  
"OPBC09\_00030" 34439 "s59E5H2" 0.2754457 "Teichoic acids export ATP-binding protein TagH"  
"OPBC09\_00030" 34439 "s63E6H2" 0.08973049 "Teichoic acids export ATP-binding protein TagH"  
"OPBC09\_00031" 34440 "s59E13H2" 0 "Teichoic acid translocation permease protein TagG"  
"OPBC09\_00031" 34440 "s59E25H2" 0 "Teichoic acid translocation permease protein TagG"  
"OPBC09\_00031" 34440 "s59E5H2" 0.1701132 "Teichoic acid translocation permease protein TagG"  
"OPBC09\_00031" 34440 "s63E6H2" 0.02658199 "Teichoic acid translocation permease protein TagG"  
"OPBC09\_00032" 34441 "s59E13H2" 0.007289366 "hypothetical protein"  
"OPBC09\_00032" 34441 "s59E25H2" 0 "hypothetical protein"  
"OPBC09\_00032" 34441 "s59E5H2" 0.612684 "hypothetical protein"  
"OPBC09\_00032" 34441 "s63E6H2" 0.002599456 "hypothetical protein"  
"OPBC09\_00033" 34442 "s59E13H2" 2.379114 "putative glutamine synthetase 2"  
"OPBC09\_00033" 34442 "s59E25H2" 0 "putative glutamine synthetase 2"  
"OPBC09\_00033" 34442 "s59E5H2" 0.1871256 "putative glutamine synthetase 2"  
"OPBC09\_00033" 34442 "s63E6H2" 0.01717467 "putative glutamine synthetase 2"  
"OPBC09\_00034" 34443 "s59E13H2" 3.496586 "VIT family protein"  
"OPBC09\_00034" 34443 "s59E25H2" 0 "VIT family protein"  
"OPBC09\_00034" 34443 "s59E5H2" 0.1250925 "VIT family protein"  
"OPBC09\_00034" 34443 "s63E6H2" 0 "VIT family protein"  
"OPBC09\_00035" 34444 "s59E13H2" 3.669993 "Trehalose/maltose import ATP-binding protein Malk"  
"OPBC09\_00035" 34444 "s59E25H2" 0 "Trehalose/maltose import ATP-binding protein Malk"  
"OPBC09\_00035" 34444 "s59E5H2" 0.1706451 "Trehalose/maltose import ATP-binding protein Malk"  
"OPBC09\_00035" 34444 "s63E6H2" 0.002781483 "Trehalose/maltose import ATP-binding protein Malk"  
"OPBC09\_00036" 34445 "s59E13H2" 0.04563845 "Cyclic di-GMP phosphodiesterase response regulator RpfG"  
"OPBC09\_00036" 34445 "s59E25H2" 0 "Cyclic di-GMP phosphodiesterase response regulator RpfG"  
"OPBC09\_00036" 34445 "s59E5H2" 0 "Cyclic di-GMP phosphodiesterase response regulator RpfG"  
"OPBC09\_00036" 34445 "s63E6H2" 0.008404351 "Cyclic di-GMP phosphodiesterase response regulator RpfG"  
"OPBC09\_00037" 34446 "s59E13H2" 2.362468 "SPFH domain / Band 7 family protein"

"OPBC09\_00037" 34446 "s59E25H2" 0 "SPFH domain / Band 7 family protein"  
"OPBC09\_00037" 34446 "s59E5H2" 0.06012074 "SPFH domain / Band 7 family protein"  
"OPBC09\_00037" 34446 "s63E6H2" 0.02398945 "SPFH domain / Band 7 family protein"  
"OPBC09\_00038" 34447 "s59E13H2" 2.301479 "AsnC family protein"  
"OPBC09\_00038" 34447 "s59E25H2" 0 "AsnC family protein"  
"OPBC09\_00038" 34447 "s59E5H2" 0.04849839 "AsnC family protein"  
"OPBC09\_00038" 34447 "s63E6H2" 0.04624877 "AsnC family protein"  
"OPBC09\_00039" 34448 "s59E13H2" 2.303213 "Lipoyl synthase"  
"OPBC09\_00039" 34448 "s59E25H2" 0 "Lipoyl synthase"  
"OPBC09\_00039" 34448 "s59E5H2" 0.07679144 "Lipoyl synthase"  
"OPBC09\_00039" 34448 "s63E6H2" 0.02792979 "Lipoyl synthase"  
"OPBC09\_00040" 34449 "s59E13H2" 2.033142 "putative chromosome-partitioning protein ParB"  
"OPBC09\_00040" 34449 "s59E25H2" 0 "putative chromosome-partitioning protein ParB"  
"OPBC09\_00040" 34449 "s59E5H2" 0.06465864 "putative chromosome-partitioning protein ParB"  
"OPBC09\_00040" 34449 "s63E6H2" 0.02386527 "putative chromosome-partitioning protein ParB"  
"OPBC09\_00041" 34450 "s59E13H2" 1.877344 "Sporulation initiation inhibitor protein Soj"  
"OPBC09\_00041" 34450 "s59E25H2" 0 "Sporulation initiation inhibitor protein Soj"  
"OPBC09\_00041" 34450 "s59E5H2" 0.0486352 "Sporulation initiation inhibitor protein Soj"  
"OPBC09\_00041" 34450 "s63E6H2" 0.03940853 "Sporulation initiation inhibitor protein Soj"  
"OPBC09\_00042" 34451 "s59E13H2" 0.01200755 "LemA family protein"  
"OPBC09\_00042" 34451 "s59E25H2" 0 "LemA family protein"  
"OPBC09\_00042" 34451 "s59E5H2" 0 "LemA family protein"  
"OPBC09\_00042" 34451 "s63E6H2" 0.07413534 "LemA family protein"  
"OPBC09\_00043" 34452 "s59E13H2" 0.01018682 "hypothetical protein"  
"OPBC09\_00043" 34452 "s59E25H2" 0 "hypothetical protein"  
"OPBC09\_00043" 34452 "s59E5H2" 0.01368991 "hypothetical protein"  
"OPBC09\_00043" 34452 "s63E6H2" 0.003808401 "hypothetical protein"  
"OPBC09\_00044" 34453 "s59E13H2" 0.004237315 "Adenine phosphoribosyltransferase"  
"OPBC09\_00044" 34453 "s59E25H2" 0 "Adenine phosphoribosyltransferase"  
"OPBC09\_00044" 34453 "s59E5H2" 0.08531347 "Adenine phosphoribosyltransferase"  
"OPBC09\_00044" 34453 "s63E6H2" 0.002876599 "Adenine phosphoribosyltransferase"  
"OPBC09\_00045" 34454 "s59E13H2" 0.004539096 "hypothetical protein"  
"OPBC09\_00045" 34454 "s59E25H2" 0 "hypothetical protein"  
"OPBC09\_00045" 34454 "s59E5H2" 0.03409792 "hypothetical protein"  
"OPBC09\_00045" 34454 "s63E6H2" 0 "hypothetical protein"  
"OPBC09\_00046" 34455 "s59E13H2" 0.003126704 "putative lysine decarboxylase"  
"OPBC09\_00046" 34455 "s59E25H2" 0 "putative lysine decarboxylase"  
"OPBC09\_00046" 34455 "s59E5H2" 0.02312874 "putative lysine decarboxylase"  
"OPBC09\_00046" 34455 "s63E6H2" 0 "putative lysine decarboxylase"  
"OPBC09\_00047" 34456 "s59E13H2" 0.005987092 "hypothetical protein"  
"OPBC09\_00047" 34456 "s59E25H2" 0 "hypothetical protein"  
"OPBC09\_00047" 34456 "s59E5H2" 0.006293162 "hypothetical protein"  
"OPBC09\_00047" 34456 "s63E6H2" 0 "hypothetical protein"  
"OPBC09\_00048" 34457 "s59E13H2" 0 "Thioredoxin reductase"  
"OPBC09\_00048" 34457 "s59E25H2" 0 "Thioredoxin reductase"  
"OPBC09\_00048" 34457 "s59E5H2" 0.05492857 "Thioredoxin reductase"  
"OPBC09\_00048" 34457 "s63E6H2" 0.004719945 "Thioredoxin reductase"

"OPBC09\_00049" 34458 "s59E13H2" 0.006454113 "N-acetylmuramoyl-L-alanine amidase LytC precursor"  
"OPBC09\_00049" 34458 "s59E25H2" 0 "N-acetylmuramoyl-L-alanine amidase LytC precursor"  
"OPBC09\_00049" 34458 "s59E5H2" 0.08980207 "N-acetylmuramoyl-L-alanine amidase LytC precursor"  
"OPBC09\_00049" 34458 "s63E6H2" 0.003267334 "N-acetylmuramoyl-L-alanine amidase LytC precursor"  
"OPBC09\_00050" 34459 "s59E13H2" 0.01233511 "Histone deacetylase-like amidohydrolase"  
"OPBC09\_00050" 34459 "s59E25H2" 0 "Histone deacetylase-like amidohydrolase"  
"OPBC09\_00050" 34459 "s59E5H2" 0.06407277 "Histone deacetylase-like amidohydrolase"  
"OPBC09\_00050" 34459 "s63E6H2" 0 "Histone deacetylase-like amidohydrolase"  
"OPBC09\_00051" 34460 "s59E13H2" 0.0002477819 "hypothetical protein"  
"OPBC09\_00051" 34460 "s59E25H2" 0 "hypothetical protein"  
"OPBC09\_00051" 34460 "s59E5H2" 0.07536599 "hypothetical protein"  
"OPBC09\_00051" 34460 "s63E6H2" 0.0003403165 "hypothetical protein"  
"OPBC09\_00052" 34461 "s59E13H2" 0.002629815 "heat shock protein GrpE"  
"OPBC09\_00052" 34461 "s59E25H2" 0 "heat shock protein GrpE"  
"OPBC09\_00052" 34461 "s59E5H2" 0.07833169 "heat shock protein GrpE"  
"OPBC09\_00052" 34461 "s63E6H2" 0.007983758 "heat shock protein GrpE"  
"OPBC09\_00053" 34462 "s59E13H2" 0.002007617 "Light-independent protochlorophyllide reductase iron-sulfur ATP-binding protein"  
"OPBC09\_00053" 34462 "s59E25H2" 0 "Light-independent protochlorophyllide reductase iron-sulfur ATP-binding protein"  
"OPBC09\_00053" 34462 "s59E5H2" 0.01037302 "Light-independent protochlorophyllide reductase iron-sulfur ATP-binding protein"  
"OPBC09\_00053" 34462 "s63E6H2" 0.01115701 "Light-independent protochlorophyllide reductase iron-sulfur ATP-binding protein"  
"OPBC09\_00054" 34463 "s59E13H2" 0.00674647 "Sulfide dehydrogenase subunit beta precursor"  
"OPBC09\_00054" 34463 "s59E25H2" 0 "Sulfide dehydrogenase subunit beta precursor"  
"OPBC09\_00054" 34463 "s59E5H2" 0.1333389 "Sulfide dehydrogenase subunit beta precursor"  
"OPBC09\_00054" 34463 "s63E6H2" 0.01496379 "Sulfide dehydrogenase subunit beta precursor"  
"OPBC09\_00055" 34464 "s59E13H2" 0.0008049785 "Sulfide dehydrogenase subunit alpha precursor"  
"OPBC09\_00055" 34464 "s59E25H2" 0 "Sulfide dehydrogenase subunit alpha precursor"  
"OPBC09\_00055" 34464 "s59E5H2" 0.08465378 "Sulfide dehydrogenase subunit alpha precursor"  
"OPBC09\_00055" 34464 "s63E6H2" 0.03514023 "Sulfide dehydrogenase subunit alpha precursor"  
"OPBC09\_00057" 34466 "s59E13H2" 0 "tRNA(fMet)-specific endonuclease VapC"  
"OPBC09\_00057" 34466 "s59E25H2" 0 "tRNA(fMet)-specific endonuclease VapC"  
"OPBC09\_00057" 34466 "s59E5H2" 0.005696894 "tRNA(fMet)-specific endonuclease VapC"  
"OPBC09\_00057" 34466 "s63E6H2" 0 "tRNA(fMet)-specific endonuclease VapC"  
"OPBC09\_00058" 34467 "s59E13H2" 0 "Ribbon-helix-helix protein, copG family"  
"OPBC09\_00058" 34467 "s59E25H2" 0 "Ribbon-helix-helix protein, copG family"  
"OPBC09\_00058" 34467 "s59E5H2" 0 "Ribbon-helix-helix protein, copG family"  
"OPBC09\_00058" 34467 "s63E6H2" 0 "Ribbon-helix-helix protein, copG family"  
"OPBC09\_00059" 34468 "s59E13H2" 0.006702308 "3'-5' exoribonuclease YhaM"  
"OPBC09\_00059" 34468 "s59E25H2" 0 "3'-5' exoribonuclease YhaM"  
"OPBC09\_00059" 34468 "s59E5H2" 0.7332365 "3'-5' exoribonuclease YhaM"  
"OPBC09\_00059" 34468 "s63E6H2" 0.007594855 "3'-5' exoribonuclease YhaM"  
"OPBC09\_00060" 34469 "s59E13H2" 0.009891802 "5'-nucleotidase SurE"  
"OPBC09\_00060" 34469 "s59E25H2" 0 "5'-nucleotidase SurE"  
"OPBC09\_00060" 34469 "s59E5H2" 0.03108814 "5'-nucleotidase SurE"  
"OPBC09\_00060" 34469 "s63E6H2" 0.005336004 "5'-nucleotidase SurE"  
"OPBC09\_00061" 34470 "s59E13H2" 0.08508355 "hypothetical protein"  
"OPBC09\_00061" 34470 "s59E25H2" 0 "hypothetical protein"  
"OPBC09\_00061" 34470 "s59E5H2" 0.04593324 "hypothetical protein"



"OPBC09\_00061" 34470 "s63E6H2" 0.009775383 "hypothetical protein"  
"OPBC09\_00062" 34471 "s59E13H2" 0.0009902059 "Phd\_YefM"  
"OPBC09\_00062" 34471 "s59E25H2" 0 "Phd\_YefM"  
"OPBC09\_00062" 34471 "s59E5H2" 0 "Phd\_YefM"  
"OPBC09\_00062" 34471 "s63E6H2" 0.009161152 "Phd\_YefM"  
"OPBC09\_00063" 34472 "s59E13H2" 0.05512011 "hypothetical protein"  
"OPBC09\_00063" 34472 "s59E25H2" 0 "hypothetical protein"  
"OPBC09\_00063" 34472 "s59E5H2" 0 "hypothetical protein"  
"OPBC09\_00063" 34472 "s63E6H2" 0.7783561 "hypothetical protein"  
"OPBC09\_00064" 34473 "s59E13H2" 0.9175011 "ABC-2 family transporter protein"  
"OPBC09\_00064" 34473 "s59E25H2" 0 "ABC-2 family transporter protein"  
"OPBC09\_00064" 34473 "s59E5H2" 0.01823246 "ABC-2 family transporter protein"  
"OPBC09\_00064" 34473 "s63E6H2" 0.08864626 "ABC-2 family transporter protein"  
"OPBC09\_00065" 34474 "s59E13H2" 0.8998643 "ABC-2 family transporter protein"  
"OPBC09\_00065" 34474 "s59E25H2" 0 "ABC-2 family transporter protein"  
"OPBC09\_00065" 34474 "s59E5H2" 0.02599966 "ABC-2 family transporter protein"  
"OPBC09\_00065" 34474 "s63E6H2" 0.1459315 "ABC-2 family transporter protein"  
"OPBC09\_00066" 34475 "s59E13H2" 0.7203118 "Fluoroquinolones export ATP-binding protein/MT2762"  
"OPBC09\_00066" 34475 "s59E25H2" 0 "Fluoroquinolones export ATP-binding protein/MT2762"  
"OPBC09\_00066" 34475 "s59E5H2" 0.04445517 "Fluoroquinolones export ATP-binding protein/MT2762"  
"OPBC09\_00066" 34475 "s63E6H2" 0.1248478 "Fluoroquinolones export ATP-binding protein/MT2762"  
"OPBC09\_00067" 34476 "s59E13H2" 0.009520582 "hypothetical protein"  
"OPBC09\_00067" 34476 "s59E25H2" 0 "hypothetical protein"  
"OPBC09\_00067" 34476 "s59E5H2" 0 "hypothetical protein"  
"OPBC09\_00067" 34476 "s63E6H2" 0.007044636 "hypothetical protein"  
"OPBC09\_00068" 34477 "s59E13H2" 0.0053067 "Acetamidase/Formamidase family protein"  
"OPBC09\_00068" 34477 "s59E25H2" 0 "Acetamidase/Formamidase family protein"  
"OPBC09\_00068" 34477 "s59E5H2" 0 "Acetamidase/Formamidase family protein"  
"OPBC09\_00068" 34477 "s63E6H2" 0.001365638 "Acetamidase/Formamidase family protein"  
"OPBC09\_00069" 34478 "s59E13H2" 0.003630907 "Threonylcarbamoyl-AMP synthase"  
"OPBC09\_00069" 34478 "s59E25H2" 0 "Threonylcarbamoyl-AMP synthase"  
"OPBC09\_00069" 34478 "s59E5H2" 0.02708753 "Threonylcarbamoyl-AMP synthase"  
"OPBC09\_00069" 34478 "s63E6H2" 0 "Threonylcarbamoyl-AMP synthase"  
"OPBC09\_00070" 34479 "s59E13H2" 0.03652075 "Putative sugar phosphate isomerase YwIF"  
"OPBC09\_00070" 34479 "s59E25H2" 0 "Putative sugar phosphate isomerase YwIF"  
"OPBC09\_00070" 34479 "s59E5H2" 0.01951211 "Putative sugar phosphate isomerase YwIF"  
"OPBC09\_00070" 34479 "s63E6H2" 0.00410726 "Putative sugar phosphate isomerase YwIF"  
"OPBC09\_00071" 34480 "s59E13H2" 0.1403939 "Serine hydroxymethyltransferase"  
"OPBC09\_00071" 34480 "s59E25H2" 0 "Serine hydroxymethyltransferase"  
"OPBC09\_00071" 34480 "s59E5H2" 0.0236882 "Serine hydroxymethyltransferase"  
"OPBC09\_00071" 34480 "s63E6H2" 0.1255957 "Serine hydroxymethyltransferase"  
"OPBC09\_00072" 34481 "s59E13H2" 0.1644365 "V-type sodium ATPase subunit D"  
"OPBC09\_00072" 34481 "s59E25H2" 0 "V-type sodium ATPase subunit D"  
"OPBC09\_00072" 34481 "s59E5H2" 0.02341695 "V-type sodium ATPase subunit D"  
"OPBC09\_00072" 34481 "s63E6H2" 0.2605969 "V-type sodium ATPase subunit D"  
"OPBC09\_00073" 34482 "s59E13H2" 0.1227583 "V-type sodium ATPase subunit B"  
"OPBC09\_00073" 34482 "s59E25H2" 0 "V-type sodium ATPase subunit B"

"OPBC09\_00073" 34482 "s59E5H2" 0.03072608 "V-type sodium ATPase subunit B"  
"OPBC09\_00073" 34482 "s63E6H2" 0.1897873 "V-type sodium ATPase subunit B"  
"OPBC09\_00074" 34483 "s59E13H2" 0.09528885 "V-type sodium ATPase catalytic subunit A"  
"OPBC09\_00074" 34483 "s59E25H2" 0 "V-type sodium ATPase catalytic subunit A"  
"OPBC09\_00074" 34483 "s59E5H2" 0.03134637 "V-type sodium ATPase catalytic subunit A"  
"OPBC09\_00074" 34483 "s63E6H2" 0.005992985 "V-type sodium ATPase catalytic subunit A"  
"OPBC09\_00075" 34484 "s59E13H2" 0.04797575 "V-type sodium ATPase subunit G"  
"OPBC09\_00075" 34484 "s59E25H2" 0 "V-type sodium ATPase subunit G"  
"OPBC09\_00075" 34484 "s59E5H2" 0.007805649 "V-type sodium ATPase subunit G"  
"OPBC09\_00075" 34484 "s63E6H2" 0 "V-type sodium ATPase subunit G"  
"OPBC09\_00078" 34487 "s59E13H2" 0 "D-inositol 3-phosphate glycosyltransferase"  
"OPBC09\_00078" 34487 "s59E25H2" 0 "D-inositol 3-phosphate glycosyltransferase"  
"OPBC09\_00078" 34487 "s59E5H2" 0.2587982 "D-inositol 3-phosphate glycosyltransferase"  
"OPBC09\_00078" 34487 "s63E6H2" 0 "D-inositol 3-phosphate glycosyltransferase"  
"OPBC09\_00079" 34488 "s59E13H2" 0.4916456 "Hydrogenase isoenzymes nickel incorporation protein HypB"  
"OPBC09\_00079" 34488 "s59E25H2" 0 "Hydrogenase isoenzymes nickel incorporation protein HypB"  
"OPBC09\_00079" 34488 "s59E5H2" 0.09997235 "Hydrogenase isoenzymes nickel incorporation protein HypB"  
"OPBC09\_00079" 34488 "s63E6H2" 0.01660035 "Hydrogenase isoenzymes nickel incorporation protein HypB"  
"OPBC09\_00080" 34489 "s59E13H2" 0.009328043 "Sulfhydrogenase 1 subunit beta"  
"OPBC09\_00080" 34489 "s59E25H2" 0 "Sulfhydrogenase 1 subunit beta"  
"OPBC09\_00080" 34489 "s59E5H2" 0.0130228 "Sulfhydrogenase 1 subunit beta"  
"OPBC09\_00080" 34489 "s63E6H2" 0.001443242 "Sulfhydrogenase 1 subunit beta"  
"OPBC09\_00081" 34490 "s59E13H2" 0.0006971806 "Sulfhydrogenase 2 subunit gamma"  
"OPBC09\_00081" 34490 "s59E25H2" 0 "Sulfhydrogenase 2 subunit gamma"  
"OPBC09\_00081" 34490 "s59E5H2" 0.04699135 "Sulfhydrogenase 2 subunit gamma"  
"OPBC09\_00081" 34490 "s63E6H2" 0 "Sulfhydrogenase 2 subunit gamma"  
"OPBC09\_00082" 34491 "s59E13H2" 0.003082174 "Sulfhydrogenase 1 subunit delta"  
"OPBC09\_00082" 34491 "s59E25H2" 0 "Sulfhydrogenase 1 subunit delta"  
"OPBC09\_00082" 34491 "s59E5H2" 0.009371068 "Sulfhydrogenase 1 subunit delta"  
"OPBC09\_00082" 34491 "s63E6H2" 0 "Sulfhydrogenase 1 subunit delta"  
"OPBC09\_00083" 34492 "s59E13H2" 0.006079466 "Sulfhydrogenase 1 subunit alpha"  
"OPBC09\_00083" 34492 "s59E25H2" 0 "Sulfhydrogenase 1 subunit alpha"  
"OPBC09\_00083" 34492 "s59E5H2" 0.0007719873 "Sulfhydrogenase 1 subunit alpha"  
"OPBC09\_00083" 34492 "s63E6H2" 0 "Sulfhydrogenase 1 subunit alpha"  
"OPBC09\_00084" 34493 "s59E13H2" 0 "Hydrogenase 2 maturation protease"  
"OPBC09\_00084" 34493 "s59E25H2" 0 "Hydrogenase 2 maturation protease"  
"OPBC09\_00084" 34493 "s59E5H2" 0.01408877 "Hydrogenase 2 maturation protease"  
"OPBC09\_00084" 34493 "s63E6H2" 0 "Hydrogenase 2 maturation protease"  
"OPBC09\_00085" 34494 "s59E13H2" 0 "hypothetical protein"  
"OPBC09\_00085" 34494 "s59E25H2" 0 "hypothetical protein"  
"OPBC09\_00085" 34494 "s59E5H2" 0.1044558 "hypothetical protein"  
"OPBC09\_00085" 34494 "s63E6H2" 0.005233088 "hypothetical protein"  
"OPBC09\_00086" 34495 "s59E13H2" 0.02103643 "CoB--CoM heterodisulfide reductase iron-sulfur subunit C"  
"OPBC09\_00086" 34495 "s59E25H2" 0 "CoB--CoM heterodisulfide reductase iron-sulfur subunit C"  
"OPBC09\_00086" 34495 "s59E5H2" 0.02636054 "CoB--CoM heterodisulfide reductase iron-sulfur subunit C"  
"OPBC09\_00086" 34495 "s63E6H2" 0.02449015 "CoB--CoM heterodisulfide reductase iron-sulfur subunit C"  
"OPBC09\_00087" 34496 "s59E13H2" 0.13349 "CoB--CoM heterodisulfide reductase iron-sulfur subunit A"

"OPBC09\_00087" 34496 "s59E25H2" 0 "CoB--CoM heterodisulfide reductase iron-sulfur subunit A"  
"OPBC09\_00087" 34496 "s59E5H2" 0.04465174 "CoB--CoM heterodisulfide reductase iron-sulfur subunit A"  
"OPBC09\_00087" 34496 "s63E6H2" 0.4795228 "CoB--CoM heterodisulfide reductase iron-sulfur subunit A"  
"OPBC09\_00088" 34497 "s59E13H2" 0 "F420-non-reducing hydrogenase vhc iron-sulfur subunit D"  
"OPBC09\_00088" 34497 "s59E25H2" 0 "F420-non-reducing hydrogenase vhc iron-sulfur subunit D"  
"OPBC09\_00088" 34497 "s59E5H2" 0 "F420-non-reducing hydrogenase vhc iron-sulfur subunit D"  
"OPBC09\_00088" 34497 "s63E6H2" 0.05444436 "F420-non-reducing hydrogenase vhc iron-sulfur subunit D"  
"OPBC09\_00089" 34498 "s59E13H2" 0 "Formate dehydrogenase subunit beta"  
"OPBC09\_00089" 34498 "s59E25H2" 0 "Formate dehydrogenase subunit beta"  
"OPBC09\_00089" 34498 "s59E5H2" 0.008089687 "Formate dehydrogenase subunit beta"  
"OPBC09\_00089" 34498 "s63E6H2" 0.06198206 "Formate dehydrogenase subunit beta"  
"OPBC09\_00090" 34499 "s59E13H2" 0.0008419597 "Sulphydrogenase 2 subunit beta"  
"OPBC09\_00090" 34499 "s59E25H2" 0 "Sulphydrogenase 2 subunit beta"  
"OPBC09\_00090" 34499 "s59E5H2" 0.006765872 "Sulphydrogenase 2 subunit beta"  
"OPBC09\_00090" 34499 "s63E6H2" 0.04748106 "Sulphydrogenase 2 subunit beta"  
"OPBC09\_00091" 34500 "s59E13H2" 0 "Sulphydrogenase 1 subunit gamma"  
"OPBC09\_00091" 34500 "s59E25H2" 0 "Sulphydrogenase 1 subunit gamma"  
"OPBC09\_00091" 34500 "s59E5H2" 0 "Sulphydrogenase 1 subunit gamma"  
"OPBC09\_00091" 34500 "s63E6H2" 0.006934414 "Sulphydrogenase 1 subunit gamma"  
"OPBC09\_00092" 34501 "s59E13H2" 0 "CoB--CoM heterodisulfide reductase iron-sulfur subunit A"  
"OPBC09\_00092" 34501 "s59E25H2" 0 "CoB--CoM heterodisulfide reductase iron-sulfur subunit A"  
"OPBC09\_00092" 34501 "s59E5H2" 0 "CoB--CoM heterodisulfide reductase iron-sulfur subunit A"  
"OPBC09\_00092" 34501 "s63E6H2" 0 "CoB--CoM heterodisulfide reductase iron-sulfur subunit A"  
"OPBC09\_00093" 34502 "s59E13H2" 0 "NADP-reducing hydrogenase subunit HndB"  
"OPBC09\_00093" 34502 "s59E25H2" 0 "NADP-reducing hydrogenase subunit HndB"  
"OPBC09\_00093" 34502 "s59E5H2" 0 "NADP-reducing hydrogenase subunit HndB"  
"OPBC09\_00093" 34502 "s63E6H2" 0 "NADP-reducing hydrogenase subunit HndB"  
"OPBC09\_00094" 34503 "s59E13H2" 0 "NADP-reducing hydrogenase subunit HndC"  
"OPBC09\_00094" 34503 "s59E25H2" 0 "NADP-reducing hydrogenase subunit HndC"  
"OPBC09\_00094" 34503 "s59E5H2" 0 "NADP-reducing hydrogenase subunit HndC"  
"OPBC09\_00094" 34503 "s63E6H2" 0 "NADP-reducing hydrogenase subunit HndC"  
"OPBC09\_00095" 34504 "s59E13H2" 0 "DRTGG domain protein"  
"OPBC09\_00095" 34504 "s59E25H2" 0 "DRTGG domain protein"  
"OPBC09\_00095" 34504 "s59E5H2" 0 "DRTGG domain protein"  
"OPBC09\_00095" 34504 "s63E6H2" 0.0128227 "DRTGG domain protein"  
"OPBC09\_00096" 34505 "s59E13H2" 0.003689949 "Serine/threonine-protein kinase RsbT"  
"OPBC09\_00096" 34505 "s59E25H2" 0 "Serine/threonine-protein kinase RsbT"  
"OPBC09\_00096" 34505 "s59E5H2" 0.008741621 "Serine/threonine-protein kinase RsbT"  
"OPBC09\_00096" 34505 "s63E6H2" 0.02509859 "Serine/threonine-protein kinase RsbT"  
"OPBC09\_00097" 34506 "s59E13H2" 0.006422125 "DRTGG domain protein"  
"OPBC09\_00097" 34506 "s59E25H2" 0 "DRTGG domain protein"  
"OPBC09\_00097" 34506 "s59E5H2" 0.03510151 "DRTGG domain protein"  
"OPBC09\_00097" 34506 "s63E6H2" 0.029177 "DRTGG domain protein"  
"OPBC09\_00098" 34507 "s59E13H2" 0.002559658 "hypothetical protein"  
"OPBC09\_00098" 34507 "s59E25H2" 0 "hypothetical protein"  
"OPBC09\_00098" 34507 "s59E5H2" 0.01104559 "hypothetical protein"  
"OPBC09\_00098" 34507 "s63E6H2" 0.02785125 "hypothetical protein"

"OPBC09\_00099" 34508 "s59E13H2" 0.0480898 "Globin-coupled histidine kinase"  
"OPBC09\_00099" 34508 "s59E25H2" 0 "Globin-coupled histidine kinase"  
"OPBC09\_00099" 34508 "s59E5H2" 0.0652513 "Globin-coupled histidine kinase"  
"OPBC09\_00099" 34508 "s63E6H2" 0.0370685 "Globin-coupled histidine kinase"  
"OPBC09\_00100" 34509 "s59E13H2" 0.1109223 "CoB--CoM heterodisulfide reductase iron-sulfur subunit A"  
"OPBC09\_00100" 34509 "s59E25H2" 0 "CoB--CoM heterodisulfide reductase iron-sulfur subunit A"  
"OPBC09\_00100" 34509 "s59E5H2" 0.0385791 "CoB--CoM heterodisulfide reductase iron-sulfur subunit A"  
"OPBC09\_00100" 34509 "s63E6H2" 0.04501582 "CoB--CoM heterodisulfide reductase iron-sulfur subunit A"  
"OPBC09\_00101" 34510 "s59E13H2" 0.0575487 "F420-non-reducing hydrogenase iron-sulfur subunit D"  
"OPBC09\_00101" 34510 "s59E25H2" 0 "F420-non-reducing hydrogenase iron-sulfur subunit D"  
"OPBC09\_00101" 34510 "s59E5H2" 0.02694798 "F420-non-reducing hydrogenase iron-sulfur subunit D"  
"OPBC09\_00101" 34510 "s63E6H2" 0.006522152 "F420-non-reducing hydrogenase iron-sulfur subunit D"  
"OPBC09\_00103" 34512 "s59E13H2" 0.06431109 "F420-non-reducing hydrogenase subunit G"  
"OPBC09\_00103" 34512 "s59E25H2" 0 "F420-non-reducing hydrogenase subunit G"  
"OPBC09\_00103" 34512 "s59E5H2" 0.02476355 "F420-non-reducing hydrogenase subunit G"  
"OPBC09\_00103" 34512 "s63E6H2" 0.3181036 "F420-non-reducing hydrogenase subunit G"  
"OPBC09\_00104" 34513 "s59E13H2" 0.04106354 "F420-non-reducing hydrogenase subunit A"  
"OPBC09\_00104" 34513 "s59E25H2" 0 "F420-non-reducing hydrogenase subunit A"  
"OPBC09\_00104" 34513 "s59E5H2" 0.05063498 "F420-non-reducing hydrogenase subunit A"  
"OPBC09\_00104" 34513 "s63E6H2" 0.4458988 "F420-non-reducing hydrogenase subunit A"  
"OPBC09\_00105" 34514 "s59E13H2" 0.02011256 "Hydrogenase 2 maturation protease"  
"OPBC09\_00105" 34514 "s59E25H2" 0 "Hydrogenase 2 maturation protease"  
"OPBC09\_00105" 34514 "s59E5H2" 0.0292332 "Hydrogenase 2 maturation protease"  
"OPBC09\_00105" 34514 "s63E6H2" 0.2655478 "Hydrogenase 2 maturation protease"  
"OPBC09\_00106" 34515 "s59E13H2" 0.08852756 "Hydrogenase/urease nickel incorporation protein HypA"  
"OPBC09\_00106" 34515 "s59E25H2" 0 "Hydrogenase/urease nickel incorporation protein HypA"  
"OPBC09\_00106" 34515 "s59E5H2" 0.04487596 "Hydrogenase/urease nickel incorporation protein HypA"  
"OPBC09\_00106" 34515 "s63E6H2" 0.2045108 "Hydrogenase/urease nickel incorporation protein HypA"  
"OPBC09\_00107" 34516 "s59E13H2" 0.004880081 "Hydrogenase isoenzymes formation protein HypE"  
"OPBC09\_00107" 34516 "s59E25H2" 0 "Hydrogenase isoenzymes formation protein HypE"  
"OPBC09\_00107" 34516 "s59E5H2" 0.01947245 "Hydrogenase isoenzymes formation protein HypE"  
"OPBC09\_00107" 34516 "s63E6H2" 0.007973686 "Hydrogenase isoenzymes formation protein HypE"  
"OPBC09\_00108" 34517 "s59E13H2" 0 "Hydrogenase isoenzymes formation protein HypD"  
"OPBC09\_00108" 34517 "s59E25H2" 0 "Hydrogenase isoenzymes formation protein HypD"  
"OPBC09\_00108" 34517 "s59E5H2" 0.02175188 "Hydrogenase isoenzymes formation protein HypD"  
"OPBC09\_00108" 34517 "s63E6H2" 0 "Hydrogenase isoenzymes formation protein HypD"  
"OPBC09\_00109" 34518 "s59E13H2" 0 "Hydrogenase isoenzymes formation protein HypC"  
"OPBC09\_00109" 34518 "s59E25H2" 0 "Hydrogenase isoenzymes formation protein HypC"  
"OPBC09\_00109" 34518 "s59E5H2" 0 "Hydrogenase isoenzymes formation protein HypC"  
"OPBC09\_00109" 34518 "s63E6H2" 0 "Hydrogenase isoenzymes formation protein HypC"  
"OPBC09\_00110" 34519 "s59E13H2" 0.001474091 "Carbamoyltransferase HypF"  
"OPBC09\_00110" 34519 "s59E25H2" 0 "Carbamoyltransferase HypF"  
"OPBC09\_00110" 34519 "s59E5H2" 0.0324509 "Carbamoyltransferase HypF"  
"OPBC09\_00110" 34519 "s63E6H2" 0.0009617827 "Carbamoyltransferase HypF"  
"OPBC09\_00111" 34520 "s59E13H2" 0.007005995 "hypothetical protein"  
"OPBC09\_00111" 34520 "s59E25H2" 0 "hypothetical protein"  
"OPBC09\_00111" 34520 "s59E5H2" 0 "hypothetical protein"

"OPBC09\_00111" 34520 "s63E6H2" 0.0422026 "hypothetical protein"  
"OPBC09\_00112" 34521 "s59E13H2" 0.06709708 "Elongation factor G"  
"OPBC09\_00112" 34521 "s59E25H2" 0 "Elongation factor G"  
"OPBC09\_00112" 34521 "s59E5H2" 0.02656793 "Elongation factor G"  
"OPBC09\_00112" 34521 "s63E6H2" 0.3924616 "Elongation factor G"  
"OPBC09\_00113" 34522 "s59E13H2" 0.007905546 "Cell division protein FtsL"  
"OPBC09\_00113" 34522 "s59E25H2" 0 "Cell division protein FtsL"  
"OPBC09\_00113" 34522 "s59E5H2" 0.04593324 "Cell division protein FtsL"  
"OPBC09\_00113" 34522 "s63E6H2" 0.0150575 "Cell division protein FtsL"  
"OPBC09\_00114" 34523 "s59E13H2" 0.01790789 "Exopolyphosphatase"  
"OPBC09\_00114" 34523 "s59E25H2" 0 "Exopolyphosphatase"  
"OPBC09\_00114" 34523 "s59E5H2" 0.09323891 "Exopolyphosphatase"  
"OPBC09\_00114" 34523 "s63E6H2" 0.02972097 "Exopolyphosphatase"  
"OPBC09\_00116" 34525 "s59E13H2" 0.004661213 "hypothetical protein"  
"OPBC09\_00116" 34525 "s59E25H2" 0 "hypothetical protein"  
"OPBC09\_00116" 34525 "s59E5H2" 0.2870265 "hypothetical protein"  
"OPBC09\_00116" 34525 "s63E6H2" 0.01211636 "hypothetical protein"  
"OPBC09\_00117" 34526 "s59E13H2" 0 "HNH endonuclease"  
"OPBC09\_00117" 34526 "s59E25H2" 0 "HNH endonuclease"  
"OPBC09\_00117" 34526 "s59E5H2" 0.06017388 "HNH endonuclease"  
"OPBC09\_00117" 34526 "s63E6H2" 0 "HNH endonuclease"  
"OPBC09\_00119" 34528 "s59E13H2" 0.04813712 "putative kinase inhibitor protein"  
"OPBC09\_00119" 34528 "s59E25H2" 0 "putative kinase inhibitor protein"  
"OPBC09\_00119" 34528 "s59E5H2" 0.8108072 "putative kinase inhibitor protein"  
"OPBC09\_00119" 34528 "s63E6H2" 0.04076295 "putative kinase inhibitor protein"  
"OPBC09\_00120" 34529 "s59E13H2" 0.1332245 "Hydrogenase 2 maturation protease"  
"OPBC09\_00120" 34529 "s59E25H2" 0 "Hydrogenase 2 maturation protease"  
"OPBC09\_00120" 34529 "s59E5H2" 1.235062 "Hydrogenase 2 maturation protease"  
"OPBC09\_00120" 34529 "s63E6H2" 0.04126066 "Hydrogenase 2 maturation protease"  
"OPBC09\_00121" 34530 "s59E13H2" 0.07076526 "Bifunctional homocysteine S-methyltransferase/5,10-methylenetetrahydrofolate reductase"  
"OPBC09\_00121" 34530 "s59E25H2" 0 "Bifunctional homocysteine S-methyltransferase/5,10-methylenetetrahydrofolate reductase"  
"OPBC09\_00121" 34530 "s59E5H2" 1.990165 "Bifunctional homocysteine S-methyltransferase/5,10-methylenetetrahydrofolate reductase"  
"OPBC09\_00121" 34530 "s63E6H2" 0 "Bifunctional homocysteine S-methyltransferase/5,10-methylenetetrahydrofolate reductase"  
"OPBC09\_00122" 34531 "s59E13H2" 0.04804283 "hypothetical protein"  
"OPBC09\_00122" 34531 "s59E25H2" 0 "hypothetical protein"  
"OPBC09\_00122" 34531 "s59E5H2" 1.007686 "hypothetical protein"  
"OPBC09\_00122" 34531 "s63E6H2" 0 "hypothetical protein"  
"OPBC09\_00123" 34532 "s59E13H2" 0 "hypothetical protein"  
"OPBC09\_00123" 34532 "s59E25H2" 0 "hypothetical protein"  
"OPBC09\_00123" 34532 "s59E5H2" 0.03242347 "hypothetical protein"  
"OPBC09\_00123" 34532 "s63E6H2" 0 "hypothetical protein"  
"OPBC09\_00124" 34533 "s59E13H2" 0.05171503 "NAD dependent epimerase/dehydratase family protein"  
"OPBC09\_00124" 34533 "s59E25H2" 0 "NAD dependent epimerase/dehydratase family protein"  
"OPBC09\_00124" 34533 "s59E5H2" 0.01850153 "NAD dependent epimerase/dehydratase family protein"  
"OPBC09\_00124" 34533 "s63E6H2" 0.3590559 "NAD dependent epimerase/dehydratase family protein"  
"OPBC09\_00125" 34534 "s59E13H2" 0.0450232 "Undecaprenyl phosphate N,N'-diacetylbaicillosamine 1-phosphate transferase"  
"OPBC09\_00125" 34534 "s59E25H2" 0 "Undecaprenyl phosphate N,N'-diacetylbaicillosamine 1-phosphate transferase"

"OPBC09\_00125" 34534 "s59E5H2" 0.04139226 "Undecaprenyl phosphate N,N'-diacetylbacillosamine 1-phosphate transferase"  
"OPBC09\_00125" 34534 "s63E6H2" 0.004339318 "Undecaprenyl phosphate N,N'-diacetylbacillosamine 1-phosphate transferase"  
"OPBC09\_00126" 34535 "s59E13H2" 0.03774934 "UDP-N-acetyl-alpha-D-glucosamine C6 dehydratase"  
"OPBC09\_00126" 34535 "s59E25H2" 0 "UDP-N-acetyl-alpha-D-glucosamine C6 dehydratase"  
"OPBC09\_00126" 34535 "s59E5H2" 0.04050089 "UDP-N-acetyl-alpha-D-glucosamine C6 dehydratase"  
"OPBC09\_00126" 34535 "s63E6H2" 0.01856316 "UDP-N-acetyl-alpha-D-glucosamine C6 dehydratase"  
"OPBC09\_00127" 34536 "s59E13H2" 0 "Nitroreductase family protein"  
"OPBC09\_00127" 34536 "s59E25H2" 0 "Nitroreductase family protein"  
"OPBC09\_00127" 34536 "s59E5H2" 0.004132402 "Nitroreductase family protein"  
"OPBC09\_00127" 34536 "s63E6H2" 0 "Nitroreductase family protein"  
"OPBC09\_00128" 34537 "s59E13H2" 0 "hypothetical protein"  
"OPBC09\_00128" 34537 "s59E25H2" 0 "hypothetical protein"  
"OPBC09\_00128" 34537 "s59E5H2" 0.05679621 "hypothetical protein"  
"OPBC09\_00128" 34537 "s63E6H2" 0 "hypothetical protein"  
"OPBC09\_00129" 34538 "s59E13H2" 0.005616441 "Metallo-beta-lactamase superfamily protein"  
"OPBC09\_00129" 34538 "s59E25H2" 0 "Metallo-beta-lactamase superfamily protein"  
"OPBC09\_00129" 34538 "s59E5H2" 0.02231443 "Metallo-beta-lactamase superfamily protein"  
"OPBC09\_00129" 34538 "s63E6H2" 0 "Metallo-beta-lactamase superfamily protein"  
"OPBC09\_00130" 34539 "s59E13H2" 0.02869628 "NAD-dependent protein deacetylase"  
"OPBC09\_00130" 34539 "s59E25H2" 0 "NAD-dependent protein deacetylase"  
"OPBC09\_00130" 34539 "s59E5H2" 0.2993767 "NAD-dependent protein deacetylase"  
"OPBC09\_00130" 34539 "s63E6H2" 0.0521416 "NAD-dependent protein deacetylase"  
"OPBC09\_00131" 34540 "s59E13H2" 0.01610769 "UDP-D-galactose:(glucosyl)lipopolysaccharide-1,6-D-galactosyltransferase"  
"OPBC09\_00131" 34540 "s59E25H2" 0 "UDP-D-galactose:(glucosyl)lipopolysaccharide-1,6-D-galactosyltransferase"  
"OPBC09\_00131" 34540 "s59E5H2" 0.3990362 "UDP-D-galactose:(glucosyl)lipopolysaccharide-1,6-D-galactosyltransferase"  
"OPBC09\_00131" 34540 "s63E6H2" 0.002047761 "UDP-D-galactose:(glucosyl)lipopolysaccharide-1,6-D-galactosyltransferase"  
"OPBC09\_00132" 34541 "s59E13H2" 0 "DNA replication and repair protein RecF"  
"OPBC09\_00132" 34541 "s59E25H2" 0 "DNA replication and repair protein RecF"  
"OPBC09\_00132" 34541 "s59E5H2" 0.07322108 "DNA replication and repair protein RecF"  
"OPBC09\_00132" 34541 "s63E6H2" 0.02234103 "DNA replication and repair protein RecF"  
"OPBC09\_00133" 34542 "s59E13H2" 0 "hypothetical protein"  
"OPBC09\_00133" 34542 "s59E25H2" 0 "hypothetical protein"  
"OPBC09\_00133" 34542 "s59E5H2" 0.1386103 "hypothetical protein"  
"OPBC09\_00133" 34542 "s63E6H2" 0.02449954 "hypothetical protein"  
"OPBC09\_00134" 34543 "s59E13H2" 0.2652217 "DNA gyrase subunit B"  
"OPBC09\_00134" 34543 "s59E25H2" 0 "DNA gyrase subunit B"  
"OPBC09\_00134" 34543 "s59E5H2" 0.02227943 "DNA gyrase subunit B"  
"OPBC09\_00134" 34543 "s63E6H2" 0.02035046 "DNA gyrase subunit B"  
"OPBC09\_00135" 34544 "s59E13H2" 0.5026209 "DNA gyrase subunit A"  
"OPBC09\_00135" 34544 "s59E25H2" 0.0945335 "DNA gyrase subunit A"  
"OPBC09\_00135" 34544 "s59E5H2" 0.04642299 "DNA gyrase subunit A"  
"OPBC09\_00135" 34544 "s63E6H2" 0.02665342 "DNA gyrase subunit A"  
"OPBC09\_00136" 34545 "s59E13H2" 0.00555369 "Chloroplast import component protein (Tic20)"  
"OPBC09\_00136" 34545 "s59E25H2" 0 "Chloroplast import component protein (Tic20)"  
"OPBC09\_00136" 34545 "s59E5H2" 0.001466177 "Chloroplast import component protein (Tic20)"  
"OPBC09\_00136" 34545 "s63E6H2" 0.0003141752 "Chloroplast import component protein (Tic20)"  
"OPBC09\_00137" 34546 "s59E13H2" 0.4282256 "hypothetical protein"

"OPBC09\_00137" 34546 "s59E25H2" 0 "hypothetical protein"  
"OPBC09\_00137" 34546 "s59E5H2" 0.08167274 "hypothetical protein"  
"OPBC09\_00137" 34546 "s63E6H2" 0.01756239 "hypothetical protein"  
"OPBC09\_00140" 34549 "s59E13H2" 0.4640806 "hypothetical protein"  
"OPBC09\_00140" 34549 "s59E25H2" 0 "hypothetical protein"  
"OPBC09\_00140" 34549 "s59E5H2" 0.08360958 "hypothetical protein"  
"OPBC09\_00140" 34549 "s63E6H2" 0.03170545 "hypothetical protein"  
"OPBC09\_00141" 34550 "s59E13H2" 0.4658805 "Galactitol permease IIC component"  
"OPBC09\_00141" 34550 "s59E25H2" 0 "Galactitol permease IIC component"  
"OPBC09\_00141" 34550 "s59E5H2" 0.03650753 "Galactitol permease IIC component"  
"OPBC09\_00141" 34550 "s63E6H2" 0.02273897 "Galactitol permease IIC component"  
"OPBC09\_00142" 34551 "s59E13H2" 0.3816596 "Sorbitol operon regulator"  
"OPBC09\_00142" 34551 "s59E25H2" 0 "Sorbitol operon regulator"  
"OPBC09\_00142" 34551 "s59E5H2" 0.03113682 "Sorbitol operon regulator"  
"OPBC09\_00142" 34551 "s63E6H2" 0.1395599 "Sorbitol operon regulator"  
"OPBC09\_00143" 34552 "s59E13H2" 0.443948 "Acetoin:2,6-dichlorophenolindophenol oxidoreductase subunit alpha"  
"OPBC09\_00143" 34552 "s59E25H2" 0 "Acetoin:2,6-dichlorophenolindophenol oxidoreductase subunit alpha"  
"OPBC09\_00143" 34552 "s59E5H2" 0.03491273 "Acetoin:2,6-dichlorophenolindophenol oxidoreductase subunit alpha"  
"OPBC09\_00143" 34552 "s63E6H2" 0.1848778 "Acetoin:2,6-dichlorophenolindophenol oxidoreductase subunit alpha"  
"OPBC09\_00144" 34553 "s59E13H2" 0.5888648 "2-oxoisovalerate dehydrogenase subunit beta"  
"OPBC09\_00144" 34553 "s59E25H2" 0 "2-oxoisovalerate dehydrogenase subunit beta"  
"OPBC09\_00144" 34553 "s59E5H2" 0.04628425 "2-oxoisovalerate dehydrogenase subunit beta"  
"OPBC09\_00144" 34553 "s63E6H2" 0.1341974 "2-oxoisovalerate dehydrogenase subunit beta"  
"OPBC09\_00145" 34554 "s59E13H2" 0.3528927 "Dihydrolipoyllysine-residue acetyltransferase component of pyruvate dehydrogenase complex"  
"OPBC09\_00145" 34554 "s59E25H2" 0 "Dihydrolipoyllysine-residue acetyltransferase component of pyruvate dehydrogenase complex"  
"OPBC09\_00145" 34554 "s59E5H2" 0.05959965 "Dihydrolipoyllysine-residue acetyltransferase component of pyruvate dehydrogenase complex"  
"OPBC09\_00145" 34554 "s63E6H2" 0.09512473 "Dihydrolipoyllysine-residue acetyltransferase component of pyruvate dehydrogenase complex"  
"OPBC09\_00147" 34556 "s59E13H2" 0.3698727 "Octanoyltransferase"  
"OPBC09\_00147" 34556 "s59E25H2" 0 "Octanoyltransferase"  
"OPBC09\_00147" 34556 "s59E5H2" 0.2103729 "Octanoyltransferase"  
"OPBC09\_00147" 34556 "s63E6H2" 0.5509126 "Octanoyltransferase"  
"OPBC09\_00148" 34557 "s59E13H2" 0.008220246 "Dihydrolipoyl dehydrogenase"  
"OPBC09\_00148" 34557 "s59E25H2" 0 "Dihydrolipoyl dehydrogenase"  
"OPBC09\_00148" 34557 "s59E5H2" 0.02308944 "Dihydrolipoyl dehydrogenase"  
"OPBC09\_00148" 34557 "s63E6H2" 0.04973964 "Dihydrolipoyl dehydrogenase"  
"OPBC09\_00149" 34558 "s59E13H2" 0.01429761 "hypothetical protein"  
"OPBC09\_00149" 34558 "s59E25H2" 0 "hypothetical protein"  
"OPBC09\_00149" 34558 "s59E5H2" 0.0402837 "hypothetical protein"  
"OPBC09\_00149" 34558 "s63E6H2" 0.03512478 "hypothetical protein"  
"OPBC09\_00150" 34559 "s59E13H2" 0.038843483 "hypothetical protein"  
"OPBC09\_00150" 34559 "s59E25H2" 0 "hypothetical protein"  
"OPBC09\_00150" 34559 "s59E5H2" 0.05592828 "hypothetical protein"  
"OPBC09\_00150" 34559 "s63E6H2" 0.09988816 "hypothetical protein"  
"OPBC09\_00151" 34560 "s59E13H2" 0.02874103 "Murein hydrolase activator NlpD precursor"  
"OPBC09\_00151" 34560 "s59E25H2" 0 "Murein hydrolase activator NlpD precursor"  
"OPBC09\_00151" 34560 "s59E5H2" 0.09439001 "Murein hydrolase activator NlpD precursor"  
"OPBC09\_00151" 34560 "s63E6H2" 0.03209788 "Murein hydrolase activator NlpD precursor"

"OPBC09\_00152" 34561 "s59E13H2" 0.0001715078 "Putative transposase DNA-binding domain protein"  
"OPBC09\_00152" 34561 "s59E25H2" 0 "Putative transposase DNA-binding domain protein"  
"OPBC09\_00152" 34561 "s59E5H2" 0.06933292 "Putative transposase DNA-binding domain protein"  
"OPBC09\_00152" 34561 "s63E6H2" 0.00274262 "Putative transposase DNA-binding domain protein"  
"OPBC09\_00153" 34562 "s59E13H2" 0.023746 "Fructose-bisphosphate aldolase class 1"  
"OPBC09\_00153" 34562 "s59E25H2" 0 "Fructose-bisphosphate aldolase class 1"  
"OPBC09\_00153" 34562 "s59E5H2" 0.01762452 "Fructose-bisphosphate aldolase class 1"  
"OPBC09\_00153" 34562 "s63E6H2" 0.0629319 "Fructose-bisphosphate aldolase class 1"  
"OPBC09\_00154" 34563 "s59E13H2" 0.02471401 "DNA-binding protein HU"  
"OPBC09\_00154" 34563 "s59E25H2" 0 "DNA-binding protein HU"  
"OPBC09\_00154" 34563 "s59E5H2" 0.01573666 "DNA-binding protein HU"  
"OPBC09\_00154" 34563 "s63E6H2" 0.005255357 "DNA-binding protein HU"  
"OPBC09\_00155" 34564 "s59E13H2" 0.0006196674 "hypothetical protein"  
"OPBC09\_00155" 34564 "s59E25H2" 0 "hypothetical protein"  
"OPBC09\_00155" 34564 "s59E5H2" 0 "hypothetical protein"  
"OPBC09\_00155" 34564 "s63E6H2" 0 "hypothetical protein"  
"OPBC09\_00156" 34565 "s59E13H2" 0.02922315 "hypothetical protein"  
"OPBC09\_00156" 34565 "s59E25H2" 0 "hypothetical protein"  
"OPBC09\_00156" 34565 "s59E5H2" 0.08916453 "hypothetical protein"  
"OPBC09\_00156" 34565 "s63E6H2" 0.004559467 "hypothetical protein"  
"OPBC09\_00157" 34566 "s59E13H2" 0.0251634 "putative transporter"  
"OPBC09\_00157" 34566 "s59E25H2" 0 "putative transporter"  
"OPBC09\_00157" 34566 "s59E5H2" 0.3608855 "putative transporter"  
"OPBC09\_00157" 34566 "s63E6H2" 0.07321311 "putative transporter"  
"OPBC09\_00158" 34567 "s59E13H2" 0 "putative lipoprotein YbbD precursor"  
"OPBC09\_00158" 34567 "s59E25H2" 0 "putative lipoprotein YbbD precursor"  
"OPBC09\_00158" 34567 "s59E5H2" 0.3711136 "putative lipoprotein YbbD precursor"  
"OPBC09\_00158" 34567 "s63E6H2" 0.05467814 "putative lipoprotein YbbD precursor"  
"OPBC09\_00159" 34568 "s59E13H2" 0 "hypothetical protein"  
"OPBC09\_00159" 34568 "s59E25H2" 0 "hypothetical protein"  
"OPBC09\_00159" 34568 "s59E5H2" 0 "hypothetical protein"  
"OPBC09\_00159" 34568 "s63E6H2" 0 "hypothetical protein"  
"OPBC09\_00160" 34569 "s59E13H2" 0 "hypothetical protein"  
"OPBC09\_00160" 34569 "s59E25H2" 0 "hypothetical protein"  
"OPBC09\_00160" 34569 "s59E5H2" 0 "hypothetical protein"  
"OPBC09\_00160" 34569 "s63E6H2" 0 "hypothetical protein"  
"OPBC09\_00161" 34570 "s59E13H2" 0 "hypothetical protein"  
"OPBC09\_00161" 34570 "s59E25H2" 0 "hypothetical protein"  
"OPBC09\_00161" 34570 "s59E5H2" 0 "hypothetical protein"  
"OPBC09\_00161" 34570 "s63E6H2" 0 "hypothetical protein"  
"OPBC09\_00162" 34571 "s59E13H2" 0 "SpoVT / AbrB like domain protein"  
"OPBC09\_00162" 34571 "s59E25H2" 0 "SpoVT / AbrB like domain protein"  
"OPBC09\_00162" 34571 "s59E5H2" 0.287339 "SpoVT / AbrB like domain protein"  
"OPBC09\_00162" 34571 "s63E6H2" 0.001304369 "SpoVT / AbrB like domain protein"  
"OPBC09\_00163" 34572 "s59E13H2" 0 "hypothetical protein"  
"OPBC09\_00163" 34572 "s59E25H2" 0 "hypothetical protein"  
"OPBC09\_00163" 34572 "s59E5H2" 0.1826072 "hypothetical protein"



"OPBC09\_00163" 34572 "s63E6H2" 0.002927065 "hypothetical protein"  
"OPBC09\_00164" 34573 "s59E13H2" 0 "Archaeal ATPase"  
"OPBC09\_00164" 34573 "s59E25H2" 0 "Archaeal ATPase"  
"OPBC09\_00164" 34573 "s59E5H2" 0.005600417 "Archaeal ATPase"  
"OPBC09\_00164" 34573 "s63E6H2" 0 "Archaeal ATPase"  
"OPBC09\_00166" 34575 "s59E13H2" 0.002687388 "Toxin VapC4"  
"OPBC09\_00166" 34575 "s59E25H2" 0 "Toxin VapC4"  
"OPBC09\_00166" 34575 "s59E5H2" 0.03582138 "Toxin VapC4"  
"OPBC09\_00166" 34575 "s63E6H2" 0 "Toxin VapC4"  
"OPBC09\_00167" 34576 "s59E13H2" 0.008794427 "hypothetical protein"  
"OPBC09\_00167" 34576 "s59E25H2" 0 "hypothetical protein"  
"OPBC09\_00167" 34576 "s59E5H2" 0.04037405 "hypothetical protein"  
"OPBC09\_00167" 34576 "s63E6H2" 0 "hypothetical protein"  
"OPBC09\_00169" 34578 "s59E13H2" 0.03531837 "PIN domain protein"  
"OPBC09\_00169" 34578 "s59E25H2" 0 "PIN domain protein"  
"OPBC09\_00169" 34578 "s59E5H2" 0.202992 "PIN domain protein"  
"OPBC09\_00169" 34578 "s63E6H2" 0.03930969 "PIN domain protein"  
"OPBC09\_00170" 34579 "s59E13H2" 0.01099646 "acetyltransferase"  
"OPBC09\_00170" 34579 "s59E25H2" 0 "acetyltransferase"  
"OPBC09\_00170" 34579 "s59E5H2" 0.04514582 "acetyltransferase"  
"OPBC09\_00170" 34579 "s63E6H2" 0 "acetyltransferase"  
"OPBC09\_00172" 34581 "s59E13H2" 0.001135799 "ABC-2 family transporter protein"  
"OPBC09\_00172" 34581 "s59E25H2" 0 "ABC-2 family transporter protein"  
"OPBC09\_00172" 34581 "s59E5H2" 0.1302189 "ABC-2 family transporter protein"  
"OPBC09\_00172" 34581 "s63E6H2" 0 "ABC-2 family transporter protein"  
"OPBC09\_00173" 34582 "s59E13H2" 0.01060221 "putative ABC transporter ATP-binding protein YxIF"  
"OPBC09\_00173" 34582 "s59E25H2" 0 "putative ABC transporter ATP-binding protein YxIF"  
"OPBC09\_00173" 34582 "s59E5H2" 0.1515019 "putative ABC transporter ATP-binding protein YxIF"  
"OPBC09\_00173" 34582 "s63E6H2" 0 "putative ABC transporter ATP-binding protein YxIF"  
"OPBC09\_00174" 34583 "s59E13H2" 0.005973627 "hypothetical protein"  
"OPBC09\_00174" 34583 "s59E25H2" 0 "hypothetical protein"  
"OPBC09\_00174" 34583 "s59E5H2" 0.07495542 "hypothetical protein"  
"OPBC09\_00174" 34583 "s63E6H2" 0.001692665 "hypothetical protein"  
"OPBC09\_00176" 34585 "s59E13H2" 0.006791656 "hypothetical protein"  
"OPBC09\_00176" 34585 "s59E25H2" 0 "hypothetical protein"  
"OPBC09\_00176" 34585 "s59E5H2" 0.1364078 "hypothetical protein"  
"OPBC09\_00176" 34585 "s63E6H2" 0 "hypothetical protein"  
"OPBC09\_00178" 34587 "s59E13H2" 0.05130628 "hypothetical protein"  
"OPBC09\_00178" 34587 "s59E25H2" 0 "hypothetical protein"  
"OPBC09\_00178" 34587 "s59E5H2" 0.2484161 "hypothetical protein"  
"OPBC09\_00178" 34587 "s63E6H2" 1.03001 "hypothetical protein"  
"OPBC09\_00179" 34588 "s59E13H2" 0.05285496 "4,4'-diaponeurosporenoate glycosyltransferase"  
"OPBC09\_00179" 34588 "s59E25H2" 0 "4,4'-diaponeurosporenoate glycosyltransferase"  
"OPBC09\_00179" 34588 "s59E5H2" 0.1611947 "4,4'-diaponeurosporenoate glycosyltransferase"  
"OPBC09\_00179" 34588 "s63E6H2" 1.133137 "4,4'-diaponeurosporenoate glycosyltransferase"  
"OPBC09\_00180" 34589 "s59E13H2" 0.02219907 "hypothetical protein"  
"OPBC09\_00180" 34589 "s59E25H2" 0 "hypothetical protein"

"OPBC09\_00180" 34589 "s59E5H2" 0.1500593 "hypothetical protein"  
"OPBC09\_00180" 34589 "s63E6H2" 0.5808066 "hypothetical protein"  
"OPBC09\_00181" 34590 "s59E13H2" 0.001475429 "hypothetical protein"  
"OPBC09\_00181" 34590 "s59E25H2" 0 "hypothetical protein"  
"OPBC09\_00181" 34590 "s59E5H2" 0.06028519 "hypothetical protein"  
"OPBC09\_00181" 34590 "s63E6H2" 0.01844841 "hypothetical protein"  
"OPBC09\_00182" 34591 "s59E13H2" 0.004287885 "putative permease"  
"OPBC09\_00182" 34591 "s59E25H2" 0 "putative permease"  
"OPBC09\_00182" 34591 "s59E5H2" 0.1907646 "putative permease"  
"OPBC09\_00182" 34591 "s63E6H2" 1.004511 "putative permease"  
"OPBC09\_00183" 34592 "s59E13H2" 0 "Glycine/sarcosine N-methyltransferase"  
"OPBC09\_00183" 34592 "s59E25H2" 0 "Glycine/sarcosine N-methyltransferase"  
"OPBC09\_00183" 34592 "s59E5H2" 0 "Glycine/sarcosine N-methyltransferase"  
"OPBC09\_00183" 34592 "s63E6H2" 0 "Glycine/sarcosine N-methyltransferase"  
"OPBC09\_00186" 34595 "s59E13H2" 0.05476591 "Lon protease 2"  
"OPBC09\_00186" 34595 "s59E25H2" 0 "Lon protease 2"  
"OPBC09\_00186" 34595 "s59E5H2" 0.9458388 "Lon protease 2"  
"OPBC09\_00186" 34595 "s63E6H2" 1.132643 "Lon protease 2"  
"OPBC09\_00187" 34596 "s59E13H2" 0 "Archaeal ATPase"  
"OPBC09\_00187" 34596 "s59E25H2" 0 "Archaeal ATPase"  
"OPBC09\_00187" 34596 "s59E5H2" 0.0005303573 "Archaeal ATPase"  
"OPBC09\_00187" 34596 "s63E6H2" 0.0001075029 "Archaeal ATPase"  
"OPBC09\_00188" 34597 "s59E13H2" 0.04931544 "Bifunctional purine biosynthesis protein PurH"  
"OPBC09\_00188" 34597 "s59E25H2" 0 "Bifunctional purine biosynthesis protein PurH"  
"OPBC09\_00188" 34597 "s59E5H2" 0.6906275 "Bifunctional purine biosynthesis protein PurH"  
"OPBC09\_00188" 34597 "s63E6H2" 0.3997613 "Bifunctional purine biosynthesis protein PurH"  
"OPBC09\_00189" 34598 "s59E13H2" 0.06038359 "Phosphoribosylglycinamide formyltransferase"  
"OPBC09\_00189" 34598 "s59E25H2" 0 "Phosphoribosylglycinamide formyltransferase"  
"OPBC09\_00189" 34598 "s59E5H2" 0.4381122 "Phosphoribosylglycinamide formyltransferase"  
"OPBC09\_00189" 34598 "s63E6H2" 0.2170553 "Phosphoribosylglycinamide formyltransferase"  
"OPBC09\_00190" 34599 "s59E13H2" 0.01593664 "Phosphoribosylformylglycinamide cyclo-ligase"  
"OPBC09\_00190" 34599 "s59E25H2" 0 "Phosphoribosylformylglycinamide cyclo-ligase"  
"OPBC09\_00190" 34599 "s59E5H2" 0.3345871 "Phosphoribosylformylglycinamide cyclo-ligase"  
"OPBC09\_00190" 34599 "s63E6H2" 0.06761787 "Phosphoribosylformylglycinamide cyclo-ligase"  
"OPBC09\_00191" 34600 "s59E13H2" 0.01715713 "Amidophosphoribosyltransferase precursor"  
"OPBC09\_00191" 34600 "s59E25H2" 0 "Amidophosphoribosyltransferase precursor"  
"OPBC09\_00191" 34600 "s59E5H2" 0.1727675 "Amidophosphoribosyltransferase precursor"  
"OPBC09\_00191" 34600 "s63E6H2" 0.126787 "Amidophosphoribosyltransferase precursor"  
"OPBC09\_00192" 34601 "s59E13H2" 0.0190732 "Phosphoribosylformylglycinamide synthase"  
"OPBC09\_00192" 34601 "s59E25H2" 0 "Phosphoribosylformylglycinamide synthase"  
"OPBC09\_00192" 34601 "s59E5H2" 0.1322301 "Phosphoribosylformylglycinamide synthase"  
"OPBC09\_00192" 34601 "s63E6H2" 0.06168663 "Phosphoribosylformylglycinamide synthase"  
"OPBC09\_00193" 34602 "s59E13H2" 0.01695339 "Adenylosuccinate lyase"  
"OPBC09\_00193" 34602 "s59E25H2" 0 "Adenylosuccinate lyase"  
"OPBC09\_00193" 34602 "s59E5H2" 0.7598994 "Adenylosuccinate lyase"  
"OPBC09\_00193" 34602 "s63E6H2" 0.174696 "Adenylosuccinate lyase"  
"OPBC09\_00194" 34603 "s59E13H2" 0.0435233 "Purine nucleoside phosphorylase 1"

"OPBC09\_00194" 34603 "s59E25H2" 0 "Purine nucleoside phosphorylase 1"  
"OPBC09\_00194" 34603 "s59E5H2" 1.126004 "Purine nucleoside phosphorylase 1"  
"OPBC09\_00194" 34603 "s63E6H2" 0.004443925 "Purine nucleoside phosphorylase 1"  
"OPBC09\_00195" 34604 "s59E13H2" 0.04834511 "Purine nucleoside phosphorylase 1"  
"OPBC09\_00195" 34604 "s59E25H2" 0 "Purine nucleoside phosphorylase 1"  
"OPBC09\_00195" 34604 "s59E5H2" 1.286096 "Purine nucleoside phosphorylase 1"  
"OPBC09\_00195" 34604 "s63E6H2" 0.00908625 "Purine nucleoside phosphorylase 1"  
"OPBC09\_00196" 34605 "s59E13H2" 0.03052596 "DegV domain-containing protein"  
"OPBC09\_00196" 34605 "s59E25H2" 0 "DegV domain-containing protein"  
"OPBC09\_00196" 34605 "s59E5H2" 1.709526 "DegV domain-containing protein"  
"OPBC09\_00196" 34605 "s63E6H2" 0.018868 "DegV domain-containing protein"  
"OPBC09\_00197" 34606 "s59E13H2" 0.04710462 "5-formyltetrahydrofolate cyclo-ligase family protein"  
"OPBC09\_00197" 34606 "s59E25H2" 0 "5-formyltetrahydrofolate cyclo-ligase family protein"  
"OPBC09\_00197" 34606 "s59E5H2" 1.58875 "5-formyltetrahydrofolate cyclo-ligase family protein"  
"OPBC09\_00197" 34606 "s63E6H2" 0.01571247 "5-formyltetrahydrofolate cyclo-ligase family protein"  
"OPBC09\_00198" 34607 "s59E13H2" 0.05870947 "Putative glycosyltransferase CsbB"  
"OPBC09\_00198" 34607 "s59E25H2" 0 "Putative glycosyltransferase CsbB"  
"OPBC09\_00198" 34607 "s59E5H2" 2.244052 "Putative glycosyltransferase CsbB"  
"OPBC09\_00198" 34607 "s63E6H2" 0.05931772 "Putative glycosyltransferase CsbB"  
"OPBC09\_00199" 34608 "s59E13H2" 0.02261916 "hypothetical protein"  
"OPBC09\_00199" 34608 "s59E25H2" 0 "hypothetical protein"  
"OPBC09\_00199" 34608 "s59E5H2" 1.063502 "hypothetical protein"  
"OPBC09\_00199" 34608 "s63E6H2" 0.0008011467 "hypothetical protein"  
"OPBC09\_00200" 34609 "s59E13H2" 0.01359908 "Cyclic di-GMP phosphodiesterase response regulator RpfG"  
"OPBC09\_00200" 34609 "s59E25H2" 0 "Cyclic di-GMP phosphodiesterase response regulator RpfG"  
"OPBC09\_00200" 34609 "s59E5H2" 0.3438888 "Cyclic di-GMP phosphodiesterase response regulator RpfG"  
"OPBC09\_00200" 34609 "s63E6H2" 0.01966027 "Cyclic di-GMP phosphodiesterase response regulator RpfG"  
"OPBC09\_00201" 34610 "s59E13H2" 0.02662017 "hypothetical protein"  
"OPBC09\_00201" 34610 "s59E25H2" 0 "hypothetical protein"  
"OPBC09\_00201" 34610 "s59E5H2" 0.01511094 "hypothetical protein"  
"OPBC09\_00201" 34610 "s63E6H2" 0.01320932 "hypothetical protein"  
"OPBC09\_00202" 34611 "s59E13H2" 0.04901776 "Helix-turn-helix domain protein"  
"OPBC09\_00202" 34611 "s59E25H2" 0 "Helix-turn-helix domain protein"  
"OPBC09\_00202" 34611 "s59E5H2" 0.818884 "Helix-turn-helix domain protein"  
"OPBC09\_00202" 34611 "s63E6H2" 0.04126258 "Helix-turn-helix domain protein"  
"OPBC09\_00203" 34612 "s59E13H2" 0.02581942 "CobQ/CobB/MinD/ParA nucleotide binding domain protein"  
"OPBC09\_00203" 34612 "s59E25H2" 0 "CobQ/CobB/MinD/ParA nucleotide binding domain protein"  
"OPBC09\_00203" 34612 "s59E5H2" 0.0934126 "CobQ/CobB/MinD/ParA nucleotide binding domain protein"  
"OPBC09\_00203" 34612 "s63E6H2" 0.03100438 "CobQ/CobB/MinD/ParA nucleotide binding domain protein"  
"OPBC09\_00204" 34613 "s59E13H2" 0.01743728 "hypothetical protein"  
"OPBC09\_00204" 34613 "s59E25H2" 0 "hypothetical protein"  
"OPBC09\_00204" 34613 "s59E5H2" 0.05488347 "hypothetical protein"  
"OPBC09\_00204" 34613 "s63E6H2" 0.01139867 "hypothetical protein"  
"OPBC09\_00205" 34614 "s59E13H2" 0.01392836 "Cell cycle protein GpsB"  
"OPBC09\_00205" 34614 "s59E25H2" 0 "Cell cycle protein GpsB"  
"OPBC09\_00205" 34614 "s59E5H2" 0.033164 "Cell cycle protein GpsB"  
"OPBC09\_00205" 34614 "s63E6H2" 0.01566355 "Cell cycle protein GpsB"

"OPBC09\_00206" 34615 "s59E13H2" 0.004862759 "YGGT family protein"  
"OPBC09\_00206" 34615 "s59E25H2" 0 "YGGT family protein"  
"OPBC09\_00206" 34615 "s59E5H2" 0.05241315 "YGGT family protein"  
"OPBC09\_00206" 34615 "s63E6H2" 0.01737708 "YGGT family protein"  
"OPBC09\_00207" 34616 "s59E13H2" 0.03816268 "Pyrroline-5-carboxylate reductase"  
"OPBC09\_00207" 34616 "s59E25H2" 0 "Pyrroline-5-carboxylate reductase"  
"OPBC09\_00207" 34616 "s59E5H2" 0.02552066 "Pyrroline-5-carboxylate reductase"  
"OPBC09\_00207" 34616 "s63E6H2" 0.03841342 "Pyrroline-5-carboxylate reductase"  
"OPBC09\_00208" 34617 "s59E13H2" 0.02486658 "Cell division protein SepF"  
"OPBC09\_00208" 34617 "s59E25H2" 0 "Cell division protein SepF"  
"OPBC09\_00208" 34617 "s59E5H2" 0 "Cell division protein SepF"  
"OPBC09\_00208" 34617 "s63E6H2" 0.01467088 "Cell division protein SepF"  
"OPBC09\_00209" 34618 "s59E13H2" 0.01488315 "hypothetical protein"  
"OPBC09\_00209" 34618 "s59E25H2" 0 "hypothetical protein"  
"OPBC09\_00209" 34618 "s59E5H2" 0.02357427 "hypothetical protein"  
"OPBC09\_00209" 34618 "s63E6H2" 0.02064481 "hypothetical protein"  
"OPBC09\_00210" 34619 "s59E13H2" 0.01709993 "Cell division protein FtsZ"  
"OPBC09\_00210" 34619 "s59E25H2" 0 "Cell division protein FtsZ"  
"OPBC09\_00210" 34619 "s59E5H2" 0.04564248 "Cell division protein FtsZ"  
"OPBC09\_00210" 34619 "s63E6H2" 0.02543941 "Cell division protein FtsZ"  
"OPBC09\_00211" 34620 "s59E13H2" 0.01918057 "Cell division protein FtsA"  
"OPBC09\_00211" 34620 "s59E25H2" 0 "Cell division protein FtsA"  
"OPBC09\_00211" 34620 "s59E5H2" 0.03001885 "Cell division protein FtsA"  
"OPBC09\_00211" 34620 "s63E6H2" 0.02406507 "Cell division protein FtsA"  
"OPBC09\_00212" 34621 "s59E13H2" 0.008977122 "cell division protein FtsQ"  
"OPBC09\_00212" 34621 "s59E25H2" 0 "cell division protein FtsQ"  
"OPBC09\_00212" 34621 "s59E5H2" 0.05013132 "cell division protein FtsQ"  
"OPBC09\_00212" 34621 "s63E6H2" 0.0224917 "cell division protein FtsQ"  
"OPBC09\_00213" 34622 "s59E13H2" 0.009715071 "D-alanine--D-alanine ligase B"  
"OPBC09\_00213" 34622 "s59E25H2" 0 "D-alanine--D-alanine ligase B"  
"OPBC09\_00213" 34622 "s59E5H2" 0.09219801 "D-alanine--D-alanine ligase B"  
"OPBC09\_00213" 34622 "s63E6H2" 0.03449282 "D-alanine--D-alanine ligase B"  
"OPBC09\_00214" 34623 "s59E13H2" 0 "UDP-N-acetylenolpyruvoylglucosamine reductase"  
"OPBC09\_00214" 34623 "s59E25H2" 0 "UDP-N-acetylenolpyruvoylglucosamine reductase"  
"OPBC09\_00214" 34623 "s59E5H2" 0.04861465 "UDP-N-acetylenolpyruvoylglucosamine reductase"  
"OPBC09\_00214" 34623 "s63E6H2" 0.01901608 "UDP-N-acetylenolpyruvoylglucosamine reductase"  
"OPBC09\_00215" 34624 "s59E13H2" 0.02392336 "2-dehydro-3-deoxygluconokinase"  
"OPBC09\_00215" 34624 "s59E25H2" 0 "2-dehydro-3-deoxygluconokinase"  
"OPBC09\_00215" 34624 "s59E5H2" 0.1334123 "2-dehydro-3-deoxygluconokinase"  
"OPBC09\_00215" 34624 "s63E6H2" 0 "2-dehydro-3-deoxygluconokinase"  
"OPBC09\_00216" 34625 "s59E13H2" 0.009110847 "D-tagatose-1,6-bisphosphate aldolase subunit KbaZ"  
"OPBC09\_00216" 34625 "s59E25H2" 0 "D-tagatose-1,6-bisphosphate aldolase subunit KbaZ"  
"OPBC09\_00216" 34625 "s59E5H2" 0.1237572 "D-tagatose-1,6-bisphosphate aldolase subunit KbaZ"  
"OPBC09\_00216" 34625 "s63E6H2" 0.002349898 "D-tagatose-1,6-bisphosphate aldolase subunit KbaZ"  
"OPBC09\_00218" 34627 "s59E13H2" 0 "Melibiase"  
"OPBC09\_00218" 34627 "s59E25H2" 0 "Melibiase"  
"OPBC09\_00218" 34627 "s59E5H2" 0 "Melibiase"

"OPBC09\_00218" 34627 "s63E6H2" 0.0009819229 "Melibiase"  
"OPBC09\_00219" 34628 "s59E13H2" 0 "Alpha-galactosidase"  
"OPBC09\_00219" 34628 "s59E25H2" 0 "Alpha-galactosidase"  
"OPBC09\_00219" 34628 "s59E5H2" 0 "Alpha-galactosidase"  
"OPBC09\_00219" 34628 "s63E6H2" 0.0008905387 "Alpha-galactosidase"  
"OPBC09\_00220" 34629 "s59E13H2" 0 "L-arabinose transport system permease protein AraQ"  
"OPBC09\_00220" 34629 "s59E25H2" 0 "L-arabinose transport system permease protein AraQ"  
"OPBC09\_00220" 34629 "s59E5H2" 0 "L-arabinose transport system permease protein AraQ"  
"OPBC09\_00220" 34629 "s63E6H2" 0.001608821 "L-arabinose transport system permease protein AraQ"  
"OPBC09\_00221" 34630 "s59E13H2" 0 "Lactose transport system permease protein LacF"  
"OPBC09\_00221" 34630 "s59E25H2" 0 "Lactose transport system permease protein LacF"  
"OPBC09\_00221" 34630 "s59E5H2" 0 "Lactose transport system permease protein LacF"  
"OPBC09\_00221" 34630 "s63E6H2" 0.0008267336 "Lactose transport system permease protein LacF"  
"OPBC09\_00222" 34631 "s59E13H2" 0.0004116044 "Putative ABC transporter substrate-binding protein YesO"  
"OPBC09\_00222" 34631 "s59E25H2" 0 "Putative ABC transporter substrate-binding protein YesO"  
"OPBC09\_00222" 34631 "s59E5H2" 0.01220434 "Putative ABC transporter substrate-binding protein YesO"  
"OPBC09\_00222" 34631 "s63E6H2" 0.002295103 "Putative ABC transporter substrate-binding protein YesO"  
"OPBC09\_00223" 34632 "s59E13H2" 0 "L-fucose isomerase"  
"OPBC09\_00223" 34632 "s59E25H2" 0 "L-fucose isomerase"  
"OPBC09\_00223" 34632 "s59E5H2" 0 "L-fucose isomerase"  
"OPBC09\_00223" 34632 "s63E6H2" 0 "L-fucose isomerase"  
"OPBC09\_00224" 34633 "s59E13H2" 0 "N-acetylglucosamine repressor"  
"OPBC09\_00224" 34633 "s59E25H2" 0 "N-acetylglucosamine repressor"  
"OPBC09\_00224" 34633 "s59E5H2" 0 "N-acetylglucosamine repressor"  
"OPBC09\_00224" 34633 "s63E6H2" 0 "N-acetylglucosamine repressor"  
"OPBC09\_00225" 34634 "s59E13H2" 0 "Toxin RelG"  
"OPBC09\_00225" 34634 "s59E25H2" 0 "Toxin RelG"  
"OPBC09\_00225" 34634 "s59E5H2" 0 "Toxin RelG"  
"OPBC09\_00225" 34634 "s63E6H2" 0.003943912 "Toxin RelG"  
"OPBC09\_00226" 34635 "s59E13H2" 0.005473645 "Phd\_YefM"  
"OPBC09\_00226" 34635 "s59E25H2" 0 "Phd\_YefM"  
"OPBC09\_00226" 34635 "s59E5H2" 0.01080782 "Phd\_YefM"  
"OPBC09\_00226" 34635 "s63E6H2" 0.002068212 "Phd\_YefM"  
"OPBC09\_00227" 34636 "s59E13H2" 0 "hypothetical protein"  
"OPBC09\_00227" 34636 "s59E25H2" 0 "hypothetical protein"  
"OPBC09\_00227" 34636 "s59E5H2" 0 "hypothetical protein"  
"OPBC09\_00227" 34636 "s63E6H2" 0 "hypothetical protein"  
"OPBC09\_00228" 34637 "s59E13H2" 0.0380052 "alanine racemase"  
"OPBC09\_00228" 34637 "s59E25H2" 0 "alanine racemase"  
"OPBC09\_00228" 34637 "s59E5H2" 0 "alanine racemase"  
"OPBC09\_00228" 34637 "s63E6H2" 0.02598736 "alanine racemase"  
"OPBC09\_00229" 34638 "s59E13H2" 0.03753561 "30S ribosomal protein S9"  
"OPBC09\_00229" 34638 "s59E25H2" 0 "30S ribosomal protein S9"  
"OPBC09\_00229" 34638 "s59E5H2" 0.0248498 "30S ribosomal protein S9"  
"OPBC09\_00229" 34638 "s63E6H2" 0.03547787 "30S ribosomal protein S9"  
"OPBC09\_00230" 34639 "s59E13H2" 0.03921137 "50S ribosomal protein L13"  
"OPBC09\_00230" 34639 "s59E25H2" 0 "50S ribosomal protein L13"

"OPBC09\_00230" 34639 "s59E5H2" 0.03764481 "50S ribosomal protein L13"  
"OPBC09\_00230" 34639 "s63E6H2" 0.01701927 "50S ribosomal protein L13"  
"OPBC09\_00231" 34640 "s59E13H2" 0.07783772 "tRNA pseudouridine synthase A"  
"OPBC09\_00231" 34640 "s59E25H2" 0 "tRNA pseudouridine synthase A"  
"OPBC09\_00231" 34640 "s59E5H2" 0.02353944 "tRNA pseudouridine synthase A"  
"OPBC09\_00231" 34640 "s63E6H2" 0.01198025 "tRNA pseudouridine synthase A"  
"OPBC09\_00232" 34641 "s59E13H2" 0.05924918 "50S ribosomal protein L17"  
"OPBC09\_00232" 34641 "s59E25H2" 0 "50S ribosomal protein L17"  
"OPBC09\_00232" 34641 "s59E5H2" 0.04146026 "50S ribosomal protein L17"  
"OPBC09\_00232" 34641 "s63E6H2" 0.0104557 "50S ribosomal protein L17"  
"OPBC09\_00233" 34642 "s59E13H2" 0.03757952 "DNA-directed RNA polymerase subunit alpha"  
"OPBC09\_00233" 34642 "s59E25H2" 0 "DNA-directed RNA polymerase subunit alpha"  
"OPBC09\_00233" 34642 "s59E5H2" 0.009526125 "DNA-directed RNA polymerase subunit alpha"  
"OPBC09\_00233" 34642 "s63E6H2" 0.0114896 "DNA-directed RNA polymerase subunit alpha"  
"OPBC09\_00234" 34643 "s59E13H2" 0.03130571 "30S ribosomal protein S4"  
"OPBC09\_00234" 34643 "s59E25H2" 0 "30S ribosomal protein S4"  
"OPBC09\_00234" 34643 "s59E5H2" 0.02474422 "30S ribosomal protein S4"  
"OPBC09\_00234" 34643 "s63E6H2" 0.07329083 "30S ribosomal protein S4"  
"OPBC09\_00235" 34644 "s59E13H2" 0.02308071 "30S ribosomal protein S11"  
"OPBC09\_00235" 34644 "s59E25H2" 0 "30S ribosomal protein S11"  
"OPBC09\_00235" 34644 "s59E5H2" 0.02823848 "30S ribosomal protein S11"  
"OPBC09\_00235" 34644 "s63E6H2" 0.01089396 "30S ribosomal protein S11"  
"OPBC09\_00236" 34645 "s59E13H2" 0.01858505 "30S ribosomal protein S13"  
"OPBC09\_00236" 34645 "s59E25H2" 0 "30S ribosomal protein S13"  
"OPBC09\_00236" 34645 "s59E5H2" 0 "30S ribosomal protein S13"  
"OPBC09\_00236" 34645 "s63E6H2" 0.004776585 "30S ribosomal protein S13"  
"OPBC09\_00237" 34646 "s59E13H2" 0.01641276 "50S ribosomal protein L36"  
"OPBC09\_00237" 34646 "s59E25H2" 0 "50S ribosomal protein L36"  
"OPBC09\_00237" 34646 "s59E5H2" 0 "50S ribosomal protein L36"  
"OPBC09\_00237" 34646 "s63E6H2" 0.003572916 "50S ribosomal protein L36"  
"OPBC09\_00238" 34647 "s59E13H2" 0.03040338 "Translation initiation factor IF-1"  
"OPBC09\_00238" 34647 "s59E25H2" 0 "Translation initiation factor IF-1"  
"OPBC09\_00238" 34647 "s59E5H2" 0.2390976 "Translation initiation factor IF-1"  
"OPBC09\_00238" 34647 "s63E6H2" 0.01345855 "Translation initiation factor IF-1"  
"OPBC09\_00239" 34648 "s59E13H2" 0.03627819 "Methionine aminopeptidase 1"  
"OPBC09\_00239" 34648 "s59E25H2" 0 "Methionine aminopeptidase 1"  
"OPBC09\_00239" 34648 "s59E5H2" 0.1314952 "Methionine aminopeptidase 1"  
"OPBC09\_00239" 34648 "s63E6H2" 0.0005642216 "Methionine aminopeptidase 1"  
"OPBC09\_00240" 34649 "s59E13H2" 0.03097207 "Adenylate kinase"  
"OPBC09\_00240" 34649 "s59E25H2" 0 "Adenylate kinase"  
"OPBC09\_00240" 34649 "s59E5H2" 0.0602587 "Adenylate kinase"  
"OPBC09\_00240" 34649 "s63E6H2" 0.004769757 "Adenylate kinase"  
"OPBC09\_00241" 34650 "s59E13H2" 0.02477689 "preprotein translocase subunit SecY"  
"OPBC09\_00241" 34650 "s59E25H2" 0 "preprotein translocase subunit SecY"  
"OPBC09\_00241" 34650 "s59E5H2" 0.03355302 "preprotein translocase subunit SecY"  
"OPBC09\_00241" 34650 "s63E6H2" 0.01459896 "preprotein translocase subunit SecY"  
"OPBC09\_00242" 34651 "s59E13H2" 0.0008674775 "50S ribosomal protein L15"

"OPBC09\_00242" 34651 "s59E25H2" 0 "50S ribosomal protein L15"  
"OPBC09\_00242" 34651 "s59E5H2" 0.04297396 "50S ribosomal protein L15"  
"OPBC09\_00242" 34651 "s63E6H2" 0.02569568 "50S ribosomal protein L15"  
"OPBC09\_00243" 34652 "s59E13H2" 0.005423957 "30S ribosomal protein S5"  
"OPBC09\_00243" 34652 "s59E25H2" 0 "30S ribosomal protein S5"  
"OPBC09\_00243" 34652 "s59E5H2" 0.008908265 "30S ribosomal protein S5"  
"OPBC09\_00243" 34652 "s63E6H2" 0.01876597 "30S ribosomal protein S5"  
"OPBC09\_00244" 34653 "s59E13H2" 0.005325901 "50S ribosomal protein L18"  
"OPBC09\_00244" 34653 "s59E25H2" 0 "50S ribosomal protein L18"  
"OPBC09\_00244" 34653 "s59E5H2" 0.0158593 "50S ribosomal protein L18"  
"OPBC09\_00244" 34653 "s63E6H2" 0.01082231 "50S ribosomal protein L18"  
"OPBC09\_00245" 34654 "s59E13H2" 0.01536027 "50S ribosomal protein L6"  
"OPBC09\_00245" 34654 "s59E25H2" 0 "50S ribosomal protein L6"  
"OPBC09\_00245" 34654 "s59E5H2" 0.02522804 "50S ribosomal protein L6"  
"OPBC09\_00245" 34654 "s63E6H2" 0.01131056 "50S ribosomal protein L6"  
"OPBC09\_00246" 34655 "s59E13H2" 0.009016509 "30S ribosomal protein S8"  
"OPBC09\_00246" 34655 "s59E25H2" 0 "30S ribosomal protein S8"  
"OPBC09\_00246" 34655 "s59E5H2" 0.0274999 "30S ribosomal protein S8"  
"OPBC09\_00246" 34655 "s63E6H2" 0.01834294 "30S ribosomal protein S8"  
"OPBC09\_00247" 34656 "s59E13H2" 0.008900167 "30S ribosomal protein S14 type Z"  
"OPBC09\_00247" 34656 "s59E25H2" 0 "30S ribosomal protein S14 type Z"  
"OPBC09\_00247" 34656 "s59E5H2" 0.01856505 "30S ribosomal protein S14 type Z"  
"OPBC09\_00247" 34656 "s63E6H2" 0.008105719 "30S ribosomal protein S14 type Z"  
"OPBC09\_00248" 34657 "s59E13H2" 0.00175491 "50S ribosomal protein L5"  
"OPBC09\_00248" 34657 "s59E25H2" 0 "50S ribosomal protein L5"  
"OPBC09\_00248" 34657 "s59E5H2" 0.01594303 "50S ribosomal protein L5"  
"OPBC09\_00248" 34657 "s63E6H2" 0.01228173 "50S ribosomal protein L5"  
"OPBC09\_00249" 34658 "s59E13H2" 0 "50S ribosomal protein L24"  
"OPBC09\_00249" 34658 "s59E25H2" 0 "50S ribosomal protein L24"  
"OPBC09\_00249" 34658 "s59E5H2" 0.004520579 "50S ribosomal protein L24"  
"OPBC09\_00249" 34658 "s63E6H2" 0.008748721 "50S ribosomal protein L24"  
"OPBC09\_00250" 34659 "s59E13H2" 0.006409082 "50S ribosomal protein L14"  
"OPBC09\_00250" 34659 "s59E25H2" 0 "50S ribosomal protein L14"  
"OPBC09\_00250" 34659 "s59E5H2" 0.03562721 "50S ribosomal protein L14"  
"OPBC09\_00250" 34659 "s63E6H2" 0.006151662 "50S ribosomal protein L14"  
"OPBC09\_00251" 34660 "s59E13H2" 0.002045763 "30S ribosomal protein S17"  
"OPBC09\_00251" 34660 "s59E25H2" 0 "30S ribosomal protein S17"  
"OPBC09\_00251" 34660 "s59E5H2" 0.0219971 "30S ribosomal protein S17"  
"OPBC09\_00251" 34660 "s63E6H2" 0.01311219 "30S ribosomal protein S17"  
"OPBC09\_00252" 34661 "s59E13H2" 0 "50S ribosomal protein L29"  
"OPBC09\_00252" 34661 "s59E25H2" 0 "50S ribosomal protein L29"  
"OPBC09\_00252" 34661 "s59E5H2" 0 "50S ribosomal protein L29"  
"OPBC09\_00252" 34661 "s63E6H2" 0.02876321 "50S ribosomal protein L29"  
"OPBC09\_00253" 34662 "s59E13H2" 0 "50S ribosomal protein L16"  
"OPBC09\_00253" 34662 "s59E25H2" 0 "50S ribosomal protein L16"  
"OPBC09\_00253" 34662 "s59E5H2" 0 "50S ribosomal protein L16"  
"OPBC09\_00253" 34662 "s63E6H2" 0.01703649 "50S ribosomal protein L16"

"OPBC09\_00254" 34663 "s59E13H2" 0 "30S ribosomal protein S3"  
"OPBC09\_00254" 34663 "s59E25H2" 0 "30S ribosomal protein S3"  
"OPBC09\_00254" 34663 "s59E5H2" 0 "30S ribosomal protein S3"  
"OPBC09\_00254" 34663 "s63E6H2" 0.01622891 "30S ribosomal protein S3"  
"OPBC09\_00255" 34664 "s59E13H2" 0 "50S ribosomal protein L22"  
"OPBC09\_00255" 34664 "s59E25H2" 0 "50S ribosomal protein L22"  
"OPBC09\_00255" 34664 "s59E5H2" 0 "50S ribosomal protein L22"  
"OPBC09\_00255" 34664 "s63E6H2" 0.01451692 "50S ribosomal protein L22"  
"OPBC09\_00256" 34665 "s59E13H2" 0.0008043883 "30S ribosomal protein S19"  
"OPBC09\_00256" 34665 "s59E25H2" 0 "30S ribosomal protein S19"  
"OPBC09\_00256" 34665 "s59E5H2" 0.02029224 "30S ribosomal protein S19"  
"OPBC09\_00256" 34665 "s63E6H2" 0.00365998 "30S ribosomal protein S19"  
"OPBC09\_00257" 34666 "s59E13H2" 0.001523367 "50S ribosomal protein L2"  
"OPBC09\_00257" 34666 "s59E25H2" 0 "50S ribosomal protein L2"  
"OPBC09\_00257" 34666 "s59E5H2" 0.02422981 "50S ribosomal protein L2"  
"OPBC09\_00257" 34666 "s63E6H2" 0.01398017 "50S ribosomal protein L2"  
"OPBC09\_00258" 34667 "s59E13H2" 0 "50S ribosomal protein L23"  
"OPBC09\_00258" 34667 "s59E25H2" 0 "50S ribosomal protein L23"  
"OPBC09\_00258" 34667 "s59E5H2" 0 "50S ribosomal protein L23"  
"OPBC09\_00258" 34667 "s63E6H2" 0.00529827 "50S ribosomal protein L23"  
"OPBC09\_00259" 34668 "s59E13H2" 0 "50S ribosomal protein L4"  
"OPBC09\_00259" 34668 "s59E25H2" 0 "50S ribosomal protein L4"  
"OPBC09\_00259" 34668 "s59E5H2" 0.001826674 "50S ribosomal protein L4"  
"OPBC09\_00259" 34668 "s63E6H2" 0.01091228 "50S ribosomal protein L4"  
"OPBC09\_00260" 34669 "s59E13H2" 0 "50S ribosomal protein L3"  
"OPBC09\_00260" 34669 "s59E25H2" 0 "50S ribosomal protein L3"  
"OPBC09\_00260" 34669 "s59E5H2" 0.01831614 "50S ribosomal protein L3"  
"OPBC09\_00260" 34669 "s63E6H2" 0.03275412 "50S ribosomal protein L3"  
"OPBC09\_00261" 34670 "s59E13H2" 0 "30S ribosomal protein S10"  
"OPBC09\_00261" 34670 "s59E25H2" 0 "30S ribosomal protein S10"  
"OPBC09\_00261" 34670 "s59E5H2" 0.0210601 "30S ribosomal protein S10"  
"OPBC09\_00261" 34670 "s63E6H2" 0.01939312 "30S ribosomal protein S10"  
"OPBC09\_00262" 34671 "s59E13H2" 0.04883873 "Elongation factor Tu"  
"OPBC09\_00262" 34671 "s59E25H2" 0 "Elongation factor Tu"  
"OPBC09\_00262" 34671 "s59E5H2" 0.07014357 "Elongation factor Tu"  
"OPBC09\_00262" 34671 "s63E6H2" 0.009297441 "Elongation factor Tu"  
"OPBC09\_00263" 34672 "s59E13H2" 0.006965572 "Elongation factor G"  
"OPBC09\_00263" 34672 "s59E25H2" 0 "Elongation factor G"  
"OPBC09\_00263" 34672 "s59E5H2" 0.01705682 "Elongation factor G"  
"OPBC09\_00263" 34672 "s63E6H2" 0.02119175 "Elongation factor G"  
"OPBC09\_00264" 34673 "s59E13H2" 0.01907988 "30S ribosomal protein S7"  
"OPBC09\_00264" 34673 "s59E25H2" 0 "30S ribosomal protein S7"  
"OPBC09\_00264" 34673 "s59E5H2" 0.01431864 "30S ribosomal protein S7"  
"OPBC09\_00264" 34673 "s63E6H2" 0.02817641 "30S ribosomal protein S7"  
"OPBC09\_00265" 34674 "s59E13H2" 0 "30S ribosomal protein S12"  
"OPBC09\_00265" 34674 "s59E25H2" 0 "30S ribosomal protein S12"  
"OPBC09\_00265" 34674 "s59E5H2" 0 "30S ribosomal protein S12"



"OPBC09\_00265" 34674 "s63E6H2" 0.01532896 "30S ribosomal protein S12"  
"OPBC09\_00266" 34675 "s59E13H2" 0.007651152 "DNA-directed RNA polymerase subunit beta"  
"OPBC09\_00266" 34675 "s59E25H2" 0 "DNA-directed RNA polymerase subunit beta"  
"OPBC09\_00266" 34675 "s59E5H2" 0.03456009 "DNA-directed RNA polymerase subunit beta"  
"OPBC09\_00266" 34675 "s63E6H2" 0.02585724 "DNA-directed RNA polymerase subunit beta"  
"OPBC09\_00267" 34676 "s59E13H2" 0.02020168 "putative glycosyl transferase"  
"OPBC09\_00267" 34676 "s59E25H2" 0 "putative glycosyl transferase"  
"OPBC09\_00267" 34676 "s59E5H2" 0.5990373 "putative glycosyl transferase"  
"OPBC09\_00267" 34676 "s63E6H2" 0.1218031 "putative glycosyl transferase"  
"OPBC09\_00268" 34677 "s59E13H2" 0.01893417 "hypothetical protein"  
"OPBC09\_00268" 34677 "s59E25H2" 0.1083658 "hypothetical protein"  
"OPBC09\_00268" 34677 "s59E5H2" 0.7697516 "hypothetical protein"  
"OPBC09\_00268" 34677 "s63E6H2" 0.08043266 "hypothetical protein"  
"OPBC09\_00269" 34678 "s59E13H2" 0.005833129 "4-amino-4-deoxy-L-arabinose-phosphoundecaprenol flippase subunit ArnF"  
"OPBC09\_00269" 34678 "s59E25H2" 0 "4-amino-4-deoxy-L-arabinose-phosphoundecaprenol flippase subunit ArnF"  
"OPBC09\_00269" 34678 "s59E5H2" 0.2373003 "4-amino-4-deoxy-L-arabinose-phosphoundecaprenol flippase subunit ArnF"  
"OPBC09\_00269" 34678 "s63E6H2" 0.01219074 "4-amino-4-deoxy-L-arabinose-phosphoundecaprenol flippase subunit ArnF"  
"OPBC09\_00270" 34679 "s59E13H2" 0.007251575 "Glycosyltransferase AgIE"  
"OPBC09\_00270" 34679 "s59E25H2" 0 "Glycosyltransferase AgIE"  
"OPBC09\_00270" 34679 "s59E5H2" 0.2744842 "Glycosyltransferase AgIE"  
"OPBC09\_00270" 34679 "s63E6H2" 0.005790416 "Glycosyltransferase AgIE"  
"OPBC09\_00271" 34680 "s59E13H2" 0.01094672 "Glycosyl transferases group 1"  
"OPBC09\_00271" 34680 "s59E25H2" 0 "Glycosyl transferases group 1"  
"OPBC09\_00271" 34680 "s59E5H2" 0.1853482 "Glycosyl transferases group 1"  
"OPBC09\_00271" 34680 "s63E6H2" 0.002800362 "Glycosyl transferases group 1"  
"OPBC09\_00272" 34681 "s59E13H2" 0.01369893 "N-acetylglucosaminyl-diphospho-decaprenol L-rhamnosyltransferase"  
"OPBC09\_00272" 34681 "s59E25H2" 0 "N-acetylglucosaminyl-diphospho-decaprenol L-rhamnosyltransferase"  
"OPBC09\_00272" 34681 "s59E5H2" 0.2487702 "N-acetylglucosaminyl-diphospho-decaprenol L-rhamnosyltransferase"  
"OPBC09\_00272" 34681 "s63E6H2" 0.009325858 "N-acetylglucosaminyl-diphospho-decaprenol L-rhamnosyltransferase"  
"OPBC09\_00273" 34682 "s59E13H2" 0.00652883 "Glycosyltransferase AgII"  
"OPBC09\_00273" 34682 "s59E25H2" 0 "Glycosyltransferase AgII"  
"OPBC09\_00273" 34682 "s59E5H2" 0.3748147 "Glycosyltransferase AgII"  
"OPBC09\_00273" 34682 "s63E6H2" 0.01159073 "Glycosyltransferase AgII"  
"OPBC09\_00276" 34685 "s59E13H2" 0.02893399 "hypothetical protein"  
"OPBC09\_00276" 34685 "s59E25H2" 0 "hypothetical protein"  
"OPBC09\_00276" 34685 "s59E5H2" 0.003701309 "hypothetical protein"  
"OPBC09\_00276" 34685 "s63E6H2" 0.1846272 "hypothetical protein"  
"OPBC09\_00277" 34686 "s59E13H2" 0.0458384 "Bifunctional protein GImU"  
"OPBC09\_00277" 34686 "s59E25H2" 0.4195251 "Bifunctional protein GImU"  
"OPBC09\_00277" 34686 "s59E5H2" 0.02379717 "Bifunctional protein GImU"  
"OPBC09\_00277" 34686 "s63E6H2" 0.2829035 "Bifunctional protein GImU"  
"OPBC09\_00278" 34687 "s59E13H2" 0.03707102 "Methylthioribose-1-phosphate isomerase"  
"OPBC09\_00278" 34687 "s59E25H2" 0 "Methylthioribose-1-phosphate isomerase"  
"OPBC09\_00278" 34687 "s59E5H2" 0.07972253 "Methylthioribose-1-phosphate isomerase"  
"OPBC09\_00278" 34687 "s63E6H2" 0.4979951 "Methylthioribose-1-phosphate isomerase"  
"OPBC09\_00279" 34688 "s59E13H2" 0.0482022 "Adenosylhomocysteinase"  
"OPBC09\_00279" 34688 "s59E25H2" 0 "Adenosylhomocysteinase"

"OPBC09\_00279" 34688 "s59E5H2" 0.06216432 "Adenosylhomocysteinase"  
"OPBC09\_00279" 34688 "s63E6H2" 0.3871158 "Adenosylhomocysteinase"  
"OPBC09\_00280" 34689 "s59E13H2" 0.0336249 "Bifunctional phosphoglucose/phosphomannose isomerase"  
"OPBC09\_00280" 34689 "s59E25H2" 0 "Bifunctional phosphoglucose/phosphomannose isomerase"  
"OPBC09\_00280" 34689 "s59E5H2" 0.06591615 "Bifunctional phosphoglucose/phosphomannose isomerase"  
"OPBC09\_00280" 34689 "s63E6H2" 0.1508607 "Bifunctional phosphoglucose/phosphomannose isomerase"  
"OPBC09\_00281" 34690 "s59E13H2" 0.01157341 "Phosphoglucomutase"  
"OPBC09\_00281" 34690 "s59E25H2" 0 "Phosphoglucomutase"  
"OPBC09\_00281" 34690 "s59E5H2" 0.04996936 "Phosphoglucomutase"  
"OPBC09\_00281" 34690 "s63E6H2" 0.1934189 "Phosphoglucomutase"  
"OPBC09\_00282" 34691 "s59E13H2" 0.008104024 "GDP-mannose 4,6-dehydratase"  
"OPBC09\_00282" 34691 "s59E25H2" 0 "GDP-mannose 4,6-dehydratase"  
"OPBC09\_00282" 34691 "s59E5H2" 0.06982998 "GDP-mannose 4,6-dehydratase"  
"OPBC09\_00282" 34691 "s63E6H2" 0.1942974 "GDP-mannose 4,6-dehydratase"  
"OPBC09\_00283" 34692 "s59E13H2" 0.004387757 "D-glycero-alpha-D-manno-heptose 1-phosphate guanylyltransferase"  
"OPBC09\_00283" 34692 "s59E25H2" 0 "D-glycero-alpha-D-manno-heptose 1-phosphate guanylyltransferase"  
"OPBC09\_00283" 34692 "s59E5H2" 0.0659219 "D-glycero-alpha-D-manno-heptose 1-phosphate guanylyltransferase"  
"OPBC09\_00283" 34692 "s63E6H2" 0.1327039 "D-glycero-alpha-D-manno-heptose 1-phosphate guanylyltransferase"  
"OPBC09\_00284" 34693 "s59E13H2" 0.01903067 "GDP-6-deoxy-D-mannose reductase"  
"OPBC09\_00284" 34693 "s59E25H2" 0 "GDP-6-deoxy-D-mannose reductase"  
"OPBC09\_00284" 34693 "s59E5H2" 0.06128908 "GDP-6-deoxy-D-mannose reductase"  
"OPBC09\_00284" 34693 "s63E6H2" 0.125733 "GDP-6-deoxy-D-mannose reductase"  
"OPBC09\_00285" 34694 "s59E13H2" 0.00375871 "N-acetylglucosaminyl-diphospho-decaprenol L-rhamnosyltransferase"  
"OPBC09\_00285" 34694 "s59E25H2" 0 "N-acetylglucosaminyl-diphospho-decaprenol L-rhamnosyltransferase"  
"OPBC09\_00285" 34694 "s59E5H2" 0.08594616 "N-acetylglucosaminyl-diphospho-decaprenol L-rhamnosyltransferase"  
"OPBC09\_00285" 34694 "s63E6H2" 0.02031963 "N-acetylglucosaminyl-diphospho-decaprenol L-rhamnosyltransferase"  
"OPBC09\_00286" 34695 "s59E13H2" 0 "YcfA-like protein"  
"OPBC09\_00286" 34695 "s59E25H2" 0 "YcfA-like protein"  
"OPBC09\_00286" 34695 "s59E5H2" 0.03611185 "YcfA-like protein"  
"OPBC09\_00286" 34695 "s63E6H2" 0 "YcfA-like protein"  
"OPBC09\_00287" 34696 "s59E13H2" 0 "hypothetical protein"  
"OPBC09\_00287" 34696 "s59E25H2" 0 "hypothetical protein"  
"OPBC09\_00287" 34696 "s59E5H2" 0.01665589 "hypothetical protein"  
"OPBC09\_00287" 34696 "s63E6H2" 0 "hypothetical protein"  
"OPBC09\_00288" 34697 "s59E13H2" 0.005270905 "Tryptophan synthase alpha chain"  
"OPBC09\_00288" 34697 "s59E25H2" 0 "Tryptophan synthase alpha chain"  
"OPBC09\_00288" 34697 "s59E5H2" 0.07958133 "Tryptophan synthase alpha chain"  
"OPBC09\_00288" 34697 "s63E6H2" 0.02999554 "Tryptophan synthase alpha chain"  
"OPBC09\_00289" 34698 "s59E13H2" 0.004943926 "Tryptophan synthase beta chain 1"  
"OPBC09\_00289" 34698 "s59E25H2" 0 "Tryptophan synthase beta chain 1"  
"OPBC09\_00289" 34698 "s59E5H2" 0.1174953 "Tryptophan synthase beta chain 1"  
"OPBC09\_00289" 34698 "s63E6H2" 0.03799059 "Tryptophan synthase beta chain 1"  
"OPBC09\_00290" 34699 "s59E13H2" 0.01524062 "N-(5'-phosphoribosyl)anthranilate isomerase"  
"OPBC09\_00290" 34699 "s59E25H2" 0 "N-(5'-phosphoribosyl)anthranilate isomerase"  
"OPBC09\_00290" 34699 "s59E5H2" 0.05304757 "N-(5'-phosphoribosyl)anthranilate isomerase"  
"OPBC09\_00290" 34699 "s63E6H2" 0.02144483 "N-(5'-phosphoribosyl)anthranilate isomerase"  
"OPBC09\_00293" 34702 "s59E13H2" 0 "recombinase A"

"OPBC09\_00293" 34702 "s59E25H2" 0 "recombinase A"  
"OPBC09\_00293" 34702 "s59E5H2" 0.6082452 "recombinase A"  
"OPBC09\_00293" 34702 "s63E6H2" 0.08406716 "recombinase A"  
"OPBC09\_00294" 34703 "s59E13H2" 0 "recombinase A"  
"OPBC09\_00294" 34703 "s59E25H2" 0 "recombinase A"  
"OPBC09\_00294" 34703 "s59E5H2" 0.3452999 "recombinase A"  
"OPBC09\_00294" 34703 "s63E6H2" 0.1289035 "recombinase A"  
"OPBC09\_00295" 34704 "s59E13H2" 0 "2'-5'-RNA ligase"  
"OPBC09\_00295" 34704 "s59E25H2" 0 "2'-5'-RNA ligase"  
"OPBC09\_00295" 34704 "s59E5H2" 0.2684918 "2'-5'-RNA ligase"  
"OPBC09\_00295" 34704 "s63E6H2" 0.09123926 "2'-5'-RNA ligase"  
"OPBC09\_00296" 34705 "s59E13H2" 0 "competence damage-inducible protein A"  
"OPBC09\_00296" 34705 "s59E25H2" 0 "competence damage-inducible protein A"  
"OPBC09\_00296" 34705 "s59E5H2" 0.1483011 "competence damage-inducible protein A"  
"OPBC09\_00296" 34705 "s63E6H2" 0.0663708 "competence damage-inducible protein A"  
"OPBC09\_00297" 34706 "s59E13H2" 0.01123912 "Sporulation and spore germination"  
"OPBC09\_00297" 34706 "s59E25H2" 0 "Sporulation and spore germination"  
"OPBC09\_00297" 34706 "s59E5H2" 0.06224079 "Sporulation and spore germination"  
"OPBC09\_00297" 34706 "s63E6H2" 0.5389657 "Sporulation and spore germination"  
"OPBC09\_00298" 34707 "s59E13H2" 0 "HEPN domain protein"  
"OPBC09\_00298" 34707 "s59E25H2" 0 "HEPN domain protein"  
"OPBC09\_00298" 34707 "s59E5H2" 0 "HEPN domain protein"  
"OPBC09\_00298" 34707 "s63E6H2" 0 "HEPN domain protein"  
"OPBC09\_00299" 34708 "s59E13H2" 0 "Nucleotidyltransferase domain protein"  
"OPBC09\_00299" 34708 "s59E25H2" 0 "Nucleotidyltransferase domain protein"  
"OPBC09\_00299" 34708 "s59E5H2" 0 "Nucleotidyltransferase domain protein"  
"OPBC09\_00299" 34708 "s63E6H2" 0 "Nucleotidyltransferase domain protein"  
"OPBC09\_00300" 34709 "s59E13H2" 0 "putative S-adenosyl-L-methionine-dependent methyltransferase"  
"OPBC09\_00300" 34709 "s59E25H2" 0 "putative S-adenosyl-L-methionine-dependent methyltransferase"  
"OPBC09\_00300" 34709 "s59E5H2" 0 "putative S-adenosyl-L-methionine-dependent methyltransferase"  
"OPBC09\_00300" 34709 "s63E6H2" 0 "putative S-adenosyl-L-methionine-dependent methyltransferase"  
"OPBC09\_00301" 34710 "s59E13H2" 0 "Phosphoribosylformylglycinamide cyclo-ligase"  
"OPBC09\_00301" 34710 "s59E25H2" 0 "Phosphoribosylformylglycinamide cyclo-ligase"  
"OPBC09\_00301" 34710 "s59E5H2" 0 "Phosphoribosylformylglycinamide cyclo-ligase"  
"OPBC09\_00301" 34710 "s63E6H2" 0 "Phosphoribosylformylglycinamide cyclo-ligase"  
"OPBC09\_00302" 34711 "s59E13H2" 0 "Phosphoribosylformylglycinamide cyclo-ligase"  
"OPBC09\_00302" 34711 "s59E25H2" 0 "Phosphoribosylformylglycinamide cyclo-ligase"  
"OPBC09\_00302" 34711 "s59E5H2" 0 "Phosphoribosylformylglycinamide cyclo-ligase"  
"OPBC09\_00302" 34711 "s63E6H2" 0 "Phosphoribosylformylglycinamide cyclo-ligase"  
"OPBC09\_00304" 34713 "s59E13H2" 0 "endonuclease IV"  
"OPBC09\_00304" 34713 "s59E25H2" 0 "endonuclease IV"  
"OPBC09\_00304" 34713 "s59E5H2" 0 "endonuclease IV"  
"OPBC09\_00304" 34713 "s63E6H2" 0 "endonuclease IV"  
"OPBC09\_00305" 34714 "s59E13H2" 0.3336173 "Alpha/beta hydrolase family protein"  
"OPBC09\_00305" 34714 "s59E25H2" 0 "Alpha/beta hydrolase family protein"  
"OPBC09\_00305" 34714 "s59E5H2" 0.3666661 "Alpha/beta hydrolase family protein"  
"OPBC09\_00305" 34714 "s63E6H2" 0.381576 "Alpha/beta hydrolase family protein"

"OPBC09\_00306" 34715 "s59E13H2" 0.1689231 "ribosomal-protein-alanine N-acetyltransferase"  
"OPBC09\_00306" 34715 "s59E25H2" 0 "ribosomal-protein-alanine N-acetyltransferase"  
"OPBC09\_00306" 34715 "s59E5H2" 0.3801434 "ribosomal-protein-alanine N-acetyltransferase"  
"OPBC09\_00306" 34715 "s63E6H2" 0.1467193 "ribosomal-protein-alanine N-acetyltransferase"  
"OPBC09\_00307" 34716 "s59E13H2" 0.09621903 "hypothetical protein"  
"OPBC09\_00307" 34716 "s59E25H2" 0 "hypothetical protein"  
"OPBC09\_00307" 34716 "s59E5H2" 0.1486768 "hypothetical protein"  
"OPBC09\_00307" 34716 "s63E6H2" 0.01810797 "hypothetical protein"  
"OPBC09\_00308" 34717 "s59E13H2" 0.2190082 "5'-nucleotidase"  
"OPBC09\_00308" 34717 "s59E25H2" 0 "5'-nucleotidase"  
"OPBC09\_00308" 34717 "s59E5H2" 0.1079771 "5'-nucleotidase"  
"OPBC09\_00308" 34717 "s63E6H2" 0.2315819 "5'-nucleotidase"  
"OPBC09\_00309" 34718 "s59E13H2" 0.252231 "hypothetical protein"  
"OPBC09\_00309" 34718 "s59E25H2" 0 "hypothetical protein"  
"OPBC09\_00309" 34718 "s59E5H2" 0.02699785 "hypothetical protein"  
"OPBC09\_00309" 34718 "s63E6H2" 0.1643036 "hypothetical protein"  
"OPBC09\_00310" 34719 "s59E13H2" 0.111674 "spermidine synthase"  
"OPBC09\_00310" 34719 "s59E25H2" 0 "spermidine synthase"  
"OPBC09\_00310" 34719 "s59E5H2" 0.1566998 "spermidine synthase"  
"OPBC09\_00310" 34719 "s63E6H2" 0.1674987 "spermidine synthase"  
"OPBC09\_00311" 34720 "s59E13H2" 0 "DOMON domain protein"  
"OPBC09\_00311" 34720 "s59E25H2" 0 "DOMON domain protein"  
"OPBC09\_00311" 34720 "s59E5H2" 0.3189031 "DOMON domain protein"  
"OPBC09\_00311" 34720 "s63E6H2" 5.427937e-05 "DOMON domain protein"  
"OPBC09\_00312" 34721 "s59E13H2" 0.003389591 "Quinoprotein glucose dehydrogenase B precursor"  
"OPBC09\_00312" 34721 "s59E25H2" 0 "Quinoprotein glucose dehydrogenase B precursor"  
"OPBC09\_00312" 34721 "s59E5H2" 0.2866422 "Quinoprotein glucose dehydrogenase B precursor"  
"OPBC09\_00312" 34721 "s63E6H2" 0.03095812 "Quinoprotein glucose dehydrogenase B precursor"  
"OPBC09\_00313" 34722 "s59E13H2" 0.01149866 "hypothetical protein"  
"OPBC09\_00313" 34722 "s59E25H2" 0 "hypothetical protein"  
"OPBC09\_00313" 34722 "s59E5H2" 0.009201254 "hypothetical protein"  
"OPBC09\_00313" 34722 "s63E6H2" 0.02757588 "hypothetical protein"  
"OPBC09\_00314" 34723 "s59E13H2" 0 "hypothetical protein"  
"OPBC09\_00314" 34723 "s59E25H2" 0 "hypothetical protein"  
"OPBC09\_00314" 34723 "s59E5H2" 0.03028565 "hypothetical protein"  
"OPBC09\_00314" 34723 "s63E6H2" 0 "hypothetical protein"  
"OPBC09\_00315" 34724 "s59E13H2" 0.001558279 "hypothetical protein"  
"OPBC09\_00315" 34724 "s59E25H2" 0 "hypothetical protein"  
"OPBC09\_00315" 34724 "s59E5H2" 0.006350421 "hypothetical protein"  
"OPBC09\_00315" 34724 "s63E6H2" 0.1536991 "hypothetical protein"  
"OPBC09\_00316" 34725 "s59E13H2" 0 "hypothetical protein"  
"OPBC09\_00316" 34725 "s59E25H2" 0 "hypothetical protein"  
"OPBC09\_00316" 34725 "s59E5H2" 0 "hypothetical protein"  
"OPBC09\_00316" 34725 "s63E6H2" 0 "hypothetical protein"  
"OPBC09\_00317" 34726 "s59E13H2" 0 "Transcriptional regulatory protein CusR"  
"OPBC09\_00317" 34726 "s59E25H2" 0 "Transcriptional regulatory protein CusR"  
"OPBC09\_00317" 34726 "s59E5H2" 0 "Transcriptional regulatory protein CusR"

"OPBC09\_00317" 34726 "s63E6H2" 0.001871253 "Transcriptional regulatory protein CusR"  
"OPBC09\_00318" 34727 "s59E13H2" 0.0003932011 "Signal-transduction histidine kinase senX3"  
"OPBC09\_00318" 34727 "s59E25H2" 0 "Signal-transduction histidine kinase senX3"  
"OPBC09\_00318" 34727 "s59E5H2" 0 "Signal-transduction histidine kinase senX3"  
"OPBC09\_00318" 34727 "s63E6H2" 0.003507738 "Signal-transduction histidine kinase senX3"  
"OPBC09\_00320" 34729 "s59E13H2" 2.623768 "RNA polymerase sigma factor SigA"  
"OPBC09\_00320" 34729 "s59E25H2" 0 "RNA polymerase sigma factor SigA"  
"OPBC09\_00320" 34729 "s59E5H2" 1.056148 "RNA polymerase sigma factor SigA"  
"OPBC09\_00320" 34729 "s63E6H2" 0.1443514 "RNA polymerase sigma factor SigA"  
"OPBC09\_00321" 34730 "s59E13H2" 0.9333867 "DNA primase"  
"OPBC09\_00321" 34730 "s59E25H2" 0 "DNA primase"  
"OPBC09\_00321" 34730 "s59E5H2" 0.6032899 "DNA primase"  
"OPBC09\_00321" 34730 "s63E6H2" 0.07705198 "DNA primase"  
"OPBC09\_00322" 34731 "s59E13H2" 0.04298954 "Pyruvate, phosphate dikinase"  
"OPBC09\_00322" 34731 "s59E25H2" 0 "Pyruvate, phosphate dikinase"  
"OPBC09\_00322" 34731 "s59E5H2" 0.1452201 "Pyruvate, phosphate dikinase"  
"OPBC09\_00322" 34731 "s63E6H2" 0.03440762 "Pyruvate, phosphate dikinase"  
"OPBC09\_00323" 34732 "s59E13H2" 0.01287128 "Glycine--tRNA ligase beta subunit"  
"OPBC09\_00323" 34732 "s59E25H2" 0 "Glycine--tRNA ligase beta subunit"  
"OPBC09\_00323" 34732 "s59E5H2" 0.08466381 "Glycine--tRNA ligase beta subunit"  
"OPBC09\_00323" 34732 "s63E6H2" 0.002066444 "Glycine--tRNA ligase beta subunit"  
"OPBC09\_00324" 34733 "s59E13H2" 0.009887618 "Glycine--tRNA ligase alpha subunit"  
"OPBC09\_00324" 34733 "s59E25H2" 0 "Glycine--tRNA ligase alpha subunit"  
"OPBC09\_00324" 34733 "s59E5H2" 0.03444761 "Glycine--tRNA ligase alpha subunit"  
"OPBC09\_00324" 34733 "s63E6H2" 0.01433125 "Glycine--tRNA ligase alpha subunit"  
"OPBC09\_00325" 34734 "s59E13H2" 0.01915231 "DNA repair protein RecO"  
"OPBC09\_00325" 34734 "s59E25H2" 0 "DNA repair protein RecO"  
"OPBC09\_00325" 34734 "s59E5H2" 0.1432761 "DNA repair protein RecO"  
"OPBC09\_00325" 34734 "s63E6H2" 0.07948885 "DNA repair protein RecO"  
"OPBC09\_00326" 34735 "s59E13H2" 0.08388777 "Deoxyribose-phosphate aldolase 2"  
"OPBC09\_00326" 34735 "s59E25H2" 0.2151899 "Deoxyribose-phosphate aldolase 2"  
"OPBC09\_00326" 34735 "s59E5H2" 0.0868958 "Deoxyribose-phosphate aldolase 2"  
"OPBC09\_00326" 34735 "s63E6H2" 0.02683951 "Deoxyribose-phosphate aldolase 2"  
"OPBC09\_00327" 34736 "s59E13H2" 0.06008859 "putative N-acetyltransferase"  
"OPBC09\_00327" 34736 "s59E25H2" 0 "putative N-acetyltransferase"  
"OPBC09\_00327" 34736 "s59E5H2" 0.09152008 "putative N-acetyltransferase"  
"OPBC09\_00327" 34736 "s63E6H2" 0.01357448 "putative N-acetyltransferase"  
"OPBC09\_00328" 34737 "s59E13H2" 0.02969157 "Mannosylfructose-phosphate synthase"  
"OPBC09\_00328" 34737 "s59E25H2" 0 "Mannosylfructose-phosphate synthase"  
"OPBC09\_00328" 34737 "s59E5H2" 0.04412496 "Mannosylfructose-phosphate synthase"  
"OPBC09\_00328" 34737 "s63E6H2" 0 "Mannosylfructose-phosphate synthase"  
"OPBC09\_00329" 34738 "s59E13H2" 0.04653052 "Beta-1,4-mannooligosaccharide phosphorylase"  
"OPBC09\_00329" 34738 "s59E25H2" 0 "Beta-1,4-mannooligosaccharide phosphorylase"  
"OPBC09\_00329" 34738 "s59E5H2" 0.1061993 "Beta-1,4-mannooligosaccharide phosphorylase"  
"OPBC09\_00329" 34738 "s63E6H2" 0 "Beta-1,4-mannooligosaccharide phosphorylase"  
"OPBC09\_00330" 34739 "s59E13H2" 0.1070563 "Endoribonuclease YbeY"  
"OPBC09\_00330" 34739 "s59E25H2" 0 "Endoribonuclease YbeY"

"OPBC09\_00330" 34739 "s59E5H2" 0.1441973 "Endoribonuclease YbeY"  
"OPBC09\_00330" 34739 "s63E6H2" 0.008471784 "Endoribonuclease YbeY"  
"OPBC09\_00331" 34740 "s59E13H2" 0.1026751 "hypothetical protein"  
"OPBC09\_00331" 34740 "s59E25H2" 0 "hypothetical protein"  
"OPBC09\_00331" 34740 "s59E5H2" 0.1911181 "hypothetical protein"  
"OPBC09\_00331" 34740 "s63E6H2" 0.00518389 "hypothetical protein"  
"OPBC09\_00332" 34741 "s59E13H2" 0.1102089 "PhoH-like protein"  
"OPBC09\_00332" 34741 "s59E25H2" 0 "PhoH-like protein"  
"OPBC09\_00332" 34741 "s59E5H2" 0.2004284 "PhoH-like protein"  
"OPBC09\_00332" 34741 "s63E6H2" 0.04513185 "PhoH-like protein"  
"OPBC09\_00333" 34742 "s59E13H2" 0.06560434 "HIT-like protein"  
"OPBC09\_00333" 34742 "s59E25H2" 0 "HIT-like protein"  
"OPBC09\_00333" 34742 "s59E5H2" 0.08890608 "HIT-like protein"  
"OPBC09\_00333" 34742 "s63E6H2" 0.07857261 "HIT-like protein"  
"OPBC09\_00334" 34743 "s59E13H2" 0.03303906 "Threonylcarbamoyladenine tRNA methylthiotransferase MtaB"  
"OPBC09\_00334" 34743 "s59E25H2" 0 "Threonylcarbamoyladenine tRNA methylthiotransferase MtaB"  
"OPBC09\_00334" 34743 "s59E5H2" 0.1267831 "Threonylcarbamoyladenine tRNA methylthiotransferase MtaB"  
"OPBC09\_00334" 34743 "s63E6H2" 0.2951403 "Threonylcarbamoyladenine tRNA methylthiotransferase MtaB"  
"OPBC09\_00335" 34744 "s59E13H2" 0.02058894 "Ribosomal RNA small subunit methyltransferase E"  
"OPBC09\_00335" 34744 "s59E25H2" 0 "Ribosomal RNA small subunit methyltransferase E"  
"OPBC09\_00335" 34744 "s59E5H2" 0.1452357 "Ribosomal RNA small subunit methyltransferase E"  
"OPBC09\_00335" 34744 "s63E6H2" 0.3022311 "Ribosomal RNA small subunit methyltransferase E"  
"OPBC09\_00336" 34745 "s59E13H2" 0.009898108 "Chaperone protein DnaJ"  
"OPBC09\_00336" 34745 "s59E25H2" 0 "Chaperone protein DnaJ"  
"OPBC09\_00336" 34745 "s59E5H2" 0.07652451 "Chaperone protein DnaJ"  
"OPBC09\_00336" 34745 "s63E6H2" 0.2260351 "Chaperone protein DnaJ"  
"OPBC09\_00337" 34746 "s59E13H2" 0.003133692 "Heat-inducible transcription repressor HrcA"  
"OPBC09\_00337" 34746 "s59E25H2" 0 "Heat-inducible transcription repressor HrcA"  
"OPBC09\_00337" 34746 "s59E5H2" 0.03617661 "Heat-inducible transcription repressor HrcA"  
"OPBC09\_00337" 34746 "s63E6H2" 0.1440809 "Heat-inducible transcription repressor HrcA"  
"OPBC09\_00339" 34748 "s59E13H2" 0.007594282 "Hydroxyethylthiazole kinase"  
"OPBC09\_00339" 34748 "s59E25H2" 0 "Hydroxyethylthiazole kinase"  
"OPBC09\_00339" 34748 "s59E5H2" 0.08287356 "Hydroxyethylthiazole kinase"  
"OPBC09\_00339" 34748 "s63E6H2" 0.2298048 "Hydroxyethylthiazole kinase"  
"OPBC09\_00340" 34749 "s59E13H2" 0.0110076 "Thiamine-phosphate synthase"  
"OPBC09\_00340" 34749 "s59E25H2" 5.866044 "Thiamine-phosphate synthase"  
"OPBC09\_00340" 34749 "s59E5H2" 0.1294666 "Thiamine-phosphate synthase"  
"OPBC09\_00340" 34749 "s63E6H2" 0.1922268 "Thiamine-phosphate synthase"  
"OPBC09\_00341" 34750 "s59E13H2" 0.01629901 "Phosphomethylpyrimidine synthase"  
"OPBC09\_00341" 34750 "s59E25H2" 0 "Phosphomethylpyrimidine synthase"  
"OPBC09\_00341" 34750 "s59E5H2" 0.1416818 "Phosphomethylpyrimidine synthase"  
"OPBC09\_00341" 34750 "s63E6H2" 0.4396374 "Phosphomethylpyrimidine synthase"  
"OPBC09\_00342" 34751 "s59E13H2" 0.006294194 "Thiamine-monophosphate kinase"  
"OPBC09\_00342" 34751 "s59E25H2" 0 "Thiamine-monophosphate kinase"  
"OPBC09\_00342" 34751 "s59E5H2" 0.2310638 "Thiamine-monophosphate kinase"  
"OPBC09\_00342" 34751 "s63E6H2" 0.5852761 "Thiamine-monophosphate kinase"  
"OPBC09\_00343" 34752 "s59E13H2" 0.01954924 "ATP-binding region"

"OPBC09\_00343" 34752 "s59E25H2" 0 "ATP-binding region"  
"OPBC09\_00343" 34752 "s59E5H2" 0.1080583 "ATP-binding region"  
"OPBC09\_00343" 34752 "s63E6H2" 0 "ATP-binding region"  
"OPBC09\_00344" 34753 "s59E13H2" 0 "Low specificity L-threonine aldolase"  
"OPBC09\_00344" 34753 "s59E25H2" 0 "Low specificity L-threonine aldolase"  
"OPBC09\_00344" 34753 "s59E5H2" 0 "Low specificity L-threonine aldolase"  
"OPBC09\_00344" 34753 "s63E6H2" 0 "Low specificity L-threonine aldolase"  
"OPBC09\_00345" 34754 "s59E13H2" 0.004984841 "tRNA(fMet)-specific endonuclease VapC"  
"OPBC09\_00345" 34754 "s59E25H2" 0 "tRNA(fMet)-specific endonuclease VapC"  
"OPBC09\_00345" 34754 "s59E5H2" 0.07453537 "tRNA(fMet)-specific endonuclease VapC"  
"OPBC09\_00345" 34754 "s63E6H2" 0 "tRNA(fMet)-specific endonuclease VapC"  
"OPBC09\_00346" 34755 "s59E13H2" 0 "Ribbon-helix-helix protein, copG family"  
"OPBC09\_00346" 34755 "s59E25H2" 0 "Ribbon-helix-helix protein, copG family"  
"OPBC09\_00346" 34755 "s59E5H2" 0.1724165 "Ribbon-helix-helix protein, copG family"  
"OPBC09\_00346" 34755 "s63E6H2" 0 "Ribbon-helix-helix protein, copG family"  
"OPBC09\_00347" 34756 "s59E13H2" 0 "aminoalkylphosphonic acid N-acetyltransferase"  
"OPBC09\_00347" 34756 "s59E25H2" 0 "aminoalkylphosphonic acid N-acetyltransferase"  
"OPBC09\_00347" 34756 "s59E5H2" 0 "aminoalkylphosphonic acid N-acetyltransferase"  
"OPBC09\_00347" 34756 "s63E6H2" 0 "aminoalkylphosphonic acid N-acetyltransferase"  
"OPBC09\_00348" 34757 "s59E13H2" 0.002053556 "Erythromycin 3"-O-methyltransferase"  
"OPBC09\_00348" 34757 "s59E25H2" 0 "Erythromycin 3"-O-methyltransferase"  
"OPBC09\_00348" 34757 "s59E5H2" 0 "Erythromycin 3"-O-methyltransferase"  
"OPBC09\_00348" 34757 "s63E6H2" 0 "Erythromycin 3"-O-methyltransferase"  
"OPBC09\_00349" 34758 "s59E13H2" 0 "hypothetical protein"  
"OPBC09\_00349" 34758 "s59E25H2" 0 "hypothetical protein"  
"OPBC09\_00349" 34758 "s59E5H2" 0 "hypothetical protein"  
"OPBC09\_00349" 34758 "s63E6H2" 0 "hypothetical protein"  
"OPBC09\_00351" 34760 "s59E13H2" 1.732992 "Aminopeptidase PepS"  
"OPBC09\_00351" 34760 "s59E25H2" 0 "Aminopeptidase PepS"  
"OPBC09\_00351" 34760 "s59E5H2" 0.9961258 "Aminopeptidase PepS"  
"OPBC09\_00351" 34760 "s63E6H2" 0.2074769 "Aminopeptidase PepS"  
"OPBC09\_00352" 34761 "s59E13H2" 0.02104153 "ATP-dependent DNA helicase PcrA"  
"OPBC09\_00352" 34761 "s59E25H2" 0 "ATP-dependent DNA helicase PcrA"  
"OPBC09\_00352" 34761 "s59E5H2" 0.2600132 "ATP-dependent DNA helicase PcrA"  
"OPBC09\_00352" 34761 "s63E6H2" 0.509493 "ATP-dependent DNA helicase PcrA"  
"OPBC09\_00353" 34762 "s59E13H2" 0.01780088 "Phospho-2-dehydro-3-deoxyheptonate aldolase"  
"OPBC09\_00353" 34762 "s59E25H2" 0 "Phospho-2-dehydro-3-deoxyheptonate aldolase"  
"OPBC09\_00353" 34762 "s59E5H2" 0.04695266 "Phospho-2-dehydro-3-deoxyheptonate aldolase"  
"OPBC09\_00353" 34762 "s63E6H2" 0.2670434 "Phospho-2-dehydro-3-deoxyheptonate aldolase"  
"OPBC09\_00354" 34763 "s59E13H2" 0.0144237 "bifunctional 3-deoxy-7-phosphoheptulonate synthase/chorismate mutase"  
"OPBC09\_00354" 34763 "s59E25H2" 0 "bifunctional 3-deoxy-7-phosphoheptulonate synthase/chorismate mutase"  
"OPBC09\_00354" 34763 "s59E5H2" 0.03048943 "bifunctional 3-deoxy-7-phosphoheptulonate synthase/chorismate mutase"  
"OPBC09\_00354" 34763 "s63E6H2" 0.4140316 "bifunctional 3-deoxy-7-phosphoheptulonate synthase/chorismate mutase"  
"OPBC09\_00355" 34764 "s59E13H2" 0.01436491 "GMP synthase [glutamine-hydrolyzing]"  
"OPBC09\_00355" 34764 "s59E25H2" 0 "GMP synthase [glutamine-hydrolyzing]"  
"OPBC09\_00355" 34764 "s59E5H2" 0.04513482 "GMP synthase [glutamine-hydrolyzing]"  
"OPBC09\_00355" 34764 "s63E6H2" 0.6289229 "GMP synthase [glutamine-hydrolyzing]"

"OPBC09\_00356" 34765 "s59E13H2" 0.01899158 "putative oxidoreductase/MSMEI\_1564"  
"OPBC09\_00356" 34765 "s59E25H2" 0 "putative oxidoreductase/MSMEI\_1564"  
"OPBC09\_00356" 34765 "s59E5H2" 0.04316147 "putative oxidoreductase/MSMEI\_1564"  
"OPBC09\_00356" 34765 "s63E6H2" 0.5385538 "putative oxidoreductase/MSMEI\_1564"  
"OPBC09\_00357" 34766 "s59E13H2" 0.01819888 "Glycerol-3-phosphate acyltransferase"  
"OPBC09\_00357" 34766 "s59E25H2" 0 "Glycerol-3-phosphate acyltransferase"  
"OPBC09\_00357" 34766 "s59E5H2" 0.01749485 "Glycerol-3-phosphate acyltransferase"  
"OPBC09\_00357" 34766 "s63E6H2" 0.3340833 "Glycerol-3-phosphate acyltransferase"  
"OPBC09\_00358" 34767 "s59E13H2" 0.008391195 "Histidine kinase-, DNA gyrase B-, and HSP90-like ATPase"  
"OPBC09\_00358" 34767 "s59E25H2" 0 "Histidine kinase-, DNA gyrase B-, and HSP90-like ATPase"  
"OPBC09\_00358" 34767 "s59E5H2" 0.8614368 "Histidine kinase-, DNA gyrase B-, and HSP90-like ATPase"  
"OPBC09\_00358" 34767 "s63E6H2" 0 "Histidine kinase-, DNA gyrase B-, and HSP90-like ATPase"  
"OPBC09\_00359" 34768 "s59E13H2" 0.01799849 "Nicotinate-nucleotide pyrophosphorylase [carboxylating]"  
"OPBC09\_00359" 34768 "s59E25H2" 0 "Nicotinate-nucleotide pyrophosphorylase [carboxylating]"  
"OPBC09\_00359" 34768 "s59E5H2" 0.8481169 "Nicotinate-nucleotide pyrophosphorylase [carboxylating]"  
"OPBC09\_00359" 34768 "s63E6H2" 0.05403117 "Nicotinate-nucleotide pyrophosphorylase [carboxylating]"  
"OPBC09\_00360" 34769 "s59E13H2" 0.02343687 "L-aspartate oxidase"  
"OPBC09\_00360" 34769 "s59E25H2" 0 "L-aspartate oxidase"  
"OPBC09\_00360" 34769 "s59E5H2" 1.191626 "L-aspartate oxidase"  
"OPBC09\_00360" 34769 "s63E6H2" 0.07844812 "L-aspartate oxidase"  
"OPBC09\_00361" 34770 "s59E13H2" 0.008916842 "Quinolate synthase A"  
"OPBC09\_00361" 34770 "s59E25H2" 0 "Quinolate synthase A"  
"OPBC09\_00361" 34770 "s59E5H2" 0.6091005 "Quinolate synthase A"  
"OPBC09\_00361" 34770 "s63E6H2" 0.02812419 "Quinolate synthase A"  
"OPBC09\_00362" 34771 "s59E13H2" 0.02304189 "FeoA domain protein"  
"OPBC09\_00362" 34771 "s59E25H2" 0 "FeoA domain protein"  
"OPBC09\_00362" 34771 "s59E5H2" 0.5226752 "FeoA domain protein"  
"OPBC09\_00362" 34771 "s63E6H2" 0.01176165 "FeoA domain protein"  
"OPBC09\_00363" 34772 "s59E13H2" 0.0563491 "Transcriptional regulator MntR"  
"OPBC09\_00363" 34772 "s59E25H2" 0 "Transcriptional regulator MntR"  
"OPBC09\_00363" 34772 "s59E5H2" 0.5359106 "Transcriptional regulator MntR"  
"OPBC09\_00363" 34772 "s63E6H2" 0.00647688 "Transcriptional regulator MntR"  
"OPBC09\_00364" 34773 "s59E13H2" 0 "Xylulose kinase"  
"OPBC09\_00364" 34773 "s59E25H2" 0 "Xylulose kinase"  
"OPBC09\_00364" 34773 "s59E5H2" 0 "Xylulose kinase"  
"OPBC09\_00364" 34773 "s63E6H2" 0.02463229 "Xylulose kinase"  
"OPBC09\_00365" 34774 "s59E13H2" 0 "hypothetical protein"  
"OPBC09\_00365" 34774 "s59E25H2" 0 "hypothetical protein"  
"OPBC09\_00365" 34774 "s59E5H2" 0 "hypothetical protein"  
"OPBC09\_00365" 34774 "s63E6H2" 0 "hypothetical protein"  
"OPBC09\_00367" 34776 "s59E13H2" 0 "General stress protein 69"  
"OPBC09\_00367" 34776 "s59E25H2" 0 "General stress protein 69"  
"OPBC09\_00367" 34776 "s59E5H2" 3.35809 "General stress protein 69"  
"OPBC09\_00367" 34776 "s63E6H2" 0.1820239 "General stress protein 69"  
"OPBC09\_00368" 34777 "s59E13H2" 0 "Trehalose/maltose-binding protein MalE precursor"  
"OPBC09\_00368" 34777 "s59E25H2" 0 "Trehalose/maltose-binding protein MalE precursor"  
"OPBC09\_00368" 34777 "s59E5H2" 2.202145 "Trehalose/maltose-binding protein MalE precursor"



"OPBC09\_00368" 34777 "s63E6H2" 1.295292 "Trehalose/maltose-binding protein MalE precursor"  
"OPBC09\_00369" 34778 "s59E13H2" 0 "Trehalose/maltose transport system permease protein MalG"  
"OPBC09\_00369" 34778 "s59E25H2" 0 "Trehalose/maltose transport system permease protein MalG"  
"OPBC09\_00369" 34778 "s59E5H2" 1.608741 "Trehalose/maltose transport system permease protein MalG"  
"OPBC09\_00369" 34778 "s63E6H2" 5.351034 "Trehalose/maltose transport system permease protein MalG"  
"OPBC09\_00370" 34779 "s59E13H2" 0 "Trehalose/maltose transport system permease protein MalF"  
"OPBC09\_00370" 34779 "s59E25H2" 0 "Trehalose/maltose transport system permease protein MalF"  
"OPBC09\_00370" 34779 "s59E5H2" 0.5400002 "Trehalose/maltose transport system permease protein MalF"  
"OPBC09\_00370" 34779 "s63E6H2" 5.392763 "Trehalose/maltose transport system permease protein MalF"  
"OPBC09\_00371" 34780 "s59E13H2" 0 "Arabinose import ATP-binding protein AraG"  
"OPBC09\_00371" 34780 "s59E25H2" 0 "Arabinose import ATP-binding protein AraG"  
"OPBC09\_00371" 34780 "s59E5H2" 0 "Arabinose import ATP-binding protein AraG"  
"OPBC09\_00371" 34780 "s63E6H2" 3.859452 "Arabinose import ATP-binding protein AraG"  
"OPBC09\_00372" 34781 "s59E13H2" 0 "Pectin degradation repressor protein KdgR"  
"OPBC09\_00372" 34781 "s59E25H2" 0 "Pectin degradation repressor protein KdgR"  
"OPBC09\_00372" 34781 "s59E5H2" 0 "Pectin degradation repressor protein KdgR"  
"OPBC09\_00372" 34781 "s63E6H2" 0.1862473 "Pectin degradation repressor protein KdgR"  
"OPBC09\_00373" 34782 "s59E13H2" 0 "2-dehydro-3-deoxygluconokinase"  
"OPBC09\_00373" 34782 "s59E25H2" 0 "2-dehydro-3-deoxygluconokinase"  
"OPBC09\_00373" 34782 "s59E5H2" 0 "2-dehydro-3-deoxygluconokinase"  
"OPBC09\_00373" 34782 "s63E6H2" 0.4400216 "2-dehydro-3-deoxygluconokinase"  
"OPBC09\_00374" 34783 "s59E13H2" 0 "KHG/KDPG aldolase"  
"OPBC09\_00374" 34783 "s59E25H2" 0 "KHG/KDPG aldolase"  
"OPBC09\_00374" 34783 "s59E5H2" 0 "KHG/KDPG aldolase"  
"OPBC09\_00374" 34783 "s63E6H2" 0.001438112 "KHG/KDPG aldolase"  
"OPBC09\_00375" 34784 "s59E13H2" 0.02243136 "NAD-dependent malic enzyme"  
"OPBC09\_00375" 34784 "s59E25H2" 0 "NAD-dependent malic enzyme"  
"OPBC09\_00375" 34784 "s59E5H2" 0.3815372 "NAD-dependent malic enzyme"  
"OPBC09\_00375" 34784 "s63E6H2" 2.16284 "NAD-dependent malic enzyme"  
"OPBC09\_00376" 34785 "s59E13H2" 0.01440076 "Putative protein phosphatase 2C-type"  
"OPBC09\_00376" 34785 "s59E25H2" 0 "Putative protein phosphatase 2C-type"  
"OPBC09\_00376" 34785 "s59E5H2" 0.2745014 "Putative protein phosphatase 2C-type"  
"OPBC09\_00376" 34785 "s63E6H2" 2.798136 "Putative protein phosphatase 2C-type"  
"OPBC09\_00377" 34786 "s59E13H2" 0.008445258 "Serine/threonine-protein kinase PrkC"  
"OPBC09\_00377" 34786 "s59E25H2" 0 "Serine/threonine-protein kinase PrkC"  
"OPBC09\_00377" 34786 "s59E5H2" 0.2224328 "Serine/threonine-protein kinase PrkC"  
"OPBC09\_00377" 34786 "s63E6H2" 2.529101 "Serine/threonine-protein kinase PrkC"  
"OPBC09\_00378" 34787 "s59E13H2" 0.009402534 "Acetyl-coenzyme A carboxylase carboxyl transferase subunit alpha"  
"OPBC09\_00378" 34787 "s59E25H2" 0.2574359 "Acetyl-coenzyme A carboxylase carboxyl transferase subunit alpha"  
"OPBC09\_00378" 34787 "s59E5H2" 0.4312321 "Acetyl-coenzyme A carboxylase carboxyl transferase subunit alpha"  
"OPBC09\_00378" 34787 "s63E6H2" 6.488865 "Acetyl-coenzyme A carboxylase carboxyl transferase subunit alpha"  
"OPBC09\_00379" 34788 "s59E13H2" 0.01089441 "Acetyl-coenzyme A carboxylase carboxyl transferase subunit beta"  
"OPBC09\_00379" 34788 "s59E25H2" 0 "Acetyl-coenzyme A carboxylase carboxyl transferase subunit beta"  
"OPBC09\_00379" 34788 "s59E5H2" 0.2391283 "Acetyl-coenzyme A carboxylase carboxyl transferase subunit beta"  
"OPBC09\_00379" 34788 "s63E6H2" 5.586061 "Acetyl-coenzyme A carboxylase carboxyl transferase subunit beta"  
"OPBC09\_00380" 34789 "s59E13H2" 0.002984138 "3-oxoacyl-[acyl-carrier-protein] synthase 2"  
"OPBC09\_00380" 34789 "s59E25H2" 0 "3-oxoacyl-[acyl-carrier-protein] synthase 2"

"OPBC09\_00380" 34789 "s59E5H2" 3.24532 "3-oxoacyl-[acyl-carrier-protein] synthase 2"  
"OPBC09\_00380" 34789 "s63E6H2" 4.70762 "3-oxoacyl-[acyl-carrier-protein] synthase 2"  
"OPBC09\_00381" 34790 "s59E13H2" 0.003973289 "3-oxoacyl-[acyl-carrier-protein] reductase FabG"  
"OPBC09\_00381" 34790 "s59E25H2" 0 "3-oxoacyl-[acyl-carrier-protein] reductase FabG"  
"OPBC09\_00381" 34790 "s59E5H2" 2.085517 "3-oxoacyl-[acyl-carrier-protein] reductase FabG"  
"OPBC09\_00381" 34790 "s63E6H2" 3.566517 "3-oxoacyl-[acyl-carrier-protein] reductase FabG"  
"OPBC09\_00382" 34791 "s59E13H2" 0 "Malonyl CoA-acyl carrier protein transacylase"  
"OPBC09\_00382" 34791 "s59E25H2" 0 "Malonyl CoA-acyl carrier protein transacylase"  
"OPBC09\_00382" 34791 "s59E5H2" 1.838225 "Malonyl CoA-acyl carrier protein transacylase"  
"OPBC09\_00382" 34791 "s63E6H2" 1.737277 "Malonyl CoA-acyl carrier protein transacylase"  
"OPBC09\_00383" 34792 "s59E13H2" 0 "3-hydroxyacyl-[acyl-carrier-protein] dehydratase FabZ"  
"OPBC09\_00383" 34792 "s59E25H2" 0 "3-hydroxyacyl-[acyl-carrier-protein] dehydratase FabZ"  
"OPBC09\_00383" 34792 "s59E5H2" 0.8721459 "3-hydroxyacyl-[acyl-carrier-protein] dehydratase FabZ"  
"OPBC09\_00383" 34792 "s63E6H2" 0.01248451 "3-hydroxyacyl-[acyl-carrier-protein] dehydratase FabZ"  
"OPBC09\_00384" 34793 "s59E13H2" 0.1017321 "Bifunctional ligase/repressor BirA"  
"OPBC09\_00384" 34793 "s59E25H2" 0 "Bifunctional ligase/repressor BirA"  
"OPBC09\_00384" 34793 "s59E5H2" 0.8380219 "Bifunctional ligase/repressor BirA"  
"OPBC09\_00384" 34793 "s63E6H2" 0.003869472 "Bifunctional ligase/repressor BirA"  
"OPBC09\_00385" 34794 "s59E13H2" 0 "hypothetical protein"  
"OPBC09\_00385" 34794 "s59E25H2" 0 "hypothetical protein"  
"OPBC09\_00385" 34794 "s59E5H2" 0.7592773 "hypothetical protein"  
"OPBC09\_00385" 34794 "s63E6H2" 0 "hypothetical protein"  
"OPBC09\_00386" 34795 "s59E13H2" 0 "hypothetical protein"  
"OPBC09\_00386" 34795 "s59E25H2" 0 "hypothetical protein"  
"OPBC09\_00386" 34795 "s59E5H2" 0 "hypothetical protein"  
"OPBC09\_00386" 34795 "s63E6H2" 0 "hypothetical protein"  
"OPBC09\_00387" 34796 "s59E13H2" 0 "Transposase IS200 like protein"  
"OPBC09\_00387" 34796 "s59E25H2" 0 "Transposase IS200 like protein"  
"OPBC09\_00387" 34796 "s59E5H2" 0 "Transposase IS200 like protein"  
"OPBC09\_00387" 34796 "s63E6H2" 0 "Transposase IS200 like protein"  
"OPBC09\_00388" 34797 "s59E13H2" 0 "hypothetical protein"  
"OPBC09\_00388" 34797 "s59E25H2" 0 "hypothetical protein"  
"OPBC09\_00388" 34797 "s59E5H2" 0 "hypothetical protein"  
"OPBC09\_00388" 34797 "s63E6H2" 0 "hypothetical protein"  
"OPBC09\_00389" 34798 "s59E13H2" 0 "Xylose isomerase-like TIM barrel"  
"OPBC09\_00389" 34798 "s59E25H2" 0 "Xylose isomerase-like TIM barrel"  
"OPBC09\_00389" 34798 "s59E5H2" 0 "Xylose isomerase-like TIM barrel"  
"OPBC09\_00389" 34798 "s63E6H2" 0 "Xylose isomerase-like TIM barrel"  
"OPBC09\_00390" 34799 "s59E13H2" 0 "hypothetical protein"  
"OPBC09\_00390" 34799 "s59E25H2" 0 "hypothetical protein"  
"OPBC09\_00390" 34799 "s59E5H2" 0 "hypothetical protein"  
"OPBC09\_00390" 34799 "s63E6H2" 0 "hypothetical protein"  
"OPBC09\_00391" 34800 "s59E13H2" 0.005921171 "Nucleotidyltransferase domain protein"  
"OPBC09\_00391" 34800 "s59E25H2" 0 "Nucleotidyltransferase domain protein"  
"OPBC09\_00391" 34800 "s59E5H2" 0 "Nucleotidyltransferase domain protein"  
"OPBC09\_00391" 34800 "s63E6H2" 0 "Nucleotidyltransferase domain protein"  
"OPBC09\_00392" 34801 "s59E13H2" 7.401368 "Acryloyl-CoA reductase electron transfer subunit beta"

"OPBC09\_00392" 34801 "s59E25H2" 0 "Acryloyl-CoA reductase electron transfer subunit beta"  
"OPBC09\_00392" 34801 "s59E5H2" 0.04417227 "Acryloyl-CoA reductase electron transfer subunit beta"  
"OPBC09\_00392" 34801 "s63E6H2" 0.6205412 "Acryloyl-CoA reductase electron transfer subunit beta"  
"OPBC09\_00393" 34802 "s59E13H2" 4.881494 "Acryloyl-CoA reductase electron transfer subunit gamma"  
"OPBC09\_00393" 34802 "s59E25H2" 0 "Acryloyl-CoA reductase electron transfer subunit gamma"  
"OPBC09\_00393" 34802 "s59E5H2" 0.04367489 "Acryloyl-CoA reductase electron transfer subunit gamma"  
"OPBC09\_00393" 34802 "s63E6H2" 0.4129078 "Acryloyl-CoA reductase electron transfer subunit gamma"  
"OPBC09\_00394" 34803 "s59E13H2" 5.111153 "Acyl-CoA dehydrogenase"  
"OPBC09\_00394" 34803 "s59E25H2" 0 "Acyl-CoA dehydrogenase"  
"OPBC09\_00394" 34803 "s59E5H2" 0.08670181 "Acyl-CoA dehydrogenase"  
"OPBC09\_00394" 34803 "s63E6H2" 0.5114994 "Acyl-CoA dehydrogenase"  
"OPBC09\_00395" 34804 "s59E13H2" 4.169197 "Biotin transporter BioY"  
"OPBC09\_00395" 34804 "s59E25H2" 0 "Biotin transporter BioY"  
"OPBC09\_00395" 34804 "s59E5H2" 0.1009745 "Biotin transporter BioY"  
"OPBC09\_00395" 34804 "s63E6H2" 0.4472321 "Biotin transporter BioY"  
"OPBC09\_00396" 34805 "s59E13H2" 6.310486 "Pyruvate carboxylase subunit B"  
"OPBC09\_00396" 34805 "s59E25H2" 0 "Pyruvate carboxylase subunit B"  
"OPBC09\_00396" 34805 "s59E5H2" 0.3876913 "Pyruvate carboxylase subunit B"  
"OPBC09\_00396" 34805 "s63E6H2" 0.6145394 "Pyruvate carboxylase subunit B"  
"OPBC09\_00397" 34806 "s59E13H2" 7.719515 "Pyruvate carboxylase subunit A"  
"OPBC09\_00397" 34806 "s59E25H2" 0 "Pyruvate carboxylase subunit A"  
"OPBC09\_00397" 34806 "s59E5H2" 0.3938206 "Pyruvate carboxylase subunit A"  
"OPBC09\_00397" 34806 "s63E6H2" 0.8982706 "Pyruvate carboxylase subunit A"  
"OPBC09\_00398" 34807 "s59E13H2" 7.00829 "Thermonuclease precursor"  
"OPBC09\_00398" 34807 "s59E25H2" 0 "Thermonuclease precursor"  
"OPBC09\_00398" 34807 "s59E5H2" 0.345593 "Thermonuclease precursor"  
"OPBC09\_00398" 34807 "s63E6H2" 1.143463 "Thermonuclease precursor"  
"OPBC09\_00399" 34808 "s59E13H2" 6.090366 "YacP-like NYN domain protein"  
"OPBC09\_00399" 34808 "s59E25H2" 0 "YacP-like NYN domain protein"  
"OPBC09\_00399" 34808 "s59E5H2" 0.2040203 "YacP-like NYN domain protein"  
"OPBC09\_00399" 34808 "s63E6H2" 0.9727769 "YacP-like NYN domain protein"  
"OPBC09\_00400" 34809 "s59E13H2" 4.484883 "Putative TrmH family tRNA/rRNA methyltransferase"  
"OPBC09\_00400" 34809 "s59E25H2" 0 "Putative TrmH family tRNA/rRNA methyltransferase"  
"OPBC09\_00400" 34809 "s59E5H2" 0.06547529 "Putative TrmH family tRNA/rRNA methyltransferase"  
"OPBC09\_00400" 34809 "s63E6H2" 0.8560566 "Putative TrmH family tRNA/rRNA methyltransferase"  
"OPBC09\_00401" 34810 "s59E13H2" 5.083829 "Cysteine--tRNA ligase"  
"OPBC09\_00401" 34810 "s59E25H2" 0 "Cysteine--tRNA ligase"  
"OPBC09\_00401" 34810 "s59E5H2" 0.05155331 "Cysteine--tRNA ligase"  
"OPBC09\_00401" 34810 "s63E6H2" 0.7995725 "Cysteine--tRNA ligase"  
"OPBC09\_00402" 34811 "s59E13H2" 6.784394 "Serine acetyltransferase"  
"OPBC09\_00402" 34811 "s59E25H2" 0 "Serine acetyltransferase"  
"OPBC09\_00402" 34811 "s59E5H2" 0.02456548 "Serine acetyltransferase"  
"OPBC09\_00402" 34811 "s63E6H2" 0.8184453 "Serine acetyltransferase"  
"OPBC09\_00403" 34812 "s59E13H2" 3.890887 "Glutamate--tRNA ligase 1"  
"OPBC09\_00403" 34812 "s59E25H2" 0 "Glutamate--tRNA ligase 1"  
"OPBC09\_00403" 34812 "s59E5H2" 0.02542121 "Glutamate--tRNA ligase 1"  
"OPBC09\_00403" 34812 "s63E6H2" 0.6821974 "Glutamate--tRNA ligase 1"

"OPBC09\_00404" 34813 "s59E13H2" 3.066976 "2-C-methyl-D-erythritol 2,4-cyclodiphosphate synthase"  
"OPBC09\_00404" 34813 "s59E25H2" 0 "2-C-methyl-D-erythritol 2,4-cyclodiphosphate synthase"  
"OPBC09\_00404" 34813 "s59E5H2" 0.01374919 "2-C-methyl-D-erythritol 2,4-cyclodiphosphate synthase"  
"OPBC09\_00404" 34813 "s63E6H2" 0.5597435 "2-C-methyl-D-erythritol 2,4-cyclodiphosphate synthase"  
"OPBC09\_00405" 34814 "s59E13H2" 2.492988 "2-C-methyl-D-erythritol 4-phosphate cytidylyltransferase"  
"OPBC09\_00405" 34814 "s59E25H2" 0 "2-C-methyl-D-erythritol 4-phosphate cytidylyltransferase"  
"OPBC09\_00405" 34814 "s59E5H2" 0.05305865 "2-C-methyl-D-erythritol 4-phosphate cytidylyltransferase"  
"OPBC09\_00405" 34814 "s63E6H2" 0.4065942 "2-C-methyl-D-erythritol 4-phosphate cytidylyltransferase"  
"OPBC09\_00406" 34815 "s59E13H2" 2.732432 "DNA integrity scanning protein DisA"  
"OPBC09\_00406" 34815 "s59E25H2" 0 "DNA integrity scanning protein DisA"  
"OPBC09\_00406" 34815 "s59E5H2" 0.04019341 "DNA integrity scanning protein DisA"  
"OPBC09\_00406" 34815 "s63E6H2" 0.4326318 "DNA integrity scanning protein DisA"  
"OPBC09\_00407" 34816 "s59E13H2" 2.376198 "ATP-dependent Clp protease ATP-binding subunit ClpC1"  
"OPBC09\_00407" 34816 "s59E25H2" 0 "ATP-dependent Clp protease ATP-binding subunit ClpC1"  
"OPBC09\_00407" 34816 "s59E5H2" 0.0184798 "ATP-dependent Clp protease ATP-binding subunit ClpC1"  
"OPBC09\_00407" 34816 "s63E6H2" 0.163204 "ATP-dependent Clp protease ATP-binding subunit ClpC1"  
"OPBC09\_00409" 34818 "s59E13H2" 0.7533227 "Lysine--tRNA ligase"  
"OPBC09\_00409" 34818 "s59E25H2" 0 "Lysine--tRNA ligase"  
"OPBC09\_00409" 34818 "s59E5H2" 0.02498015 "Lysine--tRNA ligase"  
"OPBC09\_00409" 34818 "s63E6H2" 0.01560196 "Lysine--tRNA ligase"  
"OPBC09\_00410" 34819 "s59E13H2" 0.01664586 "Transcription elongation factor GreA"  
"OPBC09\_00410" 34819 "s59E25H2" 0 "Transcription elongation factor GreA"  
"OPBC09\_00410" 34819 "s59E5H2" 0.02833589 "Transcription elongation factor GreA"  
"OPBC09\_00410" 34819 "s63E6H2" 0.01036597 "Transcription elongation factor GreA"  
"OPBC09\_00411" 34820 "s59E13H2" 0.003658461 "N5-carboxyaminoimidazole ribonucleotide mutase"  
"OPBC09\_00411" 34820 "s59E25H2" 0 "N5-carboxyaminoimidazole ribonucleotide mutase"  
"OPBC09\_00411" 34820 "s59E5H2" 0 "N5-carboxyaminoimidazole ribonucleotide mutase"  
"OPBC09\_00411" 34820 "s63E6H2" 0.01235596 "N5-carboxyaminoimidazole ribonucleotide mutase"  
"OPBC09\_00412" 34821 "s59E13H2" 0.002690574 "Phosphoribosylamine--glycine ligase"  
"OPBC09\_00412" 34821 "s59E25H2" 0 "Phosphoribosylamine--glycine ligase"  
"OPBC09\_00412" 34821 "s59E5H2" 0.003066405 "Phosphoribosylamine--glycine ligase"  
"OPBC09\_00412" 34821 "s63E6H2" 0.02051407 "Phosphoribosylamine--glycine ligase"  
"OPBC09\_00413" 34822 "s59E13H2" 0.002611618 "Adenylosuccinate synthetase"  
"OPBC09\_00413" 34822 "s59E25H2" 78.95034 "Adenylosuccinate synthetase"  
"OPBC09\_00413" 34822 "s59E5H2" 0.01776094 "Adenylosuccinate synthetase"  
"OPBC09\_00413" 34822 "s63E6H2" 0.01863126 "Adenylosuccinate synthetase"  
"OPBC09\_00414" 34823 "s59E13H2" 0.0008565273 "Replicative DNA helicase"  
"OPBC09\_00414" 34823 "s59E25H2" 0 "Replicative DNA helicase"  
"OPBC09\_00414" 34823 "s59E5H2" 0.0144678 "Replicative DNA helicase"  
"OPBC09\_00414" 34823 "s63E6H2" 0.01190904 "Replicative DNA helicase"  
"OPBC09\_00415" 34824 "s59E13H2" 0 "50S ribosomal protein L9"  
"OPBC09\_00415" 34824 "s59E25H2" 0 "50S ribosomal protein L9"  
"OPBC09\_00415" 34824 "s59E5H2" 0.03652643 "50S ribosomal protein L9"  
"OPBC09\_00415" 34824 "s63E6H2" 0.02253465 "50S ribosomal protein L9"  
"OPBC09\_00416" 34825 "s59E13H2" 0.03578057 "30S ribosomal protein S18"  
"OPBC09\_00416" 34825 "s59E25H2" 0 "30S ribosomal protein S18"  
"OPBC09\_00416" 34825 "s59E5H2" 0.01621173 "30S ribosomal protein S18"

"OPBC09\_00416" 34825 "s63E6H2" 0 "30S ribosomal protein S18"  
"OPBC09\_00417" 34826 "s59E13H2" 0 "hypothetical protein"  
"OPBC09\_00417" 34826 "s59E25H2" 0 "hypothetical protein"  
"OPBC09\_00417" 34826 "s59E5H2" 0 "hypothetical protein"  
"OPBC09\_00417" 34826 "s63E6H2" 0 "hypothetical protein"  
"OPBC09\_00422" 34831 "s59E13H2" 0 "Plasmid pRiA4b ORF-3-like protein"  
"OPBC09\_00422" 34831 "s59E25H2" 0 "Plasmid pRiA4b ORF-3-like protein"  
"OPBC09\_00422" 34831 "s59E5H2" 0 "Plasmid pRiA4b ORF-3-like protein"  
"OPBC09\_00422" 34831 "s63E6H2" 0 "Plasmid pRiA4b ORF-3-like protein"  
"OPBC09\_00423" 34832 "s59E13H2" 0 "Ribose transport system permease protein RbsC"  
"OPBC09\_00423" 34832 "s59E25H2" 0 "Ribose transport system permease protein RbsC"  
"OPBC09\_00423" 34832 "s59E5H2" 0 "Ribose transport system permease protein RbsC"  
"OPBC09\_00423" 34832 "s63E6H2" 0 "Ribose transport system permease protein RbsC"  
"OPBC09\_00428" 34837 "s59E13H2" 0 "D-tagatose 3-epimerase"  
"OPBC09\_00428" 34837 "s59E25H2" 0 "D-tagatose 3-epimerase"  
"OPBC09\_00428" 34837 "s59E5H2" 0.001410455 "D-tagatose 3-epimerase"  
"OPBC09\_00428" 34837 "s63E6H2" 0 "D-tagatose 3-epimerase"  
"OPBC09\_00429" 34838 "s59E13H2" 0 "Ribose transport system permease protein RbsC"  
"OPBC09\_00429" 34838 "s59E25H2" 0 "Ribose transport system permease protein RbsC"  
"OPBC09\_00429" 34838 "s59E5H2" 0 "Ribose transport system permease protein RbsC"  
"OPBC09\_00429" 34838 "s63E6H2" 0 "Ribose transport system permease protein RbsC"  
"OPBC09\_00430" 34839 "s59E13H2" 0 "putative methyltransferase YcgJ"  
"OPBC09\_00430" 34839 "s59E25H2" 0 "putative methyltransferase YcgJ"  
"OPBC09\_00430" 34839 "s59E5H2" 0 "putative methyltransferase YcgJ"  
"OPBC09\_00430" 34839 "s63E6H2" 0 "putative methyltransferase YcgJ"  
"OPBC09\_00431" 34840 "s59E13H2" 0 "Glycosyltransferase AgID"  
"OPBC09\_00431" 34840 "s59E25H2" 0 "Glycosyltransferase AgID"  
"OPBC09\_00431" 34840 "s59E5H2" 0 "Glycosyltransferase AgID"  
"OPBC09\_00431" 34840 "s63E6H2" 0.0001172315 "Glycosyltransferase AgID"  
"OPBC09\_00432" 34841 "s59E13H2" 0 "UDP-glucose:undecaprenyl-phosphate glucose-1-phosphate transferase"  
"OPBC09\_00432" 34841 "s59E25H2" 0 "UDP-glucose:undecaprenyl-phosphate glucose-1-phosphate transferase"  
"OPBC09\_00432" 34841 "s59E5H2" 0 "UDP-glucose:undecaprenyl-phosphate glucose-1-phosphate transferase"  
"OPBC09\_00432" 34841 "s63E6H2" 0.006727007 "UDP-glucose:undecaprenyl-phosphate glucose-1-phosphate transferase"  
"OPBC09\_00437" 34846 "s59E13H2" 0.004458713 "Ribonuclease HI"  
"OPBC09\_00437" 34846 "s59E25H2" 0 "Ribonuclease HI"  
"OPBC09\_00437" 34846 "s59E5H2" 0.008694754 "Ribonuclease HI"  
"OPBC09\_00437" 34846 "s63E6H2" 0.02905848 "Ribonuclease HI"  
"OPBC09\_00438" 34847 "s59E13H2" 0 "Putative zinc ribbon domain protein"  
"OPBC09\_00438" 34847 "s59E25H2" 0 "Putative zinc ribbon domain protein"  
"OPBC09\_00438" 34847 "s59E5H2" 0.01002064 "Putative zinc ribbon domain protein"  
"OPBC09\_00438" 34847 "s63E6H2" 0.04341666 "Putative zinc ribbon domain protein"  
"OPBC09\_00439" 34848 "s59E13H2" 0.001605137 "Putative GTP cyclohydrolase 1 type 2"  
"OPBC09\_00439" 34848 "s59E25H2" 0 "Putative GTP cyclohydrolase 1 type 2"  
"OPBC09\_00439" 34848 "s59E5H2" 0.02390908 "Putative GTP cyclohydrolase 1 type 2"  
"OPBC09\_00439" 34848 "s63E6H2" 0.02004392 "Putative GTP cyclohydrolase 1 type 2"  
"OPBC09\_00440" 34849 "s59E13H2" 0.01972025 "hypothetical protein"  
"OPBC09\_00440" 34849 "s59E25H2" 0 "hypothetical protein"

"OPBC09\_00440" 34849 "s59E5H2" 0 "hypothetical protein"  
"OPBC09\_00440" 34849 "s63E6H2" 0 "hypothetical protein"  
"OPBC09\_00441" 34850 "s59E13H2" 0.008231639 "hypothetical protein"  
"OPBC09\_00441" 34850 "s59E25H2" 0 "hypothetical protein"  
"OPBC09\_00441" 34850 "s59E5H2" 0.01058211 "hypothetical protein"  
"OPBC09\_00441" 34850 "s63E6H2" 0.01595253 "hypothetical protein"  
"OPBC09\_00442" 34851 "s59E13H2" 0.01282011 "hypothetical protein"  
"OPBC09\_00442" 34851 "s59E25H2" 0 "hypothetical protein"  
"OPBC09\_00442" 34851 "s59E5H2" 0.08600846 "hypothetical protein"  
"OPBC09\_00442" 34851 "s63E6H2" 0 "hypothetical protein"  
"OPBC09\_00443" 34852 "s59E13H2" 0.01203663 "Antitoxin HigA"  
"OPBC09\_00443" 34852 "s59E25H2" 0 "Antitoxin HigA"  
"OPBC09\_00443" 34852 "s59E5H2" 0.08094369 "Antitoxin HigA"  
"OPBC09\_00443" 34852 "s63E6H2" 0 "Antitoxin HigA"  
"OPBC09\_00444" 34853 "s59E13H2" 0.03343345 "hypothetical protein"  
"OPBC09\_00444" 34853 "s59E25H2" 0.4304124 "hypothetical protein"  
"OPBC09\_00444" 34853 "s59E5H2" 0.1174654 "hypothetical protein"  
"OPBC09\_00444" 34853 "s63E6H2" 1.00852 "hypothetical protein"  
"OPBC09\_00445" 34854 "s59E13H2" 0 "hypothetical protein"  
"OPBC09\_00445" 34854 "s59E25H2" 0 "hypothetical protein"  
"OPBC09\_00445" 34854 "s59E5H2" 0.009828852 "hypothetical protein"  
"OPBC09\_00445" 34854 "s63E6H2" 0 "hypothetical protein"  
"OPBC09\_00446" 34855 "s59E13H2" 0 "Nucleotidyltransferase domain protein"  
"OPBC09\_00446" 34855 "s59E25H2" 0 "Nucleotidyltransferase domain protein"  
"OPBC09\_00446" 34855 "s59E5H2" 0 "Nucleotidyltransferase domain protein"  
"OPBC09\_00446" 34855 "s63E6H2" 0 "Nucleotidyltransferase domain protein"  
"OPBC09\_00447" 34856 "s59E13H2" 0 "hypothetical protein"  
"OPBC09\_00447" 34856 "s59E25H2" 0 "hypothetical protein"  
"OPBC09\_00447" 34856 "s59E5H2" 0.0008428118 "hypothetical protein"  
"OPBC09\_00447" 34856 "s63E6H2" 0 "hypothetical protein"  
"OPBC09\_00448" 34857 "s59E13H2" 0.01455561 "dTDP-glucose 4,6-dehydratase"  
"OPBC09\_00448" 34857 "s59E25H2" 0 "dTDP-glucose 4,6-dehydratase"  
"OPBC09\_00448" 34857 "s59E5H2" 0.1874553 "dTDP-glucose 4,6-dehydratase"  
"OPBC09\_00448" 34857 "s63E6H2" 0.005381365 "dTDP-glucose 4,6-dehydratase"  
"OPBC09\_00449" 34858 "s59E13H2" 0.04853661 "dTDP-4-dehydrorhamnose 3,5-epimerase"  
"OPBC09\_00449" 34858 "s59E25H2" 0 "dTDP-4-dehydrorhamnose 3,5-epimerase"  
"OPBC09\_00449" 34858 "s59E5H2" 0.2714754 "dTDP-4-dehydrorhamnose 3,5-epimerase"  
"OPBC09\_00449" 34858 "s63E6H2" 0.03248954 "dTDP-4-dehydrorhamnose 3,5-epimerase"  
"OPBC09\_00450" 34859 "s59E13H2" 0.03590366 "UDP-glucose 6-dehydrogenase TuaD"  
"OPBC09\_00450" 34859 "s59E25H2" 0 "UDP-glucose 6-dehydrogenase TuaD"  
"OPBC09\_00450" 34859 "s59E5H2" 0.2400468 "UDP-glucose 6-dehydrogenase TuaD"  
"OPBC09\_00450" 34859 "s63E6H2" 0.01561118 "UDP-glucose 6-dehydrogenase TuaD"  
"OPBC09\_00451" 34860 "s59E13H2" 0.02225906 "GDP-mannose-dependent alpha-(1-6)-phosphatidylinositol monomannoside mannosyltransferase"  
"OPBC09\_00451" 34860 "s59E25H2" 0 "GDP-mannose-dependent alpha-(1-6)-phosphatidylinositol monomannoside mannosyltransferase"  
"OPBC09\_00451" 34860 "s59E5H2" 0.1209634 "GDP-mannose-dependent alpha-(1-6)-phosphatidylinositol monomannoside mannosyltransferase"  
"OPBC09\_00451" 34860 "s63E6H2" 0.5130483 "GDP-mannose-dependent alpha-(1-6)-phosphatidylinositol monomannoside mannosyltransferase"  
"OPBC09\_00452" 34861 "s59E13H2" 0 "hypothetical protein"

"OPBC09\_00452" 34861 "s59E25H2" 0 "hypothetical protein"  
"OPBC09\_00452" 34861 "s59E5H2" 0.01169707 "hypothetical protein"  
"OPBC09\_00452" 34861 "s63E6H2" 0 "hypothetical protein"  
"OPBC09\_00454" 34863 "s59E13H2" 0.01648815 "UDP-glucose 4-epimerase"  
"OPBC09\_00454" 34863 "s59E25H2" 0 "UDP-glucose 4-epimerase"  
"OPBC09\_00454" 34863 "s59E5H2" 0.1207963 "UDP-glucose 4-epimerase"  
"OPBC09\_00454" 34863 "s63E6H2" 0.2507094 "UDP-glucose 4-epimerase"  
"OPBC09\_00455" 34864 "s59E13H2" 0 "hypothetical protein"  
"OPBC09\_00455" 34864 "s59E25H2" 0 "hypothetical protein"  
"OPBC09\_00455" 34864 "s59E5H2" 0 "hypothetical protein"  
"OPBC09\_00455" 34864 "s63E6H2" 0 "hypothetical protein"  
"OPBC09\_00456" 34865 "s59E13H2" 0.06757564 "Phosphoglycerate kinase"  
"OPBC09\_00456" 34865 "s59E25H2" 0 "Phosphoglycerate kinase"  
"OPBC09\_00456" 34865 "s59E5H2" 0.1957018 "Phosphoglycerate kinase"  
"OPBC09\_00456" 34865 "s63E6H2" 0.004504372 "Phosphoglycerate kinase"  
"OPBC09\_00457" 34866 "s59E13H2" 0.004361046 "Triosephosphate isomerase"  
"OPBC09\_00457" 34866 "s59E25H2" 0 "Triosephosphate isomerase"  
"OPBC09\_00457" 34866 "s59E5H2" 0.1886222 "Triosephosphate isomerase"  
"OPBC09\_00457" 34866 "s63E6H2" 0.01456295 "Triosephosphate isomerase"  
"OPBC09\_00458" 34867 "s59E13H2" 0.01137822 "2,3-bisphosphoglycerate-independent phosphoglycerate mutase"  
"OPBC09\_00458" 34867 "s59E25H2" 0 "2,3-bisphosphoglycerate-independent phosphoglycerate mutase"  
"OPBC09\_00458" 34867 "s59E5H2" 0.3342511 "2,3-bisphosphoglycerate-independent phosphoglycerate mutase"  
"OPBC09\_00458" 34867 "s63E6H2" 0.01031176 "2,3-bisphosphoglycerate-independent phosphoglycerate mutase"  
"OPBC09\_00459" 34868 "s59E13H2" 0.006747519 "preprotein translocase subunit SecG"  
"OPBC09\_00459" 34868 "s59E25H2" 0 "preprotein translocase subunit SecG"  
"OPBC09\_00459" 34868 "s59E5H2" 0.2949288 "preprotein translocase subunit SecG"  
"OPBC09\_00459" 34868 "s63E6H2" 0 "preprotein translocase subunit SecG"  
"OPBC09\_00460" 34869 "s59E13H2" 0.008077744 "Periplasmic oligopeptide-binding protein precursor"  
"OPBC09\_00460" 34869 "s59E25H2" 0 "Periplasmic oligopeptide-binding protein precursor"  
"OPBC09\_00460" 34869 "s59E5H2" 0.3612275 "Periplasmic oligopeptide-binding protein precursor"  
"OPBC09\_00460" 34869 "s63E6H2" 0 "Periplasmic oligopeptide-binding protein precursor"  
"OPBC09\_00461" 34870 "s59E13H2" 0.01489748 "Glutathione transport system permease protein GsiC"  
"OPBC09\_00461" 34870 "s59E25H2" 0 "Glutathione transport system permease protein GsiC"  
"OPBC09\_00461" 34870 "s59E5H2" 0.3586996 "Glutathione transport system permease protein GsiC"  
"OPBC09\_00461" 34870 "s63E6H2" 0 "Glutathione transport system permease protein GsiC"  
"OPBC09\_00462" 34871 "s59E13H2" 0.0009305141 "Glutathione transport system permease protein GsiD"  
"OPBC09\_00462" 34871 "s59E25H2" 0 "Glutathione transport system permease protein GsiD"  
"OPBC09\_00462" 34871 "s59E5H2" 0.3556641 "Glutathione transport system permease protein GsiD"  
"OPBC09\_00462" 34871 "s63E6H2" 0 "Glutathione transport system permease protein GsiD"  
"OPBC09\_00463" 34872 "s59E13H2" 0.007733023 "Oligopeptide transport ATP-binding protein OppD"  
"OPBC09\_00463" 34872 "s59E25H2" 0 "Oligopeptide transport ATP-binding protein OppD"  
"OPBC09\_00463" 34872 "s59E5H2" 0.2909934 "Oligopeptide transport ATP-binding protein OppD"  
"OPBC09\_00463" 34872 "s63E6H2" 0 "Oligopeptide transport ATP-binding protein OppD"  
"OPBC09\_00464" 34873 "s59E13H2" 0.01810264 "Oligopeptide transport ATP-binding protein OppF"  
"OPBC09\_00464" 34873 "s59E25H2" 0 "Oligopeptide transport ATP-binding protein OppF"  
"OPBC09\_00464" 34873 "s59E5H2" 0.3895522 "Oligopeptide transport ATP-binding protein OppF"  
"OPBC09\_00464" 34873 "s63E6H2" 0 "Oligopeptide transport ATP-binding protein OppF"

"OPBC09\_00465" 34874 "s59E13H2" 0.007836554 "Glutathione-binding protein GsiB precursor"  
"OPBC09\_00465" 34874 "s59E25H2" 0 "Glutathione-binding protein GsiB precursor"  
"OPBC09\_00465" 34874 "s59E5H2" 0.4000947 "Glutathione-binding protein GsiB precursor"  
"OPBC09\_00465" 34874 "s63E6H2" 0 "Glutathione-binding protein GsiB precursor"  
"OPBC09\_00467" 34876 "s59E13H2" 0 "hypothetical protein"  
"OPBC09\_00467" 34876 "s59E25H2" 0 "hypothetical protein"  
"OPBC09\_00467" 34876 "s59E5H2" 0 "hypothetical protein"  
"OPBC09\_00467" 34876 "s63E6H2" 0 "hypothetical protein"  
"OPBC09\_00468" 34877 "s59E13H2" 0.04466259 "molybdenum cofactor biosynthesis protein A"  
"OPBC09\_00468" 34877 "s59E25H2" 0 "molybdenum cofactor biosynthesis protein A"  
"OPBC09\_00468" 34877 "s59E5H2" 0.4673743 "molybdenum cofactor biosynthesis protein A"  
"OPBC09\_00468" 34877 "s63E6H2" 0.0241373 "molybdenum cofactor biosynthesis protein A"  
"OPBC09\_00470" 34879 "s59E13H2" 0.01406749 "NAD(P)-specific glutamate dehydrogenase"  
"OPBC09\_00470" 34879 "s59E25H2" 0 "NAD(P)-specific glutamate dehydrogenase"  
"OPBC09\_00470" 34879 "s59E5H2" 0.5718188 "NAD(P)-specific glutamate dehydrogenase"  
"OPBC09\_00470" 34879 "s63E6H2" 0.02746837 "NAD(P)-specific glutamate dehydrogenase"  
"OPBC09\_00472" 34881 "s59E13H2" 0.01489702 "hypothetical protein"  
"OPBC09\_00472" 34881 "s59E25H2" 0 "hypothetical protein"  
"OPBC09\_00472" 34881 "s59E5H2" 0.1128864 "hypothetical protein"  
"OPBC09\_00472" 34881 "s63E6H2" 0.02190778 "hypothetical protein"  
"OPBC09\_00473" 34882 "s59E13H2" 0.01635047 "Glutaredoxin"  
"OPBC09\_00473" 34882 "s59E25H2" 0 "Glutaredoxin"  
"OPBC09\_00473" 34882 "s59E5H2" 0.1613855 "Glutaredoxin"  
"OPBC09\_00473" 34882 "s63E6H2" 0.01982102 "Glutaredoxin"  
"OPBC09\_00474" 34883 "s59E13H2" 0.004397214 "Ferredoxin thioredoxin reductase catalytic beta chain"  
"OPBC09\_00474" 34883 "s59E25H2" 0 "Ferredoxin thioredoxin reductase catalytic beta chain"  
"OPBC09\_00474" 34883 "s59E5H2" 0.05695846 "Ferredoxin thioredoxin reductase catalytic beta chain"  
"OPBC09\_00474" 34883 "s63E6H2" 0.06316871 "Ferredoxin thioredoxin reductase catalytic beta chain"  
"OPBC09\_00475" 34884 "s59E13H2" 0.002348256 "DNA polymerase IV"  
"OPBC09\_00475" 34884 "s59E25H2" 0 "DNA polymerase IV"  
"OPBC09\_00475" 34884 "s59E5H2" 0.8822785 "DNA polymerase IV"  
"OPBC09\_00475" 34884 "s63E6H2" 0.06153592 "DNA polymerase IV"  
"OPBC09\_00476" 34885 "s59E13H2" 0 "Glycosyl transferases group 1"  
"OPBC09\_00476" 34885 "s59E25H2" 0 "Glycosyl transferases group 1"  
"OPBC09\_00476" 34885 "s59E5H2" 0 "Glycosyl transferases group 1"  
"OPBC09\_00476" 34885 "s63E6H2" 0.002010411 "Glycosyl transferases group 1"  
"OPBC09\_00477" 34886 "s59E13H2" 0.0003952041 "fructoselysine 6-kinase"  
"OPBC09\_00477" 34886 "s59E25H2" 0 "fructoselysine 6-kinase"  
"OPBC09\_00477" 34886 "s59E5H2" 0.007860234 "fructoselysine 6-kinase"  
"OPBC09\_00477" 34886 "s63E6H2" 0.001013215 "fructoselysine 6-kinase"  
"OPBC09\_00478" 34887 "s59E13H2" 0 "hypothetical protein"  
"OPBC09\_00478" 34887 "s59E25H2" 0 "hypothetical protein"  
"OPBC09\_00478" 34887 "s59E5H2" 0 "hypothetical protein"  
"OPBC09\_00478" 34887 "s63E6H2" 0.007284552 "hypothetical protein"  
"OPBC09\_00479" 34888 "s59E13H2" 0.06955593 "hypothetical protein"  
"OPBC09\_00479" 34888 "s59E25H2" 0 "hypothetical protein"  
"OPBC09\_00479" 34888 "s59E5H2" 0.6403415 "hypothetical protein"



"OPBC09\_00479" 34888 "s63E6H2" 0.000840227 "hypothetical protein"  
"OPBC09\_00481" 34890 "s59E13H2" 0.05896682 "Putative superoxide reductase"  
"OPBC09\_00481" 34890 "s59E25H2" 0 "Putative superoxide reductase"  
"OPBC09\_00481" 34890 "s59E5H2" 0.6725449 "Putative superoxide reductase"  
"OPBC09\_00481" 34890 "s63E6H2" 0.007152995 "Putative superoxide reductase"  
"OPBC09\_00482" 34891 "s59E13H2" 1.692358e-05 "Amicyanin precursor"  
"OPBC09\_00482" 34891 "s59E25H2" 0 "Amicyanin precursor"  
"OPBC09\_00482" 34891 "s59E5H2" 0.4366518 "Amicyanin precursor"  
"OPBC09\_00482" 34891 "s63E6H2" 0 "Amicyanin precursor"  
"OPBC09\_00483" 34892 "s59E13H2" 0.08020668 "hypothetical protein"  
"OPBC09\_00483" 34892 "s59E25H2" 0 "hypothetical protein"  
"OPBC09\_00483" 34892 "s59E5H2" 0.4583473 "hypothetical protein"  
"OPBC09\_00483" 34892 "s63E6H2" 0.001372062 "hypothetical protein"  
"OPBC09\_00484" 34893 "s59E13H2" 0.08163669 "Double zinc ribbon"  
"OPBC09\_00484" 34893 "s59E25H2" 0 "Double zinc ribbon"  
"OPBC09\_00484" 34893 "s59E5H2" 0.4726289 "Double zinc ribbon"  
"OPBC09\_00484" 34893 "s63E6H2" 0.002373056 "Double zinc ribbon"  
"OPBC09\_00485" 34894 "s59E13H2" 0.1469544 "Putative peroxiredoxin bcp"  
"OPBC09\_00485" 34894 "s59E25H2" 0 "Putative peroxiredoxin bcp"  
"OPBC09\_00485" 34894 "s59E5H2" 0.4706117 "Putative peroxiredoxin bcp"  
"OPBC09\_00485" 34894 "s63E6H2" 0.013437 "Putative peroxiredoxin bcp"  
"OPBC09\_00486" 34895 "s59E13H2" 0.06282239 "Sensor histidine kinase LiaS"  
"OPBC09\_00486" 34895 "s59E25H2" 0 "Sensor histidine kinase LiaS"  
"OPBC09\_00486" 34895 "s59E5H2" 0.3223471 "Sensor histidine kinase LiaS"  
"OPBC09\_00486" 34895 "s63E6H2" 0.006941236 "Sensor histidine kinase LiaS"  
"OPBC09\_00487" 34896 "s59E13H2" 0.1350561 "Quinohemoprotein alcohol dehydrogenase ADH IIB precursor"  
"OPBC09\_00487" 34896 "s59E25H2" 0 "Quinohemoprotein alcohol dehydrogenase ADH IIB precursor"  
"OPBC09\_00487" 34896 "s59E5H2" 0.2666237 "Quinohemoprotein alcohol dehydrogenase ADH IIB precursor"  
"OPBC09\_00487" 34896 "s63E6H2" 0.02665246 "Quinohemoprotein alcohol dehydrogenase ADH IIB precursor"  
"OPBC09\_00488" 34897 "s59E13H2" 0.0347889 "Putative phosphoribosyl transferase/MT0597"  
"OPBC09\_00488" 34897 "s59E25H2" 0 "Putative phosphoribosyl transferase/MT0597"  
"OPBC09\_00488" 34897 "s59E5H2" 0.03752149 "Putative phosphoribosyl transferase/MT0597"  
"OPBC09\_00488" 34897 "s63E6H2" 0.04542262 "Putative phosphoribosyl transferase/MT0597"  
"OPBC09\_00489" 34898 "s59E13H2" 0.03286989 "Transcriptional regulatory protein LiaR"  
"OPBC09\_00489" 34898 "s59E25H2" 0 "Transcriptional regulatory protein LiaR"  
"OPBC09\_00489" 34898 "s59E5H2" 0.1519818 "Transcriptional regulatory protein LiaR"  
"OPBC09\_00489" 34898 "s63E6H2" 0.1297303 "Transcriptional regulatory protein LiaR"  
"OPBC09\_00490" 34899 "s59E13H2" 0.0222579 "Aminodeoxychorismate/anthranilate synthase component 2"  
"OPBC09\_00490" 34899 "s59E25H2" 0 "Aminodeoxychorismate/anthranilate synthase component 2"  
"OPBC09\_00490" 34899 "s59E5H2" 0.4289723 "Aminodeoxychorismate/anthranilate synthase component 2"  
"OPBC09\_00490" 34899 "s63E6H2" 0.02538564 "Aminodeoxychorismate/anthranilate synthase component 2"  
"OPBC09\_00491" 34900 "s59E13H2" 0 "tRNA(fMet)-specific endonuclease VapC"  
"OPBC09\_00491" 34900 "s59E25H2" 0 "tRNA(fMet)-specific endonuclease VapC"  
"OPBC09\_00491" 34900 "s59E5H2" 0.05624801 "tRNA(fMet)-specific endonuclease VapC"  
"OPBC09\_00491" 34900 "s63E6H2" 0.008386757 "tRNA(fMet)-specific endonuclease VapC"  
"OPBC09\_00492" 34901 "s59E13H2" 0 "putative regulator PrIF"  
"OPBC09\_00492" 34901 "s59E25H2" 0 "putative regulator PrIF"

"OPBC09\_00492" 34901 "s59E5H2" 0.03632991 "putative regulator PrIF"  
"OPBC09\_00492" 34901 "s63E6H2" 0.01457565 "putative regulator PrIF"  
"OPBC09\_00494" 34903 "s59E13H2" 0.00678461 "Methylcobamide:CoM methyltransferase MtaA"  
"OPBC09\_00494" 34903 "s59E25H2" 0 "Methylcobamide:CoM methyltransferase MtaA"  
"OPBC09\_00494" 34903 "s59E5H2" 0 "Methylcobamide:CoM methyltransferase MtaA"  
"OPBC09\_00494" 34903 "s63E6H2" 0.01151897 "Methylcobamide:CoM methyltransferase MtaA"  
"OPBC09\_00495" 34904 "s59E13H2" 0 "Sugar phosphatase YidA"  
"OPBC09\_00495" 34904 "s59E25H2" 0 "Sugar phosphatase YidA"  
"OPBC09\_00495" 34904 "s59E5H2" 0 "Sugar phosphatase YidA"  
"OPBC09\_00495" 34904 "s63E6H2" 0.01140721 "Sugar phosphatase YidA"  
"OPBC09\_00496" 34905 "s59E13H2" 0 "Putative phosphatase YwpJ"  
"OPBC09\_00496" 34905 "s59E25H2" 0 "Putative phosphatase YwpJ"  
"OPBC09\_00496" 34905 "s59E5H2" 0 "Putative phosphatase YwpJ"  
"OPBC09\_00496" 34905 "s63E6H2" 0.02433849 "Putative phosphatase YwpJ"  
"OPBC09\_00498" 34907 "s59E13H2" 0 "hypothetical protein"  
"OPBC09\_00498" 34907 "s59E25H2" 0 "hypothetical protein"  
"OPBC09\_00498" 34907 "s59E5H2" 0 "hypothetical protein"  
"OPBC09\_00498" 34907 "s63E6H2" 0.03584475 "hypothetical protein"  
"OPBC09\_00499" 34908 "s59E13H2" 0.007267037 "putative 2-phosphosulfolactate phosphatase"  
"OPBC09\_00499" 34908 "s59E25H2" 0 "putative 2-phosphosulfolactate phosphatase"  
"OPBC09\_00499" 34908 "s59E5H2" 0 "putative 2-phosphosulfolactate phosphatase"  
"OPBC09\_00499" 34908 "s63E6H2" 0.0252472 "putative 2-phosphosulfolactate phosphatase"  
"OPBC09\_00500" 34909 "s59E13H2" 0 "Phosphoribosylaminoimidazole-succinocarboxamide synthase"  
"OPBC09\_00500" 34909 "s59E25H2" 0 "Phosphoribosylaminoimidazole-succinocarboxamide synthase"  
"OPBC09\_00500" 34909 "s59E5H2" 0 "Phosphoribosylaminoimidazole-succinocarboxamide synthase"  
"OPBC09\_00500" 34909 "s63E6H2" 0.05111527 "Phosphoribosylaminoimidazole-succinocarboxamide synthase"  
"OPBC09\_00501" 34910 "s59E13H2" 0 "Phosphoribosylaminoimidazole-succinocarboxamide synthase"  
"OPBC09\_00501" 34910 "s59E25H2" 0 "Phosphoribosylaminoimidazole-succinocarboxamide synthase"  
"OPBC09\_00501" 34910 "s59E5H2" 0 "Phosphoribosylaminoimidazole-succinocarboxamide synthase"  
"OPBC09\_00501" 34910 "s63E6H2" 0.01993084 "Phosphoribosylaminoimidazole-succinocarboxamide synthase"  
"OPBC09\_00502" 34911 "s59E13H2" 0 "Glycerate 2-kinase"  
"OPBC09\_00502" 34911 "s59E25H2" 0 "Glycerate 2-kinase"  
"OPBC09\_00502" 34911 "s59E5H2" 0 "Glycerate 2-kinase"  
"OPBC09\_00502" 34911 "s63E6H2" 0.03508092 "Glycerate 2-kinase"  
"OPBC09\_00503" 34912 "s59E13H2" 0 "S-methyl-5'-thioadenosine phosphorylase"  
"OPBC09\_00503" 34912 "s59E25H2" 0 "S-methyl-5'-thioadenosine phosphorylase"  
"OPBC09\_00503" 34912 "s59E5H2" 0 "S-methyl-5'-thioadenosine phosphorylase"  
"OPBC09\_00503" 34912 "s63E6H2" 0.0417742 "S-methyl-5'-thioadenosine phosphorylase"  
"OPBC09\_00505" 34914 "s59E13H2" 0 "HTH-type transcriptional repressor GlcR"  
"OPBC09\_00505" 34914 "s59E25H2" 0 "HTH-type transcriptional repressor GlcR"  
"OPBC09\_00505" 34914 "s59E5H2" 0 "HTH-type transcriptional repressor GlcR"  
"OPBC09\_00505" 34914 "s63E6H2" 0.06810196 "HTH-type transcriptional repressor GlcR"  
"OPBC09\_00506" 34915 "s59E13H2" 0 "Arabinose 5-phosphate isomerase KpsF"  
"OPBC09\_00506" 34915 "s59E25H2" 0 "Arabinose 5-phosphate isomerase KpsF"  
"OPBC09\_00506" 34915 "s59E5H2" 0 "Arabinose 5-phosphate isomerase KpsF"  
"OPBC09\_00506" 34915 "s63E6H2" 0.08075016 "Arabinose 5-phosphate isomerase KpsF"  
"OPBC09\_00507" 34916 "s59E13H2" 0 "Ribulose-phosphate 3-epimerase"

"OPBC09\_00507" 34916 "s59E25H2" 0 "Ribulose-phosphate 3-epimerase"  
"OPBC09\_00507" 34916 "s59E5H2" 0 "Ribulose-phosphate 3-epimerase"  
"OPBC09\_00507" 34916 "s63E6H2" 0.01692393 "Ribulose-phosphate 3-epimerase"  
"OPBC09\_00508" 34917 "s59E13H2" 0.06074749 "Triosephosphate isomerase"  
"OPBC09\_00508" 34917 "s59E25H2" 0 "Triosephosphate isomerase"  
"OPBC09\_00508" 34917 "s59E5H2" 0.01080782 "Triosephosphate isomerase"  
"OPBC09\_00508" 34917 "s63E6H2" 0.02762526 "Triosephosphate isomerase"  
"OPBC09\_00509" 34918 "s59E13H2" 0.01103732 "hypothetical protein"  
"OPBC09\_00509" 34918 "s59E25H2" 0 "hypothetical protein"  
"OPBC09\_00509" 34918 "s59E5H2" 0.04015721 "hypothetical protein"  
"OPBC09\_00509" 34918 "s63E6H2" 0.03526231 "hypothetical protein"  
"OPBC09\_00510" 34919 "s59E13H2" 0 "HTH-type transcriptional regulator KdGR"  
"OPBC09\_00510" 34919 "s59E25H2" 0 "HTH-type transcriptional regulator KdGR"  
"OPBC09\_00510" 34919 "s59E5H2" 0 "HTH-type transcriptional regulator KdGR"  
"OPBC09\_00510" 34919 "s63E6H2" 0.01653894 "HTH-type transcriptional regulator KdGR"  
"OPBC09\_00512" 34921 "s59E13H2" 0 "Xaa-Pro dipeptidase"  
"OPBC09\_00512" 34921 "s59E25H2" 0 "Xaa-Pro dipeptidase"  
"OPBC09\_00512" 34921 "s59E5H2" 0 "Xaa-Pro dipeptidase"  
"OPBC09\_00512" 34921 "s63E6H2" 0.03772194 "Xaa-Pro dipeptidase"  
"OPBC09\_00514" 34923 "s59E13H2" 0.002805528 "Neutral/alkaline non-lysosomal ceramidase"  
"OPBC09\_00514" 34923 "s59E25H2" 0 "Neutral/alkaline non-lysosomal ceramidase"  
"OPBC09\_00514" 34923 "s59E5H2" 0.006181186 "Neutral/alkaline non-lysosomal ceramidase"  
"OPBC09\_00514" 34923 "s63E6H2" 0.02984589 "Neutral/alkaline non-lysosomal ceramidase"  
"OPBC09\_00515" 34924 "s59E13H2" 0.007827398 "Xylulose kinase"  
"OPBC09\_00515" 34924 "s59E25H2" 0 "Xylulose kinase"  
"OPBC09\_00515" 34924 "s59E5H2" 0.003657525 "Xylulose kinase"  
"OPBC09\_00515" 34924 "s63E6H2" 0.01966296 "Xylulose kinase"  
"OPBC09\_00516" 34925 "s59E13H2" 0.01514873 "Glucosamine-6-phosphate deaminase"  
"OPBC09\_00516" 34925 "s59E25H2" 0 "Glucosamine-6-phosphate deaminase"  
"OPBC09\_00516" 34925 "s59E5H2" 0.02689792 "Glucosamine-6-phosphate deaminase"  
"OPBC09\_00516" 34925 "s63E6H2" 0.02873491 "Glucosamine-6-phosphate deaminase"  
"OPBC09\_00517" 34926 "s59E13H2" 0.01138451 "N-acetylglucosamine-6-phosphate deacetylase"  
"OPBC09\_00517" 34926 "s59E25H2" 0 "N-acetylglucosamine-6-phosphate deacetylase"  
"OPBC09\_00517" 34926 "s59E5H2" 0.006306809 "N-acetylglucosamine-6-phosphate deacetylase"  
"OPBC09\_00517" 34926 "s63E6H2" 0.03300402 "N-acetylglucosamine-6-phosphate deacetylase"  
"OPBC09\_00518" 34927 "s59E13H2" 0.002126291 "Alcohol dehydrogenase 2"  
"OPBC09\_00518" 34927 "s59E25H2" 0 "Alcohol dehydrogenase 2"  
"OPBC09\_00518" 34927 "s59E5H2" 0 "Alcohol dehydrogenase 2"  
"OPBC09\_00518" 34927 "s63E6H2" 0.02485177 "Alcohol dehydrogenase 2"  
"OPBC09\_00519" 34928 "s59E13H2" 0.006353666 "Ribose import ATP-binding protein RbsA"  
"OPBC09\_00519" 34928 "s59E25H2" 0 "Ribose import ATP-binding protein RbsA"  
"OPBC09\_00519" 34928 "s59E5H2" 0 "Ribose import ATP-binding protein RbsA"  
"OPBC09\_00519" 34928 "s63E6H2" 0.02972617 "Ribose import ATP-binding protein RbsA"  
"OPBC09\_00520" 34929 "s59E13H2" 0.001865064 "Ribose transport system permease protein RbsC"  
"OPBC09\_00520" 34929 "s59E25H2" 0.232387 "Ribose transport system permease protein RbsC"  
"OPBC09\_00520" 34929 "s59E5H2" 0 "Ribose transport system permease protein RbsC"  
"OPBC09\_00520" 34929 "s63E6H2" 0.02643308 "Ribose transport system permease protein RbsC"

"OPBC09\_00521" 34930 "s59E13H2" 0.006329653 "D-ribose-binding periplasmic protein precursor"  
"OPBC09\_00521" 34930 "s59E25H2" 0 "D-ribose-binding periplasmic protein precursor"  
"OPBC09\_00521" 34930 "s59E5H2" 0 "D-ribose-binding periplasmic protein precursor"  
"OPBC09\_00521" 34930 "s63E6H2" 1.305814 "D-ribose-binding periplasmic protein precursor"  
"OPBC09\_00522" 34931 "s59E13H2" 0.001779667 "Ribose transport system permease protein RbsC"  
"OPBC09\_00522" 34931 "s59E25H2" 0 "Ribose transport system permease protein RbsC"  
"OPBC09\_00522" 34931 "s59E5H2" 0 "Ribose transport system permease protein RbsC"  
"OPBC09\_00522" 34931 "s63E6H2" 1.039689 "Ribose transport system permease protein RbsC"  
"OPBC09\_00523" 34932 "s59E13H2" 0.003244648 "Trehalose/maltose import ATP-binding protein MalK"  
"OPBC09\_00523" 34932 "s59E25H2" 0 "Trehalose/maltose import ATP-binding protein MalK"  
"OPBC09\_00523" 34932 "s59E5H2" 0.02552518 "Trehalose/maltose import ATP-binding protein MalK"  
"OPBC09\_00523" 34932 "s63E6H2" 1.114729 "Trehalose/maltose import ATP-binding protein MalK"  
"OPBC09\_00524" 34933 "s59E13H2" 0 "Trehalose transport system permease protein SugB"  
"OPBC09\_00524" 34933 "s59E25H2" 0 "Trehalose transport system permease protein SugB"  
"OPBC09\_00524" 34933 "s59E5H2" 0.02003633 "Trehalose transport system permease protein SugB"  
"OPBC09\_00524" 34933 "s63E6H2" 1.402589 "Trehalose transport system permease protein SugB"  
"OPBC09\_00525" 34934 "s59E13H2" 0.00988343 "Trehalose/maltose transport system permease protein MalF"  
"OPBC09\_00525" 34934 "s59E25H2" 0 "Trehalose/maltose transport system permease protein MalF"  
"OPBC09\_00525" 34934 "s59E5H2" 0.03124309 "Trehalose/maltose transport system permease protein MalF"  
"OPBC09\_00525" 34934 "s63E6H2" 1.436995 "Trehalose/maltose transport system permease protein MalF"  
"OPBC09\_00526" 34935 "s59E13H2" 0.007037483 "Trehalose/maltose-binding protein MalE precursor"  
"OPBC09\_00526" 34935 "s59E25H2" 0 "Trehalose/maltose-binding protein MalE precursor"  
"OPBC09\_00526" 34935 "s59E5H2" 0.02259383 "Trehalose/maltose-binding protein MalE precursor"  
"OPBC09\_00526" 34935 "s63E6H2" 1.61578 "Trehalose/maltose-binding protein MalE precursor"  
"OPBC09\_00527" 34936 "s59E13H2" 0.006245412 "hypothetical protein"  
"OPBC09\_00527" 34936 "s59E25H2" 0 "hypothetical protein"  
"OPBC09\_00527" 34936 "s59E5H2" 0.0006328905 "hypothetical protein"  
"OPBC09\_00527" 34936 "s63E6H2" 1.341131 "hypothetical protein"  
"OPBC09\_00528" 34937 "s59E13H2" 0.002074804 "hypothetical protein"  
"OPBC09\_00528" 34937 "s59E25H2" 0 "hypothetical protein"  
"OPBC09\_00528" 34937 "s59E5H2" 0.00849186 "hypothetical protein"  
"OPBC09\_00528" 34937 "s63E6H2" 0.7955021 "hypothetical protein"  
"OPBC09\_00529" 34938 "s59E13H2" 0.0008541956 "hypothetical protein"  
"OPBC09\_00529" 34938 "s59E25H2" 0 "hypothetical protein"  
"OPBC09\_00529" 34938 "s59E5H2" 0.00504839 "hypothetical protein"  
"OPBC09\_00529" 34938 "s63E6H2" 0.005311379 "hypothetical protein"  
"OPBC09\_00530" 34939 "s59E13H2" 0 "Catabolite control protein A"  
"OPBC09\_00530" 34939 "s59E25H2" 0 "Catabolite control protein A"  
"OPBC09\_00530" 34939 "s59E5H2" 0 "Catabolite control protein A"  
"OPBC09\_00530" 34939 "s63E6H2" 0 "Catabolite control protein A"  
"OPBC09\_00531" 34940 "s59E13H2" 0 "Creatinine amidohydrolase"  
"OPBC09\_00531" 34940 "s59E25H2" 0 "Creatinine amidohydrolase"  
"OPBC09\_00531" 34940 "s59E5H2" 0 "Creatinine amidohydrolase"  
"OPBC09\_00531" 34940 "s63E6H2" 0 "Creatinine amidohydrolase"  
"OPBC09\_00532" 34941 "s59E13H2" 0.01201421 "Aminodeoxychorismate/anthranilate synthase component 2"  
"OPBC09\_00532" 34941 "s59E25H2" 0 "Aminodeoxychorismate/anthranilate synthase component 2"  
"OPBC09\_00532" 34941 "s59E5H2" 0.05443212 "Aminodeoxychorismate/anthranilate synthase component 2"

"OPBC09\_00532" 34941 "s63E6H2" 0.00246856 "Aminodeoxychorismate/anthranilate synthase component 2"  
"OPBC09\_00533" 34942 "s59E13H2" 0.0006600197 "tRNA(fMet)-specific endonuclease VapC"  
"OPBC09\_00533" 34942 "s59E25H2" 0 "tRNA(fMet)-specific endonuclease VapC"  
"OPBC09\_00533" 34942 "s59E5H2" 0 "tRNA(fMet)-specific endonuclease VapC"  
"OPBC09\_00533" 34942 "s63E6H2" 0.00263288 "tRNA(fMet)-specific endonuclease VapC"  
"OPBC09\_00535" 34944 "s59E13H2" 0.02662547 "Fluoroquinolones export ATP-binding protein/MT2762"  
"OPBC09\_00535" 34944 "s59E25H2" 0 "Fluoroquinolones export ATP-binding protein/MT2762"  
"OPBC09\_00535" 34944 "s59E5H2" 0.1518008 "Fluoroquinolones export ATP-binding protein/MT2762"  
"OPBC09\_00535" 34944 "s63E6H2" 0.0116125 "Fluoroquinolones export ATP-binding protein/MT2762"  
"OPBC09\_00536" 34945 "s59E13H2" 0.04757379 "ABC-2 family transporter protein"  
"OPBC09\_00536" 34945 "s59E25H2" 0 "ABC-2 family transporter protein"  
"OPBC09\_00536" 34945 "s59E5H2" 0.3438443 "ABC-2 family transporter protein"  
"OPBC09\_00536" 34945 "s63E6H2" 0.001143705 "ABC-2 family transporter protein"  
"OPBC09\_00537" 34946 "s59E13H2" 0.003589486 "putative sugar kinase"  
"OPBC09\_00537" 34946 "s59E25H2" 0 "putative sugar kinase"  
"OPBC09\_00537" 34946 "s59E5H2" 0.1368572 "putative sugar kinase"  
"OPBC09\_00537" 34946 "s63E6H2" 0.001871586 "putative sugar kinase"  
"OPBC09\_00538" 34947 "s59E13H2" 0.05063843 "RNA polymerase sigma factor SigA"  
"OPBC09\_00538" 34947 "s59E25H2" 0 "RNA polymerase sigma factor SigA"  
"OPBC09\_00538" 34947 "s59E5H2" 0.1319955 "RNA polymerase sigma factor SigA"  
"OPBC09\_00538" 34947 "s63E6H2" 0.04202966 "RNA polymerase sigma factor SigA"  
"OPBC09\_00539" 34948 "s59E13H2" 0.009154199 "RNA recognition motif. (a.k.a. RRM, RBD, or RNP domain)"  
"OPBC09\_00539" 34948 "s59E25H2" 0 "RNA recognition motif. (a.k.a. RRM, RBD, or RNP domain)"  
"OPBC09\_00539" 34948 "s59E5H2" 0.05851131 "RNA recognition motif. (a.k.a. RRM, RBD, or RNP domain)"  
"OPBC09\_00539" 34948 "s63E6H2" 0.01601928 "RNA recognition motif. (a.k.a. RRM, RBD, or RNP domain)"  
"OPBC09\_00540" 34949 "s59E13H2" 0.02196538 "6-phosphofructokinase 1"  
"OPBC09\_00540" 34949 "s59E25H2" 0 "6-phosphofructokinase 1"  
"OPBC09\_00540" 34949 "s59E5H2" 0.08837908 "6-phosphofructokinase 1"  
"OPBC09\_00540" 34949 "s63E6H2" 0.01143401 "6-phosphofructokinase 1"  
"OPBC09\_00541" 34950 "s59E13H2" 0.01739856 "Aspartyl/glutamyl-tRNA(Asn/Gln) amidotransferase subunit B"  
"OPBC09\_00541" 34950 "s59E25H2" 0 "Aspartyl/glutamyl-tRNA(Asn/Gln) amidotransferase subunit B"  
"OPBC09\_00541" 34950 "s59E5H2" 0.1438512 "Aspartyl/glutamyl-tRNA(Asn/Gln) amidotransferase subunit B"  
"OPBC09\_00541" 34950 "s63E6H2" 0.02520895 "Aspartyl/glutamyl-tRNA(Asn/Gln) amidotransferase subunit B"  
"OPBC09\_00542" 34951 "s59E13H2" 0.003072292 "Glutamyl-tRNA(Gln) amidotransferase subunit A"  
"OPBC09\_00542" 34951 "s59E25H2" 0 "Glutamyl-tRNA(Gln) amidotransferase subunit A"  
"OPBC09\_00542" 34951 "s59E5H2" 0.1196755 "Glutamyl-tRNA(Gln) amidotransferase subunit A"  
"OPBC09\_00542" 34951 "s63E6H2" 0.4238866 "Glutamyl-tRNA(Gln) amidotransferase subunit A"  
"OPBC09\_00543" 34952 "s59E13H2" 0 "Aspartyl/glutamyl-tRNA(Asn/Gln) amidotransferase subunit C"  
"OPBC09\_00543" 34952 "s59E25H2" 0 "Aspartyl/glutamyl-tRNA(Asn/Gln) amidotransferase subunit C"  
"OPBC09\_00543" 34952 "s59E5H2" 0.01953289 "Aspartyl/glutamyl-tRNA(Asn/Gln) amidotransferase subunit C"  
"OPBC09\_00543" 34952 "s63E6H2" 0.2408707 "Aspartyl/glutamyl-tRNA(Asn/Gln) amidotransferase subunit C"  
"OPBC09\_00544" 34953 "s59E13H2" 0.005167268 "CAAX amino terminal protease self- immunity"  
"OPBC09\_00544" 34953 "s59E25H2" 0 "CAAX amino terminal protease self- immunity"  
"OPBC09\_00544" 34953 "s59E5H2" 0.04354547 "CAAX amino terminal protease self- immunity"  
"OPBC09\_00544" 34953 "s63E6H2" 0.2646297 "CAAX amino terminal protease self- immunity"  
"OPBC09\_00545" 34954 "s59E13H2" 0.0008605192 "DNA ligase"  
"OPBC09\_00545" 34954 "s59E25H2" 0 "DNA ligase"

"OPBC09\_00545" 34954 "s59E5H2" 0.07625266 "DNA ligase"  
"OPBC09\_00545" 34954 "s63E6H2" 0.2417468 "DNA ligase"  
"OPBC09\_00546" 34955 "s59E13H2" 0 "Thiosulfate sulfurtransferase PspE precursor"  
"OPBC09\_00546" 34955 "s59E25H2" 0 "Thiosulfate sulfurtransferase PspE precursor"  
"OPBC09\_00546" 34955 "s59E5H2" 0.146001 "Thiosulfate sulfurtransferase PspE precursor"  
"OPBC09\_00546" 34955 "s63E6H2" 0 "Thiosulfate sulfurtransferase PspE precursor"  
"OPBC09\_00547" 34956 "s59E13H2" 0 "5-methyltetrahydrofolate:corrinoide/iron-sulfur protein co-methyltransferase"  
"OPBC09\_00547" 34956 "s59E25H2" 0 "5-methyltetrahydrofolate:corrinoide/iron-sulfur protein co-methyltransferase"  
"OPBC09\_00547" 34956 "s59E5H2" 0.03232189 "5-methyltetrahydrofolate:corrinoide/iron-sulfur protein co-methyltransferase"  
"OPBC09\_00547" 34956 "s63E6H2" 0.09856372 "5-methyltetrahydrofolate:corrinoide/iron-sulfur protein co-methyltransferase"  
"OPBC09\_00548" 34957 "s59E13H2" 0.108313 "hypothetical protein"  
"OPBC09\_00548" 34957 "s59E25H2" 0 "hypothetical protein"  
"OPBC09\_00548" 34957 "s59E5H2" 0.01273084 "hypothetical protein"  
"OPBC09\_00548" 34957 "s63E6H2" 0.07464017 "hypothetical protein"  
"OPBC09\_00549" 34958 "s59E13H2" 0.07052486 "hypothetical protein"  
"OPBC09\_00549" 34958 "s59E25H2" 0 "hypothetical protein"  
"OPBC09\_00549" 34958 "s59E5H2" 0.02486874 "hypothetical protein"  
"OPBC09\_00549" 34958 "s63E6H2" 0.03224141 "hypothetical protein"  
"OPBC09\_00550" 34959 "s59E13H2" 0.05369163 "DAK2 domain protein"  
"OPBC09\_00550" 34959 "s59E25H2" 0 "DAK2 domain protein"  
"OPBC09\_00550" 34959 "s59E5H2" 0.02396517 "DAK2 domain protein"  
"OPBC09\_00550" 34959 "s63E6H2" 0.03014314 "DAK2 domain protein"  
"OPBC09\_00552" 34961 "s59E13H2" 0.0672374 "50S ribosomal protein L28"  
"OPBC09\_00552" 34961 "s59E25H2" 0 "50S ribosomal protein L28"  
"OPBC09\_00552" 34961 "s59E5H2" 0 "50S ribosomal protein L28"  
"OPBC09\_00552" 34961 "s63E6H2" 0.005984301 "50S ribosomal protein L28"  
"OPBC09\_00553" 34962 "s59E13H2" 0 "Ribonuclease VapC19"  
"OPBC09\_00553" 34962 "s59E25H2" 0 "Ribonuclease VapC19"  
"OPBC09\_00553" 34962 "s59E5H2" 0.01701388 "Ribonuclease VapC19"  
"OPBC09\_00553" 34962 "s63E6H2" 0 "Ribonuclease VapC19"  
"OPBC09\_00555" 34964 "s59E13H2" 0.1617653 "Ribosomal RNA small subunit methyltransferase B"  
"OPBC09\_00555" 34964 "s59E25H2" 0 "Ribosomal RNA small subunit methyltransferase B"  
"OPBC09\_00555" 34964 "s59E5H2" 0.04724713 "Ribosomal RNA small subunit methyltransferase B"  
"OPBC09\_00555" 34964 "s63E6H2" 0.04399737 "Ribosomal RNA small subunit methyltransferase B"  
"OPBC09\_00556" 34965 "s59E13H2" 0.1391974 "Methionyl-tRNA formyltransferase"  
"OPBC09\_00556" 34965 "s59E25H2" 0 "Methionyl-tRNA formyltransferase"  
"OPBC09\_00556" 34965 "s59E5H2" 0.01144592 "Methionyl-tRNA formyltransferase"  
"OPBC09\_00556" 34965 "s63E6H2" 0.01450655 "Methionyl-tRNA formyltransferase"  
"OPBC09\_00557" 34966 "s59E13H2" 0.09790078 "Methionyl-tRNA formyltransferase"  
"OPBC09\_00557" 34966 "s59E25H2" 0 "Methionyl-tRNA formyltransferase"  
"OPBC09\_00557" 34966 "s59E5H2" 0 "Methionyl-tRNA formyltransferase"  
"OPBC09\_00557" 34966 "s63E6H2" 0.03330766 "Methionyl-tRNA formyltransferase"  
"OPBC09\_00558" 34967 "s59E13H2" 0.08950088 "Peptide deformylase"  
"OPBC09\_00558" 34967 "s59E25H2" 0 "Peptide deformylase"  
"OPBC09\_00558" 34967 "s59E5H2" 0.01158911 "Peptide deformylase"  
"OPBC09\_00558" 34967 "s63E6H2" 0.01322062 "Peptide deformylase"  
"OPBC09\_00559" 34968 "s59E13H2" 0.1688031 "Primosomal protein N"

"OPBC09\_00559" 34968 "s59E25H2" 0 "Primosomal protein N"  
"OPBC09\_00559" 34968 "s59E5H2" 0.01268279 "Primosomal protein N"  
"OPBC09\_00559" 34968 "s63E6H2" 0.04009283 "Primosomal protein N"  
"OPBC09\_00560" 34969 "s59E13H2" 0.1211959 "S-adenosylmethionine synthase"  
"OPBC09\_00560" 34969 "s59E25H2" 0 "S-adenosylmethionine synthase"  
"OPBC09\_00560" 34969 "s59E5H2" 0.0356366 "S-adenosylmethionine synthase"  
"OPBC09\_00560" 34969 "s63E6H2" 0.03849719 "S-adenosylmethionine synthase"  
"OPBC09\_00561" 34970 "s59E13H2" 0.08943392 "Coenzyme A biosynthesis bifunctional protein CoaBC"  
"OPBC09\_00561" 34970 "s59E25H2" 0 "Coenzyme A biosynthesis bifunctional protein CoaBC"  
"OPBC09\_00561" 34970 "s59E5H2" 0.06618466 "Coenzyme A biosynthesis bifunctional protein CoaBC"  
"OPBC09\_00561" 34970 "s63E6H2" 0.01264035 "Coenzyme A biosynthesis bifunctional protein CoaBC"  
"OPBC09\_00562" 34971 "s59E13H2" 0.09862451 "DNA-directed RNA polymerase subunit omega"  
"OPBC09\_00562" 34971 "s59E25H2" 0 "DNA-directed RNA polymerase subunit omega"  
"OPBC09\_00562" 34971 "s59E5H2" 0.06714359 "DNA-directed RNA polymerase subunit omega"  
"OPBC09\_00562" 34971 "s63E6H2" 0.01788324 "DNA-directed RNA polymerase subunit omega"  
"OPBC09\_00563" 34972 "s59E13H2" 0.1376583 "Guanylate kinase"  
"OPBC09\_00563" 34972 "s59E25H2" 0 "Guanylate kinase"  
"OPBC09\_00563" 34972 "s59E5H2" 0.04373528 "Guanylate kinase"  
"OPBC09\_00563" 34972 "s63E6H2" 0.02178675 "Guanylate kinase"  
"OPBC09\_00564" 34973 "s59E13H2" 0.1340848 "hypothetical protein"  
"OPBC09\_00564" 34973 "s59E25H2" 0 "hypothetical protein"  
"OPBC09\_00564" 34973 "s59E5H2" 0.04823117 "hypothetical protein"  
"OPBC09\_00564" 34973 "s63E6H2" 0.02647616 "hypothetical protein"  
"OPBC09\_00565" 34974 "s59E13H2" 0.1028749 "Orotate phosphoribosyltransferase"  
"OPBC09\_00565" 34974 "s59E25H2" 0 "Orotate phosphoribosyltransferase"  
"OPBC09\_00565" 34974 "s59E5H2" 0.03155357 "Orotate phosphoribosyltransferase"  
"OPBC09\_00565" 34974 "s63E6H2" 0.03250196 "Orotate phosphoribosyltransferase"  
"OPBC09\_00566" 34975 "s59E13H2" 0.03745175 "Orotidine 5'-phosphate decarboxylase"  
"OPBC09\_00566" 34975 "s59E25H2" 0 "Orotidine 5'-phosphate decarboxylase"  
"OPBC09\_00566" 34975 "s59E5H2" 0.03205304 "Orotidine 5'-phosphate decarboxylase"  
"OPBC09\_00566" 34975 "s63E6H2" 0.01443831 "Orotidine 5'-phosphate decarboxylase"  
"OPBC09\_00567" 34976 "s59E13H2" 0.2819463 "Dihydroorotate dehydrogenase B (NAD(+) , catalytic subunit"  
"OPBC09\_00567" 34976 "s59E25H2" 0 "Dihydroorotate dehydrogenase B (NAD(+) , catalytic subunit"  
"OPBC09\_00567" 34976 "s59E5H2" 0.06300087 "Dihydroorotate dehydrogenase B (NAD(+) , catalytic subunit"  
"OPBC09\_00567" 34976 "s63E6H2" 0.01412837 "Dihydroorotate dehydrogenase B (NAD(+) , catalytic subunit"  
"OPBC09\_00568" 34977 "s59E13H2" 0.1438627 "Dihydroorotate dehydrogenase B (NAD(+) , electron transfer subunit"  
"OPBC09\_00568" 34977 "s59E25H2" 0.1056604 "Dihydroorotate dehydrogenase B (NAD(+) , electron transfer subunit"  
"OPBC09\_00568" 34977 "s59E5H2" 0.03884698 "Dihydroorotate dehydrogenase B (NAD(+) , electron transfer subunit"  
"OPBC09\_00568" 34977 "s63E6H2" 0.01332091 "Dihydroorotate dehydrogenase B (NAD(+) , electron transfer subunit"  
"OPBC09\_00569" 34978 "s59E13H2" 0.06111821 "Carbamoyl-phosphate synthase large chain"  
"OPBC09\_00569" 34978 "s59E25H2" 0 "Carbamoyl-phosphate synthase large chain"  
"OPBC09\_00569" 34978 "s59E5H2" 0.2506758 "Carbamoyl-phosphate synthase large chain"  
"OPBC09\_00569" 34978 "s63E6H2" 0.009327259 "Carbamoyl-phosphate synthase large chain"  
"OPBC09\_00570" 34979 "s59E13H2" 0.01006191 "Carbamoyl-phosphate synthase small chain"  
"OPBC09\_00570" 34979 "s59E25H2" 0 "Carbamoyl-phosphate synthase small chain"  
"OPBC09\_00570" 34979 "s59E5H2" 0.1964217 "Carbamoyl-phosphate synthase small chain"  
"OPBC09\_00570" 34979 "s63E6H2" 0.05879445 "Carbamoyl-phosphate synthase small chain"

"OPBC09\_00571" 34980 "s59E13H2" 0.01055387 "Dihydroorotase"  
"OPBC09\_00571" 34980 "s59E25H2" 0 "Dihydroorotase"  
"OPBC09\_00571" 34980 "s59E5H2" 0.2168054 "Dihydroorotase"  
"OPBC09\_00571" 34980 "s63E6H2" 0.06314692 "Dihydroorotase"  
"OPBC09\_00572" 34981 "s59E13H2" 0.017861 "Aspartate carbamoyltransferase"  
"OPBC09\_00572" 34981 "s59E25H2" 0 "Aspartate carbamoyltransferase"  
"OPBC09\_00572" 34981 "s59E5H2" 0.4992193 "Aspartate carbamoyltransferase"  
"OPBC09\_00572" 34981 "s63E6H2" 0.02687825 "Aspartate carbamoyltransferase"  
"OPBC09\_00573" 34982 "s59E13H2" 0.004688872 "Bifunctional protein PyrR"  
"OPBC09\_00573" 34982 "s59E25H2" 0 "Bifunctional protein PyrR"  
"OPBC09\_00573" 34982 "s59E5H2" 0.6216913 "Bifunctional protein PyrR"  
"OPBC09\_00573" 34982 "s63E6H2" 0.03430214 "Bifunctional protein PyrR"  
"OPBC09\_00575" 34984 "s59E13H2" 0 "RNA recognition motif. (a.k.a. RRM, RBD, or RNP domain)"  
"OPBC09\_00575" 34984 "s59E25H2" 0 "RNA recognition motif. (a.k.a. RRM, RBD, or RNP domain)"  
"OPBC09\_00575" 34984 "s59E5H2" 0.6454878 "RNA recognition motif. (a.k.a. RRM, RBD, or RNP domain)"  
"OPBC09\_00575" 34984 "s63E6H2" 0.004705044 "RNA recognition motif. (a.k.a. RRM, RBD, or RNP domain)"  
"OPBC09\_00576" 34985 "s59E13H2" 0 "Serpine (serine protease inhibitor)"  
"OPBC09\_00576" 34985 "s59E25H2" 0 "Serpine (serine protease inhibitor)"  
"OPBC09\_00576" 34985 "s59E5H2" 0.1132949 "Serpine (serine protease inhibitor)"  
"OPBC09\_00576" 34985 "s63E6H2" 0.118366 "Serpine (serine protease inhibitor)"  
"OPBC09\_00577" 34986 "s59E13H2" 0.004449606 "hypothetical protein"  
"OPBC09\_00577" 34986 "s59E25H2" 0 "hypothetical protein"  
"OPBC09\_00577" 34986 "s59E5H2" 0.2487639 "hypothetical protein"  
"OPBC09\_00577" 34986 "s63E6H2" 0.06037899 "hypothetical protein"  
"OPBC09\_00578" 34987 "s59E13H2" 0.0732383 "RNA polymerase sigma factor SigI"  
"OPBC09\_00578" 34987 "s59E25H2" 0 "RNA polymerase sigma factor SigI"  
"OPBC09\_00578" 34987 "s59E5H2" 0.2672393 "RNA polymerase sigma factor SigI"  
"OPBC09\_00578" 34987 "s63E6H2" 1.243906 "RNA polymerase sigma factor SigI"  
"OPBC09\_00579" 34988 "s59E13H2" 0.1566182 "Beta-1,4-mannooligosaccharide phosphorylase"  
"OPBC09\_00579" 34988 "s59E25H2" 0 "Beta-1,4-mannooligosaccharide phosphorylase"  
"OPBC09\_00579" 34988 "s59E5H2" 0.2391231 "Beta-1,4-mannooligosaccharide phosphorylase"  
"OPBC09\_00579" 34988 "s63E6H2" 2.043135 "Beta-1,4-mannooligosaccharide phosphorylase"  
"OPBC09\_00580" 34989 "s59E13H2" 0.2314529 "hypothetical protein"  
"OPBC09\_00580" 34989 "s59E25H2" 0 "hypothetical protein"  
"OPBC09\_00580" 34989 "s59E5H2" 0.6430654 "hypothetical protein"  
"OPBC09\_00580" 34989 "s63E6H2" 2.181645 "hypothetical protein"  
"OPBC09\_00582" 34991 "s59E13H2" 0 "hypothetical protein"  
"OPBC09\_00582" 34991 "s59E25H2" 0 "hypothetical protein"  
"OPBC09\_00582" 34991 "s59E5H2" 0 "hypothetical protein"  
"OPBC09\_00582" 34991 "s63E6H2" 0 "hypothetical protein"  
"OPBC09\_00583" 34992 "s59E13H2" 0 "hypothetical protein"  
"OPBC09\_00583" 34992 "s59E25H2" 0 "hypothetical protein"  
"OPBC09\_00583" 34992 "s59E5H2" 0 "hypothetical protein"  
"OPBC09\_00583" 34992 "s63E6H2" 0 "hypothetical protein"  
"OPBC09\_00586" 34995 "s59E13H2" 0 "B12 binding domain protein"  
"OPBC09\_00586" 34995 "s59E25H2" 0 "B12 binding domain protein"  
"OPBC09\_00586" 34995 "s59E5H2" 0 "B12 binding domain protein"



"OPBC09\_00586" 34995 "s63E6H2" 0 "B12 binding domain protein"  
"OPBC09\_00588" 34997 "s59E13H2" 0 "hypothetical protein"  
"OPBC09\_00588" 34997 "s59E25H2" 0 "hypothetical protein"  
"OPBC09\_00588" 34997 "s59E5H2" 0 "hypothetical protein"  
"OPBC09\_00588" 34997 "s63E6H2" 0 "hypothetical protein"  
"OPBC09\_00590" 34999 "s59E13H2" 0 "hypothetical protein"  
"OPBC09\_00590" 34999 "s59E25H2" 0 "hypothetical protein"  
"OPBC09\_00590" 34999 "s59E5H2" 0 "hypothetical protein"  
"OPBC09\_00590" 34999 "s63E6H2" 0 "hypothetical protein"  
"OPBC09\_00591" 35000 "s59E13H2" 0 "Transposase"  
"OPBC09\_00591" 35000 "s59E25H2" 0 "Transposase"  
"OPBC09\_00591" 35000 "s59E5H2" 0 "Transposase"  
"OPBC09\_00591" 35000 "s63E6H2" 0 "Transposase"  
"OPBC09\_00592" 35001 "s59E13H2" 0.03848159 "NPCBM-associated, NEW3 domain of alpha-galactosidase"  
"OPBC09\_00592" 35001 "s59E25H2" 0 "NPCBM-associated, NEW3 domain of alpha-galactosidase"  
"OPBC09\_00592" 35001 "s59E5H2" 0.4328919 "NPCBM-associated, NEW3 domain of alpha-galactosidase"  
"OPBC09\_00592" 35001 "s63E6H2" 3.111853 "NPCBM-associated, NEW3 domain of alpha-galactosidase"  
"OPBC09\_00593" 35002 "s59E13H2" 0.06491886 "putative ABC transporter ATP-binding protein YxIF"  
"OPBC09\_00593" 35002 "s59E25H2" 0 "putative ABC transporter ATP-binding protein YxIF"  
"OPBC09\_00593" 35002 "s59E5H2" 0.687467 "putative ABC transporter ATP-binding protein YxIF"  
"OPBC09\_00593" 35002 "s63E6H2" 4.222351 "putative ABC transporter ATP-binding protein YxIF"  
"OPBC09\_00594" 35003 "s59E13H2" 0.05888474 "ABC-2 family transporter protein"  
"OPBC09\_00594" 35003 "s59E25H2" 0 "ABC-2 family transporter protein"  
"OPBC09\_00594" 35003 "s59E5H2" 0.7910321 "ABC-2 family transporter protein"  
"OPBC09\_00594" 35003 "s63E6H2" 3.929981 "ABC-2 family transporter protein"  
"OPBC09\_00595" 35004 "s59E13H2" 0.002608347 "hypothetical protein"  
"OPBC09\_00595" 35004 "s59E25H2" 0 "hypothetical protein"  
"OPBC09\_00595" 35004 "s59E5H2" 0.4620344 "hypothetical protein"  
"OPBC09\_00595" 35004 "s63E6H2" 0.003292949 "hypothetical protein"  
"OPBC09\_00596" 35005 "s59E13H2" 0.1012521 "Ribosomal large subunit pseudouridine synthase D"  
"OPBC09\_00596" 35005 "s59E25H2" 0 "Ribosomal large subunit pseudouridine synthase D"  
"OPBC09\_00596" 35005 "s59E5H2" 0.8435136 "Ribosomal large subunit pseudouridine synthase D"  
"OPBC09\_00596" 35005 "s63E6H2" 3.484333 "Ribosomal large subunit pseudouridine synthase D"  
"OPBC09\_00597" 35006 "s59E13H2" 0.04042675 "Lipoprotein signal peptidase"  
"OPBC09\_00597" 35006 "s59E25H2" 0 "Lipoprotein signal peptidase"  
"OPBC09\_00597" 35006 "s59E5H2" 0.2231324 "Lipoprotein signal peptidase"  
"OPBC09\_00597" 35006 "s63E6H2" 0.8305292 "Lipoprotein signal peptidase"  
"OPBC09\_00598" 35007 "s59E13H2" 0.09648094 "Isoleucine--tRNA ligase"  
"OPBC09\_00598" 35007 "s59E25H2" 0 "Isoleucine--tRNA ligase"  
"OPBC09\_00598" 35007 "s59E5H2" 0.1452926 "Isoleucine--tRNA ligase"  
"OPBC09\_00598" 35007 "s63E6H2" 1.273915 "Isoleucine--tRNA ligase"  
"OPBC09\_00599" 35008 "s59E13H2" 0.01406749 "hypothetical protein"  
"OPBC09\_00599" 35008 "s59E25H2" 0 "hypothetical protein"  
"OPBC09\_00599" 35008 "s59E5H2" 0.07585715 "hypothetical protein"  
"OPBC09\_00599" 35008 "s63E6H2" 0.07068977 "hypothetical protein"  
"OPBC09\_00600" 35009 "s59E13H2" 0.01465567 "Thioredoxin-1"  
"OPBC09\_00600" 35009 "s59E25H2" 0 "Thioredoxin-1"

"OPBC09\_00600" 35009 "s59E5H2" 0.03594344 "Thioredoxin-1"  
"OPBC09\_00600" 35009 "s63E6H2" 0.07267261 "Thioredoxin-1"  
"OPBC09\_00602" 35011 "s59E13H2" 0.2070063 "Glucose-1-phosphate thymidyltransferase"  
"OPBC09\_00602" 35011 "s59E25H2" 0 "Glucose-1-phosphate thymidyltransferase"  
"OPBC09\_00602" 35011 "s59E5H2" 0.5281612 "Glucose-1-phosphate thymidyltransferase"  
"OPBC09\_00602" 35011 "s63E6H2" 0.110584 "Glucose-1-phosphate thymidyltransferase"  
"OPBC09\_00603" 35012 "s59E13H2" 0.0347632 "Undecaprenyl-diphosphatase"  
"OPBC09\_00603" 35012 "s59E25H2" 0 "Undecaprenyl-diphosphatase"  
"OPBC09\_00603" 35012 "s59E5H2" 0.3451963 "Undecaprenyl-diphosphatase"  
"OPBC09\_00603" 35012 "s63E6H2" 0.07990845 "Undecaprenyl-diphosphatase"  
"OPBC09\_00604" 35013 "s59E13H2" 0.03895687 "Putative small multi-drug export protein"  
"OPBC09\_00604" 35013 "s59E25H2" 0 "Putative small multi-drug export protein"  
"OPBC09\_00604" 35013 "s59E5H2" 0.2478033 "Putative small multi-drug export protein"  
"OPBC09\_00604" 35013 "s63E6H2" 0.5404501 "Putative small multi-drug export protein"  
"OPBC09\_00605" 35014 "s59E13H2" 0.03154498 "peptidase PmbA"  
"OPBC09\_00605" 35014 "s59E25H2" 0 "peptidase PmbA"  
"OPBC09\_00605" 35014 "s59E5H2" 2.284411 "peptidase PmbA"  
"OPBC09\_00605" 35014 "s63E6H2" 0.6663493 "peptidase PmbA"  
"OPBC09\_00606" 35015 "s59E13H2" 0.01479444 "protease TldD"  
"OPBC09\_00606" 35015 "s59E25H2" 0 "protease TldD"  
"OPBC09\_00606" 35015 "s59E5H2" 1.073893 "protease TldD"  
"OPBC09\_00606" 35015 "s63E6H2" 0.3003678 "protease TldD"  
"OPBC09\_00607" 35016 "s59E13H2" 0.04497268 "YtxH-like protein"  
"OPBC09\_00607" 35016 "s59E25H2" 0 "YtxH-like protein"  
"OPBC09\_00607" 35016 "s59E5H2" 0.9078968 "YtxH-like protein"  
"OPBC09\_00607" 35016 "s63E6H2" 0.2936088 "YtxH-like protein"  
"OPBC09\_00608" 35017 "s59E13H2" 0.04207961 "hypothetical protein"  
"OPBC09\_00608" 35017 "s59E25H2" 0 "hypothetical protein"  
"OPBC09\_00608" 35017 "s59E5H2" 0.7106143 "hypothetical protein"  
"OPBC09\_00608" 35017 "s63E6H2" 0.2031118 "hypothetical protein"  
"OPBC09\_00609" 35018 "s59E13H2" 0.0649917 "hypothetical protein"  
"OPBC09\_00609" 35018 "s59E25H2" 0 "hypothetical protein"  
"OPBC09\_00609" 35018 "s59E5H2" 0.7816715 "hypothetical protein"  
"OPBC09\_00609" 35018 "s63E6H2" 0.3483019 "hypothetical protein"  
"OPBC09\_00610" 35019 "s59E13H2" 0.1022339 "Phosphoribosylaminoimidazole-succinocarboxamide synthase"  
"OPBC09\_00610" 35019 "s59E25H2" 0 "Phosphoribosylaminoimidazole-succinocarboxamide synthase"  
"OPBC09\_00610" 35019 "s59E5H2" 1.230363 "Phosphoribosylaminoimidazole-succinocarboxamide synthase"  
"OPBC09\_00610" 35019 "s63E6H2" 0.4488576 "Phosphoribosylaminoimidazole-succinocarboxamide synthase"  
"OPBC09\_00611" 35020 "s59E13H2" 5.434057e-05 "Glycerate kinase"  
"OPBC09\_00611" 35020 "s59E25H2" 0 "Glycerate kinase"  
"OPBC09\_00611" 35020 "s59E5H2" 1.07179 "Glycerate kinase"  
"OPBC09\_00611" 35020 "s63E6H2" 0.002432771 "Glycerate kinase"  
"OPBC09\_00612" 35021 "s59E13H2" 0.0384275 "S-methyl-5'-thioadenosine phosphorylase"  
"OPBC09\_00612" 35021 "s59E25H2" 0 "S-methyl-5'-thioadenosine phosphorylase"  
"OPBC09\_00612" 35021 "s59E5H2" 0.6719663 "S-methyl-5'-thioadenosine phosphorylase"  
"OPBC09\_00612" 35021 "s63E6H2" 0.2663254 "S-methyl-5'-thioadenosine phosphorylase"  
"OPBC09\_00613" 35022 "s59E13H2" 0.05854466 "5-dehydro-2-deoxygluconokinase"

"OPBC09\_00613" 35022 "s59E25H2" 0 "5-dehydro-2-deoxygluconokinase"  
"OPBC09\_00613" 35022 "s59E5H2" 0.4749238 "5-dehydro-2-deoxygluconokinase"  
"OPBC09\_00613" 35022 "s63E6H2" 0.2664725 "5-dehydro-2-deoxygluconokinase"  
"OPBC09\_00614" 35023 "s59E13H2" 0.01523606 "hypothetical protein"  
"OPBC09\_00614" 35023 "s59E25H2" 0 "hypothetical protein"  
"OPBC09\_00614" 35023 "s59E5H2" 0.4622578 "hypothetical protein"  
"OPBC09\_00614" 35023 "s63E6H2" 0.1331197 "hypothetical protein"  
"OPBC09\_00615" 35024 "s59E13H2" 0.075699 "Replication-associated recombination protein A"  
"OPBC09\_00615" 35024 "s59E25H2" 0 "Replication-associated recombination protein A"  
"OPBC09\_00615" 35024 "s59E5H2" 0.3764403 "Replication-associated recombination protein A"  
"OPBC09\_00615" 35024 "s63E6H2" 0.3535577 "Replication-associated recombination protein A"  
"OPBC09\_00616" 35025 "s59E13H2" 0.1410951 "Aspartokinase"  
"OPBC09\_00616" 35025 "s59E25H2" 0 "Aspartokinase"  
"OPBC09\_00616" 35025 "s59E5H2" 0.041377 "Aspartokinase"  
"OPBC09\_00616" 35025 "s63E6H2" 0.4758782 "Aspartokinase"  
"OPBC09\_00617" 35026 "s59E13H2" 0.04400868 "Pyruvate-flavodoxin oxidoreductase"  
"OPBC09\_00617" 35026 "s59E25H2" 0 "Pyruvate-flavodoxin oxidoreductase"  
"OPBC09\_00617" 35026 "s59E5H2" 0.0416676 "Pyruvate-flavodoxin oxidoreductase"  
"OPBC09\_00617" 35026 "s63E6H2" 0.2146722 "Pyruvate-flavodoxin oxidoreductase"  
"OPBC09\_00618" 35027 "s59E13H2" 0.05664171 "Recombination protein RecR"  
"OPBC09\_00618" 35027 "s59E25H2" 0 "Recombination protein RecR"  
"OPBC09\_00618" 35027 "s59E5H2" 0.008295003 "Recombination protein RecR"  
"OPBC09\_00618" 35027 "s63E6H2" 0.03279777 "Recombination protein RecR"  
"OPBC09\_00619" 35028 "s59E13H2" 0.05820617 "Nucleoid-associated protein"  
"OPBC09\_00619" 35028 "s59E25H2" 0 "Nucleoid-associated protein"  
"OPBC09\_00619" 35028 "s59E5H2" 0 "Nucleoid-associated protein"  
"OPBC09\_00619" 35028 "s63E6H2" 0.0346809 "Nucleoid-associated protein"  
"OPBC09\_00620" 35029 "s59E13H2" 0.02824737 "DNA polymerase III subunit tau"  
"OPBC09\_00620" 35029 "s59E25H2" 0 "DNA polymerase III subunit tau"  
"OPBC09\_00620" 35029 "s59E5H2" 0.01678662 "DNA polymerase III subunit tau"  
"OPBC09\_00620" 35029 "s63E6H2" 0.05081331 "DNA polymerase III subunit tau"  
"OPBC09\_00624" 35033 "s59E13H2" 0.006784939 "Fosmidomycin resistance protein"  
"OPBC09\_00624" 35033 "s59E25H2" 0 "Fosmidomycin resistance protein"  
"OPBC09\_00624" 35033 "s59E5H2" 0.03194342 "Fosmidomycin resistance protein"  
"OPBC09\_00624" 35033 "s63E6H2" 0.01639145 "Fosmidomycin resistance protein"  
"OPBC09\_00625" 35034 "s59E13H2" 0.01398074 "Fosmidomycin resistance protein"  
"OPBC09\_00625" 35034 "s59E25H2" 0 "Fosmidomycin resistance protein"  
"OPBC09\_00625" 35034 "s59E5H2" 0.02761398 "Fosmidomycin resistance protein"  
"OPBC09\_00625" 35034 "s63E6H2" 0.1126036 "Fosmidomycin resistance protein"  
"OPBC09\_00626" 35035 "s59E13H2" 0.001499874 "NADH-dependent butanol dehydrogenase A"  
"OPBC09\_00626" 35035 "s59E25H2" 0 "NADH-dependent butanol dehydrogenase A"  
"OPBC09\_00626" 35035 "s59E5H2" 0.01576605 "NADH-dependent butanol dehydrogenase A"  
"OPBC09\_00626" 35035 "s63E6H2" 0.01612265 "NADH-dependent butanol dehydrogenase A"  
"OPBC09\_00627" 35036 "s59E13H2" 0 "Radical SAM superfamily protein"  
"OPBC09\_00627" 35036 "s59E25H2" 0 "Radical SAM superfamily protein"  
"OPBC09\_00627" 35036 "s59E5H2" 0.01400801 "Radical SAM superfamily protein"  
"OPBC09\_00627" 35036 "s63E6H2" 0 "Radical SAM superfamily protein"

"OPBC09\_00628" 35037 "s59E13H2" 0 "Carboxymuconolactone decarboxylase family protein"  
"OPBC09\_00628" 35037 "s59E25H2" 0 "Carboxymuconolactone decarboxylase family protein"  
"OPBC09\_00628" 35037 "s59E5H2" 0 "Carboxymuconolactone decarboxylase family protein"  
"OPBC09\_00628" 35037 "s63E6H2" 0 "Carboxymuconolactone decarboxylase family protein"  
"OPBC09\_00629" 35038 "s59E13H2" 0 "Glyoxalase-like domain protein"  
"OPBC09\_00629" 35038 "s59E25H2" 0 "Glyoxalase-like domain protein"  
"OPBC09\_00629" 35038 "s59E5H2" 0.004136787 "Glyoxalase-like domain protein"  
"OPBC09\_00629" 35038 "s63E6H2" 0 "Glyoxalase-like domain protein"  
"OPBC09\_00630" 35039 "s59E13H2" 0 "hypothetical protein"  
"OPBC09\_00630" 35039 "s59E25H2" 0 "hypothetical protein"  
"OPBC09\_00630" 35039 "s59E5H2" 0 "hypothetical protein"  
"OPBC09\_00630" 35039 "s63E6H2" 0 "hypothetical protein"  
"OPBC09\_00631" 35040 "s59E13H2" 0 "hypothetical protein"  
"OPBC09\_00631" 35040 "s59E25H2" 0 "hypothetical protein"  
"OPBC09\_00631" 35040 "s59E5H2" 0.008807673 "hypothetical protein"  
"OPBC09\_00631" 35040 "s63E6H2" 0.0004473936 "hypothetical protein"  
"OPBC09\_00633" 35042 "s59E13H2" 0 "Putative redox-active protein (C\_GCAxxG\_C\_C)"  
"OPBC09\_00633" 35042 "s59E25H2" 0 "Putative redox-active protein (C\_GCAxxG\_C\_C)"  
"OPBC09\_00633" 35042 "s59E5H2" 0.01405773 "Putative redox-active protein (C\_GCAxxG\_C\_C)"  
"OPBC09\_00633" 35042 "s63E6H2" 0 "Putative redox-active protein (C\_GCAxxG\_C\_C)"  
"OPBC09\_00635" 35044 "s59E13H2" 0.002175852 "Multidrug export protein MepA"  
"OPBC09\_00635" 35044 "s59E25H2" 0 "Multidrug export protein MepA"  
"OPBC09\_00635" 35044 "s59E5H2" 0.1304658 "Multidrug export protein MepA"  
"OPBC09\_00635" 35044 "s63E6H2" 0 "Multidrug export protein MepA"  
"OPBC09\_00636" 35045 "s59E13H2" 0.003803603 "Double zinc ribbon"  
"OPBC09\_00636" 35045 "s59E25H2" 0 "Double zinc ribbon"  
"OPBC09\_00636" 35045 "s59E5H2" 0.1128464 "Double zinc ribbon"  
"OPBC09\_00636" 35045 "s63E6H2" 0.003893924 "Double zinc ribbon"  
"OPBC09\_00637" 35046 "s59E13H2" 0.005555292 "L-2-hydroxyglutarate oxidase LhgO"  
"OPBC09\_00637" 35046 "s59E25H2" 0 "L-2-hydroxyglutarate oxidase LhgO"  
"OPBC09\_00637" 35046 "s59E5H2" 0.05013331 "L-2-hydroxyglutarate oxidase LhgO"  
"OPBC09\_00637" 35046 "s63E6H2" 0.003390759 "L-2-hydroxyglutarate oxidase LhgO"  
"OPBC09\_00638" 35047 "s59E13H2" 0.001412367 "short chain dehydrogenase"  
"OPBC09\_00638" 35047 "s59E25H2" 0 "short chain dehydrogenase"  
"OPBC09\_00638" 35047 "s59E5H2" 0 "short chain dehydrogenase"  
"OPBC09\_00638" 35047 "s63E6H2" 0 "short chain dehydrogenase"  
"OPBC09\_00639" 35048 "s59E13H2" 0.08747441 "Acetoin:2,6-dichlorophenolindophenol oxidoreductase subunit beta"  
"OPBC09\_00639" 35048 "s59E25H2" 0 "Acetoin:2,6-dichlorophenolindophenol oxidoreductase subunit beta"  
"OPBC09\_00639" 35048 "s59E5H2" 0.2411619 "Acetoin:2,6-dichlorophenolindophenol oxidoreductase subunit beta"  
"OPBC09\_00639" 35048 "s63E6H2" 0.5846682 "Acetoin:2,6-dichlorophenolindophenol oxidoreductase subunit beta"  
"OPBC09\_00640" 35049 "s59E13H2" 0.005118364 "Dihydrolipoamide dehydrogenase"  
"OPBC09\_00640" 35049 "s59E25H2" 0 "Dihydrolipoamide dehydrogenase"  
"OPBC09\_00640" 35049 "s59E5H2" 0 "Dihydrolipoamide dehydrogenase"  
"OPBC09\_00640" 35049 "s63E6H2" 0.01239379 "Dihydrolipoamide dehydrogenase"  
"OPBC09\_00641" 35050 "s59E13H2" 0.6047212 "Dihydrolipoalysine-residue acetyltransferase component of pyruvate dehydrogenase complex"  
"OPBC09\_00641" 35050 "s59E25H2" 0 "Dihydrolipoalysine-residue acetyltransferase component of pyruvate dehydrogenase complex"  
"OPBC09\_00641" 35050 "s59E5H2" 0.09358201 "Dihydrolipoalysine-residue acetyltransferase component of pyruvate dehydrogenase complex"

"OPBC09\_00641" 35050 "s63E6H2" 0.4786786 "Dihydrolipoyllysine-residue acetyltransferase component of pyruvate dehydrogenase complex"  
"OPBC09\_00642" 35051 "s59E13H2" 0.307869 "Sorbitol dehydrogenase"  
"OPBC09\_00642" 35051 "s59E25H2" 0 "Sorbitol dehydrogenase"  
"OPBC09\_00642" 35051 "s59E5H2" 0.1061528 "Sorbitol dehydrogenase"  
"OPBC09\_00642" 35051 "s63E6H2" 0.9307811 "Sorbitol dehydrogenase"  
"OPBC09\_00645" 35054 "s59E13H2" 0.5597497 "NADH-plastoquinone oxidoreductase subunit"  
"OPBC09\_00645" 35054 "s59E25H2" 0.1585586 "NADH-plastoquinone oxidoreductase subunit"  
"OPBC09\_00645" 35054 "s59E5H2" 0.137493 "NADH-plastoquinone oxidoreductase subunit"  
"OPBC09\_00645" 35054 "s63E6H2" 1.058032 "NADH-plastoquinone oxidoreductase subunit"  
"OPBC09\_00647" 35056 "s59E13H2" 0.05036138 "putative ATPase of the ABC class"  
"OPBC09\_00647" 35056 "s59E25H2" 0 "putative ATPase of the ABC class"  
"OPBC09\_00647" 35056 "s59E5H2" 0.05434459 "putative ATPase of the ABC class"  
"OPBC09\_00647" 35056 "s63E6H2" 0 "putative ATPase of the ABC class"  
"OPBC09\_00649" 35058 "s59E13H2" 0 "Xaa-Pro dipeptidase"  
"OPBC09\_00649" 35058 "s59E25H2" 0 "Xaa-Pro dipeptidase"  
"OPBC09\_00649" 35058 "s59E5H2" 0.006795827 "Xaa-Pro dipeptidase"  
"OPBC09\_00649" 35058 "s63E6H2" 0.001489119 "Xaa-Pro dipeptidase"  
"OPBC09\_00650" 35059 "s59E13H2" 0 "Ribose transport system permease protein RbsC"  
"OPBC09\_00650" 35059 "s59E25H2" 0 "Ribose transport system permease protein RbsC"  
"OPBC09\_00650" 35059 "s59E5H2" 0 "Ribose transport system permease protein RbsC"  
"OPBC09\_00650" 35059 "s63E6H2" 0.0006633059 "Ribose transport system permease protein RbsC"  
"OPBC09\_00651" 35060 "s59E13H2" 0 "Galactose/methyl galactoside import ATP-binding protein MglA"  
"OPBC09\_00651" 35060 "s59E25H2" 0 "Galactose/methyl galactoside import ATP-binding protein MglA"  
"OPBC09\_00651" 35060 "s59E5H2" 0 "Galactose/methyl galactoside import ATP-binding protein MglA"  
"OPBC09\_00651" 35060 "s63E6H2" 0 "Galactose/methyl galactoside import ATP-binding protein MglA"  
"OPBC09\_00652" 35061 "s59E13H2" 0 "D-ribose-binding periplasmic protein precursor"  
"OPBC09\_00652" 35061 "s59E25H2" 0 "D-ribose-binding periplasmic protein precursor"  
"OPBC09\_00652" 35061 "s59E5H2" 1.216497 "D-ribose-binding periplasmic protein precursor"  
"OPBC09\_00652" 35061 "s63E6H2" 0 "D-ribose-binding periplasmic protein precursor"  
"OPBC09\_00653" 35062 "s59E13H2" 0.001276805 "Xylulose kinase"  
"OPBC09\_00653" 35062 "s59E25H2" 0 "Xylulose kinase"  
"OPBC09\_00653" 35062 "s59E5H2" 2.604202 "Xylulose kinase"  
"OPBC09\_00653" 35062 "s63E6H2" 0.001401983 "Xylulose kinase"  
"OPBC09\_00654" 35063 "s59E13H2" 0 "hypothetical protein"  
"OPBC09\_00654" 35063 "s59E25H2" 0 "hypothetical protein"  
"OPBC09\_00654" 35063 "s59E5H2" 2.236476 "hypothetical protein"  
"OPBC09\_00654" 35063 "s63E6H2" 0.00417095 "hypothetical protein"  
"OPBC09\_00655" 35064 "s59E13H2" 0 "Sorbitol dehydrogenase"  
"OPBC09\_00655" 35064 "s59E25H2" 0 "Sorbitol dehydrogenase"  
"OPBC09\_00655" 35064 "s59E5H2" 1.289327 "Sorbitol dehydrogenase"  
"OPBC09\_00655" 35064 "s63E6H2" 0 "Sorbitol dehydrogenase"  
"OPBC09\_00656" 35065 "s59E13H2" 0 "Arabinose 5-phosphate isomerase KdsD"  
"OPBC09\_00656" 35065 "s59E25H2" 0 "Arabinose 5-phosphate isomerase KdsD"  
"OPBC09\_00656" 35065 "s59E5H2" 0.9913369 "Arabinose 5-phosphate isomerase KdsD"  
"OPBC09\_00656" 35065 "s63E6H2" 0 "Arabinose 5-phosphate isomerase KdsD"  
"OPBC09\_00657" 35066 "s59E13H2" 0.6075882 "Branched-chain-amino-acid aminotransferase"  
"OPBC09\_00657" 35066 "s59E25H2" 0 "Branched-chain-amino-acid aminotransferase"

"OPBC09\_00657" 35066 "s59E5H2" 0.2139839 "Branched-chain-amino-acid aminotransferase"  
"OPBC09\_00657" 35066 "s63E6H2" 0.01456154 "Branched-chain-amino-acid aminotransferase"  
"OPBC09\_00658" 35067 "s59E13H2" 0.08679918 "Aminodeoxychorismate synthase component 1"  
"OPBC09\_00658" 35067 "s59E25H2" 0 "Aminodeoxychorismate synthase component 1"  
"OPBC09\_00658" 35067 "s59E5H2" 0.3173809 "Aminodeoxychorismate synthase component 1"  
"OPBC09\_00658" 35067 "s63E6H2" 0.01301782 "Aminodeoxychorismate synthase component 1"  
"OPBC09\_00659" 35068 "s59E13H2" 0.05575013 "Aminodeoxychorismate/anthranilate synthase component 2"  
"OPBC09\_00659" 35068 "s59E25H2" 0 "Aminodeoxychorismate/anthranilate synthase component 2"  
"OPBC09\_00659" 35068 "s59E5H2" 0.3408558 "Aminodeoxychorismate/anthranilate synthase component 2"  
"OPBC09\_00659" 35068 "s63E6H2" 0.001013215 "Aminodeoxychorismate/anthranilate synthase component 2"  
"OPBC09\_00660" 35069 "s59E13H2" 0 "Riboflavin biosynthesis protein RibF"  
"OPBC09\_00660" 35069 "s59E25H2" 0 "Riboflavin biosynthesis protein RibF"  
"OPBC09\_00660" 35069 "s59E5H2" 0.01389334 "Riboflavin biosynthesis protein RibF"  
"OPBC09\_00660" 35069 "s63E6H2" 0.004768822 "Riboflavin biosynthesis protein RibF"  
"OPBC09\_00661" 35070 "s59E13H2" 0.006234272 "30S ribosomal protein S15"  
"OPBC09\_00661" 35070 "s59E25H2" 0 "30S ribosomal protein S15"  
"OPBC09\_00661" 35070 "s59E5H2" 0 "30S ribosomal protein S15"  
"OPBC09\_00661" 35070 "s63E6H2" 0 "30S ribosomal protein S15"  
"OPBC09\_00662" 35071 "s59E13H2" 0.00372262 "Polyribonucleotide nucleotidyltransferase"  
"OPBC09\_00662" 35071 "s59E25H2" 0 "Polyribonucleotide nucleotidyltransferase"  
"OPBC09\_00662" 35071 "s59E5H2" 0.01777622 "Polyribonucleotide nucleotidyltransferase"  
"OPBC09\_00662" 35071 "s63E6H2" 0.03478941 "Polyribonucleotide nucleotidyltransferase"  
"OPBC09\_00663" 35072 "s59E13H2" 0.005119531 "Peptidase M16 inactive domain protein"  
"OPBC09\_00663" 35072 "s59E25H2" 0 "Peptidase M16 inactive domain protein"  
"OPBC09\_00663" 35072 "s59E5H2" 0.02249026 "Peptidase M16 inactive domain protein"  
"OPBC09\_00663" 35072 "s63E6H2" 0.09159346 "Peptidase M16 inactive domain protein"  
"OPBC09\_00664" 35073 "s59E13H2" 0.08126189 "4-hydroxy-tetrahydrodipicolinate reductase"  
"OPBC09\_00664" 35073 "s59E25H2" 0 "4-hydroxy-tetrahydrodipicolinate reductase"  
"OPBC09\_00664" 35073 "s59E5H2" 0.008146497 "4-hydroxy-tetrahydrodipicolinate reductase"  
"OPBC09\_00664" 35073 "s63E6H2" 0.08562047 "4-hydroxy-tetrahydrodipicolinate reductase"  
"OPBC09\_00665" 35074 "s59E13H2" 0.0001644904 "4-hydroxy-tetrahydrodipicolinate synthase"  
"OPBC09\_00665" 35074 "s59E25H2" 0 "4-hydroxy-tetrahydrodipicolinate synthase"  
"OPBC09\_00665" 35074 "s59E5H2" 0.04054759 "4-hydroxy-tetrahydrodipicolinate synthase"  
"OPBC09\_00665" 35074 "s63E6H2" 0.06438022 "4-hydroxy-tetrahydrodipicolinate synthase"  
"OPBC09\_00666" 35075 "s59E13H2" 0 "Ribonuclease J 1"  
"OPBC09\_00666" 35075 "s59E25H2" 0 "Ribonuclease J 1"  
"OPBC09\_00666" 35075 "s59E5H2" 0.126682 "Ribonuclease J 1"  
"OPBC09\_00666" 35075 "s63E6H2" 0.1139958 "Ribonuclease J 1"  
"OPBC09\_00667" 35076 "s59E13H2" 0.008060639 "Ktr system potassium uptake protein B"  
"OPBC09\_00667" 35076 "s59E25H2" 0 "Ktr system potassium uptake protein B"  
"OPBC09\_00667" 35076 "s59E5H2" 0.5043931 "Ktr system potassium uptake protein B"  
"OPBC09\_00667" 35076 "s63E6H2" 0.02971947 "Ktr system potassium uptake protein B"  
"OPBC09\_00668" 35077 "s59E13H2" 0.03858623 "Ktr system potassium uptake protein A"  
"OPBC09\_00668" 35077 "s59E25H2" 0 "Ktr system potassium uptake protein A"  
"OPBC09\_00668" 35077 "s59E5H2" 0.9574703 "Ktr system potassium uptake protein A"  
"OPBC09\_00668" 35077 "s63E6H2" 0.1087028 "Ktr system potassium uptake protein A"  
"OPBC09\_00669" 35078 "s59E13H2" 0.0247278 "Pyruvate kinase"

"OPBC09\_00669" 35078 "s59E25H2" 0 "Pyruvate kinase"  
"OPBC09\_00669" 35078 "s59E5H2" 0.6132992 "Pyruvate kinase"  
"OPBC09\_00669" 35078 "s63E6H2" 0.06876464 "Pyruvate kinase"  
"OPBC09\_00670" 35079 "s59E13H2" 0.02265536 "Nucleoside triphosphate pyrophosphohydrolase"  
"OPBC09\_00670" 35079 "s59E25H2" 0 "Nucleoside triphosphate pyrophosphohydrolase"  
"OPBC09\_00670" 35079 "s59E5H2" 0.0666418 "Nucleoside triphosphate pyrophosphohydrolase"  
"OPBC09\_00670" 35079 "s63E6H2" 0.0365843 "Nucleoside triphosphate pyrophosphohydrolase"  
"OPBC09\_00671" 35080 "s59E13H2" 0.0043107 "Foldase protein PrsA 3 precursor"  
"OPBC09\_00671" 35080 "s59E25H2" 0 "Foldase protein PrsA 3 precursor"  
"OPBC09\_00671" 35080 "s59E5H2" 0.05047348 "Foldase protein PrsA 3 precursor"  
"OPBC09\_00671" 35080 "s63E6H2" 0.013668 "Foldase protein PrsA 3 precursor"  
"OPBC09\_00672" 35081 "s59E13H2" 0.08969172 "Transcription-repair-coupling factor"  
"OPBC09\_00672" 35081 "s59E25H2" 0 "Transcription-repair-coupling factor"  
"OPBC09\_00672" 35081 "s59E5H2" 0.02546214 "Transcription-repair-coupling factor"  
"OPBC09\_00672" 35081 "s63E6H2" 0.03370458 "Transcription-repair-coupling factor"  
"OPBC09\_00674" 35083 "s59E13H2" 0.006751224 "Bifunctional oligoribonuclease and PAP phosphatase NrnA"  
"OPBC09\_00674" 35083 "s59E25H2" 0 "Bifunctional oligoribonuclease and PAP phosphatase NrnA"  
"OPBC09\_00674" 35083 "s59E5H2" 0.02741376 "Bifunctional oligoribonuclease and PAP phosphatase NrnA"  
"OPBC09\_00674" 35083 "s63E6H2" 0.01687049 "Bifunctional oligoribonuclease and PAP phosphatase NrnA"  
"OPBC09\_00675" 35084 "s59E13H2" 0 "Ribosome-binding factor A"  
"OPBC09\_00675" 35084 "s59E25H2" 0 "Ribosome-binding factor A"  
"OPBC09\_00675" 35084 "s59E5H2" 0 "Ribosome-binding factor A"  
"OPBC09\_00675" 35084 "s63E6H2" 0.00982563 "Ribosome-binding factor A"  
"OPBC09\_00676" 35085 "s59E13H2" 0.001384154 "Translation initiation factor IF-2"  
"OPBC09\_00676" 35085 "s59E25H2" 0 "Translation initiation factor IF-2"  
"OPBC09\_00676" 35085 "s59E5H2" 0.007331464 "Translation initiation factor IF-2"  
"OPBC09\_00676" 35085 "s63E6H2" 0.007715143 "Translation initiation factor IF-2"  
"OPBC09\_00677" 35086 "s59E13H2" 0.00649744 "hypothetical protein"  
"OPBC09\_00677" 35086 "s59E25H2" 0 "hypothetical protein"  
"OPBC09\_00677" 35086 "s59E5H2" 0 "hypothetical protein"  
"OPBC09\_00677" 35086 "s63E6H2" 0.00302751 "hypothetical protein"  
"OPBC09\_00678" 35087 "s59E13H2" 0.2719229 "hypothetical protein"  
"OPBC09\_00678" 35087 "s59E25H2" 0 "hypothetical protein"  
"OPBC09\_00678" 35087 "s59E5H2" 0.4146796 "hypothetical protein"  
"OPBC09\_00678" 35087 "s63E6H2" 0.2890034 "hypothetical protein"  
"OPBC09\_00679" 35088 "s59E13H2" 0.260794 "hypothetical protein"  
"OPBC09\_00679" 35088 "s59E25H2" 0 "hypothetical protein"  
"OPBC09\_00679" 35088 "s59E5H2" 0.4371005 "hypothetical protein"  
"OPBC09\_00679" 35088 "s63E6H2" 0.02932991 "hypothetical protein"  
"OPBC09\_00680" 35089 "s59E13H2" 0.06448921 "Ferredoxin"  
"OPBC09\_00680" 35089 "s59E25H2" 0 "Ferredoxin"  
"OPBC09\_00680" 35089 "s59E5H2" 1.425782 "Ferredoxin"  
"OPBC09\_00680" 35089 "s63E6H2" 0.03088534 "Ferredoxin"  
"OPBC09\_00681" 35090 "s59E13H2" 0 "Electron transport complex protein RnfA"  
"OPBC09\_00681" 35090 "s59E25H2" 0 "Electron transport complex protein RnfA"  
"OPBC09\_00681" 35090 "s59E5H2" 0.04977888 "Electron transport complex protein RnfA"  
"OPBC09\_00681" 35090 "s63E6H2" 0 "Electron transport complex protein RnfA"

"OPBC09\_00682" 35091 "s59E13H2" 0.03516613 "Electron transport complex protein RnfE"  
"OPBC09\_00682" 35091 "s59E25H2" 0 "Electron transport complex protein RnfE"  
"OPBC09\_00682" 35091 "s59E5H2" 0.4264199 "Electron transport complex protein RnfE"  
"OPBC09\_00682" 35091 "s63E6H2" 0.03682417 "Electron transport complex protein RnfE"  
"OPBC09\_00683" 35092 "s59E13H2" 0.2080355 "Electron transport complex protein RnfG"  
"OPBC09\_00683" 35092 "s59E25H2" 0 "Electron transport complex protein RnfG"  
"OPBC09\_00683" 35092 "s59E5H2" 1.444184 "Electron transport complex protein RnfG"  
"OPBC09\_00683" 35092 "s63E6H2" 0.06196521 "Electron transport complex protein RnfG"  
"OPBC09\_00684" 35093 "s59E13H2" 0.05122849 "hypothetical protein"  
"OPBC09\_00684" 35093 "s59E25H2" 0 "hypothetical protein"  
"OPBC09\_00684" 35093 "s59E5H2" 1.848035 "hypothetical protein"  
"OPBC09\_00684" 35093 "s63E6H2" 0.02793578 "hypothetical protein"  
"OPBC09\_00685" 35094 "s59E13H2" 0.08255788 "hypothetical protein"  
"OPBC09\_00685" 35094 "s59E25H2" 0 "hypothetical protein"  
"OPBC09\_00685" 35094 "s59E5H2" 0.5910395 "hypothetical protein"  
"OPBC09\_00685" 35094 "s63E6H2" 0.01676771 "hypothetical protein"  
"OPBC09\_00686" 35095 "s59E13H2" 0.04296457 "Branched-chain-amino-acid aminotransferase"  
"OPBC09\_00686" 35095 "s59E25H2" 0 "Branched-chain-amino-acid aminotransferase"  
"OPBC09\_00686" 35095 "s59E5H2" 0.5645415 "Branched-chain-amino-acid aminotransferase"  
"OPBC09\_00686" 35095 "s63E6H2" 0.04395439 "Branched-chain-amino-acid aminotransferase"  
"OPBC09\_00687" 35096 "s59E13H2" 0.002963329 "HTH-type transcriptional repressor PurR"  
"OPBC09\_00687" 35096 "s59E25H2" 0 "HTH-type transcriptional repressor PurR"  
"OPBC09\_00687" 35096 "s59E5H2" 0.1005799 "HTH-type transcriptional repressor PurR"  
"OPBC09\_00687" 35096 "s63E6H2" 0.007650072 "HTH-type transcriptional repressor PurR"  
"OPBC09\_00688" 35097 "s59E13H2" 1.01747 "L-arabinose isomerase"  
"OPBC09\_00688" 35097 "s59E25H2" 0.1795977 "L-arabinose isomerase"  
"OPBC09\_00688" 35097 "s59E5H2" 0.02500473 "L-arabinose isomerase"  
"OPBC09\_00688" 35097 "s63E6H2" 0.7726725 "L-arabinose isomerase"  
"OPBC09\_00689" 35098 "s59E13H2" 0.07692752 "N-acetylglucosamine repressor"  
"OPBC09\_00689" 35098 "s59E25H2" 0 "N-acetylglucosamine repressor"  
"OPBC09\_00689" 35098 "s59E5H2" 0.01221698 "N-acetylglucosamine repressor"  
"OPBC09\_00689" 35098 "s63E6H2" 0.2079418 "N-acetylglucosamine repressor"  
"OPBC09\_00690" 35099 "s59E13H2" 0.002933737 "Ribulokinase"  
"OPBC09\_00690" 35099 "s59E25H2" 0 "Ribulokinase"  
"OPBC09\_00690" 35099 "s59E5H2" 0.004847913 "Ribulokinase"  
"OPBC09\_00690" 35099 "s63E6H2" 0.3175716 "Ribulokinase"  
"OPBC09\_00691" 35100 "s59E13H2" 0.01148594 "L-ribulose-5-phosphate 4-epimerase UlaF"  
"OPBC09\_00691" 35100 "s59E25H2" 0 "L-ribulose-5-phosphate 4-epimerase UlaF"  
"OPBC09\_00691" 35100 "s59E5H2" 0.01132786 "L-ribulose-5-phosphate 4-epimerase UlaF"  
"OPBC09\_00691" 35100 "s63E6H2" 0.1795553 "L-ribulose-5-phosphate 4-epimerase UlaF"  
"OPBC09\_00694" 35103 "s59E13H2" 0.003334141 "hypothetical protein"  
"OPBC09\_00694" 35103 "s59E25H2" 0 "hypothetical protein"  
"OPBC09\_00694" 35103 "s59E5H2" 0 "hypothetical protein"  
"OPBC09\_00694" 35103 "s63E6H2" 0.005401866 "hypothetical protein"  
"OPBC09\_00695" 35104 "s59E13H2" 0.01668296 "Xylose import ATP-binding protein XylG"  
"OPBC09\_00695" 35104 "s59E25H2" 0 "Xylose import ATP-binding protein XylG"  
"OPBC09\_00695" 35104 "s59E5H2" 0 "Xylose import ATP-binding protein XylG"



"OPBC09\_00695" 35104 "s63E6H2" 0.006955378 "Xylose import ATP-binding protein XylG"  
"OPBC09\_00696" 35105 "s59E13H2" 0.002794476 "Ribose transport system permease protein RbsC"  
"OPBC09\_00696" 35105 "s59E25H2" 0 "Ribose transport system permease protein RbsC"  
"OPBC09\_00696" 35105 "s59E5H2" 0 "Ribose transport system permease protein RbsC"  
"OPBC09\_00696" 35105 "s63E6H2" 0 "Ribose transport system permease protein RbsC"  
"OPBC09\_00697" 35106 "s59E13H2" 0.01127173 "methylcobalamin:coenzyme M methyltransferase"  
"OPBC09\_00697" 35106 "s59E25H2" 0 "methylcobalamin:coenzyme M methyltransferase"  
"OPBC09\_00697" 35106 "s59E5H2" 0 "methylcobalamin:coenzyme M methyltransferase"  
"OPBC09\_00697" 35106 "s63E6H2" 0.01046989 "methylcobalamin:coenzyme M methyltransferase"  
"OPBC09\_00698" 35107 "s59E13H2" 0.004988171 "methylcobalamin:coenzyme M methyltransferase"  
"OPBC09\_00698" 35107 "s59E25H2" 0 "methylcobalamin:coenzyme M methyltransferase"  
"OPBC09\_00698" 35107 "s59E5H2" 0.03580973 "methylcobalamin:coenzyme M methyltransferase"  
"OPBC09\_00698" 35107 "s63E6H2" 0.007121605 "methylcobalamin:coenzyme M methyltransferase"  
"OPBC09\_00699" 35108 "s59E13H2" 0.00939191 "Methylated-thiol--coenzyme M methyltransferase"  
"OPBC09\_00699" 35108 "s59E25H2" 0 "Methylated-thiol--coenzyme M methyltransferase"  
"OPBC09\_00699" 35108 "s59E5H2" 0.05950082 "Methylated-thiol--coenzyme M methyltransferase"  
"OPBC09\_00699" 35108 "s63E6H2" 0.003299721 "Methylated-thiol--coenzyme M methyltransferase"  
"OPBC09\_00700" 35109 "s59E13H2" 0 "hypothetical protein"  
"OPBC09\_00700" 35109 "s59E25H2" 0 "hypothetical protein"  
"OPBC09\_00700" 35109 "s59E5H2" 0.007505432 "hypothetical protein"  
"OPBC09\_00700" 35109 "s63E6H2" 0 "hypothetical protein"  
"OPBC09\_00701" 35110 "s59E13H2" 0.789013 "Galactokinase"  
"OPBC09\_00701" 35110 "s59E25H2" 0 "Galactokinase"  
"OPBC09\_00701" 35110 "s59E5H2" 0.04748851 "Galactokinase"  
"OPBC09\_00701" 35110 "s63E6H2" 0.004334583 "Galactokinase"  
"OPBC09\_00703" 35112 "s59E13H2" 0.248828 "Galactose-1-phosphate uridylyltransferase"  
"OPBC09\_00703" 35112 "s59E25H2" 0 "Galactose-1-phosphate uridylyltransferase"  
"OPBC09\_00703" 35112 "s59E5H2" 1.068647 "Galactose-1-phosphate uridylyltransferase"  
"OPBC09\_00703" 35112 "s63E6H2" 0.00226164 "Galactose-1-phosphate uridylyltransferase"  
"OPBC09\_00704" 35113 "s59E13H2" 0.5886343 "Glutamine-dependent NAD(+) synthetase"  
"OPBC09\_00704" 35113 "s59E25H2" 0 "Glutamine-dependent NAD(+) synthetase"  
"OPBC09\_00704" 35113 "s59E5H2" 0.9322694 "Glutamine-dependent NAD(+) synthetase"  
"OPBC09\_00704" 35113 "s63E6H2" 0.009929506 "Glutamine-dependent NAD(+) synthetase"  
"OPBC09\_00705" 35114 "s59E13H2" 0 "hypothetical protein"  
"OPBC09\_00705" 35114 "s59E25H2" 0 "hypothetical protein"  
"OPBC09\_00705" 35114 "s59E5H2" 0 "hypothetical protein"  
"OPBC09\_00705" 35114 "s63E6H2" 0 "hypothetical protein"  
"OPBC09\_00706" 35115 "s59E13H2" 0 "SpoVT / AbrB like domain protein"  
"OPBC09\_00706" 35115 "s59E25H2" 0 "SpoVT / AbrB like domain protein"  
"OPBC09\_00706" 35115 "s59E5H2" 0 "SpoVT / AbrB like domain protein"  
"OPBC09\_00706" 35115 "s63E6H2" 0 "SpoVT / AbrB like domain protein"  
"OPBC09\_00707" 35116 "s59E13H2" 0.1282068 "putative cysteine desulfurase 2"  
"OPBC09\_00707" 35116 "s59E25H2" 0 "putative cysteine desulfurase 2"  
"OPBC09\_00707" 35116 "s59E5H2" 0.1019591 "putative cysteine desulfurase 2"  
"OPBC09\_00707" 35116 "s63E6H2" 0.01091193 "putative cysteine desulfurase 2"  
"OPBC09\_00708" 35117 "s59E13H2" 0.003074931 "putative diguanylate cyclase YdaM"  
"OPBC09\_00708" 35117 "s59E25H2" 0 "putative diguanylate cyclase YdaM"

"OPBC09\_00708" 35117 "s59E5H2" 0.0288017 "putative diguanylate cyclase YdaM"  
"OPBC09\_00708" 35117 "s63E6H2" 0.007157178 "putative diguanylate cyclase YdaM"  
"OPBC09\_00709" 35118 "s59E13H2" 0.04937176 "hypothetical protein"  
"OPBC09\_00709" 35118 "s59E25H2" 0 "hypothetical protein"  
"OPBC09\_00709" 35118 "s59E5H2" 0.06931819 "hypothetical protein"  
"OPBC09\_00709" 35118 "s63E6H2" 0.01650975 "hypothetical protein"  
"OPBC09\_00710" 35119 "s59E13H2" 0.01816866 "hypothetical protein"  
"OPBC09\_00710" 35119 "s59E25H2" 0 "hypothetical protein"  
"OPBC09\_00710" 35119 "s59E5H2" 0.4365451 "hypothetical protein"  
"OPBC09\_00710" 35119 "s63E6H2" 0.1229487 "hypothetical protein"  
"OPBC09\_00711" 35120 "s59E13H2" 0.01733629 "hypothetical protein"  
"OPBC09\_00711" 35120 "s59E25H2" 0 "hypothetical protein"  
"OPBC09\_00711" 35120 "s59E5H2" 0.3063526 "hypothetical protein"  
"OPBC09\_00711" 35120 "s63E6H2" 0.2619621 "hypothetical protein"  
"OPBC09\_00712" 35121 "s59E13H2" 0.07298332 "NH(3)-dependent NAD(+) synthetase"  
"OPBC09\_00712" 35121 "s59E25H2" 0 "NH(3)-dependent NAD(+) synthetase"  
"OPBC09\_00712" 35121 "s59E5H2" 0.02958445 "NH(3)-dependent NAD(+) synthetase"  
"OPBC09\_00712" 35121 "s63E6H2" 0.1559176 "NH(3)-dependent NAD(+) synthetase"  
"OPBC09\_00713" 35122 "s59E13H2" 0.233314 "hypothetical protein"  
"OPBC09\_00713" 35122 "s59E25H2" 0 "hypothetical protein"  
"OPBC09\_00713" 35122 "s59E5H2" 0.08246478 "hypothetical protein"  
"OPBC09\_00713" 35122 "s63E6H2" 0.1865039 "hypothetical protein"  
"OPBC09\_00714" 35123 "s59E13H2" 0.07242889 "Al-2 transport protein TqsA"  
"OPBC09\_00714" 35123 "s59E25H2" 0 "Al-2 transport protein TqsA"  
"OPBC09\_00714" 35123 "s59E5H2" 0.03511074 "Al-2 transport protein TqsA"  
"OPBC09\_00714" 35123 "s63E6H2" 0.05519819 "Al-2 transport protein TqsA"  
"OPBC09\_00715" 35124 "s59E13H2" 0.02638915 "N,N'-diacetylchitobiose phosphorylase"  
"OPBC09\_00715" 35124 "s59E25H2" 0 "N,N'-diacetylchitobiose phosphorylase"  
"OPBC09\_00715" 35124 "s59E5H2" 0 "N,N'-diacetylchitobiose phosphorylase"  
"OPBC09\_00715" 35124 "s63E6H2" 0.1274382 "N,N'-diacetylchitobiose phosphorylase"  
"OPBC09\_00716" 35125 "s59E13H2" 0.03570889 "hypothetical protein"  
"OPBC09\_00716" 35125 "s59E25H2" 0 "hypothetical protein"  
"OPBC09\_00716" 35125 "s59E5H2" 0.05039556 "hypothetical protein"  
"OPBC09\_00716" 35125 "s63E6H2" 0.04748294 "hypothetical protein"  
"OPBC09\_00717" 35126 "s59E13H2" 0.04078507 "F(420)H(2) dehydrogenase subunit B"  
"OPBC09\_00717" 35126 "s59E25H2" 0 "F(420)H(2) dehydrogenase subunit B"  
"OPBC09\_00717" 35126 "s59E5H2" 0.07459035 "F(420)H(2) dehydrogenase subunit B"  
"OPBC09\_00717" 35126 "s63E6H2" 0.03259175 "F(420)H(2) dehydrogenase subunit B"  
"OPBC09\_00718" 35127 "s59E13H2" 0.05691066 "NADH-quinone oxidoreductase subunit 4"  
"OPBC09\_00718" 35127 "s59E25H2" 0 "NADH-quinone oxidoreductase subunit 4"  
"OPBC09\_00718" 35127 "s59E5H2" 0.06919167 "NADH-quinone oxidoreductase subunit 4"  
"OPBC09\_00718" 35127 "s63E6H2" 0.07869032 "NADH-quinone oxidoreductase subunit 4"  
"OPBC09\_00719" 35128 "s59E13H2" 0.07913473 "NADH-quinone oxidoreductase subunit H"  
"OPBC09\_00719" 35128 "s59E25H2" 0 "NADH-quinone oxidoreductase subunit H"  
"OPBC09\_00719" 35128 "s59E5H2" 0.1196481 "NADH-quinone oxidoreductase subunit H"  
"OPBC09\_00719" 35128 "s63E6H2" 0.1397197 "NADH-quinone oxidoreductase subunit H"  
"OPBC09\_00720" 35129 "s59E13H2" 0.03135772 "NADH-quinone oxidoreductase subunit I"

"OPBC09\_00720" 35129 "s59E25H2" 0 "NADH-quinone oxidoreductase subunit I"  
"OPBC09\_00720" 35129 "s59E5H2" 0.1394669 "NADH-quinone oxidoreductase subunit I"  
"OPBC09\_00720" 35129 "s63E6H2" 0.08536875 "NADH-quinone oxidoreductase subunit I"  
"OPBC09\_00721" 35130 "s59E13H2" 0.03426043 "hypothetical protein"  
"OPBC09\_00721" 35130 "s59E25H2" 0 "hypothetical protein"  
"OPBC09\_00721" 35130 "s59E5H2" 0.03034875 "hypothetical protein"  
"OPBC09\_00721" 35130 "s63E6H2" 0.05009986 "hypothetical protein"  
"OPBC09\_00722" 35131 "s59E13H2" 0.04307586 "NADH:ubiquinone oxidoreductase subunit K"  
"OPBC09\_00722" 35131 "s59E25H2" 0 "NADH:ubiquinone oxidoreductase subunit K"  
"OPBC09\_00722" 35131 "s59E5H2" 0.04289947 "NADH:ubiquinone oxidoreductase subunit K"  
"OPBC09\_00722" 35131 "s63E6H2" 0.04403041 "NADH:ubiquinone oxidoreductase subunit K"  
"OPBC09\_00723" 35132 "s59E13H2" 0.02796148 "NADH:ubiquinone oxidoreductase subunit N"  
"OPBC09\_00723" 35132 "s59E25H2" 0 "NADH:ubiquinone oxidoreductase subunit N"  
"OPBC09\_00723" 35132 "s59E5H2" 0.04063741 "NADH:ubiquinone oxidoreductase subunit N"  
"OPBC09\_00723" 35132 "s63E6H2" 0.03180279 "NADH:ubiquinone oxidoreductase subunit N"  
"OPBC09\_00724" 35133 "s59E13H2" 0.04945598 "hypothetical protein"  
"OPBC09\_00724" 35133 "s59E25H2" 0 "hypothetical protein"  
"OPBC09\_00724" 35133 "s59E5H2" 0.1120102 "hypothetical protein"  
"OPBC09\_00724" 35133 "s63E6H2" 0.00473885 "hypothetical protein"  
"OPBC09\_00725" 35134 "s59E13H2" 0.02914142 "Cell wall-binding protein YocH precursor"  
"OPBC09\_00725" 35134 "s59E25H2" 0 "Cell wall-binding protein YocH precursor"  
"OPBC09\_00725" 35134 "s59E5H2" 0.206347 "Cell wall-binding protein YocH precursor"  
"OPBC09\_00725" 35134 "s63E6H2" 0.005912896 "Cell wall-binding protein YocH precursor"  
"OPBC09\_00726" 35135 "s59E13H2" 0.03243756 "Uracil DNA glycosylase superfamily protein"  
"OPBC09\_00726" 35135 "s59E25H2" 0 "Uracil DNA glycosylase superfamily protein"  
"OPBC09\_00726" 35135 "s59E5H2" 0.401062 "Uracil DNA glycosylase superfamily protein"  
"OPBC09\_00726" 35135 "s63E6H2" 0.008650561 "Uracil DNA glycosylase superfamily protein"  
"OPBC09\_00727" 35136 "s59E13H2" 0.00974662 "Dimethylamine corrinoid protein"  
"OPBC09\_00727" 35136 "s59E25H2" 0 "Dimethylamine corrinoid protein"  
"OPBC09\_00727" 35136 "s59E5H2" 0.2460956 "Dimethylamine corrinoid protein"  
"OPBC09\_00727" 35136 "s63E6H2" 0.1619415 "Dimethylamine corrinoid protein"  
"OPBC09\_00728" 35137 "s59E13H2" 0 "Phd\_YefM"  
"OPBC09\_00728" 35137 "s59E25H2" 0 "Phd\_YefM"  
"OPBC09\_00728" 35137 "s59E5H2" 0.9105852 "Phd\_YefM"  
"OPBC09\_00728" 35137 "s63E6H2" 0 "Phd\_YefM"  
"OPBC09\_00729" 35138 "s59E13H2" 0.02146788 "tRNA(fMet)-specific endonuclease VapC"  
"OPBC09\_00729" 35138 "s59E25H2" 0 "tRNA(fMet)-specific endonuclease VapC"  
"OPBC09\_00729" 35138 "s59E5H2" 0.9881551 "tRNA(fMet)-specific endonuclease VapC"  
"OPBC09\_00729" 35138 "s63E6H2" 0.04091887 "tRNA(fMet)-specific endonuclease VapC"  
"OPBC09\_00730" 35139 "s59E13H2" 0 "Ribose import ATP-binding protein RbsA"  
"OPBC09\_00730" 35139 "s59E25H2" 0 "Ribose import ATP-binding protein RbsA"  
"OPBC09\_00730" 35139 "s59E5H2" 0 "Ribose import ATP-binding protein RbsA"  
"OPBC09\_00730" 35139 "s63E6H2" 0 "Ribose import ATP-binding protein RbsA"  
"OPBC09\_00733" 35142 "s59E13H2" 0 "hypothetical protein"  
"OPBC09\_00733" 35142 "s59E25H2" 0 "hypothetical protein"  
"OPBC09\_00733" 35142 "s59E5H2" 0 "hypothetical protein"  
"OPBC09\_00733" 35142 "s63E6H2" 0 "hypothetical protein"

"OPBC09\_00734" 35143 "s59E13H2" 0 "hypothetical protein"  
"OPBC09\_00734" 35143 "s59E25H2" 0 "hypothetical protein"  
"OPBC09\_00734" 35143 "s59E5H2" 0 "hypothetical protein"  
"OPBC09\_00734" 35143 "s63E6H2" 0 "hypothetical protein"  
"OPBC09\_00735" 35144 "s59E13H2" 0 "Ribose transport system permease protein RbsC"  
"OPBC09\_00735" 35144 "s59E25H2" 0 "Ribose transport system permease protein RbsC"  
"OPBC09\_00735" 35144 "s59E5H2" 0 "Ribose transport system permease protein RbsC"  
"OPBC09\_00735" 35144 "s63E6H2" 0 "Ribose transport system permease protein RbsC"  
"OPBC09\_00739" 35148 "s59E13H2" 0 "D-ribose-binding periplasmic protein precursor"  
"OPBC09\_00739" 35148 "s59E25H2" 0 "D-ribose-binding periplasmic protein precursor"  
"OPBC09\_00739" 35148 "s59E5H2" 0 "D-ribose-binding periplasmic protein precursor"  
"OPBC09\_00739" 35148 "s63E6H2" 0.001573463 "D-ribose-binding periplasmic protein precursor"  
"OPBC09\_00740" 35149 "s59E13H2" 0 "N-acetylglucosamine repressor"  
"OPBC09\_00740" 35149 "s59E25H2" 0 "N-acetylglucosamine repressor"  
"OPBC09\_00740" 35149 "s59E5H2" 0 "N-acetylglucosamine repressor"  
"OPBC09\_00740" 35149 "s63E6H2" 0 "N-acetylglucosamine repressor"  
"OPBC09\_00741" 35150 "s59E13H2" 0.004071296 "Integrase core domain protein"  
"OPBC09\_00741" 35150 "s59E25H2" 0 "Integrase core domain protein"  
"OPBC09\_00741" 35150 "s59E5H2" 0.03244932 "Integrase core domain protein"  
"OPBC09\_00741" 35150 "s63E6H2" 0.122313 "Integrase core domain protein"  
"OPBC09\_00743" 35152 "s59E13H2" 1.280749 "hypothetical protein"  
"OPBC09\_00743" 35152 "s59E25H2" 0 "hypothetical protein"  
"OPBC09\_00743" 35152 "s59E5H2" 0.0896363 "hypothetical protein"  
"OPBC09\_00743" 35152 "s63E6H2" 0 "hypothetical protein"  
"OPBC09\_00744" 35153 "s59E13H2" 1.120495 "HTH-type transcriptional regulator CymR"  
"OPBC09\_00744" 35153 "s59E25H2" 0 "HTH-type transcriptional regulator CymR"  
"OPBC09\_00744" 35153 "s59E5H2" 0.03847155 "HTH-type transcriptional regulator CymR"  
"OPBC09\_00744" 35153 "s63E6H2" 0 "HTH-type transcriptional regulator CymR"  
"OPBC09\_00745" 35154 "s59E13H2" 1.123344 "Sulfhydrogenase 1 subunit alpha"  
"OPBC09\_00745" 35154 "s59E25H2" 0 "Sulfhydrogenase 1 subunit alpha"  
"OPBC09\_00745" 35154 "s59E5H2" 0.6835574 "Sulfhydrogenase 1 subunit alpha"  
"OPBC09\_00745" 35154 "s63E6H2" 0.06791808 "Sulfhydrogenase 1 subunit alpha"  
"OPBC09\_00746" 35155 "s59E13H2" 1.022273 "Sulfhydrogenase 1 subunit delta"  
"OPBC09\_00746" 35155 "s59E25H2" 0 "Sulfhydrogenase 1 subunit delta"  
"OPBC09\_00746" 35155 "s59E5H2" 1.011059 "Sulfhydrogenase 1 subunit delta"  
"OPBC09\_00746" 35155 "s63E6H2" 0.05979551 "Sulfhydrogenase 1 subunit delta"  
"OPBC09\_00747" 35156 "s59E13H2" 0.9121245 "Sulfhydrogenase 2 subunit gamma"  
"OPBC09\_00747" 35156 "s59E25H2" 0 "Sulfhydrogenase 2 subunit gamma"  
"OPBC09\_00747" 35156 "s59E5H2" 0.5239917 "Sulfhydrogenase 2 subunit gamma"  
"OPBC09\_00747" 35156 "s63E6H2" 0.1766371 "Sulfhydrogenase 2 subunit gamma"  
"OPBC09\_00748" 35157 "s59E13H2" 0.8765674 "Sulfhydrogenase 1 subunit beta"  
"OPBC09\_00748" 35157 "s59E25H2" 0 "Sulfhydrogenase 1 subunit beta"  
"OPBC09\_00748" 35157 "s59E5H2" 0.6533992 "Sulfhydrogenase 1 subunit beta"  
"OPBC09\_00748" 35157 "s63E6H2" 0.1400014 "Sulfhydrogenase 1 subunit beta"  
"OPBC09\_00749" 35158 "s59E13H2" 0.765728 "Alkaline phosphatase synthesis sensor protein PhoR"  
"OPBC09\_00749" 35158 "s59E25H2" 0 "Alkaline phosphatase synthesis sensor protein PhoR"  
"OPBC09\_00749" 35158 "s59E5H2" 0.1476578 "Alkaline phosphatase synthesis sensor protein PhoR"

"OPBC09\_00749" 35158 "s63E6H2" 0.06757343 "Alkaline phosphatase synthesis sensor protein PhoR"  
"OPBC09\_00750" 35159 "s59E13H2" 0.6472595 "Response regulator MprA"  
"OPBC09\_00750" 35159 "s59E25H2" 0 "Response regulator MprA"  
"OPBC09\_00750" 35159 "s59E5H2" 0.1258162 "Response regulator MprA"  
"OPBC09\_00750" 35159 "s63E6H2" 0.07788606 "Response regulator MprA"  
"OPBC09\_00751" 35160 "s59E13H2" 0.3953943 "Sensor protein ZraS"  
"OPBC09\_00751" 35160 "s59E25H2" 0 "Sensor protein ZraS"  
"OPBC09\_00751" 35160 "s59E5H2" 0.05075306 "Sensor protein ZraS"  
"OPBC09\_00751" 35160 "s63E6H2" 0.09165262 "Sensor protein ZraS"  
"OPBC09\_00753" 35162 "s59E13H2" 0.1639931 "lineage-specific thermal regulator protein"  
"OPBC09\_00753" 35162 "s59E25H2" 0 "lineage-specific thermal regulator protein"  
"OPBC09\_00753" 35162 "s59E5H2" 0.09777076 "lineage-specific thermal regulator protein"  
"OPBC09\_00753" 35162 "s63E6H2" 0.1192967 "lineage-specific thermal regulator protein"  
"OPBC09\_00754" 35163 "s59E13H2" 0.09892398 "hypothetical protein"  
"OPBC09\_00754" 35163 "s59E25H2" 0 "hypothetical protein"  
"OPBC09\_00754" 35163 "s59E5H2" 0.06540984 "hypothetical protein"  
"OPBC09\_00754" 35163 "s63E6H2" 0.1552119 "hypothetical protein"  
"OPBC09\_00755" 35164 "s59E13H2" 0.1616866 "hypothetical protein"  
"OPBC09\_00755" 35164 "s59E25H2" 0 "hypothetical protein"  
"OPBC09\_00755" 35164 "s59E5H2" 0.05456149 "hypothetical protein"  
"OPBC09\_00755" 35164 "s63E6H2" 0.3460332 "hypothetical protein"  
"OPBC09\_00756" 35165 "s59E13H2" 0.2654397 "hypothetical protein"  
"OPBC09\_00756" 35165 "s59E25H2" 0.6508564 "hypothetical protein"  
"OPBC09\_00756" 35165 "s59E5H2" 0.04081768 "hypothetical protein"  
"OPBC09\_00756" 35165 "s63E6H2" 0.3942968 "hypothetical protein"  
"OPBC09\_00757" 35166 "s59E13H2" 0.3515616 "hypothetical protein"  
"OPBC09\_00757" 35166 "s59E25H2" 0 "hypothetical protein"  
"OPBC09\_00757" 35166 "s59E5H2" 0 "hypothetical protein"  
"OPBC09\_00757" 35166 "s63E6H2" 0.4151163 "hypothetical protein"  
"OPBC09\_00758" 35167 "s59E13H2" 0.4018827 "Archaemetzincin"  
"OPBC09\_00758" 35167 "s59E25H2" 0 "Archaemetzincin"  
"OPBC09\_00758" 35167 "s59E5H2" 0 "Archaemetzincin"  
"OPBC09\_00758" 35167 "s63E6H2" 0.7287 "Archaemetzincin"  
"OPBC09\_00759" 35168 "s59E13H2" 0.02397434 "Pyruvate formate-lyase-activating enzyme"  
"OPBC09\_00759" 35168 "s59E25H2" 0 "Pyruvate formate-lyase-activating enzyme"  
"OPBC09\_00759" 35168 "s59E5H2" 0.01097758 "Pyruvate formate-lyase-activating enzyme"  
"OPBC09\_00759" 35168 "s63E6H2" 0.005156256 "Pyruvate formate-lyase-activating enzyme"  
"OPBC09\_00760" 35169 "s59E13H2" 0.01271731 "Transposase IS200 like protein"  
"OPBC09\_00760" 35169 "s59E25H2" 0 "Transposase IS200 like protein"  
"OPBC09\_00760" 35169 "s59E5H2" 0.007258985 "Transposase IS200 like protein"  
"OPBC09\_00760" 35169 "s63E6H2" 0 "Transposase IS200 like protein"  
"OPBC09\_00761" 35170 "s59E13H2" 0.004564954 "putative transposase"  
"OPBC09\_00761" 35170 "s59E25H2" 0 "putative transposase"  
"OPBC09\_00761" 35170 "s59E5H2" 0.02329629 "putative transposase"  
"OPBC09\_00761" 35170 "s63E6H2" 0.003723201 "putative transposase"  
"OPBC09\_00762" 35171 "s59E13H2" 0.004830273 "Polyribonucleotide 5'-hydroxyl-kinase"  
"OPBC09\_00762" 35171 "s59E25H2" 0 "Polyribonucleotide 5'-hydroxyl-kinase"

"OPBC09\_00762" 35171 "s59E5H2" 0.0009194154 "Polyribonucleotide 5'-hydroxyl-kinase"  
"OPBC09\_00762" 35171 "s63E6H2" 0.01397392 "Polyribonucleotide 5'-hydroxyl-kinase"  
"OPBC09\_00763" 35172 "s59E13H2" 0.433863 "Putative signal peptide peptidase SppA"  
"OPBC09\_00763" 35172 "s59E25H2" 0 "Putative signal peptide peptidase SppA"  
"OPBC09\_00763" 35172 "s59E5H2" 0.2833373 "Putative signal peptide peptidase SppA"  
"OPBC09\_00763" 35172 "s63E6H2" 0.9921621 "Putative signal peptide peptidase SppA"  
"OPBC09\_00764" 35173 "s59E13H2" 0.4743836 "AsnC family protein"  
"OPBC09\_00764" 35173 "s59E25H2" 0 "AsnC family protein"  
"OPBC09\_00764" 35173 "s59E5H2" 0.189919 "AsnC family protein"  
"OPBC09\_00764" 35173 "s63E6H2" 0.3728898 "AsnC family protein"  
"OPBC09\_00765" 35174 "s59E13H2" 0.01408378 "putative transposase"  
"OPBC09\_00765" 35174 "s59E25H2" 0.01323408 "putative transposase"  
"OPBC09\_00765" 35174 "s59E5H2" 0.3150896 "putative transposase"  
"OPBC09\_00765" 35174 "s63E6H2" 0.3487974 "putative transposase"  
"OPBC09\_00767" 35176 "s59E13H2" 0.3787082 "Bifunctional homocysteine S-methyltransferase/5,10-methylenetetrahydrofolate reductase"  
"OPBC09\_00767" 35176 "s59E25H2" 0 "Bifunctional homocysteine S-methyltransferase/5,10-methylenetetrahydrofolate reductase"  
"OPBC09\_00767" 35176 "s59E5H2" 0.1857421 "Bifunctional homocysteine S-methyltransferase/5,10-methylenetetrahydrofolate reductase"  
"OPBC09\_00767" 35176 "s63E6H2" 0.4604412 "Bifunctional homocysteine S-methyltransferase/5,10-methylenetetrahydrofolate reductase"  
"OPBC09\_00768" 35177 "s59E13H2" 0.0885389 "hypothetical protein"  
"OPBC09\_00768" 35177 "s59E25H2" 0 "hypothetical protein"  
"OPBC09\_00768" 35177 "s59E5H2" 0 "hypothetical protein"  
"OPBC09\_00768" 35177 "s63E6H2" 0.1948539 "hypothetical protein"  
"OPBC09\_00769" 35178 "s59E13H2" 0.1375295 "UDP-N-acetylglucosamine 1-carboxyvinyltransferase 1"  
"OPBC09\_00769" 35178 "s59E25H2" 0 "UDP-N-acetylglucosamine 1-carboxyvinyltransferase 1"  
"OPBC09\_00769" 35178 "s59E5H2" 0.03769228 "UDP-N-acetylglucosamine 1-carboxyvinyltransferase 1"  
"OPBC09\_00769" 35178 "s63E6H2" 0.07629508 "UDP-N-acetylglucosamine 1-carboxyvinyltransferase 1"  
"OPBC09\_00770" 35179 "s59E13H2" 0.06475464 "hypothetical protein"  
"OPBC09\_00770" 35179 "s59E25H2" 0 "hypothetical protein"  
"OPBC09\_00770" 35179 "s59E5H2" 1.375509 "hypothetical protein"  
"OPBC09\_00770" 35179 "s63E6H2" 0.01669694 "hypothetical protein"  
"OPBC09\_00771" 35180 "s59E13H2" 0.02411272 "Virus attachment protein p12 family protein"  
"OPBC09\_00771" 35180 "s59E25H2" 0 "Virus attachment protein p12 family protein"  
"OPBC09\_00771" 35180 "s59E5H2" 0.3577389 "Virus attachment protein p12 family protein"  
"OPBC09\_00771" 35180 "s63E6H2" 0.0416634 "Virus attachment protein p12 family protein"  
"OPBC09\_00772" 35181 "s59E13H2" 0.7946378 "Phd\_YefM"  
"OPBC09\_00772" 35181 "s59E25H2" 0 "Phd\_YefM"  
"OPBC09\_00772" 35181 "s59E5H2" 0.03741565 "Phd\_YefM"  
"OPBC09\_00772" 35181 "s63E6H2" 0.01248667 "Phd\_YefM"  
"OPBC09\_00773" 35182 "s59E13H2" 0 "hypothetical protein"  
"OPBC09\_00773" 35182 "s59E25H2" 0 "hypothetical protein"  
"OPBC09\_00773" 35182 "s59E5H2" 0 "hypothetical protein"  
"OPBC09\_00773" 35182 "s63E6H2" 0 "hypothetical protein"  
"OPBC09\_00775" 35184 "s59E13H2" 0 "hypothetical protein"  
"OPBC09\_00775" 35184 "s59E25H2" 0 "hypothetical protein"  
"OPBC09\_00775" 35184 "s59E5H2" 0 "hypothetical protein"  
"OPBC09\_00775" 35184 "s63E6H2" 0 "hypothetical protein"  
"OPBC09\_00776" 35185 "s59E13H2" 1.173548 "Tyrosine--tRNA ligase"

"OPBC09\_00776" 35185 "s59E25H2" 0 "Tyrosine--tRNA ligase"  
"OPBC09\_00776" 35185 "s59E5H2" 0.3142121 "Tyrosine--tRNA ligase"  
"OPBC09\_00776" 35185 "s63E6H2" 0.08170106 "Tyrosine--tRNA ligase"  
"OPBC09\_00777" 35186 "s59E13H2" 1.100416 "Penicillin-binding protein 2D"  
"OPBC09\_00777" 35186 "s59E25H2" 0 "Penicillin-binding protein 2D"  
"OPBC09\_00777" 35186 "s59E5H2" 0.3429063 "Penicillin-binding protein 2D"  
"OPBC09\_00777" 35186 "s63E6H2" 0.0398109 "Penicillin-binding protein 2D"  
"OPBC09\_00778" 35187 "s59E13H2" 0.08623255 "putative protease YhbU precursor"  
"OPBC09\_00778" 35187 "s59E25H2" 0 "putative protease YhbU precursor"  
"OPBC09\_00778" 35187 "s59E5H2" 0.4743977 "putative protease YhbU precursor"  
"OPBC09\_00778" 35187 "s63E6H2" 0.01943328 "putative protease YhbU precursor"  
"OPBC09\_00779" 35188 "s59E13H2" 0.0513677 "Argininosuccinate lyase"  
"OPBC09\_00779" 35188 "s59E25H2" 0 "Argininosuccinate lyase"  
"OPBC09\_00779" 35188 "s59E5H2" 0.5836336 "Argininosuccinate lyase"  
"OPBC09\_00779" 35188 "s63E6H2" 0.03264524 "Argininosuccinate lyase"  
"OPBC09\_00780" 35189 "s59E13H2" 0.03285938 "Argininosuccinate synthase"  
"OPBC09\_00780" 35189 "s59E25H2" 0 "Argininosuccinate synthase"  
"OPBC09\_00780" 35189 "s59E5H2" 0.3893248 "Argininosuccinate synthase"  
"OPBC09\_00780" 35189 "s63E6H2" 0.03808675 "Argininosuccinate synthase"  
"OPBC09\_00781" 35190 "s59E13H2" 0.01741171 "Arginine repressor"  
"OPBC09\_00781" 35190 "s59E25H2" 0 "Arginine repressor"  
"OPBC09\_00781" 35190 "s59E5H2" 0.2668049 "Arginine repressor"  
"OPBC09\_00781" 35190 "s63E6H2" 0.03007858 "Arginine repressor"  
"OPBC09\_00782" 35191 "s59E13H2" 0.01562521 "Ornithine carbamoyltransferase"  
"OPBC09\_00782" 35191 "s59E25H2" 0 "Ornithine carbamoyltransferase"  
"OPBC09\_00782" 35191 "s59E5H2" 0.2443352 "Ornithine carbamoyltransferase"  
"OPBC09\_00782" 35191 "s63E6H2" 0.01439902 "Ornithine carbamoyltransferase"  
"OPBC09\_00783" 35192 "s59E13H2" 0.01552031 "Acetylornithine aminotransferase"  
"OPBC09\_00783" 35192 "s59E25H2" 0 "Acetylornithine aminotransferase"  
"OPBC09\_00783" 35192 "s59E5H2" 0.2866761 "Acetylornithine aminotransferase"  
"OPBC09\_00783" 35192 "s63E6H2" 0.04663309 "Acetylornithine aminotransferase"  
"OPBC09\_00784" 35193 "s59E13H2" 0.01466809 "Acetylglutamate kinase"  
"OPBC09\_00784" 35193 "s59E25H2" 0 "Acetylglutamate kinase"  
"OPBC09\_00784" 35193 "s59E5H2" 0.347893 "Acetylglutamate kinase"  
"OPBC09\_00784" 35193 "s63E6H2" 0.06343213 "Acetylglutamate kinase"  
"OPBC09\_00785" 35194 "s59E13H2" 0.003843733 "Arginine biosynthesis bifunctional protein ArgJ"  
"OPBC09\_00785" 35194 "s59E25H2" 0 "Arginine biosynthesis bifunctional protein ArgJ"  
"OPBC09\_00785" 35194 "s59E5H2" 0.1425591 "Arginine biosynthesis bifunctional protein ArgJ"  
"OPBC09\_00785" 35194 "s63E6H2" 0.156416 "Arginine biosynthesis bifunctional protein ArgJ"  
"OPBC09\_00786" 35195 "s59E13H2" 0.001260497 "N-acetyl-gamma-glutamyl-phosphate reductase"  
"OPBC09\_00786" 35195 "s59E25H2" 0 "N-acetyl-gamma-glutamyl-phosphate reductase"  
"OPBC09\_00786" 35195 "s59E5H2" 0.1197689 "N-acetyl-gamma-glutamyl-phosphate reductase"  
"OPBC09\_00786" 35195 "s63E6H2" 1.297469 "N-acetyl-gamma-glutamyl-phosphate reductase"  
"OPBC09\_00787" 35196 "s59E13H2" 0.02635719 "hypothetical protein"  
"OPBC09\_00787" 35196 "s59E25H2" 0 "hypothetical protein"  
"OPBC09\_00787" 35196 "s59E5H2" 0.2325933 "hypothetical protein"  
"OPBC09\_00787" 35196 "s63E6H2" 0.9535549 "hypothetical protein"

"OPBC09\_00788" 35197 "s59E13H2" 0.005400364 "ribonuclease Z"  
"OPBC09\_00788" 35197 "s59E25H2" 0 "ribonuclease Z"  
"OPBC09\_00788" 35197 "s59E5H2" 0.04803476 "ribonuclease Z"  
"OPBC09\_00788" 35197 "s63E6H2" 0.05151969 "ribonuclease Z"  
"OPBC09\_00789" 35198 "s59E13H2" 0.01106939 "Phenylalanine--tRNA ligase beta subunit"  
"OPBC09\_00789" 35198 "s59E25H2" 0 "Phenylalanine--tRNA ligase beta subunit"  
"OPBC09\_00789" 35198 "s59E5H2" 0.1294917 "Phenylalanine--tRNA ligase beta subunit"  
"OPBC09\_00789" 35198 "s63E6H2" 0.1019052 "Phenylalanine--tRNA ligase beta subunit"  
"OPBC09\_00790" 35199 "s59E13H2" 0.006065383 "Phenylalanine--tRNA ligase alpha subunit"  
"OPBC09\_00790" 35199 "s59E25H2" 0 "Phenylalanine--tRNA ligase alpha subunit"  
"OPBC09\_00790" 35199 "s59E5H2" 0.03843125 "Phenylalanine--tRNA ligase alpha subunit"  
"OPBC09\_00790" 35199 "s63E6H2" 0.05111364 "Phenylalanine--tRNA ligase alpha subunit"  
"OPBC09\_00791" 35200 "s59E13H2" 0.003437822 "50S ribosomal protein L20"  
"OPBC09\_00791" 35200 "s59E25H2" 0 "50S ribosomal protein L20"  
"OPBC09\_00791" 35200 "s59E5H2" 0.1159977 "50S ribosomal protein L20"  
"OPBC09\_00791" 35200 "s63E6H2" 0.05967487 "50S ribosomal protein L20"  
"OPBC09\_00792" 35201 "s59E13H2" 0.01037988 "50S ribosomal protein L35"  
"OPBC09\_00792" 35201 "s59E25H2" 0 "50S ribosomal protein L35"  
"OPBC09\_00792" 35201 "s59E5H2" 0.1129833 "50S ribosomal protein L35"  
"OPBC09\_00792" 35201 "s63E6H2" 0.07781491 "50S ribosomal protein L35"  
"OPBC09\_00793" 35202 "s59E13H2" 0 "Translation initiation factor IF-3"  
"OPBC09\_00793" 35202 "s59E25H2" 0 "Translation initiation factor IF-3"  
"OPBC09\_00793" 35202 "s59E5H2" 0.2114136 "Translation initiation factor IF-3"  
"OPBC09\_00793" 35202 "s63E6H2" 0.06653804 "Translation initiation factor IF-3"  
"OPBC09\_00794" 35203 "s59E13H2" 0.002587646 "pyrroloquinoline quinone biosynthesis protein PqqE"  
"OPBC09\_00794" 35203 "s59E25H2" 0 "pyrroloquinoline quinone biosynthesis protein PqqE"  
"OPBC09\_00794" 35203 "s59E5H2" 0.06327883 "pyrroloquinoline quinone biosynthesis protein PqqE"  
"OPBC09\_00794" 35203 "s63E6H2" 0.0143976 "pyrroloquinoline quinone biosynthesis protein PqqE"  
"OPBC09\_00795" 35204 "s59E13H2" 0.00090225 "Threonine--tRNA ligase 2"  
"OPBC09\_00795" 35204 "s59E25H2" 0 "Threonine--tRNA ligase 2"  
"OPBC09\_00795" 35204 "s59E5H2" 0.09406156 "Threonine--tRNA ligase 2"  
"OPBC09\_00795" 35204 "s63E6H2" 0.0164345 "Threonine--tRNA ligase 2"  
"OPBC09\_00797" 35206 "s59E13H2" 0.01532065 "hypothetical protein"  
"OPBC09\_00797" 35206 "s59E25H2" 0 "hypothetical protein"  
"OPBC09\_00797" 35206 "s59E5H2" 0 "hypothetical protein"  
"OPBC09\_00797" 35206 "s63E6H2" 0 "hypothetical protein"  
"OPBC09\_00799" 35208 "s59E13H2" 0.003968561 "N-formyl-4-amino-5-aminomethyl-2-methylpyrimidine deformylase"  
"OPBC09\_00799" 35208 "s59E25H2" 0 "N-formyl-4-amino-5-aminomethyl-2-methylpyrimidine deformylase"  
"OPBC09\_00799" 35208 "s59E5H2" 0 "N-formyl-4-amino-5-aminomethyl-2-methylpyrimidine deformylase"  
"OPBC09\_00799" 35208 "s63E6H2" 0 "N-formyl-4-amino-5-aminomethyl-2-methylpyrimidine deformylase"  
"OPBC09\_00800" 35209 "s59E13H2" 0 "hypothetical protein"  
"OPBC09\_00800" 35209 "s59E25H2" 0 "hypothetical protein"  
"OPBC09\_00800" 35209 "s59E5H2" 0.004358291 "hypothetical protein"  
"OPBC09\_00800" 35209 "s63E6H2" 0 "hypothetical protein"  
"OPBC09\_00801" 35210 "s59E13H2" 0 "Bacterial extracellular solute-binding protein"  
"OPBC09\_00801" 35210 "s59E25H2" 0 "Bacterial extracellular solute-binding protein"  
"OPBC09\_00801" 35210 "s59E5H2" 0.001269849 "Bacterial extracellular solute-binding protein"



"OPBC09\_00801" 35210 "s63E6H2" 0 "Bacterial extracellular solute-binding protein"  
"OPBC09\_00802" 35211 "s59E13H2" 0 "Xaa-Pro dipeptidase"  
"OPBC09\_00802" 35211 "s59E25H2" 0 "Xaa-Pro dipeptidase"  
"OPBC09\_00802" 35211 "s59E5H2" 0.01311404 "Xaa-Pro dipeptidase"  
"OPBC09\_00802" 35211 "s63E6H2" 0 "Xaa-Pro dipeptidase"  
"OPBC09\_00803" 35212 "s59E13H2" 0 "Anabaena sensory rhodopsin transducer"  
"OPBC09\_00803" 35212 "s59E25H2" 0 "Anabaena sensory rhodopsin transducer"  
"OPBC09\_00803" 35212 "s59E5H2" 0 "Anabaena sensory rhodopsin transducer"  
"OPBC09\_00803" 35212 "s63E6H2" 0 "Anabaena sensory rhodopsin transducer"  
"OPBC09\_00804" 35213 "s59E13H2" 0.1713798 "Ribonucleoside-diphosphate reductase NrdZ"  
"OPBC09\_00804" 35213 "s59E25H2" 0 "Ribonucleoside-diphosphate reductase NrdZ"  
"OPBC09\_00804" 35213 "s59E5H2" 0.02920996 "Ribonucleoside-diphosphate reductase NrdZ"  
"OPBC09\_00804" 35213 "s63E6H2" 0.5117855 "Ribonucleoside-diphosphate reductase NrdZ"  
"OPBC09\_00805" 35214 "s59E13H2" 0.101732 "O-acetyl-ADP-ribose deacetylase"  
"OPBC09\_00805" 35214 "s59E25H2" 0 "O-acetyl-ADP-ribose deacetylase"  
"OPBC09\_00805" 35214 "s59E5H2" 0.06736876 "O-acetyl-ADP-ribose deacetylase"  
"OPBC09\_00805" 35214 "s63E6H2" 0.001835045 "O-acetyl-ADP-ribose deacetylase"  
"OPBC09\_00806" 35215 "s59E13H2" 0.05449021 "Ribonucleoside-diphosphate reductase NrdZ"  
"OPBC09\_00806" 35215 "s59E25H2" 0 "Ribonucleoside-diphosphate reductase NrdZ"  
"OPBC09\_00806" 35215 "s59E5H2" 0.0069148 "Ribonucleoside-diphosphate reductase NrdZ"  
"OPBC09\_00806" 35215 "s63E6H2" 0.2875421 "Ribonucleoside-diphosphate reductase NrdZ"  
"OPBC09\_00807" 35216 "s59E13H2" 0.00213015 "Murein DD-endopeptidase MepM"  
"OPBC09\_00807" 35216 "s59E25H2" 0 "Murein DD-endopeptidase MepM"  
"OPBC09\_00807" 35216 "s59E5H2" 0.01896435 "Murein DD-endopeptidase MepM"  
"OPBC09\_00807" 35216 "s63E6H2" 0.00981552 "Murein DD-endopeptidase MepM"  
"OPBC09\_00808" 35217 "s59E13H2" 0.002765967 "Prephenate dehydratase"  
"OPBC09\_00808" 35217 "s59E25H2" 0 "Prephenate dehydratase"  
"OPBC09\_00808" 35217 "s59E5H2" 0.009764962 "Prephenate dehydratase"  
"OPBC09\_00808" 35217 "s63E6H2" 0.04729047 "Prephenate dehydratase"  
"OPBC09\_00809" 35218 "s59E13H2" 0.02150374 "Serine--tRNA ligase"  
"OPBC09\_00809" 35218 "s59E25H2" 0 "Serine--tRNA ligase"  
"OPBC09\_00809" 35218 "s59E5H2" 0.009600354 "Serine--tRNA ligase"  
"OPBC09\_00809" 35218 "s63E6H2" 0.06153518 "Serine--tRNA ligase"  
"OPBC09\_00810" 35219 "s59E13H2" 0.01220807 "Serine--tRNA ligase"  
"OPBC09\_00810" 35219 "s59E25H2" 0 "Serine--tRNA ligase"  
"OPBC09\_00810" 35219 "s59E5H2" 0.02932122 "Serine--tRNA ligase"  
"OPBC09\_00810" 35219 "s63E6H2" 0.0734143 "Serine--tRNA ligase"  
"OPBC09\_00812" 35221 "s59E13H2" 1.216221 "hypothetical protein"  
"OPBC09\_00812" 35221 "s59E25H2" 0 "hypothetical protein"  
"OPBC09\_00812" 35221 "s59E5H2" 0.01754313 "hypothetical protein"  
"OPBC09\_00812" 35221 "s63E6H2" 0.3727456 "hypothetical protein"  
"OPBC09\_00813" 35222 "s59E13H2" 0 "Flavodoxin"  
"OPBC09\_00813" 35222 "s59E25H2" 0 "Flavodoxin"  
"OPBC09\_00813" 35222 "s59E5H2" 0.2511246 "Flavodoxin"  
"OPBC09\_00813" 35222 "s63E6H2" 0.1643874 "Flavodoxin"  
"OPBC09\_00814" 35223 "s59E13H2" 0.007059478 "biotin synthase"  
"OPBC09\_00814" 35223 "s59E25H2" 0 "biotin synthase"

"OPBC09\_00814" 35223 "s59E5H2" 0.6400938 "biotin synthase"  
"OPBC09\_00814" 35223 "s63E6H2" 0.3388925 "biotin synthase"  
"OPBC09\_00815" 35224 "s59E13H2" 0.006464202 "Galactose-1-phosphate uridylyltransferase"  
"OPBC09\_00815" 35224 "s59E25H2" 0 "Galactose-1-phosphate uridylyltransferase"  
"OPBC09\_00815" 35224 "s59E5H2" 0.6884744 "Galactose-1-phosphate uridylyltransferase"  
"OPBC09\_00815" 35224 "s63E6H2" 0.01117258 "Galactose-1-phosphate uridylyltransferase"  
"OPBC09\_00816" 35225 "s59E13H2" 0 "Possibl zinc metallo-peptidase"  
"OPBC09\_00816" 35225 "s59E25H2" 0 "Possibl zinc metallo-peptidase"  
"OPBC09\_00816" 35225 "s59E5H2" 0.5522708 "Possibl zinc metallo-peptidase"  
"OPBC09\_00816" 35225 "s63E6H2" 0.5788053 "Possibl zinc metallo-peptidase"  
"OPBC09\_00817" 35226 "s59E13H2" 0.01361848 "hypothetical protein"  
"OPBC09\_00817" 35226 "s59E25H2" 0 "hypothetical protein"  
"OPBC09\_00817" 35226 "s59E5H2" 0.2915419 "hypothetical protein"  
"OPBC09\_00817" 35226 "s63E6H2" 0.621232 "hypothetical protein"  
"OPBC09\_00818" 35227 "s59E13H2" 0.9500354 "hypothetical protein"  
"OPBC09\_00818" 35227 "s59E25H2" 0 "hypothetical protein"  
"OPBC09\_00818" 35227 "s59E5H2" 0.01533812 "hypothetical protein"  
"OPBC09\_00818" 35227 "s63E6H2" 0 "hypothetical protein"  
"OPBC09\_00819" 35228 "s59E13H2" 1.169546 "Phosphoenolpyruvate carboxykinase [GTP]"  
"OPBC09\_00819" 35228 "s59E25H2" 0 "Phosphoenolpyruvate carboxykinase [GTP]"  
"OPBC09\_00819" 35228 "s59E5H2" 0.1758782 "Phosphoenolpyruvate carboxykinase [GTP]"  
"OPBC09\_00819" 35228 "s63E6H2" 0.008635059 "Phosphoenolpyruvate carboxykinase [GTP]"  
"OPBC09\_00821" 35230 "s59E13H2" 0.02398151 "Isocitrate dehydrogenase [NADP]"  
"OPBC09\_00821" 35230 "s59E25H2" 0 "Isocitrate dehydrogenase [NADP]"  
"OPBC09\_00821" 35230 "s59E5H2" 0.4288389 "Isocitrate dehydrogenase [NADP]"  
"OPBC09\_00821" 35230 "s63E6H2" 0.01731373 "Isocitrate dehydrogenase [NADP]"  
"OPBC09\_00822" 35231 "s59E13H2" 0.01561677 "Isopropylmalate/citramalate isomerase small subunit"  
"OPBC09\_00822" 35231 "s59E25H2" 0 "Isopropylmalate/citramalate isomerase small subunit"  
"OPBC09\_00822" 35231 "s59E5H2" 0.4519719 "Isopropylmalate/citramalate isomerase small subunit"  
"OPBC09\_00822" 35231 "s63E6H2" 0.008653088 "Isopropylmalate/citramalate isomerase small subunit"  
"OPBC09\_00823" 35232 "s59E13H2" 0.02989743 "Methanogen homoaconitase large subunit"  
"OPBC09\_00823" 35232 "s59E25H2" 0 "Methanogen homoaconitase large subunit"  
"OPBC09\_00823" 35232 "s59E5H2" 0.4727068 "Methanogen homoaconitase large subunit"  
"OPBC09\_00823" 35232 "s63E6H2" 0.007776848 "Methanogen homoaconitase large subunit"  
"OPBC09\_00824" 35233 "s59E13H2" 0.01840038 "(R)-citramalate synthase CimA"  
"OPBC09\_00824" 35233 "s59E25H2" 0 "(R)-citramalate synthase CimA"  
"OPBC09\_00824" 35233 "s59E5H2" 0.3561205 "(R)-citramalate synthase CimA"  
"OPBC09\_00824" 35233 "s63E6H2" 0.009604864 "(R)-citramalate synthase CimA"  
"OPBC09\_00826" 35235 "s59E13H2" 0 "hypothetical protein"  
"OPBC09\_00826" 35235 "s59E25H2" 0 "hypothetical protein"  
"OPBC09\_00826" 35235 "s59E5H2" 0 "hypothetical protein"  
"OPBC09\_00826" 35235 "s63E6H2" 0 "hypothetical protein"  
"OPBC09\_00827" 35236 "s59E13H2" 0 "2-dehydro-3-deoxygluconokinase"  
"OPBC09\_00827" 35236 "s59E25H2" 0 "2-dehydro-3-deoxygluconokinase"  
"OPBC09\_00827" 35236 "s59E5H2" 0 "2-dehydro-3-deoxygluconokinase"  
"OPBC09\_00827" 35236 "s63E6H2" 0 "2-dehydro-3-deoxygluconokinase"  
"OPBC09\_00828" 35237 "s59E13H2" 0 "6-phosphogluconate dehydrogenase, NADP(+)-dependent, decarboxylating"

"OPBC09\_00828" 35237 "s59E25H2" 0 "6-phosphogluconate dehydrogenase, NADP(+)-dependent, decarboxylating"  
"OPBC09\_00828" 35237 "s59E5H2" 0 "6-phosphogluconate dehydrogenase, NADP(+)-dependent, decarboxylating"  
"OPBC09\_00828" 35237 "s63E6H2" 0 "6-phosphogluconate dehydrogenase, NADP(+)-dependent, decarboxylating"  
"OPBC09\_00829" 35238 "s59E13H2" 0 "putative oxidoreductase UxuB"  
"OPBC09\_00829" 35238 "s59E25H2" 0 "putative oxidoreductase UxuB"  
"OPBC09\_00829" 35238 "s59E5H2" 0 "putative oxidoreductase UxuB"  
"OPBC09\_00829" 35238 "s63E6H2" 0 "putative oxidoreductase UxuB"  
"OPBC09\_00830" 35239 "s59E13H2" 0 "hypothetical protein"  
"OPBC09\_00830" 35239 "s59E25H2" 0 "hypothetical protein"  
"OPBC09\_00830" 35239 "s59E5H2" 0 "hypothetical protein"  
"OPBC09\_00830" 35239 "s63E6H2" 0 "hypothetical protein"  
"OPBC09\_00831" 35240 "s59E13H2" 0 "NADP-reducing hydrogenase subunit HndA"  
"OPBC09\_00831" 35240 "s59E25H2" 0 "NADP-reducing hydrogenase subunit HndA"  
"OPBC09\_00831" 35240 "s59E5H2" 0 "NADP-reducing hydrogenase subunit HndA"  
"OPBC09\_00831" 35240 "s63E6H2" 0 "NADP-reducing hydrogenase subunit HndA"  
"OPBC09\_00832" 35241 "s59E13H2" 0.00109883 "NADP-reducing hydrogenase subunit HndC"  
"OPBC09\_00832" 35241 "s59E25H2" 0 "NADP-reducing hydrogenase subunit HndC"  
"OPBC09\_00832" 35241 "s59E5H2" 0.007416932 "NADP-reducing hydrogenase subunit HndC"  
"OPBC09\_00832" 35241 "s63E6H2" 0.006559486 "NADP-reducing hydrogenase subunit HndC"  
"OPBC09\_00833" 35242 "s59E13H2" 0.00095744 "Formate dehydrogenase subunit alpha"  
"OPBC09\_00833" 35242 "s59E25H2" 0 "Formate dehydrogenase subunit alpha"  
"OPBC09\_00833" 35242 "s59E5H2" 0.01832855 "Formate dehydrogenase subunit alpha"  
"OPBC09\_00833" 35242 "s63E6H2" 0.04588939 "Formate dehydrogenase subunit alpha"  
"OPBC09\_00834" 35243 "s59E13H2" 0.06455322 "formate dehydrogenase accessory protein"  
"OPBC09\_00834" 35243 "s59E25H2" 0 "formate dehydrogenase accessory protein"  
"OPBC09\_00834" 35243 "s59E5H2" 0.05434901 "formate dehydrogenase accessory protein"  
"OPBC09\_00834" 35243 "s63E6H2" 0.2428012 "formate dehydrogenase accessory protein"  
"OPBC09\_00835" 35244 "s59E13H2" 0.02801688 "molybdopterin-guanine dinucleotide biosynthesis protein MobA"  
"OPBC09\_00835" 35244 "s59E25H2" 0 "molybdopterin-guanine dinucleotide biosynthesis protein MobA"  
"OPBC09\_00835" 35244 "s59E5H2" 0.03189758 "molybdopterin-guanine dinucleotide biosynthesis protein MobA"  
"OPBC09\_00835" 35244 "s63E6H2" 0.08880931 "molybdopterin-guanine dinucleotide biosynthesis protein MobA"  
"OPBC09\_00836" 35245 "s59E13H2" 0.002046279 "Putative L,D-transpeptidase YciB precursor"  
"OPBC09\_00836" 35245 "s59E25H2" 0 "Putative L,D-transpeptidase YciB precursor"  
"OPBC09\_00836" 35245 "s59E5H2" 0.04718187 "Putative L,D-transpeptidase YciB precursor"  
"OPBC09\_00836" 35245 "s63E6H2" 0.4899739 "Putative L,D-transpeptidase YciB precursor"  
"OPBC09\_00837" 35246 "s59E13H2" 0.009843344 "Molybdopterin adenyllyltransferase"  
"OPBC09\_00837" 35246 "s59E25H2" 0 "Molybdopterin adenyllyltransferase"  
"OPBC09\_00837" 35246 "s59E5H2" 0.002718135 "Molybdopterin adenyllyltransferase"  
"OPBC09\_00837" 35246 "s63E6H2" 0.1494219 "Molybdopterin adenyllyltransferase"  
"OPBC09\_00838" 35247 "s59E13H2" 0.01115696 "MOSC domain protein"  
"OPBC09\_00838" 35247 "s59E25H2" 0 "MOSC domain protein"  
"OPBC09\_00838" 35247 "s59E5H2" 0.0130927 "MOSC domain protein"  
"OPBC09\_00838" 35247 "s63E6H2" 0.7306844 "MOSC domain protein"  
"OPBC09\_00839" 35248 "s59E13H2" 0.003484738 "Cyclic pyranopterin monophosphate synthase accessory protein"  
"OPBC09\_00839" 35248 "s59E25H2" 0 "Cyclic pyranopterin monophosphate synthase accessory protein"  
"OPBC09\_00839" 35248 "s59E5H2" 0.0210979 "Cyclic pyranopterin monophosphate synthase accessory protein"  
"OPBC09\_00839" 35248 "s63E6H2" 0.7072362 "Cyclic pyranopterin monophosphate synthase accessory protein"

"OPBC09\_00840" 35249 "s59E13H2" 0.005782769 "Cyclic pyranopterin monophosphate synthase"  
"OPBC09\_00840" 35249 "s59E25H2" 0 "Cyclic pyranopterin monophosphate synthase"  
"OPBC09\_00840" 35249 "s59E5H2" 0.008816907 "Cyclic pyranopterin monophosphate synthase"  
"OPBC09\_00840" 35249 "s63E6H2" 0.6540095 "Cyclic pyranopterin monophosphate synthase"  
"OPBC09\_00841" 35250 "s59E13H2" 7.560427e-05 "Fe(3+) ions import ATP-binding protein FbpC"  
"OPBC09\_00841" 35250 "s59E25H2" 0 "Fe(3+) ions import ATP-binding protein FbpC"  
"OPBC09\_00841" 35250 "s59E5H2" 0.03718126 "Fe(3+) ions import ATP-binding protein FbpC"  
"OPBC09\_00841" 35250 "s63E6H2" 0.8690961 "Fe(3+) ions import ATP-binding protein FbpC"  
"OPBC09\_00842" 35251 "s59E13H2" 0.02114929 "Sulfate transport system permease protein CysW"  
"OPBC09\_00842" 35251 "s59E25H2" 0 "Sulfate transport system permease protein CysW"  
"OPBC09\_00842" 35251 "s59E5H2" 0.02481712 "Sulfate transport system permease protein CysW"  
"OPBC09\_00842" 35251 "s63E6H2" 0.8300274 "Sulfate transport system permease protein CysW"  
"OPBC09\_00843" 35252 "s59E13H2" 0.01862989 "PBP superfamily domain protein"  
"OPBC09\_00843" 35252 "s59E25H2" 0 "PBP superfamily domain protein"  
"OPBC09\_00843" 35252 "s59E5H2" 0.01019893 "PBP superfamily domain protein"  
"OPBC09\_00843" 35252 "s63E6H2" 0.5244529 "PBP superfamily domain protein"  
"OPBC09\_00845" 35254 "s59E13H2" 0.02180904 "Molybdopterin molybdenumtransferase"  
"OPBC09\_00845" 35254 "s59E25H2" 0 "Molybdopterin molybdenumtransferase"  
"OPBC09\_00845" 35254 "s59E5H2" 0.0101157 "Molybdopterin molybdenumtransferase"  
"OPBC09\_00845" 35254 "s63E6H2" 0.5157364 "Molybdopterin molybdenumtransferase"  
"OPBC09\_00846" 35255 "s59E13H2" 0 "YcfA-like protein"  
"OPBC09\_00846" 35255 "s59E25H2" 0 "YcfA-like protein"  
"OPBC09\_00846" 35255 "s59E5H2" 0.006114952 "YcfA-like protein"  
"OPBC09\_00846" 35255 "s63E6H2" 0.1744063 "YcfA-like protein"  
"OPBC09\_00847" 35256 "s59E13H2" 0.4407619 "Multifunctional CCA protein"  
"OPBC09\_00847" 35256 "s59E25H2" 0 "Multifunctional CCA protein"  
"OPBC09\_00847" 35256 "s59E5H2" 0.09147508 "Multifunctional CCA protein"  
"OPBC09\_00847" 35256 "s63E6H2" 0.02192379 "Multifunctional CCA protein"  
"OPBC09\_00848" 35257 "s59E13H2" 0.2555818 "FMN reductase (NADPH)"  
"OPBC09\_00848" 35257 "s59E25H2" 0 "FMN reductase (NADPH)"  
"OPBC09\_00848" 35257 "s59E5H2" 0.1271608 "FMN reductase (NADPH)"  
"OPBC09\_00848" 35257 "s63E6H2" 0.003055476 "FMN reductase (NADPH)"  
"OPBC09\_00849" 35258 "s59E13H2" 0.0004097404 "UDP-N-acetylmuramate--L-alanine ligase"  
"OPBC09\_00849" 35258 "s59E25H2" 0 "UDP-N-acetylmuramate--L-alanine ligase"  
"OPBC09\_00849" 35258 "s59E5H2" 0.03141023 "UDP-N-acetylmuramate--L-alanine ligase"  
"OPBC09\_00849" 35258 "s63E6H2" 0.01939957 "UDP-N-acetylmuramate--L-alanine ligase"  
"OPBC09\_00850" 35259 "s59E13H2" 0.05421981 "DNA utilization protein GntX"  
"OPBC09\_00850" 35259 "s59E25H2" 0 "DNA utilization protein GntX"  
"OPBC09\_00850" 35259 "s59E5H2" 0.04779084 "DNA utilization protein GntX"  
"OPBC09\_00850" 35259 "s63E6H2" 0.1707478 "DNA utilization protein GntX"  
"OPBC09\_00851" 35260 "s59E13H2" 0.05062126 "Cold shock-like protein CspE"  
"OPBC09\_00851" 35260 "s59E25H2" 0 "Cold shock-like protein CspE"  
"OPBC09\_00851" 35260 "s59E5H2" 0.0103575 "Cold shock-like protein CspE"  
"OPBC09\_00851" 35260 "s63E6H2" 0.1851932 "Cold shock-like protein CspE"  
"OPBC09\_00852" 35261 "s59E13H2" 0.08006905 "Putative sigma-54 modulation protein"  
"OPBC09\_00852" 35261 "s59E25H2" 0 "Putative sigma-54 modulation protein"  
"OPBC09\_00852" 35261 "s59E5H2" 0.06001486 "Putative sigma-54 modulation protein"

"OPBC09\_00852" 35261 "s63E6H2" 0.1925001 "Putative sigma-54 modulation protein"  
"OPBC09\_00853" 35262 "s59E13H2" 0.125588 "preprotein translocase subunit SecA"  
"OPBC09\_00853" 35262 "s59E25H2" 0 "preprotein translocase subunit SecA"  
"OPBC09\_00853" 35262 "s59E5H2" 0.05300283 "preprotein translocase subunit SecA"  
"OPBC09\_00853" 35262 "s63E6H2" 0.384316 "preprotein translocase subunit SecA"  
"OPBC09\_00854" 35263 "s59E13H2" 0.1366908 "Peptide chain release factor 2"  
"OPBC09\_00854" 35263 "s59E25H2" 0.08956916 "Peptide chain release factor 2"  
"OPBC09\_00854" 35263 "s59E5H2" 0.1353367 "Peptide chain release factor 2"  
"OPBC09\_00854" 35263 "s63E6H2" 0.3078933 "Peptide chain release factor 2"  
"OPBC09\_00855" 35264 "s59E13H2" 0.03839365 "Cell division ATP-binding protein FtsE"  
"OPBC09\_00855" 35264 "s59E25H2" 0.4537445 "Cell division ATP-binding protein FtsE"  
"OPBC09\_00855" 35264 "s59E5H2" 0.1734965 "Cell division ATP-binding protein FtsE"  
"OPBC09\_00855" 35264 "s63E6H2" 0.4934312 "Cell division ATP-binding protein FtsE"  
"OPBC09\_00856" 35265 "s59E13H2" 0.01006992 "Cell division protein FtsX"  
"OPBC09\_00856" 35265 "s59E25H2" 0 "Cell division protein FtsX"  
"OPBC09\_00856" 35265 "s59E5H2" 0.06103031 "Cell division protein FtsX"  
"OPBC09\_00856" 35265 "s63E6H2" 0.109581 "Cell division protein FtsX"  
"OPBC09\_00857" 35266 "s59E13H2" 0.03265362 "Murein DD-endopeptidase MepM"  
"OPBC09\_00857" 35266 "s59E25H2" 0 "Murein DD-endopeptidase MepM"  
"OPBC09\_00857" 35266 "s59E5H2" 0.1396376 "Murein DD-endopeptidase MepM"  
"OPBC09\_00857" 35266 "s63E6H2" 0.4395861 "Murein DD-endopeptidase MepM"  
"OPBC09\_00858" 35267 "s59E13H2" 0.03320824 "putative CtpA-like serine protease"  
"OPBC09\_00858" 35267 "s59E25H2" 0 "putative CtpA-like serine protease"  
"OPBC09\_00858" 35267 "s59E5H2" 0.137929 "putative CtpA-like serine protease"  
"OPBC09\_00858" 35267 "s63E6H2" 0.07907924 "putative CtpA-like serine protease"  
"OPBC09\_00859" 35268 "s59E13H2" 0.05205894 "SsrA-binding protein"  
"OPBC09\_00859" 35268 "s59E25H2" 0 "SsrA-binding protein"  
"OPBC09\_00859" 35268 "s59E5H2" 0.421203 "SsrA-binding protein"  
"OPBC09\_00859" 35268 "s63E6H2" 0.004367523 "SsrA-binding protein"  
"OPBC09\_00861" 35270 "s59E13H2" 0.00217146 "Glutamate racemase 1"  
"OPBC09\_00861" 35270 "s59E25H2" 0.2686567 "Glutamate racemase 1"  
"OPBC09\_00861" 35270 "s59E5H2" 0.02393449 "Glutamate racemase 1"  
"OPBC09\_00861" 35270 "s63E6H2" 1.173333 "Glutamate racemase 1"  
"OPBC09\_00862" 35271 "s59E13H2" 0 "Ribonuclease PH"  
"OPBC09\_00862" 35271 "s59E25H2" 0 "Ribonuclease PH"  
"OPBC09\_00862" 35271 "s59E5H2" 0.08497261 "Ribonuclease PH"  
"OPBC09\_00862" 35271 "s63E6H2" 1.553413 "Ribonuclease PH"  
"OPBC09\_00863" 35272 "s59E13H2" 0 "Non-canonical purine NTP pyrophosphatase"  
"OPBC09\_00863" 35272 "s59E25H2" 0 "Non-canonical purine NTP pyrophosphatase"  
"OPBC09\_00863" 35272 "s59E5H2" 0.0606107 "Non-canonical purine NTP pyrophosphatase"  
"OPBC09\_00863" 35272 "s63E6H2" 0.2797491 "Non-canonical purine NTP pyrophosphatase"  
"OPBC09\_00871" 35280 "s59E13H2" 0.007761184 "Trigger factor"  
"OPBC09\_00871" 35280 "s59E25H2" 0 "Trigger factor"  
"OPBC09\_00871" 35280 "s59E5H2" 0.07033098 "Trigger factor"  
"OPBC09\_00871" 35280 "s63E6H2" 0.09783535 "Trigger factor"  
"OPBC09\_00872" 35281 "s59E13H2" 0.003624911 "ATP-dependent Clp protease proteolytic subunit precursor"  
"OPBC09\_00872" 35281 "s59E25H2" 0 "ATP-dependent Clp protease proteolytic subunit precursor"

"OPBC09\_00872" 35281 "s59E5H2" 0.05206408 "ATP-dependent Clp protease proteolytic subunit precursor"  
"OPBC09\_00872" 35281 "s63E6H2" 0.07498819 "ATP-dependent Clp protease proteolytic subunit precursor"  
"OPBC09\_00873" 35282 "s59E13H2" 0.002171926 "ATP-dependent Clp protease ATP-binding subunit ClpX"  
"OPBC09\_00873" 35282 "s59E25H2" 0 "ATP-dependent Clp protease ATP-binding subunit ClpX"  
"OPBC09\_00873" 35282 "s59E5H2" 0.1006241 "ATP-dependent Clp protease ATP-binding subunit ClpX"  
"OPBC09\_00873" 35282 "s63E6H2" 0.08713648 "ATP-dependent Clp protease ATP-binding subunit ClpX"  
"OPBC09\_00874" 35283 "s59E13H2" 0.007321676 "Valine--tRNA ligase"  
"OPBC09\_00874" 35283 "s59E25H2" 0 "Valine--tRNA ligase"  
"OPBC09\_00874" 35283 "s59E5H2" 0.07492858 "Valine--tRNA ligase"  
"OPBC09\_00874" 35283 "s63E6H2" 0.08377347 "Valine--tRNA ligase"  
"OPBC09\_00875" 35284 "s59E13H2" 0.02583657 "Folypolyglutamate synthase"  
"OPBC09\_00875" 35284 "s59E25H2" 0 "Folypolyglutamate synthase"  
"OPBC09\_00875" 35284 "s59E5H2" 0.1537099 "Folypolyglutamate synthase"  
"OPBC09\_00875" 35284 "s63E6H2" 0.1033064 "Folypolyglutamate synthase"  
"OPBC09\_00876" 35285 "s59E13H2" 0.007645282 "Double zinc ribbon"  
"OPBC09\_00876" 35285 "s59E25H2" 0 "Double zinc ribbon"  
"OPBC09\_00876" 35285 "s59E5H2" 0.03721174 "Double zinc ribbon"  
"OPBC09\_00876" 35285 "s63E6H2" 0.06923208 "Double zinc ribbon"  
"OPBC09\_00877" 35286 "s59E13H2" 0.03124261 "Nucleoside diphosphate kinase"  
"OPBC09\_00877" 35286 "s59E25H2" 0 "Nucleoside diphosphate kinase"  
"OPBC09\_00877" 35286 "s59E5H2" 0.06833456 "Nucleoside diphosphate kinase"  
"OPBC09\_00877" 35286 "s63E6H2" 0.1049719 "Nucleoside diphosphate kinase"  
"OPBC09\_00878" 35287 "s59E13H2" 0.02446732 "hypothetical protein"  
"OPBC09\_00878" 35287 "s59E25H2" 0 "hypothetical protein"  
"OPBC09\_00878" 35287 "s59E5H2" 0.09746112 "hypothetical protein"  
"OPBC09\_00878" 35287 "s63E6H2" 0.07113961 "hypothetical protein"  
"OPBC09\_00879" 35288 "s59E13H2" 0.03432492 "Maf-like protein"  
"OPBC09\_00879" 35288 "s59E25H2" 0 "Maf-like protein"  
"OPBC09\_00879" 35288 "s59E5H2" 0.1321784 "Maf-like protein"  
"OPBC09\_00879" 35288 "s63E6H2" 0.04616533 "Maf-like protein"  
"OPBC09\_00880" 35289 "s59E13H2" 0.04440827 "Rod shape-determining protein MreB"  
"OPBC09\_00880" 35289 "s59E25H2" 0 "Rod shape-determining protein MreB"  
"OPBC09\_00880" 35289 "s59E5H2" 0.1352074 "Rod shape-determining protein MreB"  
"OPBC09\_00880" 35289 "s63E6H2" 0.08713061 "Rod shape-determining protein MreB"  
"OPBC09\_00881" 35290 "s59E13H2" 0.0445402 "Cell shape-determining protein MreC precursor"  
"OPBC09\_00881" 35290 "s59E25H2" 0 "Cell shape-determining protein MreC precursor"  
"OPBC09\_00881" 35290 "s59E5H2" 0.1082915 "Cell shape-determining protein MreC precursor"  
"OPBC09\_00881" 35290 "s63E6H2" 0.08284365 "Cell shape-determining protein MreC precursor"  
"OPBC09\_00882" 35291 "s59E13H2" 0.06580339 "hypothetical protein"  
"OPBC09\_00882" 35291 "s59E25H2" 0 "hypothetical protein"  
"OPBC09\_00882" 35291 "s59E5H2" 0.09692679 "hypothetical protein"  
"OPBC09\_00882" 35291 "s63E6H2" 0.09869768 "hypothetical protein"  
"OPBC09\_00883" 35292 "s59E13H2" 0.008279931 "Stage V sporulation protein D"  
"OPBC09\_00883" 35292 "s59E25H2" 0 "Stage V sporulation protein D"  
"OPBC09\_00883" 35292 "s59E5H2" 0.05461623 "Stage V sporulation protein D"  
"OPBC09\_00883" 35292 "s63E6H2" 0.01187986 "Stage V sporulation protein D"  
"OPBC09\_00884" 35293 "s59E13H2" 0.0688993 "Rod shape-determining protein RodA"

"OPBC09\_00884" 35293 "s59E25H2" 0 "Rod shape-determining protein RodA"  
"OPBC09\_00884" 35293 "s59E5H2" 0.1729116 "Rod shape-determining protein RodA"  
"OPBC09\_00884" 35293 "s63E6H2" 0.05771008 "Rod shape-determining protein RodA"  
"OPBC09\_00885" 35294 "s59E13H2" 0.0482886 "Radical SAM superfamily protein"  
"OPBC09\_00885" 35294 "s59E25H2" 0 "Radical SAM superfamily protein"  
"OPBC09\_00885" 35294 "s59E5H2" 0.1458697 "Radical SAM superfamily protein"  
"OPBC09\_00885" 35294 "s63E6H2" 0.04270987 "Radical SAM superfamily protein"  
"OPBC09\_00886" 35295 "s59E13H2" 0.05620473 "hypothetical protein"  
"OPBC09\_00886" 35295 "s59E25H2" 0 "hypothetical protein"  
"OPBC09\_00886" 35295 "s59E5H2" 0.1329225 "hypothetical protein"  
"OPBC09\_00886" 35295 "s63E6H2" 0.02434292 "hypothetical protein"  
"OPBC09\_00887" 35296 "s59E13H2" 0.03767405 "Ribonuclease G"  
"OPBC09\_00887" 35296 "s59E25H2" 0 "Ribonuclease G"  
"OPBC09\_00887" 35296 "s59E5H2" 0.1361824 "Ribonuclease G"  
"OPBC09\_00887" 35296 "s63E6H2" 0.07080883 "Ribonuclease G"  
"OPBC09\_00888" 35297 "s59E13H2" 0.0136161 "50S ribosomal protein L21"  
"OPBC09\_00888" 35297 "s59E25H2" 0 "50S ribosomal protein L21"  
"OPBC09\_00888" 35297 "s59E5H2" 0.2395406 "50S ribosomal protein L21"  
"OPBC09\_00888" 35297 "s63E6H2" 0.09255258 "50S ribosomal protein L21"  
"OPBC09\_00889" 35298 "s59E13H2" 0.02476737 "50S ribosomal protein L27"  
"OPBC09\_00889" 35298 "s59E25H2" 0 "50S ribosomal protein L27"  
"OPBC09\_00889" 35298 "s59E5H2" 0.05111464 "50S ribosomal protein L27"  
"OPBC09\_00889" 35298 "s63E6H2" 0.04055244 "50S ribosomal protein L27"  
"OPBC09\_00890" 35299 "s59E13H2" 0 "Ribbon-helix-helix protein, copG family"  
"OPBC09\_00890" 35299 "s59E25H2" 0 "Ribbon-helix-helix protein, copG family"  
"OPBC09\_00890" 35299 "s59E5H2" 0 "Ribbon-helix-helix protein, copG family"  
"OPBC09\_00890" 35299 "s63E6H2" 0 "Ribbon-helix-helix protein, copG family"  
"OPBC09\_00891" 35300 "s59E13H2" 0 "PIN domain protein"  
"OPBC09\_00891" 35300 "s59E25H2" 0 "PIN domain protein"  
"OPBC09\_00891" 35300 "s59E5H2" 0.005828504 "PIN domain protein"  
"OPBC09\_00891" 35300 "s63E6H2" 0 "PIN domain protein"  
"OPBC09\_00892" 35301 "s59E13H2" 0.01054864 "Sorbitol dehydrogenase"  
"OPBC09\_00892" 35301 "s59E25H2" 0 "Sorbitol dehydrogenase"  
"OPBC09\_00892" 35301 "s59E5H2" 0.06588979 "Sorbitol dehydrogenase"  
"OPBC09\_00892" 35301 "s63E6H2" 0.06172316 "Sorbitol dehydrogenase"  
"OPBC09\_00893" 35302 "s59E13H2" 0.02608518 "Sorbitol dehydrogenase"  
"OPBC09\_00893" 35302 "s59E25H2" 0 "Sorbitol dehydrogenase"  
"OPBC09\_00893" 35302 "s59E5H2" 0.04759905 "Sorbitol dehydrogenase"  
"OPBC09\_00893" 35302 "s63E6H2" 0.1274379 "Sorbitol dehydrogenase"  
"OPBC09\_00894" 35303 "s59E13H2" 0.02649294 "GTPase Obg"  
"OPBC09\_00894" 35303 "s59E25H2" 0 "GTPase Obg"  
"OPBC09\_00894" 35303 "s59E5H2" 0.03519979 "GTPase Obg"  
"OPBC09\_00894" 35303 "s63E6H2" 0.07939794 "GTPase Obg"  
"OPBC09\_00895" 35304 "s59E13H2" 0 "Glutamate 5-kinase 1"  
"OPBC09\_00895" 35304 "s59E25H2" 0 "Glutamate 5-kinase 1"  
"OPBC09\_00895" 35304 "s59E5H2" 0.0523994 "Glutamate 5-kinase 1"  
"OPBC09\_00895" 35304 "s63E6H2" 0.1348725 "Glutamate 5-kinase 1"

"OPBC09\_00896" 35305 "s59E13H2" 0.08416433 "Gamma-glutamyl phosphate reductase"  
"OPBC09\_00896" 35305 "s59E25H2" 0 "Gamma-glutamyl phosphate reductase"  
"OPBC09\_00896" 35305 "s59E5H2" 0.07034112 "Gamma-glutamyl phosphate reductase"  
"OPBC09\_00896" 35305 "s63E6H2" 0.2031508 "Gamma-glutamyl phosphate reductase"  
"OPBC09\_00897" 35306 "s59E13H2" 1.567196 "Nicotinate-nucleotide adenyllyltransferase"  
"OPBC09\_00897" 35306 "s59E25H2" 0 "Nicotinate-nucleotide adenyllyltransferase"  
"OPBC09\_00897" 35306 "s59E5H2" 0.124137 "Nicotinate-nucleotide adenyllyltransferase"  
"OPBC09\_00897" 35306 "s63E6H2" 0.183889 "Nicotinate-nucleotide adenyllyltransferase"  
"OPBC09\_00898" 35307 "s59E13H2" 1.274146 "putative nicotinate-nucleotide adenyllyltransferase"  
"OPBC09\_00898" 35307 "s59E25H2" 0 "putative nicotinate-nucleotide adenyllyltransferase"  
"OPBC09\_00898" 35307 "s59E5H2" 0.04278096 "putative nicotinate-nucleotide adenyllyltransferase"  
"OPBC09\_00898" 35307 "s63E6H2" 0.1492803 "putative nicotinate-nucleotide adenyllyltransferase"  
"OPBC09\_00899" 35308 "s59E13H2" 1.069461 "membrane-bound transcriptional regulator LytR"  
"OPBC09\_00899" 35308 "s59E25H2" 0 "membrane-bound transcriptional regulator LytR"  
"OPBC09\_00899" 35308 "s59E5H2" 0.08459093 "membrane-bound transcriptional regulator LytR"  
"OPBC09\_00899" 35308 "s63E6H2" 0.1047998 "membrane-bound transcriptional regulator LytR"  
"OPBC09\_00900" 35309 "s59E13H2" 2.247382 "Ribosomal silencing factor RsfS"  
"OPBC09\_00900" 35309 "s59E25H2" 0 "Ribosomal silencing factor RsfS"  
"OPBC09\_00900" 35309 "s59E5H2" 0.1934683 "Ribosomal silencing factor RsfS"  
"OPBC09\_00900" 35309 "s63E6H2" 0.1345333 "Ribosomal silencing factor RsfS"  
"OPBC09\_00901" 35310 "s59E13H2" 1.651303 "Leucine--tRNA ligase"  
"OPBC09\_00901" 35310 "s59E25H2" 0 "Leucine--tRNA ligase"  
"OPBC09\_00901" 35310 "s59E5H2" 0.27187 "Leucine--tRNA ligase"  
"OPBC09\_00901" 35310 "s63E6H2" 0.187616 "Leucine--tRNA ligase"  
"OPBC09\_00902" 35311 "s59E13H2" 1.465047 "Intracellular protease 1"  
"OPBC09\_00902" 35311 "s59E25H2" 0 "Intracellular protease 1"  
"OPBC09\_00902" 35311 "s59E5H2" 0.1907735 "Intracellular protease 1"  
"OPBC09\_00902" 35311 "s63E6H2" 0.1605511 "Intracellular protease 1"  
"OPBC09\_00903" 35312 "s59E13H2" 0.4497863 "ComE operon protein 1"  
"OPBC09\_00903" 35312 "s59E25H2" 0 "ComE operon protein 1"  
"OPBC09\_00903" 35312 "s59E5H2" 0.08433744 "ComE operon protein 1"  
"OPBC09\_00903" 35312 "s63E6H2" 0.06242466 "ComE operon protein 1"  
"OPBC09\_00904" 35313 "s59E13H2" 0.8974007 "ComEC family competence protein"  
"OPBC09\_00904" 35313 "s59E25H2" 0.2259001 "ComEC family competence protein"  
"OPBC09\_00904" 35313 "s59E5H2" 0.06846209 "ComEC family competence protein"  
"OPBC09\_00904" 35313 "s63E6H2" 0.1366181 "ComEC family competence protein"  
"OPBC09\_00905" 35314 "s59E13H2" 0.01108014 "hypothetical protein"  
"OPBC09\_00905" 35314 "s59E25H2" 0.3122807 "hypothetical protein"  
"OPBC09\_00905" 35314 "s59E5H2" 0.0267067 "hypothetical protein"  
"OPBC09\_00905" 35314 "s63E6H2" 0.04424016 "hypothetical protein"  
"OPBC09\_00907" 35316 "s59E13H2" 0.01136264 "Protein-L-isoaspartate O-methyltransferase"  
"OPBC09\_00907" 35316 "s59E25H2" 0 "Protein-L-isoaspartate O-methyltransferase"  
"OPBC09\_00907" 35316 "s59E5H2" 0.09223103 "Protein-L-isoaspartate O-methyltransferase"  
"OPBC09\_00907" 35316 "s63E6H2" 0.006626104 "Protein-L-isoaspartate O-methyltransferase"  
"OPBC09\_00908" 35317 "s59E13H2" 0.1012174 "hypothetical protein"  
"OPBC09\_00908" 35317 "s59E25H2" 0 "hypothetical protein"  
"OPBC09\_00908" 35317 "s59E5H2" 0.02368597 "hypothetical protein"



"OPBC09\_00908" 35317 "s63E6H2" 0.02043536 "hypothetical protein"  
"OPBC09\_00909" 35318 "s59E13H2" 0.1544451 "50S ribosomal protein L32"  
"OPBC09\_00909" 35318 "s59E25H2" 0 "50S ribosomal protein L32"  
"OPBC09\_00909" 35318 "s59E5H2" 0 "50S ribosomal protein L32"  
"OPBC09\_00909" 35318 "s63E6H2" 0.008456967 "50S ribosomal protein L32"  
"OPBC09\_00910" 35319 "s59E13H2" 0.1786162 "Succinyl-CoA ligase [ADP-forming] subunit alpha"  
"OPBC09\_00910" 35319 "s59E25H2" 0 "Succinyl-CoA ligase [ADP-forming] subunit alpha"  
"OPBC09\_00910" 35319 "s59E5H2" 0.03822824 "Succinyl-CoA ligase [ADP-forming] subunit alpha"  
"OPBC09\_00910" 35319 "s63E6H2" 0.03646417 "Succinyl-CoA ligase [ADP-forming] subunit alpha"  
"OPBC09\_00911" 35320 "s59E13H2" 0.149235 "Phosphate acetyltransferase"  
"OPBC09\_00911" 35320 "s59E25H2" 0 "Phosphate acetyltransferase"  
"OPBC09\_00911" 35320 "s59E5H2" 0.01178205 "Phosphate acetyltransferase"  
"OPBC09\_00911" 35320 "s63E6H2" 0.004703601 "Phosphate acetyltransferase"  
"OPBC09\_00912" 35321 "s59E13H2" 0.1407962 "Phosphate acyltransferase"  
"OPBC09\_00912" 35321 "s59E25H2" 0 "Phosphate acyltransferase"  
"OPBC09\_00912" 35321 "s59E5H2" 0.008868771 "Phosphate acyltransferase"  
"OPBC09\_00912" 35321 "s63E6H2" 0.01382144 "Phosphate acyltransferase"  
"OPBC09\_00913" 35322 "s59E13H2" 0.03002351 "Acyl carrier protein"  
"OPBC09\_00913" 35322 "s59E25H2" 0 "Acyl carrier protein"  
"OPBC09\_00913" 35322 "s59E5H2" 0.02701955 "Acyl carrier protein"  
"OPBC09\_00913" 35322 "s63E6H2" 0 "Acyl carrier protein"  
"OPBC09\_00914" 35323 "s59E13H2" 0.005190017 "Ribonuclease 3"  
"OPBC09\_00914" 35323 "s59E25H2" 0 "Ribonuclease 3"  
"OPBC09\_00914" 35323 "s59E5H2" 0.03095378 "Ribonuclease 3"  
"OPBC09\_00914" 35323 "s63E6H2" 0 "Ribonuclease 3"  
"OPBC09\_00915" 35324 "s59E13H2" 0.01064485 "Chromosome partition protein Smc"  
"OPBC09\_00915" 35324 "s59E25H2" 0 "Chromosome partition protein Smc"  
"OPBC09\_00915" 35324 "s59E5H2" 0.0301864 "Chromosome partition protein Smc"  
"OPBC09\_00915" 35324 "s63E6H2" 0.02529498 "Chromosome partition protein Smc"  
"OPBC09\_00916" 35325 "s59E13H2" 0 "Signal recognition particle receptor FtsY"  
"OPBC09\_00916" 35325 "s59E25H2" 0 "Signal recognition particle receptor FtsY"  
"OPBC09\_00916" 35325 "s59E5H2" 0.03184779 "Signal recognition particle receptor FtsY"  
"OPBC09\_00916" 35325 "s63E6H2" 0.01694262 "Signal recognition particle receptor FtsY"  
"OPBC09\_00917" 35326 "s59E13H2" 0.01390072 "Signal recognition particle protein"  
"OPBC09\_00917" 35326 "s59E25H2" 0 "Signal recognition particle protein"  
"OPBC09\_00917" 35326 "s59E5H2" 0.02866634 "Signal recognition particle protein"  
"OPBC09\_00917" 35326 "s63E6H2" 0.03283914 "Signal recognition particle protein"  
"OPBC09\_00918" 35327 "s59E13H2" 0.003760544 "30S ribosomal protein S16"  
"OPBC09\_00918" 35327 "s59E25H2" 0 "30S ribosomal protein S16"  
"OPBC09\_00918" 35327 "s59E5H2" 0.05502763 "30S ribosomal protein S16"  
"OPBC09\_00918" 35327 "s63E6H2" 0.03509183 "30S ribosomal protein S16"  
"OPBC09\_00919" 35328 "s59E13H2" 0.006955593 "hypothetical protein"  
"OPBC09\_00919" 35328 "s59E25H2" 0 "hypothetical protein"  
"OPBC09\_00919" 35328 "s59E5H2" 0.02469382 "hypothetical protein"  
"OPBC09\_00919" 35328 "s63E6H2" 0.02485583 "hypothetical protein"  
"OPBC09\_00920" 35329 "s59E13H2" 0.002935161 "Ribosome maturation factor RimM"  
"OPBC09\_00920" 35329 "s59E25H2" 0 "Ribosome maturation factor RimM"

"OPBC09\_00920" 35329 "s59E5H2" 0.03618896 "Ribosome maturation factor RimM"  
"OPBC09\_00920" 35329 "s63E6H2" 0.01174898 "Ribosome maturation factor RimM"  
"OPBC09\_00921" 35330 "s59E13H2" 0.009769536 "tRNA (guanine-N(1)-)-methyltransferase"  
"OPBC09\_00921" 35330 "s59E25H2" 0 "tRNA (guanine-N(1)-)-methyltransferase"  
"OPBC09\_00921" 35330 "s59E5H2" 0.0163272 "tRNA (guanine-N(1)-)-methyltransferase"  
"OPBC09\_00921" 35330 "s63E6H2" 0.04612293 "tRNA (guanine-N(1)-)-methyltransferase"  
"OPBC09\_00922" 35331 "s59E13H2" 0.004413344 "50S ribosomal protein L19"  
"OPBC09\_00922" 35331 "s59E25H2" 0 "50S ribosomal protein L19"  
"OPBC09\_00922" 35331 "s59E5H2" 0.01592732 "50S ribosomal protein L19"  
"OPBC09\_00922" 35331 "s63E6H2" 0.02652135 "50S ribosomal protein L19"  
"OPBC09\_00923" 35332 "s59E13H2" 0.03910928 "Signal peptidase I"  
"OPBC09\_00923" 35332 "s59E25H2" 0 "Signal peptidase I"  
"OPBC09\_00923" 35332 "s59E5H2" 0.01793386 "Signal peptidase I"  
"OPBC09\_00923" 35332 "s63E6H2" 0.03469426 "Signal peptidase I"  
"OPBC09\_00924" 35333 "s59E13H2" 0.0355025 "Ribonuclease HII"  
"OPBC09\_00924" 35333 "s59E25H2" 0 "Ribonuclease HII"  
"OPBC09\_00924" 35333 "s59E5H2" 0.01712104 "Ribonuclease HII"  
"OPBC09\_00924" 35333 "s63E6H2" 0.04941371 "Ribonuclease HII"  
"OPBC09\_00925" 35334 "s59E13H2" 0.03757875 "hypothetical protein"  
"OPBC09\_00925" 35334 "s59E25H2" 0 "hypothetical protein"  
"OPBC09\_00925" 35334 "s59E5H2" 0.01262354 "hypothetical protein"  
"OPBC09\_00925" 35334 "s63E6H2" 0.03410887 "hypothetical protein"  
"OPBC09\_00926" 35335 "s59E13H2" 0.01415252 "Sarcosine/dimethylglycine N-methyltransferase"  
"OPBC09\_00926" 35335 "s59E25H2" 0 "Sarcosine/dimethylglycine N-methyltransferase"  
"OPBC09\_00926" 35335 "s59E5H2" 0.0462848 "Sarcosine/dimethylglycine N-methyltransferase"  
"OPBC09\_00926" 35335 "s63E6H2" 0.001883299 "Sarcosine/dimethylglycine N-methyltransferase"  
"OPBC09\_00928" 35337 "s59E13H2" 0.04479256 "NYN domain protein"  
"OPBC09\_00928" 35337 "s59E25H2" 0 "NYN domain protein"  
"OPBC09\_00928" 35337 "s59E5H2" 0.01174148 "NYN domain protein"  
"OPBC09\_00928" 35337 "s63E6H2" 0 "NYN domain protein"  
"OPBC09\_00929" 35338 "s59E13H2" 0.03655874 "Helix-turn-helix"  
"OPBC09\_00929" 35338 "s59E25H2" 0 "Helix-turn-helix"  
"OPBC09\_00929" 35338 "s59E5H2" 0.01769113 "Helix-turn-helix"  
"OPBC09\_00929" 35338 "s63E6H2" 0.06743465 "Helix-turn-helix"  
"OPBC09\_00931" 35340 "s59E13H2" 0.03530222 "Beta-1,4-mannooligosaccharide phosphorylase"  
"OPBC09\_00931" 35340 "s59E25H2" 0 "Beta-1,4-mannooligosaccharide phosphorylase"  
"OPBC09\_00931" 35340 "s59E5H2" 0.09073063 "Beta-1,4-mannooligosaccharide phosphorylase"  
"OPBC09\_00931" 35340 "s63E6H2" 0 "Beta-1,4-mannooligosaccharide phosphorylase"  
"OPBC09\_00932" 35341 "s59E13H2" 0.07061509 "hypothetical protein"  
"OPBC09\_00932" 35341 "s59E25H2" 0 "hypothetical protein"  
"OPBC09\_00932" 35341 "s59E5H2" 0.09251375 "hypothetical protein"  
"OPBC09\_00932" 35341 "s63E6H2" 0 "hypothetical protein"  
"OPBC09\_00933" 35342 "s59E13H2" 0.06758945 "Bifunctional IPC transferase and DIPP synthase"  
"OPBC09\_00933" 35342 "s59E25H2" 0 "Bifunctional IPC transferase and DIPP synthase"  
"OPBC09\_00933" 35342 "s59E5H2" 0.4930219 "Bifunctional IPC transferase and DIPP synthase"  
"OPBC09\_00933" 35342 "s63E6H2" 0 "Bifunctional IPC transferase and DIPP synthase"  
"OPBC09\_00934" 35343 "s59E13H2" 0.03948433 "Inositol-3-phosphate synthase"

"OPBC09\_00934" 35343 "s59E25H2" 0 "Inositol-3-phosphate synthase"  
"OPBC09\_00934" 35343 "s59E5H2" 0.2885072 "Inositol-3-phosphate synthase"  
"OPBC09\_00934" 35343 "s63E6H2" 0 "Inositol-3-phosphate synthase"  
"OPBC09\_00935" 35344 "s59E13H2" 0.02634694 "DNA polymerase/3'-5' exonuclease PolX"  
"OPBC09\_00935" 35344 "s59E25H2" 0 "DNA polymerase/3'-5' exonuclease PolX"  
"OPBC09\_00935" 35344 "s59E5H2" 0.1790168 "DNA polymerase/3'-5' exonuclease PolX"  
"OPBC09\_00935" 35344 "s63E6H2" 0 "DNA polymerase/3'-5' exonuclease PolX"  
"OPBC09\_00936" 35345 "s59E13H2" 0.01718962 "hypothetical protein"  
"OPBC09\_00936" 35345 "s59E25H2" 0 "hypothetical protein"  
"OPBC09\_00936" 35345 "s59E5H2" 0 "hypothetical protein"  
"OPBC09\_00936" 35345 "s63E6H2" 0.004891827 "hypothetical protein"  
"OPBC09\_00937" 35346 "s59E13H2" 0.1129552 "Competence protein ComM"  
"OPBC09\_00937" 35346 "s59E25H2" 0 "Competence protein ComM"  
"OPBC09\_00937" 35346 "s59E5H2" 0.03004155 "Competence protein ComM"  
"OPBC09\_00937" 35346 "s63E6H2" 0.06972886 "Competence protein ComM"  
"OPBC09\_00938" 35347 "s59E13H2" 0.07889978 "hypothetical protein"  
"OPBC09\_00938" 35347 "s59E25H2" 0 "hypothetical protein"  
"OPBC09\_00938" 35347 "s59E5H2" 0.008992974 "hypothetical protein"  
"OPBC09\_00938" 35347 "s63E6H2" 0.07741064 "hypothetical protein"  
"OPBC09\_00940" 35349 "s59E13H2" 0.04821784 "Tyrosine recombinase XerC"  
"OPBC09\_00940" 35349 "s59E25H2" 0 "Tyrosine recombinase XerC"  
"OPBC09\_00940" 35349 "s59E5H2" 0.01330602 "Tyrosine recombinase XerC"  
"OPBC09\_00940" 35349 "s63E6H2" 0.02233059 "Tyrosine recombinase XerC"  
"OPBC09\_00941" 35350 "s59E13H2" 0.008977567 "30S ribosomal protein S2"  
"OPBC09\_00941" 35350 "s59E25H2" 0 "30S ribosomal protein S2"  
"OPBC09\_00941" 35350 "s59E5H2" 0.03994286 "30S ribosomal protein S2"  
"OPBC09\_00941" 35350 "s63E6H2" 0.2029807 "30S ribosomal protein S2"  
"OPBC09\_00942" 35351 "s59E13H2" 0.0007107054 "Elongation factor Ts"  
"OPBC09\_00942" 35351 "s59E25H2" 0 "Elongation factor Ts"  
"OPBC09\_00942" 35351 "s59E5H2" 0.01270869 "Elongation factor Ts"  
"OPBC09\_00942" 35351 "s63E6H2" 0.020081 "Elongation factor Ts"  
"OPBC09\_00943" 35352 "s59E13H2" 0.005216694 "Uridylate kinase"  
"OPBC09\_00943" 35352 "s59E25H2" 0 "Uridylate kinase"  
"OPBC09\_00943" 35352 "s59E5H2" 0.01855343 "Uridylate kinase"  
"OPBC09\_00943" 35352 "s63E6H2" 0.005513578 "Uridylate kinase"  
"OPBC09\_00944" 35353 "s59E13H2" 0 "Ribosome-recycling factor"  
"OPBC09\_00944" 35353 "s59E25H2" 0 "Ribosome-recycling factor"  
"OPBC09\_00944" 35353 "s59E5H2" 0.01118551 "Ribosome-recycling factor"  
"OPBC09\_00944" 35353 "s63E6H2" 0.01136326 "Ribosome-recycling factor"  
"OPBC09\_00945" 35354 "s59E13H2" 0.002420285 "UvrABC system protein A"  
"OPBC09\_00945" 35354 "s59E25H2" 0 "UvrABC system protein A"  
"OPBC09\_00945" 35354 "s59E5H2" 0.05103505 "UvrABC system protein A"  
"OPBC09\_00945" 35354 "s63E6H2" 0.01652271 "UvrABC system protein A"  
"OPBC09\_00946" 35355 "s59E13H2" 0.002917856 "UvrABC system protein B"  
"OPBC09\_00946" 35355 "s59E25H2" 0 "UvrABC system protein B"  
"OPBC09\_00946" 35355 "s59E5H2" 0.0312022 "UvrABC system protein B"  
"OPBC09\_00946" 35355 "s63E6H2" 0.03432359 "UvrABC system protein B"

"OPBC09\_00948" 35357 "s59E13H2" 0.004043192 "Acetolactate synthase large subunit llvB1"  
"OPBC09\_00948" 35357 "s59E25H2" 0 "Acetolactate synthase large subunit llvB1"  
"OPBC09\_00948" 35357 "s59E5H2" 0.1678151 "Acetolactate synthase large subunit llvB1"  
"OPBC09\_00948" 35357 "s63E6H2" 0.02869709 "Acetolactate synthase large subunit llvB1"  
"OPBC09\_00949" 35358 "s59E13H2" 0 "Putative acetolactate synthase small subunit"  
"OPBC09\_00949" 35358 "s59E25H2" 0 "Putative acetolactate synthase small subunit"  
"OPBC09\_00949" 35358 "s59E5H2" 0.06669299 "Putative acetolactate synthase small subunit"  
"OPBC09\_00949" 35358 "s63E6H2" 0.04760222 "Putative acetolactate synthase small subunit"  
"OPBC09\_00950" 35359 "s59E13H2" 0.04862853 "hypothetical protein"  
"OPBC09\_00950" 35359 "s59E25H2" 0 "hypothetical protein"  
"OPBC09\_00950" 35359 "s59E5H2" 0.1674506 "hypothetical protein"  
"OPBC09\_00950" 35359 "s63E6H2" 0.5599304 "hypothetical protein"  
"OPBC09\_00952" 35361 "s59E13H2" 0.02267308 "Mannitol-1-phosphate 5-dehydrogenase"  
"OPBC09\_00952" 35361 "s59E25H2" 0 "Mannitol-1-phosphate 5-dehydrogenase"  
"OPBC09\_00952" 35361 "s59E5H2" 0.01416956 "Mannitol-1-phosphate 5-dehydrogenase"  
"OPBC09\_00952" 35361 "s63E6H2" 0.2823806 "Mannitol-1-phosphate 5-dehydrogenase"  
"OPBC09\_00953" 35362 "s59E13H2" 0.03806543 "Riboflavin biosynthesis protein RibBA"  
"OPBC09\_00953" 35362 "s59E25H2" 0 "Riboflavin biosynthesis protein RibBA"  
"OPBC09\_00953" 35362 "s59E5H2" 1.801196 "Riboflavin biosynthesis protein RibBA"  
"OPBC09\_00953" 35362 "s63E6H2" 0.3186032 "Riboflavin biosynthesis protein RibBA"  
"OPBC09\_00954" 35363 "s59E13H2" 0 "Glucosamine-6-phosphate deaminase 1"  
"OPBC09\_00954" 35363 "s59E25H2" 0 "Glucosamine-6-phosphate deaminase 1"  
"OPBC09\_00954" 35363 "s59E5H2" 0 "Glucosamine-6-phosphate deaminase 1"  
"OPBC09\_00954" 35363 "s63E6H2" 0 "Glucosamine-6-phosphate deaminase 1"  
"OPBC09\_00955" 35364 "s59E13H2" 0.0119678 "N-acetylglucosamine-6-phosphate deacetylase"  
"OPBC09\_00955" 35364 "s59E25H2" 0 "N-acetylglucosamine-6-phosphate deacetylase"  
"OPBC09\_00955" 35364 "s59E5H2" 0 "N-acetylglucosamine-6-phosphate deacetylase"  
"OPBC09\_00955" 35364 "s63E6H2" 0.002671447 "N-acetylglucosamine-6-phosphate deacetylase"  
"OPBC09\_00956" 35365 "s59E13H2" 0 "Tyrosine recombinase XerC"  
"OPBC09\_00956" 35365 "s59E25H2" 0 "Tyrosine recombinase XerC"  
"OPBC09\_00956" 35365 "s59E5H2" 0.003545908 "Tyrosine recombinase XerC"  
"OPBC09\_00956" 35365 "s63E6H2" 0.008571847 "Tyrosine recombinase XerC"  
"OPBC09\_00957" 35366 "s59E13H2" 0 "putative tyrosine recombinase XerC-like protein"  
"OPBC09\_00957" 35366 "s59E25H2" 0 "putative tyrosine recombinase XerC-like protein"  
"OPBC09\_00957" 35366 "s59E5H2" 0.007519203 "putative tyrosine recombinase XerC-like protein"  
"OPBC09\_00957" 35366 "s63E6H2" 0 "putative tyrosine recombinase XerC-like protein"  
"OPBC09\_00958" 35367 "s59E13H2" 0 "Tyrosine recombinase XerC"  
"OPBC09\_00958" 35367 "s59E25H2" 0 "Tyrosine recombinase XerC"  
"OPBC09\_00958" 35367 "s59E5H2" 0 "Tyrosine recombinase XerC"  
"OPBC09\_00958" 35367 "s63E6H2" 0.001428663 "Tyrosine recombinase XerC"  
"OPBC09\_00959" 35368 "s59E13H2" 0 "N-acetylmuramoyl-L-alanine amidase LytC precursor"  
"OPBC09\_00959" 35368 "s59E25H2" 0 "N-acetylmuramoyl-L-alanine amidase LytC precursor"  
"OPBC09\_00959" 35368 "s59E5H2" 0.03643709 "N-acetylmuramoyl-L-alanine amidase LytC precursor"  
"OPBC09\_00959" 35368 "s63E6H2" 0.002228142 "N-acetylmuramoyl-L-alanine amidase LytC precursor"  
"OPBC09\_00960" 35369 "s59E13H2" 0.0627043 "Riboflavin synthase"  
"OPBC09\_00960" 35369 "s59E25H2" 0 "Riboflavin synthase"  
"OPBC09\_00960" 35369 "s59E5H2" 0.9918721 "Riboflavin synthase"

"OPBC09\_00960" 35369 "s63E6H2" 1.040576 "Riboflavin synthase"  
"OPBC09\_00961" 35370 "s59E13H2" 0.008494388 "Soluble lytic murein transglycosylase precursor"  
"OPBC09\_00961" 35370 "s59E25H2" 0 "Soluble lytic murein transglycosylase precursor"  
"OPBC09\_00961" 35370 "s59E5H2" 0.7446727 "Soluble lytic murein transglycosylase precursor"  
"OPBC09\_00961" 35370 "s63E6H2" 0.01899423 "Soluble lytic murein transglycosylase precursor"  
"OPBC09\_00962" 35371 "s59E13H2" 0.009641787 "O-acetylserine sulfhydrylase"  
"OPBC09\_00962" 35371 "s59E25H2" 0 "O-acetylserine sulfhydrylase"  
"OPBC09\_00962" 35371 "s59E5H2" 0.2373698 "O-acetylserine sulfhydrylase"  
"OPBC09\_00962" 35371 "s63E6H2" 0 "O-acetylserine sulfhydrylase"  
"OPBC09\_00963" 35372 "s59E13H2" 0.0270814 "hypothetical protein"  
"OPBC09\_00963" 35372 "s59E25H2" 0 "hypothetical protein"  
"OPBC09\_00963" 35372 "s59E5H2" 0.3145596 "hypothetical protein"  
"OPBC09\_00963" 35372 "s63E6H2" 0.0142059 "hypothetical protein"  
"OPBC09\_00964" 35373 "s59E13H2" 0.04706228 "hypothetical protein"  
"OPBC09\_00964" 35373 "s59E25H2" 0 "hypothetical protein"  
"OPBC09\_00964" 35373 "s59E5H2" 0.6606168 "hypothetical protein"  
"OPBC09\_00964" 35373 "s63E6H2" 0.001464479 "hypothetical protein"  
"OPBC09\_00965" 35374 "s59E13H2" 0.07682296 "hypothetical protein"  
"OPBC09\_00965" 35374 "s59E25H2" 0 "hypothetical protein"  
"OPBC09\_00965" 35374 "s59E5H2" 0.2960053 "hypothetical protein"  
"OPBC09\_00965" 35374 "s63E6H2" 0.01684659 "hypothetical protein"  
"OPBC09\_00966" 35375 "s59E13H2" 0.05519958 "hypothetical protein"  
"OPBC09\_00966" 35375 "s59E25H2" 0 "hypothetical protein"  
"OPBC09\_00966" 35375 "s59E5H2" 0.1690343 "hypothetical protein"  
"OPBC09\_00966" 35375 "s63E6H2" 0.00393938 "hypothetical protein"  
"OPBC09\_00967" 35376 "s59E13H2" 0.03394567 "hypothetical protein"  
"OPBC09\_00967" 35376 "s59E25H2" 0 "hypothetical protein"  
"OPBC09\_00967" 35376 "s59E5H2" 0.09749209 "hypothetical protein"  
"OPBC09\_00967" 35376 "s63E6H2" 0 "hypothetical protein"  
"OPBC09\_00968" 35377 "s59E13H2" 0.08884162 "Alanine racemase"  
"OPBC09\_00968" 35377 "s59E25H2" 0 "Alanine racemase"  
"OPBC09\_00968" 35377 "s59E5H2" 0.03674109 "Alanine racemase"  
"OPBC09\_00968" 35377 "s63E6H2" 0.04300878 "Alanine racemase"  
"OPBC09\_00969" 35378 "s59E13H2" 0.08781436 "Inosine-5'-monophosphate dehydrogenase"  
"OPBC09\_00969" 35378 "s59E25H2" 0 "Inosine-5'-monophosphate dehydrogenase"  
"OPBC09\_00969" 35378 "s59E5H2" 0.02509974 "Inosine-5'-monophosphate dehydrogenase"  
"OPBC09\_00969" 35378 "s63E6H2" 0.04406152 "Inosine-5'-monophosphate dehydrogenase"  
"OPBC09\_00970" 35379 "s59E13H2" 0.08854188 "Bifunctional NAD(P)H-hydrate repair enzyme Nnr"  
"OPBC09\_00970" 35379 "s59E25H2" 0 "Bifunctional NAD(P)H-hydrate repair enzyme Nnr"  
"OPBC09\_00970" 35379 "s59E5H2" 0.03056492 "Bifunctional NAD(P)H-hydrate repair enzyme Nnr"  
"OPBC09\_00970" 35379 "s63E6H2" 0.0297033 "Bifunctional NAD(P)H-hydrate repair enzyme Nnr"  
"OPBC09\_00971" 35380 "s59E13H2" 0.04262811 "Holo-[acyl-carrier-protein] synthase"  
"OPBC09\_00971" 35380 "s59E25H2" 0 "Holo-[acyl-carrier-protein] synthase"  
"OPBC09\_00971" 35380 "s59E5H2" 0 "Holo-[acyl-carrier-protein] synthase"  
"OPBC09\_00971" 35380 "s63E6H2" 0.0118235 "Holo-[acyl-carrier-protein] synthase"  
"OPBC09\_00972" 35381 "s59E13H2" 0.03353431 "HTH-type transcriptional repressor GlcR"  
"OPBC09\_00972" 35381 "s59E25H2" 0 "HTH-type transcriptional repressor GlcR"

"OPBC09\_00972" 35381 "s59E5H2" 0 "HTH-type transcriptional repressor GlcR"  
"OPBC09\_00972" 35381 "s63E6H2" 0.01920838 "HTH-type transcriptional repressor GlcR"  
"OPBC09\_00973" 35382 "s59E13H2" 0.005541854 "Transposase IS200 like protein"  
"OPBC09\_00973" 35382 "s59E25H2" 0 "Transposase IS200 like protein"  
"OPBC09\_00973" 35382 "s59E5H2" 0.03024872 "Transposase IS200 like protein"  
"OPBC09\_00973" 35382 "s63E6H2" 0.2815749 "Transposase IS200 like protein"  
"OPBC09\_00974" 35383 "s59E13H2" 0 "hypothetical protein"  
"OPBC09\_00974" 35383 "s59E25H2" 0 "hypothetical protein"  
"OPBC09\_00974" 35383 "s59E5H2" 0 "hypothetical protein"  
"OPBC09\_00974" 35383 "s63E6H2" 0 "hypothetical protein"  
"OPBC09\_00975" 35384 "s59E13H2" 0.005871997 "N-acetylglucosamine-6-phosphate deacetylase"  
"OPBC09\_00975" 35384 "s59E25H2" 0 "N-acetylglucosamine-6-phosphate deacetylase"  
"OPBC09\_00975" 35384 "s59E5H2" 0.00616582 "N-acetylglucosamine-6-phosphate deacetylase"  
"OPBC09\_00975" 35384 "s63E6H2" 0 "N-acetylglucosamine-6-phosphate deacetylase"  
"OPBC09\_00976" 35385 "s59E13H2" 0 "2-dehydro-3-deoxy-D-gluconate 5-dehydrogenase"  
"OPBC09\_00976" 35385 "s59E25H2" 0 "2-dehydro-3-deoxy-D-gluconate 5-dehydrogenase"  
"OPBC09\_00976" 35385 "s59E5H2" 0 "2-dehydro-3-deoxy-D-gluconate 5-dehydrogenase"  
"OPBC09\_00976" 35385 "s63E6H2" 0 "2-dehydro-3-deoxy-D-gluconate 5-dehydrogenase"  
"OPBC09\_00977" 35386 "s59E13H2" 0.009898805 "methylcobalamin:coenzyme M methyltransferase"  
"OPBC09\_00977" 35386 "s59E25H2" 0 "methylcobalamin:coenzyme M methyltransferase"  
"OPBC09\_00977" 35386 "s59E5H2" 0.006999885 "methylcobalamin:coenzyme M methyltransferase"  
"OPBC09\_00977" 35386 "s63E6H2" 0 "methylcobalamin:coenzyme M methyltransferase"  
"OPBC09\_00978" 35387 "s59E13H2" 0.002966218 "Xylulose kinase"  
"OPBC09\_00978" 35387 "s59E25H2" 0 "Xylulose kinase"  
"OPBC09\_00978" 35387 "s59E5H2" 0.005480484 "Xylulose kinase"  
"OPBC09\_00978" 35387 "s63E6H2" 0 "Xylulose kinase"  
"OPBC09\_00979" 35388 "s59E13H2" 0.002224282 "Xylose import ATP-binding protein XylG"  
"OPBC09\_00979" 35388 "s59E25H2" 0 "Xylose import ATP-binding protein XylG"  
"OPBC09\_00979" 35388 "s59E5H2" 0 "Xylose import ATP-binding protein XylG"  
"OPBC09\_00979" 35388 "s63E6H2" 0 "Xylose import ATP-binding protein XylG"  
"OPBC09\_00980" 35389 "s59E13H2" 0.001082907 "Ribose transport system permease protein RbsC"  
"OPBC09\_00980" 35389 "s59E25H2" 0 "Ribose transport system permease protein RbsC"  
"OPBC09\_00980" 35389 "s59E5H2" 0 "Ribose transport system permease protein RbsC"  
"OPBC09\_00980" 35389 "s63E6H2" 0 "Ribose transport system permease protein RbsC"  
"OPBC09\_00981" 35390 "s59E13H2" 0 "Periplasmic binding proteins and sugar binding domain of LacI family protein"  
"OPBC09\_00981" 35390 "s59E25H2" 0 "Periplasmic binding proteins and sugar binding domain of LacI family protein"  
"OPBC09\_00981" 35390 "s59E5H2" 0 "Periplasmic binding proteins and sugar binding domain of LacI family protein"  
"OPBC09\_00981" 35390 "s63E6H2" 0.001443326 "Periplasmic binding proteins and sugar binding domain of LacI family protein"  
"OPBC09\_00982" 35391 "s59E13H2" 0.01033209 "hypothetical protein"  
"OPBC09\_00982" 35391 "s59E25H2" 0 "hypothetical protein"  
"OPBC09\_00982" 35391 "s59E5H2" 0 "hypothetical protein"  
"OPBC09\_00982" 35391 "s63E6H2" 0 "hypothetical protein"  
"OPBC09\_00983" 35392 "s59E13H2" 0.00616621 "Ribonuclease Y"  
"OPBC09\_00983" 35392 "s59E25H2" 0 "Ribonuclease Y"  
"OPBC09\_00983" 35392 "s59E5H2" 0.05523764 "Ribonuclease Y"  
"OPBC09\_00983" 35392 "s63E6H2" 0.02627262 "Ribonuclease Y"  
"OPBC09\_00984" 35393 "s59E13H2" 0.007070912 "DNA mismatch repair protein"

"OPBC09\_00984" 35393 "s59E25H2" 0 "DNA mismatch repair protein"  
"OPBC09\_00984" 35393 "s59E5H2" 0.07979964 "DNA mismatch repair protein"  
"OPBC09\_00984" 35393 "s63E6H2" 0.06077168 "DNA mismatch repair protein"  
"OPBC09\_00985" 35394 "s59E13H2" 0 "Stage V sporulation protein S"  
"OPBC09\_00985" 35394 "s59E25H2" 0 "Stage V sporulation protein S"  
"OPBC09\_00985" 35394 "s59E5H2" 0.07702058 "Stage V sporulation protein S"  
"OPBC09\_00985" 35394 "s63E6H2" 0.03790092 "Stage V sporulation protein S"  
"OPBC09\_00986" 35395 "s59E13H2" 0 "Transposase"  
"OPBC09\_00986" 35395 "s59E25H2" 0 "Transposase"  
"OPBC09\_00986" 35395 "s59E5H2" 0.02825604 "Transposase"  
"OPBC09\_00986" 35395 "s63E6H2" 0 "Transposase"  
"OPBC09\_00987" 35396 "s59E13H2" 0.01207322 "IS2 transposase TnpB"  
"OPBC09\_00987" 35396 "s59E25H2" 0 "IS2 transposase TnpB"  
"OPBC09\_00987" 35396 "s59E5H2" 0.01200651 "IS2 transposase TnpB"  
"OPBC09\_00987" 35396 "s63E6H2" 0 "IS2 transposase TnpB"  
"OPBC09\_00988" 35397 "s59E13H2" 0 "Helix-turn-helix"  
"OPBC09\_00988" 35397 "s59E25H2" 0 "Helix-turn-helix"  
"OPBC09\_00988" 35397 "s59E5H2" 0 "Helix-turn-helix"  
"OPBC09\_00988" 35397 "s63E6H2" 0.0438539 "Helix-turn-helix"  
"OPBC09\_00991" 35400 "s59E13H2" 0 "Molybdopterin-synthase adenyltransferase"  
"OPBC09\_00991" 35400 "s59E25H2" 0 "Molybdopterin-synthase adenyltransferase"  
"OPBC09\_00991" 35400 "s59E5H2" 0 "Molybdopterin-synthase adenyltransferase"  
"OPBC09\_00991" 35400 "s63E6H2" 0 "Molybdopterin-synthase adenyltransferase"  
"OPBC09\_00992" 35401 "s59E13H2" 0 "hypothetical protein"  
"OPBC09\_00992" 35401 "s59E25H2" 0 "hypothetical protein"  
"OPBC09\_00992" 35401 "s59E5H2" 0 "hypothetical protein"  
"OPBC09\_00992" 35401 "s63E6H2" 0 "hypothetical protein"  
"OPBC09\_00993" 35402 "s59E13H2" 0 "hypothetical protein"  
"OPBC09\_00993" 35402 "s59E25H2" 0 "hypothetical protein"  
"OPBC09\_00993" 35402 "s59E5H2" 0 "hypothetical protein"  
"OPBC09\_00993" 35402 "s63E6H2" 0 "hypothetical protein"  
"OPBC09\_00994" 35403 "s59E13H2" 0 "hypothetical protein"  
"OPBC09\_00994" 35403 "s59E25H2" 0 "hypothetical protein"  
"OPBC09\_00994" 35403 "s59E5H2" 0 "hypothetical protein"  
"OPBC09\_00994" 35403 "s63E6H2" 0 "hypothetical protein"  
"OPBC09\_00995" 35404 "s59E13H2" 0 "Type-1 restriction enzyme R protein"  
"OPBC09\_00995" 35404 "s59E25H2" 0 "Type-1 restriction enzyme R protein"  
"OPBC09\_00995" 35404 "s59E5H2" 0 "Type-1 restriction enzyme R protein"  
"OPBC09\_00995" 35404 "s63E6H2" 0 "Type-1 restriction enzyme R protein"  
"OPBC09\_00996" 35405 "s59E13H2" 0 "Type-1 restriction enzyme EcoKI specificity protein"  
"OPBC09\_00996" 35405 "s59E25H2" 0 "Type-1 restriction enzyme EcoKI specificity protein"  
"OPBC09\_00996" 35405 "s59E5H2" 0 "Type-1 restriction enzyme EcoKI specificity protein"  
"OPBC09\_00996" 35405 "s63E6H2" 0 "Type-1 restriction enzyme EcoKI specificity protein"  
"OPBC09\_00997" 35406 "s59E13H2" 0 "putative type I restriction enzymeP M protein"  
"OPBC09\_00997" 35406 "s59E25H2" 0 "putative type I restriction enzymeP M protein"  
"OPBC09\_00997" 35406 "s59E5H2" 0 "putative type I restriction enzymeP M protein"  
"OPBC09\_00997" 35406 "s63E6H2" 0 "putative type I restriction enzymeP M protein"

"OPBC09\_00998" 35407 "s59E13H2" 0 "hypothetical protein"  
"OPBC09\_00998" 35407 "s59E25H2" 0 "hypothetical protein"  
"OPBC09\_00998" 35407 "s59E5H2" 0 "hypothetical protein"  
"OPBC09\_00998" 35407 "s63E6H2" 0 "hypothetical protein"  
"OPBC09\_00999" 35408 "s59E13H2" 0.01229875 "(Dimethylallyl)adenosine tRNA methylthiotransferase MiaB"  
"OPBC09\_00999" 35408 "s59E25H2" 0 "(Dimethylallyl)adenosine tRNA methylthiotransferase MiaB"  
"OPBC09\_00999" 35408 "s59E5H2" 0.06758573 "(Dimethylallyl)adenosine tRNA methylthiotransferase MiaB"  
"OPBC09\_00999" 35408 "s63E6H2" 0.03630073 "(Dimethylallyl)adenosine tRNA methylthiotransferase MiaB"  
"OPBC09\_01000" 35409 "s59E13H2" 0.008974538 "tRNA dimethylallyltransferase"  
"OPBC09\_01000" 35409 "s59E25H2" 0 "tRNA dimethylallyltransferase"  
"OPBC09\_01000" 35409 "s59E5H2" 0.07682358 "tRNA dimethylallyltransferase"  
"OPBC09\_01000" 35409 "s63E6H2" 0.03232611 "tRNA dimethylallyltransferase"  
"OPBC09\_01001" 35410 "s59E13H2" 0.004393859 "Diaminopimelate epimerase"  
"OPBC09\_01001" 35410 "s59E25H2" 0 "Diaminopimelate epimerase"  
"OPBC09\_01001" 35410 "s59E5H2" 0.3230254 "Diaminopimelate epimerase"  
"OPBC09\_01001" 35410 "s63E6H2" 0.1128353 "Diaminopimelate epimerase"  
"OPBC09\_01002" 35411 "s59E13H2" 0.01435338 "LL-diaminopimelate aminotransferase"  
"OPBC09\_01002" 35411 "s59E25H2" 0 "LL-diaminopimelate aminotransferase"  
"OPBC09\_01002" 35411 "s59E5H2" 0.7227452 "LL-diaminopimelate aminotransferase"  
"OPBC09\_01002" 35411 "s63E6H2" 0.1611325 "LL-diaminopimelate aminotransferase"  
"OPBC09\_01003" 35412 "s59E13H2" 0.01037742 "GTPase HflX"  
"OPBC09\_01003" 35412 "s59E25H2" 0 "GTPase HflX"  
"OPBC09\_01003" 35412 "s59E5H2" 0.9411377 "GTPase HflX"  
"OPBC09\_01003" 35412 "s63E6H2" 0.195236 "GTPase HflX"  
"OPBC09\_01004" 35413 "s59E13H2" 0.01882426 "LexA repressor"  
"OPBC09\_01004" 35413 "s59E25H2" 0 "LexA repressor"  
"OPBC09\_01004" 35413 "s59E5H2" 0.6985455 "LexA repressor"  
"OPBC09\_01004" 35413 "s63E6H2" 0.1554561 "LexA repressor"  
"OPBC09\_01005" 35414 "s59E13H2" 0.05551285 "Ketol-acid reductoisomerase"  
"OPBC09\_01005" 35414 "s59E25H2" 0 "Ketol-acid reductoisomerase"  
"OPBC09\_01005" 35414 "s59E5H2" 0.4277341 "Ketol-acid reductoisomerase"  
"OPBC09\_01005" 35414 "s63E6H2" 0.1073522 "Ketol-acid reductoisomerase"  
"OPBC09\_01006" 35415 "s59E13H2" 0 "Deoxyuridine 5'-triphosphate nucleotidohydrolase"  
"OPBC09\_01006" 35415 "s59E25H2" 0 "Deoxyuridine 5'-triphosphate nucleotidohydrolase"  
"OPBC09\_01006" 35415 "s59E5H2" 0.5267136 "Deoxyuridine 5'-triphosphate nucleotidohydrolase"  
"OPBC09\_01006" 35415 "s63E6H2" 0.01449247 "Deoxyuridine 5'-triphosphate nucleotidohydrolase"  
"OPBC09\_01007" 35416 "s59E13H2" 0.002873833 "Glucokinase"  
"OPBC09\_01007" 35416 "s59E25H2" 0 "Glucokinase"  
"OPBC09\_01007" 35416 "s59E5H2" 0 "Glucokinase"  
"OPBC09\_01007" 35416 "s63E6H2" 0.06583645 "Glucokinase"  
"OPBC09\_01008" 35417 "s59E13H2" 0.0523552 "hypothetical protein"  
"OPBC09\_01008" 35417 "s59E25H2" 0 "hypothetical protein"  
"OPBC09\_01008" 35417 "s59E5H2" 0 "hypothetical protein"  
"OPBC09\_01008" 35417 "s63E6H2" 0.09326773 "hypothetical protein"  
"OPBC09\_01010" 35419 "s59E13H2" 0.1598032 "Glycosyl hydrolase family 109 protein 1 precursor"  
"OPBC09\_01010" 35419 "s59E25H2" 0 "Glycosyl hydrolase family 109 protein 1 precursor"  
"OPBC09\_01010" 35419 "s59E5H2" 0.002833402 "Glycosyl hydrolase family 109 protein 1 precursor"



"OPBC09\_01010" 35419 "s63E6H2" 0.1406835 "Glycosyl hydrolase family 109 protein 1 precursor"  
"OPBC09\_01011" 35420 "s59E13H2" 0.2248326 "glucose-6-phosphate isomerase"  
"OPBC09\_01011" 35420 "s59E25H2" 0 "glucose-6-phosphate isomerase"  
"OPBC09\_01011" 35420 "s59E5H2" 0 "glucose-6-phosphate isomerase"  
"OPBC09\_01011" 35420 "s63E6H2" 0.06332948 "glucose-6-phosphate isomerase"  
"OPBC09\_01012" 35421 "s59E13H2" 0.1255505 "High-affinity branched-chain amino acid transport system permease protein LivH"  
"OPBC09\_01012" 35421 "s59E25H2" 0 "High-affinity branched-chain amino acid transport system permease protein LivH"  
"OPBC09\_01012" 35421 "s59E5H2" 0.004759234 "High-affinity branched-chain amino acid transport system permease protein LivH"  
"OPBC09\_01012" 35421 "s63E6H2" 0.04449613 "High-affinity branched-chain amino acid transport system permease protein LivH"  
"OPBC09\_01013" 35422 "s59E13H2" 0.08607546 "leucine/isoleucine/valine transporter permease subunit"  
"OPBC09\_01013" 35422 "s59E25H2" 0 "leucine/isoleucine/valine transporter permease subunit"  
"OPBC09\_01013" 35422 "s59E5H2" 0 "leucine/isoleucine/valine transporter permease subunit"  
"OPBC09\_01013" 35422 "s63E6H2" 0.02462892 "leucine/isoleucine/valine transporter permease subunit"  
"OPBC09\_01014" 35423 "s59E13H2" 0.08992263 "Lipopolysaccharide export system ATP-binding protein LptB"  
"OPBC09\_01014" 35423 "s59E25H2" 0 "Lipopolysaccharide export system ATP-binding protein LptB"  
"OPBC09\_01014" 35423 "s59E5H2" 0.005001267 "Lipopolysaccharide export system ATP-binding protein LptB"  
"OPBC09\_01014" 35423 "s63E6H2" 0.01831734 "Lipopolysaccharide export system ATP-binding protein LptB"  
"OPBC09\_01015" 35424 "s59E13H2" 0.04541593 "High-affinity branched-chain amino acid transport ATP-binding protein LivF"  
"OPBC09\_01015" 35424 "s59E25H2" 0 "High-affinity branched-chain amino acid transport ATP-binding protein LivF"  
"OPBC09\_01015" 35424 "s59E5H2" 0.01042183 "High-affinity branched-chain amino acid transport ATP-binding protein LivF"  
"OPBC09\_01015" 35424 "s63E6H2" 0.006692327 "High-affinity branched-chain amino acid transport ATP-binding protein LivF"  
"OPBC09\_01016" 35425 "s59E13H2" 0.004693611 "Xylose isomerase"  
"OPBC09\_01016" 35425 "s59E25H2" 0 "Xylose isomerase"  
"OPBC09\_01016" 35425 "s59E5H2" 0.1283758 "Xylose isomerase"  
"OPBC09\_01016" 35425 "s63E6H2" 0.0368931 "Xylose isomerase"  
"OPBC09\_01017" 35426 "s59E13H2" 0 "Xylulose kinase"  
"OPBC09\_01017" 35426 "s59E25H2" 0 "Xylulose kinase"  
"OPBC09\_01017" 35426 "s59E5H2" 0.07378621 "Xylulose kinase"  
"OPBC09\_01017" 35426 "s63E6H2" 0.003873706 "Xylulose kinase"  
"OPBC09\_01018" 35427 "s59E13H2" 0.02510953 "Deoxyuridine 5'-triphosphate nucleotidohydrolase"  
"OPBC09\_01018" 35427 "s59E25H2" 0 "Deoxyuridine 5'-triphosphate nucleotidohydrolase"  
"OPBC09\_01018" 35427 "s59E5H2" 0.009043279 "Deoxyuridine 5'-triphosphate nucleotidohydrolase"  
"OPBC09\_01018" 35427 "s63E6H2" 0.05008177 "Deoxyuridine 5'-triphosphate nucleotidohydrolase"  
"OPBC09\_01019" 35428 "s59E13H2" 0.01034421 "Serine acetyltransferase"  
"OPBC09\_01019" 35428 "s59E25H2" 0 "Serine acetyltransferase"  
"OPBC09\_01019" 35428 "s59E5H2" 0.4359986 "Serine acetyltransferase"  
"OPBC09\_01019" 35428 "s63E6H2" 0.04936175 "Serine acetyltransferase"  
"OPBC09\_01020" 35429 "s59E13H2" 0.005221119 "hypothetical protein"  
"OPBC09\_01020" 35429 "s59E25H2" 0 "hypothetical protein"  
"OPBC09\_01020" 35429 "s59E5H2" 0.150567 "hypothetical protein"  
"OPBC09\_01020" 35429 "s63E6H2" 0.04390082 "hypothetical protein"  
"OPBC09\_01021" 35430 "s59E13H2" 0.01972131 "HTH-type transcriptional regulator HmrR"  
"OPBC09\_01021" 35430 "s59E25H2" 0 "HTH-type transcriptional regulator HmrR"  
"OPBC09\_01021" 35430 "s59E5H2" 0.2061528 "HTH-type transcriptional regulator HmrR"  
"OPBC09\_01021" 35430 "s63E6H2" 0.0440266 "HTH-type transcriptional regulator HmrR"  
"OPBC09\_01022" 35431 "s59E13H2" 0.001278164 "hypothetical protein"  
"OPBC09\_01022" 35431 "s59E25H2" 0 "hypothetical protein"

"OPBC09\_01022" 35431 "s59E5H2" 0.1545657 "hypothetical protein"  
"OPBC09\_01022" 35431 "s63E6H2" 0.04287978 "hypothetical protein"  
"OPBC09\_01023" 35432 "s59E13H2" 0.02176651 "Hypoxanthine-guanine phosphoribosyltransferase"  
"OPBC09\_01023" 35432 "s59E25H2" 0 "Hypoxanthine-guanine phosphoribosyltransferase"  
"OPBC09\_01023" 35432 "s59E5H2" 0.178114 "Hypoxanthine-guanine phosphoribosyltransferase"  
"OPBC09\_01023" 35432 "s63E6H2" 0.1414166 "Hypoxanthine-guanine phosphoribosyltransferase"  
"OPBC09\_01024" 35433 "s59E13H2" 0.00939488 "Putative lipoprotein YerB precursor"  
"OPBC09\_01024" 35433 "s59E25H2" 0 "Putative lipoprotein YerB precursor"  
"OPBC09\_01024" 35433 "s59E5H2" 0.06419959 "Putative lipoprotein YerB precursor"  
"OPBC09\_01024" 35433 "s63E6H2" 0.05507245 "Putative lipoprotein YerB precursor"  
"OPBC09\_01025" 35434 "s59E13H2" 0.01221273 "D-alanyl-D-alanine carboxypeptidase DacF precursor"  
"OPBC09\_01025" 35434 "s59E25H2" 0 "D-alanyl-D-alanine carboxypeptidase DacF precursor"  
"OPBC09\_01025" 35434 "s59E5H2" 0.05055798 "D-alanyl-D-alanine carboxypeptidase DacF precursor"  
"OPBC09\_01025" 35434 "s63E6H2" 0.05305476 "D-alanyl-D-alanine carboxypeptidase DacF precursor"  
"OPBC09\_01026" 35435 "s59E13H2" 0.02807147 "MerR family regulatory protein"  
"OPBC09\_01026" 35435 "s59E25H2" 0 "MerR family regulatory protein"  
"OPBC09\_01026" 35435 "s59E5H2" 0.1655785 "MerR family regulatory protein"  
"OPBC09\_01026" 35435 "s63E6H2" 0.07344552 "MerR family regulatory protein"  
"OPBC09\_01027" 35436 "s59E13H2" 0.01496203 "Glycogen accumulation regulator GarA"  
"OPBC09\_01027" 35436 "s59E25H2" 0 "Glycogen accumulation regulator GarA"  
"OPBC09\_01027" 35436 "s59E5H2" 0.1538754 "Glycogen accumulation regulator GarA"  
"OPBC09\_01027" 35436 "s63E6H2" 0.04337143 "Glycogen accumulation regulator GarA"  
"OPBC09\_01029" 35438 "s59E13H2" 0.02082887 "Glycerol-3-phosphate dehydrogenase [NAD(P)+]"  
"OPBC09\_01029" 35438 "s59E25H2" 0 "Glycerol-3-phosphate dehydrogenase [NAD(P)+]"  
"OPBC09\_01029" 35438 "s59E5H2" 0.1561244 "Glycerol-3-phosphate dehydrogenase [NAD(P)+]"  
"OPBC09\_01029" 35438 "s63E6H2" 0.03968379 "Glycerol-3-phosphate dehydrogenase [NAD(P)+]"  
"OPBC09\_01030" 35439 "s59E13H2" 0.01349396 "GTPase Der"  
"OPBC09\_01030" 35439 "s59E25H2" 0 "GTPase Der"  
"OPBC09\_01030" 35439 "s59E5H2" 0.1637791 "GTPase Der"  
"OPBC09\_01030" 35439 "s63E6H2" 0.04117945 "GTPase Der"  
"OPBC09\_01031" 35440 "s59E13H2" 0.03166474 "4-hydroxy-3-methylbut-2-enyl diphosphate reductase"  
"OPBC09\_01031" 35440 "s59E25H2" 0 "4-hydroxy-3-methylbut-2-enyl diphosphate reductase"  
"OPBC09\_01031" 35440 "s59E5H2" 0.06135253 "4-hydroxy-3-methylbut-2-enyl diphosphate reductase"  
"OPBC09\_01031" 35440 "s63E6H2" 0.03180707 "4-hydroxy-3-methylbut-2-enyl diphosphate reductase"  
"OPBC09\_01032" 35441 "s59E13H2" 0.01538173 "1-acyl-sn-glycerol-3-phosphate acyltransferase"  
"OPBC09\_01032" 35441 "s59E25H2" 0 "1-acyl-sn-glycerol-3-phosphate acyltransferase"  
"OPBC09\_01032" 35441 "s59E5H2" 0.07280269 "1-acyl-sn-glycerol-3-phosphate acyltransferase"  
"OPBC09\_01032" 35441 "s63E6H2" 0.04752729 "1-acyl-sn-glycerol-3-phosphate acyltransferase"  
"OPBC09\_01033" 35442 "s59E13H2" 0.007761606 "Cytidylate kinase"  
"OPBC09\_01033" 35442 "s59E25H2" 0 "Cytidylate kinase"  
"OPBC09\_01033" 35442 "s59E5H2" 0.08648577 "Cytidylate kinase"  
"OPBC09\_01033" 35442 "s63E6H2" 0.05801851 "Cytidylate kinase"  
"OPBC09\_01034" 35443 "s59E13H2" 0.02481367 "3-phosphoshikimate 1-carboxyvinyltransferase 1"  
"OPBC09\_01034" 35443 "s59E25H2" 0 "3-phosphoshikimate 1-carboxyvinyltransferase 1"  
"OPBC09\_01034" 35443 "s59E5H2" 0.09068516 "3-phosphoshikimate 1-carboxyvinyltransferase 1"  
"OPBC09\_01034" 35443 "s63E6H2" 0.03429379 "3-phosphoshikimate 1-carboxyvinyltransferase 1"  
"OPBC09\_01035" 35444 "s59E13H2" 0.01097893 "T-protein"

"OPBC09\_01035" 35444 "s59E25H2" 0 "T-protein"  
"OPBC09\_01035" 35444 "s59E5H2" 0.1458478 "T-protein"  
"OPBC09\_01035" 35444 "s63E6H2" 0.02218778 "T-protein"  
"OPBC09\_01036" 35445 "s59E13H2" 0.01417725 "Transketolase"  
"OPBC09\_01036" 35445 "s59E25H2" 0 "Transketolase"  
"OPBC09\_01036" 35445 "s59E5H2" 0.01653065 "Transketolase"  
"OPBC09\_01036" 35445 "s63E6H2" 0.01196258 "Transketolase"  
"OPBC09\_01037" 35446 "s59E13H2" 0.008624535 "Ferrous-iron efflux pump FieF"  
"OPBC09\_01037" 35446 "s59E25H2" 0 "Ferrous-iron efflux pump FieF"  
"OPBC09\_01037" 35446 "s59E5H2" 0.1764191 "Ferrous-iron efflux pump FieF"  
"OPBC09\_01037" 35446 "s63E6H2" 0.01956553 "Ferrous-iron efflux pump FieF"  
"OPBC09\_01038" 35447 "s59E13H2" 0.01351779 "LVIVD repeat protein"  
"OPBC09\_01038" 35447 "s59E25H2" 0 "LVIVD repeat protein"  
"OPBC09\_01038" 35447 "s59E5H2" 0.2280242 "LVIVD repeat protein"  
"OPBC09\_01038" 35447 "s63E6H2" 0.1140604 "LVIVD repeat protein"  
"OPBC09\_01039" 35448 "s59E13H2" 0 "Segregation and condensation protein B"  
"OPBC09\_01039" 35448 "s59E25H2" 0 "Segregation and condensation protein B"  
"OPBC09\_01039" 35448 "s59E5H2" 0.02970765 "Segregation and condensation protein B"  
"OPBC09\_01039" 35448 "s63E6H2" 0.1039818 "Segregation and condensation protein B"  
"OPBC09\_01040" 35449 "s59E13H2" 0.002579249 "Segregation and condensation protein A"  
"OPBC09\_01040" 35449 "s59E25H2" 0 "Segregation and condensation protein A"  
"OPBC09\_01040" 35449 "s59E5H2" 0.0256306 "Segregation and condensation protein A"  
"OPBC09\_01040" 35449 "s63E6H2" 0.06724655 "Segregation and condensation protein A"  
"OPBC09\_01041" 35450 "s59E13H2" 0.004243614 "Tryptophan--tRNA ligase"  
"OPBC09\_01041" 35450 "s59E25H2" 0 "Tryptophan--tRNA ligase"  
"OPBC09\_01041" 35450 "s59E5H2" 0.008204119 "Tryptophan--tRNA ligase"  
"OPBC09\_01041" 35450 "s63E6H2" 0.05150816 "Tryptophan--tRNA ligase"  
"OPBC09\_01042" 35451 "s59E13H2" 0.01224347 "Peptidase family M50"  
"OPBC09\_01042" 35451 "s59E25H2" 0 "Peptidase family M50"  
"OPBC09\_01042" 35451 "s59E5H2" 0.02391468 "Peptidase family M50"  
"OPBC09\_01042" 35451 "s63E6H2" 0.05822431 "Peptidase family M50"  
"OPBC09\_01043" 35452 "s59E13H2" 0.01624487 "Tyrosine recombinase XerD"  
"OPBC09\_01043" 35452 "s59E25H2" 0.1100218 "Tyrosine recombinase XerD"  
"OPBC09\_01043" 35452 "s59E5H2" 0.03184069 "Tyrosine recombinase XerD"  
"OPBC09\_01043" 35452 "s63E6H2" 0.09381178 "Tyrosine recombinase XerD"  
"OPBC09\_01044" 35453 "s59E13H2" 0.02648709 "ADP-ribose pyrophosphatase"  
"OPBC09\_01044" 35453 "s59E25H2" 0.3019197 "ADP-ribose pyrophosphatase"  
"OPBC09\_01044" 35453 "s59E5H2" 0.01086441 "ADP-ribose pyrophosphatase"  
"OPBC09\_01044" 35453 "s63E6H2" 0.1328744 "ADP-ribose pyrophosphatase"  
"OPBC09\_01045" 35454 "s59E13H2" 0.006306404 "Peptidase T"  
"OPBC09\_01045" 35454 "s59E25H2" 0 "Peptidase T"  
"OPBC09\_01045" 35454 "s59E5H2" 0.04233784 "Peptidase T"  
"OPBC09\_01045" 35454 "s63E6H2" 0.1386186 "Peptidase T"  
"OPBC09\_01046" 35455 "s59E13H2" 0.005633455 "hypothetical protein"  
"OPBC09\_01046" 35455 "s59E25H2" 0 "hypothetical protein"  
"OPBC09\_01046" 35455 "s59E5H2" 0.02556809 "hypothetical protein"  
"OPBC09\_01046" 35455 "s63E6H2" 0.1247845 "hypothetical protein"

"OPBC09\_01047" 35456 "s59E13H2" 0.02225104 "CTP synthase"  
"OPBC09\_01047" 35456 "s59E25H2" 0 "CTP synthase"  
"OPBC09\_01047" 35456 "s59E5H2" 0.05384932 "CTP synthase"  
"OPBC09\_01047" 35456 "s63E6H2" 0.3074892 "CTP synthase"  
"OPBC09\_01048" 35457 "s59E13H2" 0.01795586 "DNA repair protein RecN"  
"OPBC09\_01048" 35457 "s59E25H2" 44.8714 "DNA repair protein RecN"  
"OPBC09\_01048" 35457 "s59E5H2" 0.03046672 "DNA repair protein RecN"  
"OPBC09\_01048" 35457 "s63E6H2" 0.2437819 "DNA repair protein RecN"  
"OPBC09\_01049" 35458 "s59E13H2" 0.01377527 "putative inorganic polyphosphate/ATP-NAD kinase"  
"OPBC09\_01049" 35458 "s59E25H2" 0 "putative inorganic polyphosphate/ATP-NAD kinase"  
"OPBC09\_01049" 35458 "s59E5H2" 0.03607576 "putative inorganic polyphosphate/ATP-NAD kinase"  
"OPBC09\_01049" 35458 "s63E6H2" 0.2220129 "putative inorganic polyphosphate/ATP-NAD kinase"  
"OPBC09\_01050" 35459 "s59E13H2" 0.08540189 "Farnesyl diphosphate synthase"  
"OPBC09\_01050" 35459 "s59E25H2" 0 "Farnesyl diphosphate synthase"  
"OPBC09\_01050" 35459 "s59E5H2" 0.07779768 "Farnesyl diphosphate synthase"  
"OPBC09\_01050" 35459 "s63E6H2" 0.2535483 "Farnesyl diphosphate synthase"  
"OPBC09\_01051" 35460 "s59E13H2" 0.02483897 "hypothetical protein"  
"OPBC09\_01051" 35460 "s59E25H2" 0 "hypothetical protein"  
"OPBC09\_01051" 35460 "s59E5H2" 0.1030717 "hypothetical protein"  
"OPBC09\_01051" 35460 "s63E6H2" 0.2763842 "hypothetical protein"  
"OPBC09\_01052" 35461 "s59E13H2" 0.02137512 "Elongation factor P"  
"OPBC09\_01052" 35461 "s59E25H2" 0 "Elongation factor P"  
"OPBC09\_01052" 35461 "s59E5H2" 0.09458289 "Elongation factor P"  
"OPBC09\_01052" 35461 "s63E6H2" 0.253488 "Elongation factor P"  
"OPBC09\_01053" 35462 "s59E13H2" 0.01679702 "Xaa-Pro dipeptidase"  
"OPBC09\_01053" 35462 "s59E25H2" 0 "Xaa-Pro dipeptidase"  
"OPBC09\_01053" 35462 "s59E5H2" 0.1211999 "Xaa-Pro dipeptidase"  
"OPBC09\_01053" 35462 "s63E6H2" 0.1546231 "Xaa-Pro dipeptidase"  
"OPBC09\_01054" 35463 "s59E13H2" 0.02971584 "hypothetical protein"  
"OPBC09\_01054" 35463 "s59E25H2" 0 "hypothetical protein"  
"OPBC09\_01054" 35463 "s59E5H2" 0.01594154 "hypothetical protein"  
"OPBC09\_01054" 35463 "s63E6H2" 0.07325544 "hypothetical protein"  
"OPBC09\_01055" 35464 "s59E13H2" 0.04855853 "3-dehydroquininate dehydratase"  
"OPBC09\_01055" 35464 "s59E25H2" 10.23709 "3-dehydroquininate dehydratase"  
"OPBC09\_01055" 35464 "s59E5H2" 0.03786543 "3-dehydroquininate dehydratase"  
"OPBC09\_01055" 35464 "s63E6H2" 0.08759314 "3-dehydroquininate dehydratase"  
"OPBC09\_01056" 35465 "s59E13H2" 0.055464 "3-dehydroquininate synthase"  
"OPBC09\_01056" 35465 "s59E25H2" 0 "3-dehydroquininate synthase"  
"OPBC09\_01056" 35465 "s59E5H2" 0.1039527 "3-dehydroquininate synthase"  
"OPBC09\_01056" 35465 "s63E6H2" 0.1759508 "3-dehydroquininate synthase"  
"OPBC09\_01057" 35466 "s59E13H2" 0.05770864 "Shikimate kinase 1"  
"OPBC09\_01057" 35466 "s59E25H2" 0 "Shikimate kinase 1"  
"OPBC09\_01057" 35466 "s59E5H2" 0.07368685 "Shikimate kinase 1"  
"OPBC09\_01057" 35466 "s63E6H2" 0.1131638 "Shikimate kinase 1"  
"OPBC09\_01058" 35467 "s59E13H2" 0.03000382 "Chorismate synthase"  
"OPBC09\_01058" 35467 "s59E25H2" 0 "Chorismate synthase"  
"OPBC09\_01058" 35467 "s59E5H2" 0.07395995 "Chorismate synthase"

"OPBC09\_01058" 35467 "s63E6H2" 0.2404158 "Chorismate synthase"  
"OPBC09\_01060" 35469 "s59E13H2" 0.04710136 "Type 4 prepilin-like proteins leader peptide-processing enzyme"  
"OPBC09\_01060" 35469 "s59E25H2" 0 "Type 4 prepilin-like proteins leader peptide-processing enzyme"  
"OPBC09\_01060" 35469 "s59E5H2" 0.07830414 "Type 4 prepilin-like proteins leader peptide-processing enzyme"  
"OPBC09\_01060" 35469 "s63E6H2" 0.1698653 "Type 4 prepilin-like proteins leader peptide-processing enzyme"  
"OPBC09\_01061" 35470 "s59E13H2" 0.04377607 "Shikimate dehydrogenase"  
"OPBC09\_01061" 35470 "s59E25H2" 0 "Shikimate dehydrogenase"  
"OPBC09\_01061" 35470 "s59E5H2" 0.06547187 "Shikimate dehydrogenase"  
"OPBC09\_01061" 35470 "s63E6H2" 0.1714608 "Shikimate dehydrogenase"  
"OPBC09\_01062" 35471 "s59E13H2" 0.005247201 "Acylphosphatase"  
"OPBC09\_01062" 35471 "s59E25H2" 0 "Acylphosphatase"  
"OPBC09\_01062" 35471 "s59E5H2" 0.07053526 "Acylphosphatase"  
"OPBC09\_01062" 35471 "s63E6H2" 0.1212872 "Acylphosphatase"  
"OPBC09\_01063" 35472 "s59E13H2" 0.0343595 "putative protease YhbU precursor"  
"OPBC09\_01063" 35472 "s59E25H2" 0 "putative protease YhbU precursor"  
"OPBC09\_01063" 35472 "s59E5H2" 0.09806121 "putative protease YhbU precursor"  
"OPBC09\_01063" 35472 "s63E6H2" 0.1976066 "putative protease YhbU precursor"  
"OPBC09\_01064" 35473 "s59E13H2" 0.04194525 "Putative O-methyltransferase/MSMEI\_4947"  
"OPBC09\_01064" 35473 "s59E25H2" 0 "Putative O-methyltransferase/MSMEI\_4947"  
"OPBC09\_01064" 35473 "s59E5H2" 0.02669062 "Putative O-methyltransferase/MSMEI\_4947"  
"OPBC09\_01064" 35473 "s63E6H2" 0.1732245 "Putative O-methyltransferase/MSMEI\_4947"  
"OPBC09\_01065" 35474 "s59E13H2" 0.02048841 "putative aminodeoxychorismate lyase"  
"OPBC09\_01065" 35474 "s59E25H2" 0 "putative aminodeoxychorismate lyase"  
"OPBC09\_01065" 35474 "s59E5H2" 0.0413174 "putative aminodeoxychorismate lyase"  
"OPBC09\_01065" 35474 "s63E6H2" 0.1727954 "putative aminodeoxychorismate lyase"  
"OPBC09\_01066" 35475 "s59E13H2" 0.0122696 "Putative Holliday junction resolvase"  
"OPBC09\_01066" 35475 "s59E25H2" 0 "Putative Holliday junction resolvase"  
"OPBC09\_01066" 35475 "s59E5H2" 0.04374407 "Putative Holliday junction resolvase"  
"OPBC09\_01066" 35475 "s63E6H2" 0.122991 "Putative Holliday junction resolvase"  
"OPBC09\_01067" 35476 "s59E13H2" 0.01787811 "Alanine--tRNA ligase"  
"OPBC09\_01067" 35476 "s59E25H2" 0 "Alanine--tRNA ligase"  
"OPBC09\_01067" 35476 "s59E5H2" 0.03951498 "Alanine--tRNA ligase"  
"OPBC09\_01067" 35476 "s63E6H2" 0.1505415 "Alanine--tRNA ligase"  
"OPBC09\_01068" 35477 "s59E13H2" 0.004159949 "Alanine--tRNA ligase"  
"OPBC09\_01068" 35477 "s59E25H2" 0 "Alanine--tRNA ligase"  
"OPBC09\_01068" 35477 "s59E5H2" 0.05417696 "Alanine--tRNA ligase"  
"OPBC09\_01068" 35477 "s63E6H2" 0.08377289 "Alanine--tRNA ligase"  
"OPBC09\_01070" 35479 "s59E13H2" 0.003859057 "Aspartate--tRNA ligase"  
"OPBC09\_01070" 35479 "s59E25H2" 0 "Aspartate--tRNA ligase"  
"OPBC09\_01070" 35479 "s59E5H2" 0.1290082 "Aspartate--tRNA ligase"  
"OPBC09\_01070" 35479 "s63E6H2" 0.04419241 "Aspartate--tRNA ligase"  
"OPBI09\_00001" 35480 "s59E13H2" 0 "hypothetical protein"  
"OPBI09\_00001" 35480 "s59E25H2" 0 "hypothetical protein"  
"OPBI09\_00001" 35480 "s59E5H2" 0 "hypothetical protein"  
"OPBI09\_00001" 35480 "s63E6H2" 0 "hypothetical protein"  
"OPBI09\_00002" 35481 "s59E13H2" 0 "hypothetical protein"  
"OPBI09\_00002" 35481 "s59E25H2" 0 "hypothetical protein"

"OPBI09\_00002" 35481 "s59E5H2" 0 "hypothetical protein"  
"OPBI09\_00002" 35481 "s63E6H2" 0 "hypothetical protein"  
"OPBI09\_00003" 35482 "s59E13H2" 12.10013 "Methylated-DNA--protein-cysteine methyltransferase, inducible"  
"OPBI09\_00003" 35482 "s59E25H2" 0 "Methylated-DNA--protein-cysteine methyltransferase, inducible"  
"OPBI09\_00003" 35482 "s59E5H2" 0.2804658 "Methylated-DNA--protein-cysteine methyltransferase, inducible"  
"OPBI09\_00003" 35482 "s63E6H2" 0.0462896 "Methylated-DNA--protein-cysteine methyltransferase, inducible"  
"OPBI09\_00004" 35483 "s59E13H2" 0 "hypothetical protein"  
"OPBI09\_00004" 35483 "s59E25H2" 0 "hypothetical protein"  
"OPBI09\_00004" 35483 "s59E5H2" 0.05498265 "hypothetical protein"  
"OPBI09\_00004" 35483 "s63E6H2" 0 "hypothetical protein"  
"OPBI09\_00005" 35484 "s59E13H2" 0 "2,3-dimethylmalate dehydratase large subunit"  
"OPBI09\_00005" 35484 "s59E25H2" 0 "2,3-dimethylmalate dehydratase large subunit"  
"OPBI09\_00005" 35484 "s59E5H2" 0.01421028 "2,3-dimethylmalate dehydratase large subunit"  
"OPBI09\_00005" 35484 "s63E6H2" 0.4976386 "2,3-dimethylmalate dehydratase large subunit"  
"OPBI09\_00006" 35485 "s59E13H2" 0 "2,3-dimethylmalate dehydratase small subunit"  
"OPBI09\_00006" 35485 "s59E25H2" 0 "2,3-dimethylmalate dehydratase small subunit"  
"OPBI09\_00006" 35485 "s59E5H2" 0.02977064 "2,3-dimethylmalate dehydratase small subunit"  
"OPBI09\_00006" 35485 "s63E6H2" 0.213033 "2,3-dimethylmalate dehydratase small subunit"  
"OPBI09\_00007" 35486 "s59E13H2" 0.01086234 "2-isopropylmalate synthase"  
"OPBI09\_00007" 35486 "s59E25H2" 0 "2-isopropylmalate synthase"  
"OPBI09\_00007" 35486 "s59E5H2" 0.02980867 "2-isopropylmalate synthase"  
"OPBI09\_00007" 35486 "s63E6H2" 0.9090557 "2-isopropylmalate synthase"  
"OPBI09\_00008" 35487 "s59E13H2" 0 "carbon-phosphorus lyase complex accessory protein"  
"OPBI09\_00008" 35487 "s59E25H2" 0 "carbon-phosphorus lyase complex accessory protein"  
"OPBI09\_00008" 35487 "s59E5H2" 0 "carbon-phosphorus lyase complex accessory protein"  
"OPBI09\_00008" 35487 "s63E6H2" 0 "carbon-phosphorus lyase complex accessory protein"  
"OPBI09\_00010" 35489 "s59E13H2" 0.003336016 "hypothetical protein"  
"OPBI09\_00010" 35489 "s59E25H2" 0 "hypothetical protein"  
"OPBI09\_00010" 35489 "s59E5H2" 0.04634145 "hypothetical protein"  
"OPBI09\_00010" 35489 "s63E6H2" 0.5754769 "hypothetical protein"  
"OPBI09\_00011" 35490 "s59E13H2" 0.0137428 "FMN reductase [NAD(P)H]"  
"OPBI09\_00011" 35490 "s59E25H2" 0 "FMN reductase [NAD(P)H]"  
"OPBI09\_00011" 35490 "s59E5H2" 0.06200912 "FMN reductase [NAD(P)H]"  
"OPBI09\_00011" 35490 "s63E6H2" 0.5646834 "FMN reductase [NAD(P)H]"  
"OPBI09\_00012" 35491 "s59E13H2" 0 "hypothetical protein"  
"OPBI09\_00012" 35491 "s59E25H2" 0 "hypothetical protein"  
"OPBI09\_00012" 35491 "s59E5H2" 0 "hypothetical protein"  
"OPBI09\_00012" 35491 "s63E6H2" 0 "hypothetical protein"  
"OPBI09\_00013" 35492 "s59E13H2" 0.09101133 "Putative K(+)-stimulated pyrophosphate-energized sodium pump"  
"OPBI09\_00013" 35492 "s59E25H2" 0 "Putative K(+)-stimulated pyrophosphate-energized sodium pump"  
"OPBI09\_00013" 35492 "s59E5H2" 0.1130401 "Putative K(+)-stimulated pyrophosphate-energized sodium pump"  
"OPBI09\_00013" 35492 "s63E6H2" 0.1013101 "Putative K(+)-stimulated pyrophosphate-energized sodium pump"  
"OPBI09\_00014" 35493 "s59E13H2" 0.08231676 "N5-carboxyaminoimidazole ribonucleotide mutase"  
"OPBI09\_00014" 35493 "s59E25H2" 0 "N5-carboxyaminoimidazole ribonucleotide mutase"  
"OPBI09\_00014" 35493 "s59E5H2" 0.1140225 "N5-carboxyaminoimidazole ribonucleotide mutase"  
"OPBI09\_00014" 35493 "s63E6H2" 0.0942134 "N5-carboxyaminoimidazole ribonucleotide mutase"  
"OPBI09\_00015" 35494 "s59E13H2" 0.00230611 "Type II secretion system protein E"

"OPBI09\_00015" 35494 "s59E25H2" 0 "Type II secretion system protein E"  
"OPBI09\_00015" 35494 "s59E5H2" 0.02940306 "Type II secretion system protein E"  
"OPBI09\_00015" 35494 "s63E6H2" 0.003405126 "Type II secretion system protein E"  
"OPBI09\_00016" 35495 "s59E13H2" 0.1033682 "DNA polymerase III subunit alpha"  
"OPBI09\_00016" 35495 "s59E25H2" 0 "DNA polymerase III subunit alpha"  
"OPBI09\_00016" 35495 "s59E5H2" 0.06985555 "DNA polymerase III subunit alpha"  
"OPBI09\_00016" 35495 "s63E6H2" 0.05094675 "DNA polymerase III subunit alpha"  
"OPBI09\_00017" 35496 "s59E13H2" 0.002921984 "Opine dehydrogenase"  
"OPBI09\_00017" 35496 "s59E25H2" 0 "Opine dehydrogenase"  
"OPBI09\_00017" 35496 "s59E5H2" 0.042417 "Opine dehydrogenase"  
"OPBI09\_00017" 35496 "s63E6H2" 0.04872315 "Opine dehydrogenase"  
"OPBI09\_00018" 35497 "s59E13H2" 0.0001273918 "B12 binding domain protein"  
"OPBI09\_00018" 35497 "s59E25H2" 0 "B12 binding domain protein"  
"OPBI09\_00018" 35497 "s59E5H2" 0.1418477 "B12 binding domain protein"  
"OPBI09\_00018" 35497 "s63E6H2" 0.0354217 "B12 binding domain protein"  
"OPBI09\_00019" 35498 "s59E13H2" 0.02528122 "ATP phosphoribosyltransferase regulatory subunit"  
"OPBI09\_00019" 35498 "s59E25H2" 0 "ATP phosphoribosyltransferase regulatory subunit"  
"OPBI09\_00019" 35498 "s59E5H2" 0.04667359 "ATP phosphoribosyltransferase regulatory subunit"  
"OPBI09\_00019" 35498 "s63E6H2" 0.0778206 "ATP phosphoribosyltransferase regulatory subunit"  
"OPBI09\_00020" 35499 "s59E13H2" 0.002264861 "ATP phosphoribosyltransferase"  
"OPBI09\_00020" 35499 "s59E25H2" 0 "ATP phosphoribosyltransferase"  
"OPBI09\_00020" 35499 "s59E5H2" 0.07565475 "ATP phosphoribosyltransferase"  
"OPBI09\_00020" 35499 "s63E6H2" 0.07041844 "ATP phosphoribosyltransferase"  
"OPBI09\_00021" 35500 "s59E13H2" 0 "Imidazoleglycerol-phosphate dehydratase"  
"OPBI09\_00021" 35500 "s59E25H2" 0 "Imidazoleglycerol-phosphate dehydratase"  
"OPBI09\_00021" 35500 "s59E5H2" 0.03164752 "Imidazoleglycerol-phosphate dehydratase"  
"OPBI09\_00021" 35500 "s63E6H2" 0.1305125 "Imidazoleglycerol-phosphate dehydratase"  
"OPBI09\_00022" 35501 "s59E13H2" 0 "1-(5-phosphoribosyl)-5-[(5-phosphoribosylamino)methylideneamino] imidazole-4-carboxamide isomerase"  
"OPBI09\_00022" 35501 "s59E25H2" 0 "1-(5-phosphoribosyl)-5-[(5-phosphoribosylamino)methylideneamino] imidazole-4-carboxamide isomerase"  
"OPBI09\_00022" 35501 "s59E5H2" 0.02018778 "1-(5-phosphoribosyl)-5-[(5-phosphoribosylamino)methylideneamino] imidazole-4-carboxamide isomerase"  
"OPBI09\_00022" 35501 "s63E6H2" 0.1256222 "1-(5-phosphoribosyl)-5-[(5-phosphoribosylamino)methylideneamino] imidazole-4-carboxamide isomerase"  
"OPBI09\_00023" 35502 "s59E13H2" 0 "Imidazole glycerol phosphate synthase subunit HisF"  
"OPBI09\_00023" 35502 "s59E25H2" 0 "Imidazole glycerol phosphate synthase subunit HisF"  
"OPBI09\_00023" 35502 "s59E5H2" 0.03994195 "Imidazole glycerol phosphate synthase subunit HisF"  
"OPBI09\_00023" 35502 "s63E6H2" 0.1330796 "Imidazole glycerol phosphate synthase subunit HisF"  
"OPBI09\_00024" 35503 "s59E13H2" 0 "Phosphoribosyl-AMP cyclohydrolase"  
"OPBI09\_00024" 35503 "s59E25H2" 0 "Phosphoribosyl-AMP cyclohydrolase"  
"OPBI09\_00024" 35503 "s59E5H2" 0.02240526 "Phosphoribosyl-AMP cyclohydrolase"  
"OPBI09\_00024" 35503 "s63E6H2" 0.1848678 "Phosphoribosyl-AMP cyclohydrolase"  
"OPBI09\_00025" 35504 "s59E13H2" 0.002714553 "6-phosphofructokinase"  
"OPBI09\_00025" 35504 "s59E25H2" 0 "6-phosphofructokinase"  
"OPBI09\_00025" 35504 "s59E5H2" 0.03480656 "6-phosphofructokinase"  
"OPBI09\_00025" 35504 "s63E6H2" 0.08185014 "6-phosphofructokinase"  
"OPBI09\_00027" 35506 "s59E13H2" 0 "hypothetical protein"  
"OPBI09\_00027" 35506 "s59E25H2" 0 "hypothetical protein"  
"OPBI09\_00027" 35506 "s59E5H2" 0.01341819 "hypothetical protein"  
"OPBI09\_00027" 35506 "s63E6H2" 0 "hypothetical protein"

"OPBI09\_00028" 35507 "s59E13H2" 0 "Acetyltransferase (GNAT) family protein"  
"OPBI09\_00028" 35507 "s59E25H2" 0 "Acetyltransferase (GNAT) family protein"  
"OPBI09\_00028" 35507 "s59E5H2" 0 "Acetyltransferase (GNAT) family protein"  
"OPBI09\_00028" 35507 "s63E6H2" 0 "Acetyltransferase (GNAT) family protein"  
"OPBI09\_00029" 35508 "s59E13H2" 0 "dTDP-3-amino-3,4,6-trideoxy-alpha-D-glucopyranose"  
"OPBI09\_00029" 35508 "s59E25H2" 0 "dTDP-3-amino-3,4,6-trideoxy-alpha-D-glucopyranose"  
"OPBI09\_00029" 35508 "s59E5H2" 0 "dTDP-3-amino-3,4,6-trideoxy-alpha-D-glucopyranose"  
"OPBI09\_00029" 35508 "s63E6H2" 0 "dTDP-3-amino-3,4,6-trideoxy-alpha-D-glucopyranose"  
"OPBI09\_00030" 35509 "s59E13H2" 0 "dTDP-3-amino-3,4,6-trideoxy-alpha-D-glucopyranose"  
"OPBI09\_00030" 35509 "s59E25H2" 0 "dTDP-3-amino-3,4,6-trideoxy-alpha-D-glucopyranose"  
"OPBI09\_00030" 35509 "s59E5H2" 0 "dTDP-3-amino-3,4,6-trideoxy-alpha-D-glucopyranose"  
"OPBI09\_00030" 35509 "s63E6H2" 0 "dTDP-3-amino-3,4,6-trideoxy-alpha-D-glucopyranose"  
"OPBI09\_00031" 35510 "s59E13H2" 0 "hypothetical protein"  
"OPBI09\_00031" 35510 "s59E25H2" 0 "hypothetical protein"  
"OPBI09\_00031" 35510 "s59E5H2" 0 "hypothetical protein"  
"OPBI09\_00031" 35510 "s63E6H2" 0 "hypothetical protein"  
"OPBI09\_00032" 35511 "s59E13H2" 0 "Ubiquinone biosynthesis O-methyltransferase"  
"OPBI09\_00032" 35511 "s59E25H2" 0 "Ubiquinone biosynthesis O-methyltransferase"  
"OPBI09\_00032" 35511 "s59E5H2" 0 "Ubiquinone biosynthesis O-methyltransferase"  
"OPBI09\_00032" 35511 "s63E6H2" 0 "Ubiquinone biosynthesis O-methyltransferase"  
"OPBI09\_00033" 35512 "s59E13H2" 0 "Carboxymuconolactone decarboxylase family protein"  
"OPBI09\_00033" 35512 "s59E25H2" 0 "Carboxymuconolactone decarboxylase family protein"  
"OPBI09\_00033" 35512 "s59E5H2" 0 "Carboxymuconolactone decarboxylase family protein"  
"OPBI09\_00033" 35512 "s63E6H2" 0 "Carboxymuconolactone decarboxylase family protein"  
"OPBI09\_00034" 35513 "s59E13H2" 0 "Acetyltransferase (GNAT) family protein"  
"OPBI09\_00034" 35513 "s59E25H2" 0 "Acetyltransferase (GNAT) family protein"  
"OPBI09\_00034" 35513 "s59E5H2" 0 "Acetyltransferase (GNAT) family protein"  
"OPBI09\_00034" 35513 "s63E6H2" 0 "Acetyltransferase (GNAT) family protein"  
"OPBI09\_00035" 35514 "s59E13H2" 0 "hypothetical protein"  
"OPBI09\_00035" 35514 "s59E25H2" 0 "hypothetical protein"  
"OPBI09\_00035" 35514 "s59E5H2" 0 "hypothetical protein"  
"OPBI09\_00035" 35514 "s63E6H2" 0 "hypothetical protein"  
"OPBI09\_00036" 35515 "s59E13H2" 0 "Methyltransferase domain protein"  
"OPBI09\_00036" 35515 "s59E25H2" 0 "Methyltransferase domain protein"  
"OPBI09\_00036" 35515 "s59E5H2" 0 "Methyltransferase domain protein"  
"OPBI09\_00036" 35515 "s63E6H2" 0 "Methyltransferase domain protein"  
"OPBI09\_00037" 35516 "s59E13H2" 0 "Demethylrebeccamycin-D-glucose O-methyltransferase"  
"OPBI09\_00037" 35516 "s59E25H2" 0 "Demethylrebeccamycin-D-glucose O-methyltransferase"  
"OPBI09\_00037" 35516 "s59E5H2" 0 "Demethylrebeccamycin-D-glucose O-methyltransferase"  
"OPBI09\_00037" 35516 "s63E6H2" 0 "Demethylrebeccamycin-D-glucose O-methyltransferase"  
"OPBI09\_00039" 35518 "s59E13H2" 0 "Isoprenylcysteine carboxyl methyltransferase (ICMT) family protein"  
"OPBI09\_00039" 35518 "s59E25H2" 0 "Isoprenylcysteine carboxyl methyltransferase (ICMT) family protein"  
"OPBI09\_00039" 35518 "s59E5H2" 0 "Isoprenylcysteine carboxyl methyltransferase (ICMT) family protein"  
"OPBI09\_00039" 35518 "s63E6H2" 0 "Isoprenylcysteine carboxyl methyltransferase (ICMT) family protein"  
"OPBI09\_00040" 35519 "s59E13H2" 0.01720839 "hypothetical protein"  
"OPBI09\_00040" 35519 "s59E25H2" 0 "hypothetical protein"  
"OPBI09\_00040" 35519 "s59E5H2" 0.01607596 "hypothetical protein"



"OPBI09\_00040" 35519 "s63E6H2" 0 "hypothetical protein"  
"OPBI09\_00042" 35521 "s59E13H2" 0 "UvrABC system protein C"  
"OPBI09\_00042" 35521 "s59E25H2" 0 "UvrABC system protein C"  
"OPBI09\_00042" 35521 "s59E5H2" 0.03324224 "UvrABC system protein C"  
"OPBI09\_00042" 35521 "s63E6H2" 0.01255772 "UvrABC system protein C"  
"OPBI09\_00043" 35522 "s59E13H2" 0 "Membrane protein of unknown function"  
"OPBI09\_00043" 35522 "s59E25H2" 0 "Membrane protein of unknown function"  
"OPBI09\_00043" 35522 "s59E5H2" 0 "Membrane protein of unknown function"  
"OPBI09\_00043" 35522 "s63E6H2" 0.01974553 "Membrane protein of unknown function"  
"OPBI09\_00044" 35523 "s59E13H2" 0.008141998 "glmZ(sRNA)-inactivating NTPase"  
"OPBI09\_00044" 35523 "s59E25H2" 0 "glmZ(sRNA)-inactivating NTPase"  
"OPBI09\_00044" 35523 "s59E5H2" 0.00903664 "glmZ(sRNA)-inactivating NTPase"  
"OPBI09\_00044" 35523 "s63E6H2" 0.000557433 "glmZ(sRNA)-inactivating NTPase"  
"OPBI09\_00045" 35524 "s59E13H2" 0.02033173 "Glyceraldehyde-3-phosphate dehydrogenase"  
"OPBI09\_00045" 35524 "s59E25H2" 0 "Glyceraldehyde-3-phosphate dehydrogenase"  
"OPBI09\_00045" 35524 "s59E5H2" 0.03421411 "Glyceraldehyde-3-phosphate dehydrogenase"  
"OPBI09\_00045" 35524 "s63E6H2" 0.01224251 "Glyceraldehyde-3-phosphate dehydrogenase"  
"OPBI09\_00046" 35525 "s59E13H2" 0.07774963 "Phosphoglycerate kinase"  
"OPBI09\_00046" 35525 "s59E25H2" 0 "Phosphoglycerate kinase"  
"OPBI09\_00046" 35525 "s59E5H2" 0.202109 "Phosphoglycerate kinase"  
"OPBI09\_00046" 35525 "s63E6H2" 0.005737298 "Phosphoglycerate kinase"  
"OPBI09\_00047" 35526 "s59E13H2" 0.004361046 "Triosephosphate isomerase"  
"OPBI09\_00047" 35526 "s59E25H2" 0 "Triosephosphate isomerase"  
"OPBI09\_00047" 35526 "s59E5H2" 0.1834542 "Triosephosphate isomerase"  
"OPBI09\_00047" 35526 "s63E6H2" 0.01456295 "Triosephosphate isomerase"  
"OPBI09\_00048" 35527 "s59E13H2" 0.0121332 "2,3-bisphosphoglycerate-independent phosphoglycerate mutase"  
"OPBI09\_00048" 35527 "s59E25H2" 0 "2,3-bisphosphoglycerate-independent phosphoglycerate mutase"  
"OPBI09\_00048" 35527 "s59E5H2" 0.3846044 "2,3-bisphosphoglycerate-independent phosphoglycerate mutase"  
"OPBI09\_00048" 35527 "s63E6H2" 0.01138939 "2,3-bisphosphoglycerate-independent phosphoglycerate mutase"  
"OPBI09\_00049" 35528 "s59E13H2" 0.006747519 "preprotein translocase subunit SecG"  
"OPBI09\_00049" 35528 "s59E25H2" 0 "preprotein translocase subunit SecG"  
"OPBI09\_00049" 35528 "s59E5H2" 0.181516 "preprotein translocase subunit SecG"  
"OPBI09\_00049" 35528 "s63E6H2" 0 "preprotein translocase subunit SecG"  
"OPBI09\_00050" 35529 "s59E13H2" 0.0007152487 "putative D,D-dipeptide-binding periplasmic protein DdpA precursor"  
"OPBI09\_00050" 35529 "s59E25H2" 0.1039861 "putative D,D-dipeptide-binding periplasmic protein DdpA precursor"  
"OPBI09\_00050" 35529 "s59E5H2" 0.02870535 "putative D,D-dipeptide-binding periplasmic protein DdpA precursor"  
"OPBI09\_00050" 35529 "s63E6H2" 0 "putative D,D-dipeptide-binding periplasmic protein DdpA precursor"  
"OPBI09\_00052" 35531 "s59E13H2" 0 "lipoprotein Nlpl"  
"OPBI09\_00052" 35531 "s59E25H2" 0 "lipoprotein Nlpl"  
"OPBI09\_00052" 35531 "s59E5H2" 0 "lipoprotein Nlpl"  
"OPBI09\_00052" 35531 "s63E6H2" 0 "lipoprotein Nlpl"  
"OPBI09\_00053" 35532 "s59E13H2" 0 "2-hydroxymuconate tautomerase"  
"OPBI09\_00053" 35532 "s59E25H2" 0 "2-hydroxymuconate tautomerase"  
"OPBI09\_00053" 35532 "s59E5H2" 0 "2-hydroxymuconate tautomerase"  
"OPBI09\_00053" 35532 "s63E6H2" 0 "2-hydroxymuconate tautomerase"  
"OPBI09\_00054" 35533 "s59E13H2" 0.04506255 "Benzylsuccinate synthase activating enzyme"  
"OPBI09\_00054" 35533 "s59E25H2" 0 "Benzylsuccinate synthase activating enzyme"

"OPBI09\_00054" 35533 "s59E5H2" 0.4524445 "Benzylsuccinate synthase activating enzyme"  
"OPBI09\_00054" 35533 "s63E6H2" 0.02176446 "Benzylsuccinate synthase activating enzyme"  
"OPBI09\_00056" 35535 "s59E13H2" 0.01406749 "NAD-specific glutamate dehydrogenase"  
"OPBI09\_00056" 35535 "s59E25H2" 0 "NAD-specific glutamate dehydrogenase"  
"OPBI09\_00056" 35535 "s59E5H2" 0.5162131 "NAD-specific glutamate dehydrogenase"  
"OPBI09\_00056" 35535 "s63E6H2" 0.02859771 "NAD-specific glutamate dehydrogenase"  
"OPBI09\_00058" 35537 "s59E13H2" 0.002024697 "Cyclic di-GMP phosphodiesterase response regulator RpfG"  
"OPBI09\_00058" 35537 "s59E25H2" 0 "Cyclic di-GMP phosphodiesterase response regulator RpfG"  
"OPBI09\_00058" 35537 "s59E5H2" 0.01806297 "Cyclic di-GMP phosphodiesterase response regulator RpfG"  
"OPBI09\_00058" 35537 "s63E6H2" 0.02246729 "Cyclic di-GMP phosphodiesterase response regulator RpfG"  
"OPBI09\_00059" 35538 "s59E13H2" 0.01489702 "hypothetical protein"  
"OPBI09\_00059" 35538 "s59E25H2" 0 "hypothetical protein"  
"OPBI09\_00059" 35538 "s59E5H2" 0.06859137 "hypothetical protein"  
"OPBI09\_00059" 35538 "s63E6H2" 0.02190778 "hypothetical protein"  
"OPBI09\_00060" 35539 "s59E13H2" 0.01635047 "Glutaredoxin"  
"OPBI09\_00060" 35539 "s59E25H2" 0 "Glutaredoxin"  
"OPBI09\_00060" 35539 "s59E5H2" 0.1613855 "Glutaredoxin"  
"OPBI09\_00060" 35539 "s63E6H2" 0.01982102 "Glutaredoxin"  
"OPBI09\_00061" 35540 "s59E13H2" 0.003264598 "Ferredoxin thioredoxin reductase catalytic beta chain"  
"OPBI09\_00061" 35540 "s59E25H2" 0 "Ferredoxin thioredoxin reductase catalytic beta chain"  
"OPBI09\_00061" 35540 "s59E5H2" 0.06705197 "Ferredoxin thioredoxin reductase catalytic beta chain"  
"OPBI09\_00061" 35540 "s63E6H2" 0.05810264 "Ferredoxin thioredoxin reductase catalytic beta chain"  
"OPBI09\_00062" 35541 "s59E13H2" 0.002949785 "DNA polymerase IV"  
"OPBI09\_00062" 35541 "s59E25H2" 0 "DNA polymerase IV"  
"OPBI09\_00062" 35541 "s59E5H2" 1.273742 "DNA polymerase IV"  
"OPBI09\_00062" 35541 "s63E6H2" 0.05334203 "DNA polymerase IV"  
"OPBI09\_00063" 35542 "s59E13H2" 0.01158721 "DNA polymerase III subunit alpha"  
"OPBI09\_00063" 35542 "s59E25H2" 0 "DNA polymerase III subunit alpha"  
"OPBI09\_00063" 35542 "s59E5H2" 0.6228087 "DNA polymerase III subunit alpha"  
"OPBI09\_00063" 35542 "s63E6H2" 0.02000474 "DNA polymerase III subunit alpha"  
"OPBI09\_00064" 35543 "s59E13H2" 0 "4-amino-4-deoxy-L-arabinose-phosphoundecaprenol flippase subunit ArnE"  
"OPBI09\_00064" 35543 "s59E25H2" 0 "4-amino-4-deoxy-L-arabinose-phosphoundecaprenol flippase subunit ArnE"  
"OPBI09\_00064" 35543 "s59E5H2" 0.1629232 "4-amino-4-deoxy-L-arabinose-phosphoundecaprenol flippase subunit ArnE"  
"OPBI09\_00064" 35543 "s63E6H2" 0 "4-amino-4-deoxy-L-arabinose-phosphoundecaprenol flippase subunit ArnE"  
"OPBI09\_00065" 35544 "s59E13H2" 0 "4-amino-4-deoxy-L-arabinose-phosphoundecaprenol flippase subunit ArnF"  
"OPBI09\_00065" 35544 "s59E25H2" 0 "4-amino-4-deoxy-L-arabinose-phosphoundecaprenol flippase subunit ArnF"  
"OPBI09\_00065" 35544 "s59E5H2" 0.1013978 "4-amino-4-deoxy-L-arabinose-phosphoundecaprenol flippase subunit ArnF"  
"OPBI09\_00065" 35544 "s63E6H2" 0 "4-amino-4-deoxy-L-arabinose-phosphoundecaprenol flippase subunit ArnF"  
"OPBI09\_00066" 35545 "s59E13H2" 0 "UDP-N-acetyl-D-glucosamine 6-dehydrogenase"  
"OPBI09\_00066" 35545 "s59E25H2" 0 "UDP-N-acetyl-D-glucosamine 6-dehydrogenase"  
"OPBI09\_00066" 35545 "s59E5H2" 0.2289506 "UDP-N-acetyl-D-glucosamine 6-dehydrogenase"  
"OPBI09\_00066" 35545 "s63E6H2" 0 "UDP-N-acetyl-D-glucosamine 6-dehydrogenase"  
"OPBI09\_00067" 35546 "s59E13H2" 0.001392511 "UDP-glucose 4-epimerase"  
"OPBI09\_00067" 35546 "s59E25H2" 0 "UDP-glucose 4-epimerase"  
"OPBI09\_00067" 35546 "s59E5H2" 0.3192364 "UDP-glucose 4-epimerase"  
"OPBI09\_00067" 35546 "s63E6H2" 0 "UDP-glucose 4-epimerase"  
"OPBI09\_00068" 35547 "s59E13H2" 0.007348071 "Glycosyltransferase AgII"

"OPBI09\_00068" 35547 "s59E25H2" 0 "Glycosyltransferase AgII"  
"OPBI09\_00068" 35547 "s59E5H2" 0.4008889 "Glycosyltransferase AgII"  
"OPBI09\_00068" 35547 "s63E6H2" 0.003506549 "Glycosyltransferase AgII"  
"OPBI09\_00069" 35548 "s59E13H2" 0.002072315 "hypothetical protein"  
"OPBI09\_00069" 35548 "s59E25H2" 0 "hypothetical protein"  
"OPBI09\_00069" 35548 "s59E5H2" 0.2065601 "hypothetical protein"  
"OPBI09\_00069" 35548 "s63E6H2" 0.007047672 "hypothetical protein"  
"OPBI09\_00070" 35549 "s59E13H2" 0.0219419 "Galactoside O-acetyltransferase"  
"OPBI09\_00070" 35549 "s59E25H2" 0 "Galactoside O-acetyltransferase"  
"OPBI09\_00070" 35549 "s59E5H2" 0.2352662 "Galactoside O-acetyltransferase"  
"OPBI09\_00070" 35549 "s63E6H2" 0.07527206 "Galactoside O-acetyltransferase"  
"OPBI09\_00071" 35550 "s59E13H2" 0.03806078 "3 beta-hydroxysteroid dehydrogenase/Delta 5--"  
"OPBI09\_00071" 35550 "s59E25H2" 0 "3 beta-hydroxysteroid dehydrogenase/Delta 5--"  
"OPBI09\_00071" 35550 "s59E5H2" 0.1604317 "3 beta-hydroxysteroid dehydrogenase/Delta 5--"  
"OPBI09\_00071" 35550 "s63E6H2" 0.08934882 "3 beta-hydroxysteroid dehydrogenase/Delta 5--"  
"OPBI09\_00072" 35551 "s59E13H2" 0.03895132 "S-adenosyl-L-methionine-dependent 2-deoxy-scylo-inosamine dehydrogenase"  
"OPBI09\_00072" 35551 "s59E25H2" 0 "S-adenosyl-L-methionine-dependent 2-deoxy-scylo-inosamine dehydrogenase"  
"OPBI09\_00072" 35551 "s59E5H2" 0.1037551 "S-adenosyl-L-methionine-dependent 2-deoxy-scylo-inosamine dehydrogenase"  
"OPBI09\_00072" 35551 "s63E6H2" 0.219907 "S-adenosyl-L-methionine-dependent 2-deoxy-scylo-inosamine dehydrogenase"  
"OPBI09\_00073" 35552 "s59E13H2" 0.01313119 "Undecaprenyl-phosphate 4-deoxy-4-formamido-L-arabinose transferase"  
"OPBI09\_00073" 35552 "s59E25H2" 0 "Undecaprenyl-phosphate 4-deoxy-4-formamido-L-arabinose transferase"  
"OPBI09\_00073" 35552 "s59E5H2" 0.0940514 "Undecaprenyl-phosphate 4-deoxy-4-formamido-L-arabinose transferase"  
"OPBI09\_00073" 35552 "s63E6H2" 0.2988546 "Undecaprenyl-phosphate 4-deoxy-4-formamido-L-arabinose transferase"  
"OPBI09\_00074" 35553 "s59E13H2" 0.04266671 "dTDP-glucose 4,6-dehydratase"  
"OPBI09\_00074" 35553 "s59E25H2" 0 "dTDP-glucose 4,6-dehydratase"  
"OPBI09\_00074" 35553 "s59E5H2" 0.06436175 "dTDP-glucose 4,6-dehydratase"  
"OPBI09\_00074" 35553 "s63E6H2" 0.1680745 "dTDP-glucose 4,6-dehydratase"  
"OPBI09\_00075" 35554 "s59E13H2" 0.007180225 "dTDP-4-dehydrorhamnose reductase"  
"OPBI09\_00075" 35554 "s59E25H2" 0 "dTDP-4-dehydrorhamnose reductase"  
"OPBI09\_00075" 35554 "s59E5H2" 0.07859044 "dTDP-4-dehydrorhamnose reductase"  
"OPBI09\_00075" 35554 "s63E6H2" 0.003225459 "dTDP-4-dehydrorhamnose reductase"  
"OPBI09\_00076" 35555 "s59E13H2" 0.00240584 "hypothetical protein"  
"OPBI09\_00076" 35555 "s59E25H2" 0 "hypothetical protein"  
"OPBI09\_00076" 35555 "s59E5H2" 0.01175746 "hypothetical protein"  
"OPBI09\_00076" 35555 "s63E6H2" 0.02952313 "hypothetical protein"  
"OPBI09\_00077" 35556 "s59E13H2" 0 "hypothetical protein"  
"OPBI09\_00077" 35556 "s59E25H2" 0 "hypothetical protein"  
"OPBI09\_00077" 35556 "s59E5H2" 0.03583322 "hypothetical protein"  
"OPBI09\_00077" 35556 "s63E6H2" 0.08055405 "hypothetical protein"  
"OPBI09\_00078" 35557 "s59E13H2" 0.003205686 "hypothetical protein"  
"OPBI09\_00078" 35557 "s59E25H2" 0 "hypothetical protein"  
"OPBI09\_00078" 35557 "s59E5H2" 0.1770954 "hypothetical protein"  
"OPBI09\_00078" 35557 "s63E6H2" 0.1141773 "hypothetical protein"  
"OPBI09\_00079" 35558 "s59E13H2" 0.01014841 "N-acetylglucosaminyl-diphospho-decaprenol L-rhamnosyltransferase"  
"OPBI09\_00079" 35558 "s59E25H2" 0 "N-acetylglucosaminyl-diphospho-decaprenol L-rhamnosyltransferase"  
"OPBI09\_00079" 35558 "s59E5H2" 0.09975955 "N-acetylglucosaminyl-diphospho-decaprenol L-rhamnosyltransferase"  
"OPBI09\_00079" 35558 "s63E6H2" 0.8090969 "N-acetylglucosaminyl-diphospho-decaprenol L-rhamnosyltransferase"

"OPBI09\_00080" 35559 "s59E13H2" 0.003603975 "Arylesterase precursor"  
"OPBI09\_00080" 35559 "s59E25H2" 0 "Arylesterase precursor"  
"OPBI09\_00080" 35559 "s59E5H2" 0.1059093 "Arylesterase precursor"  
"OPBI09\_00080" 35559 "s63E6H2" 0.5137689 "Arylesterase precursor"  
"OPBI09\_00081" 35560 "s59E13H2" 0.00143696 "Trehalose synthase"  
"OPBI09\_00081" 35560 "s59E25H2" 0 "Trehalose synthase"  
"OPBI09\_00081" 35560 "s59E5H2" 0.0343823 "Trehalose synthase"  
"OPBI09\_00081" 35560 "s63E6H2" 0.5527274 "Trehalose synthase"  
"OPBI09\_00082" 35561 "s59E13H2" 0.00303787 "D-inositol 3-phosphate glycosyltransferase"  
"OPBI09\_00082" 35561 "s59E25H2" 0 "D-inositol 3-phosphate glycosyltransferase"  
"OPBI09\_00082" 35561 "s59E5H2" 0.05318003 "D-inositol 3-phosphate glycosyltransferase"  
"OPBI09\_00082" 35561 "s63E6H2" 0.6915478 "D-inositol 3-phosphate glycosyltransferase"  
"OPBI09\_00083" 35562 "s59E13H2" 0 "Teichoic acids export ATP-binding protein TagH"  
"OPBI09\_00083" 35562 "s59E25H2" 0 "Teichoic acids export ATP-binding protein TagH"  
"OPBI09\_00083" 35562 "s59E5H2" 0.07361327 "Teichoic acids export ATP-binding protein TagH"  
"OPBI09\_00083" 35562 "s63E6H2" 0.297678 "Teichoic acids export ATP-binding protein TagH"  
"OPBI09\_00084" 35563 "s59E13H2" 0 "Teichoic acid translocation permease protein TagG"  
"OPBI09\_00084" 35563 "s59E25H2" 0 "Teichoic acid translocation permease protein TagG"  
"OPBI09\_00084" 35563 "s59E5H2" 0.1192123 "Teichoic acid translocation permease protein TagG"  
"OPBI09\_00084" 35563 "s63E6H2" 0.4866796 "Teichoic acid translocation permease protein TagG"  
"OPBI09\_00085" 35564 "s59E13H2" 0 "UDP-glucose:undecaprenyl-phosphate glucose-1-phosphate transferase"  
"OPBI09\_00085" 35564 "s59E25H2" 0 "UDP-glucose:undecaprenyl-phosphate glucose-1-phosphate transferase"  
"OPBI09\_00085" 35564 "s59E5H2" 0.03488432 "UDP-glucose:undecaprenyl-phosphate glucose-1-phosphate transferase"  
"OPBI09\_00085" 35564 "s63E6H2" 0.9400515 "UDP-glucose:undecaprenyl-phosphate glucose-1-phosphate transferase"  
"OPBI09\_00086" 35565 "s59E13H2" 0 "O-Antigen ligase"  
"OPBI09\_00086" 35565 "s59E25H2" 0 "O-Antigen ligase"  
"OPBI09\_00086" 35565 "s59E5H2" 0.04323868 "O-Antigen ligase"  
"OPBI09\_00086" 35565 "s63E6H2" 0.2067042 "O-Antigen ligase"  
"OPBI09\_00087" 35566 "s59E13H2" 0 "O-Antigen ligase"  
"OPBI09\_00087" 35566 "s59E25H2" 0 "O-Antigen ligase"  
"OPBI09\_00087" 35566 "s59E5H2" 0 "O-Antigen ligase"  
"OPBI09\_00087" 35566 "s63E6H2" 0 "O-Antigen ligase"  
"OPBI09\_00088" 35567 "s59E13H2" 0 "Glycogen synthase"  
"OPBI09\_00088" 35567 "s59E25H2" 0 "Glycogen synthase"  
"OPBI09\_00088" 35567 "s59E5H2" 0 "Glycogen synthase"  
"OPBI09\_00088" 35567 "s63E6H2" 0 "Glycogen synthase"  
"OPBI09\_00089" 35568 "s59E13H2" 0 "Glycogen synthase"  
"OPBI09\_00089" 35568 "s59E25H2" 0 "Glycogen synthase"  
"OPBI09\_00089" 35568 "s59E5H2" 0 "Glycogen synthase"  
"OPBI09\_00089" 35568 "s63E6H2" 0 "Glycogen synthase"  
"OPBI09\_00090" 35569 "s59E13H2" 0 "putative glycosyl transferase"  
"OPBI09\_00090" 35569 "s59E25H2" 0 "putative glycosyl transferase"  
"OPBI09\_00090" 35569 "s59E5H2" 0 "putative glycosyl transferase"  
"OPBI09\_00090" 35569 "s63E6H2" 0 "putative glycosyl transferase"  
"OPBI09\_00091" 35570 "s59E13H2" 0 "Heparin-sulfate lyase precursor"  
"OPBI09\_00091" 35570 "s59E25H2" 0 "Heparin-sulfate lyase precursor"  
"OPBI09\_00091" 35570 "s59E5H2" 0 "Heparin-sulfate lyase precursor"

"OPBI09\_00091" 35570 "s63E6H2" 0 "Heparin-sulfate lyase precursor"  
"OPBI09\_00092" 35571 "s59E13H2" 0 "GDP-mannose-dependent alpha-(1-6)-phosphatidylinositol monomannoside mannosyltransferase"  
"OPBI09\_00092" 35571 "s59E25H2" 0 "GDP-mannose-dependent alpha-(1-6)-phosphatidylinositol monomannoside mannosyltransferase"  
"OPBI09\_00092" 35571 "s59E5H2" 0 "GDP-mannose-dependent alpha-(1-6)-phosphatidylinositol monomannoside mannosyltransferase"  
"OPBI09\_00092" 35571 "s63E6H2" 0 "GDP-mannose-dependent alpha-(1-6)-phosphatidylinositol monomannoside mannosyltransferase"  
"OPBI09\_00093" 35572 "s59E13H2" 0 "Methyltransferase domain protein"  
"OPBI09\_00093" 35572 "s59E25H2" 0 "Methyltransferase domain protein"  
"OPBI09\_00093" 35572 "s59E5H2" 0 "Methyltransferase domain protein"  
"OPBI09\_00093" 35572 "s63E6H2" 0 "Methyltransferase domain protein"  
"OPBI09\_00094" 35573 "s59E13H2" 0 "Polysaccharide biosynthesis protein"  
"OPBI09\_00094" 35573 "s59E25H2" 0 "Polysaccharide biosynthesis protein"  
"OPBI09\_00094" 35573 "s59E5H2" 0 "Polysaccharide biosynthesis protein"  
"OPBI09\_00094" 35573 "s63E6H2" 0 "Polysaccharide biosynthesis protein"  
"OPBI09\_00095" 35574 "s59E13H2" 0 "CDP-Glycerol:Poly(glycerophosphate) glycerophosphotransferase"  
"OPBI09\_00095" 35574 "s59E25H2" 0 "CDP-Glycerol:Poly(glycerophosphate) glycerophosphotransferase"  
"OPBI09\_00095" 35574 "s59E5H2" 0 "CDP-Glycerol:Poly(glycerophosphate) glycerophosphotransferase"  
"OPBI09\_00095" 35574 "s63E6H2" 0 "CDP-Glycerol:Poly(glycerophosphate) glycerophosphotransferase"  
"OPBI09\_00096" 35575 "s59E13H2" 0 "Ribosomal protein S12 methylthiotransferase RimO"  
"OPBI09\_00096" 35575 "s59E25H2" 0 "Ribosomal protein S12 methylthiotransferase RimO"  
"OPBI09\_00096" 35575 "s59E5H2" 0 "Ribosomal protein S12 methylthiotransferase RimO"  
"OPBI09\_00096" 35575 "s63E6H2" 0 "Ribosomal protein S12 methylthiotransferase RimO"  
"OPBI09\_00097" 35576 "s59E13H2" 0 "2,3-bisphosphoglycerate-independent phosphoglycerate mutase"  
"OPBI09\_00097" 35576 "s59E25H2" 0 "2,3-bisphosphoglycerate-independent phosphoglycerate mutase"  
"OPBI09\_00097" 35576 "s59E5H2" 0 "2,3-bisphosphoglycerate-independent phosphoglycerate mutase"  
"OPBI09\_00097" 35576 "s63E6H2" 0 "2,3-bisphosphoglycerate-independent phosphoglycerate mutase"  
"OPBI09\_00098" 35577 "s59E13H2" 0 "Putative 4,5-dihydroxyphthalate dehydrogenase"  
"OPBI09\_00098" 35577 "s59E25H2" 0 "Putative 4,5-dihydroxyphthalate dehydrogenase"  
"OPBI09\_00098" 35577 "s59E5H2" 0 "Putative 4,5-dihydroxyphthalate dehydrogenase"  
"OPBI09\_00098" 35577 "s63E6H2" 0 "Putative 4,5-dihydroxyphthalate dehydrogenase"  
"OPBI09\_00099" 35578 "s59E13H2" 0 "UDP-N-acetylglucosamine 2-epimerase"  
"OPBI09\_00099" 35578 "s59E25H2" 0 "UDP-N-acetylglucosamine 2-epimerase"  
"OPBI09\_00099" 35578 "s59E5H2" 0 "UDP-N-acetylglucosamine 2-epimerase"  
"OPBI09\_00099" 35578 "s63E6H2" 0 "UDP-N-acetylglucosamine 2-epimerase"  
"OPBI09\_00100" 35579 "s59E13H2" 0 "UDP-N-acetyl-D-mannosamine dehydrogenase"  
"OPBI09\_00100" 35579 "s59E25H2" 0 "UDP-N-acetyl-D-mannosamine dehydrogenase"  
"OPBI09\_00100" 35579 "s59E5H2" 0 "UDP-N-acetyl-D-mannosamine dehydrogenase"  
"OPBI09\_00100" 35579 "s63E6H2" 0 "UDP-N-acetyl-D-mannosamine dehydrogenase"  
"OPBI09\_00101" 35580 "s59E13H2" 0 "O-Antigen ligase"  
"OPBI09\_00101" 35580 "s59E25H2" 0 "O-Antigen ligase"  
"OPBI09\_00101" 35580 "s59E5H2" 0 "O-Antigen ligase"  
"OPBI09\_00101" 35580 "s63E6H2" 0 "O-Antigen ligase"  
"OPBI09\_00102" 35581 "s59E13H2" 0 "Chain length determinant protein"  
"OPBI09\_00102" 35581 "s59E25H2" 0 "Chain length determinant protein"  
"OPBI09\_00102" 35581 "s59E5H2" 0.01435896 "Chain length determinant protein"  
"OPBI09\_00102" 35581 "s63E6H2" 0 "Chain length determinant protein"  
"OPBI09\_00103" 35582 "s59E13H2" 0 "2,3,4,5-tetrahydropyridine-2,6-dicarboxylate N-acetyltransferase"  
"OPBI09\_00103" 35582 "s59E25H2" 0 "2,3,4,5-tetrahydropyridine-2,6-dicarboxylate N-acetyltransferase"

"OPBI09\_00103" 35582 "s59E5H2" 0 "2,3,4,5-tetrahydropyridine-2,6-dicarboxylate N-acetyltransferase"  
"OPBI09\_00103" 35582 "s63E6H2" 0 "2,3,4,5-tetrahydropyridine-2,6-dicarboxylate N-acetyltransferase"  
"OPBI09\_00104" 35583 "s59E13H2" 0 "putative oxidoreductase YvaA"  
"OPBI09\_00104" 35583 "s59E25H2" 0 "putative oxidoreductase YvaA"  
"OPBI09\_00104" 35583 "s59E5H2" 0 "putative oxidoreductase YvaA"  
"OPBI09\_00104" 35583 "s63E6H2" 0 "putative oxidoreductase YvaA"  
"OPBI09\_00105" 35584 "s59E13H2" 0 "UDP-N-acetylgalactosamine-undecaprenyl-phosphate N-acetylgalactosaminephosphotransferase"  
"OPBI09\_00105" 35584 "s59E25H2" 0 "UDP-N-acetylgalactosamine-undecaprenyl-phosphate N-acetylgalactosaminephosphotransferase"  
"OPBI09\_00105" 35584 "s59E5H2" 0.002325734 "UDP-N-acetylgalactosamine-undecaprenyl-phosphate N-acetylgalactosaminephosphotransferase"  
"OPBI09\_00105" 35584 "s63E6H2" 0 "UDP-N-acetylgalactosamine-undecaprenyl-phosphate N-acetylgalactosaminephosphotransferase"  
"OPBI09\_00106" 35585 "s59E13H2" 0 "dTDP-3-amino-3,6-dideoxy-alpha-D-galactopyranose transaminase"  
"OPBI09\_00106" 35585 "s59E25H2" 0 "dTDP-3-amino-3,6-dideoxy-alpha-D-galactopyranose transaminase"  
"OPBI09\_00106" 35585 "s59E5H2" 0 "dTDP-3-amino-3,6-dideoxy-alpha-D-galactopyranose transaminase"  
"OPBI09\_00106" 35585 "s63E6H2" 0 "dTDP-3-amino-3,6-dideoxy-alpha-D-galactopyranose transaminase"  
"OPBI09\_00107" 35586 "s59E13H2" 0 "putative glycosyl transferase"  
"OPBI09\_00107" 35586 "s59E25H2" 0 "putative glycosyl transferase"  
"OPBI09\_00107" 35586 "s59E5H2" 0 "putative glycosyl transferase"  
"OPBI09\_00107" 35586 "s63E6H2" 0 "putative glycosyl transferase"  
"OPBI09\_00108" 35587 "s59E13H2" 0 "hypothetical protein"  
"OPBI09\_00108" 35587 "s59E25H2" 0 "hypothetical protein"  
"OPBI09\_00108" 35587 "s59E5H2" 0 "hypothetical protein"  
"OPBI09\_00108" 35587 "s63E6H2" 0 "hypothetical protein"  
"OPBI09\_00109" 35588 "s59E13H2" 0 "D-inositol-3-phosphate glycosyltransferase"  
"OPBI09\_00109" 35588 "s59E25H2" 0 "D-inositol-3-phosphate glycosyltransferase"  
"OPBI09\_00109" 35588 "s59E5H2" 0 "D-inositol-3-phosphate glycosyltransferase"  
"OPBI09\_00109" 35588 "s63E6H2" 0 "D-inositol-3-phosphate glycosyltransferase"  
"OPBI09\_00110" 35589 "s59E13H2" 0 "hypothetical protein"  
"OPBI09\_00110" 35589 "s59E25H2" 0 "hypothetical protein"  
"OPBI09\_00110" 35589 "s59E5H2" 0 "hypothetical protein"  
"OPBI09\_00110" 35589 "s63E6H2" 0 "hypothetical protein"  
"OPBI09\_00111" 35590 "s59E13H2" 0 "Ubiquinone biosynthesis O-methyltransferase"  
"OPBI09\_00111" 35590 "s59E25H2" 0 "Ubiquinone biosynthesis O-methyltransferase"  
"OPBI09\_00111" 35590 "s59E5H2" 0 "Ubiquinone biosynthesis O-methyltransferase"  
"OPBI09\_00111" 35590 "s63E6H2" 0 "Ubiquinone biosynthesis O-methyltransferase"  
"OPBI09\_00113" 35592 "s59E13H2" 0 "Pseudaminic acid synthase"  
"OPBI09\_00113" 35592 "s59E25H2" 0 "Pseudaminic acid synthase"  
"OPBI09\_00113" 35592 "s59E5H2" 0.005032295 "Pseudaminic acid synthase"  
"OPBI09\_00113" 35592 "s63E6H2" 0 "Pseudaminic acid synthase"  
"OPBI09\_00114" 35593 "s59E13H2" 0 "UDP-4-amino-4,6-dideoxy-N-acetyl-beta-L-altrosamine N-acetyltransferase"  
"OPBI09\_00114" 35593 "s59E25H2" 0 "UDP-4-amino-4,6-dideoxy-N-acetyl-beta-L-altrosamine N-acetyltransferase"  
"OPBI09\_00114" 35593 "s59E5H2" 0 "UDP-4-amino-4,6-dideoxy-N-acetyl-beta-L-altrosamine N-acetyltransferase"  
"OPBI09\_00114" 35593 "s63E6H2" 0 "UDP-4-amino-4,6-dideoxy-N-acetyl-beta-L-altrosamine N-acetyltransferase"  
"OPBI09\_00115" 35594 "s59E13H2" 0 "hypothetical protein"  
"OPBI09\_00115" 35594 "s59E25H2" 0 "hypothetical protein"  
"OPBI09\_00115" 35594 "s59E5H2" 0 "hypothetical protein"  
"OPBI09\_00115" 35594 "s63E6H2" 0 "hypothetical protein"  
"OPBI09\_00116" 35595 "s59E13H2" 0 "3-deoxy-manno-octulosonate cytidyltransferase"

"OPBI09\_00116" 35595 "s59E25H2" 0 "3-deoxy-manno-octulosonate cytidyltransferase"  
"OPBI09\_00116" 35595 "s59E5H2" 0 "3-deoxy-manno-octulosonate cytidyltransferase"  
"OPBI09\_00116" 35595 "s63E6H2" 0 "3-deoxy-manno-octulosonate cytidyltransferase"  
"OPBI09\_00117" 35596 "s59E13H2" 0 "hypothetical protein"  
"OPBI09\_00117" 35596 "s59E25H2" 0 "hypothetical protein"  
"OPBI09\_00117" 35596 "s59E5H2" 0 "hypothetical protein"  
"OPBI09\_00117" 35596 "s63E6H2" 0 "hypothetical protein"  
"OPBI09\_00118" 35597 "s59E13H2" 0 "hypothetical protein"  
"OPBI09\_00118" 35597 "s59E25H2" 0 "hypothetical protein"  
"OPBI09\_00118" 35597 "s59E5H2" 0 "hypothetical protein"  
"OPBI09\_00118" 35597 "s63E6H2" 0 "hypothetical protein"  
"OPBI09\_00119" 35598 "s59E13H2" 0 "UDP-4-amino-4,6-dideoxy-N-acetyl-beta-L-altrosamine transaminase"  
"OPBI09\_00119" 35598 "s59E25H2" 0 "UDP-4-amino-4,6-dideoxy-N-acetyl-beta-L-altrosamine transaminase"  
"OPBI09\_00119" 35598 "s59E5H2" 0 "UDP-4-amino-4,6-dideoxy-N-acetyl-beta-L-altrosamine transaminase"  
"OPBI09\_00119" 35598 "s63E6H2" 0 "UDP-4-amino-4,6-dideoxy-N-acetyl-beta-L-altrosamine transaminase"  
"OPBI09\_00120" 35599 "s59E13H2" 0 "UDP-N-acetylglucosamine 4,6-dehydratase (inverting)"  
"OPBI09\_00120" 35599 "s59E25H2" 0 "UDP-N-acetylglucosamine 4,6-dehydratase (inverting)"  
"OPBI09\_00120" 35599 "s59E5H2" 0 "UDP-N-acetylglucosamine 4,6-dehydratase (inverting)"  
"OPBI09\_00120" 35599 "s63E6H2" 0 "UDP-N-acetylglucosamine 4,6-dehydratase (inverting)"  
"OPBI09\_00121" 35600 "s59E13H2" 0 "hypothetical protein"  
"OPBI09\_00121" 35600 "s59E25H2" 0 "hypothetical protein"  
"OPBI09\_00121" 35600 "s59E5H2" 0 "hypothetical protein"  
"OPBI09\_00121" 35600 "s63E6H2" 0 "hypothetical protein"  
"OPBI09\_00122" 35601 "s59E13H2" 0 "bifunctional 3-demethylubiquinone-9 3-methyltransferase/ 2-octaprenyl-6-hydroxy phenol methylase"  
"OPBI09\_00122" 35601 "s59E25H2" 0 "bifunctional 3-demethylubiquinone-9 3-methyltransferase/ 2-octaprenyl-6-hydroxy phenol methylase"  
"OPBI09\_00122" 35601 "s59E5H2" 0 "bifunctional 3-demethylubiquinone-9 3-methyltransferase/ 2-octaprenyl-6-hydroxy phenol methylase"  
"OPBI09\_00122" 35601 "s63E6H2" 0 "bifunctional 3-demethylubiquinone-9 3-methyltransferase/ 2-octaprenyl-6-hydroxy phenol methylase"  
"OPBI09\_00123" 35602 "s59E13H2" 0 "dTDP-4-amino-4,6-dideoxygalactose transaminase"  
"OPBI09\_00123" 35602 "s59E25H2" 0 "dTDP-4-amino-4,6-dideoxygalactose transaminase"  
"OPBI09\_00123" 35602 "s59E5H2" 0 "dTDP-4-amino-4,6-dideoxygalactose transaminase"  
"OPBI09\_00123" 35602 "s63E6H2" 0 "dTDP-4-amino-4,6-dideoxygalactose transaminase"  
"OPBI09\_00125" 35604 "s59E13H2" 0 "Transposase DDE domain protein"  
"OPBI09\_00125" 35604 "s59E25H2" 0 "Transposase DDE domain protein"  
"OPBI09\_00125" 35604 "s59E5H2" 0 "Transposase DDE domain protein"  
"OPBI09\_00125" 35604 "s63E6H2" 0 "Transposase DDE domain protein"  
"OPBI09\_00126" 35605 "s59E13H2" 0 "Transposase IS66 family protein"  
"OPBI09\_00126" 35605 "s59E25H2" 0 "Transposase IS66 family protein"  
"OPBI09\_00126" 35605 "s59E5H2" 0 "Transposase IS66 family protein"  
"OPBI09\_00126" 35605 "s63E6H2" 0 "Transposase IS66 family protein"  
"OPBI09\_00127" 35606 "s59E13H2" 0 "dTDP-glucose 4,6-dehydratase"  
"OPBI09\_00127" 35606 "s59E25H2" 0 "dTDP-glucose 4,6-dehydratase"  
"OPBI09\_00127" 35606 "s59E5H2" 0 "dTDP-glucose 4,6-dehydratase"  
"OPBI09\_00127" 35606 "s63E6H2" 0 "dTDP-glucose 4,6-dehydratase"  
"OPBI09\_00128" 35607 "s59E13H2" 0 "WbqC-like protein family protein"  
"OPBI09\_00128" 35607 "s59E25H2" 0 "WbqC-like protein family protein"  
"OPBI09\_00128" 35607 "s59E5H2" 0 "WbqC-like protein family protein"  
"OPBI09\_00128" 35607 "s63E6H2" 0 "WbqC-like protein family protein"

"OPBI09\_00129" 35608 "s59E13H2" 0 "putative S-adenosylmethionine-dependent methyltransferase/MSMEI\_2290"  
"OPBI09\_00129" 35608 "s59E25H2" 0 "putative S-adenosylmethionine-dependent methyltransferase/MSMEI\_2290"  
"OPBI09\_00129" 35608 "s59E5H2" 0 "putative S-adenosylmethionine-dependent methyltransferase/MSMEI\_2290"  
"OPBI09\_00129" 35608 "s63E6H2" 0 "putative S-adenosylmethionine-dependent methyltransferase/MSMEI\_2290"  
"OPBI09\_00130" 35609 "s59E13H2" 0 "Undecaprenyl-phosphate 4-deoxy-4-formamido-L-arabinose transferase"  
"OPBI09\_00130" 35609 "s59E25H2" 0 "Undecaprenyl-phosphate 4-deoxy-4-formamido-L-arabinose transferase"  
"OPBI09\_00130" 35609 "s59E5H2" 0 "Undecaprenyl-phosphate 4-deoxy-4-formamido-L-arabinose transferase"  
"OPBI09\_00130" 35609 "s63E6H2" 0 "Undecaprenyl-phosphate 4-deoxy-4-formamido-L-arabinose transferase"  
"OPBI09\_00131" 35610 "s59E13H2" 0 "Demethylmenaquinone methyltransferase"  
"OPBI09\_00131" 35610 "s59E25H2" 0 "Demethylmenaquinone methyltransferase"  
"OPBI09\_00131" 35610 "s59E5H2" 0 "Demethylmenaquinone methyltransferase"  
"OPBI09\_00131" 35610 "s63E6H2" 0 "Demethylmenaquinone methyltransferase"  
"OPBI09\_00132" 35611 "s59E13H2" 0 "molybdenum cofactor biosynthesis protein A"  
"OPBI09\_00132" 35611 "s59E25H2" 0 "molybdenum cofactor biosynthesis protein A"  
"OPBI09\_00132" 35611 "s59E5H2" 0 "molybdenum cofactor biosynthesis protein A"  
"OPBI09\_00132" 35611 "s63E6H2" 0 "molybdenum cofactor biosynthesis protein A"  
"OPBI09\_00133" 35612 "s59E13H2" 0 "Creatinine amidohydrolase"  
"OPBI09\_00133" 35612 "s59E25H2" 0 "Creatinine amidohydrolase"  
"OPBI09\_00133" 35612 "s59E5H2" 0 "Creatinine amidohydrolase"  
"OPBI09\_00133" 35612 "s63E6H2" 0 "Creatinine amidohydrolase"  
"OPBI09\_00134" 35613 "s59E13H2" 0 "UDP-N-acetylglucosamine N-acetyltransferase"  
"OPBI09\_00134" 35613 "s59E25H2" 0 "UDP-N-acetylglucosamine N-acetyltransferase"  
"OPBI09\_00134" 35613 "s59E5H2" 0 "UDP-N-acetylglucosamine N-acetyltransferase"  
"OPBI09\_00134" 35613 "s63E6H2" 0 "UDP-N-acetylglucosamine N-acetyltransferase"  
"OPBI09\_00135" 35614 "s59E13H2" 0 "hypothetical protein"  
"OPBI09\_00135" 35614 "s59E25H2" 0 "hypothetical protein"  
"OPBI09\_00135" 35614 "s59E5H2" 0 "hypothetical protein"  
"OPBI09\_00135" 35614 "s63E6H2" 0 "hypothetical protein"  
"OPBI09\_00136" 35615 "s59E13H2" 0 "UDP-2-acetamido-2-deoxy-3-oxo-D-glucuronate aminotransferase"  
"OPBI09\_00136" 35615 "s59E25H2" 0 "UDP-2-acetamido-2-deoxy-3-oxo-D-glucuronate aminotransferase"  
"OPBI09\_00136" 35615 "s59E5H2" 0 "UDP-2-acetamido-2-deoxy-3-oxo-D-glucuronate aminotransferase"  
"OPBI09\_00136" 35615 "s63E6H2" 0 "UDP-2-acetamido-2-deoxy-3-oxo-D-glucuronate aminotransferase"  
"OPBI09\_00137" 35616 "s59E13H2" 0 "UDP-N-acetylglucosamine 4,6-dehydratase (inverting)"  
"OPBI09\_00137" 35616 "s59E25H2" 0 "UDP-N-acetylglucosamine 4,6-dehydratase (inverting)"  
"OPBI09\_00137" 35616 "s59E5H2" 0 "UDP-N-acetylglucosamine 4,6-dehydratase (inverting)"  
"OPBI09\_00137" 35616 "s63E6H2" 0 "UDP-N-acetylglucosamine 4,6-dehydratase (inverting)"  
"OPBI09\_00138" 35617 "s59E13H2" 0 "Lipid A export ATP-binding/permease protein MsbA"  
"OPBI09\_00138" 35617 "s59E25H2" 0 "Lipid A export ATP-binding/permease protein MsbA"  
"OPBI09\_00138" 35617 "s59E5H2" 0 "Lipid A export ATP-binding/permease protein MsbA"  
"OPBI09\_00138" 35617 "s63E6H2" 0 "Lipid A export ATP-binding/permease protein MsbA"  
"OPBI09\_00139" 35618 "s59E13H2" 0 "UDP-2-acetamido-2-deoxy-3-oxo-D-glucuronate aminotransferase"  
"OPBI09\_00139" 35618 "s59E25H2" 0 "UDP-2-acetamido-2-deoxy-3-oxo-D-glucuronate aminotransferase"  
"OPBI09\_00139" 35618 "s59E5H2" 0 "UDP-2-acetamido-2-deoxy-3-oxo-D-glucuronate aminotransferase"  
"OPBI09\_00139" 35618 "s63E6H2" 0 "UDP-2-acetamido-2-deoxy-3-oxo-D-glucuronate aminotransferase"  
"OPBI09\_00140" 35619 "s59E13H2" 0 "UDP-2-acetamido-3-amino-2,3-dideoxy-D-glucuronate N-acetyltransferase"  
"OPBI09\_00140" 35619 "s59E25H2" 0 "UDP-2-acetamido-3-amino-2,3-dideoxy-D-glucuronate N-acetyltransferase"  
"OPBI09\_00140" 35619 "s59E5H2" 0.003308248 "UDP-2-acetamido-3-amino-2,3-dideoxy-D-glucuronate N-acetyltransferase"



"OPBI09\_00140" 35619 "s63E6H2" 0 "UDP-2-acetamido-3-amino-2,3-dideoxy-D-glucuronate N-acetyltransferase"  
"OPBI09\_00142" 35621 "s59E13H2" 0.6184141 "hypothetical protein"  
"OPBI09\_00142" 35621 "s59E25H2" 0 "hypothetical protein"  
"OPBI09\_00142" 35621 "s59E5H2" 0.05846964 "hypothetical protein"  
"OPBI09\_00142" 35621 "s63E6H2" 0.0197986 "hypothetical protein"  
"OPBI09\_00143" 35622 "s59E13H2" 0.6033042 "Galactitol permease IIC component"  
"OPBI09\_00143" 35622 "s59E25H2" 0 "Galactitol permease IIC component"  
"OPBI09\_00143" 35622 "s59E5H2" 0.02313472 "Galactitol permease IIC component"  
"OPBI09\_00143" 35622 "s63E6H2" 0.02375219 "Galactitol permease IIC component"  
"OPBI09\_00144" 35623 "s59E13H2" 0.3444765 "hypothetical protein"  
"OPBI09\_00144" 35623 "s59E25H2" 0 "hypothetical protein"  
"OPBI09\_00144" 35623 "s59E5H2" 0 "hypothetical protein"  
"OPBI09\_00144" 35623 "s63E6H2" 0.03457885 "hypothetical protein"  
"OPBI09\_00145" 35624 "s59E13H2" 0.3970503 "Sorbitol operon regulator"  
"OPBI09\_00145" 35624 "s59E25H2" 0 "Sorbitol operon regulator"  
"OPBI09\_00145" 35624 "s59E5H2" 0.03113682 "Sorbitol operon regulator"  
"OPBI09\_00145" 35624 "s63E6H2" 0.1330046 "Sorbitol operon regulator"  
"OPBI09\_00146" 35625 "s59E13H2" 0.5834046 "Acetoin:2,6-dichlorophenolindophenol oxidoreductase subunit alpha"  
"OPBI09\_00146" 35625 "s59E25H2" 0 "Acetoin:2,6-dichlorophenolindophenol oxidoreductase subunit alpha"  
"OPBI09\_00146" 35625 "s59E5H2" 0.02319113 "Acetoin:2,6-dichlorophenolindophenol oxidoreductase subunit alpha"  
"OPBI09\_00146" 35625 "s63E6H2" 0.1634555 "Acetoin:2,6-dichlorophenolindophenol oxidoreductase subunit alpha"  
"OPBI09\_00147" 35626 "s59E13H2" 0.6707179 "2-oxoisovalerate dehydrogenase subunit beta"  
"OPBI09\_00147" 35626 "s59E25H2" 0 "2-oxoisovalerate dehydrogenase subunit beta"  
"OPBI09\_00147" 35626 "s59E5H2" 0.04636851 "2-oxoisovalerate dehydrogenase subunit beta"  
"OPBI09\_00147" 35626 "s63E6H2" 0.1279053 "2-oxoisovalerate dehydrogenase subunit beta"  
"OPBI09\_00148" 35627 "s59E13H2" 0.7118851 "Dihydrolipoyllysine-residue acetyltransferase component of pyruvate dehydrogenase complex"  
"OPBI09\_00148" 35627 "s59E25H2" 0 "Dihydrolipoyllysine-residue acetyltransferase component of pyruvate dehydrogenase complex"  
"OPBI09\_00148" 35627 "s59E5H2" 0.08017558 "Dihydrolipoyllysine-residue acetyltransferase component of pyruvate dehydrogenase complex"  
"OPBI09\_00148" 35627 "s63E6H2" 0.2319422 "Dihydrolipoyllysine-residue acetyltransferase component of pyruvate dehydrogenase complex"  
"OPBI09\_00150" 35629 "s59E13H2" 0.589635 "Octanoyltransferase"  
"OPBI09\_00150" 35629 "s59E25H2" 0 "Octanoyltransferase"  
"OPBI09\_00150" 35629 "s59E5H2" 0.2436449 "Octanoyltransferase"  
"OPBI09\_00150" 35629 "s63E6H2" 0.6310738 "Octanoyltransferase"  
"OPBI09\_00151" 35630 "s59E13H2" 0.2184427 "Dihydrolipoyl dehydrogenase"  
"OPBI09\_00151" 35630 "s59E25H2" 0 "Dihydrolipoyl dehydrogenase"  
"OPBI09\_00151" 35630 "s59E5H2" 0.0687102 "Dihydrolipoyl dehydrogenase"  
"OPBI09\_00151" 35630 "s63E6H2" 0.005742281 "Dihydrolipoyl dehydrogenase"  
"OPBI09\_00152" 35631 "s59E13H2" 0 "MATE family multidrug exporter"  
"OPBI09\_00152" 35631 "s59E25H2" 0 "MATE family multidrug exporter"  
"OPBI09\_00152" 35631 "s59E5H2" 0 "MATE family multidrug exporter"  
"OPBI09\_00152" 35631 "s63E6H2" 0 "MATE family multidrug exporter"  
"OPBI09\_00153" 35632 "s59E13H2" 0 "Sulfide dehydrogenase subunit alpha precursor"  
"OPBI09\_00153" 35632 "s59E25H2" 0 "Sulfide dehydrogenase subunit alpha precursor"  
"OPBI09\_00153" 35632 "s59E5H2" 0.06719499 "Sulfide dehydrogenase subunit alpha precursor"  
"OPBI09\_00153" 35632 "s63E6H2" 0.03625245 "Sulfide dehydrogenase subunit alpha precursor"  
"OPBI09\_00154" 35633 "s59E13H2" 0.04382319 "hypothetical protein"  
"OPBI09\_00154" 35633 "s59E25H2" 0 "hypothetical protein"

"OPBI09\_00154" 35633 "s59E5H2" 0.09758017 "hypothetical protein"  
"OPBI09\_00154" 35633 "s63E6H2" 0.04555595 "hypothetical protein"  
"OPBI09\_00155" 35634 "s59E13H2" 0.06254088 "YtxH-like protein"  
"OPBI09\_00155" 35634 "s59E25H2" 0 "YtxH-like protein"  
"OPBI09\_00155" 35634 "s59E5H2" 0.008660114 "YtxH-like protein"  
"OPBI09\_00155" 35634 "s63E6H2" 0 "YtxH-like protein"  
"OPBI09\_00156" 35635 "s59E13H2" 0.003192916 "Macrolide export ATP-binding/permease protein MacB"  
"OPBI09\_00156" 35635 "s59E25H2" 0 "Macrolide export ATP-binding/permease protein MacB"  
"OPBI09\_00156" 35635 "s59E5H2" 0.2544046 "Macrolide export ATP-binding/permease protein MacB"  
"OPBI09\_00156" 35635 "s63E6H2" 0 "Macrolide export ATP-binding/permease protein MacB"  
"OPBI09\_00157" 35636 "s59E13H2" 1.419348 "putative ABC transporter ATP-binding protein"  
"OPBI09\_00157" 35636 "s59E25H2" 0 "putative ABC transporter ATP-binding protein"  
"OPBI09\_00157" 35636 "s59E5H2" 0.09940241 "putative ABC transporter ATP-binding protein"  
"OPBI09\_00157" 35636 "s63E6H2" 0 "putative ABC transporter ATP-binding protein"  
"OPBI09\_00158" 35637 "s59E13H2" 1.915165 "Macrolide export protein MacA"  
"OPBI09\_00158" 35637 "s59E25H2" 0 "Macrolide export protein MacA"  
"OPBI09\_00158" 35637 "s59E5H2" 0.009623403 "Macrolide export protein MacA"  
"OPBI09\_00158" 35637 "s63E6H2" 0 "Macrolide export protein MacA"  
"OPBI09\_00159" 35638 "s59E13H2" 5.694602 "Enolase"  
"OPBI09\_00159" 35638 "s59E25H2" 0 "Enolase"  
"OPBI09\_00159" 35638 "s59E5H2" 0.08537176 "Enolase"  
"OPBI09\_00159" 35638 "s63E6H2" 0.03066444 "Enolase"  
"OPBI09\_00160" 35639 "s59E13H2" 1.357199 "SpoVT / AbrB like domain protein"  
"OPBI09\_00160" 35639 "s59E25H2" 0 "SpoVT / AbrB like domain protein"  
"OPBI09\_00160" 35639 "s59E5H2" 0.08472799 "SpoVT / AbrB like domain protein"  
"OPBI09\_00160" 35639 "s63E6H2" 0 "SpoVT / AbrB like domain protein"  
"OPBI09\_00161" 35640 "s59E13H2" 0 "tRNA(fMet)-specific endonuclease VapC"  
"OPBI09\_00161" 35640 "s59E25H2" 0 "tRNA(fMet)-specific endonuclease VapC"  
"OPBI09\_00161" 35640 "s59E5H2" 0.04492505 "tRNA(fMet)-specific endonuclease VapC"  
"OPBI09\_00161" 35640 "s63E6H2" 0 "tRNA(fMet)-specific endonuclease VapC"  
"OPBI09\_00162" 35641 "s59E13H2" 2.308576 "hypothetical protein"  
"OPBI09\_00162" 35641 "s59E25H2" 0 "hypothetical protein"  
"OPBI09\_00162" 35641 "s59E5H2" 0.009339368 "hypothetical protein"  
"OPBI09\_00162" 35641 "s63E6H2" 0.008568274 "hypothetical protein"  
"OPBI09\_00163" 35642 "s59E13H2" 5.02598 "2-aminoadipate transaminase"  
"OPBI09\_00163" 35642 "s59E25H2" 0 "2-aminoadipate transaminase"  
"OPBI09\_00163" 35642 "s59E5H2" 0.2005797 "2-aminoadipate transaminase"  
"OPBI09\_00163" 35642 "s63E6H2" 0.05459698 "2-aminoadipate transaminase"  
"OPBI09\_00164" 35643 "s59E13H2" 7.186412 "D-alanine--D-alanine ligase"  
"OPBI09\_00164" 35643 "s59E25H2" 0 "D-alanine--D-alanine ligase"  
"OPBI09\_00164" 35643 "s59E5H2" 0.338123 "D-alanine--D-alanine ligase"  
"OPBI09\_00164" 35643 "s63E6H2" 0.1760671 "D-alanine--D-alanine ligase"  
"OPBI09\_00166" 35645 "s59E13H2" 0 "Helix-turn-helix"  
"OPBI09\_00166" 35645 "s59E25H2" 0 "Helix-turn-helix"  
"OPBI09\_00166" 35645 "s59E5H2" 0 "Helix-turn-helix"  
"OPBI09\_00166" 35645 "s63E6H2" 0 "Helix-turn-helix"  
"OPBI09\_00169" 35648 "s59E13H2" 0 "hypothetical protein"

"OPBI09\_00169" 35648 "s59E25H2" 0 "hypothetical protein"  
"OPBI09\_00169" 35648 "s59E5H2" 0 "hypothetical protein"  
"OPBI09\_00169" 35648 "s63E6H2" 0.009266014 "hypothetical protein"  
"OPBI09\_00172" 35651 "s59E13H2" 0 "ISXO2-like transposase domain protein"  
"OPBI09\_00172" 35651 "s59E25H2" 0 "ISXO2-like transposase domain protein"  
"OPBI09\_00172" 35651 "s59E5H2" 0 "ISXO2-like transposase domain protein"  
"OPBI09\_00172" 35651 "s63E6H2" 0 "ISXO2-like transposase domain protein"  
"OPBI09\_00175" 35654 "s59E13H2" 0 "hypothetical protein"  
"OPBI09\_00175" 35654 "s59E25H2" 0 "hypothetical protein"  
"OPBI09\_00175" 35654 "s59E5H2" 0 "hypothetical protein"  
"OPBI09\_00175" 35654 "s63E6H2" 0 "hypothetical protein"  
"OPBI09\_00176" 35655 "s59E13H2" 0 "DNA polymerase III PolC-type"  
"OPBI09\_00176" 35655 "s59E25H2" 0 "DNA polymerase III PolC-type"  
"OPBI09\_00176" 35655 "s59E5H2" 0 "DNA polymerase III PolC-type"  
"OPBI09\_00176" 35655 "s63E6H2" 0 "DNA polymerase III PolC-type"  
"OPBI09\_00177" 35656 "s59E13H2" 0 "hypothetical protein"  
"OPBI09\_00177" 35656 "s59E25H2" 0 "hypothetical protein"  
"OPBI09\_00177" 35656 "s59E5H2" 0 "hypothetical protein"  
"OPBI09\_00177" 35656 "s63E6H2" 0 "hypothetical protein"  
"OPBI09\_00178" 35657 "s59E13H2" 0 "hypothetical protein"  
"OPBI09\_00178" 35657 "s59E25H2" 0 "hypothetical protein"  
"OPBI09\_00178" 35657 "s59E5H2" 0 "hypothetical protein"  
"OPBI09\_00178" 35657 "s63E6H2" 0 "hypothetical protein"  
"OPBI09\_00179" 35658 "s59E13H2" 0 "Sorbitol dehydrogenase"  
"OPBI09\_00179" 35658 "s59E25H2" 0 "Sorbitol dehydrogenase"  
"OPBI09\_00179" 35658 "s59E5H2" 0 "Sorbitol dehydrogenase"  
"OPBI09\_00179" 35658 "s63E6H2" 0 "Sorbitol dehydrogenase"  
"OPBI09\_00180" 35659 "s59E13H2" 0 "hypothetical protein"  
"OPBI09\_00180" 35659 "s59E25H2" 0 "hypothetical protein"  
"OPBI09\_00180" 35659 "s59E5H2" 0 "hypothetical protein"  
"OPBI09\_00180" 35659 "s63E6H2" 0 "hypothetical protein"  
"OPBI09\_00181" 35660 "s59E13H2" 0.02649078 "Gluconolactonase precursor"  
"OPBI09\_00181" 35660 "s59E25H2" 0 "Gluconolactonase precursor"  
"OPBI09\_00181" 35660 "s59E5H2" 0.2589496 "Gluconolactonase precursor"  
"OPBI09\_00181" 35660 "s63E6H2" 0 "Gluconolactonase precursor"  
"OPBI09\_00182" 35661 "s59E13H2" 0.04276208 "PIN domain protein"  
"OPBI09\_00182" 35661 "s59E25H2" 0 "PIN domain protein"  
"OPBI09\_00182" 35661 "s59E5H2" 0.2869355 "PIN domain protein"  
"OPBI09\_00182" 35661 "s63E6H2" 0.03889831 "PIN domain protein"  
"OPBI09\_00184" 35663 "s59E13H2" 0.01223741 "Antilisterial bacteriocin subtilisin biosynthesis protein Alba"  
"OPBI09\_00184" 35663 "s59E25H2" 0 "Antilisterial bacteriocin subtilisin biosynthesis protein Alba"  
"OPBI09\_00184" 35663 "s59E5H2" 0.2508265 "Antilisterial bacteriocin subtilisin biosynthesis protein Alba"  
"OPBI09\_00184" 35663 "s63E6H2" 0 "Antilisterial bacteriocin subtilisin biosynthesis protein Alba"  
"OPBI09\_00185" 35664 "s59E13H2" 0.02918228 "Oxygen-independent coproporphyrinogen-III oxidase 1"  
"OPBI09\_00185" 35664 "s59E25H2" 0 "Oxygen-independent coproporphyrinogen-III oxidase 1"  
"OPBI09\_00185" 35664 "s59E5H2" 0.203491 "Oxygen-independent coproporphyrinogen-III oxidase 1"  
"OPBI09\_00185" 35664 "s63E6H2" 0 "Oxygen-independent coproporphyrinogen-III oxidase 1"

"OPBI09\_00186" 35665 "s59E13H2" 0 "hypothetical protein"  
"OPBI09\_00186" 35665 "s59E25H2" 0 "hypothetical protein"  
"OPBI09\_00186" 35665 "s59E5H2" 0.2274521 "hypothetical protein"  
"OPBI09\_00186" 35665 "s63E6H2" 0.002927065 "hypothetical protein"  
"OPBI09\_00187" 35666 "s59E13H2" 0 "SpoVT / AbrB like domain protein"  
"OPBI09\_00187" 35666 "s59E25H2" 0 "SpoVT / AbrB like domain protein"  
"OPBI09\_00187" 35666 "s59E5H2" 0.2944821 "SpoVT / AbrB like domain protein"  
"OPBI09\_00187" 35666 "s63E6H2" 0.001304369 "SpoVT / AbrB like domain protein"  
"OPBI09\_00188" 35667 "s59E13H2" 0.002800072 "putative lipoprotein YbbD precursor"  
"OPBI09\_00188" 35667 "s59E25H2" 0 "putative lipoprotein YbbD precursor"  
"OPBI09\_00188" 35667 "s59E5H2" 0.5169326 "putative lipoprotein YbbD precursor"  
"OPBI09\_00188" 35667 "s63E6H2" 0.06942341 "putative lipoprotein YbbD precursor"  
"OPBI09\_00189" 35668 "s59E13H2" 0.0234201 "putative transporter"  
"OPBI09\_00189" 35668 "s59E25H2" 0 "putative transporter"  
"OPBI09\_00189" 35668 "s59E5H2" 0.3686151 "putative transporter"  
"OPBI09\_00189" 35668 "s63E6H2" 0.06084933 "putative transporter"  
"OPBI09\_00191" 35670 "s59E13H2" 0 "hypothetical protein"  
"OPBI09\_00191" 35670 "s59E25H2" 0 "hypothetical protein"  
"OPBI09\_00191" 35670 "s59E5H2" 0.5084612 "hypothetical protein"  
"OPBI09\_00191" 35670 "s63E6H2" 0 "hypothetical protein"  
"OPBI09\_00192" 35671 "s59E13H2" 0 "DNA-binding protein HU"  
"OPBI09\_00192" 35671 "s59E25H2" 0 "DNA-binding protein HU"  
"OPBI09\_00192" 35671 "s59E5H2" 0.01264871 "DNA-binding protein HU"  
"OPBI09\_00192" 35671 "s63E6H2" 0.02910488 "DNA-binding protein HU"  
"OPBI09\_00193" 35672 "s59E13H2" 0.023746 "Fructose-bisphosphate aldolase class 1"  
"OPBI09\_00193" 35672 "s59E25H2" 0 "Fructose-bisphosphate aldolase class 1"  
"OPBI09\_00193" 35672 "s59E5H2" 0.01762452 "Fructose-bisphosphate aldolase class 1"  
"OPBI09\_00193" 35672 "s63E6H2" 0.07705069 "Fructose-bisphosphate aldolase class 1"  
"OPBI09\_00194" 35673 "s59E13H2" 0.01724064 "Murein hydrolase activator NlpD precursor"  
"OPBI09\_00194" 35673 "s59E25H2" 0 "Murein hydrolase activator NlpD precursor"  
"OPBI09\_00194" 35673 "s59E5H2" 0.04776443 "Murein hydrolase activator NlpD precursor"  
"OPBI09\_00194" 35673 "s63E6H2" 0.06215665 "Murein hydrolase activator NlpD precursor"  
"OPBI09\_00197" 35676 "s59E13H2" 0 "F5/8 type C domain protein"  
"OPBI09\_00197" 35676 "s59E25H2" 0 "F5/8 type C domain protein"  
"OPBI09\_00197" 35676 "s59E5H2" 0 "F5/8 type C domain protein"  
"OPBI09\_00197" 35676 "s63E6H2" 0 "F5/8 type C domain protein"  
"OPBI09\_00198" 35677 "s59E13H2" 0.002007617 "protochlorophyllide reductase iron-sulfur ATP-binding protein"  
"OPBI09\_00198" 35677 "s59E25H2" 0 "protochlorophyllide reductase iron-sulfur ATP-binding protein"  
"OPBI09\_00198" 35677 "s59E5H2" 0.01037302 "protochlorophyllide reductase iron-sulfur ATP-binding protein"  
"OPBI09\_00198" 35677 "s63E6H2" 0.01115701 "protochlorophyllide reductase iron-sulfur ATP-binding protein"  
"OPBI09\_00199" 35678 "s59E13H2" 0.001307442 "heat shock protein GrpE"  
"OPBI09\_00199" 35678 "s59E25H2" 0 "heat shock protein GrpE"  
"OPBI09\_00199" 35678 "s59E5H2" 0.09328857 "heat shock protein GrpE"  
"OPBI09\_00199" 35678 "s63E6H2" 0.00376337 "heat shock protein GrpE"  
"OPBI09\_00201" 35680 "s59E13H2" 0 "hypothetical protein"  
"OPBI09\_00201" 35680 "s59E25H2" 0 "hypothetical protein"  
"OPBI09\_00201" 35680 "s59E5H2" 0.03205585 "hypothetical protein"

"OPBI09\_00201" 35680 "s63E6H2" 0 "hypothetical protein"  
"OPBI09\_00202" 35681 "s59E13H2" 0.00164598 "hypothetical protein"  
"OPBI09\_00202" 35681 "s59E25H2" 0 "hypothetical protein"  
"OPBI09\_00202" 35681 "s59E5H2" 0.1067994 "hypothetical protein"  
"OPBI09\_00202" 35681 "s63E6H2" 0.002939097 "hypothetical protein"  
"OPBI09\_00203" 35682 "s59E13H2" 0.01290171 "Histone deacetylase-like amidohydrolase"  
"OPBI09\_00203" 35682 "s59E25H2" 0 "Histone deacetylase-like amidohydrolase"  
"OPBI09\_00203" 35682 "s59E5H2" 0.06111277 "Histone deacetylase-like amidohydrolase"  
"OPBI09\_00203" 35682 "s63E6H2" 0 "Histone deacetylase-like amidohydrolase"  
"OPBI09\_00204" 35683 "s59E13H2" 0.006454113 "Germination-specific N-acetylmuramoyl-L-alanine amidase precursor"  
"OPBI09\_00204" 35683 "s59E25H2" 0 "Germination-specific N-acetylmuramoyl-L-alanine amidase precursor"  
"OPBI09\_00204" 35683 "s59E5H2" 0.08048184 "Germination-specific N-acetylmuramoyl-L-alanine amidase precursor"  
"OPBI09\_00204" 35683 "s63E6H2" 0.003267334 "Germination-specific N-acetylmuramoyl-L-alanine amidase precursor"  
"OPBI09\_00205" 35684 "s59E13H2" 0 "Thioredoxin reductase"  
"OPBI09\_00205" 35684 "s59E25H2" 0 "Thioredoxin reductase"  
"OPBI09\_00205" 35684 "s59E5H2" 0.0414584 "Thioredoxin reductase"  
"OPBI09\_00205" 35684 "s63E6H2" 0.006405308 "Thioredoxin reductase"  
"OPBI09\_00206" 35685 "s59E13H2" 0.004783804 "hypothetical protein"  
"OPBI09\_00206" 35685 "s59E25H2" 0 "hypothetical protein"  
"OPBI09\_00206" 35685 "s59E5H2" 0.006293162 "hypothetical protein"  
"OPBI09\_00206" 35685 "s63E6H2" 0 "hypothetical protein"  
"OPBI09\_00207" 35686 "s59E13H2" 0.0009936561 "putative lysine decarboxylase"  
"OPBI09\_00207" 35686 "s59E25H2" 0 "putative lysine decarboxylase"  
"OPBI09\_00207" 35686 "s59E5H2" 0.01602646 "putative lysine decarboxylase"  
"OPBI09\_00207" 35686 "s63E6H2" 0.002524353 "putative lysine decarboxylase"  
"OPBI09\_00208" 35687 "s59E13H2" 0.01138656 "hypothetical protein"  
"OPBI09\_00208" 35687 "s59E25H2" 0 "hypothetical protein"  
"OPBI09\_00208" 35687 "s59E5H2" 0.00972704 "hypothetical protein"  
"OPBI09\_00208" 35687 "s63E6H2" 0.02413703 "hypothetical protein"  
"OPBI09\_00209" 35688 "s59E13H2" 0.006462572 "Adenine phosphoribosyltransferase"  
"OPBI09\_00209" 35688 "s59E25H2" 0 "Adenine phosphoribosyltransferase"  
"OPBI09\_00209" 35688 "s59E5H2" 0.01378929 "Adenine phosphoribosyltransferase"  
"OPBI09\_00209" 35688 "s63E6H2" 0.009107288 "Adenine phosphoribosyltransferase"  
"OPBI09\_00210" 35689 "s59E13H2" 0.008391316 "hypothetical protein"  
"OPBI09\_00210" 35689 "s59E25H2" 0 "hypothetical protein"  
"OPBI09\_00210" 35689 "s59E5H2" 0.09289529 "hypothetical protein"  
"OPBI09\_00210" 35689 "s63E6H2" 0.01615459 "hypothetical protein"  
"OPBI09\_00212" 35691 "s59E13H2" 0.01123074 "3'-5' exoribonuclease YhaM"  
"OPBI09\_00212" 35691 "s59E25H2" 0 "3'-5' exoribonuclease YhaM"  
"OPBI09\_00212" 35691 "s59E5H2" 1.035969 "3'-5' exoribonuclease YhaM"  
"OPBI09\_00212" 35691 "s63E6H2" 0.01123927 "3'-5' exoribonuclease YhaM"  
"OPBI09\_00213" 35692 "s59E13H2" 3.386482 "hypothetical protein"  
"OPBI09\_00213" 35692 "s59E25H2" 0 "hypothetical protein"  
"OPBI09\_00213" 35692 "s59E5H2" 0.01699692 "hypothetical protein"  
"OPBI09\_00213" 35692 "s63E6H2" 0.04349896 "hypothetical protein"  
"OPBI09\_00214" 35693 "s59E13H2" 1.242232 "Tryptophan synthase beta chain 1"  
"OPBI09\_00214" 35693 "s59E25H2" 0 "Tryptophan synthase beta chain 1"

"OPBI09\_00214" 35693 "s59E5H2" 0.03608955 "Tryptophan synthase beta chain 1"  
"OPBI09\_00214" 35693 "s63E6H2" 0.06093126 "Tryptophan synthase beta chain 1"  
"OPBI09\_00215" 35694 "s59E13H2" 5.561872 "hypothetical protein"  
"OPBI09\_00215" 35694 "s59E25H2" 0 "hypothetical protein"  
"OPBI09\_00215" 35694 "s59E5H2" 0.03934897 "hypothetical protein"  
"OPBI09\_00215" 35694 "s63E6H2" 0.153287 "hypothetical protein"  
"OPBI09\_00216" 35695 "s59E13H2" 6.444877 "50S ribosomal protein L31"  
"OPBI09\_00216" 35695 "s59E25H2" 0 "50S ribosomal protein L31"  
"OPBI09\_00216" 35695 "s59E5H2" 0.03915877 "50S ribosomal protein L31"  
"OPBI09\_00216" 35695 "s63E6H2" 0.1827017 "50S ribosomal protein L31"  
"OPBI09\_00217" 35696 "s59E13H2" 8.938862 "Thymidylate synthase ThyX"  
"OPBI09\_00217" 35696 "s59E25H2" 0 "Thymidylate synthase ThyX"  
"OPBI09\_00217" 35696 "s59E5H2" 0.03962868 "Thymidylate synthase ThyX"  
"OPBI09\_00217" 35696 "s63E6H2" 0.1878536 "Thymidylate synthase ThyX"  
"OPBI09\_00218" 35697 "s59E13H2" 8.817451 "hypothetical protein"  
"OPBI09\_00218" 35697 "s59E25H2" 0 "hypothetical protein"  
"OPBI09\_00218" 35697 "s59E5H2" 0.04075677 "hypothetical protein"  
"OPBI09\_00218" 35697 "s63E6H2" 0.1691967 "hypothetical protein"  
"OPBI09\_00219" 35698 "s59E13H2" 11.07568 "Peptide chain release factor 1"  
"OPBI09\_00219" 35698 "s59E25H2" 0 "Peptide chain release factor 1"  
"OPBI09\_00219" 35698 "s59E5H2" 0.01217381 "Peptide chain release factor 1"  
"OPBI09\_00219" 35698 "s63E6H2" 0.2149367 "Peptide chain release factor 1"  
"OPBI09\_00220" 35699 "s59E13H2" 5.135667 "50S ribosomal protein L3 glutamine methyltransferase"  
"OPBI09\_00220" 35699 "s59E25H2" 0 "50S ribosomal protein L3 glutamine methyltransferase"  
"OPBI09\_00220" 35699 "s59E5H2" 0.003643679 "50S ribosomal protein L3 glutamine methyltransferase"  
"OPBI09\_00220" 35699 "s63E6H2" 0.2460759 "50S ribosomal protein L3 glutamine methyltransferase"  
"OPBI09\_00221" 35700 "s59E13H2" 0.7066456 "Inner membrane protein YbiR"  
"OPBI09\_00221" 35700 "s59E25H2" 0 "Inner membrane protein YbiR"  
"OPBI09\_00221" 35700 "s59E5H2" 0.1089851 "Inner membrane protein YbiR"  
"OPBI09\_00221" 35700 "s63E6H2" 0.1603768 "Inner membrane protein YbiR"  
"OPBI09\_00223" 35702 "s59E13H2" 0.1274429 "hypothetical protein"  
"OPBI09\_00223" 35702 "s59E25H2" 0 "hypothetical protein"  
"OPBI09\_00223" 35702 "s59E5H2" 0.05617223 "hypothetical protein"  
"OPBI09\_00223" 35702 "s63E6H2" 0.173713 "hypothetical protein"  
"OPBI09\_00224" 35703 "s59E13H2" 0.1216432 "hypothetical protein"  
"OPBI09\_00224" 35703 "s59E25H2" 0 "hypothetical protein"  
"OPBI09\_00224" 35703 "s59E5H2" 0.07132337 "hypothetical protein"  
"OPBI09\_00224" 35703 "s63E6H2" 0.1225449 "hypothetical protein"  
"OPBI09\_00225" 35704 "s59E13H2" 0.2521891 "tRNA(Ile)-lysine synthase"  
"OPBI09\_00225" 35704 "s59E25H2" 0 "tRNA(Ile)-lysine synthase"  
"OPBI09\_00225" 35704 "s59E5H2" 0.1404257 "tRNA(Ile)-lysine synthase"  
"OPBI09\_00225" 35704 "s63E6H2" 0.228836 "tRNA(Ile)-lysine synthase"  
"OPBI09\_00226" 35705 "s59E13H2" 0.2078269 "Hypoxanthine phosphoribosyltransferase"  
"OPBI09\_00226" 35705 "s59E25H2" 0 "Hypoxanthine phosphoribosyltransferase"  
"OPBI09\_00226" 35705 "s59E5H2" 0.05160315 "Hypoxanthine phosphoribosyltransferase"  
"OPBI09\_00226" 35705 "s63E6H2" 0.2299945 "Hypoxanthine phosphoribosyltransferase"  
"OPBI09\_00227" 35706 "s59E13H2" 0.3005884 "ATP-dependent zinc metalloprotease FtsH"

"OPBI09\_00227" 35706 "s59E25H2" 0 "ATP-dependent zinc metalloprotease FtsH"  
"OPBI09\_00227" 35706 "s59E5H2" 0.03751834 "ATP-dependent zinc metalloprotease FtsH"  
"OPBI09\_00227" 35706 "s63E6H2" 0.163173 "ATP-dependent zinc metalloprotease FtsH"  
"OPBI09\_00228" 35707 "s59E13H2" 0.2493954 "GTP cyclohydrolase 1"  
"OPBI09\_00228" 35707 "s59E25H2" 0 "GTP cyclohydrolase 1"  
"OPBI09\_00228" 35707 "s59E5H2" 0.01555411 "GTP cyclohydrolase 1"  
"OPBI09\_00228" 35707 "s63E6H2" 0.05211892 "GTP cyclohydrolase 1"  
"OPBI09\_00229" 35708 "s59E13H2" 0.3226373 "Dihydropteroate synthase"  
"OPBI09\_00229" 35708 "s59E25H2" 0 "Dihydropteroate synthase"  
"OPBI09\_00229" 35708 "s59E5H2" 0.01028616 "Dihydropteroate synthase"  
"OPBI09\_00229" 35708 "s63E6H2" 0.02624327 "Dihydropteroate synthase"  
"OPBI09\_00230" 35709 "s59E13H2" 0.2495319 "Bifunctional folate synthesis protein"  
"OPBI09\_00230" 35709 "s59E25H2" 0 "Bifunctional folate synthesis protein"  
"OPBI09\_00230" 35709 "s59E5H2" 0.009477313 "Bifunctional folate synthesis protein"  
"OPBI09\_00230" 35709 "s63E6H2" 0.03563907 "Bifunctional folate synthesis protein"  
"OPBI09\_00231" 35710 "s59E13H2" 0.1527676 "Fused nickel transport protein NikMN"  
"OPBI09\_00231" 35710 "s59E25H2" 0 "Fused nickel transport protein NikMN"  
"OPBI09\_00231" 35710 "s59E5H2" 0.3170905 "Fused nickel transport protein NikMN"  
"OPBI09\_00231" 35710 "s63E6H2" 0.05031728 "Fused nickel transport protein NikMN"  
"OPBI09\_00232" 35711 "s59E13H2" 0.0991494 "cobalt transport protein CbiM"  
"OPBI09\_00232" 35711 "s59E25H2" 0 "cobalt transport protein CbiM"  
"OPBI09\_00232" 35711 "s59E5H2" 0.2603634 "cobalt transport protein CbiM"  
"OPBI09\_00232" 35711 "s63E6H2" 0.03509664 "cobalt transport protein CbiM"  
"OPBI09\_00233" 35712 "s59E13H2" 0.08531748 "cobalt transport protein CbiN"  
"OPBI09\_00233" 35712 "s59E25H2" 0 "cobalt transport protein CbiN"  
"OPBI09\_00233" 35712 "s59E5H2" 0.09254197 "cobalt transport protein CbiN"  
"OPBI09\_00233" 35712 "s63E6H2" 0.04580901 "cobalt transport protein CbiN"  
"OPBI09\_00234" 35713 "s59E13H2" 0.003010351 "Cobalt transport protein CbiQ"  
"OPBI09\_00234" 35713 "s59E25H2" 0 "Cobalt transport protein CbiQ"  
"OPBI09\_00234" 35713 "s59E5H2" 0.2659247 "Cobalt transport protein CbiQ"  
"OPBI09\_00234" 35713 "s63E6H2" 0.08080389 "Cobalt transport protein CbiQ"  
"OPBI09\_00235" 35714 "s59E13H2" 0.002709295 "Energy-coupling factor transporter ATP-binding protein EcfA3"  
"OPBI09\_00235" 35714 "s59E25H2" 0 "Energy-coupling factor transporter ATP-binding protein EcfA3"  
"OPBI09\_00235" 35714 "s59E5H2" 0.1973338 "Energy-coupling factor transporter ATP-binding protein EcfA3"  
"OPBI09\_00235" 35714 "s63E6H2" 0.0193839 "Energy-coupling factor transporter ATP-binding protein EcfA3"  
"OPBI09\_00236" 35715 "s59E13H2" 0 "Flp/Fap pilin component"  
"OPBI09\_00236" 35715 "s59E25H2" 0 "Flp/Fap pilin component"  
"OPBI09\_00236" 35715 "s59E5H2" 0 "Flp/Fap pilin component"  
"OPBI09\_00236" 35715 "s63E6H2" 0 "Flp/Fap pilin component"  
"OPBI09\_00237" 35716 "s59E13H2" 0 "Flp/Fap pilin component"  
"OPBI09\_00237" 35716 "s59E25H2" 0 "Flp/Fap pilin component"  
"OPBI09\_00237" 35716 "s59E5H2" 0 "Flp/Fap pilin component"  
"OPBI09\_00237" 35716 "s63E6H2" 0 "Flp/Fap pilin component"  
"OPBI09\_00238" 35717 "s59E13H2" 0 "TadE-like protein"  
"OPBI09\_00238" 35717 "s59E25H2" 0 "TadE-like protein"  
"OPBI09\_00238" 35717 "s59E5H2" 0.003076679 "TadE-like protein"  
"OPBI09\_00238" 35717 "s63E6H2" 0 "TadE-like protein"

"OPBI09\_00239" 35718 "s59E13H2" 0 "hypothetical protein"  
"OPBI09\_00239" 35718 "s59E25H2" 0 "hypothetical protein"  
"OPBI09\_00239" 35718 "s59E5H2" 0 "hypothetical protein"  
"OPBI09\_00239" 35718 "s63E6H2" 0 "hypothetical protein"  
"OPBI09\_00240" 35719 "s59E13H2" 0 "hypothetical protein"  
"OPBI09\_00240" 35719 "s59E25H2" 0 "hypothetical protein"  
"OPBI09\_00240" 35719 "s59E5H2" 0.02923555 "hypothetical protein"  
"OPBI09\_00240" 35719 "s63E6H2" 0 "hypothetical protein"  
"OPBI09\_00241" 35720 "s59E13H2" 0 "Flagellum site-determining protein YlxH"  
"OPBI09\_00241" 35720 "s59E25H2" 0 "Flagellum site-determining protein YlxH"  
"OPBI09\_00241" 35720 "s59E5H2" 0.02150067 "Flagellum site-determining protein YlxH"  
"OPBI09\_00241" 35720 "s63E6H2" 0 "Flagellum site-determining protein YlxH"  
"OPBI09\_00242" 35721 "s59E13H2" 0 "Putative conjugal transfer protein/MT3759"  
"OPBI09\_00242" 35721 "s59E25H2" 0 "Putative conjugal transfer protein/MT3759"  
"OPBI09\_00242" 35721 "s59E5H2" 0.03702635 "Putative conjugal transfer protein/MT3759"  
"OPBI09\_00242" 35721 "s63E6H2" 0 "Putative conjugal transfer protein/MT3759"  
"OPBI09\_00243" 35722 "s59E13H2" 0 "Bacterial type II secretion system protein F domain protein"  
"OPBI09\_00243" 35722 "s59E25H2" 0 "Bacterial type II secretion system protein F domain protein"  
"OPBI09\_00243" 35722 "s59E5H2" 0.04045033 "Bacterial type II secretion system protein F domain protein"  
"OPBI09\_00243" 35722 "s63E6H2" 0 "Bacterial type II secretion system protein F domain protein"  
"OPBI09\_00244" 35723 "s59E13H2" 0.01824061 "Bacterial type II secretion system protein F domain protein"  
"OPBI09\_00244" 35723 "s59E25H2" 0 "Bacterial type II secretion system protein F domain protein"  
"OPBI09\_00244" 35723 "s59E5H2" 0 "Bacterial type II secretion system protein F domain protein"  
"OPBI09\_00244" 35723 "s63E6H2" 0 "Bacterial type II secretion system protein F domain protein"  
"OPBI09\_00245" 35724 "s59E13H2" 0.01544007 "O-Antigen ligase"  
"OPBI09\_00245" 35724 "s59E25H2" 0 "O-Antigen ligase"  
"OPBI09\_00245" 35724 "s59E5H2" 0.2326325 "O-Antigen ligase"  
"OPBI09\_00245" 35724 "s63E6H2" 0 "O-Antigen ligase"  
"OPBI09\_00246" 35725 "s59E13H2" 0 "hypothetical protein"  
"OPBI09\_00246" 35725 "s59E25H2" 0 "hypothetical protein"  
"OPBI09\_00246" 35725 "s59E5H2" 0.1984141 "hypothetical protein"  
"OPBI09\_00246" 35725 "s63E6H2" 0 "hypothetical protein"  
"OPBI09\_00247" 35726 "s59E13H2" 0 "Type III pantothenate kinase"  
"OPBI09\_00247" 35726 "s59E25H2" 0 "Type III pantothenate kinase"  
"OPBI09\_00247" 35726 "s59E5H2" 0.107039 "Type III pantothenate kinase"  
"OPBI09\_00247" 35726 "s63E6H2" 0.02179191 "Type III pantothenate kinase"  
"OPBI09\_00248" 35727 "s59E13H2" 0.004309942 "tRNA-dihydrouridine synthase C"  
"OPBI09\_00248" 35727 "s59E25H2" 0 "tRNA-dihydrouridine synthase C"  
"OPBI09\_00248" 35727 "s59E5H2" 0.03377444 "tRNA-dihydrouridine synthase C"  
"OPBI09\_00248" 35727 "s63E6H2" 0.745039 "tRNA-dihydrouridine synthase C"  
"OPBI09\_00253" 35732 "s59E13H2" 0 "Phosphorylated carbohydrates phosphatase"  
"OPBI09\_00253" 35732 "s59E25H2" 0 "Phosphorylated carbohydrates phosphatase"  
"OPBI09\_00253" 35732 "s59E5H2" 0 "Phosphorylated carbohydrates phosphatase"  
"OPBI09\_00253" 35732 "s63E6H2" 0 "Phosphorylated carbohydrates phosphatase"  
"OPBI09\_00254" 35733 "s59E13H2" 0 "hypothetical protein"  
"OPBI09\_00254" 35733 "s59E25H2" 0 "hypothetical protein"  
"OPBI09\_00254" 35733 "s59E5H2" 0 "hypothetical protein"



"OPBI09\_00254" 35733 "s63E6H2" 0 "hypothetical protein"  
"OPBI09\_00255" 35734 "s59E13H2" 0.003735411 "hypothetical protein"  
"OPBI09\_00255" 35734 "s59E25H2" 0 "hypothetical protein"  
"OPBI09\_00255" 35734 "s59E5H2" 0 "hypothetical protein"  
"OPBI09\_00255" 35734 "s63E6H2" 0.0007880561 "hypothetical protein"  
"OPBI09\_00257" 35736 "s59E13H2" 0.4045771 "NHL repeat protein"  
"OPBI09\_00257" 35736 "s59E25H2" 0 "NHL repeat protein"  
"OPBI09\_00257" 35736 "s59E5H2" 0.01625714 "NHL repeat protein"  
"OPBI09\_00257" 35736 "s63E6H2" 0.0002355654 "NHL repeat protein"  
"OPBI09\_00258" 35737 "s59E13H2" 0.04078997 "putative acetyltransferase"  
"OPBI09\_00258" 35737 "s59E25H2" 0 "putative acetyltransferase"  
"OPBI09\_00258" 35737 "s59E5H2" 0.006283617 "putative acetyltransferase"  
"OPBI09\_00258" 35737 "s63E6H2" 0.08586407 "putative acetyltransferase"  
"OPBI09\_00259" 35738 "s59E13H2" 0.01338599 "Maltose O-acetyltransferase"  
"OPBI09\_00259" 35738 "s59E25H2" 0 "Maltose O-acetyltransferase"  
"OPBI09\_00259" 35738 "s59E5H2" 0 "Maltose O-acetyltransferase"  
"OPBI09\_00259" 35738 "s63E6H2" 0.00202643 "Maltose O-acetyltransferase"  
"OPBI09\_00260" 35739 "s59E13H2" 0.006249373 "Flavoredoxin"  
"OPBI09\_00260" 35739 "s59E25H2" 0 "Flavoredoxin"  
"OPBI09\_00260" 35739 "s59E5H2" 0 "Flavoredoxin"  
"OPBI09\_00260" 35739 "s63E6H2" 0.01625802 "Flavoredoxin"  
"OPBI09\_00261" 35740 "s59E13H2" 0.01089553 "Radical SAM superfamily protein"  
"OPBI09\_00261" 35740 "s59E25H2" 0 "Radical SAM superfamily protein"  
"OPBI09\_00261" 35740 "s59E5H2" 0.005732527 "Radical SAM superfamily protein"  
"OPBI09\_00261" 35740 "s63E6H2" 0.005545298 "Radical SAM superfamily protein"  
"OPBI09\_00262" 35741 "s59E13H2" 0 "hypothetical protein"  
"OPBI09\_00262" 35741 "s59E25H2" 0 "hypothetical protein"  
"OPBI09\_00262" 35741 "s59E5H2" 0.06066734 "hypothetical protein"  
"OPBI09\_00262" 35741 "s63E6H2" 0.002707184 "hypothetical protein"  
"OPBI09\_00263" 35742 "s59E13H2" 0 "8-demethylnovobiocic acid C(8)-methyltransferase"  
"OPBI09\_00263" 35742 "s59E25H2" 0 "8-demethylnovobiocic acid C(8)-methyltransferase"  
"OPBI09\_00263" 35742 "s59E5H2" 0.07832003 "8-demethylnovobiocic acid C(8)-methyltransferase"  
"OPBI09\_00263" 35742 "s63E6H2" 0 "8-demethylnovobiocic acid C(8)-methyltransferase"  
"OPBI09\_00264" 35743 "s59E13H2" 0 "cytidine deaminase"  
"OPBI09\_00264" 35743 "s59E25H2" 0 "cytidine deaminase"  
"OPBI09\_00264" 35743 "s59E5H2" 0 "cytidine deaminase"  
"OPBI09\_00264" 35743 "s63E6H2" 0 "cytidine deaminase"  
"OPBI09\_00265" 35744 "s59E13H2" 0 "Glyoxalase-like domain protein"  
"OPBI09\_00265" 35744 "s59E25H2" 0 "Glyoxalase-like domain protein"  
"OPBI09\_00265" 35744 "s59E5H2" 0 "Glyoxalase-like domain protein"  
"OPBI09\_00265" 35744 "s63E6H2" 0 "Glyoxalase-like domain protein"  
"OPBI09\_00266" 35745 "s59E13H2" 0 "Lactoylglutathione lyase"  
"OPBI09\_00266" 35745 "s59E25H2" 0 "Lactoylglutathione lyase"  
"OPBI09\_00266" 35745 "s59E5H2" 0.01759413 "Lactoylglutathione lyase"  
"OPBI09\_00266" 35745 "s63E6H2" 0 "Lactoylglutathione lyase"  
"OPBI09\_00267" 35746 "s59E13H2" 0 "Aspartate-semialdehyde dehydrogenase 2"  
"OPBI09\_00267" 35746 "s59E25H2" 0 "Aspartate-semialdehyde dehydrogenase 2"

"OPBI09\_00267" 35746 "s59E5H2" 0.1289109 "Aspartate-semialdehyde dehydrogenase 2"  
"OPBI09\_00267" 35746 "s63E6H2" 0 "Aspartate-semialdehyde dehydrogenase 2"  
"OPBI09\_00268" 35747 "s59E13H2" 0 "Diaminopimelate decarboxylase"  
"OPBI09\_00268" 35747 "s59E25H2" 0 "Diaminopimelate decarboxylase"  
"OPBI09\_00268" 35747 "s59E5H2" 0 "Diaminopimelate decarboxylase"  
"OPBI09\_00268" 35747 "s63E6H2" 0 "Diaminopimelate decarboxylase"  
"OPBI09\_00270" 35749 "s59E13H2" 0 "Epoxyqueuosine reductase"  
"OPBI09\_00270" 35749 "s59E25H2" 0 "Epoxyqueuosine reductase"  
"OPBI09\_00270" 35749 "s59E5H2" 0 "Epoxyqueuosine reductase"  
"OPBI09\_00270" 35749 "s63E6H2" 0 "Epoxyqueuosine reductase"  
"OPBI09\_00271" 35750 "s59E13H2" 0 "Demethylmenaquinone methyltransferase"  
"OPBI09\_00271" 35750 "s59E25H2" 0 "Demethylmenaquinone methyltransferase"  
"OPBI09\_00271" 35750 "s59E5H2" 0.01924515 "Demethylmenaquinone methyltransferase"  
"OPBI09\_00271" 35750 "s63E6H2" 0.01188738 "Demethylmenaquinone methyltransferase"  
"OPBI09\_00273" 35752 "s59E13H2" 0.0008243665 "hypothetical protein"  
"OPBI09\_00273" 35752 "s59E25H2" 0 "hypothetical protein"  
"OPBI09\_00273" 35752 "s59E5H2" 0 "hypothetical protein"  
"OPBI09\_00273" 35752 "s63E6H2" 0 "hypothetical protein"  
"OPBI09\_00274" 35753 "s59E13H2" 0.1654328 "ubiquinone/menaquinone biosynthesis methyltransferase"  
"OPBI09\_00274" 35753 "s59E25H2" 0 "ubiquinone/menaquinone biosynthesis methyltransferase"  
"OPBI09\_00274" 35753 "s59E5H2" 0.06732273 "ubiquinone/menaquinone biosynthesis methyltransferase"  
"OPBI09\_00274" 35753 "s63E6H2" 0.04233185 "ubiquinone/menaquinone biosynthesis methyltransferase"  
"OPBI09\_00275" 35754 "s59E13H2" 0.3259067 "hypothetical protein"  
"OPBI09\_00275" 35754 "s59E25H2" 0 "hypothetical protein"  
"OPBI09\_00275" 35754 "s59E5H2" 0.009431354 "hypothetical protein"  
"OPBI09\_00275" 35754 "s63E6H2" 0.06537148 "hypothetical protein"  
"OPBI09\_00276" 35755 "s59E13H2" 0.2792061 "hypothetical protein"  
"OPBI09\_00276" 35755 "s59E25H2" 0 "hypothetical protein"  
"OPBI09\_00276" 35755 "s59E5H2" 0.01534161 "hypothetical protein"  
"OPBI09\_00276" 35755 "s63E6H2" 0.03424323 "hypothetical protein"  
"OPBI09\_00277" 35756 "s59E13H2" 0.3322039 "Tetratricopeptide repeat protein"  
"OPBI09\_00277" 35756 "s59E25H2" 0 "Tetratricopeptide repeat protein"  
"OPBI09\_00277" 35756 "s59E5H2" 0.01519561 "Tetratricopeptide repeat protein"  
"OPBI09\_00277" 35756 "s63E6H2" 0.02720958 "Tetratricopeptide repeat protein"  
"OPBI09\_00278" 35757 "s59E13H2" 0.3539343 "SAF domain protein"  
"OPBI09\_00278" 35757 "s59E25H2" 0 "SAF domain protein"  
"OPBI09\_00278" 35757 "s59E5H2" 0.03452608 "SAF domain protein"  
"OPBI09\_00278" 35757 "s63E6H2" 0.0257025 "SAF domain protein"  
"OPBI09\_00279" 35758 "s59E13H2" 0.3443383 "cell division inhibitor MinD"  
"OPBI09\_00279" 35758 "s59E25H2" 0 "cell division inhibitor MinD"  
"OPBI09\_00279" 35758 "s59E5H2" 0.03297662 "cell division inhibitor MinD"  
"OPBI09\_00279" 35758 "s63E6H2" 0.04708657 "cell division inhibitor MinD"  
"OPBI09\_00280" 35759 "s59E13H2" 0.163029 "Putative conjugal transfer protein/MT3759"  
"OPBI09\_00280" 35759 "s59E25H2" 0 "Putative conjugal transfer protein/MT3759"  
"OPBI09\_00280" 35759 "s59E5H2" 0.02753006 "Putative conjugal transfer protein/MT3759"  
"OPBI09\_00280" 35759 "s63E6H2" 0.1304106 "Putative conjugal transfer protein/MT3759"  
"OPBI09\_00281" 35760 "s59E13H2" 0.2012598 "Bacterial type II secretion system protein F domain protein"

"OPBI09\_00281" 35760 "s59E25H2" 0 "Bacterial type II secretion system protein F domain protein"  
"OPBI09\_00281" 35760 "s59E5H2" 0.0003389212 "Bacterial type II secretion system protein F domain protein"  
"OPBI09\_00281" 35760 "s63E6H2" 0.08996784 "Bacterial type II secretion system protein F domain protein"  
"OPBI09\_00282" 35761 "s59E13H2" 0.2144093 "Bacterial type II secretion system protein F domain protein"  
"OPBI09\_00282" 35761 "s59E25H2" 0 "Bacterial type II secretion system protein F domain protein"  
"OPBI09\_00282" 35761 "s59E5H2" 0.03052479 "Bacterial type II secretion system protein F domain protein"  
"OPBI09\_00282" 35761 "s63E6H2" 0.08454868 "Bacterial type II secretion system protein F domain protein"  
"OPBI09\_00283" 35762 "s59E13H2" 0.2700726 "hypothetical protein"  
"OPBI09\_00283" 35762 "s59E25H2" 0 "hypothetical protein"  
"OPBI09\_00283" 35762 "s59E5H2" 0.08029874 "hypothetical protein"  
"OPBI09\_00283" 35762 "s63E6H2" 0.01143033 "hypothetical protein"  
"OPBI09\_00284" 35763 "s59E13H2" 0.2671364 "TadE-like protein"  
"OPBI09\_00284" 35763 "s59E25H2" 0 "TadE-like protein"  
"OPBI09\_00284" 35763 "s59E5H2" 0.1346821 "TadE-like protein"  
"OPBI09\_00284" 35763 "s63E6H2" 0.03326722 "TadE-like protein"  
"OPBI09\_00285" 35764 "s59E13H2" 0.2293886 "hypothetical protein"  
"OPBI09\_00285" 35764 "s59E25H2" 0 "hypothetical protein"  
"OPBI09\_00285" 35764 "s59E5H2" 0.1078515 "hypothetical protein"  
"OPBI09\_00285" 35764 "s63E6H2" 0.03823292 "hypothetical protein"  
"OPBI09\_00286" 35765 "s59E13H2" 0.2593608 "Single-stranded DNA-binding protein"  
"OPBI09\_00286" 35765 "s59E25H2" 0 "Single-stranded DNA-binding protein"  
"OPBI09\_00286" 35765 "s59E5H2" 0.09769499 "Single-stranded DNA-binding protein"  
"OPBI09\_00286" 35765 "s63E6H2" 0.03151098 "Single-stranded DNA-binding protein"  
"OPBI09\_00287" 35766 "s59E13H2" 0.3426745 "hypothetical protein"  
"OPBI09\_00287" 35766 "s59E25H2" 0 "hypothetical protein"  
"OPBI09\_00287" 35766 "s59E5H2" 0.0211793 "hypothetical protein"  
"OPBI09\_00287" 35766 "s63E6H2" 0.02578978 "hypothetical protein"  
"OPBI09\_00288" 35767 "s59E13H2" 0.006524238 "Redox-sensing transcriptional repressor Rex"  
"OPBI09\_00288" 35767 "s59E25H2" 0 "Redox-sensing transcriptional repressor Rex"  
"OPBI09\_00288" 35767 "s59E5H2" 0.1039813 "Redox-sensing transcriptional repressor Rex"  
"OPBI09\_00288" 35767 "s63E6H2" 0.1175801 "Redox-sensing transcriptional repressor Rex"  
"OPBI09\_00289" 35768 "s59E13H2" 0 "Biofilm regulatory protein A precursor"  
"OPBI09\_00289" 35768 "s59E25H2" 0 "Biofilm regulatory protein A precursor"  
"OPBI09\_00289" 35768 "s59E5H2" 0.0183733 "Biofilm regulatory protein A precursor"  
"OPBI09\_00289" 35768 "s63E6H2" 0.09720968 "Biofilm regulatory protein A precursor"  
"OPBI09\_00291" 35770 "s59E13H2" 0.01987926 "Adenylosuccinate lyase"  
"OPBI09\_00291" 35770 "s59E25H2" 0 "Adenylosuccinate lyase"  
"OPBI09\_00291" 35770 "s59E5H2" 0.7342064 "Adenylosuccinate lyase"  
"OPBI09\_00291" 35770 "s63E6H2" 0.1427789 "Adenylosuccinate lyase"  
"OPBI09\_00292" 35771 "s59E13H2" 0.01859017 "Phosphoribosylformylglycinamide synthase"  
"OPBI09\_00292" 35771 "s59E25H2" 0 "Phosphoribosylformylglycinamide synthase"  
"OPBI09\_00292" 35771 "s59E5H2" 0.1324595 "Phosphoribosylformylglycinamide synthase"  
"OPBI09\_00292" 35771 "s63E6H2" 0.0634486 "Phosphoribosylformylglycinamide synthase"  
"OPBI09\_00293" 35772 "s59E13H2" 0.01708467 "Amidophosphoribosyltransferase precursor"  
"OPBI09\_00293" 35772 "s59E25H2" 0 "Amidophosphoribosyltransferase precursor"  
"OPBI09\_00293" 35772 "s59E5H2" 0.1740172 "Amidophosphoribosyltransferase precursor"  
"OPBI09\_00293" 35772 "s63E6H2" 0.1291976 "Amidophosphoribosyltransferase precursor"

"OPBI09\_00294" 35773 "s59E13H2" 0.01394348 "Phosphoribosylformylglycinamide cyclo-ligase"  
"OPBI09\_00294" 35773 "s59E25H2" 0 "Phosphoribosylformylglycinamide cyclo-ligase"  
"OPBI09\_00294" 35773 "s59E5H2" 0.3391067 "Phosphoribosylformylglycinamide cyclo-ligase"  
"OPBI09\_00294" 35773 "s63E6H2" 0.05828667 "Phosphoribosylformylglycinamide cyclo-ligase"  
"OPBI09\_00295" 35774 "s59E13H2" 0.06038359 "Phosphoribosylglycinamide formyltransferase"  
"OPBI09\_00295" 35774 "s59E25H2" 0 "Phosphoribosylglycinamide formyltransferase"  
"OPBI09\_00295" 35774 "s59E5H2" 0.4342635 "Phosphoribosylglycinamide formyltransferase"  
"OPBI09\_00295" 35774 "s63E6H2" 0.2180735 "Phosphoribosylglycinamide formyltransferase"  
"OPBI09\_00296" 35775 "s59E13H2" 0.05146807 "Bifunctional purine biosynthesis protein PurH"  
"OPBI09\_00296" 35775 "s59E25H2" 0 "Bifunctional purine biosynthesis protein PurH"  
"OPBI09\_00296" 35775 "s59E5H2" 0.6840249 "Bifunctional purine biosynthesis protein PurH"  
"OPBI09\_00296" 35775 "s63E6H2" 0.4720385 "Bifunctional purine biosynthesis protein PurH"  
"OPBI09\_00297" 35776 "s59E13H2" 0.03427344 "Lon protease"  
"OPBI09\_00297" 35776 "s59E25H2" 0 "Lon protease"  
"OPBI09\_00297" 35776 "s59E5H2" 0.7642372 "Lon protease"  
"OPBI09\_00297" 35776 "s63E6H2" 1.036033 "Lon protease"  
"OPBI09\_00298" 35777 "s59E13H2" 0.006091456 "biotin synthase"  
"OPBI09\_00298" 35777 "s59E25H2" 0 "biotin synthase"  
"OPBI09\_00298" 35777 "s59E5H2" 0.6495589 "biotin synthase"  
"OPBI09\_00298" 35777 "s63E6H2" 0.3558221 "biotin synthase"  
"OPBI09\_00299" 35778 "s59E13H2" 0.05424727 "Methionyl-tRNA formyltransferase"  
"OPBI09\_00299" 35778 "s59E25H2" 0 "Methionyl-tRNA formyltransferase"  
"OPBI09\_00299" 35778 "s59E5H2" 0.05107806 "Methionyl-tRNA formyltransferase"  
"OPBI09\_00299" 35778 "s63E6H2" 0.01262123 "Methionyl-tRNA formyltransferase"  
"OPBI09\_00300" 35779 "s59E13H2" 0.05891197 "Ribosomal RNA small subunit methyltransferase B"  
"OPBI09\_00300" 35779 "s59E25H2" 0 "Ribosomal RNA small subunit methyltransferase B"  
"OPBI09\_00300" 35779 "s59E5H2" 0.04962753 "Ribosomal RNA small subunit methyltransferase B"  
"OPBI09\_00300" 35779 "s63E6H2" 0.04995696 "Ribosomal RNA small subunit methyltransferase B"  
"OPBI09\_00302" 35781 "s59E13H2" 0 "Ribonuclease VapC19"  
"OPBI09\_00302" 35781 "s59E25H2" 0 "Ribonuclease VapC19"  
"OPBI09\_00302" 35781 "s59E5H2" 0.00629049 "Ribonuclease VapC19"  
"OPBI09\_00302" 35781 "s63E6H2" 0.06894611 "Ribonuclease VapC19"  
"OPBI09\_00303" 35782 "s59E13H2" 0 "Acetyltransferase (GNAT) family protein"  
"OPBI09\_00303" 35782 "s59E25H2" 0 "Acetyltransferase (GNAT) family protein"  
"OPBI09\_00303" 35782 "s59E5H2" 0 "Acetyltransferase (GNAT) family protein"  
"OPBI09\_00303" 35782 "s63E6H2" 0.001110019 "Acetyltransferase (GNAT) family protein"  
"OPBI09\_00304" 35783 "s59E13H2" 0 "Phycocyanobilin lyase subunit alpha"  
"OPBI09\_00304" 35783 "s59E25H2" 0 "Phycocyanobilin lyase subunit alpha"  
"OPBI09\_00304" 35783 "s59E5H2" 0 "Phycocyanobilin lyase subunit alpha"  
"OPBI09\_00304" 35783 "s63E6H2" 0 "Phycocyanobilin lyase subunit alpha"  
"OPBI09\_00306" 35785 "s59E13H2" 0.03340134 "50S ribosomal protein L28"  
"OPBI09\_00306" 35785 "s59E25H2" 0 "50S ribosomal protein L28"  
"OPBI09\_00306" 35785 "s59E5H2" 0 "50S ribosomal protein L28"  
"OPBI09\_00306" 35785 "s63E6H2" 0.06031795 "50S ribosomal protein L28"  
"OPBI09\_00307" 35786 "s59E13H2" 0.0715922 "DAK2 domain protein"  
"OPBI09\_00307" 35786 "s59E25H2" 0 "DAK2 domain protein"  
"OPBI09\_00307" 35786 "s59E5H2" 0.01947288 "DAK2 domain protein"

"OPBI09\_00307" 35786 "s63E6H2" 0.06107836 "DAK2 domain protein"  
"OPBI09\_00308" 35787 "s59E13H2" 0.1253803 "Ribosomal RNA small subunit methyltransferase D"  
"OPBI09\_00308" 35787 "s59E25H2" 0 "Ribosomal RNA small subunit methyltransferase D"  
"OPBI09\_00308" 35787 "s59E5H2" 0.04521018 "Ribosomal RNA small subunit methyltransferase D"  
"OPBI09\_00308" 35787 "s63E6H2" 0.08677972 "Ribosomal RNA small subunit methyltransferase D"  
"OPBI09\_00309" 35788 "s59E13H2" 0.1796651 "Phosphopantetheine adenylyltransferase"  
"OPBI09\_00309" 35788 "s59E25H2" 0 "Phosphopantetheine adenylyltransferase"  
"OPBI09\_00309" 35788 "s59E5H2" 0.03261997 "Phosphopantetheine adenylyltransferase"  
"OPBI09\_00309" 35788 "s63E6H2" 0.0780851 "Phosphopantetheine adenylyltransferase"  
"OPBI09\_00310" 35789 "s59E13H2" 0.1108228 "hypothetical protein"  
"OPBI09\_00310" 35789 "s59E25H2" 0 "hypothetical protein"  
"OPBI09\_00310" 35789 "s59E5H2" 0.03294982 "hypothetical protein"  
"OPBI09\_00310" 35789 "s63E6H2" 0.02397503 "hypothetical protein"  
"OPBI09\_00311" 35790 "s59E13H2" 0.09011357 "50S ribosomal protein L32"  
"OPBI09\_00311" 35790 "s59E25H2" 0 "50S ribosomal protein L32"  
"OPBI09\_00311" 35790 "s59E5H2" 0 "50S ribosomal protein L32"  
"OPBI09\_00311" 35790 "s63E6H2" 0.008456967 "50S ribosomal protein L32"  
"OPBI09\_00312" 35791 "s59E13H2" 0.1583315 "succinyl-CoA synthetase subunit beta"  
"OPBI09\_00312" 35791 "s59E25H2" 0 "succinyl-CoA synthetase subunit beta"  
"OPBI09\_00312" 35791 "s59E5H2" 0.02361995 "succinyl-CoA synthetase subunit beta"  
"OPBI09\_00312" 35791 "s63E6H2" 0.04194797 "succinyl-CoA synthetase subunit beta"  
"OPBI09\_00313" 35792 "s59E13H2" 0.1448919 "Phosphate acetyltransferase"  
"OPBI09\_00313" 35792 "s59E25H2" 0 "Phosphate acetyltransferase"  
"OPBI09\_00313" 35792 "s59E5H2" 0.01178205 "Phosphate acetyltransferase"  
"OPBI09\_00313" 35792 "s63E6H2" 0.004703601 "Phosphate acetyltransferase"  
"OPBI09\_00314" 35793 "s59E13H2" 0.1311402 "Phosphate acyltransferase"  
"OPBI09\_00314" 35793 "s59E25H2" 0 "Phosphate acyltransferase"  
"OPBI09\_00314" 35793 "s59E5H2" 0.009154861 "Phosphate acyltransferase"  
"OPBI09\_00314" 35793 "s63E6H2" 0.0138274 "Phosphate acyltransferase"  
"OPBI09\_00315" 35794 "s59E13H2" 0.02629625 "Acyl carrier protein"  
"OPBI09\_00315" 35794 "s59E25H2" 0 "Acyl carrier protein"  
"OPBI09\_00315" 35794 "s59E5H2" 0.02701955 "Acyl carrier protein"  
"OPBI09\_00315" 35794 "s63E6H2" 0 "Acyl carrier protein"  
"OPBI09\_00316" 35795 "s59E13H2" 0.005190017 "Ribonuclease 3"  
"OPBI09\_00316" 35795 "s59E25H2" 0 "Ribonuclease 3"  
"OPBI09\_00316" 35795 "s59E5H2" 0.03095378 "Ribonuclease 3"  
"OPBI09\_00316" 35795 "s63E6H2" 0 "Ribonuclease 3"  
"OPBI09\_00317" 35796 "s59E13H2" 0.01131071 "Chromosome partition protein Smc"  
"OPBI09\_00317" 35796 "s59E25H2" 0 "Chromosome partition protein Smc"  
"OPBI09\_00317" 35796 "s59E5H2" 0.02946634 "Chromosome partition protein Smc"  
"OPBI09\_00317" 35796 "s63E6H2" 0.0259425 "Chromosome partition protein Smc"  
"OPBI09\_00318" 35797 "s59E13H2" 0 "Signal recognition particle receptor FtsY"  
"OPBI09\_00318" 35797 "s59E25H2" 0 "Signal recognition particle receptor FtsY"  
"OPBI09\_00318" 35797 "s59E5H2" 0.03184779 "Signal recognition particle receptor FtsY"  
"OPBI09\_00318" 35797 "s63E6H2" 0.0138229 "Signal recognition particle receptor FtsY"  
"OPBI09\_00319" 35798 "s59E13H2" 0.01390072 "Signal recognition particle protein"  
"OPBI09\_00319" 35798 "s59E25H2" 0 "Signal recognition particle protein"

"OPBI09\_00319" 35798 "s59E5H2" 0.02475064 "Signal recognition particle protein"  
"OPBI09\_00319" 35798 "s63E6H2" 0.03308616 "Signal recognition particle protein"  
"OPBI09\_00320" 35799 "s59E13H2" 0.003760544 "30S ribosomal protein S16"  
"OPBI09\_00320" 35799 "s59E25H2" 0 "30S ribosomal protein S16"  
"OPBI09\_00320" 35799 "s59E5H2" 0.05502763 "30S ribosomal protein S16"  
"OPBI09\_00320" 35799 "s63E6H2" 0.03509183 "30S ribosomal protein S16"  
"OPBI09\_00321" 35800 "s59E13H2" 0.006955593 "hypothetical protein"  
"OPBI09\_00321" 35800 "s59E25H2" 0 "hypothetical protein"  
"OPBI09\_00321" 35800 "s59E5H2" 0.02459472 "hypothetical protein"  
"OPBI09\_00321" 35800 "s63E6H2" 0.02475882 "hypothetical protein"  
"OPBI09\_00322" 35801 "s59E13H2" 0.002982759 "Ribosome maturation factor RimM"  
"OPBI09\_00322" 35801 "s59E25H2" 0 "Ribosome maturation factor RimM"  
"OPBI09\_00322" 35801 "s59E5H2" 0.03598713 "Ribosome maturation factor RimM"  
"OPBI09\_00322" 35801 "s63E6H2" 0.01190664 "Ribosome maturation factor RimM"  
"OPBI09\_00323" 35802 "s59E13H2" 0.009769536 "tRNA (guanine-N(1)-methyltransferase"  
"OPBI09\_00323" 35802 "s59E25H2" 0 "tRNA (guanine-N(1)-methyltransferase"  
"OPBI09\_00323" 35802 "s59E5H2" 0.0163272 "tRNA (guanine-N(1)-methyltransferase"  
"OPBI09\_00323" 35802 "s63E6H2" 0.04612293 "tRNA (guanine-N(1)-methyltransferase"  
"OPBI09\_00324" 35803 "s59E13H2" 0.002318531 "50S ribosomal protein L19"  
"OPBI09\_00324" 35803 "s59E25H2" 0 "50S ribosomal protein L19"  
"OPBI09\_00324" 35803 "s59E5H2" 0.01545329 "50S ribosomal protein L19"  
"OPBI09\_00324" 35803 "s63E6H2" 0.02652135 "50S ribosomal protein L19"  
"OPBI09\_00325" 35804 "s59E13H2" 0.03264247 "Signal peptidase I U"  
"OPBI09\_00325" 35804 "s59E25H2" 0 "Signal peptidase I U"  
"OPBI09\_00325" 35804 "s59E5H2" 0.006911318 "Signal peptidase I U"  
"OPBI09\_00325" 35804 "s63E6H2" 0.03605979 "Signal peptidase I U"  
"OPBI09\_00326" 35805 "s59E13H2" 0.03320627 "Ribonuclease HII"  
"OPBI09\_00326" 35805 "s59E25H2" 0 "Ribonuclease HII"  
"OPBI09\_00326" 35805 "s59E5H2" 0.009560765 "Ribonuclease HII"  
"OPBI09\_00326" 35805 "s63E6H2" 0.04980341 "Ribonuclease HII"  
"OPBI09\_00327" 35806 "s59E13H2" 0.03316427 "hypothetical protein"  
"OPBI09\_00327" 35806 "s59E25H2" 0 "hypothetical protein"  
"OPBI09\_00327" 35806 "s59E5H2" 0.01076459 "hypothetical protein"  
"OPBI09\_00327" 35806 "s63E6H2" 0.0161628 "hypothetical protein"  
"OPBI09\_00328" 35807 "s59E13H2" 0 "Cyclic di-GMP phosphodiesterase response regulator RpfG"  
"OPBI09\_00328" 35807 "s59E25H2" 0 "Cyclic di-GMP phosphodiesterase response regulator RpfG"  
"OPBI09\_00328" 35807 "s59E5H2" 0.00732512 "Cyclic di-GMP phosphodiesterase response regulator RpfG"  
"OPBI09\_00328" 35807 "s63E6H2" 0 "Cyclic di-GMP phosphodiesterase response regulator RpfG"  
"OPBI09\_00329" 35808 "s59E13H2" 0.1295091 "Competence protein ComM"  
"OPBI09\_00329" 35808 "s59E25H2" 0 "Competence protein ComM"  
"OPBI09\_00329" 35808 "s59E5H2" 0.02478454 "Competence protein ComM"  
"OPBI09\_00329" 35808 "s63E6H2" 0.07641018 "Competence protein ComM"  
"OPBI09\_00330" 35809 "s59E13H2" 0.0973967 "hypothetical protein"  
"OPBI09\_00330" 35809 "s59E25H2" 0 "hypothetical protein"  
"OPBI09\_00330" 35809 "s59E5H2" 0.008363195 "hypothetical protein"  
"OPBI09\_00330" 35809 "s63E6H2" 0.09282443 "hypothetical protein"  
"OPBI09\_00332" 35811 "s59E13H2" 0.05001185 "Tyrosine recombinase XerC"

"OPBI09\_00332" 35811 "s59E25H2" 0 "Tyrosine recombinase XerC"  
"OPBI09\_00332" 35811 "s59E5H2" 0.01766459 "Tyrosine recombinase XerC"  
"OPBI09\_00332" 35811 "s63E6H2" 0.024656 "Tyrosine recombinase XerC"  
"OPBI09\_00333" 35812 "s59E13H2" 0.008806891 "30S ribosomal protein S2"  
"OPBI09\_00333" 35812 "s59E25H2" 0 "30S ribosomal protein S2"  
"OPBI09\_00333" 35812 "s59E5H2" 0.03386177 "30S ribosomal protein S2"  
"OPBI09\_00333" 35812 "s63E6H2" 0.2045924 "30S ribosomal protein S2"  
"OPBI09\_00334" 35813 "s59E13H2" 0.0007107054 "Elongation factor Ts"  
"OPBI09\_00334" 35813 "s59E25H2" 0 "Elongation factor Ts"  
"OPBI09\_00334" 35813 "s59E5H2" 0.009450055 "Elongation factor Ts"  
"OPBI09\_00334" 35813 "s63E6H2" 0.02117059 "Elongation factor Ts"  
"OPBI09\_00335" 35814 "s59E13H2" 0.005216694 "Uridylate kinase"  
"OPBI09\_00335" 35814 "s59E25H2" 0 "Uridylate kinase"  
"OPBI09\_00335" 35814 "s59E5H2" 0.02355204 "Uridylate kinase"  
"OPBI09\_00335" 35814 "s63E6H2" 0.005471361 "Uridylate kinase"  
"OPBI09\_00336" 35815 "s59E13H2" 0 "Ribosome-recycling factor"  
"OPBI09\_00336" 35815 "s59E25H2" 0 "Ribosome-recycling factor"  
"OPBI09\_00336" 35815 "s59E5H2" 0.01191185 "Ribosome-recycling factor"  
"OPBI09\_00336" 35815 "s63E6H2" 0.01226753 "Ribosome-recycling factor"  
"OPBI09\_00337" 35816 "s59E13H2" 0.004208042 "Isoprenyl transferase"  
"OPBI09\_00337" 35816 "s59E25H2" 0 "Isoprenyl transferase"  
"OPBI09\_00337" 35816 "s59E5H2" 0.02131779 "Isoprenyl transferase"  
"OPBI09\_00337" 35816 "s63E6H2" 0.009605597 "Isoprenyl transferase"  
"OPBI09\_00338" 35817 "s59E13H2" 0 "Metalloprotease MmpA"  
"OPBI09\_00338" 35817 "s59E25H2" 0 "Metalloprotease MmpA"  
"OPBI09\_00338" 35817 "s59E5H2" 0.007565475 "Metalloprotease MmpA"  
"OPBI09\_00338" 35817 "s63E6H2" 0.0009076122 "Metalloprotease MmpA"  
"OPBI09\_00340" 35819 "s59E13H2" 0.001505365 "4-hydroxy-3-methylbut-2-en-1-yl diphosphate synthase"  
"OPBI09\_00340" 35819 "s59E25H2" 0 "4-hydroxy-3-methylbut-2-en-1-yl diphosphate synthase"  
"OPBI09\_00340" 35819 "s59E5H2" 0 "4-hydroxy-3-methylbut-2-en-1-yl diphosphate synthase"  
"OPBI09\_00340" 35819 "s63E6H2" 0.004763579 "4-hydroxy-3-methylbut-2-en-1-yl diphosphate synthase"  
"OPBI09\_00341" 35820 "s59E13H2" 0.006639661 "Proline--tRNA ligase"  
"OPBI09\_00341" 35820 "s59E25H2" 0 "Proline--tRNA ligase"  
"OPBI09\_00341" 35820 "s59E5H2" 0.01149667 "Proline--tRNA ligase"  
"OPBI09\_00341" 35820 "s63E6H2" 0.007192713 "Proline--tRNA ligase"  
"OPBI09\_00342" 35821 "s59E13H2" 0.002315324 "ATP-dependent RecD-like DNA helicase"  
"OPBI09\_00342" 35821 "s59E25H2" 0 "ATP-dependent RecD-like DNA helicase"  
"OPBI09\_00342" 35821 "s59E5H2" 0.01117406 "ATP-dependent RecD-like DNA helicase"  
"OPBI09\_00342" 35821 "s63E6H2" 0.005106715 "ATP-dependent RecD-like DNA helicase"  
"OPBI09\_00343" 35822 "s59E13H2" 0 "Glycine/sarcosine N-methyltransferase"  
"OPBI09\_00343" 35822 "s59E25H2" 0 "Glycine/sarcosine N-methyltransferase"  
"OPBI09\_00343" 35822 "s59E5H2" 0 "Glycine/sarcosine N-methyltransferase"  
"OPBI09\_00343" 35822 "s63E6H2" 0 "Glycine/sarcosine N-methyltransferase"  
"OPBI09\_00344" 35823 "s59E13H2" 0 "Acetyltransferase (GNAT) family protein"  
"OPBI09\_00344" 35823 "s59E25H2" 0 "Acetyltransferase (GNAT) family protein"  
"OPBI09\_00344" 35823 "s59E5H2" 0 "Acetyltransferase (GNAT) family protein"  
"OPBI09\_00344" 35823 "s63E6H2" 0 "Acetyltransferase (GNAT) family protein"

"OPBI09\_00345" 35824 "s59E13H2" 0 "Cypemycin methyltransferase"  
"OPBI09\_00345" 35824 "s59E25H2" 0 "Cypemycin methyltransferase"  
"OPBI09\_00345" 35824 "s59E5H2" 0 "Cypemycin methyltransferase"  
"OPBI09\_00345" 35824 "s63E6H2" 0 "Cypemycin methyltransferase"  
"OPBI09\_00346" 35825 "s59E13H2" 0 "Pyrimidine 5'-nucleotidase YjjG"  
"OPBI09\_00346" 35825 "s59E25H2" 0 "Pyrimidine 5'-nucleotidase YjjG"  
"OPBI09\_00346" 35825 "s59E5H2" 0 "Pyrimidine 5'-nucleotidase YjjG"  
"OPBI09\_00346" 35825 "s63E6H2" 0 "Pyrimidine 5'-nucleotidase YjjG"  
"OPBI09\_00347" 35826 "s59E13H2" 0 "bifunctional 3-demethylubiquinone-9 3-methyltransferase/ 2-octaprenyl-6-hydroxy phenol methylase"  
"OPBI09\_00347" 35826 "s59E25H2" 0 "bifunctional 3-demethylubiquinone-9 3-methyltransferase/ 2-octaprenyl-6-hydroxy phenol methylase"  
"OPBI09\_00347" 35826 "s59E5H2" 0.01275392 "bifunctional 3-demethylubiquinone-9 3-methyltransferase/ 2-octaprenyl-6-hydroxy phenol methylase"  
"OPBI09\_00347" 35826 "s63E6H2" 0 "bifunctional 3-demethylubiquinone-9 3-methyltransferase/ 2-octaprenyl-6-hydroxy phenol methylase"  
"OPBI09\_00348" 35827 "s59E13H2" 0 "16S ribosomal RNA methyltransferase KsgA/Dim1 family protein"  
"OPBI09\_00348" 35827 "s59E25H2" 0 "16S ribosomal RNA methyltransferase KsgA/Dim1 family protein"  
"OPBI09\_00348" 35827 "s59E5H2" 0 "16S ribosomal RNA methyltransferase KsgA/Dim1 family protein"  
"OPBI09\_00348" 35827 "s63E6H2" 0 "16S ribosomal RNA methyltransferase KsgA/Dim1 family protein"  
"OPBI09\_00349" 35828 "s59E13H2" 0.007688462 "hypothetical protein"  
"OPBI09\_00349" 35828 "s59E25H2" 0 "hypothetical protein"  
"OPBI09\_00349" 35828 "s59E5H2" 0 "hypothetical protein"  
"OPBI09\_00349" 35828 "s63E6H2" 0.002905714 "hypothetical protein"  
"OPBI09\_00350" 35829 "s59E13H2" 0 "Translation initiation factor IF-2"  
"OPBI09\_00350" 35829 "s59E25H2" 0 "Translation initiation factor IF-2"  
"OPBI09\_00350" 35829 "s59E5H2" 0.008789494 "Translation initiation factor IF-2"  
"OPBI09\_00350" 35829 "s63E6H2" 0.01017827 "Translation initiation factor IF-2"  
"OPBI09\_00351" 35830 "s59E13H2" 0 "Ribosome-binding factor A"  
"OPBI09\_00351" 35830 "s59E25H2" 0 "Ribosome-binding factor A"  
"OPBI09\_00351" 35830 "s59E5H2" 0.001861852 "Ribosome-binding factor A"  
"OPBI09\_00351" 35830 "s63E6H2" 0.009433968 "Ribosome-binding factor A"  
"OPBI09\_00352" 35831 "s59E13H2" 0.006751224 "Bifunctional oligoribonuclease and PAP phosphatase NrnA"  
"OPBI09\_00352" 35831 "s59E25H2" 0 "Bifunctional oligoribonuclease and PAP phosphatase NrnA"  
"OPBI09\_00352" 35831 "s59E5H2" 0.02741376 "Bifunctional oligoribonuclease and PAP phosphatase NrnA"  
"OPBI09\_00352" 35831 "s63E6H2" 0.01834874 "Bifunctional oligoribonuclease and PAP phosphatase NrnA"  
"OPBI09\_00354" 35833 "s59E13H2" 0 "tRNA pseudouridine synthase B"  
"OPBI09\_00354" 35833 "s59E25H2" 0 "tRNA pseudouridine synthase B"  
"OPBI09\_00354" 35833 "s59E5H2" 0.02311915 "tRNA pseudouridine synthase B"  
"OPBI09\_00354" 35833 "s63E6H2" 0.01278775 "tRNA pseudouridine synthase B"  
"OPBI09\_00355" 35834 "s59E13H2" 0 "Riboflavin biosynthesis protein RibF"  
"OPBI09\_00355" 35834 "s59E25H2" 0 "Riboflavin biosynthesis protein RibF"  
"OPBI09\_00355" 35834 "s59E5H2" 0.01559804 "Riboflavin biosynthesis protein RibF"  
"OPBI09\_00355" 35834 "s63E6H2" 0.004768822 "Riboflavin biosynthesis protein RibF"  
"OPBI09\_00356" 35835 "s59E13H2" 0 "30S ribosomal protein S15"  
"OPBI09\_00356" 35835 "s59E25H2" 0 "30S ribosomal protein S15"  
"OPBI09\_00356" 35835 "s59E5H2" 0 "30S ribosomal protein S15"  
"OPBI09\_00356" 35835 "s63E6H2" 0 "30S ribosomal protein S15"  
"OPBI09\_00357" 35836 "s59E13H2" 0.0008139178 "Polyribonucleotide nucleotidyltransferase"  
"OPBI09\_00357" 35836 "s59E25H2" 0 "Polyribonucleotide nucleotidyltransferase"  
"OPBI09\_00357" 35836 "s59E5H2" 0.01791982 "Polyribonucleotide nucleotidyltransferase"



"OPBI09\_00357" 35836 "s63E6H2" 0.03332698 "Polyribonucleotide nucleotidyltransferase"  
"OPBI09\_00358" 35837 "s59E13H2" 0.004996196 "Protease 3 precursor"  
"OPBI09\_00358" 35837 "s59E25H2" 0 "Protease 3 precursor"  
"OPBI09\_00358" 35837 "s59E5H2" 0.03450379 "Protease 3 precursor"  
"OPBI09\_00358" 35837 "s63E6H2" 0.1006014 "Protease 3 precursor"  
"OPBI09\_00359" 35838 "s59E13H2" 0.06915498 "4-hydroxy-tetrahydrodipicolinate reductase"  
"OPBI09\_00359" 35838 "s59E25H2" 0 "4-hydroxy-tetrahydrodipicolinate reductase"  
"OPBI09\_00359" 35838 "s59E5H2" 0.02697892 "4-hydroxy-tetrahydrodipicolinate reductase"  
"OPBI09\_00359" 35838 "s63E6H2" 0.04813152 "4-hydroxy-tetrahydrodipicolinate reductase"  
"OPBI09\_00360" 35839 "s59E13H2" 0.002122709 "4-hydroxy-tetrahydrodipicolinate synthase"  
"OPBI09\_00360" 35839 "s59E25H2" 0 "4-hydroxy-tetrahydrodipicolinate synthase"  
"OPBI09\_00360" 35839 "s59E5H2" 0.1001549 "4-hydroxy-tetrahydrodipicolinate synthase"  
"OPBI09\_00360" 35839 "s63E6H2" 0.05532975 "4-hydroxy-tetrahydrodipicolinate synthase"  
"OPBI09\_00361" 35840 "s59E13H2" 0 "Ribonuclease J 1"  
"OPBI09\_00361" 35840 "s59E25H2" 0 "Ribonuclease J 1"  
"OPBI09\_00361" 35840 "s59E5H2" 0.1476488 "Ribonuclease J 1"  
"OPBI09\_00361" 35840 "s63E6H2" 0.1106656 "Ribonuclease J 1"  
"OPBI09\_00362" 35841 "s59E13H2" 0.0007321676 "DNA translocase SpoIIIE"  
"OPBI09\_00362" 35841 "s59E25H2" 0 "DNA translocase SpoIIIE"  
"OPBI09\_00362" 35841 "s59E5H2" 0.3269082 "DNA translocase SpoIIIE"  
"OPBI09\_00362" 35841 "s63E6H2" 0.1050251 "DNA translocase SpoIIIE"  
"OPBI09\_00363" 35842 "s59E13H2" 0 "Nicotinamide-nucleotide amidohydrolase PncC"  
"OPBI09\_00363" 35842 "s59E25H2" 0 "Nicotinamide-nucleotide amidohydrolase PncC"  
"OPBI09\_00363" 35842 "s59E5H2" 0.3997902 "Nicotinamide-nucleotide amidohydrolase PncC"  
"OPBI09\_00363" 35842 "s63E6H2" 0.1293197 "Nicotinamide-nucleotide amidohydrolase PncC"  
"OPBI09\_00364" 35843 "s59E13H2" 0 "2'-5'-RNA ligase"  
"OPBI09\_00364" 35843 "s59E25H2" 0 "2'-5'-RNA ligase"  
"OPBI09\_00364" 35843 "s59E5H2" 0.3186976 "2'-5'-RNA ligase"  
"OPBI09\_00364" 35843 "s63E6H2" 0.09605078 "2'-5'-RNA ligase"  
"OPBI09\_00365" 35844 "s59E13H2" 0 "DNA repair and recombination protein RadA"  
"OPBI09\_00365" 35844 "s59E25H2" 0 "DNA repair and recombination protein RadA"  
"OPBI09\_00365" 35844 "s59E5H2" 0.6105632 "DNA repair and recombination protein RadA"  
"OPBI09\_00365" 35844 "s63E6H2" 0.1469605 "DNA repair and recombination protein RadA"  
"OPBI09\_00369" 35848 "s59E13H2" 0.6668526 "Phosphoenolpyruvate carboxykinase [GTP]"  
"OPBI09\_00369" 35848 "s59E25H2" 0 "Phosphoenolpyruvate carboxykinase [GTP]"  
"OPBI09\_00369" 35848 "s59E5H2" 0.34178 "Phosphoenolpyruvate carboxykinase [GTP]"  
"OPBI09\_00369" 35848 "s63E6H2" 0.008842898 "Phosphoenolpyruvate carboxykinase [GTP]"  
"OPBI09\_00370" 35849 "s59E13H2" 0.01210134 "hypothetical protein"  
"OPBI09\_00370" 35849 "s59E25H2" 0 "hypothetical protein"  
"OPBI09\_00370" 35849 "s59E5H2" 0.4557881 "hypothetical protein"  
"OPBI09\_00370" 35849 "s63E6H2" 0.01333793 "hypothetical protein"  
"OPBI09\_00371" 35850 "s59E13H2" 0.4361684 "Hydrogenase isoenzymes nickel incorporation protein HypB"  
"OPBI09\_00371" 35850 "s59E25H2" 0 "Hydrogenase isoenzymes nickel incorporation protein HypB"  
"OPBI09\_00371" 35850 "s59E5H2" 0.1654334 "Hydrogenase isoenzymes nickel incorporation protein HypB"  
"OPBI09\_00371" 35850 "s63E6H2" 0.01619302 "Hydrogenase isoenzymes nickel incorporation protein HypB"  
"OPBI09\_00372" 35851 "s59E13H2" 0.007373467 "Sulphydrogenase 2 subunit beta"  
"OPBI09\_00372" 35851 "s59E25H2" 0 "Sulphydrogenase 2 subunit beta"

"OPBI09\_00372" 35851 "s59E5H2" 0.1496129 "Sulfhydrogenase 2 subunit beta"  
"OPBI09\_00372" 35851 "s63E6H2" 0.001755454 "Sulfhydrogenase 2 subunit beta"  
"OPBI09\_00373" 35852 "s59E13H2" 0.01525222 "Sulfhydrogenase 2 subunit gamma"  
"OPBI09\_00373" 35852 "s59E25H2" 0 "Sulfhydrogenase 2 subunit gamma"  
"OPBI09\_00373" 35852 "s59E5H2" 0.8569059 "Sulfhydrogenase 2 subunit gamma"  
"OPBI09\_00373" 35852 "s63E6H2" 0.02007366 "Sulfhydrogenase 2 subunit gamma"  
"OPBI09\_00374" 35853 "s59E13H2" 0.004865264 "Sulfhydrogenase 1 subunit delta"  
"OPBI09\_00374" 35853 "s59E25H2" 0 "Sulfhydrogenase 1 subunit delta"  
"OPBI09\_00374" 35853 "s59E5H2" 0.6759995 "Sulfhydrogenase 1 subunit delta"  
"OPBI09\_00374" 35853 "s63E6H2" 0.00587186 "Sulfhydrogenase 1 subunit delta"  
"OPBI09\_00375" 35854 "s59E13H2" 0 "Sulfhydrogenase 1 subunit alpha"  
"OPBI09\_00375" 35854 "s59E25H2" 0 "Sulfhydrogenase 1 subunit alpha"  
"OPBI09\_00375" 35854 "s59E5H2" 0.6901442 "Sulfhydrogenase 1 subunit alpha"  
"OPBI09\_00375" 35854 "s63E6H2" 0.003698001 "Sulfhydrogenase 1 subunit alpha"  
"OPBI09\_00376" 35855 "s59E13H2" 0.003560601 "Hydrogenase 2 maturation protease"  
"OPBI09\_00376" 35855 "s59E25H2" 0 "Hydrogenase 2 maturation protease"  
"OPBI09\_00376" 35855 "s59E5H2" 1.36378 "Hydrogenase 2 maturation protease"  
"OPBI09\_00376" 35855 "s63E6H2" 0.02818909 "Hydrogenase 2 maturation protease"  
"OPBI09\_00377" 35856 "s59E13H2" 0.005987415 "hypothetical protein"  
"OPBI09\_00377" 35856 "s59E25H2" 0 "hypothetical protein"  
"OPBI09\_00377" 35856 "s59E5H2" 1.124251 "hypothetical protein"  
"OPBI09\_00377" 35856 "s63E6H2" 0.03801226 "hypothetical protein"  
"OPBI09\_00378" 35857 "s59E13H2" 0.6403449 "Sulfhydrogenase 1 subunit alpha"  
"OPBI09\_00378" 35857 "s59E25H2" 0 "Sulfhydrogenase 1 subunit alpha"  
"OPBI09\_00378" 35857 "s59E5H2" 1.626301 "Sulfhydrogenase 1 subunit alpha"  
"OPBI09\_00378" 35857 "s63E6H2" 0.08927105 "Sulfhydrogenase 1 subunit alpha"  
"OPBI09\_00379" 35858 "s59E13H2" 0.1576148 "Sulfhydrogenase 1 subunit delta"  
"OPBI09\_00379" 35858 "s59E25H2" 0 "Sulfhydrogenase 1 subunit delta"  
"OPBI09\_00379" 35858 "s59E5H2" 0.7384149 "Sulfhydrogenase 1 subunit delta"  
"OPBI09\_00379" 35858 "s63E6H2" 0.2018752 "Sulfhydrogenase 1 subunit delta"  
"OPBI09\_00380" 35859 "s59E13H2" 0.4285498 "Sulfhydrogenase 2 subunit gamma"  
"OPBI09\_00380" 35859 "s59E25H2" 0 "Sulfhydrogenase 2 subunit gamma"  
"OPBI09\_00380" 35859 "s59E5H2" 0.8537804 "Sulfhydrogenase 2 subunit gamma"  
"OPBI09\_00380" 35859 "s63E6H2" 0.2176934 "Sulfhydrogenase 2 subunit gamma"  
"OPBI09\_00381" 35860 "s59E13H2" 0.6841946 "Sulfhydrogenase 1 subunit beta"  
"OPBI09\_00381" 35860 "s59E25H2" 0 "Sulfhydrogenase 1 subunit beta"  
"OPBI09\_00381" 35860 "s59E5H2" 0.7234562 "Sulfhydrogenase 1 subunit beta"  
"OPBI09\_00381" 35860 "s63E6H2" 0.1676757 "Sulfhydrogenase 1 subunit beta"  
"OPBI09\_00382" 35861 "s59E13H2" 0.1390234 "Alkaline phosphatase synthesis sensor protein PhoR"  
"OPBI09\_00382" 35861 "s59E25H2" 0 "Alkaline phosphatase synthesis sensor protein PhoR"  
"OPBI09\_00382" 35861 "s59E5H2" 0.2612577 "Alkaline phosphatase synthesis sensor protein PhoR"  
"OPBI09\_00382" 35861 "s63E6H2" 0.1579677 "Alkaline phosphatase synthesis sensor protein PhoR"  
"OPBI09\_00383" 35862 "s59E13H2" 0.2629674 "Response regulator MprA"  
"OPBI09\_00383" 35862 "s59E25H2" 0 "Response regulator MprA"  
"OPBI09\_00383" 35862 "s59E5H2" 0.0536266 "Response regulator MprA"  
"OPBI09\_00383" 35862 "s63E6H2" 0.0963405 "Response regulator MprA"  
"OPBI09\_00384" 35863 "s59E13H2" 0.2622432 "Sensor protein ZraS"

"OPBI09\_00384" 35863 "s59E25H2" 0 "Sensor protein ZraS"  
"OPBI09\_00384" 35863 "s59E5H2" 0.03547895 "Sensor protein ZraS"  
"OPBI09\_00384" 35863 "s63E6H2" 0.09674782 "Sensor protein ZraS"  
"OPBI09\_00385" 35864 "s59E13H2" 0.002390985 "CoB--CoM heterodisulfide reductase iron-sulfur subunit C"  
"OPBI09\_00385" 35864 "s59E25H2" 0 "CoB--CoM heterodisulfide reductase iron-sulfur subunit C"  
"OPBI09\_00385" 35864 "s59E5H2" 0.01111742 "CoB--CoM heterodisulfide reductase iron-sulfur subunit C"  
"OPBI09\_00385" 35864 "s63E6H2" 0.02080257 "CoB--CoM heterodisulfide reductase iron-sulfur subunit C"  
"OPBI09\_00386" 35865 "s59E13H2" 0.003963255 "Single-stranded-DNA-specific exonuclease RecJ"  
"OPBI09\_00386" 35865 "s59E25H2" 0 "Single-stranded-DNA-specific exonuclease RecJ"  
"OPBI09\_00386" 35865 "s59E5H2" 0.05729135 "Single-stranded-DNA-specific exonuclease RecJ"  
"OPBI09\_00386" 35865 "s63E6H2" 0.005620213 "Single-stranded-DNA-specific exonuclease RecJ"  
"OPBI09\_00387" 35866 "s59E13H2" 0.002346844 "Bifunctional (p)ppGpp synthase/hydrolase relA"  
"OPBI09\_00387" 35866 "s59E25H2" 0 "Bifunctional (p)ppGpp synthase/hydrolase relA"  
"OPBI09\_00387" 35866 "s59E5H2" 0.09132389 "Bifunctional (p)ppGpp synthase/hydrolase relA"  
"OPBI09\_00387" 35866 "s63E6H2" 0.01318142 "Bifunctional (p)ppGpp synthase/hydrolase relA"  
"OPBI09\_00388" 35867 "s59E13H2" 0.01313132 "putative metallo-hydrolase"  
"OPBI09\_00388" 35867 "s59E25H2" 0 "putative metallo-hydrolase"  
"OPBI09\_00388" 35867 "s59E5H2" 0.08361324 "putative metallo-hydrolase"  
"OPBI09\_00388" 35867 "s63E6H2" 0.01878132 "putative metallo-hydrolase"  
"OPBI09\_00389" 35868 "s59E13H2" 0.003630331 "Histidine--tRNA ligase"  
"OPBI09\_00389" 35868 "s59E25H2" 0 "Histidine--tRNA ligase"  
"OPBI09\_00389" 35868 "s59E5H2" 0.1465811 "Histidine--tRNA ligase"  
"OPBI09\_00389" 35868 "s63E6H2" 0.03271618 "Histidine--tRNA ligase"  
"OPBI09\_00390" 35869 "s59E13H2" 0.02031139 "Histidine--tRNA ligase"  
"OPBI09\_00390" 35869 "s59E25H2" 0 "Histidine--tRNA ligase"  
"OPBI09\_00390" 35869 "s59E5H2" 0.1228106 "Histidine--tRNA ligase"  
"OPBI09\_00390" 35869 "s63E6H2" 0.01809147 "Histidine--tRNA ligase"  
"OPBI09\_00391" 35870 "s59E13H2" 0.005465385 "Aspartate--tRNA ligase"  
"OPBI09\_00391" 35870 "s59E25H2" 0 "Aspartate--tRNA ligase"  
"OPBI09\_00391" 35870 "s59E5H2" 0.08077899 "Aspartate--tRNA ligase"  
"OPBI09\_00391" 35870 "s63E6H2" 0.04844148 "Aspartate--tRNA ligase"  
"OPBI09\_00393" 35872 "s59E13H2" 0.00356388 "Diaminopimelate epimerase"  
"OPBI09\_00393" 35872 "s59E25H2" 0 "Diaminopimelate epimerase"  
"OPBI09\_00393" 35872 "s59E5H2" 0.2081442 "Diaminopimelate epimerase"  
"OPBI09\_00393" 35872 "s63E6H2" 0.071858 "Diaminopimelate epimerase"  
"OPBI09\_00394" 35873 "s59E13H2" 0.01435338 "LL-diaminopimelate aminotransferase"  
"OPBI09\_00394" 35873 "s59E25H2" 0 "LL-diaminopimelate aminotransferase"  
"OPBI09\_00394" 35873 "s59E5H2" 0.7469375 "LL-diaminopimelate aminotransferase"  
"OPBI09\_00394" 35873 "s63E6H2" 0.1728576 "LL-diaminopimelate aminotransferase"  
"OPBI09\_00395" 35874 "s59E13H2" 0.01037742 "GTPase HflX"  
"OPBI09\_00395" 35874 "s59E25H2" 0 "GTPase HflX"  
"OPBI09\_00395" 35874 "s59E5H2" 0.9479702 "GTPase HflX"  
"OPBI09\_00395" 35874 "s63E6H2" 0.1951382 "GTPase HflX"  
"OPBI09\_00396" 35875 "s59E13H2" 0.02341716 "LexA repressor"  
"OPBI09\_00396" 35875 "s59E25H2" 0 "LexA repressor"  
"OPBI09\_00396" 35875 "s59E5H2" 0.7105371 "LexA repressor"  
"OPBI09\_00396" 35875 "s63E6H2" 0.1630601 "LexA repressor"

"OPBI09\_00397" 35876 "s59E13H2" 0.04443851 "hypothetical protein"  
"OPBI09\_00397" 35876 "s59E25H2" 0 "hypothetical protein"  
"OPBI09\_00397" 35876 "s59E5H2" 0.3790457 "hypothetical protein"  
"OPBI09\_00397" 35876 "s63E6H2" 0.06841613 "hypothetical protein"  
"OPBI09\_00398" 35877 "s59E13H2" 0.05912948 "Ketol-acid reductoisomerase"  
"OPBI09\_00398" 35877 "s59E25H2" 0 "Ketol-acid reductoisomerase"  
"OPBI09\_00398" 35877 "s59E5H2" 0.4800906 "Ketol-acid reductoisomerase"  
"OPBI09\_00398" 35877 "s63E6H2" 0.1155308 "Ketol-acid reductoisomerase"  
"OPBI09\_00399" 35878 "s59E13H2" 0.009529961 "Deoxyuridine 5'-triphosphate nucleotidohydrolase"  
"OPBI09\_00399" 35878 "s59E25H2" 0 "Deoxyuridine 5'-triphosphate nucleotidohydrolase"  
"OPBI09\_00399" 35878 "s59E5H2" 0.7106702 "Deoxyuridine 5'-triphosphate nucleotidohydrolase"  
"OPBI09\_00399" 35878 "s63E6H2" 0.01098465 "Deoxyuridine 5'-triphosphate nucleotidohydrolase"  
"OPBI09\_00400" 35879 "s59E13H2" 0.01785895 "Serine acetyltransferase"  
"OPBI09\_00400" 35879 "s59E25H2" 0 "Serine acetyltransferase"  
"OPBI09\_00400" 35879 "s59E5H2" 0.7354577 "Serine acetyltransferase"  
"OPBI09\_00400" 35879 "s63E6H2" 0.0736087 "Serine acetyltransferase"  
"OPBI09\_00401" 35880 "s59E13H2" 0.005221119 "hypothetical protein"  
"OPBI09\_00401" 35880 "s59E25H2" 0 "hypothetical protein"  
"OPBI09\_00401" 35880 "s59E5H2" 0.1688825 "hypothetical protein"  
"OPBI09\_00401" 35880 "s63E6H2" 0.05488376 "hypothetical protein"  
"OPBI09\_00402" 35881 "s59E13H2" 0.01972131 "HTH-type transcriptional regulator HmrR"  
"OPBI09\_00402" 35881 "s59E25H2" 0 "HTH-type transcriptional regulator HmrR"  
"OPBI09\_00402" 35881 "s59E5H2" 0.2084366 "HTH-type transcriptional regulator HmrR"  
"OPBI09\_00402" 35881 "s63E6H2" 0.0440266 "HTH-type transcriptional regulator HmrR"  
"OPBI09\_00403" 35882 "s59E13H2" 0.001619999 "hypothetical protein"  
"OPBI09\_00403" 35882 "s59E25H2" 0 "hypothetical protein"  
"OPBI09\_00403" 35882 "s59E5H2" 0.1776362 "hypothetical protein"  
"OPBI09\_00403" 35882 "s63E6H2" 0.04793286 "hypothetical protein"  
"OPBI09\_00404" 35883 "s59E13H2" 0.01926342 "Hypoxanthine phosphoribosyltransferase"  
"OPBI09\_00404" 35883 "s59E25H2" 0 "Hypoxanthine phosphoribosyltransferase"  
"OPBI09\_00404" 35883 "s59E5H2" 0.1575737 "Hypoxanthine phosphoribosyltransferase"  
"OPBI09\_00404" 35883 "s63E6H2" 0.1277861 "Hypoxanthine phosphoribosyltransferase"  
"OPBI09\_00405" 35884 "s59E13H2" 0.005200219 "Putative lipoprotein YerB precursor"  
"OPBI09\_00405" 35884 "s59E25H2" 0 "Putative lipoprotein YerB precursor"  
"OPBI09\_00405" 35884 "s59E5H2" 0.1237593 "Putative lipoprotein YerB precursor"  
"OPBI09\_00405" 35884 "s63E6H2" 0.01753621 "Putative lipoprotein YerB precursor"  
"OPBI09\_00406" 35885 "s59E13H2" 0.01894725 "D-alanyl-D-alanine carboxypeptidase DacF precursor"  
"OPBI09\_00406" 35885 "s59E25H2" 0 "D-alanyl-D-alanine carboxypeptidase DacF precursor"  
"OPBI09\_00406" 35885 "s59E5H2" 0.07647162 "D-alanyl-D-alanine carboxypeptidase DacF precursor"  
"OPBI09\_00406" 35885 "s63E6H2" 0.05147603 "D-alanyl-D-alanine carboxypeptidase DacF precursor"  
"OPBI09\_00407" 35886 "s59E13H2" 0.03566305 "zinc-responsive transcriptional regulator"  
"OPBI09\_00407" 35886 "s59E25H2" 0 "zinc-responsive transcriptional regulator"  
"OPBI09\_00407" 35886 "s59E5H2" 0.2053038 "zinc-responsive transcriptional regulator"  
"OPBI09\_00407" 35886 "s63E6H2" 0.09711728 "zinc-responsive transcriptional regulator"  
"OPBI09\_00408" 35887 "s59E13H2" 0.01496964 "Glycogen accumulation regulator GarA"  
"OPBI09\_00408" 35887 "s59E25H2" 0 "Glycogen accumulation regulator GarA"  
"OPBI09\_00408" 35887 "s59E5H2" 0.1974777 "Glycogen accumulation regulator GarA"

"OPBI09\_00408" 35887 "s63E6H2" 0.06355354 "Glycogen accumulation regulator GarA"  
"OPBI09\_00410" 35889 "s59E13H2" 0.02084144 "Glycerol-3-phosphate dehydrogenase [NAD(P)+]"  
"OPBI09\_00410" 35889 "s59E25H2" 0 "Glycerol-3-phosphate dehydrogenase [NAD(P)+]"  
"OPBI09\_00410" 35889 "s59E5H2" 0.1639186 "Glycerol-3-phosphate dehydrogenase [NAD(P)+]"  
"OPBI09\_00410" 35889 "s63E6H2" 0.0406947 "Glycerol-3-phosphate dehydrogenase [NAD(P)+]"  
"OPBI09\_00411" 35890 "s59E13H2" 0.01390062 "GTPase Der"  
"OPBI09\_00411" 35890 "s59E25H2" 0 "GTPase Der"  
"OPBI09\_00411" 35890 "s59E5H2" 0.1513095 "GTPase Der"  
"OPBI09\_00411" 35890 "s63E6H2" 0.04738338 "GTPase Der"  
"OPBI09\_00412" 35891 "s59E13H2" 0.01874198 "hypothetical protein"  
"OPBI09\_00412" 35891 "s59E25H2" 0 "hypothetical protein"  
"OPBI09\_00412" 35891 "s59E5H2" 0.0007137241 "hypothetical protein"  
"OPBI09\_00412" 35891 "s63E6H2" 0.02561167 "hypothetical protein"  
"OPBI09\_00413" 35892 "s59E13H2" 0.03173028 "4-hydroxy-3-methylbut-2-enyl diphosphate reductase"  
"OPBI09\_00413" 35892 "s59E25H2" 0 "4-hydroxy-3-methylbut-2-enyl diphosphate reductase"  
"OPBI09\_00413" 35892 "s59E5H2" 0.05340897 "4-hydroxy-3-methylbut-2-enyl diphosphate reductase"  
"OPBI09\_00413" 35892 "s63E6H2" 0.03479301 "4-hydroxy-3-methylbut-2-enyl diphosphate reductase"  
"OPBI09\_00414" 35893 "s59E13H2" 0.02524623 "1-acyl-sn-glycerol-3-phosphate acyltransferase"  
"OPBI09\_00414" 35893 "s59E25H2" 0 "1-acyl-sn-glycerol-3-phosphate acyltransferase"  
"OPBI09\_00414" 35893 "s59E5H2" 0.05581539 "1-acyl-sn-glycerol-3-phosphate acyltransferase"  
"OPBI09\_00414" 35893 "s63E6H2" 0.05055755 "1-acyl-sn-glycerol-3-phosphate acyltransferase"  
"OPBI09\_00415" 35894 "s59E13H2" 0.008736782 "Cytidylate kinase"  
"OPBI09\_00415" 35894 "s59E25H2" 0 "Cytidylate kinase"  
"OPBI09\_00415" 35894 "s59E5H2" 0.08474631 "Cytidylate kinase"  
"OPBI09\_00415" 35894 "s63E6H2" 0.06029716 "Cytidylate kinase"  
"OPBI09\_00416" 35895 "s59E13H2" 0.02533669 "3-phosphoshikimate 1-carboxyvinyltransferase 1"  
"OPBI09\_00416" 35895 "s59E25H2" 0 "3-phosphoshikimate 1-carboxyvinyltransferase 1"  
"OPBI09\_00416" 35895 "s59E5H2" 0.09043382 "3-phosphoshikimate 1-carboxyvinyltransferase 1"  
"OPBI09\_00416" 35895 "s63E6H2" 0.03561333 "3-phosphoshikimate 1-carboxyvinyltransferase 1"  
"OPBI09\_00417" 35896 "s59E13H2" 0.01253494 "T-protein"  
"OPBI09\_00417" 35896 "s59E25H2" 0 "T-protein"  
"OPBI09\_00417" 35896 "s59E5H2" 0.1327281 "T-protein"  
"OPBI09\_00417" 35896 "s63E6H2" 0.02329852 "T-protein"  
"OPBI09\_00418" 35897 "s59E13H2" 0.01056267 "Cyclic di-GMP phosphodiesterase response regulator RpfG"  
"OPBI09\_00418" 35897 "s59E25H2" 0 "Cyclic di-GMP phosphodiesterase response regulator RpfG"  
"OPBI09\_00418" 35897 "s59E5H2" 0.3720499 "Cyclic di-GMP phosphodiesterase response regulator RpfG"  
"OPBI09\_00418" 35897 "s63E6H2" 0 "Cyclic di-GMP phosphodiesterase response regulator RpfG"  
"OPBI09\_00419" 35898 "s59E13H2" 0.01823277 "Transketolase"  
"OPBI09\_00419" 35898 "s59E25H2" 0 "Transketolase"  
"OPBI09\_00419" 35898 "s59E5H2" 0.01091413 "Transketolase"  
"OPBI09\_00419" 35898 "s63E6H2" 0.0280511 "Transketolase"  
"OPBI09\_00420" 35899 "s59E13H2" 0.00987874 "Ferrous-iron efflux pump FieF"  
"OPBI09\_00420" 35899 "s59E25H2" 0 "Ferrous-iron efflux pump FieF"  
"OPBI09\_00420" 35899 "s59E5H2" 0.1629675 "Ferrous-iron efflux pump FieF"  
"OPBI09\_00420" 35899 "s63E6H2" 0.0166045 "Ferrous-iron efflux pump FieF"  
"OPBI09\_00421" 35900 "s59E13H2" 0.009450961 "LVIVD repeat protein"  
"OPBI09\_00421" 35900 "s59E25H2" 0 "LVIVD repeat protein"

"OPBI09\_00421" 35900 "s59E5H2" 0.1749663 "LVIVD repeat protein"  
"OPBI09\_00421" 35900 "s63E6H2" 0.07474975 "LVIVD repeat protein"  
"OPBI09\_00422" 35901 "s59E13H2" 0 "Segregation and condensation protein B"  
"OPBI09\_00422" 35901 "s59E25H2" 0 "Segregation and condensation protein B"  
"OPBI09\_00422" 35901 "s59E5H2" 0.02111682 "Segregation and condensation protein B"  
"OPBI09\_00422" 35901 "s63E6H2" 0.1128877 "Segregation and condensation protein B"  
"OPBI09\_00423" 35902 "s59E13H2" 0.004916403 "Segregation and condensation protein A"  
"OPBI09\_00423" 35902 "s59E25H2" 0 "Segregation and condensation protein A"  
"OPBI09\_00423" 35902 "s59E5H2" 0.0256306 "Segregation and condensation protein A"  
"OPBI09\_00423" 35902 "s63E6H2" 0.06818245 "Segregation and condensation protein A"  
"OPBI09\_00424" 35903 "s59E13H2" 0.003020471 "Tryptophan--tRNA ligase"  
"OPBI09\_00424" 35903 "s59E25H2" 0 "Tryptophan--tRNA ligase"  
"OPBI09\_00424" 35903 "s59E5H2" 0.008279386 "Tryptophan--tRNA ligase"  
"OPBI09\_00424" 35903 "s63E6H2" 0.09246593 "Tryptophan--tRNA ligase"  
"OPBI09\_00425" 35904 "s59E13H2" 0.009283824 "Peptidase family M50"  
"OPBI09\_00425" 35904 "s59E25H2" 0 "Peptidase family M50"  
"OPBI09\_00425" 35904 "s59E5H2" 0.0402467 "Peptidase family M50"  
"OPBI09\_00425" 35904 "s63E6H2" 0.09049408 "Peptidase family M50"  
"OPBI09\_00426" 35905 "s59E13H2" 0.01609422 "Tyrosine recombinase XerD"  
"OPBI09\_00426" 35905 "s59E25H2" 0.1093074 "Tyrosine recombinase XerD"  
"OPBI09\_00426" 35905 "s59E5H2" 0.03296737 "Tyrosine recombinase XerD"  
"OPBI09\_00426" 35905 "s63E6H2" 0.09185385 "Tyrosine recombinase XerD"  
"OPBI09\_00427" 35906 "s59E13H2" 0.02645853 "ADP-ribose pyrophosphatase"  
"OPBI09\_00427" 35906 "s59E25H2" 0.2869875 "ADP-ribose pyrophosphatase"  
"OPBI09\_00427" 35906 "s59E5H2" 0.0110968 "ADP-ribose pyrophosphatase"  
"OPBI09\_00427" 35906 "s63E6H2" 0.09875324 "ADP-ribose pyrophosphatase"  
"OPBI09\_00428" 35907 "s59E13H2" 0.00323976 "Peptidase T"  
"OPBI09\_00428" 35907 "s59E25H2" 0 "Peptidase T"  
"OPBI09\_00428" 35907 "s59E5H2" 0.04233784 "Peptidase T"  
"OPBI09\_00428" 35907 "s63E6H2" 0.1235528 "Peptidase T"  
"OPBI09\_00429" 35908 "s59E13H2" 0.004822155 "hypothetical protein"  
"OPBI09\_00429" 35908 "s59E25H2" 0 "hypothetical protein"  
"OPBI09\_00429" 35908 "s59E5H2" 0.005676377 "hypothetical protein"  
"OPBI09\_00429" 35908 "s63E6H2" 0.08855839 "hypothetical protein"  
"OPBI09\_00430" 35909 "s59E13H2" 0.01748112 "CTP synthase"  
"OPBI09\_00430" 35909 "s59E25H2" 0 "CTP synthase"  
"OPBI09\_00430" 35909 "s59E5H2" 0.02943683 "CTP synthase"  
"OPBI09\_00430" 35909 "s63E6H2" 0.2009986 "CTP synthase"  
"OPBI09\_00431" 35910 "s59E13H2" 0.01233411 "DNA repair protein RecN"  
"OPBI09\_00431" 35910 "s59E25H2" 59.64749 "DNA repair protein RecN"  
"OPBI09\_00431" 35910 "s59E5H2" 0.02739444 "DNA repair protein RecN"  
"OPBI09\_00431" 35910 "s63E6H2" 0.2314245 "DNA repair protein RecN"  
"OPBI09\_00432" 35911 "s59E13H2" 0.01577713 "putative inorganic polyphosphate/ATP-NAD kinase"  
"OPBI09\_00432" 35911 "s59E25H2" 0 "putative inorganic polyphosphate/ATP-NAD kinase"  
"OPBI09\_00432" 35911 "s59E5H2" 0.02777832 "putative inorganic polyphosphate/ATP-NAD kinase"  
"OPBI09\_00432" 35911 "s63E6H2" 0.2158911 "putative inorganic polyphosphate/ATP-NAD kinase"  
"OPBI09\_00433" 35912 "s59E13H2" 0.05957825 "Farnesyl diphosphate synthase"

"OPBI09\_00433" 35912 "s59E25H2" 0 "Farnesyl diphosphate synthase"  
"OPBI09\_00433" 35912 "s59E5H2" 0.08165496 "Farnesyl diphosphate synthase"  
"OPBI09\_00433" 35912 "s63E6H2" 0.2379867 "Farnesyl diphosphate synthase"  
"OPBI09\_00434" 35913 "s59E13H2" 0.02483897 "hypothetical protein"  
"OPBI09\_00434" 35913 "s59E25H2" 0 "hypothetical protein"  
"OPBI09\_00434" 35913 "s59E5H2" 0.1030717 "hypothetical protein"  
"OPBI09\_00434" 35913 "s63E6H2" 0.2754753 "hypothetical protein"  
"OPBI09\_00435" 35914 "s59E13H2" 0.01588256 "Elongation factor P"  
"OPBI09\_00435" 35914 "s59E25H2" 0 "Elongation factor P"  
"OPBI09\_00435" 35914 "s59E5H2" 0.09458289 "Elongation factor P"  
"OPBI09\_00435" 35914 "s63E6H2" 0.2394763 "Elongation factor P"  
"OPBI09\_00436" 35915 "s59E13H2" 0.01425033 "Xaa-Pro dipeptidase"  
"OPBI09\_00436" 35915 "s59E25H2" 0 "Xaa-Pro dipeptidase"  
"OPBI09\_00436" 35915 "s59E5H2" 0.1218898 "Xaa-Pro dipeptidase"  
"OPBI09\_00436" 35915 "s63E6H2" 0.1423675 "Xaa-Pro dipeptidase"  
"OPBI09\_00437" 35916 "s59E13H2" 0 "hypothetical protein"  
"OPBI09\_00437" 35916 "s59E25H2" 0 "hypothetical protein"  
"OPBI09\_00437" 35916 "s59E5H2" 0.01233321 "hypothetical protein"  
"OPBI09\_00437" 35916 "s63E6H2" 0.003241401 "hypothetical protein"  
"OPBI09\_00438" 35917 "s59E13H2" 0 "hypothetical protein"  
"OPBI09\_00438" 35917 "s59E25H2" 0 "hypothetical protein"  
"OPBI09\_00438" 35917 "s59E5H2" 0.01297502 "hypothetical protein"  
"OPBI09\_00438" 35917 "s63E6H2" 0.007451351 "hypothetical protein"  
"OPBI09\_00439" 35918 "s59E13H2" 0 "hypothetical protein"  
"OPBI09\_00439" 35918 "s59E25H2" 0.311828 "hypothetical protein"  
"OPBI09\_00439" 35918 "s59E5H2" 0.008018706 "hypothetical protein"  
"OPBI09\_00439" 35918 "s63E6H2" 0.007024164 "hypothetical protein"  
"OPBI09\_00440" 35919 "s59E13H2" 0.0383374 "3-dehydroquininate dehydratase"  
"OPBI09\_00440" 35919 "s59E25H2" 10.67136 "3-dehydroquininate dehydratase"  
"OPBI09\_00440" 35919 "s59E5H2" 0.03786543 "3-dehydroquininate dehydratase"  
"OPBI09\_00440" 35919 "s63E6H2" 0.07092504 "3-dehydroquininate dehydratase"  
"OPBI09\_00441" 35920 "s59E13H2" 0.03863595 "3-dehydroquininate synthase"  
"OPBI09\_00441" 35920 "s59E25H2" 0 "3-dehydroquininate synthase"  
"OPBI09\_00441" 35920 "s59E5H2" 0.08329577 "3-dehydroquininate synthase"  
"OPBI09\_00441" 35920 "s63E6H2" 0.1527122 "3-dehydroquininate synthase"  
"OPBI09\_00442" 35921 "s59E13H2" 0.05284374 "Shikimate kinase 1"  
"OPBI09\_00442" 35921 "s59E25H2" 0 "Shikimate kinase 1"  
"OPBI09\_00442" 35921 "s59E5H2" 0.06637752 "Shikimate kinase 1"  
"OPBI09\_00442" 35921 "s63E6H2" 0.1091812 "Shikimate kinase 1"  
"OPBI09\_00443" 35922 "s59E13H2" 0.02462173 "Chorismate synthase"  
"OPBI09\_00443" 35922 "s59E25H2" 0 "Chorismate synthase"  
"OPBI09\_00443" 35922 "s59E5H2" 0.06743081 "Chorismate synthase"  
"OPBI09\_00443" 35922 "s63E6H2" 0.2208131 "Chorismate synthase"  
"OPBI09\_00444" 35923 "s59E13H2" 0 "hypothetical protein"  
"OPBI09\_00444" 35923 "s59E25H2" 0 "hypothetical protein"  
"OPBI09\_00444" 35923 "s59E5H2" 0.007507229 "hypothetical protein"  
"OPBI09\_00444" 35923 "s63E6H2" 0.01310506 "hypothetical protein"

"OPBI09\_00445" 35924 "s59E13H2" 0 "Pilus assembly protein, PilO"  
"OPBI09\_00445" 35924 "s59E25H2" 0 "Pilus assembly protein, PilO"  
"OPBI09\_00445" 35924 "s59E5H2" 0.008016791 "Pilus assembly protein, PilO"  
"OPBI09\_00445" 35924 "s63E6H2" 0.006992296 "Pilus assembly protein, PilO"  
"OPBI09\_00446" 35925 "s59E13H2" 0 "hypothetical protein"  
"OPBI09\_00446" 35925 "s59E25H2" 0 "hypothetical protein"  
"OPBI09\_00446" 35925 "s59E5H2" 0.02785276 "hypothetical protein"  
"OPBI09\_00446" 35925 "s63E6H2" 0.004061787 "hypothetical protein"  
"OPBI09\_00447" 35926 "s59E13H2" 0 "Competence protein A"  
"OPBI09\_00447" 35926 "s59E25H2" 0 "Competence protein A"  
"OPBI09\_00447" 35926 "s59E5H2" 0.00954041 "Competence protein A"  
"OPBI09\_00447" 35926 "s63E6H2" 0.005734588 "Competence protein A"  
"OPBI09\_00448" 35927 "s59E13H2" 0.01092506 "Type 4 prepilin-like proteins leader peptide-processing enzyme"  
"OPBI09\_00448" 35927 "s59E25H2" 0 "Type 4 prepilin-like proteins leader peptide-processing enzyme"  
"OPBI09\_00448" 35927 "s59E5H2" 0 "Type 4 prepilin-like proteins leader peptide-processing enzyme"  
"OPBI09\_00448" 35927 "s63E6H2" 0.04901279 "Type 4 prepilin-like proteins leader peptide-processing enzyme"  
"OPBI09\_00449" 35928 "s59E13H2" 0 "Type II secretion system protein G precursor"  
"OPBI09\_00449" 35928 "s59E25H2" 0 "Type II secretion system protein G precursor"  
"OPBI09\_00449" 35928 "s59E5H2" 0 "Type II secretion system protein G precursor"  
"OPBI09\_00449" 35928 "s63E6H2" 0 "Type II secretion system protein G precursor"  
"OPBI09\_00450" 35929 "s59E13H2" 0 "RNA polymerase sigma-F factor"  
"OPBI09\_00450" 35929 "s59E25H2" 0 "RNA polymerase sigma-F factor"  
"OPBI09\_00450" 35929 "s59E5H2" 0.02038748 "RNA polymerase sigma-F factor"  
"OPBI09\_00450" 35929 "s63E6H2" 0 "RNA polymerase sigma-F factor"  
"OPBI09\_00451" 35930 "s59E13H2" 0 "Putative type II secretion system protein F"  
"OPBI09\_00451" 35930 "s59E25H2" 0 "Putative type II secretion system protein F"  
"OPBI09\_00451" 35930 "s59E5H2" 0.03548876 "Putative type II secretion system protein F"  
"OPBI09\_00451" 35930 "s63E6H2" 0 "Putative type II secretion system protein F"  
"OPBI09\_00452" 35931 "s59E13H2" 0 "Twitching mobility protein"  
"OPBI09\_00452" 35931 "s59E25H2" 0 "Twitching mobility protein"  
"OPBI09\_00452" 35931 "s59E5H2" 0.01893665 "Twitching mobility protein"  
"OPBI09\_00452" 35931 "s63E6H2" 0.00203217 "Twitching mobility protein"  
"OPBI09\_00453" 35932 "s59E13H2" 0.03230857 "Shikimate dehydrogenase"  
"OPBI09\_00453" 35932 "s59E25H2" 0 "Shikimate dehydrogenase"  
"OPBI09\_00453" 35932 "s59E5H2" 0.04919039 "Shikimate dehydrogenase"  
"OPBI09\_00453" 35932 "s63E6H2" 0.115444 "Shikimate dehydrogenase"  
"OPBI09\_00454" 35933 "s59E13H2" 0.005247201 "Acylphosphatase"  
"OPBI09\_00454" 35933 "s59E25H2" 0 "Acylphosphatase"  
"OPBI09\_00454" 35933 "s59E5H2" 0.07030772 "Acylphosphatase"  
"OPBI09\_00454" 35933 "s63E6H2" 0.09991366 "Acylphosphatase"  
"OPBI09\_00455" 35934 "s59E13H2" 0.03547352 "Peptidase family U32"  
"OPBI09\_00455" 35934 "s59E25H2" 0 "Peptidase family U32"  
"OPBI09\_00455" 35934 "s59E5H2" 0.05547232 "Peptidase family U32"  
"OPBI09\_00455" 35934 "s63E6H2" 0.1617884 "Peptidase family U32"  
"OPBI09\_00456" 35935 "s59E13H2" 0 "hypothetical protein"  
"OPBI09\_00456" 35935 "s59E25H2" 0 "hypothetical protein"  
"OPBI09\_00456" 35935 "s59E5H2" 0 "hypothetical protein"



"OPBI09\_00456" 35935 "s63E6H2" 0.0006235169 "hypothetical protein"  
"OPBI09\_00457" 35936 "s59E13H2" 0.9378946 "Lysine--tRNA ligase"  
"OPBI09\_00457" 35936 "s59E25H2" 0 "Lysine--tRNA ligase"  
"OPBI09\_00457" 35936 "s59E5H2" 0.021626 "Lysine--tRNA ligase"  
"OPBI09\_00457" 35936 "s63E6H2" 0.01695679 "Lysine--tRNA ligase"  
"OPBI09\_00458" 35937 "s59E13H2" 1.50407 "hypothetical protein"  
"OPBI09\_00458" 35937 "s59E25H2" 0 "hypothetical protein"  
"OPBI09\_00458" 35937 "s59E5H2" 0 "hypothetical protein"  
"OPBI09\_00458" 35937 "s63E6H2" 0.02503767 "hypothetical protein"  
"OPBI09\_00459" 35938 "s59E13H2" 1.733182 "Putative ATP:guanido phosphotransferase"  
"OPBI09\_00459" 35938 "s59E25H2" 0 "Putative ATP:guanido phosphotransferase"  
"OPBI09\_00459" 35938 "s59E5H2" 0 "Putative ATP:guanido phosphotransferase"  
"OPBI09\_00459" 35938 "s63E6H2" 0.03272039 "Putative ATP:guanido phosphotransferase"  
"OPBI09\_00460" 35939 "s59E13H2" 2.404624 "ATP-dependent Clp protease ATP-binding subunit ClpC1"  
"OPBI09\_00460" 35939 "s59E25H2" 0 "ATP-dependent Clp protease ATP-binding subunit ClpC1"  
"OPBI09\_00460" 35939 "s59E5H2" 0.01869017 "ATP-dependent Clp protease ATP-binding subunit ClpC1"  
"OPBI09\_00460" 35939 "s63E6H2" 0.170262 "ATP-dependent Clp protease ATP-binding subunit ClpC1"  
"OPBI09\_00461" 35940 "s59E13H2" 2.20288 "DNA integrity scanning protein DisA"  
"OPBI09\_00461" 35940 "s59E25H2" 0 "DNA integrity scanning protein DisA"  
"OPBI09\_00461" 35940 "s59E5H2" 0.02937099 "DNA integrity scanning protein DisA"  
"OPBI09\_00461" 35940 "s63E6H2" 0.3434415 "DNA integrity scanning protein DisA"  
"OPBI09\_00462" 35941 "s59E13H2" 2.735054 "2-C-methyl-D-erythritol 4-phosphate cytidyltransferase"  
"OPBI09\_00462" 35941 "s59E25H2" 0 "2-C-methyl-D-erythritol 4-phosphate cytidyltransferase"  
"OPBI09\_00462" 35941 "s59E5H2" 0.05832576 "2-C-methyl-D-erythritol 4-phosphate cytidyltransferase"  
"OPBI09\_00462" 35941 "s63E6H2" 0.4695332 "2-C-methyl-D-erythritol 4-phosphate cytidyltransferase"  
"OPBI09\_00463" 35942 "s59E13H2" 3.235049 "2-C-methyl-D-erythritol 2,4-cyclodiphosphate synthase"  
"OPBI09\_00463" 35942 "s59E25H2" 0 "2-C-methyl-D-erythritol 2,4-cyclodiphosphate synthase"  
"OPBI09\_00463" 35942 "s59E5H2" 0.01350978 "2-C-methyl-D-erythritol 2,4-cyclodiphosphate synthase"  
"OPBI09\_00463" 35942 "s63E6H2" 0.6168271 "2-C-methyl-D-erythritol 2,4-cyclodiphosphate synthase"  
"OPBI09\_00464" 35943 "s59E13H2" 3.924828 "Glutamate--tRNA ligase 1"  
"OPBI09\_00464" 35943 "s59E25H2" 0 "Glutamate--tRNA ligase 1"  
"OPBI09\_00464" 35943 "s59E5H2" 0.02545842 "Glutamate--tRNA ligase 1"  
"OPBI09\_00464" 35943 "s63E6H2" 0.687451 "Glutamate--tRNA ligase 1"  
"OPBI09\_00465" 35944 "s59E13H2" 6.921953 "Serine acetyltransferase"  
"OPBI09\_00465" 35944 "s59E25H2" 0 "Serine acetyltransferase"  
"OPBI09\_00465" 35944 "s59E5H2" 0.02954799 "Serine acetyltransferase"  
"OPBI09\_00465" 35944 "s63E6H2" 0.8233626 "Serine acetyltransferase"  
"OPBI09\_00466" 35945 "s59E13H2" 4.861506 "Cysteine--tRNA ligase"  
"OPBI09\_00466" 35945 "s59E25H2" 0 "Cysteine--tRNA ligase"  
"OPBI09\_00466" 35945 "s59E5H2" 0.05011291 "Cysteine--tRNA ligase"  
"OPBI09\_00466" 35945 "s63E6H2" 0.7469315 "Cysteine--tRNA ligase"  
"OPBI09\_00467" 35946 "s59E13H2" 0 "hypothetical protein"  
"OPBI09\_00467" 35946 "s59E25H2" 0 "hypothetical protein"  
"OPBI09\_00467" 35946 "s59E5H2" 0 "hypothetical protein"  
"OPBI09\_00467" 35946 "s63E6H2" 0.002093462 "hypothetical protein"  
"OPBI09\_00468" 35947 "s59E13H2" 0.002653953 "putative phycocyanin operon protein Z"  
"OPBI09\_00468" 35947 "s59E25H2" 0 "putative phycocyanin operon protein Z"

"OPBI09\_00468" 35947 "s59E5H2" 0.01091755 "putative phycocyanin operon protein Z"  
"OPBI09\_00468" 35947 "s63E6H2" 0 "putative phycocyanin operon protein Z"  
"OPBI09\_00469" 35948 "s59E13H2" 0.0003500626 "putative phycocyanin operon protein Z"  
"OPBI09\_00469" 35948 "s59E25H2" 0 "putative phycocyanin operon protein Z"  
"OPBI09\_00469" 35948 "s59E5H2" 0.05599019 "putative phycocyanin operon protein Z"  
"OPBI09\_00469" 35948 "s63E6H2" 0 "putative phycocyanin operon protein Z"  
"OPBI09\_00470" 35949 "s59E13H2" 4.078179 "Putative TrmH family tRNA/rRNA methyltransferase"  
"OPBI09\_00470" 35949 "s59E25H2" 0 "Putative TrmH family tRNA/rRNA methyltransferase"  
"OPBI09\_00470" 35949 "s59E5H2" 0.06874277 "Putative TrmH family tRNA/rRNA methyltransferase"  
"OPBI09\_00470" 35949 "s63E6H2" 0.7832387 "Putative TrmH family tRNA/rRNA methyltransferase"  
"OPBI09\_00471" 35950 "s59E13H2" 5.906827 "YacP-like NYN domain protein"  
"OPBI09\_00471" 35950 "s59E25H2" 0 "YacP-like NYN domain protein"  
"OPBI09\_00471" 35950 "s59E5H2" 0.2059826 "YacP-like NYN domain protein"  
"OPBI09\_00471" 35950 "s63E6H2" 0.9979431 "YacP-like NYN domain protein"  
"OPBI09\_00472" 35951 "s59E13H2" 7.890428 "Thermonuclease precursor"  
"OPBI09\_00472" 35951 "s59E25H2" 0 "Thermonuclease precursor"  
"OPBI09\_00472" 35951 "s59E5H2" 0.4189197 "Thermonuclease precursor"  
"OPBI09\_00472" 35951 "s63E6H2" 1.349675 "Thermonuclease precursor"  
"OPBI09\_00473" 35952 "s59E13H2" 11.80048 "Pyruvate carboxylase subunit A"  
"OPBI09\_00473" 35952 "s59E25H2" 0 "Pyruvate carboxylase subunit A"  
"OPBI09\_00473" 35952 "s59E5H2" 0.8356235 "Pyruvate carboxylase subunit A"  
"OPBI09\_00473" 35952 "s63E6H2" 1.419716 "Pyruvate carboxylase subunit A"  
"OPBI09\_00474" 35953 "s59E13H2" 6.397536 "Pyruvate carboxylase subunit B"  
"OPBI09\_00474" 35953 "s59E25H2" 0 "Pyruvate carboxylase subunit B"  
"OPBI09\_00474" 35953 "s59E5H2" 0.4109246 "Pyruvate carboxylase subunit B"  
"OPBI09\_00474" 35953 "s63E6H2" 0.6284621 "Pyruvate carboxylase subunit B"  
"OPBI09\_00475" 35954 "s59E13H2" 4.172424 "Biotin transporter BioY"  
"OPBI09\_00475" 35954 "s59E25H2" 0 "Biotin transporter BioY"  
"OPBI09\_00475" 35954 "s59E5H2" 0.08154993 "Biotin transporter BioY"  
"OPBI09\_00475" 35954 "s63E6H2" 0.4488106 "Biotin transporter BioY"  
"OPBI09\_00476" 35955 "s59E13H2" 3.875406 "Acyl-CoA dehydrogenase"  
"OPBI09\_00476" 35955 "s59E25H2" 0 "Acyl-CoA dehydrogenase"  
"OPBI09\_00476" 35955 "s59E5H2" 0.02527454 "Acyl-CoA dehydrogenase"  
"OPBI09\_00476" 35955 "s63E6H2" 0.4220515 "Acyl-CoA dehydrogenase"  
"OPBI09\_00477" 35956 "s59E13H2" 5.808941 "Acryloyl-CoA reductase electron transfer subunit gamma"  
"OPBI09\_00477" 35956 "s59E25H2" 0 "Acryloyl-CoA reductase electron transfer subunit gamma"  
"OPBI09\_00477" 35956 "s59E5H2" 0.03740394 "Acryloyl-CoA reductase electron transfer subunit gamma"  
"OPBI09\_00477" 35956 "s63E6H2" 0.543552 "Acryloyl-CoA reductase electron transfer subunit gamma"  
"OPBI09\_00478" 35957 "s59E13H2" 5.612719 "Acryloyl-CoA reductase electron transfer subunit beta"  
"OPBI09\_00478" 35957 "s59E25H2" 0 "Acryloyl-CoA reductase electron transfer subunit beta"  
"OPBI09\_00478" 35957 "s59E5H2" 0.02507038 "Acryloyl-CoA reductase electron transfer subunit beta"  
"OPBI09\_00478" 35957 "s63E6H2" 0.5420448 "Acryloyl-CoA reductase electron transfer subunit beta"  
"OPBI09\_00479" 35958 "s59E13H2" 0 "Signal-transduction histidine kinase senX3"  
"OPBI09\_00479" 35958 "s59E25H2" 0 "Signal-transduction histidine kinase senX3"  
"OPBI09\_00479" 35958 "s59E5H2" 0 "Signal-transduction histidine kinase senX3"  
"OPBI09\_00479" 35958 "s63E6H2" 0.003507738 "Signal-transduction histidine kinase senX3"  
"OPBI09\_00480" 35959 "s59E13H2" 0 "Transcriptional regulatory protein CusR"

"OPBI09\_00480" 35959 "s59E25H2" 0 "Transcriptional regulatory protein CusR"  
"OPBI09\_00480" 35959 "s59E5H2" 0 "Transcriptional regulatory protein CusR"  
"OPBI09\_00480" 35959 "s63E6H2" 0.001871253 "Transcriptional regulatory protein CusR"  
"OPBI09\_00481" 35960 "s59E13H2" 0 "hypothetical protein"  
"OPBI09\_00481" 35960 "s59E25H2" 0 "hypothetical protein"  
"OPBI09\_00481" 35960 "s59E5H2" 0 "hypothetical protein"  
"OPBI09\_00481" 35960 "s63E6H2" 0 "hypothetical protein"  
"OPBI09\_00483" 35962 "s59E13H2" 0 "hypothetical protein"  
"OPBI09\_00483" 35962 "s59E25H2" 0 "hypothetical protein"  
"OPBI09\_00483" 35962 "s59E5H2" 0 "hypothetical protein"  
"OPBI09\_00483" 35962 "s63E6H2" 0 "hypothetical protein"  
"OPBI09\_00484" 35963 "s59E13H2" 0 "hypothetical protein"  
"OPBI09\_00484" 35963 "s59E25H2" 0 "hypothetical protein"  
"OPBI09\_00484" 35963 "s59E5H2" 0 "hypothetical protein"  
"OPBI09\_00484" 35963 "s63E6H2" 0 "hypothetical protein"  
"OPBI09\_00485" 35964 "s59E13H2" 0 "hypothetical protein"  
"OPBI09\_00485" 35964 "s59E25H2" 0 "hypothetical protein"  
"OPBI09\_00485" 35964 "s59E5H2" 0 "hypothetical protein"  
"OPBI09\_00485" 35964 "s63E6H2" 0 "hypothetical protein"  
"OPBI09\_00487" 35966 "s59E13H2" 0 "hypothetical protein"  
"OPBI09\_00487" 35966 "s59E25H2" 0 "hypothetical protein"  
"OPBI09\_00487" 35966 "s59E5H2" 0 "hypothetical protein"  
"OPBI09\_00487" 35966 "s63E6H2" 0 "hypothetical protein"  
"OPBI09\_00488" 35967 "s59E13H2" 0.833374 "hypothetical protein"  
"OPBI09\_00488" 35967 "s59E25H2" 0 "hypothetical protein"  
"OPBI09\_00488" 35967 "s59E5H2" 0 "hypothetical protein"  
"OPBI09\_00488" 35967 "s63E6H2" 0 "hypothetical protein"  
"OPBI09\_00489" 35968 "s59E13H2" 0.0867793 "hypothetical protein"  
"OPBI09\_00489" 35968 "s59E25H2" 0 "hypothetical protein"  
"OPBI09\_00489" 35968 "s59E5H2" 0.1862865 "hypothetical protein"  
"OPBI09\_00489" 35968 "s63E6H2" 0.01888365 "hypothetical protein"  
"OPBI09\_00491" 35970 "s59E13H2" 0.002672412 "hypothetical protein"  
"OPBI09\_00491" 35970 "s59E25H2" 0 "hypothetical protein"  
"OPBI09\_00491" 35970 "s59E5H2" 1.094207 "hypothetical protein"  
"OPBI09\_00491" 35970 "s63E6H2" 0 "hypothetical protein"  
"OPBI09\_00492" 35971 "s59E13H2" 0.07405598 "Bifunctional ligase/repressor BirA"  
"OPBI09\_00492" 35971 "s59E25H2" 0 "Bifunctional ligase/repressor BirA"  
"OPBI09\_00492" 35971 "s59E5H2" 0.4819306 "Bifunctional ligase/repressor BirA"  
"OPBI09\_00492" 35971 "s63E6H2" 0.005941124 "Bifunctional ligase/repressor BirA"  
"OPBI09\_00493" 35972 "s59E13H2" 0 "3-hydroxyacyl-[acyl-carrier-protein] dehydratase FabZ"  
"OPBI09\_00493" 35972 "s59E25H2" 0 "3-hydroxyacyl-[acyl-carrier-protein] dehydratase FabZ"  
"OPBI09\_00493" 35972 "s59E5H2" 0.6855409 "3-hydroxyacyl-[acyl-carrier-protein] dehydratase FabZ"  
"OPBI09\_00493" 35972 "s63E6H2" 0.0165232 "3-hydroxyacyl-[acyl-carrier-protein] dehydratase FabZ"  
"OPBI09\_00494" 35973 "s59E13H2" 0 "Polyketide biosynthesis protein BaeE"  
"OPBI09\_00494" 35973 "s59E25H2" 0 "Polyketide biosynthesis protein BaeE"  
"OPBI09\_00494" 35973 "s59E5H2" 1.317001 "Polyketide biosynthesis protein BaeE"  
"OPBI09\_00494" 35973 "s63E6H2" 1.803662 "Polyketide biosynthesis protein BaeE"

"OPBI09\_00495" 35974 "s59E13H2" 0.003973289 "3-oxoacyl-[acyl-carrier-protein] reductase FabG"  
"OPBI09\_00495" 35974 "s59E25H2" 0 "3-oxoacyl-[acyl-carrier-protein] reductase FabG"  
"OPBI09\_00495" 35974 "s59E5H2" 1.900455 "3-oxoacyl-[acyl-carrier-protein] reductase FabG"  
"OPBI09\_00495" 35974 "s63E6H2" 3.612953 "3-oxoacyl-[acyl-carrier-protein] reductase FabG"  
"OPBI09\_00496" 35975 "s59E13H2" 0.002984138 "3-oxoacyl-[acyl-carrier-protein] synthase 2"  
"OPBI09\_00496" 35975 "s59E25H2" 0 "3-oxoacyl-[acyl-carrier-protein] synthase 2"  
"OPBI09\_00496" 35975 "s59E5H2" 2.321342 "3-oxoacyl-[acyl-carrier-protein] synthase 2"  
"OPBI09\_00496" 35975 "s63E6H2" 4.948944 "3-oxoacyl-[acyl-carrier-protein] synthase 2"  
"OPBI09\_00497" 35976 "s59E13H2" 0.01089441 "Acetyl-coenzyme A carboxylase carboxyl transferase subunit beta"  
"OPBI09\_00497" 35976 "s59E25H2" 0 "Acetyl-coenzyme A carboxylase carboxyl transferase subunit beta"  
"OPBI09\_00497" 35976 "s59E5H2" 0.2486008 "Acetyl-coenzyme A carboxylase carboxyl transferase subunit beta"  
"OPBI09\_00497" 35976 "s63E6H2" 5.796207 "Acetyl-coenzyme A carboxylase carboxyl transferase subunit beta"  
"OPBI09\_00498" 35977 "s59E13H2" 0.009402534 "Acetyl-coenzyme A carboxylase carboxyl transferase subunit alpha"  
"OPBI09\_00498" 35977 "s59E25H2" 0.2574359 "Acetyl-coenzyme A carboxylase carboxyl transferase subunit alpha"  
"OPBI09\_00498" 35977 "s59E5H2" 0.4291869 "Acetyl-coenzyme A carboxylase carboxyl transferase subunit alpha"  
"OPBI09\_00498" 35977 "s63E6H2" 6.488847 "Acetyl-coenzyme A carboxylase carboxyl transferase subunit alpha"  
"OPBI09\_00499" 35978 "s59E13H2" 0.008445258 "Serine/threonine-protein kinase PknB"  
"OPBI09\_00499" 35978 "s59E25H2" 0 "Serine/threonine-protein kinase PknB"  
"OPBI09\_00499" 35978 "s59E5H2" 0.6758539 "Serine/threonine-protein kinase PknB"  
"OPBI09\_00499" 35978 "s63E6H2" 2.261479 "Serine/threonine-protein kinase PknB"  
"OPBI09\_00500" 35979 "s59E13H2" 0.01440076 "Putative protein phosphatase 2C-type"  
"OPBI09\_00500" 35979 "s59E25H2" 0 "Putative protein phosphatase 2C-type"  
"OPBI09\_00500" 35979 "s59E5H2" 0.2316792 "Putative protein phosphatase 2C-type"  
"OPBI09\_00500" 35979 "s63E6H2" 2.804975 "Putative protein phosphatase 2C-type"  
"OPBI09\_00501" 35980 "s59E13H2" 0.02243136 "NAD-dependent malic enzyme"  
"OPBI09\_00501" 35980 "s59E25H2" 0 "NAD-dependent malic enzyme"  
"OPBI09\_00501" 35980 "s59E5H2" 0.3911427 "NAD-dependent malic enzyme"  
"OPBI09\_00501" 35980 "s63E6H2" 2.039569 "NAD-dependent malic enzyme"  
"OPBI09\_00502" 35981 "s59E13H2" 0 "hypothetical protein"  
"OPBI09\_00502" 35981 "s59E25H2" 0 "hypothetical protein"  
"OPBI09\_00502" 35981 "s59E5H2" 0 "hypothetical protein"  
"OPBI09\_00502" 35981 "s63E6H2" 0 "hypothetical protein"  
"OPBI09\_00503" 35982 "s59E13H2" 0 "DAK2 domain protein"  
"OPBI09\_00503" 35982 "s59E25H2" 0 "DAK2 domain protein"  
"OPBI09\_00503" 35982 "s59E5H2" 0 "DAK2 domain protein"  
"OPBI09\_00503" 35982 "s63E6H2" 0 "DAK2 domain protein"  
"OPBI09\_00504" 35983 "s59E13H2" 0 "ATP-dependent DNA helicase RecG"  
"OPBI09\_00504" 35983 "s59E25H2" 0 "ATP-dependent DNA helicase RecG"  
"OPBI09\_00504" 35983 "s59E5H2" 0 "ATP-dependent DNA helicase RecG"  
"OPBI09\_00504" 35983 "s63E6H2" 0 "ATP-dependent DNA helicase RecG"  
"OPBI09\_00505" 35984 "s59E13H2" 0 "Ribosomal RNA small subunit methyltransferase D"  
"OPBI09\_00505" 35984 "s59E25H2" 0 "Ribosomal RNA small subunit methyltransferase D"  
"OPBI09\_00505" 35984 "s59E5H2" 0 "Ribosomal RNA small subunit methyltransferase D"  
"OPBI09\_00505" 35984 "s63E6H2" 0 "Ribosomal RNA small subunit methyltransferase D"  
"OPBI09\_00506" 35985 "s59E13H2" 0 "Succinyl-CoA ligase [ADP-forming] subunit alpha"  
"OPBI09\_00506" 35985 "s59E25H2" 0 "Succinyl-CoA ligase [ADP-forming] subunit alpha"  
"OPBI09\_00506" 35985 "s59E5H2" 0 "Succinyl-CoA ligase [ADP-forming] subunit alpha"

"OPBI09\_00506" 35985 "s63E6H2" 0 "Succinyl-CoA ligase [ADP-forming] subunit alpha"  
"OPBI09\_00507" 35986 "s59E13H2" 0 "50S ribosomal protein L32"  
"OPBI09\_00507" 35986 "s59E25H2" 0 "50S ribosomal protein L32"  
"OPBI09\_00507" 35986 "s59E5H2" 0 "50S ribosomal protein L32"  
"OPBI09\_00507" 35986 "s63E6H2" 0 "50S ribosomal protein L32"  
"OPBI09\_00508" 35987 "s59E13H2" 0 "hypothetical protein"  
"OPBI09\_00508" 35987 "s59E25H2" 0 "hypothetical protein"  
"OPBI09\_00508" 35987 "s59E5H2" 0 "hypothetical protein"  
"OPBI09\_00508" 35987 "s63E6H2" 0 "hypothetical protein"  
"OPBI09\_00509" 35988 "s59E13H2" 0 "Phosphopantetheine adenylyltransferase"  
"OPBI09\_00509" 35988 "s59E25H2" 0 "Phosphopantetheine adenylyltransferase"  
"OPBI09\_00509" 35988 "s59E5H2" 0 "Phosphopantetheine adenylyltransferase"  
"OPBI09\_00509" 35988 "s63E6H2" 0 "Phosphopantetheine adenylyltransferase"  
"OPBI09\_00511" 35990 "s59E13H2" 0.1455065 "hypothetical protein"  
"OPBI09\_00511" 35990 "s59E25H2" 0 "hypothetical protein"  
"OPBI09\_00511" 35990 "s59E5H2" 0.09570152 "hypothetical protein"  
"OPBI09\_00511" 35990 "s63E6H2" 0.2687634 "hypothetical protein"  
"OPBI09\_00512" 35991 "s59E13H2" 0.1623642 "DNA polymerase III subunit delta"  
"OPBI09\_00512" 35991 "s59E25H2" 0 "DNA polymerase III subunit delta"  
"OPBI09\_00512" 35991 "s59E5H2" 0.3284828 "DNA polymerase III subunit delta"  
"OPBI09\_00512" 35991 "s63E6H2" 0.1756727 "DNA polymerase III subunit delta"  
"OPBI09\_00513" 35992 "s59E13H2" 0.1540535 "30S ribosomal protein S20"  
"OPBI09\_00513" 35992 "s59E25H2" 0 "30S ribosomal protein S20"  
"OPBI09\_00513" 35992 "s59E5H2" 0.3648841 "30S ribosomal protein S20"  
"OPBI09\_00513" 35992 "s63E6H2" 0.03417912 "30S ribosomal protein S20"  
"OPBI09\_00514" 35993 "s59E13H2" 0.06543998 "putative peptidoglycan biosynthesis protein MurJ"  
"OPBI09\_00514" 35993 "s59E25H2" 0 "putative peptidoglycan biosynthesis protein MurJ"  
"OPBI09\_00514" 35993 "s59E5H2" 0.4320864 "putative peptidoglycan biosynthesis protein MurJ"  
"OPBI09\_00514" 35993 "s63E6H2" 0.01429695 "putative peptidoglycan biosynthesis protein MurJ"  
"OPBI09\_00515" 35994 "s59E13H2" 0.1407279 "Elongation factor 4"  
"OPBI09\_00515" 35994 "s59E25H2" 0 "Elongation factor 4"  
"OPBI09\_00515" 35994 "s59E5H2" 0.2333255 "Elongation factor 4"  
"OPBI09\_00515" 35994 "s63E6H2" 0.04919125 "Elongation factor 4"  
"OPBI09\_00516" 35995 "s59E13H2" 0.0105797 "hypothetical protein"  
"OPBI09\_00516" 35995 "s59E25H2" 0 "hypothetical protein"  
"OPBI09\_00516" 35995 "s59E5H2" 0.115161 "hypothetical protein"  
"OPBI09\_00516" 35995 "s63E6H2" 0 "hypothetical protein"  
"OPBI09\_00517" 35996 "s59E13H2" 0.0307742 "CDP-6-deoxy-L-threo-D-glycero-4-hexulose-3-dehydrase reductase"  
"OPBI09\_00517" 35996 "s59E25H2" 0 "CDP-6-deoxy-L-threo-D-glycero-4-hexulose-3-dehydrase reductase"  
"OPBI09\_00517" 35996 "s59E5H2" 0.1116975 "CDP-6-deoxy-L-threo-D-glycero-4-hexulose-3-dehydrase reductase"  
"OPBI09\_00517" 35996 "s63E6H2" 0.03057783 "CDP-6-deoxy-L-threo-D-glycero-4-hexulose-3-dehydrase reductase"  
"OPBI09\_00518" 35997 "s59E13H2" 0.008455277 "Septum site-determining protein MinD"  
"OPBI09\_00518" 35997 "s59E25H2" 0 "Septum site-determining protein MinD"  
"OPBI09\_00518" 35997 "s59E5H2" 0.001929968 "Septum site-determining protein MinD"  
"OPBI09\_00518" 35997 "s63E6H2" 0.01782776 "Septum site-determining protein MinD"  
"OPBI09\_00519" 35998 "s59E13H2" 0.02105876 "Corrinoid/iron-sulfur protein small subunit"  
"OPBI09\_00519" 35998 "s59E25H2" 0 "Corrinoid/iron-sulfur protein small subunit"

"OPBI09\_00519" 35998 "s59E5H2" 0.002512646 "Corrinoid/iron-sulfur protein small subunit"  
"OPBI09\_00519" 35998 "s63E6H2" 0.01279103 "Corrinoid/iron-sulfur protein small subunit"  
"OPBI09\_00520" 35999 "s59E13H2" 0.0041061 "Carbon monoxide dehydrogenase/acetyl-CoA synthase subunit beta"  
"OPBI09\_00520" 35999 "s59E25H2" 0 "Carbon monoxide dehydrogenase/acetyl-CoA synthase subunit beta"  
"OPBI09\_00520" 35999 "s59E5H2" 0.03597107 "Carbon monoxide dehydrogenase/acetyl-CoA synthase subunit beta"  
"OPBI09\_00520" 35999 "s63E6H2" 0.002784407 "Carbon monoxide dehydrogenase/acetyl-CoA synthase subunit beta"  
"OPBI09\_00521" 36000 "s59E13H2" 0.01524107 "Carbon monoxide dehydrogenase/acetyl-CoA synthase subunit alpha"  
"OPBI09\_00521" 36000 "s59E25H2" 0 "Carbon monoxide dehydrogenase/acetyl-CoA synthase subunit alpha"  
"OPBI09\_00521" 36000 "s59E5H2" 0.02141495 "Carbon monoxide dehydrogenase/acetyl-CoA synthase subunit alpha"  
"OPBI09\_00521" 36000 "s63E6H2" 0.007185882 "Carbon monoxide dehydrogenase/acetyl-CoA synthase subunit alpha"  
"OPBI09\_00522" 36001 "s59E13H2" 0.01723441 "Corrinoid/iron-sulfur protein large subunit"  
"OPBI09\_00522" 36001 "s59E25H2" 0 "Corrinoid/iron-sulfur protein large subunit"  
"OPBI09\_00522" 36001 "s59E5H2" 0 "Corrinoid/iron-sulfur protein large subunit"  
"OPBI09\_00522" 36001 "s63E6H2" 0.00797963 "Corrinoid/iron-sulfur protein large subunit"  
"OPBI09\_00523" 36002 "s59E13H2" 0.002011305 "Formate--tetrahydrofolate ligase"  
"OPBI09\_00523" 36002 "s59E25H2" 0 "Formate--tetrahydrofolate ligase"  
"OPBI09\_00523" 36002 "s59E5H2" 0.06221181 "Formate--tetrahydrofolate ligase"  
"OPBI09\_00523" 36002 "s63E6H2" 0.002513346 "Formate--tetrahydrofolate ligase"  
"OPBI09\_00524" 36003 "s59E13H2" 0.02183214 "Bifunctional protein F<sub>0</sub>D protein"  
"OPBI09\_00524" 36003 "s59E25H2" 0 "Bifunctional protein F<sub>0</sub>D protein"  
"OPBI09\_00524" 36003 "s59E5H2" 0.6426038 "Bifunctional protein F<sub>0</sub>D protein"  
"OPBI09\_00524" 36003 "s63E6H2" 0.02994212 "Bifunctional protein F<sub>0</sub>D protein"  
"OPBI09\_00525" 36004 "s59E13H2" 0 "hypothetical protein"  
"OPBI09\_00525" 36004 "s59E25H2" 0 "hypothetical protein"  
"OPBI09\_00525" 36004 "s59E5H2" 0.5217776 "hypothetical protein"  
"OPBI09\_00525" 36004 "s63E6H2" 0.002203025 "hypothetical protein"  
"OPBI09\_00526" 36005 "s59E13H2" 0 "Methicillin resistance mecR1 protein"  
"OPBI09\_00526" 36005 "s59E25H2" 0 "Methicillin resistance mecR1 protein"  
"OPBI09\_00526" 36005 "s59E5H2" 0.001267019 "Methicillin resistance mecR1 protein"  
"OPBI09\_00526" 36005 "s63E6H2" 0 "Methicillin resistance mecR1 protein"  
"OPBI09\_00527" 36006 "s59E13H2" 0.6019287 "Penicillinase repressor"  
"OPBI09\_00527" 36006 "s59E25H2" 0 "Penicillinase repressor"  
"OPBI09\_00527" 36006 "s59E5H2" 0.01732213 "Penicillinase repressor"  
"OPBI09\_00527" 36006 "s63E6H2" 0.009937834 "Penicillinase repressor"  
"OPBI09\_00528" 36007 "s59E13H2" 0.9293226 "Na(+)-translocating NADH-quinone reductase subunit F"  
"OPBI09\_00528" 36007 "s59E25H2" 0 "Na(+)-translocating NADH-quinone reductase subunit F"  
"OPBI09\_00528" 36007 "s59E5H2" 0.00814835 "Na(+)-translocating NADH-quinone reductase subunit F"  
"OPBI09\_00528" 36007 "s63E6H2" 0.02208681 "Na(+)-translocating NADH-quinone reductase subunit F"  
"OPBI09\_00529" 36008 "s59E13H2" 0 "Arginine-binding extracellular protein ArtP precursor"  
"OPBI09\_00529" 36008 "s59E25H2" 0 "Arginine-binding extracellular protein ArtP precursor"  
"OPBI09\_00529" 36008 "s59E5H2" 0.0118886 "Arginine-binding extracellular protein ArtP precursor"  
"OPBI09\_00529" 36008 "s63E6H2" 0.01845552 "Arginine-binding extracellular protein ArtP precursor"  
"OPBI09\_00530" 36009 "s59E13H2" 0 "5-methyltetrahydrofolate:corrinoid/iron-sulfur protein co-methyltransferase"  
"OPBI09\_00530" 36009 "s59E25H2" 0 "5-methyltetrahydrofolate:corrinoid/iron-sulfur protein co-methyltransferase"  
"OPBI09\_00530" 36009 "s59E5H2" 0.04026523 "5-methyltetrahydrofolate:corrinoid/iron-sulfur protein co-methyltransferase"  
"OPBI09\_00530" 36009 "s63E6H2" 0.1117203 "5-methyltetrahydrofolate:corrinoid/iron-sulfur protein co-methyltransferase"  
"OPBI09\_00531" 36010 "s59E13H2" 0 "hypothetical protein"

"OPBI09\_00531" 36010 "s59E25H2" 0 "hypothetical protein"  
"OPBI09\_00531" 36010 "s59E5H2" 0.01320098 "hypothetical protein"  
"OPBI09\_00531" 36010 "s63E6H2" 0 "hypothetical protein"  
"OPBI09\_00532" 36011 "s59E13H2" 0 "putative adenylyltransferase/sulfurtransferase MoeZ"  
"OPBI09\_00532" 36011 "s59E25H2" 0 "putative adenylyltransferase/sulfurtransferase MoeZ"  
"OPBI09\_00532" 36011 "s59E5H2" 0.1047723 "putative adenylyltransferase/sulfurtransferase MoeZ"  
"OPBI09\_00532" 36011 "s63E6H2" 0.001025135 "putative adenylyltransferase/sulfurtransferase MoeZ"  
"OPBI09\_00533" 36012 "s59E13H2" 0.06010345 "6,7-dimethyl-8-ribityllumazine synthase"  
"OPBI09\_00533" 36012 "s59E25H2" 0 "6,7-dimethyl-8-ribityllumazine synthase"  
"OPBI09\_00533" 36012 "s59E5H2" 1.486283 "6,7-dimethyl-8-ribityllumazine synthase"  
"OPBI09\_00533" 36012 "s63E6H2" 0.6351948 "6,7-dimethyl-8-ribityllumazine synthase"  
"OPBI09\_00534" 36013 "s59E13H2" 0.02327118 "tRNA(fMet)-specific endonuclease VapC"  
"OPBI09\_00534" 36013 "s59E25H2" 0 "tRNA(fMet)-specific endonuclease VapC"  
"OPBI09\_00534" 36013 "s59E5H2" 0.9457645 "tRNA(fMet)-specific endonuclease VapC"  
"OPBI09\_00534" 36013 "s63E6H2" 0.04930979 "tRNA(fMet)-specific endonuclease VapC"  
"OPBI09\_00535" 36014 "s59E13H2" 0 "Phd\_YefM"  
"OPBI09\_00535" 36014 "s59E25H2" 0 "Phd\_YefM"  
"OPBI09\_00535" 36014 "s59E5H2" 0.9195568 "Phd\_YefM"  
"OPBI09\_00535" 36014 "s63E6H2" 0 "Phd\_YefM"  
"OPBI09\_00536" 36015 "s59E13H2" 0.01370241 "Dimethylamine corrinoid protein"  
"OPBI09\_00536" 36015 "s59E25H2" 0 "Dimethylamine corrinoid protein"  
"OPBI09\_00536" 36015 "s59E5H2" 0.1767412 "Dimethylamine corrinoid protein"  
"OPBI09\_00536" 36015 "s63E6H2" 0.6158522 "Dimethylamine corrinoid protein"  
"OPBI09\_00537" 36016 "s59E13H2" 0.02846762 "Uracil DNA glycosylase superfamily protein"  
"OPBI09\_00537" 36016 "s59E25H2" 0 "Uracil DNA glycosylase superfamily protein"  
"OPBI09\_00537" 36016 "s59E5H2" 0.3131464 "Uracil DNA glycosylase superfamily protein"  
"OPBI09\_00537" 36016 "s63E6H2" 0.006528545 "Uracil DNA glycosylase superfamily protein"  
"OPBI09\_00538" 36017 "s59E13H2" 0.02893744 "Cell wall-binding protein YocH precursor"  
"OPBI09\_00538" 36017 "s59E25H2" 0 "Cell wall-binding protein YocH precursor"  
"OPBI09\_00538" 36017 "s59E5H2" 0.1791056 "Cell wall-binding protein YocH precursor"  
"OPBI09\_00538" 36017 "s63E6H2" 0.005912896 "Cell wall-binding protein YocH precursor"  
"OPBI09\_00539" 36018 "s59E13H2" 0.01890911 "hypothetical protein"  
"OPBI09\_00539" 36018 "s59E25H2" 0 "hypothetical protein"  
"OPBI09\_00539" 36018 "s59E5H2" 0.04188557 "hypothetical protein"  
"OPBI09\_00539" 36018 "s63E6H2" 0.002767614 "hypothetical protein"  
"OPBI09\_00540" 36019 "s59E13H2" 0.02796612 "NADH:ubiquinone oxidoreductase subunit N"  
"OPBI09\_00540" 36019 "s59E25H2" 0 "NADH:ubiquinone oxidoreductase subunit N"  
"OPBI09\_00540" 36019 "s59E5H2" 0.04063741 "NADH:ubiquinone oxidoreductase subunit N"  
"OPBI09\_00540" 36019 "s63E6H2" 0.03058693 "NADH:ubiquinone oxidoreductase subunit N"  
"OPBI09\_00541" 36020 "s59E13H2" 0.04092004 "NADH:ubiquinone oxidoreductase subunit K"  
"OPBI09\_00541" 36020 "s59E25H2" 0 "NADH:ubiquinone oxidoreductase subunit K"  
"OPBI09\_00541" 36020 "s59E5H2" 0.03872803 "NADH:ubiquinone oxidoreductase subunit K"  
"OPBI09\_00541" 36020 "s63E6H2" 0.04403041 "NADH:ubiquinone oxidoreductase subunit K"  
"OPBI09\_00542" 36021 "s59E13H2" 0.03589583 "hypothetical protein"  
"OPBI09\_00542" 36021 "s59E25H2" 0 "hypothetical protein"  
"OPBI09\_00542" 36021 "s59E5H2" 0.02504134 "hypothetical protein"  
"OPBI09\_00542" 36021 "s63E6H2" 0.05199964 "hypothetical protein"

"OPBI09\_00543" 36022 "s59E13H2" 0.03147282 "NADH-quinone oxidoreductase subunit I"  
"OPBI09\_00543" 36022 "s59E25H2" 0 "NADH-quinone oxidoreductase subunit I"  
"OPBI09\_00543" 36022 "s59E5H2" 0.1394669 "NADH-quinone oxidoreductase subunit I"  
"OPBI09\_00543" 36022 "s63E6H2" 0.08529689 "NADH-quinone oxidoreductase subunit I"  
"OPBI09\_00544" 36023 "s59E13H2" 0.07738097 "F(420)H(2) dehydrogenase subunit H"  
"OPBI09\_00544" 36023 "s59E25H2" 0 "F(420)H(2) dehydrogenase subunit H"  
"OPBI09\_00544" 36023 "s59E5H2" 0.1168423 "F(420)H(2) dehydrogenase subunit H"  
"OPBI09\_00544" 36023 "s63E6H2" 0.1321596 "F(420)H(2) dehydrogenase subunit H"  
"OPBI09\_00545" 36024 "s59E13H2" 0.05686893 "NADH-quinone oxidoreductase subunit 4"  
"OPBI09\_00545" 36024 "s59E25H2" 0 "NADH-quinone oxidoreductase subunit 4"  
"OPBI09\_00545" 36024 "s59E5H2" 0.06291233 "NADH-quinone oxidoreductase subunit 4"  
"OPBI09\_00545" 36024 "s63E6H2" 0.07941984 "NADH-quinone oxidoreductase subunit 4"  
"OPBI09\_00546" 36025 "s59E13H2" 0.04078507 "F(420)H(2) dehydrogenase subunit B"  
"OPBI09\_00546" 36025 "s59E25H2" 0 "F(420)H(2) dehydrogenase subunit B"  
"OPBI09\_00546" 36025 "s59E5H2" 0.07438565 "F(420)H(2) dehydrogenase subunit B"  
"OPBI09\_00546" 36025 "s63E6H2" 0.03259175 "F(420)H(2) dehydrogenase subunit B"  
"OPBI09\_00547" 36026 "s59E13H2" 0.03999466 "hypothetical protein"  
"OPBI09\_00547" 36026 "s59E25H2" 0 "hypothetical protein"  
"OPBI09\_00547" 36026 "s59E5H2" 0.04548292 "hypothetical protein"  
"OPBI09\_00547" 36026 "s63E6H2" 0.04729871 "hypothetical protein"  
"OPBI09\_00548" 36027 "s59E13H2" 0 "Glucokinase"  
"OPBI09\_00548" 36027 "s59E25H2" 0 "Glucokinase"  
"OPBI09\_00548" 36027 "s59E5H2" 0 "Glucokinase"  
"OPBI09\_00548" 36027 "s63E6H2" 0 "Glucokinase"  
"OPBI09\_00549" 36028 "s59E13H2" 0 "N-acetylglucosamine repressor"  
"OPBI09\_00549" 36028 "s59E25H2" 0 "N-acetylglucosamine repressor"  
"OPBI09\_00549" 36028 "s59E5H2" 0 "N-acetylglucosamine repressor"  
"OPBI09\_00549" 36028 "s63E6H2" 0 "N-acetylglucosamine repressor"  
"OPBI09\_00550" 36029 "s59E13H2" 0 "hypothetical protein"  
"OPBI09\_00550" 36029 "s59E25H2" 0 "hypothetical protein"  
"OPBI09\_00550" 36029 "s59E5H2" 0 "hypothetical protein"  
"OPBI09\_00550" 36029 "s63E6H2" 0 "hypothetical protein"  
"OPBI09\_00552" 36031 "s59E13H2" 0 "hypothetical protein"  
"OPBI09\_00552" 36031 "s59E25H2" 0 "hypothetical protein"  
"OPBI09\_00552" 36031 "s59E5H2" 0 "hypothetical protein"  
"OPBI09\_00552" 36031 "s63E6H2" 0 "hypothetical protein"  
"OPBI09\_00553" 36032 "s59E13H2" 0 "Calcium-transporting ATPase 1"  
"OPBI09\_00553" 36032 "s59E25H2" 0.05910853 "Calcium-transporting ATPase 1"  
"OPBI09\_00553" 36032 "s59E5H2" 0.001947921 "Calcium-transporting ATPase 1"  
"OPBI09\_00553" 36032 "s63E6H2" 0.003652286 "Calcium-transporting ATPase 1"  
"OPBI09\_00554" 36033 "s59E13H2" 0.5425014 "Penicillin-binding protein 2D"  
"OPBI09\_00554" 36033 "s59E25H2" 0 "Penicillin-binding protein 2D"  
"OPBI09\_00554" 36033 "s59E5H2" 0.1580488 "Penicillin-binding protein 2D"  
"OPBI09\_00554" 36033 "s63E6H2" 0.02833492 "Penicillin-binding protein 2D"  
"OPBI09\_00555" 36034 "s59E13H2" 0.06225884 "putative protease YhbU precursor"  
"OPBI09\_00555" 36034 "s59E25H2" 0 "putative protease YhbU precursor"  
"OPBI09\_00555" 36034 "s59E5H2" 0.3012715 "putative protease YhbU precursor"



"OPBI09\_00555" 36034 "s63E6H2" 0.02387469 "putative protease YhbU precursor"  
"OPBI09\_00556" 36035 "s59E13H2" 0.04900117 "Argininosuccinate lyase"  
"OPBI09\_00556" 36035 "s59E25H2" 0 "Argininosuccinate lyase"  
"OPBI09\_00556" 36035 "s59E5H2" 0.5780283 "Argininosuccinate lyase"  
"OPBI09\_00556" 36035 "s63E6H2" 0.03263685 "Argininosuccinate lyase"  
"OPBI09\_00557" 36036 "s59E13H2" 0.03285938 "Argininosuccinate synthase"  
"OPBI09\_00557" 36036 "s59E25H2" 0 "Argininosuccinate synthase"  
"OPBI09\_00557" 36036 "s59E5H2" 0.3814486 "Argininosuccinate synthase"  
"OPBI09\_00557" 36036 "s63E6H2" 0.03931274 "Argininosuccinate synthase"  
"OPBI09\_00558" 36037 "s59E13H2" 0.01741171 "Arginine repressor"  
"OPBI09\_00558" 36037 "s59E25H2" 0 "Arginine repressor"  
"OPBI09\_00558" 36037 "s59E5H2" 0.2705134 "Arginine repressor"  
"OPBI09\_00558" 36037 "s63E6H2" 0.03006533 "Arginine repressor"  
"OPBI09\_00559" 36038 "s59E13H2" 0.007575398 "Ornithine carbamoyltransferase"  
"OPBI09\_00559" 36038 "s59E25H2" 0 "Ornithine carbamoyltransferase"  
"OPBI09\_00559" 36038 "s59E5H2" 0.1860693 "Ornithine carbamoyltransferase"  
"OPBI09\_00559" 36038 "s63E6H2" 0.02171557 "Ornithine carbamoyltransferase"  
"OPBI09\_00560" 36039 "s59E13H2" 0.01696219 "Acetylornithine aminotransferase"  
"OPBI09\_00560" 36039 "s59E25H2" 0 "Acetylornithine aminotransferase"  
"OPBI09\_00560" 36039 "s59E5H2" 0.3282002 "Acetylornithine aminotransferase"  
"OPBI09\_00560" 36039 "s63E6H2" 0.0415771 "Acetylornithine aminotransferase"  
"OPBI09\_00561" 36040 "s59E13H2" 0.01448693 "Acetylglutamate kinase"  
"OPBI09\_00561" 36040 "s59E25H2" 0 "Acetylglutamate kinase"  
"OPBI09\_00561" 36040 "s59E5H2" 0.3105435 "Acetylglutamate kinase"  
"OPBI09\_00561" 36040 "s63E6H2" 0.06926582 "Acetylglutamate kinase"  
"OPBI09\_00562" 36041 "s59E13H2" 0.003888083 "Arginine biosynthesis bifunctional protein ArgJ"  
"OPBI09\_00562" 36041 "s59E25H2" 0 "Arginine biosynthesis bifunctional protein ArgJ"  
"OPBI09\_00562" 36041 "s59E5H2" 0.1246622 "Arginine biosynthesis bifunctional protein ArgJ"  
"OPBI09\_00562" 36041 "s63E6H2" 0.1587595 "Arginine biosynthesis bifunctional protein ArgJ"  
"OPBI09\_00563" 36042 "s59E13H2" 0.006955593 "N-acetyl-gamma-glutamyl-phosphate reductase"  
"OPBI09\_00563" 36042 "s59E25H2" 0 "N-acetyl-gamma-glutamyl-phosphate reductase"  
"OPBI09\_00563" 36042 "s59E5H2" 0.03251996 "N-acetyl-gamma-glutamyl-phosphate reductase"  
"OPBI09\_00563" 36042 "s63E6H2" 1.597985 "N-acetyl-gamma-glutamyl-phosphate reductase"  
"OPBI09\_00564" 36043 "s59E13H2" 0 "Cell wall-binding protein YocH precursor"  
"OPBI09\_00564" 36043 "s59E25H2" 0 "Cell wall-binding protein YocH precursor"  
"OPBI09\_00564" 36043 "s59E5H2" 0.06724512 "Cell wall-binding protein YocH precursor"  
"OPBI09\_00564" 36043 "s63E6H2" 0.01232645 "Cell wall-binding protein YocH precursor"  
"OPBI09\_00565" 36044 "s59E13H2" 0.004207135 "preprotein translocase subunit SecF"  
"OPBI09\_00565" 36044 "s59E25H2" 0 "preprotein translocase subunit SecF"  
"OPBI09\_00565" 36044 "s59E5H2" 0.1727283 "preprotein translocase subunit SecF"  
"OPBI09\_00565" 36044 "s63E6H2" 0.00833386 "preprotein translocase subunit SecF"  
"OPBI09\_00566" 36045 "s59E13H2" 0 "preprotein translocase subunit SecD"  
"OPBI09\_00566" 36045 "s59E25H2" 0 "preprotein translocase subunit SecD"  
"OPBI09\_00566" 36045 "s59E5H2" 0.3392613 "preprotein translocase subunit SecD"  
"OPBI09\_00566" 36045 "s63E6H2" 0.003786224 "preprotein translocase subunit SecD"  
"OPBI09\_00567" 36046 "s59E13H2" 0 "hypothetical protein"  
"OPBI09\_00567" 36046 "s59E25H2" 0 "hypothetical protein"

"OPBI09\_00567" 36046 "s59E5H2" 1.659072 "hypothetical protein"  
"OPBI09\_00567" 36046 "s63E6H2" 0 "hypothetical protein"  
"OPBI09\_00568" 36047 "s59E13H2" 0 "Poly-beta-1,6-N-acetyl-D-glucosamine N-deacetylase precursor"  
"OPBI09\_00568" 36047 "s59E25H2" 0 "Poly-beta-1,6-N-acetyl-D-glucosamine N-deacetylase precursor"  
"OPBI09\_00568" 36047 "s59E5H2" 3.059215 "Poly-beta-1,6-N-acetyl-D-glucosamine N-deacetylase precursor"  
"OPBI09\_00568" 36047 "s63E6H2" 0.005188425 "Poly-beta-1,6-N-acetyl-D-glucosamine N-deacetylase precursor"  
"OPBI09\_00569" 36048 "s59E13H2" 0.001731271 "GDSL-like Lipase/Acylhydrolase"  
"OPBI09\_00569" 36048 "s59E25H2" 0 "GDSL-like Lipase/Acylhydrolase"  
"OPBI09\_00569" 36048 "s59E5H2" 5.053839 "GDSL-like Lipase/Acylhydrolase"  
"OPBI09\_00569" 36048 "s63E6H2" 0.009278916 "GDSL-like Lipase/Acylhydrolase"  
"OPBI09\_00570" 36049 "s59E13H2" 0.003846948 "hypothetical protein"  
"OPBI09\_00570" 36049 "s59E25H2" 0 "hypothetical protein"  
"OPBI09\_00570" 36049 "s59E5H2" 6.924825 "hypothetical protein"  
"OPBI09\_00570" 36049 "s63E6H2" 0.01356236 "hypothetical protein"  
"OPBI09\_00571" 36050 "s59E13H2" 0.4859798 "translocation protein TolB"  
"OPBI09\_00571" 36050 "s59E25H2" 0 "translocation protein TolB"  
"OPBI09\_00571" 36050 "s59E5H2" 5.115736 "translocation protein TolB"  
"OPBI09\_00571" 36050 "s63E6H2" 0.004719177 "translocation protein TolB"  
"OPBI09\_00572" 36051 "s59E13H2" 0 "Catabolite control protein A"  
"OPBI09\_00572" 36051 "s59E25H2" 0 "Catabolite control protein A"  
"OPBI09\_00572" 36051 "s59E5H2" 0 "Catabolite control protein A"  
"OPBI09\_00572" 36051 "s63E6H2" 0 "Catabolite control protein A"  
"OPBI09\_00573" 36052 "s59E13H2" 0 "Bacterial extracellular solute-binding protein"  
"OPBI09\_00573" 36052 "s59E25H2" 0 "Bacterial extracellular solute-binding protein"  
"OPBI09\_00573" 36052 "s59E5H2" 0 "Bacterial extracellular solute-binding protein"  
"OPBI09\_00573" 36052 "s63E6H2" 0 "Bacterial extracellular solute-binding protein"  
"OPBI09\_00574" 36053 "s59E13H2" 0 "L-arabinose transport system permease protein AraP"  
"OPBI09\_00574" 36053 "s59E25H2" 0 "L-arabinose transport system permease protein AraP"  
"OPBI09\_00574" 36053 "s59E5H2" 0 "L-arabinose transport system permease protein AraP"  
"OPBI09\_00574" 36053 "s63E6H2" 0 "L-arabinose transport system permease protein AraP"  
"OPBI09\_00575" 36054 "s59E13H2" 0 "L-arabinose transport system permease protein AraQ"  
"OPBI09\_00575" 36054 "s59E25H2" 0 "L-arabinose transport system permease protein AraQ"  
"OPBI09\_00575" 36054 "s59E5H2" 0 "L-arabinose transport system permease protein AraQ"  
"OPBI09\_00575" 36054 "s63E6H2" 0 "L-arabinose transport system permease protein AraQ"  
"OPBI09\_00577" 36056 "s59E13H2" 0 "hypothetical protein"  
"OPBI09\_00577" 36056 "s59E25H2" 0 "hypothetical protein"  
"OPBI09\_00577" 36056 "s59E5H2" 0.07544691 "hypothetical protein"  
"OPBI09\_00577" 36056 "s63E6H2" 0 "hypothetical protein"  
"OPBI09\_00579" 36058 "s59E13H2" 12.4319 "Bifunctional protein GlmU"  
"OPBI09\_00579" 36058 "s59E25H2" 0.3531073 "Bifunctional protein GlmU"  
"OPBI09\_00579" 36058 "s59E5H2" 0.1164474 "Bifunctional protein GlmU"  
"OPBI09\_00579" 36058 "s63E6H2" 0.5296882 "Bifunctional protein GlmU"  
"OPBI09\_00580" 36059 "s59E13H2" 1.933985 "Ribose-phosphate pyrophosphokinase"  
"OPBI09\_00580" 36059 "s59E25H2" 0 "Ribose-phosphate pyrophosphokinase"  
"OPBI09\_00580" 36059 "s59E5H2" 0.184536 "Ribose-phosphate pyrophosphokinase"  
"OPBI09\_00580" 36059 "s63E6H2" 0.02827591 "Ribose-phosphate pyrophosphokinase"  
"OPBI09\_00581" 36060 "s59E13H2" 0.03363289 "50S ribosomal protein L25"

"OPBI09\_00581" 36060 "s59E25H2" 0 "50S ribosomal protein L25"  
"OPBI09\_00581" 36060 "s59E5H2" 0.03776121 "50S ribosomal protein L25"  
"OPBI09\_00581" 36060 "s63E6H2" 0.01117431 "50S ribosomal protein L25"  
"OPBI09\_00582" 36061 "s59E13H2" 0.01181703 "Peptidyl-tRNA hydrolase"  
"OPBI09\_00582" 36061 "s59E25H2" 0 "Peptidyl-tRNA hydrolase"  
"OPBI09\_00582" 36061 "s59E5H2" 0.05395195 "Peptidyl-tRNA hydrolase"  
"OPBI09\_00582" 36061 "s63E6H2" 0.01867366 "Peptidyl-tRNA hydrolase"  
"OPBI09\_00583" 36062 "s59E13H2" 0.133651 "Transcription-repair-coupling factor"  
"OPBI09\_00583" 36062 "s59E25H2" 0 "Transcription-repair-coupling factor"  
"OPBI09\_00583" 36062 "s59E5H2" 0.01774677 "Transcription-repair-coupling factor"  
"OPBI09\_00583" 36062 "s63E6H2" 0.03351459 "Transcription-repair-coupling factor"  
"OPBI09\_00584" 36063 "s59E13H2" 0.01144029 "Foldase protein PrsA 3 precursor"  
"OPBI09\_00584" 36063 "s59E25H2" 0 "Foldase protein PrsA 3 precursor"  
"OPBI09\_00584" 36063 "s59E5H2" 0.03798177 "Foldase protein PrsA 3 precursor"  
"OPBI09\_00584" 36063 "s63E6H2" 0.01138275 "Foldase protein PrsA 3 precursor"  
"OPBI09\_00585" 36064 "s59E13H2" 0.02407132 "Nucleoside triphosphate pyrophosphohydrolase"  
"OPBI09\_00585" 36064 "s59E25H2" 0 "Nucleoside triphosphate pyrophosphohydrolase"  
"OPBI09\_00585" 36064 "s59E5H2" 0.06428724 "Nucleoside triphosphate pyrophosphohydrolase"  
"OPBI09\_00585" 36064 "s63E6H2" 0.03505 "Nucleoside triphosphate pyrophosphohydrolase"  
"OPBI09\_00586" 36065 "s59E13H2" 0.02574815 "Pyruvate kinase"  
"OPBI09\_00586" 36065 "s59E25H2" 0 "Pyruvate kinase"  
"OPBI09\_00586" 36065 "s59E5H2" 0.6249333 "Pyruvate kinase"  
"OPBI09\_00586" 36065 "s63E6H2" 0.05260344 "Pyruvate kinase"  
"OPBI09\_00587" 36066 "s59E13H2" 0.03858623 "Ktr system potassium uptake protein A"  
"OPBI09\_00587" 36066 "s59E25H2" 0 "Ktr system potassium uptake protein A"  
"OPBI09\_00587" 36066 "s59E5H2" 0.9370284 "Ktr system potassium uptake protein A"  
"OPBI09\_00587" 36066 "s63E6H2" 0.1216867 "Ktr system potassium uptake protein A"  
"OPBI09\_00588" 36067 "s59E13H2" 0.01058572 "Ktr system potassium uptake protein B"  
"OPBI09\_00588" 36067 "s59E25H2" 0 "Ktr system potassium uptake protein B"  
"OPBI09\_00588" 36067 "s59E5H2" 0.3856394 "Ktr system potassium uptake protein B"  
"OPBI09\_00588" 36067 "s63E6H2" 0.04783999 "Ktr system potassium uptake protein B"  
"OPBI09\_00589" 36068 "s59E13H2" 0.007229308 "Septum formation initiator"  
"OPBI09\_00589" 36068 "s59E25H2" 0 "Septum formation initiator"  
"OPBI09\_00589" 36068 "s59E5H2" 0.06443413 "Septum formation initiator"  
"OPBI09\_00589" 36068 "s63E6H2" 0.01721058 "Septum formation initiator"  
"OPBI09\_00590" 36069 "s59E13H2" 0.01816551 "Exopolyphosphatase"  
"OPBI09\_00590" 36069 "s59E25H2" 0 "Exopolyphosphatase"  
"OPBI09\_00590" 36069 "s59E5H2" 0.09594944 "Exopolyphosphatase"  
"OPBI09\_00590" 36069 "s63E6H2" 0.02351302 "Exopolyphosphatase"  
"OPBI09\_00592" 36071 "s59E13H2" 0 "Putative ribosome biogenesis GTPase RsgA"  
"OPBI09\_00592" 36071 "s59E25H2" 0 "Putative ribosome biogenesis GTPase RsgA"  
"OPBI09\_00592" 36071 "s59E5H2" 0 "Putative ribosome biogenesis GTPase RsgA"  
"OPBI09\_00592" 36071 "s63E6H2" 0 "Putative ribosome biogenesis GTPase RsgA"  
"OPBI09\_00593" 36072 "s59E13H2" 0 "GDP-L-fucose synthase"  
"OPBI09\_00593" 36072 "s59E25H2" 0 "GDP-L-fucose synthase"  
"OPBI09\_00593" 36072 "s59E5H2" 0 "GDP-L-fucose synthase"  
"OPBI09\_00593" 36072 "s63E6H2" 0 "GDP-L-fucose synthase"

"OPBI09\_00594" 36073 "s59E13H2" 0.02950636 "Isoprenylcysteine carboxyl methyltransferase (ICMT) family protein"  
"OPBI09\_00594" 36073 "s59E25H2" 0 "Isoprenylcysteine carboxyl methyltransferase (ICMT) family protein"  
"OPBI09\_00594" 36073 "s59E5H2" 0.0462461 "Isoprenylcysteine carboxyl methyltransferase (ICMT) family protein"  
"OPBI09\_00594" 36073 "s63E6H2" 0.03054576 "Isoprenylcysteine carboxyl methyltransferase (ICMT) family protein"  
"OPBI09\_00595" 36074 "s59E13H2" 0.008182062 "hypothetical protein"  
"OPBI09\_00595" 36074 "s59E25H2" 0 "hypothetical protein"  
"OPBI09\_00595" 36074 "s59E5H2" 0.02654965 "hypothetical protein"  
"OPBI09\_00595" 36074 "s63E6H2" 0 "hypothetical protein"  
"OPBI09\_00596" 36075 "s59E13H2" 0 "General stress protein 69"  
"OPBI09\_00596" 36075 "s59E25H2" 0 "General stress protein 69"  
"OPBI09\_00596" 36075 "s59E5H2" 0 "General stress protein 69"  
"OPBI09\_00596" 36075 "s63E6H2" 0 "General stress protein 69"  
"OPBI09\_00597" 36076 "s59E13H2" 0.02194781 "Protoporphyrinogen IX dehydrogenase [menaquinone]"  
"OPBI09\_00597" 36076 "s59E25H2" 0 "Protoporphyrinogen IX dehydrogenase [menaquinone]"  
"OPBI09\_00597" 36076 "s59E5H2" 0.3455188 "Protoporphyrinogen IX dehydrogenase [menaquinone]"  
"OPBI09\_00597" 36076 "s63E6H2" 0.005221476 "Protoporphyrinogen IX dehydrogenase [menaquinone]"  
"OPBI09\_00598" 36077 "s59E13H2" 0.01635618 "hypothetical protein"  
"OPBI09\_00598" 36077 "s59E25H2" 0 "hypothetical protein"  
"OPBI09\_00598" 36077 "s59E5H2" 0.6897355 "hypothetical protein"  
"OPBI09\_00598" 36077 "s63E6H2" 0 "hypothetical protein"  
"OPBI09\_00599" 36078 "s59E13H2" 0.02813381 "hypothetical protein"  
"OPBI09\_00599" 36078 "s59E25H2" 0 "hypothetical protein"  
"OPBI09\_00599" 36078 "s59E5H2" 0.08807568 "hypothetical protein"  
"OPBI09\_00599" 36078 "s63E6H2" 0.007667164 "hypothetical protein"  
"OPBI09\_00600" 36079 "s59E13H2" 0.05375206 "putative kinase inhibitor"  
"OPBI09\_00600" 36079 "s59E25H2" 0 "putative kinase inhibitor"  
"OPBI09\_00600" 36079 "s59E5H2" 0.4787424 "putative kinase inhibitor"  
"OPBI09\_00600" 36079 "s63E6H2" 0.04267909 "putative kinase inhibitor"  
"OPBI09\_00601" 36080 "s59E13H2" 0.1332852 "Hydrogenase 2 maturation protease"  
"OPBI09\_00601" 36080 "s59E25H2" 0 "Hydrogenase 2 maturation protease"  
"OPBI09\_00601" 36080 "s59E5H2" 1.224198 "Hydrogenase 2 maturation protease"  
"OPBI09\_00601" 36080 "s63E6H2" 0.04126066 "Hydrogenase 2 maturation protease"  
"OPBI09\_00602" 36081 "s59E13H2" 0.07046318 "Bifunctional homocysteine S-methyltransferase/5,10-methylenetetrahydrofolate reductase"  
"OPBI09\_00602" 36081 "s59E25H2" 0 "Bifunctional homocysteine S-methyltransferase/5,10-methylenetetrahydrofolate reductase"  
"OPBI09\_00602" 36081 "s59E5H2" 1.968632 "Bifunctional homocysteine S-methyltransferase/5,10-methylenetetrahydrofolate reductase"  
"OPBI09\_00602" 36081 "s63E6H2" 0 "Bifunctional homocysteine S-methyltransferase/5,10-methylenetetrahydrofolate reductase"  
"OPBI09\_00603" 36082 "s59E13H2" 0.05431107 "hypothetical protein"  
"OPBI09\_00603" 36082 "s59E25H2" 0 "hypothetical protein"  
"OPBI09\_00603" 36082 "s59E5H2" 1.09795 "hypothetical protein"  
"OPBI09\_00603" 36082 "s63E6H2" 0 "hypothetical protein"  
"OPBI09\_00604" 36083 "s59E13H2" 0.02962069 "Periplasmic [NiFe] hydrogenase large subunit precursor"  
"OPBI09\_00604" 36083 "s59E25H2" 0 "Periplasmic [NiFe] hydrogenase large subunit precursor"  
"OPBI09\_00604" 36083 "s59E5H2" 0.4971807 "Periplasmic [NiFe] hydrogenase large subunit precursor"  
"OPBI09\_00604" 36083 "s63E6H2" 0 "Periplasmic [NiFe] hydrogenase large subunit precursor"  
"OPBI09\_00605" 36084 "s59E13H2" 0.0541377 "Periplasmic [NiFeSe] hydrogenase small subunit precursor"  
"OPBI09\_00605" 36084 "s59E25H2" 0 "Periplasmic [NiFeSe] hydrogenase small subunit precursor"  
"OPBI09\_00605" 36084 "s59E5H2" 0.2792921 "Periplasmic [NiFeSe] hydrogenase small subunit precursor"

"OPBI09\_00605" 36084 "s63E6H2" 0.003688102 "Periplasmic [NiFeSe] hydrogenase small subunit precursor"  
"OPBI09\_00606" 36085 "s59E13H2" 0.01244127 "hypothetical protein"  
"OPBI09\_00606" 36085 "s59E25H2" 0 "hypothetical protein"  
"OPBI09\_00606" 36085 "s59E5H2" 0.2662751 "hypothetical protein"  
"OPBI09\_00606" 36085 "s63E6H2" 0.02101924 "hypothetical protein"  
"OPBI09\_00607" 36086 "s59E13H2" 0.01748519 "tRNA-splicing ligase RtcB"  
"OPBI09\_00607" 36086 "s59E25H2" 0 "tRNA-splicing ligase RtcB"  
"OPBI09\_00607" 36086 "s59E5H2" 0.40989 "tRNA-splicing ligase RtcB"  
"OPBI09\_00607" 36086 "s63E6H2" 0.0372325 "tRNA-splicing ligase RtcB"  
"OPBI09\_00608" 36087 "s59E13H2" 0.00335154 "hypothetical protein"  
"OPBI09\_00608" 36087 "s59E25H2" 0 "hypothetical protein"  
"OPBI09\_00608" 36087 "s59E5H2" 0.01653276 "hypothetical protein"  
"OPBI09\_00608" 36087 "s63E6H2" 0.06139481 "hypothetical protein"  
"OPBI09\_00610" 36089 "s59E13H2" 0 "hypothetical protein"  
"OPBI09\_00610" 36089 "s59E25H2" 0 "hypothetical protein"  
"OPBI09\_00610" 36089 "s59E5H2" 0 "hypothetical protein"  
"OPBI09\_00610" 36089 "s63E6H2" 0.0001266519 "hypothetical protein"  
"OPBI09\_00611" 36090 "s59E13H2" 0 "Putative KHG/KDPG aldolase"  
"OPBI09\_00611" 36090 "s59E25H2" 0 "Putative KHG/KDPG aldolase"  
"OPBI09\_00611" 36090 "s59E5H2" 0 "Putative KHG/KDPG aldolase"  
"OPBI09\_00611" 36090 "s63E6H2" 0 "Putative KHG/KDPG aldolase"  
"OPBI09\_00612" 36091 "s59E13H2" 0.04147124 "4,4'-diaponeurosporenoate glycosyltransferase"  
"OPBI09\_00612" 36091 "s59E25H2" 0 "4,4'-diaponeurosporenoate glycosyltransferase"  
"OPBI09\_00612" 36091 "s59E5H2" 0.1577587 "4,4'-diaponeurosporenoate glycosyltransferase"  
"OPBI09\_00612" 36091 "s63E6H2" 0.5810677 "4,4'-diaponeurosporenoate glycosyltransferase"  
"OPBI09\_00613" 36092 "s59E13H2" 0.05758977 "Riboflavin biosynthesis protein RibBA"  
"OPBI09\_00613" 36092 "s59E25H2" 0 "Riboflavin biosynthesis protein RibBA"  
"OPBI09\_00613" 36092 "s59E5H2" 2.215423 "Riboflavin biosynthesis protein RibBA"  
"OPBI09\_00613" 36092 "s63E6H2" 0.5193204 "Riboflavin biosynthesis protein RibBA"  
"OPBI09\_00614" 36093 "s59E13H2" 0 "Naphthalene 1,2-dioxygenase/salicylate 5-hydroxylase systems, ferredoxin component"  
"OPBI09\_00614" 36093 "s59E25H2" 0 "Naphthalene 1,2-dioxygenase/salicylate 5-hydroxylase systems, ferredoxin component"  
"OPBI09\_00614" 36093 "s59E5H2" 0.03691064 "Naphthalene 1,2-dioxygenase/salicylate 5-hydroxylase systems, ferredoxin component"  
"OPBI09\_00614" 36093 "s63E6H2" 0 "Naphthalene 1,2-dioxygenase/salicylate 5-hydroxylase systems, ferredoxin component"  
"OPBI09\_00615" 36094 "s59E13H2" 0.003029547 "hypothetical protein"  
"OPBI09\_00615" 36094 "s59E25H2" 0 "hypothetical protein"  
"OPBI09\_00615" 36094 "s59E5H2" 0.006196484 "hypothetical protein"  
"OPBI09\_00615" 36094 "s63E6H2" 0.06676411 "hypothetical protein"  
"OPBI09\_00616" 36095 "s59E13H2" 0.01085998 "pyrroloquinoline quinone biosynthesis protein PqqE"  
"OPBI09\_00616" 36095 "s59E25H2" 0 "pyrroloquinoline quinone biosynthesis protein PqqE"  
"OPBI09\_00616" 36095 "s59E5H2" 0.005066869 "pyrroloquinoline quinone biosynthesis protein PqqE"  
"OPBI09\_00616" 36095 "s63E6H2" 0.5784973 "pyrroloquinoline quinone biosynthesis protein PqqE"  
"OPBI09\_00617" 36096 "s59E13H2" 0.01162442 "hypothetical protein"  
"OPBI09\_00617" 36096 "s59E25H2" 0 "hypothetical protein"  
"OPBI09\_00617" 36096 "s59E5H2" 0 "hypothetical protein"  
"OPBI09\_00617" 36096 "s63E6H2" 1.188404 "hypothetical protein"  
"OPBI09\_00618" 36097 "s59E13H2" 0.02973691 "hypothetical protein"  
"OPBI09\_00618" 36097 "s59E25H2" 0 "hypothetical protein"

"OPBI09\_00618" 36097 "s59E5H2" 0.184388 "hypothetical protein"  
"OPBI09\_00618" 36097 "s63E6H2" 0.6380644 "hypothetical protein"  
"OPBI09\_00619" 36098 "s59E13H2" 0.05215499 "4,4'-diaponeurosporenoate glycosyltransferase"  
"OPBI09\_00619" 36098 "s59E25H2" 0 "4,4'-diaponeurosporenoate glycosyltransferase"  
"OPBI09\_00619" 36098 "s59E5H2" 0.131978 "4,4'-diaponeurosporenoate glycosyltransferase"  
"OPBI09\_00619" 36098 "s63E6H2" 1.056783 "4,4'-diaponeurosporenoate glycosyltransferase"  
"OPBI09\_00620" 36099 "s59E13H2" 0.00755353 "hypothetical protein"  
"OPBI09\_00620" 36099 "s59E25H2" 0.3122807 "hypothetical protein"  
"OPBI09\_00620" 36099 "s59E5H2" 0.02389097 "hypothetical protein"  
"OPBI09\_00620" 36099 "s63E6H2" 0.03973936 "hypothetical protein"  
"OPBI09\_00621" 36100 "s59E13H2" 0.9597587 "ComEC family competence protein"  
"OPBI09\_00621" 36100 "s59E25H2" 0.2259001 "ComEC family competence protein"  
"OPBI09\_00621" 36100 "s59E5H2" 0.07795188 "ComEC family competence protein"  
"OPBI09\_00621" 36100 "s63E6H2" 0.1362792 "ComEC family competence protein"  
"OPBI09\_00622" 36101 "s59E13H2" 1.185889 "ComE operon protein 1"  
"OPBI09\_00622" 36101 "s59E25H2" 0 "ComE operon protein 1"  
"OPBI09\_00622" 36101 "s59E5H2" 0.05954422 "ComE operon protein 1"  
"OPBI09\_00622" 36101 "s63E6H2" 0.1450605 "ComE operon protein 1"  
"OPBI09\_00624" 36103 "s59E13H2" 2.02678 "Intracellular protease 1"  
"OPBI09\_00624" 36103 "s59E25H2" 0 "Intracellular protease 1"  
"OPBI09\_00624" 36103 "s59E5H2" 0.2322446 "Intracellular protease 1"  
"OPBI09\_00624" 36103 "s63E6H2" 0.2082128 "Intracellular protease 1"  
"OPBI09\_00625" 36104 "s59E13H2" 2.731347 "Leucine--tRNA ligase"  
"OPBI09\_00625" 36104 "s59E25H2" 0 "Leucine--tRNA ligase"  
"OPBI09\_00625" 36104 "s59E5H2" 0.2173008 "Leucine--tRNA ligase"  
"OPBI09\_00625" 36104 "s63E6H2" 0.3201139 "Leucine--tRNA ligase"  
"OPBI09\_00626" 36105 "s59E13H2" 2.317504 "Ribosomal silencing factor RsfS"  
"OPBI09\_00626" 36105 "s59E25H2" 0 "Ribosomal silencing factor RsfS"  
"OPBI09\_00626" 36105 "s59E5H2" 0.1841455 "Ribosomal silencing factor RsfS"  
"OPBI09\_00626" 36105 "s63E6H2" 0.1374414 "Ribosomal silencing factor RsfS"  
"OPBI09\_00627" 36106 "s59E13H2" 0.6695071 "Cell envelope-related transcriptional attenuator domain protein"  
"OPBI09\_00627" 36106 "s59E25H2" 0 "Cell envelope-related transcriptional attenuator domain protein"  
"OPBI09\_00627" 36106 "s59E5H2" 0.04606104 "Cell envelope-related transcriptional attenuator domain protein"  
"OPBI09\_00627" 36106 "s63E6H2" 0.06872746 "Cell envelope-related transcriptional attenuator domain protein"  
"OPBI09\_00628" 36107 "s59E13H2" 1.264543 "putative nicotinate-nucleotide adenyllyltransferase"  
"OPBI09\_00628" 36107 "s59E25H2" 0 "putative nicotinate-nucleotide adenyllyltransferase"  
"OPBI09\_00628" 36107 "s59E5H2" 0.04278096 "putative nicotinate-nucleotide adenyllyltransferase"  
"OPBI09\_00628" 36107 "s63E6H2" 0.1530253 "putative nicotinate-nucleotide adenyllyltransferase"  
"OPBI09\_00629" 36108 "s59E13H2" 1.579751 "Nicotinate-nucleotide adenyllyltransferase"  
"OPBI09\_00629" 36108 "s59E25H2" 0 "Nicotinate-nucleotide adenyllyltransferase"  
"OPBI09\_00629" 36108 "s59E5H2" 0.1115194 "Nicotinate-nucleotide adenyllyltransferase"  
"OPBI09\_00629" 36108 "s63E6H2" 0.183889 "Nicotinate-nucleotide adenyllyltransferase"  
"OPBI09\_00630" 36109 "s59E13H2" 0.08915554 "Gamma-glutamyl phosphate reductase"  
"OPBI09\_00630" 36109 "s59E25H2" 0 "Gamma-glutamyl phosphate reductase"  
"OPBI09\_00630" 36109 "s59E5H2" 0.07092149 "Gamma-glutamyl phosphate reductase"  
"OPBI09\_00630" 36109 "s63E6H2" 0.2059704 "Gamma-glutamyl phosphate reductase"  
"OPBI09\_00631" 36110 "s59E13H2" 0 "Glutamate 5-kinase 1"

"OPBI09\_00631" 36110 "s59E25H2" 0 "Glutamate 5-kinase 1"  
"OPBI09\_00631" 36110 "s59E5H2" 0.0523994 "Glutamate 5-kinase 1"  
"OPBI09\_00631" 36110 "s63E6H2" 0.1381608 "Glutamate 5-kinase 1"  
"OPBI09\_00632" 36111 "s59E13H2" 0.04155275 "GTPase Obg"  
"OPBI09\_00632" 36111 "s59E25H2" 0 "GTPase Obg"  
"OPBI09\_00632" 36111 "s59E5H2" 0.02903982 "GTPase Obg"  
"OPBI09\_00632" 36111 "s63E6H2" 0.08695057 "GTPase Obg"  
"OPBI09\_00633" 36112 "s59E13H2" 0.04242433 "Sorbitol dehydrogenase"  
"OPBI09\_00633" 36112 "s59E25H2" 0 "Sorbitol dehydrogenase"  
"OPBI09\_00633" 36112 "s59E5H2" 0.02880492 "Sorbitol dehydrogenase"  
"OPBI09\_00633" 36112 "s63E6H2" 0.1821097 "Sorbitol dehydrogenase"  
"OPBI09\_00634" 36113 "s59E13H2" 0.0413516 "Sorbitol dehydrogenase"  
"OPBI09\_00634" 36113 "s59E25H2" 0 "Sorbitol dehydrogenase"  
"OPBI09\_00634" 36113 "s59E5H2" 0.03225166 "Sorbitol dehydrogenase"  
"OPBI09\_00634" 36113 "s63E6H2" 0.1382541 "Sorbitol dehydrogenase"  
"OPBI09\_00635" 36114 "s59E13H2" 0 "hypothetical protein"  
"OPBI09\_00635" 36114 "s59E25H2" 0 "hypothetical protein"  
"OPBI09\_00635" 36114 "s59E5H2" 0 "hypothetical protein"  
"OPBI09\_00635" 36114 "s63E6H2" 0 "hypothetical protein"  
"OPBI09\_00636" 36115 "s59E13H2" 0 "Calcineurin-like phosphoesterase superfamily domain protein"  
"OPBI09\_00636" 36115 "s59E25H2" 0 "Calcineurin-like phosphoesterase superfamily domain protein"  
"OPBI09\_00636" 36115 "s59E5H2" 0 "Calcineurin-like phosphoesterase superfamily domain protein"  
"OPBI09\_00636" 36115 "s63E6H2" 0.0005378202 "Calcineurin-like phosphoesterase superfamily domain protein"  
"OPBI09\_00637" 36116 "s59E13H2" 0 "hypothetical protein"  
"OPBI09\_00637" 36116 "s59E25H2" 0 "hypothetical protein"  
"OPBI09\_00637" 36116 "s59E5H2" 0 "hypothetical protein"  
"OPBI09\_00637" 36116 "s63E6H2" 0.007261374 "hypothetical protein"  
"OPBI09\_00639" 36118 "s59E13H2" 0.02476737 "50S ribosomal protein L27"  
"OPBI09\_00639" 36118 "s59E25H2" 0 "50S ribosomal protein L27"  
"OPBI09\_00639" 36118 "s59E5H2" 0.0486352 "50S ribosomal protein L27"  
"OPBI09\_00639" 36118 "s63E6H2" 0.04491522 "50S ribosomal protein L27"  
"OPBI09\_00640" 36119 "s59E13H2" 0.01898571 "50S ribosomal protein L21"  
"OPBI09\_00640" 36119 "s59E25H2" 0 "50S ribosomal protein L21"  
"OPBI09\_00640" 36119 "s59E5H2" 0.2195211 "50S ribosomal protein L21"  
"OPBI09\_00640" 36119 "s63E6H2" 0.09260402 "50S ribosomal protein L21"  
"OPBI09\_00641" 36120 "s59E13H2" 0.03813111 "Ribonuclease G"  
"OPBI09\_00641" 36120 "s59E25H2" 0 "Ribonuclease G"  
"OPBI09\_00641" 36120 "s59E5H2" 0.1192734 "Ribonuclease G"  
"OPBI09\_00641" 36120 "s63E6H2" 0.07498517 "Ribonuclease G"  
"OPBI09\_00642" 36121 "s59E13H2" 0.05855273 "hypothetical protein"  
"OPBI09\_00642" 36121 "s59E25H2" 0 "hypothetical protein"  
"OPBI09\_00642" 36121 "s59E5H2" 0.1057655 "hypothetical protein"  
"OPBI09\_00642" 36121 "s63E6H2" 0.02434292 "hypothetical protein"  
"OPBI09\_00643" 36122 "s59E13H2" 0.0510539 "Radical SAM superfamily protein"  
"OPBI09\_00643" 36122 "s59E25H2" 0 "Radical SAM superfamily protein"  
"OPBI09\_00643" 36122 "s59E5H2" 0.1451336 "Radical SAM superfamily protein"  
"OPBI09\_00643" 36122 "s63E6H2" 0.04270987 "Radical SAM superfamily protein"

"OPBI09\_00644" 36123 "s59E13H2" 0.0718107 "Rod shape-determining protein RodA"  
"OPBI09\_00644" 36123 "s59E25H2" 0 "Rod shape-determining protein RodA"  
"OPBI09\_00644" 36123 "s59E5H2" 0.1398397 "Rod shape-determining protein RodA"  
"OPBI09\_00644" 36123 "s63E6H2" 0.05756581 "Rod shape-determining protein RodA"  
"OPBI09\_00645" 36124 "s59E13H2" 0.01051968 "Stage V sporulation protein D"  
"OPBI09\_00645" 36124 "s59E25H2" 0 "Stage V sporulation protein D"  
"OPBI09\_00645" 36124 "s59E5H2" 0.02450123 "Stage V sporulation protein D"  
"OPBI09\_00645" 36124 "s63E6H2" 0.01951996 "Stage V sporulation protein D"  
"OPBI09\_00646" 36125 "s59E13H2" 0.06631266 "hypothetical protein"  
"OPBI09\_00646" 36125 "s59E25H2" 0 "hypothetical protein"  
"OPBI09\_00646" 36125 "s59E5H2" 0.09692679 "hypothetical protein"  
"OPBI09\_00646" 36125 "s63E6H2" 0.1119573 "hypothetical protein"  
"OPBI09\_00647" 36126 "s59E13H2" 0.04359528 "Cell shape-determining protein MreC precursor"  
"OPBI09\_00647" 36126 "s59E25H2" 0 "Cell shape-determining protein MreC precursor"  
"OPBI09\_00647" 36126 "s59E5H2" 0.1120759 "Cell shape-determining protein MreC precursor"  
"OPBI09\_00647" 36126 "s63E6H2" 0.08316649 "Cell shape-determining protein MreC precursor"  
"OPBI09\_00648" 36127 "s59E13H2" 0.04440827 "Rod shape-determining protein MreB"  
"OPBI09\_00648" 36127 "s59E25H2" 0 "Rod shape-determining protein MreB"  
"OPBI09\_00648" 36127 "s59E5H2" 0.1352074 "Rod shape-determining protein MreB"  
"OPBI09\_00648" 36127 "s63E6H2" 0.09012033 "Rod shape-determining protein MreB"  
"OPBI09\_00649" 36128 "s59E13H2" 0.04016122 "Maf-like protein"  
"OPBI09\_00649" 36128 "s59E25H2" 0 "Maf-like protein"  
"OPBI09\_00649" 36128 "s59E5H2" 0.1321784 "Maf-like protein"  
"OPBI09\_00649" 36128 "s63E6H2" 0.0617013 "Maf-like protein"  
"OPBI09\_00650" 36129 "s59E13H2" 0.02446732 "hypothetical protein"  
"OPBI09\_00650" 36129 "s59E25H2" 0 "hypothetical protein"  
"OPBI09\_00650" 36129 "s59E5H2" 0.09746112 "hypothetical protein"  
"OPBI09\_00650" 36129 "s63E6H2" 0.07113961 "hypothetical protein"  
"OPBI09\_00651" 36130 "s59E13H2" 0.03030759 "Nucleoside diphosphate kinase"  
"OPBI09\_00651" 36130 "s59E25H2" 0 "Nucleoside diphosphate kinase"  
"OPBI09\_00651" 36130 "s59E5H2" 0.065518 "Nucleoside diphosphate kinase"  
"OPBI09\_00651" 36130 "s63E6H2" 0.1076789 "Nucleoside diphosphate kinase"  
"OPBI09\_00652" 36131 "s59E13H2" 0.01080466 "Double zinc ribbon"  
"OPBI09\_00652" 36131 "s59E25H2" 0 "Double zinc ribbon"  
"OPBI09\_00652" 36131 "s59E5H2" 0.05711192 "Double zinc ribbon"  
"OPBI09\_00652" 36131 "s63E6H2" 0.08942781 "Double zinc ribbon"  
"OPBI09\_00653" 36132 "s59E13H2" 0.02898428 "Folypolyglutamate synthase"  
"OPBI09\_00653" 36132 "s59E25H2" 0 "Folypolyglutamate synthase"  
"OPBI09\_00653" 36132 "s59E5H2" 0.1315034 "Folypolyglutamate synthase"  
"OPBI09\_00653" 36132 "s63E6H2" 0.1186223 "Folypolyglutamate synthase"  
"OPBI09\_00654" 36133 "s59E13H2" 0.008619846 "Valine--tRNA ligase"  
"OPBI09\_00654" 36133 "s59E25H2" 0 "Valine--tRNA ligase"  
"OPBI09\_00654" 36133 "s59E5H2" 0.07143087 "Valine--tRNA ligase"  
"OPBI09\_00654" 36133 "s63E6H2" 0.09378308 "Valine--tRNA ligase"  
"OPBI09\_00655" 36134 "s59E13H2" 0.002171926 "ATP-dependent Clp protease ATP-binding subunit ClpX"  
"OPBI09\_00655" 36134 "s59E25H2" 0 "ATP-dependent Clp protease ATP-binding subunit ClpX"  
"OPBI09\_00655" 36134 "s59E5H2" 0.08134974 "ATP-dependent Clp protease ATP-binding subunit ClpX"



"OPBI09\_00655" 36134 "s63E6H2" 0.08212024 "ATP-dependent Clp protease ATP-binding subunit ClpX"  
"OPBI09\_00656" 36135 "s59E13H2" 0.003624911 "ATP-dependent Clp protease proteolytic subunit precursor"  
"OPBI09\_00656" 36135 "s59E25H2" 0 "ATP-dependent Clp protease proteolytic subunit precursor"  
"OPBI09\_00656" 36135 "s59E5H2" 0.05206408 "ATP-dependent Clp protease proteolytic subunit precursor"  
"OPBI09\_00656" 36135 "s63E6H2" 0.05771725 "ATP-dependent Clp protease proteolytic subunit precursor"  
"OPBI09\_00657" 36136 "s59E13H2" 0.005987092 "Trigger factor"  
"OPBI09\_00657" 36136 "s59E25H2" 0 "Trigger factor"  
"OPBI09\_00657" 36136 "s59E5H2" 0.06855214 "Trigger factor"  
"OPBI09\_00657" 36136 "s63E6H2" 0.09735841 "Trigger factor"  
"OPBI09\_00659" 36138 "s59E13H2" 0.00213015 "Murein DD-endopeptidase MepM"  
"OPBI09\_00659" 36138 "s59E25H2" 0 "Murein DD-endopeptidase MepM"  
"OPBI09\_00659" 36138 "s59E5H2" 0.01529982 "Murein DD-endopeptidase MepM"  
"OPBI09\_00659" 36138 "s63E6H2" 0.01381772 "Murein DD-endopeptidase MepM"  
"OPBI09\_00660" 36139 "s59E13H2" 0 "hypothetical protein"  
"OPBI09\_00660" 36139 "s59E25H2" 0 "hypothetical protein"  
"OPBI09\_00660" 36139 "s59E5H2" 0.02558682 "hypothetical protein"  
"OPBI09\_00660" 36139 "s63E6H2" 0.01573841 "hypothetical protein"  
"OPBI09\_00661" 36140 "s59E13H2" 0 "Ribosome-binding ATPase YchF"  
"OPBI09\_00661" 36140 "s59E25H2" 0 "Ribosome-binding ATPase YchF"  
"OPBI09\_00661" 36140 "s59E5H2" 0.05452485 "Ribosome-binding ATPase YchF"  
"OPBI09\_00661" 36140 "s63E6H2" 0.07604804 "Ribosome-binding ATPase YchF"  
"OPBI09\_00662" 36141 "s59E13H2" 0 "Chagasin family peptidase inhibitor I42"  
"OPBI09\_00662" 36141 "s59E25H2" 0 "Chagasin family peptidase inhibitor I42"  
"OPBI09\_00662" 36141 "s59E5H2" 0.007581026 "Chagasin family peptidase inhibitor I42"  
"OPBI09\_00662" 36141 "s63E6H2" 0.009505268 "Chagasin family peptidase inhibitor I42"  
"OPBI09\_00665" 36144 "s59E13H2" 0 "Glyoxylate reductase"  
"OPBI09\_00665" 36144 "s59E25H2" 0 "Glyoxylate reductase"  
"OPBI09\_00665" 36144 "s59E5H2" 0 "Glyoxylate reductase"  
"OPBI09\_00665" 36144 "s63E6H2" 0 "Glyoxylate reductase"  
"OPBI09\_00667" 36146 "s59E13H2" 0 "Glucose-6-phosphate isomerase"  
"OPBI09\_00667" 36146 "s59E25H2" 0 "Glucose-6-phosphate isomerase"  
"OPBI09\_00667" 36146 "s59E5H2" 0 "Glucose-6-phosphate isomerase"  
"OPBI09\_00667" 36146 "s63E6H2" 0 "Glucose-6-phosphate isomerase"  
"OPBI09\_00668" 36147 "s59E13H2" 0 "hypothetical protein"  
"OPBI09\_00668" 36147 "s59E25H2" 0 "hypothetical protein"  
"OPBI09\_00668" 36147 "s59E5H2" 0 "hypothetical protein"  
"OPBI09\_00668" 36147 "s63E6H2" 0 "hypothetical protein"  
"OPBI09\_00669" 36148 "s59E13H2" 0 "shikimate 5-dehydrogenase"  
"OPBI09\_00669" 36148 "s59E25H2" 0 "shikimate 5-dehydrogenase"  
"OPBI09\_00669" 36148 "s59E5H2" 0 "shikimate 5-dehydrogenase"  
"OPBI09\_00669" 36148 "s63E6H2" 0 "shikimate 5-dehydrogenase"  
"OPBI09\_00670" 36149 "s59E13H2" 0 "Xylulose kinase"  
"OPBI09\_00670" 36149 "s59E25H2" 0 "Xylulose kinase"  
"OPBI09\_00670" 36149 "s59E5H2" 0 "Xylulose kinase"  
"OPBI09\_00670" 36149 "s63E6H2" 0.01662946 "Xylulose kinase"  
"OPBI09\_00671" 36150 "s59E13H2" 0.002751751 "hypothetical protein"  
"OPBI09\_00671" 36150 "s59E25H2" 0 "hypothetical protein"

"OPBI09\_00671" 36150 "s59E5H2" 0.013837 "hypothetical protein"  
"OPBI09\_00671" 36150 "s63E6H2" 0.03158847 "hypothetical protein"  
"OPBM06\_00001" 30860 "s59E13H2" 0.02609598 "DNA polymerase III subunit tau"  
"OPBM06\_00001" 30860 "s59E25H2" 0 "DNA polymerase III subunit tau"  
"OPBM06\_00001" 30860 "s59E5H2" 0.01842772 "DNA polymerase III subunit tau"  
"OPBM06\_00001" 30860 "s63E6H2" 0.04095138 "DNA polymerase III subunit tau"  
"OPBM06\_00005" 30864 "s59E13H2" 0.01526464 "Fosmidomycin resistance protein"  
"OPBM06\_00005" 30864 "s59E25H2" 0 "Fosmidomycin resistance protein"  
"OPBM06\_00005" 30864 "s59E5H2" 0.005088454 "Fosmidomycin resistance protein"  
"OPBM06\_00005" 30864 "s63E6H2" 0.04952409 "Fosmidomycin resistance protein"  
"OPBM06\_00006" 30865 "s59E13H2" 0.001493899 "NADH-dependent butanol dehydrogenase A"  
"OPBM06\_00006" 30865 "s59E25H2" 0 "NADH-dependent butanol dehydrogenase A"  
"OPBM06\_00006" 30865 "s59E5H2" 0 "NADH-dependent butanol dehydrogenase A"  
"OPBM06\_00006" 30865 "s63E6H2" 0.006126294 "NADH-dependent butanol dehydrogenase A"  
"OPBM06\_00007" 30866 "s59E13H2" 0.002318531 "hypothetical protein"  
"OPBM06\_00007" 30866 "s59E25H2" 0 "hypothetical protein"  
"OPBM06\_00007" 30866 "s59E5H2" 0.005873816 "hypothetical protein"  
"OPBM06\_00007" 30866 "s63E6H2" 0.003207045 "hypothetical protein"  
"OPBM06\_00008" 30867 "s59E13H2" 0 "Rubrerythrin-1"  
"OPBM06\_00008" 30867 "s59E25H2" 0 "Rubrerythrin-1"  
"OPBM06\_00008" 30867 "s59E5H2" 0 "Rubrerythrin-1"  
"OPBM06\_00008" 30867 "s63E6H2" 0 "Rubrerythrin-1"  
"OPBM06\_00009" 30868 "s59E13H2" 0.008409684 "L-2-hydroxyglutarate oxidase LhgO"  
"OPBM06\_00009" 30868 "s59E25H2" 0 "L-2-hydroxyglutarate oxidase LhgO"  
"OPBM06\_00009" 30868 "s59E5H2" 0.05094353 "L-2-hydroxyglutarate oxidase LhgO"  
"OPBM06\_00009" 30868 "s63E6H2" 0.00650459 "L-2-hydroxyglutarate oxidase LhgO"  
"OPBM06\_00010" 30869 "s59E13H2" 0.006152441 "Double zinc ribbon"  
"OPBM06\_00010" 30869 "s59E25H2" 0 "Double zinc ribbon"  
"OPBM06\_00010" 30869 "s59E5H2" 0.1169788 "Double zinc ribbon"  
"OPBM06\_00010" 30869 "s63E6H2" 0.003893924 "Double zinc ribbon"  
"OPBM06\_00011" 30870 "s59E13H2" 0 "Multidrug export protein MepA"  
"OPBM06\_00011" 30870 "s59E25H2" 0 "Multidrug export protein MepA"  
"OPBM06\_00011" 30870 "s59E5H2" 0.001173217 "Multidrug export protein MepA"  
"OPBM06\_00011" 30870 "s63E6H2" 0 "Multidrug export protein MepA"  
"OPBM06\_00013" 30872 "s59E13H2" 0 "Putative redox-active protein (C\_GCAxxG\_C\_C)"  
"OPBM06\_00013" 30872 "s59E25H2" 0 "Putative redox-active protein (C\_GCAxxG\_C\_C)"  
"OPBM06\_00013" 30872 "s59E5H2" 0 "Putative redox-active protein (C\_GCAxxG\_C\_C)"  
"OPBM06\_00013" 30872 "s63E6H2" 0 "Putative redox-active protein (C\_GCAxxG\_C\_C)"  
"OPBM06\_00014" 30873 "s59E13H2" 0.00485138 "DNA alkylation repair enzyme"  
"OPBM06\_00014" 30873 "s59E25H2" 0 "DNA alkylation repair enzyme"  
"OPBM06\_00014" 30873 "s59E5H2" 0.099768 "DNA alkylation repair enzyme"  
"OPBM06\_00014" 30873 "s63E6H2" 0.03979636 "DNA alkylation repair enzyme"  
"OPBM06\_00015" 30874 "s59E13H2" 0 "hypothetical protein"  
"OPBM06\_00015" 30874 "s59E25H2" 0 "hypothetical protein"  
"OPBM06\_00015" 30874 "s59E5H2" 0 "hypothetical protein"  
"OPBM06\_00015" 30874 "s63E6H2" 0 "hypothetical protein"  
"OPBM06\_00017" 30876 "s59E13H2" 0 "Phosphoglycolate phosphatase"

"OPBM06\_00017" 30876 "s59E25H2" 0 "Phosphoglycolate phosphatase"  
"OPBM06\_00017" 30876 "s59E5H2" 0 "Phosphoglycolate phosphatase"  
"OPBM06\_00017" 30876 "s63E6H2" 0 "Phosphoglycolate phosphatase"  
"OPBM06\_00018" 30877 "s59E13H2" 0 "SPBc2 prophage-derived aminoglycoside N(3')-acetyltransferase-like protein YokD"  
"OPBM06\_00018" 30877 "s59E25H2" 0 "SPBc2 prophage-derived aminoglycoside N(3')-acetyltransferase-like protein YokD"  
"OPBM06\_00018" 30877 "s59E5H2" 0 "SPBc2 prophage-derived aminoglycoside N(3')-acetyltransferase-like protein YokD"  
"OPBM06\_00018" 30877 "s63E6H2" 0 "SPBc2 prophage-derived aminoglycoside N(3')-acetyltransferase-like protein YokD"  
"OPBM06\_00019" 30878 "s59E13H2" 0 "Demethylrebeccamycin-D-glucose O-methyltransferase"  
"OPBM06\_00019" 30878 "s59E25H2" 0 "Demethylrebeccamycin-D-glucose O-methyltransferase"  
"OPBM06\_00019" 30878 "s59E5H2" 0 "Demethylrebeccamycin-D-glucose O-methyltransferase"  
"OPBM06\_00019" 30878 "s63E6H2" 0 "Demethylrebeccamycin-D-glucose O-methyltransferase"  
"OPBM06\_00020" 30879 "s59E13H2" 0 "Cyclic di-GMP phosphodiesterase response regulator RpfG"  
"OPBM06\_00020" 30879 "s59E25H2" 0 "Cyclic di-GMP phosphodiesterase response regulator RpfG"  
"OPBM06\_00020" 30879 "s59E5H2" 0.4118292 "Cyclic di-GMP phosphodiesterase response regulator RpfG"  
"OPBM06\_00020" 30879 "s63E6H2" 0 "Cyclic di-GMP phosphodiesterase response regulator RpfG"  
"OPBM06\_00021" 30880 "s59E13H2" 0.1233965 "Cyclic di-GMP phosphodiesterase response regulator RpfG"  
"OPBM06\_00021" 30880 "s59E25H2" 0 "Cyclic di-GMP phosphodiesterase response regulator RpfG"  
"OPBM06\_00021" 30880 "s59E5H2" 0.2671891 "Cyclic di-GMP phosphodiesterase response regulator RpfG"  
"OPBM06\_00021" 30880 "s63E6H2" 2.860605 "Cyclic di-GMP phosphodiesterase response regulator RpfG"  
"OPBM06\_00023" 30882 "s59E13H2" 0.0172826 "Serine--tRNA ligase"  
"OPBM06\_00023" 30882 "s59E25H2" 0 "Serine--tRNA ligase"  
"OPBM06\_00023" 30882 "s59E5H2" 0.01734338 "Serine--tRNA ligase"  
"OPBM06\_00023" 30882 "s63E6H2" 0.06503648 "Serine--tRNA ligase"  
"OPBM06\_00024" 30883 "s59E13H2" 0.007295644 "Prephenate dehydratase"  
"OPBM06\_00024" 30883 "s59E25H2" 0 "Prephenate dehydratase"  
"OPBM06\_00024" 30883 "s59E5H2" 0.02356105 "Prephenate dehydratase"  
"OPBM06\_00024" 30883 "s63E6H2" 0.03693506 "Prephenate dehydratase"  
"OPBM06\_00026" 30885 "s59E13H2" 0.008979707 "hypothetical protein"  
"OPBM06\_00026" 30885 "s59E25H2" 0 "hypothetical protein"  
"OPBM06\_00026" 30885 "s59E5H2" 0.009606953 "hypothetical protein"  
"OPBM06\_00026" 30885 "s63E6H2" 0.02496047 "hypothetical protein"  
"OPBM06\_00027" 30886 "s59E13H2" 0 "Tyrosine recombinase XerC"  
"OPBM06\_00027" 30886 "s59E25H2" 0 "Tyrosine recombinase XerC"  
"OPBM06\_00027" 30886 "s59E5H2" 0.01636837 "Tyrosine recombinase XerC"  
"OPBM06\_00027" 30886 "s63E6H2" 0.1655113 "Tyrosine recombinase XerC"  
"OPBM06\_00028" 30887 "s59E13H2" 0.004583454 "hypothetical protein"  
"OPBM06\_00028" 30887 "s59E25H2" 0 "hypothetical protein"  
"OPBM06\_00028" 30887 "s59E5H2" 0 "hypothetical protein"  
"OPBM06\_00028" 30887 "s63E6H2" 0.001710166 "hypothetical protein"  
"OPBM06\_00029" 30888 "s59E13H2" 0 "Glyoxalase-like domain protein"  
"OPBM06\_00029" 30888 "s59E25H2" 0 "Glyoxalase-like domain protein"  
"OPBM06\_00029" 30888 "s59E5H2" 0.004136787 "Glyoxalase-like domain protein"  
"OPBM06\_00029" 30888 "s63E6H2" 0 "Glyoxalase-like domain protein"  
"OPBM06\_00030" 30889 "s59E13H2" 0 "Nucleotidyltransferase domain protein"  
"OPBM06\_00030" 30889 "s59E25H2" 0 "Nucleotidyltransferase domain protein"  
"OPBM06\_00030" 30889 "s59E5H2" 0.1548094 "Nucleotidyltransferase domain protein"  
"OPBM06\_00030" 30889 "s63E6H2" 0 "Nucleotidyltransferase domain protein"

"OPBM06\_00031" 30890 "s59E13H2" 0 "HEPN domain protein"  
"OPBM06\_00031" 30890 "s59E25H2" 0 "HEPN domain protein"  
"OPBM06\_00031" 30890 "s59E5H2" 0.002239779 "HEPN domain protein"  
"OPBM06\_00031" 30890 "s63E6H2" 0 "HEPN domain protein"  
"OPBM06\_00032" 30891 "s59E13H2" 0 "hypothetical protein"  
"OPBM06\_00032" 30891 "s59E25H2" 0 "hypothetical protein"  
"OPBM06\_00032" 30891 "s59E5H2" 0.0143344 "hypothetical protein"  
"OPBM06\_00032" 30891 "s63E6H2" 0.01614565 "hypothetical protein"  
"OPBM06\_00036" 30895 "s59E13H2" 0 "Sporulation initiation inhibitor protein Soj"  
"OPBM06\_00036" 30895 "s59E25H2" 0 "Sporulation initiation inhibitor protein Soj"  
"OPBM06\_00036" 30895 "s59E5H2" 0 "Sporulation initiation inhibitor protein Soj"  
"OPBM06\_00036" 30895 "s63E6H2" 0.483171 "Sporulation initiation inhibitor protein Soj"  
"OPBM06\_00037" 30896 "s59E13H2" 0 "Chromosome-partitioning protein Spo0J"  
"OPBM06\_00037" 30896 "s59E25H2" 0 "Chromosome-partitioning protein Spo0J"  
"OPBM06\_00037" 30896 "s59E5H2" 0 "Chromosome-partitioning protein Spo0J"  
"OPBM06\_00037" 30896 "s63E6H2" 0 "Chromosome-partitioning protein Spo0J"  
"OPBM06\_00038" 30897 "s59E13H2" 0 "hypothetical protein"  
"OPBM06\_00038" 30897 "s59E25H2" 0 "hypothetical protein"  
"OPBM06\_00038" 30897 "s59E5H2" 0 "hypothetical protein"  
"OPBM06\_00038" 30897 "s63E6H2" 0 "hypothetical protein"  
"OPBM06\_00040" 30899 "s59E13H2" 0.009254883 "tRNA-dihydrouridine synthase C"  
"OPBM06\_00040" 30899 "s59E25H2" 0 "tRNA-dihydrouridine synthase C"  
"OPBM06\_00040" 30899 "s59E5H2" 0 "tRNA-dihydrouridine synthase C"  
"OPBM06\_00040" 30899 "s63E6H2" 0.5371721 "tRNA-dihydrouridine synthase C"  
"OPBM06\_00042" 30901 "s59E13H2" 0.00194891 "Gas vesicle structural protein"  
"OPBM06\_00042" 30901 "s59E25H2" 0 "Gas vesicle structural protein"  
"OPBM06\_00042" 30901 "s59E5H2" 0 "Gas vesicle structural protein"  
"OPBM06\_00042" 30901 "s63E6H2" 0.01650512 "Gas vesicle structural protein"  
"OPBM06\_00043" 30902 "s59E13H2" 0 "hypothetical protein"  
"OPBM06\_00043" 30902 "s59E25H2" 0 "hypothetical protein"  
"OPBM06\_00043" 30902 "s59E5H2" 0.02235254 "hypothetical protein"  
"OPBM06\_00043" 30902 "s63E6H2" 0.002260893 "hypothetical protein"  
"OPBM06\_00044" 30903 "s59E13H2" 0 "hypothetical protein"  
"OPBM06\_00044" 30903 "s59E25H2" 0 "hypothetical protein"  
"OPBM06\_00044" 30903 "s59E5H2" 0 "hypothetical protein"  
"OPBM06\_00044" 30903 "s63E6H2" 0 "hypothetical protein"  
"OPBM06\_00045" 30904 "s59E13H2" 0 "chaperone protein DnaJ"  
"OPBM06\_00045" 30904 "s59E25H2" 0 "chaperone protein DnaJ"  
"OPBM06\_00045" 30904 "s59E5H2" 0.02060241 "chaperone protein DnaJ"  
"OPBM06\_00045" 30904 "s63E6H2" 0.003383414 "chaperone protein DnaJ"  
"OPBM06\_00046" 30905 "s59E13H2" 0 "Denitrification regulatory protein NirQ"  
"OPBM06\_00046" 30905 "s59E25H2" 0 "Denitrification regulatory protein NirQ"  
"OPBM06\_00046" 30905 "s59E5H2" 0 "Denitrification regulatory protein NirQ"  
"OPBM06\_00046" 30905 "s63E6H2" 0 "Denitrification regulatory protein NirQ"  
"OPBM06\_00047" 30906 "s59E13H2" 0 "hypothetical protein"  
"OPBM06\_00047" 30906 "s59E25H2" 0 "hypothetical protein"  
"OPBM06\_00047" 30906 "s59E5H2" 0 "hypothetical protein"

"OPBM06\_00047" 30906 "s63E6H2" 0 "hypothetical protein"  
"OPBM06\_00048" 30907 "s59E13H2" 0 "hypothetical protein"  
"OPBM06\_00048" 30907 "s59E25H2" 0 "hypothetical protein"  
"OPBM06\_00048" 30907 "s59E5H2" 0 "hypothetical protein"  
"OPBM06\_00048" 30907 "s63E6H2" 0 "hypothetical protein"  
"OPBM06\_00049" 30908 "s59E13H2" 0 "chaperone protein DnaJ"  
"OPBM06\_00049" 30908 "s59E25H2" 0 "chaperone protein DnaJ"  
"OPBM06\_00049" 30908 "s59E5H2" 0 "chaperone protein DnaJ"  
"OPBM06\_00049" 30908 "s63E6H2" 0 "chaperone protein DnaJ"  
"OPBM06\_00050" 30909 "s59E13H2" 0 "Small heat shock protein HSP16.5"  
"OPBM06\_00050" 30909 "s59E25H2" 0 "Small heat shock protein HSP16.5"  
"OPBM06\_00050" 30909 "s59E5H2" 0.01500051 "Small heat shock protein HSP16.5"  
"OPBM06\_00050" 30909 "s63E6H2" 0 "Small heat shock protein HSP16.5"  
"OPBM06\_00051" 30910 "s59E13H2" 0 "hypothetical protein"  
"OPBM06\_00051" 30910 "s59E25H2" 0 "hypothetical protein"  
"OPBM06\_00051" 30910 "s59E5H2" 0 "hypothetical protein"  
"OPBM06\_00051" 30910 "s63E6H2" 0 "hypothetical protein"  
"OPBM06\_00052" 30911 "s59E13H2" 0 "hypothetical protein"  
"OPBM06\_00052" 30911 "s59E25H2" 0 "hypothetical protein"  
"OPBM06\_00052" 30911 "s59E5H2" 0 "hypothetical protein"  
"OPBM06\_00052" 30911 "s63E6H2" 0 "hypothetical protein"  
"OPBM06\_00055" 30914 "s59E13H2" 0 "VCP-like ATPase"  
"OPBM06\_00055" 30914 "s59E25H2" 0 "VCP-like ATPase"  
"OPBM06\_00055" 30914 "s59E5H2" 0.04710297 "VCP-like ATPase"  
"OPBM06\_00055" 30914 "s63E6H2" 0.005095504 "VCP-like ATPase"  
"OPBM06\_00056" 30915 "s59E13H2" 0 "chaperone protein DnaJ"  
"OPBM06\_00056" 30915 "s59E25H2" 0 "chaperone protein DnaJ"  
"OPBM06\_00056" 30915 "s59E5H2" 0.03029278 "chaperone protein DnaJ"  
"OPBM06\_00056" 30915 "s63E6H2" 0.003068594 "chaperone protein DnaJ"  
"OPBM06\_00057" 30916 "s59E13H2" 0 "Gas vesicle synthesis protein GvpL/GvpF"  
"OPBM06\_00057" 30916 "s59E25H2" 0 "Gas vesicle synthesis protein GvpL/GvpF"  
"OPBM06\_00057" 30916 "s59E5H2" 0.09939411 "Gas vesicle synthesis protein GvpL/GvpF"  
"OPBM06\_00057" 30916 "s63E6H2" 0.02323692 "Gas vesicle synthesis protein GvpL/GvpF"  
"OPBM06\_00058" 30917 "s59E13H2" 0 "Gas vesicle synthesis protein GvpL/GvpF"  
"OPBM06\_00058" 30917 "s59E25H2" 0 "Gas vesicle synthesis protein GvpL/GvpF"  
"OPBM06\_00058" 30917 "s59E5H2" 0.111752 "Gas vesicle synthesis protein GvpL/GvpF"  
"OPBM06\_00058" 30917 "s63E6H2" 0.01978372 "Gas vesicle synthesis protein GvpL/GvpF"  
"OPBM06\_00059" 30918 "s59E13H2" 0 "Gas vesicle protein G"  
"OPBM06\_00059" 30918 "s59E25H2" 0 "Gas vesicle protein G"  
"OPBM06\_00059" 30918 "s59E5H2" 0.2599086 "Gas vesicle protein G"  
"OPBM06\_00059" 30918 "s63E6H2" 0.03647574 "Gas vesicle protein G"  
"OPBM06\_00060" 30919 "s59E13H2" 0 "Putative arsenical pump-driving ATPase"  
"OPBM06\_00060" 30919 "s59E25H2" 0 "Putative arsenical pump-driving ATPase"  
"OPBM06\_00060" 30919 "s59E5H2" 0.3867388 "Putative arsenical pump-driving ATPase"  
"OPBM06\_00060" 30919 "s63E6H2" 0.07640436 "Putative arsenical pump-driving ATPase"  
"OPBM06\_00061" 30920 "s59E13H2" 0 "Gas vesicle synthesis protein GvpO"  
"OPBM06\_00061" 30920 "s59E25H2" 0 "Gas vesicle synthesis protein GvpO"

"OPBM06\_00061" 30920 "s59E5H2" 0 "Gas vesicle synthesis protein GvpO"  
"OPBM06\_00061" 30920 "s63E6H2" 0 "Gas vesicle synthesis protein GvpO"  
"OPBM06\_00062" 30921 "s59E13H2" 0 "Gas vesicle synthesis protein GvpL/GvpF"  
"OPBM06\_00062" 30921 "s59E25H2" 0 "Gas vesicle synthesis protein GvpL/GvpF"  
"OPBM06\_00062" 30921 "s59E5H2" 0 "Gas vesicle synthesis protein GvpL/GvpF"  
"OPBM06\_00062" 30921 "s63E6H2" 0 "Gas vesicle synthesis protein GvpL/GvpF"  
"OPBM06\_00063" 30922 "s59E13H2" 0 "Gas vesicle protein K"  
"OPBM06\_00063" 30922 "s59E25H2" 0 "Gas vesicle protein K"  
"OPBM06\_00063" 30922 "s59E5H2" 0.01511881 "Gas vesicle protein K"  
"OPBM06\_00063" 30922 "s63E6H2" 0.005680834 "Gas vesicle protein K"  
"OPBM06\_00064" 30923 "s59E13H2" 0 "hypothetical protein"  
"OPBM06\_00064" 30923 "s59E25H2" 0 "hypothetical protein"  
"OPBM06\_00064" 30923 "s59E5H2" 0.009456844 "hypothetical protein"  
"OPBM06\_00064" 30923 "s63E6H2" 0 "hypothetical protein"  
"OPBM06\_00065" 30924 "s59E13H2" 0 "Gas vesicle structural protein"  
"OPBM06\_00065" 30924 "s59E25H2" 0 "Gas vesicle structural protein"  
"OPBM06\_00065" 30924 "s59E5H2" 0.004720658 "Gas vesicle structural protein"  
"OPBM06\_00065" 30924 "s63E6H2" 0.0001397538 "Gas vesicle structural protein"  
"OPBM06\_00066" 30925 "s59E13H2" 0 "Gas vesicle synthesis protein GvpO"  
"OPBM06\_00066" 30925 "s59E25H2" 0 "Gas vesicle synthesis protein GvpO"  
"OPBM06\_00066" 30925 "s59E5H2" 0 "Gas vesicle synthesis protein GvpO"  
"OPBM06\_00066" 30925 "s63E6H2" 0.004821505 "Gas vesicle synthesis protein GvpO"  
"OPBM06\_00068" 30927 "s59E13H2" 0 "hypothetical protein"  
"OPBM06\_00068" 30927 "s59E25H2" 0 "hypothetical protein"  
"OPBM06\_00068" 30927 "s59E5H2" 0.0008356563 "hypothetical protein"  
"OPBM06\_00068" 30927 "s63E6H2" 0.004951174 "hypothetical protein"  
"OPBM06\_00069" 30928 "s59E13H2" 0 "Glucokinase"  
"OPBM06\_00069" 30928 "s59E25H2" 0 "Glucokinase"  
"OPBM06\_00069" 30928 "s59E5H2" 0.003969244 "Glucokinase"  
"OPBM06\_00069" 30928 "s63E6H2" 0 "Glucokinase"  
"OPBM06\_00070" 30929 "s59E13H2" 0 "Sigma-54, DNA binding domain"  
"OPBM06\_00070" 30929 "s59E25H2" 0 "Sigma-54, DNA binding domain"  
"OPBM06\_00070" 30929 "s59E5H2" 0 "Sigma-54, DNA binding domain"  
"OPBM06\_00070" 30929 "s63E6H2" 0.001189989 "Sigma-54, DNA binding domain"  
"OPBM06\_00072" 30931 "s59E13H2" 0 "hypothetical protein"  
"OPBM06\_00072" 30931 "s59E25H2" 0 "hypothetical protein"  
"OPBM06\_00072" 30931 "s59E5H2" 0 "hypothetical protein"  
"OPBM06\_00072" 30931 "s63E6H2" 0 "hypothetical protein"  
"OPBM06\_00073" 30932 "s59E13H2" 0 "dTDP-glucose 4,6-dehydratase 2"  
"OPBM06\_00073" 30932 "s59E25H2" 0 "dTDP-glucose 4,6-dehydratase 2"  
"OPBM06\_00073" 30932 "s59E5H2" 0 "dTDP-glucose 4,6-dehydratase 2"  
"OPBM06\_00073" 30932 "s63E6H2" 0 "dTDP-glucose 4,6-dehydratase 2"  
"OPBM06\_00074" 30933 "s59E13H2" 10.78819 "Peptide chain release factor 1"  
"OPBM06\_00074" 30933 "s59E25H2" 0 "Peptide chain release factor 1"  
"OPBM06\_00074" 30933 "s59E5H2" 0.02468879 "Peptide chain release factor 1"  
"OPBM06\_00074" 30933 "s63E6H2" 0.2171905 "Peptide chain release factor 1"  
"OPBM06\_00075" 30934 "s59E13H2" 4.096735 "2-aminoadipate transaminase"

"OPBM06\_00075" 30934 "s59E25H2" 0 "2-aminoadipate transaminase"  
"OPBM06\_00075" 30934 "s59E5H2" 0.05274287 "2-aminoadipate transaminase"  
"OPBM06\_00075" 30934 "s63E6H2" 0.1461558 "2-aminoadipate transaminase"  
"OPBM06\_00076" 30935 "s59E13H2" 5.54786 "D-alanine--D-alanine ligase"  
"OPBM06\_00076" 30935 "s59E25H2" 0 "D-alanine--D-alanine ligase"  
"OPBM06\_00076" 30935 "s59E5H2" 0.2737924 "D-alanine--D-alanine ligase"  
"OPBM06\_00076" 30935 "s63E6H2" 0.199855 "D-alanine--D-alanine ligase"  
"OPBM06\_00078" 30937 "s59E13H2" 0.04042611 "PIN domain protein"  
"OPBM06\_00078" 30937 "s59E25H2" 0 "PIN domain protein"  
"OPBM06\_00078" 30937 "s59E5H2" 0.2249733 "PIN domain protein"  
"OPBM06\_00078" 30937 "s63E6H2" 0.03930969 "PIN domain protein"  
"OPBM06\_00080" 30939 "s59E13H2" 0.185457 "Phosphopantetheine adenylyltransferase"  
"OPBM06\_00080" 30939 "s59E25H2" 0 "Phosphopantetheine adenylyltransferase"  
"OPBM06\_00080" 30939 "s59E5H2" 0.04845705 "Phosphopantetheine adenylyltransferase"  
"OPBM06\_00080" 30939 "s63E6H2" 0.06693899 "Phosphopantetheine adenylyltransferase"  
"OPBM06\_00081" 30940 "s59E13H2" 0.127474 "hypothetical protein"  
"OPBM06\_00081" 30940 "s59E25H2" 0 "hypothetical protein"  
"OPBM06\_00081" 30940 "s59E5H2" 0.03294982 "hypothetical protein"  
"OPBM06\_00081" 30940 "s63E6H2" 0.02397503 "hypothetical protein"  
"OPBM06\_00082" 30941 "s59E13H2" 0.0463397 "50S ribosomal protein L32"  
"OPBM06\_00082" 30941 "s59E25H2" 0 "50S ribosomal protein L32"  
"OPBM06\_00082" 30941 "s59E5H2" 0 "50S ribosomal protein L32"  
"OPBM06\_00082" 30941 "s63E6H2" 0.008402929 "50S ribosomal protein L32"  
"OPBM06\_00083" 30942 "s59E13H2" 0.1592146 "succinyl-CoA synthetase subunit beta"  
"OPBM06\_00083" 30942 "s59E25H2" 0 "succinyl-CoA synthetase subunit beta"  
"OPBM06\_00083" 30942 "s59E5H2" 0.03455111 "succinyl-CoA synthetase subunit beta"  
"OPBM06\_00083" 30942 "s63E6H2" 0.04194797 "succinyl-CoA synthetase subunit beta"  
"OPBM06\_00084" 30943 "s59E13H2" 0.1427627 "Phosphate acetyltransferase"  
"OPBM06\_00084" 30943 "s59E25H2" 0 "Phosphate acetyltransferase"  
"OPBM06\_00084" 30943 "s59E5H2" 0.01178205 "Phosphate acetyltransferase"  
"OPBM06\_00084" 30943 "s63E6H2" 0.005400007 "Phosphate acetyltransferase"  
"OPBM06\_00085" 30944 "s59E13H2" 0.1395278 "Phosphate acyltransferase"  
"OPBM06\_00085" 30944 "s59E25H2" 0 "Phosphate acyltransferase"  
"OPBM06\_00085" 30944 "s59E5H2" 0.008868771 "Phosphate acyltransferase"  
"OPBM06\_00085" 30944 "s63E6H2" 0.01382144 "Phosphate acyltransferase"  
"OPBM06\_00086" 30945 "s59E13H2" 0.03002351 "Acyl carrier protein"  
"OPBM06\_00086" 30945 "s59E25H2" 0 "Acyl carrier protein"  
"OPBM06\_00086" 30945 "s59E5H2" 0.02701955 "Acyl carrier protein"  
"OPBM06\_00086" 30945 "s63E6H2" 0 "Acyl carrier protein"  
"OPBM06\_00087" 30946 "s59E13H2" 0.002102854 "Ribonuclease 3"  
"OPBM06\_00087" 30946 "s59E25H2" 0 "Ribonuclease 3"  
"OPBM06\_00087" 30946 "s59E5H2" 0.01815965 "Ribonuclease 3"  
"OPBM06\_00087" 30946 "s63E6H2" 0 "Ribonuclease 3"  
"OPBM06\_00088" 30947 "s59E13H2" 0.05871287 "site-specific tyrosine recombinase XerC"  
"OPBM06\_00088" 30947 "s59E25H2" 0 "site-specific tyrosine recombinase XerC"  
"OPBM06\_00088" 30947 "s59E5H2" 0.02539432 "site-specific tyrosine recombinase XerC"  
"OPBM06\_00088" 30947 "s63E6H2" 0.0007008705 "site-specific tyrosine recombinase XerC"

"OPBM06\_00090" 30949 "s59E13H2" 0.09893625 "hypothetical protein"  
"OPBM06\_00090" 30949 "s59E25H2" 0 "hypothetical protein"  
"OPBM06\_00090" 30949 "s59E5H2" 0.008363195 "hypothetical protein"  
"OPBM06\_00090" 30949 "s63E6H2" 0.09285659 "hypothetical protein"  
"OPBM06\_00091" 30950 "s59E13H2" 0.1306481 "Competence protein ComM"  
"OPBM06\_00091" 30950 "s59E25H2" 0 "Competence protein ComM"  
"OPBM06\_00091" 30950 "s59E5H2" 0.03004155 "Competence protein ComM"  
"OPBM06\_00091" 30950 "s63E6H2" 0.07647707 "Competence protein ComM"  
"OPBM06\_00092" 30951 "s59E13H2" 0.03780569 "hypothetical protein"  
"OPBM06\_00092" 30951 "s59E25H2" 0 "hypothetical protein"  
"OPBM06\_00092" 30951 "s59E5H2" 0 "hypothetical protein"  
"OPBM06\_00092" 30951 "s63E6H2" 0.04446225 "hypothetical protein"  
"OPBM06\_00093" 30952 "s59E13H2" 0.03320627 "Ribonuclease HII"  
"OPBM06\_00093" 30952 "s59E25H2" 0 "Ribonuclease HII"  
"OPBM06\_00093" 30952 "s59E5H2" 0.01696516 "Ribonuclease HII"  
"OPBM06\_00093" 30952 "s63E6H2" 0.04980341 "Ribonuclease HII"  
"OPBM06\_00094" 30953 "s59E13H2" 0.04260776 "Signal peptidase I"  
"OPBM06\_00094" 30953 "s59E25H2" 0 "Signal peptidase I"  
"OPBM06\_00094" 30953 "s59E5H2" 0.0182788 "Signal peptidase I"  
"OPBM06\_00094" 30953 "s63E6H2" 0.03565631 "Signal peptidase I"  
"OPBM06\_00095" 30954 "s59E13H2" 0.004413344 "50S ribosomal protein L19"  
"OPBM06\_00095" 30954 "s59E25H2" 0 "50S ribosomal protein L19"  
"OPBM06\_00095" 30954 "s59E5H2" 0.01592732 "50S ribosomal protein L19"  
"OPBM06\_00095" 30954 "s63E6H2" 0.02652135 "50S ribosomal protein L19"  
"OPBM06\_00096" 30955 "s59E13H2" 0.009769536 "tRNA (guanine-N(1)-)-methyltransferase"  
"OPBM06\_00096" 30955 "s59E25H2" 0 "tRNA (guanine-N(1)-)-methyltransferase"  
"OPBM06\_00096" 30955 "s59E5H2" 0.0163272 "tRNA (guanine-N(1)-)-methyltransferase"  
"OPBM06\_00096" 30955 "s63E6H2" 0.04612293 "tRNA (guanine-N(1)-)-methyltransferase"  
"OPBM06\_00097" 30956 "s59E13H2" 0.002982759 "Ribosome maturation factor RimM"  
"OPBM06\_00097" 30956 "s59E25H2" 0 "Ribosome maturation factor RimM"  
"OPBM06\_00097" 30956 "s59E5H2" 0.03598713 "Ribosome maturation factor RimM"  
"OPBM06\_00097" 30956 "s63E6H2" 0.01190664 "Ribosome maturation factor RimM"  
"OPBM06\_00098" 30957 "s59E13H2" 0.006955593 "hypothetical protein"  
"OPBM06\_00098" 30957 "s59E25H2" 0 "hypothetical protein"  
"OPBM06\_00098" 30957 "s59E5H2" 0.02459472 "hypothetical protein"  
"OPBM06\_00098" 30957 "s63E6H2" 0.02475882 "hypothetical protein"  
"OPBM06\_00099" 30958 "s59E13H2" 0.003760544 "30S ribosomal protein S16"  
"OPBM06\_00099" 30958 "s59E25H2" 0 "30S ribosomal protein S16"  
"OPBM06\_00099" 30958 "s59E5H2" 0.05502763 "30S ribosomal protein S16"  
"OPBM06\_00099" 30958 "s63E6H2" 0.03509183 "30S ribosomal protein S16"  
"OPBM06\_00100" 30959 "s59E13H2" 0.01390072 "Signal recognition particle protein"  
"OPBM06\_00100" 30959 "s59E25H2" 0 "Signal recognition particle protein"  
"OPBM06\_00100" 30959 "s59E5H2" 0.02475064 "Signal recognition particle protein"  
"OPBM06\_00100" 30959 "s63E6H2" 0.03308616 "Signal recognition particle protein"  
"OPBM06\_00101" 30960 "s59E13H2" 0 "Signal recognition particle receptor FtsY"  
"OPBM06\_00101" 30960 "s59E25H2" 0 "Signal recognition particle receptor FtsY"  
"OPBM06\_00101" 30960 "s59E5H2" 0.02720526 "Signal recognition particle receptor FtsY"



"OPBM06\_00101" 30960 "s63E6H2" 0.0138229 "Signal recognition particle receptor FtsY"  
"OPBM06\_00102" 30961 "s59E13H2" 0.01131971 "Chromosome partition protein Smc"  
"OPBM06\_00102" 30961 "s59E25H2" 0 "Chromosome partition protein Smc"  
"OPBM06\_00102" 30961 "s59E5H2" 0.02623658 "Chromosome partition protein Smc"  
"OPBM06\_00102" 30961 "s63E6H2" 0.02659525 "Chromosome partition protein Smc"  
"OPBM06\_00103" 30962 "s59E13H2" 0.009326421 "Ribonuclease 3"  
"OPBM06\_00103" 30962 "s59E25H2" 0 "Ribonuclease 3"  
"OPBM06\_00103" 30962 "s59E5H2" 0.03148895 "Ribonuclease 3"  
"OPBM06\_00103" 30962 "s63E6H2" 0 "Ribonuclease 3"  
"OPBM06\_00105" 30964 "s59E13H2" 0 "hypothetical protein"  
"OPBM06\_00105" 30964 "s59E25H2" 0 "hypothetical protein"  
"OPBM06\_00105" 30964 "s59E5H2" 0 "hypothetical protein"  
"OPBM06\_00105" 30964 "s63E6H2" 0.0001688692 "hypothetical protein"  
"OPBM06\_00106" 30965 "s59E13H2" 0 "hypothetical protein"  
"OPBM06\_00106" 30965 "s59E25H2" 0 "hypothetical protein"  
"OPBM06\_00106" 30965 "s59E5H2" 0 "hypothetical protein"  
"OPBM06\_00106" 30965 "s63E6H2" 0.006563142 "hypothetical protein"  
"OPBM06\_00107" 30966 "s59E13H2" 0 "hypothetical protein"  
"OPBM06\_00107" 30966 "s59E25H2" 0 "hypothetical protein"  
"OPBM06\_00107" 30966 "s59E5H2" 0.1835877 "hypothetical protein"  
"OPBM06\_00107" 30966 "s63E6H2" 0.005262181 "hypothetical protein"  
"OPBM06\_00108" 30967 "s59E13H2" 0 "hypothetical protein"  
"OPBM06\_00108" 30967 "s59E25H2" 0 "hypothetical protein"  
"OPBM06\_00108" 30967 "s59E5H2" 0 "hypothetical protein"  
"OPBM06\_00108" 30967 "s63E6H2" 0 "hypothetical protein"  
"OPBM06\_00110" 30969 "s59E13H2" 0 "hypothetical protein"  
"OPBM06\_00110" 30969 "s59E25H2" 0 "hypothetical protein"  
"OPBM06\_00110" 30969 "s59E5H2" 0 "hypothetical protein"  
"OPBM06\_00110" 30969 "s63E6H2" 0.0001661008 "hypothetical protein"  
"OPBM06\_00111" 30970 "s59E13H2" 0.1118943 "Bacterial mobilisation protein (MobC)"  
"OPBM06\_00111" 30970 "s59E25H2" 0 "Bacterial mobilisation protein (MobC)"  
"OPBM06\_00111" 30970 "s59E5H2" 0 "Bacterial mobilisation protein (MobC)"  
"OPBM06\_00111" 30970 "s63E6H2" 0 "Bacterial mobilisation protein (MobC)"  
"OPBM06\_00112" 30971 "s59E13H2" 3.074697 "Tyrosine recombinase XerD"  
"OPBM06\_00112" 30971 "s59E25H2" 0 "Tyrosine recombinase XerD"  
"OPBM06\_00112" 30971 "s59E5H2" 0.2944183 "Tyrosine recombinase XerD"  
"OPBM06\_00112" 30971 "s63E6H2" 0.001475383 "Tyrosine recombinase XerD"  
"OPBM06\_00113" 30972 "s59E13H2" 0 "Trehalose-6-phosphate phosphatase"  
"OPBM06\_00113" 30972 "s59E25H2" 0 "Trehalose-6-phosphate phosphatase"  
"OPBM06\_00113" 30972 "s59E5H2" 0 "Trehalose-6-phosphate phosphatase"  
"OPBM06\_00113" 30972 "s63E6H2" 0 "Trehalose-6-phosphate phosphatase"  
"OPBM06\_00114" 30973 "s59E13H2" 0 "Trehalose-phosphate synthase"  
"OPBM06\_00114" 30973 "s59E25H2" 0 "Trehalose-phosphate synthase"  
"OPBM06\_00114" 30973 "s59E5H2" 0 "Trehalose-phosphate synthase"  
"OPBM06\_00114" 30973 "s63E6H2" 0 "Trehalose-phosphate synthase"  
"OPBM06\_00115" 30974 "s59E13H2" 0 "Glycogen synthase"  
"OPBM06\_00115" 30974 "s59E25H2" 0 "Glycogen synthase"

"OPBM06\_00115" 30974 "s59E5H2" 0 "Glycogen synthase"  
"OPBM06\_00115" 30974 "s63E6H2" 0 "Glycogen synthase"  
"OPBM06\_00116" 30975 "s59E13H2" 0 "SCP-2 sterol transfer family protein"  
"OPBM06\_00116" 30975 "s59E25H2" 0 "SCP-2 sterol transfer family protein"  
"OPBM06\_00116" 30975 "s59E5H2" 0 "SCP-2 sterol transfer family protein"  
"OPBM06\_00116" 30975 "s63E6H2" 0 "SCP-2 sterol transfer family protein"  
"OPBM06\_00117" 30976 "s59E13H2" 0 "2-hydroxy-6-oxo-6-phenylhexa-2,4-dienoate hydrolase"  
"OPBM06\_00117" 30976 "s59E25H2" 0 "2-hydroxy-6-oxo-6-phenylhexa-2,4-dienoate hydrolase"  
"OPBM06\_00117" 30976 "s59E5H2" 0 "2-hydroxy-6-oxo-6-phenylhexa-2,4-dienoate hydrolase"  
"OPBM06\_00117" 30976 "s63E6H2" 0 "2-hydroxy-6-oxo-6-phenylhexa-2,4-dienoate hydrolase"  
"OPBM06\_00118" 30977 "s59E13H2" 0 "Penicillin-binding protein 2D"  
"OPBM06\_00118" 30977 "s59E25H2" 0 "Penicillin-binding protein 2D"  
"OPBM06\_00118" 30977 "s59E5H2" 0 "Penicillin-binding protein 2D"  
"OPBM06\_00118" 30977 "s63E6H2" 0.05336967 "Penicillin-binding protein 2D"  
"OPBM06\_00121" 30980 "s59E13H2" 0.01004223 "Protoporphyrinogen IX dehydrogenase [menaquinone]"  
"OPBM06\_00121" 30980 "s59E25H2" 0 "Protoporphyrinogen IX dehydrogenase [menaquinone]"  
"OPBM06\_00121" 30980 "s59E5H2" 0.1662283 "Protoporphyrinogen IX dehydrogenase [menaquinone]"  
"OPBM06\_00121" 30980 "s63E6H2" 0 "Protoporphyrinogen IX dehydrogenase [menaquinone]"  
"OPBM06\_00122" 30981 "s59E13H2" 0 "hypothetical protein"  
"OPBM06\_00122" 30981 "s59E25H2" 0 "hypothetical protein"  
"OPBM06\_00122" 30981 "s59E5H2" 0 "hypothetical protein"  
"OPBM06\_00122" 30981 "s63E6H2" 0 "hypothetical protein"  
"OPBM06\_00124" 30983 "s59E13H2" 0 "hypothetical protein"  
"OPBM06\_00124" 30983 "s59E25H2" 0 "hypothetical protein"  
"OPBM06\_00124" 30983 "s59E5H2" 0 "hypothetical protein"  
"OPBM06\_00124" 30983 "s63E6H2" 0 "hypothetical protein"  
"OPBM06\_00125" 30984 "s59E13H2" 0 "hypothetical protein"  
"OPBM06\_00125" 30984 "s59E25H2" 0 "hypothetical protein"  
"OPBM06\_00125" 30984 "s59E5H2" 0 "hypothetical protein"  
"OPBM06\_00125" 30984 "s63E6H2" 0 "hypothetical protein"  
"OPBM06\_00127" 30986 "s59E13H2" 0 "hypothetical protein"  
"OPBM06\_00127" 30986 "s59E25H2" 0 "hypothetical protein"  
"OPBM06\_00127" 30986 "s59E5H2" 0.07525148 "hypothetical protein"  
"OPBM06\_00127" 30986 "s63E6H2" 0.003977247 "hypothetical protein"  
"OPBM06\_00128" 30987 "s59E13H2" 0 "Ribbon-helix-helix protein, copG family"  
"OPBM06\_00128" 30987 "s59E25H2" 0 "Ribbon-helix-helix protein, copG family"  
"OPBM06\_00128" 30987 "s59E5H2" 0.1450049 "Ribbon-helix-helix protein, copG family"  
"OPBM06\_00128" 30987 "s63E6H2" 0.0200045 "Ribbon-helix-helix protein, copG family"  
"OPBM06\_00129" 30988 "s59E13H2" 0.199015 "spermidine synthase"  
"OPBM06\_00129" 30988 "s59E25H2" 0 "spermidine synthase"  
"OPBM06\_00129" 30988 "s59E5H2" 0.06471115 "spermidine synthase"  
"OPBM06\_00129" 30988 "s63E6H2" 0.3317337 "spermidine synthase"  
"OPBM06\_00130" 30989 "s59E13H2" 0.205879 "hypothetical protein"  
"OPBM06\_00130" 30989 "s59E25H2" 0 "hypothetical protein"  
"OPBM06\_00130" 30989 "s59E5H2" 0.004362193 "hypothetical protein"  
"OPBM06\_00130" 30989 "s63E6H2" 0.2369295 "hypothetical protein"  
"OPBM06\_00131" 30990 "s59E13H2" 0.2215995 "5'-nucleotidase"

"OPBM06\_00131" 30990 "s59E25H2" 0 "5'-nucleotidase"  
"OPBM06\_00131" 30990 "s59E5H2" 0.1084683 "5'-nucleotidase"  
"OPBM06\_00131" 30990 "s63E6H2" 0.242218 "5'-nucleotidase"  
"OPBM06\_00132" 30991 "s59E13H2" 0.08856788 "hypothetical protein"  
"OPBM06\_00132" 30991 "s59E25H2" 0 "hypothetical protein"  
"OPBM06\_00132" 30991 "s59E5H2" 0 "hypothetical protein"  
"OPBM06\_00132" 30991 "s63E6H2" 0.1100216 "hypothetical protein"  
"OPBM06\_00133" 30992 "s59E13H2" 0.2953574 "Alpha/beta hydrolase family protein"  
"OPBM06\_00133" 30992 "s59E25H2" 0 "Alpha/beta hydrolase family protein"  
"OPBM06\_00133" 30992 "s59E5H2" 0.2481507 "Alpha/beta hydrolase family protein"  
"OPBM06\_00133" 30992 "s63E6H2" 0.3779475 "Alpha/beta hydrolase family protein"  
"OPBM06\_00134" 30993 "s59E13H2" 0.1630469 "Transglutaminase-like superfamily protein"  
"OPBM06\_00134" 30993 "s59E25H2" 0 "Transglutaminase-like superfamily protein"  
"OPBM06\_00134" 30993 "s59E5H2" 0.002912556 "Transglutaminase-like superfamily protein"  
"OPBM06\_00134" 30993 "s63E6H2" 0.4903053 "Transglutaminase-like superfamily protein"  
"OPBM06\_00136" 30995 "s59E13H2" 0.2262281 "hypothetical protein"  
"OPBM06\_00136" 30995 "s59E25H2" 0 "hypothetical protein"  
"OPBM06\_00136" 30995 "s59E5H2" 0.1797388 "hypothetical protein"  
"OPBM06\_00136" 30995 "s63E6H2" 0.2230306 "hypothetical protein"  
"OPBM06\_00137" 30996 "s59E13H2" 0.2024031 "ECF RNA polymerase sigma factor SigW"  
"OPBM06\_00137" 30996 "s59E25H2" 0 "ECF RNA polymerase sigma factor SigW"  
"OPBM06\_00137" 30996 "s59E5H2" 0.2241258 "ECF RNA polymerase sigma factor SigW"  
"OPBM06\_00137" 30996 "s63E6H2" 0.218486 "ECF RNA polymerase sigma factor SigW"  
"OPBM06\_00138" 30997 "s59E13H2" 0 "putative periplasmic serine endoprotease DegP-like precursor"  
"OPBM06\_00138" 30997 "s59E25H2" 0 "putative periplasmic serine endoprotease DegP-like precursor"  
"OPBM06\_00138" 30997 "s59E5H2" 0.003750255 "putative periplasmic serine endoprotease DegP-like precursor"  
"OPBM06\_00138" 30997 "s63E6H2" 0.07770196 "putative periplasmic serine endoprotease DegP-like precursor"  
"OPBM06\_00139" 30998 "s59E13H2" 0.09322405 "Maltotriose-binding protein precursor"  
"OPBM06\_00139" 30998 "s59E25H2" 0 "Maltotriose-binding protein precursor"  
"OPBM06\_00139" 30998 "s59E5H2" 0.1301159 "Maltotriose-binding protein precursor"  
"OPBM06\_00139" 30998 "s63E6H2" 0.4139016 "Maltotriose-binding protein precursor"  
"OPBM06\_00140" 30999 "s59E13H2" 0.01172734 "L-ribulose-5-phosphate 4-epimerase UlaF"  
"OPBM06\_00140" 30999 "s59E25H2" 0 "L-ribulose-5-phosphate 4-epimerase UlaF"  
"OPBM06\_00140" 30999 "s59E5H2" 0.01123386 "L-ribulose-5-phosphate 4-epimerase UlaF"  
"OPBM06\_00140" 30999 "s63E6H2" 0.2730887 "L-ribulose-5-phosphate 4-epimerase UlaF"  
"OPBM06\_00141" 31000 "s59E13H2" 0.01557005 "Ribulokinase"  
"OPBM06\_00141" 31000 "s59E25H2" 0 "Ribulokinase"  
"OPBM06\_00141" 31000 "s59E5H2" 0 "Ribulokinase"  
"OPBM06\_00141" 31000 "s63E6H2" 0.41917 "Ribulokinase"  
"OPBM19\_00003" 36154 "s59E13H2" 0 "putative permease"  
"OPBM19\_00003" 36154 "s59E25H2" 0 "putative permease"  
"OPBM19\_00003" 36154 "s59E5H2" 0 "putative permease"  
"OPBM19\_00003" 36154 "s63E6H2" 0 "putative permease"  
"OPBM19\_00004" 36155 "s59E13H2" 0 "HTH-type transcriptional regulator SinR"  
"OPBM19\_00004" 36155 "s59E25H2" 0 "HTH-type transcriptional regulator SinR"  
"OPBM19\_00004" 36155 "s59E5H2" 0 "HTH-type transcriptional regulator SinR"  
"OPBM19\_00004" 36155 "s63E6H2" 0 "HTH-type transcriptional regulator SinR"

"OPBM19\_00005" 36156 "s59E13H2" 0 "hypothetical protein"  
"OPBM19\_00005" 36156 "s59E25H2" 0 "hypothetical protein"  
"OPBM19\_00005" 36156 "s59E5H2" 0 "hypothetical protein"  
"OPBM19\_00005" 36156 "s63E6H2" 0 "hypothetical protein"  
"OPBM19\_00006" 36157 "s59E13H2" 0 "hypothetical protein"  
"OPBM19\_00006" 36157 "s59E25H2" 0 "hypothetical protein"  
"OPBM19\_00006" 36157 "s59E5H2" 0 "hypothetical protein"  
"OPBM19\_00006" 36157 "s63E6H2" 0 "hypothetical protein"  
"OPBM19\_00007" 36158 "s59E13H2" 0 "Inner membrane transport permease YbhS"  
"OPBM19\_00007" 36158 "s59E25H2" 0 "Inner membrane transport permease YbhS"  
"OPBM19\_00007" 36158 "s59E5H2" 0 "Inner membrane transport permease YbhS"  
"OPBM19\_00007" 36158 "s63E6H2" 0 "Inner membrane transport permease YbhS"  
"OPBM19\_00010" 36161 "s59E13H2" 0 "hypothetical protein"  
"OPBM19\_00010" 36161 "s59E25H2" 0 "hypothetical protein"  
"OPBM19\_00010" 36161 "s59E5H2" 0 "hypothetical protein"  
"OPBM19\_00010" 36161 "s63E6H2" 0 "hypothetical protein"  
"OPBM19\_00012" 36163 "s59E13H2" 0 "putative phycocyanin operon protein Z"  
"OPBM19\_00012" 36163 "s59E25H2" 0 "putative phycocyanin operon protein Z"  
"OPBM19\_00012" 36163 "s59E5H2" 0 "putative phycocyanin operon protein Z"  
"OPBM19\_00012" 36163 "s63E6H2" 0 "putative phycocyanin operon protein Z"  
"OPBM19\_00013" 36164 "s59E13H2" 0 "hypothetical protein"  
"OPBM19\_00013" 36164 "s59E25H2" 0 "hypothetical protein"  
"OPBM19\_00013" 36164 "s59E5H2" 0 "hypothetical protein"  
"OPBM19\_00013" 36164 "s63E6H2" 0 "hypothetical protein"  
"OPBM19\_00014" 36165 "s59E13H2" 0 "hypothetical protein"  
"OPBM19\_00014" 36165 "s59E25H2" 0 "hypothetical protein"  
"OPBM19\_00014" 36165 "s59E5H2" 0 "hypothetical protein"  
"OPBM19\_00014" 36165 "s63E6H2" 0 "hypothetical protein"  
"OPBM19\_00015" 36166 "s59E13H2" 0 "Putative nickel-responsive regulator"  
"OPBM19\_00015" 36166 "s59E25H2" 0 "Putative nickel-responsive regulator"  
"OPBM19\_00015" 36166 "s59E5H2" 0 "Putative nickel-responsive regulator"  
"OPBM19\_00015" 36166 "s63E6H2" 0 "Putative nickel-responsive regulator"  
"OPBM19\_00016" 36167 "s59E13H2" 0 "hypothetical protein"  
"OPBM19\_00016" 36167 "s59E25H2" 0 "hypothetical protein"  
"OPBM19\_00016" 36167 "s59E5H2" 0 "hypothetical protein"  
"OPBM19\_00016" 36167 "s63E6H2" 0 "hypothetical protein"  
"OPBM19\_00017" 36168 "s59E13H2" 0 "MoaE protein"  
"OPBM19\_00017" 36168 "s59E25H2" 0 "MoaE protein"  
"OPBM19\_00017" 36168 "s59E5H2" 0 "MoaE protein"  
"OPBM19\_00017" 36168 "s63E6H2" 0 "MoaE protein"  
"OPBM19\_00018" 36169 "s59E13H2" 0 "putative oxidoreductase"  
"OPBM19\_00018" 36169 "s59E25H2" 0 "putative oxidoreductase"  
"OPBM19\_00018" 36169 "s59E5H2" 0 "putative oxidoreductase"  
"OPBM19\_00018" 36169 "s63E6H2" 0 "putative oxidoreductase"  
"OPBM19\_00019" 36170 "s59E13H2" 0 "Nucleoid-associated protein YbaB"  
"OPBM19\_00019" 36170 "s59E25H2" 0 "Nucleoid-associated protein YbaB"  
"OPBM19\_00019" 36170 "s59E5H2" 0 "Nucleoid-associated protein YbaB"

"OPBM19\_00019" 36170 "s63E6H2" 0 "Nucleoid-associated protein YbaB"  
"OPBM19\_00020" 36171 "s59E13H2" 0 "IS2 transposase TnpB"  
"OPBM19\_00020" 36171 "s59E25H2" 0 "IS2 transposase TnpB"  
"OPBM19\_00020" 36171 "s59E5H2" 0 "IS2 transposase TnpB"  
"OPBM19\_00020" 36171 "s63E6H2" 0 "IS2 transposase TnpB"  
"OPBM19\_00021" 36172 "s59E13H2" 0 "Transposase"  
"OPBM19\_00021" 36172 "s59E25H2" 0 "Transposase"  
"OPBM19\_00021" 36172 "s59E5H2" 0 "Transposase"  
"OPBM19\_00021" 36172 "s63E6H2" 0 "Transposase"  
"OPBM19\_00022" 36173 "s59E13H2" 0 "hypothetical protein"  
"OPBM19\_00022" 36173 "s59E25H2" 0 "hypothetical protein"  
"OPBM19\_00022" 36173 "s59E5H2" 0 "hypothetical protein"  
"OPBM19\_00022" 36173 "s63E6H2" 0 "hypothetical protein"  
"OPBM19\_00023" 36174 "s59E13H2" 0 "hypothetical protein"  
"OPBM19\_00023" 36174 "s59E25H2" 0 "hypothetical protein"  
"OPBM19\_00023" 36174 "s59E5H2" 0 "hypothetical protein"  
"OPBM19\_00023" 36174 "s63E6H2" 0 "hypothetical protein"  
"OPBM19\_00024" 36175 "s59E13H2" 0 "Acetyltransferase (GNAT) family protein"  
"OPBM19\_00024" 36175 "s59E25H2" 0 "Acetyltransferase (GNAT) family protein"  
"OPBM19\_00024" 36175 "s59E5H2" 0 "Acetyltransferase (GNAT) family protein"  
"OPBM19\_00024" 36175 "s63E6H2" 0 "Acetyltransferase (GNAT) family protein"  
"OPBM19\_00025" 36176 "s59E13H2" 0 "Metallo-beta-lactamase superfamily protein"  
"OPBM19\_00025" 36176 "s59E25H2" 0 "Metallo-beta-lactamase superfamily protein"  
"OPBM19\_00025" 36176 "s59E5H2" 0 "Metallo-beta-lactamase superfamily protein"  
"OPBM19\_00025" 36176 "s63E6H2" 0 "Metallo-beta-lactamase superfamily protein"  
"OPBM19\_00026" 36177 "s59E13H2" 0 "hypothetical protein"  
"OPBM19\_00026" 36177 "s59E25H2" 0 "hypothetical protein"  
"OPBM19\_00026" 36177 "s59E5H2" 0 "hypothetical protein"  
"OPBM19\_00026" 36177 "s63E6H2" 0 "hypothetical protein"  
"OPBM19\_00027" 36178 "s59E13H2" 0 "Chagasin family peptidase inhibitor I42"  
"OPBM19\_00027" 36178 "s59E25H2" 0 "Chagasin family peptidase inhibitor I42"  
"OPBM19\_00027" 36178 "s59E5H2" 0 "Chagasin family peptidase inhibitor I42"  
"OPBM19\_00027" 36178 "s63E6H2" 0 "Chagasin family peptidase inhibitor I42"  
"OPBM19\_00028" 36179 "s59E13H2" 0 "Ribosomal protein S12 methylthiotransferase RimO"  
"OPBM19\_00028" 36179 "s59E25H2" 0 "Ribosomal protein S12 methylthiotransferase RimO"  
"OPBM19\_00028" 36179 "s59E5H2" 0 "Ribosomal protein S12 methylthiotransferase RimO"  
"OPBM19\_00028" 36179 "s63E6H2" 0.000476807 "Ribosomal protein S12 methylthiotransferase RimO"  
"OPBM19\_00029" 36180 "s59E13H2" 0 "Thermonuclease precursor"  
"OPBM19\_00029" 36180 "s59E25H2" 0 "Thermonuclease precursor"  
"OPBM19\_00029" 36180 "s59E5H2" 0 "Thermonuclease precursor"  
"OPBM19\_00029" 36180 "s63E6H2" 0 "Thermonuclease precursor"  
"OPBM19\_00030" 36181 "s59E13H2" 0 "hypothetical protein"  
"OPBM19\_00030" 36181 "s59E25H2" 0 "hypothetical protein"  
"OPBM19\_00030" 36181 "s59E5H2" 0 "hypothetical protein"  
"OPBM19\_00030" 36181 "s63E6H2" 0 "hypothetical protein"  
"OPBM19\_00032" 36183 "s59E13H2" 0 "Helix-turn-helix domain protein"  
"OPBM19\_00032" 36183 "s59E25H2" 0 "Helix-turn-helix domain protein"

"OPBM19\_00032" 36183 "s59E5H2" 0 "Helix-turn-helix domain protein"  
"OPBM19\_00032" 36183 "s63E6H2" 0 "Helix-turn-helix domain protein"  
"OPBM19\_00033" 36184 "s59E13H2" 0 "6-phosphofructokinase isozyme 1"  
"OPBM19\_00033" 36184 "s59E25H2" 0 "6-phosphofructokinase isozyme 1"  
"OPBM19\_00033" 36184 "s59E5H2" 0 "6-phosphofructokinase isozyme 1"  
"OPBM19\_00033" 36184 "s63E6H2" 0 "6-phosphofructokinase isozyme 1"  
"OPBM19\_00035" 36186 "s59E13H2" 0 "acetyl-CoA acetyltransferase"  
"OPBM19\_00035" 36186 "s59E25H2" 0 "acetyl-CoA acetyltransferase"  
"OPBM19\_00035" 36186 "s59E5H2" 0 "acetyl-CoA acetyltransferase"  
"OPBM19\_00035" 36186 "s63E6H2" 0 "acetyl-CoA acetyltransferase"  
"OPBM19\_00036" 36187 "s59E13H2" 0 "acetyl-CoA acetyltransferase"  
"OPBM19\_00036" 36187 "s59E25H2" 0 "acetyl-CoA acetyltransferase"  
"OPBM19\_00036" 36187 "s59E5H2" 0 "acetyl-CoA acetyltransferase"  
"OPBM19\_00036" 36187 "s63E6H2" 0 "acetyl-CoA acetyltransferase"  
"OPBM19\_00037" 36188 "s59E13H2" 0 "peptidase PmbA"  
"OPBM19\_00037" 36188 "s59E25H2" 0 "peptidase PmbA"  
"OPBM19\_00037" 36188 "s59E5H2" 0 "peptidase PmbA"  
"OPBM19\_00037" 36188 "s63E6H2" 0 "peptidase PmbA"  
"OPBM19\_00038" 36189 "s59E13H2" 0 "protease TldD"  
"OPBM19\_00038" 36189 "s59E25H2" 0 "protease TldD"  
"OPBM19\_00038" 36189 "s59E5H2" 0 "protease TldD"  
"OPBM19\_00038" 36189 "s63E6H2" 0 "protease TldD"  
"OPBM19\_00039" 36190 "s59E13H2" 0 "Aspartate racemase"  
"OPBM19\_00039" 36190 "s59E25H2" 0 "Aspartate racemase"  
"OPBM19\_00039" 36190 "s59E5H2" 0 "Aspartate racemase"  
"OPBM19\_00039" 36190 "s63E6H2" 0 "Aspartate racemase"  
"OPBM19\_00041" 36192 "s59E13H2" 0 "Iron-sulfur flavoprotein"  
"OPBM19\_00041" 36192 "s59E25H2" 0 "Iron-sulfur flavoprotein"  
"OPBM19\_00041" 36192 "s59E5H2" 0 "Iron-sulfur flavoprotein"  
"OPBM19\_00041" 36192 "s63E6H2" 0 "Iron-sulfur flavoprotein"  
"OPBM19\_00042" 36193 "s59E13H2" 0 "hypothetical protein"  
"OPBM19\_00042" 36193 "s59E25H2" 0 "hypothetical protein"  
"OPBM19\_00042" 36193 "s59E5H2" 0 "hypothetical protein"  
"OPBM19\_00042" 36193 "s63E6H2" 0 "hypothetical protein"  
"OPBM19\_00043" 36194 "s59E13H2" 0 "LysE type translocator"  
"OPBM19\_00043" 36194 "s59E25H2" 0 "LysE type translocator"  
"OPBM19\_00043" 36194 "s59E5H2" 0 "LysE type translocator"  
"OPBM19\_00043" 36194 "s63E6H2" 0 "LysE type translocator"  
"OPBM19\_00044" 36195 "s59E13H2" 0 "Putative phosphoribosyl transferase/MT0597"  
"OPBM19\_00044" 36195 "s59E25H2" 0 "Putative phosphoribosyl transferase/MT0597"  
"OPBM19\_00044" 36195 "s59E5H2" 0 "Putative phosphoribosyl transferase/MT0597"  
"OPBM19\_00044" 36195 "s63E6H2" 0 "Putative phosphoribosyl transferase/MT0597"  
"OPBM19\_00045" 36196 "s59E13H2" 0 "putative transporter in sor 3' region"  
"OPBM19\_00045" 36196 "s59E25H2" 0 "putative transporter in sor 3' region"  
"OPBM19\_00045" 36196 "s59E5H2" 0 "putative transporter in sor 3' region"  
"OPBM19\_00045" 36196 "s63E6H2" 0 "putative transporter in sor 3' region"  
"OPBM19\_00046" 36197 "s59E13H2" 0 "Aspartate-semialdehyde dehydrogenase"

"OPBM19\_00046" 36197 "s59E25H2" 0 "Aspartate-semialdehyde dehydrogenase"  
"OPBM19\_00046" 36197 "s59E5H2" 0 "Aspartate-semialdehyde dehydrogenase"  
"OPBM19\_00046" 36197 "s63E6H2" 0 "Aspartate-semialdehyde dehydrogenase"  
"OPBM19\_00047" 36198 "s59E13H2" 0 "Pyruvate synthase subunit PorB"  
"OPBM19\_00047" 36198 "s59E25H2" 0 "Pyruvate synthase subunit PorB"  
"OPBM19\_00047" 36198 "s59E5H2" 0 "Pyruvate synthase subunit PorB"  
"OPBM19\_00047" 36198 "s63E6H2" 0 "Pyruvate synthase subunit PorB"  
"OPBM19\_00048" 36199 "s59E13H2" 0 "Pyruvate synthase subunit PorA"  
"OPBM19\_00048" 36199 "s59E25H2" 0 "Pyruvate synthase subunit PorA"  
"OPBM19\_00048" 36199 "s59E5H2" 0 "Pyruvate synthase subunit PorA"  
"OPBM19\_00048" 36199 "s63E6H2" 0 "Pyruvate synthase subunit PorA"  
"OPBM19\_00049" 36200 "s59E13H2" 0 "Pyruvate synthase subunit PorD"  
"OPBM19\_00049" 36200 "s59E25H2" 0 "Pyruvate synthase subunit PorD"  
"OPBM19\_00049" 36200 "s59E5H2" 0 "Pyruvate synthase subunit PorD"  
"OPBM19\_00049" 36200 "s63E6H2" 0 "Pyruvate synthase subunit PorD"  
"OPBM19\_00050" 36201 "s59E13H2" 0 "Pyruvate synthase subunit PorC"  
"OPBM19\_00050" 36201 "s59E25H2" 0 "Pyruvate synthase subunit PorC"  
"OPBM19\_00050" 36201 "s59E5H2" 0 "Pyruvate synthase subunit PorC"  
"OPBM19\_00050" 36201 "s63E6H2" 0 "Pyruvate synthase subunit PorC"  
"OPBM19\_00051" 36202 "s59E13H2" 0 "Transthyretin-like family protein"  
"OPBM19\_00051" 36202 "s59E25H2" 0 "Transthyretin-like family protein"  
"OPBM19\_00051" 36202 "s59E5H2" 0 "Transthyretin-like family protein"  
"OPBM19\_00051" 36202 "s63E6H2" 0 "Transthyretin-like family protein"  
"OPBM19\_00052" 36203 "s59E13H2" 0 "Recombination protein RecR"  
"OPBM19\_00052" 36203 "s59E25H2" 0 "Recombination protein RecR"  
"OPBM19\_00052" 36203 "s59E5H2" 0 "Recombination protein RecR"  
"OPBM19\_00052" 36203 "s63E6H2" 0 "Recombination protein RecR"  
"OPBM19\_00053" 36204 "s59E13H2" 0 "DNA polymerase III subunit tau"  
"OPBM19\_00053" 36204 "s59E25H2" 0 "DNA polymerase III subunit tau"  
"OPBM19\_00053" 36204 "s59E5H2" 0 "DNA polymerase III subunit tau"  
"OPBM19\_00053" 36204 "s63E6H2" 0 "DNA polymerase III subunit tau"  
"OPBM19\_00055" 36206 "s59E13H2" 0 "hypothetical protein"  
"OPBM19\_00055" 36206 "s59E25H2" 0 "hypothetical protein"  
"OPBM19\_00055" 36206 "s59E5H2" 0 "hypothetical protein"  
"OPBM19\_00055" 36206 "s63E6H2" 0 "hypothetical protein"  
"OPBM19\_00056" 36207 "s59E13H2" 0 "hypothetical protein"  
"OPBM19\_00056" 36207 "s59E25H2" 0 "hypothetical protein"  
"OPBM19\_00056" 36207 "s59E5H2" 0 "hypothetical protein"  
"OPBM19\_00056" 36207 "s63E6H2" 0 "hypothetical protein"  
"OPBM19\_00057" 36208 "s59E13H2" 0 "Adenosine monophosphate-protein transferase SoFic"  
"OPBM19\_00057" 36208 "s59E25H2" 0 "Adenosine monophosphate-protein transferase SoFic"  
"OPBM19\_00057" 36208 "s59E5H2" 0 "Adenosine monophosphate-protein transferase SoFic"  
"OPBM19\_00057" 36208 "s63E6H2" 0 "Adenosine monophosphate-protein transferase SoFic"  
"OPBM19\_00058" 36209 "s59E13H2" 0 "hypothetical protein"  
"OPBM19\_00058" 36209 "s59E25H2" 0 "hypothetical protein"  
"OPBM19\_00058" 36209 "s59E5H2" 0 "hypothetical protein"  
"OPBM19\_00058" 36209 "s63E6H2" 0 "hypothetical protein"

"OPBM19\_00059" 36210 "s59E13H2" 0 "hypothetical protein"  
"OPBM19\_00059" 36210 "s59E25H2" 0 "hypothetical protein"  
"OPBM19\_00059" 36210 "s59E5H2" 0 "hypothetical protein"  
"OPBM19\_00059" 36210 "s63E6H2" 0 "hypothetical protein"  
"OPBM19\_00060" 36211 "s59E13H2" 0 "Tetratricopeptide repeat protein"  
"OPBM19\_00060" 36211 "s59E25H2" 0 "Tetratricopeptide repeat protein"  
"OPBM19\_00060" 36211 "s59E5H2" 0 "Tetratricopeptide repeat protein"  
"OPBM19\_00060" 36211 "s63E6H2" 0 "Tetratricopeptide repeat protein"  
"OPBM19\_00061" 36212 "s59E13H2" 0 "hypothetical protein"  
"OPBM19\_00061" 36212 "s59E25H2" 0 "hypothetical protein"  
"OPBM19\_00061" 36212 "s59E5H2" 0 "hypothetical protein"  
"OPBM19\_00061" 36212 "s63E6H2" 0 "hypothetical protein"  
"OPBM19\_00062" 36213 "s59E13H2" 0 "hypothetical protein"  
"OPBM19\_00062" 36213 "s59E25H2" 0 "hypothetical protein"  
"OPBM19\_00062" 36213 "s59E5H2" 0 "hypothetical protein"  
"OPBM19\_00062" 36213 "s63E6H2" 0 "hypothetical protein"  
"OPBM19\_00063" 36214 "s59E13H2" 0 "hypothetical protein"  
"OPBM19\_00063" 36214 "s59E25H2" 0 "hypothetical protein"  
"OPBM19\_00063" 36214 "s59E5H2" 0 "hypothetical protein"  
"OPBM19\_00063" 36214 "s63E6H2" 0 "hypothetical protein"  
"OPBM19\_00064" 36215 "s59E13H2" 0 "hypothetical protein"  
"OPBM19\_00064" 36215 "s59E25H2" 0 "hypothetical protein"  
"OPBM19\_00064" 36215 "s59E5H2" 0 "hypothetical protein"  
"OPBM19\_00064" 36215 "s63E6H2" 0 "hypothetical protein"  
"OPBM19\_00065" 36216 "s59E13H2" 0 "Carbon monoxide dehydrogenase 1"  
"OPBM19\_00065" 36216 "s59E25H2" 0 "Carbon monoxide dehydrogenase 1"  
"OPBM19\_00065" 36216 "s59E5H2" 0 "Carbon monoxide dehydrogenase 1"  
"OPBM19\_00065" 36216 "s63E6H2" 0 "Carbon monoxide dehydrogenase 1"  
"OPBM19\_00066" 36217 "s59E13H2" 0 "Carbon monoxide dehydrogenase/acetyl-CoA synthase subunit alpha"  
"OPBM19\_00066" 36217 "s59E25H2" 0 "Carbon monoxide dehydrogenase/acetyl-CoA synthase subunit alpha"  
"OPBM19\_00066" 36217 "s59E5H2" 0 "Carbon monoxide dehydrogenase/acetyl-CoA synthase subunit alpha"  
"OPBM19\_00066" 36217 "s63E6H2" 0 "Carbon monoxide dehydrogenase/acetyl-CoA synthase subunit alpha"  
"OPBM19\_00067" 36218 "s59E13H2" 0 "hypothetical protein"  
"OPBM19\_00067" 36218 "s59E25H2" 0 "hypothetical protein"  
"OPBM19\_00067" 36218 "s59E5H2" 0 "hypothetical protein"  
"OPBM19\_00067" 36218 "s63E6H2" 0 "hypothetical protein"  
"OPBM19\_00068" 36219 "s59E13H2" 0 "hypothetical protein"  
"OPBM19\_00068" 36219 "s59E25H2" 0 "hypothetical protein"  
"OPBM19\_00068" 36219 "s59E5H2" 0 "hypothetical protein"  
"OPBM19\_00068" 36219 "s63E6H2" 0 "hypothetical protein"  
"OPBM19\_00069" 36220 "s59E13H2" 0 "F(420)H(2) dehydrogenase subunit B"  
"OPBM19\_00069" 36220 "s59E25H2" 0 "F(420)H(2) dehydrogenase subunit B"  
"OPBM19\_00069" 36220 "s59E5H2" 0 "F(420)H(2) dehydrogenase subunit B"  
"OPBM19\_00069" 36220 "s63E6H2" 0 "F(420)H(2) dehydrogenase subunit B"  
"OPBM19\_00070" 36221 "s59E13H2" 0 "NADH-quinone oxidoreductase subunit 4"  
"OPBM19\_00070" 36221 "s59E25H2" 0 "NADH-quinone oxidoreductase subunit 4"  
"OPBM19\_00070" 36221 "s59E5H2" 0 "NADH-quinone oxidoreductase subunit 4"



"OPBM19\_00070" 36221 "s63E6H2" 0 "NADH-quinone oxidoreductase subunit 4"  
"OPBM19\_00071" 36222 "s59E13H2" 0 "NADH-quinone oxidoreductase subunit H"  
"OPBM19\_00071" 36222 "s59E25H2" 0 "NADH-quinone oxidoreductase subunit H"  
"OPBM19\_00071" 36222 "s59E5H2" 0 "NADH-quinone oxidoreductase subunit H"  
"OPBM19\_00071" 36222 "s63E6H2" 0 "NADH-quinone oxidoreductase subunit H"  
"OPBM19\_00072" 36223 "s59E13H2" 0 "NADH-quinone oxidoreductase subunit I"  
"OPBM19\_00072" 36223 "s59E25H2" 0 "NADH-quinone oxidoreductase subunit I"  
"OPBM19\_00072" 36223 "s59E5H2" 0 "NADH-quinone oxidoreductase subunit I"  
"OPBM19\_00072" 36223 "s63E6H2" 0 "NADH-quinone oxidoreductase subunit I"  
"OPBM19\_00073" 36224 "s59E13H2" 0 "hypothetical protein"  
"OPBM19\_00073" 36224 "s59E25H2" 0 "hypothetical protein"  
"OPBM19\_00073" 36224 "s59E5H2" 0 "hypothetical protein"  
"OPBM19\_00073" 36224 "s63E6H2" 0 "hypothetical protein"  
"OPBM19\_00074" 36225 "s59E13H2" 0 "NADH:ubiquinone oxidoreductase subunit K"  
"OPBM19\_00074" 36225 "s59E25H2" 0 "NADH:ubiquinone oxidoreductase subunit K"  
"OPBM19\_00074" 36225 "s59E5H2" 0 "NADH:ubiquinone oxidoreductase subunit K"  
"OPBM19\_00074" 36225 "s63E6H2" 0 "NADH:ubiquinone oxidoreductase subunit K"  
"OPBM19\_00075" 36226 "s59E13H2" 0 "F(420)H(2) dehydrogenase subunit N"  
"OPBM19\_00075" 36226 "s59E25H2" 0 "F(420)H(2) dehydrogenase subunit N"  
"OPBM19\_00075" 36226 "s59E5H2" 0 "F(420)H(2) dehydrogenase subunit N"  
"OPBM19\_00075" 36226 "s63E6H2" 0 "F(420)H(2) dehydrogenase subunit N"  
"OPBM19\_00076" 36227 "s59E13H2" 0 "putative transposase"  
"OPBM19\_00076" 36227 "s59E25H2" 0 "putative transposase"  
"OPBM19\_00076" 36227 "s59E5H2" 0 "putative transposase"  
"OPBM19\_00076" 36227 "s63E6H2" 0 "putative transposase"  
"OPBM19\_00077" 36228 "s59E13H2" 0 "Helix-turn-helix domain protein"  
"OPBM19\_00077" 36228 "s59E25H2" 0 "Helix-turn-helix domain protein"  
"OPBM19\_00077" 36228 "s59E5H2" 0 "Helix-turn-helix domain protein"  
"OPBM19\_00077" 36228 "s63E6H2" 0 "Helix-turn-helix domain protein"  
"OPBM19\_00078" 36229 "s59E13H2" 0 "UDP-4-amino-4,6-dideoxy-N-acetyl-beta-L-altrosamine N-acetyltransferase"  
"OPBM19\_00078" 36229 "s59E25H2" 0 "UDP-4-amino-4,6-dideoxy-N-acetyl-beta-L-altrosamine N-acetyltransferase"  
"OPBM19\_00078" 36229 "s59E5H2" 0 "UDP-4-amino-4,6-dideoxy-N-acetyl-beta-L-altrosamine N-acetyltransferase"  
"OPBM19\_00078" 36229 "s63E6H2" 0 "UDP-4-amino-4,6-dideoxy-N-acetyl-beta-L-altrosamine N-acetyltransferase"  
"OPBM19\_00079" 36230 "s59E13H2" 0 "hypothetical protein"  
"OPBM19\_00079" 36230 "s59E25H2" 0 "hypothetical protein"  
"OPBM19\_00079" 36230 "s59E5H2" 0 "hypothetical protein"  
"OPBM19\_00079" 36230 "s63E6H2" 0 "hypothetical protein"  
"OPBM19\_00080" 36231 "s59E13H2" 0 "Leucine dehydrogenase"  
"OPBM19\_00080" 36231 "s59E25H2" 0 "Leucine dehydrogenase"  
"OPBM19\_00080" 36231 "s59E5H2" 0 "Leucine dehydrogenase"  
"OPBM19\_00080" 36231 "s63E6H2" 0 "Leucine dehydrogenase"  
"OPBM19\_00081" 36232 "s59E13H2" 0 "hypothetical protein"  
"OPBM19\_00081" 36232 "s59E25H2" 0 "hypothetical protein"  
"OPBM19\_00081" 36232 "s59E5H2" 0 "hypothetical protein"  
"OPBM19\_00081" 36232 "s63E6H2" 0 "hypothetical protein"  
"OPBM19\_00082" 36233 "s59E13H2" 0 "hypothetical protein"  
"OPBM19\_00082" 36233 "s59E25H2" 0 "hypothetical protein"

"OPBM19\_00082" 36233 "s59E5H2" 0 "hypothetical protein"  
"OPBM19\_00082" 36233 "s63E6H2" 0 "hypothetical protein"  
"OPBM19\_00083" 36234 "s59E13H2" 0 "Leucine dehydrogenase"  
"OPBM19\_00083" 36234 "s59E25H2" 0 "Leucine dehydrogenase"  
"OPBM19\_00083" 36234 "s59E5H2" 0 "Leucine dehydrogenase"  
"OPBM19\_00083" 36234 "s63E6H2" 0 "Leucine dehydrogenase"  
"OPBM19\_00084" 36235 "s59E13H2" 0 "2-oxoglutarate-acceptor oxidoreductase subunit OorD"  
"OPBM19\_00084" 36235 "s59E25H2" 0 "2-oxoglutarate-acceptor oxidoreductase subunit OorD"  
"OPBM19\_00084" 36235 "s59E5H2" 0 "2-oxoglutarate-acceptor oxidoreductase subunit OorD"  
"OPBM19\_00084" 36235 "s63E6H2" 0 "2-oxoglutarate-acceptor oxidoreductase subunit OorD"  
"OPBM19\_00085" 36236 "s59E13H2" 0 "Ketoisovalerate oxidoreductase subunit VorB"  
"OPBM19\_00085" 36236 "s59E25H2" 0 "Ketoisovalerate oxidoreductase subunit VorB"  
"OPBM19\_00085" 36236 "s59E5H2" 0 "Ketoisovalerate oxidoreductase subunit VorB"  
"OPBM19\_00085" 36236 "s63E6H2" 0 "Ketoisovalerate oxidoreductase subunit VorB"  
"OPBM19\_00086" 36237 "s59E13H2" 0 "Ketoisovalerate oxidoreductase subunit VorA"  
"OPBM19\_00086" 36237 "s59E25H2" 0 "Ketoisovalerate oxidoreductase subunit VorA"  
"OPBM19\_00086" 36237 "s59E5H2" 0 "Ketoisovalerate oxidoreductase subunit VorA"  
"OPBM19\_00086" 36237 "s63E6H2" 0 "Ketoisovalerate oxidoreductase subunit VorA"  
"OPBM19\_00087" 36238 "s59E13H2" 0 "Ketoisovalerate oxidoreductase subunit VorA"  
"OPBM19\_00087" 36238 "s59E25H2" 0 "Ketoisovalerate oxidoreductase subunit VorA"  
"OPBM19\_00087" 36238 "s59E5H2" 0 "Ketoisovalerate oxidoreductase subunit VorA"  
"OPBM19\_00087" 36238 "s63E6H2" 0 "Ketoisovalerate oxidoreductase subunit VorA"  
"OPBM19\_00088" 36239 "s59E13H2" 0 "L-lysine 2,3-aminomutase"  
"OPBM19\_00088" 36239 "s59E25H2" 0 "L-lysine 2,3-aminomutase"  
"OPBM19\_00088" 36239 "s59E5H2" 0 "L-lysine 2,3-aminomutase"  
"OPBM19\_00088" 36239 "s63E6H2" 0 "L-lysine 2,3-aminomutase"  
"OPBM19\_00089" 36240 "s59E13H2" 0 "L-erythro-3,5-diaminohexanoate dehydrogenase"  
"OPBM19\_00089" 36240 "s59E25H2" 0 "L-erythro-3,5-diaminohexanoate dehydrogenase"  
"OPBM19\_00089" 36240 "s59E5H2" 0 "L-erythro-3,5-diaminohexanoate dehydrogenase"  
"OPBM19\_00089" 36240 "s63E6H2" 0 "L-erythro-3,5-diaminohexanoate dehydrogenase"  
"OPBM19\_00090" 36241 "s59E13H2" 0 "3-keto-5-aminohexanoate cleavage enzyme"  
"OPBM19\_00090" 36241 "s59E25H2" 0 "3-keto-5-aminohexanoate cleavage enzyme"  
"OPBM19\_00090" 36241 "s59E5H2" 0 "3-keto-5-aminohexanoate cleavage enzyme"  
"OPBM19\_00090" 36241 "s63E6H2" 0 "3-keto-5-aminohexanoate cleavage enzyme"  
"OPBM19\_00091" 36242 "s59E13H2" 0 "3-aminobutyryl-CoA ammonia lyase"  
"OPBM19\_00091" 36242 "s59E25H2" 0 "3-aminobutyryl-CoA ammonia lyase"  
"OPBM19\_00091" 36242 "s59E5H2" 0 "3-aminobutyryl-CoA ammonia lyase"  
"OPBM19\_00091" 36242 "s63E6H2" 0 "3-aminobutyryl-CoA ammonia lyase"  
"OPBM19\_00092" 36243 "s59E13H2" 0 "Rubrerythrin"  
"OPBM19\_00092" 36243 "s59E25H2" 0 "Rubrerythrin"  
"OPBM19\_00092" 36243 "s59E5H2" 0 "Rubrerythrin"  
"OPBM19\_00092" 36243 "s63E6H2" 0 "Rubrerythrin"  
"OPBM19\_00093" 36244 "s59E13H2" 0 "Archaeal Lon protease"  
"OPBM19\_00093" 36244 "s59E25H2" 0 "Archaeal Lon protease"  
"OPBM19\_00093" 36244 "s59E5H2" 0 "Archaeal Lon protease"  
"OPBM19\_00093" 36244 "s63E6H2" 0 "Archaeal Lon protease"  
"OPBM19\_00094" 36245 "s59E13H2" 0 "Thiol-disulfide oxidoreductase ResA"

"OPBM19\_00094" 36245 "s59E25H2" 0 "Thiol-disulfide oxidoreductase ResA"  
"OPBM19\_00094" 36245 "s59E5H2" 0 "Thiol-disulfide oxidoreductase ResA"  
"OPBM19\_00094" 36245 "s63E6H2" 0 "Thiol-disulfide oxidoreductase ResA"  
"OPBM19\_00095" 36246 "s59E13H2" 0 "Putative electron transport protein YccM"  
"OPBM19\_00095" 36246 "s59E25H2" 0 "Putative electron transport protein YccM"  
"OPBM19\_00095" 36246 "s59E5H2" 0 "Putative electron transport protein YccM"  
"OPBM19\_00095" 36246 "s63E6H2" 0 "Putative electron transport protein YccM"  
"OPBM19\_00096" 36247 "s59E13H2" 0 "hypothetical protein"  
"OPBM19\_00096" 36247 "s59E25H2" 0 "hypothetical protein"  
"OPBM19\_00096" 36247 "s59E5H2" 0 "hypothetical protein"  
"OPBM19\_00096" 36247 "s63E6H2" 0 "hypothetical protein"  
"OPBM19\_00097" 36248 "s59E13H2" 0 "putative transposase"  
"OPBM19\_00097" 36248 "s59E25H2" 0 "putative transposase"  
"OPBM19\_00097" 36248 "s59E5H2" 0 "putative transposase"  
"OPBM19\_00097" 36248 "s63E6H2" 0 "putative transposase"  
"OPBM19\_00098" 36249 "s59E13H2" 0 "DNA alkylation repair enzyme"  
"OPBM19\_00098" 36249 "s59E25H2" 0 "DNA alkylation repair enzyme"  
"OPBM19\_00098" 36249 "s59E5H2" 0 "DNA alkylation repair enzyme"  
"OPBM19\_00098" 36249 "s63E6H2" 0 "DNA alkylation repair enzyme"  
"OPBM19\_00099" 36250 "s59E13H2" 0 "Sporulation initiation inhibitor protein Soj"  
"OPBM19\_00099" 36250 "s59E25H2" 0 "Sporulation initiation inhibitor protein Soj"  
"OPBM19\_00099" 36250 "s59E5H2" 0 "Sporulation initiation inhibitor protein Soj"  
"OPBM19\_00099" 36250 "s63E6H2" 0 "Sporulation initiation inhibitor protein Soj"  
"OPBM19\_00101" 36252 "s59E13H2" 0 "Xylose transport system permease protein XylH"  
"OPBM19\_00101" 36252 "s59E25H2" 0 "Xylose transport system permease protein XylH"  
"OPBM19\_00101" 36252 "s59E5H2" 0 "Xylose transport system permease protein XylH"  
"OPBM19\_00101" 36252 "s63E6H2" 0.02402479 "Xylose transport system permease protein XylH"  
"OPBM19\_00102" 36253 "s59E13H2" 0 "Galactose/methyl galactoside import ATP-binding protein MglA"  
"OPBM19\_00102" 36253 "s59E25H2" 0 "Galactose/methyl galactoside import ATP-binding protein MglA"  
"OPBM19\_00102" 36253 "s59E5H2" 0 "Galactose/methyl galactoside import ATP-binding protein MglA"  
"OPBM19\_00102" 36253 "s63E6H2" 0 "Galactose/methyl galactoside import ATP-binding protein MglA"  
"OPBM19\_00103" 36254 "s59E13H2" 0.0008664613 "Multiple sugar-binding periplasmic receptor ChvE precursor"  
"OPBM19\_00103" 36254 "s59E25H2" 0 "Multiple sugar-binding periplasmic receptor ChvE precursor"  
"OPBM19\_00103" 36254 "s59E5H2" 0 "Multiple sugar-binding periplasmic receptor ChvE precursor"  
"OPBM19\_00103" 36254 "s63E6H2" 0.03183793 "Multiple sugar-binding periplasmic receptor ChvE precursor"  
"OPBM19\_00104" 36255 "s59E13H2" 0 "hypothetical protein"  
"OPBM19\_00104" 36255 "s59E25H2" 0 "hypothetical protein"  
"OPBM19\_00104" 36255 "s59E5H2" 0 "hypothetical protein"  
"OPBM19\_00104" 36255 "s63E6H2" 0 "hypothetical protein"  
"OPBM19\_00106" 36257 "s59E13H2" 0 "D-tagatose 3-epimerase"  
"OPBM19\_00106" 36257 "s59E25H2" 0 "D-tagatose 3-epimerase"  
"OPBM19\_00106" 36257 "s59E5H2" 0 "D-tagatose 3-epimerase"  
"OPBM19\_00106" 36257 "s63E6H2" 0 "D-tagatose 3-epimerase"  
"OPBM19\_00107" 36258 "s59E13H2" 0.000585429 "Glucose--fructose oxidoreductase precursor"  
"OPBM19\_00107" 36258 "s59E25H2" 0 "Glucose--fructose oxidoreductase precursor"  
"OPBM19\_00107" 36258 "s59E5H2" 0 "Glucose--fructose oxidoreductase precursor"  
"OPBM19\_00107" 36258 "s63E6H2" 0 "Glucose--fructose oxidoreductase precursor"

"OPBM19\_00108" 36259 "s59E13H2" 0.002584946 "Inosose dehydratase"  
"OPBM19\_00108" 36259 "s59E25H2" 0 "Inosose dehydratase"  
"OPBM19\_00108" 36259 "s59E5H2" 0 "Inosose dehydratase"  
"OPBM19\_00108" 36259 "s63E6H2" 0 "Inosose dehydratase"  
"OPBM19\_00109" 36260 "s59E13H2" 0 "hypothetical protein"  
"OPBM19\_00109" 36260 "s59E25H2" 0 "hypothetical protein"  
"OPBM19\_00109" 36260 "s59E5H2" 0 "hypothetical protein"  
"OPBM19\_00109" 36260 "s63E6H2" 0 "hypothetical protein"  
"OPBM19\_00110" 36261 "s59E13H2" 0 "Inner membrane ABC transporter permease protein YcjP"  
"OPBM19\_00110" 36261 "s59E25H2" 0 "Inner membrane ABC transporter permease protein YcjP"  
"OPBM19\_00110" 36261 "s59E5H2" 0 "Inner membrane ABC transporter permease protein YcjP"  
"OPBM19\_00110" 36261 "s63E6H2" 0 "Inner membrane ABC transporter permease protein YcjP"  
"OPBM19\_00114" 36265 "s59E13H2" 0 "hypothetical protein"  
"OPBM19\_00114" 36265 "s59E25H2" 0 "hypothetical protein"  
"OPBM19\_00114" 36265 "s59E5H2" 0 "hypothetical protein"  
"OPBM19\_00114" 36265 "s63E6H2" 0 "hypothetical protein"  
"OPBM19\_00115" 36266 "s59E13H2" 0 "hypothetical protein"  
"OPBM19\_00115" 36266 "s59E25H2" 0 "hypothetical protein"  
"OPBM19\_00115" 36266 "s59E5H2" 0 "hypothetical protein"  
"OPBM19\_00115" 36266 "s63E6H2" 0 "hypothetical protein"  
"OPBM19\_00116" 36267 "s59E13H2" 0 "Formamidopyrimidine-DNA glycosylase"  
"OPBM19\_00116" 36267 "s59E25H2" 0 "Formamidopyrimidine-DNA glycosylase"  
"OPBM19\_00116" 36267 "s59E5H2" 0 "Formamidopyrimidine-DNA glycosylase"  
"OPBM19\_00116" 36267 "s63E6H2" 0 "Formamidopyrimidine-DNA glycosylase"  
"OPBM19\_00117" 36268 "s59E13H2" 0 "hypothetical protein"  
"OPBM19\_00117" 36268 "s59E25H2" 0 "hypothetical protein"  
"OPBM19\_00117" 36268 "s59E5H2" 0 "hypothetical protein"  
"OPBM19\_00117" 36268 "s63E6H2" 0 "hypothetical protein"  
"OPBM19\_00118" 36269 "s59E13H2" 0 "hypothetical protein"  
"OPBM19\_00118" 36269 "s59E25H2" 0 "hypothetical protein"  
"OPBM19\_00118" 36269 "s59E5H2" 0 "hypothetical protein"  
"OPBM19\_00118" 36269 "s63E6H2" 0 "hypothetical protein"  
"OPBM19\_00119" 36270 "s59E13H2" 0 "hypothetical protein"  
"OPBM19\_00119" 36270 "s59E25H2" 0 "hypothetical protein"  
"OPBM19\_00119" 36270 "s59E5H2" 0 "hypothetical protein"  
"OPBM19\_00119" 36270 "s63E6H2" 0 "hypothetical protein"  
"OPBM19\_00120" 36271 "s59E13H2" 0 "hypothetical protein"  
"OPBM19\_00120" 36271 "s59E25H2" 0 "hypothetical protein"  
"OPBM19\_00120" 36271 "s59E5H2" 0 "hypothetical protein"  
"OPBM19\_00120" 36271 "s63E6H2" 0 "hypothetical protein"  
"OPBM19\_00121" 36272 "s59E13H2" 0 "hypothetical protein"  
"OPBM19\_00121" 36272 "s59E25H2" 0 "hypothetical protein"  
"OPBM19\_00121" 36272 "s59E5H2" 0 "hypothetical protein"  
"OPBM19\_00121" 36272 "s63E6H2" 0 "hypothetical protein"  
"OPBM19\_00122" 36273 "s59E13H2" 0 "Laccase domain protein"  
"OPBM19\_00122" 36273 "s59E25H2" 0 "Laccase domain protein"  
"OPBM19\_00122" 36273 "s59E5H2" 0 "Laccase domain protein"

"OPBM19\_00122" 36273 "s63E6H2" 0 "Laccase domain protein"  
"OPBM19\_00123" 36274 "s59E13H2" 0 "EamA-like transporter family protein"  
"OPBM19\_00123" 36274 "s59E25H2" 0 "EamA-like transporter family protein"  
"OPBM19\_00123" 36274 "s59E5H2" 0 "EamA-like transporter family protein"  
"OPBM19\_00123" 36274 "s63E6H2" 0 "EamA-like transporter family protein"  
"OPBM19\_00124" 36275 "s59E13H2" 0 "Pyrimidine-nucleoside phosphorylase"  
"OPBM19\_00124" 36275 "s59E25H2" 0 "Pyrimidine-nucleoside phosphorylase"  
"OPBM19\_00124" 36275 "s59E5H2" 0 "Pyrimidine-nucleoside phosphorylase"  
"OPBM19\_00124" 36275 "s63E6H2" 0 "Pyrimidine-nucleoside phosphorylase"  
"OPBM19\_00125" 36276 "s59E13H2" 0 "CCA-adding enzyme"  
"OPBM19\_00125" 36276 "s59E25H2" 0 "CCA-adding enzyme"  
"OPBM19\_00125" 36276 "s59E5H2" 0 "CCA-adding enzyme"  
"OPBM19\_00125" 36276 "s63E6H2" 0 "CCA-adding enzyme"  
"OPBM19\_00126" 36277 "s59E13H2" 0 "hypothetical protein"  
"OPBM19\_00126" 36277 "s59E25H2" 0 "hypothetical protein"  
"OPBM19\_00126" 36277 "s59E5H2" 0 "hypothetical protein"  
"OPBM19\_00126" 36277 "s63E6H2" 0 "hypothetical protein"  
"OPBM19\_00127" 36278 "s59E13H2" 0 "GTPase Der"  
"OPBM19\_00127" 36278 "s59E25H2" 0 "GTPase Der"  
"OPBM19\_00127" 36278 "s59E5H2" 0 "GTPase Der"  
"OPBM19\_00127" 36278 "s63E6H2" 0 "GTPase Der"  
"OPBM19\_00128" 36279 "s59E13H2" 0 "4-hydroxy-3-methylbut-2-enyl diphosphate reductase"  
"OPBM19\_00128" 36279 "s59E25H2" 0 "4-hydroxy-3-methylbut-2-enyl diphosphate reductase"  
"OPBM19\_00128" 36279 "s59E5H2" 0 "4-hydroxy-3-methylbut-2-enyl diphosphate reductase"  
"OPBM19\_00128" 36279 "s63E6H2" 0 "4-hydroxy-3-methylbut-2-enyl diphosphate reductase"  
"OPBM19\_00129" 36280 "s59E13H2" 0 "1-acyl-sn-glycerol-3-phosphate acyltransferase"  
"OPBM19\_00129" 36280 "s59E25H2" 0 "1-acyl-sn-glycerol-3-phosphate acyltransferase"  
"OPBM19\_00129" 36280 "s59E5H2" 0 "1-acyl-sn-glycerol-3-phosphate acyltransferase"  
"OPBM19\_00129" 36280 "s63E6H2" 0 "1-acyl-sn-glycerol-3-phosphate acyltransferase"  
"OPBM19\_00130" 36281 "s59E13H2" 0 "Cytidylate kinase"  
"OPBM19\_00130" 36281 "s59E25H2" 0 "Cytidylate kinase"  
"OPBM19\_00130" 36281 "s59E5H2" 0 "Cytidylate kinase"  
"OPBM19\_00130" 36281 "s63E6H2" 0 "Cytidylate kinase"  
"OPBM19\_00131" 36282 "s59E13H2" 0 "Segregation and condensation protein A"  
"OPBM19\_00131" 36282 "s59E25H2" 0 "Segregation and condensation protein A"  
"OPBM19\_00131" 36282 "s59E5H2" 0 "Segregation and condensation protein A"  
"OPBM19\_00131" 36282 "s63E6H2" 0 "Segregation and condensation protein A"  
"OPBM19\_00132" 36283 "s59E13H2" 0 "Tryptophan--tRNA ligase"  
"OPBM19\_00132" 36283 "s59E25H2" 0 "Tryptophan--tRNA ligase"  
"OPBM19\_00132" 36283 "s59E5H2" 0 "Tryptophan--tRNA ligase"  
"OPBM19\_00132" 36283 "s63E6H2" 0 "Tryptophan--tRNA ligase"  
"OPBM19\_00133" 36284 "s59E13H2" 0 "Peptidase family M50"  
"OPBM19\_00133" 36284 "s59E25H2" 0 "Peptidase family M50"  
"OPBM19\_00133" 36284 "s59E5H2" 0 "Peptidase family M50"  
"OPBM19\_00133" 36284 "s63E6H2" 0 "Peptidase family M50"  
"OPBM19\_00134" 36285 "s59E13H2" 0 "hypothetical protein"  
"OPBM19\_00134" 36285 "s59E25H2" 0 "hypothetical protein"

"OPBM19\_00134" 36285 "s59E5H2" 0 "hypothetical protein"  
"OPBM19\_00134" 36285 "s63E6H2" 0 "hypothetical protein"  
"OPBM19\_00135" 36286 "s59E13H2" 0 "hypothetical protein"  
"OPBM19\_00135" 36286 "s59E25H2" 0 "hypothetical protein"  
"OPBM19\_00135" 36286 "s59E5H2" 0 "hypothetical protein"  
"OPBM19\_00135" 36286 "s63E6H2" 0 "hypothetical protein"  
"OPBM19\_00136" 36287 "s59E13H2" 0 "SPBc2 prophage-derived endonuclease YokF precursor"  
"OPBM19\_00136" 36287 "s59E25H2" 0 "SPBc2 prophage-derived endonuclease YokF precursor"  
"OPBM19\_00136" 36287 "s59E5H2" 0 "SPBc2 prophage-derived endonuclease YokF precursor"  
"OPBM19\_00136" 36287 "s63E6H2" 0 "SPBc2 prophage-derived endonuclease YokF precursor"  
"OPBM19\_00137" 36288 "s59E13H2" 0 "hypothetical protein"  
"OPBM19\_00137" 36288 "s59E25H2" 0 "hypothetical protein"  
"OPBM19\_00137" 36288 "s59E5H2" 0 "hypothetical protein"  
"OPBM19\_00137" 36288 "s63E6H2" 0 "hypothetical protein"  
"OPBM19\_00139" 36290 "s59E13H2" 0 "Terminase-like family protein"  
"OPBM19\_00139" 36290 "s59E25H2" 0 "Terminase-like family protein"  
"OPBM19\_00139" 36290 "s59E5H2" 0 "Terminase-like family protein"  
"OPBM19\_00139" 36290 "s63E6H2" 0 "Terminase-like family protein"  
"OPBM19\_00140" 36291 "s59E13H2" 0 "hypothetical protein"  
"OPBM19\_00140" 36291 "s59E25H2" 0 "hypothetical protein"  
"OPBM19\_00140" 36291 "s59E5H2" 0 "hypothetical protein"  
"OPBM19\_00140" 36291 "s63E6H2" 0 "hypothetical protein"  
"OPBM19\_00142" 36293 "s59E13H2" 0 "hypothetical protein"  
"OPBM19\_00142" 36293 "s59E25H2" 0 "hypothetical protein"  
"OPBM19\_00142" 36293 "s59E5H2" 0 "hypothetical protein"  
"OPBM19\_00142" 36293 "s63E6H2" 0 "hypothetical protein"  
"OPBM19\_00144" 36295 "s59E13H2" 0 "hypothetical protein"  
"OPBM19\_00144" 36295 "s59E25H2" 0 "hypothetical protein"  
"OPBM19\_00144" 36295 "s59E5H2" 0 "hypothetical protein"  
"OPBM19\_00144" 36295 "s63E6H2" 0 "hypothetical protein"  
"OPBM19\_00145" 36296 "s59E13H2" 0 "Nucleoid occlusion protein"  
"OPBM19\_00145" 36296 "s59E25H2" 0 "Nucleoid occlusion protein"  
"OPBM19\_00145" 36296 "s59E5H2" 0 "Nucleoid occlusion protein"  
"OPBM19\_00145" 36296 "s63E6H2" 0 "Nucleoid occlusion protein"  
"OPBM19\_00147" 36298 "s59E13H2" 0 "hypothetical protein"  
"OPBM19\_00147" 36298 "s59E25H2" 0 "hypothetical protein"  
"OPBM19\_00147" 36298 "s59E5H2" 0 "hypothetical protein"  
"OPBM19\_00147" 36298 "s63E6H2" 0 "hypothetical protein"  
"OPBM19\_00148" 36299 "s59E13H2" 0 "hypothetical protein"  
"OPBM19\_00148" 36299 "s59E25H2" 0 "hypothetical protein"  
"OPBM19\_00148" 36299 "s59E5H2" 0 "hypothetical protein"  
"OPBM19\_00148" 36299 "s63E6H2" 0 "hypothetical protein"  
"OPBM19\_00149" 36300 "s59E13H2" 0 "hypothetical protein"  
"OPBM19\_00149" 36300 "s59E25H2" 0 "hypothetical protein"  
"OPBM19\_00149" 36300 "s59E5H2" 0 "hypothetical protein"  
"OPBM19\_00149" 36300 "s63E6H2" 0 "hypothetical protein"  
"OPBM19\_00150" 36301 "s59E13H2" 0 "replication initiation regulator SeqA"

"OPBM19\_00150" 36301 "s59E25H2" 0 "replication initiation regulator SeqA"  
"OPBM19\_00150" 36301 "s59E5H2" 0 "replication initiation regulator SeqA"  
"OPBM19\_00150" 36301 "s63E6H2" 0 "replication initiation regulator SeqA"  
"OPBM19\_00151" 36302 "s59E13H2" 0 "hypothetical protein"  
"OPBM19\_00151" 36302 "s59E25H2" 0 "hypothetical protein"  
"OPBM19\_00151" 36302 "s59E5H2" 0 "hypothetical protein"  
"OPBM19\_00151" 36302 "s63E6H2" 0 "hypothetical protein"  
"OPBM19\_00152" 36303 "s59E13H2" 0 "hypothetical protein"  
"OPBM19\_00152" 36303 "s59E25H2" 0 "hypothetical protein"  
"OPBM19\_00152" 36303 "s59E5H2" 0 "hypothetical protein"  
"OPBM19\_00152" 36303 "s63E6H2" 0 "hypothetical protein"  
"OPBM19\_00153" 36304 "s59E13H2" 0 "hypothetical protein"  
"OPBM19\_00153" 36304 "s59E25H2" 0 "hypothetical protein"  
"OPBM19\_00153" 36304 "s59E5H2" 0 "hypothetical protein"  
"OPBM19\_00153" 36304 "s63E6H2" 0 "hypothetical protein"  
"OPBM19\_00154" 36305 "s59E13H2" 0 "Putative peptidoglycan binding domain protein"  
"OPBM19\_00154" 36305 "s59E25H2" 0 "Putative peptidoglycan binding domain protein"  
"OPBM19\_00154" 36305 "s59E5H2" 0 "Putative peptidoglycan binding domain protein"  
"OPBM19\_00154" 36305 "s63E6H2" 0 "Putative peptidoglycan binding domain protein"  
"OPBM19\_00157" 36308 "s59E13H2" 0 "hypothetical protein"  
"OPBM19\_00157" 36308 "s59E25H2" 0 "hypothetical protein"  
"OPBM19\_00157" 36308 "s59E5H2" 0 "hypothetical protein"  
"OPBM19\_00157" 36308 "s63E6H2" 0 "hypothetical protein"  
"OPBM19\_00161" 36312 "s59E13H2" 0 "Pyruvate formate-lyase 1-activating enzyme"  
"OPBM19\_00161" 36312 "s59E25H2" 0 "Pyruvate formate-lyase 1-activating enzyme"  
"OPBM19\_00161" 36312 "s59E5H2" 0 "Pyruvate formate-lyase 1-activating enzyme"  
"OPBM19\_00161" 36312 "s63E6H2" 0 "Pyruvate formate-lyase 1-activating enzyme"  
"OPBM19\_00162" 36313 "s59E13H2" 0 "Polyribonucleotide 5'-hydroxyl-kinase"  
"OPBM19\_00162" 36313 "s59E25H2" 0 "Polyribonucleotide 5'-hydroxyl-kinase"  
"OPBM19\_00162" 36313 "s59E5H2" 0 "Polyribonucleotide 5'-hydroxyl-kinase"  
"OPBM19\_00162" 36313 "s63E6H2" 0 "Polyribonucleotide 5'-hydroxyl-kinase"  
"OPBM19\_00163" 36314 "s59E13H2" 0 "CAAX amino terminal protease self- immunity"  
"OPBM19\_00163" 36314 "s59E25H2" 0 "CAAX amino terminal protease self- immunity"  
"OPBM19\_00163" 36314 "s59E5H2" 0 "CAAX amino terminal protease self- immunity"  
"OPBM19\_00163" 36314 "s63E6H2" 0 "CAAX amino terminal protease self- immunity"  
"OPBM19\_00164" 36315 "s59E13H2" 0 "Phd\_YefM"  
"OPBM19\_00164" 36315 "s59E25H2" 0 "Phd\_YefM"  
"OPBM19\_00164" 36315 "s59E5H2" 0 "Phd\_YefM"  
"OPBM19\_00164" 36315 "s63E6H2" 0 "Phd\_YefM"  
"OPBM19\_00165" 36316 "s59E13H2" 0 "PIN domain protein"  
"OPBM19\_00165" 36316 "s59E25H2" 0 "PIN domain protein"  
"OPBM19\_00165" 36316 "s59E5H2" 0 "PIN domain protein"  
"OPBM19\_00165" 36316 "s63E6H2" 0 "PIN domain protein"  
"OPBM19\_00166" 36317 "s59E13H2" 0 "DNA polymerase IV"  
"OPBM19\_00166" 36317 "s59E25H2" 0 "DNA polymerase IV"  
"OPBM19\_00166" 36317 "s59E5H2" 0 "DNA polymerase IV"  
"OPBM19\_00166" 36317 "s63E6H2" 0 "DNA polymerase IV"

"OPBM19\_00168" 36319 "s59E13H2" 0 "Cyclic di-GMP phosphodiesterase response regulator RpfG"  
"OPBM19\_00168" 36319 "s59E25H2" 0 "Cyclic di-GMP phosphodiesterase response regulator RpfG"  
"OPBM19\_00168" 36319 "s59E5H2" 0 "Cyclic di-GMP phosphodiesterase response regulator RpfG"  
"OPBM19\_00168" 36319 "s63E6H2" 0 "Cyclic di-GMP phosphodiesterase response regulator RpfG"  
"OPBM19\_00169" 36320 "s59E13H2" 0 "putative multidrug-efflux transporter/MT1297"  
"OPBM19\_00169" 36320 "s59E25H2" 0 "putative multidrug-efflux transporter/MT1297"  
"OPBM19\_00169" 36320 "s59E5H2" 0 "putative multidrug-efflux transporter/MT1297"  
"OPBM19\_00169" 36320 "s63E6H2" 0 "putative multidrug-efflux transporter/MT1297"  
"OPBM19\_00170" 36321 "s59E13H2" 0 "hypothetical protein"  
"OPBM19\_00170" 36321 "s59E25H2" 0 "hypothetical protein"  
"OPBM19\_00170" 36321 "s59E5H2" 0 "hypothetical protein"  
"OPBM19\_00170" 36321 "s63E6H2" 0 "hypothetical protein"  
"OPBM19\_00171" 36322 "s59E13H2" 0 "Sortase family protein"  
"OPBM19\_00171" 36322 "s59E25H2" 0 "Sortase family protein"  
"OPBM19\_00171" 36322 "s59E5H2" 0 "Sortase family protein"  
"OPBM19\_00171" 36322 "s63E6H2" 0 "Sortase family protein"  
"OPBM19\_00173" 36324 "s59E13H2" 0 "Cysteine-rich secretory protein family protein"  
"OPBM19\_00173" 36324 "s59E25H2" 0 "Cysteine-rich secretory protein family protein"  
"OPBM19\_00173" 36324 "s59E5H2" 0 "Cysteine-rich secretory protein family protein"  
"OPBM19\_00173" 36324 "s63E6H2" 0 "Cysteine-rich secretory protein family protein"  
"OPBM19\_00174" 36325 "s59E13H2" 0 "Cna protein B-type domain protein"  
"OPBM19\_00174" 36325 "s59E25H2" 0 "Cna protein B-type domain protein"  
"OPBM19\_00174" 36325 "s59E5H2" 0 "Cna protein B-type domain protein"  
"OPBM19\_00174" 36325 "s63E6H2" 0 "Cna protein B-type domain protein"  
"OPBM19\_00178" 36329 "s59E13H2" 0 "hypothetical protein"  
"OPBM19\_00178" 36329 "s59E25H2" 0 "hypothetical protein"  
"OPBM19\_00178" 36329 "s59E5H2" 0 "hypothetical protein"  
"OPBM19\_00178" 36329 "s63E6H2" 0 "hypothetical protein"  
"OPBM19\_00179" 36330 "s59E13H2" 0 "Phytochrome-like protein cph2"  
"OPBM19\_00179" 36330 "s59E25H2" 0 "Phytochrome-like protein cph2"  
"OPBM19\_00179" 36330 "s59E5H2" 0 "Phytochrome-like protein cph2"  
"OPBM19\_00179" 36330 "s63E6H2" 0 "Phytochrome-like protein cph2"  
"OPBM19\_00181" 36332 "s59E13H2" 0 "Trehalose/maltose-binding protein MalE precursor"  
"OPBM19\_00181" 36332 "s59E25H2" 0 "Trehalose/maltose-binding protein MalE precursor"  
"OPBM19\_00181" 36332 "s59E5H2" 0 "Trehalose/maltose-binding protein MalE precursor"  
"OPBM19\_00181" 36332 "s63E6H2" 0 "Trehalose/maltose-binding protein MalE precursor"  
"OPBM19\_00182" 36333 "s59E13H2" 0 "Putative mannose-6-phosphate isomerase YvyI"  
"OPBM19\_00182" 36333 "s59E25H2" 0 "Putative mannose-6-phosphate isomerase YvyI"  
"OPBM19\_00182" 36333 "s59E5H2" 0 "Putative mannose-6-phosphate isomerase YvyI"  
"OPBM19\_00182" 36333 "s63E6H2" 0 "Putative mannose-6-phosphate isomerase YvyI"  
"OPBM19\_00183" 36334 "s59E13H2" 0 "Phosphomannomutase/phosphoglucomutase"  
"OPBM19\_00183" 36334 "s59E25H2" 0 "Phosphomannomutase/phosphoglucomutase"  
"OPBM19\_00183" 36334 "s59E5H2" 0 "Phosphomannomutase/phosphoglucomutase"  
"OPBM19\_00183" 36334 "s63E6H2" 0 "Phosphomannomutase/phosphoglucomutase"  
"OPBM19\_00184" 36335 "s59E13H2" 0 "Helix-turn-helix domain protein"  
"OPBM19\_00184" 36335 "s59E25H2" 0 "Helix-turn-helix domain protein"  
"OPBM19\_00184" 36335 "s59E5H2" 0 "Helix-turn-helix domain protein"



"OPBM19\_00184" 36335 "s63E6H2" 0 "Helix-turn-helix domain protein"  
"OPBM19\_00185" 36336 "s59E13H2" 0 "Glycosyltransferase AgIJ"  
"OPBM19\_00185" 36336 "s59E25H2" 0 "Glycosyltransferase AgIJ"  
"OPBM19\_00185" 36336 "s59E5H2" 0 "Glycosyltransferase AgIJ"  
"OPBM19\_00185" 36336 "s63E6H2" 0 "Glycosyltransferase AgIJ"  
"OPBM19\_00186" 36337 "s59E13H2" 0 "DegV domain-containing protein"  
"OPBM19\_00186" 36337 "s59E25H2" 0 "DegV domain-containing protein"  
"OPBM19\_00186" 36337 "s59E5H2" 0 "DegV domain-containing protein"  
"OPBM19\_00186" 36337 "s63E6H2" 0 "DegV domain-containing protein"  
"OPBM19\_00187" 36338 "s59E13H2" 0 "Diacylglycerol kinase"  
"OPBM19\_00187" 36338 "s59E25H2" 0 "Diacylglycerol kinase"  
"OPBM19\_00187" 36338 "s59E5H2" 0 "Diacylglycerol kinase"  
"OPBM19\_00187" 36338 "s63E6H2" 0 "Diacylglycerol kinase"  
"OPBM19\_00188" 36339 "s59E13H2" 0 "hypothetical protein"  
"OPBM19\_00188" 36339 "s59E25H2" 0 "hypothetical protein"  
"OPBM19\_00188" 36339 "s59E5H2" 0 "hypothetical protein"  
"OPBM19\_00188" 36339 "s63E6H2" 0 "hypothetical protein"  
"OPBM19\_00189" 36340 "s59E13H2" 0 "YtxH-like protein"  
"OPBM19\_00189" 36340 "s59E25H2" 0 "YtxH-like protein"  
"OPBM19\_00189" 36340 "s59E5H2" 0 "YtxH-like protein"  
"OPBM19\_00189" 36340 "s63E6H2" 0 "YtxH-like protein"  
"OPBM19\_00191" 36342 "s59E13H2" 0 "Tungsten-containing aldehyde ferredoxin oxidoreductase"  
"OPBM19\_00191" 36342 "s59E25H2" 0 "Tungsten-containing aldehyde ferredoxin oxidoreductase"  
"OPBM19\_00191" 36342 "s59E5H2" 0 "Tungsten-containing aldehyde ferredoxin oxidoreductase"  
"OPBM19\_00191" 36342 "s63E6H2" 0 "Tungsten-containing aldehyde ferredoxin oxidoreductase"  
"OPBM19\_00192" 36343 "s59E13H2" 0 "Bifunctional (p)ppGpp synthase/hydrolase relA"  
"OPBM19\_00192" 36343 "s59E25H2" 0 "Bifunctional (p)ppGpp synthase/hydrolase relA"  
"OPBM19\_00192" 36343 "s59E5H2" 0 "Bifunctional (p)ppGpp synthase/hydrolase relA"  
"OPBM19\_00192" 36343 "s63E6H2" 0 "Bifunctional (p)ppGpp synthase/hydrolase relA"  
"OPBM19\_00193" 36344 "s59E13H2" 0 "putative metallo-hydrolase"  
"OPBM19\_00193" 36344 "s59E25H2" 0 "putative metallo-hydrolase"  
"OPBM19\_00193" 36344 "s59E5H2" 0 "putative metallo-hydrolase"  
"OPBM19\_00193" 36344 "s63E6H2" 0 "putative metallo-hydrolase"  
"OPBM19\_00194" 36345 "s59E13H2" 0 "Histidine--tRNA ligase"  
"OPBM19\_00194" 36345 "s59E25H2" 0 "Histidine--tRNA ligase"  
"OPBM19\_00194" 36345 "s59E5H2" 0 "Histidine--tRNA ligase"  
"OPBM19\_00194" 36345 "s63E6H2" 0 "Histidine--tRNA ligase"  
"OPBM19\_00195" 36346 "s59E13H2" 0 "Aspartate--tRNA ligase"  
"OPBM19\_00195" 36346 "s59E25H2" 0 "Aspartate--tRNA ligase"  
"OPBM19\_00195" 36346 "s59E5H2" 0 "Aspartate--tRNA ligase"  
"OPBM19\_00195" 36346 "s63E6H2" 0 "Aspartate--tRNA ligase"  
"OPBM19\_00197" 36348 "s59E13H2" 0 "hypothetical protein"  
"OPBM19\_00197" 36348 "s59E25H2" 0 "hypothetical protein"  
"OPBM19\_00197" 36348 "s59E5H2" 0 "hypothetical protein"  
"OPBM19\_00197" 36348 "s63E6H2" 0 "hypothetical protein"  
"OPBM19\_00198" 36349 "s59E13H2" 0 "AI-2 transport protein TqsA"  
"OPBM19\_00198" 36349 "s59E25H2" 0 "AI-2 transport protein TqsA"

"OPBM19\_00198" 36349 "s59E5H2" 0 "Al-2 transport protein TqsA"  
"OPBM19\_00198" 36349 "s63E6H2" 0 "Al-2 transport protein TqsA"  
"OPBM19\_00199" 36350 "s59E13H2" 0 "Alanine--tRNA ligase"  
"OPBM19\_00199" 36350 "s59E25H2" 0 "Alanine--tRNA ligase"  
"OPBM19\_00199" 36350 "s59E5H2" 0 "Alanine--tRNA ligase"  
"OPBM19\_00199" 36350 "s63E6H2" 0 "Alanine--tRNA ligase"  
"OPBM19\_00200" 36351 "s59E13H2" 0 "Putative Holliday junction resolvase"  
"OPBM19\_00200" 36351 "s59E25H2" 0 "Putative Holliday junction resolvase"  
"OPBM19\_00200" 36351 "s59E5H2" 0 "Putative Holliday junction resolvase"  
"OPBM19\_00200" 36351 "s63E6H2" 0 "Putative Holliday junction resolvase"  
"OPBM19\_00201" 36352 "s59E13H2" 0 "putative aminodeoxychorismate lyase"  
"OPBM19\_00201" 36352 "s59E25H2" 0 "putative aminodeoxychorismate lyase"  
"OPBM19\_00201" 36352 "s59E5H2" 0 "putative aminodeoxychorismate lyase"  
"OPBM19\_00201" 36352 "s63E6H2" 0 "putative aminodeoxychorismate lyase"  
"OPBM19\_00202" 36353 "s59E13H2" 0 "Mitochondrial PGP phosphatase"  
"OPBM19\_00202" 36353 "s59E25H2" 0 "Mitochondrial PGP phosphatase"  
"OPBM19\_00202" 36353 "s59E5H2" 0 "Mitochondrial PGP phosphatase"  
"OPBM19\_00202" 36353 "s63E6H2" 0 "Mitochondrial PGP phosphatase"  
"OPBM19\_00203" 36354 "s59E13H2" 0 "Acylphosphatase"  
"OPBM19\_00203" 36354 "s59E25H2" 0 "Acylphosphatase"  
"OPBM19\_00203" 36354 "s59E5H2" 0 "Acylphosphatase"  
"OPBM19\_00203" 36354 "s63E6H2" 0 "Acylphosphatase"  
"OPBM19\_00204" 36355 "s59E13H2" 0 "Queuosine precursor transporter QueT"  
"OPBM19\_00204" 36355 "s59E25H2" 0 "Queuosine precursor transporter QueT"  
"OPBM19\_00204" 36355 "s59E5H2" 0 "Queuosine precursor transporter QueT"  
"OPBM19\_00204" 36355 "s63E6H2" 0 "Queuosine precursor transporter QueT"  
"OPBM19\_00205" 36356 "s59E13H2" 0 "PD-(D/E)XK nuclease superfamily protein"  
"OPBM19\_00205" 36356 "s59E25H2" 0 "PD-(D/E)XK nuclease superfamily protein"  
"OPBM19\_00205" 36356 "s59E5H2" 0 "PD-(D/E)XK nuclease superfamily protein"  
"OPBM19\_00205" 36356 "s63E6H2" 0 "PD-(D/E)XK nuclease superfamily protein"  
"OPBM19\_00207" 36358 "s59E13H2" 0 "Energy-coupling factor transporter transmembrane protein EcfT"  
"OPBM19\_00207" 36358 "s59E25H2" 0 "Energy-coupling factor transporter transmembrane protein EcfT"  
"OPBM19\_00207" 36358 "s59E5H2" 0 "Energy-coupling factor transporter transmembrane protein EcfT"  
"OPBM19\_00207" 36358 "s63E6H2" 0 "Energy-coupling factor transporter transmembrane protein EcfT"  
"OPBM19\_00208" 36359 "s59E13H2" 0 "Energy-coupling factor transporter ATP-binding protein EcfA1"  
"OPBM19\_00208" 36359 "s59E25H2" 0 "Energy-coupling factor transporter ATP-binding protein EcfA1"  
"OPBM19\_00208" 36359 "s59E5H2" 0 "Energy-coupling factor transporter ATP-binding protein EcfA1"  
"OPBM19\_00208" 36359 "s63E6H2" 0 "Energy-coupling factor transporter ATP-binding protein EcfA1"  
"OPBM19\_00209" 36360 "s59E13H2" 0 "Cobalt import ATP-binding protein CbiO"  
"OPBM19\_00209" 36360 "s59E25H2" 0 "Cobalt import ATP-binding protein CbiO"  
"OPBM19\_00209" 36360 "s59E5H2" 0 "Cobalt import ATP-binding protein CbiO"  
"OPBM19\_00209" 36360 "s63E6H2" 0 "Cobalt import ATP-binding protein CbiO"  
"OPBM19\_00210" 36361 "s59E13H2" 0 "Membrane lipoprotein TmpC precursor"  
"OPBM19\_00210" 36361 "s59E25H2" 0 "Membrane lipoprotein TmpC precursor"  
"OPBM19\_00210" 36361 "s59E5H2" 0 "Membrane lipoprotein TmpC precursor"  
"OPBM19\_00210" 36361 "s63E6H2" 0 "Membrane lipoprotein TmpC precursor"  
"OPBM19\_00211" 36362 "s59E13H2" 0 "Galactose/methyl galactoside import ATP-binding protein MglA"

"OPBM19\_00211" 36362 "s59E25H2" 0 "Galactose/methyl galactoside import ATP-binding protein MglA"  
"OPBM19\_00211" 36362 "s59E5H2" 0.004227337 "Galactose/methyl galactoside import ATP-binding protein MglA"  
"OPBM19\_00211" 36362 "s63E6H2" 0 "Galactose/methyl galactoside import ATP-binding protein MglA"  
"OPBM19\_00212" 36363 "s59E13H2" 0 "beta-methylgalactoside transporter inner membrane component"  
"OPBM19\_00212" 36363 "s59E25H2" 0 "beta-methylgalactoside transporter inner membrane component"  
"OPBM19\_00212" 36363 "s59E5H2" 0 "beta-methylgalactoside transporter inner membrane component"  
"OPBM19\_00212" 36363 "s63E6H2" 0 "beta-methylgalactoside transporter inner membrane component"  
"OPBM19\_00213" 36364 "s59E13H2" 0 "Branched-chain amino acid transport system / permease component"  
"OPBM19\_00213" 36364 "s59E25H2" 0 "Branched-chain amino acid transport system / permease component"  
"OPBM19\_00213" 36364 "s59E5H2" 0 "Branched-chain amino acid transport system / permease component"  
"OPBM19\_00213" 36364 "s63E6H2" 0 "Branched-chain amino acid transport system / permease component"  
"OPBM19\_00214" 36365 "s59E13H2" 0 "Pseudouridine-5'-phosphate glycosidase"  
"OPBM19\_00214" 36365 "s59E25H2" 0 "Pseudouridine-5'-phosphate glycosidase"  
"OPBM19\_00214" 36365 "s59E5H2" 0 "Pseudouridine-5'-phosphate glycosidase"  
"OPBM19\_00214" 36365 "s63E6H2" 0 "Pseudouridine-5'-phosphate glycosidase"  
"OPBM19\_00215" 36366 "s59E13H2" 0 "Tyrosine recombinase XerD"  
"OPBM19\_00215" 36366 "s59E25H2" 0 "Tyrosine recombinase XerD"  
"OPBM19\_00215" 36366 "s59E5H2" 0 "Tyrosine recombinase XerD"  
"OPBM19\_00215" 36366 "s63E6H2" 0 "Tyrosine recombinase XerD"  
"OPBM19\_00216" 36367 "s59E13H2" 0 "30S ribosomal protein S2"  
"OPBM19\_00216" 36367 "s59E25H2" 0 "30S ribosomal protein S2"  
"OPBM19\_00216" 36367 "s59E5H2" 0 "30S ribosomal protein S2"  
"OPBM19\_00216" 36367 "s63E6H2" 0 "30S ribosomal protein S2"  
"OPBM19\_00217" 36368 "s59E13H2" 0 "Elongation factor Ts"  
"OPBM19\_00217" 36368 "s59E25H2" 0 "Elongation factor Ts"  
"OPBM19\_00217" 36368 "s59E5H2" 0 "Elongation factor Ts"  
"OPBM19\_00217" 36368 "s63E6H2" 0 "Elongation factor Ts"  
"OPBM19\_00218" 36369 "s59E13H2" 0 "Uridylate kinase"  
"OPBM19\_00218" 36369 "s59E25H2" 0 "Uridylate kinase"  
"OPBM19\_00218" 36369 "s59E5H2" 0 "Uridylate kinase"  
"OPBM19\_00218" 36369 "s63E6H2" 0 "Uridylate kinase"  
"OPBM19\_00219" 36370 "s59E13H2" 0 "Ribosome-recycling factor"  
"OPBM19\_00219" 36370 "s59E25H2" 0 "Ribosome-recycling factor"  
"OPBM19\_00219" 36370 "s59E5H2" 0 "Ribosome-recycling factor"  
"OPBM19\_00219" 36370 "s63E6H2" 0 "Ribosome-recycling factor"  
"OPBM19\_00220" 36371 "s59E13H2" 0 "Isoprenyl transferase"  
"OPBM19\_00220" 36371 "s59E25H2" 0 "Isoprenyl transferase"  
"OPBM19\_00220" 36371 "s59E5H2" 0 "Isoprenyl transferase"  
"OPBM19\_00220" 36371 "s63E6H2" 0 "Isoprenyl transferase"  
"OPBM19\_00221" 36372 "s59E13H2" 0 "Phosphatidate cytidyllyltransferase"  
"OPBM19\_00221" 36372 "s59E25H2" 0 "Phosphatidate cytidyllyltransferase"  
"OPBM19\_00221" 36372 "s59E5H2" 0 "Phosphatidate cytidyllyltransferase"  
"OPBM19\_00221" 36372 "s63E6H2" 0 "Phosphatidate cytidyllyltransferase"  
"OPBM19\_00222" 36373 "s59E13H2" 0 "Ribonuclease 3"  
"OPBM19\_00222" 36373 "s59E25H2" 0 "Ribonuclease 3"  
"OPBM19\_00222" 36373 "s59E5H2" 0 "Ribonuclease 3"  
"OPBM19\_00222" 36373 "s63E6H2" 0 "Ribonuclease 3"

"OPBM19\_00223" 36374 "s59E13H2" 0 "Chromosome partition protein Smc"  
"OPBM19\_00223" 36374 "s59E25H2" 0 "Chromosome partition protein Smc"  
"OPBM19\_00223" 36374 "s59E5H2" 0 "Chromosome partition protein Smc"  
"OPBM19\_00223" 36374 "s63E6H2" 0 "Chromosome partition protein Smc"  
"OPBM19\_00224" 36375 "s59E13H2" 0 "putative transposase"  
"OPBM19\_00224" 36375 "s59E25H2" 0 "putative transposase"  
"OPBM19\_00224" 36375 "s59E5H2" 0 "putative transposase"  
"OPBM19\_00224" 36375 "s63E6H2" 0 "putative transposase"  
"OPBM19\_00225" 36376 "s59E13H2" 0 "30S ribosomal protein S16"  
"OPBM19\_00225" 36376 "s59E25H2" 0 "30S ribosomal protein S16"  
"OPBM19\_00225" 36376 "s59E5H2" 0 "30S ribosomal protein S16"  
"OPBM19\_00225" 36376 "s63E6H2" 0 "30S ribosomal protein S16"  
"OPBM19\_00226" 36377 "s59E13H2" 0 "hypothetical protein"  
"OPBM19\_00226" 36377 "s59E25H2" 0 "hypothetical protein"  
"OPBM19\_00226" 36377 "s59E5H2" 0 "hypothetical protein"  
"OPBM19\_00226" 36377 "s63E6H2" 0 "hypothetical protein"  
"OPBM19\_00227" 36378 "s59E13H2" 0 "Ribosome maturation factor RimM"  
"OPBM19\_00227" 36378 "s59E25H2" 0 "Ribosome maturation factor RimM"  
"OPBM19\_00227" 36378 "s59E5H2" 0 "Ribosome maturation factor RimM"  
"OPBM19\_00227" 36378 "s63E6H2" 0 "Ribosome maturation factor RimM"  
"OPBM19\_00228" 36379 "s59E13H2" 0 "tRNA (guanine-N(1)-)-methyltransferase"  
"OPBM19\_00228" 36379 "s59E25H2" 0 "tRNA (guanine-N(1)-)-methyltransferase"  
"OPBM19\_00228" 36379 "s59E5H2" 0 "tRNA (guanine-N(1)-)-methyltransferase"  
"OPBM19\_00228" 36379 "s63E6H2" 0 "tRNA (guanine-N(1)-)-methyltransferase"  
"OPBM19\_00229" 36380 "s59E13H2" 0 "50S ribosomal protein L19"  
"OPBM19\_00229" 36380 "s59E25H2" 0 "50S ribosomal protein L19"  
"OPBM19\_00229" 36380 "s59E5H2" 0 "50S ribosomal protein L19"  
"OPBM19\_00229" 36380 "s63E6H2" 0 "50S ribosomal protein L19"  
"OPBM19\_00230" 36381 "s59E13H2" 0 "Signal peptidase IB"  
"OPBM19\_00230" 36381 "s59E25H2" 0 "Signal peptidase IB"  
"OPBM19\_00230" 36381 "s59E5H2" 0 "Signal peptidase IB"  
"OPBM19\_00230" 36381 "s63E6H2" 0 "Signal peptidase IB"  
"OPBM19\_00231" 36382 "s59E13H2" 0 "hypothetical protein"  
"OPBM19\_00231" 36382 "s59E25H2" 0 "hypothetical protein"  
"OPBM19\_00231" 36382 "s59E5H2" 0 "hypothetical protein"  
"OPBM19\_00231" 36382 "s63E6H2" 0 "hypothetical protein"  
"OPBM19\_00233" 36384 "s59E13H2" 0 "Tungsten-containing aldehyde ferredoxin oxidoreductase"  
"OPBM19\_00233" 36384 "s59E25H2" 0 "Tungsten-containing aldehyde ferredoxin oxidoreductase"  
"OPBM19\_00233" 36384 "s59E5H2" 0 "Tungsten-containing aldehyde ferredoxin oxidoreductase"  
"OPBM19\_00233" 36384 "s63E6H2" 0 "Tungsten-containing aldehyde ferredoxin oxidoreductase"  
"OPBM19\_00234" 36385 "s59E13H2" 0 "hypothetical protein"  
"OPBM19\_00234" 36385 "s59E25H2" 0 "hypothetical protein"  
"OPBM19\_00234" 36385 "s59E5H2" 0 "hypothetical protein"  
"OPBM19\_00234" 36385 "s63E6H2" 0 "hypothetical protein"  
"OPBM19\_00235" 36386 "s59E13H2" 0 "ThiS family protein"  
"OPBM19\_00235" 36386 "s59E25H2" 0 "ThiS family protein"  
"OPBM19\_00235" 36386 "s59E5H2" 0 "ThiS family protein"

"OPBM19\_00235" 36386 "s63E6H2" 0 "ThiS family protein"  
"OPBM19\_00236" 36387 "s59E13H2" 0 "D-inositol 3-phosphate glycosyltransferase"  
"OPBM19\_00236" 36387 "s59E25H2" 0 "D-inositol 3-phosphate glycosyltransferase"  
"OPBM19\_00236" 36387 "s59E5H2" 0 "D-inositol 3-phosphate glycosyltransferase"  
"OPBM19\_00236" 36387 "s63E6H2" 0 "D-inositol 3-phosphate glycosyltransferase"  
"OPBM19\_00237" 36388 "s59E13H2" 0 "preprotein translocase subunit SecA"  
"OPBM19\_00237" 36388 "s59E25H2" 0 "preprotein translocase subunit SecA"  
"OPBM19\_00237" 36388 "s59E5H2" 0 "preprotein translocase subunit SecA"  
"OPBM19\_00237" 36388 "s63E6H2" 0 "preprotein translocase subunit SecA"  
"OPBM19\_00238" 36389 "s59E13H2" 0 "hypothetical protein"  
"OPBM19\_00238" 36389 "s59E25H2" 0 "hypothetical protein"  
"OPBM19\_00238" 36389 "s59E5H2" 0 "hypothetical protein"  
"OPBM19\_00238" 36389 "s63E6H2" 0 "hypothetical protein"  
"OPBM19\_00239" 36390 "s59E13H2" 0 "DNA polymerase III subunit tau"  
"OPBM19\_00239" 36390 "s59E25H2" 0 "DNA polymerase III subunit tau"  
"OPBM19\_00239" 36390 "s59E5H2" 0 "DNA polymerase III subunit tau"  
"OPBM19\_00239" 36390 "s63E6H2" 0 "DNA polymerase III subunit tau"  
"OPBM19\_00240" 36391 "s59E13H2" 0 "Thymidylate kinase"  
"OPBM19\_00240" 36391 "s59E25H2" 0 "Thymidylate kinase"  
"OPBM19\_00240" 36391 "s59E5H2" 0 "Thymidylate kinase"  
"OPBM19\_00240" 36391 "s63E6H2" 0 "Thymidylate kinase"  
"OPBM19\_00241" 36392 "s59E13H2" 0 "Glyoxylate reductase"  
"OPBM19\_00241" 36392 "s59E25H2" 0 "Glyoxylate reductase"  
"OPBM19\_00241" 36392 "s59E5H2" 0 "Glyoxylate reductase"  
"OPBM19\_00241" 36392 "s63E6H2" 0 "Glyoxylate reductase"  
"OPBM19\_00242" 36393 "s59E13H2" 0 "Purine catabolism protein PucG"  
"OPBM19\_00242" 36393 "s59E25H2" 0 "Purine catabolism protein PucG"  
"OPBM19\_00242" 36393 "s59E5H2" 0 "Purine catabolism protein PucG"  
"OPBM19\_00242" 36393 "s63E6H2" 0 "Purine catabolism protein PucG"  
"OPBM19\_00243" 36394 "s59E13H2" 0 "DNA topoisomerase 1"  
"OPBM19\_00243" 36394 "s59E25H2" 0 "DNA topoisomerase 1"  
"OPBM19\_00243" 36394 "s59E5H2" 0 "DNA topoisomerase 1"  
"OPBM19\_00243" 36394 "s63E6H2" 0 "DNA topoisomerase 1"  
"OPBM19\_00244" 36395 "s59E13H2" 0 "Molybdopterin adenyllyltransferase"  
"OPBM19\_00244" 36395 "s59E25H2" 0 "Molybdopterin adenyllyltransferase"  
"OPBM19\_00244" 36395 "s59E5H2" 0 "Molybdopterin adenyllyltransferase"  
"OPBM19\_00244" 36395 "s63E6H2" 0 "Molybdopterin adenyllyltransferase"  
"OPBM19\_00245" 36396 "s59E13H2" 0 "Molybdopterin molybdenumtransferase"  
"OPBM19\_00245" 36396 "s59E25H2" 0 "Molybdopterin molybdenumtransferase"  
"OPBM19\_00245" 36396 "s59E5H2" 0 "Molybdopterin molybdenumtransferase"  
"OPBM19\_00245" 36396 "s63E6H2" 0 "Molybdopterin molybdenumtransferase"  
"OPBM19\_00246" 36397 "s59E13H2" 0 "Molybdopterin-guanine dinucleotide biosynthesis adapter protein"  
"OPBM19\_00246" 36397 "s59E25H2" 0 "Molybdopterin-guanine dinucleotide biosynthesis adapter protein"  
"OPBM19\_00246" 36397 "s59E5H2" 0 "Molybdopterin-guanine dinucleotide biosynthesis adapter protein"  
"OPBM19\_00246" 36397 "s63E6H2" 0 "Molybdopterin-guanine dinucleotide biosynthesis adapter protein"  
"OPBM19\_00247" 36398 "s59E13H2" 0 "Beta-lactamase precursor"  
"OPBM19\_00247" 36398 "s59E25H2" 0 "Beta-lactamase precursor"

"OPBM19\_00247" 36398 "s59E5H2" 0 "Beta-lactamase precursor"  
"OPBM19\_00247" 36398 "s63E6H2" 0 "Beta-lactamase precursor"  
"OPBM19\_00248" 36399 "s59E13H2" 0 "putative transposase"  
"OPBM19\_00248" 36399 "s59E25H2" 0 "putative transposase"  
"OPBM19\_00248" 36399 "s59E5H2" 0 "putative transposase"  
"OPBM19\_00248" 36399 "s63E6H2" 0 "putative transposase"  
"OPBM19\_00249" 36400 "s59E13H2" 0 "Transposase IS200 like protein"  
"OPBM19\_00249" 36400 "s59E25H2" 0 "Transposase IS200 like protein"  
"OPBM19\_00249" 36400 "s59E5H2" 0 "Transposase IS200 like protein"  
"OPBM19\_00249" 36400 "s63E6H2" 0 "Transposase IS200 like protein"  
"OPBM19\_00250" 36401 "s59E13H2" 0 "putative undecaprenyl-phosphate N-acetylglucosaminyl 1-phosphate transferase"  
"OPBM19\_00250" 36401 "s59E25H2" 0 "putative undecaprenyl-phosphate N-acetylglucosaminyl 1-phosphate transferase"  
"OPBM19\_00250" 36401 "s59E5H2" 0 "putative undecaprenyl-phosphate N-acetylglucosaminyl 1-phosphate transferase"  
"OPBM19\_00250" 36401 "s63E6H2" 0 "putative undecaprenyl-phosphate N-acetylglucosaminyl 1-phosphate transferase"  
"OPBM19\_00251" 36402 "s59E13H2" 0 "putative S-adenosylmethionine-dependent methyltransferase/MSMEI\_2290"  
"OPBM19\_00251" 36402 "s59E25H2" 0 "putative S-adenosylmethionine-dependent methyltransferase/MSMEI\_2290"  
"OPBM19\_00251" 36402 "s59E5H2" 0 "putative S-adenosylmethionine-dependent methyltransferase/MSMEI\_2290"  
"OPBM19\_00251" 36402 "s63E6H2" 0 "putative S-adenosylmethionine-dependent methyltransferase/MSMEI\_2290"  
"OPBM19\_00252" 36403 "s59E13H2" 0 "N-acetylglucosaminyl-diphospho-decaprenol L-rhamnosyltransferase"  
"OPBM19\_00252" 36403 "s59E25H2" 0 "N-acetylglucosaminyl-diphospho-decaprenol L-rhamnosyltransferase"  
"OPBM19\_00252" 36403 "s59E5H2" 0 "N-acetylglucosaminyl-diphospho-decaprenol L-rhamnosyltransferase"  
"OPBM19\_00252" 36403 "s63E6H2" 0 "N-acetylglucosaminyl-diphospho-decaprenol L-rhamnosyltransferase"  
"OPBM19\_00254" 36405 "s59E13H2" 0 "Selenocysteine-specific elongation factor"  
"OPBM19\_00254" 36405 "s59E25H2" 0 "Selenocysteine-specific elongation factor"  
"OPBM19\_00254" 36405 "s59E5H2" 0 "Selenocysteine-specific elongation factor"  
"OPBM19\_00254" 36405 "s63E6H2" 0 "Selenocysteine-specific elongation factor"  
"OPBM19\_00255" 36406 "s59E13H2" 0 "L-seryl-tRNA(Sec) selenium transferase"  
"OPBM19\_00255" 36406 "s59E25H2" 0 "L-seryl-tRNA(Sec) selenium transferase"  
"OPBM19\_00255" 36406 "s59E5H2" 0 "L-seryl-tRNA(Sec) selenium transferase"  
"OPBM19\_00255" 36406 "s63E6H2" 0 "L-seryl-tRNA(Sec) selenium transferase"  
"OPBM19\_00256" 36407 "s59E13H2" 0 "hypothetical protein"  
"OPBM19\_00256" 36407 "s59E25H2" 0 "hypothetical protein"  
"OPBM19\_00256" 36407 "s59E5H2" 0 "hypothetical protein"  
"OPBM19\_00256" 36407 "s63E6H2" 0 "hypothetical protein"  
"OPBM19\_00257" 36408 "s59E13H2" 0 "Ribosome-binding ATPase YchF"  
"OPBM19\_00257" 36408 "s59E25H2" 0 "Ribosome-binding ATPase YchF"  
"OPBM19\_00257" 36408 "s59E5H2" 0 "Ribosome-binding ATPase YchF"  
"OPBM19\_00257" 36408 "s63E6H2" 0 "Ribosome-binding ATPase YchF"  
"OPBM19\_00258" 36409 "s59E13H2" 0 "Ribosome-binding ATPase YchF"  
"OPBM19\_00258" 36409 "s59E25H2" 0 "Ribosome-binding ATPase YchF"  
"OPBM19\_00258" 36409 "s59E5H2" 0 "Ribosome-binding ATPase YchF"  
"OPBM19\_00258" 36409 "s63E6H2" 0 "Ribosome-binding ATPase YchF"  
"OPBM19\_00259" 36410 "s59E13H2" 0 "hypothetical protein"  
"OPBM19\_00259" 36410 "s59E25H2" 0 "hypothetical protein"  
"OPBM19\_00259" 36410 "s59E5H2" 0 "hypothetical protein"  
"OPBM19\_00259" 36410 "s63E6H2" 0 "hypothetical protein"  
"OPBM19\_00260" 36411 "s59E13H2" 0 "YtxH-like protein"

"OPBM19\_00260" 36411 "s59E25H2" 0 "YtxH-like protein"  
"OPBM19\_00260" 36411 "s59E5H2" 0 "YtxH-like protein"  
"OPBM19\_00260" 36411 "s63E6H2" 0 "YtxH-like protein"  
"OPBM19\_00261" 36412 "s59E13H2" 0 "hypothetical protein"  
"OPBM19\_00261" 36412 "s59E25H2" 0 "hypothetical protein"  
"OPBM19\_00261" 36412 "s59E5H2" 0 "hypothetical protein"  
"OPBM19\_00261" 36412 "s63E6H2" 0 "hypothetical protein"  
"OPBM19\_00262" 36413 "s59E13H2" 0 "Sulfide dehydrogenase subunit alpha precursor"  
"OPBM19\_00262" 36413 "s59E25H2" 0 "Sulfide dehydrogenase subunit alpha precursor"  
"OPBM19\_00262" 36413 "s59E5H2" 0 "Sulfide dehydrogenase subunit alpha precursor"  
"OPBM19\_00262" 36413 "s63E6H2" 0 "Sulfide dehydrogenase subunit alpha precursor"  
"OPBM19\_00263" 36414 "s59E13H2" 0 "Sulfide dehydrogenase subunit beta precursor"  
"OPBM19\_00263" 36414 "s59E25H2" 0 "Sulfide dehydrogenase subunit beta precursor"  
"OPBM19\_00263" 36414 "s59E5H2" 0 "Sulfide dehydrogenase subunit beta precursor"  
"OPBM19\_00263" 36414 "s63E6H2" 0 "Sulfide dehydrogenase subunit beta precursor"  
"OPBM19\_00264" 36415 "s59E13H2" 0 "protochlorophyllide reductase iron-sulfur ATP-binding protein"  
"OPBM19\_00264" 36415 "s59E25H2" 0 "protochlorophyllide reductase iron-sulfur ATP-binding protein"  
"OPBM19\_00264" 36415 "s59E5H2" 0 "protochlorophyllide reductase iron-sulfur ATP-binding protein"  
"OPBM19\_00264" 36415 "s63E6H2" 0 "protochlorophyllide reductase iron-sulfur ATP-binding protein"  
"OPBM19\_00265" 36416 "s59E13H2" 0 "hypothetical protein"  
"OPBM19\_00265" 36416 "s59E25H2" 0 "hypothetical protein"  
"OPBM19\_00265" 36416 "s59E5H2" 0 "hypothetical protein"  
"OPBM19\_00265" 36416 "s63E6H2" 0 "hypothetical protein"  
"OPBM19\_00266" 36417 "s59E13H2" 0 "Putative heat shock protein HspR"  
"OPBM19\_00266" 36417 "s59E25H2" 0 "Putative heat shock protein HspR"  
"OPBM19\_00266" 36417 "s59E5H2" 0 "Putative heat shock protein HspR"  
"OPBM19\_00266" 36417 "s63E6H2" 0 "Putative heat shock protein HspR"  
"OPBM19\_00267" 36418 "s59E13H2" 0 "Chaperone protein DnaJ"  
"OPBM19\_00267" 36418 "s59E25H2" 0 "Chaperone protein DnaJ"  
"OPBM19\_00267" 36418 "s59E5H2" 0 "Chaperone protein DnaJ"  
"OPBM19\_00267" 36418 "s63E6H2" 0 "Chaperone protein DnaJ"  
"OPBM19\_00268" 36419 "s59E13H2" 0 "heat shock protein GrpE"  
"OPBM19\_00268" 36419 "s59E25H2" 0 "heat shock protein GrpE"  
"OPBM19\_00268" 36419 "s59E5H2" 0 "heat shock protein GrpE"  
"OPBM19\_00268" 36419 "s63E6H2" 0 "heat shock protein GrpE"  
"OPBM19\_00269" 36420 "s59E13H2" 0 "Chaperone protein DnaK"  
"OPBM19\_00269" 36420 "s59E25H2" 0 "Chaperone protein DnaK"  
"OPBM19\_00269" 36420 "s59E5H2" 0 "Chaperone protein DnaK"  
"OPBM19\_00269" 36420 "s63E6H2" 0 "Chaperone protein DnaK"  
"OPBM19\_00270" 36421 "s59E13H2" 0 "hypothetical protein"  
"OPBM19\_00270" 36421 "s59E25H2" 0 "hypothetical protein"  
"OPBM19\_00270" 36421 "s59E5H2" 0 "hypothetical protein"  
"OPBM19\_00270" 36421 "s63E6H2" 0 "hypothetical protein"  
"OPBM19\_00271" 36422 "s59E13H2" 0 "Histone deacetylase-like amidohydrolase"  
"OPBM19\_00271" 36422 "s59E25H2" 0 "Histone deacetylase-like amidohydrolase"  
"OPBM19\_00271" 36422 "s59E5H2" 0 "Histone deacetylase-like amidohydrolase"  
"OPBM19\_00271" 36422 "s63E6H2" 0 "Histone deacetylase-like amidohydrolase"

"OPBM19\_00272" 36423 "s59E13H2" 0 "putative endopeptidase precursor"  
"OPBM19\_00272" 36423 "s59E25H2" 0 "putative endopeptidase precursor"  
"OPBM19\_00272" 36423 "s59E5H2" 0 "putative endopeptidase precursor"  
"OPBM19\_00272" 36423 "s63E6H2" 0 "putative endopeptidase precursor"  
"OPBM19\_00273" 36424 "s59E13H2" 0 "N-acetylmuramoyl-L-alanine amidase AmiA precursor"  
"OPBM19\_00273" 36424 "s59E25H2" 0 "N-acetylmuramoyl-L-alanine amidase AmiA precursor"  
"OPBM19\_00273" 36424 "s59E5H2" 0 "N-acetylmuramoyl-L-alanine amidase AmiA precursor"  
"OPBM19\_00273" 36424 "s63E6H2" 0 "N-acetylmuramoyl-L-alanine amidase AmiA precursor"  
"OPBM19\_00274" 36425 "s59E13H2" 0 "Thioredoxin"  
"OPBM19\_00274" 36425 "s59E25H2" 0 "Thioredoxin"  
"OPBM19\_00274" 36425 "s59E5H2" 0 "Thioredoxin"  
"OPBM19\_00274" 36425 "s63E6H2" 0 "Thioredoxin"  
"OPBM19\_00275" 36426 "s59E13H2" 0 "Thioredoxin reductase"  
"OPBM19\_00275" 36426 "s59E25H2" 0 "Thioredoxin reductase"  
"OPBM19\_00275" 36426 "s59E5H2" 0 "Thioredoxin reductase"  
"OPBM19\_00275" 36426 "s63E6H2" 0 "Thioredoxin reductase"  
"OPBM19\_00276" 36427 "s59E13H2" 0 "ECF RNA polymerase sigma-E factor"  
"OPBM19\_00276" 36427 "s59E25H2" 0 "ECF RNA polymerase sigma-E factor"  
"OPBM19\_00276" 36427 "s59E5H2" 0 "ECF RNA polymerase sigma-E factor"  
"OPBM19\_00276" 36427 "s63E6H2" 0 "ECF RNA polymerase sigma-E factor"  
"OPBM19\_00277" 36428 "s59E13H2" 0 "hypothetical protein"  
"OPBM19\_00277" 36428 "s59E25H2" 0 "hypothetical protein"  
"OPBM19\_00277" 36428 "s59E5H2" 0 "hypothetical protein"  
"OPBM19\_00277" 36428 "s63E6H2" 0 "hypothetical protein"  
"OPBM19\_00279" 36430 "s59E13H2" 0 "Adenylosuccinate lyase"  
"OPBM19\_00279" 36430 "s59E25H2" 0 "Adenylosuccinate lyase"  
"OPBM19\_00279" 36430 "s59E5H2" 0 "Adenylosuccinate lyase"  
"OPBM19\_00279" 36430 "s63E6H2" 0 "Adenylosuccinate lyase"  
"OPBM19\_00280" 36431 "s59E13H2" 0 "Adenylosuccinate synthetase"  
"OPBM19\_00280" 36431 "s59E25H2" 0 "Adenylosuccinate synthetase"  
"OPBM19\_00280" 36431 "s59E5H2" 0 "Adenylosuccinate synthetase"  
"OPBM19\_00280" 36431 "s63E6H2" 0 "Adenylosuccinate synthetase"  
"OPBM19\_00281" 36432 "s59E13H2" 0 "hypothetical protein"  
"OPBM19\_00281" 36432 "s59E25H2" 0 "hypothetical protein"  
"OPBM19\_00281" 36432 "s59E5H2" 0 "hypothetical protein"  
"OPBM19\_00281" 36432 "s63E6H2" 0 "hypothetical protein"  
"OPBM19\_00282" 36433 "s59E13H2" 0 "Glycine cleavage system H protein"  
"OPBM19\_00282" 36433 "s59E25H2" 0 "Glycine cleavage system H protein"  
"OPBM19\_00282" 36433 "s59E5H2" 0 "Glycine cleavage system H protein"  
"OPBM19\_00282" 36433 "s63E6H2" 0 "Glycine cleavage system H protein"  
"OPBM19\_00283" 36434 "s59E13H2" 0 "hypothetical protein"  
"OPBM19\_00283" 36434 "s59E25H2" 0 "hypothetical protein"  
"OPBM19\_00283" 36434 "s59E5H2" 0 "hypothetical protein"  
"OPBM19\_00283" 36434 "s63E6H2" 0 "hypothetical protein"  
"OPBM19\_00284" 36435 "s59E13H2" 0 "Pyrimidine-specific ribonucleoside hydrolase RihA"  
"OPBM19\_00284" 36435 "s59E25H2" 0 "Pyrimidine-specific ribonucleoside hydrolase RihA"  
"OPBM19\_00284" 36435 "s59E5H2" 0 "Pyrimidine-specific ribonucleoside hydrolase RihA"



"OPBM19\_00284" 36435 "s63E6H2" 0 "Pyrimidine-specific ribonucleoside hydrolase RihA"  
"OPBM19\_00285" 36436 "s59E13H2" 0 "5-methylthioadenosine/S-adenosylhomocysteine deaminase"  
"OPBM19\_00285" 36436 "s59E25H2" 0 "5-methylthioadenosine/S-adenosylhomocysteine deaminase"  
"OPBM19\_00285" 36436 "s59E5H2" 0 "5-methylthioadenosine/S-adenosylhomocysteine deaminase"  
"OPBM19\_00285" 36436 "s63E6H2" 0 "5-methylthioadenosine/S-adenosylhomocysteine deaminase"  
"OPBM19\_00286" 36437 "s59E13H2" 0 "Ribokinase"  
"OPBM19\_00286" 36437 "s59E25H2" 0 "Ribokinase"  
"OPBM19\_00286" 36437 "s59E5H2" 0 "Ribokinase"  
"OPBM19\_00286" 36437 "s63E6H2" 0 "Ribokinase"  
"OPBM19\_00288" 36439 "s59E13H2" 0 "ATP-dependent zinc metalloprotease FtsH"  
"OPBM19\_00288" 36439 "s59E25H2" 0 "ATP-dependent zinc metalloprotease FtsH"  
"OPBM19\_00288" 36439 "s59E5H2" 0 "ATP-dependent zinc metalloprotease FtsH"  
"OPBM19\_00288" 36439 "s63E6H2" 0 "ATP-dependent zinc metalloprotease FtsH"  
"OPBM19\_00289" 36440 "s59E13H2" 0 "Hypoxanthine phosphoribosyltransferase"  
"OPBM19\_00289" 36440 "s59E25H2" 0 "Hypoxanthine phosphoribosyltransferase"  
"OPBM19\_00289" 36440 "s59E5H2" 0 "Hypoxanthine phosphoribosyltransferase"  
"OPBM19\_00289" 36440 "s63E6H2" 0 "Hypoxanthine phosphoribosyltransferase"  
"OPBM19\_00290" 36441 "s59E13H2" 0 "tRNA(Ile)-lysidine synthase"  
"OPBM19\_00290" 36441 "s59E25H2" 0 "tRNA(Ile)-lysidine synthase"  
"OPBM19\_00290" 36441 "s59E5H2" 0 "tRNA(Ile)-lysidine synthase"  
"OPBM19\_00290" 36441 "s63E6H2" 0 "tRNA(Ile)-lysidine synthase"  
"OPBM19\_00291" 36442 "s59E13H2" 0 "tRNA(Ile)-lysidine synthase"  
"OPBM19\_00291" 36442 "s59E25H2" 0 "tRNA(Ile)-lysidine synthase"  
"OPBM19\_00291" 36442 "s59E5H2" 0 "tRNA(Ile)-lysidine synthase"  
"OPBM19\_00291" 36442 "s63E6H2" 0 "tRNA(Ile)-lysidine synthase"  
"OPBM19\_00292" 36443 "s59E13H2" 0 "Glycerol-3-phosphate acyltransferase"  
"OPBM19\_00292" 36443 "s59E25H2" 0 "Glycerol-3-phosphate acyltransferase"  
"OPBM19\_00292" 36443 "s59E5H2" 0 "Glycerol-3-phosphate acyltransferase"  
"OPBM19\_00292" 36443 "s63E6H2" 0 "Glycerol-3-phosphate acyltransferase"  
"OPBM19\_00293" 36444 "s59E13H2" 0 "Galactose-1-phosphate uridylyltransferase"  
"OPBM19\_00293" 36444 "s59E25H2" 0 "Galactose-1-phosphate uridylyltransferase"  
"OPBM19\_00293" 36444 "s59E5H2" 0 "Galactose-1-phosphate uridylyltransferase"  
"OPBM19\_00293" 36444 "s63E6H2" 0 "Galactose-1-phosphate uridylyltransferase"  
"OPBM19\_00294" 36445 "s59E13H2" 0 "Sporulation initiation phosphotransferase F"  
"OPBM19\_00294" 36445 "s59E25H2" 0 "Sporulation initiation phosphotransferase F"  
"OPBM19\_00294" 36445 "s59E5H2" 0 "Sporulation initiation phosphotransferase F"  
"OPBM19\_00294" 36445 "s63E6H2" 0 "Sporulation initiation phosphotransferase F"  
"OPBM19\_00295" 36446 "s59E13H2" 0 "Sporulation kinase E"  
"OPBM19\_00295" 36446 "s59E25H2" 0 "Sporulation kinase E"  
"OPBM19\_00295" 36446 "s59E5H2" 0 "Sporulation kinase E"  
"OPBM19\_00295" 36446 "s63E6H2" 0 "Sporulation kinase E"  
"OPBM19\_00296" 36447 "s59E13H2" 0 "Glycogen synthase"  
"OPBM19\_00296" 36447 "s59E25H2" 0 "Glycogen synthase"  
"OPBM19\_00296" 36447 "s59E5H2" 0 "Glycogen synthase"  
"OPBM19\_00296" 36447 "s63E6H2" 0 "Glycogen synthase"  
"OPBM19\_00297" 36448 "s59E13H2" 0 "Glycosyl hydrolase family 57"  
"OPBM19\_00297" 36448 "s59E25H2" 0 "Glycosyl hydrolase family 57"

"OPBM19\_00297" 36448 "s59E5H2" 0 "Glycosyl hydrolase family 57"  
"OPBM19\_00297" 36448 "s63E6H2" 0 "Glycosyl hydrolase family 57"  
"OPBM19\_00298" 36449 "s59E13H2" 0 "Alpha-amylase 1"  
"OPBM19\_00298" 36449 "s59E25H2" 0 "Alpha-amylase 1"  
"OPBM19\_00298" 36449 "s59E5H2" 0 "Alpha-amylase 1"  
"OPBM19\_00298" 36449 "s63E6H2" 0 "Alpha-amylase 1"  
"OPBM19\_00299" 36450 "s59E13H2" 0 "hypothetical protein"  
"OPBM19\_00299" 36450 "s59E25H2" 0 "hypothetical protein"  
"OPBM19\_00299" 36450 "s59E5H2" 0 "hypothetical protein"  
"OPBM19\_00299" 36450 "s63E6H2" 0 "hypothetical protein"  
"OPBM19\_00300" 36451 "s59E13H2" 0 "Lumazine-binding domain protein"  
"OPBM19\_00300" 36451 "s59E25H2" 0 "Lumazine-binding domain protein"  
"OPBM19\_00300" 36451 "s59E5H2" 0 "Lumazine-binding domain protein"  
"OPBM19\_00300" 36451 "s63E6H2" 0 "Lumazine-binding domain protein"  
"OPBM19\_00301" 36452 "s59E13H2" 0 "HTH-type transcriptional repressor CytR"  
"OPBM19\_00301" 36452 "s59E25H2" 0 "HTH-type transcriptional repressor CytR"  
"OPBM19\_00301" 36452 "s59E5H2" 0 "HTH-type transcriptional repressor CytR"  
"OPBM19\_00301" 36452 "s63E6H2" 0 "HTH-type transcriptional repressor CytR"  
"OPBM19\_00302" 36453 "s59E13H2" 0 "Multiple sugar-binding protein precursor"  
"OPBM19\_00302" 36453 "s59E25H2" 0 "Multiple sugar-binding protein precursor"  
"OPBM19\_00302" 36453 "s59E5H2" 0 "Multiple sugar-binding protein precursor"  
"OPBM19\_00302" 36453 "s63E6H2" 0 "Multiple sugar-binding protein precursor"  
"OPBM19\_00303" 36454 "s59E13H2" 0 "Lactose transport system permease protein LacF"  
"OPBM19\_00303" 36454 "s59E25H2" 0 "Lactose transport system permease protein LacF"  
"OPBM19\_00303" 36454 "s59E5H2" 0 "Lactose transport system permease protein LacF"  
"OPBM19\_00303" 36454 "s63E6H2" 0 "Lactose transport system permease protein LacF"  
"OPBM19\_00304" 36455 "s59E13H2" 0 "L-arabinose transport system permease protein AraQ"  
"OPBM19\_00304" 36455 "s59E25H2" 0 "L-arabinose transport system permease protein AraQ"  
"OPBM19\_00304" 36455 "s59E5H2" 0 "L-arabinose transport system permease protein AraQ"  
"OPBM19\_00304" 36455 "s63E6H2" 0 "L-arabinose transport system permease protein AraQ"  
"OPBM19\_00305" 36456 "s59E13H2" 0 "Trehalose synthase"  
"OPBM19\_00305" 36456 "s59E25H2" 0 "Trehalose synthase"  
"OPBM19\_00305" 36456 "s59E5H2" 0 "Trehalose synthase"  
"OPBM19\_00305" 36456 "s63E6H2" 0 "Trehalose synthase"  
"OPBM19\_00306" 36457 "s59E13H2" 0 "Tungsten-containing aldehyde ferredoxin oxidoreductase"  
"OPBM19\_00306" 36457 "s59E25H2" 0 "Tungsten-containing aldehyde ferredoxin oxidoreductase"  
"OPBM19\_00306" 36457 "s59E5H2" 0 "Tungsten-containing aldehyde ferredoxin oxidoreductase"  
"OPBM19\_00306" 36457 "s63E6H2" 0 "Tungsten-containing aldehyde ferredoxin oxidoreductase"  
"OPBM19\_00307" 36458 "s59E13H2" 0 "hypothetical protein"  
"OPBM19\_00307" 36458 "s59E25H2" 0 "hypothetical protein"  
"OPBM19\_00307" 36458 "s59E5H2" 0 "hypothetical protein"  
"OPBM19\_00307" 36458 "s63E6H2" 0 "hypothetical protein"  
"OPBM19\_00308" 36459 "s59E13H2" 0 "hypothetical protein"  
"OPBM19\_00308" 36459 "s59E25H2" 0 "hypothetical protein"  
"OPBM19\_00308" 36459 "s59E5H2" 0 "hypothetical protein"  
"OPBM19\_00308" 36459 "s63E6H2" 0 "hypothetical protein"  
"OPBM19\_00309" 36460 "s59E13H2" 0 "hypothetical protein"

"OPBM19\_00309" 36460 "s59E25H2" 0 "hypothetical protein"  
"OPBM19\_00309" 36460 "s59E5H2" 0 "hypothetical protein"  
"OPBM19\_00309" 36460 "s63E6H2" 0 "hypothetical protein"  
"OPBM19\_00310" 36461 "s59E13H2" 0 "hypothetical protein"  
"OPBM19\_00310" 36461 "s59E25H2" 0 "hypothetical protein"  
"OPBM19\_00310" 36461 "s59E5H2" 0 "hypothetical protein"  
"OPBM19\_00310" 36461 "s63E6H2" 0 "hypothetical protein"  
"OPBM19\_00311" 36462 "s59E13H2" 0 "Archaeal ATPase"  
"OPBM19\_00311" 36462 "s59E25H2" 0 "Archaeal ATPase"  
"OPBM19\_00311" 36462 "s59E5H2" 0 "Archaeal ATPase"  
"OPBM19\_00311" 36462 "s63E6H2" 0 "Archaeal ATPase"  
"OPBM19\_00312" 36463 "s59E13H2" 0 "hypothetical protein"  
"OPBM19\_00312" 36463 "s59E25H2" 0 "hypothetical protein"  
"OPBM19\_00312" 36463 "s59E5H2" 0 "hypothetical protein"  
"OPBM19\_00312" 36463 "s63E6H2" 0 "hypothetical protein"  
"OPBM19\_00313" 36464 "s59E13H2" 0 "Peptidase family C69"  
"OPBM19\_00313" 36464 "s59E25H2" 0 "Peptidase family C69"  
"OPBM19\_00313" 36464 "s59E5H2" 0 "Peptidase family C69"  
"OPBM19\_00313" 36464 "s63E6H2" 0 "Peptidase family C69"  
"OPBM19\_00314" 36465 "s59E13H2" 0 "Glycogen synthase"  
"OPBM19\_00314" 36465 "s59E25H2" 0 "Glycogen synthase"  
"OPBM19\_00314" 36465 "s59E5H2" 0 "Glycogen synthase"  
"OPBM19\_00314" 36465 "s63E6H2" 0 "Glycogen synthase"  
"OPBM19\_00315" 36466 "s59E13H2" 0 "ISXO2-like transposase domain protein"  
"OPBM19\_00315" 36466 "s59E25H2" 0 "ISXO2-like transposase domain protein"  
"OPBM19\_00315" 36466 "s59E5H2" 0 "ISXO2-like transposase domain protein"  
"OPBM19\_00315" 36466 "s63E6H2" 0 "ISXO2-like transposase domain protein"  
"OPBM19\_00316" 36467 "s59E13H2" 0 "Putative glycosyltransferase EpsD"  
"OPBM19\_00316" 36467 "s59E25H2" 0 "Putative glycosyltransferase EpsD"  
"OPBM19\_00316" 36467 "s59E5H2" 0 "Putative glycosyltransferase EpsD"  
"OPBM19\_00316" 36467 "s63E6H2" 0 "Putative glycosyltransferase EpsD"  
"OPBM19\_00317" 36468 "s59E13H2" 0 "hypothetical protein"  
"OPBM19\_00317" 36468 "s59E25H2" 0 "hypothetical protein"  
"OPBM19\_00317" 36468 "s59E5H2" 0 "hypothetical protein"  
"OPBM19\_00317" 36468 "s63E6H2" 0 "hypothetical protein"  
"OPBM19\_00318" 36469 "s59E13H2" 0 "CoA binding domain protein"  
"OPBM19\_00318" 36469 "s59E25H2" 0 "CoA binding domain protein"  
"OPBM19\_00318" 36469 "s59E5H2" 0 "CoA binding domain protein"  
"OPBM19\_00318" 36469 "s63E6H2" 0 "CoA binding domain protein"  
"OPBM19\_00319" 36470 "s59E13H2" 0 "Transposase"  
"OPBM19\_00319" 36470 "s59E25H2" 0 "Transposase"  
"OPBM19\_00319" 36470 "s59E5H2" 0 "Transposase"  
"OPBM19\_00319" 36470 "s63E6H2" 0 "Transposase"  
"OPBM19\_00321" 36472 "s59E13H2" 0 "hypothetical protein"  
"OPBM19\_00321" 36472 "s59E25H2" 0 "hypothetical protein"  
"OPBM19\_00321" 36472 "s59E5H2" 0 "hypothetical protein"  
"OPBM19\_00321" 36472 "s63E6H2" 0 "hypothetical protein"

"OPBM19\_00322" 36473 "s59E13H2" 0 "Tyrosine recombinase XerD"  
"OPBM19\_00322" 36473 "s59E25H2" 0 "Tyrosine recombinase XerD"  
"OPBM19\_00322" 36473 "s59E5H2" 0 "Tyrosine recombinase XerD"  
"OPBM19\_00322" 36473 "s63E6H2" 0 "Tyrosine recombinase XerD"  
"OPBM19\_00323" 36474 "s59E13H2" 0 "DNA-binding transcriptional activator PspC"  
"OPBM19\_00323" 36474 "s59E25H2" 0 "DNA-binding transcriptional activator PspC"  
"OPBM19\_00323" 36474 "s59E5H2" 0 "DNA-binding transcriptional activator PspC"  
"OPBM19\_00323" 36474 "s63E6H2" 0 "DNA-binding transcriptional activator PspC"  
"OPBM19\_00325" 36476 "s59E13H2" 0 "Cupin domain protein"  
"OPBM19\_00325" 36476 "s59E25H2" 0 "Cupin domain protein"  
"OPBM19\_00325" 36476 "s59E5H2" 0 "Cupin domain protein"  
"OPBM19\_00325" 36476 "s63E6H2" 0 "Cupin domain protein"  
"OPBM19\_00326" 36477 "s59E13H2" 0 "PII uridylyl-transferase"  
"OPBM19\_00326" 36477 "s59E25H2" 0 "PII uridylyl-transferase"  
"OPBM19\_00326" 36477 "s59E5H2" 0 "PII uridylyl-transferase"  
"OPBM19\_00326" 36477 "s63E6H2" 0 "PII uridylyl-transferase"  
"OPBM19\_00327" 36478 "s59E13H2" 0 "hypothetical protein"  
"OPBM19\_00327" 36478 "s59E25H2" 0 "hypothetical protein"  
"OPBM19\_00327" 36478 "s59E5H2" 0 "hypothetical protein"  
"OPBM19\_00327" 36478 "s63E6H2" 0 "hypothetical protein"  
"OPBM19\_00328" 36479 "s59E13H2" 0 "Adenosine monophosphate-protein transferase SoFic"  
"OPBM19\_00328" 36479 "s59E25H2" 0 "Adenosine monophosphate-protein transferase SoFic"  
"OPBM19\_00328" 36479 "s59E5H2" 0 "Adenosine monophosphate-protein transferase SoFic"  
"OPBM19\_00328" 36479 "s63E6H2" 0 "Adenosine monophosphate-protein transferase SoFic"  
"OPBM19\_00329" 36480 "s59E13H2" 0 "hypothetical protein"  
"OPBM19\_00329" 36480 "s59E25H2" 0 "hypothetical protein"  
"OPBM19\_00329" 36480 "s59E5H2" 0 "hypothetical protein"  
"OPBM19\_00329" 36480 "s63E6H2" 0 "hypothetical protein"  
"OPBM19\_00330" 36481 "s59E13H2" 0 "Ribbon-helix-helix protein, copG family"  
"OPBM19\_00330" 36481 "s59E25H2" 0 "Ribbon-helix-helix protein, copG family"  
"OPBM19\_00330" 36481 "s59E5H2" 0 "Ribbon-helix-helix protein, copG family"  
"OPBM19\_00330" 36481 "s63E6H2" 0 "Ribbon-helix-helix protein, copG family"  
"OPBM19\_00331" 36482 "s59E13H2" 0 "hypothetical protein"  
"OPBM19\_00331" 36482 "s59E25H2" 0 "hypothetical protein"  
"OPBM19\_00331" 36482 "s59E5H2" 0 "hypothetical protein"  
"OPBM19\_00331" 36482 "s63E6H2" 0 "hypothetical protein"  
"OPBM19\_00332" 36483 "s59E13H2" 0 "hypothetical protein"  
"OPBM19\_00332" 36483 "s59E25H2" 0 "hypothetical protein"  
"OPBM19\_00332" 36483 "s59E5H2" 0 "hypothetical protein"  
"OPBM19\_00332" 36483 "s63E6H2" 0 "hypothetical protein"  
"OPBM19\_00333" 36484 "s59E13H2" 0 "hypothetical protein"  
"OPBM19\_00333" 36484 "s59E25H2" 0 "hypothetical protein"  
"OPBM19\_00333" 36484 "s59E5H2" 0 "hypothetical protein"  
"OPBM19\_00333" 36484 "s63E6H2" 0 "hypothetical protein"  
"OPBM19\_00334" 36485 "s59E13H2" 0 "Demethylrebeccamycin-D-glucose O-methyltransferase"  
"OPBM19\_00334" 36485 "s59E25H2" 0 "Demethylrebeccamycin-D-glucose O-methyltransferase"  
"OPBM19\_00334" 36485 "s59E5H2" 0 "Demethylrebeccamycin-D-glucose O-methyltransferase"

"OPBM19\_00334" 36485 "s63E6H2" 0 "Demethylrebeccamycin-D-glucose O-methyltransferase"  
"OPBM19\_00335" 36486 "s59E13H2" 0 "hypothetical protein"  
"OPBM19\_00335" 36486 "s59E25H2" 0 "hypothetical protein"  
"OPBM19\_00335" 36486 "s59E5H2" 0 "hypothetical protein"  
"OPBM19\_00335" 36486 "s63E6H2" 0 "hypothetical protein"  
"OPBM19\_00336" 36487 "s59E13H2" 0 "TspO/MBR family protein"  
"OPBM19\_00336" 36487 "s59E25H2" 0 "TspO/MBR family protein"  
"OPBM19\_00336" 36487 "s59E5H2" 0 "TspO/MBR family protein"  
"OPBM19\_00336" 36487 "s63E6H2" 0 "TspO/MBR family protein"  
"OPBM19\_00337" 36488 "s59E13H2" 0 "hypothetical protein"  
"OPBM19\_00337" 36488 "s59E25H2" 0 "hypothetical protein"  
"OPBM19\_00337" 36488 "s59E5H2" 0 "hypothetical protein"  
"OPBM19\_00337" 36488 "s63E6H2" 0 "hypothetical protein"  
"OPBM19\_00339" 36490 "s59E13H2" 0 "hypothetical protein"  
"OPBM19\_00339" 36490 "s59E25H2" 0 "hypothetical protein"  
"OPBM19\_00339" 36490 "s59E5H2" 0 "hypothetical protein"  
"OPBM19\_00339" 36490 "s63E6H2" 0 "hypothetical protein"  
"OPBM19\_00341" 36492 "s59E13H2" 0 "type I restriction enzyme EcoKI subunit R"  
"OPBM19\_00341" 36492 "s59E25H2" 0 "type I restriction enzyme EcoKI subunit R"  
"OPBM19\_00341" 36492 "s59E5H2" 0 "type I restriction enzyme EcoKI subunit R"  
"OPBM19\_00341" 36492 "s63E6H2" 0 "type I restriction enzyme EcoKI subunit R"  
"OPBM19\_00343" 36494 "s59E13H2" 0 "chromosome segregation protein"  
"OPBM19\_00343" 36494 "s59E25H2" 0 "chromosome segregation protein"  
"OPBM19\_00343" 36494 "s59E5H2" 0 "chromosome segregation protein"  
"OPBM19\_00343" 36494 "s63E6H2" 0 "chromosome segregation protein"  
"OPBM19\_00345" 36496 "s59E13H2" 0 "hypothetical protein"  
"OPBM19\_00345" 36496 "s59E25H2" 0 "hypothetical protein"  
"OPBM19\_00345" 36496 "s59E5H2" 0 "hypothetical protein"  
"OPBM19\_00345" 36496 "s63E6H2" 0 "hypothetical protein"  
"OPBM19\_00346" 36497 "s59E13H2" 0 "DNA replication and repair protein RecF"  
"OPBM19\_00346" 36497 "s59E25H2" 0 "DNA replication and repair protein RecF"  
"OPBM19\_00346" 36497 "s59E5H2" 0 "DNA replication and repair protein RecF"  
"OPBM19\_00346" 36497 "s63E6H2" 0 "DNA replication and repair protein RecF"  
"OPBM19\_00347" 36498 "s59E13H2" 0 "hypothetical protein"  
"OPBM19\_00347" 36498 "s59E25H2" 0 "hypothetical protein"  
"OPBM19\_00347" 36498 "s59E5H2" 0 "hypothetical protein"  
"OPBM19\_00347" 36498 "s63E6H2" 0 "hypothetical protein"  
"OPBM19\_00348" 36499 "s59E13H2" 0 "hypothetical protein"  
"OPBM19\_00348" 36499 "s59E25H2" 0 "hypothetical protein"  
"OPBM19\_00348" 36499 "s59E5H2" 0 "hypothetical protein"  
"OPBM19\_00348" 36499 "s63E6H2" 0 "hypothetical protein"  
"OPBM19\_00349" 36500 "s59E13H2" 0 "Restriction endonuclease"  
"OPBM19\_00349" 36500 "s59E25H2" 0 "Restriction endonuclease"  
"OPBM19\_00349" 36500 "s59E5H2" 0 "Restriction endonuclease"  
"OPBM19\_00349" 36500 "s63E6H2" 0 "Restriction endonuclease"  
"OPBM19\_00350" 36501 "s59E13H2" 0 "hypothetical protein"  
"OPBM19\_00350" 36501 "s59E25H2" 0 "hypothetical protein"

"OPBM19\_00350" 36501 "s59E5H2" 0 "hypothetical protein"  
"OPBM19\_00350" 36501 "s63E6H2" 0 "hypothetical protein"  
"OPBM19\_00353" 36504 "s59E13H2" 0 "Vancomycin/teicoplanin A-type resistance protein VanA"  
"OPBM19\_00353" 36504 "s59E25H2" 0 "Vancomycin/teicoplanin A-type resistance protein VanA"  
"OPBM19\_00353" 36504 "s59E5H2" 0 "Vancomycin/teicoplanin A-type resistance protein VanA"  
"OPBM19\_00353" 36504 "s63E6H2" 0 "Vancomycin/teicoplanin A-type resistance protein VanA"  
"OPBM19\_00354" 36505 "s59E13H2" 0 "hypothetical protein"  
"OPBM19\_00354" 36505 "s59E25H2" 0 "hypothetical protein"  
"OPBM19\_00354" 36505 "s59E5H2" 0 "hypothetical protein"  
"OPBM19\_00354" 36505 "s63E6H2" 0 "hypothetical protein"  
"OPBM19\_00355" 36506 "s59E13H2" 0 "SpoVT / AbrB like domain protein"  
"OPBM19\_00355" 36506 "s59E25H2" 0 "SpoVT / AbrB like domain protein"  
"OPBM19\_00355" 36506 "s59E5H2" 0 "SpoVT / AbrB like domain protein"  
"OPBM19\_00355" 36506 "s63E6H2" 0 "SpoVT / AbrB like domain protein"  
"OPBM19\_00356" 36507 "s59E13H2" 0 "hypothetical protein"  
"OPBM19\_00356" 36507 "s59E25H2" 0 "hypothetical protein"  
"OPBM19\_00356" 36507 "s59E5H2" 0 "hypothetical protein"  
"OPBM19\_00356" 36507 "s63E6H2" 0 "hypothetical protein"  
"OPBM19\_00357" 36508 "s59E13H2" 0 "hypothetical protein"  
"OPBM19\_00357" 36508 "s59E25H2" 0 "hypothetical protein"  
"OPBM19\_00357" 36508 "s59E5H2" 0 "hypothetical protein"  
"OPBM19\_00357" 36508 "s63E6H2" 0 "hypothetical protein"  
"OPBM19\_00358" 36509 "s59E13H2" 0 "hypothetical protein"  
"OPBM19\_00358" 36509 "s59E25H2" 0 "hypothetical protein"  
"OPBM19\_00358" 36509 "s59E5H2" 0 "hypothetical protein"  
"OPBM19\_00358" 36509 "s63E6H2" 0 "hypothetical protein"  
"OPBM19\_00359" 36510 "s59E13H2" 0 "Bacterial type II secretion system protein F domain protein"  
"OPBM19\_00359" 36510 "s59E25H2" 0 "Bacterial type II secretion system protein F domain protein"  
"OPBM19\_00359" 36510 "s59E5H2" 0 "Bacterial type II secretion system protein F domain protein"  
"OPBM19\_00359" 36510 "s63E6H2" 0 "Bacterial type II secretion system protein F domain protein"  
"OPBM19\_00360" 36511 "s59E13H2" 0 "Bacterial type II secretion system protein F domain protein"  
"OPBM19\_00360" 36511 "s59E25H2" 0 "Bacterial type II secretion system protein F domain protein"  
"OPBM19\_00360" 36511 "s59E5H2" 0 "Bacterial type II secretion system protein F domain protein"  
"OPBM19\_00360" 36511 "s63E6H2" 0 "Bacterial type II secretion system protein F domain protein"  
"OPBM19\_00361" 36512 "s59E13H2" 0 "hypothetical protein"  
"OPBM19\_00361" 36512 "s59E25H2" 0 "hypothetical protein"  
"OPBM19\_00361" 36512 "s59E5H2" 0 "hypothetical protein"  
"OPBM19\_00361" 36512 "s63E6H2" 0 "hypothetical protein"  
"OPBM19\_00362" 36513 "s59E13H2" 0 "D-alanine--D-alanine ligase A"  
"OPBM19\_00362" 36513 "s59E25H2" 0 "D-alanine--D-alanine ligase A"  
"OPBM19\_00362" 36513 "s59E5H2" 0 "D-alanine--D-alanine ligase A"  
"OPBM19\_00362" 36513 "s63E6H2" 0 "D-alanine--D-alanine ligase A"  
"OPBM19\_00363" 36514 "s59E13H2" 0 "Glycerate kinase"  
"OPBM19\_00363" 36514 "s59E25H2" 0 "Glycerate kinase"  
"OPBM19\_00363" 36514 "s59E5H2" 0 "Glycerate kinase"  
"OPBM19\_00363" 36514 "s63E6H2" 0 "Glycerate kinase"  
"OPBM19\_00364" 36515 "s59E13H2" 0 "Peptide chain release factor subunit 1"

"OPBM19\_00364" 36515 "s59E25H2" 0 "Peptide chain release factor subunit 1"  
"OPBM19\_00364" 36515 "s59E5H2" 0 "Peptide chain release factor subunit 1"  
"OPBM19\_00364" 36515 "s63E6H2" 0 "Peptide chain release factor subunit 1"  
"OPBM19\_00365" 36516 "s59E13H2" 0 "PKD domain protein"  
"OPBM19\_00365" 36516 "s59E25H2" 0 "PKD domain protein"  
"OPBM19\_00365" 36516 "s59E5H2" 0 "PKD domain protein"  
"OPBM19\_00365" 36516 "s63E6H2" 0 "PKD domain protein"  
"OPBM19\_00366" 36517 "s59E13H2" 0 "Hexuronate transporter"  
"OPBM19\_00366" 36517 "s59E25H2" 0 "Hexuronate transporter"  
"OPBM19\_00366" 36517 "s59E5H2" 0 "Hexuronate transporter"  
"OPBM19\_00366" 36517 "s63E6H2" 0 "Hexuronate transporter"  
"OPBM19\_00367" 36518 "s59E13H2" 0 "Anaerobic ribonucleoside-triphosphate reductase"  
"OPBM19\_00367" 36518 "s59E25H2" 0 "Anaerobic ribonucleoside-triphosphate reductase"  
"OPBM19\_00367" 36518 "s59E5H2" 0 "Anaerobic ribonucleoside-triphosphate reductase"  
"OPBM19\_00367" 36518 "s63E6H2" 0 "Anaerobic ribonucleoside-triphosphate reductase"  
"OPBM19\_00368" 36519 "s59E13H2" 0 "molybdenum cofactor biosynthesis protein A"  
"OPBM19\_00368" 36519 "s59E25H2" 0 "molybdenum cofactor biosynthesis protein A"  
"OPBM19\_00368" 36519 "s59E5H2" 0 "molybdenum cofactor biosynthesis protein A"  
"OPBM19\_00368" 36519 "s63E6H2" 0 "molybdenum cofactor biosynthesis protein A"  
"OPBM19\_00370" 36521 "s59E13H2" 0 "Cobalt import ATP-binding protein CbiO"  
"OPBM19\_00370" 36521 "s59E25H2" 0 "Cobalt import ATP-binding protein CbiO"  
"OPBM19\_00370" 36521 "s59E5H2" 0 "Cobalt import ATP-binding protein CbiO"  
"OPBM19\_00370" 36521 "s63E6H2" 0 "Cobalt import ATP-binding protein CbiO"  
"OPBM19\_00371" 36522 "s59E13H2" 0 "Zinc ribbon domain protein"  
"OPBM19\_00371" 36522 "s59E25H2" 0 "Zinc ribbon domain protein"  
"OPBM19\_00371" 36522 "s59E5H2" 0 "Zinc ribbon domain protein"  
"OPBM19\_00371" 36522 "s63E6H2" 0 "Zinc ribbon domain protein"  
"OPBM19\_00372" 36523 "s59E13H2" 0 "Uracil DNA glycosylase superfamily protein"  
"OPBM19\_00372" 36523 "s59E25H2" 0 "Uracil DNA glycosylase superfamily protein"  
"OPBM19\_00372" 36523 "s59E5H2" 0 "Uracil DNA glycosylase superfamily protein"  
"OPBM19\_00372" 36523 "s63E6H2" 0 "Uracil DNA glycosylase superfamily protein"  
"OPBM19\_00373" 36524 "s59E13H2" 0 "tRNA threonylcarbamoyladenosine biosynthesis protein TsaE"  
"OPBM19\_00373" 36524 "s59E25H2" 0 "tRNA threonylcarbamoyladenosine biosynthesis protein TsaE"  
"OPBM19\_00373" 36524 "s59E5H2" 0 "tRNA threonylcarbamoyladenosine biosynthesis protein TsaE"  
"OPBM19\_00373" 36524 "s63E6H2" 0 "tRNA threonylcarbamoyladenosine biosynthesis protein TsaE"  
"OPBM19\_00374" 36525 "s59E13H2" 0 "tRNA threonylcarbamoyladenosine biosynthesis protein TsaB"  
"OPBM19\_00374" 36525 "s59E25H2" 0 "tRNA threonylcarbamoyladenosine biosynthesis protein TsaB"  
"OPBM19\_00374" 36525 "s59E5H2" 0 "tRNA threonylcarbamoyladenosine biosynthesis protein TsaB"  
"OPBM19\_00374" 36525 "s63E6H2" 0 "tRNA threonylcarbamoyladenosine biosynthesis protein TsaB"  
"OPBM19\_00375" 36526 "s59E13H2" 0 "putative N-acetyltransferase"  
"OPBM19\_00375" 36526 "s59E25H2" 0 "putative N-acetyltransferase"  
"OPBM19\_00375" 36526 "s59E5H2" 0 "putative N-acetyltransferase"  
"OPBM19\_00375" 36526 "s63E6H2" 0 "putative N-acetyltransferase"  
"OPBM19\_00376" 36527 "s59E13H2" 0 "tRNA N6-adenosine threonylcarbamoyltransferase"  
"OPBM19\_00376" 36527 "s59E25H2" 0 "tRNA N6-adenosine threonylcarbamoyltransferase"  
"OPBM19\_00376" 36527 "s59E5H2" 0 "tRNA N6-adenosine threonylcarbamoyltransferase"  
"OPBM19\_00376" 36527 "s63E6H2" 0 "tRNA N6-adenosine threonylcarbamoyltransferase"

"OPBM19\_00377" 36528 "s59E13H2" 0 "Apolipoprotein N-acyltransferase"  
"OPBM19\_00377" 36528 "s59E25H2" 0 "Apolipoprotein N-acyltransferase"  
"OPBM19\_00377" 36528 "s59E5H2" 0 "Apolipoprotein N-acyltransferase"  
"OPBM19\_00377" 36528 "s63E6H2" 0 "Apolipoprotein N-acyltransferase"  
"OPBM19\_00378" 36529 "s59E13H2" 0 "Asparagine--tRNA ligase"  
"OPBM19\_00378" 36529 "s59E25H2" 0 "Asparagine--tRNA ligase"  
"OPBM19\_00378" 36529 "s59E5H2" 0 "Asparagine--tRNA ligase"  
"OPBM19\_00378" 36529 "s63E6H2" 0 "Asparagine--tRNA ligase"  
"OPBM19\_00379" 36530 "s59E13H2" 0 "10 kDa chaperonin"  
"OPBM19\_00379" 36530 "s59E25H2" 0 "10 kDa chaperonin"  
"OPBM19\_00379" 36530 "s59E5H2" 0 "10 kDa chaperonin"  
"OPBM19\_00379" 36530 "s63E6H2" 0 "10 kDa chaperonin"  
"OPBM19\_00380" 36531 "s59E13H2" 0 "60 kDa chaperonin"  
"OPBM19\_00380" 36531 "s59E25H2" 0 "60 kDa chaperonin"  
"OPBM19\_00380" 36531 "s59E5H2" 0 "60 kDa chaperonin"  
"OPBM19\_00380" 36531 "s63E6H2" 0 "60 kDa chaperonin"  
"OPBM19\_00381" 36532 "s59E13H2" 0 "ATP-dependent DNA helicase PcrA"  
"OPBM19\_00381" 36532 "s59E25H2" 0 "ATP-dependent DNA helicase PcrA"  
"OPBM19\_00381" 36532 "s59E5H2" 0 "ATP-dependent DNA helicase PcrA"  
"OPBM19\_00381" 36532 "s63E6H2" 0 "ATP-dependent DNA helicase PcrA"  
"OPBM19\_00382" 36533 "s59E13H2" 0 "hypothetical protein"  
"OPBM19\_00382" 36533 "s59E25H2" 0 "hypothetical protein"  
"OPBM19\_00382" 36533 "s59E5H2" 0 "hypothetical protein"  
"OPBM19\_00382" 36533 "s63E6H2" 0 "hypothetical protein"  
"OPBM19\_00383" 36534 "s59E13H2" 0 "Ferredoxin"  
"OPBM19\_00383" 36534 "s59E25H2" 0 "Ferredoxin"  
"OPBM19\_00383" 36534 "s59E5H2" 0 "Ferredoxin"  
"OPBM19\_00383" 36534 "s63E6H2" 0 "Ferredoxin"  
"OPBM19\_00384" 36535 "s59E13H2" 0 "Septum site-determining protein MinD"  
"OPBM19\_00384" 36535 "s59E25H2" 0 "Septum site-determining protein MinD"  
"OPBM19\_00384" 36535 "s59E5H2" 0 "Septum site-determining protein MinD"  
"OPBM19\_00384" 36535 "s63E6H2" 0 "Septum site-determining protein MinD"  
"OPBM19\_00385" 36536 "s59E13H2" 0 "Corrinoid/iron-sulfur protein small subunit"  
"OPBM19\_00385" 36536 "s59E25H2" 0 "Corrinoid/iron-sulfur protein small subunit"  
"OPBM19\_00385" 36536 "s59E5H2" 0 "Corrinoid/iron-sulfur protein small subunit"  
"OPBM19\_00385" 36536 "s63E6H2" 0 "Corrinoid/iron-sulfur protein small subunit"  
"OPBM19\_00386" 36537 "s59E13H2" 0 "Corrinoid/iron-sulfur protein large subunit"  
"OPBM19\_00386" 36537 "s59E25H2" 0 "Corrinoid/iron-sulfur protein large subunit"  
"OPBM19\_00386" 36537 "s59E5H2" 0 "Corrinoid/iron-sulfur protein large subunit"  
"OPBM19\_00386" 36537 "s63E6H2" 0 "Corrinoid/iron-sulfur protein large subunit"  
"OPBM19\_00387" 36538 "s59E13H2" 0 "Formate--tetrahydrofolate ligase"  
"OPBM19\_00387" 36538 "s59E25H2" 0 "Formate--tetrahydrofolate ligase"  
"OPBM19\_00387" 36538 "s59E5H2" 0 "Formate--tetrahydrofolate ligase"  
"OPBM19\_00387" 36538 "s63E6H2" 0 "Formate--tetrahydrofolate ligase"  
"OPBM19\_00388" 36539 "s59E13H2" 0 "Bifunctional protein FOLD protein"  
"OPBM19\_00388" 36539 "s59E25H2" 0 "Bifunctional protein FOLD protein"  
"OPBM19\_00388" 36539 "s59E5H2" 0 "Bifunctional protein FOLD protein"



"OPBM19\_00388" 36539 "s63E6H2" 0 "Bifunctional protein FolD protein"  
"OPBM19\_00389" 36540 "s59E13H2" 0 "Dihydrolipoyl dehydrogenase"  
"OPBM19\_00389" 36540 "s59E25H2" 0 "Dihydrolipoyl dehydrogenase"  
"OPBM19\_00389" 36540 "s59E5H2" 0 "Dihydrolipoyl dehydrogenase"  
"OPBM19\_00389" 36540 "s63E6H2" 0 "Dihydrolipoyl dehydrogenase"  
"OPBM19\_00390" 36541 "s59E13H2" 0 "Lipoyl synthase"  
"OPBM19\_00390" 36541 "s59E25H2" 0 "Lipoyl synthase"  
"OPBM19\_00390" 36541 "s59E5H2" 0 "Lipoyl synthase"  
"OPBM19\_00390" 36541 "s63E6H2" 0 "Lipoyl synthase"  
"OPBM19\_00391" 36542 "s59E13H2" 0 "methionine synthase"  
"OPBM19\_00391" 36542 "s59E25H2" 0 "methionine synthase"  
"OPBM19\_00391" 36542 "s59E5H2" 0 "methionine synthase"  
"OPBM19\_00391" 36542 "s63E6H2" 0 "methionine synthase"  
"OPBM19\_00392" 36543 "s59E13H2" 0 "CoB--CoM heterodisulfide reductase subunit B"  
"OPBM19\_00392" 36543 "s59E25H2" 0 "CoB--CoM heterodisulfide reductase subunit B"  
"OPBM19\_00392" 36543 "s59E5H2" 0 "CoB--CoM heterodisulfide reductase subunit B"  
"OPBM19\_00392" 36543 "s63E6H2" 0 "CoB--CoM heterodisulfide reductase subunit B"  
"OPBM19\_00393" 36544 "s59E13H2" 0 "CoB--CoM heterodisulfide reductase iron-sulfur subunit C"  
"OPBM19\_00393" 36544 "s59E25H2" 0 "CoB--CoM heterodisulfide reductase iron-sulfur subunit C"  
"OPBM19\_00393" 36544 "s59E5H2" 0 "CoB--CoM heterodisulfide reductase iron-sulfur subunit C"  
"OPBM19\_00393" 36544 "s63E6H2" 0 "CoB--CoM heterodisulfide reductase iron-sulfur subunit C"  
"OPBM19\_00394" 36545 "s59E13H2" 0 "Bifunctional homocysteine S-methyltransferase/5,10-methylenetetrahydrofolate reductase"  
"OPBM19\_00394" 36545 "s59E25H2" 0 "Bifunctional homocysteine S-methyltransferase/5,10-methylenetetrahydrofolate reductase"  
"OPBM19\_00394" 36545 "s59E5H2" 0 "Bifunctional homocysteine S-methyltransferase/5,10-methylenetetrahydrofolate reductase"  
"OPBM19\_00394" 36545 "s63E6H2" 0 "Bifunctional homocysteine S-methyltransferase/5,10-methylenetetrahydrofolate reductase"  
"OPBM19\_00395" 36546 "s59E13H2" 0 "hypothetical protein"  
"OPBM19\_00395" 36546 "s59E25H2" 0 "hypothetical protein"  
"OPBM19\_00395" 36546 "s59E5H2" 0 "hypothetical protein"  
"OPBM19\_00395" 36546 "s63E6H2" 0 "hypothetical protein"  
"OPBM19\_00396" 36547 "s59E13H2" 0 "F420-non-reducing hydrogenase iron-sulfur subunit D"  
"OPBM19\_00396" 36547 "s59E25H2" 0 "F420-non-reducing hydrogenase iron-sulfur subunit D"  
"OPBM19\_00396" 36547 "s59E5H2" 0 "F420-non-reducing hydrogenase iron-sulfur subunit D"  
"OPBM19\_00396" 36547 "s63E6H2" 0 "F420-non-reducing hydrogenase iron-sulfur subunit D"  
"OPBM19\_00397" 36548 "s59E13H2" 0 "CoB--CoM heterodisulfide reductase iron-sulfur subunit A"  
"OPBM19\_00397" 36548 "s59E25H2" 0 "CoB--CoM heterodisulfide reductase iron-sulfur subunit A"  
"OPBM19\_00397" 36548 "s59E5H2" 0 "CoB--CoM heterodisulfide reductase iron-sulfur subunit A"  
"OPBM19\_00397" 36548 "s63E6H2" 0 "CoB--CoM heterodisulfide reductase iron-sulfur subunit A"  
"OPBM19\_00398" 36549 "s59E13H2" 0 "F420-non-reducing hydrogenase iron-sulfur subunit D"  
"OPBM19\_00398" 36549 "s59E25H2" 0 "F420-non-reducing hydrogenase iron-sulfur subunit D"  
"OPBM19\_00398" 36549 "s59E5H2" 0 "F420-non-reducing hydrogenase iron-sulfur subunit D"  
"OPBM19\_00398" 36549 "s63E6H2" 0 "F420-non-reducing hydrogenase iron-sulfur subunit D"  
"OPBM19\_00399" 36550 "s59E13H2" 0 "CoB--CoM heterodisulfide reductase iron-sulfur subunit A"  
"OPBM19\_00399" 36550 "s59E25H2" 0 "CoB--CoM heterodisulfide reductase iron-sulfur subunit A"  
"OPBM19\_00399" 36550 "s59E5H2" 0 "CoB--CoM heterodisulfide reductase iron-sulfur subunit A"  
"OPBM19\_00399" 36550 "s63E6H2" 0 "CoB--CoM heterodisulfide reductase iron-sulfur subunit A"  
"OPBM19\_00400" 36551 "s59E13H2" 0 "Tyrosine recombinase XerD"  
"OPBM19\_00400" 36551 "s59E25H2" 0 "Tyrosine recombinase XerD"

"OPBM19\_00400" 36551 "s59E5H2" 0 "Tyrosine recombinase XerD"  
"OPBM19\_00400" 36551 "s63E6H2" 0 "Tyrosine recombinase XerD"  
"OPBM19\_00402" 36553 "s59E13H2" 0 "hypothetical protein"  
"OPBM19\_00402" 36553 "s59E25H2" 0 "hypothetical protein"  
"OPBM19\_00402" 36553 "s59E5H2" 0 "hypothetical protein"  
"OPBM19\_00402" 36553 "s63E6H2" 0 "hypothetical protein"  
"OPBM19\_00404" 36555 "s59E13H2" 0 "putative tyrosine recombinase XerC-like protein"  
"OPBM19\_00404" 36555 "s59E25H2" 0 "putative tyrosine recombinase XerC-like protein"  
"OPBM19\_00404" 36555 "s59E5H2" 0 "putative tyrosine recombinase XerC-like protein"  
"OPBM19\_00404" 36555 "s63E6H2" 0 "putative tyrosine recombinase XerC-like protein"  
"OPBM19\_00405" 36556 "s59E13H2" 0 "hypothetical protein"  
"OPBM19\_00405" 36556 "s59E25H2" 0 "hypothetical protein"  
"OPBM19\_00405" 36556 "s59E5H2" 0 "hypothetical protein"  
"OPBM19\_00405" 36556 "s63E6H2" 0 "hypothetical protein"  
"OPBM19\_00406" 36557 "s59E13H2" 0 "Thioredoxin-2"  
"OPBM19\_00406" 36557 "s59E25H2" 0 "Thioredoxin-2"  
"OPBM19\_00406" 36557 "s59E5H2" 0 "Thioredoxin-2"  
"OPBM19\_00406" 36557 "s63E6H2" 0 "Thioredoxin-2"  
"OPBM19\_00407" 36558 "s59E13H2" 0 "hypothetical protein"  
"OPBM19\_00407" 36558 "s59E25H2" 0 "hypothetical protein"  
"OPBM19\_00407" 36558 "s59E5H2" 0 "hypothetical protein"  
"OPBM19\_00407" 36558 "s63E6H2" 0 "hypothetical protein"  
"OPBM19\_00408" 36559 "s59E13H2" 0 "Tungsten-containing aldehyde ferredoxin oxidoreductase"  
"OPBM19\_00408" 36559 "s59E25H2" 0 "Tungsten-containing aldehyde ferredoxin oxidoreductase"  
"OPBM19\_00408" 36559 "s59E5H2" 0 "Tungsten-containing aldehyde ferredoxin oxidoreductase"  
"OPBM19\_00408" 36559 "s63E6H2" 0 "Tungsten-containing aldehyde ferredoxin oxidoreductase"  
"OPBM19\_00409" 36560 "s59E13H2" 0 "Tungsten-containing aldehyde ferredoxin oxidoreductase"  
"OPBM19\_00409" 36560 "s59E25H2" 0 "Tungsten-containing aldehyde ferredoxin oxidoreductase"  
"OPBM19\_00409" 36560 "s59E5H2" 0 "Tungsten-containing aldehyde ferredoxin oxidoreductase"  
"OPBM19\_00409" 36560 "s63E6H2" 0 "Tungsten-containing aldehyde ferredoxin oxidoreductase"  
"OPBM19\_00410" 36561 "s59E13H2" 0 "Iron-sulfur protein"  
"OPBM19\_00410" 36561 "s59E25H2" 0 "Iron-sulfur protein"  
"OPBM19\_00410" 36561 "s59E5H2" 0 "Iron-sulfur protein"  
"OPBM19\_00410" 36561 "s63E6H2" 0 "Iron-sulfur protein"  
"OPBM19\_00411" 36562 "s59E13H2" 0 "Threonine synthase"  
"OPBM19\_00411" 36562 "s59E25H2" 0 "Threonine synthase"  
"OPBM19\_00411" 36562 "s59E5H2" 0 "Threonine synthase"  
"OPBM19\_00411" 36562 "s63E6H2" 0 "Threonine synthase"  
"OPBM19\_00412" 36563 "s59E13H2" 0 "Pyrroline-5-carboxylate reductase"  
"OPBM19\_00412" 36563 "s59E25H2" 0 "Pyrroline-5-carboxylate reductase"  
"OPBM19\_00412" 36563 "s59E5H2" 0 "Pyrroline-5-carboxylate reductase"  
"OPBM19\_00412" 36563 "s63E6H2" 0 "Pyrroline-5-carboxylate reductase"  
"OPBM19\_00413" 36564 "s59E13H2" 0 "hypothetical protein"  
"OPBM19\_00413" 36564 "s59E25H2" 0 "hypothetical protein"  
"OPBM19\_00413" 36564 "s59E5H2" 0 "hypothetical protein"  
"OPBM19\_00413" 36564 "s63E6H2" 0 "hypothetical protein"  
"OPBM19\_00414" 36565 "s59E13H2" 0 "Electron transport complex subunit RsbB"

"OPBM19\_00414" 36565 "s59E25H2" 0 "Electron transport complex subunit RxB"  
"OPBM19\_00414" 36565 "s59E5H2" 0 "Electron transport complex subunit RxB"  
"OPBM19\_00414" 36565 "s63E6H2" 0 "Electron transport complex subunit RxB"  
"OPBM19\_00415" 36566 "s59E13H2" 0 "FeS cluster assembly protein SufB"  
"OPBM19\_00415" 36566 "s59E25H2" 0 "FeS cluster assembly protein SufB"  
"OPBM19\_00415" 36566 "s59E5H2" 0 "FeS cluster assembly protein SufB"  
"OPBM19\_00415" 36566 "s63E6H2" 0 "FeS cluster assembly protein SufB"  
"OPBM19\_00416" 36567 "s59E13H2" 0 "putative ABC transporter ATP-binding protein"  
"OPBM19\_00416" 36567 "s59E25H2" 0 "putative ABC transporter ATP-binding protein"  
"OPBM19\_00416" 36567 "s59E5H2" 0 "putative ABC transporter ATP-binding protein"  
"OPBM19\_00416" 36567 "s63E6H2" 0 "putative ABC transporter ATP-binding protein"  
"OPBM19\_00417" 36568 "s59E13H2" 0 "Tetrahydromethanopterin S-methyltransferase subunit A 1"  
"OPBM19\_00417" 36568 "s59E25H2" 0 "Tetrahydromethanopterin S-methyltransferase subunit A 1"  
"OPBM19\_00417" 36568 "s59E5H2" 0 "Tetrahydromethanopterin S-methyltransferase subunit A 1"  
"OPBM19\_00417" 36568 "s63E6H2" 0 "Tetrahydromethanopterin S-methyltransferase subunit A 1"  
"OPBM19\_00418" 36569 "s59E13H2" 0 "hypothetical protein"  
"OPBM19\_00418" 36569 "s59E25H2" 0 "hypothetical protein"  
"OPBM19\_00418" 36569 "s59E5H2" 0 "hypothetical protein"  
"OPBM19\_00418" 36569 "s63E6H2" 0 "hypothetical protein"  
"OPBM19\_00421" 36572 "s59E13H2" 0 "hypothetical protein"  
"OPBM19\_00421" 36572 "s59E25H2" 0 "hypothetical protein"  
"OPBM19\_00421" 36572 "s59E5H2" 0 "hypothetical protein"  
"OPBM19\_00421" 36572 "s63E6H2" 0 "hypothetical protein"  
"OPBM19\_00422" 36573 "s59E13H2" 0 "putative permease"  
"OPBM19\_00422" 36573 "s59E25H2" 0 "putative permease"  
"OPBM19\_00422" 36573 "s59E5H2" 0 "putative permease"  
"OPBM19\_00422" 36573 "s63E6H2" 0 "putative permease"  
"OPBM19\_00424" 36575 "s59E13H2" 0 "putative glycine dehydrogenase (decarboxylating) subunit 1"  
"OPBM19\_00424" 36575 "s59E25H2" 0 "putative glycine dehydrogenase (decarboxylating) subunit 1"  
"OPBM19\_00424" 36575 "s59E5H2" 0 "putative glycine dehydrogenase (decarboxylating) subunit 1"  
"OPBM19\_00424" 36575 "s63E6H2" 0 "putative glycine dehydrogenase (decarboxylating) subunit 1"  
"OPBM19\_00425" 36576 "s59E13H2" 0 "putative glycine dehydrogenase (decarboxylating) subunit 2"  
"OPBM19\_00425" 36576 "s59E25H2" 0 "putative glycine dehydrogenase (decarboxylating) subunit 2"  
"OPBM19\_00425" 36576 "s59E5H2" 0 "putative glycine dehydrogenase (decarboxylating) subunit 2"  
"OPBM19\_00425" 36576 "s63E6H2" 0 "putative glycine dehydrogenase (decarboxylating) subunit 2"  
"OPBM19\_00426" 36577 "s59E13H2" 0 "Lon protease 2"  
"OPBM19\_00426" 36577 "s59E25H2" 0 "Lon protease 2"  
"OPBM19\_00426" 36577 "s59E5H2" 0 "Lon protease 2"  
"OPBM19\_00426" 36577 "s63E6H2" 0 "Lon protease 2"  
"OPBM19\_00428" 36579 "s59E13H2" 0 "Endonuclease V"  
"OPBM19\_00428" 36579 "s59E25H2" 0 "Endonuclease V"  
"OPBM19\_00428" 36579 "s59E5H2" 0 "Endonuclease V"  
"OPBM19\_00428" 36579 "s63E6H2" 0 "Endonuclease V"  
"OPBM19\_00429" 36580 "s59E13H2" 0 "Serine hydroxymethyltransferase"  
"OPBM19\_00429" 36580 "s59E25H2" 0 "Serine hydroxymethyltransferase"  
"OPBM19\_00429" 36580 "s59E5H2" 0 "Serine hydroxymethyltransferase"  
"OPBM19\_00429" 36580 "s63E6H2" 0 "Serine hydroxymethyltransferase"

"OPBM19\_00431" 36582 "s59E13H2" 0 "D-tyrosyl-tRNA(Tyr) deacylase"  
"OPBM19\_00431" 36582 "s59E25H2" 0 "D-tyrosyl-tRNA(Tyr) deacylase"  
"OPBM19\_00431" 36582 "s59E5H2" 0 "D-tyrosyl-tRNA(Tyr) deacylase"  
"OPBM19\_00431" 36582 "s63E6H2" 0 "D-tyrosyl-tRNA(Tyr) deacylase"  
"OPBM19\_00432" 36583 "s59E13H2" 0 "putative dual-specificity RNA methyltransferase RlmN"  
"OPBM19\_00432" 36583 "s59E25H2" 0 "putative dual-specificity RNA methyltransferase RlmN"  
"OPBM19\_00432" 36583 "s59E5H2" 0 "putative dual-specificity RNA methyltransferase RlmN"  
"OPBM19\_00432" 36583 "s63E6H2" 0 "putative dual-specificity RNA methyltransferase RlmN"  
"OPBM19\_00433" 36584 "s59E13H2" 0 "flavodoxin FldA"  
"OPBM19\_00433" 36584 "s59E25H2" 0 "flavodoxin FldA"  
"OPBM19\_00433" 36584 "s59E5H2" 0 "flavodoxin FldA"  
"OPBM19\_00433" 36584 "s63E6H2" 0 "flavodoxin FldA"  
"OPBM19\_00435" 36586 "s59E13H2" 0 "Modification methylase Mjall"  
"OPBM19\_00435" 36586 "s59E25H2" 0 "Modification methylase Mjall"  
"OPBM19\_00435" 36586 "s59E5H2" 0 "Modification methylase Mjall"  
"OPBM19\_00435" 36586 "s63E6H2" 0 "Modification methylase Mjall"  
"OPBM19\_00436" 36587 "s59E13H2" 0 "hypothetical protein"  
"OPBM19\_00436" 36587 "s59E25H2" 0 "hypothetical protein"  
"OPBM19\_00436" 36587 "s59E5H2" 0 "hypothetical protein"  
"OPBM19\_00436" 36587 "s63E6H2" 0 "hypothetical protein"  
"OPBM19\_00437" 36588 "s59E13H2" 0 "hypothetical protein"  
"OPBM19\_00437" 36588 "s59E25H2" 0 "hypothetical protein"  
"OPBM19\_00437" 36588 "s59E5H2" 0 "hypothetical protein"  
"OPBM19\_00437" 36588 "s63E6H2" 0 "hypothetical protein"  
"OPBM19\_00438" 36589 "s59E13H2" 0 "hypothetical protein"  
"OPBM19\_00438" 36589 "s59E25H2" 0 "hypothetical protein"  
"OPBM19\_00438" 36589 "s59E5H2" 0 "hypothetical protein"  
"OPBM19\_00438" 36589 "s63E6H2" 0 "hypothetical protein"  
"OPBM19\_00439" 36590 "s59E13H2" 0 "hypothetical protein"  
"OPBM19\_00439" 36590 "s59E25H2" 0 "hypothetical protein"  
"OPBM19\_00439" 36590 "s59E5H2" 0 "hypothetical protein"  
"OPBM19\_00439" 36590 "s63E6H2" 0 "hypothetical protein"  
"OPBM19\_00442" 36593 "s59E13H2" 0 "hypothetical protein"  
"OPBM19\_00442" 36593 "s59E25H2" 0 "hypothetical protein"  
"OPBM19\_00442" 36593 "s59E5H2" 0 "hypothetical protein"  
"OPBM19\_00442" 36593 "s63E6H2" 0 "hypothetical protein"  
"OPBM19\_00443" 36594 "s59E13H2" 0 "hypothetical protein"  
"OPBM19\_00443" 36594 "s59E25H2" 0 "hypothetical protein"  
"OPBM19\_00443" 36594 "s59E5H2" 0 "hypothetical protein"  
"OPBM19\_00443" 36594 "s63E6H2" 0 "hypothetical protein"  
"OPBM19\_00444" 36595 "s59E13H2" 0 "hypothetical protein"  
"OPBM19\_00444" 36595 "s59E25H2" 0 "hypothetical protein"  
"OPBM19\_00444" 36595 "s59E5H2" 0 "hypothetical protein"  
"OPBM19\_00444" 36595 "s63E6H2" 0 "hypothetical protein"  
"OPBM19\_00446" 36597 "s59E13H2" 0 "hypothetical protein"  
"OPBM19\_00446" 36597 "s59E25H2" 0 "hypothetical protein"  
"OPBM19\_00446" 36597 "s59E5H2" 0 "hypothetical protein"

"OPBM19\_00446" 36597 "s63E6H2" 0 "hypothetical protein"  
"OPBM19\_00448" 36599 "s59E13H2" 0 "Phage terminase, small subunit"  
"OPBM19\_00448" 36599 "s59E25H2" 0 "Phage terminase, small subunit"  
"OPBM19\_00448" 36599 "s59E5H2" 0 "Phage terminase, small subunit"  
"OPBM19\_00448" 36599 "s63E6H2" 0 "Phage terminase, small subunit"  
"OPBM19\_00449" 36600 "s59E13H2" 0 "hypothetical protein"  
"OPBM19\_00449" 36600 "s59E25H2" 0 "hypothetical protein"  
"OPBM19\_00449" 36600 "s59E5H2" 0 "hypothetical protein"  
"OPBM19\_00449" 36600 "s63E6H2" 0 "hypothetical protein"  
"OPBM19\_00450" 36601 "s59E13H2" 0 "hypothetical protein"  
"OPBM19\_00450" 36601 "s59E25H2" 0 "hypothetical protein"  
"OPBM19\_00450" 36601 "s59E5H2" 0 "hypothetical protein"  
"OPBM19\_00450" 36601 "s63E6H2" 0 "hypothetical protein"  
"OPBM19\_00451" 36602 "s59E13H2" 0 "hypothetical protein"  
"OPBM19\_00451" 36602 "s59E25H2" 0 "hypothetical protein"  
"OPBM19\_00451" 36602 "s59E5H2" 0 "hypothetical protein"  
"OPBM19\_00451" 36602 "s63E6H2" 0.001881685 "hypothetical protein"  
"OPBM19\_00452" 36603 "s59E13H2" 0 "hypothetical protein"  
"OPBM19\_00452" 36603 "s59E25H2" 0 "hypothetical protein"  
"OPBM19\_00452" 36603 "s59E5H2" 0 "hypothetical protein"  
"OPBM19\_00452" 36603 "s63E6H2" 0 "hypothetical protein"  
"OPBM19\_00453" 36604 "s59E13H2" 0 "hypothetical protein"  
"OPBM19\_00453" 36604 "s59E25H2" 0 "hypothetical protein"  
"OPBM19\_00453" 36604 "s59E5H2" 0 "hypothetical protein"  
"OPBM19\_00453" 36604 "s63E6H2" 0 "hypothetical protein"  
"OPBM19\_00456" 36607 "s59E13H2" 0 "putative permease"  
"OPBM19\_00456" 36607 "s59E25H2" 0 "putative permease"  
"OPBM19\_00456" 36607 "s59E5H2" 0 "putative permease"  
"OPBM19\_00456" 36607 "s63E6H2" 0 "putative permease"  
"OPBM19\_00457" 36608 "s59E13H2" 0 "putative permease"  
"OPBM19\_00457" 36608 "s59E25H2" 0 "putative permease"  
"OPBM19\_00457" 36608 "s59E5H2" 0 "putative permease"  
"OPBM19\_00457" 36608 "s63E6H2" 0 "putative permease"  
"OPBM19\_00460" 36611 "s59E13H2" 0 "Glutamate--tRNA ligase"  
"OPBM19\_00460" 36611 "s59E25H2" 0 "Glutamate--tRNA ligase"  
"OPBM19\_00460" 36611 "s59E5H2" 0 "Glutamate--tRNA ligase"  
"OPBM19\_00460" 36611 "s63E6H2" 0 "Glutamate--tRNA ligase"  
"OPBM19\_00461" 36612 "s59E13H2" 0 "Histidine ammonia-lyase"  
"OPBM19\_00461" 36612 "s59E25H2" 0 "Histidine ammonia-lyase"  
"OPBM19\_00461" 36612 "s59E5H2" 0 "Histidine ammonia-lyase"  
"OPBM19\_00461" 36612 "s63E6H2" 0 "Histidine ammonia-lyase"  
"OPBM19\_00462" 36613 "s59E13H2" 0 "Isoprenylcysteine carboxyl methyltransferase (ICMT) family protein"  
"OPBM19\_00462" 36613 "s59E25H2" 0 "Isoprenylcysteine carboxyl methyltransferase (ICMT) family protein"  
"OPBM19\_00462" 36613 "s59E5H2" 0 "Isoprenylcysteine carboxyl methyltransferase (ICMT) family protein"  
"OPBM19\_00462" 36613 "s63E6H2" 0 "Isoprenylcysteine carboxyl methyltransferase (ICMT) family protein"  
"OPBM19\_00463" 36614 "s59E13H2" 0 "Urocanate hydratase"  
"OPBM19\_00463" 36614 "s59E25H2" 0 "Urocanate hydratase"

"OPBM19\_00463" 36614 "s59E5H2" 0 "Urocanate hydratase"  
"OPBM19\_00463" 36614 "s63E6H2" 0 "Urocanate hydratase"  
"OPBM19\_00464" 36615 "s59E13H2" 0 "Pyruvate carboxylase subunit A"  
"OPBM19\_00464" 36615 "s59E25H2" 0 "Pyruvate carboxylase subunit A"  
"OPBM19\_00464" 36615 "s59E5H2" 0 "Pyruvate carboxylase subunit A"  
"OPBM19\_00464" 36615 "s63E6H2" 0 "Pyruvate carboxylase subunit A"  
"OPBM19\_00465" 36616 "s59E13H2" 0 "Pyruvate carboxylase subunit B"  
"OPBM19\_00465" 36616 "s59E25H2" 0 "Pyruvate carboxylase subunit B"  
"OPBM19\_00465" 36616 "s59E5H2" 0 "Pyruvate carboxylase subunit B"  
"OPBM19\_00465" 36616 "s63E6H2" 0 "Pyruvate carboxylase subunit B"  
"OPBM19\_00466" 36617 "s59E13H2" 0 "Bifunctional ligase/repressor BirA"  
"OPBM19\_00466" 36617 "s59E25H2" 0 "Bifunctional ligase/repressor BirA"  
"OPBM19\_00466" 36617 "s59E5H2" 0 "Bifunctional ligase/repressor BirA"  
"OPBM19\_00466" 36617 "s63E6H2" 0 "Bifunctional ligase/repressor BirA"  
"OPBM19\_00467" 36618 "s59E13H2" 0 "3-oxoacyl-[acyl-carrier-protein] synthase 2"  
"OPBM19\_00467" 36618 "s59E25H2" 0 "3-oxoacyl-[acyl-carrier-protein] synthase 2"  
"OPBM19\_00467" 36618 "s59E5H2" 0 "3-oxoacyl-[acyl-carrier-protein] synthase 2"  
"OPBM19\_00467" 36618 "s63E6H2" 0 "3-oxoacyl-[acyl-carrier-protein] synthase 2"  
"OPBM19\_00468" 36619 "s59E13H2" 0 "3-hydroxyacyl-[acyl-carrier-protein] dehydratase FabZ"  
"OPBM19\_00468" 36619 "s59E25H2" 0 "3-hydroxyacyl-[acyl-carrier-protein] dehydratase FabZ"  
"OPBM19\_00468" 36619 "s59E5H2" 0 "3-hydroxyacyl-[acyl-carrier-protein] dehydratase FabZ"  
"OPBM19\_00468" 36619 "s63E6H2" 0 "3-hydroxyacyl-[acyl-carrier-protein] dehydratase FabZ"  
"OPBM19\_00469" 36620 "s59E13H2" 0 "Malonyl CoA-acyl carrier protein transacylase"  
"OPBM19\_00469" 36620 "s59E25H2" 0 "Malonyl CoA-acyl carrier protein transacylase"  
"OPBM19\_00469" 36620 "s59E5H2" 0 "Malonyl CoA-acyl carrier protein transacylase"  
"OPBM19\_00469" 36620 "s63E6H2" 0 "Malonyl CoA-acyl carrier protein transacylase"  
"OPBM19\_00470" 36621 "s59E13H2" 0 "3-oxoacyl-[acyl-carrier-protein] reductase FabG"  
"OPBM19\_00470" 36621 "s59E25H2" 0 "3-oxoacyl-[acyl-carrier-protein] reductase FabG"  
"OPBM19\_00470" 36621 "s59E5H2" 0 "3-oxoacyl-[acyl-carrier-protein] reductase FabG"  
"OPBM19\_00470" 36621 "s63E6H2" 0 "3-oxoacyl-[acyl-carrier-protein] reductase FabG"  
"OPBM19\_00471" 36622 "s59E13H2" 0 "3-oxoacyl-[acyl-carrier-protein] synthase 2"  
"OPBM19\_00471" 36622 "s59E25H2" 0 "3-oxoacyl-[acyl-carrier-protein] synthase 2"  
"OPBM19\_00471" 36622 "s59E5H2" 0 "3-oxoacyl-[acyl-carrier-protein] synthase 2"  
"OPBM19\_00471" 36622 "s63E6H2" 0 "3-oxoacyl-[acyl-carrier-protein] synthase 2"  
"OPBM19\_00472" 36623 "s59E13H2" 0 "Acetyl-coenzyme A carboxylase carboxyl transferase subunit beta"  
"OPBM19\_00472" 36623 "s59E25H2" 0 "Acetyl-coenzyme A carboxylase carboxyl transferase subunit beta"  
"OPBM19\_00472" 36623 "s59E5H2" 0 "Acetyl-coenzyme A carboxylase carboxyl transferase subunit beta"  
"OPBM19\_00472" 36623 "s63E6H2" 0 "Acetyl-coenzyme A carboxylase carboxyl transferase subunit beta"  
"OPBM19\_00473" 36624 "s59E13H2" 0 "Acetyl-coenzyme A carboxylase carboxyl transferase subunit alpha"  
"OPBM19\_00473" 36624 "s59E25H2" 0 "Acetyl-coenzyme A carboxylase carboxyl transferase subunit alpha"  
"OPBM19\_00473" 36624 "s59E5H2" 0 "Acetyl-coenzyme A carboxylase carboxyl transferase subunit alpha"  
"OPBM19\_00473" 36624 "s63E6H2" 0 "Acetyl-coenzyme A carboxylase carboxyl transferase subunit alpha"  
"OPBM19\_00474" 36625 "s59E13H2" 0 "hypothetical protein"  
"OPBM19\_00474" 36625 "s59E25H2" 0 "hypothetical protein"  
"OPBM19\_00474" 36625 "s59E5H2" 0 "hypothetical protein"  
"OPBM19\_00474" 36625 "s63E6H2" 0 "hypothetical protein"  
"OPBM19\_00475" 36626 "s59E13H2" 0 "Imidazolonepropionase"

"OPBM19\_00475" 36626 "s59E25H2" 0 "Imidazolonepropionase"  
"OPBM19\_00475" 36626 "s59E5H2" 0 "Imidazolonepropionase"  
"OPBM19\_00475" 36626 "s63E6H2" 0 "Imidazolonepropionase"  
"OPBM19\_00476" 36627 "s59E13H2" 0 "Methenyltetrahydrofolate cyclohydrolase"  
"OPBM19\_00476" 36627 "s59E25H2" 0 "Methenyltetrahydrofolate cyclohydrolase"  
"OPBM19\_00476" 36627 "s59E5H2" 0 "Methenyltetrahydrofolate cyclohydrolase"  
"OPBM19\_00476" 36627 "s63E6H2" 0 "Methenyltetrahydrofolate cyclohydrolase"  
"OPBM19\_00477" 36628 "s59E13H2" 0 "hypothetical protein"  
"OPBM19\_00477" 36628 "s59E25H2" 0 "hypothetical protein"  
"OPBM19\_00477" 36628 "s59E5H2" 0 "hypothetical protein"  
"OPBM19\_00477" 36628 "s63E6H2" 0 "hypothetical protein"  
"OPBM19\_00479" 36630 "s59E13H2" 0 "Phycocyanobilin lyase subunit alpha"  
"OPBM19\_00479" 36630 "s59E25H2" 0 "Phycocyanobilin lyase subunit alpha"  
"OPBM19\_00479" 36630 "s59E5H2" 0 "Phycocyanobilin lyase subunit alpha"  
"OPBM19\_00479" 36630 "s63E6H2" 0 "Phycocyanobilin lyase subunit alpha"  
"OPBM19\_00481" 36632 "s59E13H2" 0 "hypothetical protein"  
"OPBM19\_00481" 36632 "s59E25H2" 0 "hypothetical protein"  
"OPBM19\_00481" 36632 "s59E5H2" 0 "hypothetical protein"  
"OPBM19\_00481" 36632 "s63E6H2" 0 "hypothetical protein"  
"OPBM19\_00483" 36634 "s59E13H2" 0 "Macrolide export protein MacA"  
"OPBM19\_00483" 36634 "s59E25H2" 0 "Macrolide export protein MacA"  
"OPBM19\_00483" 36634 "s59E5H2" 0 "Macrolide export protein MacA"  
"OPBM19\_00483" 36634 "s63E6H2" 0 "Macrolide export protein MacA"  
"OPBM19\_00484" 36635 "s59E13H2" 0 "putative ABC transporter ATP-binding protein"  
"OPBM19\_00484" 36635 "s59E25H2" 0 "putative ABC transporter ATP-binding protein"  
"OPBM19\_00484" 36635 "s59E5H2" 0 "putative ABC transporter ATP-binding protein"  
"OPBM19\_00484" 36635 "s63E6H2" 0 "putative ABC transporter ATP-binding protein"  
"OPBM19\_00485" 36636 "s59E13H2" 0 "Macrolide export ATP-binding/permease protein MacB"  
"OPBM19\_00485" 36636 "s59E25H2" 0 "Macrolide export ATP-binding/permease protein MacB"  
"OPBM19\_00485" 36636 "s59E5H2" 0 "Macrolide export ATP-binding/permease protein MacB"  
"OPBM19\_00485" 36636 "s63E6H2" 0 "Macrolide export ATP-binding/permease protein MacB"  
"OPBM19\_00486" 36637 "s59E13H2" 0 "hypothetical protein"  
"OPBM19\_00486" 36637 "s59E25H2" 0 "hypothetical protein"  
"OPBM19\_00486" 36637 "s59E5H2" 0 "hypothetical protein"  
"OPBM19\_00486" 36637 "s63E6H2" 0 "hypothetical protein"  
"OPBM19\_00488" 36639 "s59E13H2" 0 "hypothetical protein"  
"OPBM19\_00488" 36639 "s59E25H2" 0 "hypothetical protein"  
"OPBM19\_00488" 36639 "s59E5H2" 0 "hypothetical protein"  
"OPBM19\_00488" 36639 "s63E6H2" 0 "hypothetical protein"  
"OPBM19\_00489" 36640 "s59E13H2" 0 "hypothetical protein"  
"OPBM19\_00489" 36640 "s59E25H2" 0 "hypothetical protein"  
"OPBM19\_00489" 36640 "s59E5H2" 0 "hypothetical protein"  
"OPBM19\_00489" 36640 "s63E6H2" 0 "hypothetical protein"  
"OPBM19\_00490" 36641 "s59E13H2" 0 "hypothetical protein"  
"OPBM19\_00490" 36641 "s59E25H2" 0 "hypothetical protein"  
"OPBM19\_00490" 36641 "s59E5H2" 0 "hypothetical protein"  
"OPBM19\_00490" 36641 "s63E6H2" 0 "hypothetical protein"

"OPBM19\_00491" 36642 "s59E13H2" 0 "Tyrosine recombinase XerD"  
"OPBM19\_00491" 36642 "s59E25H2" 0 "Tyrosine recombinase XerD"  
"OPBM19\_00491" 36642 "s59E5H2" 0 "Tyrosine recombinase XerD"  
"OPBM19\_00491" 36642 "s63E6H2" 0 "Tyrosine recombinase XerD"  
"OPBM19\_00492" 36643 "s59E13H2" 0 "hypothetical protein"  
"OPBM19\_00492" 36643 "s59E25H2" 0 "hypothetical protein"  
"OPBM19\_00492" 36643 "s59E5H2" 0 "hypothetical protein"  
"OPBM19\_00492" 36643 "s63E6H2" 0 "hypothetical protein"  
"OPBM19\_00493" 36644 "s59E13H2" 0 "hypothetical protein"  
"OPBM19\_00493" 36644 "s59E25H2" 0 "hypothetical protein"  
"OPBM19\_00493" 36644 "s59E5H2" 0 "hypothetical protein"  
"OPBM19\_00493" 36644 "s63E6H2" 0 "hypothetical protein"  
"OPBM19\_00495" 36646 "s59E13H2" 0 "DNA adenine methyltransferase YhdJ"  
"OPBM19\_00495" 36646 "s59E25H2" 0 "DNA adenine methyltransferase YhdJ"  
"OPBM19\_00495" 36646 "s59E5H2" 0 "DNA adenine methyltransferase YhdJ"  
"OPBM19\_00495" 36646 "s63E6H2" 0 "DNA adenine methyltransferase YhdJ"  
"OPBM19\_00497" 36648 "s59E13H2" 0 "hypothetical protein"  
"OPBM19\_00497" 36648 "s59E25H2" 0 "hypothetical protein"  
"OPBM19\_00497" 36648 "s59E5H2" 0 "hypothetical protein"  
"OPBM19\_00497" 36648 "s63E6H2" 0 "hypothetical protein"  
"OPBM19\_00499" 36650 "s59E13H2" 0 "hypothetical protein"  
"OPBM19\_00499" 36650 "s59E25H2" 0 "hypothetical protein"  
"OPBM19\_00499" 36650 "s59E5H2" 0 "hypothetical protein"  
"OPBM19\_00499" 36650 "s63E6H2" 0 "hypothetical protein"  
"OPBM19\_00500" 36651 "s59E13H2" 0 "DNA repair and recombination protein RadA"  
"OPBM19\_00500" 36651 "s59E25H2" 0 "DNA repair and recombination protein RadA"  
"OPBM19\_00500" 36651 "s59E5H2" 0 "DNA repair and recombination protein RadA"  
"OPBM19\_00500" 36651 "s63E6H2" 0 "DNA repair and recombination protein RadA"  
"OPBM19\_00501" 36652 "s59E13H2" 0 "Regulatory protein RecX"  
"OPBM19\_00501" 36652 "s59E25H2" 0 "Regulatory protein RecX"  
"OPBM19\_00501" 36652 "s59E5H2" 0 "Regulatory protein RecX"  
"OPBM19\_00501" 36652 "s63E6H2" 0 "Regulatory protein RecX"  
"OPBM19\_00503" 36654 "s59E13H2" 0 "PBP superfamily domain protein"  
"OPBM19\_00503" 36654 "s59E25H2" 0 "PBP superfamily domain protein"  
"OPBM19\_00503" 36654 "s59E5H2" 0 "PBP superfamily domain protein"  
"OPBM19\_00503" 36654 "s63E6H2" 0 "PBP superfamily domain protein"  
"OPBM19\_00504" 36655 "s59E13H2" 0 "Sulfate transport system permease protein CysW"  
"OPBM19\_00504" 36655 "s59E25H2" 0 "Sulfate transport system permease protein CysW"  
"OPBM19\_00504" 36655 "s59E5H2" 0 "Sulfate transport system permease protein CysW"  
"OPBM19\_00504" 36655 "s63E6H2" 0 "Sulfate transport system permease protein CysW"  
"OPBM19\_00505" 36656 "s59E13H2" 0 "Sulfate/thiosulfate import ATP-binding protein CysA"  
"OPBM19\_00505" 36656 "s59E25H2" 0 "Sulfate/thiosulfate import ATP-binding protein CysA"  
"OPBM19\_00505" 36656 "s59E5H2" 0 "Sulfate/thiosulfate import ATP-binding protein CysA"  
"OPBM19\_00505" 36656 "s63E6H2" 0 "Sulfate/thiosulfate import ATP-binding protein CysA"  
"OPBM19\_00506" 36657 "s59E13H2" 0 "Cyclic pyranopterin monophosphate synthase"  
"OPBM19\_00506" 36657 "s59E25H2" 0 "Cyclic pyranopterin monophosphate synthase"  
"OPBM19\_00506" 36657 "s59E5H2" 0 "Cyclic pyranopterin monophosphate synthase"



"OPBM19\_00506" 36657 "s63E6H2" 0 "Cyclic pyranopterin monophosphate synthase"  
"OPBM19\_00507" 36658 "s59E13H2" 0 "Cyclic pyranopterin monophosphate synthase accessory protein"  
"OPBM19\_00507" 36658 "s59E25H2" 0 "Cyclic pyranopterin monophosphate synthase accessory protein"  
"OPBM19\_00507" 36658 "s59E5H2" 0 "Cyclic pyranopterin monophosphate synthase accessory protein"  
"OPBM19\_00507" 36658 "s63E6H2" 0 "Cyclic pyranopterin monophosphate synthase accessory protein"  
"OPBM19\_00508" 36659 "s59E13H2" 0 "Ribonuclease Y"  
"OPBM19\_00508" 36659 "s59E25H2" 0 "Ribonuclease Y"  
"OPBM19\_00508" 36659 "s59E5H2" 0 "Ribonuclease Y"  
"OPBM19\_00508" 36659 "s63E6H2" 0 "Ribonuclease Y"  
"OPBM19\_00509" 36660 "s59E13H2" 0 "Stage V sporulation protein S"  
"OPBM19\_00509" 36660 "s59E25H2" 0 "Stage V sporulation protein S"  
"OPBM19\_00509" 36660 "s59E5H2" 0 "Stage V sporulation protein S"  
"OPBM19\_00509" 36660 "s63E6H2" 0 "Stage V sporulation protein S"  
"OPBM19\_00510" 36661 "s59E13H2" 0 "DNA polymerase III PolC"  
"OPBM19\_00510" 36661 "s59E25H2" 0 "DNA polymerase III PolC"  
"OPBM19\_00510" 36661 "s59E5H2" 0 "DNA polymerase III PolC"  
"OPBM19\_00510" 36661 "s63E6H2" 0 "DNA polymerase III PolC"  
"OPBM19\_00511" 36662 "s59E13H2" 0 "(Dimethylallyl)adenosine tRNA methylthiotransferase MiaB"  
"OPBM19\_00511" 36662 "s59E25H2" 0 "(Dimethylallyl)adenosine tRNA methylthiotransferase MiaB"  
"OPBM19\_00511" 36662 "s59E5H2" 0 "(Dimethylallyl)adenosine tRNA methylthiotransferase MiaB"  
"OPBM19\_00511" 36662 "s63E6H2" 0 "(Dimethylallyl)adenosine tRNA methylthiotransferase MiaB"  
"OPBM19\_00512" 36663 "s59E13H2" 0 "hypothetical protein"  
"OPBM19\_00512" 36663 "s59E25H2" 0 "hypothetical protein"  
"OPBM19\_00512" 36663 "s59E5H2" 0 "hypothetical protein"  
"OPBM19\_00512" 36663 "s63E6H2" 0 "hypothetical protein"  
"OPBM19\_00513" 36664 "s59E13H2" 0 "hypothetical protein"  
"OPBM19\_00513" 36664 "s59E25H2" 0 "hypothetical protein"  
"OPBM19\_00513" 36664 "s59E5H2" 0 "hypothetical protein"  
"OPBM19\_00513" 36664 "s63E6H2" 0 "hypothetical protein"  
"OPBM19\_00514" 36665 "s59E13H2" 0 "hypothetical protein"  
"OPBM19\_00514" 36665 "s59E25H2" 0 "hypothetical protein"  
"OPBM19\_00514" 36665 "s59E5H2" 0 "hypothetical protein"  
"OPBM19\_00514" 36665 "s63E6H2" 0 "hypothetical protein"  
"OPBM19\_00515" 36666 "s59E13H2" 0 "hypothetical protein"  
"OPBM19\_00515" 36666 "s59E25H2" 0 "hypothetical protein"  
"OPBM19\_00515" 36666 "s59E5H2" 0 "hypothetical protein"  
"OPBM19\_00515" 36666 "s63E6H2" 0 "hypothetical protein"  
"OPBM19\_00516" 36667 "s59E13H2" 0 "tRNA dimethylallyltransferase"  
"OPBM19\_00516" 36667 "s59E25H2" 0 "tRNA dimethylallyltransferase"  
"OPBM19\_00516" 36667 "s59E5H2" 0 "tRNA dimethylallyltransferase"  
"OPBM19\_00516" 36667 "s63E6H2" 0 "tRNA dimethylallyltransferase"  
"OPBM19\_00517" 36668 "s59E13H2" 0 "Diaminopimelate epimerase"  
"OPBM19\_00517" 36668 "s59E25H2" 0 "Diaminopimelate epimerase"  
"OPBM19\_00517" 36668 "s59E5H2" 0 "Diaminopimelate epimerase"  
"OPBM19\_00517" 36668 "s63E6H2" 0 "Diaminopimelate epimerase"  
"OPBM19\_00518" 36669 "s59E13H2" 0 "GTPase HflX"  
"OPBM19\_00518" 36669 "s59E25H2" 0 "GTPase HflX"

"OPBM19\_00518" 36669 "s59E5H2" 0 "GTPase HflX"  
"OPBM19\_00518" 36669 "s63E6H2" 0 "GTPase HflX"  
"OPBM19\_00519" 36670 "s59E13H2" 0 "LexA repressor"  
"OPBM19\_00519" 36670 "s59E25H2" 0 "LexA repressor"  
"OPBM19\_00519" 36670 "s59E5H2" 0 "LexA repressor"  
"OPBM19\_00519" 36670 "s63E6H2" 0 "LexA repressor"  
"OPBM19\_00521" 36672 "s59E13H2" 0 "HNH endonuclease"  
"OPBM19\_00521" 36672 "s59E25H2" 0 "HNH endonuclease"  
"OPBM19\_00521" 36672 "s59E5H2" 0 "HNH endonuclease"  
"OPBM19\_00521" 36672 "s63E6H2" 0 "HNH endonuclease"  
"OPBM19\_00522" 36673 "s59E13H2" 0 "hypothetical protein"  
"OPBM19\_00522" 36673 "s59E25H2" 0 "hypothetical protein"  
"OPBM19\_00522" 36673 "s59E5H2" 0 "hypothetical protein"  
"OPBM19\_00522" 36673 "s63E6H2" 0 "hypothetical protein"  
"OPBM19\_00523" 36674 "s59E13H2" 0 "hypothetical protein"  
"OPBM19\_00523" 36674 "s59E25H2" 0 "hypothetical protein"  
"OPBM19\_00523" 36674 "s59E5H2" 0 "hypothetical protein"  
"OPBM19\_00523" 36674 "s63E6H2" 0 "hypothetical protein"  
"OPBM19\_00525" 36676 "s59E13H2" 0 "26 kDa periplasmic immunogenic protein precursor"  
"OPBM19\_00525" 36676 "s59E25H2" 0 "26 kDa periplasmic immunogenic protein precursor"  
"OPBM19\_00525" 36676 "s59E5H2" 0 "26 kDa periplasmic immunogenic protein precursor"  
"OPBM19\_00525" 36676 "s63E6H2" 0 "26 kDa periplasmic immunogenic protein precursor"  
"OPBM19\_00526" 36677 "s59E13H2" 0 "hypothetical protein"  
"OPBM19\_00526" 36677 "s59E25H2" 0 "hypothetical protein"  
"OPBM19\_00526" 36677 "s59E5H2" 0 "hypothetical protein"  
"OPBM19\_00526" 36677 "s63E6H2" 0 "hypothetical protein"  
"OPBM19\_00527" 36678 "s59E13H2" 0 "hypothetical protein"  
"OPBM19\_00527" 36678 "s59E25H2" 0 "hypothetical protein"  
"OPBM19\_00527" 36678 "s59E5H2" 0 "hypothetical protein"  
"OPBM19\_00527" 36678 "s63E6H2" 0 "hypothetical protein"  
"OPBM19\_00528" 36679 "s59E13H2" 0 "Putative lipoprotein YerB precursor"  
"OPBM19\_00528" 36679 "s59E25H2" 0 "Putative lipoprotein YerB precursor"  
"OPBM19\_00528" 36679 "s59E5H2" 0 "Putative lipoprotein YerB precursor"  
"OPBM19\_00528" 36679 "s63E6H2" 0 "Putative lipoprotein YerB precursor"  
"OPBM19\_00529" 36680 "s59E13H2" 0 "UDP-N-acetylglucosamine--N-acetylmuramyl-(pentapeptide) pyrophosphoryl-undecaprenol N-acetylglucosamine transferase"  
"OPBM19\_00529" 36680 "s59E25H2" 0 "UDP-N-acetylglucosamine--N-acetylmuramyl-(pentapeptide) pyrophosphoryl-undecaprenol N-acetylglucosamine transferase"  
"OPBM19\_00529" 36680 "s59E5H2" 0 "UDP-N-acetylglucosamine--N-acetylmuramyl-(pentapeptide) pyrophosphoryl-undecaprenol N-acetylglucosamine transferase"  
"OPBM19\_00529" 36680 "s63E6H2" 0 "UDP-N-acetylglucosamine--N-acetylmuramyl-(pentapeptide) pyrophosphoryl-undecaprenol N-acetylglucosamine transferase"  
"OPBM19\_00530" 36681 "s59E13H2" 0 "UDP-N-acetylmuramate--L-alanine ligase"  
"OPBM19\_00530" 36681 "s59E25H2" 0 "UDP-N-acetylmuramate--L-alanine ligase"  
"OPBM19\_00530" 36681 "s59E5H2" 0 "UDP-N-acetylmuramate--L-alanine ligase"  
"OPBM19\_00530" 36681 "s63E6H2" 0 "UDP-N-acetylmuramate--L-alanine ligase"  
"OPBM19\_00531" 36682 "s59E13H2" 0 "UDP-N-acetylenolpyruvoylglucosamine reductase"  
"OPBM19\_00531" 36682 "s59E25H2" 0 "UDP-N-acetylenolpyruvoylglucosamine reductase"  
"OPBM19\_00531" 36682 "s59E5H2" 0 "UDP-N-acetylenolpyruvoylglucosamine reductase"  
"OPBM19\_00531" 36682 "s63E6H2" 0 "UDP-N-acetylenolpyruvoylglucosamine reductase"  
"OPBM19\_00532" 36683 "s59E13H2" 0 "cell division protein FtsQ"

"OPBM19\_00532" 36683 "s59E25H2" 0 "cell division protein FtsQ"  
"OPBM19\_00532" 36683 "s59E5H2" 0 "cell division protein FtsQ"  
"OPBM19\_00532" 36683 "s63E6H2" 0 "cell division protein FtsQ"  
"OPBM19\_00533" 36684 "s59E13H2" 0 "Cell division protein FtsA"  
"OPBM19\_00533" 36684 "s59E25H2" 0 "Cell division protein FtsA"  
"OPBM19\_00533" 36684 "s59E5H2" 0 "Cell division protein FtsA"  
"OPBM19\_00533" 36684 "s63E6H2" 0 "Cell division protein FtsA"  
"OPBM19\_00534" 36685 "s59E13H2" 0 "Cell division protein FtsZ"  
"OPBM19\_00534" 36685 "s59E25H2" 0 "Cell division protein FtsZ"  
"OPBM19\_00534" 36685 "s59E5H2" 0 "Cell division protein FtsZ"  
"OPBM19\_00534" 36685 "s63E6H2" 0 "Cell division protein FtsZ"  
"OPBM19\_00535" 36686 "s59E13H2" 0 "hypothetical protein"  
"OPBM19\_00535" 36686 "s59E25H2" 0 "hypothetical protein"  
"OPBM19\_00535" 36686 "s59E5H2" 0 "hypothetical protein"  
"OPBM19\_00535" 36686 "s63E6H2" 0 "hypothetical protein"  
"OPBM19\_00536" 36687 "s59E13H2" 0 "Cell division protein SepF"  
"OPBM19\_00536" 36687 "s59E25H2" 0 "Cell division protein SepF"  
"OPBM19\_00536" 36687 "s59E5H2" 0 "Cell division protein SepF"  
"OPBM19\_00536" 36687 "s63E6H2" 0 "Cell division protein SepF"  
"OPBM19\_00537" 36688 "s59E13H2" 0 "Pyrroline-5-carboxylate reductase"  
"OPBM19\_00537" 36688 "s59E25H2" 0 "Pyrroline-5-carboxylate reductase"  
"OPBM19\_00537" 36688 "s59E5H2" 0 "Pyrroline-5-carboxylate reductase"  
"OPBM19\_00537" 36688 "s63E6H2" 0 "Pyrroline-5-carboxylate reductase"  
"OPBM19\_00538" 36689 "s59E13H2" 0 "Septum site-determining protein DivIVA"  
"OPBM19\_00538" 36689 "s59E25H2" 0 "Septum site-determining protein DivIVA"  
"OPBM19\_00538" 36689 "s59E5H2" 0 "Septum site-determining protein DivIVA"  
"OPBM19\_00538" 36689 "s63E6H2" 0 "Septum site-determining protein DivIVA"  
"OPBM19\_00539" 36690 "s59E13H2" 0 "Isoleucine--tRNA ligase"  
"OPBM19\_00539" 36690 "s59E25H2" 0 "Isoleucine--tRNA ligase"  
"OPBM19\_00539" 36690 "s59E5H2" 0 "Isoleucine--tRNA ligase"  
"OPBM19\_00539" 36690 "s63E6H2" 0 "Isoleucine--tRNA ligase"  
"OPBM19\_00540" 36691 "s59E13H2" 0 "Lipoprotein signal peptidase"  
"OPBM19\_00540" 36691 "s59E25H2" 0 "Lipoprotein signal peptidase"  
"OPBM19\_00540" 36691 "s59E5H2" 0 "Lipoprotein signal peptidase"  
"OPBM19\_00540" 36691 "s63E6H2" 0 "Lipoprotein signal peptidase"  
"OPBM19\_00541" 36692 "s59E13H2" 0 "Prolipoprotein diacylglyceryl transferase"  
"OPBM19\_00541" 36692 "s59E25H2" 0 "Prolipoprotein diacylglyceryl transferase"  
"OPBM19\_00541" 36692 "s59E5H2" 0 "Prolipoprotein diacylglyceryl transferase"  
"OPBM19\_00541" 36692 "s63E6H2" 0 "Prolipoprotein diacylglyceryl transferase"  
"OPBM19\_00542" 36693 "s59E13H2" 0 "Ribosomal large subunit pseudouridine synthase D"  
"OPBM19\_00542" 36693 "s59E25H2" 0 "Ribosomal large subunit pseudouridine synthase D"  
"OPBM19\_00542" 36693 "s59E5H2" 0 "Ribosomal large subunit pseudouridine synthase D"  
"OPBM19\_00542" 36693 "s63E6H2" 0 "Ribosomal large subunit pseudouridine synthase D"  
"OPBM19\_00543" 36694 "s59E13H2" 0 "hypothetical protein"  
"OPBM19\_00543" 36694 "s59E25H2" 0 "hypothetical protein"  
"OPBM19\_00543" 36694 "s59E5H2" 0 "hypothetical protein"  
"OPBM19\_00543" 36694 "s63E6H2" 0 "hypothetical protein"

"OPBM19\_00544" 36695 "s59E13H2" 0 "VIT family protein"  
"OPBM19\_00544" 36695 "s59E25H2" 0 "VIT family protein"  
"OPBM19\_00544" 36695 "s59E5H2" 0 "VIT family protein"  
"OPBM19\_00544" 36695 "s63E6H2" 0 "VIT family protein"  
"OPBM19\_00545" 36696 "s59E13H2" 0 "Endo-1,4-beta-xylanase A precursor"  
"OPBM19\_00545" 36696 "s59E25H2" 0 "Endo-1,4-beta-xylanase A precursor"  
"OPBM19\_00545" 36696 "s59E5H2" 0 "Endo-1,4-beta-xylanase A precursor"  
"OPBM19\_00545" 36696 "s63E6H2" 0 "Endo-1,4-beta-xylanase A precursor"  
"OPBM19\_00546" 36697 "s59E13H2" 0 "hypothetical protein"  
"OPBM19\_00546" 36697 "s59E25H2" 0 "hypothetical protein"  
"OPBM19\_00546" 36697 "s59E5H2" 0 "hypothetical protein"  
"OPBM19\_00546" 36697 "s63E6H2" 0 "hypothetical protein"  
"OPBM19\_00547" 36698 "s59E13H2" 0 "Guanylate kinase"  
"OPBM19\_00547" 36698 "s59E25H2" 0 "Guanylate kinase"  
"OPBM19\_00547" 36698 "s59E5H2" 0 "Guanylate kinase"  
"OPBM19\_00547" 36698 "s63E6H2" 0 "Guanylate kinase"  
"OPBM19\_00548" 36699 "s59E13H2" 0 "DNA-directed RNA polymerase subunit omega"  
"OPBM19\_00548" 36699 "s59E25H2" 0 "DNA-directed RNA polymerase subunit omega"  
"OPBM19\_00548" 36699 "s59E5H2" 0 "DNA-directed RNA polymerase subunit omega"  
"OPBM19\_00548" 36699 "s63E6H2" 0 "DNA-directed RNA polymerase subunit omega"  
"OPBM19\_00549" 36700 "s59E13H2" 0 "Primosomal protein N"  
"OPBM19\_00549" 36700 "s59E25H2" 0 "Primosomal protein N"  
"OPBM19\_00549" 36700 "s59E5H2" 0 "Primosomal protein N"  
"OPBM19\_00549" 36700 "s63E6H2" 0 "Primosomal protein N"  
"OPBM19\_00550" 36701 "s59E13H2" 0 "Peptide deformylase"  
"OPBM19\_00550" 36701 "s59E25H2" 0 "Peptide deformylase"  
"OPBM19\_00550" 36701 "s59E5H2" 0 "Peptide deformylase"  
"OPBM19\_00550" 36701 "s63E6H2" 0 "Peptide deformylase"  
"OPBM19\_00551" 36702 "s59E13H2" 0 "Methionyl-tRNA formyltransferase"  
"OPBM19\_00551" 36702 "s59E25H2" 0 "Methionyl-tRNA formyltransferase"  
"OPBM19\_00551" 36702 "s59E5H2" 0 "Methionyl-tRNA formyltransferase"  
"OPBM19\_00551" 36702 "s63E6H2" 0 "Methionyl-tRNA formyltransferase"  
"OPBM19\_00552" 36703 "s59E13H2" 0 "Ribulose-phosphate 3-epimerase"  
"OPBM19\_00552" 36703 "s59E25H2" 0 "Ribulose-phosphate 3-epimerase"  
"OPBM19\_00552" 36703 "s59E5H2" 0 "Ribulose-phosphate 3-epimerase"  
"OPBM19\_00552" 36703 "s63E6H2" 0 "Ribulose-phosphate 3-epimerase"  
"OPBM19\_00554" 36705 "s59E13H2" 0 "Riboflavin biosynthesis protein RibD"  
"OPBM19\_00554" 36705 "s59E25H2" 0 "Riboflavin biosynthesis protein RibD"  
"OPBM19\_00554" 36705 "s59E5H2" 0 "Riboflavin biosynthesis protein RibD"  
"OPBM19\_00554" 36705 "s63E6H2" 0 "Riboflavin biosynthesis protein RibD"  
"OPBM19\_00555" 36706 "s59E13H2" 0 "Riboflavin synthase"  
"OPBM19\_00555" 36706 "s59E25H2" 0 "Riboflavin synthase"  
"OPBM19\_00555" 36706 "s59E5H2" 0 "Riboflavin synthase"  
"OPBM19\_00555" 36706 "s63E6H2" 0 "Riboflavin synthase"  
"OPBM19\_00556" 36707 "s59E13H2" 0 "Riboflavin biosynthesis protein RibBA"  
"OPBM19\_00556" 36707 "s59E25H2" 0 "Riboflavin biosynthesis protein RibBA"  
"OPBM19\_00556" 36707 "s59E5H2" 0 "Riboflavin biosynthesis protein RibBA"

"OPBM19\_00556" 36707 "s63E6H2" 0 "Riboflavin biosynthesis protein RibBA"  
"OPBM19\_00557" 36708 "s59E13H2" 0 "6,7-dimethyl-8-ribityllumazine synthase"  
"OPBM19\_00557" 36708 "s59E25H2" 0 "6,7-dimethyl-8-ribityllumazine synthase"  
"OPBM19\_00557" 36708 "s59E5H2" 0 "6,7-dimethyl-8-ribityllumazine synthase"  
"OPBM19\_00557" 36708 "s63E6H2" 0 "6,7-dimethyl-8-ribityllumazine synthase"  
"OPBM19\_00558" 36709 "s59E13H2" 0 "Phosphodiesterase YfcE"  
"OPBM19\_00558" 36709 "s59E25H2" 0 "Phosphodiesterase YfcE"  
"OPBM19\_00558" 36709 "s59E5H2" 0 "Phosphodiesterase YfcE"  
"OPBM19\_00558" 36709 "s63E6H2" 0 "Phosphodiesterase YfcE"  
"OPBM19\_00559" 36710 "s59E13H2" 0 "50S ribosomal protein L28"  
"OPBM19\_00559" 36710 "s59E25H2" 0 "50S ribosomal protein L28"  
"OPBM19\_00559" 36710 "s59E5H2" 0 "50S ribosomal protein L28"  
"OPBM19\_00559" 36710 "s63E6H2" 0 "50S ribosomal protein L28"  
"OPBM19\_00560" 36711 "s59E13H2" 0 "hypothetical protein"  
"OPBM19\_00560" 36711 "s59E25H2" 0 "hypothetical protein"  
"OPBM19\_00560" 36711 "s59E5H2" 0 "hypothetical protein"  
"OPBM19\_00560" 36711 "s63E6H2" 0 "hypothetical protein"  
"OPBM19\_00561" 36712 "s59E13H2" 0 "DAK2 domain protein"  
"OPBM19\_00561" 36712 "s59E25H2" 0 "DAK2 domain protein"  
"OPBM19\_00561" 36712 "s59E5H2" 0 "DAK2 domain protein"  
"OPBM19\_00561" 36712 "s63E6H2" 0 "DAK2 domain protein"  
"OPBM19\_00562" 36713 "s59E13H2" 0 "ATP-dependent DNA helicase RecG"  
"OPBM19\_00562" 36713 "s59E25H2" 0 "ATP-dependent DNA helicase RecG"  
"OPBM19\_00562" 36713 "s59E5H2" 0 "ATP-dependent DNA helicase RecG"  
"OPBM19\_00562" 36713 "s63E6H2" 0 "ATP-dependent DNA helicase RecG"  
"OPBM19\_00563" 36714 "s59E13H2" 0 "Ribosomal RNA small subunit methyltransferase D"  
"OPBM19\_00563" 36714 "s59E25H2" 0 "Ribosomal RNA small subunit methyltransferase D"  
"OPBM19\_00563" 36714 "s59E5H2" 0 "Ribosomal RNA small subunit methyltransferase D"  
"OPBM19\_00563" 36714 "s63E6H2" 0 "Ribosomal RNA small subunit methyltransferase D"  
"OPBM19\_00564" 36715 "s59E13H2" 0 "Phosphopantetheine adenylyltransferase"  
"OPBM19\_00564" 36715 "s59E25H2" 0 "Phosphopantetheine adenylyltransferase"  
"OPBM19\_00564" 36715 "s59E5H2" 0 "Phosphopantetheine adenylyltransferase"  
"OPBM19\_00564" 36715 "s63E6H2" 0 "Phosphopantetheine adenylyltransferase"  
"OPBM19\_00565" 36716 "s59E13H2" 0 "hypothetical protein"  
"OPBM19\_00565" 36716 "s59E25H2" 0 "hypothetical protein"  
"OPBM19\_00565" 36716 "s59E5H2" 0 "hypothetical protein"  
"OPBM19\_00565" 36716 "s63E6H2" 0 "hypothetical protein"  
"OPBM19\_00566" 36717 "s59E13H2" 0 "50S ribosomal protein L32"  
"OPBM19\_00566" 36717 "s59E25H2" 0 "50S ribosomal protein L32"  
"OPBM19\_00566" 36717 "s59E5H2" 0 "50S ribosomal protein L32"  
"OPBM19\_00566" 36717 "s63E6H2" 0 "50S ribosomal protein L32"  
"OPBM19\_00567" 36718 "s59E13H2" 0 "Succinyl-CoA ligase [ADP-forming] subunit alpha"  
"OPBM19\_00567" 36718 "s59E25H2" 0 "Succinyl-CoA ligase [ADP-forming] subunit alpha"  
"OPBM19\_00567" 36718 "s59E5H2" 0 "Succinyl-CoA ligase [ADP-forming] subunit alpha"  
"OPBM19\_00567" 36718 "s63E6H2" 0 "Succinyl-CoA ligase [ADP-forming] subunit alpha"  
"OPBM19\_00568" 36719 "s59E13H2" 0 "hypothetical protein"  
"OPBM19\_00568" 36719 "s59E25H2" 0 "hypothetical protein"

"OPBM19\_00568" 36719 "s59E5H2" 0 "hypothetical protein"  
"OPBM19\_00568" 36719 "s63E6H2" 0 "hypothetical protein"  
"OPBM19\_00569" 36720 "s59E13H2" 0 "hypothetical protein"  
"OPBM19\_00569" 36720 "s59E25H2" 0 "hypothetical protein"  
"OPBM19\_00569" 36720 "s59E5H2" 0 "hypothetical protein"  
"OPBM19\_00569" 36720 "s63E6H2" 0 "hypothetical protein"  
"OPBM19\_00570" 36721 "s59E13H2" 0 "Deoxyribose-phosphate aldolase"  
"OPBM19\_00570" 36721 "s59E25H2" 0 "Deoxyribose-phosphate aldolase"  
"OPBM19\_00570" 36721 "s59E5H2" 0 "Deoxyribose-phosphate aldolase"  
"OPBM19\_00570" 36721 "s63E6H2" 0 "Deoxyribose-phosphate aldolase"  
"OPBM19\_00571" 36722 "s59E13H2" 0 "Glutamate racemase 1"  
"OPBM19\_00571" 36722 "s59E25H2" 0 "Glutamate racemase 1"  
"OPBM19\_00571" 36722 "s59E5H2" 0 "Glutamate racemase 1"  
"OPBM19\_00571" 36722 "s63E6H2" 0 "Glutamate racemase 1"  
"OPBM19\_00572" 36723 "s59E13H2" 0 "GMP synthase [glutamine-hydrolyzing] subunit A"  
"OPBM19\_00572" 36723 "s59E25H2" 0 "GMP synthase [glutamine-hydrolyzing] subunit A"  
"OPBM19\_00572" 36723 "s59E5H2" 0 "GMP synthase [glutamine-hydrolyzing] subunit A"  
"OPBM19\_00572" 36723 "s63E6H2" 0 "GMP synthase [glutamine-hydrolyzing] subunit A"  
"OPBM19\_00573" 36724 "s59E13H2" 0 "drug efflux system protein MdtG"  
"OPBM19\_00573" 36724 "s59E25H2" 0 "drug efflux system protein MdtG"  
"OPBM19\_00573" 36724 "s59E5H2" 0 "drug efflux system protein MdtG"  
"OPBM19\_00573" 36724 "s63E6H2" 0 "drug efflux system protein MdtG"  
"OPBM19\_00574" 36725 "s59E13H2" 0 "Thiamine-monophosphate kinase"  
"OPBM19\_00574" 36725 "s59E25H2" 0 "Thiamine-monophosphate kinase"  
"OPBM19\_00574" 36725 "s59E5H2" 0 "Thiamine-monophosphate kinase"  
"OPBM19\_00574" 36725 "s63E6H2" 0 "Thiamine-monophosphate kinase"  
"OPBM19\_00575" 36726 "s59E13H2" 0 "Glucokinase"  
"OPBM19\_00575" 36726 "s59E25H2" 0 "Glucokinase"  
"OPBM19\_00575" 36726 "s59E5H2" 0 "Glucokinase"  
"OPBM19\_00575" 36726 "s63E6H2" 0 "Glucokinase"  
"OPBM19\_00576" 36727 "s59E13H2" 0 "hypothetical protein"  
"OPBM19\_00576" 36727 "s59E25H2" 0 "hypothetical protein"  
"OPBM19\_00576" 36727 "s59E5H2" 0 "hypothetical protein"  
"OPBM19\_00576" 36727 "s63E6H2" 0 "hypothetical protein"  
"OPBM19\_00577" 36728 "s59E13H2" 0 "D-arabitol-phosphate dehydrogenase"  
"OPBM19\_00577" 36728 "s59E25H2" 0 "D-arabitol-phosphate dehydrogenase"  
"OPBM19\_00577" 36728 "s59E5H2" 0 "D-arabitol-phosphate dehydrogenase"  
"OPBM19\_00577" 36728 "s63E6H2" 0 "D-arabitol-phosphate dehydrogenase"  
"OPBM19\_00578" 36729 "s59E13H2" 0 "Deoxyribonucleoside regulator"  
"OPBM19\_00578" 36729 "s59E25H2" 0 "Deoxyribonucleoside regulator"  
"OPBM19\_00578" 36729 "s59E5H2" 0 "Deoxyribonucleoside regulator"  
"OPBM19\_00578" 36729 "s63E6H2" 0 "Deoxyribonucleoside regulator"  
"OPBM19\_00579" 36730 "s59E13H2" 0 "Acetoin:2,6-dichlorophenolindophenol oxidoreductase subunit alpha"  
"OPBM19\_00579" 36730 "s59E25H2" 0 "Acetoin:2,6-dichlorophenolindophenol oxidoreductase subunit alpha"  
"OPBM19\_00579" 36730 "s59E5H2" 0 "Acetoin:2,6-dichlorophenolindophenol oxidoreductase subunit alpha"  
"OPBM19\_00579" 36730 "s63E6H2" 0 "Acetoin:2,6-dichlorophenolindophenol oxidoreductase subunit alpha"  
"OPBM19\_00580" 36731 "s59E13H2" 0 "2-oxoisovalerate dehydrogenase subunit beta"

"OPBM19\_00580" 36731 "s59E25H2" 0 "2-oxoisovalerate dehydrogenase subunit beta"  
"OPBM19\_00580" 36731 "s59E5H2" 0 "2-oxoisovalerate dehydrogenase subunit beta"  
"OPBM19\_00580" 36731 "s63E6H2" 0 "2-oxoisovalerate dehydrogenase subunit beta"  
"OPBM19\_00581" 36732 "s59E13H2" 0 "Dihydrolipoyllysine-residue acetyltransferase component of pyruvate dehydrogenase complex"  
"OPBM19\_00581" 36732 "s59E25H2" 0 "Dihydrolipoyllysine-residue acetyltransferase component of pyruvate dehydrogenase complex"  
"OPBM19\_00581" 36732 "s59E5H2" 0 "Dihydrolipoyllysine-residue acetyltransferase component of pyruvate dehydrogenase complex"  
"OPBM19\_00581" 36732 "s63E6H2" 0 "Dihydrolipoyllysine-residue acetyltransferase component of pyruvate dehydrogenase complex"  
"OPBM19\_00583" 36734 "s59E13H2" 0 "Octanoyltransferase"  
"OPBM19\_00583" 36734 "s59E25H2" 0 "Octanoyltransferase"  
"OPBM19\_00583" 36734 "s59E5H2" 0 "Octanoyltransferase"  
"OPBM19\_00583" 36734 "s63E6H2" 0 "Octanoyltransferase"  
"OPBM19\_00584" 36735 "s59E13H2" 0 "dihydrodipicolinate reductase"  
"OPBM19\_00584" 36735 "s59E25H2" 0 "dihydrodipicolinate reductase"  
"OPBM19\_00584" 36735 "s59E5H2" 0 "dihydrodipicolinate reductase"  
"OPBM19\_00584" 36735 "s63E6H2" 0 "dihydrodipicolinate reductase"  
"OPBM19\_00586" 36737 "s59E13H2" 0 "Threonine synthase"  
"OPBM19\_00586" 36737 "s59E25H2" 0 "Threonine synthase"  
"OPBM19\_00586" 36737 "s59E5H2" 0 "Threonine synthase"  
"OPBM19\_00586" 36737 "s63E6H2" 0 "Threonine synthase"  
"OPBM19\_00587" 36738 "s59E13H2" 0 "D-ornithine 4,5-aminomutase subunit alpha"  
"OPBM19\_00587" 36738 "s59E25H2" 0 "D-ornithine 4,5-aminomutase subunit alpha"  
"OPBM19\_00587" 36738 "s59E5H2" 0 "D-ornithine 4,5-aminomutase subunit alpha"  
"OPBM19\_00587" 36738 "s63E6H2" 0 "D-ornithine 4,5-aminomutase subunit alpha"  
"OPBM19\_00588" 36739 "s59E13H2" 0 "D-ornithine 4,5-aminomutase subunit beta"  
"OPBM19\_00588" 36739 "s59E25H2" 0 "D-ornithine 4,5-aminomutase subunit beta"  
"OPBM19\_00588" 36739 "s59E5H2" 0 "D-ornithine 4,5-aminomutase subunit beta"  
"OPBM19\_00588" 36739 "s63E6H2" 0 "D-ornithine 4,5-aminomutase subunit beta"  
"OPBM19\_00589" 36740 "s59E13H2" 0 "hypothetical protein"  
"OPBM19\_00589" 36740 "s59E25H2" 0 "hypothetical protein"  
"OPBM19\_00589" 36740 "s59E5H2" 0 "hypothetical protein"  
"OPBM19\_00589" 36740 "s63E6H2" 0 "hypothetical protein"  
"OPBM19\_00590" 36741 "s59E13H2" 0 "Cyclic 2,3-diphosphoglycerate synthetase"  
"OPBM19\_00590" 36741 "s59E25H2" 0 "Cyclic 2,3-diphosphoglycerate synthetase"  
"OPBM19\_00590" 36741 "s59E5H2" 0 "Cyclic 2,3-diphosphoglycerate synthetase"  
"OPBM19\_00590" 36741 "s63E6H2" 0 "Cyclic 2,3-diphosphoglycerate synthetase"  
"OPBM19\_00591" 36742 "s59E13H2" 0 "DegV domain-containing protein"  
"OPBM19\_00591" 36742 "s59E25H2" 0 "DegV domain-containing protein"  
"OPBM19\_00591" 36742 "s59E5H2" 0 "DegV domain-containing protein"  
"OPBM19\_00591" 36742 "s63E6H2" 0 "DegV domain-containing protein"  
"OPBM19\_00592" 36743 "s59E13H2" 0 "Thermophilic metalloprotease (M29)"  
"OPBM19\_00592" 36743 "s59E25H2" 0 "Thermophilic metalloprotease (M29)"  
"OPBM19\_00592" 36743 "s59E5H2" 0 "Thermophilic metalloprotease (M29)"  
"OPBM19\_00592" 36743 "s63E6H2" 0 "Thermophilic metalloprotease (M29)"  
"OPBM19\_00593" 36744 "s59E13H2" 0 "Flavodoxin"  
"OPBM19\_00593" 36744 "s59E25H2" 0 "Flavodoxin"  
"OPBM19\_00593" 36744 "s59E5H2" 0 "Flavodoxin"  
"OPBM19\_00593" 36744 "s63E6H2" 0 "Flavodoxin"

"OPBM19\_00594" 36745 "s59E13H2" 0 "hypothetical protein"  
"OPBM19\_00594" 36745 "s59E25H2" 0 "hypothetical protein"  
"OPBM19\_00594" 36745 "s59E5H2" 0 "hypothetical protein"  
"OPBM19\_00594" 36745 "s63E6H2" 0 "hypothetical protein"  
"OPBM19\_00595" 36746 "s59E13H2" 0 "Putative ski2-type helicase"  
"OPBM19\_00595" 36746 "s59E25H2" 0 "Putative ski2-type helicase"  
"OPBM19\_00595" 36746 "s59E5H2" 0 "Putative ski2-type helicase"  
"OPBM19\_00595" 36746 "s63E6H2" 0 "Putative ski2-type helicase"  
"OPBM19\_00596" 36747 "s59E13H2" 0 "hypothetical protein"  
"OPBM19\_00596" 36747 "s59E25H2" 0 "hypothetical protein"  
"OPBM19\_00596" 36747 "s59E5H2" 0 "hypothetical protein"  
"OPBM19\_00596" 36747 "s63E6H2" 0 "hypothetical protein"  
"OPBM19\_00597" 36748 "s59E13H2" 0 "SpoVT / AbrB like domain protein"  
"OPBM19\_00597" 36748 "s59E25H2" 0 "SpoVT / AbrB like domain protein"  
"OPBM19\_00597" 36748 "s59E5H2" 0 "SpoVT / AbrB like domain protein"  
"OPBM19\_00597" 36748 "s63E6H2" 0 "SpoVT / AbrB like domain protein"  
"OPBM19\_00598" 36749 "s59E13H2" 0 "aminoalkylphosphonic acid N-acetyltransferase"  
"OPBM19\_00598" 36749 "s59E25H2" 0 "aminoalkylphosphonic acid N-acetyltransferase"  
"OPBM19\_00598" 36749 "s59E5H2" 0 "aminoalkylphosphonic acid N-acetyltransferase"  
"OPBM19\_00598" 36749 "s63E6H2" 0 "aminoalkylphosphonic acid N-acetyltransferase"  
"OPBM19\_00604" 36755 "s59E13H2" 0 "Endonuclease 4"  
"OPBM19\_00604" 36755 "s59E25H2" 0 "Endonuclease 4"  
"OPBM19\_00604" 36755 "s59E5H2" 0 "Endonuclease 4"  
"OPBM19\_00604" 36755 "s63E6H2" 0 "Endonuclease 4"  
"OPBM19\_00605" 36756 "s59E13H2" 0 "Indolepyruvate oxidoreductase subunit lorA"  
"OPBM19\_00605" 36756 "s59E25H2" 0 "Indolepyruvate oxidoreductase subunit lorA"  
"OPBM19\_00605" 36756 "s59E5H2" 0 "Indolepyruvate oxidoreductase subunit lorA"  
"OPBM19\_00605" 36756 "s63E6H2" 0 "Indolepyruvate oxidoreductase subunit lorA"  
"OPBM19\_00606" 36757 "s59E13H2" 0 "Indolepyruvate oxidoreductase subunit lorB"  
"OPBM19\_00606" 36757 "s59E25H2" 0 "Indolepyruvate oxidoreductase subunit lorB"  
"OPBM19\_00606" 36757 "s59E5H2" 0 "Indolepyruvate oxidoreductase subunit lorB"  
"OPBM19\_00606" 36757 "s63E6H2" 0 "Indolepyruvate oxidoreductase subunit lorB"  
"OPBM19\_00607" 36758 "s59E13H2" 0 "Succinyl-CoA ligase [ADP-forming] subunit alpha"  
"OPBM19\_00607" 36758 "s59E25H2" 0 "Succinyl-CoA ligase [ADP-forming] subunit alpha"  
"OPBM19\_00607" 36758 "s59E5H2" 0 "Succinyl-CoA ligase [ADP-forming] subunit alpha"  
"OPBM19\_00607" 36758 "s63E6H2" 0 "Succinyl-CoA ligase [ADP-forming] subunit alpha"  
"OPBM19\_00608" 36759 "s59E13H2" 0 "S-adenosylmethionine synthase"  
"OPBM19\_00608" 36759 "s59E25H2" 0 "S-adenosylmethionine synthase"  
"OPBM19\_00608" 36759 "s59E5H2" 0 "S-adenosylmethionine synthase"  
"OPBM19\_00608" 36759 "s63E6H2" 0 "S-adenosylmethionine synthase"  
"OPBM19\_00609" 36760 "s59E13H2" 0 "phosphodiesterase"  
"OPBM19\_00609" 36760 "s59E25H2" 0 "phosphodiesterase"  
"OPBM19\_00609" 36760 "s59E5H2" 0 "phosphodiesterase"  
"OPBM19\_00609" 36760 "s63E6H2" 0 "phosphodiesterase"  
"OPBM19\_00610" 36761 "s59E13H2" 0 "Carbonic anhydrase precursor"  
"OPBM19\_00610" 36761 "s59E25H2" 0 "Carbonic anhydrase precursor"  
"OPBM19\_00610" 36761 "s59E5H2" 0 "Carbonic anhydrase precursor"



"OPBM19\_00610" 36761 "s63E6H2" 0 "Carbonic anhydrase precursor"  
"OPBM19\_00611" 36762 "s59E13H2" 0 "5' nucleotidase, deoxy (Pyrimidine), cytosolic type C protein (NT5C)"  
"OPBM19\_00611" 36762 "s59E25H2" 0 "5' nucleotidase, deoxy (Pyrimidine), cytosolic type C protein (NT5C)"  
"OPBM19\_00611" 36762 "s59E5H2" 0 "5' nucleotidase, deoxy (Pyrimidine), cytosolic type C protein (NT5C)"  
"OPBM19\_00611" 36762 "s63E6H2" 0 "5' nucleotidase, deoxy (Pyrimidine), cytosolic type C protein (NT5C)"  
"OPBM19\_00612" 36763 "s59E13H2" 0 "Ribonuclease VapC11"  
"OPBM19\_00612" 36763 "s59E25H2" 0 "Ribonuclease VapC11"  
"OPBM19\_00612" 36763 "s59E5H2" 0 "Ribonuclease VapC11"  
"OPBM19\_00612" 36763 "s63E6H2" 0 "Ribonuclease VapC11"  
"OPBM19\_00614" 36765 "s59E13H2" 0 "Lipoprotein-releasing system ATP-binding protein Lold"  
"OPBM19\_00614" 36765 "s59E25H2" 0 "Lipoprotein-releasing system ATP-binding protein Lold"  
"OPBM19\_00614" 36765 "s59E5H2" 0 "Lipoprotein-releasing system ATP-binding protein Lold"  
"OPBM19\_00614" 36765 "s63E6H2" 0 "Lipoprotein-releasing system ATP-binding protein Lold"  
"OPBM19\_00615" 36766 "s59E13H2" 0 "Aminopeptidase YwaD precursor"  
"OPBM19\_00615" 36766 "s59E25H2" 0 "Aminopeptidase YwaD precursor"  
"OPBM19\_00615" 36766 "s59E5H2" 0 "Aminopeptidase YwaD precursor"  
"OPBM19\_00615" 36766 "s63E6H2" 0 "Aminopeptidase YwaD precursor"  
"OPBM19\_00616" 36767 "s59E13H2" 0 "hypothetical protein"  
"OPBM19\_00616" 36767 "s59E25H2" 0 "hypothetical protein"  
"OPBM19\_00616" 36767 "s59E5H2" 0 "hypothetical protein"  
"OPBM19\_00616" 36767 "s63E6H2" 0 "hypothetical protein"  
"OPBM19\_00617" 36768 "s59E13H2" 0 "ECF RNA polymerase sigma-E factor"  
"OPBM19\_00617" 36768 "s59E25H2" 0 "ECF RNA polymerase sigma-E factor"  
"OPBM19\_00617" 36768 "s59E5H2" 0 "ECF RNA polymerase sigma-E factor"  
"OPBM19\_00617" 36768 "s63E6H2" 0 "ECF RNA polymerase sigma-E factor"  
"OPBM19\_00618" 36769 "s59E13H2" 0 "hypothetical protein"  
"OPBM19\_00618" 36769 "s59E25H2" 0 "hypothetical protein"  
"OPBM19\_00618" 36769 "s59E5H2" 0 "hypothetical protein"  
"OPBM19\_00618" 36769 "s63E6H2" 0 "hypothetical protein"  
"OPBM19\_00619" 36770 "s59E13H2" 0 "Peptide deformylase"  
"OPBM19\_00619" 36770 "s59E25H2" 0 "Peptide deformylase"  
"OPBM19\_00619" 36770 "s59E5H2" 0 "Peptide deformylase"  
"OPBM19\_00619" 36770 "s63E6H2" 0 "Peptide deformylase"  
"OPBM19\_00620" 36771 "s59E13H2" 0 "Tyrosine phenol-lyase"  
"OPBM19\_00620" 36771 "s59E25H2" 0 "Tyrosine phenol-lyase"  
"OPBM19\_00620" 36771 "s59E5H2" 0 "Tyrosine phenol-lyase"  
"OPBM19\_00620" 36771 "s63E6H2" 0 "Tyrosine phenol-lyase"  
"OPBM19\_00622" 36773 "s59E13H2" 0 "Glucose-6-phosphate isomerase"  
"OPBM19\_00622" 36773 "s59E25H2" 0 "Glucose-6-phosphate isomerase"  
"OPBM19\_00622" 36773 "s59E5H2" 0 "Glucose-6-phosphate isomerase"  
"OPBM19\_00622" 36773 "s63E6H2" 0 "Glucose-6-phosphate isomerase"  
"OPBM19\_00624" 36775 "s59E13H2" 0 "PD-(D/E)XK nuclease superfamily protein"  
"OPBM19\_00624" 36775 "s59E25H2" 0 "PD-(D/E)XK nuclease superfamily protein"  
"OPBM19\_00624" 36775 "s59E5H2" 0 "PD-(D/E)XK nuclease superfamily protein"  
"OPBM19\_00624" 36775 "s63E6H2" 0 "PD-(D/E)XK nuclease superfamily protein"  
"OPBM19\_00625" 36776 "s59E13H2" 0 "endonuclease 4"  
"OPBM19\_00625" 36776 "s59E25H2" 0 "endonuclease 4"

"OPBM19\_00625" 36776 "s59E5H2" 0 "endonuclease 4"  
"OPBM19\_00625" 36776 "s63E6H2" 0 "endonuclease 4"  
"OPBM19\_00626" 36777 "s59E13H2" 0 "hypothetical protein"  
"OPBM19\_00626" 36777 "s59E25H2" 0 "hypothetical protein"  
"OPBM19\_00626" 36777 "s59E5H2" 0 "hypothetical protein"  
"OPBM19\_00626" 36777 "s63E6H2" 0 "hypothetical protein"  
"OPBM19\_00628" 36779 "s59E13H2" 0 "hypothetical protein"  
"OPBM19\_00628" 36779 "s59E25H2" 0 "hypothetical protein"  
"OPBM19\_00628" 36779 "s59E5H2" 0 "hypothetical protein"  
"OPBM19\_00628" 36779 "s63E6H2" 0 "hypothetical protein"  
"OPBM19\_00629" 36780 "s59E13H2" 0 "Tyrosine phenol-lyase"  
"OPBM19\_00629" 36780 "s59E25H2" 0 "Tyrosine phenol-lyase"  
"OPBM19\_00629" 36780 "s59E5H2" 0 "Tyrosine phenol-lyase"  
"OPBM19\_00629" 36780 "s63E6H2" 0 "Tyrosine phenol-lyase"  
"OPBM19\_00630" 36781 "s59E13H2" 0 "hypothetical protein"  
"OPBM19\_00630" 36781 "s59E25H2" 0 "hypothetical protein"  
"OPBM19\_00630" 36781 "s59E5H2" 0 "hypothetical protein"  
"OPBM19\_00630" 36781 "s63E6H2" 0 "hypothetical protein"  
"OPBM19\_00632" 36783 "s59E13H2" 0 "HNH endonuclease"  
"OPBM19\_00632" 36783 "s59E25H2" 0 "HNH endonuclease"  
"OPBM19\_00632" 36783 "s59E5H2" 0 "HNH endonuclease"  
"OPBM19\_00632" 36783 "s63E6H2" 0 "HNH endonuclease"  
"OPBM19\_00633" 36784 "s59E13H2" 0 "CobQ/CobB/MinD/ParA nucleotide binding domain protein"  
"OPBM19\_00633" 36784 "s59E25H2" 0 "CobQ/CobB/MinD/ParA nucleotide binding domain protein"  
"OPBM19\_00633" 36784 "s59E5H2" 0 "CobQ/CobB/MinD/ParA nucleotide binding domain protein"  
"OPBM19\_00633" 36784 "s63E6H2" 0 "CobQ/CobB/MinD/ParA nucleotide binding domain protein"  
"OPBM19\_00634" 36785 "s59E13H2" 0 "Putative conjugal transfer protein/MT3759"  
"OPBM19\_00634" 36785 "s59E25H2" 0 "Putative conjugal transfer protein/MT3759"  
"OPBM19\_00634" 36785 "s59E5H2" 0 "Putative conjugal transfer protein/MT3759"  
"OPBM19\_00634" 36785 "s63E6H2" 0 "Putative conjugal transfer protein/MT3759"  
"OPBM19\_00635" 36786 "s59E13H2" 0 "Bacterial type II secretion system protein F domain protein"  
"OPBM19\_00635" 36786 "s59E25H2" 0 "Bacterial type II secretion system protein F domain protein"  
"OPBM19\_00635" 36786 "s59E5H2" 0 "Bacterial type II secretion system protein F domain protein"  
"OPBM19\_00635" 36786 "s63E6H2" 0 "Bacterial type II secretion system protein F domain protein"  
"OPBM19\_00636" 36787 "s59E13H2" 0 "hypothetical protein"  
"OPBM19\_00636" 36787 "s59E25H2" 0 "hypothetical protein"  
"OPBM19\_00636" 36787 "s59E5H2" 0 "hypothetical protein"  
"OPBM19\_00636" 36787 "s63E6H2" 0 "hypothetical protein"  
"OPBM19\_00637" 36788 "s59E13H2" 0 "TadE-like protein"  
"OPBM19\_00637" 36788 "s59E25H2" 0 "TadE-like protein"  
"OPBM19\_00637" 36788 "s59E5H2" 0 "TadE-like protein"  
"OPBM19\_00637" 36788 "s63E6H2" 0 "TadE-like protein"  
"OPBM19\_00638" 36789 "s59E13H2" 0 "hypothetical protein"  
"OPBM19\_00638" 36789 "s59E25H2" 0 "hypothetical protein"  
"OPBM19\_00638" 36789 "s59E5H2" 0 "hypothetical protein"  
"OPBM19\_00638" 36789 "s63E6H2" 0 "hypothetical protein"  
"OPBM19\_00639" 36790 "s59E13H2" 0 "30S ribosomal protein S6"

"OPBM19\_00639" 36790 "s59E25H2" 0 "30S ribosomal protein S6"  
"OPBM19\_00639" 36790 "s59E5H2" 0 "30S ribosomal protein S6"  
"OPBM19\_00639" 36790 "s63E6H2" 0 "30S ribosomal protein S6"  
"OPBM19\_00640" 36791 "s59E13H2" 0 "Single-stranded DNA-binding protein"  
"OPBM19\_00640" 36791 "s59E25H2" 0 "Single-stranded DNA-binding protein"  
"OPBM19\_00640" 36791 "s59E5H2" 0 "Single-stranded DNA-binding protein"  
"OPBM19\_00640" 36791 "s63E6H2" 0 "Single-stranded DNA-binding protein"  
"OPBM19\_00641" 36792 "s59E13H2" 0 "30S ribosomal protein S18"  
"OPBM19\_00641" 36792 "s59E25H2" 0 "30S ribosomal protein S18"  
"OPBM19\_00641" 36792 "s59E5H2" 0 "30S ribosomal protein S18"  
"OPBM19\_00641" 36792 "s63E6H2" 0 "30S ribosomal protein S18"  
"OPBM19\_00642" 36793 "s59E13H2" 0 "50S ribosomal protein L9"  
"OPBM19\_00642" 36793 "s59E25H2" 0 "50S ribosomal protein L9"  
"OPBM19\_00642" 36793 "s59E5H2" 0 "50S ribosomal protein L9"  
"OPBM19\_00642" 36793 "s63E6H2" 0 "50S ribosomal protein L9"  
"OPBM19\_00643" 36794 "s59E13H2" 0 "Replicative DNA helicase"  
"OPBM19\_00643" 36794 "s59E25H2" 0 "Replicative DNA helicase"  
"OPBM19\_00643" 36794 "s59E5H2" 0 "Replicative DNA helicase"  
"OPBM19\_00643" 36794 "s63E6H2" 0 "Replicative DNA helicase"  
"OPBM19\_00644" 36795 "s59E13H2" 0 "Putative thiazole biosynthetic enzyme"  
"OPBM19\_00644" 36795 "s59E25H2" 0 "Putative thiazole biosynthetic enzyme"  
"OPBM19\_00644" 36795 "s59E5H2" 0 "Putative thiazole biosynthetic enzyme"  
"OPBM19\_00644" 36795 "s63E6H2" 0 "Putative thiazole biosynthetic enzyme"  
"OPBM19\_00645" 36796 "s59E13H2" 0 "Transposase"  
"OPBM19\_00645" 36796 "s59E25H2" 0 "Transposase"  
"OPBM19\_00645" 36796 "s59E5H2" 0 "Transposase"  
"OPBM19\_00645" 36796 "s63E6H2" 0 "Transposase"  
"OPBM19\_00646" 36797 "s59E13H2" 0 "hypothetical protein"  
"OPBM19\_00646" 36797 "s59E25H2" 0 "hypothetical protein"  
"OPBM19\_00646" 36797 "s59E5H2" 0 "hypothetical protein"  
"OPBM19\_00646" 36797 "s63E6H2" 0 "hypothetical protein"  
"OPBM19\_00647" 36798 "s59E13H2" 0 "hypothetical protein"  
"OPBM19\_00647" 36798 "s59E25H2" 0 "hypothetical protein"  
"OPBM19\_00647" 36798 "s59E5H2" 0 "hypothetical protein"  
"OPBM19\_00647" 36798 "s63E6H2" 0 "hypothetical protein"  
"OPBM19\_00648" 36799 "s59E13H2" 0 "Glycosyltransferase AgIJ"  
"OPBM19\_00648" 36799 "s59E25H2" 0 "Glycosyltransferase AgIJ"  
"OPBM19\_00648" 36799 "s59E5H2" 0 "Glycosyltransferase AgIJ"  
"OPBM19\_00648" 36799 "s63E6H2" 0 "Glycosyltransferase AgIJ"  
"OPBM19\_00649" 36800 "s59E13H2" 0 "GDP-mannose-dependent alpha-(1-6)-phosphatidylinositol monomannoside mannosyltransferase"  
"OPBM19\_00649" 36800 "s59E25H2" 0 "GDP-mannose-dependent alpha-(1-6)-phosphatidylinositol monomannoside mannosyltransferase"  
"OPBM19\_00649" 36800 "s59E5H2" 0 "GDP-mannose-dependent alpha-(1-6)-phosphatidylinositol monomannoside mannosyltransferase"  
"OPBM19\_00649" 36800 "s63E6H2" 0 "GDP-mannose-dependent alpha-(1-6)-phosphatidylinositol monomannoside mannosyltransferase"  
"OPBM19\_00650" 36801 "s59E13H2" 0 "Glycogen synthase"  
"OPBM19\_00650" 36801 "s59E25H2" 0 "Glycogen synthase"  
"OPBM19\_00650" 36801 "s59E5H2" 0 "Glycogen synthase"  
"OPBM19\_00650" 36801 "s63E6H2" 0 "Glycogen synthase"

"OPBM19\_00651" 36802 "s59E13H2" 0 "hypothetical protein"  
"OPBM19\_00651" 36802 "s59E25H2" 0 "hypothetical protein"  
"OPBM19\_00651" 36802 "s59E5H2" 0 "hypothetical protein"  
"OPBM19\_00651" 36802 "s63E6H2" 0 "hypothetical protein"  
"OPBM19\_00653" 36804 "s59E13H2" 0 "D-inositol 3-phosphate glycosyltransferase"  
"OPBM19\_00653" 36804 "s59E25H2" 0 "D-inositol 3-phosphate glycosyltransferase"  
"OPBM19\_00653" 36804 "s59E5H2" 0 "D-inositol 3-phosphate glycosyltransferase"  
"OPBM19\_00653" 36804 "s63E6H2" 0 "D-inositol 3-phosphate glycosyltransferase"  
"OPBM19\_00654" 36805 "s59E13H2" 0 "Glycogen synthase"  
"OPBM19\_00654" 36805 "s59E25H2" 0 "Glycogen synthase"  
"OPBM19\_00654" 36805 "s59E5H2" 0 "Glycogen synthase"  
"OPBM19\_00654" 36805 "s63E6H2" 0 "Glycogen synthase"  
"OPBM19\_00655" 36806 "s59E13H2" 0 "UDP-N-acetylglucosamine 2-epimerase"  
"OPBM19\_00655" 36806 "s59E25H2" 0 "UDP-N-acetylglucosamine 2-epimerase"  
"OPBM19\_00655" 36806 "s59E5H2" 0 "UDP-N-acetylglucosamine 2-epimerase"  
"OPBM19\_00655" 36806 "s63E6H2" 0 "UDP-N-acetylglucosamine 2-epimerase"  
"OPBM19\_00656" 36807 "s59E13H2" 0 "colanic acid exporter"  
"OPBM19\_00656" 36807 "s59E25H2" 0 "colanic acid exporter"  
"OPBM19\_00656" 36807 "s59E5H2" 0 "colanic acid exporter"  
"OPBM19\_00656" 36807 "s63E6H2" 0 "colanic acid exporter"  
"OPBM19\_00657" 36808 "s59E13H2" 0 "Sarcosine/dimethylglycine N-methyltransferase"  
"OPBM19\_00657" 36808 "s59E25H2" 0 "Sarcosine/dimethylglycine N-methyltransferase"  
"OPBM19\_00657" 36808 "s59E5H2" 0 "Sarcosine/dimethylglycine N-methyltransferase"  
"OPBM19\_00657" 36808 "s63E6H2" 0 "Sarcosine/dimethylglycine N-methyltransferase"  
"OPBM19\_00658" 36809 "s59E13H2" 0 "hypothetical protein"  
"OPBM19\_00658" 36809 "s59E25H2" 0 "hypothetical protein"  
"OPBM19\_00658" 36809 "s59E5H2" 0 "hypothetical protein"  
"OPBM19\_00658" 36809 "s63E6H2" 0 "hypothetical protein"  
"OPBM19\_00659" 36810 "s59E13H2" 0 "Ubiquinone biosynthesis O-methyltransferase"  
"OPBM19\_00659" 36810 "s59E25H2" 0 "Ubiquinone biosynthesis O-methyltransferase"  
"OPBM19\_00659" 36810 "s59E5H2" 0 "Ubiquinone biosynthesis O-methyltransferase"  
"OPBM19\_00659" 36810 "s63E6H2" 0 "Ubiquinone biosynthesis O-methyltransferase"  
"OPBM19\_00660" 36811 "s59E13H2" 0 "Putative glycosyltransferase EpsD"  
"OPBM19\_00660" 36811 "s59E25H2" 0 "Putative glycosyltransferase EpsD"  
"OPBM19\_00660" 36811 "s59E5H2" 0 "Putative glycosyltransferase EpsD"  
"OPBM19\_00660" 36811 "s63E6H2" 0 "Putative glycosyltransferase EpsD"  
"OPBM19\_00661" 36812 "s59E13H2" 0 "Glycosyltransferase AgII"  
"OPBM19\_00661" 36812 "s59E25H2" 0 "Glycosyltransferase AgII"  
"OPBM19\_00661" 36812 "s59E5H2" 0 "Glycosyltransferase AgII"  
"OPBM19\_00661" 36812 "s63E6H2" 0 "Glycosyltransferase AgII"  
"OPBM19\_00662" 36813 "s59E13H2" 0 "N-acetylmuramoyl-L-alanine amidase LytC precursor"  
"OPBM19\_00662" 36813 "s59E25H2" 0 "N-acetylmuramoyl-L-alanine amidase LytC precursor"  
"OPBM19\_00662" 36813 "s59E5H2" 0 "N-acetylmuramoyl-L-alanine amidase LytC precursor"  
"OPBM19\_00662" 36813 "s63E6H2" 0 "N-acetylmuramoyl-L-alanine amidase LytC precursor"  
"OPBM19\_00663" 36814 "s59E13H2" 0 "Sporulation and spore germination"  
"OPBM19\_00663" 36814 "s59E25H2" 0 "Sporulation and spore germination"  
"OPBM19\_00663" 36814 "s59E5H2" 0 "Sporulation and spore germination"

"OPBM19\_00663" 36814 "s63E6H2" 0 "Sporulation and spore germination"  
"OPBM19\_00664" 36815 "s59E13H2" 0 "hypothetical protein"  
"OPBM19\_00664" 36815 "s59E25H2" 0 "hypothetical protein"  
"OPBM19\_00664" 36815 "s59E5H2" 0 "hypothetical protein"  
"OPBM19\_00664" 36815 "s63E6H2" 0 "hypothetical protein"  
"OPBM19\_00665" 36816 "s59E13H2" 0 "Nucleotidyltransferase domain protein"  
"OPBM19\_00665" 36816 "s59E25H2" 0 "Nucleotidyltransferase domain protein"  
"OPBM19\_00665" 36816 "s59E5H2" 0 "Nucleotidyltransferase domain protein"  
"OPBM19\_00665" 36816 "s63E6H2" 0 "Nucleotidyltransferase domain protein"  
"OPBM19\_00666" 36817 "s59E13H2" 0 "Tungsten-containing aldehyde ferredoxin oxidoreductase"  
"OPBM19\_00666" 36817 "s59E25H2" 0 "Tungsten-containing aldehyde ferredoxin oxidoreductase"  
"OPBM19\_00666" 36817 "s59E5H2" 0 "Tungsten-containing aldehyde ferredoxin oxidoreductase"  
"OPBM19\_00666" 36817 "s63E6H2" 0 "Tungsten-containing aldehyde ferredoxin oxidoreductase"  
"OPBM19\_00667" 36818 "s59E13H2" 0 "Tetrathionate reductase subunit B precursor"  
"OPBM19\_00667" 36818 "s59E25H2" 0 "Tetrathionate reductase subunit B precursor"  
"OPBM19\_00667" 36818 "s59E5H2" 0 "Tetrathionate reductase subunit B precursor"  
"OPBM19\_00667" 36818 "s63E6H2" 0 "Tetrathionate reductase subunit B precursor"  
"OPBM19\_00668" 36819 "s59E13H2" 0 "CoB--CoM heterodisulfide reductase iron-sulfur subunit A"  
"OPBM19\_00668" 36819 "s59E25H2" 0 "CoB--CoM heterodisulfide reductase iron-sulfur subunit A"  
"OPBM19\_00668" 36819 "s59E5H2" 0 "CoB--CoM heterodisulfide reductase iron-sulfur subunit A"  
"OPBM19\_00668" 36819 "s63E6H2" 0 "CoB--CoM heterodisulfide reductase iron-sulfur subunit A"  
"OPBM19\_00669" 36820 "s59E13H2" 0 "CoB--CoM heterodisulfide reductase iron-sulfur subunit A"  
"OPBM19\_00669" 36820 "s59E25H2" 0 "CoB--CoM heterodisulfide reductase iron-sulfur subunit A"  
"OPBM19\_00669" 36820 "s59E5H2" 0 "CoB--CoM heterodisulfide reductase iron-sulfur subunit A"  
"OPBM19\_00669" 36820 "s63E6H2" 0 "CoB--CoM heterodisulfide reductase iron-sulfur subunit A"  
"OPBM19\_00670" 36821 "s59E13H2" 0 "CoB--CoM heterodisulfide reductase iron-sulfur subunit C"  
"OPBM19\_00670" 36821 "s59E25H2" 0 "CoB--CoM heterodisulfide reductase iron-sulfur subunit C"  
"OPBM19\_00670" 36821 "s59E5H2" 0 "CoB--CoM heterodisulfide reductase iron-sulfur subunit C"  
"OPBM19\_00670" 36821 "s63E6H2" 0 "CoB--CoM heterodisulfide reductase iron-sulfur subunit C"  
"OPBM19\_00671" 36822 "s59E13H2" 0 "CoB--CoM heterodisulfide reductase subunit B"  
"OPBM19\_00671" 36822 "s59E25H2" 0 "CoB--CoM heterodisulfide reductase subunit B"  
"OPBM19\_00671" 36822 "s59E5H2" 0 "CoB--CoM heterodisulfide reductase subunit B"  
"OPBM19\_00671" 36822 "s63E6H2" 0 "CoB--CoM heterodisulfide reductase subunit B"  
"OPBM19\_00672" 36823 "s59E13H2" 0 "Polyferredoxin protein MvhB"  
"OPBM19\_00672" 36823 "s59E25H2" 0 "Polyferredoxin protein MvhB"  
"OPBM19\_00672" 36823 "s59E5H2" 0 "Polyferredoxin protein MvhB"  
"OPBM19\_00672" 36823 "s63E6H2" 0 "Polyferredoxin protein MvhB"  
"OPBM19\_00673" 36824 "s59E13H2" 0 "dihydropteridine reductase"  
"OPBM19\_00673" 36824 "s59E25H2" 0 "dihydropteridine reductase"  
"OPBM19\_00673" 36824 "s59E5H2" 0 "dihydropteridine reductase"  
"OPBM19\_00673" 36824 "s63E6H2" 0 "dihydropteridine reductase"  
"OPBM19\_00674" 36825 "s59E13H2" 0 "Phosphoglycolate phosphatase"  
"OPBM19\_00674" 36825 "s59E25H2" 0 "Phosphoglycolate phosphatase"  
"OPBM19\_00674" 36825 "s59E5H2" 0 "Phosphoglycolate phosphatase"  
"OPBM19\_00674" 36825 "s63E6H2" 0 "Phosphoglycolate phosphatase"  
"OPBM19\_00675" 36826 "s59E13H2" 0 "Tetracycline resistance protein, class B"  
"OPBM19\_00675" 36826 "s59E25H2" 0 "Tetracycline resistance protein, class B"

"OPBM19\_00675" 36826 "s59E5H2" 0 "Tetracycline resistance protein, class B"  
"OPBM19\_00675" 36826 "s63E6H2" 0 "Tetracycline resistance protein, class B"  
"OPBM19\_00676" 36827 "s59E13H2" 0 "bifunctional RNase H/acid phosphatase"  
"OPBM19\_00676" 36827 "s59E25H2" 0 "bifunctional RNase H/acid phosphatase"  
"OPBM19\_00676" 36827 "s59E5H2" 0 "bifunctional RNase H/acid phosphatase"  
"OPBM19\_00676" 36827 "s63E6H2" 0 "bifunctional RNase H/acid phosphatase"  
"OPBM19\_00677" 36828 "s59E13H2" 0 "Coenzyme A biosynthesis bifunctional protein CoaBC"  
"OPBM19\_00677" 36828 "s59E25H2" 0 "Coenzyme A biosynthesis bifunctional protein CoaBC"  
"OPBM19\_00677" 36828 "s59E5H2" 0 "Coenzyme A biosynthesis bifunctional protein CoaBC"  
"OPBM19\_00677" 36828 "s63E6H2" 0 "Coenzyme A biosynthesis bifunctional protein CoaBC"  
"OPBM19\_00678" 36829 "s59E13H2" 0 "Coenzyme A biosynthesis bifunctional protein CoaBC"  
"OPBM19\_00678" 36829 "s59E25H2" 0 "Coenzyme A biosynthesis bifunctional protein CoaBC"  
"OPBM19\_00678" 36829 "s59E5H2" 0 "Coenzyme A biosynthesis bifunctional protein CoaBC"  
"OPBM19\_00678" 36829 "s63E6H2" 0 "Coenzyme A biosynthesis bifunctional protein CoaBC"  
"OPBM19\_00679" 36830 "s59E13H2" 0 "Endonuclease/Exonuclease/phosphatase family protein"  
"OPBM19\_00679" 36830 "s59E25H2" 0 "Endonuclease/Exonuclease/phosphatase family protein"  
"OPBM19\_00679" 36830 "s59E5H2" 0 "Endonuclease/Exonuclease/phosphatase family protein"  
"OPBM19\_00679" 36830 "s63E6H2" 0 "Endonuclease/Exonuclease/phosphatase family protein"  
"OPBM19\_00680" 36831 "s59E13H2" 0 "ABC-2 type transporter"  
"OPBM19\_00680" 36831 "s59E25H2" 0 "ABC-2 type transporter"  
"OPBM19\_00680" 36831 "s59E5H2" 0 "ABC-2 type transporter"  
"OPBM19\_00680" 36831 "s63E6H2" 0 "ABC-2 type transporter"  
"OPBM19\_00681" 36832 "s59E13H2" 0 "ABC-2 type transporter"  
"OPBM19\_00681" 36832 "s59E25H2" 0 "ABC-2 type transporter"  
"OPBM19\_00681" 36832 "s59E5H2" 0 "ABC-2 type transporter"  
"OPBM19\_00681" 36832 "s63E6H2" 0 "ABC-2 type transporter"  
"OPBM19\_00682" 36833 "s59E13H2" 0 "hypothetical protein"  
"OPBM19\_00682" 36833 "s59E25H2" 0 "hypothetical protein"  
"OPBM19\_00682" 36833 "s59E5H2" 0 "hypothetical protein"  
"OPBM19\_00682" 36833 "s63E6H2" 0 "hypothetical protein"  
"OPBM19\_00683" 36834 "s59E13H2" 0 "hypothetical protein"  
"OPBM19\_00683" 36834 "s59E25H2" 0 "hypothetical protein"  
"OPBM19\_00683" 36834 "s59E5H2" 0 "hypothetical protein"  
"OPBM19\_00683" 36834 "s63E6H2" 0 "hypothetical protein"  
"OPBM19\_00684" 36835 "s59E13H2" 0 "LemA family protein"  
"OPBM19\_00684" 36835 "s59E25H2" 0 "LemA family protein"  
"OPBM19\_00684" 36835 "s59E5H2" 0 "LemA family protein"  
"OPBM19\_00684" 36835 "s63E6H2" 0 "LemA family protein"  
"OPBM19\_00685" 36836 "s59E13H2" 0 "Endonuclease/Exonuclease/phosphatase family protein"  
"OPBM19\_00685" 36836 "s59E25H2" 0 "Endonuclease/Exonuclease/phosphatase family protein"  
"OPBM19\_00685" 36836 "s59E5H2" 0 "Endonuclease/Exonuclease/phosphatase family protein"  
"OPBM19\_00685" 36836 "s63E6H2" 0 "Endonuclease/Exonuclease/phosphatase family protein"  
"OPBM19\_00686" 36837 "s59E13H2" 0 "hypothetical protein"  
"OPBM19\_00686" 36837 "s59E25H2" 0 "hypothetical protein"  
"OPBM19\_00686" 36837 "s59E5H2" 0 "hypothetical protein"  
"OPBM19\_00686" 36837 "s63E6H2" 0 "hypothetical protein"  
"OPBM19\_00688" 36839 "s59E13H2" 0 "Phosphate acyltransferase"

"OPBM19\_00688" 36839 "s59E25H2" 0 "Phosphate acyltransferase"  
"OPBM19\_00688" 36839 "s59E5H2" 0 "Phosphate acyltransferase"  
"OPBM19\_00688" 36839 "s63E6H2" 0 "Phosphate acyltransferase"  
"OPBM19\_00689" 36840 "s59E13H2" 0 "Acyl carrier protein"  
"OPBM19\_00689" 36840 "s59E25H2" 0 "Acyl carrier protein"  
"OPBM19\_00689" 36840 "s59E5H2" 0 "Acyl carrier protein"  
"OPBM19\_00689" 36840 "s63E6H2" 0 "Acyl carrier protein"  
"OPBM19\_00690" 36841 "s59E13H2" 0 "Oxygen-independent coproporphyrinogen-III oxidase 1"  
"OPBM19\_00690" 36841 "s59E25H2" 0 "Oxygen-independent coproporphyrinogen-III oxidase 1"  
"OPBM19\_00690" 36841 "s59E5H2" 0 "Oxygen-independent coproporphyrinogen-III oxidase 1"  
"OPBM19\_00690" 36841 "s63E6H2" 0 "Oxygen-independent coproporphyrinogen-III oxidase 1"  
"OPBM19\_00691" 36842 "s59E13H2" 0 "molybdenum cofactor biosynthesis protein A"  
"OPBM19\_00691" 36842 "s59E25H2" 0 "molybdenum cofactor biosynthesis protein A"  
"OPBM19\_00691" 36842 "s59E5H2" 0 "molybdenum cofactor biosynthesis protein A"  
"OPBM19\_00691" 36842 "s63E6H2" 0 "molybdenum cofactor biosynthesis protein A"  
"OPBM19\_00695" 36846 "s59E13H2" 0 "Putative pit accessory protein"  
"OPBM19\_00695" 36846 "s59E25H2" 0 "Putative pit accessory protein"  
"OPBM19\_00695" 36846 "s59E5H2" 0 "Putative pit accessory protein"  
"OPBM19\_00695" 36846 "s63E6H2" 0 "Putative pit accessory protein"  
"OPBM19\_00696" 36847 "s59E13H2" 0 "Low-affinity inorganic phosphate transporter 1"  
"OPBM19\_00696" 36847 "s59E25H2" 0 "Low-affinity inorganic phosphate transporter 1"  
"OPBM19\_00696" 36847 "s59E5H2" 0 "Low-affinity inorganic phosphate transporter 1"  
"OPBM19\_00696" 36847 "s63E6H2" 0 "Low-affinity inorganic phosphate transporter 1"  
"OPBM19\_00697" 36848 "s59E13H2" 0 "Tyrosine--tRNA ligase"  
"OPBM19\_00697" 36848 "s59E25H2" 0 "Tyrosine--tRNA ligase"  
"OPBM19\_00697" 36848 "s59E5H2" 0 "Tyrosine--tRNA ligase"  
"OPBM19\_00697" 36848 "s63E6H2" 0 "Tyrosine--tRNA ligase"  
"OPBM19\_00698" 36849 "s59E13H2" 0 "hypothetical protein"  
"OPBM19\_00698" 36849 "s59E25H2" 0 "hypothetical protein"  
"OPBM19\_00698" 36849 "s59E5H2" 0 "hypothetical protein"  
"OPBM19\_00698" 36849 "s63E6H2" 0 "hypothetical protein"  
"OPBM19\_00699" 36850 "s59E13H2" 0 "hypothetical protein"  
"OPBM19\_00699" 36850 "s59E25H2" 0 "hypothetical protein"  
"OPBM19\_00699" 36850 "s59E5H2" 0 "hypothetical protein"  
"OPBM19\_00699" 36850 "s63E6H2" 0 "hypothetical protein"  
"OPBM19\_00704" 36855 "s59E13H2" 0 "RDD family protein"  
"OPBM19\_00704" 36855 "s59E25H2" 0 "RDD family protein"  
"OPBM19\_00704" 36855 "s59E5H2" 0 "RDD family protein"  
"OPBM19\_00704" 36855 "s63E6H2" 0 "RDD family protein"  
"OPBM19\_00705" 36856 "s59E13H2" 0 "tRNA-splicing ligase RtcB"  
"OPBM19\_00705" 36856 "s59E25H2" 0 "tRNA-splicing ligase RtcB"  
"OPBM19\_00705" 36856 "s59E5H2" 0 "tRNA-splicing ligase RtcB"  
"OPBM19\_00705" 36856 "s63E6H2" 0 "tRNA-splicing ligase RtcB"  
"OPBM19\_00706" 36857 "s59E13H2" 0 "Methylated-DNA--protein-cysteine methyltransferase"  
"OPBM19\_00706" 36857 "s59E25H2" 0 "Methylated-DNA--protein-cysteine methyltransferase"  
"OPBM19\_00706" 36857 "s59E5H2" 0 "Methylated-DNA--protein-cysteine methyltransferase"  
"OPBM19\_00706" 36857 "s63E6H2" 0 "Methylated-DNA--protein-cysteine methyltransferase"

"OPBM19\_00707" 36858 "s59E13H2" 0 "FMN reductase [NAD(P)H]"  
"OPBM19\_00707" 36858 "s59E25H2" 0 "FMN reductase [NAD(P)H]"  
"OPBM19\_00707" 36858 "s59E5H2" 0 "FMN reductase [NAD(P)H]"  
"OPBM19\_00707" 36858 "s63E6H2" 0 "FMN reductase [NAD(P)H]"  
"OPBM19\_00708" 36859 "s59E13H2" 0 "hypothetical protein"  
"OPBM19\_00708" 36859 "s59E25H2" 0 "hypothetical protein"  
"OPBM19\_00708" 36859 "s59E5H2" 0 "hypothetical protein"  
"OPBM19\_00708" 36859 "s63E6H2" 0 "hypothetical protein"  
"OPBM19\_00709" 36860 "s59E13H2" 0 "DNA gyrase subunit A"  
"OPBM19\_00709" 36860 "s59E25H2" 0 "DNA gyrase subunit A"  
"OPBM19\_00709" 36860 "s59E5H2" 0 "DNA gyrase subunit A"  
"OPBM19\_00709" 36860 "s63E6H2" 0 "DNA gyrase subunit A"  
"OPBM19\_00710" 36861 "s59E13H2" 0 "DNA gyrase subunit B"  
"OPBM19\_00710" 36861 "s59E25H2" 0 "DNA gyrase subunit B"  
"OPBM19\_00710" 36861 "s59E5H2" 0 "DNA gyrase subunit B"  
"OPBM19\_00710" 36861 "s63E6H2" 0 "DNA gyrase subunit B"  
"OPBM19\_00712" 36863 "s59E13H2" 0 "hypothetical protein"  
"OPBM19\_00712" 36863 "s59E25H2" 0 "hypothetical protein"  
"OPBM19\_00712" 36863 "s59E5H2" 0 "hypothetical protein"  
"OPBM19\_00712" 36863 "s63E6H2" 0 "hypothetical protein"  
"OPBM19\_00713" 36864 "s59E13H2" 0 "DNA replication and repair protein RecF"  
"OPBM19\_00713" 36864 "s59E25H2" 0 "DNA replication and repair protein RecF"  
"OPBM19\_00713" 36864 "s59E5H2" 0 "DNA replication and repair protein RecF"  
"OPBM19\_00713" 36864 "s63E6H2" 0 "DNA replication and repair protein RecF"  
"OPBM19\_00714" 36865 "s59E13H2" 0 "putative D,D-dipeptide-binding periplasmic protein DdpA precursor"  
"OPBM19\_00714" 36865 "s59E25H2" 0 "putative D,D-dipeptide-binding periplasmic protein DdpA precursor"  
"OPBM19\_00714" 36865 "s59E5H2" 0 "putative D,D-dipeptide-binding periplasmic protein DdpA precursor"  
"OPBM19\_00714" 36865 "s63E6H2" 0 "putative D,D-dipeptide-binding periplasmic protein DdpA precursor"  
"OPBM19\_00715" 36866 "s59E13H2" 0 "Dipeptide transport system permease protein DppB"  
"OPBM19\_00715" 36866 "s59E25H2" 0 "Dipeptide transport system permease protein DppB"  
"OPBM19\_00715" 36866 "s59E5H2" 0 "Dipeptide transport system permease protein DppB"  
"OPBM19\_00715" 36866 "s63E6H2" 0 "Dipeptide transport system permease protein DppB"  
"OPBM19\_00716" 36867 "s59E13H2" 0 "Glutathione transport system permease protein GsiD"  
"OPBM19\_00716" 36867 "s59E25H2" 0 "Glutathione transport system permease protein GsiD"  
"OPBM19\_00716" 36867 "s59E5H2" 0 "Glutathione transport system permease protein GsiD"  
"OPBM19\_00716" 36867 "s63E6H2" 0 "Glutathione transport system permease protein GsiD"  
"OPBM19\_00717" 36868 "s59E13H2" 0 "Oligopeptide transport ATP-binding protein OppD"  
"OPBM19\_00717" 36868 "s59E25H2" 0 "Oligopeptide transport ATP-binding protein OppD"  
"OPBM19\_00717" 36868 "s59E5H2" 0 "Oligopeptide transport ATP-binding protein OppD"  
"OPBM19\_00717" 36868 "s63E6H2" 0 "Oligopeptide transport ATP-binding protein OppD"  
"OPBM19\_00718" 36869 "s59E13H2" 0 "Oligopeptide transport ATP-binding protein OppF"  
"OPBM19\_00718" 36869 "s59E25H2" 0 "Oligopeptide transport ATP-binding protein OppF"  
"OPBM19\_00718" 36869 "s59E5H2" 0 "Oligopeptide transport ATP-binding protein OppF"  
"OPBM19\_00718" 36869 "s63E6H2" 0 "Oligopeptide transport ATP-binding protein OppF"  
"OPBM19\_00719" 36870 "s59E13H2" 0 "2,3-bisphosphoglycerate-independent phosphoglycerate mutase"  
"OPBM19\_00719" 36870 "s59E25H2" 0 "2,3-bisphosphoglycerate-independent phosphoglycerate mutase"  
"OPBM19\_00719" 36870 "s59E5H2" 0 "2,3-bisphosphoglycerate-independent phosphoglycerate mutase"



"OPBM19\_00719" 36870 "s63E6H2" 0 "2,3-bisphosphoglycerate-independent phosphoglycerate mutase"  
"OPBM19\_00720" 36871 "s59E13H2" 0 "hypothetical protein"  
"OPBM19\_00720" 36871 "s59E25H2" 0 "hypothetical protein"  
"OPBM19\_00720" 36871 "s59E5H2" 0 "hypothetical protein"  
"OPBM19\_00720" 36871 "s63E6H2" 0 "hypothetical protein"  
"OPBM19\_00721" 36872 "s59E13H2" 0 "Acetyltransferase YpeA"  
"OPBM19\_00721" 36872 "s59E25H2" 0 "Acetyltransferase YpeA"  
"OPBM19\_00721" 36872 "s59E5H2" 0 "Acetyltransferase YpeA"  
"OPBM19\_00721" 36872 "s63E6H2" 0 "Acetyltransferase YpeA"  
"OPBM19\_00722" 36873 "s59E13H2" 0 "spermidine synthase"  
"OPBM19\_00722" 36873 "s59E25H2" 0 "spermidine synthase"  
"OPBM19\_00722" 36873 "s59E5H2" 0 "spermidine synthase"  
"OPBM19\_00722" 36873 "s63E6H2" 0 "spermidine synthase"  
"OPBM19\_00723" 36874 "s59E13H2" 0 "NIF3 (NGG1p interacting factor 3)"  
"OPBM19\_00723" 36874 "s59E25H2" 0 "NIF3 (NGG1p interacting factor 3)"  
"OPBM19\_00723" 36874 "s59E5H2" 0 "NIF3 (NGG1p interacting factor 3)"  
"OPBM19\_00723" 36874 "s63E6H2" 0 "NIF3 (NGG1p interacting factor 3)"  
"OPBM19\_00724" 36875 "s59E13H2" 0 "putative sugar kinase YdjH"  
"OPBM19\_00724" 36875 "s59E25H2" 0 "putative sugar kinase YdjH"  
"OPBM19\_00724" 36875 "s59E5H2" 0 "putative sugar kinase YdjH"  
"OPBM19\_00724" 36875 "s63E6H2" 0 "putative sugar kinase YdjH"  
"OPBM19\_00725" 36876 "s59E13H2" 0 "DNA-binding transcriptional activator PspC"  
"OPBM19\_00725" 36876 "s59E25H2" 0 "DNA-binding transcriptional activator PspC"  
"OPBM19\_00725" 36876 "s59E5H2" 0 "DNA-binding transcriptional activator PspC"  
"OPBM19\_00725" 36876 "s63E6H2" 0 "DNA-binding transcriptional activator PspC"  
"OPBM19\_00726" 36877 "s59E13H2" 0 "hypothetical protein"  
"OPBM19\_00726" 36877 "s59E25H2" 0 "hypothetical protein"  
"OPBM19\_00726" 36877 "s59E5H2" 0 "hypothetical protein"  
"OPBM19\_00726" 36877 "s63E6H2" 0 "hypothetical protein"  
"OPBM19\_00727" 36878 "s59E13H2" 0 "Hydrogenase 2 maturation protease"  
"OPBM19\_00727" 36878 "s59E25H2" 0 "Hydrogenase 2 maturation protease"  
"OPBM19\_00727" 36878 "s59E5H2" 0 "Hydrogenase 2 maturation protease"  
"OPBM19\_00727" 36878 "s63E6H2" 0 "Hydrogenase 2 maturation protease"  
"OPBM19\_00728" 36879 "s59E13H2" 0 "Protein-L-isoaspartate O-methyltransferase"  
"OPBM19\_00728" 36879 "s59E25H2" 0 "Protein-L-isoaspartate O-methyltransferase"  
"OPBM19\_00728" 36879 "s59E5H2" 0 "Protein-L-isoaspartate O-methyltransferase"  
"OPBM19\_00728" 36879 "s63E6H2" 0 "Protein-L-isoaspartate O-methyltransferase"  
"OPBM19\_00729" 36880 "s59E13H2" 0 "hypothetical protein"  
"OPBM19\_00729" 36880 "s59E25H2" 0 "hypothetical protein"  
"OPBM19\_00729" 36880 "s59E5H2" 0 "hypothetical protein"  
"OPBM19\_00729" 36880 "s63E6H2" 0 "hypothetical protein"  
"OPBM19\_00730" 36881 "s59E13H2" 0 "Yip1 domain protein"  
"OPBM19\_00730" 36881 "s59E25H2" 0 "Yip1 domain protein"  
"OPBM19\_00730" 36881 "s59E5H2" 0 "Yip1 domain protein"  
"OPBM19\_00730" 36881 "s63E6H2" 0 "Yip1 domain protein"  
"OPBM19\_00731" 36882 "s59E13H2" 0 "ABC transporter permease YtrF precursor"  
"OPBM19\_00731" 36882 "s59E25H2" 0 "ABC transporter permease YtrF precursor"

"OPBM19\_00731" 36882 "s59E5H2" 0 "ABC transporter permease YtrF precursor"  
"OPBM19\_00731" 36882 "s63E6H2" 0 "ABC transporter permease YtrF precursor"  
"OPBM19\_00732" 36883 "s59E13H2" 0 "putative ABC transporter ATP-binding protein"  
"OPBM19\_00732" 36883 "s59E25H2" 0 "putative ABC transporter ATP-binding protein"  
"OPBM19\_00732" 36883 "s59E5H2" 0 "putative ABC transporter ATP-binding protein"  
"OPBM19\_00732" 36883 "s63E6H2" 0 "putative ABC transporter ATP-binding protein"  
"OPBM19\_00734" 36885 "s59E13H2" 0 "Macrolide export protein MacA"  
"OPBM19\_00734" 36885 "s59E25H2" 0 "Macrolide export protein MacA"  
"OPBM19\_00734" 36885 "s59E5H2" 0 "Macrolide export protein MacA"  
"OPBM19\_00734" 36885 "s63E6H2" 0 "Macrolide export protein MacA"  
"OPBM19\_00736" 36887 "s59E13H2" 0 "DNA polymerase III subunit beta"  
"OPBM19\_00736" 36887 "s59E25H2" 0 "DNA polymerase III subunit beta"  
"OPBM19\_00736" 36887 "s59E5H2" 0 "DNA polymerase III subunit beta"  
"OPBM19\_00736" 36887 "s63E6H2" 0 "DNA polymerase III subunit beta"  
"OPBM19\_00737" 36888 "s59E13H2" 0 "Chromosomal replication initiator protein DnaA"  
"OPBM19\_00737" 36888 "s59E25H2" 0 "Chromosomal replication initiator protein DnaA"  
"OPBM19\_00737" 36888 "s59E5H2" 0 "Chromosomal replication initiator protein DnaA"  
"OPBM19\_00737" 36888 "s63E6H2" 0 "Chromosomal replication initiator protein DnaA"  
"OPBM19\_00738" 36889 "s59E13H2" 0 "hybrid sensory kinase in two-component regulatory system with RcsB and YojN"  
"OPBM19\_00738" 36889 "s59E25H2" 0 "hybrid sensory kinase in two-component regulatory system with RcsB and YojN"  
"OPBM19\_00738" 36889 "s59E5H2" 0 "hybrid sensory kinase in two-component regulatory system with RcsB and YojN"  
"OPBM19\_00738" 36889 "s63E6H2" 0 "hybrid sensory kinase in two-component regulatory system with RcsB and YojN"  
"OPBM19\_00739" 36890 "s59E13H2" 0 "putative transposase"  
"OPBM19\_00739" 36890 "s59E25H2" 0 "putative transposase"  
"OPBM19\_00739" 36890 "s59E5H2" 0 "putative transposase"  
"OPBM19\_00739" 36890 "s63E6H2" 0 "putative transposase"  
"OPBM19\_00740" 36891 "s59E13H2" 0 "50S ribosomal protein L34"  
"OPBM19\_00740" 36891 "s59E25H2" 0 "50S ribosomal protein L34"  
"OPBM19\_00740" 36891 "s59E5H2" 0 "50S ribosomal protein L34"  
"OPBM19\_00740" 36891 "s63E6H2" 0 "50S ribosomal protein L34"  
"OPBM19\_00741" 36892 "s59E13H2" 0 "Ribonuclease P protein component"  
"OPBM19\_00741" 36892 "s59E25H2" 0 "Ribonuclease P protein component"  
"OPBM19\_00741" 36892 "s59E5H2" 0 "Ribonuclease P protein component"  
"OPBM19\_00741" 36892 "s63E6H2" 0 "Ribonuclease P protein component"  
"OPBM19\_00742" 36893 "s59E13H2" 0 "Putative membrane protein insertion efficiency factor"  
"OPBM19\_00742" 36893 "s59E25H2" 0 "Putative membrane protein insertion efficiency factor"  
"OPBM19\_00742" 36893 "s59E5H2" 0 "Putative membrane protein insertion efficiency factor"  
"OPBM19\_00742" 36893 "s63E6H2" 0 "Putative membrane protein insertion efficiency factor"  
"OPBM19\_00743" 36894 "s59E13H2" 0 "Membrane protein insertase YidC"  
"OPBM19\_00743" 36894 "s59E25H2" 0 "Membrane protein insertase YidC"  
"OPBM19\_00743" 36894 "s59E5H2" 0 "Membrane protein insertase YidC"  
"OPBM19\_00743" 36894 "s63E6H2" 0 "Membrane protein insertase YidC"  
"OPBM19\_00744" 36895 "s59E13H2" 0 "R3H domain protein"  
"OPBM19\_00744" 36895 "s59E25H2" 0 "R3H domain protein"  
"OPBM19\_00744" 36895 "s59E5H2" 0 "R3H domain protein"  
"OPBM19\_00744" 36895 "s63E6H2" 0 "R3H domain protein"  
"OPBM19\_00745" 36896 "s59E13H2" 0 "hypothetical protein"

"OPBM19\_00745" 36896 "s59E25H2" 0 "hypothetical protein"  
"OPBM19\_00745" 36896 "s59E5H2" 0 "hypothetical protein"  
"OPBM19\_00745" 36896 "s63E6H2" 0 "hypothetical protein"  
"OPBM19\_00746" 36897 "s59E13H2" 0 "CAAX amino terminal protease self- immunity"  
"OPBM19\_00746" 36897 "s59E25H2" 0 "CAAX amino terminal protease self- immunity"  
"OPBM19\_00746" 36897 "s59E5H2" 0 "CAAX amino terminal protease self- immunity"  
"OPBM19\_00746" 36897 "s63E6H2" 0 "CAAX amino terminal protease self- immunity"  
"OPBM19\_00747" 36898 "s59E13H2" 0 "Aspartyl/glutamyl-tRNA(Asn/Gln) amidotransferase subunit C"  
"OPBM19\_00747" 36898 "s59E25H2" 0 "Aspartyl/glutamyl-tRNA(Asn/Gln) amidotransferase subunit C"  
"OPBM19\_00747" 36898 "s59E5H2" 0 "Aspartyl/glutamyl-tRNA(Asn/Gln) amidotransferase subunit C"  
"OPBM19\_00747" 36898 "s63E6H2" 0 "Aspartyl/glutamyl-tRNA(Asn/Gln) amidotransferase subunit C"  
"OPBM19\_00748" 36899 "s59E13H2" 0 "Glutamyl-tRNA(Gln) amidotransferase subunit A"  
"OPBM19\_00748" 36899 "s59E25H2" 0 "Glutamyl-tRNA(Gln) amidotransferase subunit A"  
"OPBM19\_00748" 36899 "s59E5H2" 0 "Glutamyl-tRNA(Gln) amidotransferase subunit A"  
"OPBM19\_00748" 36899 "s63E6H2" 0 "Glutamyl-tRNA(Gln) amidotransferase subunit A"  
"OPBM19\_00749" 36900 "s59E13H2" 0 "Aspartyl/glutamyl-tRNA(Asn/Gln) amidotransferase subunit B"  
"OPBM19\_00749" 36900 "s59E25H2" 0 "Aspartyl/glutamyl-tRNA(Asn/Gln) amidotransferase subunit B"  
"OPBM19\_00749" 36900 "s59E5H2" 0 "Aspartyl/glutamyl-tRNA(Asn/Gln) amidotransferase subunit B"  
"OPBM19\_00749" 36900 "s63E6H2" 0 "Aspartyl/glutamyl-tRNA(Asn/Gln) amidotransferase subunit B"  
"OPBM19\_00750" 36901 "s59E13H2" 0 "Xylose isomerase-like TIM barrel"  
"OPBM19\_00750" 36901 "s59E25H2" 0 "Xylose isomerase-like TIM barrel"  
"OPBM19\_00750" 36901 "s59E5H2" 0 "Xylose isomerase-like TIM barrel"  
"OPBM19\_00750" 36901 "s63E6H2" 0 "Xylose isomerase-like TIM barrel"  
"OPBM19\_00751" 36902 "s59E13H2" 0 "DNA polymerase III subunit alpha"  
"OPBM19\_00751" 36902 "s59E25H2" 0 "DNA polymerase III subunit alpha"  
"OPBM19\_00751" 36902 "s59E5H2" 0 "DNA polymerase III subunit alpha"  
"OPBM19\_00751" 36902 "s63E6H2" 0 "DNA polymerase III subunit alpha"  
"OPBM19\_00753" 36904 "s59E13H2" 0 "DNA polymerase I"  
"OPBM19\_00753" 36904 "s59E25H2" 0 "DNA polymerase I"  
"OPBM19\_00753" 36904 "s59E5H2" 0 "DNA polymerase I"  
"OPBM19\_00753" 36904 "s63E6H2" 0 "DNA polymerase I"  
"OPBM19\_00754" 36905 "s59E13H2" 0 "30S ribosomal protein S1"  
"OPBM19\_00754" 36905 "s59E25H2" 0 "30S ribosomal protein S1"  
"OPBM19\_00754" 36905 "s59E5H2" 0 "30S ribosomal protein S1"  
"OPBM19\_00754" 36905 "s63E6H2" 0 "30S ribosomal protein S1"  
"OPBM19\_00755" 36906 "s59E13H2" 0 "Dephospho-CoA kinase"  
"OPBM19\_00755" 36906 "s59E25H2" 0 "Dephospho-CoA kinase"  
"OPBM19\_00755" 36906 "s59E5H2" 0 "Dephospho-CoA kinase"  
"OPBM19\_00755" 36906 "s63E6H2" 0 "Dephospho-CoA kinase"  
"OPBM19\_00756" 36907 "s59E13H2" 0 "UvrABC system protein B"  
"OPBM19\_00756" 36907 "s59E25H2" 0 "UvrABC system protein B"  
"OPBM19\_00756" 36907 "s59E5H2" 0 "UvrABC system protein B"  
"OPBM19\_00756" 36907 "s63E6H2" 0 "UvrABC system protein B"  
"OPBM19\_00757" 36908 "s59E13H2" 0 "UvrABC system protein A"  
"OPBM19\_00757" 36908 "s59E25H2" 0 "UvrABC system protein A"  
"OPBM19\_00757" 36908 "s59E5H2" 0 "UvrABC system protein A"  
"OPBM19\_00757" 36908 "s63E6H2" 0 "UvrABC system protein A"

"OPBM19\_00758" 36909 "s59E13H2" 0 "UvrABC system protein C"  
"OPBM19\_00758" 36909 "s59E25H2" 0 "UvrABC system protein C"  
"OPBM19\_00758" 36909 "s59E5H2" 0 "UvrABC system protein C"  
"OPBM19\_00758" 36909 "s63E6H2" 0 "UvrABC system protein C"  
"OPBM19\_00759" 36910 "s59E13H2" 0 "Membrane protein of unknown function"  
"OPBM19\_00759" 36910 "s59E25H2" 0 "Membrane protein of unknown function"  
"OPBM19\_00759" 36910 "s59E5H2" 0 "Membrane protein of unknown function"  
"OPBM19\_00759" 36910 "s63E6H2" 0 "Membrane protein of unknown function"  
"OPBM19\_00760" 36911 "s59E13H2" 0 "glmZ(sRNA)-inactivating NTPase"  
"OPBM19\_00760" 36911 "s59E25H2" 0 "glmZ(sRNA)-inactivating NTPase"  
"OPBM19\_00760" 36911 "s59E5H2" 0 "glmZ(sRNA)-inactivating NTPase"  
"OPBM19\_00760" 36911 "s63E6H2" 0 "glmZ(sRNA)-inactivating NTPase"  
"OPBM19\_00761" 36912 "s59E13H2" 0 "Sporulation transcription regulator WhiA"  
"OPBM19\_00761" 36912 "s59E25H2" 0 "Sporulation transcription regulator WhiA"  
"OPBM19\_00761" 36912 "s59E5H2" 0 "Sporulation transcription regulator WhiA"  
"OPBM19\_00761" 36912 "s63E6H2" 0 "Sporulation transcription regulator WhiA"  
"OPBM19\_00762" 36913 "s59E13H2" 0 "Triosephosphate isomerase"  
"OPBM19\_00762" 36913 "s59E25H2" 0 "Triosephosphate isomerase"  
"OPBM19\_00762" 36913 "s59E5H2" 0 "Triosephosphate isomerase"  
"OPBM19\_00762" 36913 "s63E6H2" 0 "Triosephosphate isomerase"  
"OPBM19\_00763" 36914 "s59E13H2" 0 "Phosphoglycerate kinase"  
"OPBM19\_00763" 36914 "s59E25H2" 0 "Phosphoglycerate kinase"  
"OPBM19\_00763" 36914 "s59E5H2" 0 "Phosphoglycerate kinase"  
"OPBM19\_00763" 36914 "s63E6H2" 0 "Phosphoglycerate kinase"  
"OPBM19\_00764" 36915 "s59E13H2" 0 "Glyceraldehyde-3-phosphate dehydrogenase"  
"OPBM19\_00764" 36915 "s59E25H2" 0 "Glyceraldehyde-3-phosphate dehydrogenase"  
"OPBM19\_00764" 36915 "s59E5H2" 0 "Glyceraldehyde-3-phosphate dehydrogenase"  
"OPBM19\_00764" 36915 "s63E6H2" 0 "Glyceraldehyde-3-phosphate dehydrogenase"  
"OPBM19\_00765" 36916 "s59E13H2" 0 "Transglycosylase associated protein"  
"OPBM19\_00765" 36916 "s59E25H2" 0 "Transglycosylase associated protein"  
"OPBM19\_00765" 36916 "s59E5H2" 0 "Transglycosylase associated protein"  
"OPBM19\_00765" 36916 "s63E6H2" 0 "Transglycosylase associated protein"  
"OPBM19\_00766" 36917 "s59E13H2" 0 "putative deoxyribonuclease YcfH"  
"OPBM19\_00766" 36917 "s59E25H2" 0 "putative deoxyribonuclease YcfH"  
"OPBM19\_00766" 36917 "s59E5H2" 0 "putative deoxyribonuclease YcfH"  
"OPBM19\_00766" 36917 "s63E6H2" 0 "putative deoxyribonuclease YcfH"  
"OPBM19\_00767" 36918 "s59E13H2" 0 "26 kDa periplasmic immunogenic protein precursor"  
"OPBM19\_00767" 36918 "s59E25H2" 0 "26 kDa periplasmic immunogenic protein precursor"  
"OPBM19\_00767" 36918 "s59E5H2" 0 "26 kDa periplasmic immunogenic protein precursor"  
"OPBM19\_00767" 36918 "s63E6H2" 0 "26 kDa periplasmic immunogenic protein precursor"  
"OPBM19\_00769" 36920 "s59E13H2" 0 "Pantothenic acid transporter PanT"  
"OPBM19\_00769" 36920 "s59E25H2" 0 "Pantothenic acid transporter PanT"  
"OPBM19\_00769" 36920 "s59E5H2" 0 "Pantothenic acid transporter PanT"  
"OPBM19\_00769" 36920 "s63E6H2" 0 "Pantothenic acid transporter PanT"  
"OPBM19\_00770" 36921 "s59E13H2" 0 "Energy-coupling factor transporter ATP-binding protein EcfA1"  
"OPBM19\_00770" 36921 "s59E25H2" 0 "Energy-coupling factor transporter ATP-binding protein EcfA1"  
"OPBM19\_00770" 36921 "s59E5H2" 0 "Energy-coupling factor transporter ATP-binding protein EcfA1"

"OPBM19\_00770" 36921 "s63E6H2" 0 "Energy-coupling factor transporter ATP-binding protein EcfA1"  
"OPBM19\_00771" 36922 "s59E13H2" 0 "Energy-coupling factor transporter ATP-binding protein EcfA2"  
"OPBM19\_00771" 36922 "s59E25H2" 0 "Energy-coupling factor transporter ATP-binding protein EcfA2"  
"OPBM19\_00771" 36922 "s59E5H2" 0 "Energy-coupling factor transporter ATP-binding protein EcfA2"  
"OPBM19\_00771" 36922 "s63E6H2" 0 "Energy-coupling factor transporter ATP-binding protein EcfA2"  
"OPBM19\_00772" 36923 "s59E13H2" 0 "Energy-coupling factor transporter transmembrane protein EcfT"  
"OPBM19\_00772" 36923 "s59E25H2" 0 "Energy-coupling factor transporter transmembrane protein EcfT"  
"OPBM19\_00772" 36923 "s59E5H2" 0 "Energy-coupling factor transporter transmembrane protein EcfT"  
"OPBM19\_00772" 36923 "s63E6H2" 0 "Energy-coupling factor transporter transmembrane protein EcfT"  
"OPBM19\_00773" 36924 "s59E13H2" 0 "Peptidase family S58"  
"OPBM19\_00773" 36924 "s59E25H2" 0 "Peptidase family S58"  
"OPBM19\_00773" 36924 "s59E5H2" 0 "Peptidase family S58"  
"OPBM19\_00773" 36924 "s63E6H2" 0 "Peptidase family S58"  
"OPBM19\_00775" 36926 "s59E13H2" 0 "CDP-alcohol phosphatidyltransferase"  
"OPBM19\_00775" 36926 "s59E25H2" 0 "CDP-alcohol phosphatidyltransferase"  
"OPBM19\_00775" 36926 "s59E5H2" 0 "CDP-alcohol phosphatidyltransferase"  
"OPBM19\_00775" 36926 "s63E6H2" 0 "CDP-alcohol phosphatidyltransferase"  
"OPBM19\_00777" 36928 "s59E13H2" 0 "D-lysine 5,6-aminomutase alpha subunit"  
"OPBM19\_00777" 36928 "s59E25H2" 0 "D-lysine 5,6-aminomutase alpha subunit"  
"OPBM19\_00777" 36928 "s59E5H2" 0 "D-lysine 5,6-aminomutase alpha subunit"  
"OPBM19\_00777" 36928 "s63E6H2" 0 "D-lysine 5,6-aminomutase alpha subunit"  
"OPBM19\_00778" 36929 "s59E13H2" 0 "D-lysine 5,6-aminomutase beta subunit"  
"OPBM19\_00778" 36929 "s59E25H2" 0 "D-lysine 5,6-aminomutase beta subunit"  
"OPBM19\_00778" 36929 "s59E5H2" 0 "D-lysine 5,6-aminomutase beta subunit"  
"OPBM19\_00778" 36929 "s63E6H2" 0 "D-lysine 5,6-aminomutase beta subunit"  
"OPBM19\_00779" 36930 "s59E13H2" 0 "putative hydrolase YutF"  
"OPBM19\_00779" 36930 "s59E25H2" 0 "putative hydrolase YutF"  
"OPBM19\_00779" 36930 "s59E5H2" 0 "putative hydrolase YutF"  
"OPBM19\_00779" 36930 "s63E6H2" 0 "putative hydrolase YutF"  
"OPBM19\_00780" 36931 "s59E13H2" 0 "Ribonuclease HII"  
"OPBM19\_00780" 36931 "s59E25H2" 0 "Ribonuclease HII"  
"OPBM19\_00780" 36931 "s59E5H2" 0 "Ribonuclease HII"  
"OPBM19\_00780" 36931 "s63E6H2" 0 "Ribonuclease HII"  
"OPBM19\_00781" 36932 "s59E13H2" 0 "Threonine--tRNA ligase 2"  
"OPBM19\_00781" 36932 "s59E25H2" 0 "Threonine--tRNA ligase 2"  
"OPBM19\_00781" 36932 "s59E5H2" 0 "Threonine--tRNA ligase 2"  
"OPBM19\_00781" 36932 "s63E6H2" 0 "Threonine--tRNA ligase 2"  
"OPBM19\_00782" 36933 "s59E13H2" 0 "Translation initiation factor IF-3"  
"OPBM19\_00782" 36933 "s59E25H2" 0 "Translation initiation factor IF-3"  
"OPBM19\_00782" 36933 "s59E5H2" 0 "Translation initiation factor IF-3"  
"OPBM19\_00782" 36933 "s63E6H2" 0 "Translation initiation factor IF-3"  
"OPBM19\_00783" 36934 "s59E13H2" 0 "50S ribosomal protein L35"  
"OPBM19\_00783" 36934 "s59E25H2" 0 "50S ribosomal protein L35"  
"OPBM19\_00783" 36934 "s59E5H2" 0 "50S ribosomal protein L35"  
"OPBM19\_00783" 36934 "s63E6H2" 0 "50S ribosomal protein L35"  
"OPBM19\_00784" 36935 "s59E13H2" 0 "50S ribosomal protein L20"  
"OPBM19\_00784" 36935 "s59E25H2" 0 "50S ribosomal protein L20"

"OPBM19\_00784" 36935 "s59E5H2" 0 "50S ribosomal protein L20"  
"OPBM19\_00784" 36935 "s63E6H2" 0 "50S ribosomal protein L20"  
"OPBM19\_00785" 36936 "s59E13H2" 0 "Phenylalanine--tRNA ligase alpha subunit"  
"OPBM19\_00785" 36936 "s59E25H2" 0 "Phenylalanine--tRNA ligase alpha subunit"  
"OPBM19\_00785" 36936 "s59E5H2" 0 "Phenylalanine--tRNA ligase alpha subunit"  
"OPBM19\_00785" 36936 "s63E6H2" 0 "Phenylalanine--tRNA ligase alpha subunit"  
"OPBM19\_00786" 36937 "s59E13H2" 0 "Phenylalanine--tRNA ligase beta subunit"  
"OPBM19\_00786" 36937 "s59E25H2" 0 "Phenylalanine--tRNA ligase beta subunit"  
"OPBM19\_00786" 36937 "s59E5H2" 0 "Phenylalanine--tRNA ligase beta subunit"  
"OPBM19\_00786" 36937 "s63E6H2" 0 "Phenylalanine--tRNA ligase beta subunit"  
"OPBM19\_00787" 36938 "s59E13H2" 0 "Ornithine carbamoyltransferase"  
"OPBM19\_00787" 36938 "s59E25H2" 0 "Ornithine carbamoyltransferase"  
"OPBM19\_00787" 36938 "s59E5H2" 0 "Ornithine carbamoyltransferase"  
"OPBM19\_00787" 36938 "s63E6H2" 0 "Ornithine carbamoyltransferase"  
"OPBM19\_00788" 36939 "s59E13H2" 0 "Serine/threonine-protein kinase PK-1"  
"OPBM19\_00788" 36939 "s59E25H2" 0 "Serine/threonine-protein kinase PK-1"  
"OPBM19\_00788" 36939 "s59E5H2" 0 "Serine/threonine-protein kinase PK-1"  
"OPBM19\_00788" 36939 "s63E6H2" 0 "Serine/threonine-protein kinase PK-1"  
"OPBM19\_00789" 36940 "s59E13H2" 0 "hypothetical protein"  
"OPBM19\_00789" 36940 "s59E25H2" 0 "hypothetical protein"  
"OPBM19\_00789" 36940 "s59E5H2" 0 "hypothetical protein"  
"OPBM19\_00789" 36940 "s63E6H2" 0 "hypothetical protein"  
"OPBM19\_00790" 36941 "s59E13H2" 0 "Uracil DNA glycosylase superfamily protein"  
"OPBM19\_00790" 36941 "s59E25H2" 0 "Uracil DNA glycosylase superfamily protein"  
"OPBM19\_00790" 36941 "s59E5H2" 0 "Uracil DNA glycosylase superfamily protein"  
"OPBM19\_00790" 36941 "s63E6H2" 0 "Uracil DNA glycosylase superfamily protein"  
"OPBM19\_00791" 36942 "s59E13H2" 0 "Glutamine transport ATP-binding protein GlnQ"  
"OPBM19\_00791" 36942 "s59E25H2" 0 "Glutamine transport ATP-binding protein GlnQ"  
"OPBM19\_00791" 36942 "s59E5H2" 0 "Glutamine transport ATP-binding protein GlnQ"  
"OPBM19\_00791" 36942 "s63E6H2" 0 "Glutamine transport ATP-binding protein GlnQ"  
"OPBM19\_00792" 36943 "s59E13H2" 0 "Inner membrane amino-acid ABC transporter permease protein YecS"  
"OPBM19\_00792" 36943 "s59E25H2" 0 "Inner membrane amino-acid ABC transporter permease protein YecS"  
"OPBM19\_00792" 36943 "s59E5H2" 0 "Inner membrane amino-acid ABC transporter permease protein YecS"  
"OPBM19\_00792" 36943 "s63E6H2" 0 "Inner membrane amino-acid ABC transporter permease protein YecS"  
"OPBM19\_00793" 36944 "s59E13H2" 0 "Cystine-binding periplasmic protein precursor"  
"OPBM19\_00793" 36944 "s59E25H2" 0 "Cystine-binding periplasmic protein precursor"  
"OPBM19\_00793" 36944 "s59E5H2" 0 "Cystine-binding periplasmic protein precursor"  
"OPBM19\_00793" 36944 "s63E6H2" 0 "Cystine-binding periplasmic protein precursor"  
"OPBM19\_00794" 36945 "s59E13H2" 0 "Carboxylesterase"  
"OPBM19\_00794" 36945 "s59E25H2" 0 "Carboxylesterase"  
"OPBM19\_00794" 36945 "s59E5H2" 0 "Carboxylesterase"  
"OPBM19\_00794" 36945 "s63E6H2" 0 "Carboxylesterase"  
"OPBM19\_00795" 36946 "s59E13H2" 0 "Putative sigma-54 modulation protein"  
"OPBM19\_00795" 36946 "s59E25H2" 0 "Putative sigma-54 modulation protein"  
"OPBM19\_00795" 36946 "s59E5H2" 0 "Putative sigma-54 modulation protein"  
"OPBM19\_00795" 36946 "s63E6H2" 0 "Putative sigma-54 modulation protein"  
"OPBM19\_00796" 36947 "s59E13H2" 0 "Cold shock protein CspB"

"OPBM19\_00796" 36947 "s59E25H2" 0 "Cold shock protein CspB"  
"OPBM19\_00796" 36947 "s59E5H2" 0 "Cold shock protein CspB"  
"OPBM19\_00796" 36947 "s63E6H2" 0 "Cold shock protein CspB"  
"OPBM19\_00797" 36948 "s59E13H2" 0 "DNA utilization protein GntX"  
"OPBM19\_00797" 36948 "s59E25H2" 0 "DNA utilization protein GntX"  
"OPBM19\_00797" 36948 "s59E5H2" 0 "DNA utilization protein GntX"  
"OPBM19\_00797" 36948 "s63E6H2" 0 "DNA utilization protein GntX"  
"OPBM19\_00798" 36949 "s59E13H2" 0 "Bifunctional protein GlmU"  
"OPBM19\_00798" 36949 "s59E25H2" 0 "Bifunctional protein GlmU"  
"OPBM19\_00798" 36949 "s59E5H2" 0 "Bifunctional protein GlmU"  
"OPBM19\_00798" 36949 "s63E6H2" 0 "Bifunctional protein GlmU"  
"OPBM19\_00799" 36950 "s59E13H2" 0 "Methylthioribose-1-phosphate isomerase"  
"OPBM19\_00799" 36950 "s59E25H2" 0 "Methylthioribose-1-phosphate isomerase"  
"OPBM19\_00799" 36950 "s59E5H2" 0 "Methylthioribose-1-phosphate isomerase"  
"OPBM19\_00799" 36950 "s63E6H2" 0 "Methylthioribose-1-phosphate isomerase"  
"OPBM19\_00800" 36951 "s59E13H2" 0 "Adenosylhomocysteinase"  
"OPBM19\_00800" 36951 "s59E25H2" 0 "Adenosylhomocysteinase"  
"OPBM19\_00800" 36951 "s59E5H2" 0 "Adenosylhomocysteinase"  
"OPBM19\_00800" 36951 "s63E6H2" 0 "Adenosylhomocysteinase"  
"OPBM19\_00801" 36952 "s59E13H2" 0 "GDP-6-deoxy-D-mannose reductase"  
"OPBM19\_00801" 36952 "s59E25H2" 0 "GDP-6-deoxy-D-mannose reductase"  
"OPBM19\_00801" 36952 "s59E5H2" 0 "GDP-6-deoxy-D-mannose reductase"  
"OPBM19\_00801" 36952 "s63E6H2" 0 "GDP-6-deoxy-D-mannose reductase"  
"OPBM19\_00802" 36953 "s59E13H2" 0 "Glycosyl transferases group 1"  
"OPBM19\_00802" 36953 "s59E25H2" 0 "Glycosyl transferases group 1"  
"OPBM19\_00802" 36953 "s59E5H2" 0 "Glycosyl transferases group 1"  
"OPBM19\_00802" 36953 "s63E6H2" 0 "Glycosyl transferases group 1"  
"OPBM19\_00803" 36954 "s59E13H2" 0 "Bifunctional protein GlmU"  
"OPBM19\_00803" 36954 "s59E25H2" 0 "Bifunctional protein GlmU"  
"OPBM19\_00803" 36954 "s59E5H2" 0 "Bifunctional protein GlmU"  
"OPBM19\_00803" 36954 "s63E6H2" 0 "Bifunctional protein GlmU"  
"OPBM19\_00804" 36955 "s59E13H2" 0 "Glycosyltransferase AgIE"  
"OPBM19\_00804" 36955 "s59E25H2" 0 "Glycosyltransferase AgIE"  
"OPBM19\_00804" 36955 "s59E5H2" 0 "Glycosyltransferase AgIE"  
"OPBM19\_00804" 36955 "s63E6H2" 0 "Glycosyltransferase AgIE"  
"OPBM19\_00805" 36956 "s59E13H2" 0 "N-acetylglucosaminyl-diphospho-decaprenol L-rhamnosyltransferase"  
"OPBM19\_00805" 36956 "s59E25H2" 0 "N-acetylglucosaminyl-diphospho-decaprenol L-rhamnosyltransferase"  
"OPBM19\_00805" 36956 "s59E5H2" 0 "N-acetylglucosaminyl-diphospho-decaprenol L-rhamnosyltransferase"  
"OPBM19\_00805" 36956 "s63E6H2" 0 "N-acetylglucosaminyl-diphospho-decaprenol L-rhamnosyltransferase"  
"OPBM19\_00806" 36957 "s59E13H2" 0 "Glycosyltransferase AgIE"  
"OPBM19\_00806" 36957 "s59E25H2" 0 "Glycosyltransferase AgIE"  
"OPBM19\_00806" 36957 "s59E5H2" 0 "Glycosyltransferase AgIE"  
"OPBM19\_00806" 36957 "s63E6H2" 0 "Glycosyltransferase AgIE"  
"OPBM19\_00807" 36958 "s59E13H2" 0 "hypothetical protein"  
"OPBM19\_00807" 36958 "s59E25H2" 0 "hypothetical protein"  
"OPBM19\_00807" 36958 "s59E5H2" 0 "hypothetical protein"  
"OPBM19\_00807" 36958 "s63E6H2" 0 "hypothetical protein"

"OPBM19\_00808" 36959 "s59E13H2" 0 "Glycosyltransferase AgIE"  
"OPBM19\_00808" 36959 "s59E25H2" 0 "Glycosyltransferase AgIE"  
"OPBM19\_00808" 36959 "s59E5H2" 0 "Glycosyltransferase AgIE"  
"OPBM19\_00808" 36959 "s63E6H2" 0 "Glycosyltransferase AgIE"  
"OPBM19\_00812" 36963 "s59E13H2" 0 "tetratricopeptide repeat protein"  
"OPBM19\_00812" 36963 "s59E25H2" 0 "tetratricopeptide repeat protein"  
"OPBM19\_00812" 36963 "s59E5H2" 0 "tetratricopeptide repeat protein"  
"OPBM19\_00812" 36963 "s63E6H2" 0 "tetratricopeptide repeat protein"  
"OPBM19\_00813" 36964 "s59E13H2" 0 "Putative glycosyltransferase EpsD"  
"OPBM19\_00813" 36964 "s59E25H2" 0 "Putative glycosyltransferase EpsD"  
"OPBM19\_00813" 36964 "s59E5H2" 0 "Putative glycosyltransferase EpsD"  
"OPBM19\_00813" 36964 "s63E6H2" 0 "Putative glycosyltransferase EpsD"  
"OPBM19\_00814" 36965 "s59E13H2" 0 "dTDP-4-dehydrorhamnose 3,5-epimerase"  
"OPBM19\_00814" 36965 "s59E25H2" 0 "dTDP-4-dehydrorhamnose 3,5-epimerase"  
"OPBM19\_00814" 36965 "s59E5H2" 0 "dTDP-4-dehydrorhamnose 3,5-epimerase"  
"OPBM19\_00814" 36965 "s63E6H2" 0 "dTDP-4-dehydrorhamnose 3,5-epimerase"  
"OPBM19\_00815" 36966 "s59E13H2" 0 "dTDP-glucose 4,6-dehydratase 2"  
"OPBM19\_00815" 36966 "s59E25H2" 0 "dTDP-glucose 4,6-dehydratase 2"  
"OPBM19\_00815" 36966 "s59E5H2" 0 "dTDP-glucose 4,6-dehydratase 2"  
"OPBM19\_00815" 36966 "s63E6H2" 0 "dTDP-glucose 4,6-dehydratase 2"  
"OPBM19\_00816" 36967 "s59E13H2" 0 "dTDP-4-dehydrorhamnose reductase"  
"OPBM19\_00816" 36967 "s59E25H2" 0 "dTDP-4-dehydrorhamnose reductase"  
"OPBM19\_00816" 36967 "s59E5H2" 0 "dTDP-4-dehydrorhamnose reductase"  
"OPBM19\_00816" 36967 "s63E6H2" 0 "dTDP-4-dehydrorhamnose reductase"  
"OPBM19\_00817" 36968 "s59E13H2" 0 "Polysaccharide biosynthesis protein"  
"OPBM19\_00817" 36968 "s59E25H2" 0 "Polysaccharide biosynthesis protein"  
"OPBM19\_00817" 36968 "s59E5H2" 0 "Polysaccharide biosynthesis protein"  
"OPBM19\_00817" 36968 "s63E6H2" 0 "Polysaccharide biosynthesis protein"  
"OPBM19\_00818" 36969 "s59E13H2" 0 "hypothetical protein"  
"OPBM19\_00818" 36969 "s59E25H2" 0 "hypothetical protein"  
"OPBM19\_00818" 36969 "s59E5H2" 0 "hypothetical protein"  
"OPBM19\_00818" 36969 "s63E6H2" 0 "hypothetical protein"  
"OPBM19\_00819" 36970 "s59E13H2" 0 "hypothetical protein"  
"OPBM19\_00819" 36970 "s59E25H2" 0 "hypothetical protein"  
"OPBM19\_00819" 36970 "s59E5H2" 0 "hypothetical protein"  
"OPBM19\_00819" 36970 "s63E6H2" 0 "hypothetical protein"  
"OPBM19\_00820" 36971 "s59E13H2" 0 "coproporphyrinogen III oxidase"  
"OPBM19\_00820" 36971 "s59E25H2" 0 "coproporphyrinogen III oxidase"  
"OPBM19\_00820" 36971 "s59E5H2" 0 "coproporphyrinogen III oxidase"  
"OPBM19\_00820" 36971 "s63E6H2" 0 "coproporphyrinogen III oxidase"  
"OPBM19\_00821" 36972 "s59E13H2" 0 "Glycosyltransferase AgIE"  
"OPBM19\_00821" 36972 "s59E25H2" 0 "Glycosyltransferase AgIE"  
"OPBM19\_00821" 36972 "s59E5H2" 0 "Glycosyltransferase AgIE"  
"OPBM19\_00821" 36972 "s63E6H2" 0 "Glycosyltransferase AgIE"  
"OPBM19\_00822" 36973 "s59E13H2" 0 "Glycosyltransferase AgID"  
"OPBM19\_00822" 36973 "s59E25H2" 0 "Glycosyltransferase AgID"  
"OPBM19\_00822" 36973 "s59E5H2" 0 "Glycosyltransferase AgID"



"OPBM19\_00822" 36973 "s63E6H2" 0 "Glycosyltransferase AgID"  
"OPBM19\_00823" 36974 "s59E13H2" 0 "Putative glycosyltransferase EpsH"  
"OPBM19\_00823" 36974 "s59E25H2" 0 "Putative glycosyltransferase EpsH"  
"OPBM19\_00823" 36974 "s59E5H2" 0 "Putative glycosyltransferase EpsH"  
"OPBM19\_00823" 36974 "s63E6H2" 0 "Putative glycosyltransferase EpsH"  
"OPBM19\_00824" 36975 "s59E13H2" 0 "D-inositol 3-phosphate glycosyltransferase"  
"OPBM19\_00824" 36975 "s59E25H2" 0 "D-inositol 3-phosphate glycosyltransferase"  
"OPBM19\_00824" 36975 "s59E5H2" 0 "D-inositol 3-phosphate glycosyltransferase"  
"OPBM19\_00824" 36975 "s63E6H2" 0 "D-inositol 3-phosphate glycosyltransferase"  
"OPBM19\_00825" 36976 "s59E13H2" 0 "Putative glycosyltransferase EpsH"  
"OPBM19\_00825" 36976 "s59E25H2" 0 "Putative glycosyltransferase EpsH"  
"OPBM19\_00825" 36976 "s59E5H2" 0 "Putative glycosyltransferase EpsH"  
"OPBM19\_00825" 36976 "s63E6H2" 0 "Putative glycosyltransferase EpsH"  
"OPBM19\_00826" 36977 "s59E13H2" 0 "hypothetical protein"  
"OPBM19\_00826" 36977 "s59E25H2" 0 "hypothetical protein"  
"OPBM19\_00826" 36977 "s59E5H2" 0 "hypothetical protein"  
"OPBM19\_00826" 36977 "s63E6H2" 0 "hypothetical protein"  
"OPBM19\_00827" 36978 "s59E13H2" 0 "Teichoic acid translocation permease protein TagG"  
"OPBM19\_00827" 36978 "s59E25H2" 0 "Teichoic acid translocation permease protein TagG"  
"OPBM19\_00827" 36978 "s59E5H2" 0 "Teichoic acid translocation permease protein TagG"  
"OPBM19\_00827" 36978 "s63E6H2" 0 "Teichoic acid translocation permease protein TagG"  
"OPBM19\_00828" 36979 "s59E13H2" 0 "Teichoic acids export ATP-binding protein TagH"  
"OPBM19\_00828" 36979 "s59E25H2" 0 "Teichoic acids export ATP-binding protein TagH"  
"OPBM19\_00828" 36979 "s59E5H2" 0 "Teichoic acids export ATP-binding protein TagH"  
"OPBM19\_00828" 36979 "s63E6H2" 0 "Teichoic acids export ATP-binding protein TagH"  
"OPBM19\_00829" 36980 "s59E13H2" 0 "hypothetical protein"  
"OPBM19\_00829" 36980 "s59E25H2" 0 "hypothetical protein"  
"OPBM19\_00829" 36980 "s59E5H2" 0 "hypothetical protein"  
"OPBM19\_00829" 36980 "s63E6H2" 0 "hypothetical protein"  
"OPBM19\_00830" 36981 "s59E13H2" 0 "Glycosyl transferases group 1"  
"OPBM19\_00830" 36981 "s59E25H2" 0 "Glycosyl transferases group 1"  
"OPBM19\_00830" 36981 "s59E5H2" 0 "Glycosyl transferases group 1"  
"OPBM19\_00830" 36981 "s63E6H2" 0 "Glycosyl transferases group 1"  
"OPBM19\_00831" 36982 "s59E13H2" 0 "Glycosyltransferase AgII"  
"OPBM19\_00831" 36982 "s59E25H2" 0 "Glycosyltransferase AgII"  
"OPBM19\_00831" 36982 "s59E5H2" 0 "Glycosyltransferase AgII"  
"OPBM19\_00831" 36982 "s63E6H2" 0 "Glycosyltransferase AgII"  
"OPBM19\_00832" 36983 "s59E13H2" 0 "hypothetical protein"  
"OPBM19\_00832" 36983 "s59E25H2" 0 "hypothetical protein"  
"OPBM19\_00832" 36983 "s59E5H2" 0 "hypothetical protein"  
"OPBM19\_00832" 36983 "s63E6H2" 0 "hypothetical protein"  
"OPBM19\_00833" 36984 "s59E13H2" 0 "hypothetical protein"  
"OPBM19\_00833" 36984 "s59E25H2" 0 "hypothetical protein"  
"OPBM19\_00833" 36984 "s59E5H2" 0 "hypothetical protein"  
"OPBM19\_00833" 36984 "s63E6H2" 0 "hypothetical protein"  
"OPBM19\_00834" 36985 "s59E13H2" 0 "UDP-glucose 6-dehydrogenase TuaD"  
"OPBM19\_00834" 36985 "s59E25H2" 0 "UDP-glucose 6-dehydrogenase TuaD"

"OPBM19\_00834" 36985 "s59E5H2" 0 "UDP-glucose 6-dehydrogenase TuaD"  
"OPBM19\_00834" 36985 "s63E6H2" 0 "UDP-glucose 6-dehydrogenase TuaD"  
"OPBM19\_00835" 36986 "s59E13H2" 0 "UDP-glucose 6-dehydrogenase TuaD"  
"OPBM19\_00835" 36986 "s59E25H2" 0 "UDP-glucose 6-dehydrogenase TuaD"  
"OPBM19\_00835" 36986 "s59E5H2" 0 "UDP-glucose 6-dehydrogenase TuaD"  
"OPBM19\_00835" 36986 "s63E6H2" 0 "UDP-glucose 6-dehydrogenase TuaD"  
"OPBM19\_00836" 36987 "s59E13H2" 0 "UDP-glucose 4-epimerase"  
"OPBM19\_00836" 36987 "s59E25H2" 0 "UDP-glucose 4-epimerase"  
"OPBM19\_00836" 36987 "s59E5H2" 0 "UDP-glucose 4-epimerase"  
"OPBM19\_00836" 36987 "s63E6H2" 0 "UDP-glucose 4-epimerase"  
"OPBM19\_00837" 36988 "s59E13H2" 0 "GDSL-like Lipase/Acylhydrolase"  
"OPBM19\_00837" 36988 "s59E25H2" 0 "GDSL-like Lipase/Acylhydrolase"  
"OPBM19\_00837" 36988 "s59E5H2" 0 "GDSL-like Lipase/Acylhydrolase"  
"OPBM19\_00837" 36988 "s63E6H2" 0 "GDSL-like Lipase/Acylhydrolase"  
"OPBM19\_00838" 36989 "s59E13H2" 0 "dTDP-L-rhamnose 4-epimerase"  
"OPBM19\_00838" 36989 "s59E25H2" 0 "dTDP-L-rhamnose 4-epimerase"  
"OPBM19\_00838" 36989 "s59E5H2" 0 "dTDP-L-rhamnose 4-epimerase"  
"OPBM19\_00838" 36989 "s63E6H2" 0 "dTDP-L-rhamnose 4-epimerase"  
"OPBM19\_00839" 36990 "s59E13H2" 0 "Mannosylfructose-phosphate synthase"  
"OPBM19\_00839" 36990 "s59E25H2" 0 "Mannosylfructose-phosphate synthase"  
"OPBM19\_00839" 36990 "s59E5H2" 0 "Mannosylfructose-phosphate synthase"  
"OPBM19\_00839" 36990 "s63E6H2" 0 "Mannosylfructose-phosphate synthase"  
"OPBM19\_00840" 36991 "s59E13H2" 0 "3 beta-hydroxysteroid dehydrogenase/Delta 5--"  
"OPBM19\_00840" 36991 "s59E25H2" 0 "3 beta-hydroxysteroid dehydrogenase/Delta 5--"  
"OPBM19\_00840" 36991 "s59E5H2" 0 "3 beta-hydroxysteroid dehydrogenase/Delta 5--"  
"OPBM19\_00840" 36991 "s63E6H2" 0 "3 beta-hydroxysteroid dehydrogenase/Delta 5--"  
"OPBM19\_00841" 36992 "s59E13H2" 0 "Coenzyme F420 hydrogenase subunit beta"  
"OPBM19\_00841" 36992 "s59E25H2" 0 "Coenzyme F420 hydrogenase subunit beta"  
"OPBM19\_00841" 36992 "s59E5H2" 0 "Coenzyme F420 hydrogenase subunit beta"  
"OPBM19\_00841" 36992 "s63E6H2" 0 "Coenzyme F420 hydrogenase subunit beta"  
"OPBM19\_00842" 36993 "s59E13H2" 0 "colanic acid biosynthesis protein"  
"OPBM19\_00842" 36993 "s59E25H2" 0 "colanic acid biosynthesis protein"  
"OPBM19\_00842" 36993 "s59E5H2" 0 "colanic acid biosynthesis protein"  
"OPBM19\_00842" 36993 "s63E6H2" 0 "colanic acid biosynthesis protein"  
"OPBM19\_00843" 36994 "s59E13H2" 0 "Putative acetyltransferase"  
"OPBM19\_00843" 36994 "s59E25H2" 0 "Putative acetyltransferase"  
"OPBM19\_00843" 36994 "s59E5H2" 0 "Putative acetyltransferase"  
"OPBM19\_00843" 36994 "s63E6H2" 0 "Putative acetyltransferase"  
"OPBM19\_00844" 36995 "s59E13H2" 0 "hypothetical protein"  
"OPBM19\_00844" 36995 "s59E25H2" 0 "hypothetical protein"  
"OPBM19\_00844" 36995 "s59E5H2" 0.001008492 "hypothetical protein"  
"OPBM19\_00844" 36995 "s63E6H2" 0.000759702 "hypothetical protein"  
"OPBM19\_00846" 36997 "s59E13H2" 0 "Tyrosine recombinase XerD"  
"OPBM19\_00846" 36997 "s59E25H2" 0 "Tyrosine recombinase XerD"  
"OPBM19\_00846" 36997 "s59E5H2" 0 "Tyrosine recombinase XerD"  
"OPBM19\_00846" 36997 "s63E6H2" 0 "Tyrosine recombinase XerD"  
"OPBM19\_00848" 36999 "s59E13H2" 0 "HEPN domain protein"

"OPBM19\_00848" 36999 "s59E25H2" 0 "HEPN domain protein"  
"OPBM19\_00848" 36999 "s59E5H2" 0 "HEPN domain protein"  
"OPBM19\_00848" 36999 "s63E6H2" 0 "HEPN domain protein"  
"OPBM19\_00849" 37000 "s59E13H2" 0 "hypothetical protein"  
"OPBM19\_00849" 37000 "s59E25H2" 0 "hypothetical protein"  
"OPBM19\_00849" 37000 "s59E5H2" 0 "hypothetical protein"  
"OPBM19\_00849" 37000 "s63E6H2" 0 "hypothetical protein"  
"OPBM19\_00850" 37001 "s59E13H2" 0 "Serine acetyltransferase"  
"OPBM19\_00850" 37001 "s59E25H2" 0 "Serine acetyltransferase"  
"OPBM19\_00850" 37001 "s59E5H2" 0 "Serine acetyltransferase"  
"OPBM19\_00850" 37001 "s63E6H2" 0 "Serine acetyltransferase"  
"OPBM19\_00851" 37002 "s59E13H2" 0 "Antitoxin RelF"  
"OPBM19\_00851" 37002 "s59E25H2" 0 "Antitoxin RelF"  
"OPBM19\_00851" 37002 "s59E5H2" 0 "Antitoxin RelF"  
"OPBM19\_00851" 37002 "s63E6H2" 0 "Antitoxin RelF"  
"OPBM19\_00852" 37003 "s59E13H2" 0 "Plasmid stabilisation system protein"  
"OPBM19\_00852" 37003 "s59E25H2" 0 "Plasmid stabilisation system protein"  
"OPBM19\_00852" 37003 "s59E5H2" 0 "Plasmid stabilisation system protein"  
"OPBM19\_00852" 37003 "s63E6H2" 0 "Plasmid stabilisation system protein"  
"OPBM19\_00853" 37004 "s59E13H2" 0 "Putative transcriptional regulator YvhJ"  
"OPBM19\_00853" 37004 "s59E25H2" 0 "Putative transcriptional regulator YvhJ"  
"OPBM19\_00853" 37004 "s59E5H2" 0 "Putative transcriptional regulator YvhJ"  
"OPBM19\_00853" 37004 "s63E6H2" 0 "Putative transcriptional regulator YvhJ"  
"OPBM19\_00854" 37005 "s59E13H2" 0 "UDP-N-acetylglucosamine 1-carboxyvinyltransferase"  
"OPBM19\_00854" 37005 "s59E25H2" 0 "UDP-N-acetylglucosamine 1-carboxyvinyltransferase"  
"OPBM19\_00854" 37005 "s59E5H2" 0 "UDP-N-acetylglucosamine 1-carboxyvinyltransferase"  
"OPBM19\_00854" 37005 "s63E6H2" 0 "UDP-N-acetylglucosamine 1-carboxyvinyltransferase"  
"OPBM19\_00855" 37006 "s59E13H2" 0 "ATP synthase epsilon chain"  
"OPBM19\_00855" 37006 "s59E25H2" 0 "ATP synthase epsilon chain"  
"OPBM19\_00855" 37006 "s59E5H2" 0 "ATP synthase epsilon chain"  
"OPBM19\_00855" 37006 "s63E6H2" 0 "ATP synthase epsilon chain"  
"OPBM19\_00856" 37007 "s59E13H2" 0 "ATP synthase subunit beta"  
"OPBM19\_00856" 37007 "s59E25H2" 0 "ATP synthase subunit beta"  
"OPBM19\_00856" 37007 "s59E5H2" 0 "ATP synthase subunit beta"  
"OPBM19\_00856" 37007 "s63E6H2" 0 "ATP synthase subunit beta"  
"OPBM19\_00857" 37008 "s59E13H2" 0 "ATP synthase gamma chain"  
"OPBM19\_00857" 37008 "s59E25H2" 0 "ATP synthase gamma chain"  
"OPBM19\_00857" 37008 "s59E5H2" 0 "ATP synthase gamma chain"  
"OPBM19\_00857" 37008 "s63E6H2" 0 "ATP synthase gamma chain"  
"OPBM19\_00858" 37009 "s59E13H2" 0 "ATP synthase subunit alpha"  
"OPBM19\_00858" 37009 "s59E25H2" 0 "ATP synthase subunit alpha"  
"OPBM19\_00858" 37009 "s59E5H2" 0 "ATP synthase subunit alpha"  
"OPBM19\_00858" 37009 "s63E6H2" 0 "ATP synthase subunit alpha"  
"OPBM19\_00859" 37010 "s59E13H2" 0 "FOF1 ATP synthase subunit delta"  
"OPBM19\_00859" 37010 "s59E25H2" 0 "FOF1 ATP synthase subunit delta"  
"OPBM19\_00859" 37010 "s59E5H2" 0 "FOF1 ATP synthase subunit delta"  
"OPBM19\_00859" 37010 "s63E6H2" 0 "FOF1 ATP synthase subunit delta"

"OPBM19\_00860" 37011 "s59E13H2" 0 "ATP synthase subunit b"  
"OPBM19\_00860" 37011 "s59E25H2" 0 "ATP synthase subunit b"  
"OPBM19\_00860" 37011 "s59E5H2" 0 "ATP synthase subunit b"  
"OPBM19\_00860" 37011 "s63E6H2" 0 "ATP synthase subunit b"  
"OPBM19\_00861" 37012 "s59E13H2" 0 "ATP synthase subunit c"  
"OPBM19\_00861" 37012 "s59E25H2" 0 "ATP synthase subunit c"  
"OPBM19\_00861" 37012 "s59E5H2" 0 "ATP synthase subunit c"  
"OPBM19\_00861" 37012 "s63E6H2" 0 "ATP synthase subunit c"  
"OPBM19\_00862" 37013 "s59E13H2" 0 "ATP synthase subunit a"  
"OPBM19\_00862" 37013 "s59E25H2" 0 "ATP synthase subunit a"  
"OPBM19\_00862" 37013 "s59E5H2" 0 "ATP synthase subunit a"  
"OPBM19\_00862" 37013 "s63E6H2" 0 "ATP synthase subunit a"  
"OPBM19\_00863" 37014 "s59E13H2" 0 "tRNA-specific adenosine deaminase"  
"OPBM19\_00863" 37014 "s59E25H2" 0 "tRNA-specific adenosine deaminase"  
"OPBM19\_00863" 37014 "s59E5H2" 0 "tRNA-specific adenosine deaminase"  
"OPBM19\_00863" 37014 "s63E6H2" 0 "tRNA-specific adenosine deaminase"  
"OPBM19\_00864" 37015 "s59E13H2" 0 "Uracil phosphoribosyltransferase"  
"OPBM19\_00864" 37015 "s59E25H2" 0 "Uracil phosphoribosyltransferase"  
"OPBM19\_00864" 37015 "s59E5H2" 0 "Uracil phosphoribosyltransferase"  
"OPBM19\_00864" 37015 "s63E6H2" 0 "Uracil phosphoribosyltransferase"  
"OPBM19\_00865" 37016 "s59E13H2" 0 "Ribose-5-phosphate isomerase B"  
"OPBM19\_00865" 37016 "s59E25H2" 0 "Ribose-5-phosphate isomerase B"  
"OPBM19\_00865" 37016 "s59E5H2" 0 "Ribose-5-phosphate isomerase B"  
"OPBM19\_00865" 37016 "s63E6H2" 0 "Ribose-5-phosphate isomerase B"  
"OPBM19\_00866" 37017 "s59E13H2" 0 "Threonylcarbamoyl-AMP synthase"  
"OPBM19\_00866" 37017 "s59E25H2" 0 "Threonylcarbamoyl-AMP synthase"  
"OPBM19\_00866" 37017 "s59E5H2" 0 "Threonylcarbamoyl-AMP synthase"  
"OPBM19\_00866" 37017 "s63E6H2" 0 "Threonylcarbamoyl-AMP synthase"  
"OPBM19\_00867" 37018 "s59E13H2" 0 "Release factor glutamine methyltransferase"  
"OPBM19\_00867" 37018 "s59E25H2" 0 "Release factor glutamine methyltransferase"  
"OPBM19\_00867" 37018 "s59E5H2" 0 "Release factor glutamine methyltransferase"  
"OPBM19\_00867" 37018 "s63E6H2" 0 "Release factor glutamine methyltransferase"  
"OPBM19\_00868" 37019 "s59E13H2" 0 "Peptide chain release factor 1"  
"OPBM19\_00868" 37019 "s59E25H2" 0 "Peptide chain release factor 1"  
"OPBM19\_00868" 37019 "s59E5H2" 0 "Peptide chain release factor 1"  
"OPBM19\_00868" 37019 "s63E6H2" 0 "Peptide chain release factor 1"  
"OPBM19\_00869" 37020 "s59E13H2" 0 "hypothetical protein"  
"OPBM19\_00869" 37020 "s59E25H2" 0 "hypothetical protein"  
"OPBM19\_00869" 37020 "s59E5H2" 0 "hypothetical protein"  
"OPBM19\_00869" 37020 "s63E6H2" 0 "hypothetical protein"  
"OPBM19\_00870" 37021 "s59E13H2" 0 "Thymidine kinase"  
"OPBM19\_00870" 37021 "s59E25H2" 0 "Thymidine kinase"  
"OPBM19\_00870" 37021 "s59E5H2" 0 "Thymidine kinase"  
"OPBM19\_00870" 37021 "s63E6H2" 0 "Thymidine kinase"  
"OPBM19\_00871" 37022 "s59E13H2" 0 "Thymidylate synthase ThyX"  
"OPBM19\_00871" 37022 "s59E25H2" 0 "Thymidylate synthase ThyX"  
"OPBM19\_00871" 37022 "s59E5H2" 0 "Thymidylate synthase ThyX"

"OPBM19\_00871" 37022 "s63E6H2" 0 "Thymidylate synthase ThyX"  
"OPBM19\_00872" 37023 "s59E13H2" 0 "50S ribosomal protein L31"  
"OPBM19\_00872" 37023 "s59E25H2" 0 "50S ribosomal protein L31"  
"OPBM19\_00872" 37023 "s59E5H2" 0 "50S ribosomal protein L31"  
"OPBM19\_00872" 37023 "s63E6H2" 0 "50S ribosomal protein L31"  
"OPBM19\_00874" 37025 "s59E13H2" 0 "hypothetical protein"  
"OPBM19\_00874" 37025 "s59E25H2" 0 "hypothetical protein"  
"OPBM19\_00874" 37025 "s59E5H2" 0 "hypothetical protein"  
"OPBM19\_00874" 37025 "s63E6H2" 0 "hypothetical protein"  
"OPBM19\_00875" 37026 "s59E13H2" 0 "hypothetical protein"  
"OPBM19\_00875" 37026 "s59E25H2" 0 "hypothetical protein"  
"OPBM19\_00875" 37026 "s59E5H2" 0 "hypothetical protein"  
"OPBM19\_00875" 37026 "s63E6H2" 0 "hypothetical protein"  
"OPBM19\_00877" 37028 "s59E13H2" 0 "hypothetical protein"  
"OPBM19\_00877" 37028 "s59E25H2" 0 "hypothetical protein"  
"OPBM19\_00877" 37028 "s59E5H2" 0 "hypothetical protein"  
"OPBM19\_00877" 37028 "s63E6H2" 0 "hypothetical protein"  
"OPBM19\_00878" 37029 "s59E13H2" 0 "hypothetical protein"  
"OPBM19\_00878" 37029 "s59E25H2" 0 "hypothetical protein"  
"OPBM19\_00878" 37029 "s59E5H2" 0 "hypothetical protein"  
"OPBM19\_00878" 37029 "s63E6H2" 0 "hypothetical protein"  
"OPBM19\_00879" 37030 "s59E13H2" 0 "hypothetical protein"  
"OPBM19\_00879" 37030 "s59E25H2" 0 "hypothetical protein"  
"OPBM19\_00879" 37030 "s59E5H2" 0 "hypothetical protein"  
"OPBM19\_00879" 37030 "s63E6H2" 0 "hypothetical protein"  
"OPBM19\_00880" 37031 "s59E13H2" 0 "hypothetical protein"  
"OPBM19\_00880" 37031 "s59E25H2" 0 "hypothetical protein"  
"OPBM19\_00880" 37031 "s59E5H2" 0 "hypothetical protein"  
"OPBM19\_00880" 37031 "s63E6H2" 0 "hypothetical protein"  
"OPBM19\_00881" 37032 "s59E13H2" 0 "hypothetical protein"  
"OPBM19\_00881" 37032 "s59E25H2" 0 "hypothetical protein"  
"OPBM19\_00881" 37032 "s59E5H2" 0 "hypothetical protein"  
"OPBM19\_00881" 37032 "s63E6H2" 0 "hypothetical protein"  
"OPBM19\_00884" 37035 "s59E13H2" 0 "hypothetical protein"  
"OPBM19\_00884" 37035 "s59E25H2" 0 "hypothetical protein"  
"OPBM19\_00884" 37035 "s59E5H2" 0 "hypothetical protein"  
"OPBM19\_00884" 37035 "s63E6H2" 0 "hypothetical protein"  
"OPBM19\_00885" 37036 "s59E13H2" 0 "hypothetical protein"  
"OPBM19\_00885" 37036 "s59E25H2" 0 "hypothetical protein"  
"OPBM19\_00885" 37036 "s59E5H2" 0 "hypothetical protein"  
"OPBM19\_00885" 37036 "s63E6H2" 0 "hypothetical protein"  
"OPBM19\_00886" 37037 "s59E13H2" 0 "Helix-turn-helix domain protein"  
"OPBM19\_00886" 37037 "s59E25H2" 0 "Helix-turn-helix domain protein"  
"OPBM19\_00886" 37037 "s59E5H2" 0 "Helix-turn-helix domain protein"  
"OPBM19\_00886" 37037 "s63E6H2" 0 "Helix-turn-helix domain protein"  
"OPBM19\_00887" 37038 "s59E13H2" 0 "Septum site-determining protein MinD"  
"OPBM19\_00887" 37038 "s59E25H2" 0 "Septum site-determining protein MinD"

"OPBM19\_00887" 37038 "s59E5H2" 0 "Septum site-determining protein MinD"  
"OPBM19\_00887" 37038 "s63E6H2" 0 "Septum site-determining protein MinD"  
"OPBM19\_00888" 37039 "s59E13H2" 0 "hypothetical protein"  
"OPBM19\_00888" 37039 "s59E25H2" 0 "hypothetical protein"  
"OPBM19\_00888" 37039 "s59E5H2" 0 "hypothetical protein"  
"OPBM19\_00888" 37039 "s63E6H2" 0 "hypothetical protein"  
"OPBM19\_00890" 37041 "s59E13H2" 0 "hypothetical protein"  
"OPBM19\_00890" 37041 "s59E25H2" 0 "hypothetical protein"  
"OPBM19\_00890" 37041 "s59E5H2" 0 "hypothetical protein"  
"OPBM19\_00890" 37041 "s63E6H2" 0 "hypothetical protein"  
"OPBM19\_00891" 37042 "s59E13H2" 0 "hypothetical protein"  
"OPBM19\_00891" 37042 "s59E25H2" 0 "hypothetical protein"  
"OPBM19\_00891" 37042 "s59E5H2" 0 "hypothetical protein"  
"OPBM19\_00891" 37042 "s63E6H2" 0 "hypothetical protein"  
"OPBM19\_00892" 37043 "s59E13H2" 0 "Putative nicotinate phosphoribosyltransferase"  
"OPBM19\_00892" 37043 "s59E25H2" 0 "Putative nicotinate phosphoribosyltransferase"  
"OPBM19\_00892" 37043 "s59E5H2" 0 "Putative nicotinate phosphoribosyltransferase"  
"OPBM19\_00892" 37043 "s63E6H2" 0 "Putative nicotinate phosphoribosyltransferase"  
"OPBM19\_00893" 37044 "s59E13H2" 0 "Peroxyureidoacrylate/ureidoacrylate amidohydrolase RutB"  
"OPBM19\_00893" 37044 "s59E25H2" 0 "Peroxyureidoacrylate/ureidoacrylate amidohydrolase RutB"  
"OPBM19\_00893" 37044 "s59E5H2" 0 "Peroxyureidoacrylate/ureidoacrylate amidohydrolase RutB"  
"OPBM19\_00893" 37044 "s63E6H2" 0 "Peroxyureidoacrylate/ureidoacrylate amidohydrolase RutB"  
"OPBM19\_00894" 37045 "s59E13H2" 0 "Acyl-CoA dehydrogenase"  
"OPBM19\_00894" 37045 "s59E25H2" 0 "Acyl-CoA dehydrogenase"  
"OPBM19\_00894" 37045 "s59E5H2" 0 "Acyl-CoA dehydrogenase"  
"OPBM19\_00894" 37045 "s63E6H2" 0 "Acyl-CoA dehydrogenase"  
"OPBM19\_00896" 37047 "s59E13H2" 0 "Acetyl-CoA acetyltransferase"  
"OPBM19\_00896" 37047 "s59E25H2" 0 "Acetyl-CoA acetyltransferase"  
"OPBM19\_00896" 37047 "s59E5H2" 0 "Acetyl-CoA acetyltransferase"  
"OPBM19\_00896" 37047 "s63E6H2" 0 "Acetyl-CoA acetyltransferase"  
"OPBM19\_00897" 37048 "s59E13H2" 0 "putative 3-hydroxybutyryl-CoA dehydrogenase"  
"OPBM19\_00897" 37048 "s59E25H2" 0 "putative 3-hydroxybutyryl-CoA dehydrogenase"  
"OPBM19\_00897" 37048 "s59E5H2" 0 "putative 3-hydroxybutyryl-CoA dehydrogenase"  
"OPBM19\_00897" 37048 "s63E6H2" 0 "putative 3-hydroxybutyryl-CoA dehydrogenase"  
"OPBM19\_00898" 37049 "s59E13H2" 0 "Cob(I)yrinic acid a,c-diamide adenosyltransferase"  
"OPBM19\_00898" 37049 "s59E25H2" 0 "Cob(I)yrinic acid a,c-diamide adenosyltransferase"  
"OPBM19\_00898" 37049 "s59E5H2" 0 "Cob(I)yrinic acid a,c-diamide adenosyltransferase"  
"OPBM19\_00898" 37049 "s63E6H2" 0 "Cob(I)yrinic acid a,c-diamide adenosyltransferase"  
"OPBM19\_00899" 37050 "s59E13H2" 0 "putative GTPase/MT1543"  
"OPBM19\_00899" 37050 "s59E25H2" 0 "putative GTPase/MT1543"  
"OPBM19\_00899" 37050 "s59E5H2" 0 "putative GTPase/MT1543"  
"OPBM19\_00899" 37050 "s63E6H2" 0 "putative GTPase/MT1543"  
"OPBM19\_00900" 37051 "s59E13H2" 0 "Methylmalonyl-CoA mutase"  
"OPBM19\_00900" 37051 "s59E25H2" 0 "Methylmalonyl-CoA mutase"  
"OPBM19\_00900" 37051 "s59E5H2" 0 "Methylmalonyl-CoA mutase"  
"OPBM19\_00900" 37051 "s63E6H2" 0 "Methylmalonyl-CoA mutase"  
"OPBM19\_00901" 37052 "s59E13H2" 0 "Methylmalonyl-CoA mutase"

"OPBM19\_00901" 37052 "s59E25H2" 0 "Methylmalonyl-CoA mutase"  
"OPBM19\_00901" 37052 "s59E5H2" 0 "Methylmalonyl-CoA mutase"  
"OPBM19\_00901" 37052 "s63E6H2" 0 "Methylmalonyl-CoA mutase"  
"OPBM19\_00902" 37053 "s59E13H2" 0 "Fluoroquinolones export ATP-binding protein/MT2762"  
"OPBM19\_00902" 37053 "s59E25H2" 0 "Fluoroquinolones export ATP-binding protein/MT2762"  
"OPBM19\_00902" 37053 "s59E5H2" 0 "Fluoroquinolones export ATP-binding protein/MT2762"  
"OPBM19\_00902" 37053 "s63E6H2" 0 "Fluoroquinolones export ATP-binding protein/MT2762"  
"OPBM19\_00903" 37054 "s59E13H2" 0 "ABC-2 family transporter protein"  
"OPBM19\_00903" 37054 "s59E25H2" 0 "ABC-2 family transporter protein"  
"OPBM19\_00903" 37054 "s59E5H2" 0 "ABC-2 family transporter protein"  
"OPBM19\_00903" 37054 "s63E6H2" 0 "ABC-2 family transporter protein"  
"OPBM19\_00904" 37055 "s59E13H2" 0 "hypothetical protein"  
"OPBM19\_00904" 37055 "s59E25H2" 0 "hypothetical protein"  
"OPBM19\_00904" 37055 "s59E5H2" 0 "hypothetical protein"  
"OPBM19\_00904" 37055 "s63E6H2" 0 "hypothetical protein"  
"OPBM19\_00907" 37058 "s59E13H2" 0 "Creatinine amidohydrolase"  
"OPBM19\_00907" 37058 "s59E25H2" 0 "Creatinine amidohydrolase"  
"OPBM19\_00907" 37058 "s59E5H2" 0 "Creatinine amidohydrolase"  
"OPBM19\_00907" 37058 "s63E6H2" 0 "Creatinine amidohydrolase"  
"OPBM19\_00908" 37059 "s59E13H2" 0 "Putative modulator of DNA gyrase"  
"OPBM19\_00908" 37059 "s59E25H2" 0 "Putative modulator of DNA gyrase"  
"OPBM19\_00908" 37059 "s59E5H2" 0 "Putative modulator of DNA gyrase"  
"OPBM19\_00908" 37059 "s63E6H2" 0 "Putative modulator of DNA gyrase"  
"OPBM19\_00910" 37061 "s59E13H2" 0 "hypothetical protein"  
"OPBM19\_00910" 37061 "s59E25H2" 0 "hypothetical protein"  
"OPBM19\_00910" 37061 "s59E5H2" 0 "hypothetical protein"  
"OPBM19\_00910" 37061 "s63E6H2" 0 "hypothetical protein"  
"OPBM19\_00911" 37062 "s59E13H2" 0 "tetratricopeptide repeat protein"  
"OPBM19\_00911" 37062 "s59E25H2" 0 "tetratricopeptide repeat protein"  
"OPBM19\_00911" 37062 "s59E5H2" 0 "tetratricopeptide repeat protein"  
"OPBM19\_00911" 37062 "s63E6H2" 0 "tetratricopeptide repeat protein"  
"OPBM19\_00912" 37063 "s59E13H2" 0 "hypothetical protein"  
"OPBM19\_00912" 37063 "s59E25H2" 0 "hypothetical protein"  
"OPBM19\_00912" 37063 "s59E5H2" 0 "hypothetical protein"  
"OPBM19\_00912" 37063 "s63E6H2" 0 "hypothetical protein"  
"OPBM19\_00913" 37064 "s59E13H2" 0 "FtsX-like permease family protein"  
"OPBM19\_00913" 37064 "s59E25H2" 0 "FtsX-like permease family protein"  
"OPBM19\_00913" 37064 "s59E5H2" 0 "FtsX-like permease family protein"  
"OPBM19\_00913" 37064 "s63E6H2" 0 "FtsX-like permease family protein"  
"OPBM19\_00914" 37065 "s59E13H2" 0 "hypothetical protein"  
"OPBM19\_00914" 37065 "s59E25H2" 0 "hypothetical protein"  
"OPBM19\_00914" 37065 "s59E5H2" 0 "hypothetical protein"  
"OPBM19\_00914" 37065 "s63E6H2" 0 "hypothetical protein"  
"OPBM19\_00915" 37066 "s59E13H2" 0 "putative ABC transporter ATP-binding protein"  
"OPBM19\_00915" 37066 "s59E25H2" 0 "putative ABC transporter ATP-binding protein"  
"OPBM19\_00915" 37066 "s59E5H2" 0 "putative ABC transporter ATP-binding protein"  
"OPBM19\_00915" 37066 "s63E6H2" 0 "putative ABC transporter ATP-binding protein"

"OPBM19\_00916" 37067 "s59E13H2" 0 "Tyrosine recombinase XerD"  
"OPBM19\_00916" 37067 "s59E25H2" 0 "Tyrosine recombinase XerD"  
"OPBM19\_00916" 37067 "s59E5H2" 0 "Tyrosine recombinase XerD"  
"OPBM19\_00916" 37067 "s63E6H2" 0 "Tyrosine recombinase XerD"  
"OPBM19\_00918" 37069 "s59E13H2" 0 "Helix-turn-helix domain protein"  
"OPBM19\_00918" 37069 "s59E25H2" 0 "Helix-turn-helix domain protein"  
"OPBM19\_00918" 37069 "s59E5H2" 0 "Helix-turn-helix domain protein"  
"OPBM19\_00918" 37069 "s63E6H2" 0 "Helix-turn-helix domain protein"  
"OPBM19\_00920" 37071 "s59E13H2" 0 "hypothetical protein"  
"OPBM19\_00920" 37071 "s59E25H2" 0 "hypothetical protein"  
"OPBM19\_00920" 37071 "s59E5H2" 0 "hypothetical protein"  
"OPBM19\_00920" 37071 "s63E6H2" 0 "hypothetical protein"  
"OPBM19\_00922" 37073 "s59E13H2" 0 "hypothetical protein"  
"OPBM19\_00922" 37073 "s59E25H2" 0 "hypothetical protein"  
"OPBM19\_00922" 37073 "s59E5H2" 0 "hypothetical protein"  
"OPBM19\_00922" 37073 "s63E6H2" 0 "hypothetical protein"  
"OPBM19\_00923" 37074 "s59E13H2" 0 "hypothetical protein"  
"OPBM19\_00923" 37074 "s59E25H2" 0 "hypothetical protein"  
"OPBM19\_00923" 37074 "s59E5H2" 0 "hypothetical protein"  
"OPBM19\_00923" 37074 "s63E6H2" 0 "hypothetical protein"  
"OPBM19\_00924" 37075 "s59E13H2" 0 "hypothetical protein"  
"OPBM19\_00924" 37075 "s59E25H2" 0 "hypothetical protein"  
"OPBM19\_00924" 37075 "s59E5H2" 0 "hypothetical protein"  
"OPBM19\_00924" 37075 "s63E6H2" 0 "hypothetical protein"  
"OPBM19\_00925" 37076 "s59E13H2" 0 "hypothetical protein"  
"OPBM19\_00925" 37076 "s59E25H2" 0 "hypothetical protein"  
"OPBM19\_00925" 37076 "s59E5H2" 0 "hypothetical protein"  
"OPBM19\_00925" 37076 "s63E6H2" 0 "hypothetical protein"  
"OPBM19\_00926" 37077 "s59E13H2" 0 "RDD family protein"  
"OPBM19\_00926" 37077 "s59E25H2" 0 "RDD family protein"  
"OPBM19\_00926" 37077 "s59E5H2" 0 "RDD family protein"  
"OPBM19\_00926" 37077 "s63E6H2" 0 "RDD family protein"  
"OPBM19\_00927" 37078 "s59E13H2" 0 "hypothetical protein"  
"OPBM19\_00927" 37078 "s59E25H2" 0 "hypothetical protein"  
"OPBM19\_00927" 37078 "s59E5H2" 0 "hypothetical protein"  
"OPBM19\_00927" 37078 "s63E6H2" 0 "hypothetical protein"  
"OPBM19\_00928" 37079 "s59E13H2" 0 "RDD family protein"  
"OPBM19\_00928" 37079 "s59E25H2" 0 "RDD family protein"  
"OPBM19\_00928" 37079 "s59E5H2" 0 "RDD family protein"  
"OPBM19\_00928" 37079 "s63E6H2" 0 "RDD family protein"  
"OPBM19\_00929" 37080 "s59E13H2" 0 "hypothetical protein"  
"OPBM19\_00929" 37080 "s59E25H2" 0 "hypothetical protein"  
"OPBM19\_00929" 37080 "s59E5H2" 0 "hypothetical protein"  
"OPBM19\_00929" 37080 "s63E6H2" 0 "hypothetical protein"  
"OPBM19\_00930" 37081 "s59E13H2" 0 "hypothetical protein"  
"OPBM19\_00930" 37081 "s59E25H2" 0 "hypothetical protein"  
"OPBM19\_00930" 37081 "s59E5H2" 0 "hypothetical protein"



"OPBM19\_00930" 37081 "s63E6H2" 0 "hypothetical protein"  
"OPBM19\_00931" 37082 "s59E13H2" 0 "hypothetical protein"  
"OPBM19\_00931" 37082 "s59E25H2" 0 "hypothetical protein"  
"OPBM19\_00931" 37082 "s59E5H2" 0 "hypothetical protein"  
"OPBM19\_00931" 37082 "s63E6H2" 0 "hypothetical protein"  
"OPBM19\_00932" 37083 "s59E13H2" 0 "hypothetical protein"  
"OPBM19\_00932" 37083 "s59E25H2" 0 "hypothetical protein"  
"OPBM19\_00932" 37083 "s59E5H2" 0 "hypothetical protein"  
"OPBM19\_00932" 37083 "s63E6H2" 0 "hypothetical protein"  
"OPBM19\_00933" 37084 "s59E13H2" 0 "putative tyrosine recombinase XerC-like protein"  
"OPBM19\_00933" 37084 "s59E25H2" 0 "putative tyrosine recombinase XerC-like protein"  
"OPBM19\_00933" 37084 "s59E5H2" 0 "putative tyrosine recombinase XerC-like protein"  
"OPBM19\_00933" 37084 "s63E6H2" 0 "putative tyrosine recombinase XerC-like protein"  
"OPBM19\_00934" 37085 "s59E13H2" 0 "hypothetical protein"  
"OPBM19\_00934" 37085 "s59E25H2" 0 "hypothetical protein"  
"OPBM19\_00934" 37085 "s59E5H2" 0 "hypothetical protein"  
"OPBM19\_00934" 37085 "s63E6H2" 0 "hypothetical protein"  
"OPBM19\_00936" 37087 "s59E13H2" 0 "Modification methylase MwoI"  
"OPBM19\_00936" 37087 "s59E25H2" 0 "Modification methylase MwoI"  
"OPBM19\_00936" 37087 "s59E5H2" 0 "Modification methylase MwoI"  
"OPBM19\_00936" 37087 "s63E6H2" 0 "Modification methylase MwoI"  
"OPBM19\_00938" 37089 "s59E13H2" 0 "HNH endonuclease"  
"OPBM19\_00938" 37089 "s59E25H2" 0 "HNH endonuclease"  
"OPBM19\_00938" 37089 "s59E5H2" 0 "HNH endonuclease"  
"OPBM19\_00938" 37089 "s63E6H2" 0 "HNH endonuclease"  
"OPBM19\_00939" 37090 "s59E13H2" 0 "hypothetical protein"  
"OPBM19\_00939" 37090 "s59E25H2" 0 "hypothetical protein"  
"OPBM19\_00939" 37090 "s59E5H2" 0 "hypothetical protein"  
"OPBM19\_00939" 37090 "s63E6H2" 0 "hypothetical protein"  
"OPBM19\_00940" 37091 "s59E13H2" 0 "hypothetical protein"  
"OPBM19\_00940" 37091 "s59E25H2" 0 "hypothetical protein"  
"OPBM19\_00940" 37091 "s59E5H2" 0 "hypothetical protein"  
"OPBM19\_00940" 37091 "s63E6H2" 0 "hypothetical protein"  
"OPBM19\_00943" 37094 "s59E13H2" 0 "hypothetical protein"  
"OPBM19\_00943" 37094 "s59E25H2" 0 "hypothetical protein"  
"OPBM19\_00943" 37094 "s59E5H2" 0 "hypothetical protein"  
"OPBM19\_00943" 37094 "s63E6H2" 0 "hypothetical protein"  
"OPBM19\_00944" 37095 "s59E13H2" 0 "Ribosomal silencing factor RsfS"  
"OPBM19\_00944" 37095 "s59E25H2" 0 "Ribosomal silencing factor RsfS"  
"OPBM19\_00944" 37095 "s59E5H2" 0 "Ribosomal silencing factor RsfS"  
"OPBM19\_00944" 37095 "s63E6H2" 0 "Ribosomal silencing factor RsfS"  
"OPBM19\_00945" 37096 "s59E13H2" 0 "Leucine--tRNA ligase"  
"OPBM19\_00945" 37096 "s59E25H2" 0 "Leucine--tRNA ligase"  
"OPBM19\_00945" 37096 "s59E5H2" 0 "Leucine--tRNA ligase"  
"OPBM19\_00945" 37096 "s63E6H2" 0 "Leucine--tRNA ligase"  
"OPBM19\_00946" 37097 "s59E13H2" 0 "ComE operon protein 1"  
"OPBM19\_00946" 37097 "s59E25H2" 0 "ComE operon protein 1"

"OPBM19\_00946" 37097 "s59E5H2" 0 "ComE operon protein 1"  
"OPBM19\_00946" 37097 "s63E6H2" 0 "ComE operon protein 1"  
"OPBM19\_00947" 37098 "s59E13H2" 0 "ComEC family competence protein"  
"OPBM19\_00947" 37098 "s59E25H2" 0 "ComEC family competence protein"  
"OPBM19\_00947" 37098 "s59E5H2" 0 "ComEC family competence protein"  
"OPBM19\_00947" 37098 "s63E6H2" 0 "ComEC family competence protein"  
"OPBM19\_00948" 37099 "s59E13H2" 0 "DNA polymerase III subunit delta"  
"OPBM19\_00948" 37099 "s59E25H2" 0 "DNA polymerase III subunit delta"  
"OPBM19\_00948" 37099 "s59E5H2" 0 "DNA polymerase III subunit delta"  
"OPBM19\_00948" 37099 "s63E6H2" 0 "DNA polymerase III subunit delta"  
"OPBM19\_00949" 37100 "s59E13H2" 0 "30S ribosomal protein S20"  
"OPBM19\_00949" 37100 "s59E25H2" 0 "30S ribosomal protein S20"  
"OPBM19\_00949" 37100 "s59E5H2" 0 "30S ribosomal protein S20"  
"OPBM19\_00949" 37100 "s63E6H2" 0 "30S ribosomal protein S20"  
"OPBM19\_00950" 37101 "s59E13H2" 0 "putative peptidoglycan biosynthesis protein MurJ"  
"OPBM19\_00950" 37101 "s59E25H2" 0 "putative peptidoglycan biosynthesis protein MurJ"  
"OPBM19\_00950" 37101 "s59E5H2" 0 "putative peptidoglycan biosynthesis protein MurJ"  
"OPBM19\_00950" 37101 "s63E6H2" 0 "putative peptidoglycan biosynthesis protein MurJ"  
"OPBM19\_00951" 37102 "s59E13H2" 0 "Elongation factor 4"  
"OPBM19\_00951" 37102 "s59E25H2" 0 "Elongation factor 4"  
"OPBM19\_00951" 37102 "s59E5H2" 0 "Elongation factor 4"  
"OPBM19\_00951" 37102 "s63E6H2" 0 "Elongation factor 4"  
"OPBM19\_00952" 37103 "s59E13H2" 0 "Chaperone protein DnaJ"  
"OPBM19\_00952" 37103 "s59E25H2" 0 "Chaperone protein DnaJ"  
"OPBM19\_00952" 37103 "s59E5H2" 0 "Chaperone protein DnaJ"  
"OPBM19\_00952" 37103 "s63E6H2" 0 "Chaperone protein DnaJ"  
"OPBM19\_00953" 37104 "s59E13H2" 0 "Threonylcarbamoyladenosine tRNA methylthiotransferase MtaB"  
"OPBM19\_00953" 37104 "s59E25H2" 0 "Threonylcarbamoyladenosine tRNA methylthiotransferase MtaB"  
"OPBM19\_00953" 37104 "s59E5H2" 0 "Threonylcarbamoyladenosine tRNA methylthiotransferase MtaB"  
"OPBM19\_00953" 37104 "s63E6H2" 0 "Threonylcarbamoyladenosine tRNA methylthiotransferase MtaB"  
"OPBM19\_00954" 37105 "s59E13H2" 0 "glutamyl-tRNA(Gln) amidotransferase subunit E"  
"OPBM19\_00954" 37105 "s59E25H2" 0 "glutamyl-tRNA(Gln) amidotransferase subunit E"  
"OPBM19\_00954" 37105 "s59E5H2" 0 "glutamyl-tRNA(Gln) amidotransferase subunit E"  
"OPBM19\_00954" 37105 "s63E6H2" 0 "glutamyl-tRNA(Gln) amidotransferase subunit E"  
"OPBM19\_00955" 37106 "s59E13H2" 0 "PhoH-like protein"  
"OPBM19\_00955" 37106 "s59E25H2" 0 "PhoH-like protein"  
"OPBM19\_00955" 37106 "s59E5H2" 0 "PhoH-like protein"  
"OPBM19\_00955" 37106 "s63E6H2" 0 "PhoH-like protein"  
"OPBM19\_00956" 37107 "s59E13H2" 0 "hypothetical protein"  
"OPBM19\_00956" 37107 "s59E25H2" 0 "hypothetical protein"  
"OPBM19\_00956" 37107 "s59E5H2" 0 "hypothetical protein"  
"OPBM19\_00956" 37107 "s63E6H2" 0 "hypothetical protein"  
"OPBM19\_00957" 37108 "s59E13H2" 0 "Endoribonuclease YbeY"  
"OPBM19\_00957" 37108 "s59E25H2" 0 "Endoribonuclease YbeY"  
"OPBM19\_00957" 37108 "s59E5H2" 0 "Endoribonuclease YbeY"  
"OPBM19\_00957" 37108 "s63E6H2" 0 "Endoribonuclease YbeY"  
"OPBM19\_00958" 37109 "s59E13H2" 0 "Cytidine deaminase"

"OPBM19\_00958" 37109 "s59E25H2" 0 "Cytidine deaminase"  
"OPBM19\_00958" 37109 "s59E5H2" 0 "Cytidine deaminase"  
"OPBM19\_00958" 37109 "s63E6H2" 0 "Cytidine deaminase"  
"OPBM19\_00959" 37110 "s59E13H2" 0 "Transposase IS200 like protein"  
"OPBM19\_00959" 37110 "s59E25H2" 0 "Transposase IS200 like protein"  
"OPBM19\_00959" 37110 "s59E5H2" 0 "Transposase IS200 like protein"  
"OPBM19\_00959" 37110 "s63E6H2" 0 "Transposase IS200 like protein"  
"OPBM19\_00960" 37111 "s59E13H2" 0 "Putative HMP/thiamine import ATP-binding protein YkoD"  
"OPBM19\_00960" 37111 "s59E25H2" 0 "Putative HMP/thiamine import ATP-binding protein YkoD"  
"OPBM19\_00960" 37111 "s59E5H2" 0 "Putative HMP/thiamine import ATP-binding protein YkoD"  
"OPBM19\_00960" 37111 "s63E6H2" 0 "Putative HMP/thiamine import ATP-binding protein YkoD"  
"OPBM19\_00961" 37112 "s59E13H2" 0 "Putative HMP/thiamine permease protein YkoC"  
"OPBM19\_00961" 37112 "s59E25H2" 0 "Putative HMP/thiamine permease protein YkoC"  
"OPBM19\_00961" 37112 "s59E5H2" 0 "Putative HMP/thiamine permease protein YkoC"  
"OPBM19\_00961" 37112 "s63E6H2" 0 "Putative HMP/thiamine permease protein YkoC"  
"OPBM19\_00962" 37113 "s59E13H2" 0 "Putative HMP/thiamine permease protein YkoE"  
"OPBM19\_00962" 37113 "s59E25H2" 0 "Putative HMP/thiamine permease protein YkoE"  
"OPBM19\_00962" 37113 "s59E5H2" 0 "Putative HMP/thiamine permease protein YkoE"  
"OPBM19\_00962" 37113 "s63E6H2" 0 "Putative HMP/thiamine permease protein YkoE"  
"OPBM19\_00963" 37114 "s59E13H2" 0 "AP-4-A phosphorylase"  
"OPBM19\_00963" 37114 "s59E25H2" 0 "AP-4-A phosphorylase"  
"OPBM19\_00963" 37114 "s59E5H2" 0 "AP-4-A phosphorylase"  
"OPBM19\_00963" 37114 "s63E6H2" 0 "AP-4-A phosphorylase"  
"OPBM19\_00964" 37115 "s59E13H2" 0 "hypothetical protein"  
"OPBM19\_00964" 37115 "s59E25H2" 0 "hypothetical protein"  
"OPBM19\_00964" 37115 "s59E5H2" 0 "hypothetical protein"  
"OPBM19\_00964" 37115 "s63E6H2" 0 "hypothetical protein"  
"OPBM19\_00965" 37116 "s59E13H2" 0 "Ferredoxin"  
"OPBM19\_00965" 37116 "s59E25H2" 0 "Ferredoxin"  
"OPBM19\_00965" 37116 "s59E5H2" 0 "Ferredoxin"  
"OPBM19\_00965" 37116 "s63E6H2" 0 "Ferredoxin"  
"OPBM19\_00966" 37117 "s59E13H2" 0 "YtxH-like protein"  
"OPBM19\_00966" 37117 "s59E25H2" 0 "YtxH-like protein"  
"OPBM19\_00966" 37117 "s59E5H2" 0 "YtxH-like protein"  
"OPBM19\_00966" 37117 "s63E6H2" 0 "YtxH-like protein"  
"OPBM19\_00968" 37119 "s59E13H2" 0 "Daunorubicin/doxorubicin resistance ATP-binding protein DrrA"  
"OPBM19\_00968" 37119 "s59E25H2" 0 "Daunorubicin/doxorubicin resistance ATP-binding protein DrrA"  
"OPBM19\_00968" 37119 "s59E5H2" 0 "Daunorubicin/doxorubicin resistance ATP-binding protein DrrA"  
"OPBM19\_00968" 37119 "s63E6H2" 0 "Daunorubicin/doxorubicin resistance ATP-binding protein DrrA"  
"OPBM19\_00969" 37120 "s59E13H2" 0 "Inner membrane transport permease Ybhr"  
"OPBM19\_00969" 37120 "s59E25H2" 0 "Inner membrane transport permease Ybhr"  
"OPBM19\_00969" 37120 "s59E5H2" 0 "Inner membrane transport permease Ybhr"  
"OPBM19\_00969" 37120 "s63E6H2" 0 "Inner membrane transport permease Ybhr"  
"OPBM19\_00970" 37121 "s59E13H2" 0 "NADPH-flavin oxidoreductase"  
"OPBM19\_00970" 37121 "s59E25H2" 0 "NADPH-flavin oxidoreductase"  
"OPBM19\_00970" 37121 "s59E5H2" 0 "NADPH-flavin oxidoreductase"  
"OPBM19\_00970" 37121 "s63E6H2" 0 "NADPH-flavin oxidoreductase"

"OPBM19\_00971" 37122 "s59E13H2" 0 "metal-dependent hydrolase"  
"OPBM19\_00971" 37122 "s59E25H2" 0 "metal-dependent hydrolase"  
"OPBM19\_00971" 37122 "s59E5H2" 0 "metal-dependent hydrolase"  
"OPBM19\_00971" 37122 "s63E6H2" 0 "metal-dependent hydrolase"  
"OPBM19\_00972" 37123 "s59E13H2" 0 "hypothetical protein"  
"OPBM19\_00972" 37123 "s59E25H2" 0 "hypothetical protein"  
"OPBM19\_00972" 37123 "s59E5H2" 0 "hypothetical protein"  
"OPBM19\_00972" 37123 "s63E6H2" 0 "hypothetical protein"  
"OPBM19\_00973" 37124 "s59E13H2" 0 "Cobalamin import ATP-binding protein BtuD"  
"OPBM19\_00973" 37124 "s59E25H2" 0 "Cobalamin import ATP-binding protein BtuD"  
"OPBM19\_00973" 37124 "s59E5H2" 0 "Cobalamin import ATP-binding protein BtuD"  
"OPBM19\_00973" 37124 "s63E6H2" 0 "Cobalamin import ATP-binding protein BtuD"  
"OPBM19\_00974" 37125 "s59E13H2" 0 "Hemin transport system permease protein HmuU"  
"OPBM19\_00974" 37125 "s59E25H2" 0 "Hemin transport system permease protein HmuU"  
"OPBM19\_00974" 37125 "s59E5H2" 0 "Hemin transport system permease protein HmuU"  
"OPBM19\_00974" 37125 "s63E6H2" 0 "Hemin transport system permease protein HmuU"  
"OPBM19\_00975" 37126 "s59E13H2" 0 "Vitamin B12-binding protein precursor"  
"OPBM19\_00975" 37126 "s59E25H2" 0 "Vitamin B12-binding protein precursor"  
"OPBM19\_00975" 37126 "s59E5H2" 0 "Vitamin B12-binding protein precursor"  
"OPBM19\_00975" 37126 "s63E6H2" 0 "Vitamin B12-binding protein precursor"  
"OPBM19\_00978" 37129 "s59E13H2" 0 "ECF RNA polymerase sigma-E factor"  
"OPBM19\_00978" 37129 "s59E25H2" 0 "ECF RNA polymerase sigma-E factor"  
"OPBM19\_00978" 37129 "s59E5H2" 0 "ECF RNA polymerase sigma-E factor"  
"OPBM19\_00978" 37129 "s63E6H2" 0 "ECF RNA polymerase sigma-E factor"  
"OPBM19\_00979" 37130 "s59E13H2" 0 "Periplasmic serine endoprotease DegP precursor"  
"OPBM19\_00979" 37130 "s59E25H2" 0 "Periplasmic serine endoprotease DegP precursor"  
"OPBM19\_00979" 37130 "s59E5H2" 0 "Periplasmic serine endoprotease DegP precursor"  
"OPBM19\_00979" 37130 "s63E6H2" 0 "Periplasmic serine endoprotease DegP precursor"  
"OPBM19\_00980" 37131 "s59E13H2" 0 "Acryloyl-CoA reductase electron transfer subunit beta"  
"OPBM19\_00980" 37131 "s59E25H2" 0 "Acryloyl-CoA reductase electron transfer subunit beta"  
"OPBM19\_00980" 37131 "s59E5H2" 0 "Acryloyl-CoA reductase electron transfer subunit beta"  
"OPBM19\_00980" 37131 "s63E6H2" 0 "Acryloyl-CoA reductase electron transfer subunit beta"  
"OPBM19\_00981" 37132 "s59E13H2" 0 "Acryloyl-CoA reductase electron transfer subunit gamma"  
"OPBM19\_00981" 37132 "s59E25H2" 0 "Acryloyl-CoA reductase electron transfer subunit gamma"  
"OPBM19\_00981" 37132 "s59E5H2" 0 "Acryloyl-CoA reductase electron transfer subunit gamma"  
"OPBM19\_00981" 37132 "s63E6H2" 0 "Acryloyl-CoA reductase electron transfer subunit gamma"  
"OPBM19\_00982" 37133 "s59E13H2" 0 "Acryloyl-CoA reductase (NADH)"  
"OPBM19\_00982" 37133 "s59E25H2" 0 "Acryloyl-CoA reductase (NADH)"  
"OPBM19\_00982" 37133 "s59E5H2" 0 "Acryloyl-CoA reductase (NADH)"  
"OPBM19\_00982" 37133 "s63E6H2" 0 "Acryloyl-CoA reductase (NADH)"  
"OPBM19\_00983" 37134 "s59E13H2" 0 "3-hydroxypropionyl-coenzyme A dehydratase"  
"OPBM19\_00983" 37134 "s59E25H2" 0 "3-hydroxypropionyl-coenzyme A dehydratase"  
"OPBM19\_00983" 37134 "s59E5H2" 0 "3-hydroxypropionyl-coenzyme A dehydratase"  
"OPBM19\_00983" 37134 "s63E6H2" 0 "3-hydroxypropionyl-coenzyme A dehydratase"  
"OPBM19\_00984" 37135 "s59E13H2" 0 "putative 3-hydroxybutyryl-CoA dehydrogenase"  
"OPBM19\_00984" 37135 "s59E25H2" 0 "putative 3-hydroxybutyryl-CoA dehydrogenase"  
"OPBM19\_00984" 37135 "s59E5H2" 0 "putative 3-hydroxybutyryl-CoA dehydrogenase"

"OPBM19\_00984" 37135 "s63E6H2" 0 "putative 3-hydroxybutyryl-CoA dehydrogenase"  
"OPBM19\_00985" 37136 "s59E13H2" 0 "Acetyl-CoA acetyltransferase"  
"OPBM19\_00985" 37136 "s59E25H2" 0 "Acetyl-CoA acetyltransferase"  
"OPBM19\_00985" 37136 "s59E5H2" 0 "Acetyl-CoA acetyltransferase"  
"OPBM19\_00985" 37136 "s63E6H2" 0 "Acetyl-CoA acetyltransferase"  
"OPBM19\_00986" 37137 "s59E13H2" 0 "lineage-specific thermal regulator protein"  
"OPBM19\_00986" 37137 "s59E25H2" 0 "lineage-specific thermal regulator protein"  
"OPBM19\_00986" 37137 "s59E5H2" 0 "lineage-specific thermal regulator protein"  
"OPBM19\_00986" 37137 "s63E6H2" 0 "lineage-specific thermal regulator protein"  
"OPBM19\_00987" 37138 "s59E13H2" 0 "Integrase core domain protein"  
"OPBM19\_00987" 37138 "s59E25H2" 0 "Integrase core domain protein"  
"OPBM19\_00987" 37138 "s59E5H2" 0 "Integrase core domain protein"  
"OPBM19\_00987" 37138 "s63E6H2" 0 "Integrase core domain protein"  
"OPBM19\_00988" 37139 "s59E13H2" 0 "hypothetical protein"  
"OPBM19\_00988" 37139 "s59E25H2" 0 "hypothetical protein"  
"OPBM19\_00988" 37139 "s59E5H2" 0 "hypothetical protein"  
"OPBM19\_00988" 37139 "s63E6H2" 0 "hypothetical protein"  
"OPBM19\_00989" 37140 "s59E13H2" 0 "hypothetical protein"  
"OPBM19\_00989" 37140 "s59E25H2" 0 "hypothetical protein"  
"OPBM19\_00989" 37140 "s59E5H2" 0 "hypothetical protein"  
"OPBM19\_00989" 37140 "s63E6H2" 0 "hypothetical protein"  
"OPBM19\_00991" 37142 "s59E13H2" 0 "FtsH protease regulator HflK"  
"OPBM19\_00991" 37142 "s59E25H2" 0 "FtsH protease regulator HflK"  
"OPBM19\_00991" 37142 "s59E5H2" 0 "FtsH protease regulator HflK"  
"OPBM19\_00991" 37142 "s63E6H2" 0 "FtsH protease regulator HflK"  
"OPBM19\_00992" 37143 "s59E13H2" 0 "putative transporter"  
"OPBM19\_00992" 37143 "s59E25H2" 0 "putative transporter"  
"OPBM19\_00992" 37143 "s59E5H2" 0 "putative transporter"  
"OPBM19\_00992" 37143 "s63E6H2" 0 "putative transporter"  
"OPBM19\_00994" 37145 "s59E13H2" 0 "Bacterial regulatory protein, arsR family"  
"OPBM19\_00994" 37145 "s59E25H2" 0 "Bacterial regulatory protein, arsR family"  
"OPBM19\_00994" 37145 "s59E5H2" 0 "Bacterial regulatory protein, arsR family"  
"OPBM19\_00994" 37145 "s63E6H2" 0 "Bacterial regulatory protein, arsR family"  
"OPBM19\_00995" 37146 "s59E13H2" 0 "hypothetical protein"  
"OPBM19\_00995" 37146 "s59E25H2" 0 "hypothetical protein"  
"OPBM19\_00995" 37146 "s59E5H2" 0 "hypothetical protein"  
"OPBM19\_00995" 37146 "s63E6H2" 0 "hypothetical protein"  
"OPBM19\_00996" 37147 "s59E13H2" 0 "CGGC domain protein"  
"OPBM19\_00996" 37147 "s59E25H2" 0 "CGGC domain protein"  
"OPBM19\_00996" 37147 "s59E5H2" 0 "CGGC domain protein"  
"OPBM19\_00996" 37147 "s63E6H2" 0 "CGGC domain protein"  
"OPBM19\_00997" 37148 "s59E13H2" 0 "putative tRNA (adenine(37)-N6)-methyltransferase"  
"OPBM19\_00997" 37148 "s59E25H2" 0 "putative tRNA (adenine(37)-N6)-methyltransferase"  
"OPBM19\_00997" 37148 "s59E5H2" 0 "putative tRNA (adenine(37)-N6)-methyltransferase"  
"OPBM19\_00997" 37148 "s63E6H2" 0 "putative tRNA (adenine(37)-N6)-methyltransferase"  
"OPBM19\_00998" 37149 "s59E13H2" 0 "hypothetical protein"  
"OPBM19\_00998" 37149 "s59E25H2" 0 "hypothetical protein"

"OPBM19\_00998" 37149 "s59E5H2" 0 "hypothetical protein"  
"OPBM19\_00998" 37149 "s63E6H2" 0 "hypothetical protein"  
"OPBM19\_00999" 37150 "s59E13H2" 0 "hypothetical protein"  
"OPBM19\_00999" 37150 "s59E25H2" 0 "hypothetical protein"  
"OPBM19\_00999" 37150 "s59E5H2" 0 "hypothetical protein"  
"OPBM19\_00999" 37150 "s63E6H2" 0 "hypothetical protein"  
"OPBM19\_01001" 37152 "s59E13H2" 0 "hypothetical protein"  
"OPBM19\_01001" 37152 "s59E25H2" 0 "hypothetical protein"  
"OPBM19\_01001" 37152 "s59E5H2" 0 "hypothetical protein"  
"OPBM19\_01001" 37152 "s63E6H2" 0 "hypothetical protein"  
"OPBM19\_01002" 37153 "s59E13H2" 0 "hypothetical protein"  
"OPBM19\_01002" 37153 "s59E25H2" 0 "hypothetical protein"  
"OPBM19\_01002" 37153 "s59E5H2" 0 "hypothetical protein"  
"OPBM19\_01002" 37153 "s63E6H2" 0 "hypothetical protein"  
"OPBM19\_01003" 37154 "s59E13H2" 0 "hypothetical protein"  
"OPBM19\_01003" 37154 "s59E25H2" 0 "hypothetical protein"  
"OPBM19\_01003" 37154 "s59E5H2" 0 "hypothetical protein"  
"OPBM19\_01003" 37154 "s63E6H2" 0 "hypothetical protein"  
"OPBM19\_01004" 37155 "s59E13H2" 0 "Tyrosine recombinase XerC"  
"OPBM19\_01004" 37155 "s59E25H2" 0 "Tyrosine recombinase XerC"  
"OPBM19\_01004" 37155 "s59E5H2" 0 "Tyrosine recombinase XerC"  
"OPBM19\_01004" 37155 "s63E6H2" 0 "Tyrosine recombinase XerC"  
"OPBM19\_01005" 37156 "s59E13H2" 0 "hypothetical protein"  
"OPBM19\_01005" 37156 "s59E25H2" 0 "hypothetical protein"  
"OPBM19\_01005" 37156 "s59E5H2" 0 "hypothetical protein"  
"OPBM19\_01005" 37156 "s63E6H2" 0 "hypothetical protein"  
"OPBM19\_01006" 37157 "s59E13H2" 0 "Helix-turn-helix domain protein"  
"OPBM19\_01006" 37157 "s59E25H2" 0 "Helix-turn-helix domain protein"  
"OPBM19\_01006" 37157 "s59E5H2" 0 "Helix-turn-helix domain protein"  
"OPBM19\_01006" 37157 "s63E6H2" 0 "Helix-turn-helix domain protein"  
"OPBM19\_01007" 37158 "s59E13H2" 0 "Transcriptional regulatory protein TcrA"  
"OPBM19\_01007" 37158 "s59E25H2" 0 "Transcriptional regulatory protein TcrA"  
"OPBM19\_01007" 37158 "s59E5H2" 0 "Transcriptional regulatory protein TcrA"  
"OPBM19\_01007" 37158 "s63E6H2" 0 "Transcriptional regulatory protein TcrA"  
"OPBM19\_01008" 37159 "s59E13H2" 0 "Sensor histidine kinase YycG"  
"OPBM19\_01008" 37159 "s59E25H2" 0 "Sensor histidine kinase YycG"  
"OPBM19\_01008" 37159 "s59E5H2" 0 "Sensor histidine kinase YycG"  
"OPBM19\_01008" 37159 "s63E6H2" 0 "Sensor histidine kinase YycG"  
"OPBM19\_01010" 37161 "s59E13H2" 0 "Plasmid stabilisation system protein"  
"OPBM19\_01010" 37161 "s59E25H2" 0 "Plasmid stabilisation system protein"  
"OPBM19\_01010" 37161 "s59E5H2" 0 "Plasmid stabilisation system protein"  
"OPBM19\_01010" 37161 "s63E6H2" 0 "Plasmid stabilisation system protein"  
"OPBM19\_01011" 37162 "s59E13H2" 0 "Peptidase family M50"  
"OPBM19\_01011" 37162 "s59E25H2" 0 "Peptidase family M50"  
"OPBM19\_01011" 37162 "s59E5H2" 0 "Peptidase family M50"  
"OPBM19\_01011" 37162 "s63E6H2" 0 "Peptidase family M50"  
"OPBM19\_01012" 37163 "s59E13H2" 0 "hypothetical protein"

"OPBM19\_01012" 37163 "s59E25H2" 0 "hypothetical protein"  
"OPBM19\_01012" 37163 "s59E5H2" 0 "hypothetical protein"  
"OPBM19\_01012" 37163 "s63E6H2" 0 "hypothetical protein"  
"OPBM19\_01013" 37164 "s59E13H2" 0 "DNA-3-methyladenine glycosylase"  
"OPBM19\_01013" 37164 "s59E25H2" 0 "DNA-3-methyladenine glycosylase"  
"OPBM19\_01013" 37164 "s59E5H2" 0 "DNA-3-methyladenine glycosylase"  
"OPBM19\_01013" 37164 "s63E6H2" 0 "DNA-3-methyladenine glycosylase"  
"OPBM19\_01014" 37165 "s59E13H2" 0 "Haemolysin-III related"  
"OPBM19\_01014" 37165 "s59E25H2" 0 "Haemolysin-III related"  
"OPBM19\_01014" 37165 "s59E5H2" 0 "Haemolysin-III related"  
"OPBM19\_01014" 37165 "s63E6H2" 0 "Haemolysin-III related"  
"OPBM19\_01015" 37166 "s59E13H2" 0 "hypothetical protein"  
"OPBM19\_01015" 37166 "s59E25H2" 0 "hypothetical protein"  
"OPBM19\_01015" 37166 "s59E5H2" 0 "hypothetical protein"  
"OPBM19\_01015" 37166 "s63E6H2" 0.006996379 "hypothetical protein"  
"OPBM19\_01016" 37167 "s59E13H2" 0 "hypothetical protein"  
"OPBM19\_01016" 37167 "s59E25H2" 0 "hypothetical protein"  
"OPBM19\_01016" 37167 "s59E5H2" 0.1230252 "hypothetical protein"  
"OPBM19\_01016" 37167 "s63E6H2" 0 "hypothetical protein"  
"OPBM19\_01018" 37169 "s59E13H2" 0 "G/T mismatches repair enzyme"  
"OPBM19\_01018" 37169 "s59E25H2" 0 "G/T mismatches repair enzyme"  
"OPBM19\_01018" 37169 "s59E5H2" 0 "G/T mismatches repair enzyme"  
"OPBM19\_01018" 37169 "s63E6H2" 0 "G/T mismatches repair enzyme"  
"OPBM19\_01019" 37170 "s59E13H2" 0 "hypothetical protein"  
"OPBM19\_01019" 37170 "s59E25H2" 0 "hypothetical protein"  
"OPBM19\_01019" 37170 "s59E5H2" 0 "hypothetical protein"  
"OPBM19\_01019" 37170 "s63E6H2" 0 "hypothetical protein"  
"OPBM23\_00001" 31001 "s59E13H2" 0 "hypothetical protein"  
"OPBM23\_00001" 31001 "s59E25H2" 0 "hypothetical protein"  
"OPBM23\_00001" 31001 "s59E5H2" 0 "hypothetical protein"  
"OPBM23\_00001" 31001 "s63E6H2" 0 "hypothetical protein"  
"OPBM23\_00002" 31002 "s59E13H2" 0 "hypothetical protein"  
"OPBM23\_00002" 31002 "s59E25H2" 0 "hypothetical protein"  
"OPBM23\_00002" 31002 "s59E5H2" 0.1125234 "hypothetical protein"  
"OPBM23\_00002" 31002 "s63E6H2" 0.02647433 "hypothetical protein"  
"OPBM23\_00003" 31003 "s59E13H2" 0 "F420-non-reducing hydrogenase iron-sulfur subunit D"  
"OPBM23\_00003" 31003 "s59E25H2" 0 "F420-non-reducing hydrogenase iron-sulfur subunit D"  
"OPBM23\_00003" 31003 "s59E5H2" 0 "F420-non-reducing hydrogenase iron-sulfur subunit D"  
"OPBM23\_00003" 31003 "s63E6H2" 0.03143092 "F420-non-reducing hydrogenase iron-sulfur subunit D"  
"OPBM23\_00004" 31004 "s59E13H2" 0.1027181 "CoB--CoM heterodisulfide reductase iron-sulfur subunit A"  
"OPBM23\_00004" 31004 "s59E25H2" 0 "CoB--CoM heterodisulfide reductase iron-sulfur subunit A"  
"OPBM23\_00004" 31004 "s59E5H2" 0.05482153 "CoB--CoM heterodisulfide reductase iron-sulfur subunit A"  
"OPBM23\_00004" 31004 "s63E6H2" 0.5487615 "CoB--CoM heterodisulfide reductase iron-sulfur subunit A"  
"OPBM23\_00005" 31005 "s59E13H2" 0.03108811 "CoB--CoM heterodisulfide reductase iron-sulfur subunit C"  
"OPBM23\_00005" 31005 "s59E25H2" 0 "CoB--CoM heterodisulfide reductase iron-sulfur subunit C"  
"OPBM23\_00005" 31005 "s59E5H2" 0.01252126 "CoB--CoM heterodisulfide reductase iron-sulfur subunit C"  
"OPBM23\_00005" 31005 "s63E6H2" 0.03155794 "CoB--CoM heterodisulfide reductase iron-sulfur subunit C"

"OPBM23\_00006" 31006 "s59E13H2" 0.3702476 "Sensor protein ZraS"  
"OPBM23\_00006" 31006 "s59E25H2" 0 "Sensor protein ZraS"  
"OPBM23\_00006" 31006 "s59E5H2" 0.05077987 "Sensor protein ZraS"  
"OPBM23\_00006" 31006 "s63E6H2" 0.105729 "Sensor protein ZraS"  
"OPBM23\_00007" 31007 "s59E13H2" 0.3334968 "Response regulator MprA"  
"OPBM23\_00007" 31007 "s59E25H2" 0 "Response regulator MprA"  
"OPBM23\_00007" 31007 "s59E5H2" 0.0990442 "Response regulator MprA"  
"OPBM23\_00007" 31007 "s63E6H2" 0.1313003 "Response regulator MprA"  
"OPBM23\_00008" 31008 "s59E13H2" 0.3689117 "Alkaline phosphatase synthesis sensor protein PhoR"  
"OPBM23\_00008" 31008 "s59E25H2" 0 "Alkaline phosphatase synthesis sensor protein PhoR"  
"OPBM23\_00008" 31008 "s59E5H2" 0.280488 "Alkaline phosphatase synthesis sensor protein PhoR"  
"OPBM23\_00008" 31008 "s63E6H2" 0.1609107 "Alkaline phosphatase synthesis sensor protein PhoR"  
"OPBM23\_00009" 31009 "s59E13H2" 0.6992324 "Sulfhydrogenase 1 subunit beta"  
"OPBM23\_00009" 31009 "s59E25H2" 0 "Sulfhydrogenase 1 subunit beta"  
"OPBM23\_00009" 31009 "s59E5H2" 0.704588 "Sulfhydrogenase 1 subunit beta"  
"OPBM23\_00009" 31009 "s63E6H2" 0.1706015 "Sulfhydrogenase 1 subunit beta"  
"OPBM23\_00010" 31010 "s59E13H2" 0.5052385 "Sulfhydrogenase 2 subunit gamma"  
"OPBM23\_00010" 31010 "s59E25H2" 0 "Sulfhydrogenase 2 subunit gamma"  
"OPBM23\_00010" 31010 "s59E5H2" 0.8995635 "Sulfhydrogenase 2 subunit gamma"  
"OPBM23\_00010" 31010 "s63E6H2" 0.223048 "Sulfhydrogenase 2 subunit gamma"  
"OPBM23\_00011" 31011 "s59E13H2" 0.1669976 "Sulfhydrogenase 1 subunit delta"  
"OPBM23\_00011" 31011 "s59E25H2" 0 "Sulfhydrogenase 1 subunit delta"  
"OPBM23\_00011" 31011 "s59E5H2" 0.9413782 "Sulfhydrogenase 1 subunit delta"  
"OPBM23\_00011" 31011 "s63E6H2" 0.2017881 "Sulfhydrogenase 1 subunit delta"  
"OPBM23\_00012" 31012 "s59E13H2" 0.7631248 "Sulfhydrogenase 1 subunit alpha"  
"OPBM23\_00012" 31012 "s59E25H2" 0 "Sulfhydrogenase 1 subunit alpha"  
"OPBM23\_00012" 31012 "s59E5H2" 1.615932 "Sulfhydrogenase 1 subunit alpha"  
"OPBM23\_00012" 31012 "s63E6H2" 0.08927105 "Sulfhydrogenase 1 subunit alpha"  
"OPBM23\_00013" 31013 "s59E13H2" 0.005987415 "hypothetical protein"  
"OPBM23\_00013" 31013 "s59E25H2" 0 "hypothetical protein"  
"OPBM23\_00013" 31013 "s59E5H2" 1.156674 "hypothetical protein"  
"OPBM23\_00013" 31013 "s63E6H2" 0.03801226 "hypothetical protein"  
"OPBM23\_00014" 31014 "s59E13H2" 0.003560601 "Hydrogenase 2 maturation protease"  
"OPBM23\_00014" 31014 "s59E25H2" 0 "Hydrogenase 2 maturation protease"  
"OPBM23\_00014" 31014 "s59E5H2" 1.348855 "Hydrogenase 2 maturation protease"  
"OPBM23\_00014" 31014 "s63E6H2" 0.02795991 "Hydrogenase 2 maturation protease"  
"OPBM23\_00015" 31015 "s59E13H2" 0.008718531 "Sulfhydrogenase 1 subunit alpha"  
"OPBM23\_00015" 31015 "s59E25H2" 0 "Sulfhydrogenase 1 subunit alpha"  
"OPBM23\_00015" 31015 "s59E5H2" 0.8567066 "Sulfhydrogenase 1 subunit alpha"  
"OPBM23\_00015" 31015 "s63E6H2" 0.01867677 "Sulfhydrogenase 1 subunit alpha"  
"OPBM23\_00016" 31016 "s59E13H2" 0.0008096457 "Sulfhydrogenase 1 subunit delta"  
"OPBM23\_00016" 31016 "s59E25H2" 0 "Sulfhydrogenase 1 subunit delta"  
"OPBM23\_00016" 31016 "s59E5H2" 0.7727807 "Sulfhydrogenase 1 subunit delta"  
"OPBM23\_00016" 31016 "s63E6H2" 0.01700754 "Sulfhydrogenase 1 subunit delta"  
"OPBM23\_00017" 31017 "s59E13H2" 0.004110123 "Sulfhydrogenase 2 subunit gamma"  
"OPBM23\_00017" 31017 "s59E25H2" 0 "Sulfhydrogenase 2 subunit gamma"  
"OPBM23\_00017" 31017 "s59E5H2" 0.5817329 "Sulfhydrogenase 2 subunit gamma"



"OPBM23\_00017" 31017 "s63E6H2" 0.01023843 "Sulphydrogenase 2 subunit gamma"  
"OPBM23\_00018" 31018 "s59E13H2" 0.01302152 "Sulphydrogenase 2 subunit beta"  
"OPBM23\_00018" 31018 "s59E25H2" 0 "Sulphydrogenase 2 subunit beta"  
"OPBM23\_00018" 31018 "s59E5H2" 0.01699718 "Sulphydrogenase 2 subunit beta"  
"OPBM23\_00018" 31018 "s63E6H2" 0.01136921 "Sulphydrogenase 2 subunit beta"  
"OPBM23\_00019" 31019 "s59E13H2" 0.3278256 "Hydrogenase isoenzymes nickel incorporation protein HypB"  
"OPBM23\_00019" 31019 "s59E25H2" 0 "Hydrogenase isoenzymes nickel incorporation protein HypB"  
"OPBM23\_00019" 31019 "s59E5H2" 0.1478373 "Hydrogenase isoenzymes nickel incorporation protein HypB"  
"OPBM23\_00019" 31019 "s63E6H2" 0.01892557 "Hydrogenase isoenzymes nickel incorporation protein HypB"  
"OPBM23\_00020" 31020 "s59E13H2" 0.02923272 "hypothetical protein"  
"OPBM23\_00020" 31020 "s59E25H2" 0 "hypothetical protein"  
"OPBM23\_00020" 31020 "s59E5H2" 0.3381927 "hypothetical protein"  
"OPBM23\_00020" 31020 "s63E6H2" 0.01325117 "hypothetical protein"  
"OPBM23\_00021" 31021 "s59E13H2" 0.550519 "Phosphoenolpyruvate carboxykinase [GTP]"  
"OPBM23\_00021" 31021 "s59E25H2" 0 "Phosphoenolpyruvate carboxykinase [GTP]"  
"OPBM23\_00021" 31021 "s59E5H2" 0.3066744 "Phosphoenolpyruvate carboxykinase [GTP]"  
"OPBM23\_00021" 31021 "s63E6H2" 0.01419234 "Phosphoenolpyruvate carboxykinase [GTP]"  
"OPBM23\_00022" 31022 "s59E13H2" 0.04177036 "50S ribosomal protein L13"  
"OPBM23\_00022" 31022 "s59E25H2" 0 "50S ribosomal protein L13"  
"OPBM23\_00022" 31022 "s59E5H2" 0.01200869 "50S ribosomal protein L13"  
"OPBM23\_00022" 31022 "s63E6H2" 0.02441365 "50S ribosomal protein L13"  
"OPBM23\_00023" 31023 "s59E13H2" 0.03753561 "30S ribosomal protein S9"  
"OPBM23\_00023" 31023 "s59E25H2" 0 "30S ribosomal protein S9"  
"OPBM23\_00023" 31023 "s59E5H2" 0.0248498 "30S ribosomal protein S9"  
"OPBM23\_00023" 31023 "s63E6H2" 0.03411157 "30S ribosomal protein S9"  
"OPBM23\_00024" 31024 "s59E13H2" 0.03538599 "hypothetical protein"  
"OPBM23\_00024" 31024 "s59E25H2" 0 "hypothetical protein"  
"OPBM23\_00024" 31024 "s59E5H2" 0 "hypothetical protein"  
"OPBM23\_00024" 31024 "s63E6H2" 0.02939199 "hypothetical protein"  
"OPBM23\_00025" 31025 "s59E13H2" 0 "hypothetical protein"  
"OPBM23\_00025" 31025 "s59E25H2" 0 "hypothetical protein"  
"OPBM23\_00025" 31025 "s59E5H2" 0 "hypothetical protein"  
"OPBM23\_00025" 31025 "s63E6H2" 0 "hypothetical protein"  
"OPBM23\_00027" 31027 "s59E13H2" 0 "Transposase"  
"OPBM23\_00027" 31027 "s59E25H2" 0 "Transposase"  
"OPBM23\_00027" 31027 "s59E5H2" 0 "Transposase"  
"OPBM23\_00027" 31027 "s63E6H2" 0 "Transposase"  
"OPBM23\_00028" 31028 "s59E13H2" 0 "Nicotinate-nucleotide pyrophosphorylase [carboxylating]"  
"OPBM23\_00028" 31028 "s59E25H2" 0 "Nicotinate-nucleotide pyrophosphorylase [carboxylating]"  
"OPBM23\_00028" 31028 "s59E5H2" 0 "Nicotinate-nucleotide pyrophosphorylase [carboxylating]"  
"OPBM23\_00028" 31028 "s63E6H2" 0 "Nicotinate-nucleotide pyrophosphorylase [carboxylating]"  
"OPBM23\_00029" 31029 "s59E13H2" 0 "hypothetical protein"  
"OPBM23\_00029" 31029 "s59E25H2" 0 "hypothetical protein"  
"OPBM23\_00029" 31029 "s59E5H2" 0 "hypothetical protein"  
"OPBM23\_00029" 31029 "s63E6H2" 0 "hypothetical protein"  
"OPBM23\_00030" 31030 "s59E13H2" 0 "NTE family protein RssA"  
"OPBM23\_00030" 31030 "s59E25H2" 0 "NTE family protein RssA"

"OPBM23\_00030" 31030 "s59E5H2" 0 "NTE family protein RssA"  
"OPBM23\_00030" 31030 "s63E6H2" 0 "NTE family protein RssA"  
"OPBM23\_00031" 31031 "s59E13H2" 0 "Carbon-nitrogen hydrolase"  
"OPBM23\_00031" 31031 "s59E25H2" 0 "Carbon-nitrogen hydrolase"  
"OPBM23\_00031" 31031 "s59E5H2" 0 "Carbon-nitrogen hydrolase"  
"OPBM23\_00031" 31031 "s63E6H2" 0 "Carbon-nitrogen hydrolase"  
"OPBM23\_00032" 31032 "s59E13H2" 0 "methylcobalamin:coenzyme M methyltransferase"  
"OPBM23\_00032" 31032 "s59E25H2" 0 "methylcobalamin:coenzyme M methyltransferase"  
"OPBM23\_00032" 31032 "s59E5H2" 0 "methylcobalamin:coenzyme M methyltransferase"  
"OPBM23\_00032" 31032 "s63E6H2" 0 "methylcobalamin:coenzyme M methyltransferase"  
"OPBM23\_00033" 31033 "s59E13H2" 0 "Glucosamine-6-phosphate deaminase"  
"OPBM23\_00033" 31033 "s59E25H2" 0 "Glucosamine-6-phosphate deaminase"  
"OPBM23\_00033" 31033 "s59E5H2" 0.07326286 "Glucosamine-6-phosphate deaminase"  
"OPBM23\_00033" 31033 "s63E6H2" 0.2751028 "Glucosamine-6-phosphate deaminase"  
"OPBM23\_00034" 31034 "s59E13H2" 0.001347522 "Diacetylchitobiose deacetylase"  
"OPBM23\_00034" 31034 "s59E25H2" 0 "Diacetylchitobiose deacetylase"  
"OPBM23\_00034" 31034 "s59E5H2" 0.3465893 "Diacetylchitobiose deacetylase"  
"OPBM23\_00034" 31034 "s63E6H2" 0.330005 "Diacetylchitobiose deacetylase"  
"OPBM23\_00035" 31035 "s59E13H2" 0 "hypothetical protein"  
"OPBM23\_00035" 31035 "s59E25H2" 0 "hypothetical protein"  
"OPBM23\_00035" 31035 "s59E5H2" 0.01026396 "hypothetical protein"  
"OPBM23\_00035" 31035 "s63E6H2" 0.00405286 "hypothetical protein"  
"OPBM23\_00036" 31036 "s59E13H2" 0 "Inner membrane ABC transporter permease protein YcjP"  
"OPBM23\_00036" 31036 "s59E25H2" 0 "Inner membrane ABC transporter permease protein YcjP"  
"OPBM23\_00036" 31036 "s59E5H2" 0.004923136 "Inner membrane ABC transporter permease protein YcjP"  
"OPBM23\_00036" 31036 "s63E6H2" 0.01202877 "Inner membrane ABC transporter permease protein YcjP"  
"OPBM23\_00037" 31037 "s59E13H2" 0 "Trehalose/maltose transport system permease protein MalF"  
"OPBM23\_00037" 31037 "s59E25H2" 0 "Trehalose/maltose transport system permease protein MalF"  
"OPBM23\_00037" 31037 "s59E5H2" 0.06975763 "Trehalose/maltose transport system permease protein MalF"  
"OPBM23\_00037" 31037 "s63E6H2" 0.008025306 "Trehalose/maltose transport system permease protein MalF"  
"OPBM23\_00038" 31038 "s59E13H2" 0 "Bacterial extracellular solute-binding protein"  
"OPBM23\_00038" 31038 "s59E25H2" 0 "Bacterial extracellular solute-binding protein"  
"OPBM23\_00038" 31038 "s59E5H2" 0 "Bacterial extracellular solute-binding protein"  
"OPBM23\_00038" 31038 "s63E6H2" 0.01153473 "Bacterial extracellular solute-binding protein"  
"OPBM23\_00039" 31039 "s59E13H2" 0 "hypothetical protein"  
"OPBM23\_00039" 31039 "s59E25H2" 0 "hypothetical protein"  
"OPBM23\_00039" 31039 "s59E5H2" 0 "hypothetical protein"  
"OPBM23\_00039" 31039 "s63E6H2" 0.5730636 "hypothetical protein"  
"OPBM23\_00040" 31040 "s59E13H2" 0 "2,3-bisphosphoglycerate-independent phosphoglycerate mutase"  
"OPBM23\_00040" 31040 "s59E25H2" 0 "2,3-bisphosphoglycerate-independent phosphoglycerate mutase"  
"OPBM23\_00040" 31040 "s59E5H2" 0.03548464 "2,3-bisphosphoglycerate-independent phosphoglycerate mutase"  
"OPBM23\_00040" 31040 "s63E6H2" 0.002971316 "2,3-bisphosphoglycerate-independent phosphoglycerate mutase"  
"OPBM23\_00041" 31041 "s59E13H2" 0 "Triosephosphate isomerase"  
"OPBM23\_00041" 31041 "s59E25H2" 0 "Triosephosphate isomerase"  
"OPBM23\_00041" 31041 "s59E5H2" 0.1609342 "Triosephosphate isomerase"  
"OPBM23\_00041" 31041 "s63E6H2" 0.02171517 "Triosephosphate isomerase"  
"OPBM23\_00043" 31043 "s59E13H2" 0 "hypothetical protein"

"OPBM23\_00043" 31043 "s59E25H2" 0 "hypothetical protein"  
"OPBM23\_00043" 31043 "s59E5H2" 0 "hypothetical protein"  
"OPBM23\_00043" 31043 "s63E6H2" 0 "hypothetical protein"  
"OPBM23\_00044" 31044 "s59E13H2" 0 "Undecaprenyl-phosphate mannosyltransferase"  
"OPBM23\_00044" 31044 "s59E25H2" 0 "Undecaprenyl-phosphate mannosyltransferase"  
"OPBM23\_00044" 31044 "s59E5H2" 0 "Undecaprenyl-phosphate mannosyltransferase"  
"OPBM23\_00044" 31044 "s63E6H2" 0 "Undecaprenyl-phosphate mannosyltransferase"  
"OPBM23\_00045" 31045 "s59E13H2" 0 "Phthiotriol/phenolphthiotriol dimycocerosates methyltransferase"  
"OPBM23\_00045" 31045 "s59E25H2" 0 "Phthiotriol/phenolphthiotriol dimycocerosates methyltransferase"  
"OPBM23\_00045" 31045 "s59E5H2" 0 "Phthiotriol/phenolphthiotriol dimycocerosates methyltransferase"  
"OPBM23\_00045" 31045 "s63E6H2" 0 "Phthiotriol/phenolphthiotriol dimycocerosates methyltransferase"  
"OPBM23\_00046" 31046 "s59E13H2" 0 "Asparagine synthetase [glutamine-hydrolyzing] 1"  
"OPBM23\_00046" 31046 "s59E25H2" 0 "Asparagine synthetase [glutamine-hydrolyzing] 1"  
"OPBM23\_00046" 31046 "s59E5H2" 0 "Asparagine synthetase [glutamine-hydrolyzing] 1"  
"OPBM23\_00046" 31046 "s63E6H2" 0 "Asparagine synthetase [glutamine-hydrolyzing] 1"  
"OPBM23\_00047" 31047 "s59E13H2" 0 "4-carboxy-2-hydroxymuconate-6-semialdehyde dehydrogenase"  
"OPBM23\_00047" 31047 "s59E25H2" 0 "4-carboxy-2-hydroxymuconate-6-semialdehyde dehydrogenase"  
"OPBM23\_00047" 31047 "s59E5H2" 0.01042934 "4-carboxy-2-hydroxymuconate-6-semialdehyde dehydrogenase"  
"OPBM23\_00047" 31047 "s63E6H2" 0 "4-carboxy-2-hydroxymuconate-6-semialdehyde dehydrogenase"  
"OPBM23\_00048" 31048 "s59E13H2" 0.004739822 "Glucokinase"  
"OPBM23\_00048" 31048 "s59E25H2" 0 "Glucokinase"  
"OPBM23\_00048" 31048 "s59E5H2" 0.005703297 "Glucokinase"  
"OPBM23\_00048" 31048 "s63E6H2" 0.2445356 "Glucokinase"  
"OPBM23\_00049" 31049 "s59E13H2" 0.05224357 "hypothetical protein"  
"OPBM23\_00049" 31049 "s59E25H2" 0 "hypothetical protein"  
"OPBM23\_00049" 31049 "s59E5H2" 0.003641015 "hypothetical protein"  
"OPBM23\_00049" 31049 "s63E6H2" 0.09373858 "hypothetical protein"  
"OPBM23\_00051" 31051 "s59E13H2" 0.1613635 "Glycosyl hydrolase family 109 protein 1 precursor"  
"OPBM23\_00051" 31051 "s59E25H2" 0 "Glycosyl hydrolase family 109 protein 1 precursor"  
"OPBM23\_00051" 31051 "s59E5H2" 0.002833402 "Glycosyl hydrolase family 109 protein 1 precursor"  
"OPBM23\_00051" 31051 "s63E6H2" 0.1468285 "Glycosyl hydrolase family 109 protein 1 precursor"  
"OPBM23\_00052" 31052 "s59E13H2" 0.2248326 "glucose-6-phosphate isomerase"  
"OPBM23\_00052" 31052 "s59E25H2" 0 "glucose-6-phosphate isomerase"  
"OPBM23\_00052" 31052 "s59E5H2" 0 "glucose-6-phosphate isomerase"  
"OPBM23\_00052" 31052 "s63E6H2" 0.06332948 "glucose-6-phosphate isomerase"  
"OPBM23\_00053" 31053 "s59E13H2" 0.127446 "High-affinity branched-chain amino acid transport system permease protein LivH"  
"OPBM23\_00053" 31053 "s59E25H2" 0 "High-affinity branched-chain amino acid transport system permease protein LivH"  
"OPBM23\_00053" 31053 "s59E5H2" 0.004759234 "High-affinity branched-chain amino acid transport system permease protein LivH"  
"OPBM23\_00053" 31053 "s63E6H2" 0.04449613 "High-affinity branched-chain amino acid transport system permease protein LivH"  
"OPBM23\_00054" 31054 "s59E13H2" 0.08607546 "leucine/isoleucine/valine transporter permease subunit"  
"OPBM23\_00054" 31054 "s59E25H2" 0 "leucine/isoleucine/valine transporter permease subunit"  
"OPBM23\_00054" 31054 "s59E5H2" 0 "leucine/isoleucine/valine transporter permease subunit"  
"OPBM23\_00054" 31054 "s63E6H2" 0.02462892 "leucine/isoleucine/valine transporter permease subunit"  
"OPBM23\_00055" 31055 "s59E13H2" 0.08992263 "Lipopolysaccharide export system ATP-binding protein LptB"  
"OPBM23\_00055" 31055 "s59E25H2" 0 "Lipopolysaccharide export system ATP-binding protein LptB"  
"OPBM23\_00055" 31055 "s59E5H2" 0.005001267 "Lipopolysaccharide export system ATP-binding protein LptB"  
"OPBM23\_00055" 31055 "s63E6H2" 0.01831734 "Lipopolysaccharide export system ATP-binding protein LptB"

"OPBM23\_00056" 31056 "s59E13H2" 0.06349657 "High-affinity branched-chain amino acid transport ATP-binding protein LivF"  
"OPBM23\_00056" 31056 "s59E25H2" 0 "High-affinity branched-chain amino acid transport ATP-binding protein LivF"  
"OPBM23\_00056" 31056 "s59E5H2" 0.01042183 "High-affinity branched-chain amino acid transport ATP-binding protein LivF"  
"OPBM23\_00056" 31056 "s63E6H2" 0.007049932 "High-affinity branched-chain amino acid transport ATP-binding protein LivF"  
"OPBM23\_00057" 31057 "s59E13H2" 0.02694414 "Phosphoribosylformylglycinamide cyclo-ligase"  
"OPBM23\_00057" 31057 "s59E25H2" 0 "Phosphoribosylformylglycinamide cyclo-ligase"  
"OPBM23\_00057" 31057 "s59E5H2" 0.150982 "Phosphoribosylformylglycinamide cyclo-ligase"  
"OPBM23\_00057" 31057 "s63E6H2" 0.0863996 "Phosphoribosylformylglycinamide cyclo-ligase"  
"OPBM23\_00058" 31058 "s59E13H2" 0.02075712 "Phosphoribosylglycinamide formyltransferase"  
"OPBM23\_00058" 31058 "s59E25H2" 0 "Phosphoribosylglycinamide formyltransferase"  
"OPBM23\_00058" 31058 "s59E5H2" 0.1633588 "Phosphoribosylglycinamide formyltransferase"  
"OPBM23\_00058" 31058 "s63E6H2" 0.1114947 "Phosphoribosylglycinamide formyltransferase"  
"OPBM23\_00059" 31059 "s59E13H2" 0.01025035 "Bifunctional purine biosynthesis protein PurH"  
"OPBM23\_00059" 31059 "s59E25H2" 0 "Bifunctional purine biosynthesis protein PurH"  
"OPBM23\_00059" 31059 "s59E5H2" 0.07984989 "Bifunctional purine biosynthesis protein PurH"  
"OPBM23\_00059" 31059 "s63E6H2" 0.05602012 "Bifunctional purine biosynthesis protein PurH"  
"OPBM23\_00060" 31060 "s59E13H2" 0.001752865 "hypothetical protein"  
"OPBM23\_00060" 31060 "s59E25H2" 0 "hypothetical protein"  
"OPBM23\_00060" 31060 "s59E5H2" 9.766104e-05 "hypothetical protein"  
"OPBM23\_00060" 31060 "s63E6H2" 0.006671349 "hypothetical protein"  
"OPBM23\_00061" 31061 "s59E13H2" 0.01668296 "Ribose import ATP-binding protein RbsA"  
"OPBM23\_00061" 31061 "s59E25H2" 0 "Ribose import ATP-binding protein RbsA"  
"OPBM23\_00061" 31061 "s59E5H2" 0 "Ribose import ATP-binding protein RbsA"  
"OPBM23\_00061" 31061 "s63E6H2" 0.00872279 "Ribose import ATP-binding protein RbsA"  
"OPBM23\_00062" 31062 "s59E13H2" 0.02100624 "methylcobalamin:coenzyme M methyltransferase"  
"OPBM23\_00062" 31062 "s59E25H2" 0 "methylcobalamin:coenzyme M methyltransferase"  
"OPBM23\_00062" 31062 "s59E5H2" 0 "methylcobalamin:coenzyme M methyltransferase"  
"OPBM23\_00062" 31062 "s63E6H2" 0.01225762 "methylcobalamin:coenzyme M methyltransferase"  
"OPBM23\_00063" 31063 "s59E13H2" 0.08059454 "methylcobalamin:coenzyme M methyltransferase"  
"OPBM23\_00063" 31063 "s59E25H2" 0 "methylcobalamin:coenzyme M methyltransferase"  
"OPBM23\_00063" 31063 "s59E5H2" 0.01129909 "methylcobalamin:coenzyme M methyltransferase"  
"OPBM23\_00063" 31063 "s63E6H2" 0.01193225 "methylcobalamin:coenzyme M methyltransferase"  
"OPBM23\_00064" 31064 "s59E13H2" 0.03007091 "Ribose transport system permease protein RbsC"  
"OPBM23\_00064" 31064 "s59E25H2" 0 "Ribose transport system permease protein RbsC"  
"OPBM23\_00064" 31064 "s59E5H2" 0 "Ribose transport system permease protein RbsC"  
"OPBM23\_00064" 31064 "s63E6H2" 0.005635769 "Ribose transport system permease protein RbsC"  
"OPBM23\_00065" 31065 "s59E13H2" 0.008746081 "DNA mismatch repair protein"  
"OPBM23\_00065" 31065 "s59E25H2" 0 "DNA mismatch repair protein"  
"OPBM23\_00065" 31065 "s59E5H2" 0.06426693 "DNA mismatch repair protein"  
"OPBM23\_00065" 31065 "s63E6H2" 0.06057009 "DNA mismatch repair protein"  
"OPBM23\_00066" 31066 "s59E13H2" 0 "Stage V sporulation protein S"  
"OPBM23\_00066" 31066 "s59E25H2" 0 "Stage V sporulation protein S"  
"OPBM23\_00066" 31066 "s59E5H2" 0.08675949 "Stage V sporulation protein S"  
"OPBM23\_00066" 31066 "s63E6H2" 0.04943598 "Stage V sporulation protein S"  
"OPBM23\_00067" 31067 "s59E13H2" 0.009121311 "(Dimethylallyl)adenosine tRNA methylthiotransferase MiaB"  
"OPBM23\_00067" 31067 "s59E25H2" 0 "(Dimethylallyl)adenosine tRNA methylthiotransferase MiaB"  
"OPBM23\_00067" 31067 "s59E5H2" 0.04536829 "(Dimethylallyl)adenosine tRNA methylthiotransferase MiaB"

"OPBM23\_00067" 31067 "s63E6H2" 0.0307695 "(Dimethylallyl)adenosine tRNA methylthiotransferase MiaB"  
"OPBM23\_00068" 31068 "s59E13H2" 0.006699476 "tRNA dimethylallyltransferase"  
"OPBM23\_00068" 31068 "s59E25H2" 0 "tRNA dimethylallyltransferase"  
"OPBM23\_00068" 31068 "s59E5H2" 0.06107676 "tRNA dimethylallyltransferase"  
"OPBM23\_00068" 31068 "s63E6H2" 0.04670803 "tRNA dimethylallyltransferase"  
"OPBM23\_00069" 31069 "s59E13H2" 0.0003485903 "Diaminopimelate epimerase"  
"OPBM23\_00069" 31069 "s59E25H2" 0 "Diaminopimelate epimerase"  
"OPBM23\_00069" 31069 "s59E5H2" 0.3087976 "Diaminopimelate epimerase"  
"OPBM23\_00069" 31069 "s63E6H2" 0.1332413 "Diaminopimelate epimerase"  
"OPBM23\_00070" 31070 "s59E13H2" 0.01435338 "LL-diaminopimelate aminotransferase"  
"OPBM23\_00070" 31070 "s59E25H2" 0 "LL-diaminopimelate aminotransferase"  
"OPBM23\_00070" 31070 "s59E5H2" 0.7586645 "LL-diaminopimelate aminotransferase"  
"OPBM23\_00070" 31070 "s63E6H2" 0.1728576 "LL-diaminopimelate aminotransferase"  
"OPBM23\_00071" 31071 "s59E13H2" 0.01037742 "GTPase HflX"  
"OPBM23\_00071" 31071 "s59E25H2" 0 "GTPase HflX"  
"OPBM23\_00071" 31071 "s59E5H2" 0.9515231 "GTPase HflX"  
"OPBM23\_00071" 31071 "s63E6H2" 0.1963028 "GTPase HflX"  
"OPBM23\_00072" 31072 "s59E13H2" 0.02430041 "LexA repressor"  
"OPBM23\_00072" 31072 "s59E25H2" 0 "LexA repressor"  
"OPBM23\_00072" 31072 "s59E5H2" 0.7213964 "LexA repressor"  
"OPBM23\_00072" 31072 "s63E6H2" 0.1697859 "LexA repressor"  
"OPBM23\_00074" 31074 "s59E13H2" 0.03858481 "Cell division ATP-binding protein FtsE"  
"OPBM23\_00074" 31074 "s59E25H2" 0.4672489 "Cell division ATP-binding protein FtsE"  
"OPBM23\_00074" 31074 "s59E5H2" 0.176984 "Cell division ATP-binding protein FtsE"  
"OPBM23\_00074" 31074 "s63E6H2" 0.5022626 "Cell division ATP-binding protein FtsE"  
"OPBM23\_00075" 31075 "s59E13H2" 0.04760258 "Cell division protein FtsX"  
"OPBM23\_00075" 31075 "s59E25H2" 0 "Cell division protein FtsX"  
"OPBM23\_00075" 31075 "s59E5H2" 0.09637866 "Cell division protein FtsX"  
"OPBM23\_00075" 31075 "s63E6H2" 0.5083396 "Cell division protein FtsX"  
"OPBM23\_00076" 31076 "s59E13H2" 0.03910314 "Murein DD-endopeptidase MepM"  
"OPBM23\_00076" 31076 "s59E25H2" 0 "Murein DD-endopeptidase MepM"  
"OPBM23\_00076" 31076 "s59E5H2" 0.1004661 "Murein DD-endopeptidase MepM"  
"OPBM23\_00076" 31076 "s63E6H2" 0.6145689 "Murein DD-endopeptidase MepM"  
"OPBM23\_00077" 31077 "s59E13H2" 0.04199425 "putative CtpA-like serine protease"  
"OPBM23\_00077" 31077 "s59E25H2" 0 "putative CtpA-like serine protease"  
"OPBM23\_00077" 31077 "s59E5H2" 0.02809258 "putative CtpA-like serine protease"  
"OPBM23\_00077" 31077 "s63E6H2" 0.06653768 "putative CtpA-like serine protease"  
"OPBM23\_00078" 31078 "s59E13H2" 0.09091233 "SsrA-binding protein"  
"OPBM23\_00078" 31078 "s59E25H2" 0 "SsrA-binding protein"  
"OPBM23\_00078" 31078 "s59E5H2" 0.5693574 "SsrA-binding protein"  
"OPBM23\_00078" 31078 "s63E6H2" 0.01607299 "SsrA-binding protein"  
"OPBM23\_00080" 31080 "s59E13H2" 0 "hypothetical protein"  
"OPBM23\_00080" 31080 "s59E25H2" 0 "hypothetical protein"  
"OPBM23\_00080" 31080 "s59E5H2" 0.0769132 "hypothetical protein"  
"OPBM23\_00080" 31080 "s63E6H2" 0 "hypothetical protein"  
"OPBM23\_00081" 31081 "s59E13H2" 0.03621782 "Corrinoid/iron-sulfur protein small subunit"  
"OPBM23\_00081" 31081 "s59E25H2" 0 "Corrinoid/iron-sulfur protein small subunit"

"OPBM23\_00081" 31081 "s59E5H2" 0 "Corrinoid/iron-sulfur protein small subunit"  
"OPBM23\_00081" 31081 "s63E6H2" 0.0254659 "Corrinoid/iron-sulfur protein small subunit"  
"OPBM23\_00082" 31082 "s59E13H2" 0.07538588 "Carbon monoxide dehydrogenase 2"  
"OPBM23\_00082" 31082 "s59E25H2" 0 "Carbon monoxide dehydrogenase 2"  
"OPBM23\_00082" 31082 "s59E5H2" 0.005989678 "Carbon monoxide dehydrogenase 2"  
"OPBM23\_00082" 31082 "s63E6H2" 0.03211659 "Carbon monoxide dehydrogenase 2"  
"OPBM23\_00083" 31083 "s59E13H2" 0.02570795 "Carbon monoxide dehydrogenase/acetyl-CoA synthase subunit alpha"  
"OPBM23\_00083" 31083 "s59E25H2" 0 "Carbon monoxide dehydrogenase/acetyl-CoA synthase subunit alpha"  
"OPBM23\_00083" 31083 "s59E5H2" 0.01642729 "Carbon monoxide dehydrogenase/acetyl-CoA synthase subunit alpha"  
"OPBM23\_00083" 31083 "s63E6H2" 0.007879941 "Carbon monoxide dehydrogenase/acetyl-CoA synthase subunit alpha"  
"OPBM23\_00084" 31084 "s59E13H2" 0.01696649 "Corrinoid/iron-sulfur protein large subunit"  
"OPBM23\_00084" 31084 "s59E25H2" 0 "Corrinoid/iron-sulfur protein large subunit"  
"OPBM23\_00084" 31084 "s59E5H2" 0 "Corrinoid/iron-sulfur protein large subunit"  
"OPBM23\_00084" 31084 "s63E6H2" 0.01336543 "Corrinoid/iron-sulfur protein large subunit"  
"OPBM23\_00085" 31085 "s59E13H2" 0.005063082 "Formate--tetrahydrofolate ligase"  
"OPBM23\_00085" 31085 "s59E25H2" 0 "Formate--tetrahydrofolate ligase"  
"OPBM23\_00085" 31085 "s59E5H2" 0.06216407 "Formate--tetrahydrofolate ligase"  
"OPBM23\_00085" 31085 "s63E6H2" 0.01744663 "Formate--tetrahydrofolate ligase"  
"OPBM23\_00086" 31086 "s59E13H2" 0.02268848 "Bifunctional protein FoD protein"  
"OPBM23\_00086" 31086 "s59E25H2" 0 "Bifunctional protein FoD protein"  
"OPBM23\_00086" 31086 "s59E5H2" 0.5090554 "Bifunctional protein FoD protein"  
"OPBM23\_00086" 31086 "s63E6H2" 0.03133071 "Bifunctional protein FoD protein"  
"OPBM23\_00087" 31087 "s59E13H2" 0.001728818 "hypothetical protein"  
"OPBM23\_00087" 31087 "s59E25H2" 0 "hypothetical protein"  
"OPBM23\_00087" 31087 "s59E5H2" 0.03090802 "hypothetical protein"  
"OPBM23\_00087" 31087 "s63E6H2" 0.0002907486 "hypothetical protein"  
"OPBM23\_00088" 31088 "s59E13H2" 0 "Methicillin resistance mecR1 protein"  
"OPBM23\_00088" 31088 "s59E25H2" 0 "Methicillin resistance mecR1 protein"  
"OPBM23\_00088" 31088 "s59E5H2" 0 "Methicillin resistance mecR1 protein"  
"OPBM23\_00088" 31088 "s63E6H2" 0 "Methicillin resistance mecR1 protein"  
"OPBM23\_00089" 31089 "s59E13H2" 0.000140517 "L-arabinose transport system permease protein AraP"  
"OPBM23\_00089" 31089 "s59E25H2" 0 "L-arabinose transport system permease protein AraP"  
"OPBM23\_00089" 31089 "s59E5H2" 0.0005322033 "L-arabinose transport system permease protein AraP"  
"OPBM23\_00089" 31089 "s63E6H2" 0.001550526 "L-arabinose transport system permease protein AraP"  
"OPBM23\_00090" 31090 "s59E13H2" 0.01629901 "Phosphomethylpyrimidine synthase"  
"OPBM23\_00090" 31090 "s59E25H2" 0 "Phosphomethylpyrimidine synthase"  
"OPBM23\_00090" 31090 "s59E5H2" 0.1139666 "Phosphomethylpyrimidine synthase"  
"OPBM23\_00090" 31090 "s63E6H2" 0.4512743 "Phosphomethylpyrimidine synthase"  
"OPBM23\_00091" 31091 "s59E13H2" 0.004477163 "Thiamine-monophosphate kinase"  
"OPBM23\_00091" 31091 "s59E25H2" 0 "Thiamine-monophosphate kinase"  
"OPBM23\_00091" 31091 "s59E5H2" 0.2013338 "Thiamine-monophosphate kinase"  
"OPBM23\_00091" 31091 "s63E6H2" 0.6399326 "Thiamine-monophosphate kinase"  
"OPBM23\_00092" 31092 "s59E13H2" 0 "NYN domain protein"  
"OPBM23\_00092" 31092 "s59E25H2" 0 "NYN domain protein"  
"OPBM23\_00092" 31092 "s59E5H2" 0 "NYN domain protein"  
"OPBM23\_00092" 31092 "s63E6H2" 0.00350812 "NYN domain protein"  
"OPBM23\_00094" 31094 "s59E13H2" 0 "hypothetical protein"

"OPBM23\_00094" 31094 "s59E25H2" 0 "hypothetical protein"  
"OPBM23\_00094" 31094 "s59E5H2" 0 "hypothetical protein"  
"OPBM23\_00094" 31094 "s63E6H2" 0 "hypothetical protein"  
"OPBM23\_00095" 31095 "s59E13H2" 0 "Helix-turn-helix domain protein"  
"OPBM23\_00095" 31095 "s59E25H2" 0 "Helix-turn-helix domain protein"  
"OPBM23\_00095" 31095 "s59E5H2" 0 "Helix-turn-helix domain protein"  
"OPBM23\_00095" 31095 "s63E6H2" 0.1849775 "Helix-turn-helix domain protein"  
"OPBM23\_00096" 31096 "s59E13H2" 0 "hypothetical protein"  
"OPBM23\_00096" 31096 "s59E25H2" 0 "hypothetical protein"  
"OPBM23\_00096" 31096 "s59E5H2" 0 "hypothetical protein"  
"OPBM23\_00096" 31096 "s63E6H2" 0.2492509 "hypothetical protein"  
"OPBM23\_00097" 31097 "s59E13H2" 0 "Inositol-1-monophosphatase"  
"OPBM23\_00097" 31097 "s59E25H2" 0 "Inositol-1-monophosphatase"  
"OPBM23\_00097" 31097 "s59E5H2" 0 "Inositol-1-monophosphatase"  
"OPBM23\_00097" 31097 "s63E6H2" 0.04594296 "Inositol-1-monophosphatase"  
"OPBM23\_00098" 31098 "s59E13H2" 13.14771 "Hemin transport system permease protein HmuU"  
"OPBM23\_00098" 31098 "s59E25H2" 0 "Hemin transport system permease protein HmuU"  
"OPBM23\_00098" 31098 "s59E5H2" 0.5541027 "Hemin transport system permease protein HmuU"  
"OPBM23\_00098" 31098 "s63E6H2" 0.04063341 "Hemin transport system permease protein HmuU"  
"OPBM23\_00099" 31099 "s59E13H2" 14.34404 "Energy-coupling factor transporter ATP-binding protein EcfA1"  
"OPBM23\_00099" 31099 "s59E25H2" 0 "Energy-coupling factor transporter ATP-binding protein EcfA1"  
"OPBM23\_00099" 31099 "s59E5H2" 0.4360103 "Energy-coupling factor transporter ATP-binding protein EcfA1"  
"OPBM23\_00099" 31099 "s63E6H2" 0.05341242 "Energy-coupling factor transporter ATP-binding protein EcfA1"  
"OPBM23\_00100" 31100 "s59E13H2" 15.76579 "Cobalamin import ATP-binding protein BtuD"  
"OPBM23\_00100" 31100 "s59E25H2" 0 "Cobalamin import ATP-binding protein BtuD"  
"OPBM23\_00100" 31100 "s59E5H2" 0.3922234 "Cobalamin import ATP-binding protein BtuD"  
"OPBM23\_00100" 31100 "s63E6H2" 0.06440984 "Cobalamin import ATP-binding protein BtuD"  
"OPBM23\_00101" 31101 "s59E13H2" 0.2489878 "Cobyric acid synthase"  
"OPBM23\_00101" 31101 "s59E25H2" 0 "Cobyric acid synthase"  
"OPBM23\_00101" 31101 "s59E5H2" 0.3732214 "Cobyric acid synthase"  
"OPBM23\_00101" 31101 "s63E6H2" 0.000403026 "Cobyric acid synthase"  
"OPBM23\_00102" 31102 "s59E13H2" 20.59029 "Cob(I)yrinic acid a,c-diamide adenosyltransferase"  
"OPBM23\_00102" 31102 "s59E25H2" 0 "Cob(I)yrinic acid a,c-diamide adenosyltransferase"  
"OPBM23\_00102" 31102 "s59E5H2" 0.4052382 "Cob(I)yrinic acid a,c-diamide adenosyltransferase"  
"OPBM23\_00102" 31102 "s63E6H2" 0.1261659 "Cob(I)yrinic acid a,c-diamide adenosyltransferase"  
"OPBM23\_00104" 31104 "s59E13H2" 17.56703 "Methylated-DNA--protein-cysteine methyltransferase"  
"OPBM23\_00104" 31104 "s59E25H2" 0 "Methylated-DNA--protein-cysteine methyltransferase"  
"OPBM23\_00104" 31104 "s59E5H2" 0.1149351 "Methylated-DNA--protein-cysteine methyltransferase"  
"OPBM23\_00104" 31104 "s63E6H2" 0.09139007 "Methylated-DNA--protein-cysteine methyltransferase"  
"OPBM23\_00106" 31106 "s59E13H2" 4.179859 "YcfA-like protein"  
"OPBM23\_00106" 31106 "s59E25H2" 0 "YcfA-like protein"  
"OPBM23\_00106" 31106 "s59E5H2" 0 "YcfA-like protein"  
"OPBM23\_00106" 31106 "s63E6H2" 0.03106369 "YcfA-like protein"  
"OPBM23\_00107" 31107 "s59E13H2" 1.026953 "membrane-bound transcriptional regulator LytR"  
"OPBM23\_00107" 31107 "s59E25H2" 0 "membrane-bound transcriptional regulator LytR"  
"OPBM23\_00107" 31107 "s59E5H2" 0.02283883 "membrane-bound transcriptional regulator LytR"  
"OPBM23\_00107" 31107 "s63E6H2" 0.09845642 "membrane-bound transcriptional regulator LytR"

"OPBM23\_00108" 31108 "s59E13H2" 2.318726 "Ribosomal silencing factor RsfS"  
"OPBM23\_00108" 31108 "s59E25H2" 0 "Ribosomal silencing factor RsfS"  
"OPBM23\_00108" 31108 "s59E5H2" 0.1765553 "Ribosomal silencing factor RsfS"  
"OPBM23\_00108" 31108 "s63E6H2" 0.1405662 "Ribosomal silencing factor RsfS"  
"OPBM23\_00109" 31109 "s59E13H2" 2.754317 "Leucine--tRNA ligase"  
"OPBM23\_00109" 31109 "s59E25H2" 0 "Leucine--tRNA ligase"  
"OPBM23\_00109" 31109 "s59E5H2" 0.2380252 "Leucine--tRNA ligase"  
"OPBM23\_00109" 31109 "s63E6H2" 0.3157268 "Leucine--tRNA ligase"  
"OPBM23\_00110" 31110 "s59E13H2" 2.066288 "Putative cysteine protease YraA"  
"OPBM23\_00110" 31110 "s59E25H2" 0 "Putative cysteine protease YraA"  
"OPBM23\_00110" 31110 "s59E5H2" 0.1879017 "Putative cysteine protease YraA"  
"OPBM23\_00110" 31110 "s63E6H2" 0.2029788 "Putative cysteine protease YraA"  
"OPBM23\_00112" 31112 "s59E13H2" 0 "Tyrosine recombinase XerD"  
"OPBM23\_00112" 31112 "s59E25H2" 0 "Tyrosine recombinase XerD"  
"OPBM23\_00112" 31112 "s59E5H2" 0.01148497 "Tyrosine recombinase XerD"  
"OPBM23\_00112" 31112 "s63E6H2" 0 "Tyrosine recombinase XerD"  
"OPBM23\_00113" 31113 "s59E13H2" 0 "putative tyrosine recombinase XerC-like protein"  
"OPBM23\_00113" 31113 "s59E25H2" 0 "putative tyrosine recombinase XerC-like protein"  
"OPBM23\_00113" 31113 "s59E5H2" 0.1049926 "putative tyrosine recombinase XerC-like protein"  
"OPBM23\_00113" 31113 "s63E6H2" 0.001040765 "putative tyrosine recombinase XerC-like protein"  
"OPBM23\_00114" 31114 "s59E13H2" 0 "Tyrosine recombinase XerC"  
"OPBM23\_00114" 31114 "s59E25H2" 0 "Tyrosine recombinase XerC"  
"OPBM23\_00114" 31114 "s59E5H2" 0.2280514 "Tyrosine recombinase XerC"  
"OPBM23\_00114" 31114 "s63E6H2" 0.0005455773 "Tyrosine recombinase XerC"  
"OPBM23\_00115" 31115 "s59E13H2" 0.01578775 "GDP-6-deoxy-D-mannose reductase"  
"OPBM23\_00115" 31115 "s59E25H2" 0 "GDP-6-deoxy-D-mannose reductase"  
"OPBM23\_00115" 31115 "s59E5H2" 0.05645398 "GDP-6-deoxy-D-mannose reductase"  
"OPBM23\_00115" 31115 "s63E6H2" 0.1238085 "GDP-6-deoxy-D-mannose reductase"  
"OPBM23\_00116" 31116 "s59E13H2" 0.004387757 "D-glycero-alpha-D-manno-heptose 1-phosphate guanylyltransferase"  
"OPBM23\_00116" 31116 "s59E25H2" 0 "D-glycero-alpha-D-manno-heptose 1-phosphate guanylyltransferase"  
"OPBM23\_00116" 31116 "s59E5H2" 0.06595096 "D-glycero-alpha-D-manno-heptose 1-phosphate guanylyltransferase"  
"OPBM23\_00116" 31116 "s63E6H2" 0.1413707 "D-glycero-alpha-D-manno-heptose 1-phosphate guanylyltransferase"  
"OPBM23\_00117" 31117 "s59E13H2" 0.008104024 "GDP-mannose 4,6-dehydratase"  
"OPBM23\_00117" 31117 "s59E25H2" 0 "GDP-mannose 4,6-dehydratase"  
"OPBM23\_00117" 31117 "s59E5H2" 0.06982998 "GDP-mannose 4,6-dehydratase"  
"OPBM23\_00117" 31117 "s63E6H2" 0.1955852 "GDP-mannose 4,6-dehydratase"  
"OPBM23\_00118" 31118 "s59E13H2" 0.006598896 "Phosphoglucomutase"  
"OPBM23\_00118" 31118 "s59E25H2" 0 "Phosphoglucomutase"  
"OPBM23\_00118" 31118 "s59E5H2" 0.03984642 "Phosphoglucomutase"  
"OPBM23\_00118" 31118 "s63E6H2" 0.1803411 "Phosphoglucomutase"  
"OPBM23\_00119" 31119 "s59E13H2" 0.006589509 "Non-canonical purine NTP pyrophosphatase"  
"OPBM23\_00119" 31119 "s59E25H2" 0 "Non-canonical purine NTP pyrophosphatase"  
"OPBM23\_00119" 31119 "s59E5H2" 0.0187146 "Non-canonical purine NTP pyrophosphatase"  
"OPBM23\_00119" 31119 "s63E6H2" 0.6314782 "Non-canonical purine NTP pyrophosphatase"  
"OPBM23\_00120" 31120 "s59E13H2" 0.005180915 "Ribonuclease PH"  
"OPBM23\_00120" 31120 "s59E25H2" 0 "Ribonuclease PH"  
"OPBM23\_00120" 31120 "s59E5H2" 0.2381724 "Ribonuclease PH"



"OPBM23\_00120" 31120 "s63E6H2" 0.09076404 "Ribonuclease PH"  
"OPBM23\_00121" 31121 "s59E13H2" 0 "Glutamate racemase 1"  
"OPBM23\_00121" 31121 "s59E25H2" 0 "Glutamate racemase 1"  
"OPBM23\_00121" 31121 "s59E5H2" 0.1861325 "Glutamate racemase 1"  
"OPBM23\_00121" 31121 "s63E6H2" 0 "Glutamate racemase 1"  
"OPBM23\_00122" 31122 "s59E13H2" 0 "Xylulose kinase"  
"OPBM23\_00122" 31122 "s59E25H2" 0 "Xylulose kinase"  
"OPBM23\_00122" 31122 "s59E5H2" 0 "Xylulose kinase"  
"OPBM23\_00122" 31122 "s63E6H2" 0.1803005 "Xylulose kinase"  
"OPBM23\_00124" 31124 "s59E13H2" 0.6190791 "6-phosphofructokinase"  
"OPBM23\_00124" 31124 "s59E25H2" 0 "6-phosphofructokinase"  
"OPBM23\_00124" 31124 "s59E5H2" 0.01823211 "6-phosphofructokinase"  
"OPBM23\_00124" 31124 "s63E6H2" 0.2521353 "6-phosphofructokinase"  
"OPBM23\_00125" 31125 "s59E13H2" 0 "6-phosphofructokinase"  
"OPBM23\_00125" 31125 "s59E25H2" 0 "6-phosphofructokinase"  
"OPBM23\_00125" 31125 "s59E5H2" 0.02243997 "6-phosphofructokinase"  
"OPBM23\_00125" 31125 "s63E6H2" 0.1001194 "6-phosphofructokinase"  
"OPBM23\_00126" 31126 "s59E13H2" 0 "Phosphoribosyl-AMP cyclohydrolase"  
"OPBM23\_00126" 31126 "s59E25H2" 0 "Phosphoribosyl-AMP cyclohydrolase"  
"OPBM23\_00126" 31126 "s59E5H2" 0.02134421 "Phosphoribosyl-AMP cyclohydrolase"  
"OPBM23\_00126" 31126 "s63E6H2" 0.1780852 "Phosphoribosyl-AMP cyclohydrolase"  
"OPBM23\_00127" 31127 "s59E13H2" 0 "Imidazole glycerol phosphate synthase subunit HisF"  
"OPBM23\_00127" 31127 "s59E25H2" 0 "Imidazole glycerol phosphate synthase subunit HisF"  
"OPBM23\_00127" 31127 "s59E5H2" 0.04378663 "Imidazole glycerol phosphate synthase subunit HisF"  
"OPBM23\_00127" 31127 "s63E6H2" 0.1145213 "Imidazole glycerol phosphate synthase subunit HisF"  
"OPBM23\_00128" 31128 "s59E13H2" 0 "1-(5-phosphoribosyl)-5-[(5-phosphoribosylamino)methylideneamino] imidazole-4-carboxamide isomerase"  
"OPBM23\_00128" 31128 "s59E25H2" 0 "1-(5-phosphoribosyl)-5-[(5-phosphoribosylamino)methylideneamino] imidazole-4-carboxamide isomerase"  
"OPBM23\_00128" 31128 "s59E5H2" 0.02282383 "1-(5-phosphoribosyl)-5-[(5-phosphoribosylamino)methylideneamino] imidazole-4-carboxamide isomerase"  
"OPBM23\_00128" 31128 "s63E6H2" 0.1391729 "1-(5-phosphoribosyl)-5-[(5-phosphoribosylamino)methylideneamino] imidazole-4-carboxamide isomerase"  
"OPBM23\_00129" 31129 "s59E13H2" 0 "Imidazole glycerol phosphate synthase subunit HisH 1"  
"OPBM23\_00129" 31129 "s59E25H2" 0 "Imidazole glycerol phosphate synthase subunit HisH 1"  
"OPBM23\_00129" 31129 "s59E5H2" 0.008394425 "Imidazole glycerol phosphate synthase subunit HisH 1"  
"OPBM23\_00129" 31129 "s63E6H2" 0.1138342 "Imidazole glycerol phosphate synthase subunit HisH 1"  
"OPBM23\_00130" 31130 "s59E13H2" 0 "Imidazoleglycerol-phosphate dehydratase"  
"OPBM23\_00130" 31130 "s59E25H2" 0 "Imidazoleglycerol-phosphate dehydratase"  
"OPBM23\_00130" 31130 "s59E5H2" 0.02034087 "Imidazoleglycerol-phosphate dehydratase"  
"OPBM23\_00130" 31130 "s63E6H2" 0.140364 "Imidazoleglycerol-phosphate dehydratase"  
"OPBM23\_00131" 31131 "s59E13H2" 0.002264861 "ATP phosphoribosyltransferase"  
"OPBM23\_00131" 31131 "s59E25H2" 0 "ATP phosphoribosyltransferase"  
"OPBM23\_00131" 31131 "s59E5H2" 0.07565475 "ATP phosphoribosyltransferase"  
"OPBM23\_00131" 31131 "s63E6H2" 0.0704372 "ATP phosphoribosyltransferase"  
"OPBM23\_00132" 31132 "s59E13H2" 0.02888118 "ATP phosphoribosyltransferase regulatory subunit"  
"OPBM23\_00132" 31132 "s59E25H2" 0 "ATP phosphoribosyltransferase regulatory subunit"  
"OPBM23\_00132" 31132 "s59E5H2" 0.05301401 "ATP phosphoribosyltransferase regulatory subunit"  
"OPBM23\_00132" 31132 "s63E6H2" 0.07826195 "ATP phosphoribosyltransferase regulatory subunit"  
"OPBM23\_00133" 31133 "s59E13H2" 0.0001273918 "B12 binding domain protein"  
"OPBM23\_00133" 31133 "s59E25H2" 0 "B12 binding domain protein"

"OPBM23\_00133" 31133 "s59E5H2" 0.1317723 "B12 binding domain protein"  
"OPBM23\_00133" 31133 "s63E6H2" 0.03533262 "B12 binding domain protein"  
"OPBM23\_00134" 31134 "s59E13H2" 0.002921984 "Opine dehydrogenase"  
"OPBM23\_00134" 31134 "s59E25H2" 0 "Opine dehydrogenase"  
"OPBM23\_00134" 31134 "s59E5H2" 0.04598506 "Opine dehydrogenase"  
"OPBM23\_00134" 31134 "s63E6H2" 0.03833561 "Opine dehydrogenase"  
"OPBM23\_00135" 31135 "s59E13H2" 0.08224017 "DNA polymerase III subunit alpha"  
"OPBM23\_00135" 31135 "s59E25H2" 0 "DNA polymerase III subunit alpha"  
"OPBM23\_00135" 31135 "s59E5H2" 0.03607179 "DNA polymerase III subunit alpha"  
"OPBM23\_00135" 31135 "s63E6H2" 0.03631887 "DNA polymerase III subunit alpha"  
"OPBM23\_00136" 31136 "s59E13H2" 0 "hypothetical protein"  
"OPBM23\_00136" 31136 "s59E25H2" 0 "hypothetical protein"  
"OPBM23\_00136" 31136 "s59E5H2" 0 "hypothetical protein"  
"OPBM23\_00136" 31136 "s63E6H2" 0.003659237 "hypothetical protein"  
"OPBM23\_00137" 31137 "s59E13H2" 0.03415345 "DNA polymerase I"  
"OPBM23\_00137" 31137 "s59E25H2" 0 "DNA polymerase I"  
"OPBM23\_00137" 31137 "s59E5H2" 0.4908601 "DNA polymerase I"  
"OPBM23\_00137" 31137 "s63E6H2" 0.008253779 "DNA polymerase I"  
"OPBM23\_00138" 31138 "s59E13H2" 0.006944552 "30S ribosomal protein S1"  
"OPBM23\_00138" 31138 "s59E25H2" 0 "30S ribosomal protein S1"  
"OPBM23\_00138" 31138 "s59E5H2" 0.55071 "30S ribosomal protein S1"  
"OPBM23\_00138" 31138 "s63E6H2" 0.004009436 "30S ribosomal protein S1"  
"OPBM23\_00139" 31139 "s59E13H2" 0.001738898 "Dephospho-CoA kinase"  
"OPBM23\_00139" 31139 "s59E25H2" 0 "Dephospho-CoA kinase"  
"OPBM23\_00139" 31139 "s59E5H2" 0.003657525 "Dephospho-CoA kinase"  
"OPBM23\_00139" 31139 "s63E6H2" 0.007648537 "Dephospho-CoA kinase"  
"OPBM23\_00140" 31140 "s59E13H2" 0.002917856 "UvrABC system protein B"  
"OPBM23\_00140" 31140 "s59E25H2" 0 "UvrABC system protein B"  
"OPBM23\_00140" 31140 "s59E5H2" 0.02884747 "UvrABC system protein B"  
"OPBM23\_00140" 31140 "s63E6H2" 0.04115419 "UvrABC system protein B"  
"OPBM23\_00141" 31141 "s59E13H2" 0 "UvrABC system protein A"  
"OPBM23\_00141" 31141 "s59E25H2" 0 "UvrABC system protein A"  
"OPBM23\_00141" 31141 "s59E5H2" 0.05177631 "UvrABC system protein A"  
"OPBM23\_00141" 31141 "s63E6H2" 0.01263867 "UvrABC system protein A"  
"OPBM23\_00142" 31142 "s59E13H2" 0.01067119 "preprotein translocase subunit SecG"  
"OPBM23\_00142" 31142 "s59E25H2" 0 "preprotein translocase subunit SecG"  
"OPBM23\_00142" 31142 "s59E5H2" 0.09345995 "preprotein translocase subunit SecG"  
"OPBM23\_00142" 31142 "s63E6H2" 0.001402913 "preprotein translocase subunit SecG"  
"OPBM23\_00143" 31143 "s59E13H2" 0.0111202 "Oligopeptide-binding protein OppA precursor"  
"OPBM23\_00143" 31143 "s59E25H2" 0 "Oligopeptide-binding protein OppA precursor"  
"OPBM23\_00143" 31143 "s59E5H2" 0 "Oligopeptide-binding protein OppA precursor"  
"OPBM23\_00143" 31143 "s63E6H2" 0.009696276 "Oligopeptide-binding protein OppA precursor"  
"OPBM23\_00144" 31144 "s59E13H2" 0.02327363 "Glutathione transport system permease protein GsiC"  
"OPBM23\_00144" 31144 "s59E25H2" 0 "Glutathione transport system permease protein GsiC"  
"OPBM23\_00144" 31144 "s59E5H2" 0 "Glutathione transport system permease protein GsiC"  
"OPBM23\_00144" 31144 "s63E6H2" 0.00268904 "Glutathione transport system permease protein GsiC"  
"OPBM23\_00145" 31145 "s59E13H2" 0.01416622 "Glutathione transport system permease protein GsiD"

"OPBM23\_00145" 31145 "s59E25H2" 0 "Glutathione transport system permease protein GsiD"  
"OPBM23\_00145" 31145 "s59E5H2" 0 "Glutathione transport system permease protein GsiD"  
"OPBM23\_00145" 31145 "s63E6H2" 0.004106898 "Glutathione transport system permease protein GsiD"  
"OPBM23\_00146" 31146 "s59E13H2" 0.01056295 "Oligopeptide transport ATP-binding protein OppD"  
"OPBM23\_00146" 31146 "s59E25H2" 0 "Oligopeptide transport ATP-binding protein OppD"  
"OPBM23\_00146" 31146 "s59E5H2" 0 "Oligopeptide transport ATP-binding protein OppD"  
"OPBM23\_00146" 31146 "s63E6H2" 0.008868611 "Oligopeptide transport ATP-binding protein OppD"  
"OPBM23\_00147" 31147 "s59E13H2" 0.00165976 "Oligopeptide transport ATP-binding protein OppF"  
"OPBM23\_00147" 31147 "s59E25H2" 0 "Oligopeptide transport ATP-binding protein OppF"  
"OPBM23\_00147" 31147 "s59E5H2" 0.01517482 "Oligopeptide transport ATP-binding protein OppF"  
"OPBM23\_00147" 31147 "s63E6H2" 0 "Oligopeptide transport ATP-binding protein OppF"  
"OPBM23\_00148" 31148 "s59E13H2" 0.001010332 "putative D,D-dipeptide-binding periplasmic protein DdpA precursor"  
"OPBM23\_00148" 31148 "s59E25H2" 0.2928241 "putative D,D-dipeptide-binding periplasmic protein DdpA precursor"  
"OPBM23\_00148" 31148 "s59E5H2" 0.007045724 "putative D,D-dipeptide-binding periplasmic protein DdpA precursor"  
"OPBM23\_00148" 31148 "s63E6H2" 0.001632402 "putative D,D-dipeptide-binding periplasmic protein DdpA precursor"  
"OPBM23\_00150" 31150 "s59E13H2" 0 "Tetratricopeptide repeat protein"  
"OPBM23\_00150" 31150 "s59E25H2" 0 "Tetratricopeptide repeat protein"  
"OPBM23\_00150" 31150 "s59E5H2" 0 "Tetratricopeptide repeat protein"  
"OPBM23\_00150" 31150 "s63E6H2" 0.004578952 "Tetratricopeptide repeat protein"  
"OPBM23\_00151" 31151 "s59E13H2" 0 "Tautomerase PptA"  
"OPBM23\_00151" 31151 "s59E25H2" 0 "Tautomerase PptA"  
"OPBM23\_00151" 31151 "s59E5H2" 0 "Tautomerase PptA"  
"OPBM23\_00151" 31151 "s63E6H2" 0 "Tautomerase PptA"  
"OPBM23\_00152" 31152 "s59E13H2" 0.05685591 "molybdenum cofactor biosynthesis protein A"  
"OPBM23\_00152" 31152 "s59E25H2" 0 "molybdenum cofactor biosynthesis protein A"  
"OPBM23\_00152" 31152 "s59E5H2" 0.4367973 "molybdenum cofactor biosynthesis protein A"  
"OPBM23\_00152" 31152 "s63E6H2" 0.02419013 "molybdenum cofactor biosynthesis protein A"  
"OPBM23\_00154" 31154 "s59E13H2" 0.01406749 "NAD(P)-specific glutamate dehydrogenase"  
"OPBM23\_00154" 31154 "s59E25H2" 0 "NAD(P)-specific glutamate dehydrogenase"  
"OPBM23\_00154" 31154 "s59E5H2" 0.4670558 "NAD(P)-specific glutamate dehydrogenase"  
"OPBM23\_00154" 31154 "s63E6H2" 0.02973615 "NAD(P)-specific glutamate dehydrogenase"  
"OPBM23\_00155" 31155 "s59E13H2" 0 "hypothetical protein"  
"OPBM23\_00155" 31155 "s59E25H2" 0 "hypothetical protein"  
"OPBM23\_00155" 31155 "s59E5H2" 0.0091191 "hypothetical protein"  
"OPBM23\_00155" 31155 "s63E6H2" 0.0005942895 "hypothetical protein"  
"OPBM23\_00156" 31156 "s59E13H2" 0 "hypothetical protein"  
"OPBM23\_00156" 31156 "s59E25H2" 0 "hypothetical protein"  
"OPBM23\_00156" 31156 "s59E5H2" 0.020829 "hypothetical protein"  
"OPBM23\_00156" 31156 "s63E6H2" 0.02332959 "hypothetical protein"  
"OPBM23\_00157" 31157 "s59E13H2" 0 "putative diguanylate cyclase YdaM"  
"OPBM23\_00157" 31157 "s59E25H2" 0 "putative diguanylate cyclase YdaM"  
"OPBM23\_00157" 31157 "s59E5H2" 0.0133624 "putative diguanylate cyclase YdaM"  
"OPBM23\_00157" 31157 "s63E6H2" 0.007860092 "putative diguanylate cyclase YdaM"  
"OPBM23\_00158" 31158 "s59E13H2" 0 "Cyclic di-GMP phosphodiesterase response regulator RpfG"  
"OPBM23\_00158" 31158 "s59E25H2" 0 "Cyclic di-GMP phosphodiesterase response regulator RpfG"  
"OPBM23\_00158" 31158 "s59E5H2" 0.026848 "Cyclic di-GMP phosphodiesterase response regulator RpfG"  
"OPBM23\_00158" 31158 "s63E6H2" 0.04510683 "Cyclic di-GMP phosphodiesterase response regulator RpfG"

"OPBM23\_00159" 31159 "s59E13H2" 0 "hypothetical protein"  
"OPBM23\_00159" 31159 "s59E25H2" 0.1032864 "hypothetical protein"  
"OPBM23\_00159" 31159 "s59E5H2" 0 "hypothetical protein"  
"OPBM23\_00159" 31159 "s63E6H2" 0.0005850959 "hypothetical protein"  
"OPBM23\_00160" 31160 "s59E13H2" 0 "Glutaredoxin"  
"OPBM23\_00160" 31160 "s59E25H2" 0 "Glutaredoxin"  
"OPBM23\_00160" 31160 "s59E5H2" 0 "Glutaredoxin"  
"OPBM23\_00160" 31160 "s63E6H2" 0 "Glutaredoxin"  
"OPBM23\_00161" 31161 "s59E13H2" 0 "Ferredoxin thioredoxin reductase catalytic beta chain"  
"OPBM23\_00161" 31161 "s59E25H2" 0 "Ferredoxin thioredoxin reductase catalytic beta chain"  
"OPBM23\_00161" 31161 "s59E5H2" 0.02105012 "Ferredoxin thioredoxin reductase catalytic beta chain"  
"OPBM23\_00161" 31161 "s63E6H2" 0 "Ferredoxin thioredoxin reductase catalytic beta chain"  
"OPBM23\_00162" 31162 "s59E13H2" 0.002949785 "DNA polymerase IV"  
"OPBM23\_00162" 31162 "s59E25H2" 0 "DNA polymerase IV"  
"OPBM23\_00162" 31162 "s59E5H2" 1.300445 "DNA polymerase IV"  
"OPBM23\_00162" 31162 "s63E6H2" 0.05085669 "DNA polymerase IV"  
"OPBM23\_00163" 31163 "s59E13H2" 0 "Cell wall-binding protein YocH precursor"  
"OPBM23\_00163" 31163 "s59E25H2" 0 "Cell wall-binding protein YocH precursor"  
"OPBM23\_00163" 31163 "s59E5H2" 0.05298317 "Cell wall-binding protein YocH precursor"  
"OPBM23\_00163" 31163 "s63E6H2" 0.01211199 "Cell wall-binding protein YocH precursor"  
"OPBM23\_00164" 31164 "s59E13H2" 0 "ABC-2 family transporter protein"  
"OPBM23\_00164" 31164 "s59E25H2" 0 "ABC-2 family transporter protein"  
"OPBM23\_00164" 31164 "s59E5H2" 0 "ABC-2 family transporter protein"  
"OPBM23\_00164" 31164 "s63E6H2" 0 "ABC-2 family transporter protein"  
"OPBM23\_00165" 31165 "s59E13H2" 0 "hypothetical protein"  
"OPBM23\_00165" 31165 "s59E25H2" 0 "hypothetical protein"  
"OPBM23\_00165" 31165 "s59E5H2" 0 "hypothetical protein"  
"OPBM23\_00165" 31165 "s63E6H2" 0 "hypothetical protein"  
"OPBM23\_00166" 31166 "s59E13H2" 0 "ABC-2 family transporter protein"  
"OPBM23\_00166" 31166 "s59E25H2" 0 "ABC-2 family transporter protein"  
"OPBM23\_00166" 31166 "s59E5H2" 0 "ABC-2 family transporter protein"  
"OPBM23\_00166" 31166 "s63E6H2" 0 "ABC-2 family transporter protein"  
"OPBM23\_00167" 31167 "s59E13H2" 0 "Cell division ATP-binding protein FtsE"  
"OPBM23\_00167" 31167 "s59E25H2" 0 "Cell division ATP-binding protein FtsE"  
"OPBM23\_00167" 31167 "s59E5H2" 0 "Cell division ATP-binding protein FtsE"  
"OPBM23\_00167" 31167 "s63E6H2" 0 "Cell division ATP-binding protein FtsE"  
"OPBM23\_00168" 31168 "s59E13H2" 0 "hypothetical protein"  
"OPBM23\_00168" 31168 "s59E25H2" 0 "hypothetical protein"  
"OPBM23\_00168" 31168 "s59E5H2" 0 "hypothetical protein"  
"OPBM23\_00168" 31168 "s63E6H2" 0 "hypothetical protein"  
"OPBM23\_00171" 31171 "s59E13H2" 0 "Threonine--tRNA ligase 2"  
"OPBM23\_00171" 31171 "s59E25H2" 0 "Threonine--tRNA ligase 2"  
"OPBM23\_00171" 31171 "s59E5H2" 0.08431777 "Threonine--tRNA ligase 2"  
"OPBM23\_00171" 31171 "s63E6H2" 0.01748385 "Threonine--tRNA ligase 2"  
"OPBM23\_00172" 31172 "s59E13H2" 0 "Translation initiation factor IF-3"  
"OPBM23\_00172" 31172 "s59E25H2" 0 "Translation initiation factor IF-3"  
"OPBM23\_00172" 31172 "s59E5H2" 0.1869117 "Translation initiation factor IF-3"

"OPBM23\_00172" 31172 "s63E6H2" 0.0768743 "Translation initiation factor IF-3"  
"OPBM23\_00173" 31173 "s59E13H2" 0.01037988 "50S ribosomal protein L35"  
"OPBM23\_00173" 31173 "s59E25H2" 0 "50S ribosomal protein L35"  
"OPBM23\_00173" 31173 "s59E5H2" 0.1108217 "50S ribosomal protein L35"  
"OPBM23\_00173" 31173 "s63E6H2" 0.07778373 "50S ribosomal protein L35"  
"OPBM23\_00174" 31174 "s59E13H2" 0.003351154 "50S ribosomal protein L20"  
"OPBM23\_00174" 31174 "s59E25H2" 0 "50S ribosomal protein L20"  
"OPBM23\_00174" 31174 "s59E5H2" 0.08950511 "50S ribosomal protein L20"  
"OPBM23\_00174" 31174 "s63E6H2" 0.05484984 "50S ribosomal protein L20"  
"OPBM23\_00175" 31175 "s59E13H2" 0.006065383 "Phenylalanine--tRNA ligase alpha subunit"  
"OPBM23\_00175" 31175 "s59E25H2" 0 "Phenylalanine--tRNA ligase alpha subunit"  
"OPBM23\_00175" 31175 "s59E5H2" 0.03237701 "Phenylalanine--tRNA ligase alpha subunit"  
"OPBM23\_00175" 31175 "s63E6H2" 0.05667036 "Phenylalanine--tRNA ligase alpha subunit"  
"OPBM23\_00176" 31176 "s59E13H2" 0.01110409 "Phenylalanine--tRNA ligase beta subunit"  
"OPBM23\_00176" 31176 "s59E25H2" 0 "Phenylalanine--tRNA ligase beta subunit"  
"OPBM23\_00176" 31176 "s59E5H2" 0.1228547 "Phenylalanine--tRNA ligase beta subunit"  
"OPBM23\_00176" 31176 "s63E6H2" 0.1084014 "Phenylalanine--tRNA ligase beta subunit"  
"OPBM23\_00177" 31177 "s59E13H2" 0.009350454 "ribonuclease Z"  
"OPBM23\_00177" 31177 "s59E25H2" 0 "ribonuclease Z"  
"OPBM23\_00177" 31177 "s59E5H2" 0.00422528 "ribonuclease Z"  
"OPBM23\_00177" 31177 "s63E6H2" 0.04512351 "ribonuclease Z"  
"OPBM23\_00178" 31178 "s59E13H2" 0.01984437 "hypothetical protein"  
"OPBM23\_00178" 31178 "s59E25H2" 0 "hypothetical protein"  
"OPBM23\_00178" 31178 "s59E5H2" 0.1532046 "hypothetical protein"  
"OPBM23\_00178" 31178 "s63E6H2" 1.876734 "hypothetical protein"  
"OPBM23\_00179" 31179 "s59E13H2" 0.002068944 "N-acetyl-gamma-glutamyl-phosphate reductase"  
"OPBM23\_00179" 31179 "s59E25H2" 0 "N-acetyl-gamma-glutamyl-phosphate reductase"  
"OPBM23\_00179" 31179 "s59E5H2" 0.1214732 "N-acetyl-gamma-glutamyl-phosphate reductase"  
"OPBM23\_00179" 31179 "s63E6H2" 2.462612 "N-acetyl-gamma-glutamyl-phosphate reductase"  
"OPBM23\_00180" 31180 "s59E13H2" 0.002871626 "Arginine biosynthesis bifunctional protein ArgJ"  
"OPBM23\_00180" 31180 "s59E25H2" 0 "Arginine biosynthesis bifunctional protein ArgJ"  
"OPBM23\_00180" 31180 "s59E5H2" 0.05299739 "Arginine biosynthesis bifunctional protein ArgJ"  
"OPBM23\_00180" 31180 "s63E6H2" 0.2759607 "Arginine biosynthesis bifunctional protein ArgJ"  
"OPBM23\_00181" 31181 "s59E13H2" 0.01470793 "Acetylglutamate kinase"  
"OPBM23\_00181" 31181 "s59E25H2" 0 "Acetylglutamate kinase"  
"OPBM23\_00181" 31181 "s59E5H2" 0.3127954 "Acetylglutamate kinase"  
"OPBM23\_00181" 31181 "s63E6H2" 0.07098772 "Acetylglutamate kinase"  
"OPBM23\_00182" 31182 "s59E13H2" 0.01552031 "Acetylnithine aminotransferase"  
"OPBM23\_00182" 31182 "s59E25H2" 0 "Acetylnithine aminotransferase"  
"OPBM23\_00182" 31182 "s59E5H2" 0.225163 "Acetylnithine aminotransferase"  
"OPBM23\_00182" 31182 "s63E6H2" 0.05229399 "Acetylnithine aminotransferase"  
"OPBM23\_00184" 31184 "s59E13H2" 0.02515255 "Ornithine carbamoyltransferase"  
"OPBM23\_00184" 31184 "s59E25H2" 0 "Ornithine carbamoyltransferase"  
"OPBM23\_00184" 31184 "s59E5H2" 0.3437761 "Ornithine carbamoyltransferase"  
"OPBM23\_00184" 31184 "s63E6H2" 0.01328437 "Ornithine carbamoyltransferase"  
"OPBM23\_00185" 31185 "s59E13H2" 0.01741171 "Arginine repressor"  
"OPBM23\_00185" 31185 "s59E25H2" 0 "Arginine repressor"

"OPBM23\_00185" 31185 "s59E5H2" 0.2558204 "Arginine repressor"  
"OPBM23\_00185" 31185 "s63E6H2" 0.03071432 "Arginine repressor"  
"OPBM23\_00186" 31186 "s59E13H2" 0.03209426 "Argininosuccinate synthase"  
"OPBM23\_00186" 31186 "s59E25H2" 0 "Argininosuccinate synthase"  
"OPBM23\_00186" 31186 "s59E5H2" 0.3777063 "Argininosuccinate synthase"  
"OPBM23\_00186" 31186 "s63E6H2" 0.03985988 "Argininosuccinate synthase"  
"OPBM23\_00187" 31187 "s59E13H2" 0.04797901 "Argininosuccinate lyase"  
"OPBM23\_00187" 31187 "s59E25H2" 0 "Argininosuccinate lyase"  
"OPBM23\_00187" 31187 "s59E5H2" 0.5740532 "Argininosuccinate lyase"  
"OPBM23\_00187" 31187 "s63E6H2" 0.03352447 "Argininosuccinate lyase"  
"OPBM23\_00188" 31188 "s59E13H2" 0.0622199 "putative protease YhbU precursor"  
"OPBM23\_00188" 31188 "s59E25H2" 0 "putative protease YhbU precursor"  
"OPBM23\_00188" 31188 "s59E5H2" 0.2960631 "putative protease YhbU precursor"  
"OPBM23\_00188" 31188 "s63E6H2" 0.02613414 "putative protease YhbU precursor"  
"OPBM23\_00189" 31189 "s59E13H2" 0.7752591 "Penicillin-binding protein 2D"  
"OPBM23\_00189" 31189 "s59E25H2" 0 "Penicillin-binding protein 2D"  
"OPBM23\_00189" 31189 "s59E5H2" 0.09093042 "Penicillin-binding protein 2D"  
"OPBM23\_00189" 31189 "s63E6H2" 0.04707519 "Penicillin-binding protein 2D"  
"OPBM23\_00191" 31191 "s59E13H2" 0.01350452 "GTPase Der"  
"OPBM23\_00191" 31191 "s59E25H2" 0 "GTPase Der"  
"OPBM23\_00191" 31191 "s59E5H2" 0.1513095 "GTPase Der"  
"OPBM23\_00191" 31191 "s63E6H2" 0.04727721 "GTPase Der"  
"OPBM23\_00192" 31192 "s59E13H2" 0.02084144 "Glycerol-3-phosphate dehydrogenase [NAD(P)+]"  
"OPBM23\_00192" 31192 "s59E25H2" 0 "Glycerol-3-phosphate dehydrogenase [NAD(P)+]"  
"OPBM23\_00192" 31192 "s59E5H2" 0.1639039 "Glycerol-3-phosphate dehydrogenase [NAD(P)+]"  
"OPBM23\_00192" 31192 "s63E6H2" 0.0406947 "Glycerol-3-phosphate dehydrogenase [NAD(P)+]"  
"OPBM23\_00194" 31194 "s59E13H2" 0.01496964 "Glycogen accumulation regulator GarA"  
"OPBM23\_00194" 31194 "s59E25H2" 0 "Glycogen accumulation regulator GarA"  
"OPBM23\_00194" 31194 "s59E5H2" 0.1852993 "Glycogen accumulation regulator GarA"  
"OPBM23\_00194" 31194 "s63E6H2" 0.06627013 "Glycogen accumulation regulator GarA"  
"OPBM23\_00195" 31195 "s59E13H2" 0.03566305 "zinc-responsive transcriptional regulator"  
"OPBM23\_00195" 31195 "s59E25H2" 0 "zinc-responsive transcriptional regulator"  
"OPBM23\_00195" 31195 "s59E5H2" 0.2053038 "zinc-responsive transcriptional regulator"  
"OPBM23\_00195" 31195 "s63E6H2" 0.09652869 "zinc-responsive transcriptional regulator"  
"OPBM23\_00196" 31196 "s59E13H2" 0.02095285 "D-alanyl-D-alanine carboxypeptidase DacF precursor"  
"OPBM23\_00196" 31196 "s59E25H2" 0 "D-alanyl-D-alanine carboxypeptidase DacF precursor"  
"OPBM23\_00196" 31196 "s59E5H2" 0.08060729 "D-alanyl-D-alanine carboxypeptidase DacF precursor"  
"OPBM23\_00196" 31196 "s63E6H2" 0.05547528 "D-alanyl-D-alanine carboxypeptidase DacF precursor"  
"OPBM23\_00197" 31197 "s59E13H2" 0.01112161 "Putative lipoprotein YerB precursor"  
"OPBM23\_00197" 31197 "s59E25H2" 0 "Putative lipoprotein YerB precursor"  
"OPBM23\_00197" 31197 "s59E5H2" 0.06269392 "Putative lipoprotein YerB precursor"  
"OPBM23\_00197" 31197 "s63E6H2" 0.01806142 "Putative lipoprotein YerB precursor"  
"OPBM23\_00198" 31198 "s59E13H2" 0.01996705 "Hypoxanthine-guanine phosphoribosyltransferase"  
"OPBM23\_00198" 31198 "s59E25H2" 0 "Hypoxanthine-guanine phosphoribosyltransferase"  
"OPBM23\_00198" 31198 "s59E5H2" 0.1552616 "Hypoxanthine-guanine phosphoribosyltransferase"  
"OPBM23\_00198" 31198 "s63E6H2" 0.1346921 "Hypoxanthine-guanine phosphoribosyltransferase"  
"OPBM23\_00199" 31199 "s59E13H2" 0 "hypothetical protein"

"OPBM23\_00199" 31199 "s59E25H2" 0 "hypothetical protein"  
"OPBM23\_00199" 31199 "s59E5H2" 0.1647846 "hypothetical protein"  
"OPBM23\_00199" 31199 "s63E6H2" 0.04673779 "hypothetical protein"  
"OPBM23\_00200" 31200 "s59E13H2" 0.01972131 "hypothetical protein"  
"OPBM23\_00200" 31200 "s59E25H2" 0 "hypothetical protein"  
"OPBM23\_00200" 31200 "s59E5H2" 0.211621 "hypothetical protein"  
"OPBM23\_00200" 31200 "s63E6H2" 0.0440266 "hypothetical protein"  
"OPBM23\_00201" 31201 "s59E13H2" 0.005221119 "hypothetical protein"  
"OPBM23\_00201" 31201 "s59E25H2" 0 "hypothetical protein"  
"OPBM23\_00201" 31201 "s59E5H2" 0.1688825 "hypothetical protein"  
"OPBM23\_00201" 31201 "s63E6H2" 0.05488376 "hypothetical protein"  
"OPBM23\_00202" 31202 "s59E13H2" 0.02373674 "Serine acetyltransferase"  
"OPBM23\_00202" 31202 "s59E25H2" 0 "Serine acetyltransferase"  
"OPBM23\_00202" 31202 "s59E5H2" 0.6786728 "Serine acetyltransferase"  
"OPBM23\_00202" 31202 "s63E6H2" 0.08190063 "Serine acetyltransferase"  
"OPBM23\_00203" 31203 "s59E13H2" 0.03738431 "Deoxyuridine 5'-triphosphate nucleotidohydrolase"  
"OPBM23\_00203" 31203 "s59E25H2" 0 "Deoxyuridine 5'-triphosphate nucleotidohydrolase"  
"OPBM23\_00203" 31203 "s59E5H2" 0.0567597 "Deoxyuridine 5'-triphosphate nucleotidohydrolase"  
"OPBM23\_00203" 31203 "s63E6H2" 0.07616581 "Deoxyuridine 5'-triphosphate nucleotidohydrolase"  
"OPBM23\_00204" 31204 "s59E13H2" 0.06230878 "Ketol-acid reductoisomerase"  
"OPBM23\_00204" 31204 "s59E25H2" 0 "Ketol-acid reductoisomerase"  
"OPBM23\_00204" 31204 "s59E5H2" 0.4509677 "Ketol-acid reductoisomerase"  
"OPBM23\_00204" 31204 "s63E6H2" 0.1198081 "Ketol-acid reductoisomerase"  
"OPBM23\_00205" 31205 "s59E13H2" 0.04976678 "hypothetical protein"  
"OPBM23\_00205" 31205 "s59E25H2" 0 "hypothetical protein"  
"OPBM23\_00205" 31205 "s59E5H2" 0.9653973 "hypothetical protein"  
"OPBM23\_00205" 31205 "s63E6H2" 0.03045353 "hypothetical protein"  
"OPBM23\_00206" 31206 "s59E13H2" 0.04322363 "Leucine-specific-binding protein precursor"  
"OPBM23\_00206" 31206 "s59E25H2" 0 "Leucine-specific-binding protein precursor"  
"OPBM23\_00206" 31206 "s59E5H2" 0.9342061 "Leucine-specific-binding protein precursor"  
"OPBM23\_00206" 31206 "s63E6H2" 0.0212398 "Leucine-specific-binding protein precursor"  
"OPBM23\_00207" 31207 "s59E13H2" 0.05448548 "Purine nucleoside phosphorylase 1"  
"OPBM23\_00207" 31207 "s59E25H2" 0 "Purine nucleoside phosphorylase 1"  
"OPBM23\_00207" 31207 "s59E5H2" 0.8166285 "Purine nucleoside phosphorylase 1"  
"OPBM23\_00207" 31207 "s63E6H2" 0.01122276 "Purine nucleoside phosphorylase 1"  
"OPBM23\_00208" 31208 "s59E13H2" 0.02167785 "DegV domain-containing protein"  
"OPBM23\_00208" 31208 "s59E25H2" 0 "DegV domain-containing protein"  
"OPBM23\_00208" 31208 "s59E5H2" 0.9889921 "DegV domain-containing protein"  
"OPBM23\_00208" 31208 "s63E6H2" 0.05416941 "DegV domain-containing protein"  
"OPBM23\_00209" 31209 "s59E13H2" 0.02614464 "putative 5-formyltetrahydrofolate cyclo-ligase"  
"OPBM23\_00209" 31209 "s59E25H2" 0 "putative 5-formyltetrahydrofolate cyclo-ligase"  
"OPBM23\_00209" 31209 "s59E5H2" 0.5465282 "putative 5-formyltetrahydrofolate cyclo-ligase"  
"OPBM23\_00209" 31209 "s63E6H2" 0.04070171 "putative 5-formyltetrahydrofolate cyclo-ligase"  
"OPBM23\_00210" 31210 "s59E13H2" 0.0539625 "Glycosyltransferase AgII"  
"OPBM23\_00210" 31210 "s59E25H2" 0 "Glycosyltransferase AgII"  
"OPBM23\_00210" 31210 "s59E5H2" 2.008934 "Glycosyltransferase AgII"  
"OPBM23\_00210" 31210 "s63E6H2" 0.07302766 "Glycosyltransferase AgII"

"OPBM23\_00211" 31211 "s59E13H2" 0.003784905 "Cyclic di-GMP phosphodiesterase response regulator RpfG"  
"OPBM23\_00211" 31211 "s59E25H2" 0 "Cyclic di-GMP phosphodiesterase response regulator RpfG"  
"OPBM23\_00211" 31211 "s59E5H2" 0 "Cyclic di-GMP phosphodiesterase response regulator RpfG"  
"OPBM23\_00211" 31211 "s63E6H2" 0.002152175 "Cyclic di-GMP phosphodiesterase response regulator RpfG"  
"OPBM23\_00212" 31212 "s59E13H2" 0.01966458 "hypothetical protein"  
"OPBM23\_00212" 31212 "s59E25H2" 0 "hypothetical protein"  
"OPBM23\_00212" 31212 "s59E5H2" 0.01511094 "hypothetical protein"  
"OPBM23\_00212" 31212 "s63E6H2" 0.01317179 "hypothetical protein"  
"OPBM23\_00213" 31213 "s59E13H2" 0.04901776 "Helix-turn-helix domain protein"  
"OPBM23\_00213" 31213 "s59E25H2" 0 "Helix-turn-helix domain protein"  
"OPBM23\_00213" 31213 "s59E5H2" 0.7044657 "Helix-turn-helix domain protein"  
"OPBM23\_00213" 31213 "s63E6H2" 0.04126258 "Helix-turn-helix domain protein"  
"OPBM23\_00214" 31214 "s59E13H2" 0.02581942 "CobQ/CobB/MinD/ParA nucleotide binding domain protein"  
"OPBM23\_00214" 31214 "s59E25H2" 0 "CobQ/CobB/MinD/ParA nucleotide binding domain protein"  
"OPBM23\_00214" 31214 "s59E5H2" 0.09444835 "CobQ/CobB/MinD/ParA nucleotide binding domain protein"  
"OPBM23\_00214" 31214 "s63E6H2" 0.02974349 "CobQ/CobB/MinD/ParA nucleotide binding domain protein"  
"OPBM23\_00215" 31215 "s59E13H2" 0.01813606 "hypothetical protein"  
"OPBM23\_00215" 31215 "s59E25H2" 0 "hypothetical protein"  
"OPBM23\_00215" 31215 "s59E5H2" 0.05644085 "hypothetical protein"  
"OPBM23\_00215" 31215 "s63E6H2" 0.01128046 "hypothetical protein"  
"OPBM23\_00216" 31216 "s59E13H2" 0.001682545 "Cell cycle protein GpsB"  
"OPBM23\_00216" 31216 "s59E25H2" 0.8113426 "Cell cycle protein GpsB"  
"OPBM23\_00216" 31216 "s59E5H2" 0.0342623 "Cell cycle protein GpsB"  
"OPBM23\_00216" 31216 "s63E6H2" 0.02950285 "Cell cycle protein GpsB"  
"OPBM23\_00217" 31217 "s59E13H2" 0.007183645 "hypothetical protein"  
"OPBM23\_00217" 31217 "s59E25H2" 0 "hypothetical protein"  
"OPBM23\_00217" 31217 "s59E5H2" 0.03676431 "hypothetical protein"  
"OPBM23\_00217" 31217 "s63E6H2" 0.01019859 "hypothetical protein"  
"OPBM23\_00218" 31218 "s59E13H2" 0.03816268 "Pyrroline-5-carboxylate reductase"  
"OPBM23\_00218" 31218 "s59E25H2" 0 "Pyrroline-5-carboxylate reductase"  
"OPBM23\_00218" 31218 "s59E5H2" 0.02445565 "Pyrroline-5-carboxylate reductase"  
"OPBM23\_00218" 31218 "s63E6H2" 0.03841342 "Pyrroline-5-carboxylate reductase"  
"OPBM23\_00219" 31219 "s59E13H2" 0.02486658 "Cell division protein SepF"  
"OPBM23\_00219" 31219 "s59E25H2" 0 "Cell division protein SepF"  
"OPBM23\_00219" 31219 "s59E5H2" 0 "Cell division protein SepF"  
"OPBM23\_00219" 31219 "s63E6H2" 0.02059611 "Cell division protein SepF"  
"OPBM23\_00220" 31220 "s59E13H2" 0.01485432 "hypothetical protein"  
"OPBM23\_00220" 31220 "s59E25H2" 0 "hypothetical protein"  
"OPBM23\_00220" 31220 "s59E5H2" 0.02287503 "hypothetical protein"  
"OPBM23\_00220" 31220 "s63E6H2" 0.02165532 "hypothetical protein"  
"OPBM23\_00221" 31221 "s59E13H2" 0.01562726 "Cell division protein FtsZ"  
"OPBM23\_00221" 31221 "s59E25H2" 0 "Cell division protein FtsZ"  
"OPBM23\_00221" 31221 "s59E5H2" 0.04856428 "Cell division protein FtsZ"  
"OPBM23\_00221" 31221 "s63E6H2" 0.02942312 "Cell division protein FtsZ"  
"OPBM23\_00222" 31222 "s59E13H2" 0.01914175 "Cell division protein FtsA"  
"OPBM23\_00222" 31222 "s59E25H2" 0 "Cell division protein FtsA"  
"OPBM23\_00222" 31222 "s59E5H2" 0.03895211 "Cell division protein FtsA"



"OPBM23\_00222" 31222 "s63E6H2" 0.02449653 "Cell division protein FtsA"  
"OPBM23\_00223" 31223 "s59E13H2" 0.004150457 "cell division protein FtsQ"  
"OPBM23\_00223" 31223 "s59E25H2" 0 "cell division protein FtsQ"  
"OPBM23\_00223" 31223 "s59E5H2" 0.08541737 "cell division protein FtsQ"  
"OPBM23\_00223" 31223 "s63E6H2" 0.02272437 "cell division protein FtsQ"  
"OPBM23\_00224" 31224 "s59E13H2" 0.009715071 "D-alanine--D-alanine ligase B"  
"OPBM23\_00224" 31224 "s59E25H2" 0 "D-alanine--D-alanine ligase B"  
"OPBM23\_00224" 31224 "s59E5H2" 0.09930929 "D-alanine--D-alanine ligase B"  
"OPBM23\_00224" 31224 "s63E6H2" 0.03340501 "D-alanine--D-alanine ligase B"  
"OPBM23\_00225" 31225 "s59E13H2" 0 "UDP-N-acetylenolpyruvoylglucosamine reductase"  
"OPBM23\_00225" 31225 "s59E25H2" 0 "UDP-N-acetylenolpyruvoylglucosamine reductase"  
"OPBM23\_00225" 31225 "s59E5H2" 0.04917212 "UDP-N-acetylenolpyruvoylglucosamine reductase"  
"OPBM23\_00225" 31225 "s63E6H2" 0.01730259 "UDP-N-acetylenolpyruvoylglucosamine reductase"  
"OPBM23\_00226" 31226 "s59E13H2" 0.001648955 "UDP-N-acetylmuramate--L-alanine ligase"  
"OPBM23\_00226" 31226 "s59E25H2" 0 "UDP-N-acetylmuramate--L-alanine ligase"  
"OPBM23\_00226" 31226 "s59E5H2" 0.03993537 "UDP-N-acetylmuramate--L-alanine ligase"  
"OPBM23\_00226" 31226 "s63E6H2" 0.02127315 "UDP-N-acetylmuramate--L-alanine ligase"  
"OPBM23\_00227" 31227 "s59E13H2" 0.006125349 "UDP-N-acetylglucosamine--N-acetylmuramyl-(pentapeptide) pyrophosphoryl-undecaprenol N-acetylglucosamine transferase"  
"OPBM23\_00227" 31227 "s59E25H2" 0 "UDP-N-acetylglucosamine--N-acetylmuramyl-(pentapeptide) pyrophosphoryl-undecaprenol N-acetylglucosamine transferase"  
"OPBM23\_00227" 31227 "s59E5H2" 0.07098187 "UDP-N-acetylglucosamine--N-acetylmuramyl-(pentapeptide) pyrophosphoryl-undecaprenol N-acetylglucosamine transferase"  
"OPBM23\_00227" 31227 "s63E6H2" 0.03572859 "UDP-N-acetylglucosamine--N-acetylmuramyl-(pentapeptide) pyrophosphoryl-undecaprenol N-acetylglucosamine transferase"  
"OPBM23\_00228" 31228 "s59E13H2" 0 "Lipid II flippase FtsW"  
"OPBM23\_00228" 31228 "s59E25H2" 0 "Lipid II flippase FtsW"  
"OPBM23\_00228" 31228 "s59E5H2" 0.03134268 "Lipid II flippase FtsW"  
"OPBM23\_00228" 31228 "s63E6H2" 0.01100941 "Lipid II flippase FtsW"  
"OPBM23\_00229" 31229 "s59E13H2" 0 "UDP-N-acetylmuramoylalanine--D-glutamate ligase"  
"OPBM23\_00229" 31229 "s59E25H2" 0 "UDP-N-acetylmuramoylalanine--D-glutamate ligase"  
"OPBM23\_00229" 31229 "s59E5H2" 0.014276 "UDP-N-acetylmuramoylalanine--D-glutamate ligase"  
"OPBM23\_00229" 31229 "s63E6H2" 0.0218673 "UDP-N-acetylmuramoylalanine--D-glutamate ligase"  
"OPBM23\_00230" 31230 "s59E13H2" 0 "UDP-N-acetylmuramoylalanine--D-glutamate ligase"  
"OPBM23\_00230" 31230 "s59E25H2" 0 "UDP-N-acetylmuramoylalanine--D-glutamate ligase"  
"OPBM23\_00230" 31230 "s59E5H2" 0.02667645 "UDP-N-acetylmuramoylalanine--D-glutamate ligase"  
"OPBM23\_00230" 31230 "s63E6H2" 0.04144761 "UDP-N-acetylmuramoylalanine--D-glutamate ligase"  
"OPBM23\_00231" 31231 "s59E13H2" 0 "Phospho-N-acetylmuramoyl-pentapeptide-transferase"  
"OPBM23\_00231" 31231 "s59E25H2" 0 "Phospho-N-acetylmuramoyl-pentapeptide-transferase"  
"OPBM23\_00231" 31231 "s59E5H2" 0.003793896 "Phospho-N-acetylmuramoyl-pentapeptide-transferase"  
"OPBM23\_00231" 31231 "s63E6H2" 0.02153754 "Phospho-N-acetylmuramoyl-pentapeptide-transferase"  
"OPBM23\_00232" 31232 "s59E13H2" 0.001657482 "UDP-N-acetylmuramoyl-tripeptide--D-alanyl-D-alanine ligase"  
"OPBM23\_00232" 31232 "s59E25H2" 0 "UDP-N-acetylmuramoyl-tripeptide--D-alanyl-D-alanine ligase"  
"OPBM23\_00232" 31232 "s59E5H2" 0.0131076 "UDP-N-acetylmuramoyl-tripeptide--D-alanyl-D-alanine ligase"  
"OPBM23\_00232" 31232 "s63E6H2" 0.04156943 "UDP-N-acetylmuramoyl-tripeptide--D-alanyl-D-alanine ligase"  
"OPBM23\_00233" 31233 "s59E13H2" 0 "UDP-N-acetylmuramoyl-L-alanyl-D-glutamate--L-lysine ligase"  
"OPBM23\_00233" 31233 "s59E25H2" 0 "UDP-N-acetylmuramoyl-L-alanyl-D-glutamate--L-lysine ligase"  
"OPBM23\_00233" 31233 "s59E5H2" 0.007625878 "UDP-N-acetylmuramoyl-L-alanyl-D-glutamate--L-lysine ligase"  
"OPBM23\_00233" 31233 "s63E6H2" 0.05481877 "UDP-N-acetylmuramoyl-L-alanyl-D-glutamate--L-lysine ligase"  
"OPBM23\_00234" 31234 "s59E13H2" 0.00579226 "Stage V sporulation protein D"  
"OPBM23\_00234" 31234 "s59E25H2" 0 "Stage V sporulation protein D"

"OPBM23\_00234" 31234 "s59E5H2" 0.004740273 "Stage V sporulation protein D"  
"OPBM23\_00234" 31234 "s63E6H2" 0.04718737 "Stage V sporulation protein D"  
"OPBM23\_00235" 31235 "s59E13H2" 0 "Cell division protein FtsL"  
"OPBM23\_00235" 31235 "s59E25H2" 0 "Cell division protein FtsL"  
"OPBM23\_00235" 31235 "s59E5H2" 0.01509472 "Cell division protein FtsL"  
"OPBM23\_00235" 31235 "s63E6H2" 0.03302288 "Cell division protein FtsL"  
"OPBM23\_00236" 31236 "s59E13H2" 0 "Ribosomal RNA small subunit methyltransferase H"  
"OPBM23\_00236" 31236 "s59E25H2" 0 "Ribosomal RNA small subunit methyltransferase H"  
"OPBM23\_00236" 31236 "s59E5H2" 0 "Ribosomal RNA small subunit methyltransferase H"  
"OPBM23\_00236" 31236 "s63E6H2" 0.03560083 "Ribosomal RNA small subunit methyltransferase H"  
"OPBM23\_00237" 31237 "s59E13H2" 0.00727539 "cell division protein MraZ"  
"OPBM23\_00237" 31237 "s59E25H2" 0 "cell division protein MraZ"  
"OPBM23\_00237" 31237 "s59E5H2" 0.02608785 "cell division protein MraZ"  
"OPBM23\_00237" 31237 "s63E6H2" 0.0239538 "cell division protein MraZ"  
"OPBM23\_00238" 31238 "s59E13H2" 0.009388619 "Exodeoxyribonuclease 7 small subunit"  
"OPBM23\_00238" 31238 "s59E25H2" 0 "Exodeoxyribonuclease 7 small subunit"  
"OPBM23\_00238" 31238 "s59E5H2" 0.02154893 "Exodeoxyribonuclease 7 small subunit"  
"OPBM23\_00238" 31238 "s63E6H2" 0.01521073 "Exodeoxyribonuclease 7 small subunit"  
"OPBM23\_00240" 31240 "s59E13H2" 0.04732844 "Tyrosine recombinase XerC"  
"OPBM23\_00240" 31240 "s59E25H2" 0 "Tyrosine recombinase XerC"  
"OPBM23\_00240" 31240 "s59E5H2" 0.01330602 "Tyrosine recombinase XerC"  
"OPBM23\_00240" 31240 "s63E6H2" 0.02514766 "Tyrosine recombinase XerC"  
"OPBM23\_00241" 31241 "s59E13H2" 0.008806891 "30S ribosomal protein S2"  
"OPBM23\_00241" 31241 "s59E25H2" 0 "30S ribosomal protein S2"  
"OPBM23\_00241" 31241 "s59E5H2" 0.03386177 "30S ribosomal protein S2"  
"OPBM23\_00241" 31241 "s63E6H2" 0.2048158 "30S ribosomal protein S2"  
"OPBM23\_00242" 31242 "s59E13H2" 0.0007107054 "Elongation factor Ts"  
"OPBM23\_00242" 31242 "s59E25H2" 0 "Elongation factor Ts"  
"OPBM23\_00242" 31242 "s59E5H2" 0.009450055 "Elongation factor Ts"  
"OPBM23\_00242" 31242 "s63E6H2" 0.02117059 "Elongation factor Ts"  
"OPBM23\_00243" 31243 "s59E13H2" 0.005216694 "Uridylate kinase"  
"OPBM23\_00243" 31243 "s59E25H2" 0 "Uridylate kinase"  
"OPBM23\_00243" 31243 "s59E5H2" 0.02355204 "Uridylate kinase"  
"OPBM23\_00243" 31243 "s63E6H2" 0.005513578 "Uridylate kinase"  
"OPBM23\_00244" 31244 "s59E13H2" 0 "Ribosome-recycling factor"  
"OPBM23\_00244" 31244 "s59E25H2" 0 "Ribosome-recycling factor"  
"OPBM23\_00244" 31244 "s59E5H2" 0.01191185 "Ribosome-recycling factor"  
"OPBM23\_00244" 31244 "s63E6H2" 0.01226753 "Ribosome-recycling factor"  
"OPBM23\_00245" 31245 "s59E13H2" 0.002263762 "Isoprenyl transferase"  
"OPBM23\_00245" 31245 "s59E25H2" 0 "Isoprenyl transferase"  
"OPBM23\_00245" 31245 "s59E5H2" 0.02167947 "Isoprenyl transferase"  
"OPBM23\_00245" 31245 "s63E6H2" 0.009908763 "Isoprenyl transferase"  
"OPBM23\_00246" 31246 "s59E13H2" 0 "Metalloprotease MmpA"  
"OPBM23\_00246" 31246 "s59E25H2" 0 "Metalloprotease MmpA"  
"OPBM23\_00246" 31246 "s59E5H2" 0.01067082 "Metalloprotease MmpA"  
"OPBM23\_00246" 31246 "s63E6H2" 0.002186261 "Metalloprotease MmpA"  
"OPBM23\_00247" 31247 "s59E13H2" 0.00146296 "4-hydroxy-3-methylbut-2-en-1-yl diphosphate synthase"

"OPBM23\_00247" 31247 "s59E25H2" 0 "4-hydroxy-3-methylbut-2-en-1-yl diphosphate synthase"  
"OPBM23\_00247" 31247 "s59E5H2" 0 "4-hydroxy-3-methylbut-2-en-1-yl diphosphate synthase"  
"OPBM23\_00247" 31247 "s63E6H2" 0.004800641 "4-hydroxy-3-methylbut-2-en-1-yl diphosphate synthase"  
"OPBM23\_00248" 31248 "s59E13H2" 0.007877909 "Proline--tRNA ligase"  
"OPBM23\_00248" 31248 "s59E25H2" 0 "Proline--tRNA ligase"  
"OPBM23\_00248" 31248 "s59E5H2" 0.01149667 "Proline--tRNA ligase"  
"OPBM23\_00248" 31248 "s63E6H2" 0.007192713 "Proline--tRNA ligase"  
"OPBM23\_00249" 31249 "s59E13H2" 0.002315324 "ATP-dependent RecD-like DNA helicase"  
"OPBM23\_00249" 31249 "s59E25H2" 0 "ATP-dependent RecD-like DNA helicase"  
"OPBM23\_00249" 31249 "s59E5H2" 0.01265397 "ATP-dependent RecD-like DNA helicase"  
"OPBM23\_00249" 31249 "s63E6H2" 0.005106715 "ATP-dependent RecD-like DNA helicase"  
"OPBM23\_00250" 31250 "s59E13H2" 0.006350242 "hypothetical protein"  
"OPBM23\_00250" 31250 "s59E25H2" 0 "hypothetical protein"  
"OPBM23\_00250" 31250 "s59E5H2" 0 "hypothetical protein"  
"OPBM23\_00250" 31250 "s63E6H2" 0.009454367 "hypothetical protein"  
"OPBM23\_00252" 31252 "s59E13H2" 0.1033888 "4-diphosphocytidyl-2-C-methyl-D-erythritol kinase"  
"OPBM23\_00252" 31252 "s59E25H2" 0.1995754 "4-diphosphocytidyl-2-C-methyl-D-erythritol kinase"  
"OPBM23\_00252" 31252 "s59E5H2" 0.1720302 "4-diphosphocytidyl-2-C-methyl-D-erythritol kinase"  
"OPBM23\_00252" 31252 "s63E6H2" 4.376088 "4-diphosphocytidyl-2-C-methyl-D-erythritol kinase"  
"OPBM23\_00253" 31253 "s59E13H2" 0.05117557 "Ribosomal RNA small subunit methyltransferase A"  
"OPBM23\_00253" 31253 "s59E25H2" 0.3724138 "Ribosomal RNA small subunit methyltransferase A"  
"OPBM23\_00253" 31253 "s59E5H2" 0.117358 "Ribosomal RNA small subunit methyltransferase A"  
"OPBM23\_00253" 31253 "s63E6H2" 5.076745 "Ribosomal RNA small subunit methyltransferase A"  
"OPBM23\_00254" 31254 "s59E13H2" 0.04055712 "putative deoxyribonuclease YcfH"  
"OPBM23\_00254" 31254 "s59E25H2" 0.5061728 "putative deoxyribonuclease YcfH"  
"OPBM23\_00254" 31254 "s59E5H2" 0.127152 "putative deoxyribonuclease YcfH"  
"OPBM23\_00254" 31254 "s63E6H2" 4.528613 "putative deoxyribonuclease YcfH"  
"OPBM23\_00255" 31255 "s59E13H2" 0.04565513 "Methionine--tRNA ligase"  
"OPBM23\_00255" 31255 "s59E25H2" 0 "Methionine--tRNA ligase"  
"OPBM23\_00255" 31255 "s59E5H2" 0.1372087 "Methionine--tRNA ligase"  
"OPBM23\_00255" 31255 "s63E6H2" 3.705905 "Methionine--tRNA ligase"  
"OPBM23\_00256" 31256 "s59E13H2" 0.02758027 "Ribosomal RNA small subunit methyltransferase I"  
"OPBM23\_00256" 31256 "s59E25H2" 0 "Ribosomal RNA small subunit methyltransferase I"  
"OPBM23\_00256" 31256 "s59E5H2" 0.08685322 "Ribosomal RNA small subunit methyltransferase I"  
"OPBM23\_00256" 31256 "s63E6H2" 2.591039 "Ribosomal RNA small subunit methyltransferase I"  
"OPBM23\_00257" 31257 "s59E13H2" 0.004259951 "tRNA(fMet)-specific endonuclease VapC"  
"OPBM23\_00257" 31257 "s59E25H2" 0 "tRNA(fMet)-specific endonuclease VapC"  
"OPBM23\_00257" 31257 "s59E5H2" 0.07360387 "tRNA(fMet)-specific endonuclease VapC"  
"OPBM23\_00257" 31257 "s63E6H2" 1.918004 "tRNA(fMet)-specific endonuclease VapC"  
"OPBM23\_00258" 31258 "s59E13H2" 0.01051427 "Ribbon-helix-helix protein, copG family"  
"OPBM23\_00258" 31258 "s59E25H2" 0 "Ribbon-helix-helix protein, copG family"  
"OPBM23\_00258" 31258 "s59E5H2" 0.059066 "Ribbon-helix-helix protein, copG family"  
"OPBM23\_00258" 31258 "s63E6H2" 1.3025 "Ribbon-helix-helix protein, copG family"  
"OPBM23\_00259" 31259 "s59E13H2" 0 "Phosphate import ATP-binding protein PstB 3"  
"OPBM23\_00259" 31259 "s59E25H2" 0 "Phosphate import ATP-binding protein PstB 3"  
"OPBM23\_00259" 31259 "s59E5H2" 0 "Phosphate import ATP-binding protein PstB 3"  
"OPBM23\_00259" 31259 "s63E6H2" 0.001304369 "Phosphate import ATP-binding protein PstB 3"

"OPBM23\_00260" 31260 "s59E13H2" 0 "hypothetical protein"  
"OPBM23\_00260" 31260 "s59E25H2" 0 "hypothetical protein"  
"OPBM23\_00260" 31260 "s59E5H2" 0 "hypothetical protein"  
"OPBM23\_00260" 31260 "s63E6H2" 0 "hypothetical protein"  
"OPBM23\_00261" 31261 "s59E13H2" 0 "Phosphate transport system permease protein PstA"  
"OPBM23\_00261" 31261 "s59E25H2" 0.5684932 "Phosphate transport system permease protein PstA"  
"OPBM23\_00261" 31261 "s59E5H2" 0 "Phosphate transport system permease protein PstA"  
"OPBM23\_00261" 31261 "s63E6H2" 0.8892627 "Phosphate transport system permease protein PstA"  
"OPBM23\_00262" 31262 "s59E13H2" 0 "Phosphate transport system permease protein PstC"  
"OPBM23\_00262" 31262 "s59E25H2" 0 "Phosphate transport system permease protein PstC"  
"OPBM23\_00262" 31262 "s59E5H2" 0 "Phosphate transport system permease protein PstC"  
"OPBM23\_00262" 31262 "s63E6H2" 1.072645 "Phosphate transport system permease protein PstC"  
"OPBM23\_00263" 31263 "s59E13H2" 0 "Phosphate-binding protein PstS 1 precursor"  
"OPBM23\_00263" 31263 "s59E25H2" 0 "Phosphate-binding protein PstS 1 precursor"  
"OPBM23\_00263" 31263 "s59E5H2" 0 "Phosphate-binding protein PstS 1 precursor"  
"OPBM23\_00263" 31263 "s63E6H2" 1.235302 "Phosphate-binding protein PstS 1 precursor"  
"OPBM23\_00269" 31269 "s59E13H2" 0.04059658 "YtxH-like protein"  
"OPBM23\_00269" 31269 "s59E25H2" 0 "YtxH-like protein"  
"OPBM23\_00269" 31269 "s59E5H2" 0.2765347 "YtxH-like protein"  
"OPBM23\_00269" 31269 "s63E6H2" 3.187418 "YtxH-like protein"  
"OPBM23\_00270" 31270 "s59E13H2" 0.007132703 "Glucosyl-3-phosphoglycerate/mannosyl-3-phosphoglycerate phosphatase"  
"OPBM23\_00270" 31270 "s59E25H2" 0 "Glucosyl-3-phosphoglycerate/mannosyl-3-phosphoglycerate phosphatase"  
"OPBM23\_00270" 31270 "s59E5H2" 0.1255846 "Glucosyl-3-phosphoglycerate/mannosyl-3-phosphoglycerate phosphatase"  
"OPBM23\_00270" 31270 "s63E6H2" 0.9065529 "Glucosyl-3-phosphoglycerate/mannosyl-3-phosphoglycerate phosphatase"  
"OPBM23\_00271" 31271 "s59E13H2" 0.01263136 "Putative zinc metalloprotease Rip3"  
"OPBM23\_00271" 31271 "s59E25H2" 0 "Putative zinc metalloprotease Rip3"  
"OPBM23\_00271" 31271 "s59E5H2" 0.6352838 "Putative zinc metalloprotease Rip3"  
"OPBM23\_00271" 31271 "s63E6H2" 0.6013255 "Putative zinc metalloprotease Rip3"  
"OPBM23\_00272" 31272 "s59E13H2" 0.00653766 "putative Mg(2+) transport ATPase"  
"OPBM23\_00272" 31272 "s59E25H2" 0 "putative Mg(2+) transport ATPase"  
"OPBM23\_00272" 31272 "s59E5H2" 0.333419 "putative Mg(2+) transport ATPase"  
"OPBM23\_00272" 31272 "s63E6H2" 0.6392125 "putative Mg(2+) transport ATPase"  
"OPBM23\_00273" 31273 "s59E13H2" 0.01078276 "hypothetical protein"  
"OPBM23\_00273" 31273 "s59E25H2" 0 "hypothetical protein"  
"OPBM23\_00273" 31273 "s59E5H2" 0.6842239 "hypothetical protein"  
"OPBM23\_00273" 31273 "s63E6H2" 0.6624344 "hypothetical protein"  
"OPBM23\_00274" 31274 "s59E13H2" 0.01610676 "1-acyl-sn-glycerol-3-phosphate acyltransferase"  
"OPBM23\_00274" 31274 "s59E25H2" 0 "1-acyl-sn-glycerol-3-phosphate acyltransferase"  
"OPBM23\_00274" 31274 "s59E5H2" 0.0986009 "1-acyl-sn-glycerol-3-phosphate acyltransferase"  
"OPBM23\_00274" 31274 "s63E6H2" 0.5664178 "1-acyl-sn-glycerol-3-phosphate acyltransferase"  
"OPBM23\_00275" 31275 "s59E13H2" 0.02081897 "SpoVT / AbrB like domain protein"  
"OPBM23\_00275" 31275 "s59E25H2" 0 "SpoVT / AbrB like domain protein"  
"OPBM23\_00275" 31275 "s59E5H2" 0.4385524 "SpoVT / AbrB like domain protein"  
"OPBM23\_00275" 31275 "s63E6H2" 0.7663456 "SpoVT / AbrB like domain protein"  
"OPBM23\_00276" 31276 "s59E13H2" 0.001601617 "hypothetical protein"  
"OPBM23\_00276" 31276 "s59E25H2" 0 "hypothetical protein"  
"OPBM23\_00276" 31276 "s59E5H2" 0.06854434 "hypothetical protein"

"OPBM23\_00276" 31276 "s63E6H2" 0.1290782 "hypothetical protein"  
"OPBM23\_00277" 31277 "s59E13H2" 0.002600705 "putative type I restriction enzymeP M protein"  
"OPBM23\_00277" 31277 "s59E25H2" 0 "putative type I restriction enzymeP M protein"  
"OPBM23\_00277" 31277 "s59E5H2" 0.0005261414 "putative type I restriction enzymeP M protein"  
"OPBM23\_00277" 31277 "s63E6H2" 0 "putative type I restriction enzymeP M protein"  
"OPBM23\_00278" 31278 "s59E13H2" 0 "Type-1 restriction enzyme EcoKI specificity protein"  
"OPBM23\_00278" 31278 "s59E25H2" 0 "Type-1 restriction enzyme EcoKI specificity protein"  
"OPBM23\_00278" 31278 "s59E5H2" 0 "Type-1 restriction enzyme EcoKI specificity protein"  
"OPBM23\_00278" 31278 "s63E6H2" 0 "Type-1 restriction enzyme EcoKI specificity protein"  
"OPBM23\_00279" 31279 "s59E13H2" 0 "type I restriction enzyme EcoKI subunit R"  
"OPBM23\_00279" 31279 "s59E25H2" 0 "type I restriction enzyme EcoKI subunit R"  
"OPBM23\_00279" 31279 "s59E5H2" 0 "type I restriction enzyme EcoKI subunit R"  
"OPBM23\_00279" 31279 "s63E6H2" 0 "type I restriction enzyme EcoKI subunit R"  
"OPBM23\_00280" 31280 "s59E13H2" 0 "Very short patch repair protein"  
"OPBM23\_00280" 31280 "s59E25H2" 0 "Very short patch repair protein"  
"OPBM23\_00280" 31280 "s59E5H2" 0 "Very short patch repair protein"  
"OPBM23\_00280" 31280 "s63E6H2" 0 "Very short patch repair protein"  
"OPBM23\_00281" 31281 "s59E13H2" 0 "DNA mismatch repair protein MutL"  
"OPBM23\_00281" 31281 "s59E25H2" 0 "DNA mismatch repair protein MutL"  
"OPBM23\_00281" 31281 "s59E5H2" 0 "DNA mismatch repair protein MutL"  
"OPBM23\_00281" 31281 "s63E6H2" 0 "DNA mismatch repair protein MutL"  
"OPBM23\_00282" 31282 "s59E13H2" 0 "putative BsuMI modification methylase subunit YdiO"  
"OPBM23\_00282" 31282 "s59E25H2" 0 "putative BsuMI modification methylase subunit YdiO"  
"OPBM23\_00282" 31282 "s59E5H2" 0 "putative BsuMI modification methylase subunit YdiO"  
"OPBM23\_00282" 31282 "s63E6H2" 0 "putative BsuMI modification methylase subunit YdiO"  
"OPBM23\_00283" 31283 "s59E13H2" 0.02697635 "Chaperone protein ClpB 1"  
"OPBM23\_00283" 31283 "s59E25H2" 0 "Chaperone protein ClpB 1"  
"OPBM23\_00283" 31283 "s59E5H2" 0.1534436 "Chaperone protein ClpB 1"  
"OPBM23\_00283" 31283 "s63E6H2" 0.2277277 "Chaperone protein ClpB 1"  
"OPBM23\_00284" 31284 "s59E13H2" 0.005543555 "Chaperone protein DnaJ"  
"OPBM23\_00284" 31284 "s59E25H2" 0 "Chaperone protein DnaJ"  
"OPBM23\_00284" 31284 "s59E5H2" 0.07853955 "Chaperone protein DnaJ"  
"OPBM23\_00284" 31284 "s63E6H2" 1.117942 "Chaperone protein DnaJ"  
"OPBM23\_00285" 31285 "s59E13H2" 0 "Holliday junction DNA helicase RuvA"  
"OPBM23\_00285" 31285 "s59E25H2" 0 "Holliday junction DNA helicase RuvA"  
"OPBM23\_00285" 31285 "s59E5H2" 0.02710814 "Holliday junction DNA helicase RuvA"  
"OPBM23\_00285" 31285 "s63E6H2" 0.1454711 "Holliday junction DNA helicase RuvA"  
"OPBM23\_00286" 31286 "s59E13H2" 0 "Holliday junction ATP-dependent DNA helicase RuvB"  
"OPBM23\_00286" 31286 "s59E25H2" 0 "Holliday junction ATP-dependent DNA helicase RuvB"  
"OPBM23\_00286" 31286 "s59E5H2" 0.4465174 "Holliday junction ATP-dependent DNA helicase RuvB"  
"OPBM23\_00286" 31286 "s63E6H2" 0.04683948 "Holliday junction ATP-dependent DNA helicase RuvB"  
"OPBM23\_00287" 31287 "s59E13H2" 0.02320556 "S-adenosylmethionine:tRNA ribosyltransferase-isomerase"  
"OPBM23\_00287" 31287 "s59E25H2" 0 "S-adenosylmethionine:tRNA ribosyltransferase-isomerase"  
"OPBM23\_00287" 31287 "s59E5H2" 0.05281202 "S-adenosylmethionine:tRNA ribosyltransferase-isomerase"  
"OPBM23\_00287" 31287 "s63E6H2" 0.008503926 "S-adenosylmethionine:tRNA ribosyltransferase-isomerase"  
"OPBM23\_00288" 31288 "s59E13H2" 0.002223897 "S-adenosylmethionine:tRNA ribosyltransferase-isomerase"  
"OPBM23\_00288" 31288 "s59E25H2" 0 "S-adenosylmethionine:tRNA ribosyltransferase-isomerase"

"OPBM23\_00288" 31288 "s59E5H2" 0.01378549 "S-adenosylmethionine:tRNA ribosyltransferase-isomerase"  
"OPBM23\_00288" 31288 "s63E6H2" 0.02475139 "S-adenosylmethionine:tRNA ribosyltransferase-isomerase"  
"OPBM23\_00289" 31289 "s59E13H2" 0 "hypothetical protein"  
"OPBM23\_00289" 31289 "s59E25H2" 0 "hypothetical protein"  
"OPBM23\_00289" 31289 "s59E5H2" 0.4799599 "hypothetical protein"  
"OPBM23\_00289" 31289 "s63E6H2" 0.002721206 "hypothetical protein"  
"OPBM23\_00290" 31290 "s59E13H2" 0.009344703 "Vancomycin B-type resistance protein VanB"  
"OPBM23\_00290" 31290 "s59E25H2" 0 "Vancomycin B-type resistance protein VanB"  
"OPBM23\_00290" 31290 "s59E5H2" 0.8430019 "Vancomycin B-type resistance protein VanB"  
"OPBM23\_00290" 31290 "s63E6H2" 0.002652557 "Vancomycin B-type resistance protein VanB"  
"OPBM23\_00291" 31291 "s59E13H2" 0.01082803 "Queuine tRNA-ribosyltransferase"  
"OPBM23\_00291" 31291 "s59E25H2" 0.1906028 "Queuine tRNA-ribosyltransferase"  
"OPBM23\_00291" 31291 "s59E5H2" 1.192382 "Queuine tRNA-ribosyltransferase"  
"OPBM23\_00291" 31291 "s63E6H2" 0.01941816 "Queuine tRNA-ribosyltransferase"  
"OPBM23\_00292" 31292 "s59E13H2" 0.007137763 "preprotein translocase subunit YajC"  
"OPBM23\_00292" 31292 "s59E25H2" 0 "preprotein translocase subunit YajC"  
"OPBM23\_00292" 31292 "s59E5H2" 0.1781747 "preprotein translocase subunit YajC"  
"OPBM23\_00292" 31292 "s63E6H2" 0.003633099 "preprotein translocase subunit YajC"  
"OPBM23\_00293" 31293 "s59E13H2" 0.0002815673 "preprotein translocase subunit SecD"  
"OPBM23\_00293" 31293 "s59E25H2" 0 "preprotein translocase subunit SecD"  
"OPBM23\_00293" 31293 "s59E5H2" 0.108068 "preprotein translocase subunit SecD"  
"OPBM23\_00293" 31293 "s63E6H2" 0 "preprotein translocase subunit SecD"  
"OPBM23\_00294" 31294 "s59E13H2" 0.0004262005 "preprotein translocase subunit SecF"  
"OPBM23\_00294" 31294 "s59E25H2" 0 "preprotein translocase subunit SecF"  
"OPBM23\_00294" 31294 "s59E5H2" 0.01311243 "preprotein translocase subunit SecF"  
"OPBM23\_00294" 31294 "s63E6H2" 0.0002384035 "preprotein translocase subunit SecF"  
"OPBM23\_00295" 31295 "s59E13H2" 0.003801266 "Single-stranded-DNA-specific exonuclease RecJ"  
"OPBM23\_00295" 31295 "s59E25H2" 0 "Single-stranded-DNA-specific exonuclease RecJ"  
"OPBM23\_00295" 31295 "s59E5H2" 0.08509521 "Single-stranded-DNA-specific exonuclease RecJ"  
"OPBM23\_00295" 31295 "s63E6H2" 0.007016996 "Single-stranded-DNA-specific exonuclease RecJ"  
"OPBM23\_00296" 31296 "s59E13H2" 0.002346844 "Bifunctional (p)ppGpp synthase/hydrolase relA"  
"OPBM23\_00296" 31296 "s59E25H2" 0 "Bifunctional (p)ppGpp synthase/hydrolase relA"  
"OPBM23\_00296" 31296 "s59E5H2" 0.1149926 "Bifunctional (p)ppGpp synthase/hydrolase relA"  
"OPBM23\_00296" 31296 "s63E6H2" 0.01380557 "Bifunctional (p)ppGpp synthase/hydrolase relA"  
"OPBM23\_00297" 31297 "s59E13H2" 0.01313132 "putative metallo-hydrolase"  
"OPBM23\_00297" 31297 "s59E25H2" 0 "putative metallo-hydrolase"  
"OPBM23\_00297" 31297 "s59E5H2" 0.07069298 "putative metallo-hydrolase"  
"OPBM23\_00297" 31297 "s63E6H2" 0.01878132 "putative metallo-hydrolase"  
"OPBM23\_00298" 31298 "s59E13H2" 0.01398161 "Histidine--tRNA ligase"  
"OPBM23\_00298" 31298 "s59E25H2" 0 "Histidine--tRNA ligase"  
"OPBM23\_00298" 31298 "s59E5H2" 0.1290121 "Histidine--tRNA ligase"  
"OPBM23\_00298" 31298 "s63E6H2" 0.02305301 "Histidine--tRNA ligase"  
"OPBM23\_00299" 31299 "s59E13H2" 0.005465385 "Aspartate--tRNA ligase"  
"OPBM23\_00299" 31299 "s59E25H2" 0 "Aspartate--tRNA ligase"  
"OPBM23\_00299" 31299 "s59E5H2" 0.08925926 "Aspartate--tRNA ligase"  
"OPBM23\_00299" 31299 "s63E6H2" 0.05064045 "Aspartate--tRNA ligase"  
"OPBM23\_00301" 31301 "s59E13H2" 0.008677783 "Alanine--tRNA ligase"

"OPBM23\_00301" 31301 "s59E25H2" 0 "Alanine--tRNA ligase"  
"OPBM23\_00301" 31301 "s59E5H2" 0.04139204 "Alanine--tRNA ligase"  
"OPBM23\_00301" 31301 "s63E6H2" 0.1141046 "Alanine--tRNA ligase"  
"OPBM23\_00302" 31302 "s59E13H2" 0.01022184 "Putative Holliday junction resolvase"  
"OPBM23\_00302" 31302 "s59E25H2" 0 "Putative Holliday junction resolvase"  
"OPBM23\_00302" 31302 "s59E5H2" 0.0563269 "Putative Holliday junction resolvase"  
"OPBM23\_00302" 31302 "s63E6H2" 0.1093976 "Putative Holliday junction resolvase"  
"OPBM23\_00303" 31303 "s59E13H2" 0.004211209 "putative aminodeoxychorismate lyase"  
"OPBM23\_00303" 31303 "s59E25H2" 0 "putative aminodeoxychorismate lyase"  
"OPBM23\_00303" 31303 "s59E5H2" 0.02443576 "putative aminodeoxychorismate lyase"  
"OPBM23\_00303" 31303 "s63E6H2" 0.02773787 "putative aminodeoxychorismate lyase"  
"OPBM23\_00304" 31304 "s59E13H2" 0.0187297 "Putative O-methyltransferase/MSMEI\_4947"  
"OPBM23\_00304" 31304 "s59E25H2" 0 "Putative O-methyltransferase/MSMEI\_4947"  
"OPBM23\_00304" 31304 "s59E5H2" 0.0163527 "Putative O-methyltransferase/MSMEI\_4947"  
"OPBM23\_00304" 31304 "s63E6H2" 0.05977087 "Putative O-methyltransferase/MSMEI\_4947"  
"OPBM23\_00305" 31305 "s59E13H2" 0.03478362 "putative protease YhbU precursor"  
"OPBM23\_00305" 31305 "s59E25H2" 0 "putative protease YhbU precursor"  
"OPBM23\_00305" 31305 "s59E5H2" 0.08921725 "putative protease YhbU precursor"  
"OPBM23\_00305" 31305 "s63E6H2" 0.1810739 "putative protease YhbU precursor"  
"OPBM23\_00306" 31306 "s59E13H2" 0.004295384 "Acylphosphatase"  
"OPBM23\_00306" 31306 "s59E25H2" 0 "Acylphosphatase"  
"OPBM23\_00306" 31306 "s59E5H2" 0.07053526 "Acylphosphatase"  
"OPBM23\_00306" 31306 "s63E6H2" 0.1188128 "Acylphosphatase"  
"OPBM23\_00307" 31307 "s59E13H2" 0.03402346 "Shikimate dehydrogenase"  
"OPBM23\_00307" 31307 "s59E25H2" 0 "Shikimate dehydrogenase"  
"OPBM23\_00307" 31307 "s59E5H2" 0.04632709 "Shikimate dehydrogenase"  
"OPBM23\_00307" 31307 "s63E6H2" 0.1415204 "Shikimate dehydrogenase"  
"OPBM23\_00308" 31308 "s59E13H2" 0 "Twitching mobility protein"  
"OPBM23\_00308" 31308 "s59E25H2" 0 "Twitching mobility protein"  
"OPBM23\_00308" 31308 "s59E5H2" 0.01511449 "Twitching mobility protein"  
"OPBM23\_00308" 31308 "s63E6H2" 0.002849346 "Twitching mobility protein"  
"OPBM23\_00309" 31309 "s59E13H2" 0 "hypothetical protein"  
"OPBM23\_00309" 31309 "s59E25H2" 0 "hypothetical protein"  
"OPBM23\_00309" 31309 "s59E5H2" 0.0007799459 "hypothetical protein"  
"OPBM23\_00309" 31309 "s63E6H2" 0 "hypothetical protein"  
"OPBM23\_00310" 31310 "s59E13H2" 0.03289758 "Type 4 prepilin-like proteins leader peptide-processing enzyme"  
"OPBM23\_00310" 31310 "s59E25H2" 0 "Type 4 prepilin-like proteins leader peptide-processing enzyme"  
"OPBM23\_00310" 31310 "s59E5H2" 0.03225326 "Type 4 prepilin-like proteins leader peptide-processing enzyme"  
"OPBM23\_00310" 31310 "s63E6H2" 0.1388104 "Type 4 prepilin-like proteins leader peptide-processing enzyme"  
"OPBM23\_00311" 31311 "s59E13H2" 0 "Competence protein A"  
"OPBM23\_00311" 31311 "s59E25H2" 0 "Competence protein A"  
"OPBM23\_00311" 31311 "s59E5H2" 0.001233501 "Competence protein A"  
"OPBM23\_00311" 31311 "s63E6H2" 0.1455065 "Competence protein A"  
"OPBM23\_00313" 31313 "s59E13H2" 0.02258929 "Chorismate synthase"  
"OPBM23\_00313" 31313 "s59E25H2" 0 "Chorismate synthase"  
"OPBM23\_00313" 31313 "s59E5H2" 0.06758362 "Chorismate synthase"  
"OPBM23\_00313" 31313 "s63E6H2" 0.2422235 "Chorismate synthase"

"OPBM23\_00314" 31314 "s59E13H2" 0.05457259 "Shikimate kinase 1"  
"OPBM23\_00314" 31314 "s59E25H2" 0 "Shikimate kinase 1"  
"OPBM23\_00314" 31314 "s59E5H2" 0.06637752 "Shikimate kinase 1"  
"OPBM23\_00314" 31314 "s63E6H2" 0.1094272 "Shikimate kinase 1"  
"OPBM23\_00315" 31315 "s59E13H2" 0.05097652 "3-dehydroquininate synthase"  
"OPBM23\_00315" 31315 "s59E25H2" 0 "3-dehydroquininate synthase"  
"OPBM23\_00315" 31315 "s59E5H2" 0.09549815 "3-dehydroquininate synthase"  
"OPBM23\_00315" 31315 "s63E6H2" 0.165775 "3-dehydroquininate synthase"  
"OPBM23\_00316" 31316 "s59E13H2" 0.03448406 "3-dehydroquininate dehydratase"  
"OPBM23\_00316" 31316 "s59E25H2" 30.89202 "3-dehydroquininate dehydratase"  
"OPBM23\_00316" 31316 "s59E5H2" 0.03786543 "3-dehydroquininate dehydratase"  
"OPBM23\_00316" 31316 "s63E6H2" 0.06717187 "3-dehydroquininate dehydratase"  
"OPBM23\_00317" 31317 "s59E13H2" 0 "hypothetical protein"  
"OPBM23\_00317" 31317 "s59E25H2" 1.687215 "hypothetical protein"  
"OPBM23\_00317" 31317 "s59E5H2" 0.003109099 "hypothetical protein"  
"OPBM23\_00317" 31317 "s63E6H2" 0.007855886 "hypothetical protein"  
"OPBM23\_00318" 31318 "s59E13H2" 0.01438599 "Xaa-Pro dipeptidase"  
"OPBM23\_00318" 31318 "s59E25H2" 0 "Xaa-Pro dipeptidase"  
"OPBM23\_00318" 31318 "s59E5H2" 0.1212574 "Xaa-Pro dipeptidase"  
"OPBM23\_00318" 31318 "s63E6H2" 0.1463772 "Xaa-Pro dipeptidase"  
"OPBM23\_00319" 31319 "s59E13H2" 0.01828788 "Elongation factor P"  
"OPBM23\_00319" 31319 "s59E25H2" 0 "Elongation factor P"  
"OPBM23\_00319" 31319 "s59E5H2" 0.1006803 "Elongation factor P"  
"OPBM23\_00319" 31319 "s63E6H2" 0.2464876 "Elongation factor P"  
"OPBM23\_00320" 31320 "s59E13H2" 0.02483897 "hypothetical protein"  
"OPBM23\_00320" 31320 "s59E25H2" 0 "hypothetical protein"  
"OPBM23\_00320" 31320 "s59E5H2" 0.1034293 "hypothetical protein"  
"OPBM23\_00320" 31320 "s63E6H2" 0.275967 "hypothetical protein"  
"OPBM23\_00321" 31321 "s59E13H2" 0.09620304 "Farnesyl diphosphate synthase"  
"OPBM23\_00321" 31321 "s59E25H2" 0 "Farnesyl diphosphate synthase"  
"OPBM23\_00321" 31321 "s59E5H2" 0.07477895 "Farnesyl diphosphate synthase"  
"OPBM23\_00321" 31321 "s63E6H2" 0.2182744 "Farnesyl diphosphate synthase"  
"OPBM23\_00322" 31322 "s59E13H2" 8.087898e-05 "16S/23S rRNA (cytidine-2'-O)-methyltransferase TlyA"  
"OPBM23\_00322" 31322 "s59E25H2" 0 "16S/23S rRNA (cytidine-2'-O)-methyltransferase TlyA"  
"OPBM23\_00322" 31322 "s59E5H2" 0 "16S/23S rRNA (cytidine-2'-O)-methyltransferase TlyA"  
"OPBM23\_00322" 31322 "s63E6H2" 0.03550965 "16S/23S rRNA (cytidine-2'-O)-methyltransferase TlyA"  
"OPBM23\_00323" 31323 "s59E13H2" 0.01303974 "putative inorganic polyphosphate/ATP-NAD kinase"  
"OPBM23\_00323" 31323 "s59E25H2" 0 "putative inorganic polyphosphate/ATP-NAD kinase"  
"OPBM23\_00323" 31323 "s59E5H2" 0.02688912 "putative inorganic polyphosphate/ATP-NAD kinase"  
"OPBM23\_00323" 31323 "s63E6H2" 0.2088131 "putative inorganic polyphosphate/ATP-NAD kinase"  
"OPBM23\_00324" 31324 "s59E13H2" 0.01848155 "DNA repair protein RecN"  
"OPBM23\_00324" 31324 "s59E25H2" 96.17484 "DNA repair protein RecN"  
"OPBM23\_00324" 31324 "s59E5H2" 0.03049415 "DNA repair protein RecN"  
"OPBM23\_00324" 31324 "s63E6H2" 0.2361905 "DNA repair protein RecN"  
"OPBM23\_00325" 31325 "s59E13H2" 0.01995394 "CTP synthase"  
"OPBM23\_00325" 31325 "s59E25H2" 0 "CTP synthase"  
"OPBM23\_00325" 31325 "s59E5H2" 0.03863646 "CTP synthase"



"OPBM23\_00325" 31325 "s63E6H2" 0.2166669 "CTP synthase"  
"OPBM23\_00326" 31326 "s59E13H2" 0.004771748 "hypothetical protein"  
"OPBM23\_00326" 31326 "s59E25H2" 0 "hypothetical protein"  
"OPBM23\_00326" 31326 "s59E5H2" 0.009260644 "hypothetical protein"  
"OPBM23\_00326" 31326 "s63E6H2" 0.07315328 "hypothetical protein"  
"OPBM23\_00327" 31327 "s59E13H2" 0.006114739 "Peptidase T"  
"OPBM23\_00327" 31327 "s59E25H2" 0 "Peptidase T"  
"OPBM23\_00327" 31327 "s59E5H2" 0.04233784 "Peptidase T"  
"OPBM23\_00327" 31327 "s63E6H2" 0.1382728 "Peptidase T"  
"OPBM23\_00328" 31328 "s59E13H2" 0.02648709 "ADP-ribose pyrophosphatase"  
"OPBM23\_00328" 31328 "s59E25H2" 0.3019197 "ADP-ribose pyrophosphatase"  
"OPBM23\_00328" 31328 "s59E5H2" 0.01086441 "ADP-ribose pyrophosphatase"  
"OPBM23\_00328" 31328 "s63E6H2" 0.1328744 "ADP-ribose pyrophosphatase"  
"OPBM23\_00329" 31329 "s59E13H2" 0.01625245 "Tyrosine recombinase XerD"  
"OPBM23\_00329" 31329 "s59E25H2" 0.1100218 "Tyrosine recombinase XerD"  
"OPBM23\_00329" 31329 "s59E5H2" 0.03569054 "Tyrosine recombinase XerD"  
"OPBM23\_00329" 31329 "s63E6H2" 0.09813616 "Tyrosine recombinase XerD"  
"OPBM23\_00330" 31330 "s59E13H2" 0.007838381 "Peptidase family M50"  
"OPBM23\_00330" 31330 "s59E25H2" 0 "Peptidase family M50"  
"OPBM23\_00330" 31330 "s59E5H2" 0.02331143 "Peptidase family M50"  
"OPBM23\_00330" 31330 "s63E6H2" 0.111691 "Peptidase family M50"  
"OPBM23\_00331" 31331 "s59E13H2" 0.003779134 "Tryptophan--tRNA ligase"  
"OPBM23\_00331" 31331 "s59E25H2" 0 "Tryptophan--tRNA ligase"  
"OPBM23\_00331" 31331 "s59E5H2" 3.305144e-05 "Tryptophan--tRNA ligase"  
"OPBM23\_00331" 31331 "s63E6H2" 0.1070909 "Tryptophan--tRNA ligase"  
"OPBM23\_00332" 31332 "s59E13H2" 0.004916403 "Segregation and condensation protein A"  
"OPBM23\_00332" 31332 "s59E25H2" 0 "Segregation and condensation protein A"  
"OPBM23\_00332" 31332 "s59E5H2" 0.02163735 "Segregation and condensation protein A"  
"OPBM23\_00332" 31332 "s63E6H2" 0.08143155 "Segregation and condensation protein A"  
"OPBM23\_00333" 31333 "s59E13H2" 0 "Segregation and condensation protein B"  
"OPBM23\_00333" 31333 "s59E25H2" 0 "Segregation and condensation protein B"  
"OPBM23\_00333" 31333 "s59E5H2" 0.03456363 "Segregation and condensation protein B"  
"OPBM23\_00333" 31333 "s63E6H2" 0.1467155 "Segregation and condensation protein B"  
"OPBM23\_00334" 31334 "s59E13H2" 0.007925417 "LVIVD repeat protein"  
"OPBM23\_00334" 31334 "s59E25H2" 0 "LVIVD repeat protein"  
"OPBM23\_00334" 31334 "s59E5H2" 0.1787574 "LVIVD repeat protein"  
"OPBM23\_00334" 31334 "s63E6H2" 0.1216995 "LVIVD repeat protein"  
"OPBM23\_00335" 31335 "s59E13H2" 0.003792597 "Ferrous-iron efflux pump FieF"  
"OPBM23\_00335" 31335 "s59E25H2" 0 "Ferrous-iron efflux pump FieF"  
"OPBM23\_00335" 31335 "s59E5H2" 0.05683423 "Ferrous-iron efflux pump FieF"  
"OPBM23\_00335" 31335 "s63E6H2" 0.01005791 "Ferrous-iron efflux pump FieF"  
"OPBM23\_00336" 31336 "s59E13H2" 0.01521488 "Transketolase"  
"OPBM23\_00336" 31336 "s59E25H2" 0 "Transketolase"  
"OPBM23\_00336" 31336 "s59E5H2" 0.008646257 "Transketolase"  
"OPBM23\_00336" 31336 "s63E6H2" 0.03073529 "Transketolase"  
"OPBM23\_00337" 31337 "s59E13H2" 0.01253494 "T-protein"  
"OPBM23\_00337" 31337 "s59E25H2" 0 "T-protein"

"OPBM23\_00337" 31337 "s59E5H2" 0.1389556 "T-protein"  
"OPBM23\_00337" 31337 "s63E6H2" 0.02325518 "T-protein"  
"OPBM23\_00338" 31338 "s59E13H2" 0.02457104 "3-phosphoshikimate 1-carboxyvinyltransferase 1"  
"OPBM23\_00338" 31338 "s59E25H2" 0 "3-phosphoshikimate 1-carboxyvinyltransferase 1"  
"OPBM23\_00338" 31338 "s59E5H2" 0.08094556 "3-phosphoshikimate 1-carboxyvinyltransferase 1"  
"OPBM23\_00338" 31338 "s63E6H2" 0.03336069 "3-phosphoshikimate 1-carboxyvinyltransferase 1"  
"OPBM23\_00339" 31339 "s59E13H2" 2.435238 "ATP-dependent Clp protease ATP-binding subunit ClpC"  
"OPBM23\_00339" 31339 "s59E25H2" 0 "ATP-dependent Clp protease ATP-binding subunit ClpC"  
"OPBM23\_00339" 31339 "s59E5H2" 0.009345756 "ATP-dependent Clp protease ATP-binding subunit ClpC"  
"OPBM23\_00339" 31339 "s63E6H2" 0.3066574 "ATP-dependent Clp protease ATP-binding subunit ClpC"  
"OPBM23\_00340" 31340 "s59E13H2" 2.79091 "DNA integrity scanning protein DisA"  
"OPBM23\_00340" 31340 "s59E25H2" 0 "DNA integrity scanning protein DisA"  
"OPBM23\_00340" 31340 "s59E5H2" 0.04019341 "DNA integrity scanning protein DisA"  
"OPBM23\_00340" 31340 "s63E6H2" 0.4389521 "DNA integrity scanning protein DisA"  
"OPBM23\_00341" 31341 "s59E13H2" 2.742509 "2-C-methyl-D-erythritol 4-phosphate cytidyltransferase"  
"OPBM23\_00341" 31341 "s59E25H2" 0 "2-C-methyl-D-erythritol 4-phosphate cytidyltransferase"  
"OPBM23\_00341" 31341 "s59E5H2" 0.05305865 "2-C-methyl-D-erythritol 4-phosphate cytidyltransferase"  
"OPBM23\_00341" 31341 "s63E6H2" 0.4701574 "2-C-methyl-D-erythritol 4-phosphate cytidyltransferase"  
"OPBM23\_00342" 31342 "s59E13H2" 3.28298 "2-C-methyl-D-erythritol 2,4-cyclodiphosphate synthase"  
"OPBM23\_00342" 31342 "s59E25H2" 0 "2-C-methyl-D-erythritol 2,4-cyclodiphosphate synthase"  
"OPBM23\_00342" 31342 "s59E5H2" 0.01350978 "2-C-methyl-D-erythritol 2,4-cyclodiphosphate synthase"  
"OPBM23\_00342" 31342 "s63E6H2" 0.6181001 "2-C-methyl-D-erythritol 2,4-cyclodiphosphate synthase"  
"OPBM23\_00343" 31343 "s59E13H2" 3.90998 "Glutamate--tRNA ligase"  
"OPBM23\_00343" 31343 "s59E25H2" 0 "Glutamate--tRNA ligase"  
"OPBM23\_00343" 31343 "s59E5H2" 0.02545842 "Glutamate--tRNA ligase"  
"OPBM23\_00343" 31343 "s63E6H2" 0.6865831 "Glutamate--tRNA ligase"  
"OPBM23\_00344" 31344 "s59E13H2" 4.884861 "Serine acetyltransferase"  
"OPBM23\_00344" 31344 "s59E25H2" 0 "Serine acetyltransferase"  
"OPBM23\_00344" 31344 "s59E5H2" 0.03418801 "Serine acetyltransferase"  
"OPBM23\_00344" 31344 "s63E6H2" 0.7604695 "Serine acetyltransferase"  
"OPBM23\_00345" 31345 "s59E13H2" 8.195937 "Serine acetyltransferase"  
"OPBM23\_00345" 31345 "s59E25H2" 0 "Serine acetyltransferase"  
"OPBM23\_00345" 31345 "s59E5H2" 0.02775091 "Serine acetyltransferase"  
"OPBM23\_00345" 31345 "s63E6H2" 0.8738331 "Serine acetyltransferase"  
"OPBM23\_00346" 31346 "s59E13H2" 4.891846 "Cysteine--tRNA ligase"  
"OPBM23\_00346" 31346 "s59E25H2" 0 "Cysteine--tRNA ligase"  
"OPBM23\_00346" 31346 "s59E5H2" 0.05013449 "Cysteine--tRNA ligase"  
"OPBM23\_00346" 31346 "s63E6H2" 0.7640328 "Cysteine--tRNA ligase"  
"OPBM23\_00347" 31347 "s59E13H2" 0 "Anaerobic sulfatase-maturating enzyme"  
"OPBM23\_00347" 31347 "s59E25H2" 0 "Anaerobic sulfatase-maturating enzyme"  
"OPBM23\_00347" 31347 "s59E5H2" 0 "Anaerobic sulfatase-maturating enzyme"  
"OPBM23\_00347" 31347 "s63E6H2" 0.0008375129 "Anaerobic sulfatase-maturating enzyme"  
"OPBM23\_00348" 31348 "s59E13H2" 0 "Ribokinase"  
"OPBM23\_00348" 31348 "s59E25H2" 0 "Ribokinase"  
"OPBM23\_00348" 31348 "s59E5H2" 0 "Ribokinase"  
"OPBM23\_00348" 31348 "s63E6H2" 0 "Ribokinase"  
"OPBM23\_00349" 31349 "s59E13H2" 0 "Ribulose-phosphate 3-epimerase"

"OPBM23\_00349" 31349 "s59E25H2" 0 "Ribulose-phosphate 3-epimerase"  
"OPBM23\_00349" 31349 "s59E5H2" 0 "Ribulose-phosphate 3-epimerase"  
"OPBM23\_00349" 31349 "s63E6H2" 0 "Ribulose-phosphate 3-epimerase"  
"OPBM23\_00350" 31350 "s59E13H2" 0 "Sorbitol dehydrogenase"  
"OPBM23\_00350" 31350 "s59E25H2" 0 "Sorbitol dehydrogenase"  
"OPBM23\_00350" 31350 "s59E5H2" 0 "Sorbitol dehydrogenase"  
"OPBM23\_00350" 31350 "s63E6H2" 0 "Sorbitol dehydrogenase"  
"OPBM23\_00351" 31351 "s59E13H2" 0 "HTH-type transcriptional repressor YvoA"  
"OPBM23\_00351" 31351 "s59E25H2" 0 "HTH-type transcriptional repressor YvoA"  
"OPBM23\_00351" 31351 "s59E5H2" 0 "HTH-type transcriptional repressor YvoA"  
"OPBM23\_00351" 31351 "s63E6H2" 0 "HTH-type transcriptional repressor YvoA"  
"OPBM23\_00352" 31352 "s59E13H2" 0 "Ribulokinase"  
"OPBM23\_00352" 31352 "s59E25H2" 0 "Ribulokinase"  
"OPBM23\_00352" 31352 "s59E5H2" 0 "Ribulokinase"  
"OPBM23\_00352" 31352 "s63E6H2" 0 "Ribulokinase"  
"OPBM23\_00353" 31353 "s59E13H2" 0 "hypothetical protein"  
"OPBM23\_00353" 31353 "s59E25H2" 0 "hypothetical protein"  
"OPBM23\_00353" 31353 "s59E5H2" 0 "hypothetical protein"  
"OPBM23\_00353" 31353 "s63E6H2" 0 "hypothetical protein"  
"OPBM23\_00354" 31354 "s59E13H2" 0 "Trehalose transport system permease protein SugB"  
"OPBM23\_00354" 31354 "s59E25H2" 0 "Trehalose transport system permease protein SugB"  
"OPBM23\_00354" 31354 "s59E5H2" 0 "Trehalose transport system permease protein SugB"  
"OPBM23\_00354" 31354 "s63E6H2" 0 "Trehalose transport system permease protein SugB"  
"OPBM23\_00355" 31355 "s59E13H2" 0 "Trehalose transport system permease protein SugA"  
"OPBM23\_00355" 31355 "s59E25H2" 0 "Trehalose transport system permease protein SugA"  
"OPBM23\_00355" 31355 "s59E5H2" 0 "Trehalose transport system permease protein SugA"  
"OPBM23\_00355" 31355 "s63E6H2" 0 "Trehalose transport system permease protein SugA"  
"OPBM23\_00356" 31356 "s59E13H2" 0 "Trehalose/maltose-binding protein MalE precursor"  
"OPBM23\_00356" 31356 "s59E25H2" 0 "Trehalose/maltose-binding protein MalE precursor"  
"OPBM23\_00356" 31356 "s59E5H2" 0 "Trehalose/maltose-binding protein MalE precursor"  
"OPBM23\_00356" 31356 "s63E6H2" 0 "Trehalose/maltose-binding protein MalE precursor"  
"OPBM23\_00357" 31357 "s59E13H2" 0 "3-oxoacyl-[acyl-carrier-protein] reductase FabG"  
"OPBM23\_00357" 31357 "s59E25H2" 0 "3-oxoacyl-[acyl-carrier-protein] reductase FabG"  
"OPBM23\_00357" 31357 "s59E5H2" 0 "3-oxoacyl-[acyl-carrier-protein] reductase FabG"  
"OPBM23\_00357" 31357 "s63E6H2" 0 "3-oxoacyl-[acyl-carrier-protein] reductase FabG"  
"OPBM23\_00358" 31358 "s59E13H2" 0 "hypothetical protein"  
"OPBM23\_00358" 31358 "s59E25H2" 0 "hypothetical protein"  
"OPBM23\_00358" 31358 "s59E5H2" 0 "hypothetical protein"  
"OPBM23\_00358" 31358 "s63E6H2" 0 "hypothetical protein"  
"OPBM23\_00359" 31359 "s59E13H2" 0 "hypothetical protein"  
"OPBM23\_00359" 31359 "s59E25H2" 0 "hypothetical protein"  
"OPBM23\_00359" 31359 "s59E5H2" 0 "hypothetical protein"  
"OPBM23\_00359" 31359 "s63E6H2" 0 "hypothetical protein"  
"OPBM23\_00360" 31360 "s59E13H2" 0 "2-dehydro-3-deoxygluconokinase"  
"OPBM23\_00360" 31360 "s59E25H2" 0 "2-dehydro-3-deoxygluconokinase"  
"OPBM23\_00360" 31360 "s59E5H2" 0 "2-dehydro-3-deoxygluconokinase"  
"OPBM23\_00360" 31360 "s63E6H2" 0.4863925 "2-dehydro-3-deoxygluconokinase"

"OPBM23\_00361" 31361 "s59E13H2" 0 "Pectin degradation repressor protein KdgR"  
"OPBM23\_00361" 31361 "s59E25H2" 0 "Pectin degradation repressor protein KdgR"  
"OPBM23\_00361" 31361 "s59E5H2" 0 "Pectin degradation repressor protein KdgR"  
"OPBM23\_00361" 31361 "s63E6H2" 0.2395432 "Pectin degradation repressor protein KdgR"  
"OPBM23\_00362" 31362 "s59E13H2" 0 "hypothetical protein"  
"OPBM23\_00362" 31362 "s59E25H2" 0 "hypothetical protein"  
"OPBM23\_00362" 31362 "s59E5H2" 0 "hypothetical protein"  
"OPBM23\_00362" 31362 "s63E6H2" 0.4670722 "hypothetical protein"  
"OPBM23\_00363" 31363 "s59E13H2" 0 "Autoinducer 2 import ATP-binding protein LsrA"  
"OPBM23\_00363" 31363 "s59E25H2" 0 "Autoinducer 2 import ATP-binding protein LsrA"  
"OPBM23\_00363" 31363 "s59E5H2" 0 "Autoinducer 2 import ATP-binding protein LsrA"  
"OPBM23\_00363" 31363 "s63E6H2" 3.464397 "Autoinducer 2 import ATP-binding protein LsrA"  
"OPBM23\_00364" 31364 "s59E13H2" 0 "Trehalose/maltose transport system permease protein MalF"  
"OPBM23\_00364" 31364 "s59E25H2" 0 "Trehalose/maltose transport system permease protein MalF"  
"OPBM23\_00364" 31364 "s59E5H2" 0.4544213 "Trehalose/maltose transport system permease protein MalF"  
"OPBM23\_00364" 31364 "s63E6H2" 5.403552 "Trehalose/maltose transport system permease protein MalF"  
"OPBM23\_00365" 31365 "s59E13H2" 0 "Trehalose/maltose transport system permease protein MalG"  
"OPBM23\_00365" 31365 "s59E25H2" 0 "Trehalose/maltose transport system permease protein MalG"  
"OPBM23\_00365" 31365 "s59E5H2" 1.543401 "Trehalose/maltose transport system permease protein MalG"  
"OPBM23\_00365" 31365 "s63E6H2" 5.32771 "Trehalose/maltose transport system permease protein MalG"  
"OPBM23\_00366" 31366 "s59E13H2" 0 "hypothetical protein"  
"OPBM23\_00366" 31366 "s59E25H2" 0 "hypothetical protein"  
"OPBM23\_00366" 31366 "s59E5H2" 0.0292892 "hypothetical protein"  
"OPBM23\_00366" 31366 "s63E6H2" 0 "hypothetical protein"  
"OPBM23\_00367" 31367 "s59E13H2" 0.1307414 "Diaminopimelate decarboxylase"  
"OPBM23\_00367" 31367 "s59E25H2" 0 "Diaminopimelate decarboxylase"  
"OPBM23\_00367" 31367 "s59E5H2" 0.02660387 "Diaminopimelate decarboxylase"  
"OPBM23\_00367" 31367 "s63E6H2" 0.0525313 "Diaminopimelate decarboxylase"  
"OPBM23\_00368" 31368 "s59E13H2" 0.1095833 "Homoserine dehydrogenase"  
"OPBM23\_00368" 31368 "s59E25H2" 0 "Homoserine dehydrogenase"  
"OPBM23\_00368" 31368 "s59E5H2" 0.1530173 "Homoserine dehydrogenase"  
"OPBM23\_00368" 31368 "s63E6H2" 0.4038908 "Homoserine dehydrogenase"  
"OPBM23\_00369" 31369 "s59E13H2" 0.08664401 "Threonine synthase"  
"OPBM23\_00369" 31369 "s59E25H2" 0 "Threonine synthase"  
"OPBM23\_00369" 31369 "s59E5H2" 0.1655858 "Threonine synthase"  
"OPBM23\_00369" 31369 "s63E6H2" 0.5221951 "Threonine synthase"  
"OPBM23\_00370" 31370 "s59E13H2" 0.1344863 "2,3-bisphosphoglycerate-independent phosphoglycerate mutase 1"  
"OPBM23\_00370" 31370 "s59E25H2" 0 "2,3-bisphosphoglycerate-independent phosphoglycerate mutase 1"  
"OPBM23\_00370" 31370 "s59E5H2" 0.02872252 "2,3-bisphosphoglycerate-independent phosphoglycerate mutase 1"  
"OPBM23\_00370" 31370 "s63E6H2" 0.6368169 "2,3-bisphosphoglycerate-independent phosphoglycerate mutase 1"  
"OPBM23\_00371" 31371 "s59E13H2" 0.004175953 "Hydrogenase expression/formation protein HypD"  
"OPBM23\_00371" 31371 "s59E25H2" 0 "Hydrogenase expression/formation protein HypD"  
"OPBM23\_00371" 31371 "s59E5H2" 0.1544126 "Hydrogenase expression/formation protein HypD"  
"OPBM23\_00371" 31371 "s63E6H2" 0.002713259 "Hydrogenase expression/formation protein HypD"  
"OPBM23\_00372" 31372 "s59E13H2" 0.02182301 "Hydrogenase isoenzymes formation protein HypE"  
"OPBM23\_00372" 31372 "s59E25H2" 0 "Hydrogenase isoenzymes formation protein HypE"  
"OPBM23\_00372" 31372 "s59E5H2" 0.08968355 "Hydrogenase isoenzymes formation protein HypE"

"OPBM23\_00372" 31372 "s63E6H2" 0 "Hydrogenase isoenzymes formation protein HypE"  
"OPBM23\_00373" 31373 "s59E13H2" 0.05719715 "Hydrogenase/urease nickel incorporation protein HypA"  
"OPBM23\_00373" 31373 "s59E25H2" 0 "Hydrogenase/urease nickel incorporation protein HypA"  
"OPBM23\_00373" 31373 "s59E5H2" 0.02523391 "Hydrogenase/urease nickel incorporation protein HypA"  
"OPBM23\_00373" 31373 "s63E6H2" 0.1322113 "Hydrogenase/urease nickel incorporation protein HypA"  
"OPBM23\_00374" 31374 "s59E13H2" 0.013143 "Hydrogenase 2 maturation protease"  
"OPBM23\_00374" 31374 "s59E25H2" 0 "Hydrogenase 2 maturation protease"  
"OPBM23\_00374" 31374 "s59E5H2" 0.03590671 "Hydrogenase 2 maturation protease"  
"OPBM23\_00374" 31374 "s63E6H2" 0.2284494 "Hydrogenase 2 maturation protease"  
"OPBM23\_00375" 31375 "s59E13H2" 0.04081771 "F420-non-reducing hydrogenase subunit A"  
"OPBM23\_00375" 31375 "s59E25H2" 0 "F420-non-reducing hydrogenase subunit A"  
"OPBM23\_00375" 31375 "s59E5H2" 0.04372562 "F420-non-reducing hydrogenase subunit A"  
"OPBM23\_00375" 31375 "s63E6H2" 0.4760341 "F420-non-reducing hydrogenase subunit A"  
"OPBM23\_00376" 31376 "s59E13H2" 0.03371249 "F420-non-reducing hydrogenase subunit G"  
"OPBM23\_00376" 31376 "s59E25H2" 0 "F420-non-reducing hydrogenase subunit G"  
"OPBM23\_00376" 31376 "s59E5H2" 0.02927556 "F420-non-reducing hydrogenase subunit G"  
"OPBM23\_00376" 31376 "s63E6H2" 0.3971999 "F420-non-reducing hydrogenase subunit G"  
"OPBM23\_00378" 31378 "s59E13H2" 0.02089898 "F420-non-reducing hydrogenase vhc iron-sulfur subunit D"  
"OPBM23\_00378" 31378 "s59E25H2" 0 "F420-non-reducing hydrogenase vhc iron-sulfur subunit D"  
"OPBM23\_00378" 31378 "s59E5H2" 0.002739483 "F420-non-reducing hydrogenase vhc iron-sulfur subunit D"  
"OPBM23\_00378" 31378 "s63E6H2" 0.01030102 "F420-non-reducing hydrogenase vhc iron-sulfur subunit D"  
"OPBM23\_00379" 31379 "s59E13H2" 0.0981559 "CoB--CoM heterodisulfide reductase iron-sulfur subunit A"  
"OPBM23\_00379" 31379 "s59E25H2" 0 "CoB--CoM heterodisulfide reductase iron-sulfur subunit A"  
"OPBM23\_00379" 31379 "s59E5H2" 0.05560891 "CoB--CoM heterodisulfide reductase iron-sulfur subunit A"  
"OPBM23\_00379" 31379 "s63E6H2" 0.05100146 "CoB--CoM heterodisulfide reductase iron-sulfur subunit A"  
"OPBM23\_00380" 31380 "s59E13H2" 0.1716975 "Globin-coupled histidine kinase"  
"OPBM23\_00380" 31380 "s59E25H2" 0 "Globin-coupled histidine kinase"  
"OPBM23\_00380" 31380 "s59E5H2" 0.1186655 "Globin-coupled histidine kinase"  
"OPBM23\_00380" 31380 "s63E6H2" 0.0436992 "Globin-coupled histidine kinase"  
"OPBM23\_00381" 31381 "s59E13H2" 0.01234386 "hypothetical protein"  
"OPBM23\_00381" 31381 "s59E25H2" 0 "hypothetical protein"  
"OPBM23\_00381" 31381 "s59E5H2" 0.01104559 "hypothetical protein"  
"OPBM23\_00381" 31381 "s63E6H2" 0.02785125 "hypothetical protein"  
"OPBM23\_00382" 31382 "s59E13H2" 0 "DRTGG domain protein"  
"OPBM23\_00382" 31382 "s59E25H2" 0 "DRTGG domain protein"  
"OPBM23\_00382" 31382 "s59E5H2" 0.03356836 "DRTGG domain protein"  
"OPBM23\_00382" 31382 "s63E6H2" 0.02957214 "DRTGG domain protein"  
"OPBM23\_00383" 31383 "s59E13H2" 0.003689949 "Serine/threonine-protein kinase RsbT"  
"OPBM23\_00383" 31383 "s59E25H2" 0 "Serine/threonine-protein kinase RsbT"  
"OPBM23\_00383" 31383 "s59E5H2" 0.02753169 "Serine/threonine-protein kinase RsbT"  
"OPBM23\_00383" 31383 "s63E6H2" 0.02437676 "Serine/threonine-protein kinase RsbT"  
"OPBM23\_00384" 31384 "s59E13H2" 0 "DRTGG domain protein"  
"OPBM23\_00384" 31384 "s59E25H2" 0 "DRTGG domain protein"  
"OPBM23\_00384" 31384 "s59E5H2" 0.01067159 "DRTGG domain protein"  
"OPBM23\_00384" 31384 "s63E6H2" 0.01709694 "DRTGG domain protein"  
"OPBM23\_00385" 31385 "s59E13H2" 0.001934694 "NADP-reducing hydrogenase subunit HndC"  
"OPBM23\_00385" 31385 "s59E25H2" 136.6343 "NADP-reducing hydrogenase subunit HndC"

"OPBM23\_00385" 31385 "s59E5H2" 0.01602196 "NADP-reducing hydrogenase subunit HndC"  
"OPBM23\_00385" 31385 "s63E6H2" 0.229095 "NADP-reducing hydrogenase subunit HndC"  
"OPBM23\_00386" 31386 "s59E13H2" 0 "NADP-reducing hydrogenase subunit HndB"  
"OPBM23\_00386" 31386 "s59E25H2" 0 "NADP-reducing hydrogenase subunit HndB"  
"OPBM23\_00386" 31386 "s59E5H2" 0 "NADP-reducing hydrogenase subunit HndB"  
"OPBM23\_00386" 31386 "s63E6H2" 0.3498384 "NADP-reducing hydrogenase subunit HndB"  
"OPBM23\_00388" 31388 "s59E13H2" 0.006356245 "PBS lyase HEAT-like repeat protein"  
"OPBM23\_00388" 31388 "s59E25H2" 0 "PBS lyase HEAT-like repeat protein"  
"OPBM23\_00388" 31388 "s59E5H2" 0.01702048 "PBS lyase HEAT-like repeat protein"  
"OPBM23\_00388" 31388 "s63E6H2" 0.0003170605 "PBS lyase HEAT-like repeat protein"  
"OPBM23\_00389" 31389 "s59E13H2" 4.123939 "Putative TrmH family tRNA/rRNA methyltransferase"  
"OPBM23\_00389" 31389 "s59E25H2" 0 "Putative TrmH family tRNA/rRNA methyltransferase"  
"OPBM23\_00389" 31389 "s59E5H2" 0.06874277 "Putative TrmH family tRNA/rRNA methyltransferase"  
"OPBM23\_00389" 31389 "s63E6H2" 0.7923498 "Putative TrmH family tRNA/rRNA methyltransferase"  
"OPBM23\_00390" 31390 "s59E13H2" 6.012728 "YacP-like NYN domain protein"  
"OPBM23\_00390" 31390 "s59E25H2" 0 "YacP-like NYN domain protein"  
"OPBM23\_00390" 31390 "s59E5H2" 0.2059826 "YacP-like NYN domain protein"  
"OPBM23\_00390" 31390 "s63E6H2" 0.9996526 "YacP-like NYN domain protein"  
"OPBM23\_00391" 31391 "s59E13H2" 7.872499 "Thermonuclease precursor"  
"OPBM23\_00391" 31391 "s59E25H2" 0 "Thermonuclease precursor"  
"OPBM23\_00391" 31391 "s59E5H2" 0.4001071 "Thermonuclease precursor"  
"OPBM23\_00391" 31391 "s63E6H2" 1.336479 "Thermonuclease precursor"  
"OPBM23\_00392" 31392 "s59E13H2" 9.80516 "Pyruvate carboxylase subunit A"  
"OPBM23\_00392" 31392 "s59E25H2" 0 "Pyruvate carboxylase subunit A"  
"OPBM23\_00392" 31392 "s59E5H2" 0.8428438 "Pyruvate carboxylase subunit A"  
"OPBM23\_00392" 31392 "s63E6H2" 1.252458 "Pyruvate carboxylase subunit A"  
"OPBM23\_00393" 31393 "s59E13H2" 0.04094057 "Branched-chain-amino-acid aminotransferase"  
"OPBM23\_00393" 31393 "s59E25H2" 0 "Branched-chain-amino-acid aminotransferase"  
"OPBM23\_00393" 31393 "s59E5H2" 0.577708 "Branched-chain-amino-acid aminotransferase"  
"OPBM23\_00393" 31393 "s63E6H2" 0.04359134 "Branched-chain-amino-acid aminotransferase"  
"OPBM23\_00395" 31395 "s59E13H2" 0.05625847 "tRNA-specific 2-thiouridylase MnmA"  
"OPBM23\_00395" 31395 "s59E25H2" 0 "tRNA-specific 2-thiouridylase MnmA"  
"OPBM23\_00395" 31395 "s59E5H2" 0.4602596 "tRNA-specific 2-thiouridylase MnmA"  
"OPBM23\_00395" 31395 "s63E6H2" 0.04670722 "tRNA-specific 2-thiouridylase MnmA"  
"OPBM23\_00396" 31396 "s59E13H2" 0 "hypothetical protein"  
"OPBM23\_00396" 31396 "s59E25H2" 0 "hypothetical protein"  
"OPBM23\_00396" 31396 "s59E5H2" 0 "hypothetical protein"  
"OPBM23\_00396" 31396 "s63E6H2" 0 "hypothetical protein"  
"OPBM23\_00400" 31400 "s59E13H2" 0.01315007 "2-isopropylmalate synthase"  
"OPBM23\_00400" 31400 "s59E25H2" 0 "2-isopropylmalate synthase"  
"OPBM23\_00400" 31400 "s59E5H2" 0.02443552 "2-isopropylmalate synthase"  
"OPBM23\_00400" 31400 "s63E6H2" 0.9910434 "2-isopropylmalate synthase"  
"OPBM23\_00401" 31401 "s59E13H2" 0 "2,3-dimethylmalate dehydratase small subunit"  
"OPBM23\_00401" 31401 "s59E25H2" 0 "2,3-dimethylmalate dehydratase small subunit"  
"OPBM23\_00401" 31401 "s59E5H2" 0.0135589 "2,3-dimethylmalate dehydratase small subunit"  
"OPBM23\_00401" 31401 "s63E6H2" 0.5771149 "2,3-dimethylmalate dehydratase small subunit"  
"OPBM23\_00402" 31402 "s59E13H2" 0.006797758 "2,3-dimethylmalate dehydratase large subunit"

"OPBM23\_00402" 31402 "s59E25H2" 0 "2,3-dimethylmalate dehydratase large subunit"  
"OPBM23\_00402" 31402 "s59E5H2" 0.03764978 "2,3-dimethylmalate dehydratase large subunit"  
"OPBM23\_00402" 31402 "s63E6H2" 0.4183388 "2,3-dimethylmalate dehydratase large subunit"  
"OPBM23\_00403" 31403 "s59E13H2" 0.01380772 "2-isopropylmalate synthase"  
"OPBM23\_00403" 31403 "s59E25H2" 0 "2-isopropylmalate synthase"  
"OPBM23\_00403" 31403 "s59E5H2" 0.0284226 "2-isopropylmalate synthase"  
"OPBM23\_00403" 31403 "s63E6H2" 0.5317179 "2-isopropylmalate synthase"  
"OPBM23\_00404" 31404 "s59E13H2" 0.02730365 "hypothetical protein"  
"OPBM23\_00404" 31404 "s59E25H2" 0 "hypothetical protein"  
"OPBM23\_00404" 31404 "s59E5H2" 0.04684 "hypothetical protein"  
"OPBM23\_00404" 31404 "s63E6H2" 0.01847829 "hypothetical protein"  
"OPBM23\_00405" 31405 "s59E13H2" 0.09500057 "Inner membrane protein YhhQ"  
"OPBM23\_00405" 31405 "s59E25H2" 0 "Inner membrane protein YhhQ"  
"OPBM23\_00405" 31405 "s59E5H2" 0 "Inner membrane protein YhhQ"  
"OPBM23\_00405" 31405 "s63E6H2" 0.05435144 "Inner membrane protein YhhQ"  
"OPBM23\_00406" 31406 "s59E13H2" 0.06176982 "hypothetical protein"  
"OPBM23\_00406" 31406 "s59E25H2" 0 "hypothetical protein"  
"OPBM23\_00406" 31406 "s59E5H2" 0.2246253 "hypothetical protein"  
"OPBM23\_00406" 31406 "s63E6H2" 0.03460053 "hypothetical protein"  
"OPBM23\_00407" 31407 "s59E13H2" 0.1174475 "hypothetical protein"  
"OPBM23\_00407" 31407 "s59E25H2" 0 "hypothetical protein"  
"OPBM23\_00407" 31407 "s59E5H2" 0.0795888 "hypothetical protein"  
"OPBM23\_00407" 31407 "s63E6H2" 0.03679997 "hypothetical protein"  
"OPBM23\_00408" 31408 "s59E13H2" 0.1139207 "Alanine racemase"  
"OPBM23\_00408" 31408 "s59E25H2" 0 "Alanine racemase"  
"OPBM23\_00408" 31408 "s59E5H2" 0.03130968 "Alanine racemase"  
"OPBM23\_00408" 31408 "s63E6H2" 0.06411872 "Alanine racemase"  
"OPBM23\_00409" 31409 "s59E13H2" 0.08781436 "Inosine-5'-monophosphate dehydrogenase"  
"OPBM23\_00409" 31409 "s59E25H2" 0 "Inosine-5'-monophosphate dehydrogenase"  
"OPBM23\_00409" 31409 "s59E5H2" 0.02509974 "Inosine-5'-monophosphate dehydrogenase"  
"OPBM23\_00409" 31409 "s63E6H2" 0.04406152 "Inosine-5'-monophosphate dehydrogenase"  
"OPBM23\_00410" 31410 "s59E13H2" 0.08681273 "Bifunctional NAD(P)H-hydrate repair enzyme Nnr"  
"OPBM23\_00410" 31410 "s59E25H2" 0 "Bifunctional NAD(P)H-hydrate repair enzyme Nnr"  
"OPBM23\_00410" 31410 "s59E5H2" 0.03561531 "Bifunctional NAD(P)H-hydrate repair enzyme Nnr"  
"OPBM23\_00410" 31410 "s63E6H2" 0.03040024 "Bifunctional NAD(P)H-hydrate repair enzyme Nnr"  
"OPBM23\_00411" 31411 "s59E13H2" 0.04255508 "Holo-[acyl-carrier-protein] synthase"  
"OPBM23\_00411" 31411 "s59E25H2" 0 "Holo-[acyl-carrier-protein] synthase"  
"OPBM23\_00411" 31411 "s59E5H2" 0 "Holo-[acyl-carrier-protein] synthase"  
"OPBM23\_00411" 31411 "s63E6H2" 0.0118235 "Holo-[acyl-carrier-protein] synthase"  
"OPBM23\_00413" 31413 "s59E13H2" 0 "Transposase DDE domain protein"  
"OPBM23\_00413" 31413 "s59E25H2" 0 "Transposase DDE domain protein"  
"OPBM23\_00413" 31413 "s59E5H2" 0.01539524 "Transposase DDE domain protein"  
"OPBM23\_00413" 31413 "s63E6H2" 0 "Transposase DDE domain protein"  
"OPBM23\_00414" 31414 "s59E13H2" 0.02760917 "Glucitol operon repressor"  
"OPBM23\_00414" 31414 "s59E25H2" 0 "Glucitol operon repressor"  
"OPBM23\_00414" 31414 "s59E5H2" 0.0200835 "Glucitol operon repressor"  
"OPBM23\_00414" 31414 "s63E6H2" 0.001909968 "Glucitol operon repressor"

"OPBM23\_00415" 31415 "s59E13H2" 0 "Trimethylamine methyltransferase MttB"  
"OPBM23\_00415" 31415 "s59E25H2" 0 "Trimethylamine methyltransferase MttB"  
"OPBM23\_00415" 31415 "s59E5H2" 0 "Trimethylamine methyltransferase MttB"  
"OPBM23\_00415" 31415 "s63E6H2" 0 "Trimethylamine methyltransferase MttB"  
"OPBM23\_00416" 31416 "s59E13H2" 0.002992292 "IS2 repressor TnpA"  
"OPBM23\_00416" 31416 "s59E25H2" 0 "IS2 repressor TnpA"  
"OPBM23\_00416" 31416 "s59E5H2" 0 "IS2 repressor TnpA"  
"OPBM23\_00416" 31416 "s63E6H2" 0.006183209 "IS2 repressor TnpA"  
"OPBM23\_00417" 31417 "s59E13H2" 0.001017892 "IS2 transposase TnpB"  
"OPBM23\_00417" 31417 "s59E25H2" 0 "IS2 transposase TnpB"  
"OPBM23\_00417" 31417 "s59E5H2" 0.01665107 "IS2 transposase TnpB"  
"OPBM23\_00417" 31417 "s63E6H2" 0.0004448261 "IS2 transposase TnpB"  
"OPBM23\_00418" 31418 "s59E13H2" 0.01017495 "Integrase core domain protein"  
"OPBM23\_00418" 31418 "s59E25H2" 0 "Integrase core domain protein"  
"OPBM23\_00418" 31418 "s59E5H2" 0.01961929 "Integrase core domain protein"  
"OPBM23\_00418" 31418 "s63E6H2" 0 "Integrase core domain protein"  
"OPBM23\_00421" 31421 "s59E13H2" 0 "Aminopeptidase YwaD precursor"  
"OPBM23\_00421" 31421 "s59E25H2" 0 "Aminopeptidase YwaD precursor"  
"OPBM23\_00421" 31421 "s59E5H2" 0 "Aminopeptidase YwaD precursor"  
"OPBM23\_00421" 31421 "s63E6H2" 0 "Aminopeptidase YwaD precursor"  
"OPBM23\_00423" 31423 "s59E13H2" 0 "Cupin domain protein"  
"OPBM23\_00423" 31423 "s59E25H2" 0 "Cupin domain protein"  
"OPBM23\_00423" 31423 "s59E5H2" 0.001064407 "Cupin domain protein"  
"OPBM23\_00423" 31423 "s63E6H2" 0.0005526627 "Cupin domain protein"  
"OPBM23\_00425" 31425 "s59E13H2" 0 "Pyruvate dehydrogenase E1 component subunit beta"  
"OPBM23\_00425" 31425 "s59E25H2" 0 "Pyruvate dehydrogenase E1 component subunit beta"  
"OPBM23\_00425" 31425 "s59E5H2" 0 "Pyruvate dehydrogenase E1 component subunit beta"  
"OPBM23\_00425" 31425 "s63E6H2" 0.009048497 "Pyruvate dehydrogenase E1 component subunit beta"  
"OPBM23\_00426" 31426 "s59E13H2" 0.0001571885 "2-oxoisovalerate dehydrogenase subunit beta"  
"OPBM23\_00426" 31426 "s59E25H2" 0 "2-oxoisovalerate dehydrogenase subunit beta"  
"OPBM23\_00426" 31426 "s59E5H2" 0 "2-oxoisovalerate dehydrogenase subunit beta"  
"OPBM23\_00426" 31426 "s63E6H2" 0.01619427 "2-oxoisovalerate dehydrogenase subunit beta"  
"OPBM23\_00427" 31427 "s59E13H2" 0.003584538 "Acetoin:2,6-dichlorophenolindophenol oxidoreductase subunit alpha"  
"OPBM23\_00427" 31427 "s59E25H2" 0 "Acetoin:2,6-dichlorophenolindophenol oxidoreductase subunit alpha"  
"OPBM23\_00427" 31427 "s59E5H2" 0 "Acetoin:2,6-dichlorophenolindophenol oxidoreductase subunit alpha"  
"OPBM23\_00427" 31427 "s63E6H2" 0.01176371 "Acetoin:2,6-dichlorophenolindophenol oxidoreductase subunit alpha"  
"OPBM23\_00431" 31431 "s59E13H2" 0 "methylcobalamin:coenzyme M methyltransferase"  
"OPBM23\_00431" 31431 "s59E25H2" 0 "methylcobalamin:coenzyme M methyltransferase"  
"OPBM23\_00431" 31431 "s59E5H2" 0 "methylcobalamin:coenzyme M methyltransferase"  
"OPBM23\_00431" 31431 "s63E6H2" 0 "methylcobalamin:coenzyme M methyltransferase"  
"OPBM23\_00432" 31432 "s59E13H2" 0 "N-acyl homoserine lactonase AttM"  
"OPBM23\_00432" 31432 "s59E25H2" 0 "N-acyl homoserine lactonase AttM"  
"OPBM23\_00432" 31432 "s59E5H2" 0 "N-acyl homoserine lactonase AttM"  
"OPBM23\_00432" 31432 "s63E6H2" 0 "N-acyl homoserine lactonase AttM"  
"OPBM23\_00433" 31433 "s59E13H2" 0 "Trehalose/maltose transport system permease protein MalG"  
"OPBM23\_00433" 31433 "s59E25H2" 0 "Trehalose/maltose transport system permease protein MalG"  
"OPBM23\_00433" 31433 "s59E5H2" 0 "Trehalose/maltose transport system permease protein MalG"



"OPBM23\_00433" 31433 "s63E6H2" 0 "Trehalose/maltose transport system permease protein MalG"  
"OPBM23\_00434" 31434 "s59E13H2" 0 "Lactose transport system permease protein LacF"  
"OPBM23\_00434" 31434 "s59E25H2" 0 "Lactose transport system permease protein LacF"  
"OPBM23\_00434" 31434 "s59E5H2" 0 "Lactose transport system permease protein LacF"  
"OPBM23\_00434" 31434 "s63E6H2" 0 "Lactose transport system permease protein LacF"  
"OPBM23\_00436" 31436 "s59E13H2" 0 "transposase/IS protein"  
"OPBM23\_00436" 31436 "s59E25H2" 0 "transposase/IS protein"  
"OPBM23\_00436" 31436 "s59E5H2" 0 "transposase/IS protein"  
"OPBM23\_00436" 31436 "s63E6H2" 0 "transposase/IS protein"  
"OPBM23\_00437" 31437 "s59E13H2" 0 "Integrase core domain protein"  
"OPBM23\_00437" 31437 "s59E25H2" 0 "Integrase core domain protein"  
"OPBM23\_00437" 31437 "s59E5H2" 0 "Integrase core domain protein"  
"OPBM23\_00437" 31437 "s63E6H2" 0 "Integrase core domain protein"  
"OPBM23\_00438" 31438 "s59E13H2" 0 "Bacterial extracellular solute-binding protein"  
"OPBM23\_00438" 31438 "s59E25H2" 0 "Bacterial extracellular solute-binding protein"  
"OPBM23\_00438" 31438 "s59E5H2" 0 "Bacterial extracellular solute-binding protein"  
"OPBM23\_00438" 31438 "s63E6H2" 0 "Bacterial extracellular solute-binding protein"  
"OPBM23\_00439" 31439 "s59E13H2" 0.0280909 "Glutamine--fructose-6-phosphate aminotransferase [isomerizing]"  
"OPBM23\_00439" 31439 "s59E25H2" 0 "Glutamine--fructose-6-phosphate aminotransferase [isomerizing]"  
"OPBM23\_00439" 31439 "s59E5H2" 0.1475848 "Glutamine--fructose-6-phosphate aminotransferase [isomerizing]"  
"OPBM23\_00439" 31439 "s63E6H2" 0 "Glutamine--fructose-6-phosphate aminotransferase [isomerizing]"  
"OPBM23\_00440" 31440 "s59E13H2" 0.02392336 "2-dehydro-3-deoxygluconokinase"  
"OPBM23\_00440" 31440 "s59E25H2" 0 "2-dehydro-3-deoxygluconokinase"  
"OPBM23\_00440" 31440 "s59E5H2" 0.1314141 "2-dehydro-3-deoxygluconokinase"  
"OPBM23\_00440" 31440 "s63E6H2" 0 "2-dehydro-3-deoxygluconokinase"  
"OPBM23\_00441" 31441 "s59E13H2" 0.002475996 "D-tagatose-1,6-bisphosphate aldolase subunit KbaZ"  
"OPBM23\_00441" 31441 "s59E25H2" 0 "D-tagatose-1,6-bisphosphate aldolase subunit KbaZ"  
"OPBM23\_00441" 31441 "s59E5H2" 0.06250566 "D-tagatose-1,6-bisphosphate aldolase subunit KbaZ"  
"OPBM23\_00441" 31441 "s63E6H2" 0.002344394 "D-tagatose-1,6-bisphosphate aldolase subunit KbaZ"  
"OPBM23\_00442" 31442 "s59E13H2" 0 "Beta-glucosidase A"  
"OPBM23\_00442" 31442 "s59E25H2" 0 "Beta-glucosidase A"  
"OPBM23\_00442" 31442 "s59E5H2" 0 "Beta-glucosidase A"  
"OPBM23\_00442" 31442 "s63E6H2" 0.005299204 "Beta-glucosidase A"  
"OPBM23\_00443" 31443 "s59E13H2" 0.01107459 "3',5'-cyclic adenosine monophosphate phosphodiesterase CpdA"  
"OPBM23\_00443" 31443 "s59E25H2" 0 "3',5'-cyclic adenosine monophosphate phosphodiesterase CpdA"  
"OPBM23\_00443" 31443 "s59E5H2" 0.004077676 "3',5'-cyclic adenosine monophosphate phosphodiesterase CpdA"  
"OPBM23\_00443" 31443 "s63E6H2" 1.293463 "3',5'-cyclic adenosine monophosphate phosphodiesterase CpdA"  
"OPBM23\_00444" 31444 "s59E13H2" 0.003411407 "Cyclic 2,3-diphosphoglycerate synthetase"  
"OPBM23\_00444" 31444 "s59E25H2" 0 "Cyclic 2,3-diphosphoglycerate synthetase"  
"OPBM23\_00444" 31444 "s59E5H2" 0.005856221 "Cyclic 2,3-diphosphoglycerate synthetase"  
"OPBM23\_00444" 31444 "s63E6H2" 0.1488221 "Cyclic 2,3-diphosphoglycerate synthetase"  
"OPBM23\_00445" 31445 "s59E13H2" 0 "Glucosamine kinase GspK"  
"OPBM23\_00445" 31445 "s59E25H2" 0 "Glucosamine kinase GspK"  
"OPBM23\_00445" 31445 "s59E5H2" 0.004244712 "Glucosamine kinase GspK"  
"OPBM23\_00445" 31445 "s63E6H2" 0.003196262 "Glucosamine kinase GspK"  
"OPBM23\_00446" 31446 "s59E13H2" 0.01514497 "L-arabinose transport system permease protein AraQ"  
"OPBM23\_00446" 31446 "s59E25H2" 0 "L-arabinose transport system permease protein AraQ"

"OPBM23\_00446" 31446 "s59E5H2" 0.03444993 "L-arabinose transport system permease protein AraQ"  
"OPBM23\_00446" 31446 "s63E6H2" 0.009459085 "L-arabinose transport system permease protein AraQ"  
"OPBM23\_00447" 31447 "s59E13H2" 0 "hypothetical protein"  
"OPBM23\_00447" 31447 "s59E25H2" 0 "hypothetical protein"  
"OPBM23\_00447" 31447 "s59E5H2" 0 "hypothetical protein"  
"OPBM23\_00447" 31447 "s63E6H2" 0 "hypothetical protein"  
"OPBM23\_00448" 31448 "s59E13H2" 0.04521135 "Arginine--tRNA ligase"  
"OPBM23\_00448" 31448 "s59E25H2" 0 "Arginine--tRNA ligase"  
"OPBM23\_00448" 31448 "s59E5H2" 0.1751299 "Arginine--tRNA ligase"  
"OPBM23\_00448" 31448 "s63E6H2" 0.119227 "Arginine--tRNA ligase"  
"OPBM23\_00449" 31449 "s59E13H2" 0.0351565 "hypothetical protein"  
"OPBM23\_00449" 31449 "s59E25H2" 0 "hypothetical protein"  
"OPBM23\_00449" 31449 "s59E5H2" 0.1203565 "hypothetical protein"  
"OPBM23\_00449" 31449 "s63E6H2" 0.04085944 "hypothetical protein"  
"OPBM23\_00450" 31450 "s59E13H2" 0.03833391 "DNA polymerase III subunit tau"  
"OPBM23\_00450" 31450 "s59E25H2" 0 "DNA polymerase III subunit tau"  
"OPBM23\_00450" 31450 "s59E5H2" 0.1239105 "DNA polymerase III subunit tau"  
"OPBM23\_00450" 31450 "s63E6H2" 0.01906893 "DNA polymerase III subunit tau"  
"OPBM23\_00451" 31451 "s59E13H2" 0.01973473 "Thymidylate kinase"  
"OPBM23\_00451" 31451 "s59E25H2" 0 "Thymidylate kinase"  
"OPBM23\_00451" 31451 "s59E5H2" 0.1719103 "Thymidylate kinase"  
"OPBM23\_00451" 31451 "s63E6H2" 0.01095985 "Thymidylate kinase"  
"OPBM23\_00452" 31452 "s59E13H2" 0.01232666 "N-acetylglucosamine-6-phosphate deacetylase"  
"OPBM23\_00452" 31452 "s59E25H2" 0 "N-acetylglucosamine-6-phosphate deacetylase"  
"OPBM23\_00452" 31452 "s59E5H2" 0.0496671 "N-acetylglucosamine-6-phosphate deacetylase"  
"OPBM23\_00452" 31452 "s63E6H2" 0.02636395 "N-acetylglucosamine-6-phosphate deacetylase"  
"OPBM23\_00453" 31453 "s59E13H2" 0.002382935 "hypothetical protein"  
"OPBM23\_00453" 31453 "s59E25H2" 0 "hypothetical protein"  
"OPBM23\_00453" 31453 "s59E5H2" 0.05108312 "hypothetical protein"  
"OPBM23\_00453" 31453 "s63E6H2" 0.01664444 "hypothetical protein"  
"OPBM23\_00454" 31454 "s59E13H2" 0.002037497 "putative lipoprotein YbbD precursor"  
"OPBM23\_00454" 31454 "s59E25H2" 0 "putative lipoprotein YbbD precursor"  
"OPBM23\_00454" 31454 "s59E5H2" 0.06701213 "putative lipoprotein YbbD precursor"  
"OPBM23\_00454" 31454 "s63E6H2" 0.007839623 "putative lipoprotein YbbD precursor"  
"OPBM23\_00455" 31455 "s59E13H2" 0 "putative lipoprotein YbbD precursor"  
"OPBM23\_00455" 31455 "s59E25H2" 0 "putative lipoprotein YbbD precursor"  
"OPBM23\_00455" 31455 "s59E5H2" 0 "putative lipoprotein YbbD precursor"  
"OPBM23\_00455" 31455 "s63E6H2" 0.007808919 "putative lipoprotein YbbD precursor"  
"OPBM23\_00456" 31456 "s59E13H2" 0.00282476 "N-acetylglucosamine repressor"  
"OPBM23\_00456" 31456 "s59E25H2" 0 "N-acetylglucosamine repressor"  
"OPBM23\_00456" 31456 "s59E5H2" 0.01168094 "N-acetylglucosamine repressor"  
"OPBM23\_00456" 31456 "s63E6H2" 0.01271607 "N-acetylglucosamine repressor"  
"OPBM23\_00457" 31457 "s59E13H2" 0.02418471 "DNA-directed RNA polymerase subunit beta"  
"OPBM23\_00457" 31457 "s59E25H2" 2.017057 "DNA-directed RNA polymerase subunit beta"  
"OPBM23\_00457" 31457 "s59E5H2" 0.01108434 "DNA-directed RNA polymerase subunit beta"  
"OPBM23\_00457" 31457 "s63E6H2" 0.002641565 "DNA-directed RNA polymerase subunit beta"  
"OPBM23\_00458" 31458 "s59E13H2" 0.005170967 "DNA-directed RNA polymerase subunit beta"

"OPBM23\_00458" 31458 "s59E25H2" 0 "DNA-directed RNA polymerase subunit beta"  
"OPBM23\_00458" 31458 "s59E5H2" 0.02818714 "DNA-directed RNA polymerase subunit beta"  
"OPBM23\_00458" 31458 "s63E6H2" 0.01841358 "DNA-directed RNA polymerase subunit beta"  
"OPBM23\_00459" 31459 "s59E13H2" 0 "30S ribosomal protein S12"  
"OPBM23\_00459" 31459 "s59E25H2" 0 "30S ribosomal protein S12"  
"OPBM23\_00459" 31459 "s59E5H2" 0 "30S ribosomal protein S12"  
"OPBM23\_00459" 31459 "s63E6H2" 0.01487138 "30S ribosomal protein S12"  
"OPBM23\_00460" 31460 "s59E13H2" 0.01907988 "30S ribosomal protein S7"  
"OPBM23\_00460" 31460 "s59E25H2" 0 "30S ribosomal protein S7"  
"OPBM23\_00460" 31460 "s59E5H2" 0.01431864 "30S ribosomal protein S7"  
"OPBM23\_00460" 31460 "s63E6H2" 0.02817641 "30S ribosomal protein S7"  
"OPBM23\_00461" 31461 "s59E13H2" 0.006945613 "Elongation factor G"  
"OPBM23\_00461" 31461 "s59E25H2" 0 "Elongation factor G"  
"OPBM23\_00461" 31461 "s59E5H2" 0.0371296 "Elongation factor G"  
"OPBM23\_00461" 31461 "s63E6H2" 0.02293035 "Elongation factor G"  
"OPBM23\_00462" 31462 "s59E13H2" 0.01095405 "Elongation factor Tu"  
"OPBM23\_00462" 31462 "s59E25H2" 0 "Elongation factor Tu"  
"OPBM23\_00462" 31462 "s59E5H2" 0.06228577 "Elongation factor Tu"  
"OPBM23\_00462" 31462 "s63E6H2" 0.009297441 "Elongation factor Tu"  
"OPBM23\_00463" 31463 "s59E13H2" 0 "30S ribosomal protein S10"  
"OPBM23\_00463" 31463 "s59E25H2" 0 "30S ribosomal protein S10"  
"OPBM23\_00463" 31463 "s59E5H2" 0.01388856 "30S ribosomal protein S10"  
"OPBM23\_00463" 31463 "s63E6H2" 0.01939312 "30S ribosomal protein S10"  
"OPBM23\_00464" 31464 "s59E13H2" 0 "50S ribosomal protein L3"  
"OPBM23\_00464" 31464 "s59E25H2" 0 "50S ribosomal protein L3"  
"OPBM23\_00464" 31464 "s59E5H2" 0.01983902 "50S ribosomal protein L3"  
"OPBM23\_00464" 31464 "s63E6H2" 0.02043085 "50S ribosomal protein L3"  
"OPBM23\_00465" 31465 "s59E13H2" 0 "50S ribosomal protein L4"  
"OPBM23\_00465" 31465 "s59E25H2" 0 "50S ribosomal protein L4"  
"OPBM23\_00465" 31465 "s59E5H2" 0.001826674 "50S ribosomal protein L4"  
"OPBM23\_00465" 31465 "s63E6H2" 0.008724113 "50S ribosomal protein L4"  
"OPBM23\_00466" 31466 "s59E13H2" 0 "50S ribosomal protein L23"  
"OPBM23\_00466" 31466 "s59E25H2" 0 "50S ribosomal protein L23"  
"OPBM23\_00466" 31466 "s59E5H2" 0 "50S ribosomal protein L23"  
"OPBM23\_00466" 31466 "s63E6H2" 0.00529827 "50S ribosomal protein L23"  
"OPBM23\_00467" 31467 "s59E13H2" 0.001523367 "50S ribosomal protein L2"  
"OPBM23\_00467" 31467 "s59E25H2" 0 "50S ribosomal protein L2"  
"OPBM23\_00467" 31467 "s59E5H2" 0.02422981 "50S ribosomal protein L2"  
"OPBM23\_00467" 31467 "s63E6H2" 0.02590465 "50S ribosomal protein L2"  
"OPBM23\_00468" 31468 "s59E13H2" 0.0008043883 "30S ribosomal protein S19"  
"OPBM23\_00468" 31468 "s59E25H2" 0 "30S ribosomal protein S19"  
"OPBM23\_00468" 31468 "s59E5H2" 0.02029224 "30S ribosomal protein S19"  
"OPBM23\_00468" 31468 "s63E6H2" 0.007444028 "30S ribosomal protein S19"  
"OPBM23\_00469" 31469 "s59E13H2" 0 "50S ribosomal protein L22"  
"OPBM23\_00469" 31469 "s59E25H2" 0 "50S ribosomal protein L22"  
"OPBM23\_00469" 31469 "s59E5H2" 0 "50S ribosomal protein L22"  
"OPBM23\_00469" 31469 "s63E6H2" 0.01566989 "50S ribosomal protein L22"

"OPBM23\_00470" 31470 "s59E13H2" 0 "30S ribosomal protein S3"  
"OPBM23\_00470" 31470 "s59E25H2" 0 "30S ribosomal protein S3"  
"OPBM23\_00470" 31470 "s59E5H2" 0 "30S ribosomal protein S3"  
"OPBM23\_00470" 31470 "s63E6H2" 0.01808938 "30S ribosomal protein S3"  
"OPBM23\_00471" 31471 "s59E13H2" 0 "50S ribosomal protein L16"  
"OPBM23\_00471" 31471 "s59E25H2" 0 "50S ribosomal protein L16"  
"OPBM23\_00471" 31471 "s59E5H2" 0 "50S ribosomal protein L16"  
"OPBM23\_00471" 31471 "s63E6H2" 0.01703649 "50S ribosomal protein L16"  
"OPBM23\_00472" 31472 "s59E13H2" 0 "50S ribosomal protein L29"  
"OPBM23\_00472" 31472 "s59E25H2" 0 "50S ribosomal protein L29"  
"OPBM23\_00472" 31472 "s59E5H2" 0 "50S ribosomal protein L29"  
"OPBM23\_00472" 31472 "s63E6H2" 0.02876321 "50S ribosomal protein L29"  
"OPBM23\_00473" 31473 "s59E13H2" 0 "30S ribosomal protein S17"  
"OPBM23\_00473" 31473 "s59E25H2" 0 "30S ribosomal protein S17"  
"OPBM23\_00473" 31473 "s59E5H2" 0 "30S ribosomal protein S17"  
"OPBM23\_00473" 31473 "s63E6H2" 0.03153125 "30S ribosomal protein S17"  
"OPBM23\_00474" 31474 "s59E13H2" 0.006409082 "50S ribosomal protein L14"  
"OPBM23\_00474" 31474 "s59E25H2" 0 "50S ribosomal protein L14"  
"OPBM23\_00474" 31474 "s59E5H2" 0.03562721 "50S ribosomal protein L14"  
"OPBM23\_00474" 31474 "s63E6H2" 0.006151662 "50S ribosomal protein L14"  
"OPBM23\_00475" 31475 "s59E13H2" 0 "50S ribosomal protein L24"  
"OPBM23\_00475" 31475 "s59E25H2" 0 "50S ribosomal protein L24"  
"OPBM23\_00475" 31475 "s59E5H2" 0.004520579 "50S ribosomal protein L24"  
"OPBM23\_00475" 31475 "s63E6H2" 0.008748721 "50S ribosomal protein L24"  
"OPBM23\_00476" 31476 "s59E13H2" 0.00175491 "50S ribosomal protein L5"  
"OPBM23\_00476" 31476 "s59E25H2" 0 "50S ribosomal protein L5"  
"OPBM23\_00476" 31476 "s59E5H2" 0.01594303 "50S ribosomal protein L5"  
"OPBM23\_00476" 31476 "s63E6H2" 0.0126176 "50S ribosomal protein L5"  
"OPBM23\_00477" 31477 "s59E13H2" 0.008900167 "30S ribosomal protein S14 type Z"  
"OPBM23\_00477" 31477 "s59E25H2" 0 "30S ribosomal protein S14 type Z"  
"OPBM23\_00477" 31477 "s59E5H2" 0.01856505 "30S ribosomal protein S14 type Z"  
"OPBM23\_00477" 31477 "s63E6H2" 0.008105719 "30S ribosomal protein S14 type Z"  
"OPBM23\_00478" 31478 "s59E13H2" 0.009016509 "30S ribosomal protein S8"  
"OPBM23\_00478" 31478 "s59E25H2" 0 "30S ribosomal protein S8"  
"OPBM23\_00478" 31478 "s59E5H2" 0.02838054 "30S ribosomal protein S8"  
"OPBM23\_00478" 31478 "s63E6H2" 0.0178626 "30S ribosomal protein S8"  
"OPBM23\_00479" 31479 "s59E13H2" 0.01360877 "50S ribosomal protein L6"  
"OPBM23\_00479" 31479 "s59E25H2" 0 "50S ribosomal protein L6"  
"OPBM23\_00479" 31479 "s59E5H2" 0.02907539 "50S ribosomal protein L6"  
"OPBM23\_00479" 31479 "s63E6H2" 0.01294052 "50S ribosomal protein L6"  
"OPBM23\_00480" 31480 "s59E13H2" 0.002701759 "50S ribosomal protein L18"  
"OPBM23\_00480" 31480 "s59E25H2" 0 "50S ribosomal protein L18"  
"OPBM23\_00480" 31480 "s59E5H2" 0.01808747 "50S ribosomal protein L18"  
"OPBM23\_00480" 31480 "s63E6H2" 0.009445508 "50S ribosomal protein L18"  
"OPBM23\_00481" 31481 "s59E13H2" 0.005414618 "30S ribosomal protein S5"  
"OPBM23\_00481" 31481 "s59E25H2" 0 "30S ribosomal protein S5"  
"OPBM23\_00481" 31481 "s59E5H2" 0.001515731 "30S ribosomal protein S5"

"OPBM23\_00481" 31481 "s63E6H2" 0.01500052 "30S ribosomal protein S5"  
"OPBM23\_00482" 31482 "s59E13H2" 0.0008674775 "50S ribosomal protein L15"  
"OPBM23\_00482" 31482 "s59E25H2" 0 "50S ribosomal protein L15"  
"OPBM23\_00482" 31482 "s59E5H2" 0.01334435 "50S ribosomal protein L15"  
"OPBM23\_00482" 31482 "s63E6H2" 0.02153254 "50S ribosomal protein L15"  
"OPBM23\_00483" 31483 "s59E13H2" 0.01686396 "preprotein translocase subunit SecY"  
"OPBM23\_00483" 31483 "s59E25H2" 0 "preprotein translocase subunit SecY"  
"OPBM23\_00483" 31483 "s59E5H2" 0.03068239 "preprotein translocase subunit SecY"  
"OPBM23\_00483" 31483 "s63E6H2" 0.019673 "preprotein translocase subunit SecY"  
"OPBM23\_00484" 31484 "s59E13H2" 0.02782237 "Translation initiation factor IF-1"  
"OPBM23\_00484" 31484 "s59E25H2" 0 "Translation initiation factor IF-1"  
"OPBM23\_00484" 31484 "s59E5H2" 0.2751916 "Translation initiation factor IF-1"  
"OPBM23\_00484" 31484 "s63E6H2" 0.01345855 "Translation initiation factor IF-1"  
"OPBM23\_00485" 31485 "s59E13H2" 0.03627819 "Methionine aminopeptidase 1"  
"OPBM23\_00485" 31485 "s59E25H2" 0 "Methionine aminopeptidase 1"  
"OPBM23\_00485" 31485 "s59E5H2" 0.1310925 "Methionine aminopeptidase 1"  
"OPBM23\_00485" 31485 "s63E6H2" 0.0005642216 "Methionine aminopeptidase 1"  
"OPBM23\_00486" 31486 "s59E13H2" 0.03097207 "Adenylate kinase"  
"OPBM23\_00486" 31486 "s59E25H2" 0 "Adenylate kinase"  
"OPBM23\_00486" 31486 "s59E5H2" 0.0602587 "Adenylate kinase"  
"OPBM23\_00486" 31486 "s63E6H2" 0.004769757 "Adenylate kinase"  
"OPBM23\_00487" 31487 "s59E13H2" 0.04048947 "preprotein translocase subunit SecY"  
"OPBM23\_00487" 31487 "s59E25H2" 0 "preprotein translocase subunit SecY"  
"OPBM23\_00487" 31487 "s59E5H2" 0.0684056 "preprotein translocase subunit SecY"  
"OPBM23\_00487" 31487 "s63E6H2" 0 "preprotein translocase subunit SecY"  
"OPBM23\_00488" 31488 "s59E13H2" 0.5656434 "hypothetical protein"  
"OPBM23\_00488" 31488 "s59E25H2" 0 "hypothetical protein"  
"OPBM23\_00488" 31488 "s59E5H2" 0.001578671 "hypothetical protein"  
"OPBM23\_00488" 31488 "s63E6H2" 0.1017086 "hypothetical protein"  
"OPBM23\_00489" 31489 "s59E13H2" 0.1239238 "Methionine import ATP-binding protein MetN 2"  
"OPBM23\_00489" 31489 "s59E25H2" 0 "Methionine import ATP-binding protein MetN 2"  
"OPBM23\_00489" 31489 "s59E5H2" 0.09777946 "Methionine import ATP-binding protein MetN 2"  
"OPBM23\_00489" 31489 "s63E6H2" 0.1555432 "Methionine import ATP-binding protein MetN 2"  
"OPBM23\_00490" 31490 "s59E13H2" 0.03663279 "putative N-acetyltransferase YjcF"  
"OPBM23\_00490" 31490 "s59E25H2" 0 "putative N-acetyltransferase YjcF"  
"OPBM23\_00490" 31490 "s59E5H2" 0.03333538 "putative N-acetyltransferase YjcF"  
"OPBM23\_00490" 31490 "s63E6H2" 0.02384855 "putative N-acetyltransferase YjcF"  
"OPBM23\_00495" 31495 "s59E13H2" 0.06887898 "hypothetical protein"  
"OPBM23\_00495" 31495 "s59E25H2" 0 "hypothetical protein"  
"OPBM23\_00495" 31495 "s59E5H2" 0.0455388 "hypothetical protein"  
"OPBM23\_00495" 31495 "s63E6H2" 0.01323836 "hypothetical protein"  
"OPBM23\_00496" 31496 "s59E13H2" 0.08217511 "hypothetical protein"  
"OPBM23\_00496" 31496 "s59E25H2" 0 "hypothetical protein"  
"OPBM23\_00496" 31496 "s59E5H2" 0.02272943 "hypothetical protein"  
"OPBM23\_00496" 31496 "s63E6H2" 0.003387696 "hypothetical protein"  
"OPBM23\_00497" 31497 "s59E13H2" 0 "hypothetical protein"  
"OPBM23\_00497" 31497 "s59E25H2" 0 "hypothetical protein"

"OPBM23\_00497" 31497 "s59E5H2" 0 "hypothetical protein"  
"OPBM23\_00497" 31497 "s63E6H2" 0 "hypothetical protein"  
"OPBM23\_00498" 31498 "s59E13H2" 0 "hypothetical protein"  
"OPBM23\_00498" 31498 "s59E25H2" 0 "hypothetical protein"  
"OPBM23\_00498" 31498 "s59E5H2" 0 "hypothetical protein"  
"OPBM23\_00498" 31498 "s63E6H2" 0 "hypothetical protein"  
"OPBM23\_00499" 31499 "s59E13H2" 0 "hypothetical protein"  
"OPBM23\_00499" 31499 "s59E25H2" 0 "hypothetical protein"  
"OPBM23\_00499" 31499 "s59E5H2" 0 "hypothetical protein"  
"OPBM23\_00499" 31499 "s63E6H2" 0 "hypothetical protein"  
"OPBM23\_00500" 31500 "s59E13H2" 0.002626203 "N-acetylglucosamine repressor"  
"OPBM23\_00500" 31500 "s59E25H2" 0 "N-acetylglucosamine repressor"  
"OPBM23\_00500" 31500 "s59E5H2" 0 "N-acetylglucosamine repressor"  
"OPBM23\_00500" 31500 "s63E6H2" 0 "N-acetylglucosamine repressor"  
"OPBM23\_00501" 31501 "s59E13H2" 0 "hypothetical protein"  
"OPBM23\_00501" 31501 "s59E25H2" 0 "hypothetical protein"  
"OPBM23\_00501" 31501 "s59E5H2" 0 "hypothetical protein"  
"OPBM23\_00501" 31501 "s63E6H2" 0 "hypothetical protein"  
"OPBM23\_00502" 31502 "s59E13H2" 0 "Multiple sugar-binding protein precursor"  
"OPBM23\_00502" 31502 "s59E25H2" 0 "Multiple sugar-binding protein precursor"  
"OPBM23\_00502" 31502 "s59E5H2" 0 "Multiple sugar-binding protein precursor"  
"OPBM23\_00502" 31502 "s63E6H2" 0 "Multiple sugar-binding protein precursor"  
"OPBM23\_00503" 31503 "s59E13H2" 0 "hypothetical protein"  
"OPBM23\_00503" 31503 "s59E25H2" 0 "hypothetical protein"  
"OPBM23\_00503" 31503 "s59E5H2" 0 "hypothetical protein"  
"OPBM23\_00503" 31503 "s63E6H2" 0.001934319 "hypothetical protein"  
"OPBM23\_00504" 31504 "s59E13H2" 0.006068254 "hypothetical protein"  
"OPBM23\_00504" 31504 "s59E25H2" 613.2922 "hypothetical protein"  
"OPBM23\_00504" 31504 "s59E5H2" 0 "hypothetical protein"  
"OPBM23\_00504" 31504 "s63E6H2" 0.09962029 "hypothetical protein"  
"OPBM23\_00505" 31505 "s59E13H2" 0.07062784 "Soluble lytic murein transglycosylase precursor"  
"OPBM23\_00505" 31505 "s59E25H2" 0 "Soluble lytic murein transglycosylase precursor"  
"OPBM23\_00505" 31505 "s59E5H2" 1.370978 "Soluble lytic murein transglycosylase precursor"  
"OPBM23\_00505" 31505 "s63E6H2" 0.09607296 "Soluble lytic murein transglycosylase precursor"  
"OPBM23\_00506" 31506 "s59E13H2" 0.01032381 "Methionine biosynthesis protein MetW"  
"OPBM23\_00506" 31506 "s59E25H2" 0 "Methionine biosynthesis protein MetW"  
"OPBM23\_00506" 31506 "s59E5H2" 2.540914 "Methionine biosynthesis protein MetW"  
"OPBM23\_00506" 31506 "s63E6H2" 0.01448746 "Methionine biosynthesis protein MetW"  
"OPBM23\_00507" 31507 "s59E13H2" 0.01678788 "Homoserine O-acetyltransferase"  
"OPBM23\_00507" 31507 "s59E25H2" 3.171958 "Homoserine O-acetyltransferase"  
"OPBM23\_00507" 31507 "s59E5H2" 2.094845 "Homoserine O-acetyltransferase"  
"OPBM23\_00507" 31507 "s63E6H2" 0.04462434 "Homoserine O-acetyltransferase"  
"OPBM23\_00508" 31508 "s59E13H2" 0.001084474 "O-acetylserine sulfhydrylase"  
"OPBM23\_00508" 31508 "s59E25H2" 0.5247312 "O-acetylserine sulfhydrylase"  
"OPBM23\_00508" 31508 "s59E5H2" 1.406499 "O-acetylserine sulfhydrylase"  
"OPBM23\_00508" 31508 "s63E6H2" 0.01813328 "O-acetylserine sulfhydrylase"  
"OPBM23\_00509" 31509 "s59E13H2" 0.007133941 "Methionine gamma-lyase"

"OPBM23\_00509" 31509 "s59E25H2" 0 "Methionine gamma-lyase"  
"OPBM23\_00509" 31509 "s59E5H2" 0.7131399 "Methionine gamma-lyase"  
"OPBM23\_00509" 31509 "s63E6H2" 0.00924411 "Methionine gamma-lyase"  
"OPBM23\_00510" 31510 "s59E13H2" 0.01613508 "HTH-type transcriptional regulator CymR"  
"OPBM23\_00510" 31510 "s59E25H2" 0 "HTH-type transcriptional regulator CymR"  
"OPBM23\_00510" 31510 "s59E5H2" 0.05308331 "HTH-type transcriptional regulator CymR"  
"OPBM23\_00510" 31510 "s63E6H2" 0.006520417 "HTH-type transcriptional regulator CymR"  
"OPBM23\_00512" 31512 "s59E13H2" 0 "Transposase DDE domain protein"  
"OPBM23\_00512" 31512 "s59E25H2" 0 "Transposase DDE domain protein"  
"OPBM23\_00512" 31512 "s59E5H2" 5.469545e-05 "Transposase DDE domain protein"  
"OPBM23\_00512" 31512 "s63E6H2" 0.0002379209 "Transposase DDE domain protein"  
"OPBM23\_00514" 31514 "s59E13H2" 0 "hypothetical protein"  
"OPBM23\_00514" 31514 "s59E25H2" 0 "hypothetical protein"  
"OPBM23\_00514" 31514 "s59E5H2" 0 "hypothetical protein"  
"OPBM23\_00514" 31514 "s63E6H2" 0 "hypothetical protein"  
"OPBM23\_00515" 31515 "s59E13H2" 0.007688462 "hypothetical protein"  
"OPBM23\_00515" 31515 "s59E25H2" 0 "hypothetical protein"  
"OPBM23\_00515" 31515 "s59E5H2" 0 "hypothetical protein"  
"OPBM23\_00515" 31515 "s63E6H2" 0.002905714 "hypothetical protein"  
"OPBM23\_00516" 31516 "s59E13H2" 0 "Translation initiation factor IF-2"  
"OPBM23\_00516" 31516 "s59E25H2" 0 "Translation initiation factor IF-2"  
"OPBM23\_00516" 31516 "s59E5H2" 0.008766024 "Translation initiation factor IF-2"  
"OPBM23\_00516" 31516 "s63E6H2" 0.010183355 "Translation initiation factor IF-2"  
"OPBM23\_00517" 31517 "s59E13H2" 0 "Ribosome-binding factor A"  
"OPBM23\_00517" 31517 "s59E25H2" 0 "Ribosome-binding factor A"  
"OPBM23\_00517" 31517 "s59E5H2" 0.001861852 "Ribosome-binding factor A"  
"OPBM23\_00517" 31517 "s63E6H2" 0.00982563 "Ribosome-binding factor A"  
"OPBM23\_00518" 31518 "s59E13H2" 0.006751224 "Bifunctional oligoribonuclease and PAP phosphatase NrnA"  
"OPBM23\_00518" 31518 "s59E25H2" 0 "Bifunctional oligoribonuclease and PAP phosphatase NrnA"  
"OPBM23\_00518" 31518 "s59E5H2" 0.02741376 "Bifunctional oligoribonuclease and PAP phosphatase NrnA"  
"OPBM23\_00518" 31518 "s63E6H2" 0.01837337 "Bifunctional oligoribonuclease and PAP phosphatase NrnA"  
"OPBM23\_00520" 31520 "s59E13H2" 0 "tRNA pseudouridine synthase B"  
"OPBM23\_00520" 31520 "s59E25H2" 0 "tRNA pseudouridine synthase B"  
"OPBM23\_00520" 31520 "s59E5H2" 0.02234019 "tRNA pseudouridine synthase B"  
"OPBM23\_00520" 31520 "s63E6H2" 0.01356236 "tRNA pseudouridine synthase B"  
"OPBM23\_00521" 31521 "s59E13H2" 0 "Riboflavin biosynthesis protein RibF"  
"OPBM23\_00521" 31521 "s59E25H2" 0 "Riboflavin biosynthesis protein RibF"  
"OPBM23\_00521" 31521 "s59E5H2" 0.01559804 "Riboflavin biosynthesis protein RibF"  
"OPBM23\_00521" 31521 "s63E6H2" 0.004768822 "Riboflavin biosynthesis protein RibF"  
"OPBM23\_00522" 31522 "s59E13H2" 0 "30S ribosomal protein S15"  
"OPBM23\_00522" 31522 "s59E25H2" 0 "30S ribosomal protein S15"  
"OPBM23\_00522" 31522 "s59E5H2" 0 "30S ribosomal protein S15"  
"OPBM23\_00522" 31522 "s63E6H2" 0 "30S ribosomal protein S15"  
"OPBM23\_00523" 31523 "s59E13H2" 0.00162135 "Polyribonucleotide nucleotidyltransferase"  
"OPBM23\_00523" 31523 "s59E25H2" 0 "Polyribonucleotide nucleotidyltransferase"  
"OPBM23\_00523" 31523 "s59E5H2" 0.01618906 "Polyribonucleotide nucleotidyltransferase"  
"OPBM23\_00523" 31523 "s63E6H2" 0.03063452 "Polyribonucleotide nucleotidyltransferase"

"OPBM23\_00524" 31524 "s59E13H2" 0.004975071 "Insulinase (Peptidase family M16)"  
"OPBM23\_00524" 31524 "s59E25H2" 0 "Insulinase (Peptidase family M16)"  
"OPBM23\_00524" 31524 "s59E5H2" 0.03450379 "Insulinase (Peptidase family M16)"  
"OPBM23\_00524" 31524 "s63E6H2" 0.1006799 "Insulinase (Peptidase family M16)"  
"OPBM23\_00525" 31525 "s59E13H2" 0.06089194 "4-hydroxy-tetrahydrodipicolinate reductase"  
"OPBM23\_00525" 31525 "s59E25H2" 0 "4-hydroxy-tetrahydrodipicolinate reductase"  
"OPBM23\_00525" 31525 "s59E5H2" 0.02697892 "4-hydroxy-tetrahydrodipicolinate reductase"  
"OPBM23\_00525" 31525 "s63E6H2" 0.03101352 "4-hydroxy-tetrahydrodipicolinate reductase"  
"OPBM23\_00526" 31526 "s59E13H2" 0.001958219 "4-hydroxy-tetrahydrodipicolinate synthase"  
"OPBM23\_00526" 31526 "s59E25H2" 0 "4-hydroxy-tetrahydrodipicolinate synthase"  
"OPBM23\_00526" 31526 "s59E5H2" 0.1001549 "4-hydroxy-tetrahydrodipicolinate synthase"  
"OPBM23\_00526" 31526 "s63E6H2" 0.07041159 "4-hydroxy-tetrahydrodipicolinate synthase"  
"OPBM23\_00527" 31527 "s59E13H2" 0 "Ribonuclease J 1"  
"OPBM23\_00527" 31527 "s59E25H2" 0 "Ribonuclease J 1"  
"OPBM23\_00527" 31527 "s59E5H2" 0.14976 "Ribonuclease J 1"  
"OPBM23\_00527" 31527 "s63E6H2" 0.1397365 "Ribonuclease J 1"  
"OPBM23\_00528" 31528 "s59E13H2" 0.0007312055 "DNA translocase SpoIIIE"  
"OPBM23\_00528" 31528 "s59E25H2" 0 "DNA translocase SpoIIIE"  
"OPBM23\_00528" 31528 "s59E5H2" 0.3343963 "DNA translocase SpoIIIE"  
"OPBM23\_00528" 31528 "s63E6H2" 0.1033692 "DNA translocase SpoIIIE"  
"OPBM23\_00529" 31529 "s59E13H2" 0 "Nicotinamide-nucleotide amidohydrolase PncC"  
"OPBM23\_00529" 31529 "s59E25H2" 0 "Nicotinamide-nucleotide amidohydrolase PncC"  
"OPBM23\_00529" 31529 "s59E5H2" 0.3893914 "Nicotinamide-nucleotide amidohydrolase PncC"  
"OPBM23\_00529" 31529 "s63E6H2" 0.1304816 "Nicotinamide-nucleotide amidohydrolase PncC"  
"OPBM23\_00530" 31530 "s59E13H2" 0 "2'-5'-RNA ligase"  
"OPBM23\_00530" 31530 "s59E25H2" 0 "2'-5'-RNA ligase"  
"OPBM23\_00530" 31530 "s59E5H2" 0.3088481 "2'-5'-RNA ligase"  
"OPBM23\_00530" 31530 "s63E6H2" 0.09605078 "2'-5'-RNA ligase"  
"OPBM23\_00531" 31531 "s59E13H2" 0 "DNA repair and recombination protein RadA"  
"OPBM23\_00531" 31531 "s59E25H2" 0 "DNA repair and recombination protein RadA"  
"OPBM23\_00531" 31531 "s59E5H2" 0.6042297 "DNA repair and recombination protein RadA"  
"OPBM23\_00531" 31531 "s63E6H2" 0.154883 "DNA repair and recombination protein RadA"  
"OPBM23\_00535" 31535 "s59E13H2" 0.022953 "Xylulose kinase"  
"OPBM23\_00535" 31535 "s59E25H2" 0.07400131 "Xylulose kinase"  
"OPBM23\_00535" 31535 "s59E5H2" 0.9207351 "Xylulose kinase"  
"OPBM23\_00535" 31535 "s63E6H2" 0.2780787 "Xylulose kinase"  
"OPBM23\_00536" 31536 "s59E13H2" 0.02202984 "Xylose isomerase"  
"OPBM23\_00536" 31536 "s59E25H2" 10.25137 "Xylose isomerase"  
"OPBM23\_00536" 31536 "s59E5H2" 0.2958331 "Xylose isomerase"  
"OPBM23\_00536" 31536 "s63E6H2" 0.3462272 "Xylose isomerase"  
"OPBM23\_00537" 31537 "s59E13H2" 0 "NAD dependent epimerase/dehydratase family protein"  
"OPBM23\_00537" 31537 "s59E25H2" 0 "NAD dependent epimerase/dehydratase family protein"  
"OPBM23\_00537" 31537 "s59E5H2" 0.006137473 "NAD dependent epimerase/dehydratase family protein"  
"OPBM23\_00537" 31537 "s63E6H2" 0 "NAD dependent epimerase/dehydratase family protein"  
"OPBM23\_00539" 31539 "s59E13H2" 12.69652 "Cobalamin-binding protein precursor"  
"OPBM23\_00539" 31539 "s59E25H2" 0 "Cobalamin-binding protein precursor"  
"OPBM23\_00539" 31539 "s59E5H2" 0.1749055 "Cobalamin-binding protein precursor"



"OPBM23\_00539" 31539 "s63E6H2" 0.07721831 "Cobalamin-binding protein precursor"  
"OPBM23\_00540" 31540 "s59E13H2" 0 "SPFH domain / Band 7 family protein"  
"OPBM23\_00540" 31540 "s59E25H2" 0 "SPFH domain / Band 7 family protein"  
"OPBM23\_00540" 31540 "s59E5H2" 0 "SPFH domain / Band 7 family protein"  
"OPBM23\_00540" 31540 "s63E6H2" 0.00163825 "SPFH domain / Band 7 family protein"  
"OPBM23\_00541" 31541 "s59E13H2" 0 "hypothetical protein"  
"OPBM23\_00541" 31541 "s59E25H2" 0 "hypothetical protein"  
"OPBM23\_00541" 31541 "s59E5H2" 0 "hypothetical protein"  
"OPBM23\_00541" 31541 "s63E6H2" 0.0009916572 "hypothetical protein"  
"OPBM23\_00542" 31542 "s59E13H2" 0 "Beta-1,4-mannooligosaccharide phosphorylase"  
"OPBM23\_00542" 31542 "s59E25H2" 0 "Beta-1,4-mannooligosaccharide phosphorylase"  
"OPBM23\_00542" 31542 "s59E5H2" 0 "Beta-1,4-mannooligosaccharide phosphorylase"  
"OPBM23\_00542" 31542 "s63E6H2" 0.225062 "Beta-1,4-mannooligosaccharide phosphorylase"  
"OPBM23\_00543" 31543 "s59E13H2" 0 "Beta-1,4-mannooligosaccharide phosphorylase"  
"OPBM23\_00543" 31543 "s59E25H2" 0 "Beta-1,4-mannooligosaccharide phosphorylase"  
"OPBM23\_00543" 31543 "s59E5H2" 0.008516763 "Beta-1,4-mannooligosaccharide phosphorylase"  
"OPBM23\_00543" 31543 "s63E6H2" 0.6315644 "Beta-1,4-mannooligosaccharide phosphorylase"  
"OPBO21\_00002" 31545 "s59E13H2" 0.01110766 "Glycosyl transferases group 1"  
"OPBO21\_00002" 31545 "s59E25H2" 0 "Glycosyl transferases group 1"  
"OPBO21\_00002" 31545 "s59E5H2" 0.1413564 "Glycosyl transferases group 1"  
"OPBO21\_00002" 31545 "s63E6H2" 0 "Glycosyl transferases group 1"  
"OPBO21\_00003" 31546 "s59E13H2" 0.01188655 "N-acetylglucosaminyl-diphospho-decaprenol L-rhamnosyltransferase"  
"OPBO21\_00003" 31546 "s59E25H2" 0 "N-acetylglucosaminyl-diphospho-decaprenol L-rhamnosyltransferase"  
"OPBO21\_00003" 31546 "s59E5H2" 0.240474 "N-acetylglucosaminyl-diphospho-decaprenol L-rhamnosyltransferase"  
"OPBO21\_00003" 31546 "s63E6H2" 0.009325858 "N-acetylglucosaminyl-diphospho-decaprenol L-rhamnosyltransferase"  
"OPBO21\_00004" 31547 "s59E13H2" 0.0195005 "Histidine--tRNA ligase"  
"OPBO21\_00004" 31547 "s59E25H2" 0 "Histidine--tRNA ligase"  
"OPBO21\_00004" 31547 "s59E5H2" 0.1156823 "Histidine--tRNA ligase"  
"OPBO21\_00004" 31547 "s63E6H2" 0.0143587 "Histidine--tRNA ligase"  
"OPBO21\_00005" 31548 "s59E13H2" 0.1226706 "High-affinity branched-chain amino acid transport system permease protein LivH"  
"OPBO21\_00005" 31548 "s59E25H2" 0 "High-affinity branched-chain amino acid transport system permease protein LivH"  
"OPBO21\_00005" 31548 "s59E5H2" 0.004759234 "High-affinity branched-chain amino acid transport system permease protein LivH"  
"OPBO21\_00005" 31548 "s63E6H2" 0.04279678 "High-affinity branched-chain amino acid transport system permease protein LivH"  
"OPBO21\_00006" 31549 "s59E13H2" 0.01566336 "multidrug efflux pump VmrA"  
"OPBO21\_00006" 31549 "s59E25H2" 0 "multidrug efflux pump VmrA"  
"OPBO21\_00006" 31549 "s59E5H2" 0.1056444 "multidrug efflux pump VmrA"  
"OPBO21\_00006" 31549 "s63E6H2" 0.6592394 "multidrug efflux pump VmrA"  
"OPBO21\_00007" 31550 "s59E13H2" 0.06751358 "Multidrug export protein MepA"  
"OPBO21\_00007" 31550 "s59E25H2" 0 "Multidrug export protein MepA"  
"OPBO21\_00007" 31550 "s59E5H2" 0.322998 "Multidrug export protein MepA"  
"OPBO21\_00007" 31550 "s63E6H2" 0.9915594 "Multidrug export protein MepA"  
"OPBO21\_00008" 31551 "s59E13H2" 0.8563494 "Putative transcriptional regulator YvhJ"  
"OPBO21\_00008" 31551 "s59E25H2" 0 "Putative transcriptional regulator YvhJ"  
"OPBO21\_00008" 31551 "s59E5H2" 0.137026 "Putative transcriptional regulator YvhJ"  
"OPBO21\_00008" 31551 "s63E6H2" 0.7818058 "Putative transcriptional regulator YvhJ"  
"OPBO21\_00009" 31552 "s59E13H2" 0 "hypothetical protein"  
"OPBO21\_00009" 31552 "s59E25H2" 0 "hypothetical protein"

"OPBO21\_00009" 31552 "s59E5H2" 0 "hypothetical protein"  
"OPBO21\_00009" 31552 "s63E6H2" 0.001617426 "hypothetical protein"  
"OPBO21\_00010" 31553 "s59E13H2" 0.01777822 "Manganese transport system membrane protein MntB"  
"OPBO21\_00010" 31553 "s59E25H2" 0 "Manganese transport system membrane protein MntB"  
"OPBO21\_00010" 31553 "s59E5H2" 0.04494713 "Manganese transport system membrane protein MntB"  
"OPBO21\_00010" 31553 "s63E6H2" 0.3561635 "Manganese transport system membrane protein MntB"  
"OPBO21\_00011" 31554 "s59E13H2" 0.03915741 "High-affinity zinc uptake system ATP-binding protein ZnuC"  
"OPBO21\_00011" 31554 "s59E25H2" 0 "High-affinity zinc uptake system ATP-binding protein ZnuC"  
"OPBO21\_00011" 31554 "s59E5H2" 0.01348833 "High-affinity zinc uptake system ATP-binding protein ZnuC"  
"OPBO21\_00011" 31554 "s63E6H2" 0.3108559 "High-affinity zinc uptake system ATP-binding protein ZnuC"  
"OPBO21\_00012" 31555 "s59E13H2" 0.008859306 "High-affinity zinc uptake system binding-protein ZnuA precursor"  
"OPBO21\_00012" 31555 "s59E25H2" 0 "High-affinity zinc uptake system binding-protein ZnuA precursor"  
"OPBO21\_00012" 31555 "s59E5H2" 0.04742666 "High-affinity zinc uptake system binding-protein ZnuA precursor"  
"OPBO21\_00012" 31555 "s63E6H2" 0.234153 "High-affinity zinc uptake system binding-protein ZnuA precursor"  
"OPBO21\_00013" 31556 "s59E13H2" 0 "hypothetical protein"  
"OPBO21\_00013" 31556 "s59E25H2" 0 "hypothetical protein"  
"OPBO21\_00013" 31556 "s59E5H2" 0.02827679 "hypothetical protein"  
"OPBO21\_00013" 31556 "s63E6H2" 0.01330827 "hypothetical protein"  
"OPBO21\_00014" 31557 "s59E13H2" 0 "hypothetical protein"  
"OPBO21\_00014" 31557 "s59E25H2" 0 "hypothetical protein"  
"OPBO21\_00014" 31557 "s59E5H2" 0 "hypothetical protein"  
"OPBO21\_00014" 31557 "s63E6H2" 0.004103161 "hypothetical protein"  
"OPBO21\_00015" 31558 "s59E13H2" 0 "NADP-reducing hydrogenase subunit HndA"  
"OPBO21\_00015" 31558 "s59E25H2" 0 "NADP-reducing hydrogenase subunit HndA"  
"OPBO21\_00015" 31558 "s59E5H2" 0.005993428 "NADP-reducing hydrogenase subunit HndA"  
"OPBO21\_00015" 31558 "s63E6H2" 0.001719395 "NADP-reducing hydrogenase subunit HndA"  
"OPBO21\_00016" 31559 "s59E13H2" 0 "DNA replication and repair protein RecF"  
"OPBO21\_00016" 31559 "s59E25H2" 0 "DNA replication and repair protein RecF"  
"OPBO21\_00016" 31559 "s59E5H2" 0.06284954 "DNA replication and repair protein RecF"  
"OPBO21\_00016" 31559 "s63E6H2" 0.003822001 "DNA replication and repair protein RecF"  
"OPBO21\_00017" 31560 "s59E13H2" 0.001808454 "hypothetical protein"  
"OPBO21\_00017" 31560 "s59E25H2" 0 "hypothetical protein"  
"OPBO21\_00017" 31560 "s59E5H2" 0.04069145 "hypothetical protein"  
"OPBO21\_00017" 31560 "s63E6H2" 0.03448984 "hypothetical protein"  
"OPBO21\_00018" 31561 "s59E13H2" 0.3033734 "DNA gyrase subunit B"  
"OPBO21\_00018" 31561 "s59E25H2" 0 "DNA gyrase subunit B"  
"OPBO21\_00018" 31561 "s59E5H2" 0.02685786 "DNA gyrase subunit B"  
"OPBO21\_00018" 31561 "s63E6H2" 0.02762965 "DNA gyrase subunit B"  
"OPBO21\_00020" 31563 "s59E13H2" 0 "GDP-L-fucose synthase"  
"OPBO21\_00020" 31563 "s59E25H2" 0 "GDP-L-fucose synthase"  
"OPBO21\_00020" 31563 "s59E5H2" 0 "GDP-L-fucose synthase"  
"OPBO21\_00020" 31563 "s63E6H2" 0.08060603 "GDP-L-fucose synthase"  
"OPBO21\_00021" 31564 "s59E13H2" 0 "UDP-glucose 6-dehydrogenase TuaD"  
"OPBO21\_00021" 31564 "s59E25H2" 0 "UDP-glucose 6-dehydrogenase TuaD"  
"OPBO21\_00021" 31564 "s59E5H2" 0 "UDP-glucose 6-dehydrogenase TuaD"  
"OPBO21\_00021" 31564 "s63E6H2" 0.008843823 "UDP-glucose 6-dehydrogenase TuaD"  
"OPBO21\_00022" 31565 "s59E13H2" 0 "dTDP-glucose 4,6-dehydratase 2"

"OPBO21\_00022" 31565 "s59E25H2" 0 "dTDP-glucose 4,6-dehydratase 2"  
"OPBO21\_00022" 31565 "s59E5H2" 0 "dTDP-glucose 4,6-dehydratase 2"  
"OPBO21\_00022" 31565 "s63E6H2" 0 "dTDP-glucose 4,6-dehydratase 2"  
"OPBO21\_00023" 31566 "s59E13H2" 0 "Polysaccharide biosynthesis protein"  
"OPBO21\_00023" 31566 "s59E25H2" 0 "Polysaccharide biosynthesis protein"  
"OPBO21\_00023" 31566 "s59E5H2" 0 "Polysaccharide biosynthesis protein"  
"OPBO21\_00023" 31566 "s63E6H2" 0 "Polysaccharide biosynthesis protein"  
"OPBO21\_00024" 31567 "s59E13H2" 0.02730365 "hypothetical protein"  
"OPBO21\_00024" 31567 "s59E25H2" 0 "hypothetical protein"  
"OPBO21\_00024" 31567 "s59E5H2" 0.04684 "hypothetical protein"  
"OPBO21\_00024" 31567 "s63E6H2" 0.01847829 "hypothetical protein"  
"OPBO21\_00025" 31568 "s59E13H2" 0.09500057 "Inner membrane protein YhhQ"  
"OPBO21\_00025" 31568 "s59E25H2" 0 "Inner membrane protein YhhQ"  
"OPBO21\_00025" 31568 "s59E5H2" 0 "Inner membrane protein YhhQ"  
"OPBO21\_00025" 31568 "s63E6H2" 0.05225602 "Inner membrane protein YhhQ"  
"OPBO21\_00026" 31569 "s59E13H2" 0.06176982 "hypothetical protein"  
"OPBO21\_00026" 31569 "s59E25H2" 0 "hypothetical protein"  
"OPBO21\_00026" 31569 "s59E5H2" 0.2246253 "hypothetical protein"  
"OPBO21\_00026" 31569 "s63E6H2" 0.03460053 "hypothetical protein"  
"OPBO21\_00027" 31570 "s59E13H2" 0.1174475 "hypothetical protein"  
"OPBO21\_00027" 31570 "s59E25H2" 0 "hypothetical protein"  
"OPBO21\_00027" 31570 "s59E5H2" 0.0795888 "hypothetical protein"  
"OPBO21\_00027" 31570 "s63E6H2" 0.03679997 "hypothetical protein"  
"OPBO21\_00028" 31571 "s59E13H2" 0.1139207 "Alanine racemase"  
"OPBO21\_00028" 31571 "s59E25H2" 0 "Alanine racemase"  
"OPBO21\_00028" 31571 "s59E5H2" 0.03130968 "Alanine racemase"  
"OPBO21\_00028" 31571 "s63E6H2" 0.06411872 "Alanine racemase"  
"OPBO21\_00029" 31572 "s59E13H2" 0.08781436 "Inosine-5'-monophosphate dehydrogenase"  
"OPBO21\_00029" 31572 "s59E25H2" 0 "Inosine-5'-monophosphate dehydrogenase"  
"OPBO21\_00029" 31572 "s59E5H2" 0.02509974 "Inosine-5'-monophosphate dehydrogenase"  
"OPBO21\_00029" 31572 "s63E6H2" 0.04406152 "Inosine-5'-monophosphate dehydrogenase"  
"OPBO21\_00030" 31573 "s59E13H2" 0.08681273 "Bifunctional NAD(P)H-hydrate repair enzyme Nnr"  
"OPBO21\_00030" 31573 "s59E25H2" 0 "Bifunctional NAD(P)H-hydrate repair enzyme Nnr"  
"OPBO21\_00030" 31573 "s59E5H2" 0.03561531 "Bifunctional NAD(P)H-hydrate repair enzyme Nnr"  
"OPBO21\_00030" 31573 "s63E6H2" 0.03040024 "Bifunctional NAD(P)H-hydrate repair enzyme Nnr"  
"OPBO21\_00031" 31574 "s59E13H2" 0.04255508 "Holo-[acyl-carrier-protein] synthase"  
"OPBO21\_00031" 31574 "s59E25H2" 0 "Holo-[acyl-carrier-protein] synthase"  
"OPBO21\_00031" 31574 "s59E5H2" 0 "Holo-[acyl-carrier-protein] synthase"  
"OPBO21\_00031" 31574 "s63E6H2" 0.0118235 "Holo-[acyl-carrier-protein] synthase"  
"OPBO21\_00032" 31575 "s59E13H2" 0.06924356 "putative peptidoglycan biosynthesis protein MurJ"  
"OPBO21\_00032" 31575 "s59E25H2" 0 "putative peptidoglycan biosynthesis protein MurJ"  
"OPBO21\_00032" 31575 "s59E5H2" 0.1995038 "putative peptidoglycan biosynthesis protein MurJ"  
"OPBO21\_00032" 31575 "s63E6H2" 0.01729964 "putative peptidoglycan biosynthesis protein MurJ"  
"OPBO21\_00033" 31576 "s59E13H2" 0 "hypothetical protein"  
"OPBO21\_00033" 31576 "s59E25H2" 0 "hypothetical protein"  
"OPBO21\_00033" 31576 "s59E5H2" 0.01556326 "hypothetical protein"  
"OPBO21\_00033" 31576 "s63E6H2" 0 "hypothetical protein"

"OPBO21\_00034" 31577 "s59E13H2" 0 "Trehalose/maltose transport system permease protein MalG"  
"OPBO21\_00034" 31577 "s59E25H2" 0 "Trehalose/maltose transport system permease protein MalG"  
"OPBO21\_00034" 31577 "s59E5H2" 1.542725 "Trehalose/maltose transport system permease protein MalG"  
"OPBO21\_00034" 31577 "s63E6H2" 5.35289 "Trehalose/maltose transport system permease protein MalG"  
"OPBO21\_00035" 31578 "s59E13H2" 0 "Trehalose/maltose transport system permease protein MalF"  
"OPBO21\_00035" 31578 "s59E25H2" 0 "Trehalose/maltose transport system permease protein MalF"  
"OPBO21\_00035" 31578 "s59E5H2" 0.4796226 "Trehalose/maltose transport system permease protein MalF"  
"OPBO21\_00035" 31578 "s63E6H2" 5.403252 "Trehalose/maltose transport system permease protein MalF"  
"OPBO21\_00036" 31579 "s59E13H2" 0 "Autoinducer 2 import ATP-binding protein LsrA"  
"OPBO21\_00036" 31579 "s59E25H2" 0 "Autoinducer 2 import ATP-binding protein LsrA"  
"OPBO21\_00036" 31579 "s59E5H2" 0 "Autoinducer 2 import ATP-binding protein LsrA"  
"OPBO21\_00036" 31579 "s63E6H2" 3.476924 "Autoinducer 2 import ATP-binding protein LsrA"  
"OPBO21\_00037" 31580 "s59E13H2" 0 "hypothetical protein"  
"OPBO21\_00037" 31580 "s59E25H2" 0 "hypothetical protein"  
"OPBO21\_00037" 31580 "s59E5H2" 0 "hypothetical protein"  
"OPBO21\_00037" 31580 "s63E6H2" 0.4687808 "hypothetical protein"  
"OPBO21\_00038" 31581 "s59E13H2" 0 "HTH-type transcriptional repressor AllR"  
"OPBO21\_00038" 31581 "s59E25H2" 0 "HTH-type transcriptional repressor AllR"  
"OPBO21\_00038" 31581 "s59E5H2" 0 "HTH-type transcriptional repressor AllR"  
"OPBO21\_00038" 31581 "s63E6H2" 0.09904943 "HTH-type transcriptional repressor AllR"  
"OPBO21\_00040" 31583 "s59E13H2" 0 "hypothetical protein"  
"OPBO21\_00040" 31583 "s59E25H2" 0 "hypothetical protein"  
"OPBO21\_00040" 31583 "s59E5H2" 0.07034243 "hypothetical protein"  
"OPBO21\_00040" 31583 "s63E6H2" 0 "hypothetical protein"  
"OPBO21\_00041" 31584 "s59E13H2" 0 "hypothetical protein"  
"OPBO21\_00041" 31584 "s59E25H2" 0 "hypothetical protein"  
"OPBO21\_00041" 31584 "s59E5H2" 0.09404158 "hypothetical protein"  
"OPBO21\_00041" 31584 "s63E6H2" 0 "hypothetical protein"  
"OPBO21\_00042" 31585 "s59E13H2" 0.07643187 "N5-carboxyaminoimidazole ribonucleotide mutase"  
"OPBO21\_00042" 31585 "s59E25H2" 0 "N5-carboxyaminoimidazole ribonucleotide mutase"  
"OPBO21\_00042" 31585 "s59E5H2" 0.08910265 "N5-carboxyaminoimidazole ribonucleotide mutase"  
"OPBO21\_00042" 31585 "s63E6H2" 0.09271303 "N5-carboxyaminoimidazole ribonucleotide mutase"  
"OPBO21\_00043" 31586 "s59E13H2" 0.01920462 "Putative K(+)-stimulated pyrophosphate-energized sodium pump"  
"OPBO21\_00043" 31586 "s59E25H2" 0 "Putative K(+)-stimulated pyrophosphate-energized sodium pump"  
"OPBO21\_00043" 31586 "s59E5H2" 0.03195157 "Putative K(+)-stimulated pyrophosphate-energized sodium pump"  
"OPBO21\_00043" 31586 "s63E6H2" 0.0306733 "Putative K(+)-stimulated pyrophosphate-energized sodium pump"  
"OPBO21\_00044" 31587 "s59E13H2" 0.02981096 "hypothetical protein"  
"OPBO21\_00044" 31587 "s59E25H2" 0 "hypothetical protein"  
"OPBO21\_00044" 31587 "s59E5H2" 0.06341282 "hypothetical protein"  
"OPBO21\_00044" 31587 "s63E6H2" 0.1636654 "hypothetical protein"  
"OPBO21\_00047" 31590 "s59E13H2" 0.00137919 "hypothetical protein"  
"OPBO21\_00047" 31590 "s59E25H2" 0 "hypothetical protein"  
"OPBO21\_00047" 31590 "s59E5H2" 0.008705336 "hypothetical protein"  
"OPBO21\_00047" 31590 "s63E6H2" 0.05034147 "hypothetical protein"  
"OPBO21\_00049" 31592 "s59E13H2" 0 "Putative transposase"  
"OPBO21\_00049" 31592 "s59E25H2" 0 "Putative transposase"  
"OPBO21\_00049" 31592 "s59E5H2" 0 "Putative transposase"

"OPBO21\_00049" 31592 "s63E6H2" 0.231013 "Putative transposase"  
"OPBO21\_00050" 31593 "s59E13H2" 0 "Putative transposase"  
"OPBO21\_00050" 31593 "s59E25H2" 0 "Putative transposase"  
"OPBO21\_00050" 31593 "s59E5H2" 0 "Putative transposase"  
"OPBO21\_00050" 31593 "s63E6H2" 0.05910023 "Putative transposase"  
"OPBO21\_00051" 31594 "s59E13H2" 0.007137763 "preprotein translocase subunit YajC"  
"OPBO21\_00051" 31594 "s59E25H2" 0 "preprotein translocase subunit YajC"  
"OPBO21\_00051" 31594 "s59E5H2" 0.1771325 "preprotein translocase subunit YajC"  
"OPBO21\_00051" 31594 "s63E6H2" 0.003633099 "preprotein translocase subunit YajC"  
"OPBO21\_00052" 31595 "s59E13H2" 0.0002815673 "preprotein translocase subunit SecD"  
"OPBO21\_00052" 31595 "s59E25H2" 0 "preprotein translocase subunit SecD"  
"OPBO21\_00052" 31595 "s59E5H2" 0.1054942 "preprotein translocase subunit SecD"  
"OPBO21\_00052" 31595 "s63E6H2" 0 "preprotein translocase subunit SecD"  
"OPBO21\_00053" 31596 "s59E13H2" 0 "hypothetical protein"  
"OPBO21\_00053" 31596 "s59E25H2" 0 "hypothetical protein"  
"OPBO21\_00053" 31596 "s59E5H2" 0 "hypothetical protein"  
"OPBO21\_00053" 31596 "s63E6H2" 0.001717313 "hypothetical protein"  
"OPBO21\_00054" 31597 "s59E13H2" 0.03112706 "Threonylcarbamoyladenine tRNA methylthiotransferase MtaB"  
"OPBO21\_00054" 31597 "s59E25H2" 0 "Threonylcarbamoyladenine tRNA methylthiotransferase MtaB"  
"OPBO21\_00054" 31597 "s59E5H2" 0.1177857 "Threonylcarbamoyladenine tRNA methylthiotransferase MtaB"  
"OPBO21\_00054" 31597 "s63E6H2" 0.3183466 "Threonylcarbamoyladenine tRNA methylthiotransferase MtaB"  
"OPBO21\_00055" 31598 "s59E13H2" 0.02058894 "Ribosomal RNA small subunit methyltransferase E"  
"OPBO21\_00055" 31598 "s59E25H2" 0 "Ribosomal RNA small subunit methyltransferase E"  
"OPBO21\_00055" 31598 "s59E5H2" 0.1452357 "Ribosomal RNA small subunit methyltransferase E"  
"OPBO21\_00055" 31598 "s63E6H2" 0.3021976 "Ribosomal RNA small subunit methyltransferase E"  
"OPBO21\_00056" 31599 "s59E13H2" 0.009898108 "Chaperone protein DnaJ"  
"OPBO21\_00056" 31599 "s59E25H2" 0 "Chaperone protein DnaJ"  
"OPBO21\_00056" 31599 "s59E5H2" 0.08671922 "Chaperone protein DnaJ"  
"OPBO21\_00056" 31599 "s63E6H2" 0.2346274 "Chaperone protein DnaJ"  
"OPBO21\_00057" 31600 "s59E13H2" 0.008705427 "Heat-inducible transcription repressor HrcA"  
"OPBO21\_00057" 31600 "s59E25H2" 0 "Heat-inducible transcription repressor HrcA"  
"OPBO21\_00057" 31600 "s59E5H2" 0.01075684 "Heat-inducible transcription repressor HrcA"  
"OPBO21\_00057" 31600 "s63E6H2" 0.1175138 "Heat-inducible transcription repressor HrcA"  
"OPBO21\_00058" 31601 "s59E13H2" 0 "Putative teichuronic acid biosynthesis glycosyltransferase TuaG"  
"OPBO21\_00058" 31601 "s59E25H2" 0 "Putative teichuronic acid biosynthesis glycosyltransferase TuaG"  
"OPBO21\_00058" 31601 "s59E5H2" 0 "Putative teichuronic acid biosynthesis glycosyltransferase TuaG"  
"OPBO21\_00058" 31601 "s63E6H2" 0 "Putative teichuronic acid biosynthesis glycosyltransferase TuaG"  
"OPBO21\_00059" 31602 "s59E13H2" 0 "coproporphyrinogen III oxidase"  
"OPBO21\_00059" 31602 "s59E25H2" 0 "coproporphyrinogen III oxidase"  
"OPBO21\_00059" 31602 "s59E5H2" 0 "coproporphyrinogen III oxidase"  
"OPBO21\_00059" 31602 "s63E6H2" 0 "coproporphyrinogen III oxidase"  
"OPBO21\_00060" 31603 "s59E13H2" 0 "GDP-6-deoxy-D-mannose reductase"  
"OPBO21\_00060" 31603 "s59E25H2" 0 "GDP-6-deoxy-D-mannose reductase"  
"OPBO21\_00060" 31603 "s59E5H2" 0.1011895 "GDP-6-deoxy-D-mannose reductase"  
"OPBO21\_00060" 31603 "s63E6H2" 0 "GDP-6-deoxy-D-mannose reductase"  
"OPBO21\_00065" 31608 "s59E13H2" 0.01835978 "hypothetical protein"  
"OPBO21\_00065" 31608 "s59E25H2" 0.1278119 "hypothetical protein"

"OPBO21\_00065" 31608 "s59E5H2" 0.7236351 "hypothetical protein"  
"OPBO21\_00065" 31608 "s63E6H2" 0.0772219 "hypothetical protein"  
"OPBO21\_00066" 31609 "s59E13H2" 0.005833129 "4-amino-4-deoxy-L-arabinose-phosphoundecaprenol flippase subunit ArnF"  
"OPBO21\_00066" 31609 "s59E25H2" 0 "4-amino-4-deoxy-L-arabinose-phosphoundecaprenol flippase subunit ArnF"  
"OPBO21\_00066" 31609 "s59E5H2" 0.2320251 "4-amino-4-deoxy-L-arabinose-phosphoundecaprenol flippase subunit ArnF"  
"OPBO21\_00066" 31609 "s63E6H2" 0.0148444 "4-amino-4-deoxy-L-arabinose-phosphoundecaprenol flippase subunit ArnF"  
"OPBO21\_00067" 31610 "s59E13H2" 0.06032418 "Argininosuccinate lyase"  
"OPBO21\_00067" 31610 "s59E25H2" 0 "Argininosuccinate lyase"  
"OPBO21\_00067" 31610 "s59E5H2" 0.604081 "Argininosuccinate lyase"  
"OPBO21\_00067" 31610 "s63E6H2" 0.02818483 "Argininosuccinate lyase"  
"OPBO21\_00068" 31611 "s59E13H2" 0.0622199 "putative protease YhbU precursor"  
"OPBO21\_00068" 31611 "s59E25H2" 0 "putative protease YhbU precursor"  
"OPBO21\_00068" 31611 "s59E5H2" 0.2960631 "putative protease YhbU precursor"  
"OPBO21\_00068" 31611 "s63E6H2" 0.02613414 "putative protease YhbU precursor"  
"OPBO21\_00069" 31612 "s59E13H2" 0 "PASTA domain protein"  
"OPBO21\_00069" 31612 "s59E25H2" 0 "PASTA domain protein"  
"OPBO21\_00069" 31612 "s59E5H2" 0 "PASTA domain protein"  
"OPBO21\_00069" 31612 "s63E6H2" 0.02066958 "PASTA domain protein"  
"OPBO21\_00071" 31614 "s59E13H2" 0 "Transposase DDE domain protein"  
"OPBO21\_00071" 31614 "s59E25H2" 0 "Transposase DDE domain protein"  
"OPBO21\_00071" 31614 "s59E5H2" 0.01539524 "Transposase DDE domain protein"  
"OPBO21\_00071" 31614 "s63E6H2" 0 "Transposase DDE domain protein"  
"OPBO21\_00072" 31615 "s59E13H2" 0.02760917 "Glucitol operon repressor"  
"OPBO21\_00072" 31615 "s59E25H2" 0 "Glucitol operon repressor"  
"OPBO21\_00072" 31615 "s59E5H2" 0.0200835 "Glucitol operon repressor"  
"OPBO21\_00072" 31615 "s63E6H2" 0.001909968 "Glucitol operon repressor"  
"OPBO21\_00073" 31616 "s59E13H2" 0 "Trimethylamine methyltransferase MttB"  
"OPBO21\_00073" 31616 "s59E25H2" 0 "Trimethylamine methyltransferase MttB"  
"OPBO21\_00073" 31616 "s59E5H2" 0 "Trimethylamine methyltransferase MttB"  
"OPBO21\_00073" 31616 "s63E6H2" 0 "Trimethylamine methyltransferase MttB"  
"OPBO21\_00074" 31617 "s59E13H2" 0 "IS2 repressor TnpA"  
"OPBO21\_00074" 31617 "s59E25H2" 0 "IS2 repressor TnpA"  
"OPBO21\_00074" 31617 "s59E5H2" 0 "IS2 repressor TnpA"  
"OPBO21\_00074" 31617 "s63E6H2" 0.006183209 "IS2 repressor TnpA"  
"OPBO21\_00075" 31618 "s59E13H2" 0.001017892 "IS2 transposase TnpB"  
"OPBO21\_00075" 31618 "s59E25H2" 0 "IS2 transposase TnpB"  
"OPBO21\_00075" 31618 "s59E5H2" 0.01665107 "IS2 transposase TnpB"  
"OPBO21\_00075" 31618 "s63E6H2" 0.0004448261 "IS2 transposase TnpB"  
"OPBO21\_00076" 31619 "s59E13H2" 0.01017495 "Integrase core domain protein"  
"OPBO21\_00076" 31619 "s59E25H2" 0 "Integrase core domain protein"  
"OPBO21\_00076" 31619 "s59E5H2" 0.01961929 "Integrase core domain protein"  
"OPBO21\_00076" 31619 "s63E6H2" 0 "Integrase core domain protein"  
"OPBO21\_00079" 31622 "s59E13H2" 0 "Aminopeptidase YwaD precursor"  
"OPBO21\_00079" 31622 "s59E25H2" 0 "Aminopeptidase YwaD precursor"  
"OPBO21\_00079" 31622 "s59E5H2" 0 "Aminopeptidase YwaD precursor"  
"OPBO21\_00079" 31622 "s63E6H2" 0 "Aminopeptidase YwaD precursor"  
"OPBO21\_00081" 31624 "s59E13H2" 0 "Cupin domain protein"

"OPBO21\_00081" 31624 "s59E25H2" 0 "Cupin domain protein"  
"OPBO21\_00081" 31624 "s59E5H2" 0.001064407 "Cupin domain protein"  
"OPBO21\_00081" 31624 "s63E6H2" 0.0005526627 "Cupin domain protein"  
"OPBO21\_00083" 31626 "s59E13H2" 0 "Pyruvate dehydrogenase E1 component subunit beta"  
"OPBO21\_00083" 31626 "s59E25H2" 0 "Pyruvate dehydrogenase E1 component subunit beta"  
"OPBO21\_00083" 31626 "s59E5H2" 0 "Pyruvate dehydrogenase E1 component subunit beta"  
"OPBO21\_00083" 31626 "s63E6H2" 0.009918841 "Pyruvate dehydrogenase E1 component subunit beta"  
"OPBO21\_00084" 31627 "s59E13H2" 0.0001973218 "2-oxoisovalerate dehydrogenase subunit beta"  
"OPBO21\_00084" 31627 "s59E25H2" 0 "2-oxoisovalerate dehydrogenase subunit beta"  
"OPBO21\_00084" 31627 "s59E5H2" 0 "2-oxoisovalerate dehydrogenase subunit beta"  
"OPBO21\_00084" 31627 "s63E6H2" 0.01692285 "2-oxoisovalerate dehydrogenase subunit beta"  
"OPBO21\_00085" 31628 "s59E13H2" 0.003584538 "Acetoin:2,6-dichlorophenolindophenol oxidoreductase subunit alpha"  
"OPBO21\_00085" 31628 "s59E25H2" 0 "Acetoin:2,6-dichlorophenolindophenol oxidoreductase subunit alpha"  
"OPBO21\_00085" 31628 "s59E5H2" 0 "Acetoin:2,6-dichlorophenolindophenol oxidoreductase subunit alpha"  
"OPBO21\_00085" 31628 "s63E6H2" 0.01176371 "Acetoin:2,6-dichlorophenolindophenol oxidoreductase subunit alpha"  
"OPBO21\_00089" 31632 "s59E13H2" 0 "methylcobalamin:coenzyme M methyltransferase"  
"OPBO21\_00089" 31632 "s59E25H2" 0 "methylcobalamin:coenzyme M methyltransferase"  
"OPBO21\_00089" 31632 "s59E5H2" 0 "methylcobalamin:coenzyme M methyltransferase"  
"OPBO21\_00089" 31632 "s63E6H2" 0 "methylcobalamin:coenzyme M methyltransferase"  
"OPBO21\_00090" 31633 "s59E13H2" 0 "N-acyl homoserine lactonase AttM"  
"OPBO21\_00090" 31633 "s59E25H2" 0 "N-acyl homoserine lactonase AttM"  
"OPBO21\_00090" 31633 "s59E5H2" 0 "N-acyl homoserine lactonase AttM"  
"OPBO21\_00090" 31633 "s63E6H2" 0 "N-acyl homoserine lactonase AttM"  
"OPBO21\_00091" 31634 "s59E13H2" 0 "Inner membrane ABC transporter permease protein YcjP"  
"OPBO21\_00091" 31634 "s59E25H2" 0 "Inner membrane ABC transporter permease protein YcjP"  
"OPBO21\_00091" 31634 "s59E5H2" 0 "Inner membrane ABC transporter permease protein YcjP"  
"OPBO21\_00091" 31634 "s63E6H2" 0 "Inner membrane ABC transporter permease protein YcjP"  
"OPBO21\_00092" 31635 "s59E13H2" 5.841572 "Pyruvate carboxylase subunit B"  
"OPBO21\_00092" 31635 "s59E25H2" 0 "Pyruvate carboxylase subunit B"  
"OPBO21\_00092" 31635 "s59E5H2" 0.3696083 "Pyruvate carboxylase subunit B"  
"OPBO21\_00092" 31635 "s63E6H2" 0.5729288 "Pyruvate carboxylase subunit B"  
"OPBO21\_00093" 31636 "s59E13H2" 3.636422 "Biotin transporter BioY"  
"OPBO21\_00093" 31636 "s59E25H2" 0 "Biotin transporter BioY"  
"OPBO21\_00093" 31636 "s59E5H2" 0.06304563 "Biotin transporter BioY"  
"OPBO21\_00093" 31636 "s63E6H2" 0.38723 "Biotin transporter BioY"  
"OPBO21\_00094" 31637 "s59E13H2" 0.01112161 "Putative lipoprotein YerB precursor"  
"OPBO21\_00094" 31637 "s59E25H2" 0 "Putative lipoprotein YerB precursor"  
"OPBO21\_00094" 31637 "s59E5H2" 0.06252282 "Putative lipoprotein YerB precursor"  
"OPBO21\_00094" 31637 "s63E6H2" 0.01741981 "Putative lipoprotein YerB precursor"  
"OPBO21\_00095" 31638 "s59E13H2" 0.01996705 "Hypoxanthine-guanine phosphoribosyltransferase"  
"OPBO21\_00095" 31638 "s59E25H2" 0 "Hypoxanthine-guanine phosphoribosyltransferase"  
"OPBO21\_00095" 31638 "s59E5H2" 0.1552616 "Hypoxanthine-guanine phosphoribosyltransferase"  
"OPBO21\_00095" 31638 "s63E6H2" 0.1346921 "Hypoxanthine-guanine phosphoribosyltransferase"  
"OPBO21\_00096" 31639 "s59E13H2" 0 "hypothetical protein"  
"OPBO21\_00096" 31639 "s59E25H2" 0 "hypothetical protein"  
"OPBO21\_00096" 31639 "s59E5H2" 0.1647846 "hypothetical protein"  
"OPBO21\_00096" 31639 "s63E6H2" 0.04673779 "hypothetical protein"

"OPBO21\_00097" 31640 "s59E13H2" 0.01972131 "hypothetical protein"  
"OPBO21\_00097" 31640 "s59E25H2" 0 "hypothetical protein"  
"OPBO21\_00097" 31640 "s59E5H2" 0.211621 "hypothetical protein"  
"OPBO21\_00097" 31640 "s63E6H2" 0.0440266 "hypothetical protein"  
"OPBO21\_00098" 31641 "s59E13H2" 0.005221119 "hypothetical protein"  
"OPBO21\_00098" 31641 "s59E25H2" 0 "hypothetical protein"  
"OPBO21\_00098" 31641 "s59E5H2" 0.1688825 "hypothetical protein"  
"OPBO21\_00098" 31641 "s63E6H2" 0.05488376 "hypothetical protein"  
"OPBO21\_00099" 31642 "s59E13H2" 0.02373674 "Serine acetyltransferase"  
"OPBO21\_00099" 31642 "s59E25H2" 0 "Serine acetyltransferase"  
"OPBO21\_00099" 31642 "s59E5H2" 0.6786728 "Serine acetyltransferase"  
"OPBO21\_00099" 31642 "s63E6H2" 0.08190063 "Serine acetyltransferase"  
"OPBO21\_00100" 31643 "s59E13H2" 0.03738431 "Deoxyuridine 5'-triphosphate nucleotidohydrolase"  
"OPBO21\_00100" 31643 "s59E25H2" 0 "Deoxyuridine 5'-triphosphate nucleotidohydrolase"  
"OPBO21\_00100" 31643 "s59E5H2" 0.0567597 "Deoxyuridine 5'-triphosphate nucleotidohydrolase"  
"OPBO21\_00100" 31643 "s63E6H2" 0.07616581 "Deoxyuridine 5'-triphosphate nucleotidohydrolase"  
"OPBO21\_00101" 31644 "s59E13H2" 0.06269058 "Ketol-acid reductoisomerase"  
"OPBO21\_00101" 31644 "s59E25H2" 0 "Ketol-acid reductoisomerase"  
"OPBO21\_00101" 31644 "s59E5H2" 0.4511457 "Ketol-acid reductoisomerase"  
"OPBO21\_00101" 31644 "s63E6H2" 0.1200447 "Ketol-acid reductoisomerase"  
"OPBO21\_00102" 31645 "s59E13H2" 0.02510638 "LexA repressor"  
"OPBO21\_00102" 31645 "s59E25H2" 0 "LexA repressor"  
"OPBO21\_00102" 31645 "s59E5H2" 0.7235322 "LexA repressor"  
"OPBO21\_00102" 31645 "s63E6H2" 0.1725939 "LexA repressor"  
"OPBO21\_00103" 31646 "s59E13H2" 0.01037742 "GTPase HflX"  
"OPBO21\_00103" 31646 "s59E25H2" 0 "GTPase HflX"  
"OPBO21\_00103" 31646 "s59E5H2" 0.9517591 "GTPase HflX"  
"OPBO21\_00103" 31646 "s63E6H2" 0.1962469 "GTPase HflX"  
"OPBO21\_00104" 31647 "s59E13H2" 0.01435338 "LL-diaminopimelate aminotransferase"  
"OPBO21\_00104" 31647 "s59E25H2" 0 "LL-diaminopimelate aminotransferase"  
"OPBO21\_00104" 31647 "s59E5H2" 0.7587063 "LL-diaminopimelate aminotransferase"  
"OPBO21\_00104" 31647 "s63E6H2" 0.1728576 "LL-diaminopimelate aminotransferase"  
"OPBO21\_00105" 31648 "s59E13H2" 0.0003485903 "Diaminopimelate epimerase"  
"OPBO21\_00105" 31648 "s59E25H2" 0 "Diaminopimelate epimerase"  
"OPBO21\_00105" 31648 "s59E5H2" 0.3084575 "Diaminopimelate epimerase"  
"OPBO21\_00105" 31648 "s63E6H2" 0.1332413 "Diaminopimelate epimerase"  
"OPBO21\_00106" 31649 "s59E13H2" 0.006699476 "tRNA dimethylallyltransferase"  
"OPBO21\_00106" 31649 "s59E25H2" 0 "tRNA dimethylallyltransferase"  
"OPBO21\_00106" 31649 "s59E5H2" 0.06107676 "tRNA dimethylallyltransferase"  
"OPBO21\_00106" 31649 "s63E6H2" 0.04668447 "tRNA dimethylallyltransferase"  
"OPBO21\_00107" 31650 "s59E13H2" 0.009121311 "(Dimethylallyl)adenosine tRNA methylthiotransferase MiaB"  
"OPBO21\_00107" 31650 "s59E25H2" 0 "(Dimethylallyl)adenosine tRNA methylthiotransferase MiaB"  
"OPBO21\_00107" 31650 "s59E5H2" 0.04536829 "(Dimethylallyl)adenosine tRNA methylthiotransferase MiaB"  
"OPBO21\_00107" 31650 "s63E6H2" 0.03187943 "(Dimethylallyl)adenosine tRNA methylthiotransferase MiaB"  
"OPBO21\_00108" 31651 "s59E13H2" 0 "Stage V sporulation protein S"  
"OPBO21\_00108" 31651 "s59E25H2" 0 "Stage V sporulation protein S"  
"OPBO21\_00108" 31651 "s59E5H2" 0.08675949 "Stage V sporulation protein S"



"OPBO21\_00108" 31651 "s63E6H2" 0.04943598 "Stage V sporulation protein S"  
"OPBO21\_00109" 31652 "s59E13H2" 0.01011778 "DNA mismatch repair protein"  
"OPBO21\_00109" 31652 "s59E25H2" 0 "DNA mismatch repair protein"  
"OPBO21\_00109" 31652 "s59E5H2" 0.07235865 "DNA mismatch repair protein"  
"OPBO21\_00109" 31652 "s63E6H2" 0.06188568 "DNA mismatch repair protein"  
"OPBO21\_00110" 31653 "s59E13H2" 0.338965 "Ribonuclease Y"  
"OPBO21\_00110" 31653 "s59E25H2" 0 "Ribonuclease Y"  
"OPBO21\_00110" 31653 "s59E5H2" 0.03974228 "Ribonuclease Y"  
"OPBO21\_00110" 31653 "s63E6H2" 0.03188736 "Ribonuclease Y"  
"OPBO21\_00111" 31654 "s59E13H2" 0.005587414 "putative oxidoreductase UxuB"  
"OPBO21\_00111" 31654 "s59E25H2" 0 "putative oxidoreductase UxuB"  
"OPBO21\_00111" 31654 "s59E5H2" 0 "putative oxidoreductase UxuB"  
"OPBO21\_00111" 31654 "s63E6H2" 0.2107845 "putative oxidoreductase UxuB"  
"OPBO21\_00112" 31655 "s59E13H2" 0.00567715 "Glyoxylate reductase"  
"OPBO21\_00112" 31655 "s59E25H2" 0 "Glyoxylate reductase"  
"OPBO21\_00112" 31655 "s59E5H2" 0 "Glyoxylate reductase"  
"OPBO21\_00112" 31655 "s63E6H2" 0.2961997 "Glyoxylate reductase"  
"OPBO21\_00113" 31656 "s59E13H2" 0.004905142 "Putative KHG/KDPG aldolase"  
"OPBO21\_00113" 31656 "s59E25H2" 0 "Putative KHG/KDPG aldolase"  
"OPBO21\_00113" 31656 "s59E5H2" 0 "Putative KHG/KDPG aldolase"  
"OPBO21\_00113" 31656 "s63E6H2" 0.4258859 "Putative KHG/KDPG aldolase"  
"OPBO21\_00114" 31657 "s59E13H2" 0.01923373 "2-dehydro-3-deoxygluconokinase"  
"OPBO21\_00114" 31657 "s59E25H2" 0 "2-dehydro-3-deoxygluconokinase"  
"OPBO21\_00114" 31657 "s59E5H2" 0.01351761 "2-dehydro-3-deoxygluconokinase"  
"OPBO21\_00114" 31657 "s63E6H2" 0.5891213 "2-dehydro-3-deoxygluconokinase"  
"OPBO21\_00115" 31658 "s59E13H2" 0.009551694 "Polyferredoxin protein MvhB"  
"OPBO21\_00115" 31658 "s59E25H2" 0 "Polyferredoxin protein MvhB"  
"OPBO21\_00115" 31658 "s59E5H2" 0.8835014 "Polyferredoxin protein MvhB"  
"OPBO21\_00115" 31658 "s63E6H2" 0.2117905 "Polyferredoxin protein MvhB"  
"OPBO21\_00116" 31659 "s59E13H2" 0.06297807 "hypothetical protein"  
"OPBO21\_00116" 31659 "s59E25H2" 0 "hypothetical protein"  
"OPBO21\_00116" 31659 "s59E5H2" 0.1079264 "hypothetical protein"  
"OPBO21\_00116" 31659 "s63E6H2" 0.2581336 "hypothetical protein"  
"OPBO21\_00117" 31660 "s59E13H2" 0.08579219 "exonuclease subunit SbcD"  
"OPBO21\_00117" 31660 "s59E25H2" 0 "exonuclease subunit SbcD"  
"OPBO21\_00117" 31660 "s59E5H2" 0.1260607 "exonuclease subunit SbcD"  
"OPBO21\_00117" 31660 "s63E6H2" 0.1480954 "exonuclease subunit SbcD"  
"OPBO21\_00118" 31661 "s59E13H2" 0.05093437 "Glycine/sarcosine N-methyltransferase"  
"OPBO21\_00118" 31661 "s59E25H2" 0 "Glycine/sarcosine N-methyltransferase"  
"OPBO21\_00118" 31661 "s59E5H2" 0.05480804 "Glycine/sarcosine N-methyltransferase"  
"OPBO21\_00118" 31661 "s63E6H2" 0.1839806 "Glycine/sarcosine N-methyltransferase"  
"OPBO21\_00119" 31662 "s59E13H2" 0.1312889 "Putative nickel-responsive regulator"  
"OPBO21\_00119" 31662 "s59E25H2" 0 "Putative nickel-responsive regulator"  
"OPBO21\_00119" 31662 "s59E5H2" 0.2382775 "Putative nickel-responsive regulator"  
"OPBO21\_00119" 31662 "s63E6H2" 0.2737284 "Putative nickel-responsive regulator"  
"OPBO21\_00120" 31663 "s59E13H2" 0.1344848 "Ultraviolet N-glycosylase/AP lyase"  
"OPBO21\_00120" 31663 "s59E25H2" 0 "Ultraviolet N-glycosylase/AP lyase"

"OPBO21\_00120" 31663 "s59E5H2" 0.1673341 "Ultraviolet N-glycosylase/AP lyase"  
"OPBO21\_00120" 31663 "s63E6H2" 0.272875 "Ultraviolet N-glycosylase/AP lyase"  
"OPBO21\_00121" 31664 "s59E13H2" 0.09318726 "DNA polymerase/3'-5' exonuclease PolX"  
"OPBO21\_00121" 31664 "s59E25H2" 0 "DNA polymerase/3'-5' exonuclease PolX"  
"OPBO21\_00121" 31664 "s59E5H2" 0.04570379 "DNA polymerase/3'-5' exonuclease PolX"  
"OPBO21\_00121" 31664 "s63E6H2" 0.7071538 "DNA polymerase/3'-5' exonuclease PolX"  
"OPBO21\_00122" 31665 "s59E13H2" 0.01873624 "Protein-L-isoaspartate O-methyltransferase"  
"OPBO21\_00122" 31665 "s59E25H2" 0 "Protein-L-isoaspartate O-methyltransferase"  
"OPBO21\_00122" 31665 "s59E5H2" 0.120736 "Protein-L-isoaspartate O-methyltransferase"  
"OPBO21\_00122" 31665 "s63E6H2" 0.03452233 "Protein-L-isoaspartate O-methyltransferase"  
"OPBO21\_00123" 31666 "s59E13H2" 0.004820708 "DNA polymerase/3'-5' exonuclease PolX"  
"OPBO21\_00123" 31666 "s59E25H2" 0 "DNA polymerase/3'-5' exonuclease PolX"  
"OPBO21\_00123" 31666 "s59E5H2" 0.1030399 "DNA polymerase/3'-5' exonuclease PolX"  
"OPBO21\_00123" 31666 "s63E6H2" 0.0683569 "DNA polymerase/3'-5' exonuclease PolX"  
"OPBO21\_00124" 31667 "s59E13H2" 0.003142411 "Radical SAM superfamily protein"  
"OPBO21\_00124" 31667 "s59E25H2" 0 "Radical SAM superfamily protein"  
"OPBO21\_00124" 31667 "s59E5H2" 0.0501816 "Radical SAM superfamily protein"  
"OPBO21\_00124" 31667 "s63E6H2" 0.07035153 "Radical SAM superfamily protein"  
"OPBO21\_00126" 31669 "s59E13H2" 0.002695966 "Phycocyanobilin lyase subunit alpha"  
"OPBO21\_00126" 31669 "s59E25H2" 0 "Phycocyanobilin lyase subunit alpha"  
"OPBO21\_00126" 31669 "s59E5H2" 0.1771352 "Phycocyanobilin lyase subunit alpha"  
"OPBO21\_00126" 31669 "s63E6H2" 0 "Phycocyanobilin lyase subunit alpha"  
"OPBO21\_00127" 31670 "s59E13H2" 0 "translocation protein TolB"  
"OPBO21\_00127" 31670 "s59E25H2" 0 "translocation protein TolB"  
"OPBO21\_00127" 31670 "s59E5H2" 0 "translocation protein TolB"  
"OPBO21\_00127" 31670 "s63E6H2" 0 "translocation protein TolB"  
"OPBO21\_00128" 31671 "s59E13H2" 0 "hypothetical protein"  
"OPBO21\_00128" 31671 "s59E25H2" 0 "hypothetical protein"  
"OPBO21\_00128" 31671 "s59E5H2" 0 "hypothetical protein"  
"OPBO21\_00128" 31671 "s63E6H2" 0 "hypothetical protein"  
"OPBO21\_00129" 31672 "s59E13H2" 0 "hypothetical protein"  
"OPBO21\_00129" 31672 "s59E25H2" 0 "hypothetical protein"  
"OPBO21\_00129" 31672 "s59E5H2" 0 "hypothetical protein"  
"OPBO21\_00129" 31672 "s63E6H2" 0 "hypothetical protein"  
"OPBO21\_00130" 31673 "s59E13H2" 0 "hypothetical protein"  
"OPBO21\_00130" 31673 "s59E25H2" 0 "hypothetical protein"  
"OPBO21\_00130" 31673 "s59E5H2" 0 "hypothetical protein"  
"OPBO21\_00130" 31673 "s63E6H2" 0 "hypothetical protein"  
"OPBO21\_00131" 31674 "s59E13H2" 0 "Endonuclease/Exonuclease/phosphatase family protein"  
"OPBO21\_00131" 31674 "s59E25H2" 0 "Endonuclease/Exonuclease/phosphatase family protein"  
"OPBO21\_00131" 31674 "s59E5H2" 0 "Endonuclease/Exonuclease/phosphatase family protein"  
"OPBO21\_00131" 31674 "s63E6H2" 0 "Endonuclease/Exonuclease/phosphatase family protein"  
"OPBO21\_00133" 31676 "s59E13H2" 0 "hypothetical protein"  
"OPBO21\_00133" 31676 "s59E25H2" 0 "hypothetical protein"  
"OPBO21\_00133" 31676 "s59E5H2" 0 "hypothetical protein"  
"OPBO21\_00133" 31676 "s63E6H2" 0 "hypothetical protein"  
"OPBO21\_00134" 31677 "s59E13H2" 0.01242683 "Tyrosine recombinase XerD"

"OPBO21\_00134" 31677 "s59E25H2" 0 "Tyrosine recombinase XerD"  
"OPBO21\_00134" 31677 "s59E5H2" 0.03305249 "Tyrosine recombinase XerD"  
"OPBO21\_00134" 31677 "s63E6H2" 0 "Tyrosine recombinase XerD"  
"OPBO21\_00135" 31678 "s59E13H2" 0.002801349 "Type II secretion system protein E"  
"OPBO21\_00135" 31678 "s59E25H2" 0 "Type II secretion system protein E"  
"OPBO21\_00135" 31678 "s59E5H2" 0.02740639 "Type II secretion system protein E"  
"OPBO21\_00135" 31678 "s63E6H2" 0.002061596 "Type II secretion system protein E"  
"OPBO21\_00136" 31679 "s59E13H2" 0.1027895 "DNA polymerase III subunit alpha"  
"OPBO21\_00136" 31679 "s59E25H2" 0 "DNA polymerase III subunit alpha"  
"OPBO21\_00136" 31679 "s59E5H2" 0.06853945 "DNA polymerase III subunit alpha"  
"OPBO21\_00136" 31679 "s63E6H2" 0.05167396 "DNA polymerase III subunit alpha"  
"OPBO21\_00137" 31680 "s59E13H2" 0.002921984 "Opine dehydrogenase"  
"OPBO21\_00137" 31680 "s59E25H2" 0 "Opine dehydrogenase"  
"OPBO21\_00137" 31680 "s59E5H2" 0.04598506 "Opine dehydrogenase"  
"OPBO21\_00137" 31680 "s63E6H2" 0.04389303 "Opine dehydrogenase"  
"OPBO21\_00138" 31681 "s59E13H2" 0.0001273918 "B12 binding domain protein"  
"OPBO21\_00138" 31681 "s59E25H2" 0 "B12 binding domain protein"  
"OPBO21\_00138" 31681 "s59E5H2" 0.1342466 "B12 binding domain protein"  
"OPBO21\_00138" 31681 "s63E6H2" 0.03533262 "B12 binding domain protein"  
"OPBO21\_00139" 31682 "s59E13H2" 0.02888118 "ATP phosphoribosyltransferase regulatory subunit"  
"OPBO21\_00139" 31682 "s59E25H2" 0 "ATP phosphoribosyltransferase regulatory subunit"  
"OPBO21\_00139" 31682 "s59E5H2" 0.05301401 "ATP phosphoribosyltransferase regulatory subunit"  
"OPBO21\_00139" 31682 "s63E6H2" 0.07921585 "ATP phosphoribosyltransferase regulatory subunit"  
"OPBO21\_00140" 31683 "s59E13H2" 0.002264861 "ATP phosphoribosyltransferase"  
"OPBO21\_00140" 31683 "s59E25H2" 0 "ATP phosphoribosyltransferase"  
"OPBO21\_00140" 31683 "s59E5H2" 0.07565475 "ATP phosphoribosyltransferase"  
"OPBO21\_00140" 31683 "s63E6H2" 0.07041844 "ATP phosphoribosyltransferase"  
"OPBO21\_00141" 31684 "s59E13H2" 0 "Imidazoleglycerol-phosphate dehydratase"  
"OPBO21\_00141" 31684 "s59E25H2" 0 "Imidazoleglycerol-phosphate dehydratase"  
"OPBO21\_00141" 31684 "s59E5H2" 0.02034087 "Imidazoleglycerol-phosphate dehydratase"  
"OPBO21\_00141" 31684 "s63E6H2" 0.1406342 "Imidazoleglycerol-phosphate dehydratase"  
"OPBO21\_00142" 31685 "s59E13H2" 0 "Imidazole glycerol phosphate synthase subunit HisH 1"  
"OPBO21\_00142" 31685 "s59E25H2" 0 "Imidazole glycerol phosphate synthase subunit HisH 1"  
"OPBO21\_00142" 31685 "s59E5H2" 0.008394425 "Imidazole glycerol phosphate synthase subunit HisH 1"  
"OPBO21\_00142" 31685 "s63E6H2" 0.1138342 "Imidazole glycerol phosphate synthase subunit HisH 1"  
"OPBO21\_00143" 31686 "s59E13H2" 0 "1-(5-phosphoribosyl)-5-[(5-phosphoribosylamino)methylideneamino] imidazole-4-carboxamide isomerase"  
"OPBO21\_00143" 31686 "s59E25H2" 0 "1-(5-phosphoribosyl)-5-[(5-phosphoribosylamino)methylideneamino] imidazole-4-carboxamide isomerase"  
"OPBO21\_00143" 31686 "s59E5H2" 0.02282383 "1-(5-phosphoribosyl)-5-[(5-phosphoribosylamino)methylideneamino] imidazole-4-carboxamide isomerase"  
"OPBO21\_00143" 31686 "s63E6H2" 0.1391729 "1-(5-phosphoribosyl)-5-[(5-phosphoribosylamino)methylideneamino] imidazole-4-carboxamide isomerase"  
"OPBO21\_00144" 31687 "s59E13H2" 0 "Imidazole glycerol phosphate synthase subunit HisF"  
"OPBO21\_00144" 31687 "s59E25H2" 0 "Imidazole glycerol phosphate synthase subunit HisF"  
"OPBO21\_00144" 31687 "s59E5H2" 0.04378663 "Imidazole glycerol phosphate synthase subunit HisF"  
"OPBO21\_00144" 31687 "s63E6H2" 0.1144893 "Imidazole glycerol phosphate synthase subunit HisF"  
"OPBO21\_00145" 31688 "s59E13H2" 0 "Phosphoribosyl-AMP cyclohydrolase"  
"OPBO21\_00145" 31688 "s59E25H2" 0 "Phosphoribosyl-AMP cyclohydrolase"  
"OPBO21\_00145" 31688 "s59E5H2" 0.02238058 "Phosphoribosyl-AMP cyclohydrolase"  
"OPBO21\_00145" 31688 "s63E6H2" 0.1785109 "Phosphoribosyl-AMP cyclohydrolase"

"OPBO21\_00146" 31689 "s59E13H2" 0.4285898 "6-phosphofructokinase"  
"OPBO21\_00146" 31689 "s59E25H2" 0 "6-phosphofructokinase"  
"OPBO21\_00146" 31689 "s59E5H2" 0.01995419 "6-phosphofructokinase"  
"OPBO21\_00146" 31689 "s63E6H2" 0.267558 "6-phosphofructokinase"  
"OPBO21\_00148" 31691 "s59E13H2" 0 "Xylulose kinase"  
"OPBO21\_00148" 31691 "s59E25H2" 0 "Xylulose kinase"  
"OPBO21\_00148" 31691 "s59E5H2" 0 "Xylulose kinase"  
"OPBO21\_00148" 31691 "s63E6H2" 0.1803483 "Xylulose kinase"  
"OPBO21\_00149" 31692 "s59E13H2" 0 "hypothetical protein"  
"OPBO21\_00149" 31692 "s59E25H2" 0 "hypothetical protein"  
"OPBO21\_00149" 31692 "s59E5H2" 0 "hypothetical protein"  
"OPBO21\_00149" 31692 "s63E6H2" 0.01437111 "hypothetical protein"  
"OPBO21\_00150" 31693 "s59E13H2" 0 "hypothetical protein"  
"OPBO21\_00150" 31693 "s59E25H2" 0 "hypothetical protein"  
"OPBO21\_00150" 31693 "s59E5H2" 0 "hypothetical protein"  
"OPBO21\_00150" 31693 "s63E6H2" 0.003808712 "hypothetical protein"  
"OPBO21\_00151" 31694 "s59E13H2" 0 "IS2 transposase TnpB"  
"OPBO21\_00151" 31694 "s59E25H2" 2.804734 "IS2 transposase TnpB"  
"OPBO21\_00151" 31694 "s59E5H2" 0 "IS2 transposase TnpB"  
"OPBO21\_00151" 31694 "s63E6H2" 0.006558918 "IS2 transposase TnpB"  
"OPBO21\_00152" 31695 "s59E13H2" 0 "hypothetical protein"  
"OPBO21\_00152" 31695 "s59E25H2" 0 "hypothetical protein"  
"OPBO21\_00152" 31695 "s59E5H2" 0 "hypothetical protein"  
"OPBO21\_00152" 31695 "s63E6H2" 0 "hypothetical protein"  
"OPBO21\_00153" 31696 "s59E13H2" 0 "Transcriptional regulatory protein TcrA"  
"OPBO21\_00153" 31696 "s59E25H2" 0 "Transcriptional regulatory protein TcrA"  
"OPBO21\_00153" 31696 "s59E5H2" 0 "Transcriptional regulatory protein TcrA"  
"OPBO21\_00153" 31696 "s63E6H2" 0 "Transcriptional regulatory protein TcrA"  
"OPBO21\_00154" 31697 "s59E13H2" 0 "Alkaline phosphatase synthesis sensor protein PhoR"  
"OPBO21\_00154" 31697 "s59E25H2" 34.62016 "Alkaline phosphatase synthesis sensor protein PhoR"  
"OPBO21\_00154" 31697 "s59E5H2" 0 "Alkaline phosphatase synthesis sensor protein PhoR"  
"OPBO21\_00154" 31697 "s63E6H2" 0 "Alkaline phosphatase synthesis sensor protein PhoR"  
"OPBO21\_00159" 31702 "s59E13H2" 0 "Epoxyqueuosine reductase"  
"OPBO21\_00159" 31702 "s59E25H2" 0 "Epoxyqueuosine reductase"  
"OPBO21\_00159" 31702 "s59E5H2" 0 "Epoxyqueuosine reductase"  
"OPBO21\_00159" 31702 "s63E6H2" 0.006549474 "Epoxyqueuosine reductase"  
"OPBO21\_00160" 31703 "s59E13H2" 0.0006642982 "Ribosome-binding ATPase YchF"  
"OPBO21\_00160" 31703 "s59E25H2" 0 "Ribosome-binding ATPase YchF"  
"OPBO21\_00160" 31703 "s59E5H2" 0.04720832 "Ribosome-binding ATPase YchF"  
"OPBO21\_00160" 31703 "s63E6H2" 0.07754509 "Ribosome-binding ATPase YchF"  
"OPBO21\_00161" 31704 "s59E13H2" 0.0003176996 "hypothetical protein"  
"OPBO21\_00161" 31704 "s59E25H2" 0 "hypothetical protein"  
"OPBO21\_00161" 31704 "s59E5H2" 0.03012326 "hypothetical protein"  
"OPBO21\_00161" 31704 "s63E6H2" 0.02639085 "hypothetical protein"  
"OPBO21\_00162" 31705 "s59E13H2" 0.001869546 "Murein DD-endopeptidase MepM"  
"OPBO21\_00162" 31705 "s59E25H2" 0 "Murein DD-endopeptidase MepM"  
"OPBO21\_00162" 31705 "s59E5H2" 0.01454767 "Murein DD-endopeptidase MepM"

"OPBO21\_00162" 31705 "s63E6H2" 0.01930576 "Murein DD-endopeptidase MepM"  
"OPBO21\_00163" 31706 "s59E13H2" 0.002765967 "Prephenate dehydratase"  
"OPBO21\_00163" 31706 "s59E25H2" 0 "Prephenate dehydratase"  
"OPBO21\_00163" 31706 "s59E5H2" 0.01353822 "Prephenate dehydratase"  
"OPBO21\_00163" 31706 "s63E6H2" 0.04729047 "Prephenate dehydratase"  
"OPBO21\_00164" 31707 "s59E13H2" 0.0172335 "Serine--tRNA ligase"  
"OPBO21\_00164" 31707 "s59E25H2" 0 "Serine--tRNA ligase"  
"OPBO21\_00164" 31707 "s59E5H2" 0.01734338 "Serine--tRNA ligase"  
"OPBO21\_00164" 31707 "s63E6H2" 0.06503648 "Serine--tRNA ligase"  
"OPBO21\_00166" 31709 "s59E13H2" 1.818971 "hypothetical protein"  
"OPBO21\_00166" 31709 "s59E25H2" 0 "hypothetical protein"  
"OPBO21\_00166" 31709 "s59E5H2" 0.01715154 "hypothetical protein"  
"OPBO21\_00166" 31709 "s63E6H2" 0.5942432 "hypothetical protein"  
"OPBO21\_00168" 31711 "s59E13H2" 0.4484916 "NADH-plastoquinone oxidoreductase subunit"  
"OPBO21\_00168" 31711 "s59E25H2" 0.1585586 "NADH-plastoquinone oxidoreductase subunit"  
"OPBO21\_00168" 31711 "s59E5H2" 0.1120362 "NADH-plastoquinone oxidoreductase subunit"  
"OPBO21\_00168" 31711 "s63E6H2" 1.340067 "NADH-plastoquinone oxidoreductase subunit"  
"OPBO21\_00170" 31713 "s59E13H2" 0.001521907 "Rubrerythrin-1"  
"OPBO21\_00170" 31713 "s59E25H2" 0 "Rubrerythrin-1"  
"OPBO21\_00170" 31713 "s59E5H2" 0 "Rubrerythrin-1"  
"OPBO21\_00170" 31713 "s63E6H2" 0.001028803 "Rubrerythrin-1"  
"OPBO21\_00171" 31714 "s59E13H2" 0.01066711 "High molecular weight rubredoxin"  
"OPBO21\_00171" 31714 "s59E25H2" 0 "High molecular weight rubredoxin"  
"OPBO21\_00171" 31714 "s59E5H2" 0.003268494 "High molecular weight rubredoxin"  
"OPBO21\_00171" 31714 "s63E6H2" 0.00908625 "High molecular weight rubredoxin"  
"OPBO21\_00172" 31715 "s59E13H2" 0 "Type A flavoprotein FprA"  
"OPBO21\_00172" 31715 "s59E25H2" 0 "Type A flavoprotein FprA"  
"OPBO21\_00172" 31715 "s59E5H2" 0.002719387 "Type A flavoprotein FprA"  
"OPBO21\_00172" 31715 "s63E6H2" 0.002810854 "Type A flavoprotein FprA"  
"OPBO21\_00173" 31716 "s59E13H2" 0 "Desulfoferrodoxin"  
"OPBO21\_00173" 31716 "s59E25H2" 0 "Desulfoferrodoxin"  
"OPBO21\_00173" 31716 "s59E5H2" 0 "Desulfoferrodoxin"  
"OPBO21\_00173" 31716 "s63E6H2" 0 "Desulfoferrodoxin"  
"OPBO21\_00174" 31717 "s59E13H2" 0 "hypothetical protein"  
"OPBO21\_00174" 31717 "s59E25H2" 0 "hypothetical protein"  
"OPBO21\_00174" 31717 "s59E5H2" 0 "hypothetical protein"  
"OPBO21\_00174" 31717 "s63E6H2" 0 "hypothetical protein"  
"OPBO21\_00175" 31718 "s59E13H2" 0.008409684 "L-2-hydroxyglutarate oxidase LhgO"  
"OPBO21\_00175" 31718 "s59E25H2" 0 "L-2-hydroxyglutarate oxidase LhgO"  
"OPBO21\_00175" 31718 "s59E5H2" 0.04775456 "L-2-hydroxyglutarate oxidase LhgO"  
"OPBO21\_00175" 31718 "s63E6H2" 0.00650459 "L-2-hydroxyglutarate oxidase LhgO"  
"OPBO21\_00176" 31719 "s59E13H2" 0.006152441 "Double zinc ribbon"  
"OPBO21\_00176" 31719 "s59E25H2" 0 "Double zinc ribbon"  
"OPBO21\_00176" 31719 "s59E5H2" 0.1169788 "Double zinc ribbon"  
"OPBO21\_00176" 31719 "s63E6H2" 0.003893924 "Double zinc ribbon"  
"OPBO21\_00177" 31720 "s59E13H2" 0.008247055 "Multidrug export protein MepA"  
"OPBO21\_00177" 31720 "s59E25H2" 0 "Multidrug export protein MepA"

"OPBO21\_00177" 31720 "s59E5H2" 0.3274936 "Multidrug export protein MepA"  
"OPBO21\_00177" 31720 "s63E6H2" 0.007230266 "Multidrug export protein MepA"  
"OPBO21\_00178" 31721 "s59E13H2" 0.007196827 "hypothetical protein"  
"OPBO21\_00178" 31721 "s59E25H2" 0 "hypothetical protein"  
"OPBO21\_00178" 31721 "s59E5H2" 0.002373972 "hypothetical protein"  
"OPBO21\_00178" 31721 "s63E6H2" 0.005833307 "hypothetical protein"  
"OPBO21\_00179" 31722 "s59E13H2" 0 "Glyoxalase-like domain protein"  
"OPBO21\_00179" 31722 "s59E25H2" 0 "Glyoxalase-like domain protein"  
"OPBO21\_00179" 31722 "s59E5H2" 0.004136787 "Glyoxalase-like domain protein"  
"OPBO21\_00179" 31722 "s63E6H2" 0 "Glyoxalase-like domain protein"  
"OPBO21\_00180" 31723 "s59E13H2" 0.02061747 "Carboxymuconolactone decarboxylase family protein"  
"OPBO21\_00180" 31723 "s59E25H2" 0 "Carboxymuconolactone decarboxylase family protein"  
"OPBO21\_00180" 31723 "s59E5H2" 0 "Carboxymuconolactone decarboxylase family protein"  
"OPBO21\_00180" 31723 "s63E6H2" 0.08001129 "Carboxymuconolactone decarboxylase family protein"  
"OPBO21\_00181" 31724 "s59E13H2" 0.002255134 "Radical SAM superfamily protein"  
"OPBO21\_00181" 31724 "s59E25H2" 0 "Radical SAM superfamily protein"  
"OPBO21\_00181" 31724 "s59E5H2" 0.01057562 "Radical SAM superfamily protein"  
"OPBO21\_00181" 31724 "s63E6H2" 0.01021131 "Radical SAM superfamily protein"  
"OPBO21\_00183" 31726 "s59E13H2" 0 "Transposase DDE domain protein"  
"OPBO21\_00183" 31726 "s59E25H2" 0 "Transposase DDE domain protein"  
"OPBO21\_00183" 31726 "s59E5H2" 0.0002953555 "Transposase DDE domain protein"  
"OPBO21\_00183" 31726 "s63E6H2" 0.0002379209 "Transposase DDE domain protein"  
"OPBO21\_00184" 31727 "s59E13H2" 0 "N-acyltransferase YncA"  
"OPBO21\_00184" 31727 "s59E25H2" 0 "N-acyltransferase YncA"  
"OPBO21\_00184" 31727 "s59E5H2" 0 "N-acyltransferase YncA"  
"OPBO21\_00184" 31727 "s63E6H2" 0.02635448 "N-acyltransferase YncA"  
"OPBO21\_00185" 31728 "s59E13H2" 0.006907788 "NADH-dependent butanol dehydrogenase A"  
"OPBO21\_00185" 31728 "s59E25H2" 0 "NADH-dependent butanol dehydrogenase A"  
"OPBO21\_00185" 31728 "s59E5H2" 0 "NADH-dependent butanol dehydrogenase A"  
"OPBO21\_00185" 31728 "s63E6H2" 0.06745713 "NADH-dependent butanol dehydrogenase A"  
"OPBO21\_00186" 31729 "s59E13H2" 0.0225027 "Fosmidomycin resistance protein"  
"OPBO21\_00186" 31729 "s59E25H2" 0 "Fosmidomycin resistance protein"  
"OPBO21\_00186" 31729 "s59E5H2" 0.005088454 "Fosmidomycin resistance protein"  
"OPBO21\_00186" 31729 "s63E6H2" 0.05535137 "Fosmidomycin resistance protein"  
"OPBO21\_00190" 31733 "s59E13H2" 0.02893145 "DNA polymerase III subunit tau"  
"OPBO21\_00190" 31733 "s59E25H2" 0 "DNA polymerase III subunit tau"  
"OPBO21\_00190" 31733 "s59E5H2" 0.02007167 "DNA polymerase III subunit tau"  
"OPBO21\_00190" 31733 "s63E6H2" 0.0508669 "DNA polymerase III subunit tau"  
"OPBO21\_00192" 31735 "s59E13H2" 0.05820617 "Nucleoid-associated protein"  
"OPBO21\_00192" 31735 "s59E25H2" 0 "Nucleoid-associated protein"  
"OPBO21\_00192" 31735 "s59E5H2" 0 "Nucleoid-associated protein"  
"OPBO21\_00192" 31735 "s63E6H2" 0.03537568 "Nucleoid-associated protein"  
"OPBO21\_00193" 31736 "s59E13H2" 0.06084984 "Recombination protein RecR"  
"OPBO21\_00193" 31736 "s59E25H2" 0 "Recombination protein RecR"  
"OPBO21\_00193" 31736 "s59E5H2" 0.01305044 "Recombination protein RecR"  
"OPBO21\_00193" 31736 "s63E6H2" 0.0365264 "Recombination protein RecR"  
"OPBO21\_00194" 31737 "s59E13H2" 0.05710171 "Pyruvate-flavodoxin oxidoreductase"

"OPBO21\_00194" 31737 "s59E25H2" 0 "Pyruvate-flavodoxin oxidoreductase"  
"OPBO21\_00194" 31737 "s59E5H2" 0.02434977 "Pyruvate-flavodoxin oxidoreductase"  
"OPBO21\_00194" 31737 "s63E6H2" 0.2699063 "Pyruvate-flavodoxin oxidoreductase"  
"OPBO21\_00195" 31738 "s59E13H2" 0.1458856 "Aspartokinase"  
"OPBO21\_00195" 31738 "s59E25H2" 0 "Aspartokinase"  
"OPBO21\_00195" 31738 "s59E5H2" 0.04123131 "Aspartokinase"  
"OPBO21\_00195" 31738 "s63E6H2" 0.5051423 "Aspartokinase"  
"OPBO21\_00196" 31739 "s59E13H2" 0.08297028 "Replication-associated recombination protein A"  
"OPBO21\_00196" 31739 "s59E25H2" 0 "Replication-associated recombination protein A"  
"OPBO21\_00196" 31739 "s59E5H2" 0.1141335 "Replication-associated recombination protein A"  
"OPBO21\_00196" 31739 "s63E6H2" 0.4254553 "Replication-associated recombination protein A"  
"OPBO21\_00197" 31740 "s59E13H2" 0.06664469 "hypothetical protein"  
"OPBO21\_00197" 31740 "s59E25H2" 0 "hypothetical protein"  
"OPBO21\_00197" 31740 "s59E5H2" 0.04973223 "hypothetical protein"  
"OPBO21\_00197" 31740 "s63E6H2" 0.4013398 "hypothetical protein"  
"OPBO21\_00198" 31741 "s59E13H2" 0.08479799 "putative sugar kinase"  
"OPBO21\_00198" 31741 "s59E25H2" 0 "putative sugar kinase"  
"OPBO21\_00198" 31741 "s59E5H2" 0.3065699 "putative sugar kinase"  
"OPBO21\_00198" 31741 "s63E6H2" 0.3961272 "putative sugar kinase"  
"OPBO21\_00199" 31742 "s59E13H2" 0 "Transposase IS200 like protein"  
"OPBO21\_00199" 31742 "s59E25H2" 0 "Transposase IS200 like protein"  
"OPBO21\_00199" 31742 "s59E5H2" 0.02512819 "Transposase IS200 like protein"  
"OPBO21\_00199" 31742 "s63E6H2" 0 "Transposase IS200 like protein"  
"OPBO21\_00200" 31743 "s59E13H2" 0 "putative transposase"  
"OPBO21\_00200" 31743 "s59E25H2" 0 "putative transposase"  
"OPBO21\_00200" 31743 "s59E5H2" 0.01642628 "putative transposase"  
"OPBO21\_00200" 31743 "s63E6H2" 0 "putative transposase"  
"OPBO21\_00201" 31744 "s59E13H2" 0.03199573 "S-methyl-5'-thioadenosine phosphorylase"  
"OPBO21\_00201" 31744 "s59E25H2" 0 "S-methyl-5'-thioadenosine phosphorylase"  
"OPBO21\_00201" 31744 "s59E5H2" 0.004963592 "S-methyl-5'-thioadenosine phosphorylase"  
"OPBO21\_00201" 31744 "s63E6H2" 0.4779673 "S-methyl-5'-thioadenosine phosphorylase"  
"OPBO21\_00202" 31745 "s59E13H2" 0.1245605 "Phosphoribosylaminoimidazole-succinocarboxamide synthase"  
"OPBO21\_00202" 31745 "s59E25H2" 0 "Phosphoribosylaminoimidazole-succinocarboxamide synthase"  
"OPBO21\_00202" 31745 "s59E5H2" 1.032602 "Phosphoribosylaminoimidazole-succinocarboxamide synthase"  
"OPBO21\_00202" 31745 "s63E6H2" 0.4673002 "Phosphoribosylaminoimidazole-succinocarboxamide synthase"  
"OPBO21\_00203" 31746 "s59E13H2" 0.0632137 "hypothetical protein"  
"OPBO21\_00203" 31746 "s59E25H2" 0 "hypothetical protein"  
"OPBO21\_00203" 31746 "s59E5H2" 0.5189756 "hypothetical protein"  
"OPBO21\_00203" 31746 "s63E6H2" 0.2929639 "hypothetical protein"  
"OPBO21\_00204" 31747 "s59E13H2" 0 "UDP-glucose:undecaprenyl-phosphate glucose-1-phosphate transferase"  
"OPBO21\_00204" 31747 "s59E25H2" 0 "UDP-glucose:undecaprenyl-phosphate glucose-1-phosphate transferase"  
"OPBO21\_00204" 31747 "s59E5H2" 0 "UDP-glucose:undecaprenyl-phosphate glucose-1-phosphate transferase"  
"OPBO21\_00204" 31747 "s63E6H2" 0 "UDP-glucose:undecaprenyl-phosphate glucose-1-phosphate transferase"  
"OPBO21\_00205" 31748 "s59E13H2" 0 "Sporulation and spore germination"  
"OPBO21\_00205" 31748 "s59E25H2" 0 "Sporulation and spore germination"  
"OPBO21\_00205" 31748 "s59E5H2" 0.01011271 "Sporulation and spore germination"  
"OPBO21\_00205" 31748 "s63E6H2" 0.004195803 "Sporulation and spore germination"

"OPBO21\_00206" 31749 "s59E13H2" 0 "N-acetylmuramoyl-L-alanine amidase LytC precursor"  
"OPBO21\_00206" 31749 "s59E25H2" 72.37807 "N-acetylmuramoyl-L-alanine amidase LytC precursor"  
"OPBO21\_00206" 31749 "s59E5H2" 0.03163406 "N-acetylmuramoyl-L-alanine amidase LytC precursor"  
"OPBO21\_00206" 31749 "s63E6H2" 0.005434298 "N-acetylmuramoyl-L-alanine amidase LytC precursor"  
"OPBO21\_00207" 31750 "s59E13H2" 0 "bifunctional 3-demethylubiquinone-9 3-methyltransferase/ 2-octaprenyl-6-hydroxy phenol methylase"  
"OPBO21\_00207" 31750 "s59E25H2" 0 "bifunctional 3-demethylubiquinone-9 3-methyltransferase/ 2-octaprenyl-6-hydroxy phenol methylase"  
"OPBO21\_00207" 31750 "s59E5H2" 0.05690383 "bifunctional 3-demethylubiquinone-9 3-methyltransferase/ 2-octaprenyl-6-hydroxy phenol methylase"  
"OPBO21\_00207" 31750 "s63E6H2" 0.002606282 "bifunctional 3-demethylubiquinone-9 3-methyltransferase/ 2-octaprenyl-6-hydroxy phenol methylase"  
"OPBO21\_00208" 31751 "s59E13H2" 0 "Teichoic acid translocation permease protein TagG"  
"OPBO21\_00208" 31751 "s59E25H2" 0 "Teichoic acid translocation permease protein TagG"  
"OPBO21\_00208" 31751 "s59E5H2" 0.03299444 "Teichoic acid translocation permease protein TagG"  
"OPBO21\_00208" 31751 "s63E6H2" 0.01922432 "Teichoic acid translocation permease protein TagG"  
"OPBO21\_00209" 31752 "s59E13H2" 0 "Teichoic acids export ATP-binding protein TagH"  
"OPBO21\_00209" 31752 "s59E25H2" 0 "Teichoic acids export ATP-binding protein TagH"  
"OPBO21\_00209" 31752 "s59E5H2" 0.04413397 "Teichoic acids export ATP-binding protein TagH"  
"OPBO21\_00209" 31752 "s63E6H2" 0.003110547 "Teichoic acids export ATP-binding protein TagH"  
"OPBO21\_00210" 31753 "s59E13H2" 0 "N-acetylglucosaminyl-diphospho-decaprenol L-rhamnosyltransferase"  
"OPBO21\_00210" 31753 "s59E25H2" 0 "N-acetylglucosaminyl-diphospho-decaprenol L-rhamnosyltransferase"  
"OPBO21\_00210" 31753 "s59E5H2" 0.1186394 "N-acetylglucosaminyl-diphospho-decaprenol L-rhamnosyltransferase"  
"OPBO21\_00210" 31753 "s63E6H2" 0.002598203 "N-acetylglucosaminyl-diphospho-decaprenol L-rhamnosyltransferase"  
"OPBO21\_00211" 31754 "s59E13H2" 0 "Mannosylfructose-phosphate synthase"  
"OPBO21\_00211" 31754 "s59E25H2" 0 "Mannosylfructose-phosphate synthase"  
"OPBO21\_00211" 31754 "s59E5H2" 0.1191311 "Mannosylfructose-phosphate synthase"  
"OPBO21\_00211" 31754 "s63E6H2" 0.1106121 "Mannosylfructose-phosphate synthase"  
"OPBO21\_00212" 31755 "s59E13H2" 0 "D-inositol 3-phosphate glycosyltransferase"  
"OPBO21\_00212" 31755 "s59E25H2" 0 "D-inositol 3-phosphate glycosyltransferase"  
"OPBO21\_00212" 31755 "s59E5H2" 0.1637561 "D-inositol 3-phosphate glycosyltransferase"  
"OPBO21\_00212" 31755 "s63E6H2" 0.1064257 "D-inositol 3-phosphate glycosyltransferase"  
"OPBO21\_00213" 31756 "s59E13H2" 0 "hypothetical protein"  
"OPBO21\_00213" 31756 "s59E25H2" 0 "hypothetical protein"  
"OPBO21\_00213" 31756 "s59E5H2" 0 "hypothetical protein"  
"OPBO21\_00213" 31756 "s63E6H2" 0 "hypothetical protein"  
"OPBO21\_00214" 31757 "s59E13H2" 0.003007029 "N-acetylgalactosamine-N,N'-diacetylbaucillosaminyl-diphospho-undecaprenol 4-alpha-N-acetylgalactosaminyltransferase"  
"OPBO21\_00214" 31757 "s59E25H2" 0 "N-acetylgalactosamine-N,N'-diacetylbaucillosaminyl-diphospho-undecaprenol 4-alpha-N-acetylgalactosaminyltransferase"  
"OPBO21\_00214" 31757 "s59E5H2" 0.01169933 "N-acetylgalactosamine-N,N'-diacetylbaucillosaminyl-diphospho-undecaprenol 4-alpha-N-acetylgalactosaminyltransferase"  
"OPBO21\_00214" 31757 "s63E6H2" 0.2377043 "N-acetylgalactosamine-N,N'-diacetylbaucillosaminyl-diphospho-undecaprenol 4-alpha-N-acetylgalactosaminyltransferase"  
"OPBO21\_00215" 31758 "s59E13H2" 0.002747675 "D-inositol 3-phosphate glycosyltransferase"  
"OPBO21\_00215" 31758 "s59E25H2" 0 "D-inositol 3-phosphate glycosyltransferase"  
"OPBO21\_00215" 31758 "s59E5H2" 0.02736863 "D-inositol 3-phosphate glycosyltransferase"  
"OPBO21\_00215" 31758 "s63E6H2" 0.3034635 "D-inositol 3-phosphate glycosyltransferase"  
"OPBO21\_00216" 31759 "s59E13H2" 0.001991865 "Arylesterase precursor"  
"OPBO21\_00216" 31759 "s59E25H2" 0 "Arylesterase precursor"  
"OPBO21\_00216" 31759 "s59E5H2" 0.05307346 "Arylesterase precursor"  
"OPBO21\_00216" 31759 "s63E6H2" 0.4346588 "Arylesterase precursor"  
"OPBO21\_00217" 31760 "s59E13H2" 0.01199854 "N-acetylglucosaminyl-diphospho-decaprenol L-rhamnosyltransferase"  
"OPBO21\_00217" 31760 "s59E25H2" 0 "N-acetylglucosaminyl-diphospho-decaprenol L-rhamnosyltransferase"  
"OPBO21\_00217" 31760 "s59E5H2" 0.02860703 "N-acetylglucosaminyl-diphospho-decaprenol L-rhamnosyltransferase"



"OPBO21\_00217" 31760 "s63E6H2" 0.4683215 "N-acetylglucosaminyl-diphospho-decaprenol L-rhamnosyltransferase"  
"OPBO21\_00218" 31761 "s59E13H2" 0 "hypothetical protein"  
"OPBO21\_00218" 31761 "s59E25H2" 0 "hypothetical protein"  
"OPBO21\_00218" 31761 "s59E5H2" 0 "hypothetical protein"  
"OPBO21\_00218" 31761 "s63E6H2" 7.346573e-05 "hypothetical protein"  
"OPBO21\_00219" 31762 "s59E13H2" 0.00504559 "hypothetical protein"  
"OPBO21\_00219" 31762 "s59E25H2" 0 "hypothetical protein"  
"OPBO21\_00219" 31762 "s59E5H2" 0.002683407 "hypothetical protein"  
"OPBO21\_00219" 31762 "s63E6H2" 0.04604216 "hypothetical protein"  
"OPBO21\_00220" 31763 "s59E13H2" 0 "hypothetical protein"  
"OPBO21\_00220" 31763 "s59E25H2" 0 "hypothetical protein"  
"OPBO21\_00220" 31763 "s59E5H2" 0 "hypothetical protein"  
"OPBO21\_00220" 31763 "s63E6H2" 0.00456588 "hypothetical protein"  
"OPBO21\_00221" 31764 "s59E13H2" 0.002974115 "dTDP-4-dehydrorhamnose reductase"  
"OPBO21\_00221" 31764 "s59E25H2" 0 "dTDP-4-dehydrorhamnose reductase"  
"OPBO21\_00221" 31764 "s59E5H2" 0.03669069 "dTDP-4-dehydrorhamnose reductase"  
"OPBO21\_00221" 31764 "s63E6H2" 0.01279446 "dTDP-4-dehydrorhamnose reductase"  
"OPBO21\_00222" 31765 "s59E13H2" 0.01004216 "hypothetical protein"  
"OPBO21\_00222" 31765 "s59E25H2" 0 "hypothetical protein"  
"OPBO21\_00222" 31765 "s59E5H2" 0.0005882951 "hypothetical protein"  
"OPBO21\_00222" 31765 "s63E6H2" 0.01263761 "hypothetical protein"  
"OPBO21\_00223" 31766 "s59E13H2" 0.005982694 "hypothetical protein"  
"OPBO21\_00223" 31766 "s59E25H2" 0 "hypothetical protein"  
"OPBO21\_00223" 31766 "s59E5H2" 0 "hypothetical protein"  
"OPBO21\_00223" 31766 "s63E6H2" 0.01412979 "hypothetical protein"  
"OPBO21\_00224" 31767 "s59E13H2" 0.03669452 "dTDP-glucose 4,6-dehydratase"  
"OPBO21\_00224" 31767 "s59E25H2" 0 "dTDP-glucose 4,6-dehydratase"  
"OPBO21\_00224" 31767 "s59E5H2" 0.05639809 "dTDP-glucose 4,6-dehydratase"  
"OPBO21\_00224" 31767 "s63E6H2" 0.2274244 "dTDP-glucose 4,6-dehydratase"  
"OPBO21\_00225" 31768 "s59E13H2" 0.01177155 "Undecaprenyl-phosphate 4-deoxy-4-formamido-L-arabinose transferase"  
"OPBO21\_00225" 31768 "s59E25H2" 0 "Undecaprenyl-phosphate 4-deoxy-4-formamido-L-arabinose transferase"  
"OPBO21\_00225" 31768 "s59E5H2" 0.07221893 "Undecaprenyl-phosphate 4-deoxy-4-formamido-L-arabinose transferase"  
"OPBO21\_00225" 31768 "s63E6H2" 0.2920686 "Undecaprenyl-phosphate 4-deoxy-4-formamido-L-arabinose transferase"  
"OPBO21\_00226" 31769 "s59E13H2" 0.01909664 "pyrroloquinoline quinone biosynthesis protein PqqE"  
"OPBO21\_00226" 31769 "s59E25H2" 0 "pyrroloquinoline quinone biosynthesis protein PqqE"  
"OPBO21\_00226" 31769 "s59E5H2" 0.04672603 "pyrroloquinoline quinone biosynthesis protein PqqE"  
"OPBO21\_00226" 31769 "s63E6H2" 0.111399 "pyrroloquinoline quinone biosynthesis protein PqqE"  
"OPBO21\_00227" 31770 "s59E13H2" 0.01563413 "3 beta-hydroxysteroid dehydrogenase/Delta 5--"  
"OPBO21\_00227" 31770 "s59E25H2" 0 "3 beta-hydroxysteroid dehydrogenase/Delta 5--"  
"OPBO21\_00227" 31770 "s59E5H2" 0.06963939 "3 beta-hydroxysteroid dehydrogenase/Delta 5--"  
"OPBO21\_00227" 31770 "s63E6H2" 0.04352176 "3 beta-hydroxysteroid dehydrogenase/Delta 5--"  
"OPBO21\_00228" 31771 "s59E13H2" 0.001914383 "Galactoside O-acetyltransferase"  
"OPBO21\_00228" 31771 "s59E25H2" 0 "Galactoside O-acetyltransferase"  
"OPBO21\_00228" 31771 "s59E5H2" 0.004065327 "Galactoside O-acetyltransferase"  
"OPBO21\_00228" 31771 "s63E6H2" 0.00634886 "Galactoside O-acetyltransferase"  
"OPBO21\_00229" 31772 "s59E13H2" 0.02817802 "hypothetical protein"  
"OPBO21\_00229" 31772 "s59E25H2" 0 "hypothetical protein"

"OPBO21\_00229" 31772 "s59E5H2" 0.01608421 "hypothetical protein"  
"OPBO21\_00229" 31772 "s63E6H2" 0.06401486 "hypothetical protein"  
"OPBO21\_00230" 31773 "s59E13H2" 0.01814863 "GDSL-like Lipase/Acylhydrolase"  
"OPBO21\_00230" 31773 "s59E25H2" 0 "GDSL-like Lipase/Acylhydrolase"  
"OPBO21\_00230" 31773 "s59E5H2" 0.000404195 "GDSL-like Lipase/Acylhydrolase"  
"OPBO21\_00230" 31773 "s63E6H2" 0.06328722 "GDSL-like Lipase/Acylhydrolase"  
"OPBO21\_00231" 31774 "s59E13H2" 0.02114421 "hypothetical protein"  
"OPBO21\_00231" 31774 "s59E25H2" 0 "hypothetical protein"  
"OPBO21\_00231" 31774 "s59E5H2" 0 "hypothetical protein"  
"OPBO21\_00231" 31774 "s63E6H2" 0.06458596 "hypothetical protein"  
"OPBO21\_00232" 31775 "s59E13H2" 0.01410355 "Glycosyltransferase AgIJ"  
"OPBO21\_00232" 31775 "s59E25H2" 0 "Glycosyltransferase AgIJ"  
"OPBO21\_00232" 31775 "s59E5H2" 0 "Glycosyltransferase AgIJ"  
"OPBO21\_00232" 31775 "s63E6H2" 0.0451124 "Glycosyltransferase AgIJ"  
"OPBO21\_00233" 31776 "s59E13H2" 0.002538127 "Poly-beta-1,6-N-acetyl-D-glucosamine N-deacetylase precursor"  
"OPBO21\_00233" 31776 "s59E25H2" 0 "Poly-beta-1,6-N-acetyl-D-glucosamine N-deacetylase precursor"  
"OPBO21\_00233" 31776 "s59E5H2" 0 "Poly-beta-1,6-N-acetyl-D-glucosamine N-deacetylase precursor"  
"OPBO21\_00233" 31776 "s63E6H2" 0.02407167 "Poly-beta-1,6-N-acetyl-D-glucosamine N-deacetylase precursor"  
"OPBO21\_00234" 31777 "s59E13H2" 0.1587512 "Poly-beta-1,6-N-acetyl-D-glucosamine N-deacetylase precursor"  
"OPBO21\_00234" 31777 "s59E25H2" 0 "Poly-beta-1,6-N-acetyl-D-glucosamine N-deacetylase precursor"  
"OPBO21\_00234" 31777 "s59E5H2" 0 "Poly-beta-1,6-N-acetyl-D-glucosamine N-deacetylase precursor"  
"OPBO21\_00234" 31777 "s63E6H2" 0.08996596 "Poly-beta-1,6-N-acetyl-D-glucosamine N-deacetylase precursor"  
"OPBO21\_00235" 31778 "s59E13H2" 0.2700464 "hypothetical protein"  
"OPBO21\_00235" 31778 "s59E25H2" 0 "hypothetical protein"  
"OPBO21\_00235" 31778 "s59E5H2" 0.1984886 "hypothetical protein"  
"OPBO21\_00235" 31778 "s63E6H2" 0.1429664 "hypothetical protein"  
"OPBO21\_00236" 31779 "s59E13H2" 0.1436818 "translocation protein TolB"  
"OPBO21\_00236" 31779 "s59E25H2" 0 "translocation protein TolB"  
"OPBO21\_00236" 31779 "s59E5H2" 0.05121287 "translocation protein TolB"  
"OPBO21\_00236" 31779 "s63E6H2" 0.07625866 "translocation protein TolB"  
"OPBO21\_00237" 31780 "s59E13H2" 0.007236921 "putative transposase"  
"OPBO21\_00237" 31780 "s59E25H2" 0 "putative transposase"  
"OPBO21\_00237" 31780 "s59E5H2" 0 "putative transposase"  
"OPBO21\_00237" 31780 "s63E6H2" 1.080163 "putative transposase"  
"OPBO21\_00238" 31781 "s59E13H2" 0 "hypothetical protein"  
"OPBO21\_00238" 31781 "s59E25H2" 0 "hypothetical protein"  
"OPBO21\_00238" 31781 "s59E5H2" 0 "hypothetical protein"  
"OPBO21\_00238" 31781 "s63E6H2" 0.003944943 "hypothetical protein"  
"OPBO21\_00239" 31782 "s59E13H2" 0.0311209 "hypothetical protein"  
"OPBO21\_00239" 31782 "s59E25H2" 0.4304124 "hypothetical protein"  
"OPBO21\_00239" 31782 "s59E5H2" 0.1200281 "hypothetical protein"  
"OPBO21\_00239" 31782 "s63E6H2" 1.051884 "hypothetical protein"  
"OPBO21\_00240" 31783 "s59E13H2" 0 "hypothetical protein"  
"OPBO21\_00240" 31783 "s59E25H2" 0 "hypothetical protein"  
"OPBO21\_00240" 31783 "s59E5H2" 0 "hypothetical protein"  
"OPBO21\_00240" 31783 "s63E6H2" 0.01569808 "hypothetical protein"  
"OPBO21\_00241" 31784 "s59E13H2" 0 "hypothetical protein"

"OPBO21\_00241" 31784 "s59E25H2" 0 "hypothetical protein"  
"OPBO21\_00241" 31784 "s59E5H2" 0 "hypothetical protein"  
"OPBO21\_00241" 31784 "s63E6H2" 0.01130798 "hypothetical protein"  
"OPBO21\_00242" 31785 "s59E13H2" 0 "Glutamate racemase 1"  
"OPBO21\_00242" 31785 "s59E25H2" 0 "Glutamate racemase 1"  
"OPBO21\_00242" 31785 "s59E5H2" 0.1721791 "Glutamate racemase 1"  
"OPBO21\_00242" 31785 "s63E6H2" 0 "Glutamate racemase 1"  
"OPBO21\_00243" 31786 "s59E13H2" 0 "hypothetical protein"  
"OPBO21\_00243" 31786 "s59E25H2" 0 "hypothetical protein"  
"OPBO21\_00243" 31786 "s59E5H2" 0.08966081 "hypothetical protein"  
"OPBO21\_00243" 31786 "s63E6H2" 0 "hypothetical protein"  
"OPBO21\_00244" 31787 "s59E13H2" 0 "hypothetical protein"  
"OPBO21\_00244" 31787 "s59E25H2" 0 "hypothetical protein"  
"OPBO21\_00244" 31787 "s59E5H2" 0.1338393 "hypothetical protein"  
"OPBO21\_00244" 31787 "s63E6H2" 0 "hypothetical protein"  
"OPBO21\_00245" 31788 "s59E13H2" 0.09091233 "SsrA-binding protein"  
"OPBO21\_00245" 31788 "s59E25H2" 0 "SsrA-binding protein"  
"OPBO21\_00245" 31788 "s59E5H2" 0.5619732 "SsrA-binding protein"  
"OPBO21\_00245" 31788 "s63E6H2" 0.01607299 "SsrA-binding protein"  
"OPBO21\_00246" 31789 "s59E13H2" 0.04199425 "putative CtpA-like serine protease"  
"OPBO21\_00246" 31789 "s59E25H2" 0 "putative CtpA-like serine protease"  
"OPBO21\_00246" 31789 "s59E5H2" 0.02801501 "putative CtpA-like serine protease"  
"OPBO21\_00246" 31789 "s63E6H2" 0.0685932 "putative CtpA-like serine protease"  
"OPBO21\_00247" 31790 "s59E13H2" 0.04195129 "Murein DD-endopeptidase MepM"  
"OPBO21\_00247" 31790 "s59E25H2" 0 "Murein DD-endopeptidase MepM"  
"OPBO21\_00247" 31790 "s59E5H2" 0.1004661 "Murein DD-endopeptidase MepM"  
"OPBO21\_00247" 31790 "s63E6H2" 0.6233329 "Murein DD-endopeptidase MepM"  
"OPBO21\_00248" 31791 "s59E13H2" 0.04952321 "Cell division protein FtsX"  
"OPBO21\_00248" 31791 "s59E25H2" 0 "Cell division protein FtsX"  
"OPBO21\_00248" 31791 "s59E5H2" 0.09637866 "Cell division protein FtsX"  
"OPBO21\_00248" 31791 "s63E6H2" 0.5085871 "Cell division protein FtsX"  
"OPBO21\_00249" 31792 "s59E13H2" 0.03869618 "Cell division ATP-binding protein FtsE"  
"OPBO21\_00249" 31792 "s59E25H2" 0.4672489 "Cell division ATP-binding protein FtsE"  
"OPBO21\_00249" 31792 "s59E5H2" 0.176984 "Cell division ATP-binding protein FtsE"  
"OPBO21\_00249" 31792 "s63E6H2" 0.5139522 "Cell division ATP-binding protein FtsE"  
"OPBO21\_00250" 31793 "s59E13H2" 0.1211945 "Peptide chain release factor 2"  
"OPBO21\_00250" 31793 "s59E25H2" 0.08956916 "Peptide chain release factor 2"  
"OPBO21\_00250" 31793 "s59E5H2" 0.1356492 "Peptide chain release factor 2"  
"OPBO21\_00250" 31793 "s63E6H2" 0.2730373 "Peptide chain release factor 2"  
"OPBO21\_00251" 31794 "s59E13H2" 0.1167694 "preprotein translocase subunit SecA"  
"OPBO21\_00251" 31794 "s59E25H2" 0 "preprotein translocase subunit SecA"  
"OPBO21\_00251" 31794 "s59E5H2" 0.05919508 "preprotein translocase subunit SecA"  
"OPBO21\_00251" 31794 "s63E6H2" 0.3638085 "preprotein translocase subunit SecA"  
"OPBO21\_00252" 31795 "s59E13H2" 0.07713715 "Putative sigma-54 modulation protein"  
"OPBO21\_00252" 31795 "s59E25H2" 0 "Putative sigma-54 modulation protein"  
"OPBO21\_00252" 31795 "s59E5H2" 0.05998627 "Putative sigma-54 modulation protein"  
"OPBO21\_00252" 31795 "s63E6H2" 0.2014529 "Putative sigma-54 modulation protein"

"OPBO21\_00253" 31796 "s59E13H2" 0.04836713 "Cold shock-like protein CspE"  
"OPBO21\_00253" 31796 "s59E25H2" 0 "Cold shock-like protein CspE"  
"OPBO21\_00253" 31796 "s59E5H2" 0.0103575 "Cold shock-like protein CspE"  
"OPBO21\_00253" 31796 "s63E6H2" 0.1891616 "Cold shock-like protein CspE"  
"OPBO21\_00254" 31797 "s59E13H2" 0.04157703 "DNA utilization protein GntX"  
"OPBO21\_00254" 31797 "s59E25H2" 0 "DNA utilization protein GntX"  
"OPBO21\_00254" 31797 "s59E5H2" 0.02772639 "DNA utilization protein GntX"  
"OPBO21\_00254" 31797 "s63E6H2" 0.2523461 "DNA utilization protein GntX"  
"OPBO21\_00255" 31798 "s59E13H2" 0.0368885 "Bifunctional protein GlnU"  
"OPBO21\_00255" 31798 "s59E25H2" 0.4195251 "Bifunctional protein GlnU"  
"OPBO21\_00255" 31798 "s59E5H2" 0.01663948 "Bifunctional protein GlnU"  
"OPBO21\_00255" 31798 "s63E6H2" 0.335302 "Bifunctional protein GlnU"  
"OPBO21\_00256" 31799 "s59E13H2" 0.0326123 "Methylthioribose-1-phosphate isomerase"  
"OPBO21\_00256" 31799 "s59E25H2" 0 "Methylthioribose-1-phosphate isomerase"  
"OPBO21\_00256" 31799 "s59E5H2" 0.07250742 "Methylthioribose-1-phosphate isomerase"  
"OPBO21\_00256" 31799 "s63E6H2" 0.4824016 "Methylthioribose-1-phosphate isomerase"  
"OPBO21\_00257" 31800 "s59E13H2" 0.03401988 "Adenosylhomocysteinase"  
"OPBO21\_00257" 31800 "s59E25H2" 0 "Adenosylhomocysteinase"  
"OPBO21\_00257" 31800 "s59E5H2" 0.0499894 "Adenosylhomocysteinase"  
"OPBO21\_00257" 31800 "s63E6H2" 0.3827583 "Adenosylhomocysteinase"  
"OPBO21\_00258" 31801 "s59E13H2" 0.03130341 "Bifunctional phosphoglucose/phosphomannose isomerase"  
"OPBO21\_00258" 31801 "s59E25H2" 0 "Bifunctional phosphoglucose/phosphomannose isomerase"  
"OPBO21\_00258" 31801 "s59E5H2" 0.05098143 "Bifunctional phosphoglucose/phosphomannose isomerase"  
"OPBO21\_00258" 31801 "s63E6H2" 0.172502 "Bifunctional phosphoglucose/phosphomannose isomerase"  
"OPBO21\_00259" 31802 "s59E13H2" 0.01381017 "Phosphoglucomutase"  
"OPBO21\_00259" 31802 "s59E25H2" 0 "Phosphoglucomutase"  
"OPBO21\_00259" 31802 "s59E5H2" 0.04882579 "Phosphoglucomutase"  
"OPBO21\_00259" 31802 "s63E6H2" 0.2065445 "Phosphoglucomutase"  
"OPBO21\_00260" 31803 "s59E13H2" 0.008104024 "GDP-mannose 4,6-dehydratase"  
"OPBO21\_00260" 31803 "s59E25H2" 0 "GDP-mannose 4,6-dehydratase"  
"OPBO21\_00260" 31803 "s59E5H2" 0.06982998 "GDP-mannose 4,6-dehydratase"  
"OPBO21\_00260" 31803 "s63E6H2" 0.196993 "GDP-mannose 4,6-dehydratase"  
"OPBO21\_00261" 31804 "s59E13H2" 0.004387757 "D-glycero-alpha-D-manno-heptose 1-phosphate guanylyltransferase"  
"OPBO21\_00261" 31804 "s59E25H2" 0 "D-glycero-alpha-D-manno-heptose 1-phosphate guanylyltransferase"  
"OPBO21\_00261" 31804 "s59E5H2" 0.06595096 "D-glycero-alpha-D-manno-heptose 1-phosphate guanylyltransferase"  
"OPBO21\_00261" 31804 "s63E6H2" 0.1414415 "D-glycero-alpha-D-manno-heptose 1-phosphate guanylyltransferase"  
"OPBO21\_00262" 31805 "s59E13H2" 0.01579499 "GDP-6-deoxy-D-mannose reductase"  
"OPBO21\_00262" 31805 "s59E25H2" 0 "GDP-6-deoxy-D-mannose reductase"  
"OPBO21\_00262" 31805 "s59E5H2" 0.05368448 "GDP-6-deoxy-D-mannose reductase"  
"OPBO21\_00262" 31805 "s63E6H2" 0.1268608 "GDP-6-deoxy-D-mannose reductase"  
"OPBO21\_00263" 31806 "s59E13H2" 0.6983184 "Sulfhydrogenase 1 subunit beta"  
"OPBO21\_00263" 31806 "s59E25H2" 0 "Sulfhydrogenase 1 subunit beta"  
"OPBO21\_00263" 31806 "s59E5H2" 0.7072961 "Sulfhydrogenase 1 subunit beta"  
"OPBO21\_00263" 31806 "s63E6H2" 0.1678915 "Sulfhydrogenase 1 subunit beta"  
"OPBO21\_00264" 31807 "s59E13H2" 0.504852 "Sulfhydrogenase 2 subunit gamma"  
"OPBO21\_00264" 31807 "s59E25H2" 0 "Sulfhydrogenase 2 subunit gamma"  
"OPBO21\_00264" 31807 "s59E5H2" 0.8995635 "Sulfhydrogenase 2 subunit gamma"

"OPBO21\_00264" 31807 "s63E6H2" 0.223048 "Sulfhydrogenase 2 subunit gamma"  
"OPBO21\_00265" 31808 "s59E13H2" 0.1669976 "Sulfhydrogenase 1 subunit delta"  
"OPBO21\_00265" 31808 "s59E25H2" 0 "Sulfhydrogenase 1 subunit delta"  
"OPBO21\_00265" 31808 "s59E5H2" 0.9413782 "Sulfhydrogenase 1 subunit delta"  
"OPBO21\_00265" 31808 "s63E6H2" 0.2017881 "Sulfhydrogenase 1 subunit delta"  
"OPBO21\_00266" 31809 "s59E13H2" 0.7631248 "Sulfhydrogenase 1 subunit alpha"  
"OPBO21\_00266" 31809 "s59E25H2" 0 "Sulfhydrogenase 1 subunit alpha"  
"OPBO21\_00266" 31809 "s59E5H2" 1.615443 "Sulfhydrogenase 1 subunit alpha"  
"OPBO21\_00266" 31809 "s63E6H2" 0.08927105 "Sulfhydrogenase 1 subunit alpha"  
"OPBO21\_00267" 31810 "s59E13H2" 0.005987415 "hypothetical protein"  
"OPBO21\_00267" 31810 "s59E25H2" 0 "hypothetical protein"  
"OPBO21\_00267" 31810 "s59E5H2" 1.146757 "hypothetical protein"  
"OPBO21\_00267" 31810 "s63E6H2" 0.03801226 "hypothetical protein"  
"OPBO21\_00268" 31811 "s59E13H2" 0.003560601 "Hydrogenase 2 maturation protease"  
"OPBO21\_00268" 31811 "s59E25H2" 0 "Hydrogenase 2 maturation protease"  
"OPBO21\_00268" 31811 "s59E5H2" 1.348855 "Hydrogenase 2 maturation protease"  
"OPBO21\_00268" 31811 "s63E6H2" 0.02795991 "Hydrogenase 2 maturation protease"  
"OPBO21\_00269" 31812 "s59E13H2" 0.008718531 "Sulfhydrogenase 1 subunit alpha"  
"OPBO21\_00269" 31812 "s59E25H2" 0 "Sulfhydrogenase 1 subunit alpha"  
"OPBO21\_00269" 31812 "s59E5H2" 0.8567066 "Sulfhydrogenase 1 subunit alpha"  
"OPBO21\_00269" 31812 "s63E6H2" 0.01867677 "Sulfhydrogenase 1 subunit alpha"  
"OPBO21\_00270" 31813 "s59E13H2" 0.0008096457 "Sulfhydrogenase 1 subunit delta"  
"OPBO21\_00270" 31813 "s59E25H2" 0 "Sulfhydrogenase 1 subunit delta"  
"OPBO21\_00270" 31813 "s59E5H2" 0.7727807 "Sulfhydrogenase 1 subunit delta"  
"OPBO21\_00270" 31813 "s63E6H2" 0.01700754 "Sulfhydrogenase 1 subunit delta"  
"OPBO21\_00271" 31814 "s59E13H2" 0.004110123 "Sulfhydrogenase 2 subunit gamma"  
"OPBO21\_00271" 31814 "s59E25H2" 0 "Sulfhydrogenase 2 subunit gamma"  
"OPBO21\_00271" 31814 "s59E5H2" 0.5817329 "Sulfhydrogenase 2 subunit gamma"  
"OPBO21\_00271" 31814 "s63E6H2" 0.01023843 "Sulfhydrogenase 2 subunit gamma"  
"OPBO21\_00272" 31815 "s59E13H2" 0.01120353 "Sulfhydrogenase 1 subunit beta"  
"OPBO21\_00272" 31815 "s59E25H2" 0 "Sulfhydrogenase 1 subunit beta"  
"OPBO21\_00272" 31815 "s59E5H2" 0.03299031 "Sulfhydrogenase 1 subunit beta"  
"OPBO21\_00272" 31815 "s63E6H2" 0.001502109 "Sulfhydrogenase 1 subunit beta"  
"OPBO21\_00273" 31816 "s59E13H2" 0.01811889 "Alanine--tRNA ligase"  
"OPBO21\_00273" 31816 "s59E25H2" 0 "Alanine--tRNA ligase"  
"OPBO21\_00273" 31816 "s59E5H2" 0.03515271 "Alanine--tRNA ligase"  
"OPBO21\_00273" 31816 "s63E6H2" 0.1484957 "Alanine--tRNA ligase"  
"OPBO21\_00274" 31817 "s59E13H2" 0.01022184 "Putative Holliday junction resolvase"  
"OPBO21\_00274" 31817 "s59E25H2" 0 "Putative Holliday junction resolvase"  
"OPBO21\_00274" 31817 "s59E5H2" 0.0563269 "Putative Holliday junction resolvase"  
"OPBO21\_00274" 31817 "s63E6H2" 0.1093976 "Putative Holliday junction resolvase"  
"OPBO21\_00275" 31818 "s59E13H2" 0.004211209 "putative aminodeoxychorismate lyase"  
"OPBO21\_00275" 31818 "s59E25H2" 0 "putative aminodeoxychorismate lyase"  
"OPBO21\_00275" 31818 "s59E5H2" 0.02443576 "putative aminodeoxychorismate lyase"  
"OPBO21\_00275" 31818 "s63E6H2" 0.02328917 "putative aminodeoxychorismate lyase"  
"OPBO21\_00276" 31819 "s59E13H2" 0.0187297 "Putative O-methyltransferase/MSMEI\_4947"  
"OPBO21\_00276" 31819 "s59E25H2" 0 "Putative O-methyltransferase/MSMEI\_4947"

"OPBO21\_00276" 31819 "s59E5H2" 0.0163527 "Putative O-methyltransferase/MSMEI\_4947"  
"OPBO21\_00276" 31819 "s63E6H2" 0.05977087 "Putative O-methyltransferase/MSMEI\_4947"  
"OPBO21\_00277" 31820 "s59E13H2" 0.03478362 "putative protease YhbU precursor"  
"OPBO21\_00277" 31820 "s59E25H2" 0 "putative protease YhbU precursor"  
"OPBO21\_00277" 31820 "s59E5H2" 0.08921725 "putative protease YhbU precursor"  
"OPBO21\_00277" 31820 "s63E6H2" 0.1810739 "putative protease YhbU precursor"  
"OPBO21\_00278" 31821 "s59E13H2" 0.004295384 "Acylphosphatase"  
"OPBO21\_00278" 31821 "s59E25H2" 0 "Acylphosphatase"  
"OPBO21\_00278" 31821 "s59E5H2" 0.07053526 "Acylphosphatase"  
"OPBO21\_00278" 31821 "s63E6H2" 0.1188128 "Acylphosphatase"  
"OPBO21\_00279" 31822 "s59E13H2" 0.03402346 "Shikimate dehydrogenase"  
"OPBO21\_00279" 31822 "s59E25H2" 0 "Shikimate dehydrogenase"  
"OPBO21\_00279" 31822 "s59E5H2" 0.04632709 "Shikimate dehydrogenase"  
"OPBO21\_00279" 31822 "s63E6H2" 0.1415204 "Shikimate dehydrogenase"  
"OPBO21\_00280" 31823 "s59E13H2" 0 "Twitching mobility protein"  
"OPBO21\_00280" 31823 "s59E25H2" 0 "Twitching mobility protein"  
"OPBO21\_00280" 31823 "s59E5H2" 0.01511449 "Twitching mobility protein"  
"OPBO21\_00280" 31823 "s63E6H2" 0.002849346 "Twitching mobility protein"  
"OPBO21\_00281" 31824 "s59E13H2" 0 "hypothetical protein"  
"OPBO21\_00281" 31824 "s59E25H2" 0 "hypothetical protein"  
"OPBO21\_00281" 31824 "s59E5H2" 0.0007799459 "hypothetical protein"  
"OPBO21\_00281" 31824 "s63E6H2" 0 "hypothetical protein"  
"OPBO21\_00282" 31825 "s59E13H2" 0.03289758 "Type 4 prepilin-like proteins leader peptide-processing enzyme"  
"OPBO21\_00282" 31825 "s59E25H2" 0 "Type 4 prepilin-like proteins leader peptide-processing enzyme"  
"OPBO21\_00282" 31825 "s59E5H2" 0.03225326 "Type 4 prepilin-like proteins leader peptide-processing enzyme"  
"OPBO21\_00282" 31825 "s63E6H2" 0.1388104 "Type 4 prepilin-like proteins leader peptide-processing enzyme"  
"OPBO21\_00283" 31826 "s59E13H2" 0 "Competence protein A"  
"OPBO21\_00283" 31826 "s59E25H2" 0 "Competence protein A"  
"OPBO21\_00283" 31826 "s59E5H2" 0.001233501 "Competence protein A"  
"OPBO21\_00283" 31826 "s63E6H2" 0.1455065 "Competence protein A"  
"OPBO21\_00285" 31828 "s59E13H2" 0.02258929 "Chorismate synthase"  
"OPBO21\_00285" 31828 "s59E25H2" 0 "Chorismate synthase"  
"OPBO21\_00285" 31828 "s59E5H2" 0.06758362 "Chorismate synthase"  
"OPBO21\_00285" 31828 "s63E6H2" 0.2422235 "Chorismate synthase"  
"OPBO21\_00286" 31829 "s59E13H2" 0.05457259 "Shikimate kinase 1"  
"OPBO21\_00286" 31829 "s59E25H2" 0 "Shikimate kinase 1"  
"OPBO21\_00286" 31829 "s59E5H2" 0.06637752 "Shikimate kinase 1"  
"OPBO21\_00286" 31829 "s63E6H2" 0.1094272 "Shikimate kinase 1"  
"OPBO21\_00287" 31830 "s59E13H2" 0.05097652 "3-dehydroquininate synthase"  
"OPBO21\_00287" 31830 "s59E25H2" 0 "3-dehydroquininate synthase"  
"OPBO21\_00287" 31830 "s59E5H2" 0.09549815 "3-dehydroquininate synthase"  
"OPBO21\_00287" 31830 "s63E6H2" 0.165775 "3-dehydroquininate synthase"  
"OPBO21\_00288" 31831 "s59E13H2" 0.03448406 "3-dehydroquininate dehydratase"  
"OPBO21\_00288" 31831 "s59E25H2" 30.89202 "3-dehydroquininate dehydratase"  
"OPBO21\_00288" 31831 "s59E5H2" 0.03786543 "3-dehydroquininate dehydratase"  
"OPBO21\_00288" 31831 "s63E6H2" 0.06717187 "3-dehydroquininate dehydratase"  
"OPBO21\_00289" 31832 "s59E13H2" 0 "hypothetical protein"

"OPBO21\_00289" 31832 "s59E25H2" 1.687215 "hypothetical protein"  
"OPBO21\_00289" 31832 "s59E5H2" 0.003109099 "hypothetical protein"  
"OPBO21\_00289" 31832 "s63E6H2" 0.007855886 "hypothetical protein"  
"OPBO21\_00290" 31833 "s59E13H2" 0.01438599 "Xaa-Pro dipeptidase"  
"OPBO21\_00290" 31833 "s59E25H2" 0 "Xaa-Pro dipeptidase"  
"OPBO21\_00290" 31833 "s59E5H2" 0.1212574 "Xaa-Pro dipeptidase"  
"OPBO21\_00290" 31833 "s63E6H2" 0.1463772 "Xaa-Pro dipeptidase"  
"OPBO21\_00291" 31834 "s59E13H2" 0.01828788 "Elongation factor P"  
"OPBO21\_00291" 31834 "s59E25H2" 0 "Elongation factor P"  
"OPBO21\_00291" 31834 "s59E5H2" 0.1006803 "Elongation factor P"  
"OPBO21\_00291" 31834 "s63E6H2" 0.2464876 "Elongation factor P"  
"OPBO21\_00292" 31835 "s59E13H2" 0.02483897 "hypothetical protein"  
"OPBO21\_00292" 31835 "s59E25H2" 0 "hypothetical protein"  
"OPBO21\_00292" 31835 "s59E5H2" 0.1034293 "hypothetical protein"  
"OPBO21\_00292" 31835 "s63E6H2" 0.275967 "hypothetical protein"  
"OPBO21\_00293" 31836 "s59E13H2" 0.09620304 "Farnesyl diphosphate synthase"  
"OPBO21\_00293" 31836 "s59E25H2" 0 "Farnesyl diphosphate synthase"  
"OPBO21\_00293" 31836 "s59E5H2" 0.07477895 "Farnesyl diphosphate synthase"  
"OPBO21\_00293" 31836 "s63E6H2" 0.2182744 "Farnesyl diphosphate synthase"  
"OPBO21\_00294" 31837 "s59E13H2" 8.087898e-05 "16S/23S rRNA (cytidine-2'-O)-methyltransferase TlyA"  
"OPBO21\_00294" 31837 "s59E25H2" 0 "16S/23S rRNA (cytidine-2'-O)-methyltransferase TlyA"  
"OPBO21\_00294" 31837 "s59E5H2" 0 "16S/23S rRNA (cytidine-2'-O)-methyltransferase TlyA"  
"OPBO21\_00294" 31837 "s63E6H2" 0.03550965 "16S/23S rRNA (cytidine-2'-O)-methyltransferase TlyA"  
"OPBO21\_00295" 31838 "s59E13H2" 0.01303974 "putative inorganic polyphosphate/ATP-NAD kinase"  
"OPBO21\_00295" 31838 "s59E25H2" 0 "putative inorganic polyphosphate/ATP-NAD kinase"  
"OPBO21\_00295" 31838 "s59E5H2" 0.02688912 "putative inorganic polyphosphate/ATP-NAD kinase"  
"OPBO21\_00295" 31838 "s63E6H2" 0.2088131 "putative inorganic polyphosphate/ATP-NAD kinase"  
"OPBO21\_00296" 31839 "s59E13H2" 0.01848155 "DNA repair protein RecN"  
"OPBO21\_00296" 31839 "s59E25H2" 96.17484 "DNA repair protein RecN"  
"OPBO21\_00296" 31839 "s59E5H2" 0.03049415 "DNA repair protein RecN"  
"OPBO21\_00296" 31839 "s63E6H2" 0.2361905 "DNA repair protein RecN"  
"OPBO21\_00297" 31840 "s59E13H2" 0.01995394 "CTP synthase"  
"OPBO21\_00297" 31840 "s59E25H2" 0 "CTP synthase"  
"OPBO21\_00297" 31840 "s59E5H2" 0.03863646 "CTP synthase"  
"OPBO21\_00297" 31840 "s63E6H2" 0.2166669 "CTP synthase"  
"OPBO21\_00298" 31841 "s59E13H2" 0.004771748 "hypothetical protein"  
"OPBO21\_00298" 31841 "s59E25H2" 0 "hypothetical protein"  
"OPBO21\_00298" 31841 "s59E5H2" 0.009260644 "hypothetical protein"  
"OPBO21\_00298" 31841 "s63E6H2" 0.07315328 "hypothetical protein"  
"OPBO21\_00299" 31842 "s59E13H2" 0.006114739 "Peptidase T"  
"OPBO21\_00299" 31842 "s59E25H2" 0 "Peptidase T"  
"OPBO21\_00299" 31842 "s59E5H2" 0.04233784 "Peptidase T"  
"OPBO21\_00299" 31842 "s63E6H2" 0.1381863 "Peptidase T"  
"OPBO21\_00300" 31843 "s59E13H2" 0.02465412 "ADP-ribose pyrophosphatase"  
"OPBO21\_00300" 31843 "s59E25H2" 0.3019197 "ADP-ribose pyrophosphatase"  
"OPBO21\_00300" 31843 "s59E5H2" 0.01086441 "ADP-ribose pyrophosphatase"  
"OPBO21\_00300" 31843 "s63E6H2" 0.128238 "ADP-ribose pyrophosphatase"

"OPBO21\_00301" 31844 "s59E13H2" 0 "Trehalose/maltose transport system permease protein MalG"  
"OPBO21\_00301" 31844 "s59E25H2" 0 "Trehalose/maltose transport system permease protein MalG"  
"OPBO21\_00301" 31844 "s59E5H2" 0 "Trehalose/maltose transport system permease protein MalG"  
"OPBO21\_00301" 31844 "s63E6H2" 0 "Trehalose/maltose transport system permease protein MalG"  
"OPBO21\_00302" 31845 "s59E13H2" 0 "Glucose--fructose oxidoreductase precursor"  
"OPBO21\_00302" 31845 "s59E25H2" 0 "Glucose--fructose oxidoreductase precursor"  
"OPBO21\_00302" 31845 "s59E5H2" 0 "Glucose--fructose oxidoreductase precursor"  
"OPBO21\_00302" 31845 "s63E6H2" 0 "Glucose--fructose oxidoreductase precursor"  
"OPBO21\_00304" 31847 "s59E13H2" 0 "Trimethylamine methyltransferase MttB"  
"OPBO21\_00304" 31847 "s59E25H2" 0 "Trimethylamine methyltransferase MttB"  
"OPBO21\_00304" 31847 "s59E5H2" 0 "Trimethylamine methyltransferase MttB"  
"OPBO21\_00304" 31847 "s63E6H2" 0 "Trimethylamine methyltransferase MttB"  
"OPBO21\_00305" 31848 "s59E13H2" 0 "Nitrogen regulatory protein P-II"  
"OPBO21\_00305" 31848 "s59E25H2" 0 "Nitrogen regulatory protein P-II"  
"OPBO21\_00305" 31848 "s59E5H2" 0 "Nitrogen regulatory protein P-II"  
"OPBO21\_00305" 31848 "s63E6H2" 0 "Nitrogen regulatory protein P-II"  
"OPBO21\_00306" 31849 "s59E13H2" 0 "Glutamate dehydrogenase"  
"OPBO21\_00306" 31849 "s59E25H2" 0 "Glutamate dehydrogenase"  
"OPBO21\_00306" 31849 "s59E5H2" 0 "Glutamate dehydrogenase"  
"OPBO21\_00306" 31849 "s63E6H2" 0 "Glutamate dehydrogenase"  
"OPBO21\_00307" 31850 "s59E13H2" 0 "putative sugar kinase"  
"OPBO21\_00307" 31850 "s59E25H2" 0 "putative sugar kinase"  
"OPBO21\_00307" 31850 "s59E5H2" 0 "putative sugar kinase"  
"OPBO21\_00307" 31850 "s63E6H2" 0 "putative sugar kinase"  
"OPBO21\_00308" 31851 "s59E13H2" 0 "Glucose/mannose transporter GlcP"  
"OPBO21\_00308" 31851 "s59E25H2" 0 "Glucose/mannose transporter GlcP"  
"OPBO21\_00308" 31851 "s59E5H2" 0 "Glucose/mannose transporter GlcP"  
"OPBO21\_00308" 31851 "s63E6H2" 0 "Glucose/mannose transporter GlcP"  
"OPBO21\_00310" 31853 "s59E13H2" 0 "Inositol-1-monophosphatase"  
"OPBO21\_00310" 31853 "s59E25H2" 0 "Inositol-1-monophosphatase"  
"OPBO21\_00310" 31853 "s59E5H2" 0 "Inositol-1-monophosphatase"  
"OPBO21\_00310" 31853 "s63E6H2" 0.04594296 "Inositol-1-monophosphatase"  
"OPBO21\_00311" 31854 "s59E13H2" 0 "hypothetical protein"  
"OPBO21\_00311" 31854 "s59E25H2" 0 "hypothetical protein"  
"OPBO21\_00311" 31854 "s59E5H2" 0 "hypothetical protein"  
"OPBO21\_00311" 31854 "s63E6H2" 0.2504301 "hypothetical protein"  
"OPBO21\_00312" 31855 "s59E13H2" 0 "Helix-turn-helix domain protein"  
"OPBO21\_00312" 31855 "s59E25H2" 0 "Helix-turn-helix domain protein"  
"OPBO21\_00312" 31855 "s59E5H2" 0 "Helix-turn-helix domain protein"  
"OPBO21\_00312" 31855 "s63E6H2" 0.1866172 "Helix-turn-helix domain protein"  
"OPBO21\_00313" 31856 "s59E13H2" 0 "hypothetical protein"  
"OPBO21\_00313" 31856 "s59E25H2" 0 "hypothetical protein"  
"OPBO21\_00313" 31856 "s59E5H2" 0 "hypothetical protein"  
"OPBO21\_00313" 31856 "s63E6H2" 0 "hypothetical protein"  
"OPBO21\_00315" 31858 "s59E13H2" 0 "NYN domain protein"  
"OPBO21\_00315" 31858 "s59E25H2" 0 "NYN domain protein"  
"OPBO21\_00315" 31858 "s59E5H2" 0 "NYN domain protein"



"OPBO21\_00315" 31858 "s63E6H2" 0.00350812 "NYN domain protein"  
"OPBO21\_00316" 31859 "s59E13H2" 0.00534912 "Thiamine-monophosphate kinase"  
"OPBO21\_00316" 31859 "s59E25H2" 0 "Thiamine-monophosphate kinase"  
"OPBO21\_00316" 31859 "s59E5H2" 0.2100846 "Thiamine-monophosphate kinase"  
"OPBO21\_00316" 31859 "s63E6H2" 0.6873164 "Thiamine-monophosphate kinase"  
"OPBO21\_00317" 31860 "s59E13H2" 0.01629901 "Phosphomethylpyrimidine synthase"  
"OPBO21\_00317" 31860 "s59E25H2" 0 "Phosphomethylpyrimidine synthase"  
"OPBO21\_00317" 31860 "s59E5H2" 0.1268242 "Phosphomethylpyrimidine synthase"  
"OPBO21\_00317" 31860 "s63E6H2" 0.4729874 "Phosphomethylpyrimidine synthase"  
"OPBO21\_00318" 31861 "s59E13H2" 0.008331543 "Thiamine-phosphate synthase"  
"OPBO21\_00318" 31861 "s59E25H2" 7.937695 "Thiamine-phosphate synthase"  
"OPBO21\_00318" 31861 "s59E5H2" 0.1309817 "Thiamine-phosphate synthase"  
"OPBO21\_00318" 31861 "s63E6H2" 0.1971981 "Thiamine-phosphate synthase"  
"OPBO21\_00319" 31862 "s59E13H2" 0.006929345 "Hydroxyethylthiazole kinase"  
"OPBO21\_00319" 31862 "s59E25H2" 0 "Hydroxyethylthiazole kinase"  
"OPBO21\_00319" 31862 "s59E5H2" 0.0788971 "Hydroxyethylthiazole kinase"  
"OPBO21\_00319" 31862 "s63E6H2" 0.2292924 "Hydroxyethylthiazole kinase"  
"OPBO21\_00320" 31863 "s59E13H2" 0.003517771 "V-type sodium ATPase subunit G"  
"OPBO21\_00320" 31863 "s59E25H2" 0 "V-type sodium ATPase subunit G"  
"OPBO21\_00320" 31863 "s59E5H2" 0 "V-type sodium ATPase subunit G"  
"OPBO21\_00320" 31863 "s63E6H2" 0.006009413 "V-type sodium ATPase subunit G"  
"OPBO21\_00321" 31864 "s59E13H2" 0.06176693 "V-type sodium ATPase catalytic subunit A"  
"OPBO21\_00321" 31864 "s59E25H2" 0 "V-type sodium ATPase catalytic subunit A"  
"OPBO21\_00321" 31864 "s59E5H2" 0.01321979 "V-type sodium ATPase catalytic subunit A"  
"OPBO21\_00321" 31864 "s63E6H2" 0.01197907 "V-type sodium ATPase catalytic subunit A"  
"OPBO21\_00322" 31865 "s59E13H2" 0.0423231 "V-type sodium ATPase subunit B"  
"OPBO21\_00322" 31865 "s59E25H2" 0 "V-type sodium ATPase subunit B"  
"OPBO21\_00322" 31865 "s59E5H2" 0.009468391 "V-type sodium ATPase subunit B"  
"OPBO21\_00322" 31865 "s63E6H2" 0.2515674 "V-type sodium ATPase subunit B"  
"OPBO21\_00323" 31866 "s59E13H2" 0.08798097 "V-type sodium ATPase subunit D"  
"OPBO21\_00323" 31866 "s59E25H2" 0 "V-type sodium ATPase subunit D"  
"OPBO21\_00323" 31866 "s59E5H2" 0.01960549 "V-type sodium ATPase subunit D"  
"OPBO21\_00323" 31866 "s63E6H2" 0.271757 "V-type sodium ATPase subunit D"  
"OPBO21\_00324" 31867 "s59E13H2" 0.1081139 "Serine hydroxymethyltransferase"  
"OPBO21\_00324" 31867 "s59E25H2" 0 "Serine hydroxymethyltransferase"  
"OPBO21\_00324" 31867 "s59E5H2" 0.02178211 "Serine hydroxymethyltransferase"  
"OPBO21\_00324" 31867 "s63E6H2" 0.1075833 "Serine hydroxymethyltransferase"  
"OPBO21\_00325" 31868 "s59E13H2" 0.03050223 "Ribose-5-phosphate isomerase B"  
"OPBO21\_00325" 31868 "s59E25H2" 0 "Ribose-5-phosphate isomerase B"  
"OPBO21\_00325" 31868 "s59E5H2" 0.01993131 "Ribose-5-phosphate isomerase B"  
"OPBO21\_00325" 31868 "s63E6H2" 0.001039532 "Ribose-5-phosphate isomerase B"  
"OPBO21\_00326" 31869 "s59E13H2" 0.02548323 "KHG/KDPG aldolase"  
"OPBO21\_00326" 31869 "s59E25H2" 0 "KHG/KDPG aldolase"  
"OPBO21\_00326" 31869 "s59E5H2" 0.01758072 "KHG/KDPG aldolase"  
"OPBO21\_00326" 31869 "s63E6H2" 0.1260259 "KHG/KDPG aldolase"  
"OPBO21\_00327" 31870 "s59E13H2" 0.09124618 "D-tagatose 3-epimerase"  
"OPBO21\_00327" 31870 "s59E25H2" 0 "D-tagatose 3-epimerase"

"OPBO21\_00327" 31870 "s59E5H2" 0 "D-tagatose 3-epimerase"  
"OPBO21\_00327" 31870 "s63E6H2" 0.1610732 "D-tagatose 3-epimerase"  
"OPBO21\_00328" 31871 "s59E13H2" 0.06900486 "Ribose transport system permease protein RbsC"  
"OPBO21\_00328" 31871 "s59E25H2" 0.1642512 "Ribose transport system permease protein RbsC"  
"OPBO21\_00328" 31871 "s59E5H2" 0.003649598 "Ribose transport system permease protein RbsC"  
"OPBO21\_00328" 31871 "s63E6H2" 0.1227899 "Ribose transport system permease protein RbsC"  
"OPBO21\_00329" 31872 "s59E13H2" 0.03928907 "Ribose import ATP-binding protein RbsA"  
"OPBO21\_00329" 31872 "s59E25H2" 0 "Ribose import ATP-binding protein RbsA"  
"OPBO21\_00329" 31872 "s59E5H2" 0.002305089 "Ribose import ATP-binding protein RbsA"  
"OPBO21\_00329" 31872 "s63E6H2" 0.08640664 "Ribose import ATP-binding protein RbsA"  
"OPBO21\_00330" 31873 "s59E13H2" 0.04802541 "Cyclopentanol dehydrogenase"  
"OPBO21\_00330" 31873 "s59E25H2" 0 "Cyclopentanol dehydrogenase"  
"OPBO21\_00330" 31873 "s59E5H2" 0 "Cyclopentanol dehydrogenase"  
"OPBO21\_00330" 31873 "s63E6H2" 0.0714098 "Cyclopentanol dehydrogenase"  
"OPBO21\_00331" 31874 "s59E13H2" 0.02874037 "D-ribose-binding periplasmic protein precursor"  
"OPBO21\_00331" 31874 "s59E25H2" 0 "D-ribose-binding periplasmic protein precursor"  
"OPBO21\_00331" 31874 "s59E5H2" 0 "D-ribose-binding periplasmic protein precursor"  
"OPBO21\_00331" 31874 "s63E6H2" 0.01444217 "D-ribose-binding periplasmic protein precursor"  
"OPBO21\_00332" 31875 "s59E13H2" 0.3046832 "HTH-type transcriptional repressor YvoA"  
"OPBO21\_00332" 31875 "s59E25H2" 0 "HTH-type transcriptional repressor YvoA"  
"OPBO21\_00332" 31875 "s59E5H2" 0 "HTH-type transcriptional repressor YvoA"  
"OPBO21\_00332" 31875 "s63E6H2" 0.002977908 "HTH-type transcriptional repressor YvoA"  
"OPBO21\_00333" 31876 "s59E13H2" 0.009101517 "Vegetative catalase"  
"OPBO21\_00333" 31876 "s59E25H2" 0 "Vegetative catalase"  
"OPBO21\_00333" 31876 "s59E5H2" 0.2135795 "Vegetative catalase"  
"OPBO21\_00333" 31876 "s63E6H2" 0.01010769 "Vegetative catalase"  
"OPBO21\_00335" 31878 "s59E13H2" 0 "Cadmium, cobalt and zinc/H(+)-K(+) antiporter"  
"OPBO21\_00335" 31878 "s59E25H2" 0 "Cadmium, cobalt and zinc/H(+)-K(+) antiporter"  
"OPBO21\_00335" 31878 "s59E5H2" 0 "Cadmium, cobalt and zinc/H(+)-K(+) antiporter"  
"OPBO21\_00335" 31878 "s63E6H2" 0.001095091 "Cadmium, cobalt and zinc/H(+)-K(+) antiporter"  
"OPBO21\_00336" 31879 "s59E13H2" 0 "Nucleoside-triphosphatase THEP1"  
"OPBO21\_00336" 31879 "s59E25H2" 0 "Nucleoside-triphosphatase THEP1"  
"OPBO21\_00336" 31879 "s59E5H2" 0.1644798 "Nucleoside-triphosphatase THEP1"  
"OPBO21\_00336" 31879 "s63E6H2" 0.006843019 "Nucleoside-triphosphatase THEP1"  
"OPBO21\_00337" 31880 "s59E13H2" 0 "putative oxidoreductase YvaA"  
"OPBO21\_00337" 31880 "s59E25H2" 0 "putative oxidoreductase YvaA"  
"OPBO21\_00337" 31880 "s59E5H2" 0.05587805 "putative oxidoreductase YvaA"  
"OPBO21\_00337" 31880 "s63E6H2" 0.5058332 "putative oxidoreductase YvaA"  
"OPBO21\_00338" 31881 "s59E13H2" 0.1946216 "DegV domain-containing protein"  
"OPBO21\_00338" 31881 "s59E25H2" 0 "DegV domain-containing protein"  
"OPBO21\_00338" 31881 "s59E5H2" 0.1662443 "DegV domain-containing protein"  
"OPBO21\_00338" 31881 "s63E6H2" 0.6280614 "DegV domain-containing protein"  
"OPBO21\_00339" 31882 "s59E13H2" 0.07419727 "Na+/Pi-cotransporter"  
"OPBO21\_00339" 31882 "s59E25H2" 0 "Na+/Pi-cotransporter"  
"OPBO21\_00339" 31882 "s59E5H2" 0.001498312 "Na+/Pi-cotransporter"  
"OPBO21\_00339" 31882 "s63E6H2" 0.4286367 "Na+/Pi-cotransporter"  
"OPBO21\_00341" 31884 "s59E13H2" 0 "hypothetical protein"

"OPBO21\_00341" 31884 "s59E25H2" 7.718213 "hypothetical protein"  
"OPBO21\_00341" 31884 "s59E5H2" 0 "hypothetical protein"  
"OPBO21\_00341" 31884 "s63E6H2" 0.01957489 "hypothetical protein"  
"OPBO21\_00342" 31885 "s59E13H2" 0.2443483 "Cadmium, cobalt and zinc/H(+)-K(+) antiporter"  
"OPBO21\_00342" 31885 "s59E25H2" 0 "Cadmium, cobalt and zinc/H(+)-K(+) antiporter"  
"OPBO21\_00342" 31885 "s59E5H2" 0 "Cadmium, cobalt and zinc/H(+)-K(+) antiporter"  
"OPBO21\_00342" 31885 "s63E6H2" 0.1816715 "Cadmium, cobalt and zinc/H(+)-K(+) antiporter"  
"OPBO21\_00343" 31886 "s59E13H2" 0.07798851 "Na+/Pi-cotransporter"  
"OPBO21\_00343" 31886 "s59E25H2" 0 "Na+/Pi-cotransporter"  
"OPBO21\_00343" 31886 "s59E5H2" 0.03294384 "Na+/Pi-cotransporter"  
"OPBO21\_00343" 31886 "s63E6H2" 0.7170147 "Na+/Pi-cotransporter"  
"OPBO21\_00345" 31888 "s59E13H2" 0.1498705 "ATP cone domain protein"  
"OPBO21\_00345" 31888 "s59E25H2" 0 "ATP cone domain protein"  
"OPBO21\_00345" 31888 "s59E5H2" 0.0155897 "ATP cone domain protein"  
"OPBO21\_00345" 31888 "s63E6H2" 0.5711398 "ATP cone domain protein"  
"OPBO21\_00346" 31889 "s59E13H2" 0.000276522 "hypothetical protein"  
"OPBO21\_00346" 31889 "s59E25H2" 0 "hypothetical protein"  
"OPBO21\_00346" 31889 "s59E5H2" 0 "hypothetical protein"  
"OPBO21\_00346" 31889 "s63E6H2" 0 "hypothetical protein"  
"OPBO21\_00347" 31890 "s59E13H2" 0 "Carboxymuconolactone decarboxylase family protein"  
"OPBO21\_00347" 31890 "s59E25H2" 0 "Carboxymuconolactone decarboxylase family protein"  
"OPBO21\_00347" 31890 "s59E5H2" 0.03519354 "Carboxymuconolactone decarboxylase family protein"  
"OPBO21\_00347" 31890 "s63E6H2" 0 "Carboxymuconolactone decarboxylase family protein"  
"OPBO21\_00348" 31891 "s59E13H2" 0 "Ferric uptake regulation protein"  
"OPBO21\_00348" 31891 "s59E25H2" 0 "Ferric uptake regulation protein"  
"OPBO21\_00348" 31891 "s59E5H2" 0.03931925 "Ferric uptake regulation protein"  
"OPBO21\_00348" 31891 "s63E6H2" 0 "Ferric uptake regulation protein"  
"OPBO21\_00349" 31892 "s59E13H2" 0 "NADP-reducing hydrogenase subunit HndC"  
"OPBO21\_00349" 31892 "s59E25H2" 0 "NADP-reducing hydrogenase subunit HndC"  
"OPBO21\_00349" 31892 "s59E5H2" 0.04247054 "NADP-reducing hydrogenase subunit HndC"  
"OPBO21\_00349" 31892 "s63E6H2" 0.003590519 "NADP-reducing hydrogenase subunit HndC"  
"OPBO21\_00350" 31893 "s59E13H2" 0.001697624 "NADP-reducing hydrogenase subunit HndC"  
"OPBO21\_00350" 31893 "s59E25H2" 0 "NADP-reducing hydrogenase subunit HndC"  
"OPBO21\_00350" 31893 "s59E5H2" 0.06667054 "NADP-reducing hydrogenase subunit HndC"  
"OPBO21\_00350" 31893 "s63E6H2" 0.001257892 "NADP-reducing hydrogenase subunit HndC"  
"OPBO21\_00351" 31894 "s59E13H2" 0 "NADP-reducing hydrogenase subunit HndA"  
"OPBO21\_00351" 31894 "s59E25H2" 0 "NADP-reducing hydrogenase subunit HndA"  
"OPBO21\_00351" 31894 "s59E5H2" 0.01639407 "NADP-reducing hydrogenase subunit HndA"  
"OPBO21\_00351" 31894 "s63E6H2" 0.00706764 "NADP-reducing hydrogenase subunit HndA"  
"OPBO21\_00353" 31896 "s59E13H2" 0.0206488 "IS2 repressor TnpA"  
"OPBO21\_00353" 31896 "s59E25H2" 0 "IS2 repressor TnpA"  
"OPBO21\_00353" 31896 "s59E5H2" 0.01436424 "IS2 repressor TnpA"  
"OPBO21\_00353" 31896 "s63E6H2" 0.001680032 "IS2 repressor TnpA"  
"OPBO21\_00354" 31897 "s59E13H2" 0.2282097 "IS2 transposase TnpB"  
"OPBO21\_00354" 31897 "s59E25H2" 0 "IS2 transposase TnpB"  
"OPBO21\_00354" 31897 "s59E5H2" 0.08966929 "IS2 transposase TnpB"  
"OPBO21\_00354" 31897 "s63E6H2" 0.003206658 "IS2 transposase TnpB"

"OPBO21\_00355" 31898 "s59E13H2" 0 "YcfA-like protein"  
"OPBO21\_00355" 31898 "s59E25H2" 0 "YcfA-like protein"  
"OPBO21\_00355" 31898 "s59E5H2" 0.007876887 "YcfA-like protein"  
"OPBO21\_00355" 31898 "s63E6H2" 0.2404239 "YcfA-like protein"  
"OPBO21\_00356" 31899 "s59E13H2" 0 "Thioredoxin reductase"  
"OPBO21\_00356" 31899 "s59E25H2" 0 "Thioredoxin reductase"  
"OPBO21\_00356" 31899 "s59E5H2" 0.01584537 "Thioredoxin reductase"  
"OPBO21\_00356" 31899 "s63E6H2" 0.00865526 "Thioredoxin reductase"  
"OPBO21\_00357" 31900 "s59E13H2" 0.006454113 "Germination-specific N-acetylmuramoyl-L-alanine amidase precursor"  
"OPBO21\_00357" 31900 "s59E25H2" 0 "Germination-specific N-acetylmuramoyl-L-alanine amidase precursor"  
"OPBO21\_00357" 31900 "s59E5H2" 0.08339631 "Germination-specific N-acetylmuramoyl-L-alanine amidase precursor"  
"OPBO21\_00357" 31900 "s63E6H2" 0.003267334 "Germination-specific N-acetylmuramoyl-L-alanine amidase precursor"  
"OPBO21\_00358" 31901 "s59E13H2" 0.01290171 "Histone deacetylase-like amidohydrolase"  
"OPBO21\_00358" 31901 "s59E25H2" 0 "Histone deacetylase-like amidohydrolase"  
"OPBO21\_00358" 31901 "s59E5H2" 0.06407277 "Histone deacetylase-like amidohydrolase"  
"OPBO21\_00358" 31901 "s63E6H2" 0 "Histone deacetylase-like amidohydrolase"  
"OPBO21\_00359" 31902 "s59E13H2" 0.004941369 "hypothetical protein"  
"OPBO21\_00359" 31902 "s59E25H2" 0 "hypothetical protein"  
"OPBO21\_00359" 31902 "s59E5H2" 0.1017286 "hypothetical protein"  
"OPBO21\_00359" 31902 "s63E6H2" 0.002406385 "hypothetical protein"  
"OPBO21\_00360" 31903 "s59E13H2" 0 "hypothetical protein"  
"OPBO21\_00360" 31903 "s59E25H2" 0 "hypothetical protein"  
"OPBO21\_00360" 31903 "s59E5H2" 0.01034867 "hypothetical protein"  
"OPBO21\_00360" 31903 "s63E6H2" 0.005920354 "hypothetical protein"  
"OPBO21\_00361" 31904 "s59E13H2" 0.002717895 "heat shock protein GrpE"  
"OPBO21\_00361" 31904 "s59E25H2" 0 "heat shock protein GrpE"  
"OPBO21\_00361" 31904 "s59E5H2" 0.06187349 "heat shock protein GrpE"  
"OPBO21\_00361" 31904 "s63E6H2" 0.005895069 "heat shock protein GrpE"  
"OPBO21\_00362" 31905 "s59E13H2" 0.002007617 "protochlorophyllide reductase iron-sulfur ATP-binding protein"  
"OPBO21\_00362" 31905 "s59E25H2" 0 "protochlorophyllide reductase iron-sulfur ATP-binding protein"  
"OPBO21\_00362" 31905 "s59E5H2" 0.005196864 "protochlorophyllide reductase iron-sulfur ATP-binding protein"  
"OPBO21\_00362" 31905 "s63E6H2" 0.007306017 "protochlorophyllide reductase iron-sulfur ATP-binding protein"  
"OPBO21\_00363" 31906 "s59E13H2" 0.005932241 "Sulfide dehydrogenase subunit beta precursor"  
"OPBO21\_00363" 31906 "s59E25H2" 0 "Sulfide dehydrogenase subunit beta precursor"  
"OPBO21\_00363" 31906 "s59E5H2" 0.1031029 "Sulfide dehydrogenase subunit beta precursor"  
"OPBO21\_00363" 31906 "s63E6H2" 0.01332552 "Sulfide dehydrogenase subunit beta precursor"  
"OPBO21\_00364" 31907 "s59E13H2" 0.0008049785 "Sulfide dehydrogenase subunit alpha precursor"  
"OPBO21\_00364" 31907 "s59E25H2" 0 "Sulfide dehydrogenase subunit alpha precursor"  
"OPBO21\_00364" 31907 "s59E5H2" 0.08679962 "Sulfide dehydrogenase subunit alpha precursor"  
"OPBO21\_00364" 31907 "s63E6H2" 0.04241179 "Sulfide dehydrogenase subunit alpha precursor"  
"OPBO21\_00365" 31908 "s59E13H2" 0.007316253 "hypothetical protein"  
"OPBO21\_00365" 31908 "s59E25H2" 0 "hypothetical protein"  
"OPBO21\_00365" 31908 "s59E5H2" 0 "hypothetical protein"  
"OPBO21\_00365" 31908 "s63E6H2" 0.08617152 "hypothetical protein"  
"OPBO21\_00366" 31909 "s59E13H2" 0.02300696 "YtxH-like protein"  
"OPBO21\_00366" 31909 "s59E25H2" 0 "YtxH-like protein"  
"OPBO21\_00366" 31909 "s59E5H2" 0 "YtxH-like protein"

"OPBO21\_00366" 31909 "s63E6H2" 0.06731384 "YtxH-like protein"  
"OPBO21\_00369" 31912 "s59E13H2" 0 "hypothetical protein"  
"OPBO21\_00369" 31912 "s59E25H2" 0 "hypothetical protein"  
"OPBO21\_00369" 31912 "s59E5H2" 0 "hypothetical protein"  
"OPBO21\_00369" 31912 "s63E6H2" 0.01128512 "hypothetical protein"  
"OPBO21\_00370" 31913 "s59E13H2" 0 "hypothetical protein"  
"OPBO21\_00370" 31913 "s59E25H2" 0 "hypothetical protein"  
"OPBO21\_00370" 31913 "s59E5H2" 0 "hypothetical protein"  
"OPBO21\_00370" 31913 "s63E6H2" 0.00441339 "hypothetical protein"  
"OPBO21\_00372" 31915 "s59E13H2" 6.324657 "Macrolide export ATP-binding/permease protein MacB"  
"OPBO21\_00372" 31915 "s59E25H2" 0 "Macrolide export ATP-binding/permease protein MacB"  
"OPBO21\_00372" 31915 "s59E5H2" 0.2766938 "Macrolide export ATP-binding/permease protein MacB"  
"OPBO21\_00372" 31915 "s63E6H2" 0.03126077 "Macrolide export ATP-binding/permease protein MacB"  
"OPBO21\_00374" 31917 "s59E13H2" 20.59788 "Cob(I)yrinic acid a,c-diamide adenosyltransferase"  
"OPBO21\_00374" 31917 "s59E25H2" 0 "Cob(I)yrinic acid a,c-diamide adenosyltransferase"  
"OPBO21\_00374" 31917 "s59E5H2" 0.4052382 "Cob(I)yrinic acid a,c-diamide adenosyltransferase"  
"OPBO21\_00374" 31917 "s63E6H2" 0.1261659 "Cob(I)yrinic acid a,c-diamide adenosyltransferase"  
"OPBO21\_00375" 31918 "s59E13H2" 0.2489145 "Cobyric acid synthase"  
"OPBO21\_00375" 31918 "s59E25H2" 0 "Cobyric acid synthase"  
"OPBO21\_00375" 31918 "s59E5H2" 0.3732314 "Cobyric acid synthase"  
"OPBO21\_00375" 31918 "s63E6H2" 0.000403026 "Cobyric acid synthase"  
"OPBO21\_00376" 31919 "s59E13H2" 15.4831 "Cobalamin import ATP-binding protein BtuD"  
"OPBO21\_00376" 31919 "s59E25H2" 0 "Cobalamin import ATP-binding protein BtuD"  
"OPBO21\_00376" 31919 "s59E5H2" 0.4024579 "Cobalamin import ATP-binding protein BtuD"  
"OPBO21\_00376" 31919 "s63E6H2" 0.0615987 "Cobalamin import ATP-binding protein BtuD"  
"OPBO21\_00377" 31920 "s59E13H2" 11.30796 "Hemin transport system permease protein HmuU"  
"OPBO21\_00377" 31920 "s59E25H2" 0 "Hemin transport system permease protein HmuU"  
"OPBO21\_00377" 31920 "s59E5H2" 0.4751612 "Hemin transport system permease protein HmuU"  
"OPBO21\_00377" 31920 "s63E6H2" 0.0346461 "Hemin transport system permease protein HmuU"  
"OPBO21\_00378" 31921 "s59E13H2" 0.002315324 "ATP-dependent RecD-like DNA helicase"  
"OPBO21\_00378" 31921 "s59E25H2" 0 "ATP-dependent RecD-like DNA helicase"  
"OPBO21\_00378" 31921 "s59E5H2" 0.01265397 "ATP-dependent RecD-like DNA helicase"  
"OPBO21\_00378" 31921 "s63E6H2" 0.005106715 "ATP-dependent RecD-like DNA helicase"  
"OPBO21\_00379" 31922 "s59E13H2" 0.007877909 "Proline--tRNA ligase"  
"OPBO21\_00379" 31922 "s59E25H2" 0 "Proline--tRNA ligase"  
"OPBO21\_00379" 31922 "s59E5H2" 0.01149667 "Proline--tRNA ligase"  
"OPBO21\_00379" 31922 "s63E6H2" 0.007192713 "Proline--tRNA ligase"  
"OPBO21\_00380" 31923 "s59E13H2" 0.00146296 "4-hydroxy-3-methylbut-2-en-1-yl diphosphate synthase"  
"OPBO21\_00380" 31923 "s59E25H2" 0 "4-hydroxy-3-methylbut-2-en-1-yl diphosphate synthase"  
"OPBO21\_00380" 31923 "s59E5H2" 0 "4-hydroxy-3-methylbut-2-en-1-yl diphosphate synthase"  
"OPBO21\_00380" 31923 "s63E6H2" 0.004800641 "4-hydroxy-3-methylbut-2-en-1-yl diphosphate synthase"  
"OPBO21\_00381" 31924 "s59E13H2" 0 "Metalloprotease MmpA"  
"OPBO21\_00381" 31924 "s59E25H2" 0 "Metalloprotease MmpA"  
"OPBO21\_00381" 31924 "s59E5H2" 0.01067082 "Metalloprotease MmpA"  
"OPBO21\_00381" 31924 "s63E6H2" 0.002186261 "Metalloprotease MmpA"  
"OPBO21\_00382" 31925 "s59E13H2" 0.002263762 "Isoprenyl transferase"  
"OPBO21\_00382" 31925 "s59E25H2" 0 "Isoprenyl transferase"

"OPBO21\_00382" 31925 "s59E5H2" 0.02167947 "Isoprenyl transferase"  
"OPBO21\_00382" 31925 "s63E6H2" 0.009908763 "Isoprenyl transferase"  
"OPBO21\_00383" 31926 "s59E13H2" 0 "Ribosome-recycling factor"  
"OPBO21\_00383" 31926 "s59E25H2" 0 "Ribosome-recycling factor"  
"OPBO21\_00383" 31926 "s59E5H2" 0.01191185 "Ribosome-recycling factor"  
"OPBO21\_00383" 31926 "s63E6H2" 0.01226753 "Ribosome-recycling factor"  
"OPBO21\_00384" 31927 "s59E13H2" 0.005216694 "Uridylate kinase"  
"OPBO21\_00384" 31927 "s59E25H2" 0 "Uridylate kinase"  
"OPBO21\_00384" 31927 "s59E5H2" 0.02355204 "Uridylate kinase"  
"OPBO21\_00384" 31927 "s63E6H2" 0.005513578 "Uridylate kinase"  
"OPBO21\_00385" 31928 "s59E13H2" 0.0007107054 "Elongation factor Ts"  
"OPBO21\_00385" 31928 "s59E25H2" 0 "Elongation factor Ts"  
"OPBO21\_00385" 31928 "s59E5H2" 0.009450055 "Elongation factor Ts"  
"OPBO21\_00385" 31928 "s63E6H2" 0.02117059 "Elongation factor Ts"  
"OPBO21\_00386" 31929 "s59E13H2" 0.008806891 "30S ribosomal protein S2"  
"OPBO21\_00386" 31929 "s59E25H2" 0 "30S ribosomal protein S2"  
"OPBO21\_00386" 31929 "s59E5H2" 0.03386177 "30S ribosomal protein S2"  
"OPBO21\_00386" 31929 "s63E6H2" 0.2048004 "30S ribosomal protein S2"  
"OPBO21\_00387" 31930 "s59E13H2" 0.04733604 "Tyrosine recombinase XerC"  
"OPBO21\_00387" 31930 "s59E25H2" 0 "Tyrosine recombinase XerC"  
"OPBO21\_00387" 31930 "s59E5H2" 0.01330602 "Tyrosine recombinase XerC"  
"OPBO21\_00387" 31930 "s63E6H2" 0.02514766 "Tyrosine recombinase XerC"  
"OPBO21\_00389" 31932 "s59E13H2" 0.09893625 "hypothetical protein"  
"OPBO21\_00389" 31932 "s59E25H2" 0 "hypothetical protein"  
"OPBO21\_00389" 31932 "s59E5H2" 0.008363195 "hypothetical protein"  
"OPBO21\_00389" 31932 "s63E6H2" 0.09285659 "hypothetical protein"  
"OPBO21\_00390" 31933 "s59E13H2" 0.133894 "Competence protein ComM"  
"OPBO21\_00390" 31933 "s59E25H2" 0 "Competence protein ComM"  
"OPBO21\_00390" 31933 "s59E5H2" 0.03004155 "Competence protein ComM"  
"OPBO21\_00390" 31933 "s63E6H2" 0.07772834 "Competence protein ComM"  
"OPBO21\_00392" 31935 "s59E13H2" 0.03649051 "Helix-turn-helix"  
"OPBO21\_00392" 31935 "s59E25H2" 0 "Helix-turn-helix"  
"OPBO21\_00392" 31935 "s59E5H2" 0.01762412 "Helix-turn-helix"  
"OPBO21\_00392" 31935 "s63E6H2" 0.06727901 "Helix-turn-helix"  
"OPBO21\_00393" 31936 "s59E13H2" 0 "putative methyltransferase YcgJ"  
"OPBO21\_00393" 31936 "s59E25H2" 0 "putative methyltransferase YcgJ"  
"OPBO21\_00393" 31936 "s59E5H2" 0.01161015 "putative methyltransferase YcgJ"  
"OPBO21\_00393" 31936 "s63E6H2" 0.001875996 "putative methyltransferase YcgJ"  
"OPBO21\_00397" 31940 "s59E13H2" 0 "Histidine kinase-, DNA gyrase B-, and HSP90-like ATPase"  
"OPBO21\_00397" 31940 "s59E25H2" 0 "Histidine kinase-, DNA gyrase B-, and HSP90-like ATPase"  
"OPBO21\_00397" 31940 "s59E5H2" 0 "Histidine kinase-, DNA gyrase B-, and HSP90-like ATPase"  
"OPBO21\_00397" 31940 "s63E6H2" 0 "Histidine kinase-, DNA gyrase B-, and HSP90-like ATPase"  
"OPBO21\_00399" 31942 "s59E13H2" 0.004111009 "hypothetical protein"  
"OPBO21\_00399" 31942 "s59E25H2" 0 "hypothetical protein"  
"OPBO21\_00399" 31942 "s59E5H2" 0.001952674 "hypothetical protein"  
"OPBO21\_00399" 31942 "s63E6H2" 0.001004701 "hypothetical protein"  
"OPBO21\_00400" 31943 "s59E13H2" 0.0303304 "Ribonuclease HII"

"OPBO21\_00400" 31943 "s59E25H2" 0 "Ribonuclease HII"  
"OPBO21\_00400" 31943 "s59E5H2" 0.01696516 "Ribonuclease HII"  
"OPBO21\_00400" 31943 "s63E6H2" 0.04944294 "Ribonuclease HII"  
"OPBO21\_00401" 31944 "s59E13H2" 0.03589289 "Signal peptidase I"  
"OPBO21\_00401" 31944 "s59E25H2" 0 "Signal peptidase I"  
"OPBO21\_00401" 31944 "s59E5H2" 0.0182788 "Signal peptidase I"  
"OPBO21\_00401" 31944 "s63E6H2" 0.03567845 "Signal peptidase I"  
"OPBO21\_00402" 31945 "s59E13H2" 0.004413344 "50S ribosomal protein L19"  
"OPBO21\_00402" 31945 "s59E25H2" 0 "50S ribosomal protein L19"  
"OPBO21\_00402" 31945 "s59E5H2" 0.01592732 "50S ribosomal protein L19"  
"OPBO21\_00402" 31945 "s63E6H2" 0.02652135 "50S ribosomal protein L19"  
"OPBO21\_00403" 31946 "s59E13H2" 0.009769536 "tRNA (guanine-N(1)-)-methyltransferase"  
"OPBO21\_00403" 31946 "s59E25H2" 0 "tRNA (guanine-N(1)-)-methyltransferase"  
"OPBO21\_00403" 31946 "s59E5H2" 0.0163272 "tRNA (guanine-N(1)-)-methyltransferase"  
"OPBO21\_00403" 31946 "s63E6H2" 0.04612293 "tRNA (guanine-N(1)-)-methyltransferase"  
"OPBO21\_00404" 31947 "s59E13H2" 0.002982759 "Ribosome maturation factor RimM"  
"OPBO21\_00404" 31947 "s59E25H2" 0 "Ribosome maturation factor RimM"  
"OPBO21\_00404" 31947 "s59E5H2" 0.03598713 "Ribosome maturation factor RimM"  
"OPBO21\_00404" 31947 "s63E6H2" 0.01190664 "Ribosome maturation factor RimM"  
"OPBO21\_00405" 31948 "s59E13H2" 0.006955593 "hypothetical protein"  
"OPBO21\_00405" 31948 "s59E25H2" 0 "hypothetical protein"  
"OPBO21\_00405" 31948 "s59E5H2" 0.02459472 "hypothetical protein"  
"OPBO21\_00405" 31948 "s63E6H2" 0.02475882 "hypothetical protein"  
"OPBO21\_00406" 31949 "s59E13H2" 0.003760544 "30S ribosomal protein S16"  
"OPBO21\_00406" 31949 "s59E25H2" 0 "30S ribosomal protein S16"  
"OPBO21\_00406" 31949 "s59E5H2" 0.05502763 "30S ribosomal protein S16"  
"OPBO21\_00406" 31949 "s63E6H2" 0.03509183 "30S ribosomal protein S16"  
"OPBO21\_00407" 31950 "s59E13H2" 0.01390069 "Signal recognition particle protein"  
"OPBO21\_00407" 31950 "s59E25H2" 0 "Signal recognition particle protein"  
"OPBO21\_00407" 31950 "s59E5H2" 0.02887791 "Signal recognition particle protein"  
"OPBO21\_00407" 31950 "s63E6H2" 0.033106 "Signal recognition particle protein"  
"OPBO21\_00408" 31951 "s59E13H2" 0 "Signal recognition particle receptor FtsY"  
"OPBO21\_00408" 31951 "s59E25H2" 0 "Signal recognition particle receptor FtsY"  
"OPBO21\_00408" 31951 "s59E5H2" 0.03184779 "Signal recognition particle receptor FtsY"  
"OPBO21\_00408" 31951 "s63E6H2" 0.0138229 "Signal recognition particle receptor FtsY"  
"OPBO21\_00409" 31952 "s59E13H2" 0.01131071 "Chromosome partition protein Smc"  
"OPBO21\_00409" 31952 "s59E25H2" 0 "Chromosome partition protein Smc"  
"OPBO21\_00409" 31952 "s59E5H2" 0.0273691 "Chromosome partition protein Smc"  
"OPBO21\_00409" 31952 "s63E6H2" 0.02659525 "Chromosome partition protein Smc"  
"OPBO21\_00410" 31953 "s59E13H2" 0.005190017 "Ribonuclease 3"  
"OPBO21\_00410" 31953 "s59E25H2" 0 "Ribonuclease 3"  
"OPBO21\_00410" 31953 "s59E5H2" 0.03095378 "Ribonuclease 3"  
"OPBO21\_00410" 31953 "s63E6H2" 0 "Ribonuclease 3"  
"OPBO21\_00411" 31954 "s59E13H2" 0.03002351 "Acyl carrier protein"  
"OPBO21\_00411" 31954 "s59E25H2" 0 "Acyl carrier protein"  
"OPBO21\_00411" 31954 "s59E5H2" 0.02701955 "Acyl carrier protein"  
"OPBO21\_00411" 31954 "s63E6H2" 0 "Acyl carrier protein"

"OPBO21\_00412" 31955 "s59E13H2" 0.1366706 "Phosphate acyltransferase"  
"OPBO21\_00412" 31955 "s59E25H2" 0 "Phosphate acyltransferase"  
"OPBO21\_00412" 31955 "s59E5H2" 0.008868771 "Phosphate acyltransferase"  
"OPBO21\_00412" 31955 "s63E6H2" 0.01382144 "Phosphate acyltransferase"  
"OPBO21\_00413" 31956 "s59E13H2" 0.1453882 "Phosphate acetyltransferase"  
"OPBO21\_00413" 31956 "s59E25H2" 0 "Phosphate acetyltransferase"  
"OPBO21\_00413" 31956 "s59E5H2" 0.01178205 "Phosphate acetyltransferase"  
"OPBO21\_00413" 31956 "s63E6H2" 0.005400007 "Phosphate acetyltransferase"  
"OPBO21\_00414" 31957 "s59E13H2" 0.1755729 "hypothetical protein"  
"OPBO21\_00414" 31957 "s59E25H2" 0 "hypothetical protein"  
"OPBO21\_00414" 31957 "s59E5H2" 0.1303744 "hypothetical protein"  
"OPBO21\_00414" 31957 "s63E6H2" 0.01025223 "hypothetical protein"  
"OPBO21\_00416" 31959 "s59E13H2" 0.003487145 "Adenosine monophosphate-protein transferase SoFic"  
"OPBO21\_00416" 31959 "s59E25H2" 0 "Adenosine monophosphate-protein transferase SoFic"  
"OPBO21\_00416" 31959 "s59E5H2" 0 "Adenosine monophosphate-protein transferase SoFic"  
"OPBO21\_00416" 31959 "s63E6H2" 0 "Adenosine monophosphate-protein transferase SoFic"  
"OPBO21\_00417" 31960 "s59E13H2" 0.2935894 "hypothetical protein"  
"OPBO21\_00417" 31960 "s59E25H2" 0 "hypothetical protein"  
"OPBO21\_00417" 31960 "s59E5H2" 0.005633322 "hypothetical protein"  
"OPBO21\_00417" 31960 "s63E6H2" 0.06039143 "hypothetical protein"  
"OPBO21\_00419" 31962 "s59E13H2" 0 "Aspartate-semialdehyde dehydrogenase 2"  
"OPBO21\_00419" 31962 "s59E25H2" 0 "Aspartate-semialdehyde dehydrogenase 2"  
"OPBO21\_00419" 31962 "s59E5H2" 0.1132672 "Aspartate-semialdehyde dehydrogenase 2"  
"OPBO21\_00419" 31962 "s63E6H2" 0 "Aspartate-semialdehyde dehydrogenase 2"  
"OPBO21\_00420" 31963 "s59E13H2" 0.00664912 "Flavoredoxin"  
"OPBO21\_00420" 31963 "s59E25H2" 0 "Flavoredoxin"  
"OPBO21\_00420" 31963 "s59E5H2" 0 "Flavoredoxin"  
"OPBO21\_00420" 31963 "s63E6H2" 0.01567572 "Flavoredoxin"  
"OPBO21\_00422" 31965 "s59E13H2" 0 "Demethylmenaquinone methyltransferase"  
"OPBO21\_00422" 31965 "s59E25H2" 0 "Demethylmenaquinone methyltransferase"  
"OPBO21\_00422" 31965 "s59E5H2" 0 "Demethylmenaquinone methyltransferase"  
"OPBO21\_00422" 31965 "s63E6H2" 0 "Demethylmenaquinone methyltransferase"  
"OPBO21\_00423" 31966 "s59E13H2" 0 "Glyoxalase/Bleomycin resistance protein/Dioxygenase superfamily protein"  
"OPBO21\_00423" 31966 "s59E25H2" 0 "Glyoxalase/Bleomycin resistance protein/Dioxygenase superfamily protein"  
"OPBO21\_00423" 31966 "s59E5H2" 0 "Glyoxalase/Bleomycin resistance protein/Dioxygenase superfamily protein"  
"OPBO21\_00423" 31966 "s63E6H2" 0 "Glyoxalase/Bleomycin resistance protein/Dioxygenase superfamily protein"  
"OPBO21\_00424" 31967 "s59E13H2" 0 "Lactoylglutathione lyase"  
"OPBO21\_00424" 31967 "s59E25H2" 0 "Lactoylglutathione lyase"  
"OPBO21\_00424" 31967 "s59E5H2" 0.0100653 "Lactoylglutathione lyase"  
"OPBO21\_00424" 31967 "s63E6H2" 0 "Lactoylglutathione lyase"  
"OPBO21\_00425" 31968 "s59E13H2" 0.008349844 "Radical SAM superfamily protein"  
"OPBO21\_00425" 31968 "s59E25H2" 0 "Radical SAM superfamily protein"  
"OPBO21\_00425" 31968 "s59E5H2" 0.002519391 "Radical SAM superfamily protein"  
"OPBO21\_00425" 31968 "s63E6H2" 0.005545298 "Radical SAM superfamily protein"  
"OPBO21\_00426" 31969 "s59E13H2" 0 "hypothetical protein"  
"OPBO21\_00426" 31969 "s59E25H2" 0 "hypothetical protein"  
"OPBO21\_00426" 31969 "s59E5H2" 0.04259802 "hypothetical protein"



"OPBO21\_00426" 31969 "s63E6H2" 0.002707184 "hypothetical protein"  
"OPBO21\_00427" 31970 "s59E13H2" 0 "cytidine deaminase"  
"OPBO21\_00427" 31970 "s59E25H2" 0 "cytidine deaminase"  
"OPBO21\_00427" 31970 "s59E5H2" 0 "cytidine deaminase"  
"OPBO21\_00427" 31970 "s63E6H2" 0 "cytidine deaminase"  
"OPBO21\_00428" 31971 "s59E13H2" 0 "Demethylmenaquinone methyltransferase"  
"OPBO21\_00428" 31971 "s59E25H2" 0 "Demethylmenaquinone methyltransferase"  
"OPBO21\_00428" 31971 "s59E5H2" 0.01924515 "Demethylmenaquinone methyltransferase"  
"OPBO21\_00428" 31971 "s63E6H2" 0.01188738 "Demethylmenaquinone methyltransferase"  
"OPBO21\_00430" 31973 "s59E13H2" 0.03204789 "Argininosuccinate synthase"  
"OPBO21\_00430" 31973 "s59E25H2" 0 "Argininosuccinate synthase"  
"OPBO21\_00430" 31973 "s59E5H2" 0.3643587 "Argininosuccinate synthase"  
"OPBO21\_00430" 31973 "s63E6H2" 0.03826406 "Argininosuccinate synthase"  
"OPBO21\_00431" 31974 "s59E13H2" 0.01741171 "Arginine repressor"  
"OPBO21\_00431" 31974 "s59E25H2" 0 "Arginine repressor"  
"OPBO21\_00431" 31974 "s59E5H2" 0.2558204 "Arginine repressor"  
"OPBO21\_00431" 31974 "s63E6H2" 0.03071432 "Arginine repressor"  
"OPBO21\_00432" 31975 "s59E13H2" 0.02131059 "Ornithine carbamoyltransferase"  
"OPBO21\_00432" 31975 "s59E25H2" 0 "Ornithine carbamoyltransferase"  
"OPBO21\_00432" 31975 "s59E5H2" 0.2749217 "Ornithine carbamoyltransferase"  
"OPBO21\_00432" 31975 "s63E6H2" 0.02168882 "Ornithine carbamoyltransferase"  
"OPBO21\_00433" 31976 "s59E13H2" 0.01552031 "Acetylornithine aminotransferase"  
"OPBO21\_00433" 31976 "s59E25H2" 0 "Acetylornithine aminotransferase"  
"OPBO21\_00433" 31976 "s59E5H2" 0.2338737 "Acetylornithine aminotransferase"  
"OPBO21\_00433" 31976 "s63E6H2" 0.05353404 "Acetylornithine aminotransferase"  
"OPBO21\_00434" 31977 "s59E13H2" 0.01470793 "Acetylglutamate kinase"  
"OPBO21\_00434" 31977 "s59E25H2" 0 "Acetylglutamate kinase"  
"OPBO21\_00434" 31977 "s59E5H2" 0.3067044 "Acetylglutamate kinase"  
"OPBO21\_00434" 31977 "s63E6H2" 0.07073703 "Acetylglutamate kinase"  
"OPBO21\_00435" 31978 "s59E13H2" 0.002871626 "Arginine biosynthesis bifunctional protein ArgJ"  
"OPBO21\_00435" 31978 "s59E25H2" 0 "Arginine biosynthesis bifunctional protein ArgJ"  
"OPBO21\_00435" 31978 "s59E5H2" 0.0529453 "Arginine biosynthesis bifunctional protein ArgJ"  
"OPBO21\_00435" 31978 "s63E6H2" 0.2770545 "Arginine biosynthesis bifunctional protein ArgJ"  
"OPBO21\_00436" 31979 "s59E13H2" 0.002068944 "N-acetyl-gamma-glutamyl-phosphate reductase"  
"OPBO21\_00436" 31979 "s59E25H2" 0 "N-acetyl-gamma-glutamyl-phosphate reductase"  
"OPBO21\_00436" 31979 "s59E5H2" 0.1250095 "N-acetyl-gamma-glutamyl-phosphate reductase"  
"OPBO21\_00436" 31979 "s63E6H2" 2.528181 "N-acetyl-gamma-glutamyl-phosphate reductase"  
"OPBO21\_00437" 31980 "s59E13H2" 0.01984437 "hypothetical protein"  
"OPBO21\_00437" 31980 "s59E25H2" 0 "hypothetical protein"  
"OPBO21\_00437" 31980 "s59E5H2" 0.1532046 "hypothetical protein"  
"OPBO21\_00437" 31980 "s63E6H2" 1.888168 "hypothetical protein"  
"OPBO21\_00438" 31981 "s59E13H2" 0.009350454 "ribonuclease Z"  
"OPBO21\_00438" 31981 "s59E25H2" 0 "ribonuclease Z"  
"OPBO21\_00438" 31981 "s59E5H2" 0.00422528 "ribonuclease Z"  
"OPBO21\_00438" 31981 "s63E6H2" 0.04512351 "ribonuclease Z"  
"OPBO21\_00439" 31982 "s59E13H2" 0.01177478 "Phenylalanine--tRNA ligase beta subunit"  
"OPBO21\_00439" 31982 "s59E25H2" 0 "Phenylalanine--tRNA ligase beta subunit"

"OPBO21\_00439" 31982 "s59E5H2" 0.1211702 "Phenylalanine--tRNA ligase beta subunit"  
"OPBO21\_00439" 31982 "s63E6H2" 0.1090406 "Phenylalanine--tRNA ligase beta subunit"  
"OPBO21\_00440" 31983 "s59E13H2" 0.006065383 "Phenylalanine--tRNA ligase alpha subunit"  
"OPBO21\_00440" 31983 "s59E25H2" 0 "Phenylalanine--tRNA ligase alpha subunit"  
"OPBO21\_00440" 31983 "s59E5H2" 0.03237701 "Phenylalanine--tRNA ligase alpha subunit"  
"OPBO21\_00440" 31983 "s63E6H2" 0.05667036 "Phenylalanine--tRNA ligase alpha subunit"  
"OPBO21\_00441" 31984 "s59E13H2" 0.003351154 "50S ribosomal protein L20"  
"OPBO21\_00441" 31984 "s59E25H2" 0 "50S ribosomal protein L20"  
"OPBO21\_00441" 31984 "s59E5H2" 0.08950511 "50S ribosomal protein L20"  
"OPBO21\_00441" 31984 "s63E6H2" 0.06142296 "50S ribosomal protein L20"  
"OPBO21\_00442" 31985 "s59E13H2" 0.01037988 "50S ribosomal protein L35"  
"OPBO21\_00442" 31985 "s59E25H2" 0 "50S ribosomal protein L35"  
"OPBO21\_00442" 31985 "s59E5H2" 0.1108217 "50S ribosomal protein L35"  
"OPBO21\_00442" 31985 "s63E6H2" 0.07781491 "50S ribosomal protein L35"  
"OPBO21\_00443" 31986 "s59E13H2" 0.02301821 "Molybdopterin molybdenumtransferase"  
"OPBO21\_00443" 31986 "s59E25H2" 0 "Molybdopterin molybdenumtransferase"  
"OPBO21\_00443" 31986 "s59E5H2" 0.008097752 "Molybdopterin molybdenumtransferase"  
"OPBO21\_00443" 31986 "s63E6H2" 0.4661336 "Molybdopterin molybdenumtransferase"  
"OPBO21\_00445" 31988 "s59E13H2" 0.01862989 "PBP superfamily domain protein"  
"OPBO21\_00445" 31988 "s59E25H2" 0 "PBP superfamily domain protein"  
"OPBO21\_00445" 31988 "s59E5H2" 0.01019893 "PBP superfamily domain protein"  
"OPBO21\_00445" 31988 "s63E6H2" 0.5328797 "PBP superfamily domain protein"  
"OPBO21\_00446" 31989 "s59E13H2" 0.02114929 "Sulfate transport system permease protein CysW"  
"OPBO21\_00446" 31989 "s59E25H2" 0 "Sulfate transport system permease protein CysW"  
"OPBO21\_00446" 31989 "s59E5H2" 0.02481712 "Sulfate transport system permease protein CysW"  
"OPBO21\_00446" 31989 "s63E6H2" 0.8325051 "Sulfate transport system permease protein CysW"  
"OPBO21\_00447" 31990 "s59E13H2" 7.560427e-05 "Fe(3+) ions import ATP-binding protein FbpC"  
"OPBO21\_00447" 31990 "s59E25H2" 0 "Fe(3+) ions import ATP-binding protein FbpC"  
"OPBO21\_00447" 31990 "s59E5H2" 0.03718126 "Fe(3+) ions import ATP-binding protein FbpC"  
"OPBO21\_00447" 31990 "s63E6H2" 0.8673505 "Fe(3+) ions import ATP-binding protein FbpC"  
"OPBO21\_00448" 31991 "s59E13H2" 0.006813227 "Cyclic pyranopterin monophosphate synthase"  
"OPBO21\_00448" 31991 "s59E25H2" 0 "Cyclic pyranopterin monophosphate synthase"  
"OPBO21\_00448" 31991 "s59E5H2" 0.008816907 "Cyclic pyranopterin monophosphate synthase"  
"OPBO21\_00448" 31991 "s63E6H2" 0.6144467 "Cyclic pyranopterin monophosphate synthase"  
"OPBO21\_00449" 31992 "s59E13H2" 0.003484738 "Cyclic pyranopterin monophosphate synthase accessory protein"  
"OPBO21\_00449" 31992 "s59E25H2" 0 "Cyclic pyranopterin monophosphate synthase accessory protein"  
"OPBO21\_00449" 31992 "s59E5H2" 0.0210979 "Cyclic pyranopterin monophosphate synthase accessory protein"  
"OPBO21\_00449" 31992 "s63E6H2" 0.6704813 "Cyclic pyranopterin monophosphate synthase accessory protein"  
"OPBO21\_00450" 31993 "s59E13H2" 0.01115696 "MOSC domain protein"  
"OPBO21\_00450" 31993 "s59E25H2" 0 "MOSC domain protein"  
"OPBO21\_00450" 31993 "s59E5H2" 0.0130927 "MOSC domain protein"  
"OPBO21\_00450" 31993 "s63E6H2" 0.7304396 "MOSC domain protein"  
"OPBO21\_00451" 31994 "s59E13H2" 0.008413352 "Molybdopterin adenyllyltransferase"  
"OPBO21\_00451" 31994 "s59E25H2" 0 "Molybdopterin adenyllyltransferase"  
"OPBO21\_00451" 31994 "s59E5H2" 0.006601185 "Molybdopterin adenyllyltransferase"  
"OPBO21\_00451" 31994 "s63E6H2" 0.1345695 "Molybdopterin adenyllyltransferase"  
"OPBO21\_00452" 31995 "s59E13H2" 0.01737142 "Putative L,D-transpeptidase YciB precursor"

"OPBO21\_00452" 31995 "s59E25H2" 0 "Putative L,D-transpeptidase YciB precursor"  
"OPBO21\_00452" 31995 "s59E5H2" 0.05188983 "Putative L,D-transpeptidase YciB precursor"  
"OPBO21\_00452" 31995 "s63E6H2" 0 "Putative L,D-transpeptidase YciB precursor"  
"OPBO21\_00453" 31996 "s59E13H2" 0.0107895 "molybdopterin-guanine dinucleotide biosynthesis protein MobA"  
"OPBO21\_00453" 31996 "s59E25H2" 0 "molybdopterin-guanine dinucleotide biosynthesis protein MobA"  
"OPBO21\_00453" 31996 "s59E5H2" 0.05449826 "molybdopterin-guanine dinucleotide biosynthesis protein MobA"  
"OPBO21\_00453" 31996 "s63E6H2" 0.03017791 "molybdopterin-guanine dinucleotide biosynthesis protein MobA"  
"OPBO21\_00454" 31997 "s59E13H2" 0.0478323 "formate dehydrogenase accessory protein"  
"OPBO21\_00454" 31997 "s59E25H2" 0 "formate dehydrogenase accessory protein"  
"OPBO21\_00454" 31997 "s59E5H2" 0.03232557 "formate dehydrogenase accessory protein"  
"OPBO21\_00454" 31997 "s63E6H2" 0.1231423 "formate dehydrogenase accessory protein"  
"OPBO21\_00455" 31998 "s59E13H2" 3.007824e-05 "Formate dehydrogenase subunit alpha"  
"OPBO21\_00455" 31998 "s59E25H2" 0 "Formate dehydrogenase subunit alpha"  
"OPBO21\_00455" 31998 "s59E5H2" 0.01020609 "Formate dehydrogenase subunit alpha"  
"OPBO21\_00455" 31998 "s63E6H2" 0.01250033 "Formate dehydrogenase subunit alpha"  
"OPBO21\_00456" 31999 "s59E13H2" 0 "NADP-reducing hydrogenase subunit HndC"  
"OPBO21\_00456" 31999 "s59E25H2" 0 "NADP-reducing hydrogenase subunit HndC"  
"OPBO21\_00456" 31999 "s59E5H2" 0.005431482 "NADP-reducing hydrogenase subunit HndC"  
"OPBO21\_00456" 31999 "s63E6H2" 0.004501569 "NADP-reducing hydrogenase subunit HndC"  
"OPBO21\_00457" 32000 "s59E13H2" 10.79226 "Peptide chain release factor 1"  
"OPBO21\_00457" 32000 "s59E25H2" 0 "Peptide chain release factor 1"  
"OPBO21\_00457" 32000 "s59E5H2" 0.005183343 "Peptide chain release factor 1"  
"OPBO21\_00457" 32000 "s63E6H2" 0.2213358 "Peptide chain release factor 1"  
"OPBO21\_00458" 32001 "s59E13H2" 5.329827 "50S ribosomal protein L3 glutamine methyltransferase"  
"OPBO21\_00458" 32001 "s59E25H2" 0 "50S ribosomal protein L3 glutamine methyltransferase"  
"OPBO21\_00458" 32001 "s59E5H2" 0.003626077 "50S ribosomal protein L3 glutamine methyltransferase"  
"OPBO21\_00458" 32001 "s63E6H2" 0.2141943 "50S ribosomal protein L3 glutamine methyltransferase"  
"OPBO21\_00459" 32002 "s59E13H2" 0.0006609145 "Arsenical pump membrane protein"  
"OPBO21\_00459" 32002 "s59E25H2" 0 "Arsenical pump membrane protein"  
"OPBO21\_00459" 32002 "s59E5H2" 0.009242551 "Arsenical pump membrane protein"  
"OPBO21\_00459" 32002 "s63E6H2" 0.04595104 "Arsenical pump membrane protein"  
"OPBO21\_00461" 32004 "s59E13H2" 0.01052666 "hypothetical protein"  
"OPBO21\_00461" 32004 "s59E25H2" 0 "hypothetical protein"  
"OPBO21\_00461" 32004 "s59E5H2" 0.04677178 "hypothetical protein"  
"OPBO21\_00461" 32004 "s63E6H2" 0.1631392 "hypothetical protein"  
"OPBO21\_00463" 32006 "s59E13H2" 0.1467488 "hypothetical protein"  
"OPBO21\_00463" 32006 "s59E25H2" 0 "hypothetical protein"  
"OPBO21\_00463" 32006 "s59E5H2" 0.05047088 "hypothetical protein"  
"OPBO21\_00463" 32006 "s63E6H2" 0.1667551 "hypothetical protein"  
"OPBO21\_00464" 32007 "s59E13H2" 0.2531622 "tRNA(Ile)-lysidine synthase"  
"OPBO21\_00464" 32007 "s59E25H2" 0 "tRNA(Ile)-lysidine synthase"  
"OPBO21\_00464" 32007 "s59E5H2" 0.138581 "tRNA(Ile)-lysidine synthase"  
"OPBO21\_00464" 32007 "s63E6H2" 0.2299754 "tRNA(Ile)-lysidine synthase"  
"OPBO21\_00465" 32008 "s59E13H2" 0.2103376 "Hypoxanthine phosphoribosyltransferase"  
"OPBO21\_00465" 32008 "s59E25H2" 0 "Hypoxanthine phosphoribosyltransferase"  
"OPBO21\_00465" 32008 "s59E5H2" 0.05840704 "Hypoxanthine phosphoribosyltransferase"  
"OPBO21\_00465" 32008 "s63E6H2" 0.230173 "Hypoxanthine phosphoribosyltransferase"

"OPBO21\_00466" 32009 "s59E13H2" 0.3021854 "ATP-dependent zinc metalloprotease FtsH"  
"OPBO21\_00466" 32009 "s59E25H2" 0 "ATP-dependent zinc metalloprotease FtsH"  
"OPBO21\_00466" 32009 "s59E5H2" 0.03392455 "ATP-dependent zinc metalloprotease FtsH"  
"OPBO21\_00466" 32009 "s63E6H2" 0.1720902 "ATP-dependent zinc metalloprotease FtsH"  
"OPBO21\_00467" 32010 "s59E13H2" 0.2679682 "GTP cyclohydrolase 1"  
"OPBO21\_00467" 32010 "s59E25H2" 0 "GTP cyclohydrolase 1"  
"OPBO21\_00467" 32010 "s59E5H2" 0.01555411 "GTP cyclohydrolase 1"  
"OPBO21\_00467" 32010 "s63E6H2" 0.05909884 "GTP cyclohydrolase 1"  
"OPBO21\_00468" 32011 "s59E13H2" 0.3036587 "Dihydropteroate synthase"  
"OPBO21\_00468" 32011 "s59E25H2" 0 "Dihydropteroate synthase"  
"OPBO21\_00468" 32011 "s59E5H2" 0.01028616 "Dihydropteroate synthase"  
"OPBO21\_00468" 32011 "s63E6H2" 0.0307275 "Dihydropteroate synthase"  
"OPBO21\_00469" 32012 "s59E13H2" 0.07272328 "Bifunctional folate synthesis protein"  
"OPBO21\_00469" 32012 "s59E25H2" 0 "Bifunctional folate synthesis protein"  
"OPBO21\_00469" 32012 "s59E5H2" 0.004597904 "Bifunctional folate synthesis protein"  
"OPBO21\_00469" 32012 "s63E6H2" 0.02423473 "Bifunctional folate synthesis protein"  
"OPBO21\_00470" 32013 "s59E13H2" 0.1316171 "Fused nickel transport protein NikMN"  
"OPBO21\_00470" 32013 "s59E25H2" 0 "Fused nickel transport protein NikMN"  
"OPBO21\_00470" 32013 "s59E5H2" 0.1389308 "Fused nickel transport protein NikMN"  
"OPBO21\_00470" 32013 "s63E6H2" 0.04888173 "Fused nickel transport protein NikMN"  
"OPBO21\_00471" 32014 "s59E13H2" 0.06734886 "cobalt transport protein CbiN"  
"OPBO21\_00471" 32014 "s59E25H2" 0 "cobalt transport protein CbiN"  
"OPBO21\_00471" 32014 "s59E5H2" 0.07659004 "cobalt transport protein CbiN"  
"OPBO21\_00471" 32014 "s63E6H2" 0.04333442 "cobalt transport protein CbiN"  
"OPBO21\_00472" 32015 "s59E13H2" 0.003010351 "Cobalt transport protein CbiQ"  
"OPBO21\_00472" 32015 "s59E25H2" 0 "Cobalt transport protein CbiQ"  
"OPBO21\_00472" 32015 "s59E5H2" 0.252611 "Cobalt transport protein CbiQ"  
"OPBO21\_00472" 32015 "s63E6H2" 0.08081206 "Cobalt transport protein CbiQ"  
"OPBO21\_00473" 32016 "s59E13H2" 0.002709295 "Energy-coupling factor transporter ATP-binding protein EcfA3"  
"OPBO21\_00473" 32016 "s59E25H2" 0 "Energy-coupling factor transporter ATP-binding protein EcfA3"  
"OPBO21\_00473" 32016 "s59E5H2" 0.187882 "Energy-coupling factor transporter ATP-binding protein EcfA3"  
"OPBO21\_00473" 32016 "s63E6H2" 0.02383142 "Energy-coupling factor transporter ATP-binding protein EcfA3"  
"OPBO21\_00474" 32017 "s59E13H2" 0 "Type III pantothenate kinase"  
"OPBO21\_00474" 32017 "s59E25H2" 0 "Type III pantothenate kinase"  
"OPBO21\_00474" 32017 "s59E5H2" 0.1116531 "Type III pantothenate kinase"  
"OPBO21\_00474" 32017 "s63E6H2" 0.02179191 "Type III pantothenate kinase"  
"OPBO21\_00476" 32019 "s59E13H2" 0.006196501 "tRNA-dihydrouridine synthase C"  
"OPBO21\_00476" 32019 "s59E25H2" 0 "tRNA-dihydrouridine synthase C"  
"OPBO21\_00476" 32019 "s59E5H2" 5.7693e-05 "tRNA-dihydrouridine synthase C"  
"OPBO21\_00476" 32019 "s63E6H2" 0.9509725 "tRNA-dihydrouridine synthase C"  
"OPBO21\_00477" 32020 "s59E13H2" 0.00194891 "Gas vesicle structural protein"  
"OPBO21\_00477" 32020 "s59E25H2" 0 "Gas vesicle structural protein"  
"OPBO21\_00477" 32020 "s59E5H2" 0 "Gas vesicle structural protein"  
"OPBO21\_00477" 32020 "s63E6H2" 0.0135389 "Gas vesicle structural protein"  
"OPBO21\_00478" 32021 "s59E13H2" 0 "hypothetical protein"  
"OPBO21\_00478" 32021 "s59E25H2" 0 "hypothetical protein"  
"OPBO21\_00478" 32021 "s59E5H2" 0.01136445 "hypothetical protein"

"OPBO21\_00478" 32021 "s63E6H2" 0 "hypothetical protein"  
"OPBO21\_00479" 32022 "s59E13H2" 0 "hypothetical protein"  
"OPBO21\_00479" 32022 "s59E25H2" 0 "hypothetical protein"  
"OPBO21\_00479" 32022 "s59E5H2" 0 "hypothetical protein"  
"OPBO21\_00479" 32022 "s63E6H2" 0 "hypothetical protein"  
"OPBO21\_00480" 32023 "s59E13H2" 0 "chaperone protein DnaJ"  
"OPBO21\_00480" 32023 "s59E25H2" 0 "chaperone protein DnaJ"  
"OPBO21\_00480" 32023 "s59E5H2" 0.03981829 "chaperone protein DnaJ"  
"OPBO21\_00480" 32023 "s63E6H2" 0.01027435 "chaperone protein DnaJ"  
"OPBO21\_00481" 32024 "s59E13H2" 0 "Denitrification regulatory protein NirQ"  
"OPBO21\_00481" 32024 "s59E25H2" 0 "Denitrification regulatory protein NirQ"  
"OPBO21\_00481" 32024 "s59E5H2" 0 "Denitrification regulatory protein NirQ"  
"OPBO21\_00481" 32024 "s63E6H2" 0 "Denitrification regulatory protein NirQ"  
"OPBO21\_00482" 32025 "s59E13H2" 0 "hypothetical protein"  
"OPBO21\_00482" 32025 "s59E25H2" 0 "hypothetical protein"  
"OPBO21\_00482" 32025 "s59E5H2" 0 "hypothetical protein"  
"OPBO21\_00482" 32025 "s63E6H2" 0 "hypothetical protein"  
"OPBO21\_00483" 32026 "s59E13H2" 0 "hypothetical protein"  
"OPBO21\_00483" 32026 "s59E25H2" 0 "hypothetical protein"  
"OPBO21\_00483" 32026 "s59E5H2" 0 "hypothetical protein"  
"OPBO21\_00483" 32026 "s63E6H2" 0 "hypothetical protein"  
"OPBO21\_00484" 32027 "s59E13H2" 0 "hypothetical protein"  
"OPBO21\_00484" 32027 "s59E25H2" 0 "hypothetical protein"  
"OPBO21\_00484" 32027 "s59E5H2" 0 "hypothetical protein"  
"OPBO21\_00484" 32027 "s63E6H2" 0 "hypothetical protein"  
"OPBO21\_00487" 32030 "s59E13H2" 0 "hypothetical protein"  
"OPBO21\_00487" 32030 "s59E25H2" 0 "hypothetical protein"  
"OPBO21\_00487" 32030 "s59E5H2" 0.0150398 "hypothetical protein"  
"OPBO21\_00487" 32030 "s63E6H2" 0.00932646 "hypothetical protein"  
"OPBO21\_00488" 32031 "s59E13H2" 0 "Small heat shock protein HSP16.5"  
"OPBO21\_00488" 32031 "s59E25H2" 0 "Small heat shock protein HSP16.5"  
"OPBO21\_00488" 32031 "s59E5H2" 0.01506263 "Small heat shock protein HSP16.5"  
"OPBO21\_00488" 32031 "s63E6H2" 0.002969768 "Small heat shock protein HSP16.5"  
"OPBO21\_00489" 32032 "s59E13H2" 0 "VCP-like ATPase"  
"OPBO21\_00489" 32032 "s59E25H2" 0 "VCP-like ATPase"  
"OPBO21\_00489" 32032 "s59E5H2" 0.03942687 "VCP-like ATPase"  
"OPBO21\_00489" 32032 "s63E6H2" 0.00503104 "VCP-like ATPase"  
"OPBO21\_00490" 32033 "s59E13H2" 0 "chaperone protein DnaJ"  
"OPBO21\_00490" 32033 "s59E25H2" 0 "chaperone protein DnaJ"  
"OPBO21\_00490" 32033 "s59E5H2" 0.06901566 "chaperone protein DnaJ"  
"OPBO21\_00490" 32033 "s63E6H2" 0.01915845 "chaperone protein DnaJ"  
"OPBO21\_00491" 32034 "s59E13H2" 0 "Gas vesicle synthesis protein GvpL/GvpF"  
"OPBO21\_00491" 32034 "s59E25H2" 0 "Gas vesicle synthesis protein GvpL/GvpF"  
"OPBO21\_00491" 32034 "s59E5H2" 0.1145966 "Gas vesicle synthesis protein GvpL/GvpF"  
"OPBO21\_00491" 32034 "s63E6H2" 0.02658802 "Gas vesicle synthesis protein GvpL/GvpF"  
"OPBO21\_00492" 32035 "s59E13H2" 0 "Gas vesicle synthesis protein GvpL/GvpF"  
"OPBO21\_00492" 32035 "s59E25H2" 0 "Gas vesicle synthesis protein GvpL/GvpF"

"OPBO21\_00492" 32035 "s59E5H2" 0.1498874 "Gas vesicle synthesis protein GvpL/GvpF"  
"OPBO21\_00492" 32035 "s63E6H2" 0.0133851 "Gas vesicle synthesis protein GvpL/GvpF"  
"OPBO21\_00493" 32036 "s59E13H2" 0.0005520312 "Gas vesicle protein G"  
"OPBO21\_00493" 32036 "s59E25H2" 0 "Gas vesicle protein G"  
"OPBO21\_00493" 32036 "s59E5H2" 0.01846336 "Gas vesicle protein G"  
"OPBO21\_00493" 32036 "s63E6H2" 0 "Gas vesicle protein G"  
"OPBO21\_00494" 32037 "s59E13H2" 0.01016587 "Gas vesicle synthesis protein GvpO"  
"OPBO21\_00494" 32037 "s59E25H2" 0 "Gas vesicle synthesis protein GvpO"  
"OPBO21\_00494" 32037 "s59E5H2" 0 "Gas vesicle synthesis protein GvpO"  
"OPBO21\_00494" 32037 "s63E6H2" 0 "Gas vesicle synthesis protein GvpO"  
"OPBO21\_00495" 32038 "s59E13H2" 0 "Gas vesicle synthesis protein GvpL/GvpF"  
"OPBO21\_00495" 32038 "s59E25H2" 0 "Gas vesicle synthesis protein GvpL/GvpF"  
"OPBO21\_00495" 32038 "s59E5H2" 0 "Gas vesicle synthesis protein GvpL/GvpF"  
"OPBO21\_00495" 32038 "s63E6H2" 0 "Gas vesicle synthesis protein GvpL/GvpF"  
"OPBO21\_00496" 32039 "s59E13H2" 0 "Gas vesicle protein K"  
"OPBO21\_00496" 32039 "s59E25H2" 0 "Gas vesicle protein K"  
"OPBO21\_00496" 32039 "s59E5H2" 0.01380076 "Gas vesicle protein K"  
"OPBO21\_00496" 32039 "s63E6H2" 0.005185582 "Gas vesicle protein K"  
"OPBO21\_00497" 32040 "s59E13H2" 0 "hypothetical protein"  
"OPBO21\_00497" 32040 "s59E25H2" 0 "hypothetical protein"  
"OPBO21\_00497" 32040 "s59E5H2" 0.009456844 "hypothetical protein"  
"OPBO21\_00497" 32040 "s63E6H2" 0 "hypothetical protein"  
"OPBO21\_00498" 32041 "s59E13H2" 0 "Gas vesicle structural protein"  
"OPBO21\_00498" 32041 "s59E25H2" 0 "Gas vesicle structural protein"  
"OPBO21\_00498" 32041 "s59E5H2" 0.004720658 "Gas vesicle structural protein"  
"OPBO21\_00498" 32041 "s63E6H2" 0.0001397538 "Gas vesicle structural protein"  
"OPBO21\_00499" 32042 "s59E13H2" 0 "Gas vesicle synthesis protein GvpO"  
"OPBO21\_00499" 32042 "s59E25H2" 0 "Gas vesicle synthesis protein GvpO"  
"OPBO21\_00499" 32042 "s59E5H2" 0 "Gas vesicle synthesis protein GvpO"  
"OPBO21\_00499" 32042 "s63E6H2" 0.004821505 "Gas vesicle synthesis protein GvpO"  
"OPBO21\_00501" 32044 "s59E13H2" 0 "hypothetical protein"  
"OPBO21\_00501" 32044 "s59E25H2" 0 "hypothetical protein"  
"OPBO21\_00501" 32044 "s59E5H2" 0 "hypothetical protein"  
"OPBO21\_00501" 32044 "s63E6H2" 0.005710848 "hypothetical protein"  
"OPBO21\_00502" 32045 "s59E13H2" 0 "Sigma-54, DNA binding domain"  
"OPBO21\_00502" 32045 "s59E25H2" 0 "Sigma-54, DNA binding domain"  
"OPBO21\_00502" 32045 "s59E5H2" 0 "Sigma-54, DNA binding domain"  
"OPBO21\_00502" 32045 "s63E6H2" 0.001189989 "Sigma-54, DNA binding domain"  
"OPBO21\_00506" 32049 "s59E13H2" 0 "Serine dehydrogenase proteinase"  
"OPBO21\_00506" 32049 "s59E25H2" 0 "Serine dehydrogenase proteinase"  
"OPBO21\_00506" 32049 "s59E5H2" 0.01329584 "Serine dehydrogenase proteinase"  
"OPBO21\_00506" 32049 "s63E6H2" 0.002888108 "Serine dehydrogenase proteinase"  
"OPBO21\_00508" 32051 "s59E13H2" 0 "hypothetical protein"  
"OPBO21\_00508" 32051 "s59E25H2" 0 "hypothetical protein"  
"OPBO21\_00508" 32051 "s59E5H2" 0.01757272 "hypothetical protein"  
"OPBO21\_00508" 32051 "s63E6H2" 0 "hypothetical protein"  
"OPBO21\_00511" 32054 "s59E13H2" 0 "ubiquinone/menaquinone biosynthesis methyltransferase"

"OPBO21\_00511" 32054 "s59E25H2" 16.46313 "ubiquinone/menaquinone biosynthesis methyltransferase"  
"OPBO21\_00511" 32054 "s59E5H2" 0 "ubiquinone/menaquinone biosynthesis methyltransferase"  
"OPBO21\_00511" 32054 "s63E6H2" 0 "ubiquinone/menaquinone biosynthesis methyltransferase"  
"OPBO21\_00512" 32055 "s59E13H2" 0.00690039 "Xylulose kinase"  
"OPBO21\_00512" 32055 "s59E25H2" 0 "Xylulose kinase"  
"OPBO21\_00512" 32055 "s59E5H2" 0.5791191 "Xylulose kinase"  
"OPBO21\_00512" 32055 "s63E6H2" 0.1005013 "Xylulose kinase"  
"OPBO21\_00516" 32059 "s59E13H2" 0 "DNA repair and recombination protein RadA"  
"OPBO21\_00516" 32059 "s59E25H2" 0 "DNA repair and recombination protein RadA"  
"OPBO21\_00516" 32059 "s59E5H2" 0.6076328 "DNA repair and recombination protein RadA"  
"OPBO21\_00516" 32059 "s63E6H2" 0.1549894 "DNA repair and recombination protein RadA"  
"OPBO21\_00517" 32060 "s59E13H2" 0 "2'-5'-RNA ligase"  
"OPBO21\_00517" 32060 "s59E25H2" 0 "2'-5'-RNA ligase"  
"OPBO21\_00517" 32060 "s59E5H2" 0.3088481 "2'-5'-RNA ligase"  
"OPBO21\_00517" 32060 "s63E6H2" 0.09578125 "2'-5'-RNA ligase"  
"OPBO21\_00518" 32061 "s59E13H2" 0 "Nicotinamide-nucleotide amidohydrolase PncC"  
"OPBO21\_00518" 32061 "s59E25H2" 0 "Nicotinamide-nucleotide amidohydrolase PncC"  
"OPBO21\_00518" 32061 "s59E5H2" 0.3893914 "Nicotinamide-nucleotide amidohydrolase PncC"  
"OPBO21\_00518" 32061 "s63E6H2" 0.1304026 "Nicotinamide-nucleotide amidohydrolase PncC"  
"OPBO21\_00519" 32062 "s59E13H2" 0.0007312055 "DNA translocase SpoIIIE"  
"OPBO21\_00519" 32062 "s59E25H2" 0 "DNA translocase SpoIIIE"  
"OPBO21\_00519" 32062 "s59E5H2" 0.3343963 "DNA translocase SpoIIIE"  
"OPBO21\_00519" 32062 "s63E6H2" 0.1028872 "DNA translocase SpoIIIE"  
"OPBO21\_00520" 32063 "s59E13H2" 0 "Ribonuclease J 1"  
"OPBO21\_00520" 32063 "s59E25H2" 0 "Ribonuclease J 1"  
"OPBO21\_00520" 32063 "s59E5H2" 0.1497116 "Ribonuclease J 1"  
"OPBO21\_00520" 32063 "s63E6H2" 0.1396929 "Ribonuclease J 1"  
"OPBO21\_00521" 32064 "s59E13H2" 0.001958219 "4-hydroxy-tetrahydrodipicolinate synthase"  
"OPBO21\_00521" 32064 "s59E25H2" 0 "4-hydroxy-tetrahydrodipicolinate synthase"  
"OPBO21\_00521" 32064 "s59E5H2" 0.09989933 "4-hydroxy-tetrahydrodipicolinate synthase"  
"OPBO21\_00521" 32064 "s63E6H2" 0.07179449 "4-hydroxy-tetrahydrodipicolinate synthase"  
"OPBO21\_00522" 32065 "s59E13H2" 0.06089194 "4-hydroxy-tetrahydrodipicolinate reductase"  
"OPBO21\_00522" 32065 "s59E25H2" 0 "4-hydroxy-tetrahydrodipicolinate reductase"  
"OPBO21\_00522" 32065 "s59E5H2" 0.02697892 "4-hydroxy-tetrahydrodipicolinate reductase"  
"OPBO21\_00522" 32065 "s63E6H2" 0.03101352 "4-hydroxy-tetrahydrodipicolinate reductase"  
"OPBO21\_00523" 32066 "s59E13H2" 0.004980352 "Insulinase (Peptidase family M16)"  
"OPBO21\_00523" 32066 "s59E25H2" 0 "Insulinase (Peptidase family M16)"  
"OPBO21\_00523" 32066 "s59E5H2" 0.03450379 "Insulinase (Peptidase family M16)"  
"OPBO21\_00523" 32066 "s63E6H2" 0.1008414 "Insulinase (Peptidase family M16)"  
"OPBO21\_00524" 32067 "s59E13H2" 0 "Polyribonucleotide nucleotidyltransferase"  
"OPBO21\_00524" 32067 "s59E25H2" 0 "Polyribonucleotide nucleotidyltransferase"  
"OPBO21\_00524" 32067 "s59E5H2" 0.03085142 "Polyribonucleotide nucleotidyltransferase"  
"OPBO21\_00524" 32067 "s63E6H2" 0.0846188 "Polyribonucleotide nucleotidyltransferase"  
"OPBO21\_00526" 32069 "s59E13H2" 0 "hypothetical protein"  
"OPBO21\_00526" 32069 "s59E25H2" 0 "hypothetical protein"  
"OPBO21\_00526" 32069 "s59E5H2" 0 "hypothetical protein"  
"OPBO21\_00526" 32069 "s63E6H2" 0 "hypothetical protein"

"OPBO21\_00527" 32070 "s59E13H2" 0.04155872 "NPCBM-associated, NEW3 domain of alpha-galactosidase"  
"OPBO21\_00527" 32070 "s59E25H2" 0 "NPCBM-associated, NEW3 domain of alpha-galactosidase"  
"OPBO21\_00527" 32070 "s59E5H2" 0.3377533 "NPCBM-associated, NEW3 domain of alpha-galactosidase"  
"OPBO21\_00527" 32070 "s63E6H2" 3.438898 "NPCBM-associated, NEW3 domain of alpha-galactosidase"  
"OPBO21\_00528" 32071 "s59E13H2" 0.08010007 "putative ABC transporter ATP-binding protein Yx1F"  
"OPBO21\_00528" 32071 "s59E25H2" 0 "putative ABC transporter ATP-binding protein Yx1F"  
"OPBO21\_00528" 32071 "s59E5H2" 0.639589 "putative ABC transporter ATP-binding protein Yx1F"  
"OPBO21\_00528" 32071 "s63E6H2" 5.147932 "putative ABC transporter ATP-binding protein Yx1F"  
"OPBO21\_00529" 32072 "s59E13H2" 0.05834226 "ABC-2 family transporter protein"  
"OPBO21\_00529" 32072 "s59E25H2" 0 "ABC-2 family transporter protein"  
"OPBO21\_00529" 32072 "s59E5H2" 0.5010915 "ABC-2 family transporter protein"  
"OPBO21\_00529" 32072 "s63E6H2" 4.599866 "ABC-2 family transporter protein"  
"OPBO21\_00530" 32073 "s59E13H2" 0.1295238 "Ribosomal large subunit pseudouridine synthase D"  
"OPBO21\_00530" 32073 "s59E25H2" 0 "Ribosomal large subunit pseudouridine synthase D"  
"OPBO21\_00530" 32073 "s59E5H2" 1.044933 "Ribosomal large subunit pseudouridine synthase D"  
"OPBO21\_00530" 32073 "s63E6H2" 5.334873 "Ribosomal large subunit pseudouridine synthase D"  
"OPBO21\_00531" 32074 "s59E13H2" 0.0924883 "Lipoprotein signal peptidase"  
"OPBO21\_00531" 32074 "s59E25H2" 0 "Lipoprotein signal peptidase"  
"OPBO21\_00531" 32074 "s59E5H2" 0.3087762 "Lipoprotein signal peptidase"  
"OPBO21\_00531" 32074 "s63E6H2" 2.361994 "Lipoprotein signal peptidase"  
"OPBO21\_00532" 32075 "s59E13H2" 0.1312501 "Isoleucine--tRNA ligase"  
"OPBO21\_00532" 32075 "s59E25H2" 0 "Isoleucine--tRNA ligase"  
"OPBO21\_00532" 32075 "s59E5H2" 0.1364732 "Isoleucine--tRNA ligase"  
"OPBO21\_00532" 32075 "s63E6H2" 1.459992 "Isoleucine--tRNA ligase"  
"OPBO21\_00533" 32076 "s59E13H2" 0.01406749 "hypothetical protein"  
"OPBO21\_00533" 32076 "s59E25H2" 0 "hypothetical protein"  
"OPBO21\_00533" 32076 "s59E5H2" 0.0671947 "hypothetical protein"  
"OPBO21\_00533" 32076 "s63E6H2" 0.07233671 "hypothetical protein"  
"OPBO21\_00534" 32077 "s59E13H2" 0.02303641 "Thioredoxin-1"  
"OPBO21\_00534" 32077 "s59E25H2" 0 "Thioredoxin-1"  
"OPBO21\_00534" 32077 "s59E5H2" 0.001487315 "Thioredoxin-1"  
"OPBO21\_00534" 32077 "s63E6H2" 0.08405036 "Thioredoxin-1"  
"OPBO21\_00536" 32079 "s59E13H2" 0.1742047 "Glucose-1-phosphate thymidyltransferase"  
"OPBO21\_00536" 32079 "s59E25H2" 0 "Glucose-1-phosphate thymidyltransferase"  
"OPBO21\_00536" 32079 "s59E5H2" 0.3124706 "Glucose-1-phosphate thymidyltransferase"  
"OPBO21\_00536" 32079 "s63E6H2" 0.08965493 "Glucose-1-phosphate thymidyltransferase"  
"OPBO21\_00537" 32080 "s59E13H2" 0.001344603 "Undecaprenyl-diphosphatase"  
"OPBO21\_00537" 32080 "s59E25H2" 0 "Undecaprenyl-diphosphatase"  
"OPBO21\_00537" 32080 "s59E5H2" 0.004489142 "Undecaprenyl-diphosphatase"  
"OPBO21\_00537" 32080 "s63E6H2" 0.01072293 "Undecaprenyl-diphosphatase"  
"OPBO21\_00538" 32081 "s59E13H2" 0.02371596 "Sensor histidine kinase CitA"  
"OPBO21\_00538" 32081 "s59E25H2" 0 "Sensor histidine kinase CitA"  
"OPBO21\_00538" 32081 "s59E5H2" 0.3582184 "Sensor histidine kinase CitA"  
"OPBO21\_00538" 32081 "s63E6H2" 0.06349718 "Sensor histidine kinase CitA"  
"OPBO21\_00539" 32082 "s59E13H2" 0.06414262 "Chromosomal replication initiator protein DnaA"  
"OPBO21\_00539" 32082 "s59E25H2" 0 "Chromosomal replication initiator protein DnaA"  
"OPBO21\_00539" 32082 "s59E5H2" 0.07722593 "Chromosomal replication initiator protein DnaA"



"OPBO21\_00539" 32082 "s63E6H2" 0.09763464 "Chromosomal replication initiator protein DnaA"  
"OPBO21\_00540" 32083 "s59E13H2" 0.01685008 "DNA polymerase III subunit beta"  
"OPBO21\_00540" 32083 "s59E25H2" 0 "DNA polymerase III subunit beta"  
"OPBO21\_00540" 32083 "s59E5H2" 0.01533542 "DNA polymerase III subunit beta"  
"OPBO21\_00540" 32083 "s63E6H2" 0.06398589 "DNA polymerase III subunit beta"  
"OPBO21\_00541" 32084 "s59E13H2" 0.04296504 "NADP oxidoreductase coenzyme F420-dependent"  
"OPBO21\_00541" 32084 "s59E25H2" 0 "NADP oxidoreductase coenzyme F420-dependent"  
"OPBO21\_00541" 32084 "s59E5H2" 0.03345109 "NADP oxidoreductase coenzyme F420-dependent"  
"OPBO21\_00541" 32084 "s63E6H2" 0.3889948 "NADP oxidoreductase coenzyme F420-dependent"  
"OPBO21\_00542" 32085 "s59E13H2" 0.03973512 "3-methyl-2-oxobutanoate hydroxymethyltransferase"  
"OPBO21\_00542" 32085 "s59E25H2" 0 "3-methyl-2-oxobutanoate hydroxymethyltransferase"  
"OPBO21\_00542" 32085 "s59E5H2" 0.02008319 "3-methyl-2-oxobutanoate hydroxymethyltransferase"  
"OPBO21\_00542" 32085 "s63E6H2" 0.9913401 "3-methyl-2-oxobutanoate hydroxymethyltransferase"  
"OPBO21\_00543" 32086 "s59E13H2" 0.04067157 "Pantothenate synthetase"  
"OPBO21\_00543" 32086 "s59E25H2" 0 "Pantothenate synthetase"  
"OPBO21\_00543" 32086 "s59E5H2" 0.03208336 "Pantothenate synthetase"  
"OPBO21\_00543" 32086 "s63E6H2" 1.156907 "Pantothenate synthetase"  
"OPBO21\_00544" 32087 "s59E13H2" 0.09102045 "Aspartate 1-decarboxylase precursor"  
"OPBO21\_00544" 32087 "s59E25H2" 0 "Aspartate 1-decarboxylase precursor"  
"OPBO21\_00544" 32087 "s59E5H2" 0.03947388 "Aspartate 1-decarboxylase precursor"  
"OPBO21\_00544" 32087 "s63E6H2" 1.469652 "Aspartate 1-decarboxylase precursor"  
"OPBO21\_00545" 32088 "s59E13H2" 0.1264077 "hypothetical protein"  
"OPBO21\_00545" 32088 "s59E25H2" 0 "hypothetical protein"  
"OPBO21\_00545" 32088 "s59E5H2" 0.09360707 "hypothetical protein"  
"OPBO21\_00545" 32088 "s63E6H2" 1.662485 "hypothetical protein"  
"OPBO21\_00546" 32089 "s59E13H2" 0.124008 "Magnesium transport protein CorA"  
"OPBO21\_00546" 32089 "s59E25H2" 0 "Magnesium transport protein CorA"  
"OPBO21\_00546" 32089 "s59E5H2" 0.124601 "Magnesium transport protein CorA"  
"OPBO21\_00546" 32089 "s63E6H2" 1.530873 "Magnesium transport protein CorA"  
"OPBO21\_00547" 32090 "s59E13H2" 0.06110593 "putative acetyltransferase"  
"OPBO21\_00547" 32090 "s59E25H2" 0 "putative acetyltransferase"  
"OPBO21\_00547" 32090 "s59E5H2" 0.03672611 "putative acetyltransferase"  
"OPBO21\_00547" 32090 "s63E6H2" 0.1335331 "putative acetyltransferase"  
"OPBO21\_00548" 32091 "s59E13H2" 0.3196476 "Alpha/beta hydrolase family protein"  
"OPBO21\_00548" 32091 "s59E25H2" 0 "Alpha/beta hydrolase family protein"  
"OPBO21\_00548" 32091 "s59E5H2" 0.2794622 "Alpha/beta hydrolase family protein"  
"OPBO21\_00548" 32091 "s63E6H2" 0.420305 "Alpha/beta hydrolase family protein"  
"OPBO21\_00549" 32092 "s59E13H2" 0.1643811 "Transglutaminase-like superfamily protein"  
"OPBO21\_00549" 32092 "s59E25H2" 0 "Transglutaminase-like superfamily protein"  
"OPBO21\_00549" 32092 "s59E5H2" 0.002912556 "Transglutaminase-like superfamily protein"  
"OPBO21\_00549" 32092 "s63E6H2" 0.491868 "Transglutaminase-like superfamily protein"  
"OPBO21\_00550" 32093 "s59E13H2" 0.2159348 "hypothetical protein"  
"OPBO21\_00550" 32093 "s59E25H2" 0 "hypothetical protein"  
"OPBO21\_00550" 32093 "s59E5H2" 0.1804261 "hypothetical protein"  
"OPBO21\_00550" 32093 "s63E6H2" 0.25654 "hypothetical protein"  
"OPBO21\_00551" 32094 "s59E13H2" 0.2389901 "hypothetical protein"  
"OPBO21\_00551" 32094 "s59E25H2" 0 "hypothetical protein"

"OPBO21\_00551" 32094 "s59E5H2" 0.1436031 "hypothetical protein"  
"OPBO21\_00551" 32094 "s63E6H2" 0.2196474 "hypothetical protein"  
"OPBO21\_00552" 32095 "s59E13H2" 0.2073212 "ECF RNA polymerase sigma factor SigE"  
"OPBO21\_00552" 32095 "s59E25H2" 0 "ECF RNA polymerase sigma factor SigE"  
"OPBO21\_00552" 32095 "s59E5H2" 0.2241258 "ECF RNA polymerase sigma factor SigE"  
"OPBO21\_00552" 32095 "s63E6H2" 0.2176263 "ECF RNA polymerase sigma factor SigE"  
"OPBO21\_00553" 32096 "s59E13H2" 0 "putative periplasmic serine endoprotease DegP-like precursor"  
"OPBO21\_00553" 32096 "s59E25H2" 0 "putative periplasmic serine endoprotease DegP-like precursor"  
"OPBO21\_00553" 32096 "s59E5H2" 0.004532789 "putative periplasmic serine endoprotease DegP-like precursor"  
"OPBO21\_00553" 32096 "s63E6H2" 0.07770196 "putative periplasmic serine endoprotease DegP-like precursor"  
"OPBO21\_00554" 32097 "s59E13H2" 0.1170248 "Maltotriose-binding protein precursor"  
"OPBO21\_00554" 32097 "s59E25H2" 0 "Maltotriose-binding protein precursor"  
"OPBO21\_00554" 32097 "s59E5H2" 0.165637 "Maltotriose-binding protein precursor"  
"OPBO21\_00554" 32097 "s63E6H2" 0.4134139 "Maltotriose-binding protein precursor"  
"OPBO21\_00555" 32098 "s59E13H2" 0.01423132 "L-ribulose-5-phosphate 4-epimerase UlaF"  
"OPBO21\_00555" 32098 "s59E25H2" 0 "L-ribulose-5-phosphate 4-epimerase UlaF"  
"OPBO21\_00555" 32098 "s59E5H2" 0.005652626 "L-ribulose-5-phosphate 4-epimerase UlaF"  
"OPBO21\_00555" 32098 "s63E6H2" 0.2819027 "L-ribulose-5-phosphate 4-epimerase UlaF"  
"OPBO21\_00556" 32099 "s59E13H2" 0.01834736 "Ribulokinase"  
"OPBO21\_00556" 32099 "s59E25H2" 0 "Ribulokinase"  
"OPBO21\_00556" 32099 "s59E5H2" 0 "Ribulokinase"  
"OPBO21\_00556" 32099 "s63E6H2" 0.6746256 "Ribulokinase"  
"OPBO21\_00557" 32100 "s59E13H2" 0.01917653 "N-acetylglucosamine repressor"  
"OPBO21\_00557" 32100 "s59E25H2" 0 "N-acetylglucosamine repressor"  
"OPBO21\_00557" 32100 "s59E5H2" 0 "N-acetylglucosamine repressor"  
"OPBO21\_00557" 32100 "s63E6H2" 1.105585 "N-acetylglucosamine repressor"  
"OPBO21\_00558" 32101 "s59E13H2" 0.4306621 "L-arabinose isomerase"  
"OPBO21\_00558" 32101 "s59E25H2" 0 "L-arabinose isomerase"  
"OPBO21\_00558" 32101 "s59E5H2" 0.005660131 "L-arabinose isomerase"  
"OPBO21\_00558" 32101 "s63E6H2" 1.211919 "L-arabinose isomerase"  
"OPBO21\_00559" 32102 "s59E13H2" 0 "Organic hydroperoxide resistance transcriptional regulator"  
"OPBO21\_00559" 32102 "s59E25H2" 0 "Organic hydroperoxide resistance transcriptional regulator"  
"OPBO21\_00559" 32102 "s59E5H2" 0 "Organic hydroperoxide resistance transcriptional regulator"  
"OPBO21\_00559" 32102 "s63E6H2" 0 "Organic hydroperoxide resistance transcriptional regulator"  
"OPBO21\_00560" 32103 "s59E13H2" 0 "putative ABC transporter ATP-binding protein"  
"OPBO21\_00560" 32103 "s59E25H2" 0 "putative ABC transporter ATP-binding protein"  
"OPBO21\_00560" 32103 "s59E5H2" 0 "putative ABC transporter ATP-binding protein"  
"OPBO21\_00560" 32103 "s63E6H2" 0 "putative ABC transporter ATP-binding protein"  
"OPBO21\_00561" 32104 "s59E13H2" 0 "putative ABC transporter ATP-binding protein"  
"OPBO21\_00561" 32104 "s59E25H2" 0 "putative ABC transporter ATP-binding protein"  
"OPBO21\_00561" 32104 "s59E5H2" 0 "putative ABC transporter ATP-binding protein"  
"OPBO21\_00561" 32104 "s63E6H2" 0 "putative ABC transporter ATP-binding protein"  
"OPBO21\_00562" 32105 "s59E13H2" 0 "Flavodoxin"  
"OPBO21\_00562" 32105 "s59E25H2" 0 "Flavodoxin"  
"OPBO21\_00562" 32105 "s59E5H2" 0 "Flavodoxin"  
"OPBO21\_00562" 32105 "s63E6H2" 0 "Flavodoxin"  
"OPBO21\_00563" 32106 "s59E13H2" 0 "hypothetical protein"

"OPBO21\_00563" 32106 "s59E25H2" 0 "hypothetical protein"  
"OPBO21\_00563" 32106 "s59E5H2" 0 "hypothetical protein"  
"OPBO21\_00563" 32106 "s63E6H2" 0.02258022 "hypothetical protein"  
"OPBO21\_00564" 32107 "s59E13H2" 0 "NAD dependent epimerase/dehydratase family protein"  
"OPBO21\_00564" 32107 "s59E25H2" 0 "NAD dependent epimerase/dehydratase family protein"  
"OPBO21\_00564" 32107 "s59E5H2" 0 "NAD dependent epimerase/dehydratase family protein"  
"OPBO21\_00564" 32107 "s63E6H2" 0 "NAD dependent epimerase/dehydratase family protein"  
"OPBO21\_00565" 32108 "s59E13H2" 0 "hypothetical protein"  
"OPBO21\_00565" 32108 "s59E25H2" 0 "hypothetical protein"  
"OPBO21\_00565" 32108 "s59E5H2" 0.03959076 "hypothetical protein"  
"OPBO21\_00565" 32108 "s63E6H2" 0 "hypothetical protein"  
"OPBO21\_00566" 32109 "s59E13H2" 0.001495826 "DsrE/DsrF-like family protein"  
"OPBO21\_00566" 32109 "s59E25H2" 0 "DsrE/DsrF-like family protein"  
"OPBO21\_00566" 32109 "s59E5H2" 0.04802508 "DsrE/DsrF-like family protein"  
"OPBO21\_00566" 32109 "s63E6H2" 0.05110198 "DsrE/DsrF-like family protein"  
"OPBO21\_00567" 32110 "s59E13H2" 0.0141294 "Sulfurtransferase TusA"  
"OPBO21\_00567" 32110 "s59E25H2" 0 "Sulfurtransferase TusA"  
"OPBO21\_00567" 32110 "s59E5H2" 0.0413876 "Sulfurtransferase TusA"  
"OPBO21\_00567" 32110 "s63E6H2" 0.04441457 "Sulfurtransferase TusA"  
"OPBO21\_00568" 32111 "s59E13H2" 0.0180709 "Double zinc ribbon"  
"OPBO21\_00568" 32111 "s59E25H2" 0 "Double zinc ribbon"  
"OPBO21\_00568" 32111 "s59E5H2" 0.01621173 "Double zinc ribbon"  
"OPBO21\_00568" 32111 "s63E6H2" 0.05072035 "Double zinc ribbon"  
"OPBO21\_00569" 32112 "s59E13H2" 0.009071712 "NifU-like protein"  
"OPBO21\_00569" 32112 "s59E25H2" 0 "NifU-like protein"  
"OPBO21\_00569" 32112 "s59E5H2" 0.3886527 "NifU-like protein"  
"OPBO21\_00569" 32112 "s63E6H2" 0.03948322 "NifU-like protein"  
"OPBO21\_00570" 32113 "s59E13H2" 0.01935329 "N-glycosylase/DNA lyase"  
"OPBO21\_00570" 32113 "s59E25H2" 0 "N-glycosylase/DNA lyase"  
"OPBO21\_00570" 32113 "s59E5H2" 0.9777326 "N-glycosylase/DNA lyase"  
"OPBO21\_00570" 32113 "s63E6H2" 0.04973197 "N-glycosylase/DNA lyase"  
"OPBO21\_00571" 32114 "s59E13H2" 0.005603116 "Rubrerythrin"  
"OPBO21\_00571" 32114 "s59E25H2" 0 "Rubrerythrin"  
"OPBO21\_00571" 32114 "s59E5H2" 0.9513135 "Rubrerythrin"  
"OPBO21\_00571" 32114 "s63E6H2" 0.02965765 "Rubrerythrin"  
"OPBO21\_00572" 32115 "s59E13H2" 0.02384253 "Desulfoferrodoxin"  
"OPBO21\_00572" 32115 "s59E25H2" 0 "Desulfoferrodoxin"  
"OPBO21\_00572" 32115 "s59E5H2" 0.6384699 "Desulfoferrodoxin"  
"OPBO21\_00572" 32115 "s63E6H2" 0.02669462 "Desulfoferrodoxin"  
"OPBO21\_00574" 32117 "s59E13H2" 0.005216694 "HTH-type transcriptional regulator CymR"  
"OPBO21\_00574" 32117 "s59E25H2" 0 "HTH-type transcriptional regulator CymR"  
"OPBO21\_00574" 32117 "s59E5H2" 0.4445909 "HTH-type transcriptional regulator CymR"  
"OPBO21\_00574" 32117 "s63E6H2" 0.02087521 "HTH-type transcriptional regulator CymR"  
"OPBO21\_00575" 32118 "s59E13H2" 0 "hypothetical protein"  
"OPBO21\_00575" 32118 "s59E25H2" 0 "hypothetical protein"  
"OPBO21\_00575" 32118 "s59E5H2" 0 "hypothetical protein"  
"OPBO21\_00575" 32118 "s63E6H2" 0 "hypothetical protein"

"OPBO21\_00576" 32119 "s59E13H2" 0 "hypothetical protein"  
"OPBO21\_00576" 32119 "s59E25H2" 0 "hypothetical protein"  
"OPBO21\_00576" 32119 "s59E5H2" 0 "hypothetical protein"  
"OPBO21\_00576" 32119 "s63E6H2" 0 "hypothetical protein"  
"OPBO21\_00577" 32120 "s59E13H2" 0 "Copper-exporting P-type ATPase B"  
"OPBO21\_00577" 32120 "s59E25H2" 0 "Copper-exporting P-type ATPase B"  
"OPBO21\_00577" 32120 "s59E5H2" 0.001836677 "Copper-exporting P-type ATPase B"  
"OPBO21\_00577" 32120 "s63E6H2" 0 "Copper-exporting P-type ATPase B"  
"OPBO21\_00578" 32121 "s59E13H2" 0 "Rubrerythrin"  
"OPBO21\_00578" 32121 "s59E25H2" 0 "Rubrerythrin"  
"OPBO21\_00578" 32121 "s59E5H2" 0 "Rubrerythrin"  
"OPBO21\_00578" 32121 "s63E6H2" 0 "Rubrerythrin"  
"OPBO21\_00579" 32122 "s59E13H2" 0 "Poly-beta-1,6-N-acetyl-D-glucosamine synthase"  
"OPBO21\_00579" 32122 "s59E25H2" 0 "Poly-beta-1,6-N-acetyl-D-glucosamine synthase"  
"OPBO21\_00579" 32122 "s59E5H2" 0 "Poly-beta-1,6-N-acetyl-D-glucosamine synthase"  
"OPBO21\_00579" 32122 "s63E6H2" 0 "Poly-beta-1,6-N-acetyl-D-glucosamine synthase"  
"OPBO21\_00580" 32123 "s59E13H2" 0 "putative lyase"  
"OPBO21\_00580" 32123 "s59E25H2" 0 "putative lyase"  
"OPBO21\_00580" 32123 "s59E5H2" 0 "putative lyase"  
"OPBO21\_00580" 32123 "s63E6H2" 0 "putative lyase"  
"OPBO21\_00581" 32124 "s59E13H2" 0 "hypothetical protein"  
"OPBO21\_00581" 32124 "s59E25H2" 0 "hypothetical protein"  
"OPBO21\_00581" 32124 "s59E5H2" 0.1724185 "hypothetical protein"  
"OPBO21\_00581" 32124 "s63E6H2" 0 "hypothetical protein"  
"OPBO21\_00582" 32125 "s59E13H2" 0 "hypothetical protein"  
"OPBO21\_00582" 32125 "s59E25H2" 0 "hypothetical protein"  
"OPBO21\_00582" 32125 "s59E5H2" 0.06270723 "hypothetical protein"  
"OPBO21\_00582" 32125 "s63E6H2" 0 "hypothetical protein"  
"OPBO21\_00583" 32126 "s59E13H2" 0.02682997 "hypothetical protein"  
"OPBO21\_00583" 32126 "s59E25H2" 0 "hypothetical protein"  
"OPBO21\_00583" 32126 "s59E5H2" 0 "hypothetical protein"  
"OPBO21\_00583" 32126 "s63E6H2" 0.04114267 "hypothetical protein"  
"OPBO21\_00585" 32128 "s59E13H2" 0 "hypothetical protein"  
"OPBO21\_00585" 32128 "s59E25H2" 0 "hypothetical protein"  
"OPBO21\_00585" 32128 "s59E5H2" 0.02124551 "hypothetical protein"  
"OPBO21\_00585" 32128 "s63E6H2" 0 "hypothetical protein"  
"OPBO21\_00586" 32129 "s59E13H2" 0 "hypothetical protein"  
"OPBO21\_00586" 32129 "s59E25H2" 0 "hypothetical protein"  
"OPBO21\_00586" 32129 "s59E5H2" 0 "hypothetical protein"  
"OPBO21\_00586" 32129 "s63E6H2" 0.02222085 "hypothetical protein"  
"OPBO21\_00587" 32130 "s59E13H2" 0 "hypothetical protein"  
"OPBO21\_00587" 32130 "s59E25H2" 0 "hypothetical protein"  
"OPBO21\_00587" 32130 "s59E5H2" 0 "hypothetical protein"  
"OPBO21\_00587" 32130 "s63E6H2" 0.01055273 "hypothetical protein"  
"OPBO21\_00589" 32132 "s59E13H2" 2.592105 "RNA polymerase sigma factor SigA"  
"OPBO21\_00589" 32132 "s59E25H2" 0 "RNA polymerase sigma factor SigA"  
"OPBO21\_00589" 32132 "s59E5H2" 1.022885 "RNA polymerase sigma factor SigA"

"OPBO21\_00589" 32132 "s63E6H2" 0.1468085 "RNA polymerase sigma factor SigA"  
"OPBO21\_00590" 32133 "s59E13H2" 0.8782762 "DNA primase"  
"OPBO21\_00590" 32133 "s59E25H2" 0 "DNA primase"  
"OPBO21\_00590" 32133 "s59E5H2" 0.5902206 "DNA primase"  
"OPBO21\_00590" 32133 "s63E6H2" 0.08187348 "DNA primase"  
"OPBO21\_00591" 32134 "s59E13H2" 0.03789672 "Pyruvate, phosphate dikinase"  
"OPBO21\_00591" 32134 "s59E25H2" 0 "Pyruvate, phosphate dikinase"  
"OPBO21\_00591" 32134 "s59E5H2" 0.1305461 "Pyruvate, phosphate dikinase"  
"OPBO21\_00591" 32134 "s63E6H2" 0.04916929 "Pyruvate, phosphate dikinase"  
"OPBO21\_00592" 32135 "s59E13H2" 0.06402612 "Glycine--tRNA ligase beta subunit"  
"OPBO21\_00592" 32135 "s59E25H2" 0 "Glycine--tRNA ligase beta subunit"  
"OPBO21\_00592" 32135 "s59E5H2" 0.08400833 "Glycine--tRNA ligase beta subunit"  
"OPBO21\_00592" 32135 "s63E6H2" 0.01874662 "Glycine--tRNA ligase beta subunit"  
"OPBO21\_00593" 32136 "s59E13H2" 0.01301086 "Glycine--tRNA ligase alpha subunit"  
"OPBO21\_00593" 32136 "s59E25H2" 0 "Glycine--tRNA ligase alpha subunit"  
"OPBO21\_00593" 32136 "s59E5H2" 0.05494905 "Glycine--tRNA ligase alpha subunit"  
"OPBO21\_00593" 32136 "s63E6H2" 0.02718619 "Glycine--tRNA ligase alpha subunit"  
"OPBO21\_00594" 32137 "s59E13H2" 0.01888581 "DNA repair protein RecO"  
"OPBO21\_00594" 32137 "s59E25H2" 0 "DNA repair protein RecO"  
"OPBO21\_00594" 32137 "s59E5H2" 0.1606887 "DNA repair protein RecO"  
"OPBO21\_00594" 32137 "s63E6H2" 0.07989258 "DNA repair protein RecO"  
"OPBO21\_00595" 32138 "s59E13H2" 0.07707892 "Deoxyribose-phosphate aldolase 2"  
"OPBO21\_00595" 32138 "s59E25H2" 1.178622 "Deoxyribose-phosphate aldolase 2"  
"OPBO21\_00595" 32138 "s59E5H2" 0.1049088 "Deoxyribose-phosphate aldolase 2"  
"OPBO21\_00595" 32138 "s63E6H2" 0.02636924 "Deoxyribose-phosphate aldolase 2"  
"OPBO21\_00596" 32139 "s59E13H2" 0.05485703 "ribosomal-protein-alanine N-acetyltransferase"  
"OPBO21\_00596" 32139 "s59E25H2" 0 "ribosomal-protein-alanine N-acetyltransferase"  
"OPBO21\_00596" 32139 "s59E5H2" 0.1046835 "ribosomal-protein-alanine N-acetyltransferase"  
"OPBO21\_00596" 32139 "s63E6H2" 0.01483451 "ribosomal-protein-alanine N-acetyltransferase"  
"OPBO21\_00597" 32140 "s59E13H2" 0.09043738 "Endoribonuclease YbeY"  
"OPBO21\_00597" 32140 "s59E25H2" 0 "Endoribonuclease YbeY"  
"OPBO21\_00597" 32140 "s59E5H2" 0.1169707 "Endoribonuclease YbeY"  
"OPBO21\_00597" 32140 "s63E6H2" 0.0164423 "Endoribonuclease YbeY"  
"OPBO21\_00598" 32141 "s59E13H2" 0.05686268 "hypothetical protein"  
"OPBO21\_00598" 32141 "s59E25H2" 0 "hypothetical protein"  
"OPBO21\_00598" 32141 "s59E5H2" 0.1721194 "hypothetical protein"  
"OPBO21\_00598" 32141 "s63E6H2" 0.007007954 "hypothetical protein"  
"OPBO21\_00599" 32142 "s59E13H2" 0.09122417 "PhoH-like protein"  
"OPBO21\_00599" 32142 "s59E25H2" 0 "PhoH-like protein"  
"OPBO21\_00599" 32142 "s59E5H2" 0.202163 "PhoH-like protein"  
"OPBO21\_00599" 32142 "s63E6H2" 0.04469404 "PhoH-like protein"  
"OPBO21\_00600" 32143 "s59E13H2" 0.02074581 "HIT-like protein"  
"OPBO21\_00600" 32143 "s59E25H2" 0 "HIT-like protein"  
"OPBO21\_00600" 32143 "s59E5H2" 0.01010296 "HIT-like protein"  
"OPBO21\_00600" 32143 "s63E6H2" 0.03088984 "HIT-like protein"  
"OPBO21\_00602" 32145 "s59E13H2" 0.004466894 "RNA recognition motif. (a.k.a. RRM, RBD, or RNP domain)"  
"OPBO21\_00602" 32145 "s59E25H2" 0 "RNA recognition motif. (a.k.a. RRM, RBD, or RNP domain)"

"OPBO21\_00602" 32145 "s59E5H2" 0.02424323 "RNA recognition motif. (a.k.a. RRM, RBD, or RNP domain)"  
"OPBO21\_00602" 32145 "s63E6H2" 0.3950795 "RNA recognition motif. (a.k.a. RRM, RBD, or RNP domain)"  
"OPBO21\_00603" 32146 "s59E13H2" 0.01706335 "hypothetical protein"  
"OPBO21\_00603" 32146 "s59E25H2" 0 "hypothetical protein"  
"OPBO21\_00603" 32146 "s59E5H2" 0 "hypothetical protein"  
"OPBO21\_00603" 32146 "s63E6H2" 0.03975446 "hypothetical protein"  
"OPBO21\_00605" 32148 "s59E13H2" 0.009945277 "hypothetical protein"  
"OPBO21\_00605" 32148 "s59E25H2" 1.017544 "hypothetical protein"  
"OPBO21\_00605" 32148 "s59E5H2" 0.01490342 "hypothetical protein"  
"OPBO21\_00605" 32148 "s63E6H2" 0.04118985 "hypothetical protein"  
"OPBO21\_00606" 32149 "s59E13H2" 0.9305912 "ComEC family competence protein"  
"OPBO21\_00606" 32149 "s59E25H2" 0.4157956 "ComEC family competence protein"  
"OPBO21\_00606" 32149 "s59E5H2" 0.07642674 "ComEC family competence protein"  
"OPBO21\_00606" 32149 "s63E6H2" 0.1411723 "ComEC family competence protein"  
"OPBO21\_00607" 32150 "s59E13H2" 1.074982 "ComE operon protein 1"  
"OPBO21\_00607" 32150 "s59E25H2" 0 "ComE operon protein 1"  
"OPBO21\_00607" 32150 "s59E5H2" 0.0696639 "ComE operon protein 1"  
"OPBO21\_00607" 32150 "s63E6H2" 0.0942935 "ComE operon protein 1"  
"OPBO21\_00609" 32152 "s59E13H2" 2.156618 "Putative cysteine protease YraA"  
"OPBO21\_00609" 32152 "s59E25H2" 0 "Putative cysteine protease YraA"  
"OPBO21\_00609" 32152 "s59E5H2" 0.1879017 "Putative cysteine protease YraA"  
"OPBO21\_00609" 32152 "s63E6H2" 0.2183218 "Putative cysteine protease YraA"  
"OPBO21\_00610" 32153 "s59E13H2" 2.757871 "Leucine--tRNA ligase"  
"OPBO21\_00610" 32153 "s59E25H2" 0 "Leucine--tRNA ligase"  
"OPBO21\_00610" 32153 "s59E5H2" 0.2379746 "Leucine--tRNA ligase"  
"OPBO21\_00610" 32153 "s63E6H2" 0.316657 "Leucine--tRNA ligase"  
"OPBO21\_00611" 32154 "s59E13H2" 2.318726 "Ribosomal silencing factor RsfS"  
"OPBO21\_00611" 32154 "s59E25H2" 0 "Ribosomal silencing factor RsfS"  
"OPBO21\_00611" 32154 "s59E5H2" 0.1765553 "Ribosomal silencing factor RsfS"  
"OPBO21\_00611" 32154 "s63E6H2" 0.1405662 "Ribosomal silencing factor RsfS"  
"OPBO21\_00612" 32155 "s59E13H2" 1.06692 "membrane-bound transcriptional regulator LytR"  
"OPBO21\_00612" 32155 "s59E25H2" 0 "membrane-bound transcriptional regulator LytR"  
"OPBO21\_00612" 32155 "s59E5H2" 0.02417155 "membrane-bound transcriptional regulator LytR"  
"OPBO21\_00612" 32155 "s63E6H2" 0.1033308 "membrane-bound transcriptional regulator LytR"  
"OPBO21\_00613" 32156 "s59E13H2" 1.27734 "putative nicotinate-nucleotide adenyllyltransferase"  
"OPBO21\_00613" 32156 "s59E25H2" 0 "putative nicotinate-nucleotide adenyllyltransferase"  
"OPBO21\_00613" 32156 "s59E5H2" 0.04278096 "putative nicotinate-nucleotide adenyllyltransferase"  
"OPBO21\_00613" 32156 "s63E6H2" 0.1545053 "putative nicotinate-nucleotide adenyllyltransferase"  
"OPBO21\_00614" 32157 "s59E13H2" 1.580658 "Nicotinate-nucleotide adenyllyltransferase"  
"OPBO21\_00614" 32157 "s59E25H2" 0 "Nicotinate-nucleotide adenyllyltransferase"  
"OPBO21\_00614" 32157 "s59E5H2" 0.1178664 "Nicotinate-nucleotide adenyllyltransferase"  
"OPBO21\_00614" 32157 "s63E6H2" 0.183889 "Nicotinate-nucleotide adenyllyltransferase"  
"OPBO21\_00615" 32158 "s59E13H2" 0.08801564 "Gamma-glutamyl phosphate reductase"  
"OPBO21\_00615" 32158 "s59E25H2" 0 "Gamma-glutamyl phosphate reductase"  
"OPBO21\_00615" 32158 "s59E5H2" 0.07034112 "Gamma-glutamyl phosphate reductase"  
"OPBO21\_00615" 32158 "s63E6H2" 0.2050321 "Gamma-glutamyl phosphate reductase"  
"OPBO21\_00616" 32159 "s59E13H2" 0 "Glutamate 5-kinase 1"

"OPBO21\_00616" 32159 "s59E25H2" 0 "Glutamate 5-kinase 1"  
"OPBO21\_00616" 32159 "s59E5H2" 0.0290392 "Glutamate 5-kinase 1"  
"OPBO21\_00616" 32159 "s63E6H2" 0.1380224 "Glutamate 5-kinase 1"  
"OPBO21\_00618" 32161 "s59E13H2" 0.1617736 "Putative conjugal transfer protein/MT3759"  
"OPBO21\_00618" 32161 "s59E25H2" 0 "Putative conjugal transfer protein/MT3759"  
"OPBO21\_00618" 32161 "s59E5H2" 0.03029427 "Putative conjugal transfer protein/MT3759"  
"OPBO21\_00618" 32161 "s63E6H2" 0.1333148 "Putative conjugal transfer protein/MT3759"  
"OPBO21\_00619" 32162 "s59E13H2" 0.2013016 "Bacterial type II secretion system protein F domain protein"  
"OPBO21\_00619" 32162 "s59E25H2" 0 "Bacterial type II secretion system protein F domain protein"  
"OPBO21\_00619" 32162 "s59E5H2" 0.005797946 "Bacterial type II secretion system protein F domain protein"  
"OPBO21\_00619" 32162 "s63E6H2" 0.09261066 "Bacterial type II secretion system protein F domain protein"  
"OPBO21\_00620" 32163 "s59E13H2" 0.2113075 "Bacterial type II secretion system protein F domain protein"  
"OPBO21\_00620" 32163 "s59E25H2" 0 "Bacterial type II secretion system protein F domain protein"  
"OPBO21\_00620" 32163 "s59E5H2" 0.03052479 "Bacterial type II secretion system protein F domain protein"  
"OPBO21\_00620" 32163 "s63E6H2" 0.08612327 "Bacterial type II secretion system protein F domain protein"  
"OPBO21\_00621" 32164 "s59E13H2" 0.004021825 "putative transposase"  
"OPBO21\_00621" 32164 "s59E25H2" 0 "putative transposase"  
"OPBO21\_00621" 32164 "s59E5H2" 0.02250523 "putative transposase"  
"OPBO21\_00621" 32164 "s63E6H2" 0.003823828 "putative transposase"  
"OPBO21\_00622" 32165 "s59E13H2" 0.009056761 "hypothetical protein"  
"OPBO21\_00622" 32165 "s59E25H2" 0 "hypothetical protein"  
"OPBO21\_00622" 32165 "s59E5H2" 0 "hypothetical protein"  
"OPBO21\_00622" 32165 "s63E6H2" 0.06072957 "hypothetical protein"  
"OPBO21\_00623" 32166 "s59E13H2" 0.1721377 "TadE-like protein"  
"OPBO21\_00623" 32166 "s59E25H2" 0 "TadE-like protein"  
"OPBO21\_00623" 32166 "s59E5H2" 0.09395436 "TadE-like protein"  
"OPBO21\_00623" 32166 "s63E6H2" 0.02987833 "TadE-like protein"  
"OPBO21\_00624" 32167 "s59E13H2" 0.2091866 "hypothetical protein"  
"OPBO21\_00624" 32167 "s59E25H2" 0 "hypothetical protein"  
"OPBO21\_00624" 32167 "s59E5H2" 0.07920697 "hypothetical protein"  
"OPBO21\_00624" 32167 "s63E6H2" 0.04127965 "hypothetical protein"  
"OPBO21\_00625" 32168 "s59E13H2" 0.1581569 "Single-stranded DNA-binding protein"  
"OPBO21\_00625" 32168 "s59E25H2" 0 "Single-stranded DNA-binding protein"  
"OPBO21\_00625" 32168 "s59E5H2" 0.05724286 "Single-stranded DNA-binding protein"  
"OPBO21\_00625" 32168 "s63E6H2" 0.02715416 "Single-stranded DNA-binding protein"  
"OPBO21\_00626" 32169 "s59E13H2" 0.3227885 "hypothetical protein"  
"OPBO21\_00626" 32169 "s59E25H2" 0 "hypothetical protein"  
"OPBO21\_00626" 32169 "s59E5H2" 0.01654082 "hypothetical protein"  
"OPBO21\_00626" 32169 "s63E6H2" 0.02464191 "hypothetical protein"  
"OPBO21\_00627" 32170 "s59E13H2" 0.006524238 "Redox-sensing transcriptional repressor Rex"  
"OPBO21\_00627" 32170 "s59E25H2" 0.03565891 "Redox-sensing transcriptional repressor Rex"  
"OPBO21\_00627" 32170 "s59E5H2" 0.1039562 "Redox-sensing transcriptional repressor Rex"  
"OPBO21\_00627" 32170 "s63E6H2" 0.1431225 "Redox-sensing transcriptional repressor Rex"  
"OPBO21\_00628" 32171 "s59E13H2" 0.01433961 "Transcriptional regulator LytR"  
"OPBO21\_00628" 32171 "s59E25H2" 0.06884058 "Transcriptional regulator LytR"  
"OPBO21\_00628" 32171 "s59E5H2" 0.05010365 "Transcriptional regulator LytR"  
"OPBO21\_00628" 32171 "s63E6H2" 0.2658588 "Transcriptional regulator LytR"

"OPBO21\_00630" 32173 "s59E13H2" 0 "Putative zinc ribbon domain protein"  
"OPBO21\_00630" 32173 "s59E25H2" 0 "Putative zinc ribbon domain protein"  
"OPBO21\_00630" 32173 "s59E5H2" 0.008339369 "Putative zinc ribbon domain protein"  
"OPBO21\_00630" 32173 "s63E6H2" 0.0419963 "Putative zinc ribbon domain protein"  
"OPBO21\_00631" 32174 "s59E13H2" 0.004458713 "Ribonuclease HI"  
"OPBO21\_00631" 32174 "s59E25H2" 0 "Ribonuclease HI"  
"OPBO21\_00631" 32174 "s59E5H2" 0.01326729 "Ribonuclease HI"  
"OPBO21\_00631" 32174 "s63E6H2" 0.03300742 "Ribonuclease HI"  
"OPBO21\_00635" 32178 "s59E13H2" 0.0003392972 "Bifunctional phosphoglucose/phosphomannose isomerase"  
"OPBO21\_00635" 32178 "s59E25H2" 0 "Bifunctional phosphoglucose/phosphomannose isomerase"  
"OPBO21\_00635" 32178 "s59E5H2" 0.06320881 "Bifunctional phosphoglucose/phosphomannose isomerase"  
"OPBO21\_00635" 32178 "s63E6H2" 0.01294232 "Bifunctional phosphoglucose/phosphomannose isomerase"  
"OPBO21\_00637" 32180 "s59E13H2" 0.005037535 "Glycosyltransferase AgII"  
"OPBO21\_00637" 32180 "s59E25H2" 0 "Glycosyltransferase AgII"  
"OPBO21\_00637" 32180 "s59E5H2" 0.2858833 "Glycosyltransferase AgII"  
"OPBO21\_00637" 32180 "s63E6H2" 0.01278493 "Glycosyltransferase AgII"  
"OPBO21\_00638" 32181 "s59E13H2" 0.01270555 "hypothetical protein"  
"OPBO21\_00638" 32181 "s59E25H2" 0 "hypothetical protein"  
"OPBO21\_00638" 32181 "s59E5H2" 0.08156303 "hypothetical protein"  
"OPBO21\_00638" 32181 "s63E6H2" 0.004296031 "hypothetical protein"  
"OPBO21\_00639" 32182 "s59E13H2" 0 "coproporphyrinogen III oxidase"  
"OPBO21\_00639" 32182 "s59E25H2" 0 "coproporphyrinogen III oxidase"  
"OPBO21\_00639" 32182 "s59E5H2" 0 "coproporphyrinogen III oxidase"  
"OPBO21\_00639" 32182 "s63E6H2" 0 "coproporphyrinogen III oxidase"  
"OPBO21\_00640" 32183 "s59E13H2" 0.03513717 "Anthranilate synthase component 1"  
"OPBO21\_00640" 32183 "s59E25H2" 0 "Anthranilate synthase component 1"  
"OPBO21\_00640" 32183 "s59E5H2" 0.1740125 "Anthranilate synthase component 1"  
"OPBO21\_00640" 32183 "s63E6H2" 0.1645486 "Anthranilate synthase component 1"  
"OPBO21\_00641" 32184 "s59E13H2" 0.03009999 "Anthranilate phosphoribosyltransferase"  
"OPBO21\_00641" 32184 "s59E25H2" 0 "Anthranilate phosphoribosyltransferase"  
"OPBO21\_00641" 32184 "s59E5H2" 0.1998176 "Anthranilate phosphoribosyltransferase"  
"OPBO21\_00641" 32184 "s63E6H2" 0.008910331 "Anthranilate phosphoribosyltransferase"  
"OPBO21\_00642" 32185 "s59E13H2" 0.01682004 "Indole-3-glycerol phosphate synthase"  
"OPBO21\_00642" 32185 "s59E25H2" 0 "Indole-3-glycerol phosphate synthase"  
"OPBO21\_00642" 32185 "s59E5H2" 0.1944411 "Indole-3-glycerol phosphate synthase"  
"OPBO21\_00642" 32185 "s63E6H2" 0.008217883 "Indole-3-glycerol phosphate synthase"  
"OPBO21\_00643" 32186 "s59E13H2" 0.001738898 "30S ribosomal protein S17"  
"OPBO21\_00643" 32186 "s59E25H2" 0 "30S ribosomal protein S17"  
"OPBO21\_00643" 32186 "s59E5H2" 0.01869753 "30S ribosomal protein S17"  
"OPBO21\_00643" 32186 "s63E6H2" 0.01661672 "30S ribosomal protein S17"  
"OPBO21\_00644" 32187 "s59E13H2" 0.006409082 "50S ribosomal protein L14"  
"OPBO21\_00644" 32187 "s59E25H2" 0 "50S ribosomal protein L14"  
"OPBO21\_00644" 32187 "s59E5H2" 0.03562721 "50S ribosomal protein L14"  
"OPBO21\_00644" 32187 "s63E6H2" 0.006151662 "50S ribosomal protein L14"  
"OPBO21\_00645" 32188 "s59E13H2" 0 "50S ribosomal protein L24"  
"OPBO21\_00645" 32188 "s59E25H2" 0 "50S ribosomal protein L24"  
"OPBO21\_00645" 32188 "s59E5H2" 0.004520579 "50S ribosomal protein L24"



"OPBO21\_00645" 32188 "s63E6H2" 0.008748721 "50S ribosomal protein L24"  
"OPBO21\_00646" 32189 "s59E13H2" 0.00175491 "50S ribosomal protein L5"  
"OPBO21\_00646" 32189 "s59E25H2" 0 "50S ribosomal protein L5"  
"OPBO21\_00646" 32189 "s59E5H2" 0.01594303 "50S ribosomal protein L5"  
"OPBO21\_00646" 32189 "s63E6H2" 0.0126176 "50S ribosomal protein L5"  
"OPBO21\_00647" 32190 "s59E13H2" 0.008900167 "30S ribosomal protein S14 type Z"  
"OPBO21\_00647" 32190 "s59E25H2" 0 "30S ribosomal protein S14 type Z"  
"OPBO21\_00647" 32190 "s59E5H2" 0.01856505 "30S ribosomal protein S14 type Z"  
"OPBO21\_00647" 32190 "s63E6H2" 0.008105719 "30S ribosomal protein S14 type Z"  
"OPBO21\_00648" 32191 "s59E13H2" 0.009016509 "30S ribosomal protein S8"  
"OPBO21\_00648" 32191 "s59E25H2" 0 "30S ribosomal protein S8"  
"OPBO21\_00648" 32191 "s59E5H2" 0.02838054 "30S ribosomal protein S8"  
"OPBO21\_00648" 32191 "s63E6H2" 0.0178626 "30S ribosomal protein S8"  
"OPBO21\_00649" 32192 "s59E13H2" 0.01360877 "50S ribosomal protein L6"  
"OPBO21\_00649" 32192 "s59E25H2" 0 "50S ribosomal protein L6"  
"OPBO21\_00649" 32192 "s59E5H2" 0.02907539 "50S ribosomal protein L6"  
"OPBO21\_00649" 32192 "s63E6H2" 0.01294052 "50S ribosomal protein L6"  
"OPBO21\_00650" 32193 "s59E13H2" 0.002701759 "50S ribosomal protein L18"  
"OPBO21\_00650" 32193 "s59E25H2" 0 "50S ribosomal protein L18"  
"OPBO21\_00650" 32193 "s59E5H2" 0.01808747 "50S ribosomal protein L18"  
"OPBO21\_00650" 32193 "s63E6H2" 0.009445508 "50S ribosomal protein L18"  
"OPBO21\_00651" 32194 "s59E13H2" 0.005414618 "30S ribosomal protein S5"  
"OPBO21\_00651" 32194 "s59E25H2" 0 "30S ribosomal protein S5"  
"OPBO21\_00651" 32194 "s59E5H2" 0.001515731 "30S ribosomal protein S5"  
"OPBO21\_00651" 32194 "s63E6H2" 0.01500052 "30S ribosomal protein S5"  
"OPBO21\_00652" 32195 "s59E13H2" 0.0008674775 "50S ribosomal protein L15"  
"OPBO21\_00652" 32195 "s59E25H2" 0 "50S ribosomal protein L15"  
"OPBO21\_00652" 32195 "s59E5H2" 0.01334435 "50S ribosomal protein L15"  
"OPBO21\_00652" 32195 "s63E6H2" 0.02153254 "50S ribosomal protein L15"  
"OPBO21\_00653" 32196 "s59E13H2" 0.02346618 "preprotein translocase subunit SecY"  
"OPBO21\_00653" 32196 "s59E25H2" 0 "preprotein translocase subunit SecY"  
"OPBO21\_00653" 32196 "s59E5H2" 0.03355302 "preprotein translocase subunit SecY"  
"OPBO21\_00653" 32196 "s63E6H2" 0.01459896 "preprotein translocase subunit SecY"  
"OPBO21\_00654" 32197 "s59E13H2" 0.03097207 "Adenylate kinase"  
"OPBO21\_00654" 32197 "s59E25H2" 0 "Adenylate kinase"  
"OPBO21\_00654" 32197 "s59E5H2" 0.0602587 "Adenylate kinase"  
"OPBO21\_00654" 32197 "s63E6H2" 0.004769757 "Adenylate kinase"  
"OPBO21\_00655" 32198 "s59E13H2" 0.03627819 "Methionine aminopeptidase 1"  
"OPBO21\_00655" 32198 "s59E25H2" 0 "Methionine aminopeptidase 1"  
"OPBO21\_00655" 32198 "s59E5H2" 0.1310713 "Methionine aminopeptidase 1"  
"OPBO21\_00655" 32198 "s63E6H2" 0.0005642216 "Methionine aminopeptidase 1"  
"OPBO21\_00656" 32199 "s59E13H2" 0.03040338 "Translation initiation factor IF-1"  
"OPBO21\_00656" 32199 "s59E25H2" 0 "Translation initiation factor IF-1"  
"OPBO21\_00656" 32199 "s59E5H2" 0.2751916 "Translation initiation factor IF-1"  
"OPBO21\_00656" 32199 "s63E6H2" 0.01345855 "Translation initiation factor IF-1"  
"OPBO21\_00657" 32200 "s59E13H2" 0.01641276 "50S ribosomal protein L36"  
"OPBO21\_00657" 32200 "s59E25H2" 0 "50S ribosomal protein L36"

"OPBO21\_00657" 32200 "s59E5H2" 0 "50S ribosomal protein L36"  
"OPBO21\_00657" 32200 "s63E6H2" 0.003572916 "50S ribosomal protein L36"  
"OPBO21\_00658" 32201 "s59E13H2" 0.01845551 "30S ribosomal protein S13"  
"OPBO21\_00658" 32201 "s59E25H2" 0 "30S ribosomal protein S13"  
"OPBO21\_00658" 32201 "s59E5H2" 0 "30S ribosomal protein S13"  
"OPBO21\_00658" 32201 "s63E6H2" 0.004717529 "30S ribosomal protein S13"  
"OPBO21\_00659" 32202 "s59E13H2" 0.02308071 "30S ribosomal protein S11"  
"OPBO21\_00659" 32202 "s59E25H2" 0 "30S ribosomal protein S11"  
"OPBO21\_00659" 32202 "s59E5H2" 0.03445501 "30S ribosomal protein S11"  
"OPBO21\_00659" 32202 "s63E6H2" 0.0136365 "30S ribosomal protein S11"  
"OPBO21\_00660" 32203 "s59E13H2" 0.008815248 "30S ribosomal protein S4"  
"OPBO21\_00660" 32203 "s59E25H2" 0 "30S ribosomal protein S4"  
"OPBO21\_00660" 32203 "s59E5H2" 0.05854237 "30S ribosomal protein S4"  
"OPBO21\_00660" 32203 "s63E6H2" 0.02697685 "30S ribosomal protein S4"  
"OPBO21\_00661" 32204 "s59E13H2" 0.002475996 "D-tagatose-1,6-bisphosphate aldolase subunit KbaZ"  
"OPBO21\_00661" 32204 "s59E25H2" 0 "D-tagatose-1,6-bisphosphate aldolase subunit KbaZ"  
"OPBO21\_00661" 32204 "s59E5H2" 0.05545653 "D-tagatose-1,6-bisphosphate aldolase subunit KbaZ"  
"OPBO21\_00661" 32204 "s63E6H2" 0.002344394 "D-tagatose-1,6-bisphosphate aldolase subunit KbaZ"  
"OPBO21\_00662" 32205 "s59E13H2" 0 "hypothetical protein"  
"OPBO21\_00662" 32205 "s59E25H2" 0 "hypothetical protein"  
"OPBO21\_00662" 32205 "s59E5H2" 0 "hypothetical protein"  
"OPBO21\_00662" 32205 "s63E6H2" 0 "hypothetical protein"  
"OPBO21\_00663" 32206 "s59E13H2" 0.03551294 "hypothetical protein"  
"OPBO21\_00663" 32206 "s59E25H2" 0 "hypothetical protein"  
"OPBO21\_00663" 32206 "s59E5H2" 0 "hypothetical protein"  
"OPBO21\_00663" 32206 "s63E6H2" 0.02939199 "hypothetical protein"  
"OPBO21\_00664" 32207 "s59E13H2" 0.03753561 "30S ribosomal protein S9"  
"OPBO21\_00664" 32207 "s59E25H2" 0 "30S ribosomal protein S9"  
"OPBO21\_00664" 32207 "s59E5H2" 0.0248498 "30S ribosomal protein S9"  
"OPBO21\_00664" 32207 "s63E6H2" 0.03753501 "30S ribosomal protein S9"  
"OPBO21\_00665" 32208 "s59E13H2" 0.02855866 "50S ribosomal protein L13"  
"OPBO21\_00665" 32208 "s59E25H2" 0 "50S ribosomal protein L13"  
"OPBO21\_00665" 32208 "s59E5H2" 0.04330431 "50S ribosomal protein L13"  
"OPBO21\_00665" 32208 "s63E6H2" 0.01373317 "50S ribosomal protein L13"  
"OPBO21\_00666" 32209 "s59E13H2" 0.139455 "tRNA pseudouridine synthase A"  
"OPBO21\_00666" 32209 "s59E25H2" 0 "tRNA pseudouridine synthase A"  
"OPBO21\_00666" 32209 "s59E5H2" 0.02083748 "tRNA pseudouridine synthase A"  
"OPBO21\_00666" 32209 "s63E6H2" 0.017711 "tRNA pseudouridine synthase A"  
"OPBO21\_00667" 32210 "s59E13H2" 0.05794379 "50S ribosomal protein L17"  
"OPBO21\_00667" 32210 "s59E25H2" 0 "50S ribosomal protein L17"  
"OPBO21\_00667" 32210 "s59E5H2" 0.04146026 "50S ribosomal protein L17"  
"OPBO21\_00667" 32210 "s63E6H2" 0.0104557 "50S ribosomal protein L17"  
"OPBO21\_00668" 32211 "s59E13H2" 0.03281613 "DNA-directed RNA polymerase subunit alpha"  
"OPBO21\_00668" 32211 "s59E25H2" 0 "DNA-directed RNA polymerase subunit alpha"  
"OPBO21\_00668" 32211 "s59E5H2" 0.009526125 "DNA-directed RNA polymerase subunit alpha"  
"OPBO21\_00668" 32211 "s63E6H2" 0.01791962 "DNA-directed RNA polymerase subunit alpha"  
"OPBO21\_00669" 32212 "s59E13H2" 0.01910988 "30S ribosomal protein S4"

"OPBO21\_00669" 32212 "s59E25H2" 0 "30S ribosomal protein S4"  
"OPBO21\_00669" 32212 "s59E5H2" 0.02510637 "30S ribosomal protein S4"  
"OPBO21\_00669" 32212 "s63E6H2" 0.1136311 "30S ribosomal protein S4"  
"OPBO21\_00670" 32213 "s59E13H2" 0.01613508 "HTH-type transcriptional regulator CymR"  
"OPBO21\_00670" 32213 "s59E25H2" 0 "HTH-type transcriptional regulator CymR"  
"OPBO21\_00670" 32213 "s59E5H2" 0.05308331 "HTH-type transcriptional regulator CymR"  
"OPBO21\_00670" 32213 "s63E6H2" 0.006520417 "HTH-type transcriptional regulator CymR"  
"OPBO21\_00671" 32214 "s59E13H2" 0.007133941 "Methionine gamma-lyase"  
"OPBO21\_00671" 32214 "s59E25H2" 0 "Methionine gamma-lyase"  
"OPBO21\_00671" 32214 "s59E5H2" 0.7132533 "Methionine gamma-lyase"  
"OPBO21\_00671" 32214 "s63E6H2" 0.00924411 "Methionine gamma-lyase"  
"OPBO21\_00672" 32215 "s59E13H2" 0.001084474 "O-acetylserine sulfhydrylase"  
"OPBO21\_00672" 32215 "s59E25H2" 0.5247312 "O-acetylserine sulfhydrylase"  
"OPBO21\_00672" 32215 "s59E5H2" 1.40622 "O-acetylserine sulfhydrylase"  
"OPBO21\_00672" 32215 "s63E6H2" 0.01813328 "O-acetylserine sulfhydrylase"  
"OPBO21\_00673" 32216 "s59E13H2" 0.0183029 "Homoserine O-acetyltransferase"  
"OPBO21\_00673" 32216 "s59E25H2" 3.171958 "Homoserine O-acetyltransferase"  
"OPBO21\_00673" 32216 "s59E5H2" 2.093958 "Homoserine O-acetyltransferase"  
"OPBO21\_00673" 32216 "s63E6H2" 0.04462434 "Homoserine O-acetyltransferase"  
"OPBO21\_00674" 32217 "s59E13H2" 0.01032381 "Methionine biosynthesis protein MetW"  
"OPBO21\_00674" 32217 "s59E25H2" 0 "Methionine biosynthesis protein MetW"  
"OPBO21\_00674" 32217 "s59E5H2" 2.526933 "Methionine biosynthesis protein MetW"  
"OPBO21\_00674" 32217 "s63E6H2" 0.01448746 "Methionine biosynthesis protein MetW"  
"OPBO21\_00675" 32218 "s59E13H2" 0.05169465 "Soluble lytic murein transglycosylase precursor"  
"OPBO21\_00675" 32218 "s59E25H2" 0 "Soluble lytic murein transglycosylase precursor"  
"OPBO21\_00675" 32218 "s59E5H2" 1.467362 "Soluble lytic murein transglycosylase precursor"  
"OPBO21\_00675" 32218 "s63E6H2" 0.05015414 "Soluble lytic murein transglycosylase precursor"  
"OPBO21\_00676" 32219 "s59E13H2" 0.03420753 "hypothetical protein"  
"OPBO21\_00676" 32219 "s59E25H2" 0 "hypothetical protein"  
"OPBO21\_00676" 32219 "s59E5H2" 0.4789323 "hypothetical protein"  
"OPBO21\_00676" 32219 "s63E6H2" 0.1797572 "hypothetical protein"  
"OPBO21\_00677" 32220 "s59E13H2" 0.04918354 "YtxH-like protein"  
"OPBO21\_00677" 32220 "s59E25H2" 0 "YtxH-like protein"  
"OPBO21\_00677" 32220 "s59E5H2" 0.5558876 "YtxH-like protein"  
"OPBO21\_00677" 32220 "s63E6H2" 0.3276856 "YtxH-like protein"  
"OPBO21\_00678" 32221 "s59E13H2" 0.01633009 "protease TldD"  
"OPBO21\_00678" 32221 "s59E25H2" 0 "protease TldD"  
"OPBO21\_00678" 32221 "s59E5H2" 0.5670831 "protease TldD"  
"OPBO21\_00678" 32221 "s63E6H2" 0.3053637 "protease TldD"  
"OPBO21\_00679" 32222 "s59E13H2" 0.007069782 "peptidase PmbA"  
"OPBO21\_00679" 32222 "s59E25H2" 0 "peptidase PmbA"  
"OPBO21\_00679" 32222 "s59E5H2" 0.5832058 "peptidase PmbA"  
"OPBO21\_00679" 32222 "s63E6H2" 0.1976659 "peptidase PmbA"  
"OPBO21\_00680" 32223 "s59E13H2" 0 "hypothetical protein"  
"OPBO21\_00680" 32223 "s59E25H2" 0 "hypothetical protein"  
"OPBO21\_00680" 32223 "s59E5H2" 0 "hypothetical protein"  
"OPBO21\_00680" 32223 "s63E6H2" 0.01126108 "hypothetical protein"

"OPBO21\_00681" 32224 "s59E13H2" 0.01069384 "hypothetical protein"  
"OPBO21\_00681" 32224 "s59E25H2" 0 "hypothetical protein"  
"OPBO21\_00681" 32224 "s59E5H2" 0 "hypothetical protein"  
"OPBO21\_00681" 32224 "s63E6H2" 0.03980551 "hypothetical protein"  
"OPBO21\_00682" 32225 "s59E13H2" 0 "General stress protein 69"  
"OPBO21\_00682" 32225 "s59E25H2" 0 "General stress protein 69"  
"OPBO21\_00682" 32225 "s59E5H2" 3.33463 "General stress protein 69"  
"OPBO21\_00682" 32225 "s63E6H2" 0.1819938 "General stress protein 69"  
"OPBO21\_00684" 32227 "s59E13H2" 0 "30S ribosomal protein S15"  
"OPBO21\_00684" 32227 "s59E25H2" 0 "30S ribosomal protein S15"  
"OPBO21\_00684" 32227 "s59E5H2" 0 "30S ribosomal protein S15"  
"OPBO21\_00684" 32227 "s63E6H2" 0 "30S ribosomal protein S15"  
"OPBO21\_00685" 32228 "s59E13H2" 0 "Riboflavin biosynthesis protein RibF"  
"OPBO21\_00685" 32228 "s59E25H2" 0 "Riboflavin biosynthesis protein RibF"  
"OPBO21\_00685" 32228 "s59E5H2" 0.01559804 "Riboflavin biosynthesis protein RibF"  
"OPBO21\_00685" 32228 "s63E6H2" 0.004768822 "Riboflavin biosynthesis protein RibF"  
"OPBO21\_00686" 32229 "s59E13H2" 0 "tRNA pseudouridine synthase B"  
"OPBO21\_00686" 32229 "s59E25H2" 0 "tRNA pseudouridine synthase B"  
"OPBO21\_00686" 32229 "s59E5H2" 0.02988755 "tRNA pseudouridine synthase B"  
"OPBO21\_00686" 32229 "s63E6H2" 0.01356236 "tRNA pseudouridine synthase B"  
"OPBO21\_00688" 32231 "s59E13H2" 0.006751224 "Bifunctional oligoribonuclease and PAP phosphatase NrnA"  
"OPBO21\_00688" 32231 "s59E25H2" 0 "Bifunctional oligoribonuclease and PAP phosphatase NrnA"  
"OPBO21\_00688" 32231 "s59E5H2" 0.02741376 "Bifunctional oligoribonuclease and PAP phosphatase NrnA"  
"OPBO21\_00688" 32231 "s63E6H2" 0.0183241 "Bifunctional oligoribonuclease and PAP phosphatase NrnA"  
"OPBO21\_00689" 32232 "s59E13H2" 0 "Ribosome-binding factor A"  
"OPBO21\_00689" 32232 "s59E25H2" 0 "Ribosome-binding factor A"  
"OPBO21\_00689" 32232 "s59E5H2" 0.001861852 "Ribosome-binding factor A"  
"OPBO21\_00689" 32232 "s63E6H2" 0.0096894 "Ribosome-binding factor A"  
"OPBO21\_00690" 32233 "s59E13H2" 0 "Translation initiation factor IF-2"  
"OPBO21\_00690" 32233 "s59E25H2" 0 "Translation initiation factor IF-2"  
"OPBO21\_00690" 32233 "s59E5H2" 0.008766024 "Translation initiation factor IF-2"  
"OPBO21\_00690" 32233 "s63E6H2" 0.01011592 "Translation initiation factor IF-2"  
"OPBO21\_00691" 32234 "s59E13H2" 0.007688462 "hypothetical protein"  
"OPBO21\_00691" 32234 "s59E25H2" 0 "hypothetical protein"  
"OPBO21\_00691" 32234 "s59E5H2" 0 "hypothetical protein"  
"OPBO21\_00691" 32234 "s63E6H2" 0.002905714 "hypothetical protein"  
"OPBO21\_00692" 32235 "s59E13H2" 0 "hypothetical protein"  
"OPBO21\_00692" 32235 "s59E25H2" 0 "hypothetical protein"  
"OPBO21\_00692" 32235 "s59E5H2" 0 "hypothetical protein"  
"OPBO21\_00692" 32235 "s63E6H2" 0 "hypothetical protein"  
"OPBO21\_00694" 32237 "s59E13H2" 0 "Protein TolB"  
"OPBO21\_00694" 32237 "s59E25H2" 0 "Protein TolB"  
"OPBO21\_00694" 32237 "s59E5H2" 0.2220048 "Protein TolB"  
"OPBO21\_00694" 32237 "s63E6H2" 0 "Protein TolB"  
"OPBO21\_00695" 32238 "s59E13H2" 0.06905311 "Guanylate kinase"  
"OPBO21\_00695" 32238 "s59E25H2" 0 "Guanylate kinase"  
"OPBO21\_00695" 32238 "s59E5H2" 0.02363397 "Guanylate kinase"

"OPBO21\_00695" 32238 "s63E6H2" 0.006933808 "Guanylate kinase"  
"OPBO21\_00696" 32239 "s59E13H2" 0.08390184 "DNA-directed RNA polymerase subunit omega"  
"OPBO21\_00696" 32239 "s59E25H2" 0 "DNA-directed RNA polymerase subunit omega"  
"OPBO21\_00696" 32239 "s59E5H2" 0.05478215 "DNA-directed RNA polymerase subunit omega"  
"OPBO21\_00696" 32239 "s63E6H2" 0.01714866 "DNA-directed RNA polymerase subunit omega"  
"OPBO21\_00697" 32240 "s59E13H2" 0.08951916 "Coenzyme A biosynthesis bifunctional protein CoaBC"  
"OPBO21\_00697" 32240 "s59E25H2" 0 "Coenzyme A biosynthesis bifunctional protein CoaBC"  
"OPBO21\_00697" 32240 "s59E5H2" 0.06113836 "Coenzyme A biosynthesis bifunctional protein CoaBC"  
"OPBO21\_00697" 32240 "s63E6H2" 0.01264035 "Coenzyme A biosynthesis bifunctional protein CoaBC"  
"OPBO21\_00698" 32241 "s59E13H2" 0.1075579 "S-adenosylmethionine synthase"  
"OPBO21\_00698" 32241 "s59E25H2" 0 "S-adenosylmethionine synthase"  
"OPBO21\_00698" 32241 "s59E5H2" 0.03547493 "S-adenosylmethionine synthase"  
"OPBO21\_00698" 32241 "s63E6H2" 0.04005476 "S-adenosylmethionine synthase"  
"OPBO21\_00699" 32242 "s59E13H2" 0.1320948 "Primosomal protein N"  
"OPBO21\_00699" 32242 "s59E25H2" 0 "Primosomal protein N"  
"OPBO21\_00699" 32242 "s59E5H2" 0.009633992 "Primosomal protein N"  
"OPBO21\_00699" 32242 "s63E6H2" 0.05038161 "Primosomal protein N"  
"OPBO21\_00700" 32243 "s59E13H2" 0.0541363 "Peptide deformylase"  
"OPBO21\_00700" 32243 "s59E25H2" 0 "Peptide deformylase"  
"OPBO21\_00700" 32243 "s59E5H2" 0.01158911 "Peptide deformylase"  
"OPBO21\_00700" 32243 "s63E6H2" 0.01684622 "Peptide deformylase"  
"OPBO21\_00701" 32244 "s59E13H2" 0.03337823 "Methionyl-tRNA formyltransferase"  
"OPBO21\_00701" 32244 "s59E25H2" 0 "Methionyl-tRNA formyltransferase"  
"OPBO21\_00701" 32244 "s59E5H2" 0.03473226 "Methionyl-tRNA formyltransferase"  
"OPBO21\_00701" 32244 "s63E6H2" 0.02877154 "Methionyl-tRNA formyltransferase"  
"OPBO21\_00702" 32245 "s59E13H2" 0.08785216 "Ribosomal RNA small subunit methyltransferase B"  
"OPBO21\_00702" 32245 "s59E25H2" 0 "Ribosomal RNA small subunit methyltransferase B"  
"OPBO21\_00702" 32245 "s59E5H2" 0.03956342 "Ribosomal RNA small subunit methyltransferase B"  
"OPBO21\_00702" 32245 "s63E6H2" 0.08078798 "Ribosomal RNA small subunit methyltransferase B"  
"OPBO21\_00703" 32246 "s59E13H2" 0.012464 "Carbamoyl-phosphate synthase small chain"  
"OPBO21\_00703" 32246 "s59E25H2" 0 "Carbamoyl-phosphate synthase small chain"  
"OPBO21\_00703" 32246 "s59E5H2" 0.1573315 "Carbamoyl-phosphate synthase small chain"  
"OPBO21\_00703" 32246 "s63E6H2" 0.05848171 "Carbamoyl-phosphate synthase small chain"  
"OPBO21\_00704" 32247 "s59E13H2" 0.008503077 "Dihydroorotase"  
"OPBO21\_00704" 32247 "s59E25H2" 0 "Dihydroorotase"  
"OPBO21\_00704" 32247 "s59E5H2" 0.1503544 "Dihydroorotase"  
"OPBO21\_00704" 32247 "s63E6H2" 0.04912443 "Dihydroorotase"  
"OPBO21\_00705" 32248 "s59E13H2" 0.0216371 "Aspartate carbamoyltransferase"  
"OPBO21\_00705" 32248 "s59E25H2" 0 "Aspartate carbamoyltransferase"  
"OPBO21\_00705" 32248 "s59E5H2" 0.4849966 "Aspartate carbamoyltransferase"  
"OPBO21\_00705" 32248 "s63E6H2" 0.04534714 "Aspartate carbamoyltransferase"  
"OPBO21\_00706" 32249 "s59E13H2" 0.003963522 "Bifunctional protein PyrR"  
"OPBO21\_00706" 32249 "s59E25H2" 0 "Bifunctional protein PyrR"  
"OPBO21\_00706" 32249 "s59E5H2" 0.4682383 "Bifunctional protein PyrR"  
"OPBO21\_00706" 32249 "s63E6H2" 0.03447195 "Bifunctional protein PyrR"  
"OPBO21\_00707" 32250 "s59E13H2" 1.258015 "N-6 DNA Methylase"  
"OPBO21\_00707" 32250 "s59E25H2" 0 "N-6 DNA Methylase"

"OPBO21\_00707" 32250 "s59E5H2" 0.02998879 "N-6 DNA Methylase"  
"OPBO21\_00707" 32250 "s63E6H2" 0.0009943598 "N-6 DNA Methylase"  
"OPBO21\_00709" 32252 "s59E13H2" 0 "B12 binding domain protein"  
"OPBO21\_00709" 32252 "s59E25H2" 0 "B12 binding domain protein"  
"OPBO21\_00709" 32252 "s59E5H2" 0 "B12 binding domain protein"  
"OPBO21\_00709" 32252 "s63E6H2" 0 "B12 binding domain protein"  
"OPBO21\_00710" 32253 "s59E13H2" 0 "hypothetical protein"  
"OPBO21\_00710" 32253 "s59E25H2" 0 "hypothetical protein"  
"OPBO21\_00710" 32253 "s59E5H2" 0 "hypothetical protein"  
"OPBO21\_00710" 32253 "s63E6H2" 0 "hypothetical protein"  
"OPBO21\_00711" 32254 "s59E13H2" 1.758829 "hypothetical protein"  
"OPBO21\_00711" 32254 "s59E25H2" 0 "hypothetical protein"  
"OPBO21\_00711" 32254 "s59E5H2" 0.03052736 "hypothetical protein"  
"OPBO21\_00711" 32254 "s63E6H2" 0.004337271 "hypothetical protein"  
"OPBO21\_00712" 32255 "s59E13H2" 3.16486 "TadE-like protein"  
"OPBO21\_00712" 32255 "s59E25H2" 0 "TadE-like protein"  
"OPBO21\_00712" 32255 "s59E5H2" 0.09338871 "TadE-like protein"  
"OPBO21\_00712" 32255 "s63E6H2" 0.01242972 "TadE-like protein"  
"OPBO21\_00714" 32257 "s59E13H2" 0.0007468345 "hypothetical protein"  
"OPBO21\_00714" 32257 "s59E25H2" 0 "hypothetical protein"  
"OPBO21\_00714" 32257 "s59E5H2" 0 "hypothetical protein"  
"OPBO21\_00714" 32257 "s63E6H2" 0 "hypothetical protein"  
"OPBO21\_00715" 32258 "s59E13H2" 1.889849 "hypothetical protein"  
"OPBO21\_00715" 32258 "s59E25H2" 0 "hypothetical protein"  
"OPBO21\_00715" 32258 "s59E5H2" 0.02260786 "hypothetical protein"  
"OPBO21\_00715" 32258 "s63E6H2" 0.01784427 "hypothetical protein"  
"OPBO21\_00716" 32259 "s59E13H2" 5.499663 "hypothetical protein"  
"OPBO21\_00716" 32259 "s59E25H2" 0 "hypothetical protein"  
"OPBO21\_00716" 32259 "s59E5H2" 0.09608941 "hypothetical protein"  
"OPBO21\_00716" 32259 "s63E6H2" 0.05986691 "hypothetical protein"  
"OPBO21\_00717" 32260 "s59E13H2" 0.01157267 "hypothetical protein"  
"OPBO21\_00717" 32260 "s59E25H2" 0 "hypothetical protein"  
"OPBO21\_00717" 32260 "s59E5H2" 0.01001587 "hypothetical protein"  
"OPBO21\_00717" 32260 "s63E6H2" 0 "hypothetical protein"  
"OPBO21\_00718" 32261 "s59E13H2" 0.01438853 "antitoxin HipB"  
"OPBO21\_00718" 32261 "s59E25H2" 0 "antitoxin HipB"  
"OPBO21\_00718" 32261 "s59E5H2" 0.07115149 "antitoxin HipB"  
"OPBO21\_00718" 32261 "s63E6H2" 0.0001788026 "antitoxin HipB"  
"OPBO21\_00719" 32262 "s59E13H2" 0 "hypothetical protein"  
"OPBO21\_00719" 32262 "s59E25H2" 0.4180479 "hypothetical protein"  
"OPBO21\_00719" 32262 "s59E5H2" 0 "hypothetical protein"  
"OPBO21\_00719" 32262 "s63E6H2" 0 "hypothetical protein"  
"OPBO21\_00723" 32266 "s59E13H2" 0 "YcfA-like protein"  
"OPBO21\_00723" 32266 "s59E25H2" 0 "YcfA-like protein"  
"OPBO21\_00723" 32266 "s59E5H2" 0.042085 "YcfA-like protein"  
"OPBO21\_00723" 32266 "s63E6H2" 0 "YcfA-like protein"  
"OPBO21\_00724" 32267 "s59E13H2" 0 "hypothetical protein"

"OPBO21\_00724" 32267 "s59E25H2" 0 "hypothetical protein"  
"OPBO21\_00724" 32267 "s59E5H2" 0.02231043 "hypothetical protein"  
"OPBO21\_00724" 32267 "s63E6H2" 0 "hypothetical protein"  
"OPBO21\_00725" 32268 "s59E13H2" 0 "hypothetical protein"  
"OPBO21\_00725" 32268 "s59E25H2" 0 "hypothetical protein"  
"OPBO21\_00725" 32268 "s59E5H2" 0 "hypothetical protein"  
"OPBO21\_00725" 32268 "s63E6H2" 0 "hypothetical protein"  
"OPBO21\_00727" 32270 "s59E13H2" 0 "enterobactin exporter EntS"  
"OPBO21\_00727" 32270 "s59E25H2" 0 "enterobactin exporter EntS"  
"OPBO21\_00727" 32270 "s59E5H2" 0 "enterobactin exporter EntS"  
"OPBO21\_00727" 32270 "s63E6H2" 0 "enterobactin exporter EntS"  
"OPBO21\_00728" 32271 "s59E13H2" 0 "hypothetical protein"  
"OPBO21\_00728" 32271 "s59E25H2" 0 "hypothetical protein"  
"OPBO21\_00728" 32271 "s59E5H2" 0.0003672561 "hypothetical protein"  
"OPBO21\_00728" 32271 "s63E6H2" 0 "hypothetical protein"  
"OPBO21\_00729" 32272 "s59E13H2" 0.00609231 "Alpha-D-kanosaminyltransferase"  
"OPBO21\_00729" 32272 "s59E25H2" 0 "Alpha-D-kanosaminyltransferase"  
"OPBO21\_00729" 32272 "s59E5H2" 0.2650024 "Alpha-D-kanosaminyltransferase"  
"OPBO21\_00729" 32272 "s63E6H2" 0.008860241 "Alpha-D-kanosaminyltransferase"  
"OPBO21\_00730" 32273 "s59E13H2" 0.6079686 "Penicillinase repressor"  
"OPBO21\_00730" 32273 "s59E25H2" 0 "Penicillinase repressor"  
"OPBO21\_00730" 32273 "s59E5H2" 0.01762618 "Penicillinase repressor"  
"OPBO21\_00730" 32273 "s63E6H2" 0.009098534 "Penicillinase repressor"  
"OPBO21\_00731" 32274 "s59E13H2" 0.02453996 "Methicillin resistance mecR1 protein"  
"OPBO21\_00731" 32274 "s59E25H2" 0 "Methicillin resistance mecR1 protein"  
"OPBO21\_00731" 32274 "s59E5H2" 0 "Methicillin resistance mecR1 protein"  
"OPBO21\_00731" 32274 "s63E6H2" 0 "Methicillin resistance mecR1 protein"  
"OPBO21\_00732" 32275 "s59E13H2" 0.001728818 "hypothetical protein"  
"OPBO21\_00732" 32275 "s59E25H2" 0 "hypothetical protein"  
"OPBO21\_00732" 32275 "s59E5H2" 0.03079054 "hypothetical protein"  
"OPBO21\_00732" 32275 "s63E6H2" 0.0002907486 "hypothetical protein"  
"OPBO21\_00733" 32276 "s59E13H2" 0.02268848 "Bifunctional protein FolD protein"  
"OPBO21\_00733" 32276 "s59E25H2" 0 "Bifunctional protein FolD protein"  
"OPBO21\_00733" 32276 "s59E5H2" 0.5091081 "Bifunctional protein FolD protein"  
"OPBO21\_00733" 32276 "s63E6H2" 0.03133071 "Bifunctional protein FolD protein"  
"OPBO21\_00734" 32277 "s59E13H2" 0.005063082 "Formate--tetrahydrofolate ligase"  
"OPBO21\_00734" 32277 "s59E25H2" 0 "Formate--tetrahydrofolate ligase"  
"OPBO21\_00734" 32277 "s59E5H2" 0.06216407 "Formate--tetrahydrofolate ligase"  
"OPBO21\_00734" 32277 "s63E6H2" 0.01744663 "Formate--tetrahydrofolate ligase"  
"OPBO21\_00735" 32278 "s59E13H2" 0.01696649 "Corrinoid/iron-sulfur protein large subunit"  
"OPBO21\_00735" 32278 "s59E25H2" 0 "Corrinoid/iron-sulfur protein large subunit"  
"OPBO21\_00735" 32278 "s59E5H2" 0 "Corrinoid/iron-sulfur protein large subunit"  
"OPBO21\_00735" 32278 "s63E6H2" 0.01336543 "Corrinoid/iron-sulfur protein large subunit"  
"OPBO21\_00736" 32279 "s59E13H2" 0.02563779 "Carbon monoxide dehydrogenase/acetyl-CoA synthase subunit alpha"  
"OPBO21\_00736" 32279 "s59E25H2" 0 "Carbon monoxide dehydrogenase/acetyl-CoA synthase subunit alpha"  
"OPBO21\_00736" 32279 "s59E5H2" 0.01642729 "Carbon monoxide dehydrogenase/acetyl-CoA synthase subunit alpha"  
"OPBO21\_00736" 32279 "s63E6H2" 0.007879941 "Carbon monoxide dehydrogenase/acetyl-CoA synthase subunit alpha"

"OPBO21\_00737" 32280 "s59E13H2" 0.07603365 "Carbon monoxide dehydrogenase 2"  
"OPBO21\_00737" 32280 "s59E25H2" 0 "Carbon monoxide dehydrogenase 2"  
"OPBO21\_00737" 32280 "s59E5H2" 0.005989678 "Carbon monoxide dehydrogenase 2"  
"OPBO21\_00737" 32280 "s63E6H2" 0.03211659 "Carbon monoxide dehydrogenase 2"  
"OPBO21\_00738" 32281 "s59E13H2" 0.03621782 "Corrinoid/iron-sulfur protein small subunit"  
"OPBO21\_00738" 32281 "s59E25H2" 0 "Corrinoid/iron-sulfur protein small subunit"  
"OPBO21\_00738" 32281 "s59E5H2" 0 "Corrinoid/iron-sulfur protein small subunit"  
"OPBO21\_00738" 32281 "s63E6H2" 0.02547235 "Corrinoid/iron-sulfur protein small subunit"  
"OPBO21\_00739" 32282 "s59E13H2" 0.02140961 "Septum site-determining protein MinD"  
"OPBO21\_00739" 32282 "s59E25H2" 0 "Septum site-determining protein MinD"  
"OPBO21\_00739" 32282 "s59E5H2" 0 "Septum site-determining protein MinD"  
"OPBO21\_00739" 32282 "s63E6H2" 0.02710752 "Septum site-determining protein MinD"  
"OPBO21\_00740" 32283 "s59E13H2" 0.03210163 "Ferredoxin"  
"OPBO21\_00740" 32283 "s59E25H2" 0 "Ferredoxin"  
"OPBO21\_00740" 32283 "s59E5H2" 0.1018487 "Ferredoxin"  
"OPBO21\_00740" 32283 "s63E6H2" 0.03155664 "Ferredoxin"  
"OPBO21\_00741" 32284 "s59E13H2" 0.003071301 "UDP-glucose 4-epimerase"  
"OPBO21\_00741" 32284 "s59E25H2" 0 "UDP-glucose 4-epimerase"  
"OPBO21\_00741" 32284 "s59E5H2" 0.0520916 "UDP-glucose 4-epimerase"  
"OPBO21\_00741" 32284 "s63E6H2" 1.897515 "UDP-glucose 4-epimerase"  
"OPBO21\_00742" 32285 "s59E13H2" 0.006944029 "D-inositol 3-phosphate glycosyltransferase"  
"OPBO21\_00742" 32285 "s59E25H2" 0 "D-inositol 3-phosphate glycosyltransferase"  
"OPBO21\_00742" 32285 "s59E5H2" 0.0515056 "D-inositol 3-phosphate glycosyltransferase"  
"OPBO21\_00742" 32285 "s63E6H2" 0.3371656 "D-inositol 3-phosphate glycosyltransferase"  
"OPBO21\_00743" 32286 "s59E13H2" 0.04023871 "dTDP-4-dehydrorhamnose 3,5-epimerase"  
"OPBO21\_00743" 32286 "s59E25H2" 0 "dTDP-4-dehydrorhamnose 3,5-epimerase"  
"OPBO21\_00743" 32286 "s59E5H2" 0.1951807 "dTDP-4-dehydrorhamnose 3,5-epimerase"  
"OPBO21\_00743" 32286 "s63E6H2" 0.02585031 "dTDP-4-dehydrorhamnose 3,5-epimerase"  
"OPBO21\_00744" 32287 "s59E13H2" 0 "hypothetical protein"  
"OPBO21\_00744" 32287 "s59E25H2" 0 "hypothetical protein"  
"OPBO21\_00744" 32287 "s59E5H2" 0 "hypothetical protein"  
"OPBO21\_00744" 32287 "s63E6H2" 0.005110127 "hypothetical protein"  
"OPBO21\_00745" 32288 "s59E13H2" 0.04226591 "dTDP-glucose 4,6-dehydratase"  
"OPBO21\_00745" 32288 "s59E25H2" 0 "dTDP-glucose 4,6-dehydratase"  
"OPBO21\_00745" 32288 "s59E5H2" 0.02238297 "dTDP-glucose 4,6-dehydratase"  
"OPBO21\_00745" 32288 "s63E6H2" 0.03525743 "dTDP-glucose 4,6-dehydratase"  
"OPBO21\_00746" 32289 "s59E13H2" 0 "hypothetical protein"  
"OPBO21\_00746" 32289 "s59E25H2" 0 "hypothetical protein"  
"OPBO21\_00746" 32289 "s59E5H2" 0.01048994 "hypothetical protein"  
"OPBO21\_00746" 32289 "s63E6H2" 0.0008582526 "hypothetical protein"  
"OPBO21\_00747" 32290 "s59E13H2" 0 "mRNA interferase MazF6"  
"OPBO21\_00747" 32290 "s59E25H2" 0 "mRNA interferase MazF6"  
"OPBO21\_00747" 32290 "s59E5H2" 0.01121652 "mRNA interferase MazF6"  
"OPBO21\_00747" 32290 "s63E6H2" 0.008037604 "mRNA interferase MazF6"  
"OPBO21\_00748" 32291 "s59E13H2" 0.008308069 "hypothetical protein"  
"OPBO21\_00748" 32291 "s59E25H2" 0 "hypothetical protein"  
"OPBO21\_00748" 32291 "s59E5H2" 0.01562435 "hypothetical protein"



"OPBO21\_00748" 32291 "s63E6H2" 0.02545519 "hypothetical protein"  
"OPBO21\_00749" 32292 "s59E13H2" 0 "hypothetical protein"  
"OPBO21\_00749" 32292 "s59E25H2" 0 "hypothetical protein"  
"OPBO21\_00749" 32292 "s59E5H2" 0.05490802 "hypothetical protein"  
"OPBO21\_00749" 32292 "s63E6H2" 0.01174347 "hypothetical protein"  
"OPBO21\_00750" 32293 "s59E13H2" 0 "Archaeal ATPase"  
"OPBO21\_00750" 32293 "s59E25H2" 0 "Archaeal ATPase"  
"OPBO21\_00750" 32293 "s59E5H2" 0.06223605 "Archaeal ATPase"  
"OPBO21\_00750" 32293 "s63E6H2" 0.00302826 "Archaeal ATPase"  
"OPBO21\_00751" 32294 "s59E13H2" 0.003981477 "tRNA(fMet)-specific endonuclease VapC"  
"OPBO21\_00751" 32294 "s59E25H2" 0 "tRNA(fMet)-specific endonuclease VapC"  
"OPBO21\_00751" 32294 "s59E5H2" 0.01855964 "tRNA(fMet)-specific endonuclease VapC"  
"OPBO21\_00751" 32294 "s63E6H2" 0 "tRNA(fMet)-specific endonuclease VapC"  
"OPBO21\_00754" 32297 "s59E13H2" 0 "hypothetical protein"  
"OPBO21\_00754" 32297 "s59E25H2" 0 "hypothetical protein"  
"OPBO21\_00754" 32297 "s59E5H2" 0.008013276 "hypothetical protein"  
"OPBO21\_00754" 32297 "s63E6H2" 0.004728336 "hypothetical protein"  
"OPBO21\_00756" 32299 "s59E13H2" 0 "Toxin RelG"  
"OPBO21\_00756" 32299 "s59E25H2" 0 "Toxin RelG"  
"OPBO21\_00756" 32299 "s59E5H2" 0 "Toxin RelG"  
"OPBO21\_00756" 32299 "s63E6H2" 0 "Toxin RelG"  
"OPBO21\_00757" 32300 "s59E13H2" 0 "Ribbon-helix-helix protein, copG family"  
"OPBO21\_00757" 32300 "s59E25H2" 0 "Ribbon-helix-helix protein, copG family"  
"OPBO21\_00757" 32300 "s59E5H2" 0 "Ribbon-helix-helix protein, copG family"  
"OPBO21\_00757" 32300 "s63E6H2" 0 "Ribbon-helix-helix protein, copG family"  
"OPBO21\_00758" 32301 "s59E13H2" 0 "mRNA interferase MazF9"  
"OPBO21\_00758" 32301 "s59E25H2" 0 "mRNA interferase MazF9"  
"OPBO21\_00758" 32301 "s59E5H2" 0 "mRNA interferase MazF9"  
"OPBO21\_00758" 32301 "s63E6H2" 0.00216266 "mRNA interferase MazF9"  
"OPBO21\_00760" 32303 "s59E13H2" 0 "hypothetical protein"  
"OPBO21\_00760" 32303 "s59E25H2" 0 "hypothetical protein"  
"OPBO21\_00760" 32303 "s59E5H2" 0 "hypothetical protein"  
"OPBO21\_00760" 32303 "s63E6H2" 0 "hypothetical protein"  
"OPBO21\_00762" 32305 "s59E13H2" 0 "hypothetical protein"  
"OPBO21\_00762" 32305 "s59E25H2" 0 "hypothetical protein"  
"OPBO21\_00762" 32305 "s59E5H2" 0.02613642 "hypothetical protein"  
"OPBO21\_00762" 32305 "s63E6H2" 0 "hypothetical protein"  
"OPBO21\_00763" 32306 "s59E13H2" 0 "hypothetical protein"  
"OPBO21\_00763" 32306 "s59E25H2" 0 "hypothetical protein"  
"OPBO21\_00763" 32306 "s59E5H2" 0 "hypothetical protein"  
"OPBO21\_00763" 32306 "s63E6H2" 0 "hypothetical protein"  
"OPBO21\_00766" 32309 "s59E13H2" 0 "Trehalose/maltose-binding protein MalE precursor"  
"OPBO21\_00766" 32309 "s59E25H2" 0 "Trehalose/maltose-binding protein MalE precursor"  
"OPBO21\_00766" 32309 "s59E5H2" 2.274919 "Trehalose/maltose-binding protein MalE precursor"  
"OPBO21\_00766" 32309 "s63E6H2" 1.62468 "Trehalose/maltose-binding protein MalE precursor"  
"OPBO21\_00767" 32310 "s59E13H2" 0 "hydrogenase nickel incorporation protein"  
"OPBO21\_00767" 32310 "s59E25H2" 0 "hydrogenase nickel incorporation protein"

"OPBO21\_00767" 32310 "s59E5H2" 0.003646012 "hydrogenase nickel incorporation protein"  
"OPBO21\_00767" 32310 "s63E6H2" 0 "hydrogenase nickel incorporation protein"  
"OPBO21\_00768" 32311 "s59E13H2" 1.054346 "Tyrosine--tRNA ligase"  
"OPBO21\_00768" 32311 "s59E25H2" 0 "Tyrosine--tRNA ligase"  
"OPBO21\_00768" 32311 "s59E5H2" 0.2532362 "Tyrosine--tRNA ligase"  
"OPBO21\_00768" 32311 "s63E6H2" 0.07840119 "Tyrosine--tRNA ligase"  
"OPBO21\_00769" 32312 "s59E13H2" 0.01036651 "Putative 2-hydroxyacid dehydrogenase"  
"OPBO21\_00769" 32312 "s59E25H2" 0 "Putative 2-hydroxyacid dehydrogenase"  
"OPBO21\_00769" 32312 "s59E5H2" 0.07825279 "Putative 2-hydroxyacid dehydrogenase"  
"OPBO21\_00769" 32312 "s63E6H2" 0.1157598 "Putative 2-hydroxyacid dehydrogenase"  
"OPBO21\_00770" 32313 "s59E13H2" 0.002537851 "PBS lyase HEAT-like repeat protein"  
"OPBO21\_00770" 32313 "s59E25H2" 0 "PBS lyase HEAT-like repeat protein"  
"OPBO21\_00770" 32313 "s59E5H2" 0 "PBS lyase HEAT-like repeat protein"  
"OPBO21\_00770" 32313 "s63E6H2" 0 "PBS lyase HEAT-like repeat protein"  
"OPBO21\_00771" 32314 "s59E13H2" 0 "YcfA-like protein"  
"OPBO21\_00771" 32314 "s59E25H2" 0 "YcfA-like protein"  
"OPBO21\_00771" 32314 "s59E5H2" 0 "YcfA-like protein"  
"OPBO21\_00771" 32314 "s63E6H2" 0 "YcfA-like protein"  
"OPBO21\_00772" 32315 "s59E13H2" 0 "ISXO2-like transposase domain protein"  
"OPBO21\_00772" 32315 "s59E25H2" 0 "ISXO2-like transposase domain protein"  
"OPBO21\_00772" 32315 "s59E5H2" 0 "ISXO2-like transposase domain protein"  
"OPBO21\_00772" 32315 "s63E6H2" 0.0006174853 "ISXO2-like transposase domain protein"  
"OPBO21\_00773" 32316 "s59E13H2" 0 "hypothetical protein"  
"OPBO21\_00773" 32316 "s59E25H2" 0 "hypothetical protein"  
"OPBO21\_00773" 32316 "s59E5H2" 0 "hypothetical protein"  
"OPBO21\_00773" 32316 "s63E6H2" 0 "hypothetical protein"  
"OPBO21\_00774" 32317 "s59E13H2" 0 "putative copper-transporting ATPase PacS"  
"OPBO21\_00774" 32317 "s59E25H2" 0 "putative copper-transporting ATPase PacS"  
"OPBO21\_00774" 32317 "s59E5H2" 0 "putative copper-transporting ATPase PacS"  
"OPBO21\_00774" 32317 "s63E6H2" 0 "putative copper-transporting ATPase PacS"  
"OPBO21\_00775" 32318 "s59E13H2" 0 "Putative cystathionine beta-synthase"  
"OPBO21\_00775" 32318 "s59E25H2" 0 "Putative cystathionine beta-synthase"  
"OPBO21\_00775" 32318 "s59E5H2" 0 "Putative cystathionine beta-synthase"  
"OPBO21\_00775" 32318 "s63E6H2" 0 "Putative cystathionine beta-synthase"  
"OPBO21\_00776" 32319 "s59E13H2" 0 "Cystathionine gamma-synthase"  
"OPBO21\_00776" 32319 "s59E25H2" 0 "Cystathionine gamma-synthase"  
"OPBO21\_00776" 32319 "s59E5H2" 0 "Cystathionine gamma-synthase"  
"OPBO21\_00776" 32319 "s63E6H2" 0 "Cystathionine gamma-synthase"  
"OPBO21\_00777" 32320 "s59E13H2" 0 "hypothetical protein"  
"OPBO21\_00777" 32320 "s59E25H2" 0 "hypothetical protein"  
"OPBO21\_00777" 32320 "s59E5H2" 0 "hypothetical protein"  
"OPBO21\_00777" 32320 "s63E6H2" 0 "hypothetical protein"  
"OPBO21\_00778" 32321 "s59E13H2" 0 "hypothetical protein"  
"OPBO21\_00778" 32321 "s59E25H2" 0 "hypothetical protein"  
"OPBO21\_00778" 32321 "s59E5H2" 0 "hypothetical protein"  
"OPBO21\_00778" 32321 "s63E6H2" 0.007850421 "hypothetical protein"  
"OPBO21\_00779" 32322 "s59E13H2" 0 "Papain family cysteine protease"

"OPBO21\_00779" 32322 "s59E25H2" 0 "Papain family cysteine protease"  
"OPBO21\_00779" 32322 "s59E5H2" 0 "Papain family cysteine protease"  
"OPBO21\_00779" 32322 "s63E6H2" 0 "Papain family cysteine protease"  
"OPBO21\_00780" 32323 "s59E13H2" 0 "putative diguanylate cyclase AdrA"  
"OPBO21\_00780" 32323 "s59E25H2" 0 "putative diguanylate cyclase AdrA"  
"OPBO21\_00780" 32323 "s59E5H2" 0 "putative diguanylate cyclase AdrA"  
"OPBO21\_00780" 32323 "s63E6H2" 0 "putative diguanylate cyclase AdrA"  
"OPBO21\_00781" 32324 "s59E13H2" 0 "Methionine biosynthesis protein MetW"  
"OPBO21\_00781" 32324 "s59E25H2" 0 "Methionine biosynthesis protein MetW"  
"OPBO21\_00781" 32324 "s59E5H2" 0 "Methionine biosynthesis protein MetW"  
"OPBO21\_00781" 32324 "s63E6H2" 0 "Methionine biosynthesis protein MetW"  
"OPBO21\_00782" 32325 "s59E13H2" 0 "Homoserine O-acetyltransferase"  
"OPBO21\_00782" 32325 "s59E25H2" 0 "Homoserine O-acetyltransferase"  
"OPBO21\_00782" 32325 "s59E5H2" 0 "Homoserine O-acetyltransferase"  
"OPBO21\_00782" 32325 "s63E6H2" 0 "Homoserine O-acetyltransferase"  
"OPBO21\_00783" 32326 "s59E13H2" 0 "Cysteine synthase"  
"OPBO21\_00783" 32326 "s59E25H2" 0 "Cysteine synthase"  
"OPBO21\_00783" 32326 "s59E5H2" 0 "Cysteine synthase"  
"OPBO21\_00783" 32326 "s63E6H2" 0 "Cysteine synthase"  
"OPBO21\_00784" 32327 "s59E13H2" 0 "Methionine gamma-lyase"  
"OPBO21\_00784" 32327 "s59E25H2" 0 "Methionine gamma-lyase"  
"OPBO21\_00784" 32327 "s59E5H2" 0 "Methionine gamma-lyase"  
"OPBO21\_00784" 32327 "s63E6H2" 0 "Methionine gamma-lyase"  
"OPBO21\_00785" 32328 "s59E13H2" 0 "hypothetical protein"  
"OPBO21\_00785" 32328 "s59E25H2" 0 "hypothetical protein"  
"OPBO21\_00785" 32328 "s59E5H2" 0 "hypothetical protein"  
"OPBO21\_00785" 32328 "s63E6H2" 0 "hypothetical protein"  
"OPBO21\_00786" 32329 "s59E13H2" 0 "HTH-type transcriptional regulator CymR"  
"OPBO21\_00786" 32329 "s59E25H2" 0 "HTH-type transcriptional regulator CymR"  
"OPBO21\_00786" 32329 "s59E5H2" 0 "HTH-type transcriptional regulator CymR"  
"OPBO21\_00786" 32329 "s63E6H2" 0 "HTH-type transcriptional regulator CymR"  
"OPBO21\_00787" 32330 "s59E13H2" 0 "tRNA-specific 2-thiouridylase MnmA"  
"OPBO21\_00787" 32330 "s59E25H2" 0 "tRNA-specific 2-thiouridylase MnmA"  
"OPBO21\_00787" 32330 "s59E5H2" 0 "tRNA-specific 2-thiouridylase MnmA"  
"OPBO21\_00787" 32330 "s63E6H2" 0 "tRNA-specific 2-thiouridylase MnmA"  
"OPBO21\_00788" 32331 "s59E13H2" 0 "Cysteine desulfurase"  
"OPBO21\_00788" 32331 "s59E25H2" 0 "Cysteine desulfurase"  
"OPBO21\_00788" 32331 "s59E5H2" 0 "Cysteine desulfurase"  
"OPBO21\_00788" 32331 "s63E6H2" 0 "Cysteine desulfurase"  
"OPBO21\_00789" 32332 "s59E13H2" 0 "Modification methylase DpnIIB"  
"OPBO21\_00789" 32332 "s59E25H2" 0 "Modification methylase DpnIIB"  
"OPBO21\_00789" 32332 "s59E5H2" 0 "Modification methylase DpnIIB"  
"OPBO21\_00789" 32332 "s63E6H2" 0 "Modification methylase DpnIIB"  
"OPBO21\_00790" 32333 "s59E13H2" 0 "hypothetical protein"  
"OPBO21\_00790" 32333 "s59E25H2" 0 "hypothetical protein"  
"OPBO21\_00790" 32333 "s59E5H2" 0 "hypothetical protein"  
"OPBO21\_00790" 32333 "s63E6H2" 0 "hypothetical protein"

"OPBO21\_00792" 32335 "s59E13H2" 0 "Calcium-transporting ATPase 1"  
"OPBO21\_00792" 32335 "s59E25H2" 0 "Calcium-transporting ATPase 1"  
"OPBO21\_00792" 32335 "s59E5H2" 0 "Calcium-transporting ATPase 1"  
"OPBO21\_00792" 32335 "s63E6H2" 0 "Calcium-transporting ATPase 1"  
"OPBO21\_00793" 32336 "s59E13H2" 0 "hypothetical protein"  
"OPBO21\_00793" 32336 "s59E25H2" 0 "hypothetical protein"  
"OPBO21\_00793" 32336 "s59E5H2" 0 "hypothetical protein"  
"OPBO21\_00793" 32336 "s63E6H2" 0 "hypothetical protein"  
"OPBO21\_00794" 32337 "s59E13H2" 0 "hypothetical protein"  
"OPBO21\_00794" 32337 "s59E25H2" 0 "hypothetical protein"  
"OPBO21\_00794" 32337 "s59E5H2" 0 "hypothetical protein"  
"OPBO21\_00794" 32337 "s63E6H2" 0 "hypothetical protein"  
"OPBO21\_00795" 32338 "s59E13H2" 0 "hypothetical protein"  
"OPBO21\_00795" 32338 "s59E25H2" 0 "hypothetical protein"  
"OPBO21\_00795" 32338 "s59E5H2" 0 "hypothetical protein"  
"OPBO21\_00795" 32338 "s63E6H2" 0 "hypothetical protein"  
"OPBO21\_00796" 32339 "s59E13H2" 0 "Poly(hydroxyalcanoate) granule associated protein (phasin)"  
"OPBO21\_00796" 32339 "s59E25H2" 0 "Poly(hydroxyalcanoate) granule associated protein (phasin)"  
"OPBO21\_00796" 32339 "s59E5H2" 0 "Poly(hydroxyalcanoate) granule associated protein (phasin)"  
"OPBO21\_00796" 32339 "s63E6H2" 0 "Poly(hydroxyalcanoate) granule associated protein (phasin)"  
"OPBO21\_00797" 32340 "s59E13H2" 0 "hypothetical protein"  
"OPBO21\_00797" 32340 "s59E25H2" 0 "hypothetical protein"  
"OPBO21\_00797" 32340 "s59E5H2" 0 "hypothetical protein"  
"OPBO21\_00797" 32340 "s63E6H2" 0 "hypothetical protein"  
"OPBO21\_00798" 32341 "s59E13H2" 0 "SpoVT / AbrB like domain protein"  
"OPBO21\_00798" 32341 "s59E25H2" 0 "SpoVT / AbrB like domain protein"  
"OPBO21\_00798" 32341 "s59E5H2" 0 "SpoVT / AbrB like domain protein"  
"OPBO21\_00798" 32341 "s63E6H2" 0 "SpoVT / AbrB like domain protein"  
"OPBO21\_00799" 32342 "s59E13H2" 0 "Putative transposase"  
"OPBO21\_00799" 32342 "s59E25H2" 0 "Putative transposase"  
"OPBO21\_00799" 32342 "s59E5H2" 0 "Putative transposase"  
"OPBO21\_00799" 32342 "s63E6H2" 0 "Putative transposase"  
"OPBO21\_00800" 32343 "s59E13H2" 0 "CTP synthase"  
"OPBO21\_00800" 32343 "s59E25H2" 0 "CTP synthase"  
"OPBO21\_00800" 32343 "s59E5H2" 0 "CTP synthase"  
"OPBO21\_00800" 32343 "s63E6H2" 0 "CTP synthase"  
"OPBO21\_00801" 32344 "s59E13H2" 0 "Glutamine--fructose-6-phosphate aminotransferase [isomerizing]"  
"OPBO21\_00801" 32344 "s59E25H2" 0 "Glutamine--fructose-6-phosphate aminotransferase [isomerizing]"  
"OPBO21\_00801" 32344 "s59E5H2" 0 "Glutamine--fructose-6-phosphate aminotransferase [isomerizing]"  
"OPBO21\_00801" 32344 "s63E6H2" 0.001657081 "Glutamine--fructose-6-phosphate aminotransferase [isomerizing]"  
"OPBO21\_00802" 32345 "s59E13H2" 0 "GMP synthase [glutamine-hydrolyzing]"  
"OPBO21\_00802" 32345 "s59E25H2" 0 "GMP synthase [glutamine-hydrolyzing]"  
"OPBO21\_00802" 32345 "s59E5H2" 0 "GMP synthase [glutamine-hydrolyzing]"  
"OPBO21\_00802" 32345 "s63E6H2" 0 "GMP synthase [glutamine-hydrolyzing]"  
"OPBO21\_00803" 32346 "s59E13H2" 0 "GMP synthase [glutamine-hydrolyzing]"  
"OPBO21\_00803" 32346 "s59E25H2" 0 "GMP synthase [glutamine-hydrolyzing]"  
"OPBO21\_00803" 32346 "s59E5H2" 0 "GMP synthase [glutamine-hydrolyzing]"

"OPBO21\_00803" 32346 "s63E6H2" 0 "GMP synthase [glutamine-hydrolyzing]"  
"OPBO21\_00804" 32347 "s59E13H2" 0 "hypothetical protein"  
"OPBO21\_00804" 32347 "s59E25H2" 0 "hypothetical protein"  
"OPBO21\_00804" 32347 "s59E5H2" 0 "hypothetical protein"  
"OPBO21\_00804" 32347 "s63E6H2" 0 "hypothetical protein"  
"OPBO21\_00806" 32349 "s59E13H2" 0 "hypothetical protein"  
"OPBO21\_00806" 32349 "s59E25H2" 0 "hypothetical protein"  
"OPBO21\_00806" 32349 "s59E5H2" 0 "hypothetical protein"  
"OPBO21\_00806" 32349 "s63E6H2" 0.001378128 "hypothetical protein"  
"OPBO21\_00807" 32350 "s59E13H2" 0 "putative transcriptional regulatory protein pdtaR"  
"OPBO21\_00807" 32350 "s59E25H2" 0 "putative transcriptional regulatory protein pdtaR"  
"OPBO21\_00807" 32350 "s59E5H2" 0 "putative transcriptional regulatory protein pdtaR"  
"OPBO21\_00807" 32350 "s63E6H2" 0.04077004 "putative transcriptional regulatory protein pdtaR"  
"OPBO21\_00808" 32351 "s59E13H2" 0 "putative transcriptional regulatory protein pdtaR"  
"OPBO21\_00808" 32351 "s59E25H2" 0 "putative transcriptional regulatory protein pdtaR"  
"OPBO21\_00808" 32351 "s59E5H2" 0 "putative transcriptional regulatory protein pdtaR"  
"OPBO21\_00808" 32351 "s63E6H2" 0.07384778 "putative transcriptional regulatory protein pdtaR"  
"OPBO21\_00810" 32353 "s59E13H2" 0 "hypothetical protein"  
"OPBO21\_00810" 32353 "s59E25H2" 0 "hypothetical protein"  
"OPBO21\_00810" 32353 "s59E5H2" 0 "hypothetical protein"  
"OPBO21\_00810" 32353 "s63E6H2" 0 "hypothetical protein"  
"OPBO21\_00812" 32355 "s59E13H2" 9.843519 "Pyruvate carboxylase subunit A"  
"OPBO21\_00812" 32355 "s59E25H2" 0 "Pyruvate carboxylase subunit A"  
"OPBO21\_00812" 32355 "s59E5H2" 0.8448059 "Pyruvate carboxylase subunit A"  
"OPBO21\_00812" 32355 "s63E6H2" 1.255433 "Pyruvate carboxylase subunit A"  
"OPBO21\_00813" 32356 "s59E13H2" 7.877417 "Thermonuclease precursor"  
"OPBO21\_00813" 32356 "s59E25H2" 0 "Thermonuclease precursor"  
"OPBO21\_00813" 32356 "s59E5H2" 0.4158636 "Thermonuclease precursor"  
"OPBO21\_00813" 32356 "s63E6H2" 1.337785 "Thermonuclease precursor"  
"OPBO21\_00814" 32357 "s59E13H2" 6.010461 "YacP-like NYN domain protein"  
"OPBO21\_00814" 32357 "s59E25H2" 0 "YacP-like NYN domain protein"  
"OPBO21\_00814" 32357 "s59E5H2" 0.2059826 "YacP-like NYN domain protein"  
"OPBO21\_00814" 32357 "s63E6H2" 0.9979884 "YacP-like NYN domain protein"  
"OPBO21\_00815" 32358 "s59E13H2" 4.121189 "Putative TrmH family tRNA/rRNA methyltransferase"  
"OPBO21\_00815" 32358 "s59E25H2" 0 "Putative TrmH family tRNA/rRNA methyltransferase"  
"OPBO21\_00815" 32358 "s59E5H2" 0.06874277 "Putative TrmH family tRNA/rRNA methyltransferase"  
"OPBO21\_00815" 32358 "s63E6H2" 0.7917214 "Putative TrmH family tRNA/rRNA methyltransferase"  
"OPBO21\_00816" 32359 "s59E13H2" 0.006580056 "PBS lyase HEAT-like repeat protein"  
"OPBO21\_00816" 32359 "s59E25H2" 0 "PBS lyase HEAT-like repeat protein"  
"OPBO21\_00816" 32359 "s59E5H2" 0.01761979 "PBS lyase HEAT-like repeat protein"  
"OPBO21\_00816" 32359 "s63E6H2" 0.0003282246 "PBS lyase HEAT-like repeat protein"  
"OPBO21\_00818" 32361 "s59E13H2" 0 "3-oxoacyl-[acyl-carrier-protein] reductase FabG"  
"OPBO21\_00818" 32361 "s59E25H2" 0 "3-oxoacyl-[acyl-carrier-protein] reductase FabG"  
"OPBO21\_00818" 32361 "s59E5H2" 0 "3-oxoacyl-[acyl-carrier-protein] reductase FabG"  
"OPBO21\_00818" 32361 "s63E6H2" 0 "3-oxoacyl-[acyl-carrier-protein] reductase FabG"  
"OPBO21\_00819" 32362 "s59E13H2" 0 "Trehalose/maltose-binding protein MalE precursor"  
"OPBO21\_00819" 32362 "s59E25H2" 0 "Trehalose/maltose-binding protein MalE precursor"

"OPBO21\_00819" 32362 "s59E5H2" 0 "Trehalose/maltose-binding protein MalE precursor"  
"OPBO21\_00819" 32362 "s63E6H2" 0 "Trehalose/maltose-binding protein MalE precursor"  
"OPBO21\_00820" 32363 "s59E13H2" 0 "Trehalose transport system permease protein SugA"  
"OPBO21\_00820" 32363 "s59E25H2" 0 "Trehalose transport system permease protein SugA"  
"OPBO21\_00820" 32363 "s59E5H2" 0 "Trehalose transport system permease protein SugA"  
"OPBO21\_00820" 32363 "s63E6H2" 0 "Trehalose transport system permease protein SugA"  
"OPBO21\_00821" 32364 "s59E13H2" 0 "Trehalose transport system permease protein SugB"  
"OPBO21\_00821" 32364 "s59E25H2" 0 "Trehalose transport system permease protein SugB"  
"OPBO21\_00821" 32364 "s59E5H2" 0 "Trehalose transport system permease protein SugB"  
"OPBO21\_00821" 32364 "s63E6H2" 0 "Trehalose transport system permease protein SugB"  
"OPBO21\_00822" 32365 "s59E13H2" 0 "hypothetical protein"  
"OPBO21\_00822" 32365 "s59E25H2" 0 "hypothetical protein"  
"OPBO21\_00822" 32365 "s59E5H2" 0 "hypothetical protein"  
"OPBO21\_00822" 32365 "s63E6H2" 0 "hypothetical protein"  
"OPBO21\_00823" 32366 "s59E13H2" 0 "Ribulokinase"  
"OPBO21\_00823" 32366 "s59E25H2" 0 "Ribulokinase"  
"OPBO21\_00823" 32366 "s59E5H2" 0 "Ribulokinase"  
"OPBO21\_00823" 32366 "s63E6H2" 0 "Ribulokinase"  
"OPBO21\_00824" 32367 "s59E13H2" 0 "HTH-type transcriptional repressor YvoA"  
"OPBO21\_00824" 32367 "s59E25H2" 0 "HTH-type transcriptional repressor YvoA"  
"OPBO21\_00824" 32367 "s59E5H2" 0 "HTH-type transcriptional repressor YvoA"  
"OPBO21\_00824" 32367 "s63E6H2" 0 "HTH-type transcriptional repressor YvoA"  
"OPBO21\_00825" 32368 "s59E13H2" 0 "Sorbitol dehydrogenase"  
"OPBO21\_00825" 32368 "s59E25H2" 0 "Sorbitol dehydrogenase"  
"OPBO21\_00825" 32368 "s59E5H2" 0 "Sorbitol dehydrogenase"  
"OPBO21\_00825" 32368 "s63E6H2" 0 "Sorbitol dehydrogenase"  
"OPBO21\_00826" 32369 "s59E13H2" 0 "Ribulose-phosphate 3-epimerase"  
"OPBO21\_00826" 32369 "s59E25H2" 0 "Ribulose-phosphate 3-epimerase"  
"OPBO21\_00826" 32369 "s59E5H2" 0 "Ribulose-phosphate 3-epimerase"  
"OPBO21\_00826" 32369 "s63E6H2" 0 "Ribulose-phosphate 3-epimerase"  
"OPBO21\_00827" 32370 "s59E13H2" 0 "Ribokinase"  
"OPBO21\_00827" 32370 "s59E25H2" 0 "Ribokinase"  
"OPBO21\_00827" 32370 "s59E5H2" 0 "Ribokinase"  
"OPBO21\_00827" 32370 "s63E6H2" 0 "Ribokinase"  
"OPBO21\_00828" 32371 "s59E13H2" 0 "Anaerobic sulfatase-maturing enzyme"  
"OPBO21\_00828" 32371 "s59E25H2" 0 "Anaerobic sulfatase-maturing enzyme"  
"OPBO21\_00828" 32371 "s59E5H2" 0 "Anaerobic sulfatase-maturing enzyme"  
"OPBO21\_00828" 32371 "s63E6H2" 0.0008375129 "Anaerobic sulfatase-maturing enzyme"  
"OPBO21\_00829" 32372 "s59E13H2" 4.892424 "Cysteine--tRNA ligase"  
"OPBO21\_00829" 32372 "s59E25H2" 0 "Cysteine--tRNA ligase"  
"OPBO21\_00829" 32372 "s59E5H2" 0.05013449 "Cysteine--tRNA ligase"  
"OPBO21\_00829" 32372 "s63E6H2" 0.7639479 "Cysteine--tRNA ligase"  
"OPBO21\_00830" 32373 "s59E13H2" 6.869318 "Serine acetyltransferase"  
"OPBO21\_00830" 32373 "s59E25H2" 0 "Serine acetyltransferase"  
"OPBO21\_00830" 32373 "s59E5H2" 0.02957278 "Serine acetyltransferase"  
"OPBO21\_00830" 32373 "s63E6H2" 0.8243572 "Serine acetyltransferase"  
"OPBO21\_00831" 32374 "s59E13H2" 3.911675 "Glutamate--tRNA ligase"

"OPBO21\_00831" 32374 "s59E25H2" 0 "Glutamate--tRNA ligase"  
"OPBO21\_00831" 32374 "s59E5H2" 0.02545842 "Glutamate--tRNA ligase"  
"OPBO21\_00831" 32374 "s63E6H2" 0.6892359 "Glutamate--tRNA ligase"  
"OPBO21\_00832" 32375 "s59E13H2" 3.286146 "2-C-methyl-D-erythritol 2,4-cyclodiphosphate synthase"  
"OPBO21\_00832" 32375 "s59E25H2" 0 "2-C-methyl-D-erythritol 2,4-cyclodiphosphate synthase"  
"OPBO21\_00832" 32375 "s59E5H2" 0.01350978 "2-C-methyl-D-erythritol 2,4-cyclodiphosphate synthase"  
"OPBO21\_00832" 32375 "s63E6H2" 0.6179182 "2-C-methyl-D-erythritol 2,4-cyclodiphosphate synthase"  
"OPBO21\_00833" 32376 "s59E13H2" 2.744172 "2-C-methyl-D-erythritol 4-phosphate cytidylyltransferase"  
"OPBO21\_00833" 32376 "s59E25H2" 0 "2-C-methyl-D-erythritol 4-phosphate cytidylyltransferase"  
"OPBO21\_00833" 32376 "s59E5H2" 0.05305865 "2-C-methyl-D-erythritol 4-phosphate cytidylyltransferase"  
"OPBO21\_00833" 32376 "s63E6H2" 0.4702856 "2-C-methyl-D-erythritol 4-phosphate cytidylyltransferase"  
"OPBO21\_00834" 32377 "s59E13H2" 2.792796 "DNA integrity scanning protein DisA"  
"OPBO21\_00834" 32377 "s59E25H2" 0 "DNA integrity scanning protein DisA"  
"OPBO21\_00834" 32377 "s59E5H2" 0.04019341 "DNA integrity scanning protein DisA"  
"OPBO21\_00834" 32377 "s63E6H2" 0.4383113 "DNA integrity scanning protein DisA"  
"OPBO21\_00835" 32378 "s59E13H2" 2.406638 "ATP-dependent Clp protease ATP-binding subunit ClpC1"  
"OPBO21\_00835" 32378 "s59E25H2" 0 "ATP-dependent Clp protease ATP-binding subunit ClpC1"  
"OPBO21\_00835" 32378 "s59E5H2" 0.01869017 "ATP-dependent Clp protease ATP-binding subunit ClpC1"  
"OPBO21\_00835" 32378 "s63E6H2" 0.1703853 "ATP-dependent Clp protease ATP-binding subunit ClpC1"  
"OPBO21\_00836" 32379 "s59E13H2" 1.815347 "Putative ATP:guanido phosphotransferase"  
"OPBO21\_00836" 32379 "s59E25H2" 0 "Putative ATP:guanido phosphotransferase"  
"OPBO21\_00836" 32379 "s59E5H2" 0 "Putative ATP:guanido phosphotransferase"  
"OPBO21\_00836" 32379 "s63E6H2" 0.02437151 "Putative ATP:guanido phosphotransferase"  
"OPBO21\_00837" 32380 "s59E13H2" 0.01037543 "Modulator of FtsH protease HflK"  
"OPBO21\_00837" 32380 "s59E25H2" 0 "Modulator of FtsH protease HflK"  
"OPBO21\_00837" 32380 "s59E5H2" 0.4419386 "Modulator of FtsH protease HflK"  
"OPBO21\_00837" 32380 "s63E6H2" 0 "Modulator of FtsH protease HflK"  
"OPBO21\_00838" 32381 "s59E13H2" 0 "hypothetical protein"  
"OPBO21\_00838" 32381 "s59E25H2" 0 "hypothetical protein"  
"OPBO21\_00838" 32381 "s59E5H2" 0.020829 "hypothetical protein"  
"OPBO21\_00838" 32381 "s63E6H2" 0.02332959 "hypothetical protein"  
"OPBO21\_00839" 32382 "s59E13H2" 0 "hypothetical protein"  
"OPBO21\_00839" 32382 "s59E25H2" 0 "hypothetical protein"  
"OPBO21\_00839" 32382 "s59E5H2" 0.0091191 "hypothetical protein"  
"OPBO21\_00839" 32382 "s63E6H2" 0.0005942895 "hypothetical protein"  
"OPBO21\_00840" 32383 "s59E13H2" 0.01406749 "NAD(P)-specific glutamate dehydrogenase"  
"OPBO21\_00840" 32383 "s59E25H2" 0 "NAD(P)-specific glutamate dehydrogenase"  
"OPBO21\_00840" 32383 "s59E5H2" 0.4672379 "NAD(P)-specific glutamate dehydrogenase"  
"OPBO21\_00840" 32383 "s63E6H2" 0.02973615 "NAD(P)-specific glutamate dehydrogenase"  
"OPBO21\_00842" 32385 "s59E13H2" 0.05685591 "molybdenum cofactor biosynthesis protein A"  
"OPBO21\_00842" 32385 "s59E25H2" 0 "molybdenum cofactor biosynthesis protein A"  
"OPBO21\_00842" 32385 "s59E5H2" 0.4367973 "molybdenum cofactor biosynthesis protein A"  
"OPBO21\_00842" 32385 "s63E6H2" 0.02419013 "molybdenum cofactor biosynthesis protein A"  
"OPBO21\_00843" 32386 "s59E13H2" 0 "Tautomerase PptA"  
"OPBO21\_00843" 32386 "s59E25H2" 0 "Tautomerase PptA"  
"OPBO21\_00843" 32386 "s59E5H2" 0 "Tautomerase PptA"  
"OPBO21\_00843" 32386 "s63E6H2" 0 "Tautomerase PptA"

"OPBO21\_00844" 32387 "s59E13H2" 0 "Tetratricopeptide repeat protein"  
"OPBO21\_00844" 32387 "s59E25H2" 0 "Tetratricopeptide repeat protein"  
"OPBO21\_00844" 32387 "s59E5H2" 0 "Tetratricopeptide repeat protein"  
"OPBO21\_00844" 32387 "s63E6H2" 0.004578952 "Tetratricopeptide repeat protein"  
"OPBO21\_00846" 32389 "s59E13H2" 0.001010332 "putative D,D-dipeptide-binding periplasmic protein DdpA precursor"  
"OPBO21\_00846" 32389 "s59E25H2" 0.2928241 "putative D,D-dipeptide-binding periplasmic protein DdpA precursor"  
"OPBO21\_00846" 32389 "s59E5H2" 0.007045724 "putative D,D-dipeptide-binding periplasmic protein DdpA precursor"  
"OPBO21\_00846" 32389 "s63E6H2" 0.001632402 "putative D,D-dipeptide-binding periplasmic protein DdpA precursor"  
"OPBO21\_00847" 32390 "s59E13H2" 0.001350736 "Oligopeptide transport ATP-binding protein OppF"  
"OPBO21\_00847" 32390 "s59E25H2" 0 "Oligopeptide transport ATP-binding protein OppF"  
"OPBO21\_00847" 32390 "s59E5H2" 0.01234948 "Oligopeptide transport ATP-binding protein OppF"  
"OPBO21\_00847" 32390 "s63E6H2" 0 "Oligopeptide transport ATP-binding protein OppF"  
"OPBO21\_00848" 32391 "s59E13H2" 0.01056295 "Oligopeptide transport ATP-binding protein OppD"  
"OPBO21\_00848" 32391 "s59E25H2" 0 "Oligopeptide transport ATP-binding protein OppD"  
"OPBO21\_00848" 32391 "s59E5H2" 0 "Oligopeptide transport ATP-binding protein OppD"  
"OPBO21\_00848" 32391 "s63E6H2" 0.008868611 "Oligopeptide transport ATP-binding protein OppD"  
"OPBO21\_00849" 32392 "s59E13H2" 0.01416622 "Glutathione transport system permease protein GsiD"  
"OPBO21\_00849" 32392 "s59E25H2" 0 "Glutathione transport system permease protein GsiD"  
"OPBO21\_00849" 32392 "s59E5H2" 0 "Glutathione transport system permease protein GsiD"  
"OPBO21\_00849" 32392 "s63E6H2" 0.004106898 "Glutathione transport system permease protein GsiD"  
"OPBO21\_00850" 32393 "s59E13H2" 0.02327363 "Glutathione transport system permease protein GsiC"  
"OPBO21\_00850" 32393 "s59E25H2" 0 "Glutathione transport system permease protein GsiC"  
"OPBO21\_00850" 32393 "s59E5H2" 0 "Glutathione transport system permease protein GsiC"  
"OPBO21\_00850" 32393 "s63E6H2" 0.00268904 "Glutathione transport system permease protein GsiC"  
"OPBO21\_00851" 32394 "s59E13H2" 0.01110477 "Oligopeptide-binding protein OppA precursor"  
"OPBO21\_00851" 32394 "s59E25H2" 0 "Oligopeptide-binding protein OppA precursor"  
"OPBO21\_00851" 32394 "s59E5H2" 0 "Oligopeptide-binding protein OppA precursor"  
"OPBO21\_00851" 32394 "s63E6H2" 0.009811392 "Oligopeptide-binding protein OppA precursor"  
"OPBO21\_00852" 32395 "s59E13H2" 0.01194935 "preprotein translocase subunit SecG"  
"OPBO21\_00852" 32395 "s59E25H2" 0 "preprotein translocase subunit SecG"  
"OPBO21\_00852" 32395 "s59E5H2" 0.1463906 "preprotein translocase subunit SecG"  
"OPBO21\_00852" 32395 "s63E6H2" 0.001402913 "preprotein translocase subunit SecG"  
"OPBO21\_00853" 32396 "s59E13H2" 0.0003261132 "2,3-bisphosphoglycerate-independent phosphoglycerate mutase"  
"OPBO21\_00853" 32396 "s59E25H2" 0 "2,3-bisphosphoglycerate-independent phosphoglycerate mutase"  
"OPBO21\_00853" 32396 "s59E5H2" 0.03998269 "2,3-bisphosphoglycerate-independent phosphoglycerate mutase"  
"OPBO21\_00853" 32396 "s63E6H2" 0.002971316 "2,3-bisphosphoglycerate-independent phosphoglycerate mutase"  
"OPBO21\_00854" 32397 "s59E13H2" 0.004361046 "Triosephosphate isomerase"  
"OPBO21\_00854" 32397 "s59E25H2" 0 "Triosephosphate isomerase"  
"OPBO21\_00854" 32397 "s59E5H2" 0.1839474 "Triosephosphate isomerase"  
"OPBO21\_00854" 32397 "s63E6H2" 0.01456295 "Triosephosphate isomerase"  
"OPBO21\_00855" 32398 "s59E13H2" 0.08336857 "Phosphoglycerate kinase"  
"OPBO21\_00855" 32398 "s59E25H2" 0 "Phosphoglycerate kinase"  
"OPBO21\_00855" 32398 "s59E5H2" 0.1974589 "Phosphoglycerate kinase"  
"OPBO21\_00855" 32398 "s63E6H2" 0.005831052 "Phosphoglycerate kinase"  
"OPBO21\_00856" 32399 "s59E13H2" 0.02071587 "Glyceraldehyde-3-phosphate dehydrogenase"  
"OPBO21\_00856" 32399 "s59E25H2" 0 "Glyceraldehyde-3-phosphate dehydrogenase"  
"OPBO21\_00856" 32399 "s59E5H2" 0.03421411 "Glyceraldehyde-3-phosphate dehydrogenase"



"OPBO21\_00856" 32399 "s63E6H2" 0.01224251 "Glyceraldehyde-3-phosphate dehydrogenase"  
"OPBO21\_00857" 32400 "s59E13H2" 0.008894164 "glmZ(sRNA)-inactivating NTPase"  
"OPBO21\_00857" 32400 "s59E25H2" 0 "glmZ(sRNA)-inactivating NTPase"  
"OPBO21\_00857" 32400 "s59E5H2" 0.008964347 "glmZ(sRNA)-inactivating NTPase"  
"OPBO21\_00857" 32400 "s63E6H2" 0.0005557433 "glmZ(sRNA)-inactivating NTPase"  
"OPBO21\_00858" 32401 "s59E13H2" 0 "Membrane protein of unknown function"  
"OPBO21\_00858" 32401 "s59E25H2" 0 "Membrane protein of unknown function"  
"OPBO21\_00858" 32401 "s59E5H2" 0 "Membrane protein of unknown function"  
"OPBO21\_00858" 32401 "s63E6H2" 0.01974553 "Membrane protein of unknown function"  
"OPBO21\_00859" 32402 "s59E13H2" 0.002764544 "UvrABC system protein C"  
"OPBO21\_00859" 32402 "s59E25H2" 0 "UvrABC system protein C"  
"OPBO21\_00859" 32402 "s59E5H2" 0.03320527 "UvrABC system protein C"  
"OPBO21\_00859" 32402 "s63E6H2" 0.009081885 "UvrABC system protein C"  
"OPBO21\_00860" 32403 "s59E13H2" 0.001812185 "UvrABC system protein A"  
"OPBO21\_00860" 32403 "s59E25H2" 0 "UvrABC system protein A"  
"OPBO21\_00860" 32403 "s59E5H2" 0.04172926 "UvrABC system protein A"  
"OPBO21\_00860" 32403 "s63E6H2" 0.0200462 "UvrABC system protein A"  
"OPBO21\_00861" 32404 "s59E13H2" 0.002917856 "UvrABC system protein B"  
"OPBO21\_00861" 32404 "s59E25H2" 0 "UvrABC system protein B"  
"OPBO21\_00861" 32404 "s59E5H2" 0.02930245 "UvrABC system protein B"  
"OPBO21\_00861" 32404 "s63E6H2" 0.0359609 "UvrABC system protein B"  
"OPBO21\_00862" 32405 "s59E13H2" 0.001738898 "Dephospho-CoA kinase"  
"OPBO21\_00862" 32405 "s59E25H2" 0 "Dephospho-CoA kinase"  
"OPBO21\_00862" 32405 "s59E5H2" 0.003657525 "Dephospho-CoA kinase"  
"OPBO21\_00862" 32405 "s63E6H2" 0.007648537 "Dephospho-CoA kinase"  
"OPBO21\_00863" 32406 "s59E13H2" 0.006944552 "30S ribosomal protein S1"  
"OPBO21\_00863" 32406 "s59E25H2" 0 "30S ribosomal protein S1"  
"OPBO21\_00863" 32406 "s59E5H2" 0.5489215 "30S ribosomal protein S1"  
"OPBO21\_00863" 32406 "s63E6H2" 0.004009436 "30S ribosomal protein S1"  
"OPBO21\_00864" 32407 "s59E13H2" 0.0337025 "DNA polymerase I"  
"OPBO21\_00864" 32407 "s59E25H2" 0 "DNA polymerase I"  
"OPBO21\_00864" 32407 "s59E5H2" 0.6672419 "DNA polymerase I"  
"OPBO21\_00864" 32407 "s63E6H2" 0.009790342 "DNA polymerase I"  
"OPBO21\_00865" 32408 "s59E13H2" 0 "O-Antigen ligase"  
"OPBO21\_00865" 32408 "s59E25H2" 0 "O-Antigen ligase"  
"OPBO21\_00865" 32408 "s59E5H2" 0 "O-Antigen ligase"  
"OPBO21\_00865" 32408 "s63E6H2" 0 "O-Antigen ligase"  
"OPBO21\_00866" 32409 "s59E13H2" 0 "GDP-mannose-dependent alpha-(1-6)-phosphatidylinositol monomannoside mannosyltransferase"  
"OPBO21\_00866" 32409 "s59E25H2" 0 "GDP-mannose-dependent alpha-(1-6)-phosphatidylinositol monomannoside mannosyltransferase"  
"OPBO21\_00866" 32409 "s59E5H2" 0 "GDP-mannose-dependent alpha-(1-6)-phosphatidylinositol monomannoside mannosyltransferase"  
"OPBO21\_00866" 32409 "s63E6H2" 0 "GDP-mannose-dependent alpha-(1-6)-phosphatidylinositol monomannoside mannosyltransferase"  
"OPBO21\_00867" 32410 "s59E13H2" 0 "Chain length determinant protein"  
"OPBO21\_00867" 32410 "s59E25H2" 0 "Chain length determinant protein"  
"OPBO21\_00867" 32410 "s59E5H2" 0 "Chain length determinant protein"  
"OPBO21\_00867" 32410 "s63E6H2" 0 "Chain length determinant protein"  
"OPBO21\_00870" 32413 "s59E13H2" 0 "Glycosyltransferase AgID"  
"OPBO21\_00870" 32413 "s59E25H2" 0 "Glycosyltransferase AgID"

"OPBO21\_00870" 32413 "s59E5H2" 0 "Glycosyltransferase AglD"  
"OPBO21\_00870" 32413 "s63E6H2" 0 "Glycosyltransferase AglD"  
"OPBO21\_00871" 32414 "s59E13H2" 0 "hypothetical protein"  
"OPBO21\_00871" 32414 "s59E25H2" 0 "hypothetical protein"  
"OPBO21\_00871" 32414 "s59E5H2" 0 "hypothetical protein"  
"OPBO21\_00871" 32414 "s63E6H2" 0 "hypothetical protein"  
"OPBO21\_00872" 32415 "s59E13H2" 0 "hypothetical protein"  
"OPBO21\_00872" 32415 "s59E25H2" 0 "hypothetical protein"  
"OPBO21\_00872" 32415 "s59E5H2" 0 "hypothetical protein"  
"OPBO21\_00872" 32415 "s63E6H2" 0 "hypothetical protein"  
"OPBO21\_00873" 32416 "s59E13H2" 0 "bifunctional 3-demethylubiquinone-9 3-methyltransferase/ 2-octaprenyl-6-hydroxy phenol methylase"  
"OPBO21\_00873" 32416 "s59E25H2" 0 "bifunctional 3-demethylubiquinone-9 3-methyltransferase/ 2-octaprenyl-6-hydroxy phenol methylase"  
"OPBO21\_00873" 32416 "s59E5H2" 0 "bifunctional 3-demethylubiquinone-9 3-methyltransferase/ 2-octaprenyl-6-hydroxy phenol methylase"  
"OPBO21\_00873" 32416 "s63E6H2" 0 "bifunctional 3-demethylubiquinone-9 3-methyltransferase/ 2-octaprenyl-6-hydroxy phenol methylase"  
"OPBO21\_00874" 32417 "s59E13H2" 0 "putative methyltransferase YcgJ"  
"OPBO21\_00874" 32417 "s59E25H2" 0 "putative methyltransferase YcgJ"  
"OPBO21\_00874" 32417 "s59E5H2" 0 "putative methyltransferase YcgJ"  
"OPBO21\_00874" 32417 "s63E6H2" 0 "putative methyltransferase YcgJ"  
"OPBO21\_00875" 32418 "s59E13H2" 0 "hypothetical protein"  
"OPBO21\_00875" 32418 "s59E25H2" 0 "hypothetical protein"  
"OPBO21\_00875" 32418 "s59E5H2" 0 "hypothetical protein"  
"OPBO21\_00875" 32418 "s63E6H2" 0 "hypothetical protein"  
"OPBO21\_00876" 32419 "s59E13H2" 0 "Glycosyltransferase Gtf1"  
"OPBO21\_00876" 32419 "s59E25H2" 0 "Glycosyltransferase Gtf1"  
"OPBO21\_00876" 32419 "s59E5H2" 0 "Glycosyltransferase Gtf1"  
"OPBO21\_00876" 32419 "s63E6H2" 0 "Glycosyltransferase Gtf1"  
"OPBO21\_00877" 32420 "s59E13H2" 0 "Transposase, Mutator family"  
"OPBO21\_00877" 32420 "s59E25H2" 0 "Transposase, Mutator family"  
"OPBO21\_00877" 32420 "s59E5H2" 0 "Transposase, Mutator family"  
"OPBO21\_00877" 32420 "s63E6H2" 0 "Transposase, Mutator family"  
"OPBO21\_00880" 32423 "s59E13H2" 0 "hypothetical protein"  
"OPBO21\_00880" 32423 "s59E25H2" 0 "hypothetical protein"  
"OPBO21\_00880" 32423 "s59E5H2" 0 "hypothetical protein"  
"OPBO21\_00880" 32423 "s63E6H2" 0.002761011 "hypothetical protein"  
"OPBO21\_00881" 32424 "s59E13H2" 0 "bifunctional 3-demethylubiquinone-9 3-methyltransferase/ 2-octaprenyl-6-hydroxy phenol methylase"  
"OPBO21\_00881" 32424 "s59E25H2" 0 "bifunctional 3-demethylubiquinone-9 3-methyltransferase/ 2-octaprenyl-6-hydroxy phenol methylase"  
"OPBO21\_00881" 32424 "s59E5H2" 0 "bifunctional 3-demethylubiquinone-9 3-methyltransferase/ 2-octaprenyl-6-hydroxy phenol methylase"  
"OPBO21\_00881" 32424 "s63E6H2" 0 "bifunctional 3-demethylubiquinone-9 3-methyltransferase/ 2-octaprenyl-6-hydroxy phenol methylase"  
"OPBO21\_00882" 32425 "s59E13H2" 0 "Glycosyltransferase AglE"  
"OPBO21\_00882" 32425 "s59E25H2" 0 "Glycosyltransferase AglE"  
"OPBO21\_00882" 32425 "s59E5H2" 0 "Glycosyltransferase AglE"  
"OPBO21\_00882" 32425 "s63E6H2" 0 "Glycosyltransferase AglE"  
"OPBO21\_00883" 32426 "s59E13H2" 0 "dTDP-4-amino-4,6-dideoxy-D-glucose transaminase"  
"OPBO21\_00883" 32426 "s59E25H2" 0 "dTDP-4-amino-4,6-dideoxy-D-glucose transaminase"  
"OPBO21\_00883" 32426 "s59E5H2" 0 "dTDP-4-amino-4,6-dideoxy-D-glucose transaminase"  
"OPBO21\_00883" 32426 "s63E6H2" 0 "dTDP-4-amino-4,6-dideoxy-D-glucose transaminase"  
"OPBO21\_00886" 32429 "s59E13H2" 0 "molybdenum cofactor biosynthesis protein A"

"OPBO21\_00886" 32429 "s59E25H2" 0 "molybdenum cofactor biosynthesis protein A"  
"OPBO21\_00886" 32429 "s59E5H2" 0 "molybdenum cofactor biosynthesis protein A"  
"OPBO21\_00886" 32429 "s63E6H2" 0 "molybdenum cofactor biosynthesis protein A"  
"OPBO21\_00887" 32430 "s59E13H2" 0 "hypothetical protein"  
"OPBO21\_00887" 32430 "s59E25H2" 0 "hypothetical protein"  
"OPBO21\_00887" 32430 "s59E5H2" 0 "hypothetical protein"  
"OPBO21\_00887" 32430 "s63E6H2" 0 "hypothetical protein"  
"OPBO21\_00888" 32431 "s59E13H2" 0 "Alcohol dehydrogenase"  
"OPBO21\_00888" 32431 "s59E25H2" 0 "Alcohol dehydrogenase"  
"OPBO21\_00888" 32431 "s59E5H2" 0 "Alcohol dehydrogenase"  
"OPBO21\_00888" 32431 "s63E6H2" 0 "Alcohol dehydrogenase"  
"OPBO21\_00889" 32432 "s59E13H2" 0 "hypothetical protein"  
"OPBO21\_00889" 32432 "s59E25H2" 0 "hypothetical protein"  
"OPBO21\_00889" 32432 "s59E5H2" 0 "hypothetical protein"  
"OPBO21\_00889" 32432 "s63E6H2" 0 "hypothetical protein"  
"OPBO21\_00890" 32433 "s59E13H2" 0 "GDP-6-deoxy-D-talose 4-dehydrogenase"  
"OPBO21\_00890" 32433 "s59E25H2" 0 "GDP-6-deoxy-D-talose 4-dehydrogenase"  
"OPBO21\_00890" 32433 "s59E5H2" 0 "GDP-6-deoxy-D-talose 4-dehydrogenase"  
"OPBO21\_00890" 32433 "s63E6H2" 0 "GDP-6-deoxy-D-talose 4-dehydrogenase"  
"OPBO21\_00891" 32434 "s59E13H2" 0 "Acetolactate synthase large subunit"  
"OPBO21\_00891" 32434 "s59E25H2" 0 "Acetolactate synthase large subunit"  
"OPBO21\_00891" 32434 "s59E5H2" 0 "Acetolactate synthase large subunit"  
"OPBO21\_00891" 32434 "s63E6H2" 0 "Acetolactate synthase large subunit"  
"OPBO21\_00892" 32435 "s59E13H2" 0 "hypothetical protein"  
"OPBO21\_00892" 32435 "s59E25H2" 0 "hypothetical protein"  
"OPBO21\_00892" 32435 "s59E5H2" 0 "hypothetical protein"  
"OPBO21\_00892" 32435 "s63E6H2" 0 "hypothetical protein"  
"OPBO21\_00893" 32436 "s59E13H2" 0 "Spore coat polysaccharide biosynthesis protein SpsE"  
"OPBO21\_00893" 32436 "s59E25H2" 0 "Spore coat polysaccharide biosynthesis protein SpsE"  
"OPBO21\_00893" 32436 "s59E5H2" 0 "Spore coat polysaccharide biosynthesis protein SpsE"  
"OPBO21\_00893" 32436 "s63E6H2" 0 "Spore coat polysaccharide biosynthesis protein SpsE"  
"OPBO21\_00894" 32437 "s59E13H2" 0 "Ribonuclease Z"  
"OPBO21\_00894" 32437 "s59E25H2" 0 "Ribonuclease Z"  
"OPBO21\_00894" 32437 "s59E5H2" 0 "Ribonuclease Z"  
"OPBO21\_00894" 32437 "s63E6H2" 0 "Ribonuclease Z"  
"OPBO21\_00895" 32438 "s59E13H2" 0 "CDP-glucose 4,6-dehydratase"  
"OPBO21\_00895" 32438 "s59E25H2" 0 "CDP-glucose 4,6-dehydratase"  
"OPBO21\_00895" 32438 "s59E5H2" 0 "CDP-glucose 4,6-dehydratase"  
"OPBO21\_00895" 32438 "s63E6H2" 0 "CDP-glucose 4,6-dehydratase"  
"OPBO21\_00896" 32439 "s59E13H2" 0 "Glucose-1-phosphate cytidyltransferase"  
"OPBO21\_00896" 32439 "s59E25H2" 0 "Glucose-1-phosphate cytidyltransferase"  
"OPBO21\_00896" 32439 "s59E5H2" 0 "Glucose-1-phosphate cytidyltransferase"  
"OPBO21\_00896" 32439 "s63E6H2" 0 "Glucose-1-phosphate cytidyltransferase"  
"OPBO21\_00897" 32440 "s59E13H2" 0 "putative S-adenosylmethionine-dependent methyltransferase/MSMEI\_2290"  
"OPBO21\_00897" 32440 "s59E25H2" 0 "putative S-adenosylmethionine-dependent methyltransferase/MSMEI\_2290"  
"OPBO21\_00897" 32440 "s59E5H2" 0 "putative S-adenosylmethionine-dependent methyltransferase/MSMEI\_2290"  
"OPBO21\_00897" 32440 "s63E6H2" 0 "putative S-adenosylmethionine-dependent methyltransferase/MSMEI\_2290"

"OPBO21\_00898" 32441 "s59E13H2" 2.039712 "2-aminoadipate transaminase"  
"OPBO21\_00898" 32441 "s59E25H2" 0 "2-aminoadipate transaminase"  
"OPBO21\_00898" 32441 "s59E5H2" 0.05729468 "2-aminoadipate transaminase"  
"OPBO21\_00898" 32441 "s63E6H2" 0.128322 "2-aminoadipate transaminase"  
"OPBO21\_00899" 32442 "s59E13H2" 6.119807 "D-alanine--D-alanine ligase"  
"OPBO21\_00899" 32442 "s59E25H2" 0 "D-alanine--D-alanine ligase"  
"OPBO21\_00899" 32442 "s59E5H2" 0.3149585 "D-alanine--D-alanine ligase"  
"OPBO21\_00899" 32442 "s63E6H2" 0.1870446 "D-alanine--D-alanine ligase"  
"OPBO21\_00901" 32444 "s59E13H2" 0 "hypothetical protein"  
"OPBO21\_00901" 32444 "s59E25H2" 0 "hypothetical protein"  
"OPBO21\_00901" 32444 "s59E5H2" 0.02019945 "hypothetical protein"  
"OPBO21\_00901" 32444 "s63E6H2" 0.007155394 "hypothetical protein"  
"OPBO21\_00902" 32445 "s59E13H2" 0 "putative transporter"  
"OPBO21\_00902" 32445 "s59E25H2" 0 "putative transporter"  
"OPBO21\_00902" 32445 "s59E5H2" 0.01169009 "putative transporter"  
"OPBO21\_00902" 32445 "s63E6H2" 0.01104197 "putative transporter"  
"OPBO21\_00903" 32446 "s59E13H2" 0.03531837 "PIN domain protein"  
"OPBO21\_00903" 32446 "s59E25H2" 0 "PIN domain protein"  
"OPBO21\_00903" 32446 "s59E5H2" 0.1718281 "PIN domain protein"  
"OPBO21\_00903" 32446 "s63E6H2" 0.04194557 "PIN domain protein"  
"OPBO21\_00905" 32448 "s59E13H2" 0 "zinc transporter ZupT"  
"OPBO21\_00905" 32448 "s59E25H2" 3.789617 "zinc transporter ZupT"  
"OPBO21\_00905" 32448 "s59E5H2" 0.02772826 "zinc transporter ZupT"  
"OPBO21\_00905" 32448 "s63E6H2" 0.02713257 "zinc transporter ZupT"  
"OPBO21\_00907" 32450 "s59E13H2" 0 "hypothetical protein"  
"OPBO21\_00907" 32450 "s59E25H2" 0 "hypothetical protein"  
"OPBO21\_00907" 32450 "s59E5H2" 0.1596405 "hypothetical protein"  
"OPBO21\_00907" 32450 "s63E6H2" 0.002927065 "hypothetical protein"  
"OPBO21\_00908" 32451 "s59E13H2" 0 "SpoVT / AbrB like domain protein"  
"OPBO21\_00908" 32451 "s59E25H2" 0 "SpoVT / AbrB like domain protein"  
"OPBO21\_00908" 32451 "s59E5H2" 0.2875253 "SpoVT / AbrB like domain protein"  
"OPBO21\_00908" 32451 "s63E6H2" 0.001304369 "SpoVT / AbrB like domain protein"  
"OPBO21\_00910" 32453 "s59E13H2" 0.2843927 "hypothetical protein"  
"OPBO21\_00910" 32453 "s59E25H2" 0 "hypothetical protein"  
"OPBO21\_00910" 32453 "s59E5H2" 0.5703699 "hypothetical protein"  
"OPBO21\_00910" 32453 "s63E6H2" 2.734788 "hypothetical protein"  
"OPBO21\_00911" 32454 "s59E13H2" 0.01595195 "Cellobiose 2-epimerase"  
"OPBO21\_00911" 32454 "s59E25H2" 0 "Cellobiose 2-epimerase"  
"OPBO21\_00911" 32454 "s59E5H2" 0.07693636 "Cellobiose 2-epimerase"  
"OPBO21\_00911" 32454 "s63E6H2" 2.043528 "Cellobiose 2-epimerase"  
"OPBO21\_00912" 32455 "s59E13H2" 0.1564129 "Beta-1,4-mannooligosaccharide phosphorylase"  
"OPBO21\_00912" 32455 "s59E25H2" 0 "Beta-1,4-mannooligosaccharide phosphorylase"  
"OPBO21\_00912" 32455 "s59E5H2" 0.2364845 "Beta-1,4-mannooligosaccharide phosphorylase"  
"OPBO21\_00912" 32455 "s63E6H2" 2.331382 "Beta-1,4-mannooligosaccharide phosphorylase"  
"OPBO21\_00913" 32456 "s59E13H2" 0.1293203 "RNA polymerase sigma factor SigI"  
"OPBO21\_00913" 32456 "s59E25H2" 0 "RNA polymerase sigma factor SigI"  
"OPBO21\_00913" 32456 "s59E5H2" 0.2733961 "RNA polymerase sigma factor SigI"

"OPBO21\_00913" 32456 "s63E6H2" 1.664282 "RNA polymerase sigma factor SigI"  
"OPBO22\_00001" 37171 "s59E13H2" 0 "Putative K(+)-stimulated pyrophosphate-energized sodium pump"  
"OPBO22\_00001" 37171 "s59E25H2" 0 "Putative K(+)-stimulated pyrophosphate-energized sodium pump"  
"OPBO22\_00001" 37171 "s59E5H2" 0 "Putative K(+)-stimulated pyrophosphate-energized sodium pump"  
"OPBO22\_00001" 37171 "s63E6H2" 0 "Putative K(+)-stimulated pyrophosphate-energized sodium pump"  
"OPBO22\_00004" 37174 "s59E13H2" 0 "Sporulation and spore germination"  
"OPBO22\_00004" 37174 "s59E25H2" 0 "Sporulation and spore germination"  
"OPBO22\_00004" 37174 "s59E5H2" 0 "Sporulation and spore germination"  
"OPBO22\_00004" 37174 "s63E6H2" 0 "Sporulation and spore germination"  
"OPBO22\_00005" 37175 "s59E13H2" 0 "Acetyltransferase (GNAT) family protein"  
"OPBO22\_00005" 37175 "s59E25H2" 0 "Acetyltransferase (GNAT) family protein"  
"OPBO22\_00005" 37175 "s59E5H2" 0 "Acetyltransferase (GNAT) family protein"  
"OPBO22\_00005" 37175 "s63E6H2" 0 "Acetyltransferase (GNAT) family protein"  
"OPBO22\_00006" 37176 "s59E13H2" 0 "Copper-exporting P-type ATPase B"  
"OPBO22\_00006" 37176 "s59E25H2" 0 "Copper-exporting P-type ATPase B"  
"OPBO22\_00006" 37176 "s59E5H2" 0 "Copper-exporting P-type ATPase B"  
"OPBO22\_00006" 37176 "s63E6H2" 0 "Copper-exporting P-type ATPase B"  
"OPBO22\_00007" 37177 "s59E13H2" 0 "hypothetical protein"  
"OPBO22\_00007" 37177 "s59E25H2" 0 "hypothetical protein"  
"OPBO22\_00007" 37177 "s59E5H2" 0 "hypothetical protein"  
"OPBO22\_00007" 37177 "s63E6H2" 0 "hypothetical protein"  
"OPBO22\_00008" 37178 "s59E13H2" 0 "hypothetical protein"  
"OPBO22\_00008" 37178 "s59E25H2" 0 "hypothetical protein"  
"OPBO22\_00008" 37178 "s59E5H2" 0 "hypothetical protein"  
"OPBO22\_00008" 37178 "s63E6H2" 0 "hypothetical protein"  
"OPBO22\_00009" 37179 "s59E13H2" 0 "hypothetical protein"  
"OPBO22\_00009" 37179 "s59E25H2" 0 "hypothetical protein"  
"OPBO22\_00009" 37179 "s59E5H2" 0 "hypothetical protein"  
"OPBO22\_00009" 37179 "s63E6H2" 0 "hypothetical protein"  
"OPBO22\_00010" 37180 "s59E13H2" 0 "hypothetical protein"  
"OPBO22\_00010" 37180 "s59E25H2" 0 "hypothetical protein"  
"OPBO22\_00010" 37180 "s59E5H2" 0 "hypothetical protein"  
"OPBO22\_00010" 37180 "s63E6H2" 0 "hypothetical protein"  
"OPBO22\_00011" 37181 "s59E13H2" 0 "tRNA(fMet)-specific endonuclease VapC"  
"OPBO22\_00011" 37181 "s59E25H2" 0 "tRNA(fMet)-specific endonuclease VapC"  
"OPBO22\_00011" 37181 "s59E5H2" 0 "tRNA(fMet)-specific endonuclease VapC"  
"OPBO22\_00011" 37181 "s63E6H2" 0 "tRNA(fMet)-specific endonuclease VapC"  
"OPBO22\_00012" 37182 "s59E13H2" 0 "Phd\_YefM"  
"OPBO22\_00012" 37182 "s59E25H2" 0 "Phd\_YefM"  
"OPBO22\_00012" 37182 "s59E5H2" 0 "Phd\_YefM"  
"OPBO22\_00012" 37182 "s63E6H2" 0 "Phd\_YefM"  
"OPBO22\_00013" 37183 "s59E13H2" 0 "Chagasin family peptidase inhibitor I42"  
"OPBO22\_00013" 37183 "s59E25H2" 0 "Chagasin family peptidase inhibitor I42"  
"OPBO22\_00013" 37183 "s59E5H2" 0 "Chagasin family peptidase inhibitor I42"  
"OPBO22\_00013" 37183 "s63E6H2" 0 "Chagasin family peptidase inhibitor I42"  
"OPBO22\_00014" 37184 "s59E13H2" 0 "translocation protein TolB"  
"OPBO22\_00014" 37184 "s59E25H2" 0 "translocation protein TolB"

"OPBO22\_00014" 37184 "s59E5H2" 0 "translocation protein TolB"  
"OPBO22\_00014" 37184 "s63E6H2" 0 "translocation protein TolB"  
"OPBO22\_00015" 37185 "s59E13H2" 0 "Major Facilitator Superfamily protein"  
"OPBO22\_00015" 37185 "s59E25H2" 0 "Major Facilitator Superfamily protein"  
"OPBO22\_00015" 37185 "s59E5H2" 0 "Major Facilitator Superfamily protein"  
"OPBO22\_00015" 37185 "s63E6H2" 0 "Major Facilitator Superfamily protein"  
"OPBO22\_00016" 37186 "s59E13H2" 0 "PKD domain protein"  
"OPBO22\_00016" 37186 "s59E25H2" 0 "PKD domain protein"  
"OPBO22\_00016" 37186 "s59E5H2" 0 "PKD domain protein"  
"OPBO22\_00016" 37186 "s63E6H2" 0 "PKD domain protein"  
"OPBO22\_00017" 37187 "s59E13H2" 0 "Mrr restriction system protein"  
"OPBO22\_00017" 37187 "s59E25H2" 0 "Mrr restriction system protein"  
"OPBO22\_00017" 37187 "s59E5H2" 0 "Mrr restriction system protein"  
"OPBO22\_00017" 37187 "s63E6H2" 0 "Mrr restriction system protein"  
"OPBO22\_00018" 37188 "s59E13H2" 0 "Macrolide export ATP-binding/permease protein MacB"  
"OPBO22\_00018" 37188 "s59E25H2" 0 "Macrolide export ATP-binding/permease protein MacB"  
"OPBO22\_00018" 37188 "s59E5H2" 0 "Macrolide export ATP-binding/permease protein MacB"  
"OPBO22\_00018" 37188 "s63E6H2" 0 "Macrolide export ATP-binding/permease protein MacB"  
"OPBO22\_00019" 37189 "s59E13H2" 0 "Zinc ribbon domain protein"  
"OPBO22\_00019" 37189 "s59E25H2" 0 "Zinc ribbon domain protein"  
"OPBO22\_00019" 37189 "s59E5H2" 0 "Zinc ribbon domain protein"  
"OPBO22\_00019" 37189 "s63E6H2" 0 "Zinc ribbon domain protein"  
"OPBO22\_00020" 37190 "s59E13H2" 0 "Trifunctional nucleotide phosphoesterase protein YfkN precursor"  
"OPBO22\_00020" 37190 "s59E25H2" 0 "Trifunctional nucleotide phosphoesterase protein YfkN precursor"  
"OPBO22\_00020" 37190 "s59E5H2" 0 "Trifunctional nucleotide phosphoesterase protein YfkN precursor"  
"OPBO22\_00020" 37190 "s63E6H2" 0 "Trifunctional nucleotide phosphoesterase protein YfkN precursor"  
"OPBO22\_00021" 37191 "s59E13H2" 0 "hypothetical protein"  
"OPBO22\_00021" 37191 "s59E25H2" 0 "hypothetical protein"  
"OPBO22\_00021" 37191 "s59E5H2" 0 "hypothetical protein"  
"OPBO22\_00021" 37191 "s63E6H2" 0 "hypothetical protein"  
"OPBO22\_00022" 37192 "s59E13H2" 0 "RDD family protein"  
"OPBO22\_00022" 37192 "s59E25H2" 0 "RDD family protein"  
"OPBO22\_00022" 37192 "s59E5H2" 0 "RDD family protein"  
"OPBO22\_00022" 37192 "s63E6H2" 0 "RDD family protein"  
"OPBO22\_00023" 37193 "s59E13H2" 0 "DNA gyrase subunit A"  
"OPBO22\_00023" 37193 "s59E25H2" 0 "DNA gyrase subunit A"  
"OPBO22\_00023" 37193 "s59E5H2" 0 "DNA gyrase subunit A"  
"OPBO22\_00023" 37193 "s63E6H2" 0 "DNA gyrase subunit A"  
"OPBO22\_00025" 37195 "s59E13H2" 0 "2,3-bisphosphoglycerate-independent phosphoglycerate mutase"  
"OPBO22\_00025" 37195 "s59E25H2" 0 "2,3-bisphosphoglycerate-independent phosphoglycerate mutase"  
"OPBO22\_00025" 37195 "s59E5H2" 0 "2,3-bisphosphoglycerate-independent phosphoglycerate mutase"  
"OPBO22\_00025" 37195 "s63E6H2" 0 "2,3-bisphosphoglycerate-independent phosphoglycerate mutase"  
"OPBO22\_00026" 37196 "s59E13H2" 0 "Putative lipoprotein YerB precursor"  
"OPBO22\_00026" 37196 "s59E25H2" 0 "Putative lipoprotein YerB precursor"  
"OPBO22\_00026" 37196 "s59E5H2" 0 "Putative lipoprotein YerB precursor"  
"OPBO22\_00026" 37196 "s63E6H2" 0 "Putative lipoprotein YerB precursor"  
"OPBO22\_00027" 37197 "s59E13H2" 0 "hypothetical protein"

"OPBO22\_00027" 37197 "s59E25H2" 0 "hypothetical protein"  
"OPBO22\_00027" 37197 "s59E5H2" 0 "hypothetical protein"  
"OPBO22\_00027" 37197 "s63E6H2" 0 "hypothetical protein"  
"OPBO22\_00028" 37198 "s59E13H2" 0 "hypothetical protein"  
"OPBO22\_00028" 37198 "s59E25H2" 0 "hypothetical protein"  
"OPBO22\_00028" 37198 "s59E5H2" 0 "hypothetical protein"  
"OPBO22\_00028" 37198 "s63E6H2" 0 "hypothetical protein"  
"OPBO22\_00029" 37199 "s59E13H2" 0 "Ribonuclease BN"  
"OPBO22\_00029" 37199 "s59E25H2" 0 "Ribonuclease BN"  
"OPBO22\_00029" 37199 "s59E5H2" 0 "Ribonuclease BN"  
"OPBO22\_00029" 37199 "s63E6H2" 0 "Ribonuclease BN"  
"OPBO22\_00030" 37200 "s59E13H2" 0 "Laccase domain protein YfiH"  
"OPBO22\_00030" 37200 "s59E25H2" 0 "Laccase domain protein YfiH"  
"OPBO22\_00030" 37200 "s59E5H2" 0 "Laccase domain protein YfiH"  
"OPBO22\_00030" 37200 "s63E6H2" 0 "Laccase domain protein YfiH"  
"OPBO22\_00031" 37201 "s59E13H2" 0 "hypothetical protein"  
"OPBO22\_00031" 37201 "s59E25H2" 0 "hypothetical protein"  
"OPBO22\_00031" 37201 "s59E5H2" 0 "hypothetical protein"  
"OPBO22\_00031" 37201 "s63E6H2" 0 "hypothetical protein"  
"OPBO22\_00032" 37202 "s59E13H2" 0 "bifunctional biotin--[acetyl-CoA-carboxylase] synthetase/biotin operon repressor"  
"OPBO22\_00032" 37202 "s59E25H2" 0 "bifunctional biotin--[acetyl-CoA-carboxylase] synthetase/biotin operon repressor"  
"OPBO22\_00032" 37202 "s59E5H2" 0 "bifunctional biotin--[acetyl-CoA-carboxylase] synthetase/biotin operon repressor"  
"OPBO22\_00032" 37202 "s63E6H2" 0 "bifunctional biotin--[acetyl-CoA-carboxylase] synthetase/biotin operon repressor"  
"OPBO22\_00034" 37204 "s59E13H2" 0 "hypothetical protein"  
"OPBO22\_00034" 37204 "s59E25H2" 0 "hypothetical protein"  
"OPBO22\_00034" 37204 "s59E5H2" 0 "hypothetical protein"  
"OPBO22\_00034" 37204 "s63E6H2" 0 "hypothetical protein"  
"OPBO22\_00035" 37205 "s59E13H2" 0 "Anaerobic ribonucleoside-triphosphate reductase"  
"OPBO22\_00035" 37205 "s59E25H2" 0 "Anaerobic ribonucleoside-triphosphate reductase"  
"OPBO22\_00035" 37205 "s59E5H2" 0 "Anaerobic ribonucleoside-triphosphate reductase"  
"OPBO22\_00035" 37205 "s63E6H2" 0 "Anaerobic ribonucleoside-triphosphate reductase"  
"OPBO22\_00036" 37206 "s59E13H2" 0 "molybdenum cofactor biosynthesis protein A"  
"OPBO22\_00036" 37206 "s59E25H2" 0 "molybdenum cofactor biosynthesis protein A"  
"OPBO22\_00036" 37206 "s59E5H2" 0 "molybdenum cofactor biosynthesis protein A"  
"OPBO22\_00036" 37206 "s63E6H2" 0 "molybdenum cofactor biosynthesis protein A"  
"OPBO22\_00037" 37207 "s59E13H2" 0 "Tungsten-containing aldehyde ferredoxin oxidoreductase"  
"OPBO22\_00037" 37207 "s59E25H2" 0 "Tungsten-containing aldehyde ferredoxin oxidoreductase"  
"OPBO22\_00037" 37207 "s59E5H2" 0 "Tungsten-containing aldehyde ferredoxin oxidoreductase"  
"OPBO22\_00037" 37207 "s63E6H2" 0 "Tungsten-containing aldehyde ferredoxin oxidoreductase"  
"OPBO22\_00038" 37208 "s59E13H2" 0 "hypothetical protein"  
"OPBO22\_00038" 37208 "s59E25H2" 0 "hypothetical protein"  
"OPBO22\_00038" 37208 "s59E5H2" 0 "hypothetical protein"  
"OPBO22\_00038" 37208 "s63E6H2" 0 "hypothetical protein"  
"OPBO22\_00039" 37209 "s59E13H2" 0 "hypothetical protein"  
"OPBO22\_00039" 37209 "s59E25H2" 0 "hypothetical protein"  
"OPBO22\_00039" 37209 "s59E5H2" 0 "hypothetical protein"  
"OPBO22\_00039" 37209 "s63E6H2" 0 "hypothetical protein"

"OPBO22\_00043" 37213 "s59E13H2" 0 "Helix-turn-helix domain protein"  
"OPBO22\_00043" 37213 "s59E25H2" 0 "Helix-turn-helix domain protein"  
"OPBO22\_00043" 37213 "s59E5H2" 0 "Helix-turn-helix domain protein"  
"OPBO22\_00043" 37213 "s63E6H2" 0 "Helix-turn-helix domain protein"  
"OPBO22\_00044" 37214 "s59E13H2" 0 "hypothetical protein"  
"OPBO22\_00044" 37214 "s59E25H2" 0 "hypothetical protein"  
"OPBO22\_00044" 37214 "s59E5H2" 0 "hypothetical protein"  
"OPBO22\_00044" 37214 "s63E6H2" 0 "hypothetical protein"  
"OPBO22\_00045" 37215 "s59E13H2" 0 "hypothetical protein"  
"OPBO22\_00045" 37215 "s59E25H2" 0 "hypothetical protein"  
"OPBO22\_00045" 37215 "s59E5H2" 0 "hypothetical protein"  
"OPBO22\_00045" 37215 "s63E6H2" 0 "hypothetical protein"  
"OPBO22\_00046" 37216 "s59E13H2" 0 "50S ribosomal protein L16"  
"OPBO22\_00046" 37216 "s59E25H2" 0 "50S ribosomal protein L16"  
"OPBO22\_00046" 37216 "s59E5H2" 0 "50S ribosomal protein L16"  
"OPBO22\_00046" 37216 "s63E6H2" 0 "50S ribosomal protein L16"  
"OPBO22\_00047" 37217 "s59E13H2" 0 "30S ribosomal protein S3"  
"OPBO22\_00047" 37217 "s59E25H2" 0 "30S ribosomal protein S3"  
"OPBO22\_00047" 37217 "s59E5H2" 0 "30S ribosomal protein S3"  
"OPBO22\_00047" 37217 "s63E6H2" 0 "30S ribosomal protein S3"  
"OPBO22\_00048" 37218 "s59E13H2" 0 "50S ribosomal protein L22"  
"OPBO22\_00048" 37218 "s59E25H2" 0 "50S ribosomal protein L22"  
"OPBO22\_00048" 37218 "s59E5H2" 0 "50S ribosomal protein L22"  
"OPBO22\_00048" 37218 "s63E6H2" 0 "50S ribosomal protein L22"  
"OPBO22\_00049" 37219 "s59E13H2" 0 "30S ribosomal protein S19"  
"OPBO22\_00049" 37219 "s59E25H2" 0 "30S ribosomal protein S19"  
"OPBO22\_00049" 37219 "s59E5H2" 0 "30S ribosomal protein S19"  
"OPBO22\_00049" 37219 "s63E6H2" 0 "30S ribosomal protein S19"  
"OPBO22\_00050" 37220 "s59E13H2" 0 "50S ribosomal protein L2"  
"OPBO22\_00050" 37220 "s59E25H2" 0 "50S ribosomal protein L2"  
"OPBO22\_00050" 37220 "s59E5H2" 0 "50S ribosomal protein L2"  
"OPBO22\_00050" 37220 "s63E6H2" 0 "50S ribosomal protein L2"  
"OPBO22\_00051" 37221 "s59E13H2" 0 "50S ribosomal protein L23"  
"OPBO22\_00051" 37221 "s59E25H2" 0 "50S ribosomal protein L23"  
"OPBO22\_00051" 37221 "s59E5H2" 0 "50S ribosomal protein L23"  
"OPBO22\_00051" 37221 "s63E6H2" 0 "50S ribosomal protein L23"  
"OPBO22\_00052" 37222 "s59E13H2" 0 "50S ribosomal protein L4"  
"OPBO22\_00052" 37222 "s59E25H2" 0 "50S ribosomal protein L4"  
"OPBO22\_00052" 37222 "s59E5H2" 0 "50S ribosomal protein L4"  
"OPBO22\_00052" 37222 "s63E6H2" 0 "50S ribosomal protein L4"  
"OPBO22\_00053" 37223 "s59E13H2" 0 "50S ribosomal protein L3"  
"OPBO22\_00053" 37223 "s59E25H2" 0 "50S ribosomal protein L3"  
"OPBO22\_00053" 37223 "s59E5H2" 0 "50S ribosomal protein L3"  
"OPBO22\_00053" 37223 "s63E6H2" 0 "50S ribosomal protein L3"  
"OPBO22\_00054" 37224 "s59E13H2" 0 "30S ribosomal protein S10"  
"OPBO22\_00054" 37224 "s59E25H2" 0 "30S ribosomal protein S10"  
"OPBO22\_00054" 37224 "s59E5H2" 0 "30S ribosomal protein S10"



"OPBO22\_00054" 37224 "s63E6H2" 0 "30S ribosomal protein S10"  
"OPBO22\_00055" 37225 "s59E13H2" 0 "Elongation factor Tu"  
"OPBO22\_00055" 37225 "s59E25H2" 0 "Elongation factor Tu"  
"OPBO22\_00055" 37225 "s59E5H2" 0 "Elongation factor Tu"  
"OPBO22\_00055" 37225 "s63E6H2" 0 "Elongation factor Tu"  
"OPBO22\_00056" 37226 "s59E13H2" 0 "Elongation factor G"  
"OPBO22\_00056" 37226 "s59E25H2" 0 "Elongation factor G"  
"OPBO22\_00056" 37226 "s59E5H2" 0 "Elongation factor G"  
"OPBO22\_00056" 37226 "s63E6H2" 0 "Elongation factor G"  
"OPBO22\_00057" 37227 "s59E13H2" 0 "30S ribosomal protein S7"  
"OPBO22\_00057" 37227 "s59E25H2" 0 "30S ribosomal protein S7"  
"OPBO22\_00057" 37227 "s59E5H2" 0 "30S ribosomal protein S7"  
"OPBO22\_00057" 37227 "s63E6H2" 0 "30S ribosomal protein S7"  
"OPBO22\_00058" 37228 "s59E13H2" 0 "30S ribosomal protein S12"  
"OPBO22\_00058" 37228 "s59E25H2" 0 "30S ribosomal protein S12"  
"OPBO22\_00058" 37228 "s59E5H2" 0 "30S ribosomal protein S12"  
"OPBO22\_00058" 37228 "s63E6H2" 0 "30S ribosomal protein S12"  
"OPBO22\_00059" 37229 "s59E13H2" 0 "DNA-directed RNA polymerase subunit beta"  
"OPBO22\_00059" 37229 "s59E25H2" 0 "DNA-directed RNA polymerase subunit beta"  
"OPBO22\_00059" 37229 "s59E5H2" 0 "DNA-directed RNA polymerase subunit beta"  
"OPBO22\_00059" 37229 "s63E6H2" 0 "DNA-directed RNA polymerase subunit beta"  
"OPBO22\_00060" 37230 "s59E13H2" 0 "DNA-directed RNA polymerase subunit beta"  
"OPBO22\_00060" 37230 "s59E25H2" 0 "DNA-directed RNA polymerase subunit beta"  
"OPBO22\_00060" 37230 "s59E5H2" 0 "DNA-directed RNA polymerase subunit beta"  
"OPBO22\_00060" 37230 "s63E6H2" 0 "DNA-directed RNA polymerase subunit beta"  
"OPBO22\_00061" 37231 "s59E13H2" 0 "50S ribosomal protein L7/L12"  
"OPBO22\_00061" 37231 "s59E25H2" 0 "50S ribosomal protein L7/L12"  
"OPBO22\_00061" 37231 "s59E5H2" 0 "50S ribosomal protein L7/L12"  
"OPBO22\_00061" 37231 "s63E6H2" 0 "50S ribosomal protein L7/L12"  
"OPBO22\_00062" 37232 "s59E13H2" 0 "50S ribosomal protein L10"  
"OPBO22\_00062" 37232 "s59E25H2" 0 "50S ribosomal protein L10"  
"OPBO22\_00062" 37232 "s59E5H2" 0 "50S ribosomal protein L10"  
"OPBO22\_00062" 37232 "s63E6H2" 0 "50S ribosomal protein L10"  
"OPBO22\_00063" 37233 "s59E13H2" 0 "50S ribosomal protein L1"  
"OPBO22\_00063" 37233 "s59E25H2" 0 "50S ribosomal protein L1"  
"OPBO22\_00063" 37233 "s59E5H2" 0 "50S ribosomal protein L1"  
"OPBO22\_00063" 37233 "s63E6H2" 0 "50S ribosomal protein L1"  
"OPBO22\_00064" 37234 "s59E13H2" 0 "50S ribosomal protein L11"  
"OPBO22\_00064" 37234 "s59E25H2" 0 "50S ribosomal protein L11"  
"OPBO22\_00064" 37234 "s59E5H2" 0 "50S ribosomal protein L11"  
"OPBO22\_00064" 37234 "s63E6H2" 0 "50S ribosomal protein L11"  
"OPBO22\_00065" 37235 "s59E13H2" 0 "hypothetical protein"  
"OPBO22\_00065" 37235 "s59E25H2" 0 "hypothetical protein"  
"OPBO22\_00065" 37235 "s59E5H2" 0 "hypothetical protein"  
"OPBO22\_00065" 37235 "s63E6H2" 0 "hypothetical protein"  
"OPBO22\_00066" 37236 "s59E13H2" 0 "preprotein translocase subunit SecE"  
"OPBO22\_00066" 37236 "s59E25H2" 0 "preprotein translocase subunit SecE"

"OPBO22\_00066" 37236 "s59E5H2" 0 "preprotein translocase subunit SecE"  
"OPBO22\_00066" 37236 "s63E6H2" 0 "preprotein translocase subunit SecE"  
"OPBO22\_00068" 37238 "s59E13H2" 0 "50S ribosomal protein L33"  
"OPBO22\_00068" 37238 "s59E25H2" 0 "50S ribosomal protein L33"  
"OPBO22\_00068" 37238 "s59E5H2" 0 "50S ribosomal protein L33"  
"OPBO22\_00068" 37238 "s63E6H2" 0 "50S ribosomal protein L33"  
"OPBO22\_00074" 37244 "s59E13H2" 0 "RNA polymerase sigma-H factor"  
"OPBO22\_00074" 37244 "s59E25H2" 0 "RNA polymerase sigma-H factor"  
"OPBO22\_00074" 37244 "s59E5H2" 0 "RNA polymerase sigma-H factor"  
"OPBO22\_00074" 37244 "s63E6H2" 0 "RNA polymerase sigma-H factor"  
"OPBO22\_00075" 37245 "s59E13H2" 0 "YacP-like NYN domain protein"  
"OPBO22\_00075" 37245 "s59E25H2" 0 "YacP-like NYN domain protein"  
"OPBO22\_00075" 37245 "s59E5H2" 0 "YacP-like NYN domain protein"  
"OPBO22\_00075" 37245 "s63E6H2" 0 "YacP-like NYN domain protein"  
"OPBO22\_00076" 37246 "s59E13H2" 0 "Putative TrmH family tRNA/rRNA methyltransferase"  
"OPBO22\_00076" 37246 "s59E25H2" 0 "Putative TrmH family tRNA/rRNA methyltransferase"  
"OPBO22\_00076" 37246 "s59E5H2" 0 "Putative TrmH family tRNA/rRNA methyltransferase"  
"OPBO22\_00076" 37246 "s63E6H2" 0 "Putative TrmH family tRNA/rRNA methyltransferase"  
"OPBO22\_00077" 37247 "s59E13H2" 0 "Cysteine--tRNA ligase"  
"OPBO22\_00077" 37247 "s59E25H2" 0 "Cysteine--tRNA ligase"  
"OPBO22\_00077" 37247 "s59E5H2" 0 "Cysteine--tRNA ligase"  
"OPBO22\_00077" 37247 "s63E6H2" 0 "Cysteine--tRNA ligase"  
"OPBO22\_00078" 37248 "s59E13H2" 0 "2-C-methyl-D-erythritol 2,4-cyclodiphosphate synthase"  
"OPBO22\_00078" 37248 "s59E25H2" 0 "2-C-methyl-D-erythritol 2,4-cyclodiphosphate synthase"  
"OPBO22\_00078" 37248 "s59E5H2" 0 "2-C-methyl-D-erythritol 2,4-cyclodiphosphate synthase"  
"OPBO22\_00078" 37248 "s63E6H2" 0 "2-C-methyl-D-erythritol 2,4-cyclodiphosphate synthase"  
"OPBO22\_00079" 37249 "s59E13H2" 0 "2-C-methyl-D-erythritol 4-phosphate cytidylyltransferase"  
"OPBO22\_00079" 37249 "s59E25H2" 0 "2-C-methyl-D-erythritol 4-phosphate cytidylyltransferase"  
"OPBO22\_00079" 37249 "s59E5H2" 0 "2-C-methyl-D-erythritol 4-phosphate cytidylyltransferase"  
"OPBO22\_00079" 37249 "s63E6H2" 0 "2-C-methyl-D-erythritol 4-phosphate cytidylyltransferase"  
"OPBO22\_00080" 37250 "s59E13H2" 0 "putative PIN and TRAM-domain containing protein precursor"  
"OPBO22\_00080" 37250 "s59E25H2" 0 "putative PIN and TRAM-domain containing protein precursor"  
"OPBO22\_00080" 37250 "s59E5H2" 0 "putative PIN and TRAM-domain containing protein precursor"  
"OPBO22\_00080" 37250 "s63E6H2" 0 "putative PIN and TRAM-domain containing protein precursor"  
"OPBO22\_00082" 37252 "s59E13H2" 0 "hypothetical protein"  
"OPBO22\_00082" 37252 "s59E25H2" 0 "hypothetical protein"  
"OPBO22\_00082" 37252 "s59E5H2" 0 "hypothetical protein"  
"OPBO22\_00082" 37252 "s63E6H2" 0 "hypothetical protein"  
"OPBO22\_00083" 37253 "s59E13H2" 0 "Leucine dehydrogenase"  
"OPBO22\_00083" 37253 "s59E25H2" 0 "Leucine dehydrogenase"  
"OPBO22\_00083" 37253 "s59E5H2" 0 "Leucine dehydrogenase"  
"OPBO22\_00083" 37253 "s63E6H2" 0 "Leucine dehydrogenase"  
"OPBO22\_00084" 37254 "s59E13H2" 0 "Inner membrane ABC transporter permease protein YcjP"  
"OPBO22\_00084" 37254 "s59E25H2" 0 "Inner membrane ABC transporter permease protein YcjP"  
"OPBO22\_00084" 37254 "s59E5H2" 0.01044756 "Inner membrane ABC transporter permease protein YcjP"  
"OPBO22\_00084" 37254 "s63E6H2" 1.014735 "Inner membrane ABC transporter permease protein YcjP"  
"OPBO22\_00085" 37255 "s59E13H2" 0.001625562 "Trehalose/maltose import ATP-binding protein Malk"

"OPBO22\_00085" 37255 "s59E25H2" 0 "Trehalose/maltose import ATP-binding protein Malk"  
"OPBO22\_00085" 37255 "s59E5H2" 0.01550228 "Trehalose/maltose import ATP-binding protein Malk"  
"OPBO22\_00085" 37255 "s63E6H2" 0.9112198 "Trehalose/maltose import ATP-binding protein Malk"  
"OPBO22\_00086" 37256 "s59E13H2" 0 "Ribose transport system permease protein RbsC"  
"OPBO22\_00086" 37256 "s59E25H2" 0 "Ribose transport system permease protein RbsC"  
"OPBO22\_00086" 37256 "s59E5H2" 0 "Ribose transport system permease protein RbsC"  
"OPBO22\_00086" 37256 "s63E6H2" 1.021079 "Ribose transport system permease protein RbsC"  
"OPBO22\_00087" 37257 "s59E13H2" 0.006226732 "D-ribose-binding periplasmic protein precursor"  
"OPBO22\_00087" 37257 "s59E25H2" 0 "D-ribose-binding periplasmic protein precursor"  
"OPBO22\_00087" 37257 "s59E5H2" 0 "D-ribose-binding periplasmic protein precursor"  
"OPBO22\_00087" 37257 "s63E6H2" 1.041958 "D-ribose-binding periplasmic protein precursor"  
"OPBO22\_00088" 37258 "s59E13H2" 0.001865064 "Ribose transport system permease protein RbsC"  
"OPBO22\_00088" 37258 "s59E25H2" 0.232387 "Ribose transport system permease protein RbsC"  
"OPBO22\_00088" 37258 "s59E5H2" 0 "Ribose transport system permease protein RbsC"  
"OPBO22\_00088" 37258 "s63E6H2" 0.01966979 "Ribose transport system permease protein RbsC"  
"OPBO22\_00089" 37259 "s59E13H2" 0.006353666 "Ribose import ATP-binding protein RbsA"  
"OPBO22\_00089" 37259 "s59E25H2" 0 "Ribose import ATP-binding protein RbsA"  
"OPBO22\_00089" 37259 "s59E5H2" 0 "Ribose import ATP-binding protein RbsA"  
"OPBO22\_00089" 37259 "s63E6H2" 0.02950014 "Ribose import ATP-binding protein RbsA"  
"OPBO22\_00090" 37260 "s59E13H2" 0.002126291 "1,3-propanediol dehydrogenase"  
"OPBO22\_00090" 37260 "s59E25H2" 0 "1,3-propanediol dehydrogenase"  
"OPBO22\_00090" 37260 "s59E5H2" 0 "1,3-propanediol dehydrogenase"  
"OPBO22\_00090" 37260 "s63E6H2" 0.02228564 "1,3-propanediol dehydrogenase"  
"OPBO22\_00091" 37261 "s59E13H2" 0.008667027 "N-acetylglucosamine-6-phosphate deacetylase"  
"OPBO22\_00091" 37261 "s59E25H2" 0 "N-acetylglucosamine-6-phosphate deacetylase"  
"OPBO22\_00091" 37261 "s59E5H2" 0.02925658 "N-acetylglucosamine-6-phosphate deacetylase"  
"OPBO22\_00091" 37261 "s63E6H2" 0.02297294 "N-acetylglucosamine-6-phosphate deacetylase"  
"OPBO22\_00092" 37262 "s59E13H2" 0.01541711 "Glucosamine-6-phosphate deaminase"  
"OPBO22\_00092" 37262 "s59E25H2" 0 "Glucosamine-6-phosphate deaminase"  
"OPBO22\_00092" 37262 "s59E5H2" 0.02689792 "Glucosamine-6-phosphate deaminase"  
"OPBO22\_00092" 37262 "s63E6H2" 0.02208222 "Glucosamine-6-phosphate deaminase"  
"OPBO22\_00093" 37263 "s59E13H2" 0.006036663 "Xylulose kinase"  
"OPBO22\_00093" 37263 "s59E25H2" 0 "Xylulose kinase"  
"OPBO22\_00093" 37263 "s59E5H2" 0.02481186 "Xylulose kinase"  
"OPBO22\_00093" 37263 "s63E6H2" 0.001243865 "Xylulose kinase"  
"OPBO22\_00094" 37264 "s59E13H2" 0.005241667 "Neutral/alkaline non-lysosomal ceramidase"  
"OPBO22\_00094" 37264 "s59E25H2" 0 "Neutral/alkaline non-lysosomal ceramidase"  
"OPBO22\_00094" 37264 "s59E5H2" 0.02232636 "Neutral/alkaline non-lysosomal ceramidase"  
"OPBO22\_00094" 37264 "s63E6H2" 0 "Neutral/alkaline non-lysosomal ceramidase"  
"OPBO22\_00095" 37265 "s59E13H2" 0 "hypothetical protein"  
"OPBO22\_00095" 37265 "s59E25H2" 0 "hypothetical protein"  
"OPBO22\_00095" 37265 "s59E5H2" 0 "hypothetical protein"  
"OPBO22\_00095" 37265 "s63E6H2" 0 "hypothetical protein"  
"OPBO22\_00096" 37266 "s59E13H2" 0 "Triosephosphate isomerase"  
"OPBO22\_00096" 37266 "s59E25H2" 0 "Triosephosphate isomerase"  
"OPBO22\_00096" 37266 "s59E5H2" 0 "Triosephosphate isomerase"  
"OPBO22\_00096" 37266 "s63E6H2" 0 "Triosephosphate isomerase"

"OPBO22\_00097" 37267 "s59E13H2" 0 "hypothetical protein"  
"OPBO22\_00097" 37267 "s59E25H2" 0 "hypothetical protein"  
"OPBO22\_00097" 37267 "s59E5H2" 0 "hypothetical protein"  
"OPBO22\_00097" 37267 "s63E6H2" 0 "hypothetical protein"  
"OPBO22\_00098" 37268 "s59E13H2" 0 "Acetoin:2,6-dichlorophenolindophenol oxidoreductase subunit alpha"  
"OPBO22\_00098" 37268 "s59E25H2" 0 "Acetoin:2,6-dichlorophenolindophenol oxidoreductase subunit alpha"  
"OPBO22\_00098" 37268 "s59E5H2" 0 "Acetoin:2,6-dichlorophenolindophenol oxidoreductase subunit alpha"  
"OPBO22\_00098" 37268 "s63E6H2" 0 "Acetoin:2,6-dichlorophenolindophenol oxidoreductase subunit alpha"  
"OPBO22\_00099" 37269 "s59E13H2" 0 "putative isochorismatase family protein"  
"OPBO22\_00099" 37269 "s59E25H2" 0 "putative isochorismatase family protein"  
"OPBO22\_00099" 37269 "s59E5H2" 0 "putative isochorismatase family protein"  
"OPBO22\_00099" 37269 "s63E6H2" 0 "putative isochorismatase family protein"  
"OPBO22\_00100" 37270 "s59E13H2" 0 "Replication-associated recombination protein A"  
"OPBO22\_00100" 37270 "s59E25H2" 0 "Replication-associated recombination protein A"  
"OPBO22\_00100" 37270 "s59E5H2" 0 "Replication-associated recombination protein A"  
"OPBO22\_00100" 37270 "s63E6H2" 0 "Replication-associated recombination protein A"  
"OPBO22\_00101" 37271 "s59E13H2" 0 "hypothetical protein"  
"OPBO22\_00101" 37271 "s59E25H2" 0 "hypothetical protein"  
"OPBO22\_00101" 37271 "s59E5H2" 0 "hypothetical protein"  
"OPBO22\_00101" 37271 "s63E6H2" 0 "hypothetical protein"  
"OPBO22\_00102" 37272 "s59E13H2" 0 "hypothetical protein"  
"OPBO22\_00102" 37272 "s59E25H2" 0 "hypothetical protein"  
"OPBO22\_00102" 37272 "s59E5H2" 0 "hypothetical protein"  
"OPBO22\_00102" 37272 "s63E6H2" 0 "hypothetical protein"  
"OPBO22\_00103" 37273 "s59E13H2" 0 "Hydrogenase expression/formation protein HypE"  
"OPBO22\_00103" 37273 "s59E25H2" 0 "Hydrogenase expression/formation protein HypE"  
"OPBO22\_00103" 37273 "s59E5H2" 0 "Hydrogenase expression/formation protein HypE"  
"OPBO22\_00103" 37273 "s63E6H2" 0 "Hydrogenase expression/formation protein HypE"  
"OPBO22\_00104" 37274 "s59E13H2" 0 "hypothetical protein"  
"OPBO22\_00104" 37274 "s59E25H2" 0 "hypothetical protein"  
"OPBO22\_00104" 37274 "s59E5H2" 0 "hypothetical protein"  
"OPBO22\_00104" 37274 "s63E6H2" 0 "hypothetical protein"  
"OPBO22\_00105" 37275 "s59E13H2" 0 "Hydrogenase isoenzymes formation protein HypD"  
"OPBO22\_00105" 37275 "s59E25H2" 0 "Hydrogenase isoenzymes formation protein HypD"  
"OPBO22\_00105" 37275 "s59E5H2" 0 "Hydrogenase isoenzymes formation protein HypD"  
"OPBO22\_00105" 37275 "s63E6H2" 0 "Hydrogenase isoenzymes formation protein HypD"  
"OPBO22\_00106" 37276 "s59E13H2" 0 "Hydrogenase isoenzymes formation protein HypC"  
"OPBO22\_00106" 37276 "s59E25H2" 0 "Hydrogenase isoenzymes formation protein HypC"  
"OPBO22\_00106" 37276 "s59E5H2" 0 "Hydrogenase isoenzymes formation protein HypC"  
"OPBO22\_00106" 37276 "s63E6H2" 0 "Hydrogenase isoenzymes formation protein HypC"  
"OPBO22\_00107" 37277 "s59E13H2" 0 "hypothetical protein"  
"OPBO22\_00107" 37277 "s59E25H2" 0 "hypothetical protein"  
"OPBO22\_00107" 37277 "s59E5H2" 0 "hypothetical protein"  
"OPBO22\_00107" 37277 "s63E6H2" 0 "hypothetical protein"  
"OPBO22\_00108" 37278 "s59E13H2" 0 "Integrase core domain protein"  
"OPBO22\_00108" 37278 "s59E25H2" 0 "Integrase core domain protein"  
"OPBO22\_00108" 37278 "s59E5H2" 0 "Integrase core domain protein"

"OPBO22\_00108" 37278 "s63E6H2" 0 "Integrase core domain protein"  
"OPBO22\_00109" 37279 "s59E13H2" 0 "Transposase"  
"OPBO22\_00109" 37279 "s59E25H2" 0 "Transposase"  
"OPBO22\_00109" 37279 "s59E5H2" 0 "Transposase"  
"OPBO22\_00109" 37279 "s63E6H2" 0 "Transposase"  
"OPBO22\_00110" 37280 "s59E13H2" 0 "Carbamoyltransferase HypF"  
"OPBO22\_00110" 37280 "s59E25H2" 0 "Carbamoyltransferase HypF"  
"OPBO22\_00110" 37280 "s59E5H2" 0 "Carbamoyltransferase HypF"  
"OPBO22\_00110" 37280 "s63E6H2" 0 "Carbamoyltransferase HypF"  
"OPBO22\_00111" 37281 "s59E13H2" 0 "Hydrogenase isoenzymes nickel incorporation protein HypB"  
"OPBO22\_00111" 37281 "s59E25H2" 0 "Hydrogenase isoenzymes nickel incorporation protein HypB"  
"OPBO22\_00111" 37281 "s59E5H2" 0 "Hydrogenase isoenzymes nickel incorporation protein HypB"  
"OPBO22\_00111" 37281 "s63E6H2" 0 "Hydrogenase isoenzymes nickel incorporation protein HypB"  
"OPBO22\_00112" 37282 "s59E13H2" 0 "putative hydrogenase nickel incorporation protein HypA"  
"OPBO22\_00112" 37282 "s59E25H2" 0 "putative hydrogenase nickel incorporation protein HypA"  
"OPBO22\_00112" 37282 "s59E5H2" 0 "putative hydrogenase nickel incorporation protein HypA"  
"OPBO22\_00112" 37282 "s63E6H2" 0 "putative hydrogenase nickel incorporation protein HypA"  
"OPBO22\_00113" 37283 "s59E13H2" 0 "Amino-acid acetyltransferase"  
"OPBO22\_00113" 37283 "s59E25H2" 0 "Amino-acid acetyltransferase"  
"OPBO22\_00113" 37283 "s59E5H2" 0 "Amino-acid acetyltransferase"  
"OPBO22\_00113" 37283 "s63E6H2" 0 "Amino-acid acetyltransferase"  
"OPBO22\_00114" 37284 "s59E13H2" 0 "Demethylmenaquinone methyltransferase"  
"OPBO22\_00114" 37284 "s59E25H2" 0 "Demethylmenaquinone methyltransferase"  
"OPBO22\_00114" 37284 "s59E5H2" 0 "Demethylmenaquinone methyltransferase"  
"OPBO22\_00114" 37284 "s63E6H2" 0 "Demethylmenaquinone methyltransferase"  
"OPBO22\_00115" 37285 "s59E13H2" 0 "Ubiquinone/menaquinone biosynthesis C-methyltransferase UbiE"  
"OPBO22\_00115" 37285 "s59E25H2" 0 "Ubiquinone/menaquinone biosynthesis C-methyltransferase UbiE"  
"OPBO22\_00115" 37285 "s59E5H2" 0 "Ubiquinone/menaquinone biosynthesis C-methyltransferase UbiE"  
"OPBO22\_00115" 37285 "s63E6H2" 0 "Ubiquinone/menaquinone biosynthesis C-methyltransferase UbiE"  
"OPBO22\_00116" 37286 "s59E13H2" 0 "hypothetical protein"  
"OPBO22\_00116" 37286 "s59E25H2" 0 "hypothetical protein"  
"OPBO22\_00116" 37286 "s59E5H2" 0 "hypothetical protein"  
"OPBO22\_00116" 37286 "s63E6H2" 0 "hypothetical protein"  
"OPBO22\_00117" 37287 "s59E13H2" 0 "Divalent-cation tolerance protein CutA"  
"OPBO22\_00117" 37287 "s59E25H2" 0 "Divalent-cation tolerance protein CutA"  
"OPBO22\_00117" 37287 "s59E5H2" 0 "Divalent-cation tolerance protein CutA"  
"OPBO22\_00117" 37287 "s63E6H2" 0 "Divalent-cation tolerance protein CutA"  
"OPBO22\_00118" 37288 "s59E13H2" 0 "Capsule biosynthesis protein CapA"  
"OPBO22\_00118" 37288 "s59E25H2" 0 "Capsule biosynthesis protein CapA"  
"OPBO22\_00118" 37288 "s59E5H2" 0 "Capsule biosynthesis protein CapA"  
"OPBO22\_00118" 37288 "s63E6H2" 0 "Capsule biosynthesis protein CapA"  
"OPBO22\_00120" 37290 "s59E13H2" 0 "Putative HMP/thiamine permease protein YkoE"  
"OPBO22\_00120" 37290 "s59E25H2" 0 "Putative HMP/thiamine permease protein YkoE"  
"OPBO22\_00120" 37290 "s59E5H2" 0 "Putative HMP/thiamine permease protein YkoE"  
"OPBO22\_00120" 37290 "s63E6H2" 0 "Putative HMP/thiamine permease protein YkoE"  
"OPBO22\_00121" 37291 "s59E13H2" 0 "Putative HMP/thiamine import ATP-binding protein YkoD"  
"OPBO22\_00121" 37291 "s59E25H2" 0 "Putative HMP/thiamine import ATP-binding protein YkoD"

"OPBO22\_00121" 37291 "s59E5H2" 0 "Putative HMP/thiamine import ATP-binding protein YkoD"  
"OPBO22\_00121" 37291 "s63E6H2" 0 "Putative HMP/thiamine import ATP-binding protein YkoD"  
"OPBO22\_00122" 37292 "s59E13H2" 0 "Putative HMP/thiamine permease protein YkoC"  
"OPBO22\_00122" 37292 "s59E25H2" 0 "Putative HMP/thiamine permease protein YkoC"  
"OPBO22\_00122" 37292 "s59E5H2" 0 "Putative HMP/thiamine permease protein YkoC"  
"OPBO22\_00122" 37292 "s63E6H2" 0 "Putative HMP/thiamine permease protein YkoC"  
"OPBO22\_00123" 37293 "s59E13H2" 0 "FeoC like transcriptional regulator"  
"OPBO22\_00123" 37293 "s59E25H2" 0 "FeoC like transcriptional regulator"  
"OPBO22\_00123" 37293 "s59E5H2" 0 "FeoC like transcriptional regulator"  
"OPBO22\_00123" 37293 "s63E6H2" 0 "FeoC like transcriptional regulator"  
"OPBO22\_00124" 37294 "s59E13H2" 0 "hypothetical protein"  
"OPBO22\_00124" 37294 "s59E25H2" 0 "hypothetical protein"  
"OPBO22\_00124" 37294 "s59E5H2" 0 "hypothetical protein"  
"OPBO22\_00124" 37294 "s63E6H2" 0 "hypothetical protein"  
"OPBO22\_00125" 37295 "s59E13H2" 0 "FeoA domain protein"  
"OPBO22\_00125" 37295 "s59E25H2" 0 "FeoA domain protein"  
"OPBO22\_00125" 37295 "s59E5H2" 0 "FeoA domain protein"  
"OPBO22\_00125" 37295 "s63E6H2" 0 "FeoA domain protein"  
"OPBO22\_00126" 37296 "s59E13H2" 0 "Transcriptional regulator MntR"  
"OPBO22\_00126" 37296 "s59E25H2" 0 "Transcriptional regulator MntR"  
"OPBO22\_00126" 37296 "s59E5H2" 0 "Transcriptional regulator MntR"  
"OPBO22\_00126" 37296 "s63E6H2" 0 "Transcriptional regulator MntR"  
"OPBO22\_00127" 37297 "s59E13H2" 0 "Modulator of FtsH protease HflC"  
"OPBO22\_00127" 37297 "s59E25H2" 0 "Modulator of FtsH protease HflC"  
"OPBO22\_00127" 37297 "s59E5H2" 0 "Modulator of FtsH protease HflC"  
"OPBO22\_00127" 37297 "s63E6H2" 0 "Modulator of FtsH protease HflC"  
"OPBO22\_00128" 37298 "s59E13H2" 0 "Transketolase 2"  
"OPBO22\_00128" 37298 "s59E25H2" 0 "Transketolase 2"  
"OPBO22\_00128" 37298 "s59E5H2" 0 "Transketolase 2"  
"OPBO22\_00128" 37298 "s63E6H2" 0 "Transketolase 2"  
"OPBO22\_00129" 37299 "s59E13H2" 0 "hypothetical protein"  
"OPBO22\_00129" 37299 "s59E25H2" 0 "hypothetical protein"  
"OPBO22\_00129" 37299 "s59E5H2" 0 "hypothetical protein"  
"OPBO22\_00129" 37299 "s63E6H2" 0 "hypothetical protein"  
"OPBO22\_00130" 37300 "s59E13H2" 0 "hypothetical protein"  
"OPBO22\_00130" 37300 "s59E25H2" 0 "hypothetical protein"  
"OPBO22\_00130" 37300 "s59E5H2" 0 "hypothetical protein"  
"OPBO22\_00130" 37300 "s63E6H2" 0 "hypothetical protein"  
"OPBO22\_00131" 37301 "s59E13H2" 0 "Formate dehydrogenase subunit alpha"  
"OPBO22\_00131" 37301 "s59E25H2" 0 "Formate dehydrogenase subunit alpha"  
"OPBO22\_00131" 37301 "s59E5H2" 0 "Formate dehydrogenase subunit alpha"  
"OPBO22\_00131" 37301 "s63E6H2" 0 "Formate dehydrogenase subunit alpha"  
"OPBO22\_00132" 37302 "s59E13H2" 0 "NADP-reducing hydrogenase subunit HndC"  
"OPBO22\_00132" 37302 "s59E25H2" 0 "NADP-reducing hydrogenase subunit HndC"  
"OPBO22\_00132" 37302 "s59E5H2" 0 "NADP-reducing hydrogenase subunit HndC"  
"OPBO22\_00132" 37302 "s63E6H2" 0 "NADP-reducing hydrogenase subunit HndC"  
"OPBO22\_00133" 37303 "s59E13H2" 0 "NADP-reducing hydrogenase subunit HndA"

"OPBO22\_00133" 37303 "s59E25H2" 0 "NADP-reducing hydrogenase subunit HndA"  
"OPBO22\_00133" 37303 "s59E5H2" 0 "NADP-reducing hydrogenase subunit HndA"  
"OPBO22\_00133" 37303 "s63E6H2" 0 "NADP-reducing hydrogenase subunit HndA"  
"OPBO22\_00134" 37304 "s59E13H2" 0 "putative molybdenum cofactor guanylyltransferase"  
"OPBO22\_00134" 37304 "s59E25H2" 0 "putative molybdenum cofactor guanylyltransferase"  
"OPBO22\_00134" 37304 "s59E5H2" 0 "putative molybdenum cofactor guanylyltransferase"  
"OPBO22\_00134" 37304 "s63E6H2" 0 "putative molybdenum cofactor guanylyltransferase"  
"OPBO22\_00135" 37305 "s59E13H2" 0 "MOSC domain protein"  
"OPBO22\_00135" 37305 "s59E25H2" 0 "MOSC domain protein"  
"OPBO22\_00135" 37305 "s59E5H2" 0 "MOSC domain protein"  
"OPBO22\_00135" 37305 "s63E6H2" 0 "MOSC domain protein"  
"OPBO22\_00136" 37306 "s59E13H2" 0 "NAD-reducing hydrogenase HoxS subunit beta"  
"OPBO22\_00136" 37306 "s59E25H2" 0 "NAD-reducing hydrogenase HoxS subunit beta"  
"OPBO22\_00136" 37306 "s59E5H2" 0 "NAD-reducing hydrogenase HoxS subunit beta"  
"OPBO22\_00136" 37306 "s63E6H2" 0 "NAD-reducing hydrogenase HoxS subunit beta"  
"OPBO22\_00137" 37307 "s59E13H2" 0 "NAD-reducing hydrogenase HoxS subunit delta"  
"OPBO22\_00137" 37307 "s59E25H2" 0 "NAD-reducing hydrogenase HoxS subunit delta"  
"OPBO22\_00137" 37307 "s59E5H2" 0 "NAD-reducing hydrogenase HoxS subunit delta"  
"OPBO22\_00137" 37307 "s63E6H2" 0 "NAD-reducing hydrogenase HoxS subunit delta"  
"OPBO22\_00138" 37308 "s59E13H2" 0 "NADH-quinone oxidoreductase subunit 3"  
"OPBO22\_00138" 37308 "s59E25H2" 0 "NADH-quinone oxidoreductase subunit 3"  
"OPBO22\_00138" 37308 "s59E5H2" 0 "NADH-quinone oxidoreductase subunit 3"  
"OPBO22\_00138" 37308 "s63E6H2" 0 "NADH-quinone oxidoreductase subunit 3"  
"OPBO22\_00139" 37309 "s59E13H2" 0 "NADP-reducing hydrogenase subunit HndC"  
"OPBO22\_00139" 37309 "s59E25H2" 0 "NADP-reducing hydrogenase subunit HndC"  
"OPBO22\_00139" 37309 "s59E5H2" 0 "NADP-reducing hydrogenase subunit HndC"  
"OPBO22\_00139" 37309 "s63E6H2" 0 "NADP-reducing hydrogenase subunit HndC"  
"OPBO22\_00140" 37310 "s59E13H2" 0 "UvrABC system protein A"  
"OPBO22\_00140" 37310 "s59E25H2" 0 "UvrABC system protein A"  
"OPBO22\_00140" 37310 "s59E5H2" 0 "UvrABC system protein A"  
"OPBO22\_00140" 37310 "s63E6H2" 0 "UvrABC system protein A"  
"OPBO22\_00141" 37311 "s59E13H2" 0 "UvrABC system protein B"  
"OPBO22\_00141" 37311 "s59E25H2" 0 "UvrABC system protein B"  
"OPBO22\_00141" 37311 "s59E5H2" 0 "UvrABC system protein B"  
"OPBO22\_00141" 37311 "s63E6H2" 0 "UvrABC system protein B"  
"OPBO22\_00142" 37312 "s59E13H2" 0 "Dephospho-CoA kinase"  
"OPBO22\_00142" 37312 "s59E25H2" 0 "Dephospho-CoA kinase"  
"OPBO22\_00142" 37312 "s59E5H2" 0 "Dephospho-CoA kinase"  
"OPBO22\_00142" 37312 "s63E6H2" 0 "Dephospho-CoA kinase"  
"OPBO22\_00143" 37313 "s59E13H2" 0 "ABC transporter permease YtrF precursor"  
"OPBO22\_00143" 37313 "s59E25H2" 0 "ABC transporter permease YtrF precursor"  
"OPBO22\_00143" 37313 "s59E5H2" 0 "ABC transporter permease YtrF precursor"  
"OPBO22\_00143" 37313 "s63E6H2" 0 "ABC transporter permease YtrF precursor"  
"OPBO22\_00144" 37314 "s59E13H2" 0 "NADH dehydrogenase"  
"OPBO22\_00144" 37314 "s59E25H2" 0 "NADH dehydrogenase"  
"OPBO22\_00144" 37314 "s59E5H2" 0 "NADH dehydrogenase"  
"OPBO22\_00144" 37314 "s63E6H2" 0 "NADH dehydrogenase"

"OPBO22\_00145" 37315 "s59E13H2" 0 "Alkyl hydroperoxide reductase subunit F"  
"OPBO22\_00145" 37315 "s59E25H2" 0 "Alkyl hydroperoxide reductase subunit F"  
"OPBO22\_00145" 37315 "s59E5H2" 0 "Alkyl hydroperoxide reductase subunit F"  
"OPBO22\_00145" 37315 "s63E6H2" 0 "Alkyl hydroperoxide reductase subunit F"  
"OPBO22\_00146" 37316 "s59E13H2" 0 "Archaeal Lon protease"  
"OPBO22\_00146" 37316 "s59E25H2" 0 "Archaeal Lon protease"  
"OPBO22\_00146" 37316 "s59E5H2" 0 "Archaeal Lon protease"  
"OPBO22\_00146" 37316 "s63E6H2" 0 "Archaeal Lon protease"  
"OPBO22\_00147" 37317 "s59E13H2" 0 "Rubrerythrin"  
"OPBO22\_00147" 37317 "s59E25H2" 0 "Rubrerythrin"  
"OPBO22\_00147" 37317 "s59E5H2" 0 "Rubrerythrin"  
"OPBO22\_00147" 37317 "s63E6H2" 0 "Rubrerythrin"  
"OPBO22\_00148" 37318 "s59E13H2" 0 "hypothetical protein"  
"OPBO22\_00148" 37318 "s59E25H2" 0 "hypothetical protein"  
"OPBO22\_00148" 37318 "s59E5H2" 0 "hypothetical protein"  
"OPBO22\_00148" 37318 "s63E6H2" 0 "hypothetical protein"  
"OPBO22\_00149" 37319 "s59E13H2" 0 "hypothetical protein"  
"OPBO22\_00149" 37319 "s59E25H2" 0 "hypothetical protein"  
"OPBO22\_00149" 37319 "s59E5H2" 0 "hypothetical protein"  
"OPBO22\_00149" 37319 "s63E6H2" 0 "hypothetical protein"  
"OPBO22\_00150" 37320 "s59E13H2" 0 "3-aminobutyryl-CoA ammonia lyase"  
"OPBO22\_00150" 37320 "s59E25H2" 0 "3-aminobutyryl-CoA ammonia lyase"  
"OPBO22\_00150" 37320 "s59E5H2" 0 "3-aminobutyryl-CoA ammonia lyase"  
"OPBO22\_00150" 37320 "s63E6H2" 0 "3-aminobutyryl-CoA ammonia lyase"  
"OPBO22\_00151" 37321 "s59E13H2" 0 "3-keto-5-aminohexanoate cleavage enzyme"  
"OPBO22\_00151" 37321 "s59E25H2" 0 "3-keto-5-aminohexanoate cleavage enzyme"  
"OPBO22\_00151" 37321 "s59E5H2" 0 "3-keto-5-aminohexanoate cleavage enzyme"  
"OPBO22\_00151" 37321 "s63E6H2" 0 "3-keto-5-aminohexanoate cleavage enzyme"  
"OPBO22\_00152" 37322 "s59E13H2" 0 "L-erythro-3,5-diaminohexanoate dehydrogenase"  
"OPBO22\_00152" 37322 "s59E25H2" 0 "L-erythro-3,5-diaminohexanoate dehydrogenase"  
"OPBO22\_00152" 37322 "s59E5H2" 0 "L-erythro-3,5-diaminohexanoate dehydrogenase"  
"OPBO22\_00152" 37322 "s63E6H2" 0 "L-erythro-3,5-diaminohexanoate dehydrogenase"  
"OPBO22\_00153" 37323 "s59E13H2" 0 "L-lysine 2,3-aminomutase"  
"OPBO22\_00153" 37323 "s59E25H2" 0 "L-lysine 2,3-aminomutase"  
"OPBO22\_00153" 37323 "s59E5H2" 0 "L-lysine 2,3-aminomutase"  
"OPBO22\_00153" 37323 "s63E6H2" 0 "L-lysine 2,3-aminomutase"  
"OPBO22\_00154" 37324 "s59E13H2" 0 "L-lysine 2,3-aminomutase"  
"OPBO22\_00154" 37324 "s59E25H2" 0 "L-lysine 2,3-aminomutase"  
"OPBO22\_00154" 37324 "s59E5H2" 0 "L-lysine 2,3-aminomutase"  
"OPBO22\_00154" 37324 "s63E6H2" 0 "L-lysine 2,3-aminomutase"  
"OPBO22\_00155" 37325 "s59E13H2" 0 "Ketoisovalerate oxidoreductase subunit VorA"  
"OPBO22\_00155" 37325 "s59E25H2" 0 "Ketoisovalerate oxidoreductase subunit VorA"  
"OPBO22\_00155" 37325 "s59E5H2" 0 "Ketoisovalerate oxidoreductase subunit VorA"  
"OPBO22\_00155" 37325 "s63E6H2" 0 "Ketoisovalerate oxidoreductase subunit VorA"  
"OPBO22\_00156" 37326 "s59E13H2" 0 "Ketoisovalerate oxidoreductase subunit VorA"  
"OPBO22\_00156" 37326 "s59E25H2" 0 "Ketoisovalerate oxidoreductase subunit VorA"  
"OPBO22\_00156" 37326 "s59E5H2" 0 "Ketoisovalerate oxidoreductase subunit VorA"



"OPBO22\_00156" 37326 "s63E6H2" 0 "Ketoisovalerate oxidoreductase subunit VorA"  
"OPBO22\_00157" 37327 "s59E13H2" 0 "Ketoisovalerate oxidoreductase subunit VorB"  
"OPBO22\_00157" 37327 "s59E25H2" 0 "Ketoisovalerate oxidoreductase subunit VorB"  
"OPBO22\_00157" 37327 "s59E5H2" 0 "Ketoisovalerate oxidoreductase subunit VorB"  
"OPBO22\_00157" 37327 "s63E6H2" 0 "Ketoisovalerate oxidoreductase subunit VorB"  
"OPBO22\_00158" 37328 "s59E13H2" 0 "2-oxoglutarate-acceptor oxidoreductase subunit OorD"  
"OPBO22\_00158" 37328 "s59E25H2" 0 "2-oxoglutarate-acceptor oxidoreductase subunit OorD"  
"OPBO22\_00158" 37328 "s59E5H2" 0 "2-oxoglutarate-acceptor oxidoreductase subunit OorD"  
"OPBO22\_00158" 37328 "s63E6H2" 0 "2-oxoglutarate-acceptor oxidoreductase subunit OorD"  
"OPBO22\_00159" 37329 "s59E13H2" 0 "Leucine dehydrogenase"  
"OPBO22\_00159" 37329 "s59E25H2" 0 "Leucine dehydrogenase"  
"OPBO22\_00159" 37329 "s59E5H2" 0 "Leucine dehydrogenase"  
"OPBO22\_00159" 37329 "s63E6H2" 0 "Leucine dehydrogenase"  
"OPBO22\_00160" 37330 "s59E13H2" 0 "Exodeoxyribonuclease 7 large subunit"  
"OPBO22\_00160" 37330 "s59E25H2" 0 "Exodeoxyribonuclease 7 large subunit"  
"OPBO22\_00160" 37330 "s59E5H2" 0 "Exodeoxyribonuclease 7 large subunit"  
"OPBO22\_00160" 37330 "s63E6H2" 0 "Exodeoxyribonuclease 7 large subunit"  
"OPBO22\_00161" 37331 "s59E13H2" 0 "Exodeoxyribonuclease 7 small subunit"  
"OPBO22\_00161" 37331 "s59E25H2" 0 "Exodeoxyribonuclease 7 small subunit"  
"OPBO22\_00161" 37331 "s59E5H2" 0 "Exodeoxyribonuclease 7 small subunit"  
"OPBO22\_00161" 37331 "s63E6H2" 0 "Exodeoxyribonuclease 7 small subunit"  
"OPBO22\_00162" 37332 "s59E13H2" 0 "cell division protein MraZ"  
"OPBO22\_00162" 37332 "s59E25H2" 0 "cell division protein MraZ"  
"OPBO22\_00162" 37332 "s59E5H2" 0 "cell division protein MraZ"  
"OPBO22\_00162" 37332 "s63E6H2" 0 "cell division protein MraZ"  
"OPBO22\_00163" 37333 "s59E13H2" 0 "Ribosomal RNA small subunit methyltransferase H"  
"OPBO22\_00163" 37333 "s59E25H2" 0 "Ribosomal RNA small subunit methyltransferase H"  
"OPBO22\_00163" 37333 "s59E5H2" 0 "Ribosomal RNA small subunit methyltransferase H"  
"OPBO22\_00163" 37333 "s63E6H2" 0 "Ribosomal RNA small subunit methyltransferase H"  
"OPBO22\_00164" 37334 "s59E13H2" 0 "Cell division protein FtsL"  
"OPBO22\_00164" 37334 "s59E25H2" 0 "Cell division protein FtsL"  
"OPBO22\_00164" 37334 "s59E5H2" 0 "Cell division protein FtsL"  
"OPBO22\_00164" 37334 "s63E6H2" 0 "Cell division protein FtsL"  
"OPBO22\_00165" 37335 "s59E13H2" 0 "Stage V sporulation protein D"  
"OPBO22\_00165" 37335 "s59E25H2" 0 "Stage V sporulation protein D"  
"OPBO22\_00165" 37335 "s59E5H2" 0 "Stage V sporulation protein D"  
"OPBO22\_00165" 37335 "s63E6H2" 0 "Stage V sporulation protein D"  
"OPBO22\_00166" 37336 "s59E13H2" 0 "Carbon-nitrogen hydrolase"  
"OPBO22\_00166" 37336 "s59E25H2" 0 "Carbon-nitrogen hydrolase"  
"OPBO22\_00166" 37336 "s59E5H2" 0 "Carbon-nitrogen hydrolase"  
"OPBO22\_00166" 37336 "s63E6H2" 0 "Carbon-nitrogen hydrolase"  
"OPBO22\_00167" 37337 "s59E13H2" 0 "hypothetical protein"  
"OPBO22\_00167" 37337 "s59E25H2" 0 "hypothetical protein"  
"OPBO22\_00167" 37337 "s59E5H2" 0 "hypothetical protein"  
"OPBO22\_00167" 37337 "s63E6H2" 0 "hypothetical protein"  
"OPBO22\_00168" 37338 "s59E13H2" 0 "colanic acid biosynthesis protein"  
"OPBO22\_00168" 37338 "s59E25H2" 0 "colanic acid biosynthesis protein"

"OPBO22\_00168" 37338 "s59E5H2" 0 "colanic acid biosynthesis protein"  
"OPBO22\_00168" 37338 "s63E6H2" 0 "colanic acid biosynthesis protein"  
"OPBO22\_00169" 37339 "s59E13H2" 0 "F(420)H(2) dehydrogenase subunit F"  
"OPBO22\_00169" 37339 "s59E25H2" 0 "F(420)H(2) dehydrogenase subunit F"  
"OPBO22\_00169" 37339 "s59E5H2" 0 "F(420)H(2) dehydrogenase subunit F"  
"OPBO22\_00169" 37339 "s63E6H2" 0 "F(420)H(2) dehydrogenase subunit F"  
"OPBO22\_00170" 37340 "s59E13H2" 0 "3 beta-hydroxysteroid dehydrogenase/Delta 5--"  
"OPBO22\_00170" 37340 "s59E25H2" 0 "3 beta-hydroxysteroid dehydrogenase/Delta 5--"  
"OPBO22\_00170" 37340 "s59E5H2" 0 "3 beta-hydroxysteroid dehydrogenase/Delta 5--"  
"OPBO22\_00170" 37340 "s63E6H2" 0 "3 beta-hydroxysteroid dehydrogenase/Delta 5--"  
"OPBO22\_00171" 37341 "s59E13H2" 0 "Mannosylfructose-phosphate synthase"  
"OPBO22\_00171" 37341 "s59E25H2" 0 "Mannosylfructose-phosphate synthase"  
"OPBO22\_00171" 37341 "s59E5H2" 0 "Mannosylfructose-phosphate synthase"  
"OPBO22\_00171" 37341 "s63E6H2" 0 "Mannosylfructose-phosphate synthase"  
"OPBO22\_00172" 37342 "s59E13H2" 0 "dTDP-L-rhamnose 4-epimerase"  
"OPBO22\_00172" 37342 "s59E25H2" 0 "dTDP-L-rhamnose 4-epimerase"  
"OPBO22\_00172" 37342 "s59E5H2" 0 "dTDP-L-rhamnose 4-epimerase"  
"OPBO22\_00172" 37342 "s63E6H2" 0 "dTDP-L-rhamnose 4-epimerase"  
"OPBO22\_00173" 37343 "s59E13H2" 0 "GDSL-like Lipase/Acylhydrolase"  
"OPBO22\_00173" 37343 "s59E25H2" 0 "GDSL-like Lipase/Acylhydrolase"  
"OPBO22\_00173" 37343 "s59E5H2" 0 "GDSL-like Lipase/Acylhydrolase"  
"OPBO22\_00173" 37343 "s63E6H2" 0 "GDSL-like Lipase/Acylhydrolase"  
"OPBO22\_00174" 37344 "s59E13H2" 0 "Peptide chain release factor subunit 1"  
"OPBO22\_00174" 37344 "s59E25H2" 0 "Peptide chain release factor subunit 1"  
"OPBO22\_00174" 37344 "s59E5H2" 0 "Peptide chain release factor subunit 1"  
"OPBO22\_00174" 37344 "s63E6H2" 0 "Peptide chain release factor subunit 1"  
"OPBO22\_00175" 37345 "s59E13H2" 0 "Glycerate kinase"  
"OPBO22\_00175" 37345 "s59E25H2" 0 "Glycerate kinase"  
"OPBO22\_00175" 37345 "s59E5H2" 0 "Glycerate kinase"  
"OPBO22\_00175" 37345 "s63E6H2" 0 "Glycerate kinase"  
"OPBO22\_00176" 37346 "s59E13H2" 0 "D-alanine--D-alanine ligase A"  
"OPBO22\_00176" 37346 "s59E25H2" 0 "D-alanine--D-alanine ligase A"  
"OPBO22\_00176" 37346 "s59E5H2" 0 "D-alanine--D-alanine ligase A"  
"OPBO22\_00176" 37346 "s63E6H2" 0 "D-alanine--D-alanine ligase A"  
"OPBO22\_00177" 37347 "s59E13H2" 0 "hypothetical protein"  
"OPBO22\_00177" 37347 "s59E25H2" 0 "hypothetical protein"  
"OPBO22\_00177" 37347 "s59E5H2" 0 "hypothetical protein"  
"OPBO22\_00177" 37347 "s63E6H2" 0 "hypothetical protein"  
"OPBO22\_00178" 37348 "s59E13H2" 0 "Long-chain-fatty-acid--CoA ligase"  
"OPBO22\_00178" 37348 "s59E25H2" 0 "Long-chain-fatty-acid--CoA ligase"  
"OPBO22\_00178" 37348 "s59E5H2" 0 "Long-chain-fatty-acid--CoA ligase"  
"OPBO22\_00178" 37348 "s63E6H2" 0 "Long-chain-fatty-acid--CoA ligase"  
"OPBO22\_00179" 37349 "s59E13H2" 0 "hypothetical protein"  
"OPBO22\_00179" 37349 "s59E25H2" 0 "hypothetical protein"  
"OPBO22\_00179" 37349 "s59E5H2" 0 "hypothetical protein"  
"OPBO22\_00179" 37349 "s63E6H2" 0 "hypothetical protein"  
"OPBO22\_00180" 37350 "s59E13H2" 0 "hypothetical protein"

"OPBO22\_00180" 37350 "s59E25H2" 0 "hypothetical protein"  
"OPBO22\_00180" 37350 "s59E5H2" 0 "hypothetical protein"  
"OPBO22\_00180" 37350 "s63E6H2" 0 "hypothetical protein"  
"OPBO22\_00185" 37355 "s59E13H2" 0 "DNA polymerase III subunit tau"  
"OPBO22\_00185" 37355 "s59E25H2" 0 "DNA polymerase III subunit tau"  
"OPBO22\_00185" 37355 "s59E5H2" 0 "DNA polymerase III subunit tau"  
"OPBO22\_00185" 37355 "s63E6H2" 0 "DNA polymerase III subunit tau"  
"OPBO22\_00186" 37356 "s59E13H2" 0 "Recombination protein RecR"  
"OPBO22\_00186" 37356 "s59E25H2" 0 "Recombination protein RecR"  
"OPBO22\_00186" 37356 "s59E5H2" 0 "Recombination protein RecR"  
"OPBO22\_00186" 37356 "s63E6H2" 0 "Recombination protein RecR"  
"OPBO22\_00188" 37358 "s59E13H2" 0 "Pyruvate synthase subunit PorC"  
"OPBO22\_00188" 37358 "s59E25H2" 0 "Pyruvate synthase subunit PorC"  
"OPBO22\_00188" 37358 "s59E5H2" 0 "Pyruvate synthase subunit PorC"  
"OPBO22\_00188" 37358 "s63E6H2" 0 "Pyruvate synthase subunit PorC"  
"OPBO22\_00189" 37359 "s59E13H2" 0 "Pyruvate synthase subunit PorD"  
"OPBO22\_00189" 37359 "s59E25H2" 0 "Pyruvate synthase subunit PorD"  
"OPBO22\_00189" 37359 "s59E5H2" 0 "Pyruvate synthase subunit PorD"  
"OPBO22\_00189" 37359 "s63E6H2" 0 "Pyruvate synthase subunit PorD"  
"OPBO22\_00190" 37360 "s59E13H2" 0 "Pyruvate synthase subunit PorA"  
"OPBO22\_00190" 37360 "s59E25H2" 0 "Pyruvate synthase subunit PorA"  
"OPBO22\_00190" 37360 "s59E5H2" 0 "Pyruvate synthase subunit PorA"  
"OPBO22\_00190" 37360 "s63E6H2" 0 "Pyruvate synthase subunit PorA"  
"OPBO22\_00191" 37361 "s59E13H2" 0 "Pyruvate synthase subunit PorB"  
"OPBO22\_00191" 37361 "s59E25H2" 0 "Pyruvate synthase subunit PorB"  
"OPBO22\_00191" 37361 "s59E5H2" 0 "Pyruvate synthase subunit PorB"  
"OPBO22\_00191" 37361 "s63E6H2" 0 "Pyruvate synthase subunit PorB"  
"OPBO22\_00192" 37362 "s59E13H2" 0 "Aspartate-semialdehyde dehydrogenase"  
"OPBO22\_00192" 37362 "s59E25H2" 0 "Aspartate-semialdehyde dehydrogenase"  
"OPBO22\_00192" 37362 "s59E5H2" 0 "Aspartate-semialdehyde dehydrogenase"  
"OPBO22\_00192" 37362 "s63E6H2" 0 "Aspartate-semialdehyde dehydrogenase"  
"OPBO22\_00193" 37363 "s59E13H2" 0 "putative transporter in sor 3' region"  
"OPBO22\_00193" 37363 "s59E25H2" 0 "putative transporter in sor 3' region"  
"OPBO22\_00193" 37363 "s59E5H2" 0 "putative transporter in sor 3' region"  
"OPBO22\_00193" 37363 "s63E6H2" 0 "putative transporter in sor 3' region"  
"OPBO22\_00194" 37364 "s59E13H2" 0 "Putative phosphoribosyl transferase/MT0597"  
"OPBO22\_00194" 37364 "s59E25H2" 0 "Putative phosphoribosyl transferase/MT0597"  
"OPBO22\_00194" 37364 "s59E5H2" 0 "Putative phosphoribosyl transferase/MT0597"  
"OPBO22\_00194" 37364 "s63E6H2" 0 "Putative phosphoribosyl transferase/MT0597"  
"OPBO22\_00195" 37365 "s59E13H2" 0 "LysE type translocator"  
"OPBO22\_00195" 37365 "s59E25H2" 0 "LysE type translocator"  
"OPBO22\_00195" 37365 "s59E5H2" 0 "LysE type translocator"  
"OPBO22\_00195" 37365 "s63E6H2" 0 "LysE type translocator"  
"OPBO22\_00196" 37366 "s59E13H2" 0.009345554 "2-hydroxyglutaryl-CoA dehydratase, D-component"  
"OPBO22\_00196" 37366 "s59E25H2" 0 "2-hydroxyglutaryl-CoA dehydratase, D-component"  
"OPBO22\_00196" 37366 "s59E5H2" 0.1350492 "2-hydroxyglutaryl-CoA dehydratase, D-component"  
"OPBO22\_00196" 37366 "s63E6H2" 0.1892774 "2-hydroxyglutaryl-CoA dehydratase, D-component"

"OPBO22\_00199" 37369 "s59E13H2" 0 "Carbon monoxide dehydrogenase 2"  
"OPBO22\_00199" 37369 "s59E25H2" 0 "Carbon monoxide dehydrogenase 2"  
"OPBO22\_00199" 37369 "s59E5H2" 0 "Carbon monoxide dehydrogenase 2"  
"OPBO22\_00199" 37369 "s63E6H2" 0 "Carbon monoxide dehydrogenase 2"  
"OPBO22\_00200" 37370 "s59E13H2" 0 "Carbon monoxide dehydrogenase/acetyl-CoA synthase subunit alpha"  
"OPBO22\_00200" 37370 "s59E25H2" 0 "Carbon monoxide dehydrogenase/acetyl-CoA synthase subunit alpha"  
"OPBO22\_00200" 37370 "s59E5H2" 0 "Carbon monoxide dehydrogenase/acetyl-CoA synthase subunit alpha"  
"OPBO22\_00200" 37370 "s63E6H2" 0 "Carbon monoxide dehydrogenase/acetyl-CoA synthase subunit alpha"  
"OPBO22\_00201" 37371 "s59E13H2" 0 "hypothetical protein"  
"OPBO22\_00201" 37371 "s59E25H2" 0 "hypothetical protein"  
"OPBO22\_00201" 37371 "s59E5H2" 0 "hypothetical protein"  
"OPBO22\_00201" 37371 "s63E6H2" 0 "hypothetical protein"  
"OPBO22\_00202" 37372 "s59E13H2" 0 "Corrinoid/iron-sulfur protein small subunit"  
"OPBO22\_00202" 37372 "s59E25H2" 0 "Corrinoid/iron-sulfur protein small subunit"  
"OPBO22\_00202" 37372 "s59E5H2" 0 "Corrinoid/iron-sulfur protein small subunit"  
"OPBO22\_00202" 37372 "s63E6H2" 0 "Corrinoid/iron-sulfur protein small subunit"  
"OPBO22\_00203" 37373 "s59E13H2" 0 "Corrinoid/iron-sulfur protein large subunit"  
"OPBO22\_00203" 37373 "s59E25H2" 0 "Corrinoid/iron-sulfur protein large subunit"  
"OPBO22\_00203" 37373 "s59E5H2" 0 "Corrinoid/iron-sulfur protein large subunit"  
"OPBO22\_00203" 37373 "s63E6H2" 0 "Corrinoid/iron-sulfur protein large subunit"  
"OPBO22\_00204" 37374 "s59E13H2" 0 "Formate--tetrahydrofolate ligase"  
"OPBO22\_00204" 37374 "s59E25H2" 0 "Formate--tetrahydrofolate ligase"  
"OPBO22\_00204" 37374 "s59E5H2" 0 "Formate--tetrahydrofolate ligase"  
"OPBO22\_00204" 37374 "s63E6H2" 0 "Formate--tetrahydrofolate ligase"  
"OPBO22\_00205" 37375 "s59E13H2" 0 "Bifunctional protein FoD protein"  
"OPBO22\_00205" 37375 "s59E25H2" 0 "Bifunctional protein FoD protein"  
"OPBO22\_00205" 37375 "s59E5H2" 0 "Bifunctional protein FoD protein"  
"OPBO22\_00205" 37375 "s63E6H2" 0 "Bifunctional protein FoD protein"  
"OPBO22\_00206" 37376 "s59E13H2" 0 "Dihydrolipoyl dehydrogenase"  
"OPBO22\_00206" 37376 "s59E25H2" 0 "Dihydrolipoyl dehydrogenase"  
"OPBO22\_00206" 37376 "s59E5H2" 0 "Dihydrolipoyl dehydrogenase"  
"OPBO22\_00206" 37376 "s63E6H2" 0 "Dihydrolipoyl dehydrogenase"  
"OPBO22\_00207" 37377 "s59E13H2" 0 "Lipoyl synthase"  
"OPBO22\_00207" 37377 "s59E25H2" 0 "Lipoyl synthase"  
"OPBO22\_00207" 37377 "s59E5H2" 0 "Lipoyl synthase"  
"OPBO22\_00207" 37377 "s63E6H2" 0 "Lipoyl synthase"  
"OPBO22\_00208" 37378 "s59E13H2" 0 "methionine synthase"  
"OPBO22\_00208" 37378 "s59E25H2" 0 "methionine synthase"  
"OPBO22\_00208" 37378 "s59E5H2" 0 "methionine synthase"  
"OPBO22\_00208" 37378 "s63E6H2" 0 "methionine synthase"  
"OPBO22\_00209" 37379 "s59E13H2" 0 "CoB--CoM heterodisulfide reductase subunit B"  
"OPBO22\_00209" 37379 "s59E25H2" 0 "CoB--CoM heterodisulfide reductase subunit B"  
"OPBO22\_00209" 37379 "s59E5H2" 0 "CoB--CoM heterodisulfide reductase subunit B"  
"OPBO22\_00209" 37379 "s63E6H2" 0 "CoB--CoM heterodisulfide reductase subunit B"  
"OPBO22\_00210" 37380 "s59E13H2" 0 "CoB--CoM heterodisulfide reductase iron-sulfur subunit C"  
"OPBO22\_00210" 37380 "s59E25H2" 0 "CoB--CoM heterodisulfide reductase iron-sulfur subunit C"  
"OPBO22\_00210" 37380 "s59E5H2" 0 "CoB--CoM heterodisulfide reductase iron-sulfur subunit C"

"OPBO22\_00210" 37380 "s63E6H2" 0 "CoB--CoM heterodisulfide reductase iron-sulfur subunit C"  
"OPBO22\_00211" 37381 "s59E13H2" 0 "Bifunctional homocysteine S-methyltransferase/5,10-methylenetetrahydrofolate reductase"  
"OPBO22\_00211" 37381 "s59E25H2" 0 "Bifunctional homocysteine S-methyltransferase/5,10-methylenetetrahydrofolate reductase"  
"OPBO22\_00211" 37381 "s59E5H2" 0 "Bifunctional homocysteine S-methyltransferase/5,10-methylenetetrahydrofolate reductase"  
"OPBO22\_00211" 37381 "s63E6H2" 0 "Bifunctional homocysteine S-methyltransferase/5,10-methylenetetrahydrofolate reductase"  
"OPBO22\_00212" 37382 "s59E13H2" 0 "hypothetical protein"  
"OPBO22\_00212" 37382 "s59E25H2" 0 "hypothetical protein"  
"OPBO22\_00212" 37382 "s59E5H2" 0 "hypothetical protein"  
"OPBO22\_00212" 37382 "s63E6H2" 0 "hypothetical protein"  
"OPBO22\_00213" 37383 "s59E13H2" 0 "putative transposase"  
"OPBO22\_00213" 37383 "s59E25H2" 0 "putative transposase"  
"OPBO22\_00213" 37383 "s59E5H2" 0 "putative transposase"  
"OPBO22\_00213" 37383 "s63E6H2" 0 "putative transposase"  
"OPBO22\_00214" 37384 "s59E13H2" 0 "DNA integrity scanning protein DisA"  
"OPBO22\_00214" 37384 "s59E25H2" 0 "DNA integrity scanning protein DisA"  
"OPBO22\_00214" 37384 "s59E5H2" 0 "DNA integrity scanning protein DisA"  
"OPBO22\_00214" 37384 "s63E6H2" 0 "DNA integrity scanning protein DisA"  
"OPBO22\_00215" 37385 "s59E13H2" 0 "hypothetical protein"  
"OPBO22\_00215" 37385 "s59E25H2" 0 "hypothetical protein"  
"OPBO22\_00215" 37385 "s59E5H2" 0 "hypothetical protein"  
"OPBO22\_00215" 37385 "s63E6H2" 0 "hypothetical protein"  
"OPBO22\_00216" 37386 "s59E13H2" 0 "ATP-dependent Clp protease ATP-binding subunit ClpC1"  
"OPBO22\_00216" 37386 "s59E25H2" 0 "ATP-dependent Clp protease ATP-binding subunit ClpC1"  
"OPBO22\_00216" 37386 "s59E5H2" 0 "ATP-dependent Clp protease ATP-binding subunit ClpC1"  
"OPBO22\_00216" 37386 "s63E6H2" 0 "ATP-dependent Clp protease ATP-binding subunit ClpC1"  
"OPBO22\_00217" 37387 "s59E13H2" 0 "acetyl-CoA acetyltransferase"  
"OPBO22\_00217" 37387 "s59E25H2" 0 "acetyl-CoA acetyltransferase"  
"OPBO22\_00217" 37387 "s59E5H2" 0 "acetyl-CoA acetyltransferase"  
"OPBO22\_00217" 37387 "s63E6H2" 0 "acetyl-CoA acetyltransferase"  
"OPBO22\_00218" 37388 "s59E13H2" 0 "acetyl-CoA acetyltransferase"  
"OPBO22\_00218" 37388 "s59E25H2" 0 "acetyl-CoA acetyltransferase"  
"OPBO22\_00218" 37388 "s59E5H2" 0 "acetyl-CoA acetyltransferase"  
"OPBO22\_00218" 37388 "s63E6H2" 0 "acetyl-CoA acetyltransferase"  
"OPBO22\_00219" 37389 "s59E13H2" 0 "hypothetical protein"  
"OPBO22\_00219" 37389 "s59E25H2" 0 "hypothetical protein"  
"OPBO22\_00219" 37389 "s59E5H2" 0 "hypothetical protein"  
"OPBO22\_00219" 37389 "s63E6H2" 0 "hypothetical protein"  
"OPBO22\_00220" 37390 "s59E13H2" 0 "hypothetical protein"  
"OPBO22\_00220" 37390 "s59E25H2" 0 "hypothetical protein"  
"OPBO22\_00220" 37390 "s59E5H2" 0 "hypothetical protein"  
"OPBO22\_00220" 37390 "s63E6H2" 0 "hypothetical protein"  
"OPBO22\_00221" 37391 "s59E13H2" 0 "hypothetical protein"  
"OPBO22\_00221" 37391 "s59E25H2" 0 "hypothetical protein"  
"OPBO22\_00221" 37391 "s59E5H2" 0 "hypothetical protein"  
"OPBO22\_00221" 37391 "s63E6H2" 0 "hypothetical protein"  
"OPBO22\_00222" 37392 "s59E13H2" 0 "Tetratricopeptide repeat protein"  
"OPBO22\_00222" 37392 "s59E25H2" 0 "Tetratricopeptide repeat protein"

"OPBO22\_00222" 37392 "s59E5H2" 0 "Tetratricopeptide repeat protein"  
"OPBO22\_00222" 37392 "s63E6H2" 0 "Tetratricopeptide repeat protein"  
"OPBO22\_00223" 37393 "s59E13H2" 0 "hypothetical protein"  
"OPBO22\_00223" 37393 "s59E25H2" 0 "hypothetical protein"  
"OPBO22\_00223" 37393 "s59E5H2" 0 "hypothetical protein"  
"OPBO22\_00223" 37393 "s63E6H2" 0 "hypothetical protein"  
"OPBO22\_00224" 37394 "s59E13H2" 0 "hypothetical protein"  
"OPBO22\_00224" 37394 "s59E25H2" 0 "hypothetical protein"  
"OPBO22\_00224" 37394 "s59E5H2" 0 "hypothetical protein"  
"OPBO22\_00224" 37394 "s63E6H2" 0 "hypothetical protein"  
"OPBO22\_00225" 37395 "s59E13H2" 0 "hypothetical protein"  
"OPBO22\_00225" 37395 "s59E25H2" 0 "hypothetical protein"  
"OPBO22\_00225" 37395 "s59E5H2" 0 "hypothetical protein"  
"OPBO22\_00225" 37395 "s63E6H2" 0 "hypothetical protein"  
"OPBO22\_00226" 37396 "s59E13H2" 0 "N-acetylmuramoyl-L-alanine amidase LytC precursor"  
"OPBO22\_00226" 37396 "s59E25H2" 0 "N-acetylmuramoyl-L-alanine amidase LytC precursor"  
"OPBO22\_00226" 37396 "s59E5H2" 0 "N-acetylmuramoyl-L-alanine amidase LytC precursor"  
"OPBO22\_00226" 37396 "s63E6H2" 0 "N-acetylmuramoyl-L-alanine amidase LytC precursor"  
"OPBO22\_00227" 37397 "s59E13H2" 0 "Sporulation and spore germination"  
"OPBO22\_00227" 37397 "s59E25H2" 0 "Sporulation and spore germination"  
"OPBO22\_00227" 37397 "s59E5H2" 0 "Sporulation and spore germination"  
"OPBO22\_00227" 37397 "s63E6H2" 0 "Sporulation and spore germination"  
"OPBO22\_00228" 37398 "s59E13H2" 0 "S-adenosyl-L-methionine-binding protein"  
"OPBO22\_00228" 37398 "s59E25H2" 0 "S-adenosyl-L-methionine-binding protein"  
"OPBO22\_00228" 37398 "s59E5H2" 0 "S-adenosyl-L-methionine-binding protein"  
"OPBO22\_00228" 37398 "s63E6H2" 0 "S-adenosyl-L-methionine-binding protein"  
"OPBO22\_00229" 37399 "s59E13H2" 0 "6-phosphofructokinase isozyme 1"  
"OPBO22\_00229" 37399 "s59E25H2" 0 "6-phosphofructokinase isozyme 1"  
"OPBO22\_00229" 37399 "s59E5H2" 0 "6-phosphofructokinase isozyme 1"  
"OPBO22\_00229" 37399 "s63E6H2" 0 "6-phosphofructokinase isozyme 1"  
"OPBO22\_00230" 37400 "s59E13H2" 0 "hypothetical protein"  
"OPBO22\_00230" 37400 "s59E25H2" 0 "hypothetical protein"  
"OPBO22\_00230" 37400 "s59E5H2" 0 "hypothetical protein"  
"OPBO22\_00230" 37400 "s63E6H2" 0 "hypothetical protein"  
"OPBO22\_00231" 37401 "s59E13H2" 0 "hypothetical protein"  
"OPBO22\_00231" 37401 "s59E25H2" 0 "hypothetical protein"  
"OPBO22\_00231" 37401 "s59E5H2" 0 "hypothetical protein"  
"OPBO22\_00231" 37401 "s63E6H2" 0 "hypothetical protein"  
"OPBO22\_00232" 37402 "s59E13H2" 0 "hypothetical protein"  
"OPBO22\_00232" 37402 "s59E25H2" 0 "hypothetical protein"  
"OPBO22\_00232" 37402 "s59E5H2" 0 "hypothetical protein"  
"OPBO22\_00232" 37402 "s63E6H2" 0 "hypothetical protein"  
"OPBO22\_00233" 37403 "s59E13H2" 0 "Ribosomal protein S12 methylthiotransferase RimO"  
"OPBO22\_00233" 37403 "s59E25H2" 0 "Ribosomal protein S12 methylthiotransferase RimO"  
"OPBO22\_00233" 37403 "s59E5H2" 0 "Ribosomal protein S12 methylthiotransferase RimO"  
"OPBO22\_00233" 37403 "s63E6H2" 0.000476807 "Ribosomal protein S12 methylthiotransferase RimO"  
"OPBO22\_00234" 37404 "s59E13H2" 0 "Oxygen-independent coproporphyrinogen-III oxidase 1"

"OPBO22\_00234" 37404 "s59E25H2" 0 "Oxygen-independent coproporphyrinogen-III oxidase 1"  
"OPBO22\_00234" 37404 "s59E5H2" 0 "Oxygen-independent coproporphyrinogen-III oxidase 1"  
"OPBO22\_00234" 37404 "s63E6H2" 0 "Oxygen-independent coproporphyrinogen-III oxidase 1"  
"OPBO22\_00235" 37405 "s59E13H2" 0 "Plasmid stabilisation system protein"  
"OPBO22\_00235" 37405 "s59E25H2" 0 "Plasmid stabilisation system protein"  
"OPBO22\_00235" 37405 "s59E5H2" 0 "Plasmid stabilisation system protein"  
"OPBO22\_00235" 37405 "s63E6H2" 0 "Plasmid stabilisation system protein"  
"OPBO22\_00236" 37406 "s59E13H2" 0 "Phd\_YefM"  
"OPBO22\_00236" 37406 "s59E25H2" 0 "Phd\_YefM"  
"OPBO22\_00236" 37406 "s59E5H2" 0 "Phd\_YefM"  
"OPBO22\_00236" 37406 "s63E6H2" 0 "Phd\_YefM"  
"OPBO22\_00237" 37407 "s59E13H2" 0 "Molybdopterin molybdenumtransferase"  
"OPBO22\_00237" 37407 "s59E25H2" 0 "Molybdopterin molybdenumtransferase"  
"OPBO22\_00237" 37407 "s59E5H2" 0 "Molybdopterin molybdenumtransferase"  
"OPBO22\_00237" 37407 "s63E6H2" 0 "Molybdopterin molybdenumtransferase"  
"OPBO22\_00238" 37408 "s59E13H2" 0 "Molybdopterin adenyllyltransferase"  
"OPBO22\_00238" 37408 "s59E25H2" 0 "Molybdopterin adenyllyltransferase"  
"OPBO22\_00238" 37408 "s59E5H2" 0 "Molybdopterin adenyllyltransferase"  
"OPBO22\_00238" 37408 "s63E6H2" 0 "Molybdopterin adenyllyltransferase"  
"OPBO22\_00239" 37409 "s59E13H2" 0 "DNA topoisomerase 1"  
"OPBO22\_00239" 37409 "s59E25H2" 0 "DNA topoisomerase 1"  
"OPBO22\_00239" 37409 "s59E5H2" 0 "DNA topoisomerase 1"  
"OPBO22\_00239" 37409 "s63E6H2" 0 "DNA topoisomerase 1"  
"OPBO22\_00240" 37410 "s59E13H2" 0 "Purine catabolism protein PucG"  
"OPBO22\_00240" 37410 "s59E25H2" 0 "Purine catabolism protein PucG"  
"OPBO22\_00240" 37410 "s59E5H2" 0 "Purine catabolism protein PucG"  
"OPBO22\_00240" 37410 "s63E6H2" 0 "Purine catabolism protein PucG"  
"OPBO22\_00241" 37411 "s59E13H2" 0 "Glyoxylate reductase"  
"OPBO22\_00241" 37411 "s59E25H2" 0 "Glyoxylate reductase"  
"OPBO22\_00241" 37411 "s59E5H2" 0 "Glyoxylate reductase"  
"OPBO22\_00241" 37411 "s63E6H2" 0 "Glyoxylate reductase"  
"OPBO22\_00242" 37412 "s59E13H2" 0 "Thymidylate kinase"  
"OPBO22\_00242" 37412 "s59E25H2" 0 "Thymidylate kinase"  
"OPBO22\_00242" 37412 "s59E5H2" 0 "Thymidylate kinase"  
"OPBO22\_00242" 37412 "s63E6H2" 0 "Thymidylate kinase"  
"OPBO22\_00243" 37413 "s59E13H2" 0 "DNA polymerase III subunit tau"  
"OPBO22\_00243" 37413 "s59E25H2" 0 "DNA polymerase III subunit tau"  
"OPBO22\_00243" 37413 "s59E5H2" 0 "DNA polymerase III subunit tau"  
"OPBO22\_00243" 37413 "s63E6H2" 0 "DNA polymerase III subunit tau"  
"OPBO22\_00244" 37414 "s59E13H2" 0 "hypothetical protein"  
"OPBO22\_00244" 37414 "s59E25H2" 0 "hypothetical protein"  
"OPBO22\_00244" 37414 "s59E5H2" 0 "hypothetical protein"  
"OPBO22\_00244" 37414 "s63E6H2" 0 "hypothetical protein"  
"OPBO22\_00246" 37416 "s59E13H2" 0 "Arginine--tRNA ligase"  
"OPBO22\_00246" 37416 "s59E25H2" 0 "Arginine--tRNA ligase"  
"OPBO22\_00246" 37416 "s59E5H2" 0 "Arginine--tRNA ligase"  
"OPBO22\_00246" 37416 "s63E6H2" 0 "Arginine--tRNA ligase"

"OPBO22\_00247" 37417 "s59E13H2" 0 "Putative signal peptide peptidase SppA"  
"OPBO22\_00247" 37417 "s59E25H2" 0 "Putative signal peptide peptidase SppA"  
"OPBO22\_00247" 37417 "s59E5H2" 0 "Putative signal peptide peptidase SppA"  
"OPBO22\_00247" 37417 "s63E6H2" 0 "Putative signal peptide peptidase SppA"  
"OPBO22\_00248" 37418 "s59E13H2" 0 "hypothetical protein"  
"OPBO22\_00248" 37418 "s59E25H2" 0 "hypothetical protein"  
"OPBO22\_00248" 37418 "s59E5H2" 0 "hypothetical protein"  
"OPBO22\_00248" 37418 "s63E6H2" 0 "hypothetical protein"  
"OPBO22\_00250" 37420 "s59E13H2" 0 "HNH endonuclease"  
"OPBO22\_00250" 37420 "s59E25H2" 0 "HNH endonuclease"  
"OPBO22\_00250" 37420 "s59E5H2" 0 "HNH endonuclease"  
"OPBO22\_00250" 37420 "s63E6H2" 0 "HNH endonuclease"  
"OPBO22\_00251" 37421 "s59E13H2" 0 "50S ribosomal protein L31"  
"OPBO22\_00251" 37421 "s59E25H2" 0 "50S ribosomal protein L31"  
"OPBO22\_00251" 37421 "s59E5H2" 0 "50S ribosomal protein L31"  
"OPBO22\_00251" 37421 "s63E6H2" 0 "50S ribosomal protein L31"  
"OPBO22\_00252" 37422 "s59E13H2" 0 "Thymidylate synthase ThyX"  
"OPBO22\_00252" 37422 "s59E25H2" 0 "Thymidylate synthase ThyX"  
"OPBO22\_00252" 37422 "s59E5H2" 0 "Thymidylate synthase ThyX"  
"OPBO22\_00252" 37422 "s63E6H2" 0 "Thymidylate synthase ThyX"  
"OPBO22\_00253" 37423 "s59E13H2" 0 "Thymidine kinase"  
"OPBO22\_00253" 37423 "s59E25H2" 0 "Thymidine kinase"  
"OPBO22\_00253" 37423 "s59E5H2" 0 "Thymidine kinase"  
"OPBO22\_00253" 37423 "s63E6H2" 0 "Thymidine kinase"  
"OPBO22\_00254" 37424 "s59E13H2" 0 "hypothetical protein"  
"OPBO22\_00254" 37424 "s59E25H2" 0 "hypothetical protein"  
"OPBO22\_00254" 37424 "s59E5H2" 0 "hypothetical protein"  
"OPBO22\_00254" 37424 "s63E6H2" 0 "hypothetical protein"  
"OPBO22\_00255" 37425 "s59E13H2" 0 "Peptide chain release factor 1"  
"OPBO22\_00255" 37425 "s59E25H2" 0 "Peptide chain release factor 1"  
"OPBO22\_00255" 37425 "s59E5H2" 0 "Peptide chain release factor 1"  
"OPBO22\_00255" 37425 "s63E6H2" 0 "Peptide chain release factor 1"  
"OPBO22\_00256" 37426 "s59E13H2" 0 "Release factor glutamine methyltransferase"  
"OPBO22\_00256" 37426 "s59E25H2" 0 "Release factor glutamine methyltransferase"  
"OPBO22\_00256" 37426 "s59E5H2" 0 "Release factor glutamine methyltransferase"  
"OPBO22\_00256" 37426 "s63E6H2" 0 "Release factor glutamine methyltransferase"  
"OPBO22\_00257" 37427 "s59E13H2" 0 "Threonylcarbamoyl-AMP synthase"  
"OPBO22\_00257" 37427 "s59E25H2" 0 "Threonylcarbamoyl-AMP synthase"  
"OPBO22\_00257" 37427 "s59E5H2" 0 "Threonylcarbamoyl-AMP synthase"  
"OPBO22\_00257" 37427 "s63E6H2" 0 "Threonylcarbamoyl-AMP synthase"  
"OPBO22\_00258" 37428 "s59E13H2" 0 "Ribose-5-phosphate isomerase B"  
"OPBO22\_00258" 37428 "s59E25H2" 0 "Ribose-5-phosphate isomerase B"  
"OPBO22\_00258" 37428 "s59E5H2" 0 "Ribose-5-phosphate isomerase B"  
"OPBO22\_00258" 37428 "s63E6H2" 0 "Ribose-5-phosphate isomerase B"  
"OPBO22\_00259" 37429 "s59E13H2" 0 "Uracil phosphoribosyltransferase"  
"OPBO22\_00259" 37429 "s59E25H2" 0 "Uracil phosphoribosyltransferase"  
"OPBO22\_00259" 37429 "s59E5H2" 0 "Uracil phosphoribosyltransferase"



"OPBO22\_00259" 37429 "s63E6H2" 0 "Uracil phosphoribosyltransferase"  
"OPBO22\_00260" 37430 "s59E13H2" 0 "tRNA-specific adenosine deaminase"  
"OPBO22\_00260" 37430 "s59E25H2" 0 "tRNA-specific adenosine deaminase"  
"OPBO22\_00260" 37430 "s59E5H2" 0 "tRNA-specific adenosine deaminase"  
"OPBO22\_00260" 37430 "s63E6H2" 0 "tRNA-specific adenosine deaminase"  
"OPBO22\_00261" 37431 "s59E13H2" 0 "ATP synthase subunit a"  
"OPBO22\_00261" 37431 "s59E25H2" 0 "ATP synthase subunit a"  
"OPBO22\_00261" 37431 "s59E5H2" 0 "ATP synthase subunit a"  
"OPBO22\_00261" 37431 "s63E6H2" 0 "ATP synthase subunit a"  
"OPBO22\_00262" 37432 "s59E13H2" 0 "ATP synthase subunit c"  
"OPBO22\_00262" 37432 "s59E25H2" 0 "ATP synthase subunit c"  
"OPBO22\_00262" 37432 "s59E5H2" 0 "ATP synthase subunit c"  
"OPBO22\_00262" 37432 "s63E6H2" 0 "ATP synthase subunit c"  
"OPBO22\_00263" 37433 "s59E13H2" 0 "ATP synthase subunit b"  
"OPBO22\_00263" 37433 "s59E25H2" 0 "ATP synthase subunit b"  
"OPBO22\_00263" 37433 "s59E5H2" 0 "ATP synthase subunit b"  
"OPBO22\_00263" 37433 "s63E6H2" 0 "ATP synthase subunit b"  
"OPBO22\_00264" 37434 "s59E13H2" 0 "FOF1 ATP synthase subunit delta"  
"OPBO22\_00264" 37434 "s59E25H2" 0 "FOF1 ATP synthase subunit delta"  
"OPBO22\_00264" 37434 "s59E5H2" 0 "FOF1 ATP synthase subunit delta"  
"OPBO22\_00264" 37434 "s63E6H2" 0 "FOF1 ATP synthase subunit delta"  
"OPBO22\_00265" 37435 "s59E13H2" 0 "ATP synthase subunit alpha"  
"OPBO22\_00265" 37435 "s59E25H2" 0 "ATP synthase subunit alpha"  
"OPBO22\_00265" 37435 "s59E5H2" 0 "ATP synthase subunit alpha"  
"OPBO22\_00265" 37435 "s63E6H2" 0 "ATP synthase subunit alpha"  
"OPBO22\_00266" 37436 "s59E13H2" 0 "ATP synthase gamma chain, sodium ion specific"  
"OPBO22\_00266" 37436 "s59E25H2" 0 "ATP synthase gamma chain, sodium ion specific"  
"OPBO22\_00266" 37436 "s59E5H2" 0 "ATP synthase gamma chain, sodium ion specific"  
"OPBO22\_00266" 37436 "s63E6H2" 0 "ATP synthase gamma chain, sodium ion specific"  
"OPBO22\_00267" 37437 "s59E13H2" 0 "ATP synthase subunit beta"  
"OPBO22\_00267" 37437 "s59E25H2" 0 "ATP synthase subunit beta"  
"OPBO22\_00267" 37437 "s59E5H2" 0 "ATP synthase subunit beta"  
"OPBO22\_00267" 37437 "s63E6H2" 0 "ATP synthase subunit beta"  
"OPBO22\_00268" 37438 "s59E13H2" 0 "ATP synthase epsilon chain"  
"OPBO22\_00268" 37438 "s59E25H2" 0 "ATP synthase epsilon chain"  
"OPBO22\_00268" 37438 "s59E5H2" 0 "ATP synthase epsilon chain"  
"OPBO22\_00268" 37438 "s63E6H2" 0 "ATP synthase epsilon chain"  
"OPBO22\_00269" 37439 "s59E13H2" 0 "UDP-N-acetylglucosamine 1-carboxyvinyltransferase"  
"OPBO22\_00269" 37439 "s59E25H2" 0 "UDP-N-acetylglucosamine 1-carboxyvinyltransferase"  
"OPBO22\_00269" 37439 "s59E5H2" 0 "UDP-N-acetylglucosamine 1-carboxyvinyltransferase"  
"OPBO22\_00269" 37439 "s63E6H2" 0 "UDP-N-acetylglucosamine 1-carboxyvinyltransferase"  
"OPBO22\_00270" 37440 "s59E13H2" 0 "Putative transcriptional regulator YvhJ"  
"OPBO22\_00270" 37440 "s59E25H2" 0 "Putative transcriptional regulator YvhJ"  
"OPBO22\_00270" 37440 "s59E5H2" 0 "Putative transcriptional regulator YvhJ"  
"OPBO22\_00270" 37440 "s63E6H2" 0 "Putative transcriptional regulator YvhJ"  
"OPBO22\_00271" 37441 "s59E13H2" 0 "Plasmid stabilisation system protein"  
"OPBO22\_00271" 37441 "s59E25H2" 0 "Plasmid stabilisation system protein"

"OPBO22\_00271" 37441 "s59E5H2" 0 "Plasmid stabilisation system protein"  
"OPBO22\_00271" 37441 "s63E6H2" 0 "Plasmid stabilisation system protein"  
"OPBO22\_00272" 37442 "s59E13H2" 0 "Antitoxin RelF"  
"OPBO22\_00272" 37442 "s59E25H2" 0 "Antitoxin RelF"  
"OPBO22\_00272" 37442 "s59E5H2" 0 "Antitoxin RelF"  
"OPBO22\_00272" 37442 "s63E6H2" 0 "Antitoxin RelF"  
"OPBO22\_00273" 37443 "s59E13H2" 0 "Serine acetyltransferase"  
"OPBO22\_00273" 37443 "s59E25H2" 0 "Serine acetyltransferase"  
"OPBO22\_00273" 37443 "s59E5H2" 0 "Serine acetyltransferase"  
"OPBO22\_00273" 37443 "s63E6H2" 0 "Serine acetyltransferase"  
"OPBO22\_00274" 37444 "s59E13H2" 0 "hypothetical protein"  
"OPBO22\_00274" 37444 "s59E25H2" 0 "hypothetical protein"  
"OPBO22\_00274" 37444 "s59E5H2" 0 "hypothetical protein"  
"OPBO22\_00274" 37444 "s63E6H2" 0 "hypothetical protein"  
"OPBO22\_00275" 37445 "s59E13H2" 0 "HEPN domain protein"  
"OPBO22\_00275" 37445 "s59E25H2" 0 "HEPN domain protein"  
"OPBO22\_00275" 37445 "s59E5H2" 0 "HEPN domain protein"  
"OPBO22\_00275" 37445 "s63E6H2" 0 "HEPN domain protein"  
"OPBO22\_00276" 37446 "s59E13H2" 0 "Nucleotidyltransferase domain protein"  
"OPBO22\_00276" 37446 "s59E25H2" 0 "Nucleotidyltransferase domain protein"  
"OPBO22\_00276" 37446 "s59E5H2" 0 "Nucleotidyltransferase domain protein"  
"OPBO22\_00276" 37446 "s63E6H2" 0 "Nucleotidyltransferase domain protein"  
"OPBO22\_00277" 37447 "s59E13H2" 0 "hypothetical protein"  
"OPBO22\_00277" 37447 "s59E25H2" 0 "hypothetical protein"  
"OPBO22\_00277" 37447 "s59E5H2" 0 "hypothetical protein"  
"OPBO22\_00277" 37447 "s63E6H2" 0 "hypothetical protein"  
"OPBO22\_00278" 37448 "s59E13H2" 0 "Membrane lipoprotein TmpC precursor"  
"OPBO22\_00278" 37448 "s59E25H2" 0 "Membrane lipoprotein TmpC precursor"  
"OPBO22\_00278" 37448 "s59E5H2" 0 "Membrane lipoprotein TmpC precursor"  
"OPBO22\_00278" 37448 "s63E6H2" 0 "Membrane lipoprotein TmpC precursor"  
"OPBO22\_00279" 37449 "s59E13H2" 0 "Galactose/methyl galactoside import ATP-binding protein MglA"  
"OPBO22\_00279" 37449 "s59E25H2" 0 "Galactose/methyl galactoside import ATP-binding protein MglA"  
"OPBO22\_00279" 37449 "s59E5H2" 0 "Galactose/methyl galactoside import ATP-binding protein MglA"  
"OPBO22\_00279" 37449 "s63E6H2" 0 "Galactose/methyl galactoside import ATP-binding protein MglA"  
"OPBO22\_00280" 37450 "s59E13H2" 0 "beta-methylgalactoside transporter inner membrane component"  
"OPBO22\_00280" 37450 "s59E25H2" 0 "beta-methylgalactoside transporter inner membrane component"  
"OPBO22\_00280" 37450 "s59E5H2" 0 "beta-methylgalactoside transporter inner membrane component"  
"OPBO22\_00280" 37450 "s63E6H2" 0 "beta-methylgalactoside transporter inner membrane component"  
"OPBO22\_00281" 37451 "s59E13H2" 0 "beta-methylgalactoside transporter inner membrane component"  
"OPBO22\_00281" 37451 "s59E25H2" 0 "beta-methylgalactoside transporter inner membrane component"  
"OPBO22\_00281" 37451 "s59E5H2" 0 "beta-methylgalactoside transporter inner membrane component"  
"OPBO22\_00281" 37451 "s63E6H2" 0 "beta-methylgalactoside transporter inner membrane component"  
"OPBO22\_00282" 37452 "s59E13H2" 0 "Pyrimidine-specific ribonucleoside hydrolase RihA"  
"OPBO22\_00282" 37452 "s59E25H2" 0 "Pyrimidine-specific ribonucleoside hydrolase RihA"  
"OPBO22\_00282" 37452 "s59E5H2" 0 "Pyrimidine-specific ribonucleoside hydrolase RihA"  
"OPBO22\_00282" 37452 "s63E6H2" 0 "Pyrimidine-specific ribonucleoside hydrolase RihA"  
"OPBO22\_00283" 37453 "s59E13H2" 0 "5-methylthioadenosine/S-adenosylhomocysteine deaminase"

"OPBO22\_00283" 37453 "s59E25H2" 0 "5-methylthioadenosine/S-adenosylhomocysteine deaminase"  
"OPBO22\_00283" 37453 "s59E5H2" 0 "5-methylthioadenosine/S-adenosylhomocysteine deaminase"  
"OPBO22\_00283" 37453 "s63E6H2" 0 "5-methylthioadenosine/S-adenosylhomocysteine deaminase"  
"OPBO22\_00284" 37454 "s59E13H2" 0 "Ribokinase"  
"OPBO22\_00284" 37454 "s59E25H2" 0 "Ribokinase"  
"OPBO22\_00284" 37454 "s59E5H2" 0 "Ribokinase"  
"OPBO22\_00284" 37454 "s63E6H2" 0 "Ribokinase"  
"OPBO22\_00285" 37455 "s59E13H2" 0 "ATP-dependent zinc metalloprotease FtsH"  
"OPBO22\_00285" 37455 "s59E25H2" 0 "ATP-dependent zinc metalloprotease FtsH"  
"OPBO22\_00285" 37455 "s59E5H2" 0 "ATP-dependent zinc metalloprotease FtsH"  
"OPBO22\_00285" 37455 "s63E6H2" 0 "ATP-dependent zinc metalloprotease FtsH"  
"OPBO22\_00286" 37456 "s59E13H2" 0 "GTPase HflX"  
"OPBO22\_00286" 37456 "s59E25H2" 0 "GTPase HflX"  
"OPBO22\_00286" 37456 "s59E5H2" 0 "GTPase HflX"  
"OPBO22\_00286" 37456 "s63E6H2" 0 "GTPase HflX"  
"OPBO22\_00287" 37457 "s59E13H2" 0 "HNH endonuclease"  
"OPBO22\_00287" 37457 "s59E25H2" 0 "HNH endonuclease"  
"OPBO22\_00287" 37457 "s59E5H2" 0 "HNH endonuclease"  
"OPBO22\_00287" 37457 "s63E6H2" 0 "HNH endonuclease"  
"OPBO22\_00289" 37459 "s59E13H2" 0 "LexA repressor"  
"OPBO22\_00289" 37459 "s59E25H2" 0 "LexA repressor"  
"OPBO22\_00289" 37459 "s59E5H2" 0 "LexA repressor"  
"OPBO22\_00289" 37459 "s63E6H2" 0 "LexA repressor"  
"OPBO22\_00290" 37460 "s59E13H2" 0 "hypothetical protein"  
"OPBO22\_00290" 37460 "s59E25H2" 0 "hypothetical protein"  
"OPBO22\_00290" 37460 "s59E5H2" 0 "hypothetical protein"  
"OPBO22\_00290" 37460 "s63E6H2" 0 "hypothetical protein"  
"OPBO22\_00291" 37461 "s59E13H2" 0 "GTPase Der"  
"OPBO22\_00291" 37461 "s59E25H2" 0 "GTPase Der"  
"OPBO22\_00291" 37461 "s59E5H2" 0 "GTPase Der"  
"OPBO22\_00291" 37461 "s63E6H2" 0 "GTPase Der"  
"OPBO22\_00292" 37462 "s59E13H2" 0 "4-hydroxy-3-methylbut-2-enyl diphosphate reductase"  
"OPBO22\_00292" 37462 "s59E25H2" 0 "4-hydroxy-3-methylbut-2-enyl diphosphate reductase"  
"OPBO22\_00292" 37462 "s59E5H2" 0 "4-hydroxy-3-methylbut-2-enyl diphosphate reductase"  
"OPBO22\_00292" 37462 "s63E6H2" 0 "4-hydroxy-3-methylbut-2-enyl diphosphate reductase"  
"OPBO22\_00293" 37463 "s59E13H2" 0 "AAA-like domain protein"  
"OPBO22\_00293" 37463 "s59E25H2" 0 "AAA-like domain protein"  
"OPBO22\_00293" 37463 "s59E5H2" 0 "AAA-like domain protein"  
"OPBO22\_00293" 37463 "s63E6H2" 0 "AAA-like domain protein"  
"OPBO22\_00295" 37465 "s59E13H2" 0 "hypothetical protein"  
"OPBO22\_00295" 37465 "s59E25H2" 0 "hypothetical protein"  
"OPBO22\_00295" 37465 "s59E5H2" 0 "hypothetical protein"  
"OPBO22\_00295" 37465 "s63E6H2" 0 "hypothetical protein"  
"OPBO22\_00299" 37469 "s59E13H2" 0 "Type 4 prepilin-like proteins leader peptide-processing enzyme"  
"OPBO22\_00299" 37469 "s59E25H2" 0 "Type 4 prepilin-like proteins leader peptide-processing enzyme"  
"OPBO22\_00299" 37469 "s59E5H2" 0 "Type 4 prepilin-like proteins leader peptide-processing enzyme"  
"OPBO22\_00299" 37469 "s63E6H2" 0 "Type 4 prepilin-like proteins leader peptide-processing enzyme"

"OPBO22\_00300" 37470 "s59E13H2" 0 "Type II secretion system protein G precursor"  
"OPBO22\_00300" 37470 "s59E25H2" 0 "Type II secretion system protein G precursor"  
"OPBO22\_00300" 37470 "s59E5H2" 0 "Type II secretion system protein G precursor"  
"OPBO22\_00300" 37470 "s63E6H2" 0 "Type II secretion system protein G precursor"  
"OPBO22\_00301" 37471 "s59E13H2" 0 "hypothetical protein"  
"OPBO22\_00301" 37471 "s59E25H2" 0 "hypothetical protein"  
"OPBO22\_00301" 37471 "s59E5H2" 0 "hypothetical protein"  
"OPBO22\_00301" 37471 "s63E6H2" 0 "hypothetical protein"  
"OPBO22\_00302" 37472 "s59E13H2" 0 "Competence protein ComM"  
"OPBO22\_00302" 37472 "s59E25H2" 0 "Competence protein ComM"  
"OPBO22\_00302" 37472 "s59E5H2" 0 "Competence protein ComM"  
"OPBO22\_00302" 37472 "s63E6H2" 0 "Competence protein ComM"  
"OPBO22\_00303" 37473 "s59E13H2" 0 "D-inositol 3-phosphate glycosyltransferase"  
"OPBO22\_00303" 37473 "s59E25H2" 0 "D-inositol 3-phosphate glycosyltransferase"  
"OPBO22\_00303" 37473 "s59E5H2" 0 "D-inositol 3-phosphate glycosyltransferase"  
"OPBO22\_00303" 37473 "s63E6H2" 0 "D-inositol 3-phosphate glycosyltransferase"  
"OPBO22\_00304" 37474 "s59E13H2" 0 "Small archaeal modifier protein 1"  
"OPBO22\_00304" 37474 "s59E25H2" 0 "Small archaeal modifier protein 1"  
"OPBO22\_00304" 37474 "s59E5H2" 0 "Small archaeal modifier protein 1"  
"OPBO22\_00304" 37474 "s63E6H2" 0 "Small archaeal modifier protein 1"  
"OPBO22\_00305" 37475 "s59E13H2" 0 "Tungsten-containing aldehyde ferredoxin oxidoreductase"  
"OPBO22\_00305" 37475 "s59E25H2" 0 "Tungsten-containing aldehyde ferredoxin oxidoreductase"  
"OPBO22\_00305" 37475 "s59E5H2" 0 "Tungsten-containing aldehyde ferredoxin oxidoreductase"  
"OPBO22\_00305" 37475 "s63E6H2" 0 "Tungsten-containing aldehyde ferredoxin oxidoreductase"  
"OPBO22\_00306" 37476 "s59E13H2" 0 "IS2 transposase TnpB"  
"OPBO22\_00306" 37476 "s59E25H2" 0 "IS2 transposase TnpB"  
"OPBO22\_00306" 37476 "s59E5H2" 0 "IS2 transposase TnpB"  
"OPBO22\_00306" 37476 "s63E6H2" 0 "IS2 transposase TnpB"  
"OPBO22\_00307" 37477 "s59E13H2" 0 "IS2 repressor TnpA"  
"OPBO22\_00307" 37477 "s59E25H2" 0 "IS2 repressor TnpA"  
"OPBO22\_00307" 37477 "s59E5H2" 0 "IS2 repressor TnpA"  
"OPBO22\_00307" 37477 "s63E6H2" 0 "IS2 repressor TnpA"  
"OPBO22\_00308" 37478 "s59E13H2" 0 "hypothetical protein"  
"OPBO22\_00308" 37478 "s59E25H2" 0 "hypothetical protein"  
"OPBO22\_00308" 37478 "s59E5H2" 0 "hypothetical protein"  
"OPBO22\_00308" 37478 "s63E6H2" 0 "hypothetical protein"  
"OPBO22\_00309" 37479 "s59E13H2" 0 "putative transposase"  
"OPBO22\_00309" 37479 "s59E25H2" 0 "putative transposase"  
"OPBO22\_00309" 37479 "s59E5H2" 0 "putative transposase"  
"OPBO22\_00309" 37479 "s63E6H2" 0 "putative transposase"  
"OPBO22\_00310" 37480 "s59E13H2" 0 "hypothetical protein"  
"OPBO22\_00310" 37480 "s59E25H2" 0 "hypothetical protein"  
"OPBO22\_00310" 37480 "s59E5H2" 0 "hypothetical protein"  
"OPBO22\_00310" 37480 "s63E6H2" 0 "hypothetical protein"  
"OPBO22\_00311" 37481 "s59E13H2" 0 "Signal peptidase I"  
"OPBO22\_00311" 37481 "s59E25H2" 0 "Signal peptidase I"  
"OPBO22\_00311" 37481 "s59E5H2" 0 "Signal peptidase I"

"OPBO22\_00311" 37481 "s63E6H2" 0 "Signal peptidase I"  
"OPBO22\_00312" 37482 "s59E13H2" 0 "50S ribosomal protein L19"  
"OPBO22\_00312" 37482 "s59E25H2" 0 "50S ribosomal protein L19"  
"OPBO22\_00312" 37482 "s59E5H2" 0 "50S ribosomal protein L19"  
"OPBO22\_00312" 37482 "s63E6H2" 0 "50S ribosomal protein L19"  
"OPBO22\_00313" 37483 "s59E13H2" 0 "tRNA (guanine-N(1)-)-methyltransferase"  
"OPBO22\_00313" 37483 "s59E25H2" 0 "tRNA (guanine-N(1)-)-methyltransferase"  
"OPBO22\_00313" 37483 "s59E5H2" 0 "tRNA (guanine-N(1)-)-methyltransferase"  
"OPBO22\_00313" 37483 "s63E6H2" 0 "tRNA (guanine-N(1)-)-methyltransferase"  
"OPBO22\_00314" 37484 "s59E13H2" 0 "Ribosome maturation factor RimM"  
"OPBO22\_00314" 37484 "s59E25H2" 0 "Ribosome maturation factor RimM"  
"OPBO22\_00314" 37484 "s59E5H2" 0 "Ribosome maturation factor RimM"  
"OPBO22\_00314" 37484 "s63E6H2" 0 "Ribosome maturation factor RimM"  
"OPBO22\_00315" 37485 "s59E13H2" 0 "hypothetical protein"  
"OPBO22\_00315" 37485 "s59E25H2" 0 "hypothetical protein"  
"OPBO22\_00315" 37485 "s59E5H2" 0 "hypothetical protein"  
"OPBO22\_00315" 37485 "s63E6H2" 0 "hypothetical protein"  
"OPBO22\_00316" 37486 "s59E13H2" 0 "30S ribosomal protein S16"  
"OPBO22\_00316" 37486 "s59E25H2" 0 "30S ribosomal protein S16"  
"OPBO22\_00316" 37486 "s59E5H2" 0 "30S ribosomal protein S16"  
"OPBO22\_00316" 37486 "s63E6H2" 0 "30S ribosomal protein S16"  
"OPBO22\_00317" 37487 "s59E13H2" 0 "Putative transposase DNA-binding domain protein"  
"OPBO22\_00317" 37487 "s59E25H2" 0 "Putative transposase DNA-binding domain protein"  
"OPBO22\_00317" 37487 "s59E5H2" 0 "Putative transposase DNA-binding domain protein"  
"OPBO22\_00317" 37487 "s63E6H2" 0 "Putative transposase DNA-binding domain protein"  
"OPBO22\_00318" 37488 "s59E13H2" 0 "Helix-turn-helix domain protein"  
"OPBO22\_00318" 37488 "s59E25H2" 0 "Helix-turn-helix domain protein"  
"OPBO22\_00318" 37488 "s59E5H2" 0 "Helix-turn-helix domain protein"  
"OPBO22\_00318" 37488 "s63E6H2" 0 "Helix-turn-helix domain protein"  
"OPBO22\_00319" 37489 "s59E13H2" 0 "Chromosome partition protein Smc"  
"OPBO22\_00319" 37489 "s59E25H2" 0 "Chromosome partition protein Smc"  
"OPBO22\_00319" 37489 "s59E5H2" 0 "Chromosome partition protein Smc"  
"OPBO22\_00319" 37489 "s63E6H2" 0 "Chromosome partition protein Smc"  
"OPBO22\_00320" 37490 "s59E13H2" 0 "Ribonuclease 3"  
"OPBO22\_00320" 37490 "s59E25H2" 0 "Ribonuclease 3"  
"OPBO22\_00320" 37490 "s59E5H2" 0 "Ribonuclease 3"  
"OPBO22\_00320" 37490 "s63E6H2" 0 "Ribonuclease 3"  
"OPBO22\_00321" 37491 "s59E13H2" 0 "Acyl carrier protein"  
"OPBO22\_00321" 37491 "s59E25H2" 0 "Acyl carrier protein"  
"OPBO22\_00321" 37491 "s59E5H2" 0 "Acyl carrier protein"  
"OPBO22\_00321" 37491 "s63E6H2" 0 "Acyl carrier protein"  
"OPBO22\_00322" 37492 "s59E13H2" 0 "Phosphate acyltransferase"  
"OPBO22\_00322" 37492 "s59E25H2" 0 "Phosphate acyltransferase"  
"OPBO22\_00322" 37492 "s59E5H2" 0 "Phosphate acyltransferase"  
"OPBO22\_00322" 37492 "s63E6H2" 0 "Phosphate acyltransferase"  
"OPBO22\_00323" 37493 "s59E13H2" 0 "Phosphate acetyltransferase"  
"OPBO22\_00323" 37493 "s59E25H2" 0 "Phosphate acetyltransferase"

"OPBO22\_00323" 37493 "s59E5H2" 0 "Phosphate acetyltransferase"  
"OPBO22\_00323" 37493 "s63E6H2" 0 "Phosphate acetyltransferase"  
"OPBO22\_00324" 37494 "s59E13H2" 0 "Succinyl-CoA ligase [ADP-forming] subunit alpha"  
"OPBO22\_00324" 37494 "s59E25H2" 0 "Succinyl-CoA ligase [ADP-forming] subunit alpha"  
"OPBO22\_00324" 37494 "s59E5H2" 0 "Succinyl-CoA ligase [ADP-forming] subunit alpha"  
"OPBO22\_00324" 37494 "s63E6H2" 0 "Succinyl-CoA ligase [ADP-forming] subunit alpha"  
"OPBO22\_00325" 37495 "s59E13H2" 0 "50S ribosomal protein L32"  
"OPBO22\_00325" 37495 "s59E25H2" 0 "50S ribosomal protein L32"  
"OPBO22\_00325" 37495 "s59E5H2" 0 "50S ribosomal protein L32"  
"OPBO22\_00325" 37495 "s63E6H2" 0 "50S ribosomal protein L32"  
"OPBO22\_00326" 37496 "s59E13H2" 0 "hypothetical protein"  
"OPBO22\_00326" 37496 "s59E25H2" 0 "hypothetical protein"  
"OPBO22\_00326" 37496 "s59E5H2" 0 "hypothetical protein"  
"OPBO22\_00326" 37496 "s63E6H2" 0 "hypothetical protein"  
"OPBO22\_00327" 37497 "s59E13H2" 0 "Phosphopantetheine adenylyltransferase"  
"OPBO22\_00327" 37497 "s59E25H2" 0 "Phosphopantetheine adenylyltransferase"  
"OPBO22\_00327" 37497 "s59E5H2" 0 "Phosphopantetheine adenylyltransferase"  
"OPBO22\_00327" 37497 "s63E6H2" 0 "Phosphopantetheine adenylyltransferase"  
"OPBO22\_00328" 37498 "s59E13H2" 0 "Ribosomal RNA small subunit methyltransferase D"  
"OPBO22\_00328" 37498 "s59E25H2" 0 "Ribosomal RNA small subunit methyltransferase D"  
"OPBO22\_00328" 37498 "s59E5H2" 0 "Ribosomal RNA small subunit methyltransferase D"  
"OPBO22\_00328" 37498 "s63E6H2" 0 "Ribosomal RNA small subunit methyltransferase D"  
"OPBO22\_00329" 37499 "s59E13H2" 0 "ATP-dependent DNA helicase RecG"  
"OPBO22\_00329" 37499 "s59E25H2" 0 "ATP-dependent DNA helicase RecG"  
"OPBO22\_00329" 37499 "s59E5H2" 0 "ATP-dependent DNA helicase RecG"  
"OPBO22\_00329" 37499 "s63E6H2" 0 "ATP-dependent DNA helicase RecG"  
"OPBO22\_00330" 37500 "s59E13H2" 0 "DAK2 domain protein"  
"OPBO22\_00330" 37500 "s59E25H2" 0 "DAK2 domain protein"  
"OPBO22\_00330" 37500 "s59E5H2" 0 "DAK2 domain protein"  
"OPBO22\_00330" 37500 "s63E6H2" 0 "DAK2 domain protein"  
"OPBO22\_00331" 37501 "s59E13H2" 0 "hypothetical protein"  
"OPBO22\_00331" 37501 "s59E25H2" 0 "hypothetical protein"  
"OPBO22\_00331" 37501 "s59E5H2" 0 "hypothetical protein"  
"OPBO22\_00331" 37501 "s63E6H2" 0 "hypothetical protein"  
"OPBO22\_00332" 37502 "s59E13H2" 0 "50S ribosomal protein L28"  
"OPBO22\_00332" 37502 "s59E25H2" 0 "50S ribosomal protein L28"  
"OPBO22\_00332" 37502 "s59E5H2" 0 "50S ribosomal protein L28"  
"OPBO22\_00332" 37502 "s63E6H2" 0 "50S ribosomal protein L28"  
"OPBO22\_00333" 37503 "s59E13H2" 0 "Phosphodiesterase YfcE"  
"OPBO22\_00333" 37503 "s59E25H2" 0 "Phosphodiesterase YfcE"  
"OPBO22\_00333" 37503 "s59E5H2" 0 "Phosphodiesterase YfcE"  
"OPBO22\_00333" 37503 "s63E6H2" 0 "Phosphodiesterase YfcE"  
"OPBO22\_00334" 37504 "s59E13H2" 0 "6,7-dimethyl-8-ribityllumazine synthase"  
"OPBO22\_00334" 37504 "s59E25H2" 0 "6,7-dimethyl-8-ribityllumazine synthase"  
"OPBO22\_00334" 37504 "s59E5H2" 0 "6,7-dimethyl-8-ribityllumazine synthase"  
"OPBO22\_00334" 37504 "s63E6H2" 0 "6,7-dimethyl-8-ribityllumazine synthase"  
"OPBO22\_00335" 37505 "s59E13H2" 0 "Riboflavin biosynthesis protein RibBA"

"OPBO22\_00335" 37505 "s59E25H2" 0 "Riboflavin biosynthesis protein RibBA"  
"OPBO22\_00335" 37505 "s59E5H2" 0 "Riboflavin biosynthesis protein RibBA"  
"OPBO22\_00335" 37505 "s63E6H2" 0 "Riboflavin biosynthesis protein RibBA"  
"OPBO22\_00336" 37506 "s59E13H2" 0 "Riboflavin synthase"  
"OPBO22\_00336" 37506 "s59E25H2" 0 "Riboflavin synthase"  
"OPBO22\_00336" 37506 "s59E5H2" 0 "Riboflavin synthase"  
"OPBO22\_00336" 37506 "s63E6H2" 0 "Riboflavin synthase"  
"OPBO22\_00337" 37507 "s59E13H2" 0 "Riboflavin biosynthesis protein RibD"  
"OPBO22\_00337" 37507 "s59E25H2" 0 "Riboflavin biosynthesis protein RibD"  
"OPBO22\_00337" 37507 "s59E5H2" 0 "Riboflavin biosynthesis protein RibD"  
"OPBO22\_00337" 37507 "s63E6H2" 0 "Riboflavin biosynthesis protein RibD"  
"OPBO22\_00339" 37509 "s59E13H2" 0 "Ribulose-phosphate 3-epimerase"  
"OPBO22\_00339" 37509 "s59E25H2" 0 "Ribulose-phosphate 3-epimerase"  
"OPBO22\_00339" 37509 "s59E5H2" 0 "Ribulose-phosphate 3-epimerase"  
"OPBO22\_00339" 37509 "s63E6H2" 0 "Ribulose-phosphate 3-epimerase"  
"OPBO22\_00340" 37510 "s59E13H2" 0 "Methionyl-tRNA formyltransferase"  
"OPBO22\_00340" 37510 "s59E25H2" 0 "Methionyl-tRNA formyltransferase"  
"OPBO22\_00340" 37510 "s59E5H2" 0 "Methionyl-tRNA formyltransferase"  
"OPBO22\_00340" 37510 "s63E6H2" 0 "Methionyl-tRNA formyltransferase"  
"OPBO22\_00341" 37511 "s59E13H2" 0 "Peptide deformylase"  
"OPBO22\_00341" 37511 "s59E25H2" 0 "Peptide deformylase"  
"OPBO22\_00341" 37511 "s59E5H2" 0 "Peptide deformylase"  
"OPBO22\_00341" 37511 "s63E6H2" 0 "Peptide deformylase"  
"OPBO22\_00342" 37512 "s59E13H2" 0 "Primosomal protein N"  
"OPBO22\_00342" 37512 "s59E25H2" 0 "Primosomal protein N"  
"OPBO22\_00342" 37512 "s59E5H2" 0 "Primosomal protein N"  
"OPBO22\_00342" 37512 "s63E6H2" 0 "Primosomal protein N"  
"OPBO22\_00343" 37513 "s59E13H2" 0 "DNA-directed RNA polymerase subunit omega"  
"OPBO22\_00343" 37513 "s59E25H2" 0 "DNA-directed RNA polymerase subunit omega"  
"OPBO22\_00343" 37513 "s59E5H2" 0 "DNA-directed RNA polymerase subunit omega"  
"OPBO22\_00343" 37513 "s63E6H2" 0 "DNA-directed RNA polymerase subunit omega"  
"OPBO22\_00344" 37514 "s59E13H2" 0 "Guanylate kinase"  
"OPBO22\_00344" 37514 "s59E25H2" 0 "Guanylate kinase"  
"OPBO22\_00344" 37514 "s59E5H2" 0 "Guanylate kinase"  
"OPBO22\_00344" 37514 "s63E6H2" 0 "Guanylate kinase"  
"OPBO22\_00345" 37515 "s59E13H2" 0 "hypothetical protein"  
"OPBO22\_00345" 37515 "s59E25H2" 0 "hypothetical protein"  
"OPBO22\_00345" 37515 "s59E5H2" 0 "hypothetical protein"  
"OPBO22\_00345" 37515 "s63E6H2" 0 "hypothetical protein"  
"OPBO22\_00346" 37516 "s59E13H2" 0 "Endo-1,4-beta-xylanase A precursor"  
"OPBO22\_00346" 37516 "s59E25H2" 0 "Endo-1,4-beta-xylanase A precursor"  
"OPBO22\_00346" 37516 "s59E5H2" 0 "Endo-1,4-beta-xylanase A precursor"  
"OPBO22\_00346" 37516 "s63E6H2" 0 "Endo-1,4-beta-xylanase A precursor"  
"OPBO22\_00347" 37517 "s59E13H2" 0 "VIT family protein"  
"OPBO22\_00347" 37517 "s59E25H2" 0 "VIT family protein"  
"OPBO22\_00347" 37517 "s59E5H2" 0 "VIT family protein"  
"OPBO22\_00347" 37517 "s63E6H2" 0 "VIT family protein"

"OPBO22\_00348" 37518 "s59E13H2" 0 "hypothetical protein"  
"OPBO22\_00348" 37518 "s59E25H2" 0 "hypothetical protein"  
"OPBO22\_00348" 37518 "s59E5H2" 0 "hypothetical protein"  
"OPBO22\_00348" 37518 "s63E6H2" 0 "hypothetical protein"  
"OPBO22\_00349" 37519 "s59E13H2" 0 "Ribosomal large subunit pseudouridine synthase D"  
"OPBO22\_00349" 37519 "s59E25H2" 0 "Ribosomal large subunit pseudouridine synthase D"  
"OPBO22\_00349" 37519 "s59E5H2" 0 "Ribosomal large subunit pseudouridine synthase D"  
"OPBO22\_00349" 37519 "s63E6H2" 0 "Ribosomal large subunit pseudouridine synthase D"  
"OPBO22\_00350" 37520 "s59E13H2" 0 "Prolipoprotein diacylglyceryl transferase"  
"OPBO22\_00350" 37520 "s59E25H2" 0 "Prolipoprotein diacylglyceryl transferase"  
"OPBO22\_00350" 37520 "s59E5H2" 0 "Prolipoprotein diacylglyceryl transferase"  
"OPBO22\_00350" 37520 "s63E6H2" 0 "Prolipoprotein diacylglyceryl transferase"  
"OPBO22\_00351" 37521 "s59E13H2" 0 "Lipoprotein signal peptidase"  
"OPBO22\_00351" 37521 "s59E25H2" 0 "Lipoprotein signal peptidase"  
"OPBO22\_00351" 37521 "s59E5H2" 0 "Lipoprotein signal peptidase"  
"OPBO22\_00351" 37521 "s63E6H2" 0 "Lipoprotein signal peptidase"  
"OPBO22\_00352" 37522 "s59E13H2" 0 "Isoleucine--tRNA ligase"  
"OPBO22\_00352" 37522 "s59E25H2" 0 "Isoleucine--tRNA ligase"  
"OPBO22\_00352" 37522 "s59E5H2" 0 "Isoleucine--tRNA ligase"  
"OPBO22\_00352" 37522 "s63E6H2" 0 "Isoleucine--tRNA ligase"  
"OPBO22\_00353" 37523 "s59E13H2" 0 "Septum site-determining protein DivIVA"  
"OPBO22\_00353" 37523 "s59E25H2" 0 "Septum site-determining protein DivIVA"  
"OPBO22\_00353" 37523 "s59E5H2" 0 "Septum site-determining protein DivIVA"  
"OPBO22\_00353" 37523 "s63E6H2" 0 "Septum site-determining protein DivIVA"  
"OPBO22\_00354" 37524 "s59E13H2" 0 "Pyrroline-5-carboxylate reductase"  
"OPBO22\_00354" 37524 "s59E25H2" 0 "Pyrroline-5-carboxylate reductase"  
"OPBO22\_00354" 37524 "s59E5H2" 0 "Pyrroline-5-carboxylate reductase"  
"OPBO22\_00354" 37524 "s63E6H2" 0 "Pyrroline-5-carboxylate reductase"  
"OPBO22\_00355" 37525 "s59E13H2" 0 "Cell division protein SepF"  
"OPBO22\_00355" 37525 "s59E25H2" 0 "Cell division protein SepF"  
"OPBO22\_00355" 37525 "s59E5H2" 0 "Cell division protein SepF"  
"OPBO22\_00355" 37525 "s63E6H2" 0 "Cell division protein SepF"  
"OPBO22\_00356" 37526 "s59E13H2" 0 "hypothetical protein"  
"OPBO22\_00356" 37526 "s59E25H2" 0 "hypothetical protein"  
"OPBO22\_00356" 37526 "s59E5H2" 0 "hypothetical protein"  
"OPBO22\_00356" 37526 "s63E6H2" 0 "hypothetical protein"  
"OPBO22\_00357" 37527 "s59E13H2" 0 "Cell division protein FtsZ"  
"OPBO22\_00357" 37527 "s59E25H2" 0 "Cell division protein FtsZ"  
"OPBO22\_00357" 37527 "s59E5H2" 0 "Cell division protein FtsZ"  
"OPBO22\_00357" 37527 "s63E6H2" 0 "Cell division protein FtsZ"  
"OPBO22\_00358" 37528 "s59E13H2" 0 "Cell division protein FtsA"  
"OPBO22\_00358" 37528 "s59E25H2" 0 "Cell division protein FtsA"  
"OPBO22\_00358" 37528 "s59E5H2" 0 "Cell division protein FtsA"  
"OPBO22\_00358" 37528 "s63E6H2" 0 "Cell division protein FtsA"  
"OPBO22\_00359" 37529 "s59E13H2" 0 "cell division protein FtsQ"  
"OPBO22\_00359" 37529 "s59E25H2" 0 "cell division protein FtsQ"  
"OPBO22\_00359" 37529 "s59E5H2" 0 "cell division protein FtsQ"



"OPBO22\_00359" 37529 "s63E6H2" 0 "cell division protein FtsQ"  
"OPBO22\_00360" 37530 "s59E13H2" 0 "UDP-N-acetylenolpyruvoylglucosamine reductase"  
"OPBO22\_00360" 37530 "s59E25H2" 0 "UDP-N-acetylenolpyruvoylglucosamine reductase"  
"OPBO22\_00360" 37530 "s59E5H2" 0 "UDP-N-acetylenolpyruvoylglucosamine reductase"  
"OPBO22\_00360" 37530 "s63E6H2" 0 "UDP-N-acetylenolpyruvoylglucosamine reductase"  
"OPBO22\_00361" 37531 "s59E13H2" 0 "UDP-N-acetylmuramate--L-alanine ligase"  
"OPBO22\_00361" 37531 "s59E25H2" 0 "UDP-N-acetylmuramate--L-alanine ligase"  
"OPBO22\_00361" 37531 "s59E5H2" 0 "UDP-N-acetylmuramate--L-alanine ligase"  
"OPBO22\_00361" 37531 "s63E6H2" 0 "UDP-N-acetylmuramate--L-alanine ligase"  
"OPBO22\_00362" 37532 "s59E13H2" 0 "UDP-N-acetylglucosamine--N-acetylmuramyl-(pentapeptide) pyrophosphoryl-undecaprenol N-acetylglucosamine transferase"  
"OPBO22\_00362" 37532 "s59E25H2" 0 "UDP-N-acetylglucosamine--N-acetylmuramyl-(pentapeptide) pyrophosphoryl-undecaprenol N-acetylglucosamine transferase"  
"OPBO22\_00362" 37532 "s59E5H2" 0 "UDP-N-acetylglucosamine--N-acetylmuramyl-(pentapeptide) pyrophosphoryl-undecaprenol N-acetylglucosamine transferase"  
"OPBO22\_00362" 37532 "s63E6H2" 0 "UDP-N-acetylglucosamine--N-acetylmuramyl-(pentapeptide) pyrophosphoryl-undecaprenol N-acetylglucosamine transferase"  
"OPBO22\_00363" 37533 "s59E13H2" 0 "Lipid II flippase FtsW"  
"OPBO22\_00363" 37533 "s59E25H2" 0 "Lipid II flippase FtsW"  
"OPBO22\_00363" 37533 "s59E5H2" 0 "Lipid II flippase FtsW"  
"OPBO22\_00363" 37533 "s63E6H2" 0 "Lipid II flippase FtsW"  
"OPBO22\_00364" 37534 "s59E13H2" 0 "UDP-N-acetylmuramoylalanine--D-glutamate ligase"  
"OPBO22\_00364" 37534 "s59E25H2" 0 "UDP-N-acetylmuramoylalanine--D-glutamate ligase"  
"OPBO22\_00364" 37534 "s59E5H2" 0 "UDP-N-acetylmuramoylalanine--D-glutamate ligase"  
"OPBO22\_00364" 37534 "s63E6H2" 0 "UDP-N-acetylmuramoylalanine--D-glutamate ligase"  
"OPBO22\_00365" 37535 "s59E13H2" 0 "Phospho-N-acetylmuramoyl-pentapeptide-transferase"  
"OPBO22\_00365" 37535 "s59E25H2" 0 "Phospho-N-acetylmuramoyl-pentapeptide-transferase"  
"OPBO22\_00365" 37535 "s59E5H2" 0 "Phospho-N-acetylmuramoyl-pentapeptide-transferase"  
"OPBO22\_00365" 37535 "s63E6H2" 0 "Phospho-N-acetylmuramoyl-pentapeptide-transferase"  
"OPBO22\_00366" 37536 "s59E13H2" 0 "UDP-N-acetylmuramoyl-tripeptide--D-alanyl-D-alanine ligase"  
"OPBO22\_00366" 37536 "s59E25H2" 0 "UDP-N-acetylmuramoyl-tripeptide--D-alanyl-D-alanine ligase"  
"OPBO22\_00366" 37536 "s59E5H2" 0 "UDP-N-acetylmuramoyl-tripeptide--D-alanyl-D-alanine ligase"  
"OPBO22\_00366" 37536 "s63E6H2" 0 "UDP-N-acetylmuramoyl-tripeptide--D-alanyl-D-alanine ligase"  
"OPBO22\_00367" 37537 "s59E13H2" 0 "UDP-N-acetylmuramoyl-L-alanyl-D-glutamate--2,6-diaminopimelate ligase"  
"OPBO22\_00367" 37537 "s59E25H2" 0 "UDP-N-acetylmuramoyl-L-alanyl-D-glutamate--2,6-diaminopimelate ligase"  
"OPBO22\_00367" 37537 "s59E5H2" 0 "UDP-N-acetylmuramoyl-L-alanyl-D-glutamate--2,6-diaminopimelate ligase"  
"OPBO22\_00367" 37537 "s63E6H2" 0 "UDP-N-acetylmuramoyl-L-alanyl-D-glutamate--2,6-diaminopimelate ligase"  
"OPBO22\_00368" 37538 "s59E13H2" 0 "Flagellum site-determining protein YlxH"  
"OPBO22\_00368" 37538 "s59E25H2" 0 "Flagellum site-determining protein YlxH"  
"OPBO22\_00368" 37538 "s59E5H2" 0 "Flagellum site-determining protein YlxH"  
"OPBO22\_00368" 37538 "s63E6H2" 0 "Flagellum site-determining protein YlxH"  
"OPBO22\_00369" 37539 "s59E13H2" 0 "Putative conjugal transfer protein/MT3759"  
"OPBO22\_00369" 37539 "s59E25H2" 0 "Putative conjugal transfer protein/MT3759"  
"OPBO22\_00369" 37539 "s59E5H2" 0 "Putative conjugal transfer protein/MT3759"  
"OPBO22\_00369" 37539 "s63E6H2" 0 "Putative conjugal transfer protein/MT3759"  
"OPBO22\_00370" 37540 "s59E13H2" 0 "von Willebrand factor type A domain protein"  
"OPBO22\_00370" 37540 "s59E25H2" 0 "von Willebrand factor type A domain protein"  
"OPBO22\_00370" 37540 "s59E5H2" 0 "von Willebrand factor type A domain protein"  
"OPBO22\_00370" 37540 "s63E6H2" 0 "von Willebrand factor type A domain protein"  
"OPBO22\_00371" 37541 "s59E13H2" 0 "Bacterial type II secretion system protein F domain protein"  
"OPBO22\_00371" 37541 "s59E25H2" 0 "Bacterial type II secretion system protein F domain protein"

"OPBO22\_00371" 37541 "s59E5H2" 0 "Bacterial type II secretion system protein F domain protein"  
"OPBO22\_00371" 37541 "s63E6H2" 0 "Bacterial type II secretion system protein F domain protein"  
"OPBO22\_00372" 37542 "s59E13H2" 0 "Bacterial type II secretion system protein F domain protein"  
"OPBO22\_00372" 37542 "s59E25H2" 0 "Bacterial type II secretion system protein F domain protein"  
"OPBO22\_00372" 37542 "s59E5H2" 0 "Bacterial type II secretion system protein F domain protein"  
"OPBO22\_00372" 37542 "s63E6H2" 0 "Bacterial type II secretion system protein F domain protein"  
"OPBO22\_00373" 37543 "s59E13H2" 0 "hypothetical protein"  
"OPBO22\_00373" 37543 "s59E25H2" 0 "hypothetical protein"  
"OPBO22\_00373" 37543 "s59E5H2" 0 "hypothetical protein"  
"OPBO22\_00373" 37543 "s63E6H2" 0 "hypothetical protein"  
"OPBO22\_00374" 37544 "s59E13H2" 0 "hypothetical protein"  
"OPBO22\_00374" 37544 "s59E25H2" 0 "hypothetical protein"  
"OPBO22\_00374" 37544 "s59E5H2" 0 "hypothetical protein"  
"OPBO22\_00374" 37544 "s63E6H2" 0 "hypothetical protein"  
"OPBO22\_00375" 37545 "s59E13H2" 0 "hypothetical protein"  
"OPBO22\_00375" 37545 "s59E25H2" 0 "hypothetical protein"  
"OPBO22\_00375" 37545 "s59E5H2" 0 "hypothetical protein"  
"OPBO22\_00375" 37545 "s63E6H2" 0 "hypothetical protein"  
"OPBO22\_00377" 37547 "s59E13H2" 0 "Ribbon-helix-helix protein, copG family"  
"OPBO22\_00377" 37547 "s59E25H2" 0 "Ribbon-helix-helix protein, copG family"  
"OPBO22\_00377" 37547 "s59E5H2" 0 "Ribbon-helix-helix protein, copG family"  
"OPBO22\_00377" 37547 "s63E6H2" 0 "Ribbon-helix-helix protein, copG family"  
"OPBO22\_00378" 37548 "s59E13H2" 0 "Toxin RelG"  
"OPBO22\_00378" 37548 "s59E25H2" 0 "Toxin RelG"  
"OPBO22\_00378" 37548 "s59E5H2" 0 "Toxin RelG"  
"OPBO22\_00378" 37548 "s63E6H2" 0 "Toxin RelG"  
"OPBO22\_00380" 37550 "s59E13H2" 0 "hypothetical protein"  
"OPBO22\_00380" 37550 "s59E25H2" 0 "hypothetical protein"  
"OPBO22\_00380" 37550 "s59E5H2" 0 "hypothetical protein"  
"OPBO22\_00380" 37550 "s63E6H2" 0 "hypothetical protein"  
"OPBO22\_00381" 37551 "s59E13H2" 0 "hypothetical protein"  
"OPBO22\_00381" 37551 "s59E25H2" 0 "hypothetical protein"  
"OPBO22\_00381" 37551 "s59E5H2" 0 "hypothetical protein"  
"OPBO22\_00381" 37551 "s63E6H2" 0 "hypothetical protein"  
"OPBO22\_00383" 37553 "s59E13H2" 0 "hypothetical protein"  
"OPBO22\_00383" 37553 "s59E25H2" 0 "hypothetical protein"  
"OPBO22\_00383" 37553 "s59E5H2" 0 "hypothetical protein"  
"OPBO22\_00383" 37553 "s63E6H2" 0 "hypothetical protein"  
"OPBO22\_00384" 37554 "s59E13H2" 0 "hypothetical protein"  
"OPBO22\_00384" 37554 "s59E25H2" 0 "hypothetical protein"  
"OPBO22\_00384" 37554 "s59E5H2" 0 "hypothetical protein"  
"OPBO22\_00384" 37554 "s63E6H2" 0 "hypothetical protein"  
"OPBO22\_00386" 37556 "s59E13H2" 0 "Endonuclease III"  
"OPBO22\_00386" 37556 "s59E25H2" 0 "Endonuclease III"  
"OPBO22\_00386" 37556 "s59E5H2" 0 "Endonuclease III"  
"OPBO22\_00386" 37556 "s63E6H2" 0 "Endonuclease III"  
"OPBO22\_00387" 37557 "s59E13H2" 0 "putative ATP-dependent RNA helicase"

"OPBO22\_00387" 37557 "s59E25H2" 0 "putative ATP-dependent RNA helicase"  
"OPBO22\_00387" 37557 "s59E5H2" 0 "putative ATP-dependent RNA helicase"  
"OPBO22\_00387" 37557 "s63E6H2" 0 "putative ATP-dependent RNA helicase"  
"OPBO22\_00390" 37560 "s59E13H2" 0 "Type IIS restriction enzyme Eco57I"  
"OPBO22\_00390" 37560 "s59E25H2" 0 "Type IIS restriction enzyme Eco57I"  
"OPBO22\_00390" 37560 "s59E5H2" 0 "Type IIS restriction enzyme Eco57I"  
"OPBO22\_00390" 37560 "s63E6H2" 0 "Type IIS restriction enzyme Eco57I"  
"OPBO22\_00391" 37561 "s59E13H2" 0 "Penicillin-binding protein 2D"  
"OPBO22\_00391" 37561 "s59E25H2" 0 "Penicillin-binding protein 2D"  
"OPBO22\_00391" 37561 "s59E5H2" 0 "Penicillin-binding protein 2D"  
"OPBO22\_00391" 37561 "s63E6H2" 0 "Penicillin-binding protein 2D"  
"OPBO22\_00392" 37562 "s59E13H2" 0 "Transcriptional regulator LytR"  
"OPBO22\_00392" 37562 "s59E25H2" 0 "Transcriptional regulator LytR"  
"OPBO22\_00392" 37562 "s59E5H2" 0 "Transcriptional regulator LytR"  
"OPBO22\_00392" 37562 "s63E6H2" 0 "Transcriptional regulator LytR"  
"OPBO22\_00393" 37563 "s59E13H2" 0 "1,4-alpha-glucan branching enzyme"  
"OPBO22\_00393" 37563 "s59E25H2" 0 "1,4-alpha-glucan branching enzyme"  
"OPBO22\_00393" 37563 "s59E5H2" 0 "1,4-alpha-glucan branching enzyme"  
"OPBO22\_00393" 37563 "s63E6H2" 0 "1,4-alpha-glucan branching enzyme"  
"OPBO22\_00394" 37564 "s59E13H2" 0 "NIF3 (NGG1p interacting factor 3)"  
"OPBO22\_00394" 37564 "s59E25H2" 0 "NIF3 (NGG1p interacting factor 3)"  
"OPBO22\_00394" 37564 "s59E5H2" 0 "NIF3 (NGG1p interacting factor 3)"  
"OPBO22\_00394" 37564 "s63E6H2" 0 "NIF3 (NGG1p interacting factor 3)"  
"OPBO22\_00395" 37565 "s59E13H2" 0 "putative sugar kinase"  
"OPBO22\_00395" 37565 "s59E25H2" 0 "putative sugar kinase"  
"OPBO22\_00395" 37565 "s59E5H2" 0 "putative sugar kinase"  
"OPBO22\_00395" 37565 "s63E6H2" 0 "putative sugar kinase"  
"OPBO22\_00396" 37566 "s59E13H2" 0 "DNA-binding transcriptional activator PspC"  
"OPBO22\_00396" 37566 "s59E25H2" 0 "DNA-binding transcriptional activator PspC"  
"OPBO22\_00396" 37566 "s59E5H2" 0 "DNA-binding transcriptional activator PspC"  
"OPBO22\_00396" 37566 "s63E6H2" 0 "DNA-binding transcriptional activator PspC"  
"OPBO22\_00397" 37567 "s59E13H2" 0 "hypothetical protein"  
"OPBO22\_00397" 37567 "s59E25H2" 0 "hypothetical protein"  
"OPBO22\_00397" 37567 "s59E5H2" 0 "hypothetical protein"  
"OPBO22\_00397" 37567 "s63E6H2" 0 "hypothetical protein"  
"OPBO22\_00398" 37568 "s59E13H2" 0 "Hydrogenase 2 maturation protease"  
"OPBO22\_00398" 37568 "s59E25H2" 0 "Hydrogenase 2 maturation protease"  
"OPBO22\_00398" 37568 "s59E5H2" 0 "Hydrogenase 2 maturation protease"  
"OPBO22\_00398" 37568 "s63E6H2" 0 "Hydrogenase 2 maturation protease"  
"OPBO22\_00399" 37569 "s59E13H2" 0 "Protein-L-isoaspartate O-methyltransferase"  
"OPBO22\_00399" 37569 "s59E25H2" 0 "Protein-L-isoaspartate O-methyltransferase"  
"OPBO22\_00399" 37569 "s59E5H2" 0 "Protein-L-isoaspartate O-methyltransferase"  
"OPBO22\_00399" 37569 "s63E6H2" 0 "Protein-L-isoaspartate O-methyltransferase"  
"OPBO22\_00400" 37570 "s59E13H2" 0 "F420-non-reducing hydrogenase iron-sulfur subunit D"  
"OPBO22\_00400" 37570 "s59E25H2" 0 "F420-non-reducing hydrogenase iron-sulfur subunit D"  
"OPBO22\_00400" 37570 "s59E5H2" 0 "F420-non-reducing hydrogenase iron-sulfur subunit D"  
"OPBO22\_00400" 37570 "s63E6H2" 0 "F420-non-reducing hydrogenase iron-sulfur subunit D"

"OPBO22\_00401" 37571 "s59E13H2" 0 "CoB--CoM heterodisulfide reductase iron-sulfur subunit A"  
"OPBO22\_00401" 37571 "s59E25H2" 0 "CoB--CoM heterodisulfide reductase iron-sulfur subunit A"  
"OPBO22\_00401" 37571 "s59E5H2" 0 "CoB--CoM heterodisulfide reductase iron-sulfur subunit A"  
"OPBO22\_00401" 37571 "s63E6H2" 0 "CoB--CoM heterodisulfide reductase iron-sulfur subunit A"  
"OPBO22\_00402" 37572 "s59E13H2" 0 "F420-non-reducing hydrogenase iron-sulfur subunit D"  
"OPBO22\_00402" 37572 "s59E25H2" 0 "F420-non-reducing hydrogenase iron-sulfur subunit D"  
"OPBO22\_00402" 37572 "s59E5H2" 0 "F420-non-reducing hydrogenase iron-sulfur subunit D"  
"OPBO22\_00402" 37572 "s63E6H2" 0 "F420-non-reducing hydrogenase iron-sulfur subunit D"  
"OPBO22\_00403" 37573 "s59E13H2" 0 "CoB--CoM heterodisulfide reductase iron-sulfur subunit A"  
"OPBO22\_00403" 37573 "s59E25H2" 0 "CoB--CoM heterodisulfide reductase iron-sulfur subunit A"  
"OPBO22\_00403" 37573 "s59E5H2" 0 "CoB--CoM heterodisulfide reductase iron-sulfur subunit A"  
"OPBO22\_00403" 37573 "s63E6H2" 0 "CoB--CoM heterodisulfide reductase iron-sulfur subunit A"  
"OPBO22\_00404" 37574 "s59E13H2" 0 "zinc-responsive transcriptional regulator"  
"OPBO22\_00404" 37574 "s59E25H2" 0 "zinc-responsive transcriptional regulator"  
"OPBO22\_00404" 37574 "s59E5H2" 0 "zinc-responsive transcriptional regulator"  
"OPBO22\_00404" 37574 "s63E6H2" 0 "zinc-responsive transcriptional regulator"  
"OPBO22\_00405" 37575 "s59E13H2" 0 "D-alanyl-D-alanine carboxypeptidase DacB precursor"  
"OPBO22\_00405" 37575 "s59E25H2" 0 "D-alanyl-D-alanine carboxypeptidase DacB precursor"  
"OPBO22\_00405" 37575 "s59E5H2" 0 "D-alanyl-D-alanine carboxypeptidase DacB precursor"  
"OPBO22\_00405" 37575 "s63E6H2" 0 "D-alanyl-D-alanine carboxypeptidase DacB precursor"  
"OPBO22\_00406" 37576 "s59E13H2" 0 "Putative phosphoribosyl transferase/MT0597"  
"OPBO22\_00406" 37576 "s59E25H2" 0 "Putative phosphoribosyl transferase/MT0597"  
"OPBO22\_00406" 37576 "s59E5H2" 0 "Putative phosphoribosyl transferase/MT0597"  
"OPBO22\_00406" 37576 "s63E6H2" 0 "Putative phosphoribosyl transferase/MT0597"  
"OPBO22\_00407" 37577 "s59E13H2" 0 "Putative lipoprotein YerB precursor"  
"OPBO22\_00407" 37577 "s59E25H2" 0 "Putative lipoprotein YerB precursor"  
"OPBO22\_00407" 37577 "s59E5H2" 0 "Putative lipoprotein YerB precursor"  
"OPBO22\_00407" 37577 "s63E6H2" 0 "Putative lipoprotein YerB precursor"  
"OPBO22\_00408" 37578 "s59E13H2" 0 "Stage V sporulation protein D"  
"OPBO22\_00408" 37578 "s59E25H2" 0 "Stage V sporulation protein D"  
"OPBO22\_00408" 37578 "s59E5H2" 0 "Stage V sporulation protein D"  
"OPBO22\_00408" 37578 "s63E6H2" 0 "Stage V sporulation protein D"  
"OPBO22\_00409" 37579 "s59E13H2" 0 "Rod shape-determining protein RodA"  
"OPBO22\_00409" 37579 "s59E25H2" 0 "Rod shape-determining protein RodA"  
"OPBO22\_00409" 37579 "s59E5H2" 0 "Rod shape-determining protein RodA"  
"OPBO22\_00409" 37579 "s63E6H2" 0 "Rod shape-determining protein RodA"  
"OPBO22\_00410" 37580 "s59E13H2" 0 "Radical SAM superfamily protein"  
"OPBO22\_00410" 37580 "s59E25H2" 0 "Radical SAM superfamily protein"  
"OPBO22\_00410" 37580 "s59E5H2" 0 "Radical SAM superfamily protein"  
"OPBO22\_00410" 37580 "s63E6H2" 0 "Radical SAM superfamily protein"  
"OPBO22\_00411" 37581 "s59E13H2" 0 "hypothetical protein"  
"OPBO22\_00411" 37581 "s59E25H2" 0 "hypothetical protein"  
"OPBO22\_00411" 37581 "s59E5H2" 0 "hypothetical protein"  
"OPBO22\_00411" 37581 "s63E6H2" 0 "hypothetical protein"  
"OPBO22\_00412" 37582 "s59E13H2" 0 "Ribonuclease G"  
"OPBO22\_00412" 37582 "s59E25H2" 0 "Ribonuclease G"  
"OPBO22\_00412" 37582 "s59E5H2" 0 "Ribonuclease G"

"OPBO22\_00412" 37582 "s63E6H2" 0 "Ribonuclease G"  
"OPBO22\_00413" 37583 "s59E13H2" 0 "50S ribosomal protein L27"  
"OPBO22\_00413" 37583 "s59E25H2" 0 "50S ribosomal protein L27"  
"OPBO22\_00413" 37583 "s59E5H2" 0 "50S ribosomal protein L27"  
"OPBO22\_00413" 37583 "s63E6H2" 0 "50S ribosomal protein L27"  
"OPBO22\_00414" 37584 "s59E13H2" 0 "GTPase ObgE"  
"OPBO22\_00414" 37584 "s59E25H2" 0 "GTPase ObgE"  
"OPBO22\_00414" 37584 "s59E5H2" 0 "GTPase ObgE"  
"OPBO22\_00414" 37584 "s63E6H2" 0 "GTPase ObgE"  
"OPBO22\_00415" 37585 "s59E13H2" 0 "putative nicotinate-nucleotide adenyllyltransferase"  
"OPBO22\_00415" 37585 "s59E25H2" 0 "putative nicotinate-nucleotide adenyllyltransferase"  
"OPBO22\_00415" 37585 "s59E5H2" 0 "putative nicotinate-nucleotide adenyllyltransferase"  
"OPBO22\_00415" 37585 "s63E6H2" 0 "putative nicotinate-nucleotide adenyllyltransferase"  
"OPBO22\_00416" 37586 "s59E13H2" 0 "Cell envelope-related transcriptional attenuator domain protein"  
"OPBO22\_00416" 37586 "s59E25H2" 0 "Cell envelope-related transcriptional attenuator domain protein"  
"OPBO22\_00416" 37586 "s59E5H2" 0 "Cell envelope-related transcriptional attenuator domain protein"  
"OPBO22\_00416" 37586 "s63E6H2" 0 "Cell envelope-related transcriptional attenuator domain protein"  
"OPBO22\_00417" 37587 "s59E13H2" 0 "Ribosomal silencing factor RsfS"  
"OPBO22\_00417" 37587 "s59E25H2" 0 "Ribosomal silencing factor RsfS"  
"OPBO22\_00417" 37587 "s59E5H2" 0 "Ribosomal silencing factor RsfS"  
"OPBO22\_00417" 37587 "s63E6H2" 0 "Ribosomal silencing factor RsfS"  
"OPBO22\_00419" 37589 "s59E13H2" 0 "Leucine--tRNA ligase"  
"OPBO22\_00419" 37589 "s59E25H2" 0 "Leucine--tRNA ligase"  
"OPBO22\_00419" 37589 "s59E5H2" 0 "Leucine--tRNA ligase"  
"OPBO22\_00419" 37589 "s63E6H2" 0 "Leucine--tRNA ligase"  
"OPBO22\_00420" 37590 "s59E13H2" 0 "ComE operon protein 1"  
"OPBO22\_00420" 37590 "s59E25H2" 0 "ComE operon protein 1"  
"OPBO22\_00420" 37590 "s59E5H2" 0 "ComE operon protein 1"  
"OPBO22\_00420" 37590 "s63E6H2" 0 "ComE operon protein 1"  
"OPBO22\_00421" 37591 "s59E13H2" 0 "ComEC family competence protein"  
"OPBO22\_00421" 37591 "s59E25H2" 0 "ComEC family competence protein"  
"OPBO22\_00421" 37591 "s59E5H2" 0 "ComEC family competence protein"  
"OPBO22\_00421" 37591 "s63E6H2" 0 "ComEC family competence protein"  
"OPBO22\_00422" 37592 "s59E13H2" 0 "DNA polymerase III subunit delta"  
"OPBO22\_00422" 37592 "s59E25H2" 0 "DNA polymerase III subunit delta"  
"OPBO22\_00422" 37592 "s59E5H2" 0 "DNA polymerase III subunit delta"  
"OPBO22\_00422" 37592 "s63E6H2" 0 "DNA polymerase III subunit delta"  
"OPBO22\_00423" 37593 "s59E13H2" 0 "30S ribosomal protein S20"  
"OPBO22\_00423" 37593 "s59E25H2" 0 "30S ribosomal protein S20"  
"OPBO22\_00423" 37593 "s59E5H2" 0 "30S ribosomal protein S20"  
"OPBO22\_00423" 37593 "s63E6H2" 0 "30S ribosomal protein S20"  
"OPBO22\_00424" 37594 "s59E13H2" 0 "putative peptidoglycan biosynthesis protein MurJ"  
"OPBO22\_00424" 37594 "s59E25H2" 0 "putative peptidoglycan biosynthesis protein MurJ"  
"OPBO22\_00424" 37594 "s59E5H2" 0 "putative peptidoglycan biosynthesis protein MurJ"  
"OPBO22\_00424" 37594 "s63E6H2" 0 "putative peptidoglycan biosynthesis protein MurJ"  
"OPBO22\_00425" 37595 "s59E13H2" 0 "Elongation factor 4"  
"OPBO22\_00425" 37595 "s59E25H2" 0 "Elongation factor 4"

"OPBO22\_00425" 37595 "s59E5H2" 0 "Elongation factor 4"  
"OPBO22\_00425" 37595 "s63E6H2" 0 "Elongation factor 4"  
"OPBO22\_00426" 37596 "s59E13H2" 0 "Chaperone protein DnaJ"  
"OPBO22\_00426" 37596 "s59E25H2" 0 "Chaperone protein DnaJ"  
"OPBO22\_00426" 37596 "s59E5H2" 0 "Chaperone protein DnaJ"  
"OPBO22\_00426" 37596 "s63E6H2" 0 "Chaperone protein DnaJ"  
"OPBO22\_00427" 37597 "s59E13H2" 0 "Threonylcarbamoyladenosine tRNA methylthiotransferase MtaB"  
"OPBO22\_00427" 37597 "s59E25H2" 0 "Threonylcarbamoyladenosine tRNA methylthiotransferase MtaB"  
"OPBO22\_00427" 37597 "s59E5H2" 0 "Threonylcarbamoyladenosine tRNA methylthiotransferase MtaB"  
"OPBO22\_00427" 37597 "s63E6H2" 0 "Threonylcarbamoyladenosine tRNA methylthiotransferase MtaB"  
"OPBO22\_00428" 37598 "s59E13H2" 0 "glutamyl-tRNA(Gln) amidotransferase subunit E"  
"OPBO22\_00428" 37598 "s59E25H2" 0 "glutamyl-tRNA(Gln) amidotransferase subunit E"  
"OPBO22\_00428" 37598 "s59E5H2" 0 "glutamyl-tRNA(Gln) amidotransferase subunit E"  
"OPBO22\_00428" 37598 "s63E6H2" 0 "glutamyl-tRNA(Gln) amidotransferase subunit E"  
"OPBO22\_00429" 37599 "s59E13H2" 0 "PhoH-like protein"  
"OPBO22\_00429" 37599 "s59E25H2" 0 "PhoH-like protein"  
"OPBO22\_00429" 37599 "s59E5H2" 0 "PhoH-like protein"  
"OPBO22\_00429" 37599 "s63E6H2" 0 "PhoH-like protein"  
"OPBO22\_00430" 37600 "s59E13H2" 0 "hypothetical protein"  
"OPBO22\_00430" 37600 "s59E25H2" 0 "hypothetical protein"  
"OPBO22\_00430" 37600 "s59E5H2" 0 "hypothetical protein"  
"OPBO22\_00430" 37600 "s63E6H2" 0 "hypothetical protein"  
"OPBO22\_00431" 37601 "s59E13H2" 0 "Endoribonuclease YbeY"  
"OPBO22\_00431" 37601 "s59E25H2" 0 "Endoribonuclease YbeY"  
"OPBO22\_00431" 37601 "s59E5H2" 0 "Endoribonuclease YbeY"  
"OPBO22\_00431" 37601 "s63E6H2" 0 "Endoribonuclease YbeY"  
"OPBO22\_00432" 37602 "s59E13H2" 0 "Cytidine deaminase"  
"OPBO22\_00432" 37602 "s59E25H2" 0 "Cytidine deaminase"  
"OPBO22\_00432" 37602 "s59E5H2" 0 "Cytidine deaminase"  
"OPBO22\_00432" 37602 "s63E6H2" 0 "Cytidine deaminase"  
"OPBO22\_00433" 37603 "s59E13H2" 0 "GTPase Era"  
"OPBO22\_00433" 37603 "s59E25H2" 0 "GTPase Era"  
"OPBO22\_00433" 37603 "s59E5H2" 0 "GTPase Era"  
"OPBO22\_00433" 37603 "s63E6H2" 0 "GTPase Era"  
"OPBO22\_00434" 37604 "s59E13H2" 0 "DNA repair protein RecO"  
"OPBO22\_00434" 37604 "s59E25H2" 0 "DNA repair protein RecO"  
"OPBO22\_00434" 37604 "s59E5H2" 0 "DNA repair protein RecO"  
"OPBO22\_00434" 37604 "s63E6H2" 0 "DNA repair protein RecO"  
"OPBO22\_00435" 37605 "s59E13H2" 0 "Glycine--tRNA ligase alpha subunit"  
"OPBO22\_00435" 37605 "s59E25H2" 0 "Glycine--tRNA ligase alpha subunit"  
"OPBO22\_00435" 37605 "s59E5H2" 0 "Glycine--tRNA ligase alpha subunit"  
"OPBO22\_00435" 37605 "s63E6H2" 0 "Glycine--tRNA ligase alpha subunit"  
"OPBO22\_00436" 37606 "s59E13H2" 0 "Glycine--tRNA ligase beta subunit"  
"OPBO22\_00436" 37606 "s59E25H2" 0 "Glycine--tRNA ligase beta subunit"  
"OPBO22\_00436" 37606 "s59E5H2" 0 "Glycine--tRNA ligase beta subunit"  
"OPBO22\_00436" 37606 "s63E6H2" 0 "Glycine--tRNA ligase beta subunit"  
"OPBO22\_00437" 37607 "s59E13H2" 0 "RNA polymerase sigma factor SigA"

"OPBO22\_00437" 37607 "s59E25H2" 0 "RNA polymerase sigma factor SigA"  
"OPBO22\_00437" 37607 "s59E5H2" 0 "RNA polymerase sigma factor SigA"  
"OPBO22\_00437" 37607 "s63E6H2" 0 "RNA polymerase sigma factor SigA"  
"OPBO22\_00438" 37608 "s59E13H2" 0 "DNA primase"  
"OPBO22\_00438" 37608 "s59E25H2" 0 "DNA primase"  
"OPBO22\_00438" 37608 "s59E5H2" 0 "DNA primase"  
"OPBO22\_00438" 37608 "s63E6H2" 0 "DNA primase"  
"OPBO22\_00439" 37609 "s59E13H2" 0 "Pyruvate, phosphate dikinase"  
"OPBO22\_00439" 37609 "s59E25H2" 0 "Pyruvate, phosphate dikinase"  
"OPBO22\_00439" 37609 "s59E5H2" 0 "Pyruvate, phosphate dikinase"  
"OPBO22\_00439" 37609 "s63E6H2" 0 "Pyruvate, phosphate dikinase"  
"OPBO22\_00440" 37610 "s59E13H2" 0 "Glycine--tRNA ligase beta subunit"  
"OPBO22\_00440" 37610 "s59E25H2" 0 "Glycine--tRNA ligase beta subunit"  
"OPBO22\_00440" 37610 "s59E5H2" 0 "Glycine--tRNA ligase beta subunit"  
"OPBO22\_00440" 37610 "s63E6H2" 0 "Glycine--tRNA ligase beta subunit"  
"OPBO22\_00441" 37611 "s59E13H2" 0 "26 kDa periplasmic immunogenic protein precursor"  
"OPBO22\_00441" 37611 "s59E25H2" 0 "26 kDa periplasmic immunogenic protein precursor"  
"OPBO22\_00441" 37611 "s59E5H2" 0 "26 kDa periplasmic immunogenic protein precursor"  
"OPBO22\_00441" 37611 "s63E6H2" 0 "26 kDa periplasmic immunogenic protein precursor"  
"OPBO22\_00442" 37612 "s59E13H2" 0 "hypothetical protein"  
"OPBO22\_00442" 37612 "s59E25H2" 0 "hypothetical protein"  
"OPBO22\_00442" 37612 "s59E5H2" 0 "hypothetical protein"  
"OPBO22\_00442" 37612 "s63E6H2" 0 "hypothetical protein"  
"OPBO22\_00443" 37613 "s59E13H2" 0 "hypothetical protein"  
"OPBO22\_00443" 37613 "s59E25H2" 0 "hypothetical protein"  
"OPBO22\_00443" 37613 "s59E5H2" 0 "hypothetical protein"  
"OPBO22\_00443" 37613 "s63E6H2" 0 "hypothetical protein"  
"OPBO22\_00444" 37614 "s59E13H2" 0 "Integrase core domain protein"  
"OPBO22\_00444" 37614 "s59E25H2" 0 "Integrase core domain protein"  
"OPBO22\_00444" 37614 "s59E5H2" 0 "Integrase core domain protein"  
"OPBO22\_00444" 37614 "s63E6H2" 0 "Integrase core domain protein"  
"OPBO22\_00445" 37615 "s59E13H2" 0 "hypothetical protein"  
"OPBO22\_00445" 37615 "s59E25H2" 0 "hypothetical protein"  
"OPBO22\_00445" 37615 "s59E5H2" 0 "hypothetical protein"  
"OPBO22\_00445" 37615 "s63E6H2" 0 "hypothetical protein"  
"OPBO22\_00446" 37616 "s59E13H2" 0 "Purine-binding protein precursor"  
"OPBO22\_00446" 37616 "s59E25H2" 0 "Purine-binding protein precursor"  
"OPBO22\_00446" 37616 "s59E5H2" 0 "Purine-binding protein precursor"  
"OPBO22\_00446" 37616 "s63E6H2" 0 "Purine-binding protein precursor"  
"OPBO22\_00447" 37617 "s59E13H2" 0 "Galactose/methyl galactoside import ATP-binding protein MglA"  
"OPBO22\_00447" 37617 "s59E25H2" 0 "Galactose/methyl galactoside import ATP-binding protein MglA"  
"OPBO22\_00447" 37617 "s59E5H2" 0 "Galactose/methyl galactoside import ATP-binding protein MglA"  
"OPBO22\_00447" 37617 "s63E6H2" 0 "Galactose/methyl galactoside import ATP-binding protein MglA"  
"OPBO22\_00448" 37618 "s59E13H2" 0 "beta-methylgalactoside transporter inner membrane component"  
"OPBO22\_00448" 37618 "s59E25H2" 0 "beta-methylgalactoside transporter inner membrane component"  
"OPBO22\_00448" 37618 "s59E5H2" 0 "beta-methylgalactoside transporter inner membrane component"  
"OPBO22\_00448" 37618 "s63E6H2" 0 "beta-methylgalactoside transporter inner membrane component"

"OPBO22\_00449" 37619 "s59E13H2" 0 "L-arabinose transporter permease protein"  
"OPBO22\_00449" 37619 "s59E25H2" 0 "L-arabinose transporter permease protein"  
"OPBO22\_00449" 37619 "s59E5H2" 0 "L-arabinose transporter permease protein"  
"OPBO22\_00449" 37619 "s63E6H2" 0 "L-arabinose transporter permease protein"  
"OPBO22\_00450" 37620 "s59E13H2" 0 "putative transposase"  
"OPBO22\_00450" 37620 "s59E25H2" 0 "putative transposase"  
"OPBO22\_00450" 37620 "s59E5H2" 0 "putative transposase"  
"OPBO22\_00450" 37620 "s63E6H2" 0 "putative transposase"  
"OPBO22\_00451" 37621 "s59E13H2" 0 "Transposase IS200 like protein"  
"OPBO22\_00451" 37621 "s59E25H2" 0 "Transposase IS200 like protein"  
"OPBO22\_00451" 37621 "s59E5H2" 0 "Transposase IS200 like protein"  
"OPBO22\_00451" 37621 "s63E6H2" 0 "Transposase IS200 like protein"  
"OPBO22\_00452" 37622 "s59E13H2" 0 "NADH-dependent phenylglyoxylate dehydrogenase subunit epsilon"  
"OPBO22\_00452" 37622 "s59E25H2" 0 "NADH-dependent phenylglyoxylate dehydrogenase subunit epsilon"  
"OPBO22\_00452" 37622 "s59E5H2" 0 "NADH-dependent phenylglyoxylate dehydrogenase subunit epsilon"  
"OPBO22\_00452" 37622 "s63E6H2" 0 "NADH-dependent phenylglyoxylate dehydrogenase subunit epsilon"  
"OPBO22\_00453" 37623 "s59E13H2" 0 "Carbon monoxide dehydrogenase 1"  
"OPBO22\_00453" 37623 "s59E25H2" 0 "Carbon monoxide dehydrogenase 1"  
"OPBO22\_00453" 37623 "s59E5H2" 0 "Carbon monoxide dehydrogenase 1"  
"OPBO22\_00453" 37623 "s63E6H2" 0 "Carbon monoxide dehydrogenase 1"  
"OPBO22\_00454" 37624 "s59E13H2" 0 "Iron-sulfur protein"  
"OPBO22\_00454" 37624 "s59E25H2" 0 "Iron-sulfur protein"  
"OPBO22\_00454" 37624 "s59E5H2" 0 "Iron-sulfur protein"  
"OPBO22\_00454" 37624 "s63E6H2" 0 "Iron-sulfur protein"  
"OPBO22\_00455" 37625 "s59E13H2" 0 "ThiS family protein"  
"OPBO22\_00455" 37625 "s59E25H2" 0 "ThiS family protein"  
"OPBO22\_00455" 37625 "s59E5H2" 0 "ThiS family protein"  
"OPBO22\_00455" 37625 "s63E6H2" 0 "ThiS family protein"  
"OPBO22\_00456" 37626 "s59E13H2" 0 "Tungsten-containing aldehyde ferredoxin oxidoreductase"  
"OPBO22\_00456" 37626 "s59E25H2" 0 "Tungsten-containing aldehyde ferredoxin oxidoreductase"  
"OPBO22\_00456" 37626 "s59E5H2" 0 "Tungsten-containing aldehyde ferredoxin oxidoreductase"  
"OPBO22\_00456" 37626 "s63E6H2" 0 "Tungsten-containing aldehyde ferredoxin oxidoreductase"  
"OPBO22\_00457" 37627 "s59E13H2" 0 "Tungsten-containing aldehyde ferredoxin oxidoreductase"  
"OPBO22\_00457" 37627 "s59E25H2" 0 "Tungsten-containing aldehyde ferredoxin oxidoreductase"  
"OPBO22\_00457" 37627 "s59E5H2" 0 "Tungsten-containing aldehyde ferredoxin oxidoreductase"  
"OPBO22\_00457" 37627 "s63E6H2" 0 "Tungsten-containing aldehyde ferredoxin oxidoreductase"  
"OPBO22\_00458" 37628 "s59E13H2" 0 "Iron-sulfur protein"  
"OPBO22\_00458" 37628 "s59E25H2" 0 "Iron-sulfur protein"  
"OPBO22\_00458" 37628 "s59E5H2" 0 "Iron-sulfur protein"  
"OPBO22\_00458" 37628 "s63E6H2" 0 "Iron-sulfur protein"  
"OPBO22\_00459" 37629 "s59E13H2" 0 "2-oxoglutarate oxidoreductase subunit KorA"  
"OPBO22\_00459" 37629 "s59E25H2" 0 "2-oxoglutarate oxidoreductase subunit KorA"  
"OPBO22\_00459" 37629 "s59E5H2" 0 "2-oxoglutarate oxidoreductase subunit KorA"  
"OPBO22\_00459" 37629 "s63E6H2" 0 "2-oxoglutarate oxidoreductase subunit KorA"  
"OPBO22\_00460" 37630 "s59E13H2" 0 "2-oxoglutarate oxidoreductase subunit KorB"  
"OPBO22\_00460" 37630 "s59E25H2" 0 "2-oxoglutarate oxidoreductase subunit KorB"  
"OPBO22\_00460" 37630 "s59E5H2" 0 "2-oxoglutarate oxidoreductase subunit KorB"



"OPBO22\_00460" 37630 "s63E6H2" 0 "2-oxoglutarate oxidoreductase subunit KorB"  
"OPBO22\_00461" 37631 "s59E13H2" 0 "NADH-quinone oxidoreductase subunit I"  
"OPBO22\_00461" 37631 "s59E25H2" 0 "NADH-quinone oxidoreductase subunit I"  
"OPBO22\_00461" 37631 "s59E5H2" 0 "NADH-quinone oxidoreductase subunit I"  
"OPBO22\_00461" 37631 "s63E6H2" 0 "NADH-quinone oxidoreductase subunit I"  
"OPBO22\_00462" 37632 "s59E13H2" 0 "NADH-quinone oxidoreductase subunit H"  
"OPBO22\_00462" 37632 "s59E25H2" 0 "NADH-quinone oxidoreductase subunit H"  
"OPBO22\_00462" 37632 "s59E5H2" 0 "NADH-quinone oxidoreductase subunit H"  
"OPBO22\_00462" 37632 "s63E6H2" 0 "NADH-quinone oxidoreductase subunit H"  
"OPBO22\_00463" 37633 "s59E13H2" 0 "NADH-quinone oxidoreductase subunit 4"  
"OPBO22\_00463" 37633 "s59E25H2" 0 "NADH-quinone oxidoreductase subunit 4"  
"OPBO22\_00463" 37633 "s59E5H2" 0 "NADH-quinone oxidoreductase subunit 4"  
"OPBO22\_00463" 37633 "s63E6H2" 0 "NADH-quinone oxidoreductase subunit 4"  
"OPBO22\_00464" 37634 "s59E13H2" 0 "F(420)H(2) dehydrogenase subunit B"  
"OPBO22\_00464" 37634 "s59E25H2" 0 "F(420)H(2) dehydrogenase subunit B"  
"OPBO22\_00464" 37634 "s59E5H2" 0 "F(420)H(2) dehydrogenase subunit B"  
"OPBO22\_00464" 37634 "s63E6H2" 0 "F(420)H(2) dehydrogenase subunit B"  
"OPBO22\_00465" 37635 "s59E13H2" 0 "HTH-type transcriptional repressor SmtB"  
"OPBO22\_00465" 37635 "s59E25H2" 0 "HTH-type transcriptional repressor SmtB"  
"OPBO22\_00465" 37635 "s59E5H2" 0 "HTH-type transcriptional repressor SmtB"  
"OPBO22\_00465" 37635 "s63E6H2" 0 "HTH-type transcriptional repressor SmtB"  
"OPBO22\_00466" 37636 "s59E13H2" 0 "hypothetical protein"  
"OPBO22\_00466" 37636 "s59E25H2" 0 "hypothetical protein"  
"OPBO22\_00466" 37636 "s59E5H2" 0 "hypothetical protein"  
"OPBO22\_00466" 37636 "s63E6H2" 0 "hypothetical protein"  
"OPBO22\_00467" 37637 "s59E13H2" 0 "putative amino acid permease YhdG"  
"OPBO22\_00467" 37637 "s59E25H2" 0 "putative amino acid permease YhdG"  
"OPBO22\_00467" 37637 "s59E5H2" 0 "putative amino acid permease YhdG"  
"OPBO22\_00467" 37637 "s63E6H2" 0 "putative amino acid permease YhdG"  
"OPBO22\_00469" 37639 "s59E13H2" 0 "putative membrane protein"  
"OPBO22\_00469" 37639 "s59E25H2" 0 "putative membrane protein"  
"OPBO22\_00469" 37639 "s59E5H2" 0 "putative membrane protein"  
"OPBO22\_00469" 37639 "s63E6H2" 0 "putative membrane protein"  
"OPBO22\_00470" 37640 "s59E13H2" 0 "HNH endonuclease"  
"OPBO22\_00470" 37640 "s59E25H2" 0 "HNH endonuclease"  
"OPBO22\_00470" 37640 "s59E5H2" 0 "HNH endonuclease"  
"OPBO22\_00470" 37640 "s63E6H2" 0 "HNH endonuclease"  
"OPBO22\_00473" 37643 "s59E13H2" 0 "Phd\_YefM"  
"OPBO22\_00473" 37643 "s59E25H2" 0 "Phd\_YefM"  
"OPBO22\_00473" 37643 "s59E5H2" 0 "Phd\_YefM"  
"OPBO22\_00473" 37643 "s63E6H2" 0 "Phd\_YefM"  
"OPBO22\_00474" 37644 "s59E13H2" 0 "5-methylthioadenosine/S-adenosylhomocysteine deaminase"  
"OPBO22\_00474" 37644 "s59E25H2" 0 "5-methylthioadenosine/S-adenosylhomocysteine deaminase"  
"OPBO22\_00474" 37644 "s59E5H2" 0 "5-methylthioadenosine/S-adenosylhomocysteine deaminase"  
"OPBO22\_00474" 37644 "s63E6H2" 0 "5-methylthioadenosine/S-adenosylhomocysteine deaminase"  
"OPBO22\_00475" 37645 "s59E13H2" 0 "Dihydroorotate dehydrogenase B (NAD(+) ), catalytic subunit"  
"OPBO22\_00475" 37645 "s59E25H2" 0 "Dihydroorotate dehydrogenase B (NAD(+) ), catalytic subunit"

"OPBO22\_00475" 37645 "s59E5H2" 0 "Dihydroorotate dehydrogenase B (NAD(+) , catalytic subunit"  
"OPBO22\_00475" 37645 "s63E6H2" 0 "Dihydroorotate dehydrogenase B (NAD(+) , catalytic subunit"  
"OPBO22\_00476" 37646 "s59E13H2" 0 "Sortase family protein"  
"OPBO22\_00476" 37646 "s59E25H2" 0 "Sortase family protein"  
"OPBO22\_00476" 37646 "s59E5H2" 0 "Sortase family protein"  
"OPBO22\_00476" 37646 "s63E6H2" 0 "Sortase family protein"  
"OPBO22\_00477" 37647 "s59E13H2" 0 "hypothetical protein"  
"OPBO22\_00477" 37647 "s59E25H2" 0 "hypothetical protein"  
"OPBO22\_00477" 37647 "s59E5H2" 0 "hypothetical protein"  
"OPBO22\_00477" 37647 "s63E6H2" 0 "hypothetical protein"  
"OPBO22\_00478" 37648 "s59E13H2" 0 "Adenine deaminase"  
"OPBO22\_00478" 37648 "s59E25H2" 0 "Adenine deaminase"  
"OPBO22\_00478" 37648 "s59E5H2" 0 "Adenine deaminase"  
"OPBO22\_00478" 37648 "s63E6H2" 0 "Adenine deaminase"  
"OPBO22\_00479" 37649 "s59E13H2" 0 "hypothetical protein"  
"OPBO22\_00479" 37649 "s59E25H2" 0 "hypothetical protein"  
"OPBO22\_00479" 37649 "s59E5H2" 0 "hypothetical protein"  
"OPBO22\_00479" 37649 "s63E6H2" 0 "hypothetical protein"  
"OPBO22\_00480" 37650 "s59E13H2" 0 "Sporulation and spore germination"  
"OPBO22\_00480" 37650 "s59E25H2" 0 "Sporulation and spore germination"  
"OPBO22\_00480" 37650 "s59E5H2" 0 "Sporulation and spore germination"  
"OPBO22\_00480" 37650 "s63E6H2" 0 "Sporulation and spore germination"  
"OPBO22\_00481" 37651 "s59E13H2" 0 "S-methyl-5'-thioadenosine phosphorylase"  
"OPBO22\_00481" 37651 "s59E25H2" 0 "S-methyl-5'-thioadenosine phosphorylase"  
"OPBO22\_00481" 37651 "s59E5H2" 0 "S-methyl-5'-thioadenosine phosphorylase"  
"OPBO22\_00481" 37651 "s63E6H2" 0 "S-methyl-5'-thioadenosine phosphorylase"  
"OPBO22\_00482" 37652 "s59E13H2" 0 "Putative zinc metalloprotease Rip3"  
"OPBO22\_00482" 37652 "s59E25H2" 0 "Putative zinc metalloprotease Rip3"  
"OPBO22\_00482" 37652 "s59E5H2" 0 "Putative zinc metalloprotease Rip3"  
"OPBO22\_00482" 37652 "s63E6H2" 0 "Putative zinc metalloprotease Rip3"  
"OPBO22\_00483" 37653 "s59E13H2" 0 "Diacylglycerol kinase"  
"OPBO22\_00483" 37653 "s59E25H2" 0 "Diacylglycerol kinase"  
"OPBO22\_00483" 37653 "s59E5H2" 0 "Diacylglycerol kinase"  
"OPBO22\_00483" 37653 "s63E6H2" 0 "Diacylglycerol kinase"  
"OPBO22\_00484" 37654 "s59E13H2" 0 "Deoxyribose-phosphate aldolase"  
"OPBO22\_00484" 37654 "s59E25H2" 0 "Deoxyribose-phosphate aldolase"  
"OPBO22\_00484" 37654 "s59E5H2" 0 "Deoxyribose-phosphate aldolase"  
"OPBO22\_00484" 37654 "s63E6H2" 0 "Deoxyribose-phosphate aldolase"  
"OPBO22\_00485" 37655 "s59E13H2" 0 "Glutamate racemase 1"  
"OPBO22\_00485" 37655 "s59E25H2" 0 "Glutamate racemase 1"  
"OPBO22\_00485" 37655 "s59E5H2" 0 "Glutamate racemase 1"  
"OPBO22\_00485" 37655 "s63E6H2" 0 "Glutamate racemase 1"  
"OPBO22\_00486" 37656 "s59E13H2" 0 "GMP synthase [glutamine-hydrolyzing] subunit A"  
"OPBO22\_00486" 37656 "s59E25H2" 0 "GMP synthase [glutamine-hydrolyzing] subunit A"  
"OPBO22\_00486" 37656 "s59E5H2" 0 "GMP synthase [glutamine-hydrolyzing] subunit A"  
"OPBO22\_00486" 37656 "s63E6H2" 0 "GMP synthase [glutamine-hydrolyzing] subunit A"  
"OPBO22\_00487" 37657 "s59E13H2" 0 "drug efflux system protein MdtG"

"OPBO22\_00487" 37657 "s59E25H2" 0 "drug efflux system protein MdtG"  
"OPBO22\_00487" 37657 "s59E5H2" 0 "drug efflux system protein MdtG"  
"OPBO22\_00487" 37657 "s63E6H2" 0 "drug efflux system protein MdtG"  
"OPBO22\_00488" 37658 "s59E13H2" 0 "Thiamine-monophosphate kinase"  
"OPBO22\_00488" 37658 "s59E25H2" 0 "Thiamine-monophosphate kinase"  
"OPBO22\_00488" 37658 "s59E5H2" 0 "Thiamine-monophosphate kinase"  
"OPBO22\_00488" 37658 "s63E6H2" 0 "Thiamine-monophosphate kinase"  
"OPBO22\_00489" 37659 "s59E13H2" 0 "Glucokinase"  
"OPBO22\_00489" 37659 "s59E25H2" 0 "Glucokinase"  
"OPBO22\_00489" 37659 "s59E5H2" 0 "Glucokinase"  
"OPBO22\_00489" 37659 "s63E6H2" 0 "Glucokinase"  
"OPBO22\_00490" 37660 "s59E13H2" 0 "hypothetical protein"  
"OPBO22\_00490" 37660 "s59E25H2" 0 "hypothetical protein"  
"OPBO22\_00490" 37660 "s59E5H2" 0 "hypothetical protein"  
"OPBO22\_00490" 37660 "s63E6H2" 0 "hypothetical protein"  
"OPBO22\_00491" 37661 "s59E13H2" 0 "hypothetical protein"  
"OPBO22\_00491" 37661 "s59E25H2" 0 "hypothetical protein"  
"OPBO22\_00491" 37661 "s59E5H2" 0 "hypothetical protein"  
"OPBO22\_00491" 37661 "s63E6H2" 0 "hypothetical protein"  
"OPBO22\_00492" 37662 "s59E13H2" 0 "hypothetical protein"  
"OPBO22\_00492" 37662 "s59E25H2" 0 "hypothetical protein"  
"OPBO22\_00492" 37662 "s59E5H2" 0 "hypothetical protein"  
"OPBO22\_00492" 37662 "s63E6H2" 0 "hypothetical protein"  
"OPBO22\_00493" 37663 "s59E13H2" 0 "Nucleotidyltransferase domain protein"  
"OPBO22\_00493" 37663 "s59E25H2" 0 "Nucleotidyltransferase domain protein"  
"OPBO22\_00493" 37663 "s59E5H2" 0 "Nucleotidyltransferase domain protein"  
"OPBO22\_00493" 37663 "s63E6H2" 0 "Nucleotidyltransferase domain protein"  
"OPBO22\_00494" 37664 "s59E13H2" 0 "D-arabitol-phosphate dehydrogenase"  
"OPBO22\_00494" 37664 "s59E25H2" 0 "D-arabitol-phosphate dehydrogenase"  
"OPBO22\_00494" 37664 "s59E5H2" 0 "D-arabitol-phosphate dehydrogenase"  
"OPBO22\_00494" 37664 "s63E6H2" 0 "D-arabitol-phosphate dehydrogenase"  
"OPBO22\_00495" 37665 "s59E13H2" 0 "Deoxyribonucleoside regulator"  
"OPBO22\_00495" 37665 "s59E25H2" 0 "Deoxyribonucleoside regulator"  
"OPBO22\_00495" 37665 "s59E5H2" 0 "Deoxyribonucleoside regulator"  
"OPBO22\_00495" 37665 "s63E6H2" 0 "Deoxyribonucleoside regulator"  
"OPBO22\_00496" 37666 "s59E13H2" 0 "Acetoin:2,6-dichlorophenolindophenol oxidoreductase subunit alpha"  
"OPBO22\_00496" 37666 "s59E25H2" 0 "Acetoin:2,6-dichlorophenolindophenol oxidoreductase subunit alpha"  
"OPBO22\_00496" 37666 "s59E5H2" 0 "Acetoin:2,6-dichlorophenolindophenol oxidoreductase subunit alpha"  
"OPBO22\_00496" 37666 "s63E6H2" 0 "Acetoin:2,6-dichlorophenolindophenol oxidoreductase subunit alpha"  
"OPBO22\_00497" 37667 "s59E13H2" 0 "2-oxoisovalerate dehydrogenase subunit beta"  
"OPBO22\_00497" 37667 "s59E25H2" 0 "2-oxoisovalerate dehydrogenase subunit beta"  
"OPBO22\_00497" 37667 "s59E5H2" 0 "2-oxoisovalerate dehydrogenase subunit beta"  
"OPBO22\_00497" 37667 "s63E6H2" 0 "2-oxoisovalerate dehydrogenase subunit beta"  
"OPBO22\_00498" 37668 "s59E13H2" 0 "Dihydrolipoyllysine-residue acetyltransferase component of pyruvate dehydrogenase complex"  
"OPBO22\_00498" 37668 "s59E25H2" 0 "Dihydrolipoyllysine-residue acetyltransferase component of pyruvate dehydrogenase complex"  
"OPBO22\_00498" 37668 "s59E5H2" 0 "Dihydrolipoyllysine-residue acetyltransferase component of pyruvate dehydrogenase complex"  
"OPBO22\_00498" 37668 "s63E6H2" 0 "Dihydrolipoyllysine-residue acetyltransferase component of pyruvate dehydrogenase complex"

"OPBO22\_00500" 37670 "s59E13H2" 0 "Octanoyltransferase"  
"OPBO22\_00500" 37670 "s59E25H2" 0 "Octanoyltransferase"  
"OPBO22\_00500" 37670 "s59E5H2" 0 "Octanoyltransferase"  
"OPBO22\_00500" 37670 "s63E6H2" 0 "Octanoyltransferase"  
"OPBO22\_00501" 37671 "s59E13H2" 0 "dihydrodipicolinate reductase"  
"OPBO22\_00501" 37671 "s59E25H2" 0 "dihydrodipicolinate reductase"  
"OPBO22\_00501" 37671 "s59E5H2" 0 "dihydrodipicolinate reductase"  
"OPBO22\_00501" 37671 "s63E6H2" 0 "dihydrodipicolinate reductase"  
"OPBO22\_00503" 37673 "s59E13H2" 0 "Threonine synthase"  
"OPBO22\_00503" 37673 "s59E25H2" 0 "Threonine synthase"  
"OPBO22\_00503" 37673 "s59E5H2" 0 "Threonine synthase"  
"OPBO22\_00503" 37673 "s63E6H2" 0 "Threonine synthase"  
"OPBO22\_00504" 37674 "s59E13H2" 0 "D-ornithine 4,5-aminomutase subunit alpha"  
"OPBO22\_00504" 37674 "s59E25H2" 0 "D-ornithine 4,5-aminomutase subunit alpha"  
"OPBO22\_00504" 37674 "s59E5H2" 0 "D-ornithine 4,5-aminomutase subunit alpha"  
"OPBO22\_00504" 37674 "s63E6H2" 0 "D-ornithine 4,5-aminomutase subunit alpha"  
"OPBO22\_00505" 37675 "s59E13H2" 0 "D-ornithine 4,5-aminomutase subunit beta"  
"OPBO22\_00505" 37675 "s59E25H2" 0 "D-ornithine 4,5-aminomutase subunit beta"  
"OPBO22\_00505" 37675 "s59E5H2" 0 "D-ornithine 4,5-aminomutase subunit beta"  
"OPBO22\_00505" 37675 "s63E6H2" 0 "D-ornithine 4,5-aminomutase subunit beta"  
"OPBO22\_00506" 37676 "s59E13H2" 0 "hypothetical protein"  
"OPBO22\_00506" 37676 "s59E25H2" 0 "hypothetical protein"  
"OPBO22\_00506" 37676 "s59E5H2" 0 "hypothetical protein"  
"OPBO22\_00506" 37676 "s63E6H2" 0 "hypothetical protein"  
"OPBO22\_00507" 37677 "s59E13H2" 0 "Cyclic 2,3-diphosphoglycerate synthetase"  
"OPBO22\_00507" 37677 "s59E25H2" 0 "Cyclic 2,3-diphosphoglycerate synthetase"  
"OPBO22\_00507" 37677 "s59E5H2" 0 "Cyclic 2,3-diphosphoglycerate synthetase"  
"OPBO22\_00507" 37677 "s63E6H2" 0 "Cyclic 2,3-diphosphoglycerate synthetase"  
"OPBO22\_00508" 37678 "s59E13H2" 0 "DegV domain-containing protein"  
"OPBO22\_00508" 37678 "s59E25H2" 0 "DegV domain-containing protein"  
"OPBO22\_00508" 37678 "s59E5H2" 0 "DegV domain-containing protein"  
"OPBO22\_00508" 37678 "s63E6H2" 0 "DegV domain-containing protein"  
"OPBO22\_00509" 37679 "s59E13H2" 0 "Thermophilic metalloprotease (M29)"  
"OPBO22\_00509" 37679 "s59E25H2" 0 "Thermophilic metalloprotease (M29)"  
"OPBO22\_00509" 37679 "s59E5H2" 0 "Thermophilic metalloprotease (M29)"  
"OPBO22\_00509" 37679 "s63E6H2" 0 "Thermophilic metalloprotease (M29)"  
"OPBO22\_00510" 37680 "s59E13H2" 0 "Flavoredoxin"  
"OPBO22\_00510" 37680 "s59E25H2" 0 "Flavoredoxin"  
"OPBO22\_00510" 37680 "s59E5H2" 0 "Flavoredoxin"  
"OPBO22\_00510" 37680 "s63E6H2" 0 "Flavoredoxin"  
"OPBO22\_00511" 37681 "s59E13H2" 0 "hypothetical protein"  
"OPBO22\_00511" 37681 "s59E25H2" 0 "hypothetical protein"  
"OPBO22\_00511" 37681 "s59E5H2" 0 "hypothetical protein"  
"OPBO22\_00511" 37681 "s63E6H2" 0 "hypothetical protein"  
"OPBO22\_00512" 37682 "s59E13H2" 0 "Putative ski2-type helicase"  
"OPBO22\_00512" 37682 "s59E25H2" 0 "Putative ski2-type helicase"  
"OPBO22\_00512" 37682 "s59E5H2" 0 "Putative ski2-type helicase"

"OPBO22\_00512" 37682 "s63E6H2" 0 "Putative ski2-type helicase"  
"OPBO22\_00513" 37683 "s59E13H2" 0 "hypothetical protein"  
"OPBO22\_00513" 37683 "s59E25H2" 0 "hypothetical protein"  
"OPBO22\_00513" 37683 "s59E5H2" 0 "hypothetical protein"  
"OPBO22\_00513" 37683 "s63E6H2" 0 "hypothetical protein"  
"OPBO22\_00514" 37684 "s59E13H2" 0 "SpoVT / AbrB like domain protein"  
"OPBO22\_00514" 37684 "s59E25H2" 0 "SpoVT / AbrB like domain protein"  
"OPBO22\_00514" 37684 "s59E5H2" 0 "SpoVT / AbrB like domain protein"  
"OPBO22\_00514" 37684 "s63E6H2" 0 "SpoVT / AbrB like domain protein"  
"OPBO22\_00515" 37685 "s59E13H2" 0 "aminoalkylphosphonic acid N-acetyltransferase"  
"OPBO22\_00515" 37685 "s59E25H2" 0 "aminoalkylphosphonic acid N-acetyltransferase"  
"OPBO22\_00515" 37685 "s59E5H2" 0 "aminoalkylphosphonic acid N-acetyltransferase"  
"OPBO22\_00515" 37685 "s63E6H2" 0 "aminoalkylphosphonic acid N-acetyltransferase"  
"OPBO22\_00521" 37691 "s59E13H2" 0 "HTH-type transcriptional regulator DegA"  
"OPBO22\_00521" 37691 "s59E25H2" 0 "HTH-type transcriptional regulator DegA"  
"OPBO22\_00521" 37691 "s59E5H2" 0 "HTH-type transcriptional regulator DegA"  
"OPBO22\_00521" 37691 "s63E6H2" 0 "HTH-type transcriptional regulator DegA"  
"OPBO22\_00522" 37692 "s59E13H2" 0 "Neopullulanase 2"  
"OPBO22\_00522" 37692 "s59E25H2" 0 "Neopullulanase 2"  
"OPBO22\_00522" 37692 "s59E5H2" 0 "Neopullulanase 2"  
"OPBO22\_00522" 37692 "s63E6H2" 0 "Neopullulanase 2"  
"OPBO22\_00523" 37693 "s59E13H2" 0 "Trehalose/maltose transport system permease protein MalG"  
"OPBO22\_00523" 37693 "s59E25H2" 0 "Trehalose/maltose transport system permease protein MalG"  
"OPBO22\_00523" 37693 "s59E5H2" 0.1280143 "Trehalose/maltose transport system permease protein MalG"  
"OPBO22\_00523" 37693 "s63E6H2" 0 "Trehalose/maltose transport system permease protein MalG"  
"OPBO22\_00524" 37694 "s59E13H2" 0 "Lactose transport system permease protein LacF"  
"OPBO22\_00524" 37694 "s59E25H2" 0 "Lactose transport system permease protein LacF"  
"OPBO22\_00524" 37694 "s59E5H2" 0.008894306 "Lactose transport system permease protein LacF"  
"OPBO22\_00524" 37694 "s63E6H2" 0 "Lactose transport system permease protein LacF"  
"OPBO22\_00525" 37695 "s59E13H2" 0 "Trehalose/maltose-binding protein MalE precursor"  
"OPBO22\_00525" 37695 "s59E25H2" 0 "Trehalose/maltose-binding protein MalE precursor"  
"OPBO22\_00525" 37695 "s59E5H2" 0.02444685 "Trehalose/maltose-binding protein MalE precursor"  
"OPBO22\_00525" 37695 "s63E6H2" 0 "Trehalose/maltose-binding protein MalE precursor"  
"OPBO22\_00526" 37696 "s59E13H2" 0 "Beta/alpha-amylase precursor"  
"OPBO22\_00526" 37696 "s59E25H2" 0 "Beta/alpha-amylase precursor"  
"OPBO22\_00526" 37696 "s59E5H2" 0 "Beta/alpha-amylase precursor"  
"OPBO22\_00526" 37696 "s63E6H2" 0 "Beta/alpha-amylase precursor"  
"OPBO22\_00528" 37698 "s59E13H2" 0 "Endonuclease 4"  
"OPBO22\_00528" 37698 "s59E25H2" 0 "Endonuclease 4"  
"OPBO22\_00528" 37698 "s59E5H2" 0 "Endonuclease 4"  
"OPBO22\_00528" 37698 "s63E6H2" 0 "Endonuclease 4"  
"OPBO22\_00529" 37699 "s59E13H2" 0 "Indolepyruvate oxidoreductase subunit IorA"  
"OPBO22\_00529" 37699 "s59E25H2" 0 "Indolepyruvate oxidoreductase subunit IorA"  
"OPBO22\_00529" 37699 "s59E5H2" 0 "Indolepyruvate oxidoreductase subunit IorA"  
"OPBO22\_00529" 37699 "s63E6H2" 0 "Indolepyruvate oxidoreductase subunit IorA"  
"OPBO22\_00530" 37700 "s59E13H2" 0 "Indolepyruvate oxidoreductase subunit IorB"  
"OPBO22\_00530" 37700 "s59E25H2" 0 "Indolepyruvate oxidoreductase subunit IorB"

"OPBO22\_00530" 37700 "s59E5H2" 0 "Indolepyruvate oxidoreductase subunit IorB"  
"OPBO22\_00530" 37700 "s63E6H2" 0 "Indolepyruvate oxidoreductase subunit IorB"  
"OPBO22\_00531" 37701 "s59E13H2" 0 "Succinyl-CoA ligase [ADP-forming] subunit alpha"  
"OPBO22\_00531" 37701 "s59E25H2" 0 "Succinyl-CoA ligase [ADP-forming] subunit alpha"  
"OPBO22\_00531" 37701 "s59E5H2" 0 "Succinyl-CoA ligase [ADP-forming] subunit alpha"  
"OPBO22\_00531" 37701 "s63E6H2" 0 "Succinyl-CoA ligase [ADP-forming] subunit alpha"  
"OPBO22\_00532" 37702 "s59E13H2" 0 "S-adenosylmethionine synthase"  
"OPBO22\_00532" 37702 "s59E25H2" 0 "S-adenosylmethionine synthase"  
"OPBO22\_00532" 37702 "s59E5H2" 0 "S-adenosylmethionine synthase"  
"OPBO22\_00532" 37702 "s63E6H2" 0 "S-adenosylmethionine synthase"  
"OPBO22\_00533" 37703 "s59E13H2" 0 "phosphodiesterase"  
"OPBO22\_00533" 37703 "s59E25H2" 0 "phosphodiesterase"  
"OPBO22\_00533" 37703 "s59E5H2" 0 "phosphodiesterase"  
"OPBO22\_00533" 37703 "s63E6H2" 0 "phosphodiesterase"  
"OPBO22\_00534" 37704 "s59E13H2" 0 "Carbonic anhydrase precursor"  
"OPBO22\_00534" 37704 "s59E25H2" 0 "Carbonic anhydrase precursor"  
"OPBO22\_00534" 37704 "s59E5H2" 0 "Carbonic anhydrase precursor"  
"OPBO22\_00534" 37704 "s63E6H2" 0 "Carbonic anhydrase precursor"  
"OPBO22\_00535" 37705 "s59E13H2" 0 "5' nucleotidase, deoxy (Pyrimidine), cytosolic type C protein (NT5C)"  
"OPBO22\_00535" 37705 "s59E25H2" 0 "5' nucleotidase, deoxy (Pyrimidine), cytosolic type C protein (NT5C)"  
"OPBO22\_00535" 37705 "s59E5H2" 0 "5' nucleotidase, deoxy (Pyrimidine), cytosolic type C protein (NT5C)"  
"OPBO22\_00535" 37705 "s63E6H2" 0 "5' nucleotidase, deoxy (Pyrimidine), cytosolic type C protein (NT5C)"  
"OPBO22\_00536" 37706 "s59E13H2" 0 "Ribonuclease VapC11"  
"OPBO22\_00536" 37706 "s59E25H2" 0 "Ribonuclease VapC11"  
"OPBO22\_00536" 37706 "s59E5H2" 0 "Ribonuclease VapC11"  
"OPBO22\_00536" 37706 "s63E6H2" 0 "Ribonuclease VapC11"  
"OPBO22\_00539" 37709 "s59E13H2" 0 "Peptide deformylase"  
"OPBO22\_00539" 37709 "s59E25H2" 0 "Peptide deformylase"  
"OPBO22\_00539" 37709 "s59E5H2" 0 "Peptide deformylase"  
"OPBO22\_00539" 37709 "s63E6H2" 0 "Peptide deformylase"  
"OPBO22\_00540" 37710 "s59E13H2" 0 "Tyrosine phenol-lyase"  
"OPBO22\_00540" 37710 "s59E25H2" 0 "Tyrosine phenol-lyase"  
"OPBO22\_00540" 37710 "s59E5H2" 0 "Tyrosine phenol-lyase"  
"OPBO22\_00540" 37710 "s63E6H2" 0 "Tyrosine phenol-lyase"  
"OPBO22\_00542" 37712 "s59E13H2" 0 "Glucose-6-phosphate isomerase"  
"OPBO22\_00542" 37712 "s59E25H2" 0 "Glucose-6-phosphate isomerase"  
"OPBO22\_00542" 37712 "s59E5H2" 0 "Glucose-6-phosphate isomerase"  
"OPBO22\_00542" 37712 "s63E6H2" 0 "Glucose-6-phosphate isomerase"  
"OPBO22\_00543" 37713 "s59E13H2" 0 "hypothetical protein"  
"OPBO22\_00543" 37713 "s59E25H2" 0 "hypothetical protein"  
"OPBO22\_00543" 37713 "s59E5H2" 0 "hypothetical protein"  
"OPBO22\_00543" 37713 "s63E6H2" 0 "hypothetical protein"  
"OPBO22\_00544" 37714 "s59E13H2" 0 "endonuclease 4"  
"OPBO22\_00544" 37714 "s59E25H2" 0 "endonuclease 4"  
"OPBO22\_00544" 37714 "s59E5H2" 0 "endonuclease 4"  
"OPBO22\_00544" 37714 "s63E6H2" 0 "endonuclease 4"  
"OPBO22\_00545" 37715 "s59E13H2" 0 "PD-(D/E)XK nuclease superfamily protein"

"OPBO22\_00545" 37715 "s59E25H2" 0 "PD-(D/E)XK nuclease superfamily protein"  
"OPBO22\_00545" 37715 "s59E5H2" 0 "PD-(D/E)XK nuclease superfamily protein"  
"OPBO22\_00545" 37715 "s63E6H2" 0 "PD-(D/E)XK nuclease superfamily protein"  
"OPBO22\_00546" 37716 "s59E13H2" 0 "Thermostable carboxypeptidase 1"  
"OPBO22\_00546" 37716 "s59E25H2" 0 "Thermostable carboxypeptidase 1"  
"OPBO22\_00546" 37716 "s59E5H2" 0 "Thermostable carboxypeptidase 1"  
"OPBO22\_00546" 37716 "s63E6H2" 0 "Thermostable carboxypeptidase 1"  
"OPBO22\_00547" 37717 "s59E13H2" 0 "RNA recognition motif. (a.k.a. RRM, RBD, or RNP domain)"  
"OPBO22\_00547" 37717 "s59E25H2" 0 "RNA recognition motif. (a.k.a. RRM, RBD, or RNP domain)"  
"OPBO22\_00547" 37717 "s59E5H2" 0 "RNA recognition motif. (a.k.a. RRM, RBD, or RNP domain)"  
"OPBO22\_00547" 37717 "s63E6H2" 0 "RNA recognition motif. (a.k.a. RRM, RBD, or RNP domain)"  
"OPBO22\_00548" 37718 "s59E13H2" 0 "cell division protein FtsB"  
"OPBO22\_00548" 37718 "s59E25H2" 0 "cell division protein FtsB"  
"OPBO22\_00548" 37718 "s59E5H2" 0 "cell division protein FtsB"  
"OPBO22\_00548" 37718 "s63E6H2" 0 "cell division protein FtsB"  
"OPBO22\_00549" 37719 "s59E13H2" 0 "Pyruvate kinase"  
"OPBO22\_00549" 37719 "s59E25H2" 0 "Pyruvate kinase"  
"OPBO22\_00549" 37719 "s59E5H2" 0 "Pyruvate kinase"  
"OPBO22\_00549" 37719 "s63E6H2" 0 "Pyruvate kinase"  
"OPBO22\_00550" 37720 "s59E13H2" 0 "Nucleoside triphosphate pyrophosphohydrolase/pyrophosphatase MazG"  
"OPBO22\_00550" 37720 "s59E25H2" 0 "Nucleoside triphosphate pyrophosphohydrolase/pyrophosphatase MazG"  
"OPBO22\_00550" 37720 "s59E5H2" 0 "Nucleoside triphosphate pyrophosphohydrolase/pyrophosphatase MazG"  
"OPBO22\_00550" 37720 "s63E6H2" 0 "Nucleoside triphosphate pyrophosphohydrolase/pyrophosphatase MazG"  
"OPBO22\_00552" 37722 "s59E13H2" 0 "N-substituted formamide deformylase precursor"  
"OPBO22\_00552" 37722 "s59E25H2" 0 "N-substituted formamide deformylase precursor"  
"OPBO22\_00552" 37722 "s59E5H2" 0 "N-substituted formamide deformylase precursor"  
"OPBO22\_00552" 37722 "s63E6H2" 0 "N-substituted formamide deformylase precursor"  
"OPBO22\_00553" 37723 "s59E13H2" 0 "30S ribosomal protein S8"  
"OPBO22\_00553" 37723 "s59E25H2" 0 "30S ribosomal protein S8"  
"OPBO22\_00553" 37723 "s59E5H2" 0 "30S ribosomal protein S8"  
"OPBO22\_00553" 37723 "s63E6H2" 0 "30S ribosomal protein S8"  
"OPBO22\_00554" 37724 "s59E13H2" 0 "30S ribosomal protein S14 type Z"  
"OPBO22\_00554" 37724 "s59E25H2" 0 "30S ribosomal protein S14 type Z"  
"OPBO22\_00554" 37724 "s59E5H2" 0 "30S ribosomal protein S14 type Z"  
"OPBO22\_00554" 37724 "s63E6H2" 0 "30S ribosomal protein S14 type Z"  
"OPBO22\_00555" 37725 "s59E13H2" 0 "50S ribosomal protein L5"  
"OPBO22\_00555" 37725 "s59E25H2" 0 "50S ribosomal protein L5"  
"OPBO22\_00555" 37725 "s59E5H2" 0 "50S ribosomal protein L5"  
"OPBO22\_00555" 37725 "s63E6H2" 0 "50S ribosomal protein L5"  
"OPBO22\_00556" 37726 "s59E13H2" 0 "50S ribosomal protein L24"  
"OPBO22\_00556" 37726 "s59E25H2" 0 "50S ribosomal protein L24"  
"OPBO22\_00556" 37726 "s59E5H2" 0 "50S ribosomal protein L24"  
"OPBO22\_00556" 37726 "s63E6H2" 0 "50S ribosomal protein L24"  
"OPBO22\_00557" 37727 "s59E13H2" 0 "50S ribosomal protein L14"  
"OPBO22\_00557" 37727 "s59E25H2" 0 "50S ribosomal protein L14"  
"OPBO22\_00557" 37727 "s59E5H2" 0 "50S ribosomal protein L14"  
"OPBO22\_00557" 37727 "s63E6H2" 0 "50S ribosomal protein L14"

"OPBO22\_00558" 37728 "s59E13H2" 0 "30S ribosomal protein S17"  
"OPBO22\_00558" 37728 "s59E25H2" 0 "30S ribosomal protein S17"  
"OPBO22\_00558" 37728 "s59E5H2" 0 "30S ribosomal protein S17"  
"OPBO22\_00558" 37728 "s63E6H2" 0 "30S ribosomal protein S17"  
"OPBO22\_00559" 37729 "s59E13H2" 0 "putative acetyltransferase"  
"OPBO22\_00559" 37729 "s59E25H2" 0 "putative acetyltransferase"  
"OPBO22\_00559" 37729 "s59E5H2" 0 "putative acetyltransferase"  
"OPBO22\_00559" 37729 "s63E6H2" 0 "putative acetyltransferase"  
"OPBO22\_00560" 37730 "s59E13H2" 0 "hypothetical protein"  
"OPBO22\_00560" 37730 "s59E25H2" 0 "hypothetical protein"  
"OPBO22\_00560" 37730 "s59E5H2" 0 "hypothetical protein"  
"OPBO22\_00560" 37730 "s63E6H2" 0 "hypothetical protein"  
"OPBO22\_00562" 37732 "s59E13H2" 0 "26 kDa periplasmic immunogenic protein precursor"  
"OPBO22\_00562" 37732 "s59E25H2" 0 "26 kDa periplasmic immunogenic protein precursor"  
"OPBO22\_00562" 37732 "s59E5H2" 0 "26 kDa periplasmic immunogenic protein precursor"  
"OPBO22\_00562" 37732 "s63E6H2" 0 "26 kDa periplasmic immunogenic protein precursor"  
"OPBO22\_00563" 37733 "s59E13H2" 0 "hypothetical protein"  
"OPBO22\_00563" 37733 "s59E25H2" 0 "hypothetical protein"  
"OPBO22\_00563" 37733 "s59E5H2" 0 "hypothetical protein"  
"OPBO22\_00563" 37733 "s63E6H2" 0 "hypothetical protein"  
"OPBO22\_00565" 37735 "s59E13H2" 0 "Reverse transcriptase (RNA-dependent DNA polymerase)"  
"OPBO22\_00565" 37735 "s59E25H2" 0 "Reverse transcriptase (RNA-dependent DNA polymerase)"  
"OPBO22\_00565" 37735 "s59E5H2" 0 "Reverse transcriptase (RNA-dependent DNA polymerase)"  
"OPBO22\_00565" 37735 "s63E6H2" 0 "Reverse transcriptase (RNA-dependent DNA polymerase)"  
"OPBO22\_00566" 37736 "s59E13H2" 0 "Group II intron-encoded protein LtrA"  
"OPBO22\_00566" 37736 "s59E25H2" 0 "Group II intron-encoded protein LtrA"  
"OPBO22\_00566" 37736 "s59E5H2" 0 "Group II intron-encoded protein LtrA"  
"OPBO22\_00566" 37736 "s63E6H2" 0 "Group II intron-encoded protein LtrA"  
"OPBO22\_00569" 37739 "s59E13H2" 0 "hypothetical protein"  
"OPBO22\_00569" 37739 "s59E25H2" 0 "hypothetical protein"  
"OPBO22\_00569" 37739 "s59E5H2" 0 "hypothetical protein"  
"OPBO22\_00569" 37739 "s63E6H2" 0 "hypothetical protein"  
"OPBO22\_00570" 37740 "s59E13H2" 0 "Phosphoglycerate kinase"  
"OPBO22\_00570" 37740 "s59E25H2" 0 "Phosphoglycerate kinase"  
"OPBO22\_00570" 37740 "s59E5H2" 0 "Phosphoglycerate kinase"  
"OPBO22\_00570" 37740 "s63E6H2" 0 "Phosphoglycerate kinase"  
"OPBO22\_00571" 37741 "s59E13H2" 0 "EamA-like transporter family protein"  
"OPBO22\_00571" 37741 "s59E25H2" 0 "EamA-like transporter family protein"  
"OPBO22\_00571" 37741 "s59E5H2" 0 "EamA-like transporter family protein"  
"OPBO22\_00571" 37741 "s63E6H2" 0 "EamA-like transporter family protein"  
"OPBO22\_00572" 37742 "s59E13H2" 0 "Double zinc ribbon"  
"OPBO22\_00572" 37742 "s59E25H2" 0 "Double zinc ribbon"  
"OPBO22\_00572" 37742 "s59E5H2" 0 "Double zinc ribbon"  
"OPBO22\_00572" 37742 "s63E6H2" 0 "Double zinc ribbon"  
"OPBO22\_00573" 37743 "s59E13H2" 0 "Nucleoside diphosphate kinase"  
"OPBO22\_00573" 37743 "s59E25H2" 0 "Nucleoside diphosphate kinase"  
"OPBO22\_00573" 37743 "s59E5H2" 0 "Nucleoside diphosphate kinase"



"OPBO22\_00573" 37743 "s63E6H2" 0 "Nucleoside diphosphate kinase"  
"OPBO22\_00574" 37744 "s59E13H2" 0 "hypothetical protein"  
"OPBO22\_00574" 37744 "s59E25H2" 0 "hypothetical protein"  
"OPBO22\_00574" 37744 "s59E5H2" 0 "hypothetical protein"  
"OPBO22\_00574" 37744 "s63E6H2" 0 "hypothetical protein"  
"OPBO22\_00575" 37745 "s59E13H2" 0 "Rod shape-determining protein MreB"  
"OPBO22\_00575" 37745 "s59E25H2" 0 "Rod shape-determining protein MreB"  
"OPBO22\_00575" 37745 "s59E5H2" 0 "Rod shape-determining protein MreB"  
"OPBO22\_00575" 37745 "s63E6H2" 0 "Rod shape-determining protein MreB"  
"OPBO22\_00576" 37746 "s59E13H2" 0 "putative L-threonine 3-dehydrogenase"  
"OPBO22\_00576" 37746 "s59E25H2" 0 "putative L-threonine 3-dehydrogenase"  
"OPBO22\_00576" 37746 "s59E5H2" 0 "putative L-threonine 3-dehydrogenase"  
"OPBO22\_00576" 37746 "s63E6H2" 0 "putative L-threonine 3-dehydrogenase"  
"OPBO22\_00577" 37747 "s59E13H2" 0 "8-amino-7-oxononanoate synthase/2-amino-3-ketobutyrate coenzyme A ligase"  
"OPBO22\_00577" 37747 "s59E25H2" 0 "8-amino-7-oxononanoate synthase/2-amino-3-ketobutyrate coenzyme A ligase"  
"OPBO22\_00577" 37747 "s59E5H2" 0 "8-amino-7-oxononanoate synthase/2-amino-3-ketobutyrate coenzyme A ligase"  
"OPBO22\_00577" 37747 "s63E6H2" 0 "8-amino-7-oxononanoate synthase/2-amino-3-ketobutyrate coenzyme A ligase"  
"OPBO22\_00578" 37748 "s59E13H2" 0 "NADH dehydrogenase subunit I"  
"OPBO22\_00578" 37748 "s59E25H2" 0 "NADH dehydrogenase subunit I"  
"OPBO22\_00578" 37748 "s59E5H2" 0 "NADH dehydrogenase subunit I"  
"OPBO22\_00578" 37748 "s63E6H2" 0 "NADH dehydrogenase subunit I"  
"OPBO22\_00579" 37749 "s59E13H2" 0 "2,3-bisphosphoglycerate-independent phosphoglycerate mutase 1"  
"OPBO22\_00579" 37749 "s59E25H2" 0 "2,3-bisphosphoglycerate-independent phosphoglycerate mutase 1"  
"OPBO22\_00579" 37749 "s59E5H2" 0 "2,3-bisphosphoglycerate-independent phosphoglycerate mutase 1"  
"OPBO22\_00579" 37749 "s63E6H2" 0 "2,3-bisphosphoglycerate-independent phosphoglycerate mutase 1"  
"OPBO22\_00580" 37750 "s59E13H2" 0 "Lysine--tRNA ligase"  
"OPBO22\_00580" 37750 "s59E25H2" 0 "Lysine--tRNA ligase"  
"OPBO22\_00580" 37750 "s59E5H2" 0 "Lysine--tRNA ligase"  
"OPBO22\_00580" 37750 "s63E6H2" 0 "Lysine--tRNA ligase"  
"OPBO22\_00581" 37751 "s59E13H2" 0 "Transcription elongation factor GreA"  
"OPBO22\_00581" 37751 "s59E25H2" 0 "Transcription elongation factor GreA"  
"OPBO22\_00581" 37751 "s59E5H2" 0 "Transcription elongation factor GreA"  
"OPBO22\_00581" 37751 "s63E6H2" 0 "Transcription elongation factor GreA"  
"OPBO22\_00582" 37752 "s59E13H2" 0 "Glyceraldehyde-3-phosphate dehydrogenase"  
"OPBO22\_00582" 37752 "s59E25H2" 0 "Glyceraldehyde-3-phosphate dehydrogenase"  
"OPBO22\_00582" 37752 "s59E5H2" 0 "Glyceraldehyde-3-phosphate dehydrogenase"  
"OPBO22\_00582" 37752 "s63E6H2" 0 "Glyceraldehyde-3-phosphate dehydrogenase"  
"OPBO22\_00583" 37753 "s59E13H2" 0 "Sporulation transcription regulator WhiA"  
"OPBO22\_00583" 37753 "s59E25H2" 0 "Sporulation transcription regulator WhiA"  
"OPBO22\_00583" 37753 "s59E5H2" 0 "Sporulation transcription regulator WhiA"  
"OPBO22\_00583" 37753 "s63E6H2" 0 "Sporulation transcription regulator WhiA"  
"OPBO22\_00584" 37754 "s59E13H2" 0 "glmZ(sRNA)-inactivating NTPase"  
"OPBO22\_00584" 37754 "s59E25H2" 0 "glmZ(sRNA)-inactivating NTPase"  
"OPBO22\_00584" 37754 "s59E5H2" 0 "glmZ(sRNA)-inactivating NTPase"  
"OPBO22\_00584" 37754 "s63E6H2" 0 "glmZ(sRNA)-inactivating NTPase"  
"OPBO22\_00585" 37755 "s59E13H2" 0 "Membrane protein of unknown function"  
"OPBO22\_00585" 37755 "s59E25H2" 0 "Membrane protein of unknown function"

"OPBO22\_00585" 37755 "s59E5H2" 0 "Membrane protein of unknown function"  
"OPBO22\_00585" 37755 "s63E6H2" 0 "Membrane protein of unknown function"  
"OPBO22\_00586" 37756 "s59E13H2" 0 "UvrABC system protein C"  
"OPBO22\_00586" 37756 "s59E25H2" 0 "UvrABC system protein C"  
"OPBO22\_00586" 37756 "s59E5H2" 0 "UvrABC system protein C"  
"OPBO22\_00586" 37756 "s63E6H2" 0 "UvrABC system protein C"  
"OPBO22\_00590" 37760 "s59E13H2" 0 "FMN reductase [NAD(P)H]"  
"OPBO22\_00590" 37760 "s59E25H2" 0 "FMN reductase [NAD(P)H]"  
"OPBO22\_00590" 37760 "s59E5H2" 0 "FMN reductase [NAD(P)H]"  
"OPBO22\_00590" 37760 "s63E6H2" 0 "FMN reductase [NAD(P)H]"  
"OPBO22\_00591" 37761 "s59E13H2" 0 "Methylated-DNA--protein-cysteine methyltransferase"  
"OPBO22\_00591" 37761 "s59E25H2" 0 "Methylated-DNA--protein-cysteine methyltransferase"  
"OPBO22\_00591" 37761 "s59E5H2" 0 "Methylated-DNA--protein-cysteine methyltransferase"  
"OPBO22\_00591" 37761 "s63E6H2" 0 "Methylated-DNA--protein-cysteine methyltransferase"  
"OPBO22\_00592" 37762 "s59E13H2" 0 "tRNA-splicing ligase RtcB"  
"OPBO22\_00592" 37762 "s59E25H2" 0 "tRNA-splicing ligase RtcB"  
"OPBO22\_00592" 37762 "s59E5H2" 0 "tRNA-splicing ligase RtcB"  
"OPBO22\_00592" 37762 "s63E6H2" 0 "tRNA-splicing ligase RtcB"  
"OPBO22\_00593" 37763 "s59E13H2" 0 "hypothetical protein"  
"OPBO22\_00593" 37763 "s59E25H2" 0 "hypothetical protein"  
"OPBO22\_00593" 37763 "s59E5H2" 0 "hypothetical protein"  
"OPBO22\_00593" 37763 "s63E6H2" 0 "hypothetical protein"  
"OPBO22\_00594" 37764 "s59E13H2" 0 "Pyrimidine-nucleoside phosphorylase"  
"OPBO22\_00594" 37764 "s59E25H2" 0 "Pyrimidine-nucleoside phosphorylase"  
"OPBO22\_00594" 37764 "s59E5H2" 0 "Pyrimidine-nucleoside phosphorylase"  
"OPBO22\_00594" 37764 "s63E6H2" 0 "Pyrimidine-nucleoside phosphorylase"  
"OPBO22\_00597" 37767 "s59E13H2" 0 "putative transposase"  
"OPBO22\_00597" 37767 "s59E25H2" 0 "putative transposase"  
"OPBO22\_00597" 37767 "s59E5H2" 0 "putative transposase"  
"OPBO22\_00597" 37767 "s63E6H2" 0 "putative transposase"  
"OPBO22\_00598" 37768 "s59E13H2" 0 "30S ribosomal protein S1"  
"OPBO22\_00598" 37768 "s59E25H2" 0 "30S ribosomal protein S1"  
"OPBO22\_00598" 37768 "s59E5H2" 0 "30S ribosomal protein S1"  
"OPBO22\_00598" 37768 "s63E6H2" 0 "30S ribosomal protein S1"  
"OPBO22\_00602" 37772 "s59E13H2" 0 "hypothetical protein"  
"OPBO22\_00602" 37772 "s59E25H2" 0 "hypothetical protein"  
"OPBO22\_00602" 37772 "s59E5H2" 0 "hypothetical protein"  
"OPBO22\_00602" 37772 "s63E6H2" 0 "hypothetical protein"  
"OPBO22\_00603" 37773 "s59E13H2" 0 "Ornithine carbamoyltransferase"  
"OPBO22\_00603" 37773 "s59E25H2" 0 "Ornithine carbamoyltransferase"  
"OPBO22\_00603" 37773 "s59E5H2" 0 "Ornithine carbamoyltransferase"  
"OPBO22\_00603" 37773 "s63E6H2" 0 "Ornithine carbamoyltransferase"  
"OPBO22\_00604" 37774 "s59E13H2" 0 "Ornithine carbamoyltransferase"  
"OPBO22\_00604" 37774 "s59E25H2" 0 "Ornithine carbamoyltransferase"  
"OPBO22\_00604" 37774 "s59E5H2" 0 "Ornithine carbamoyltransferase"  
"OPBO22\_00604" 37774 "s63E6H2" 0 "Ornithine carbamoyltransferase"  
"OPBO22\_00605" 37775 "s59E13H2" 0 "Biotin transporter BioY"

"OPBO22\_00605" 37775 "s59E25H2" 0 "Biotin transporter BioY"  
"OPBO22\_00605" 37775 "s59E5H2" 0 "Biotin transporter BioY"  
"OPBO22\_00605" 37775 "s63E6H2" 0 "Biotin transporter BioY"  
"OPBO22\_00606" 37776 "s59E13H2" 0 "Carbamate kinase"  
"OPBO22\_00606" 37776 "s59E25H2" 0 "Carbamate kinase"  
"OPBO22\_00606" 37776 "s59E5H2" 0 "Carbamate kinase"  
"OPBO22\_00606" 37776 "s63E6H2" 0 "Carbamate kinase"  
"OPBO22\_00607" 37777 "s59E13H2" 0 "VIT family protein"  
"OPBO22\_00607" 37777 "s59E25H2" 0 "VIT family protein"  
"OPBO22\_00607" 37777 "s59E5H2" 0 "VIT family protein"  
"OPBO22\_00607" 37777 "s63E6H2" 0 "VIT family protein"  
"OPBO22\_00608" 37778 "s59E13H2" 0 "D-hydantoinase"  
"OPBO22\_00608" 37778 "s59E25H2" 0 "D-hydantoinase"  
"OPBO22\_00608" 37778 "s59E5H2" 0 "D-hydantoinase"  
"OPBO22\_00608" 37778 "s63E6H2" 0 "D-hydantoinase"  
"OPBO22\_00609" 37779 "s59E13H2" 0 "8-oxoguanine deaminase"  
"OPBO22\_00609" 37779 "s59E25H2" 0 "8-oxoguanine deaminase"  
"OPBO22\_00609" 37779 "s59E5H2" 0 "8-oxoguanine deaminase"  
"OPBO22\_00609" 37779 "s63E6H2" 0 "8-oxoguanine deaminase"  
"OPBO22\_00610" 37780 "s59E13H2" 0 "Cysteine synthase"  
"OPBO22\_00610" 37780 "s59E25H2" 0 "Cysteine synthase"  
"OPBO22\_00610" 37780 "s59E5H2" 0 "Cysteine synthase"  
"OPBO22\_00610" 37780 "s63E6H2" 0 "Cysteine synthase"  
"OPBO22\_00611" 37781 "s59E13H2" 0 "Threonine synthase"  
"OPBO22\_00611" 37781 "s59E25H2" 0 "Threonine synthase"  
"OPBO22\_00611" 37781 "s59E5H2" 0 "Threonine synthase"  
"OPBO22\_00611" 37781 "s63E6H2" 0 "Threonine synthase"  
"OPBO22\_00612" 37782 "s59E13H2" 0 "Pyrroline-5-carboxylate reductase"  
"OPBO22\_00612" 37782 "s59E25H2" 0 "Pyrroline-5-carboxylate reductase"  
"OPBO22\_00612" 37782 "s59E5H2" 0 "Pyrroline-5-carboxylate reductase"  
"OPBO22\_00612" 37782 "s63E6H2" 0 "Pyrroline-5-carboxylate reductase"  
"OPBO22\_00613" 37783 "s59E13H2" 0 "2-oxoglutarate-acceptor oxidoreductase subunit OorD"  
"OPBO22\_00613" 37783 "s59E25H2" 0 "2-oxoglutarate-acceptor oxidoreductase subunit OorD"  
"OPBO22\_00613" 37783 "s59E5H2" 0 "2-oxoglutarate-acceptor oxidoreductase subunit OorD"  
"OPBO22\_00613" 37783 "s63E6H2" 0 "2-oxoglutarate-acceptor oxidoreductase subunit OorD"  
"OPBO22\_00614" 37784 "s59E13H2" 0 "FeS cluster assembly protein SufB"  
"OPBO22\_00614" 37784 "s59E25H2" 0 "FeS cluster assembly protein SufB"  
"OPBO22\_00614" 37784 "s59E5H2" 0 "FeS cluster assembly protein SufB"  
"OPBO22\_00614" 37784 "s63E6H2" 0 "FeS cluster assembly protein SufB"  
"OPBO22\_00615" 37785 "s59E13H2" 0 "Lipopolysaccharide export system ATP-binding protein LptB"  
"OPBO22\_00615" 37785 "s59E25H2" 0 "Lipopolysaccharide export system ATP-binding protein LptB"  
"OPBO22\_00615" 37785 "s59E5H2" 0 "Lipopolysaccharide export system ATP-binding protein LptB"  
"OPBO22\_00615" 37785 "s63E6H2" 0 "Lipopolysaccharide export system ATP-binding protein LptB"  
"OPBO22\_00616" 37786 "s59E13H2" 0 "Tetrahydromethanopterin S-methyltransferase subunit A 1"  
"OPBO22\_00616" 37786 "s59E25H2" 0 "Tetrahydromethanopterin S-methyltransferase subunit A 1"  
"OPBO22\_00616" 37786 "s59E5H2" 0 "Tetrahydromethanopterin S-methyltransferase subunit A 1"  
"OPBO22\_00616" 37786 "s63E6H2" 0 "Tetrahydromethanopterin S-methyltransferase subunit A 1"

"OPBO22\_00619" 37789 "s59E13H2" 0 "hypothetical protein"  
"OPBO22\_00619" 37789 "s59E25H2" 0 "hypothetical protein"  
"OPBO22\_00619" 37789 "s59E5H2" 0 "hypothetical protein"  
"OPBO22\_00619" 37789 "s63E6H2" 0 "hypothetical protein"  
"OPBO22\_00620" 37790 "s59E13H2" 0 "putative permease"  
"OPBO22\_00620" 37790 "s59E25H2" 0 "putative permease"  
"OPBO22\_00620" 37790 "s59E5H2" 0 "putative permease"  
"OPBO22\_00620" 37790 "s63E6H2" 0 "putative permease"  
"OPBO22\_00621" 37791 "s59E13H2" 0 "GDP-mannose 4,6-dehydratase"  
"OPBO22\_00621" 37791 "s59E25H2" 0 "GDP-mannose 4,6-dehydratase"  
"OPBO22\_00621" 37791 "s59E5H2" 0 "GDP-mannose 4,6-dehydratase"  
"OPBO22\_00621" 37791 "s63E6H2" 0 "GDP-mannose 4,6-dehydratase"  
"OPBO22\_00622" 37792 "s59E13H2" 0 "Putative pyridoxal phosphate-dependent aminotransferase EpsN"  
"OPBO22\_00622" 37792 "s59E25H2" 0 "Putative pyridoxal phosphate-dependent aminotransferase EpsN"  
"OPBO22\_00622" 37792 "s59E5H2" 0 "Putative pyridoxal phosphate-dependent aminotransferase EpsN"  
"OPBO22\_00622" 37792 "s63E6H2" 0 "Putative pyridoxal phosphate-dependent aminotransferase EpsN"  
"OPBO22\_00623" 37793 "s59E13H2" 0 "GDP-mannose-dependent alpha-(1-6)-phosphatidylinositol monomannoside mannosyltransferase"  
"OPBO22\_00623" 37793 "s59E25H2" 0 "GDP-mannose-dependent alpha-(1-6)-phosphatidylinositol monomannoside mannosyltransferase"  
"OPBO22\_00623" 37793 "s59E5H2" 0 "GDP-mannose-dependent alpha-(1-6)-phosphatidylinositol monomannoside mannosyltransferase"  
"OPBO22\_00623" 37793 "s63E6H2" 0 "GDP-mannose-dependent alpha-(1-6)-phosphatidylinositol monomannoside mannosyltransferase"  
"OPBO22\_00624" 37794 "s59E13H2" 0 "hypothetical protein"  
"OPBO22\_00624" 37794 "s59E25H2" 0 "hypothetical protein"  
"OPBO22\_00624" 37794 "s59E5H2" 0 "hypothetical protein"  
"OPBO22\_00624" 37794 "s63E6H2" 0 "hypothetical protein"  
"OPBO22\_00625" 37795 "s59E13H2" 0 "Bifunctional protein GImU"  
"OPBO22\_00625" 37795 "s59E25H2" 0 "Bifunctional protein GImU"  
"OPBO22\_00625" 37795 "s59E5H2" 0 "Bifunctional protein GImU"  
"OPBO22\_00625" 37795 "s63E6H2" 0 "Bifunctional protein GImU"  
"OPBO22\_00626" 37796 "s59E13H2" 0 "hypothetical protein"  
"OPBO22\_00626" 37796 "s59E25H2" 0 "hypothetical protein"  
"OPBO22\_00626" 37796 "s59E5H2" 0 "hypothetical protein"  
"OPBO22\_00626" 37796 "s63E6H2" 0 "hypothetical protein"  
"OPBO22\_00627" 37797 "s59E13H2" 0 "Acetyltransferase (GNAT) family protein"  
"OPBO22\_00627" 37797 "s59E25H2" 0 "Acetyltransferase (GNAT) family protein"  
"OPBO22\_00627" 37797 "s59E5H2" 0 "Acetyltransferase (GNAT) family protein"  
"OPBO22\_00627" 37797 "s63E6H2" 0 "Acetyltransferase (GNAT) family protein"  
"OPBO22\_00628" 37798 "s59E13H2" 0 "dTDP-4-amino-4,6-dideoxy-D-glucose acyltransferase"  
"OPBO22\_00628" 37798 "s59E25H2" 0 "dTDP-4-amino-4,6-dideoxy-D-glucose acyltransferase"  
"OPBO22\_00628" 37798 "s59E5H2" 0 "dTDP-4-amino-4,6-dideoxy-D-glucose acyltransferase"  
"OPBO22\_00628" 37798 "s63E6H2" 0 "dTDP-4-amino-4,6-dideoxy-D-glucose acyltransferase"  
"OPBO22\_00629" 37799 "s59E13H2" 0 "putative 3-hydroxybutyryl-CoA dehydrogenase"  
"OPBO22\_00629" 37799 "s59E25H2" 0 "putative 3-hydroxybutyryl-CoA dehydrogenase"  
"OPBO22\_00629" 37799 "s59E5H2" 0 "putative 3-hydroxybutyryl-CoA dehydrogenase"  
"OPBO22\_00629" 37799 "s63E6H2" 0 "putative 3-hydroxybutyryl-CoA dehydrogenase"  
"OPBO22\_00630" 37800 "s59E13H2" 0 "GDP-mannose-dependent alpha-(1-6)-phosphatidylinositol monomannoside mannosyltransferase"  
"OPBO22\_00630" 37800 "s59E25H2" 0 "GDP-mannose-dependent alpha-(1-6)-phosphatidylinositol monomannoside mannosyltransferase"  
"OPBO22\_00630" 37800 "s59E5H2" 0 "GDP-mannose-dependent alpha-(1-6)-phosphatidylinositol monomannoside mannosyltransferase"

"OPBO22\_00630" 37800 "s63E6H2" 0 "GDP-mannose-dependent alpha-(1-6)-phosphatidylinositol monomannoside mannosyltransferase"  
"OPBO22\_00632" 37802 "s59E13H2" 0 "hypothetical protein"  
"OPBO22\_00632" 37802 "s59E25H2" 0 "hypothetical protein"  
"OPBO22\_00632" 37802 "s59E5H2" 0 "hypothetical protein"  
"OPBO22\_00632" 37802 "s63E6H2" 0 "hypothetical protein"  
"OPBO22\_00633" 37803 "s59E13H2" 0 "Glycosyltransferase AgIJ"  
"OPBO22\_00633" 37803 "s59E25H2" 0 "Glycosyltransferase AgIJ"  
"OPBO22\_00633" 37803 "s59E5H2" 0 "Glycosyltransferase AgIJ"  
"OPBO22\_00633" 37803 "s63E6H2" 0 "Glycosyltransferase AgIJ"  
"pid" "gene\_callers\_id" "accession"  
"Unk\_C08\_00001" 37804 "s59E13H2" 0 "Glycerol kinase"  
"Unk\_C08\_00001" 37804 "s59E25H2" 0 "Glycerol kinase"  
"Unk\_C08\_00001" 37804 "s59E5H2" 0 "Glycerol kinase"  
"Unk\_C08\_00001" 37804 "s63E6H2" 0.0004863432 "Glycerol kinase"  
"Unk\_C08\_00002" 37805 "s59E13H2" 0 "putative L-threonine 3-dehydrogenase"  
"Unk\_C08\_00002" 37805 "s59E25H2" 0 "putative L-threonine 3-dehydrogenase"  
"Unk\_C08\_00002" 37805 "s59E5H2" 0 "putative L-threonine 3-dehydrogenase"  
"Unk\_C08\_00002" 37805 "s63E6H2" 0 "putative L-threonine 3-dehydrogenase"  
"Unk\_C08\_00003" 37806 "s59E13H2" 0 "Galactitol-1-phosphate 5-dehydrogenase"  
"Unk\_C08\_00003" 37806 "s59E25H2" 0 "Galactitol-1-phosphate 5-dehydrogenase"  
"Unk\_C08\_00003" 37806 "s59E5H2" 0 "Galactitol-1-phosphate 5-dehydrogenase"  
"Unk\_C08\_00003" 37806 "s63E6H2" 0.0009410486 "Galactitol-1-phosphate 5-dehydrogenase"  
"Unk\_C08\_00004" 37807 "s59E13H2" 0 "Ribulose biphosphate carboxylase"  
"Unk\_C08\_00004" 37807 "s59E25H2" 0 "Ribulose biphosphate carboxylase"  
"Unk\_C08\_00004" 37807 "s59E5H2" 0 "Ribulose biphosphate carboxylase"  
"Unk\_C08\_00004" 37807 "s63E6H2" 0 "Ribulose biphosphate carboxylase"  
"Unk\_C08\_00005" 37808 "s59E13H2" 0 "Uroporphyrinogen decarboxylase (URO-D)"  
"Unk\_C08\_00005" 37808 "s59E25H2" 0 "Uroporphyrinogen decarboxylase (URO-D)"  
"Unk\_C08\_00005" 37808 "s59E5H2" 0 "Uroporphyrinogen decarboxylase (URO-D)"  
"Unk\_C08\_00005" 37808 "s63E6H2" 0 "Uroporphyrinogen decarboxylase (URO-D)"  
"Unk\_C08\_00006" 37809 "s59E13H2" 0 "2-oxoisovalerate dehydrogenase subunit beta"  
"Unk\_C08\_00006" 37809 "s59E25H2" 0 "2-oxoisovalerate dehydrogenase subunit beta"  
"Unk\_C08\_00006" 37809 "s59E5H2" 0 "2-oxoisovalerate dehydrogenase subunit beta"  
"Unk\_C08\_00006" 37809 "s63E6H2" 0 "2-oxoisovalerate dehydrogenase subunit beta"  
"Unk\_C08\_00007" 37810 "s59E13H2" 0 "Acetoin:2,6-dichlorophenolindophenol oxidoreductase subunit alpha"  
"Unk\_C08\_00007" 37810 "s59E25H2" 0 "Acetoin:2,6-dichlorophenolindophenol oxidoreductase subunit alpha"  
"Unk\_C08\_00007" 37810 "s59E5H2" 0 "Acetoin:2,6-dichlorophenolindophenol oxidoreductase subunit alpha"  
"Unk\_C08\_00007" 37810 "s63E6H2" 0 "Acetoin:2,6-dichlorophenolindophenol oxidoreductase subunit alpha"  
"Unk\_C08\_00008" 37811 "s59E13H2" 0 "3-hydroxyanthranilate 3,4-dioxygenase"  
"Unk\_C08\_00008" 37811 "s59E25H2" 0 "3-hydroxyanthranilate 3,4-dioxygenase"  
"Unk\_C08\_00008" 37811 "s59E5H2" 0 "3-hydroxyanthranilate 3,4-dioxygenase"  
"Unk\_C08\_00008" 37811 "s63E6H2" 0 "3-hydroxyanthranilate 3,4-dioxygenase"  
"Unk\_C08\_00011" 37814 "s59E13H2" 0.01064518 "CRISPR-associated endonuclease Cas9"  
"Unk\_C08\_00011" 37814 "s59E25H2" 0 "CRISPR-associated endonuclease Cas9"  
"Unk\_C08\_00011" 37814 "s59E5H2" 0 "CRISPR-associated endonuclease Cas9"  
"Unk\_C08\_00011" 37814 "s63E6H2" 0 "CRISPR-associated endonuclease Cas9"  
"Unk\_C08\_00012" 37815 "s59E13H2" 0 "Phosphoribosylaminoimidazole-succinocarboxamide synthase"

"Unk\_C08\_00012" 37815 "s59E25H2" 0 "Phosphoribosylaminoimidazole-succinocarboxamide synthase"  
"Unk\_C08\_00012" 37815 "s59E5H2" 0 "Phosphoribosylaminoimidazole-succinocarboxamide synthase"  
"Unk\_C08\_00012" 37815 "s63E6H2" 0 "Phosphoribosylaminoimidazole-succinocarboxamide synthase"  
"Unk\_C08\_00013" 37816 "s59E13H2" 0 "Peptide chain release factor 1"  
"Unk\_C08\_00013" 37816 "s59E25H2" 0 "Peptide chain release factor 1"  
"Unk\_C08\_00013" 37816 "s59E5H2" 0 "Peptide chain release factor 1"  
"Unk\_C08\_00013" 37816 "s63E6H2" 0 "Peptide chain release factor 1"  
"Unk\_C08\_00014" 37817 "s59E13H2" 0 "Transcription-repair-coupling factor"  
"Unk\_C08\_00014" 37817 "s59E25H2" 0 "Transcription-repair-coupling factor"  
"Unk\_C08\_00014" 37817 "s59E5H2" 0 "Transcription-repair-coupling factor"  
"Unk\_C08\_00014" 37817 "s63E6H2" 0 "Transcription-repair-coupling factor"  
"Unk\_C08\_00015" 37818 "s59E13H2" 0 "Chaperone SurA precursor"  
"Unk\_C08\_00015" 37818 "s59E25H2" 0 "Chaperone SurA precursor"  
"Unk\_C08\_00015" 37818 "s59E5H2" 0 "Chaperone SurA precursor"  
"Unk\_C08\_00015" 37818 "s63E6H2" 0.007822663 "Chaperone SurA precursor"  
"Unk\_C08\_00016" 37819 "s59E13H2" 0 "UDP-N-acetylglucosamine 1-carboxyvinyltransferase 1"  
"Unk\_C08\_00016" 37819 "s59E25H2" 0 "UDP-N-acetylglucosamine 1-carboxyvinyltransferase 1"  
"Unk\_C08\_00016" 37819 "s59E5H2" 0 "UDP-N-acetylglucosamine 1-carboxyvinyltransferase 1"  
"Unk\_C08\_00016" 37819 "s63E6H2" 0.001068833 "UDP-N-acetylglucosamine 1-carboxyvinyltransferase 1"  
"Unk\_C08\_00017" 37820 "s59E13H2" 0 "Rod shape-determining protein MreB"  
"Unk\_C08\_00017" 37820 "s59E25H2" 0 "Rod shape-determining protein MreB"  
"Unk\_C08\_00017" 37820 "s59E5H2" 0 "Rod shape-determining protein MreB"  
"Unk\_C08\_00017" 37820 "s63E6H2" 0.005169216 "Rod shape-determining protein MreB"  
"Unk\_C08\_00018" 37821 "s59E13H2" 0 "hypothetical protein"  
"Unk\_C08\_00018" 37821 "s59E25H2" 0 "hypothetical protein"  
"Unk\_C08\_00018" 37821 "s59E5H2" 0 "hypothetical protein"  
"Unk\_C08\_00018" 37821 "s63E6H2" 0.009777413 "hypothetical protein"  
"Unk\_C08\_00019" 37822 "s59E13H2" 0 "DNA integrity scanning protein DisA"  
"Unk\_C08\_00019" 37822 "s59E25H2" 0 "DNA integrity scanning protein DisA"  
"Unk\_C08\_00019" 37822 "s59E5H2" 0 "DNA integrity scanning protein DisA"  
"Unk\_C08\_00019" 37822 "s63E6H2" 0.003176258 "DNA integrity scanning protein DisA"  
"Unk\_C08\_00020" 37823 "s59E13H2" 0 "putative PIN and TRAM-domain containing protein precursor"  
"Unk\_C08\_00020" 37823 "s59E25H2" 0 "putative PIN and TRAM-domain containing protein precursor"  
"Unk\_C08\_00020" 37823 "s59E5H2" 0 "putative PIN and TRAM-domain containing protein precursor"  
"Unk\_C08\_00020" 37823 "s63E6H2" 0.006055863 "putative PIN and TRAM-domain containing protein precursor"  
"Unk\_C08\_00021" 37824 "s59E13H2" 0 "2-C-methyl-D-erythritol 4-phosphate cytidyltransferase"  
"Unk\_C08\_00021" 37824 "s59E25H2" 0 "2-C-methyl-D-erythritol 4-phosphate cytidyltransferase"  
"Unk\_C08\_00021" 37824 "s59E5H2" 0 "2-C-methyl-D-erythritol 4-phosphate cytidyltransferase"  
"Unk\_C08\_00021" 37824 "s63E6H2" 0.01765889 "2-C-methyl-D-erythritol 4-phosphate cytidyltransferase"  
"Unk\_C08\_00022" 37825 "s59E13H2" 0 "2-C-methyl-D-erythritol 2,4-cyclodiphosphate synthase"  
"Unk\_C08\_00022" 37825 "s59E25H2" 0 "2-C-methyl-D-erythritol 2,4-cyclodiphosphate synthase"  
"Unk\_C08\_00022" 37825 "s59E5H2" 0 "2-C-methyl-D-erythritol 2,4-cyclodiphosphate synthase"  
"Unk\_C08\_00022" 37825 "s63E6H2" 0.033965 "2-C-methyl-D-erythritol 2,4-cyclodiphosphate synthase"  
"Unk\_C08\_00023" 37826 "s59E13H2" 0 "Cysteine--tRNA ligase"  
"Unk\_C08\_00023" 37826 "s59E25H2" 0 "Cysteine--tRNA ligase"  
"Unk\_C08\_00023" 37826 "s59E5H2" 0 "Cysteine--tRNA ligase"  
"Unk\_C08\_00023" 37826 "s63E6H2" 0.02547269 "Cysteine--tRNA ligase"

"Unk\_C08\_00024" 37827 "s59E13H2" 0 "hypothetical protein"  
"Unk\_C08\_00024" 37827 "s59E25H2" 0 "hypothetical protein"  
"Unk\_C08\_00024" 37827 "s59E5H2" 0 "hypothetical protein"  
"Unk\_C08\_00024" 37827 "s63E6H2" 0 "hypothetical protein"  
"Unk\_C08\_00026" 37829 "s59E13H2" 0 "Alanine--tRNA ligase"  
"Unk\_C08\_00026" 37829 "s59E25H2" 0 "Alanine--tRNA ligase"  
"Unk\_C08\_00026" 37829 "s59E5H2" 0.01149256 "Alanine--tRNA ligase"  
"Unk\_C08\_00026" 37829 "s63E6H2" 0.01258422 "Alanine--tRNA ligase"  
"Unk\_C08\_00027" 37830 "s59E13H2" 0 "Primosomal protein N"  
"Unk\_C08\_00027" 37830 "s59E25H2" 0 "Primosomal protein N"  
"Unk\_C08\_00027" 37830 "s59E5H2" 0.004152392 "Primosomal protein N"  
"Unk\_C08\_00027" 37830 "s63E6H2" 0.005249448 "Primosomal protein N"  
"Unk\_C08\_00028" 37831 "s59E13H2" 0 "Aspartate--tRNA ligase"  
"Unk\_C08\_00028" 37831 "s59E25H2" 0 "Aspartate--tRNA ligase"  
"Unk\_C08\_00028" 37831 "s59E5H2" 0 "Aspartate--tRNA ligase"  
"Unk\_C08\_00028" 37831 "s63E6H2" 0.002275889 "Aspartate--tRNA ligase"  
"Unk\_C08\_00029" 37832 "s59E13H2" 0 "Histidine--tRNA ligase"  
"Unk\_C08\_00029" 37832 "s59E25H2" 0 "Histidine--tRNA ligase"  
"Unk\_C08\_00029" 37832 "s59E5H2" 0 "Histidine--tRNA ligase"  
"Unk\_C08\_00029" 37832 "s63E6H2" 0.001209087 "Histidine--tRNA ligase"  
"Unk\_C08\_00030" 37833 "s59E13H2" 0 "putative aminodeoxychorismate lyase"  
"Unk\_C08\_00030" 37833 "s59E25H2" 0 "putative aminodeoxychorismate lyase"  
"Unk\_C08\_00030" 37833 "s59E5H2" 0 "putative aminodeoxychorismate lyase"  
"Unk\_C08\_00030" 37833 "s63E6H2" 0.002455211 "putative aminodeoxychorismate lyase"  
"Unk\_C08\_00031" 37834 "s59E13H2" 0 "Putative Holliday junction resolvase"  
"Unk\_C08\_00031" 37834 "s59E25H2" 0 "Putative Holliday junction resolvase"  
"Unk\_C08\_00031" 37834 "s59E5H2" 0.003566581 "Putative Holliday junction resolvase"  
"Unk\_C08\_00031" 37834 "s63E6H2" 0.0007160052 "Putative Holliday junction resolvase"  
"Unk\_C08\_00032" 37835 "s59E13H2" 0 "Putative zinc ribbon domain protein"  
"Unk\_C08\_00032" 37835 "s59E25H2" 0 "Putative zinc ribbon domain protein"  
"Unk\_C08\_00032" 37835 "s59E5H2" 0.00895376 "Putative zinc ribbon domain protein"  
"Unk\_C08\_00032" 37835 "s63E6H2" 0 "Putative zinc ribbon domain protein"  
"Unk\_C08\_00036" 37839 "s59E13H2" 0 "Regulatory protein RecX"  
"Unk\_C08\_00036" 37839 "s59E25H2" 0 "Regulatory protein RecX"  
"Unk\_C08\_00036" 37839 "s59E5H2" 0 "Regulatory protein RecX"  
"Unk\_C08\_00036" 37839 "s63E6H2" 0 "Regulatory protein RecX"  
"Unk\_C08\_00037" 37840 "s59E13H2" 0 "hypothetical protein"  
"Unk\_C08\_00037" 37840 "s59E25H2" 0 "hypothetical protein"  
"Unk\_C08\_00037" 37840 "s59E5H2" 0 "hypothetical protein"  
"Unk\_C08\_00037" 37840 "s63E6H2" 0 "hypothetical protein"  
"Unk\_C08\_00038" 37841 "s59E13H2" 0 "Twitching mobility protein"  
"Unk\_C08\_00038" 37841 "s59E25H2" 0 "Twitching mobility protein"  
"Unk\_C08\_00038" 37841 "s59E5H2" 0 "Twitching mobility protein"  
"Unk\_C08\_00038" 37841 "s63E6H2" 0 "Twitching mobility protein"  
"Unk\_C08\_00039" 37842 "s59E13H2" 0 "putative phosphoglucosamine mutase"  
"Unk\_C08\_00039" 37842 "s59E25H2" 0 "putative phosphoglucosamine mutase"  
"Unk\_C08\_00039" 37842 "s59E5H2" 3.610631e-05 "putative phosphoglucosamine mutase"

"Unk\_C08\_00039" 37842 "s63E6H2" 0 "putative phosphoglucosamine mutase"  
"Unk\_C08\_00040" 37843 "s59E13H2" 0 "Putative transposase DNA-binding domain protein"  
"Unk\_C08\_00040" 37843 "s59E25H2" 0 "Putative transposase DNA-binding domain protein"  
"Unk\_C08\_00040" 37843 "s59E5H2" 0.1346384 "Putative transposase DNA-binding domain protein"  
"Unk\_C08\_00040" 37843 "s63E6H2" 0.04719555 "Putative transposase DNA-binding domain protein"  
"Unk\_C08\_00041" 37844 "s59E13H2" 0 "Ribonuclease 3"  
"Unk\_C08\_00041" 37844 "s59E25H2" 0 "Ribonuclease 3"  
"Unk\_C08\_00041" 37844 "s59E5H2" 0.001156392 "Ribonuclease 3"  
"Unk\_C08\_00041" 37844 "s63E6H2" 0.0009173139 "Ribonuclease 3"  
"Unk\_C08\_00042" 37845 "s59E13H2" 0 "3-oxoacyl-[acyl-carrier-protein] synthase 2"  
"Unk\_C08\_00042" 37845 "s59E25H2" 0 "3-oxoacyl-[acyl-carrier-protein] synthase 2"  
"Unk\_C08\_00042" 37845 "s59E5H2" 0 "3-oxoacyl-[acyl-carrier-protein] synthase 2"  
"Unk\_C08\_00042" 37845 "s63E6H2" 0 "3-oxoacyl-[acyl-carrier-protein] synthase 2"  
"Unk\_C08\_00043" 37846 "s59E13H2" 0 "Acyl carrier protein"  
"Unk\_C08\_00043" 37846 "s59E25H2" 0 "Acyl carrier protein"  
"Unk\_C08\_00043" 37846 "s59E5H2" 0 "Acyl carrier protein"  
"Unk\_C08\_00043" 37846 "s63E6H2" 0 "Acyl carrier protein"  
"Unk\_C08\_00044" 37847 "s59E13H2" 0 "Ribosomal large subunit pseudouridine synthase D"  
"Unk\_C08\_00044" 37847 "s59E25H2" 0 "Ribosomal large subunit pseudouridine synthase D"  
"Unk\_C08\_00044" 37847 "s59E5H2" 0 "Ribosomal large subunit pseudouridine synthase D"  
"Unk\_C08\_00044" 37847 "s63E6H2" 0.003205799 "Ribosomal large subunit pseudouridine synthase D"  
"Unk\_C08\_00045" 37848 "s59E13H2" 0 "Prolipoprotein diacylglycerol transferase"  
"Unk\_C08\_00045" 37848 "s59E25H2" 0 "Prolipoprotein diacylglycerol transferase"  
"Unk\_C08\_00045" 37848 "s59E5H2" 0 "Prolipoprotein diacylglycerol transferase"  
"Unk\_C08\_00045" 37848 "s63E6H2" 0 "Prolipoprotein diacylglycerol transferase"  
"Unk\_C08\_00046" 37849 "s59E13H2" 0 "Putative transposase DNA-binding domain protein"  
"Unk\_C08\_00046" 37849 "s59E25H2" 0 "Putative transposase DNA-binding domain protein"  
"Unk\_C08\_00046" 37849 "s59E5H2" 0 "Putative transposase DNA-binding domain protein"  
"Unk\_C08\_00046" 37849 "s63E6H2" 0 "Putative transposase DNA-binding domain protein"  
"Unk\_C08\_00048" 37851 "s59E13H2" 0 "Group II intron-encoded protein LtrA"  
"Unk\_C08\_00048" 37851 "s59E25H2" 0 "Group II intron-encoded protein LtrA"  
"Unk\_C08\_00048" 37851 "s59E5H2" 0.01683624 "Group II intron-encoded protein LtrA"  
"Unk\_C08\_00048" 37851 "s63E6H2" 0 "Group II intron-encoded protein LtrA"  
"Unk\_C08\_00049" 37852 "s59E13H2" 0 "putative transposase"  
"Unk\_C08\_00049" 37852 "s59E25H2" 0 "putative transposase"  
"Unk\_C08\_00049" 37852 "s59E5H2" 0.05502636 "putative transposase"  
"Unk\_C08\_00049" 37852 "s63E6H2" 0 "putative transposase"  
"Unk\_C08\_00050" 37853 "s59E13H2" 0 "5-dehydro-2-deoxygluconokinase"  
"Unk\_C08\_00050" 37853 "s59E25H2" 0 "5-dehydro-2-deoxygluconokinase"  
"Unk\_C08\_00050" 37853 "s59E5H2" 0.0148904 "5-dehydro-2-deoxygluconokinase"  
"Unk\_C08\_00050" 37853 "s63E6H2" 0.006041175 "5-dehydro-2-deoxygluconokinase"  
"Unk\_C08\_00051" 37854 "s59E13H2" 0 "methylcobalamin:coenzyme M methyltransferase"  
"Unk\_C08\_00051" 37854 "s59E25H2" 0 "methylcobalamin:coenzyme M methyltransferase"  
"Unk\_C08\_00051" 37854 "s59E5H2" 0.01445951 "methylcobalamin:coenzyme M methyltransferase"  
"Unk\_C08\_00051" 37854 "s63E6H2" 0 "methylcobalamin:coenzyme M methyltransferase"  
"Unk\_C08\_00052" 37855 "s59E13H2" 0 "Shikimate dehydrogenase"  
"Unk\_C08\_00052" 37855 "s59E25H2" 0 "Shikimate dehydrogenase"



"Unk\_C08\_00052" 37855 "s59E5H2" 0 "Shikimate dehydrogenase"  
"Unk\_C08\_00052" 37855 "s63E6H2" 0 "Shikimate dehydrogenase"  
"Unk\_C08\_00053" 37856 "s59E13H2" 0 "Glyoxalase/Bleomycin resistance protein/Dioxygenase superfamily protein"  
"Unk\_C08\_00053" 37856 "s59E25H2" 0 "Glyoxalase/Bleomycin resistance protein/Dioxygenase superfamily protein"  
"Unk\_C08\_00053" 37856 "s59E5H2" 0 "Glyoxalase/Bleomycin resistance protein/Dioxygenase superfamily protein"  
"Unk\_C08\_00053" 37856 "s63E6H2" 0 "Glyoxalase/Bleomycin resistance protein/Dioxygenase superfamily protein"  
"Unk\_C08\_00056" 37859 "s59E13H2" 0 "Galactose/methyl galactoside import ATP-binding protein MglA"  
"Unk\_C08\_00056" 37859 "s59E25H2" 0 "Galactose/methyl galactoside import ATP-binding protein MglA"  
"Unk\_C08\_00056" 37859 "s59E5H2" 0.0100567 "Galactose/methyl galactoside import ATP-binding protein MglA"  
"Unk\_C08\_00056" 37859 "s63E6H2" 0 "Galactose/methyl galactoside import ATP-binding protein MglA"  
"Unk\_C08\_00057" 37860 "s59E13H2" 0 "Ribose transport system permease protein RbsC"  
"Unk\_C08\_00057" 37860 "s59E25H2" 0 "Ribose transport system permease protein RbsC"  
"Unk\_C08\_00057" 37860 "s59E5H2" 0.006235282 "Ribose transport system permease protein RbsC"  
"Unk\_C08\_00057" 37860 "s63E6H2" 0 "Ribose transport system permease protein RbsC"  
"Unk\_C08\_00058" 37861 "s59E13H2" 0 "D-ribose-binding periplasmic protein precursor"  
"Unk\_C08\_00058" 37861 "s59E25H2" 0 "D-ribose-binding periplasmic protein precursor"  
"Unk\_C08\_00058" 37861 "s59E5H2" 0 "D-ribose-binding periplasmic protein precursor"  
"Unk\_C08\_00058" 37861 "s63E6H2" 0 "D-ribose-binding periplasmic protein precursor"  
"Unk\_C08\_00060" 37863 "s59E13H2" 0 "DNA-binding protein HU"  
"Unk\_C08\_00060" 37863 "s59E25H2" 0 "DNA-binding protein HU"  
"Unk\_C08\_00060" 37863 "s59E5H2" 0 "DNA-binding protein HU"  
"Unk\_C08\_00060" 37863 "s63E6H2" 0 "DNA-binding protein HU"  
"Unk\_C08\_00061" 37864 "s59E13H2" 0 "hypothetical protein"  
"Unk\_C08\_00061" 37864 "s59E25H2" 0 "hypothetical protein"  
"Unk\_C08\_00061" 37864 "s59E5H2" 0 "hypothetical protein"  
"Unk\_C08\_00061" 37864 "s63E6H2" 0 "hypothetical protein"  
"Unk\_C08\_00062" 37865 "s59E13H2" 0 "hypothetical protein"  
"Unk\_C08\_00062" 37865 "s59E25H2" 0 "hypothetical protein"  
"Unk\_C08\_00062" 37865 "s59E5H2" 0 "hypothetical protein"  
"Unk\_C08\_00062" 37865 "s63E6H2" 0 "hypothetical protein"  
"Unk\_C08\_00063" 37866 "s59E13H2" 0 "Anaerobic ribonucleoside-triphosphate reductase"  
"Unk\_C08\_00063" 37866 "s59E25H2" 0 "Anaerobic ribonucleoside-triphosphate reductase"  
"Unk\_C08\_00063" 37866 "s59E5H2" 0 "Anaerobic ribonucleoside-triphosphate reductase"  
"Unk\_C08\_00063" 37866 "s63E6H2" 0 "Anaerobic ribonucleoside-triphosphate reductase"  
"Unk\_C08\_00064" 37867 "s59E13H2" 0 "Pyruvate formate-lyase 1-activating enzyme"  
"Unk\_C08\_00064" 37867 "s59E25H2" 0 "Pyruvate formate-lyase 1-activating enzyme"  
"Unk\_C08\_00064" 37867 "s59E5H2" 0 "Pyruvate formate-lyase 1-activating enzyme"  
"Unk\_C08\_00064" 37867 "s63E6H2" 0 "Pyruvate formate-lyase 1-activating enzyme"  
"Unk\_C08\_00065" 37868 "s59E13H2" 0 "Phosphoribosylformylglycinamide synthase 2"  
"Unk\_C08\_00065" 37868 "s59E25H2" 0 "Phosphoribosylformylglycinamide synthase 2"  
"Unk\_C08\_00065" 37868 "s59E5H2" 0 "Phosphoribosylformylglycinamide synthase 2"  
"Unk\_C08\_00065" 37868 "s63E6H2" 0 "Phosphoribosylformylglycinamide synthase 2"  
"Unk\_C08\_00067" 37870 "s59E13H2" 0 "Trehalose/maltose-binding protein MalE precursor"  
"Unk\_C08\_00067" 37870 "s59E25H2" 0 "Trehalose/maltose-binding protein MalE precursor"  
"Unk\_C08\_00067" 37870 "s59E5H2" 0 "Trehalose/maltose-binding protein MalE precursor"  
"Unk\_C08\_00067" 37870 "s63E6H2" 0 "Trehalose/maltose-binding protein MalE precursor"  
"Unk\_C08\_00068" 37871 "s59E13H2" 0 "Inner membrane ABC transporter permease protein YcjO"

"Unk\_C08\_00068" 37871 "s59E25H2" 0 "Inner membrane ABC transporter permease protein YcjO"  
"Unk\_C08\_00068" 37871 "s59E5H2" 0 "Inner membrane ABC transporter permease protein YcjO"  
"Unk\_C08\_00068" 37871 "s63E6H2" 0 "Inner membrane ABC transporter permease protein YcjO"  
"Unk\_C08\_00069" 37872 "s59E13H2" 0 "Trehalose/maltose transport system permease protein MalG"  
"Unk\_C08\_00069" 37872 "s59E25H2" 0 "Trehalose/maltose transport system permease protein MalG"  
"Unk\_C08\_00069" 37872 "s59E5H2" 0 "Trehalose/maltose transport system permease protein MalG"  
"Unk\_C08\_00069" 37872 "s63E6H2" 0 "Trehalose/maltose transport system permease protein MalG"  
"Unk\_C08\_00070" 37873 "s59E13H2" 0 "hypothetical protein"  
"Unk\_C08\_00070" 37873 "s59E25H2" 0 "hypothetical protein"  
"Unk\_C08\_00070" 37873 "s59E5H2" 0 "hypothetical protein"  
"Unk\_C08\_00070" 37873 "s63E6H2" 0 "hypothetical protein"  
"Unk\_C08\_00071" 37874 "s59E13H2" 0 "hypothetical protein"  
"Unk\_C08\_00071" 37874 "s59E25H2" 0 "hypothetical protein"  
"Unk\_C08\_00071" 37874 "s59E5H2" 0 "hypothetical protein"  
"Unk\_C08\_00071" 37874 "s63E6H2" 0 "hypothetical protein"  
"Unk\_C08\_00072" 37875 "s59E13H2" 0 "putative L-threonine 3-dehydrogenase"  
"Unk\_C08\_00072" 37875 "s59E25H2" 0 "putative L-threonine 3-dehydrogenase"  
"Unk\_C08\_00072" 37875 "s59E5H2" 0 "putative L-threonine 3-dehydrogenase"  
"Unk\_C08\_00072" 37875 "s63E6H2" 0 "putative L-threonine 3-dehydrogenase"  
"Unk\_C08\_00073" 37876 "s59E13H2" 0 "UDP-glucose 4-epimerase"  
"Unk\_C08\_00073" 37876 "s59E25H2" 0 "UDP-glucose 4-epimerase"  
"Unk\_C08\_00073" 37876 "s59E5H2" 0 "UDP-glucose 4-epimerase"  
"Unk\_C08\_00073" 37876 "s63E6H2" 0 "UDP-glucose 4-epimerase"  
"Unk\_C08\_00074" 37877 "s59E13H2" 0 "Xylulose kinase"  
"Unk\_C08\_00074" 37877 "s59E25H2" 0 "Xylulose kinase"  
"Unk\_C08\_00074" 37877 "s59E5H2" 0.009858486 "Xylulose kinase"  
"Unk\_C08\_00074" 37877 "s63E6H2" 0 "Xylulose kinase"  
"Unk\_C08\_00075" 37878 "s59E13H2" 0 "Cellulose synthase operon protein C precursor"  
"Unk\_C08\_00075" 37878 "s59E25H2" 0 "Cellulose synthase operon protein C precursor"  
"Unk\_C08\_00075" 37878 "s59E5H2" 0 "Cellulose synthase operon protein C precursor"  
"Unk\_C08\_00075" 37878 "s63E6H2" 0 "Cellulose synthase operon protein C precursor"  
"Unk\_C08\_00076" 37879 "s59E13H2" 0 "transport protein TonB"  
"Unk\_C08\_00076" 37879 "s59E25H2" 0 "transport protein TonB"  
"Unk\_C08\_00076" 37879 "s59E5H2" 0 "transport protein TonB"  
"Unk\_C08\_00076" 37879 "s63E6H2" 0 "transport protein TonB"  
"Unk\_C08\_00077" 37880 "s59E13H2" 0 "Vitamin B12 transporter BtuB precursor"  
"Unk\_C08\_00077" 37880 "s59E25H2" 0 "Vitamin B12 transporter BtuB precursor"  
"Unk\_C08\_00077" 37880 "s59E5H2" 1.138366 "Vitamin B12 transporter BtuB precursor"  
"Unk\_C08\_00077" 37880 "s63E6H2" 0.001288409 "Vitamin B12 transporter BtuB precursor"  
"Unk\_C08\_00079" 37882 "s59E13H2" 0 "Ribosomal protein S12 methylthiotransferase RimO"  
"Unk\_C08\_00079" 37882 "s59E25H2" 0 "Ribosomal protein S12 methylthiotransferase RimO"  
"Unk\_C08\_00079" 37882 "s59E5H2" 1.083508 "Ribosomal protein S12 methylthiotransferase RimO"  
"Unk\_C08\_00079" 37882 "s63E6H2" 0 "Ribosomal protein S12 methylthiotransferase RimO"  
"Unk\_C08\_00080" 37883 "s59E13H2" 0 "5-methyltetrahydrofolate:corrinoid/iron-sulfur protein co-methyltransferase"  
"Unk\_C08\_00080" 37883 "s59E25H2" 0 "5-methyltetrahydrofolate:corrinoid/iron-sulfur protein co-methyltransferase"  
"Unk\_C08\_00080" 37883 "s59E5H2" 0.7426836 "5-methyltetrahydrofolate:corrinoid/iron-sulfur protein co-methyltransferase"  
"Unk\_C08\_00080" 37883 "s63E6H2" 0 "5-methyltetrahydrofolate:corrinoid/iron-sulfur protein co-methyltransferase"

"Unk\_C08\_00081" 37884 "s59E13H2" 0 "Bifunctional homocysteine S-methyltransferase/5,10-methylenetetrahydrofolate reductase"  
"Unk\_C08\_00081" 37884 "s59E25H2" 0 "Bifunctional homocysteine S-methyltransferase/5,10-methylenetetrahydrofolate reductase"  
"Unk\_C08\_00081" 37884 "s59E5H2" 0.5229765 "Bifunctional homocysteine S-methyltransferase/5,10-methylenetetrahydrofolate reductase"  
"Unk\_C08\_00081" 37884 "s63E6H2" 0 "Bifunctional homocysteine S-methyltransferase/5,10-methylenetetrahydrofolate reductase"  
"Unk\_C08\_00083" 37886 "s59E13H2" 0 "Bifunctional adenosylcobalamin biosynthesis protein CobP"  
"Unk\_C08\_00083" 37886 "s59E25H2" 0 "Bifunctional adenosylcobalamin biosynthesis protein CobP"  
"Unk\_C08\_00083" 37886 "s59E5H2" 0.4465413 "Bifunctional adenosylcobalamin biosynthesis protein CobP"  
"Unk\_C08\_00083" 37886 "s63E6H2" 0 "Bifunctional adenosylcobalamin biosynthesis protein CobP"  
"Unk\_C08\_00084" 37887 "s59E13H2" 0 "Nicotinate-nucleotide--dimethylbenzimidazole phosphoribosyltransferase"  
"Unk\_C08\_00084" 37887 "s59E25H2" 0 "Nicotinate-nucleotide--dimethylbenzimidazole phosphoribosyltransferase"  
"Unk\_C08\_00084" 37887 "s59E5H2" 0.5242699 "Nicotinate-nucleotide--dimethylbenzimidazole phosphoribosyltransferase"  
"Unk\_C08\_00084" 37887 "s63E6H2" 0 "Nicotinate-nucleotide--dimethylbenzimidazole phosphoribosyltransferase"  
"Unk\_C08\_00085" 37888 "s59E13H2" 0 "Cobalamin synthase"  
"Unk\_C08\_00085" 37888 "s59E25H2" 0 "Cobalamin synthase"  
"Unk\_C08\_00085" 37888 "s59E5H2" 0.6570059 "Cobalamin synthase"  
"Unk\_C08\_00085" 37888 "s63E6H2" 0 "Cobalamin synthase"  
"Unk\_C08\_00086" 37889 "s59E13H2" 0 "Asparagine synthetase B [glutamine-hydrolyzing]"  
"Unk\_C08\_00086" 37889 "s59E25H2" 0 "Asparagine synthetase B [glutamine-hydrolyzing]"  
"Unk\_C08\_00086" 37889 "s59E5H2" 0.8451155 "Asparagine synthetase B [glutamine-hydrolyzing]"  
"Unk\_C08\_00086" 37889 "s63E6H2" 0 "Asparagine synthetase B [glutamine-hydrolyzing]"  
"Unk\_C08\_00087" 37890 "s59E13H2" 0 "ATP-binding region"  
"Unk\_C08\_00087" 37890 "s59E25H2" 0 "ATP-binding region"  
"Unk\_C08\_00087" 37890 "s59E5H2" 0.5586086 "ATP-binding region"  
"Unk\_C08\_00087" 37890 "s63E6H2" 0 "ATP-binding region"  
"Unk\_C08\_00088" 37891 "s59E13H2" 0 "cobalamin biosynthesis protein"  
"Unk\_C08\_00088" 37891 "s59E25H2" 0 "cobalamin biosynthesis protein"  
"Unk\_C08\_00088" 37891 "s59E5H2" 0.0002045644 "cobalamin biosynthesis protein"  
"Unk\_C08\_00088" 37891 "s63E6H2" 0 "cobalamin biosynthesis protein"  
"Unk\_C08\_00089" 37892 "s59E13H2" 0 "Cobalamin-binding protein precursor"  
"Unk\_C08\_00089" 37892 "s59E25H2" 0 "Cobalamin-binding protein precursor"  
"Unk\_C08\_00089" 37892 "s59E5H2" 0 "Cobalamin-binding protein precursor"  
"Unk\_C08\_00089" 37892 "s63E6H2" 0 "Cobalamin-binding protein precursor"  
"Unk\_C08\_00090" 37893 "s59E13H2" 0 "Cobalamin import system permease protein BtuC"  
"Unk\_C08\_00090" 37893 "s59E25H2" 0 "Cobalamin import system permease protein BtuC"  
"Unk\_C08\_00090" 37893 "s59E5H2" 0 "Cobalamin import system permease protein BtuC"  
"Unk\_C08\_00090" 37893 "s63E6H2" 0 "Cobalamin import system permease protein BtuC"  
"Unk\_C08\_00091" 37894 "s59E13H2" 0 "Cobalamin import ATP-binding protein BtuD"  
"Unk\_C08\_00091" 37894 "s59E25H2" 0 "Cobalamin import ATP-binding protein BtuD"  
"Unk\_C08\_00091" 37894 "s59E5H2" 0 "Cobalamin import ATP-binding protein BtuD"  
"Unk\_C08\_00091" 37894 "s63E6H2" 0 "Cobalamin import ATP-binding protein BtuD"  
"Unk\_C08\_00092" 37895 "s59E13H2" 0 "Threonine-phosphate decarboxylase"  
"Unk\_C08\_00092" 37895 "s59E25H2" 0 "Threonine-phosphate decarboxylase"  
"Unk\_C08\_00092" 37895 "s59E5H2" 0 "Threonine-phosphate decarboxylase"  
"Unk\_C08\_00092" 37895 "s63E6H2" 0 "Threonine-phosphate decarboxylase"  
"Unk\_C08\_00093" 37896 "s59E13H2" 0 "Glutamate dehydrogenase"  
"Unk\_C08\_00093" 37896 "s59E25H2" 0 "Glutamate dehydrogenase"  
"Unk\_C08\_00093" 37896 "s59E5H2" 0 "Glutamate dehydrogenase"

"Unk\_C08\_00093" 37896 "s63E6H2" 0 "Glutamate dehydrogenase"  
"Unk\_C08\_00094" 37897 "s59E13H2" 0 "Nitrogen regulatory protein P-II"  
"Unk\_C08\_00094" 37897 "s59E25H2" 0 "Nitrogen regulatory protein P-II"  
"Unk\_C08\_00094" 37897 "s59E5H2" 0 "Nitrogen regulatory protein P-II"  
"Unk\_C08\_00094" 37897 "s63E6H2" 0 "Nitrogen regulatory protein P-II"  
"Unk\_C08\_00095" 37898 "s59E13H2" 0 "1,5-anhydro-D-fructose reductase"  
"Unk\_C08\_00095" 37898 "s59E25H2" 0 "1,5-anhydro-D-fructose reductase"  
"Unk\_C08\_00095" 37898 "s59E5H2" 0 "1,5-anhydro-D-fructose reductase"  
"Unk\_C08\_00095" 37898 "s63E6H2" 0 "1,5-anhydro-D-fructose reductase"  
"Unk\_C08\_00096" 37899 "s59E13H2" 0 "Ribosomal silencing factor RsfS"  
"Unk\_C08\_00096" 37899 "s59E25H2" 0 "Ribosomal silencing factor RsfS"  
"Unk\_C08\_00096" 37899 "s59E5H2" 0.04406982 "Ribosomal silencing factor RsfS"  
"Unk\_C08\_00096" 37899 "s63E6H2" 0 "Ribosomal silencing factor RsfS"  
"Unk\_C08\_00098" 37901 "s59E13H2" 0 "Dihydroxy-acid dehydratase"  
"Unk\_C08\_00098" 37901 "s59E25H2" 0 "Dihydroxy-acid dehydratase"  
"Unk\_C08\_00098" 37901 "s59E5H2" 0.04057775 "Dihydroxy-acid dehydratase"  
"Unk\_C08\_00098" 37901 "s63E6H2" 0 "Dihydroxy-acid dehydratase"  
"Unk\_C08\_00099" 37902 "s59E13H2" 0 "Histidinol-phosphate aminotransferase 2"  
"Unk\_C08\_00099" 37902 "s59E25H2" 0 "Histidinol-phosphate aminotransferase 2"  
"Unk\_C08\_00099" 37902 "s59E5H2" 0.07244834 "Histidinol-phosphate aminotransferase 2"  
"Unk\_C08\_00099" 37902 "s63E6H2" 0 "Histidinol-phosphate aminotransferase 2"  
"Unk\_C08\_00100" 37903 "s59E13H2" 0 "Cytidylate kinase"  
"Unk\_C08\_00100" 37903 "s59E25H2" 0 "Cytidylate kinase"  
"Unk\_C08\_00100" 37903 "s59E5H2" 0.02486961 "Cytidylate kinase"  
"Unk\_C08\_00100" 37903 "s63E6H2" 0 "Cytidylate kinase"  
"Unk\_C08\_00101" 37904 "s59E13H2" 0 "1-acyl-sn-glycerol-3-phosphate acyltransferase"  
"Unk\_C08\_00101" 37904 "s59E25H2" 0 "1-acyl-sn-glycerol-3-phosphate acyltransferase"  
"Unk\_C08\_00101" 37904 "s59E5H2" 0.06885462 "1-acyl-sn-glycerol-3-phosphate acyltransferase"  
"Unk\_C08\_00101" 37904 "s63E6H2" 0 "1-acyl-sn-glycerol-3-phosphate acyltransferase"  
"Unk\_C08\_00102" 37905 "s59E13H2" 0 "4-hydroxy-3-methylbut-2-enyl diphosphate reductase"  
"Unk\_C08\_00102" 37905 "s59E25H2" 0 "4-hydroxy-3-methylbut-2-enyl diphosphate reductase"  
"Unk\_C08\_00102" 37905 "s59E5H2" 0 "4-hydroxy-3-methylbut-2-enyl diphosphate reductase"  
"Unk\_C08\_00102" 37905 "s63E6H2" 0 "4-hydroxy-3-methylbut-2-enyl diphosphate reductase"  
"Unk\_C08\_00103" 37906 "s59E13H2" 0 "30S ribosomal protein S1"  
"Unk\_C08\_00103" 37906 "s59E25H2" 0 "30S ribosomal protein S1"  
"Unk\_C08\_00103" 37906 "s59E5H2" 0 "30S ribosomal protein S1"  
"Unk\_C08\_00103" 37906 "s63E6H2" 0 "30S ribosomal protein S1"  
"Unk\_C08\_00104" 37907 "s59E13H2" 0 "Glycerol-3-phosphate acyltransferase"  
"Unk\_C08\_00104" 37907 "s59E25H2" 0 "Glycerol-3-phosphate acyltransferase"  
"Unk\_C08\_00104" 37907 "s59E5H2" 0 "Glycerol-3-phosphate acyltransferase"  
"Unk\_C08\_00104" 37907 "s63E6H2" 0 "Glycerol-3-phosphate acyltransferase"  
"Unk\_C08\_00105" 37908 "s59E13H2" 0 "DNA-binding protein HU"  
"Unk\_C08\_00105" 37908 "s59E25H2" 0 "DNA-binding protein HU"  
"Unk\_C08\_00105" 37908 "s59E5H2" 0 "DNA-binding protein HU"  
"Unk\_C08\_00105" 37908 "s63E6H2" 0 "DNA-binding protein HU"  
"Unk\_C08\_00106" 37909 "s59E13H2" 0 "HTH-type transcriptional repressor YcgE"  
"Unk\_C08\_00106" 37909 "s59E25H2" 0 "HTH-type transcriptional repressor YcgE"

"Unk\_C08\_00106" 37909 "s59E5H2" 0 "HTH-type transcriptional repressor YcgE"  
"Unk\_C08\_00106" 37909 "s63E6H2" 0 "HTH-type transcriptional repressor YcgE"  
"Unk\_C08\_00108" 37911 "s59E13H2" 0 "Tryptophan--tRNA ligase"  
"Unk\_C08\_00108" 37911 "s59E25H2" 0 "Tryptophan--tRNA ligase"  
"Unk\_C08\_00108" 37911 "s59E5H2" 0.007726934 "Tryptophan--tRNA ligase"  
"Unk\_C08\_00108" 37911 "s63E6H2" 0 "Tryptophan--tRNA ligase"  
"Unk\_C08\_00109" 37912 "s59E13H2" 0 "Trehalose/maltose transport system permease protein MalG"  
"Unk\_C08\_00109" 37912 "s59E25H2" 0 "Trehalose/maltose transport system permease protein MalG"  
"Unk\_C08\_00109" 37912 "s59E5H2" 9.547546e-05 "Trehalose/maltose transport system permease protein MalG"  
"Unk\_C08\_00109" 37912 "s63E6H2" 0 "Trehalose/maltose transport system permease protein MalG"  
"Unk\_C08\_00110" 37913 "s59E13H2" 0 "Trehalose transport system permease protein SugA"  
"Unk\_C08\_00110" 37913 "s59E25H2" 0 "Trehalose transport system permease protein SugA"  
"Unk\_C08\_00110" 37913 "s59E5H2" 0 "Trehalose transport system permease protein SugA"  
"Unk\_C08\_00110" 37913 "s63E6H2" 0 "Trehalose transport system permease protein SugA"  
"Unk\_C08\_00111" 37914 "s59E13H2" 0 "Trehalose/maltose-binding protein MalE precursor"  
"Unk\_C08\_00111" 37914 "s59E25H2" 0 "Trehalose/maltose-binding protein MalE precursor"  
"Unk\_C08\_00111" 37914 "s59E5H2" 0 "Trehalose/maltose-binding protein MalE precursor"  
"Unk\_C08\_00111" 37914 "s63E6H2" 0 "Trehalose/maltose-binding protein MalE precursor"  
"Unk\_C08\_00112" 37915 "s59E13H2" 0 "Tungsten-containing aldehyde ferredoxin oxidoreductase"  
"Unk\_C08\_00112" 37915 "s59E25H2" 0 "Tungsten-containing aldehyde ferredoxin oxidoreductase"  
"Unk\_C08\_00112" 37915 "s59E5H2" 0 "Tungsten-containing aldehyde ferredoxin oxidoreductase"  
"Unk\_C08\_00112" 37915 "s63E6H2" 0 "Tungsten-containing aldehyde ferredoxin oxidoreductase"  
"Unk\_C08\_00113" 37916 "s59E13H2" 0 "Acetyl-CoA acetyltransferase"  
"Unk\_C08\_00113" 37916 "s59E25H2" 0 "Acetyl-CoA acetyltransferase"  
"Unk\_C08\_00113" 37916 "s59E5H2" 0 "Acetyl-CoA acetyltransferase"  
"Unk\_C08\_00113" 37916 "s63E6H2" 0 "Acetyl-CoA acetyltransferase"  
"Unk\_C08\_00114" 37917 "s59E13H2" 0 "3-oxoacyl-[acyl-carrier-protein] reductase FabG"  
"Unk\_C08\_00114" 37917 "s59E25H2" 0 "3-oxoacyl-[acyl-carrier-protein] reductase FabG"  
"Unk\_C08\_00114" 37917 "s59E5H2" 0.03290674 "3-oxoacyl-[acyl-carrier-protein] reductase FabG"  
"Unk\_C08\_00114" 37917 "s63E6H2" 0 "3-oxoacyl-[acyl-carrier-protein] reductase FabG"  
"Unk\_C08\_00115" 37918 "s59E13H2" 0 "Acetate CoA-transferase YdiF"  
"Unk\_C08\_00115" 37918 "s59E25H2" 0 "Acetate CoA-transferase YdiF"  
"Unk\_C08\_00115" 37918 "s59E5H2" 0 "Acetate CoA-transferase YdiF"  
"Unk\_C08\_00115" 37918 "s63E6H2" 0 "Acetate CoA-transferase YdiF"  
"Unk\_C08\_00116" 37919 "s59E13H2" 0 "L-fucose isomerase"  
"Unk\_C08\_00116" 37919 "s59E25H2" 0 "L-fucose isomerase"  
"Unk\_C08\_00116" 37919 "s59E5H2" 0.02220407 "L-fucose isomerase"  
"Unk\_C08\_00116" 37919 "s63E6H2" 0 "L-fucose isomerase"  
"Unk\_C08\_00118" 37921 "s59E13H2" 0 "hypothetical protein"  
"Unk\_C08\_00118" 37921 "s59E25H2" 0 "hypothetical protein"  
"Unk\_C08\_00118" 37921 "s59E5H2" 0 "hypothetical protein"  
"Unk\_C08\_00118" 37921 "s63E6H2" 0 "hypothetical protein"  
"Unk\_C08\_00121" 37924 "s59E13H2" 0 "hypothetical protein"  
"Unk\_C08\_00121" 37924 "s59E25H2" 0 "hypothetical protein"  
"Unk\_C08\_00121" 37924 "s59E5H2" 0 "hypothetical protein"  
"Unk\_C08\_00121" 37924 "s63E6H2" 0 "hypothetical protein"  
"Unk\_C08\_00122" 37925 "s59E13H2" 0 "L-arabinose transport system permease protein AraQ"

"Unk\_C08\_00122" 37925 "s59E25H2" 0 "L-arabinose transport system permease protein AraQ"  
"Unk\_C08\_00122" 37925 "s59E5H2" 0 "L-arabinose transport system permease protein AraQ"  
"Unk\_C08\_00122" 37925 "s63E6H2" 0 "L-arabinose transport system permease protein AraQ"  
"Unk\_C08\_00123" 37926 "s59E13H2" 0 "Lactose transport system permease protein LacF"  
"Unk\_C08\_00123" 37926 "s59E25H2" 0 "Lactose transport system permease protein LacF"  
"Unk\_C08\_00123" 37926 "s59E5H2" 0 "Lactose transport system permease protein LacF"  
"Unk\_C08\_00123" 37926 "s63E6H2" 0 "Lactose transport system permease protein LacF"  
"Unk\_C08\_00125" 37928 "s59E13H2" 0 "transposase"  
"Unk\_C08\_00125" 37928 "s59E25H2" 0 "transposase"  
"Unk\_C08\_00125" 37928 "s59E5H2" 0 "transposase"  
"Unk\_C08\_00125" 37928 "s63E6H2" 0 "transposase"  
"Unk\_C08\_00127" 37930 "s59E13H2" 0 "Integrase core domain protein"  
"Unk\_C08\_00127" 37930 "s59E25H2" 0 "Integrase core domain protein"  
"Unk\_C08\_00127" 37930 "s59E5H2" 0.001941211 "Integrase core domain protein"  
"Unk\_C08\_00127" 37930 "s63E6H2" 0 "Integrase core domain protein"  
"Unk\_C08\_00128" 37931 "s59E13H2" 0 "Transposase DDE domain protein"  
"Unk\_C08\_00128" 37931 "s59E25H2" 0 "Transposase DDE domain protein"  
"Unk\_C08\_00128" 37931 "s59E5H2" 0.009662807 "Transposase DDE domain protein"  
"Unk\_C08\_00128" 37931 "s63E6H2" 0 "Transposase DDE domain protein"  
"Unk\_C08\_00129" 37932 "s59E13H2" 0 "Bacterial extracellular solute-binding protein"  
"Unk\_C08\_00129" 37932 "s59E25H2" 0 "Bacterial extracellular solute-binding protein"  
"Unk\_C08\_00129" 37932 "s59E5H2" 0 "Bacterial extracellular solute-binding protein"  
"Unk\_C08\_00129" 37932 "s63E6H2" 0 "Bacterial extracellular solute-binding protein"  
"Unk\_C08\_00131" 37934 "s59E13H2" 0 "fructoselysine 3-epimerase"  
"Unk\_C08\_00131" 37934 "s59E25H2" 0 "fructoselysine 3-epimerase"  
"Unk\_C08\_00131" 37934 "s59E5H2" 0 "fructoselysine 3-epimerase"  
"Unk\_C08\_00131" 37934 "s63E6H2" 0 "fructoselysine 3-epimerase"  
"Unk\_C08\_00134" 37937 "s59E13H2" 0 "Opacity family porin protein"  
"Unk\_C08\_00134" 37937 "s59E25H2" 0 "Opacity family porin protein"  
"Unk\_C08\_00134" 37937 "s59E5H2" 0 "Opacity family porin protein"  
"Unk\_C08\_00134" 37937 "s63E6H2" 0 "Opacity family porin protein"  
"Unk\_C08\_00135" 37938 "s59E13H2" 0 "hypothetical protein"  
"Unk\_C08\_00135" 37938 "s59E25H2" 0 "hypothetical protein"  
"Unk\_C08\_00135" 37938 "s59E5H2" 0 "hypothetical protein"  
"Unk\_C08\_00135" 37938 "s63E6H2" 0 "hypothetical protein"  
"Unk\_C08\_00139" 37942 "s59E13H2" 0 "Trehalose/maltose import ATP-binding protein Malk"  
"Unk\_C08\_00139" 37942 "s59E25H2" 0 "Trehalose/maltose import ATP-binding protein Malk"  
"Unk\_C08\_00139" 37942 "s59E5H2" 0 "Trehalose/maltose import ATP-binding protein Malk"  
"Unk\_C08\_00139" 37942 "s63E6H2" 0.09656009 "Trehalose/maltose import ATP-binding protein Malk"  
"Unk\_C08\_00140" 37943 "s59E13H2" 0 "Multiple sugar-binding protein precursor"  
"Unk\_C08\_00140" 37943 "s59E25H2" 0 "Multiple sugar-binding protein precursor"  
"Unk\_C08\_00140" 37943 "s59E5H2" 0 "Multiple sugar-binding protein precursor"  
"Unk\_C08\_00140" 37943 "s63E6H2" 0.2422772 "Multiple sugar-binding protein precursor"  
"Unk\_C08\_00141" 37944 "s59E13H2" 0 "Trehalose/maltose transport system permease protein MalF"  
"Unk\_C08\_00141" 37944 "s59E25H2" 0 "Trehalose/maltose transport system permease protein MalF"  
"Unk\_C08\_00141" 37944 "s59E5H2" 0 "Trehalose/maltose transport system permease protein MalF"  
"Unk\_C08\_00141" 37944 "s63E6H2" 0.2405299 "Trehalose/maltose transport system permease protein MalF"

"Unk\_C08\_00142" 37945 "s59E13H2" 0 "L-arabinose transport system permease protein AraQ"  
"Unk\_C08\_00142" 37945 "s59E25H2" 0 "L-arabinose transport system permease protein AraQ"  
"Unk\_C08\_00142" 37945 "s59E5H2" 0 "L-arabinose transport system permease protein AraQ"  
"Unk\_C08\_00142" 37945 "s63E6H2" 0.207887 "L-arabinose transport system permease protein AraQ"  
"Unk\_C08\_00143" 37946 "s59E13H2" 0 "hypothetical protein"  
"Unk\_C08\_00143" 37946 "s59E25H2" 0 "hypothetical protein"  
"Unk\_C08\_00143" 37946 "s59E5H2" 0 "hypothetical protein"  
"Unk\_C08\_00143" 37946 "s63E6H2" 0 "hypothetical protein"  
"Unk\_C08\_00144" 37947 "s59E13H2" 0 "Beta-glucosidase A"  
"Unk\_C08\_00144" 37947 "s59E25H2" 0 "Beta-glucosidase A"  
"Unk\_C08\_00144" 37947 "s59E5H2" 0 "Beta-glucosidase A"  
"Unk\_C08\_00144" 37947 "s63E6H2" 0 "Beta-glucosidase A"  
"Unk\_C08\_00145" 37948 "s59E13H2" 0 "hypothetical protein"  
"Unk\_C08\_00145" 37948 "s59E25H2" 0 "hypothetical protein"  
"Unk\_C08\_00145" 37948 "s59E5H2" 0 "hypothetical protein"  
"Unk\_C08\_00145" 37948 "s63E6H2" 0 "hypothetical protein"  
"Unk\_C08\_00146" 37949 "s59E13H2" 0 "Glucosamine-6-phosphate deaminase"  
"Unk\_C08\_00146" 37949 "s59E25H2" 0 "Glucosamine-6-phosphate deaminase"  
"Unk\_C08\_00146" 37949 "s59E5H2" 0.5142516 "Glucosamine-6-phosphate deaminase"  
"Unk\_C08\_00146" 37949 "s63E6H2" 0 "Glucosamine-6-phosphate deaminase"  
"Unk\_C08\_00147" 37950 "s59E13H2" 0 "putative 6-phospho-beta-glucosidase"  
"Unk\_C08\_00147" 37950 "s59E25H2" 0 "putative 6-phospho-beta-glucosidase"  
"Unk\_C08\_00147" 37950 "s59E5H2" 0 "putative 6-phospho-beta-glucosidase"  
"Unk\_C08\_00147" 37950 "s63E6H2" 0 "putative 6-phospho-beta-glucosidase"  
"Unk\_C08\_00148" 37951 "s59E13H2" 0 "Integrase core domain protein"  
"Unk\_C08\_00148" 37951 "s59E25H2" 0 "Integrase core domain protein"  
"Unk\_C08\_00148" 37951 "s59E5H2" 0 "Integrase core domain protein"  
"Unk\_C08\_00148" 37951 "s63E6H2" 0 "Integrase core domain protein"  
"Unk\_C08\_00149" 37952 "s59E13H2" 0 "hypothetical protein"  
"Unk\_C08\_00149" 37952 "s59E25H2" 0 "hypothetical protein"  
"Unk\_C08\_00149" 37952 "s59E5H2" 0 "hypothetical protein"  
"Unk\_C08\_00149" 37952 "s63E6H2" 0 "hypothetical protein"  
"Unk\_C08\_00153" 37956 "s59E13H2" 0 "AAA-like domain protein"  
"Unk\_C08\_00153" 37956 "s59E25H2" 0 "AAA-like domain protein"  
"Unk\_C08\_00153" 37956 "s59E5H2" 0 "AAA-like domain protein"  
"Unk\_C08\_00153" 37956 "s63E6H2" 0 "AAA-like domain protein"  
"Unk\_C08\_00155" 37958 "s59E13H2" 0 "HD domain protein"  
"Unk\_C08\_00155" 37958 "s59E25H2" 0 "HD domain protein"  
"Unk\_C08\_00155" 37958 "s59E5H2" 0 "HD domain protein"  
"Unk\_C08\_00155" 37958 "s63E6H2" 0 "HD domain protein"  
"Unk\_C08\_00156" 37959 "s59E13H2" 0 "CHAT domain protein"  
"Unk\_C08\_00156" 37959 "s59E25H2" 0 "CHAT domain protein"  
"Unk\_C08\_00156" 37959 "s59E5H2" 0 "CHAT domain protein"  
"Unk\_C08\_00156" 37959 "s63E6H2" 0 "CHAT domain protein"  
"Unk\_C08\_00157" 37960 "s59E13H2" 0 "Putative ribose 1,5-bisphosphate isomerase"  
"Unk\_C08\_00157" 37960 "s59E25H2" 0 "Putative ribose 1,5-bisphosphate isomerase"  
"Unk\_C08\_00157" 37960 "s59E5H2" 0 "Putative ribose 1,5-bisphosphate isomerase"

"Unk\_C08\_00157" 37960 "s63E6H2" 0 "Putative ribose 1,5-bisphosphate isomerase"  
"Unk\_C08\_00159" 37962 "s59E13H2" 0 "hypothetical protein"  
"Unk\_C08\_00159" 37962 "s59E25H2" 0 "hypothetical protein"  
"Unk\_C08\_00159" 37962 "s59E5H2" 0 "hypothetical protein"  
"Unk\_C08\_00159" 37962 "s63E6H2" 0 "hypothetical protein"  
"Unk\_C08\_00160" 37963 "s59E13H2" 0 "Ribonuclease VapC11"  
"Unk\_C08\_00160" 37963 "s59E25H2" 0 "Ribonuclease VapC11"  
"Unk\_C08\_00160" 37963 "s59E5H2" 0 "Ribonuclease VapC11"  
"Unk\_C08\_00160" 37963 "s63E6H2" 0 "Ribonuclease VapC11"  
"Unk\_C08\_00161" 37964 "s59E13H2" 0 "FMN reductase [NAD(P)H]"  
"Unk\_C08\_00161" 37964 "s59E25H2" 0 "FMN reductase [NAD(P)H]"  
"Unk\_C08\_00161" 37964 "s59E5H2" 0 "FMN reductase [NAD(P)H]"  
"Unk\_C08\_00161" 37964 "s63E6H2" 0 "FMN reductase [NAD(P)H]"  
"Unk\_C08\_00162" 37965 "s59E13H2" 0 "D-aminopeptidase"  
"Unk\_C08\_00162" 37965 "s59E25H2" 0 "D-aminopeptidase"  
"Unk\_C08\_00162" 37965 "s59E5H2" 0 "D-aminopeptidase"  
"Unk\_C08\_00162" 37965 "s63E6H2" 0 "D-aminopeptidase"  
"Unk\_C08\_00163" 37966 "s59E13H2" 0 "Membrane transport protein"  
"Unk\_C08\_00163" 37966 "s59E25H2" 0 "Membrane transport protein"  
"Unk\_C08\_00163" 37966 "s59E5H2" 0 "Membrane transport protein"  
"Unk\_C08\_00163" 37966 "s63E6H2" 0 "Membrane transport protein"  
"Unk\_C08\_00164" 37967 "s59E13H2" 0 "hypothetical protein"  
"Unk\_C08\_00164" 37967 "s59E25H2" 0 "hypothetical protein"  
"Unk\_C08\_00164" 37967 "s59E5H2" 0 "hypothetical protein"  
"Unk\_C08\_00164" 37967 "s63E6H2" 0 "hypothetical protein"  
"Unk\_C08\_00165" 37968 "s59E13H2" 0 "NAD-dependent methanol dehydrogenase"  
"Unk\_C08\_00165" 37968 "s59E25H2" 0 "NAD-dependent methanol dehydrogenase"  
"Unk\_C08\_00165" 37968 "s59E5H2" 0 "NAD-dependent methanol dehydrogenase"  
"Unk\_C08\_00165" 37968 "s63E6H2" 0 "NAD-dependent methanol dehydrogenase"  
"Unk\_C08\_00166" 37969 "s59E13H2" 0 "1-deoxy-D-xylulose-5-phosphate synthase"  
"Unk\_C08\_00166" 37969 "s59E25H2" 0 "1-deoxy-D-xylulose-5-phosphate synthase"  
"Unk\_C08\_00166" 37969 "s59E5H2" 0 "1-deoxy-D-xylulose-5-phosphate synthase"  
"Unk\_C08\_00166" 37969 "s63E6H2" 0 "1-deoxy-D-xylulose-5-phosphate synthase"  
"Unk\_C08\_00167" 37970 "s59E13H2" 0 "Transketolase 2"  
"Unk\_C08\_00167" 37970 "s59E25H2" 0 "Transketolase 2"  
"Unk\_C08\_00167" 37970 "s59E5H2" 0 "Transketolase 2"  
"Unk\_C08\_00167" 37970 "s63E6H2" 0 "Transketolase 2"  
"Unk\_C08\_00168" 37971 "s59E13H2" 0 "D-arabitol-phosphate dehydrogenase"  
"Unk\_C08\_00168" 37971 "s59E25H2" 0 "D-arabitol-phosphate dehydrogenase"  
"Unk\_C08\_00168" 37971 "s59E5H2" 0 "D-arabitol-phosphate dehydrogenase"  
"Unk\_C08\_00168" 37971 "s63E6H2" 0 "D-arabitol-phosphate dehydrogenase"  
"Unk\_C08\_00169" 37972 "s59E13H2" 0 "4-hydroxyphenylacetate decarboxylase activating enzyme"  
"Unk\_C08\_00169" 37972 "s59E25H2" 0 "4-hydroxyphenylacetate decarboxylase activating enzyme"  
"Unk\_C08\_00169" 37972 "s59E5H2" 0 "4-hydroxyphenylacetate decarboxylase activating enzyme"  
"Unk\_C08\_00169" 37972 "s63E6H2" 0 "4-hydroxyphenylacetate decarboxylase activating enzyme"  
"Unk\_C08\_00170" 37973 "s59E13H2" 0 "Benzylsuccinate synthase alpha subunit"  
"Unk\_C08\_00170" 37973 "s59E25H2" 0 "Benzylsuccinate synthase alpha subunit"



"Unk\_C08\_00170" 37973 "s59E5H2" 0 "Benzylsuccinate synthase alpha subunit"  
"Unk\_C08\_00170" 37973 "s63E6H2" 0 "Benzylsuccinate synthase alpha subunit"  
"Unk\_C08\_00171" 37974 "s59E13H2" 0 "Glucose 1-dehydrogenase 2"  
"Unk\_C08\_00171" 37974 "s59E25H2" 0 "Glucose 1-dehydrogenase 2"  
"Unk\_C08\_00171" 37974 "s59E5H2" 0 "Glucose 1-dehydrogenase 2"  
"Unk\_C08\_00171" 37974 "s63E6H2" 0 "Glucose 1-dehydrogenase 2"  
"Unk\_C08\_00172" 37975 "s59E13H2" 0 "2-hydroxy-3-oxopropionate reductase"  
"Unk\_C08\_00172" 37975 "s59E25H2" 0 "2-hydroxy-3-oxopropionate reductase"  
"Unk\_C08\_00172" 37975 "s59E5H2" 0 "2-hydroxy-3-oxopropionate reductase"  
"Unk\_C08\_00172" 37975 "s63E6H2" 0 "2-hydroxy-3-oxopropionate reductase"  
"Unk\_C08\_00173" 37976 "s59E13H2" 0 "Xaa-Pro dipeptidase"  
"Unk\_C08\_00173" 37976 "s59E25H2" 0 "Xaa-Pro dipeptidase"  
"Unk\_C08\_00173" 37976 "s59E5H2" 0 "Xaa-Pro dipeptidase"  
"Unk\_C08\_00173" 37976 "s63E6H2" 0 "Xaa-Pro dipeptidase"  
"Unk\_C08\_00174" 37977 "s59E13H2" 0 "ureidoglycolate hydrolase"  
"Unk\_C08\_00174" 37977 "s59E25H2" 0 "ureidoglycolate hydrolase"  
"Unk\_C08\_00174" 37977 "s59E5H2" 0 "ureidoglycolate hydrolase"  
"Unk\_C08\_00174" 37977 "s63E6H2" 0 "ureidoglycolate hydrolase"  
"Unk\_C08\_00175" 37978 "s59E13H2" 0 "D-arabitol-phosphate dehydrogenase"  
"Unk\_C08\_00175" 37978 "s59E25H2" 0 "D-arabitol-phosphate dehydrogenase"  
"Unk\_C08\_00175" 37978 "s59E5H2" 0 "D-arabitol-phosphate dehydrogenase"  
"Unk\_C08\_00175" 37978 "s63E6H2" 0 "D-arabitol-phosphate dehydrogenase"  
"Unk\_C08\_00176" 37979 "s59E13H2" 0 "Endoribonuclease L-PSP"  
"Unk\_C08\_00176" 37979 "s59E25H2" 0 "Endoribonuclease L-PSP"  
"Unk\_C08\_00176" 37979 "s59E5H2" 0 "Endoribonuclease L-PSP"  
"Unk\_C08\_00176" 37979 "s63E6H2" 0 "Endoribonuclease L-PSP"  
"Unk\_C08\_00177" 37980 "s59E13H2" 0 "L-cysteate sulfo-lyase"  
"Unk\_C08\_00177" 37980 "s59E25H2" 0 "L-cysteate sulfo-lyase"  
"Unk\_C08\_00177" 37980 "s59E5H2" 0 "L-cysteate sulfo-lyase"  
"Unk\_C08\_00177" 37980 "s63E6H2" 0 "L-cysteate sulfo-lyase"  
"Unk\_C08\_00178" 37981 "s59E13H2" 0 "L-arabinolactonase"  
"Unk\_C08\_00178" 37981 "s59E25H2" 0 "L-arabinolactonase"  
"Unk\_C08\_00178" 37981 "s59E5H2" 0 "L-arabinolactonase"  
"Unk\_C08\_00178" 37981 "s63E6H2" 0 "L-arabinolactonase"  
"Unk\_C08\_00179" 37982 "s59E13H2" 0 "L-arabinose isomerase"  
"Unk\_C08\_00179" 37982 "s59E25H2" 0 "L-arabinose isomerase"  
"Unk\_C08\_00179" 37982 "s59E5H2" 0 "L-arabinose isomerase"  
"Unk\_C08\_00179" 37982 "s63E6H2" 0 "L-arabinose isomerase"  
"Unk\_C08\_00180" 37983 "s59E13H2" 0 "Galactose/methyl galactoside import ATP-binding protein MglA"  
"Unk\_C08\_00180" 37983 "s59E25H2" 0 "Galactose/methyl galactoside import ATP-binding protein MglA"  
"Unk\_C08\_00180" 37983 "s59E5H2" 0 "Galactose/methyl galactoside import ATP-binding protein MglA"  
"Unk\_C08\_00180" 37983 "s63E6H2" 0 "Galactose/methyl galactoside import ATP-binding protein MglA"  
"Unk\_C08\_00181" 37984 "s59E13H2" 0 "Transposase IS200 like protein"  
"Unk\_C08\_00181" 37984 "s59E25H2" 0 "Transposase IS200 like protein"  
"Unk\_C08\_00181" 37984 "s59E5H2" 0 "Transposase IS200 like protein"  
"Unk\_C08\_00181" 37984 "s63E6H2" 0 "Transposase IS200 like protein"  
"Unk\_C08\_00182" 37985 "s59E13H2" 0 "putative oxidoreductase YcjS"

"Unk\_C08\_00182" 37985 "s59E25H2" 0 "putative oxidoreductase YcjS"  
"Unk\_C08\_00182" 37985 "s59E5H2" 0 "putative oxidoreductase YcjS"  
"Unk\_C08\_00182" 37985 "s63E6H2" 0 "putative oxidoreductase YcjS"  
"Unk\_C08\_00183" 37986 "s59E13H2" 0 "DNA polymerase III subunit delta"  
"Unk\_C08\_00183" 37986 "s59E25H2" 0 "DNA polymerase III subunit delta"  
"Unk\_C08\_00183" 37986 "s59E5H2" 0 "DNA polymerase III subunit delta"  
"Unk\_C08\_00183" 37986 "s63E6H2" 0.001707733 "DNA polymerase III subunit delta"  
"Unk\_C08\_00184" 37987 "s59E13H2" 0 "Bifunctional protein F0D protein"  
"Unk\_C08\_00184" 37987 "s59E25H2" 0 "Bifunctional protein F0D protein"  
"Unk\_C08\_00184" 37987 "s59E5H2" 0 "Bifunctional protein F0D protein"  
"Unk\_C08\_00184" 37987 "s63E6H2" 0 "Bifunctional protein F0D protein"  
"Unk\_C08\_00185" 37988 "s59E13H2" 0 "Formate--tetrahydrofolate ligase"  
"Unk\_C08\_00185" 37988 "s59E25H2" 0 "Formate--tetrahydrofolate ligase"  
"Unk\_C08\_00185" 37988 "s59E5H2" 0 "Formate--tetrahydrofolate ligase"  
"Unk\_C08\_00185" 37988 "s63E6H2" 0 "Formate--tetrahydrofolate ligase"  
"Unk\_C08\_00186" 37989 "s59E13H2" 0 "GTP cyclohydrolase 1"  
"Unk\_C08\_00186" 37989 "s59E25H2" 0 "GTP cyclohydrolase 1"  
"Unk\_C08\_00186" 37989 "s59E5H2" 0 "GTP cyclohydrolase 1"  
"Unk\_C08\_00186" 37989 "s63E6H2" 0 "GTP cyclohydrolase 1"  
"Unk\_C08\_00187" 37990 "s59E13H2" 0 "Ketoisovalerate oxidoreductase subunit VorD"  
"Unk\_C08\_00187" 37990 "s59E25H2" 0 "Ketoisovalerate oxidoreductase subunit VorD"  
"Unk\_C08\_00187" 37990 "s59E5H2" 0 "Ketoisovalerate oxidoreductase subunit VorD"  
"Unk\_C08\_00187" 37990 "s63E6H2" 0 "Ketoisovalerate oxidoreductase subunit VorD"  
"Unk\_C08\_00188" 37991 "s59E13H2" 0 "General stress protein 69"  
"Unk\_C08\_00188" 37991 "s59E25H2" 0 "General stress protein 69"  
"Unk\_C08\_00188" 37991 "s59E5H2" 0.01147292 "General stress protein 69"  
"Unk\_C08\_00188" 37991 "s63E6H2" 0 "General stress protein 69"  
"Unk\_C08\_00189" 37992 "s59E13H2" 0 "hypothetical protein"  
"Unk\_C08\_00189" 37992 "s59E25H2" 0 "hypothetical protein"  
"Unk\_C08\_00189" 37992 "s59E5H2" 0 "hypothetical protein"  
"Unk\_C08\_00189" 37992 "s63E6H2" 0 "hypothetical protein"  
"Unk\_C08\_00191" 37994 "s59E13H2" 0 "Integrase core domain protein"  
"Unk\_C08\_00191" 37994 "s59E25H2" 0 "Integrase core domain protein"  
"Unk\_C08\_00191" 37994 "s59E5H2" 0 "Integrase core domain protein"  
"Unk\_C08\_00191" 37994 "s63E6H2" 0.008410209 "Integrase core domain protein"  
"Unk\_C08\_00193" 37996 "s59E13H2" 0 "hypothetical protein"  
"Unk\_C08\_00193" 37996 "s59E25H2" 0 "hypothetical protein"  
"Unk\_C08\_00193" 37996 "s59E5H2" 0 "hypothetical protein"  
"Unk\_C08\_00193" 37996 "s63E6H2" 0 "hypothetical protein"  
"Unk\_C08\_00194" 37997 "s59E13H2" 0 "hypothetical protein"  
"Unk\_C08\_00194" 37997 "s59E25H2" 0 "hypothetical protein"  
"Unk\_C08\_00194" 37997 "s59E5H2" 0 "hypothetical protein"  
"Unk\_C08\_00194" 37997 "s63E6H2" 0 "hypothetical protein"  
"Unk\_C08\_00195" 37998 "s59E13H2" 0 "hypothetical protein"  
"Unk\_C08\_00195" 37998 "s59E25H2" 0 "hypothetical protein"  
"Unk\_C08\_00195" 37998 "s59E5H2" 0 "hypothetical protein"  
"Unk\_C08\_00195" 37998 "s63E6H2" 0 "hypothetical protein"

"Unk\_C08\_00196" 37999 "s59E13H2" 0 "hypothetical protein"  
"Unk\_C08\_00196" 37999 "s59E25H2" 0 "hypothetical protein"  
"Unk\_C08\_00196" 37999 "s59E5H2" 0 "hypothetical protein"  
"Unk\_C08\_00196" 37999 "s63E6H2" 0 "hypothetical protein"  
"Unk\_C08\_00197" 38000 "s59E13H2" 0 "hypothetical protein"  
"Unk\_C08\_00197" 38000 "s59E25H2" 0 "hypothetical protein"  
"Unk\_C08\_00197" 38000 "s59E5H2" 0 "hypothetical protein"  
"Unk\_C08\_00197" 38000 "s63E6H2" 0 "hypothetical protein"  
"Unk\_C08\_00198" 38001 "s59E13H2" 0 "Modification methylase DpnIIB"  
"Unk\_C08\_00198" 38001 "s59E25H2" 0 "Modification methylase DpnIIB"  
"Unk\_C08\_00198" 38001 "s59E5H2" 0 "Modification methylase DpnIIB"  
"Unk\_C08\_00198" 38001 "s63E6H2" 0.000430673 "Modification methylase DpnIIB"  
"Unk\_C08\_00199" 38002 "s59E13H2" 0 "Integrase core domain protein"  
"Unk\_C08\_00199" 38002 "s59E25H2" 0 "Integrase core domain protein"  
"Unk\_C08\_00199" 38002 "s59E5H2" 0 "Integrase core domain protein"  
"Unk\_C08\_00199" 38002 "s63E6H2" 0 "Integrase core domain protein"  
"Unk\_C08\_00200" 38003 "s59E13H2" 0 "hypothetical protein"  
"Unk\_C08\_00200" 38003 "s59E25H2" 0 "hypothetical protein"  
"Unk\_C08\_00200" 38003 "s59E5H2" 0 "hypothetical protein"  
"Unk\_C08\_00200" 38003 "s63E6H2" 0.002400739 "hypothetical protein"  
"Unk\_C08\_00201" 38004 "s59E13H2" 0 "Transposase"  
"Unk\_C08\_00201" 38004 "s59E25H2" 0 "Transposase"  
"Unk\_C08\_00201" 38004 "s59E5H2" 0 "Transposase"  
"Unk\_C08\_00201" 38004 "s63E6H2" 0.004071623 "Transposase"  
"Unk\_C08\_00203" 38006 "s59E13H2" 0 "hypothetical protein"  
"Unk\_C08\_00203" 38006 "s59E25H2" 0 "hypothetical protein"  
"Unk\_C08\_00203" 38006 "s59E5H2" 0 "hypothetical protein"  
"Unk\_C08\_00203" 38006 "s63E6H2" 0 "hypothetical protein"  
"Unk\_C08\_00204" 38007 "s59E13H2" 0 "hypothetical protein"  
"Unk\_C08\_00204" 38007 "s59E25H2" 0 "hypothetical protein"  
"Unk\_C08\_00204" 38007 "s59E5H2" 0 "hypothetical protein"  
"Unk\_C08\_00204" 38007 "s63E6H2" 0 "hypothetical protein"  
"Unk\_C08\_00205" 38008 "s59E13H2" 0 "hypothetical protein"  
"Unk\_C08\_00205" 38008 "s59E25H2" 0 "hypothetical protein"  
"Unk\_C08\_00205" 38008 "s59E5H2" 0 "hypothetical protein"  
"Unk\_C08\_00205" 38008 "s63E6H2" 0 "hypothetical protein"  
"Unk\_C08\_00206" 38009 "s59E13H2" 0 "DNA-binding protein HU"  
"Unk\_C08\_00206" 38009 "s59E25H2" 0 "DNA-binding protein HU"  
"Unk\_C08\_00206" 38009 "s59E5H2" 0 "DNA-binding protein HU"  
"Unk\_C08\_00206" 38009 "s63E6H2" 0 "DNA-binding protein HU"  
"Unk\_C08\_00207" 38010 "s59E13H2" 0 "Glutamate dehydrogenase"  
"Unk\_C08\_00207" 38010 "s59E25H2" 0 "Glutamate dehydrogenase"  
"Unk\_C08\_00207" 38010 "s59E5H2" 0 "Glutamate dehydrogenase"  
"Unk\_C08\_00207" 38010 "s63E6H2" 0 "Glutamate dehydrogenase"  
"Unk\_C08\_00208" 38011 "s59E13H2" 0 "Nitrogen regulatory protein P-II"  
"Unk\_C08\_00208" 38011 "s59E25H2" 0 "Nitrogen regulatory protein P-II"  
"Unk\_C08\_00208" 38011 "s59E5H2" 0 "Nitrogen regulatory protein P-II"

"Unk\_C08\_00208" 38011 "s63E6H2" 0 "Nitrogen regulatory protein P-II"  
"Unk\_C08\_00209" 38012 "s59E13H2" 0 "Diacetylchitobiose deacetylase"  
"Unk\_C08\_00209" 38012 "s59E25H2" 0 "Diacetylchitobiose deacetylase"  
"Unk\_C08\_00209" 38012 "s59E5H2" 0 "Diacetylchitobiose deacetylase"  
"Unk\_C08\_00209" 38012 "s63E6H2" 0 "Diacetylchitobiose deacetylase"  
"Unk\_C08\_00210" 38013 "s59E13H2" 0 "Glucosamine-6-phosphate deaminase"  
"Unk\_C08\_00210" 38013 "s59E25H2" 0 "Glucosamine-6-phosphate deaminase"  
"Unk\_C08\_00210" 38013 "s59E5H2" 0.05880934 "Glucosamine-6-phosphate deaminase"  
"Unk\_C08\_00210" 38013 "s63E6H2" 0 "Glucosamine-6-phosphate deaminase"  
"Unk\_C08\_00211" 38014 "s59E13H2" 0 "putative oxidoreductase YcjS"  
"Unk\_C08\_00211" 38014 "s59E25H2" 0 "putative oxidoreductase YcjS"  
"Unk\_C08\_00211" 38014 "s59E5H2" 0 "putative oxidoreductase YcjS"  
"Unk\_C08\_00211" 38014 "s63E6H2" 0 "putative oxidoreductase YcjS"  
"Unk\_C08\_00212" 38015 "s59E13H2" 0 "hypothetical protein"  
"Unk\_C08\_00212" 38015 "s59E25H2" 0 "hypothetical protein"  
"Unk\_C08\_00212" 38015 "s59E5H2" 0 "hypothetical protein"  
"Unk\_C08\_00212" 38015 "s63E6H2" 0 "hypothetical protein"  
"Unk\_C08\_00213" 38016 "s59E13H2" 0 "hypothetical protein"  
"Unk\_C08\_00213" 38016 "s59E25H2" 0 "hypothetical protein"  
"Unk\_C08\_00213" 38016 "s59E5H2" 0 "hypothetical protein"  
"Unk\_C08\_00213" 38016 "s63E6H2" 0 "hypothetical protein"  
"Unk\_C08\_00214" 38017 "s59E13H2" 0 "Anabaena sensory rhodopsin transducer"  
"Unk\_C08\_00214" 38017 "s59E25H2" 0 "Anabaena sensory rhodopsin transducer"  
"Unk\_C08\_00214" 38017 "s59E5H2" 0 "Anabaena sensory rhodopsin transducer"  
"Unk\_C08\_00214" 38017 "s63E6H2" 0 "Anabaena sensory rhodopsin transducer"  
"Unk\_C08\_00215" 38018 "s59E13H2" 0 "Spermidine/putrescine-binding periplasmic protein precursor"  
"Unk\_C08\_00215" 38018 "s59E25H2" 0 "Spermidine/putrescine-binding periplasmic protein precursor"  
"Unk\_C08\_00215" 38018 "s59E5H2" 0 "Spermidine/putrescine-binding periplasmic protein precursor"  
"Unk\_C08\_00215" 38018 "s63E6H2" 0 "Spermidine/putrescine-binding periplasmic protein precursor"  
"Unk\_C08\_00216" 38019 "s59E13H2" 0 "Iron-sulfur flavoprotein"  
"Unk\_C08\_00216" 38019 "s59E25H2" 0 "Iron-sulfur flavoprotein"  
"Unk\_C08\_00216" 38019 "s59E5H2" 0 "Iron-sulfur flavoprotein"  
"Unk\_C08\_00216" 38019 "s63E6H2" 0 "Iron-sulfur flavoprotein"  
"Unk\_C08\_00217" 38020 "s59E13H2" 0 "hypothetical protein"  
"Unk\_C08\_00217" 38020 "s59E25H2" 0 "hypothetical protein"  
"Unk\_C08\_00217" 38020 "s59E5H2" 0 "hypothetical protein"  
"Unk\_C08\_00217" 38020 "s63E6H2" 0 "hypothetical protein"  
"Unk\_C08\_00218" 38021 "s59E13H2" 0 "D-inositol 3-phosphate glycosyltransferase"  
"Unk\_C08\_00218" 38021 "s59E25H2" 0 "D-inositol 3-phosphate glycosyltransferase"  
"Unk\_C08\_00218" 38021 "s59E5H2" 0 "D-inositol 3-phosphate glycosyltransferase"  
"Unk\_C08\_00218" 38021 "s63E6H2" 0 "D-inositol 3-phosphate glycosyltransferase"  
"Unk\_C08\_00219" 38022 "s59E13H2" 0 "Glycosyl transferase family 2"  
"Unk\_C08\_00219" 38022 "s59E25H2" 0 "Glycosyl transferase family 2"  
"Unk\_C08\_00219" 38022 "s59E5H2" 0 "Glycosyl transferase family 2"  
"Unk\_C08\_00219" 38022 "s63E6H2" 0 "Glycosyl transferase family 2"  
"Unk\_C08\_00221" 38024 "s59E13H2" 0 "hypothetical protein"  
"Unk\_C08\_00221" 38024 "s59E25H2" 0 "hypothetical protein"

"Unk\_C08\_00221" 38024 "s59E5H2" 0 "hypothetical protein"  
"Unk\_C08\_00221" 38024 "s63E6H2" 0 "hypothetical protein"  
"Unk\_C08\_00222" 38025 "s59E13H2" 0 "hypothetical protein"  
"Unk\_C08\_00222" 38025 "s59E25H2" 0 "hypothetical protein"  
"Unk\_C08\_00222" 38025 "s59E5H2" 0 "hypothetical protein"  
"Unk\_C08\_00222" 38025 "s63E6H2" 0 "hypothetical protein"  
"Unk\_C08\_00223" 38026 "s59E13H2" 0 "YcfA-like protein"  
"Unk\_C08\_00223" 38026 "s59E25H2" 0 "YcfA-like protein"  
"Unk\_C08\_00223" 38026 "s59E5H2" 0 "YcfA-like protein"  
"Unk\_C08\_00223" 38026 "s63E6H2" 0 "YcfA-like protein"  
"Unk\_C08\_00225" 38028 "s59E13H2" 0 "hypothetical protein"  
"Unk\_C08\_00225" 38028 "s59E25H2" 0 "hypothetical protein"  
"Unk\_C08\_00225" 38028 "s59E5H2" 0 "hypothetical protein"  
"Unk\_C08\_00225" 38028 "s63E6H2" 0 "hypothetical protein"  
"Unk\_C08\_00227" 38030 "s59E13H2" 0 "PemK-like protein"  
"Unk\_C08\_00227" 38030 "s59E25H2" 0 "PemK-like protein"  
"Unk\_C08\_00227" 38030 "s59E5H2" 0 "PemK-like protein"  
"Unk\_C08\_00227" 38030 "s63E6H2" 0 "PemK-like protein"  
"Unk\_C08\_00229" 38032 "s59E13H2" 0 "hypothetical protein"  
"Unk\_C08\_00229" 38032 "s59E25H2" 0 "hypothetical protein"  
"Unk\_C08\_00229" 38032 "s59E5H2" 0 "hypothetical protein"  
"Unk\_C08\_00229" 38032 "s63E6H2" 0 "hypothetical protein"  
"Unk\_C08\_00230" 38033 "s59E13H2" 0 "hypothetical protein"  
"Unk\_C08\_00230" 38033 "s59E25H2" 0 "hypothetical protein"  
"Unk\_C08\_00230" 38033 "s59E5H2" 0 "hypothetical protein"  
"Unk\_C08\_00230" 38033 "s63E6H2" 0 "hypothetical protein"  
"Unk\_C08\_00231" 38034 "s59E13H2" 0 "hypothetical protein"  
"Unk\_C08\_00231" 38034 "s59E25H2" 0 "hypothetical protein"  
"Unk\_C08\_00231" 38034 "s59E5H2" 0 "hypothetical protein"  
"Unk\_C08\_00231" 38034 "s63E6H2" 0 "hypothetical protein"  
"Unk\_C08\_00232" 38035 "s59E13H2" 0 "O-Antigen ligase"  
"Unk\_C08\_00232" 38035 "s59E25H2" 0 "O-Antigen ligase"  
"Unk\_C08\_00232" 38035 "s59E5H2" 0 "O-Antigen ligase"  
"Unk\_C08\_00232" 38035 "s63E6H2" 0 "O-Antigen ligase"  
"Unk\_C08\_00233" 38036 "s59E13H2" 0 "N-glycosyltransferase"  
"Unk\_C08\_00233" 38036 "s59E25H2" 0 "N-glycosyltransferase"  
"Unk\_C08\_00233" 38036 "s59E5H2" 0 "N-glycosyltransferase"  
"Unk\_C08\_00233" 38036 "s63E6H2" 0 "N-glycosyltransferase"  
"Unk\_C08\_00234" 38037 "s59E13H2" 0 "dTDP-4-dehydrorhamnose reductase"  
"Unk\_C08\_00234" 38037 "s59E25H2" 0 "dTDP-4-dehydrorhamnose reductase"  
"Unk\_C08\_00234" 38037 "s59E5H2" 0 "dTDP-4-dehydrorhamnose reductase"  
"Unk\_C08\_00234" 38037 "s63E6H2" 0 "dTDP-4-dehydrorhamnose reductase"  
"Unk\_C08\_00235" 38038 "s59E13H2" 0 "UDP-glucose 4-epimerase"  
"Unk\_C08\_00235" 38038 "s59E25H2" 0 "UDP-glucose 4-epimerase"  
"Unk\_C08\_00235" 38038 "s59E5H2" 0 "UDP-glucose 4-epimerase"  
"Unk\_C08\_00235" 38038 "s63E6H2" 0 "UDP-glucose 4-epimerase"  
"Unk\_C08\_00236" 38039 "s59E13H2" 0 "dTDP-4-dehydrorhamnose 3,5-epimerase"

"Unk\_C08\_00236" 38039 "s59E25H2" 0 "dTDP-4-dehydrorhamnose 3,5-epimerase"  
"Unk\_C08\_00236" 38039 "s59E5H2" 0 "dTDP-4-dehydrorhamnose 3,5-epimerase"  
"Unk\_C08\_00236" 38039 "s63E6H2" 0 "dTDP-4-dehydrorhamnose 3,5-epimerase"  
"Unk\_C08\_00237" 38040 "s59E13H2" 0 "hypothetical protein"  
"Unk\_C08\_00237" 38040 "s59E25H2" 0 "hypothetical protein"  
"Unk\_C08\_00237" 38040 "s59E5H2" 0 "hypothetical protein"  
"Unk\_C08\_00237" 38040 "s63E6H2" 0 "hypothetical protein"  
"Unk\_C08\_00238" 38041 "s59E13H2" 0 "hypothetical protein"  
"Unk\_C08\_00238" 38041 "s59E25H2" 0 "hypothetical protein"  
"Unk\_C08\_00238" 38041 "s59E5H2" 0 "hypothetical protein"  
"Unk\_C08\_00238" 38041 "s63E6H2" 0 "hypothetical protein"  
"Unk\_C08\_00239" 38042 "s59E13H2" 0 "Nucleotidyltransferase domain protein"  
"Unk\_C08\_00239" 38042 "s59E25H2" 0 "Nucleotidyltransferase domain protein"  
"Unk\_C08\_00239" 38042 "s59E5H2" 0 "Nucleotidyltransferase domain protein"  
"Unk\_C08\_00239" 38042 "s63E6H2" 0 "Nucleotidyltransferase domain protein"  
"Unk\_C08\_00241" 38044 "s59E13H2" 0 "mRNA interferase MazF9"  
"Unk\_C08\_00241" 38044 "s59E25H2" 0 "mRNA interferase MazF9"  
"Unk\_C08\_00241" 38044 "s59E5H2" 0 "mRNA interferase MazF9"  
"Unk\_C08\_00241" 38044 "s63E6H2" 0 "mRNA interferase MazF9"  
"Unk\_C08\_00243" 38046 "s59E13H2" 0 "Orotate phosphoribosyltransferase"  
"Unk\_C08\_00243" 38046 "s59E25H2" 0 "Orotate phosphoribosyltransferase"  
"Unk\_C08\_00243" 38046 "s59E5H2" 0 "Orotate phosphoribosyltransferase"  
"Unk\_C08\_00243" 38046 "s63E6H2" 0 "Orotate phosphoribosyltransferase"  
"Unk\_C08\_00244" 38047 "s59E13H2" 0 "hypothetical protein"  
"Unk\_C08\_00244" 38047 "s59E25H2" 0 "hypothetical protein"  
"Unk\_C08\_00244" 38047 "s59E5H2" 0 "hypothetical protein"  
"Unk\_C08\_00244" 38047 "s63E6H2" 0 "hypothetical protein"  
"Unk\_C08\_00245" 38048 "s59E13H2" 0 "tol-pal system protein YbgF"  
"Unk\_C08\_00245" 38048 "s59E25H2" 0 "tol-pal system protein YbgF"  
"Unk\_C08\_00245" 38048 "s59E5H2" 0 "tol-pal system protein YbgF"  
"Unk\_C08\_00245" 38048 "s63E6H2" 0 "tol-pal system protein YbgF"  
"Unk\_C08\_00247" 38050 "s59E13H2" 0 "Glutamine--tRNA ligase"  
"Unk\_C08\_00247" 38050 "s59E25H2" 0 "Glutamine--tRNA ligase"  
"Unk\_C08\_00247" 38050 "s59E5H2" 0.004650526 "Glutamine--tRNA ligase"  
"Unk\_C08\_00247" 38050 "s63E6H2" 0 "Glutamine--tRNA ligase"  
"Unk\_C08\_00248" 38051 "s59E13H2" 0 "2-dehydro-3-deoxygluconokinase"  
"Unk\_C08\_00248" 38051 "s59E25H2" 0 "2-dehydro-3-deoxygluconokinase"  
"Unk\_C08\_00248" 38051 "s59E5H2" 0 "2-dehydro-3-deoxygluconokinase"  
"Unk\_C08\_00248" 38051 "s63E6H2" 0 "2-dehydro-3-deoxygluconokinase"  
"Unk\_C08\_00250" 38053 "s59E13H2" 0 "Purine nucleoside phosphorylase 1"  
"Unk\_C08\_00250" 38053 "s59E25H2" 0 "Purine nucleoside phosphorylase 1"  
"Unk\_C08\_00250" 38053 "s59E5H2" 0 "Purine nucleoside phosphorylase 1"  
"Unk\_C08\_00250" 38053 "s63E6H2" 0.003131755 "Purine nucleoside phosphorylase 1"  
"Unk\_C08\_00251" 38054 "s59E13H2" 0.0005234596 "Isoleucine--tRNA ligase"  
"Unk\_C08\_00251" 38054 "s59E25H2" 0 "Isoleucine--tRNA ligase"  
"Unk\_C08\_00251" 38054 "s59E5H2" 0 "Isoleucine--tRNA ligase"  
"Unk\_C08\_00251" 38054 "s63E6H2" 0.003312641 "Isoleucine--tRNA ligase"

"Unk\_C08\_00252" 38055 "s59E13H2" 0 "Riboflavin biosynthesis protein RibBA"  
"Unk\_C08\_00252" 38055 "s59E25H2" 0 "Riboflavin biosynthesis protein RibBA"  
"Unk\_C08\_00252" 38055 "s59E5H2" 0 "Riboflavin biosynthesis protein RibBA"  
"Unk\_C08\_00252" 38055 "s63E6H2" 0 "Riboflavin biosynthesis protein RibBA"  
"Unk\_C08\_00253" 38056 "s59E13H2" 0 "Riboflavin synthase"  
"Unk\_C08\_00253" 38056 "s59E25H2" 0 "Riboflavin synthase"  
"Unk\_C08\_00253" 38056 "s59E5H2" 0.01035115 "Riboflavin synthase"  
"Unk\_C08\_00253" 38056 "s63E6H2" 0 "Riboflavin synthase"  
"Unk\_C08\_00254" 38057 "s59E13H2" 0 "Dihydrolipoyllysine-residue acetyltransferase component of pyruvate dehydrogenase complex"  
"Unk\_C08\_00254" 38057 "s59E25H2" 0 "Dihydrolipoyllysine-residue acetyltransferase component of pyruvate dehydrogenase complex"  
"Unk\_C08\_00254" 38057 "s59E5H2" 0.003703959 "Dihydrolipoyllysine-residue acetyltransferase component of pyruvate dehydrogenase complex"  
"Unk\_C08\_00254" 38057 "s63E6H2" 0 "Dihydrolipoyllysine-residue acetyltransferase component of pyruvate dehydrogenase complex"  
"Unk\_C08\_00255" 38058 "s59E13H2" 0 "hypothetical protein"  
"Unk\_C08\_00255" 38058 "s59E25H2" 0 "hypothetical protein"  
"Unk\_C08\_00255" 38058 "s59E5H2" 0 "hypothetical protein"  
"Unk\_C08\_00255" 38058 "s63E6H2" 0 "hypothetical protein"  
"Unk\_C08\_00256" 38059 "s59E13H2" 0 "Sporulation and spore germination"  
"Unk\_C08\_00256" 38059 "s59E25H2" 0 "Sporulation and spore germination"  
"Unk\_C08\_00256" 38059 "s59E5H2" 0 "Sporulation and spore germination"  
"Unk\_C08\_00256" 38059 "s63E6H2" 0 "Sporulation and spore germination"  
"Unk\_C08\_00257" 38060 "s59E13H2" 0 "N-acetylmuramoyl-L-alanine amidase AmiC precursor"  
"Unk\_C08\_00257" 38060 "s59E25H2" 0 "N-acetylmuramoyl-L-alanine amidase AmiC precursor"  
"Unk\_C08\_00257" 38060 "s59E5H2" 0 "N-acetylmuramoyl-L-alanine amidase AmiC precursor"  
"Unk\_C08\_00257" 38060 "s63E6H2" 0 "N-acetylmuramoyl-L-alanine amidase AmiC precursor"  
"Unk\_C08\_00258" 38061 "s59E13H2" 0 "DNA repair and recombination protein RadA"  
"Unk\_C08\_00258" 38061 "s59E25H2" 0 "DNA repair and recombination protein RadA"  
"Unk\_C08\_00258" 38061 "s59E5H2" 0 "DNA repair and recombination protein RadA"  
"Unk\_C08\_00258" 38061 "s63E6H2" 0 "DNA repair and recombination protein RadA"  
"Unk\_C08\_00259" 38062 "s59E13H2" 0 "2'-5'-RNA ligase"  
"Unk\_C08\_00259" 38062 "s59E25H2" 0 "2'-5'-RNA ligase"  
"Unk\_C08\_00259" 38062 "s59E5H2" 0 "2'-5'-RNA ligase"  
"Unk\_C08\_00259" 38062 "s63E6H2" 0 "2'-5'-RNA ligase"  
"Unk\_C08\_00261" 38064 "s59E13H2" 0 "Ribosomal RNA small subunit methyltransferase I"  
"Unk\_C08\_00261" 38064 "s59E25H2" 0 "Ribosomal RNA small subunit methyltransferase I"  
"Unk\_C08\_00261" 38064 "s59E5H2" 0 "Ribosomal RNA small subunit methyltransferase I"  
"Unk\_C08\_00261" 38064 "s63E6H2" 0 "Ribosomal RNA small subunit methyltransferase I"  
"Unk\_C08\_00262" 38065 "s59E13H2" 0 "Nucleotidyltransferase domain protein"  
"Unk\_C08\_00262" 38065 "s59E25H2" 0 "Nucleotidyltransferase domain protein"  
"Unk\_C08\_00262" 38065 "s59E5H2" 0 "Nucleotidyltransferase domain protein"  
"Unk\_C08\_00262" 38065 "s63E6H2" 0 "Nucleotidyltransferase domain protein"  
"Unk\_C08\_00263" 38066 "s59E13H2" 0 "HEPN domain protein"  
"Unk\_C08\_00263" 38066 "s59E25H2" 0 "HEPN domain protein"  
"Unk\_C08\_00263" 38066 "s59E5H2" 0 "HEPN domain protein"  
"Unk\_C08\_00263" 38066 "s63E6H2" 0 "HEPN domain protein"  
"Unk\_C08\_00264" 38067 "s59E13H2" 0 "Digeranylgeranyllycerophospholipid reductase"  
"Unk\_C08\_00264" 38067 "s59E25H2" 0 "Digeranylgeranyllycerophospholipid reductase"  
"Unk\_C08\_00264" 38067 "s59E5H2" 0 "Digeranylgeranyllycerophospholipid reductase"

"Unk\_C08\_00264" 38067 "s63E6H2" 0 "Digeranylgeranyllycerophospholipid reductase"  
"Unk\_C08\_00265" 38068 "s59E13H2" 0 "hypothetical protein"  
"Unk\_C08\_00265" 38068 "s59E25H2" 0 "hypothetical protein"  
"Unk\_C08\_00265" 38068 "s59E5H2" 0 "hypothetical protein"  
"Unk\_C08\_00265" 38068 "s63E6H2" 0 "hypothetical protein"  
"Unk\_C08\_00266" 38069 "s59E13H2" 0 "GDP-6-deoxy-D-mannose reductase"  
"Unk\_C08\_00266" 38069 "s59E25H2" 0 "GDP-6-deoxy-D-mannose reductase"  
"Unk\_C08\_00266" 38069 "s59E5H2" 0 "GDP-6-deoxy-D-mannose reductase"  
"Unk\_C08\_00266" 38069 "s63E6H2" 0 "GDP-6-deoxy-D-mannose reductase"  
"Unk\_C08\_00267" 38070 "s59E13H2" 0 "CDP-glucose 4,6-dehydratase"  
"Unk\_C08\_00267" 38070 "s59E25H2" 0 "CDP-glucose 4,6-dehydratase"  
"Unk\_C08\_00267" 38070 "s59E5H2" 0 "CDP-glucose 4,6-dehydratase"  
"Unk\_C08\_00267" 38070 "s63E6H2" 0 "CDP-glucose 4,6-dehydratase"  
"Unk\_C08\_00268" 38071 "s59E13H2" 0 "Glucose-1-phosphate cytidyltransferase"  
"Unk\_C08\_00268" 38071 "s59E25H2" 0 "Glucose-1-phosphate cytidyltransferase"  
"Unk\_C08\_00268" 38071 "s59E5H2" 0 "Glucose-1-phosphate cytidyltransferase"  
"Unk\_C08\_00268" 38071 "s63E6H2" 0 "Glucose-1-phosphate cytidyltransferase"  
"Unk\_C08\_00269" 38072 "s59E13H2" 0 "Undecaprenyl-phosphate 4-deoxy-4-formamido-L-arabinose transferase"  
"Unk\_C08\_00269" 38072 "s59E25H2" 0 "Undecaprenyl-phosphate 4-deoxy-4-formamido-L-arabinose transferase"  
"Unk\_C08\_00269" 38072 "s59E5H2" 0 "Undecaprenyl-phosphate 4-deoxy-4-formamido-L-arabinose transferase"  
"Unk\_C08\_00269" 38072 "s63E6H2" 0 "Undecaprenyl-phosphate 4-deoxy-4-formamido-L-arabinose transferase"  
"Unk\_C08\_00270" 38073 "s59E13H2" 0 "dTDP-L-rhamnose 4-epimerase"  
"Unk\_C08\_00270" 38073 "s59E25H2" 0 "dTDP-L-rhamnose 4-epimerase"  
"Unk\_C08\_00270" 38073 "s59E5H2" 0 "dTDP-L-rhamnose 4-epimerase"  
"Unk\_C08\_00270" 38073 "s63E6H2" 0 "dTDP-L-rhamnose 4-epimerase"  
"Unk\_C08\_00271" 38074 "s59E13H2" 0 "Putative pyridoxal phosphate-dependent aminotransferase EpsN"  
"Unk\_C08\_00271" 38074 "s59E25H2" 0 "Putative pyridoxal phosphate-dependent aminotransferase EpsN"  
"Unk\_C08\_00271" 38074 "s59E5H2" 0.0467976 "Putative pyridoxal phosphate-dependent aminotransferase EpsN"  
"Unk\_C08\_00271" 38074 "s63E6H2" 0 "Putative pyridoxal phosphate-dependent aminotransferase EpsN"  
"Unk\_C08\_00272" 38075 "s59E13H2" 0 "dTDP-glucose 4,6-dehydratase 2"  
"Unk\_C08\_00272" 38075 "s59E25H2" 0 "dTDP-glucose 4,6-dehydratase 2"  
"Unk\_C08\_00272" 38075 "s59E5H2" 0 "dTDP-glucose 4,6-dehydratase 2"  
"Unk\_C08\_00272" 38075 "s63E6H2" 0 "dTDP-glucose 4,6-dehydratase 2"  
"Unk\_C08\_00273" 38076 "s59E13H2" 0 "Undecaprenyl-phosphate mannosyltransferase"  
"Unk\_C08\_00273" 38076 "s59E25H2" 0 "Undecaprenyl-phosphate mannosyltransferase"  
"Unk\_C08\_00273" 38076 "s59E5H2" 0 "Undecaprenyl-phosphate mannosyltransferase"  
"Unk\_C08\_00273" 38076 "s63E6H2" 0 "Undecaprenyl-phosphate mannosyltransferase"  
"Unk\_C08\_00274" 38077 "s59E13H2" 0 "UDP-N-acetylgalactosamine-undecaprenyl-phosphate N-acetylgalactosaminephosphotransferase"  
"Unk\_C08\_00274" 38077 "s59E25H2" 0 "UDP-N-acetylgalactosamine-undecaprenyl-phosphate N-acetylgalactosaminephosphotransferase"  
"Unk\_C08\_00274" 38077 "s59E5H2" 0 "UDP-N-acetylgalactosamine-undecaprenyl-phosphate N-acetylgalactosaminephosphotransferase"  
"Unk\_C08\_00274" 38077 "s63E6H2" 0 "UDP-N-acetylgalactosamine-undecaprenyl-phosphate N-acetylgalactosaminephosphotransferase"  
"Unk\_C08\_00275" 38078 "s59E13H2" 0 "Putative teichuronic acid biosynthesis glycosyltransferase TuaH"  
"Unk\_C08\_00275" 38078 "s59E25H2" 0 "Putative teichuronic acid biosynthesis glycosyltransferase TuaH"  
"Unk\_C08\_00275" 38078 "s59E5H2" 0 "Putative teichuronic acid biosynthesis glycosyltransferase TuaH"  
"Unk\_C08\_00275" 38078 "s63E6H2" 0 "Putative teichuronic acid biosynthesis glycosyltransferase TuaH"  
"Unk\_C08\_00276" 38079 "s59E13H2" 0 "UDP-N-acetylglucosamine 2-epimerase"  
"Unk\_C08\_00276" 38079 "s59E25H2" 0 "UDP-N-acetylglucosamine 2-epimerase"



"Unk\_C08\_00276" 38079 "s59E5H2" 0 "UDP-N-acetylglucosamine 2-epimerase"  
"Unk\_C08\_00276" 38079 "s63E6H2" 0 "UDP-N-acetylglucosamine 2-epimerase"  
"Unk\_C08\_00277" 38080 "s59E13H2" 0 "Phosphoheptose isomerase"  
"Unk\_C08\_00277" 38080 "s59E25H2" 0 "Phosphoheptose isomerase"  
"Unk\_C08\_00277" 38080 "s59E5H2" 0 "Phosphoheptose isomerase"  
"Unk\_C08\_00277" 38080 "s63E6H2" 0 "Phosphoheptose isomerase"  
"Unk\_C08\_00278" 38081 "s59E13H2" 0 "D-glycero-alpha-D-manno-heptose 7-phosphate kinase"  
"Unk\_C08\_00278" 38081 "s59E25H2" 0 "D-glycero-alpha-D-manno-heptose 7-phosphate kinase"  
"Unk\_C08\_00278" 38081 "s59E5H2" 0 "D-glycero-alpha-D-manno-heptose 7-phosphate kinase"  
"Unk\_C08\_00278" 38081 "s63E6H2" 0 "D-glycero-alpha-D-manno-heptose 7-phosphate kinase"  
"Unk\_C08\_00279" 38082 "s59E13H2" 0 "D-glycero-alpha-D-manno-heptose 1-phosphate guanylyltransferase"  
"Unk\_C08\_00279" 38082 "s59E25H2" 0 "D-glycero-alpha-D-manno-heptose 1-phosphate guanylyltransferase"  
"Unk\_C08\_00279" 38082 "s59E5H2" 0 "D-glycero-alpha-D-manno-heptose 1-phosphate guanylyltransferase"  
"Unk\_C08\_00279" 38082 "s63E6H2" 0 "D-glycero-alpha-D-manno-heptose 1-phosphate guanylyltransferase"  
"Unk\_C08\_00280" 38083 "s59E13H2" 0 "D-inositol-3-phosphate glycosyltransferase"  
"Unk\_C08\_00280" 38083 "s59E25H2" 0 "D-inositol-3-phosphate glycosyltransferase"  
"Unk\_C08\_00280" 38083 "s59E5H2" 0 "D-inositol-3-phosphate glycosyltransferase"  
"Unk\_C08\_00280" 38083 "s63E6H2" 0 "D-inositol-3-phosphate glycosyltransferase"  
"Unk\_C08\_00281" 38084 "s59E13H2" 0 "Antitoxin MqsA"  
"Unk\_C08\_00281" 38084 "s59E25H2" 0 "Antitoxin MqsA"  
"Unk\_C08\_00281" 38084 "s59E5H2" 0 "Antitoxin MqsA"  
"Unk\_C08\_00281" 38084 "s63E6H2" 0 "Antitoxin MqsA"  
"Unk\_C08\_00282" 38085 "s59E13H2" 0 "hypothetical protein"  
"Unk\_C08\_00282" 38085 "s59E25H2" 0 "hypothetical protein"  
"Unk\_C08\_00282" 38085 "s59E5H2" 0 "hypothetical protein"  
"Unk\_C08\_00282" 38085 "s63E6H2" 0 "hypothetical protein"  
"Unk\_C08\_00287" 38090 "s59E13H2" 0 "hypothetical protein"  
"Unk\_C08\_00287" 38090 "s59E25H2" 0 "hypothetical protein"  
"Unk\_C08\_00287" 38090 "s59E5H2" 0 "hypothetical protein"  
"Unk\_C08\_00287" 38090 "s63E6H2" 0 "hypothetical protein"  
"Unk\_C08\_00288" 38091 "s59E13H2" 0 "hypothetical protein"  
"Unk\_C08\_00288" 38091 "s59E25H2" 0 "hypothetical protein"  
"Unk\_C08\_00288" 38091 "s59E5H2" 0 "hypothetical protein"  
"Unk\_C08\_00288" 38091 "s63E6H2" 0 "hypothetical protein"  
"Unk\_C08\_00289" 38092 "s59E13H2" 0 "hypothetical protein"  
"Unk\_C08\_00289" 38092 "s59E25H2" 0 "hypothetical protein"  
"Unk\_C08\_00289" 38092 "s59E5H2" 0 "hypothetical protein"  
"Unk\_C08\_00289" 38092 "s63E6H2" 0 "hypothetical protein"  
"Unk\_C08\_00290" 38093 "s59E13H2" 0 "Transposase, Mutator family"  
"Unk\_C08\_00290" 38093 "s59E25H2" 0 "Transposase, Mutator family"  
"Unk\_C08\_00290" 38093 "s59E5H2" 0 "Transposase, Mutator family"  
"Unk\_C08\_00290" 38093 "s63E6H2" 0 "Transposase, Mutator family"  
"Unk\_C08\_00291" 38094 "s59E13H2" 0 "Fibronectin type III domain protein"  
"Unk\_C08\_00291" 38094 "s59E25H2" 0 "Fibronectin type III domain protein"  
"Unk\_C08\_00291" 38094 "s59E5H2" 0 "Fibronectin type III domain protein"  
"Unk\_C08\_00291" 38094 "s63E6H2" 0 "Fibronectin type III domain protein"  
"Unk\_C08\_00292" 38095 "s59E13H2" 0 "hypothetical protein"

"Unk\_C08\_00292" 38095 "s59E25H2" 0 "hypothetical protein"  
"Unk\_C08\_00292" 38095 "s59E5H2" 0 "hypothetical protein"  
"Unk\_C08\_00292" 38095 "s63E6H2" 0 "hypothetical protein"  
"Unk\_C08\_00293" 38096 "s59E13H2" 0 "Sporulation protein YtfJ (Spore\_Ytfj)"  
"Unk\_C08\_00293" 38096 "s59E25H2" 0 "Sporulation protein YtfJ (Spore\_Ytfj)"  
"Unk\_C08\_00293" 38096 "s59E5H2" 0 "Sporulation protein YtfJ (Spore\_Ytfj)"  
"Unk\_C08\_00293" 38096 "s63E6H2" 0 "Sporulation protein YtfJ (Spore\_Ytfj)"  
"Unk\_C08\_00294" 38097 "s59E13H2" 0 "hypothetical protein"  
"Unk\_C08\_00294" 38097 "s59E25H2" 0 "hypothetical protein"  
"Unk\_C08\_00294" 38097 "s59E5H2" 0 "hypothetical protein"  
"Unk\_C08\_00294" 38097 "s63E6H2" 0 "hypothetical protein"  
"Unk\_C08\_00295" 38098 "s59E13H2" 0 "hypothetical protein"  
"Unk\_C08\_00295" 38098 "s59E25H2" 0 "hypothetical protein"  
"Unk\_C08\_00295" 38098 "s59E5H2" 0.1603522 "hypothetical protein"  
"Unk\_C08\_00295" 38098 "s63E6H2" 0 "hypothetical protein"  
"Unk\_C08\_00296" 38099 "s59E13H2" 0 "site-specific tyrosine recombinase XerD"  
"Unk\_C08\_00296" 38099 "s59E25H2" 0 "site-specific tyrosine recombinase XerD"  
"Unk\_C08\_00296" 38099 "s59E5H2" 0 "site-specific tyrosine recombinase XerD"  
"Unk\_C08\_00296" 38099 "s63E6H2" 0.1970515 "site-specific tyrosine recombinase XerD"  
"Unk\_C08\_00302" 38105 "s59E13H2" 0 "ATP-dependent Clp protease proteolytic subunit"  
"Unk\_C08\_00302" 38105 "s59E25H2" 0 "ATP-dependent Clp protease proteolytic subunit"  
"Unk\_C08\_00302" 38105 "s59E5H2" 0 "ATP-dependent Clp protease proteolytic subunit"  
"Unk\_C08\_00302" 38105 "s63E6H2" 0.009916134 "ATP-dependent Clp protease proteolytic subunit"  
"Unk\_C08\_00303" 38106 "s59E13H2" 0.0004418111 "V-type sodium ATPase catalytic subunit A"  
"Unk\_C08\_00303" 38106 "s59E25H2" 0 "V-type sodium ATPase catalytic subunit A"  
"Unk\_C08\_00303" 38106 "s59E5H2" 0 "V-type sodium ATPase catalytic subunit A"  
"Unk\_C08\_00303" 38106 "s63E6H2" 0.01165624 "V-type sodium ATPase catalytic subunit A"  
"Unk\_C08\_00304" 38107 "s59E13H2" 0 "V-type sodium ATPase subunit B"  
"Unk\_C08\_00304" 38107 "s59E25H2" 0 "V-type sodium ATPase subunit B"  
"Unk\_C08\_00304" 38107 "s59E5H2" 0 "V-type sodium ATPase subunit B"  
"Unk\_C08\_00304" 38107 "s63E6H2" 0.01335343 "V-type sodium ATPase subunit B"  
"Unk\_C08\_00305" 38108 "s59E13H2" 0 "V-type sodium ATPase subunit D"  
"Unk\_C08\_00305" 38108 "s59E25H2" 0 "V-type sodium ATPase subunit D"  
"Unk\_C08\_00305" 38108 "s59E5H2" 0 "V-type sodium ATPase subunit D"  
"Unk\_C08\_00305" 38108 "s63E6H2" 0.0009360176 "V-type sodium ATPase subunit D"  
"Unk\_C08\_00306" 38109 "s59E13H2" 0 "hypothetical protein"  
"Unk\_C08\_00306" 38109 "s59E25H2" 0 "hypothetical protein"  
"Unk\_C08\_00306" 38109 "s59E5H2" 0 "hypothetical protein"  
"Unk\_C08\_00306" 38109 "s63E6H2" 0.002135698 "hypothetical protein"  
"Unk\_C08\_00307" 38110 "s59E13H2" 0 "hypothetical protein"  
"Unk\_C08\_00307" 38110 "s59E25H2" 0 "hypothetical protein"  
"Unk\_C08\_00307" 38110 "s59E5H2" 0 "hypothetical protein"  
"Unk\_C08\_00307" 38110 "s63E6H2" 0 "hypothetical protein"  
"Unk\_C08\_00308" 38111 "s59E13H2" 0 "Glycosyltransferase AgII"  
"Unk\_C08\_00308" 38111 "s59E25H2" 0 "Glycosyltransferase AgII"  
"Unk\_C08\_00308" 38111 "s59E5H2" 0 "Glycosyltransferase AgII"  
"Unk\_C08\_00308" 38111 "s63E6H2" 0 "Glycosyltransferase AgII"

"Unk\_C08\_00309" 38112 "s59E13H2" 0 "Glycosyltransferase AgIE"  
"Unk\_C08\_00309" 38112 "s59E25H2" 0 "Glycosyltransferase AgIE"  
"Unk\_C08\_00309" 38112 "s59E5H2" 0 "Glycosyltransferase AgIE"  
"Unk\_C08\_00309" 38112 "s63E6H2" 0 "Glycosyltransferase AgIE"  
"Unk\_C08\_00310" 38113 "s59E13H2" 0 "Glycosyltransferase AgII"  
"Unk\_C08\_00310" 38113 "s59E25H2" 0 "Glycosyltransferase AgII"  
"Unk\_C08\_00310" 38113 "s59E5H2" 0 "Glycosyltransferase AgII"  
"Unk\_C08\_00310" 38113 "s63E6H2" 0 "Glycosyltransferase AgII"  
"Unk\_C08\_00311" 38114 "s59E13H2" 0 "Capsular glucan synthase"  
"Unk\_C08\_00311" 38114 "s59E25H2" 0 "Capsular glucan synthase"  
"Unk\_C08\_00311" 38114 "s59E5H2" 0 "Capsular glucan synthase"  
"Unk\_C08\_00311" 38114 "s63E6H2" 0 "Capsular glucan synthase"  
"Unk\_C08\_00313" 38116 "s59E13H2" 0 "molybdenum cofactor biosynthesis protein A"  
"Unk\_C08\_00313" 38116 "s59E25H2" 0 "molybdenum cofactor biosynthesis protein A"  
"Unk\_C08\_00313" 38116 "s59E5H2" 0 "molybdenum cofactor biosynthesis protein A"  
"Unk\_C08\_00313" 38116 "s63E6H2" 0 "molybdenum cofactor biosynthesis protein A"  
"Unk\_C08\_00314" 38117 "s59E13H2" 0 "GDP-mannose-dependent alpha-(1-6)-phosphatidylinositol monomannoside mannosyltransferase"  
"Unk\_C08\_00314" 38117 "s59E25H2" 0 "GDP-mannose-dependent alpha-(1-6)-phosphatidylinositol monomannoside mannosyltransferase"  
"Unk\_C08\_00314" 38117 "s59E5H2" 0 "GDP-mannose-dependent alpha-(1-6)-phosphatidylinositol monomannoside mannosyltransferase"  
"Unk\_C08\_00314" 38117 "s63E6H2" 0 "GDP-mannose-dependent alpha-(1-6)-phosphatidylinositol monomannoside mannosyltransferase"  
"Unk\_C08\_00315" 38118 "s59E13H2" 0 "Putative multidrug export ATP-binding/permease protein"  
"Unk\_C08\_00315" 38118 "s59E25H2" 0 "Putative multidrug export ATP-binding/permease protein"  
"Unk\_C08\_00315" 38118 "s59E5H2" 0.01414774 "Putative multidrug export ATP-binding/permease protein"  
"Unk\_C08\_00315" 38118 "s63E6H2" 0 "Putative multidrug export ATP-binding/permease protein"  
"Unk\_C08\_00316" 38119 "s59E13H2" 0 "Lipid-A-disaccharide synthase"  
"Unk\_C08\_00316" 38119 "s59E25H2" 0 "Lipid-A-disaccharide synthase"  
"Unk\_C08\_00316" 38119 "s59E5H2" 0 "Lipid-A-disaccharide synthase"  
"Unk\_C08\_00316" 38119 "s63E6H2" 0 "Lipid-A-disaccharide synthase"  
"Unk\_C08\_00317" 38120 "s59E13H2" 0 "Lipid-A-disaccharide synthase"  
"Unk\_C08\_00317" 38120 "s59E25H2" 0 "Lipid-A-disaccharide synthase"  
"Unk\_C08\_00317" 38120 "s59E5H2" 0 "Lipid-A-disaccharide synthase"  
"Unk\_C08\_00317" 38120 "s63E6H2" 0 "Lipid-A-disaccharide synthase"  
"Unk\_C08\_00318" 38121 "s59E13H2" 0 "Pantothenate synthetase"  
"Unk\_C08\_00318" 38121 "s59E25H2" 0 "Pantothenate synthetase"  
"Unk\_C08\_00318" 38121 "s59E5H2" 0.04107741 "Pantothenate synthetase"  
"Unk\_C08\_00318" 38121 "s63E6H2" 0 "Pantothenate synthetase"  
"Unk\_C08\_00319" 38122 "s59E13H2" 0 "3-phosphoshikimate 1-carboxyvinyltransferase 1"  
"Unk\_C08\_00319" 38122 "s59E25H2" 0 "3-phosphoshikimate 1-carboxyvinyltransferase 1"  
"Unk\_C08\_00319" 38122 "s59E5H2" 0.08366658 "3-phosphoshikimate 1-carboxyvinyltransferase 1"  
"Unk\_C08\_00319" 38122 "s63E6H2" 0 "3-phosphoshikimate 1-carboxyvinyltransferase 1"  
"Unk\_C08\_00320" 38123 "s59E13H2" 0 "Phospho-2-dehydro-3-deoxyheptonate aldolase"  
"Unk\_C08\_00320" 38123 "s59E25H2" 0 "Phospho-2-dehydro-3-deoxyheptonate aldolase"  
"Unk\_C08\_00320" 38123 "s59E5H2" 0.07018708 "Phospho-2-dehydro-3-deoxyheptonate aldolase"  
"Unk\_C08\_00320" 38123 "s63E6H2" 0 "Phospho-2-dehydro-3-deoxyheptonate aldolase"  
"Unk\_C08\_00321" 38124 "s59E13H2" 0 "P-protein"  
"Unk\_C08\_00321" 38124 "s59E25H2" 0 "P-protein"  
"Unk\_C08\_00321" 38124 "s59E5H2" 0.0648164 "P-protein"

"Unk\_C08\_00321" 38124 "s63E6H2" 0 "P-protein"  
"Unk\_C08\_00324" 38127 "s59E13H2" 0 "Type III restriction enzyme, res subunit"  
"Unk\_C08\_00324" 38127 "s59E25H2" 0 "Type III restriction enzyme, res subunit"  
"Unk\_C08\_00324" 38127 "s59E5H2" 0 "Type III restriction enzyme, res subunit"  
"Unk\_C08\_00324" 38127 "s63E6H2" 0.002974007 "Type III restriction enzyme, res subunit"  
"Unk\_C08\_00325" 38128 "s59E13H2" 0 "hypothetical protein"  
"Unk\_C08\_00325" 38128 "s59E25H2" 0 "hypothetical protein"  
"Unk\_C08\_00325" 38128 "s59E5H2" 0 "hypothetical protein"  
"Unk\_C08\_00325" 38128 "s63E6H2" 0 "hypothetical protein"  
"Unk\_C08\_00327" 38130 "s59E13H2" 0 "hypothetical protein"  
"Unk\_C08\_00327" 38130 "s59E25H2" 0 "hypothetical protein"  
"Unk\_C08\_00327" 38130 "s59E5H2" 0 "hypothetical protein"  
"Unk\_C08\_00327" 38130 "s63E6H2" 0 "hypothetical protein"  
"Unk\_C08\_00328" 38131 "s59E13H2" 0 "DNA adenine methyltransferase YhdJ"  
"Unk\_C08\_00328" 38131 "s59E25H2" 0 "DNA adenine methyltransferase YhdJ"  
"Unk\_C08\_00328" 38131 "s59E5H2" 0 "DNA adenine methyltransferase YhdJ"  
"Unk\_C08\_00328" 38131 "s63E6H2" 0 "DNA adenine methyltransferase YhdJ"  
"Unk\_C08\_00330" 38133 "s59E13H2" 0 "hypothetical protein"  
"Unk\_C08\_00330" 38133 "s59E25H2" 0 "hypothetical protein"  
"Unk\_C08\_00330" 38133 "s59E5H2" 0.0113406 "hypothetical protein"  
"Unk\_C08\_00330" 38133 "s63E6H2" 0 "hypothetical protein"  
"Unk\_C08\_00331" 38134 "s59E13H2" 0 "3-dehydroquininate dehydratase"  
"Unk\_C08\_00331" 38134 "s59E25H2" 0 "3-dehydroquininate dehydratase"  
"Unk\_C08\_00331" 38134 "s59E5H2" 0.05590969 "3-dehydroquininate dehydratase"  
"Unk\_C08\_00331" 38134 "s63E6H2" 0 "3-dehydroquininate dehydratase"  
"Unk\_C08\_00332" 38135 "s59E13H2" 0 "3-dehydroquininate synthase"  
"Unk\_C08\_00332" 38135 "s59E25H2" 0 "3-dehydroquininate synthase"  
"Unk\_C08\_00332" 38135 "s59E5H2" 0.1155273 "3-dehydroquininate synthase"  
"Unk\_C08\_00332" 38135 "s63E6H2" 0 "3-dehydroquininate synthase"  
"Unk\_C08\_00333" 38136 "s59E13H2" 0 "Shikimate kinase"  
"Unk\_C08\_00333" 38136 "s59E25H2" 0 "Shikimate kinase"  
"Unk\_C08\_00333" 38136 "s59E5H2" 0.07239377 "Shikimate kinase"  
"Unk\_C08\_00333" 38136 "s63E6H2" 0 "Shikimate kinase"  
"Unk\_C08\_00334" 38137 "s59E13H2" 0 "Chorismate synthase"  
"Unk\_C08\_00334" 38137 "s59E25H2" 0 "Chorismate synthase"  
"Unk\_C08\_00334" 38137 "s59E5H2" 0.004046005 "Chorismate synthase"  
"Unk\_C08\_00334" 38137 "s63E6H2" 0 "Chorismate synthase"  
"Unk\_C08\_00335" 38138 "s59E13H2" 0 "Shikimate dehydrogenase"  
"Unk\_C08\_00335" 38138 "s59E25H2" 0 "Shikimate dehydrogenase"  
"Unk\_C08\_00335" 38138 "s59E5H2" 0 "Shikimate dehydrogenase"  
"Unk\_C08\_00335" 38138 "s63E6H2" 0 "Shikimate dehydrogenase"  
"Unk\_C08\_00336" 38139 "s59E13H2" 0 "hypothetical protein"  
"Unk\_C08\_00336" 38139 "s59E25H2" 0 "hypothetical protein"  
"Unk\_C08\_00336" 38139 "s59E5H2" 0 "hypothetical protein"  
"Unk\_C08\_00336" 38139 "s63E6H2" 0 "hypothetical protein"  
"Unk\_C08\_00337" 38140 "s59E13H2" 0 "Gas vesicle synthesis protein GvpL/GvpF"  
"Unk\_C08\_00337" 38140 "s59E25H2" 0 "Gas vesicle synthesis protein GvpL/GvpF"

"Unk\_C08\_00337" 38140 "s59E5H2" 0 "Gas vesicle synthesis protein GvpL/GvpF"  
"Unk\_C08\_00337" 38140 "s63E6H2" 0 "Gas vesicle synthesis protein GvpL/GvpF"  
"Unk\_C08\_00338" 38141 "s59E13H2" 0 "Gas vesicle protein G"  
"Unk\_C08\_00338" 38141 "s59E25H2" 0 "Gas vesicle protein G"  
"Unk\_C08\_00338" 38141 "s59E5H2" 0 "Gas vesicle protein G"  
"Unk\_C08\_00338" 38141 "s63E6H2" 0 "Gas vesicle protein G"  
"Unk\_C08\_00340" 38143 "s59E13H2" 0 "Gas vesicle synthesis protein GvpO"  
"Unk\_C08\_00340" 38143 "s59E25H2" 0 "Gas vesicle synthesis protein GvpO"  
"Unk\_C08\_00340" 38143 "s59E5H2" 0 "Gas vesicle synthesis protein GvpO"  
"Unk\_C08\_00340" 38143 "s63E6H2" 0 "Gas vesicle synthesis protein GvpO"  
"Unk\_C08\_00341" 38144 "s59E13H2" 0 "Putative arsenical pump-driving ATPase"  
"Unk\_C08\_00341" 38144 "s59E25H2" 0 "Putative arsenical pump-driving ATPase"  
"Unk\_C08\_00341" 38144 "s59E5H2" 0 "Putative arsenical pump-driving ATPase"  
"Unk\_C08\_00341" 38144 "s63E6H2" 0 "Putative arsenical pump-driving ATPase"  
"Unk\_C08\_00342" 38145 "s59E13H2" 0 "chaperone protein DnaJ"  
"Unk\_C08\_00342" 38145 "s59E25H2" 0 "chaperone protein DnaJ"  
"Unk\_C08\_00342" 38145 "s59E5H2" 0 "chaperone protein DnaJ"  
"Unk\_C08\_00342" 38145 "s63E6H2" 0 "chaperone protein DnaJ"  
"Unk\_C08\_00343" 38146 "s59E13H2" 0 "Gas vesicle structural protein"  
"Unk\_C08\_00343" 38146 "s59E25H2" 0 "Gas vesicle structural protein"  
"Unk\_C08\_00343" 38146 "s59E5H2" 0 "Gas vesicle structural protein"  
"Unk\_C08\_00343" 38146 "s63E6H2" 0 "Gas vesicle structural protein"  
"Unk\_C08\_00345" 38148 "s59E13H2" 0 "Hsp20/alpha crystallin family protein"  
"Unk\_C08\_00345" 38148 "s59E25H2" 0 "Hsp20/alpha crystallin family protein"  
"Unk\_C08\_00345" 38148 "s59E5H2" 0 "Hsp20/alpha crystallin family protein"  
"Unk\_C08\_00345" 38148 "s63E6H2" 0 "Hsp20/alpha crystallin family protein"  
"Unk\_C08\_00346" 38149 "s59E13H2" 0 "Gas vesicle protein K"  
"Unk\_C08\_00346" 38149 "s59E25H2" 0 "Gas vesicle protein K"  
"Unk\_C08\_00346" 38149 "s59E5H2" 0 "Gas vesicle protein K"  
"Unk\_C08\_00346" 38149 "s63E6H2" 0 "Gas vesicle protein K"  
"Unk\_C08\_00347" 38150 "s59E13H2" 0 "Gas vesicle synthesis protein GvpL/GvpF"  
"Unk\_C08\_00347" 38150 "s59E25H2" 0 "Gas vesicle synthesis protein GvpL/GvpF"  
"Unk\_C08\_00347" 38150 "s59E5H2" 0 "Gas vesicle synthesis protein GvpL/GvpF"  
"Unk\_C08\_00347" 38150 "s63E6H2" 0 "Gas vesicle synthesis protein GvpL/GvpF"  
"Unk\_C08\_00348" 38151 "s59E13H2" 0 "gas vesicle synthesis protein GvpA"  
"Unk\_C08\_00348" 38151 "s59E25H2" 0 "gas vesicle synthesis protein GvpA"  
"Unk\_C08\_00348" 38151 "s59E5H2" 0 "gas vesicle synthesis protein GvpA"  
"Unk\_C08\_00348" 38151 "s63E6H2" 0 "gas vesicle synthesis protein GvpA"  
"Unk\_C08\_00349" 38152 "s59E13H2" 0 "hypothetical protein"  
"Unk\_C08\_00349" 38152 "s59E25H2" 0 "hypothetical protein"  
"Unk\_C08\_00349" 38152 "s59E5H2" 0 "hypothetical protein"  
"Unk\_C08\_00349" 38152 "s63E6H2" 0 "hypothetical protein"  
"Unk\_C08\_00350" 38153 "s59E13H2" 0 "Chaperone protein DnaK"  
"Unk\_C08\_00350" 38153 "s59E25H2" 0 "Chaperone protein DnaK"  
"Unk\_C08\_00350" 38153 "s59E5H2" 0.003103415 "Chaperone protein DnaK"  
"Unk\_C08\_00350" 38153 "s63E6H2" 0 "Chaperone protein DnaK"  
"Unk\_C08\_00351" 38154 "s59E13H2" 0 "Sporulation initiation phosphotransferase F"

"Unk\_C08\_00351" 38154 "s59E25H2" 0 "Sporulation initiation phosphotransferase F"  
"Unk\_C08\_00351" 38154 "s59E5H2" 0.3234978 "Sporulation initiation phosphotransferase F"  
"Unk\_C08\_00351" 38154 "s63E6H2" 0 "Sporulation initiation phosphotransferase F"  
"Unk\_C08\_00352" 38155 "s59E13H2" 0 "Hsp20/alpha crystallin family protein"  
"Unk\_C08\_00352" 38155 "s59E25H2" 0 "Hsp20/alpha crystallin family protein"  
"Unk\_C08\_00352" 38155 "s59E5H2" 0.4344618 "Hsp20/alpha crystallin family protein"  
"Unk\_C08\_00352" 38155 "s63E6H2" 0 "Hsp20/alpha crystallin family protein"  
"Unk\_C08\_00353" 38156 "s59E13H2" 0 "VCP-like ATPase"  
"Unk\_C08\_00353" 38156 "s59E25H2" 0 "VCP-like ATPase"  
"Unk\_C08\_00353" 38156 "s59E5H2" 0.001878968 "VCP-like ATPase"  
"Unk\_C08\_00353" 38156 "s63E6H2" 0 "VCP-like ATPase"  
"Unk\_C08\_00355" 38158 "s59E13H2" 0 "PHB/PHA accumulation regulator DNA-binding domain protein"  
"Unk\_C08\_00355" 38158 "s59E25H2" 0 "PHB/PHA accumulation regulator DNA-binding domain protein"  
"Unk\_C08\_00355" 38158 "s59E5H2" 0 "PHB/PHA accumulation regulator DNA-binding domain protein"  
"Unk\_C08\_00355" 38158 "s63E6H2" 0 "PHB/PHA accumulation regulator DNA-binding domain protein"  
"Unk\_C08\_00356" 38159 "s59E13H2" 0 "Hsp20/alpha crystallin family protein"  
"Unk\_C08\_00356" 38159 "s59E25H2" 0 "Hsp20/alpha crystallin family protein"  
"Unk\_C08\_00356" 38159 "s59E5H2" 0 "Hsp20/alpha crystallin family protein"  
"Unk\_C08\_00356" 38159 "s63E6H2" 0 "Hsp20/alpha crystallin family protein"  
"Unk\_C08\_00358" 38161 "s59E13H2" 0 "RNA polymerase sigma-54 factor"  
"Unk\_C08\_00358" 38161 "s59E25H2" 0 "RNA polymerase sigma-54 factor"  
"Unk\_C08\_00358" 38161 "s59E5H2" 0.01497853 "RNA polymerase sigma-54 factor"  
"Unk\_C08\_00358" 38161 "s63E6H2" 0 "RNA polymerase sigma-54 factor"  
"Unk\_C08\_00359" 38162 "s59E13H2" 0 "Transcriptional regulatory protein ZraR"  
"Unk\_C08\_00359" 38162 "s59E25H2" 0 "Transcriptional regulatory protein ZraR"  
"Unk\_C08\_00359" 38162 "s59E5H2" 0.01970493 "Transcriptional regulatory protein ZraR"  
"Unk\_C08\_00359" 38162 "s63E6H2" 0 "Transcriptional regulatory protein ZraR"  
"Unk\_C08\_00360" 38163 "s59E13H2" 0 "Sporulation kinase E"  
"Unk\_C08\_00360" 38163 "s59E25H2" 0 "Sporulation kinase E"  
"Unk\_C08\_00360" 38163 "s59E5H2" 0.02282023 "Sporulation kinase E"  
"Unk\_C08\_00360" 38163 "s63E6H2" 0 "Sporulation kinase E"  
"Unk\_C08\_00361" 38164 "s59E13H2" 0 "Nitrogen regulation protein NR(I)"  
"Unk\_C08\_00361" 38164 "s59E25H2" 0 "Nitrogen regulation protein NR(I)"  
"Unk\_C08\_00361" 38164 "s59E5H2" 0.01694083 "Nitrogen regulation protein NR(I)"  
"Unk\_C08\_00361" 38164 "s63E6H2" 0 "Nitrogen regulation protein NR(I)"  
"Unk\_C08\_00362" 38165 "s59E13H2" 0 "Transcriptional regulatory protein ZraR"  
"Unk\_C08\_00362" 38165 "s59E25H2" 0 "Transcriptional regulatory protein ZraR"  
"Unk\_C08\_00362" 38165 "s59E5H2" 0.06998508 "Transcriptional regulatory protein ZraR"  
"Unk\_C08\_00362" 38165 "s63E6H2" 0 "Transcriptional regulatory protein ZraR"  
"Unk\_C08\_00363" 38166 "s59E13H2" 0 "Transcriptional regulatory protein ZraR"  
"Unk\_C08\_00363" 38166 "s59E25H2" 0 "Transcriptional regulatory protein ZraR"  
"Unk\_C08\_00363" 38166 "s59E5H2" 0.01984989 "Transcriptional regulatory protein ZraR"  
"Unk\_C08\_00363" 38166 "s63E6H2" 0 "Transcriptional regulatory protein ZraR"  
"Unk\_C08\_00365" 38168 "s59E13H2" 0 "Gas vesicle synthesis protein GvpL/GvpF"  
"Unk\_C08\_00365" 38168 "s59E25H2" 0 "Gas vesicle synthesis protein GvpL/GvpF"  
"Unk\_C08\_00365" 38168 "s59E5H2" 0 "Gas vesicle synthesis protein GvpL/GvpF"  
"Unk\_C08\_00365" 38168 "s63E6H2" 0 "Gas vesicle synthesis protein GvpL/GvpF"

"Unk\_C08\_00366" 38169 "s59E13H2" 0 "hypothetical protein"  
"Unk\_C08\_00366" 38169 "s59E25H2" 0 "hypothetical protein"  
"Unk\_C08\_00366" 38169 "s59E5H2" 0.001643457 "hypothetical protein"  
"Unk\_C08\_00366" 38169 "s63E6H2" 0 "hypothetical protein"  
"Unk\_C08\_00367" 38170 "s59E13H2" 0 "glycerol-3-phosphate transporter periplasmic binding protein"  
"Unk\_C08\_00367" 38170 "s59E25H2" 0 "glycerol-3-phosphate transporter periplasmic binding protein"  
"Unk\_C08\_00367" 38170 "s59E5H2" 0.02211578 "glycerol-3-phosphate transporter periplasmic binding protein"  
"Unk\_C08\_00367" 38170 "s63E6H2" 0 "glycerol-3-phosphate transporter periplasmic binding protein"  
"Unk\_C08\_00368" 38171 "s59E13H2" 0 "Trehalose/maltose transport system permease protein MalF"  
"Unk\_C08\_00368" 38171 "s59E25H2" 0 "Trehalose/maltose transport system permease protein MalF"  
"Unk\_C08\_00368" 38171 "s59E5H2" 0.006947885 "Trehalose/maltose transport system permease protein MalF"  
"Unk\_C08\_00368" 38171 "s63E6H2" 0 "Trehalose/maltose transport system permease protein MalF"  
"Unk\_C08\_00369" 38172 "s59E13H2" 0 "Inner membrane ABC transporter permease protein YcjP"  
"Unk\_C08\_00369" 38172 "s59E25H2" 0 "Inner membrane ABC transporter permease protein YcjP"  
"Unk\_C08\_00369" 38172 "s59E5H2" 0 "Inner membrane ABC transporter permease protein YcjP"  
"Unk\_C08\_00369" 38172 "s63E6H2" 0 "Inner membrane ABC transporter permease protein YcjP"  
"Unk\_C08\_00370" 38173 "s59E13H2" 0 "hypothetical protein"  
"Unk\_C08\_00370" 38173 "s59E25H2" 0 "hypothetical protein"  
"Unk\_C08\_00370" 38173 "s59E5H2" 0 "hypothetical protein"  
"Unk\_C08\_00370" 38173 "s63E6H2" 0 "hypothetical protein"  
"Unk\_C08\_00371" 38174 "s59E13H2" 0 "Diacetylchitobiose deacetylase"  
"Unk\_C08\_00371" 38174 "s59E25H2" 0 "Diacetylchitobiose deacetylase"  
"Unk\_C08\_00371" 38174 "s59E5H2" 0 "Diacetylchitobiose deacetylase"  
"Unk\_C08\_00371" 38174 "s63E6H2" 0 "Diacetylchitobiose deacetylase"  
"Unk\_C08\_00372" 38175 "s59E13H2" 0 "Coenzyme F420:L-glutamate ligase"  
"Unk\_C08\_00372" 38175 "s59E25H2" 0 "Coenzyme F420:L-glutamate ligase"  
"Unk\_C08\_00372" 38175 "s59E5H2" 0 "Coenzyme F420:L-glutamate ligase"  
"Unk\_C08\_00372" 38175 "s63E6H2" 0 "Coenzyme F420:L-glutamate ligase"  
"Unk\_C08\_00373" 38176 "s59E13H2" 0 "D-tagatose-1,6-bisphosphate aldolase subunit KbaY"  
"Unk\_C08\_00373" 38176 "s59E25H2" 0 "D-tagatose-1,6-bisphosphate aldolase subunit KbaY"  
"Unk\_C08\_00373" 38176 "s59E5H2" 0 "D-tagatose-1,6-bisphosphate aldolase subunit KbaY"  
"Unk\_C08\_00373" 38176 "s63E6H2" 0 "D-tagatose-1,6-bisphosphate aldolase subunit KbaY"  
"Unk\_C08\_00374" 38177 "s59E13H2" 0 "Macrolide export ATP-binding/permease protein MacB"  
"Unk\_C08\_00374" 38177 "s59E25H2" 0 "Macrolide export ATP-binding/permease protein MacB"  
"Unk\_C08\_00374" 38177 "s59E5H2" 0 "Macrolide export ATP-binding/permease protein MacB"  
"Unk\_C08\_00374" 38177 "s63E6H2" 0 "Macrolide export ATP-binding/permease protein MacB"  
"Unk\_C08\_00375" 38178 "s59E13H2" 0 "putative ABC transporter ATP-binding protein"  
"Unk\_C08\_00375" 38178 "s59E25H2" 0 "putative ABC transporter ATP-binding protein"  
"Unk\_C08\_00375" 38178 "s59E5H2" 0 "putative ABC transporter ATP-binding protein"  
"Unk\_C08\_00375" 38178 "s63E6H2" 0 "putative ABC transporter ATP-binding protein"  
"Unk\_C08\_00376" 38179 "s59E13H2" 0 "Macrolide export protein MacA"  
"Unk\_C08\_00376" 38179 "s59E25H2" 0 "Macrolide export protein MacA"  
"Unk\_C08\_00376" 38179 "s59E5H2" 0 "Macrolide export protein MacA"  
"Unk\_C08\_00376" 38179 "s63E6H2" 0 "Macrolide export protein MacA"  
"Unk\_C08\_00377" 38180 "s59E13H2" 0 "outer membrane channel protein"  
"Unk\_C08\_00377" 38180 "s59E25H2" 0 "outer membrane channel protein"  
"Unk\_C08\_00377" 38180 "s59E5H2" 0 "outer membrane channel protein"

"Unk\_C08\_00377" 38180 "s63E6H2" 0 "outer membrane channel protein"  
"Unk\_C08\_00378" 38181 "s59E13H2" 0 "Outer membrane efflux protein"  
"Unk\_C08\_00378" 38181 "s59E25H2" 0 "Outer membrane efflux protein"  
"Unk\_C08\_00378" 38181 "s59E5H2" 0 "Outer membrane efflux protein"  
"Unk\_C08\_00378" 38181 "s63E6H2" 0 "Outer membrane efflux protein"  
"Unk\_C08\_00379" 38182 "s59E13H2" 0 "periplasmic repressor CpxP"  
"Unk\_C08\_00379" 38182 "s59E25H2" 0 "periplasmic repressor CpxP"  
"Unk\_C08\_00379" 38182 "s59E5H2" 0 "periplasmic repressor CpxP"  
"Unk\_C08\_00379" 38182 "s63E6H2" 0 "periplasmic repressor CpxP"  
"Unk\_C08\_00380" 38183 "s59E13H2" 0 "LTXXQ motif protein"  
"Unk\_C08\_00380" 38183 "s59E25H2" 0 "LTXXQ motif protein"  
"Unk\_C08\_00380" 38183 "s59E5H2" 0 "LTXXQ motif protein"  
"Unk\_C08\_00380" 38183 "s63E6H2" 0 "LTXXQ motif protein"  
"Unk\_C08\_00381" 38184 "s59E13H2" 0 "hypothetical protein"  
"Unk\_C08\_00381" 38184 "s59E25H2" 0 "hypothetical protein"  
"Unk\_C08\_00381" 38184 "s59E5H2" 0 "hypothetical protein"  
"Unk\_C08\_00381" 38184 "s63E6H2" 0 "hypothetical protein"  
"Unk\_C08\_00382" 38185 "s59E13H2" 0 "ECF RNA polymerase sigma factor SigE"  
"Unk\_C08\_00382" 38185 "s59E25H2" 0 "ECF RNA polymerase sigma factor SigE"  
"Unk\_C08\_00382" 38185 "s59E5H2" 0 "ECF RNA polymerase sigma factor SigE"  
"Unk\_C08\_00382" 38185 "s63E6H2" 0 "ECF RNA polymerase sigma factor SigE"  
"Unk\_C08\_00383" 38186 "s59E13H2" 0 "Transposase IS200 like protein"  
"Unk\_C08\_00383" 38186 "s59E25H2" 0 "Transposase IS200 like protein"  
"Unk\_C08\_00383" 38186 "s59E5H2" 0 "Transposase IS200 like protein"  
"Unk\_C08\_00383" 38186 "s63E6H2" 0 "Transposase IS200 like protein"  
"Unk\_C08\_00384" 38187 "s59E13H2" 0 "hypothetical protein"  
"Unk\_C08\_00384" 38187 "s59E25H2" 0 "hypothetical protein"  
"Unk\_C08\_00384" 38187 "s59E5H2" 0 "hypothetical protein"  
"Unk\_C08\_00384" 38187 "s63E6H2" 0 "hypothetical protein"  
"Unk\_C08\_00385" 38188 "s59E13H2" 0 "D-ribose-binding periplasmic protein precursor"  
"Unk\_C08\_00385" 38188 "s59E25H2" 0 "D-ribose-binding periplasmic protein precursor"  
"Unk\_C08\_00385" 38188 "s59E5H2" 0 "D-ribose-binding periplasmic protein precursor"  
"Unk\_C08\_00385" 38188 "s63E6H2" 0 "D-ribose-binding periplasmic protein precursor"  
"Unk\_C08\_00386" 38189 "s59E13H2" 0 "Ribose transport system permease protein RbsC"  
"Unk\_C08\_00386" 38189 "s59E25H2" 0 "Ribose transport system permease protein RbsC"  
"Unk\_C08\_00386" 38189 "s59E5H2" 0 "Ribose transport system permease protein RbsC"  
"Unk\_C08\_00386" 38189 "s63E6H2" 0 "Ribose transport system permease protein RbsC"  
"Unk\_C08\_00387" 38190 "s59E13H2" 0 "Ribose transport system permease protein RbsC"  
"Unk\_C08\_00387" 38190 "s59E25H2" 0 "Ribose transport system permease protein RbsC"  
"Unk\_C08\_00387" 38190 "s59E5H2" 0 "Ribose transport system permease protein RbsC"  
"Unk\_C08\_00387" 38190 "s63E6H2" 0 "Ribose transport system permease protein RbsC"  
"Unk\_C08\_00388" 38191 "s59E13H2" 0 "Galactose/methyl galactoside import ATP-binding protein MglA"  
"Unk\_C08\_00388" 38191 "s59E25H2" 0 "Galactose/methyl galactoside import ATP-binding protein MglA"  
"Unk\_C08\_00388" 38191 "s59E5H2" 0 "Galactose/methyl galactoside import ATP-binding protein MglA"  
"Unk\_C08\_00388" 38191 "s63E6H2" 0 "Galactose/methyl galactoside import ATP-binding protein MglA"  
"Unk\_C08\_00389" 38192 "s59E13H2" 0 "Periplasmic binding proteins and sugar binding domain of LacI family protein"  
"Unk\_C08\_00389" 38192 "s59E25H2" 0 "Periplasmic binding proteins and sugar binding domain of LacI family protein"



"Unk\_C08\_00389" 38192 "s59E5H2" 0 "Periplasmic binding proteins and sugar binding domain of LacI family protein"  
"Unk\_C08\_00389" 38192 "s63E6H2" 0 "Periplasmic binding proteins and sugar binding domain of LacI family protein"  
"Unk\_C08\_00390" 38193 "s59E13H2" 0 "Ribose transport system permease protein RbsC"  
"Unk\_C08\_00390" 38193 "s59E25H2" 0 "Ribose transport system permease protein RbsC"  
"Unk\_C08\_00390" 38193 "s59E5H2" 0 "Ribose transport system permease protein RbsC"  
"Unk\_C08\_00390" 38193 "s63E6H2" 0 "Ribose transport system permease protein RbsC"  
"Unk\_C08\_00391" 38194 "s59E13H2" 0 "Xylose import ATP-binding protein XylG"  
"Unk\_C08\_00391" 38194 "s59E25H2" 0 "Xylose import ATP-binding protein XylG"  
"Unk\_C08\_00391" 38194 "s59E5H2" 0.005088508 "Xylose import ATP-binding protein XylG"  
"Unk\_C08\_00391" 38194 "s63E6H2" 0 "Xylose import ATP-binding protein XylG"  
"Unk\_C08\_00392" 38195 "s59E13H2" 0 "Deoxyribonucleoside regulator"  
"Unk\_C08\_00392" 38195 "s59E25H2" 0 "Deoxyribonucleoside regulator"  
"Unk\_C08\_00392" 38195 "s59E5H2" 0.01037114 "Deoxyribonucleoside regulator"  
"Unk\_C08\_00392" 38195 "s63E6H2" 0 "Deoxyribonucleoside regulator"  
"Unk\_C08\_00393" 38196 "s59E13H2" 0 "2-amino-3,7-dideoxy-D-threo-hept-6-ulosonate synthase"  
"Unk\_C08\_00393" 38196 "s59E25H2" 0 "2-amino-3,7-dideoxy-D-threo-hept-6-ulosonate synthase"  
"Unk\_C08\_00393" 38196 "s59E5H2" 0 "2-amino-3,7-dideoxy-D-threo-hept-6-ulosonate synthase"  
"Unk\_C08\_00393" 38196 "s63E6H2" 0 "2-amino-3,7-dideoxy-D-threo-hept-6-ulosonate synthase"  
"Unk\_C08\_00394" 38197 "s59E13H2" 0 "Radical SAM superfamily protein"  
"Unk\_C08\_00394" 38197 "s59E25H2" 0 "Radical SAM superfamily protein"  
"Unk\_C08\_00394" 38197 "s59E5H2" 0 "Radical SAM superfamily protein"  
"Unk\_C08\_00394" 38197 "s63E6H2" 0.001255672 "Radical SAM superfamily protein"  
"Unk\_C08\_00395" 38198 "s59E13H2" 0 "2,3-bisphosphoglycerate-independent phosphoglycerate mutase"  
"Unk\_C08\_00395" 38198 "s59E25H2" 0 "2,3-bisphosphoglycerate-independent phosphoglycerate mutase"  
"Unk\_C08\_00395" 38198 "s59E5H2" 0 "2,3-bisphosphoglycerate-independent phosphoglycerate mutase"  
"Unk\_C08\_00395" 38198 "s63E6H2" 0.003807851 "2,3-bisphosphoglycerate-independent phosphoglycerate mutase"  
"Unk\_C08\_00396" 38199 "s59E13H2" 0 "Threonine synthase"  
"Unk\_C08\_00396" 38199 "s59E25H2" 0 "Threonine synthase"  
"Unk\_C08\_00396" 38199 "s59E5H2" 0 "Threonine synthase"  
"Unk\_C08\_00396" 38199 "s63E6H2" 0 "Threonine synthase"  
"Unk\_C08\_00397" 38200 "s59E13H2" 0 "Crossover junction endodeoxyribonuclease RuvC"  
"Unk\_C08\_00397" 38200 "s59E25H2" 0 "Crossover junction endodeoxyribonuclease RuvC"  
"Unk\_C08\_00397" 38200 "s59E5H2" 0 "Crossover junction endodeoxyribonuclease RuvC"  
"Unk\_C08\_00397" 38200 "s63E6H2" 0 "Crossover junction endodeoxyribonuclease RuvC"  
"Unk\_C08\_00398" 38201 "s59E13H2" 0 "Dihydropteroate synthase"  
"Unk\_C08\_00398" 38201 "s59E25H2" 0 "Dihydropteroate synthase"  
"Unk\_C08\_00398" 38201 "s59E5H2" 0 "Dihydropteroate synthase"  
"Unk\_C08\_00398" 38201 "s63E6H2" 0 "Dihydropteroate synthase"  
"Unk\_C08\_00399" 38202 "s59E13H2" 0 "ATP-dependent zinc metalloprotease FtsH"  
"Unk\_C08\_00399" 38202 "s59E25H2" 0 "ATP-dependent zinc metalloprotease FtsH"  
"Unk\_C08\_00399" 38202 "s59E5H2" 0.003890082 "ATP-dependent zinc metalloprotease FtsH"  
"Unk\_C08\_00399" 38202 "s63E6H2" 0 "ATP-dependent zinc metalloprotease FtsH"  
"Unk\_C08\_00400" 38203 "s59E13H2" 0 "Inner membrane ABC transporter permease protein YcjO"  
"Unk\_C08\_00400" 38203 "s59E25H2" 0 "Inner membrane ABC transporter permease protein YcjO"  
"Unk\_C08\_00400" 38203 "s59E5H2" 0 "Inner membrane ABC transporter permease protein YcjO"  
"Unk\_C08\_00400" 38203 "s63E6H2" 2.548624 "Inner membrane ABC transporter permease protein YcjO"  
"Unk\_C08\_00401" 38204 "s59E13H2" 0 "Trehalose/maltose transport system permease protein MalG"

"Unk\_C08\_00401" 38204 "s59E25H2" 0 "Trehalose/maltose transport system permease protein MalG"  
"Unk\_C08\_00401" 38204 "s59E5H2" 0 "Trehalose/maltose transport system permease protein MalG"  
"Unk\_C08\_00401" 38204 "s63E6H2" 2.799754 "Trehalose/maltose transport system permease protein MalG"  
"Unk\_C08\_00402" 38205 "s59E13H2" 0 "Methylcobamide:CoM methyltransferase MtaA"  
"Unk\_C08\_00402" 38205 "s59E25H2" 0.456621 "Methylcobamide:CoM methyltransferase MtaA"  
"Unk\_C08\_00402" 38205 "s59E5H2" 0 "Methylcobamide:CoM methyltransferase MtaA"  
"Unk\_C08\_00402" 38205 "s63E6H2" 2.806289 "Methylcobamide:CoM methyltransferase MtaA"  
"Unk\_C08\_00404" 38207 "s59E13H2" 0 "Fosmidomycin resistance protein"  
"Unk\_C08\_00404" 38207 "s59E25H2" 0.3961606 "Fosmidomycin resistance protein"  
"Unk\_C08\_00404" 38207 "s59E5H2" 0 "Fosmidomycin resistance protein"  
"Unk\_C08\_00404" 38207 "s63E6H2" 3.063018 "Fosmidomycin resistance protein"  
"Unk\_C08\_00406" 38209 "s59E13H2" 0 "Modulator of FtsH protease HflC"  
"Unk\_C08\_00406" 38209 "s59E25H2" 0 "Modulator of FtsH protease HflC"  
"Unk\_C08\_00406" 38209 "s59E5H2" 0.004794065 "Modulator of FtsH protease HflC"  
"Unk\_C08\_00406" 38209 "s63E6H2" 3.136151 "Modulator of FtsH protease HflC"  
"Unk\_C08\_00407" 38210 "s59E13H2" 0 "Modulator of FtsH protease HflK"  
"Unk\_C08\_00407" 38210 "s59E25H2" 0 "Modulator of FtsH protease HflK"  
"Unk\_C08\_00407" 38210 "s59E5H2" 0.003652643 "Modulator of FtsH protease HflK"  
"Unk\_C08\_00407" 38210 "s63E6H2" 0 "Modulator of FtsH protease HflK"  
"Unk\_C08\_00408" 38211 "s59E13H2" 0 "Fibronectin type III domain protein"  
"Unk\_C08\_00408" 38211 "s59E25H2" 0 "Fibronectin type III domain protein"  
"Unk\_C08\_00408" 38211 "s59E5H2" 0 "Fibronectin type III domain protein"  
"Unk\_C08\_00408" 38211 "s63E6H2" 0 "Fibronectin type III domain protein"  
"Unk\_C08\_00409" 38212 "s59E13H2" 0 "hypothetical protein"  
"Unk\_C08\_00409" 38212 "s59E25H2" 0 "hypothetical protein"  
"Unk\_C08\_00409" 38212 "s59E5H2" 0 "hypothetical protein"  
"Unk\_C08\_00409" 38212 "s63E6H2" 0 "hypothetical protein"  
"Unk\_C08\_00410" 38213 "s59E13H2" 0 "Major Facilitator Superfamily protein"  
"Unk\_C08\_00410" 38213 "s59E25H2" 0 "Major Facilitator Superfamily protein"  
"Unk\_C08\_00410" 38213 "s59E5H2" 0 "Major Facilitator Superfamily protein"  
"Unk\_C08\_00410" 38213 "s63E6H2" 0 "Major Facilitator Superfamily protein"  
"Unk\_C08\_00411" 38214 "s59E13H2" 0 "hypothetical protein"  
"Unk\_C08\_00411" 38214 "s59E25H2" 0 "hypothetical protein"  
"Unk\_C08\_00411" 38214 "s59E5H2" 0 "hypothetical protein"  
"Unk\_C08\_00411" 38214 "s63E6H2" 0 "hypothetical protein"  
"Unk\_C08\_00412" 38215 "s59E13H2" 0 "Helix-turn-helix domain protein"  
"Unk\_C08\_00412" 38215 "s59E25H2" 0 "Helix-turn-helix domain protein"  
"Unk\_C08\_00412" 38215 "s59E5H2" 0 "Helix-turn-helix domain protein"  
"Unk\_C08\_00412" 38215 "s63E6H2" 0 "Helix-turn-helix domain protein"  
"Unk\_C08\_00414" 38217 "s59E13H2" 0 "Phosphoserine phosphatase 1"  
"Unk\_C08\_00414" 38217 "s59E25H2" 0 "Phosphoserine phosphatase 1"  
"Unk\_C08\_00414" 38217 "s59E5H2" 0 "Phosphoserine phosphatase 1"  
"Unk\_C08\_00414" 38217 "s63E6H2" 0 "Phosphoserine phosphatase 1"  
"Unk\_C08\_00415" 38218 "s59E13H2" 0 "Glucosyl-3-phosphoglycerate synthase"  
"Unk\_C08\_00415" 38218 "s59E25H2" 0 "Glucosyl-3-phosphoglycerate synthase"  
"Unk\_C08\_00415" 38218 "s59E5H2" 0 "Glucosyl-3-phosphoglycerate synthase"  
"Unk\_C08\_00415" 38218 "s63E6H2" 0 "Glucosyl-3-phosphoglycerate synthase"

"Unk\_C08\_00416" 38219 "s59E13H2" 0 "putative methyltransferase YcgJ"  
"Unk\_C08\_00416" 38219 "s59E25H2" 0 "putative methyltransferase YcgJ"  
"Unk\_C08\_00416" 38219 "s59E5H2" 0 "putative methyltransferase YcgJ"  
"Unk\_C08\_00416" 38219 "s63E6H2" 0 "putative methyltransferase YcgJ"  
"Unk\_C08\_00417" 38220 "s59E13H2" 0 "hypothetical protein"  
"Unk\_C08\_00417" 38220 "s59E25H2" 0 "hypothetical protein"  
"Unk\_C08\_00417" 38220 "s59E5H2" 0 "hypothetical protein"  
"Unk\_C08\_00417" 38220 "s63E6H2" 0 "hypothetical protein"  
"Unk\_C08\_00418" 38221 "s59E13H2" 0 "hypothetical protein"  
"Unk\_C08\_00418" 38221 "s59E25H2" 0 "hypothetical protein"  
"Unk\_C08\_00418" 38221 "s59E5H2" 0 "hypothetical protein"  
"Unk\_C08\_00418" 38221 "s63E6H2" 0 "hypothetical protein"  
"Unk\_C08\_00419" 38222 "s59E13H2" 0 "hypothetical protein"  
"Unk\_C08\_00419" 38222 "s59E25H2" 0 "hypothetical protein"  
"Unk\_C08\_00419" 38222 "s59E5H2" 0 "hypothetical protein"  
"Unk\_C08\_00419" 38222 "s63E6H2" 0 "hypothetical protein"  
"Unk\_C08\_00420" 38223 "s59E13H2" 0 "Prefoldin subunit"  
"Unk\_C08\_00420" 38223 "s59E25H2" 0 "Prefoldin subunit"  
"Unk\_C08\_00420" 38223 "s59E5H2" 0 "Prefoldin subunit"  
"Unk\_C08\_00420" 38223 "s63E6H2" 0 "Prefoldin subunit"  
"Unk\_C08\_00422" 38225 "s59E13H2" 0 "Modulator of FtsH protease HflC"  
"Unk\_C08\_00422" 38225 "s59E25H2" 0 "Modulator of FtsH protease HflC"  
"Unk\_C08\_00422" 38225 "s59E5H2" 0 "Modulator of FtsH protease HflC"  
"Unk\_C08\_00422" 38225 "s63E6H2" 0 "Modulator of FtsH protease HflC"  
"Unk\_C08\_00423" 38226 "s59E13H2" 0 "NADP-reducing hydrogenase subunit HndC"  
"Unk\_C08\_00423" 38226 "s59E25H2" 0 "NADP-reducing hydrogenase subunit HndC"  
"Unk\_C08\_00423" 38226 "s59E5H2" 0 "NADP-reducing hydrogenase subunit HndC"  
"Unk\_C08\_00423" 38226 "s63E6H2" 0 "NADP-reducing hydrogenase subunit HndC"  
"Unk\_C08\_00424" 38227 "s59E13H2" 0 "CoB--CoM heterodisulfide reductase iron-sulfur subunit A"  
"Unk\_C08\_00424" 38227 "s59E25H2" 0 "CoB--CoM heterodisulfide reductase iron-sulfur subunit A"  
"Unk\_C08\_00424" 38227 "s59E5H2" 0 "CoB--CoM heterodisulfide reductase iron-sulfur subunit A"  
"Unk\_C08\_00424" 38227 "s63E6H2" 0 "CoB--CoM heterodisulfide reductase iron-sulfur subunit A"  
"Unk\_C08\_00425" 38228 "s59E13H2" 0 "F420-non-reducing hydrogenase vhc iron-sulfur subunit D"  
"Unk\_C08\_00425" 38228 "s59E25H2" 0 "F420-non-reducing hydrogenase vhc iron-sulfur subunit D"  
"Unk\_C08\_00425" 38228 "s59E5H2" 0 "F420-non-reducing hydrogenase vhc iron-sulfur subunit D"  
"Unk\_C08\_00425" 38228 "s63E6H2" 0 "F420-non-reducing hydrogenase vhc iron-sulfur subunit D"  
"Unk\_C08\_00426" 38229 "s59E13H2" 0 "Formate dehydrogenase subunit beta"  
"Unk\_C08\_00426" 38229 "s59E25H2" 0 "Formate dehydrogenase subunit beta"  
"Unk\_C08\_00426" 38229 "s59E5H2" 0 "Formate dehydrogenase subunit beta"  
"Unk\_C08\_00426" 38229 "s63E6H2" 0 "Formate dehydrogenase subunit beta"  
"Unk\_C08\_00427" 38230 "s59E13H2" 0 "Sulphydrogenase 2 subunit beta"  
"Unk\_C08\_00427" 38230 "s59E25H2" 0 "Sulphydrogenase 2 subunit beta"  
"Unk\_C08\_00427" 38230 "s59E5H2" 0 "Sulphydrogenase 2 subunit beta"  
"Unk\_C08\_00427" 38230 "s63E6H2" 0 "Sulphydrogenase 2 subunit beta"  
"Unk\_C08\_00428" 38231 "s59E13H2" 0 "Sulphydrogenase 1 subunit gamma"  
"Unk\_C08\_00428" 38231 "s59E25H2" 0 "Sulphydrogenase 1 subunit gamma"  
"Unk\_C08\_00428" 38231 "s59E5H2" 0 "Sulphydrogenase 1 subunit gamma"

"Unk\_C08\_00428" 38231 "s63E6H2" 0 "Sulfhydrogenase 1 subunit gamma"  
"Unk\_C08\_00429" 38232 "s59E13H2" 0 "Cytochrome c-type protein TorC"  
"Unk\_C08\_00429" 38232 "s59E25H2" 0 "Cytochrome c-type protein TorC"  
"Unk\_C08\_00429" 38232 "s59E5H2" 0 "Cytochrome c-type protein TorC"  
"Unk\_C08\_00429" 38232 "s63E6H2" 0 "Cytochrome c-type protein TorC"  
"Unk\_C08\_00430" 38233 "s59E13H2" 0 "1,4-dihydroxy-2-naphthoate octaprenyltransferase"  
"Unk\_C08\_00430" 38233 "s59E25H2" 0 "1,4-dihydroxy-2-naphthoate octaprenyltransferase"  
"Unk\_C08\_00430" 38233 "s59E5H2" 0 "1,4-dihydroxy-2-naphthoate octaprenyltransferase"  
"Unk\_C08\_00430" 38233 "s63E6H2" 0 "1,4-dihydroxy-2-naphthoate octaprenyltransferase"  
"Unk\_C08\_00432" 38235 "s59E13H2" 0 "B12 binding domain protein"  
"Unk\_C08\_00432" 38235 "s59E25H2" 0 "B12 binding domain protein"  
"Unk\_C08\_00432" 38235 "s59E5H2" 0 "B12 binding domain protein"  
"Unk\_C08\_00432" 38235 "s63E6H2" 0 "B12 binding domain protein"  
"Unk\_C08\_00433" 38236 "s59E13H2" 0 "hypothetical protein"  
"Unk\_C08\_00433" 38236 "s59E25H2" 0 "hypothetical protein"  
"Unk\_C08\_00433" 38236 "s59E5H2" 0 "hypothetical protein"  
"Unk\_C08\_00433" 38236 "s63E6H2" 0 "hypothetical protein"  
"Unk\_C08\_00434" 38237 "s59E13H2" 0 "Putative heat shock protein HspR"  
"Unk\_C08\_00434" 38237 "s59E25H2" 0 "Putative heat shock protein HspR"  
"Unk\_C08\_00434" 38237 "s59E5H2" 0 "Putative heat shock protein HspR"  
"Unk\_C08\_00434" 38237 "s63E6H2" 0 "Putative heat shock protein HspR"  
"Unk\_C08\_00435" 38238 "s59E13H2" 0 "Sulfhydrogenase 2 subunit beta"  
"Unk\_C08\_00435" 38238 "s59E25H2" 0 "Sulfhydrogenase 2 subunit beta"  
"Unk\_C08\_00435" 38238 "s59E5H2" 0 "Sulfhydrogenase 2 subunit beta"  
"Unk\_C08\_00435" 38238 "s63E6H2" 0.002614748 "Sulfhydrogenase 2 subunit beta"  
"Unk\_C08\_00436" 38239 "s59E13H2" 0 "Formate dehydrogenase subunit beta"  
"Unk\_C08\_00436" 38239 "s59E25H2" 0 "Formate dehydrogenase subunit beta"  
"Unk\_C08\_00436" 38239 "s59E5H2" 0.004044843 "Formate dehydrogenase subunit beta"  
"Unk\_C08\_00436" 38239 "s63E6H2" 0.05562975 "Formate dehydrogenase subunit beta"  
"Unk\_C08\_00437" 38240 "s59E13H2" 0 "F420-non-reducing hydrogenase vhc iron-sulfur subunit D"  
"Unk\_C08\_00437" 38240 "s59E25H2" 0 "F420-non-reducing hydrogenase vhc iron-sulfur subunit D"  
"Unk\_C08\_00437" 38240 "s59E5H2" 0 "F420-non-reducing hydrogenase vhc iron-sulfur subunit D"  
"Unk\_C08\_00437" 38240 "s63E6H2" 0.01170511 "F420-non-reducing hydrogenase vhc iron-sulfur subunit D"  
"Unk\_C08\_00438" 38241 "s59E13H2" 0 "CoB--CoM heterodisulfide reductase iron-sulfur subunit A"  
"Unk\_C08\_00438" 38241 "s59E25H2" 0 "CoB--CoM heterodisulfide reductase iron-sulfur subunit A"  
"Unk\_C08\_00438" 38241 "s59E5H2" 0 "CoB--CoM heterodisulfide reductase iron-sulfur subunit A"  
"Unk\_C08\_00438" 38241 "s63E6H2" 0.03837118 "CoB--CoM heterodisulfide reductase iron-sulfur subunit A"  
"Unk\_C08\_00439" 38242 "s59E13H2" 0 "6,7-dimethyl-8-ribityllumazine synthase"  
"Unk\_C08\_00439" 38242 "s59E25H2" 0 "6,7-dimethyl-8-ribityllumazine synthase"  
"Unk\_C08\_00439" 38242 "s59E5H2" 0 "6,7-dimethyl-8-ribityllumazine synthase"  
"Unk\_C08\_00439" 38242 "s63E6H2" 0 "6,7-dimethyl-8-ribityllumazine synthase"  
"Unk\_C08\_00440" 38243 "s59E13H2" 0 "Release factor glutamine methyltransferase"  
"Unk\_C08\_00440" 38243 "s59E25H2" 0 "Release factor glutamine methyltransferase"  
"Unk\_C08\_00440" 38243 "s59E5H2" 0 "Release factor glutamine methyltransferase"  
"Unk\_C08\_00440" 38243 "s63E6H2" 0 "Release factor glutamine methyltransferase"  
"Unk\_C08\_00441" 38244 "s59E13H2" 0 "Stage V sporulation protein D"  
"Unk\_C08\_00441" 38244 "s59E25H2" 0 "Stage V sporulation protein D"

"Unk\_C08\_00441" 38244 "s59E5H2" 0 "Stage V sporulation protein D"  
"Unk\_C08\_00441" 38244 "s63E6H2" 0 "Stage V sporulation protein D"  
"Unk\_C08\_00442" 38245 "s59E13H2" 0 "hypothetical protein"  
"Unk\_C08\_00442" 38245 "s59E25H2" 0 "hypothetical protein"  
"Unk\_C08\_00442" 38245 "s59E5H2" 0 "hypothetical protein"  
"Unk\_C08\_00442" 38245 "s63E6H2" 0 "hypothetical protein"  
"Unk\_C08\_00443" 38246 "s59E13H2" 0 "hypothetical protein"  
"Unk\_C08\_00443" 38246 "s59E25H2" 0 "hypothetical protein"  
"Unk\_C08\_00443" 38246 "s59E5H2" 0 "hypothetical protein"  
"Unk\_C08\_00443" 38246 "s63E6H2" 0 "hypothetical protein"  
"Unk\_C08\_00444" 38247 "s59E13H2" 0 "hypothetical protein"  
"Unk\_C08\_00444" 38247 "s59E25H2" 0 "hypothetical protein"  
"Unk\_C08\_00444" 38247 "s59E5H2" 0 "hypothetical protein"  
"Unk\_C08\_00444" 38247 "s63E6H2" 0 "hypothetical protein"  
"Unk\_C08\_00445" 38248 "s59E13H2" 0 "hypothetical protein"  
"Unk\_C08\_00445" 38248 "s59E25H2" 0 "hypothetical protein"  
"Unk\_C08\_00445" 38248 "s59E5H2" 0 "hypothetical protein"  
"Unk\_C08\_00445" 38248 "s63E6H2" 0 "hypothetical protein"  
"Unk\_C08\_00446" 38249 "s59E13H2" 0 "hypothetical protein"  
"Unk\_C08\_00446" 38249 "s59E25H2" 0 "hypothetical protein"  
"Unk\_C08\_00446" 38249 "s59E5H2" 0 "hypothetical protein"  
"Unk\_C08\_00446" 38249 "s63E6H2" 0 "hypothetical protein"  
"Unk\_C08\_00447" 38250 "s59E13H2" 0 "GDP-mannose 4,6-dehydratase"  
"Unk\_C08\_00447" 38250 "s59E25H2" 0 "GDP-mannose 4,6-dehydratase"  
"Unk\_C08\_00447" 38250 "s59E5H2" 0 "GDP-mannose 4,6-dehydratase"  
"Unk\_C08\_00447" 38250 "s63E6H2" 0 "GDP-mannose 4,6-dehydratase"  
"Unk\_C08\_00448" 38251 "s59E13H2" 0 "Undecaprenyl-phosphate mannosyltransferase"  
"Unk\_C08\_00448" 38251 "s59E25H2" 0 "Undecaprenyl-phosphate mannosyltransferase"  
"Unk\_C08\_00448" 38251 "s59E5H2" 0 "Undecaprenyl-phosphate mannosyltransferase"  
"Unk\_C08\_00448" 38251 "s63E6H2" 0 "Undecaprenyl-phosphate mannosyltransferase"  
"Unk\_C08\_00449" 38252 "s59E13H2" 0 "Dolichyl-phosphate-mannose-protein mannosyltransferase"  
"Unk\_C08\_00449" 38252 "s59E25H2" 0 "Dolichyl-phosphate-mannose-protein mannosyltransferase"  
"Unk\_C08\_00449" 38252 "s59E5H2" 0 "Dolichyl-phosphate-mannose-protein mannosyltransferase"  
"Unk\_C08\_00449" 38252 "s63E6H2" 0 "Dolichyl-phosphate-mannose-protein mannosyltransferase"  
"Unk\_C08\_00450" 38253 "s59E13H2" 0 "Glycosyl transferases group 1"  
"Unk\_C08\_00450" 38253 "s59E25H2" 0 "Glycosyl transferases group 1"  
"Unk\_C08\_00450" 38253 "s59E5H2" 0 "Glycosyl transferases group 1"  
"Unk\_C08\_00450" 38253 "s63E6H2" 0 "Glycosyl transferases group 1"  
"Unk\_C08\_00451" 38254 "s59E13H2" 0 "putative S-adenosylmethionine-dependent methyltransferase/MSMEI\_2290"  
"Unk\_C08\_00451" 38254 "s59E25H2" 0 "putative S-adenosylmethionine-dependent methyltransferase/MSMEI\_2290"  
"Unk\_C08\_00451" 38254 "s59E5H2" 0 "putative S-adenosylmethionine-dependent methyltransferase/MSMEI\_2290"  
"Unk\_C08\_00451" 38254 "s63E6H2" 0 "putative S-adenosylmethionine-dependent methyltransferase/MSMEI\_2290"  
"Unk\_C08\_00452" 38255 "s59E13H2" 0 "UDP-galactopyranose mutase precursor"  
"Unk\_C08\_00452" 38255 "s59E25H2" 0 "UDP-galactopyranose mutase precursor"  
"Unk\_C08\_00452" 38255 "s59E5H2" 0 "UDP-galactopyranose mutase precursor"  
"Unk\_C08\_00452" 38255 "s63E6H2" 0 "UDP-galactopyranose mutase precursor"  
"Unk\_C08\_00453" 38256 "s59E13H2" 0 "Undecaprenyl phosphate-alpha-4-amino-4-deoxy-L-arabinose arabinosyl transferase"

"Unk\_C08\_00453" 38256 "s59E25H2" 0 "Undecaprenyl phosphate-alpha-4-amino-4-deoxy-L-arabinose arabinosyl transferase"  
"Unk\_C08\_00453" 38256 "s59E5H2" 0 "Undecaprenyl phosphate-alpha-4-amino-4-deoxy-L-arabinose arabinosyl transferase"  
"Unk\_C08\_00453" 38256 "s63E6H2" 0 "Undecaprenyl phosphate-alpha-4-amino-4-deoxy-L-arabinose arabinosyl transferase"  
"Unk\_C08\_00454" 38257 "s59E13H2" 0 "Dolichyl-phosphate-mannose-protein mannosyltransferase"  
"Unk\_C08\_00454" 38257 "s59E25H2" 0 "Dolichyl-phosphate-mannose-protein mannosyltransferase"  
"Unk\_C08\_00454" 38257 "s59E5H2" 0 "Dolichyl-phosphate-mannose-protein mannosyltransferase"  
"Unk\_C08\_00454" 38257 "s63E6H2" 0 "Dolichyl-phosphate-mannose-protein mannosyltransferase"  
"Unk\_C08\_00455" 38258 "s59E13H2" 0 "Glycosyltransferase AgIE"  
"Unk\_C08\_00455" 38258 "s59E25H2" 0 "Glycosyltransferase AgIE"  
"Unk\_C08\_00455" 38258 "s59E5H2" 0 "Glycosyltransferase AgIE"  
"Unk\_C08\_00455" 38258 "s63E6H2" 0 "Glycosyltransferase AgIE"  
"Unk\_C08\_00456" 38259 "s59E13H2" 0 "hypothetical protein"  
"Unk\_C08\_00456" 38259 "s59E25H2" 0 "hypothetical protein"  
"Unk\_C08\_00456" 38259 "s59E5H2" 0 "hypothetical protein"  
"Unk\_C08\_00456" 38259 "s63E6H2" 0 "hypothetical protein"  
"Unk\_C08\_00457" 38260 "s59E13H2" 0 "coproporphyrinogen III oxidase"  
"Unk\_C08\_00457" 38260 "s59E25H2" 0 "coproporphyrinogen III oxidase"  
"Unk\_C08\_00457" 38260 "s59E5H2" 0 "coproporphyrinogen III oxidase"  
"Unk\_C08\_00457" 38260 "s63E6H2" 0 "coproporphyrinogen III oxidase"  
"Unk\_C08\_00458" 38261 "s59E13H2" 0 "Glycosyltransferase AgIJ"  
"Unk\_C08\_00458" 38261 "s59E25H2" 0 "Glycosyltransferase AgIJ"  
"Unk\_C08\_00458" 38261 "s59E5H2" 0 "Glycosyltransferase AgIJ"  
"Unk\_C08\_00458" 38261 "s63E6H2" 0 "Glycosyltransferase AgIJ"  
"Unk\_C08\_00459" 38262 "s59E13H2" 0 "O-Antigen ligase"  
"Unk\_C08\_00459" 38262 "s59E25H2" 0 "O-Antigen ligase"  
"Unk\_C08\_00459" 38262 "s59E5H2" 0 "O-Antigen ligase"  
"Unk\_C08\_00459" 38262 "s63E6H2" 0 "O-Antigen ligase"  
"Unk\_C08\_00460" 38263 "s59E13H2" 0 "GDP-L-fucose synthase"  
"Unk\_C08\_00460" 38263 "s59E25H2" 0 "GDP-L-fucose synthase"  
"Unk\_C08\_00460" 38263 "s59E5H2" 0 "GDP-L-fucose synthase"  
"Unk\_C08\_00460" 38263 "s63E6H2" 0 "GDP-L-fucose synthase"  
"Unk\_C08\_00461" 38264 "s59E13H2" 0 "CDP-paratose 2-epimerase"  
"Unk\_C08\_00461" 38264 "s59E25H2" 0 "CDP-paratose 2-epimerase"  
"Unk\_C08\_00461" 38264 "s59E5H2" 0 "CDP-paratose 2-epimerase"  
"Unk\_C08\_00461" 38264 "s63E6H2" 0 "CDP-paratose 2-epimerase"  
"Unk\_C08\_00463" 38266 "s59E13H2" 0 "Mannosylfructose-phosphate synthase"  
"Unk\_C08\_00463" 38266 "s59E25H2" 0 "Mannosylfructose-phosphate synthase"  
"Unk\_C08\_00463" 38266 "s59E5H2" 0.06386948 "Mannosylfructose-phosphate synthase"  
"Unk\_C08\_00463" 38266 "s63E6H2" 0 "Mannosylfructose-phosphate synthase"  
"Unk\_C08\_00464" 38267 "s59E13H2" 0 "hypothetical protein"  
"Unk\_C08\_00464" 38267 "s59E25H2" 0 "hypothetical protein"  
"Unk\_C08\_00464" 38267 "s59E5H2" 0.08288248 "hypothetical protein"  
"Unk\_C08\_00464" 38267 "s63E6H2" 0 "hypothetical protein"  
"Unk\_C08\_00465" 38268 "s59E13H2" 0 "Undecaprenyl-phosphate mannosyltransferase"  
"Unk\_C08\_00465" 38268 "s59E25H2" 0 "Undecaprenyl-phosphate mannosyltransferase"  
"Unk\_C08\_00465" 38268 "s59E5H2" 0 "Undecaprenyl-phosphate mannosyltransferase"  
"Unk\_C08\_00465" 38268 "s63E6H2" 0 "Undecaprenyl-phosphate mannosyltransferase"

"Unk\_C08\_00466" 38269 "s59E13H2" 0 "hypothetical protein"  
"Unk\_C08\_00466" 38269 "s59E25H2" 0 "hypothetical protein"  
"Unk\_C08\_00466" 38269 "s59E5H2" 0 "hypothetical protein"  
"Unk\_C08\_00466" 38269 "s63E6H2" 0 "hypothetical protein"  
"Unk\_C08\_00467" 38270 "s59E13H2" 0 "Tetratricopeptide repeat protein"  
"Unk\_C08\_00467" 38270 "s59E25H2" 0 "Tetratricopeptide repeat protein"  
"Unk\_C08\_00467" 38270 "s59E5H2" 0 "Tetratricopeptide repeat protein"  
"Unk\_C08\_00467" 38270 "s63E6H2" 0 "Tetratricopeptide repeat protein"  
"Unk\_C08\_00468" 38271 "s59E13H2" 0 "hypothetical protein"  
"Unk\_C08\_00468" 38271 "s59E25H2" 0 "hypothetical protein"  
"Unk\_C08\_00468" 38271 "s59E5H2" 0 "hypothetical protein"  
"Unk\_C08\_00468" 38271 "s63E6H2" 0 "hypothetical protein"  
"Unk\_C08\_00469" 38272 "s59E13H2" 0 "Glycosyltransferase AgID"  
"Unk\_C08\_00469" 38272 "s59E25H2" 0 "Glycosyltransferase AgID"  
"Unk\_C08\_00469" 38272 "s59E5H2" 0 "Glycosyltransferase AgID"  
"Unk\_C08\_00469" 38272 "s63E6H2" 0 "Glycosyltransferase AgID"  
"Unk\_C08\_00470" 38273 "s59E13H2" 0 "hypothetical protein"  
"Unk\_C08\_00470" 38273 "s59E25H2" 0 "hypothetical protein"  
"Unk\_C08\_00470" 38273 "s59E5H2" 0 "hypothetical protein"  
"Unk\_C08\_00470" 38273 "s63E6H2" 0 "hypothetical protein"  
"Unk\_C08\_00471" 38274 "s59E13H2" 0 "Protective antigen precursor"  
"Unk\_C08\_00471" 38274 "s59E25H2" 0 "Protective antigen precursor"  
"Unk\_C08\_00471" 38274 "s59E5H2" 0 "Protective antigen precursor"  
"Unk\_C08\_00471" 38274 "s63E6H2" 0 "Protective antigen precursor"  
"Unk\_C08\_00472" 38275 "s59E13H2" 0 "PA14 domain protein"  
"Unk\_C08\_00472" 38275 "s59E25H2" 0 "PA14 domain protein"  
"Unk\_C08\_00472" 38275 "s59E5H2" 0 "PA14 domain protein"  
"Unk\_C08\_00472" 38275 "s63E6H2" 0 "PA14 domain protein"  
"Unk\_C08\_00473" 38276 "s59E13H2" 0 "Undecaprenyl-phosphate mannosyltransferase"  
"Unk\_C08\_00473" 38276 "s59E25H2" 0 "Undecaprenyl-phosphate mannosyltransferase"  
"Unk\_C08\_00473" 38276 "s59E5H2" 0 "Undecaprenyl-phosphate mannosyltransferase"  
"Unk\_C08\_00473" 38276 "s63E6H2" 0 "Undecaprenyl-phosphate mannosyltransferase"  
"Unk\_C08\_00474" 38277 "s59E13H2" 0 "Undecaprenyl-phosphate 4-deoxy-4-formamido-L-arabinose transferase"  
"Unk\_C08\_00474" 38277 "s59E25H2" 0 "Undecaprenyl-phosphate 4-deoxy-4-formamido-L-arabinose transferase"  
"Unk\_C08\_00474" 38277 "s59E5H2" 0 "Undecaprenyl-phosphate 4-deoxy-4-formamido-L-arabinose transferase"  
"Unk\_C08\_00474" 38277 "s63E6H2" 0 "Undecaprenyl-phosphate 4-deoxy-4-formamido-L-arabinose transferase"  
"Unk\_C08\_00475" 38278 "s59E13H2" 0 "Phosphoheptose isomerase"  
"Unk\_C08\_00475" 38278 "s59E25H2" 0 "Phosphoheptose isomerase"  
"Unk\_C08\_00475" 38278 "s59E5H2" 0 "Phosphoheptose isomerase"  
"Unk\_C08\_00475" 38278 "s63E6H2" 0 "Phosphoheptose isomerase"  
"Unk\_C08\_00476" 38279 "s59E13H2" 0 "D-glycero-alpha-D-manno-heptose 7-phosphate kinase"  
"Unk\_C08\_00476" 38279 "s59E25H2" 0 "D-glycero-alpha-D-manno-heptose 7-phosphate kinase"  
"Unk\_C08\_00476" 38279 "s59E5H2" 0 "D-glycero-alpha-D-manno-heptose 7-phosphate kinase"  
"Unk\_C08\_00476" 38279 "s63E6H2" 0 "D-glycero-alpha-D-manno-heptose 7-phosphate kinase"  
"Unk\_C08\_00477" 38280 "s59E13H2" 0 "Galactoside O-acetyltransferase"  
"Unk\_C08\_00477" 38280 "s59E25H2" 0 "Galactoside O-acetyltransferase"  
"Unk\_C08\_00477" 38280 "s59E5H2" 0 "Galactoside O-acetyltransferase"

"Unk\_C08\_00477" 38280 "s63E6H2" 0 "Galactoside O-acetyltransferase"  
"Unk\_C08\_00478" 38281 "s59E13H2" 0 "hypothetical protein"  
"Unk\_C08\_00478" 38281 "s59E25H2" 0 "hypothetical protein"  
"Unk\_C08\_00478" 38281 "s59E5H2" 0 "hypothetical protein"  
"Unk\_C08\_00478" 38281 "s63E6H2" 0 "hypothetical protein"  
"Unk\_C08\_00479" 38282 "s59E13H2" 0 "Demethylrebeccamycin-D-glucose O-methyltransferase"  
"Unk\_C08\_00479" 38282 "s59E25H2" 0 "Demethylrebeccamycin-D-glucose O-methyltransferase"  
"Unk\_C08\_00479" 38282 "s59E5H2" 0 "Demethylrebeccamycin-D-glucose O-methyltransferase"  
"Unk\_C08\_00479" 38282 "s63E6H2" 0 "Demethylrebeccamycin-D-glucose O-methyltransferase"  
"Unk\_C08\_00480" 38283 "s59E13H2" 0 "Oligosaccharyl transferase STT3 subunit"  
"Unk\_C08\_00480" 38283 "s59E25H2" 0 "Oligosaccharyl transferase STT3 subunit"  
"Unk\_C08\_00480" 38283 "s59E5H2" 0 "Oligosaccharyl transferase STT3 subunit"  
"Unk\_C08\_00480" 38283 "s63E6H2" 0 "Oligosaccharyl transferase STT3 subunit"  
"Unk\_C08\_00481" 38284 "s59E13H2" 0 "bifunctional 3-demethylubiquinone-9 3-methyltransferase/ 2-octaprenyl-6-hydroxy phenol methylase"  
"Unk\_C08\_00481" 38284 "s59E25H2" 0 "bifunctional 3-demethylubiquinone-9 3-methyltransferase/ 2-octaprenyl-6-hydroxy phenol methylase"  
"Unk\_C08\_00481" 38284 "s59E5H2" 0 "bifunctional 3-demethylubiquinone-9 3-methyltransferase/ 2-octaprenyl-6-hydroxy phenol methylase"  
"Unk\_C08\_00481" 38284 "s63E6H2" 0 "bifunctional 3-demethylubiquinone-9 3-methyltransferase/ 2-octaprenyl-6-hydroxy phenol methylase"  
"Unk\_C08\_00482" 38285 "s59E13H2" 0 "Glycosyltransferase AgIE"  
"Unk\_C08\_00482" 38285 "s59E25H2" 0 "Glycosyltransferase AgIE"  
"Unk\_C08\_00482" 38285 "s59E5H2" 0 "Glycosyltransferase AgIE"  
"Unk\_C08\_00482" 38285 "s63E6H2" 0 "Glycosyltransferase AgIE"  
"Unk\_C08\_00483" 38286 "s59E13H2" 0 "hypothetical protein"  
"Unk\_C08\_00483" 38286 "s59E25H2" 0 "hypothetical protein"  
"Unk\_C08\_00483" 38286 "s59E5H2" 0 "hypothetical protein"  
"Unk\_C08\_00483" 38286 "s63E6H2" 0 "hypothetical protein"  
"Unk\_C08\_00484" 38287 "s59E13H2" 0 "(Dimethylallyl)adenosine tRNA methylthiotransferase MiaB"  
"Unk\_C08\_00484" 38287 "s59E25H2" 0 "(Dimethylallyl)adenosine tRNA methylthiotransferase MiaB"  
"Unk\_C08\_00484" 38287 "s59E5H2" 0 "(Dimethylallyl)adenosine tRNA methylthiotransferase MiaB"  
"Unk\_C08\_00484" 38287 "s63E6H2" 0 "(Dimethylallyl)adenosine tRNA methylthiotransferase MiaB"  
"Unk\_C08\_00485" 38288 "s59E13H2" 0 "D-inositol 3-phosphate glycosyltransferase"  
"Unk\_C08\_00485" 38288 "s59E25H2" 0 "D-inositol 3-phosphate glycosyltransferase"  
"Unk\_C08\_00485" 38288 "s59E5H2" 0 "D-inositol 3-phosphate glycosyltransferase"  
"Unk\_C08\_00485" 38288 "s63E6H2" 0 "D-inositol 3-phosphate glycosyltransferase"  
"Unk\_C08\_00487" 38290 "s59E13H2" 0 "hypothetical protein"  
"Unk\_C08\_00487" 38290 "s59E25H2" 0 "hypothetical protein"  
"Unk\_C08\_00487" 38290 "s59E5H2" 0 "hypothetical protein"  
"Unk\_C08\_00487" 38290 "s63E6H2" 0.005631896 "hypothetical protein"  
"Unk\_C08\_00488" 38291 "s59E13H2" 0 "Sorbitol dehydrogenase"  
"Unk\_C08\_00488" 38291 "s59E25H2" 0 "Sorbitol dehydrogenase"  
"Unk\_C08\_00488" 38291 "s59E5H2" 0 "Sorbitol dehydrogenase"  
"Unk\_C08\_00488" 38291 "s63E6H2" 0.009473993 "Sorbitol dehydrogenase"  
"Unk\_C08\_00489" 38292 "s59E13H2" 0 "PTS-dependent dihydroxyacetone kinase, dihydroxyacetone-binding subunit DhaK"  
"Unk\_C08\_00489" 38292 "s59E25H2" 0 "PTS-dependent dihydroxyacetone kinase, dihydroxyacetone-binding subunit DhaK"  
"Unk\_C08\_00489" 38292 "s59E5H2" 0 "PTS-dependent dihydroxyacetone kinase, dihydroxyacetone-binding subunit DhaK"  
"Unk\_C08\_00489" 38292 "s63E6H2" 0.004082925 "PTS-dependent dihydroxyacetone kinase, dihydroxyacetone-binding subunit DhaK"  
"Unk\_C08\_00490" 38293 "s59E13H2" 0 "Putative sugar phosphate isomerase YwIF"  
"Unk\_C08\_00490" 38293 "s59E25H2" 0 "Putative sugar phosphate isomerase YwIF"



"Unk\_C08\_00490" 38293 "s59E5H2" 0 "Putative sugar phosphate isomerase YwIF"  
"Unk\_C08\_00490" 38293 "s63E6H2" 0.0002837002 "Putative sugar phosphate isomerase YwIF"  
"Unk\_C08\_00491" 38294 "s59E13H2" 0 "PTS-dependent dihydroxyacetone kinase, ADP-binding subunit DhaL"  
"Unk\_C08\_00491" 38294 "s59E25H2" 0 "PTS-dependent dihydroxyacetone kinase, ADP-binding subunit DhaL"  
"Unk\_C08\_00491" 38294 "s59E5H2" 0 "PTS-dependent dihydroxyacetone kinase, ADP-binding subunit DhaL"  
"Unk\_C08\_00491" 38294 "s63E6H2" 0.01322808 "PTS-dependent dihydroxyacetone kinase, ADP-binding subunit DhaL"  
"Unk\_C08\_00492" 38295 "s59E13H2" 0 "Trehalose/maltose-binding protein MalE precursor"  
"Unk\_C08\_00492" 38295 "s59E25H2" 0 "Trehalose/maltose-binding protein MalE precursor"  
"Unk\_C08\_00492" 38295 "s59E5H2" 0 "Trehalose/maltose-binding protein MalE precursor"  
"Unk\_C08\_00492" 38295 "s63E6H2" 0 "Trehalose/maltose-binding protein MalE precursor"  
"Unk\_C08\_00493" 38296 "s59E13H2" 0 "Trehalose transport system permease protein SugA"  
"Unk\_C08\_00493" 38296 "s59E25H2" 0 "Trehalose transport system permease protein SugA"  
"Unk\_C08\_00493" 38296 "s59E5H2" 0 "Trehalose transport system permease protein SugA"  
"Unk\_C08\_00493" 38296 "s63E6H2" 0 "Trehalose transport system permease protein SugA"  
"Unk\_C08\_00494" 38297 "s59E13H2" 0 "Trehalose/maltose transport system permease protein MalG"  
"Unk\_C08\_00494" 38297 "s59E25H2" 0 "Trehalose/maltose transport system permease protein MalG"  
"Unk\_C08\_00494" 38297 "s59E5H2" 0 "Trehalose/maltose transport system permease protein MalG"  
"Unk\_C08\_00494" 38297 "s63E6H2" 0 "Trehalose/maltose transport system permease protein MalG"  
"Unk\_C08\_00495" 38298 "s59E13H2" 0 "hypothetical protein"  
"Unk\_C08\_00495" 38298 "s59E25H2" 0 "hypothetical protein"  
"Unk\_C08\_00495" 38298 "s59E5H2" 0 "hypothetical protein"  
"Unk\_C08\_00495" 38298 "s63E6H2" 0 "hypothetical protein"  
"Unk\_C08\_00496" 38299 "s59E13H2" 0 "Trehalose/maltose import ATP-binding protein Malk"  
"Unk\_C08\_00496" 38299 "s59E25H2" 0 "Trehalose/maltose import ATP-binding protein Malk"  
"Unk\_C08\_00496" 38299 "s59E5H2" 0 "Trehalose/maltose import ATP-binding protein Malk"  
"Unk\_C08\_00496" 38299 "s63E6H2" 0 "Trehalose/maltose import ATP-binding protein Malk"  
"Unk\_C08\_00497" 38300 "s59E13H2" 0 "Trehalose/maltose import ATP-binding protein Malk"  
"Unk\_C08\_00497" 38300 "s59E25H2" 0 "Trehalose/maltose import ATP-binding protein Malk"  
"Unk\_C08\_00497" 38300 "s59E5H2" 0 "Trehalose/maltose import ATP-binding protein Malk"  
"Unk\_C08\_00497" 38300 "s63E6H2" 0 "Trehalose/maltose import ATP-binding protein Malk"  
"Unk\_C08\_00498" 38301 "s59E13H2" 0 "putative L-threonine 3-dehydrogenase"  
"Unk\_C08\_00498" 38301 "s59E25H2" 0 "putative L-threonine 3-dehydrogenase"  
"Unk\_C08\_00498" 38301 "s59E5H2" 0 "putative L-threonine 3-dehydrogenase"  
"Unk\_C08\_00498" 38301 "s63E6H2" 0.0136044 "putative L-threonine 3-dehydrogenase"  
"Unk\_C08\_00499" 38302 "s59E13H2" 0 "L-xylulose/3-keto-L-gulonate kinase"  
"Unk\_C08\_00499" 38302 "s59E25H2" 0 "L-xylulose/3-keto-L-gulonate kinase"  
"Unk\_C08\_00499" 38302 "s59E5H2" 0 "L-xylulose/3-keto-L-gulonate kinase"  
"Unk\_C08\_00499" 38302 "s63E6H2" 0.0196335 "L-xylulose/3-keto-L-gulonate kinase"  
"Unk\_C08\_00500" 38303 "s59E13H2" 0 "Sorbitol dehydrogenase"  
"Unk\_C08\_00500" 38303 "s59E25H2" 0 "Sorbitol dehydrogenase"  
"Unk\_C08\_00500" 38303 "s59E5H2" 0.004872891 "Sorbitol dehydrogenase"  
"Unk\_C08\_00500" 38303 "s63E6H2" 0.01998903 "Sorbitol dehydrogenase"  
"Unk\_C08\_00501" 38304 "s59E13H2" 0 "putative transposase"  
"Unk\_C08\_00501" 38304 "s59E25H2" 0 "putative transposase"  
"Unk\_C08\_00501" 38304 "s59E5H2" 0 "putative transposase"  
"Unk\_C08\_00501" 38304 "s63E6H2" 0 "putative transposase"  
"Unk\_C08\_00502" 38305 "s59E13H2" 0 "Transposase IS200 like protein"

"Unk\_C08\_00502" 38305 "s59E25H2" 0 "Transposase IS200 like protein"  
"Unk\_C08\_00502" 38305 "s59E5H2" 0 "Transposase IS200 like protein"  
"Unk\_C08\_00502" 38305 "s63E6H2" 0 "Transposase IS200 like protein"  
"Unk\_C08\_00503" 38306 "s59E13H2" 0 "Xylose isomerase"  
"Unk\_C08\_00503" 38306 "s59E25H2" 0 "Xylose isomerase"  
"Unk\_C08\_00503" 38306 "s59E5H2" 0 "Xylose isomerase"  
"Unk\_C08\_00503" 38306 "s63E6H2" 0 "Xylose isomerase"  
"Unk\_C08\_00504" 38307 "s59E13H2" 0 "Xylulose kinase"  
"Unk\_C08\_00504" 38307 "s59E25H2" 0 "Xylulose kinase"  
"Unk\_C08\_00504" 38307 "s59E5H2" 0 "Xylulose kinase"  
"Unk\_C08\_00504" 38307 "s63E6H2" 0 "Xylulose kinase"  
"Unk\_C08\_00505" 38308 "s59E13H2" 0 "Cupin domain protein"  
"Unk\_C08\_00505" 38308 "s59E25H2" 0 "Cupin domain protein"  
"Unk\_C08\_00505" 38308 "s59E5H2" 0 "Cupin domain protein"  
"Unk\_C08\_00505" 38308 "s63E6H2" 0.006719999 "Cupin domain protein"  
"Unk\_C08\_00506" 38309 "s59E13H2" 0 "Sorbitol dehydrogenase"  
"Unk\_C08\_00506" 38309 "s59E25H2" 0 "Sorbitol dehydrogenase"  
"Unk\_C08\_00506" 38309 "s59E5H2" 0 "Sorbitol dehydrogenase"  
"Unk\_C08\_00506" 38309 "s63E6H2" 0.0009570893 "Sorbitol dehydrogenase"  
"Unk\_C08\_00507" 38310 "s59E13H2" 0 "Pyruvate dehydrogenase E1 component subunit beta"  
"Unk\_C08\_00507" 38310 "s59E25H2" 0 "Pyruvate dehydrogenase E1 component subunit beta"  
"Unk\_C08\_00507" 38310 "s59E5H2" 0 "Pyruvate dehydrogenase E1 component subunit beta"  
"Unk\_C08\_00507" 38310 "s63E6H2" 0 "Pyruvate dehydrogenase E1 component subunit beta"  
"Unk\_C08\_00508" 38311 "s59E13H2" 0 "Serine dehydrogenase proteinase"  
"Unk\_C08\_00508" 38311 "s59E25H2" 0 "Serine dehydrogenase proteinase"  
"Unk\_C08\_00508" 38311 "s59E5H2" 0 "Serine dehydrogenase proteinase"  
"Unk\_C08\_00508" 38311 "s63E6H2" 0 "Serine dehydrogenase proteinase"  
"Unk\_C08\_00510" 38313 "s59E13H2" 0 "hypothetical protein"  
"Unk\_C08\_00510" 38313 "s59E25H2" 0 "hypothetical protein"  
"Unk\_C08\_00510" 38313 "s59E5H2" 0 "hypothetical protein"  
"Unk\_C08\_00510" 38313 "s63E6H2" 0 "hypothetical protein"  
"Unk\_C08\_00512" 38315 "s59E13H2" 0 "Trehalose/maltose-binding protein MalE precursor"  
"Unk\_C08\_00512" 38315 "s59E25H2" 0 "Trehalose/maltose-binding protein MalE precursor"  
"Unk\_C08\_00512" 38315 "s59E5H2" 0 "Trehalose/maltose-binding protein MalE precursor"  
"Unk\_C08\_00512" 38315 "s63E6H2" 0 "Trehalose/maltose-binding protein MalE precursor"  
"Unk\_C08\_00513" 38316 "s59E13H2" 0 "Trehalose transport system permease protein SugA"  
"Unk\_C08\_00513" 38316 "s59E25H2" 0 "Trehalose transport system permease protein SugA"  
"Unk\_C08\_00513" 38316 "s59E5H2" 0 "Trehalose transport system permease protein SugA"  
"Unk\_C08\_00513" 38316 "s63E6H2" 0 "Trehalose transport system permease protein SugA"  
"Unk\_C08\_00514" 38317 "s59E13H2" 0 "Inner membrane ABC transporter permease protein YcjP"  
"Unk\_C08\_00514" 38317 "s59E25H2" 0 "Inner membrane ABC transporter permease protein YcjP"  
"Unk\_C08\_00514" 38317 "s59E5H2" 0 "Inner membrane ABC transporter permease protein YcjP"  
"Unk\_C08\_00514" 38317 "s63E6H2" 0 "Inner membrane ABC transporter permease protein YcjP"  
"Unk\_C08\_00515" 38318 "s59E13H2" 0 "methylcobalamin:coenzyme M methyltransferase"  
"Unk\_C08\_00515" 38318 "s59E25H2" 0 "methylcobalamin:coenzyme M methyltransferase"  
"Unk\_C08\_00515" 38318 "s59E5H2" 0 "methylcobalamin:coenzyme M methyltransferase"  
"Unk\_C08\_00515" 38318 "s63E6H2" 0 "methylcobalamin:coenzyme M methyltransferase"

"Unk\_C08\_00516" 38319 "s59E13H2" 0 "D-tagatose 3-epimerase"  
"Unk\_C08\_00516" 38319 "s59E25H2" 0 "D-tagatose 3-epimerase"  
"Unk\_C08\_00516" 38319 "s59E5H2" 0 "D-tagatose 3-epimerase"  
"Unk\_C08\_00516" 38319 "s63E6H2" 0 "D-tagatose 3-epimerase"  
"Unk\_C08\_00517" 38320 "s59E13H2" 0 "5-dehydro-2-deoxygluconokinase"  
"Unk\_C08\_00517" 38320 "s59E25H2" 0 "5-dehydro-2-deoxygluconokinase"  
"Unk\_C08\_00517" 38320 "s59E5H2" 0 "5-dehydro-2-deoxygluconokinase"  
"Unk\_C08\_00517" 38320 "s63E6H2" 0 "5-dehydro-2-deoxygluconokinase"  
"Unk\_C08\_00518" 38321 "s59E13H2" 0 "Transketolase 1"  
"Unk\_C08\_00518" 38321 "s59E25H2" 0 "Transketolase 1"  
"Unk\_C08\_00518" 38321 "s59E5H2" 0 "Transketolase 1"  
"Unk\_C08\_00518" 38321 "s63E6H2" 0 "Transketolase 1"  
"Unk\_C08\_00519" 38322 "s59E13H2" 0 "1-deoxy-D-xylulose-5-phosphate synthase"  
"Unk\_C08\_00519" 38322 "s59E25H2" 0 "1-deoxy-D-xylulose-5-phosphate synthase"  
"Unk\_C08\_00519" 38322 "s59E5H2" 0 "1-deoxy-D-xylulose-5-phosphate synthase"  
"Unk\_C08\_00519" 38322 "s63E6H2" 0 "1-deoxy-D-xylulose-5-phosphate synthase"  
"Unk\_C08\_00520" 38323 "s59E13H2" 0 "Polyribonucleotide 5'-hydroxyl-kinase"  
"Unk\_C08\_00520" 38323 "s59E25H2" 0 "Polyribonucleotide 5'-hydroxyl-kinase"  
"Unk\_C08\_00520" 38323 "s59E5H2" 0 "Polyribonucleotide 5'-hydroxyl-kinase"  
"Unk\_C08\_00520" 38323 "s63E6H2" 0 "Polyribonucleotide 5'-hydroxyl-kinase"  
"Unk\_C08\_00521" 38324 "s59E13H2" 0 "Arginine biosynthesis bifunctional protein ArgJ"  
"Unk\_C08\_00521" 38324 "s59E25H2" 0 "Arginine biosynthesis bifunctional protein ArgJ"  
"Unk\_C08\_00521" 38324 "s59E5H2" 0 "Arginine biosynthesis bifunctional protein ArgJ"  
"Unk\_C08\_00521" 38324 "s63E6H2" 0 "Arginine biosynthesis bifunctional protein ArgJ"  
"Unk\_C08\_00522" 38325 "s59E13H2" 0 "N-acetyl-gamma-glutamyl-phosphate reductase"  
"Unk\_C08\_00522" 38325 "s59E25H2" 0 "N-acetyl-gamma-glutamyl-phosphate reductase"  
"Unk\_C08\_00522" 38325 "s59E5H2" 0 "N-acetyl-gamma-glutamyl-phosphate reductase"  
"Unk\_C08\_00522" 38325 "s63E6H2" 0 "N-acetyl-gamma-glutamyl-phosphate reductase"  
"Unk\_C08\_00523" 38326 "s59E13H2" 0 "HTH-type transcriptional regulator GlnR"  
"Unk\_C08\_00523" 38326 "s59E25H2" 0 "HTH-type transcriptional regulator GlnR"  
"Unk\_C08\_00523" 38326 "s59E5H2" 0 "HTH-type transcriptional regulator GlnR"  
"Unk\_C08\_00523" 38326 "s63E6H2" 0 "HTH-type transcriptional regulator GlnR"  
"Unk\_C08\_00524" 38327 "s59E13H2" 0 "Phenylacetate-coenzyme A ligase"  
"Unk\_C08\_00524" 38327 "s59E25H2" 0 "Phenylacetate-coenzyme A ligase"  
"Unk\_C08\_00524" 38327 "s59E5H2" 0 "Phenylacetate-coenzyme A ligase"  
"Unk\_C08\_00524" 38327 "s63E6H2" 0 "Phenylacetate-coenzyme A ligase"  
"Unk\_C08\_00525" 38328 "s59E13H2" 0 "Phenylacetate-coenzyme A ligase"  
"Unk\_C08\_00525" 38328 "s59E25H2" 0 "Phenylacetate-coenzyme A ligase"  
"Unk\_C08\_00525" 38328 "s59E5H2" 0.001431912 "Phenylacetate-coenzyme A ligase"  
"Unk\_C08\_00525" 38328 "s63E6H2" 0 "Phenylacetate-coenzyme A ligase"  
"Unk\_C08\_00526" 38329 "s59E13H2" 0 "High-affinity branched-chain amino acid transport ATP-binding protein LivF"  
"Unk\_C08\_00526" 38329 "s59E25H2" 0 "High-affinity branched-chain amino acid transport ATP-binding protein LivF"  
"Unk\_C08\_00526" 38329 "s59E5H2" 0.002271848 "High-affinity branched-chain amino acid transport ATP-binding protein LivF"  
"Unk\_C08\_00526" 38329 "s63E6H2" 0 "High-affinity branched-chain amino acid transport ATP-binding protein LivF"  
"Unk\_C08\_00527" 38330 "s59E13H2" 0 "putative branched-chain amino acid transport ATP-binding protein LivG"  
"Unk\_C08\_00527" 38330 "s59E25H2" 0 "putative branched-chain amino acid transport ATP-binding protein LivG"  
"Unk\_C08\_00527" 38330 "s59E5H2" 0 "putative branched-chain amino acid transport ATP-binding protein LivG"

"Unk\_C08\_00527" 38330 "s63E6H2" 0 "putative branched-chain amino acid transport ATP-binding protein LivG"  
"Unk\_C08\_00528" 38331 "s59E13H2" 0 "High-affinity branched-chain amino acid transport system permease protein LivH"  
"Unk\_C08\_00528" 38331 "s59E25H2" 0 "High-affinity branched-chain amino acid transport system permease protein LivH"  
"Unk\_C08\_00528" 38331 "s59E5H2" 0 "High-affinity branched-chain amino acid transport system permease protein LivH"  
"Unk\_C08\_00528" 38331 "s63E6H2" 0 "High-affinity branched-chain amino acid transport system permease protein LivH"  
"Unk\_C08\_00529" 38332 "s59E13H2" 0 "High-affinity branched-chain amino acid transport system permease protein LivH"  
"Unk\_C08\_00529" 38332 "s59E25H2" 0 "High-affinity branched-chain amino acid transport system permease protein LivH"  
"Unk\_C08\_00529" 38332 "s59E5H2" 0 "High-affinity branched-chain amino acid transport system permease protein LivH"  
"Unk\_C08\_00529" 38332 "s63E6H2" 0 "High-affinity branched-chain amino acid transport system permease protein LivH"  
"Unk\_C08\_00530" 38333 "s59E13H2" 0 "Leucine-, isoleucine-, valine-, threonine-, and alanine-binding protein precursor"  
"Unk\_C08\_00530" 38333 "s59E25H2" 0 "Leucine-, isoleucine-, valine-, threonine-, and alanine-binding protein precursor"  
"Unk\_C08\_00530" 38333 "s59E5H2" 0 "Leucine-, isoleucine-, valine-, threonine-, and alanine-binding protein precursor"  
"Unk\_C08\_00530" 38333 "s63E6H2" 0 "Leucine-, isoleucine-, valine-, threonine-, and alanine-binding protein precursor"  
"Unk\_C08\_00531" 38334 "s59E13H2" 0 "hypothetical protein"  
"Unk\_C08\_00531" 38334 "s59E25H2" 0 "hypothetical protein"  
"Unk\_C08\_00531" 38334 "s59E5H2" 0 "hypothetical protein"  
"Unk\_C08\_00531" 38334 "s63E6H2" 0 "hypothetical protein"  
"Unk\_C08\_00532" 38335 "s59E13H2" 0 "hypothetical protein"  
"Unk\_C08\_00532" 38335 "s59E25H2" 0 "hypothetical protein"  
"Unk\_C08\_00532" 38335 "s59E5H2" 0 "hypothetical protein"  
"Unk\_C08\_00532" 38335 "s63E6H2" 0 "hypothetical protein"  
"Unk\_C08\_00533" 38336 "s59E13H2" 0 "Phenylacetate-coenzyme A ligase"  
"Unk\_C08\_00533" 38336 "s59E25H2" 0 "Phenylacetate-coenzyme A ligase"  
"Unk\_C08\_00533" 38336 "s59E5H2" 0 "Phenylacetate-coenzyme A ligase"  
"Unk\_C08\_00533" 38336 "s63E6H2" 0 "Phenylacetate-coenzyme A ligase"  
"Unk\_C08\_00534" 38337 "s59E13H2" 0 "putative transaldolase"  
"Unk\_C08\_00534" 38337 "s59E25H2" 0 "putative transaldolase"  
"Unk\_C08\_00534" 38337 "s59E5H2" 0.02751565 "putative transaldolase"  
"Unk\_C08\_00534" 38337 "s63E6H2" 0 "putative transaldolase"  
"Unk\_C08\_00535" 38338 "s59E13H2" 0 "Indolepyruvate oxidoreductase subunit IorB"  
"Unk\_C08\_00535" 38338 "s59E25H2" 0 "Indolepyruvate oxidoreductase subunit IorB"  
"Unk\_C08\_00535" 38338 "s59E5H2" 0 "Indolepyruvate oxidoreductase subunit IorB"  
"Unk\_C08\_00535" 38338 "s63E6H2" 0 "Indolepyruvate oxidoreductase subunit IorB"  
"Unk\_C08\_00536" 38339 "s59E13H2" 0 "hypothetical protein"  
"Unk\_C08\_00536" 38339 "s59E25H2" 0 "hypothetical protein"  
"Unk\_C08\_00536" 38339 "s59E5H2" 0 "hypothetical protein"  
"Unk\_C08\_00536" 38339 "s63E6H2" 0 "hypothetical protein"  
"Unk\_C08\_00537" 38340 "s59E13H2" 0 "putative membrane protein"  
"Unk\_C08\_00537" 38340 "s59E25H2" 0 "putative membrane protein"  
"Unk\_C08\_00537" 38340 "s59E5H2" 0 "putative membrane protein"  
"Unk\_C08\_00537" 38340 "s63E6H2" 0 "putative membrane protein"  
"Unk\_C08\_00538" 38341 "s59E13H2" 0 "Dihydroorotate dehydrogenase B (NAD(+) ), catalytic subunit"  
"Unk\_C08\_00538" 38341 "s59E25H2" 0 "Dihydroorotate dehydrogenase B (NAD(+) ), catalytic subunit"  
"Unk\_C08\_00538" 38341 "s59E5H2" 0 "Dihydroorotate dehydrogenase B (NAD(+) ), catalytic subunit"  
"Unk\_C08\_00538" 38341 "s63E6H2" 0.00496674 "Dihydroorotate dehydrogenase B (NAD(+) ), catalytic subunit"  
"Unk\_C08\_00539" 38342 "s59E13H2" 0 "hypothetical protein"  
"Unk\_C08\_00539" 38342 "s59E25H2" 0 "hypothetical protein"

"Unk\_C08\_00539" 38342 "s59E5H2" 0 "hypothetical protein"  
"Unk\_C08\_00539" 38342 "s63E6H2" 0 "hypothetical protein"  
"Unk\_C08\_00540" 38343 "s59E13H2" 0 "DeoR-like helix-turn-helix domain protein"  
"Unk\_C08\_00540" 38343 "s59E25H2" 0 "DeoR-like helix-turn-helix domain protein"  
"Unk\_C08\_00540" 38343 "s59E5H2" 0 "DeoR-like helix-turn-helix domain protein"  
"Unk\_C08\_00540" 38343 "s63E6H2" 0 "DeoR-like helix-turn-helix domain protein"  
"Unk\_C08\_00541" 38344 "s59E13H2" 0 "hypothetical protein"  
"Unk\_C08\_00541" 38344 "s59E25H2" 0 "hypothetical protein"  
"Unk\_C08\_00541" 38344 "s59E5H2" 0 "hypothetical protein"  
"Unk\_C08\_00541" 38344 "s63E6H2" 0 "hypothetical protein"  
"Unk\_C08\_00542" 38345 "s59E13H2" 0 "UDP-N-acetylglucosamine 1-carboxyvinyltransferase 1"  
"Unk\_C08\_00542" 38345 "s59E25H2" 0 "UDP-N-acetylglucosamine 1-carboxyvinyltransferase 1"  
"Unk\_C08\_00542" 38345 "s59E5H2" 0 "UDP-N-acetylglucosamine 1-carboxyvinyltransferase 1"  
"Unk\_C08\_00542" 38345 "s63E6H2" 0 "UDP-N-acetylglucosamine 1-carboxyvinyltransferase 1"  
"Unk\_C08\_00543" 38346 "s59E13H2" 0 "Sporulation kinase E"  
"Unk\_C08\_00543" 38346 "s59E25H2" 0 "Sporulation kinase E"  
"Unk\_C08\_00543" 38346 "s59E5H2" 0 "Sporulation kinase E"  
"Unk\_C08\_00543" 38346 "s63E6H2" 0 "Sporulation kinase E"  
"Unk\_C08\_00544" 38347 "s59E13H2" 0 "Transcriptional regulatory protein ZraR"  
"Unk\_C08\_00544" 38347 "s59E25H2" 0 "Transcriptional regulatory protein ZraR"  
"Unk\_C08\_00544" 38347 "s59E5H2" 0 "Transcriptional regulatory protein ZraR"  
"Unk\_C08\_00544" 38347 "s63E6H2" 0 "Transcriptional regulatory protein ZraR"  
"Unk\_C08\_00545" 38348 "s59E13H2" 0 "Photosynthetic apparatus regulatory protein RegA"  
"Unk\_C08\_00545" 38348 "s59E25H2" 0 "Photosynthetic apparatus regulatory protein RegA"  
"Unk\_C08\_00545" 38348 "s59E5H2" 0 "Photosynthetic apparatus regulatory protein RegA"  
"Unk\_C08\_00545" 38348 "s63E6H2" 0 "Photosynthetic apparatus regulatory protein RegA"  
"Unk\_C08\_00547" 38350 "s59E13H2" 0 "Gas vesicle structural protein"  
"Unk\_C08\_00547" 38350 "s59E25H2" 0 "Gas vesicle structural protein"  
"Unk\_C08\_00547" 38350 "s59E5H2" 0 "Gas vesicle structural protein"  
"Unk\_C08\_00547" 38350 "s63E6H2" 0 "Gas vesicle structural protein"  
"Unk\_C08\_00548" 38351 "s59E13H2" 0 "hypothetical protein"  
"Unk\_C08\_00548" 38351 "s59E25H2" 0 "hypothetical protein"  
"Unk\_C08\_00548" 38351 "s59E5H2" 0 "hypothetical protein"  
"Unk\_C08\_00548" 38351 "s63E6H2" 0 "hypothetical protein"  
"Unk\_C08\_00549" 38352 "s59E13H2" 0 "Inner membrane ABC transporter permease protein YcjP"  
"Unk\_C08\_00549" 38352 "s59E25H2" 0 "Inner membrane ABC transporter permease protein YcjP"  
"Unk\_C08\_00549" 38352 "s59E5H2" 0 "Inner membrane ABC transporter permease protein YcjP"  
"Unk\_C08\_00549" 38352 "s63E6H2" 0 "Inner membrane ABC transporter permease protein YcjP"  
"Unk\_C08\_00550" 38353 "s59E13H2" 0 "Trimethylamine methyltransferase MttB"  
"Unk\_C08\_00550" 38353 "s59E25H2" 0 "Trimethylamine methyltransferase MttB"  
"Unk\_C08\_00550" 38353 "s59E5H2" 0 "Trimethylamine methyltransferase MttB"  
"Unk\_C08\_00550" 38353 "s63E6H2" 0 "Trimethylamine methyltransferase MttB"  
"Unk\_C08\_00551" 38354 "s59E13H2" 0 "Glucose 1-dehydrogenase 1"  
"Unk\_C08\_00551" 38354 "s59E25H2" 0 "Glucose 1-dehydrogenase 1"  
"Unk\_C08\_00551" 38354 "s59E5H2" 0 "Glucose 1-dehydrogenase 1"  
"Unk\_C08\_00551" 38354 "s63E6H2" 0 "Glucose 1-dehydrogenase 1"  
"Unk\_C08\_00552" 38355 "s59E13H2" 0 "hypothetical protein"

"Unk\_C08\_00552" 38355 "s59E25H2" 0 "hypothetical protein"  
"Unk\_C08\_00552" 38355 "s59E5H2" 0 "hypothetical protein"  
"Unk\_C08\_00552" 38355 "s63E6H2" 0 "hypothetical protein"  
"Unk\_C08\_00553" 38356 "s59E13H2" 0 "hypothetical protein"  
"Unk\_C08\_00553" 38356 "s59E25H2" 0 "hypothetical protein"  
"Unk\_C08\_00553" 38356 "s59E5H2" 0 "hypothetical protein"  
"Unk\_C08\_00553" 38356 "s63E6H2" 0 "hypothetical protein"  
"Unk\_C08\_00554" 38357 "s59E13H2" 0 "putative sugar kinase"  
"Unk\_C08\_00554" 38357 "s59E25H2" 0 "putative sugar kinase"  
"Unk\_C08\_00554" 38357 "s59E5H2" 0 "putative sugar kinase"  
"Unk\_C08\_00554" 38357 "s63E6H2" 0 "putative sugar kinase"  
"Unk\_C08\_00555" 38358 "s59E13H2" 0 "putative oxidoreductase YcjS"  
"Unk\_C08\_00555" 38358 "s59E25H2" 0 "putative oxidoreductase YcjS"  
"Unk\_C08\_00555" 38358 "s59E5H2" 0 "putative oxidoreductase YcjS"  
"Unk\_C08\_00555" 38358 "s63E6H2" 0 "putative oxidoreductase YcjS"  
"Unk\_C08\_00556" 38359 "s59E13H2" 0 "Arabinose 5-phosphate isomerase KpsF"  
"Unk\_C08\_00556" 38359 "s59E25H2" 0 "Arabinose 5-phosphate isomerase KpsF"  
"Unk\_C08\_00556" 38359 "s59E5H2" 0 "Arabinose 5-phosphate isomerase KpsF"  
"Unk\_C08\_00556" 38359 "s63E6H2" 0 "Arabinose 5-phosphate isomerase KpsF"  
"Unk\_C08\_00557" 38360 "s59E13H2" 0 "hypothetical protein"  
"Unk\_C08\_00557" 38360 "s59E25H2" 0 "hypothetical protein"  
"Unk\_C08\_00557" 38360 "s59E5H2" 0 "hypothetical protein"  
"Unk\_C08\_00557" 38360 "s63E6H2" 0 "hypothetical protein"  
"Unk\_C08\_00559" 38362 "s59E13H2" 0 "Nicotinamide-nucleotide amidohydrolase PncC"  
"Unk\_C08\_00559" 38362 "s59E25H2" 0 "Nicotinamide-nucleotide amidohydrolase PncC"  
"Unk\_C08\_00559" 38362 "s59E5H2" 0 "Nicotinamide-nucleotide amidohydrolase PncC"  
"Unk\_C08\_00559" 38362 "s63E6H2" 0 "Nicotinamide-nucleotide amidohydrolase PncC"  
"Unk\_C08\_00560" 38363 "s59E13H2" 0 "NUDIX domain protein"  
"Unk\_C08\_00560" 38363 "s59E25H2" 0 "NUDIX domain protein"  
"Unk\_C08\_00560" 38363 "s59E5H2" 0 "NUDIX domain protein"  
"Unk\_C08\_00560" 38363 "s63E6H2" 0 "NUDIX domain protein"  
"Unk\_C08\_00561" 38364 "s59E13H2" 0 "Ribose 1,5-bisphosphate isomerase"  
"Unk\_C08\_00561" 38364 "s59E25H2" 0 "Ribose 1,5-bisphosphate isomerase"  
"Unk\_C08\_00561" 38364 "s59E5H2" 0 "Ribose 1,5-bisphosphate isomerase"  
"Unk\_C08\_00561" 38364 "s63E6H2" 0 "Ribose 1,5-bisphosphate isomerase"  
"Unk\_C08\_00562" 38365 "s59E13H2" 0.0003337963 "Xylulose kinase"  
"Unk\_C08\_00562" 38365 "s59E25H2" 0 "Xylulose kinase"  
"Unk\_C08\_00562" 38365 "s59E5H2" 6.665608 "Xylulose kinase"  
"Unk\_C08\_00562" 38365 "s63E6H2" 0 "Xylulose kinase"  
"Unk\_C08\_00563" 38366 "s59E13H2" 0.001426788 "Sorbitol dehydrogenase"  
"Unk\_C08\_00563" 38366 "s59E25H2" 0 "Sorbitol dehydrogenase"  
"Unk\_C08\_00563" 38366 "s59E5H2" 0.2956147 "Sorbitol dehydrogenase"  
"Unk\_C08\_00563" 38366 "s63E6H2" 0 "Sorbitol dehydrogenase"  
"Unk\_C08\_00564" 38367 "s59E13H2" 0 "hypothetical protein"  
"Unk\_C08\_00564" 38367 "s59E25H2" 0 "hypothetical protein"  
"Unk\_C08\_00564" 38367 "s59E5H2" 0.1616461 "hypothetical protein"  
"Unk\_C08\_00564" 38367 "s63E6H2" 0 "hypothetical protein"

"Unk\_C08\_00566" 38369 "s59E13H2" 0 "hypothetical protein"  
"Unk\_C08\_00566" 38369 "s59E25H2" 0 "hypothetical protein"  
"Unk\_C08\_00566" 38369 "s59E5H2" 0 "hypothetical protein"  
"Unk\_C08\_00566" 38369 "s63E6H2" 0 "hypothetical protein"  
"Unk\_C08\_00567" 38370 "s59E13H2" 0.05750866 "Transposase IS116/IS110/IS902 family protein"  
"Unk\_C08\_00567" 38370 "s59E25H2" 0 "Transposase IS116/IS110/IS902 family protein"  
"Unk\_C08\_00567" 38370 "s59E5H2" 0.02491362 "Transposase IS116/IS110/IS902 family protein"  
"Unk\_C08\_00567" 38370 "s63E6H2" 0 "Transposase IS116/IS110/IS902 family protein"  
"Unk\_C08\_00568" 38371 "s59E13H2" 0 "hypothetical protein"  
"Unk\_C08\_00568" 38371 "s59E25H2" 0 "hypothetical protein"  
"Unk\_C08\_00568" 38371 "s59E5H2" 0 "hypothetical protein"  
"Unk\_C08\_00568" 38371 "s63E6H2" 0 "hypothetical protein"  
"Unk\_C08\_00569" 38372 "s59E13H2" 0 "Sporulation kinase A"  
"Unk\_C08\_00569" 38372 "s59E25H2" 0 "Sporulation kinase A"  
"Unk\_C08\_00569" 38372 "s59E5H2" 0 "Sporulation kinase A"  
"Unk\_C08\_00569" 38372 "s63E6H2" 0 "Sporulation kinase A"  
"Unk\_C08\_00570" 38373 "s59E13H2" 0 "Blue-light-activated protein"  
"Unk\_C08\_00570" 38373 "s59E25H2" 0 "Blue-light-activated protein"  
"Unk\_C08\_00570" 38373 "s59E5H2" 0 "Blue-light-activated protein"  
"Unk\_C08\_00570" 38373 "s63E6H2" 0 "Blue-light-activated protein"  
"Unk\_C08\_00571" 38374 "s59E13H2" 0 "flagellar accessory protein FlaH"  
"Unk\_C08\_00571" 38374 "s59E25H2" 0 "flagellar accessory protein FlaH"  
"Unk\_C08\_00571" 38374 "s59E5H2" 0 "flagellar accessory protein FlaH"  
"Unk\_C08\_00571" 38374 "s63E6H2" 0 "flagellar accessory protein FlaH"  
"Unk\_C08\_00572" 38375 "s59E13H2" 0 "GH3 auxin-responsive promoter"  
"Unk\_C08\_00572" 38375 "s59E25H2" 0 "GH3 auxin-responsive promoter"  
"Unk\_C08\_00572" 38375 "s59E5H2" 0 "GH3 auxin-responsive promoter"  
"Unk\_C08\_00572" 38375 "s63E6H2" 0 "GH3 auxin-responsive promoter"  
"Unk\_C08\_00573" 38376 "s59E13H2" 0 "Ferredoxin"  
"Unk\_C08\_00573" 38376 "s59E25H2" 0 "Ferredoxin"  
"Unk\_C08\_00573" 38376 "s59E5H2" 0 "Ferredoxin"  
"Unk\_C08\_00573" 38376 "s63E6H2" 0 "Ferredoxin"  
"Unk\_C08\_00574" 38377 "s59E13H2" 0 "hypothetical protein"  
"Unk\_C08\_00574" 38377 "s59E25H2" 0 "hypothetical protein"  
"Unk\_C08\_00574" 38377 "s59E5H2" 0 "hypothetical protein"  
"Unk\_C08\_00574" 38377 "s63E6H2" 0 "hypothetical protein"  
"Unk\_C08\_00575" 38378 "s59E13H2" 0 "O-acetylserine sulfhydrylase"  
"Unk\_C08\_00575" 38378 "s59E25H2" 0 "O-acetylserine sulfhydrylase"  
"Unk\_C08\_00575" 38378 "s59E5H2" 0 "O-acetylserine sulfhydrylase"  
"Unk\_C08\_00575" 38378 "s63E6H2" 0 "O-acetylserine sulfhydrylase"  
"Unk\_C08\_00577" 38380 "s59E13H2" 0 "Quinolate synthase A"  
"Unk\_C08\_00577" 38380 "s59E25H2" 0 "Quinolate synthase A"  
"Unk\_C08\_00577" 38380 "s59E5H2" 0 "Quinolate synthase A"  
"Unk\_C08\_00577" 38380 "s63E6H2" 0 "Quinolate synthase A"  
"Unk\_C08\_00578" 38381 "s59E13H2" 0 "Diacetylchitobiose deacetylase"  
"Unk\_C08\_00578" 38381 "s59E25H2" 0 "Diacetylchitobiose deacetylase"  
"Unk\_C08\_00578" 38381 "s59E5H2" 0 "Diacetylchitobiose deacetylase"

"Unk\_C08\_00578" 38381 "s63E6H2" 0 "Diacetylchitobiose deacetylase"  
"Unk\_C08\_00579" 38382 "s59E13H2" 0 "Putative glycosyltransferase EpsD"  
"Unk\_C08\_00579" 38382 "s59E25H2" 0 "Putative glycosyltransferase EpsD"  
"Unk\_C08\_00579" 38382 "s59E5H2" 0 "Putative glycosyltransferase EpsD"  
"Unk\_C08\_00579" 38382 "s63E6H2" 0 "Putative glycosyltransferase EpsD"  
"Unk\_C08\_00580" 38383 "s59E13H2" 0 "hypothetical protein"  
"Unk\_C08\_00580" 38383 "s59E25H2" 0 "hypothetical protein"  
"Unk\_C08\_00580" 38383 "s59E5H2" 0 "hypothetical protein"  
"Unk\_C08\_00580" 38383 "s63E6H2" 0 "hypothetical protein"
